# Supplementary material
Source: publisher figshare collection journal article supplement (https://acs.figshare.com/ndownloader/files/4205155)

# checkCIF/PLATON report

You have not supplied any structure factors. As a result the full set of tests cannot be run.

THIS REPORT IS FOR GUIDANCE ONLY. IF USED AS PART OF A REVIEW PROCEDURE FOR PUBLICATION, IT SHOULD NOT REPLACE THE EXPERTISE OF AN EXPERIENCED CRYSTALLOGRAPHIC REFEREE.

No syntax errors found.      CIF dictionary      Interpreting this report

## Datablock: MgEr

---

Bond precision:    C-C = 0.0108 Å                      Wavelength=0.71073

Cell:                a=12.9581(7)            b=14.1259(6)            c=14.2362(6)  
                      alpha=98.689(4)    beta=107.817(4)       gamma=116.987(5)  
Temperature:    150 K

|                | Calculated                       | Reported                         |
|----------------|----------------------------------|----------------------------------|
| Volume         | 2077.6(2)                        | 2077.64(19)                      |
| Space group    | P -1                             | P -1                             |
| Hall group     | -P 1                             | -P 1                             |
| Moiety formula | C50 H90 Er2 Mg2 O22, 2(C6 H16 N) | C50 H90 Er2 Mg2 O22, 2(C6 H16 N) |
| Sum formula    | C62 H122 Er2 Mg2 N2 O22          | C62 H122 Er2 Mg2 N2 O22          |
| Mr             | 1630.76                          | 1630.75                          |
| Dx,g cm-3      | 1.303                            | 1.303                            |
| Z              | 1                                | 1                                |
| Mu (mm-1)      | 2.083                            | 2.083                            |
| F000           | 844.0                            | 844.0                            |
| F000'          | 843.92                           |                                  |
| h,k,lmax       | 16,17,17                         | 16,17,17                         |
| Nref           | 8485                             | 8395                             |
| Tmin,Tmax      | 0.819,0.864                      | 0.743,1.000                      |
| Tmin'          | 0.812                            |                                  |

Correction method= # Reported T Limits: Tmin=0.743 Tmax=1.000  
AbsCorr = MULTI-SCAN

Data completeness= 0.989                      Theta(max)= 26.371

R(reflections)= 0.0473( 7318)              wR2(reflections)= 0.1113( 8395)

S = 1.077                                      Npar= 426

---



The following ALERTS were generated. Each ALERT has the format

**test-name\_ALERT\_alert-type\_alert-level.**

Click on the hyperlinks for more details of the test.

---

### Alert level B

PLAT601\_ALERT\_2\_B Structure Contains Solvent Accessible VOIDS of . 108 Ang3

---

### Alert level C

|                                                         |                                        |        |        |
|---------------------------------------------------------|----------------------------------------|--------|--------|
| PLAT213_ALERT_2_C Atom C3                               | has ADP max/min Ratio .....            | 3.2    | prolat |
| PLAT213_ALERT_2_C Atom C5                               | has ADP max/min Ratio .....            | 3.1    | prolat |
| PLAT213_ALERT_2_C Atom C18                              | has ADP max/min Ratio .....            | 3.6    | prolat |
| PLAT213_ALERT_2_C Atom C19                              | has ADP max/min Ratio .....            | 3.1    | prolat |
| PLAT220_ALERT_2_C Large Non-Solvent C                   | Ueq(max)/Ueq(min) Range                | 5.1    | Ratio  |
| PLAT234_ALERT_4_C Large Hirshfeld Difference C2         | -- C5 ..                               | 0.17   | Ang.   |
| PLAT234_ALERT_4_C Large Hirshfeld Difference C12        | -- C15 ..                              | 0.19   | Ang.   |
| PLAT234_ALERT_4_C Large Hirshfeld Difference C12        | -- C15B ..                             | 0.19   | Ang.   |
| PLAT241_ALERT_2_C High                                  | Ueq as Compared to Neighbors for ..... | 03     | Check  |
| PLAT242_ALERT_2_C Low                                   | Ueq as Compared to Neighbors for ..... | C2     | Check  |
| PLAT242_ALERT_2_C Low                                   | Ueq as Compared to Neighbors for ..... | C12    | Check  |
| PLAT242_ALERT_2_C Low                                   | Ueq as Compared to Neighbors for ..... | C17    | Check  |
| PLAT342_ALERT_3_C Low Bond Precision on C-C Bonds ..... |                                        | 0.0108 | Ang.   |

---

### Alert level G

|                                                                    |                   |       |        |
|--------------------------------------------------------------------|-------------------|-------|--------|
| PLAT003_ALERT_2_G Number of Uiso or Uij Restrained non-H Atoms ... |                   | 2     | Report |
| PLAT007_ALERT_5_G Number of Unrefined Donor-H Atoms .....          |                   | 2     | Report |
| PLAT171_ALERT_4_G The CIF-Embedded .res File Contains EADP Records |                   | 1     | Report |
| PLAT230_ALERT_2_G Hirshfeld Test Diff for C12                      | -- C13 ..         | 5.7   | su     |
| PLAT230_ALERT_2_G Hirshfeld Test Diff for C12                      | -- C14 ..         | 7.1   | su     |
| PLAT230_ALERT_2_G Hirshfeld Test Diff for C12                      | -- C13B ..        | 7.0   | su     |
| PLAT230_ALERT_2_G Hirshfeld Test Diff for C12                      | -- C14B ..        | 6.6   | su     |
| PLAT300_ALERT_4_G Atom Site Occupancy of >C13                      | is Constrained at | 0.625 | Check  |
| PLAT300_ALERT_4_G Atom Site Occupancy of >C14                      | is Constrained at | 0.625 | Check  |
| PLAT300_ALERT_4_G Atom Site Occupancy of >C15                      | is Constrained at | 0.625 | Check  |
| PLAT300_ALERT_4_G Atom Site Occupancy of <C13B                     | is Constrained at | 0.375 | Check  |
| PLAT300_ALERT_4_G Atom Site Occupancy of <C14B                     | is Constrained at | 0.375 | Check  |
| PLAT300_ALERT_4_G Atom Site Occupancy of <C15B                     | is Constrained at | 0.375 | Check  |
| PLAT300_ALERT_4_G Atom Site Occupancy of >C13_a                    | is Constrained at | 0.625 | Check  |
| PLAT300_ALERT_4_G Atom Site Occupancy of >C14_a                    | is Constrained at | 0.625 | Check  |
| PLAT300_ALERT_4_G Atom Site Occupancy of >C15_a                    | is Constrained at | 0.625 | Check  |
| PLAT300_ALERT_4_G Atom Site Occupancy of <C13B_a                   | is Constrained at | 0.375 | Check  |
| PLAT300_ALERT_4_G Atom Site Occupancy of <C14B_a                   | is Constrained at | 0.375 | Check  |
| PLAT300_ALERT_4_G Atom Site Occupancy of <C15B_a                   | is Constrained at | 0.375 | Check  |
| PLAT301_ALERT_3_G Main Residue Disorder .....                      | Percentage =      | 8     | Note   |
| PLAT764_ALERT_4_G Overcomplete CIF Bond List Detected (Rep/Expd) . |                   | 1.17  | Ratio  |
| PLAT860_ALERT_3_G Number of Least-Squares Restraints .....         |                   | 12    | Note   |

---

0 **ALERT level A** = Most likely a serious problem - resolve or explain

1 **ALERT level B** = A potentially serious problem, consider carefully

13 **ALERT level C** = Check. Ensure it is not caused by an omission or oversight

22 **ALERT level G** = General information/check it is not something unexpected

0 ALERT type 1 CIF construction/syntax error, inconsistent or missing data

15 ALERT type 2 Indicator that the structure model may be wrong or deficient

3 ALERT type 3 Indicator that the structure quality may be low

17 ALERT type 4 Improvement, methodology, query or suggestion

1 ALERT type 5 Informative message, check

---



---

It is advisable to attempt to resolve as many as possible of the alerts in all categories. Often the minor alerts point to easily fixed oversights, errors and omissions in your CIF or refinement strategy, so attention to these fine details can be worthwhile. In order to resolve some of the more serious problems it may be necessary to carry out additional measurements or structure refinements. However, the purpose of your study may justify the reported deviations and the more serious of these should normally be commented upon in the discussion or experimental section of a paper or in the "special\_details" fields of the CIF. checkCIF was carefully designed to identify outliers and unusual parameters, but every test has its limitations and alerts that are not important in a particular case may appear. Conversely, the absence of alerts does not guarantee there are no aspects of the results needing attention. It is up to the individual to critically assess their own results and, if necessary, seek expert advice.

### **Publication of your CIF in IUCr journals**

A basic structural check has been run on your CIF. These basic checks will be run on all CIFs submitted for publication in IUCr journals (*Acta Crystallographica*, *Journal of Applied Crystallography*, *Journal of Synchrotron Radiation*); however, if you intend to submit to *Acta Crystallographica Section C* or *E*, you should make sure that full publication checks are run on the final version of your CIF prior to submission.

### **Publication of your CIF in other journals**

Please refer to the *Notes for Authors* of the relevant journal for any special instructions relating to CIF submission.



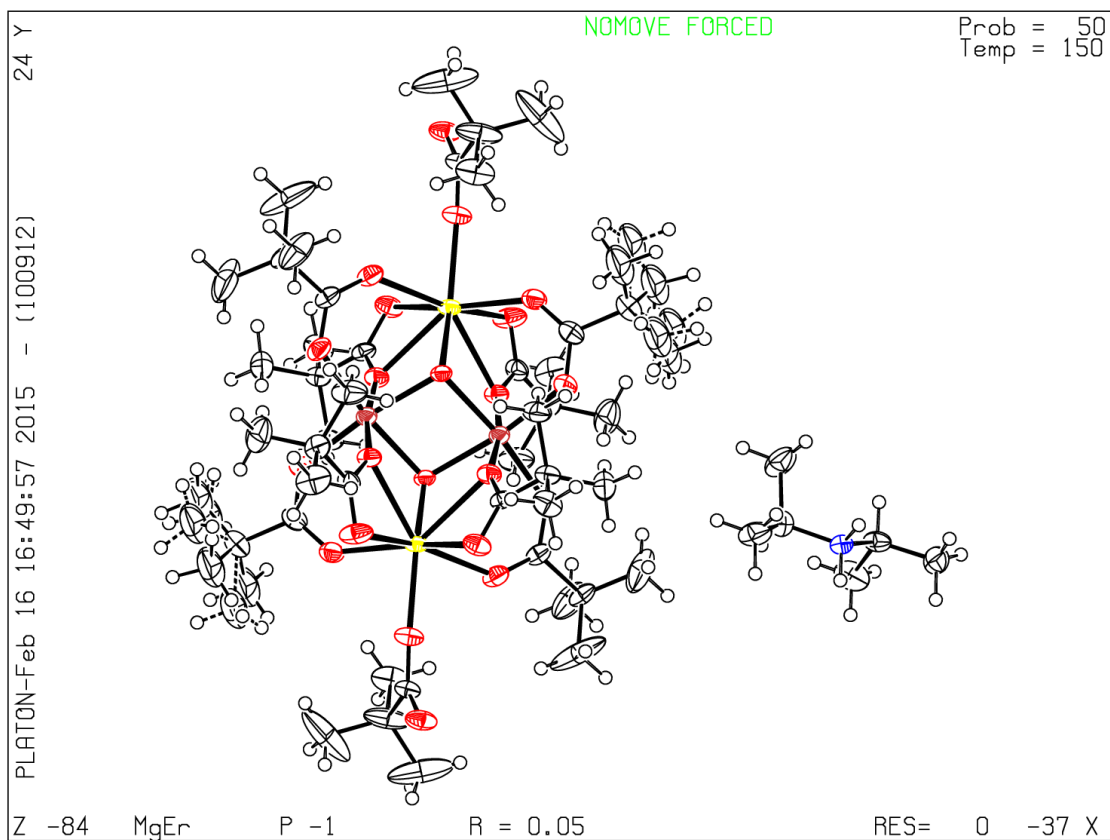

Supplement: Supplementary file 16 [file 4205155]
