# Supplementary material
Source: publisher figshare collection journal article supplement (https://acs.figshare.com/ndownloader/files/4205155)

# checkCIF/PLATON report

You have not supplied any structure factors. As a result the full set of tests cannot be run.

THIS REPORT IS FOR GUIDANCE ONLY. IF USED AS PART OF A REVIEW PROCEDURE FOR PUBLICATION, IT SHOULD NOT REPLACE THE EXPERTISE OF AN EXPERIENCED CRYSTALLOGRAPHIC REFEREE.

No syntax errors found.      CIF dictionary      Interpreting this report

## Datablock: MnGd

---

Bond precision:    C-C = 0.0192 Å

Wavelength=0.71073

Cell:                    a=12.9744(11)                    b=13.1470(9)                    c=13.1693(11)  
                          alpha=86.455(6)                    beta=77.910(7)                    gamma=66.666(7)  
Temperature:    150 K

|                        | Calculated                                    | Reported                                     |
|------------------------|-----------------------------------------------|----------------------------------------------|
| Volume                 | 2016.3(3)                                     | 2016.3(3)                                    |
| Space group            | P -1                                          | P -1                                         |
| Hall group             | -P 1                                          | -P 1                                         |
| Moiety formula         | C50 H90 Gd2 Mn2 O22, 2(C6 H16 N), 0.666(H2 O) | C50 H90 Gd2 Mn2 O22, 2(C6 H16 N), 0.67(H2 O) |
| Sum formula            | C62 H123.33 Gd2 Mn2 N2 O22.67                 | C62 H123.33 Gd2 Mn2 N2 O22.67                |
| Mr                     | 1683.99                                       | 1684.05                                      |
| Dx, g cm <sup>-3</sup> | 1.387                                         | 1.387                                        |
| Z                      | 1                                             | 1                                            |
| Mu (mm <sup>-1</sup> ) | 1.994                                         | 1.994                                        |
| F000                   | 868.7                                         | 869.0                                        |
| F000'                  | 869.35                                        |                                              |
| h,k,lmax               | 15,15,15                                      | 15,15,15                                     |
| Nref                   | 6882                                          | 6812                                         |
| Tmin,Tmax              | 0.953,0.980                                   | 0.801,1.000                                  |
| Tmin'                  | 0.942                                         |                                              |

Correction method= # Reported T Limits: Tmin=0.801 Tmax=1.000  
AbsCorr = MULTI-SCAN

Data completeness= 0.990

Theta(max)= 24.712

R(reflections)= 0.0813( 3900)

wR2(reflections)= 0.1423( 6812)

S = 1.024

Npar= 436

---

The following ALERTS were generated. Each ALERT has the format

**test-name\_ALERT\_alert-type\_alert-level.**

Click on the hyperlinks for more details of the test.

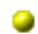

### Alert level C

THETM01\_ALERT\_3\_C The value of  $\sin(\theta_{\max})/\lambda$  is less than 0.590  
Calculated  $\sin(\theta_{\max})/\lambda = 0.5882$

|                   |                                                  |              |
|-------------------|--------------------------------------------------|--------------|
| PLAT077_ALERT_4_C | Unitcell contains non-integer number of atoms .. | Please Check |
| PLAT213_ALERT_2_C | Atom C3 has ADP max/min Ratio .....              | 3.1 prolat   |
| PLAT213_ALERT_2_C | Atom C23 has ADP max/min Ratio .....             | 3.7 prolat   |
| PLAT220_ALERT_2_C | Large Non-Solvent C Ueq(max)/Ueq(min) Range      | 3.6 Ratio    |
| PLAT234_ALERT_4_C | Large Hirshfeld Difference Gd1 -- C21 ..         | 0.16 Ang.    |
| PLAT234_ALERT_4_C | Large Hirshfeld Difference C17 -- C19 ..         | 0.18 Ang.    |
| PLAT241_ALERT_2_C | High Ueq as Compared to Neighbors for .....      | 09 Check     |
| PLAT242_ALERT_2_C | Low Ueq as Compared to Neighbors for .....       | Gd1 Check    |
| PLAT242_ALERT_2_C | Low Ueq as Compared to Neighbors for .....       | C2 Check     |
| PLAT242_ALERT_2_C | Low Ueq as Compared to Neighbors for .....       | C7 Check     |
| PLAT242_ALERT_2_C | Low Ueq as Compared to Neighbors for .....       | C12 Check    |
| PLAT242_ALERT_2_C | Low Ueq as Compared to Neighbors for .....       | C17 Check    |
| PLAT250_ALERT_2_C | Large U3/U1 Ratio for Average U(i,j) Tensor .... | 2.5 Note     |
| PLAT342_ALERT_3_C | Low Bond Precision on C-C Bonds .....            | 0.0192 Ang.  |

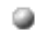

### Alert level G

|                   |                                                  |              |
|-------------------|--------------------------------------------------|--------------|
| PLAT003_ALERT_2_G | Number of Uiso or Uij Restrained non-H Atoms ... | 4 Report     |
| PLAT007_ALERT_5_G | Number of Unrefined Donor-H Atoms .....          | 3 Report     |
| PLAT042_ALERT_1_G | Calc. and Reported MoietyFormula Strings Differ  | Please Check |
| PLAT068_ALERT_1_G | Reported F000 Differs from Calcd (or Missing)... | Please Check |
| PLAT300_ALERT_4_G | Atom Site Occupancy of <O12 is Constrained at    | 0.333 Check  |
| PLAT302_ALERT_4_G | Anion/Solvent Disorder ..... Percentage =        | 5 Note       |
| PLAT764_ALERT_4_G | Overcomplete CIF Bond List Detected (Rep/Expd) . | 1.24 Ratio   |
| PLAT789_ALERT_4_G | Atoms with Negative _atom_site_disorder_group #  | 3 Check      |
| PLAT790_ALERT_4_G | Centre of Gravity not Within Unit Cell: Resd. #  | 2 Note       |
|                   | C6 H16 N                                         |              |
| PLAT860_ALERT_3_G | Number of Least-Squares Restraints .....         | 24 Note      |

0 **ALERT level A** = Most likely a serious problem - resolve or explain  
0 **ALERT level B** = A potentially serious problem, consider carefully  
15 **ALERT level C** = Check. Ensure it is not caused by an omission or oversight  
10 **ALERT level G** = General information/check it is not something unexpected

2 **ALERT type 1** CIF construction/syntax error, inconsistent or missing data  
11 **ALERT type 2** Indicator that the structure model may be wrong or deficient  
3 **ALERT type 3** Indicator that the structure quality may be low  
8 **ALERT type 4** Improvement, methodology, query or suggestion  
1 **ALERT type 5** Informative message, check

It is advisable to attempt to resolve as many as possible of the alerts in all categories. Often the minor alerts point to easily fixed oversights, errors and omissions in your CIF or refinement strategy, so attention to these fine details can be worthwhile. In order to resolve some of the more serious problems it may be necessary to carry out additional measurements or structure refinements. However, the purpose of your study may justify the reported deviations and the more serious of these should normally be commented upon in the discussion or experimental section of a paper or in the "special\_details" fields of the CIF. checkCIF was carefully designed to identify outliers and unusual parameters, but every test has its limitations and alerts that are not important in a particular case may appear. Conversely, the absence of alerts does not guarantee there are no aspects of the results needing attention. It is up to the individual to critically assess their own results and, if necessary, seek expert advice.

### **Publication of your CIF in IUCr journals**

A basic structural check has been run on your CIF. These basic checks will be run on all CIFs submitted for publication in IUCr journals (*Acta Crystallographica*, *Journal of Applied Crystallography*, *Journal of Synchrotron Radiation*); however, if you intend to submit to *Acta Crystallographica Section C* or *E*, you should make sure that full publication checks are run on the final version of your CIF prior to submission.

### **Publication of your CIF in other journals**

Please refer to the *Notes for Authors* of the relevant journal for any special instructions relating to CIF submission.

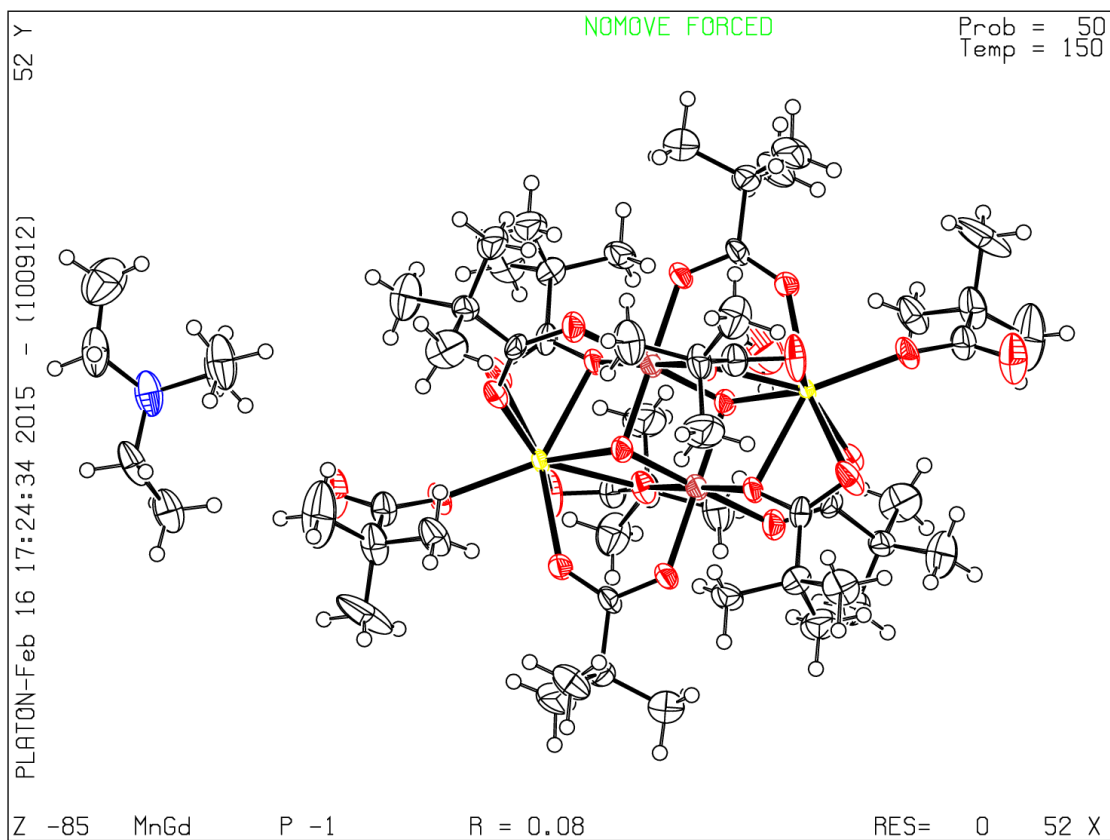

Supplement: Supplementary file 18 [file 4205155]
