# Supplementary material
Source: publisher figshare collection journal article supplement (https://acs.figshare.com/ndownloader/files/4205155)

# checkCIF/PLATON report

You have not supplied any structure factors. As a result the full set of tests cannot be run.

THIS REPORT IS FOR GUIDANCE ONLY. IF USED AS PART OF A REVIEW PROCEDURE FOR PUBLICATION, IT SHOULD NOT REPLACE THE EXPERTISE OF AN EXPERIENCED CRYSTALLOGRAPHIC REFEREE.

No syntax errors found.      CIF dictionary      Interpreting this report

## Datablock: MnY

---

Bond precision:    C-C = 0.0058 A

Wavelength=0.71073

Cell:                a=13.1987(7)                b=13.5750(8)                c=14.1952(7)  
                      alpha=71.486(5)            beta=64.349(5)            gamma=81.392(4)  
Temperature:        156 K

|                | Calculated                               | Reported                                 |
|----------------|------------------------------------------|------------------------------------------|
| Volume         | 2173.9(2)                                | 2173.8(2)                                |
| Space group    | P -1                                     | P -1                                     |
| Hall group     | -P 1                                     | -P 1                                     |
| Moiety formula | C50 H90 Mn2 O22 Y2, 2(C6 H15 N), 3(C2 N) | C50 H90 Mn2 O22 Y2, 2(C6 H15 N), 3(C2 N) |
| Sum formula    | C68 H120 Mn2 N5 O22 Y2                   | C68 H120 Mn2 N5 O22 Y2                   |
| Mr             | 1647.39                                  | 1647.38                                  |
| Dx,g cm-3      | 1.258                                    | 1.258                                    |
| Z              | 1                                        | 1                                        |
| Mu (mm-1)      | 1.670                                    | 1.670                                    |
| F000           | 867.0                                    | 867.0                                    |
| F000'          | 862.45                                   |                                          |
| h,k,lmax       | 17,18,19                                 | 16,18,19                                 |
| Nref           | 11424                                    | 9805                                     |
| Tmin,Tmax      | 0.869,0.905                              | 0.767,1.000                              |
| Tmin'          | 0.846                                    |                                          |

Correction method= # Reported T Limits: Tmin=0.767 Tmax=1.000  
AbsCorr = MULTI-SCAN

Data completeness= 0.858

Theta(max)= 28.859

R(reflections)= 0.0434( 7813)

wR2(reflections)= 0.1162( 9805)

S = 1.028

Npar= 612

---

The following ALERTS were generated. Each ALERT has the format

**test-name\_ALERT\_alert-type\_alert-level.**

Click on the hyperlinks for more details of the test.

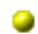

#### Alert level C

|                   |                                                  |      |        |
|-------------------|--------------------------------------------------|------|--------|
| PLAT094_ALERT_2_C | Ratio of Maximum / Minimum Residual Density .... | 2.51 | Report |
| PLAT213_ALERT_2_C | Atom O1B has ADP max/min Ratio .....             | 3.3  | prolat |
| PLAT220_ALERT_2_C | Large Non-Solvent C Ueq(max)/Ueq(min) Range      | 3.8  | Ratio  |
| PLAT220_ALERT_2_C | Large Non-Solvent O Ueq(max)/Ueq(min) Range      | 5.0  | Ratio  |
| PLAT234_ALERT_4_C | Large Hirshfeld Difference C28B -- C29B ..       | 0.16 | Ang.   |
| PLAT241_ALERT_2_C | High Ueq as Compared to Neighbors for .....      | 03   | Check  |
| PLAT241_ALERT_2_C | High Ueq as Compared to Neighbors for .....      | 09   | Check  |
| PLAT242_ALERT_2_C | Low Ueq as Compared to Neighbors for .....       | C7   | Check  |
| PLAT242_ALERT_2_C | Low Ueq as Compared to Neighbors for .....       | C12  | Check  |
| PLAT243_ALERT_4_C | High 'Solvent' Ueq as Compared to Neighbors of   | N2   | Check  |
| PLAT250_ALERT_2_C | Large U3/U1 Ratio for Average U(i,j) Tensor .... | 3.8  | Note   |
| PLAT250_ALERT_2_C | Large U3/U1 Ratio for Average U(i,j) Tensor .... | 2.5  | Note   |

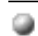

#### Alert level G

|                   |                                                  |       |        |
|-------------------|--------------------------------------------------|-------|--------|
| PLAT003_ALERT_2_G | Number of Uiso or Uij Restrained non-H Atoms ... | 29    | Report |
| PLAT232_ALERT_2_G | Hirshfeld Test Diff (M-X) Y1 -- O4 ..            | 8.1   | su     |
| PLAT232_ALERT_2_G | Hirshfeld Test Diff (M-X) Y1 -- O10 ..           | 5.9   | su     |
| PLAT300_ALERT_4_G | Atom Site Occupancy of >O1B is Constrained at    | 0.576 | Check  |
| PLAT300_ALERT_4_G | Atom Site Occupancy of <O2 is Constrained at     | 0.424 | Check  |
| PLAT300_ALERT_4_G | Atom Site Occupancy of >C1B is Constrained at    | 0.576 | Check  |
| PLAT300_ALERT_4_G | Atom Site Occupancy of >C3 is Constrained at     | 0.710 | Check  |
| PLAT300_ALERT_4_G | Atom Site Occupancy of >C4 is Constrained at     | 0.710 | Check  |
| PLAT300_ALERT_4_G | Atom Site Occupancy of >C5 is Constrained at     | 0.710 | Check  |
| PLAT300_ALERT_4_G | Atom Site Occupancy of <C1 is Constrained at     | 0.424 | Check  |
| PLAT300_ALERT_4_G | Atom Site Occupancy of <C3B is Constrained at    | 0.290 | Check  |
| PLAT300_ALERT_4_G | Atom Site Occupancy of <C4B is Constrained at    | 0.290 | Check  |
| PLAT300_ALERT_4_G | Atom Site Occupancy of <C5B is Constrained at    | 0.290 | Check  |
| PLAT300_ALERT_4_G | Atom Site Occupancy of >O1B_a is Constrained at  | 0.576 | Check  |
| PLAT300_ALERT_4_G | Atom Site Occupancy of <O2_a is Constrained at   | 0.424 | Check  |
| PLAT300_ALERT_4_G | Atom Site Occupancy of >C1B_a is Constrained at  | 0.576 | Check  |
| PLAT300_ALERT_4_G | Atom Site Occupancy of >C3_a is Constrained at   | 0.710 | Check  |
| PLAT300_ALERT_4_G | Atom Site Occupancy of >C4_a is Constrained at   | 0.710 | Check  |
| PLAT300_ALERT_4_G | Atom Site Occupancy of >C5_a is Constrained at   | 0.710 | Check  |
| PLAT300_ALERT_4_G | Atom Site Occupancy of <C1_a is Constrained at   | 0.424 | Check  |
| PLAT300_ALERT_4_G | Atom Site Occupancy of <C3B_a is Constrained at  | 0.290 | Check  |
| PLAT300_ALERT_4_G | Atom Site Occupancy of <C4B_a is Constrained at  | 0.290 | Check  |
| PLAT300_ALERT_4_G | Atom Site Occupancy of <C5B_a is Constrained at  | 0.290 | Check  |
| PLAT300_ALERT_4_G | Atom Site Occupancy of >N1B is Constrained at    | 0.576 | Check  |
| PLAT300_ALERT_4_G | Atom Site Occupancy of >C26B is Constrained at   | 0.576 | Check  |
| PLAT300_ALERT_4_G | Atom Site Occupancy of >C27B is Constrained at   | 0.576 | Check  |
| PLAT300_ALERT_4_G | Atom Site Occupancy of >C28B is Constrained at   | 0.576 | Check  |
| PLAT300_ALERT_4_G | Atom Site Occupancy of >C29B is Constrained at   | 0.576 | Check  |
| PLAT300_ALERT_4_G | Atom Site Occupancy of >C30B is Constrained at   | 0.576 | Check  |
| PLAT300_ALERT_4_G | Atom Site Occupancy of >C31B is Constrained at   | 0.576 | Check  |
| PLAT300_ALERT_4_G | Atom Site Occupancy of <N1 is Constrained at     | 0.424 | Check  |
| PLAT300_ALERT_4_G | Atom Site Occupancy of <C26 is Constrained at    | 0.424 | Check  |
| PLAT300_ALERT_4_G | Atom Site Occupancy of <C27 is Constrained at    | 0.424 | Check  |
| PLAT300_ALERT_4_G | Atom Site Occupancy of <C28 is Constrained at    | 0.424 | Check  |
| PLAT300_ALERT_4_G | Atom Site Occupancy of <C29 is Constrained at    | 0.424 | Check  |
| PLAT300_ALERT_4_G | Atom Site Occupancy of <C30 is Constrained at    | 0.424 | Check  |
| PLAT300_ALERT_4_G | Atom Site Occupancy of <C31 is Constrained at    | 0.424 | Check  |
| PLAT300_ALERT_4_G | Atom Site Occupancy of >C32B is Constrained at   | 0.576 | Check  |
| PLAT300_ALERT_4_G | Atom Site Occupancy of >C33B is Constrained at   | 0.576 | Check  |
| PLAT300_ALERT_4_G | Atom Site Occupancy of <C32 is Constrained at    | 0.424 | Check  |

|                   |                                                  |                   |       |       |
|-------------------|--------------------------------------------------|-------------------|-------|-------|
| PLAT300_ALERT_4_G | Atom Site Occupancy of <C33                      | is Constrained at | 0.424 | Check |
| PLAT300_ALERT_4_G | Atom Site Occupancy of *N3                       | is Constrained at | 0.500 | Check |
| PLAT300_ALERT_4_G | Atom Site Occupancy of *C1A                      | is Constrained at | 0.500 | Check |
| PLAT300_ALERT_4_G | Atom Site Occupancy of *C2                       | is Constrained at | 0.500 | Check |
| PLAT301_ALERT_3_G | Main Residue Disorder .....                      | Percentage =      | 13    | Note  |
| PLAT302_ALERT_4_G | Anion/Solvent Disorder .....                     | Percentage =      | 91    | Note  |
| PLAT304_ALERT_4_G | Non-Integer Number of Atoms ( 12.67) in Resd. #  |                   | 2     | Check |
| PLAT304_ALERT_4_G | Non-Integer Number of Atoms ( 9.33) in Resd. #   |                   | 3     | Check |
| PLAT304_ALERT_4_G | Non-Integer Number of Atoms ( 1.50) in Resd. #   |                   | 5     | Check |
| PLAT432_ALERT_2_G | Short Inter X...Y Contact N3 .. C2 ..            |                   | 1.46  | Ang.  |
| PLAT432_ALERT_2_G | Short Inter X...Y Contact N3 .. C32B ..          |                   | 2.36  | Ang.  |
| PLAT432_ALERT_2_G | Short Inter X...Y Contact N3 .. C1A ..           |                   | 2.68  | Ang.  |
| PLAT432_ALERT_2_G | Short Inter X...Y Contact C1A .. C2 ..           |                   | 1.04  | Ang.  |
| PLAT432_ALERT_2_G | Short Inter X...Y Contact C1A .. C1A ..          |                   | 1.71  | Ang.  |
| PLAT432_ALERT_2_G | Short Inter X...Y Contact C1A .. C32B ..         |                   | 2.39  | Ang.  |
| PLAT432_ALERT_2_G | Short Inter X...Y Contact C2 .. C2 ..            |                   | 1.86  | Ang.  |
| PLAT432_ALERT_2_G | Short Inter X...Y Contact C2 .. C27B ..          |                   | 2.69  | Ang.  |
| PLAT432_ALERT_2_G | Short Inter X...Y Contact C2 .. C32B ..          |                   | 3.08  | Ang.  |
| PLAT720_ALERT_4_G | Number of Unusual/Non-Standard Labels .....      |                   | 11    | Note  |
| PLAT764_ALERT_4_G | Overcomplete CIF Bond List Detected (Rep/Expd) . |                   | 1.24  | Ratio |
| PLAT773_ALERT_2_G | Check long C-C Bond in CIF: C1A -- C1A .         |                   | 1.71  | Ang.  |
| PLAT773_ALERT_2_G | Check long C-C Bond in CIF: C2 -- C2 .           |                   | 1.86  | Ang.  |
| PLAT779_ALERT_4_G | Suspect or Irrelevant (Bond) Angle in CIF .... # |                   | 199   | Check |
|                   | C2 -C1A -C1A 1.555 1.555 2.773                   |                   | 37.30 | Deg.  |
| PLAT779_ALERT_4_G | Suspect or Irrelevant (Bond) Angle in CIF .... # |                   | 205   | Check |
|                   | C1A -C2 -C2 1.555 1.555 2.773                    |                   | 33.70 | Deg.  |
| PLAT790_ALERT_4_G | Centre of Gravity not Within Unit Cell: Resd. #  |                   | 2     | Note  |
|                   | C6 H15 N                                         |                   |       |       |
| PLAT790_ALERT_4_G | Centre of Gravity not Within Unit Cell: Resd. #  |                   | 3     | Note  |
|                   | C6 H15 N                                         |                   |       |       |
| PLAT790_ALERT_4_G | Centre of Gravity not Within Unit Cell: Resd. #  |                   | 4     | Note  |
|                   | C2 N                                             |                   |       |       |
| PLAT790_ALERT_4_G | Centre of Gravity not Within Unit Cell: Resd. #  |                   | 5     | Note  |
|                   | C2 N                                             |                   |       |       |
| PLAT811_ALERT_5_G | No ADDSYM Analysis: Too Many Excluded Atoms .... |                   | !     | Info  |
| PLAT860_ALERT_3_G | Number of Least-Squares Restraints .....         |                   | 135   | Note  |

---

0 **ALERT level A** = Most likely a serious problem - resolve or explain  
 0 **ALERT level B** = A potentially serious problem, consider carefully  
 12 **ALERT level C** = Check. Ensure it is not caused by an omission or oversight  
 70 **ALERT level G** = General information/check it is not something unexpected

0 ALERT type 1 CIF construction/syntax error, inconsistent or missing data  
 24 ALERT type 2 Indicator that the structure model may be wrong or deficient  
 2 ALERT type 3 Indicator that the structure quality may be low  
 55 ALERT type 4 Improvement, methodology, query or suggestion  
 1 ALERT type 5 Informative message, check

---

It is advisable to attempt to resolve as many as possible of the alerts in all categories. Often the minor alerts point to easily fixed oversights, errors and omissions in your CIF or refinement strategy, so attention to these fine details can be worthwhile. In order to resolve some of the more serious problems it may be necessary to carry out additional measurements or structure refinements. However, the purpose of your study may justify the reported deviations and the more serious of these should normally be commented upon in the discussion or experimental section of a paper or in the "special\_details" fields of the CIF. checkCIF was carefully designed to identify outliers and unusual parameters, but every test has its limitations and alerts that are not important in a particular case may appear. Conversely, the absence of alerts does not guarantee there are no aspects of the results needing attention. It is up to the individual to critically assess their own results and, if necessary, seek expert advice.

### **Publication of your CIF in IUCr journals**

A basic structural check has been run on your CIF. These basic checks will be run on all CIFs submitted for publication in IUCr journals (*Acta Crystallographica*, *Journal of Applied Crystallography*, *Journal of Synchrotron Radiation*); however, if you intend to submit to *Acta Crystallographica Section C* or *E*, you should make sure that full publication checks are run on the final version of your CIF prior to submission.

### **Publication of your CIF in other journals**

Please refer to the *Notes for Authors* of the relevant journal for any special instructions relating to CIF submission.

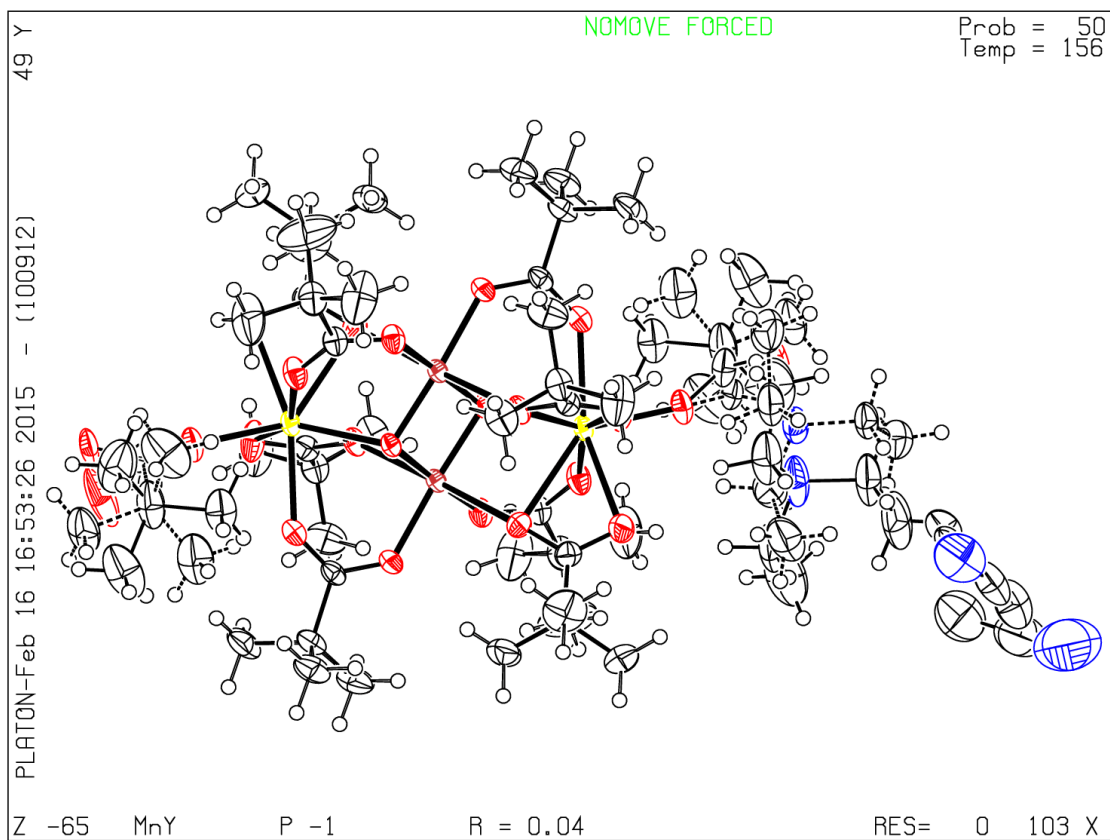

Supplement: Supplementary file 12 [file 4205155]
