# Supplementary material
Source: publisher figshare collection journal article supplement (https://acs.figshare.com/ndownloader/files/4205155)
Supplement: Supplementary file 27 [file 4205155]

Archive with 134 entries (93 files):
- CIFs/
- CIFs/.DS_Store
- __MACOSX/
- __MACOSX/CIFs/
- __MACOSX/CIFs/._.DS_Store
- CIFs/Co/
- CIFs/Co/.DS_Store
- __MACOSX/CIFs/Co/
- __MACOSX/CIFs/Co/._.DS_Store
- CIFs/Co/CoDy/
- CIFs/Co/CoDy/.DS_Store
- __MACOSX/CIFs/Co/CoDy/
- __MACOSX/CIFs/Co/CoDy/._.DS_Store
- CIFs/Co/CoDy/CoDy.cif
- __MACOSX/CIFs/Co/CoDy/._CoDy.cif
- CIFs/Co/CoDy/CoDy.pdf
- __MACOSX/CIFs/Co/CoDy/._CoDy.pdf
- CIFs/Co/CoGd/
- CIFs/Co/CoGd/.DS_Store
- __MACOSX/CIFs/Co/CoGd/
- __MACOSX/CIFs/Co/CoGd/._.DS_Store
- CIFs/Co/CoGd/CoGd.cif
- __MACOSX/CIFs/Co/CoGd/._CoGd.cif
- CIFs/Co/CoGd/CoGd.pdf
- __MACOSX/CIFs/Co/CoGd/._CoGd.pdf
- CIFs/Cu/
- CIFs/Cu/.DS_Store
- __MACOSX/CIFs/Cu/
- __MACOSX/CIFs/Cu/._.DS_Store
- CIFs/Cu/CuDy/
- CIFs/Cu/CuDy/.DS_Store
- __MACOSX/CIFs/Cu/CuDy/
- __MACOSX/CIFs/Cu/CuDy/._.DS_Store
- CIFs/Cu/CuDy/CuDy.cif
- __MACOSX/CIFs/Cu/CuDy/._CuDy.cif
- CIFs/Cu/CuDy/CuDy.pdf
- __MACOSX/CIFs/Cu/CuDy/._CuDy.pdf
- CIFs/Cu/CuGd/
- CIFs/Cu/CuGd/.DS_Store
- __MACOSX/CIFs/Cu/CuGd/
- __MACOSX/CIFs/Cu/CuGd/._.DS_Store
- CIFs/Cu/CuGd/CuGd.cif
- __MACOSX/CIFs/Cu/CuGd/._CuGd.cif
- CIFs/Cu/CuGd/CuGd.pdf
- __MACOSX/CIFs/Cu/CuGd/._CuGd.pdf
- CIFs/Mg/
- CIFs/Mg/.DS_Store
- __MACOSX/CIFs/Mg/
- __MACOSX/CIFs/Mg/._.DS_Store
- CIFs/Mg/MgDy/
- CIFs/Mg/MgDy/.DS_Store
- __MACOSX/CIFs/Mg/MgDy/
- __MACOSX/CIFs/Mg/MgDy/._.DS_Store
- CIFs/Mg/MgDy/MgDy.cif
- __MACOSX/CIFs/Mg/MgDy/._MgDy.cif
- CIFs/Mg/MgDy/MgDy.pdf
- __MACOSX/CIFs/Mg/MgDy/._MgDy.pdf
- CIFs/Mg/MgEr/
- CIFs/Mg/MgEr/.DS_Store
- __MACOSX/CIFs/Mg/MgEr/
- __MACOSX/CIFs/Mg/MgEr/._.DS_Store
- CIFs/Mg/MgEr/MgEr.cif
- __MACOSX/CIFs/Mg/MgEr/._MgEr.cif
- CIFs/Mg/MgEr/MgEr.pdf
- __MACOSX/CIFs/Mg/MgEr/._MgEr.pdf
- CIFs/Mg/MgGd/
- CIFs/Mg/MgGd/.DS_Store
- __MACOSX/CIFs/Mg/MgGd/
- __MACOSX/CIFs/Mg/MgGd/._.DS_Store
- CIFs/Mg/MgGd/MgGd.cif
- __MACOSX/CIFs/Mg/MgGd/._MgGd.cif
- CIFs/Mg/MgGd/MgGd.pdf
- __MACOSX/CIFs/Mg/MgGd/._MgGd.pdf
- CIFs/Mn/
- CIFs/Mn/.DS_Store
- __MACOSX/CIFs/Mn/
- __MACOSX/CIFs/Mn/._.DS_Store
- CIFs/Mn/MnDy/
- CIFs/Mn/MnDy/.DS_Store
- __MACOSX/CIFs/Mn/MnDy/
- __MACOSX/CIFs/Mn/MnDy/._.DS_Store
- CIFs/Mn/MnDy/MnDy.cif
- CIFs/Mn/MnDy/MnDy.pdf
- __MACOSX/CIFs/Mn/MnDy/._MnDy.pdf
- CIFs/Mn/MnGd/
- CIFs/Mn/MnGd/.DS_Store
- __MACOSX/CIFs/Mn/MnGd/
- __MACOSX/CIFs/Mn/MnGd/._.DS_Store
- CIFs/Mn/MnGd/MnGd.cif
- CIFs/Mn/MnGd/MnGd.pdf
- __MACOSX/CIFs/Mn/MnGd/._MnGd.pdf
- CIFs/Mn/MnY/
- CIFs/Mn/MnY/.DS_Store
- __MACOSX/CIFs/Mn/MnY/
- __MACOSX/CIFs/Mn/MnY/._.DS_Store
- CIFs/Mn/MnY/MnY.cif
- __MACOSX/CIFs/Mn/MnY/._MnY.cif
- CIFs/Mn/MnY/MnY.pdf
- __MACOSX/CIFs/Mn/MnY/._MnY.pdf
- CIFs/Ni/
- CIFs/Ni/.DS_Store
- __MACOSX/CIFs/Ni/
- __MACOSX/CIFs/Ni/._.DS_Store
- CIFs/Ni/NiDy/
- CIFs/Ni/NiDy/.DS_Store
- __MACOSX/CIFs/Ni/NiDy/
- __MACOSX/CIFs/Ni/NiDy/._.DS_Store
- CIFs/Ni/NiDy/NiDy.cif
- __MACOSX/CIFs/Ni/NiDy/._NiDy.cif
- CIFs/Ni/NiDy/NiDy.pdf
- __MACOSX/CIFs/Ni/NiDy/._NiDy.pdf
- CIFs/Ni/NiEr/
- CIFs/Ni/NiEr/.DS_Store
- __MACOSX/CIFs/Ni/NiEr/
- __MACOSX/CIFs/Ni/NiEr/._.DS_Store
- CIFs/Ni/NiEr/NiEr.cif
- __MACOSX/CIFs/Ni/NiEr/._NiEr.cif
- CIFs/Ni/NiEr/NiEr.pdf
- __MACOSX/CIFs/Ni/NiEr/._NiEr.pdf
- CIFs/Ni/NiGd/
- CIFs/Ni/NiGd/.DS_Store
- __MACOSX/CIFs/Ni/NiGd/
- __MACOSX/CIFs/Ni/NiGd/._.DS_Store
- CIFs/Ni/NiGd/NIGd.cif
- CIFs/Ni/NiGd/NIGd.pdf
- __MACOSX/CIFs/Ni/NiGd/._NIGd.pdf
- CIFs/Ni/NiY/
- CIFs/Ni/NiY/.DS_Store
- __MACOSX/CIFs/Ni/NiY/
- __MACOSX/CIFs/Ni/NiY/._.DS_Store
- CIFs/Ni/NiY/NiY.cif
- __MACOSX/CIFs/Ni/NiY/._NiY.cif
- CIFs/Ni/NiY/NiY.pdf
- __MACOSX/CIFs/Ni/NiY/._NiY.pdf
