# Supplementary material
Source: publisher figshare collection journal article supplement (https://acs.figshare.com/ndownloader/files/4205155)
Supplement: Supplementary file 27 [file 4205155 › CIFs/Co/CoDy/CoDy.cif]

data_CoDy
_audit_creation_date              2015-02-16
_audit_creation_method
;
Olex2 1.2
(compiled 2015.01.26 svn.r3151 for OlexSys, GUI svn.r4998)
;
_shelxl_version_number            2014/6
_publ_contact_author_address      
;
The University of Manchester
School of Chemistry
Oxford Road, 
Manchester
M13 9PL
United Kingdom
;
_publ_contact_author_email        eufemio.morenopineda@manchester.ac.uk
_publ_contact_author_name         'Eufemio Moreno Pineda'
_publ_contact_author_phone        '+44 074 1192 4293'
_publ_section_references
;
Dolomanov, O.V., Bourhis, L.J., Gildea, R.J, Howard, J.A.K. & Puschmann, H.
 (2009), J. Appl. Cryst. 42, 339-341.

Palatinus, L. & Chapuis, G. (2007). J. Appl. Cryst., 40, 786-790;
Palatinus, L. & van der Lee, A. (2008). J. Appl. Cryst. 41, 975-984;
Palatinus, L., Prathapa, S. J. & van Smaalen, S. (2012). J. Appl. Cryst. 45,
 575-580.

Sheldrick, G.M. (2008). Acta Cryst. A64, 112-122.
;
_chemical_name_common             ?
_chemical_name_systematic         ?
_chemical_formula_moiety          'C50 H92 Co2 Dy2 O22, 2(C6 H16 N), C2 N2'
_chemical_formula_sum             'C64 H124 Co2 Dy2 N4 O22'
_chemical_formula_weight          1744.52
_chemical_melting_point           ?
loop_
  _atom_type_symbol
  _atom_type_description
  _atom_type_scat_dispersion_real
  _atom_type_scat_dispersion_imag
  _atom_type_scat_source
 'C' 'C' 0.0033 0.0016 'International Tables Vol C Tables 4.2.6.8 and 6.1.1.4'
 'H' 'H' 0.0000 0.0000 'International Tables Vol C Tables 4.2.6.8 and 6.1.1.4'
 'Co' 'Co' 0.3494 0.9721 'International Tables Vol C Tables 4.2.6.8 and 6.1.1.4'
 'Dy' 'Dy' -0.1892 4.4098
 'International Tables Vol C Tables 4.2.6.8 and 6.1.1.4'
 'N' 'N' 0.0061 0.0033 'International Tables Vol C Tables 4.2.6.8 and 6.1.1.4'
 'O' 'O' 0.0106 0.0060 'International Tables Vol C Tables 4.2.6.8 and 6.1.1.4'

_shelx_space_group_comment
;
The symmetry employed for this shelxl refinement is uniquely defined
by the following loop, which should always be used as a source of
symmetry information in preference to the above space-group names.
They are only intended as comments.
;
_space_group_crystal_system       'triclinic'
_space_group_IT_number            2
_space_group_name_H-M_alt         'P -1'
_space_group_name_Hall            '-P 1'
loop_
  _space_group_symop_operation_xyz
 'x, y, z'
 '-x, -y, -z'

_cell_length_a                    11.3913(4)
_cell_length_b                    13.3809(5)
_cell_length_c                    15.4188(5)
_cell_angle_alpha                 103.070(3)
_cell_angle_beta                  98.378(3)
_cell_angle_gamma                 109.653(3)
_cell_volume                      2092.04(14)
_cell_formula_units_Z             1
_cell_measurement_reflns_used     9325
_cell_measurement_temperature     104.2(2)
_cell_measurement_theta_max       28.5870
_cell_measurement_theta_min       3.0930
_shelx_estimated_absorpt_T_max    ?
_shelx_estimated_absorpt_T_min    ?
_exptl_absorpt_coefficient_mu     2.219
_exptl_absorpt_correction_T_max   1.00000
_exptl_absorpt_correction_T_min   0.62689
_exptl_absorpt_correction_type    multi-scan
_exptl_absorpt_process_details
;
CrysAlisPro, Agilent Technologies,
Version 1.171.36.28 (release 01-02-2013 CrysAlis171 .NET)
(compiled Feb  1 2013,16:14:44)
Empirical absorption correction using spherical harmonics,
 implemented in SCALE3 ABSPACK scaling algorithm.
;
_exptl_crystal_colour             'clear green'
_exptl_crystal_colour_lustre      clear
_exptl_crystal_colour_primary     green
_exptl_crystal_density_diffrn     1.385
_exptl_crystal_density_meas       ?
_exptl_crystal_density_method     ?
_exptl_crystal_description        irregular
_exptl_crystal_F_000              898
_exptl_crystal_size_max           0.2
_exptl_crystal_size_mid           0.1
_exptl_crystal_size_min           0.08
_exptl_transmission_factor_max    ?
_exptl_transmission_factor_min    ?
_diffrn_reflns_av_R_equivalents   0.0352
_diffrn_reflns_av_unetI/netI      0.0535
_diffrn_reflns_Laue_measured_fraction_full 0.998
_diffrn_reflns_Laue_measured_fraction_max 0.998
_diffrn_reflns_limit_h_max        13
_diffrn_reflns_limit_h_min        -14
_diffrn_reflns_limit_k_max        16
_diffrn_reflns_limit_k_min        -14
_diffrn_reflns_limit_l_max        19
_diffrn_reflns_limit_l_min        -19
_diffrn_reflns_number             13979
_diffrn_reflns_point_group_measured_fraction_full 0.998
_diffrn_reflns_point_group_measured_fraction_max 0.998
_diffrn_reflns_theta_full         25.242
_diffrn_reflns_theta_max          26.371
_diffrn_reflns_theta_min          2.909
_diffrn_ambient_temperature       104.2(2)
_diffrn_detector_area_resol_mean  8.3367
_diffrn_measured_fraction_theta_full 0.998
_diffrn_measured_fraction_theta_max 0.998
_diffrn_measurement_details
;
#__ type_ start__ end____ width___ exp.time_
  1 omega -109.00    7.90   0.7000    7.0000
omega____ theta____ kappa____ phi______ frames
    -      -21.2308  -37.0000   30.0000 167

#__ type_ start__ end____ width___ exp.time_
  2 omega  -82.00  -47.00   0.7000    7.0000
omega____ theta____ kappa____ phi______ frames
    -      -21.2308  179.0000  -90.0000 50

#__ type_ start__ end____ width___ exp.time_
  3 omega   86.00  121.00   0.7000    7.0000
omega____ theta____ kappa____ phi______ frames
    -       22.6371  179.0000 -180.0000 50

#__ type_ start__ end____ width___ exp.time_
  4 omega  -27.00   60.50   0.7000    7.0000
omega____ theta____ kappa____ phi______ frames
    -       22.6371  -77.0000  -90.0000 125

#__ type_ start__ end____ width___ exp.time_
  5 omega  -68.00   51.00   0.7000    7.0000
omega____ theta____ kappa____ phi______ frames
    -       22.6371  -77.0000 -180.0000 170
;
_diffrn_measurement_device_type   'Xcalibur, Sapphire2, large Be window'
_diffrn_measurement_method        '\w scans'
_diffrn_orient_matrix_UB_11       -0.0104729000
_diffrn_orient_matrix_UB_12       -0.0470643000
_diffrn_orient_matrix_UB_13       -0.0369713000
_diffrn_orient_matrix_UB_21       -0.0112645000
_diffrn_orient_matrix_UB_22       -0.0340053000
_diffrn_orient_matrix_UB_23       0.0295778000
_diffrn_orient_matrix_UB_31       -0.0663819000
_diffrn_orient_matrix_UB_32       -0.0099780000
_diffrn_orient_matrix_UB_33       -0.0112635000
_diffrn_radiation_monochromator   graphite
_diffrn_radiation_type            MoK\a
_diffrn_radiation_wavelength      0.71073
_diffrn_source                    'Enhance (Mo) X-ray Source'
_reflns_Friedel_coverage          0.000
_reflns_Friedel_fraction_full     .
_reflns_Friedel_fraction_max      .
_reflns_number_gt                 7833
_reflns_number_total              8551
_reflns_special_details
;
 Reflections were merged by SHELXL according to the crystal
 class for the calculation of statistics and refinement.
 
 _reflns_Friedel_fraction is defined as the number of unique
 Friedel pairs measured divided by the number that would be
 possible theoretically, ignoring centric projections and
 systematic absences.
;
_reflns_threshold_expression      'I > 2\s(I)'
_computing_cell_refinement
;
CrysAlisPro, Agilent Technologies,
Version 1.171.36.28 (release 01-02-2013 CrysAlis171 .NET)
(compiled Feb  1 2013,16:14:44)
;
_computing_data_collection
;
CrysAlisPro, Agilent Technologies,
Version 1.171.36.28 (release 01-02-2013 CrysAlis171 .NET)
(compiled Feb  1 2013,16:14:44)
;
_computing_data_reduction
;
CrysAlisPro, Agilent Technologies,
Version 1.171.36.28 (release 01-02-2013 CrysAlis171 .NET)
(compiled Feb  1 2013,16:14:44)
;
_computing_molecular_graphics     'Olex2 (Dolomanov et al., 2009)'
_computing_publication_material   'Olex2 (Dolomanov et al., 2009)'
_computing_structure_refinement   'ShelXL (Sheldrick, 2008)'
_computing_structure_solution
;
Superflip (Palatinus & Chapuis, 2007;Palatinus & van der Lee, 2008;
Palatinus et al., 2012)
;
_refine_diff_density_max          1.149
_refine_diff_density_min          -0.946
_refine_diff_density_rms          0.107
_refine_ls_extinction_coef        .
_refine_ls_extinction_method      none
_refine_ls_goodness_of_fit_ref    1.071
_refine_ls_hydrogen_treatment     mixed
_refine_ls_matrix_type            full
_refine_ls_number_parameters      478
_refine_ls_number_reflns          8551
_refine_ls_number_restraints      0
_refine_ls_R_factor_all           0.0358
_refine_ls_R_factor_gt            0.0315
_refine_ls_restrained_S_all       1.071
_refine_ls_shift/su_max           0.001
_refine_ls_shift/su_mean          0.000
_refine_ls_structure_factor_coef  Fsqd
_refine_ls_weighting_details
'w=1/[\s^2^(Fo^2^)+(0.0288P)^2^+0.3830P] where P=(Fo^2^+2Fc^2^)/3'
_refine_ls_weighting_scheme       calc
_refine_ls_wR_factor_gt           0.0716
_refine_ls_wR_factor_ref          0.0752
_refine_special_details           ?
_olex2_refinement_description
;
1. Fixed Uiso
 At 1.2 times of:
  All C(H) groups, All N(H,H) groups
 At 1.5 times of:
  All C(H,H,H) groups
2. Others
 Sof(C17B)=Sof(H17D)=Sof(H17E)=Sof(H17F)=Sof(C18B)=Sof(H18D)=Sof(H18E)=
 Sof(H18F)=Sof(C19B)=Sof(H19D)=Sof(H19E)=Sof(H19F)=1-FVAR(1)
 Sof(C17)=Sof(H17A)=Sof(H17B)=Sof(H17C)=Sof(C18)=Sof(H18A)=Sof(H18B)=Sof(H18C)=
 Sof(C19)=Sof(H19A)=Sof(H19B)=Sof(H19C)=FVAR(1)
3.a Ternary CH refined with riding coordinates:
 C25(H25), C28(H28)
3.b Secondary CH2 refined with riding coordinates:
 N1(H1A,H1B)
3.c Idealised Me refined as rotating group:
 C3(H3A,H3B,H3C), C4(H4A,H4B,H4C), C5(H5A,H5B,H5C), C7(H7A,H7B,H7C), C8(H8A,
 H8B,H8C), C9(H9A,H9B,H9C), C12(H12A,H12B,H12C), C13(H13A,H13B,H13C), C14(H14A,
 H14B,H14C), C17(H17A,H17B,H17C), C17B(H17D,H17E,H17F), C18(H18A,H18B,H18C),
 C18B(H18D,H18E,H18F), C19(H19A,H19B,H19C), C19B(H19D,H19E,H19F), C22(H22A,H22B,
 H22C), C23(H23A,H23B,H23C), C24(H24A,H24B,H24C), C26(H26A,H26B,H26C), C27(H27A,
 H27B,H27C), C29(H29A,H29B,H29C), C30(H30A,H30B,H30C)
;
_atom_sites_solution_hydrogens    mixed
_atom_sites_solution_primary      iterative
_atom_sites_solution_secondary    ?
loop_
  _atom_site_label
  _atom_site_type_symbol
  _atom_site_fract_x
  _atom_site_fract_y
  _atom_site_fract_z
  _atom_site_U_iso_or_equiv
  _atom_site_adp_type
  _atom_site_occupancy
  _atom_site_site_symmetry_order
  _atom_site_calc_flag
  _atom_site_refinement_flags_posn
  _atom_site_refinement_flags_adp
  _atom_site_refinement_flags_occupancy
  _atom_site_disorder_assembly
  _atom_site_disorder_group
 Dy1 Dy 0.03635(2) 0.42423(2) 0.30442(2) 0.01797(6) Uani 1 1 d . . . . .
 Co1 Co 0.03685(4) 0.62366(3) 0.49266(3) 0.01595(9) Uani 1 1 d . . . . .
 O1 O 0.1079(2) 0.2501(2) 0.05451(18) 0.0402(7) Uani 1 1 d . . . . .
 O1OH O 0.0953(2) 0.49059(18) 0.46240(16) 0.0177(5) Uani 1 1 d . . . . .
 H1OH H 0.154(4) 0.509(4) 0.479(3) 0.053(17) Uiso 1 1 d . . . . .
 O2 O 0.0973(2) 0.28905(18) 0.34395(16) 0.0258(5) Uani 1 1 d . . . . .
 O3 O -0.0774(3) 0.4978(2) 0.20595(17) 0.0393(6) Uani 1 1 d . . . . .
 O4 O -0.07505(19) 0.54792(17) 0.35151(15) 0.0217(5) Uani 1 1 d . . . . .
 O5 O 0.1966(2) 0.59749(18) 0.33063(16) 0.0282(5) Uani 1 1 d . . . . .
 O6 O 0.10631(19) 0.36947(18) 0.17955(15) 0.0250(5) Uani 1 1 d . . . . .
 O8 O 0.0418(2) 0.26105(17) 0.47273(15) 0.0234(5) Uani 1 1 d . . . . .
 O9 O 0.18118(19) 0.72143(17) 0.44873(15) 0.0205(5) Uani 1 1 d . . . . .
 O10 O 0.14295(19) 0.67507(17) 0.63516(15) 0.0226(5) Uani 1 1 d . . . . .
 O11 O -0.1663(2) 0.26250(19) 0.21745(15) 0.0276(5) Uani 1 1 d . . . . .
 C1 C 0.1648(3) 0.3279(3) 0.1266(2) 0.0267(7) Uani 1 1 d . . . . .
 C2 C 0.3131(3) 0.3811(3) 0.1522(2) 0.0287(8) Uani 1 1 d . . . . .
 C3 C 0.3682(4) 0.3043(4) 0.1036(5) 0.094(3) Uani 1 1 d . . . . .
 H3A H 0.3503 0.2408 0.1260 0.141 Uiso 1 1 calc GR . . . .
 H3B H 0.4595 0.3423 0.1147 0.141 Uiso 1 1 calc GR . . . .
 H3C H 0.3303 0.2806 0.0389 0.141 Uiso 1 1 calc GR . . . .
 C4 C 0.3627(4) 0.4145(5) 0.2553(3) 0.0784(19) Uani 1 1 d . . . . .
 H4A H 0.3342 0.4707 0.2840 0.118 Uiso 1 1 calc GR . . . .
 H4B H 0.4548 0.4431 0.2706 0.118 Uiso 1 1 calc GR . . . .
 H4C H 0.3303 0.3508 0.2767 0.118 Uiso 1 1 calc GR . . . .
 C5 C 0.3490(4) 0.4861(4) 0.1219(3) 0.0521(12) Uani 1 1 d . . . . .
 H5A H 0.3182 0.4665 0.0566 0.078 Uiso 1 1 calc GR . . . .
 H5B H 0.4407 0.5241 0.1384 0.078 Uiso 1 1 calc GR . . . .
 H5C H 0.3108 0.5339 0.1517 0.078 Uiso 1 1 calc GR . . . .
 C6 C -0.1716(3) 0.6316(3) 0.2531(2) 0.0273(7) Uani 1 1 d . . . . .
 C7 C -0.2354(4) 0.5997(4) 0.1525(3) 0.0523(12) Uani 1 1 d . . . . .
 H7A H -0.2787 0.6482 0.1430 0.078 Uiso 1 1 calc GR . . . .
 H7B H -0.2966 0.5244 0.1331 0.078 Uiso 1 1 calc GR . . . .
 H7C H -0.1716 0.6063 0.1175 0.078 Uiso 1 1 calc GR . . . .
 C8 C -0.0687(4) 0.7508(3) 0.2869(3) 0.0476(11) Uani 1 1 d . . . . .
 H8A H -0.0054 0.7566 0.2514 0.071 Uiso 1 1 calc GR . . . .
 H8B H -0.0282 0.7678 0.3504 0.071 Uiso 1 1 calc GR . . . .
 H8C H -0.1085 0.8023 0.2798 0.071 Uiso 1 1 calc GR . . . .
 C9 C -0.2714(4) 0.6245(4) 0.3099(3) 0.0454(10) Uani 1 1 d . . . . .
 H9A H -0.3152 0.6720 0.2987 0.068 Uiso 1 1 calc GR . . . .
 H9B H -0.2295 0.6478 0.3739 0.068 Uiso 1 1 calc GR . . . .
 H9C H -0.3323 0.5493 0.2930 0.068 Uiso 1 1 calc GR . . . .
 C10 C 0.2287(3) 0.6952(3) 0.3824(2) 0.0192(6) Uani 1 1 d . . . . .
 C11 C 0.3340(3) 0.7884(3) 0.3629(2) 0.0206(7) Uani 1 1 d . . . . .
 C12 C 0.4614(3) 0.7775(3) 0.3943(3) 0.0451(11) Uani 1 1 d . . . . .
 H12A H 0.4764 0.7833 0.4584 0.068 Uiso 1 1 calc GR . . . .
 H12B H 0.5298 0.8356 0.3840 0.068 Uiso 1 1 calc GR . . . .
 H12C H 0.4580 0.7067 0.3600 0.068 Uiso 1 1 calc GR . . . .
 C13 C 0.3399(4) 0.9021(3) 0.4148(3) 0.0443(10) Uani 1 1 d . . . . .
 H13A H 0.2576 0.9064 0.3980 0.066 Uiso 1 1 calc GR . . . .
 H13B H 0.4036 0.9588 0.3993 0.066 Uiso 1 1 calc GR . . . .
 H13C H 0.3621 0.9126 0.4796 0.066 Uiso 1 1 calc GR . . . .
 C14 C 0.3052(4) 0.7773(3) 0.2611(2) 0.0391(9) Uani 1 1 d . . . . .
 H14A H 0.3060 0.7080 0.2271 0.059 Uiso 1 1 calc GR . . . .
 H14B H 0.3694 0.8374 0.2495 0.059 Uiso 1 1 calc GR . . . .
 H14C H 0.2222 0.7794 0.2424 0.059 Uiso 1 1 calc GR . . . .
 C15 C 0.0880(3) 0.2390(3) 0.4050(2) 0.0217(7) Uani 1 1 d . . . . .
 C16 C 0.1372(3) 0.1440(3) 0.3942(2) 0.0262(7) Uani 1 1 d . . . . .
 C17 C 0.0880(8) 0.0711(6) 0.2918(5) 0.047(2) Uani 0.564(7) 1 d . . P A 1
 H17A H -0.0042 0.0418 0.2751 0.071 Uiso 0.564(7) 1 calc GR . P A 1
 H17B H 0.1173 0.0109 0.2840 0.071 Uiso 0.564(7) 1 calc GR . P A 1
 H17C H 0.1208 0.1157 0.2533 0.071 Uiso 0.564(7) 1 calc GR . P A 1
 C17B C 0.0295(8) 0.0397(6) 0.3436(7) 0.033(2) Uani 0.436(7) 1 d . . P A 2
 H17D H -0.0386 0.0299 0.3749 0.050 Uiso 0.436(7) 1 calc GR . P A 2
 H17E H 0.0574 -0.0210 0.3399 0.050 Uiso 0.436(7) 1 calc GR . P A 2
 H17F H -0.0008 0.0418 0.2829 0.050 Uiso 0.436(7) 1 calc GR . P A 2
 C18 C 0.0804(8) 0.0700(6) 0.4528(6) 0.048(2) Uani 0.564(7) 1 d . . P A 1
 H18A H 0.1155 0.1108 0.5166 0.073 Uiso 0.564(7) 1 calc GR . P A 1
 H18B H 0.1016 0.0054 0.4398 0.073 Uiso 0.564(7) 1 calc GR . P A 1
 H18C H -0.0112 0.0476 0.4386 0.073 Uiso 0.564(7) 1 calc GR . P A 1
 C18B C 0.1959(10) 0.1388(8) 0.4902(6) 0.043(3) Uani 0.436(7) 1 d . . P A 2
 H18D H 0.2632 0.2092 0.5239 0.065 Uiso 0.436(7) 1 calc GR . P A 2
 H18E H 0.2303 0.0819 0.4825 0.065 Uiso 0.436(7) 1 calc GR . P A 2
 H18F H 0.1302 0.1221 0.5234 0.065 Uiso 0.436(7) 1 calc GR . P A 2
 C19 C 0.2794(7) 0.1956(6) 0.4219(7) 0.044(2) Uani 0.564(7) 1 d . . P A 1
 H19A H 0.3098 0.2457 0.3870 0.066 Uiso 0.564(7) 1 calc GR . P A 1
 H19B H 0.3136 0.1387 0.4106 0.066 Uiso 0.564(7) 1 calc GR . P A 1
 H19C H 0.3067 0.2357 0.4861 0.066 Uiso 0.564(7) 1 calc GR . P A 1
 C19B C 0.2501(9) 0.1657(8) 0.3451(9) 0.045(3) Uani 0.436(7) 1 d . . P A 2
 H19D H 0.2179 0.1600 0.2823 0.068 Uiso 0.436(7) 1 calc GR . P A 2
 H19E H 0.2876 0.1116 0.3472 0.068 Uiso 0.436(7) 1 calc GR . P A 2
 H19F H 0.3140 0.2388 0.3755 0.068 Uiso 0.436(7) 1 calc GR . P A 2
 C20 C -0.2081(3) 0.2553(3) 0.2886(2) 0.0204(7) Uani 1 1 d . . . . .
 C21 C -0.3336(3) 0.1622(3) 0.2842(2) 0.0261(7) Uani 1 1 d . . . . .
 C22 C -0.4143(3) 0.1041(3) 0.1851(3) 0.0424(10) Uani 1 1 d . . . . .
 H22A H -0.4342 0.1573 0.1596 0.064 Uiso 1 1 calc GR . . . .
 H22B H -0.4926 0.0466 0.1847 0.064 Uiso 1 1 calc GR . . . .
 H22C H -0.3667 0.0721 0.1491 0.064 Uiso 1 1 calc GR . . . .
 C23 C -0.2973(3) 0.0789(3) 0.3246(3) 0.0377(9) Uani 1 1 d . . . . .
 H23A H -0.2491 0.0485 0.2880 0.057 Uiso 1 1 calc GR . . . .
 H23B H -0.3740 0.0201 0.3248 0.057 Uiso 1 1 calc GR . . . .
 H23C H -0.2461 0.1160 0.3863 0.057 Uiso 1 1 calc GR . . . .
 C24 C -0.4098(3) 0.2117(3) 0.3429(3) 0.0414(10) Uani 1 1 d . . . . .
 H24A H -0.3584 0.2485 0.4046 0.062 Uiso 1 1 calc GR . . . .
 H24B H -0.4869 0.1534 0.3431 0.062 Uiso 1 1 calc GR . . . .
 H24C H -0.4317 0.2643 0.3177 0.062 Uiso 1 1 calc GR . . . .
 C40 C -0.1043(3) 0.5547(3) 0.2706(2) 0.0243(7) Uani 1 1 d . . . . .
 N1 N -0.1492(2) 0.1951(2) 0.03226(19) 0.0245(6) Uani 1 1 d . . . . .
 H1A H -0.1598 0.2166 0.0886 0.029 Uiso 1 1 calc R . . . .
 H1B H -0.0651 0.2190 0.0364 0.029 Uiso 1 1 calc R . . . .
 C25 C -0.2034(3) 0.0694(3) 0.0000(3) 0.0321(8) Uani 1 1 d . . . . .
 H25 H -0.2967 0.0417 -0.0073 0.039 Uiso 1 1 calc R . . . .
 C26 C -0.1744(4) 0.0286(3) -0.0910(3) 0.0473(11) Uani 1 1 d . . . . .
 H26A H -0.2224 0.0462 -0.1377 0.071 Uiso 1 1 calc GR . . . .
 H26B H -0.1982 -0.0504 -0.1066 0.071 Uiso 1 1 calc GR . . . .
 H26C H -0.0842 0.0641 -0.0865 0.071 Uiso 1 1 calc GR . . . .
 C27 C -0.1440(4) 0.0298(3) 0.0732(3) 0.0443(10) Uani 1 1 d . . . . .
 H27A H -0.0529 0.0548 0.0794 0.066 Uiso 1 1 calc GR . . . .
 H27B H -0.1807 -0.0499 0.0559 0.066 Uiso 1 1 calc GR . . . .
 H27C H -0.1610 0.0593 0.1307 0.066 Uiso 1 1 calc GR . . . .
 C28 C -0.2051(3) 0.2522(3) -0.0258(2) 0.0315(8) Uani 1 1 d . . . . .
 H28 H -0.2266 0.2084 -0.0903 0.038 Uiso 1 1 calc R . . . .
 C29 C -0.3273(4) 0.2574(4) -0.0014(3) 0.0535(12) Uani 1 1 d . . . . .
 H29A H -0.3845 0.1842 -0.0050 0.080 Uiso 1 1 calc GR . . . .
 H29B H -0.3679 0.2857 -0.0436 0.080 Uiso 1 1 calc GR . . . .
 H29C H -0.3071 0.3055 0.0598 0.080 Uiso 1 1 calc GR . . . .
 C30 C -0.1074(4) 0.3657(3) -0.0143(3) 0.0376(9) Uani 1 1 d . . . . .
 H30A H -0.0856 0.4101 0.0484 0.056 Uiso 1 1 calc GR . . . .
 H30B H -0.1424 0.4005 -0.0534 0.056 Uiso 1 1 calc GR . . . .
 H30C H -0.0316 0.3590 -0.0306 0.056 Uiso 1 1 calc GR . . . .
 N2 N -0.3764(6) 0.4828(8) 0.4895(6) 0.124(3) Uani 1 1 d . . . . .
 C31 C -0.4490(6) 0.4917(6) 0.4954(5) 0.073(2) Uani 1 1 d . . . . .

loop_
  _atom_site_aniso_label
  _atom_site_aniso_U_11
  _atom_site_aniso_U_22
  _atom_site_aniso_U_33
  _atom_site_aniso_U_23
  _atom_site_aniso_U_13
  _atom_site_aniso_U_12
 Dy1 0.01995(9) 0.01667(8) 0.01504(9) 0.00264(6) 0.00415(6) 0.00562(6)
 Co1 0.01753(19) 0.0144(2) 0.0164(2) 0.00378(16) 0.00515(16) 0.00672(16)
 O1 0.0263(12) 0.0473(16) 0.0302(15) -0.0130(12) 0.0048(11) 0.0103(11)
 O1OH 0.0153(11) 0.0166(11) 0.0205(12) 0.0044(9) 0.0037(10) 0.0063(9)
 O2 0.0346(12) 0.0227(12) 0.0269(13) 0.0081(10) 0.0134(10) 0.0163(10)
 O3 0.0619(17) 0.0491(16) 0.0178(13) 0.0063(12) 0.0049(12) 0.0389(14)
 O4 0.0232(11) 0.0232(11) 0.0177(12) 0.0054(9) 0.0036(9) 0.0088(9)
 O5 0.0363(13) 0.0187(11) 0.0246(13) 0.0015(10) 0.0145(10) 0.0049(10)
 O6 0.0240(11) 0.0301(12) 0.0187(12) 0.0028(10) 0.0075(9) 0.0093(10)
 O8 0.0301(12) 0.0210(11) 0.0242(13) 0.0089(10) 0.0095(10) 0.0132(9)
 O9 0.0213(10) 0.0185(11) 0.0209(12) 0.0070(9) 0.0064(9) 0.0051(9)
 O10 0.0237(11) 0.0181(11) 0.0188(12) 0.0009(9) 0.0013(9) 0.0036(9)
 O11 0.0234(11) 0.0332(13) 0.0168(12) 0.0031(10) 0.0025(9) 0.0029(10)
 C1 0.0235(16) 0.0310(18) 0.0251(19) 0.0069(15) 0.0071(14) 0.0104(14)
 C2 0.0195(16) 0.0305(18) 0.034(2) 0.0095(16) 0.0033(14) 0.0082(14)
 C3 0.025(2) 0.050(3) 0.178(7) -0.021(4) 0.027(3) 0.014(2)
 C4 0.028(2) 0.138(5) 0.055(3) 0.059(3) -0.005(2) 0.001(3)
 C5 0.034(2) 0.055(3) 0.066(3) 0.029(2) 0.011(2) 0.0080(19)
 C6 0.0272(17) 0.0286(18) 0.030(2) 0.0109(15) 0.0032(15) 0.0154(14)
 C7 0.066(3) 0.072(3) 0.036(2) 0.021(2) 0.002(2) 0.048(3)
 C8 0.041(2) 0.037(2) 0.075(3) 0.030(2) 0.013(2) 0.0190(18)
 C9 0.037(2) 0.064(3) 0.050(3) 0.025(2) 0.0157(19) 0.032(2)
 C10 0.0155(14) 0.0238(16) 0.0168(16) 0.0077(13) 0.0008(12) 0.0057(12)
 C11 0.0189(15) 0.0215(16) 0.0178(16) 0.0056(13) 0.0025(12) 0.0040(12)
 C12 0.0196(17) 0.053(2) 0.069(3) 0.039(2) 0.0087(18) 0.0080(17)
 C13 0.052(2) 0.0218(18) 0.056(3) 0.0093(18) 0.031(2) 0.0041(17)
 C14 0.040(2) 0.041(2) 0.026(2) 0.0151(17) 0.0063(17) 0.0005(17)
 C15 0.0208(15) 0.0187(15) 0.0233(18) 0.0020(13) 0.0039(13) 0.0083(13)
 C16 0.0325(18) 0.0207(16) 0.0298(19) 0.0061(14) 0.0098(15) 0.0155(14)
 C17 0.070(5) 0.034(4) 0.038(5) 0.000(3) 0.006(4) 0.032(4)
 C17B 0.033(4) 0.013(4) 0.050(6) 0.005(4) 0.001(4) 0.010(3)
 C18 0.062(5) 0.041(4) 0.067(6) 0.031(4) 0.035(5) 0.033(4)
 C18B 0.065(7) 0.045(6) 0.035(5) 0.009(4) 0.006(5) 0.044(5)
 C19 0.038(4) 0.045(4) 0.062(6) 0.019(4) 0.007(4) 0.031(3)
 C19B 0.044(5) 0.034(5) 0.081(9) 0.025(6) 0.033(6) 0.030(5)
 C20 0.0193(15) 0.0223(16) 0.0207(17) 0.0059(13) 0.0022(13) 0.0106(13)
 C21 0.0199(15) 0.0296(18) 0.0213(18) 0.0027(14) 0.0046(13) 0.0035(14)
 C22 0.0248(18) 0.051(2) 0.028(2) 0.0030(18) -0.0002(16) -0.0061(17)
 C23 0.039(2) 0.0286(19) 0.036(2) 0.0094(17) 0.0078(17) 0.0017(16)
 C24 0.0217(17) 0.057(3) 0.035(2) 0.0041(19) 0.0088(16) 0.0080(17)
 C40 0.0235(16) 0.0216(16) 0.0217(18) 0.0052(14) -0.0008(14) 0.0047(13)
 N1 0.0233(13) 0.0279(15) 0.0199(15) 0.0028(12) 0.0031(11) 0.0105(12)
 C25 0.0296(18) 0.0277(18) 0.031(2) -0.0003(15) 0.0047(15) 0.0076(15)
 C26 0.052(2) 0.043(2) 0.035(2) -0.0108(19) 0.0027(19) 0.021(2)
 C27 0.054(2) 0.036(2) 0.048(3) 0.0139(19) 0.009(2) 0.0236(19)
 C28 0.0376(19) 0.035(2) 0.0179(18) 0.0062(15) -0.0003(15) 0.0127(16)
 C29 0.042(2) 0.074(3) 0.065(3) 0.041(3) 0.011(2) 0.034(2)
 C30 0.049(2) 0.034(2) 0.026(2) 0.0099(16) 0.0032(17) 0.0127(17)
 N2 0.099(5) 0.156(7) 0.109(6) 0.031(5) 0.010(5) 0.049(5)
 C31 0.096(6) 0.059(3) 0.047(3) 0.006(3) 0.024(5) 0.012(4)

_geom_special_details
;
 All esds (except the esd in the dihedral angle between two l.s. planes)
 are estimated using the full covariance matrix.  The cell esds are taken
 into account individually in the estimation of esds in distances, angles
 and torsion angles; correlations between esds in cell parameters are only
 used when they are defined by crystal symmetry.  An approximate (isotropic)
 treatment of cell esds is used for estimating esds involving l.s. planes.
;
loop_
  _geom_bond_atom_site_label_1
  _geom_bond_atom_site_label_2
  _geom_bond_distance
  _geom_bond_site_symmetry_2
  _geom_bond_publ_flag
 Dy1 Co1 3.4680(4) . ?
 Dy1 Co1 3.4933(4) 2_566 ?
 Dy1 O1OH 2.306(2) . ?
 Dy1 O2 2.312(2) . ?
 Dy1 O3 2.432(2) . ?
 Dy1 O4 2.453(2) . ?
 Dy1 O5 2.320(2) . ?
 Dy1 O6 2.254(2) . ?
 Dy1 O10 2.469(2) 2_566 ?
 Dy1 O11 2.497(2) . ?
 Dy1 C20 2.870(3) . ?
 Dy1 C40 2.818(3) . ?
 Co1 Dy1 3.4933(4) 2_566 ?
 Co1 O1OH 2.078(2) 2_566 ?
 Co1 O1OH 2.084(2) . ?
 Co1 O4 2.171(2) . ?
 Co1 O8 2.041(2) 2_566 ?
 Co1 O9 2.038(2) . ?
 Co1 O10 2.178(2) . ?
 O1 C1 1.246(4) . ?
 O1OH Co1 2.078(2) 2_566 ?
 O2 C15 1.269(4) . ?
 O3 C40 1.254(4) . ?
 O4 C40 1.275(4) . ?
 O5 C10 1.266(4) . ?
 O6 C1 1.274(4) . ?
 O8 Co1 2.041(2) 2_566 ?
 O8 C15 1.257(4) . ?
 O9 C10 1.260(4) . ?
 O10 Dy1 2.469(2) 2_566 ?
 O10 C20 1.259(4) 2_566 ?
 O11 C20 1.268(4) . ?
 C1 C2 1.544(4) . ?
 C2 C3 1.495(5) . ?
 C2 C4 1.515(6) . ?
 C2 C5 1.524(5) . ?
 C6 C7 1.510(5) . ?
 C6 C8 1.542(5) . ?
 C6 C9 1.525(5) . ?
 C6 C40 1.521(4) . ?
 C10 C11 1.534(4) . ?
 C11 C12 1.526(4) . ?
 C11 C13 1.525(5) . ?
 C11 C14 1.518(4) . ?
 C15 C16 1.539(4) . ?
 C16 C17 1.561(8) . ?
 C16 C17B 1.462(8) . ?
 C16 C18 1.535(8) . ?
 C16 C18B 1.560(9) . ?
 C16 C19 1.481(8) . ?
 C16 C19B 1.563(10) . ?
 C20 O10 1.259(4) 2_566 ?
 C20 C21 1.528(4) . ?
 C21 C22 1.535(5) . ?
 C21 C23 1.533(5) . ?
 C21 C24 1.535(5) . ?
 N1 C25 1.513(4) . ?
 N1 C28 1.505(4) . ?
 C25 C26 1.512(5) . ?
 C25 C27 1.517(5) . ?
 C28 C29 1.513(5) . ?
 C28 C30 1.503(5) . ?
 N2 C31 0.888(8) . ?
 C31 C31 1.276(13) 2_466 ?

loop_
  _geom_angle_atom_site_label_1
  _geom_angle_atom_site_label_2
  _geom_angle_atom_site_label_3
  _geom_angle
  _geom_angle_site_symmetry_1
  _geom_angle_site_symmetry_3
  _geom_angle_publ_flag
 Co1 Dy1 Co1 54.712(12) . 2_566 ?
 O1OH Dy1 Co1 35.63(6) . . ?
 O1OH Dy1 Co1 34.97(6) . 2_566 ?
 O1OH Dy1 O2 77.94(8) . . ?
 O1OH Dy1 O3 124.28(8) . . ?
 O1OH Dy1 O4 72.37(7) . . ?
 O1OH Dy1 O5 77.54(8) . . ?
 O1OH Dy1 O10 71.50(8) . 2_566 ?
 O1OH Dy1 O11 123.14(8) . . ?
 O1OH Dy1 C20 97.15(9) . . ?
 O1OH Dy1 C40 98.39(9) . . ?
 O2 Dy1 Co1 113.12(6) . . ?
 O2 Dy1 Co1 66.23(6) . 2_566 ?
 O2 Dy1 O3 155.40(8) . . ?
 O2 Dy1 O4 142.24(8) . . ?
 O2 Dy1 O5 117.39(8) . . ?
 O2 Dy1 O10 77.12(7) . 2_566 ?
 O2 Dy1 O11 83.18(8) . . ?
 O2 Dy1 C20 78.50(8) . . ?
 O2 Dy1 C40 163.01(9) . . ?
 O3 Dy1 Co1 88.68(6) . . ?
 O3 Dy1 Co1 124.53(6) . 2_566 ?
 O3 Dy1 O4 53.17(8) . . ?
 O3 Dy1 O10 98.81(8) . 2_566 ?
 O3 Dy1 O11 75.61(8) . . ?
 O3 Dy1 C20 87.49(9) . . ?
 O3 Dy1 C40 26.34(9) . . ?
 O4 Dy1 Co1 38.41(5) . . ?
 O4 Dy1 Co1 76.08(5) . 2_566 ?
 O4 Dy1 O10 71.74(7) . 2_566 ?
 O4 Dy1 O11 93.84(7) . . ?
 O4 Dy1 C20 82.55(8) . . ?
 O4 Dy1 C40 26.87(8) . . ?
 O5 Dy1 Co1 112.21(6) . 2_566 ?
 O5 Dy1 Co1 66.65(6) . . ?
 O5 Dy1 O3 80.85(9) . . ?
 O5 Dy1 O4 78.47(7) . . ?
 O5 Dy1 O10 142.07(7) . 2_566 ?
 O5 Dy1 O11 154.98(8) . . ?
 O5 Dy1 C20 161.01(8) . . ?
 O5 Dy1 C40 77.30(8) . . ?
 O6 Dy1 Co1 147.09(6) . 2_566 ?
 O6 Dy1 Co1 152.68(6) . . ?
 O6 Dy1 O1OH 143.57(8) . . ?
 O6 Dy1 O2 81.19(8) . . ?
 O6 Dy1 O3 83.96(8) . . ?
 O6 Dy1 O4 136.02(8) . . ?
 O6 Dy1 O5 86.19(8) . . ?
 O6 Dy1 O10 131.68(7) . 2_566 ?
 O6 Dy1 O11 83.04(7) . . ?
 O6 Dy1 C20 107.54(8) . . ?
 O6 Dy1 C40 109.61(9) . . ?
 O10 Dy1 Co1 75.42(5) 2_566 . ?
 O10 Dy1 Co1 38.21(5) 2_566 2_566 ?
 O10 Dy1 O11 52.05(7) 2_566 . ?
 O10 Dy1 C20 25.91(8) 2_566 . ?
 O10 Dy1 C40 85.97(8) 2_566 . ?
 O11 Dy1 Co1 88.43(5) . 2_566 ?
 O11 Dy1 Co1 120.51(5) . . ?
 O11 Dy1 C20 26.15(8) . . ?
 O11 Dy1 C40 85.15(8) . . ?
 C20 Dy1 Co1 98.34(6) . . ?
 C20 Dy1 Co1 62.85(6) . 2_566 ?
 C40 Dy1 Co1 101.20(7) . 2_566 ?
 C40 Dy1 Co1 63.10(7) . . ?
 C40 Dy1 C20 85.59(9) . . ?
 Dy1 Co1 Dy1 125.287(12) . 2_566 ?
 O1OH Co1 Dy1 39.49(6) 2_566 2_566 ?
 O1OH Co1 Dy1 93.13(7) . 2_566 ?
 O1OH Co1 Dy1 93.97(6) 2_566 . ?
 O1OH Co1 Dy1 40.12(7) . . ?
 O1OH Co1 O1OH 79.55(10) 2_566 . ?
 O1OH Co1 O4 82.69(9) . . ?
 O1OH Co1 O4 91.91(9) 2_566 . ?
 O1OH Co1 O10 90.62(9) . . ?
 O1OH Co1 O10 81.96(9) 2_566 . ?
 O4 Co1 Dy1 130.62(6) . 2_566 ?
 O4 Co1 Dy1 44.58(6) . . ?
 O4 Co1 O10 171.67(8) . . ?
 O8 Co1 Dy1 141.07(6) 2_566 . ?
 O8 Co1 Dy1 80.91(6) 2_566 2_566 ?
 O8 Co1 O1OH 92.29(9) 2_566 2_566 ?
 O8 Co1 O1OH 171.80(9) 2_566 . ?
 O8 Co1 O4 96.87(8) 2_566 . ?
 O8 Co1 O10 89.04(9) 2_566 . ?
 O9 Co1 Dy1 81.14(6) . . ?
 O9 Co1 Dy1 140.13(6) . 2_566 ?
 O9 Co1 O1OH 171.74(9) . 2_566 ?
 O9 Co1 O1OH 92.49(9) . . ?
 O9 Co1 O4 89.25(8) . . ?
 O9 Co1 O8 95.70(9) . 2_566 ?
 O9 Co1 O10 96.02(8) . . ?
 O10 Co1 Dy1 44.50(6) . 2_566 ?
 O10 Co1 Dy1 129.88(6) . . ?
 Co1 O1OH Dy1 104.25(10) . . ?
 Co1 O1OH Dy1 105.54(10) 2_566 . ?
 Co1 O1OH Co1 100.44(10) 2_566 . ?
 C15 O2 Dy1 138.4(2) . . ?
 C40 O3 Dy1 94.3(2) . . ?
 Co1 O4 Dy1 97.01(8) . . ?
 C40 O4 Dy1 92.74(19) . . ?
 C40 O4 Co1 149.9(2) . . ?
 C10 O5 Dy1 137.4(2) . . ?
 C1 O6 Dy1 161.8(2) . . ?
 C15 O8 Co1 129.2(2) . 2_566 ?
 C10 O9 Co1 129.30(19) . . ?
 Co1 O10 Dy1 97.29(7) . 2_566 ?
 C20 O10 Dy1 95.16(18) 2_566 2_566 ?
 C20 O10 Co1 154.7(2) 2_566 . ?
 C20 O11 Dy1 93.59(18) . . ?
 O1 C1 O6 123.1(3) . . ?
 O1 C1 C2 119.5(3) . . ?
 O6 C1 C2 117.4(3) . . ?
 C3 C2 C1 111.0(3) . . ?
 C3 C2 C4 111.6(4) . . ?
 C3 C2 C5 109.9(4) . . ?
 C4 C2 C1 109.8(3) . . ?
 C4 C2 C5 108.3(4) . . ?
 C5 C2 C1 106.1(3) . . ?
 C7 C6 C8 111.5(3) . . ?
 C7 C6 C9 110.1(3) . . ?
 C7 C6 C40 110.7(3) . . ?
 C9 C6 C8 108.6(3) . . ?
 C40 C6 C8 107.1(3) . . ?
 C40 C6 C9 108.8(3) . . ?
 O5 C10 C11 117.2(3) . . ?
 O9 C10 O5 125.0(3) . . ?
 O9 C10 C11 117.8(3) . . ?
 C12 C11 C10 107.4(3) . . ?
 C13 C11 C10 110.9(3) . . ?
 C13 C11 C12 109.9(3) . . ?
 C14 C11 C10 109.7(2) . . ?
 C14 C11 C12 111.2(3) . . ?
 C14 C11 C13 107.9(3) . . ?
 O2 C15 C16 116.8(3) . . ?
 O8 C15 O2 125.1(3) . . ?
 O8 C15 C16 118.1(3) . . ?
 C15 C16 C17 108.4(4) . . ?
 C15 C16 C18B 110.3(4) . . ?
 C15 C16 C19B 110.9(4) . . ?
 C17B C16 C15 108.5(4) . . ?
 C17B C16 C18B 110.5(6) . . ?
 C17B C16 C19B 111.7(6) . . ?
 C18 C16 C15 109.5(4) . . ?
 C18 C16 C17 107.7(5) . . ?
 C18B C16 C19B 105.0(6) . . ?
 C19 C16 C15 107.2(4) . . ?
 C19 C16 C17 111.4(5) . . ?
 C19 C16 C18 112.6(5) . . ?
 O10 C20 Dy1 58.93(15) 2_566 . ?
 O10 C20 O11 119.2(3) 2_566 . ?
 O10 C20 C21 119.4(3) 2_566 . ?
 O11 C20 Dy1 60.26(15) . . ?
 O11 C20 C21 121.4(3) . . ?
 C21 C20 Dy1 176.2(2) . . ?
 C20 C21 C22 111.5(3) . . ?
 C20 C21 C23 107.0(3) . . ?
 C20 C21 C24 108.7(3) . . ?
 C22 C21 C24 110.0(3) . . ?
 C23 C21 C22 109.9(3) . . ?
 C23 C21 C24 109.7(3) . . ?
 O3 C40 Dy1 59.40(17) . . ?
 O3 C40 O4 119.6(3) . . ?
 O3 C40 C6 120.4(3) . . ?
 O4 C40 Dy1 60.39(16) . . ?
 O4 C40 C6 120.0(3) . . ?
 C6 C40 Dy1 176.1(2) . . ?
 C28 N1 C25 116.9(3) . . ?
 N1 C25 C27 107.9(3) . . ?
 C26 C25 N1 110.2(3) . . ?
 C26 C25 C27 111.3(3) . . ?
 N1 C28 C29 110.0(3) . . ?
 C30 C28 N1 109.9(3) . . ?
 C30 C28 C29 112.0(3) . . ?
 N2 C31 C31 177.9(14) . 2_466 ?

_shelx_SHELXL_version_number      '2014/7'
_iucr_refine_instructions_details
;

    oejlm1163.res created by SHELXL-2014/7

TITL oejlm1163 in P1
CELL 0.71073 11.391292 13.380943 15.418799 103.0701 98.3775 109.6533
ZERR 1 0.000397 0.000513 0.000476 0.003 0.0028 0.0033
LATT 1
SFAC C H Co Dy N O
UNIT 64 124 2 2 4 22
 
L.S. 10
PLAN  20
fmap 2 53
acta
SHEL 100 0.8
REM <olex2.extras>
REM <HklSrc "%./oejlm1163.hkl">
REM </olex2.extras>
 
WGHT    0.028800    0.383000
FVAR       2.53563   0.56405
DY1   4    0.036350    0.424226    0.304418    11.00000    0.01995    0.01667 =
         0.01504    0.00264    0.00415    0.00562
CO1   3    0.036850    0.623658    0.492655    11.00000    0.01753    0.01439 =
         0.01637    0.00378    0.00515    0.00672
O1    6    0.107919    0.250082    0.054506    11.00000    0.02626    0.04727 =
         0.03025   -0.01297    0.00483    0.01034
O1OH  6    0.095308    0.490586    0.462397    11.00000    0.01530    0.01660 =
         0.02048    0.00439    0.00374    0.00629
H1OH  2    0.154161    0.509394    0.479059    11.00000    0.05295
O2    6    0.097307    0.289046    0.343954    11.00000    0.03459    0.02265 =
         0.02692    0.00815    0.01335    0.01626
O3    6   -0.077354    0.497830    0.205947    11.00000    0.06193    0.04909 =
         0.01779    0.00627    0.00491    0.03886
O4    6   -0.075048    0.547921    0.351514    11.00000    0.02324    0.02323 =
         0.01774    0.00542    0.00365    0.00880
O5    6    0.196574    0.597488    0.330631    11.00000    0.03635    0.01874 =
         0.02464    0.00147    0.01452    0.00490
O6    6    0.106311    0.369468    0.179549    11.00000    0.02399    0.03006 =
         0.01869    0.00283    0.00748    0.00934
O8    6    0.041798    0.261047    0.472732    11.00000    0.03013    0.02098 =
         0.02418    0.00888    0.00948    0.01322
O9    6    0.181176    0.721426    0.448726    11.00000    0.02128    0.01847 =
         0.02094    0.00705    0.00643    0.00510
O10   6    0.142946    0.675069    0.635156    11.00000    0.02373    0.01813 =
         0.01877    0.00093    0.00133    0.00364
O11   6   -0.166325    0.262502    0.217454    11.00000    0.02344    0.03322 =
         0.01675    0.00311    0.00254    0.00294
C1    1    0.164817    0.327854    0.126609    11.00000    0.02352    0.03102 =
         0.02513    0.00686    0.00705    0.01043
C2    1    0.313085    0.381144    0.152213    11.00000    0.01950    0.03049 =
         0.03396    0.00947    0.00335    0.00817
C3    1    0.368214    0.304346    0.103631    11.00000    0.02545    0.05019 =
         0.17785   -0.02132    0.02695    0.01388
AFIX 137
H3A   2    0.350270    0.240765    0.126044    11.00000   -1.50000
H3B   2    0.459470    0.342305    0.114721    11.00000   -1.50000
H3C   2    0.330306    0.280647    0.038927    11.00000   -1.50000
AFIX   0
C4    1    0.362659    0.414500    0.255336    11.00000    0.02800    0.13824 =
         0.05532    0.05941   -0.00523    0.00128
AFIX 137
H4A   2    0.334209    0.470722    0.283992    11.00000   -1.50000
H4B   2    0.454849    0.443081    0.270643    11.00000   -1.50000
H4C   2    0.330341    0.350838    0.276733    11.00000   -1.50000
AFIX   0
C5    1    0.349023    0.486114    0.121940    11.00000    0.03410    0.05468 =
         0.06567    0.02887    0.01071    0.00799
AFIX 137
H5A   2    0.318178    0.466492    0.056634    11.00000   -1.50000
H5B   2    0.440749    0.524081    0.138434    11.00000   -1.50000
H5C   2    0.310775    0.533875    0.151688    11.00000   -1.50000
AFIX   0
C6    1   -0.171594    0.631580    0.253092    11.00000    0.02721    0.02859 =
         0.02978    0.01092    0.00323    0.01537
C7    1   -0.235431    0.599729    0.152504    11.00000    0.06584    0.07176 =
         0.03585    0.02085    0.00163    0.04791
AFIX 137
H7A   2   -0.278667    0.648210    0.143021    11.00000   -1.50000
H7B   2   -0.296638    0.524405    0.133071    11.00000   -1.50000
H7C   2   -0.171578    0.606322    0.117467    11.00000   -1.50000
AFIX   0
C8    1   -0.068694    0.750813    0.286872    11.00000    0.04087    0.03674 =
         0.07541    0.03030    0.01274    0.01903
AFIX 137
H8A   2   -0.005350    0.756598    0.251437    11.00000   -1.50000
H8B   2   -0.028182    0.767768    0.350413    11.00000   -1.50000
H8C   2   -0.108503    0.802285    0.279791    11.00000   -1.50000
AFIX   0
C9    1   -0.271395    0.624509    0.309924    11.00000    0.03703    0.06447 =
         0.05028    0.02454    0.01570    0.03151
AFIX 137
H9A   2   -0.315202    0.672036    0.298688    11.00000   -1.50000
H9B   2   -0.229474    0.647753    0.373889    11.00000   -1.50000
H9C   2   -0.332346    0.549285    0.292979    11.00000   -1.50000
AFIX   0
C10   1    0.228677    0.695217    0.382445    11.00000    0.01545    0.02376 =
         0.01677    0.00770    0.00076    0.00569
C11   1    0.334027    0.788353    0.362937    11.00000    0.01887    0.02150 =
         0.01775    0.00564    0.00251    0.00405
C12   1    0.461372    0.777491    0.394258    11.00000    0.01964    0.05287 =
         0.06854    0.03877    0.00874    0.00802
AFIX 137
H12A  2    0.476414    0.783324    0.458446    11.00000   -1.50000
H12B  2    0.529805    0.835643    0.384011    11.00000   -1.50000
H12C  2    0.458020    0.706673    0.360024    11.00000   -1.50000
AFIX   0
C13   1    0.339860    0.902066    0.414770    11.00000    0.05210    0.02179 =
         0.05568    0.00928    0.03096    0.00409
AFIX 137
H13A  2    0.257562    0.906392    0.398023    11.00000   -1.50000
H13B  2    0.403562    0.958837    0.399332    11.00000   -1.50000
H13C  2    0.362126    0.912566    0.479589    11.00000   -1.50000
AFIX   0
C14   1    0.305248    0.777278    0.261145    11.00000    0.04000    0.04076 =
         0.02636    0.01506    0.00628    0.00050
AFIX 137
H14A  2    0.305979    0.707969    0.227143    11.00000   -1.50000
H14B  2    0.369367    0.837446    0.249525    11.00000   -1.50000
H14C  2    0.222199    0.779416    0.242402    11.00000   -1.50000
AFIX   0
C15   1    0.087981    0.239028    0.404993    11.00000    0.02083    0.01874 =
         0.02329    0.00201    0.00385    0.00830
C16   1    0.137184    0.143994    0.394196    11.00000    0.03249    0.02066 =
         0.02975    0.00610    0.00978    0.01548
PART 1
C17   1    0.088043    0.071076    0.291790    21.00000    0.07011    0.03411 =
         0.03844   -0.00031    0.00602    0.03175
AFIX 137
H17A  2   -0.004154    0.041768    0.275073    21.00000   -1.50000
H17B  2    0.117301    0.010930    0.283983    21.00000   -1.50000
H17C  2    0.120761    0.115687    0.253336    21.00000   -1.50000
AFIX   0
PART 0
PART 2
C17B  1    0.029532    0.039734    0.343605   -21.00000    0.03280    0.01304 =
         0.05006    0.00494    0.00103    0.01014
AFIX 137
H17D  2   -0.038634    0.029914    0.374866   -21.00000   -1.50000
H17E  2    0.057354   -0.021000    0.339869   -21.00000   -1.50000
H17F  2   -0.000822    0.041818    0.282857   -21.00000   -1.50000
AFIX   0
PART 0
PART 1
C18   1    0.080450    0.070047    0.452795    21.00000    0.06220    0.04106 =
         0.06736    0.03087    0.03545    0.03293
AFIX 137
H18A  2    0.115487    0.110836    0.516614    21.00000   -1.50000
H18B  2    0.101623    0.005445    0.439765    21.00000   -1.50000
H18C  2   -0.011234    0.047625    0.438643    21.00000   -1.50000
AFIX   0
PART 0
PART 2
C18B  1    0.195863    0.138814    0.490230   -21.00000    0.06485    0.04463 =
         0.03547    0.00904    0.00631    0.04415
AFIX 137
H18D  2    0.263191    0.209190    0.523905   -21.00000   -1.50000
H18E  2    0.230334    0.081922    0.482508   -21.00000   -1.50000
H18F  2    0.130177    0.122142    0.523377   -21.00000   -1.50000
AFIX   0
PART 0
PART 1
C19   1    0.279355    0.195564    0.421894    21.00000    0.03811    0.04476 =
         0.06245    0.01948    0.00740    0.03074
AFIX 137
H19A  2    0.309843    0.245698    0.386978    21.00000   -1.50000
H19B  2    0.313623    0.138689    0.410600    21.00000   -1.50000
H19C  2    0.306724    0.235722    0.486054    21.00000   -1.50000
AFIX   0
PART 0
PART 2
C19B  1    0.250051    0.165713    0.345069   -21.00000    0.04404    0.03410 =
         0.08095    0.02479    0.03338    0.03040
AFIX 137
H19D  2    0.217883    0.160018    0.282288   -21.00000   -1.50000
H19E  2    0.287557    0.111646    0.347197   -21.00000   -1.50000
H19F  2    0.314032    0.238815    0.375549   -21.00000   -1.50000
AFIX   0
PART 0
C20   1   -0.208070    0.255328    0.288579    11.00000    0.01925    0.02228 =
         0.02071    0.00590    0.00219    0.01059
C21   1   -0.333569    0.162205    0.284165    11.00000    0.01993    0.02957 =
         0.02131    0.00268    0.00456    0.00351
C22   1   -0.414342    0.104133    0.185113    11.00000    0.02477    0.05110 =
         0.02775    0.00300   -0.00021   -0.00606
AFIX 137
H22A  2   -0.434180    0.157314    0.159568    11.00000   -1.50000
H22B  2   -0.492626    0.046640    0.184682    11.00000   -1.50000
H22C  2   -0.366741    0.072123    0.149137    11.00000   -1.50000
AFIX   0
C23   1   -0.297289    0.078943    0.324563    11.00000    0.03878    0.02856 =
         0.03613    0.00940    0.00778    0.00168
AFIX 137
H23A  2   -0.249125    0.048520    0.287972    11.00000   -1.50000
H23B  2   -0.373962    0.020141    0.324767    11.00000   -1.50000
H23C  2   -0.246053    0.116011    0.386256    11.00000   -1.50000
AFIX   0
C24   1   -0.409763    0.211728    0.342894    11.00000    0.02172    0.05700 =
         0.03528    0.00414    0.00883    0.00802
AFIX 137
H24A  2   -0.358352    0.248452    0.404572    11.00000   -1.50000
H24B  2   -0.486868    0.153381    0.343092    11.00000   -1.50000
H24C  2   -0.431713    0.264317    0.317744    11.00000   -1.50000
AFIX   0
C40   1   -0.104328    0.554722    0.270638    11.00000    0.02351    0.02159 =
         0.02174    0.00524   -0.00079    0.00467
 
N1    5   -0.149229    0.195079    0.032261    11.00000    0.02333    0.02794 =
         0.01989    0.00282    0.00306    0.01047
AFIX  23
H1A   2   -0.159818    0.216586    0.088573    11.00000   -1.20000
H1B   2   -0.065076    0.219018    0.036380    11.00000   -1.20000
AFIX   0
C25   1   -0.203361    0.069439    0.000047    11.00000    0.02958    0.02770 =
         0.03069   -0.00033    0.00465    0.00759
AFIX  13
H25   2   -0.296650    0.041687   -0.007323    11.00000   -1.20000
AFIX   0
C26   1   -0.174413    0.028593   -0.091002    11.00000    0.05152    0.04266 =
         0.03549   -0.01083    0.00265    0.02084
AFIX 137
H26A  2   -0.222433    0.046166   -0.137715    11.00000   -1.50000
H26B  2   -0.198192   -0.050386   -0.106586    11.00000   -1.50000
H26C  2   -0.084240    0.064073   -0.086497    11.00000   -1.50000
AFIX   0
C27   1   -0.144034    0.029770    0.073250    11.00000    0.05413    0.03596 =
         0.04787    0.01386    0.00933    0.02361
AFIX 137
H27A  2   -0.052919    0.054799    0.079390    11.00000   -1.50000
H27B  2   -0.180673   -0.049905    0.055947    11.00000   -1.50000
H27C  2   -0.160975    0.059318    0.130724    11.00000   -1.50000
AFIX   0
C28   1   -0.205108    0.252242   -0.025824    11.00000    0.03756    0.03487 =
         0.01791    0.00618   -0.00033    0.01266
AFIX  13
H28   2   -0.226569    0.208392   -0.090268    11.00000   -1.20000
AFIX   0
C29   1   -0.327333    0.257396   -0.001428    11.00000    0.04189    0.07392 =
         0.06487    0.04136    0.01059    0.03431
AFIX 137
H29A  2   -0.384533    0.184250   -0.005017    11.00000   -1.50000
H29B  2   -0.367915    0.285679   -0.043622    11.00000   -1.50000
H29C  2   -0.307086    0.305527    0.059831    11.00000   -1.50000
AFIX   0
C30   1   -0.107363    0.365710   -0.014315    11.00000    0.04880    0.03351 =
         0.02647    0.00986    0.00324    0.01275
AFIX 137
H30A  2   -0.085647    0.410113    0.048430    11.00000   -1.50000
H30B  2   -0.142437    0.400496   -0.053416    11.00000   -1.50000
H30C  2   -0.031586    0.358980   -0.030609    11.00000   -1.50000
AFIX   0
 
N2    5   -0.376386    0.482820    0.489507    11.00000    0.09884    0.15589 =
         0.10946    0.03121    0.00988    0.04921
C31   1   -0.448977    0.491694    0.495397    11.00000    0.09561    0.05868 =
         0.04749    0.00614    0.02367    0.01232
HKLF 4
 
REM  oejlm1163 in P1
REM R1 =  0.0315 for    7833 Fo > 4sig(Fo)  and  0.0358 for all    8551 data
REM    478 parameters refined using      0 restraints
 
END  
     
WGHT      0.0288      0.3830 

REM Highest difference peak  1.149,  deepest hole -0.946,  1-sigma level  0.107
Q1    1   0.1122  0.4789  0.3044  11.00000  0.05    1.15
Q2    1   0.0988  0.4615  0.2840  11.00000  0.05    1.06
Q3    1  -0.1031  0.5323 -0.0970  11.00000  0.05    0.98
Q4    1  -0.0360  0.3813  0.3175  11.00000  0.05    0.94
Q5    1  -0.1138  0.7208  0.0835  11.00000  0.05    0.93
Q6    1   0.0545  0.4391  0.2446  11.00000  0.05    0.87
Q7    1   0.0355  0.2220  0.1166  11.00000  0.05    0.82
Q8    1   0.0343  0.4253  0.3714  11.00000  0.05    0.77
Q9    1  -0.0225  0.3943  0.3388  11.00000  0.05    0.76
Q10   1   0.3581  0.3394  0.2335  11.00000  0.05    0.53
Q11   1   0.1356  0.6841  0.4995  11.00000  0.05    0.46
Q12   1   0.2952  0.7551  0.3806  11.00000  0.05    0.43
Q13   1  -0.2810  0.2205  0.2950  11.00000  0.05    0.42
Q14   1   0.2371  0.6116  0.3799  11.00000  0.05    0.42
Q15   1   0.3753  0.7567  0.2675  11.00000  0.05    0.42
Q16   1   0.1859  0.6975  0.6595  11.00000  0.05    0.41
Q17   1  -0.0194  0.5970  0.5274  11.00000  0.05    0.41
Q18   1  -0.1139  0.3946 -0.0386  11.00000  0.05    0.39
Q19   1  -0.0629  0.5591  0.3759  11.00000  0.05    0.39
Q20   1  -0.0530  0.4920  0.3146  11.00000  0.05    0.39

REM The information below was added by Olex2.
REM
REM R1 = 0.0315 for 7833 Fo > 4sig(Fo) and 0.0358 for all 14734 data
REM n/a parameters refined using n/a restraints
REM Highest difference peak 1.15, deepest hole -0.95
REM Mean Shift 0, Max Shift 0.001.

REM +++ Tabular Listing of Refinement Information +++
REM R1_all = 0.0358
REM R1_gt = 0.0315
REM wR_ref = 0.0752
REM GOOF = 1.071
REM Shift_max = 0.001
REM Shift_mean = 0
REM Reflections_all = 14734
REM Reflections_gt = 7833
REM Parameters = n/a
REM Hole = -0.95
REM Peak = 1.15
REM Flack = n/a

;
_olex2_date_sample_data_collection 2012-08-31
_olex2_submission_special_instructions 'No special instructions were received'
loop_
  _refln_index_h
  _refln_index_k
  _refln_index_l
  _refln_F_squared_meas
  _refln_F_squared_sigma
  _refln_scale_group_code
 -15 5 6 5351.97 667.664 3
 -15 6 1 1876.28 406.135 5
 -15 6 2 4558.1 657.847 5
 -15 6 3 2043.21 443.987 5
 -15 6 4 388.673 123.244 5
 -15 6 4 345.005 165.783 3
 -15 6 5 9145.52 953.836 5
 -15 6 6 63.6871 93.5018 5
 -15 7 2 7858.84 910.958 5
 -15 7 3 5928.59 772.783 5
 -15 7 4 844.309 303.65 5
 -14 2 3 509.178 237.607 3
 -14 2 4 9638.3 946.09 3
 -14 2 5 13589.9 1135.07 3
 -14 2 6 1089.54 344.127 3
 -14 2 7 7433.95 817.723 3
 -14 2 8 1189.74 396.033 3
 -14 2 9 14220.1 1140.08 3
 -14 2 10 6872.07 789.571 3
 -14 3 1 9586.28 926.013 3
 -14 3 2 7917.98 843.596 3
 -14 3 3 -117.168 166.693 3
 -14 3 4 6983.39 781.816 3
 -14 3 5 1002.46 306.658 3
 -14 3 6 9096.24 893.609 3
 -14 3 7 5067.94 670.298 3
 -14 3 8 1041.13 302.637 3
 -14 4 -3 3394 769.862 4
 -14 4 -2 1155.8 427.576 4
 -14 4 0 3191.74 522.44 3
 -14 4 1 7782.05 812.078 3
 -14 4 2 714.777 209.888 3
 -14 4 3 1290.61 331.999 3
 -14 4 4 1836.3 360.087 3
 -14 4 5 2567.86 457.324 3
 -14 4 6 15351.5 1133.12 3
 -14 4 7 3212.47 508.545 3
 -14 5 -4 4067.64 813.271 4
 -14 5 -3 -11.3613 108.084 4
 -14 5 0 9238.53 891.485 3
 -14 5 1 5453.82 690.861 5
 -14 5 1 7281.86 787.316 3
 -14 5 2 48.8479 73.2044 3
 -14 5 2 -78.4096 175.323 5
 -14 5 3 1490.06 368.69 5
 -14 5 3 2328.71 421.647 3
 -14 5 4 592.003 208.608 5
 -14 5 4 930.533 284.871 3
 -14 5 5 8544.68 883.943 5
 -14 5 5 9915.81 882.812 3
 -14 5 6 8600.7 940.108 5
 -14 5 6 9706.07 858.725 3
 -14 5 7 1004.85 341.441 5
 -14 5 8 984.698 352.871 5
 -14 5 9 -48.4865 80.6462 5
 -14 5 10 4533.77 729.089 5
 -14 6 -4 -119.184 296.982 4
 -14 6 -3 4350.37 824.992 4
 -14 6 0 9345.33 919.849 5
 -14 6 1 2807.4 507.172 5
 -14 6 1 3015.97 497.38 3
 -14 6 2 559.263 172.687 5
 -14 6 2 463.187 184.43 3
 -14 6 3 4350.52 632.675 5
 -14 6 3 5475.16 662.605 3
 -14 6 4 286.587 86.4785 3
 -14 6 4 357 163.296 5
 -14 6 5 5785.53 652.439 3
 -14 6 5 6189.4 796.07 5
 -14 6 6 1978.29 486.765 5
 -14 6 7 1012.49 385.076 5
 -14 6 8 3459.6 668.692 5
 -14 6 9 322.75 222.835 5
 -14 7 -4 297.751 297.666 4
 -14 7 -1 312.413 195.498 5
 -14 7 0 3912.01 615.895 5
 -14 7 1 220.676 154.805 5
 -14 7 2 5477.57 717.577 5
 -14 7 3 8294.53 902.638 5
 -14 7 4 445.111 126.408 5
 -14 7 4 788.05 225.073 3
 -14 7 5 2501.8 530.184 5
 -14 7 6 192.052 155.749 5
 -14 7 7 13078.3 1228.53 5
 -14 7 8 7166.65 934.262 5
 -14 8 -5 901.019 352.868 4
 -14 8 -4 3764.94 770.48 4
 -14 8 -1 1915.16 439.701 5
 -14 8 0 -153.718 213.581 5
 -14 8 1 3782.37 609.471 5
 -14 8 2 25930 1674.64 5
 -14 8 3 2595.38 506.468 5
 -14 8 4 1773.51 441.718 5
 -14 8 5 5036.49 767.54 5
 -14 8 6 1929.41 480.803 5
 -14 8 7 18149.2 1481.48 5
 -14 9 -5 -441.43 368.422 4
 -14 9 -1 1525.11 402.611 5
 -14 9 0 -299.909 233.903 5
 -14 9 1 7799.18 899.814 5
 -14 9 2 14225.3 1235.85 5
 -14 9 3 -471.672 346.806 5
 -14 9 4 4614.56 789.734 5
 -14 9 5 433.873 125.388 5
 -13 -1 3 4010.85 629.423 3
 -13 -1 4 17.7423 129.287 3
 -13 -1 5 8579.11 901.826 3
 -13 -1 6 9420.9 947.57 3
 -13 -1 7 435.411 284.611 3
 -13 -1 8 7475 853.515 3
 -13 -1 9 2335.79 494.378 3
 -13 0 0 14116.8 1163.91 3
 -13 0 1 6348.05 772.995 3
 -13 0 2 144.65 135.586 3
 -13 0 3 864.738 319.333 3
 -13 0 4 2969.27 498.468 3
 -13 0 5 18321.7 1302.94 3
 -13 0 6 12434.6 1061.02 3
 -13 0 7 -64.6419 137.669 3
 -13 0 8 6521.62 777.942 3
 -13 0 9 415.118 233.336 3
 -13 0 10 15190.1 1195.85 3
 -13 0 11 6816.74 806.24 3
 -13 1 -1 4765.67 651.82 3
 -13 1 0 11391.2 1010.57 3
 -13 1 1 33.706 151.35 3
 -13 1 2 5600.17 698.828 3
 -13 1 3 1365.62 355.14 3
 -13 1 4 8356.26 855.964 3
 -13 1 5 16473.9 1204.45 3
 -13 1 6 2421.28 456.562 3
 -13 1 7 2169.63 420.122 3
 -13 1 8 2290.81 457.568 3
 -13 1 9 7518.46 812.307 3
 -13 1 10 9734.08 927.401 3
 -13 1 11 6379.62 746.182 3
 -13 2 -4 5258.05 958.706 4
 -13 2 -2 721.329 223.579 3
 -13 2 -1 6218.37 746.677 3
 -13 2 0 8038.31 833.895 3
 -13 2 1 1314.37 327.752 3
 -13 2 2 19158.1 1288.41 3
 -13 2 3 793.178 255.289 3
 -13 2 4 4483.06 615.421 3
 -13 2 5 5146.52 649.433 3
 -13 2 6 239.463 169.031 3
 -13 2 7 8866.7 853.828 3
 -13 2 8 88.0589 108.675 3
 -13 2 9 11184.8 954.31 3
 -13 2 10 11055.6 946.799 3
 -13 3 -5 916.16 434.495 4
 -13 3 -4 10584.9 1343.06 4
 -13 3 -3 4844.57 895.567 4
 -13 3 -3 6528.74 755.381 3
 -13 3 -2 -156.349 126.253 4
 -13 3 -2 15.0137 97.9207 3
 -13 3 -1 4819.4 832.177 4
 -13 3 -1 5414.67 672.7 3
 -13 3 0 -156.754 192.077 3
 -13 3 1 11722.1 977.425 3
 -13 3 2 9229.61 806.272 5
 -13 3 2 11752.5 979.178 3
 -13 3 3 -14.0396 153.636 5
 -13 3 3 117.712 83.2446 3
 -13 3 4 4022.76 567.349 3
 -13 3 4 2754.36 463.807 5
 -13 3 5 3033.78 488.132 3
 -13 3 6 6029.27 687.749 3
 -13 3 7 11769.7 954.057 3
 -13 3 8 -105.32 107.453 3
 -13 3 9 4970.49 617.953 3
 -13 4 -5 3449.52 779.757 4
 -13 4 -4 11743.3 1361.98 4
 -13 4 -3 1191.57 390.971 4
 -13 4 -2 1875.26 379.398 3
 -13 4 -2 1877.56 526.853 4
 -13 4 -1 708.581 206.874 3
 -13 4 -1 1200.5 398.834 4
 -13 4 0 4053.17 735.415 4
 -13 4 0 5068.04 636.184 3
 -13 4 1 22174 1339.7 3
 -13 4 1 21825.3 1298.6 5
 -13 4 2 1758.1 344.28 5
 -13 4 2 1781.7 374.071 3
 -13 4 3 3416.78 506.194 3
 -13 4 3 3425.88 512.21 5
 -13 4 4 3303.43 492.314 3
 -13 4 4 2747.96 455.877 5
 -13 4 5 -13.5877 146.256 5
 -13 4 5 36.6529 121.104 3
 -13 4 6 21264.2 1272.76 3
 -13 4 6 20117.8 1366.95 5
 -13 4 7 11133.9 906.421 3
 -13 4 7 9589.54 932.04 5
 -13 4 8 -32.3119 153.067 5
 -13 4 8 130.143 82.3415 3
 -13 4 9 2672.69 503.556 5
 -13 4 10 140.026 86.9426 5
 -13 4 11 9227.9 1028.03 5
 -13 4 12 6568.79 882.899 5
 -13 5 -6 -181.446 228.855 4
 -13 5 -5 6958.51 1053.84 4
 -13 5 -4 8670.89 1146.85 4
 -13 5 -3 -103.291 206.405 4
 -13 5 -2 5297.94 853.045 4
 -13 5 -1 442.497 226.38 4
 -13 5 -1 465.304 189.939 3
 -13 5 0 6411.53 715.038 5
 -13 5 0 6504.78 706.687 3
 -13 5 1 17493.8 1164.5 3
 -13 5 1 16478.5 1161.05 5
 -13 5 2 -16.1542 122.416 3
 -13 5 2 -188.392 187.724 5
 -13 5 3 2705.49 437.029 3
 -13 5 3 2564.97 453.757 5
 -13 5 4 5879.07 652.717 3
 -13 5 4 4488.07 623.813 5
 -13 5 5 3343.76 479.484 3
 -13 5 5 4211.34 644.902 5
 -13 5 6 17237.2 1102.54 3
 -13 5 6 15921.4 1245.18 5
 -13 5 7 3906.55 620.311 5
 -13 5 7 5480.53 609.295 3
 -13 5 8 2627.06 519.164 5
 -13 5 9 4113.49 663.677 5
 -13 5 10 2538.59 542.369 5
 -13 5 11 12647.7 1256.6 5
 -13 5 12 4279.49 746.257 5
 -13 6 -6 -142.527 147.058 4
 -13 6 -5 4707.15 837.907 4
 -13 6 -4 6373.6 958.163 4
 -13 6 -3 2000.78 524.856 4
 -13 6 -2 9899.43 1144.41 4
 -13 6 -1 810.695 259.117 5
 -13 6 -1 1156.06 369.304 4
 -13 6 0 11063.2 968.785 5
 -13 6 1 3267.85 535.718 5
 -13 6 1 4316.97 558.767 3
 -13 6 2 -28.0362 181.868 3
 -13 6 2 -92.652 186.543 5
 -13 6 3 7469.54 724.289 3
 -13 6 3 5866.47 717.393 5
 -13 6 4 1050.58 258.661 3
 -13 6 4 731.456 246.337 5
 -13 6 5 5316.14 587.95 3
 -13 6 5 4093.56 638.703 5
 -13 6 6 6001.44 771.605 5
 -13 6 7 128.21 84.9529 5
 -13 6 8 11833.2 1137.88 5
 -13 6 9 970.174 283.146 5
 -13 6 10 6370.87 873.798 5
 -13 6 11 9232.81 1081.39 5
 -13 7 -6 -29.0782 150.211 4
 -13 7 -5 6504.85 979.813 4
 -13 7 -4 -8.16448 183.049 4
 -13 7 -3 8378.11 1058.27 4
 -13 7 -2 14388.1 1141.17 5
 -13 7 -2 13025 1273.98 4
 -13 7 -1 110.458 95.2697 5
 -13 7 0 5155.31 674.57 5
 -13 7 1 -33.8254 96.324 5
 -13 7 2 6652.99 771.311 5
 -13 7 3 11955.1 1079.76 5
 -13 7 4 -2.22715 136.189 3
 -13 7 4 -13.4864 199.957 5
 -13 7 5 5379.2 749.232 5
 -13 7 6 40.664 143.888 5
 -13 7 7 9725.01 1029.38 5
 -13 7 8 10065.5 1085.72 5
 -13 7 9 -149.646 326.521 5
 -13 7 10 2390.9 568.443 5
 -13 8 -6 3217.99 716.613 4
 -13 8 -5 2168.14 588.305 4
 -13 8 -4 2548 588.251 4
 -13 8 -3 15117.8 1412.87 4
 -13 8 -2 7564.46 834.799 5
 -13 8 -1 1144.75 340.769 5
 -13 8 0 361.441 212.778 5
 -13 8 1 1939.6 400.217 5
 -13 8 2 23387.9 1528.19 5
 -13 8 3 8788.91 972.064 5
 -13 8 4 155.306 221.243 5
 -13 8 5 526.072 228.455 5
 -13 8 6 3052.56 590.547 5
 -13 8 7 13187.8 1242.86 5
 -13 8 8 4800.92 750.716 5
 -13 8 9 510.95 243.02 5
 -13 9 -6 6107.27 951.962 4
 -13 9 -5 32.6294 237.393 4
 -13 9 -4 2641.09 564.59 4
 -13 9 -3 8142.19 1034.41 4
 -13 9 -3 8580.64 928.824 5
 -13 9 -2 -4.50415 99.908 5
 -13 9 -1 3559.91 589.341 5
 -13 9 0 -20.2978 175.772 5
 -13 9 1 8212.43 902.581 5
 -13 9 2 15504.3 1280.43 5
 -13 9 3 -27.906 278.434 5
 -13 9 4 2972.03 605.759 5
 -13 9 5 497.347 265.153 5
 -13 9 6 5537.57 812.03 5
 -13 9 7 15391.5 1373.33 5
 -13 9 8 1458.5 429.506 5
 -13 10 -6 6445.38 986.846 4
 -13 10 -5 267.358 154.098 4
 -13 10 -4 2213.52 550.993 4
 -13 10 -3 1785.67 394.771 5
 -13 10 -2 6905.54 843.116 5
 -13 10 -1 6814.37 828.801 5
 -13 10 0 146.947 123.09 5
 -13 10 1 9908.89 1024.35 5
 -13 10 2 4354.12 698.885 5
 -13 10 3 3495.26 632.899 5
 -13 10 4 9246.81 1047.53 5
 -13 10 5 -262.194 190.785 5
 -13 10 6 7844.94 975.375 5
 -13 11 -6 5876.41 954.247 4
 -13 11 -5 -637.153 309.649 4
 -13 11 -3 30.8716 98.8316 5
 -13 11 -2 8171.57 942.35 5
 -13 11 -1 9732.35 1027.91 5
 -13 11 0 87.7179 103.747 5
 -13 11 1 3551.6 592.506 5
 -13 11 2 -395.893 243.382 5
 -13 11 3 10253.7 1118.46 5
 -13 11 4 9163.73 1073 5
 -13 12 -6 3039.03 668.208 4
 -13 12 -5 601.045 277.404 4
 -12 -3 1 3224.66 557.68 3
 -12 -3 2 5917.45 764.218 3
 -12 -3 3 1202.89 335.549 3
 -12 -3 4 16467.1 1273.33 3
 -12 -3 5 5655.18 742.573 3
 -12 -3 6 1283.3 388.645 3
 -12 -2 -1 7210.86 828.021 3
 -12 -2 0 775.389 279.47 3
 -12 -2 1 12091.7 1073.51 3
 -12 -2 2 2432.24 459.714 3
 -12 -2 3 6583.77 774.032 3
 -12 -2 4 5571.77 718.022 3
 -12 -2 5 143.417 125.786 3
 -12 -2 6 18170.7 1319.26 3
 -12 -1 -3 445.531 203.22 3
 -12 -1 -2 5334.4 684.13 3
 -12 -1 -1 285.092 158.477 3
 -12 -1 0 4031.55 578.723 3
 -12 -1 1 16446 1218.4 3
 -12 -1 2 989.406 286.163 3
 -12 -1 3 1901.38 406.428 3
 -12 -1 4 362.879 186.181 3
 -12 -1 5 10479.6 946.554 3
 -12 -1 6 21931.8 1411.77 3
 -12 -1 7 610.532 199.371 3
 -12 0 -4 8032.75 854.315 3
 -12 0 -3 2839.91 508.565 3
 -12 0 -2 2344.45 453.889 3
 -12 0 -1 -55.4878 184.073 3
 -12 0 0 12070.4 1033.38 3
 -12 0 1 16899.7 1209.12 3
 -12 0 2 115.235 121.214 3
 -12 0 3 2245.99 423.645 3
 -12 0 4 272.685 102.346 3
 -12 0 5 22429.8 1376.32 3
 -12 0 6 13672.8 1074.81 3
 -12 0 7 924.88 299.067 3
 -12 0 8 2054.69 409.495 3
 -12 1 -5 10387 1333.83 4
 -12 1 -5 10859.3 993.198 3
 -12 1 -4 293.33 165.814 4
 -12 1 -4 -56.5593 186.027 3
 -12 1 -3 9476.7 906.947 3
 -12 1 -2 5464.9 668.338 3
 -12 1 -1 1891.35 414.934 3
 -12 1 0 19599.6 1271.12 3
 -12 1 1 2749.74 463.505 3
 -12 1 2 6113.27 699.165 3
 -12 1 3 6589.58 716.591 3
 -12 1 4 3527.89 528.696 3
 -12 1 5 15121.8 1090.61 3
 -12 1 6 1908.11 386.474 3
 -12 1 7 657.601 214.26 3
 -12 1 8 4161.61 573.978 3
 -12 1 9 6317.83 701.147 3
 -12 2 -6 1983.17 556.257 4
 -12 2 -5 2554.35 627.674 4
 -12 2 -4 2633.31 630.942 4
 -12 2 -4 2780.78 472.986 3
 -12 2 -3 21468.8 1808.52 4
 -12 2 -3 20296.2 1321.84 3
 -12 2 -2 4445.86 595.386 3
 -12 2 -2 4152.4 762.129 4
 -12 2 -1 6714.83 719.468 3
 -12 2 -1 7184.54 990.802 4
 -12 2 0 7169.61 744.42 3
 -12 2 1 1333.77 324.758 3
 -12 2 2 22771.8 1336.96 3
 -12 2 2 20596.7 1152.29 5
 -12 2 3 5112.04 614.265 3
 -12 2 3 3751.22 484.518 5
 -12 2 4 5189.1 571.007 5
 -12 2 4 6091.52 665.664 3
 -12 2 5 3489.9 475.712 5
 -12 2 5 4799.4 595.226 3
 -12 2 6 26.5498 114.436 3
 -12 2 6 -198.855 151.266 5
 -12 2 7 12659.1 968.901 5
 -12 2 7 14718.5 1032.39 3
 -12 2 8 1683.73 332.619 3
 -12 2 9 2856.32 451.989 3
 -12 2 10 11516.5 919.165 3
 -12 3 -7 1337.09 456.097 4
 -12 3 -6 436.218 226.476 4
 -12 3 -5 110.6 154.631 4
 -12 3 -4 7843.22 1060.93 4
 -12 3 -3 10126.4 1217.8 4
 -12 3 -3 11156.8 955.091 3
 -12 3 -2 415.892 173.71 3
 -12 3 -2 335.346 187.915 4
 -12 3 -1 7882.64 776.952 3
 -12 3 -1 6360.52 899.398 4
 -12 3 0 2.52801 114.445 3
 -12 3 0 -170.655 99.3301 4
 -12 3 1 12128.6 912.114 5
 -12 3 1 14330.2 1017.6 3
 -12 3 1 12713.8 1216.52 4
 -12 3 2 25360.7 1343.21 5
 -12 3 2 27560.9 1445.2 3
 -12 3 3 -559.364 194.766 5
 -12 3 3 -96.4771 170.316 3
 -12 3 4 12198.3 937.571 3
 -12 3 4 9412.78 811.96 5
 -12 3 5 4071.47 525.454 3
 -12 3 5 4192.98 579.881 5
 -12 3 6 5591.46 657.122 5
 -12 3 6 5716.13 622.71 3
 -12 3 7 16648.8 1164.15 5
 -12 3 7 19157.7 1156.78 3
 -12 3 8 1773.45 369.963 5
 -12 3 8 2043.28 369.153 3
 -12 3 9 5439.24 701.495 5
 -12 3 9 6644.43 664.253 3
 -12 3 10 5558.39 736.23 5
 -12 3 11 1437.69 372.231 5
 -12 3 12 11534 1122.15 5
 -12 3 13 4845.97 774.907 5
 -12 3 14 1169.4 363.106 5
 -12 4 -7 338.382 114.43 4
 -12 4 -6 512.483 278.35 4
 -12 4 -5 595.507 286.992 4
 -12 4 -4 5174.53 851.725 4
 -12 4 -3 9212.03 1128.16 4
 -12 4 -2 775.153 252.48 3
 -12 4 -2 435.347 176.784 4
 -12 4 -1 1660.52 446.063 4
 -12 4 -1 1791 370.195 3
 -12 4 0 1568.17 324.598 3
 -12 4 0 824.156 242.344 5
 -12 4 0 1089.84 316.917 4
 -12 4 1 20126.8 1205.51 3
 -12 4 1 20594.9 1486.9 4
 -12 4 1 18891.8 1186.04 5
 -12 4 2 12852.4 933.693 3
 -12 4 2 9392 813.16 5
 -12 4 3 3553.13 482.088 3
 -12 4 3 2211.12 393.873 5
 -12 4 4 9209.25 863.093 5
 -12 4 4 9971.55 818.808 3
 -12 4 5 834.07 257.075 3
 -12 4 5 355.428 162.148 5
 -12 4 6 21820.3 1220.22 3
 -12 4 6 18729.9 1262.41 5
 -12 4 7 27552.1 1368.79 3
 -12 4 7 23460.7 1454.82 5
 -12 4 8 -227.941 211.995 5
 -12 4 8 30.0539 139.376 3
 -12 4 9 6565.65 803.519 5
 -12 4 10 169.083 74.2298 5
 -12 4 11 12454.5 1176.85 5
 -12 4 12 11386.8 1164.28 5
 -12 4 13 127.032 223.754 5
 -12 4 14 2364.81 555.486 5
 -12 5 -8 -67.0336 205.595 4
 -12 5 -7 5909.54 966.445 4
 -12 5 -6 2824.05 642.628 4
 -12 5 -5 2384.54 554.75 4
 -12 5 -4 17993.2 1552.61 4
 -12 5 -3 1709.82 446.519 4
 -12 5 -2 7090.34 921.181 4
 -12 5 -1 2111.67 401.933 3
 -12 5 -1 2624.49 560.222 4
 -12 5 -1 1406.99 315.614 5
 -12 5 0 3728.75 640.991 4
 -12 5 0 3086.21 464.098 5
 -12 5 0 4476.81 548.599 3
 -12 5 1 21584.2 1289.54 5
 -12 5 1 23444.1 1293.46 3
 -12 5 2 1612.87 320.6 3
 -12 5 2 1469.53 335.397 5
 -12 5 3 2716.06 420.357 3
 -12 5 3 2071.42 412.07 5
 -12 5 4 9636.88 930.18 5
 -12 5 4 8968.94 754.936 3
 -12 5 5 1257.83 290.514 3
 -12 5 5 676.914 226.433 5
 -12 5 6 26158.9 1292.48 3
 -12 5 6 21123.9 1404.52 5
 -12 5 7 7953.47 693.225 3
 -12 5 7 6429.66 754.575 5
 -12 5 8 6064.54 760.085 5
 -12 5 9 6809.11 849.212 5
 -12 5 10 2635.2 530.93 5
 -12 5 11 15449.1 1352.05 5
 -12 5 12 4187.65 714.772 5
 -12 5 13 1035 407.42 5
 -12 6 -8 3177.03 705.61 4
 -12 6 -7 12942.5 1382.05 4
 -12 6 -6 1773.26 501.922 4
 -12 6 -5 4938.5 811.447 4
 -12 6 -4 7619.86 974.272 4
 -12 6 -3 4680.7 747.473 4
 -12 6 -2 20324.8 1532.87 4
 -12 6 -2 20538.1 1317.26 5
 -12 6 -1 2415.88 446.118 5
 -12 6 -1 2301.56 487.318 4
 -12 6 0 8256.63 914.843 4
 -12 6 0 9946.43 879.707 5
 -12 6 1 9092.31 769.923 3
 -12 6 1 7605.3 771.607 5
 -12 6 2 57.1561 189.484 5
 -12 6 2 262.079 173.906 3
 -12 6 3 14225.7 1152.37 5
 -12 6 3 14641.7 964.743 3
 -12 6 4 2341.96 359.691 3
 -12 6 4 1896.31 421.343 5
 -12 6 5 9274.79 734.239 3
 -12 6 5 8547.29 870.572 5
 -12 6 6 11949.6 1061.85 5
 -12 6 6 12850.7 862.213 3
 -12 6 7 -138.401 237.57 5
 -12 6 8 17786.8 1360.7 5
 -12 6 9 3527.7 624.195 5
 -12 6 10 2299.74 520.163 5
 -12 6 11 7995.83 1004.34 5
 -12 6 12 354.946 175.427 5
 -12 7 -8 14325.9 1511.5 4
 -12 7 -7 7904.06 1081.78 4
 -12 7 -6 37.5999 137.132 4
 -12 7 -5 5989.56 867.219 4
 -12 7 -4 156.72 190.37 4
 -12 7 -3 8973.28 1037.06 4
 -12 7 -2 18441.4 1448.01 4
 -12 7 -2 19081.5 1269.89 5
 -12 7 -1 337.167 118.113 5
 -12 7 -1 448.37 253.291 4
 -12 7 0 3644.72 558.453 5
 -12 7 1 340.925 143.759 5
 -12 7 2 10517.5 978.129 5
 -12 7 3 15895.8 1256.9 5
 -12 7 3 17648 1040.03 3
 -12 7 4 1761 301.435 3
 -12 7 4 1204.34 318.262 5
 -12 7 5 4025.39 614.589 5
 -12 7 6 -111.858 156.303 5
 -12 7 7 4728.16 706.206 5
 -12 7 8 10633.3 1077.3 5
 -12 7 9 1164 389.047 5
 -12 7 10 2416.15 538.124 5
 -12 7 11 761.082 305.712 5
 -12 7 12 3634.41 694.771 5
 -12 8 -8 12890.8 1394.25 4
 -12 8 -7 3486.65 706.351 4
 -12 8 -6 1941.71 520.493 4
 -12 8 -5 3400.13 679.459 4
 -12 8 -4 -238.583 264.674 4
 -12 8 -3 12680.9 1226.71 4
 -12 8 -3 14139.8 1135.6 5
 -12 8 -2 13851.2 1102.87 5
 -12 8 -2 13488.2 1238.48 4
 -12 8 -1 342.611 161.978 5
 -12 8 -1 210.681 123.433 4
 -12 8 0 2575.32 473.374 5
 -12 8 1 2183.75 425.727 5
 -12 8 2 16804 1307.55 5
 -12 8 3 19790.9 1409.83 5
 -12 8 4 121.767 117.161 5
 -12 8 5 416.281 147.105 5
 -12 8 6 1668.63 392.45 5
 -12 8 7 13120.4 1185.92 5
 -12 8 8 9920.78 1078.42 5
 -12 8 9 118.227 139.008 5
 -12 8 10 3299.08 680.271 5
 -12 9 -8 6426.1 1000.7 4
 -12 9 -7 -45.3176 109.258 4
 -12 9 -6 3318.15 674.605 4
 -12 9 -5 2214.19 530.144 4
 -12 9 -4 1700.73 466.023 4
 -12 9 -3 13435.8 1117.32 5
 -12 9 -3 13318.9 1236.13 4
 -12 9 -2 1488.04 370.184 5
 -12 9 -2 1219.77 359.529 4
 -12 9 -1 7394.75 812.799 5
 -12 9 0 3793.91 594.538 5
 -12 9 1 2491.31 486.67 5
 -12 9 2 17240.6 1413.98 5
 -12 9 3 4586.13 698.733 5
 -12 9 4 1697.1 411.15 5
 -12 9 5 1047.97 347.493 5
 -12 9 6 4010.69 665.21 5
 -12 9 7 17570.6 1453.41 5
 -12 9 8 3496.97 660.276 5
 -12 9 9 1771.87 472.184 5
 -12 10 -8 1464.49 472.432 4
 -12 10 -7 4544.42 777.974 4
 -12 10 -6 12519 1306.48 4
 -12 10 -5 997.823 347.738 4
 -12 10 -4 3942.02 620.863 5
 -12 10 -4 3961.23 702.706 4
 -12 10 -3 2879.78 518.468 5
 -12 10 -3 3484.94 629.791 4
 -12 10 -2 3152.02 539.282 5
 -12 10 -1 16858.5 1266.95 5
 -12 10 0 3177.18 541.474 5
 -12 10 1 4488.33 672.909 5
 -12 10 2 4333.25 685.311 5
 -12 10 3 1057.16 370.445 5
 -12 10 4 12094.3 1145.65 5
 -12 10 5 790.695 280.059 5
 -12 10 6 4154.76 690.65 5
 -12 10 7 8743.99 1028.63 5
 -12 10 8 -275.214 304.69 5
 -12 11 -8 652.732 273.902 4
 -12 11 -7 9030.66 1149.51 4
 -12 11 -6 14901.4 1442.07 4
 -12 11 -5 81.232 96.9324 4
 -12 11 -4 4282.91 734.331 4
 -12 11 -4 4806.37 693.136 5
 -12 11 -3 -111.546 127.428 5
 -12 11 -3 167.103 162.955 4
 -12 11 -2 11956.5 1086.74 5
 -12 11 -1 13010.9 1151.06 5
 -12 11 0 -171.199 185.638 5
 -12 11 1 6426.6 848.458 5
 -12 11 2 351.92 184.495 5
 -12 11 3 17722.6 1417.19 5
 -12 11 4 18973.7 1482.86 5
 -12 11 5 907.943 293.471 5
 -12 11 6 6333.2 863.263 5
 -12 12 -7 5875.26 924.928 4
 -12 12 -6 6178.39 929.814 4
 -12 12 -5 553.77 283.931 4
 -12 12 -4 2176.31 509.441 4
 -12 12 -4 1878.18 436.756 5
 -12 12 -3 2096.22 477.191 5
 -12 12 -2 17772.1 1380.56 5
 -12 12 -1 7684.55 888.378 5
 -12 12 0 -162.772 216.298 5
 -12 12 1 10997.2 1157.36 5
 -12 12 2 -376.388 284.209 5
 -12 12 3 18282.6 1472.3 5
 -12 12 4 8896.69 1022.07 5
 -12 13 -7 4647.51 847.396 4
 -12 13 -6 65.4932 160.007 4
 -12 13 -5 3760.47 735.408 4
 -12 13 -3 5541.06 760.899 5
 -12 13 -2 8154.7 934.376 5
 -12 13 -1 1094.21 280.629 5
 -12 13 0 3329.1 574.579 5
 -12 13 1 8771.43 1056.39 5
 -12 14 -6 1733.47 515.93 4
 -11 -5 1 3054.86 537.4 3
 -11 -5 2 1059.57 322.842 3
 -11 -5 3 555.056 223.197 3
 -11 -5 4 3717.68 591.964 3
 -11 -4 -2 199.803 139.444 3
 -11 -4 -1 11272 1036 3
 -11 -4 0 17704.5 1298.41 3
 -11 -4 1 70.6766 104.7 3
 -11 -4 2 4167.4 618.974 3
 -11 -4 3 49.2693 173.737 3
 -11 -4 4 16065.8 1221.83 3
 -11 -3 -4 6130.51 751.359 3
 -11 -3 -3 3817.32 582.305 3
 -11 -3 -2 126.885 108.063 3
 -11 -3 -1 17171.6 1265.88 3
 -11 -3 0 2058.62 431.694 3
 -11 -3 1 3229.16 534.782 3
 -11 -3 2 6757.67 758.793 3
 -11 -3 3 1562.78 375.426 3
 -11 -3 4 16023.5 1187.52 3
 -11 -2 -5 2374.8 471.36 3
 -11 -2 -4 11756.9 1016.51 3
 -11 -2 -3 5181.76 660.575 3
 -11 -2 -2 3723.98 589.137 3
 -11 -2 -1 4848.08 653.623 3
 -11 -2 0 318.482 174.89 3
 -11 -2 1 10556.5 942.948 3
 -11 -2 2 13331.9 1050.36 3
 -11 -2 3 1909.09 392.046 3
 -11 -2 4 13563.2 1057.3 3
 -11 -2 5 1312.71 320.773 3
 -11 -1 -6 586.506 243.115 3
 -11 -1 -5 10465.4 947.476 3
 -11 -1 -4 13158.9 1060.04 3
 -11 -1 -3 586.857 190.718 3
 -11 -1 -2 6381.01 724.8 3
 -11 -1 -1 3327.56 525.692 3
 -11 -1 0 2147.64 412.871 3
 -11 -1 1 27697.5 1514.21 3
 -11 -1 2 9180.36 843.63 3
 -11 -1 3 3938.54 560.172 3
 -11 -1 4 4533.04 589.778 3
 -11 -1 5 5490.75 652.047 3
 -11 0 -6 1865.07 545.567 4
 -11 0 -5 7621.13 797.46 3
 -11 0 -4 7208.06 772.106 3
 -11 0 -3 760.184 230.972 3
 -11 0 -2 5010.7 623.695 3
 -11 0 -1 1502.51 320.465 3
 -11 0 0 11632.5 961.86 3
 -11 0 1 25134 1417.14 3
 -11 0 2 -126.254 188.064 3
 -11 0 3 10425.8 872.364 3
 -11 0 4 538.792 177.534 3
 -11 0 5 17765.4 1151.92 3
 -11 0 6 21792.9 1284.18 3
 -11 1 -7 3170.26 730.924 4
 -11 1 -6 2408.83 657.254 4
 -11 1 -5 9136.31 1200.13 4
 -11 1 -5 9883.67 894.202 3
 -11 1 -4 37.2882 101.276 4
 -11 1 -4 97.7891 174.17 3
 -11 1 -3 6102.07 940.521 4
 -11 1 -3 5577.98 646.182 3
 -11 1 -2 7424.81 748.213 3
 -11 1 -2 6383.71 932.719 4
 -11 1 -1 66.0056 112.678 3
 -11 1 0 10942.1 897.598 3
 -11 1 1 4509.37 587.38 3
 -11 1 2 2288.17 350.611 5
 -11 1 2 3337.33 481.023 3
 -11 1 3 6447.34 587.703 5
 -11 1 3 7313.02 711.068 3
 -11 1 4 199.092 96.6926 3
 -11 1 4 68.7699 53.7141 5
 -11 1 5 8721.14 712.151 5
 -11 1 5 8438.19 753.7 3
 -11 1 6 3317.12 450.498 5
 -11 1 6 3933.56 516.48 3
 -11 1 7 1244.07 298.036 3
 -11 1 7 825.71 228.835 5
 -11 1 8 6581.88 669.516 5
 -11 2 -8 23188.1 1988.8 4
 -11 2 -7 4697.01 869.886 4
 -11 2 -6 1542.45 488.949 4
 -11 2 -5 4192.06 784.412 4
 -11 2 -4 4267.51 576.948 3
 -11 2 -4 4704.94 808.211 4
 -11 2 -3 16868.6 1504.46 4
 -11 2 -3 17691.1 1161.71 3
 -11 2 -2 8857.28 800.547 3
 -11 2 -2 8537.05 1025.91 4
 -11 2 -1 1818.11 468.273 4
 -11 2 -1 2374.02 412.422 3
 -11 2 0 2947.53 584.051 4
 -11 2 0 3731.23 505.749 3
 -11 2 1 1324.15 300.612 3
 -11 2 1 1230.95 251.4 5
 -11 2 1 1088.58 370.206 4
 -11 2 2 21907.1 1245.2 3
 -11 2 2 20443.4 1118.89 5
 -11 2 3 5699.94 578.228 5
 -11 2 3 6233.52 645.142 3
 -11 2 4 1685.83 316.629 5
 -11 2 4 1851.69 369.789 3
 -11 2 5 2788.66 435.046 5
 -11 2 5 3217.89 454.509 3
 -11 2 6 157.226 70.7833 5
 -11 2 6 641.221 195.144 3
 -11 2 7 17965.5 1088.65 3
 -11 2 7 16709.4 1100.34 5
 -11 2 8 12792.8 987.881 5
 -11 2 8 14076.6 951.645 3
 -11 2 9 595.259 194.04 3
 -11 2 9 530.218 182.344 5
 -11 2 10 16112.4 1159.55 5
 -11 2 11 1426.34 367.772 5
 -11 2 12 5324.51 722.844 5
 -11 2 13 8115.45 923.576 5
 -11 2 14 879.397 335.394 5
 -11 2 15 7710.08 950.179 5
 -11 3 -8 20862.8 1845.14 4
 -11 3 -7 4124.12 822.557 4
 -11 3 -6 739.147 356.858 4
 -11 3 -5 885.325 407.202 4
 -11 3 -4 10752.7 1215.5 4
 -11 3 -4 11333.5 913.775 3
 -11 3 -3 23834.5 1739.78 4
 -11 3 -3 26192.2 1414.62 3
 -11 3 -2 6609.26 680.289 3
 -11 3 -2 6755.32 915.248 4
 -11 3 -1 5706.42 794.148 4
 -11 3 -1 6437.89 657.244 3
 -11 3 0 785.405 234.602 3
 -11 3 0 751.677 291.866 4
 -11 3 0 635.448 165.993 5
 -11 3 1 18916.3 1094.72 5
 -11 3 1 18913.3 1368.11 4
 -11 3 1 18362.6 1110.87 3
 -11 3 2 44254.1 1773.17 3
 -11 3 2 40294.5 1676.3 5
 -11 3 2 39069.4 1966.54 4
 -11 3 3 3220.42 454.688 5
 -11 3 3 4077.77 504.062 3
 -11 3 4 8586.15 729.298 3
 -11 3 4 7479.87 760.666 5
 -11 3 5 12606.1 877.321 3
 -11 3 5 10973.9 873.681 5
 -11 3 6 4886.7 591.707 5
 -11 3 6 5233.12 554.91 3
 -11 3 7 34108.3 1665.62 5
 -11 3 7 36749 1550.1 3
 -11 3 8 8338.39 820.586 5
 -11 3 8 10496.2 790.867 3
 -11 3 9 8948.67 734.829 3
 -11 3 9 7568.43 805.688 5
 -11 3 10 9363.78 751.013 3
 -11 3 10 7298.34 816.032 5
 -11 3 11 684.944 280.059 5
 -11 3 12 16160.8 1305.21 5
 -11 3 13 3921.78 659.356 5
 -11 3 14 47.1187 216.729 5
 -11 3 15 5506.34 856.721 5
 -11 4 -9 11254.2 1330.75 4
 -11 4 -8 8013.13 1092.78 4
 -11 4 -7 -277.691 229.737 4
 -11 4 -6 8012.52 1063.24 4
 -11 4 -5 792.398 354.43 4
 -11 4 -4 10117.8 1085.01 4
 -11 4 -3 25720.6 1376.82 3
 -11 4 -3 25702.1 1746.05 4
 -11 4 -2 96.0526 128.192 4
 -11 4 -2 254.823 130.438 3
 -11 4 -1 4632.73 704.494 4
 -11 4 -1 5168.95 583.885 5
 -11 4 -1 4906.83 561.792 3
 -11 4 0 405.862 137.455 3
 -11 4 0 644.055 273.17 4
 -11 4 0 558.277 158.214 5
 -11 4 1 34719.9 1829.46 4
 -11 4 1 35386.6 1553.27 3
 -11 4 1 34521.5 1565.93 5
 -11 4 2 25682.4 1490.67 4
 -11 4 2 25323.4 1271.13 3
 -11 4 2 25373.8 1333.99 5
 -11 4 3 364.765 199.89 5
 -11 4 3 407.446 139.701 3
 -11 4 4 23366.5 1350.95 5
 -11 4 4 23329.3 1210.35 3
 -11 4 5 5701.16 571.233 3
 -11 4 5 4381.22 559.325 5
 -11 4 6 17085.7 1163.39 5
 -11 4 6 18303.5 1045.2 3
 -11 4 7 31747 1661.33 5
 -11 4 7 33867.2 1442.46 3
 -11 4 8 56.0413 107.059 5
 -11 4 8 -122.587 71.7711 3
 -11 4 9 5591.97 715.911 5
 -11 4 10 498.186 205.715 5
 -11 4 11 13164.1 1174.87 5
 -11 4 12 15126.3 1306.62 5
 -11 4 13 1775.27 460.404 5
 -11 4 14 2799.37 589.047 5
 -11 4 15 1162.93 462.07 5
 -11 5 -9 6643.63 1007.66 4
 -11 5 -8 454.922 236.711 4
 -11 5 -7 11871 1282.48 4
 -11 5 -6 5621.3 846.053 4
 -11 5 -5 3081.27 654.561 4
 -11 5 -4 14451.6 1302.12 4
 -11 5 -3 1658.45 440.91 4
 -11 5 -2 3946.87 629.122 4
 -11 5 -2 4136.36 551.558 5
 -11 5 -1 8278.96 727.488 3
 -11 5 -1 7894.88 880.307 4
 -11 5 -1 8712.21 783.904 5
 -11 5 0 3385.65 474.507 5
 -11 5 0 3441.87 551.202 4
 -11 5 0 3358.94 447.707 3
 -11 5 1 19778.1 1312.48 4
 -11 5 1 22693.7 1188.6 3
 -11 5 1 20025.5 1223.91 5
 -11 5 2 3215.37 477.577 5
 -11 5 2 4765.98 530.831 3
 -11 5 2 3393.86 518.032 4
 -11 5 3 2050.73 398.473 5
 -11 5 3 2778.66 398.331 3
 -11 5 4 11184.1 927.257 5
 -11 5 4 11669.8 809.589 3
 -11 5 5 2171.37 406.222 5
 -11 5 5 2786.33 386.223 3
 -11 5 6 41920.4 1949.47 5
 -11 5 6 43462 1639.65 3
 -11 5 7 9988.33 725.763 3
 -11 5 7 8797.3 895.883 5
 -11 5 8 2641.67 490.216 5
 -11 5 9 9196.35 949.799 5
 -11 5 10 126.288 146.42 5
 -11 5 11 7972.36 940.874 5
 -11 5 12 7356.32 930.245 5
 -11 5 13 162.356 182.899 5
 -11 5 14 2329.98 548.737 5
 -11 6 -10 1247.55 472.463 4
 -11 6 -9 1061.6 402.363 4
 -11 6 -8 3328.01 686.949 4
 -11 6 -7 14835.5 1425 4
 -11 6 -6 1422.89 436.871 4
 -11 6 -5 4160.79 679.741 4
 -11 6 -4 1651.37 439.783 4
 -11 6 -3 133.932 117.856 4
 -11 6 -2 13857.5 1019.73 5
 -11 6 -2 14507.9 1219.59 4
 -11 6 -1 9487.61 947.111 4
 -11 6 -1 8679.17 804.628 5
 -11 6 0 2153.76 434.737 4
 -11 6 0 2123.3 402.276 5
 -11 6 1 4691.24 605.079 4
 -11 6 1 5382.87 550.79 3
 -11 6 1 4391.65 568.638 5
 -11 6 2 -0.96935 119.642 5
 -11 6 2 68.4391 94.7853 3
 -11 6 3 8544.1 835.839 5
 -11 6 3 9657.7 731.14 3
 -11 6 4 6959.8 604.494 3
 -11 6 4 6476.58 720.084 5
 -11 6 5 4433.43 466.028 3
 -11 6 5 3651.35 560.134 5
 -11 6 6 18449.5 1301.91 5
 -11 6 6 19880 1012.21 3
 -11 6 7 335.23 84.4698 5
 -11 6 8 13607.2 1166.34 5
 -11 6 9 7639.75 901.724 5
 -11 6 10 793.65 294.635 5
 -11 6 11 7676.25 971.462 5
 -11 6 12 479.511 232.51 5
 -11 6 13 7113.02 989.53 5
 -11 7 -10 7371.05 1064.12 4
 -11 7 -9 -13.7154 241.715 4
 -11 7 -8 10385.3 1197.72 4
 -11 7 -7 12744.3 1311.08 4
 -11 7 -6 325.668 187.286 4
 -11 7 -5 3123.22 627.267 4
 -11 7 -4 1902.7 462.055 4
 -11 7 -3 6266.63 696.814 5
 -11 7 -3 5813.3 777.972 4
 -11 7 -2 23551.5 1563.83 4
 -11 7 -2 22301.6 1339.75 5
 -11 7 -1 2596.45 473.713 4
 -11 7 -1 1777.26 353.157 5
 -11 7 0 4623.1 596.3 5
 -11 7 0 4669.78 639.442 4
 -11 7 1 1513.96 352.689 5
 -11 7 2 4338.66 621.069 5
 -11 7 3 13926.6 1095.6 5
 -11 7 4 10040.4 711.831 3
 -11 7 4 9418.87 896.038 5
 -11 7 5 703.421 230.233 5
 -11 7 5 404.969 139.652 3
 -11 7 6 820.734 303.641 5
 -11 7 7 7152.6 849.272 5
 -11 7 8 20413 1459.42 5
 -11 7 9 3156.93 576.44 5
 -11 7 10 3549.87 645.207 5
 -11 7 11 4789.37 776.51 5
 -11 7 12 2219.88 575.88 5
 -11 7 13 22318.5 1782.77 5
 -11 8 -10 6008.7 973.521 4
 -11 8 -9 506.697 177.806 4
 -11 8 -8 10271.3 1182.19 4
 -11 8 -7 4078.8 731.698 4
 -11 8 -6 952.373 321.176 4
 -11 8 -5 13356.6 1246.99 4
 -11 8 -4 8.80593 154.001 4
 -11 8 -3 18435.9 1233.63 5
 -11 8 -3 17095.6 1336.67 4
 -11 8 -2 20987.9 1327.53 5
 -11 8 -2 21006.7 1441.91 4
 -11 8 -1 1042.21 315.171 4
 -11 8 -1 994.844 297.674 5
 -11 8 0 12297.6 1004.04 5
 -11 8 0 11597.1 992.668 4
 -11 8 1 238.649 140.82 5
 -11 8 2 16748.3 1239.93 5
 -11 8 3 26703.1 1565.55 5
 -11 8 4 614.584 186.698 5
 -11 8 5 1175.86 305.717 5
 -11 8 6 2.27558 184.193 5
 -11 8 7 15544.2 1275.5 5
 -11 8 8 18160.5 1407.84 5
 -11 8 9 459.609 238.274 5
 -11 8 10 3971.31 706.277 5
 -11 8 11 179.559 199.164 5
 -11 8 12 12348.5 1321.18 5
 -11 9 -10 2022.25 562.49 4
 -11 9 -9 3043.74 634.694 4
 -11 9 -8 8108.45 1045.98 4
 -11 9 -7 -236.685 268.644 4
 -11 9 -6 6633.89 887.606 4
 -11 9 -5 8849.06 1005.37 4
 -11 9 -4 446.238 230.458 4
 -11 9 -4 -204.191 209.549 5
 -11 9 -3 22833.4 1553.93 4
 -11 9 -3 24726.3 1480.48 5
 -11 9 -2 5846.34 701.981 5
 -11 9 -2 6171.51 774.761 4
 -11 9 -1 9801.98 916.057 5
 -11 9 -1 9352.31 921.948 4
 -11 9 0 12889.4 1065.27 5
 -11 9 1 -392.931 244.741 5
 -11 9 2 14800.3 1193.39 5
 -11 9 3 6772.31 803.228 5
 -11 9 4 2446.74 483.432 5
 -11 9 5 6513.2 805.325 5
 -11 9 6 245.572 184.283 5
 -11 9 7 18802.4 1447.94 5
 -11 9 8 7205.65 913.423 5
 -11 9 9 524.614 265.962 5
 -11 9 10 5622.18 879.605 5
 -11 9 11 699.259 311.972 5
 -11 10 -9 6374.74 986.565 4
 -11 10 -8 2436.25 584.42 4
 -11 10 -7 2826.78 617.57 4
 -11 10 -6 14515 1333.39 4
 -11 10 -5 5669.55 808.886 4
 -11 10 -4 1102.69 333.179 4
 -11 10 -4 1320.11 352.034 5
 -11 10 -3 6672.32 839.424 4
 -11 10 -3 6774.84 771.876 5
 -11 10 -2 3142.75 532.725 5
 -11 10 -2 2790.02 520.75 4
 -11 10 -1 23668 1468.19 5
 -11 10 -1 24289.2 1542.94 4
 -11 10 0 9127.75 917.958 5
 -11 10 1 1335.33 320.46 5
 -11 10 2 5013.46 727.298 5
 -11 10 3 -152.498 199.468 5
 -11 10 4 16744.3 1321.09 5
 -11 10 5 13533.4 1197.69 5
 -11 10 6 1029.8 326.334 5
 -11 10 7 9163.85 1032.1 5
 -11 10 8 328.681 196.198 5
 -11 10 9 6300.25 890.398 5
 -11 11 -9 2061.55 544.478 4
 -11 11 -8 -128.474 306.11 4
 -11 11 -7 9025.89 1107.83 4
 -11 11 -6 16664.6 1471.67 4
 -11 11 -5 1429.63 365.441 5
 -11 11 -5 1190.91 296.523 4
 -11 11 -4 1376.47 353.566 5
 -11 11 -4 1779.35 438.114 4
 -11 11 -3 -132.353 123.242 5
 -11 11 -3 126.984 98.3688 4
 -11 11 -2 18976.9 1406.15 4
 -11 11 -2 20003.5 1379.94 5
 -11 11 -1 20350.5 1386.55 5
 -11 11 0 378.239 170.54 5
 -11 11 1 5170.69 735.697 5
 -11 11 2 2831.11 537.453 5
 -11 11 3 11616 1097.88 5
 -11 11 4 24524.1 1643.37 5
 -11 11 5 4747.15 718.126 5
 -11 11 6 6392.45 863.405 5
 -11 11 7 1569.46 417.913 5
 -11 11 8 1073.9 365.095 5
 -11 12 -9 1386.4 340.938 4
 -11 12 -8 63.1158 223.458 4
 -11 12 -7 11745.4 1270.22 4
 -11 12 -6 6670.18 923.998 4
 -11 12 -5 -92.9829 130.692 4
 -11 12 -5 134.256 89.7256 5
 -11 12 -4 4804.37 696.225 5
 -11 12 -4 4562.89 753.125 4
 -11 12 -3 709.732 275.349 5
 -11 12 -3 833.799 364.292 4
 -11 12 -2 13970.4 1174.31 5
 -11 12 -1 9485.71 952.185 5
 -11 12 0 193.492 125.826 5
 -11 12 1 7735.56 926.423 5
 -11 12 2 -84.4971 166.856 5
 -11 12 3 12946.3 1199.1 5
 -11 12 4 11477.7 1151.07 5
 -11 12 5 1270.23 350.934 5
 -11 12 6 6222.57 873.246 5
 -11 13 -8 584.064 350.385 4
 -11 13 -7 5700.07 902.965 4
 -11 13 -6 548.233 286.665 4
 -11 13 -5 2036.22 521.01 4
 -11 13 -5 2445.63 480.258 5
 -11 13 -4 5072.5 719.553 5
 -11 13 -4 5361.53 844.353 4
 -11 13 -3 3345.06 574.833 5
 -11 13 -3 3073.98 629.437 4
 -11 13 -2 7201.62 853.908 5
 -11 13 -1 3396.73 576.353 5
 -11 13 0 3205.48 593.113 5
 -11 13 1 5013.01 744.258 5
 -11 13 2 59.1846 125.497 5
 -11 13 3 13810.2 1248.7 5
 -11 13 4 992.126 367.063 5
 -11 13 5 4267.63 699.594 5
 -11 14 -7 389.617 201.126 4
 -11 14 -6 291.445 297.75 4
 -11 14 -5 6611.31 933.898 4
 -11 14 -5 8186.22 928.286 5
 -11 14 -4 937.045 281.204 4
 -11 14 -4 1741.09 413.887 5
 -11 14 -3 2174.11 448.693 5
 -11 14 -2 1560.32 406.647 5
 -11 14 -1 477.012 271.653 5
 -11 14 0 7444.72 919.96 5
 -11 14 1 5707.61 831.874 5
 -11 14 2 2853.45 586.274 5
 -11 15 -6 3488.5 706.531 4
 -11 15 -5 13588.9 1398.15 4
 -10 -7 1 3308.47 592.414 3
 -10 -7 2 526.854 254.926 3
 -10 -7 3 6410.07 794.057 3
 -10 -6 -2 2161.62 453.564 3
 -10 -6 -1 500.96 261.493 3
 -10 -6 0 6630.39 770.819 3
 -10 -6 1 14166.8 1142.46 3
 -10 -6 2 -360.943 242.66 3
 -10 -6 3 2728.34 496.355 3
 -10 -5 -4 7435.21 815.269 3
 -10 -5 -3 2442.37 478.963 3
 -10 -5 -2 2634.76 489.66 3
 -10 -5 -1 2577.01 483.502 3
 -10 -5 0 20173.1 1350.57 3
 -10 -5 1 7965.46 831.679 3
 -10 -5 2 697.486 273.962 3
 -10 -5 3 1763.46 408.095 3
 -10 -4 -6 2230.45 437.291 3
 -10 -4 -5 9966.9 949.779 3
 -10 -4 -4 -82.4907 124.092 3
 -10 -4 -3 13317.4 1072.09 3
 -10 -4 -2 749.66 251.466 3
 -10 -4 -1 11281.7 965.946 3
 -10 -4 0 16624.5 1181.28 3
 -10 -4 1 493.507 200.106 3
 -10 -4 2 3527.63 532.494 3
 -10 -4 3 16.7698 106.804 3
 -10 -3 -7 167.754 175.455 3
 -10 -3 -6 5311.68 661.911 3
 -10 -3 -5 1669.9 381.79 3
 -10 -3 -4 13365.9 1063.89 3
 -10 -3 -3 8689.02 840.627 3
 -10 -3 -2 38.1548 129.818 3
 -10 -3 -1 10699.1 927.543 3
 -10 -3 0 4864.45 616.867 3
 -10 -3 1 3376.21 514.967 3
 -10 -3 2 19887.6 1254.57 3
 -10 -3 3 1725.43 359.418 3
 -10 -2 -6 8510.41 848.865 3
 -10 -2 -5 1128.44 284.827 3
 -10 -2 -4 14496.6 1070.94 3
 -10 -2 -3 4620.65 607.118 3
 -10 -2 -2 2501.3 434.807 3
 -10 -2 -1 11754 961.473 3
 -10 -2 0 36.3999 105.449 3
 -10 -2 1 18107.4 1168.83 3
 -10 -2 2 26743.2 1428.26 3
 -10 -2 3 215.983 160.256 3
 -10 -1 -6 1456.23 330.187 3
 -10 -1 -5 3144.84 487.593 3
 -10 -1 -4 19796.2 1253.57 3
 -10 -1 -3 2009.77 396.108 3
 -10 -1 -2 2860.96 472.851 3
 -10 -1 -1 6081.43 675.127 3
 -10 -1 0 8426.45 768.141 3
 -10 -1 1 31566.6 1533.62 3
 -10 -1 2 4998.26 578.753 3
 -10 -1 3 9043.04 790.607 3
 -10 -1 4 8197.65 752.687 3
 -10 0 -8 -137.663 318.507 4
 -10 0 -7 6029.77 989.324 4
 -10 0 -6 73.0327 230.595 4
 -10 0 -6 16.7631 111.108 3
 -10 0 -5 12056.8 962.016 3
 -10 0 -5 11564.3 1311.49 4
 -10 0 -4 11278.6 906.202 3
 -10 0 -4 11648.2 1287.52 4
 -10 0 -3 614.082 190.388 3
 -10 0 -3 516.575 222.593 4
 -10 0 -2 10597.5 864.088 3
 -10 0 -1 1916.54 360.553 3
 -10 0 0 10149.4 837.893 3
 -10 0 1 31423.1 1493.14 3
 -10 0 2 1525.42 260.319 5
 -10 0 2 2000.81 347.392 3
 -10 0 3 9176.13 772.332 3
 -10 0 3 8527.03 626.501 5
 -10 0 4 5106.97 481.223 5
 -10 0 4 5192.09 576.202 3
 -10 0 5 10472.5 727.344 5
 -10 0 5 11313.1 857.918 3
 -10 0 6 9255.37 700.924 5
 -10 0 7 5543.55 535.407 5
 -10 0 8 1163.78 260.005 5
 -10 0 9 427.248 158.294 5
 -10 0 10 11072.6 873.508 5
 -10 1 -9 2241.77 604.815 4
 -10 1 -8 7511.5 1073.03 4
 -10 1 -7 12179.2 1347.06 4
 -10 1 -6 -129.066 201.638 4
 -10 1 -5 16674.2 1504.34 4
 -10 1 -5 15817.6 1091.45 3
 -10 1 -4 2845.75 440.262 3
 -10 1 -4 3785.55 716.675 4
 -10 1 -3 2079.99 526.43 4
 -10 1 -3 2325.13 382.278 3
 -10 1 -2 15887.8 1036 3
 -10 1 -2 16504 1392.18 4
 -10 1 -1 1853.68 342.379 3
 -10 1 -1 1890.61 448.319 4
 -10 1 0 6957.88 674.101 3
 -10 1 0 6830.92 854.827 4
 -10 1 1 11285.2 748.414 5
 -10 1 1 12093.6 887.702 3
 -10 1 2 2204.41 360.393 3
 -10 1 2 1704.19 280.311 5
 -10 1 3 8435.85 646.796 5
 -10 1 3 9522.26 762.924 3
 -10 1 4 -42.5132 99.2482 5
 -10 1 4 52.209 59.2431 3
 -10 1 5 9402.77 725.16 5
 -10 1 5 9700.34 762.6 3
 -10 1 6 11598.5 841.224 3
 -10 1 6 9562.26 744.476 5
 -10 1 7 62.0232 86.4932 5
 -10 1 8 14369.6 977.751 5
 -10 1 9 4575.4 568.979 5
 -10 1 10 18146.5 1178.89 5
 -10 1 11 14525 1096.97 5
 -10 1 12 26.5464 77.4568 5
 -10 1 13 10502.9 994.168 5
 -10 1 14 -5.92377 109.343 5
 -10 1 15 8365.84 972.864 5
 -10 1 16 17886.2 1491.9 5
 -10 2 -10 2940.41 675.355 4
 -10 2 -9 549.943 400.691 4
 -10 2 -8 23686.3 1899.81 4
 -10 2 -7 15975.6 1513.32 4
 -10 2 -6 433.405 323.511 4
 -10 2 -5 10307.4 1151.42 4
 -10 2 -5 9584.69 826.745 3
 -10 2 -4 1117.82 381.463 4
 -10 2 -4 1415.49 317.408 3
 -10 2 -3 22879.5 1267.75 3
 -10 2 -3 22580.4 1621.91 4
 -10 2 -2 18695.7 1125.28 3
 -10 2 -2 18032.8 1408.25 4
 -10 2 -1 -7.01063 152.499 3
 -10 2 -1 46.2618 96.3827 4
 -10 2 0 6261.13 582.568 5
 -10 2 0 7630.62 684.638 3
 -10 2 0 7443.9 855.193 4
 -10 2 1 291.834 119.629 5
 -10 2 1 354.214 153.58 4
 -10 2 1 466.396 178.5 3
 -10 2 2 28741.6 1352.72 3
 -10 2 2 27175.1 1545.97 4
 -10 2 2 27141.9 1241.08 5
 -10 2 3 15969.2 942.089 5
 -10 2 3 16718.3 1000.89 3
 -10 2 4 769.499 228.509 5
 -10 2 4 516.722 176.376 3
 -10 2 5 8308.85 698.84 5
 -10 2 5 10078.4 751.714 3
 -10 2 6 839.292 200.156 3
 -10 2 6 406.539 159.283 5
 -10 2 7 17731.3 1107.32 5
 -10 2 7 18264 1033.05 3
 -10 2 8 40467 1765.49 5
 -10 2 9 193.059 81.862 5
 -10 2 10 9686.33 897.505 5
 -10 2 11 1888.57 420.506 5
 -10 2 12 4874.59 669.901 5
 -10 2 13 8258.24 916.754 5
 -10 2 14 523.656 248.976 5
 -10 2 15 8230.27 987.13 5
 -10 2 16 2871.07 594.448 5
 -10 2 17 3238.8 643.791 5
 -10 3 -10 3746.38 802.572 4
 -10 3 -9 6083.27 959.184 4
 -10 3 -8 23779.1 1835.66 4
 -10 3 -7 9424.45 1132.15 4
 -10 3 -6 6648.05 925.91 4
 -10 3 -5 1651.03 448.564 4
 -10 3 -4 20783.2 1534.65 4
 -10 3 -4 19897.2 1173.93 3
 -10 3 -3 51476.3 1971.58 3
 -10 3 -3 51993.4 2459.83 4
 -10 3 -2 2958.65 428.664 3
 -10 3 -2 3827.94 611.797 4
 -10 3 -1 1618.78 405.551 4
 -10 3 -1 1778.66 342.601 3
 -10 3 -1 1759.76 327.35 5
 -10 3 0 4639.15 513.331 3
 -10 3 0 4223.11 489.369 5
 -10 3 0 4108.31 605.282 4
 -10 3 1 16092.8 965.558 3
 -10 3 1 14079.4 913.716 5
 -10 3 1 14917.1 1129.87 4
 -10 3 2 59406.3 2026.94 5
 -10 3 2 61463 2342.67 4
 -10 3 2 63995.9 2095.36 3
 -10 3 3 15707.3 1048.73 5
 -10 3 3 14107.5 1008.73 4
 -10 3 3 16526.3 972.64 3
 -10 3 4 3329.35 457.733 5
 -10 3 4 3566.7 440.776 3
 -10 3 5 5127.32 579.475 5
 -10 3 5 5283.83 535.967 3
 -10 3 6 870.441 202.968 3
 -10 3 6 606.195 190.437 5
 -10 3 7 41420.5 1570.62 3
 -10 3 7 39508.1 1769.01 5
 -10 3 8 6440.19 709.087 5
 -10 3 8 6832.54 597.747 3
 -10 3 9 4486.52 473.434 3
 -10 3 9 3997.13 571.634 5
 -10 3 10 9257.27 906.932 5
 -10 3 11 66.9614 158.171 5
 -10 3 12 16824.9 1297.54 5
 -10 3 13 9139.61 991.311 5
 -10 3 14 144.263 89.4208 5
 -10 3 15 6207.18 904.118 5
 -10 3 16 -137.472 149.488 5
 -10 4 -11 6532.06 1002.23 4
 -10 4 -10 2151.12 575.818 4
 -10 4 -9 10135 1193.84 4
 -10 4 -8 14719.9 1401.2 4
 -10 4 -7 293.161 326.096 4
 -10 4 -6 22587.3 1661.81 4
 -10 4 -5 839.28 327.882 4
 -10 4 -4 24722.5 1642.48 4
 -10 4 -3 15748 1003.59 3
 -10 4 -3 14551.7 1217.93 4
 -10 4 -2 86.4138 129.214 4
 -10 4 -2 60.2909 75.0126 3
 -10 4 -1 7467.15 661.147 3
 -10 4 -1 5830.03 607.692 5
 -10 4 -1 6416.32 752.187 4
 -10 4 0 639.082 237.472 4
 -10 4 0 471.372 140.015 3
 -10 4 0 592.202 162.69 5
 -10 4 1 36356.4 1474.08 3
 -10 4 1 33478.3 1655.37 4
 -10 4 1 31664.8 1463.07 5
 -10 4 2 41937 1596.4 3
 -10 4 2 41546.9 1804.17 4
 -10 4 2 41549.6 1736.09 5
 -10 4 3 -209.093 125.22 5
 -10 4 3 -80.7981 61.4604 3
 -10 4 3 33.78 90.5207 4
 -10 4 4 10924.5 760.109 3
 -10 4 4 8861.2 775.119 5
 -10 4 5 542.954 191.299 5
 -10 4 5 699.487 180.684 3
 -10 4 6 14948.2 870.038 3
 -10 4 6 13197.3 1002.19 5
 -10 4 7 34670.3 1369.75 3
 -10 4 7 35205.2 1689.96 5
 -10 4 8 192.606 71.1683 5
 -10 4 8 90.4027 63.3047 3
 -10 4 9 9623.49 670.416 3
 -10 4 9 9400.79 905.353 5
 -10 4 10 8070.72 865.925 5
 -10 4 11 3035.96 579.501 5
 -10 4 12 17974.5 1406.52 5
 -10 4 13 11349.7 1123.27 5
 -10 4 14 1506.76 414.199 5
 -10 4 15 3767.07 701.625 5
 -10 5 -11 8774.57 1172.56 4
 -10 5 -10 161.736 179.298 4
 -10 5 -9 5155.84 828.713 4
 -10 5 -8 -267.475 249.798 4
 -10 5 -7 16076.6 1408.51 4
 -10 5 -6 16783.4 1417.36 4
 -10 5 -5 370.873 141.148 4
 -10 5 -4 11694.1 1091.28 4
 -10 5 -3 2846.32 516.016 4
 -10 5 -2 918.685 305.337 4
 -10 5 -2 948.929 261.522 5
 -10 5 -1 15260.6 1156.44 4
 -10 5 -1 17493.3 1009.89 3
 -10 5 -1 18004.8 1106.4 5
 -10 5 0 39.3626 84.5144 4
 -10 5 0 47.9507 114.992 5
 -10 5 0 24.8114 117.428 3
 -10 5 1 18810.2 1129.17 5
 -10 5 1 19143.7 1024.81 3
 -10 5 1 17934.9 1149.59 4
 -10 5 2 5835.01 647.024 5
 -10 5 2 5244.06 580.109 4
 -10 5 2 5662.21 525.595 3
 -10 5 3 11839.5 845.034 4
 -10 5 3 12690.8 794.169 3
 -10 5 3 11395.1 902.991 5
 -10 5 4 12001.4 931.97 5
 -10 5 4 12293.1 775.298 3
 -10 5 5 383.811 141.629 3
 -10 5 5 381.847 159.91 5
 -10 5 6 38231 1418.54 3
 -10 5 6 34197.6 1708.59 5
 -10 5 7 17246.4 1193.66 5
 -10 5 7 19862.3 973.708 3
 -10 5 8 511.532 199.388 5
 -10 5 9 7447.37 828.672 5
 -10 5 10 351.958 203.094 5
 -10 5 11 7629.17 901.203 5
 -10 5 12 7533.97 908.453 5
 -10 5 13 301.61 217.087 5
 -10 5 14 7384.18 993.008 5
 -10 5 15 1022.71 396.115 5
 -10 6 -11 6101.5 940.255 4
 -10 6 -10 218.112 179.942 4
 -10 6 -9 3141.42 640.597 4
 -10 6 -8 1126.56 404.062 4
 -10 6 -7 16105.6 1408.38 4
 -10 6 -6 12784.2 1213.38 4
 -10 6 -5 1000.32 341.912 4
 -10 6 -4 4148.54 662.639 4
 -10 6 -3 310.915 179.291 4
 -10 6 -3 -25.4505 142.462 5
 -10 6 -2 21885.2 1254.63 5
 -10 6 -2 21580.1 1403.71 4
 -10 6 -1 25033.3 1476.68 4
 -10 6 -1 24812.9 1330.68 5
 -10 6 0 -24.7385 157.14 5
 -10 6 0 300.587 119.659 4
 -10 6 1 17214.7 1107 4
 -10 6 1 17251.8 1165.89 5
 -10 6 1 17183.8 954.584 3
 -10 6 2 -79.0214 160.109 5
 -10 6 2 17.1334 66.5543 4
 -10 6 2 -3.89186 87.5764 3
 -10 6 3 7720.04 749.537 5
 -10 6 3 8490.45 630.936 3
 -10 6 4 25355.3 1425.01 5
 -10 6 4 24266.2 1097.81 3
 -10 6 5 105.834 112.01 5
 -10 6 5 54.1906 60.8524 3
 -10 6 6 18213.3 1254.51 5
 -10 6 6 20803.5 957.056 3
 -10 6 7 880.934 257.808 5
 -10 6 8 10802.1 1005.05 5
 -10 6 9 14859.6 1225.62 5
 -10 6 10 406.698 230.933 5
 -10 6 11 7574.39 927.63 5
 -10 6 12 2184.34 502.177 5
 -10 6 13 9261.46 1081.9 5
 -10 6 14 9781.39 1167.26 5
 -10 7 -11 2288.9 635.08 4
 -10 7 -10 1182.01 415.875 4
 -10 7 -9 1901.73 496.821 4
 -10 7 -8 3819.43 687.467 4
 -10 7 -7 16526.7 1397.3 4
 -10 7 -6 1157.76 354.662 4
 -10 7 -5 3591.99 600.739 4
 -10 7 -4 1639.78 385.255 4
 -10 7 -3 9099.76 906.118 4
 -10 7 -3 8595.85 791.256 5
 -10 7 -2 35745.4 1656.99 5
 -10 7 -2 35339 1796.42 4
 -10 7 -1 11567.2 916.562 5
 -10 7 -1 9821.7 896.477 4
 -10 7 0 9279.39 824.52 4
 -10 7 0 9099.28 817.216 5
 -10 7 1 7120.11 697.418 4
 -10 7 1 7207.76 767.564 5
 -10 7 2 4587.27 592.107 5
 -10 7 2 4246.47 503.096 4
 -10 7 3 16591.2 1153.73 5
 -10 7 4 18113.3 1224.05 5
 -10 7 5 30.1029 96.0101 5
 -10 7 5 360.665 89.4517 3
 -10 7 6 3296.2 550.513 5
 -10 7 7 3909.21 598.866 5
 -10 7 8 39626.8 2035.59 5
 -10 7 9 13652.9 1214.69 5
 -10 7 10 661.379 272.944 5
 -10 7 11 3514.91 637.034 5
 -10 7 12 718.697 281.943 5
 -10 7 13 25028.4 1823.88 5
 -10 8 -11 865.8 344.997 4
 -10 8 -10 3262.98 689.339 4
 -10 8 -9 -249.41 231.874 4
 -10 8 -8 11438.5 1168.14 4
 -10 8 -7 7772.09 932.427 4
 -10 8 -6 623.877 275.967 4
 -10 8 -5 11217.4 1086.71 4
 -10 8 -4 19.942 110.465 4
 -10 8 -4 70.8209 95.3424 5
 -10 8 -3 14187.9 1143.44 4
 -10 8 -3 14480.7 1067.26 5
 -10 8 -2 17449.5 1152.95 5
 -10 8 -2 16270.6 1186.55 4
 -10 8 -1 372.101 120.646 5
 -10 8 -1 775.615 271.897 4
 -10 8 0 29687.8 1584.35 5
 -10 8 0 24617 1380.46 4
 -10 8 1 -68.3717 141.888 4
 -10 8 1 141.801 97.1929 5
 -10 8 2 12482.7 998.877 5
 -10 8 3 28136.7 1569.2 5
 -10 8 4 5445.59 685.581 5
 -10 8 5 754.136 253.496 5
 -10 8 6 1375.91 360.868 5
 -10 8 7 13854.9 1171.32 5
 -10 8 8 32222.9 1868.35 5
 -10 8 9 910.977 297.744 5
 -10 8 10 1426.61 411.087 5
 -10 8 11 569.889 249.697 5
 -10 8 12 11430.4 1217.23 5
 -10 9 -11 8257.89 1094.26 4
 -10 9 -10 8355.83 1065.01 4
 -10 9 -9 1280.54 401.412 4
 -10 9 -8 11798.3 1199.59 4
 -10 9 -7 3077.39 603.495 4
 -10 9 -6 10369.4 1061.44 4
 -10 9 -5 14855.4 1253.93 4
 -10 9 -4 278.473 183.194 4
 -10 9 -4 -56.1562 172.799 5
 -10 9 -3 27292.6 1629.57 4
 -10 9 -3 27461.8 1522.31 5
 -10 9 -2 7149.58 753.076 5
 -10 9 -2 8281.94 847.314 4
 -10 9 -1 7056.17 742.927 5
 -10 9 -1 7607.44 785.819 4
 -10 9 0 17544 1268.11 5
 -10 9 0 16596.7 1137.24 4
 -10 9 1 -70.6605 193.892 5
 -10 9 2 8661 854.781 5
 -10 9 3 10898.1 981.284 5
 -10 9 4 2738.95 475.383 5
 -10 9 5 12289.7 1093.02 5
 -10 9 6 1570.39 356.702 5
 -10 9 7 19801.3 1450.28 5
 -10 9 8 9441.82 1016.12 5
 -10 9 9 295.686 228.809 5
 -10 9 10 5762.04 855.072 5
 -10 9 11 -122.841 171.488 5
 -10 10 -11 12615.1 1360.25 4
 -10 10 -10 8776.27 1111.99 4
 -10 10 -9 4293.58 748.248 4
 -10 10 -8 5309.13 802.37 4
 -10 10 -7 978.822 338.122 4
 -10 10 -6 21808 1585.57 4
 -10 10 -5 12118.1 1029.23 5
 -10 10 -5 13106.2 1177.51 4
 -10 10 -4 744.27 216.675 5
 -10 10 -4 681.486 285.144 4
 -10 10 -3 12653.2 1115.29 4
 -10 10 -3 15512.9 1219.13 5
 -10 10 -2 3.84905 172.837 5
 -10 10 -2 91.2873 109.617 4
 -10 10 -1 33736.5 1754.01 4
 -10 10 -1 35385.4 1794.62 5
 -10 10 0 15926.9 1249.82 5
 -10 10 0 12211 1003.05 4
 -10 10 1 -111.092 171.423 5
 -10 10 2 12703.1 1077.26 5
 -10 10 3 5064.46 734.481 5
 -10 10 4 21323.8 1467.15 5
 -10 10 5 22906.9 1537.83 5
 -10 10 6 51.1454 134.264 5
 -10 10 7 5563.01 789.26 5
 -10 10 8 369.77 246.336 5
 -10 10 9 5776.94 845.598 5
 -10 10 10 7287.16 967.766 5
 -10 11 -10 1615.51 465.831 4
 -10 11 -9 3337.16 688.936 4
 -10 11 -8 631.556 306.211 4
 -10 11 -7 14476.2 1323.58 4
 -10 11 -6 16972.3 1424.43 4
 -10 11 -5 3189.12 595.236 4
 -10 11 -5 3303.53 547.911 5
 -10 11 -4 182.896 98.3446 5
 -10 11 -4 66.8292 86.1594 4
 -10 11 -3 1574.86 383.656 4
 -10 11 -3 1339.09 330.504 5
 -10 11 -2 15034.9 1148.07 5
 -10 11 -2 13467.4 1137.51 4
 -10 11 -1 38232.6 1924.66 5
 -10 11 -1 35824.3 1861.27 4
 -10 11 0 4619.3 663.071 5
 -10 11 1 1189.74 334.032 5
 -10 11 2 3788.54 579.176 5
 -10 11 3 4737.9 676.082 5
 -10 11 4 17936.6 1366.96 5
 -10 11 5 9246.87 990.11 5
 -10 11 6 1290.38 375.447 5
 -10 11 7 2143.73 515.696 5
 -10 11 8 1332.79 428.621 5
 -10 11 9 11876.7 1235.99 5
 -10 12 -10 154.795 122.818 4
 -10 12 -9 7974.26 1049.14 4
 -10 12 -8 -49.6903 203.579 4
 -10 12 -7 14974.5 1404.26 4
 -10 12 -6 7552.89 959.486 4
 -10 12 -5 1477.16 434.353 4
 -10 12 -5 1235.25 299.132 5
 -10 12 -4 3482.47 555.951 5
 -10 12 -4 2613.13 551.328 4
 -10 12 -3 67.9906 110.191 5
 -10 12 -3 280.454 216.381 4
 -10 12 -2 13220.6 1148.73 4
 -10 12 -2 13958.2 1132.12 5
 -10 12 -1 14340.2 1174.39 5
 -10 12 -1 11865.2 1071.23 4
 -10 12 0 300.397 144.648 5
 -10 12 1 4804.08 704.463 5
 -10 12 2 284.762 170.323 5
 -10 12 3 7851.01 905.865 5
 -10 12 4 19384.6 1440.52 5
 -10 12 5 -73.0348 229.793 5
 -10 12 6 7438.52 941.209 5
 -10 12 7 3052.38 605.56 5
 -10 12 8 2900.31 616.575 5
 -10 13 -9 8381.75 1097.91 4
 -10 13 -8 507.3 331.718 4
 -10 13 -7 3133.5 618.349 4
 -10 13 -6 1134.35 328.495 5
 -10 13 -6 851.188 335.54 4
 -10 13 -5 2377.48 520.584 4
 -10 13 -5 2445.61 473.837 5
 -10 13 -4 8696.28 913.265 5
 -10 13 -4 8298.26 987.202 4
 -10 13 -3 -93.7408 121.895 4
 -10 13 -3 -89.0598 83.585 5
 -10 13 -2 6770.85 867.137 4
 -10 13 -2 7316.69 830.363 5
 -10 13 -1 3509.44 596.938 5
 -10 13 0 6639.79 848.305 5
 -10 13 1 5280.51 744.328 5
 -10 13 2 27.7891 208.923 5
 -10 13 3 15162 1282.69 5
 -10 13 4 2985.96 564.401 5
 -10 13 5 6238.87 854.518 5
 -10 13 6 12514.4 1242.55 5
 -10 14 -8 746.028 358.192 4
 -10 14 -7 842.334 325.094 4
 -10 14 -6 -279.742 225.297 5
 -10 14 -6 -33.8212 263.771 4
 -10 14 -5 13258.7 1148.23 5
 -10 14 -5 9989.76 1130.2 4
 -10 14 -4 8216.65 907.391 5
 -10 14 -4 6913.14 927.166 4
 -10 14 -3 268.016 123.464 5
 -10 14 -3 413.651 226.245 4
 -10 14 -2 5538.4 732.467 5
 -10 14 -1 277.678 115.848 5
 -10 14 0 16189.3 1406.12 5
 -10 14 1 11231.2 1118.93 5
 -10 14 2 1202.44 349.454 5
 -10 14 3 9311.75 1029.34 5
 -10 14 4 169.49 103.21 5
 -10 15 -7 3432.1 721.072 4
 -10 15 -6 3714.93 621.531 5
 -10 15 -6 4337.69 799.695 4
 -10 15 -5 14818.3 1468.75 4
 -10 15 -5 17816.2 1354.39 5
 -10 15 -4 1939.5 490.222 4
 -10 15 -4 2244.22 485.224 5
 -10 15 -3 4099.55 642.815 5
 -10 15 -2 2078.98 466.713 5
 -10 15 -1 1909.43 389.652 5
 -10 15 0 20730.6 1636.86 5
 -10 15 1 6381.78 871.443 5
 -10 15 2 756.681 300.888 5
 -10 16 -6 9432.45 1220.43 4
 -10 16 -5 6419.86 975.304 4
 -9 -8 -2 990.412 309.252 3
 -9 -8 -1 16321.3 1226.47 3
 -9 -8 0 1180.04 332.023 3
 -9 -8 1 958.913 316.234 3
 -9 -8 2 2535.61 485.523 3
 -9 -7 -4 6403.52 747.224 3
 -9 -7 -3 4487.49 635.741 3
 -9 -7 -2 2641.39 492.339 3
 -9 -7 -1 4459.38 631.006 3
 -9 -7 0 562.053 216.178 3
 -9 -7 1 9998.3 929.235 3
 -9 -6 -5 8385.69 878.653 3
 -9 -6 -4 14704.9 1120.75 3
 -9 -6 -3 786.907 277.975 3
 -9 -6 -2 8811.1 858.753 3
 -9 -6 -1 54.4476 108.636 3
 -9 -6 0 11175 953.983 3
 -9 -6 1 19028.1 1266.8 3
 -9 -5 -7 3120.47 535.506 3
 -9 -5 -6 820.598 255.768 3
 -9 -5 -5 14544.1 1112.19 3
 -9 -5 -5 14652 1310.33 2
 -9 -5 -4 10729.9 940.42 3
 -9 -5 -4 11479.5 1121.87 2
 -9 -5 -3 4606.49 612.425 3
 -9 -5 -2 6228.89 707.014 3
 -9 -5 -1 2681.53 458.992 3
 -9 -5 0 25236.5 1427.32 3
 -9 -5 1 6668.72 713.811 3
 -9 -4 -7 1376.02 346.968 3
 -9 -4 -6 2212.73 412.54 3
 -9 -4 -6 3222.45 619.259 2
 -9 -4 -5 8929.41 858.383 3
 -9 -4 -5 10010.9 1046.78 2
 -9 -4 -4 -167.82 133.628 3
 -9 -4 -3 17532.5 1175.5 3
 -9 -4 -2 5396.23 634.437 3
 -9 -4 -1 7295.28 736.761 3
 -9 -4 0 19206.2 1198.97 3
 -9 -4 1 2661.71 436.486 3
 -9 -4 2 11048.7 898.237 3
 -9 -3 -8 12297.7 1170.9 2
 -9 -3 -7 343.151 93.0792 2
 -9 -3 -7 514.511 186.819 3
 -9 -3 -6 3165.19 499.28 3
 -9 -3 -6 3255.84 575.937 2
 -9 -3 -5 2405.58 418.425 3
 -9 -3 -4 7852.99 767.605 3
 -9 -3 -3 18905.6 1205.05 3
 -9 -3 -2 2473.98 422.119 3
 -9 -3 -1 12534.4 948.559 3
 -9 -3 0 13107 961.874 3
 -9 -3 1 2860.22 436.748 3
 -9 -3 2 34160.3 1581.9 3
 -9 -2 -9 15004.4 1303.18 2
 -9 -2 -8 16339 1317.37 2
 -9 -2 -7 969.564 286.091 3
 -9 -2 -7 1091.61 267.644 2
 -9 -2 -6 1967.53 380.783 3
 -9 -2 -5 446.202 162.793 3
 -9 -2 -4 12157.3 927.747 3
 -9 -2 -3 12215.6 927.495 3
 -9 -2 -2 59.5483 107.034 3
 -9 -2 -1 8844.98 766.214 3
 -9 -2 0 62.6686 113.576 3
 -9 -2 1 17995.2 1099.87 3
 -9 -2 2 25370 1305.92 3
 -9 -1 -10 3080.02 576.688 2
 -9 -1 -9 14571.6 1604.8 4
 -9 -1 -9 13422.8 1168.7 2
 -9 -1 -8 5168.26 928.216 4
 -9 -1 -7 209.348 134.825 4
 -9 -1 -6 2071.85 531.274 4
 -9 -1 -6 2668.76 446.217 3
 -9 -1 -5 793.673 253.039 4
 -9 -1 -5 959.473 235.811 3
 -9 -1 -4 20446.6 1194.48 3
 -9 -1 -3 5605.29 614.009 3
 -9 -1 -2 1248.83 287.93 3
 -9 -1 -1 5035.7 568.323 3
 -9 -1 0 449.08 128.762 3
 -9 -1 1 45422.6 1771.61 3
 -9 -1 2 16954.8 1038.41 3
 -9 -1 3 745.482 215.749 3
 -9 -1 3 756.48 168.061 5
 -9 -1 4 11538.7 662.12 5
 -9 -1 5 192.757 75.8351 5
 -9 -1 6 17379.3 879.443 5
 -9 -1 7 12438.6 765.272 5
 -9 -1 8 526.675 168.812 5
 -9 -1 9 1820.94 318.791 5
 -9 -1 10 106.355 75.383 5
 -9 0 -10 3714.41 788.505 4
 -9 0 -9 6336.63 1017.99 4
 -9 0 -8 319.145 203.467 4
 -9 0 -7 3451.7 714.923 4
 -9 0 -6 4979.68 587.385 3
 -9 0 -6 4772.24 816.511 4
 -9 0 -5 13320.3 1320.43 4
 -9 0 -5 13438.3 963.336 3
 -9 0 -4 23025.7 1705.79 4
 -9 0 -4 22102.9 1237.99 3
 -9 0 -3 5413.82 793.534 4
 -9 0 -3 4721.09 545.813 3
 -9 0 -2 14268 1256.15 4
 -9 0 -2 15378.9 988.401 3
 -9 0 -1 7228.93 670.333 3
 -9 0 -1 6254.63 797.503 4
 -9 0 0 5056.51 555.934 3
 -9 0 1 43234.9 1682.9 3
 -9 0 2 3203.55 422.954 3
 -9 0 2 2271.86 298.894 5
 -9 0 3 9238.53 618.63 5
 -9 0 3 9233.87 726.852 3
 -9 0 4 5577.67 497.7 5
 -9 0 5 8593.17 632.316 5
 -9 0 6 30436.7 1267.99 5
 -9 0 7 6657.52 590.51 5
 -9 0 8 5528.97 550.213 5
 -9 0 9 21950.2 1177.96 5
 -9 0 10 3434.4 479.814 5
 -9 0 11 43270.7 1842.85 5
 -9 0 12 7620.54 784.414 5
 -9 0 13 2388.5 470.935 5
 -9 0 14 2837.69 509.264 5
 -9 0 15 2181.63 536.367 5
 -9 0 16 20507.2 1562.4 5
 -9 1 -11 53.8298 109.943 4
 -9 1 -10 4726.58 865.25 4
 -9 1 -9 2212.36 547.393 4
 -9 1 -8 4866.25 833.79 4
 -9 1 -7 19649.2 1640.3 4
 -9 1 -6 3851.51 713.483 4
 -9 1 -5 6176.92 632.129 3
 -9 1 -5 5441.18 804.693 4
 -9 1 -4 18022.9 1092.95 3
 -9 1 -4 19266.8 1486.82 4
 -9 1 -3 2907.2 555.26 4
 -9 1 -3 3201.43 453.638 3
 -9 1 -2 23679.3 1227.72 3
 -9 1 -2 24240.3 1592.63 4
 -9 1 -1 2517.23 504.069 4
 -9 1 -1 2444.97 367.386 3
 -9 1 0 12801 858.205 3
 -9 1 0 10477.6 988.119 4
 -9 1 1 14584.1 824.456 5
 -9 1 1 14305.6 912.416 3
 -9 1 1 14155.6 1112.66 4
 -9 1 2 9055.57 696.635 3
 -9 1 2 8530.74 619.679 5
 -9 1 3 44927.7 1568.92 5
 -9 1 3 44728.5 1659.78 3
 -9 1 4 5826.17 546.583 3
 -9 1 4 6015.72 548.098 5
 -9 1 5 30420 1306.36 5
 -9 1 6 25471.9 1204.14 5
 -9 1 7 954.349 245.426 5
 -9 1 8 25728.2 1298.79 5
 -9 1 9 15023.5 1021.8 5
 -9 1 10 15729.4 1075.29 5
 -9 1 11 13252 1019.77 5
 -9 1 12 -48.9664 134.191 5
 -9 1 13 14822.7 1192 5
 -9 1 14 2637.19 540.178 5
 -9 1 15 2894.53 598.234 5
 -9 1 16 15758.9 1402.9 5
 -9 1 17 145.076 209.028 5
 -9 1 18 5184.87 864.099 5
 -9 2 -11 2672.77 622.146 4
 -9 2 -10 9969.36 1221.48 4
 -9 2 -9 -185.706 253.649 4
 -9 2 -8 21512.4 1713.54 4
 -9 2 -7 21368.8 1650.43 4
 -9 2 -6 618.456 248.021 4
 -9 2 -5 12373 1160.99 4
 -9 2 -5 11091.5 851.119 3
 -9 2 -4 163.282 158.402 3
 -9 2 -4 113.301 177.952 4
 -9 2 -3 40800.5 1648.61 3
 -9 2 -3 39622.4 2075.97 4
 -9 2 -2 33577.3 1830.32 4
 -9 2 -2 31561.3 1405.27 3
 -9 2 -1 3716.72 569.717 4
 -9 2 -1 4876.04 509.767 3
 -9 2 0 9257.55 716.814 3
 -9 2 0 8205.71 836.041 4
 -9 2 0 8375.65 640.878 5
 -9 2 1 588.913 237.895 4
 -9 2 1 567.982 190.272 3
 -9 2 1 775.377 191.301 5
 -9 2 2 16183 909.78 5
 -9 2 2 17416.6 965.214 3
 -9 2 2 16274.5 1094.72 4
 -9 2 3 67102 2129.21 5
 -9 2 3 64102 2015.72 3
 -9 2 4 632.25 178.793 5
 -9 2 4 558.374 159.049 3
 -9 2 5 11592.9 807.101 5
 -9 2 5 12262.3 786.054 3
 -9 2 6 362.295 115.481 3
 -9 2 6 304.238 165.295 5
 -9 2 7 9571.2 776.749 5
 -9 2 8 36929.3 1655.06 5
 -9 2 9 438.998 163.425 5
 -9 2 10 6008.42 677.974 5
 -9 2 11 2322.79 453.106 5
 -9 2 12 10036.2 969.923 5
 -9 2 13 14908.6 1236.72 5
 -9 2 14 254.142 134.09 5
 -9 2 15 5274.65 791.852 5
 -9 2 16 7462.08 1009.43 5
 -9 2 17 406.626 109.49 5
 -9 3 -12 163.205 220.789 4
 -9 3 -11 5644.23 907.496 4
 -9 3 -10 5977.97 903.591 4
 -9 3 -9 2816.1 597.711 4
 -9 3 -8 36707.4 2164.96 4
 -9 3 -7 4050.7 693.971 4
 -9 3 -6 14924.8 1286.5 4
 -9 3 -5 4601.81 699.09 4
 -9 3 -4 11133.6 1043.74 4
 -9 3 -4 11210.5 816.109 3
 -9 3 -3 60096.5 2031.83 3
 -9 3 -3 58101.7 2441.45 4
 -9 3 -2 24901.7 1201.56 3
 -9 3 -2 22186.3 1404.03 4
 -9 3 -1 698.617 246.508 4
 -9 3 -1 782.52 221.802 3
 -9 3 -1 416.145 125.329 5
 -9 3 0 5339.37 524.018 5
 -9 3 0 5013.1 617.105 4
 -9 3 0 5204.39 521.255 3
 -9 3 1 359.369 185.897 4
 -9 3 1 426.383 145.121 5
 -9 3 1 647.423 170.794 3
 -9 3 2 46087.9 1646.88 3
 -9 3 2 46867.7 1841.06 4
 -9 3 2 49819.2 1838.62 5
 -9 3 3 44999.8 1701.59 5
 -9 3 3 44042.6 1567.93 3
 -9 3 3 43950.2 1694.91 4
 -9 3 4 519.017 176.076 5
 -9 3 4 281.891 127.459 3
 -9 3 5 1026.99 224.358 3
 -9 3 5 1266.62 292.744 5
 -9 3 6 1926.51 302.126 3
 -9 3 6 1717.79 329.473 5
 -9 3 7 34355.6 1323.96 3
 -9 3 7 34656.1 1589.96 5
 -9 3 8 18253 1160.49 5
 -9 3 9 12.3697 132.413 5
 -9 3 10 14015.3 1070.77 5
 -9 3 11 94.0179 92.3704 5
 -9 3 12 13623.8 1155.33 5
 -9 3 13 18334.7 1404.66 5
 -9 3 14 872.072 306.114 5
 -9 3 15 6021.69 864.989 5
 -9 3 16 542.252 254.709 5
 -9 3 17 6099.95 940.445 5
 -9 4 -12 491.469 331.398 4
 -9 4 -11 5626.43 871.874 4
 -9 4 -10 2470.37 588.357 4
 -9 4 -9 6199.01 886.549 4
 -9 4 -8 17153.3 1438.91 4
 -9 4 -7 82.9742 179.559 4
 -9 4 -6 10520.9 1062.16 4
 -9 4 -5 11208.6 1071.44 4
 -9 4 -4 11776.4 1064.09 4
 -9 4 -3 14761.8 1148.85 4
 -9 4 -2 3474.54 426.084 3
 -9 4 -2 3193.58 515.065 4
 -9 4 -2 3725.99 462.841 5
 -9 4 -1 13645.8 1037.08 4
 -9 4 -1 14815.6 887.428 3
 -9 4 -1 13929.9 892.968 5
 -9 4 0 4825.54 515.555 5
 -9 4 0 5782.74 532.364 3
 -9 4 0 5542.38 633.848 4
 -9 4 1 4424.71 508.214 5
 -9 4 1 4572.54 536.403 4
 -9 4 1 4180.35 445.393 3
 -9 4 2 70236.5 2064.16 3
 -9 4 2 70152.7 2288.22 5
 -9 4 2 69520.3 2232.74 4
 -9 4 3 3134.79 428.433 5
 -9 4 3 3993.75 420.946 3
 -9 4 3 3670.9 434.818 4
 -9 4 4 4648.6 543.573 5
 -9 4 4 6169.59 526.458 3
 -9 4 4 5472.6 500.429 4
 -9 4 5 167.154 96.4352 3
 -9 4 5 -1.47501 124.823 5
 -9 4 6 4967.74 584.376 5
 -9 4 6 5465.63 478.085 3
 -9 4 7 33006.4 1237.73 3
 -9 4 7 32970.7 1597.37 5
 -9 4 8 8641.73 830.339 5
 -9 4 8 9602.25 623.083 3
 -9 4 9 5254.58 454.588 3
 -9 4 9 3949.66 580.236 5
 -9 4 10 5478.66 692.006 5
 -9 4 11 2578.78 490.857 5
 -9 4 12 16707.1 1332.53 5
 -9 4 13 12358.3 1187.58 5
 -9 4 14 2250.83 538.862 5
 -9 4 15 4849.65 799.679 5
 -9 4 16 1301.74 413.439 5
 -9 5 -12 6218.4 951.757 4
 -9 5 -11 10747.5 1216.95 4
 -9 5 -10 969.431 299.701 4
 -9 5 -9 5110.56 780.623 4
 -9 5 -8 924.897 346.305 4
 -9 5 -7 5429.46 765.314 4
 -9 5 -6 39471.3 2067.6 4
 -9 5 -5 3322.49 556.357 4
 -9 5 -4 3199.45 536.316 4
 -9 5 -3 8092.01 820.656 4
 -9 5 -3 7221.14 664.233 5
 -9 5 -2 11044.2 821.332 5
 -9 5 -2 11736.9 971.076 4
 -9 5 -1 21902.6 1075.04 3
 -9 5 -1 21641.9 1287.15 4
 -9 5 -1 20960.3 1147.57 5
 -9 5 0 3366.74 471.576 4
 -9 5 0 3347.07 441.694 5
 -9 5 0 3827.87 427.439 3
 -9 5 1 21895.7 1264.6 5
 -9 5 1 20755.4 1008.3 3
 -9 5 1 20597.1 1152.04 4
 -9 5 2 33676.4 1505.34 5
 -9 5 2 33469.4 1291.27 3
 -9 5 2 33967.4 1423.92 4
 -9 5 3 17118.9 869.931 3
 -9 5 3 16901.2 923.732 4
 -9 5 3 16935 1058.07 5
 -9 5 4 25664.9 1080.76 3
 -9 5 4 26016.4 1342.05 5
 -9 5 5 1820.76 337.976 5
 -9 5 5 2268.33 297.897 3
 -9 5 6 8439.52 577.312 3
 -9 5 6 7597.74 742.136 5
 -9 5 7 22575.4 1361.94 5
 -9 5 7 23747 990.655 3
 -9 5 8 -25.2891 66.358 5
 -9 5 9 7970.91 852.141 5
 -9 5 10 524.891 221.803 5
 -9 5 11 12178.8 1107.45 5
 -9 5 12 17296.5 1381.79 5
 -9 5 13 65.3878 126.336 5
 -9 5 14 9844.94 1122.3 5
 -9 5 15 3387.66 700.119 5
 -9 6 -12 16179.5 1524.3 4
 -9 6 -11 18710 1613.56 4
 -9 6 -10 1608.37 412.598 4
 -9 6 -9 2673 558.832 4
 -9 6 -8 400.487 230.844 4
 -9 6 -7 12973.4 1165.72 4
 -9 6 -6 21981.4 1480.92 4
 -9 6 -5 177.014 118.137 4
 -9 6 -4 9983.28 931.586 4
 -9 6 -3 392.083 194.355 4
 -9 6 -3 267.622 105.447 5
 -9 6 -2 38606 1650.79 5
 -9 6 -2 39888.1 1808.14 4
 -9 6 -1 18702.6 1108.39 5
 -9 6 -1 17857.1 1135.76 4
 -9 6 0 766.625 200.903 5
 -9 6 0 1108.42 269.76 4
 -9 6 1 35078.9 1505.82 4
 -9 6 1 34429.5 1600.42 5
 -9 6 1 35396.2 1333.71 3
 -9 6 2 427.581 159.886 4
 -9 6 2 579.175 160.823 3
 -9 6 2 235.128 111.14 5
 -9 6 3 43852.3 1447.61 3
 -9 6 3 43977.7 1835.04 5
 -9 6 3 39404.8 1485.49 4
 -9 6 4 32764.6 1204.67 3
 -9 6 4 30833.8 1531.64 5
 -9 6 5 124.973 69.8387 3
 -9 6 5 4.17207 85.7097 5
 -9 6 6 29550 1567.96 5
 -9 6 6 31659.4 1123.93 3
 -9 6 7 6389.38 717.826 5
 -9 6 8 9774.2 931.219 5
 -9 6 9 37136.8 1924.04 5
 -9 6 10 -46.6418 163.837 5
 -9 6 11 8644.65 960.307 5
 -9 6 12 5168.01 766.72 5
 -9 6 13 1963.72 464.76 5
 -9 6 14 12194.3 1269.61 5
 -9 6 15 1797.07 523.919 5
 -9 7 -13 3204.86 716.62 4
 -9 7 -12 18932.5 1633.65 4
 -9 7 -11 6008.71 880.311 4
 -9 7 -10 808.109 372.83 4
 -9 7 -9 1515.08 439.069 4
 -9 7 -8 1244.04 363.903 4
 -9 7 -7 16531.1 1309.34 4
 -9 7 -6 6247.51 772.121 4
 -9 7 -5 302.795 160.855 4
 -9 7 -4 11246.8 979.399 4
 -9 7 -4 11800.4 904.235 5
 -9 7 -3 5356.57 595.959 5
 -9 7 -3 5405.02 673.898 4
 -9 7 -2 30788.5 1470.79 5
 -9 7 -2 30081 1540.17 4
 -9 7 -1 19049 1164.23 4
 -9 7 -1 20302 1180.43 5
 -9 7 0 7664.7 759.802 5
 -9 7 0 6956.18 666.46 4
 -9 7 1 15750.4 965.556 4
 -9 7 1 15554 1067.51 5
 -9 7 2 279.474 135.647 5
 -9 7 2 607.644 180.197 4
 -9 7 3 33644.6 1621.01 5
 -9 7 4 24665.6 1405.18 5
 -9 7 5 805.023 245.551 5
 -9 7 6 19376.8 1298.33 5
 -9 7 7 724.381 247.355 5
 -9 7 8 49162.1 2229.73 5
 -9 7 9 21396.9 1460.63 5
 -9 7 10 333.404 82.4997 5
 -9 7 11 3564.13 624.478 5
 -9 7 12 182.002 136.007 5
 -9 7 13 17781.7 1523.16 5
 -9 7 14 12709.5 1318.55 5
 -9 8 -12 6357.8 926.157 4
 -9 8 -11 1662.85 469.676 4
 -9 8 -10 10099.7 1104.11 4
 -9 8 -9 1708.46 460.004 4
 -9 8 -8 6998.69 886.445 4
 -9 8 -7 22448 1549.35 4
 -9 8 -6 -131.275 84.3522 4
 -9 8 -5 9533.96 944.057 4
 -9 8 -4 2536.09 464.186 4
 -9 8 -4 2789.48 452.064 5
 -9 8 -3 19445 1185.17 5
 -9 8 -3 20411.6 1298.79 4
 -9 8 -2 19759.2 1204.25 5
 -9 8 -2 19414.7 1228.5 4
 -9 8 -1 2450.08 409.108 5
 -9 8 -1 2291.8 400.299 4
 -9 8 0 26467.2 1361.79 4
 -9 8 0 28136.8 1534.57 5
 -9 8 1 7073.79 661.357 4
 -9 8 1 8136.47 771.451 5
 -9 8 2 718.312 216.677 4
 -9 8 2 555.786 157.924 5
 -9 8 3 23926.6 1394.78 5
 -9 8 4 12873.3 1021.48 5
 -9 8 5 2814.03 484.59 5
 -9 8 6 9405.77 923.471 5
 -9 8 7 10021.2 970.074 5
 -9 8 8 33060.9 1848.73 5
 -9 8 9 4733.67 699.687 5
 -9 8 10 1097.69 369.414 5
 -9 8 11 2287.98 553.859 5
 -9 8 12 4952.29 782.793 5
 -9 8 13 14104.7 1387.77 5
 -9 9 -12 33.1214 225.245 4
 -9 9 -11 8431.65 1032.97 4
 -9 9 -10 14361 1334.28 4
 -9 9 -9 113.417 170.86 4
 -9 9 -8 11705.8 1150.59 4
 -9 9 -7 8124.29 916.979 4
 -9 9 -6 9650.45 973.887 4
 -9 9 -5 30268.9 1565 5
 -9 9 -5 30019.7 1716.34 4
 -9 9 -4 404.037 214.697 4
 -9 9 -4 -19.5494 77.179 5
 -9 9 -3 8291.58 771.543 5
 -9 9 -3 8734.35 864.655 4
 -9 9 -2 9134.86 860.467 4
 -9 9 -2 9580.76 839.402 5
 -9 9 -1 5999.43 679.215 5
 -9 9 -1 5914.4 665.739 4
 -9 9 0 30225.8 1606.2 5
 -9 9 0 28676.2 1458.26 4
 -9 9 1 -15.5218 114.854 4
 -9 9 1 -4.41556 115.737 5
 -9 9 2 13273 1038.84 5
 -9 9 3 9905.98 900.192 5
 -9 9 4 815.607 257.371 5
 -9 9 5 22279.8 1415.69 5
 -9 9 6 9193.27 931.346 5
 -9 9 7 5154.64 711.516 5
 -9 9 8 8521.54 957.994 5
 -9 9 9 206.191 127.386 5
 -9 9 10 6085.92 841.525 5
 -9 9 11 787.595 330.703 5
 -9 9 12 2598.03 572.02 5
 -9 10 -12 161.843 145.773 4
 -9 10 -11 15743.1 1445.03 4
 -9 10 -10 5304.06 822.957 4
 -9 10 -9 899.594 307.529 4
 -9 10 -8 5021.97 759.463 4
 -9 10 -7 571.863 257.666 4
 -9 10 -6 21830.8 1543.46 4
 -9 10 -5 23572.2 1548.29 4
 -9 10 -5 22435.4 1349.69 5
 -9 10 -4 -117.564 133.408 5
 -9 10 -4 197.832 143.551 4
 -9 10 -3 2614.69 483.142 4
 -9 10 -3 4219.89 553.145 5
 -9 10 -2 1530.1 339.544 4
 -9 10 -2 1646.2 348.833 5
 -9 10 -1 43366.4 1993.34 5
 -9 10 -1 36523.4 1751.15 4
 -9 10 0 26498.8 1421.29 4
 -9 10 0 26882.5 1539.22 5
 -9 10 1 740.965 220.02 5
 -9 10 1 464.428 206.178 4
 -9 10 2 9854.87 913.688 5
 -9 10 3 -17.827 104.861 5
 -9 10 4 7609.38 833.125 5
 -9 10 5 29195 1692.52 5
 -9 10 6 1487.96 398.104 5
 -9 10 7 3684.61 622.982 5
 -9 10 8 563.669 235.424 5
 -9 10 9 9223.24 1037.8 5
 -9 10 10 9349.36 1059.54 5
 -9 10 11 195.074 88.7078 5
 -9 11 -12 2710.81 623.255 4
 -9 11 -11 18751.2 1616.88 4
 -9 11 -10 283.796 168.77 4
 -9 11 -9 3526.57 665.613 4
 -9 11 -8 1161.24 376.953 4
 -9 11 -7 6073.43 811.023 4
 -9 11 -6 24019 1616.18 4
 -9 11 -5 6452.26 799.97 4
 -9 11 -5 7717.66 783.379 5
 -9 11 -4 -49.3131 124.611 5
 -9 11 -4 -81.7228 188.467 4
 -9 11 -3 5166.97 635.297 5
 -9 11 -3 5106.41 703.59 4
 -9 11 -2 2731.4 497.953 4
 -9 11 -2 3151.8 487.122 5
 -9 11 -1 36669.3 1838.24 4
 -9 11 -1 39956.4 1972.57 5
 -9 11 0 20028.9 1341.96 5
 -9 11 0 17081 1216.92 4
 -9 11 1 -24.7802 164.625 5
 -9 11 2 473.06 213.212 5
 -9 11 3 2046.54 434.652 5
 -9 11 4 25371.5 1586.57 5
 -9 11 5 12733.8 1129.96 5
 -9 11 6 135.509 123.369 5
 -9 11 7 3924.55 650.675 5
 -9 11 8 205.991 206.818 5
 -9 11 9 18266.3 1508.43 5
 -9 11 10 12062.9 1252.06 5
 -9 12 -11 8065.13 1072.2 4
 -9 12 -10 126.985 184.661 4
 -9 12 -9 11530 1235.88 4
 -9 12 -8 2997.78 616.837 4
 -9 12 -7 5713.87 820.738 4
 -9 12 -6 15405.7 1163.42 5
 -9 12 -6 13956.3 1254.22 4
 -9 12 -5 2381.84 438.826 5
 -9 12 -5 2482.07 549.833 4
 -9 12 -4 3768.2 619.147 4
 -9 12 -4 4993.36 654.355 5
 -9 12 -3 3546.59 627.827 4
 -9 12 -3 3367.55 523.232 5
 -9 12 -2 9688.73 903.616 5
 -9 12 -2 9086.9 941.025 4
 -9 12 -1 30170.2 1754.31 5
 -9 12 -1 28656 1646.49 4
 -9 12 0 1637.71 399.38 5
 -9 12 0 1291.7 345.117 4
 -9 12 1 4673.85 657.291 5
 -9 12 2 -171.532 209.353 5
 -9 12 3 12389.1 1097.71 5
 -9 12 4 27805.4 1711.23 5
 -9 12 5 1504.53 408.18 5
 -9 12 6 8146.33 937.625 5
 -9 12 7 7549.64 955.44 5
 -9 12 8 2678.35 543.9 5
 -9 12 9 21770.9 1692.5 5
 -9 13 -10 3899.91 750.549 4
 -9 13 -9 16654.2 1484.4 4
 -9 13 -8 952.348 372.68 4
 -9 13 -7 5300.97 811.543 4
 -9 13 -6 2295.85 454.564 5
 -9 13 -6 2721.93 582.08 4
 -9 13 -5 2669.48 493.295 5
 -9 13 -5 3488.5 646.102 4
 -9 13 -4 16121.8 1193.27 5
 -9 13 -4 15267.7 1316.61 4
 -9 13 -3 2909.78 490.933 5
 -9 13 -3 2770.71 536.492 4
 -9 13 -2 8528.28 938.315 4
 -9 13 -2 9650.42 946.583 5
 -9 13 -1 7124.12 839.745 5
 -9 13 -1 6187.47 777.365 4
 -9 13 0 7323.66 864.683 5
 -9 13 1 11778.9 1078.41 5
 -9 13 2 444.865 140.63 5
 -9 13 3 9951.29 1018.47 5
 -9 13 4 7621.02 897.746 5
 -9 13 5 1069.9 352.341 5
 -9 13 6 15500.8 1334.39 5
 -9 13 7 1155.56 382.156 5
 -9 14 -10 10932.3 1238.94 4
 -9 14 -9 12726 1353.3 4
 -9 14 -8 -120.909 130.577 4
 -9 14 -7 2362.37 584.887 4
 -9 14 -6 319.077 152.938 4
 -9 14 -6 886.95 250.931 5
 -9 14 -5 12994.3 1113.77 5
 -9 14 -5 12937.8 1249.65 4
 -9 14 -4 13714.7 1267.94 4
 -9 14 -4 14324 1148.06 5
 -9 14 -3 214.216 133.153 4
 -9 14 -3 110.826 124.228 5
 -9 14 -2 6070.95 764.095 5
 -9 14 -2 4776.13 714.366 4
 -9 14 -1 -310.402 241.584 5
 -9 14 0 15790.5 1296.52 5
 -9 14 1 13826.3 1199.1 5
 -9 14 2 -242.111 201.114 5
 -9 14 3 4428.24 673.651 5
 -9 14 4 313.181 120.45 5
 -9 14 5 5663.89 811.006 5
 -9 14 6 5485.84 804.647 5
 -9 15 -8 1309.07 463.665 4
 -9 15 -7 3186.61 665.681 4
 -9 15 -6 2322.27 570.49 4
 -9 15 -6 1830.1 423.589 5
 -9 15 -5 13402.2 1319.87 4
 -9 15 -5 13587.4 1160.73 5
 -9 15 -4 2809.13 477.654 5
 -9 15 -4 3310.4 638.536 4
 -9 15 -3 2114.19 530.318 4
 -9 15 -3 2132.28 419.902 5
 -9 15 -2 5377.34 728.243 5
 -9 15 -1 705.651 257.669 5
 -9 15 0 16249.3 1354.21 5
 -9 15 1 7163.41 875.901 5
 -9 15 2 1750.37 452.187 5
 -9 15 3 4969.6 763.007 5
 -9 15 4 291.987 156.093 5
 -9 16 -7 231.21 202.859 4
 -9 16 -6 2870.39 610.936 4
 -9 16 -6 3459.15 580.829 5
 -9 16 -5 8704.79 927.023 5
 -9 16 -5 7745.85 1044.88 4
 -9 16 -4 -305.233 270.753 5
 -9 16 -4 -168.58 107.226 4
 -9 16 -3 4166.04 640.164 5
 -9 16 -3 3935.61 701.881 4
 -9 16 -2 2860.2 538.704 5
 -9 16 -1 1504.98 408.275 5
 -9 16 0 11876.7 1189.82 5
 -9 16 1 2496.71 527.448 5
 -9 17 -4 3209.04 664.548 4
 -8 -10 0 12685.4 1080.67 3
 -8 -10 1 720.564 251.997 3
 -8 -9 -2 250.631 167.507 3
 -8 -9 -1 11030 973.974 3
 -8 -9 0 12705.9 1053.21 3
 -8 -9 1 -5.02761 74.8053 3
 -8 -8 -3 7128.9 773.869 3
 -8 -8 -2 -206.018 168.066 3
 -8 -8 -2 -196.934 220.342 2
 -8 -8 -1 15736 1307.71 2
 -8 -8 -1 15594.4 1132.22 3
 -8 -8 0 5533.55 666.705 3
 -8 -7 -5 944.273 260.437 3
 -8 -7 -4 12371.5 1004.5 3
 -8 -7 -4 13101.3 1254.28 2
 -8 -7 -3 4670.7 605.049 3
 -8 -7 -3 5079.72 760.628 2
 -8 -7 -2 3172.28 500.713 3
 -8 -7 -2 4505.61 687.86 2
 -8 -7 -1 10765.8 911.721 3
 -8 -7 -1 12951.5 1120.76 2
 -8 -7 0 7.0787 98.1769 3
 -8 -6 -6 432.828 174.935 3
 -8 -6 -5 8176.29 789.599 3
 -8 -6 -5 9704.54 1051.07 2
 -8 -6 -4 15147.7 1098.06 3
 -8 -6 -4 17319.3 1395.5 2
 -8 -6 -3 154.788 132.076 3
 -8 -6 -3 -98.7516 208.592 2
 -8 -6 -2 3899.8 591.995 2
 -8 -6 -2 4344 577.116 3
 -8 -6 -1 67.0928 117.954 3
 -8 -6 -1 244.776 180.454 2
 -8 -6 0 16161.8 1102.53 3
 -8 -5 -7 3209.29 496.537 3
 -8 -5 -7 5427.09 794.726 2
 -8 -5 -6 540.888 240.518 2
 -8 -5 -6 -9.42985 154.128 3
 -8 -5 -5 15443.8 1299.6 2
 -8 -5 -5 13425.9 1006.26 3
 -8 -5 -4 7390.24 737.607 3
 -8 -5 -4 9156.58 957.797 2
 -8 -5 -3 1845.85 420.531 2
 -8 -5 -3 1893.75 353.97 3
 -8 -5 -2 6367.55 662.028 3
 -8 -5 -2 6058.13 734.725 2
 -8 -5 -1 4.68733 110.124 3
 -8 -5 0 14907.1 1025.28 3
 -8 -4 -8 13635.9 1262.31 2
 -8 -4 -7 2491.55 440.396 3
 -8 -4 -7 3463.55 605.214 2
 -8 -4 -6 4364.39 553.897 3
 -8 -4 -6 4757.83 694.726 2
 -8 -4 -5 19790.6 1214.41 3
 -8 -4 -5 19469.4 1400.9 2
 -8 -4 -4 541.983 196.062 3
 -8 -4 -4 386.546 162.249 2
 -8 -4 -3 12263.6 1011.2 2
 -8 -4 -3 14282.5 995.608 3
 -8 -4 -2 16225.7 1060.69 3
 -8 -4 -1 1048.54 271.597 3
 -8 -4 0 14534.7 981.748 3
 -8 -4 1 5770.62 606.516 3
 -8 -3 -10 2705.83 561.955 2
 -8 -3 -9 7456.5 909.492 2
 -8 -3 -8 26670.8 1720.13 2
 -8 -3 -7 5193.2 713.214 2
 -8 -3 -7 4978.56 605.651 3
 -8 -3 -6 1775.33 397.673 2
 -8 -3 -6 1070.31 243.953 3
 -8 -3 -5 5042.37 597.565 3
 -8 -3 -5 6145.95 739.875 2
 -8 -3 -4 2697.36 422.101 3
 -8 -3 -4 2745.75 469.199 2
 -8 -3 -3 33499.8 1551.93 3
 -8 -3 -3 31339.1 1631.34 2
 -8 -3 -2 4554.65 535.28 3
 -8 -3 -1 6221.12 617.353 3
 -8 -3 0 8536.73 732.954 3
 -8 -3 1 4062.3 497.051 3
 -8 -2 -11 5860.91 787.29 2
 -8 -2 -10 79.5885 162.126 2
 -8 -2 -9 10563.5 1044.77 2
 -8 -2 -8 22934 1510.63 2
 -8 -2 -7 3811.23 501.402 3
 -8 -2 -7 3568.05 572.442 2
 -8 -2 -6 27.3169 102.273 3
 -8 -2 -6 385.19 131.255 2
 -8 -2 -5 360.933 198.464 3
 -8 -2 -5 209.221 96.2216 2
 -8 -2 -4 11131.6 839.763 3
 -8 -2 -4 11708 956.392 2
 -8 -2 -3 21527.7 1190.23 3
 -8 -2 -2 2114.12 351.948 3
 -8 -2 -1 10550.2 790.391 3
 -8 -2 0 2140.66 358.345 3
 -8 -2 1 21890.6 1142.13 3
 -8 -2 3 7244.43 457.403 5
 -8 -2 4 24122.1 881.745 5
 -8 -2 5 14510.3 692.862 5
 -8 -2 6 387.632 126.034 5
 -8 -2 7 43749.1 1406.26 5
 -8 -2 8 3325.05 363.229 5
 -8 -2 9 3068.53 384.111 5
 -8 -2 10 9886.38 724.099 5
 -8 -2 11 3728.94 461.307 5
 -8 -1 -12 3343.33 596.832 2
 -8 -1 -11 4212.09 652.145 2
 -8 -1 -11 5080.67 924.635 4
 -8 -1 -10 390.59 281.954 4
 -8 -1 -10 -22.7311 149.546 2
 -8 -1 -9 19216 1352.8 2
 -8 -1 -9 18910.6 1721.67 4
 -8 -1 -8 5678.98 903.365 4
 -8 -1 -8 5206.5 677.989 2
 -8 -1 -7 126.551 138.649 4
 -8 -1 -7 243.153 125.205 2
 -8 -1 -6 8730.18 1056.01 4
 -8 -1 -6 8318.97 727.567 3
 -8 -1 -6 7298.97 750.741 2
 -8 -1 -5 890.367 334.422 4
 -8 -1 -5 582.29 166.156 3
 -8 -1 -4 18750.9 1100.97 3
 -8 -1 -4 21005.6 1570.22 4
 -8 -1 -3 30598.3 1900.15 4
 -8 -1 -3 32375.2 1436.83 3
 -8 -1 -2 394.89 172.89 3
 -8 -1 -1 7613.78 662.642 3
 -8 -1 0 895.534 226.526 3
 -8 -1 1 26839.5 1241.88 3
 -8 -1 2 18684.4 1012.48 3
 -8 -1 2 17392.8 782.153 5
 -8 -1 3 208.382 101.991 5
 -8 -1 4 14178.9 725.688 5
 -8 -1 5 356.673 108.261 5
 -8 -1 6 41574.7 1402.71 5
 -8 -1 7 68709.5 1967.56 5
 -8 -1 8 714.536 199.625 5
 -8 -1 9 18820.9 1019.17 5
 -8 -1 10 4814.42 517.292 5
 -8 -1 11 34382 1565.72 5
 -8 -1 12 44527.1 1884.15 5
 -8 -1 13 3073.6 482.496 5
 -8 -1 14 3776.63 592.864 5
 -8 -1 15 -92.7832 191.816 5
 -8 -1 16 6033.57 813.19 5
 -8 -1 17 18046.1 1498.06 5
 -8 0 -13 -112.557 133.541 2
 -8 0 -12 9029.42 944.133 2
 -8 0 -12 9923.97 1291.52 4
 -8 0 -11 6828.7 1057.31 4
 -8 0 -11 6137.44 746.896 2
 -8 0 -10 1870.53 397.236 2
 -8 0 -10 1539.72 454.462 4
 -8 0 -9 9603.3 1179.09 4
 -8 0 -9 9236.25 873.511 2
 -8 0 -8 109.749 104.066 4
 -8 0 -8 435.225 149.067 2
 -8 0 -7 12804.2 1275.48 4
 -8 0 -7 10073.5 896.844 2
 -8 0 -6 21597.1 1627.67 4
 -8 0 -6 19498.5 1133.09 3
 -8 0 -5 3373.71 445.541 3
 -8 0 -5 3139.49 600.332 4
 -8 0 -4 29116.5 1795.5 4
 -8 0 -4 28355.9 1334.12 3
 -8 0 -3 7168.22 847.708 4
 -8 0 -3 7523.99 655.914 3
 -8 0 -2 13794.1 881.172 3
 -8 0 -2 13262 1129.3 4
 -8 0 -1 1675.8 399.779 4
 -8 0 -1 2397.11 378.724 3
 -8 0 0 12601.1 1050.98 4
 -8 0 0 12656.8 826.648 3
 -8 0 1 21292.5 1068.56 3
 -8 0 1 21013.6 907.665 5
 -8 0 2 3571.81 364.21 5
 -8 0 2 3712.42 426.531 3
 -8 0 3 22920.6 975.528 5
 -8 0 4 7694.48 563.622 5
 -8 0 5 5569.13 479.075 5
 -8 0 6 87576 2351.73 5
 -8 0 7 5657.16 523.026 5
 -8 0 8 7547.64 641.337 5
 -8 0 9 26072.3 1261.48 5
 -8 0 10 2148.63 379.481 5
 -8 0 11 29531.2 1492.39 5
 -8 0 12 16349 1142.83 5
 -8 0 13 2902.25 509.828 5
 -8 0 14 3769.82 617.031 5
 -8 0 15 -25.8774 198.046 5
 -8 0 16 11970.2 1191.53 5
 -8 0 17 10719.4 1182.5 5
 -8 0 18 227.541 183.622 5
 -8 1 -13 5482.9 699.212 2
 -8 1 -12 14157.2 1496.43 4
 -8 1 -12 13039.8 1051.26 2
 -8 1 -11 1097.63 417.784 4
 -8 1 -11 704.458 222.792 2
 -8 1 -10 6416.97 947.822 4
 -8 1 -10 5276.98 647.552 2
 -8 1 -9 3118.44 496.126 2
 -8 1 -9 4141.43 741.953 4
 -8 1 -8 1973.77 532.698 4
 -8 1 -7 38038 2192.77 4
 -8 1 -6 3501.04 616.176 4
 -8 1 -5 5637.57 799.409 4
 -8 1 -5 5612.15 568.517 3
 -8 1 -4 12373.3 834.331 3
 -8 1 -4 11926.8 1098.58 4
 -8 1 -3 8863.47 687.024 3
 -8 1 -3 8848.83 912.318 4
 -8 1 -2 39962.5 1934.52 4
 -8 1 -2 39944.1 1533.36 3
 -8 1 -1 11001.2 946.953 4
 -8 1 -1 10392.5 735.276 3
 -8 1 0 4283.83 453.364 3
 -8 1 0 3715.71 380.559 5
 -8 1 0 4237.68 576.125 4
 -8 1 1 36602.3 1308.48 5
 -8 1 1 35937.1 1676.66 4
 -8 1 1 36502.8 1408.36 3
 -8 1 2 144.832 91.9287 5
 -8 1 2 192.229 127.39 4
 -8 1 2 129.076 68.4975 3
 -8 1 3 34311.4 1343.69 3
 -8 1 3 37071.3 1365.93 5
 -8 1 4 23573.8 1060.12 5
 -8 1 5 9068.98 666.258 5
 -8 1 6 13089.1 813.79 5
 -8 1 7 636.692 176.321 5
 -8 1 8 15733.3 966.408 5
 -8 1 9 12309.4 873.729 5
 -8 1 10 5604.77 619.855 5
 -8 1 11 17706.7 1189.35 5
 -8 1 12 7.73392 109.712 5
 -8 1 13 18027 1298.32 5
 -8 1 14 5239.15 742.727 5
 -8 1 15 539.249 211.269 5
 -8 1 16 13680.4 1306.01 5
 -8 1 17 3078.33 688.172 5
 -8 1 18 4469.15 823.622 5
 -8 2 -13 13301 1468.45 4
 -8 2 -12 8304.66 1100.85 4
 -8 2 -11 868.507 358.551 4
 -8 2 -10 9255.06 1098.08 4
 -8 2 -9 14.2303 100.1 4
 -8 2 -8 31314.3 1954.97 4
 -8 2 -7 21329.9 1537.76 4
 -8 2 -6 4168.31 648.429 4
 -8 2 -5 16488.8 976.844 3
 -8 2 -5 15921.2 1242.67 4
 -8 2 -4 957.563 313.976 4
 -8 2 -4 936.711 219.485 3
 -8 2 -3 31784.3 1352.12 3
 -8 2 -3 30308.8 1645.73 4
 -8 2 -2 67120.4 2478.67 4
 -8 2 -2 62752 2003.41 3
 -8 2 -1 26379.3 1139.44 5
 -8 2 -1 26634 1450.53 4
 -8 2 -1 26690 1183.34 3
 -8 2 0 5519.31 510.684 3
 -8 2 0 5871.59 509.04 5
 -8 2 0 5538.27 629.75 4
 -8 2 1 3931.44 422.973 3
 -8 2 1 3793.3 495.528 4
 -8 2 1 3154.58 373.701 5
 -8 2 2 10070.7 771.391 4
 -8 2 2 11451.2 770.691 5
 -8 2 2 10563.1 686.676 3
 -8 2 3 76976.9 2279.58 4
 -8 2 3 73907.4 2144.93 5
 -8 2 3 76394.6 2102.71 3
 -8 2 4 23041.9 1112.5 5
 -8 2 4 23855.8 1048.59 3
 -8 2 5 4844.81 500.667 5
 -8 2 6 173.909 60.2942 5
 -8 2 7 4269.99 496.543 5
 -8 2 8 34296.9 1529.68 5
 -8 2 9 9387.1 794.017 5
 -8 2 10 5561.32 639.63 5
 -8 2 11 8867.56 850.771 5
 -8 2 12 7962.69 838.869 5
 -8 2 13 22170.7 1489.33 5
 -8 2 14 7086.85 866.741 5
 -8 2 15 4643.42 738.323 5
 -8 2 16 9389.7 1096.81 5
 -8 2 17 -203.904 241.123 5
 -8 3 -13 11393 1285.9 4
 -8 3 -12 4034.67 756.886 4
 -8 3 -11 4739.16 795.642 4
 -8 3 -10 4771.41 759.51 4
 -8 3 -9 427.192 190.104 4
 -8 3 -8 33296.2 1977.18 4
 -8 3 -7 2453.59 500.958 4
 -8 3 -6 8514.92 916.799 4
 -8 3 -5 11161.4 1011.36 4
 -8 3 -4 1829.32 415.334 4
 -8 3 -4 1005.55 213.771 3
 -8 3 -3 37720.4 1804.36 4
 -8 3 -3 38506.5 1492.56 3
 -8 3 -2 54653.5 1799.08 3
 -8 3 -2 57767.7 1857.17 5
 -8 3 -2 57637.2 2208.83 4
 -8 3 -1 531.87 174.906 4
 -8 3 -1 569.486 162.508 5
 -8 3 -1 495.536 141.638 3
 -8 3 0 14151.4 842.804 5
 -8 3 0 15017.5 832.305 3
 -8 3 0 13537.6 930.255 4
 -8 3 1 -43.9686 104.27 5
 -8 3 1 -43.8083 86.9817 3
 -8 3 1 -95.9894 45.6 4
 -8 3 2 41359.1 1574.93 4
 -8 3 2 42188.2 1572.39 5
 -8 3 2 42802.2 1467.29 3
 -8 3 3 98367.3 2450.9 3
 -8 3 3 95611 2638.54 5
 -8 3 3 98069.3 2547.15 4
 -8 3 4 1314.06 228.566 4
 -8 3 4 1607.61 251.148 3
 -8 3 4 1614.87 298.828 5
 -8 3 5 2847.96 330.735 3
 -8 3 5 2661.23 381.587 5
 -8 3 6 2429.33 381.839 5
 -8 3 6 2518.35 316.542 3
 -8 3 7 30930.1 1453.55 5
 -8 3 8 33765.1 1549.37 5
 -8 3 9 4072.49 543.777 5
 -8 3 10 13607.8 1047.71 5
 -8 3 11 1692.6 373.787 5
 -8 3 12 15090 1200.71 5
 -8 3 13 16993.1 1343.07 5
 -8 3 14 -141.923 158.481 5
 -8 3 15 7156.56 935.138 5
 -8 3 16 1241.38 448.892 5
 -8 3 17 8137.83 1086.81 5
 -8 4 -13 12718 1357.45 4
 -8 4 -12 395.253 357.957 4
 -8 4 -11 8318.27 1022.16 4
 -8 4 -10 9837.28 1089.3 4
 -8 4 -9 3388.16 596.833 4
 -8 4 -8 24349.7 1649.99 4
 -8 4 -7 594.927 272.853 4
 -8 4 -6 14374.8 1175.06 4
 -8 4 -5 10787.8 968.473 4
 -8 4 -4 5062.16 639.862 4
 -8 4 -3 19505.8 1238.12 4
 -8 4 -2 11999.3 761.11 3
 -8 4 -2 12197.9 798.717 5
 -8 4 -2 12391.8 941.201 4
 -8 4 -1 21568.8 1089.56 5
 -8 4 -1 23567.1 1272.96 4
 -8 4 -1 23862.4 1068.08 3
 -8 4 0 34098.2 1379.16 5
 -8 4 0 33148.2 1270.92 3
 -8 4 0 32432.9 1456.4 4
 -8 4 1 210.568 89.4325 3
 -8 4 1 280.032 122.982 5
 -8 4 1 221.167 92.8826 4
 -8 4 2 41643.4 1407.49 3
 -8 4 2 42343.9 1525.31 4
 -8 4 2 41453.5 1582.01 5
 -8 4 3 31719.4 1180.8 3
 -8 4 3 29930.3 1341.73 5
 -8 4 3 30345.5 1186.09 4
 -8 4 4 7631.2 531.017 4
 -8 4 4 8936.78 577.169 3
 -8 4 4 8531.64 698.105 5
 -8 4 5 5733.75 589.713 5
 -8 4 5 6022.47 467.189 3
 -8 4 6 1906.46 253.961 3
 -8 4 6 1499.92 311.298 5
 -8 4 7 19313.4 1191.28 5
 -8 4 7 22313.3 907.008 3
 -8 4 8 17651 1142 5
 -8 4 8 20241.4 862.326 3
 -8 4 9 1209.81 199.01 3
 -8 4 9 916.025 248.813 5
 -8 4 10 16204.2 1180.87 5
 -8 4 11 2981.36 521.389 5
 -8 4 12 34018.7 1908.31 5
 -8 4 13 8509.63 958.654 5
 -8 4 14 1917.76 483.852 5
 -8 4 15 7880.31 1001.65 5
 -8 4 16 306.785 239.486 5
 -8 5 -14 3590.71 725.879 4
 -8 5 -13 2210.91 613.535 4
 -8 5 -12 6598.19 910.214 4
 -8 5 -11 18064 1525.21 4
 -8 5 -10 7848.2 944.511 4
 -8 5 -9 8886.51 975.7 4
 -8 5 -8 6353.69 798.345 4
 -8 5 -7 3432.47 575.969 4
 -8 5 -6 61505.2 2476.25 4
 -8 5 -5 1544.39 376.921 4
 -8 5 -4 115.979 94.8605 4
 -8 5 -3 6752.9 612.723 5
 -8 5 -3 7081.2 713.556 4
 -8 5 -2 15243.5 1015.99 4
 -8 5 -2 15267.4 921.506 5
 -8 5 -1 38264.2 1612.69 4
 -8 5 -1 38638.4 1529.94 5
 -8 5 0 7132.47 655.767 5
 -8 5 0 6453.27 597.949 4
 -8 5 0 6370.77 512.432 3
 -8 5 1 12030.7 788.795 4
 -8 5 1 11218.6 818.253 5
 -8 5 1 11392.8 676.611 3
 -8 5 2 18081.2 849.865 3
 -8 5 2 18197.4 928.842 4
 -8 5 2 17195.5 1026.51 5
 -8 5 3 5322.5 441.174 3
 -8 5 3 4505.9 424.242 4
 -8 5 3 5400.73 568.698 5
 -8 5 4 40500.2 1288.92 3
 -8 5 4 36974.7 1598.16 5
 -8 5 4 38048.9 1228.71 4
 -8 5 5 7450.87 695.503 5
 -8 5 5 7962.47 520.583 3
 -8 5 6 1768.84 232.794 3
 -8 5 6 1743.5 367.109 5
 -8 5 7 21626.5 855.83 3
 -8 5 7 20163.3 1231.47 5
 -8 5 8 1497.05 348.511 5
 -8 5 9 20688.8 1321.34 5
 -8 5 10 9337.82 921.057 5
 -8 5 11 5971.42 748.564 5
 -8 5 12 21258.3 1516.65 5
 -8 5 13 1484.98 407.499 5
 -8 5 14 7341.37 946.529 5
 -8 5 15 8555.52 1074.78 5
 -8 5 16 1091.46 452.06 5
 -8 6 -14 6330.33 965.634 4
 -8 6 -13 70.6641 239.844 4
 -8 6 -12 11720.6 1230.96 4
 -8 6 -11 25157 1760.99 4
 -8 6 -10 3973.66 649.255 4
 -8 6 -9 596.106 219.11 4
 -8 6 -8 64.6378 166.944 4
 -8 6 -7 25052.3 1538.72 4
 -8 6 -6 32320.1 1729.32 4
 -8 6 -5 4369.72 593.952 4
 -8 6 -4 11290.7 829.914 5
 -8 6 -4 10300.4 885.493 4
 -8 6 -3 103.266 104.378 4
 -8 6 -3 92.894 114.628 5
 -8 6 -2 28765.5 1337.02 5
 -8 6 -2 28101 1408.01 4
 -8 6 -1 25133.7 1256.76 4
 -8 6 -1 24917.6 1235.53 5
 -8 6 0 364.36 148.188 4
 -8 6 0 126.377 94.2824 5
 -8 6 1 19523.6 1104.8 5
 -8 6 1 20347.5 1030.65 4
 -8 6 2 972.965 240.991 5
 -8 6 2 1533.55 239.152 3
 -8 6 2 1517.4 274.927 4
 -8 6 3 58235.9 1621.89 3
 -8 6 3 57940.5 2083.04 5
 -8 6 3 57359.4 1683.37 4
 -8 6 4 58224.3 1576.85 3
 -8 6 4 55203.1 2056.12 5
 -8 6 4 56985.4 1567.33 4
 -8 6 5 3543.3 317.941 3
 -8 6 5 2428.13 401.403 5
 -8 6 6 22961.5 1334.14 5
 -8 6 6 24325.5 872.451 3
 -8 6 7 6989.82 746.996 5
 -8 6 8 5139.82 644.219 5
 -8 6 9 42457.1 2016.04 5
 -8 6 10 1421.35 353.52 5
 -8 6 11 3480.66 591.406 5
 -8 6 12 5461.6 797.927 5
 -8 6 13 1586.67 416.706 5
 -8 6 14 18836.3 1556.12 5
 -8 6 15 5985.54 921.285 5
 -8 7 -14 4882.95 862.689 4
 -8 7 -13 2010.42 490.416 4
 -8 7 -12 13905.5 1325.23 4
 -8 7 -11 12065.1 1189.39 4
 -8 7 -10 1182.14 360.498 4
 -8 7 -9 2760.39 536.283 4
 -8 7 -8 424.025 206.786 4
 -8 7 -7 30891.4 1726.68 4
 -8 7 -6 16431 1208.8 4
 -8 7 -5 1437.75 341.298 4
 -8 7 -4 19925.6 1131.39 5
 -8 7 -4 20530.8 1262.92 4
 -8 7 -3 3993.12 483.285 5
 -8 7 -3 5134.19 599.293 4
 -8 7 -2 32528.9 1481.42 5
 -8 7 -2 33085.2 1538.61 4
 -8 7 -1 33974.6 1527.48 4
 -8 7 -1 38189.7 1640.75 5
 -8 7 0 915.744 235.215 4
 -8 7 0 853.5 239.452 5
 -8 7 1 24478.4 1158.12 4
 -8 7 1 24407.4 1285.22 5
 -8 7 2 3189.28 378.927 4
 -8 7 2 3005.71 432.764 5
 -8 7 3 51225.4 2020.21 5
 -8 7 3 53692.2 1640.87 4
 -8 7 4 27258.6 1420.62 5
 -8 7 5 3900.52 523.312 5
 -8 7 6 25429.3 1443.75 5
 -8 7 7 280.747 131.886 5
 -8 7 8 44045.5 2023.84 5
 -8 7 9 33147.4 1791.95 5
 -8 7 10 749.291 243.633 5
 -8 7 11 3475.27 623.789 5
 -8 7 12 -61.3921 113.3 5
 -8 7 13 9555.73 1090.1 5
 -8 7 14 18728.8 1583.71 5
 -8 8 -14 1420.09 448.2 4
 -8 8 -13 4329.54 786.96 4
 -8 8 -12 7715.45 971.496 4
 -8 8 -11 199.618 93.9171 4
 -8 8 -10 21339.3 1550.61 4
 -8 8 -9 11696.9 1104.18 4
 -8 8 -8 7491.24 847.553 4
 -8 8 -7 20843.9 1410.62 4
 -8 8 -6 546.255 223.839 4
 -8 8 -5 12108.9 1018.33 4
 -8 8 -5 12360.9 921.325 5
 -8 8 -4 8049.93 803.604 4
 -8 8 -4 8375.46 735.82 5
 -8 8 -3 11426.7 918.498 4
 -8 8 -3 11631.3 866.307 5
 -8 8 -2 24368.7 1324.09 4
 -8 8 -2 24956.7 1294.2 5
 -8 8 -1 3973.28 495.83 4
 -8 8 -1 4699.92 572.656 5
 -8 8 0 7758.76 731.018 5
 -8 8 0 6863.29 629.997 4
 -8 8 1 18641 1008.94 4
 -8 8 1 18824.6 1154.1 5
 -8 8 2 5428.87 512.294 4
 -8 8 2 4912.81 590.795 5
 -8 8 3 37432.7 1362.8 4
 -8 8 3 39622.7 1764.73 5
 -8 8 4 9614.43 841.514 5
 -8 8 5 11407 947.157 5
 -8 8 6 21034.7 1346.05 5
 -8 8 7 1675.9 358.809 5
 -8 8 8 32484.2 1769.99 5
 -8 8 9 14715 1185.43 5
 -8 8 10 284.633 220.799 5
 -8 8 11 2900.58 577.684 5
 -8 8 12 380.439 248.452 5
 -8 8 13 12764.3 1286.25 5
 -8 9 -14 507.1 240.952 4
 -8 9 -13 3985.46 750.843 4
 -8 9 -12 898.379 321.968 4
 -8 9 -11 7681.02 957.453 4
 -8 9 -10 30925 1893.56 4
 -8 9 -9 3821.86 638.01 4
 -8 9 -8 8405.94 928.394 4
 -8 9 -7 3586.17 604.364 4
 -8 9 -6 109.436 98.6817 4
 -8 9 -5 26325 1519.61 4
 -8 9 -5 25278.8 1360.57 5
 -8 9 -4 1363.03 342.04 4
 -8 9 -4 1453.27 327.141 5
 -8 9 -3 1489.08 345.506 4
 -8 9 -3 2358.28 387.086 5
 -8 9 -2 9580.25 807.482 5
 -8 9 -2 9511.2 827.185 4
 -8 9 -1 3266.16 465.522 4
 -8 9 -1 3362.42 504.087 5
 -8 9 0 25829.3 1397.2 5
 -8 9 0 25082.7 1307.97 4
 -8 9 1 7679.31 676.844 4
 -8 9 1 8113.91 765.527 5
 -8 9 2 6923.28 718.729 5
 -8 9 2 6444.2 596.204 4
 -8 9 3 18427.7 1212.91 5
 -8 9 4 2057.29 398.356 5
 -8 9 5 16795.4 1208.39 5
 -8 9 6 10159.8 946.015 5
 -8 9 7 977.74 323.06 5
 -8 9 8 10271.5 1011.65 5
 -8 9 9 158.714 104.269 5
 -8 9 10 8681.02 975.391 5
 -8 9 11 6658 887.987 5
 -8 9 12 1823.05 510.334 5
 -8 9 13 10546.5 1199.06 5
 -8 10 -13 3255.25 665.133 4
 -8 10 -12 422.81 224.386 4
 -8 10 -11 12008.9 1212.81 4
 -8 10 -10 8109.48 972.814 4
 -8 10 -9 -45.2829 119.793 4
 -8 10 -8 6290.11 822.898 4
 -8 10 -7 562.48 206.416 4
 -8 10 -6 23808.8 1522.52 4
 -8 10 -5 42001.1 1822.99 5
 -8 10 -5 40654.8 1981.57 4
 -8 10 -4 4496.83 556.307 5
 -8 10 -4 3981.45 587.922 4
 -8 10 -3 8315.87 780.248 5
 -8 10 -3 7007.69 778.115 4
 -8 10 -2 5723.5 640.657 5
 -8 10 -2 4714.8 607.159 4
 -8 10 -1 11358.8 917.627 4
 -8 10 -1 12274 982.092 5
 -8 10 0 46843 1981.45 5
 -8 10 0 47032 1890.91 4
 -8 10 1 10577.9 901.413 5
 -8 10 1 11011.5 854.036 4
 -8 10 2 1317.11 326.868 5
 -8 10 2 864.065 244.18 4
 -8 10 3 316.146 146.635 5
 -8 10 4 4162.72 596.645 5
 -8 10 5 26994.8 1591.32 5
 -8 10 6 7789.77 856.625 5
 -8 10 7 8118.84 912.382 5
 -8 10 8 1724.3 432.587 5
 -8 10 9 4566.45 704.499 5
 -8 10 10 21551.3 1579.24 5
 -8 10 11 4605.71 766.869 5
 -8 10 12 6478.65 905.06 5
 -8 11 -13 3754.46 696.482 4
 -8 11 -12 776.453 389.988 4
 -8 11 -11 11246.2 1199.25 4
 -8 11 -10 978.027 347.346 4
 -8 11 -9 5866.1 812.908 4
 -8 11 -8 3666.29 626.528 4
 -8 11 -7 644.683 267.193 4
 -8 11 -6 32086 1630.66 5
 -8 11 -6 32980.8 1874.56 4
 -8 11 -5 19246.1 1227.1 5
 -8 11 -5 22708.7 1479.66 4
 -8 11 -4 399.039 197.123 4
 -8 11 -4 703.674 197.991 5
 -8 11 -3 11833.2 940.121 5
 -8 11 -3 10893.4 977.311 4
 -8 11 -2 725.62 259.634 4
 -8 11 -2 415.517 145.859 5
 -8 11 -1 33330.6 1722.62 5
 -8 11 -1 31274.3 1623.67 4
 -8 11 0 32687.1 1667.4 5
 -8 11 0 29804 1533.57 4
 -8 11 1 664.014 201.222 5
 -8 11 1 947.368 259.04 4
 -8 11 2 1242.09 344.271 5
 -8 11 3 1161.08 319.316 5
 -8 11 4 25082.6 1518.82 5
 -8 11 5 23882 1516.17 5
 -8 11 6 23.8249 107.62 5
 -8 11 7 8645.16 955.296 5
 -8 11 8 -107.65 207.4 5
 -8 11 9 17783.4 1474.3 5
 -8 11 10 17151.9 1446.63 5
 -8 12 -12 4408.76 757.766 4
 -8 12 -11 11678.1 1230.46 4
 -8 12 -10 743.691 278.785 4
 -8 12 -9 11279.3 1155.78 4
 -8 12 -8 2918.52 595.31 4
 -8 12 -7 2572.22 535.163 4
 -8 12 -6 14542 1083.19 5
 -8 12 -6 12205.5 1138.94 4
 -8 12 -5 740.363 298.958 4
 -8 12 -5 455.599 165.985 5
 -8 12 -4 17044.9 1276.26 4
 -8 12 -4 16152.6 1147.31 5
 -8 12 -3 6495.08 705.352 5
 -8 12 -3 6658.9 778.29 4
 -8 12 -2 5582.38 668.239 5
 -8 12 -2 6357.79 756.248 4
 -8 12 -1 35537.8 1796.6 4
 -8 12 -1 39488.4 1918.92 5
 -8 12 0 1281.08 316.699 5
 -8 12 0 1477.12 350.124 4
 -8 12 1 4605.25 622.867 5
 -8 12 1 4291.18 580.772 4
 -8 12 2 5429.19 697.48 5
 -8 12 3 8151.53 853.388 5
 -8 12 4 21687.3 1453.83 5
 -8 12 5 11286.7 1055.21 5
 -8 12 6 3569.94 598.187 5
 -8 12 7 5034.13 755.997 5
 -8 12 8 1177.57 392.709 5
 -8 12 9 15478.9 1372.49 5
 -8 13 -11 2806.8 626.826 4
 -8 13 -10 6210.38 905.489 4
 -8 13 -9 18355.3 1534.97 4
 -8 13 -8 1231.45 360.523 4
 -8 13 -7 4687.2 725.955 4
 -8 13 -6 2771.82 579.195 4
 -8 13 -6 2966.44 476.425 5
 -8 13 -5 5588.82 675.703 5
 -8 13 -5 4962.1 717.888 4
 -8 13 -4 28620.8 1747.15 4
 -8 13 -4 32027.3 1665.2 5
 -8 13 -3 4524.02 595.314 5
 -8 13 -3 3843.7 610.719 4
 -8 13 -2 7787.2 879.46 4
 -8 13 -2 9190.04 910.308 5
 -8 13 -1 7941.97 848.164 5
 -8 13 -1 5703.3 740.822 4
 -8 13 0 1814.97 388.56 5
 -8 13 0 1966.11 424.679 4
 -8 13 1 22660.3 1455.81 5
 -8 13 2 6049.89 735.847 5
 -8 13 3 2075.32 474.033 5
 -8 13 4 11032.8 1053.23 5
 -8 13 5 314.868 125.743 5
 -8 13 6 13205.8 1211.97 5
 -8 13 7 4861.56 750.23 5
 -8 13 8 2627.46 563.833 5
 -8 14 -11 -218.175 221.02 4
 -8 14 -10 12237.5 1308.06 4
 -8 14 -9 17941.8 1548.14 4
 -8 14 -8 645.203 246.437 4
 -8 14 -7 1019.72 351.631 4
 -8 14 -6 -35.2149 204.18 5
 -8 14 -6 -63.5378 113.863 4
 -8 14 -5 11587.9 1001.24 5
 -8 14 -5 10380.2 1085.25 4
 -8 14 -4 17470.4 1242.54 5
 -8 14 -4 16419.4 1350.03 4
 -8 14 -3 479.829 188.316 4
 -8 14 -3 1620.27 380.716 5
 -8 14 -2 4701.13 655.021 5
 -8 14 -2 3424.5 608.977 4
 -8 14 -1 38.6535 195.238 4
 -8 14 -1 -62.3392 148.945 1
 -8 14 -1 48.4891 109.159 5
 -8 14 0 12031.1 1078.23 5
 -8 14 1 15444.2 1233.85 5
 -8 14 2 1565.69 372.142 5
 -8 14 3 2591.2 519.203 5
 -8 14 4 738.468 211.336 5
 -8 14 5 9179.24 1015.87 5
 -8 14 6 10321.2 1098.47 5
 -8 14 7 1899.68 470.402 5
 -8 15 -9 9850.69 1177.11 4
 -8 15 -8 1194.84 407.189 4
 -8 15 -7 2909.65 651.143 4
 -8 15 -6 -175.239 186.577 5
 -8 15 -6 60.3061 132.947 4
 -8 15 -5 9053.76 1043.27 4
 -8 15 -5 9042.76 916.854 5
 -8 15 -4 7506.38 810.153 5
 -8 15 -4 5269.19 788.692 4
 -8 15 -3 128.774 116.595 5
 -8 15 -3 193.054 151.75 4
 -8 15 -2 6894.85 797.661 5
 -8 15 -2 5787.03 840.431 4
 -8 15 -1 126.417 204.827 1
 -8 15 -1 348.553 211.714 5
 -8 15 -1 123.832 125.295 4
 -8 15 0 11565.6 1075.07 5
 -8 15 1 9631.37 989.045 5
 -8 15 2 84.7948 87.0878 5
 -8 15 3 5997.38 800.3 5
 -8 15 4 -37.606 222.17 5
 -8 15 5 7365.04 948.399 5
 -8 16 -8 6643.27 963.998 4
 -8 16 -7 3054.49 646.109 4
 -8 16 -6 924.761 301.033 5
 -8 16 -6 988.211 341.028 4
 -8 16 -5 10751.8 1002.51 5
 -8 16 -5 9199.31 1108.66 4
 -8 16 -4 1030.88 276.287 5
 -8 16 -4 808.689 283.177 4
 -8 16 -3 3858.39 694.063 4
 -8 16 -3 4600.74 668.88 5
 -8 16 -2 3868.55 706.882 4
 -8 16 -2 4814.66 681.562 5
 -8 16 -1 786.283 310.829 5
 -8 16 0 11610.7 1130.08 5
 -8 16 0 10323.2 1089.91 1
 -8 16 1 773.982 296.07 5
 -8 16 2 6334.94 840.683 5
 -8 16 3 7539.75 924.244 5
 -8 17 -6 3462.93 579.591 5
 -8 17 -5 1446.1 466.518 4
 -8 17 -5 1551.52 396.14 5
 -8 17 -4 828.084 370.263 4
 -8 17 -4 1396.78 374.371 5
 -8 17 -3 7559.12 1018.49 4
 -8 17 -3 9212.94 954.084 5
 -8 17 -2 976.875 305.369 5
 -8 17 -1 1551.05 377.222 5
 -8 17 0 5519.6 790.608 5
 -8 17 0 3756.92 652.114 1
 -7 -11 1 8146.24 901.332 2
 -7 -10 -1 2601.33 462.368 3
 -7 -10 -1 2444.88 523.109 2
 -7 -10 0 17566.1 1369.58 2
 -7 -10 0 17941.4 1225.28 3
 -7 -10 1 9047.96 928.186 2
 -7 -9 -3 7137.36 921.041 2
 -7 -9 -2 971.894 277.266 3
 -7 -9 -2 932.134 277.407 2
 -7 -9 -1 8543.74 823.358 3
 -7 -9 -1 8294.33 946.554 2
 -7 -9 0 16793.7 1170.67 3
 -7 -9 0 19867.5 1410.96 2
 -7 -9 1 -223.296 215.449 2
 -7 -8 -4 6116.19 833.046 2
 -7 -8 -3 11963.3 949.236 3
 -7 -8 -3 13261.1 1226.53 2
 -7 -8 -2 342.78 181.197 3
 -7 -8 -2 285.809 149.787 2
 -7 -8 -1 18094.2 1342.67 2
 -7 -8 -1 17656.9 1157.6 3
 -7 -8 0 4519.61 632.41 2
 -7 -8 1 4452.66 588.165 2
 -7 -7 -6 4500.29 726.27 2
 -7 -7 -5 156.077 138.204 3
 -7 -7 -5 84.5471 146.587 2
 -7 -7 -4 13252.4 998.791 3
 -7 -7 -4 15020.1 1270.79 2
 -7 -7 -3 3848.9 515.931 3
 -7 -7 -3 4752.13 708.026 2
 -7 -7 -2 3453.76 577.412 2
 -7 -7 -2 2931.83 452.122 3
 -7 -7 -1 5739.42 633.06 3
 -7 -7 -1 6975.02 785.158 2
 -7 -7 0 1228.28 310.659 2
 -7 -7 1 18083.3 1187.46 2
 -7 -6 -7 4848.59 746.886 2
 -7 -6 -6 2036.73 488.505 2
 -7 -6 -6 1827.64 361.533 3
 -7 -6 -5 4467.59 556.805 3
 -7 -6 -5 5188 736.212 2
 -7 -6 -4 15116.3 1227.24 2
 -7 -6 -4 12680.3 950.034 3
 -7 -6 -3 1742.31 338.99 3
 -7 -6 -3 2232.27 460.276 2
 -7 -6 -2 7537.58 703.123 3
 -7 -6 -2 7214.08 795.148 2
 -7 -6 -1 4916.99 640.361 2
 -7 -6 -1 4905.8 582.672 3
 -7 -6 0 12793.6 982.74 2
 -7 -5 -9 6030.87 857.906 2
 -7 -5 -8 4308.96 707.474 2
 -7 -5 -7 9857.55 1035.01 2
 -7 -5 -7 8691.19 774.317 3
 -7 -5 -6 406.012 189.061 2
 -7 -5 -6 122.811 99.8519 3
 -7 -5 -5 22524 1507.57 2
 -7 -5 -5 21849.6 1222.3 3
 -7 -5 -4 22696.8 1259.04 3
 -7 -5 -4 23790.9 1483.95 2
 -7 -5 -3 -61.1465 130.371 2
 -7 -5 -3 18.017 104.06 3
 -7 -5 -2 24102.1 1256.89 3
 -7 -5 -2 27304.9 1509.48 2
 -7 -5 -1 527.222 173.923 3
 -7 -5 -1 657.562 220.042 2
 -7 -5 0 5151.1 589.978 2
 -7 -4 -10 12232.5 1197.82 2
 -7 -4 -9 -91.2426 145.124 2
 -7 -4 -8 14500.9 1239.65 2
 -7 -4 -7 13435.3 960.886 3
 -7 -4 -7 13444.2 1159.56 2
 -7 -4 -6 129.91 72.7879 3
 -7 -4 -6 461.097 255.05 2
 -7 -4 -5 18751.7 1298.22 2
 -7 -4 -5 18001.8 1088.9 3
 -7 -4 -4 6796.78 660.161 3
 -7 -4 -4 7020.15 764.774 2
 -7 -4 -3 11671 960.234 2
 -7 -4 -3 9990.82 784.733 3
 -7 -4 -2 13681.5 912.237 3
 -7 -4 -2 14185 1028.37 2
 -7 -4 -1 -49.3401 95.0407 3
 -7 -4 -1 230.474 119.13 2
 -7 -4 0 8275.18 688.067 3
 -7 -3 -11 3704.49 616.494 2
 -7 -3 -10 3892.59 643.121 2
 -7 -3 -9 933.451 289.092 2
 -7 -3 -8 26407.2 1622.35 2
 -7 -3 -7 15078.1 991.553 3
 -7 -3 -7 14873 1171.41 2
 -7 -3 -6 152.115 93.9726 3
 -7 -3 -6 327.904 182.102 2
 -7 -3 -5 3416.74 453.902 3
 -7 -3 -5 3972.03 564.103 2
 -7 -3 -4 912.144 236.093 3
 -7 -3 -4 698.838 215.986 2
 -7 -3 -3 50466.6 1841.99 3
 -7 -3 -3 51737.5 2043.18 2
 -7 -3 -2 17540.7 1002.49 3
 -7 -3 -2 17612.9 1077.91 2
 -7 -3 -1 236.288 106.578 3
 -7 -3 0 16946.8 972.225 3
 -7 -3 4 1337.1 161.675 5
 -7 -3 5 4255.02 296.02 5
 -7 -3 6 1654.83 200.523 5
 -7 -3 7 19524.9 783.822 5
 -7 -3 8 20820.4 869.454 5
 -7 -3 9 120.164 80.7475 5
 -7 -3 10 15708.5 858.981 5
 -7 -3 11 2697.44 379.785 5
 -7 -2 -12 615.989 301.745 2
 -7 -2 -11 5768.43 975.877 4
 -7 -2 -11 5263.82 728.009 2
 -7 -2 -10 1826.22 482.212 4
 -7 -2 -10 1797.42 406.546 2
 -7 -2 -9 13269.8 1398.22 4
 -7 -2 -9 12001.9 1054.62 2
 -7 -2 -8 27096.2 1573.37 2
 -7 -2 -8 27396.4 1987.42 4
 -7 -2 -7 8368.45 831.144 2
 -7 -2 -7 10539.8 1185.66 4
 -7 -2 -7 8920.35 742.276 3
 -7 -2 -6 325.906 155.925 3
 -7 -2 -6 110.574 187.644 4
 -7 -2 -6 477.436 216.58 2
 -7 -2 -5 7619.41 950.145 4
 -7 -2 -5 6174.66 599.546 3
 -7 -2 -5 6268.61 675.303 2
 -7 -2 -4 19570.6 1077.84 3
 -7 -2 -4 20751 1215.96 2
 -7 -2 -3 71171 2226.67 3
 -7 -2 -3 67866.5 2276.8 2
 -7 -2 -2 12269.6 855.656 2
 -7 -2 -2 12202.1 816.189 3
 -7 -2 -1 9641.86 708.773 3
 -7 -2 0 3467.42 420.826 3
 -7 -2 3 18820.4 716.23 5
 -7 -2 4 12756.8 585.127 5
 -7 -2 5 8963.39 506.379 5
 -7 -2 6 6485.37 452.445 5
 -7 -2 7 67471.6 1810.17 5
 -7 -2 8 6821.89 518.758 5
 -7 -2 9 23330.9 1061.95 5
 -7 -2 10 24963.3 1173.82 5
 -7 -2 11 665.701 193.634 5
 -7 -2 12 37108.4 1649.04 5
 -7 -2 13 29166.6 1550.54 5
 -7 -2 14 877.572 307.943 5
 -7 -2 15 7971.46 869.431 5
 -7 -2 16 509.291 243.918 5
 -7 -2 17 13490.1 1237.63 5
 -7 -1 -13 9424.49 981.021 2
 -7 -1 -12 3438.15 716.237 4
 -7 -1 -12 2574.64 500.158 2
 -7 -1 -11 8559.03 889.081 2
 -7 -1 -11 9532.09 1216.61 4
 -7 -1 -10 410.538 331.473 4
 -7 -1 -10 504.719 189.752 2
 -7 -1 -9 22234.9 1751.4 4
 -7 -1 -9 19197.5 1289.21 2
 -7 -1 -8 13129.4 1304.44 4
 -7 -1 -8 12260.9 998.322 2
 -7 -1 -7 -0.84788 107.952 2
 -7 -1 -7 40.1699 149.028 4
 -7 -1 -6 34810.7 1645.8 2
 -7 -1 -6 36888.7 2096.36 4
 -7 -1 -6 35759.8 1509 3
 -7 -1 -5 1974.2 472.376 4
 -7 -1 -5 2274.76 348.952 3
 -7 -1 -5 1975.69 358.416 2
 -7 -1 -4 29933.2 1796.14 4
 -7 -1 -4 29091 1295.76 3
 -7 -1 -4 28383.8 1355.54 2
 -7 -1 -3 36797.9 1950.61 4
 -7 -1 -3 36440.8 1468.85 3
 -7 -1 -2 46.052 126.564 4
 -7 -1 -2 6.1742 88.6035 3
 -7 -1 -1 11205.5 748.903 3
 -7 -1 0 11172.2 733.668 3
 -7 -1 1 33760.1 1323.18 3
 -7 -1 2 33358.9 1086.42 5
 -7 -1 3 3072.88 297.409 5
 -7 -1 4 27848.3 1003.68 5
 -7 -1 5 2350.44 278.099 5
 -7 -1 6 60810.6 1715.41 5
 -7 -1 7 63352.5 1834.45 5
 -7 -1 8 97.1514 39.8154 5
 -7 -1 9 19015.7 1005.83 5
 -7 -1 10 4899.11 535.895 5
 -7 -1 11 10655.1 830.172 5
 -7 -1 12 48710.1 2005.68 5
 -7 -1 13 7107.82 789.481 5
 -7 -1 14 3746.44 591.245 5
 -7 -1 15 3174.56 547.919 5
 -7 -1 16 2708.88 553.967 5
 -7 -1 17 18014.8 1469.51 5
 -7 -1 18 7488.35 998.269 5
 -7 -1 19 684.57 343.131 5
 -7 0 -14 8081.26 874.351 2
 -7 0 -13 -211.796 187.934 4
 -7 0 -13 44.7254 69.8794 2
 -7 0 -12 10503.3 972.799 2
 -7 0 -12 11685.6 1340.43 4
 -7 0 -11 13348.2 1390.32 4
 -7 0 -11 13367.5 1077.81 2
 -7 0 -10 1070.13 373.996 4
 -7 0 -10 561.775 219.509 2
 -7 0 -9 10497.1 1152.7 4
 -7 0 -9 9169.25 839.061 2
 -7 0 -8 1741.14 465.195 4
 -7 0 -8 1496.92 302.119 2
 -7 0 -7 19395.3 1170.46 2
 -7 0 -7 19641.6 1508.04 4
 -7 0 -6 30121.5 1342.03 3
 -7 0 -6 32759.3 1903.93 4
 -7 0 -6 27985 1381.96 2
 -7 0 -5 2709.59 414.287 2
 -7 0 -5 2746.83 530.823 4
 -7 0 -5 2912.11 402.57 3
 -7 0 -4 27894.5 1651.42 4
 -7 0 -4 26615.7 1212.33 3
 -7 0 -3 2231.28 457.468 4
 -7 0 -3 1811.45 306.795 3
 -7 0 -2 16416.5 915.045 3
 -7 0 -2 17288.1 1191.31 4
 -7 0 -1 25259.2 1424.51 4
 -7 0 -1 25739.2 1139.24 3
 -7 0 0 4541.52 569.996 4
 -7 0 0 4180.64 424.77 3
 -7 0 1 48200.7 1924.03 4
 -7 0 1 50006.9 1626.61 3
 -7 0 1 49638.4 1454.17 5
 -7 0 2 21133.7 978.631 3
 -7 0 2 20654.6 858.451 5
 -7 0 3 5926.38 472.002 5
 -7 0 4 19116.6 864.437 5
 -7 0 5 148.209 52.8705 5
 -7 0 6 67865.7 1931.83 5
 -7 0 7 14485.7 822.376 5
 -7 0 8 735.149 195.647 5
 -7 0 9 17669.8 1011.11 5
 -7 0 10 42.296 84.779 5
 -7 0 11 15164.7 1045.72 5
 -7 0 12 17302.5 1185.2 5
 -7 0 13 84.9368 120.133 5
 -7 0 14 7945.91 888.919 5
 -7 0 15 501.474 172.132 5
 -7 0 16 6654.26 862.853 5
 -7 0 17 14252.3 1338.17 5
 -7 0 18 1420.06 464.314 5
 -7 0 19 4668.94 865.06 5
 -7 1 -14 1638.65 518.066 4
 -7 1 -13 520.976 194.858 4
 -7 1 -13 802.479 265.246 2
 -7 1 -12 21310.6 1753.69 4
 -7 1 -12 17605.2 1222.39 2
 -7 1 -11 7607.65 764.84 2
 -7 1 -11 7651.32 993.933 4
 -7 1 -10 4238.6 546.715 2
 -7 1 -10 4668 752.89 4
 -7 1 -9 2766.71 545.328 4
 -7 1 -9 3169.94 464.79 2
 -7 1 -8 867.372 327.237 4
 -7 1 -8 627.95 178.391 2
 -7 1 -7 30351.4 1392.04 2
 -7 1 -7 32813.9 1879.51 4
 -7 1 -6 7923.46 884.46 4
 -7 1 -5 12316.3 806.484 3
 -7 1 -5 12604.6 1075.83 4
 -7 1 -4 14322.7 849.717 3
 -7 1 -4 15899.2 1174.63 4
 -7 1 -3 775.96 237.024 4
 -7 1 -3 431.988 153.591 3
 -7 1 -2 67050.5 1982.34 3
 -7 1 -2 68911.8 2454.35 4
 -7 1 -1 52410 2038.5 4
 -7 1 -1 49638.9 1655.02 3
 -7 1 0 28.4776 52.6085 4
 -7 1 0 76.5277 85.8369 5
 -7 1 0 158.52 98.9306 3
 -7 1 1 39234.2 1296.43 5
 -7 1 1 37237.6 1325.89 3
 -7 1 1 37076 1559.02 4
 -7 1 2 11.3844 58.1237 4
 -7 1 2 36.1506 53.8365 5
 -7 1 2 -37.2057 69.409 3
 -7 1 3 20318.3 919.464 5
 -7 1 4 58688.9 1744.79 5
 -7 1 5 226.233 98.21 5
 -7 1 6 18466.2 949.687 5
 -7 1 7 5422.11 516.309 5
 -7 1 8 25107.5 1211.25 5
 -7 1 9 20234.6 1131.5 5
 -7 1 10 270.268 125.053 5
 -7 1 11 23408.1 1360.7 5
 -7 1 12 3113.39 519.811 5
 -7 1 13 17110.3 1283.92 5
 -7 1 14 23786.8 1601.27 5
 -7 1 15 -110.537 245.526 5
 -7 1 16 9810.31 1099.63 5
 -7 1 17 4310.88 752.857 5
 -7 1 18 2658.39 598.655 5
 -7 2 -14 819.421 368.727 4
 -7 2 -13 4558.72 791.661 4
 -7 2 -13 5222.6 627.643 2
 -7 2 -12 22330.7 1728.55 4
 -7 2 -12 21983.8 1287.99 2
 -7 2 -11 496.797 319.942 4
 -7 2 -11 314.039 118.746 2
 -7 2 -10 5516.25 804.6 4
 -7 2 -10 5083.21 575.3 2
 -7 2 -9 719.338 329.362 4
 -7 2 -9 646.181 200.997 2
 -7 2 -8 6391.93 810.957 4
 -7 2 -7 35130.5 1895.42 4
 -7 2 -6 2566.9 473.022 4
 -7 2 -5 13263.8 1064.92 4
 -7 2 -4 11621.8 969.829 4
 -7 2 -4 11465.4 742.853 3
 -7 2 -3 16719.7 882.216 3
 -7 2 -3 15898.9 1087.88 4
 -7 2 -2 54970.7 1739.18 3
 -7 2 -2 57505.1 2113.28 4
 -7 2 -1 25424.1 1057.3 5
 -7 2 -1 25644.4 1083.36 3
 -7 2 -1 26204.8 1308.86 4
 -7 2 0 16444.3 839.51 3
 -7 2 0 15576.6 802.565 5
 -7 2 0 15030.6 936.529 4
 -7 2 1 12711.2 825.462 4
 -7 2 1 11979.5 728.904 5
 -7 2 1 12981.4 718.046 3
 -7 2 2 23175 1026.63 5
 -7 2 2 23521.9 984.75 3
 -7 2 2 23463.9 1087.27 4
 -7 2 3 99085 2484.22 5
 -7 2 3 99705.7 2376.99 3
 -7 2 3 95037 2453.7 4
 -7 2 4 40673.5 1321.65 3
 -7 2 4 38998.4 1418.57 5
 -7 2 5 225.02 97.3283 5
 -7 2 6 911.683 209.418 5
 -7 2 7 14720.3 908.906 5
 -7 2 8 33784.7 1493.51 5
 -7 2 9 34674.5 1580.66 5
 -7 2 10 1374.91 332.004 5
 -7 2 11 7883.1 796.987 5
 -7 2 12 4770.41 651.775 5
 -7 2 13 38923.6 2041.5 5
 -7 2 14 8692.45 974.828 5
 -7 2 15 3184.32 616.496 5
 -7 2 16 6969.92 940.885 5
 -7 2 17 367.49 157.396 5
 -7 2 18 10482.8 1235.38 5
 -7 3 -14 -271.057 285.895 4
 -7 3 -13 13683.9 1346.44 4
 -7 3 -12 10071.1 1123.37 4
 -7 3 -11 4008.68 691.716 4
 -7 3 -10 6462.83 847.102 4
 -7 3 -9 -298.938 268.351 4
 -7 3 -8 19032.7 1372.92 4
 -7 3 -7 11754.8 1041.3 4
 -7 3 -6 1947.93 409.853 4
 -7 3 -5 29192.2 1579.62 4
 -7 3 -4 204.543 137.729 4
 -7 3 -3 35602.6 1632.94 4
 -7 3 -3 35411.7 1331.5 3
 -7 3 -2 61785.2 1870.74 5
 -7 3 -2 59610 2120.72 4
 -7 3 -2 61794.6 1817.95 3
 -7 3 -1 3671.28 447.634 4
 -7 3 -1 3664.91 375.46 3
 -7 3 -1 3651.31 389.876 5
 -7 3 0 48709.9 1581.29 5
 -7 3 0 47763.7 1499.15 3
 -7 3 0 47830.9 1719.12 4
 -7 3 1 2190.06 288.355 3
 -7 3 1 2253.75 311.329 5
 -7 3 1 1955.02 306.665 4
 -7 3 2 39245.5 1424.5 5
 -7 3 2 39707.7 1374.74 4
 -7 3 2 38055.2 1279.96 3
 -7 3 3 77488.9 1969.67 3
 -7 3 3 80071.1 2031.25 4
 -7 3 3 78146.6 2214.77 5
 -7 3 4 2060.95 255.007 3
 -7 3 4 1626.76 220.347 4
 -7 3 4 1854.4 298.677 5
 -7 3 5 1316.92 203.942 3
 -7 3 5 1501.72 277.208 5
 -7 3 6 1074.6 241.018 5
 -7 3 7 25177.8 1245.6 5
 -7 3 8 50026.6 1922.6 5
 -7 3 9 11948.5 920.196 5
 -7 3 10 6800.25 734.664 5
 -7 3 11 412.742 182.872 5
 -7 3 12 27605.8 1640.19 5
 -7 3 13 23820.6 1590.19 5
 -7 3 14 45.0373 141.366 5
 -7 3 15 4676.4 771.85 5
 -7 3 16 3613.57 716.365 5
 -7 3 17 6160.53 951.316 5
 -7 4 -15 6928.56 1007.77 4
 -7 4 -14 480.573 230.779 4
 -7 4 -13 13029.9 1325.97 4
 -7 4 -12 89.0493 93.8479 4
 -7 4 -11 13886 1288.09 4
 -7 4 -10 20620.9 1513.02 4
 -7 4 -9 4524.43 679.294 4
 -7 4 -8 27239.7 1634.28 4
 -7 4 -7 3814.03 572.016 4
 -7 4 -6 26155.4 1489 4
 -7 4 -5 21092.4 1278.01 4
 -7 4 -4 472.605 195.871 4
 -7 4 -3 34060.2 1348.69 5
 -7 4 -3 32954.9 1510.54 4
 -7 4 -2 10480.2 782.225 4
 -7 4 -2 10435 707.34 5
 -7 4 -2 10775.1 668.701 3
 -7 4 -1 17563.3 913.475 5
 -7 4 -1 16069.4 942.027 4
 -7 4 -1 16678 827.747 3
 -7 4 0 54774 1636.17 3
 -7 4 0 58066.9 1871.48 4
 -7 4 1 30.5256 50.5203 4
 -7 4 1 167.661 78.6064 3
 -7 4 1 49.5606 44.9872 5
 -7 4 2 28701.5 1241.52 5
 -7 4 2 28409.9 1112.26 4
 -7 4 2 30054.3 1068.26 3
 -7 4 3 20549.7 1047.08 5
 -7 4 3 20729 849.784 3
 -7 4 3 18580.4 814.24 4
 -7 4 4 5693.98 415.112 3
 -7 4 4 5513.11 550.04 5
 -7 4 4 5039.02 363.133 4
 -7 4 5 22847.6 715.928 4
 -7 4 5 25980.3 923.991 3
 -7 4 5 25989 1233.85 5
 -7 4 6 665.895 130.858 3
 -7 4 6 484.558 144.758 5
 -7 4 7 30478 1002.18 3
 -7 4 7 29913.4 1425.38 5
 -7 4 8 25417.3 1359.55 5
 -7 4 9 1172.8 303.071 5
 -7 4 10 23906.5 1417.5 5
 -7 4 11 -48.918 182.52 5
 -7 4 12 47506.1 2240.74 5
 -7 4 13 14671.5 1257.4 5
 -7 4 14 -254.594 222.791 5
 -7 4 15 9671.07 1113.53 5
 -7 4 16 104.245 149.103 5
 -7 4 17 11808.9 1355.48 5
 -7 5 -15 5319.84 886.367 4
 -7 5 -14 3618.66 696.708 4
 -7 5 -13 2965.1 615.656 4
 -7 5 -12 5837.15 817.921 4
 -7 5 -11 29055 1819.97 4
 -7 5 -10 17931.5 1371.75 4
 -7 5 -9 929.4 308.735 4
 -7 5 -8 13751.7 1104.73 4
 -7 5 -7 2475.71 437.305 4
 -7 5 -6 58466.6 2276.25 4
 -7 5 -5 15564.4 1066.1 4
 -7 5 -4 2594.43 405.128 4
 -7 5 -3 3583.17 469.93 4
 -7 5 -3 3733.85 430.33 5
 -7 5 -2 11309.7 802.579 4
 -7 5 -2 11152.8 742.712 5
 -7 5 -1 85752.5 2408.71 5
 -7 5 -1 85753.3 2442.18 4
 -7 5 0 25903.7 1216.3 5
 -7 5 0 24837.6 985.534 3
 -7 5 0 24956.5 1130.53 4
 -7 5 1 3681 345.688 3
 -7 5 1 3040.28 352.832 4
 -7 5 1 3559.87 424.792 5
 -7 5 2 32782.5 1178.81 4
 -7 5 2 34880.3 1135.31 3
 -7 5 2 33448.8 1399.68 5
 -7 5 3 -41.2862 48.4675 4
 -7 5 3 -28.5222 94.4165 5
 -7 5 3 -1.61577 45.6595 3
 -7 5 4 43405.9 1240.02 3
 -7 5 4 42553.3 1653.51 5
 -7 5 4 42639.6 1199.64 4
 -7 5 5 58273.4 1441.74 3
 -7 5 5 55915.7 1977 5
 -7 5 6 504.199 161.662 5
 -7 5 6 897.343 151.924 3
 -7 5 7 16961.3 662.38 3
 -7 5 7 15415.3 1040.68 5
 -7 5 8 4123.38 552.325 5
 -7 5 9 16020.3 1151.4 5
 -7 5 10 19921.6 1325.88 5
 -7 5 11 930.843 285.839 5
 -7 5 12 24412.4 1620.47 5
 -7 5 13 3149.61 594.251 5
 -7 5 14 4620.25 764.014 5
 -7 5 15 11009.3 1205.85 5
 -7 5 16 78.5967 225.16 5
 -7 6 -15 592.393 249.077 4
 -7 6 -14 10139.5 1145.14 4
 -7 6 -13 25.2632 186.648 4
 -7 6 -12 8283.37 960.874 4
 -7 6 -11 27407 1736.18 4
 -7 6 -10 8147.68 906.792 4
 -7 6 -9 1974.02 434.426 4
 -7 6 -8 4427.15 611.249 4
 -7 6 -7 54039.9 2240.83 4
 -7 6 -6 73051.8 2584.53 4
 -7 6 -5 8001.73 759.744 4
 -7 6 -4 8815.38 760.802 4
 -7 6 -4 8589.5 683.466 5
 -7 6 -3 1280.81 263.424 5
 -7 6 -3 1612.24 314.963 4
 -7 6 -2 18641.2 1068.96 4
 -7 6 -2 18649.1 1008.32 5
 -7 6 -1 74403.9 2323.53 5
 -7 6 -1 71406.9 2212.51 4
 -7 6 0 3600.94 435.907 5
 -7 6 0 3813.64 439.763 4
 -7 6 1 11788.2 822.668 5
 -7 6 1 12895.3 762.813 4
 -7 6 2 13083.4 876.293 5
 -7 6 2 14014 751.743 4
 -7 6 3 31142.5 1091.7 4
 -7 6 3 31055.5 1390.47 5
 -7 6 4 61346.4 2108.01 5
 -7 6 4 59914.7 1490.29 3
 -7 6 4 61261 1538.77 4
 -7 6 5 14817.2 606.759 3
 -7 6 5 13429.7 933.449 5
 -7 6 6 13726.9 552.489 3
 -7 6 6 13663.6 971.949 5
 -7 6 7 9402.13 834.508 5
 -7 6 8 1390.42 342.893 5
 -7 6 9 31992 1703.85 5
 -7 6 10 18875.8 1330.03 5
 -7 6 11 1212.44 333.019 5
 -7 6 12 7009.77 852.081 5
 -7 6 13 105.538 158.753 5
 -7 6 14 12908.2 1288.42 5
 -7 6 15 7461.37 1020.9 5
 -7 7 -15 4122.63 733.966 4
 -7 7 -14 8864.57 1066.9 4
 -7 7 -13 336.813 148.708 4
 -7 7 -12 9915.86 1072.03 4
 -7 7 -11 15279 1282.22 4
 -7 7 -10 -148.988 217.249 4
 -7 7 -9 18520.6 1322.22 4
 -7 7 -8 331.518 112.564 4
 -7 7 -7 49344.1 2128.81 4
 -7 7 -6 44155.5 1965.22 4
 -7 7 -5 688.502 227.928 4
 -7 7 -4 8544.52 772.275 4
 -7 7 -4 7825.73 664.513 5
 -7 7 -3 200.472 131.941 4
 -7 7 -3 -6.95576 59.6303 5
 -7 7 -2 24769.9 1202.32 5
 -7 7 -2 22767.5 1181.41 4
 -7 7 -1 25046.4 1206.42 4
 -7 7 -1 29067.4 1388.45 5
 -7 7 0 491.595 170.589 5
 -7 7 0 391.858 133.997 4
 -7 7 1 17500.8 1033.57 5
 -7 7 1 17500.3 913.517 4
 -7 7 2 1537.55 289.971 5
 -7 7 2 1621.02 264.348 4
 -7 7 3 48380.3 1844.2 5
 -7 7 3 49379.7 1504.28 4
 -7 7 4 29183.2 1419.83 5
 -7 7 4 27352.2 994.505 4
 -7 7 5 6526.37 664.912 5
 -7 7 6 33869.9 1612.38 5
 -7 7 7 8689.2 822.145 5
 -7 7 8 14919 1135.82 5
 -7 7 9 40316.5 1972.72 5
 -7 7 10 6841.59 808.386 5
 -7 7 11 2876.57 556.435 5
 -7 7 12 3216.82 609.63 5
 -7 7 13 1635.17 425.913 5
 -7 7 14 24805.1 1822.6 5
 -7 7 15 2286.63 558.562 5
 -7 8 -15 11237.3 1268.03 4
 -7 8 -14 5073.41 809.346 4
 -7 8 -13 2331.82 514.907 4
 -7 8 -12 8025.98 944.33 4
 -7 8 -11 12929.7 1189.13 4
 -7 8 -10 13757.6 1191.33 4
 -7 8 -9 27113.6 1662.94 4
 -7 8 -8 259.066 186.363 4
 -7 8 -7 10639.3 958.682 4
 -7 8 -6 3754.2 548.461 4
 -7 8 -5 5389.52 561.888 5
 -7 8 -5 5362.39 620.842 4
 -7 8 -4 14818 954.518 5
 -7 8 -4 13202.7 979.755 4
 -7 8 -3 197.484 119.494 4
 -7 8 -3 139.885 68.7331 5
 -7 8 -2 18296.1 1073.1 5
 -7 8 -2 19105.8 1127.5 4
 -7 8 -1 6291.31 627.197 5
 -7 8 -1 6054.13 600.793 4
 -7 8 0 3108.12 432.527 5
 -7 8 0 2970.87 400.688 4
 -7 8 1 34159.1 1539.76 5
 -7 8 1 34300.1 1379.87 4
 -7 8 2 2000.16 370.217 5
 -7 8 2 1704.52 282.977 4
 -7 8 3 34895.3 1573.05 5
 -7 8 3 34108.3 1258.97 4
 -7 8 4 11257.9 892.837 5
 -7 8 4 10180.9 619.041 4
 -7 8 5 8443.65 789.185 5
 -7 8 6 12249.4 980.249 5
 -7 8 7 163.777 158.944 5
 -7 8 8 21621.5 1390.6 5
 -7 8 9 11182.3 1027.27 5
 -7 8 10 1447.23 369.607 5
 -7 8 11 7287.91 894.529 5
 -7 8 12 920.021 285.233 5
 -7 8 13 16763.1 1449.81 5
 -7 8 14 10767.4 1204.08 5
 -7 9 -15 20076.7 1668.66 4
 -7 9 -14 1998.62 584.908 4
 -7 9 -13 3051.64 592.935 4
 -7 9 -12 2459.92 554.261 4
 -7 9 -11 2818.59 559.675 4
 -7 9 -10 32737.3 1916.65 4
 -7 9 -9 10235.9 1003.12 4
 -7 9 -8 4616.44 636.251 4
 -7 9 -7 4105.73 596.623 4
 -7 9 -6 1530.33 371.451 4
 -7 9 -5 37225.8 1610.94 5
 -7 9 -5 33428.1 1698.37 4
 -7 9 -4 16713.6 1023.8 5
 -7 9 -4 15328.8 1087.06 4
 -7 9 -4 15041.5 732.264 1
 -7 9 -3 3163.73 427.903 5
 -7 9 -3 3662.64 506.065 4
 -7 9 -2 23787.8 1287.94 5
 -7 9 -2 21739.7 1225.08 4
 -7 9 -1 1540.9 320.724 5
 -7 9 -1 1454.43 304.671 4
 -7 9 0 26169.8 1339.03 5
 -7 9 0 23337.3 1198.76 4
 -7 9 1 36834.5 1481.55 4
 -7 9 1 33900.1 1571.73 5
 -7 9 2 -47.6342 152.775 5
 -7 9 2 8.60749 68.7449 4
 -7 9 3 18559.7 1173.42 5
 -7 9 3 19125.8 982.486 4
 -7 9 4 1091.41 277.295 5
 -7 9 5 15974.5 1126.68 5
 -7 9 6 8932.08 865.602 5
 -7 9 7 620.936 260.847 5
 -7 9 8 20324.1 1376.27 5
 -7 9 9 178.42 205.645 5
 -7 9 10 14451.6 1254.68 5
 -7 9 11 15673.1 1348.97 5
 -7 9 12 1071.29 352.572 5
 -7 9 13 10521.4 1179.87 5
 -7 10 -14 872.183 378.857 4
 -7 10 -13 1345.4 399.348 4
 -7 10 -12 599.605 298.064 4
 -7 10 -11 5511.63 788.77 4
 -7 10 -10 14873.3 1256.52 4
 -7 10 -9 50.351 170.659 4
 -7 10 -8 22568.8 1502.49 4
 -7 10 -7 4534.21 656.878 4
 -7 10 -6 21339.4 1236.08 5
 -7 10 -6 21055.8 1384.95 4
 -7 10 -5 51113.7 1976.91 5
 -7 10 -5 50276.4 2156.38 4
 -7 10 -4 14872 831.863 1
 -7 10 -4 15201.9 1013.65 5
 -7 10 -4 14027.4 1060.6 4
 -7 10 -3 17185.2 929.197 1
 -7 10 -3 18672.6 1127.27 5
 -7 10 -3 16158.2 1108.17 4
 -7 10 -2 5420.07 526.198 1
 -7 10 -2 5579.79 632.822 5
 -7 10 -2 5367.79 614.695 4
 -7 10 -1 17397.2 1135.01 5
 -7 10 -1 16630.8 970.609 1
 -7 10 -1 16528.8 1071.82 4
 -7 10 0 62605.4 2264.86 5
 -7 10 0 63559.6 2204.95 4
 -7 10 1 11298.3 843.341 4
 -7 10 1 12237.8 934.845 5
 -7 10 2 1457 299.427 4
 -7 10 2 2703.1 440.054 5
 -7 10 3 5202.89 541.486 4
 -7 10 3 5580.61 640.748 5
 -7 10 4 12452.8 1005.91 5
 -7 10 5 39500.3 1902.04 5
 -7 10 6 26779.9 1562.54 5
 -7 10 7 5388.61 701.625 5
 -7 10 8 3922.33 617.528 5
 -7 10 9 4972.88 702.142 5
 -7 10 10 25709 1726.65 5
 -7 10 11 8454.44 1010.02 5
 -7 10 12 3114.1 655.718 5
 -7 11 -14 1721.56 489.843 4
 -7 11 -13 5126.34 824.802 4
 -7 11 -12 -142.477 150.201 4
 -7 11 -11 6375.94 850.318 4
 -7 11 -10 5311.47 751.36 4
 -7 11 -9 2377.44 492.596 4
 -7 11 -8 11233.3 1083.03 4
 -7 11 -7 425.77 211.024 4
 -7 11 -6 15419.9 1053.6 5
 -7 11 -6 14962.3 1186.77 4
 -7 11 -5 22808.8 1288.46 5
 -7 11 -5 23059.5 1447.71 4
 -7 11 -4 3097.79 498.573 4
 -7 11 -4 3364.03 430.306 1
 -7 11 -4 3152.51 464.851 5
 -7 11 -3 14560.8 919.713 1
 -7 11 -3 14855.6 1026.09 5
 -7 11 -3 14755.8 1096.48 4
 -7 11 -2 -58.0655 101.891 1
 -7 11 -2 228.096 180.109 4
 -7 11 -1 56070.6 2165.09 5
 -7 11 -1 49990.6 1924.39 1
 -7 11 -1 50597.6 2069.93 4
 -7 11 0 26353.8 1374.22 1
 -7 11 0 29746.5 1505.02 4
 -7 11 0 29552.2 1508.58 5
 -7 11 1 482.143 227.007 5
 -7 11 1 579.075 223.782 4
 -7 11 2 4118.58 533.575 4
 -7 11 2 5068.11 625.821 5
 -7 11 3 -166.371 218.137 5
 -7 11 4 15739.2 1164.97 5
 -7 11 5 39943.6 1954.68 5
 -7 11 6 3337.28 554.864 5
 -7 11 7 4618.25 676.105 5
 -7 11 8 -165.935 236.036 5
 -7 11 9 10341.5 1063.84 5
 -7 11 10 16467.4 1382.97 5
 -7 11 11 738.636 323.106 5
 -7 12 -13 5243.73 833.577 4
 -7 12 -12 1529.94 443.612 4
 -7 12 -11 8563.86 1026.66 4
 -7 12 -10 328.052 269.031 4
 -7 12 -9 9696.09 1034.32 4
 -7 12 -8 6810.01 834.488 4
 -7 12 -7 2650.63 526.587 4
 -7 12 -6 16916.8 1123.9 5
 -7 12 -6 14885.9 1220.8 4
 -7 12 -5 -6.33271 143.407 4
 -7 12 -5 40.6879 160.043 5
 -7 12 -4 15548 978.253 1
 -7 12 -4 16393.4 1100.72 5
 -7 12 -4 15444.1 1195.02 4
 -7 12 -3 20260.4 1230.14 5
 -7 12 -3 18476.5 1295.6 4
 -7 12 -3 18142.2 1090.14 1
 -7 12 -2 278.942 160.671 4
 -7 12 -2 249.388 99.7725 1
 -7 12 -2 233.536 145.156 5
 -7 12 -1 23979.8 1409.29 5
 -7 12 -1 21460.2 1365.37 4
 -7 12 -1 21488.4 1279.23 1
 -7 12 0 2214.4 425.602 4
 -7 12 0 2299.14 411.861 5
 -7 12 0 1864.66 380.853 1
 -7 12 1 2152.55 419.272 5
 -7 12 1 1844.37 371.934 1
 -7 12 1 1425.94 323.846 4
 -7 12 2 9396.43 865.985 4
 -7 12 2 11268.9 975.167 5
 -7 12 3 375.185 189.217 5
 -7 12 4 10981.9 1000.8 5
 -7 12 5 18136 1337.64 5
 -7 12 6 -85.2405 174.947 5
 -7 12 7 3295.04 573.527 5
 -7 12 8 584.564 278.531 5
 -7 12 9 9880.96 1073.37 5
 -7 12 10 6082.7 866.559 5
 -7 13 -12 2370.72 588.445 4
 -7 13 -11 2862.3 621.509 4
 -7 13 -10 3039.6 609.105 4
 -7 13 -9 21177.4 1582.08 4
 -7 13 -8 5021.54 746.186 4
 -7 13 -7 3122.46 594.098 4
 -7 13 -6 4617.53 588.094 5
 -7 13 -6 4895.14 706.517 4
 -7 13 -5 2418.99 418.126 5
 -7 13 -5 2090.97 444.277 4
 -7 13 -4 25392.7 1608.58 4
 -7 13 -4 24470 1407 5
 -7 13 -3 14465.3 1188.94 4
 -7 13 -3 12781.3 979.775 1
 -7 13 -3 15101.9 1086.07 5
 -7 13 -2 5159.43 704.084 4
 -7 13 -2 4495.39 576.098 1
 -7 13 -2 4973.79 654.931 5
 -7 13 -1 7584.04 851.222 4
 -7 13 -1 8077.89 822.233 1
 -7 13 -1 8470.36 856.473 5
 -7 13 0 66.5584 131.136 4
 -7 13 0 -26.5834 168.305 5
 -7 13 0 137.279 146.946 1
 -7 13 1 27415.1 1591.8 1
 -7 13 1 31886.1 1691.56 5
 -7 13 2 7416.95 801.12 5
 -7 13 3 91.6985 91.8623 5
 -7 13 4 13588.5 1131.29 5
 -7 13 5 -151.385 139.805 5
 -7 13 6 13848.7 1215.14 5
 -7 13 7 9283.33 1003.37 5
 -7 13 8 243.326 85.4591 5
 -7 13 9 9764.72 1097.07 5
 -7 14 -11 498.406 243.96 4
 -7 14 -10 13079.1 1305.18 4
 -7 14 -9 20391.1 1598.73 4
 -7 14 -8 2828.76 590.605 4
 -7 14 -7 480.893 269.776 4
 -7 14 -6 -59.4301 133.464 4
 -7 14 -6 -160.551 220.502 5
 -7 14 -5 8539.81 831.015 5
 -7 14 -5 8392.57 961.552 4
 -7 14 -4 23419.5 1618.64 4
 -7 14 -4 25734.2 1456.41 5
 -7 14 -3 6050.39 681.587 5
 -7 14 -3 4988.66 727.32 4
 -7 14 -3 4985.2 635.493 1
 -7 14 -2 3110.06 572.192 4
 -7 14 -2 3483.56 530.047 1
 -7 14 -2 4404.53 614.571 5
 -7 14 -1 1298.33 335.171 5
 -7 14 -1 1057.68 347.772 4
 -7 14 -1 1241.26 345.571 1
 -7 14 0 9052.66 885.486 5
 -7 14 0 7460.42 897.174 4
 -7 14 0 8928.75 922.042 1
 -7 14 1 21026.1 1391.6 5
 -7 14 1 17848.7 1333.42 1
 -7 14 2 4489.92 647.437 5
 -7 14 2 3992.69 632.535 1
 -7 14 3 1520.29 359.354 5
 -7 14 4 3478.08 575.938 5
 -7 14 5 6879.79 847.027 5
 -7 14 6 14783.1 1291.32 5
 -7 14 7 4796.16 740.316 5
 -7 15 -10 17128.9 1554.2 4
 -7 15 -9 17801.8 1543.19 4
 -7 15 -8 -144.021 156.087 4
 -7 15 -7 2790.02 596.811 4
 -7 15 -6 529.37 217.589 4
 -7 15 -6 207.552 185.638 5
 -7 15 -5 8238.5 847.534 5
 -7 15 -5 5508.67 810.409 4
 -7 15 -4 13154.3 1257.05 4
 -7 15 -4 13439.9 1067.16 5
 -7 15 -3 -261.229 160.842 5
 -7 15 -3 -347.666 173.172 4
 -7 15 -3 122.577 150.817 1
 -7 15 -2 5250.75 778.41 4
 -7 15 -2 4565.38 645.388 1
 -7 15 -2 6899.08 796.351 5
 -7 15 -1 -37.8436 161.807 5
 -7 15 -1 60.4779 110.267 1
 -7 15 -1 -26.7042 103.567 4
 -7 15 0 11335.4 1031.55 5
 -7 15 0 10119.7 1017.34 1
 -7 15 1 5620.11 764.274 1
 -7 15 1 7270.16 825.021 5
 -7 15 2 175.781 103.345 1
 -7 15 2 -201.88 162.695 5
 -7 15 3 6480.1 804.98 5
 -7 15 4 546.995 198.049 5
 -7 15 5 5746.64 807.201 5
 -7 15 6 9116.39 1016.91 5
 -7 16 -8 4222.21 738.362 4
 -7 16 -7 8922.31 1089.02 4
 -7 16 -6 -155.203 225.321 5
 -7 16 -6 -21.089 134.272 4
 -7 16 -5 5035.41 831.835 4
 -7 16 -5 7020.57 782.671 5
 -7 16 -4 3463.32 660.254 4
 -7 16 -4 3474.27 543.28 5
 -7 16 -3 3719.27 586.23 5
 -7 16 -3 2098.68 527.448 4
 -7 16 -2 5026.8 815.011 4
 -7 16 -2 5271.58 697.713 5
 -7 16 -2 3875.63 597.075 1
 -7 16 -1 919.833 282.241 5
 -7 16 -1 644.823 229.833 4
 -7 16 0 14666.7 1208.2 5
 -7 16 0 12923.4 1210.52 1
 -7 16 1 -231.148 226.597 5
 -7 16 1 345.378 153.51 1
 -7 16 2 5409.48 741.327 5
 -7 16 2 5650.29 826.336 1
 -7 16 3 14092.2 1249.03 5
 -7 16 4 217.85 179.906 5
 -7 17 -6 1590.95 480.236 4
 -7 17 -5 3871.29 731.421 4
 -7 17 -4 -85.3897 115.69 4
 -7 17 -3 10362.8 1181.03 4
 -7 17 -2 6445.87 932.116 4
 -7 17 -2 5188.58 732.247 1
 -7 17 -1 987.406 305.969 1
 -7 17 0 2939.22 589.433 1
 -6 -12 1 9713.98 999.468 2
 -6 -12 2 3239.89 548.112 2
 -6 -11 -1 -311.337 273.898 2
 -6 -11 0 9385.3 1003.49 2
 -6 -11 1 31793.9 1806.22 2
 -6 -11 2 462.357 209.902 2
 -6 -11 3 2676.6 459.195 2
 -6 -10 -3 1699.87 456.855 2
 -6 -10 -2 5483.18 776.64 2
 -6 -10 -1 1119.63 367.672 2
 -6 -10 -1 846.474 237.821 3
 -6 -10 0 24915.4 1578.13 2
 -6 -10 1 12799.3 1083.88 2
 -6 -10 2 716.636 264.932 2
 -6 -10 3 1076.71 292.217 2
 -6 -9 -4 -29.3915 166.554 2
 -6 -9 -3 10493.7 1067 2
 -6 -9 -2 1631.56 330.048 3
 -6 -9 -2 1717.61 420.441 2
 -6 -9 -1 5748.11 733.803 2
 -6 -9 -1 6402.97 668.818 3
 -6 -9 0 19224.1 1323.41 2
 -6 -9 1 402.106 166.227 2
 -6 -9 2 6365.61 694.566 2
 -6 -9 3 1711.16 355.504 2
 -6 -8 -6 6897.33 913.44 2
 -6 -8 -5 2514.63 516.164 2
 -6 -8 -4 5262 597.002 3
 -6 -8 -4 5782.07 782.371 2
 -6 -8 -3 8033.81 727.611 3
 -6 -8 -3 8633.39 919.749 2
 -6 -8 -2 145.11 124.077 3
 -6 -8 -2 39.512 87.7064 2
 -6 -8 -1 7844.96 723.366 3
 -6 -8 -1 7713.93 821.953 2
 -6 -8 0 4792.51 618.852 2
 -6 -8 1 7871.59 771.237 2
 -6 -8 2 12111.8 924.755 2
 -6 -7 -8 16551.4 1435.89 2
 -6 -7 -7 -28.4801 170.865 2
 -6 -7 -6 4656.22 709.784 2
 -6 -7 -5 10.3357 104.503 3
 -6 -7 -5 -25.1154 155.184 2
 -6 -7 -4 8943.84 760.715 3
 -6 -7 -4 9467.03 962.672 2
 -6 -7 -3 6950.7 653.681 3
 -6 -7 -3 6922.31 793.328 2
 -6 -7 -2 409.919 157.769 3
 -6 -7 -2 186.084 134.953 2
 -6 -7 -1 25694.4 1298.37 3
 -6 -7 -1 27601.3 1516.38 2
 -6 -7 0 -137.778 143.122 2
 -6 -7 1 25619.7 1370.45 2
 -6 -7 2 26811.7 1325.19 2
 -6 -6 -9 17272.6 1453.76 2
 -6 -6 -8 1008.87 313.421 2
 -6 -6 -7 2830.82 550.932 2
 -6 -6 -6 2765.48 422.409 3
 -6 -6 -6 2696.92 523.437 2
 -6 -6 -5 8544.79 729.276 3
 -6 -6 -5 8290.71 886.387 2
 -6 -6 -4 18732.9 1084.17 3
 -6 -6 -4 20150 1353.49 2
 -6 -6 -3 14482.6 1113.05 2
 -6 -6 -3 13885 916.162 3
 -6 -6 -2 8711.75 824.619 2
 -6 -6 -2 8229.51 707.03 3
 -6 -6 -1 16747.5 1005.14 3
 -6 -6 -1 17700 1142.47 2
 -6 -6 0 4415.04 544.798 2
 -6 -6 1 40699.9 1686.51 2
 -6 -6 2 23977.6 1217.88 2
 -6 -5 -10 7902.18 965.803 2
 -6 -5 -9 9021.28 1002.92 2
 -6 -5 -8 991.012 356.068 2
 -6 -5 -8 933.847 244.592 3
 -6 -5 -7 15933.9 1289.29 2
 -6 -5 -7 16305.9 1008.94 3
 -6 -5 -6 1938.21 355.428 3
 -6 -5 -6 1701.77 382.418 2
 -6 -5 -5 9229.91 735.356 3
 -6 -5 -5 9911.74 926.419 2
 -6 -5 -4 17998.5 1038.46 3
 -6 -5 -4 18238.5 1233.43 2
 -6 -5 -3 11076.4 913.768 2
 -6 -5 -3 9073.31 712.164 3
 -6 -5 -2 13450.3 979.727 2
 -6 -5 -2 12536.4 833.738 3
 -6 -5 -1 1507.53 284.658 3
 -6 -5 -1 1907.65 367.005 2
 -6 -5 0 10456.3 807.472 2
 -6 -5 1 43051.3 1643.09 2
 -6 -4 -11 427.475 249.332 2
 -6 -4 -10 7754.66 919.528 2
 -6 -4 -9 2659.55 520.001 2
 -6 -4 -8 6557.84 796.236 2
 -6 -4 -7 26990.3 1311.62 3
 -6 -4 -7 28941.5 1649.57 2
 -6 -4 -6 1551.94 359.26 2
 -6 -4 -6 1601.11 311.795 3
 -6 -4 -5 2897.82 402.479 3
 -6 -4 -5 2890.94 482.679 2
 -6 -4 -4 18067.1 1170.22 2
 -6 -4 -4 17451.8 1002.65 3
 -6 -4 -3 1970.83 328.477 3
 -6 -4 -3 1752.81 356.154 2
 -6 -4 -2 40218.2 1529.76 3
 -6 -4 -2 43099.1 1745.5 2
 -6 -4 -1 14196.7 861.503 3
 -6 -4 -1 15747.8 986.762 2
 -6 -4 0 14586.3 912.703 2
 -6 -4 9 9069.7 549.409 5
 -6 -4 10 18501.5 887.32 5
 -6 -3 -13 9793.47 1042.85 2
 -6 -3 -12 10613.4 1066.67 2
 -6 -3 -11 2976.47 555.322 2
 -6 -3 -10 4169.5 646.163 2
 -6 -3 -9 755.974 278.1 2
 -6 -3 -8 33131.3 1755.83 2
 -6 -3 -7 20804.1 1109.06 3
 -6 -3 -7 19923.1 1305.05 2
 -6 -3 -6 13.3917 54.9746 3
 -6 -3 -6 -7.72342 162 2
 -6 -3 -5 12978.6 831.102 3
 -6 -3 -5 14369.4 1024.1 2
 -6 -3 -4 124.903 91.333 2
 -6 -3 -4 93.7509 87.0829 3
 -6 -3 -3 92442.9 2534.34 3
 -6 -3 -3 95288.6 2771.47 2
 -6 -3 -2 75312.7 2182.39 3
 -6 -3 -2 77332.5 2384.84 2
 -6 -3 -1 2984.73 372.423 3
 -6 -3 -1 3225.11 416.016 2
 -6 -3 0 5836.91 531.327 2
 -6 -3 4 3019.13 221.204 5
 -6 -3 5 10904.1 476.785 5
 -6 -3 6 1430.78 177.178 5
 -6 -3 7 35687.2 1101.53 5
 -6 -3 8 36685.3 1198.69 5
 -6 -3 9 1171.78 224.072 5
 -6 -3 10 21616.9 1038.91 5
 -6 -3 11 3868.72 460.308 5
 -6 -3 12 10537.1 807.203 5
 -6 -3 13 25403 1358.43 5
 -6 -3 14 565.366 245.566 5
 -6 -3 15 18470.1 1277.74 5
 -6 -3 16 3672.87 590.979 5
 -6 -3 17 2460.03 475.119 5
 -6 -3 18 8455.98 990.122 5
 -6 -2 -14 1180.07 316.811 2
 -6 -2 -13 16245.9 1650.3 4
 -6 -2 -13 15160.3 1248.22 2
 -6 -2 -12 567.268 261.399 4
 -6 -2 -12 201.177 157.03 2
 -6 -2 -11 4763.85 839.821 4
 -6 -2 -11 4244.37 639.365 2
 -6 -2 -10 6541.4 957.397 4
 -6 -2 -10 5668.62 704.849 2
 -6 -2 -9 10051.8 913.336 2
 -6 -2 -9 11576.2 1230.61 4
 -6 -2 -8 31603.6 1624.5 2
 -6 -2 -8 31338 2010.33 4
 -6 -2 -7 11409.3 920.085 2
 -6 -2 -7 11441.9 805.82 3
 -6 -2 -7 11472.8 1156.87 4
 -6 -2 -6 2816.29 554.427 4
 -6 -2 -6 2352.79 346.573 3
 -6 -2 -6 2566.22 442.547 2
 -6 -2 -5 13335.5 1179.48 4
 -6 -2 -5 11071.2 765.188 3
 -6 -2 -5 13111.7 928.389 2
 -6 -2 -4 30818.2 1294.1 3
 -6 -2 -4 30932 1420.09 2
 -6 -2 -4 30787.5 1798.1 4
 -6 -2 -3 104277 2695.87 3
 -6 -2 -3 105371 2873.71 2
 -6 -2 -2 13762.1 797.481 3
 -6 -2 -2 13684.2 856.833 2
 -6 -2 -1 1030.72 209.344 3
 -6 -2 -1 1287.39 257.443 2
 -6 -2 0 2044.1 291.381 3
 -6 -2 3 29339.7 875.431 5
 -6 -2 4 2166.22 221.119 5
 -6 -2 5 7064.47 425.221 5
 -6 -2 6 12861.6 623.033 5
 -6 -2 7 51489.5 1480.06 5
 -6 -2 8 17440.1 842.227 5
 -6 -2 9 8979.14 633.515 5
 -6 -2 10 19137.5 1040.35 5
 -6 -2 11 895.543 235.357 5
 -6 -2 12 20586.5 1197.14 5
 -6 -2 13 29349.4 1514.45 5
 -6 -2 14 291.633 187.437 5
 -6 -2 15 10727.9 995.756 5
 -6 -2 16 364.161 208.693 5
 -6 -2 17 13108 1210.67 5
 -6 -2 18 12249.2 1192.69 5
 -6 -2 19 -992.524 355.298 5
 -6 -1 -15 535.467 308.99 2
 -6 -1 -14 5011.44 861.264 4
 -6 -1 -14 4336.58 638.054 2
 -6 -1 -13 5182.92 887.213 4
 -6 -1 -13 5330.89 698.316 2
 -6 -1 -12 68.588 99.9471 4
 -6 -1 -12 529.447 194.107 2
 -6 -1 -11 9638 908.187 2
 -6 -1 -11 10524 1192.82 4
 -6 -1 -10 1525.23 450.619 4
 -6 -1 -10 1900.5 399.526 2
 -6 -1 -9 16448.7 1423.88 4
 -6 -1 -9 15353.8 1084.38 2
 -6 -1 -8 10227.9 1084.19 4
 -6 -1 -8 11055.3 895.459 2
 -6 -1 -7 273.702 238.588 4
 -6 -1 -7 108.841 102.708 2
 -6 -1 -6 16433.4 1020.24 2
 -6 -1 -6 15793.5 913.394 3
 -6 -1 -6 17111.2 1318.89 4
 -6 -1 -5 8761.93 906.535 4
 -6 -1 -5 8370.79 700.242 2
 -6 -1 -5 7738.91 609.785 3
 -6 -1 -4 17747.3 926.978 3
 -6 -1 -4 18361.6 1298.1 4
 -6 -1 -4 18123.5 1014.03 2
 -6 -1 -3 27572.2 1171.39 3
 -6 -1 -3 28225.9 1575.07 4
 -6 -1 -3 28055.4 1240.38 2
 -6 -1 -2 551.84 213.542 4
 -6 -1 -2 414.038 119.376 2
 -6 -1 -2 433.718 140.316 3
 -6 -1 -1 21391.3 1278.12 4
 -6 -1 -1 20680.3 954.91 3
 -6 -1 0 170.188 76.97 3
 -6 -1 1 27469 903.683 5
 -6 -1 2 129988 2614.1 5
 -6 -1 3 3944.94 325.143 5
 -6 -1 4 19188.5 769.352 5
 -6 -1 5 12920.7 640.748 5
 -6 -1 6 23527.8 939.264 5
 -6 -1 7 65140.8 1819.44 5
 -6 -1 8 3475.24 383.165 5
 -6 -1 9 7979.51 637.513 5
 -6 -1 10 4861.55 539.521 5
 -6 -1 11 1521.31 309.454 5
 -6 -1 12 32555.3 1564.82 5
 -6 -1 13 17391.7 1185.23 5
 -6 -1 14 284.609 191.124 5
 -6 -1 15 10120 976.432 5
 -6 -1 16 643.194 291.129 5
 -6 -1 17 19893.7 1514.96 5
 -6 -1 18 9791.93 1098.57 5
 -6 -1 19 642.58 336.334 5
 -6 0 -14 6162.75 728.284 2
 -6 0 -14 6773.92 1028.25 4
 -6 0 -13 594.498 294.165 4
 -6 0 -13 805.76 225.601 2
 -6 0 -12 8722.13 836.314 2
 -6 0 -12 9544.46 1137.33 4
 -6 0 -11 22801.4 1354.52 2
 -6 0 -11 27273.3 1885.84 4
 -6 0 -10 83.5914 183.167 4
 -6 0 -10 152.373 94.374 2
 -6 0 -9 11926.2 908.674 2
 -6 0 -9 12541.5 1194.26 4
 -6 0 -8 353.181 175.303 4
 -6 0 -8 270.589 90.8782 2
 -6 0 -7 13719.9 1158.07 4
 -6 0 -7 11389.3 836.207 2
 -6 0 -6 24480.4 1133.95 3
 -6 0 -6 25236.7 1233.54 2
 -6 0 -6 26262.2 1586.79 4
 -6 0 -5 3282.29 391.701 3
 -6 0 -5 3896.77 571.204 4
 -6 0 -5 3285.75 411.93 2
 -6 0 -4 28854.2 1182.59 3
 -6 0 -4 32226.5 1671.57 4
 -6 0 -4 28611.4 1238.73 2
 -6 0 -3 9136.62 823.986 4
 -6 0 -3 8524.45 608.857 3
 -6 0 -3 8351.44 615.532 2
 -6 0 -2 21842.5 1250.79 4
 -6 0 -2 21682.8 989.62 3
 -6 0 -1 29693.5 1153.81 3
 -6 0 -1 30707.7 1450.1 4
 -6 0 0 5037.99 388.116 5
 -6 0 0 5452.31 445.751 3
 -6 0 0 5264.17 556.552 4
 -6 0 1 53483.6 1878.08 4
 -6 0 1 52743.3 1438.22 5
 -6 0 1 54232 1588.54 3
 -6 0 2 27215.6 1007.58 5
 -6 0 3 3919.57 339.253 5
 -6 0 4 80752 1988.01 5
 -6 0 5 4199.78 387.418 5
 -6 0 6 68203.2 1874.31 5
 -6 0 7 53351.3 1694.5 5
 -6 0 8 484.087 160.443 5
 -6 0 9 14721.3 920.644 5
 -6 0 10 7030.89 658.358 5
 -6 0 11 15931.6 1057.91 5
 -6 0 12 30529.3 1551.13 5
 -6 0 13 1647.42 374.287 5
 -6 0 14 18151.3 1305.34 5
 -6 0 15 5779.38 766.28 5
 -6 0 16 4417.7 680.986 5
 -6 0 17 15188.4 1346.98 5
 -6 0 18 3010.72 620.139 5
 -6 0 19 2535.46 588.541 5
 -6 1 -15 597.284 252.285 4
 -6 1 -14 7318.66 1043.59 4
 -6 1 -14 6935.6 747.188 2
 -6 1 -13 511.075 303.824 4
 -6 1 -13 511.15 195.094 2
 -6 1 -12 28770 1489.45 2
 -6 1 -12 29393.2 1969.86 4
 -6 1 -11 31520 1537.14 2
 -6 1 -11 34972 2052.38 4
 -6 1 -10 1224.33 281.532 2
 -6 1 -10 939.513 325.303 4
 -6 1 -9 6968.86 834.408 4
 -6 1 -9 6856.9 653.66 2
 -6 1 -8 319.251 266.216 4
 -6 1 -8 366.233 160.706 2
 -6 1 -7 13003.3 841.731 2
 -6 1 -7 13467.7 1095.16 4
 -6 1 -6 37026.8 1456.47 2
 -6 1 -6 37981 1849.59 4
 -6 1 -5 277.703 80.1555 4
 -6 1 -5 220.246 57.1968 2
 -6 1 -5 380.341 147.285 3
 -6 1 -4 31887.5 1235.8 3
 -6 1 -4 32600.9 803.405 1
 -6 1 -4 33378 1597.3 4
 -6 1 -3 1308.45 289.733 4
 -6 1 -3 1172.71 218.032 3
 -6 1 -2 43620.3 1425.15 3
 -6 1 -2 43579 1734.26 4
 -6 1 -1 53911.4 1532.04 5
 -6 1 -1 53425.2 1609.62 3
 -6 1 -1 53349.8 1893.35 4
 -6 1 0 306.031 144.981 4
 -6 1 0 380.428 121.103 5
 -6 1 0 505.592 134.027 3
 -6 1 1 38527.7 1252.1 5
 -6 1 1 37252.1 1233.27 3
 -6 1 1 38185.5 1443.63 4
 -6 1 2 1070.3 221.349 4
 -6 1 2 1020.47 184.839 5
 -6 1 2 1180.09 190.658 3
 -6 1 3 71577.5 1867.97 5
 -6 1 4 75733.1 1991.79 5
 -6 1 5 462.527 127.609 5
 -6 1 6 29985.4 1197.38 5
 -6 1 7 1077.37 214.747 5
 -6 1 8 27902.5 1257.04 5
 -6 1 9 41955.6 1687.75 5
 -6 1 10 1162.43 289.708 5
 -6 1 11 24857.1 1374.95 5
 -6 1 12 9046.42 860.99 5
 -6 1 13 14322.7 1121.53 5
 -6 1 14 24141.7 1546.58 5
 -6 1 15 944.358 327.167 5
 -6 1 16 5054.26 785.559 5
 -6 1 17 5997.74 862.036 5
 -6 1 18 2781.69 637.698 5
 -6 2 -15 5350.07 891.373 4
 -6 2 -14 3576.34 682.772 4
 -6 2 -13 5316.91 589.503 2
 -6 2 -13 4707.5 759.406 4
 -6 2 -12 35072.3 1597.44 2
 -6 2 -12 37415.8 2153.48 4
 -6 2 -11 5105.68 762.112 4
 -6 2 -11 5019.95 553.722 2
 -6 2 -10 5242.78 553.922 2
 -6 2 -10 5217.65 727.173 4
 -6 2 -9 3543.44 565.533 4
 -6 2 -9 4169.59 476.501 2
 -6 2 -8 959.123 263.701 4
 -6 2 -8 935.224 235.207 2
 -6 2 -7 34953.9 1763.46 4
 -6 2 -7 30682.4 1282.36 2
 -6 2 -6 15944.1 1142.41 4
 -6 2 -5 5117.72 612.461 4
 -6 2 -4 40704.2 1407.76 3
 -6 2 -4 39998.8 1727.43 4
 -6 2 -3 7598.32 548.331 3
 -6 2 -3 6760.46 647.155 4
 -6 2 -2 81676.6 2116.16 3
 -6 2 -2 85737.8 2147.4 5
 -6 2 -2 84623.2 2501.84 4
 -6 2 -1 68791.4 1826.82 5
 -6 2 -1 67995.9 2099.61 4
 -6 2 -1 65108.4 1803.71 3
 -6 2 0 14474.7 732.625 5
 -6 2 0 14967.9 851.031 4
 -6 2 0 14883.1 732.325 3
 -6 2 1 52289.3 1564.41 5
 -6 2 1 49580.3 1449.51 3
 -6 2 1 49858.4 1599.68 4
 -6 2 2 1550.88 214.942 3
 -6 2 2 1786.18 248.259 5
 -6 2 2 1555.78 237.348 4
 -6 2 3 68751.2 1728.78 3
 -6 2 3 66163.1 1857.05 5
 -6 2 3 67092.7 1731.45 4
 -6 2 4 35025.1 1275.3 5
 -6 2 5 9735.48 648.143 5
 -6 2 6 6640.44 562.201 5
 -6 2 7 13919.9 861.778 5
 -6 2 8 47331.9 1764 5
 -6 2 9 66749.7 2278.06 5
 -6 2 10 -39.3769 146.02 5
 -6 2 11 1249.43 331.869 5
 -6 2 12 5337.02 659.685 5
 -6 2 13 44405.3 2096.52 5
 -6 2 14 8180.35 886.842 5
 -6 2 15 351.505 205.763 5
 -6 2 16 7807.2 961.179 5
 -6 2 17 -98.8596 213.047 5
 -6 2 18 13830.3 1385.41 5
 -6 3 -16 1637.66 528.482 4
 -6 3 -15 7117.46 980.006 4
 -6 3 -14 1276.51 397.378 4
 -6 3 -13 9072.04 1058.86 4
 -6 3 -12 9268.07 741.308 2
 -6 3 -12 9224.82 1034.35 4
 -6 3 -11 3920.97 629.635 4
 -6 3 -11 3501.32 426.939 2
 -6 3 -10 11993.7 792.195 2
 -6 3 -10 12506.5 1121.35 4
 -6 3 -9 397.49 198.59 4
 -6 3 -9 420.049 140.758 2
 -6 3 -8 14951.8 1130.11 4
 -6 3 -7 25387 1456.68 4
 -6 3 -6 1275.91 297.881 4
 -6 3 -5 41461 1760.46 4
 -6 3 -4 10171.1 796.948 4
 -6 3 -3 25108.3 1027.88 3
 -6 3 -3 25071.7 1232 4
 -6 3 -2 53683.1 1622.55 5
 -6 3 -2 52871.8 1566.83 3
 -6 3 -2 52954.2 1810.43 4
 -6 3 -1 2236.97 317.366 4
 -6 3 -1 2122.72 267.48 3
 -6 3 -1 2374.63 299.242 5
 -6 3 0 45519.9 1518.95 5
 -6 3 0 42313.3 1293.59 3
 -6 3 0 41407.1 1447.44 4
 -6 3 1 4244.91 358.472 3
 -6 3 1 4174.05 400.145 5
 -6 3 1 4039.08 384.637 4
 -6 3 2 32749.9 1060.96 3
 -6 3 2 31168.8 1081.43 4
 -6 3 2 31530.9 1210.5 5
 -6 3 3 77175.8 1822.35 3
 -6 3 3 74912.6 1779.48 4
 -6 3 3 77068.8 2089.93 5
 -6 3 4 15559.8 864.7 5
 -6 3 4 16390.9 609.177 4
 -6 3 4 17369.2 704.167 3
 -6 3 5 8269.19 610.057 5
 -6 3 6 4300.72 472.544 5
 -6 3 7 3740.54 453.436 5
 -6 3 8 93690.3 2739.62 5
 -6 3 9 10205.5 837.337 5
 -6 3 10 1063.05 285.709 5
 -6 3 11 1815.12 387.534 5
 -6 3 12 15623 1198.57 5
 -6 3 13 31070.8 1778.38 5
 -6 3 14 3103.2 571.221 5
 -6 3 15 3759.6 641.554 5
 -6 3 16 4074.13 737.471 5
 -6 3 17 2160.23 555.841 5
 -6 4 -16 8189.59 1072.97 4
 -6 4 -15 6338.76 927.345 4
 -6 4 -14 -140.71 88.5804 4
 -6 4 -13 10211.1 1102.47 4
 -6 4 -12 381.358 224.914 4
 -6 4 -11 17150.7 1316.21 4
 -6 4 -10 20990.6 1428.78 4
 -6 4 -9 565.564 205.338 4
 -6 4 -8 5720.64 670.687 4
 -6 4 -7 13454.3 1010.43 4
 -6 4 -6 8411.47 755.391 4
 -6 4 -5 33334.7 1521.66 4
 -6 4 -4 -96.8836 89.2794 4
 -6 4 -3 41800.7 1459.96 5
 -6 4 -3 43528.8 1629.63 4
 -6 4 -2 3401.52 376.499 5
 -6 4 -2 3243.56 399.08 4
 -6 4 -1 34357.7 1156.12 3
 -6 4 -1 34788.5 1297.78 5
 -6 4 -1 35786.3 1336.94 4
 -6 4 0 66637.5 1928.8 5
 -6 4 0 65006.2 1851.65 4
 -6 4 0 64540.1 1686.1 3
 -6 4 1 7527.69 572.542 5
 -6 4 1 8198.32 483.691 3
 -6 4 1 7964.44 529.506 4
 -6 4 2 73704 1745.15 3
 -6 4 2 71705.2 2058.99 5
 -6 4 2 72159.3 1782.68 4
 -6 4 3 31178.1 988.572 3
 -6 4 3 30960.8 953.879 4
 -6 4 3 30611.6 1267.93 5
 -6 4 4 19508.6 720.042 3
 -6 4 4 18429 974.211 5
 -6 4 4 17588.3 611.02 4
 -6 4 5 54065.3 1736.43 5
 -6 4 5 54932.8 1261.18 3
 -6 4 6 5102.99 530.567 5
 -6 4 6 5260.65 334.334 3
 -6 4 7 22429.1 744.205 3
 -6 4 7 21241.3 1162.64 5
 -6 4 8 31890.2 1497.45 5
 -6 4 9 3087.36 469.981 5
 -6 4 10 21137.8 1315.79 5
 -6 4 11 5972.73 733.256 5
 -6 4 12 32747.4 1809.93 5
 -6 4 13 11173.3 1068.27 5
 -6 4 14 908.518 334.65 5
 -6 4 15 8252.04 991.291 5
 -6 4 16 525.708 323.719 5
 -6 4 17 8144.59 1082.36 5
 -6 5 -16 15005.4 1448.74 4
 -6 5 -15 4935.68 798.981 4
 -6 5 -14 3935.08 688.056 4
 -6 5 -13 5435.59 766.711 4
 -6 5 -12 2554.44 527.981 4
 -6 5 -11 30031.6 1737.75 4
 -6 5 -10 13867.6 1131.27 4
 -6 5 -9 246.053 154.462 4
 -6 5 -8 12798.8 1008.02 4
 -6 5 -7 12055.8 951.461 4
 -6 5 -6 64713.4 2280.88 4
 -6 5 -5 57657.3 2055.74 4
 -6 5 -4 4727.34 466.599 5
 -6 5 -4 5199.43 544.718 4
 -6 5 -3 6648.81 552.531 5
 -6 5 -3 7449.75 630.701 4
 -6 5 -2 -2.9945 90.558 5
 -6 5 -2 -31.1225 54.9417 4
 -6 5 -1 87925.8 2420.4 5
 -6 5 -1 81792.9 2282.78 4
 -6 5 0 86509.6 2351.11 5
 -6 5 0 88121.3 2263.56 4
 -6 5 1 5172.45 423.067 4
 -6 5 1 5296.6 491.124 5
 -6 5 2 55806.2 1423.1 3
 -6 5 2 55802.6 1816.45 5
 -6 5 2 57400.8 1552.65 4
 -6 5 3 599.953 175.99 5
 -6 5 3 698.511 132.286 3
 -6 5 3 725.011 137.23 4
 -6 5 4 63598.4 1464.31 3
 -6 5 4 63451.6 2018.72 5
 -6 5 4 62514 1433.71 4
 -6 5 5 46363.8 1107.77 3
 -6 5 5 44114.9 1642.36 5
 -6 5 6 312.563 131.494 5
 -6 5 6 299.221 63.6161 3
 -6 5 7 14867.2 525.329 3
 -6 5 7 13339.9 933.497 5
 -6 5 8 4442.95 553.361 5
 -6 5 9 21523.4 1308.27 5
 -6 5 10 37951.1 1852.91 5
 -6 5 11 -49.4503 118.441 5
 -6 5 12 14504.3 1234.97 5
 -6 5 13 5652.79 818.802 5
 -6 5 14 1821.46 472.81 5
 -6 5 15 11372.6 1211.28 5
 -6 5 16 644.036 206.847 5
 -6 6 -16 8796.16 1081.16 4
 -6 6 -15 228.64 237.91 4
 -6 6 -14 6225.41 843.339 4
 -6 6 -13 1012.68 312.847 4
 -6 6 -12 13711.2 1195.73 4
 -6 6 -11 30456.6 1744.81 4
 -6 6 -10 2030.34 426.651 4
 -6 6 -9 22683.2 1405.75 4
 -6 6 -8 6856 741.362 4
 -6 6 -7 53962.2 2132.5 4
 -6 6 -6 125502 3500.26 4
 -6 6 -5 19406.7 1135.31 4
 -6 6 -4 13.6174 107.623 4
 -6 6 -4 89.1094 77.5678 5
 -6 6 -3 883.097 202.182 5
 -6 6 -3 609.498 172.712 4
 -6 6 -2 12626 786.774 5
 -6 6 -2 11682.1 767.244 4
 -6 6 -1 66452.6 2047.97 5
 -6 6 -1 60799.7 1902.85 4
 -6 6 0 27089.5 1201.5 5
 -6 6 0 25485 1085.91 4
 -6 6 1 120.59 85.7591 4
 -6 6 1 159.343 95.2792 5
 -6 6 2 13492.2 841.264 5
 -6 6 2 12980.3 668.428 4
 -6 6 3 22638.4 1134.67 5
 -6 6 3 22026.1 835.501 4
 -6 6 4 59222.1 2019.12 5
 -6 6 4 59704.6 1463.23 4
 -6 6 5 15135.9 961.937 5
 -6 6 5 14692.2 559.21 4
 -6 6 6 1067.99 273.116 5
 -6 6 7 27961 1424.58 5
 -6 6 8 287.123 165.212 5
 -6 6 9 20499.2 1308.15 5
 -6 6 10 45225.2 2081.41 5
 -6 6 11 596.41 218.817 5
 -6 6 12 8374.21 937.589 5
 -6 6 13 1599.84 456.616 5
 -6 6 14 19196.1 1582.46 5
 -6 6 15 13390.4 1389.75 5
 -6 7 -16 1293.21 340.599 4
 -6 7 -15 542.84 254.346 4
 -6 7 -14 15126.7 1341.76 4
 -6 7 -13 816.829 296.867 4
 -6 7 -12 10271.4 1041.09 4
 -6 7 -11 14854.2 1199.49 4
 -6 7 -10 168.558 134.373 4
 -6 7 -9 26240.1 1548.96 4
 -6 7 -8 11741.4 982.768 4
 -6 7 -7 26680.9 1449.91 4
 -6 7 -6 52313.7 2030.55 4
 -6 7 -5 1069.83 142.204 1
 -6 7 -5 936.238 215.906 5
 -6 7 -5 743.407 242.966 4
 -6 7 -4 6192.73 563.765 5
 -6 7 -4 5420.92 334.411 1
 -6 7 -3 8188.43 647.219 5
 -6 7 -3 8542.02 703.427 4
 -6 7 -2 24551.3 1174.36 5
 -6 7 -2 21902.5 1108.85 4
 -6 7 -1 45329.7 1672.14 5
 -6 7 -1 43527.1 1555.1 4
 -6 7 0 16683.7 955.532 5
 -6 7 0 15580.9 849.24 4
 -6 7 1 22031.6 1113.28 5
 -6 7 1 20308 951.765 4
 -6 7 2 714.454 171.785 4
 -6 7 2 465.578 138.281 5
 -6 7 3 38449.8 1577.57 5
 -6 7 3 38396.9 1248.38 4
 -6 7 4 41713.5 1259.96 4
 -6 7 4 42118.1 1690.34 5
 -6 7 5 1148.6 261.223 5
 -6 7 5 1295.29 190.362 4
 -6 7 6 18337.1 1128.82 5
 -6 7 7 6282.98 680.182 5
 -6 7 8 657.87 242.052 5
 -6 7 9 37877.1 1858.13 5
 -6 7 10 7191.84 810.13 5
 -6 7 11 5204.3 724.743 5
 -6 7 12 8217.4 964.684 5
 -6 7 13 3175.07 630.097 5
 -6 7 14 29823.4 2004.14 5
 -6 7 15 5375.14 863.005 5
 -6 8 -16 -47.5045 108.242 4
 -6 8 -15 10593.1 1146.62 4
 -6 8 -14 20013.2 1546.58 4
 -6 8 -13 -13.8845 153.781 4
 -6 8 -12 5704.1 776.279 4
 -6 8 -11 2748.78 538.53 4
 -6 8 -10 3666.75 585.296 4
 -6 8 -9 30674.4 1661.02 4
 -6 8 -8 11129.5 953.064 4
 -6 8 -7 11646.8 957.365 4
 -6 8 -6 3571.37 289.049 1
 -6 8 -6 3453.66 493.597 4
 -6 8 -5 15653.8 941.896 5
 -6 8 -5 13939.1 629.582 1
 -6 8 -5 15329.1 1029.76 4
 -6 8 -4 41373.2 1716.46 4
 -6 8 -4 41069.8 1246.32 1
 -6 8 -4 41170.6 1596.23 5
 -6 8 -3 6349.87 462.59 1
 -6 8 -3 7659.44 640.149 5
 -6 8 -3 7582.7 662.371 4
 -6 8 -2 21679.1 1132.82 4
 -6 8 -2 22312.3 957.329 1
 -6 8 -1 43188.7 1656.14 5
 -6 8 -1 39859.9 1398.44 1
 -6 8 -1 41682.8 1578.31 4
 -6 8 0 2719.13 368.579 4
 -6 8 0 2613.21 383.412 5
 -6 8 1 72387.9 2086.97 4
 -6 8 1 68364.3 2238.72 5
 -6 8 2 1387.51 252.07 4
 -6 8 2 1429.79 288.277 5
 -6 8 3 20920.6 968.194 4
 -6 8 3 19485.7 1123.74 5
 -6 8 4 9435.72 782.876 5
 -6 8 5 6581.09 665.303 5
 -6 8 6 12659.1 952.078 5
 -6 8 7 393.857 135.872 5
 -6 8 8 27039.3 1540.04 5
 -6 8 9 25826.2 1553 5
 -6 8 10 1693.96 408.561 5
 -6 8 11 14268.4 1216.8 5
 -6 8 12 4402.26 713.692 5
 -6 8 13 12272.4 1224.97 5
 -6 8 14 8526.99 1070.06 5
 -6 9 -16 670.641 281.254 4
 -6 9 -15 23131 1725.67 4
 -6 9 -14 7210.39 954.655 4
 -6 9 -13 737.403 339.779 4
 -6 9 -12 4818.35 732.73 4
 -6 9 -11 2343.49 477.941 4
 -6 9 -10 20159.4 1392.89 4
 -6 9 -9 22800 1457.97 4
 -6 9 -8 73.9637 91.4792 4
 -6 9 -7 13033.7 1030.58 4
 -6 9 -6 562.846 141.737 1
 -6 9 -6 556.901 235.931 4
 -6 9 -5 35489.6 1223.69 1
 -6 9 -5 37573 1550.17 5
 -6 9 -5 35720.3 1670.83 4
 -6 9 -4 29628.4 1128.51 1
 -6 9 -4 28385.4 1332.47 5
 -6 9 -4 29482.1 1445.82 4
 -6 9 -3 355.232 153.254 4
 -6 9 -3 316.739 119.311 5
 -6 9 -3 435.451 119.752 1
 -6 9 -2 7161.58 675.837 4
 -6 9 -2 6824.92 559.2 1
 -6 9 -1 264.218 73.175 5
 -6 9 -1 261.844 186.678 4
 -6 9 -1 199.175 94.712 1
 -6 9 0 44158.6 1682.14 4
 -6 9 0 43762.2 1623.21 1
 -6 9 0 44551.6 1743.48 5
 -6 9 1 25438.7 1220.03 4
 -6 9 1 22413.4 1152.62 1
 -6 9 1 23687.3 1239.5 5
 -6 9 2 4452.13 535.513 5
 -6 9 3 17176.5 1088.97 5
 -6 9 4 95.753 75.7025 5
 -6 9 5 27272 1470.34 5
 -6 9 6 16339.4 1125.18 5
 -6 9 7 537.25 185.807 5
 -6 9 8 25899.2 1542.53 5
 -6 9 9 751.511 300.524 5
 -6 9 10 14329 1215.01 5
 -6 9 11 19963.9 1501.9 5
 -6 9 12 -55.0301 211.513 5
 -6 9 13 6443.1 903.222 5
 -6 10 -15 18508.7 1546.93 4
 -6 10 -14 652.12 219.539 4
 -6 10 -13 3218.3 620.742 4
 -6 10 -12 790.711 291.352 4
 -6 10 -11 11932.6 1209.78 4
 -6 10 -10 18487.7 1373.93 4
 -6 10 -9 4446.86 647.205 4
 -6 10 -8 13483.7 1101.42 4
 -6 10 -7 10061.1 922.104 4
 -6 10 -6 4310.99 518.019 5
 -6 10 -6 3947.2 401.007 1
 -6 10 -6 4112.12 577.251 4
 -6 10 -5 41723.5 1689.61 5
 -6 10 -5 40062.9 1437.89 1
 -6 10 -5 39520.4 1813.8 4
 -6 10 -4 1737.85 271.653 1
 -6 10 -4 2190.99 390.567 4
 -6 10 -4 2063.18 344.52 5
 -6 10 -3 12309.1 943.339 4
 -6 10 -3 11860 773.418 1
 -6 10 -3 12549.5 874.872 5
 -6 10 -2 6699.38 674.157 4
 -6 10 -2 6532.13 580.295 1
 -6 10 -2 7562.37 714.848 5
 -6 10 -1 10624.1 814.806 5
 -6 10 -1 9382.42 807.969 4
 -6 10 -1 8675.95 696.385 1
 -6 10 0 66648.7 2241.29 1
 -6 10 0 68807.9 2303.95 5
 -6 10 0 67665.5 2328.51 4
 -6 10 1 18032.8 1088.02 1
 -6 10 1 18695.9 1126.28 5
 -6 10 2 917.884 233.615 5
 -6 10 2 1216 282.483 1
 -6 10 3 13595.9 1007.59 5
 -6 10 4 7841.34 766.373 5
 -6 10 5 46682.9 2018.15 5
 -6 10 6 26165.9 1505.3 5
 -6 10 7 797.267 211.364 5
 -6 10 8 4209.52 625.948 5
 -6 10 9 5568.27 749.92 5
 -6 10 10 20026.5 1504.45 5
 -6 10 11 9009.8 1015.86 5
 -6 10 12 243.307 127.469 5
 -6 11 -15 6429.91 927.189 4
 -6 11 -14 2910.03 653.462 4
 -6 11 -13 6261.98 870.378 4
 -6 11 -12 -23.7642 89.2893 4
 -6 11 -11 5665.57 799.011 4
 -6 11 -10 7667.27 912.823 4
 -6 11 -9 1467.8 386.672 4
 -6 11 -8 16527 1255.8 4
 -6 11 -7 237.015 186.338 4
 -6 11 -6 22661.6 1237.01 5
 -6 11 -6 21127.1 1057.83 1
 -6 11 -6 21521.1 1384.47 4
 -6 11 -5 28424.6 1568.55 4
 -6 11 -5 27591.2 1248.18 1
 -6 11 -5 27305.4 1365.83 5
 -6 11 -4 3618.55 445.006 1
 -6 11 -4 3455.5 465.292 5
 -6 11 -4 3409.03 539.223 4
 -6 11 -3 16368.9 1142.44 4
 -6 11 -3 14901.3 938.152 1
 -6 11 -3 16927.3 1070.2 5
 -6 11 -2 9807.04 886.582 4
 -6 11 -2 8656.66 723.584 1
 -6 11 -1 22492.3 1226.49 1
 -6 11 -1 24660.8 1314.45 5
 -6 11 0 38101.7 1684.32 1
 -6 11 0 39290.5 1745.16 5
 -6 11 1 10069.6 837.143 5
 -6 11 1 9207.84 824.743 1
 -6 11 2 10083 855.711 5
 -6 11 2 8951.59 824.772 1
 -6 11 3 6746.22 712.503 5
 -6 11 3 6732.24 714.159 1
 -6 11 4 6714 729.037 5
 -6 11 5 54898.5 2266.07 5
 -6 11 6 14374.8 1131.45 5
 -6 11 7 2183.86 446.01 5
 -6 11 8 733.222 294.353 5
 -6 11 9 5914.81 784.428 5
 -6 11 10 17733.2 1437.21 5
 -6 11 11 3397.7 638.472 5
 -6 12 -14 9609.76 1113.51 4
 -6 12 -13 7500.35 988.749 4
 -6 12 -12 340.18 263.232 4
 -6 12 -11 5813.18 822.951 4
 -6 12 -10 1704.3 454.018 4
 -6 12 -9 10872.3 1068.19 4
 -6 12 -8 14102.1 1200.6 4
 -6 12 -7 -238.34 218.708 4
 -6 12 -6 20658.5 1407.37 4
 -6 12 -6 18667.1 1058.89 1
 -6 12 -6 21583.8 1239.3 5
 -6 12 -5 214.848 143.909 4
 -6 12 -5 24.1803 161.548 1
 -6 12 -5 179.78 93.715 5
 -6 12 -4 5744.24 712.545 4
 -6 12 -4 5587.94 610.356 5
 -6 12 -4 5185.84 574.014 1
 -6 12 -3 29594.5 1671.95 4
 -6 12 -3 27298.3 1381.74 1
 -6 12 -3 30255.7 1493.16 5
 -6 12 -2 368.415 181.585 5
 -6 12 -2 86.9644 154.065 4
 -6 12 -2 165.396 88.0718 1
 -6 12 -1 15643.8 1072.74 1
 -6 12 -1 19033.4 1171.96 5
 -6 12 0 9598.28 837.757 5
 -6 12 0 8809.12 826.668 1
 -6 12 1 5666.21 674.972 1
 -6 12 1 5402.04 652.461 5
 -6 12 2 19661 1264.19 5
 -6 12 2 18622 1261.1 1
 -6 12 3 6067.49 718.27 1
 -6 12 3 5734.75 668.281 5
 -6 12 4 6754.12 768.249 5
 -6 12 5 17155.4 1262.52 5
 -6 12 6 303.801 172.289 5
 -6 12 7 10511.9 1034.42 5
 -6 12 8 206.139 101.351 5
 -6 12 9 5393.88 775.834 5
 -6 12 10 10367 1103.5 5
 -6 13 -13 7823.47 1050.45 4
 -6 13 -12 219.893 135.752 4
 -6 13 -11 4157.17 731.348 4
 -6 13 -10 76.4664 174.532 4
 -6 13 -9 15376.1 1302 4
 -6 13 -8 13608.1 1202.78 4
 -6 13 -7 399.653 245.033 4
 -6 13 -6 6320.93 805.717 4
 -6 13 -6 7441.56 713.783 5
 -6 13 -5 492.361 173.997 5
 -6 13 -5 523.58 214.425 4
 -6 13 -5 657.438 253.7 1
 -6 13 -4 20708.2 1445.87 4
 -6 13 -4 18459.4 1170.36 1
 -6 13 -4 22336.6 1294.92 5
 -6 13 -3 29016.2 1728.2 4
 -6 13 -3 24620.3 1391.36 1
 -6 13 -3 29796.7 1496.21 5
 -6 13 -2 58.3037 96.09 5
 -6 13 -2 82.8256 106.404 1
 -6 13 -1 12824 987.358 5
 -6 13 -1 11213.1 949.152 1
 -6 13 0 138.365 145.941 1
 -6 13 0 -147.408 180.598 5
 -6 13 1 27944.4 1536.59 5
 -6 13 1 27640.7 1599.81 1
 -6 13 2 12577.7 1074.49 1
 -6 13 2 12911.4 1045.17 5
 -6 13 3 20.5193 141.841 1
 -6 13 3 253.09 147.42 5
 -6 13 4 8975.93 904.879 5
 -6 13 5 1268.34 319.464 5
 -6 13 6 13134.8 1161.85 5
 -6 13 7 14964.1 1272.74 5
 -6 13 8 80.2672 105.216 5
 -6 13 9 2492.81 539.447 5
 -6 14 -12 6007.93 898.562 4
 -6 14 -11 962.287 298.991 4
 -6 14 -10 9187.35 1071.67 4
 -6 14 -9 20476.2 1562.31 4
 -6 14 -8 7533.46 934.496 4
 -6 14 -7 1004.81 365.765 4
 -6 14 -6 1901.35 373.693 5
 -6 14 -6 1605.4 438.536 4
 -6 14 -5 5065.69 761.2 4
 -6 14 -5 4522.15 581.177 1
 -6 14 -5 6060.6 673.045 5
 -6 14 -4 25403.2 1695.11 4
 -6 14 -4 24208.7 1407.09 1
 -6 14 -4 25002.7 1404.15 5
 -6 14 -3 14559.4 1049.82 5
 -6 14 -3 12248.6 1002.37 1
 -6 14 -2 143.958 76.5814 5
 -6 14 -2 248.447 157.711 1
 -6 14 -1 3153.64 534.322 1
 -6 14 -1 3715.6 551.466 5
 -6 14 0 7358.22 822.228 1
 -6 14 0 7303.2 770.386 5
 -6 14 1 20983.3 1450.85 1
 -6 14 1 20793 1366.05 5
 -6 14 2 4712.76 637.578 5
 -6 14 2 3980.84 630.48 1
 -6 14 3 1113.92 318.464 5
 -6 14 3 1161.55 356.463 1
 -6 14 4 4685.42 663.373 5
 -6 14 5 1966.36 446.757 5
 -6 14 6 21230.2 1520.9 5
 -6 14 7 8343.85 969.494 5
 -6 14 8 1400.2 421.27 5
 -6 15 -11 519.124 285.163 4
 -6 15 -10 11030.6 1201.33 4
 -6 15 -9 16824.4 1479.04 4
 -6 15 -8 361.359 172.068 4
 -6 15 -7 2301.68 517.781 4
 -6 15 -6 53.5886 84.9817 5
 -6 15 -6 -12.2502 185.39 4
 -6 15 -5 4335.81 748.69 4
 -6 15 -5 3754.42 557.563 1
 -6 15 -5 5108.37 630.74 5
 -6 15 -4 13765.6 1300.86 4
 -6 15 -4 15398 1109.23 5
 -6 15 -4 12360.9 1042.36 1
 -6 15 -3 -176.179 161.352 5
 -6 15 -3 -242.881 276.147 1
 -6 15 -2 4975.92 665.271 5
 -6 15 -2 4112.91 630.095 1
 -6 15 -1 115.847 157.776 1
 -6 15 -1 241.237 172.12 5
 -6 15 0 12517.5 1039.91 5
 -6 15 0 12664.2 1122.79 1
 -6 15 1 8417.77 949.463 1
 -6 15 1 9056.24 902.87 5
 -6 15 2 -124.096 150.369 5
 -6 15 2 59.3319 172.35 1
 -6 15 3 5568.7 730.252 5
 -6 15 3 5181.2 773.831 1
 -6 15 4 1163.88 332.364 1
 -6 15 4 1241.35 373.452 5
 -6 15 5 4109.09 654.547 5
 -6 15 6 16024.1 1352.51 5
 -6 16 -9 509.918 214.324 4
 -6 16 -8 5881.18 873.603 4
 -6 16 -7 13286.7 1333.26 4
 -6 16 -6 1074.71 370.513 4
 -6 16 -5 5291.4 828.223 4
 -6 16 -4 3437.09 555.393 1
 -6 16 -3 3374.08 571.079 1
 -6 16 -2 10675.5 1039.1 1
 -6 16 -1 111.588 100.328 1
 -6 16 0 12588.5 1184.12 1
 -6 16 1 2805.21 567.938 1
 -6 16 2 1667.17 473.38 1
 -6 17 -6 359.864 164.309 4
 -6 17 -5 5451.45 884.76 4
 -6 17 -4 744.632 268.845 1
 -6 17 -3 9205.72 989.039 1
 -6 17 -2 10255 1075.63 1
 -6 17 -1 410.965 313.335 1
 -5 -12 -1 4669.06 713.228 2
 -5 -12 0 1425.62 402.854 2
 -5 -12 1 21946.4 1459.4 2
 -5 -12 2 14148.4 1128.44 2
 -5 -11 -3 1322.78 376.727 2
 -5 -11 -2 5968.07 799.756 2
 -5 -11 -1 340.622 207.682 2
 -5 -11 0 8800.55 908.001 2
 -5 -11 1 26787.7 1568.51 2
 -5 -11 2 2984.11 487.73 2
 -5 -11 3 1060.76 280.753 2
 -5 -11 4 303.072 164.716 2
 -5 -10 -5 13545.5 1284.09 2
 -5 -10 -4 8883.73 1011.16 2
 -5 -10 -3 652.073 282.804 2
 -5 -10 -2 7441.39 870.114 2
 -5 -10 -1 102.914 110.759 2
 -5 -10 0 15453.5 1173 2
 -5 -10 1 17123.4 1197.61 2
 -5 -10 2 4.34442 90.681 2
 -5 -10 3 5743.25 628.767 2
 -5 -10 4 38.582 68.1525 2
 -5 -9 -6 4566.41 743.646 2
 -5 -9 -5 7228.94 903.312 2
 -5 -9 -4 30.9418 173.92 2
 -5 -9 -3 7818.62 691.292 3
 -5 -9 -3 7424.55 872.489 2
 -5 -9 -2 2823.24 412.981 3
 -5 -9 -2 3376.04 562.417 2
 -5 -9 -1 1179.82 335.779 2
 -5 -9 0 15525.8 1118.4 2
 -5 -9 1 1579.16 333.366 2
 -5 -9 2 11800 905.212 2
 -5 -9 3 4733.46 561.202 2
 -5 -9 4 2094.51 354.89 2
 -5 -8 -8 21465.2 1655.88 2
 -5 -8 -7 2997.48 587.479 2
 -5 -8 -6 3804.33 678.697 2
 -5 -8 -5 2335.54 492.308 2
 -5 -8 -4 4725.9 523.106 3
 -5 -8 -4 4900.47 701.707 2
 -5 -8 -3 11366.2 816.856 3
 -5 -8 -3 10290.8 974.542 2
 -5 -8 -2 844.941 275.908 2
 -5 -8 -2 1466.89 292.353 3
 -5 -8 -1 6130.62 687.489 2
 -5 -8 0 15848.2 1086.7 2
 -5 -8 1 13362.8 954.694 2
 -5 -8 2 28645.3 1381.35 2
 -5 -8 3 5406.52 560.569 2
 -5 -7 -9 13724.6 1293.71 2
 -5 -7 -8 19372.4 1525.46 2
 -5 -7 -7 411.058 281.83 2
 -5 -7 -6 4136.79 651.895 2
 -5 -7 -5 162.544 185.992 2
 -5 -7 -5 36.2762 72.3144 3
 -5 -7 -4 19503.3 1063.52 3
 -5 -7 -4 22007.6 1436.73 2
 -5 -7 -3 14559.9 903.093 3
 -5 -7 -3 14834 1121.31 2
 -5 -7 -2 1190.05 256.616 3
 -5 -7 -2 1207.5 314.667 2
 -5 -7 -1 17819.7 1140.63 2
 -5 -7 0 6508.97 657.685 2
 -5 -7 1 18071.5 1069.73 2
 -5 -7 2 34400.4 1462.79 2
 -5 -7 3 73.419 46.4333 2
 -5 -6 -10 414.469 216.359 2
 -5 -6 -9 25797.5 1753.1 2
 -5 -6 -8 8007.19 922.23 2
 -5 -6 -7 1268.08 271.603 3
 -5 -6 -7 811.736 277.298 2
 -5 -6 -6 16687.7 962.17 3
 -5 -6 -6 13577.9 1156.82 2
 -5 -6 -5 2005.1 325.563 3
 -5 -6 -5 1960.79 422.593 2
 -5 -6 -4 18274.5 1240.65 2
 -5 -6 -4 19315.5 1032.4 3
 -5 -6 -3 22317.4 1098.31 3
 -5 -6 -3 23754 1366.79 2
 -5 -6 -2 486.789 192.756 2
 -5 -6 -2 275.655 101.898 3
 -5 -6 -1 8191.06 730.144 2
 -5 -6 0 101.262 82.603 2
 -5 -6 1 57403.7 1946.5 2
 -5 -6 2 10377.5 733.682 2
 -5 -6 3 353.076 133.232 2
 -5 -5 -11 4803.63 754.352 2
 -5 -5 -10 3993.46 674.86 2
 -5 -5 -9 17121 1356.67 2
 -5 -5 -8 1509.49 406.23 2
 -5 -5 -7 13229.6 850.263 3
 -5 -5 -7 13572.5 1133.9 2
 -5 -5 -6 16147.2 940.988 3
 -5 -5 -6 15008.3 1150.44 2
 -5 -5 -5 1186.65 241.962 3
 -5 -5 -5 1291.38 330.797 2
 -5 -5 -4 25115.5 1166.89 3
 -5 -5 -4 26620.9 1442.56 2
 -5 -5 -3 17157 925.55 3
 -5 -5 -3 16059.3 1065.52 2
 -5 -5 -2 9381.2 672.223 3
 -5 -5 -2 9184.93 761.1 2
 -5 -5 -1 28108.5 1317.01 2
 -5 -5 0 14373 885.172 2
 -5 -5 1 59145.9 1896.78 2
 -5 -5 2 9553.08 658.375 2
 -5 -4 -13 3073.63 565.758 2
 -5 -4 -12 10886.7 1103.84 2
 -5 -4 -11 638.329 267.826 2
 -5 -4 -10 5088.12 713.869 2
 -5 -4 -9 1652.65 398.349 2
 -5 -4 -8 8554.36 872.898 2
 -5 -4 -7 37847.4 1485.45 3
 -5 -4 -7 36343.9 1811.04 2
 -5 -4 -6 2250.31 341.679 3
 -5 -4 -6 2873.96 481.655 2
 -5 -4 -5 10105.8 700.453 3
 -5 -4 -5 10731.6 885.791 2
 -5 -4 -4 22139.7 1058.43 3
 -5 -4 -4 22930.9 1263.29 2
 -5 -4 -3 4148.63 426.21 3
 -5 -4 -3 4109.68 503.103 2
 -5 -4 -2 70384.2 2032.38 3
 -5 -4 -2 71699.6 2234.62 2
 -5 -4 -1 27882.5 1251.17 2
 -5 -4 0 10384.4 712.458 2
 -5 -4 1 18596.8 939.734 2
 -5 -4 5 5748.97 256.962 5
 -5 -4 6 46152.6 1059.78 5
 -5 -4 7 1791.98 190.118 5
 -5 -4 8 22546.6 836.668 5
 -5 -4 9 4503.52 395.989 5
 -5 -4 10 18889.4 905.757 5
 -5 -4 11 15694.6 884.385 5
 -5 -4 12 3617.05 449.664 5
 -5 -4 13 23912 1270.3 5
 -5 -4 14 6183.15 673.406 5
 -5 -4 15 8010.41 817.867 5
 -5 -4 16 16203.5 1237.62 5
 -5 -4 17 1675.05 401.644 5
 -5 -4 18 4322.1 709.377 5
 -5 -3 -14 178.514 93.889 2
 -5 -3 -13 11658.7 1112.22 2
 -5 -3 -12 6319.57 805.686 2
 -5 -3 -11 343.989 191.908 2
 -5 -3 -10 5515.18 708.719 2
 -5 -3 -9 2.92856 87.7147 2
 -5 -3 -8 34768.3 1733.34 2
 -5 -3 -7 24887.6 1144.7 3
 -5 -3 -7 25619.8 1420.68 2
 -5 -3 -6 7317.04 708.408 2
 -5 -3 -6 7934.27 610.913 3
 -5 -3 -5 14371.5 820.206 3
 -5 -3 -5 14028.8 967.944 2
 -5 -3 -4 1475.1 265.129 3
 -5 -3 -4 1763.81 319.922 2
 -5 -3 -3 72072.3 2032.55 3
 -5 -3 -3 71190.7 2202.38 2
 -5 -3 -2 84114.4 2213.25 3
 -5 -3 -2 86119.3 2403.84 2
 -5 -3 -1 8621.91 636.386 2
 -5 -3 -1 8446.52 589.034 3
 -5 -3 0 1693.2 275.31 2
 -5 -3 1 226.976 106.064 2
 -5 -3 3 57943.3 1186.94 5
 -5 -3 4 19740.9 619.227 5
 -5 -3 5 17091 583.02 5
 -5 -3 6 1488.42 172.692 5
 -5 -3 7 28422.4 952.418 5
 -5 -3 8 71241.6 1866.93 5
 -5 -3 9 1481.11 243.74 5
 -5 -3 10 16607.1 891.774 5
 -5 -3 11 12160.2 809.018 5
 -5 -3 12 3348.18 444.811 5
 -5 -3 13 33597.1 1584.25 5
 -5 -3 14 2313.2 439.756 5
 -5 -3 15 9394.33 910.818 5
 -5 -3 16 9846.16 975.634 5
 -5 -3 17 696.5 289.622 5
 -5 -3 18 12798.1 1211.5 5
 -5 -3 19 2486.42 550.703 5
 -5 -3 20 1636.46 443.47 5
 -5 -2 -15 1426.95 395.749 2
 -5 -2 -14 1011.09 338.749 4
 -5 -2 -14 1272.32 361.006 2
 -5 -2 -13 18823.2 1686.15 4
 -5 -2 -13 15670.8 1244.01 2
 -5 -2 -12 2184.81 552.472 4
 -5 -2 -12 1312.64 375.677 2
 -5 -2 -11 1731.17 463.139 4
 -5 -2 -11 1160.5 309.462 2
 -5 -2 -10 14915.1 1120.87 2
 -5 -2 -10 15645 1398.91 4
 -5 -2 -9 1570.05 425.221 4
 -5 -2 -9 965.619 261.896 2
 -5 -2 -8 35991 2029.79 4
 -5 -2 -8 32648.4 1608.13 2
 -5 -2 -7 4350.85 447.654 3
 -5 -2 -7 5061.29 720.553 4
 -5 -2 -7 4657.82 572.615 2
 -5 -2 -6 10112.5 677.599 3
 -5 -2 -6 9903.89 979.334 4
 -5 -2 -6 9642.3 775.947 2
 -5 -2 -5 2886.47 348.213 3
 -5 -2 -5 3413.7 550.475 4
 -5 -2 -5 3639.88 458.389 2
 -5 -2 -4 8196.24 828.582 4
 -5 -2 -4 7513.86 628.253 2
 -5 -2 -4 7482.05 567.246 3
 -5 -2 -3 90657.6 2988.68 4
 -5 -2 -3 88164.5 2427.72 2
 -5 -2 -3 91001.5 2306.09 3
 -5 -2 -2 42162.4 1407.38 3
 -5 -2 -2 44006.4 1519.22 2
 -5 -2 -1 871.135 172.282 3
 -5 -2 -1 1059.35 200.095 2
 -5 -2 0 8264.31 564.566 2
 -5 -2 2 49910.6 1150.72 5
 -5 -2 3 106080 2101.03 5
 -5 -2 4 3293.01 252.408 5
 -5 -2 5 20689.6 732.93 5
 -5 -2 6 35.3506 31.1045 5
 -5 -2 7 66371.1 1737.11 5
 -5 -2 8 55984.1 1680.9 5
 -5 -2 9 206.167 100.026 5
 -5 -2 10 10986.6 748.814 5
 -5 -2 11 7910.42 668.183 5
 -5 -2 12 11654.1 877.209 5
 -5 -2 13 36768.8 1706.79 5
 -5 -2 14 462.36 222.727 5
 -5 -2 15 14058.5 1142.12 5
 -5 -2 16 2010.52 454.828 5
 -5 -2 17 15845.2 1329.85 5
 -5 -2 18 12450.3 1212.91 5
 -5 -2 19 1677.17 466.766 5
 -5 -1 -15 3113.84 651.792 4
 -5 -1 -15 2809.08 509.805 2
 -5 -1 -14 3935.91 761.827 4
 -5 -1 -14 3691.87 587.303 2
 -5 -1 -13 6479.34 754.879 2
 -5 -1 -13 6554.09 955.361 4
 -5 -1 -12 124.669 163.844 4
 -5 -1 -12 157.785 102.427 2
 -5 -1 -11 19162.9 1244.95 2
 -5 -1 -11 22067 1649.76 4
 -5 -1 -10 7148.03 909.536 4
 -5 -1 -10 7303.93 736.76 2
 -5 -1 -9 11529.2 1108.59 4
 -5 -1 -9 8887.48 787.576 2
 -5 -1 -8 30586.6 1463.18 2
 -5 -1 -8 32552.5 1847.6 4
 -5 -1 -7 137.795 112.874 4
 -5 -1 -7 80.9799 110.639 2
 -5 -1 -6 13227.7 774.525 3
 -5 -1 -6 13226.8 862.814 2
 -5 -1 -6 13892.9 1102.54 4
 -5 -1 -5 25263.6 1066.94 3
 -5 -1 -5 24897 1159.01 2
 -5 -1 -5 25474.2 1468.75 4
 -5 -1 -4 2556.71 310.548 3
 -5 -1 -4 2688.11 447.935 4
 -5 -1 -4 2876.14 362.481 2
 -5 -1 -3 42293.4 1422.94 3
 -5 -1 -3 45191.7 1868.96 4
 -5 -1 -3 44287 1500.15 2
 -5 -1 -2 24.0076 68.244 4
 -5 -1 -2 111.073 57.0422 3
 -5 -1 -2 76.8516 56.849 2
 -5 -1 -1 46501.5 1405.44 3
 -5 -1 -1 48018.2 1815.62 4
 -5 -1 -1 43729.1 1417.46 2
 -5 -1 0 25772.2 985.668 3
 -5 -1 1 241.226 77.9817 5
 -5 -1 2 105446 2156.88 5
 -5 -1 3 75727.6 1699.01 5
 -5 -1 4 15998.1 656.59 5
 -5 -1 5 24724.4 871.596 5
 -5 -1 6 1036.49 178.251 5
 -5 -1 7 74242.8 1970.7 5
 -5 -1 8 21330.5 996.557 5
 -5 -1 9 3224.26 395.431 5
 -5 -1 10 8535.43 691.108 5
 -5 -1 11 76.7321 51.1838 5
 -5 -1 12 47342.7 1905.63 5
 -5 -1 13 25623 1420.91 5
 -5 -1 14 4438.04 617.142 5
 -5 -1 15 19092 1356.63 5
 -5 -1 16 1332.38 430.132 5
 -5 -1 17 14655.3 1276.15 5
 -5 -1 18 12449.4 1230.92 5
 -5 -1 19 -218.064 232.58 5
 -5 0 -16 16994.5 1637.19 4
 -5 0 -15 3739.4 743.049 4
 -5 0 -15 2225.91 424.754 2
 -5 0 -14 6385.33 927.72 4
 -5 0 -14 6976.78 764.175 2
 -5 0 -13 2134.41 560.604 4
 -5 0 -13 2098.96 387.943 2
 -5 0 -12 14060.6 1304.51 4
 -5 0 -12 12537.7 967.165 2
 -5 0 -11 40257.9 1766.24 2
 -5 0 -11 42857.1 2265.63 4
 -5 0 -10 6562.33 657.951 2
 -5 0 -10 7196.96 857.431 4
 -5 0 -9 13026 1135.69 4
 -5 0 -9 13282.5 911.066 2
 -5 0 -8 2933.09 523.088 4
 -5 0 -8 3126.36 423.599 2
 -5 0 -7 14401.3 881.381 2
 -5 0 -7 14827.8 1124.29 4
 -5 0 -6 40223.5 1493.94 2
 -5 0 -6 40298.3 1850.71 4
 -5 0 -5 29088 1138.56 3
 -5 0 -5 26750.1 1149.79 2
 -5 0 -5 28465.4 1481.21 4
 -5 0 -4 11600.1 668.013 3
 -5 0 -4 11852.2 895.023 4
 -5 0 -4 11102.1 690.308 2
 -5 0 -3 11091.8 636.113 3
 -5 0 -3 11516 855.754 4
 -5 0 -3 11218.3 666.857 2
 -5 0 -2 29944 1084.78 3
 -5 0 -2 29405.6 1349.48 4
 -5 0 -1 44472.5 1350 3
 -5 0 -1 47126.1 1701.33 4
 -5 0 0 2037.44 221.26 5
 -5 0 0 2138.43 254.542 3
 -5 0 0 1900.05 314.489 4
 -5 0 1 13690.6 796.623 4
 -5 0 1 12665.8 577.107 5
 -5 0 2 46010.9 1249.81 5
 -5 0 3 11448.6 562.464 5
 -5 0 4 75042.7 1819.99 5
 -5 0 5 13186.9 658.421 5
 -5 0 6 6802.25 493.965 5
 -5 0 7 40935.7 1426.09 5
 -5 0 8 320.182 128.716 5
 -5 0 9 10311 731.525 5
 -5 0 10 12235.9 846.146 5
 -5 0 11 9718.29 794.46 5
 -5 0 12 31338.6 1560.68 5
 -5 0 13 1762.39 374.138 5
 -5 0 14 13944.3 1116.88 5
 -5 0 15 7401.42 837.057 5
 -5 0 16 2104.19 482.211 5
 -5 0 17 8618.55 1000.46 5
 -5 0 18 1342.18 388.795 5
 -5 0 19 5092.33 799.783 5
 -5 1 -16 18435.2 1683.84 4
 -5 1 -15 249.431 211.898 4
 -5 1 -14 10362.9 882.021 2
 -5 1 -14 12304.3 1257.39 4
 -5 1 -13 65.2789 93.5159 4
 -5 1 -13 21.4595 162.629 2
 -5 1 -12 27603 1386.41 2
 -5 1 -12 28471.9 1804.04 4
 -5 1 -11 54810.9 1994.55 2
 -5 1 -11 57939.1 2572.85 4
 -5 1 -10 1130.37 321.425 4
 -5 1 -10 1212.03 247.709 2
 -5 1 -9 6569.17 590.933 2
 -5 1 -9 6929.14 789.391 4
 -5 1 -8 739.899 239.27 4
 -5 1 -8 646.659 182.951 2
 -5 1 -7 19058.2 959.265 2
 -5 1 -7 19030.4 1235.07 4
 -5 1 -6 37086 906.052 1
 -5 1 -6 38651.2 1742.39 4
 -5 1 -6 38768.7 1380.6 2
 -5 1 -5 6978.7 292.002 1
 -5 1 -5 7509.89 552.229 2
 -5 1 -5 7473.62 703.03 4
 -5 1 -4 27336.3 662.727 1
 -5 1 -4 30434.2 1121.76 3
 -5 1 -4 29289.8 1379.84 4
 -5 1 -4 28780.6 1088.71 2
 -5 1 -3 8938.24 707.474 4
 -5 1 -3 8935.54 563.587 3
 -5 1 -3 9175.69 333.124 1
 -5 1 -2 64176.3 1719.04 3
 -5 1 -2 65469.1 2041.88 4
 -5 1 -1 59715.2 1543.16 5
 -5 1 -1 59690.1 1618.52 3
 -5 1 -1 60896.3 1873.18 4
 -5 1 0 6717.25 430.151 5
 -5 1 0 7006.82 460.013 3
 -5 1 0 6892.4 540.568 4
 -5 1 1 5600.3 464.121 4
 -5 1 1 5756.97 400.916 3
 -5 1 1 5522.84 407.741 5
 -5 1 2 14500.3 660.492 5
 -5 1 2 13831.2 701.89 4
 -5 1 3 105358 2349.38 5
 -5 1 4 53011.4 1509.91 5
 -5 1 5 15971 772.683 5
 -5 1 6 60767.8 1772.76 5
 -5 1 7 1045.58 219.806 5
 -5 1 8 24854 1168.67 5
 -5 1 9 82835.9 2438.35 5
 -5 1 10 5355.6 573.035 5
 -5 1 11 5085.53 593.239 5
 -5 1 12 4014.87 541.185 5
 -5 1 13 5166.84 650.19 5
 -5 1 14 17299.5 1262.91 5
 -5 1 15 2049.43 474.109 5
 -5 1 16 3250.74 597.757 5
 -5 1 17 6283.93 857.755 5
 -5 1 18 1824.76 491.379 5
 -5 2 -16 2913.51 621.635 4
 -5 2 -15 4961.17 789.176 4
 -5 2 -14 8233.95 1001.81 4
 -5 2 -13 2815.22 558.642 4
 -5 2 -13 2917 428.7 2
 -5 2 -12 40724.1 1639.28 2
 -5 2 -12 41697.5 2178.85 4
 -5 2 -11 10604.5 765.764 2
 -5 2 -11 10517.7 1025.48 4
 -5 2 -10 6748.59 580.194 2
 -5 2 -10 6149.48 741.332 4
 -5 2 -9 8405.44 629.87 2
 -5 2 -9 8923.55 867.503 4
 -5 2 -8 5334.81 482.202 2
 -5 2 -8 4894.76 633.38 4
 -5 2 -7 39222.1 1375.74 2
 -5 2 -7 40438.7 1803.49 4
 -5 2 -6 36879.1 1285.61 2
 -5 2 -6 37709.1 1662 4
 -5 2 -5 249.026 138.293 4
 -5 2 -5 181.197 98.016 2
 -5 2 -4 55750.5 1920.53 4
 -5 2 -3 295.761 151.903 4
 -5 2 -3 114.053 44.3007 3
 -5 2 -2 102331 2376.64 5
 -5 2 -2 104653 2343.68 3
 -5 2 -2 105704 2674.23 4
 -5 2 -1 5801.35 419.243 5
 -5 2 -1 6427.82 429.174 3
 -5 2 -1 6157.44 507.987 4
 -5 2 0 758.66 164.149 4
 -5 2 0 853.025 173.532 5
 -5 2 0 789.986 153.099 3
 -5 2 1 19357.1 812.164 5
 -5 2 1 19605.1 749.015 3
 -5 2 1 18758.1 811.896 4
 -5 2 2 5056.05 405.223 5
 -5 2 2 4918.06 345.949 3
 -5 2 2 4801.95 355.416 4
 -5 2 3 77269.5 1960.59 5
 -5 2 3 78580.4 1721.01 4
 -5 2 4 134152 2937.39 5
 -5 2 5 1320.31 232.898 5
 -5 2 6 77929.3 2162.86 5
 -5 2 7 795.564 183.989 5
 -5 2 8 99298.4 2746.74 5
 -5 2 9 89264.1 2643.59 5
 -5 2 10 1185.37 249.01 5
 -5 2 11 6491.09 690.473 5
 -5 2 12 1116.75 301.717 5
 -5 2 13 46185 2133.58 5
 -5 2 14 32525.8 1800.7 5
 -5 2 15 858.95 240.154 5
 -5 2 16 2810.33 567.104 5
 -5 2 17 1885.17 472.007 5
 -5 2 18 12959.7 1332.59 5
 -5 3 -17 4561.98 800.705 4
 -5 3 -16 401.556 200.329 4
 -5 3 -15 10854.6 1176.18 4
 -5 3 -14 4625.28 731.174 4
 -5 3 -13 9852.36 741.121 2
 -5 3 -13 9552.58 1027.75 4
 -5 3 -12 15330.8 903.664 2
 -5 3 -12 15620.1 1276.04 4
 -5 3 -11 -181.601 224.322 4
 -5 3 -11 180.106 117.394 2
 -5 3 -10 32002.1 1730.01 4
 -5 3 -10 33333.8 1304.34 2
 -5 3 -9 9696.34 646.465 2
 -5 3 -9 9451.28 866.113 4
 -5 3 -8 3469.65 501.165 4
 -5 3 -8 3253.79 358.331 2
 -5 3 -7 47552.6 1462.5 2
 -5 3 -7 50201.8 1966.82 4
 -5 3 -6 9586.91 777.332 4
 -5 3 -5 17926.2 1030.26 4
 -5 3 -4 5982.94 552.112 4
 -5 3 -3 47391.8 1628.8 4
 -5 3 -2 47603.4 1376.28 3
 -5 3 -2 50358.4 1481.4 5
 -5 3 -2 48455.7 1580.65 4
 -5 3 -1 1029.54 208.76 4
 -5 3 -1 1003.29 193.554 5
 -5 3 -1 689.263 148.571 3
 -5 3 0 37049.4 1098.96 3
 -5 3 0 35388.5 1192.59 4
 -5 3 1 10219.7 555.924 4
 -5 3 1 10903.5 621.425 5
 -5 3 1 10892.8 521.864 3
 -5 3 2 27126 1041.16 5
 -5 3 2 26927.7 861.082 4
 -5 3 2 27318 863.845 3
 -5 3 3 66094 1839.86 5
 -5 3 3 66270.5 1517.15 3
 -5 3 3 66975.5 1448.93 4
 -5 3 4 60111.4 1330.28 3
 -5 3 4 59377.8 1710.09 5
 -5 3 5 58544.8 1787.07 5
 -5 3 6 7047.6 577.139 5
 -5 3 7 5648.59 551.92 5
 -5 3 8 99484.8 2857.89 5
 -5 3 9 20916.9 1183.92 5
 -5 3 10 1098.45 275.615 5
 -5 3 11 11797.6 956.799 5
 -5 3 12 7743.06 812.394 5
 -5 3 13 33157.9 1797.87 5
 -5 3 14 13183.8 1156.13 5
 -5 3 15 372.487 180.228 5
 -5 3 16 4841.07 761.93 5
 -5 3 17 104.943 148.994 5
 -5 4 -17 745.426 251.058 4
 -5 4 -16 11432.1 1227.87 4
 -5 4 -15 14654.5 1339.52 4
 -5 4 -14 1234.28 369.717 4
 -5 4 -13 7405.16 884.856 4
 -5 4 -12 5268.9 487.984 2
 -5 4 -12 5414.33 718.68 4
 -5 4 -11 18196.3 892.655 2
 -5 4 -11 18834.1 1299.44 4
 -5 4 -10 23302.3 978.298 2
 -5 4 -10 23444.1 1417.25 4
 -5 4 -9 2456.89 420.961 4
 -5 4 -8 10137 847.465 4
 -5 4 -7 7964.09 716.052 4
 -5 4 -6 23326.6 1222.81 4
 -5 4 -5 71505.7 2225.46 4
 -5 4 -4 7716.8 617.98 4
 -5 4 -3 51958.2 1583.36 5
 -5 4 -3 53049.4 1726.44 4
 -5 4 -2 64005.3 1796.54 5
 -5 4 -2 65380.5 1891.72 4
 -5 4 -1 813.636 187.076 5
 -5 4 -1 540.244 169.193 4
 -5 4 0 95022.3 2347.45 5
 -5 4 0 96048.2 2074.38 3
 -5 4 0 98133.7 2266.76 4
 -5 4 1 30057.8 921.037 3
 -5 4 1 30182.9 1150.9 5
 -5 4 1 30407.9 1001.69 4
 -5 4 2 6132.12 359.329 3
 -5 4 2 5111.85 343.213 4
 -5 4 2 6101.92 495.21 5
 -5 4 3 42810.2 1076.96 3
 -5 4 3 42423.2 1064.23 4
 -5 4 3 42644.9 1438.09 5
 -5 4 4 3853.39 256.832 3
 -5 4 4 3134.14 360.386 5
 -5 4 4 2990.83 193.573 4
 -5 4 5 49037.7 1679.42 5
 -5 4 5 49539 1137.57 3
 -5 4 6 10234 409.152 3
 -5 4 6 10564.3 742.099 5
 -5 4 7 5287.95 554.447 5
 -5 4 8 24556.6 1305.08 5
 -5 4 9 77.4429 61.8762 5
 -5 4 10 19946.8 1245.91 5
 -5 4 11 11281.4 958.582 5
 -5 4 12 4780.29 644.269 5
 -5 4 13 9612.93 967.968 5
 -5 4 14 1899.28 478.605 5
 -5 4 15 5679.47 805.292 5
 -5 4 16 4836.1 767.634 5
 -5 4 17 3933.81 718.048 5
 -5 5 -17 568.116 347.629 4
 -5 5 -16 7602.46 975.346 4
 -5 5 -15 4700.08 725.33 4
 -5 5 -14 -123.182 173.103 4
 -5 5 -13 6028.34 797.061 4
 -5 5 -12 1209.08 338.798 4
 -5 5 -11 41028.7 1979.34 4
 -5 5 -10 6291.05 716.434 4
 -5 5 -9 8250.83 800.521 4
 -5 5 -8 16007.6 1078.59 4
 -5 5 -7 8456.6 752.708 4
 -5 5 -6 59914 2103.87 4
 -5 5 -5 144667 3529.83 4
 -5 5 -4 1297.16 256.493 4
 -5 5 -4 1021.01 197.663 5
 -5 5 -3 780.719 201.546 4
 -5 5 -3 1184.09 218.066 5
 -5 5 -2 10203.4 640.403 5
 -5 5 -2 10290.3 672.561 4
 -5 5 -1 64708.8 1873.62 5
 -5 5 -1 63387.8 1802.41 4
 -5 5 0 163345 3555.83 5
 -5 5 0 165741 3376.99 4
 -5 5 1 36181.5 1335.69 5
 -5 5 1 36746.5 1147.08 4
 -5 5 2 8701.88 613.498 5
 -5 5 2 7911.35 449.725 4
 -5 5 3 33414.9 1293.57 5
 -5 5 3 31428.9 921.727 4
 -5 5 4 37185.1 1398.28 5
 -5 5 4 34769 921.046 4
 -5 5 5 45583.5 966.494 3
 -5 5 5 46758.9 1656.17 5
 -5 5 6 7408.7 293.418 4
 -5 5 6 8527.5 302.588 3
 -5 5 6 6365.52 291.103 4
 -5 5 6 9314.43 715.298 5
 -5 5 7 4545.24 198.654 4
 -5 5 7 4112.24 186.656 3
 -5 5 8 6890.57 696.635 5
 -5 5 9 6601.37 719.482 5
 -5 5 10 63520.5 2412.18 5
 -5 5 11 4496.73 618.437 5
 -5 5 12 8198.71 882.397 5
 -5 5 13 9347.63 983.806 5
 -5 5 14 1005.19 331.816 5
 -5 5 15 13315.7 1258.43 5
 -5 5 16 1280.55 391.872 5
 -5 6 -17 1199.32 340.098 4
 -5 6 -16 7127.72 939.305 4
 -5 6 -15 1379.74 417.439 4
 -5 6 -14 4957.56 724.614 4
 -5 6 -13 8772.44 943.599 4
 -5 6 -12 4904.31 678.999 4
 -5 6 -11 35424.5 1806.34 4
 -5 6 -10 1607.11 374.548 4
 -5 6 -9 13891.8 1045.34 4
 -5 6 -8 4692.72 582.008 4
 -5 6 -7 4183.44 510.292 4
 -5 6 -7 3833.98 221.796 1
 -5 6 -6 82835.9 1610.19 1
 -5 6 -6 82020 2526.25 4
 -5 6 -5 22852.1 665.078 1
 -5 6 -5 22730.6 1169.28 4
 -5 6 -4 1681.68 303.569 4
 -5 6 -4 1976.12 283.961 5
 -5 6 -4 1883.56 183.602 1
 -5 6 -3 2830.86 344.19 5
 -5 6 -3 3110.13 249.994 1
 -5 6 -3 2856 373.692 4
 -5 6 -2 4981.99 469.461 5
 -5 6 -2 4444.57 333.961 1
 -5 6 -2 4623.69 444.408 4
 -5 6 -1 88493.3 2349.81 5
 -5 6 -1 86276 1997.08 1
 -5 6 -1 86866.1 2231.08 4
 -5 6 0 60312.3 1834.87 5
 -5 6 0 60284.2 1708.51 4
 -5 6 1 5384.3 422.485 4
 -5 6 1 6217.97 532.035 5
 -5 6 2 37663.8 1188.77 4
 -5 6 2 36858.3 1414.15 5
 -5 6 3 4312.36 463.498 5
 -5 6 3 4434.57 360.802 4
 -5 6 4 90859 2501.29 5
 -5 6 5 28748.7 1321.94 5
 -5 6 6 2115.48 359.141 5
 -5 6 7 11793.7 891.876 5
 -5 6 8 2508.91 427.409 5
 -5 6 9 15831.2 1136.21 5
 -5 6 10 44201.7 2086.59 5
 -5 6 11 2570.55 505.101 5
 -5 6 12 15087.3 1250.67 5
 -5 6 13 235.261 165.813 5
 -5 6 14 16761.9 1398.35 5
 -5 6 15 17405.8 1514.28 5
 -5 6 16 488.71 279.259 5
 -5 7 -17 6252.86 897.503 4
 -5 7 -16 9197.72 1072.64 4
 -5 7 -15 1.31561 122.657 4
 -5 7 -14 23342 1617.38 4
 -5 7 -13 9283.89 965.581 4
 -5 7 -12 4180.45 628.23 4
 -5 7 -11 24151.5 1508.76 4
 -5 7 -10 -108.353 145.04 4
 -5 7 -9 29106.7 1526.8 4
 -5 7 -8 12160.5 959.717 4
 -5 7 -7 16152.3 606.927 1
 -5 7 -7 16191.6 1065.58 4
 -5 7 -6 43836.3 1764.59 4
 -5 7 -6 42122.9 1132.4 1
 -5 7 -5 476.772 204.323 4
 -5 7 -5 307.275 92.9185 5
 -5 7 -5 326.794 97.3507 1
 -5 7 -4 23059.8 832.685 1
 -5 7 -4 25823.3 1134.61 5
 -5 7 -4 25255 1211.48 4
 -5 7 -3 31520.3 1035.34 1
 -5 7 -3 32345.1 1286.79 5
 -5 7 -3 31904.1 1326.01 4
 -5 7 -2 14582.3 696.34 1
 -5 7 -2 14467.5 835.823 4
 -5 7 -1 69122.3 1993.05 4
 -5 7 -1 67509.6 2008.51 5
 -5 7 -1 65174.1 1788.11 1
 -5 7 0 26503.9 1104.77 4
 -5 7 0 25850.3 1058.46 1
 -5 7 0 24823.8 1138.54 5
 -5 7 1 12501.4 725.848 4
 -5 7 1 12329.7 735.419 1
 -5 7 1 12909 803.98 5
 -5 7 2 15577.1 913.877 5
 -5 7 3 30514.3 1324.38 5
 -5 7 4 46730.4 1721.96 5
 -5 7 5 9782.93 766.116 5
 -5 7 6 9625.32 788.606 5
 -5 7 7 6230.28 655.774 5
 -5 7 8 -63.3883 67.5985 5
 -5 7 9 58394.8 2345.36 5
 -5 7 10 6069.17 748.487 5
 -5 7 11 15474 1279.79 5
 -5 7 12 10460.6 1067.66 5
 -5 7 13 2775.87 546.569 5
 -5 7 14 24272.2 1767.87 5
 -5 7 15 10248.7 1202.51 5
 -5 8 -17 2837.77 602.092 4
 -5 8 -16 3012.89 598.353 4
 -5 8 -15 11349.8 1157.52 4
 -5 8 -14 29491.6 1824.9 4
 -5 8 -13 4802.37 711.466 4
 -5 8 -12 11629.9 1069.38 4
 -5 8 -11 7903.47 828.285 4
 -5 8 -10 8869.65 874.596 4
 -5 8 -9 49779.4 2130.34 4
 -5 8 -8 9241.43 505.85 1
 -5 8 -8 9928.77 866.941 4
 -5 8 -7 12521.3 606.513 1
 -5 8 -7 13231.2 968.777 4
 -5 8 -6 9662.88 552.907 1
 -5 8 -6 9291.71 774.857 4
 -5 8 -5 28610.5 1020.73 1
 -5 8 -5 31215.8 1298 5
 -5 8 -5 29886.8 1398.03 4
 -5 8 -4 68539.6 2053.87 5
 -5 8 -4 65233.1 1759.58 1
 -5 8 -4 68341.6 2209.79 4
 -5 8 -3 13873.1 724.763 1
 -5 8 -3 14880.7 926.629 4
 -5 8 -3 15076.8 863.102 5
 -5 8 -2 25102.9 1189.26 4
 -5 8 -2 23630 1009.82 1
 -5 8 -2 27590.7 1243.82 5
 -5 8 -1 12491.8 822.56 4
 -5 8 -1 13159.1 824.434 5
 -5 8 -1 12959.9 742.276 1
 -5 8 0 5503.93 535.037 5
 -5 8 0 4682.73 456.393 1
 -5 8 1 48564.9 1736.07 5
 -5 8 1 52062.5 1752.35 1
 -5 8 2 2222.5 347.749 5
 -5 8 2 2533.64 368.905 1
 -5 8 3 16536.9 988.261 5
 -5 8 4 11324.4 819.937 5
 -5 8 5 11809.3 880.358 5
 -5 8 6 24054.1 1317.13 5
 -5 8 7 9947.07 855.383 5
 -5 8 8 22242 1370 5
 -5 8 9 36420.5 1840.7 5
 -5 8 10 24.09 124.799 5
 -5 8 11 19744.4 1444.11 5
 -5 8 12 7011.3 896.583 5
 -5 8 13 4233.41 748.871 5
 -5 8 14 14184.9 1384.7 5
 -5 9 -16 1678.67 451.951 4
 -5 9 -15 30122.5 1921.34 4
 -5 9 -14 13703.3 1263.48 4
 -5 9 -13 -14.3109 81.5737 4
 -5 9 -12 7321.38 842.361 4
 -5 9 -11 600.198 280.131 4
 -5 9 -10 16299.8 1229.79 4
 -5 9 -9 48863.2 2129.33 4
 -5 9 -8 5014.16 406.1 1
 -5 9 -8 5722.13 664.158 4
 -5 9 -7 12230.9 663.685 1
 -5 9 -7 12459.8 959.883 4
 -5 9 -6 144.636 127.658 4
 -5 9 -6 -24.5707 82.8363 1
 -5 9 -5 24678.4 1025 1
 -5 9 -5 25994.7 1222.37 5
 -5 9 -5 24683 1324.21 4
 -5 9 -4 32434.8 1501.95 4
 -5 9 -4 32120.3 1347.68 5
 -5 9 -4 29024.9 1165.33 1
 -5 9 -3 786.759 198.107 5
 -5 9 -3 896.871 196.746 1
 -5 9 -3 682.013 222.459 4
 -5 9 -2 2363.49 377.631 4
 -5 9 -2 1833.24 298.247 1
 -5 9 -2 2616.36 391.024 5
 -5 9 -1 126.89 63.1243 5
 -5 9 -1 85.9509 59.2942 1
 -5 9 0 35626.5 1485.93 5
 -5 9 0 35421.5 1435.12 1
 -5 9 1 57931.2 1974.56 1
 -5 9 1 56723.4 1983.52 5
 -5 9 2 -100.328 144.484 1
 -5 9 2 2.03791 88.4886 5
 -5 9 3 12463.5 899.237 1
 -5 9 3 12839.2 900.477 5
 -5 9 4 187.4 109.276 5
 -5 9 5 17370.8 1093.74 5
 -5 9 6 23049.2 1334.38 5
 -5 9 7 367.333 169.823 5
 -5 9 8 10414.4 947.756 5
 -5 9 9 4420.85 625.91 5
 -5 9 10 5389.69 732.095 5
 -5 9 11 21909.5 1548.42 5
 -5 9 12 3499.02 615.389 5
 -5 9 13 2389.16 538.815 5
 -5 10 -16 6643.71 919.957 4
 -5 10 -15 17022.6 1466.96 4
 -5 10 -14 1619.51 445.93 4
 -5 10 -13 2400.23 496.629 4
 -5 10 -12 764.005 310.911 4
 -5 10 -11 5272.49 726.55 4
 -5 10 -10 23654.3 1516.53 4
 -5 10 -9 11247.8 1009.85 4
 -5 10 -8 5255.26 457.152 1
 -5 10 -8 6468.34 732.139 4
 -5 10 -7 10738 678.092 1
 -5 10 -7 12915.4 1024.49 4
 -5 10 -6 399.662 199.314 4
 -5 10 -6 311.112 96.8146 1
 -5 10 -6 626.751 197.052 5
 -5 10 -5 44509.8 1906.02 4
 -5 10 -5 45376.8 1701.13 5
 -5 10 -5 41419.7 1503.57 1
 -5 10 -4 2592.41 436.753 4
 -5 10 -4 2575.75 356.196 1
 -5 10 -4 3074.54 414.238 5
 -5 10 -3 2795.34 456.915 4
 -5 10 -3 4310.27 494.069 5
 -5 10 -3 3632.76 427.766 1
 -5 10 -2 12381.3 820.827 1
 -5 10 -2 14424.2 927.626 5
 -5 10 -1 881.74 248.637 1
 -5 10 -1 1034.03 243.041 5
 -5 10 0 43667.9 1703.43 5
 -5 10 0 41860 1675.12 1
 -5 10 1 39637 1646.96 5
 -5 10 1 39562.5 1666.58 1
 -5 10 2 2381.81 391.481 5
 -5 10 2 2137.47 396.406 1
 -5 10 3 22939.2 1267.13 5
 -5 10 3 22587.2 1303.47 1
 -5 10 4 563.329 221.026 1
 -5 10 4 398.708 185.826 5
 -5 10 5 34855.6 1664.51 5
 -5 10 6 35934.8 1747.47 5
 -5 10 7 2015.9 425.707 5
 -5 10 8 4665.11 645.992 5
 -5 10 9 1638.43 392.38 5
 -5 10 10 18849 1424.36 5
 -5 10 11 10894 1122.85 5
 -5 10 12 326.433 222.164 5
 -5 11 -15 4883.68 783.785 4
 -5 11 -14 362.93 175.88 4
 -5 11 -13 9139.69 1035.31 4
 -5 11 -12 2152.27 488.527 4
 -5 11 -11 5288.81 746.78 4
 -5 11 -10 16477.2 1279.87 4
 -5 11 -9 490.2 251.477 4
 -5 11 -8 13889.3 834.781 1
 -5 11 -8 14443.8 1147.46 4
 -5 11 -7 6339.05 745.403 4
 -5 11 -7 5753.93 548.059 1
 -5 11 -6 12171.3 1027.71 4
 -5 11 -6 13293.1 896.757 5
 -5 11 -6 11356.4 779.626 1
 -5 11 -5 28186 1567.29 4
 -5 11 -5 29418.1 1368.76 5
 -5 11 -5 25658.3 1215.91 1
 -5 11 -4 131.059 91.0456 1
 -5 11 -4 -35.5509 106.859 5
 -5 11 -4 -16.7713 152.374 4
 -5 11 -3 16711.5 1016.92 5
 -5 11 -3 13554.6 885.684 1
 -5 11 -2 6329.32 619.009 1
 -5 11 -2 7820.83 699.468 5
 -5 11 -1 5002.43 558.953 5
 -5 11 -1 4384.63 516.078 1
 -5 11 0 45441.9 1845.66 1
 -5 11 0 47797.3 1846.52 5
 -5 11 1 10624.4 846.555 5
 -5 11 1 10290.1 849.977 1
 -5 11 2 26325.6 1435.59 1
 -5 11 2 26424.9 1368.25 5
 -5 11 3 17935.5 1142.95 5
 -5 11 3 16672.2 1160.61 1
 -5 11 4 5231.91 647.322 1
 -5 11 4 5290.47 640.034 5
 -5 11 5 39720.5 1861.37 5
 -5 11 6 21968.5 1375.31 5
 -5 11 7 4007.29 603.008 5
 -5 11 8 2270.3 463.853 5
 -5 11 9 3656.8 618.094 5
 -5 11 10 21707.8 1574.16 5
 -5 11 11 7328.31 928.333 5
 -5 12 -15 733.18 336.322 4
 -5 12 -14 9598.32 1118.82 4
 -5 12 -13 16289.7 1413.21 4
 -5 12 -12 1479.53 438.356 4
 -5 12 -11 4142.84 677.065 4
 -5 12 -10 4330.25 666.679 4
 -5 12 -9 7004.1 838.404 4
 -5 12 -8 12566.5 1108.64 4
 -5 12 -7 2190.34 454.015 4
 -5 12 -7 1487.45 300.482 1
 -5 12 -6 11927.2 1050.16 4
 -5 12 -6 12767.2 900.842 5
 -5 12 -6 11557.9 846.13 1
 -5 12 -5 3169.52 551.519 4
 -5 12 -5 3706.89 467.413 5
 -5 12 -5 2749 394.698 1
 -5 12 -4 8011.02 705.059 5
 -5 12 -4 6805.06 651.625 1
 -5 12 -3 28963.2 1439.84 1
 -5 12 -3 33905.4 1512.44 5
 -5 12 -2 2581.85 415.166 5
 -5 12 -2 2045.53 395.334 1
 -5 12 -1 3410.86 480.286 5
 -5 12 -1 3845.36 521.611 1
 -5 12 0 22399.6 1280.52 5
 -5 12 0 23143.8 1333.1 1
 -5 12 1 1745.6 352.38 5
 -5 12 1 1737.56 393.683 1
 -5 12 2 19103.8 1282.88 1
 -5 12 2 20606.8 1240.06 5
 -5 12 3 8803.98 827.438 5
 -5 12 3 8100 839.295 1
 -5 12 4 4843.15 622.523 5
 -5 12 4 5010.03 667.127 1
 -5 12 5 11099.3 980.676 5
 -5 12 5 10717.5 1013.03 1
 -5 12 6 145.836 99.467 5
 -5 12 7 12592.3 1091.27 5
 -5 12 8 5514.54 738.002 5
 -5 12 9 2824.44 552.831 5
 -5 12 10 8977.78 1021.01 5
 -5 13 -14 15937.3 1481.14 4
 -5 13 -13 7500.59 975.458 4
 -5 13 -12 -855.878 320.785 4
 -5 13 -11 4152.4 699.232 4
 -5 13 -10 1141.5 369.08 4
 -5 13 -9 25251.1 1677.42 4
 -5 13 -8 24224.8 1619.03 4
 -5 13 -7 47.5274 174.133 4
 -5 13 -7 -140.499 188.513 1
 -5 13 -6 9289.09 1001.9 4
 -5 13 -6 8374.3 753.165 1
 -5 13 -6 11261.8 858.567 5
 -5 13 -5 555.538 167.654 5
 -5 13 -5 465.456 157.456 1
 -5 13 -4 23093.1 1250.85 5
 -5 13 -4 20544.9 1235.67 1
 -5 13 -3 29556.9 1530.83 1
 -5 13 -3 33778.7 1551.65 5
 -5 13 -2 3041.09 474.132 1
 -5 13 -2 3391.56 485.92 5
 -5 13 -1 7777.6 734.056 5
 -5 13 -1 6319.35 697.329 1
 -5 13 0 1068.42 334.104 5
 -5 13 0 216.758 114.481 1
 -5 13 1 17005.3 1146.08 5
 -5 13 1 15892.3 1183.03 1
 -5 13 2 26544.2 1578.91 1
 -5 13 2 27468.9 1505.61 5
 -5 13 3 1160.43 307.29 1
 -5 13 3 1839 407.346 5
 -5 13 4 3976.92 585.647 5
 -5 13 4 3315.71 565.815 1
 -5 13 5 3759.55 626.838 1
 -5 13 5 3919.77 592.985 5
 -5 13 6 7464.34 873.009 5
 -5 13 7 20127.1 1461.51 5
 -5 13 8 2076.05 464.486 5
 -5 13 9 4401.21 700.508 5
 -5 14 -13 1084.34 427.062 4
 -5 14 -12 8032.6 1008.4 4
 -5 14 -11 4287.1 739.257 4
 -5 14 -10 2083.85 504.196 4
 -5 14 -9 23455.4 1672.16 4
 -5 14 -8 10948.5 1119.45 4
 -5 14 -7 985.435 404.787 4
 -5 14 -7 377.216 189.972 1
 -5 14 -6 4714.15 740.134 4
 -5 14 -6 4384.14 543.406 5
 -5 14 -6 3612.24 526.729 1
 -5 14 -5 2177.82 413.526 1
 -5 14 -5 2890.43 436.052 5
 -5 14 -4 30930.6 1490.74 5
 -5 14 -4 26498.4 1482.28 1
 -5 14 -3 14245.1 1092.67 1
 -5 14 -3 17740.6 1116.51 5
 -5 14 -2 337.92 144.52 5
 -5 14 -2 158.954 93.4562 1
 -5 14 -1 4069.04 551.351 5
 -5 14 -1 3398.49 530.343 1
 -5 14 0 5193.88 620.082 5
 -5 14 0 3942.91 593.154 1
 -5 14 1 25313.4 1456.48 5
 -5 14 1 23962.6 1542.47 1
 -5 14 2 7363.39 844.229 1
 -5 14 2 7780.26 807.865 5
 -5 14 3 396.988 232.897 1
 -5 14 3 402.147 163.293 5
 -5 14 4 4405.12 638.688 5
 -5 14 4 4580.23 734.535 1
 -5 14 5 130.087 163.146 5
 -5 14 5 10.1856 127.36 1
 -5 14 6 22148.3 1523.2 5
 -5 14 7 11573.3 1123.28 5
 -5 14 8 393.378 254.267 5
 -5 15 -11 1171.77 398.485 4
 -5 15 -10 3384.95 693.572 4
 -5 15 -9 7571.23 975.781 4
 -5 15 -8 -39.2437 222.944 4
 -5 15 -7 4731.65 775.597 4
 -5 15 -7 3620.58 535.774 1
 -5 15 -6 349.235 156.687 1
 -5 15 -5 6920.36 769.036 1
 -5 15 -4 15880.2 1192.15 1
 -5 15 -3 641.78 222.086 5
 -5 15 -3 978.369 333.113 1
 -5 15 -2 5219.14 661.026 5
 -5 15 -2 4311.3 621.387 1
 -5 15 -1 3305.97 515.322 5
 -5 15 -1 2159.76 471.385 1
 -5 15 0 8148.44 811.536 5
 -5 15 0 6765.37 823.281 1
 -5 15 1 11761.4 997.876 5
 -5 15 1 10876.6 1073.41 1
 -5 15 2 1138.58 310.056 5
 -5 15 2 1868.36 437.655 1
 -5 15 3 2216.38 513.389 1
 -5 15 4 2385.66 540.218 1
 -5 16 -9 872.07 310.43 4
 -5 16 -8 7350.91 997.634 4
 -5 16 -7 17744 1569.19 4
 -5 16 -6 443.167 112.057 1
 -5 16 -5 3799.7 601.162 1
 -5 16 -4 1512.21 373.709 1
 -5 16 -3 2056.7 461.011 1
 -5 16 -2 13715.4 1209.16 1
 -5 16 -1 621.936 244.037 1
 -5 16 0 4054.9 665.457 1
 -5 16 1 4354.91 707.922 1
 -5 16 2 307.509 218.707 1
 -5 17 -6 94.4204 175.742 1
 -5 17 -5 2041.93 458.436 1
 -5 17 -4 185.632 158.618 1
 -5 17 -3 5655.17 772.083 1
 -5 17 -2 8013.69 936.579 1
 -4 -13 -1 9696.84 1016.92 2
 -4 -13 0 2532.56 481.782 2
 -4 -13 1 4139.6 615.784 2
 -4 -12 -3 4093.57 673.312 2
 -4 -12 -2 3758.01 635.547 2
 -4 -12 -1 4589.49 686.043 2
 -4 -12 0 276.153 169.229 2
 -4 -12 1 16061.2 1188.67 2
 -4 -12 2 14127.7 1074.11 2
 -4 -12 3 390.795 196.442 2
 -4 -11 -4 22632.8 1629.18 2
 -4 -11 -3 1733.01 436.022 2
 -4 -11 -2 4036.56 639.086 2
 -4 -11 -1 1862.98 419.199 2
 -4 -11 0 5632.42 704.283 2
 -4 -11 1 29331.6 1571.49 2
 -4 -11 2 9258.23 828.538 2
 -4 -11 3 2762.24 429.231 2
 -4 -11 4 4456.57 527.89 2
 -4 -10 -6 -186.732 249.471 2
 -4 -10 -5 16094.4 1369.73 2
 -4 -10 -4 10932.9 1088.47 2
 -4 -10 -3 83.2737 169.185 2
 -4 -10 -2 6908.09 803.237 2
 -4 -10 -1 162.517 97.7845 2
 -4 -10 0 11835.3 977.226 2
 -4 -10 1 21716.2 1285.89 2
 -4 -10 2 -44.6532 110.538 2
 -4 -10 3 13560 925.54 2
 -4 -10 4 1108.19 258.088 2
 -4 -10 5 15172.9 876.479 2
 -4 -9 -7 11163.9 1151.76 2
 -4 -9 -6 91.9983 163.089 2
 -4 -9 -5 10139.3 1057.62 2
 -4 -9 -4 1857.43 433.662 2
 -4 -9 -3 9657.31 731.125 3
 -4 -9 -3 8761.81 906.337 2
 -4 -9 -2 7154.83 781.226 2
 -4 -9 -1 103.741 94.7881 2
 -4 -9 0 11790.7 931.18 2
 -4 -9 1 3972.23 508.098 2
 -4 -9 2 9379.96 754.763 2
 -4 -9 3 13589.6 883.589 2
 -4 -9 4 2680.03 374.449 2
 -4 -9 5 16309.3 883.815 2
 -4 -8 -9 6141.63 880.185 2
 -4 -8 -8 26950.3 1834.63 2
 -4 -8 -7 7376.61 909.307 2
 -4 -8 -6 496.524 205.503 2
 -4 -8 -5 4370.17 651.19 2
 -4 -8 -4 3802.18 443.101 3
 -4 -8 -4 3868.7 617.77 2
 -4 -8 -3 24999.1 1496.22 2
 -4 -8 -3 24600.5 1156.57 3
 -4 -8 -2 9916.5 896.726 2
 -4 -8 -1 1065.6 285.272 2
 -4 -8 0 21466.2 1212.42 2
 -4 -8 1 -89.0187 105.708 2
 -4 -8 2 37086.4 1499.54 2
 -4 -8 3 12462.1 801.772 2
 -4 -8 4 4982.2 476.647 2
 -4 -7 -10 55.001 151.943 2
 -4 -7 -9 16541.7 1393.59 2
 -4 -7 -8 28683.9 1808.88 2
 -4 -7 -7 2789.92 525.775 2
 -4 -7 -6 6404.18 795.021 2
 -4 -7 -5 667.307 205.458 3
 -4 -7 -5 599.006 221.89 2
 -4 -7 -4 11217 739.621 3
 -4 -7 -4 11480.2 986.737 2
 -4 -7 -3 43808.4 1582.23 3
 -4 -7 -3 55609.3 2181.96 2
 -4 -7 -2 13685.7 1006.22 2
 -4 -7 -1 3229.17 460.121 2
 -4 -7 0 10409.4 789.274 2
 -4 -7 1 10731.7 767.346 2
 -4 -7 2 42457.7 1548.37 2
 -4 -7 3 367.37 135.407 2
 -4 -7 4 9155.61 611.971 2
 -4 -6 -11 11764.4 1205.28 2
 -4 -6 -10 960.242 309.056 2
 -4 -6 -9 24539.2 1647.3 2
 -4 -6 -8 19706.2 1436.52 2
 -4 -6 -7 230.862 102.137 3
 -4 -6 -7 63.4805 127.554 2
 -4 -6 -6 22973.8 1071.95 3
 -4 -6 -6 23049.3 1464.63 2
 -4 -6 -5 1283.59 254.112 3
 -4 -6 -5 1636.41 377.431 2
 -4 -6 -4 28520.7 1186.75 3
 -4 -6 -4 28239.2 1512.75 2
 -4 -6 -3 36691.1 1381.15 3
 -4 -6 -3 45257.5 1866.75 2
 -4 -6 -2 -2.17058 119.853 2
 -4 -6 -1 15478.3 971.095 2
 -4 -6 0 633.255 175.797 2
 -4 -6 1 59769.9 1875.7 2
 -4 -6 2 23815.2 1066.38 2
 -4 -6 3 218.496 113.761 2
 -4 -5 -13 288.467 247.697 2
 -4 -5 -12 9133.93 1044.93 2
 -4 -5 -11 12112.6 1170.49 2
 -4 -5 -10 645.915 291.353 2
 -4 -5 -9 12005.5 1110.69 2
 -4 -5 -8 3199.25 548.835 2
 -4 -5 -7 13287.6 1084.73 2
 -4 -5 -7 15016.7 837.184 3
 -4 -5 -6 25483.9 1135.22 3
 -4 -5 -6 27182.1 1528.59 2
 -4 -5 -5 3646.82 401.83 3
 -4 -5 -5 3894.88 547.883 2
 -4 -5 -4 38457.9 1699.46 2
 -4 -5 -4 39210.1 1390.16 3
 -4 -5 -3 1758.09 265.895 3
 -4 -5 -3 1977.51 358.48 2
 -4 -5 -2 16139.6 977.565 2
 -4 -5 -1 40818.1 1544.75 2
 -4 -5 0 13110 791.943 2
 -4 -5 1 57607.1 1753.33 2
 -4 -5 2 21255.8 942.764 2
 -4 -5 3 31408.7 1114.4 2
 -4 -5 6 25683.8 604.738 5
 -4 -5 7 20760.7 653.686 5
 -4 -5 8 5744.01 367.931 5
 -4 -5 9 10839.6 596.098 5
 -4 -5 10 1576.24 252.111 5
 -4 -5 11 27112.9 1198.6 5
 -4 -5 12 10964.6 797.548 5
 -4 -5 13 1165.37 268.81 5
 -4 -5 14 12460.3 953.197 5
 -4 -5 15 536.046 179.867 5
 -4 -5 16 11021.1 1000.44 5
 -4 -5 17 17267.5 1318.35 5
 -4 -5 18 476.469 200.163 5
 -4 -4 -14 2560.22 537.934 2
 -4 -4 -13 660.707 236.637 2
 -4 -4 -12 8918.44 970.623 2
 -4 -4 -11 3147.25 568.323 2
 -4 -4 -10 2622.88 513.484 2
 -4 -4 -9 7080.07 802.597 2
 -4 -4 -8 1819.6 373.504 2
 -4 -4 -7 41332.8 1464.88 3
 -4 -4 -7 40706 1872.68 2
 -4 -4 -6 6608.55 530.031 3
 -4 -4 -6 6885.27 705.629 2
 -4 -4 -5 7261.03 700.178 2
 -4 -4 -5 7854.58 570.429 3
 -4 -4 -4 6614.43 514.869 3
 -4 -4 -4 8187.42 708.309 2
 -4 -4 -3 4236.55 399.83 3
 -4 -4 -3 4742.22 504.096 2
 -4 -4 -2 57617 1677.04 3
 -4 -4 -2 58386.2 1887.51 2
 -4 -4 -1 37685.6 1409.65 2
 -4 -4 0 1166.01 222.949 2
 -4 -4 1 33555.8 1212.7 2
 -4 -4 2 6354.32 470.835 2
 -4 -4 5 569.993 72.9934 5
 -4 -4 6 15076.8 519.165 5
 -4 -4 7 2310.05 223.655 5
 -4 -4 8 35121.5 1107.8 5
 -4 -4 9 20560.8 908.394 5
 -4 -4 10 7240.15 574.413 5
 -4 -4 11 28046.9 1267.32 5
 -4 -4 12 837.629 230.683 5
 -4 -4 13 15060.8 1028.48 5
 -4 -4 14 37374.8 1759.2 5
 -4 -4 15 14.5814 93.7508 5
 -4 -4 16 17588.9 1304.73 5
 -4 -4 17 5949.53 772.857 5
 -4 -4 18 5355.05 779.345 5
 -4 -4 19 5974.95 845.704 5
 -4 -4 20 32.624 159.714 5
 -4 -3 -15 3053.01 586.629 2
 -4 -3 -14 516.295 226.433 2
 -4 -3 -13 8441.57 922.141 2
 -4 -3 -12 10354.3 1007.27 2
 -4 -3 -11 3695.16 697.804 4
 -4 -3 -11 2894.95 516.02 2
 -4 -3 -10 7873.73 831.341 2
 -4 -3 -10 8153.91 997.396 4
 -4 -3 -9 133.195 119.487 4
 -4 -3 -9 199.811 166.116 2
 -4 -3 -8 18694.1 1414.22 4
 -4 -3 -8 16537.7 1143.59 2
 -4 -3 -7 34998.3 1641.47 2
 -4 -3 -7 36294.7 1331.96 3
 -4 -3 -7 37851.9 1991.81 4
 -4 -3 -6 1387.96 234.761 3
 -4 -3 -6 1431.84 293.931 2
 -4 -3 -5 10332.8 638.811 3
 -4 -3 -5 10143.3 775.984 2
 -4 -3 -4 2748.46 329.069 3
 -4 -3 -4 2599.64 379.991 2
 -4 -3 -3 27974.6 1061.95 3
 -4 -3 -3 27975.1 1225.44 2
 -4 -3 -2 131281 2886.23 3
 -4 -3 -2 135985 3117.12 2
 -4 -3 -1 64299.7 1826.61 2
 -4 -3 0 1744.6 249.215 2
 -4 -3 1 1804.24 243.322 2
 -4 -3 3 106558 1845.68 5
 -4 -3 4 63931.1 1277.48 5
 -4 -3 5 9782.81 401.521 5
 -4 -3 6 2494.16 230.63 5
 -4 -3 7 15293.1 663.083 5
 -4 -3 8 65382.3 1731.5 5
 -4 -3 9 27122.7 1109.49 5
 -4 -3 10 931.034 213.325 5
 -4 -3 11 1725.51 314.663 5
 -4 -3 12 97.5694 70.7353 5
 -4 -3 13 34944.4 1643.62 5
 -4 -3 14 5202.97 637.164 5
 -4 -3 15 7939 835.943 5
 -4 -3 16 18802.7 1364.49 5
 -4 -3 17 2169.78 482.17 5
 -4 -3 18 14975.1 1334.43 5
 -4 -3 19 6736.08 921.458 5
 -4 -3 20 468.72 320.946 5
 -4 -2 -16 2662.1 644.337 4
 -4 -2 -16 2027.17 469.378 2
 -4 -2 -15 5177.94 892.906 4
 -4 -2 -15 4644.2 675.8 2
 -4 -2 -14 651.303 243.937 4
 -4 -2 -14 319.209 192.189 2
 -4 -2 -13 14623.3 1168.62 2
 -4 -2 -13 15842.7 1479.57 4
 -4 -2 -12 6737.66 923.18 4
 -4 -2 -12 5669.38 708.288 2
 -4 -2 -11 6453.42 865.832 4
 -4 -2 -11 4344.89 589.812 2
 -4 -2 -10 10422.3 1077.94 4
 -4 -2 -10 9667 874.668 2
 -4 -2 -9 275.627 219.941 4
 -4 -2 -9 -28.6268 107.527 2
 -4 -2 -8 43119.8 1809.4 2
 -4 -2 -8 47549.9 2213.73 4
 -4 -2 -7 14301.9 949.533 2
 -4 -2 -7 16032.8 1200.03 4
 -4 -2 -6 18113.7 866.052 3
 -4 -2 -6 19140 1063.26 2
 -4 -2 -6 19894.7 1309.71 4
 -4 -2 -5 14646.7 749.529 3
 -4 -2 -5 15287.3 906.25 2
 -4 -2 -5 15583.2 1116.58 4
 -4 -2 -4 283.457 167.718 4
 -4 -2 -4 321.719 104.145 3
 -4 -2 -4 342.333 128.878 2
 -4 -2 -3 84296.3 2244.69 2
 -4 -2 -3 85704.5 2695.5 4
 -4 -2 -3 87048.4 2104.43 3
 -4 -2 -2 97056 2254.1 3
 -4 -2 -2 100208 2859.14 4
 -4 -2 -2 97358.8 2382.54 2
 -4 -2 -1 67.5528 42.2343 2
 -4 -2 0 63989.4 1691.93 2
 -4 -2 2 101205 1863.21 5
 -4 -2 3 236717 3974.35 5
 -4 -2 4 35131.1 909.299 5
 -4 -2 5 30525.6 892.765 5
 -4 -2 6 362.968 92.5052 5
 -4 -2 7 35855.1 1155.9 5
 -4 -2 8 75092.6 1972.03 5
 -4 -2 9 5572.55 501.592 5
 -4 -2 10 4654.21 494.197 5
 -4 -2 11 5496.64 572.661 5
 -4 -2 12 21532.8 1228.44 5
 -4 -2 13 32168.1 1601.4 5
 -4 -2 14 251.672 126.556 5
 -4 -2 15 18682.7 1323.4 5
 -4 -2 16 1118.28 341.273 5
 -4 -2 17 11623.8 1143.36 5
 -4 -2 18 15230.4 1356 5
 -4 -2 19 3869.02 682.883 5
 -4 -1 -16 7705.47 1071.78 4
 -4 -1 -15 8298.45 876.654 2
 -4 -1 -15 8128.07 1078.46 4
 -4 -1 -14 3124.48 650.983 4
 -4 -1 -14 2469.04 461.908 2
 -4 -1 -13 12163.7 1005.69 2
 -4 -1 -13 13851.8 1320.64 4
 -4 -1 -12 -76.3423 95.185 4
 -4 -1 -12 366.865 171.149 2
 -4 -1 -11 31294.4 1883.3 4
 -4 -1 -11 28554.9 1492.12 2
 -4 -1 -10 21865.8 1248.93 2
 -4 -1 -10 25475.2 1631.63 4
 -4 -1 -9 80.4878 83.9863 4
 -4 -1 -9 454.809 186.128 2
 -4 -1 -8 56832.8 2006.16 2
 -4 -1 -8 66153.9 2560.2 4
 -4 -1 -7 2062.77 395.285 4
 -4 -1 -7 1574.66 288.2 2
 -4 -1 -6 23643.8 1113.77 2
 -4 -1 -6 22285.4 962.415 3
 -4 -1 -6 25288.5 1412.61 4
 -4 -1 -5 24539.4 1095.82 2
 -4 -1 -5 25889.7 1391.44 4
 -4 -1 -5 25466.8 998.11 3
 -4 -1 -4 9116.98 555.312 3
 -4 -1 -4 9411.73 617.357 2
 -4 -1 -4 9664.16 789.166 4
 -4 -1 -3 38561.5 1235.65 3
 -4 -1 -3 38625 1292.36 2
 -4 -1 -3 39465.5 1598.85 4
 -4 -1 -2 19045.2 792.169 3
 -4 -1 -2 19760.3 1047.6 4
 -4 -1 -2 20358.2 850.996 2
 -4 -1 -1 91069.2 2126.81 3
 -4 -1 -1 94263 2557.95 4
 -4 -1 -1 94979.6 2177.3 2
 -4 -1 0 119824 2529.01 2
 -4 -1 0 119792 2923.46 4
 -4 -1 1 7057.97 344.221 5
 -4 -1 2 31875.6 856.581 5
 -4 -1 3 81104.6 1692.09 5
 -4 -1 4 4618 312.634 5
 -4 -1 5 39354.4 1134.01 5
 -4 -1 6 1162.99 186.096 5
 -4 -1 7 40211.8 1291.67 5
 -4 -1 8 57943.8 1737.28 5
 -4 -1 9 1014.17 218.952 5
 -4 -1 10 17720.6 1002.62 5
 -4 -1 11 149.396 108.212 5
 -4 -1 12 54434.2 2091.11 5
 -4 -1 13 39979.1 1848.78 5
 -4 -1 14 1100.44 344.185 5
 -4 -1 15 19419 1368.77 5
 -4 -1 16 884.87 324.661 5
 -4 -1 17 11733.5 1160.25 5
 -4 -1 18 12590.8 1242.5 5
 -4 -1 19 625.338 270.066 5
 -4 0 -17 7747.36 1084.65 4
 -4 0 -16 25882 1960.68 4
 -4 0 -15 5708.12 680.305 2
 -4 0 -15 6272.58 911.158 4
 -4 0 -14 3316.83 509.072 2
 -4 0 -14 4068.76 718.755 4
 -4 0 -13 7022.94 713.144 2
 -4 0 -13 7756.33 936.794 4
 -4 0 -12 9715.93 815.156 2
 -4 0 -12 9834.26 1032.49 4
 -4 0 -11 41646.9 1734.24 2
 -4 0 -11 44180.3 2155.39 4
 -4 0 -10 23125.5 1216.7 2
 -4 0 -10 24443.8 1523.94 4
 -4 0 -9 2617.08 469.025 4
 -4 0 -9 2483.66 359.408 2
 -4 0 -8 13285 835.434 2
 -4 0 -8 13727.9 1038.92 4
 -4 0 -7 3927.01 426.129 2
 -4 0 -7 3798.51 520.066 4
 -4 0 -6 69872.4 1995.76 2
 -4 0 -6 71948.9 2418.29 4
 -4 0 -5 50498.9 1556.9 2
 -4 0 -5 50573.4 1485.51 3
 -4 0 -5 49804.4 1882.27 4
 -4 0 -4 1294.06 273.211 4
 -4 0 -4 1386.59 211.495 3
 -4 0 -4 1162.55 129.405 1
 -4 0 -4 1152.47 191.736 2
 -4 0 -3 21669 850.077 3
 -4 0 -3 22066.5 629.527 1
 -4 0 -3 21668.8 874.725 2
 -4 0 -3 22937.3 1106.36 4
 -4 0 -2 512.123 170.266 4
 -4 0 -2 922.155 109.209 1
 -4 0 -2 521.832 126.708 3
 -4 0 -2 481.561 119.313 2
 -4 0 -1 182359 3134.45 1
 -4 0 -1 175531 3424.06 3
 -4 0 -1 184445 3857.22 4
 -4 0 0 1707.08 209.432 3
 -4 0 0 1777.61 260.734 4
 -4 0 0 1703.43 183.187 5
 -4 0 1 7252.97 395.084 5
 -4 0 1 6024.68 468.844 4
 -4 0 2 32391.2 930.176 5
 -4 0 3 89.4231 55.0124 5
 -4 0 4 33115.2 1009.58 5
 -4 0 5 40519.9 1219.92 5
 -4 0 6 148.109 115.205 5
 -4 0 7 66146.6 1848.36 5
 -4 0 8 436.533 140.828 5
 -4 0 9 16863.8 936.233 5
 -4 0 10 23694.5 1208.45 5
 -4 0 11 -21.6438 78.3037 5
 -4 0 12 25689 1409.88 5
 -4 0 13 10839.1 937.994 5
 -4 0 14 8392.74 866.497 5
 -4 0 15 12748.3 1124.11 5
 -4 0 16 1675.99 430.423 5
 -4 0 17 11722.1 1162.15 5
 -4 0 18 1980.08 509.14 5
 -4 0 19 3902.31 726.556 5
 -4 1 -17 14411.2 1435.16 4
 -4 1 -16 19727.7 1646.42 4
 -4 1 -15 557.006 253.965 4
 -4 1 -14 10311.5 841.824 2
 -4 1 -14 9412.51 1048.31 4
 -4 1 -13 -23.3995 102.755 4
 -4 1 -13 -64.6638 58.5179 2
 -4 1 -12 29192.4 1376.6 2
 -4 1 -12 30814 1803.71 4
 -4 1 -11 44271.3 1705 2
 -4 1 -11 50705.3 2274.46 4
 -4 1 -10 5824.49 553.987 2
 -4 1 -10 5459.21 679.678 4
 -4 1 -9 5608.39 518.244 2
 -4 1 -9 5501.67 658.87 4
 -4 1 -8 751.676 277.929 4
 -4 1 -8 652.214 160.15 2
 -4 1 -7 20880.9 953.313 2
 -4 1 -7 21597.8 1235.81 4
 -4 1 -6 122969 2715.59 2
 -4 1 -6 122558 3260.67 4
 -4 1 -6 115096 2161.56 1
 -4 1 -5 29913.1 732.921 1
 -4 1 -5 29925.3 1066.11 2
 -4 1 -5 31528.8 1384.36 4
 -4 1 -4 14377.6 697.163 3
 -4 1 -4 14071.2 404.549 1
 -4 1 -4 14517 683.39 2
 -4 1 -4 15111.3 888.68 4
 -4 1 -3 14507.1 383.725 1
 -4 1 -3 15020.5 673.551 3
 -4 1 -3 14480.3 650.916 2
 -4 1 -3 15041.1 840.527 4
 -4 1 -2 33916.7 1041.2 3
 -4 1 -2 33263.5 1248.82 4
 -4 1 -2 32954 715.269 1
 -4 1 -1 9292.74 475.736 5
 -4 1 -1 9312.39 504.214 3
 -4 1 -1 8672.68 561.459 4
 -4 1 0 24740 818.293 3
 -4 1 0 25942.7 832.203 5
 -4 1 0 24621 943.051 4
 -4 1 1 2012.02 212.195 5
 -4 1 1 2016.13 208.003 3
 -4 1 1 1823.4 220.234 4
 -4 1 2 2671.73 251.435 5
 -4 1 2 2827.36 253.934 4
 -4 1 3 74014 1736.87 5
 -4 1 4 83674.6 1958.55 5
 -4 1 5 13437.4 688.592 5
 -4 1 6 112177 2616.47 5
 -4 1 7 17300.4 862.778 5
 -4 1 8 22875.3 1079.83 5
 -4 1 9 90038.5 2534.69 5
 -4 1 10 20777 1144.66 5
 -4 1 11 1395.77 308.978 5
 -4 1 12 7973.37 791.457 5
 -4 1 13 165.265 103.526 5
 -4 1 14 44657.7 2119.08 5
 -4 1 15 12686.4 1144.79 5
 -4 1 16 741.001 304.314 5
 -4 1 17 6806.44 897.663 5
 -4 1 18 -131.465 234.322 5
 -4 2 -17 7791.26 1017.64 4
 -4 2 -16 2632.79 582.639 4
 -4 2 -15 7509.21 945.335 4
 -4 2 -14 14989.3 971.036 2
 -4 2 -14 16611.1 1352 4
 -4 2 -13 1026.54 313.868 4
 -4 2 -13 935.018 194.584 2
 -4 2 -12 26654.9 1224.21 2
 -4 2 -12 26523.6 1616.26 4
 -4 2 -11 26498.3 1194.08 2
 -4 2 -11 28973.8 1641.78 4
 -4 2 -10 4170.1 429.544 2
 -4 2 -10 3970.48 568.951 4
 -4 2 -9 28789.9 1145.77 2
 -4 2 -9 27837.1 1483.08 4
 -4 2 -8 2415.39 404.223 4
 -4 2 -8 2716.73 314.657 2
 -4 2 -7 45308.8 1341.23 2
 -4 2 -7 47685.5 1787.9 4
 -4 2 -6 78135.3 1454.89 1
 -4 2 -6 77593.1 1923.1 2
 -4 2 -6 78705.3 2366.61 4
 -4 2 -5 275.419 119.685 4
 -4 2 -5 222.293 94.0001 2
 -4 2 -4 18607.4 758.476 2
 -4 2 -4 23756.8 1064.7 4
 -4 2 -3 241.929 140.27 4
 -4 2 -2 90295.9 2014.88 3
 -4 2 -2 91378.1 2047.18 5
 -4 2 -2 91262 2234.89 4
 -4 2 -1 6253.45 399.247 5
 -4 2 -1 6018.87 372.379 3
 -4 2 -1 5786.58 428.008 4
 -4 2 0 6765.55 429.26 5
 -4 2 0 6189.94 413.3 4
 -4 2 0 7001.09 391.665 3
 -4 2 1 34975.4 952.05 3
 -4 2 1 33549.8 1055.82 5
 -4 2 1 33580.4 981.499 4
 -4 2 2 7522.91 457.993 5
 -4 2 2 7411.51 376.197 3
 -4 2 2 7686.45 372.084 4
 -4 2 3 43750.7 1271.95 5
 -4 2 3 43818.4 956.791 4
 -4 2 4 81516.3 1999.24 5
 -4 2 5 30620.6 1149.38 5
 -4 2 6 64470.1 1877.75 5
 -4 2 7 401.909 122.536 5
 -4 2 8 109122 2846.22 5
 -4 2 9 57696.9 1982.47 5
 -4 2 10 2664.28 416.376 5
 -4 2 11 12662.3 942.448 5
 -4 2 12 1603.08 334.563 5
 -4 2 13 21280.6 1396.13 5
 -4 2 14 52048.2 2332.18 5
 -4 2 15 8067.81 927.728 5
 -4 2 16 947.231 338.895 5
 -4 2 17 3127.99 640.391 5
 -4 2 18 8179.81 1033.28 5
 -4 3 -18 1143.56 398.45 4
 -4 3 -17 5242.95 839.9 4
 -4 3 -16 1028.67 362.357 4
 -4 3 -15 16436.2 1382.36 4
 -4 3 -14 9247.05 1005.57 4
 -4 3 -13 2943.79 538.891 4
 -4 3 -13 3163.81 393.149 2
 -4 3 -12 13098.2 782.573 2
 -4 3 -12 13664.5 1100.2 4
 -4 3 -11 952.785 277.519 4
 -4 3 -11 1522.66 252.612 2
 -4 3 -10 44422 1437.03 2
 -4 3 -10 44549.4 1943.18 4
 -4 3 -9 19616.5 1187.72 4
 -4 3 -9 20165.8 879.928 2
 -4 3 -8 1394.91 146.973 1
 -4 3 -8 1618.33 332.203 4
 -4 3 -8 1419.89 138.215 1
 -4 3 -8 1760.08 241.549 2
 -4 3 -7 39334.4 863.368 1
 -4 3 -7 40518.9 1210.48 2
 -4 3 -7 39368.4 1612.47 4
 -4 3 -7 37205.6 833.484 1
 -4 3 -6 652.181 181.527 4
 -4 3 -6 627.354 133.51 2
 -4 3 -5 30438.5 1273.62 4
 -4 3 -4 80388.4 2197.97 4
 -4 3 -3 41711.8 1275.29 5
 -4 3 -3 40779.5 1379.54 4
 -4 3 -2 128670 2807.52 4
 -4 3 -2 124635 2657.89 5
 -4 3 -1 17847.9 764.83 5
 -4 3 -1 15444.3 620.66 3
 -4 3 -1 16691.8 734.22 4
 -4 3 0 15113 682.958 5
 -4 3 0 14019.7 559.249 3
 -4 3 0 14649.5 641.354 4
 -4 3 1 32096.5 1060.04 5
 -4 3 1 31595.4 864.513 3
 -4 3 1 30744.9 904.815 4
 -4 3 2 2637.6 289.794 5
 -4 3 2 2671.24 208.593 3
 -4 3 2 2666.12 204.457 4
 -4 3 3 20743 855.785 5
 -4 3 3 20358.5 604.685 3
 -4 3 3 18922.5 533.854 4
 -4 3 4 50777.1 1537.33 5
 -4 3 4 50107.7 1098.25 3
 -4 3 5 25598.9 1078.61 5
 -4 3 6 62046.4 1897.66 5
 -4 3 7 7188.07 593.807 5
 -4 3 8 39660.6 1568.01 5
 -4 3 9 19531.4 1110.54 5
 -4 3 10 -6.04697 59.4099 5
 -4 3 11 10484.1 886.259 5
 -4 3 12 150.97 171.297 5
 -4 3 13 23543.5 1473.87 5
 -4 3 14 18242 1340.42 5
 -4 3 15 280.96 133.996 5
 -4 3 16 7243.79 902.483 5
 -4 3 17 -54.2687 165.679 5
 -4 4 -18 3745.9 778.612 4
 -4 4 -17 1323.66 441.021 4
 -4 4 -16 2306.68 538.471 4
 -4 4 -15 17949.2 1409.57 4
 -4 4 -14 2438.36 498.714 4
 -4 4 -13 992.439 284.296 4
 -4 4 -12 7383.68 534.401 2
 -4 4 -12 6631.83 746.28 4
 -4 4 -11 24243.8 983.888 2
 -4 4 -11 25356 1454.15 4
 -4 4 -10 31916.7 1111.03 2
 -4 4 -10 30984.6 1580.07 4
 -4 4 -9 4439.38 268.234 1
 -4 4 -9 4643.48 371.416 2
 -4 4 -9 4190.01 538.056 4
 -4 4 -8 33452.5 820.316 1
 -4 4 -8 33020.3 1500.86 4
 -4 4 -7 5445.58 234.612 1
 -4 4 -7 5462.94 564.968 4
 -4 4 -6 8323.5 273.05 1
 -4 4 -6 10621.6 751.691 4
 -4 4 -5 171678 3815.62 4
 -4 4 -4 46753 1534.73 4
 -4 4 -3 23972.3 572.228 1
 -4 4 -3 23919.4 940.477 5
 -4 4 -3 23488.9 1008.59 4
 -4 4 -2 58725.6 1597.3 5
 -4 4 -2 57297.2 1643.65 4
 -4 4 -1 -38.5393 54.8868 4
 -4 4 -1 2.61045 77.8362 5
 -4 4 0 137835 2911.76 5
 -4 4 0 135255 2735.35 4
 -4 4 1 59507.8 1620.9 5
 -4 4 1 57215.2 1391 4
 -4 4 2 1297.66 134.173 3
 -4 4 2 1499.77 220.657 5
 -4 4 2 1542.58 167.22 4
 -4 4 3 51410.2 1142.49 4
 -4 4 3 50546.5 1077.56 3
 -4 4 3 49076.9 1524.5 5
 -4 4 4 17804.3 490.589 3
 -4 4 4 17966.1 883.902 5
 -4 4 5 63326.7 1180.36 3
 -4 4 5 66776 1924.42 5
 -4 4 6 38310.6 780.136 3
 -4 4 6 35106.9 830.213 4
 -4 4 7 702.001 208.375 5
 -4 4 7 767.017 92.2691 4
 -4 4 8 19008.2 1075.98 5
 -4 4 9 2164.9 371.32 5
 -4 4 10 18955.5 1170.34 5
 -4 4 11 43183.8 1937.81 5
 -4 4 12 -54.6114 204.792 5
 -4 4 13 21024.4 1410.28 5
 -4 4 14 464.998 198.386 5
 -4 4 15 5662.07 783.375 5
 -4 4 16 8957.82 1033.71 5
 -4 4 17 339.638 280.783 5
 -4 5 -18 2853.5 634.812 4
 -4 5 -17 168.458 169.163 4
 -4 5 -16 3372.39 610.291 4
 -4 5 -15 14679.6 1248.74 4
 -4 5 -14 1232.64 328.89 4
 -4 5 -13 8503.02 882.782 4
 -4 5 -12 2095.78 418.618 4
 -4 5 -11 19559.7 1273.47 4
 -4 5 -10 26859.1 1441.46 4
 -4 5 -9 1495.35 332.273 4
 -4 5 -9 1112.24 126.49 1
 -4 5 -8 15458.8 518.064 1
 -4 5 -8 16741.5 1028.98 4
 -4 5 -7 2395.23 171.986 1
 -4 5 -7 2688.77 387.761 4
 -4 5 -6 23075.9 621.168 1
 -4 5 -6 23717.8 1152.62 4
 -4 5 -5 184455 3131.05 1
 -4 5 -5 176419 3982.75 4
 -4 5 -4 14128.7 736.998 5
 -4 5 -4 14285.9 483.682 1
 -4 5 -4 14232.1 797.56 4
 -4 5 -3 6814.63 490.256 5
 -4 5 -3 5778 487.363 4
 -4 5 -3 6439.83 323.26 1
 -4 5 -2 21576.1 912.383 5
 -4 5 -2 19854.4 667.162 1
 -4 5 -2 19344.6 868.315 4
 -4 5 -1 111212 2526.28 5
 -4 5 -1 108231 2231.85 1
 -4 5 -1 106184 2427.35 4
 -4 5 0 409852 7011.24 4
 -4 5 0 404273 7193.61 5
 -4 5 0 409611 6924.92 1
 -4 5 1 78439.4 1854.77 4
 -4 5 1 79321.1 2043.72 5
 -4 5 2 510.198 151.37 5
 -4 5 3 6796.02 519.992 5
 -4 5 4 23096.1 1046.53 5
 -4 5 5 99795.6 2625.87 5
 -4 5 6 33269.7 1406.32 5
 -4 5 6 29271.5 900.192 4
 -4 5 7 8837.63 732.059 5
 -4 5 8 5450.73 589.209 5
 -4 5 9 959.458 258.83 5
 -4 5 10 60661.8 2296.36 5
 -4 5 11 16790.2 1183.76 5
 -4 5 12 9255.91 908.92 5
 -4 5 13 6144.05 768.785 5
 -4 5 14 3282.23 584.165 5
 -4 5 15 14000.6 1276.48 5
 -4 5 16 5085.72 806.386 5
 -4 6 -18 9899.59 1141.4 4
 -4 6 -17 234.24 251.384 4
 -4 6 -16 14622 1290.91 4
 -4 6 -15 7622.41 902.541 4
 -4 6 -14 2843.89 538.799 4
 -4 6 -13 18406.7 1318.87 4
 -4 6 -12 -34.2129 129.702 4
 -4 6 -11 28351.2 1553.4 4
 -4 6 -10 9059.85 814.065 4
 -4 6 -9 8476.2 418.262 1
 -4 6 -9 8241.93 744.889 4
 -4 6 -8 5291.77 316.101 1
 -4 6 -8 5570.3 599.776 4
 -4 6 -7 632.112 101.07 1
 -4 6 -7 737.466 202.197 4
 -4 6 -6 61916.6 1383.74 1
 -4 6 -6 68308.5 2127.53 4
 -4 6 -5 59729.1 1376.77 1
 -4 6 -5 59583.3 1905.28 4
 -4 6 -4 2861.74 333.204 5
 -4 6 -4 2166.7 224.993 1
 -4 6 -4 2322.64 331.194 4
 -4 6 -3 28167.6 1157.62 4
 -4 6 -3 28428.9 1103.86 5
 -4 6 -3 27265.7 881.2 1
 -4 6 -2 412.441 142.194 4
 -4 6 -2 396.648 121.61 5
 -4 6 -2 165.573 60.0033 1
 -4 6 -1 148484 3233.36 5
 -4 6 -1 142591 2981.94 1
 -4 6 0 138276 2947.3 1
 -4 6 0 142061 3138.89 5
 -4 6 1 1302.06 242.548 5
 -4 6 1 1024.32 203.557 1
 -4 6 2 18441.7 899.195 5
 -4 6 2 17499.8 866.567 1
 -4 6 3 53.9327 52.411 5
 -4 6 4 45602.1 1606.37 5
 -4 6 5 74976.1 2255.92 5
 -4 6 6 7490.73 653.153 5
 -4 6 7 1663.83 332.871 5
 -4 6 8 345.827 150.156 5
 -4 6 9 25410.1 1421.22 5
 -4 6 10 27095.7 1521.52 5
 -4 6 11 1080.12 308.246 5
 -4 6 12 18502.7 1333.35 5
 -4 6 13 372.55 185.941 5
 -4 6 14 8471.77 976.135 5
 -4 6 15 15713.6 1380.97 5
 -4 7 -18 7628.44 1015.8 4
 -4 7 -17 1799.58 463.234 4
 -4 7 -16 9030.22 1013.41 4
 -4 7 -15 393.659 249.582 4
 -4 7 -14 17111.4 1322.97 4
 -4 7 -13 14511.4 1185.02 4
 -4 7 -12 8827.57 870.272 4
 -4 7 -11 22578.5 1361.51 4
 -4 7 -10 560.197 206.393 4
 -4 7 -9 39383 1759.46 4
 -4 7 -9 36494.9 1083.18 1
 -4 7 -8 5014.06 352.57 1
 -4 7 -8 5550.22 607.889 4
 -4 7 -7 4325.37 323.859 1
 -4 7 -7 4940.59 541.179 4
 -4 7 -6 40853.4 1153.75 1
 -4 7 -6 44347.1 1678.88 4
 -4 7 -5 176.937 91.3415 5
 -4 7 -5 56.6289 92.0183 4
 -4 7 -5 68.1492 39.7344 1
 -4 7 -4 40565.7 1530.74 4
 -4 7 -4 42702.3 1433.82 5
 -4 7 -4 37677.3 1185.3 1
 -4 7 -3 28432.2 1223.36 4
 -4 7 -3 27115 978.264 1
 -4 7 -3 28188.5 1127.83 5
 -4 7 -2 10528 693.328 5
 -4 7 -2 8386.95 525.18 1
 -4 7 -1 27669.4 1069.75 1
 -4 7 -1 29832 1192.42 5
 -4 7 0 10014.9 661.064 5
 -4 7 0 9739.56 618.224 1
 -4 7 1 7877.98 592.329 5
 -4 7 1 6798.38 540.101 1
 -4 7 2 7601.15 588.734 5
 -4 7 2 7778.13 599.128 1
 -4 7 3 3446.92 404.38 5
 -4 7 3 3531.73 412.416 1
 -4 7 4 49874 1752.86 5
 -4 7 5 17318.2 1006.1 5
 -4 7 6 2806.73 406.811 5
 -4 7 7 9602.62 815.099 5
 -4 7 8 441.094 207.506 5
 -4 7 9 31857 1673.39 5
 -4 7 10 16955.6 1225.1 5
 -4 7 11 9772.53 964.947 5
 -4 7 12 12436.7 1147.79 5
 -4 7 13 318.289 187.952 5
 -4 7 14 14801.6 1344.37 5
 -4 7 15 13225 1302.89 5
 -4 8 -18 578.513 304.177 4
 -4 8 -17 1600.12 417.896 4
 -4 8 -16 3416.5 633.905 4
 -4 8 -15 10150.5 1071.26 4
 -4 8 -14 33308.5 1906.74 4
 -4 8 -13 9916.27 976.449 4
 -4 8 -12 3289.77 562.833 4
 -4 8 -11 10303 940.66 4
 -4 8 -10 3453.65 326.448 1
 -4 8 -10 3756.34 548.179 4
 -4 8 -9 39056.5 1226.71 1
 -4 8 -9 43489.1 1849.07 4
 -4 8 -8 10025.8 558.261 1
 -4 8 -8 11689.5 899.357 4
 -4 8 -7 8134.1 491.638 1
 -4 8 -7 9099.79 759.627 4
 -4 8 -6 7930.24 699.243 4
 -4 8 -6 7359.46 485.024 1
 -4 8 -5 23827.2 1222.61 4
 -4 8 -5 25327.1 1101.46 5
 -4 8 -5 23750.4 946.02 1
 -4 8 -4 65721.1 2140.97 4
 -4 8 -4 64096.3 1890.18 5
 -4 8 -4 59260.3 1718.43 1
 -4 8 -3 12376.6 688.569 1
 -4 8 -3 12741.4 764.816 5
 -4 8 -2 14940.4 835.261 5
 -4 8 -2 12695.5 727.126 1
 -4 8 -1 6727.87 539.231 1
 -4 8 -1 6980.4 569.504 5
 -4 8 0 3799.21 423.989 5
 -4 8 0 3443.15 389.811 1
 -4 8 1 41158.6 1543.75 5
 -4 8 1 43642.2 1560.56 1
 -4 8 2 18745 994.365 5
 -4 8 2 17556.1 978.635 1
 -4 8 3 11114.2 760.517 5
 -4 8 3 10796.1 790.144 1
 -4 8 4 31372.8 1419.42 1
 -4 8 4 30854.1 1385.48 5
 -4 8 5 4487.75 529.967 5
 -4 8 6 26642.3 1374.26 5
 -4 8 7 25640.9 1388.96 5
 -4 8 8 1106.45 313.972 5
 -4 8 9 32889.8 1746.98 5
 -4 8 10 4958.99 697.769 5
 -4 8 11 15353.5 1257.76 5
 -4 8 12 7622.35 904.869 5
 -4 8 13 232.752 116.084 5
 -4 8 14 14234.4 1344.35 5
 -4 9 -17 3359.31 647.773 4
 -4 9 -16 920.323 331.484 4
 -4 9 -15 22213.3 1578.91 4
 -4 9 -14 21499.3 1498.96 4
 -4 9 -13 1005.29 325.931 4
 -4 9 -12 3546.96 574.92 4
 -4 9 -11 473.536 192.238 4
 -4 9 -10 18896.1 861.679 1
 -4 9 -10 23918.7 1425.01 4
 -4 9 -9 71186.5 1911.49 1
 -4 9 -9 79503.5 2668.97 4
 -4 9 -8 7606.18 513.351 1
 -4 9 -8 8244.1 777.295 4
 -4 9 -7 12755.4 960.383 4
 -4 9 -7 11854 667.322 1
 -4 9 -6 274.537 162.538 4
 -4 9 -6 342.163 136.303 1
 -4 9 -5 16062.2 1054.17 4
 -4 9 -5 15712.3 889.775 5
 -4 9 -5 13947.4 768.825 1
 -4 9 -4 49981.7 1659.49 5
 -4 9 -4 46725.4 1562.61 1
 -4 9 -3 278.693 74.2819 5
 -4 9 -3 383.237 136.058 1
 -4 9 -2 15099.7 872.039 5
 -4 9 -2 14135.2 820.763 1
 -4 9 -1 2237.13 334.58 1
 -4 9 -1 2907.11 378.298 5
 -4 9 0 18620.4 1014.38 1
 -4 9 0 20070.6 1041.57 5
 -4 9 1 72883.6 2185.17 5
 -4 9 1 68850.2 2180.21 1
 -4 9 2 12100.7 815.396 5
 -4 9 2 10472.6 789.972 1
 -4 9 3 20578.6 1171.26 1
 -4 9 3 20715.1 1123.98 5
 -4 9 4 3472.45 457.689 5
 -4 9 4 3396.75 473.693 1
 -4 9 5 13849.7 998.432 1
 -4 9 5 14100.7 977.981 5
 -4 9 6 41992.1 1807.94 5
 -4 9 7 8290.35 802.496 5
 -4 9 8 3084.24 494.892 5
 -4 9 9 18481.6 1301.92 5
 -4 9 10 2113.15 435.594 5
 -4 9 11 19468 1459.94 5
 -4 9 12 10859.4 1144.48 5
 -4 9 13 1210.1 414.42 5
 -4 10 -17 2877.56 633.361 4
 -4 10 -16 1076.06 416.793 4
 -4 10 -15 13838.5 1256.29 4
 -4 10 -14 4764.86 717.395 4
 -4 10 -13 4949.64 720.463 4
 -4 10 -12 8509.18 908.306 4
 -4 10 -11 120.384 144.317 4
 -4 10 -10 42506.8 1999.63 4
 -4 10 -9 40018.1 1390.9 1
 -4 10 -9 46222.2 2028.42 4
 -4 10 -8 3466.97 532.245 4
 -4 10 -8 2213.45 289.669 1
 -4 10 -7 20910.9 1306.15 4
 -4 10 -7 21028.5 995.07 1
 -4 10 -6 1893.6 315.286 5
 -4 10 -6 1628.26 358.773 4
 -4 10 -6 1382.65 242.746 1
 -4 10 -5 26261.7 1187.72 5
 -4 10 -5 23778.9 1114.42 1
 -4 10 -4 13982.5 842.389 5
 -4 10 -4 12427.9 812.414 1
 -4 10 -3 699.105 184.894 5
 -4 10 -3 667.281 179.503 1
 -4 10 -2 19009 1025.76 5
 -4 10 -2 16663.9 954.113 1
 -4 10 -1 79.6234 59.7713 5
 -4 10 -1 108.408 82.783 1
 -4 10 0 25664.7 1278.27 1
 -4 10 0 27669.8 1292.99 5
 -4 10 1 31018.4 1380.6 5
 -4 10 1 28355.1 1381.86 1
 -4 10 2 1493.91 317.702 1
 -4 10 2 1553.27 285.734 5
 -4 10 3 37655.5 1690.23 1
 -4 10 3 37398.3 1604.94 5
 -4 10 4 330.542 130.084 5
 -4 10 4 373.006 211.963 1
 -4 10 5 25835.5 1385.27 5
 -4 10 5 27059.6 1486.98 1
 -4 10 6 19818.7 1254.9 5
 -4 10 7 2892.77 492.757 5
 -4 10 8 4972.11 653.753 5
 -4 10 9 462.111 180.151 5
 -4 10 10 16950.9 1326.39 5
 -4 10 11 27064.5 1768.82 5
 -4 10 12 5288.65 808.725 5
 -4 11 -16 1317.38 379.322 4
 -4 11 -15 9050.32 1056.31 4
 -4 11 -14 136.96 95.9991 4
 -4 11 -13 17835.8 1407.6 4
 -4 11 -12 14374.9 1232.79 4
 -4 11 -11 607.522 258.886 4
 -4 11 -10 14794.3 1193.4 4
 -4 11 -9 2199.97 462.327 4
 -4 11 -9 2120.51 305.945 1
 -4 11 -8 18335 1278.9 4
 -4 11 -8 16772.7 939.349 1
 -4 11 -7 28953.1 1622 4
 -4 11 -7 26048.5 1208.29 1
 -4 11 -6 2770.71 382.147 5
 -4 11 -6 2677.77 366.356 1
 -4 11 -5 20217.1 1046.81 5
 -4 11 -5 15462.5 953.423 1
 -4 11 -4 10858.3 781.265 5
 -4 11 -4 10176.5 762.211 1
 -4 11 -3 17463.1 1012.06 5
 -4 11 -3 14563.6 936.305 1
 -4 11 -2 17622.3 1020.16 5
 -4 11 -2 15327.2 986.175 1
 -4 11 -1 -0.65197 81.206 5
 -4 11 -1 -111.101 140.561 1
 -4 11 0 29352.5 1451.29 1
 -4 11 0 30406.5 1382.24 5
 -4 11 1 11334.9 838.106 5
 -4 11 1 10546.9 860.672 1
 -4 11 2 18871.8 1113.26 5
 -4 11 2 18655.4 1192.18 1
 -4 11 3 22569.6 1260.08 5
 -4 11 3 21033.4 1299.76 1
 -4 11 4 7841.03 750.275 5
 -4 11 4 6362.1 729.979 1
 -4 11 5 14460.3 1055.92 5
 -4 11 5 15423.5 1169.11 1
 -4 11 6 10860.6 995.568 1
 -4 11 6 9457.82 879.082 5
 -4 11 7 2544.64 488.327 5
 -4 11 8 6311 761.767 5
 -4 11 9 101.456 122.82 5
 -4 11 10 15612.4 1304.08 5
 -4 11 11 10581.4 1112.7 5
 -4 12 -15 2119.48 518.857 4
 -4 12 -14 7013.99 917.448 4
 -4 12 -13 15255.8 1323.48 4
 -4 12 -12 2532.37 515.762 4
 -4 12 -11 1714.61 439.873 4
 -4 12 -10 2261.08 476.412 4
 -4 12 -9 8830.43 931.783 4
 -4 12 -9 7649.07 654.945 1
 -4 12 -8 29065.8 1720.41 4
 -4 12 -8 26200.4 1278.75 1
 -4 12 -7 4376.6 665.174 4
 -4 12 -7 3224.01 419.047 1
 -4 12 -6 6711.4 612.303 5
 -4 12 -6 5614.75 590.561 1
 -4 12 -5 18277.9 1032.12 5
 -4 12 -5 16276.4 1045.66 1
 -4 12 -4 818.229 191.014 5
 -4 12 -4 623.718 162.474 1
 -4 12 -3 33456.7 1479.98 5
 -4 12 -3 30286.3 1472.71 1
 -4 12 -2 18685.4 1097.24 5
 -4 12 -2 15381 1042.96 1
 -4 12 -1 49.3291 77.9356 5
 -4 12 -1 238.792 140.266 1
 -4 12 0 16530 1123.82 1
 -4 12 0 17193.4 1059.03 5
 -4 12 1 -3.80257 124.544 5
 -4 12 1 -95.4008 149.17 1
 -4 12 2 26838.3 1379.19 5
 -4 12 2 22635.7 1387.41 1
 -4 12 3 11254.9 921.438 5
 -4 12 3 9231.4 878.122 1
 -4 12 4 3554.43 604.469 1
 -4 12 4 3227.73 496.328 5
 -4 12 5 11637.1 974.634 5
 -4 12 5 11187.4 1022.77 1
 -4 12 6 254.464 207.177 5
 -4 12 6 251.482 205.107 1
 -4 12 7 11911 1041.58 5
 -4 12 8 11355.6 1069.04 5
 -4 12 9 1645.17 411.57 5
 -4 12 10 6551.79 858.151 5
 -4 13 -14 6705.34 918.605 4
 -4 13 -13 7971.59 979.138 4
 -4 13 -12 213.813 153.897 4
 -4 13 -11 6259.04 855.516 4
 -4 13 -10 -149.921 132.506 4
 -4 13 -9 22825.8 1569.54 4
 -4 13 -9 20507.7 1174.45 1
 -4 13 -8 28232.6 1760.85 4
 -4 13 -8 23591 1276.73 1
 -4 13 -7 1703.71 359.06 1
 -4 13 -6 6532.9 621.465 5
 -4 13 -6 5143.97 598.286 1
 -4 13 -5 -24.6883 104.991 1
 -4 13 -5 -57.5286 84.4324 5
 -4 13 -4 27119.2 1440.37 1
 -4 13 -4 32148.6 1432.16 5
 -4 13 -3 37482.6 1587.61 5
 -4 13 -3 32198.1 1595.3 1
 -4 13 -2 920.599 253.456 5
 -4 13 -2 716.301 250.763 1
 -4 13 -1 6559.88 711.717 1
 -4 13 -1 8054.94 732.671 5
 -4 13 0 679.969 216.286 1
 -4 13 0 760.049 245.466 5
 -4 13 1 10672.9 872.442 5
 -4 13 1 9038.79 895.528 1
 -4 13 2 45195.1 1908.34 5
 -4 13 2 41026 1992.48 1
 -4 13 3 3719.16 529.712 5
 -4 13 3 3728.17 574.046 1
 -4 13 4 2853.96 481.973 5
 -4 13 4 2976.42 564.419 1
 -4 13 5 3873.43 583.741 5
 -4 13 5 3917.08 641.25 1
 -4 13 6 5206.63 736.794 1
 -4 13 6 5012.52 685.543 5
 -4 13 7 27170.7 1654 5
 -4 13 8 4761.47 683.35 5
 -4 13 9 2682.31 527.02 5
 -4 14 -13 3065.15 622.714 4
 -4 14 -12 2767.05 597.096 4
 -4 14 -11 6059.58 866.567 4
 -4 14 -10 190.04 185.3 4
 -4 14 -9 11496.7 1165.33 4
 -4 14 -9 9328.46 825.434 1
 -4 14 -8 7702.76 939.295 4
 -4 14 -8 7116.07 723.925 1
 -4 14 -7 1143.63 320.868 1
 -4 14 -6 7557.14 679.08 5
 -4 14 -6 5880.56 695.371 1
 -4 14 -5 1753.94 328.976 5
 -4 14 -5 1359.21 333.074 1
 -4 14 -4 43456 1730.3 5
 -4 14 -4 38637.2 1831.25 1
 -4 14 -3 19828.7 1142.38 5
 -4 14 -3 15880.3 1154.31 1
 -4 14 -2 423.178 193.159 5
 -4 14 -2 76.6883 85.2497 1
 -4 14 -1 2459.34 443.219 1
 -4 14 -1 3838.2 514.532 5
 -4 14 0 1065.53 284.388 5
 -4 14 0 1063.22 337.523 1
 -4 14 1 29193.8 1518.87 5
 -4 14 1 28558.3 1670.57 1
 -4 14 2 19557.7 1262.89 5
 -4 14 2 18443.2 1363.17 1
 -4 14 3 138.787 156.909 5
 -4 14 3 -204.357 229.54 1
 -4 14 4 3222.25 525.094 5
 -4 14 4 4035.76 658.722 1
 -4 14 5 -33.5523 65.5321 5
 -4 14 5 388.873 239.275 1
 -4 14 6 16136.6 1363.41 1
 -4 14 6 15225.4 1231.74 5
 -4 15 -12 4737.88 800.59 4
 -4 15 -11 3178.5 648.374 4
 -4 15 -10 3676.19 691.337 4
 -4 15 -9 5384.41 834.907 4
 -4 15 -8 16.3054 105.025 1
 -4 15 -7 10134.9 932.976 1
 -4 15 -6 5831.95 717.343 1
 -4 15 -5 3035.68 508.949 1
 -4 15 -4 16090.1 1205.52 1
 -4 15 -3 3384.08 573.777 1
 -4 15 -2 2296.12 478.385 1
 -4 15 -1 6919.71 830.054 1
 -4 15 0 672.446 262.103 1
 -4 15 1 13101.5 1161.85 1
 -4 15 2 6160.85 818.497 1
 -4 15 3 -51.6013 185.947 1
 -4 15 4 4164.92 698.08 1
 -4 16 -9 2459.05 615.721 4
 -4 16 -8 761.87 243.068 1
 -4 16 -7 15842.7 1216.46 1
 -4 16 -6 3718.59 574.628 1
 -4 16 -5 934.508 291.577 1
 -4 16 -4 2626.03 508.525 1
 -4 16 -3 807.167 304.155 1
 -4 16 -2 13776.6 1195.13 1
 -4 16 -1 4962.4 712.576 1
 -4 16 0 1496.57 375.223 1
 -4 16 1 4903.27 730.394 1
 -4 17 -7 16207.7 1278.95 1
 -4 17 -6 1373.48 377.011 1
 -4 17 -5 1898.86 452.578 1
 -4 17 -4 294.218 124.134 1
 -4 17 -3 4317.79 671.453 1
 -3 -14 -1 4168.43 670.485 2
 -3 -13 -2 179.669 197.107 2
 -3 -13 -1 7453.68 873.186 2
 -3 -13 0 3054.99 538.876 2
 -3 -13 1 1843.61 385.976 2
 -3 -12 -4 10452.1 1118.38 2
 -3 -12 -3 9472.05 1017 2
 -3 -12 -2 1961.14 480.748 2
 -3 -12 -1 5684.96 731.739 2
 -3 -12 0 240.735 125.844 2
 -3 -12 1 14407.5 1086.79 2
 -3 -12 2 15177.7 1061.55 2
 -3 -12 3 482.575 190.665 2
 -3 -11 -6 2353.93 544.754 2
 -3 -11 -5 2164.25 495.185 2
 -3 -11 -4 20077.6 1528.21 2
 -3 -11 -3 3493.39 605.391 2
 -3 -11 -2 2293.86 475.587 2
 -3 -11 -1 2547.29 474.848 2
 -3 -11 0 8609.6 830.315 2
 -3 -11 1 27187.2 1458.22 2
 -3 -11 2 18995.9 1150.49 2
 -3 -11 3 2027.65 351.68 2
 -3 -11 4 5901.5 560.252 2
 -3 -10 -7 11182.9 1185.29 2
 -3 -10 -6 1261.5 380.706 2
 -3 -10 -5 11137.6 1120.61 2
 -3 -10 -4 24201.8 1637.91 2
 -3 -10 -3 269.158 202.304 2
 -3 -10 -2 8746.58 895.851 2
 -3 -10 -1 555.46 220.422 2
 -3 -10 0 6315.73 693.342 2
 -3 -10 1 20189.6 1186.97 2
 -3 -10 2 1110.52 262.184 2
 -3 -10 3 17505.4 996.169 2
 -3 -10 4 3477.98 414.527 2
 -3 -10 5 13098.5 778.859 2
 -3 -9 -9 146.493 176.309 2
 -3 -9 -8 10619.9 1143.51 2
 -3 -9 -7 20023.1 1560.3 2
 -3 -9 -6 498.311 262.789 2
 -3 -9 -5 12189.8 1136.41 2
 -3 -9 -4 9060.19 936.699 2
 -3 -9 -3 7439.44 592.122 3
 -3 -9 -3 7784.45 836.148 2
 -3 -9 -2 31480 1664.37 2
 -3 -9 -1 2804.92 468.63 2
 -3 -9 0 17470 1103.95 2
 -3 -9 1 24914.6 1281.61 2
 -3 -9 2 2169.55 351.209 2
 -3 -9 3 41668.5 1533.85 2
 -3 -9 4 1230.23 240.593 2
 -3 -9 5 13488.2 746.081 2
 -3 -8 -10 2772.64 604.092 2
 -3 -8 -9 4117.72 683.622 2
 -3 -8 -8 28188.7 1839.29 2
 -3 -8 -7 12661 1197.07 2
 -3 -8 -6 72.4573 97.4272 2
 -3 -8 -5 7210.51 842.67 2
 -3 -8 -4 -30.0378 91.0018 3
 -3 -8 -4 22.5812 125.805 2
 -3 -8 -3 57397.1 1774.31 3
 -3 -8 -3 61072.1 2379.91 2
 -3 -8 -2 53204.7 2140.83 2
 -3 -8 -1 596.801 186.613 2
 -3 -8 0 18868.1 1112.81 2
 -3 -8 1 6222.95 585.68 2
 -3 -8 2 21898.7 1063.28 2
 -3 -8 3 21407.8 995.624 2
 -3 -8 4 184.14 92.6254 2
 -3 -8 5 14821 740.723 2
 -3 -7 -11 6006.6 867.454 2
 -3 -7 -10 3769.71 683.471 2
 -3 -7 -9 10031.8 1069.2 2
 -3 -7 -8 28629.6 1805.43 2
 -3 -7 -7 15782.3 1294.75 2
 -3 -7 -6 4702.2 689.45 2
 -3 -7 -5 8166.44 585.389 3
 -3 -7 -5 8130.44 856.976 2
 -3 -7 -4 3153.31 352.848 3
 -3 -7 -4 3523.07 542.946 2
 -3 -7 -3 78375.7 2653.48 2
 -3 -7 -3 75448 2055.15 3
 -3 -7 -2 14092 982.938 2
 -3 -7 -1 918.787 255.57 2
 -3 -7 0 9022.05 716.673 2
 -3 -7 1 14367.7 843.608 2
 -3 -7 2 39057.9 1393.46 2
 -3 -7 3 16211.5 803.667 2
 -3 -7 4 14176.4 715.665 2
 -3 -6 -12 3067.96 604.741 2
 -3 -6 -11 18726.2 1492.63 2
 -3 -6 -10 4550.01 724.151 2
 -3 -6 -9 11095.2 1101.22 2
 -3 -6 -8 17503.8 1340.59 2
 -3 -6 -7 861.128 183.255 3
 -3 -6 -7 958.876 314.386 2
 -3 -6 -6 21602.2 945.163 3
 -3 -6 -6 16399.6 1237.77 2
 -3 -6 -5 3612.77 387.003 3
 -3 -6 -5 5130.14 657.352 2
 -3 -6 -4 23479.9 986.005 3
 -3 -6 -4 24710.7 1388.2 2
 -3 -6 -3 14279.3 744.355 3
 -3 -6 -3 15104.5 1026.16 2
 -3 -6 -2 409.946 137.955 2
 -3 -6 -1 21878.4 1118.29 2
 -3 -6 0 562.588 182.063 2
 -3 -6 1 26476.6 1109.13 2
 -3 -6 2 55808.8 1633.74 2
 -3 -6 3 738.1 154.113 2
 -3 -6 4 21407.6 853.408 2
 -3 -6 6 13478.4 376.31 5
 -3 -6 7 69935.5 1488.78 5
 -3 -6 8 6800.44 417.834 5
 -3 -6 9 18937.7 838.633 5
 -3 -6 10 3723.91 394.213 5
 -3 -6 11 19226.3 1014.72 5
 -3 -6 12 34785 1499.51 5
 -3 -6 13 4113.68 521.405 5
 -3 -6 14 876.622 245.184 5
 -3 -6 15 6644.89 748.204 5
 -3 -6 16 959.712 264.051 5
 -3 -6 17 27119.3 1683.3 5
 -3 -6 18 16406.3 1354.36 5
 -3 -5 -14 6642.63 905.929 2
 -3 -5 -13 357.306 184.728 2
 -3 -5 -12 9125.03 1012.47 2
 -3 -5 -11 22862.9 1608.39 2
 -3 -5 -10 307.288 124.856 2
 -3 -5 -9 12633.1 1123.04 2
 -3 -5 -8 2226.14 447.765 2
 -3 -5 -7 17779.7 852.181 3
 -3 -5 -7 18981.6 1294.49 2
 -3 -5 -6 22074.7 945.411 3
 -3 -5 -6 23786.5 1405.05 2
 -3 -5 -5 1554.42 246.862 3
 -3 -5 -5 1537.63 366.086 2
 -3 -5 -4 13996 717.44 3
 -3 -5 -4 15101.6 1017.17 2
 -3 -5 -3 134.811 68.9493 3
 -3 -5 -3 146.108 137.442 2
 -3 -5 -2 8755.08 692.614 2
 -3 -5 -1 57960.6 1835.69 2
 -3 -5 0 7165.1 545.223 2
 -3 -5 1 21754.1 926.577 2
 -3 -5 2 29417.5 1042.21 2
 -3 -5 3 15967.8 705.112 2
 -3 -5 6 23488.5 647.679 5
 -3 -5 7 20986.8 723.333 5
 -3 -5 8 8021.05 492.177 5
 -3 -5 9 41574.2 1380.24 5
 -3 -5 10 1089.24 230.607 5
 -3 -5 11 47976.5 1736.86 5
 -3 -5 12 38723.7 1639.38 5
 -3 -5 13 1195.59 280.671 5
 -3 -5 14 20687.5 1296.98 5
 -3 -5 15 10658.4 970.389 5
 -3 -5 16 4898.24 683.134 5
 -3 -5 17 23664.6 1586.37 5
 -3 -5 18 716.775 249.154 5
 -3 -5 19 4903.82 763.475 5
 -3 -5 20 1404.71 431.496 5
 -3 -4 -15 150.164 138.998 2
 -3 -4 -14 3004.82 574.383 2
 -3 -4 -13 152.187 189.7 2
 -3 -4 -12 17452.8 1355.72 2
 -3 -4 -11 20722.3 1460.04 2
 -3 -4 -10 1753.42 415.341 2
 -3 -4 -9 14504.7 1148.62 2
 -3 -4 -8 300.116 165.342 2
 -3 -4 -7 33867.5 1201.99 3
 -3 -4 -7 34729.7 1704.18 2
 -3 -4 -6 27287.3 1436.73 2
 -3 -4 -6 25464.3 1006.7 3
 -3 -4 -5 3077.2 317.259 3
 -3 -4 -5 3765.94 492.543 2
 -3 -4 -4 15305.9 729.499 3
 -3 -4 -4 15492.4 971.152 2
 -3 -4 -3 998.887 240.361 2
 -3 -4 -3 901.095 164.025 3
 -3 -4 -2 77857.2 2190.53 2
 -3 -4 -1 99128.9 2454.99 2
 -3 -4 0 540.074 145.595 2
 -3 -4 1 55654.1 1522.17 2
 -3 -4 2 4447.5 352.215 2
 -3 -4 3 122386 2479.38 2
 -3 -4 5 947.491 103.993 5
 -3 -4 6 29384 836.179 5
 -3 -4 7 1011.44 159.492 5
 -3 -4 8 20803.8 866.592 5
 -3 -4 9 57588 1736.06 5
 -3 -4 10 2067.81 314.275 5
 -3 -4 11 12664.3 857.565 5
 -3 -4 12 5614.1 596.31 5
 -3 -4 13 7871.15 752.56 5
 -3 -4 14 31189.1 1634.49 5
 -3 -4 15 691.805 255.514 5
 -3 -4 16 17014.1 1306.17 5
 -3 -4 17 6321.73 828.022 5
 -3 -4 18 4559.62 726.379 5
 -3 -4 19 11460.6 1182.1 5
 -3 -4 20 1137.94 360.212 5
 -3 -3 -16 290.83 264.135 2
 -3 -3 -15 3444.61 601.606 2
 -3 -3 -14 1815.24 435.975 2
 -3 -3 -13 6484.26 797.612 2
 -3 -3 -13 6272.01 907.8 4
 -3 -3 -12 15951.3 1243.99 2
 -3 -3 -12 16675.3 1430.39 4
 -3 -3 -11 5382.03 692.544 2
 -3 -3 -11 5369.5 790 4
 -3 -3 -10 11610.2 1003.88 2
 -3 -3 -10 10659.5 1077.83 4
 -3 -3 -9 692.356 246.463 4
 -3 -3 -9 663.492 252.562 2
 -3 -3 -8 11846.8 944.577 2
 -3 -3 -8 12713.9 1092.99 4
 -3 -3 -7 67625.8 2376.99 2
 -3 -3 -7 70347 2650.23 4
 -3 -3 -6 5312.35 422.077 3
 -3 -3 -6 6471.29 645.784 2
 -3 -3 -6 5644.41 671.285 4
 -3 -3 -5 19632.8 1096.28 2
 -3 -3 -5 23275 913.039 3
 -3 -3 -4 21137.5 855.562 3
 -3 -3 -4 20889.7 1062.12 2
 -3 -3 -3 4089.02 343.742 3
 -3 -3 -3 3873.41 418.01 2
 -3 -3 -2 138270 2807.66 3
 -3 -3 -2 133882 3045.69 2
 -3 -3 -1 106204 2460.52 2
 -3 -3 0 17009.2 740.37 2
 -3 -3 1 126022 2591.05 2
 -3 -3 2 79446 1793.5 2
 -3 -3 4 182615 3042.1 5
 -3 -3 5 111.21 49.2309 5
 -3 -3 6 4444.69 316.713 5
 -3 -3 7 327.764 103.174 5
 -3 -3 8 51484.4 1544.68 5
 -3 -3 9 69058 2001.42 5
 -3 -3 10 1111.26 224.98 5
 -3 -3 11 1892.06 446.035 5
 -3 -3 12 5044.08 568.629 5
 -3 -3 13 27855.1 1473.26 5
 -3 -3 14 10505.6 931.678 5
 -3 -3 15 2466.12 463.81 5
 -3 -3 16 15192.4 1226.46 5
 -3 -3 17 -172.367 237.143 5
 -3 -3 18 8676.46 994.22 5
 -3 -3 19 12146.5 1235.71 5
 -3 -3 20 -326.553 255.634 5
 -3 -2 -16 2241.75 578.087 4
 -3 -2 -16 2956.44 540.324 2
 -3 -2 -15 11222.1 1052.1 2
 -3 -2 -15 10469.9 1208.3 4
 -3 -2 -14 1023.54 384.238 4
 -3 -2 -14 340.27 186.446 2
 -3 -2 -13 9633.54 1068.07 4
 -3 -2 -13 8770.8 884.737 2
 -3 -2 -12 22936.9 1430.35 2
 -3 -2 -12 24490.4 1670.28 4
 -3 -2 -11 5084.94 640.349 2
 -3 -2 -11 5413.66 738.151 4
 -3 -2 -10 14320.2 1063.43 2
 -3 -2 -10 15309.5 1226.05 4
 -3 -2 -9 876.667 294.347 4
 -3 -2 -9 1210.32 294.62 2
 -3 -2 -8 34084.8 1573.56 2
 -3 -2 -8 36136.9 1785.25 4
 -3 -2 -7 20230.6 1134.62 2
 -3 -2 -7 20273.3 1270.67 4
 -3 -2 -6 3978.76 358.79 3
 -3 -2 -6 4282.67 483.411 2
 -3 -2 -6 4738.37 578.851 4
 -3 -2 -5 10146.7 565.52 3
 -3 -2 -5 10483.6 711.919 2
 -3 -2 -5 10218.3 822.552 4
 -3 -2 -4 287.11 139.92 4
 -3 -2 -4 459.46 122.28 3
 -3 -2 -4 497.863 137.076 2
 -3 -2 -3 51141.1 1374.48 3
 -3 -2 -3 50498.3 1545.83 2
 -3 -2 -3 51263.1 1834.32 4
 -3 -2 -2 107681 2273.27 3
 -3 -2 -2 106004 2430.87 2
 -3 -2 -2 106009 2805.68 4
 -3 -2 -1 3040.6 298.736 2
 -3 -2 0 90915.6 2006.21 2
 -3 -2 1 39856.8 1098.39 2
 -3 -2 2 103781 1804.36 5
 -3 -2 3 66870.7 1287.39 5
 -3 -2 4 26243 727.471 5
 -3 -2 5 13763.8 537.84 5
 -3 -2 6 466.426 108.032 5
 -3 -2 7 17838.5 778.524 5
 -3 -2 8 120239 2788.15 5
 -3 -2 9 16829.4 902.141 5
 -3 -2 10 4301.32 476.423 5
 -3 -2 11 4305.12 514.574 5
 -3 -2 12 17049.8 1105.54 5
 -3 -2 13 19669.7 1242.98 5
 -3 -2 14 5798.17 711.49 5
 -3 -2 15 9243.57 939.242 5
 -3 -2 16 2190.31 478.684 5
 -3 -2 17 4055.97 660.912 5
 -3 -2 18 15021.2 1346.95 5
 -3 -2 19 2999.99 641.763 5
 -3 -1 -16 14157.4 1156.13 2
 -3 -1 -16 15283.1 1450.11 4
 -3 -1 -15 10998 987.749 2
 -3 -1 -15 10127.7 1127.17 4
 -3 -1 -14 807.641 335.769 4
 -3 -1 -14 269.801 161.907 2
 -3 -1 -13 14754.1 1099.95 2
 -3 -1 -13 16660.4 1367.25 4
 -3 -1 -12 937.912 354.98 4
 -3 -1 -12 1428.88 326.498 2
 -3 -1 -11 20671.5 1251.03 2
 -3 -1 -11 22472.2 1506.82 4
 -3 -1 -10 40779.7 1749.14 2
 -3 -1 -10 42734 2015.2 4
 -3 -1 -9 1543.17 336.872 4
 -3 -1 -9 1628.57 311.882 2
 -3 -1 -8 29224.7 1350.85 2
 -3 -1 -8 29333.5 1529.05 4
 -3 -1 -7 4301.73 471.193 2
 -3 -1 -7 4822.03 575.555 4
 -3 -1 -6 6115.2 537.794 2
 -3 -1 -6 5593.19 598.569 4
 -3 -1 -5 70966.4 1767.6 3
 -3 -1 -5 69198.7 1962.35 2
 -3 -1 -5 72047.9 2281.67 4
 -3 -1 -4 3238.11 338.253 2
 -3 -1 -4 2442.71 256.599 3
 -3 -1 -4 2681.84 378.91 4
 -3 -1 -3 43481.3 1227.81 3
 -3 -1 -3 45582.6 1602.06 4
 -3 -1 -3 43900 1312.72 2
 -3 -1 -2 40999.1 1148.14 3
 -3 -1 -2 43052 1221.96 2
 -3 -1 -2 42377.7 1465.54 4
 -3 -1 -1 10942.4 503.865 3
 -3 -1 -1 10796 654.38 4
 -3 -1 -1 11253.6 527.379 2
 -3 -1 0 168557 3554.18 4
 -3 -1 0 177362 3238.14 2
 -3 -1 1 4685.14 236.843 5
 -3 -1 2 6565.82 294.667 5
 -3 -1 3 34996 863.877 5
 -3 -1 4 15710.9 582.982 5
 -3 -1 5 102279 2133.39 5
 -3 -1 6 2167.91 248.396 5
 -3 -1 7 44741.9 1390.7 5
 -3 -1 8 32033.9 1234.05 5
 -3 -1 9 3434.63 415.566 5
 -3 -1 10 35747 1500.76 5
 -3 -1 11 483.188 197.728 5
 -3 -1 12 27106.8 1423.36 5
 -3 -1 13 32210.4 1639.83 5
 -3 -1 14 -50.7525 107.216 5
 -3 -1 15 10908.1 1017.2 5
 -3 -1 16 124.346 198.235 5
 -3 -1 17 14936.9 1284.43 5
 -3 -1 18 11302.1 1163.96 5
 -3 -1 19 112.467 230.296 5
 -3 0 -17 529.35 291.997 4
 -3 0 -16 24125 1795.88 4
 -3 0 -15 4958.92 625.501 2
 -3 0 -15 6617.96 889.596 4
 -3 0 -14 1929.63 454.491 4
 -3 0 -14 1705.5 357.219 2
 -3 0 -13 2839.36 449.988 2
 -3 0 -13 3610.71 593.836 4
 -3 0 -12 13511.7 959.966 2
 -3 0 -12 14261.7 1154.34 4
 -3 0 -11 47474.2 1846.42 2
 -3 0 -11 48728.8 2155 4
 -3 0 -10 26249.1 1270.84 2
 -3 0 -10 26392.1 1500.8 4
 -3 0 -9 1645.62 362.9 4
 -3 0 -9 1720.46 306.5 2
 -3 0 -8 20082.3 1009 2
 -3 0 -8 20308 1196.4 4
 -3 0 -7 1953.86 360.674 4
 -3 0 -7 1690.82 265.011 2
 -3 0 -6 140370 3448.34 4
 -3 0 -6 131672 2989.99 2
 -3 0 -5 108166 2506.73 2
 -3 0 -5 119012 2969.42 4
 -3 0 -4 -17.5847 65.8108 4
 -3 0 -4 113.705 77.1178 3
 -3 0 -4 125.138 55.7071 1
 -3 0 -4 114.358 69.6265 2
 -3 0 -3 7276.3 429.261 3
 -3 0 -3 8949.44 339.171 1
 -3 0 -3 7746.6 451.031 2
 -3 0 -3 8013.05 583.191 4
 -3 0 -2 1850.13 214.899 3
 -3 0 -2 2013.9 138.323 1
 -3 0 -2 1970.91 203.911 2
 -3 0 -2 2079.1 268.051 4
 -3 0 -1 143139 2418.02 1
 -3 0 -1 142409 2678.2 3
 -3 0 -1 140064 2958.13 4
 -3 0 -1 135680 2663.88 2
 -3 0 0 42576 1007.93 5
 -3 0 0 41020.6 1066.66 3
 -3 0 0 43299.5 1258.2 4
 -3 0 0 44903.3 967.215 1
 -3 0 1 2027.83 176.681 5
 -3 0 1 2122.1 221.858 4
 -3 0 2 72466.6 1519.93 5
 -3 0 3 6619.15 350.116 5
 -3 0 4 69221.7 1599.06 5
 -3 0 5 87568.6 1971.69 5
 -3 0 6 4732.25 397.562 5
 -3 0 7 85335.5 2192.35 5
 -3 0 8 167.567 77.2697 5
 -3 0 9 42281.4 1575.11 5
 -3 0 10 40554.8 1626.2 5
 -3 0 11 152.297 104.031 5
 -3 0 12 30817 1556.37 5
 -3 0 13 9253.56 862.919 5
 -3 0 14 12620.4 1058.11 5
 -3 0 15 22597.2 1486.87 5
 -3 0 16 -61.8893 75.0325 5
 -3 0 17 12391.3 1195.6 5
 -3 0 18 3939.13 667.857 5
 -3 0 19 390.238 209.131 5
 -3 1 -17 10157.9 1136.74 4
 -3 1 -16 12746.2 1240.06 4
 -3 1 -15 401.614 230.456 4
 -3 1 -14 9869.84 998.209 4
 -3 1 -14 8844.04 760.517 2
 -3 1 -13 661.152 262.285 4
 -3 1 -13 671.852 216.986 2
 -3 1 -12 19810.3 1103.79 2
 -3 1 -12 21168.9 1386.67 4
 -3 1 -11 43728.5 1982.1 4
 -3 1 -11 42778.9 1618.68 2
 -3 1 -10 13701.1 826.31 2
 -3 1 -10 11764.9 951.276 4
 -3 1 -9 13002.3 776.724 2
 -3 1 -9 14043.2 997.259 4
 -3 1 -8 6759.38 516.274 2
 -3 1 -8 6739.27 645.705 4
 -3 1 -7 44479.6 1407.38 2
 -3 1 -7 49109.7 1783.79 4
 -3 1 -6 214655 3663.89 1
 -3 1 -6 212542 4529.23 4
 -3 1 -5 42921.4 961.268 1
 -3 1 -5 39000.2 1178.44 2
 -3 1 -5 39716.3 1472.26 4
 -3 1 -4 6294.75 246.002 1
 -3 1 -4 6101.8 377.929 2
 -3 1 -4 6822.53 524.447 4
 -3 1 -3 1222.47 206.222 4
 -3 1 -3 1138.18 161.57 3
 -3 1 -3 1035.07 72.3286 1
 -3 1 -3 1105.61 153.167 2
 -3 1 -2 30758.9 897.313 3
 -3 1 -2 28161.6 833.217 2
 -3 1 -2 31272.3 1061.11 4
 -3 1 -1 39240.7 1023.8 5
 -3 1 -1 40128.9 1026.92 3
 -3 1 -1 39932.7 1170.16 4
 -3 1 0 10696.3 480.549 5
 -3 1 0 9539.69 411.568 3
 -3 1 0 9749.68 479.899 4
 -3 1 1 43724.4 1088.66 5
 -3 1 1 42933.3 1022.06 3
 -3 1 1 44179.8 1074.79 4
 -3 1 2 1707.58 178.52 5
 -3 1 2 1671.35 153.393 4
 -3 1 3 25259.1 814.355 5
 -3 1 4 75785 1792.86 5
 -3 1 5 26907 957.083 5
 -3 1 6 40702.1 1307.92 5
 -3 1 7 40528.1 1407.37 5
 -3 1 8 14285.8 843.175 5
 -3 1 9 65902.9 2112.1 5
 -3 1 10 38423.1 1614.95 5
 -3 1 11 23.0383 86.054 5
 -3 1 12 12675.7 994.986 5
 -3 1 13 2045.43 415.388 5
 -3 1 14 48911.1 2207.77 5
 -3 1 15 36115.8 1952.69 5
 -3 1 16 347.423 235.823 5
 -3 1 17 5670.53 811.691 5
 -3 1 18 61.1111 90.7057 5
 -3 2 -18 135.461 148.975 4
 -3 2 -17 14498.2 1346.54 4
 -3 2 -16 1743.79 421.435 4
 -3 2 -15 4563.42 707.105 4
 -3 2 -14 22827.8 1160.63 2
 -3 2 -14 24456.9 1578.9 4
 -3 2 -13 141.58 144.382 4
 -3 2 -13 326.638 149.854 2
 -3 2 -12 8503.47 848.529 4
 -3 2 -12 8106.85 627.947 2
 -3 2 -11 32266 1275.6 2
 -3 2 -11 36592.9 1744.04 4
 -3 2 -10 3424.68 361.13 2
 -3 2 -10 3126.25 471.554 4
 -3 2 -9 18116.4 835.742 2
 -3 2 -9 18926.6 1112.58 4
 -3 2 -8 5961.06 444.617 2
 -3 2 -8 6321.51 606.639 4
 -3 2 -7 18507 763.727 2
 -3 2 -7 19728.9 1034.63 4
 -3 2 -6 86370.9 1642.02 1
 -3 2 -6 83824 1908.65 2
 -3 2 -6 84320.7 2346.37 4
 -3 2 -5 468.068 148.889 4
 -3 2 -5 387.642 55.0099 1
 -3 2 -5 426.15 95.4204 2
 -3 2 -4 36986.8 1001.55 2
 -3 2 -4 36792.5 1272.67 4
 -3 2 -3 7753.79 505.049 4
 -3 2 -2 99131.7 2073.99 5
 -3 2 -2 99770.1 2216.95 4
 -3 2 -1 126776 2472.87 5
 -3 2 -1 124737 2384.38 3
 -3 2 -1 128188 2544.57 4
 -3 2 0 5192.69 331.793 5
 -3 2 0 4961.24 274.151 3
 -3 2 0 5058.65 311.987 4
 -3 2 1 39640.3 917.327 3
 -3 2 1 38543.5 1072.9 5
 -3 2 1 38764.5 939.101 4
 -3 2 2 11146 390.39 3
 -3 2 2 10864 513.39 5
 -3 2 2 11281.8 353.251 4
 -3 2 3 40759.1 1175.47 5
 -3 2 4 108277 2400.66 5
 -3 2 5 802.109 161.617 5
 -3 2 6 19785.4 490.557 4
 -3 2 6 47144.3 1351.56 5
 -3 2 7 16383.3 859.135 5
 -3 2 7 14992.6 466.973 4
 -3 2 8 52155 1746.03 5
 -3 2 8 46395.3 1106.5 4
 -3 2 9 40031.6 1603.6 5
 -3 2 10 15661.9 1015.57 5
 -3 2 11 362.694 146.038 5
 -3 2 12 16833.5 1174.69 5
 -3 2 13 1781.48 400.54 5
 -3 2 14 58856.6 2486.35 5
 -3 2 15 17951.9 1388.31 5
 -3 2 16 1545.66 451.139 5
 -3 2 17 2009.73 522.633 5
 -3 2 18 1847.95 489.139 5
 -3 3 -18 636.362 247.733 4
 -3 3 -17 3941.26 679.414 4
 -3 3 -16 159.772 141.93 4
 -3 3 -15 19664.3 1421.63 4
 -3 3 -14 18569.8 1337.26 4
 -3 3 -13 -160.437 233.473 4
 -3 3 -13 109.235 75.4307 2
 -3 3 -12 15883.2 827.534 2
 -3 3 -12 17112 1181.98 4
 -3 3 -11 97.9486 106.646 4
 -3 3 -11 -39.4564 78.4468 2
 -3 3 -10 28240.2 1033.83 2
 -3 3 -10 27744.3 1398.16 4
 -3 3 -9 24745.3 908.376 2
 -3 3 -9 24040.6 1258.6 4
 -3 3 -8 62.8908 56.8046 4
 -3 3 -8 59.6505 42.1099 2
 -3 3 -7 11524.4 534.19 2
 -3 3 -7 12239.6 795.193 4
 -3 3 -7 11723.9 448.253 1
 -3 3 -6 4864.38 321.558 2
 -3 3 -6 4846.04 483.601 4
 -3 3 -6 4666.85 232.92 1
 -3 3 -5 19960.4 483.33 1
 -3 3 -5 20565.7 959.963 4
 -3 3 -4 71015.2 1300.3 1
 -3 3 -4 146563 2500.72 4
 -3 3 -3 1284.54 181.806 5
 -3 3 -3 1448.32 211.798 4
 -3 3 -2 53891.5 1372.25 5
 -3 3 -2 54598.7 1018.06 1
 -3 3 -1 11701 560.993 5
 -3 3 -1 10792.6 367.862 1
 -3 3 -1 10744.6 514.878 4
 -3 3 0 3254.23 277.226 5
 -3 3 0 3202.46 242.341 4
 -3 3 1 134333 2425.14 4
 -3 3 1 129796 2339.73 3
 -3 3 1 135624 2693.09 5
 -3 3 2 1009.36 108.987 4
 -3 3 2 879.246 91.6835 3
 -3 3 2 790.681 140.721 5
 -3 3 3 128506 2168.74 3
 -3 3 3 125617 2682.13 5
 -3 3 4 65376.2 1774.92 5
 -3 3 5 3325 357.969 5
 -3 3 5 2970.66 180.922 4
 -3 3 6 71381.3 1968.8 5
 -3 3 6 66400 1362.01 4
 -3 3 7 766.925 114.266 4
 -3 3 7 729.725 198.544 5
 -3 3 8 43213.9 1617.46 5
 -3 3 9 32406.5 1462 5
 -3 3 10 926.924 250.16 5
 -3 3 11 22858.4 1345.43 5
 -3 3 12 8764.44 844.801 5
 -3 3 13 20756.6 1395.29 5
 -3 3 14 36614.4 1958.07 5
 -3 3 15 415.355 234.766 5
 -3 3 16 4505.5 715.732 5
 -3 3 17 1009.24 381.887 5
 -3 4 -19 3750.78 690.755 4
 -3 4 -18 1518.7 439.829 4
 -3 4 -17 1896.98 484.37 4
 -3 4 -16 -142.414 221.049 4
 -3 4 -15 31376.7 1803.67 4
 -3 4 -14 7151.48 803.228 4
 -3 4 -13 1115.43 325.621 4
 -3 4 -12 20766.1 862.518 2
 -3 4 -12 20924.6 1312.23 4
 -3 4 -11 5404.96 396.86 2
 -3 4 -11 5999.56 648.003 4
 -3 4 -11 5083.25 394.496 1
 -3 4 -10 45819.8 1268.96 2
 -3 4 -10 45072.5 1817.77 4
 -3 4 -10 43527.9 1237.17 1
 -3 4 -9 36813.1 1058.78 2
 -3 4 -9 38070.2 1606.11 4
 -3 4 -8 14577.1 546.352 1
 -3 4 -8 15210 602.004 2
 -3 4 -8 15923.2 961.064 4
 -3 4 -7 9943.65 414.093 1
 -3 4 -7 9705.8 698.376 4
 -3 4 -6 7440.02 313.199 1
 -3 4 -6 7639.41 594.651 4
 -3 4 -5 127591 2229.69 1
 -3 4 -5 126183 2938.42 4
 -3 4 -4 73986 1421.05 1
 -3 4 -4 79573.7 2006.21 4
 -3 4 -3 4612.52 359.653 5
 -3 4 -3 4847.94 242.167 1
 -3 4 -3 4174.04 368.703 4
 -3 4 -2 80247.2 1571.41 1
 -3 4 -2 78372.7 1843.27 5
 -3 4 -2 76370.4 1869.1 4
 -3 4 -1 377.212 95.8909 4
 -3 4 -1 534.513 119.358 5
 -3 4 -1 508.489 101.5 1
 -3 4 0 59656.8 1553.14 5
 -3 4 0 61825.8 1421.47 1
 -3 4 1 63674.9 1630.93 5
 -3 4 1 63374.9 1544.09 1
 -3 4 2 243.843 110.399 5
 -3 4 3 15987.1 757.717 5
 -3 4 4 271.083 96.8679 5
 -3 4 5 51468.3 1631.77 5
 -3 4 5 49702.4 1235.54 4
 -3 4 6 37655.6 1399.25 5
 -3 4 6 34985.2 997.005 4
 -3 4 7 323.822 128.14 5
 -3 4 8 23183.5 531.744 3
 -3 4 8 39564.4 1510.11 5
 -3 4 9 1140.18 269.903 5
 -3 4 10 25178.6 1347.57 5
 -3 4 11 26024.9 1448.42 5
 -3 4 12 285.361 153.73 5
 -3 4 13 20608.5 1396.67 5
 -3 4 14 239.907 228.77 5
 -3 4 15 8656.57 971.923 5
 -3 4 16 11555.5 1174.42 5
 -3 4 17 -199.954 190.845 5
 -3 5 -19 27.3932 95.9478 4
 -3 5 -18 5489.27 809.307 4
 -3 5 -17 1012.26 345.225 4
 -3 5 -16 9261.05 981.512 4
 -3 5 -15 26133.1 1606.02 4
 -3 5 -14 3858.22 582.447 4
 -3 5 -13 16357.8 1193.13 4
 -3 5 -12 6563.58 714.885 4
 -3 5 -11 8514.42 497.741 1
 -3 5 -11 9920.73 493.926 2
 -3 5 -11 9548.84 849.662 4
 -3 5 -10 40410.5 1163.76 1
 -3 5 -10 42314.3 1747.17 4
 -3 5 -9 536.945 170.664 4
 -3 5 -9 626.023 123.569 1
 -3 5 -8 11525.5 497.469 1
 -3 5 -8 13718.6 889.211 4
 -3 5 -7 25636.8 767.353 1
 -3 5 -7 28195.1 1259.29 4
 -3 5 -6 20261.6 641.224 1
 -3 5 -6 19791.7 991.44 4
 -3 5 -5 131134 2471.34 1
 -3 5 -5 139209 3090.14 4
 -3 5 -4 87619.8 2039.33 5
 -3 5 -4 85626.4 2169.73 4
 -3 5 -3 145065 3108.45 4
 -3 5 -3 148279 2997.77 5
 -3 5 -3 142882 2694.53 1
 -3 5 -2 62939.7 1726.66 4
 -3 5 -2 60537 1444.05 1
 -3 5 -1 97510.8 2227.43 5
 -3 5 -1 96351.9 2061.91 1
 -3 5 0 311384 5587.09 5
 -3 5 0 312803 5486.3 1
 -3 5 1 101295 2316.9 5
 -3 5 1 98288.4 2247.25 1
 -3 5 2 495.429 137.536 5
 -3 5 2 689.419 178.399 1
 -3 5 3 7100.22 518.936 1
 -3 5 3 7179.95 518.076 5
 -3 5 4 13782.5 769.653 5
 -3 5 5 87697.8 2386.5 5
 -3 5 6 90854.5 2489.26 5
 -3 5 7 1372.92 280.474 5
 -3 5 8 508.137 167.73 5
 -3 5 9 10271.8 830.738 5
 -3 5 10 22612.6 1312.46 5
 -3 5 11 8720.35 831.745 5
 -3 5 12 5191.3 665.09 5
 -3 5 13 4475.26 649.549 5
 -3 5 14 3704.29 619.772 5
 -3 5 15 14565.6 1286.22 5
 -3 5 16 8453.35 1003.89 5
 -3 6 -19 6214.62 891.346 4
 -3 6 -18 12311.9 1196.47 4
 -3 6 -17 335.736 253.29 4
 -3 6 -16 12071.9 1117.39 4
 -3 6 -15 10421.7 1001.83 4
 -3 6 -14 2430.25 463.983 4
 -3 6 -13 21813.4 1400.43 4
 -3 6 -12 1826.8 402.041 4
 -3 6 -11 15667 717.411 1
 -3 6 -11 15973.8 1088.68 4
 -3 6 -10 7348.92 445.518 1
 -3 6 -10 8139.17 742.844 4
 -3 6 -9 2997.22 273.275 1
 -3 6 -9 3662.27 483.486 4
 -3 6 -8 8365.41 453.001 1
 -3 6 -8 8521.12 700.825 4
 -3 6 -7 2374.38 227.446 1
 -3 6 -7 3209.57 416.563 4
 -3 6 -6 29869.6 925.339 1
 -3 6 -6 31431.6 1299.2 4
 -3 6 -5 44085.8 1513.84 4
 -3 6 -5 37863.9 1076.29 1
 -3 6 -4 3192.33 268.106 1
 -3 6 -4 3901.62 398.515 4
 -3 6 -4 4016.89 375.034 5
 -3 6 -3 78459.2 1924.44 5
 -3 6 -3 72681.7 1735.35 1
 -3 6 -2 2488.5 304.591 5
 -3 6 -2 2542.12 268.244 1
 -3 6 -1 162079 3293.8 5
 -3 6 -1 154318 3160.12 1
 -3 6 0 190367 3808.46 1
 -3 6 0 197510 3868.71 5
 -3 6 1 6778.98 491.497 5
 -3 6 1 5508.74 453.283 1
 -3 6 2 16776.7 817.259 5
 -3 6 2 17025.2 835.002 1
 -3 6 3 17561 901.558 1
 -3 6 3 17738.3 880.041 5
 -3 6 4 13200.4 799.075 1
 -3 6 4 12907.4 773.397 5
 -3 6 5 97883.9 2648.42 5
 -3 6 6 17089.7 1001.84 5
 -3 6 7 3565.01 460.558 5
 -3 6 8 109.65 56.7213 5
 -3 6 9 22327.1 1285.56 5
 -3 6 10 34414.3 1693.19 5
 -3 6 11 5270.7 660.292 5
 -3 6 12 12498.8 1084.72 5
 -3 6 13 2948.01 525.126 5
 -3 6 14 2895.9 559.114 5
 -3 6 15 13419 1269.48 5
 -3 7 -19 16070.5 1438.48 4
 -3 7 -18 8212.85 974.475 4
 -3 7 -17 749.343 279.23 4
 -3 7 -16 6820.5 858.778 4
 -3 7 -15 100.677 158.777 4
 -3 7 -14 16193.1 1251.98 4
 -3 7 -13 20196.5 1315.13 4
 -3 7 -12 763.346 279.591 4
 -3 7 -11 5552.75 431.547 1
 -3 7 -11 6479.83 704.264 4
 -3 7 -10 347.09 148.011 4
 -3 7 -10 280.158 69.1393 1
 -3 7 -9 7867.98 485.98 1
 -3 7 -9 8590.39 749.702 4
 -3 7 -8 13829.8 636.518 1
 -3 7 -8 16371.9 1006.82 4
 -3 7 -7 319.779 81.7736 1
 -3 7 -7 95.8471 97.706 4
 -3 7 -6 24177.4 1169.84 4
 -3 7 -6 21114 817.539 1
 -3 7 -5 822.98 229.836 4
 -3 7 -5 694.025 163.483 5
 -3 7 -5 669.751 132.706 1
 -3 7 -4 21649.2 849.491 1
 -3 7 -4 24833.6 994.236 5
 -3 7 -3 35785 1224.48 5
 -3 7 -3 32913 1119.2 1
 -3 7 -2 1874.25 258.348 5
 -3 7 -2 1723.77 246.34 1
 -3 7 -1 15812.5 788.355 5
 -3 7 -1 16179.9 783.632 1
 -3 7 0 3456.32 372.22 1
 -3 7 0 4085.11 395.799 5
 -3 7 1 29909.6 1189.16 1
 -3 7 1 31284.5 1190.7 5
 -3 7 2 40555.2 1396.74 5
 -3 7 2 39364.7 1437.53 1
 -3 7 3 341.9 128.964 1
 -3 7 3 528.909 139.658 5
 -3 7 4 49997.9 1709.96 5
 -3 7 4 49448.4 1766.73 1
 -3 7 5 39628.4 1576.53 1
 -3 7 5 37800.3 1516.83 5
 -3 7 6 454.516 205.903 5
 -3 7 7 52965.9 2011.04 5
 -3 7 8 276.447 149.141 5
 -3 7 9 8219.88 791.043 5
 -3 7 10 28346.2 1573.97 5
 -3 7 11 566.788 232.193 5
 -3 7 12 11439.7 1065.19 5
 -3 7 13 795.533 266.561 5
 -3 7 14 8389 981.462 5
 -3 7 15 11393 1200.5 5
 -3 8 -18 2002.12 501.619 4
 -3 8 -17 3280.37 619.534 4
 -3 8 -16 2350.94 526.721 4
 -3 8 -15 2852.75 523.283 4
 -3 8 -14 29484.5 1695.8 4
 -3 8 -13 18919.8 1323.19 4
 -3 8 -12 1002.53 295.638 4
 -3 8 -11 5196.77 433.572 1
 -3 8 -11 6480.84 721.319 4
 -3 8 -10 8604.94 547.239 1
 -3 8 -10 9364.58 819.152 4
 -3 8 -9 39803.1 1295.06 1
 -3 8 -9 44356.6 1818.77 4
 -3 8 -8 33703.1 1540.36 4
 -3 8 -8 31899 1133.93 1
 -3 8 -7 3766.41 483.231 4
 -3 8 -7 2715.55 302.481 1
 -3 8 -6 13130 911.463 4
 -3 8 -6 11607.3 638.079 1
 -3 8 -5 1476.38 219.618 1
 -3 8 -5 1881.66 256.21 5
 -3 8 -4 56255.9 1648.33 5
 -3 8 -4 52677.5 1579.29 1
 -3 8 -3 45538.4 1475.77 1
 -3 8 -3 51939 1588.7 5
 -3 8 -2 666.461 170.008 5
 -3 8 -2 320.278 86.3538 1
 -3 8 -1 23851.3 1022.01 5
 -3 8 -1 20924.2 986.683 1
 -3 8 0 710.224 168.006 1
 -3 8 0 681.806 170.097 5
 -3 8 1 63698.8 1991.43 1
 -3 8 1 67586 1957.57 5
 -3 8 2 57051.5 1815.47 5
 -3 8 2 57942.8 1889.3 1
 -3 8 3 2726.51 367.864 5
 -3 8 3 2741.07 396.638 1
 -3 8 4 35946.6 1537.01 1
 -3 8 4 34520.7 1439.7 5
 -3 8 5 2317.63 367.198 5
 -3 8 5 2406.84 388.223 1
 -3 8 6 56951.5 2073.42 5
 -3 8 6 57623.4 2117.88 1
 -3 8 7 33267.2 1592.67 5
 -3 8 8 1507.98 339.831 5
 -3 8 9 19723.7 1309.66 5
 -3 8 10 4170.6 606.832 5
 -3 8 11 8933.22 934.796 5
 -3 8 12 8783.98 950.32 5
 -3 8 13 -41.9053 207.433 5
 -3 8 14 10276 1120.15 5
 -3 9 -18 36.3872 150.915 4
 -3 9 -17 3489.15 651.937 4
 -3 9 -16 339.934 226.139 4
 -3 9 -15 11401.3 1077.29 4
 -3 9 -14 27498.4 1710.26 4
 -3 9 -13 1156.48 315.099 4
 -3 9 -12 19593.3 1326.33 4
 -3 9 -11 1730.08 382.751 4
 -3 9 -11 1159.85 204.953 1
 -3 9 -10 27498.2 1124.59 1
 -3 9 -10 31357.3 1599.38 4
 -3 9 -9 92185.1 2925.93 4
 -3 9 -9 86434.5 2267.91 1
 -3 9 -8 18820.9 1179.61 4
 -3 9 -8 17678 858.27 1
 -3 9 -7 4461.61 565.755 4
 -3 9 -7 3466.67 361.871 1
 -3 9 -6 534.641 139.962 1
 -3 9 -5 26888.8 1114.22 1
 -3 9 -5 29911.5 1178.86 5
 -3 9 -4 52666.9 1628.01 5
 -3 9 -4 48659.5 1608.05 1
 -3 9 -3 21983.1 1028.93 5
 -3 9 -3 19561 967.856 1
 -3 9 -2 6088.07 518.55 5
 -3 9 -2 5743.25 516.154 1
 -3 9 -1 8051.94 599.113 5
 -3 9 -1 7503.91 606.674 1
 -3 9 0 4928.04 471.135 5
 -3 9 0 4358.56 471.546 1
 -3 9 1 49850.4 1808.88 1
 -3 9 1 52724.9 1740.92 5
 -3 9 2 12983.3 818.304 5
 -3 9 2 12105.5 855.031 1
 -3 9 3 8936.24 686.847 5
 -3 9 3 7596.94 686.906 1
 -3 9 4 9526.5 789.932 1
 -3 9 4 9354.95 739.183 5
 -3 9 5 12359.2 886.39 5
 -3 9 5 12596.6 947.533 1
 -3 9 6 47673 1966.5 1
 -3 9 6 43921.3 1836.04 5
 -3 9 7 11449.4 940.437 5
 -3 9 8 239.315 109.302 5
 -3 9 9 21369.7 1421.55 5
 -3 9 10 1582.3 418.015 5
 -3 9 11 23538.9 1618.37 5
 -3 9 12 23625.9 1655.03 5
 -3 9 13 1106.57 377.804 5
 -3 10 -17 4829.71 759.737 4
 -3 10 -16 -323.405 290.884 4
 -3 10 -15 15278.1 1307.58 4
 -3 10 -14 9494.4 990.826 4
 -3 10 -13 3469.33 563.297 4
 -3 10 -12 18350.1 1305.47 4
 -3 10 -11 234.845 62.5896 1
 -3 10 -11 777.549 295.492 4
 -3 10 -10 34188.7 1745 4
 -3 10 -10 29480.7 1235.54 1
 -3 10 -9 61796 2343.77 4
 -3 10 -9 51945.3 1712.23 1
 -3 10 -8 65.8833 97.0053 1
 -3 10 -8 136.003 77.7457 4
 -3 10 -7 20820 978.103 1
 -3 10 -6 460.344 101.423 1
 -3 10 -5 19780.9 961.041 5
 -3 10 -5 17338.5 937.594 1
 -3 10 -4 23248.3 1124.02 1
 -3 10 -4 26264.3 1123.23 5
 -3 10 -3 1012.48 241.255 1
 -3 10 -3 1121.97 232.071 5
 -3 10 -2 21285.3 1021.2 5
 -3 10 -2 18775.8 1052.3 1
 -3 10 -1 3747.63 421.983 5
 -3 10 -1 3551.05 444.639 1
 -3 10 0 25836.6 1172.89 5
 -3 10 0 23066.8 1205.89 1
 -3 10 1 25575.7 1308.1 1
 -3 10 1 27048.2 1246.77 5
 -3 10 2 108.035 88.9902 5
 -3 10 2 15.3829 112.38 1
 -3 10 3 13369.3 909.35 5
 -3 10 3 13483.9 971.2 1
 -3 10 4 1952.36 376.907 1
 -3 10 4 1994.29 354.094 5
 -3 10 5 16636.5 1160.25 1
 -3 10 5 15901.4 1047.14 5
 -3 10 6 10024 861.105 5
 -3 10 6 10068.6 908.683 1
 -3 10 7 2854.91 477.455 5
 -3 10 8 4760.21 630.601 5
 -3 10 9 6114.65 747.359 5
 -3 10 10 9912 1010.56 5
 -3 10 11 35455.2 2034.02 5
 -3 10 12 6138.48 852.634 5
 -3 11 -17 11430.7 1214.55 4
 -3 11 -16 154.592 178.62 4
 -3 11 -15 8252.36 972.748 4
 -3 11 -14 330.101 260.062 4
 -3 11 -13 15552.5 1269.06 4
 -3 11 -12 15657.4 1247.27 4
 -3 11 -11 75.7375 122.418 4
 -3 11 -11 68.6686 66.7527 1
 -3 11 -10 12100.5 1050.76 4
 -3 11 -10 10524.6 744.024 1
 -3 11 -9 2540.41 470.033 4
 -3 11 -9 2489.86 349.366 1
 -3 11 -8 21291 1048.12 1
 -3 11 -7 55847.4 1867.1 1
 -3 11 -6 116.645 94.2602 1
 -3 11 -5 17946 938.454 5
 -3 11 -5 16686 976.496 1
 -3 11 -4 32627 1303.1 5
 -3 11 -4 29032.9 1353.8 1
 -3 11 -3 7516.6 629.85 5
 -3 11 -3 6035.37 593.569 1
 -3 11 -2 35224 1402.74 5
 -3 11 -2 30313 1430.1 1
 -3 11 -1 895.398 257.605 1
 -3 11 -1 944.975 227.047 5
 -3 11 0 34391.9 1439.63 5
 -3 11 0 31873.5 1527.3 1
 -3 11 1 4287.92 549.826 1
 -3 11 1 4799.5 525.664 5
 -3 11 2 6290.35 613.583 5
 -3 11 2 6762.25 712.34 1
 -3 11 3 30571.8 1453.97 5
 -3 11 3 29499.2 1542.84 1
 -3 11 4 916.194 294.931 1
 -3 11 4 566.078 185.686 5
 -3 11 5 17943.3 1264.94 1
 -3 11 5 17749.7 1156.01 5
 -3 11 6 7123.95 755.797 5
 -3 11 6 6988.81 802.225 1
 -3 11 7 427.897 128.275 5
 -3 11 7 1123.17 348.426 1
 -3 11 8 13153.4 1114.81 5
 -3 11 9 -34.1971 102.649 5
 -3 11 10 10658.4 1070.45 5
 -3 11 11 11307.3 1145.09 5
 -3 12 -16 1417.52 386.709 4
 -3 12 -15 2968.79 602.965 4
 -3 12 -14 2163.54 481.833 4
 -3 12 -13 21376.3 1545.11 4
 -3 12 -12 2995.46 551.243 4
 -3 12 -11 393.286 216.221 4
 -3 12 -11 310.091 122.918 1
 -3 12 -10 5058.9 717.358 4
 -3 12 -10 3716.04 456.045 1
 -3 12 -9 1824.32 436.429 4
 -3 12 -9 1093.96 231.937 1
 -3 12 -8 32851.7 1441.89 1
 -3 12 -7 15581.8 973.401 1
 -3 12 -6 1428.94 268.411 5
 -3 12 -6 1121.6 265.62 1
 -3 12 -5 18637.3 976.457 5
 -3 12 -5 14506.8 976.53 1
 -3 12 -4 168.943 76.5729 5
 -3 12 -4 133.682 76.4135 1
 -3 12 -3 22017.3 1112.06 5
 -3 12 -3 18245.4 1147.42 1
 -3 12 -2 25789.3 1235.81 5
 -3 12 -2 23705.2 1311.44 1
 -3 12 -1 1186.75 275.478 1
 -3 12 -1 1215.43 246.879 5
 -3 12 0 9771.72 860.848 1
 -3 12 0 10452.4 778.49 5
 -3 12 1 -124.59 164.126 1
 -3 12 1 -90.0326 103.36 5
 -3 12 2 24625.5 1294.85 5
 -3 12 2 23828.9 1416.92 1
 -3 12 3 17840 1121.81 5
 -3 12 3 15255.9 1153.2 1
 -3 12 4 2259.31 441.828 1
 -3 12 4 2403.57 409.548 5
 -3 12 5 14615.2 1191.09 1
 -3 12 5 12684.1 992.782 5
 -3 12 6 -133.856 139.517 5
 -3 12 6 401.34 216.054 1
 -3 12 7 14559.5 1217.99 1
 -3 12 7 11778.5 1042.76 5
 -3 12 8 10977.9 1032.34 5
 -3 12 9 584.617 231.796 5
 -3 12 10 7886.19 964.009 5
 -3 13 -15 103.289 82.1407 4
 -3 13 -14 6279.54 865.321 4
 -3 13 -13 11106.2 1146.5 4
 -3 13 -12 226.545 146.131 4
 -3 13 -11 2792.04 556.067 4
 -3 13 -11 1950 331.982 1
 -3 13 -10 2950.67 594.418 4
 -3 13 -10 2110.63 368.122 1
 -3 13 -9 2923.41 438.218 1
 -3 13 -8 13421.3 962.108 1
 -3 13 -7 518.619 189.78 1
 -3 13 -6 6878.84 694.97 1
 -3 13 -5 -17.0519 135.642 1
 -3 13 -5 53.9579 74.893 5
 -3 13 -4 24882.9 1169.46 5
 -3 13 -4 19434.7 1237.02 1
 -3 13 -3 38993.3 1541.27 5
 -3 13 -3 33509.1 1663.05 1
 -3 13 -2 9479.41 756.185 5
 -3 13 -2 6992.52 726.49 1
 -3 13 -1 3956.58 487.503 5
 -3 13 -1 3655.65 553.972 1
 -3 13 0 3211.73 442.155 5
 -3 13 0 2058.23 419.232 1
 -3 13 1 2750.16 493.803 1
 -3 13 1 2429.16 406.979 5
 -3 13 2 41360.1 1764.34 5
 -3 13 2 42754 2027.6 1
 -3 13 3 9267.64 828.685 5
 -3 13 3 9106.84 922.842 1
 -3 13 4 1188.33 355.694 1
 -3 13 4 1300.09 317.715 5
 -3 13 5 4132.01 663.226 1
 -3 13 5 3480.74 530.984 5
 -3 13 6 1165.36 332.591 5
 -3 13 6 1517.88 406.423 1
 -3 13 7 20140.1 1504.81 1
 -3 13 7 19891.8 1385.44 5
 -3 13 8 7584.15 875.165 5
 -3 14 -14 5219.82 810.791 4
 -3 14 -13 663.218 270.285 4
 -3 14 -12 -33.321 199.428 4
 -3 14 -11 7174.79 951.492 4
 -3 14 -10 105.49 187.207 4
 -3 14 -10 -186.881 146.284 1
 -3 14 -9 7273.54 730.301 1
 -3 14 -8 5968.51 652.046 1
 -3 14 -7 3568.88 510.601 1
 -3 14 -6 8996.19 832.997 1
 -3 14 -5 -72.2998 207.251 1
 -3 14 -4 20869.3 1333.09 1
 -3 14 -3 19892.3 1295.3 1
 -3 14 -2 -9.67674 119.226 1
 -3 14 -1 6515.59 769.116 1
 -3 14 0 1615.76 356.935 1
 -3 14 1 15927.7 1247.76 1
 -3 14 2 38829.8 2003.98 1
 -3 14 3 3808.55 640.937 1
 -3 14 4 1482.56 385.454 1
 -3 14 5 2793.48 564.357 1
 -3 14 6 8878.09 1023.05 1
 -3 15 -12 3485.49 664.421 4
 -3 15 -11 9943.34 1160.75 4
 -3 15 -10 143.187 214.838 4
 -3 15 -10 436.02 251.1 1
 -3 15 -9 6611.09 740.313 1
 -3 15 -8 536.25 178.931 1
 -3 15 -7 6960.9 770.395 1
 -3 15 -6 11650.7 1019.71 1
 -3 15 -5 117.945 94.2998 1
 -3 15 -4 11491.6 1019.01 1
 -3 15 -3 3963.13 617.094 1
 -3 15 -2 4456.59 643.337 1
 -3 15 -1 12424.3 1099.54 1
 -3 15 0 575.306 253.691 1
 -3 15 1 12485.6 1139.87 1
 -3 15 2 7313.98 890.765 1
 -3 15 3 303.286 201.022 1
 -3 16 -10 391.656 241.67 1
 -3 16 -9 3141.23 510.458 1
 -3 16 -8 631.62 263.9 1
 -3 16 -7 14106.7 1164.23 1
 -3 16 -6 7744.89 855.779 1
 -3 16 -5 109.221 91.9463 1
 -3 16 -4 4840.06 674.801 1
 -3 16 -3 981.44 323.237 1
 -3 16 -2 13971.4 1217.57 1
 -3 16 -1 11917.4 1125.79 1
 -3 16 0 272.222 110.608 1
 -3 17 -9 897.373 266.664 1
 -3 17 -8 4764.4 702.398 1
 -3 17 -7 11945.9 1121.02 1
 -3 17 -6 3819.18 648.749 1
 -3 17 -5 1257.63 351.184 1
 -2 -14 -2 738.443 285.866 2
 -2 -14 -1 1917.23 441.991 2
 -2 -14 0 6902.5 818.11 2
 -2 -13 -4 642.566 269.927 2
 -2 -13 -3 10511.4 1097.99 2
 -2 -13 -2 825.224 310.875 2
 -2 -13 -1 4344.04 682.796 2
 -2 -13 0 5506.15 721.057 2
 -2 -13 1 1407.78 357.754 2
 -2 -13 2 7696.89 744.236 2
 -2 -12 -5 709.342 287.964 2
 -2 -12 -4 11963.5 1178.93 2
 -2 -12 -3 9912.41 1042.95 2
 -2 -12 -2 143.542 168.17 2
 -2 -12 -1 6211.75 777.379 2
 -2 -12 0 363.869 214.57 2
 -2 -12 1 7466.6 772.112 2
 -2 -12 2 13409.6 968.508 2
 -2 -12 3 652.438 201.324 2
 -2 -11 -7 2718.84 635.33 2
 -2 -11 -6 8418.27 1042.94 2
 -2 -11 -5 2102.07 486.843 2
 -2 -11 -4 17354.3 1397.76 2
 -2 -11 -3 8431.72 946.804 2
 -2 -11 -2 423.757 232.581 2
 -2 -11 -1 6884.8 791.291 2
 -2 -11 0 2182.92 432.48 2
 -2 -11 1 14996.4 1042.87 2
 -2 -11 2 26280.8 1317.77 2
 -2 -11 3 123.736 101.761 2
 -2 -11 4 6888.6 576.37 2
 -2 -10 -8 318.206 227.563 2
 -2 -10 -7 17750.6 1477.78 2
 -2 -10 -6 7328.41 913.759 2
 -2 -10 -5 6403.54 831.755 2
 -2 -10 -4 18496 1386.42 2
 -2 -10 -3 3755.89 610.976 2
 -2 -10 -2 15880.1 1206.54 2
 -2 -10 -1 10425.9 923.164 2
 -2 -10 0 7359.56 734.55 2
 -2 -10 1 41091.1 1719.98 2
 -2 -10 2 8835.57 711.867 2
 -2 -10 3 24470.4 1141.41 2
 -2 -10 4 27082 1135.79 2
 -2 -10 5 564.975 147.282 2
 -2 -10 6 30421 1090.5 2
 -2 -9 -10 2652.19 580.824 2
 -2 -9 -9 -260.685 280.622 2
 -2 -9 -3 11573.2 1004.11 2
 -2 -9 -2 95265.8 3080.11 2
 -2 -9 -1 22406.2 1325 2
 -2 -9 0 8859.8 769.808 2
 -2 -9 1 20808 1132.19 2
 -2 -9 2 -73.0175 104.028 2
 -2 -9 3 38133.1 1389.24 2
 -2 -9 4 18320.3 864.614 2
 -2 -9 5 8845.28 545.204 2
 -2 -9 6 24915.7 899.928 2
 -2 -8 -11 690.308 304.221 2
 -2 -8 -4 666.318 155.53 3
 -2 -8 -2 74507.3 2551.69 2
 -2 -8 -1 8089.32 741.971 2
 -2 -8 0 2288.36 375.811 2
 -2 -8 1 160.504 96.9879 2
 -2 -8 2 27535.6 1159.55 2
 -2 -8 3 33156.2 1206.35 2
 -2 -8 4 3868.7 356.003 2
 -2 -8 5 14624.8 672.021 2
 -2 -7 -5 6913.66 486.937 3
 -2 -7 -4 6634.56 469.36 3
 -2 -7 -1 -60.6636 127.144 2
 -2 -7 0 20259.5 1069.03 2
 -2 -7 1 9345.2 653.886 2
 -2 -7 2 66823.2 1848.55 2
 -2 -7 3 59234.8 1630.55 2
 -2 -7 4 126.861 48.0022 2
 -2 -7 5 6018.31 223.938 5
 -2 -7 5 16368.7 625.197 2
 -2 -7 12 23094.6 1217.33 5
 -2 -7 13 17336.6 1105.82 5
 -2 -7 14 243.596 148.149 5
 -2 -7 15 8676.16 853.297 5
 -2 -7 16 1692.68 392.136 5
 -2 -7 17 13984.2 1201.84 5
 -2 -7 18 34252.7 1988.63 5
 -2 -6 -7 844.48 162.267 3
 -2 -6 -6 4157.71 369.971 3
 -2 -6 -5 11091.2 610.43 3
 -2 -6 -4 17898.7 770.997 3
 -2 -6 -1 25832.9 1188.46 2
 -2 -6 0 4611.33 457.071 2
 -2 -6 1 1475.65 243.874 2
 -2 -6 2 89077.3 2131.54 2
 -2 -6 3 19140.1 760.343 2
 -2 -6 4 3232.12 274.434 2
 -2 -6 5 12128.7 374.576 5
 -2 -6 6 14922.6 490.975 5
 -2 -6 11 11105.5 782.761 5
 -2 -6 12 71811.4 2354.48 5
 -2 -6 13 16963.9 1102.45 5
 -2 -6 14 964.271 262.406 5
 -2 -6 15 17386.4 1230.84 5
 -2 -6 16 -46.13 77.9023 5
 -2 -6 17 28752.6 1759.71 5
 -2 -6 18 12924.7 1204.23 5
 -2 -6 19 314.167 207.983 5
 -2 -6 20 2108.72 521.003 5
 -2 -5 -15 1008.29 345.461 2
 -2 -5 -14 6933.21 901.569 2
 -2 -5 -6 24317.5 913.287 3
 -2 -5 -5 701.135 153.425 3
 -2 -5 -4 16295.3 704.554 3
 -2 -5 -3 1769.39 221.858 3
 -2 -5 -1 40477.9 1462.39 2
 -2 -5 0 1401.11 234.409 2
 -2 -5 1 36305.4 1188.81 2
 -2 -5 2 25398.4 886.148 2
 -2 -5 3 7113.79 403.375 2
 -2 -5 4 49874.1 1215.17 2
 -2 -5 5 5640.75 247.268 5
 -2 -5 10 40481.1 1520.98 5
 -2 -5 11 14887.2 932.257 5
 -2 -5 12 38552.2 1652.51 5
 -2 -5 13 3321.68 498.013 5
 -2 -5 14 9045.24 861.298 5
 -2 -5 15 3764.45 563.968 5
 -2 -5 16 2297.95 453.322 5
 -2 -5 17 18851.7 1427.6 5
 -2 -5 18 243.449 106.888 5
 -2 -5 19 8133.51 1024.77 5
 -2 -5 20 2255.96 559.047 5
 -2 -4 -16 9172.43 1066.77 2
 -2 -4 -15 201.131 224.421 2
 -2 -4 -6 37757.5 1164.07 3
 -2 -4 -5 4283.8 340.956 3
 -2 -4 -4 14997 650.655 3
 -2 -4 -3 9857.75 509.001 3
 -2 -4 -1 58957.8 1719.34 2
 -2 -4 0 6733.23 468.7 2
 -2 -4 1 180000 3446.73 2
 -2 -4 2 6915.36 389.085 2
 -2 -4 3 184939 3319.99 2
 -2 -4 4 186004 3062.87 5
 -2 -4 5 18188.9 592.612 5
 -2 -4 6 16612.7 657.278 5
 -2 -4 7 16196.2 724.411 5
 -2 -4 8 19152.6 874.394 5
 -2 -4 9 90064.6 2374.84 5
 -2 -4 10 12130.3 793.789 5
 -2 -4 11 19453.5 1095.66 5
 -2 -4 12 7263.76 684.102 5
 -2 -4 13 15464.2 1082.48 5
 -2 -4 14 20464.6 1311.8 5
 -2 -4 15 6536.72 770.363 5
 -2 -4 16 4313.22 654.513 5
 -2 -4 17 9701.09 1013.74 5
 -2 -4 18 766.176 270.605 5
 -2 -4 19 12474.5 1247.09 5
 -2 -4 20 733.903 232.362 5
 -2 -3 -17 8313.35 967.851 2
 -2 -3 -16 1447.58 399.979 2
 -2 -3 -15 8096.11 915.669 2
 -2 -3 -13 4730.55 740.59 4
 -2 -3 -12 29365.6 1821.2 4
 -2 -3 -11 10223 1006.58 4
 -2 -3 -10 21385.9 1431.62 4
 -2 -3 -9 20300.9 1347.07 4
 -2 -3 -8 5885.02 685.99 4
 -2 -3 -7 72371.7 2536.85 4
 -2 -3 -6 20299.8 790.195 3
 -2 -3 -6 22583.5 1272.97 4
 -2 -3 -5 6958.93 425.353 3
 -2 -3 -4 24309.9 831.219 3
 -2 -3 -3 3510.82 285.441 3
 -2 -3 -2 111244 2576.58 2
 -2 -3 -1 77216.8 1905.49 2
 -2 -3 0 17868.1 711.061 2
 -2 -3 1 97497.3 2028.4 2
 -2 -3 2 38070.8 980.363 2
 -2 -3 4 90352.6 1684.74 5
 -2 -3 5 8107.89 401.046 5
 -2 -3 6 21461.1 789.995 5
 -2 -3 7 244.43 105.873 5
 -2 -3 8 117971 2746.87 5
 -2 -3 9 114897 2842.26 5
 -2 -3 10 3518.74 424.549 5
 -2 -3 11 14080.7 927.857 5
 -2 -3 12 6283.26 663.151 5
 -2 -3 13 42290.8 1877.03 5
 -2 -3 14 33658 1749.85 5
 -2 -3 15 173.303 196.326 5
 -2 -3 16 9723.21 982.686 5
 -2 -3 17 2050.3 457.333 5
 -2 -3 18 10895.5 1132.85 5
 -2 -3 19 10130.1 1143.18 5
 -2 -2 -16 3562.41 603.178 2
 -2 -2 -15 22024.8 1466.61 2
 -2 -2 -15 24863.9 1764.47 4
 -2 -2 -14 1024.73 328.873 4
 -2 -2 -13 6212.12 829.529 4
 -2 -2 -12 29855.1 1756.19 4
 -2 -2 -11 358.151 160.458 4
 -2 -2 -10 29220.2 1611.18 4
 -2 -2 -9 11774.7 967.069 4
 -2 -2 -8 11633.6 915.681 4
 -2 -2 -7 49933.4 1933.81 4
 -2 -2 -6 393.857 148.65 4
 -2 -2 -5 36870.9 1084.34 3
 -2 -2 -5 37593.6 1522.49 4
 -2 -2 -4 56171.8 1385.68 3
 -2 -2 -4 56325 1855.75 4
 -2 -2 -3 24654.4 790.968 3
 -2 -2 -3 23790.9 1086.76 4
 -2 -2 -2 140505 2718.16 3
 -2 -2 -2 154897 3038.09 2
 -2 -2 -1 53969.9 1373.55 2
 -2 -2 0 21779.9 709.389 2
 -2 -2 1 27139.9 765.932 2
 -2 -2 3 44300 885.766 5
 -2 -2 4 10251.6 407.034 5
 -2 -2 5 6036.12 362.29 5
 -2 -2 6 17807.5 739.798 5
 -2 -2 7 3278.8 337.242 5
 -2 -2 8 90458.4 2351.26 5
 -2 -2 9 34372.5 1368.78 5
 -2 -2 10 1425.56 290.899 5
 -2 -2 11 1800.65 341.502 5
 -2 -2 12 6787.76 690.789 5
 -2 -2 13 25923.7 1459.68 5
 -2 -2 14 6333.21 734.3 5
 -2 -2 15 2217.42 474.399 5
 -2 -2 16 5304.03 750.257 5
 -2 -2 17 1756.26 447.991 5
 -2 -2 18 23202.3 1693.05 5
 -2 -2 19 6986.23 962.31 5
 -2 -1 -16 14595 1158.69 2
 -2 -1 -16 15106.8 1358.36 4
 -2 -1 -15 14680.7 1128.46 2
 -2 -1 -15 15945.9 1353.84 4
 -2 -1 -14 1030.94 360.647 4
 -2 -1 -13 5771.62 761.624 4
 -2 -1 -12 206.787 140.513 4
 -2 -1 -11 18540.8 1259.45 4
 -2 -1 -10 50164.9 2075.25 4
 -2 -1 -9 6126.79 652.732 4
 -2 -1 -8 23448.8 1250.95 4
 -2 -1 -7 2582.47 386.42 4
 -2 -1 -6 29847.9 1315.9 4
 -2 -1 -5 114473 2853.36 4
 -2 -1 -4 19110.3 686.54 3
 -2 -1 -4 19871.2 951.171 4
 -2 -1 -3 33859.2 940.597 3
 -2 -1 -3 35394.5 1260.79 4
 -2 -1 -2 28398.5 811.386 3
 -2 -1 -2 29134.5 901.439 2
 -2 -1 -2 29692.1 1068.83 4
 -2 -1 -2 29854 763.339 1
 -2 -1 -1 7226.75 310.174 1
 -2 -1 -1 7803.57 358.715 3
 -2 -1 -1 8544.26 400.113 2
 -2 -1 -1 7963.99 484.386 4
 -2 -1 0 271922 4449.37 1
 -2 -1 0 272319 4546.31 2
 -2 -1 1 211747 3628.65 1
 -2 -1 1 217592 3478.54 5
 -2 -1 2 34490.7 733.317 5
 -2 -1 2 34396.3 896.711 1
 -2 -1 3 107915 1956.88 5
 -2 -1 4 7490.77 367.66 5
 -2 -1 5 60611.6 1487.94 5
 -2 -1 6 21255.7 846.738 5
 -2 -1 7 22855.1 960.896 5
 -2 -1 8 30248.5 1211.63 5
 -2 -1 9 8952.15 673.866 5
 -2 -1 10 56434.6 1957.2 5
 -2 -1 11 2899.58 424.989 5
 -2 -1 12 9171.48 822.159 5
 -2 -1 13 14402.8 1084.36 5
 -2 -1 14 240.429 70.5346 5
 -2 -1 15 3367.13 574.134 5
 -2 -1 16 3662.26 624.306 5
 -2 -1 17 11948 1169.83 5
 -2 -1 18 10742.6 1150.93 5
 -2 -1 19 2663.74 587.541 5
 -2 0 -16 18126.3 1469.99 4
 -2 0 -15 7600.71 783.458 2
 -2 0 -15 7013.71 872.599 4
 -2 0 -14 631.837 218.286 4
 -2 0 -14 447.693 165.095 2
 -2 0 -13 917.901 296.837 4
 -2 0 -12 2456.42 466.59 4
 -2 0 -11 44739.5 1954.36 4
 -2 0 -10 44689.5 1872.29 4
 -2 0 -9 893.101 258.453 4
 -2 0 -8 19992.9 1106.77 4
 -2 0 -7 59159.2 1942.26 4
 -2 0 -6 137003 3241.29 4
 -2 0 -5 80666.9 1925.71 2
 -2 0 -5 74076.5 2092.78 4
 -2 0 -4 6977.52 429.045 2
 -2 0 -4 7188.61 332.173 1
 -2 0 -4 6110.95 475.006 4
 -2 0 -3 1140.46 187.768 4
 -2 0 -3 1058.8 140.73 3
 -2 0 -3 1340.44 122.171 1
 -2 0 -3 1364.26 162.45 2
 -2 0 -2 8661.29 385.701 3
 -2 0 -2 9107.4 399.756 2
 -2 0 -2 8982.39 500.411 4
 -2 0 -2 8852.7 287.729 1
 -2 0 -1 147868 2402.95 1
 -2 0 -1 143185 2610.17 3
 -2 0 -1 148326 2604.51 2
 -2 0 -1 144835 2818.2 4
 -2 0 0 36075.5 800.49 5
 -2 0 0 35984.9 958.623 4
 -2 0 0 36428.6 753.407 1
 -2 0 1 66984.4 1278.52 5
 -2 0 1 64830.3 1369.17 4
 -2 0 2 58029.7 1191.78 5
 -2 0 3 7396.56 348.345 5
 -2 0 4 65399.2 1503.75 5
 -2 0 5 126540 2609.43 5
 -2 0 6 30.7523 42.4012 5
 -2 0 7 59814.3 1757.62 5
 -2 0 8 22625.7 1057.92 5
 -2 0 9 48801.6 1744.91 5
 -2 0 10 57286.9 2026.04 5
 -2 0 11 1474.07 320.594 5
 -2 0 12 23167.4 1338.81 5
 -2 0 13 15471.5 1142.8 5
 -2 0 14 4055.17 599.169 5
 -2 0 15 31221.3 1786.87 5
 -2 0 16 2848.41 562.473 5
 -2 0 17 7731.47 936.555 5
 -2 0 18 1878.19 470.88 5
 -2 1 -17 10679.5 1112.27 4
 -2 1 -16 14525.8 1262.56 4
 -2 1 -15 1976.77 453.234 4
 -2 1 -15 2401.53 394.089 2
 -2 1 -14 7308.22 687.347 2
 -2 1 -14 6291.38 771.539 4
 -2 1 -13 3477.56 461.444 2
 -2 1 -13 3592.98 550.775 4
 -2 1 -12 6618.5 720.69 4
 -2 1 -11 39228.2 1770.21 4
 -2 1 -10 21317.7 1207.55 4
 -2 1 -9 18570 1059.31 4
 -2 1 -8 6976.45 607.349 4
 -2 1 -7 71235.5 1833.44 2
 -2 1 -7 71613.1 2096.82 4
 -2 1 -6 108789 2352.47 2
 -2 1 -6 103957 2591.65 4
 -2 1 -5 59553.4 1264.91 1
 -2 1 -5 59265.8 1449.94 2
 -2 1 -5 58131.1 1680.09 4
 -2 1 -4 4408.19 285.623 2
 -2 1 -4 4694.55 221.946 1
 -2 1 -4 4772.24 387.1 4
 -2 1 -3 547.299 57.1015 1
 -2 1 -3 413.712 106.547 4
 -2 1 -3 595.178 89.0655 2
 -2 1 -2 105057 1981.69 3
 -2 1 -2 102783 1916.81 2
 -2 1 -2 104761 2165.04 4
 -2 1 -1 34126.9 838.864 5
 -2 1 -1 34206.2 816.622 3
 -2 1 -1 34549.9 913.323 4
 -2 1 0 36662.1 827.312 5
 -2 1 0 35167.5 818.024 4
 -2 1 1 1250.53 140.571 5
 -2 1 1 1223.96 99.9592 4
 -2 1 2 6644.01 330.938 5
 -2 1 3 1027.27 143.02 5
 -2 1 4 172573 3270.21 5
 -2 1 5 38382.9 1192.91 5
 -2 1 5 39530.2 839.307 4
 -2 1 6 1681.06 239.713 5
 -2 1 6 1482.98 148.314 4
 -2 1 7 59814.9 1779.09 5
 -2 1 7 57386.1 1328.53 4
 -2 1 8 213.531 99.8624 5
 -2 1 9 24409.8 1194.01 5
 -2 1 10 66180.4 2234.54 5
 -2 1 11 109.561 127.633 5
 -2 1 12 25967 1445.29 5
 -2 1 13 4951.21 640.117 5
 -2 1 14 36450.2 1884.66 5
 -2 1 15 53407.5 2421.3 5
 -2 1 16 271.281 237.909 5
 -2 1 17 3839.85 668.925 5
 -2 1 18 77.7778 134.274 5
 -2 2 -17 11341.6 1139.91 4
 -2 2 -16 10492.1 1045.95 4
 -2 2 -15 1521.36 380.707 4
 -2 2 -14 29478.8 1333.88 2
 -2 2 -14 30488.6 1696.24 4
 -2 2 -13 2668.18 452.988 4
 -2 2 -13 3311.58 412.816 2
 -2 2 -12 10324 705.157 2
 -2 2 -12 9970.61 853.994 4
 -2 2 -11 30991.4 1258.37 2
 -2 2 -11 31265.6 1494.67 4
 -2 2 -10 -72.3891 140.064 4
 -2 2 -10 75.8933 84.4111 2
 -2 2 -9 43628.9 1366.01 2
 -2 2 -9 42560.9 1632.36 4
 -2 2 -8 7908.17 485.498 2
 -2 2 -8 7398.24 614.124 4
 -2 2 -7 30692.5 970.349 2
 -2 2 -7 29960 1220.67 4
 -2 2 -6 85547.9 1834.96 2
 -2 2 -6 89202.4 2261.69 4
 -2 2 -5 490.981 124.075 4
 -2 2 -5 538.167 97.6152 2
 -2 2 -4 41495.8 960.645 2
 -2 2 -4 42179.1 1259.35 4
 -2 2 -3 80427.2 1539.95 2
 -2 2 -3 84078.6 1881.73 4
 -2 2 -2 54910.8 1250.01 5
 -2 2 -2 54018.5 1320.26 4
 -2 2 -1 325185 5363.47 5
 -2 2 -1 310065 5036.02 1
 -2 2 -1 321468 5338.63 4
 -2 2 0 145907 2614.17 5
 -2 2 0 139718 2487.39 4
 -2 2 1 15413.2 417.054 4
 -2 2 1 14218.1 522.661 5
 -2 2 2 90928.6 1527.21 3
 -2 2 2 89182.3 1868.88 5
 -2 2 3 31073.3 867.061 5
 -2 2 3 17171.1 463.954 4
 -2 2 4 166319 3233.16 5
 -2 2 4 166779 2816.47 4
 -2 2 5 6595.61 465.847 5
 -2 2 5 6586.09 302.754 4
 -2 2 6 40968.4 1360.31 5
 -2 2 6 40025.6 1014.37 4
 -2 2 7 23935.9 1062.46 5
 -2 2 8 12324.9 795.044 5
 -2 2 9 71698.8 2258.43 5
 -2 2 10 20413.1 1164.25 5
 -2 2 11 15022.5 1045.74 5
 -2 2 12 28723.2 1536.57 5
 -2 2 13 1304.86 349.567 5
 -2 2 14 65677.1 2654.68 5
 -2 2 15 20633.1 1486.89 5
 -2 2 16 1178.93 377.902 5
 -2 2 17 3160.73 614.21 5
 -2 2 18 220.038 198.601 5
 -2 3 -18 241.418 208.685 4
 -2 3 -17 5590.3 772.526 4
 -2 3 -16 2732.61 507.778 4
 -2 3 -15 23371.8 1509.37 4
 -2 3 -14 33262.3 1720.39 4
 -2 3 -13 6320.89 516.853 2
 -2 3 -13 5839.93 670.354 4
 -2 3 -12 35202.2 1268.43 2
 -2 3 -12 36772.8 1687.89 4
 -2 3 -11 5332.07 424.857 2
 -2 3 -11 4692.5 563.672 4
 -2 3 -10 15344.8 704.818 2
 -2 3 -10 15288.3 963.865 4
 -2 3 -9 95784 2137.22 2
 -2 3 -9 105279 2775.04 4
 -2 3 -8 2394.12 227.321 2
 -2 3 -8 3062.11 389.859 4
 -2 3 -7 17981.6 608.059 2
 -2 3 -7 17929.6 908.382 4
 -2 3 -7 16265 611.376 1
 -2 3 -6 33847.2 843.143 2
 -2 3 -6 33472.7 1235.71 4
 -2 3 -6 32736.6 859.671 1
 -2 3 -5 15479 486.651 1
 -2 3 -5 16473.9 495.549 2
 -2 3 -4 122416 2143.77 1
 -2 3 -4 133630 2696.58 4
 -2 3 -3 84937.8 1528.63 1
 -2 3 -3 85712.9 1925.93 4
 -2 3 -2 68737.8 1584.34 4
 -2 3 -2 69412.1 1313.6 1
 -2 3 -2 70813 1542.56 5
 -2 3 -1 19926.4 660.501 5
 -2 3 -1 19346.1 545.018 1
 -2 3 0 410.653 96.619 5
 -2 3 0 521.469 98.0154 1
 -2 3 1 171852 3096.32 1
 -2 3 1 167592 3115.24 5
 -2 3 2 12892.7 561.436 1
 -2 3 2 13177 571.537 5
 -2 3 3 19479.6 762.728 5
 -2 3 4 23115.2 892.921 5
 -2 3 4 24435.7 741.995 4
 -2 3 5 484.203 104.77 4
 -2 3 5 456.103 141.729 5
 -2 3 6 61420.7 1816.89 5
 -2 3 7 835.731 204.072 5
 -2 3 8 38416 1515.07 5
 -2 3 9 53144.3 1935.69 5
 -2 3 10 1177.84 261.028 5
 -2 3 11 18135.2 1166.3 5
 -2 3 12 12772.5 1016.97 5
 -2 3 13 6982.24 785.804 5
 -2 3 14 27698.5 1668.39 5
 -2 3 15 115.472 181.003 5
 -2 3 16 8789.75 1002.44 5
 -2 3 17 2726.13 577.915 5
 -2 4 -18 1180.05 333.939 4
 -2 4 -17 6585.78 823.035 4
 -2 4 -16 1492.38 386.166 4
 -2 4 -15 40672.5 1982.08 4
 -2 4 -14 31158.5 1647.23 4
 -2 4 -13 3414.11 513.482 4
 -2 4 -13 2804.34 342.409 1
 -2 4 -12 28341.5 970.56 2
 -2 4 -12 28965.8 1454.61 4
 -2 4 -11 -7.02293 83.5315 1
 -2 4 -11 94.751 82.651 4
 -2 4 -11 38.8142 37.7335 2
 -2 4 -10 69333.4 1586.79 2
 -2 4 -10 71241.2 2269.64 4
 -2 4 -10 68007.6 1759.03 1
 -2 4 -9 29796.8 840.892 2
 -2 4 -9 27960.8 1270.9 4
 -2 4 -9 28011.2 950.87 1
 -2 4 -8 98.1678 47.2881 4
 -2 4 -8 87.419 34.258 1
 -2 4 -8 180.943 47.6275 2
 -2 4 -7 20137.4 700.339 1
 -2 4 -7 21816.9 599.56 2
 -2 4 -7 22430.2 1027.01 4
 -2 4 -6 19288.2 652.691 1
 -2 4 -6 21428.9 947.547 4
 -2 4 -5 38998 959.089 1
 -2 4 -5 42261 1342.02 4
 -2 4 -4 131876 2844.57 4
 -2 4 -4 134889 2425.35 1
 -2 4 -3 4096.39 346.074 4
 -2 4 -3 3909.81 303.658 5
 -2 4 -3 3755.01 234.536 1
 -2 4 -2 23822.2 701.966 1
 -2 4 -2 25592.2 825.902 5
 -2 4 -1 632.044 120.689 5
 -2 4 -1 436.546 91.6853 1
 -2 4 0 67256.7 1583.95 5
 -2 4 0 66733.1 1526.18 1
 -2 4 1 19315.6 726.56 1
 -2 4 1 18572.6 713.734 5
 -2 4 2 11118.9 558.843 5
 -2 4 2 10625.7 553.467 1
 -2 4 3 19649.8 824.192 5
 -2 4 3 20667.6 852.562 1
 -2 4 4 6602.82 478.57 1
 -2 4 4 6499.96 462.521 5
 -2 4 5 42765.6 1400.94 5
 -2 4 6 65886.6 1926.01 5
 -2 4 7 7619.09 626.528 5
 -2 4 8 4819.17 209.052 3
 -2 4 8 5380.64 546.785 5
 -2 4 9 832.44 221.53 5
 -2 4 10 14963.2 1041.74 5
 -2 4 11 5259.67 636.709 5
 -2 4 12 4702.32 636.499 5
 -2 4 13 8834.95 911.731 5
 -2 4 14 2116.29 464.647 5
 -2 4 15 5737.34 814.459 5
 -2 4 16 18099.8 1490.07 5
 -2 5 -18 5876.1 811.021 4
 -2 5 -17 8091.54 919.689 4
 -2 5 -16 8651.33 899.95 4
 -2 5 -15 25903.4 1569.3 4
 -2 5 -14 5168.8 658.432 4
 -2 5 -13 13205.1 753.967 1
 -2 5 -13 16031.7 1116.51 4
 -2 5 -12 8260.94 561.248 1
 -2 5 -12 9151.66 814.38 4
 -2 5 -11 7477.59 513.991 1
 -2 5 -11 8798.3 403.009 2
 -2 5 -11 7884.23 718.255 4
 -2 5 -10 36926.6 1190.35 1
 -2 5 -10 38593.3 934.277 2
 -2 5 -10 38608.3 1615.64 4
 -2 5 -9 654.244 194.551 4
 -2 5 -9 603.573 126.61 1
 -2 5 -8 2451.64 250.603 1
 -2 5 -8 2288.12 341.449 4
 -2 5 -7 31761.4 949.685 1
 -2 5 -7 35808.2 1340.69 4
 -2 5 -6 6708.66 537.99 4
 -2 5 -6 6308.2 366.645 1
 -2 5 -5 30351.5 1156.72 4
 -2 5 -5 27712 839.706 1
 -2 5 -4 20602 779.393 5
 -2 5 -4 19056.1 670.3 1
 -2 5 -3 133587 2585.63 5
 -2 5 -3 119384 2417.84 1
 -2 5 -2 5239.2 343.264 1
 -2 5 -2 6464.72 413.077 5
 -2 5 -1 51147.8 1315.29 5
 -2 5 -1 44534.9 1254.14 1
 -2 5 0 138911 2763.62 5
 -2 5 0 131168 2744.76 1
 -2 5 1 112541 2441.64 1
 -2 5 1 106919 2346.83 5
 -2 5 2 5361.25 407.634 5
 -2 5 2 4928.77 405.6 1
 -2 5 3 35339 1203.74 5
 -2 5 3 33948.2 1225.2 1
 -2 5 4 3577.94 373.36 5
 -2 5 4 3688.33 385.05 1
 -2 5 5 119747 2856.1 1
 -2 5 5 115196 2792.39 5
 -2 5 6 82423.3 2302.34 5
 -2 5 7 1717.11 299.375 5
 -2 5 8 8240.49 690.693 5
 -2 5 9 12305.6 910.611 5
 -2 5 10 40434.4 1805.31 5
 -2 5 11 29751.6 1592.53 5
 -2 5 12 -93.9947 121.028 5
 -2 5 13 6357.93 792.233 5
 -2 5 14 48.6212 97.0515 5
 -2 5 15 11058.4 1125.1 5
 -2 5 16 13490.5 1287.58 5
 -2 6 -19 2596.34 545.752 4
 -2 6 -18 12420.8 1174.84 4
 -2 6 -17 2197.09 484.749 4
 -2 6 -16 6921.66 814.388 4
 -2 6 -15 7424.59 823.769 4
 -2 6 -14 1082.87 324.764 4
 -2 6 -13 18770.7 902.979 1
 -2 6 -13 20205.8 1253.12 4
 -2 6 -12 6525.04 503.521 1
 -2 6 -12 6708.38 702.788 4
 -2 6 -11 7665.33 538.637 1
 -2 6 -11 7768.73 738.248 4
 -2 6 -10 17866.9 801.828 1
 -2 6 -10 19982.2 1123.21 4
 -2 6 -9 213.232 84.98 4
 -2 6 -9 442.934 116.011 1
 -2 6 -8 14051.8 646.388 1
 -2 6 -8 15520 920.794 4
 -2 6 -7 1299.51 262.42 4
 -2 6 -7 1356.56 187.682 1
 -2 6 -6 6630.85 566.582 4
 -2 6 -6 5979.6 388.221 1
 -2 6 -5 65326 1603.23 1
 -2 6 -4 7911.43 475.101 5
 -2 6 -4 6836.42 426.146 1
 -2 6 -3 53823.4 1423.14 5
 -2 6 -3 48477.7 1304.71 1
 -2 6 -2 3394.33 312.183 1
 -2 6 -2 3543.4 314.254 5
 -2 6 -1 52806.3 1386.54 5
 -2 6 -1 40251.5 1312.19 1
 -2 6 0 107406 2352.03 5
 -2 6 0 99705 2377.99 1
 -2 6 1 2851.67 293.834 5
 -2 6 1 2762.16 317.058 1
 -2 6 2 5801.37 475.147 1
 -2 6 2 5957.16 452.153 5
 -2 6 3 26049.7 1052.73 5
 -2 6 3 26609.1 1110.13 1
 -2 6 4 39643 1454.77 1
 -2 6 4 37610.7 1395.99 5
 -2 6 5 120543 2994.28 5
 -2 6 5 127705 3114.12 1
 -2 6 6 26241.1 1210.04 5
 -2 6 7 11174 801.033 5
 -2 6 8 12820.1 895.784 5
 -2 6 9 13254.2 966.601 5
 -2 6 10 45860.1 1956.69 5
 -2 6 11 17727.3 1232.44 5
 -2 6 12 2067.82 443.96 5
 -2 6 13 4682.03 682.353 5
 -2 6 14 856.046 331.743 5
 -2 6 15 20164.5 1542.84 5
 -2 7 -19 13422.8 1285.67 4
 -2 7 -18 13375.5 1224.65 4
 -2 7 -17 -125.692 281.896 4
 -2 7 -16 5329.01 739.043 4
 -2 7 -15 368.813 217.374 4
 -2 7 -14 9041.33 870.561 4
 -2 7 -13 21065.1 992.884 1
 -2 7 -13 25103.1 1450.95 4
 -2 7 -12 918.542 266.339 4
 -2 7 -12 908.392 180.817 1
 -2 7 -11 11889 667.289 1
 -2 7 -11 12595.1 938.508 4
 -2 7 -10 52.996 68.8662 4
 -2 7 -10 -25.8113 96.9942 1
 -2 7 -9 24693.5 964.272 1
 -2 7 -9 25426.6 1281.15 4
 -2 7 -8 40507.4 1614.71 4
 -2 7 -8 38037.5 1231.27 1
 -2 7 -7 8108.44 685.714 4
 -2 7 -7 6583.27 440.56 1
 -2 7 -6 30932 1067.64 1
 -2 7 -5 25226.9 933.954 1
 -2 7 -4 15428.4 708.281 5
 -2 7 -4 12762 648.843 1
 -2 7 -3 59321.1 1635.83 1
 -2 7 -3 64771.7 1656.81 5
 -2 7 -2 12256.2 637.003 5
 -2 7 -2 11552 644.497 1
 -2 7 -1 52028.3 1458.28 5
 -2 7 -1 43878.2 1452.31 1
 -2 7 0 11903 650.132 5
 -2 7 0 11415.8 676.954 1
 -2 7 1 14195.5 733.403 5
 -2 7 1 13740.2 772.041 1
 -2 7 2 127007 2996.91 1
 -2 7 2 121973 2840.6 5
 -2 7 3 30392.3 1200.57 5
 -2 7 3 30502.2 1276.15 1
 -2 7 4 29657.3 1250.57 5
 -2 7 4 31329.5 1333.2 1
 -2 7 5 45271.5 1737.58 1
 -2 7 5 45912 1690.12 5
 -2 7 6 1322.81 293.545 1
 -2 7 6 1165.48 257.649 5
 -2 7 7 41260.5 1678.91 5
 -2 7 8 1867.18 362.646 5
 -2 7 9 2460.68 422.763 5
 -2 7 10 19079.8 1257.54 5
 -2 7 11 494.371 207.785 5
 -2 7 12 9236.36 945.411 5
 -2 7 13 3665.02 619.76 5
 -2 7 14 5517.87 782.78 5
 -2 7 15 11713.6 1202.72 5
 -2 8 -19 11080.1 1168.9 4
 -2 8 -18 6619.79 876.158 4
 -2 8 -17 1024.93 355.883 4
 -2 8 -16 3189.08 572.315 4
 -2 8 -15 618.986 197.756 4
 -2 8 -14 27906.2 1633.59 4
 -2 8 -13 22813.5 1059.3 1
 -2 8 -13 26822.9 1525.47 4
 -2 8 -12 3435.41 382.104 1
 -2 8 -12 4689.25 622.54 4
 -2 8 -11 7155.87 542.788 1
 -2 8 -11 7507.44 748.244 4
 -2 8 -10 14822.1 1029.32 4
 -2 8 -10 14019.2 764.408 1
 -2 8 -9 69233.5 2309.08 4
 -2 8 -9 62764.9 1797.65 1
 -2 8 -8 43056.3 1758.31 4
 -2 8 -8 37931.2 1290.85 1
 -2 8 -7 343.143 97.0953 1
 -2 8 -6 20411.5 892.017 1
 -2 8 -5 1614.17 225.426 5
 -2 8 -5 1474.11 232.282 1
 -2 8 -4 60757.6 1741.39 1
 -2 8 -4 73378 1821.58 5
 -2 8 -3 76194.8 2094.8 1
 -2 8 -3 86984.4 2103.02 5
 -2 8 -2 6365.27 467.392 5
 -2 8 -2 5270.39 470.145 1
 -2 8 -1 28612.4 1077.51 5
 -2 8 -1 27880 1177.63 1
 -2 8 0 6114.81 479.731 5
 -2 8 0 6137.83 535.205 1
 -2 8 1 47342.3 1516.25 5
 -2 8 1 46936.6 1648.88 1
 -2 8 2 86960.4 2442.84 1
 -2 8 2 85208.9 2257.77 5
 -2 8 3 78.5014 69.1416 5
 -2 8 3 67.2651 118.051 1
 -2 8 4 15837.3 910.973 5
 -2 8 4 16167.9 988.369 1
 -2 8 5 15231.1 994.719 1
 -2 8 5 15421.6 947.885 5
 -2 8 6 41029.4 1715.76 5
 -2 8 6 42228.9 1775.03 1
 -2 8 7 37555.1 1707.57 1
 -2 8 7 38853.4 1697.83 5
 -2 8 8 7810.67 758.101 5
 -2 8 9 11680.4 969.924 5
 -2 8 10 5991.77 712.981 5
 -2 8 11 5914.32 740.076 5
 -2 8 12 18423.4 1379.69 5
 -2 8 13 143.691 125.856 5
 -2 8 14 8994.33 1035.49 5
 -2 9 -19 6188.17 867.625 4
 -2 9 -18 281.283 243.418 4
 -2 9 -17 4986.55 750.668 4
 -2 9 -16 2645.33 536.239 4
 -2 9 -15 5766.94 755.304 4
 -2 9 -14 34343.7 1858.31 4
 -2 9 -13 8709.1 650.7 1
 -2 9 -13 10377.6 963.421 4
 -2 9 -12 15441.6 882.378 1
 -2 9 -12 17010.9 1208.88 4
 -2 9 -11 7862.01 797.53 4
 -2 9 -11 7723.47 591.493 1
 -2 9 -10 18220.9 1178.07 4
 -2 9 -10 14765.6 817 1
 -2 9 -9 56934.9 2156.24 4
 -2 9 -9 48752.8 1617.21 1
 -2 9 -8 19378.5 949.052 1
 -2 9 -7 111.591 86.8062 1
 -2 9 -6 7968.54 576.741 1
 -2 9 -5 26138.3 1015.56 5
 -2 9 -5 21528 976.704 1
 -2 9 -4 53557.8 1728.45 1
 -2 9 -4 60462 1677.43 5
 -2 9 -3 68268.4 1887.2 5
 -2 9 -3 61508.9 1921.05 1
 -2 9 -2 116.876 72.028 1
 -2 9 -2 293.537 99.1702 5
 -2 9 -1 10865.8 665.243 5
 -2 9 -1 9910.55 717.479 1
 -2 9 0 237.076 96.928 5
 -2 9 0 156.223 120.142 1
 -2 9 1 50377 1655.63 5
 -2 9 1 49490.2 1789.91 1
 -2 9 2 9589.76 767.428 1
 -2 9 2 11201.1 721.792 5
 -2 9 3 2324.28 348.576 5
 -2 9 3 1883.53 350.268 1
 -2 9 4 8588.69 759.851 1
 -2 9 4 8518.55 694.23 5
 -2 9 5 752.9 205.024 5
 -2 9 5 878.624 233.356 1
 -2 9 6 30767.8 1485.45 5
 -2 9 6 31505.4 1590.68 1
 -2 9 7 20282.2 1284.62 1
 -2 9 7 20954.8 1276.24 5
 -2 9 8 911.867 281.82 5
 -2 9 9 20416.2 1367.13 5
 -2 9 10 -94.0824 194.9 5
 -2 9 11 18999.8 1404.76 5
 -2 9 12 18678.9 1442.48 5
 -2 9 13 -45.4765 127.23 5
 -2 10 -18 1481.31 411.782 4
 -2 10 -17 11091.7 1149.72 4
 -2 10 -16 2352.63 517.927 4
 -2 10 -15 4661.97 705.713 4
 -2 10 -14 14077.2 1181.96 4
 -2 10 -13 757.582 271.586 4
 -2 10 -13 997.618 204.36 1
 -2 10 -12 22329.7 1096.47 1
 -2 10 -12 27598.6 1588.69 4
 -2 10 -11 2517.28 457.851 4
 -2 10 -11 2294.43 345.096 1
 -2 10 -10 32396.6 1685.16 4
 -2 10 -10 29712.8 1290.5 1
 -2 10 -9 20879 1341.19 4
 -2 10 -9 18767.2 996.684 1
 -2 10 -8 3811.21 418.254 1
 -2 10 -7 23032.8 1086.41 1
 -2 10 -6 1868.61 299.873 1
 -2 10 -5 8198.03 630.081 1
 -2 10 -5 10007.7 622.684 5
 -2 10 -4 54232.1 1843.81 1
 -2 10 -4 57525.9 1685.36 5
 -2 10 -3 264.04 74.3502 1
 -2 10 -3 760.677 173.813 5
 -2 10 -2 7716.72 559.969 5
 -2 10 -2 5495.83 560.183 1
 -2 10 -1 16172.6 847.075 5
 -2 10 -1 15252.5 954.042 1
 -2 10 0 7021.35 563.871 5
 -2 10 0 6697.42 637.574 1
 -2 10 1 28270.2 1218.33 5
 -2 10 1 24736 1297.55 1
 -2 10 2 1174.13 245.424 5
 -2 10 2 933.024 255.53 1
 -2 10 3 3856.86 457.487 5
 -2 10 3 3578.62 510.355 1
 -2 10 4 3099.82 425.596 5
 -2 10 4 2862.23 458.175 1
 -2 10 5 4115.28 523.272 5
 -2 10 5 4146.05 567.649 1
 -2 10 6 20666.6 1330.86 1
 -2 10 6 20428.3 1219.65 5
 -2 10 7 1193.36 355.373 1
 -2 10 7 954.619 275.799 5
 -2 10 8 9014.37 862.504 5
 -2 10 9 9824.13 965.36 5
 -2 10 10 4005.11 648.385 5
 -2 10 11 27616.2 1808.94 5
 -2 10 12 5568.77 832.681 5
 -2 11 -17 14651 1371.38 4
 -2 11 -16 300.053 163.574 4
 -2 11 -15 4592.97 700.058 4
 -2 11 -14 974.463 319.071 4
 -2 11 -13 15736 972.353 1
 -2 11 -13 18072.1 1354.03 4
 -2 11 -12 26047.9 1599.1 4
 -2 11 -12 21158.8 1142 1
 -2 11 -11 -70.3269 63.5021 1
 -2 11 -11 28.2766 77.5919 4
 -2 11 -10 15887.5 1261.95 4
 -2 11 -10 13839.5 889.783 1
 -2 11 -9 3126.87 420.486 1
 -2 11 -8 18245.8 1012.12 1
 -2 11 -7 59122.7 1945.92 1
 -2 11 -6 4765.67 506.818 1
 -2 11 -5 13092.6 886.61 1
 -2 11 -5 15708.3 812.637 5
 -2 11 -4 7062.6 537.143 5
 -2 11 -4 6535.82 619.55 1
 -2 11 -3 12155.5 743.602 5
 -2 11 -3 9550.31 767.487 1
 -2 11 -2 15427.2 857.098 5
 -2 11 -2 14075 976.486 1
 -2 11 -1 1134.39 230.051 5
 -2 11 -1 993.128 246.577 1
 -2 11 0 21117.7 1054.25 5
 -2 11 0 20533.3 1198.42 1
 -2 11 1 3949.55 462.673 5
 -2 11 1 3556.32 503.513 1
 -2 11 2 4951.04 603.265 1
 -2 11 2 5749.89 563.182 5
 -2 11 3 18715 1078.56 5
 -2 11 3 18494.7 1215.76 1
 -2 11 4 799.453 246.731 5
 -2 11 4 807.55 274.735 1
 -2 11 5 14780.3 1028.15 5
 -2 11 5 14818.5 1123.53 1
 -2 11 6 5071.34 708.707 1
 -2 11 6 4934.65 609.418 5
 -2 11 7 390.54 219.132 1
 -2 11 7 611.736 243.249 5
 -2 11 8 18495 1298.32 5
 -2 11 9 1335.41 348.579 5
 -2 11 10 7953.79 911.793 5
 -2 11 11 14180.1 1279.91 5
 -2 12 -16 1641.88 463.894 4
 -2 12 -15 4291.51 708.055 4
 -2 12 -14 729.278 253.751 4
 -2 12 -13 20938.2 1524.93 4
 -2 12 -13 16921.3 1074.29 1
 -2 12 -12 12160 1121.85 4
 -2 12 -12 9159.17 767.627 1
 -2 12 -11 257.601 224.018 4
 -2 12 -11 173.436 122.809 1
 -2 12 -10 5916.52 603.911 1
 -2 12 -9 228.179 125.282 1
 -2 12 -8 30557.3 1377.73 1
 -2 12 -7 22665.1 1191.58 1
 -2 12 -6 124.354 79.7387 1
 -2 12 -5 16044.5 847.154 5
 -2 12 -5 14074.1 965.63 1
 -2 12 -4 897.743 237.437 1
 -2 12 -4 1247.42 230.282 5
 -2 12 -3 17930.1 922.332 5
 -2 12 -3 13314.6 988.321 1
 -2 12 -2 36077.8 1408.48 5
 -2 12 -2 31995.7 1574.48 1
 -2 12 -1 117.283 93.9492 5
 -2 12 -1 -203.159 173.813 1
 -2 12 0 7775.59 650.211 5
 -2 12 0 6621.1 714.903 1
 -2 12 1 263.888 116.237 5
 -2 12 1 220.043 88.1561 1
 -2 12 2 20449.9 1317.29 1
 -2 12 2 23362.7 1219.08 5
 -2 12 3 20523 1181.64 5
 -2 12 3 20563.4 1345.26 1
 -2 12 4 77.0709 135.312 5
 -2 12 4 31.5516 159.823 1
 -2 12 5 6204.09 676.499 5
 -2 12 5 5896.61 740.129 1
 -2 12 6 940.699 288.717 1
 -2 12 6 1435.76 341.145 5
 -2 12 7 6242.35 735.015 5
 -2 12 7 8215.85 920.333 1
 -2 12 8 10992.9 1016.2 5
 -2 12 9 669.595 283.286 5
 -2 13 -15 2170.76 531.895 4
 -2 13 -14 4819.25 761.892 4
 -2 13 -13 8933.4 1020.71 4
 -2 13 -12 1411.44 413.532 4
 -2 13 -12 888.442 256.446 1
 -2 13 -11 1199.49 280.079 1
 -2 13 -11 1638.61 442.857 4
 -2 13 -10 1713.92 315.187 1
 -2 13 -9 848.551 226.668 1
 -2 13 -8 13773.2 970.731 1
 -2 13 -7 298.785 130.375 1
 -2 13 -6 8964.95 801.558 1
 -2 13 -5 4790.14 594.574 1
 -2 13 -4 5236.69 633.757 1
 -2 13 -3 32951.6 1658.54 1
 -2 13 -2 25686.3 1454.66 1
 -2 13 -1 1020.44 286.259 1
 -2 13 0 11670.8 989.343 1
 -2 13 1 93.5488 92.3787 1
 -2 13 2 41881.1 2017.23 1
 -2 13 3 27354.2 1626.26 1
 -2 13 4 -49.3577 123.147 1
 -2 13 5 6990.9 850.066 1
 -2 13 6 308.447 208.48 1
 -2 13 7 13447 1237.82 1
 -2 14 -14 6174.99 889.581 4
 -2 14 -13 3641.71 685.435 4
 -2 14 -12 910.222 382.002 4
 -2 14 -12 256.935 89.3825 1
 -2 14 -11 8529.21 782.432 1
 -2 14 -10 2652.19 454.865 1
 -2 14 -9 3076.7 491.735 1
 -2 14 -8 8574.05 799.98 1
 -2 14 -7 1097.57 272.688 1
 -2 14 -6 11670.6 961.244 1
 -2 14 -5 373.864 166.001 1
 -2 14 -4 9723.84 917.745 1
 -2 14 -3 18542 1280.88 1
 -2 14 -2 617.977 234.655 1
 -2 14 -1 9916.97 945.589 1
 -2 14 0 7108.31 806.885 1
 -2 14 1 8360.61 880.617 1
 -2 14 2 39775.9 2061.23 1
 -2 14 3 4663.29 695.363 1
 -2 14 4 4480.85 686.191 1
 -2 14 5 2372.39 544.061 1
 -2 15 -12 3934.26 727.508 4
 -2 15 -12 2933.01 477.443 1
 -2 15 -11 11186.3 958.723 1
 -2 15 -10 603.113 108.582 1
 -2 15 -9 6098.22 729.891 1
 -2 15 -8 2487.68 459.431 1
 -2 15 -7 5443.87 698.094 1
 -2 15 -6 12977.1 1073.2 1
 -2 15 -5 -137.097 257.354 1
 -2 15 -4 6184.4 770.856 1
 -2 15 -3 4476 647.094 1
 -2 15 -2 3712.46 600.411 1
 -2 15 -1 12797.7 1125.7 1
 -2 15 0 1530.83 415.99 1
 -2 15 1 12382.2 1155.35 1
 -2 15 2 7476.11 886.898 1
 -2 16 -11 5957.35 748.609 1
 -2 16 -10 -27.2318 91.9738 1
 -2 16 -9 4676.9 643.716 1
 -2 16 -8 2.19955 90.415 1
 -2 16 -7 11712 1071.7 1
 -2 16 -6 7258.34 843.622 1
 -2 16 -5 -206.046 153.924 1
 -2 16 -4 3479.51 618.307 1
 -2 16 -3 603.726 210.34 1
 -2 16 -2 11155.3 1094.58 1
 -2 16 -1 13655.7 1214.53 1
 -1 -14 -3 3357.79 644.982 2
 -1 -14 -2 3821.07 652.963 2
 -1 -14 -1 362.583 124.774 2
 -1 -14 0 7014.96 820.923 2
 -1 -13 -5 3565.99 663.667 2
 -1 -13 -4 820.741 294.68 2
 -1 -13 -3 16841.7 1388.16 2
 -1 -13 -2 3734.02 642.298 2
 -1 -13 -1 956.298 316.501 2
 -1 -13 0 5164.57 685.826 2
 -1 -13 1 400.557 177.982 2
 -1 -13 2 12898.7 979.29 2
 -1 -12 -1 2110.6 454.552 2
 -1 -12 0 3661.26 574.15 2
 -1 -12 1 7231.35 738.937 2
 -1 -12 2 14575.5 998.224 2
 -1 -12 3 1506.82 289.373 2
 -1 -11 0 268.644 157.892 2
 -1 -11 1 45087.9 1876.68 2
 -1 -11 2 36362.9 1561.55 2
 -1 -11 3 210.274 112.698 2
 -1 -11 4 10955.1 705.539 2
 -1 -10 1 49303.7 1867.57 2
 -1 -10 2 28688.4 1324.08 2
 -1 -10 3 7336.58 589.458 2
 -1 -10 4 20019.5 916.031 2
 -1 -10 5 66.0604 48.8246 2
 -1 -10 6 31757.3 1029.22 2
 -1 -9 2 171.39 121.742 2
 -1 -9 3 29887.6 1172.4 2
 -1 -9 4 32731.4 1136 2
 -1 -9 5 4193.09 340.404 2
 -1 -9 6 16870.9 656.885 2
 -1 -8 -4 856.948 162.968 3
 -1 -8 2 26940.6 1120.77 2
 -1 -8 3 88986.1 2184.73 2
 -1 -8 4 40135.6 1203.41 2
 -1 -8 5 3665.01 284.852 2
 -1 -8 6 8721.86 410.237 2
 -1 -8 16 10909.2 1013.85 5
 -1 -8 17 300.64 132.086 5
 -1 -8 18 21366.3 1548.77 5
 -1 -7 -5 16333.4 692.081 3
 -1 -7 -4 6965.47 431.828 3
 -1 -7 2 67109.3 1432.29 5
 -1 -7 2 76685.5 1933.84 2
 -1 -7 3 63161.9 1306.85 5
 -1 -7 3 67255.1 1674.2 2
 -1 -7 4 1470.36 141.533 5
 -1 -7 4 1699.22 194.67 2
 -1 -7 5 38817.4 1009.9 2
 -1 -7 16 3810.47 602.034 5
 -1 -7 17 7795.9 888.512 5
 -1 -7 18 23101.2 1626.33 5
 -1 -7 19 2490.27 525.091 5
 -1 -7 20 1363.56 398.175 5
 -1 -6 -6 16299.3 666.241 3
 -1 -6 -5 37497.5 1092.74 3
 -1 -6 -4 2107.34 221.951 3
 -1 -6 1 363.645 73.4841 5
 -1 -6 2 103635 1927.45 5
 -1 -6 2 113270 2430.19 2
 -1 -6 3 3833.7 208.573 5
 -1 -6 3 3463.37 285.947 2
 -1 -6 4 39050.4 913.833 5
 -1 -6 4 39499.1 1007.29 2
 -1 -6 5 26974.5 751.368 5
 -1 -6 5 25740.8 707.468 2
 -1 -6 15 11721 1022.22 5
 -1 -6 16 -107.976 94.1367 5
 -1 -6 17 20176 1469.81 5
 -1 -6 18 12154.1 1170.81 5
 -1 -6 19 218.697 118.065 5
 -1 -6 20 6057.72 889.24 5
 -1 -5 -6 48604.3 1273.37 3
 -1 -5 -5 22957.4 780.398 3
 -1 -5 -4 4759.56 322.858 3
 -1 -5 0 72947.3 1543.89 5
 -1 -5 1 58282.2 1200.05 5
 -1 -5 2 26131.4 611.87 5
 -1 -5 2 28083.7 889.586 2
 -1 -5 3 12983.9 401.641 5
 -1 -5 3 13398.4 512.689 2
 -1 -5 4 86424.6 1637.42 5
 -1 -5 4 86364.5 1675.21 2
 -1 -5 5 27506.2 750.05 5
 -1 -5 15 12934.7 1072.47 5
 -1 -5 16 350.403 222.438 5
 -1 -5 17 13005.9 1173.46 5
 -1 -5 18 4312.92 715.255 5
 -1 -5 19 6408.71 887.204 5
 -1 -5 20 7941 1033.02 5
 -1 -4 -5 13227.2 542.167 3
 -1 -4 -4 7761.75 400.46 3
 -1 -4 -3 10354.2 452.022 3
 -1 -4 0 1621.32 149.676 5
 -1 -4 1 15620.5 424.28 5
 -1 -4 2 113.131 30.709 5
 -1 -4 2 153.707 50.8221 2
 -1 -4 3 54160.8 1066.59 5
 -1 -4 3 59905.4 1194.96 2
 -1 -4 4 70387 1361.57 5
 -1 -4 14 34769.9 1745.51 5
 -1 -4 15 13833.6 1121.07 5
 -1 -4 16 508.751 216.678 5
 -1 -4 17 7151.36 874.662 5
 -1 -4 18 -79.3818 168.383 5
 -1 -4 19 14449.8 1363.19 5
 -1 -3 -14 14793.6 1281.98 4
 -1 -3 -13 1606.12 440.562 4
 -1 -3 -12 42077.4 2085.17 4
 -1 -3 -11 20645.3 1373.98 4
 -1 -3 -10 4952.63 624.408 4
 -1 -3 -9 35641.4 1697.51 4
 -1 -3 -8 -132.346 145.221 4
 -1 -3 -7 99414.9 2887.19 4
 -1 -3 -6 90868.6 2642.97 4
 -1 -3 -5 427.045 99.1112 3
 -1 -3 -4 58094.2 1313.51 3
 -1 -3 -3 784.73 114.902 3
 -1 -3 1 11157.4 454.133 2
 -1 -3 2 46715.1 1007.24 2
 -1 -3 12 3632.83 506.053 5
 -1 -3 13 39243.7 1804.02 5
 -1 -3 14 56728.4 2313.89 5
 -1 -3 15 1719.09 387.811 5
 -1 -3 16 1086.48 319.243 5
 -1 -3 17 3992.44 653.441 5
 -1 -3 18 13255.8 1267.44 5
 -1 -3 19 17531.7 1503.12 5
 -1 -2 -15 22837.3 1598.45 4
 -1 -2 -14 10117.2 1015.82 4
 -1 -2 -13 3512.95 582.03 4
 -1 -2 -12 12607.1 1046.31 4
 -1 -2 -11 1037.07 253.715 4
 -1 -2 -10 20919.9 1261.52 4
 -1 -2 -9 19566.6 1166.99 4
 -1 -2 -8 10794.1 817.114 4
 -1 -2 -7 102190 2797.07 4
 -1 -2 -6 275.138 158.389 4
 -1 -2 -5 87333.2 2341.61 4
 -1 -2 -4 13307.1 500.459 3
 -1 -2 -4 14809.2 780.571 4
 -1 -2 -3 20576.5 619.107 3
 -1 -2 -3 20284 886.427 4
 -1 -2 -2 207273 3505.64 3
 -1 -2 -1 87093.8 1728.53 1
 -1 -2 0 153452 2698.77 2
 -1 -2 0 145632 2637.16 1
 -1 -2 1 10534.6 395.539 1
 -1 -2 1 10387.7 360.597 2
 -1 -2 2 88817.5 1691.49 1
 -1 -2 2 84127.6 1514.81 2
 -1 -2 11 3905.86 491.028 5
 -1 -2 12 200.952 125.731 5
 -1 -2 13 37921.6 1791.22 5
 -1 -2 14 15914 1176.98 5
 -1 -2 15 461.993 203.743 5
 -1 -2 16 8616.57 950.042 5
 -1 -2 17 29.8285 156.541 5
 -1 -2 18 19909.2 1570.37 5
 -1 -2 19 14236.9 1370.38 5
 -1 -1 -15 13655.6 1189.95 4
 -1 -1 -14 1890.27 426.999 4
 -1 -1 -13 2658.96 479.225 4
 -1 -1 -12 7141.06 754.927 4
 -1 -1 -11 9571.46 826.779 4
 -1 -1 -10 35024.2 1585.75 4
 -1 -1 -9 15034.5 952.721 4
 -1 -1 -8 25638.3 1208.91 4
 -1 -1 -7 3964 427.918 4
 -1 -1 -6 68833.3 1969.92 4
 -1 -1 -5 90000.4 2253.18 4
 -1 -1 -4 1074.06 189.767 4
 -1 -1 -3 9781.06 380.053 3
 -1 -1 -3 9844.15 536.23 4
 -1 -1 -3 9838.83 412.296 1
 -1 -1 -2 214230 3700.16 3
 -1 -1 -2 222143 4060.25 4
 -1 -1 -1 16266.8 604.801 4
 -1 -1 -1 16559.8 457.662 1
 -1 -1 0 121847 2156.6 1
 -1 -1 0 132516 2202.95 2
 -1 -1 1 93211 1599.71 2
 -1 -1 2 19157.6 460.937 5
 -1 -1 3 782.499 97.3685 5
 -1 -1 8 69474.5 2036.44 5
 -1 -1 9 23.7432 77.8335 5
 -1 -1 10 34096 1483.23 5
 -1 -1 11 35720.2 1592.97 5
 -1 -1 12 678.562 234.631 5
 -1 -1 13 24678 1444.98 5
 -1 -1 14 3339.41 554.419 5
 -1 -1 15 7492.03 851.261 5
 -1 -1 16 18592.1 1418.3 5
 -1 -1 17 3972 676.4 5
 -1 -1 18 13284.7 1292.42 5
 -1 0 -16 8162.62 914.745 4
 -1 0 -15 9382.27 943.729 4
 -1 0 -14 116.837 68.4941 4
 -1 0 -13 5534.38 669.438 4
 -1 0 -12 2722.15 444.746 4
 -1 0 -11 25855.3 1352.22 4
 -1 0 -10 37668.5 1600.93 4
 -1 0 -9 2695.96 391.399 4
 -1 0 -8 31939.9 1321.51 4
 -1 0 -7 183.879 106.758 4
 -1 0 -6 92256 2295.81 4
 -1 0 -5 141051 2990.39 4
 -1 0 -4 67170.1 1413.63 1
 -1 0 -4 67809.6 1667.81 4
 -1 0 -3 1281.22 118.82 1
 -1 0 -3 1232.96 174.479 4
 -1 0 -2 229.161 68.9134 4
 -1 0 -2 211.888 54.4002 3
 -1 0 -2 147.318 37.3321 1
 -1 0 2 19319.7 512.342 5
 -1 0 3 218668 3760.1 5
 -1 0 4 40447.5 887.445 4
 -1 0 4 37126.5 1056.92 5
 -1 0 5 107112 2327.52 5
 -1 0 5 105748 2031.04 4
 -1 0 6 19487.4 849.409 5
 -1 0 7 2154.33 304.609 5
 -1 0 8 26729.9 1168.61 5
 -1 0 9 2782.67 382.109 5
 -1 0 10 66199.9 2195.99 5
 -1 0 11 9274.14 794.837 5
 -1 0 12 16164.4 1114.16 5
 -1 0 13 22969.3 1405.99 5
 -1 0 14 2187.1 461.313 5
 -1 0 15 31317.9 1811.05 5
 -1 0 16 6285.67 828.189 5
 -1 0 17 4907.12 769.217 5
 -1 0 18 6367.73 862.5 5
 -1 1 -16 18261.8 1355.18 4
 -1 1 -15 2981.54 511.478 4
 -1 1 -14 3496.91 541.141 4
 -1 1 -13 11722.9 958.938 4
 -1 1 -12 845.231 251.147 4
 -1 1 -11 23763.3 1246.76 4
 -1 1 -10 20294.6 1081.19 4
 -1 1 -9 16802.1 928.38 4
 -1 1 -8 29521.8 1219.22 4
 -1 1 -7 27982.5 1098.89 4
 -1 1 -6 107963 2504.04 4
 -1 1 -5 2874.07 290.113 4
 -1 1 -4 2057.17 226.141 4
 -1 1 -3 76411.7 1696.7 4
 -1 1 -3 81993.2 1519.79 2
 -1 1 -2 527.111 93.2342 4
 -1 1 -2 183.968 33.3764 2
 -1 1 2 56629.6 1195.83 5
 -1 1 3 91012.8 1896.34 5
 -1 1 3 96139 1687.97 4
 -1 1 4 160332 3166.07 5
 -1 1 4 168639 2890.25 4
 -1 1 5 16354.8 734.801 5
 -1 1 5 17388.7 615.841 4
 -1 1 6 26335.7 1036.94 5
 -1 1 7 36521.3 1355.42 5
 -1 1 8 1652.44 283.131 5
 -1 1 9 16437.9 976.923 5
 -1 1 10 59236.8 2099.52 5
 -1 1 11 2551.9 451.697 5
 -1 1 12 35289.2 1714.24 5
 -1 1 13 1540.25 368.97 5
 -1 1 14 15409.9 1228.2 5
 -1 1 15 39797 2070.83 5
 -1 1 16 813.364 326.038 5
 -1 1 17 3249.79 609.413 5
 -1 1 18 895.029 329.676 5
 -1 2 -17 3971.76 639.569 4
 -1 2 -16 18961.8 1369.77 4
 -1 2 -15 675.451 238.649 4
 -1 2 -14 25726.1 1441.55 4
 -1 2 -13 23534.1 1325.83 4
 -1 2 -12 3343.31 473.627 4
 -1 2 -11 23116 1202.8 4
 -1 2 -10 870.127 218.879 4
 -1 2 -9 107777 2740.08 4
 -1 2 -8 24280.4 1073.5 4
 -1 2 -7 54355.8 1631.8 4
 -1 2 -6 78201.7 1943.77 4
 -1 2 -5 8301.19 491.978 4
 -1 2 -4 70828.4 1297.78 2
 -1 2 -4 67493.8 1372.65 1
 -1 2 -4 71768.7 1645.87 4
 -1 2 -3 247857 4004.04 1
 -1 2 -3 241680 3911.01 2
 -1 2 -3 252704 4308.39 4
 -1 2 -2 8759.57 386.27 4
 -1 2 -2 8691.07 270.903 1
 -1 2 -1 83472.4 2066.94 5
 -1 2 -1 154134 2056.24 1
 -1 2 0 2619.56 182.507 5
 -1 2 0 7450.93 274.264 1
 -1 2 1 462.573 80.9017 5
 -1 2 1 373.033 78.7998 1
 -1 2 2 6054.17 315.373 5
 -1 2 2 6530.45 344.65 1
 -1 2 3 17498.4 656.022 5
 -1 2 3 17982 586.816 4
 -1 2 4 56960.9 1484.36 5
 -1 2 4 58642.5 1341.65 4
 -1 2 5 44752.7 1363 5
 -1 2 6 33254.4 1219.91 5
 -1 2 7 17888.4 935.741 5
 -1 2 8 664.171 166.969 5
 -1 2 9 57366.9 1998.5 5
 -1 2 10 26381.1 1362.42 5
 -1 2 11 11727.1 931.693 5
 -1 2 12 17583.9 1191.74 5
 -1 2 13 447.772 195.086 5
 -1 2 14 35270.4 1913.39 5
 -1 2 15 13694.8 1198.67 5
 -1 2 16 2588.26 540.025 5
 -1 2 17 3788.86 676.091 5
 -1 3 -17 7006.95 835.538 4
 -1 3 -16 2166.12 436.448 4
 -1 3 -15 31426.1 1651.19 4
 -1 3 -14 59896.7 2289.37 4
 -1 3 -13 9504.12 822.042 4
 -1 3 -12 16806.9 1044.75 4
 -1 3 -11 14870.9 945.345 4
 -1 3 -10 6628.36 595.433 4
 -1 3 -9 133176 3163.18 4
 -1 3 -8 60278.7 1810.89 4
 -1 3 -7 8290.43 461.341 1
 -1 3 -7 10184.3 635.364 4
 -1 3 -6 35659.8 799.312 2
 -1 3 -6 36130.7 1194.33 4
 -1 3 -6 34528.1 970.849 1
 -1 3 -5 14919.8 528.834 1
 -1 3 -5 14083.9 362.193 2
 -1 3 -5 15039.1 682.172 4
 -1 3 -4 135838 2786.85 4
 -1 3 -4 142457 2539.51 1
 -1 3 -3 54544.6 1142.8 1
 -1 3 -2 100763 1901.95 5
 -1 3 -2 99807.7 1861.02 1
 -1 3 -1 5716.66 280.609 1
 -1 3 -1 6167.76 302.981 5
 -1 3 0 137029 2487.64 5
 -1 3 0 137932 2532.84 1
 -1 3 1 72270.3 1531.13 5
 -1 3 1 72840.2 1584.12 1
 -1 3 2 33303.7 948.282 5
 -1 3 2 36337.3 1012.87 1
 -1 3 3 13716.2 615.124 1
 -1 3 3 12630.9 574.971 5
 -1 3 4 25369.5 918.307 1
 -1 3 4 24916.4 926.602 5
 -1 3 5 614.532 66.3999 3
 -1 3 5 442.869 129.095 5
 -1 3 6 95676.5 1725.84 3
 -1 3 6 93149.1 2390.83 5
 -1 3 7 10193.1 385.73 3
 -1 3 7 9353.81 674.866 5
 -1 3 8 967.192 232.179 5
 -1 3 9 37036.9 1575.57 5
 -1 3 10 2970.49 452.476 5
 -1 3 11 8101.12 779.52 5
 -1 3 12 15343.6 1136.39 5
 -1 3 13 3251.24 540.564 5
 -1 3 14 22935.9 1521.13 5
 -1 3 15 763.179 287.021 5
 -1 3 16 10273.5 1078.24 5
 -1 3 17 10971.3 1175.37 5
 -1 4 -17 6267.26 768.957 4
 -1 4 -16 3579.16 582.157 4
 -1 4 -15 52274.6 2156.17 4
 -1 4 -15 48422.3 1776.73 1
 -1 4 -14 43893.2 1893.91 4
 -1 4 -14 38404.5 1521.26 1
 -1 4 -13 1252.3 232.587 1
 -1 4 -13 2004.31 388.879 4
 -1 4 -12 5880.3 409.022 2
 -1 4 -12 5546.64 597.694 4
 -1 4 -12 4751.56 474.071 1
 -1 4 -11 1620.01 245.33 1
 -1 4 -11 2518.09 245.946 2
 -1 4 -11 2357.29 361.4 4
 -1 4 -10 65054.4 1450.98 2
 -1 4 -10 64424.5 2056.9 4
 -1 4 -10 60166.6 1709.44 1
 -1 4 -9 70310.5 1469.82 2
 -1 4 -9 72360.2 2116.51 4
 -1 4 -9 70209.2 1782.51 1
 -1 4 -8 32337.5 1008.35 1
 -1 4 -8 33277.7 1234.32 4
 -1 4 -7 29351.8 929.972 1
 -1 4 -7 27499.9 598.84 2
 -1 4 -7 30701.1 1158.53 4
 -1 4 -6 976.886 179.81 4
 -1 4 -6 955.424 147.051 1
 -1 4 -5 7857.57 517.132 4
 -1 4 -5 7035.6 377.203 1
 -1 4 -4 64280.4 1415.77 1
 -1 4 -3 1714.49 182.44 5
 -1 4 -3 1682.35 169.953 1
 -1 4 -2 646.348 109.317 5
 -1 4 -2 521.889 99.5851 1
 -1 4 -1 1926.1 188.394 1
 -1 4 -1 2085.36 191.207 5
 -1 4 0 67854.4 1509.63 5
 -1 4 0 69777.2 1597.91 1
 -1 4 1 87517.4 1868.65 5
 -1 4 1 88715.6 1954.11 1
 -1 4 2 11822.3 592.438 1
 -1 4 2 12024.6 552.074 5
 -1 4 3 3712.08 313.217 5
 -1 4 3 3873.49 345.31 1
 -1 4 4 17555.2 807.446 1
 -1 4 4 15650.5 734.256 5
 -1 4 5 36181.8 1267.6 1
 -1 4 5 35949.1 1276.09 5
 -1 4 6 108155 2694.29 5
 -1 4 7 6455.2 567.463 5
 -1 4 8 5318.28 545.381 5
 -1 4 9 4375.03 517.188 5
 -1 4 10 16403.6 1076.4 5
 -1 4 11 40208.8 1827.42 5
 -1 4 12 18197 1244.08 5
 -1 4 13 5078.89 687.361 5
 -1 4 14 13755.9 1186.54 5
 -1 4 15 -52.4551 187.178 5
 -1 4 16 23301.4 1700.65 5
 -1 5 -18 4194.98 660.796 4
 -1 5 -17 6182.44 766.84 4
 -1 5 -16 3056.24 532.896 4
 -1 5 -15 29704.7 1599.6 4
 -1 5 -15 26076.9 1246.16 1
 -1 5 -14 6128.16 563.622 1
 -1 5 -14 7198.41 740.801 4
 -1 5 -13 1117.19 280.068 4
 -1 5 -13 1046.6 237.838 1
 -1 5 -12 23396.5 1038.96 1
 -1 5 -12 24169.9 1287.39 4
 -1 5 -11 1149.88 259.651 4
 -1 5 -11 1034.76 191.637 1
 -1 5 -11 1093.86 116.393 2
 -1 5 -10 57514.7 1602.24 1
 -1 5 -10 60076.5 1950.16 4
 -1 5 -9 39831.4 1193.71 1
 -1 5 -9 44431.7 1517.4 4
 -1 5 -8 5063.44 388.585 1
 -1 5 -8 4739.56 471.399 4
 -1 5 -7 34703.1 1310.77 4
 -1 5 -7 33148.7 1046.99 1
 -1 5 -6 1435.02 191.022 1
 -1 5 -5 47503.2 1242.09 1
 -1 5 -4 42414.6 1120.61 1
 -1 5 -3 32710.7 921.864 5
 -1 5 -3 30572.4 945.486 1
 -1 5 -2 13390.6 548.939 5
 -1 5 -2 11381.7 525.401 1
 -1 5 -1 143.543 55.5218 5
 -1 5 -1 58.4308 36.6781 1
 -1 5 0 26017.4 832.634 5
 -1 5 0 25308.2 915.664 1
 -1 5 1 42408.8 1172.58 5
 -1 5 1 41488.5 1274.26 1
 -1 5 2 419.595 114.592 5
 -1 5 2 427.225 133.655 1
 -1 5 3 5401.63 447.076 1
 -1 5 3 5176.42 399.685 5
 -1 5 4 169.768 112.932 1
 -1 5 4 315.199 120.209 5
 -1 5 5 165505 3603.35 1
 -1 5 5 153709 3412.12 5
 -1 5 6 85461.5 2340.18 1
 -1 5 6 81859.8 2304.77 5
 -1 5 7 1443.09 273.682 5
 -1 5 8 22112.6 1182.7 5
 -1 5 9 2917.75 448.798 5
 -1 5 10 28938.2 1508.37 5
 -1 5 11 52894.7 2191.47 5
 -1 5 12 6952.64 790.292 5
 -1 5 13 4475.27 660.624 5
 -1 5 14 1515.5 355.84 5
 -1 5 15 13439.7 1259.63 5
 -1 5 16 17468 1492.35 5
 -1 6 -18 12475.6 1152.05 4
 -1 6 -17 6087.27 757.722 4
 -1 6 -16 1366.25 366.96 4
 -1 6 -15 6146.66 579.427 1
 -1 6 -15 7608.47 799.817 4
 -1 6 -14 128.466 112.769 4
 -1 6 -14 -13.98 111.971 1
 -1 6 -13 15425.7 855.773 1
 -1 6 -13 16466.4 1109.33 4
 -1 6 -12 19432.7 939.792 1
 -1 6 -12 21565.7 1241.02 4
 -1 6 -11 4674.87 434.962 1
 -1 6 -11 4564.51 531.313 4
 -1 6 -10 38807.9 1350.87 1
 -1 6 -10 38923.2 1572.11 4
 -1 6 -9 532.885 181.091 4
 -1 6 -9 121.91 41.0756 1
 -1 6 -8 41627.6 1543.04 4
 -1 6 -8 36093.7 1173.25 1
 -1 6 -7 10448.3 565.991 1
 -1 6 -6 2368.03 256.221 1
 -1 6 -5 183594 3506.96 1
 -1 6 -4 7548.3 426.362 5
 -1 6 -4 7075.61 450.78 1
 -1 6 -3 73283 1641.59 5
 -1 6 -3 69729.3 1737.32 1
 -1 6 -2 5825.7 411.192 1
 -1 6 -2 7553.7 421.371 5
 -1 6 -1 7412.19 490.171 1
 -1 6 -1 8279.69 454.641 5
 -1 6 0 120124 2356.51 5
 -1 6 0 93519.5 2394.25 1
 -1 6 1 5494.84 391.215 5
 -1 6 1 5187.09 435.02 1
 -1 6 2 13816.2 683.745 5
 -1 6 2 14181.7 759.916 1
 -1 6 3 85812.1 2350.58 1
 -1 6 3 101874 2355.6 5
 -1 6 4 11940.7 702.125 5
 -1 6 4 13101.2 786.87 1
 -1 6 5 92236.5 2497.79 1
 -1 6 5 87683.8 2358.39 5
 -1 6 6 34252.1 1380.73 5
 -1 6 6 35742.9 1458.81 1
 -1 6 7 5854.31 576.246 1
 -1 6 7 6148.86 580.535 5
 -1 6 8 5853.51 600.883 5
 -1 6 9 1136.13 290.949 5
 -1 6 10 25017.5 1418.46 5
 -1 6 11 20782.4 1345.93 5
 -1 6 12 233.677 85.9143 5
 -1 6 13 4671.59 681.374 5
 -1 6 14 255.181 190.948 5
 -1 6 15 15209.9 1344.68 5
 -1 7 -19 5107.79 731.28 4
 -1 7 -18 9550.06 1018.15 4
 -1 7 -17 3617.36 622.174 4
 -1 7 -16 3684.74 594.982 4
 -1 7 -15 724.302 298.143 4
 -1 7 -15 333.543 160.535 1
 -1 7 -14 5197.29 531.646 1
 -1 7 -14 4954.83 650.502 4
 -1 7 -13 16814.9 948.61 1
 -1 7 -13 17973.4 1173.17 4
 -1 7 -12 1598.78 355.305 4
 -1 7 -12 1393.16 258.548 1
 -1 7 -11 12164 721.317 1
 -1 7 -11 13327 953.122 4
 -1 7 -10 3708.58 483.951 4
 -1 7 -10 3692.63 373.043 1
 -1 7 -9 40677.1 1654.66 4
 -1 7 -9 36606.3 1286.54 1
 -1 7 -8 35632.4 1225.1 1
 -1 7 -7 9997.9 588.823 1
 -1 7 -6 11986.8 640.215 1
 -1 7 -5 29044.2 1068.44 1
 -1 7 -4 25580.6 864.717 5
 -1 7 -4 23454.6 941.705 1
 -1 7 -3 97970.2 2078.95 5
 -1 7 -3 89167 2195.7 1
 -1 7 -2 12624.3 684.082 1
 -1 7 -2 14032.8 632.105 5
 -1 7 -1 46809.6 1500.35 1
 -1 7 -1 48165.8 1336.46 5
 -1 7 0 36931.4 1144.34 5
 -1 7 0 31870.3 1242.59 1
 -1 7 1 554.711 126.656 5
 -1 7 1 778.449 172.223 1
 -1 7 2 91687.1 2239.76 5
 -1 7 2 91030.2 2422.33 1
 -1 7 3 48353.1 1668.65 1
 -1 7 3 47621.8 1548.69 5
 -1 7 4 7199.43 575.486 5
 -1 7 4 6029.74 560.204 1
 -1 7 5 27793.2 1220.78 5
 -1 7 5 27674.8 1297.63 1
 -1 7 6 750.248 211.305 1
 -1 7 6 791.731 219.143 5
 -1 7 7 26817.3 1348.81 1
 -1 7 7 25513.1 1278.06 5
 -1 7 8 16233.7 1049.64 5
 -1 7 9 907.403 282.456 5
 -1 7 10 19066.2 1244.7 5
 -1 7 11 1773.23 408.926 5
 -1 7 12 11373.3 1040.43 5
 -1 7 13 5502.93 748.702 5
 -1 7 14 1638.35 436.94 5
 -1 8 -19 6519.72 865.557 4
 -1 8 -18 7237.72 899.943 4
 -1 8 -17 701.499 336.89 4
 -1 8 -16 10864.2 1031.7 4
 -1 8 -15 383.921 182.994 4
 -1 8 -15 338.72 157.381 1
 -1 8 -14 12892.7 833.513 1
 -1 8 -14 16353.7 1173.97 4
 -1 8 -13 26313.4 1190.54 1
 -1 8 -13 31914.6 1620.09 4
 -1 8 -12 219.074 148.047 4
 -1 8 -12 133.015 129.315 1
 -1 8 -11 8278.71 785.136 4
 -1 8 -11 7802.58 604.137 1
 -1 8 -10 11.4693 93.2035 4
 -1 8 -10 -1.94381 105.447 1
 -1 8 -9 66543.9 2316.37 4
 -1 8 -9 63039.1 1883.53 1
 -1 8 -8 30537.9 1183.85 1
 -1 8 -7 8370.51 573.381 1
 -1 8 -6 10718 672.551 1
 -1 8 -5 3334.32 355.434 1
 -1 8 -4 70620.6 1712.85 5
 -1 8 -4 66824.2 1886.36 1
 -1 8 -3 133186 3092.01 1
 -1 8 -3 150981 2946.97 5
 -1 8 -2 5573.26 493.048 1
 -1 8 -2 5711.17 412.494 5
 -1 8 -1 14882.9 701.942 5
 -1 8 -1 13983.5 805.614 1
 -1 8 0 501.185 162.295 1
 -1 8 0 585.221 128.885 5
 -1 8 1 41561.6 1355.48 5
 -1 8 1 42276.7 1557.82 1
 -1 8 2 76839 2062.12 5
 -1 8 2 75641.2 2264.66 1
 -1 8 3 2646.75 338.664 5
 -1 8 3 2252.15 351.903 1
 -1 8 4 10037.4 714.19 5
 -1 8 4 9233.78 744.98 1
 -1 8 5 21368 1114.18 5
 -1 8 5 17339.8 1066.98 1
 -1 8 6 15332.3 1041.04 1
 -1 8 6 16132.5 996.837 5
 -1 8 7 38492 1655.33 5
 -1 8 7 39906.5 1767.43 1
 -1 8 8 13442.1 986.686 5
 -1 8 9 6204.44 701.16 5
 -1 8 10 5630.52 697.157 5
 -1 8 11 4951.5 677.846 5
 -1 8 12 22091.5 1522.84 5
 -1 8 13 1992.07 471.789 5
 -1 8 14 3225.48 616.77 5
 -1 9 -19 12012.7 1202.57 4
 -1 9 -18 879.285 330.33 4
 -1 9 -17 8597.62 964.35 4
 -1 9 -16 12511.5 1134.57 4
 -1 9 -15 9.68568 100.651 4
 -1 9 -15 -63.8487 121.224 1
 -1 9 -14 25507.8 1251.83 1
 -1 9 -14 30681.4 1680.95 4
 -1 9 -13 6701.11 604.087 1
 -1 9 -13 7146.63 791.048 4
 -1 9 -12 5222.91 654.153 4
 -1 9 -12 4405.29 475.157 1
 -1 9 -11 21984.9 1349.63 4
 -1 9 -11 20535.2 1054.62 1
 -1 9 -10 8577.83 826.73 4
 -1 9 -10 6778.85 570.475 1
 -1 9 -9 22985.7 1064.88 1
 -1 9 -8 21380 1020.97 1
 -1 9 -7 78.2144 76.8701 1
 -1 9 -6 19060.8 950.77 1
 -1 9 -5 497.801 121.017 1
 -1 9 -4 111593 2366.99 5
 -1 9 -4 94762.5 2490.05 1
 -1 9 -3 81575.6 2338.21 1
 -1 9 -3 93056.5 2151.05 5
 -1 9 -2 120.874 56.579 5
 -1 9 -2 9.32688 71.1838 1
 -1 9 -1 19735.5 865.057 5
 -1 9 -1 18831.9 1018.8 1
 -1 9 0 394.34 129.68 5
 -1 9 0 262.85 83.0465 1
 -1 9 1 35488.2 1289.41 5
 -1 9 1 35248.8 1495.83 1
 -1 9 2 36299 1342.4 5
 -1 9 2 34103.7 1506.73 1
 -1 9 3 1.09509 113.862 5
 -1 9 3 45.7126 146.67 1
 -1 9 4 9656.28 718.121 5
 -1 9 4 8050.8 733.357 1
 -1 9 5 -74.271 103.529 1
 -1 9 5 102.508 106.406 5
 -1 9 6 27251.3 1469.78 1
 -1 9 6 26673 1386.81 5
 -1 9 7 18981.5 1195.61 5
 -1 9 7 19268.8 1244.09 1
 -1 9 8 1230.95 306.085 5
 -1 9 8 1467.84 340.65 1
 -1 9 9 13451.5 1072.13 5
 -1 9 10 464.81 216.648 5
 -1 9 11 13475.5 1149.06 5
 -1 9 12 12930.8 1183.03 5
 -1 9 13 -231.158 109.394 5
 -1 10 -18 314.907 182.006 4
 -1 10 -17 12246.3 1190.88 4
 -1 10 -16 4785.7 722.041 4
 -1 10 -15 2986.22 562.355 4
 -1 10 -14 10908.9 822.894 1
 -1 10 -14 12662.5 1091.82 4
 -1 10 -13 2349.8 473.151 4
 -1 10 -13 1522.07 278.036 1
 -1 10 -12 30418.8 1660.83 4
 -1 10 -12 25592.7 1251.03 1
 -1 10 -11 8472.56 881.366 4
 -1 10 -11 7382.8 625.861 1
 -1 10 -10 12262.5 813.434 1
 -1 10 -9 7643.29 650.122 1
 -1 10 -8 1294.85 240.419 1
 -1 10 -7 25730.1 1194.21 1
 -1 10 -6 5080.13 507.613 1
 -1 10 -5 3362.9 324.432 5
 -1 10 -5 3127.28 379.147 1
 -1 10 -4 52850.6 1835.55 1
 -1 10 -4 59537.4 1601.63 5
 -1 10 -3 1528.75 224.26 5
 -1 10 -3 1467.91 275.108 1
 -1 10 -2 5119.2 430.613 5
 -1 10 -2 4455.29 503.379 1
 -1 10 -1 11620.6 680.825 5
 -1 10 -1 10491.2 792.838 1
 -1 10 0 -15.3841 60.6199 5
 -1 10 0 -111.281 82.1776 1
 -1 10 1 19155.1 954.229 5
 -1 10 1 17233.1 1065.5 1
 -1 10 2 6320.71 543.158 5
 -1 10 2 5335.46 606.673 1
 -1 10 3 3620.61 497.923 1
 -1 10 3 3570.61 428.977 5
 -1 10 4 4522.68 503.48 5
 -1 10 4 4748.49 589.031 1
 -1 10 5 1171.27 317.508 1
 -1 10 5 1544.01 317.954 5
 -1 10 6 19375.8 1281.1 1
 -1 10 6 19568.2 1186.57 5
 -1 10 7 4206.26 570.781 5
 -1 10 7 4000.88 597.348 1
 -1 10 8 8376.27 877.758 1
 -1 10 8 8386.84 862.77 5
 -1 10 9 10832.3 1006.72 5
 -1 10 10 569.445 221.736 5
 -1 10 11 21919.8 1550.36 5
 -1 10 12 5003.31 756.235 5
 -1 11 -18 7721.4 992.034 4
 -1 11 -17 14879.4 1325.48 4
 -1 11 -16 1409.72 419.547 4
 -1 11 -15 2437.44 524.151 4
 -1 11 -14 2159.11 505.686 4
 -1 11 -14 1676.65 331.507 1
 -1 11 -13 8231.38 899.112 4
 -1 11 -13 5612.81 576.424 1
 -1 11 -12 38137.5 1975.82 4
 -1 11 -12 31380.2 1450.14 1
 -1 11 -11 2616.07 412.704 1
 -1 11 -10 7392.11 670.701 1
 -1 11 -9 8084.09 682.865 1
 -1 11 -8 11267.7 811.04 1
 -1 11 -7 30833.2 1381.69 1
 -1 11 -6 15610.1 946.901 1
 -1 11 -5 4939.27 534.711 1
 -1 11 -5 5739.36 443.998 5
 -1 11 -4 335.816 116.822 5
 -1 11 -4 36.1609 78.1887 1
 -1 11 -3 10329.2 623.975 5
 -1 11 -3 8982.42 749.001 1
 -1 11 -2 25091.5 1040.04 5
 -1 11 -2 22345.6 1237.42 1
 -1 11 -1 2804.96 335.235 5
 -1 11 -1 2441.25 410.966 1
 -1 11 0 5781.95 501.671 5
 -1 11 0 5658.92 621.099 1
 -1 11 1 12446.2 785.94 5
 -1 11 1 11722.6 926.7 1
 -1 11 2 952.358 223.466 5
 -1 11 2 797.66 266.705 1
 -1 11 3 17305.4 1174.88 1
 -1 11 3 16022.6 963.866 5
 -1 11 4 8271.39 715.432 5
 -1 11 4 7705.46 787.361 1
 -1 11 5 4013.52 512.664 5
 -1 11 5 4085.07 596.254 1
 -1 11 6 6660.47 777.792 1
 -1 11 6 7551.18 752.369 5
 -1 11 7 930.84 323.991 1
 -1 11 7 877.476 248.151 5
 -1 11 8 15595.1 1252.32 1
 -1 11 8 13463.1 1091.1 5
 -1 11 9 5433.38 702.37 5
 -1 11 10 3406.67 605.568 5
 -1 11 11 11992.4 1180.26 5
 -1 12 -17 8684.91 1040.94 4
 -1 12 -16 26.7792 87.5375 4
 -1 12 -15 1859.03 471.268 4
 -1 12 -14 -2.44105 148.242 1
 -1 12 -14 -91.2086 122.265 4
 -1 12 -13 15201.8 1283.05 4
 -1 12 -13 11275.8 901.921 1
 -1 12 -12 28236.6 1777.73 4
 -1 12 -12 23649.4 1312.06 1
 -1 12 -11 -91.8473 130.952 1
 -1 12 -10 5359.5 588.741 1
 -1 12 -9 880.249 237.549 1
 -1 12 -8 21162.9 1183.87 1
 -1 12 -7 28161 1345.22 1
 -1 12 -6 289.125 154.281 1
 -1 12 -5 14098 975.806 1
 -1 12 -4 762.649 246.699 1
 -1 12 -3 19869.4 1205.2 1
 -1 12 -2 37001.6 1722.52 1
 -1 12 -1 1377.01 330.025 1
 -1 12 0 6868.74 730.886 1
 -1 12 1 4286.8 573.787 1
 -1 12 2 18613.8 1260.87 1
 -1 12 3 40204.7 1933.44 1
 -1 12 4 2389.98 500.015 1
 -1 12 5 2884.1 524.115 1
 -1 12 6 3763.75 608.013 1
 -1 12 7 3349.11 590.415 1
 -1 12 8 14017.4 1228.85 1
 -1 13 -15 4837.66 781.131 4
 -1 13 -14 1663.9 387.502 1
 -1 13 -14 1194.3 390.709 4
 -1 13 -13 17210.9 1424.6 4
 -1 13 -13 15191 1082.88 1
 -1 13 -12 5043.48 605.285 1
 -1 13 -11 2205.61 377.955 1
 -1 13 -10 5639.57 642.331 1
 -1 13 -9 128.331 141.514 1
 -1 13 -8 18425.4 1111.3 1
 -1 13 -7 5221.14 602.65 1
 -1 13 -6 5311 615.33 1
 -1 13 -5 14324.7 1048.06 1
 -1 13 -4 91.2915 78.7065 1
 -1 13 -3 22870.2 1384.02 1
 -1 13 -2 18849.2 1262.27 1
 -1 13 -1 122.361 97.6081 1
 -1 13 0 15762.8 1165.15 1
 -1 13 1 14.0794 245.697 1
 -1 13 2 32204.5 1768.66 1
 -1 13 3 21259.8 1457.91 1
 -1 13 4 212.041 167.312 1
 -1 13 5 4752.82 691.738 1
 -1 13 6 228.177 227.723 1
 -1 14 -14 4419.12 763.059 4
 -1 14 -13 12492.2 1306.4 4
 -1 14 -13 10886.4 938.836 1
 -1 14 -12 -112.587 195.468 1
 -1 14 -11 10853.3 927.902 1
 -1 14 -10 8202.52 794.723 1
 -1 14 -9 1612.81 352.202 1
 -1 14 -8 11785.2 974.88 1
 -1 14 -7 302.94 199.196 1
 -1 14 -6 16954.2 1193.76 1
 -1 14 -5 4797.54 635.673 1
 -1 14 -4 1353.64 318.932 1
 -1 14 -3 16663.9 1227.57 1
 -1 14 -2 1189.67 318.904 1
 -1 14 -1 9595.02 935.845 1
 -1 14 0 8004.02 869.956 1
 -1 14 1 4927.49 682.074 1
 -1 14 2 24675.5 1611.45 1
 -1 14 3 1961.65 460.247 1
 -1 14 4 4977.48 737.863 1
 -1 15 -13 24.5274 140.323 1
 -1 15 -12 6205.79 726.567 1
 -1 15 -11 10181.7 901.934 1
 -1 15 -10 2037.03 425.124 1
 -1 15 -9 2727.69 469.218 1
 -1 15 -8 5061.23 670.341 1
 -1 15 -7 2839.42 496.796 1
 -1 15 -6 12032.6 1056.36 1
 -1 15 -5 2496.57 486.363 1
 -1 15 -4 4244.14 642.977 1
 -1 15 -3 4825.11 686.337 1
 -1 15 -2 1595.69 425.657 1
 -1 15 -1 18699.3 1380.88 1
 -1 15 0 4962.12 696.803 1
 -1 15 1 5548.95 770.767 1
 -1 16 -11 6229.63 764.986 1
 -1 16 -10 -141.012 161.258 1
 -1 16 -9 924.587 315.519 1
 -1 16 -8 -118.084 211.576 1
 -1 16 -7 8030.41 896.526 1
 -1 16 -6 10187 1024.78 1
 -1 16 -5 -340.011 285.446 1
 -1 16 -4 2236.66 502.084 1
 -1 16 -3 -148.094 244.123 1
 0 -15 -2 9571.81 1058.65 2
 0 -15 -1 1222.78 346.33 2
 0 -14 0 8384.28 881.449 2
 0 -13 2 11542.4 907.877 2
 0 -12 3 5564.15 577.465 2
 0 -11 4 3053.8 380.834 2
 0 -11 5 2492.04 305.01 2
 0 -10 4 17576.6 848.795 2
 0 -10 5 480.049 117.145 2
 0 -9 4 109589 2487.19 2
 0 -9 5 314.948 99.5753 2
 0 -9 6 7846.31 378.16 2
 0 -8 -4 845.87 143.127 3
 0 -8 4 84515 1948.05 2
 0 -8 5 9795.89 446.884 2
 0 -8 6 2972.84 205.228 2
 0 -8 19 9329.3 1072.79 5
 0 -8 20 -63.3775 110.608 5
 0 -7 -5 29145.7 855.869 3
 0 -7 -4 670.902 112.26 3
 0 -7 4 1031.14 148.644 2
 0 -7 5 27173.1 715.737 2
 0 -7 18 12758.6 1210.54 5
 0 -7 19 3103.88 617.007 5
 0 -6 -5 35483.7 926.542 3
 0 -6 -4 437.337 85.2293 3
 0 -6 4 40901.1 983.831 2
 0 -6 5 36042.2 766.148 2
 0 -6 18 14742.6 1316.09 5
 0 -6 19 344.956 130.232 5
 0 -5 -5 81147.8 1629.56 3
 0 -5 -4 4895.47 273.895 3
 0 -5 1 12407.9 462.29 5
 0 -5 2 69616.9 1431.66 5
 0 -5 3 11223.5 440.121 5
 0 -5 4 74371 1360.89 2
 0 -5 17 9118.79 1004.76 5
 0 -5 18 7187.37 916.83 5
 0 -5 19 1644.16 460.752 5
 0 -4 -4 18303.5 545.27 3
 0 -4 -3 5045.96 249.835 3
 0 -4 0 149.783 49.5988 5
 0 -4 1 812.413 99.6532 5
 0 -4 2 62327.8 1265.5 5
 0 -4 3 21049.3 627.686 5
 0 -4 3 18296 489.862 2
 0 -4 16 781.575 307.615 5
 0 -4 17 5293.85 749.655 5
 0 -4 18 -32.652 165.761 5
 0 -4 19 13089 1304.44 5
 0 -3 -13 2306.25 449.286 4
 0 -3 -12 22195.2 1390.46 4
 0 -3 -11 17967.3 1190.42 4
 0 -3 -10 1260.88 296.211 4
 0 -3 -9 42394.8 1743.61 4
 0 -3 -8 4655.25 516.205 4
 0 -3 -7 38535.9 1516.39 4
 0 -3 -4 45191.4 972.864 3
 0 -3 -3 20613.7 536.93 3
 0 -3 -1 24093.9 680.265 5
 0 -3 0 1916.64 139.673 5
 0 -3 1 120693 2075.34 5
 0 -3 2 4963 232.836 5
 0 -3 3 84779.2 1599.44 5
 0 -3 15 20626.5 1408.76 5
 0 -3 16 336.779 189.871 5
 0 -3 17 6136.29 829.934 5
 0 -3 18 3757.81 678.517 5
 0 -3 19 17636.3 1538.17 5
 0 -2 -14 20232.6 1366.29 4
 0 -2 -13 44.1078 70.7678 4
 0 -2 -12 9223.62 839.274 4
 0 -2 -11 1327.41 308.133 4
 0 -2 -10 34380 1534.05 4
 0 -2 -9 30507.7 1372.02 4
 0 -2 -8 4191.8 460.437 4
 0 -2 -7 18295.9 934.754 4
 0 -2 -6 1286.58 234.272 4
 0 -2 -5 105644 2467.92 4
 0 -2 -4 30801.7 1058.92 4
 0 -2 -3 19811.3 501.021 3
 0 -2 -2 29289.7 617.386 3
 0 -2 -2 30946.9 830.668 5
 0 -2 -1 9868.76 392.763 1
 0 -2 -1 9314.15 349.183 5
 0 -2 0 424.696 78.6355 1
 0 -2 0 309.375 48.9913 5
 0 -2 1 23703 514.254 5
 0 -2 1 22849 588.946 1
 0 -2 2 26520.4 657.117 1
 0 -2 3 2289.79 192.523 1
 0 -2 14 24144 1482.26 5
 0 -2 15 433.941 208.096 5
 0 -2 16 22863 1562.1 5
 0 -2 17 2307.65 502.478 5
 0 -2 18 10442.4 1142.58 5
 0 -1 -14 4780.68 634.099 4
 0 -1 -13 1672.34 350.91 4
 0 -1 -12 21175.9 1223.68 4
 0 -1 -11 5025.54 553.577 4
 0 -1 -10 42826.6 1638.28 4
 0 -1 -9 33712.5 1371.84 4
 0 -1 -8 2890.83 358.112 4
 0 -1 -7 30462.8 1164.44 4
 0 -1 -6 49221.4 1473.81 4
 0 -1 -5 177911 3469.82 4
 0 -1 -4 99220.5 2103.06 4
 0 -1 -3 300.733 73.8993 4
 0 -1 -3 131.706 49.5374 1
 0 -1 -2 51299.6 1083.25 1
 0 -1 -2 51105.5 1142.25 4
 0 -1 3 1697.3 150.612 4
 0 -1 4 726.279 116.87 4
 0 -1 12 -4.25006 70.3897 5
 0 -1 13 22440.3 1370.3 5
 0 -1 14 804.634 308.929 5
 0 -1 15 11545.2 1076.53 5
 0 -1 16 25690.6 1687.32 5
 0 -1 17 413.187 252.422 5
 0 -1 18 17982 1522.79 5
 0 0 -15 18742.9 1261.22 4
 0 0 -14 1634.46 343.578 4
 0 0 -13 8877.29 782.562 4
 0 0 -12 4175.32 510.962 4
 0 0 -11 15201.4 948.025 4
 0 0 -10 57873 1903.63 4
 0 0 -9 8569.1 626.429 4
 0 0 -8 7230.32 540.437 4
 0 0 -7 2808.62 322.669 4
 0 0 -6 116742 2505.09 4
 0 0 -5 167637 3183.89 4
 0 0 -4 32207.8 903.203 4
 0 0 -3 112374 2098.3 4
 0 0 3 119434 2187.47 4
 0 0 4 33021.8 906.378 4
 0 0 10 58495.5 2080.04 5
 0 0 11 16353 1079.57 5
 0 0 12 4078.18 556.105 5
 0 0 13 8548.88 840.707 5
 0 0 14 1017.88 327.015 5
 0 0 15 16253.7 1295.23 5
 0 0 16 9712.19 1025.81 5
 0 0 17 709.301 293.547 5
 0 0 18 7130.6 962.703 5
 0 1 -15 11864.9 981.537 4
 0 1 -14 909.267 254.476 4
 0 1 -13 23493.3 1281.77 4
 0 1 -12 14.08 76.8165 4
 0 1 -11 40019.6 1550.48 4
 0 1 -10 16085.8 892.196 4
 0 1 -9 8091.56 591.405 4
 0 1 -8 12626.2 694.723 4
 0 1 -7 4989.11 404.997 4
 0 1 -6 112034 2396.27 4
 0 1 -5 81249.5 1783.34 4
 0 1 -4 1094.97 137.189 4
 0 1 -3 1141.14 127.358 4
 0 1 2 46009.9 797.205 5
 0 1 2 51977.6 839.047 4
 0 1 3 168.359 62.0145 4
 0 1 3 124.651 36.9459 3
 0 1 3 74.0034 43.3996 5
 0 1 4 94506.9 2090.46 5
 0 1 5 169746 3428.42 5
 0 1 6 50176.5 1549.96 5
 0 1 7 29821.1 1214.43 5
 0 1 8 2090.51 329.215 5
 0 1 9 35003 1479.3 5
 0 1 10 41308.8 1705.48 5
 0 1 11 4456.43 572.589 5
 0 1 12 19020.7 1239.33 5
 0 1 13 1622.11 386.235 5
 0 1 14 3317.23 566.639 5
 0 1 15 20518.2 1467.19 5
 0 1 16 2227.47 500.145 5
 0 1 17 558.612 258.013 5
 0 2 -16 22896.7 1402.26 4
 0 2 -15 480.529 224.922 4
 0 2 -14 22864.6 1289.73 4
 0 2 -13 31711.3 1461.73 4
 0 2 -12 4352.51 503.748 4
 0 2 -11 21807.4 1091.02 4
 0 2 -10 8681.08 646.136 4
 0 2 -9 47769.9 1545.69 4
 0 2 -8 55626.5 1610.58 4
 0 2 -7 1304.34 207.078 4
 0 2 -6 68642.5 1683.48 4
 0 2 -5 52216.3 1318.15 4
 0 2 -4 10424.8 474.827 4
 0 2 -4 9774.16 415.252 1
 0 2 -3 2772.05 183.218 1
 0 2 -2 23726.2 595.625 1
 0 2 -1 -28.1027 18.9048 5
 0 2 -1 21704.3 451.843 1
 0 2 0 -17.278 21.8976 5
 0 2 0 284.197 62.1866 1
 0 2 1 8629.33 327.794 5
 0 2 1 9837.79 388.499 1
 0 2 2 31165 848.528 1
 0 2 2 29578.1 822.431 5
 0 2 2 30737.5 912.044 4
 0 2 3 21413.2 517.229 3
 0 2 3 20760.1 731.992 5
 0 2 3 21417.3 720.173 1
 0 2 4 31167.3 960.277 1
 0 2 4 31468.2 728.619 3
 0 2 4 29905.6 1010.16 5
 0 2 5 103816 1921.71 3
 0 2 5 100331 2380.36 5
 0 2 6 1448.11 243.982 5
 0 2 7 17772.9 931.861 5
 0 2 8 3067.87 403.649 5
 0 2 9 28985.1 1366.54 5
 0 2 10 33279.2 1549.16 5
 0 2 11 1102.31 316.064 5
 0 2 12 8050.55 808.516 5
 0 2 13 -4.12583 164.342 5
 0 2 14 18770.5 1365.02 5
 0 2 15 14794.2 1260.5 5
 0 2 16 134.652 179.692 5
 0 2 17 8575.05 1039.18 5
 0 3 -16 586.953 220.94 4
 0 3 -15 21595.3 1285.16 4
 0 3 -14 62731 2249.57 4
 0 3 -13 5911.32 607.98 4
 0 3 -12 523.933 186.942 4
 0 3 -11 18598.8 1008.75 4
 0 3 -10 383.704 156.941 4
 0 3 -9 67561.2 1931.81 4
 0 3 -8 54521.3 1514.03 1
 0 3 -8 58282.3 1664.37 4
 0 3 -7 4738.1 362.189 1
 0 3 -7 4896.51 403.601 4
 0 3 -6 32613.2 1070.97 4
 0 3 -6 31740.2 970.486 1
 0 3 -5 5357.25 338.276 1
 0 3 -4 27259.3 789.967 1
 0 3 -3 78049.6 1583.46 1
 0 3 -2 4641.83 211.616 5
 0 3 -2 4861.09 271.515 1
 0 3 -1 114629 1999.71 5
 0 3 -1 114925 2169.67 1
 0 3 0 2197.48 193.941 1
 0 3 0 2190.62 155.561 5
 0 3 1 23251.7 660.6 5
 0 3 1 25551.2 790.408 1
 0 3 2 47775.8 1186.68 5
 0 3 2 51389.2 1283.13 1
 0 3 3 20471.4 774.493 1
 0 3 3 20276.1 751.854 5
 0 3 4 45937.6 1347.16 5
 0 3 4 46497.3 1329.97 1
 0 3 5 190.753 98.2091 5
 0 3 5 354.006 129.413 1
 0 3 6 74444.6 2076.19 5
 0 3 7 36617 1427.17 5
 0 3 8 4452.29 498.81 5
 0 3 9 39852.1 1661.66 5
 0 3 10 1396.42 289.601 5
 0 3 11 17505.4 1178.45 5
 0 3 12 20247.1 1319.77 5
 0 3 13 1545.08 384.232 5
 0 3 14 27201.1 1683.41 5
 0 3 15 8251.11 949.593 5
 0 3 16 6427.05 873.436 5
 0 4 -17 6344.15 767.474 4
 0 4 -16 433.368 237.434 1
 0 4 -16 406.104 184.35 4
 0 4 -15 26945.8 1452.76 4
 0 4 -15 24563.8 1252.77 1
 0 4 -14 32557.8 1558.72 4
 0 4 -14 29501 1344.51 1
 0 4 -13 109.997 108.655 1
 0 4 -13 107.752 100.925 4
 0 4 -12 4165.92 492.469 4
 0 4 -12 3437.77 408.244 1
 0 4 -11 4383.58 491.095 4
 0 4 -11 4270.58 419.487 1
 0 4 -10 40139.3 1475.02 4
 0 4 -10 38043 1328.56 1
 0 4 -9 128212 2966.04 4
 0 4 -9 123687 2772.35 1
 0 4 -8 31319.3 1181.15 4
 0 4 -8 29777.1 1048.78 1
 0 4 -7 43507.2 1411.65 4
 0 4 -7 41142.4 1211.41 1
 0 4 -6 373.084 118.239 1
 0 4 -5 814.711 129.697 1
 0 4 -4 36264.1 1006.28 1
 0 4 -3 17258.2 626.671 1
 0 4 -2 60560.4 1218.25 5
 0 4 -2 59985.7 1413.21 1
 0 4 -1 814.304 101.854 5
 0 4 -1 726.148 122.628 1
 0 4 0 284.471 66.5099 5
 0 4 0 285.998 83.1157 1
 0 4 1 36726.5 1122.66 1
 0 4 1 39625.8 995.316 5
 0 4 2 2310.6 220.562 5
 0 4 2 2729.95 273.938 1
 0 4 3 5383.45 408.488 1
 0 4 3 5002.32 365.109 5
 0 4 4 18455.8 800.067 5
 0 4 4 19347.5 848.345 1
 0 4 5 39844 1353.81 1
 0 4 5 39083.5 1339.85 5
 0 4 6 118110 2879.06 5
 0 4 6 119626 2843.48 1
 0 4 7 7789.65 630.417 5
 0 4 8 14869.9 947.703 5
 0 4 9 12103.6 889.091 5
 0 4 10 2827.09 471.693 5
 0 4 11 53154.2 2179.59 5
 0 4 12 36077.6 1824.25 5
 0 4 13 893.221 301.266 5
 0 4 14 15950 1294 5
 0 4 15 285.291 167.344 5
 0 4 16 20652.8 1587.94 5
 0 5 -17 9303.98 909.048 4
 0 5 -16 231.884 162.101 4
 0 5 -16 -30.5599 85.3336 1
 0 5 -15 24552.8 1394.38 4
 0 5 -15 20717 1148.69 1
 0 5 -14 5420.94 547.229 1
 0 5 -14 5557.82 626.855 4
 0 5 -13 4918.64 494.072 1
 0 5 -13 5411.37 595.753 4
 0 5 -12 22166.1 1069.83 1
 0 5 -12 26258.2 1287.12 4
 0 5 -11 80.5205 103.875 4
 0 5 -11 -20.9698 91.8468 1
 0 5 -10 35003.3 1274.7 1
 0 5 -10 38197.5 1471.46 4
 0 5 -9 71859.6 2088.54 4
 0 5 -9 68030.3 1836.68 1
 0 5 -8 11654.6 742.04 4
 0 5 -8 10931.8 610.851 1
 0 5 -7 82212.1 1993.29 1
 0 5 -6 4355.34 343.826 1
 0 5 -5 28033.9 943.762 1
 0 5 -4 78818.8 1823.53 1
 0 5 -3 11295.2 430.077 5
 0 5 -3 11128.6 546.331 1
 0 5 -2 75380.3 1513.16 5
 0 5 -2 68118.2 1692.98 1
 0 5 -1 12907.6 478.639 5
 0 5 -1 10547.8 524.682 1
 0 5 0 41839.1 1253.9 1
 0 5 0 41853.9 1057.1 5
 0 5 1 31332.5 940.894 5
 0 5 1 29455.5 1057.71 1
 0 5 2 1880.46 220.684 5
 0 5 2 1956.17 266.527 1
 0 5 3 71269.8 1897.71 1
 0 5 3 66672.1 1719.81 5
 0 5 4 5011.67 452.466 1
 0 5 4 5313.5 433.996 5
 0 5 5 81300.9 2178.89 5
 0 5 5 82239.2 2225.72 1
 0 5 6 69075.1 2052.46 1
 0 5 6 64019.7 1972.21 5
 0 5 7 3607.25 432.122 1
 0 5 7 3909.56 454.923 5
 0 5 8 7495.4 667.482 5
 0 5 9 1657.61 339.285 5
 0 5 10 7533.6 743.103 5
 0 5 11 42987.4 1944.91 5
 0 5 12 22223.2 1422.6 5
 0 5 13 4023.73 627.61 5
 0 5 14 2403.99 499.964 5
 0 5 15 8357.36 987.247 5
 0 6 -17 17345 1274.97 4
 0 6 -16 26.8585 167.548 4
 0 6 -16 294.184 140.486 1
 0 6 -15 6688.81 634.166 1
 0 6 -15 8878.62 832.123 4
 0 6 -14 -130.85 158.528 4
 0 6 -14 -52.2168 131.814 1
 0 6 -13 35512.7 1423.06 1
 0 6 -13 39124.6 1691.66 4
 0 6 -12 19918.1 993.3 1
 0 6 -12 20433.5 1154.91 4
 0 6 -11 117.35 52.4678 4
 0 6 -11 94.6207 55.3403 1
 0 6 -10 23594.3 1181.29 4
 0 6 -10 23285.2 1042.67 1
 0 6 -9 170.699 131.41 4
 0 6 -9 103.309 71.3722 1
 0 6 -8 71599 1877.22 1
 0 6 -7 51482.5 1492.57 1
 0 6 -6 442.476 142.194 1
 0 6 -5 42212.6 1283.96 1
 0 6 -4 41965.4 1272.39 1
 0 6 -3 53973.6 1223.01 5
 0 6 -3 53303.7 1502.61 1
 0 6 -2 69298.8 1476.83 5
 0 6 -2 63504.6 1713.65 1
 0 6 -1 403.271 96.2512 5
 0 6 -1 349.062 91.8579 1
 0 6 0 104025 2415.05 1
 0 6 0 100740 2105.72 5
 0 6 1 28746.9 945.263 5
 0 6 1 30029.8 1143.41 1
 0 6 2 15516 704.373 5
 0 6 2 15898.1 810.712 1
 0 6 3 81794.1 2209.38 1
 0 6 3 81638.2 2024.89 5
 0 6 4 547.483 188.437 1
 0 6 4 513.147 136.879 5
 0 6 5 34009.9 1303.31 5
 0 6 5 35824.4 1426.6 1
 0 6 6 27473.4 1263.56 1
 0 6 6 26257 1206.26 5
 0 6 7 13971.1 904.359 5
 0 6 7 13562.5 904.186 1
 0 6 8 22785.9 1240.84 5
 0 6 9 113.918 105.47 5
 0 6 10 20590.3 1290.84 5
 0 6 11 25817 1511.5 5
 0 6 12 496.197 210.603 5
 0 6 13 9166.89 966.375 5
 0 6 14 704.228 282.24 5
 0 6 15 8741.62 1037.88 5
 0 7 -18 14490.5 1236.35 4
 0 7 -17 6856.78 785.962 4
 0 7 -16 2796.58 497.349 4
 0 7 -16 2330.39 384.51 1
 0 7 -15 3536.39 456.081 1
 0 7 -15 3332.54 525.712 4
 0 7 -14 3307.89 430.154 1
 0 7 -14 3677.54 538.786 4
 0 7 -13 42855.3 1659.54 1
 0 7 -13 42003.4 1808.64 4
 0 7 -12 10876.2 750.098 1
 0 7 -12 10935.9 874.605 4
 0 7 -11 3953.83 507.453 4
 0 7 -11 3562.19 419.31 1
 0 7 -10 12668.1 906.729 4
 0 7 -10 11167.4 690.191 1
 0 7 -9 13031.7 738.518 1
 0 7 -8 65363.5 1852.93 1
 0 7 -7 25017.6 1035.27 1
 0 7 -6 107.683 68.9924 1
 0 7 -5 27118.3 1049.88 1
 0 7 -4 948.861 182.483 1
 0 7 -3 122034 2343.06 5
 0 7 -3 116079 2707.29 1
 0 7 -2 68408 1522.53 5
 0 7 -2 60409.3 1739.24 1
 0 7 -1 5471.03 464.525 1
 0 7 -1 5463.66 356.007 5
 0 7 0 6561.35 526.605 1
 0 7 0 6836.92 420.451 5
 0 7 1 858.713 196.862 1
 0 7 1 802.74 164.244 5
 0 7 2 50747.7 1486.67 5
 0 7 2 48739.9 1664.27 1
 0 7 3 35272.7 1253.69 5
 0 7 3 34786.5 1405.76 1
 0 7 4 533.91 149.801 1
 0 7 4 751.486 191.844 5
 0 7 5 29349.7 1240.73 5
 0 7 5 29716.6 1349.37 1
 0 7 6 281.086 143.538 1
 0 7 6 244.62 99.1039 5
 0 7 7 20187.4 1160.16 1
 0 7 7 18352.3 1054.29 5
 0 7 8 25294.6 1338.66 1
 0 7 8 24154.1 1302.93 5
 0 7 9 2093.79 390.876 5
 0 7 10 6595.57 732.84 5
 0 7 11 1655.02 375.857 5
 0 7 12 12493.5 1113.89 5
 0 7 13 11925.5 1123.62 5
 0 7 14 345.193 134.577 5
 0 8 -18 13430.9 1186.64 4
 0 8 -17 339.724 186.023 4
 0 8 -16 8546.99 749.825 1
 0 8 -16 11620.9 1044.29 4
 0 8 -15 5036.3 557.318 1
 0 8 -15 5469.71 684.05 4
 0 8 -14 8027.83 682.208 1
 0 8 -14 9186.81 867.462 4
 0 8 -13 19476.6 1059.06 1
 0 8 -13 23098.3 1356.48 4
 0 8 -12 1226.18 285.244 4
 0 8 -12 953.033 227.904 1
 0 8 -11 4817.37 611.106 4
 0 8 -11 4733.48 481.05 1
 0 8 -10 475.107 146.884 1
 0 8 -9 28537.4 1199.55 1
 0 8 -8 51517 1678.5 1
 0 8 -7 12398.6 725.372 1
 0 8 -6 3604.84 399.999 1
 0 8 -5 8150.89 589.761 1
 0 8 -4 81590 1759.76 5
 0 8 -4 77537.6 2146 1
 0 8 -3 179260 3269.78 5
 0 8 -3 168419 3698.32 1
 0 8 -2 10115.8 667.377 1
 0 8 -2 9784.22 496.723 5
 0 8 -1 13282.7 793.301 1
 0 8 -1 14063.7 629.986 5
 0 8 0 200.588 63.8813 1
 0 8 0 284.822 97.2769 5
 0 8 1 23405.6 930.951 5
 0 8 1 23570 1141.34 1
 0 8 2 91144.6 2266.69 5
 0 8 2 90581.7 2559.4 1
 0 8 3 33254.9 1441.66 1
 0 8 3 33572 1282.51 5
 0 8 4 969.015 246.25 1
 0 8 4 855.077 199.797 5
 0 8 5 7882.61 636.592 5
 0 8 5 7668.22 695.308 1
 0 8 6 4751.04 528.954 5
 0 8 6 4817.46 562.252 1
 0 8 7 31172.3 1572.56 1
 0 8 7 28507.3 1401.4 5
 0 8 8 5455.13 637.79 1
 0 8 8 5045.17 599.047 5
 0 8 9 435.588 147.915 5
 0 8 10 2316.09 443.132 5
 0 8 11 2444.94 466.826 5
 0 8 12 17533.8 1348.78 5
 0 8 13 4859.85 726.041 5
 0 9 -18 6436.8 842.963 4
 0 9 -17 5593.23 764.991 4
 0 9 -16 10052.5 808.682 1
 0 9 -16 12271.7 1096.14 4
 0 9 -15 250.469 179.197 4
 0 9 -15 17.9336 84.0432 1
 0 9 -14 18878.4 1095.74 1
 0 9 -14 20933.6 1363.17 4
 0 9 -13 2184.51 458.482 4
 0 9 -13 2585.49 396.365 1
 0 9 -12 426.474 231.635 4
 0 9 -12 240.046 152.947 1
 0 9 -11 9688.02 729.182 1
 0 9 -10 2103.59 340.52 1
 0 9 -9 9306.32 688.633 1
 0 9 -8 13891.6 829.275 1
 0 9 -7 2404.4 347.78 1
 0 9 -6 8611.37 654.027 1
 0 9 -5 212.303 60.3922 1
 0 9 -4 108072 2214.83 5
 0 9 -4 99229.7 2664.3 1
 0 9 -3 74089.2 2192.66 1
 0 9 -3 81555.7 1823.33 5
 0 9 -2 865.402 147.187 5
 0 9 -2 627.387 170.756 1
 0 9 -1 13837.6 662.813 5
 0 9 -1 13245.2 851.873 1
 0 9 0 1234.21 270.979 1
 0 9 0 1282.07 204.841 5
 0 9 1 28071.9 1076.39 5
 0 9 1 28140.2 1329.4 1
 0 9 2 47738.8 1549.95 5
 0 9 2 47734.7 1818.4 1
 0 9 3 2197.74 314.036 5
 0 9 3 1797.44 353.447 1
 0 9 4 12375.4 927.088 1
 0 9 4 12176.5 809.125 5
 0 9 5 346.872 133.181 5
 0 9 5 313.991 128.763 1
 0 9 6 30573.1 1448.88 5
 0 9 6 30862 1566.77 1
 0 9 7 31410.1 1642.18 1
 0 9 7 27149 1419.44 5
 0 9 8 427.346 191.671 1
 0 9 8 278.832 165.042 5
 0 9 9 6872.57 764.435 5
 0 9 10 3574.78 555.52 5
 0 9 11 7576.86 857.2 5
 0 9 12 8723.92 956.078 5
 0 10 -19 4681.85 759.024 4
 0 10 -18 -199.306 230.118 4
 0 10 -17 13185.7 1194.57 4
 0 10 -16 5161 608.08 1
 0 10 -16 6934.75 843.679 4
 0 10 -15 1617.58 409.604 4
 0 10 -15 1012.43 228.199 1
 0 10 -14 8436.47 893.186 4
 0 10 -14 6857.98 670.054 1
 0 10 -13 237.848 194.66 4
 0 10 -13 302.985 139.118 1
 0 10 -12 17494.5 1279.12 4
 0 10 -12 14067.6 949.22 1
 0 10 -11 8295.28 705.158 1
 0 10 -10 469.993 159.675 1
 0 10 -9 10010.3 760.904 1
 0 10 -8 995.787 258.224 1
 0 10 -7 6395.46 594.908 1
 0 10 -6 11934.9 810.365 1
 0 10 -5 6.63696 74.36 1
 0 10 -4 14169.7 864.431 1
 0 10 -4 18160.1 704.589 5
 0 10 -3 7084.15 632.726 1
 0 10 -3 8399.76 477.075 5
 0 10 -2 10434 792.133 1
 0 10 -2 11987.1 617.148 5
 0 10 -1 11321.5 619.698 5
 0 10 -1 10296 799.237 1
 0 10 0 99.9946 71.6467 5
 0 10 0 -153.147 167.512 1
 0 10 1 26849.6 1103.18 5
 0 10 1 25775.4 1341.61 1
 0 10 2 13338.8 789.865 5
 0 10 2 14070.5 982.512 1
 0 10 3 993.137 220.12 5
 0 10 3 1012.25 289.916 1
 0 10 4 26681.3 1447.79 1
 0 10 4 26042.6 1251.11 5
 0 10 5 -63.3636 96.7883 5
 0 10 5 15.0693 87.8466 1
 0 10 6 23059 1300.57 5
 0 10 6 23333.2 1424.47 1
 0 10 7 10644.9 966.374 1
 0 10 7 10681.2 919.094 5
 0 10 8 2498.11 444.36 5
 0 10 8 2160.61 430.061 1
 0 10 9 11929.7 1040.15 5
 0 10 10 727.567 257.487 5
 0 10 11 9246.99 990.896 5
 0 11 -18 5486.32 828.954 4
 0 11 -17 13926.5 1254.47 4
 0 11 -16 2344.19 443.547 1
 0 11 -16 3499.02 612.038 4
 0 11 -15 2385.58 535.406 4
 0 11 -15 2404.6 414.788 1
 0 11 -14 3286.11 486.176 1
 0 11 -14 3361.31 587.508 4
 0 11 -13 4570.69 689.304 4
 0 11 -13 3866.49 502.616 1
 0 11 -12 37461.3 1610.43 1
 0 11 -11 8353.12 728.637 1
 0 11 -10 3663.64 481.321 1
 0 11 -9 11480.5 855.948 1
 0 11 -8 1020.86 235.077 1
 0 11 -7 19956.8 1118.22 1
 0 11 -6 20955.1 1151.18 1
 0 11 -5 2802.31 402.503 1
 0 11 -4 3341.58 456.741 1
 0 11 -3 1843.35 347.462 1
 0 11 -2 47088.1 1876.16 1
 0 11 -1 17815 1139.9 1
 0 11 0 1451.17 311.813 1
 0 11 1 20967.7 1270.43 1
 0 11 2 1221.35 300.688 1
 0 11 3 19892.7 1273.75 1
 0 11 4 25653.3 1494.92 1
 0 11 5 2200.02 448.902 1
 0 11 6 11201.7 1003.92 1
 0 11 7 372.986 136.397 1
 0 11 8 7430.81 844.015 1
 0 12 -17 13065.7 1263 4
 0 12 -16 321.452 168.123 4
 0 12 -15 3701.44 664.12 4
 0 12 -15 2954.12 475.599 1
 0 12 -14 315.124 205.456 4
 0 12 -14 370.487 113.459 1
 0 12 -13 17924.5 1434.73 4
 0 12 -13 15082.3 1065.14 1
 0 12 -12 35408.9 1666.8 1
 0 12 -11 109.373 94.3218 1
 0 12 -10 11449.4 898.435 1
 0 12 -9 1010.83 244.955 1
 0 12 -8 16690.4 1073.45 1
 0 12 -7 44024.9 1810.18 1
 0 12 -6 817.831 205.013 1
 0 12 -5 9603.51 812.536 1
 0 12 -4 8621.65 787.546 1
 0 12 -3 5589.88 635.285 1
 0 12 -2 29328.4 1533.98 1
 0 12 -1 4489.99 600.83 1
 0 12 0 6710.61 727.042 1
 0 12 1 3882.32 562.501 1
 0 12 2 7474.22 801.857 1
 0 12 3 35629.2 1837.49 1
 0 12 4 4772.14 682.811 1
 0 12 5 4445 730.511 1
 0 12 6 2202.15 484.878 1
 0 12 7 2513.36 532.076 1
 0 12 8 19082.7 1459.8 1
 0 13 -15 5957.96 854.229 4
 0 13 -15 5375.73 680.311 1
 0 13 -14 133.247 76.8445 1
 0 13 -14 335.27 203.378 4
 0 13 -13 14596.1 1110.59 1
 0 13 -12 9287.54 850.69 1
 0 13 -11 2973.2 476.805 1
 0 13 -10 14710.2 1080.47 1
 0 13 -9 -123.293 131.706 1
 0 13 -8 15074 1063.7 1
 0 13 -7 13131 964.607 1
 0 13 -6 502.694 211.207 1
 0 13 -5 16044.8 1130.5 1
 0 13 -4 1330.51 308.446 1
 0 13 -3 8408.76 833.553 1
 0 13 -2 11374.4 991.217 1
 0 13 -1 -220.71 239.7 1
 0 13 0 7215.84 802.949 1
 0 13 1 -46.5058 154.587 1
 0 13 2 11301 1031.02 1
 0 13 3 12829.2 1126.05 1
 0 13 4 -97.1677 186.595 1
 0 13 5 3483.9 599.551 1
 0 13 6 431.004 268.156 1
 0 14 -15 3574.58 556.19 1
 0 14 -14 1036.59 320.598 1
 0 14 -13 5894.79 708.994 1
 0 14 -12 -175.083 202.178 1
 0 14 -11 11625.2 980.608 1
 0 14 -10 8825.03 845.037 1
 0 14 -9 -188.273 188.764 1
 0 14 -8 8031.88 789.652 1
 0 14 -7 1733.84 347.755 1
 0 14 -6 9613.79 900.1 1
 0 14 -5 14667.6 1132.33 1
 0 14 -4 229.49 169.899 1
 0 14 -3 10369 987.916 1
 0 14 -2 1158.32 342.114 1
 0 14 -1 9255.86 932.821 1
 0 14 0 9944.8 977.924 1
 0 14 1 -228.444 310.51 1
 0 14 2 13729.5 1195.79 1
 0 14 3 4302.07 681.049 1
 0 15 -13 576.056 112.965 1
 0 15 -12 3175 514.417 1
 0 15 -11 13271.7 1089.3 1
 0 15 -10 4398.5 593.229 1
 0 15 -9 284.166 197.022 1
 0 15 -8 3308.08 543.026 1
 0 15 -7 2073.68 449.051 1
 0 15 -6 13014.2 1116.64 1
 0 15 -5 5446.92 727.967 1
 0 15 -4 2365.79 490.061 1
 0 15 -3 5580.46 749.973 1
 0 15 -2 278.641 174.908 1
 0 15 -1 16110.4 1302.86 1
 0 15 0 9517.12 1007.48 1
 1 -9 6 17879.7 566.608 2
 1 -8 -4 8661.8 383.573 3
 1 -8 6 7453.64 277.351 2
 1 -7 -5 26383.2 663.487 3
 1 -7 -4 6544.53 301.464 3
 1 -6 -5 81112.2 1487.03 3
 1 -6 -4 11858.9 383.168 3
 1 -6 5 92388.3 1578.04 2
 1 -6 19 942.394 363.4 5
 1 -5 -4 185.205 38.6724 3
 1 -5 18 2986.45 606.801 5
 1 -5 19 2321.2 559.735 5
 1 -4 -3 3275.78 140.971 3
 1 -4 1 2104.9 191.757 5
 1 -4 2 500.395 95.6967 5
 1 -4 18 292.26 242.294 5
 1 -4 19 13053.5 1306.58 5
 1 -3 -12 16116.3 1081.51 4
 1 -3 -11 8640 754.212 4
 1 -3 -10 3063.99 420.84 4
 1 -3 -9 39149.6 1531.88 4
 1 -3 -1 69749.1 1473.79 5
 1 -3 0 138493 2508.5 1
 1 -3 0 136656 2482.33 5
 1 -3 1 6515.66 309.956 5
 1 -3 1 6350.79 296.642 1
 1 -3 2 113490 2092.2 5
 1 -3 2 103824 1944.69 1
 1 -3 3 59335.9 1223.11 1
 1 -3 4 141628 2552.76 1
 1 -3 17 5738.22 803.855 5
 1 -3 18 1079.69 385.05 5
 1 -2 -13 196.357 109.213 4
 1 -2 -12 19779.4 1142.67 4
 1 -2 -11 12946.9 879.731 4
 1 -2 -10 28029.2 1257.14 4
 1 -2 -9 62545 1920.77 4
 1 -2 -8 107.694 102.745 4
 1 -2 -7 19099.2 855.082 4
 1 -2 -6 33458.9 1107.44 4
 1 -2 -5 44119.5 1230.75 4
 1 -2 -2 5980.65 318.746 5
 1 -2 -1 334.38 63.7293 5
 1 -2 -1 311.279 67.1469 1
 1 -2 0 8716.04 322.36 5
 1 -2 0 6857.24 279.343 1
 1 -2 1 179997 1946.26 5
 1 -2 1 69115.6 1536.42 1
 1 -2 2 8204.94 264.014 1
 1 -2 2 8954.92 349.621 5
 1 -2 16 17855.8 1396.71 5
 1 -2 17 3283.24 624.36 5
 1 -2 18 5943.21 855.162 5
 1 -1 -13 2231.34 403.495 4
 1 -1 -12 35703 1504.86 4
 1 -1 -11 2083.83 330.12 4
 1 -1 -10 57660.1 1821.85 4
 1 -1 -9 17159.3 858.282 4
 1 -1 -8 1961.17 254.931 4
 1 -1 -7 38275.4 1192.76 4
 1 -1 -6 27085.9 895.122 4
 1 -1 -5 16614.8 612.595 4
 1 -1 -4 164297 2899.2 4
 1 -1 -3 93679.9 1695.49 4
 1 -1 -2 60732.2 1246.06 5
 1 -1 2 402.078 81.3284 4
 1 -1 2 472.903 59.0133 2
 1 -1 3 84938.2 1790.22 4
 1 -1 14 3525.99 562.522 5
 1 -1 15 2346.39 495.886 5
 1 -1 16 16509.6 1338.8 5
 1 -1 17 1235.14 392.376 5
 1 -1 18 10373 1150.43 5
 1 0 -14 2846.54 442.635 4
 1 0 -13 23224.9 1223.09 4
 1 0 -12 18950.1 1041.12 4
 1 0 -11 9816.76 693.485 4
 1 0 -10 57691.2 1762.61 4
 1 0 -9 3179.36 345.764 4
 1 0 -8 27552.4 997.735 4
 1 0 -7 1788.67 229.345 4
 1 0 -6 18627.4 675.817 4
 1 0 -5 108154 2093.91 4
 1 0 -4 38274.4 865.486 4
 1 0 -3 220246 3718.85 5
 1 0 -3 215455 3490.86 4
 1 0 -2 6916.42 274.7 5
 1 0 2 80.9057 46.4726 4
 1 0 2 21.4587 15.1183 1
 1 0 3 1399.55 135.494 3
 1 0 13 5139.78 665.916 5
 1 0 14 5.33677 145.853 5
 1 0 15 8131.34 903.324 5
 1 0 16 7740.39 933.867 5
 1 0 17 73.1924 82.2544 5
 1 1 -15 8620.3 786.288 4
 1 1 -14 3742.41 497.277 4
 1 1 -13 25132.6 1234.11 4
 1 1 -12 585.757 191.993 4
 1 1 -11 34512.4 1332.84 4
 1 1 -10 34433.9 1266.01 4
 1 1 -9 70.0458 54.7128 4
 1 1 -8 68975 1759.24 4
 1 1 -7 22942.9 824.419 4
 1 1 -6 18721 670.435 4
 1 1 -5 99593.2 1954.62 4
 1 1 -2 19916 556.822 1
 1 1 -1 22382.1 562.287 1
 1 1 0 64549.8 772.334 2
 1 1 0 2914.3 192.018 1
 1 1 1 8489.88 319.733 1
 1 1 1 16902.4 579.636 4
 1 1 2 223393 3693.99 3
 1 1 2 221167 3987.15 4
 1 1 2 222996 3720.09 1
 1 1 3 9819.32 383.371 3
 1 1 3 9629.12 399.882 1
 1 1 4 948.596 132.134 1
 1 1 10 29853.4 1462.5 5
 1 1 11 9675.13 837.755 5
 1 1 12 6025.51 691.484 5
 1 1 13 2978.04 505.136 5
 1 1 14 839.532 267.451 5
 1 1 15 10396.6 1057.44 5
 1 1 16 5006.02 746.045 5
 1 1 17 4628.14 762.399 5
 1 2 -15 851.161 240.016 4
 1 2 -14 15403 988.905 4
 1 2 -13 40139.3 1592.39 4
 1 2 -12 53.5095 67.8821 4
 1 2 -11 4384.37 451.516 4
 1 2 -10 5142.89 453.126 4
 1 2 -9 42860.3 1372.03 4
 1 2 -8 61976.7 1634.09 4
 1 2 -7 3789.91 326.655 4
 1 2 -6 15583.4 632.273 4
 1 2 -5 3586.98 289.547 1
 1 2 -4 40235.4 1046.17 1
 1 2 -3 94812.5 1859.34 1
 1 2 -2 86978.6 1675.35 1
 1 2 -2 85021.2 1521.97 2
 1 2 -1 10570.3 401.619 1
 1 2 -1 11141.4 386.785 2
 1 2 0 140501 2334.92 5
 1 2 0 146293 2539.53 1
 1 2 1 85673.4 1713.62 1
 1 2 2 211332 3708.95 1
 1 2 3 20686.6 709.674 1
 1 2 4 14067.4 607.259 1
 1 2 5 85116.3 1978.12 1
 1 2 7 97520.2 2591.21 5
 1 2 8 9821.74 727.738 5
 1 2 9 20128.8 1124.22 5
 1 2 10 20828.8 1209.75 5
 1 2 11 1071.58 271.608 5
 1 2 12 11173.6 965.112 5
 1 2 13 3417.95 554.551 5
 1 2 14 8714.66 918.384 5
 1 2 15 20456.4 1505.55 5
 1 2 16 313.116 226.762 5
 1 2 17 10364.3 1155.46 5
 1 3 -15 2432.08 395.013 4
 1 3 -14 57742.5 2041.47 4
 1 3 -13 42339.3 1666.69 4
 1 3 -12 4391.56 477.685 4
 1 3 -11 13312 804.368 4
 1 3 -10 14028.2 774.305 4
 1 3 -9 107412 2524.68 4
 1 3 -8 67689 1771.64 4
 1 3 -8 65883.2 1791.88 1
 1 3 -7 251.511 76.9694 1
 1 3 -7 387.016 124.075 4
 1 3 -6 25600.8 899.108 1
 1 3 -5 14212.5 600.416 1
 1 3 -4 38740.8 1062.21 1
 1 3 -4 38918.2 789.515 2
 1 3 -3 84458 1799.57 1
 1 3 -3 88762 1592.53 2
 1 3 -2 47125.9 1151.66 1
 1 3 -1 10888.8 466.144 1
 1 3 0 122.408 51.5831 1
 1 3 0 56.3905 24.6086 5
 1 3 1 61730.6 1436.96 1
 1 3 1 58895.8 1273.41 5
 1 3 2 106581 2252.24 1
 1 3 2 107741 2154.52 5
 1 3 3 932.773 161.179 1
 1 3 3 975.009 158.161 5
 1 3 4 58638.4 1562.3 1
 1 3 4 60477.2 1620.74 5
 1 3 5 528.481 147.643 1
 1 3 5 1092.61 220.945 5
 1 3 6 89085.7 2346.54 5
 1 3 6 88348.4 2203.18 1
 1 3 7 114314 2907.84 5
 1 3 8 168.152 95.2248 5
 1 3 9 35301.8 1566.99 5
 1 3 10 4781.71 574.541 5
 1 3 11 20899 1296.15 5
 1 3 12 41019.7 1953.85 5
 1 3 13 1908.07 408.082 5
 1 3 14 14780.3 1238.43 5
 1 3 15 7338.47 890.162 5
 1 3 16 5863.05 841.509 5
 1 4 -18 505.7 221.654 1
 1 4 -17 6165.43 691.378 1
 1 4 -16 624.16 221.788 1
 1 4 -16 714.719 261.969 4
 1 4 -15 14548.8 1013.69 4
 1 4 -15 13095.1 943.287 1
 1 4 -14 32993.9 1485.4 4
 1 4 -14 28503.9 1402 1
 1 4 -13 8723.18 713.195 4
 1 4 -13 8683.92 696.412 1
 1 4 -12 13023.8 836.704 4
 1 4 -12 11573.4 775.364 1
 1 4 -11 8850.43 652.45 4
 1 4 -11 8963.95 656.887 1
 1 4 -10 30775.5 1219.44 1
 1 4 -10 31481.6 1240.24 4
 1 4 -9 152663 3337.91 4
 1 4 -9 152281 3304.22 1
 1 4 -8 62557.4 1726.73 1
 1 4 -7 14183 689.901 1
 1 4 -6 474.914 127.864 1
 1 4 -6 498.752 62.4694 2
 1 4 -5 38416.1 1213.64 1
 1 4 -5 48299.4 924.578 2
 1 4 -4 69348.9 1633.59 1
 1 4 -3 61381.2 1496.78 1
 1 4 -2 162.751 34.0758 5
 1 4 -2 116.925 57.7284 1
 1 4 -1 15253.6 417.571 5
 1 4 -1 15836.9 638.784 1
 1 4 0 1986.8 151.095 5
 1 4 0 1758.95 197.147 1
 1 4 1 49350.6 1335.27 1
 1 4 1 45455.4 1110.94 5
 1 4 2 19900.9 810.434 1
 1 4 2 18404.7 679.499 5
 1 4 3 10420 544.263 5
 1 4 3 10507.7 588.905 1
 1 4 4 7776.7 533.447 1
 1 4 4 7977.31 522.51 5
 1 4 5 13863 755.937 5
 1 4 5 13824.4 742.255 1
 1 4 6 83947 2249.95 1
 1 4 6 80744.7 2270.6 5
 1 4 7 35745.8 1355.45 1
 1 4 7 34590.9 1425.93 5
 1 4 8 141.372 125.995 5
 1 4 9 24715.2 1314.35 5
 1 4 10 184.778 149.161 5
 1 4 11 53646.3 2202.46 5
 1 4 12 37795.6 1897.28 5
 1 4 13 1344.87 357.185 5
 1 4 14 12573.1 1164.97 5
 1 4 15 194.418 197.797 5
 1 5 -18 3256.71 507.009 1
 1 5 -17 12099.3 946.721 1
 1 5 -16 45.1691 104.241 4
 1 5 -16 -52.1352 93.7969 1
 1 5 -15 12561.7 898.611 1
 1 5 -15 12751 941.232 4
 1 5 -14 6764.95 648.538 1
 1 5 -14 8289 744.2 4
 1 5 -13 4087.17 479.716 1
 1 5 -13 5277.94 560.03 4
 1 5 -12 18410.9 987.862 1
 1 5 -12 20784.1 1092.3 4
 1 5 -11 318.28 127.386 4
 1 5 -11 210.865 97.8383 1
 1 5 -10 49140.4 1678.01 4
 1 5 -10 47985.1 1577.68 1
 1 5 -9 50589.9 1578.54 1
 1 5 -8 3075.32 325.784 1
 1 5 -8 2523.31 130.467 2
 1 5 -7 74864.4 1862.91 1
 1 5 -7 61973.9 1184.91 2
 1 5 -6 211.797 98.482 1
 1 5 -5 28240.1 991.27 1
 1 5 -4 86779.3 2036.77 1
 1 5 -3 13570.2 626.756 1
 1 5 -2 28178.5 672.454 5
 1 5 -2 28420.7 987.761 1
 1 5 -1 57423.6 1175.39 5
 1 5 -1 56590.1 1518.37 1
 1 5 0 71239.9 1815.15 1
 1 5 0 75153.2 1530.45 5
 1 5 1 35964.7 1196.62 1
 1 5 1 34194.6 951.984 5
 1 5 2 8728.77 472.719 5
 1 5 2 8944.05 572.126 1
 1 5 3 22483.5 870.264 5
 1 5 3 22310.3 959.414 1
 1 5 4 4770.01 438.769 1
 1 5 4 5097.7 421.648 5
 1 5 5 23876.6 1062.33 1
 1 5 5 23013.7 1024.39 5
 1 5 6 49531.2 1697.9 5
 1 5 6 51541.6 1720.14 1
 1 5 7 6989.39 624.055 5
 1 5 7 6670.27 591.918 1
 1 5 8 7194.85 661.004 5
 1 5 9 10450.4 850.793 5
 1 5 10 18824.4 1208.1 5
 1 5 11 43319 1984.63 5
 1 5 12 20447.1 1379.81 5
 1 5 13 2624.87 504.677 5
 1 5 14 4783.13 711.535 5
 1 5 15 5217.97 767.209 5
 1 6 -18 10135.9 879.814 1
 1 6 -17 15542.1 1085.41 1
 1 6 -17 21561.3 1363.68 4
 1 6 -16 -127.066 109.108 4
 1 6 -16 5.35149 125.117 1
 1 6 -15 11353.3 855.937 1
 1 6 -15 12909.5 990.515 4
 1 6 -14 1104.29 283.123 4
 1 6 -14 869.654 221.386 1
 1 6 -13 36756.6 1515.21 1
 1 6 -13 39557.8 1651.93 4
 1 6 -12 46149.9 1763.57 4
 1 6 -12 41127.8 1569.79 1
 1 6 -11 938.405 237.805 4
 1 6 -11 983.29 222.612 1
 1 6 -10 30148.6 1253.44 1
 1 6 -9 5082.88 469.202 1
 1 6 -8 47937.9 1521.09 1
 1 6 -7 101705 2422.8 1
 1 6 -6 670.656 160.06 1
 1 6 -5 27087.3 1040.68 1
 1 6 -4 38784.8 1238.84 1
 1 6 -3 3958.04 372.606 1
 1 6 -2 102454 1904.47 5
 1 6 -2 107425 2439.42 1
 1 6 -1 357.385 74.4644 5
 1 6 -1 308.318 116.095 1
 1 6 0 36878.4 1281.91 1
 1 6 0 37839.9 1000.06 5
 1 6 1 30250.4 1177.44 1
 1 6 1 33385.7 998.529 5
 1 6 2 2733.9 272.939 5
 1 6 2 2938.11 351.332 1
 1 6 3 18561.2 805.791 5
 1 6 3 19074.9 943.885 1
 1 6 4 2320.35 336.255 1
 1 6 4 2513.29 314.324 5
 1 6 5 37767.9 1466.05 1
 1 6 5 36835.6 1376.64 5
 1 6 6 15844.7 913.191 5
 1 6 6 16785.6 964.664 1
 1 6 7 2191.8 353.572 5
 1 6 7 1709.59 323.984 1
 1 6 8 28748.3 1383.94 1
 1 6 8 27425.5 1361.17 5
 1 6 9 265.738 129.58 5
 1 6 10 9939.58 878.151 5
 1 6 11 21556.5 1383.2 5
 1 6 12 -18.5032 83.1303 5
 1 6 13 9703.72 1000.03 5
 1 6 14 1375.51 412.735 5
 1 7 -18 19572.9 1237.06 1
 1 7 -17 6839.88 698.229 1
 1 7 -17 9005.38 889.942 4
 1 7 -16 3732.74 513.197 1
 1 7 -16 4465.76 606.871 4
 1 7 -15 16618.3 1063.73 1
 1 7 -15 19180.2 1236.19 4
 1 7 -14 326.028 168.06 4
 1 7 -14 323.019 155.296 1
 1 7 -13 48089.7 1932.57 4
 1 7 -13 47193.7 1812.32 1
 1 7 -12 18676.7 1132.25 4
 1 7 -12 16826.4 991.644 1
 1 7 -11 3111.84 453.998 4
 1 7 -11 2449.01 359.128 1
 1 7 -10 12695.9 782.186 1
 1 7 -9 76.8992 63.9647 1
 1 7 -8 53244.2 1684.52 1
 1 7 -7 35802.2 1313.79 1
 1 7 -6 1274.49 230.728 1
 1 7 -5 38962.7 1338.26 1
 1 7 -4 2545.02 323.391 1
 1 7 -3 61397.4 1271.4 5
 1 7 -3 66919 1848.5 1
 1 7 -2 70970.3 1462.09 5
 1 7 -2 69673.9 1951.86 1
 1 7 -1 1735.72 181.421 5
 1 7 -1 1432.72 239.596 1
 1 7 0 23991.3 1065.05 1
 1 7 0 23778.6 793.531 5
 1 7 1 3403.02 395.371 1
 1 7 1 3229.74 293.497 5
 1 7 2 26416.9 982.89 5
 1 7 2 26242.2 1175.64 1
 1 7 3 49973.2 1522.08 5
 1 7 3 51976.8 1767.03 1
 1 7 4 7469.36 644.93 1
 1 7 4 7193.77 542.403 5
 1 7 5 17685.2 1027.41 1
 1 7 5 16322.7 891.089 5
 1 7 6 922.606 257.075 1
 1 7 6 1253.06 257.961 5
 1 7 7 5265.86 587.134 1
 1 7 7 5105.33 553.781 5
 1 7 8 16383.6 1070.18 5
 1 7 8 16791.8 1089.98 1
 1 7 9 1184.23 289.238 5
 1 7 10 4346.77 598.977 5
 1 7 11 3751.23 591.527 5
 1 7 12 4458.86 661.478 5
 1 7 13 12057.3 1142.89 5
 1 7 14 901.505 354.354 5
 1 8 -18 17637.7 1204.22 1
 1 8 -17 39.0348 123.626 4
 1 8 -17 689.198 244.926 1
 1 8 -16 8797.36 798.346 1
 1 8 -16 11423.8 1001.3 4
 1 8 -15 8398.85 753.312 1
 1 8 -15 10442.3 932.874 4
 1 8 -14 3186.53 450.668 1
 1 8 -14 3242.87 509.943 4
 1 8 -13 13453.9 1018.61 4
 1 8 -13 12382.5 867.63 1
 1 8 -12 2462.83 434.212 4
 1 8 -12 1803.36 311.203 1
 1 8 -11 5919.71 557.703 1
 1 8 -10 2331.67 334.955 1
 1 8 -9 2462.77 346.46 1
 1 8 -8 23648.1 1118 1
 1 8 -7 1672.75 273.595 1
 1 8 -6 9782 666.179 1
 1 8 -5 3671.24 411.967 1
 1 8 -4 40692.9 1460.84 1
 1 8 -3 77713 1577.64 5
 1 8 -3 82701.3 2233.5 1
 1 8 -2 22074.2 1010.71 1
 1 8 -2 24279.8 735.203 5
 1 8 -1 5358.72 515.337 1
 1 8 -1 5664.1 349.949 5
 1 8 0 4218.61 460.525 1
 1 8 0 4075.56 317.529 5
 1 8 1 5449.17 406.899 5
 1 8 1 4706.73 500.873 1
 1 8 2 59622.4 1701.83 5
 1 8 2 64417.7 2077.89 1
 1 8 3 51337.3 1629.59 5
 1 8 3 50134.6 1839.16 1
 1 8 4 1071.83 222.142 5
 1 8 4 676.053 198.508 1
 1 8 5 8805.33 757.535 1
 1 8 5 9169.96 681.778 5
 1 8 6 243.228 84.3606 5
 1 8 6 208.367 91.51 1
 1 8 7 52102.4 2064.82 1
 1 8 7 46504.9 1844.35 5
 1 8 8 9485.97 812.926 5
 1 8 8 10373.8 910.061 1
 1 8 9 88.937 113.993 5
 1 8 10 4894.82 635.088 5
 1 8 11 75.1662 128.592 5
 1 8 12 9749.32 986.258 5
 1 8 13 10232.9 1046.18 5
 1 9 -18 5480.59 750.718 4
 1 9 -17 1612.48 409.623 4
 1 9 -17 1368.26 282.714 1
 1 9 -16 11406.5 895.987 1
 1 9 -16 14472.3 1162 4
 1 9 -15 2747.17 419.811 1
 1 9 -15 3950.84 591.132 4
 1 9 -14 5823.39 715.454 4
 1 9 -14 4021.5 509.16 1
 1 9 -13 10729.7 947.248 4
 1 9 -13 10020.1 794.376 1
 1 9 -12 144.934 111.347 1
 1 9 -11 16226.7 993.143 1
 1 9 -10 2491.07 368.938 1
 1 9 -9 5478.53 547.953 1
 1 9 -8 10982.2 753.765 1
 1 9 -7 249.582 122.065 1
 1 9 -6 18488.9 1009.77 1
 1 9 -5 4782.35 496.494 1
 1 9 -4 23459.4 1129.83 1
 1 9 -3 29358.5 808.944 5
 1 9 -3 28198.9 1227.57 1
 1 9 -2 92.6499 55.5867 5
 1 9 -2 79.9302 62.7002 1
 1 9 -1 5880.29 577.11 1
 1 9 -1 6175.36 393.49 5
 1 9 0 113.819 90.1892 1
 1 9 0 103.622 60.107 5
 1 9 1 30467.8 1092.94 5
 1 9 1 32171.2 1460.27 1
 1 9 2 55921.4 1672.08 5
 1 9 2 54943.4 2007.13 1
 1 9 3 4652.7 452.556 5
 1 9 3 4565.92 545.521 1
 1 9 4 16974.6 1110.25 1
 1 9 4 18218.3 999.655 5
 1 9 5 14478.8 1036 1
 1 9 5 14271.8 907.271 5
 1 9 6 14790.4 966.397 5
 1 9 6 14106.5 1044.38 1
 1 9 7 42720.2 1944.47 1
 1 9 7 42030.5 1780.4 5
 1 9 8 3184.48 491.059 5
 1 9 8 3068.53 521.981 1
 1 9 9 2761.51 487.495 5
 1 9 9 2517.9 470.631 1
 1 9 10 6055.09 743.302 5
 1 9 11 1842.99 399.259 5
 1 9 12 10410.2 1049.39 5
 1 10 -18 52.1435 106.218 4
 1 10 -17 8851.94 840.52 1
 1 10 -17 10940.1 1066.04 4
 1 10 -16 10479.3 911.034 1
 1 10 -16 12910.2 1138.57 4
 1 10 -15 88.8496 162.209 4
 1 10 -15 169.909 165.488 1
 1 10 -14 5611.24 722.524 4
 1 10 -14 4706.39 581.01 1
 1 10 -13 2265.56 504.447 4
 1 10 -13 1584.97 315.577 1
 1 10 -12 14345.6 995.511 1
 1 10 -11 24424.9 1287.94 1
 1 10 -10 2544.67 397.08 1
 1 10 -9 11597.3 834.82 1
 1 10 -8 2586.9 388.329 1
 1 10 -7 1383.4 280.388 1
 1 10 -6 33894.9 1463.8 1
 1 10 -5 49.5104 108.789 1
 1 10 -4 13314 868.485 1
 1 10 -3 6312.12 613.666 1
 1 10 -2 28529.8 1372.69 1
 1 10 -1 46021.1 1812.55 1
 1 10 0 4773.88 556.402 1
 1 10 1 26070.8 1377.15 1
 1 10 2 19138.9 1180.82 1
 1 10 3 1718.13 341.392 1
 1 10 4 32541.2 1643.23 1
 1 10 5 1406.06 293.715 1
 1 10 6 13637.6 1078.73 1
 1 10 7 10100.3 955.309 1
 1 10 8 469.301 166.888 1
 1 10 9 10653.7 1014.71 1
 1 11 -18 2163.5 489.628 4
 1 11 -17 15258.7 1148.97 1
 1 11 -17 18264 1425.89 4
 1 11 -16 7009.16 865.965 4
 1 11 -16 6268.28 699.531 1
 1 11 -15 2570.69 512.996 4
 1 11 -15 1594.73 355.931 1
 1 11 -14 3642.85 629.926 4
 1 11 -14 3485.2 535.356 1
 1 11 -13 5275.67 607.483 1
 1 11 -12 34797.3 1627.61 1
 1 11 -11 13496 953.25 1
 1 11 -10 2476.6 400.941 1
 1 11 -9 3016.68 453.263 1
 1 11 -8 2954.14 445.624 1
 1 11 -7 34027.4 1548.97 1
 1 11 -6 21216.5 1188.59 1
 1 11 -5 -45.2732 116.815 1
 1 11 -4 11217.3 848.959 1
 1 11 -3 -37.3142 169.391 1
 1 11 -2 34754.3 1614.45 1
 1 11 -1 40110.2 1775.74 1
 1 11 0 96.3454 105.508 1
 1 11 1 13372.3 1019.35 1
 1 11 2 -260.065 201.56 1
 1 11 3 15979.7 1145.49 1
 1 11 4 24568 1471.9 1
 1 11 5 224.693 179.064 1
 1 11 6 10624.1 990.668 1
 1 11 7 -188.398 166.989 1
 1 11 8 9453.66 994.116 1
 1 11 9 16598 1325.81 1
 1 12 -17 12359.9 1059.33 1
 1 12 -17 15024 1340.98 4
 1 12 -16 2573.9 546.278 4
 1 12 -16 2049.11 431.495 1
 1 12 -15 5076.46 763.871 4
 1 12 -15 3981.69 566.81 1
 1 12 -14 453.872 279.326 4
 1 12 -14 589.055 212.723 1
 1 12 -13 17056 1158.19 1
 1 12 -12 42645.5 1895.86 1
 1 12 -11 1232.63 312.588 1
 1 12 -10 11538.1 936.143 1
 1 12 -9 1904.83 389.718 1
 1 12 -8 11881.9 934.129 1
 1 12 -7 41937.2 1812.76 1
 1 12 -6 12589 925.985 1
 1 12 -5 1285.07 284.938 1
 1 12 -4 5904.69 653.698 1
 1 12 -3 2054.99 391.162 1
 1 12 -2 15123.2 1100.01 1
 1 12 -1 5644 676.04 1
 1 12 0 3385.76 523.967 1
 1 12 1 2161.15 432.522 1
 1 12 2 2055.24 426.03 1
 1 12 3 16378.9 1235.23 1
 1 12 4 14727.6 1193.32 1
 1 12 5 1549.2 379.907 1
 1 12 6 2721.25 526.768 1
 1 12 7 712.601 287.146 1
 1 13 -16 474.898 169.586 1
 1 13 -15 9643.97 1097.14 4
 1 13 -15 7986.11 848.041 1
 1 13 -14 191.663 136.665 1
 1 13 -13 12367 1052.98 1
 1 13 -12 12045.8 1016.86 1
 1 13 -11 511.221 169.861 1
 1 13 -10 8718.18 834.308 1
 1 13 -9 709.706 240.672 1
 1 13 -8 11238.4 945.923 1
 1 13 -7 19135.3 1215.19 1
 1 13 -6 449.108 156.097 1
 1 13 -5 16475.6 1170.26 1
 1 13 -4 4260.11 595.111 1
 1 13 -3 4348.72 608.521 1
 1 13 -2 13927.7 1115.48 1
 1 13 -1 498.647 184.556 1
 1 13 0 5274.02 692.841 1
 1 13 1 880.597 262.308 1
 1 13 2 3111.83 518.966 1
 1 13 3 17176.7 1321.55 1
 1 13 4 1398.69 385.796 1
 1 13 5 3522.21 590.707 1
 1 14 -14 -36.5079 164.042 1
 1 14 -13 4471.89 645.167 1
 1 14 -12 -53.1092 158.71 1
 1 14 -11 7308.02 801.818 1
 1 14 -10 11379.4 1000.86 1
 1 14 -9 -9.7535 161.611 1
 1 14 -8 7427.88 773.241 1
 1 14 -7 2879.99 488.81 1
 1 14 -6 5506.83 703.503 1
 1 14 -5 13398.5 1113.29 1
 1 14 -4 -46.2421 109.449 1
 1 14 -3 6115.14 757.923 1
 1 14 -2 5085.3 711.448 1
 1 14 -1 2903.64 551.895 1
 1 14 0 8192.57 899.887 1
 1 14 1 547.782 198.494 1
 1 14 2 4188.79 668.272 1
 1 15 -10 9721.29 929.708 1
 1 15 -9 575.619 262.013 1
 1 15 -8 3626.25 582.691 1
 1 15 -7 932.65 329.511 1
 1 15 -6 18446.4 1379.18 1
 1 15 -5 8264.81 908.217 1
 1 15 -4 138.525 122.342 1
 1 15 -3 7378.3 909.988 1
 1 15 -2 455.529 161.108 1
 2 -7 -4 18196.2 415.362 3
 2 -5 5 24470.1 531.175 2
 2 -4 3 3867.54 225.722 1
 2 -4 4 134655 2341.82 1
 2 -4 4 125902 2173.86 2
 2 -4 5 42319 885.566 2
 2 -3 -1 173659 2843.86 3
 2 -3 0 373.996 82.8357 1
 2 -3 1 19438.6 533.314 1
 2 -3 2 68566.1 1267.41 1
 2 -3 3 89921 1490.77 1
 2 -3 3 74791.2 1463.94 2
 2 -3 4 99012 1776.95 2
 2 -3 18 150.907 158.724 5
 2 -2 -12 30754.1 1332.82 4
 2 -2 -11 15935.3 879.527 4
 2 -2 -10 22794.4 1012.09 4
 2 -2 -9 75847.4 1975.55 4
 2 -2 -8 13712.8 662.519 4
 2 -2 -7 25305.3 875.291 4
 2 -2 -6 42077.6 1103.68 4
 2 -2 -1 16267.5 559.148 5
 2 -2 -1 15701.4 407.834 3
 2 -2 -1 14939.2 493.147 1
 2 -2 0 151067 2482.62 3
 2 -2 0 154709 2675.23 5
 2 -2 1 333608 5550.03 4
 2 -2 1 336505 5585.1 5
 2 -2 1 340994 5479.13 3
 2 -2 1 350299 5275.42 1
 2 -2 3 86598.2 1617.06 2
 2 -2 17 11355.4 1162.22 5
 2 -2 18 345.895 186.998 5
 2 -1 -13 6650.84 593.733 4
 2 -1 -12 27378.4 1191.73 4
 2 -1 -11 331.486 116.508 4
 2 -1 -10 69737.2 1892.82 4
 2 -1 -9 24352.1 933.038 4
 2 -1 -8 273.578 95.7475 4
 2 -1 -7 56493.8 1365.62 4
 2 -1 -6 2151.04 187.072 4
 2 -1 -5 45842.3 975.067 4
 2 -1 -2 6470.23 318.02 5
 2 -1 -1 1379.48 133.812 5
 2 -1 -1 569.294 73.8202 4
 2 -1 0 34521.8 776.217 5
 2 -1 0 36541.8 732.438 3
 2 -1 1 35487.9 863.773 5
 2 -1 1 36348 849.567 3
 2 -1 1 36181 941.46 4
 2 -1 2 103963 1914.92 2
 2 -1 16 12977 1201.62 5
 2 -1 17 10170.2 1108.78 5
 2 0 -13 15528.6 916.3 4
 2 0 -12 23830 1080.17 4
 2 0 -11 1891.5 279.092 4
 2 0 -10 58977.6 1645.58 4
 2 0 -9 49244.9 1383.39 4
 2 0 -8 23657 821.682 4
 2 0 -7 57810 1357 4
 2 0 -6 84.426 37.0609 4
 2 0 -5 114361 2029.44 4
 2 0 -3 7801.68 345.381 5
 2 0 -2 58048 1179.52 5
 2 0 -1 54015.9 1114.16 5
 2 0 -1 49442.2 1168.62 4
 2 0 0 34008.4 868.435 4
 2 0 0 35286.2 773.419 2
 2 0 1 152463 2637.8 5
 2 0 1 151638 2676.2 3
 2 0 1 149897 2651.36 2
 2 0 1 148679 2468.66 1
 2 0 1 155635 2866.69 4
 2 0 2 9706.66 305.412 1
 2 0 3 1235.71 109.765 1
 2 0 14 344.688 162.933 5
 2 0 15 5668.48 774.871 5
 2 0 16 17043 1395.49 5
 2 0 17 305.245 218.508 5
 2 1 -14 219.79 116.335 4
 2 1 -13 15481.4 886.866 4
 2 1 -12 10893.6 701.482 4
 2 1 -11 3192.03 345.54 4
 2 1 -10 58369 1641.27 4
 2 1 -9 8793.62 507.443 4
 2 1 -8 24528.9 849.748 4
 2 1 -7 21694.8 726.369 4
 2 1 -6 20163 648.186 4
 2 1 -4 8193.63 376.624 5
 2 1 -3 111405 2008.84 5
 2 1 -3 111654 2179.79 1
 2 1 -2 35361.9 875.562 1
 2 1 -2 34370.7 719.961 5
 2 1 -1 215310 3528.47 1
 2 1 -1 211144 3512.98 2
 2 1 0 274717 4325.8 5
 2 1 0 266424 4412.07 1
 2 1 0 259841 4754.96 4
 2 1 1 8381.22 326.917 1
 2 1 2 30435.4 777.572 1
 2 1 3 35851.2 911.684 1
 2 1 4 19341.1 657.842 1
 2 1 5 114965 2329.22 1
 2 1 12 47.7794 162.862 5
 2 1 13 4618.85 649.601 5
 2 1 14 484.612 231.449 5
 2 1 15 15696 1299.03 5
 2 1 16 14830.9 1342.07 5
 2 2 -14 6502.18 597.812 4
 2 2 -13 28272 1232.31 4
 2 2 -12 7376.18 586.377 4
 2 2 -11 1860.11 277.051 4
 2 2 -10 1295.73 222.868 4
 2 2 -9 33771.7 1109.74 4
 2 2 -8 85868.9 1968.85 4
 2 2 -6 16577.8 728.606 1
 2 2 -5 5987.91 405.5 1
 2 2 -4 10028.8 490.715 1
 2 2 -3 45868 1144.32 1
 2 2 -3 45300.5 1002.94 2
 2 2 -2 14197.7 536.063 1
 2 2 -1 28011.5 787.864 1
 2 2 0 21367.4 671.183 1
 2 2 1 49189.3 1137.22 1
 2 2 2 143514 2711.67 1
 2 2 3 25597 821.786 1
 2 2 4 54890.8 1411.31 1
 2 2 5 38082.2 1157.92 1
 2 2 6 473.72 109.57 1
 2 2 10 26617.1 1408.71 5
 2 2 11 378.182 146.501 5
 2 2 12 28701 1599.75 5
 2 2 13 6844.58 794.305 5
 2 2 14 1014.38 299.895 5
 2 2 15 22417.7 1589.94 5
 2 2 16 2254.12 516.853 5
 2 3 -19 9651.41 948.742 1
 2 3 -18 9012.87 896.94 1
 2 3 -15 131.963 140.965 4
 2 3 -14 36838.9 1530.12 4
 2 3 -13 41892.4 1545.25 4
 2 3 -12 6595.13 563.918 4
 2 3 -11 14225.1 784.701 4
 2 3 -10 3223 387.046 1
 2 3 -10 3629.44 362.538 4
 2 3 -9 113532 2564.13 4
 2 3 -9 109802 2704.38 1
 2 3 -8 118917 2749.06 1
 2 3 -7 144.539 78.0841 1
 2 3 -6 20627.3 832.875 1
 2 3 -5 8298.82 475.607 1
 2 3 -4 95124.1 2092.54 1
 2 3 -3 68601.9 1580.98 1
 2 3 -2 38350.1 1058.45 1
 2 3 -1 96021.5 1995.49 1
 2 3 0 18036.1 498.27 5
 2 3 0 18257 669.969 1
 2 3 1 72280.2 1647.43 1
 2 3 2 109426 2317.26 1
 2 3 3 3845.94 324.745 1
 2 3 4 25034.7 935.332 1
 2 3 5 7594.86 499.57 1
 2 3 6 21989.5 944.421 1
 2 3 6 21423.5 1022.99 5
 2 3 7 70203.7 1971.68 1
 2 3 7 74457.3 2222.63 5
 2 3 8 5976.12 585.587 5
 2 3 9 22704.8 1239.48 5
 2 3 10 21869.7 1279.02 5
 2 3 11 9283.21 869.52 5
 2 3 12 31276.1 1709.18 5
 2 3 13 4077.11 613.098 5
 2 3 14 4899.13 722.697 5
 2 3 15 8909.2 999.417 5
 2 3 16 2279.06 513.774 5
 2 4 -19 10827.6 985.207 1
 2 4 -18 1310.43 318.898 1
 2 4 -17 9024.18 861.304 1
 2 4 -16 3574.13 503.565 1
 2 4 -15 6384.5 628.515 4
 2 4 -15 5878.32 631.317 1
 2 4 -14 21691.1 1139.89 4
 2 4 -14 18279.3 1109.92 1
 2 4 -13 16085.8 948.936 4
 2 4 -13 14796.9 966.122 1
 2 4 -12 8104.26 632.177 4
 2 4 -12 7730.64 657.689 1
 2 4 -11 17782.3 980.741 1
 2 4 -11 18305.9 936.615 4
 2 4 -10 13104.1 758.501 4
 2 4 -10 12632.9 778.032 1
 2 4 -9 85113.1 2261.78 1
 2 4 -8 18049.2 858.127 1
 2 4 -7 16942.8 790.02 1
 2 4 -6 16347.6 758.996 1
 2 4 -5 18170 779.311 1
 2 4 -4 186074 3560.43 1
 2 4 -3 183137 3509.39 1
 2 4 -2 6891.93 433.972 1
 2 4 -1 121264 2058.8 5
 2 4 -1 140219 2669.51 1
 2 4 0 6873.22 290.186 5
 2 4 0 6557.44 422.865 1
 2 4 1 54199.5 1470.4 1
 2 4 1 53682.2 1248.74 5
 2 4 2 35036.7 1145.2 1
 2 4 2 33036.7 1005.42 5
 2 4 3 10271.7 562.808 5
 2 4 3 10013.6 590.204 1
 2 4 4 15592.3 773.245 1
 2 4 4 15720.9 770.018 5
 2 4 5 5034.14 445.326 1
 2 4 5 5373.73 472.081 5
 2 4 6 35842.8 1405.76 5
 2 4 6 38579.5 1366.75 1
 2 4 7 30807.9 1278.7 1
 2 4 7 31462.6 1376.01 5
 2 4 8 988.722 270.109 5
 2 4 9 27376.2 1412.19 5
 2 4 10 341.895 187.441 5
 2 4 11 35840.4 1791.78 5
 2 4 12 23613.2 1496.3 5
 2 4 13 613.59 237.177 5
 2 4 14 8629.53 968.413 5
 2 4 15 -811.764 310.779 5
 2 5 -19 7095.04 800.652 1
 2 5 -18 406.819 239.054 1
 2 5 -17 14059.1 1062.06 1
 2 5 -16 2606.07 418.77 4
 2 5 -16 2096.88 384.432 1
 2 5 -15 3437.29 469.976 1
 2 5 -15 4968.99 575.165 4
 2 5 -14 7903.94 722.534 1
 2 5 -14 8879.21 743.959 4
 2 5 -13 2997.07 409.631 1
 2 5 -13 2987.49 414.279 4
 2 5 -12 39418 1532.32 4
 2 5 -12 36623.4 1507.59 1
 2 5 -11 15282.2 895.171 4
 2 5 -11 12893.2 825.721 1
 2 5 -10 37524 1412.85 1
 2 5 -9 41910.2 1460.5 1
 2 5 -8 -6.88195 70.1322 1
 2 5 -7 56496.9 1702.75 1
 2 5 -6 39397.4 1297.25 1
 2 5 -5 7245.86 502.346 1
 2 5 -4 51850.9 1492.67 1
 2 5 -3 6630.09 454.54 1
 2 5 -2 25267.5 962.383 1
 2 5 -1 32085.5 708.282 5
 2 5 -1 35211.8 1146.63 1
 2 5 0 1488.7 139.687 5
 2 5 0 1588.95 219.17 1
 2 5 1 40455.4 1304.76 1
 2 5 1 37625.2 1015.89 5
 2 5 2 6299.52 498.575 1
 2 5 2 6167.69 395.677 5
 2 5 3 1970.82 249.862 5
 2 5 3 2126.45 290.88 1
 2 5 4 17153.6 825.853 5
 2 5 4 17936.3 895.453 1
 2 5 5 723.335 196.536 1
 2 5 5 737.108 195.097 5
 2 5 6 26246.9 1195.77 5
 2 5 6 25451.5 1159.74 1
 2 5 7 7116.56 621.755 1
 2 5 7 8352.89 690.087 5
 2 5 8 4359.9 525.328 5
 2 5 8 4651.1 502.697 1
 2 5 9 19268.4 1187.09 5
 2 5 10 4151.3 560.703 5
 2 5 11 29784.6 1648.78 5
 2 5 12 8350.66 872.567 5
 2 5 13 2319.58 496.703 5
 2 5 14 6125.91 804.265 5
 2 6 -19 133.24 123.948 1
 2 6 -18 11408.4 959.653 1
 2 6 -17 27147.4 1471.44 1
 2 6 -16 13.1256 131.511 4
 2 6 -16 -176.474 211.023 1
 2 6 -15 13059.1 955.098 1
 2 6 -15 17183.2 1114.53 4
 2 6 -14 1432.81 310.612 4
 2 6 -14 1045.59 253.485 1
 2 6 -13 16522 1028.88 4
 2 6 -13 15283.5 960.801 1
 2 6 -12 69796.8 2230.15 4
 2 6 -12 64985.1 2112.29 1
 2 6 -11 9937.21 730.314 1
 2 6 -10 14989 893.879 1
 2 6 -9 17382.1 938.516 1
 2 6 -8 17720.7 892.152 1
 2 6 -7 90832.5 2320.78 1
 2 6 -6 16682 837.151 1
 2 6 -5 16451.7 823.15 1
 2 6 -4 3071.71 337.746 1
 2 6 -3 20734.2 916.552 1
 2 6 -2 90893.1 2260.1 1
 2 6 -1 1558.79 130.992 5
 2 6 -1 1539.39 241.352 1
 2 6 0 4762.3 435.883 1
 2 6 0 4907.8 294.969 5
 2 6 1 25675.5 1079.43 1
 2 6 1 23790.3 787.18 5
 2 6 2 7564.95 579.243 1
 2 6 2 7853.08 468.335 5
 2 6 3 11891 641.678 5
 2 6 3 11668.2 740.369 1
 2 6 4 18380.6 872.666 5
 2 6 4 18466 976.884 1
 2 6 5 10704.5 760.929 1
 2 6 5 10596.7 698.422 5
 2 6 6 5421.41 534.128 5
 2 6 6 4457.91 511.574 1
 2 6 7 1074.77 259.307 1
 2 6 7 1275.86 265.179 5
 2 6 8 20330 1176.96 5
 2 6 8 20650.7 1168.28 1
 2 6 9 5076.65 598.869 5
 2 6 10 2822.44 481.682 5
 2 6 11 13250.9 1075.9 5
 2 6 12 -110.196 180.33 5
 2 6 13 8818.26 953.573 5
 2 6 14 6195.38 821.815 5
 2 7 -19 1961.75 398.805 1
 2 7 -18 30369.7 1622.59 1
 2 7 -17 13180 1013.56 1
 2 7 -16 1937.28 404.255 4
 2 7 -16 2207.07 420.296 1
 2 7 -15 8742.87 790.337 1
 2 7 -15 10608.8 889.364 4
 2 7 -14 238.847 147.623 4
 2 7 -14 138.393 110.694 1
 2 7 -13 18810.1 1151.59 4
 2 7 -13 19433.3 1161.28 1
 2 7 -12 25866 1367.95 4
 2 7 -12 22785.7 1203.52 1
 2 7 -11 361.555 162.49 1
 2 7 -10 10582.7 744.919 1
 2 7 -9 1275.69 246.29 1
 2 7 -8 37067.1 1411.46 1
 2 7 -7 32157.6 1278.84 1
 2 7 -6 785.623 178.589 1
 2 7 -5 16157.1 843.092 1
 2 7 -4 95.0329 79.2641 1
 2 7 -3 57989.3 1781.22 1
 2 7 -2 41891.1 901.032 5
 2 7 -2 63922.1 1746.85 1
 2 7 -1 8787.45 370.959 5
 2 7 -1 8491.36 590.901 1
 2 7 0 19472.8 974.525 1
 2 7 0 19481.1 669.49 5
 2 7 1 -15.6606 116.966 1
 2 7 1 144.236 67.248 5
 2 7 2 17768.6 758.719 5
 2 7 2 18075.5 986.236 1
 2 7 3 64976.9 1784.07 5
 2 7 3 69036.8 2125.43 1
 2 7 4 6942.85 537.352 5
 2 7 4 7382.86 640.396 1
 2 7 5 7707.03 677.205 1
 2 7 5 8026.85 623.453 5
 2 7 6 984.733 233.232 5
 2 7 6 1049.15 251.646 1
 2 7 7 19231.2 1112.6 5
 2 7 7 18595.9 1128.06 1
 2 7 8 33128.2 1584.65 1
 2 7 8 30507.5 1505.14 5
 2 7 9 1322.21 267.891 1
 2 7 9 1840.42 383.569 5
 2 7 10 6763.43 757.506 5
 2 7 11 4231.04 615.654 5
 2 7 12 1070.18 351.32 5
 2 7 13 16171.2 1333.03 5
 2 8 -19 1117.21 274.046 1
 2 8 -18 12353.6 1048.77 1
 2 8 -17 2075.02 463.258 4
 2 8 -17 1572.78 347.599 1
 2 8 -16 3320.64 517.981 1
 2 8 -16 3772.88 579.359 4
 2 8 -15 7061.58 715.764 1
 2 8 -15 8058.01 816.441 4
 2 8 -14 2281.15 424.181 4
 2 8 -14 1823.71 367.764 1
 2 8 -13 19940.4 1269.87 4
 2 8 -13 14896.6 989.839 1
 2 8 -12 10063.6 769.308 1
 2 8 -11 7971.21 681.225 1
 2 8 -10 13307 870.058 1
 2 8 -9 351.291 144.678 1
 2 8 -8 35312 1447.17 1
 2 8 -7 10180.7 721.146 1
 2 8 -6 2947.88 379.341 1
 2 8 -5 14331.5 863.837 1
 2 8 -4 4483.9 462.669 1
 2 8 -3 33896.7 1362.8 1
 2 8 -2 21893.8 600.538 5
 2 8 -2 25157.2 1118.22 1
 2 8 -1 228.217 58.9514 5
 2 8 -1 188.702 95.2466 1
 2 8 0 1982.31 205.429 5
 2 8 0 2022.18 329.577 1
 2 8 1 7116.93 630.455 1
 2 8 1 6728.83 432.464 5
 2 8 2 69684 1866.11 5
 2 8 2 74358.7 2319.08 1
 2 8 3 77567.6 2074.04 5
 2 8 3 80354 2468.17 1
 2 8 4 560.512 182.585 1
 2 8 4 934.826 194.22 5
 2 8 5 10290.4 838.904 1
 2 8 5 10399.7 728.589 5
 2 8 6 404.927 163.422 5
 2 8 6 121.37 89.2855 1
 2 8 7 42945.4 1749.34 5
 2 8 7 44552.3 1896.56 1
 2 8 8 23637.7 1398.85 1
 2 8 8 21808.5 1274.5 5
 2 8 9 872.375 287.02 5
 2 8 9 363.109 116.894 1
 2 8 10 4555.85 631.565 5
 2 8 11 254.124 170.045 5
 2 8 12 8993.96 965.355 5
 2 9 -19 1201.03 303.922 1
 2 9 -18 3206.39 498.625 1
 2 9 -17 308.206 218.103 4
 2 9 -17 795.161 272.842 1
 2 9 -16 10475.7 897.096 1
 2 9 -16 12326 1071.2 4
 2 9 -15 7472.5 816.844 4
 2 9 -15 6669.57 697.827 1
 2 9 -14 3056.46 530.211 4
 2 9 -14 2384.72 413.733 1
 2 9 -13 20407.1 1205.46 1
 2 9 -12 55.4318 103.079 1
 2 9 -11 21434 1180.9 1
 2 9 -10 19835 1129.3 1
 2 9 -9 11739.6 838.844 1
 2 9 -8 27638.3 1287.59 1
 2 9 -7 630.504 181.835 1
 2 9 -6 27258.5 1287.59 1
 2 9 -5 8905.36 707.378 1
 2 9 -4 18816.4 1033.62 1
 2 9 -3 35960.1 1468.8 1
 2 9 -2 44.4985 65.6078 1
 2 9 -1 22233.6 1176.46 1
 2 9 0 8691.61 725.763 1
 2 9 1 17015.2 1053.08 1
 2 9 2 86696.5 2684.7 1
 2 9 3 10417.2 837.061 1
 2 9 4 8348.78 775.581 1
 2 9 5 10806.8 898.592 1
 2 9 6 2964.62 464.312 1
 2 9 7 30747.7 1634.49 1
 2 9 8 10942.1 982.049 1
 2 9 9 -137.664 225.85 1
 2 10 -18 -151.005 200.51 1
 2 10 -17 6734.01 740.413 1
 2 10 -17 9133.03 974.85 4
 2 10 -16 16716.6 1300.07 4
 2 10 -16 13629.4 1068.59 1
 2 10 -15 1754.33 405.098 4
 2 10 -15 1155.26 297.354 1
 2 10 -14 5419.9 753.511 4
 2 10 -14 4752.52 604.32 1
 2 10 -13 2361.71 398.697 1
 2 10 -12 5657.07 629.283 1
 2 10 -11 26227 1367.64 1
 2 10 -10 2248.58 373.262 1
 2 10 -9 9270.78 756.778 1
 2 10 -8 676.358 232.798 1
 2 10 -7 5792.46 606.195 1
 2 10 -6 33509.7 1509.67 1
 2 10 -5 703.1 205.368 1
 2 10 -4 27809 1343.61 1
 2 10 -3 23686 1225.49 1
 2 10 -2 8491.54 736.545 1
 2 10 -1 41377.1 1742.62 1
 2 10 0 8103.32 749.882 1
 2 10 1 10013 860.507 1
 2 10 2 15243.4 1068.21 1
 2 10 3 4242.21 570.716 1
 2 10 4 19357.1 1259.63 1
 2 10 5 5597.17 678.464 1
 2 10 6 6006.12 713.909 1
 2 10 7 17446 1265.9 1
 2 10 8 28.0505 152.555 1
 2 10 9 7940.75 906.55 1
 2 11 -17 11765.4 1156.7 4
 2 11 -17 10302.1 966.318 1
 2 11 -16 9645.8 1031.33 4
 2 11 -16 8933.49 878.18 1
 2 11 -15 687.752 275.32 4
 2 11 -15 -127.373 195.475 1
 2 11 -14 3564.61 543.349 1
 2 11 -13 714.215 248.998 1
 2 11 -12 26448.7 1444.74 1
 2 11 -11 17229.9 1110.03 1
 2 11 -10 696.282 253.304 1
 2 11 -9 3026.37 448.132 1
 2 11 -8 -105.492 172.214 1
 2 11 -7 15344.7 1044.51 1
 2 11 -6 26125.1 1372.32 1
 2 11 -5 4915.12 572.702 1
 2 11 -4 7491.73 686.645 1
 2 11 -3 426.744 171.839 1
 2 11 -2 20510.1 1239.5 1
 2 11 -1 13977.6 1030.05 1
 2 11 0 1748.19 370.702 1
 2 11 1 7364.33 770.295 1
 2 11 2 458.254 160.729 1
 2 11 3 7849.74 801.128 1
 2 11 4 16915.9 1234.14 1
 2 11 5 1811.44 408.271 1
 2 11 6 8337.27 907.963 1
 2 11 7 2453.98 487.874 1
 2 11 8 6684.26 813.323 1
 2 12 -16 1602.62 491.97 4
 2 12 -16 1112.14 336.43 1
 2 12 -15 5423.4 801.513 4
 2 12 -15 4574.43 624.544 1
 2 12 -14 1761.99 365.931 1
 2 12 -13 7297.06 761.92 1
 2 12 -12 28134.8 1555.45 1
 2 12 -11 4020.89 550.557 1
 2 12 -10 2899.06 473.098 1
 2 12 -9 6197.49 698.247 1
 2 12 -8 2257.12 423.859 1
 2 12 -7 27451.7 1471.85 1
 2 12 -6 24527.1 1372.11 1
 2 12 -5 679.163 211.088 1
 2 12 -4 10918.7 920.907 1
 2 12 -3 808.575 256.869 1
 2 12 -2 15494.1 1132.57 1
 2 12 -1 10627 957.855 1
 2 12 0 357.649 113.516 1
 2 12 1 8395.55 860.089 1
 2 12 2 -28.9386 165.427 1
 2 12 3 8958.26 915.577 1
 2 12 4 10700.6 1025.21 1
 2 12 5 351.864 169.468 1
 2 12 6 4220.47 661.05 1
 2 13 -14 1912.41 434.013 1
 2 13 -13 3615.55 591.282 1
 2 13 -12 5862.29 725.31 1
 2 13 -11 932.321 229.216 1
 2 13 -10 10698.7 960.707 1
 2 13 -9 2582.68 465.993 1
 2 13 -8 7693.99 804.644 1
 2 13 -7 19512 1261.76 1
 2 13 -6 726.909 227.068 1
 2 13 -5 11796.5 999.048 1
 2 13 -4 10028 930.77 1
 2 13 -3 1024.64 298.952 1
 2 13 -2 10665.4 984.054 1
 2 13 -1 2256.55 471.064 1
 2 13 0 6574.45 788.671 1
 2 13 1 5173.74 709.754 1
 2 13 2 853.108 299.984 1
 2 13 3 12162.1 1121.81 1
 2 13 4 1153.72 373.121 1
 2 14 -12 1266.03 341.278 1
 2 14 -11 5487.46 707.265 1
 2 14 -10 14933.9 1180.79 1
 2 14 -9 1570.45 376.887 1
 2 14 -8 2548.79 453.084 1
 2 14 -7 2201.89 457.113 1
 2 14 -6 6452.27 772.1 1
 2 14 -5 18147 1328.47 1
 2 14 -4 1134.27 311.086 1
 2 14 -3 3880.1 610.342 1
 2 14 -2 4261.7 660.156 1
 2 14 -1 793.82 292.881 1
 2 14 0 8895.47 955.457 1
 3 -7 6 19392.9 520.537 2
 3 -7 7 99.2104 33.2662 2
 3 -6 -3 9561.03 272.735 3
 3 -6 6 30497.3 725.765 2
 3 -5 -2 609.729 78.1467 3
 3 -5 5 132860 2364.01 2
 3 -5 6 17942.5 556.076 2
 3 -4 -2 238.976 52.3735 3
 3 -4 -1 66924.2 1343.54 3
 3 -4 1 469.505 84.4873 1
 3 -4 2 77783.9 1496.57 1
 3 -4 3 4980.61 228.085 1
 3 -4 4 77366 1436.89 1
 3 -3 -1 139985 2472.4 3
 3 -3 0 3129.79 205.136 1
 3 -3 1 11510.7 367.16 1
 3 -3 2 53297.1 980.324 1
 3 -2 -11 409.14 117.721 4
 3 -2 -10 17110.8 751.797 4
 3 -2 -9 41412.1 1176.39 4
 3 -2 -8 54789.6 1312.72 4
 3 -2 -2 10636.6 325.89 4
 3 -2 -1 36912.8 855.841 4
 3 -2 0 5098.51 307.037 4
 3 -2 1 126546 2086.55 1
 3 -1 -11 170.27 101.056 4
 3 -1 -10 40106.5 1192.52 4
 3 -1 -9 64467.6 1529.44 4
 3 -1 -8 16148.7 571.971 4
 3 -1 -7 38616.4 897.967 4
 3 -1 -6 32881.3 707.497 4
 3 -1 -2 1818.46 141.395 4
 3 -1 -1 46223.8 1144.47 5
 3 -1 -1 45809.1 1076.37 4
 3 -1 0 10248.6 465.404 4
 3 -1 1 41742.1 795.546 1
 3 -1 3 1134.28 82.8406 1
 3 -1 16 12179.3 1199.36 5
 3 -1 17 9314.05 1063.17 5
 3 0 -12 33479.2 1203.16 4
 3 0 -11 96.9897 52.7202 4
 3 0 -10 41640.7 1206.41 4
 3 0 -9 41203 1121.74 4
 3 0 -8 231.26 60.2314 4
 3 0 -7 75949.1 1528.89 4
 3 0 -6 4211.61 223.332 4
 3 0 -3 6269.07 327.238 5
 3 0 -3 6599.29 328.034 4
 3 0 -2 76610 1544.43 5
 3 0 -2 72523.6 1593.04 4
 3 0 -1 2290.12 190.311 5
 3 0 -1 2088.66 212.527 4
 3 0 -1 2073.24 168.583 1
 3 0 0 46105.2 978.427 1
 3 0 0 43909.9 1084.74 5
 3 0 1 131878 2264.26 1
 3 0 2 2151.15 142.689 1
 3 0 3 8702.75 334.28 1
 3 0 4 180.059 67.1987 1
 3 0 15 5154.43 746.015 5
 3 0 16 23868.8 1685.79 5
 3 1 -13 35296.5 1301.04 4
 3 1 -12 29363.4 1114.95 4
 3 1 -11 460.489 121.815 4
 3 1 -10 33177 1068 4
 3 1 -9 4053.97 315.348 4
 3 1 -8 31215.9 919.104 4
 3 1 -4 15173.8 537.848 5
 3 1 -4 14898.7 638.54 1
 3 1 -3 34727.6 838.996 5
 3 1 -3 36300.8 1013.43 1
 3 1 -2 6984.61 361.045 1
 3 1 -2 7280.27 306.365 5
 3 1 -1 4960.64 290.619 1
 3 1 -1 4886.2 258.301 5
 3 1 0 182353 3131.09 5
 3 1 0 176345 3129.94 1
 3 1 1 11465.5 434.806 1
 3 1 2 42167.7 1013.18 1
 3 1 3 44841.6 1095.76 1
 3 1 4 2716.23 233.682 1
 3 1 5 68817.3 1604.73 1
 3 1 13 14493.3 1189.95 5
 3 1 14 553.323 255.517 5
 3 1 15 9231.67 1006.06 5
 3 1 16 17776.6 1460.36 5
 3 2 -13 18791.1 937.134 4
 3 2 -12 15828.8 801.708 4
 3 2 -11 4380.57 400.491 4
 3 2 -10 4249.13 363.563 4
 3 2 -9 17047 725.408 4
 3 2 -7 18182.4 849.006 1
 3 2 -6 476.301 171.545 1
 3 2 -5 14851.5 690.978 1
 3 2 -4 25706.7 889.901 1
 3 2 -4 26643.3 703.369 5
 3 2 -3 69996.4 1609.68 1
 3 2 -3 68503.1 1296.75 5
 3 2 -2 110976 2233.81 1
 3 2 -2 110907 1915.76 5
 3 2 -1 38055.7 849.43 5
 3 2 -1 39680.5 1045.65 1
 3 2 0 90423.2 1705.97 5
 3 2 0 87593.9 1848.5 1
 3 2 1 3220.09 257.825 1
 3 2 2 108457 2216.3 1
 3 2 3 53028 1359.91 1
 3 2 4 398.489 123.502 1
 3 2 5 9808.78 536.542 1
 3 2 6 4246.92 370.339 1
 3 2 11 3945.35 564.078 5
 3 2 12 23489.2 1455.38 5
 3 2 13 9801.05 960.192 5
 3 2 14 826.975 323.143 5
 3 2 15 11303 1133.93 5
 3 3 -20 492.001 248.634 1
 3 3 -19 11140.6 1049.31 1
 3 3 -18 8483.18 885.721 1
 3 3 -17 -147.528 178.816 1
 3 3 -16 12802.1 1021.99 1
 3 3 -15 1980.24 359.894 1
 3 3 -14 10866.5 733.5 4
 3 3 -14 10087.9 839.049 1
 3 3 -13 25476.2 1324.65 1
 3 3 -13 27466.9 1184.31 4
 3 3 -12 4027.58 497.682 1
 3 3 -12 5401.24 476.019 4
 3 3 -11 471.119 156.414 1
 3 3 -11 523.969 142.838 4
 3 3 -10 1137.5 256.774 1
 3 3 -10 1108.6 209.129 4
 3 3 -9 69229.5 2032.3 1
 3 3 -8 52603.1 1655.92 1
 3 3 -7 407.548 144.662 1
 3 3 -6 4771.82 403.781 1
 3 3 -5 325.937 126.036 1
 3 3 -4 209011 4008.26 1
 3 3 -3 331588 5743.6 1
 3 3 -2 80865.4 1849.56 1
 3 3 -1 122137 2102.09 5
 3 3 -1 123468 2495.56 1
 3 3 0 17629.5 701.637 1
 3 3 1 99374.5 2133.19 1
 3 3 2 139641 2845.52 1
 3 3 3 4222.71 358.854 1
 3 3 4 21070.4 859.181 1
 3 3 5 19192.8 853.517 1
 3 3 6 5839.54 469.706 1
 3 3 7 68247.2 1932.65 1
 3 3 9 617.025 186.116 5
 3 3 10 10895.3 915.631 5
 3 3 11 6174.37 698.512 5
 3 3 12 19167.1 1326.8 5
 3 3 13 6495.7 801.865 5
 3 3 14 890.133 286.37 5
 3 3 15 3625.23 663.171 5
 3 4 -20 729.332 248.552 1
 3 4 -19 10643.2 992.804 1
 3 4 -18 3489.15 579.53 1
 3 4 -17 5440.78 677.407 1
 3 4 -16 15811.3 1133.62 1
 3 4 -15 300.361 156.35 1
 3 4 -14 33665 1412.17 4
 3 4 -14 31633.2 1531.73 1
 3 4 -13 8205.94 646.644 4
 3 4 -13 8410.29 737.369 1
 3 4 -12 5682.8 570.87 1
 3 4 -12 6465.37 546.561 4
 3 4 -11 12619.4 764.042 4
 3 4 -11 11995.7 828.126 1
 3 4 -10 1821.93 286.318 1
 3 4 -9 57777.4 1809.91 1
 3 4 -8 20717.3 966.386 1
 3 4 -7 1144.81 211.206 1
 3 4 -6 29641.1 1125.73 1
 3 4 -5 1404.24 229.675 1
 3 4 -4 77183.6 1907.29 1
 3 4 -3 129137 2757.22 1
 3 4 -2 4283.58 358.667 1
 3 4 -1 53792.9 945.552 5
 3 4 -1 57334.3 1484.36 1
 3 4 0 674.69 150.08 1
 3 4 0 732.68 99.4632 5
 3 4 1 85131.3 2032.94 1
 3 4 1 87592.8 1827.59 5
 3 4 2 78205.3 1957.58 1
 3 4 2 74395.4 1777.51 5
 3 4 3 795.474 177.548 1
 3 4 3 918.377 171.394 5
 3 4 4 16546.9 809.742 5
 3 4 4 16401.6 805.668 1
 3 4 5 3707.77 387.371 1
 3 4 5 3852.81 408.363 5
 3 4 6 26879.3 1137.65 1
 3 4 6 27494.5 1218.94 5
 3 4 7 35883.9 1392.1 1
 3 4 7 34315.3 1463.42 5
 3 4 8 528.493 166.914 1
 3 4 8 487.354 173.424 5
 3 4 9 18440.9 1156.63 5
 3 4 10 1393.33 336.664 5
 3 4 11 21351.9 1378.27 5
 3 4 12 18163.6 1314.7 5
 3 4 13 286.496 206.866 5
 3 4 14 3204.14 612.726 5
 3 5 -20 978.862 307.201 1
 3 5 -19 4755.21 654.719 1
 3 5 -18 191.964 90.8922 1
 3 5 -17 22983.2 1419.09 1
 3 5 -16 5080.66 614.729 1
 3 5 -15 9443.2 841.388 1
 3 5 -15 12218.8 880.65 4
 3 5 -14 21472.8 1228.18 1
 3 5 -14 23448.5 1186.25 4
 3 5 -13 1357.08 279.688 4
 3 5 -13 1610.63 302.38 1
 3 5 -12 37850.8 1492.12 4
 3 5 -12 33618.4 1486.55 1
 3 5 -11 47697.4 1735.5 1
 3 5 -10 1023.31 239.489 1
 3 5 -9 42749 1520.67 1
 3 5 -8 8121.91 609.451 1
 3 5 -7 22540.2 1015.75 1
 3 5 -6 25429.8 1047.38 1
 3 5 -5 1220.55 211.315 1
 3 5 -4 7545.8 524.698 1
 3 5 -3 16320.2 776.247 1
 3 5 -2 29216.6 1087.11 1
 3 5 -1 18956.8 441.443 5
 3 5 -1 21619.2 890.924 1
 3 5 0 7635.62 337.97 5
 3 5 0 7417.87 512.622 1
 3 5 1 58975.4 1713.4 1
 3 5 1 58726.6 1389.1 5
 3 5 2 9620.03 617.183 1
 3 5 2 8958.29 500.838 5
 3 5 3 154.655 88.9435 1
 3 5 3 162.654 68.966 5
 3 5 4 16814.4 831.864 5
 3 5 4 15479.6 857.546 1
 3 5 5 2004.29 296.181 5
 3 5 5 1977.36 318.219 1
 3 5 6 23164.7 1112.63 1
 3 5 6 23607.5 1146.09 5
 3 5 7 18975.2 1075.93 5
 3 5 7 18460.2 1014.45 1
 3 5 8 2620.94 413.617 5
 3 5 8 2507.87 390.565 1
 3 5 9 13611.3 1003.74 5
 3 5 10 455.641 181.824 5
 3 5 11 23412.4 1471.2 5
 3 5 12 7988.4 882.833 5
 3 5 13 181.1 134.538 5
 3 5 14 5768.42 805.141 5
 3 6 -20 1844.33 422.164 1
 3 6 -19 284.619 93.8261 1
 3 6 -18 14851.5 1144.11 1
 3 6 -17 26627.7 1506.91 1
 3 6 -16 1114.98 297.588 1
 3 6 -15 6047.42 654.341 1
 3 6 -15 6722.99 674.299 4
 3 6 -14 1648.05 334.037 4
 3 6 -14 997.38 288.401 1
 3 6 -13 4166.6 511.728 4
 3 6 -13 4079.61 503.669 1
 3 6 -12 32504.2 1452.04 1
 3 6 -11 20231.7 1102.52 1
 3 6 -10 4104.82 482.38 1
 3 6 -9 18178.1 986.295 1
 3 6 -8 5811.92 522.914 1
 3 6 -7 68803.9 1994.65 1
 3 6 -6 20586.5 969.452 1
 3 6 -5 846.197 181.526 1
 3 6 -4 19571.6 923.4 1
 3 6 -3 978.721 203.47 1
 3 6 -2 56003.7 1715.37 1
 3 6 -1 22508.8 557.342 5
 3 6 -1 28000.1 1105.54 1
 3 6 0 390.293 78.6812 5
 3 6 0 478.953 150.888 1
 3 6 1 22912.6 1045.27 1
 3 6 1 22223 757.028 5
 3 6 2 90.0504 77.2115 1
 3 6 2 163.425 69.3184 5
 3 6 3 15353.4 744.515 5
 3 6 3 15522.7 887.085 1
 3 6 4 23773.5 1039.87 5
 3 6 4 24014.8 1146.64 1
 3 6 5 3973.18 466.384 1
 3 6 5 4777.47 479.908 5
 3 6 6 18223.9 1026.3 1
 3 6 6 17696.4 1000.16 5
 3 6 7 1008.71 236.594 1
 3 6 7 802.348 211.41 5
 3 6 8 19186.4 1141.94 1
 3 6 8 18665.2 1149.58 5
 3 6 9 10293.5 822.408 1
 3 6 9 10006.5 871.601 5
 3 6 10 4083.53 576.888 5
 3 6 11 15699.3 1200.3 5
 3 6 12 2925.16 551.782 5
 3 6 13 9210.69 994.178 5
 3 7 -19 108.057 95.2923 1
 3 7 -18 17417.6 1233.11 1
 3 7 -17 15500.2 1149.77 1
 3 7 -16 620.527 208.323 1
 3 7 -15 3248.03 492.765 1
 3 7 -15 3361.39 508.09 4
 3 7 -14 1040.18 290.103 4
 3 7 -14 641.64 206.419 1
 3 7 -13 15589.4 1080.07 4
 3 7 -13 14688.6 1034.07 1
 3 7 -12 30518.4 1472.39 1
 3 7 -11 407.605 160.55 1
 3 7 -10 16773.9 971.703 1
 3 7 -9 12024.1 795.406 1
 3 7 -8 27321.6 1226.66 1
 3 7 -7 40045.1 1513.08 1
 3 7 -6 3796.03 424.949 1
 3 7 -5 7183.73 573.187 1
 3 7 -4 15442.1 864.101 1
 3 7 -3 16953 910.342 1
 3 7 -2 38115.8 1426.06 1
 3 7 -1 11700.8 381.389 5
 3 7 -1 13745 796.338 1
 3 7 0 8603.72 648.871 1
 3 7 0 8719.51 405.377 5
 3 7 1 946.238 147.175 5
 3 7 1 782.473 201.291 1
 3 7 2 11602.3 810.517 1
 3 7 2 13264.8 634.345 5
 3 7 3 74210.7 1966 5
 3 7 3 78838.2 2353.32 1
 3 7 4 3691.82 390.669 5
 3 7 4 3532.72 449.981 1
 3 7 5 8191.54 705.982 1
 3 7 5 7928.81 632.487 5
 3 7 6 4645.76 541.564 1
 3 7 6 4928.87 519.013 5
 3 7 7 12966.7 911.751 5
 3 7 7 14589.5 1000.16 1
 3 7 8 29382.2 1517.78 1
 3 7 8 27326.6 1418.02 5
 3 7 9 9774.32 856.702 1
 3 7 9 10206.3 889.596 5
 3 7 10 4045.61 577.285 5
 3 7 11 6022.53 760.669 5
 3 7 12 884.839 286.78 5
 3 7 13 11873.3 1167.55 5
 3 8 -19 17.087 183.312 1
 3 8 -18 8539.73 894.557 1
 3 8 -17 1803.14 378.911 1
 3 8 -16 4959.81 639.975 1
 3 8 -16 5963.37 699.695 4
 3 8 -15 9443.03 877.396 4
 3 8 -15 9737.47 867.79 1
 3 8 -14 775.667 259.567 4
 3 8 -14 805.631 267.416 1
 3 8 -13 17652.8 1108.57 1
 3 8 -12 11807.4 864.994 1
 3 8 -11 4254.83 510.347 1
 3 8 -10 29625.3 1379.03 1
 3 8 -9 647.678 199.349 1
 3 8 -8 46034.1 1739.28 1
 3 8 -7 10132.4 747.385 1
 3 8 -6 2247.98 337.94 1
 3 8 -5 16704.8 956.587 1
 3 8 -4 105.578 73.1403 1
 3 8 -3 21118.1 1081.71 1
 3 8 -2 21891.5 1100.57 1
 3 8 -1 6264.58 575.599 1
 3 8 0 21167.2 1119.02 1
 3 8 1 255.221 121.168 1
 3 8 2 54211.8 1979.37 1
 3 8 3 56359.4 2035.71 1
 3 8 4 182.716 102.355 1
 3 8 5 8382.56 764.056 1
 3 8 6 112.855 140.145 1
 3 8 7 12515.1 983.961 1
 3 8 8 27549.1 1544.62 1
 3 8 9 3679.37 537.637 1
 3 9 -18 4072.26 575.179 1
 3 9 -17 1184.76 289.643 1
 3 9 -16 18695.7 1322.31 4
 3 9 -16 18222.4 1222.82 1
 3 9 -15 8337.66 879.892 4
 3 9 -15 6114 689.92 1
 3 9 -14 980.466 270.115 1
 3 9 -13 13770.3 1002.15 1
 3 9 -12 823.215 286.138 1
 3 9 -11 14491.9 994.903 1
 3 9 -10 19065.1 1142.01 1
 3 9 -9 9504.58 782.692 1
 3 9 -8 14422 948.077 1
 3 9 -7 191.234 107.15 1
 3 9 -6 23396.5 1220.22 1
 3 9 -5 14472 937.111 1
 3 9 -4 1521.94 299.883 1
 3 9 -3 40869.7 1635 1
 3 9 -2 1825.33 310.527 1
 3 9 -1 26346.1 1324.87 1
 3 9 0 15053.4 994.316 1
 3 9 1 3154.87 446.783 1
 3 9 2 33351.8 1577.16 1
 3 9 3 7536.05 732.594 1
 3 9 4 8032.44 772.461 1
 3 9 5 13239.9 1009.51 1
 3 9 6 481.557 202.762 1
 3 9 7 18873.8 1275.16 1
 3 9 8 11177.3 1016.64 1
 3 9 9 -189.882 242.136 1
 3 10 -17 4692.35 647.285 1
 3 10 -16 19953.5 1419.94 4
 3 10 -16 19577.4 1314.14 1
 3 10 -15 5699.01 766.332 4
 3 10 -15 6022.35 732.672 1
 3 10 -14 3527.68 551.123 1
 3 10 -13 2642.91 440.68 1
 3 10 -12 6582.51 712.385 1
 3 10 -11 30300.2 1543.3 1
 3 10 -10 6175.06 648.16 1
 3 10 -9 4327.88 543.484 1
 3 10 -8 3832.11 511.062 1
 3 10 -7 3695.91 505.577 1
 3 10 -6 36275.5 1618.85 1
 3 10 -5 13557.1 952.016 1
 3 10 -4 3266.29 447.645 1
 3 10 -3 16198.5 1001.33 1
 3 10 -2 945.55 233.622 1
 3 10 -1 19876.2 1204.4 1
 3 10 0 7082.75 714.197 1
 3 10 1 662.071 249.847 1
 3 10 2 9286.99 848.984 1
 3 10 3 19.7021 121.82 1
 3 10 4 24190.7 1437.1 1
 3 10 5 11174.3 974.427 1
 3 10 6 1941.5 396.695 1
 3 10 7 10675.7 999.559 1
 3 10 8 889.337 322.162 1
 3 10 9 10055.9 1007.93 1
 3 11 -17 6687.36 853.417 4
 3 11 -16 10501 1068.31 4
 3 11 -16 9246.53 922.908 1
 3 11 -15 22.9853 102.668 1
 3 11 -14 3889.2 566.35 1
 3 11 -13 511.251 260.632 1
 3 11 -12 13295 1037.85 1
 3 11 -11 27084.5 1461.24 1
 3 11 -10 4342.39 566.34 1
 3 11 -9 1980.33 407.398 1
 3 11 -8 1672.18 340.028 1
 3 11 -7 12954.8 974.164 1
 3 11 -6 35125.6 1655.54 1
 3 11 -5 5984.42 652.035 1
 3 11 -4 6587.6 659.732 1
 3 11 -3 2284.57 422.372 1
 3 11 -2 21702.2 1311.58 1
 3 11 -1 29942.1 1568.74 1
 3 11 0 7231.01 769.69 1
 3 11 1 2271.79 423.767 1
 3 11 2 2703.54 461.494 1
 3 11 3 3974.76 584.781 1
 3 11 4 20943.2 1400.91 1
 3 11 5 2329.64 469.752 1
 3 11 6 2536.57 495.69 1
 3 11 7 5005.95 699.407 1
 3 12 -16 740.078 301.604 4
 3 12 -15 1346.19 339.139 1
 3 12 -14 2065.69 406.295 1
 3 12 -13 356.683 171.488 1
 3 12 -12 11366.8 994.925 1
 3 12 -11 6160.82 728.797 1
 3 12 -10 761.062 245.147 1
 3 12 -9 3267.21 517.451 1
 3 12 -8 1003.88 284.632 1
 3 12 -7 21369.1 1329.85 1
 3 12 -6 28214.9 1532.65 1
 3 12 -5 -8.30203 117.798 1
 3 12 -4 8285.94 822.385 1
 3 12 -3 408.473 185.301 1
 3 12 -2 18934.1 1282.26 1
 3 12 -1 16513 1214.09 1
 3 12 0 644.936 280.031 1
 3 12 1 7212.61 811.79 1
 3 12 2 1174.35 368.236 1
 3 12 3 10324.8 998.698 1
 3 12 4 11393 1083.62 1
 3 12 5 -111.296 174.516 1
 3 13 -13 808.339 275.339 1
 3 13 -12 7904.14 878.34 1
 3 13 -11 -9.70427 158.867 1
 3 13 -10 11559.9 1028.06 1
 3 13 -9 4024.34 589.389 1
 3 13 -8 412.933 157.903 1
 3 13 -7 9542.56 910.209 1
 3 13 -6 1638.97 369.767 1
 3 13 -5 4874.73 662.699 1
 3 13 -4 7393.6 821.702 1
 3 13 -3 1595.76 373.127 1
 3 13 -2 11752.8 1051.84 1
 3 13 -1 2698.26 510.815 1
 3 13 0 3647.89 604.579 1
 3 13 1 10150.5 1008.03 1
 3 13 2 -13.1782 113.079 1
 3 14 -9 1343.79 367.105 1
 3 14 -8 1708.6 403.19 1
 3 14 -7 2917.7 525.942 1
 3 14 -6 3390.14 555.773 1
 3 14 -5 25307 1633.14 1
 3 14 -4 7773.48 889.509 1
 3 14 -3 2211.12 484.389 1
 4 -7 -3 2761.77 169.178 3
 4 -6 -3 33.8749 23.3912 3
 4 -5 3 6365.96 288.695 1
 4 -5 4 14956 449.37 1
 4 -5 5 183898 3093.93 1
 4 -4 1 58.9281 39.7517 1
 4 -4 2 60445.9 1184.76 1
 4 -4 3 24789.9 550.991 1
 4 -3 -1 31851 871.698 4
 4 -3 0 14545.2 497.811 1
 4 -3 1 16789.4 469.58 1
 4 -3 2 116799 1924.77 1
 4 -2 -3 41010.3 855.285 4
 4 -2 -2 6862.65 325.862 4
 4 -2 -1 37268.6 997.546 4
 4 -1 -10 20823.7 674.939 4
 4 -1 -9 77156.5 1528.3 4
 4 -1 -8 17570.5 474.744 4
 4 -1 -4 79222.7 1501.98 4
 4 -1 -3 74023.4 1511.39 4
 4 -1 -2 3323.83 259.254 4
 4 -1 0 25582.3 671.775 1
 4 -1 1 9149.18 311.905 1
 4 -1 2 33669.9 703.202 1
 4 -1 3 14495.7 384.998 1
 4 -1 4 14508.5 414.984 1
 4 0 -11 203.394 86.1692 4
 4 0 -10 23771.4 770.356 4
 4 0 -9 16026.6 558.289 4
 4 0 -8 565.707 90.7824 4
 4 0 -7 59031.4 1229.52 4
 4 0 -4 33915.6 958.403 4
 4 0 -3 145.5 79.1104 4
 4 0 -2 34748.7 972.348 1
 4 0 -1 6274.7 332.602 1
 4 0 0 1688.69 156.37 1
 4 0 1 178588 3080.48 1
 4 0 2 555.496 79.043 1
 4 0 3 21867.7 629.025 1
 4 0 4 1559.41 150.303 1
 4 0 5 52909.8 1233.79 1
 4 0 16 25190.9 1763.02 5
 4 1 -12 56519.1 1570.39 4
 4 1 -11 213.308 77.4091 4
 4 1 -10 17827.7 701.084 4
 4 1 -9 1358.79 172.537 4
 4 1 -5 39566.5 1248.36 1
 4 1 -4 5105.68 382.456 1
 4 1 -3 80092.4 1848.47 1
 4 1 -3 83084.1 1720.6 5
 4 1 -2 32029.5 945.577 1
 4 1 -2 33725.1 881.461 5
 4 1 -1 7215.55 381.376 1
 4 1 -1 7664.33 387.757 5
 4 1 0 123433 2374.37 1
 4 1 1 99216.1 1992.67 1
 4 1 2 17438.1 582.51 1
 4 1 3 41387.1 1085.05 1
 4 1 4 9707.11 467.628 1
 4 1 5 24577.1 829.425 1
 4 1 6 24051.8 858.789 1
 4 1 14 2593.62 511.951 5
 4 1 15 8889 1007.66 5
 4 2 -12 22141.5 925.531 4
 4 2 -11 5644.1 420.801 4
 4 2 -10 4411.54 367.146 4
 4 2 -8 77593 2181.68 1
 4 2 -7 37003.3 1318.87 1
 4 2 -6 345.242 133.638 1
 4 2 -5 31896 1103.59 1
 4 2 -4 36554.7 1150.72 1
 4 2 -4 36465.7 898.023 5
 4 2 -3 250888 4495.36 1
 4 2 -3 242160 4076.98 5
 4 2 -2 102842 2200.85 1
 4 2 -2 104422 1941.29 5
 4 2 -1 4734.23 275.675 5
 4 2 -1 5312.99 358.606 1
 4 2 0 60684.8 1462.24 1
 4 2 1 68.7355 65.8932 1
 4 2 2 94096.9 2028.74 1
 4 2 3 89066.6 2016.42 1
 4 2 4 246.421 70.844 1
 4 2 5 15719.6 713.371 1
 4 2 6 19708.8 835.128 1
 4 2 7 16071.4 776.255 1
 4 2 12 6007.85 732.524 5
 4 2 13 15714.4 1260.44 5
 4 2 14 739.85 291.422 5
 4 2 15 5875.8 824.002 5
 4 3 -19 6949.08 878.177 1
 4 3 -18 16023.4 1266.17 1
 4 3 -17 1565.26 358.644 1
 4 3 -16 17326.5 1232.06 1
 4 3 -15 7797.08 793.086 1
 4 3 -14 4537.85 598.616 1
 4 3 -13 35432.2 1635.32 1
 4 3 -13 35897 1322.42 4
 4 3 -12 97.5708 100.305 1
 4 3 -12 141.979 53.649 4
 4 3 -11 1755.07 259.315 4
 4 3 -11 1684.43 318.458 1
 4 3 -10 1235.37 254.061 1
 4 3 -9 27254.2 1218.39 1
 4 3 -8 70679.7 2038.27 1
 4 3 -7 16517.5 841.77 1
 4 3 -6 2469.71 297.978 1
 4 3 -5 10314.7 602.105 1
 4 3 -4 76973.4 1921.72 1
 4 3 -4 73490.4 1405.8 5
 4 3 -3 133960 2700.65 1
 4 3 -3 124443 2133.71 5
 4 3 -2 33407.7 760.651 5
 4 3 -2 38944.4 1163.17 1
 4 3 -1 1866.52 159.039 5
 4 3 -1 1886.46 232.059 1
 4 3 0 2023.93 187.707 5
 4 3 0 1848.51 231.739 1
 4 3 1 62939.3 1611.3 1
 4 3 2 137011 2863.56 1
 4 3 3 28754 1038.82 1
 4 3 4 2846.63 303.591 1
 4 3 5 11238.1 642.661 1
 4 3 6 1286.78 218.808 1
 4 3 7 40437.8 1428.32 1
 4 3 8 17892.2 911.6 1
 4 3 10 8562.16 829.788 5
 4 3 11 2954.21 497.062 5
 4 3 12 11275.5 1035.39 5
 4 3 13 10447.7 1044.27 5
 4 3 14 629.304 301.602 5
 4 4 -19 5146.75 735.152 1
 4 4 -18 6514.69 760.099 1
 4 4 -17 6591.15 766.268 1
 4 4 -16 17207.4 1208.2 1
 4 4 -15 62.717 80.6302 1
 4 4 -14 36732 1703.17 1
 4 4 -13 14355.3 999.177 1
 4 4 -13 14690.6 853.712 4
 4 4 -12 1059.7 271.048 1
 4 4 -12 1288.13 240.632 4
 4 4 -11 27315.2 1306.97 1
 4 4 -10 7140.26 623.025 1
 4 4 -9 21123.2 1059.9 1
 4 4 -8 35087.4 1341.47 1
 4 4 -7 2231.14 309.241 1
 4 4 -6 18551.1 914.886 1
 4 4 -5 898.066 172.901 1
 4 4 -4 24445.4 971.781 1
 4 4 -3 56799.1 1611.53 1
 4 4 -2 5501.69 433.495 1
 4 4 -1 29350.5 735.232 5
 4 4 -1 34601.8 1155.16 1
 4 4 0 1251.79 141.971 5
 4 4 0 1306.88 203.794 1
 4 4 1 34898.8 1144.58 1
 4 4 2 59346.2 1688.39 1
 4 4 3 4265.39 403.262 1
 4 4 4 7434.93 545.897 1
 4 4 5 7836.78 578.289 1
 4 4 6 7198.22 569.545 1
 4 4 7 44802.6 1738.17 5
 4 4 7 43977.4 1576.61 1
 4 4 8 2226.17 379.833 5
 4 4 8 2736.63 361.506 1
 4 4 9 9133.98 814.279 5
 4 4 10 2781.82 477.108 5
 4 4 11 3274.32 538.809 5
 4 4 12 10345.7 1005.72 5
 4 4 13 576.773 265.524 5
 4 4 14 2873.32 574.291 5
 4 5 -19 3001.81 531.991 1
 4 5 -18 140.38 159.856 1
 4 5 -17 17706.3 1255.96 1
 4 5 -16 11141.6 963.353 1
 4 5 -15 560.828 225.421 1
 4 5 -14 14456.4 1022.48 1
 4 5 -14 16216.9 965.548 4
 4 5 -13 959.945 245.84 4
 4 5 -13 1254.88 277.606 1
 4 5 -12 11943.1 861.45 1
 4 5 -11 26148.1 1273.34 1
 4 5 -10 1768.28 309.431 1
 4 5 -9 11518.4 779.063 1
 4 5 -8 6004.41 549.794 1
 4 5 -7 20188.1 1000.36 1
 4 5 -6 33861 1260.76 1
 4 5 -5 82.9833 60.89 1
 4 5 -4 8557.28 590.141 1
 4 5 -3 32855.9 1208.48 1
 4 5 -2 22542.8 976.719 1
 4 5 -1 52568.1 1013.49 5
 4 5 -1 57261.8 1644.47 1
 4 5 0 12321.2 485.384 5
 4 5 0 13733.8 500.702 5
 4 5 0 13360.9 733.946 1
 4 5 1 40386.4 1386.2 1
 4 5 1 41228.3 1134.52 5
 4 5 2 17172.4 884.413 1
 4 5 2 19170.4 782.382 5
 4 5 3 2197.69 313.285 1
 4 5 3 2405.04 284.861 5
 4 5 4 41254.5 1431.2 5
 4 5 4 41765.9 1513.8 1
 4 5 5 4309.96 459.79 1
 4 5 5 5272.02 505.995 5
 4 5 6 27738.2 1251.59 1
 4 5 6 28620.7 1307.51 5
 4 5 7 16302.1 1017.25 5
 4 5 7 15075 925.369 1
 4 5 8 4440.65 517.977 1
 4 5 8 3733.06 505.684 5
 4 5 9 13705.5 1029.56 5
 4 5 10 928.935 278.67 5
 4 5 11 13358.2 1112.7 5
 4 5 12 10835.2 1057.05 5
 4 5 13 -30.3693 151.182 5
 4 6 -19 3435.77 550.659 1
 4 6 -18 3805.78 585.273 1
 4 6 -17 21434 1370.42 1
 4 6 -16 12232.7 1012.03 1
 4 6 -15 450.883 167.986 1
 4 6 -14 1829.95 343.024 4
 4 6 -14 1661.41 382.704 1
 4 6 -13 5985.48 626.233 1
 4 6 -12 48133.4 1885.95 1
 4 6 -11 16946.6 1056.97 1
 4 6 -10 3306.06 444.455 1
 4 6 -9 23059 1150.24 1
 4 6 -8 630.141 145.938 1
 4 6 -7 68040.1 2055.72 1
 4 6 -6 26592.3 1173.13 1
 4 6 -5 124.903 109.719 1
 4 6 -4 4175.05 428.346 1
 4 6 -3 79.5385 57.8748 1
 4 6 -2 23813 1074.31 1
 4 6 -1 48327 976.357 5
 4 6 -1 61909 1789.48 1
 4 6 0 354.267 120.49 1
 4 6 0 679.961 101.71 5
 4 6 1 15791.4 885.338 1
 4 6 1 15942.4 627.71 5
 4 6 2 62.5521 99.0453 1
 4 6 2 55.6198 37.3936 5
 4 6 3 38484 1509.22 1
 4 6 3 39321.1 1311.31 5
 4 6 4 29625.4 1194.81 5
 4 6 4 30186.1 1328.66 1
 4 6 5 1394.04 284.441 1
 4 6 5 2045.34 314.675 5
 4 6 6 23320.1 1210.17 1
 4 6 6 24476.3 1215.52 5
 4 6 7 199.403 82.6462 1
 4 6 7 87.2496 105.091 5
 4 6 8 20981.3 1216.43 1
 4 6 8 20075.8 1210.31 5
 4 6 9 26667 1386.99 1
 4 6 9 26359.5 1466.58 5
 4 6 10 847.006 269.904 5
 4 6 11 11839.8 1056.49 5
 4 6 12 2864.89 513.521 5
 4 6 13 7206.51 892.395 5
 4 7 -19 914.6 297.855 1
 4 7 -18 8855.67 911.275 1
 4 7 -17 15505.6 1196.17 1
 4 7 -16 635.595 203.191 1
 4 7 -15 7713.25 760.989 4
 4 7 -15 7043.97 772.072 1
 4 7 -14 423.802 184.544 4
 4 7 -14 90.9099 74.8913 1
 4 7 -13 18440.4 1194.73 1
 4 7 -12 64837.1 2283.66 1
 4 7 -11 1837.23 350.466 1
 4 7 -10 19171.5 1088.93 1
 4 7 -9 15888.9 954.516 1
 4 7 -8 25101.7 1211.31 1
 4 7 -7 62807.5 2042.44 1
 4 7 -6 460.627 164.281 1
 4 7 -5 11326.1 752.412 1
 4 7 -4 9302.23 690.111 1
 4 7 -3 381.799 148.841 1
 4 7 -2 44096.3 1600.57 1
 4 7 -1 10668.2 731.259 1
 4 7 0 11721.9 783.716 1
 4 7 1 3704.81 444.491 1
 4 7 2 15512.8 959.88 1
 4 7 3 45973.8 1761.56 1
 4 7 4 12294.3 873.071 1
 4 7 5 613.678 195.265 1
 4 7 6 7131.77 688.63 1
 4 7 7 2203.03 373.853 1
 4 7 8 31153.7 1583.49 1
 4 7 9 18199.1 1195.27 1
 4 8 -18 7258.98 848.28 1
 4 8 -17 2549.29 487.481 1
 4 8 -16 5874.59 715.378 1
 4 8 -15 7315.32 782.943 4
 4 8 -15 7123.88 757.267 1
 4 8 -14 249.503 167.335 1
 4 8 -13 14222.7 1015.88 1
 4 8 -12 5679.41 622.586 1
 4 8 -11 4797.93 583.479 1
 4 8 -10 22427.8 1230.68 1
 4 8 -9 233.08 140.993 1
 4 8 -8 27122.1 1332.39 1
 4 8 -7 21151.9 1137.59 1
 4 8 -6 641.839 204.818 1
 4 8 -5 13917.9 900.471 1
 4 8 -4 5488.95 557.94 1
 4 8 -3 12754.8 853.609 1
 4 8 -2 35485.7 1477.88 1
 4 8 -1 135.277 75.8361 1
 4 8 0 22243.3 1185.54 1
 4 8 1 791.753 227.098 1
 4 8 2 11209.6 861.421 1
 4 8 3 27311 1389.77 1
 4 8 4 5223.14 598.067 1
 4 8 5 4247.95 554.692 1
 4 8 6 463.843 185.446 1
 4 8 7 8180.7 795.243 1
 4 8 8 28505.7 1576.11 1
 4 9 -17 -267.846 217.437 1
 4 9 -16 17735.2 1234.18 1
 4 9 -15 10452.7 929.698 1
 4 9 -14 404.268 184.733 1
 4 9 -13 11226.2 946.794 1
 4 9 -12 453.839 174.878 1
 4 9 -11 15405.5 1083.79 1
 4 9 -10 19823.8 1202.45 1
 4 9 -9 309.635 170.188 1
 4 9 -8 11738.9 875.597 1
 4 9 -7 3023.85 440.663 1
 4 9 -6 14218.4 965.846 1
 4 9 -5 19359.2 1137.02 1
 4 9 -4 2968.47 424.769 1
 4 9 -3 13771.8 937.111 1
 4 9 -2 9722.67 763.545 1
 4 9 -1 4784.72 553.722 1
 4 9 0 13056.3 945.211 1
 4 9 1 -71.2601 107.936 1
 4 9 2 8686.49 795.625 1
 4 9 3 10903.9 900.15 1
 4 9 4 2054.59 386.28 1
 4 9 5 9338.92 866.315 1
 4 9 6 252.575 135.6 1
 4 9 7 12968.1 1071.55 1
 4 9 8 8921.64 895.945 1
 4 10 -16 21413.8 1439.15 1
 4 10 -15 8555.53 873.138 1
 4 10 -14 2364.75 435.361 1
 4 10 -13 3735.06 554.312 1
 4 10 -12 987.904 294.275 1
 4 10 -11 28082.3 1522 1
 4 10 -10 15837.9 1091.93 1
 4 10 -9 850.81 221.973 1
 4 10 -8 9695.94 845.714 1
 4 10 -7 5022.82 597.873 1
 4 10 -6 34435.8 1622.48 1
 4 10 -5 16925.1 1097.34 1
 4 10 -4 915.02 263.357 1
 4 10 -3 13294.3 926.209 1
 4 10 -2 9.70836 85.2787 1
 4 10 -1 22315.6 1306.24 1
 4 10 0 12663.3 983.35 1
 4 10 1 442.022 205.745 1
 4 10 2 6761.44 743.8 1
 4 10 3 780.764 232.394 1
 4 10 4 12110.1 1020.66 1
 4 10 5 16207.3 1210.72 1
 4 10 6 -58.7799 153.247 1
 4 10 7 8045.61 878.772 1
 4 11 -16 9755.51 1065.83 4
 4 11 -15 359.413 145.638 1
 4 11 -14 3908.36 609.751 1
 4 11 -13 2621.22 450.664 1
 4 11 -12 2107.96 439.967 1
 4 11 -11 15596.6 1126.34 1
 4 11 -10 4376.98 591.854 1
 4 11 -9 1683.64 385.915 1
 4 11 -8 14.6642 181.772 1
 4 11 -7 12722.8 992.511 1
 4 11 -6 28292.8 1512.4 1
 4 11 -5 4112.38 543.785 1
 4 11 -4 4269.19 547.839 1
 4 11 -3 3369.98 512.138 1
 4 11 -2 9738.5 890.143 1
 4 11 -1 32929.4 1694.41 1
 4 11 0 6732.64 761.545 1
 4 11 1 1685.76 391.289 1
 4 11 2 5180.25 673.417 1
 4 11 3 1746.87 394.624 1
 4 11 4 27793.7 1649.25 1
 4 11 5 7224 830.988 1
 4 11 6 3434.84 599.433 1
 4 12 -13 305.19 84.2854 1
 4 12 -12 6542.18 778.827 1
 4 12 -11 11780.1 1039.4 1
 4 12 -10 9.37872 124.135 1
 4 12 -9 8049.58 838.012 1
 4 12 -8 562.186 251.811 1
 4 12 -7 7243.98 785.973 1
 4 12 -6 11372.7 979.253 1
 4 12 -5 236.836 140.084 1
 4 12 -4 3404.32 553.736 1
 4 12 -3 754.329 281.323 1
 4 12 -2 17165.5 1259.68 1
 4 12 -1 19654.6 1358.46 1
 4 12 0 159.293 143.418 1
 4 12 1 6241.26 767.67 1
 4 12 2 3718.95 598.179 1
 4 12 3 5735.53 759.454 1
 4 13 -10 7916.78 872.909 1
 4 13 -9 8703.39 907.625 1
 4 13 -8 -43.7552 204.543 1
 4 13 -7 7135.99 804.202 1
 4 13 -6 1367.18 333.75 1
 4 13 -5 7763.73 844.698 1
 4 13 -4 17951.8 1323.9 1
 4 13 -3 652.608 267.331 1
 4 13 -2 12467.7 1112.79 1
 4 13 -1 4942.48 710.516 1
 4 13 0 3105.13 567.651 1
 5 -6 5 21848.5 591.157 1
 5 -5 3 1237.33 115.629 1
 5 -5 4 1213.62 93.8496 1
 5 -4 1 499.192 88.0534 1
 5 -4 2 64984.3 1243.43 1
 5 -3 -3 65063.3 1346.36 4
 5 -3 -2 26421 789.564 4
 5 -3 2 45748.1 861.938 1
 5 -3 2 43977.1 847.423 1
 5 -2 -4 116653 2091.54 4
 5 -2 -3 70511.6 1500.02 4
 5 -2 1 6217.84 265.64 1
 5 -2 2 102718 1749.28 1
 5 -1 -6 45781.3 970.695 4
 5 -1 -5 15901.2 528.217 4
 5 -1 -4 54932.6 1291.26 4
 5 -1 -1 5794.54 336.643 1
 5 -1 0 6841.96 332.503 1
 5 -1 1 58653.6 1210.32 1
 5 -1 2 66508.9 1301.27 1
 5 -1 3 9747.08 338.449 1
 5 -1 4 29604.7 692.308 1
 5 0 -10 11131.4 437.662 4
 5 0 -9 9795.47 393.113 4
 5 0 -6 7056.38 404.28 4
 5 0 -3 12219.1 588.686 1
 5 0 -2 45372.7 1211.89 1
 5 0 -1 14463.8 568.226 1
 5 0 0 1782.78 175.964 1
 5 0 1 44420.1 1064.23 1
 5 0 2 29824 798.569 1
 5 0 3 11817.2 457.076 1
 5 0 4 11616.5 463.355 1
 5 0 5 29016.2 830.516 1
 5 1 -10 8035.88 435.916 4
 5 1 -6 1098.23 204.736 1
 5 1 -5 26240 1025.48 1
 5 1 -4 16756.7 757.236 1
 5 1 -3 76863.4 1841.54 1
 5 1 -2 106173 2282.84 1
 5 1 -1 194.677 97.6727 1
 5 1 0 26846.9 860.666 1
 5 1 1 48434.5 1235.85 1
 5 1 2 90.7077 33.4431 1
 5 1 3 44746.5 1178.72 1
 5 1 4 2700.11 247.21 1
 5 1 5 25018.8 857.349 1
 5 1 6 14798.3 660.113 1
 5 1 15 3363.81 629.586 5
 5 2 -19 1285.1 313.974 1
 5 2 -18 13164.9 1156.04 1
 5 2 -11 7959.1 496.27 4
 5 2 -11 7411.25 671.323 1
 5 2 -10 10595.4 797.293 1
 5 2 -9 134.253 98.7753 1
 5 2 -8 49365.5 1693.15 1
 5 2 -7 68726.2 1992.21 1
 5 2 -6 75.139 94.5289 1
 5 2 -5 21474.1 915.871 1
 5 2 -4 3993.72 351.623 1
 5 2 -3 104224 2364.71 1
 5 2 -2 50575.8 1378.69 1
 5 2 -1 1453.6 201.798 1
 5 2 0 8873.11 487.52 1
 5 2 1 1094.34 173.098 1
[truncated: 38,601 more chars]
