# Supplementary material
Source: publisher figshare collection journal article supplement (https://acs.figshare.com/ndownloader/files/4205155)
Supplement: Supplementary file 27 [file 4205155 › CIFs/Co/CoGd/CoGd.cif]

data_CoGd
_audit_creation_date              2015-02-16
_audit_creation_method
;
Olex2 1.2
(compiled 2015.01.26 svn.r3151 for OlexSys, GUI svn.r4998)
;
_publ_contact_author_address      
;
The University of Manchester
School of Chemistry
Oxford Road, 
Manchester
M13 9PL
United Kingdom
;
_publ_contact_author_email        eufemio.morenopineda@manchester.ac.uk
_publ_contact_author_name         'Eufemio Moreno Pineda'
_publ_contact_author_phone        '+44 074 1192 4293'
_publ_section_references
;
Dolomanov, O.V., Bourhis, L.J., Gildea, R.J, Howard, J.A.K. & Puschmann, H.
 (2009), J. Appl. Cryst. 42, 339-341.

Palatinus, L. & Chapuis, G. (2007). J. Appl. Cryst., 40, 786-790;
Palatinus, L. & van der Lee, A. (2008). J. Appl. Cryst. 41, 975-984;
Palatinus, L., Prathapa, S. J. & van Smaalen, S. (2012). J. Appl. Cryst. 45,
 575-580.

Sheldrick, G.M. (2008). Acta Cryst. A64, 112-122.
;
_chemical_name_common             ?
_chemical_name_systematic         ?
_chemical_formula_moiety          'C50 H90 Co2 Gd2 O22, 2(C6 H16 N), C2 N'
_chemical_formula_sum             'C64 H122 Co2 Gd2 N3 O22'
_chemical_formula_weight          1718.00
_chemical_melting_point           ?
loop_
  _atom_type_symbol
  _atom_type_description
  _atom_type_scat_dispersion_real
  _atom_type_scat_dispersion_imag
  _atom_type_scat_source
 'C' 'C' 0.0033 0.0016 'International Tables Vol C Tables 4.2.6.8 and 6.1.1.4'
 'H' 'H' 0.0000 0.0000 'International Tables Vol C Tables 4.2.6.8 and 6.1.1.4'
 'Co' 'Co' 0.3494 0.9721 'International Tables Vol C Tables 4.2.6.8 and 6.1.1.4'
 'Gd' 'Gd' -0.1653 3.9035
 'International Tables Vol C Tables 4.2.6.8 and 6.1.1.4'
 'N' 'N' 0.0061 0.0033 'International Tables Vol C Tables 4.2.6.8 and 6.1.1.4'
 'O' 'O' 0.0106 0.0060 'International Tables Vol C Tables 4.2.6.8 and 6.1.1.4'

_shelx_space_group_comment
;
The symmetry employed for this shelxl refinement is uniquely defined
by the following loop, which should always be used as a source of
symmetry information in preference to the above space-group names.
They are only intended as comments.
;
_space_group_crystal_system       'monoclinic'
_space_group_IT_number            14
_space_group_name_H-M_alt         'P 1 21/c 1'
_space_group_name_Hall            '-P 2ybc'
loop_
  _space_group_symop_operation_xyz
 'x, y, z'
 '-x, y+1/2, -z+1/2'
 '-x, -y, -z'
 'x, -y-1/2, z-1/2'

_cell_length_a                    15.7469(4)
_cell_length_b                    13.0245(2)
_cell_length_c                    21.9609(5)
_cell_angle_alpha                 90
_cell_angle_beta                  110.893(3)
_cell_angle_gamma                 90
_cell_volume                      4207.91(18)
_cell_formula_units_Z             2
_cell_measurement_reflns_used     16359
_cell_measurement_temperature     101.0(3)
_cell_measurement_theta_max       28.0190
_cell_measurement_theta_min       3.1560
_shelx_estimated_absorpt_T_max    ?
_shelx_estimated_absorpt_T_min    ?
_exptl_absorpt_coefficient_mu     2.006
_exptl_absorpt_correction_T_max   1.00000
_exptl_absorpt_correction_T_min   0.65164
_exptl_absorpt_correction_type    multi-scan
_exptl_absorpt_process_details
;
CrysAlisPro, Agilent Technologies,
Version 1.171.36.32 (release 02-08-2013 CrysAlis171 .NET)
(compiled Aug  2 2013,16:46:58)
Empirical absorption correction using spherical harmonics,
 implemented in SCALE3 ABSPACK scaling algorithm.
;
_exptl_absorpt_special_details    ?
_exptl_crystal_colour             'clear green'
_exptl_crystal_colour_lustre      clear
_exptl_crystal_colour_primary     green
_exptl_crystal_density_diffrn     1.356
_exptl_crystal_density_meas       ?
_exptl_crystal_density_method     ?
_exptl_crystal_description        ''
_exptl_crystal_F_000              1770
_exptl_crystal_recrystallization_method ?
_exptl_crystal_size_max           0.13
_exptl_crystal_size_mid           0.1
_exptl_crystal_size_min           0.08
_exptl_transmission_factor_max    ?
_exptl_transmission_factor_min    ?
_diffrn_reflns_av_R_equivalents   0.0303
_diffrn_reflns_av_unetI/netI      0.0318
_diffrn_reflns_Laue_measured_fraction_full 0.998
_diffrn_reflns_Laue_measured_fraction_max 0.998
_diffrn_reflns_limit_h_max        19
_diffrn_reflns_limit_h_min        -19
_diffrn_reflns_limit_k_max        16
_diffrn_reflns_limit_k_min        -15
_diffrn_reflns_limit_l_max        27
_diffrn_reflns_limit_l_min        -27
_diffrn_reflns_number             28355
_diffrn_reflns_point_group_measured_fraction_full 0.998
_diffrn_reflns_point_group_measured_fraction_max 0.998
_diffrn_reflns_theta_full         25.242
_diffrn_reflns_theta_max          26.372
_diffrn_reflns_theta_min          3.023
_diffrn_ambient_temperature       101.0(3)
_diffrn_detector_area_resol_mean  8.3367
_diffrn_measured_fraction_theta_full 0.998
_diffrn_measured_fraction_theta_max 0.998
_diffrn_measurement_details
;
#__ type_ start__ end____ width___ exp.time_
  1 omega  -20.00   29.20   0.6000   23.2300
omega____ theta____ kappa____ phi______ frames
    -      -25.5278  -99.0000  -30.0000 82

#__ type_ start__ end____ width___ exp.time_
  2 omega  -58.00   72.20   0.6000   23.2300
omega____ theta____ kappa____ phi______ frames
    -       26.7778  -57.0000  150.0000 217

#__ type_ start__ end____ width___ exp.time_
  3 omega  -58.00   72.20   0.6000   23.2300
omega____ theta____ kappa____ phi______ frames
    -       26.7778  -57.0000   30.0000 217

#__ type_ start__ end____ width___ exp.time_
  4 omega  -67.00  -32.80   0.6000   23.2300
omega____ theta____ kappa____ phi______ frames
    -       26.7778  179.0000   90.0000 57

#__ type_ start__ end____ width___ exp.time_
  5 omega  -56.00   70.00   0.6000   23.2300
omega____ theta____ kappa____ phi______ frames
    -       26.7778  -57.0000  -90.0000 210
;
_diffrn_measurement_device_type   'Xcalibur, Sapphire2, large Be window'
_diffrn_measurement_method        '\w scans'
_diffrn_orient_matrix_UB_11       0.0380065000
_diffrn_orient_matrix_UB_12       -0.0321878000
_diffrn_orient_matrix_UB_13       0.0152348000
_diffrn_orient_matrix_UB_21       -0.0236881000
_diffrn_orient_matrix_UB_22       -0.0420495000
_diffrn_orient_matrix_UB_23       -0.0190522000
_diffrn_orient_matrix_UB_31       0.0178211000
_diffrn_orient_matrix_UB_32       0.0126629000
_diffrn_orient_matrix_UB_33       -0.0245108000
_diffrn_radiation_monochromator   graphite
_diffrn_radiation_type            MoK\a
_diffrn_radiation_wavelength      0.71073
_diffrn_source                    'Enhance (Mo) X-ray Source'
_reflns_Friedel_coverage          0.000
_reflns_Friedel_fraction_full     .
_reflns_Friedel_fraction_max      .
_reflns_number_gt                 7604
_reflns_number_total              8600
_reflns_odcompleteness_completeness 99.80
_reflns_odcompleteness_iscentric  1
_reflns_odcompleteness_theta      26.32
_reflns_special_details
;
Two B alerts were found during the .cif check, i.e. PLAT223_Alert_4_B
and PLAT232_Alert_2_B. These can be attributed to the disorder observed
on the capping pivalate group on the Gd(III) ion. We modelled the disorder
associated to the rotation of the pivalate group, however splitting all atoms
into parts render the refinement unstable.

 Reflections were merged by SHELXL according to the crystal
 class for the calculation of statistics and refinement.
 
 _reflns_Friedel_fraction is defined as the number of unique
 Friedel pairs measured divided by the number that would be
 possible theoretically, ignoring centric projections and
 systematic absences.
;
_reflns_threshold_expression      'I > 2\s(I)'
_computing_cell_refinement
;
CrysAlisPro, Agilent Technologies,
Version 1.171.36.32 (release 02-08-2013 CrysAlis171 .NET)
(compiled Aug  2 2013,16:46:58)
;
_computing_data_collection
;
CrysAlisPro, Agilent Technologies,
Version 1.171.36.32 (release 02-08-2013 CrysAlis171 .NET)
(compiled Aug  2 2013,16:46:58)
;
_computing_data_reduction
;
CrysAlisPro, Agilent Technologies,
Version 1.171.36.32 (release 02-08-2013 CrysAlis171 .NET)
(compiled Aug  2 2013,16:46:58)
;
_computing_molecular_graphics     'Olex2 (Dolomanov et al., 2009)'
_computing_publication_material   'Olex2 (Dolomanov et al., 2009)'
_computing_structure_refinement   'ShelXL (Sheldrick, 2008)'
_computing_structure_solution
;
Superflip (Palatinus & Chapuis, 2007;Palatinus & van der Lee, 2008;
Palatinus et al., 2012)
;
_refine_diff_density_max          1.551
_refine_diff_density_min          -0.670
_refine_diff_density_rms          0.112
_refine_ls_extinction_coef        .
_refine_ls_extinction_method      none
_refine_ls_goodness_of_fit_ref    1.060
_refine_ls_hydrogen_treatment     constr
_refine_ls_matrix_type            full
_refine_ls_number_parameters      519
_refine_ls_number_reflns          8600
_refine_ls_number_restraints      62
_refine_ls_R_factor_all           0.0430
_refine_ls_R_factor_gt            0.0345
_refine_ls_restrained_S_all       1.069
_refine_ls_shift/su_max           0.001
_refine_ls_shift/su_mean          0.000
_refine_ls_structure_factor_coef  Fsqd
_refine_ls_weighting_details
'w=1/[\s^2^(Fo^2^)+(0.0474P)^2^+8.8998P] where P=(Fo^2^+2Fc^2^)/3'
_refine_ls_weighting_scheme       calc
_refine_ls_wR_factor_gt           0.0888
_refine_ls_wR_factor_ref          0.0947
_refine_special_details           ?
_olex2_refinement_description
;
1. Fixed Uiso
 At 1.2 times of:
  All C(H,H) groups, All N(H,H) groups
 At 1.5 times of:
  All C(H,H,H) groups
2. Restrained distances
 C32-C33
 1.52 with sigma of 0.02
 C31-C29 \\sim C29-C30
 with sigma of 0.02
3. Uiso/Uaniso restraints and constraints
Uanis(C31) \\sim Ueq, Uanis(C30A) \\sim Ueq: with sigma of 0.01 and sigma for
terminal atoms of 0.02
Uanis(C9) \\sim Ueq, Uanis(C3AA) \\sim Ueq, Uanis(C4AA) \\sim Ueq: with sigma
of 0.01 and sigma for terminal atoms of 0.02
Uanis(C30) \\sim Ueq, Uanis(C31A) \\sim Ueq: with sigma of 0.01 and sigma for
terminal atoms of 0.02
Uanis(C32) \\sim Ueq, Uanis(N1) \\sim Ueq, Uanis(C33) \\sim Ueq: with sigma of
0.01 and sigma for terminal atoms of 0.02
Uanis(C30) = Uanis(C31A) = Uanis(C30A) = Uanis(C31)
Uanis(C2AA) = Uanis(C4)
Uanis(C5AA) = Uanis(C9) = Uanis(C8)
4. Others
 Sof(C3AA)=Sof(H3AA)=Sof(H3AB)=Sof(H3AC)=Sof(C4AA)=Sof(H4AA)=Sof(H4AB)=
 Sof(H4AC)=Sof(C5AA)=Sof(H5AA)=Sof(H5AB)=Sof(H5AC)=1-FVAR(1)
 Sof(C8)=Sof(H8A)=Sof(H8B)=Sof(H8C)=Sof(C9)=Sof(H9A)=Sof(H9B)=Sof(H9C)=
 Sof(C10)=Sof(H10A)=Sof(H10B)=Sof(H10C)=FVAR(1)
 Sof(H29A)=Sof(C30A)=Sof(H30D)=Sof(H30E)=Sof(H30F)=Sof(C31A)=Sof(H31D)=
 Sof(H31E)=Sof(H31F)=1-FVAR(2)
 Sof(H29)=Sof(C30)=Sof(H30A)=Sof(H30B)=Sof(H30C)=Sof(C31)=Sof(H31A)=Sof(H31B)=
 Sof(H31C)=FVAR(2)
 Sof(H26A)=Sof(C26A)=Sof(H26B)=Sof(H26C)=Sof(H26D)=1-FVAR(3)
 Sof(H26)=Sof(C27)=Sof(H27A)=Sof(H27B)=Sof(H27C)=FVAR(3)
 Sof(O13)=Sof(C0AA)=1-FVAR(4)
 Sof(O11)=Sof(C1)=FVAR(4)
 Sof(C1AA)=Sof(H1AA)=Sof(H1AB)=Sof(H1AC)=Sof(C2AA)=Sof(H2AA)=Sof(H2AB)=
 Sof(H2AC)=1-FVAR(5)
 Sof(C3)=Sof(H3A)=Sof(H3B)=Sof(H3C)=Sof(C4)=Sof(H4A)=Sof(H4B)=Sof(H4C)=FVAR(5)
 Fixed Sof: N1(0.5) C32(0.5) C33(0.5)
5.a Ternary CH refined with riding coordinates:
 C26(H26), C26(H26A), C29(H29), C29(H29A)
5.b Secondary CH2 refined with riding coordinates:
 N11(H11A,H11B)
5.c Idealised Me refined as rotating group:
 C5(H5A,H5B,H5C), C13(H13A,H13B,H13C), C14(H14A,H14B,H14C), C15(H15A,H15B,
 H15C), C18(H18A,H18B,H18C), C19(H19A,H19B,H19C), C20(H20A,H20B,H20C), C23(H23A,
 H23B,H23C), C24(H24A,H24B,H24C), C25(H25A,H25B,H25C), C3(H3A,H3B,H3C), C4(H4A,
 H4B,H4C), C8(H8A,H8B,H8C), C9(H9A,H9B,H9C), C10(H10A,H10B,H10C), C1AA(H1AA,
 H1AB,H1AC), C2AA(H2AA,H2AB,H2AC), C3AA(H3AA,H3AB,H3AC), C4AA(H4AA,H4AB,H4AC),
 C5AA(H5AA,H5AB,H5AC), C28(H28A,H28B,H28C), C27(H27A,H27B,H27C), C30(H30A,H30B,
 H30C), C31(H31A,H31B,H31C), C26A(H26B,H26C,H26D), C30A(H30D,H30E,H30F),
 C31A(H31D,H31E,H31F)
;
_atom_sites_solution_hydrogens    geom
_atom_sites_solution_primary      iterative
_atom_sites_solution_secondary    ?
loop_
  _atom_site_label
  _atom_site_type_symbol
  _atom_site_fract_x
  _atom_site_fract_y
  _atom_site_fract_z
  _atom_site_U_iso_or_equiv
  _atom_site_adp_type
  _atom_site_occupancy
  _atom_site_site_symmetry_order
  _atom_site_calc_flag
  _atom_site_refinement_flags_posn
  _atom_site_refinement_flags_adp
  _atom_site_refinement_flags_occupancy
  _atom_site_disorder_assembly
  _atom_site_disorder_group
 Gd1 Gd 0.29488(2) 0.95085(2) 0.45747(2) 0.02017(7) Uani 1 1 d . . . . .
 Co1 Co 0.51954(3) 0.88539(3) 0.48180(2) 0.02144(11) Uani 1 1 d . . . . .
 O1 O 0.1361(2) 0.9161(3) 0.40762(15) 0.0463(8) Uani 1 1 d . . . . .
 O2 O 0.31160(18) 0.8159(2) 0.39058(14) 0.0400(7) Uani 1 1 d . . . . .
 O3 O 0.42721(16) 1.00559(18) 0.44367(12) 0.0235(5) Uani 1 1 d . . . . .
 O4 O 0.28683(17) 0.7907(2) 0.51972(13) 0.0300(6) Uani 1 1 d . . . . .
 O5 O 0.61256(17) 0.95679(18) 0.44351(12) 0.0244(5) Uani 1 1 d . . . . .
 O6 O 0.38525(17) 1.22113(19) 0.47197(12) 0.0276(5) Uani 1 1 d . . . . .
 O7 O 0.42175(16) 0.84177(18) 0.52583(12) 0.0235(5) Uani 1 1 d . . . . .
 O8 O 0.75182(19) 0.9936(3) 0.45128(14) 0.0403(7) Uani 1 1 d . . . . .
 O9 O 0.2601(2) 1.1249(2) 0.43588(16) 0.0431(7) Uani 1 1 d . . . . .
 O10 O 0.45780(17) 0.79404(19) 0.40353(12) 0.0274(5) Uani 1 1 d . . . . .
 C2 C 0.0332(3) 0.9495(4) 0.2971(2) 0.0379(10) Uani 1 1 d . . . . .
 C5 C 0.0446(5) 0.8804(7) 0.2447(3) 0.089(2) Uani 1 1 d . . . . .
 H5A H -0.0075 0.8873 0.2054 0.134 Uiso 1 1 calc GR . . . .
 H5B H 0.0500 0.8103 0.2592 0.134 Uiso 1 1 calc GR . . . .
 H5C H 0.0983 0.9000 0.2365 0.134 Uiso 1 1 calc GR . . . .
 C6 C 0.3008(3) 1.2091(3) 0.44552(18) 0.0295(8) Uani 1 1 d . . . . .
 C7 C 0.2429(3) 1.3060(3) 0.4234(2) 0.0379(10) Uani 1 1 d . . . . .
 C11 C 0.6767(3) 0.9529(3) 0.42090(18) 0.0280(8) Uani 1 1 d . . . . .
 C12 C 0.6566(3) 0.9006(4) 0.3551(2) 0.0439(11) Uani 1 1 d . . . . .
 C13 C 0.7320(4) 0.9258(5) 0.3280(3) 0.0602(15) Uani 1 1 d . . . . .
 H13A H 0.7180 0.8939 0.2861 0.090 Uiso 1 1 calc GR . . . .
 H13B H 0.7891 0.9003 0.3574 0.090 Uiso 1 1 calc GR . . . .
 H13C H 0.7357 0.9988 0.3236 0.090 Uiso 1 1 calc GR . . . .
 C14 C 0.5642(4) 0.9368(5) 0.3090(2) 0.0580(15) Uani 1 1 d . . . . .
 H14A H 0.5510 0.9053 0.2671 0.087 Uiso 1 1 calc GR . . . .
 H14B H 0.5649 1.0101 0.3045 0.087 Uiso 1 1 calc GR . . . .
 H14C H 0.5183 0.9179 0.3263 0.087 Uiso 1 1 calc GR . . . .
 C15 C 0.6545(5) 0.7847(4) 0.3668(3) 0.0696(18) Uani 1 1 d . . . . .
 H15A H 0.6113 0.7703 0.3873 0.104 Uiso 1 1 calc GR . . . .
 H15B H 0.7138 0.7622 0.3946 0.104 Uiso 1 1 calc GR . . . .
 H15C H 0.6373 0.7492 0.3259 0.104 Uiso 1 1 calc GR . . . .
 C16 C 0.3742(2) 0.7747(3) 0.37674(17) 0.0264(8) Uani 1 1 d . . . . .
 C17 C 0.3484(3) 0.6941(3) 0.32188(18) 0.0288(8) Uani 1 1 d . . . . .
 C18 C 0.3495(4) 0.7476(4) 0.2608(2) 0.0554(14) Uani 1 1 d . . . . .
 H18A H 0.4090 0.7751 0.2686 0.083 Uiso 1 1 calc GR . . . .
 H18B H 0.3058 0.8023 0.2497 0.083 Uiso 1 1 calc GR . . . .
 H18C H 0.3344 0.6992 0.2256 0.083 Uiso 1 1 calc GR . . . .
 C19 C 0.2543(3) 0.6512(4) 0.3098(3) 0.0550(14) Uani 1 1 d . . . . .
 H19A H 0.2379 0.6048 0.2734 0.082 Uiso 1 1 calc GR . . . .
 H19B H 0.2112 0.7065 0.3004 0.082 Uiso 1 1 calc GR . . . .
 H19C H 0.2541 0.6152 0.3479 0.082 Uiso 1 1 calc GR . . . .
 C20 C 0.4165(4) 0.6063(4) 0.3396(2) 0.0589(15) Uani 1 1 d . . . . .
 H20A H 0.4213 0.5787 0.3812 0.088 Uiso 1 1 calc GR . . . .
 H20B H 0.4749 0.6312 0.3416 0.088 Uiso 1 1 calc GR . . . .
 H20C H 0.3965 0.5534 0.3071 0.088 Uiso 1 1 calc GR . . . .
 C21 C 0.3712(2) 0.7756(3) 0.53858(17) 0.0241(7) Uani 1 1 d . . . . .
 C22 C 0.4143(3) 0.6779(3) 0.57446(18) 0.0291(8) Uani 1 1 d . . . . .
 C23 C 0.5002(3) 0.7062(3) 0.63232(19) 0.0383(9) Uani 1 1 d . . . . .
 H23A H 0.4842 0.7505 0.6615 0.057 Uiso 1 1 calc GR . . . .
 H23B H 0.5423 0.7408 0.6167 0.057 Uiso 1 1 calc GR . . . .
 H23C H 0.5279 0.6449 0.6550 0.057 Uiso 1 1 calc GR . . . .
 C24 C 0.4403(3) 0.6126(3) 0.5256(2) 0.0339(9) Uani 1 1 d . . . . .
 H24A H 0.4675 0.5496 0.5460 0.051 Uiso 1 1 calc GR . . . .
 H24B H 0.4828 0.6498 0.5117 0.051 Uiso 1 1 calc GR . . . .
 H24C H 0.3867 0.5977 0.4885 0.051 Uiso 1 1 calc GR . . . .
 C25 C 0.3485(3) 0.6193(3) 0.5984(2) 0.0397(10) Uani 1 1 d . . . . .
 H25A H 0.3311 0.6618 0.6277 0.060 Uiso 1 1 calc GR . . . .
 H25B H 0.3775 0.5582 0.6208 0.060 Uiso 1 1 calc GR . . . .
 H25C H 0.2954 0.6008 0.5619 0.060 Uiso 1 1 calc GR . . . .
 O11 O 0.1930(2) 0.9760(3) 0.34210(17) 0.0274(10) Uani 0.696(6) 1 d . . P A 1
 C1 C 0.1252(4) 0.9447(4) 0.3529(3) 0.0275(13) Uani 0.696(6) 1 d . . P A 1
 C3 C 0.0105(7) 1.0552(10) 0.2734(6) 0.075(4) Uani 0.728(9) 1 d . . P A 1
 H3A H 0.0556 1.0803 0.2570 0.112 Uiso 0.728(9) 1 calc GR . P A 1
 H3B H 0.0092 1.0981 0.3086 0.112 Uiso 0.728(9) 1 calc GR . P A 1
 H3C H -0.0480 1.0561 0.2391 0.112 Uiso 0.728(9) 1 calc GR . P A 1
 C4 C -0.0421(4) 0.9056(7) 0.3191(3) 0.0537(18) Uani 0.728(9) 1 d . . P A 1
 H4A H -0.1002 0.9161 0.2853 0.081 Uiso 0.728(9) 1 calc GR . P A 1
 H4B H -0.0409 0.9400 0.3581 0.081 Uiso 0.728(9) 1 calc GR . P A 1
 H4C H -0.0321 0.8335 0.3276 0.081 Uiso 0.728(9) 1 calc GR . P A 1
 C8 C 0.2294(4) 1.3192(5) 0.3502(4) 0.0549(14) Uani 0.758(7) 1 d . . P B 1
 H8A H 0.2876 1.3252 0.3456 0.082 Uiso 0.758(7) 1 calc GR . P B 1
 H8B H 0.1944 1.3801 0.3336 0.082 Uiso 0.758(7) 1 calc GR . P B 1
 H8C H 0.1978 1.2606 0.3262 0.082 Uiso 0.758(7) 1 calc GR . P B 1
 C9 C 0.2947(4) 1.3983(5) 0.4603(4) 0.0549(14) Uani 0.758(7) 1 d . U P B 1
 H9A H 0.3048 1.3908 0.5058 0.082 Uiso 0.758(7) 1 calc GR . P B 1
 H9B H 0.2601 1.4595 0.4440 0.082 Uiso 0.758(7) 1 calc GR . P B 1
 H9C H 0.3521 1.4031 0.4543 0.082 Uiso 0.758(7) 1 calc GR . P B 1
 C10 C 0.1523(4) 1.2914(5) 0.4310(4) 0.0453(16) Uani 0.758(7) 1 d . . P B 1
 H10A H 0.1225 1.2321 0.4067 0.068 Uiso 0.758(7) 1 calc GR . P B 1
 H10B H 0.1152 1.3510 0.4150 0.068 Uiso 0.758(7) 1 calc GR . P B 1
 H10C H 0.1614 1.2817 0.4763 0.068 Uiso 0.758(7) 1 calc GR . P B 1
 O13 O 0.0170(7) 0.8776(9) 0.3929(5) 0.048(3) Uani 0.304(6) 1 d . . P A 2
 C0AA C 0.0691(8) 0.9194(10) 0.3680(6) 0.028(3) Uani 0.304(6) 1 d . . P A 2
 C1AA C 0.054(3) 1.071(2) 0.2948(13) 0.073(9) Uani 0.272(9) 1 d . . P A 2
 H1AA H 0.1188 1.0817 0.3126 0.109 Uiso 0.272(9) 1 calc GR . P A 2
 H1AB H 0.0257 1.1080 0.3199 0.109 Uiso 0.272(9) 1 calc GR . P A 2
 H1AC H 0.0310 1.0940 0.2504 0.109 Uiso 0.272(9) 1 calc GR . P A 2
 C2AA C -0.0693(11) 0.9528(17) 0.2717(9) 0.0537(18) Uani 0.272(9) 1 d . . P A
 2
 H2AA H -0.0912 0.9750 0.2270 0.081 Uiso 0.272(9) 1 calc GR . P A 2
 H2AB H -0.0894 0.9999 0.2973 0.081 Uiso 0.272(9) 1 calc GR . P A 2
 H2AC H -0.0926 0.8855 0.2744 0.081 Uiso 0.272(9) 1 calc GR . P A 2
 C3AA C 0.2804(16) 1.3813(18) 0.3890(12) 0.060(6) Uani 0.242(7) 1 d . U P B 2
 H3AA H 0.3333 1.4133 0.4197 0.090 Uiso 0.242(7) 1 calc GR . P B 2
 H3AB H 0.2355 1.4327 0.3689 0.090 Uiso 0.242(7) 1 calc GR . P B 2
 H3AC H 0.2967 1.3466 0.3562 0.090 Uiso 0.242(7) 1 calc GR . P B 2
 C4AA C 0.2473(19) 1.3636(18) 0.4902(10) 0.064(7) Uani 0.242(7) 1 d . U P B 2
 H4AA H 0.2326 1.3156 0.5181 0.097 Uiso 0.242(7) 1 calc GR . P B 2
 H4AB H 0.2043 1.4192 0.4798 0.097 Uiso 0.242(7) 1 calc GR . P B 2
 H4AC H 0.3074 1.3901 0.5120 0.097 Uiso 0.242(7) 1 calc GR . P B 2
 C5AA C 0.1428(14) 1.2836(17) 0.3857(14) 0.0549(14) Uani 0.242(7) 1 d . . P B
 2
 H5AA H 0.1359 1.2554 0.3439 0.082 Uiso 0.242(7) 1 calc GR . P B 2
 H5AB H 0.1085 1.3462 0.3800 0.082 Uiso 0.242(7) 1 calc GR . P B 2
 H5AC H 0.1208 1.2352 0.4096 0.082 Uiso 0.242(7) 1 calc GR . P B 2
 N11 N 0.1009(2) 0.7598(3) 0.49173(17) 0.0393(8) Uani 1 1 d . . . . .
 H11A H 0.0874 0.8096 0.4621 0.047 Uiso 1 1 calc R . . . .
 H11B H 0.1612 0.7561 0.5096 0.047 Uiso 1 1 calc R . . . .
 C26 C 0.0662(4) 0.6607(5) 0.4579(3) 0.0650(16) Uani 1 1 d . . . . .
 H26 H 0.0875 0.6072 0.4913 0.078 Uiso 0.468(13) 1 calc R . P C 1
 H26A H 0.0032 0.6752 0.4301 0.078 Uiso 0.532(13) 1 calc R . P C 2
 C28 C 0.1153(5) 0.6417(4) 0.4104(3) 0.0669(16) Uani 1 1 d . . . . .
 H28A H 0.1002 0.6951 0.3782 0.100 Uiso 1 1 calc GR . . . .
 H28B H 0.0968 0.5765 0.3893 0.100 Uiso 1 1 calc GR . . . .
 H28C H 0.1797 0.6413 0.4337 0.100 Uiso 1 1 calc GR . . . .
 C29 C 0.0642(4) 0.7889(6) 0.5439(3) 0.0721(18) Uani 1 1 d D . . . .
 H29 H 0.0228 0.7334 0.5450 0.087 Uiso 0.626(8) 1 calc R . P D 1
 H29A H -0.0023 0.7918 0.5289 0.087 Uiso 0.374(8) 1 calc R . P D 2
 C27 C -0.0276(7) 0.6466(10) 0.4284(6) 0.059(4) Uani 0.468(13) 1 d . . P C 1
 H27A H -0.0551 0.6490 0.4609 0.088 Uiso 0.468(13) 1 calc GR . P C 1
 H27B H -0.0395 0.5811 0.4070 0.088 Uiso 0.468(13) 1 calc GR . P C 1
 H27C H -0.0526 0.7000 0.3969 0.088 Uiso 0.468(13) 1 calc GR . P C 1
 C30 C 0.1308(10) 0.7955(12) 0.6092(5) 0.105(3) Uani 0.626(8) 1 d D U P D 1
 H30A H 0.1843 0.7581 0.6114 0.157 Uiso 0.626(8) 1 calc GR . P D 1
 H30B H 0.1060 0.7666 0.6395 0.157 Uiso 0.626(8) 1 calc GR . P D 1
 H30C H 0.1463 0.8661 0.6200 0.157 Uiso 0.626(8) 1 calc GR . P D 1
 C31 C 0.0066(11) 0.8808(10) 0.5209(6) 0.105(3) Uani 0.626(8) 1 d D U P D 1
 H31A H 0.0382 0.9301 0.5043 0.157 Uiso 0.626(8) 1 calc GR . P D 1
 H31B H -0.0066 0.9106 0.5565 0.157 Uiso 0.626(8) 1 calc GR . P D 1
 H31C H -0.0491 0.8616 0.4870 0.157 Uiso 0.626(8) 1 calc GR . P D 1
 C26A C 0.0596(14) 0.5846(13) 0.4994(9) 0.137(9) Uani 0.532(13) 1 d . . P C 2
 H26B H 0.1184 0.5722 0.5319 0.206 Uiso 0.532(13) 1 calc GR . P C 2
 H26C H 0.0377 0.5227 0.4751 0.206 Uiso 0.532(13) 1 calc GR . P C 2
 H26D H 0.0181 0.6056 0.5201 0.206 Uiso 0.532(13) 1 calc GR . P C 2
 C30A C 0.1054(19) 0.8730(18) 0.5751(11) 0.105(3) Uani 0.374(8) 1 d . U P D 2
 H30D H 0.1699 0.8659 0.5868 0.157 Uiso 0.374(8) 1 calc GR . P D 2
 H30E H 0.0911 0.8822 0.6138 0.157 Uiso 0.374(8) 1 calc GR . P D 2
 H30F H 0.0847 0.9316 0.5471 0.157 Uiso 0.374(8) 1 calc GR . P D 2
 C31A C 0.1110(18) 0.7033(19) 0.6040(10) 0.105(3) Uani 0.374(8) 1 d . U P D 2
 H31D H 0.0925 0.6352 0.5880 0.157 Uiso 0.374(8) 1 calc GR . P D 2
 H31E H 0.0911 0.7175 0.6397 0.157 Uiso 0.374(8) 1 calc GR . P D 2
 H31F H 0.1760 0.7083 0.6186 0.157 Uiso 0.374(8) 1 calc GR . P D 2
 N1 N 0.3068(10) 1.0700(10) 0.2627(8) 0.092(4) Uani 0.5 1 d . U P . .
 C32 C 0.2576(10) 1.0470(11) 0.2157(8) 0.076(4) Uani 0.5 1 d D U P . .
 C33 C 0.1953(11) 1.0259(15) 0.1577(8) 0.106(6) Uani 0.5 1 d D U P . .

loop_
  _atom_site_aniso_label
  _atom_site_aniso_U_11
  _atom_site_aniso_U_22
  _atom_site_aniso_U_33
  _atom_site_aniso_U_23
  _atom_site_aniso_U_13
  _atom_site_aniso_U_12
 Gd1 0.01883(10) 0.01990(10) 0.02005(10) -0.00093(6) 0.00484(7) 0.00009(6)
 Co1 0.0225(2) 0.0183(2) 0.0219(2) -0.00064(18) 0.00582(19) 0.00047(18)
 O1 0.0456(19) 0.0490(19) 0.0316(16) -0.0081(14) -0.0017(15) 0.0101(15)
 O2 0.0247(14) 0.0517(18) 0.0363(16) -0.0222(14) 0.0019(12) 0.0048(13)
 O3 0.0263(12) 0.0194(12) 0.0246(12) 0.0000(10) 0.0090(10) 0.0009(10)
 O4 0.0266(14) 0.0291(14) 0.0348(14) 0.0046(11) 0.0115(11) -0.0032(11)
 O5 0.0244(13) 0.0279(13) 0.0220(12) -0.0011(10) 0.0095(10) -0.0006(10)
 O6 0.0236(13) 0.0216(12) 0.0345(14) 0.0020(11) 0.0066(11) 0.0015(10)
 O7 0.0226(12) 0.0202(12) 0.0256(12) 0.0026(10) 0.0062(10) -0.0010(10)
 O8 0.0255(14) 0.060(2) 0.0377(16) -0.0144(15) 0.0140(12) -0.0058(14)
 O9 0.0318(15) 0.0237(14) 0.0553(19) 0.0029(13) -0.0072(14) 0.0019(12)
 O10 0.0258(13) 0.0264(13) 0.0288(13) -0.0053(11) 0.0083(11) -0.0013(10)
 C2 0.0226(19) 0.059(3) 0.026(2) -0.0010(18) 0.0020(16) -0.0021(18)
 C5 0.067(4) 0.135(7) 0.068(4) -0.040(4) 0.027(3) 0.005(4)
 C6 0.0275(19) 0.0260(19) 0.0270(18) -0.0002(15) 0.0000(15) 0.0027(15)
 C7 0.027(2) 0.027(2) 0.048(2) 0.0059(18) -0.0009(18) 0.0059(16)
 C11 0.031(2) 0.0278(19) 0.0257(19) -0.0012(15) 0.0109(16) 0.0007(15)
 C12 0.054(3) 0.050(3) 0.040(2) -0.021(2) 0.032(2) -0.018(2)
 C13 0.064(3) 0.082(4) 0.050(3) -0.031(3) 0.040(3) -0.031(3)
 C14 0.054(3) 0.097(4) 0.024(2) -0.014(2) 0.014(2) -0.030(3)
 C15 0.095(5) 0.050(3) 0.092(4) -0.034(3) 0.068(4) -0.018(3)
 C16 0.0281(19) 0.0249(18) 0.0232(17) -0.0035(14) 0.0054(15) 0.0009(15)
 C17 0.0311(19) 0.0293(19) 0.0239(18) -0.0065(15) 0.0072(15) -0.0019(16)
 C18 0.084(4) 0.051(3) 0.027(2) -0.008(2) 0.013(2) -0.020(3)
 C19 0.051(3) 0.052(3) 0.069(3) -0.034(3) 0.030(3) -0.021(2)
 C20 0.064(3) 0.052(3) 0.044(3) -0.024(2) -0.001(2) 0.020(3)
 C21 0.0274(18) 0.0228(17) 0.0228(17) -0.0024(14) 0.0101(15) -0.0028(14)
 C22 0.038(2) 0.0228(18) 0.0281(19) 0.0040(15) 0.0139(17) -0.0001(16)
 C23 0.043(2) 0.038(2) 0.028(2) 0.0092(17) 0.0063(18) 0.0044(19)
 C24 0.044(2) 0.0229(19) 0.038(2) 0.0018(16) 0.0183(19) 0.0011(17)
 C25 0.051(3) 0.031(2) 0.043(2) 0.0061(18) 0.024(2) -0.0047(19)
 O11 0.0193(18) 0.034(2) 0.026(2) -0.0012(16) 0.0041(15) -0.0016(15)
 C1 0.023(3) 0.030(3) 0.031(3) -0.003(2) 0.012(2) 0.002(2)
 C3 0.053(6) 0.096(9) 0.059(7) 0.022(6) -0.001(5) 0.021(6)
 C4 0.024(3) 0.090(5) 0.042(3) -0.007(3) 0.005(3) -0.005(3)
 C8 0.037(2) 0.038(2) 0.075(3) 0.010(2) 0.003(2) 0.0105(19)
 C9 0.037(2) 0.038(2) 0.075(3) 0.010(2) 0.003(2) 0.0105(19)
 C10 0.037(3) 0.043(3) 0.053(4) -0.003(3) 0.012(3) 0.010(3)
 O13 0.029(5) 0.055(7) 0.057(7) 0.016(5) 0.012(5) -0.003(5)
 C0AA 0.024(7) 0.030(6) 0.023(6) 0.005(5) -0.002(5) 0.003(5)
 C1AA 0.12(3) 0.050(12) 0.035(14) 0.009(11) 0.017(15) -0.024(18)
 C2AA 0.024(3) 0.090(5) 0.042(3) -0.007(3) 0.005(3) -0.005(3)
 C3AA 0.057(12) 0.051(11) 0.073(13) 0.029(10) 0.024(10) 0.018(9)
 C4AA 0.096(15) 0.046(11) 0.040(10) -0.006(8) 0.010(10) 0.035(11)
 C5AA 0.037(2) 0.038(2) 0.075(3) 0.010(2) 0.003(2) 0.0105(19)
 N11 0.0323(18) 0.050(2) 0.039(2) -0.0062(17) 0.0176(16) -0.0120(16)
 C26 0.071(4) 0.067(4) 0.059(3) -0.013(3) 0.025(3) -0.043(3)
 C28 0.094(5) 0.051(3) 0.055(3) -0.018(3) 0.025(3) -0.016(3)
 C29 0.056(3) 0.109(5) 0.062(4) -0.024(4) 0.034(3) -0.010(3)
 C27 0.043(6) 0.064(8) 0.064(8) -0.005(6) 0.013(5) -0.025(5)
 C30 0.159(7) 0.102(5) 0.083(4) 0.006(4) 0.079(5) 0.025(5)
 C31 0.159(7) 0.102(5) 0.083(4) 0.006(4) 0.079(5) 0.025(5)
 C26A 0.17(2) 0.103(12) 0.127(15) 0.023(11) 0.043(14) -0.073(13)
 C30A 0.159(7) 0.102(5) 0.083(4) 0.006(4) 0.079(5) 0.025(5)
 C31A 0.159(7) 0.102(5) 0.083(4) 0.006(4) 0.079(5) 0.025(5)
 N1 0.093(9) 0.099(8) 0.107(9) -0.002(7) 0.061(8) -0.031(7)
 C32 0.086(7) 0.084(7) 0.090(7) 0.002(6) 0.070(6) -0.015(6)
 C33 0.093(10) 0.166(13) 0.097(10) -0.029(9) 0.081(9) -0.040(9)

_geom_special_details
;
 All esds (except the esd in the dihedral angle between two l.s. planes)
 are estimated using the full covariance matrix.  The cell esds are taken
 into account individually in the estimation of esds in distances, angles
 and torsion angles; correlations between esds in cell parameters are only
 used when they are defined by crystal symmetry.  An approximate (isotropic)
 treatment of cell esds is used for estimating esds involving l.s. planes.
;
loop_
  _geom_bond_atom_site_label_1
  _geom_bond_atom_site_label_2
  _geom_bond_distance
  _geom_bond_site_symmetry_2
  _geom_bond_publ_flag
 Gd1 O1 2.388(3) . ?
 Gd1 O2 2.364(3) . ?
 Gd1 O3 2.322(2) . ?
 Gd1 O4 2.522(3) . ?
 Gd1 O5 2.457(2) 3_676 ?
 Gd1 O7 2.475(2) . ?
 Gd1 O8 2.476(3) 3_676 ?
 Gd1 O9 2.341(3) . ?
 Gd1 C11 2.838(4) 3_676 ?
 Gd1 C21 2.881(4) . ?
 Gd1 O11 2.490(4) . ?
 Gd1 C1 2.836(6) . ?
 Co1 Gd1 3.4768(5) 3_676 ?
 Co1 O3 2.102(2) 3_676 ?
 Co1 O3 2.097(2) . ?
 Co1 O5 2.144(2) . ?
 Co1 O6 2.029(2) 3_676 ?
 Co1 O7 2.166(2) . ?
 Co1 O10 2.031(2) . ?
 O1 C1 1.210(6) . ?
 O1 C0AA 1.104(12) . ?
 O2 C16 1.251(4) . ?
 O3 Co1 2.102(2) 3_676 ?
 O4 C21 1.257(4) . ?
 O5 Gd1 2.457(2) 3_676 ?
 O5 C11 1.275(5) . ?
 O6 Co1 2.029(2) 3_676 ?
 O6 C6 1.257(4) . ?
 O7 C21 1.271(4) . ?
 O8 Gd1 2.476(3) 3_676 ?
 O8 C11 1.250(5) . ?
 O9 C6 1.249(5) . ?
 O10 C16 1.262(4) . ?
 C2 C5 1.521(7) . ?
 C2 C1 1.529(7) . ?
 C2 C3 1.469(13) . ?
 C2 C4 1.541(8) . ?
 C2 C0AA 1.506(12) . ?
 C2 C1AA 1.62(3) . ?
 C2 C2AA 1.509(17) . ?
 C6 C7 1.531(5) . ?
 C7 C8 1.554(9) . ?
 C7 C9 1.515(8) . ?
 C7 C10 1.507(7) . ?
 C7 C3AA 1.48(2) . ?
 C7 C4AA 1.63(2) . ?
 C7 C5AA 1.52(2) . ?
 C11 Gd1 2.837(4) 3_676 ?
 C11 C12 1.526(5) . ?
 C12 C13 1.541(6) . ?
 C12 C14 1.522(7) . ?
 C12 C15 1.533(7) . ?
 C16 C17 1.539(5) . ?
 C17 C18 1.516(6) . ?
 C17 C19 1.516(6) . ?
 C17 C20 1.521(6) . ?
 C21 C22 1.523(5) . ?
 C22 C23 1.534(6) . ?
 C22 C24 1.534(5) . ?
 C22 C25 1.525(5) . ?
 O11 C1 1.242(6) . ?
 O13 C0AA 1.259(16) . ?
 N11 C26 1.492(6) . ?
 N11 C29 1.504(6) . ?
 C26 C28 1.523(8) . ?
 C26 C27 1.398(12) . ?
 C26 C26A 1.376(15) . ?
 C29 C30 1.445(13) . ?
 C29 C31 1.478(12) . ?
 C29 C30A 1.33(2) . ?
 C29 C31A 1.68(2) . ?
 N1 C32 1.088(18) . ?
 C32 C33 1.330(15) . ?

loop_
  _geom_angle_atom_site_label_1
  _geom_angle_atom_site_label_2
  _geom_angle_atom_site_label_3
  _geom_angle
  _geom_angle_site_symmetry_1
  _geom_angle_site_symmetry_3
  _geom_angle_publ_flag
 O1 Gd1 O4 81.07(10) . . ?
 O1 Gd1 O5 133.80(9) . 3_676 ?
 O1 Gd1 O7 130.99(10) . . ?
 O1 Gd1 O8 82.07(10) . 3_676 ?
 O1 Gd1 C11 107.67(11) . 3_676 ?
 O1 Gd1 C21 105.70(11) . . ?
 O1 Gd1 O11 50.89(11) . . ?
 O1 Gd1 C1 24.94(13) . . ?
 O2 Gd1 O1 84.52(10) . . ?
 O2 Gd1 O4 76.13(10) . . ?
 O2 Gd1 O5 138.70(9) . 3_676 ?
 O2 Gd1 O7 72.88(9) . . ?
 O2 Gd1 O8 148.33(11) . 3_676 ?
 O2 Gd1 C11 153.87(11) . 3_676 ?
 O2 Gd1 C21 71.41(10) . . ?
 O2 Gd1 O11 68.89(11) . . ?
 O2 Gd1 C1 75.97(12) . . ?
 O3 Gd1 O1 147.12(10) . . ?
 O3 Gd1 O2 80.98(9) . . ?
 O3 Gd1 O4 123.07(8) . . ?
 O3 Gd1 O5 71.86(8) . 3_676 ?
 O3 Gd1 O7 71.80(8) . . ?
 O3 Gd1 O8 123.72(9) . 3_676 ?
 O3 Gd1 O9 80.33(10) . . ?
 O3 Gd1 C11 98.02(10) . 3_676 ?
 O3 Gd1 C21 97.37(9) . . ?
 O3 Gd1 O11 96.28(10) . . ?
 O3 Gd1 C1 122.22(13) . . ?
 O4 Gd1 C11 82.92(10) . 3_676 ?
 O4 Gd1 C21 25.83(9) . . ?
 O4 Gd1 C1 101.57(13) . . ?
 O5 Gd1 O4 93.10(8) 3_676 . ?
 O5 Gd1 O7 69.42(8) 3_676 . ?
 O5 Gd1 O8 52.73(9) 3_676 3_676 ?
 O5 Gd1 C11 26.64(10) 3_676 3_676 ?
 O5 Gd1 C21 81.71(9) 3_676 . ?
 O5 Gd1 O11 143.07(10) 3_676 . ?
 O5 Gd1 C1 145.12(12) 3_676 . ?
 O7 Gd1 O4 51.83(8) . . ?
 O7 Gd1 O8 94.90(9) . 3_676 ?
 O7 Gd1 C11 81.96(10) . 3_676 ?
 O7 Gd1 C21 26.06(9) . . ?
 O7 Gd1 O11 141.32(10) . . ?
 O7 Gd1 C1 143.01(12) . . ?
 O8 Gd1 O4 73.52(10) 3_676 . ?
 O8 Gd1 C11 26.09(10) 3_676 3_676 ?
 O8 Gd1 C21 84.83(10) 3_676 . ?
 O8 Gd1 O11 121.01(11) 3_676 . ?
 O8 Gd1 C1 101.38(13) 3_676 . ?
 O9 Gd1 O1 87.70(11) . . ?
 O9 Gd1 O2 131.58(12) . . ?
 O9 Gd1 O4 149.06(10) . . ?
 O9 Gd1 O5 74.16(9) . 3_676 ?
 O9 Gd1 O7 139.36(9) . . ?
 O9 Gd1 O8 76.43(12) . 3_676 ?
 O9 Gd1 C11 73.14(11) . 3_676 ?
 O9 Gd1 C21 155.29(10) . . ?
 O9 Gd1 O11 69.33(12) . . ?
 O9 Gd1 C1 77.20(13) . . ?
 C11 Gd1 C21 82.92(10) 3_676 . ?
 O11 Gd1 O4 121.45(11) . . ?
 O11 Gd1 C11 136.69(12) . 3_676 ?
 O11 Gd1 C21 135.13(11) . . ?
 O11 Gd1 C1 25.95(14) . . ?
 C1 Gd1 C11 124.16(13) . 3_676 ?
 C1 Gd1 C21 122.89(13) . . ?
 Gd1 Co1 Gd1 125.192(13) 3_676 . ?
 O3 Co1 Gd1 93.64(7) . 3_676 ?
 O3 Co1 Gd1 40.51(6) 3_676 3_676 ?
 O3 Co1 Gd1 93.17(7) 3_676 . ?
 O3 Co1 Gd1 40.17(7) . . ?
 O3 Co1 O3 80.44(10) . 3_676 ?
 O3 Co1 O5 89.60(9) . . ?
 O3 Co1 O5 82.75(9) 3_676 . ?
 O3 Co1 O7 82.64(9) . . ?
 O3 Co1 O7 88.81(9) 3_676 . ?
 O5 Co1 Gd1 129.13(7) . . ?
 O5 Co1 Gd1 44.43(7) . 3_676 ?
 O5 Co1 O7 169.39(9) . . ?
 O6 Co1 Gd1 81.81(7) 3_676 3_676 ?
 O6 Co1 Gd1 140.47(7) 3_676 . ?
 O6 Co1 O3 93.08(10) 3_676 3_676 ?
 O6 Co1 O3 173.47(10) 3_676 . ?
 O6 Co1 O5 90.38(10) 3_676 . ?
 O6 Co1 O7 96.51(10) 3_676 . ?
 O6 Co1 O10 93.91(10) 3_676 . ?
 O7 Co1 Gd1 128.59(7) . 3_676 ?
 O7 Co1 Gd1 44.69(6) . . ?
 O10 Co1 Gd1 140.11(7) . 3_676 ?
 O10 Co1 Gd1 81.98(7) . . ?
 O10 Co1 O3 92.58(10) . . ?
 O10 Co1 O3 172.95(10) . 3_676 ?
 O10 Co1 O5 96.32(10) . . ?
 O10 Co1 O7 91.28(10) . . ?
 C1 O1 Gd1 98.7(3) . . ?
 C0AA O1 Gd1 154.8(7) . . ?
 C16 O2 Gd1 137.9(2) . . ?
 Co1 O3 Gd1 103.48(9) 3_676 . ?
 Co1 O3 Gd1 104.20(10) . . ?
 Co1 O3 Co1 99.56(10) . 3_676 ?
 C21 O4 Gd1 93.2(2) . . ?
 Co1 O5 Gd1 97.93(9) . 3_676 ?
 C11 O5 Gd1 93.5(2) . 3_676 ?
 C11 O5 Co1 151.9(2) . . ?
 C6 O6 Co1 128.1(2) . 3_676 ?
 Co1 O7 Gd1 97.31(9) . . ?
 C21 O7 Gd1 95.1(2) . . ?
 C21 O7 Co1 151.4(2) . . ?
 C11 O8 Gd1 93.3(2) . 3_676 ?
 C6 O9 Gd1 138.3(3) . . ?
 C16 O10 Co1 128.1(2) . . ?
 C5 C2 C1 104.4(4) . . ?
 C5 C2 C4 109.2(5) . . ?
 C5 C2 C1AA 118.2(12) . . ?
 C1 C2 C4 110.4(4) . . ?
 C3 C2 C5 111.4(7) . . ?
 C3 C2 C1 111.3(5) . . ?
 C3 C2 C4 110.0(7) . . ?
 C0AA C2 C5 121.7(7) . . ?
 C0AA C2 C1AA 106.4(11) . . ?
 C0AA C2 C2AA 110.3(10) . . ?
 C2AA C2 C5 97.8(8) . . ?
 C2AA C2 C1AA 99.6(16) . . ?
 O6 C6 C7 117.1(3) . . ?
 O9 C6 O6 125.6(4) . . ?
 O9 C6 C7 117.3(3) . . ?
 C6 C7 C8 105.4(4) . . ?
 C6 C7 C4AA 105.4(8) . . ?
 C9 C7 C6 109.8(4) . . ?
 C9 C7 C8 108.3(5) . . ?
 C10 C7 C6 109.9(4) . . ?
 C10 C7 C8 110.1(4) . . ?
 C10 C7 C9 113.1(5) . . ?
 C3AA C7 C6 114.0(9) . . ?
 C3AA C7 C4AA 104.9(15) . . ?
 C3AA C7 C5AA 111.9(14) . . ?
 C5AA C7 C6 113.5(8) . . ?
 C5AA C7 C4AA 106.3(15) . . ?
 O5 C11 Gd1 59.82(18) . 3_676 ?
 O5 C11 C12 117.5(3) . . ?
 O8 C11 Gd1 60.60(19) . 3_676 ?
 O8 C11 O5 120.4(3) . . ?
 O8 C11 C12 122.1(3) . . ?
 C12 C11 Gd1 177.3(3) . 3_676 ?
 C11 C12 C13 110.1(4) . . ?
 C11 C12 C15 106.9(4) . . ?
 C14 C12 C11 108.5(4) . . ?
 C14 C12 C13 111.3(4) . . ?
 C14 C12 C15 110.1(4) . . ?
 C15 C12 C13 109.9(4) . . ?
 O2 C16 O10 125.6(3) . . ?
 O2 C16 C17 118.2(3) . . ?
 O10 C16 C17 116.2(3) . . ?
 C18 C17 C16 107.2(3) . . ?
 C18 C17 C20 110.0(4) . . ?
 C19 C17 C16 110.9(3) . . ?
 C19 C17 C18 109.5(4) . . ?
 C19 C17 C20 108.9(4) . . ?
 C20 C17 C16 110.3(3) . . ?
 O4 C21 Gd1 60.94(18) . . ?
 O4 C21 O7 119.5(3) . . ?
 O4 C21 C22 121.7(3) . . ?
 O7 C21 Gd1 58.82(18) . . ?
 O7 C21 C22 118.8(3) . . ?
 C22 C21 Gd1 173.0(2) . . ?
 C21 C22 C23 109.1(3) . . ?
 C21 C22 C24 106.4(3) . . ?
 C21 C22 C25 111.3(3) . . ?
 C23 C22 C24 109.7(3) . . ?
 C25 C22 C23 110.0(3) . . ?
 C25 C22 C24 110.3(3) . . ?
 C1 O11 Gd1 92.7(3) . . ?
 O1 C1 Gd1 56.3(3) . . ?
 O1 C1 C2 124.6(5) . . ?
 O1 C1 O11 117.6(5) . . ?
 C2 C1 Gd1 176.0(4) . . ?
 O11 C1 Gd1 61.3(3) . . ?
 O11 C1 C2 117.8(5) . . ?
 O1 C0AA C2 136.5(11) . . ?
 O1 C0AA O13 103.2(11) . . ?
 O13 C0AA C2 119.9(10) . . ?
 C26 N11 C29 115.2(4) . . ?
 N11 C26 C28 107.3(4) . . ?
 C27 C26 N11 118.9(7) . . ?
 C27 C26 C28 111.8(7) . . ?
 C26A C26 N11 113.2(9) . . ?
 C26A C26 C28 120.8(11) . . ?
 N11 C29 C31A 104.5(8) . . ?
 C30 C29 N11 115.5(6) . . ?
 C30 C29 C31 115.5(9) . . ?
 C31 C29 N11 107.4(6) . . ?
 C30A C29 N11 110.5(10) . . ?
 C30A C29 C31A 98.4(14) . . ?
 N1 C32 C33 176(2) . . ?

_shelx_SHELXL_version_number      '2014/7'
_iucr_refine_instructions_details
;

    oejlm1194.res created by SHELXL-2014/7

TITL CF solution in P21/c
CELL 0.71073 15.746918 13.024452 21.960918 90 110.8933 90
ZERR 2 0.000379 0.000237 0.000532 0 0.0028 0
LATT 1
SYMM -X,0.5+Y,0.5-Z
SFAC C H Co Gd N O
UNIT 128 244 4 4 6 44
DFIX 1.52 C32 C33
SADI C31 C29 C29 C30
ISOR 0.01 0.02 C31 C30A
ISOR 0.01 0.02 C9 C3AA C4AA
ISOR 0.01 0.02 C30 C31A
ISOR 0.01 0.02 C32 N1 C33
EADP C30 C31A C30A C31
EADP C2AA C4
EADP C5AA C9 C8
 
L.S. 10
PLAN  25
BOND
fmap 2
acta
SHEL 100 0.8
OMIT 10 0 12
OMIT 0 2 0
OMIT 1 1 2
REM <olex2.extras>
REM <HklSrc "%./oejlm1194.hkl">
REM </olex2.extras>
 
WGHT    0.047400    8.899800
FVAR       1.08228   0.75824   0.62607   0.46776   0.69642   0.72803
GD1   4    0.294884    0.950849    0.457472    11.00000    0.01883    0.01990 =
         0.02005   -0.00093    0.00484    0.00009
CO1   3    0.519541    0.885389    0.481797    11.00000    0.02246    0.01826 =
         0.02188   -0.00064    0.00582    0.00047
O1    6    0.136142    0.916077    0.407618    11.00000    0.04559    0.04901 =
         0.03161   -0.00813   -0.00171    0.01009
O2    6    0.311596    0.815945    0.390577    11.00000    0.02470    0.05168 =
         0.03627   -0.02217    0.00190    0.00481
O3    6    0.427207    1.005587    0.443670    11.00000    0.02628    0.01938 =
         0.02463    0.00000    0.00897    0.00085
O4    6    0.286830    0.790650    0.519718    11.00000    0.02658    0.02910 =
         0.03476    0.00457    0.01155   -0.00317
O5    6    0.612559    0.956785    0.443511    11.00000    0.02438    0.02794 =
         0.02201   -0.00114    0.00952   -0.00057
O6    6    0.385245    1.221131    0.471965    11.00000    0.02357    0.02155 =
         0.03448    0.00197    0.00662    0.00151
O7    6    0.421749    0.841772    0.525832    11.00000    0.02261    0.02023 =
         0.02561    0.00262    0.00625   -0.00096
O8    6    0.751823    0.993571    0.451276    11.00000    0.02553    0.05990 =
         0.03768   -0.01444    0.01399   -0.00578
O9    6    0.260123    1.124946    0.435878    11.00000    0.03176    0.02375 =
         0.05531    0.00290   -0.00719    0.00191
O10   6    0.457805    0.794035    0.403528    11.00000    0.02575    0.02635 =
         0.02882   -0.00527    0.00826   -0.00131
C2    1    0.033231    0.949526    0.297121    11.00000    0.02257    0.05911 =
         0.02637   -0.00101    0.00199   -0.00213
C5    1    0.044556    0.880416    0.244717    11.00000    0.06745    0.13453 =
         0.06835   -0.04018    0.02684    0.00459
AFIX 137
H5A   2   -0.007504    0.887265    0.205362    11.00000   -1.50000
H5B   2    0.050041    0.810347    0.259177    11.00000   -1.50000
H5C   2    0.098279    0.900011    0.236531    11.00000   -1.50000
AFIX   0
C6    1    0.300780    1.209114    0.445520    11.00000    0.02753    0.02601 =
         0.02698   -0.00021   -0.00004    0.00274
C7    1    0.242881    1.306022    0.423395    11.00000    0.02742    0.02689 =
         0.04760    0.00591   -0.00090    0.00586
C11   1    0.676653    0.952943    0.420899    11.00000    0.03104    0.02776 =
         0.02569   -0.00118    0.01086    0.00073
C12   1    0.656631    0.900579    0.355109    11.00000    0.05434    0.05016 =
         0.04006   -0.02145    0.03250   -0.01823
C13   1    0.731980    0.925779    0.328002    11.00000    0.06443    0.08189 =
         0.05014   -0.03113    0.03983   -0.03061
AFIX 137
H13A  2    0.718046    0.893909    0.286144    11.00000   -1.50000
H13B  2    0.789121    0.900322    0.357369    11.00000   -1.50000
H13C  2    0.735723    0.998809    0.323603    11.00000   -1.50000
AFIX   0
C14   1    0.564184    0.936791    0.309010    11.00000    0.05355    0.09679 =
         0.02367   -0.01370    0.01380   -0.02992
AFIX 137
H14A  2    0.551022    0.905272    0.267125    11.00000   -1.50000
H14B  2    0.564870    1.010075    0.304525    11.00000   -1.50000
H14C  2    0.518334    0.917874    0.326297    11.00000   -1.50000
AFIX   0
C15   1    0.654543    0.784743    0.366813    11.00000    0.09473    0.05002 =
         0.09243   -0.03384    0.06801   -0.01760
AFIX 137
H15A  2    0.611278    0.770262    0.387328    11.00000   -1.50000
H15B  2    0.713757    0.762205    0.394556    11.00000   -1.50000
H15C  2    0.637286    0.749211    0.325888    11.00000   -1.50000
AFIX   0
C16   1    0.374151    0.774673    0.376739    11.00000    0.02813    0.02485 =
         0.02318   -0.00349    0.00539    0.00088
C17   1    0.348363    0.694084    0.321877    11.00000    0.03106    0.02929 =
         0.02386   -0.00649    0.00720   -0.00194
C18   1    0.349490    0.747580    0.260839    11.00000    0.08366    0.05051 =
         0.02687   -0.00847    0.01350   -0.02049
AFIX 137
H18A  2    0.408982    0.775126    0.268587    11.00000   -1.50000
H18B  2    0.305777    0.802306    0.249685    11.00000   -1.50000
H18C  2    0.334423    0.699174    0.225603    11.00000   -1.50000
AFIX   0
C19   1    0.254276    0.651201    0.309783    11.00000    0.05051    0.05211 =
         0.06948   -0.03446    0.03016   -0.02094
AFIX 137
H19A  2    0.237923    0.604804    0.273449    11.00000   -1.50000
H19B  2    0.211168    0.706470    0.300357    11.00000   -1.50000
H19C  2    0.254140    0.615165    0.347881    11.00000   -1.50000
AFIX   0
C20   1    0.416532    0.606254    0.339598    11.00000    0.06434    0.05180 =
         0.04425   -0.02401   -0.00051    0.02035
AFIX 137
H20A  2    0.421305    0.578684    0.381233    11.00000   -1.50000
H20B  2    0.474853    0.631212    0.341649    11.00000   -1.50000
H20C  2    0.396456    0.553444    0.307095    11.00000   -1.50000
AFIX   0
C21   1    0.371156    0.775592    0.538581    11.00000    0.02744    0.02281 =
         0.02281   -0.00238    0.01006   -0.00285
C22   1    0.414345    0.677925    0.574457    11.00000    0.03801    0.02279 =
         0.02814    0.00405    0.01391   -0.00005
C23   1    0.500212    0.706185    0.632320    11.00000    0.04344    0.03817 =
         0.02811    0.00919    0.00635    0.00438
AFIX 137
H23A  2    0.484221    0.750547    0.661457    11.00000   -1.50000
H23B  2    0.542253    0.740844    0.616704    11.00000   -1.50000
H23C  2    0.527900    0.644852    0.655013    11.00000   -1.50000
AFIX   0
C24   1    0.440263    0.612634    0.525580    11.00000    0.04356    0.02295 =
         0.03834    0.00177    0.01834    0.00109
AFIX 137
H24A  2    0.467484    0.549597    0.545984    11.00000   -1.50000
H24B  2    0.482787    0.649759    0.511662    11.00000   -1.50000
H24C  2    0.386733    0.597696    0.488513    11.00000   -1.50000
AFIX   0
C25   1    0.348471    0.619256    0.598434    11.00000    0.05085    0.03120 =
         0.04308    0.00615    0.02417   -0.00467
AFIX 137
H25A  2    0.331063    0.661848    0.627699    11.00000   -1.50000
H25B  2    0.377474    0.558227    0.620795    11.00000   -1.50000
H25C  2    0.295419    0.600771    0.561896    11.00000   -1.50000
AFIX   0
PART 1
O11   6    0.192991    0.976040    0.342104    51.00000    0.01925    0.03429 =
         0.02558   -0.00115    0.00408   -0.00160
C1    1    0.125201    0.944722    0.352931    51.00000    0.02298    0.03045 =
         0.03112   -0.00343    0.01208    0.00172
C3    1    0.010544    1.055165    0.273420    61.00000    0.05256    0.09620 =
         0.05911    0.02168   -0.00093    0.02075
AFIX 137
H3A   2    0.055587    1.080306    0.257043    61.00000   -1.50000
H3B   2    0.009224    1.098144    0.308584    61.00000   -1.50000
H3C   2   -0.047999    1.056064    0.239147    61.00000   -1.50000
AFIX   0
C4    1   -0.042072    0.905636    0.319078    61.00000    0.02388    0.09031 =
         0.04164   -0.00707    0.00511   -0.00509
AFIX 137
H4A   2   -0.100166    0.916078    0.285300    61.00000   -1.50000
H4B   2   -0.040861    0.939995    0.358053    61.00000   -1.50000
H4C   2   -0.032115    0.833483    0.327562    61.00000   -1.50000
AFIX   0
C8    1    0.229392    1.319216    0.350200    21.00000    0.03724    0.03827 =
         0.07546    0.00951    0.00326    0.01054
AFIX 137
H8A   2    0.287601    1.325173    0.345645    21.00000   -1.50000
H8B   2    0.194398    1.380059    0.333553    21.00000   -1.50000
H8C   2    0.197843    1.260565    0.326184    21.00000   -1.50000
AFIX   0
C9    1    0.294732    1.398341    0.460259    21.00000    0.03724    0.03827 =
         0.07546    0.00951    0.00326    0.01054
AFIX 137
H9A   2    0.304840    1.390836    0.505800    21.00000   -1.50000
H9B   2    0.260069    1.459528    0.443987    21.00000   -1.50000
H9C   2    0.352133    1.403144    0.454342    21.00000   -1.50000
AFIX   0
C10   1    0.152277    1.291377    0.431039    21.00000    0.03724    0.04269 =
         0.05283   -0.00335    0.01206    0.00999
AFIX 137
H10A  2    0.122528    1.232132    0.406723    21.00000   -1.50000
H10B  2    0.115161    1.350982    0.414987    21.00000   -1.50000
H10C  2    0.161424    1.281686    0.476277    21.00000   -1.50000
AFIX   0
PART 0
PART 2
O13   6    0.017008    0.877589    0.392869   -51.00000    0.02892    0.05474 =
         0.05697    0.01568    0.01187   -0.00344
C0AA  1    0.069061    0.919425    0.368003   -51.00000    0.02364    0.02991 =
         0.02304    0.00450   -0.00212    0.00255
C1AA  1    0.054335    1.070579    0.294754   -61.00000    0.12372    0.04957 =
         0.03502    0.00855    0.01681   -0.02385
AFIX 137
H1AA  2    0.118815    1.081668    0.312609   -61.00000   -1.50000
H1AB  2    0.025743    1.108031    0.319857   -61.00000   -1.50000
H1AC  2    0.030985    1.093953    0.250389   -61.00000   -1.50000
AFIX   0
C2AA  1   -0.069324    0.952754    0.271661   -61.00000    0.02388    0.09031 =
         0.04164   -0.00707    0.00511   -0.00509
AFIX 137
H2AA  2   -0.091186    0.974959    0.227044   -61.00000   -1.50000
H2AB  2   -0.089412    0.999877    0.297326   -61.00000   -1.50000
H2AC  2   -0.092601    0.885480    0.274418   -61.00000   -1.50000
AFIX   0
C3AA  1    0.280400    1.381269    0.389015   -21.00000    0.05661    0.05144 =
         0.07303    0.02878    0.02353    0.01818
AFIX 137
H3AA  2    0.333327    1.413253    0.419696   -21.00000   -1.50000
H3AB  2    0.235456    1.432689    0.368894   -21.00000   -1.50000
H3AC  2    0.296712    1.346593    0.356193   -21.00000   -1.50000
AFIX   0
C4AA  1    0.247254    1.363647    0.490194   -21.00000    0.09572    0.04579 =
         0.04024   -0.00603    0.01033    0.03532
AFIX 137
H4AA  2    0.232614    1.315644    0.518140   -21.00000   -1.50000
H4AB  2    0.204346    1.419170    0.479809   -21.00000   -1.50000
H4AC  2    0.307384    1.390121    0.512043   -21.00000   -1.50000
AFIX   0
C5AA  1    0.142753    1.283643    0.385736   -21.00000    0.03724    0.03827 =
         0.07546    0.00951    0.00326    0.01054
AFIX 137
H5AA  2    0.135944    1.255434    0.343867   -21.00000   -1.50000
H5AB  2    0.108474    1.346153    0.379997   -21.00000   -1.50000
H5AC  2    0.120798    1.235250    0.409633   -21.00000   -1.50000
AFIX   0
 
PART 0
N11   5    0.100882    0.759769    0.491726    11.00000    0.03226    0.05005 =
         0.03936   -0.00618    0.01758   -0.01205
AFIX  23
H11A  2    0.087354    0.809628    0.462078    11.00000   -1.20000
H11B  2    0.161184    0.756135    0.509584    11.00000   -1.20000
AFIX   0
C26   1    0.066234    0.660721    0.457865    11.00000    0.07074    0.06706 =
         0.05862   -0.01258    0.02485   -0.04327
PART 1
AFIX  13
H26   2    0.087463    0.607213    0.491260    41.00000   -1.20000
AFIX  13
PART 0
PART 2
H26A  2    0.003241    0.675226    0.430069   -41.00000   -1.20000
AFIX   0
PART 0
C28   1    0.115280    0.641652    0.410390    11.00000    0.09357    0.05121 =
         0.05483   -0.01797    0.02519   -0.01637
AFIX 137
H28A  2    0.100222    0.695136    0.378202    11.00000   -1.50000
H28B  2    0.096805    0.576548    0.389328    11.00000   -1.50000
H28C  2    0.179730    0.641252    0.433713    11.00000   -1.50000
AFIX   0
C29   1    0.064219    0.788891    0.543926    11.00000    0.05552    0.10926 =
         0.06203   -0.02439    0.03377   -0.00973
PART 1
AFIX  13
H29   2    0.022767    0.733402    0.545041    31.00000   -1.20000
AFIX  13
PART 0
PART 2
H29A  2   -0.002282    0.791830    0.528860   -31.00000   -1.20000
AFIX   0
PART 0
PART 1
C27   1   -0.027597    0.646593    0.428352    41.00000    0.04337    0.06397 =
         0.06368   -0.00520    0.01267   -0.02493
AFIX 137
H27A  2   -0.055105    0.649048    0.460932    41.00000   -1.50000
H27B  2   -0.039485    0.581060    0.406957    41.00000   -1.50000
H27C  2   -0.052640    0.699969    0.396901    41.00000   -1.50000
AFIX   0
C30   1    0.130781    0.795487    0.609170    31.00000    0.15853    0.10216 =
         0.08305    0.00561    0.07853    0.02468
AFIX 137
H30A  2    0.184322    0.758062    0.611378    31.00000   -1.50000
H30B  2    0.105975    0.766641    0.639461    31.00000   -1.50000
H30C  2    0.146271    0.866140    0.620018    31.00000   -1.50000
AFIX   0
C31   1    0.006626    0.880838    0.520896    31.00000    0.15853    0.10216 =
         0.08305    0.00561    0.07853    0.02468
AFIX 137
H31A  2    0.038214    0.930067    0.504261    31.00000   -1.50000
H31B  2   -0.006643    0.910574    0.556502    31.00000   -1.50000
H31C  2   -0.049096    0.861585    0.486970    31.00000   -1.50000
AFIX   0
PART 0
PART 2
C26A  1    0.059628    0.584559    0.499395   -41.00000    0.17274    0.10338 =
         0.12735    0.02325    0.04264   -0.07312
AFIX 137
H26B  2    0.118406    0.572237    0.531950   -41.00000   -1.50000
H26C  2    0.037749    0.522700    0.475086   -41.00000   -1.50000
H26D  2    0.018121    0.605615    0.520115   -41.00000   -1.50000
AFIX   0
C30A  1    0.105358    0.873037    0.575088   -31.00000    0.15853    0.10216 =
         0.08305    0.00561    0.07853    0.02468
AFIX 137
H30D  2    0.169918    0.865950    0.586820   -31.00000   -1.50000
H30E  2    0.091142    0.882243    0.613766   -31.00000   -1.50000
H30F  2    0.084675    0.931587    0.547147   -31.00000   -1.50000
AFIX   0
C31A  1    0.111005    0.703297    0.604001   -31.00000    0.15853    0.10216 =
         0.08305    0.00561    0.07853    0.02468
AFIX 137
H31D  2    0.092525    0.635231    0.587959   -31.00000   -1.50000
H31E  2    0.091137    0.717509    0.639697   -31.00000   -1.50000
H31F  2    0.176038    0.708329    0.618613   -31.00000   -1.50000
AFIX   0
 
PART 0
N1    5    0.306766    1.070027    0.262666    10.50000    0.09283    0.09865 =
         0.10676   -0.00175    0.06112   -0.03113
C32   1    0.257602    1.047034    0.215702    10.50000    0.08647    0.08427 =
         0.08974    0.00163    0.07046   -0.01468
C33   1    0.195278    1.025940    0.157738    10.50000    0.09337    0.16649 =
         0.09710   -0.02918    0.08071   -0.03997
HKLF 4
 
REM  CF solution in P21/c
REM R1 =  0.0345 for    7604 Fo > 4sig(Fo)  and  0.0430 for all    8600 data
REM    519 parameters refined using     62 restraints
 
END  
     
WGHT      0.0474      8.8886 

REM Highest difference peak  1.551,  deepest hole -0.670,  1-sigma level  0.112
Q1    1   0.2160  1.0835  0.1902  11.00000  0.05    1.55
Q2    1   0.1978  0.9846  0.1690  11.00000  0.05    1.28
Q3    1   0.1588  1.0941  0.1500  11.00000  0.05    1.26
Q4    1   0.0702  0.8592  0.5338  11.00000  0.05    0.97
Q5    1   0.1181  0.9551  0.6316  11.00000  0.05    0.96
Q6    1   0.2957  1.1497  0.4590  11.00000  0.05    0.90
Q7    1   0.4818  0.7844  0.5204  11.00000  0.05    0.84
Q8    1   0.0424  0.8977  0.5419  11.00000  0.05    0.80
Q9    1   0.5216  1.0137  0.4846  11.00000  0.05    0.77
Q10   1   0.4327  1.0372  0.4077  11.00000  0.05    0.68
Q11   1   0.0663  0.8903  0.4345  11.00000  0.05    0.67
Q12   1   0.2805  1.1156  0.4080  11.00000  0.05    0.66
Q13   1   0.1112  1.1141  0.3999  11.00000  0.05    0.65
Q14   1   0.3503  0.9578  0.4476  11.00000  0.05    0.61
Q15   1   0.2952  1.1232  0.2772  11.00000  0.05    0.54
Q16   1   0.1744  0.9380  0.4045  11.00000  0.05    0.52
Q17   1   0.2997  0.9991  0.4861  11.00000  0.05    0.49
Q18   1   0.2945  0.8963  0.4324  11.00000  0.05    0.45
Q19   1   0.2427  0.9569  0.4680  11.00000  0.05    0.40
Q20   1  -0.0283  0.9322  0.4720  11.00000  0.05    0.39
Q21   1   0.3033  0.8174  0.4717  11.00000  0.05    0.39
Q22   1   0.0900  0.8991  0.2709  11.00000  0.05    0.39
Q23   1   0.3488  1.0861  0.2606  11.00000  0.05    0.39
Q24   1   0.4288  0.6459  0.3116  11.00000  0.05    0.38
Q25   1   0.3007  0.9888  0.4207  11.00000  0.05    0.38

REM The information below was added by Olex2.
REM
REM R1 = 0.0345 for 7604 Fo > 4sig(Fo) and 0.0430 for all 30350 data
REM n/a parameters refined using n/a restraints
REM Highest difference peak 1.55, deepest hole -0.67
REM Mean Shift 0, Max Shift 0.001.

REM +++ Tabular Listing of Refinement Information +++
REM R1_all = 0.0430
REM R1_gt = 0.0345
REM wR_ref = 0.0947
REM GOOF = 1.060
REM Shift_max = 0.001
REM Shift_mean = 0
REM Reflections_all = 30350
REM Reflections_gt = 7604
REM Parameters = n/a
REM Hole = -0.67
REM Peak = 1.55
REM Flack = n/a

;
_olex2_date_sample_data_collection 2012-10-05
_olex2_submission_special_instructions 'No special instructions were received'
loop_
  _refln_index_h
  _refln_index_k
  _refln_index_l
  _refln_F_squared_meas
  _refln_F_squared_sigma
  _refln_scale_group_code
 0 0 -3 -1.60156 11.5047 2
 0 0 3 13.328 9.61158 4
 0 0 -4 35226.4 300.793 2
 0 0 -4 36154.3 323.556 3
 0 0 4 35896.2 274.143 4
 0 0 5 102.371 24.3126 4
 0 0 -5 51.0362 20.0131 2
 0 0 -5 48.5067 23.8397 3
 0 0 -6 592.54 50.8283 2
 0 0 6 724.609 50.1919 4
 0 0 -6 598.873 54.8084 3
 0 0 7 68.2462 23.5989 4
 0 0 -7 37.3919 26.3791 2
 0 0 -7 43.4392 28.4758 3
 0 0 -8 12730.6 280.748 3
 0 0 8 13133.6 239.868 4
 0 0 -8 12930 261.775 2
 0 0 9 26.7236 28.1103 4
 0 0 9 27.1564 13.7014 5
 0 0 -9 22.7922 28.7468 3
 0 0 -9 5.45248 32.1863 2
 0 0 -10 36794.2 538.581 3
 0 0 10 37920.9 460.334 4
 0 0 -10 36394.4 495.373 2
 0 0 -11 105.612 47.675 2
 0 0 11 209.736 51.5501 4
 0 0 -11 133.742 51.0023 3
 0 0 11 83.1613 22.2788 5
 0 0 12 27992.2 438.138 4
 0 0 -12 28462.2 519.556 3
 0 0 -12 27564.4 473.636 2
 0 0 12 26284.6 267.336 5
 0 0 13 291.824 62.0175 4
 0 0 -13 228.975 66.7756 2
 0 0 -13 165.142 68.8398 3
 0 0 13 157.856 25.902 5
 0 0 14 28940.5 485.876 4
 0 0 -14 28074.9 560.073 3
 0 0 -14 29344.8 540.179 2
 0 0 -15 318.822 79.9236 3
 0 0 -15 267.526 70.9582 2
 0 0 -16 6645.55 282.579 2
 0 0 -16 6682.29 301.194 3
 0 0 -17 64.569 54.1405 3
 0 0 -17 174.615 73.9188 2
 0 0 -18 182.799 64.4051 2
 0 0 -18 228.12 79.9724 3
 0 0 -19 -53.9937 61.363 2
 0 0 -19 -30.3681 64.7093 3
 0 0 -20 2056.69 187.279 2
 0 0 -20 1834.71 186.522 3
 0 0 -21 44.2024 67.1468 3
 0 0 -21 92.69 59.0138 2
 0 0 -22 2893.22 277.686 3
 0 0 -22 3604.2 260.146 2
 0 0 -23 -101.621 58.5382 2
 0 0 -23 224.899 117.905 3
 0 0 -24 1891.51 216.325 3
 0 0 -25 86.2153 81.8798 3
 0 1 -3 52830.8 349.601 2
 0 1 -3 53477 370.6 3
 0 -1 3 54133.2 353.644 4
 0 1 -4 13864.3 203.8 2
 0 -1 -4 14336.6 194.288 2
 0 -1 -4 14252.9 207.106 3
 0 1 -4 14462.2 217.221 3
 0 1 4 14341 141.172 4
 0 -1 4 14659 205.483 4
 0 1 -5 16087 242.767 2
 0 1 -5 16997.6 260.577 3
 0 -1 -5 17835.7 242.579 2
 0 -1 5 17255.4 243.424 4
 0 1 5 17059.9 180.751 4
 0 -1 -5 16944.9 253.139 3
 0 -1 -6 663.766 56.982 2
 0 -1 -6 621.861 54.3058 3
 0 -1 6 698.909 57.0898 4
 0 1 -6 598.178 58.5088 3
 0 1 6 630.02 40.9605 4
 0 1 -6 610.482 60.7907 2
 0 1 7 9816.43 173.866 4
 0 1 -7 10085.6 236.335 3
 0 -1 -7 10625.4 221.388 2
 0 -1 -7 10169.2 231.701 3
 0 1 -7 9927.44 224.717 2
 0 -1 7 10658.6 219.799 4
 0 1 -8 66.3256 33.6844 2
 0 1 8 3.042 19.155 4
 0 -1 -8 40.0994 31.5574 3
 0 1 -8 19.1197 25.7915 3
 0 -1 8 104.333 34.8102 4
 0 -1 -8 33.8045 27.9741 2
 0 -1 -9 27294.9 434.688 3
 0 1 -9 26698.7 414.715 2
 0 1 -9 26701.6 436.644 3
 0 1 9 28311.4 346.006 4
 0 -1 -9 27850.3 409.015 2
 0 -1 9 27439.1 395.874 4
 0 1 10 552.361 58.7781 4
 0 -1 -10 473.8 70.1504 3
 0 1 -10 535.629 74.0937 2
 0 -1 10 564.853 69.2241 4
 0 1 -10 614.495 78.2089 3
 0 -1 10 243.536 17.5788 5
 0 -1 -10 461.897 66.4595 2
 0 -1 -11 38570.1 572.924 3
 0 1 -11 38795.5 560.6 2
 0 1 -11 39084.5 584.314 3
 0 1 11 39273 462.131 4
 0 -1 -11 39721.6 545.797 2
 0 -1 11 37392.4 512.776 4
 0 1 -12 2939.81 169.395 2
 0 1 12 2925.11 136.287 4
 0 1 -12 3181.43 180.453 3
 0 1 12 2829.29 108.241 5
 0 -1 12 2985.07 154.346 4
 0 -1 -12 2930.16 162.188 2
 0 -1 -12 3156.15 179.916 3
 0 1 13 25014.6 411.475 4
 0 -1 13 24986.8 455.681 4
 0 1 13 24074.5 320.296 5
 0 -1 -13 25253.9 477.337 2
 0 -1 -13 25281.7 512.265 3
 0 1 -13 25366.6 517.661 3
 0 1 -13 24276.2 484.499 2
 0 1 -14 164.454 61.6869 2
 0 1 14 154.687 48.7533 4
 0 1 14 65.4836 24.8892 5
 0 -1 -14 163.541 64.4875 3
 0 -1 -14 153.965 63.5439 2
 0 1 -14 124.973 66.3495 3
 0 -1 -15 7606.11 308.884 3
 0 -1 -15 8167.54 296.451 2
 0 1 -15 7917.21 301.899 2
 0 1 -15 7291.49 304.35 3
 0 -1 -16 1207.78 122.139 2
 0 1 -16 1530.07 143.452 2
 0 1 -16 1212.34 136.118 3
 0 -1 -16 1019.71 124.745 3
 0 1 -17 518.115 98.1455 3
 0 1 -17 573.045 95.6446 2
 0 -1 -17 881.851 132.548 3
 0 -1 -17 599.268 97.0262 2
 0 1 -18 279.574 77.895 2
 0 -1 -18 216.913 73.9372 3
 0 1 -18 262.496 84.3086 3
 0 -1 -18 293.187 81.4909 2
 0 1 -19 1485.61 157.092 2
 0 1 -19 1263.68 153.374 3
 0 -1 -19 1440.4 160.239 3
 0 -1 -19 1439.12 152.19 2
 0 -1 -20 211.698 86.5609 3
 0 1 -20 330.129 88.5582 2
 0 -1 -20 229.893 74.0172 2
 0 1 -20 330.7 93.2158 3
 0 -1 -21 5257.21 299.565 2
 0 1 -21 4972.24 315.768 3
 0 1 -21 5192.05 303.008 2
 0 -1 -21 5081.58 314.279 3
 0 1 -22 379.616 108.482 3
 0 -1 -22 290.577 83.3571 2
 0 1 -22 358.59 100.993 2
 0 -1 -22 340.854 96.3555 3
 0 -1 -23 2283.57 271.131 3
 0 1 -23 2937.25 243.094 2
 0 1 -23 3224.21 273.905 3
 0 1 -24 474.818 113.168 2
 0 -1 -24 530.379 126.991 3
 0 1 -24 426.399 118.446 3
 0 1 -25 1706.29 217.827 3
 0 -1 -25 1687.91 212.644 3
 0 2 0 2036.22 65.378 2
 0 -2 0 1997.43 60.7341 3
 0 2 -1 14388.8 176.976 2
 0 -2 -1 8992.02 130.13 3
 0 -2 2 1506.63 64.8745 4
 0 -2 -2 1370.9 57.3115 3
 0 2 -2 1409.59 62.0907 2
 0 2 -3 49936.5 391.149 2
 0 -2 -3 51458.7 374.622 3
 0 -2 3 52343 404.462 4
 0 2 -4 15868.9 240.228 2
 0 -2 4 16507.2 246.241 4
 0 -2 -4 16139.8 233.703 3
 0 -2 5 8942.38 194.284 4
 0 -2 -5 8866.71 188.457 3
 0 2 5 9445.66 109.001 4
 0 2 -5 8573.14 193.608 2
 0 2 6 100.444 15.5166 4
 0 2 -6 151.206 33.6055 2
 0 -2 6 113.608 27.4132 4
 0 -2 -6 151.233 30.7697 3
 0 2 -6 132.261 33.7322 3
 0 -2 -7 5709.52 167.355 2
 0 2 -7 5865.81 189.587 3
 0 -2 -7 5618.91 174.081 3
 0 2 -7 5659.43 177.149 2
 0 -2 7 5723.05 176.185 4
 0 2 7 5692.26 115.437 4
 0 -2 8 44945.2 514.345 4
 0 2 -8 45216.6 524.938 2
 0 2 8 44604.6 360.107 4
 0 -2 -8 45347.7 532.097 3
 0 -2 -8 45578.8 499.864 2
 0 2 -8 45032 550.677 3
 0 -2 -9 15438.8 329.213 3
 0 2 -9 15501.5 340.322 3
 0 2 9 15804.4 237.112 4
 0 -2 9 15177.3 315.095 4
 0 -2 -9 16401.3 320.9 2
 0 2 -9 15534.5 329.011 2
 0 -2 -10 34912.9 521.322 3
 0 2 -10 34837.3 514.917 2
 0 2 10 37197.6 391.679 4
 0 -2 10 34394.8 497.614 4
 0 2 -10 34992.9 537.034 3
 0 -2 -10 33881 484.454 2
 0 2 -11 6238.16 240.864 3
 0 -2 11 6123.92 220.527 4
 0 -2 -11 6085.36 231.616 3
 0 2 -11 6364.27 234.149 2
 0 -2 -11 5821.12 213.487 2
 0 2 11 5906.26 167.061 4
 0 2 12 18153.8 311.21 4
 0 -2 12 18755.8 397.623 4
 0 2 -12 19428.3 422.817 2
 0 -2 -12 19226.9 402.459 2
 0 2 -12 19450.2 441.217 3
 0 -2 -12 18824 424.519 3
 0 -2 -13 1147.68 117.989 3
 0 -2 13 1032.76 103.454 4
 0 2 -13 1037.41 110.41 3
 0 -2 -13 1185.15 110.456 2
 0 2 13 1167.42 82.7169 5
 0 2 -13 1201.53 121.434 2
 0 2 13 1003.78 80.3228 4
 0 -2 -14 4292.35 223.168 3
 0 2 14 4114.28 156.329 5
 0 -2 -14 3874.52 197.752 2
 0 2 -14 3786.88 207.085 2
 0 2 -14 4001.95 223.142 3
 0 -2 -15 97.5417 51.0646 3
 0 -2 -15 38.6608 39.6694 2
 0 2 -15 76.4488 51.5296 3
 0 2 -15 63.9694 49.8691 2
 0 -2 -16 1802.98 147.477 2
 0 -2 -16 1720.87 156.796 3
 0 2 -16 2111.45 168.819 2
 0 2 -16 2088.49 174.991 3
 0 -2 -17 588.028 102.651 3
 0 -2 -17 539.605 89.1313 2
 0 2 -17 616.02 105.671 2
 0 2 -17 642.27 111.453 3
 0 -2 -18 712.243 112.393 3
 0 2 -18 774.986 127.557 3
 0 -2 -18 851.683 115.213 2
 0 2 -18 730.009 113.753 2
 0 -2 -19 1900.62 166.471 2
 0 2 -19 1939.62 194.358 3
 0 -2 -19 2004.78 190.584 3
 0 2 -19 1653.74 171.825 2
 0 -2 -20 5114.35 280.226 2
 0 2 -20 6026.1 324.815 2
 0 -2 -20 6062.51 332.895 3
 0 2 -20 5636.85 331.191 3
 0 2 -21 123.697 78.2806 2
 0 -2 -21 55.0138 67.6839 3
 0 2 -21 121.872 84.1686 3
 0 2 -22 4614.28 301.616 2
 0 -2 -22 5159.71 327.226 3
 0 2 -22 4972.85 332.472 3
 0 -2 -23 301.469 99.5382 3
 0 2 -23 319.379 96.9604 2
 0 2 -23 331.04 98.4096 3
 0 -2 -24 3474.58 287.97 3
 0 2 -24 3336.63 277.692 2
 0 2 -24 3366.59 290.799 3
 0 2 -25 454.451 120.123 2
 0 2 -25 747.291 154.35 3
 0 -2 -25 540.705 131.416 3
 0 -3 0 34.3585 17.5001 3
 0 3 0 30.2985 18.8383 2
 0 -3 1 24840.2 268.233 3
 0 3 -1 24617.3 279.819 2
 0 3 1 25484.6 270.687 2
 0 -3 -1 25101.6 260.553 3
 0 3 -2 75369.2 514.935 2
 0 -3 -2 77135.1 477.687 3
 0 3 2 77996 476.608 2
 0 -3 3 1571.15 81.2285 4
 0 -3 -3 1481.62 73.4974 3
 0 3 -3 1552.14 81.6494 2
 0 -3 3 1469.2 42.0038 1
 0 3 -4 29503.1 360.972 2
 0 -3 -4 30002.9 340.371 3
 0 -3 4 30693 371.144 4
 0 3 -5 208.315 39.4134 2
 0 3 -5 227.98 22.2633 5
 0 -3 -5 185.009 32.5137 3
 0 -3 5 241.214 39.8151 4
 0 3 -6 66973.5 609.556 2
 0 3 6 65996.2 277.297 4
 0 -3 6 66155.2 606.401 4
 0 -3 -6 66962.7 582.524 3
 0 3 7 26122.7 206.753 4
 0 -3 -7 25955.8 385.591 3
 0 -3 7 26794.6 405.086 4
 0 3 -7 26100.1 403.925 2
 0 -3 8 68697.6 682.52 4
 0 -3 -8 68645.6 667.693 3
 0 3 8 68110.2 383.656 4
 0 3 -8 69120.9 685.819 2
 0 -3 -9 45318.6 569.633 3
 0 3 -9 46395.1 594.212 2
 0 -3 -9 48827 557.587 2
 0 3 9 47755.2 361.884 4
 0 -3 9 46283.2 581.365 4
 0 -3 10 6122.47 222.481 4
 0 3 -10 6213.28 240.896 3
 0 -3 -10 5880.54 206.935 2
 0 3 10 6282.15 144.291 4
 0 3 -10 6025.27 228.056 2
 0 -3 -10 5750.86 217.727 3
 0 3 -11 13569 367.38 3
 0 -3 11 13380.4 338.706 4
 0 -3 -11 13362.5 346.232 3
 0 -3 -11 13239.7 325.609 2
 0 3 11 11678.3 213.205 4
 0 3 -11 13730 355.588 2
 0 3 12 1095.22 71.4458 4
 0 3 -12 1395.51 123.08 2
 0 3 -12 1374.7 124.801 3
 0 -3 -12 1153.1 108.09 3
 0 -3 -12 1147.41 108.357 2
 0 3 -13 2748.11 175.625 2
 0 -3 -13 2852.85 176.125 3
 0 3 -13 2811.05 185.491 3
 0 -3 -13 2800.61 165.241 2
 0 3 -14 506.721 88.2465 3
 0 -3 -14 624.921 94.7142 3
 0 -3 -14 477.438 75.53 2
 0 3 -14 481.494 81.666 2
 0 3 14 597.775 68.4831 5
 0 3 -15 338.5 87.5628 3
 0 -3 -15 265.184 61.7693 2
 0 3 -15 387.188 81.2953 2
 0 -3 -15 214.056 64.3729 3
 0 3 15 307.716 53.417 5
 0 -3 -16 1432.62 134.9 2
 0 3 -16 1600.31 151.394 2
 0 -3 -16 1589.32 151.29 3
 0 3 -16 1534.42 154.041 3
 0 -3 -17 129.466 73.0401 3
 0 3 -17 84.057 56.369 3
 0 3 -17 86.5356 64.4716 2
 0 -3 -17 104.777 57.1326 2
 0 -3 -18 7353.06 341.683 3
 0 3 -18 7247.18 335.778 2
 0 3 -18 6408.28 332.219 3
 0 -3 -18 7309.61 310.949 2
 0 -3 -19 1416.55 177.662 3
 0 3 -19 1818.35 182.971 2
 0 -3 -19 1584.53 157.389 2
 0 3 -19 1812.15 190.555 3
 0 3 -20 2399.04 223.194 3
 0 3 -20 2610.26 222.897 2
 0 3 -21 5227 334.957 3
 0 3 -21 4790.28 305.455 2
 0 -3 -21 5076.99 315.573 3
 0 -3 -22 447.453 113.923 3
 0 3 -22 259.258 97.7926 2
 0 3 -23 5451.3 345.847 2
 0 -3 -23 5188.55 337.841 3
 0 3 -24 328.795 104.333 2
 0 -3 -24 237.62 100.52 3
 0 3 -25 3604.84 302.543 2
 0 -3 -25 3714.92 309.081 3
 0 3 -26 1180.18 182.415 2
 0 4 0 227.555 35.1937 2
 0 -4 0 181.214 29.7748 3
 0 -4 -1 7015.98 158.523 3
 0 -4 1 6892.44 159.975 3
 0 4 -1 7069.45 170.296 2
 0 4 1 7173.81 167.693 2
 0 4 2 -5.67892 22.7916 2
 0 4 -2 21.453 21.585 2
 0 -4 -2 -10.5663 15.375 3
 0 -4 -3 37785.2 394.56 3
 0 4 -3 37923.7 433.239 2
 0 4 3 38168.8 400.52 2
 0 -4 -4 356.626 42.7628 3
 0 -4 4 308.58 23.7093 1
 0 4 -4 402.755 48.4709 2
 0 4 -5 81271.8 686.549 2
 0 -4 -5 79019.4 631.412 3
 0 -4 5 78339.8 374.484 1
 0 4 -6 3751.39 99.7582 5
 0 4 -6 4216.27 167.854 2
 0 -4 -6 3922.41 151.154 3
 0 -4 6 4079.13 165.11 4
 0 -4 7 141264 979.665 4
 0 -4 -7 138791 930.204 3
 0 4 -7 140352 990.983 2
 0 4 8 5570.09 89.4219 4
 0 -4 8 6760.25 226.812 4
 0 4 -8 6568.07 227.479 2
 0 -4 -8 6820.43 220.059 3
 0 4 9 22861.1 211.653 4
 0 -4 -9 22085.5 412.066 3
 0 4 -9 22616.1 434.484 2
 0 4 -10 13769.5 354.763 2
 0 -4 -10 13236.2 332.567 3
 0 4 -11 4276.89 208.697 2
 0 -4 -11 4065.03 186.032 2
 0 4 11 3743.71 105.707 4
 0 -4 -11 4355.33 201.239 3
 0 -4 -12 10845 330.493 3
 0 4 -12 10942.9 344.899 2
 0 -4 -12 10616.6 308.267 2
 0 -4 -13 121.325 51.0147 2
 0 4 -13 104.428 52.3057 2
 0 -4 -13 67.6037 47.9188 3
 0 4 -14 1195.01 130.598 2
 0 -4 -14 1084.43 118.988 3
 0 4 14 1119.49 101.108 5
 0 -4 -14 1096.21 111.68 2
 0 -4 -15 8826.22 313.671 2
 0 4 -15 8436.03 337.069 2
 0 -4 -15 8371.06 326.843 3
 0 4 15 8491.06 274.448 5
 0 -4 -16 74.3504 50.0543 2
 0 4 -16 146.889 70.5555 2
 0 4 16 175.855 46.2215 5
 0 -4 -16 118.775 59.4952 3
 0 -4 -17 11939.5 423.112 3
 0 4 -17 12103.4 430.092 2
 0 -4 -17 12548.1 395.065 2
 0 -4 -18 2327.61 186.085 2
 0 -4 -18 2238.87 194.947 3
 0 4 -18 2139.9 198.722 2
 0 -4 -19 11479.3 443.725 3
 0 4 -19 11244.4 443.49 2
 0 4 -20 2973.12 244.914 2
 0 -4 -20 3021.26 243.726 3
 0 4 -21 2983.23 250.52 2
 0 -4 -21 2652.61 256.584 3
 0 -4 -22 2985.06 254.25 3
 0 4 -22 2993.97 257.525 2
 0 -4 -23 17.2662 76.2064 3
 0 4 -23 -134.192 89.3035 2
 0 4 -24 2720.54 260.15 2
 0 -4 -24 3049.66 272.901 3
 0 4 -25 647.772 149.622 2
 0 4 -26 1105.51 188.623 2
 0 5 0 79.856 32.0705 2
 0 -5 0 -1.3892 23.6425 3
 0 5 1 2985.73 125.375 2
 0 5 -1 2799.39 122.22 2
 0 -5 1 2651.07 110.409 3
 0 -5 -1 2773.12 112.447 3
 0 5 -2 34530.1 434.99 2
 0 -5 -2 34254.1 397.66 3
 0 -5 2 34309.3 410.275 3
 0 5 2 34374.5 411.535 2
 0 5 -3 2821.64 132.174 2
 0 -5 -3 2813.5 119.956 3
 0 5 3 3014 124.248 2
 0 5 -4 27648.7 418.944 2
 0 -5 -4 26273.7 376.176 3
 0 5 -5 1663.87 112.4 2
 0 -5 5 1255.39 50.9663 1
 0 -5 -5 1585.94 99.1741 3
 0 -5 -6 30795.9 438.702 3
 0 -5 6 30047.9 254.399 1
 0 5 -6 30092.8 340.716 5
 0 5 -6 31374.5 483.286 2
 0 -5 -7 510.522 67.3634 3
 0 5 -7 282.672 35.0144 5
 0 5 -7 531.538 76.4387 2
 0 -5 7 508.742 40.1486 1
 0 5 -8 15360.9 362.664 2
 0 -5 -8 14854.2 333.1 3
 0 5 -9 320.205 67.4235 2
 0 -5 -9 314.386 55.7344 3
 0 5 -9 276.939 29.5351 5
 0 5 -10 1245.97 113.973 2
 0 -5 -10 1463.36 117.031 3
 0 5 -11 3797.43 204.64 2
 0 -5 -11 3832.26 193.05 3
 0 5 -12 2522.39 173.78 2
 0 -5 -12 2405.54 161.56 3
 0 -5 -12 2165.56 142.994 2
 0 -5 -13 2385.55 157.069 2
 0 -5 -13 2477.85 168.899 3
 0 5 -13 2258.55 173.937 2
 0 -5 -14 7965.83 291.543 2
 0 5 -14 7642.98 319.804 2
 0 -5 -14 7693.13 309.616 3
 0 5 15 1186.56 116.609 5
 0 -5 -15 1149.83 119.768 2
 0 5 -15 1008.87 132.096 2
 0 -5 -15 1017.03 122.969 3
 0 5 16 12350 362.292 5
 0 5 -16 12018.9 428.596 2
 0 -5 -16 12215.3 413.958 3
 0 -5 -16 11791.5 378.201 2
 0 -5 -17 242.647 81.9299 3
 0 5 17 124.791 45.0696 5
 0 5 -17 107.201 76.4205 2
 0 -5 -18 13742.8 474.17 3
 0 5 -18 13378.4 480.644 2
 0 -5 -19 2327.77 210.181 3
 0 5 -19 2271.65 213.237 2
 0 5 -20 7134.48 375.986 2
 0 -5 -20 7961.08 384.515 3
 0 5 -21 687.078 137.681 2
 0 -5 -21 752.774 132.152 3
 0 5 -22 845.598 146.093 2
 0 -5 -22 770.918 138.739 3
 0 5 -23 -11.7102 86.6467 2
 0 -5 -23 -25.49 78.2048 3
 0 -5 -24 -75.2344 85.9662 3
 0 5 -24 -130.123 68.7954 2
 0 5 -25 260.846 111.098 2
 0 -6 0 15749.1 291.275 3
 0 6 0 16368.2 320.453 2
 0 6 -1 11079.5 265.957 2
 0 -6 -1 10678.7 239.409 3
 0 6 1 10564.2 252.943 2
 0 -6 1 10331.4 241.245 3
 0 -6 2 919.205 78.2312 3
 0 -6 -2 892.121 72.9303 3
 0 6 2 883.548 78.3316 2
 0 6 -2 1019.19 88.7255 2
 0 -6 -3 40530.7 483.452 3
 0 6 3 39488.4 485.098 2
 0 6 -3 40717.9 534.407 2
 0 -6 -4 4832.55 173.417 3
 0 6 4 4941.81 176.799 2
 0 6 -4 4879.8 192.122 2
 0 6 -5 10261.7 285.471 2
 0 -6 -5 10454.2 262.913 3
 0 6 -6 2302.95 144.024 2
 0 -6 6 1811.82 61.9507 1
 0 6 -6 2179.9 108.102 5
 0 -6 -6 2301.78 130.265 3
 0 -6 7 6074.33 119.474 1
 0 6 -7 5961.11 170.952 5
 0 6 -7 7030.13 255.378 2
 0 -6 -7 6620.87 224.995 3
 0 6 -8 1559.56 84.6631 5
 0 6 -8 1603.37 131.906 2
 0 -6 -8 1713.56 120.116 3
 0 -6 8 1732.72 70.5026 1
 0 6 -9 110.355 42.4228 2
 0 6 -9 95.5034 24.1574 5
 0 -6 9 69.5314 20.1908 1
 0 -6 -9 74.5065 35.7824 3
 0 6 -10 49.1304 40.4171 2
 0 -6 10 64.3152 22.8533 1
 0 -6 -10 122.742 48.9488 3
 0 -6 -11 4748.6 221.727 3
 0 6 -11 4853.46 241.501 2
 0 -6 -12 605.233 91.028 3
 0 6 -12 541.97 94.6832 2
 0 6 -13 14430.9 437.391 2
 0 -6 -13 13858.3 401.48 3
 0 -6 -14 918.635 104.467 2
 0 -6 -14 864.588 110.634 3
 0 6 -14 904.408 123.591 2
 0 -6 -15 15568.3 463.653 3
 0 6 -15 14863.2 473.086 2
 0 -6 -15 15606.5 426.118 2
 0 6 15 15734.8 432.125 5
 0 6 16 485.748 87.5697 5
 0 -6 -16 673.837 111.988 3
 0 6 -16 713.658 126.217 2
 0 6 17 16615.7 458.509 5
 0 -6 -17 16625.4 508.638 3
 0 6 -17 16441.2 530.446 2
 0 6 -18 238.294 97.4886 2
 0 -6 -18 237.775 90.4916 3
 0 6 -19 13460.1 508.883 2
 0 -6 -19 14117.2 500.465 3
 0 6 -20 106.836 77.013 2
 0 -6 -20 136.435 85.0299 3
 0 6 -21 4190.96 305.029 2
 0 -6 -21 4334.7 297.29 3
 0 -6 -22 412.297 102.977 3
 0 6 -22 297.176 96.4545 2
 0 -6 -23 571.365 122.849 3
 0 6 -23 603.49 132.457 2
 0 6 -24 211.949 101.597 2
 0 7 0 78.7549 41.408 2
 0 -7 0 76.0755 33.8882 3
 0 -7 1 20208.2 359.045 3
 0 7 1 19882 379.668 2
 0 7 -1 19882 385.379 2
 0 -7 -1 19329.7 349.883 3
 0 -7 -2 7794.05 223.415 3
 0 7 -2 8047.44 251.736 2
 0 -7 2 8004.91 226.493 3
 0 7 2 8140.42 239.947 2
 0 7 -3 731.655 84.2395 2
 0 7 3 813.987 80.4448 2
 0 -7 3 708.4 74.8578 3
 0 -7 -3 672.665 71.862 3
 0 7 4 16519.6 343.171 2
 0 -7 -4 16166.9 336.041 3
 0 7 -4 16960.7 380.908 2
 0 -7 -5 144.766 45.0969 3
 0 7 -5 204.481 58.0577 2
 0 7 -6 19585.6 359.416 5
 0 7 -6 20531.7 439.612 2
 0 -7 -6 20615.6 398.985 3
 0 -7 -7 1195.89 103.243 3
 0 7 -7 1054.27 109.65 2
 0 7 -7 1145.84 88.4029 5
 0 -7 -8 4556.78 201.111 3
 0 7 -8 4372.26 220.475 2
 0 7 -8 4066.17 155.066 5
 0 -7 -9 1392.44 117.681 3
 0 7 -9 1518.66 137.909 2
 0 7 -10 -19.0799 51.6312 2
 0 -7 -10 -29.9356 46.1037 3
 0 -7 -11 3348.54 191.868 3
 0 7 -11 3028.42 205.375 2
 0 -7 -12 1305.08 127.507 3
 0 7 -12 1254.83 141.633 2
 0 -7 -13 8041.68 313.989 3
 0 7 -13 8071.06 349.15 2
 0 -7 -14 15427.5 449.88 3
 0 7 -14 15189.1 486.291 2
 0 7 15 4735.46 254.25 5
 0 -7 -15 4863.79 267.267 3
 0 7 -15 4759.45 286.378 2
 0 7 16 20057.1 528.387 5
 0 7 -16 20111.3 591.089 2
 0 -7 -16 19236.8 542.833 3
 0 7 17 820.634 117.753 5
 0 7 -17 838.191 147.774 2
 0 -7 -17 866.878 128.909 3
 0 7 -18 17209.5 581.624 2
 0 7 18 17654.7 511.135 5
 0 -7 -18 17285.5 541.688 3
 0 7 -19 185.876 97.4776 2
 0 -7 -19 417.741 108.07 3
 0 -7 -20 6099.59 346.263 3
 0 7 -20 5608.02 357.112 2
 0 -7 -21 2821.72 248.575 3
 0 7 -21 2513.1 249.705 2
 0 7 -22 1071.41 176.256 2
 0 -7 -22 1250.33 172.506 3
 0 -7 -23 2348.52 237.893 3
 0 7 -23 2479.91 263.504 2
 0 -8 0 7693.62 236.695 3
 0 8 0 7934.78 260.905 2
 0 8 1 26.2647 33.0535 2
 0 -8 -1 51.5169 28.1115 3
 0 8 -1 -31.3289 39.6476 2
 0 -8 1 41.0403 31.8435 3
 0 -8 2 609.681 74.5294 3
 0 8 -2 623.389 84.8247 2
 0 8 2 517.73 72.1687 2
 0 -8 -2 537.229 68.2811 3
 0 -8 3 1869.94 121.618 3
 0 -8 -3 1837.25 119.504 3
 0 8 3 2021.35 132.16 2
 0 8 -3 2058.24 143.062 2
 0 -8 -4 622.1 73.6113 3
 0 8 -4 659.856 97.4547 2
 0 8 4 613.277 74.0695 2
 0 -8 4 608.101 74.1298 3
 0 -8 -5 10385.5 293.71 3
 0 8 -5 10799.2 333.215 2
 0 -8 -6 2459.59 147.794 3
 0 8 -6 2430.66 166.288 2
 0 8 -6 2348.92 140.633 5
 0 8 -7 13061.1 321.373 5
 0 8 -7 13661.8 395.107 2
 0 -8 -7 13074 344.041 3
 0 8 -8 9519.07 266.723 5
 0 -8 -8 9600.54 304.019 3
 0 8 -8 10066.9 347.156 2
 0 8 -9 2527.36 182.913 2
 0 -8 -9 2672.85 167.245 3
 0 8 -10 7560.79 317.351 2
 0 -8 -10 7586.37 287.186 3
 0 8 -11 566.654 106.103 2
 0 -8 -11 588.38 88.2272 3
 0 8 -12 11500.9 418.938 2
 0 -8 -12 11698.5 376.151 3
 0 -8 -13 4112.64 234.054 3
 0 8 -13 3794.66 250.25 2
 0 8 14 4980.99 276.232 5
 0 -8 -14 4651.23 253.429 3
 0 8 -14 4828.31 291.058 2
 0 8 -15 6131.98 334.865 2
 0 -8 -15 5857.22 295.108 3
 0 8 15 5948.38 302.928 5
 0 -8 -16 954.581 130.106 3
 0 8 -16 941.296 149.718 2
 0 8 16 1108.68 137.668 5
 0 -8 -17 7461.38 356.446 3
 0 8 -17 7750.8 398.287 2
 0 8 17 8405.08 369.584 5
 0 8 -18 26.1946 84.4928 2
 0 -8 -18 230.738 89.6233 3
 0 8 18 104.827 62.4859 5
 0 -8 -19 3471.6 258.939 3
 0 8 -19 2635.32 250.55 2
 0 8 -20 1672.4 212.975 2
 0 -8 -20 2274.86 217.021 3
 0 8 -21 495.447 139.57 2
 0 -8 -21 601.351 128.669 3
 0 8 -22 5648.94 396.449 2
 0 -8 -22 5418.25 353.418 3
 0 9 0 -10.1621 33.9029 2
 0 -9 0 -15.2974 34.7483 3
 0 9 -1 1500.21 126.246 2
 0 -9 1 1603.19 117.737 3
 0 -9 -1 1499.05 112.922 3
 0 9 1 1600.16 128.262 2
 0 -9 2 840.874 90.6264 3
 0 9 2 663.919 83.502 2
 0 -9 -2 783.183 83.3291 3
 0 9 -2 804.061 96.5325 2
 0 9 -3 448.411 78.6155 2
 0 9 3 243.916 55.2226 2
 0 -9 -3 297.044 59.5322 3
 0 -9 3 388.478 68.8948 3
 0 -9 4 4268.55 195.393 3
 0 -9 -4 4358.54 196.865 3
 0 9 4 4589.36 207.916 2
 0 9 -4 4428.58 223.592 2
 0 -9 5 64.4572 43.1059 3
 0 9 -5 62.965 40.0522 5
 0 -9 -5 -17.6216 48.9663 3
 0 9 -5 130.707 63.2714 2
 0 9 -6 6838.63 258.426 5
 0 -9 -6 7386.82 263.882 3
 0 9 -6 7641.36 304.198 2
 0 9 -7 4420.91 205.444 5
 0 9 -7 4786.06 250.217 2
 0 -9 -7 4300.67 207.824 3
 0 -9 -8 3171.62 182.586 3
 0 9 -8 2860.28 198.909 2
 0 -9 -9 9934.61 330.229 3
 0 9 -9 9431.82 363.429 2
 0 9 -10 1044.68 129.754 2
 0 -9 -10 868.166 105.941 3
 0 -9 -11 11258.7 369.193 3
 0 9 -11 11612.5 418.527 2
 0 -9 -12 600.325 99.1767 3
 0 9 -12 426.909 102.562 2
 0 -9 -13 8655.03 343.682 3
 0 9 -13 8539.99 384.694 2
 0 9 13 8883.52 380.072 5
 0 -9 -14 293.945 72.4259 3
 0 9 14 481.444 100.175 5
 0 9 15 4500.08 278.867 5
 0 -9 -15 4371.73 261.275 3
 0 9 16 161.122 65.3144 5
 0 -9 -16 184.86 65.3895 3
 0 9 -16 206.289 88.6025 2
 0 9 -17 88.5293 72.0697 2
 0 9 17 32.8274 50.1244 5
 0 -9 -17 121.221 72.7743 3
 0 9 18 300.96 89.4803 5
 0 -9 -18 289.209 81.2858 3
 0 9 -18 185.405 74.7223 2
 0 -9 -19 1616.4 184.33 3
 0 9 -19 1426.95 197.918 2
 0 9 19 1525.97 171.089 5
 0 -9 -20 78.8525 62.4168 3
 0 9 -20 156.816 96.4796 2
 0 -9 -21 4648.6 323.633 3
 0 9 -21 4616.11 354.531 2
 0 -10 0 4196.68 196.736 3
 0 10 0 4553.52 226.307 2
 0 -10 -1 -8.75309 38.1171 3
 0 10 1 73.1369 40.816 2
 0 -10 1 7.98068 33.6928 3
 0 10 -1 -29.0054 45.7722 2
 0 10 2 3769.25 203.619 2
 0 -10 2 3564.5 183.578 3
 0 10 -2 3765.9 214.902 2
 0 -10 -2 3862.37 189.414 3
 0 -10 -3 25.0998 42.3557 3
 0 10 3 -24.9194 46.5755 2
 0 -10 3 -31.4487 43.8902 3
 0 10 -3 -28.5002 44.0544 2
 0 10 -4 4100.24 230.006 2
 0 10 -4 4236.97 229.985 5
 0 -10 4 4536.63 211.816 3
 0 10 4 4110.88 208.66 2
 0 -10 -4 4244.04 202.729 3
 0 10 -5 -23.4825 38.6595 5
 0 10 -5 -24.351 51.8471 2
 0 -10 5 94.782 38.3311 3
 0 -10 -5 4.545 38.2044 3
 0 10 -6 609.199 87.9095 5
 0 -10 6 576.425 86.4099 3
 0 10 -6 479.194 90.5539 2
 0 -10 -6 622.514 86.9965 3
 0 10 -7 213.79 72.586 2
 0 -10 7 264.957 63.1931 3
 0 10 -7 221.863 61.9001 5
 0 -10 -7 143.958 44.4274 3
 0 10 -8 5901.84 294.768 2
 0 -10 -8 5885.73 260.521 3
 0 10 -9 2212.33 194.885 2
 0 -10 -9 2037.61 159.393 3
 0 -10 -10 10377 362.367 3
 0 10 -10 10215.3 405.755 2
 0 -10 -11 2095.84 168.303 3
 0 10 -11 2082.87 196.942 2
 0 10 12 12876.2 475.471 5
 0 -10 -12 13536.4 430.456 3
 0 10 13 597.634 116.778 5
 0 -10 -13 772.773 115.384 3
 0 -10 -14 5172.89 285.18 3
 0 10 14 5265.48 311.968 5
 0 -10 -15 279.565 74.6613 3
 0 10 15 240.091 84.0235 5
 0 10 -15 263.611 93.7403 2
 0 -10 -16 568.981 110.645 3
 0 10 16 388.014 86.5894 5
 0 10 -16 656.05 132.174 2
 0 -10 -17 230.485 74.6279 3
 0 10 -17 42.7886 101.748 2
 0 10 18 -3.4879 66.3788 5
 0 10 -18 110.476 70.0613 2
 0 -10 -18 114.162 65.489 3
 0 10 -19 152.006 77.588 2
 0 10 19 112.287 71.263 5
 0 -10 -19 198.558 78.6125 3
 0 -10 -20 2692.79 244.109 3
 0 10 -20 2528.19 268.682 2
 0 -11 0 46.1451 41.8934 3
 0 11 0 31.4324 56.1817 2
 0 11 1 25363.6 554.939 2
 0 -11 1 25171.3 504.137 3
 0 -11 -1 24968.1 505.737 3
 0 11 -1 24774.4 564.342 2
 0 -11 -2 588.303 85.0153 3
 0 -11 2 516.86 85.2031 3
 0 11 -2 621.284 104.673 2
 0 11 -2 499.146 96.772 5
 0 11 2 563.22 88.2346 2
 0 11 3 10480.9 352.127 2
 0 11 -3 9634.57 373.819 5
 0 -11 -3 11313.8 344.397 3
 0 -11 3 10882.3 338.298 3
 0 11 -3 10320.2 377.434 2
 0 11 -4 1329.82 143.154 5
 0 11 4 1362.83 132.767 2
 0 -11 4 1570.11 133.515 3
 0 -11 -4 1463.2 126.472 3
 0 11 -4 1499.61 152.95 2
 0 11 -5 1720.82 161.877 5
 0 -11 5 1539.67 133.145 3
 0 -11 -5 1709.11 138.489 3
 0 11 -5 1626.48 153.286 2
 0 -11 6 945.771 105.553 3
 0 11 -6 632.561 96.5574 5
 0 11 -6 719.639 111.629 2
 0 -11 -6 771.057 97.2902 3
 0 -11 -7 1193.04 127.221 3
 0 -11 7 1210.13 127.153 3
 0 11 -7 1211.23 148.422 2
 0 11 -8 65.5157 59.8139 2
 0 -11 8 89.1852 45.1048 3
 0 -11 -8 52.4111 48.4469 3
 0 -11 -9 7703.24 314.532 3
 0 11 -9 7889.58 367.737 2
 0 11 -10 228.467 94.5399 2
 0 -11 -10 292.656 80.1116 3
 0 11 10 237.897 78.5361 5
 0 -11 -11 12722.8 422.275 3
 0 11 11 11865.2 474.101 5
 0 11 -11 11891.8 468.111 2
 0 11 -12 1276.57 171.791 2
 0 11 12 847.906 136.454 5
 0 -11 -12 1110.45 133.92 3
 0 -11 -13 7365.38 334.332 3
 0 11 -13 7312.49 388.348 2
 0 11 13 7393.62 384.681 5
 0 11 14 2953.08 253.186 5
 0 -11 -14 2835.61 215.501 3
 0 11 15 2145.07 217.081 5
 0 -11 -15 2161.62 195.367 3
 0 11 -16 1703.29 206.237 2
 0 11 16 2068.44 214.278 5
 0 -11 -16 1941.99 187.363 3
 0 11 17 362.938 100.771 5
 0 -11 -17 439.018 110.076 3
 0 11 -17 265.261 114.189 2
 0 11 -18 826.147 153.808 2
 0 11 18 853.333 142.257 5
 0 -11 -18 980.262 148.174 3
 0 11 19 169.77 80.1514 5
 0 -11 -19 270.042 89.0102 3
 0 11 -19 163.741 81.5987 2
 0 -12 0 27941.4 560.594 3
 0 12 0 28403.2 696.373 5
 0 12 0 28242.2 625.614 2
 0 12 -1 160.986 73.5116 2
 0 12 1 140.403 76.6967 5
 0 12 -1 108.448 66.7758 5
 0 -12 1 -35.4889 49.9667 3
 0 12 1 139.861 72.4953 2
 0 -12 -1 32.4014 47.9189 3
 0 12 -2 17623.7 509.382 2
 0 -12 2 17520.6 443.702 3
 0 12 -2 16962.1 532.139 5
 0 12 2 17864.9 561.457 5
 0 -12 -2 17685.2 444.313 3
 0 12 2 16934 476.08 2
 0 12 -3 139.37 65.6742 2
 0 -12 3 79.0955 44.1955 3
 0 12 3 97.3465 71.3167 5
 0 12 3 78.933 63.8028 2
 0 -12 -3 197.573 63.2901 3
 0 12 -3 -27.4558 58.658 5
 0 12 -4 3423.53 239.548 2
 0 -12 -4 3919.39 217.67 3
 0 12 4 3528.03 220.774 2
 0 -12 4 3419.84 202.47 3
 0 12 -4 3279.16 231.88 5
 0 -12 5 274.906 74.9075 3
 0 12 -5 211.737 81.0876 2
 0 12 -5 225.107 74.1521 5
 0 -12 -5 72.1373 48.8788 3
 0 12 -6 75.4111 38.7009 5
 0 12 6 10.7457 53.4086 5
 0 -12 6 18.3369 40.1024 3
 0 12 -6 16.4399 57.1483 2
 0 -12 -6 52.0304 54.5765 3
 0 12 7 478.529 119.183 5
 0 12 -7 539.659 106.119 2
 0 -12 -7 567.002 91.6675 3
 0 -12 7 631.813 96.145 3
 0 -12 8 1506.66 145.469 3
 0 -12 -8 1274.55 132.976 3
 0 12 -8 1299.98 154.076 2
 0 12 8 1028.78 147.677 5
 0 -12 9 43.0946 49.6938 3
 0 12 9 81.2909 62.7559 5
 0 12 -9 -26.075 71.911 2
 0 -12 -9 -35.2691 43.7615 3
 0 12 10 3822.21 283.271 5
 0 -12 -10 3752.41 233.576 3
 0 12 -10 3899.61 278.696 2
 0 -12 10 3855.83 232.422 3
 0 -12 -11 349.513 73.2061 3
 0 12 11 254.259 87.6631 5
 0 12 -11 477.646 117.674 2
 0 12 -12 5875.57 352.054 2
 0 12 12 5429.16 343.206 5
 0 -12 -12 5823.86 299.69 3
 0 12 13 2539.22 241.518 5
 0 -12 -13 2753.16 212.588 3
 0 12 -13 2632.95 245.133 2
 0 12 14 3620.74 290.138 5
 0 12 -14 3460 289.484 2
 0 -12 -14 3668.57 253.839 3
 0 12 15 4046.52 310.272 5
 0 -12 -15 4530.12 286.52 3
 0 12 -15 4138.68 318.122 2
 0 12 16 1187.95 180.795 5
 0 12 -16 1104.08 178.314 2
 0 -12 -16 1340.57 161.503 3
 0 12 -17 2147.98 246.072 2
 0 -12 -17 2569.19 231.367 3
 0 12 17 2505.93 250.743 5
 0 -12 -18 -18.6885 65.5381 3
 0 12 18 -177.679 99.3753 5
 0 13 0 162.629 82.1786 5
 0 -13 0 130.756 54.8895 3
 0 13 0 197.55 90.8761 2
 0 -13 -1 5869.35 267.964 3
 0 -13 1 5925.57 270.757 3
 0 13 -1 5797.19 334.136 5
 0 13 1 5639.68 296.454 2
 0 13 1 5657.39 335.733 5
 0 13 -1 5776.39 305.348 2
 0 13 -2 1300.33 153.992 2
 0 13 2 1375.61 149.157 2
 0 -13 -2 1488.38 138.986 3
 0 13 -2 1429.83 170.429 5
 0 13 2 1249.93 166.455 5
 0 -13 2 1660.67 147.35 3
 0 13 -3 5046.36 310.619 5
 0 13 3 4793.62 314.283 5
 0 13 3 5112.92 275.795 2
 0 -13 -3 5290.34 256.579 3
 0 13 -3 5423.38 302.33 2
 0 13 4 3895.46 245.706 2
 0 -13 -4 4127.61 233.415 3
 0 13 -4 3916.83 261.52 2
 0 13 -4 3744.26 267.42 5
 0 13 4 3641.56 277.444 5
 0 13 -5 930.885 136.569 5
 0 13 -5 973.99 140.123 2
 0 13 5 1102.56 156.719 5
 0 -13 -5 1240.63 131.964 3
 0 -13 -6 4557.83 247.603 3
 0 13 -6 4307.81 282.721 2
 0 13 6 4545.2 314.428 5
 0 -13 -7 52.0376 48.4435 3
 0 13 7 -61.5949 74.396 5
 0 13 -7 113.37 71.0555 2
 0 -13 -8 1795.88 162.304 3
 0 13 -8 1647.27 193.687 2
 0 13 8 1715.97 200.662 5
 0 13 9 602.396 127.98 5
 0 13 -9 757.881 133.932 2
 0 -13 -9 691.617 113.269 3
 0 13 10 148.619 94.7301 5
 0 -13 -10 377.28 92.8499 3
 0 13 -10 177.451 88.5901 2
 0 -13 -11 1968.25 182.42 3
 0 13 11 1673.27 204.209 5
 0 13 -11 1701.31 199.074 2
 0 -13 -12 78.9594 56.3312 3
 0 13 12 -20.508 67.1065 5
 0 13 -12 -58.3712 87.4589 2
 0 -13 -13 1638.24 172.461 3
 0 13 13 1293.72 179.335 5
 0 13 -13 1406.74 187.745 2
 0 -13 -14 1650.28 174.438 3
 0 13 14 1542.32 207.531 5
 0 13 -14 1650.02 213.175 2
 0 -13 -15 478.526 102.364 3
 0 13 -15 560.222 136.867 2
 0 13 15 544.084 131.666 5
 0 -13 -16 1877.8 193.978 3
 0 13 16 2006.65 235.345 5
 0 -13 -17 68.7661 54.8723 3
 0 14 0 2220.53 197.444 2
 0 14 0 2019.66 216.428 5
 0 14 1 932.575 125.71 2
 0 14 -1 1047.32 154.872 5
 0 14 -1 891.561 133.229 2
 0 14 1 930.098 154.438 5
 0 14 -2 1724.58 181.522 2
 0 14 2 1930.44 182.892 2
 0 14 2 1646.16 199.211 5
 0 14 -2 1477.75 181.966 5
 0 14 -3 5998.06 355.968 5
 0 14 -3 6849.36 356.526 2
 0 14 3 6314.38 321.175 2
 0 14 3 6518.45 387.392 5
 0 14 4 1422.6 191.212 5
 0 14 -4 1348.2 176.384 5
 0 14 -4 1477.43 177.934 2
 0 14 -5 11908.8 483.081 2
 0 14 5 11732.3 522.474 5
 0 14 -6 194.789 96.908 2
 0 14 6 219.088 90.8835 5
 0 14 -7 8332.5 423.651 2
 0 14 7 8345.72 452.33 5
 0 14 8 -108.949 98.278 5
 0 14 -8 124.158 91.36 2
 0 14 -9 4862.92 330.599 2
 0 14 9 4547.36 339.165 5
 0 14 -10 524.018 130.482 2
 0 14 10 212.885 89.1006 5
 0 14 -11 1679.74 209.072 2
 0 14 11 1654.7 215.35 5
 0 14 12 17.2835 64.5062 5
 0 14 -12 -75.2839 83.1341 2
 0 14 -13 159 83.6765 2
 0 14 13 -36.4386 95.047 5
 0 15 0 -19.0996 69.9654 2
 0 15 0 -81.1374 88.7816 5
 0 15 -1 120.575 57.7412 5
 0 15 1 17.6843 64.4667 2
 0 15 1 -15.4199 60.4849 5
 0 15 -1 12.0006 78.1231 2
 0 15 2 1665.85 174.873 2
 0 15 -2 2146.74 214.479 2
 0 15 -2 1517.15 194.281 5
 0 15 2 1739.31 214.971 5
 0 15 -3 34.3236 73.4831 2
 0 15 3 -95.3893 95.7553 5
 0 15 -3 -21.6715 53.1995 5
 0 15 -4 7953.62 411.525 2
 0 15 4 8068.97 455.874 5
 0 15 -5 218.614 106.257 2
 0 15 5 37.9648 84.1551 5
 0 15 -6 14353.9 557.208 2
 0 15 6 14838.7 622.292 5
 0 15 7 163.264 112.367 5
 0 15 -7 -34.7657 77.8149 2
 0 15 -8 10675.2 504.11 2
 0 15 8 11090.6 548.696 5
 0 15 -9 139.412 97.2633 2
 0 15 9 23.5131 70.0725 5
 0 15 -10 5082.29 357.846 2
 0 16 0 362.224 106.311 5
 0 16 0 532.236 110.005 2
 0 16 -1 477.038 103.873 2
 0 16 1 667.465 145.809 5
 0 16 -1 727.281 140.088 5
 0 16 -2 389.273 107.089 2
 0 16 -2 396.061 105.525 5
 0 16 2 85.7356 60.9826 5
 0 16 -3 4336.3 310.887 2
 0 16 3 4952.09 376.708 5
 0 16 -4 340.936 119.965 2
 0 16 4 497.183 135.767 5
 0 16 5 9931.22 533.68 5
 0 16 -5 8749.7 456.072 2
 0 16 -6 29.3995 98.6304 2
 0 16 -7 8459.53 458.46 2
 0 17 0 -147.009 92.5721 5
 0 17 -1 2304.76 264.275 5
 1 0 -26 896.433 159.732 3
 1 0 -25 11.0673 74.0645 3
 1 0 -24 63.7451 68.0518 3
 1 0 -23 194.942 87.6429 3
 1 0 -22 1094.14 144.439 2
 1 0 -22 1276.77 164.346 3
 1 0 -21 212.796 72.2094 2
 1 0 -21 101.007 64.927 3
 1 0 -20 11810.4 452.353 3
 1 0 -20 11510.5 408.249 2
 1 0 -19 495.14 111.36 3
 1 0 -19 263.803 78.4917 2
 -1 0 18 21800 485.479 4
 1 0 -18 21995.7 565.676 3
 1 0 -17 213.587 77.7499 3
 -1 0 17 309.065 64.1528 4
 1 0 -17 282.731 82.2806 2
 1 0 -16 29262.5 558.909 2
 -1 0 16 27458.6 508.793 4
 1 0 -16 27903.9 593.856 3
 1 0 -15 223.477 68.2102 2
 -1 0 15 220.777 61.3712 4
 1 0 -15 224.771 75.5268 3
 1 0 -14 23587.4 462.21 2
 -1 0 14 23975.1 437.622 4
 1 0 -14 23262.5 503.74 3
 -1 0 13 103.575 41.5585 4
 1 0 -13 20.1584 37.522 3
 1 0 -13 34.6391 30.6822 2
 -1 0 12 10201.4 260.405 4
 1 0 -12 10173.8 276.702 2
 1 0 -12 10009.3 300.357 3
 1 0 -11 55.8368 44.4434 3
 -1 0 11 31.2958 31.2505 4
 1 0 -11 43.6723 36.8973 2
 1 0 -10 677.506 79.7533 3
 -1 0 10 722.093 67.6007 4
 1 0 -10 696.576 72.5445 2
 1 0 -9 175.462 50.1111 3
 -1 0 9 58.4349 32.2142 4
 1 0 -9 157.897 45.4712 2
 1 0 -8 12210.5 261.972 3
 -1 0 8 11624.5 221.6 4
 1 0 -8 11970.9 229.551 2
 -1 0 7 1.30576 16.2276 4
 1 0 -7 -15.251 19.9601 3
 1 0 -7 10.2125 20.9205 2
 1 0 -6 91101.9 601.747 3
 1 0 -6 88820.2 520.353 2
 -1 0 6 89210.9 521.785 4
 1 0 -5 92.324 19.8823 2
 1 0 -5 55.753 19.832 3
 1 0 -4 91282.9 374.191 5
 1 0 -4 88085.7 395.944 2
 1 0 -4 89484.1 469.638 3
 1 0 3 -7.86878 7.26494 5
 -1 0 -3 9.22918 19.8423 2
 -1 0 -4 22518.7 280.281 3
 -1 0 -4 22606.6 283.655 2
 1 0 4 22588.7 180.186 5
 1 0 5 30.2431 10.5306 5
 -1 0 -5 32.9291 23.2285 2
 -1 0 -5 34.871 20.0064 3
 -1 0 -6 10941.7 237.239 3
 1 0 6 10718.8 140.018 5
 -1 0 -6 11166.7 233.232 2
 1 0 7 21.775 10.3793 5
 -1 0 -7 -0.31555 27.8493 2
 -1 0 -7 -5.84697 24.9454 3
 -1 0 -8 13464.2 292.332 2
 1 0 8 12776.9 169.694 5
 -1 0 -8 13183 294.834 3
 -1 0 -9 15.9938 41.7565 2
 -1 0 -9 28.2866 37.5387 3
 1 0 9 -19.3699 15.8556 5
 1 0 10 10194.3 166.589 5
 -1 0 -10 10429 292.652 3
 -1 0 -10 10630.7 291.77 2
 -1 0 -11 51.6187 44.2226 3
 1 0 11 26.9202 17.0458 5
 -1 0 -11 61.5256 39.1026 2
 -1 0 -12 911.445 101.378 2
 -1 0 -12 868.756 98.5242 3
 1 0 12 859.865 52.3004 5
 -1 0 -13 -10.4645 40.7322 2
 -1 0 -13 18.2122 41.2915 3
 -1 0 -14 340.766 64.6572 2
 -1 0 -14 576.388 90.8406 3
 -1 0 -15 -40.3809 46.4506 2
 -1 0 -15 70.4068 53.6715 3
 -1 0 -16 12731.1 405.868 2
 -1 0 -16 11375.2 400.405 3
 -1 0 -17 143.921 68.8549 2
 -1 0 -17 199.328 81.6423 3
 -1 0 -18 8232.09 368.847 3
 -1 0 -18 7741.63 346.622 2
 -1 0 -19 36.0496 54.946 2
 -1 0 -19 146.806 78.8922 3
 -1 0 -20 2053.93 223.948 3
 -1 0 -20 3203.61 243.172 2
 -1 0 -21 14.1708 58.1665 2
 -1 0 -21 -2.59681 54.8162 3
 -1 0 -22 174.303 110.53 3
 -1 0 -22 322.249 92.6336 2
 -1 0 -23 -23.2269 59.7327 2
 -1 0 -23 9.24372 68.9637 3
 -1 0 -24 416.432 116.421 3
 -1 0 -25 -26.5077 79.6643 3
 1 -1 -26 14.2494 68.8091 3
 1 1 -26 -8.28529 64.3431 3
 1 -1 -25 595.461 138.17 3
 1 1 -25 437.538 114.557 3
 1 -1 -24 391.096 109.701 3
 1 1 -24 289.101 97.6052 3
 1 1 -23 224.442 82.4668 3
 1 -1 -23 76.5969 58.0724 3
 1 1 -23 213.359 71.9199 2
 1 1 -22 91.932 63.4775 2
 1 1 -22 86.4584 68.9604 3
 1 -1 -22 8.95485 58.5189 3
 1 -1 -21 1278.2 158.072 3
 1 1 -21 1360.51 165.101 3
 1 -1 -21 1324.31 150.078 2
 1 1 -21 1453.95 157.003 2
 1 -1 -20 156.771 68.4262 2
 1 -1 -20 224.447 89.8327 3
 1 1 -20 113.529 62.4373 3
 1 1 -20 169.24 64.5913 2
 1 1 -19 12585.3 421.007 2
 1 -1 -19 12196.8 402.51 2
 1 1 -19 12056.5 442.983 3
 1 -1 -19 12293.5 442.488 3
 1 -1 -18 290.537 91.8095 3
 1 1 -18 515.709 105.794 3
 -1 -1 18 315.891 75.5656 4
 1 -1 -18 387.622 86.3625 2
 1 1 -18 410.391 91.3421 2
 -1 1 18 303.884 68.5371 4
 1 1 -17 19192 479.732 2
 1 -1 -17 16981.9 486.002 3
 -1 1 17 17132.7 398.699 4
 1 1 -17 17982.2 498.979 3
 1 -1 -17 17949.8 450.077 2
 -1 -1 17 16962 433.145 4
 -1 -1 16 451.414 78.1567 4
 1 1 -16 639.373 98.7296 2
 1 -1 -16 462.186 90.2224 3
 -1 1 16 437.922 68.9938 4
 1 -1 -16 568.347 89.5263 2
 1 1 -16 501.901 96.4049 3
 -1 1 15 13544 327.281 4
 1 -1 -15 13585 401.943 3
 1 1 -15 13913.8 379.862 2
 1 -1 -15 13912.1 362.016 2
 -1 -1 15 14007.9 365.382 4
 1 1 -15 13413.7 399.309 3
 -1 -1 14 12006.3 325.427 4
 1 1 -14 11890.1 336.104 2
 1 -1 -14 11984.4 317.116 2
 -1 1 14 11951.4 294.363 4
 1 -1 -14 11896 357.633 3
 1 1 -14 11810.1 357.672 3
 1 1 -13 9333.75 285.728 2
 -1 -1 13 9250.27 274.528 4
 1 -1 -13 9530.24 305.451 3
 -1 1 13 9327.37 247.121 4
 1 -1 -13 9401.48 272.748 2
 1 1 -13 10034.2 313.838 3
 1 -1 -12 5303.91 220.596 3
 1 1 -12 5132.47 215.006 3
 -1 1 12 5038.8 174.305 4
 1 1 -12 5199.12 204.652 2
 -1 -1 12 5155.7 196.924 4
 1 -1 -12 4863.87 185.646 2
 1 1 -11 444.938 65.9084 2
 1 -1 -11 445.048 67.5521 3
 -1 -1 11 431.961 58.5666 4
 -1 1 11 481.59 55.4201 4
 1 -1 -11 397.446 57.1649 2
 1 1 -11 364.077 63.5618 3
 -1 1 10 99.1866 34.9131 4
 1 -1 -10 61.9888 33.7676 2
 -1 -1 10 128.144 41.0876 4
 1 1 -10 101.244 42.3657 2
 1 1 -10 35.538 38.2892 3
 1 -1 -10 78.2922 39.535 3
 1 1 -9 4424.81 172.168 3
 -1 1 9 4447.79 137.455 4
 1 -1 -9 4195.58 143.305 2
 -1 -1 9 4417.46 157.642 4
 1 1 -9 4470.31 160.871 2
 1 -1 -9 4243.12 166.458 3
 1 1 -8 2247.6 114.829 3
 1 -1 -8 2074.94 95.2813 2
 1 -1 -8 1919.45 107.644 3
 1 1 -8 1910.76 102.367 2
 -1 1 8 1930.08 84.4652 4
 -1 -1 8 2104.52 103.5 4
 -1 1 7 7851.88 153.833 4
 1 1 -7 7750.34 182.848 2
 1 -1 -7 7588.34 166.196 2
 1 1 -7 8196.91 201.188 3
 1 -1 -7 8521.73 202.915 3
 -1 -1 7 7963.57 185.956 4
 1 -1 -6 68.7901 22.3457 3
 1 1 -6 97.1542 33.3027 3
 1 -1 -6 64.0439 18.2112 2
 1 1 -6 54.4078 19.471 2
 -1 -1 6 84.3051 26.6821 4
 1 1 -5 60534.6 447.925 3
 -1 -1 5 61442.8 444.506 4
 1 1 -5 58270.2 422.069 2
 1 -1 -5 60192.6 453.105 3
 1 -1 -5 60218.9 362.584 2
 -1 -1 4 8461.45 149.323 4
 1 1 -4 8481.81 144.323 2
 1 -1 -4 8517.87 155.523 3
 1 1 -4 8720.44 148.871 3
 1 -1 -4 8333.24 114.568 2
 1 -1 -3 105911 481.022 3
 1 1 -3 112311 475.171 2
 1 1 -3 114662 446.877 3
 -1 -1 3 107470 473.049 4
 1 1 -3 106094 356.428 5
 -1 -1 -2 2148.53 65.0588 3
 1 1 2 2478.2 68.0692 5
 -1 1 -3 4435.19 115.951 2
 1 1 3 4534.03 97.5175 5
 -1 -1 -3 4662.88 110.859 3
 -1 -1 -4 616.03 48.6913 3
 -1 1 -4 494.2 47.8621 2
 -1 1 -4 577.381 50.2935 3
 1 1 4 597.773 38.789 5
 -1 1 -5 20776.4 305.676 2
 -1 1 -5 21201.9 317.461 3
 1 1 5 20722.4 230.537 5
 -1 -1 -5 21920.7 309.943 2
 -1 -1 -5 21703.5 304.445 3
 -1 -1 -6 297.716 45.1032 2
 -1 -1 -6 418.167 62.6183 3
 -1 1 -6 264.188 42.0473 2
 -1 1 -6 282.604 45.656 3
 1 1 6 265.265 28.8642 5
 -1 -1 -7 11815.5 259.216 2
 1 1 7 11157.3 183.36 5
 -1 1 -7 11762.9 259.49 2
 -1 1 -7 11981.8 272.711 3
 -1 -1 -7 11721.5 259.544 3
 -1 -1 -8 746.576 75.3844 2
 1 1 8 818.859 53.4894 5
 1 -1 8 582.673 28.4448 5
 -1 1 -8 853.332 79.1645 2
 -1 -1 -8 766.665 76.8879 3
 -1 1 -8 837.445 83.0019 3
 -1 1 -9 25057.7 442.787 3
 -1 -1 -9 24244.1 426.291 3
 -1 1 -9 24393.1 417.616 2
 -1 -1 -9 24338.2 420.743 2
 1 1 9 23409.8 285.802 5
 1 -1 10 702.78 34.1964 5
 -1 1 -10 957.576 97.3331 2
 1 1 10 958.386 62.8788 5
 -1 -1 -10 936.657 96.3423 2
 -1 -1 -10 1037.42 99.8675 3
 -1 1 -10 969.509 98.9541 3
 -1 -1 -11 5171.65 214.863 2
 -1 1 -11 5158.98 212.691 2
 -1 1 -11 5622.74 233.331 3
 1 -1 11 3904.05 81.0022 5
 1 1 11 5189.94 143.655 5
 -1 -1 -11 5309.13 223.436 3
 -1 -1 -12 388.219 72.8829 3
 -1 -1 -12 352.945 67.087 2
 -1 1 -12 402.164 77.1363 3
 1 1 12 409.02 43.886 5
 -1 1 -12 377.834 70.0468 2
 1 1 13 32.6143 20.3826 5
 -1 -1 -13 16.5195 38.2803 3
 -1 1 -13 24.9578 44.4404 3
 -1 -1 -13 105.46 51.1586 2
 -1 1 -13 31.3838 39.3787 2
 -1 1 -14 4078.93 228.511 3
 -1 -1 -14 4162.67 224.642 3
 -1 1 -14 4458.9 231.158 2
 -1 -1 -14 4242.37 219.275 2
 -1 -1 -15 5546.94 268.309 3
 -1 -1 -15 5648.18 262.899 2
 -1 1 -15 5591.29 265.742 2
 -1 1 -15 5428.02 272.142 3
 -1 -1 -16 1457.08 147.511 2
 -1 1 -16 1376.29 150.804 3
 -1 -1 -16 1279.11 139.73 3
 -1 1 -16 1239.9 140.688 2
 -1 -1 -17 17169.8 482.879 2
 -1 1 -17 17727.5 511.208 2
 -1 1 -17 15753.1 494.515 3
 -1 -1 -17 16038.2 490.256 3
 -1 1 -18 579.863 110.827 2
 -1 1 -18 457.039 110.661 3
 -1 -1 -18 315.197 91.3168 2
 -1 -1 -18 415.118 100.789 3
 -1 -1 -19 8539.12 387.263 3
 -1 -1 -19 8653.61 374.049 2
 -1 1 -19 8737.48 397.806 3
 -1 1 -19 8806.08 384.48 2
 -1 -1 -20 1057.94 150.16 3
 -1 1 -20 1327.14 162.099 2
 -1 -1 -20 1491.32 165.804 2
 -1 -1 -21 3154.17 241.249 2
 -1 1 -21 2954.55 241.002 2
 -1 -1 -22 1976.25 206.887 2
 -1 1 -22 2235.25 217.964 2
 -1 -1 -22 1105.98 225.922 3
 -1 1 -22 1269.05 226.005 3
 -1 1 -23 162.834 75.0439 2
 -1 -1 -23 367.352 114.386 3
 -1 1 -23 185.896 87.3751 3
 -1 1 -24 1126.19 169.664 2
 -1 -1 -24 1099.79 175.205 3
 -1 1 -24 1262 191.416 3
 -1 1 -25 724.437 151 3
 -1 -1 -25 725.676 146.016 3
 1 2 -26 1791.66 227.271 3
 1 -2 -25 1502.67 196.096 3
 1 2 -25 1437.44 199.883 3
 1 2 -24 227.534 82.6678 2
 1 2 -24 130.786 83.6825 3
 1 -2 -24 299.899 100.539 3
 1 2 -23 1108.7 163.063 3
 1 2 -23 922.363 144.415 2
 1 -2 -23 894.467 150.696 3
 1 -2 -22 236.789 93.2324 3
 1 2 -22 279.678 100.795 3
 1 2 -22 150.931 64.7976 2
 1 2 -21 923.471 143.823 3
 1 -2 -21 973.218 147.415 3
 1 2 -21 940.512 134.505 2
 1 -2 -20 1497.75 173.607 3
 1 2 -20 1250.96 155.41 3
 1 2 -20 1456.66 162.189 2
 1 2 -19 291.257 91.6525 3
 1 -2 -19 366.354 86.318 3
 1 2 -19 376.01 89.8065 2
 1 -2 -19 484.324 96.7769 2
 1 2 -18 8101.29 353.536 3
 1 2 -18 8474.93 343.866 2
 1 -2 -18 7644.31 340.751 3
 1 -2 -18 8032.52 307.741 2
 1 2 -17 2669.22 190.018 2
 1 2 -17 2605.19 194.385 3
 1 -2 -17 2262.18 161.725 2
 1 -2 -17 2817.12 206.124 3
 -1 -2 17 2386.36 171.264 4
 1 -2 -16 4160.31 210.652 2
 -1 2 16 3843.71 175.209 4
 1 2 -16 3967.91 232.006 3
 -1 -2 16 3998.8 217.534 4
 1 -2 -16 4361.85 240.389 3
 1 2 -16 4308.44 235.892 2
 -1 -2 15 9344.5 311.948 4
 -1 2 15 10198.2 269.68 4
 1 -2 -15 10288.8 350.758 3
 1 2 -15 10151.6 353.216 3
 1 2 -15 10012.1 331.228 2
 1 -2 -15 9766.5 302.42 2
 1 2 -14 4333.38 222.49 3
 1 -2 -14 4224.93 193.36 2
 1 -2 -14 4060.36 215.235 3
 1 2 -14 4411.97 213.355 2
 -1 -2 14 3885.81 194.417 4
 -1 2 14 4036.13 163.352 4
 -1 2 13 16342 307.472 4
 1 2 -13 17725.7 404.559 2
 1 2 -13 18035.1 429.854 3
 1 -2 -13 16932.6 363.857 2
 1 -2 -13 17015.5 410.88 3
 -1 -2 13 17510.5 394.572 4
 1 -2 -12 973.646 91.1667 2
 -1 2 12 1067.24 78.8175 4
 -1 -2 12 1060.64 99.7642 4
 1 2 -12 1025.37 102.573 2
 1 2 -12 1101.47 109.41 3
 1 -2 -12 1162.97 111.336 3
 -1 2 11 32759.3 388.376 4
 1 2 -11 33085.3 525.556 3
 1 2 -11 32812.8 497.875 2
 1 -2 -11 33320.5 526.555 3
 1 -2 -11 32877 456.509 2
 -1 -2 11 32217.5 489.747 4
 1 -2 -10 1613.96 99.7685 2
 1 2 -10 1574.25 113.629 3
 1 2 -10 1506.65 107.255 2
 1 -2 -10 1449.74 109.411 3
 -1 -2 10 1550.52 109.169 4
 -1 2 10 1509.44 80.6658 4
 1 -2 -9 9948.53 257.589 3
 -1 -2 9 10153.7 251.286 4
 1 2 -9 9912.44 248.925 2
 -1 2 9 9533.91 182.836 4
 1 2 -9 9907.45 259.565 3
 1 -2 -9 9848.01 222.629 2
 1 2 -8 4505.63 159.865 2
 1 2 -8 4414.69 163.629 3
 1 -2 -8 4295.62 161.531 3
 1 -2 -8 4187.05 134.549 2
 -1 -2 8 4110.8 153.021 4
 1 2 -7 4213.94 146.251 2
 1 -2 -7 3920.62 121.113 2
 1 -2 -7 4232.99 148.905 3
 1 2 -7 4210.86 149.127 3
 -1 -2 7 4122.2 145.524 4
 1 2 -6 14800.1 255.199 3
 1 2 -6 12906.9 129.278 5
 1 2 -6 14224.3 249.301 2
 1 -2 -6 14769.5 257.666 3
 -1 -2 6 14346.6 251.364 4
 1 -2 -5 18148.8 265.908 3
 1 2 -5 17948.1 259.134 3
 1 2 -5 16792.9 252.5 2
 -1 -2 5 16560.1 253.027 4
 1 2 -5 16211.3 156.034 5
 1 -2 -4 53148.8 422.164 3
 1 2 -4 50462.9 283.895 5
 -1 -2 4 52953.8 419.044 4
 1 2 -4 53025.2 425.606 2
 -1 -2 3 1885.24 59.1563 1
 -1 -2 3 1958.16 74.8259 4
 1 2 -3 1889.81 76.4323 2
 1 2 -3 1763.81 57.088 5
 1 -2 -3 2028.48 77.5362 3
 1 2 -2 22017.9 207.424 5
 -1 -2 2 23046.4 227.908 4
 1 2 -2 22876.8 244.263 2
 1 -2 -2 23930.6 245.54 3
 1 2 -1 5098.05 104.138 5
 1 2 -1 4795.58 109.062 2
 -1 2 1 524.36 29.641 2
 -1 -2 1 719.17 30.1974 3
 1 -2 -1 5252.85 112.881 3
 -1 -2 1 3154.81 73.6017 4
 1 -2 0 358.564 34.1395 3
 1 2 0 330.505 32.0762 5
 -1 -2 0 41.4566 8.52941 3
 1 2 0 256.227 28.0698 2
 -1 2 0 112.99 17.3431 2
 -1 -2 0 100.173 12.1761 4
 -1 2 -1 20010.9 215.297 2
 1 2 1 20543.5 232.629 5
 1 2 1 20038.8 234.69 2
 -1 -2 -2 18467.7 201.411 3
 1 2 2 18605.9 230.801 5
 -1 2 -2 17706.5 227.785 2
 -1 -2 -3 100161 531.9 3
 1 2 3 99735.9 555.567 5
 -1 2 -3 96006.5 577.508 2
 -1 -2 -4 5886.92 145.063 3
 -1 2 -4 5636.05 153.769 2
 1 2 4 5638.37 139.462 5
 -1 -2 -5 10436.8 212.837 3
 1 2 5 11307.5 203.258 5
 -1 2 -5 10587.9 226.069 2
 -1 2 -6 19192.6 324.266 2
 1 2 6 19380.1 273.411 5
 -1 -2 -6 18986.1 311.003 3
 -1 2 -7 6090.21 195.6 2
 -1 2 -7 5755.97 200.159 3
 -1 -2 -7 5778.14 182.006 3
 -1 -2 -7 6207.49 194.611 2
 1 2 7 5871.99 156.681 5
 1 2 8 56178.1 496.408 5
 -1 -2 -8 58001.7 617.449 2
 -1 2 -8 55513.2 651.233 3
 -1 -2 -8 55613.2 606.027 3
 -1 2 -8 53238.6 607.771 2
 1 2 9 1202.06 77.6272 5
 -1 2 -9 1208.93 105.72 2
 -1 -2 -9 1087.33 95.6963 3
 -1 -2 -9 1078.46 95.6075 2
 -1 2 -9 1165.14 103.9 3
 -1 2 -10 22962.2 461.169 3
 -1 2 -10 24038.1 454.233 2
 -1 -2 -10 23204.3 438.522 2
 -1 -2 -10 23722 444.983 3
 1 2 10 22505.9 333.048 5
 1 2 11 708.531 62.7479 5
 -1 2 -11 642.085 88.1317 2
 -1 -2 -11 872.504 101.238 3
 -1 -2 -11 703.73 92.8179 2
 -1 2 -11 692.498 93.8229 3
 -1 2 -12 757.82 100.919 2
 -1 -2 -12 654.152 86.1797 3
 -1 -2 -12 689.082 86.5014 2
 1 2 12 796.137 68.7945 5
 -1 2 -12 584.055 85.5864 3
 -1 2 -13 4021.86 213.693 2
 1 2 13 3882.97 149.217 5
 -1 2 -13 3586.1 210.046 3
 -1 -2 -13 3693.81 203.416 3
 -1 -2 -13 4044.79 209.182 2
 -1 2 -14 1232.6 134.986 3
 1 2 14 1316.74 90.4233 5
 -1 -2 -14 1165.23 121.194 2
 -1 -2 -14 1286.2 128.531 3
 -1 2 -14 1312.25 132.676 2
 -1 -2 -15 1338.17 141.404 3
 -1 -2 -15 1308.85 134.856 2
 -1 2 -15 1286.21 145.203 3
 -1 2 -15 1205.17 132.42 2
 -1 -2 -16 8055.04 328.073 2
 -1 2 -16 8760.26 349.269 2
 -1 -2 -16 8622.94 349.113 3
 -1 2 -16 7773.87 346.541 3
 -1 2 -17 134.87 86.6996 3
 -1 -2 -17 26.0871 63.5049 3
 -1 -2 -17 160.337 77.6162 2
 -1 2 -17 79.4969 62.7836 2
 -1 -2 -18 19003.5 529.117 2
 -1 2 -18 17141.2 547.597 3
 -1 -2 -18 18140.1 539.836 3
 -1 2 -18 18150.6 537.487 2
 -1 -2 -19 1653.23 183.005 3
 -1 -2 -19 1539.07 169.951 2
 -1 2 -19 1891.57 191.73 2
 -1 2 -19 1626.13 190.289 3
 -1 2 -20 7684.81 393.458 3
 -1 -2 -20 8132.39 389.721 3
 -1 2 -20 8975.28 405.131 2
 -1 -2 -20 8338.27 371.802 2
 -1 2 -21 1908.77 199.283 2
 -1 -2 -21 2164.63 198.917 2
 -1 2 -21 2128.78 223.703 3
 -1 -2 -21 2044.91 210.505 3
 -1 -2 -22 2179.04 221.207 3
 -1 2 -22 2248.06 224.352 2
 -1 2 -22 1742.09 205.075 3
 -1 2 -23 4067.9 318.653 3
 -1 2 -23 3473.44 285.001 2
 -1 -2 -23 3628.16 292.12 3
 -1 2 -24 -22.0199 64.6005 2
 -1 -2 -24 186.145 94.8779 3
 -1 2 -25 2910.41 271.889 2
 1 -3 -25 1376.62 190.842 3
 1 3 -25 1241.82 174.897 2
 1 -3 -24 3183.79 271.867 3
 1 3 -24 2713.97 246.451 2
 1 3 -24 2744.41 262.888 3
 1 -3 -23 553.705 125.4 3
 1 3 -23 474.8 121.185 3
 1 3 -23 532.827 125.992 2
 1 3 -22 3351.57 269.753 3
 1 3 -22 3536.11 261.159 2
 1 -3 -22 2794.39 267.298 3
 1 3 -21 -0.28363 68.0356 3
 1 -3 -21 108.947 79.2654 3
 1 3 -21 148.774 75.7381 2
 1 3 -20 2107.51 199.313 3
 1 3 -20 2257.34 199.065 2
 1 -3 -20 2393.27 210.914 3
 1 3 -19 1599.68 165.187 2
 1 3 -19 1654.4 175.044 3
 1 -3 -19 1658.14 172.074 3
 1 -3 -18 213.557 59.5569 2
 1 3 -18 188.065 66.1811 3
 1 3 -18 189.957 72.6751 2
 1 -3 -18 189.928 65.4771 3
 1 -3 -17 748.873 111.864 3
 1 -3 -17 766.258 101.71 2
 1 3 -17 687.03 113.046 3
 1 3 -17 969.852 127.36 2
 -1 -3 17 662.071 99.3228 4
 1 -3 -16 8326.06 291.497 2
 1 -3 -16 7979.89 322.406 3
 -1 -3 16 7317.85 297.989 4
 1 3 -16 8024.18 333.662 3
 1 3 -16 8502.44 327.03 2
 1 3 -15 192.296 62.8915 3
 1 -3 -15 204.834 67.265 3
 -1 -3 15 173.695 59.3246 4
 1 -3 -15 145.972 51.6404 2
 1 3 -15 104.389 52.7631 2
 -1 -3 14 12739.4 364.643 4
 -1 3 14 12996.2 272.806 4
 1 -3 -14 12763.6 334.811 2
 1 3 -14 13449 398.348 3
 1 3 -14 12856.5 372.532 2
 1 -3 -14 13052.8 381.559 3
 1 3 -13 727.511 97.2794 2
 -1 3 13 690.911 63.2557 4
 -1 -3 13 686.379 88.4333 4
 1 -3 -13 593.006 73.3221 2
 1 -3 -13 660.225 92.0109 3
 1 3 -13 763.226 97.4631 3
 1 3 -12 23098.5 478.295 3
 -1 3 12 21334.1 309.82 4
 1 -3 -12 22219.5 456.34 3
 -1 -3 12 22386 448.825 4
 1 3 -12 22782.1 457.995 2
 1 -3 -12 22647.3 407.535 2
 -1 -3 11 215.491 61.1965 4
 1 -3 -11 127.273 35.8684 2
 1 3 -11 140.267 48.305 2
 1 -3 -11 197.435 49.3607 3
 1 3 -11 191.004 51.4377 3
 -1 3 11 65.885 20.463 4
 -1 3 10 38780.8 365.904 4
 1 3 -10 39270 567.7 3
 1 -3 -10 39095.8 551.094 3
 1 3 -10 39451.3 550.756 2
 -1 -3 10 40137.9 551.601 4
 1 -3 -10 40106.5 487.767 2
 1 3 -9 132.449 43.7256 2
 1 3 -9 140.17 45.2156 3
 -1 -3 9 143.954 46.8603 4
 1 -3 -9 175.609 49.3751 3
 1 -3 -9 115.598 39.5764 2
 1 3 -8 64295 650.241 3
 1 -3 -8 62975.5 630.398 3
 -1 -3 8 62609.5 631.69 4
 1 3 -8 64284 637.612 2
 -1 -3 7 16363.2 306.453 4
 1 3 -7 16536.2 305.895 2
 1 -3 -7 16134.2 302.314 3
 1 3 -7 14737.9 167.426 5
 1 -3 -6 33092.7 408.231 3
 1 3 -6 32891.8 414.844 2
 -1 -3 6 35549.8 427.452 4
 1 3 -5 628.025 59.1891 2
 -1 -3 5 757.504 61.4934 4
 1 3 -5 706.547 40.7221 5
 1 -3 -5 801.338 61.7224 3
 -1 -3 5 733.155 44.5576 1
 -1 -3 4 1740.38 85.929 4
 -1 -3 4 1839.79 63.5799 1
 1 3 -4 2141.82 98.3985 2
 1 -3 -4 1740.92 86.4851 3
 1 3 -4 1673.21 64.68 5
 -1 -3 3 1306.68 68.8661 4
 -1 -3 3 1558.26 58.4858 1
 1 3 -3 1382.47 77.6539 2
 -1 3 3 1427.32 59.5192 2
 1 3 -3 1267.33 59.5222 5
 1 -3 -3 1372.27 72.0173 3
 1 3 -2 36530.3 327.754 5
 1 3 -2 36805 367.976 2
 1 -3 -2 37357.7 355.589 3
 -1 -3 2 37224.5 333.599 4
 1 3 -1 8305.27 163.274 5
 1 -3 -1 8130.77 164.038 3
 1 3 -1 8032.53 168.783 2
 -1 -3 1 8259.04 142.886 4
 -1 3 1 8004.66 140.294 2
 1 3 0 6104.35 145.117 5
 -1 3 0 6043.12 129.663 2
 1 -3 0 6326.17 146.223 3
 -1 -3 0 10256.4 159.743 3
 1 3 0 6401.05 149.934 2
 -1 -3 0 12069.3 162.384 4
 -1 -3 -1 17283.2 157.67 4
 -1 -3 -1 17510.4 202.653 3
 1 3 1 17528.1 248.792 2
 -1 3 -1 17389.8 235.485 2
 -1 3 -2 23599.7 292.416 2
 -1 -3 -2 24440.1 260.772 3
 -1 3 -3 7593.17 182.118 2
 -1 -3 -3 8167.22 163.853 3
 -1 -3 -4 3886.03 123.55 3
 -1 3 -4 3938.83 139.487 2
 -1 3 -5 6982.24 194.996 2
 -1 -3 -5 7261.21 182.649 3
 -1 3 -6 16227.5 312.14 2
 -1 -3 -6 15977.1 290.101 3
 -1 3 -7 50166.8 581.62 2
 1 3 7 51708.4 521.295 5
 -1 -3 -7 52814.1 559.166 3
 -1 -3 -8 3636.17 160.061 3
 1 3 8 3549.84 142.763 5
 -1 3 -8 3580.85 166.881 2
 -1 3 -9 36516.8 548.745 2
 1 3 9 36845.2 465.962 5
 -1 -3 -9 36662.8 527.222 3
 -1 -3 -10 1589.94 118.311 3
 -1 -3 -10 1366.1 111.279 2
 -1 3 -10 1647.19 126.699 2
 1 3 10 1569.55 101.34 5
 1 3 11 3399.07 149.295 5
 -1 -3 -11 3462.87 183.312 3
 -1 -3 -11 3184.67 173.327 2
 -1 3 -11 3452.88 189.08 2
 -1 3 -12 8709.42 304.216 2
 -1 -3 -12 8675.16 293.407 2
 1 3 12 9092.69 248.828 5
 -1 -3 -12 8800.47 301.191 3
 1 3 13 140.586 38.208 5
 -1 -3 -13 199.481 62.5148 2
 -1 3 -13 110.474 57.9817 2
 -1 -3 -13 184.983 65.626 3
 -1 3 -14 4810.45 247.639 2
 -1 -3 -14 4371.5 231.691 3
 1 3 14 4522.01 181.414 5
 -1 -3 -14 4503.32 233.513 2
 1 3 15 1667.91 114.116 5
 -1 3 -15 1546.75 152.868 2
 -1 -3 -15 1554.97 150.353 3
 -1 -3 -15 1557 141.827 2
 -1 -3 -16 1878.5 162.777 2
 -1 -3 -16 1858.78 167.51 3
 -1 3 -16 1732.82 162.175 2
 -1 -3 -17 8943.47 372.385 3
 -1 -3 -17 9303.91 364.153 2
 -1 3 -17 9939.54 391.755 2
 -1 -3 -18 218.805 86.6095 3
 -1 3 -18 267.186 87.9507 2
 -1 -3 -18 167.13 73.0488 2
 -1 -3 -19 6747.18 345.043 3
 -1 -3 -19 6443.45 319.749 2
 -1 3 -19 6959.19 356.153 2
 -1 3 -20 3396.96 262.708 2
 -1 -3 -20 3570.19 261.765 3
 -1 -3 -20 3410.92 247.934 2
 -1 3 -21 3697.24 278.95 2
 -1 -3 -21 4169.27 288.486 3
 -1 3 -22 4552.04 321.707 2
 -1 -3 -22 4272.1 303.525 3
 -1 3 -23 1402.86 190.967 2
 -1 -3 -23 1665.41 203.231 3
 -1 3 -24 4685.47 343.399 2
 -1 -3 -24 4816.45 346.667 3
 -1 3 -25 171.749 103.979 2
 -1 3 -26 2831.77 280.715 2
 1 4 -26 1063.47 178.633 2
 1 -4 -25 3772.43 308.889 3
 1 4 -25 3310.03 284.244 2
 1 4 -24 939.694 157.936 2
 1 -4 -24 1222.59 183.005 3
 1 -4 -23 7371.82 398.253 3
 1 4 -23 6992.49 386.077 2
 1 -4 -22 1184.66 192.448 3
 1 4 -22 1365.75 177.754 2
 1 -4 -21 7964.68 407.328 3
 1 4 -21 8046.63 389.199 2
 1 -4 -20 42.1915 56.8075 3
 1 4 -20 216.459 85.7498 2
 1 4 -19 2060.78 190.859 2
 1 -4 -19 1894.42 194.113 3
 1 -4 -18 116.972 67.8541 3
 1 4 -18 95.2102 59.8129 2
 1 4 -17 28.6717 54.0267 2
 1 -4 -17 113.42 56.4276 3
 1 -4 -16 91.0781 64.5427 3
 -1 -4 16 -45.4169 52.0162 4
 1 4 -16 49.8561 58.0966 2
 1 -4 -16 5.25724 43.9053 2
 1 -4 -15 3042.09 173.044 2
 -1 -4 15 2926.46 190.912 4
 1 -4 -15 3508.03 211.153 3
 1 4 -15 3110.67 200.442 2
 1 -4 -14 466.681 82.2905 3
 1 4 -14 463.739 82.0345 2
 1 -4 -14 369.861 67.266 2
 -1 -4 14 453.766 78.7014 4
 1 4 -13 23418.5 501.391 2
 1 -4 -13 23129.3 439.193 2
 1 -4 -13 23092.7 492.638 3
 -1 -4 13 22742.7 487.632 4
 -1 4 12 1050.34 63.2786 4
 1 -4 -12 1120.12 97.2747 2
 1 -4 -12 1197.55 112.693 3
 -1 -4 12 1151.75 110.631 4
 1 4 -12 1132.11 112.244 2
 1 4 -11 33299 553.158 2
 1 -4 -11 32939.3 475.667 2
 -1 -4 11 33268.1 549.426 4
 1 -4 -11 33456.5 547.04 3
 -1 4 11 32605.4 328.267 4
 1 4 -10 -4.79639 43.3576 2
 -1 -4 10 15.1786 36.8423 4
 1 4 -10 49.8829 10.6117 5
 1 -4 -10 40.8636 32.9743 3
 -1 4 10 38.9749 14.2988 4
 -1 -4 9 49656.1 617.327 4
 1 4 -9 49582.3 627.184 2
 1 -4 -9 49069.4 606.521 3
 -1 -4 8 160.35 48.3638 4
 1 -4 -8 181.594 47.0494 3
 1 4 -8 129.824 22.6473 5
 1 4 -8 188.304 53.3821 2
 1 -4 -7 46647 539.73 3
 1 4 -7 44997.2 355.964 5
 -1 -4 7 46240.3 384.685 1
 -1 -4 7 47379.5 553.552 4
 1 4 -7 48383.1 575.231 2
 -1 -4 6 10521.1 250.65 4
 1 -4 -6 10390.4 242.973 3
 1 4 -6 10056.2 175.114 5
 1 4 -6 11075.6 266.352 2
 -1 -4 6 10095.4 173.597 1
 -1 -4 5 4970.67 164.291 4
 -1 -4 5 5250.5 117.102 1
 1 4 -5 5104.03 173.007 2
 1 4 -5 4943.25 127.45 5
 1 -4 -5 5175.91 166.62 3
 1 4 -4 2711.27 121.285 2
 -1 4 4 2712.41 99.1761 2
 -1 -4 4 2500.05 111.68 4
 1 -4 -4 2444.38 110.771 3
 1 4 -4 2407.77 93.1632 5
 -1 -4 4 2464.69 78.8985 1
 1 4 -3 11532.9 210.69 5
 1 -4 -3 11940.6 231.357 3
 1 4 -3 11920.1 244.525 2
 -1 -4 3 11493.9 221.213 4
 -1 4 3 12242.2 202.137 2
 1 -4 -2 1945.41 91.2008 3
 -1 -4 2 1994.2 80.9612 3
 1 4 -2 1840.3 95.7515 2
 1 4 -2 2023.98 92.3574 5
 -1 -4 2 1856.81 84.8583 4
 -1 4 2 2017.46 82.7319 2
 -1 -4 1 22342 257.825 3
 1 4 -1 21988.7 309.836 5
 1 4 -1 22365 318.565 2
 1 -4 -1 22626 307.758 3
 -1 -4 1 22603.6 270.02 4
 -1 4 1 22106.6 279.569 2
 -1 4 0 424.566 41.8234 2
 1 -4 0 408.081 44.949 3
 1 4 0 395.979 44.0349 2
 -1 -4 0 428.367 36.7809 4
 -1 -4 0 375.431 35.1808 3
 -1 -4 -1 10622.6 181.848 3
 1 -4 1 10516.2 218.933 3
 1 4 1 10196 215.507 2
 -1 4 -1 10366.8 207.812 2
 -1 -4 -2 4234.15 121.769 3
 1 4 2 4115.33 138.7 2
 -1 4 -2 4471.91 143.354 2
 -1 4 -3 12917.3 256.299 2
 -1 -4 -3 12919.5 227.037 3
 -1 4 -4 10067.1 237.887 2
 -1 -4 -4 10415.7 216.632 3
 -1 4 -5 33976.1 455.376 2
 -1 -4 -5 33722.3 412.428 3
 -1 4 -6 31202.1 459.097 2
 -1 -4 -6 30589.7 417.645 3
 -1 -4 -7 7626.2 222.319 3
 -1 4 -7 8130.98 249.484 2
 -1 4 -8 17040.4 374.667 2
 -1 -4 -8 16497.3 342.79 3
 -1 4 -9 4401 203.171 2
 -1 -4 -9 4414.6 187.196 3
 1 4 9 4404.9 179.53 5
 -1 4 -10 11013.5 330.513 2
 1 4 10 10878.1 284.502 5
 -1 -4 -10 10856 310.21 3
 -1 4 -11 15221.5 401.976 2
 -1 -4 -11 14889.9 372.338 2
 1 4 11 15406.4 345.909 5
 -1 -4 -11 15567.4 384.612 3
 1 4 12 1678.61 121.389 5
 -1 -4 -12 1563.44 131.849 3
 -1 4 -12 1534.2 140.45 2
 -1 -4 -12 1567.23 131.053 2
 -1 4 -13 15113.6 431.904 2
 1 4 13 15112.8 355.168 5
 -1 -4 -13 15232.6 414.354 3
 -1 -4 -13 15545 412.28 2
 1 4 14 481.406 68.2978 5
 -1 4 -14 428.496 89.3965 2
 -1 -4 -14 396.458 79.8382 2
 -1 -4 -14 453.749 83.724 3
 -1 -4 -15 9465.27 344.958 2
 -1 -4 -15 8313.92 335.164 3
 -1 4 -15 8718.36 353.225 2
 1 4 15 8863.19 282.627 5
 -1 -4 -16 2351.58 191.26 3
 -1 -4 -16 2398.01 188.128 2
 -1 4 -16 2646.86 209.981 2
 -1 -4 -17 1284.39 152.447 3
 -1 4 -17 1219.54 146.124 2
 -1 -4 -17 1268.08 143.494 2
 -1 4 -18 1636.78 180.293 2
 -1 -4 -18 1865.34 174.995 2
 -1 -4 -18 1799.26 178.835 3
 -1 -4 -19 903.238 126.564 2
 -1 4 -19 935.042 141.507 2
 -1 -4 -19 803.283 128.832 3
 -1 -4 -20 2373.82 216.721 3
 -1 4 -20 2355.48 222.016 2
 -1 4 -21 4492.5 313.058 2
 -1 -4 -21 4247.38 298.67 3
 -1 -4 -22 1844.37 206.64 3
 -1 4 -22 2208.94 231.199 2
 -1 -4 -23 6616.61 385.881 3
 -1 4 -23 6729.49 405.19 2
 -1 4 -24 1309.08 198.436 2
 -1 -4 -24 1038.91 170.553 3
 -1 4 -25 3235.48 301.404 2
 1 5 -26 1772.35 223.101 2
 1 5 -25 264.393 110.701 2
 1 -5 -24 6629.26 393.824 3
 1 5 -24 6423.26 389.679 2
 1 5 -23 267.566 98.3243 2
 1 -5 -23 270.233 107.451 3
 1 -5 -22 7537.36 444.788 3
 1 5 -22 8778.57 428.501 2
 1 5 -21 896.154 147.094 2
 1 -5 -21 334.696 139.723 3
 1 -5 -20 11673 461.319 3
 1 5 -20 11241.8 455.658 2
 1 5 -19 1338.07 167.788 2
 1 -5 -19 1581.99 172.465 3
 1 -5 -18 2273 193.581 3
 1 5 -18 2285.82 200.33 2
 1 5 -17 49.1976 54.6092 2
 1 -5 -17 64.2418 52.1336 3
 1 -5 -16 46.8977 50.5522 3
 1 5 -16 -12.9257 58.226 2
 1 -5 -15 444.131 75.8855 2
 1 -5 -15 589.231 95.9751 3
 1 5 -15 744.839 107.034 2
 -1 -5 14 1501.72 138.092 4
 1 -5 -14 1516.55 123.185 2
 1 -5 -14 1811.47 149.933 3
 1 5 -14 1659.89 150.676 2
 -1 -5 13 703.13 95.9292 4
 1 -5 -13 737.241 82.1935 2
 1 5 -13 824.319 107.28 2
 1 -5 -13 698.765 95.0349 3
 1 -5 -12 11107.1 336.368 3
 -1 -5 12 11107.7 343.669 4
 1 -5 -12 11355.2 301.525 2
 1 5 -12 11408.8 353.882 2
 1 5 -11 124.045 44.7989 2
 1 -5 -11 188.803 48.8495 3
 -1 -5 11 206.151 59.0654 4
 1 5 -10 22670.2 467.628 2
 1 -5 -10 21547.7 430.906 3
 -1 -5 10 21742.5 446.639 4
 1 -5 -9 -8.84585 30.5475 3
 1 5 -9 41.0487 38.161 2
 -1 -5 9 69.0903 24.7918 1
 1 5 -9 51.7361 19.299 5
 -1 -5 9 30.6894 35.3538 4
 -1 -5 8 2492.32 95.6406 1
 1 -5 -8 2577.15 141.756 3
 1 5 -8 2128.82 90.5104 5
 1 5 -8 2397.9 146.037 2
 -1 -5 8 2914.56 155.612 4
 1 5 -7 4184.74 183.063 2
 1 -5 -7 4099.64 169.581 3
 -1 -5 7 4083.68 174.849 4
 -1 -5 7 4208.42 116.34 1
 1 5 -7 3631.13 120.543 5
 1 -5 -6 1694.03 107.27 3
 -1 -5 6 1641.22 73.0921 1
 1 5 -6 1641.97 85.1564 5
 1 5 -6 1693.25 115.215 2
 -1 -5 6 1831.91 115.822 4
 -1 -5 5 18627.3 227.694 1
 1 5 -5 19640.9 364.595 2
 -1 -5 5 19350.9 344.999 4
 1 -5 -5 19524.9 342.311 3
 1 5 -5 19448.8 294.854 5
 -1 5 4 453.146 50.0941 2
 1 5 -4 386.413 56.0806 2
 1 5 -4 300.952 43.0245 5
 1 -5 -4 397.58 53.4711 3
 -1 -5 4 378.297 50.6853 4
 1 5 -3 2895.24 135.702 2
 1 5 -3 3084.82 127.352 5
 -1 -5 3 3161.58 129.757 4
 1 -5 -3 2810.68 124.355 3
 -1 5 3 2902.1 114.947 2
 -1 5 2 14834.3 254.835 2
 1 -5 -2 14835.5 277.421 3
 -1 -5 2 15240.1 244.854 3
 1 5 -2 15389.5 287.085 5
 1 5 -2 15289.1 296.816 2
 -1 -5 2 15513.3 267.661 4
 -1 -5 1 1375.23 74.2176 3
 -1 -5 1 1401.45 77.7504 4
 1 5 -1 1274.48 88.407 2
 -1 5 1 1439.57 84.5365 2
 1 -5 -1 1412.61 88.6377 3
 1 5 0 24017.2 365.404 2
 -1 -5 0 24452.9 304.543 3
 1 -5 0 24728.8 358.373 3
 -1 5 0 24939.1 343.109 2
 1 -5 1 1640.81 95.7576 3
 -1 5 -1 1623.3 94.4191 2
 -1 -5 -1 1576.14 80.5883 3
 1 5 1 1570.55 97.6479 2
 -1 -5 -2 55363.6 484.981 3
 1 5 2 55895.4 557.874 2
 -1 5 -2 56321 556.024 2
 -1 -5 -3 528.46 53.988 3
 -1 5 -3 570.988 66.2559 2
 -1 5 -4 37308.9 495.13 2
 -1 -5 -4 36411.6 431.727 3
 -1 5 -5 1914.73 122.841 2
 -1 -5 -5 2016.33 108.66 3
 -1 5 -6 5653.83 212.327 2
 -1 -5 -6 6124.95 199.015 3
 1 -5 6 5237.26 91.7971 1
 -1 -5 -7 4389.77 174.783 3
 -1 5 -7 4263.67 195.156 2
 -1 5 -8 2247.44 148.584 2
 -1 -5 -8 2271.75 133.668 3
 -1 5 -9 2524.28 161.804 2
 -1 -5 -9 2653.52 151.069 3
 1 5 9 2602.34 150.074 5
 -1 -5 -10 26362.9 486.004 3
 1 5 10 26682.9 484.111 5
 -1 5 -10 26670.5 529.178 2
 -1 -5 -11 482.879 79.7743 3
 -1 5 -11 368.113 84.9893 2
 1 5 11 620.128 87.4665 5
 -1 -5 -12 27507.3 549.178 3
 -1 5 -12 27987.6 583.473 2
 1 5 12 28573.1 521.511 5
 1 5 13 840.876 95.0151 5
 -1 5 -13 905.707 119.751 2
 -1 -5 -13 830.978 106.146 2
 -1 -5 -13 828.1 105.015 3
 -1 5 -14 16909.2 485.941 2
 -1 -5 -14 17535.9 467.364 3
 1 5 14 18015.2 428.68 5
 -1 -5 -14 18222.7 465.132 2
 1 5 15 188.098 54.3732 5
 -1 -5 -15 32.8124 43.9815 2
 -1 5 -15 280.574 87.4448 2
 -1 -5 -15 174.413 68.2101 3
 -1 -5 -16 11612 399.956 2
 1 5 16 11035.1 344.284 5
 -1 5 -16 11186.9 425.25 2
 -1 -5 -16 11109.9 405.432 3
 -1 -5 -17 239.061 86.6609 3
 -1 -5 -17 191.977 67.8224 2
 -1 5 -17 159.507 74.9853 2
 -1 -5 -18 369.767 90.1956 3
 -1 5 -18 397.834 104.075 2
 -1 5 -19 447.45 109.294 2
 -1 -5 -19 486.569 106.556 3
 -1 5 -20 620.99 136.005 2
 -1 -5 -20 671.231 121.474 3
 -1 5 -21 -17.6181 64.128 2
 -1 -5 -21 -20.8689 68.3022 3
 -1 5 -22 3106.17 276.931 2
 -1 -5 -22 3020.23 260.354 3
 -1 5 -23 136.343 76.4642 2
 -1 -5 -23 336.379 104.751 3
 -1 -5 -24 4055.47 318.826 3
 -1 5 -24 3807.17 323.935 2
 1 6 -25 2679.24 273.193 2
 1 -6 -24 169.109 76.4783 3
 1 6 -24 52.9028 74.2819 2
 1 -6 -23 5024.1 334.164 3
 1 6 -23 4892.42 342.837 2
 1 6 -22 229.524 109.171 2
 1 -6 -22 335.875 111.839 3
 1 6 -21 8927.24 436.411 2
 1 -6 -21 8846.41 418.413 3
 1 6 -20 669.303 132.574 2
 1 -6 -20 958.858 153.248 3
 1 -6 -19 7285.58 357.168 3
 1 6 -19 7603.75 377.401 2
 1 6 -18 1620.24 179.312 2
 -1 6 18 1820.31 157.788 5
 1 -6 -18 1549.56 164.835 3
 1 6 -17 1037.6 140.418 2
 1 -6 -17 956.897 130.129 3
 1 -6 -16 2025.49 174.843 3
 1 6 -16 1996.09 183.819 2
 1 6 -15 97.3902 60.119 2
 1 -6 -15 60.8931 49.6017 3
 1 6 -14 774.6 112.036 2
 1 -6 -14 792.002 103.556 3
 1 6 -13 1166.12 131.96 2
 1 -6 -13 1253.42 127.519 3
 -1 -6 12 278.636 43.5266 1
 1 6 -12 220.695 62.518 2
 1 -6 -12 258.463 62.1353 3
 1 -6 -11 4501.98 212.945 3
 1 6 -11 5074.52 243.769 2
 -1 -6 11 4564.61 224.463 4
 -1 -6 11 4672.91 149.203 1
 -1 -6 10 329.161 42.2816 1
 1 -6 -10 327.87 59.4018 3
 -1 -6 10 286.716 60.6526 4
 1 6 -10 240.622 63.1315 2
 -1 -6 9 3370.25 179.003 4
 -1 -6 9 3340.9 114.082 1
 1 6 -9 3148.59 180.302 2
 1 -6 -9 3272.22 170.302 3
 1 6 -9 2921.09 117.605 5
 1 6 -8 1844.39 96.0704 5
 1 -6 -8 2329.76 140.995 3
 -1 -6 8 2256.27 142.934 4
 1 6 -8 2338.45 154.37 2
 -1 -6 8 2270.34 89.5492 1
 1 6 -7 566.515 58.5929 5
 1 -6 -7 602.373 72.7432 3
 1 6 -7 580.201 80.7346 2
 -1 -6 7 712.545 50.1118 1
 -1 -6 7 584.261 77.188 4
 1 6 -6 8415.12 213.931 5
 1 -6 -6 8784.78 253.031 3
 -1 -6 6 8470.68 159.247 1
 -1 -6 6 8846.97 259.418 4
 1 6 -6 8640.14 270.964 2
 -1 -6 5 1355.36 102.53 4
 1 -6 -5 1438.05 103.096 3
 1 6 -5 1405.24 93.3312 5
 1 6 -5 1247.79 106.44 2
 1 6 -4 10410 251.141 5
 1 6 -4 10232.5 277.415 2
 1 -6 -4 10406.2 258.367 3
 -1 -6 4 10109 256.435 4
 -1 6 4 9903.12 231.204 2
 -1 -6 3 7105.73 196.393 3
 1 6 -3 7018.4 226.942 2
 -1 6 3 6683.57 191.5 2
 1 6 -3 6631.17 208.234 5
 1 -6 -3 6747.83 205.732 3
 -1 6 2 179.824 38.9859 2
 -1 -6 2 177.629 37.278 3
 1 6 -2 120.781 37.766 5
 1 -6 -2 133.891 43.2898 3
 1 6 -2 168.545 42.8285 2
 -1 -6 1 42485.5 447.429 3
 1 -6 -1 42940.2 507.255 3
 1 6 -1 42844.9 539.062 2
 -1 6 1 42790.2 489.924 2
 -1 -6 0 318.452 46.919 3
 1 -6 0 273.465 52.1342 3
 1 6 0 222.635 46.0881 2
 -1 6 0 245.589 50.4464 2
 1 6 1 71062.9 682.518 2
 1 -6 1 68983.2 655.214 3
 -1 -6 -1 69649.9 582.421 3
 -1 6 -1 70678.1 655.932 2
 1 -6 2 323.98 55.5486 3
 1 6 2 252.4 47.8335 2
 -1 6 -2 352.286 55.1443 2
 -1 -6 -2 326.176 47.7645 3
 -1 -6 -3 18214 317.291 3
 1 6 3 19265.8 362.506 2
 -1 6 -3 18818.5 361.902 2
 -1 6 -4 3515.83 166.363 2
 -1 -6 -4 3287.24 140.831 3
 -1 -6 -5 404.709 57.4514 3
 -1 6 -5 445.674 69.5136 2
 -1 6 -6 1410.87 115.527 2
 -1 -6 -6 1455.84 103.639 3
 -1 -6 -7 6225.03 217.962 3
 -1 6 -7 6436.65 246.751 2
 -1 6 -8 199.061 57.8138 2
 1 -6 8 291.258 27.5933 1
 -1 -6 -8 223.986 48.5267 3
 1 6 9 15720.3 392.731 5
 -1 6 -9 14934.9 398.973 2
 -1 -6 -9 14541.1 359.437 3
 1 6 10 3778.92 201.156 5
 -1 -6 -10 3871.98 195.943 3
 -1 6 -10 3950.57 218.406 2
 1 6 11 31034.9 569.331 5
 -1 -6 -11 29502 553.054 3
 -1 6 -11 30290.9 606.393 2
 -1 6 -12 96.7218 70.978 2
 1 6 12 13.8454 38.6042 5
 -1 -6 -12 57.4048 42.9601 3
 -1 6 -13 27984.7 623.064 2
 1 6 13 29140.3 573.842 5
 -1 -6 -13 28917.9 595.23 3
 -1 -6 -14 5.5639 59.352 2
 -1 6 -14 108.354 79.5378 2
 1 6 14 122.929 57.8133 5
 -1 -6 -14 34.1631 52.7777 3
 1 6 15 27870.4 578.99 5
 -1 -6 -15 27613 618.076 3
 -1 -6 -15 27436.2 599.223 2
 -1 6 -15 27135.6 656.875 2
 1 6 16 179.819 60.3723 5
 -1 -6 -16 -33.441 54.9238 2
 -1 6 -16 47.634 65.1501 2
 -1 -6 -16 30.6286 56.0702 3
 -1 6 -17 8323.6 391.102 2
 -1 -6 -17 8575.47 370.861 3
 1 6 17 8553 329.773 5
 -1 -6 -18 54.6628 64.1756 3
 -1 6 -18 286.473 93.6101 2
 -1 -6 -19 87.8827 69.4045 3
 -1 6 -19 107.662 88.9152 2
 -1 -6 -20 670.623 128.865 3
 -1 6 -20 554.893 125.511 2
 -1 -6 -21 712.609 131.173 3
 -1 6 -21 411.556 108.901 2
 -1 -6 -22 -4.44057 68.7131 3
 -1 6 -22 37.2526 66.4527 2
 -1 6 -23 2303.01 252.423 2
 -1 -6 -23 2308.85 237.215 3
 -1 6 -24 -69.2041 90.1875 2
 1 7 -24 1825.31 236.767 2
 1 7 -23 -45.1883 97.0958 2
 1 -7 -23 144.512 85.1924 3
 1 7 -22 4192.82 323.905 2
 1 -7 -22 4735.15 322.538 3
 1 -7 -21 331.054 99.4755 3
 1 7 -21 118.75 81.4053 2
 1 7 -20 6814.57 384.58 2
 1 -7 -20 6469.45 349.908 3
 1 -7 -19 2666.79 221.698 3
 1 7 -19 2786.82 243.673 2
 -1 7 18 3978.3 242.2 5
 1 -7 -18 3827.17 260.64 3
 1 7 -18 3491.06 263.418 2
 1 7 -17 3610.04 264.149 2
 1 -7 -17 3828.13 249.052 3
 1 7 -16 540.878 112.361 2
 1 -7 -16 682.234 108.968 3
 1 7 -15 5691.01 305.559 2
 1 -7 -15 5663.05 280.965 3
 1 7 -14 1200.83 141.935 2
 1 -7 -14 1194.08 133.062 3
 1 -7 -13 1667.91 145.692 3
 1 7 -13 1728.58 160.783 2
 1 7 -12 9766.62 364.383 2
 1 -7 -12 9052.89 321.684 3
 1 7 -11 598.751 93.6802 2
 1 -7 -11 792.802 96.3642 3
 1 -7 -10 2869.6 172.126 3
 1 7 -10 3155.1 195.219 2
 1 -7 -9 2169.98 147.783 3
 1 7 -9 2442.93 170.65 2
 1 7 -9 1938.21 109.528 5
 1 7 -8 1107.25 116.149 2
 1 7 -8 1001.82 81.6318 5
 -1 -7 8 961.244 58.9167 1
 1 -7 -8 1017.17 97.3679 3
 1 7 -7 3527.85 190.111 2
 1 7 -7 3507.47 152.392 5
 1 -7 -7 3922.59 183.512 3
 1 7 -6 1030.98 105.485 2
 1 7 -6 886.045 82.1111 5
 1 -7 -6 1045.87 96.1488 3
 1 7 -5 6980.39 251.919 2
 1 -7 -5 6477.53 223.788 3
 1 7 -5 6356.17 214.703 5
 -1 7 5 6569.17 209.112 2
 -1 7 4 530.011 65.7663 2
 1 7 -4 555.412 77.5746 2
 1 -7 -4 658.174 78.0119 3
 -1 -7 4 573.58 66.5133 3
 1 7 -4 500.67 71.4114 5
 1 -7 -3 3860.19 166.547 3
 1 7 -3 4019.06 185.283 2
 1 7 -3 3877.2 175.678 5
 -1 7 3 3790.5 158.634 2
 -1 -7 3 4054.94 155.614 3
 1 7 -2 13970.1 336.78 5
 1 -7 -2 12083.8 293.722 3
 -1 -7 2 14363 288.238 3
 -1 7 2 14108 306.075 2
 1 7 -2 14242.9 340.742 2
 1 -7 -1 678.915 76.8416 3
 -1 7 1 659.026 73.5787 2
 1 7 -1 743.993 84.1928 2
 -1 -7 1 647.715 64.4703 3
 1 7 0 25453.6 446.875 2
 -1 -7 0 23834.3 364.586 3
 1 -7 0 26128.7 428.739 3
 -1 7 0 26112.3 427.461 2
 -1 7 -1 182.613 44.0417 2
 1 -7 1 187.887 50.1439 3
 -1 -7 -1 258.085 44.5813 3
 1 7 1 194.221 50.434 2
 -1 7 -2 16613.4 355.863 2
 -1 -7 -2 15993.2 307.553 3
 1 -7 2 15981.6 342.359 3
 1 7 2 16035.5 348.986 2
 -1 -7 -3 3992.43 159.002 3
 1 -7 3 3943.11 177.349 3
 -1 7 -3 3904.75 179.573 2
 1 7 3 3543.93 168.499 2
 -1 -7 -4 6801.66 213.471 3
 -1 7 -4 7042.89 245.603 2
 -1 7 -5 14677.1 367.271 2
 -1 -7 -5 13815.3 311.766 3
 -1 7 -6 911.991 103.428 2
 -1 -7 -6 956.14 88.5432 3
 -1 7 -7 6020.21 252.445 2
 -1 -7 -7 5707.33 219.317 3
 -1 -7 -8 8194.89 268.18 3
 -1 7 -8 7972.42 301.338 2
 1 7 9 5666.94 259.157 5
 -1 7 -9 5822.85 266.347 2
 -1 -7 -9 5947.17 237.705 3
 -1 7 -10 18791.2 484.679 2
 1 7 10 19064.2 475.291 5
 -1 -7 -10 18622.6 433.666 3
 -1 7 -11 2790.03 202.125 2
 -1 -7 -11 2979.12 183.498 3
 1 7 11 2861.39 190.991 5
 1 7 12 20823.4 508.992 5
 -1 7 -12 19648.7 523.795 2
 -1 -7 -12 19840.1 480.942 3
 -1 7 -13 -66.532 67.0783 2
 1 7 13 106.926 57.0977 5
 -1 -7 -13 56.5138 60.582 3
 -1 7 -14 22183.9 595.196 2
 -1 -7 -14 22864.1 558.67 3
 1 7 14 22803.9 548.403 5
 -1 7 -15 627.733 123.65 2
 -1 -7 -15 684.354 107.767 3
 1 7 15 790.672 112.612 5
 -1 -7 -15 568.822 90.371 2
 -1 7 -16 11310.1 451.314 2
 -1 -7 -16 11849.8 427.312 3
 1 7 16 12138.2 412.005 5
 -1 7 -17 3157.78 251.744 2
 1 7 17 3520.67 225.963 5
 -1 -7 -17 3611.23 247.523 3
 -1 -7 -18 1795.68 182.62 3
 -1 7 -18 2080.14 210.429 2
 -1 -7 -19 5154.51 315.148 3
 -1 7 -19 4746.22 324.023 2
 -1 -7 -20 61.221 72.033 3
 -1 7 -20 97.8223 69.4266 2
 -1 -7 -21 1642.85 189.389 3
 -1 7 -21 1610.88 205.883 2
 -1 7 -22 797.887 154.414 2
 -1 -7 -22 831.134 143.8 3
 -1 7 -23 326.831 114.42 2
 1 -8 -23 1772.1 211.145 3
 1 8 -23 1707.9 225.729 2
 1 -8 -22 380.073 108.514 3
 1 8 -22 107.976 88.5761 2
 1 -8 -21 2925.91 250.891 3
 1 8 -21 2730.59 258.953 2
 1 8 -20 938.209 166.366 2
 1 -8 -20 900.455 142.175 3
 1 -8 -19 2117.83 205.387 3
 -1 8 19 2322.33 201.652 5
 1 8 -19 2244.36 228.253 2
 1 -8 -18 6090.01 329.824 3
 1 8 -18 6431.28 367.761 2
 -1 8 18 5901.06 313.551 5
 1 -8 -17 377.545 89.4415 3
 1 8 -17 494.601 113.087 2
 1 -8 -16 4499.65 262.312 3
 1 8 -16 4342.14 286.603 2
 1 8 -15 44.1399 60.4093 2
 1 -8 -15 194.718 71.3232 3
 1 -8 -14 4720.99 254.402 3
 1 8 -14 4984.51 287.339 2
 1 -8 -13 997.552 122.422 3
 1 8 -13 944.218 127.405 2
 1 -8 -12 -19.8156 50.3076 3
 1 8 -12 92.9084 54.9426 2
 1 8 -11 3065.43 210.153 2
 1 -8 -11 2953.65 187.065 3
 1 8 -10 1037.5 125.1 2
 1 -8 -10 949.255 104.486 3
 1 8 -9 2181.41 167.409 2
 1 -8 -9 2462.52 162.497 3
 1 8 -8 1659.12 115.428 5
 1 8 -8 1781.66 151.69 2
 1 -8 -8 1932.19 142.171 3
 1 -8 -7 73.2062 46.3158 3
 1 8 -7 118.109 39.8478 5
 1 8 -7 90.6906 56.9956 2
 1 8 -6 2867.2 155.732 5
 1 8 -6 2711.61 173.74 2
 1 -8 -6 3000.53 166.518 3
 -1 8 5 51.9994 35.3631 2
 -1 -8 5 66.1758 33.0643 3
 1 8 -5 64.9949 48.5772 2
 1 8 -5 32.4544 34.5017 5
 1 -8 -5 34.6218 35.8875 3
 1 -8 -4 4259.89 188.909 3
 -1 -8 4 4489.43 179.21 3
 1 8 -4 4569.69 216.293 2
 1 8 -4 4333.29 198.052 5
 -1 8 4 4549.64 186.781 2
 1 8 -3 360.075 68.5209 2
 1 8 -3 304.111 63.8776 5
 1 -8 -3 470.02 68.2484 3
 -1 -8 3 399.512 58.1357 3
 -1 8 3 416.031 64.415 2
 -1 -8 2 3891.09 162.508 3
 1 8 -2 3575.89 187.275 5
 -1 8 2 3895.36 177.913 2
 1 8 -2 3764.37 190.355 2
 1 -8 -2 3820.73 175.762 3
 1 8 -1 6291.01 241.377 2
 -1 -8 1 6389.87 205.034 3
 -1 8 1 6371.84 226.917 2
 1 -8 -1 6447.75 226.042 3
 1 8 -1 6605.24 255.608 5
 -1 8 0 377.339 65.3371 2
 -1 -8 0 370.033 55.8131 3
 1 8 0 433.118 68.0353 2
 1 -8 0 374.511 61.5204 3
 -1 8 -1 5999.84 227.693 2
 -1 -8 -1 5591.93 193.583 3
 1 -8 1 5731.66 219.027 3
 1 8 1 5738.93 229.332 2
 1 8 2 8286.91 269.953 2
 1 -8 2 8085.97 256.777 3
 -1 -8 -2 8207.04 238.798 3
 -1 8 -2 8168.48 269.953 2
 -1 8 -3 3100.92 171.579 2
 1 8 3 3047.69 163.161 2
 -1 -8 -3 2983.85 148.286 3
 1 -8 3 3107.87 165.693 3
 -1 8 -4 22390.9 464.887 2
 -1 -8 -4 21735.9 404.692 3
 1 -8 4 22342.8 449.444 3
 -1 8 -5 7369.54 277.732 2
 -1 -8 -5 7251.02 239.593 3
 -1 8 -6 20173.7 466.957 2
 -1 -8 -6 20578.8 413.969 3
 -1 -8 -7 822.815 88.6364 3
 -1 8 -7 780.744 100.496 2
 -1 -8 -8 16998.1 403.021 3
 1 8 8 18497.7 482.849 5
 -1 8 -8 18517.3 476.686 2
 1 8 9 7977.89 322.424 5
 -1 -8 -9 7359.72 273.644 3
 -1 8 -9 7932.86 323.693 2
 -1 8 -10 6923.38 312.949 2
 -1 -8 -10 7318.62 281.826 3
 1 8 10 7715.81 322.26 5
 1 8 11 16119.8 469.16 5
 -1 8 -11 16876 497.206 2
 -1 -8 -11 15508.3 420.636 3
 -1 -8 -12 712.385 104.105 3
 -1 8 -12 820.523 127.348 2
 1 8 12 742.622 111.951 5
 -1 -8 -13 6554.07 292.562 3
 -1 8 -13 6787.98 336.78 2
 1 8 13 6858.43 318.773 5
 -1 8 -14 676.57 124.109 2
 -1 -8 -14 760.126 109.504 3
 1 8 14 726.364 110.898 5
 -1 8 -15 6705.02 356.098 2
 -1 -8 -15 6699.91 320.463 3
 1 8 15 6475.74 317.816 5
 1 8 16 6717.86 326.794 5
 -1 -8 -16 6499.83 323.298 3
 -1 8 -16 6058.73 347.379 2
 -1 8 -17 1971.46 207.075 2
 1 8 17 2176.12 194.168 5
 -1 -8 -17 2244.68 198.751 3
 -1 -8 -18 10190 429.019 3
 1 8 18 9828.92 403.555 5
 -1 8 -18 9822.74 463.278 2
 -1 -8 -19 65.576 71.094 3
 -1 8 -19 95.8045 92.978 2
 -1 -8 -20 5489.29 340.288 3
 -1 8 -20 5393.03 366.949 2
 -1 8 -21 250.142 111.779 2
 -1 -8 -21 280.254 96.5425 3
 -1 8 -22 2875.66 285.647 2
 -1 -8 -22 3139.5 274.698 3
 1 9 -22 621.329 148.929 2
 1 -9 -22 665.224 134.905 3
 1 9 -21 108.155 69.0958 2
 1 -9 -21 240.878 83.0395 3
 1 9 -20 674.936 144.502 2
 1 -9 -20 842.514 140.976 3
 -1 9 19 2712.09 231.081 5
 1 -9 -19 2358.23 215.588 3
 1 9 -19 2193.58 231.595 2
 1 9 -18 102.554 73.5946 2
 1 -9 -18 68.309 55.0076 3
 -1 9 18 22.0008 47.952 5
 -1 9 17 6443.35 338.521 5
 1 9 -17 6063.83 354.489 2
 1 -9 -17 6555.78 335.382 3
 1 9 -16 103.369 76.0295 2
 1 -9 -16 165.289 71.8117 3
 1 9 -15 7509.12 370.923 2
 1 -9 -15 7277.19 335.53 3
 1 9 -14 242.691 86.8633 2
 1 -9 -14 354.675 88.9734 3
 1 -9 -13 4638.67 254.418 3
 1 9 -13 4762.22 284.892 2
 1 -9 -12 667.025 100.701 3
 1 9 -12 560.474 102.831 2
 1 9 -11 -22.2423 59.3021 2
 1 -9 -11 -34.7333 47.9501 3
 1 -9 -10 4982.18 241.937 3
 1 9 -10 5614.77 288.38 2
 1 -9 -9 2661.19 174.506 3
 1 9 -9 2080.67 174.727 2
 1 -9 -8 1842.22 142.566 3
 1 9 -8 2106.84 171.576 2
 1 9 -8 1663.42 127.977 5
 1 -9 -7 7165.89 270.608 3
 1 9 -7 6920.09 295.924 2
 1 9 -7 6368.11 247.902 5
 1 9 -6 28.7995 32.1123 5
 -1 -9 6 26.6493 35.6678 3
 1 9 -6 45.0243 50.7065 2
 1 -9 -6 0.83428 39.1757 3
 1 9 -5 7618.13 299.575 2
 -1 -9 5 7204.65 242.703 3
 1 9 -5 7549.34 279.028 5
 -1 9 5 7138.96 249.856 2
 1 -9 -5 7246.24 264.325 3
 -1 -9 4 23.38 27.8673 3
 -1 9 4 40.2325 38.7185 2
 1 -9 -4 25.886 30.8978 3
 1 9 -4 72.7083 42.5566 5
 1 9 -4 24.3788 45.1592 2
 1 9 -3 5345.15 242.827 5
 1 -9 -3 5291.63 219.334 3
 -1 9 3 5466.23 221.545 2
 1 9 -3 5112.23 240.009 2
 -1 -9 3 5625.39 210.615 3
 -1 9 2 843.883 91.8824 2
 -1 -9 2 843.158 83.4473 3
 1 9 -2 798.38 98.2082 2
 1 -9 -2 893.782 94.0491 3
 1 9 -2 755.992 97.2911 5
 1 -9 -1 322.07 56.3254 3
 1 9 -1 389.877 73.6338 2
 1 9 -1 302.529 68.798 5
 -1 -9 1 368.478 56.6579 3
 -1 9 1 367.151 66.7859 2
 1 9 0 2853.79 172.983 2
 -1 9 0 2629.5 166.018 2
 1 9 0 2658.97 179.51 5
 -1 -9 0 2852.8 148.079 3
 1 -9 0 2684.62 155.26 3
 1 9 1 2465.15 173.661 5
 1 9 1 2892.07 173.058 2
 -1 -9 -1 2908.85 149.66 3
 1 -9 1 2912.6 165.846 3
 -1 9 -1 2910.22 169.618 2
 1 -9 2 344.304 64.5963 3
 -1 -9 -2 385.517 59.7924 3
 -1 9 -2 299.554 62.5441 2
 1 9 2 320.47 64.9372 2
 1 9 2 246.043 61.1289 5
 1 9 3 10438.2 362.112 5
 1 -9 3 10486.4 313.585 3
 -1 9 -3 10483.9 333.343 2
 -1 -9 -3 10655.1 290.871 3
 1 9 3 10437.9 319.767 2
 -1 -9 -4 1965.05 132.605 3
 -1 9 -4 1853.92 147.937 2
 1 -9 4 1914.44 138.343 3
 1 9 4 2028.11 147.164 2
 -1 -9 -5 19370.2 410.884 3
 1 9 5 19595.1 507.56 5
 -1 9 -5 20152.7 481.242 2
 1 -9 5 19594.4 446.178 3
 -1 9 -6 1138.65 121.982 2
 1 9 6 1223.76 137.957 5
 -1 -9 -6 1047.08 101.498 3
 -1 9 -7 23037.4 541.308 2
 1 9 7 23266.9 569.346 5
 -1 -9 -7 22204.7 462.523 3
 -1 9 -8 40.1588 57.2143 2
 -1 -9 -8 74.0231 36.9519 3
 1 9 8 189.978 67.2019 5
 1 9 9 24113.1 592.798 5
 -1 -9 -9 23472.4 502.692 3
 -1 9 -9 23639.4 578.946 2
 1 9 10 1741.42 168.944 5
 -1 -9 -10 1721.07 144.158 3
 -1 9 -10 1640.79 165.485 2
 1 9 11 4338.08 264.157 5
 -1 9 -11 4193.82 262.07 2
 -1 -9 -11 4166.3 227.667 3
 -1 9 -12 1535 168.824 2
 -1 -9 -12 1381.86 137.184 3
 1 9 12 1423.6 155.676 5
 -1 9 -13 1.00759 65.7711 2
 1 9 13 23.7627 48.5513 5
 -1 -9 -13 -42.2999 54.105 3
 1 9 14 1311.95 156.405 5
 -1 -9 -14 1184.15 135.874 3
 -1 -9 -15 1688.9 169.052 3
 1 9 15 1868.45 185.462 5
 -1 9 -16 25.3204 94.4841 2
 -1 -9 -16 285.387 81.5436 3
 1 9 16 141.58 70.8828 5
 1 9 17 8662.75 395.651 5
 -1 -9 -17 8383.35 385.356 3
 1 9 18 125.409 71.4601 5
 -1 -9 -18 -40.4768 62.3182 3
 -1 9 -18 262.38 104.902 2
 -1 -9 -19 8296.66 405.012 3
 -1 9 -19 7950.28 449.305 2
 -1 9 -20 416.317 145.465 2
 -1 -9 -20 243.971 92.5751 3
 -1 -9 -21 5220.86 340.964 3
 -1 9 -21 4971.91 376.99 2
 1 -10 -21 161.274 74.126 3
 1 10 -21 56.671 73.1492 2
 1 10 -20 2663.95 273.842 2
 1 -10 -20 2598.82 242.577 3
 -1 10 20 2433.29 234.838 5
 1 10 -19 237.754 97.575 2
 1 -10 -19 209.801 84.8648 3
 -1 10 19 82.1243 64.5853 5
 1 10 -18 5087.8 346.138 2
 -1 10 18 5177.91 325.956 5
 1 -10 -18 5462.21 320.312 3
 1 10 -17 380.126 111.751 2
 -1 10 17 380.644 93.4333 5
 1 -10 -17 428.987 99.7993 3
 -1 10 16 4737.89 304.372 5
 1 -10 -16 4912.25 290.575 3
 1 -10 -15 893.252 126.825 3
 1 10 -15 824.174 140.093 2
 1 10 -14 4338.17 337.877 2
 1 -10 -14 6531.27 315.107 3
 1 -10 -13 1228.21 138.659 3
 1 10 -13 1089.24 151.33 2
 1 -10 -12 1412.2 149.134 3
 1 10 -12 1134.08 148.983 2
 1 -10 -11 1473.96 142.967 3
 1 10 -11 1762.01 172.892 2
 1 -10 -10 1110.86 121.531 3
 1 10 -10 1084.15 139.726 2
 1 -10 -9 1427.49 135.643 3
 1 10 -9 1263.24 145.882 2
 1 10 -8 5377.92 283.537 2
 1 -10 -8 5488.85 252.693 3
 1 10 -7 43.5273 55.601 2
 1 -10 -7 15.4577 39.44 3
 1 10 -7 44.0519 38.541 5
 -1 -10 7 2.49137 36.2836 3
 -1 -10 6 8017.61 273.484 3
 1 -10 -6 7933.1 297.633 3
 1 10 -6 7781.49 328.493 2
 1 10 -6 7905.89 304.859 5
 1 10 -5 176.321 76.0206 2
 -1 10 5 167.632 50.4988 2
 1 -10 -5 184.124 53.5071 3
 -1 -10 5 141.535 45.1812 3
 1 10 -5 115.757 50.7052 5
 1 10 -4 8743.09 327.961 5
 1 -10 -4 8360.25 295.326 3
 1 10 -4 8687.15 334.772 2
 -1 -10 4 8885.2 280.573 3
 -1 10 4 8390.4 288.593 2
 1 10 -3 1044.78 122.774 5
 1 10 -3 1145.09 126.83 2
 1 -10 -3 936.861 99.9427 3
 -1 -10 3 1154.38 104.672 3
 -1 10 3 1212.09 116.497 2
 1 10 -2 2200.16 173.019 5
 1 -10 -2 2240 151.381 3
 -1 10 2 2311.69 156.861 2
 -1 -10 2 2303.49 141.969 3
 1 10 -2 2281.43 170.652 2
 1 -10 -1 546.699 79.4755 3
 1 10 -1 538.676 88.8315 2
 -1 10 1 589.187 84.6417 2
 1 10 -1 570.971 92.0223 5
 -1 -10 1 627.463 76.4965 3
 -1 10 0 639.963 96.2346 2
 1 -10 0 726.43 89.4723 3
 -1 -10 0 674.879 80.1131 3
 1 10 0 527.642 91.9565 5
 1 10 0 727.552 100.58 2
 1 -10 1 98.2624 42.6962 3
 -1 10 -1 215.989 64.1581 2
 1 10 1 160.614 60.4485 2
 -1 -10 -1 159.601 40.2178 3
 1 10 1 67.135 39.3513 5
 1 -10 2 3252.75 185.798 3
 -1 10 -2 3587.01 205.112 2
 -1 -10 -2 3523.92 176.979 3
 1 10 2 3501.46 224.423 5
 1 10 2 3102.52 189.079 2
 1 10 3 171.121 56.1363 5
 1 -10 3 222.024 50.8047 3
 -1 -10 -3 229.041 55.9386 3
 1 10 3 259.392 63.2069 2
 -1 10 -3 282.519 73.2231 2
 1 -10 4 7229.01 277.63 3
 1 10 4 7444.23 290.815 2
 -1 10 -4 7078.96 297.434 2
 1 10 4 6899.01 318.572 5
 -1 -10 -4 6900.57 255.519 3
 1 -10 5 968.074 109.243 3
 -1 -10 -5 985.933 101.674 3
 1 10 5 898.653 125.212 5
 -1 10 -5 1038.13 129.153 2
 1 -10 6 21512.4 494.834 3
 -1 10 -6 21392.2 532.744 2
 -1 -10 -6 21633.7 465.778 3
 1 10 6 22706 588.142 5
 -1 -10 -7 478.299 79.8227 3
 1 10 7 454.171 96.2998 5
 -1 10 -7 585.954 118.4 2
 -1 10 -8 24184 593.828 2
 -1 -10 -8 24006.1 514.856 3
 1 10 8 23751 616.118 5
 1 10 9 724.039 120.515 5
 -1 10 -9 554.867 111.959 2
 -1 -10 -9 502.261 79.192 3
 1 10 10 13915.3 483.489 5
 -1 -10 -10 13301.4 401.302 3
 -1 10 -10 13788.5 474.332 2
 -1 10 -11 1028.08 137.671 2
 -1 -10 -11 1136.07 123.609 3
 1 10 11 1245.43 153.504 5
 1 10 12 1039.76 141.376 5
 -1 -10 -12 1240.37 138.069 3
 -1 -10 -13 647.603 101.591 3
 1 10 13 721.982 121.486 5
 1 10 14 256.71 75.6949 5
 -1 10 -14 113.065 107.725 2
 -1 -10 -14 310.77 74.2709 3
 -1 -10 -15 711.987 117.703 3
 1 10 15 741.071 128.137 5
 -1 -10 -16 4707.78 289.592 3
 1 10 16 4907.5 313.481 5
 -1 -10 -17 686.773 121.545 3
 -1 10 -17 1087.48 176.293 2
 1 10 17 842.485 139.715 5
 -1 10 -18 7571.27 436.718 2
 -1 -10 -18 7104.01 372.003 3
 1 10 18 8085.64 407.784 5
 1 10 19 397.438 107.814 5
 -1 -10 -19 453.937 113.146 3
 -1 10 -19 294.848 119.408 2
 -1 -10 -20 5942.21 359.843 3
 -1 11 20 1270.39 179.418 5
 1 -11 -20 922.706 153.738 3
 1 -11 -19 5052.02 325.711 3
 1 11 -19 5210.34 372.92 2
 -1 11 19 5845.71 365.762 5
 1 -11 -18 350.029 93.1116 3
 -1 11 18 431.173 110.408 5
 1 11 -18 361.086 120.491 2
 1 -11 -17 8097.45 389.308 3
 1 11 -17 7448.73 421.318 2
 -1 11 17 8001.75 417.807 5
 -1 11 16 895.289 141.967 5
 1 11 -16 1288.79 182.948 2
 1 -11 -16 1430.08 166.238 3
 1 11 -15 6005.17 366.444 2
 -1 11 15 6158 361.544 5
 1 -11 -15 6448.45 329.893 3
 1 -11 -14 1428.17 158.233 3
 1 11 -14 1453.78 186.828 2
 1 11 -13 4188.42 294.577 2
 1 -11 -13 4094.94 254.705 3
 1 11 -12 -55.1199 73.8353 2
 1 -11 -12 -1.89168 49.3555 3
 1 11 -11 91.3787 62.1591 2
 1 -11 -11 57.7232 50.6537 3
 1 -11 -10 -20.6955 56.4565 3
 1 11 -10 53.1909 63.8296 2
 -1 -11 9 3333.89 199.11 3
 1 11 -9 3342.85 239.427 2
 1 -11 -9 3045.28 201.027 3
 -1 -11 8 -72.1518 46.8547 3
 1 -11 -8 -59.0935 63.0943 3
 1 11 -8 50.9313 59.5661 2
 -1 -11 7 10627.8 333.426 3
 1 -11 -7 10285.4 354.785 3
 1 11 -7 9487.22 354.981 5
 1 11 -7 11020.9 416.002 2
 1 11 -6 5.39921 43.403 5
 1 -11 -6 44.009 43.0661 3
 1 11 -6 62.306 64.7981 2
 -1 -11 6 -21.4877 47.089 3
 1 11 -5 9672.7 378.22 2
 -1 -11 5 10559 326.165 3
 1 11 -5 10034.3 373.594 5
 1 -11 -5 10119.7 342.653 3
 -1 11 5 9976.62 334.205 2
 1 11 -4 1568.16 155.66 5
 1 -11 -4 2052.84 156.391 3
 -1 11 4 1984.28 153.968 2
 -1 -11 4 2154.17 147.945 3
 1 11 -4 2351.31 193.131 2
 1 11 -3 11657.3 399.217 2
 -1 11 3 11986.4 366.995 2
 -1 -11 3 12111.1 339.544 3
 1 -11 -3 11835.5 361.839 3
 1 11 -3 11557.1 410.004 5
 -1 -11 2 4929.25 216.41 3
 1 11 -2 4558.63 264.125 5
 1 -11 -2 4883.88 234.255 3
 -1 11 2 5102.19 246.781 2
 1 11 -2 4899.12 259.42 2
 1 11 -1 7997.22 325.25 2
 -1 11 1 7619.29 301.975 2
 1 -11 -1 8099.42 298.176 3
 -1 -11 1 8086.65 276.635 3
 1 11 -1 8043.84 348.751 5
 1 -11 0 2800.49 175.762 3
 -1 11 0 2862.48 190.681 2
 1 11 0 2621.81 190.43 2
 1 11 0 2577.43 201.189 5
 -1 -11 0 2992.46 168.092 3
 -1 -11 -1 597.388 82.3293 3
 1 11 1 412.133 92.5768 5
 -1 11 -1 460.024 91.0055 2
 1 11 1 605.797 101.172 2
 1 -11 1 333.856 68.0427 3
 1 11 2 1188.73 147.005 5
 1 -11 2 892.005 105.534 3
 -1 -11 -2 1124.74 105.133 3
 -1 11 -2 1061.97 125.521 2
 1 11 2 924.539 114.156 2
 1 11 3 1954.45 163.707 2
 1 11 3 1713.56 172.309 5
 -1 -11 -3 2133.16 150.079 3
 -1 11 -3 1845.77 164.355 2
 1 -11 3 1960.51 154.217 3
 1 -11 4 54.1892 48.6008 3
 -1 -11 -4 55.8047 35.9832 3
 1 11 4 89.445 52.6704 2
 -1 11 -4 47.9129 54.3972 2
 1 11 4 101.866 61.0789 5
 -1 11 -5 10016.6 376.804 2
 1 11 5 10429.1 421.715 5
 1 -11 5 10023.8 341.031 3
 -1 -11 -5 10238.1 328.487 3
 -1 11 -6 740.184 123.076 2
 -1 -11 -6 760.623 97.0677 3
 1 -11 6 697.195 99.2974 3
 1 11 6 810.552 129.729 5
 -1 11 -6 683.315 102.304 5
 1 11 7 17968.6 562.981 5
 -1 11 -7 17455.9 522.454 2
 1 -11 7 16919 463.482 3
 -1 -11 -7 17391.1 442.331 3
 1 11 8 1998.15 199.972 5
 -1 11 -8 1883.68 185.347 2
 -1 -11 -8 1904.18 156.193 3
 1 -11 8 2057.66 171.892 3
 1 11 9 12174.1 479.276 5
 -1 -11 -9 11932.6 388.431 3
 -1 11 -9 12370.7 456.822 2
 -1 11 -10 3411.81 250.648 2
 -1 -11 -10 3212.09 206.936 3
 1 11 10 3718.74 270.924 5
 -1 11 -11 1074.1 154.108 2
 1 11 11 924.437 136.622 5
 -1 -11 -11 1293.05 142.174 3
 -1 -11 -12 5784.9 289.904 3
 1 11 12 5413.48 330.958 5
 -1 11 -12 5063.38 317.278 2
 1 11 13 28.9122 57.1211 5
 -1 -11 -13 135.252 60.9863 3
 -1 11 -13 1.15867 88.6185 2
 -1 -11 -14 2360.19 199.699 3
 1 11 14 2537.13 230.846 5
 -1 11 -14 2169.73 220.694 2
 -1 11 -15 1161.72 170.479 2
 1 11 15 1488.27 183.021 5
 -1 -11 -15 1794.73 182.952 3
 -1 -11 -16 1390.86 169.675 3
 1 11 16 1390.96 180.184 5
 -1 11 -16 1139.16 173.927 2
 -1 -11 -17 4326.69 297.187 3
 1 11 17 4687.79 322.945 5
 -1 11 -17 4199.53 326.647 2
 1 11 18 829.5 148.003 5
 -1 11 -18 802.573 156.6 2
 -1 -11 -18 926.542 145.013 3
 -1 -11 -19 2890.46 247.972 3
 1 11 19 3090.42 272.827 5
 -1 12 19 876.154 157.951 5
 -1 12 18 4966.64 351.939 5
 1 -12 -18 4779.72 314.281 3
 1 -12 -17 646.982 124.259 3
 -1 12 17 596.171 133.954 5
 1 12 -17 541.34 146.563 2
 1 12 -16 6466 401.208 2
 1 -12 -16 6675.79 357.181 3
 -1 12 16 6703.57 397.389 5
 1 -12 -15 28.102 55.7189 3
 -1 12 15 87.261 70.1782 5
 1 12 -15 159.162 86.558 2
 1 -12 -14 4951.5 293.61 3
 1 12 -14 4626.57 323.405 2
 -1 12 14 5176.28 342.204 5
 1 -12 -13 73.4987 55.7261 3
 1 12 -13 151.07 97.4261 2
 1 -12 -12 1096.69 136.211 3
 1 12 -12 1028.35 161.38 2
 1 -12 -11 305.14 70.5321 3
 1 12 -11 312.152 106.665 2
 1 -12 -10 330.357 80.95 3
 1 12 -10 343.167 104.582 2
 1 12 -9 118.375 76.7509 2
 1 -12 -9 265.014 86.3415 3
 1 12 -8 6901.65 352.087 2
 1 -12 -8 6796.41 305.302 3
 1 -12 -7 85.3101 56.513 3
 1 12 -7 61.3297 68.9695 2
 1 12 -6 13155.4 454.196 5
 1 -12 -6 13238 414.255 3
 1 12 -6 14149.1 485.52 2
 1 12 -5 871.606 123.047 5
 -1 12 5 1181.84 128.067 2
 1 12 -5 1216.89 156.301 2
 1 -12 -5 1187.01 126.596 3
 1 12 -4 10941.5 420.446 5
 1 -12 -4 12774.1 396.377 3
 -1 12 4 12049.5 387.497 2
 1 12 -4 12087.3 437.562 2
 1 12 -3 2671.87 208.833 2
 -1 12 3 2674.78 192.537 2
 1 12 -3 2374.57 203.466 5
 1 -12 -3 2509.62 173.552 3
 -1 -12 3 2744.59 171.944 3
 -1 12 2 13430.3 421.204 2
 -1 -12 2 11524.2 349.384 3
 1 12 -2 12920.7 469.476 5
 1 -12 -2 13321.2 400.635 3
 1 12 -2 13360.3 450.019 2
 -1 -12 1 2953.94 176.741 3
 1 -12 -1 2946.06 191.385 3
 1 12 -1 2604.77 199.035 2
 1 12 -1 2581.23 217.212 5
 -1 12 1 2590.44 193.511 2
 1 12 0 5815.56 293.132 2
 -1 12 0 5312.64 271.355 2
 1 -12 0 5000.11 248.031 3
 -1 -12 0 5943.91 247.902 3
 1 12 0 5373.96 311.384 5
 1 12 1 4025.26 273.263 5
 -1 -12 -1 4228.92 210.9 3
 -1 12 -1 4111.49 240.108 2
 1 12 1 3799.36 236.16 2
 1 -12 1 3900.52 217.535 3
 -1 -12 -2 249.209 69.4024 3
 1 12 2 168.461 50.7113 2
 1 12 2 137.604 67.4305 5
 -1 12 -2 66.3298 53.9333 2
 1 -12 2 149.001 53.5547 3
 -1 12 -3 1878.04 172.484 2
 1 -12 3 1796.05 154.05 3
 1 12 3 1656.99 179.57 5
 1 12 3 1857.67 162.298 2
 -1 -12 -3 1938.37 146.39 3
 -1 -12 -4 2714.44 175.653 3
 -1 12 -4 2270.58 194.313 5
 1 12 4 2682.54 229.799 5
 -1 12 -4 2504.61 199.926 2
 1 -12 4 2827.95 191.225 3
 -1 12 -5 173.049 71.4417 2
 1 12 5 -4.03273 68.9212 5
 1 -12 5 23.2768 57.4489 3
 -1 -12 -5 115.171 55.568 3
 -1 12 -5 83.1077 58.0356 5
 -1 -12 -6 5091.66 245.927 3
 1 -12 6 4779.52 247.669 3
 1 12 6 4716.13 304.117 5
 -1 12 -6 4856.02 284.75 2
 -1 -12 -7 113.757 56.7475 3
 1 12 7 173.334 66.9117 5
 1 -12 7 245.835 78.1136 3
 -1 12 -7 239.65 89.2499 2
 -1 -12 -8 4349.92 237.066 3
 -1 12 -8 4245.17 277.207 2
 1 -12 8 4464.46 252.239 3
 1 12 8 3922.91 288.062 5
 -1 -12 -9 3693.88 225.919 3
 -1 12 -9 3641.03 265.745 2
 1 12 9 4116.12 294.762 5
 1 -12 9 3709.54 233.962 3
 1 -12 10 296.821 88.8787 3
 -1 -12 -10 356.077 79.1762 3
 1 12 10 335.703 98.5085 5
 -1 12 -10 287.913 98.5343 2
 -1 12 -11 7581.1 393.988 2
 -1 -12 -11 7592.7 334.236 3
 1 12 11 7778.43 409.218 5
 1 12 12 -66.9412 86.7371 5
 -1 12 -12 -52.913 78.2127 2
 -1 -12 -12 181.388 77.4207 3
 1 12 13 5471.33 354.37 5
 -1 12 -13 5832.27 361.764 2
 -1 -12 -13 5904.95 309.999 3
 -1 12 -14 596.698 131.745 2
 1 12 14 312.489 80.9084 5
 -1 -12 -14 516.342 103.521 3
 1 12 15 3941.18 303.282 5
 -1 12 -15 3690.88 307.677 2
 -1 -12 -15 4034.36 270.873 3
 -1 -12 -16 2357.55 215.895 3
 -1 12 -16 2094.5 240.899 2
 1 12 16 2450.75 246.789 5
 1 12 17 1346.16 184.532 5
 -1 -12 -17 1396.55 177.595 3
 1 12 18 2408.33 247.381 5
 -1 -12 -18 2406.41 228.402 3
 1 -13 -17 3939.93 288.554 3
 -1 13 16 141.233 78.1074 5
 1 -13 -16 227.117 89.1473 3
 -1 13 15 2017.04 235.603 5
 1 13 -15 2221.49 246.868 2
 1 -13 -15 2158.6 204.504 3
 1 -13 -14 1698.89 179.549 3
 1 13 -14 1654.06 208.187 2
 -1 13 14 1611.42 201.504 5
 1 -13 -13 429.401 88.5209 3
 1 13 -13 296.297 103.375 2
 -1 13 13 518.52 133.635 5
 1 13 -12 4393.38 318.703 2
 1 -13 -12 4373.32 272.144 3
 -1 13 12 4853.34 346.174 5
 1 13 -11 215.907 97.8771 2
 1 -13 -11 275.388 86.4336 3
 -1 13 11 152.478 88.655 5
 1 -13 -10 2550.29 202.488 3
 1 13 -10 2319.01 227.385 2
 1 13 -9 1987.98 211.615 2
 1 -13 -9 1790.94 167.434 3
 1 -13 -8 1337.77 148.57 3
 1 13 -8 1442.9 179.422 2
 1 13 -7 5200.78 316.997 2
 1 -13 -7 4737.61 262.892 3
 1 13 -6 146.062 74.5055 2
 1 -13 -6 282.714 74.5068 3
 1 -13 -5 8058.48 333.364 3
 1 13 -5 7329.34 363.469 5
 1 13 -5 7629.54 371.296 2
 -1 13 4 1.96456 51.0662 2
 1 -13 -4 68.6927 56.2501 3
 1 13 -4 122.693 79.928 2
 1 13 -4 51.0356 59.7396 5
 1 13 -3 7054.84 365.65 5
 1 -13 -3 7747.05 319.836 3
 1 13 -3 7131.25 354.048 2
 -1 13 3 7215.43 319.155 2
 -1 13 2 2053.04 175.342 2
 1 13 -2 2157.92 196.74 2
 1 -13 -2 2112.83 170.004 3
 1 13 -2 1936.36 200.049 5
 1 13 -1 2778.07 234.065 5
 1 13 -1 2747.91 215.459 2
 1 -13 -1 2741.98 189.45 3
 -1 13 1 2642.51 203.219 2
 1 -13 0 4057.2 235.435 3
 -1 13 0 4207.7 257.014 2
 1 13 0 4311.97 292.552 5
 1 13 0 4005.92 254.446 2
 1 13 1 475.189 91.9439 2
 1 -13 1 350.327 75.0331 3
 1 13 1 361.184 99.985 5
 -1 13 -1 189.954 84.6657 2
 1 13 2 6248.44 356.991 5
 1 13 2 6241.44 311.282 2
 -1 13 -2 6854.25 332.045 2
 1 -13 2 6639.39 295.988 3
 -1 13 -2 6214.95 340.84 5
 1 13 3 -54.6266 82.1631 2
 -1 13 -3 -70.2662 74.1101 2
 1 -13 3 -94.3978 67.4717 3
 -1 13 -3 -106.255 70.5282 5
 1 13 3 127.797 76.3216 5
 -1 13 -4 3929.77 270.592 5
 1 13 4 4052.96 294.125 5
 1 -13 4 4348.28 245.291 3
 -1 13 -4 3963.2 267.46 2
 -1 13 -5 1223.66 156.507 2
 1 -13 5 1436.9 146.858 3
 1 13 5 1266.15 166.683 5
 -1 13 -6 1174.35 152.837 2
 1 -13 6 1194.37 137.136 3
 1 13 6 902.578 146.451 5
 -1 13 -7 2008.38 197.351 2
 1 13 7 1795.11 204.974 5
 1 -13 7 1963.16 172.688 3
 1 13 8 622.178 124.771 5
 1 -13 8 619.733 107.624 3
 -1 13 -8 519.335 116.405 2
 1 -13 9 633.582 104.714 3
 -1 13 -9 613.237 120.601 2
 1 13 9 544.729 119.748 5
 1 13 10 3308.1 280.121 5
 1 -13 10 3460.78 234.031 3
 -1 13 -10 3301.56 269.615 2
 1 13 11 241.004 88.6725 5
 -1 13 -11 142.068 88.2025 2
 1 13 12 4364.37 326.674 5
 -1 13 -12 4054.4 312.474 2
 1 13 13 273.966 94.6077 5
 -1 13 -13 344.904 115.102 2
 1 13 14 4505.8 339.969 5
 -1 13 -14 4089.22 324.398 2
 1 13 15 1469.28 200.961 5
 -1 13 -15 1513.08 211.481 2
 1 -14 -15 2274.02 216.013 3
 1 -14 -14 316.635 92.3668 3
 -1 14 13 6490.25 415.189 5
 1 -14 -13 6533.74 346.042 3
 1 14 -13 6448.59 406.848 2
 1 -14 -12 101.212 72.1243 3
 -1 14 12 -28.8428 63.2226 5
 1 14 -12 88.0436 84.035 2
 -1 14 11 9464.37 492.72 5
 1 14 -11 9551.81 480.493 2
 1 -14 -11 9432.83 404.225 3
 -1 14 10 435.48 130.803 5
 1 -14 -10 398.258 92.6423 3
 1 14 -10 520.75 132.494 2
 1 -14 -9 7331.8 344.048 3
 1 14 -9 7239.47 402.949 2
 -1 14 9 7154.26 423.039 5
 1 14 -8 1379.44 181.832 2
 -1 14 8 1256.49 184.793 5
 1 -14 -8 1668.35 166.507 3
 -1 14 7 3303.68 287.17 5
 1 14 -7 3263.09 267.463 2
 1 -14 -7 3670.79 241.809 3
 -1 14 6 1283.66 185.078 5
 1 14 -6 1547.11 183.892 2
 1 -14 -6 1707.69 167.235 3
 -1 14 5 700.603 143.455 5
 1 -14 -5 697.83 109.768 3
 1 14 -5 765.79 134.465 5
 1 14 -5 1009.18 155.823 2
 1 14 -4 1529.33 180.816 5
 -1 14 4 1535.98 189.54 5
 1 -14 -4 1846.18 169.47 3
 1 14 -4 1610.42 183.691 2
 -1 14 3 125.787 75.0515 5
 1 14 -3 223.974 72.0835 2
 1 -14 -3 248.709 78.6003 3
 1 14 -3 105.506 68.1322 5
 1 14 -2 1952.51 192.359 2
 -1 14 2 2045.66 185.653 2
 1 14 -2 1763.19 198.054 5
 1 -14 -2 2199.85 179.939 3
 -1 14 2 2035.82 217.331 5
 1 14 -1 2534.32 238.141 5
 -1 14 1 2742.86 249.89 5
 1 14 -1 3047.29 239.764 2
 1 -14 -1 3178.27 214.035 3
 -1 14 1 3069.87 230.632 2
 1 14 0 1328.76 178.432 5
 1 14 0 1369.59 167.243 2
 -1 14 0 1446.36 161.49 2
 1 -14 0 1589.98 153.118 3
 -1 14 0 1170.1 165.064 5
 1 14 1 6747.36 387.914 5
 1 -14 1 6347.71 300.68 3
 -1 14 -1 5978 360.112 5
 -1 14 -1 6410.34 336.346 2
 1 14 1 6159.77 329.601 2
 -1 14 -2 432.642 108.039 2
 1 14 2 431.738 96.8555 2
 -1 14 -2 343.579 99.3757 5
 1 14 2 352.165 106.768 5
 -1 14 -3 7886.09 406.472 5
 1 14 3 8093.19 433.399 5
 -1 14 -3 7885.36 378.959 2
 1 14 3 8120.68 372.691 2
 -1 14 -4 47.4841 61.0613 5
 -1 14 -4 -45.86 68.1393 2
 1 14 4 88.8253 79.6169 5
 -1 14 -5 3820.02 277.446 2
 1 14 5 3983.2 310.028 5
 1 14 6 342.982 113.948 5
 -1 14 -6 25.7162 68.7705 2
 -1 14 -7 343.977 94.5481 2
 1 14 7 239.728 92.3618 5
 -1 14 -8 723.082 128.125 2
 1 14 8 713.494 138.21 5
 -1 14 -9 311.192 100.792 2
 1 14 9 -27.872 91.3242 5
 -1 14 -10 165.085 82.3708 2
 1 14 10 163.274 74.6184 5
 -1 14 -11 1670.46 209.611 2
 1 14 11 1612.66 208.301 5
 1 14 12 73.4178 62.8149 5
 -1 14 -12 24.7682 81.232 2
 1 15 -11 111.18 104.454 2
 1 15 -10 10088.1 504.986 2
 -1 15 10 10938.7 552.323 5
 -1 15 9 47.8874 77.0092 5
 1 15 -9 181.169 115.12 2
 -1 15 8 7771.22 458.951 5
 1 15 -8 7319.38 414.856 2
 -1 15 7 226.21 96.8028 5
 1 15 -7 372.755 109.402 2
 1 15 -6 3112.95 268.742 2
 -1 15 6 2920.74 281.191 5
 1 15 -5 -166.757 108.873 2
 -1 15 5 -123.516 110.093 5
 1 15 -4 39.5447 53.5798 5
 -1 15 4 7.88723 71.8687 5
 1 15 -4 31.3457 75.9461 2
 1 15 -3 36.4128 66.2324 2
 1 15 -3 -153.072 101.571 5
 -1 15 3 -186.246 96.7801 5
 -1 15 2 1357.86 188.193 5
 1 15 -2 1787.33 210.454 2
 1 15 -2 1135.53 173.097 5
 1 15 -1 115.044 91.594 2
 -1 15 1 -40.173 74.399 5
 1 15 -1 42.2176 61.1814 5
 1 15 0 4925.55 349.935 5
 -1 15 0 4967.29 348.973 5
 -1 15 0 5432.89 320.971 2
 1 15 0 5116.93 316.237 2
 -1 15 -1 124.923 76.5228 5
 1 15 1 83.0122 79.5735 2
 -1 15 -1 32.2261 76.4247 2
 1 15 1 48.6043 74.6806 5
 -1 15 -2 6993.43 370.372 2
 1 15 2 6652.1 359.172 2
 -1 15 -2 6368.27 389.482 5
 1 15 2 5902.14 385.661 5
 -1 15 -3 25.3736 77.5681 2
 1 15 3 -51.0578 77.8577 5
 -1 15 -3 96.2004 75.0994 5
 1 15 3 150.991 102.415 2
 1 15 4 5054.69 362.564 5
 -1 15 -4 5504.16 340.363 2
 -1 15 -5 223.979 85.8438 2
 1 15 5 -35.1352 86.7654 5
 -1 15 -6 2307.63 238.599 2
 1 15 6 1907.81 225.495 5
 -1 15 -7 -60.2332 79.545 2
 1 15 7 -137.866 115.424 5
 -1 15 -8 74.7444 71.1644 2
 1 15 8 -123.485 117.05 5
 -1 15 -9 -49.2635 81.202 2
 1 15 9 -109.416 100.361 5
 -1 15 -10 704.919 138.412 2
 1 16 -7 3218.63 291.332 2
 1 16 -6 76.4979 77.0964 2
 -1 16 6 232.457 98.9084 5
 1 16 -5 418.458 124.756 2
 -1 16 5 183.061 84.1953 5
 -1 16 4 349.629 109.434 5
 1 16 -4 480.545 118.689 2
 -1 16 3 150.277 79.088 5
 1 16 -3 107.506 76.2313 2
 1 16 -3 158.155 81.6147 5
 -1 16 2 257.02 93.8112 5
 1 16 -2 449.813 127.186 5
 1 16 -2 349.882 99.8299 2
 1 16 -1 2653.88 270.177 5
 1 16 -1 2548.94 239.918 2
 -1 16 1 2561.83 265.07 5
 1 16 0 127.777 66.3673 2
 -1 16 0 27.6139 68.1719 5
 -1 16 -1 5050.71 370.388 5
 1 16 1 4583.48 310.694 2
 1 16 1 4263.29 342.366 5
 -1 16 -2 13.5092 65.8202 5
 -1 16 -2 -95.5215 83.4107 2
 1 16 2 92.7191 97.627 5
 1 16 3 4782.85 368.257 5
 -1 16 -3 4920.43 332.798 2
 1 16 4 52.1198 65.7335 5
 -1 16 -4 50.8336 86.4757 2
 -1 16 -5 3920.11 308.038 2
 1 16 5 3367.85 315.039 5
 -1 16 -6 42.8208 81.6444 2
 -1 16 -7 580.173 133.856 2
 1 17 -2 803.817 155.32 5
 1 17 -1 1458.86 197.013 2
 1 17 -1 991.098 183.388 5
 -1 17 0 2202.19 260.967 5
 -1 17 -1 3.35217 84.4486 5
 2 0 -26 2762.58 273.566 3
 2 0 -25 107.245 72.7656 3
 2 0 -24 8792.5 436.845 3
 2 0 -23 318.572 101.833 3
 2 0 -22 15893 547.773 3
 2 0 -21 213.879 79.9704 2
 -2 0 21 287.949 75.1749 4
 2 0 -21 323.919 103.301 3
 2 0 -20 16703.6 467.412 2
 -2 0 20 14740.2 424.539 4
 2 0 -20 16171.8 511.105 3
 -2 0 19 252.569 67.868 4
 2 0 -19 185.422 79.4169 3
 2 0 -19 165.855 73.962 2
 -2 0 18 13415.8 379.987 4
 2 0 -18 13285.3 435.233 3
 2 0 -18 13839.2 395.089 2
 -2 0 17 119.515 50.9567 4
 2 0 -17 37.4717 50.6956 2
 2 0 -17 160.791 65.1933 3
 2 0 -16 13555.5 361.92 2
 2 0 -16 12720.7 395.504 3
 -2 0 16 13049.2 348.076 4
 -2 0 15 -19.0178 29.3519 4
 2 0 -15 21.2265 41.4714 2
 2 0 -15 48.7305 47.9549 3
 -2 0 14 104.867 41.6384 4
 2 0 -14 14.2838 30.741 2
 2 0 -14 9.16894 34.0057 3
 2 0 -13 3.85158 35.5254 2
 2 0 -13 -36.745 34.9871 3
 -2 0 13 29.3978 30.7207 4
 2 0 -12 12947.9 287.944 2
 2 0 -12 13311.2 335.814 3
 -2 0 12 12719.5 291.564 4
 -2 0 11 -31.6113 33.5187 4
 2 0 -11 27.5009 35.4725 2
 2 0 -11 -6.45796 32.9798 3
 -2 0 10 79060.5 646.28 4
 2 0 -10 78214.3 723.759 3
 2 0 -10 77254.5 621.83 2
 -2 0 9 0.89074 22.7958 4
 2 0 -9 -12.8253 27.4863 3
 2 0 -9 20.5931 22.1355 2
 2 0 -8 76189.4 626.298 3
 2 0 -8 74430.5 518.646 2
 2 0 -7 13.1958 19.7755 3
 2 0 -7 8.11182 11.8769 5
 2 0 -7 19.6204 16.6225 2
 2 0 -6 26508.4 264.363 5
 2 0 -6 27533.7 257.286 2
 2 0 -6 27245.4 313.45 3
 2 0 -5 74.9196 21.8982 3
 2 0 -5 100.935 19.5921 2
 2 0 -5 62.2569 17.0329 5
 2 0 -4 11383.4 160.057 3
 2 0 -4 11292.6 126.998 2
 2 0 -4 11711.9 165.77 5
 2 0 -3 61.9624 16.1393 5
 2 0 -3 49.5462 11.2242 2
 2 0 -3 57.5724 15.3275 3
 2 0 1 2.66038 7.76271 5
 -2 0 -2 5885 138.627 2
 2 0 2 5678.05 111.968 5
 -2 0 -2 5986.02 132.762 3
 2 0 3 178.021 24.151 5
 -2 0 -3 143.358 29.6872 3
 -2 0 -3 152.033 33.3895 2
 -2 0 -4 573.522 56.4379 2
 -2 0 -4 613.18 56.1642 3
 2 0 4 604.813 39.9132 5
 -2 0 -5 6.10739 22.1064 2
 -2 0 -5 -7.56369 23.2351 3
 2 0 5 3.11289 9.6248 5
 -2 0 -6 177.577 42.7963 3
 -2 0 -6 141.562 43.8155 2
 2 0 6 130.425 20.5673 5
 -2 0 -7 59.1922 35.5369 3
 2 0 7 61.3442 17.9233 5
 -2 0 -7 -1.02766 35.8269 2
 2 0 8 11818.3 189.461 5
 -2 0 -8 11809.6 296.538 3
 -2 0 -8 11967.7 299.22 2
 2 0 9 4.53902 15.082 5
 -2 0 -9 5.631 37.689 2
 -2 0 -9 -11.9942 39.3401 3
 -2 0 -10 26107.6 485.026 2
 -2 0 -10 25146.3 477.759 3
 2 0 10 24619.5 288.502 5
 -2 0 -11 183.563 69.4172 2
 2 0 11 0.77769 15.7094 5
 -2 0 -11 206.431 79.5432 3
 -2 0 -12 22443.6 496.902 3
 2 0 12 21207.7 280.987 5
 -2 0 -12 22640.4 494.721 2
 -2 0 -13 172.456 72.4254 2
 -2 0 -13 283.26 82.1369 3
 -2 0 -14 31486.2 621.347 2
 -2 0 -14 31079.1 632.645 3
 -2 0 -15 274.87 82.8251 3
 -2 0 -15 394.328 92.0951 2
 -2 0 -16 26718.3 634.78 3
 -2 0 -16 27003 615.895 2
 -2 0 -17 363.471 91.611 3
 -2 0 -17 225.097 78.5247 2
 -2 0 -18 109.011 66.7643 2
 -2 0 -18 374.153 105.521 3
 -2 0 -19 23.1837 51.1994 3
 -2 0 -19 -0.75225 55.6167 2
 -2 0 -20 1112.58 148.752 2
 -2 0 -20 476.055 138.045 3
 -2 0 -21 61.2565 82.1209 3
 -2 0 -21 113.853 76.763 2
 -2 0 -22 3557.51 280.519 2
 -2 0 -22 2249.17 288.626 3
 -2 0 -23 215.616 101.614 2
 -2 0 -23 311.916 117.033 3
 -2 0 -24 7015.85 410.778 2
 -2 0 -24 8082.19 460.718 3
 2 -1 -26 482.546 114.077 3
 2 1 -26 414.958 115.574 3
 2 -1 -25 4564.92 326.39 3
 2 1 -25 4505.77 329.524 3
 2 1 -24 245.367 85.4664 3
 2 -1 -24 387.535 114.264 3
 2 -1 -23 12257.6 496.441 3
 2 1 -23 12334.2 504.63 3
 2 1 -22 1067.16 147.187 2
 2 -1 -22 1241.82 168.506 3
 2 1 -22 945.32 144.23 3
 2 -1 -21 15758.6 527.389 3
 2 1 -21 15305.7 523.068 3
 -2 -1 21 13854.8 440.909 4
 2 1 -21 15300.5 476.917 2
 2 -1 -20 4081.3 269.614 3
 2 1 -20 4030.94 265.074 3
 -2 -1 20 3425.62 215.737 4
 2 1 -20 4262.25 248.185 2
 -2 -1 19 10513.9 361.948 4
 -2 1 19 11493.7 350.857 4
 2 -1 -19 11598.5 367.732 2
 2 1 -19 11574.2 388.481 2
 2 1 -19 11416.9 421.771 3
 2 -1 -19 10866 412.782 3
 -2 -1 18 2256.38 166.692 4
 -2 1 18 2095.11 148.104 4
 2 -1 -18 2532.44 196.448 3
 2 1 -18 2563.08 179.676 2
 2 -1 -18 2332.07 162.551 2
 2 1 -18 2059.48 177.693 3
 -2 1 17 6218.42 242.145 4
 2 1 -17 6879.87 278.482 2
 -2 -1 17 6090.81 258.38 4
 2 -1 -17 6270.2 289.607 3
 2 1 -17 6508.06 293.26 3
 2 -1 -17 6564.58 256.478 2
 2 -1 -16 5884.73 268.213 3
 2 1 -16 6272.36 275.805 3
 2 -1 -16 5860.17 233.615 2
 2 1 -16 6423.85 256.521 2
 -2 1 16 5482.06 217.107 4
 -2 -1 16 5723.13 242.816 4
 -2 -1 15 80.4991 44.1559 4
 2 -1 -15 40.8778 38.382 2
 2 1 -15 48.483 45.412 2
 2 -1 -15 2.07683 39.9076 3
 2 1 -15 87.4381 49.1306 3
 -2 1 15 60.1382 36.0386 4
 2 1 -14 14307.3 347.904 2
 2 1 -14 14604.8 387.202 3
 2 -1 -14 14459.4 331.605 2
 2 -1 -14 14525.3 387.822 3
 -2 1 14 14121.8 318.423 4
 -2 -1 14 14547.6 355.562 4
 2 -1 -13 3942.84 194.923 3
 2 1 -13 3960.31 195.373 3
 2 -1 -13 3934.12 165.472 2
 -2 1 13 3678.07 157.238 4
 2 1 -13 3824.74 174.09 2
 -2 -1 13 3914.59 177.853 4
 2 1 -12 3265.35 154.099 2
 2 -1 -12 3225.1 166.997 3
 -2 -1 12 2935.03 148.744 4
 2 -1 -12 3020.92 141.877 2
 -2 1 12 3230.5 142.651 4
 2 1 -12 3114.05 166.135 3
 2 1 -11 46469.5 542.292 2
 2 -1 -11 46307.9 495.841 2
 -2 -1 11 45241.7 549.718 4
 2 -1 -11 47039.1 599.932 3
 2 1 -11 45797.8 592.847 3
 -2 1 11 47238.6 498.898 4
 2 1 -10 62.8633 38.2665 2
 2 -1 -10 48.2571 34.0431 3
 -2 -1 10 31.8167 33.7627 4
 -2 1 10 -2.06755 24.1037 4
 2 -1 -10 29.0817 28.8412 2
 2 1 -10 16.2515 38.9029 3
 2 1 -9 60254.9 547.886 2
 2 1 -9 60400.8 598.537 3
 2 -1 -9 57469.7 466.752 2
 -2 -1 9 61406 576.569 4
 2 1 -9 58533.6 383.998 5
 2 -1 -9 60598 605.211 3
 2 1 -8 87.2514 16.4431 5
 2 -1 -8 135.926 24.8664 2
 2 1 -8 78.398 27.9042 3
 2 1 -8 90.6523 25.2137 2
 -2 -1 8 124.935 31.3085 4
 2 -1 -8 114.606 30.8456 3
 2 -1 -7 12341.8 239.206 3
 2 -1 -7 12358.9 174.551 2
 2 1 -7 12510.8 216.511 2
 2 1 -7 12773.7 234.369 3
 -2 -1 7 12408.6 231.562 4
 2 1 -7 12020.4 168.824 5
 2 1 -6 845.992 57.0516 3
 2 1 -6 772.381 50.925 2
 2 1 -6 756.617 42.3954 5
 2 -1 -6 808.657 60.0518 3
 2 -1 -6 738.325 37.7405 2
 2 -1 -5 81058.5 522.121 3
 2 1 -5 81368.2 476.239 2
 2 1 -5 78934.5 427.31 5
 2 -1 -5 82832 514.302 5
 2 -1 -5 80625.8 315.285 2
 2 1 -5 81664.5 474.361 3
 2 1 -4 5432.58 103.968 3
 2 1 -4 5555.37 115.009 2
 2 1 -4 5291.83 108.976 5
 2 -1 -4 5550.64 129.363 5
 2 -1 -4 5678.88 126.803 3
 2 1 -3 354.279 30.6099 2
 2 -1 -3 414.496 35.3003 3
 2 1 -3 413.265 24.3138 3
 -2 -1 3 413.342 34.0182 1
 2 -1 -3 375.842 35.9607 5
 2 1 -3 394.465 31.9164 5
 2 -1 -2 1505.43 63.6672 5
 2 1 -2 1583.22 57.9872 2
 -2 -1 2 957.899 47.7613 1
 2 -1 -2 1756.88 61.7429 3
 2 1 -2 1641.19 62.2819 5
 2 -1 -1 6240.41 123.891 5
 2 1 -1 32235.7 269.684 2
 -2 -1 1 18127.7 209.074 1
 -2 1 1 38723.7 245.994 1
 2 -1 -1 38422.6 284.741 3
 2 1 -1 32325.7 276.587 5
 -2 1 0 718.238 36.6807 1
 -2 1 0 49.043 11.7776 2
 2 -1 0 8.18755 9.2876 5
 2 1 0 532.789 36.7213 5
 -2 -1 -1 3729.02 79.6668 3
 2 1 1 8065.94 140.746 5
 -2 1 -1 8072.64 141.559 2
 2 -1 1 3220.57 84.2811 5
 -2 -1 -2 596.37 40.958 3
 2 -1 2 597.767 37.7751 5
 -2 1 -2 574.569 47.1859 2
 2 1 2 557.123 39.6972 5
 2 1 3 52135.4 378.107 5
 -2 1 -3 49891.3 438.56 2
 -2 -1 -3 49154.5 404.244 3
 2 -1 3 51574.2 324.751 5
 -2 -1 -4 1679.11 85.0498 3
 2 1 4 1819.51 73.7399 5
 2 -1 4 1841.85 61.6999 5
 -2 1 -4 1758.21 90.9913 2
 -2 -1 -5 9444.01 212.328 3
 2 -1 5 9808.82 142.577 5
 2 1 5 9712 175.089 5
 -2 1 -5 9914.47 236.829 3
 -2 -1 -5 9798.49 227.95 2
 -2 1 -5 9748.55 227.409 2
 2 1 6 291.752 33.6714 5
 -2 -1 -6 223.169 45.8911 2
 -2 1 -6 262.517 45.7188 3
 2 -1 6 258.438 24.7754 5
 -2 -1 -6 276.856 46.0402 3
 -2 1 -6 207.283 42.6019 2
 2 -1 7 215.055 24.5679 5
 -2 1 -7 186.175 44.2051 3
 -2 -1 -7 208.263 50.9288 2
 -2 1 -7 239.013 50.6449 2
 -2 -1 -7 281.354 49.7118 3
 2 1 7 245.908 33.4846 5
 2 1 8 2134.52 91.8442 5
 -2 1 -8 2097.48 129.511 2
 -2 1 -8 2141.02 132.656 3
 -2 -1 -8 2102.44 126.316 3
 -2 -1 -8 2235.19 137.542 2
 2 -1 8 1972.56 68.1069 5
 2 -1 9 14728 187.04 5
 -2 -1 -9 16307.3 361.545 3
 -2 1 -9 16105.7 364.043 2
 -2 -1 -9 17008.5 377.003 2
 2 1 9 16151.1 255.973 5
 -2 1 -9 16748.7 382.075 3
 -2 1 -10 1212.89 112.52 3
 -2 1 -10 1184.59 110.511 2
 2 -1 10 1171.99 54.0802 5
 2 1 10 1245.67 74.9255 5
 -2 -1 -10 1229.09 112.829 2
 -2 -1 -10 1397.37 117.906 3
 2 1 11 19734.8 298.383 5
 -2 -1 -11 19528.6 433 3
 -2 -1 -11 20699.7 450.229 2
 -2 1 -11 20369.8 460.321 3
 2 -1 11 18075.2 213.188 5
 -2 1 -11 20329.3 448.603 2
 -2 -1 -12 419.865 83.6067 3
 2 1 12 250.533 41.8606 5
 -2 1 -12 336.745 76.6019 3
 -2 -1 -12 184.149 64.5747 2
 -2 1 -12 252.732 76.5409 2
 -2 1 -13 20221.9 482.022 2
 2 1 13 19282.6 309.621 5
 -2 1 -13 19723.8 493.15 3
 -2 -1 -13 20064.3 481.908 3
 -2 -1 -13 20863.5 489.518 2
 -2 -1 -14 721.797 108.718 3
 -2 -1 -14 547.869 98.5961 2
 -2 1 -14 591.787 108.766 3
 -2 1 -14 526.066 96.8723 2
 -2 -1 -15 24769.1 576.87 2
 -2 -1 -15 23643.6 566.748 3
 -2 1 -15 23238.2 578.391 3
 -2 1 -15 24972.9 581.254 2
 -2 -1 -16 3481.55 232.866 3
 -2 1 -16 3309.16 229.479 2
 -2 1 -16 3491.93 239.643 3
 -2 -1 -16 3247.8 222.043 2
 -2 -1 -17 4840.19 274.428 2
 -2 1 -17 5429.36 299.642 2
 -2 1 -17 4920.51 292.407 3
 -2 -1 -17 5570.28 301.754 3
 -2 1 -18 2578.15 224.011 3
 -2 1 -18 2701.98 220.514 2
 -2 -1 -18 2526.78 213.572 3
 -2 -1 -18 2767.74 216.97 2
 -2 1 -19 39.2604 64.3044 3
 -2 -1 -19 -19.3697 64.5113 3
 -2 1 -19 -76.0237 68.9459 2
 -2 -1 -19 -29.2168 68.4962 2
 -2 1 -20 1466.46 176.671 2
 -2 -1 -20 1503.45 173.436 2
 -2 1 -20 867.766 182.014 3
 -2 -1 -20 942.802 188.027 3
 -2 1 -21 944.994 146.482 2
 -2 -1 -21 414.067 157.046 3
 -2 -1 -21 1199.09 162.811 2
 -2 1 -21 406.08 154.978 3
 -2 -1 -22 1235.59 174.743 2
 -2 -1 -22 1467.46 187.533 3
 -2 1 -22 784.786 202.067 3
 -2 1 -22 1448.23 188.969 2
 -2 -1 -23 6253.31 375.582 2
 -2 1 -23 6033.02 392.474 3
 -2 -1 -23 6006.51 379.964 3
 -2 1 -23 5529.24 358.824 2
 -2 1 -24 679.628 145.291 2
 -2 1 -24 1076.23 191.455 3
 -2 -1 -24 798.323 155.963 3
 -2 1 -25 7583.37 446.201 2
 2 -2 -26 428.472 112.219 3
 2 2 -26 562.341 128.609 3
 2 -2 -25 1765.91 212.163 3
 2 2 -25 1604.8 207.16 3
 2 -2 -24 4555.44 313.236 3
 2 2 -24 3918.34 300.755 3
 2 2 -23 101.774 71.1379 3
 2 2 -23 151.651 80.6715 2
 2 -2 -23 170.531 81.3414 3
 2 2 -22 11031.1 430.835 2
 2 -2 -22 11149.7 465.176 3
 2 2 -22 10901.9 460.989 3
 2 2 -21 1321.79 152.414 2
 2 2 -21 1413.96 168.633 3
 2 -2 -21 1123.43 155.601 3
 -2 -2 21 1084.65 134.305 4
 -2 -2 20 6506.78 306.527 4
 2 2 -20 6816.45 316.722 2
 2 -2 -20 6759.54 338.324 3
 2 2 -20 6843.97 343.249 3
 -2 -2 19 4175 238.043 4
 2 2 -19 5119.37 287.936 3
 2 -2 -19 5096.31 284.063 3
 2 2 -19 5579.59 279.287 2
 -2 -2 18 3283.6 207.25 4
 2 -2 -18 3893.82 208.744 2
 2 2 -18 3489.65 216.537 2
 2 -2 -18 3424.01 228.7 3
 2 2 -18 3383.03 226.711 3
 2 2 -17 17748.5 457.324 2
 -2 2 17 16054.1 367.54 4
 -2 -2 17 17265.5 450.339 4
 2 -2 -17 18339.9 420.114 2
 2 2 -17 17124.9 483.143 3
 2 -2 -17 16965.1 476.549 3
 -2 2 16 408.13 63.8107 4
 2 -2 -16 644.914 91.5192 2
 2 -2 -16 489.986 93.3456 3
 2 2 -16 585.289 92.2405 2
 -2 -2 16 445.597 79.1352 4
 2 2 -16 803.226 111.6 3
 -2 -2 15 17900.9 426.136 4
 -2 2 15 17693.9 354.643 4
 2 -2 -15 18220.6 376.879 2
 2 2 -15 18749.7 459.82 3
 2 2 -15 18566.7 431.038 2
 2 -2 -15 18515.4 458.022 3
 2 -2 -14 2940.45 149.485 2
 -2 2 14 2761.21 136.074 4
 -2 -2 14 3119.16 173.463 4
 2 -2 -14 3100.84 183.204 3
 2 2 -14 3111.29 174.103 2
 2 2 -14 2932.49 176.491 3
 -2 -2 13 27853.6 492.429 4
 2 2 -13 27994.3 485.772 2
 2 -2 -13 27530.9 514.972 3
 2 2 -13 28322.7 518.927 3
 2 -2 -13 26575 415.595 2
 -2 2 13 28042.1 410.963 4
 -2 2 12 7996.96 205.732 4
 2 -2 -12 8000.1 217.544 2
 2 2 -12 7831.93 247.546 2
 -2 -2 12 8119.95 255.287 4
 2 2 -12 7922.76 261.766 3
 2 -2 -12 7974.88 265.999 3
 2 2 -11 15550.1 349.805 3
 2 -2 -11 15522.5 349.286 3
 -2 2 11 14746.6 265.577 4
 -2 -2 11 15393.9 337.368 4
 2 -2 -11 15299.9 279.34 2
 2 2 -11 15598.3 330.961 2
 -2 -2 10 38678.2 509.558 4
 2 2 -10 38130.7 511.91 3
 2 -2 -10 38562.4 416.203 2
 2 -2 -10 38946.1 527.713 3
 2 2 -10 38591.9 496.089 2
 2 2 -9 760.061 73.5184 2
 2 2 -9 855.252 77.0449 3
 2 -2 -9 825.457 77.6473 3
 -2 -2 9 787.495 75.2525 4
 2 -2 -9 852.502 59.8944 2
 2 2 -9 757.676 41.879 5
 2 2 -8 38589.2 451.034 3
 2 2 -8 35915.8 282.941 5
 2 -2 -8 36910.1 339.162 2
 2 -2 -8 37839.9 464.861 3
 -2 -2 8 39124.7 465.757 4
 2 2 -8 36800.1 435.98 2
 2 2 -7 781.02 43.2055 5
 2 -2 -7 746.164 44.2645 2
 2 2 -7 808.258 64.7963 2
 2 2 -7 803.063 62.7947 3
 2 -2 -7 836.904 69.2402 3
 -2 -2 7 834.556 67.6139 4
 2 2 -6 17038.4 203.823 5
 2 2 -6 18259.4 277.35 2
 2 2 -6 17513 256.672 3
 2 -2 -6 17471.4 181.638 2
 2 -2 -6 17516.9 279.951 3
 -2 -2 6 17657.4 276.13 4
 -2 -2 5 4509.12 132.601 4
 2 2 -5 4734.63 119.594 3
 2 -2 -5 4711.65 137.717 3
 2 2 -5 4389.4 129.189 2
 2 2 -5 4467.53 106.829 5
 -2 -2 5 4611.36 119.559 1
 2 -2 -4 7793.45 166.786 3
 2 2 -4 7625.98 159.908 2
 2 2 -4 7263.09 139.286 5
 -2 -2 4 7449.88 144.017 1
 2 2 -4 7591.74 131.636 3
 2 2 -3 70805.2 469.984 2
 2 2 -3 68382.2 426.955 5
 -2 -2 3 72276.7 433.136 1
 2 -2 -3 71488.5 477.173 3
 2 -2 -2 33332.3 316.686 3
 -2 -2 2 34262.8 305.157 1
 2 2 -2 33568.4 301.831 5
 2 2 -2 33290.5 316.267 2
 -2 2 2 32928.8 192.733 2
 2 2 -1 4407.55 118.223 2
 2 2 -1 4408.92 113.165 5
 2 -2 -1 4192.02 114.898 5
 -2 2 1 4309.3 83.6152 2
 2 -2 -1 4190.73 113.281 3
 -2 2 0 27179.9 242.608 2
 -2 2 0 27946.5 188.753 1
 2 2 0 28314.2 307.794 2
 2 -2 0 26755.6 276.669 5
 2 2 0 27807.1 290.407 5
 -2 -2 0 26802.4 170.228 3
 -2 2 -1 812.856 52.3685 2
 2 -2 1 719.424 45.1184 5
 2 2 1 759.225 49.8512 5
 -2 -2 -1 791.467 37.291 3
 -2 2 -2 23359.8 285.779 2
 2 2 2 24016.9 282.68 5
 -2 -2 -2 22713.7 237.402 3
 -2 -2 -3 281.115 33.4467 3
 2 -2 3 262.776 26.5336 5
 -2 2 -3 224.498 35.0996 2
 2 2 3 260.635 34.6473 5
 2 -2 4 17251.5 190.398 5
 2 2 4 17821.9 257.985 5
 -2 -2 -4 17592.1 264.437 3
 -2 2 -4 17443.1 285.244 2
 -2 2 -5 117.574 36.5958 2
 -2 -2 -5 118.273 30.6847 3
 2 -2 5 86.1359 14.2612 5
 2 2 5 90.2765 25.0131 5
 2 2 6 12223.2 226.673 5
 -2 2 -6 11721.5 267.488 2
 2 -2 6 11649.6 145.743 5
 -2 -2 -6 12490.3 263.508 3
 -2 2 -7 3018.49 146.443 2
 2 -2 7 2570.26 66.4907 5
 -2 -2 -7 3173.45 143.082 3
 2 2 7 3356.22 124 5
 2 -2 8 467.789 27.2747 5
 -2 -2 -8 761.931 80.0615 3
 -2 2 -8 658.794 80.6065 2
 2 2 8 681.856 60.8053 5
 -2 -2 -8 687.682 77.0237 2
 -2 -2 -9 1567.32 124.543 2
 -2 -2 -9 1502.46 111.565 3
 -2 2 -9 1585.16 122.796 2
 2 2 9 1486.78 87.7731 5
 -2 2 -10 9776.99 303.924 2
 -2 -2 -10 10185.2 306.557 2
 -2 -2 -10 9474.96 291.646 3
 2 2 10 9572.07 224.856 5
 -2 2 -10 9602.65 315.301 3
 -2 -2 -11 243.971 60.8617 3
 -2 2 -11 362.541 79.8702 2
 -2 -2 -11 182.659 56.517 2
 -2 2 -11 181.498 54.8237 3
 2 2 11 289.162 44.8747 5
 -2 -2 -12 14467.2 393.997 3
 -2 -2 -12 15225.9 406.823 2
 -2 2 -12 15034.5 425.426 3
 -2 2 -12 14872.9 407.418 2
 2 2 12 14736.6 294.533 5
 -2 2 -13 139.915 67.3132 2
 -2 -2 -13 100.493 53.377 3
 -2 -2 -13 -11.912 40.8436 2
 2 2 13 25.2602 24.8756 5
 -2 2 -13 99.4972 68.9894 3
 -2 2 -14 16412.6 481.931 3
 -2 -2 -14 16152 446.802 2
 -2 2 -14 16048.2 461.419 2
 -2 -2 -14 16118.7 450.13 3
 -2 -2 -15 1891.15 169.953 2
 -2 -2 -15 1799.8 164.532 3
 -2 2 -15 2276.47 190.288 2
 -2 2 -15 1713.33 171.492 3
 -2 2 -16 8074.6 351.756 2
 -2 2 -16 8084.21 364.601 3
 -2 -2 -16 8371.1 347.859 3
 -2 -2 -16 8682.19 356.922 2
 -2 -2 -17 14481.6 470.542 2
 -2 2 -17 14063.6 477.252 2
 -2 2 -17 14279.7 497.833 3
 -2 -2 -17 14357.8 474.855 3
 -2 -2 -18 1614.48 178.656 3
 -2 2 -18 1765.9 188.306 2
 -2 -2 -18 1511.53 169.97 2
 -2 2 -18 1533.5 183.746 3
 -2 2 -19 8923.1 405.882 2
 -2 2 -19 8782.23 417.633 3
 -2 -2 -19 9301.46 403.562 2
 -2 -2 -19 8550.75 397.304 3
 -2 2 -20 240.222 106.336 3
 -2 2 -20 280.917 97.3617 2
 -2 -2 -20 327.968 101.788 2
 -2 -2 -20 287.231 103.245 3
 -2 2 -21 5742.51 352.612 2
 -2 -2 -21 5612.4 344.593 3
 -2 -2 -21 5054.19 313.704 2
 -2 2 -22 2103.66 223.125 2
 -2 -2 -22 1737.74 201.683 2
 -2 -2 -22 1957.32 217.266 3
 -2 -2 -23 3558.32 296.384 3
 -2 2 -23 3735.75 300.689 2
 -2 -2 -24 5293.83 367.923 3
 -2 2 -24 5261.07 365.921 2
 -2 2 -25 763.816 155.321 2
 2 3 -26 2868.56 275.382 3
 2 -3 -26 3062.76 277.778 3
 2 3 -25 143.483 86.1143 3
 2 -3 -25 195.462 79.466 3
 2 3 -24 1265.96 176.378 3
 2 -3 -24 1406.67 188.905 3
 2 3 -24 1425.36 176.9 2
 2 3 -23 906.222 135.535 2
 2 -3 -23 494.797 140.912 3
 2 3 -23 891.843 143.686 3
 2 3 -22 22.651 54.8599 2
 2 -3 -22 8.8697 78.71 3
 2 3 -22 22.9133 61.8071 3
 2 3 -21 2888.98 238.916 3
 2 3 -21 3167.88 234.596 2
 2 -3 -21 2488.18 242.427 3
 2 3 -20 2663.6 218.817 3
 2 -3 -20 2668.21 217.987 3
 2 3 -20 2519.01 205.99 2
 -2 -3 20 2193.84 187.351 4
 -2 -3 19 731.985 110.734 4
 2 3 -19 861.428 122.381 2
 2 -3 -19 862.678 125.675 3
 2 3 -19 865.86 126.904 3
 2 3 -18 8629.42 361.306 3
 -2 -3 18 8187.89 332.964 4
 2 -3 -18 9121.28 367.768 3
 2 3 -18 9577.64 360.965 2
 2 -3 -17 146.201 87.7278 3
 2 3 -17 89.3177 65.0765 3
 -2 -3 17 -15.4653 44.7096 4
 2 -3 -17 119.166 52.9699 2
 2 3 -17 22.8552 50.077 2
 2 3 -16 22434 517.88 2
 -2 -3 16 20866.6 496.483 4
 2 -3 -16 21311.2 431.113 2
 2 -3 -16 21802 524.033 3
 2 3 -16 20879.9 517.83 3
 -2 3 15 1931.27 113.084 4
 2 3 -15 2258.92 160.746 2
 -2 -3 15 2009.96 153.942 4
 2 -3 -15 1990.13 130.346 2
 2 3 -15 1824.18 150.767 3
 2 -3 -15 1952.02 156.824 3
 -2 3 14 14300.7 290.732 4
 2 3 -14 15277.4 391.275 2
 -2 -3 14 15187.4 394.509 4
 2 -3 -14 15420.7 334.656 2
 2 3 -14 15205.2 403.789 3
 2 -3 -14 15343.7 408.789 3
 2 3 -13 4668.04 211.02 2
 -2 3 13 4460.37 154.864 4
 2 3 -13 4463.56 212.268 3
 2 -3 -13 4664.73 216.299 3
 2 -3 -13 4379.16 171.128 2
 -2 -3 13 4267.78 203.248 4
 2 3 -12 22599.2 440.064 2
 2 -3 -12 22197.1 362.974 2
 2 -3 -12 22818.6 454.635 3
 -2 3 12 22437.5 326.666 4
 -2 -3 12 22597.2 444.349 4
 2 3 -12 22455.9 446.414 3
 -2 -3 11 5153.04 205.934 4
 2 -3 -11 5250.27 212.293 3
 2 3 -11 5347.14 210.839 3
 2 3 -11 5035.69 199.874 2
 2 -3 -11 5108.15 165.784 2
 -2 -3 10 2130.33 130.198 4
 2 3 -10 1907.6 64.4416 5
 2 -3 -10 2227.97 133.21 3
 2 -3 -10 2119.07 100.492 2
 2 3 -10 2174.94 129.097 3
 2 3 -10 2412.34 135.101 2
 2 3 -9 28653 433.549 3
 2 3 -9 26733.6 253.01 5
 2 3 -9 27765.1 431.678 2
 -2 -3 9 28718.7 439.691 4
 2 -3 -9 28474.6 443.818 3
 2 -3 -9 28350.7 337.2 2
 2 3 -8 3092.19 135.696 3
 2 -3 -8 2961.19 103.825 2
 2 3 -8 2862.46 134.957 2
 -2 -3 8 2922.28 137.902 4
 2 3 -8 2815.47 87.59 5
 2 -3 -8 3135.44 144.142 3
 2 -3 -7 9307.96 229.247 3
 2 3 -7 9843.68 236.09 2
 2 3 -7 9611.26 220.43 3
 2 3 -7 8975.63 159.818 5
 -2 -3 7 9249.63 227.801 4
 -2 -3 6 44404.2 472.927 4
 2 3 -6 44118.7 472.882 2
 2 3 -6 43231.1 361.538 5
 2 -3 -6 44306.9 477.348 3
 -2 -3 6 42640 381.817 1
 2 3 -5 359.042 44.616 2
 -2 -3 5 388.859 38.9363 1
 -2 -3 5 391.151 45.3386 4
 2 -3 -5 354.031 44.0901 3
 2 3 -5 355.774 35.786 5
 -2 -3 4 29986.4 343.221 4
 -2 -3 4 30467.9 303.254 1
 2 3 -4 30161.7 310.209 5
 2 3 -4 30361.4 364.182 2
 -2 3 4 31219.7 238.541 2
 2 -3 -4 30332.7 361.215 3
 2 -3 -3 36199.7 381.944 3
 -2 3 3 36103.9 254.656 2
 -2 -3 3 36192.3 334.063 1
 -2 -3 3 35231 342.796 4
 2 3 -3 36421.6 391.859 2
 2 3 -3 36873.9 353.458 5
 2 -3 -2 26890 323.701 3
 2 3 -2 25349.3 300.925 5
 -2 -3 2 25803.8 270.481 4
 -2 -3 2 26404 201.062 3
 2 3 -2 25853 325.719 2
 -2 3 2 25780.4 228.977 2
 -2 3 1 44408.3 329.749 2
 2 -3 -1 45332.4 423.653 3
 2 3 -1 44504.9 403.08 5
 2 3 -1 45598.2 428.64 2
 2 -3 0 1166.14 71.6795 3
 2 3 0 1136.44 69.5322 5
 -2 3 0 1088.59 36.6095 1
 2 3 0 1209.92 72.7899 2
 -2 3 0 1220.4 60.8941 2
 -2 -3 0 1127.59 44.7257 3
 -2 -3 -1 19525.6 206.348 3
 -2 3 -1 17988.5 249.493 2
 2 3 1 18189.2 274.13 5
 -2 -3 -2 1188.93 58.1905 3
 -2 3 -2 1141.4 69.9033 2
 2 3 2 1033.22 67.7162 5
 -2 3 -3 5877.92 165.862 2
 -2 -3 -3 6120.5 144.959 3
 2 3 3 6321.66 170.294 5
 -2 3 -4 2234.1 111.358 2
 -2 -3 -4 2287.56 97.6845 3
 2 3 4 2328.22 107.028 5
 -2 -3 -5 19573.6 309.56 3
 2 3 5 20657.8 321.202 5
 -2 3 -5 19324.7 340.614 2
 2 3 6 3089.57 130.849 5
 -2 -3 -6 3042.78 134.631 3
 -2 3 -6 2800.78 139.695 2
 -2 3 -7 15215.5 339.123 2
 2 3 7 15450.2 292.787 5
 -2 -3 -7 14668.6 307.478 3
 2 3 8 10360.8 247.496 5
 -2 3 -8 10854.7 298.703 2
 -2 -3 -8 10652.4 277.224 3
 -2 -3 -9 550.596 73.0484 3
 2 3 9 585.131 64.5655 5
 -2 3 -9 517.44 75.4097 2
 -2 -3 -10 4602.25 208.745 2
 2 3 10 4364.18 168.726 5
 -2 -3 -10 4716.79 208.196 3
 -2 3 -10 4520.69 213.192 2
 -2 -3 -11 805.028 101.716 3
 2 3 11 590.604 69.196 5
 -2 3 -11 531.186 85.315 2
 -2 -3 -11 604.084 86.6974 2
 -2 -3 -12 1199.34 125.415 2
 2 3 12 1181.27 92.9096 5
 -2 3 -12 1096.83 117.893 2
 -2 -3 -12 1225.97 116.386 3
 2 3 13 5331.87 198.555 5
 -2 3 -13 5026.67 253.148 2
 -2 -3 -13 5103.01 246.981 3
 -2 -3 -13 5342.89 255.877 2
 -2 3 -14 70.5438 57.6809 2
 2 3 14 107.043 37.3952 5
 -2 -3 -14 57.9032 56.877 3
 -2 -3 -14 -10.3755 47.1192 2
 -2 3 -15 9160.32 365.502 2
 -2 -3 -15 8964.17 353.68 3
 -2 -3 -15 9954.79 366.594 2
 -2 3 -16 6684.28 326.006 2
 -2 -3 -16 6360.1 309.516 3
 -2 -3 -16 6249.23 300.362 2
 -2 3 -17 3036.32 228.548 2
 -2 -3 -17 3141.89 229.455 3
 -2 -3 -17 3041.25 223.89 2
 -2 3 -18 15759.7 531.051 2
 -2 -3 -18 15527.7 511.613 3
 -2 -3 -18 15894.2 510.31 2
 -2 3 -19 277.606 97.2478 2
 -2 -3 -19 342.453 96.3991 2
 -2 -3 -19 423.674 112.639 3
 -2 -3 -20 8827.06 415.514 3
 -2 3 -20 8400.2 412.451 2
 -2 -3 -20 8753.19 400.018 2
 -2 -3 -21 0.29612 66.5037 3
 -2 -3 -21 -59.5525 78.8025 2
 -2 3 -21 38.6599 67.1639 2
 -2 3 -22 4200.94 315.613 2
 -2 -3 -22 4786.58 330.197 3
 -2 -3 -23 1533.69 198.259 3
 -2 3 -23 1075.87 176.511 2
 -2 -3 -24 1229.87 183.732 3
 -2 3 -24 1199.15 191.58 2
 -2 3 -25 1164.79 191.5 2
 2 4 -25 4813.89 328.789 2
 2 -4 -25 5132.5 351.949 3
 2 4 -24 91.0213 83.7683 2
 2 -4 -24 -13.7219 67.3239 3
 2 -4 -23 1334.62 212.462 3
 2 4 -23 1968.74 198.851 2
 2 -4 -22 1.11426 56.2211 3
 2 4 -22 98.0584 66.2859 2
 2 4 -21 705.789 120.475 2
 2 -4 -21 406.659 124.74 3
 2 4 -20 19.5251 59.5246 3
 -2 -4 20 71.4173 59.4858 4
 2 -4 -20 48.7542 91.0296 3
 2 4 -20 110.96 61.1472 2
 2 4 -19 5615.34 295.593 2
 2 4 -19 5754.87 314.607 3
 -2 -4 19 5609.61 294.403 4
 2 -4 -19 6404.88 322.337 3
 -2 -4 18 17.7492 52.9599 4
 2 4 -18 -14.4833 63.4346 2
 2 4 -18 -35.8067 51.1525 3
 2 -4 -18 34.4343 53.1122 3
 -2 -4 17 9774.82 362.707 4
 2 4 -17 11072.6 385.86 2
 2 4 -17 11015.8 400.563 3
 2 -4 -17 11382.2 397.271 3
 2 4 -16 460.147 91.5359 3
 2 -4 -16 303.252 76.34 3
 -2 -4 16 567.699 94.267 4
 2 4 -16 549.015 94.7921 2
 2 4 -15 14138 420.977 3
 2 4 -15 14815.9 417.475 2
 2 -4 -15 14810.8 421.527 3
 2 -4 -15 14491.9 343.748 2
 -2 -4 15 14484.4 411.704 4
 2 -4 -14 3792.16 206.448 3
 2 4 -14 3613.6 200.075 2
 2 4 -14 3379.94 198.618 3
 -2 -4 14 3830.31 207.112 4
 2 -4 -14 3680.72 167.403 2
 2 -4 -13 11328.7 341.903 3
 -2 -4 13 11405.5 341.882 4
 -2 4 13 10590.6 221.568 4
 2 4 -13 11637.6 351.752 3
 2 -4 -13 11508 280.68 2
 2 4 -13 11468.9 343.62 2
 -2 -4 12 2767.61 166.203 4
 2 -4 -12 2725.95 134.117 2
 2 4 -12 3195.26 178.234 2
 2 -4 -12 2767.71 163.47 3
 -2 -4 11 7941.66 265.657 4
 2 -4 -11 7120.85 200.955 2
 2 4 -11 7794.56 265.708 2
 2 -4 -11 7889.29 264.293 3
 2 4 -10 6891.7 140.986 5
 -2 -4 10 8085.84 257.516 4
 2 -4 -10 7901.41 252.06 3
 2 4 -10 8011.51 260.233 2
 2 -4 -10 7539.19 195.308 2
 2 -4 -9 56.3819 41.6076 3
 2 4 -9 -3.0681 14.5257 5
 2 4 -9 44.7433 38.2462 2
 -2 -4 9 103.856 45.7997 4
 2 4 -8 136.144 27.2585 5
 2 -4 -8 204.09 55.8992 3
 2 4 -8 157.061 47.0458 2
 -2 -4 8 151.257 34.409 1
 -2 -4 8 123.343 40.063 4
 2 4 -7 11885.4 279.233 2
 2 4 -7 10684.7 198.553 5
 2 -4 -7 11606.6 272.593 3
 -2 -4 7 11541.8 271.047 4
 -2 -4 7 11501.1 208.903 1
 2 4 -6 1604.85 101.685 2
 2 -4 -6 1621.46 102.628 3
 -2 -4 6 1742.47 83.8054 1
 -2 -4 6 1770.04 104.293 4
 2 4 -6 1641.02 80.5081 5
 2 4 -5 43034.5 414.795 5
 -2 -4 5 45767.9 482.152 4
 -2 -4 5 45764.6 397.438 1
 2 -4 -5 46056.4 500.43 3
 2 4 -5 46147 512.546 2
 2 4 -4 2235.19 96.5667 5
 -2 -4 4 2337.4 105.004 4
 2 4 -4 2653.77 121.8 2
 -2 4 4 2423.52 83.0564 2
 2 -4 -4 2449.57 114.521 3
 -2 -4 4 2409.45 93.1605 1
 2 4 -3 67609.8 536.282 5
 -2 -4 3 64869.1 513.769 4
 2 4 -3 66785.1 587.574 2
 -2 4 3 65957.9 431.322 2
 2 -4 -3 67039.4 576.838 3
 -2 -4 2 7463.49 131.231 3
 2 4 -2 7008.27 179.722 5
 -2 4 2 7382.79 149.626 2
 -2 -4 2 7775.44 165.669 4
 2 4 -2 7572.48 198.125 2
 2 -4 -2 7540.62 192.724 3
 2 4 -1 5111.6 156.211 5
 2 -4 -1 5086.67 159.223 3
 -2 -4 1 5535.51 128.881 4
 -2 4 1 5277.01 133.867 2
 -2 -4 1 5411.32 110.738 3
 2 4 -1 5275.63 164.921 2
 2 -4 0 36018.1 426.659 3
 2 4 0 36395.3 430.245 2
 -2 -4 0 36927.5 303.37 4
 -2 -4 0 36328.8 299.164 3
 -2 4 0 36025.4 372.447 2
 2 4 0 36662 424.164 5
 -2 -4 -1 244.258 27.7125 3
 -2 4 -1 249.641 36.9963 2
 2 4 1 268.463 44.243 5
 2 4 1 228.724 41.1203 2
 -2 -4 -1 279.586 25.2407 4
 2 4 2 44614 492.847 5
 -2 -4 -2 44797.5 256.216 4
 -2 -4 -2 44368.4 382.072 3
 -2 4 -2 44188.9 457.774 2
 2 4 3 1186.65 85.6184 5
 -2 4 -3 1251.61 86.1333 2
 -2 -4 -3 1233.09 72.0435 3
 -2 4 -4 57229 584.456 2
 2 4 4 56775.8 584.118 5
 -2 -4 -4 56401.1 504.736 3
 2 4 5 7642.72 219.94 5
 -2 -4 -5 7477.46 198.332 3
 -2 4 -5 7434.14 225.799 2
 -2 4 -6 18228 365.129 2
 2 4 6 17779.9 342.099 5
 -2 -4 -6 17457.6 323.208 3
 2 4 7 29538.8 448.345 5
 -2 4 -7 29902.6 488.63 2
 -2 -4 -7 28157.6 437.275 3
 -2 -4 -8 1925.09 124.235 3
 2 4 8 2065.11 124.581 5
 -2 4 -8 1979.49 137.396 2
 -2 4 -9 28589.3 521.959 2
 2 4 9 27577.8 450.182 5
 -2 -4 -9 27798.9 478.548 3
 -2 4 -10 197.051 55.8592 2
 2 4 10 406.609 63.0946 5
 -2 -4 -10 293.803 59.8249 3
 -2 4 -11 6639.64 275.1 2
 -2 -4 -11 6970.28 265.36 3
 -2 -4 -11 7096.48 273.946 2
 2 4 11 7126.61 239.011 5
 -2 -4 -12 31.9635 42.3366 2
 -2 4 -12 55.7256 47.8387 2
 2 4 12 115.951 34.7139 5
 -2 -4 -12 -29.5782 43.3928 3
 2 4 13 446.717 67.3673 5
 -2 4 -13 183.054 58.5618 2
 -2 -4 -13 411.309 76.1404 3
 -2 -4 -13 409.934 81.1713 2
 2 4 14 2120.68 140.883 5
 -2 -4 -14 2103.34 169.175 2
 -2 -4 -14 2377.49 178.959 3
 -2 4 -14 1941.56 169.288 2
 -2 -4 -15 2733.26 201.275 2
 -2 -4 -15 2688.37 198.101 3
 2 4 15 2791.09 163.024 5
 -2 4 -15 2624.42 206.207 2
 -2 -4 -16 2754.25 208.997 3
 -2 4 -16 2691.2 215.231 2
 -2 -4 -16 2366.17 192.257 2
 -2 4 -17 11942.5 456.01 2
 -2 -4 -17 11998 429.49 2
 -2 -4 -17 12494.3 449.274 3
 -2 -4 -18 746.766 123.356 2
 -2 4 -18 801.213 143.6 2
 -2 -4 -18 857.758 134.06 3
 -2 4 -19 7650.53 391.29 2
 -2 -4 -19 8126.74 384.645 3
 -2 -4 -19 8148.25 380.319 2
 -2 4 -20 1067.17 164.13 2
 -2 -4 -20 793.667 138.596 3
 -2 -4 -20 708.833 125.16 2
 -2 -4 -21 6815.46 375.9 3
 -2 4 -21 7146.03 405.066 2
 -2 4 -22 37.793 65.591 2
 -2 -4 -22 75.472 89.4472 3
 -2 -4 -23 2696.3 255.726 3
 -2 4 -23 2439.57 256.487 2
 -2 4 -24 -170.587 93.4379 2
 2 5 -26 5021.91 363.669 2
 2 5 -25 514.949 122.539 2
 2 -5 -25 420.55 131.676 3
 2 -5 -24 4731.01 332.633 3
 2 5 -24 4254.55 314.286 2
 2 5 -23 496.665 125.279 2
 2 -5 -23 62.3479 113.16 3
 2 5 -22 452.166 109.065 2
 2 -5 -22 61.6138 91.0866 3
 2 5 -21 808.378 136.019 2
 2 -5 -21 447.214 143.22 3
 2 -5 -20 377.022 122.186 3
 2 5 -20 908.919 141.517 2
 2 5 -19 268.13 88.2021 2
 2 -5 -19 358.943 92.712 3
 2 -5 -18 7392.53 337.509 3
 -2 -5 18 7201.99 333.956 4
 2 5 -18 7343.19 341.939 2
 2 5 -17 129.459 69.6725 2
 2 -5 -17 16.076 56.7945 3
 -2 -5 17 17.7748 47.3071 4
 2 5 -16 15659 467.626 2
 2 -5 -16 15663.8 455.164 3
 -2 -5 16 13898.6 434.97 4
 2 -5 -15 -31.2195 54.7139 3
 2 5 -15 12.0315 45.8681 2
 -2 -5 15 19.1901 41.2761 4
 2 5 -14 12577.5 392.589 2
 -2 -5 14 11692.4 373.191 4
 2 -5 -14 12308.2 313.375 2
 2 -5 -14 12282.4 377.589 3
 2 -5 -13 523.284 81.3242 3
 2 -5 -13 503.055 64.3739 2
 2 5 -13 485.094 86.653 2
 -2 -5 13 513.089 83.3796 4
 -2 -5 12 13312.9 370.944 4
 2 -5 -12 13208.8 365.212 3
 2 -5 -12 13721.7 302.964 2
 2 5 -12 13105.6 374.864 2
 2 5 -11 2.12541 43.8561 2
 -2 -5 11 81.6679 30.9823 1
 2 -5 -11 52.7773 38.978 3
 -2 -5 11 -19.7389 44.4112 4
 2 5 -10 206.073 31.0254 5
 2 5 -10 273.305 68.3483 2
 -2 -5 10 357.622 54.3572 1
 -2 -5 10 263.088 60.934 4
 2 -5 -10 234.419 53.8616 3
 -2 -5 9 1131.2 101.821 4
 -2 -5 9 1066.66 73.9151 1
 2 5 -9 1075.47 69.1171 5
 2 5 -9 1057.2 99.205 2
 2 -5 -9 1176.36 102.919 3
 2 -5 -8 15138.8 340.662 3
 -2 -5 8 14756 336.183 4
 -2 -5 8 14933.6 253.274 1
 2 5 -8 14123.4 250.086 5
 2 5 -8 15088.8 353.096 2
 -2 -5 7 7080.37 224.395 4
 2 5 -7 6755.26 177.601 5
 -2 -5 7 7055.1 166.847 1
 2 -5 -7 6895.64 222.804 3
 2 5 -7 6944.82 233.118 2
 -2 -5 6 20424.7 363.524 4
 -2 -5 6 18574.3 266.969 1
 2 -5 -6 19218.7 358.449 3
 2 5 -6 17712.5 295.842 5
 2 5 -6 19060.3 371.863 2
 2 5 -5 1281.73 99.3885 2
 2 5 -5 1237.68 82.9027 5
 -2 -5 5 1296.41 76.2951 1
 2 -5 -5 1180.32 91.3332 3
 -2 5 5 1270.23 72.2698 2
 -2 -5 5 1416.2 96.3912 4
 2 5 -4 64847.4 575.454 5
 -2 5 4 63542.5 491.183 2
 2 -5 -4 64472.9 623.365 3
 -2 -5 4 63495.4 578.47 4
 2 5 -4 65335.7 656.123 2
 -2 -5 3 23.6783 20.4959 3
 2 5 -3 54.7366 27.1496 5
 -2 5 3 46.1363 23.6264 2
 -2 -5 3 125.299 34.7194 4
 2 -5 -3 18.0009 26.7443 3
 2 5 -3 40.5541 33.3386 2
 2 -5 -2 30649 421.815 3
 2 5 -2 32444.7 425.381 5
 -2 -5 2 30992.5 317.455 3
 -2 5 2 31052.8 355.751 2
 2 5 -2 30790.7 436.115 2
 -2 -5 2 31931.8 368.605 4
 2 5 -1 1376.6 95.3002 2
 -2 -5 1 1513.8 77.9413 4
 2 -5 -1 1333.18 91.3929 3
 2 5 -1 1333.76 92.6644 5
 -2 -5 1 1511.4 71.2499 3
 -2 5 1 1345.84 78.0823 2
 -2 -5 0 367.304 37.8514 4
 -2 5 0 464.77 52.3129 2
 2 5 0 313.01 48.6229 5
 2 -5 0 488.573 59.2221 3
 2 5 0 326.566 46.9823 2
 -2 -5 0 398.661 39.6529 3
 -2 -5 -1 19103.1 261.776 3
 2 -5 1 18989.1 345.855 3
 -2 -5 -1 18079.1 222.469 4
 2 5 1 18497.4 336.6 2
 2 5 1 18699.5 348.335 5
 -2 5 -1 19040.3 315.425 2
 -2 5 -2 7466.92 207.953 2
 -2 -5 -2 7244.63 171.308 3
 -2 -5 -2 8595.02 137.394 4
 2 5 2 7643.13 225.323 2
 2 5 2 7227.41 221.951 5
 -2 5 -3 23884.6 384.906 2
 2 5 3 24275.5 414.215 5
 -2 -5 -3 23660.8 327.406 3
 2 5 4 16517.6 348.629 5
 -2 5 -4 16143.9 331.514 2
 -2 -5 -4 15600.2 283.242 3
 -2 5 -5 9045.84 260.492 2
 2 5 5 9362.28 268.866 5
 -2 -5 -5 9104.37 230.699 3
 2 5 6 38748.4 550.974 5
 -2 5 -6 37200.8 547.919 2
 -2 -5 -6 36329.6 479.674 3
 -2 5 -7 2267.04 148.205 2
 2 5 7 2429.51 142.865 5
 -2 -5 -7 2427.03 135.466 3
 -2 -5 -8 31095 490.517 3
 2 5 8 32817.1 523.864 5
 -2 5 -8 31761.9 549.591 2
 2 5 9 2248 141.894 5
 -2 5 -9 2087.81 149.925 2
 -2 -5 -9 2019.16 137.028 3
 -2 5 -10 22793.8 504.697 2
 -2 -5 -10 22624 467.61 3
 2 5 10 23452.1 459.333 5
 -2 5 -11 19.764 44.5719 2
 2 5 11 19.4775 30.2448 5
 -2 -5 -11 -29.0751 42.7469 3
 -2 5 -12 3664.2 222.586 2
 2 5 12 4095.06 199.273 5
 -2 -5 -12 4106.67 215.3 3
 -2 -5 -13 1167.96 126.766 2
 -2 -5 -13 1101.92 117.424 3
 -2 5 -13 855.09 116.573 2
 2 5 13 1010.82 105.23 5
 -2 -5 -14 1180.95 127.446 2
 -2 5 -14 1154.5 143.842 2
 2 5 14 1215.71 116.373 5
 -2 -5 -14 1125.25 125.725 3
 -2 -5 -15 -46.6822 58.4234 2
 -2 -5 -15 -26.2701 60.6294 3
 -2 5 -15 25.7837 57.182 2
 2 5 15 -18.5244 35.7343 5
 2 5 16 3085.69 187.212 5
 -2 -5 -16 3161.97 220.959 3
 -2 5 -16 3134.71 236.802 2
 -2 -5 -16 3237.55 225.865 2
 -2 -5 -17 -84.1366 62.9853 3
 -2 5 -17 -54.001 61.8487 2
 -2 -5 -17 36.7169 46.897 2
 -2 -5 -18 6450.21 327.544 2
 -2 5 -18 6190.42 349.069 2
 -2 -5 -18 6237.15 332.558 3
 -2 -5 -19 267.292 91.3396 3
 -2 5 -19 161.048 81.3037 2
 -2 -5 -20 5977.36 349.088 3
 -2 5 -20 6498.1 382.007 2
 -2 -5 -21 158.484 84.1673 3
 -2 5 -21 -85.4412 75.7024 2
 -2 -5 -22 5015.53 333.787 3
 -2 5 -22 4681.27 345.453 2
 -2 -5 -23 208.566 92.9125 3
 -2 5 -23 107.016 95.4061 2
 -2 5 -24 862.335 160.312 2
 2 6 -26 90.9216 107.988 2
 2 6 -25 2532.68 262.122 2
 2 6 -24 1995.7 230.525 2
 2 -6 -24 2308.68 236.421 3
 2 -6 -23 1151.73 167.505 3
 2 6 -23 1019.93 164.784 2
 2 6 -22 2193.93 224.942 2
 2 -6 -22 965.798 206.455 3
 2 6 -21 4.92492 63.9266 2
 2 -6 -21 -13.3094 59.1699 3
 2 -6 -20 1002.03 144.116 3
 2 6 -20 925.739 143.053 2
 2 -6 -19 844.878 124.562 3
 2 6 -19 861.215 134.944 2
 2 6 -18 289.6 88.6124 2
 2 -6 -18 296.819 84.1725 3
 2 -6 -17 7020.21 321.581 3
 -2 -6 17 6676.21 321.632 4
 2 6 -17 6306.1 321.2 2
 -2 -6 16 67.718 49.3594 4
 2 -6 -16 -4.89119 51.1055 3
 2 6 -16 37.4479 55.2452 2
 2 6 -15 12449.2 419.701 2
 -2 -6 15 12122 407.164 4
 2 -6 -15 13231.2 415.791 3
 2 -6 -14 541.383 85.0936 3
 -2 -6 14 457.918 82.1493 4
 2 6 -14 607.917 99.3608 2
 -2 -6 13 4201.52 226.667 4
 2 -6 -13 4183.27 219.239 3
 -2 -6 13 4190.7 162.84 1
 2 6 -13 4260.61 233.747 2
 2 -6 -12 365.574 75.2641 3
 -2 -6 12 258.875 65.5989 4
 -2 -6 12 280.872 48.6976 1
 2 6 -12 318.708 77.6968 2
 -2 -6 11 525.759 81.8516 4
 2 -6 -11 540.147 81.4357 3
 2 6 -11 518.823 79.5239 2
 -2 -6 11 517.275 56.2012 1
 -2 -6 10 6811.42 183.615 1
 -2 -6 10 6751.16 258.175 4
 2 -6 -10 7132.54 258.661 3
 2 6 -10 6542.61 183.37 5
 2 6 -10 6840.07 269.063 2
 2 -6 -9 15014.3 362.429 3
 2 6 -9 13699.7 270.774 5
 -2 -6 9 15113.8 371.63 4
 2 6 -9 15786.4 392.044 2
 -2 -6 9 14914.9 259.377 1
 -2 -6 8 4649.4 142.879 1
 2 6 -8 4288.29 155.754 5
 -2 -6 8 4825.92 203.494 4
 2 -6 -8 4683.36 200.891 3
 2 6 -8 4786.31 214.899 2
 2 -6 -7 34194.7 521.672 3
 -2 -6 7 34834.2 518.954 4
 2 6 -7 35445.2 558.247 2
 -2 -6 7 34377.9 376.396 1
 2 6 -7 34155.6 445.34 5
 2 -6 -6 8590.13 255.197 3
 2 6 -6 8587.92 268.358 2
 -2 -6 6 8579.62 249.903 4
 -2 -6 6 8335.09 182.841 1
 2 6 -6 8450.62 225.99 5
 2 -6 -5 47168.7 580.238 3
 2 6 -5 48264.8 619.102 2
 2 6 -5 45104 529.095 5
 -2 6 5 46958.9 471.306 2
 -2 -6 5 45516.7 550.958 4
 2 -6 -4 187.305 48.494 3
 2 6 -4 153.573 41.7469 5
 -2 6 4 171.346 39.2561 2
 -2 -6 4 208.15 48.0977 4
 2 6 -4 140.048 47.5601 2
 -2 -6 4 183.64 37.8774 3
 2 6 -3 49322.1 567.837 5
 -2 -6 3 45157.4 498.72 4
 -2 -6 3 46504.5 441.11 3
 2 -6 -3 45291 555.103 3
 2 6 -3 48528.7 602.494 2
 -2 6 3 46342.6 474.768 2
 -2 -6 2 2586.5 104.533 3
 -2 6 2 2675.64 119.027 2
 2 -6 -2 2554.65 134.525 3
 2 6 -2 2644.11 143.013 2
 2 6 -2 2599.33 137.355 5
 -2 -6 2 2603.75 116.936 4
 2 6 -1 12339.3 301.343 2
 -2 6 1 12071.4 254.104 2
 -2 -6 1 12355 237.055 4
 2 6 -1 12824.9 304.218 5
 2 -6 -1 12193 288.648 3
 -2 -6 1 12172 220.58 3
 2 6 0 68.3989 39.6494 5
 2 6 0 106.219 42.9714 2
 2 -6 0 75.7038 37.5476 3
 -2 -6 0 85.4219 27.1579 4
 -2 -6 0 66.1315 23.0082 3
 -2 6 0 90.2777 33.3657 2
 -2 -6 -1 167.806 34.0098 3
 -2 6 -1 114.061 41.0745 2
 2 6 1 122.034 45.297 5
 2 6 1 161.075 43.8383 2
 2 -6 1 160.514 49.1035 3
 2 6 2 605.979 74.1328 2
 -2 -6 -2 637.348 59.1301 3
 -2 6 -2 673.809 75.6152 2
 2 6 2 677.537 79.381 5
 2 -6 2 608.676 77.8446 3
 2 6 3 4975.58 206.575 5
 -2 -6 -3 4673.02 156.04 3
 -2 6 -3 4968.97 191.474 2
 2 6 4 898.949 94.5275 5
 -2 -6 -4 884.701 74.9747 3
 -2 6 -4 888.756 91.2831 2
 2 6 5 32318.2 536.417 5
 -2 6 -5 31075.8 508.179 2
 -2 -6 -5 29618.7 435.36 3
 -2 -6 -6 27.5138 30.249 3
 -2 6 -6 53.3077 46.5577 2
 2 6 6 23.5096 39.2745 5
 2 6 7 27519.4 512.232 5
 -2 -6 -7 26528.5 445.584 3
 -2 6 -7 26568.3 505.775 2
 -2 6 -8 98.2261 54.0912 2
 2 6 8 34.25 36.4729 5
 -2 -6 -8 36.284 37.8987 3
 2 6 9 18670.4 436.082 5
 -2 -6 -9 18203.1 405.72 3
 -2 6 -9 18625.8 457.801 2
 -2 -6 -10 638.261 83.9748 3
 -2 6 -10 722.039 105.362 2
 2 6 10 661.716 88.0963 5
 -2 6 -11 9263.86 347.144 2
 2 6 11 9021.6 313.511 5
 -2 -6 -11 8948.43 312.8 3
 -2 6 -12 1661.47 155.218 2
 2 6 12 1844.96 147.092 5
 -2 -6 -12 1852.92 151.295 3
 -2 6 -13 6136.26 304.126 2
 2 6 13 6379.63 270.145 5
 -2 -6 -13 5974.35 271.993 3
 2 6 14 699.401 96.5322 5
 -2 -6 -14 716.751 106.415 2
 -2 -6 -14 702.654 101.583 3
 -2 6 -14 654.375 116.71 2
 -2 -6 -15 186.804 67.3477 3
 -2 6 -15 178.53 76.536 2
 2 6 15 223.324 61.1301 5
 -2 -6 -15 97.8495 56.801 2
 2 6 16 620.939 93.6897 5
 -2 6 -16 518.594 114.95 2
 -2 -6 -16 694.474 117.186 3
 -2 -6 -16 732.741 112.564 2
 -2 6 -17 1318.24 168.015 2
 -2 -6 -17 1406.28 157.972 2
 -2 -6 -17 1289.75 152.441 3
 -2 6 -18 -49.4687 68.7072 2
 -2 -6 -18 -16.8376 62.7136 3
 -2 -6 -19 3772.65 271.746 3
 -2 6 -19 3702.3 289.195 2
 -2 6 -20 26.1652 66.0593 2
 -2 -6 -20 -132.764 79.3098 3
 -2 -6 -21 2806.6 251.266 3
 -2 6 -21 3346.44 291.301 2
 -2 6 -22 -38.2952 74.4366 2
 -2 -6 -22 73.0419 62.6596 3
 -2 -6 -23 1638.27 208.775 3
 -2 6 -23 1756.38 226.857 2
 2 7 -25 31.1444 81.5733 2
 2 7 -24 1639.57 213.378 2
 2 -7 -24 1504.69 198.429 3
 2 -7 -23 1747.44 203.642 3
 2 7 -23 1696.38 213.613 2
 2 7 -22 279.465 94.4396 2
 2 -7 -22 347.532 105.401 3
 2 -7 -21 1118.03 153.801 3
 2 7 -21 1034.94 162.531 2
 2 7 -20 215.097 81.8683 2
 2 -7 -20 323.346 88.6767 3
 2 7 -19 113.365 65.7428 2
 2 -7 -19 247.641 85.0719 3
 2 -7 -18 2046.99 185.184 3
 2 7 -18 1691.74 179.481 2
 2 7 -17 339.603 96.7773 2
 2 -7 -17 536.747 99.9456 3
 2 -7 -16 4587.49 258.349 3
 2 7 -16 4433.61 271.713 2
 2 7 -15 78.51 59.8041 2
 -2 -7 15 2.65026 57.6249 4
 2 -7 -15 97.3333 53.3316 3
 2 7 -14 2799.73 205.516 2
 -2 -7 14 2872.72 204.413 4
 2 -7 -14 3060.81 201.863 3
 -2 -7 13 3436.3 212.967 4
 2 7 -13 3564.37 222.667 2
 2 -7 -13 3986.72 221.107 3
 -2 -7 12 146.636 67.3208 4
 2 7 -12 12.9535 53.942 2
 2 -7 -12 48.9849 45.0646 3
 2 7 -11 7574.46 305.378 2
 -2 -7 11 7683.16 295.551 4
 2 -7 -11 8017.57 292.767 3
 2 -7 -10 4004.79 203.477 3
 2 7 -10 3745.41 155.085 5
 -2 -7 10 3917.57 139.414 1
 -2 -7 10 3826.1 205.012 4
 2 7 -10 3788.15 214.356 2
 2 7 -9 6688.23 210.293 5
 2 -7 -9 7123.34 262.234 3
 -2 -7 9 7272.43 181.252 1
 -2 -7 9 6909.89 261.782 4
 2 7 -9 7104.44 281.671 2
 2 -7 -8 16589.9 389.773 3
 -2 -7 8 17177.1 399.218 4
 2 7 -8 17356.8 426.243 2
 -2 -7 8 16128.5 263.546 1
 2 7 -8 16701.2 339.92 5
 2 7 -7 135.452 38.4621 5
 2 -7 -7 73.6978 37.7525 3
 2 7 -7 196.118 50.5994 2
 -2 -7 7 182.429 48.5501 4
 -2 -7 6 30069.6 490.296 4
 2 7 -6 30115.5 539.745 2
 2 7 -6 28792.6 457.025 5
 2 -7 -6 29211 494.019 3
 2 -7 -5 42.243 34.1534 3
 2 7 -5 81.6671 35.6628 5
 -2 7 5 80.9552 31.7442 2
 2 7 -5 84.5949 47.013 2
 -2 -7 5 20.0409 34.4729 4
 -2 -7 4 43036.9 545.257 4
 -2 -7 4 41170.1 467.802 3
 -2 7 4 41365.6 493.967 2
 2 7 -4 41597.4 569.856 5
 2 7 -4 43515.9 621.672 2
 2 -7 -4 42032.7 576.869 3
 -2 7 3 4906.85 173.508 2
 2 7 -3 4638.63 196.806 5
 2 7 -3 4713.12 204.771 2
 -2 -7 3 4883.46 179.495 4
 2 -7 -3 4829.67 196.211 3
 -2 -7 3 4769.9 157.732 3
 -2 -7 2 42300.3 455.892 3
 2 7 -2 43817 610.376 2
 2 7 -2 45234.9 610.999 5
 -2 7 2 42605.2 514.377 2
 -2 -7 2 43469.7 504.632 4
 2 -7 -2 43228.9 575.287 3
 -2 -7 1 12563.2 248.427 3
 2 7 -1 13534.2 340.824 2
 2 7 -1 14058 348.105 5
 2 -7 -1 13200.3 321.837 3
 -2 7 1 13257.5 294.475 2
 -2 -7 0 9800.57 221.902 3
 2 -7 0 10074.6 282.911 3
 2 7 0 10046.3 292.415 2
 -2 7 0 10097 262.184 2
 2 7 0 9702.74 296.971 5
 -2 -7 -1 8485.67 210.639 3
 2 -7 1 8310.57 256.343 3
 2 7 1 8286.99 279.281 5
 2 7 1 8363.56 265.554 2
 -2 7 -1 8258.85 246.413 2
 -2 7 -2 99.9442 39.7473 2
 2 -7 2 -7.33449 35.2185 3
 -2 -7 -2 51.3348 32.6624 3
 2 7 2 25.8057 36.8392 2
 2 7 2 91.8727 45.0237 5
 -2 -7 -3 10660.6 252.065 3
 -2 7 -3 10726.5 296.188 2
 2 7 3 11217.9 331.945 5
 -2 7 -4 8469.76 274.866 2
 2 7 4 8328.44 291.162 5
 -2 -7 -4 7952.85 227.165 3
 2 7 5 9577.1 316.709 5
 -2 7 -5 9601.09 303.447 2
 -2 -7 -5 9080.13 251.987 3
 -2 7 -6 18638.5 436.188 2
 2 7 6 19240 452.671 5
 -2 -7 -6 18170 371.444 3
 -2 7 -7 5303.14 243.094 2
 2 7 7 5493.96 246.581 5
 -2 -7 -7 5442.28 210.738 3
 -2 7 -8 20275.6 479.066 2
 2 7 8 20898.6 484.748 5
 -2 -7 -8 19703.4 415.596 3
 2 7 9 584.503 90.6225 5
 -2 7 -9 369.722 76.8466 2
 -2 -7 -9 544.184 80.8694 3
 -2 -7 -10 10569.4 329.737 3
 -2 7 -10 11055.2 380.728 2
 2 7 10 11241.8 368.22 5
 2 7 11 1301.42 131.377 5
 -2 -7 -11 1168.22 121.302 3
 -2 7 -11 1078.93 132.197 2
 2 7 12 7642.48 313.086 5
 -2 -7 -12 7694.68 307.553 3
 -2 7 -12 7921.09 346.928 2
 -2 -7 -13 3581.96 218.526 3
 -2 7 -13 3215.47 231.643 2
 2 7 13 3447.81 212.578 5
 2 7 14 860.54 113.165 5
 -2 -7 -14 1020.22 127.276 3
 -2 7 -14 825.839 131.075 2
 -2 -7 -15 3766.05 237.959 2
 -2 7 -15 3473.81 254.724 2
 2 7 15 3936.31 236.449 5
 -2 -7 -15 3632.96 233.068 3
 -2 -7 -16 474.155 105.797 2
 -2 -7 -16 711.887 117.426 3
 2 7 16 609.623 106.811 5
 -2 7 -16 458.656 110.188 2
 2 7 17 1114.72 133.27 5
 -2 -7 -17 1122.49 141.194 3
 -2 7 -17 1126.25 165.4 2
 -2 7 -18 984.019 152.41 2
 -2 -7 -18 946.914 135.17 3
 -2 -7 -19 -63.3825 61.402 3
 -2 7 -19 147.341 85.6207 2
 -2 -7 -20 812.128 136.513 3
 -2 7 -20 842.31 158.445 2
 -2 7 -21 -136.321 97.4964 2
 -2 -7 -21 -24.7695 66.8479 3
 -2 7 -22 1713.1 223.916 2
 -2 -7 -22 1586.39 201.459 3
 2 8 -24 159.033 90.1831 2
 2 8 -23 715.875 152.474 2
 2 -8 -23 542.613 124.479 3
 2 8 -22 1053 170.953 2
 2 -8 -22 1222.76 168.188 3
 2 8 -21 -94.8491 75.3772 2
 2 -8 -21 -79.2174 52.3796 3
 2 8 -20 1186.32 166.555 2
 2 -8 -20 1190.25 154.958 3
 2 8 -19 649.412 126.015 2
 2 -8 -19 748.164 122.087 3
 2 8 -18 1097.1 150.226 2
 2 -8 -18 1441.22 161.887 3
 2 -8 -17 2955.47 220.809 3
 2 8 -17 2666.38 223.747 2
 2 -8 -16 36.5579 52.8763 3
 2 8 -16 11.0637 61.2763 2
 2 8 -15 3560.11 246.914 2
 2 -8 -15 3548.56 228.185 3
 2 -8 -14 4016.71 237.794 3
 2 8 -14 3929.43 253.657 2
 2 8 -13 588.384 109.312 2
 2 -8 -13 771.135 108.116 3
 2 -8 -12 10503.3 360.214 3
 2 8 -12 10707.3 392.508 2
 2 -8 -11 95.2589 46.7203 3
 -2 -8 11 -44.1394 58.0413 4
 2 8 -11 -96.5677 70.6821 2
 2 -8 -10 13045.6 376.903 3
 -2 -8 10 12857.8 384.214 4
 2 8 -10 13500.4 417.626 2
 2 8 -9 5010.23 252.486 2
 -2 -8 9 5139.17 237.27 4
 2 8 -9 4851.88 200.348 5
 2 -8 -9 4759.71 225.981 3
 2 8 -8 4466.54 232.649 2
 2 8 -8 4253.65 190.311 5
 2 -8 -8 4614.19 215.832 3
 -2 -8 8 4359.54 211.841 4
 2 -8 -7 12065.7 341.965 3
 2 8 -7 12008.8 320.514 5
 2 8 -7 12615.9 378.668 2
 -2 -8 7 12237.6 340.904 4
 -2 8 6 22.2389 36.403 2
 -2 -8 6 -4.92118 41.7505 4
 2 -8 -6 -30.2782 48.7174 3
 2 8 -6 45.2053 34.6142 5
 2 8 -6 2.32311 52.4795 2
 -2 -8 5 19731.5 402.345 4
 -2 -8 5 19711.8 357.454 3
 2 8 -5 20560.6 463.324 2
 2 8 -5 20128.9 426.286 5
 -2 8 5 19655.1 367.56 2
 2 -8 -5 20196 425.628 3
 -2 8 4 2552.91 136.853 2
 2 -8 -4 2432.94 151.169 3
 2 8 -4 2158.48 144.884 5
 -2 -8 4 2395.51 123.737 3
 2 8 -4 2311.46 157.794 2
 -2 -8 3 23401.4 373.893 3
 2 -8 -3 23625.6 455.026 3
 -2 8 3 23262.2 410.49 2
 2 8 -3 24219.7 478.503 5
 2 8 -3 23902.5 487.015 2
 2 8 -2 17813 418.865 5
 2 -8 -2 17612.4 389.491 3
 -2 8 2 17312.7 360.343 2
 -2 -8 2 17241.8 317.486 3
 2 8 -2 18071.9 420.176 2
 2 -8 -1 15149.2 363.14 3
 -2 8 1 15052.4 339.139 2
 2 8 -1 15881.9 400.268 5
 2 8 -1 15322.4 384.898 2
 -2 -8 1 14691 294.766 3
 2 8 0 27141.2 508.016 2
 -2 -8 0 26765.3 396.673 3
 2 -8 0 27360.9 489.307 3
 -2 8 0 26826.2 462.002 2
 2 8 0 27492.4 537.188 5
 2 8 1 2321.7 163.766 5
 2 8 1 2618.54 161.72 2
 -2 8 -1 2537.78 147.937 2
 -2 -8 -1 2553.1 126.799 3
 2 -8 1 2484.23 153.437 3
 2 -8 2 30688.6 528.642 3
 -2 -8 -2 31511.6 451.235 3
 2 8 2 31467.8 539.83 2
 -2 8 -2 31532.9 526.796 2
 2 8 2 33109.9 601.127 5
 2 -8 3 1812.18 137.898 3
 2 8 3 1938.85 141.643 2
 -2 -8 -3 1887.13 115.287 3
 2 8 3 2067.64 158.089 5
 -2 8 -3 1969.34 138.544 2
 2 8 4 22982.6 517.41 5
 -2 -8 -4 22823.6 403.797 3
 -2 8 -4 22891.9 472.046 2
 -2 -8 -5 6265.29 220.895 3
 -2 8 -5 6219.27 256.812 2
 2 8 5 6512.63 281.666 5
 2 8 6 8812.16 329.022 5
 -2 8 -6 9165.92 321.488 2
 -2 -8 -6 8642.75 269.4 3
 2 8 7 8099.07 319.161 5
 -2 -8 -7 8259.41 268.176 3
 -2 8 -7 8580.64 324.079 2
 -2 -8 -8 1688.61 131.901 3
 2 8 8 1933.18 161.778 5
 -2 8 -8 1585.5 148.944 2
 -2 8 -9 12510.3 412.022 2
 2 8 9 13444.5 422.033 5
 -2 -8 -9 12938.8 361.109 3
 -2 -8 -10 332.815 68.7337 3
 -2 8 -10 203.363 79.6666 2
 2 8 10 402.632 87.6529 5
 -2 8 -11 6234.91 309.233 2
 2 8 11 6297.85 298.387 5
 -2 -8 -11 6383.08 273.488 3
 -2 8 -12 462.044 101.331 2
 2 8 12 464.871 86.6586 5
 -2 -8 -12 526.028 91.757 3
 -2 8 -13 2009.86 195.863 2
 2 8 13 2132.5 182.437 5
 -2 -8 -13 1920.26 166.061 3
 2 8 14 5616.91 293.655 5
 -2 -8 -14 5856.59 289.862 3
 -2 8 -14 5319.89 312.854 2
 -2 -8 -15 298.665 76.9194 3
 2 8 15 186.022 66.3292 5
 -2 8 -15 151.746 78.4495 2
 -2 8 -16 6760.12 371.823 2
 -2 -8 -16 6554.54 328.317 3
 2 8 16 6697.64 329.267 5
 2 8 17 64.4691 52.5801 5
 -2 8 -17 193.173 77.6476 2
 -2 8 -18 1840.9 215.299 2
 -2 -8 -18 2228.86 212.307 3
 -2 -8 -19 925.727 138.882 3
 -2 8 -19 886.766 151.453 2
 -2 8 -20 -57.2672 83.5484 2
 -2 -8 -20 227.252 85.0548 3
 -2 8 -21 1597.55 215.126 2
 -2 -8 -21 1412.33 183.946 3
 2 9 -22 -12.7179 89.2904 2
 2 -9 -22 59.1132 66.345 3
 2 -9 -21 3306.55 266.751 3
 2 9 -21 2846.84 269.704 2
 2 9 -20 156.475 84.8455 2
 -2 9 20 178.149 71.0118 5
 2 -9 -20 170.706 75.6274 3
 2 -9 -19 2542.96 222.771 3
 2 9 -19 2378.24 238.054 2
 2 9 -18 1800.59 202.782 2
 2 -9 -18 1625.16 176.902 3
 2 -9 -17 660.057 109.392 3
 2 9 -17 693.356 129.897 2
 2 -9 -16 2130.3 189.033 3
 2 9 -16 1824.57 193.881 2
 2 9 -15 1992.49 197.713 2
 2 -9 -15 2086.43 181.257 3
 2 9 -14 1713.84 181.167 2
 2 -9 -14 1812.47 168.374 3
 2 9 -13 5693.04 307.366 2
 2 -9 -13 6075.74 291.863 3
 2 -9 -12 2036.44 164.671 3
 2 9 -12 2067.96 186.379 2
 2 -9 -11 6222.84 279.556 3
 2 9 -11 5726.68 296.41 2
 2 9 -10 521.847 104.993 2
 2 -9 -10 453.73 78.712 3
 2 -9 -9 12618.6 382.214 3
 2 9 -9 12657.5 415.851 2
 2 9 -9 13197 359.204 5
 2 9 -8 1418.5 122.606 5
 2 9 -8 1626.8 157.634 2
 2 -9 -8 1638.81 139.179 3
 -2 -9 7 4841.06 199.918 3
 2 9 -7 4366.44 209.815 5
 2 -9 -7 4807.46 228.826 3
 2 9 -7 4758.79 250.532 2
 -2 9 6 2355.96 141.124 2
 -2 -9 6 2422.54 140.017 3
 2 -9 -6 2309.51 155.692 3
 2 9 -6 2336.43 173.198 2
 2 9 -6 2312.99 158.082 5
 2 -9 -5 61.3425 45.9964 3
 2 9 -5 126.212 49.3771 2
 -2 -9 5 104.474 40.109 3
 2 9 -5 113.644 46.0947 5
 -2 9 5 116.819 43.0542 2
 2 -9 -4 3578.02 189.261 3
 2 9 -4 3734.5 213.115 2
 -2 -9 4 3692.73 163.182 3
 2 9 -4 3520.77 201.472 5
 -2 9 4 3785.47 180.375 2
 2 9 -3 13260.3 384.709 2
 -2 -9 3 13162.8 301.366 3
 2 -9 -3 13523.1 362.59 3
 2 9 -3 12997.3 379.252 5
 -2 9 3 13021.2 334.069 2
 2 9 -2 1577.61 138.694 2
 2 9 -2 1561.2 138.98 5
 -2 9 2 1723.85 127.975 2
 -2 -9 2 1604.86 106.531 3
 2 -9 -2 1584.42 127.089 3
 -2 -9 1 22831.5 391.407 3
 2 -9 -1 23161.2 472.592 3
 2 9 -1 22685.4 497.216 2
 2 9 -1 22730.3 516.539 5
 -2 9 1 23217.3 454.954 2
 2 -9 0 -19.0993 48.7901 3
 -2 -9 0 -8.72907 31.4626 3
 2 9 0 18.4039 41.4296 2
 2 9 0 36.6401 43.9199 5
 -2 9 0 50.1429 37.3086 2
 -2 -9 -1 30554.7 462.616 3
 2 -9 1 29697.3 545.843 3
 -2 9 -1 29671.6 533.206 2
 2 9 1 30626.2 612.01 5
 2 9 1 30109 566.372 2
 2 -9 2 389.395 69.8375 3
 -2 -9 -2 407.934 60.1385 3
 2 9 2 450.476 83.4049 2
 2 9 2 433.613 86.888 5
 -2 9 -2 372.033 71.3051 2
 2 -9 3 26518.8 520.797 3
 -2 9 -3 27107.7 532.041 2
 2 9 3 27263.8 540.32 2
 2 9 3 26402.5 584.552 5
 -2 -9 -3 26610.2 449.175 3
 -2 9 -4 674.821 96.6434 2
 -2 -9 -4 588.423 70.4524 3
 2 -9 4 442.761 76.0525 3
 2 9 4 452.378 81.418 5
 -2 -9 -5 8235.62 263.353 3
 -2 9 -5 7983.19 308.896 2
 2 9 5 7927.19 330.047 5
 2 -9 5 7530.22 294.43 3
 -2 -9 -6 2810.75 160.499 3
 2 9 6 2535.95 190.243 5
 -2 9 -6 2783.26 187.055 2
 -2 9 -7 2537.86 188.62 2
 -2 -9 -7 2701.31 164.221 3
 2 9 7 2493.27 189.016 5
 2 9 8 1207.38 137.445 5
 -2 9 -8 1035.68 129.529 2
 -2 -9 -8 1111.56 109.168 3
 2 9 9 119.3 61.6694 5
 -2 9 -9 130.135 66.8565 2
 -2 -9 -9 132.143 53.3139 3
 -2 9 -10 1122.38 140.362 2
 -2 -9 -10 1181.81 118.974 3
 2 9 10 1124.58 136.562 5
 2 9 11 1973.68 180.82 5
 -2 -9 -11 1827.19 151.619 3
 -2 9 -11 1910.01 184.622 2
 -2 9 -12 582.719 114.294 2
 2 9 12 549.504 105.561 5
 -2 -9 -12 527.476 90.3513 3
 -2 -9 -13 6993.24 317.825 3
 2 9 13 7214.76 345.507 5
 2 9 14 27.6429 48.4901 5
 -2 9 -14 30.2332 80.3103 2
 -2 -9 -14 158.913 70.8794 3
 2 9 15 8551.66 385.886 5
 -2 -9 -15 8384.14 367 3
 -2 -9 -16 395.754 98.853 3
 -2 9 -16 168.05 134.221 2
 2 9 16 450.374 102.255 5
 2 9 17 3433.87 253.024 5
 -2 -9 -17 3383.22 248.392 3
 -2 9 -17 3448.85 286.621 2
 2 9 18 890.56 134.639 5
 -2 9 -18 862.998 166.8 2
 -2 -9 -18 841.825 139.488 3
 -2 9 -19 583.018 140.305 2
 -2 -9 -19 530.862 109.422 3
 -2 9 -20 1391.56 214.051 2
 -2 -9 -20 1289.64 173.726 3
 -2 -9 -21 167.714 100.371 3
 2 10 -21 322.709 121.248 2
 2 -10 -21 261.539 94.2451 3
 2 10 -20 3562.95 305.538 2
 -2 10 20 4248.73 299.885 5
 2 -10 -20 4142.94 300.535 3
 -2 10 19 800.12 139.494 5
 2 10 -19 698.512 145.845 2
 2 -10 -19 793.257 129.415 3
 2 10 -18 671.707 134.99 2
 2 -10 -18 1030.38 143.895 3
 2 10 -17 804.82 145.844 2
 2 -10 -17 687.314 114.373 3
 2 -10 -16 38.6276 50.0539 3
 2 10 -16 68.9606 65.7776 2
 2 10 -15 857.015 144.013 2
 2 -10 -15 721.974 111.66 3
 2 -10 -14 3046.04 223.122 3
 2 10 -14 3204.33 251.242 2
 2 10 -13 939.757 138.985 2
 2 -10 -13 1037.64 133.512 3
 2 -10 -12 6679.75 305.859 3
 2 10 -12 6053.96 324.608 2
 2 10 -11 935.218 137.821 2
 2 -10 -11 1013.1 121.103 3
 2 -10 -10 13836.2 420.583 3
 2 10 -10 14481.8 480.149 2
 2 -10 -9 1403.98 138.31 3
 2 10 -9 1368.3 153.139 2
 -2 -10 8 6893.62 254.995 3
 2 10 -8 6815.14 282.69 5
 2 10 -8 6762.29 317.148 2
 2 -10 -8 6831.35 287.235 3
 -2 -10 7 1199.69 108.323 3
 2 10 -7 1006.17 111.965 5
 2 10 -7 1140.67 134.933 2
 2 -10 -7 1094.01 115.796 3
 2 -10 -6 1219.2 121.001 3
 -2 -10 6 1451.06 111.839 3
 -2 10 6 1314.41 116.26 2
 2 10 -6 1310.57 139.937 2
 2 10 -6 1069.7 119.697 5
 -2 -10 5 2348.9 139.679 3
 -2 10 5 2052.87 137.703 2
 2 10 -5 1853.45 155.843 5
 2 10 -5 2095.81 172.437 2
 2 -10 -5 1914.94 147.59 3
 -2 -10 4 546.115 72.6397 3
 2 -10 -4 502.664 81.435 3
 -2 10 4 559.081 82.7799 2
 2 10 -4 375.914 80.0769 5
 2 10 -4 433.288 88.1387 2
 -2 -10 3 2210.7 133.558 3
 2 -10 -3 2274.13 160.122 3
 2 10 -3 2259.24 176.232 5
 2 10 -3 1984.03 164.591 2
 -2 10 3 2181.05 147.728 2
 2 10 -2 11423.9 386.92 5
 2 10 -2 11199.6 372.386 2
 2 -10 -2 10748.5 339.204 3
 -2 -10 2 10813.6 288.636 3
 -2 10 2 11112.4 331.629 2
 2 -10 -1 1240.69 124.178 3
 -2 10 1 1297.63 126.3 2
 -2 -10 1 1276.49 103.755 3
 2 10 -1 1090.55 122.801 2
 2 10 -1 1100.22 126.968 5
 2 -10 0 17301.4 431.48 3
 -2 10 0 16734.6 418.95 2
 2 10 0 16385.5 474.805 5
 2 10 0 17170.3 453.775 2
 -2 -10 0 17063 362.09 3
 -2 10 -1 163.491 56.9612 2
 2 10 1 126.049 48.9434 2
 2 10 1 287.334 75.8948 5
 2 -10 1 257.268 71.0689 3
 -2 -10 -1 267.106 51.0577 3
 -2 -10 -2 15360.4 352.422 3
 -2 10 -2 15373.4 417.36 2
 2 -10 2 15060.1 410.846 3
 2 10 2 14964.5 417.022 2
 2 10 2 15622.4 472.522 5
 2 -10 3 -49.9044 50.6133 3
 -2 10 -3 -8.56301 42.4014 2
 2 10 3 32.7064 44.4013 5
 2 10 3 -22.3415 50.7133 2
 -2 -10 -3 -57.4236 44.9367 3
 2 10 4 11757.5 418.785 5
 2 -10 4 11612.1 364.731 3
 -2 -10 -4 11923.8 325.559 3
 -2 10 -4 11813.6 381.765 2
 -2 -10 -5 17.7344 33.1932 3
 2 10 5 64.9572 54.39 5
 2 -10 5 21.5432 46.8473 3
 -2 10 -5 38.6691 52.2342 2
 2 -10 6 3826.41 221.614 3
 2 10 6 4028.29 252.399 5
 -2 -10 -6 4652.84 213.179 3
 -2 10 -6 3829.23 231.891 2
 -2 10 -7 -72.2962 63.0409 2
 2 10 7 -36.8101 66.5543 5
 -2 -10 -7 46.0156 41.5998 3
 -2 10 -8 448.009 100.119 2
 2 10 8 474.047 100.628 5
 -2 -10 -8 449.429 79.5257 3
 -2 -10 -9 697.209 97.5372 3
 2 10 9 684.126 113.475 5
 -2 10 -9 515.494 103.603 2
 -2 10 -10 634.14 109.433 2
 2 10 10 717.966 118.968 5
 -2 -10 -10 620.613 91.7825 3
 -2 10 -11 1056.56 141.42 2
 2 10 11 1178.46 146.843 5
 -2 -10 -11 1078.66 124.547 3
 2 10 12 7162.91 362.206 5
 -2 10 -12 7160.78 372.014 2
 -2 -10 -12 7001.26 311.69 3
 -2 10 -13 873.747 143.439 2
 2 10 13 847.382 129.144 5
 -2 -10 -13 1078.08 132.915 3
 -2 -10 -14 7648.3 347.038 3
 2 10 14 7448.86 377.007 5
 2 10 15 1140.34 155.241 5
 -2 -10 -15 1436.4 164.458 3
 -2 -10 -16 3848.84 261.425 3
 2 10 16 3749.2 275.633 5
 2 10 17 476.138 111.054 5
 -2 -10 -17 477.257 104.358 3
 -2 10 -17 462.125 112.414 2
 -2 10 -18 1346.11 206.312 2
 2 10 18 1320.73 171.716 5
 -2 -10 -18 1161.21 158.508 3
 -2 -10 -19 441.087 121.21 3
 -2 10 -19 479.745 135.75 2
 -2 -10 -20 16.1088 75.6695 3
 -2 11 20 17.4347 64.0302 5
 2 -11 -20 -28.9414 60.2433 3
 2 -11 -19 3316.36 263.853 3
 2 11 -19 3772.3 321.363 2
 -2 11 19 3534.94 286.278 5
 2 11 -18 58.0936 84.6936 2
 2 -11 -18 27.205 56.9948 3
 2 -11 -17 1427.1 165.993 3
 2 11 -17 1461.52 191.586 2
 2 -11 -16 36.4803 61.7153 3
 2 11 -16 181.214 93.4397 2
 2 -11 -15 130.68 67.3999 3
 2 11 -15 134.129 84.9086 2
 2 -11 -14 600.218 105.305 3
 2 11 -14 615.2 125.319 2
 2 -11 -13 4277.34 262.017 3
 2 11 -13 4805.19 311.386 2
 2 -11 -12 258.109 67.105 3
 2 11 -12 243.67 93.3112 2
 2 -11 -11 12016.1 416.854 3
 2 11 -11 12671.3 477.705 2
 2 -11 -10 81.7887 60.0859 3
 2 11 -10 105.983 86.1328 2
 2 -11 -9 16478.4 471.86 3
 2 11 -9 17549.5 543.434 2
 2 -11 -8 1631.8 150.407 3
 2 11 -8 1560.12 165.667 2
 2 -11 -7 7676.51 316.229 3
 2 11 -7 7437.2 320.374 5
 2 11 -7 7619.37 352.331 2
 2 -11 -6 4812.44 243.153 3
 2 11 -6 4827.24 275.404 2
 -2 11 6 5000.35 230.638 2
 2 11 -6 4824.96 261.428 5
 2 11 -5 864.668 121.02 5
 2 -11 -5 868.658 109.511 3
 2 11 -5 860.723 120.366 2
 -2 11 5 1006.6 111.924 2
 2 -11 -4 8453.48 317.14 3
 -2 11 4 8508.63 302.386 2
 2 11 -4 7610.74 332.681 5
 2 11 -4 8681.73 356.25 2
 -2 11 3 1064.99 117.455 2
 -2 -11 3 1156.75 106.522 3
 2 11 -3 1174.82 143.608 2
 2 11 -3 979.501 127.885 5
 2 -11 -3 1126.76 122.598 3
 2 11 -2 3163.21 221.456 5
 2 -11 -2 3437.25 204.159 3
 2 11 -2 3197.44 213.138 2
 -2 11 2 3527.33 203.072 2
 -2 -11 2 3630.61 178.947 3
 2 11 -1 6645.77 304.861 2
 2 11 -1 6707.55 320.461 5
 -2 11 1 6948.04 285.867 2
 -2 -11 1 6962.98 246.675 3
 2 -11 -1 7105.37 288.348 3
 2 -11 0 378.505 74.0458 3
 -2 11 0 397.244 91.4402 2
 2 11 0 389.25 83.1971 2
 -2 -11 0 473.788 70.342 3
 2 11 0 244.493 69.3633 5
 -2 11 -1 14005.7 414.835 2
 2 11 1 14885.8 485.429 5
 2 -11 1 14206.3 412.158 3
 2 11 1 13822.5 428.544 2
 -2 -11 -1 14932.9 362.59 3
 -2 11 -2 116.206 68.2925 2
 -2 -11 -2 104.763 41.7449 3
 2 11 2 183.537 69.5802 5
 2 11 2 101.389 57.2002 2
 2 -11 2 155.331 63.8468 3
 -2 11 -3 12520.9 407.329 2
 2 11 3 12900.5 460.977 5
 2 11 3 12346.4 404.019 2
 -2 -11 -3 12906.7 348.563 3
 2 -11 3 12565.4 394.666 3
 -2 -11 -4 1074.8 108.559 3
 2 -11 4 850.668 107.434 3
 2 11 4 981.72 137.502 5
 -2 11 -4 895.396 122.305 2
 -2 -11 -5 3510.53 190.656 3
 2 -11 5 3249.27 205.955 3
 -2 11 -5 3410.47 223.75 2
 2 11 5 3269.98 238.214 5
 2 -11 6 3193.78 207.477 3
 2 11 6 2947.01 229.752 5
 -2 11 -6 3066.7 218.706 2
 -2 -11 -6 3215.34 186.268 3
 2 11 7 351.143 90.3065 5
 2 -11 7 280.186 80.8138 3
 -2 -11 -7 227.758 65.8189 3
 -2 11 -7 230.393 83.9985 2
 -2 -11 -8 1761.7 146.02 3
 2 11 8 1372.87 163.234 5
 -2 11 -8 1548.09 166.306 2
 -2 11 -9 1624.48 178.109 2
 -2 -11 -9 1725.89 150.592 3
 2 11 9 1597.1 181.902 5
 2 11 10 3579.68 265.138 5
 -2 11 -10 3620.19 260.875 2
 -2 -11 -10 4009.37 228.291 3
 2 11 11 4332.79 293.556 5
 -2 11 -11 4508.25 297.163 2
 -2 -11 -11 4707.09 256.607 3
 2 11 12 3962.78 281.623 5
 -2 -11 -12 4181.11 250.032 3
 -2 11 -12 3886.8 285.255 2
 2 11 13 4884.53 316.323 5
 -2 11 -13 4604.9 313.248 2
 -2 -11 -13 4381.03 261.413 3
 -2 11 -14 1058.83 168.222 2
 2 11 14 955.932 148.321 5
 -2 -11 -14 1084.59 139.357 3
 -2 -11 -15 4771.31 290.004 3
 2 11 15 4627.16 317.278 5
 -2 11 -15 4228.74 322.776 2
 -2 11 -16 90.3788 86.5676 2
 -2 -11 -16 171.654 74.3879 3
 2 11 16 163.219 73.0386 5
 2 11 17 2782.42 251.311 5
 -2 11 -17 2525.16 265.502 2
 -2 -11 -17 2831.57 238.521 3
 2 11 18 21.1711 70.6801 5
 -2 -11 -18 112.094 50.1901 3
 -2 -11 -19 559.371 121.323 3
 -2 12 19 178.481 93.0669 5
 -2 12 18 2964.65 269.305 5
 2 12 -18 2747.42 274.017 2
 2 -12 -18 2871.28 249.175 3
 2 12 -17 368.501 106.435 2
 -2 12 17 432.636 109.398 5
 2 -12 -17 441.093 100.46 3
 2 -12 -16 366.264 87.7576 3
 2 12 -16 578.342 139.848 2
 2 -12 -15 764.521 129.076 3
 2 12 -15 755.114 146.407 2
 2 -12 -14 442.291 98.3466 3
 2 12 -14 392.29 116.246 2
 2 12 -13 135.122 86.0149 2
 2 -12 -13 -34.6663 63.031 3
 2 -12 -12 5337.1 293.356 3
 2 12 -12 5078.69 329.264 2
 2 -12 -11 211.739 72.7238 3
 2 12 -11 -7.35779 85.5079 2
 2 12 -10 9465.54 427.802 2
 2 -12 -10 9558.44 377.888 3
 2 12 -9 637.909 126.22 2
 2 -12 -9 518.794 95.039 3
 2 12 -8 11833 463.055 2
 2 -12 -8 11034.7 394.907 3
 2 -12 -7 3288.18 219.969 3
 2 12 -7 3231.19 228.07 5
 2 12 -7 2987.13 235.731 2
 2 12 -6 4349.06 265.581 5
 2 12 -6 4556.35 281.072 2
 2 -12 -6 4926.48 262.434 3
 2 -12 -5 6321.64 291.973 3
 2 12 -5 6337.45 329.299 2
 2 12 -5 5656.87 306.096 5
 -2 12 4 310.382 68.8625 2
 2 12 -4 232.598 84.2269 5
 2 12 -4 284.409 90.1445 2
 2 -12 -4 325.005 73.6067 3
 2 -12 -3 4387.53 243.217 3
 2 12 -3 4285.1 268.554 5
 2 12 -3 4259.86 262.116 2
 -2 12 3 4419.64 237.755 2
 -2 12 2 1608.05 146.862 2
 2 -12 -2 1773.1 154.975 3
 2 12 -2 1802.2 173.499 2
 2 12 -2 1567.93 173.408 5
 -2 12 1 3352.42 213.083 2
 2 -12 -1 3413.53 214.802 3
 2 12 -1 3412.06 232.539 2
 2 12 -1 3216.32 237.577 5
 2 -12 0 4147.9 231.512 3
 -2 12 0 4143.01 236.375 2
 2 12 0 3667.81 257.8 5
 2 12 0 3691.16 236.488 2
 2 -12 1 1877.29 161.45 3
 2 12 1 1526.21 171.933 5
 2 12 1 1752.11 164.472 2
 -2 12 -1 1564.93 152.843 2
 2 12 2 7155.87 362.936 5
 2 -12 2 7092.08 306.901 3
 -2 12 -2 6909.28 317.907 2
 2 12 2 6893.28 321.105 2
 2 12 3 486.431 100.331 2
 -2 12 -3 272.651 73.695 2
 2 12 3 353.359 98.7222 5
 2 -12 3 372.109 85.5778 3
 2 -12 4 3257.88 214.814 3
 -2 12 -4 3106.14 221.085 2
 2 12 4 3157.61 244.486 5
 2 -12 5 3107.31 208.793 3
 -2 12 -5 2987.78 221.395 2
 2 12 5 2687.25 232.455 5
 -2 12 -6 126.462 77.2781 2
 2 -12 6 53.8778 58.2554 3
 2 12 6 100.57 61.927 5
 2 -12 7 3879.2 239.695 3
 2 12 7 3331.96 260.977 5
 -2 12 -7 3684.42 253.348 2
 2 12 8 1317.57 174.832 5
 2 -12 8 1165.15 143.22 3
 -2 12 -8 945.736 140.024 2
 -2 12 -9 6773.51 359.984 2
 2 12 9 6489.96 370.28 5
 2 -12 9 6215.58 310.48 3
 2 12 10 3608.36 285.272 5
 -2 -12 -10 3724.6 229.032 3
 -2 12 -10 3387.63 263.327 2
 2 12 11 4093.52 301.395 5
 -2 12 -11 4094.05 298.691 2
 -2 -12 -11 4202.24 249.733 3
 -2 -12 -12 3222.94 225.915 3
 2 12 12 3238.41 270.615 5
 -2 12 -12 3059.57 264.788 2
 -2 12 -13 1187.21 179.55 2
 2 12 13 1208.06 170.968 5
 -2 -12 -13 1091.92 136.537 3
 2 12 14 3508.47 288.572 5
 -2 -12 -14 3915.92 258.663 3
 -2 12 -14 3214.72 285.346 2
 -2 12 -15 56.1328 91.4063 2
 -2 -12 -15 205.344 70.474 3
 2 12 15 57.1877 64.8859 5
 2 12 16 2081.76 227.962 5
 -2 12 -16 2137.9 241.064 2
 2 12 17 31.369 75.2067 5
 2 -13 -17 1312.94 171.164 3
 2 13 -16 2960.83 283.261 2
 -2 13 16 3008.09 276.766 5
 2 -13 -16 3155.74 251.788 3
 2 13 -15 -85.0043 96.5883 2
 2 -13 -15 -14.2696 58.5349 3
 2 13 -14 3701.56 304.353 2
 2 -13 -14 3665.12 262.169 3
 2 13 -13 1793.04 216.527 2
 2 -13 -13 1628.77 176.549 3
 2 13 -12 1365.61 189.208 2
 2 -13 -12 1498.14 166.281 3
 2 -13 -11 5234.48 296.471 3
 2 13 -11 5384.83 343.904 2
 2 -13 -10 191.465 75.0882 3
 2 13 -10 76.8538 86.5217 2
 2 -13 -9 4845.4 276.698 3
 2 13 -9 5117.86 327.028 2
 2 -13 -8 1885.41 170.519 3
 2 13 -8 2085.7 214.221 2
 2 13 -7 2599.24 230.86 2
 2 -13 -7 2757.18 206.539 3
 2 13 -6 3138.78 248.641 2
 2 -13 -6 3512.79 229.132 3
 2 13 -6 3023.51 240.071 5
 2 13 -5 1522.31 174.76 5
 2 13 -5 1638.57 179.648 2
 2 -13 -5 1828.49 168.388 3
 2 13 -4 4187.58 278.409 2
 2 13 -4 3789.63 270.628 5
 2 -13 -4 4199.18 246.463 3
 2 -13 -3 240.113 66.0116 3
 2 13 -3 162.656 77.7558 5
 -2 13 3 260.115 77.7929 2
 2 13 -3 200.349 69.8651 2
 -2 13 2 3512.06 225.418 2
 2 13 -2 3163.14 251.597 5
 2 13 -2 3624.59 255.468 2
 2 -13 -2 3530.34 223.395 3
 2 13 -1 379.758 99.0935 2
 -2 13 1 451.29 90.2837 2
 2 -13 -1 303.611 70.0898 3
 2 13 -1 348.022 94.9398 5
 -2 13 0 1216.44 147.179 2
 2 13 0 1299.5 154.865 2
 2 13 0 1009.93 148.658 5
 2 -13 0 1461.12 147.241 3
 -2 13 -1 823.237 120.408 2
 2 -13 1 943.989 124.313 3
 2 13 1 849.01 134.456 5
 2 13 1 973.953 138.771 2
 2 13 2 370.974 90.8465 2
 2 -13 2 323.242 82.2379 3
 2 13 2 272.428 84.0192 5
 -2 13 -2 251.451 84.8591 2
 -2 13 -3 929.813 128.734 2
 2 -13 3 1208.08 139.793 3
 2 13 3 921.261 145.844 5
 2 -13 4 701.589 109.542 3
 -2 13 -4 541.246 102.353 2
 2 13 4 654.838 129.464 5
 2 13 5 241.195 74.2265 5
 -2 13 -5 380.542 95.1103 2
 2 -13 5 458.149 89.8723 3
 -2 13 -6 2281.6 209.594 2
 2 -13 6 2619.54 203.654 3
 2 13 6 2295.23 225.942 5
 2 -13 7 386.583 84.5915 3
 -2 13 -7 322.435 96.0388 2
 2 13 7 332.707 99.5231 5
 2 13 8 4781.21 329.96 5
 -2 13 -8 5413.08 328.938 2
 2 -13 8 5454.7 295.285 3
 2 -13 9 1661.32 168.873 3
 2 13 9 1979.22 221.129 5
 -2 13 -9 1703.68 195.93 2
 2 -13 10 2662.1 221.951 3
 2 13 10 2887.62 260.736 5
 -2 13 -10 2461.14 237.391 2
 2 -13 11 2516.95 213.022 3
 2 13 11 2150.42 231.586 5
 -2 13 -11 2171.56 223.94 2
 2 -13 12 697.217 121.936 3
 2 13 12 839.224 148.594 5
 -2 13 -12 1049.95 169.123 2
 -2 13 -13 2337.96 246.786 2
 2 13 13 2199.36 236.47 5
 -2 13 -14 -42.7815 86.375 2
 2 13 14 -149.794 100.685 5
 2 -14 -15 5791.95 342.476 3
 2 -14 -14 100.294 67.3998 3
 -2 14 14 334.932 120.831 5
 2 14 -13 3188.35 289.623 2
 2 -14 -13 3230.02 249.93 3
 2 -14 -12 839.69 136.953 3
 2 14 -12 777.147 158.488 2
 2 -14 -11 1880.26 187.112 3
 2 14 -11 1695.55 212.263 2
 2 14 -10 1846.34 210.287 2
 2 -14 -10 1525.1 167.242 3
 2 -14 -9 70.5273 56.6032 3
 2 14 -9 -61.8233 88.1543 2
 2 -14 -8 1122.9 144.15 3
 2 14 -8 1261.23 172.443 2
 2 -14 -7 797.247 125.496 3
 2 14 -7 798.144 138.057 2
 2 14 -6 966.582 150.397 2
 2 -14 -6 1162.11 138.262 3
 2 14 -5 2590.72 236.042 5
 2 14 -5 3328.75 264.337 2
 2 -14 -5 2932.91 215.942 3
 2 -14 -4 290.166 81.7433 3
 2 14 -4 497.631 110.98 2
 2 14 -4 414.91 113.183 5
 2 14 -3 3419.7 275.039 5
 2 -14 -3 3784.75 243.526 3
 2 14 -3 3706.96 271.881 2
 2 14 -2 17.0765 58.0677 2
 2 14 -2 24.7215 50.0733 5
 2 -14 -2 45.661 49.8138 3
 2 -14 -1 1220.52 140.331 3
 2 14 -1 1114.37 159.528 5
 -2 14 1 1284.42 153.903 2
 2 14 -1 1246.2 162.269 2
 2 14 0 162.181 71.0723 2
 2 -14 0 31.1812 48.7896 3
 2 14 0 -5.01915 70.4238 5
 -2 14 0 81.8302 56.7779 2
 2 -14 1 409.3 85.3707 3
 -2 14 -1 440.669 99.1184 2
 2 14 1 433.849 95.9582 2
 2 14 1 370.741 100.916 5
 2 -14 2 -45.3495 63.6104 3
 2 14 2 -71.121 79.8985 2
 -2 14 -2 44.2858 60.7321 2
 2 14 2 -44.1911 75.985 5
 2 -14 3 128.247 59.2879 3
 -2 14 -3 -17.3671 63.3381 5
 2 14 3 47.4127 72.5584 5
 -2 14 -3 -50.6982 79.5669 2
 -2 14 -4 227.548 92.0896 2
 2 14 4 167.111 64.2893 5
 2 -14 4 308.009 83.9214 3
 2 14 5 2034.42 223.858 5
 2 -14 5 2120.79 187.523 3
 -2 14 -5 1979.07 200.533 2
 2 -14 6 508.621 100.637 3
 2 14 6 381.943 107.727 5
 -2 14 -6 445.215 110.606 2
 2 -14 7 2779.44 215.029 3
 2 14 7 2278.02 246.014 5
 -2 14 -7 2360.46 226.189 2
 2 -14 8 146.628 64.7366 3
 2 14 8 229.237 92.7265 5
 -2 14 -9 1585.46 196.582 2
 2 14 9 1460.07 194.994 5
 -2 14 -10 728.393 143.468 2
 2 14 10 486.747 125.519 5
 2 14 11 826.166 155.549 5
 -2 14 -11 608.195 131.633 2
 2 14 12 701.473 143.65 5
 -2 14 -12 847.724 158.897 2
 2 -15 -13 -40.1787 61.1675 3
 2 -15 -12 3022.81 241.368 3
 2 15 -11 -202.056 116.642 2
 2 -15 -11 -128.053 77.5256 3
 -2 15 10 779.488 155.939 5
 2 -15 -10 902.42 132.469 3
 2 15 -10 782.573 153.149 2
 2 -15 -9 -4.03833 60.9305 3
 2 15 -9 24.4515 81.533 2
 2 -15 -8 -8.1726 60.9327 3
 2 15 -8 -274.029 116.096 2
 2 15 -7 -50.1036 86.0711 2
 2 -15 -7 57.8698 62.3498 3
 2 -15 -6 1516.28 165.917 3
 2 15 -6 1417.65 186.171 2
 2 -15 -5 22.0146 49.7934 3
 2 15 -5 -209.178 107.982 2
 2 -15 -4 4125.81 260.261 3
 2 15 -4 3763.02 302.667 5
 2 15 -4 3978 298.891 2
 2 -15 -3 10.428 62.6968 3
 2 15 -3 -32.7569 62.2139 2
 2 15 -3 25.2901 51.787 5
 2 15 -2 2695.31 260.776 5
 2 -15 -2 3172.91 230.608 3
 2 15 -2 2928.86 249.612 2
 2 15 -1 -127.661 92.9085 5
 2 15 -1 41.379 64.277 2
 2 -15 -1 -70.3875 65.7159 3
 2 15 0 1973.58 228.096 5
 2 15 0 2028.69 207.578 2
 -2 15 0 1679.55 208.849 5
 2 15 1 -76.4625 76.7751 2
 2 15 1 -116.829 87.6506 5
 -2 15 -1 51.4289 61.3297 2
 -2 15 -1 -64.4758 80.1106 5
 -2 15 -2 -66.5693 80.9112 5
 -2 15 -2 -98.717 96.7061 2
 2 15 2 -10.8918 61.9345 2
 2 15 2 68.1177 74.4866 5
 -2 15 -3 251.612 87.554 2
 2 15 3 159.199 75.7387 5
 -2 15 -4 1643.12 188.427 2
 2 15 4 1728.45 219.455 5
 -2 15 -5 443.227 125.557 2
 2 15 5 249.615 101.959 5
 2 15 6 3304.49 302.217 5
 -2 15 -6 3204.5 267.72 2
 -2 15 -7 80.4423 78.972 2
 2 15 7 98.2771 80.0366 5
 -2 15 -8 3100.59 276.939 2
 2 15 8 3250.23 302.565 5
 -2 15 -9 -63.6748 78.5157 2
 2 16 -7 519.891 120.005 2
 2 16 -6 561.64 132.322 2
 -2 16 6 544.489 138.74 5
 2 16 -5 2138.59 231.481 2
 -2 16 5 2023.54 250.816 5
 2 16 -4 227.716 101.797 2
 -2 16 4 122.954 74.8055 5
 2 16 -3 3334.45 279.694 2
 2 16 -3 3347.62 302.554 5
 -2 16 3 3328.92 306.267 5
 2 16 -2 154.704 95.5391 2
 2 16 -2 -36.2329 73.3845 5
 -2 16 2 -30.9856 83.6692 5
 2 16 -1 1551.87 210.505 5
 -2 16 1 1579.63 210.313 5
 2 16 -1 1723.84 197.004 2
 2 16 0 -115.31 103.859 2
 -2 16 0 -36.9055 79.0357 5
 2 16 0 20.8724 67.4092 5
 -2 16 -1 -49.8892 79.8202 5
 2 16 1 208 81.0362 2
 2 16 1 -10.3403 91.7128 5
 2 16 2 -80.569 109.865 5
 2 16 3 508.061 140.769 5
 -2 16 -3 456.507 108.993 2
 2 16 4 -60.063 97.6944 5
 -2 16 -4 49.664 67.8417 2
 -2 16 -5 1298.53 181.069 2
 -2 16 -6 -64.3042 89.9351 2
 2 17 -2 2441.93 275.251 5
 -2 17 0 506.042 136.915 5
 2 17 0 711.542 138.223 2
 3 0 -27 153.372 87.6541 3
 3 0 -26 6985.7 410.616 3
 3 0 -25 20.5353 71.1709 3
 3 0 -24 6570.91 374.974 3
 3 0 -23 100.661 80.3018 3
 3 0 -22 5262.66 309.898 3
 -3 0 21 -68.8109 58.7152 4
 3 0 -21 56.6562 52.7825 3
 -3 0 20 34.8181 42.4532 4
 3 0 -20 114.263 57.5399 2
 3 0 -20 20.2429 56.5652 3
 3 0 -19 102.027 55.5625 2
 -3 0 19 68.8412 41.7678 4
 -3 0 18 566.411 84.5355 4
 3 0 -18 382.357 80.4472 3
 3 0 -18 534.01 82.8228 2
 3 0 -17 -17.8355 43.2972 3
 3 0 -17 31.2432 36.7817 2
 -3 0 17 12.0903 36.0331 4
 -3 0 16 4578.17 208.703 4
 3 0 -16 4815.93 240.36 3
 3 0 -16 4581.15 201.502 2
 -3 0 15 67.9206 40.9809 4
 3 0 -15 80.45 48.1428 2
 3 0 -15 132.067 62.4244 3
 -3 0 14 40299.3 572.83 4
 3 0 -14 38784.8 524.513 2
 3 0 -14 39109.8 618.686 3
 3 0 -13 -0.89979 27.3554 2
 -3 0 13 4.80757 29.6977 4
 3 0 -13 65.1006 42.9086 3
 3 0 -12 41628.4 483.849 2
 -3 0 12 40597.2 521.776 4
 3 0 -12 40891.6 569.741 3
 3 0 -11 39.6745 29.0227 2
 3 0 -11 7.38865 31.8752 3
 3 0 -10 19283 288.319 2
 3 0 -10 19998.6 358.471 3
 3 0 -9 67.6601 23.9839 5
 3 0 -9 72.759 34.7831 3
 3 0 -9 41.3051 20.7068 2
 3 0 -8 379.762 36.2316 2
 3 0 -8 446.736 43.8057 5
 3 0 -8 519.553 54.6057 3
 3 0 -7 51.998 19.2878 2
 3 0 -7 12.3478 13.657 5
 3 0 -7 21.2152 22.1974 3
 3 0 -6 10699.9 198.137 5
 3 0 -6 11133.9 153.786 2
 3 0 -6 11272.8 195.704 3
 3 0 -5 28.4633 16.2366 3
 3 0 -5 9.42687 14.9809 5
 3 0 -5 -1.95737 11.2313 2
 -3 0 4 126087 641.488 1
 3 0 -4 126838 457.46 2
 3 0 -4 127687 659.492 5
 3 0 -4 127559 540.795 3
 -3 0 3 48.6082 24.0905 1
 3 0 -3 69.8554 23.7445 5
 3 0 -3 31.374 13.6336 3
 -3 0 2 31363.1 300.135 1
 3 0 -2 30533.6 318.849 5
 3 0 -2 31033 236.734 3
 3 0 -1 55.4871 21.0761 5
 -3 0 1 56.2983 21.8904 1
 3 0 0 93622.2 550.959 5
 3 0 1 68.6299 21.7578 5
 3 0 2 1736.2 75.5307 5
 -3 0 -3 30.4022 24.6524 2
 3 0 3 13.8508 16.7901 5
 -3 0 -4 4940.18 160.923 3
 -3 0 -4 4946.71 168.839 2
 3 0 4 5026.89 130.72 5
 -3 0 -5 -24.5594 39.8155 2
 3 0 5 1.15235 14.1374 5
 -3 0 -5 5.53341 25.2072 3
 3 0 6 91001.6 576.344 5
 -3 0 -6 88160 764.51 3
 -3 0 -6 93706.3 810.842 2
 3 0 7 -36.9715 18.899 5
 -3 0 -7 76.5595 46.5615 2
 -3 0 -7 48.949 42.8482 3
 -3 0 -8 67679 763.69 2
 -3 0 -8 67698 739.229 3
 3 0 8 67234.8 516.955 5
 -3 0 -9 -4.94667 47.5705 2
 3 0 9 3.23148 17.0054 5
 -3 0 -9 53.233 49.9013 3
 3 0 10 47957.6 454.441 5
 -3 0 -10 48941.8 696.902 3
 -3 0 -10 49815.4 708.105 2
 3 0 11 0.38756 17.6073 5
 -3 0 -11 125.765 69.0046 3
 -3 0 -11 41.5719 61.6938 2
 -3 0 -12 27567.1 572.724 2
 -3 0 -12 26026.3 553.238 3
 -3 0 -13 120.784 64.5891 3
 -3 0 -13 126.728 70.0827 2
 -3 0 -14 3100.42 213.315 2
 -3 0 -14 3649.88 225.955 3
 -3 0 -15 -9.86639 51.7012 3
 -3 0 -15 88.1039 73.1734 2
 -3 0 -16 1905.33 176.903 2
 -3 0 -16 1847.08 175.925 3
 -3 0 -17 19.9496 57.2615 3
 -3 0 -17 123.706 72.5875 2
 -3 0 -18 4645.53 317.719 3
 -3 0 -18 6018.05 328.177 2
 -3 0 -19 171.445 90.0598 2
 -3 0 -19 -2.26724 68.9882 3
 -3 0 -20 10126 453.758 2
 -3 0 -20 7551.2 473.546 3
 -3 0 -21 84.9716 107.317 3
 -3 0 -21 186.838 104.604 2
 -3 0 -22 7996.22 443.846 3
 -3 0 -22 8317.07 440.641 2
 -3 0 -23 155.987 93.9976 2
 -3 0 -23 213.818 92.1828 3
 -3 0 -24 7053.8 423.596 2
 -3 0 -25 165.466 95.1446 2
 3 1 -27 8337.95 462.114 3
 3 -1 -27 7421.39 434.293 3
 3 -1 -26 0.34168 68.6028 3
 3 1 -26 71.7655 82.6008 3
 3 1 -25 6798.52 393.963 3
 3 -1 -25 7800.3 418.337 3
 3 1 -24 257.107 94.8044 3
 3 -1 -24 131.553 78.6792 3
 3 -1 -23 6125.4 352.096 3
 -3 -1 23 5594.05 298.071 4
 3 1 -23 6639.91 362.693 3
 3 -1 -22 1222.15 159.818 3
 3 1 -22 1118.3 151.753 3
 -3 -1 22 1002.8 130.727 4
 -3 -1 21 804.76 117.562 4
 3 -1 -21 979.397 134.475 3
 3 1 -21 1067.85 140.429 3
 3 1 -21 1080.18 130.78 2
 3 1 -20 1432.45 138.437 2
 -3 1 20 1263.05 125.007 4
 3 1 -20 1690.93 171.665 3
 3 -1 -20 1431.57 158.286 3
 -3 -1 20 1217.83 132.252 4
 -3 -1 19 208.193 57.8617 4
 3 1 -19 354.504 73.656 2
 3 1 -19 417.362 86.0988 3
 -3 1 19 274.904 62.3316 4
 3 -1 -19 155.359 60.3751 3
 -3 -1 18 251.842 62.8988 4
 3 -1 -18 169.561 59.6621 3
 3 1 -18 199.453 65.1638 3
 3 -1 -18 232.783 59.534 2
 3 1 -18 272.259 64.3198 2
 -3 1 18 292.344 66.322 4
 -3 1 17 4833.14 213.429 4
 3 1 -17 5095.96 229.191 2
 3 1 -17 5068.76 253.479 3
 3 -1 -17 4631.16 201.82 2
 3 -1 -17 5188.81 260.356 3
 -3 -1 17 4670.39 227.213 4
 3 -1 -16 4115.79 183.083 2
 -3 1 16 3966.67 187.225 4
 3 -1 -16 4331.9 229.205 3
 3 1 -16 4473.5 206.252 2
 3 1 -16 4277.24 227.479 3
 -3 -1 16 3953.51 201.71 4
 3 1 -15 10398.9 335.821 3
 3 -1 -15 10154.8 331.824 3
 -3 1 15 10569.8 293.59 4
 -3 -1 15 10540.6 314.727 4
 3 -1 -15 10359.9 273.989 2
 3 1 -15 10449.7 299.39 2
 -3 -1 14 4304.63 196.142 4
 3 1 -14 4379.92 209.691 3
 -3 1 14 4081.86 173.889 4
 3 -1 -14 4217.67 167.538 2
 3 1 -14 3853.09 175.241 2
 3 -1 -14 4312.13 207.734 3
 3 -1 -13 20097.6 427.267 3
 -3 -1 13 20523.5 408.165 4
 3 -1 -13 20128.6 339.554 2
 3 1 -13 19125 368.25 2
 3 1 -13 19145.4 410.401 3
 -3 1 13 19197.9 359.521 4
 3 1 -12 70.0052 33.4516 2
 3 -1 -12 58.5168 24.4003 2
 -3 -1 12 11.203 30.2449 4
 3 1 -12 32.4435 33.1863 3
 3 -1 -12 63.3164 41.5105 3
 3 -1 -11 20412.5 385.405 3
 3 -1 -11 19733.9 292.039 2
 3 1 -11 19478.7 269.541 5
 3 1 -11 19957.5 375.19 3
 3 1 -11 20190.6 338.454 2
 -3 -1 11 20692.8 373.183 4
 3 1 -10 305.424 35.4633 5
 3 1 -10 316.29 46.9253 2
 -3 -1 10 373.172 55.8772 4
 3 -1 -10 381.781 47.41 2
 3 1 -10 297.662 49.7825 3
 3 -1 -10 352.868 59.9521 3
 3 1 -9 1179.82 65.803 5
 3 -1 -9 1158.05 61.7615 2
 3 1 -9 1266.24 87.1614 3
 3 1 -9 1133.36 74.9187 2
 3 -1 -9 1060.62 82.342 3
 3 1 -8 46.8451 19.1028 5
 3 1 -8 27.3236 18.5936 2
 3 -1 -8 66.293 28.4591 3
 3 1 -8 18.4078 21.0881 3
 3 -1 -8 55.5199 18.0467 2
 3 1 -7 5150.16 141.163 3
 3 1 -7 5382.07 137.316 5
 3 -1 -7 5389.76 97.1866 2
 3 -1 -7 5381.19 158.414 3
 3 -1 -7 5378.62 153.959 5
 3 1 -7 5280.47 137.112 2
 3 1 -6 27544.9 294.713 3
 3 -1 -6 26863.4 326.899 3
 3 -1 -6 26735.5 332.856 5
 3 -1 -6 25930.1 179.576 2
 3 1 -6 26238.9 301.639 5
 3 1 -6 26565.5 287.138 2
 3 -1 -5 22928.1 281.424 3
 3 -1 -5 22358.7 295.173 5
 -3 -1 5 22104.8 284.142 1
 3 1 -5 22859.4 251.764 2
 3 1 -5 22246.2 273.088 5
 3 1 -5 22798 230.362 3
 3 -1 -4 13278.1 223.7 5
 3 1 -4 13284.8 149.004 3
 3 -1 -4 12841.8 199.54 3
 -3 -1 4 12616.6 206.944 1
 3 1 -4 12751.8 186.088 2
 3 1 -4 12627.5 206.407 5
 3 1 -3 13575.1 214.242 5
 3 1 -3 13646.2 191.411 2
 3 1 -3 13251 121.125 3
 3 -1 -3 13245.2 193.613 3
 -3 1 3 13335.7 197.073 1
 3 -1 -3 12881 217.655 5
 -3 -1 3 13546.6 208.679 1
 3 -1 -2 18630.9 255.075 5
 3 -1 -2 19553.9 232.269 3
 -3 -1 2 20127.3 256.938 1
 3 1 -2 19434.6 235.581 2
 -3 1 2 19265.9 224.994 1
 3 1 -2 18856.1 255.942 5
 -3 1 2 19788 174.572 2
 -3 1 1 40756 294.151 2
 3 -1 -1 40315 375.314 5
 3 1 -1 41428 376.06 5
 -3 1 1 41183.5 327.053 1
 -3 1 0 27609.9 277.33 2
 3 -1 0 28388.5 306.531 5
 -3 1 0 28614.2 280.553 1
 3 1 0 28893.4 316.802 5
 -3 1 -1 11213.3 197.382 2
 3 1 1 11582.4 203.173 5
 3 -1 1 11355.5 193.653 5
 3 1 2 3028.96 104.606 5
 -3 -1 -2 3082.52 99.2601 3
 -3 1 -2 2906.99 111.483 2
 3 -1 2 3026 99.1608 5
 3 -1 3 1836.11 77.356 5
 3 1 3 1884.28 84.9077 5
 -3 -1 -3 1822.91 85.2665 3
 -3 1 -3 1766.78 93.5397 2
 3 1 4 232.612 33.6679 5
 -3 1 -4 197.35 39.4468 2
 -3 -1 -4 219.013 35.3717 3
 3 -1 4 242.947 30.3513 5
 3 1 5 12755.1 226.477 5
 3 -1 5 12866.4 201.693 5
 -3 -1 -5 12673.3 262.437 3
 -3 1 -5 12546.5 278.777 2
 3 1 6 28.0095 22.2442 5
 -3 -1 -6 52.4316 34.6347 2
 3 -1 6 17.7799 16.2223 5
 -3 -1 -6 30.0788 31.1048 3
 -3 1 -6 -7.71695 36.4224 2
 3 1 7 60399.8 515.106 5
 -3 -1 -7 59537.1 649.148 3
 -3 -1 -7 62989.3 701.745 2
 -3 1 -7 61757.6 703.843 3
 -3 1 -7 61870.5 693.288 2
 3 -1 7 61291 450.19 5
 3 -1 8 236.091 30.9431 5
 -3 1 -8 261.382 64.9867 2
 -3 -1 -8 175.628 51.0068 2
 -3 1 -8 188.79 54.5606 3
 -3 -1 -8 197.176 54.2691 3
 3 1 8 207.999 34.5777 5
 3 -1 9 45806 395.611 5
 -3 -1 -9 46146.7 631.785 3
 3 1 9 45406.8 466.59 5
 -3 1 -9 46125.7 655.294 2
 -3 1 -9 45742.5 664.833 3
 -3 -1 -9 47075.9 669.843 2
 -3 -1 -10 763.896 99.5328 2
 -3 -1 -10 942.484 108.837 3
 3 -1 10 731.484 51.1363 5
 -3 1 -10 794.522 100.831 3
 3 1 10 813.88 66.7177 5
 -3 1 -10 733.009 105.95 2
 -3 1 -11 34454 628 3
 3 1 11 34008.2 425.767 5
 -3 1 -11 34910 618.682 2
 -3 -1 -11 34202.5 599.295 3
 -3 -1 -11 35868.6 628.694 2
 -3 1 -12 9884.34 349.287 2
 -3 -1 -12 9629.51 340.059 2
 3 1 12 9755.44 233.751 5
 -3 1 -12 9510.26 347.532 3
 -3 -1 -12 9619 332.817 3
 -3 -1 -13 8864.06 334.352 3
 -3 1 -13 8632.71 340.996 3
 -3 1 -13 8628.16 337.97 2
 -3 -1 -13 8794.94 340.244 2
 -3 1 -14 9887.67 378.999 3
 -3 -1 -14 9691.22 372.381 2
 -3 -1 -14 10050.1 369.852 3
 -3 1 -14 9166.84 359.623 2
 -3 1 -15 120.091 53.7209 2
 -3 1 -15 196.523 79.9047 3
 -3 -1 -15 254.489 78.5344 3
 -3 -1 -15 161.488 75.9075 2
 -3 1 -16 3346.72 240.421 3
 -3 -1 -16 3300.75 232.604 2
 -3 1 -16 3764.11 247.683 2
 -3 -1 -16 3609.57 243.386 3
 -3 1 -17 4101.66 266.87 2
 -3 1 -17 4357.9 282.705 3
 -3 -1 -17 4021.71 263.741 2
 -3 -1 -17 4143.59 268.751 3
 -3 1 -18 588.889 115.992 2
 -3 -1 -18 741.576 129.223 3
 -3 -1 -18 849.739 141.674 2
 -3 1 -18 324.842 115.369 3
 -3 -1 -19 6172.8 341.361 2
 -3 1 -19 6287.73 355.135 2
 -3 -1 -19 6629.88 358.821 3
 -3 -1 -20 656.975 128.518 3
 -3 1 -20 610.657 128.23 2
 -3 -1 -20 839.468 136.878 2
 -3 -1 -21 7624.8 404.355 2
 -3 -1 -21 7373.77 406.769 3
 -3 1 -21 7397.48 403.851 2
 -3 1 -22 223.412 97.9846 2
 -3 -1 -22 357.234 108.028 3
 -3 -1 -22 141.277 81.1892 2
 -3 -1 -23 6008.96 380.018 2
 -3 -1 -23 6208.23 397.975 3
 -3 1 -23 5604.16 378.21 2
 -3 -1 -24 224.13 85.6907 2
 -3 1 -24 222.979 113.007 2
 -3 1 -25 2830.96 287.314 2
 3 2 -27 85.451 68.0633 3
 3 2 -26 3202.61 283.962 3
 3 -2 -26 4116.8 312.104 3
 3 2 -25 180.147 94.8731 3
 3 -2 -25 234.437 93.8392 3
 3 -2 -24 4161.86 301.145 3
 3 2 -24 4233.52 304.925 3
 -3 -2 24 3528.57 250.972 4
 -3 -2 23 1743.35 176.906 4
 3 2 -23 2122.63 213.739 3
 3 -2 -23 1897.22 202.555 3
 3 -2 -22 2225.22 211.975 3
 -3 -2 22 1985.21 180.072 4
 3 2 -22 2210.55 190.151 2
 3 2 -22 2223.32 209.168 3
 3 -2 -21 3773.24 259.271 3
 -3 -2 21 3582.62 236.309 4
 3 2 -21 3748.03 261.557 3
 3 2 -21 3548.94 229.961 2
 -3 -2 20 99.6456 65.336 4
 3 -2 -20 -58.0805 59.6832 3
 3 2 -20 56.3546 54.8158 2
 3 2 -20 14.5922 55.8882 3
 3 2 -19 7635.6 310.991 2
 3 2 -19 8272 352.938 3
 3 -2 -19 7742.19 343.308 3
 -3 -2 19 7458.13 315.329 4
 3 2 -18 1216 138.937 3
 -3 -2 18 1043.17 122.51 4
 -3 2 18 1233.25 112.951 4
 3 2 -18 1267.04 129.217 2
 3 -2 -18 1295.37 148.612 3
 -3 -2 17 7460.96 296.238 4
 3 2 -17 7358.02 307.372 3
 3 -2 -17 7235.85 245.026 2
 -3 2 17 6881.34 243.898 4
 3 2 -17 7543.35 285.662 2
 3 -2 -17 7604.92 314.438 3
 3 2 -16 6511.67 279.326 3
 3 -2 -16 6635.9 283.633 3
 -3 2 16 6465.69 229.493 4
 -3 -2 16 6357.68 263.596 4
 3 2 -16 6446.33 256.015 2
 3 -2 -16 6659.11 225.289 2
 3 2 -15 5272.37 224.155 2
 -3 2 15 5053.55 193.754 4
 3 -2 -15 5237.62 242.213 3
 3 -2 -15 5488.47 194.661 2
 -3 -2 15 5422.43 235.372 4
 3 2 -15 5034.63 232.544 3
 -3 2 14 2827.13 139.274 4
 3 -2 -14 2825.9 134.833 2
 3 2 -14 2457.31 148.777 2
 -3 -2 14 3060.61 170.308 4
 3 -2 -14 2942.95 176.638 3
 3 2 -14 2933.46 171.842 3
 3 -2 -13 2007.13 105.773 2
 3 2 -13 1975.71 129.239 2
 -3 -2 13 2083.99 136.445 4
 3 2 -13 1910.82 132.354 3
 3 -2 -13 2055.87 142.345 3
 3 2 -12 2752.68 148.949 3
 3 2 -12 2616.37 139.919 2
 3 2 -12 2459.66 89.2308 5
 -3 -2 12 2776.23 152.084 4
 3 -2 -12 2800.45 157.528 3
 3 -2 -12 2488.71 109.325 2
 3 2 -11 213.763 31.5877 5
 3 2 -11 192.483 46.1891 2
 3 2 -11 213.975 54.8496 3
 3 -2 -11 170.916 32.0433 2
 -3 -2 11 248.348 52.1314 4
 3 -2 -11 182.949 53.8106 3
 3 2 -10 1002.69 87.1327 2
 3 2 -10 944.211 82.7884 3
 3 -2 -10 900.38 56.545 2
 -3 -2 10 1071.02 92.3721 4
 3 2 -10 938.153 56.4729 5
 3 -2 -10 866.444 83.9578 3
 3 2 -9 393.797 56.8577 2
 3 -2 -9 580.466 41.6701 2
 3 2 -9 326.332 52.3594 3
 -3 -2 9 319.189 52.1301 4
 3 2 -9 286.922 35.1039 5
 3 -2 -9 546.347 64.2243 3
 3 2 -8 56.2649 28.7867 2
 3 -2 -8 29.3364 22.8121 3
 3 -2 -8 30.4328 14.2612 2
 3 2 -8 11.6407 18.6438 3
 3 2 -8 82.8987 22.3952 5
 3 -2 -7 2266.7 54.8174 2
 3 2 -7 2607.62 95.01 5
 3 -2 -7 2753.56 121.049 3
 3 2 -7 2404.87 97.5106 3
 -3 -2 7 2523.86 106.634 1
 3 2 -7 2492.15 106.84 2
 3 2 -6 1009.89 62.0757 5
 -3 -2 6 968.403 65.0279 1
 3 -2 -6 1006.89 70.6364 3
 3 2 -6 977.328 66.4652 2
 3 2 -6 1028.17 58.6216 3
 3 2 -5 8192.48 136.592 3
 -3 -2 5 8077.07 173.421 1
 3 -2 -5 8239.08 188.055 3
 3 2 -5 8095.81 175.787 2
 3 -2 -5 8187.94 198.787 5
 3 2 -5 7951.67 169.491 5
 3 -2 -4 24213.6 328.794 5
 3 -2 -4 23747.4 304.897 3
 3 2 -4 22718.9 287.417 5
 3 2 -4 23351.9 293.414 2
 -3 -2 4 23498.9 291.084 1
 3 2 -4 23786.1 190.613 3
 3 -2 -3 1210.08 74.2873 5
 -3 -2 3 1199.87 70.0649 1
 3 -2 -3 1151.27 67.1284 3
 3 2 -3 1183.4 68.9853 2
 3 2 -3 1170.3 68.7212 5
 -3 -2 2 11982.8 214.96 1
 3 2 -2 12034.7 211.737 2
 3 2 -2 12297.6 215.201 5
 -3 2 2 11880.9 173.647 1
 3 -2 -2 11913.5 211.181 3
 -3 2 2 11637.9 134.896 2
 3 -2 -2 11286.5 210.254 5
 3 -2 -1 19244.6 271.414 5
 -3 2 1 19940.3 214.944 1
 3 2 -1 20561.7 284.701 2
 3 -2 -1 19925.8 277.316 3
 3 2 -1 20000.6 276.554 5
 3 -2 0 8466.75 176.732 5
 -3 2 0 8940.04 145.191 1
 -3 -2 0 8757.29 111.783 3
 3 2 0 8477.96 183.13 5
 -3 2 0 8598.54 156.399 2
 3 2 1 42919.6 415.139 5
 3 -2 1 42995.1 384.291 5
 -3 -2 -1 43564.9 306.833 3
 -3 2 -1 40998.3 379.522 2
 3 -2 2 8402.91 169.918 5
 -3 -2 -2 8980.11 162.511 3
 -3 2 -2 8706.82 192.847 2
 3 2 2 8924.13 193.44 5
 3 -2 3 21805.8 264.93 5
 3 2 3 22124.1 307.851 5
 -3 -2 -3 21161.1 280.625 3
 -3 2 -3 21273.1 323.285 2
 3 2 4 1247.78 75.9511 5
 3 -2 4 1172.68 61.4752 5
 -3 2 -4 1265.01 87.1838 2
 -3 -2 -4 1188.02 76.1354 3
 3 2 5 6633.59 177.892 5
 -3 2 -5 6379.96 202.701 2
 -3 -2 -5 6359.62 186.807 3
 3 -2 5 6577.26 142.472 5
 -3 -2 -6 18795.5 344.023 3
 3 -2 6 19878.2 243.775 5
 -3 2 -6 19452.7 373.074 2
 3 2 6 19922.5 315.486 5
 3 2 7 84.5181 33.0601 5
 -3 -2 -7 71.3247 36.5115 3
 -3 2 -7 35.9902 46.1298 2
 3 -2 7 38.5491 18.0337 5
 3 2 8 29231.3 399.315 5
 -3 -2 -8 30034.1 513.415 2
 -3 -2 -8 28431.3 471.343 3
 -3 2 -8 29152 498.693 2
 3 -2 8 29304.3 288.13 5
 3 -2 9 1925.04 73.6662 5
 -3 -2 -9 1956.06 141 2
 -3 2 -9 2028.32 147.799 2
 -3 -2 -9 2053.86 136.367 3
 3 2 9 2024.98 108.997 5
 -3 -2 -10 22351.7 479.992 2
 3 2 10 21284.5 354.567 5
 -3 2 -10 21517.4 466.658 2
 -3 -2 -10 21272.7 448.372 3
 3 2 11 7417.08 214.408 5
 -3 -2 -11 7381.27 277.304 3
 -3 2 -11 7764.42 297.167 2
 -3 -2 -11 7930.93 304.384 2
 -3 2 -12 14039.8 413.725 2
 3 2 12 14057 302.156 5
 -3 -2 -12 13903.1 390.869 3
 -3 -2 -12 14900.2 423.957 2
 3 2 13 14670.9 314.863 5
 -3 -2 -13 14704 420.472 3
 -3 2 -13 15168.8 443.157 2
 -3 -2 -13 15141.8 442.957 2
 -3 -2 -14 387.351 82.5251 2
 -3 -2 -14 503.881 94.4082 3
 -3 2 -14 485.522 103.031 2
 -3 -2 -15 20205.7 538.39 3
 -3 2 -15 19118.8 540.709 2
 -3 -2 -15 20181 545.963 2
 -3 2 -16 641.634 124.497 2
 -3 -2 -16 709.294 123.577 3
 -3 -2 -16 630.521 114.987 2
 -3 -2 -17 8936.7 386.535 3
 -3 2 -17 9675.13 414.353 2
 -3 -2 -17 9109.03 392.162 2
 -3 2 -18 1958.86 202.289 2
 -3 -2 -18 2133.7 204.239 3
 -3 -2 -18 2295.87 216.776 2
 -3 -2 -19 4059.17 278.112 2
 -3 -2 -19 4071.89 283.573 3
 -3 2 -19 3804.17 280.915 2
 -3 -2 -20 6546.99 371.917 3
 -3 -2 -20 6105.13 349.539 2
 -3 2 -20 6348.08 371.187 2
 -3 -2 -21 589.527 122.772 3
 -3 2 -21 347.586 116.325 2
 -3 -2 -21 527.042 122.654 2
 -3 2 -22 5032.76 352.946 2
 -3 -2 -22 4680.27 320.1 2
 -3 -2 -22 4931.12 339.522 3
 -3 -2 -23 150.339 90.5648 3
 -3 2 -23 -78.2304 76.5135 2
 -3 -2 -23 127.416 84.1399 2
 -3 2 -24 1689.48 221.909 2
 3 3 -27 734.084 150.105 3
 3 -3 -26 94.8906 78.3453 3
 3 3 -26 169.562 83.9091 3
 3 3 -25 445.582 117.689 3
 3 -3 -25 595.199 130.351 3
 3 3 -24 1582.52 191.847 3
 3 -3 -24 1220.98 172.822 3
 3 -3 -23 396.191 113.228 3
 3 3 -23 612.866 113.478 2
 3 3 -23 363.301 107.771 3
 -3 -3 23 358.358 93.368 4
 3 3 -22 9282.63 390.877 2
 3 3 -22 9080.51 418.075 3
 -3 -3 22 8711.14 383.248 4
 3 -3 -22 9902.59 431.804 3
 3 3 -21 32.2989 66.4883 2
 -3 -3 21 65.379 61.9589 4
 3 -3 -21 82.7441 78.0871 3
 3 3 -21 -67.191 63.3786 3
 3 3 -20 11519.3 436.032 3
 3 3 -20 12172 417.924 2
 -3 -3 20 11508.4 417.619 4
 3 -3 -20 12910.2 462.008 3
 3 3 -19 1719.35 160.113 2
 3 3 -19 1661.86 164.98 3
 -3 -3 19 1542.97 154.812 4
 3 -3 -19 1526.88 161.906 3
 3 3 -18 17684.5 468.403 2
 -3 -3 18 16690.5 469.852 4
 3 -3 -18 17806.5 500.417 3
 3 3 -18 17937.7 504.535 3
 3 3 -17 2179.56 168.104 2
 3 -3 -17 2045.96 170.151 3
 -3 -3 17 2336.05 174.203 4
 3 3 -17 2215.82 173.588 3
 3 3 -16 8343.22 319.334 3
 -3 -3 16 8652.3 318.813 4
 3 3 -16 8853.88 311.722 2
 3 -3 -16 8606.4 329.983 3
 -3 3 16 9047.87 259.658 4
 -3 3 15 4962.98 182.802 4
 3 3 -15 4837 233.137 3
 3 3 -15 5083.77 227.662 2
 3 -3 -15 4891.76 177.91 2
 -3 -3 15 5299.32 242.46 4
 3 -3 -15 5144.16 242.856 3
 3 -3 -14 1501.58 128.658 3
 3 3 -14 1660.42 131.062 2
 3 3 -14 1652.6 133.962 3
 3 -3 -14 1638.22 98.9761 2
 -3 -3 14 1712.11 133.927 4
 3 3 -13 3740.61 182.65 2
 -3 -3 13 3744.37 189.304 4
 3 3 -13 3909.62 190.261 3
 3 -3 -13 3812.71 142.155 2
 3 -3 -13 3695.39 192.04 3
 3 3 -12 2427.99 145.068 2
 3 3 -12 1853.26 75.5402 5
 3 -3 -12 2176.12 99.9824 2
 -3 -3 12 2399.98 149.331 4
 3 3 -12 2214.68 137.357 3
 3 -3 -12 2569.42 155.62 3
 3 -3 -11 621.217 75.2139 3
 -3 -3 11 705.333 79.6062 4
 3 -3 -11 613.738 54.8838 2
 3 3 -11 574.514 74.8468 2
 3 3 -11 576.594 45.4833 5
 3 3 -11 691.956 78.2764 3
 3 -3 -10 4968.75 195.332 3
 3 3 -10 4633.92 128.174 5
 3 -3 -10 4726.42 125.874 2
 -3 -3 10 4975.95 196.944 4
 3 3 -10 4767.78 179.705 3
 3 3 -10 4655.52 186.439 2
 3 -3 -9 1411.27 102.234 3
 3 3 -9 1267.63 69.7697 5
 3 3 -9 1394.68 92.5862 3
 3 3 -9 1447.56 100.912 2
 3 -3 -9 1221.8 58.4639 2
 -3 -3 9 1415.45 104.537 4
 3 -3 -8 33293.6 458.954 3
 -3 -3 8 33021.3 396.266 1
 3 3 -8 32137.7 349.804 5
 3 3 -8 32897.8 402.079 3
 -3 -3 8 33748.9 455.948 4
 3 3 -8 33612.7 444.853 2
 3 -3 -8 31628.9 261.553 2
 3 -3 -7 1280.57 89.3064 3
 3 -3 -7 1185.28 45.8434 2
 -3 -3 7 1407.55 79.9589 1
 3 3 -7 1326.52 90.453 2
 -3 -3 7 1346.2 91.0361 4
 3 3 -7 1320.17 73.9089 5
 3 3 -7 1210.63 73.244 3
 3 3 -6 28879.4 316.097 3
 3 3 -6 27956.5 340.044 5
 -3 -3 6 27927.2 342.528 1
 3 -3 -6 28462.6 392.059 3
 3 3 -6 28274.5 381.183 2
 -3 -3 6 27699.1 375.451 4
 3 -3 -5 7723.14 197.885 3
 3 3 -5 7803.32 197.434 2
 3 3 -5 7594.77 178.478 5
 -3 -3 5 7677.75 176.153 1
 -3 -3 4 3269.8 116.368 1
 -3 3 4 3207.86 66.2057 2
 3 3 -4 3410.73 129.719 2
 3 3 -4 3473.5 121.878 5
 3 -3 -4 3505.12 131.045 3
 3 -3 -3 13476 249.825 3
 -3 -3 3 13704.5 238.757 1
 3 3 -3 13327.1 251.183 2
 -3 3 3 13609.9 150.214 2
 3 3 -3 14175.8 245.049 5
 3 3 -2 16342.4 267.22 5
 -3 3 2 16026.5 185.464 2
 3 -3 -2 16270.8 274.798 3
 3 3 -2 16156 277.535 2
 -3 3 1 18682.1 225.043 2
 3 3 -1 18084.1 284.091 5
 3 3 -1 18466.3 296.48 2
 -3 3 1 18398.5 198.724 1
 3 -3 -1 18478 294.645 3
 -3 -3 1 17398.9 139.827 3
 3 -3 -1 17772.1 285.932 5
 -3 3 0 7802.72 161.708 2
 3 -3 0 7762.6 185.805 5
 3 3 0 7811.9 192.599 5
 -3 3 0 8031.97 126.119 1
 -3 -3 0 8303.01 116.285 3
 3 3 1 2375.15 109.275 5
 3 -3 1 2225.17 97.1978 5
 -3 -3 -1 2441.1 75.5705 3
 -3 3 -1 2270.6 95.6538 2
 3 3 2 8573.19 208.36 5
 -3 3 -2 8455.99 197.82 2
 3 -3 2 8025.8 177.661 5
 -3 -3 -2 8173.58 157.748 3
 3 -3 3 12100.2 212.108 5
 -3 3 -3 13069.5 264.831 2
 -3 -3 -3 12388.1 217.191 3
 3 3 3 12971.8 260.48 5
 -3 3 -4 32680.3 442.571 2
 3 -3 4 32158 335.549 5
 -3 -3 -4 33168 387.736 3
 3 3 4 33718 426.861 5
 3 3 5 1504.79 94.7024 5
 3 -3 5 1510.2 72.0464 5
 -3 -3 -5 1641.69 98.7332 3
 -3 3 -5 1573.46 107.887 2
 -3 3 -6 20290.5 389.992 2
 3 -3 6 18918.4 241.056 5
 3 3 6 19978.5 343.378 5
 -3 -3 -6 19912.3 351.822 3
 3 3 7 5386.8 183.24 5
 3 -3 7 5016.12 119.753 5
 -3 3 -7 5318.74 211.972 2
 -3 -3 -7 5249.55 194.393 3
 3 -3 8 962.479 51.1058 5
 -3 -3 -8 1031.77 95.816 3
 3 3 8 1094.41 88.0153 5
 -3 3 -8 1157.31 111.061 2
 3 -3 9 2962.51 83.4114 5
 3 3 9 3934.96 164.807 5
 -3 3 -9 3892.29 201.911 2
 -3 -3 -9 4046.82 187.927 3
 -3 -3 -10 5587.24 244.703 2
 3 3 10 5808.69 204.66 5
 -3 3 -10 5575.83 247.974 2
 -3 -3 -10 5613.14 234.305 3
 -3 3 -11 1151.54 124.368 2
 -3 -3 -11 1320.73 121.944 3
 3 3 11 1419.05 104.57 5
 -3 -3 -11 1232.45 123.838 2
 -3 -3 -12 14841.4 426.177 2
 -3 3 -12 15549 443.068 2
 -3 -3 -12 14459.5 408.273 3
 3 3 12 15068.4 341.591 5
 3 3 13 2270.86 138 5
 -3 -3 -13 2034.3 167.732 2
 -3 -3 -13 1997.69 163.06 3
 -3 3 -13 2189.7 182.126 2
 -3 3 -14 21702.4 559.791 2
 3 3 14 21870.1 426.565 5
 -3 -3 -14 21496.7 532.819 3
 -3 -3 -14 23176.6 568.898 2
 -3 -3 -15 528.433 102.284 2
 -3 -3 -15 717.4 114.662 3
 -3 3 -15 829.754 131.872 2
 -3 3 -16 7674.5 361.441 2
 -3 -3 -16 8372.17 356.383 3
 -3 -3 -16 7336.32 341.868 2
 -3 -3 -17 203.873 67.8225 2
 -3 3 -17 398.272 106.836 2
 -3 -3 -17 286.972 87.7135 3
 -3 -3 -18 6532.64 347.681 2
 -3 -3 -18 6753.56 347.115 3
 -3 3 -18 6943.97 367.45 2
 -3 -3 -19 1925.37 202.522 2
 -3 3 -19 1864.03 202.45 2
 -3 -3 -19 1853.14 191.769 3
 -3 3 -20 721.215 143.913 2
 -3 -3 -20 667.153 128.425 3
 -3 -3 -20 499.117 109.29 2
 -3 3 -21 2071.24 228.401 2
 -3 -3 -21 2299.69 230.097 3
 -3 -3 -21 2170.89 218.575 2
 -3 3 -22 68.8834 65.8202 2
 -3 -3 -22 95.4163 62.7852 2
 -3 -3 -22 136.503 83.3749 3
 -3 -3 -23 1869.52 219.11 3
 -3 3 -23 1643.09 216.468 2
 -3 3 -24 1177.45 189.322 2
 3 -4 -26 8.80585 65.4029 3
 3 -4 -25 118.57 64.0774 3
 3 4 -24 -36.0729 66.44 2
 3 -4 -24 110.788 83.9401 3
 3 4 -23 3016.51 242.043 2
 3 -4 -23 2232.75 262.28 3
 3 4 -23 2693.46 244.674 3
 3 4 -22 452.571 110.569 2
 3 -4 -22 284.88 134.639 3
 -3 -4 22 528.828 107.663 4
 3 4 -22 443.29 104.144 3
 3 -4 -21 11748.7 507.083 3
 3 4 -21 14724.1 493.728 2
 -3 -4 21 12981.1 468.864 4
 3 4 -21 13431 497.115 3
 -3 -4 20 2179.55 194.108 4
 3 -4 -20 2650.35 222.523 3
 3 4 -20 2553.37 213.852 3
 3 4 -20 2850.52 220.426 2
 3 4 -19 14450.1 461.865 2
 -3 -4 19 13538.7 452.748 4
 3 4 -19 14220.9 476.157 3
 3 -4 -19 14782.2 481.108 3
 3 4 -18 8259.85 337.878 2
 -3 -4 18 7724.87 334.909 4
 3 4 -18 7949.69 344.079 3
 3 -4 -18 8519.53 356.738 3
 3 4 -17 7181.51 314.797 3
 3 -4 -17 7840.96 329.553 3
 -3 -4 17 6621.53 298.403 4
 3 4 -17 7056.65 302.422 2
 3 4 -16 6557.1 284.363 2
 -3 -4 16 6702.2 292.026 4
 3 4 -16 6306.18 285.042 3
 3 -4 -16 6477.54 285.531 3
 3 4 -15 957.893 108.418 2
 -3 -4 15 1012.61 115.839 4
 3 -4 -15 931.189 111.354 3
 3 4 -15 917.934 107.523 3
 3 4 -14 5271.4 241.379 2
 3 -4 -14 5593.4 248.663 3
 -3 -4 14 5634.89 249.663 4
 3 4 -14 6058.77 256.545 3
 3 4 -13 3674.44 194.66 2
 3 -4 -13 3444.32 136.661 2
 3 -4 -13 3403.18 187.48 3
 3 4 -13 3313.84 180.007 3
 -3 -4 13 3691.15 193.652 4
 -3 -4 12 7394.72 264.554 4
 3 4 -12 6592.59 149.851 5
 3 4 -12 7343.27 256.762 3
 3 -4 -12 7427.94 265.314 3
 3 -4 -12 7047.4 184.043 2
 3 4 -12 7691.02 271.677 2
 3 -4 -11 15533.1 369.156 3
 3 4 -11 14960.4 359.603 2
 3 4 -11 14415.1 338.291 3
 -3 -4 11 14312.9 295.056 1
 -3 -4 11 15020.2 361.93 4
 3 4 -11 14086.6 229.266 5
 3 -4 -11 14558.9 249.733 2
 3 -4 -10 3519.39 113.941 2
 3 4 -10 3806.32 176.579 2
 3 4 -10 3189.17 115.158 5
 -3 -4 10 3499.26 141.224 1
 -3 -4 10 3749.45 176.38 4
 3 -4 -10 3701.57 174.425 3
 3 -4 -9 21682.3 404.23 3
 -3 -4 9 21560.7 333.399 1
 3 4 -9 20469.3 298.375 5
 3 4 -9 21757.8 403.738 2
 -3 -4 9 22112.3 409.12 4
 3 -4 -8 91.1412 37.7207 3
 -3 -4 8 82.2462 32.9341 1
 3 4 -8 54.026 22.8437 5
 -3 -4 8 24.1197 32.1058 4
 3 4 -8 49.464 33.8909 2
 3 -4 -7 64851.9 655.796 3
 -3 -4 7 66043 646.625 4
 3 4 -7 64281.9 548.939 5
 -3 -4 7 64988.4 549.226 1
 3 4 -7 65425.9 655.881 2
 3 -4 -6 446.43 58.3761 3
 -3 -4 6 422.471 52.8185 1
 3 4 -6 413.064 50.179 5
 -3 -4 6 488.955 59.7724 4
 3 4 -6 444.793 58.8375 2
 3 4 -5 8967.84 207.572 5
 -3 4 5 9476.7 143.041 2
 -3 -4 5 9312.56 217.747 4
 3 -4 -5 9401.34 235.672 3
 -3 -4 5 9565.77 209.2 1
 3 4 -5 9398.18 238.072 2
 3 -4 -4 9141.54 227.697 3
 -3 -4 4 9069 204.681 1
 3 4 -4 8978.39 213.147 5
 -3 -4 4 9176.65 205.553 4
 -3 4 4 9098 146.328 2
 3 4 -4 9043.91 231.728 2
 -3 -4 3 2544.4 102.668 4
 -3 -4 3 2507.14 67.7859 3
 3 4 -3 2414.72 113.202 5
 -3 4 3 2484.19 81.2617 2
 3 4 -3 2430.49 120.114 2
 3 -4 -3 2397.3 117.979 3
 3 -4 -2 7409.63 204.107 3
 3 4 -2 7446.47 208.066 2
 3 4 -2 7521.93 201.049 5
 -3 -4 2 7017.48 107.732 3
 -3 4 2 7439.94 150.818 2
 -3 -4 1 10860.2 140.751 3
 -3 4 1 10438.6 190.759 2
 3 4 -1 10748.9 249.265 2
 3 4 -1 10904.5 245.7 5
 3 -4 -1 10550.8 244.273 3
 -3 -4 0 11387 157.597 3
 3 4 0 11328 261.754 2
 -3 4 0 10719.4 137.123 1
 3 4 0 11089.7 250.324 5
 3 -4 0 10757.3 253.258 3
 -3 4 0 11031.2 209.783 2
 -3 4 -1 41569 437.99 2
 -3 -4 -1 42041.3 337.195 3
 3 4 1 41987.3 490.596 5
 3 4 2 29538.8 417.925 5
 -3 4 -2 29059.5 388.869 2
 -3 -4 -2 28944.1 310.702 3
 -3 4 -3 66972.6 622.438 2
 -3 -4 -3 67470.2 522.054 3
 3 4 3 67426.3 643.602 5
 3 4 4 28048.2 423.751 5
 -3 4 -4 27610.5 423.697 2
 -3 -4 -4 26883.7 362.124 3
 -3 4 -5 57439 641.453 2
 3 4 5 57602.3 617.322 5
 -3 4 -6 6457.29 229.363 2
 3 4 6 6444.97 212.782 5
 -3 -4 -6 6367.22 201.622 3
 -3 4 -7 18285.1 399.821 2
 3 4 7 17951.6 359.827 5
 -3 -4 -7 17716.3 353.87 3
 3 4 8 371.59 57.8511 5
 -3 -4 -8 294.08 58.8103 3
 -3 4 -8 395.783 71.8744 2
 3 4 9 242.544 46.0046 5
 -3 -4 -9 371.089 64.5075 3
 -3 4 -9 220.871 60.92 2
 3 4 10 162.365 46.5702 5
 -3 4 -10 165.185 56.7012 2
 -3 -4 -10 127.067 40.8834 3
 -3 -4 -11 11523.5 364.451 2
 -3 -4 -11 11659.2 349.279 3
 -3 4 -11 11819 379.548 2
 3 4 11 12033.3 319.509 5
 3 4 12 38.3249 32.5361 5
 -3 -4 -12 44.039 47.5074 2
 -3 4 -12 -66.8216 52.5817 2
 -3 -4 -12 15.7131 42.0969 3
 -3 4 -13 24841.9 589.629 2
 3 4 13 24426.5 474.371 5
 -3 -4 -13 24290.7 551.645 3
 -3 -4 -14 61.789 53.9502 3
 3 4 14 59.9856 38.8043 5
 -3 -4 -14 -59.0991 64.6432 2
 -3 4 -15 17652.2 533.435 2
 -3 -4 -15 17076 500.059 3
 -3 -4 -15 18681.8 537.156 2
 -3 -4 -16 665.738 114.394 3
 -3 4 -16 643.645 128.133 2
 -3 -4 -16 405.141 94.4353 2
 -3 -4 -17 5286.19 300.878 2
 -3 4 -17 5519.4 322.409 2
 -3 -4 -17 5643.06 306.899 3
 -3 -4 -18 947.741 138.382 2
 -3 4 -18 1122.56 164.765 2
 -3 -4 -18 755.52 128.817 3
 -3 4 -19 1667.88 200.127 2
 -3 -4 -19 1457.81 172.112 2
 -3 -4 -19 1842.54 194.566 3
 -3 4 -20 253.116 109.59 2
 -3 -4 -20 265.472 91.0664 3
 -3 -4 -20 286.77 99.3616 2
 -3 4 -21 -55.0707 79.0495 2
 -3 -4 -21 46.4615 61.5361 3
 -3 4 -22 352.776 116.986 2
 -3 -4 -22 223.378 91.7692 3
 -3 4 -23 1333.68 202.531 2
 -3 -4 -23 1325.04 189.744 3
 3 5 -25 30.6756 69.1509 2
 3 -5 -25 68.3078 76.3818 3
 3 5 -24 1043.04 153.245 2
 3 -5 -24 1198.47 166.609 3
 3 5 -23 784.762 139.603 2
 3 -5 -23 227.314 139.457 3
 -3 -5 22 4031.17 278.84 4
 3 -5 -22 3388.29 300.291 3
 3 5 -22 3958.85 280.64 2
 3 5 -21 1161.06 156.592 2
 -3 -5 21 936.282 137.12 4
 -3 -5 20 6840.73 342.529 4
 3 5 -20 7197.53 351.971 2
 3 -5 -20 6095.1 352.204 3
 3 5 -19 1288.35 148.69 2
 -3 -5 19 1351.4 151.817 4
 3 -5 -19 1664.94 171.178 3
 3 5 -18 3308.28 232.571 2
 -3 -5 18 3016.87 218.073 4
 3 -5 -18 3219.89 225.15 3
 3 5 -17 1684.27 162.138 2
 -3 -5 17 1554.9 155.427 4
 3 -5 -17 1727.44 159.405 3
 3 5 -16 457.281 93.7899 2
 -3 -5 16 361.988 77.1264 4
 3 -5 -16 498.247 93.2749 3
 3 5 -15 770.892 110.178 2
 -3 -5 15 799.644 108.81 4
 3 -5 -15 764.776 98.8608 3
 -3 -5 14 810.464 82.5845 1
 -3 -5 14 850.312 104.819 4
 3 -5 -14 902.512 108.425 3
 3 5 -14 877.638 111.487 2
 3 5 -13 508.523 86.1674 2
 -3 -5 13 670.611 91.4958 4
 3 -5 -13 578.136 85.8673 3
 -3 -5 13 589.065 68.8539 1
 -3 -5 12 11923.3 349.815 4
 -3 -5 12 12139.9 279.096 1
 3 -5 -12 11403.1 243.133 2
 3 -5 -12 12238.3 350.851 3
 3 5 -12 11932.3 351.271 2
 3 -5 -11 5.30474 34.389 3
 3 -5 -11 3.99708 25.7554 2
 3 5 -11 -3.98491 17.0961 5
 -3 -5 11 61.803 45.5322 4
 3 5 -11 -15.8656 42.3746 2
 -3 -5 11 66.1755 28.4735 1
 3 -5 -10 41706.1 600.637 3
 3 5 -10 41458.2 454.945 5
 -3 -5 10 42873.7 614.49 4
 3 5 -10 43202.1 624.637 2
 -3 -5 10 40007.2 470.15 1
 3 -5 -9 3358.25 170.883 3
 -3 -5 9 3241.58 133.398 1
 3 5 -9 2742.43 148.579 2
 3 5 -9 2878.17 125.359 5
 -3 -5 9 3413.95 169.087 4
 3 -5 -8 43525.7 583.478 3
 3 5 -8 45381.8 605.165 2
 -3 -5 8 43908.9 575.147 4
 3 5 -8 44553.3 490.112 5
 -3 -5 8 43555.9 466.092 1
 3 5 -7 10.0913 22.4932 5
 3 -5 -7 34.991 35.5098 3
 -3 -5 7 -34.3272 31.7366 4
 3 5 -7 -62.3957 43.9235 2
 -3 -5 7 47.1081 32.4974 1
 3 5 -6 42305.9 487.843 5
 -3 -5 6 41102.4 443.709 1
 -3 -5 6 41921.4 516.837 4
 3 -5 -6 41806.1 546.752 3
 3 5 -6 41938.8 559.109 2
 3 5 -5 920.616 78.1007 5
 -3 -5 5 1101.93 78.3546 1
 -3 -5 5 1120.4 85.0535 4
 3 5 -5 971.049 88.9007 2
 3 -5 -5 1096.47 92.5725 3
 -3 5 5 1045.47 60.2538 2
 3 -5 -4 6922.27 215.985 3
 -3 5 4 6646.45 150.109 2
 -3 -5 4 6791.91 189.581 4
 3 5 -4 6938.13 207.638 5
 3 5 -4 6521.6 217.539 2
 3 -5 -3 1588.35 113.488 3
 -3 -5 3 1489.45 86.75 4
 3 5 -3 1449.2 97.9495 5
 3 5 -3 1468.48 104.446 2
 -3 -5 3 1476 64.4153 3
 -3 5 3 1467.47 74.4187 2
 3 -5 -2 5897.06 198.11 3
 3 5 -2 5886.65 201.147 2
 3 5 -2 5563.28 190.135 5
 -3 5 2 5934.99 153.344 2
 -3 -5 2 5676.11 155.599 4
 -3 -5 2 5628.41 118.272 3
 3 -5 -1 12785.1 290.985 3
 -3 -5 1 13273.9 186.696 3
 -3 5 1 13067.8 241.168 2
 3 5 -1 13498.5 302.129 2
 -3 -5 1 11807.5 210.556 4
 3 5 -1 13433.2 293.244 5
 -3 -5 0 27295.9 282.08 3
 -3 -5 0 24672.9 281.509 4
 3 -5 0 27058.8 430.233 3
 3 5 0 26726.5 420.198 5
 3 5 0 27018.7 424.815 2
 -3 5 0 26470.5 211.534 1
 -3 5 0 28241.5 372.823 2
 -3 -5 -1 24663.9 285.431 3
 -3 5 -1 24008.4 359 2
 -3 -5 -1 22828.7 246.712 4
 3 5 1 25511.8 425.727 2
 3 5 1 25496.7 416.698 5
 3 5 2 63306.8 670.233 5
 -3 5 -2 63890.7 619.833 2
 -3 -5 -2 62912.8 498.389 3
 -3 5 -3 26193.6 417.008 2
 -3 -5 -3 26139.1 204.729 4
 3 5 3 26305.5 442.497 5
 -3 -5 -3 26014.7 342.231 3
 -3 -5 -4 44279.5 477.082 3
 3 5 4 44928.3 585.669 5
 -3 5 -4 45499.4 573.98 2
 -3 5 -5 4557.73 191.964 2
 3 5 5 4496.34 190.081 5
 -3 -5 -5 4266.99 160.226 3
 -3 5 -6 13899.8 347.059 2
 3 5 6 13722.7 335.743 5
 -3 -5 -6 13441.2 298.188 3
 -3 5 -7 4560.88 213.093 2
 3 5 7 4443.04 195.488 5
 -3 -5 -7 4124.3 175.665 3
 -3 -5 -8 225.671 56.0962 3
 -3 5 -8 198.761 62.4766 2
 3 5 8 254.072 57.9499 5
 -3 5 -9 1724.13 143.89 2
 3 5 9 1866.79 134.534 5
 -3 -5 -9 1965.04 136.956 3
 -3 5 -10 3461.04 206.26 2
 3 5 10 3760.63 189.818 5
 -3 -5 -10 3651.14 191.198 3
 -3 5 -11 116.898 59.8562 2
 -3 -5 -11 104.47 43.9468 3
 3 5 11 -17.0841 36.464 5
 -3 5 -12 8427.8 342.221 2
 3 5 12 8383.34 292.508 5
 -3 -5 -12 8492.48 312.684 3
 -3 -5 -13 -120.404 77.9188 2
 -3 5 -13 55.7078 67.8843 2
 -3 -5 -13 -2.67185 45.8977 3
 3 5 13 -16.9657 36.281 5
 -3 5 -14 14163.4 473.405 2
 -3 -5 -14 13818.2 445.961 2
 3 5 14 14496 398.475 5
 -3 -5 -14 13600 432.586 3
 -3 -5 -15 150.375 65.1212 2
 -3 5 -15 345.184 91.9624 2
 3 5 15 396.187 70.0029 5
 -3 -5 -15 434.651 94.2376 3
 -3 -5 -16 8952.78 379.558 3
 -3 5 -16 9297.36 413.305 2
 -3 -5 -16 9021.27 385.269 2
 -3 -5 -17 295.817 87.7094 2
 -3 -5 -17 219.303 85.139 3
 -3 5 -17 318.269 105.487 2
 -3 5 -18 2962.57 257.347 2
 -3 -5 -18 2555.05 218.137 3
 -3 -5 -18 2514.05 219.216 2
 -3 -5 -19 8.08733 55.3609 2
 -3 5 -19 52.4114 66.9398 2
 -3 -5 -19 119.519 74.8772 3
 -3 5 -20 155.929 76.717 2
 -3 -5 -20 163.591 72.1881 3
 -3 -5 -21 7.4271 67.0689 3
 -3 5 -21 84.7717 83.0216 2
 -3 -5 -22 576.955 129.452 3
 -3 5 -22 617.893 143.114 2
 -3 5 -23 -97.4449 98.5674 2
 3 6 -26 674.2 149.592 2
 3 -6 -25 213.023 98.2565 3
 3 6 -25 221.842 101.805 2
 3 6 -24 1525.96 194.75 2
 3 -6 -24 1791.42 213.876 3
 3 -6 -23 3174.81 264.195 3
 3 6 -23 2876.01 254.759 2
 3 6 -22 600.579 129.19 2
 3 -6 -22 206.689 131.712 3
 3 -6 -21 2548.64 265.947 3
 3 6 -21 3435.59 263.955 2
 -3 -6 20 1.01881 56.2967 4
 3 6 -20 -10.9289 59.6989 2
 3 -6 -20 9.21362 57.6301 3
 -3 -6 19 2807.03 223.718 4
 3 -6 -19 2180.27 224.5 3
 3 6 -19 2899.66 229.311 2
 3 6 -18 456.41 100.75 2
 -3 -6 18 426.972 99.2692 4
 3 -6 -18 505.853 92.6987 3
 3 -6 -17 1344.25 147.338 3
 -3 -6 17 1190.26 143.352 4
 3 6 -17 1241.13 147.809 2
 -3 -6 16 3368.91 223.195 4
 3 -6 -16 3287.62 217.004 3
 3 6 -16 3147.74 217.355 2
 3 -6 -15 -14.855 53.0037 3
 -3 -6 15 -68.5404 52.8832 4
 3 6 -15 -25.6745 54.7526 2
 -3 -6 15 27.7789 33.5735 1
 -3 -6 14 4448.86 181.187 1
 -3 -6 14 3979.15 228.52 4
 3 6 -14 4117.92 230.61 2
 3 -6 -14 3990 223.094 3
 -3 -6 13 3890.25 165.036 1
 3 6 -13 4020.43 221.223 2
 -3 -6 13 4120.04 222.691 4
 3 -6 -13 3755.78 208.408 3
 -3 -6 12 2926.01 184.069 4
 -3 -6 12 3002.05 139.62 1
 3 6 -12 2994.3 190.479 2
 3 -6 -12 2752.26 178.185 3
 3 6 -11 31005.5 422.323 5
 -3 -6 11 32301.9 440.751 1
 -3 -6 11 32096.3 574.55 4
 3 -6 -11 31886.8 565.368 3
 3 6 -11 32837.7 593.704 2
 3 6 -10 2984.61 136.503 5
 3 -6 -10 2981.86 172.317 3
 -3 -6 10 3030.08 132.68 1
 -3 -6 10 3201.05 178.314 4
 3 6 -10 3068.9 180.678 2
 3 -6 -9 49150.9 668.485 3
 3 6 -9 51162.1 567.504 5
 -3 -6 9 51711.7 678.652 4
 -3 -6 9 50275.2 519.614 1
 3 6 -9 51838 709.58 2
 3 6 -8 182.225 41.9307 5
 -3 -6 8 166.162 48.925 1
 -3 -6 8 134.698 46.5157 4
 3 6 -8 83.8498 44.3473 2
 3 -6 -8 160.716 51.7884 3
 3 6 -7 52228.6 584.202 5
 3 6 -7 52636.4 687.077 2
 -3 -6 7 51696 510.075 1
 3 -6 -7 51950.8 654.787 3
 -3 -6 7 51630.5 630.395 4
 -3 -6 6 3768.24 165.121 4
 -3 6 6 3582.29 122.462 2
 3 6 -6 3325.4 154.72 5
 -3 -6 6 3547.84 134.314 1
 3 6 -6 3654.77 181.507 2
 3 -6 -6 3491.26 171.906 3
 -3 -6 5 19554.2 356.902 4
 3 6 -5 20425 410.979 2
 -3 6 5 19153.4 285.407 2
 3 6 -5 19322.7 370.108 5
 3 -6 -5 19499.3 388.149 3
 3 6 -4 6036.42 209.617 5
 3 -6 -4 6131.16 216.306 3
 -3 -6 4 6036.48 189.721 4
 -3 -6 4 6418.13 153.977 3
 3 6 -4 6599.64 233.569 2
 -3 6 4 6048.68 162.712 2
 3 6 -3 827.611 80.2369 5
 3 -6 -3 704.074 81.3301 3
 -3 6 3 781.143 64.503 2
 -3 -6 3 744.449 66.2824 4
 -3 -6 3 830.59 55.9764 3
 3 6 -3 774.528 84.6415 2
 3 -6 -2 118.69 41.106 3
 -3 -6 2 80.8319 19.1491 3
 -3 6 2 103.983 29.3459 2
 3 6 -2 79.2896 36.978 5
 -3 -6 2 122.659 34.2143 4
 3 6 -2 58.2204 35.6007 2
 -3 -6 1 14415.9 221.781 3
 3 6 -1 14366.3 330.98 5
 3 6 -1 14053.4 332.27 2
 -3 -6 1 13635.9 243.613 4
 -3 6 1 14001.5 275.16 2
 3 -6 -1 14023.9 328.123 3
 -3 -6 0 2976.56 106.616 3
 3 6 0 2907.2 154.174 5
 3 -6 0 2825.97 150.688 3
 3 6 0 2618.73 145.059 2
 -3 -6 0 2604.35 101.973 4
 -3 6 0 2508.6 68.1822 1
 -3 6 0 3056.63 136.961 2
 -3 -6 -1 13389.5 234.472 3
 3 6 1 14005.3 338.101 2
 3 -6 1 13405.6 329.531 3
 3 6 1 13785.7 335.29 5
 -3 -6 -1 13447.5 210.027 4
 -3 6 -1 13977.6 299.358 2
 -3 -6 -2 51.9354 21.2853 3
 -3 6 -2 64.6294 38.6079 2
 3 6 2 20.7616 29.5249 5
 -3 -6 -2 19.2529 15.291 4
 -3 -6 -3 25408.7 361.572 3
 3 6 3 27989.7 488.764 5
 -3 -6 -3 26553.6 237.98 4
 -3 6 -3 26764 444.445 2
 -3 6 -4 1901.08 127.911 2
 3 6 4 1891.02 133.465 5
 -3 -6 -4 1877.78 107.9 3
 -3 -6 -5 25705.4 402.859 3
 3 6 5 26566.7 492.104 5
 -3 6 -5 25718.6 473.525 2
 -3 6 -6 6648.98 252.243 2
 -3 -6 -6 6533.07 216.045 3
 3 6 6 6726.15 254.684 5
 3 6 7 4949.62 220.636 5
 -3 6 -7 4703.66 220.921 2
 -3 -6 -7 4669.21 193.199 3
 3 6 8 5103.01 227.706 5
 -3 6 -8 4594.23 227.907 2
 -3 -6 -8 4761.61 204.31 3
 3 6 9 57.974 40.2137 5
 -3 -6 -9 74.6265 36.3082 3
 -3 6 -9 144.499 60.5514 2
 -3 6 -10 4564.64 245.065 2
 -3 -6 -10 4786.07 221.065 3
 3 6 10 4669.63 225.817 5
 3 6 11 1325.12 129.8 5
 -3 6 -11 968.379 121.287 2
 -3 -6 -11 1142.88 116.916 3
 -3 6 -12 797.685 117.828 2
 3 6 12 669.748 93.9146 5
 -3 -6 -12 803.445 104.021 3
 -3 6 -13 5473.6 294.668 2
 3 6 13 5473.92 256.477 5
 -3 -6 -13 5419.46 265.708 3
 -3 -6 -14 273.76 70.3451 2
 3 6 14 360.747 73.9997 5
 -3 6 -14 288.755 88.9544 2
 -3 -6 -14 367.603 87.4251 3
 -3 -6 -15 3570.18 239.257 2
 -3 -6 -15 4302.68 256.317 3
 3 6 15 4129.91 231.443 5
 -3 6 -15 4210.97 278.663 2
 3 6 16 1009.11 121.783 5
 -3 6 -16 891.177 143.584 2
 -3 -6 -16 861.988 123.681 2
 -3 -6 -16 913.858 127.895 3
 -3 6 -17 1439.84 180.562 2
 -3 -6 -17 1230.98 151.898 3
 -3 -6 -17 1318.2 159.479 2
 -3 -6 -18 528.896 113.512 2
 -3 6 -18 779.804 145.257 2
 -3 -6 -18 622.576 113.215 3
 -3 6 -19 -6.19444 82.4848 2
 -3 -6 -19 47.6075 57.7845 3
 -3 6 -20 816.678 147.576 2
 -3 -6 -20 813.699 141.158 3
 -3 6 -21 255.035 100.892 2
 -3 -6 -21 429.737 114.312 3
 -3 6 -22 228.523 109.66 2
 -3 -6 -22 138.867 85.1834 3
 3 7 -25 877.811 169.316 2
 3 -7 -24 602.637 133.842 3
 3 7 -24 699.6 144.777 2
 3 7 -23 1060.94 171.163 2
 3 -7 -23 931.387 151.724 3
 3 -7 -22 2554.16 267.909 3
 3 7 -22 3037.42 261.895 2
 3 7 -21 -120.805 84.8969 2
 3 -7 -21 -124.495 71.7313 3
 3 -7 -20 5670.1 324.982 3
 3 7 -20 5050.99 317.84 2
 -3 -7 19 1256.07 155.913 4
 3 7 -19 1500.28 176.615 2
 3 -7 -19 1082.63 167.689 3
 -3 -7 18 4522.79 281.088 4
 3 -7 -18 4254.5 264.66 3
 3 7 -18 4513 284.825 2
 -3 -7 17 3964.5 260.557 4
 3 7 -17 3845.18 257.032 2
 3 -7 -17 4044.69 249.784 3
 3 -7 -16 308.443 73.484 3
 3 7 -16 377.57 92.0463 2
 -3 -7 16 473.2 99.0263 4
 -3 -7 15 12082 418.068 4
 3 7 -15 11812.4 417.022 2
 3 -7 -15 12343.6 409.811 3
 3 -7 -14 2042.36 165.861 3
 -3 -7 14 1897.25 166.369 4
 3 7 -14 1725.89 161.292 2
 3 -7 -13 15719.2 437.775 3
 -3 -7 13 15605.7 445.811 4
 3 7 -13 16755 474.426 2
 -3 -7 12 17735 459.705 4
 3 7 -12 17388.6 471.775 2
 3 -7 -12 17780.8 451.135 3
 -3 -7 11 13961.4 392.599 4
 3 -7 -11 13692.6 383.34 3
 3 7 -11 14250.6 416.557 2
 -3 -7 11 13802.8 286.873 1
 -3 -7 10 27187.1 392.336 1
 -3 -7 10 27969.9 539.271 4
 3 -7 -10 27391.9 532.866 3
 3 7 -10 28105.7 454.437 5
 3 7 -10 27765.1 566.011 2
 -3 -7 9 670.591 86.8549 4
 3 -7 -9 519.711 76.8594 3
 3 7 -9 571.467 68.842 5
 -3 -7 9 624.39 64.8206 1
 3 7 -9 517.611 85.7441 2
 3 -7 -8 25583.5 496.758 3
 3 7 -8 26433.3 528.131 2
 3 7 -8 25068.1 436.785 5
 -3 -7 8 26192.6 485.359 4
 -3 -7 8 26108.5 372.84 1
 3 7 -7 4242.07 184.745 5
 3 -7 -7 4097.09 195.235 3
 -3 -7 7 4307.43 194.57 4
 3 7 -7 4191.99 210.292 2
 3 -7 -6 34585.3 554.928 3
 3 7 -6 36006.7 539.68 5
 -3 7 6 34373.4 417.39 2
 -3 -7 6 34966.5 520.691 4
 3 7 -6 36203 594.688 2
 3 7 -5 12663.6 323.217 5
 -3 -7 5 12867.6 248.589 3
 3 7 -5 13434.4 360.784 2
 3 -7 -5 12564.9 331.314 3
 -3 7 5 12790.2 262.317 2
 -3 -7 5 12674.6 303.326 4
 3 7 -4 17004.6 375.073 5
 3 7 -4 17505.9 403.953 2
 -3 -7 4 16751.2 275.708 3
 3 -7 -4 16746.2 377.221 3
 -3 7 4 16374.2 299.19 2
 -3 -7 4 16551 332.403 4
 3 7 -3 9487.13 285.226 5
 -3 -7 3 9313.71 239.18 4
 3 -7 -3 8986.64 274.422 3
 -3 7 3 9193.04 228.878 2
 -3 -7 3 9203.62 198.863 3
 3 7 -3 9237.42 292.028 2
 3 7 -2 433.521 78.5617 2
 -3 -7 2 412.988 48.6854 3
 3 -7 -2 354.904 74.0554 3
 3 7 -2 350.439 62.3599 5
 -3 -7 2 390.697 53.9955 4
 3 7 -1 21551.2 442.905 5
 -3 -7 1 21342.2 326.563 4
 -3 7 1 21849.3 371.95 2
 3 -7 -1 23027 442.712 3
 3 7 -1 22843.6 451.927 2
 -3 -7 1 22446.7 308.417 3
 -3 7 0 10903.3 273.981 2
 3 -7 0 10612.9 302.774 3
 -3 -7 0 10641.6 220.034 4
 3 7 0 11233 322.023 5
 3 7 0 10610.8 307.656 2
 -3 -7 0 11191.7 224.767 3
 -3 -7 -1 18477.8 273.756 4
 3 7 1 17691.5 409.441 5
 3 7 1 16914.2 391.442 2
 3 -7 1 17021.8 386.456 3
 -3 -7 -1 17190.6 288.068 3
 -3 7 -1 16615.9 347.134 2
 -3 -7 -2 27367 378.474 3
 3 7 2 29259.2 531.023 5
 3 -7 2 28925.1 515.184 3
 -3 7 -2 29161.9 480.849 2
 -3 -7 -3 3618.46 145.319 3
 3 7 3 3092.23 180.837 5
 -3 7 -3 3372.64 172.174 2
 -3 7 -4 37706.1 588.011 2
 3 7 4 38191.6 623.716 5
 -3 -7 -4 36756.5 481.967 3
 -3 -7 -5 388.462 54.1411 3
 -3 7 -5 411.482 79.5608 2
 3 7 5 563.338 85.1516 5
 -3 7 -6 18442.7 436.736 2
 3 7 6 18101.7 442.403 5
 -3 -7 -6 18195.2 372.135 3
 -3 7 -7 4182.25 217.788 2
 -3 -7 -7 4292.12 188.081 3
 3 7 7 4275.2 221.467 5
 -3 7 -8 2794.34 186.294 2
 3 7 8 2767.97 181.826 5
 -3 -7 -8 2941.68 164.293 3
 3 7 9 4613.65 237.052 5
 -3 7 -9 4417.58 241.181 2
 -3 -7 -9 4616.1 214.922 3
 -3 -7 -10 171.305 58.465 3
 -3 7 -10 101.714 57.6212 2
 3 7 10 142.956 55.5949 5
 -3 7 -11 4507.08 261.982 2
 3 7 11 4287.99 235.853 5
 -3 -7 -11 4275.78 224.131 3
 -3 7 -12 632.414 116.051 2
 3 7 12 682.188 102.334 5
 -3 -7 -12 438.236 79.7679 3
 -3 7 -13 -53.0621 58.8051 2
 3 7 13 -19.2398 47.7246 5
 -3 -7 -13 67.1452 57.5347 3
 3 7 14 4213.75 244.459 5
 -3 7 -14 4091.93 274.411 2
 -3 -7 -14 4247.93 250.864 3
 3 7 15 2764.39 202.648 5
 -3 -7 -15 2478.12 198.563 3
 -3 7 -15 2235 238.661 2
 -3 -7 -15 2524.66 203.333 2
 -3 -7 -16 1535.14 167.166 2
 -3 7 -16 1379.56 195.054 2
 -3 -7 -16 1383.13 159.765 3
 3 7 16 1506.98 155.128 5
 -3 -7 -17 1171.73 149.026 2
 -3 7 -17 1410.73 181.72 2
 -3 -7 -17 1235.03 151.355 3
 -3 7 -18 53.0461 72.4093 2
 -3 -7 -18 134.651 72.8512 3
 -3 7 -19 1297.23 183.793 2
 -3 -7 -19 1387.87 174.668 3
 -3 -7 -20 374.124 109.789 3
 -3 7 -20 344.017 115.105 2
 -3 -7 -21 355.353 111.084 3
 -3 7 -21 303.304 114.998 2
 3 8 -24 708.007 157.727 2
 3 8 -23 1871.06 221.099 2
 3 -8 -23 2239.92 228.222 3
 3 8 -22 75.2241 69.2433 2
 3 -8 -22 -55.3506 65.5317 3
 3 -8 -21 4046.8 291.111 3
 3 8 -21 3667.74 290.155 2
 3 8 -20 927.572 152.362 2
 3 -8 -20 1187.96 159.917 3
 3 -8 -19 5392.24 311.502 3
 3 8 -19 5019.14 318.608 2
 3 8 -18 2981.55 246.104 2
 3 -8 -18 3191.21 234.699 3
 3 -8 -17 2085.77 190.038 3
 3 8 -17 1946.16 195.734 2
 3 -8 -16 10478.5 397.267 3
 -3 -8 16 9915.95 400.457 4
 3 8 -16 10285.4 420.061 2
 3 8 -15 74.6435 71.1273 2
 3 -8 -15 -26.4841 57.9114 3
 -3 -8 15 6.08154 57.7577 4
 -3 -8 14 13993 452.179 4
 3 -8 -14 13867 435.706 3
 3 8 -14 13895.7 462.355 2
 -3 -8 13 2594.21 193.149 4
 3 8 -13 2694.48 206.535 2
 3 -8 -13 2719.12 191.398 3
 3 -8 -12 11625.4 377.366 3
 -3 -8 12 11484.7 383.828 4
 3 8 -12 12106.9 413.428 2
 -3 -8 11 13474.6 404.166 4
 3 -8 -11 13250.7 396.136 3
 3 8 -11 12868.6 417.942 2
 3 -8 -10 2323.69 165.833 3
 3 8 -10 2305.77 142.217 5
 -3 -8 10 2382.5 169.121 4
 3 8 -10 2421.72 186.887 2
 3 8 -9 13069.1 339.904 5
 -3 -8 9 13447.2 376.487 4
 3 8 -9 13661.8 410.703 2
 3 -8 -9 13526.9 383.004 3
 3 -8 -8 112.604 43.6962 3
 3 8 -8 106.266 37.218 5
 -3 -8 8 143.835 50.5281 4
 3 8 -8 137.131 59.8313 2
 3 8 -7 23678.5 471.683 5
 -3 -8 7 23262.5 463.485 4
 3 8 -7 24442.8 529.646 2
 3 -8 -7 22853.5 481.375 3
 3 -8 -6 17070.3 410.318 3
 3 8 -6 17472.4 407.487 5
 -3 8 6 17553.9 330.605 2
 3 8 -6 17428.9 444.623 2
 -3 -8 6 17373.2 323.169 3
 -3 -8 6 17809.3 392.172 4
 3 -8 -5 34334.1 575.505 3
 -3 8 5 34443 470.86 2
 3 8 -5 35736.4 582.846 5
 -3 -8 5 34050.8 521.445 4
 3 8 -5 36076.6 631.264 2
 -3 -8 5 33793.7 427.96 3
 -3 -8 4 39735 458.773 3
 3 8 -4 41016.5 629.161 5
 3 -8 -4 40235.7 615.422 3
 -3 8 4 38975.8 508.074 2
 -3 -8 4 40331.1 548.489 4
 3 8 -4 40761.2 652.506 2
 -3 -8 3 6183.93 179.007 3
 3 -8 -3 6069.41 241.459 3
 -3 8 3 6047.98 205.908 2
 3 8 -3 6004.31 250.285 5
 3 8 -3 6032.85 252.972 2
 -3 -8 3 6301.4 210.075 4
 3 8 -2 34804.4 592.354 2
 3 -8 -2 33748.9 564.492 3
 -3 -8 2 35117.7 475.449 4
 -3 8 2 33910 489.522 2
 -3 -8 2 34475.4 419.332 3
 3 8 -2 33972.4 591.406 5
 -3 -8 1 928.483 70.1242 3
 3 -8 -1 812.945 94.1997 3
 -3 -8 1 881.579 76.0277 4
 -3 8 1 922.078 87.3746 2
 3 8 -1 1017.95 112.667 2
 3 8 -1 732.898 91.9983 5
 -3 -8 0 24249.2 359.033 3
 3 8 0 24761.4 511.079 5
 3 8 0 24519.6 496.969 2
 -3 8 0 23914.9 433.879 2
 3 -8 0 23101 475.429 3
 -3 -8 -1 8280.3 217.531 3
 3 -8 1 8212.81 283.753 3
 3 8 1 8178.09 300.324 5
 3 8 1 8338.28 289.538 2
 -3 8 -1 8215.94 264.402 2
 -3 -8 -2 5964.88 190.148 3
 3 8 2 6131.12 253.365 2
 3 -8 2 5274.27 233.838 3
 3 8 2 6112.37 262.224 5
 -3 8 -2 6097.57 234.549 2
 -3 -8 -3 14421.4 305.915 3
 3 -8 3 14205 386.544 3
 3 8 3 14322.6 405.973 5
 -3 8 -3 14744 374.743 2
 -3 -8 -4 311.595 52.6833 3
 3 8 4 294.446 71.8051 5
 -3 8 -4 236.855 58.7807 2
 3 8 5 7072.68 292.369 5
 -3 8 -5 6731.82 273.93 2
 -3 -8 -5 6905.83 228.718 3
 -3 8 -6 628.711 96.9014 2
 -3 -8 -6 739.895 80.2445 3
 3 8 6 674.189 96.6615 5
 -3 8 -7 1793.57 149.85 2
 3 8 7 1819.86 155.712 5
 -3 -8 -7 1843.16 130.847 3
 -3 8 -8 7640.39 316.424 2
 3 8 8 7922.78 322.489 5
 -3 -8 -8 7724.67 272.118 3
 -3 8 -9 -57.1845 61.7548 2
 3 8 9 -9.93241 43.9167 5
 -3 -8 -9 58.3705 37.3667 3
 -3 8 -10 3565.25 232.795 2
 3 8 10 3536.19 224.571 5
 -3 -8 -10 3711.06 205.872 3
 3 8 11 373.366 82.2968 5
 -3 8 -11 358.292 86.0637 2
 -3 -8 -11 321.274 71.1724 3
 3 8 12 834.606 120.262 5
 -3 -8 -12 915.383 116.502 3
 -3 8 -12 748.721 129.836 2
 -3 8 -13 799.64 128.41 2
 3 8 13 719.418 110.117 5
 -3 -8 -13 751.622 111.234 3
 3 8 14 126.613 69.9254 5
 -3 8 -14 29.2938 70.4115 2
 -3 -8 -14 -35.4516 61.6865 3
 3 8 15 1126.8 140.059 5
 -3 8 -15 1230.99 166.536 2
 -3 -8 -15 1366.63 156.694 3
 -3 8 -16 922.384 146.291 2
 3 8 16 968.512 140.202 5
 -3 -8 -16 813.253 124.319 3
 -3 8 -17 159.08 95.6241 2
 -3 -8 -17 108.603 53.4821 3
 3 8 17 190.507 73.7787 5
 -3 8 -18 2808.66 260.233 2
 -3 -8 -18 2754.2 234.137 3
 -3 -8 -19 -58.1789 58.987 3
 -3 8 -19 -170.069 113.969 2
 -3 8 -20 1131.69 181.782 2
 -3 -8 -20 1661.8 199.37 3
 -3 -8 -21 414.151 115.172 3
 3 9 -23 571.395 133.835 2
 3 -9 -22 756.574 141.885 3
 3 9 -22 559.506 123.834 2
 3 9 -21 -161.04 103.596 2
 3 -9 -21 51.1669 67.859 3
 3 9 -20 1336.63 184.952 2
 3 -9 -20 1411.78 171.765 3
 3 9 -19 1188.84 170.095 2
 3 -9 -19 1455.1 169.255 3
 3 9 -18 1408.39 182.556 2
 3 -9 -18 1694.84 178.45 3
 3 9 -17 8508.75 410.076 2
 3 -9 -17 8314.6 374.597 3
 3 -9 -16 572.712 108.429 3
 3 9 -16 592.141 128.436 2
 3 9 -15 16853.8 546.312 2
 3 -9 -15 16475.4 498.441 3
 3 -9 -14 31.0923 52.634 3
 -3 -9 14 167.602 77.0506 4
 3 9 -14 108.682 73.3037 2
 3 -9 -13 6454.07 302.716 3
 -3 -9 13 6628.7 312.694 4
 3 9 -13 6506.24 329.611 2
 3 -9 -12 47.2904 50.4516 3
 -3 -9 12 17.3453 45.6773 4
 3 9 -12 -85.9967 77.5009 2
 -3 -9 11 185.019 57.9801 4
 3 -9 -11 221.16 70.7881 3
 3 9 -11 134.543 60.0125 2
 3 -9 -10 2101.42 164.191 3
 -3 -9 10 1976.46 160.09 4
 3 9 -10 2650.53 204.33 2
 3 -9 -9 1424.21 136.055 3
 3 9 -9 1113.2 111.749 5
 3 9 -9 1287.93 143.556 2
 -3 -9 9 1290.31 128.569 4
 -3 -9 8 1461.27 129.425 4
 3 9 -8 1497.91 129.455 5
 3 9 -8 1375.24 141.982 2
 3 -9 -8 1517.76 135.72 3
 -3 -9 7 3588.68 163.264 3
 -3 -9 7 3434.6 189.659 4
 3 -9 -7 3338.27 195.018 3
 3 9 -7 3410.48 195.231 5
 3 9 -7 3417.9 218.833 2
 3 -9 -6 4538.76 223.877 3
 -3 9 6 4502.69 183.55 2
 3 9 -6 4546.93 226.393 5
 -3 -9 6 4204.24 202.875 4
 3 9 -6 4344.77 236.372 2
 -3 -9 6 4359.94 170.561 3
 -3 -9 5 32369.4 454.827 3
 3 -9 -5 31901.1 581.237 3
 -3 9 5 31898.3 491.581 2
 -3 -9 5 31485.2 529.373 4
 3 9 -5 32755.5 630.974 2
 3 9 -5 31583.3 591.831 5
 3 -9 -4 4117.21 212.849 3
 -3 -9 4 4255.37 163.731 3
 3 9 -4 4395.83 233.956 2
 3 9 -4 3856.79 211.558 5
 -3 -9 4 4242.71 190.73 4
 -3 9 4 4451.33 188.893 2
 3 -9 -3 39991.6 645.865 3
 -3 -9 3 41127.6 495.511 3
 -3 9 3 40763.7 569.34 2
 3 9 -3 41232.7 691.708 5
 3 9 -3 41964.3 703.036 2
 -3 -9 2 282.714 43.1837 3
 3 -9 -2 343.304 69.341 3
 3 9 -2 321.65 75.6669 5
 -3 9 2 263.659 54.8822 2
 3 9 -2 328.044 79.9605 2
 -3 -9 1 26573.8 399.796 3
 3 -9 -1 25067.1 513.83 3
 3 9 -1 26505.1 565.723 5
 3 9 -1 26416.8 551.304 2
 -3 9 1 25898.3 474.269 2
 -3 -9 0 2483.83 126.235 3
 3 -9 0 2250.76 156.74 3
 3 9 0 2486.71 177.778 5
 3 9 0 2324.72 166.709 2
 -3 9 0 2405.67 152.553 2
 -3 9 -1 11968.3 340.379 2
 -3 -9 -1 12219 282.916 3
 3 9 1 12278.6 390.721 5
 3 -9 1 11462.2 355.733 3
 3 9 1 12304.5 370.682 2
 -3 -9 -2 1291.91 94.4904 3
 3 9 2 1203.17 127.956 5
 3 -9 2 1168.27 117.218 3
 3 9 2 1162.55 120.78 2
 -3 9 -2 1236.5 116.667 2
 -3 -9 -3 923.949 85.3174 3
 3 9 3 803.444 108.565 5
 3 -9 3 869.935 105.227 3
 -3 9 -3 833.655 99.4843 2
 -3 -9 -4 2231.13 133.088 3
 3 -9 4 1855.58 151.845 3
 3 9 4 1894.2 164.164 5
 -3 9 -4 2061.86 157.153 2
 3 9 5 3204.03 211.787 5
 -3 9 -5 3355.92 202.519 2
 -3 -9 -5 3420.86 170.137 3
 3 9 6 1805.18 164.254 5
 -3 -9 -6 1618.26 122.502 3
 -3 9 -6 1914.12 164.614 2
 3 9 7 10808.5 393.75 5
 -3 -9 -7 10692.1 316.315 3
 -3 9 -7 10944.1 387.383 2
 -3 9 -8 574.184 103.748 2
 3 9 8 490.918 97.0952 5
 -3 -9 -8 650.561 90.875 3
 -3 9 -9 9117.72 375.859 2
 -3 -9 -9 9751.84 327.366 3
 3 9 9 10109.7 391.886 5
 -3 9 -10 361.756 102.503 2
 3 9 10 336.596 80.9697 5
 -3 -9 -10 298.231 74.409 3
 -3 9 -11 6335.74 332.541 2
 3 9 11 6094.62 314.287 5
 -3 -9 -11 6208.84 281.293 3
 -3 9 -12 584.46 116.119 2
 3 9 12 659.715 112.284 5
 -3 -9 -12 477.846 89.9575 3
 -3 9 -13 1338.64 165.824 2
 -3 -9 -13 1443.85 148.702 3
 3 9 13 1318.37 153.575 5
 -3 9 -14 1206.16 165.192 2
 3 9 14 1295.86 154.984 5
 -3 -9 -14 1439.97 151.803 3
 -3 9 -15 66.6983 66.6783 2
 -3 -9 -15 218.979 82.0751 3
 3 9 15 254.497 83.2199 5
 -3 -9 -16 1219.62 157.831 3
 3 9 16 1160.83 152.655 5
 -3 9 -16 1063.41 158.164 2
 -3 9 -17 2245.38 240.764 2
 -3 -9 -17 2460.95 218.691 3
 3 9 17 2361.18 215.754 5
 -3 9 -18 467.218 131.635 2
 -3 -9 -18 373.809 91.8364 3
 -3 9 -19 4068.65 331.391 2
 -3 -9 -19 4020.18 293.184 3
 -3 -9 -20 131.288 86.1364 3
 3 -10 -21 15.5535 61.9315 3
 3 10 -21 92.1816 108.366 2
 3 -10 -20 345.627 91.5509 3
 3 10 -20 538.039 130.488 2
 3 10 -19 308.978 102.971 2
 3 -10 -19 288.929 91.3024 3
 3 10 -18 3733.85 292.761 2
 3 -10 -18 4154.32 277.164 3
 3 -10 -17 177.547 68.3458 3
 3 10 -17 113.767 80.945 2
 3 -10 -16 10202.1 416.179 3
 3 10 -16 9871.15 446.37 2
 3 -10 -15 181.208 68.0343 3
 3 10 -15 160.648 85.7875 2
 3 10 -14 12680.6 485.217 2
 3 -10 -14 12308.4 438.285 3
 3 -10 -13 802.579 121.913 3
 3 10 -13 780.168 138.452 2
 3 -10 -12 7761.18 334.943 3
 3 10 -12 8033.88 372.642 2
 3 -10 -11 1125.46 131.277 3
 3 10 -11 1131.65 155.428 2
 3 -10 -10 1381.47 142.706 3
 3 10 -10 1660.47 168.33 2
 3 -10 -9 2574.09 182.441 3
 3 10 -9 2608.31 206.839 2
 3 -10 -8 1313.13 130.337 3
 3 10 -8 1385.07 135.291 5
 3 10 -8 1302.98 151.238 2
 3 10 -7 6281.21 283.918 5
 3 10 -7 6274.82 305.525 2
 3 -10 -7 5851.31 267.226 3
 3 -10 -6 7221.68 294.862 3
 3 10 -6 7006.57 299.122 5
 -3 10 6 6694.3 239.664 2
 3 10 -6 6841.01 315.341 2
 3 -10 -5 3138.86 197.856 3
 3 10 -5 3003.75 201.081 5
 -3 10 5 3063.34 167.312 2
 3 10 -5 2834.21 202.298 2
 3 -10 -4 24764.6 537.737 3
 3 10 -4 25261.2 574.739 5
 3 10 -4 25275.3 580.67 2
 -3 10 4 24641.7 469.06 2
 -3 10 3 1009.04 101.686 2
 3 10 -3 1161.14 131.183 5
 3 10 -3 1071.78 127.06 2
 3 -10 -3 994.49 110.784 3
 3 10 -2 26835.8 588.29 2
 3 -10 -2 26394.4 547.41 3
 -3 -10 2 26823.1 429.232 3
 3 10 -2 27067.1 604.602 5
 -3 10 2 26137.8 503.67 2
 3 -10 -1 185.918 68.2786 3
 -3 -10 1 234.163 49.0503 3
 3 10 -1 136.616 52.8142 5
 3 10 -1 137.276 68.8741 2
 -3 10 1 178.68 55.8111 2
 -3 -10 0 17836.2 356.307 3
 -3 10 0 17330.1 424.638 2
 3 10 0 17635.4 468.083 2
 3 -10 0 17327.1 453.085 3
 3 10 0 17514.2 494.886 5
 3 -10 1 170.19 48.7939 3
 3 10 1 124.61 57.5909 2
 3 10 1 160.36 65.9786 5
 -3 -10 -1 137.959 34.9672 3
 -3 10 -1 124.589 54.0928 2
 -3 -10 -2 2860.88 151.007 3
 3 -10 2 2760.8 188.358 3
 3 10 2 2322.05 187.077 5
 3 10 2 2956.73 199.003 2
 -3 10 -2 2860.35 183.554 2
 3 -10 3 147.242 57.7153 3
 3 10 3 140.417 61.8475 5
 -3 -10 -3 99.47 35.7688 3
 -3 10 -3 171.738 64.8976 2
 -3 10 -4 184.765 66.5374 2
 -3 -10 -4 331.87 63.9612 3
 3 -10 4 208.321 60.6094 3
 -3 10 -5 108.766 70.4641 2
 -3 -10 -5 54.5793 45.2307 3
 3 -10 5 41.7787 47.7651 3
 3 10 5 10.4698 56.0384 5
 3 10 6 11201.2 421.404 5
 3 -10 6 10826.5 385.028 3
 -3 -10 -6 11637.4 332.464 3
 -3 10 -6 11572.9 397.823 2
 -3 -10 -7 496.635 77.3826 3
 -3 10 -7 414.401 96.9927 2
 3 10 7 438.95 102.666 5
 3 10 8 11957.2 446.258 5
 -3 -10 -8 12128.7 361.356 3
 -3 10 -8 11832.1 427.287 2
 -3 10 -9 958.523 147.968 2
 3 10 9 957.857 136.756 5
 -3 -10 -9 898.911 109.279 3
 3 10 10 7314.76 357.886 5
 -3 -10 -10 7819.72 311.534 3
 -3 10 -10 7562.84 365.921 2
 3 10 11 694.073 121.478 5
 -3 10 -11 854.4 137.694 2
 -3 -10 -11 714.12 100.077 3
 3 10 12 3539.51 260.004 5
 -3 -10 -12 3639.54 229.236 3
 -3 10 -12 3328.11 259.626 2
 -3 10 -13 950.911 145.544 2
 -3 -10 -13 1124.8 139.172 3
 3 10 13 1142.03 152.548 5
 -3 10 -14 6.78014 69.3305 2
 3 10 14 -114.305 82.0548 5
 -3 -10 -14 74.0791 63.794 3
 3 10 15 2299.58 216.52 5
 -3 -10 -15 1972.87 190.044 3
 3 10 16 1121.04 154.404 5
 -3 10 -16 1072.84 176.697 2
 -3 -10 -16 1416.09 164.003 3
 -3 10 -17 889.177 166.833 2
 3 10 17 1058.32 157.061 5
 -3 -10 -17 1002.32 147.743 3
 -3 10 -18 2554.92 271.112 2
 -3 -10 -18 2599.02 236.713 3
 -3 -10 -19 478.62 121.147 3
 -3 11 21 -24.6713 63.2249 5
 3 11 -20 7.07656 75.9491 2
 3 -11 -20 44.134 63.0015 3
 3 11 -19 947.369 169.754 2
 3 -11 -19 972.966 150.052 3
 3 -11 -18 67.23 60.0922 3
 3 11 -18 -12.2476 77.1871 2
 3 11 -17 4020.95 304.415 2
 3 -11 -17 4603.22 292.652 3
 3 11 -16 31.8192 65.3755 2
 3 -11 -16 137.857 82.8299 3
 3 11 -15 8882.91 436.536 2
 3 -11 -15 9291.74 401.834 3
 3 11 -14 2321.2 232.116 2
 3 -11 -14 2417.74 206.835 3
 3 -11 -13 14458.1 478.23 3
 3 11 -13 14696.3 539.677 2
 3 11 -12 3463.86 263.008 2
 3 -11 -12 3456.9 232.945 3
 3 -11 -11 9311.47 373.19 3
 3 11 -11 9981.29 427.399 2
 3 -11 -10 3526.49 227.783 3
 3 11 -10 3717.04 260.217 2
 3 -11 -9 1100.75 133.662 3
 3 11 -9 1258.72 155.075 2
 3 11 -8 8105.32 343.298 5
 3 -11 -8 7797.42 327.656 3
 3 11 -8 7982.87 366.305 2
 3 -11 -7 1557.25 151.017 3
 3 11 -7 1285.17 142.237 5
 3 11 -7 1660.14 176.829 2
 3 11 -6 9191.84 365.774 5
 3 11 -6 9541.61 389.667 2
 3 -11 -6 9437.5 353.317 3
 3 11 -5 17989.3 526.026 2
 3 -11 -5 18265.6 485.529 3
 3 11 -5 17065.2 504.129 5
 3 11 -4 4725.03 270.664 2
 -3 11 4 4667.1 220.184 2
 3 11 -4 4602.79 266.828 5
 3 -11 -4 4421.2 240.392 3
 -3 11 3 26796.1 534.34 2
 3 11 -3 27403.8 644.305 5
 3 11 -3 28042.4 639.399 2
 3 -11 -3 26816.8 579.048 3
 3 11 -2 705.953 116.391 5
 3 11 -2 1017.45 129.444 2
 3 -11 -2 763.799 101.922 3
 -3 11 2 850.254 109.689 2
 3 11 -1 20384.6 564.375 5
 3 -11 -1 20504.8 508.051 3
 3 11 -1 22042.2 556.675 2
 -3 11 1 20184.2 481.224 2
 3 11 0 37.8524 57.2892 2
 3 11 0 35.5803 49.5114 5
 3 -11 0 -61.0129 66.7534 3
 -3 11 0 23.5779 47.4782 2
 3 -11 1 6839.58 297.289 3
 3 11 1 6906.07 310.707 2
 3 11 1 6326.98 318.672 5
 -3 11 -1 6650.02 285.624 2
 3 11 2 133.859 62.6356 5
 3 -11 2 82.0071 55.3075 3
 3 11 2 125.958 52.9197 2
 -3 11 -2 183.343 62.6055 2
 3 11 3 112.546 47.7418 5
 3 -11 3 171.231 68.146 3
 -3 11 -3 178.38 62.2784 2
 3 -11 4 1084.59 130.029 3
 -3 11 -4 1132.1 133.305 2
 3 11 4 1215.1 144.15 5
 3 -11 5 7874.43 330.629 3
 3 11 5 8232.69 382.196 5
 -3 11 -5 8144.76 345.799 2
 -3 11 -6 1169.69 140.999 2
 3 -11 6 1003.33 127.077 3
 3 11 6 957.834 136.808 5
 3 -11 7 12678.6 430.693 3
 3 11 7 13061.7 485.152 5
 -3 11 -7 13495.8 463.783 2
 -3 11 -8 289.212 89.8491 2
 3 11 8 392.294 96.8506 5
 3 11 9 10032.7 438.439 5
 -3 -11 -9 10708.6 361.935 3
 -3 11 -9 9471.39 408.483 2
 -3 11 -10 490.792 115.171 2
 3 11 10 740.354 130.116 5
 -3 -11 -10 700.008 96.2067 3
 3 11 11 4190.11 291.496 5
 -3 -11 -11 4043.13 236.221 3
 -3 11 -11 3810.37 278.812 2
 3 11 12 223.085 86.3141 5
 -3 -11 -12 176.613 61.0569 3
 -3 11 -12 264.876 91.0051 2
 -3 11 -13 741.156 137.371 2
 3 11 13 651.926 116.876 5
 -3 -11 -13 771.165 124.698 3
 -3 11 -14 93.0865 80.4335 2
 3 11 14 227.185 84.53 5
 -3 -11 -14 275.788 76.4797 3
 3 11 15 32.7297 60.0874 5
 -3 -11 -15 161.917 70.7522 3
 -3 11 -15 76.3097 80.435 2
 -3 11 -16 -96.1042 111.109 2
 3 11 16 -142.992 96.2033 5
 -3 -11 -16 -98.5092 90.344 3
 -3 -11 -17 2337.19 220.116 3
 3 11 17 2251.85 233.658 5
 -3 11 -17 2187.73 253.956 2
 3 11 18 -59.521 85.7872 5
 3 -12 -19 415.607 108.637 3
 3 -12 -18 507.105 116.591 3
 3 12 -18 416.293 120.908 2
 3 -12 -17 115.442 77.705 3
 3 12 -17 -71.1355 92.3624 2
 3 12 -16 4382.71 329.084 2
 3 -12 -16 4555.94 293.23 3
 3 -12 -15 36.3279 54.2256 3
 3 12 -15 143.295 96.5517 2
 3 12 -14 7465.07 411.425 2
 3 -12 -14 7653.27 371.038 3
 3 -12 -13 2314.04 201.127 3
 3 12 -13 2152.9 227.578 2
 3 -12 -12 7579.47 352.212 3
 3 12 -12 7365.28 394.068 2
 3 12 -11 3770.46 277.276 2
 3 -12 -11 3494.6 238.596 3
 3 -12 -10 1729.54 169.928 3
 3 12 -10 1763.95 191.402 2
 3 12 -9 3280.74 250.759 2
 3 -12 -9 3292.5 224.618 3
 3 -12 -8 -2.28812 55.4134 3
 3 12 -8 -24.0855 72.7011 2
 3 12 -7 5402.03 302.392 5
 3 -12 -7 6247.11 299.382 3
 3 12 -7 6241.67 333.518 2
 3 -12 -6 3072.77 210.413 3
 3 12 -6 2471.16 207.382 5
 3 12 -6 2672.28 220.155 2
 3 -12 -5 1765.63 165.001 3
 3 12 -5 2013.49 195.203 2
 3 12 -5 1820.17 181.674 5
 3 -12 -4 9807.59 367.951 3
 3 12 -4 9492.48 401.405 5
 3 12 -4 9893.49 406.117 2
 3 12 -3 221.865 84.7226 2
 3 12 -3 226.113 76.1204 5
 -3 12 3 269.335 77.9448 2
 3 -12 -3 98.3019 54.8744 3
 3 12 -2 10008.6 401.206 2
 3 -12 -2 9387.97 360.066 3
 -3 12 2 9685.13 346.872 2
 3 12 -2 9356.32 405.519 5
 3 -12 -1 156.808 65.1542 3
 -3 12 1 208.006 65.5344 2
 3 12 -1 237.945 87.771 5
 3 12 -1 227.302 80.4056 2
 3 -12 0 3735.64 228.153 3
 -3 12 0 3991.26 234.249 2
 3 12 0 3880.35 247.519 2
 3 12 0 4043.06 272.686 5
 3 12 1 321.067 82.9847 5
 3 -12 1 254.287 69.5811 3
 -3 12 -1 282.715 75.2264 2
 3 12 1 231.914 71.447 2
 -3 12 -2 18.6399 53.9328 2
 3 12 2 38.1008 53.3924 5
 3 -12 2 42.0631 51.1153 3
 3 12 2 81.2094 70.1479 2
 3 12 3 3615.28 262.712 5
 -3 12 -3 3478.72 233.7 2
 3 -12 3 3690.47 234.653 3
 -3 12 -4 3713.39 242.286 2
 3 -12 4 4034.08 243.154 3
 3 12 4 3586.51 267.432 5
 3 -12 5 1943.18 176.637 3
 3 12 5 2004.73 203.16 5
 -3 12 -5 1847.8 177.376 2
 3 -12 6 10734.9 400.77 3
 3 12 6 10176.8 449.815 5
 -3 12 -6 10381.5 418.96 2
 3 12 7 1285.67 171.828 5
 3 -12 7 1238.51 150.114 3
 -3 12 -7 1261.65 160.478 2
 3 12 8 13457.3 528.199 5
 3 -12 8 13063.5 458.947 3
 -3 12 -8 12723.9 483.426 2
 -3 12 -9 506.444 126.363 2
 3 -12 9 173.066 78.4255 3
 3 12 9 422.949 108.914 5
 3 12 10 6172.83 368.047 5
 -3 12 -10 5846.37 345.408 2
 3 12 11 6.03424 55.959 5
 -3 12 -11 58.2563 68.6347 2
 -3 12 -12 1742.03 206.836 2
 3 12 12 1784.59 206.783 5
 3 12 13 628.673 131.24 5
 -3 12 -13 407.892 116.629 2
 -3 12 -14 164.12 85.6052 2
 3 12 14 187.705 94.4133 5
 -3 12 -15 608.908 137.647 2
 3 12 15 521.335 113.793 5
 3 12 16 1111.23 172.18 5
 3 -13 -17 380.994 98.6992 3
 3 -13 -16 188.786 72.4163 3
 3 13 -16 110.145 79.4714 2
 3 13 -15 1914.31 225.708 2
 3 -13 -15 1930.37 198.792 3
 3 -13 -14 110.57 83.3202 3
 3 13 -14 -122.031 94.563 2
 3 -13 -13 2773.36 227.601 3
 3 13 -13 2267.9 234.78 2
 3 -13 -12 1164.06 151.768 3
 3 13 -12 1017.66 165.355 2
 3 -13 -11 2501.35 209.846 3
 3 13 -11 2629.59 248.858 2
 3 -13 -10 3568.3 246.016 3
 3 13 -10 3463.35 281.131 2
 3 -13 -9 527.268 99.1534 3
 3 13 -9 467.412 116.103 2
 3 -13 -8 3810.87 248.355 3
 3 13 -8 4024.58 288.958 2
 3 -13 -7 28.2658 50.7787 3
 3 13 -7 -73.9137 74.2504 2
 3 -13 -6 1621.45 162.936 3
 3 13 -6 1554.32 181.553 2
 3 13 -6 1495.56 174.027 5
 3 13 -5 503.853 106.767 5
 3 13 -5 255.826 71.2135 2
 3 -13 -5 533.716 96.5533 3
 3 -13 -4 55.8065 50.3773 3
 3 13 -4 65.4257 46.5669 5
 3 13 -4 -0.51678 82.34 2
 3 13 -3 2083.25 207.384 5
 3 -13 -3 2298.58 187.838 3
 3 13 -3 2378.41 216.131 2
 3 13 -2 525.136 114.511 5
 3 -13 -2 425.021 91.9744 3
 3 13 -2 478.293 106.497 2
 3 13 -1 1065.37 143.457 2
 3 -13 -1 1124.61 136.509 3
 3 13 -1 968.077 148.618 5
 -3 13 1 1111.51 129.94 2
 3 13 0 2567.86 232.171 5
 3 -13 0 3018.67 216.02 3
 3 13 0 2965.13 230.849 2
 -3 13 0 2907.01 209.078 2
 3 -13 1 -36.9905 66.3011 3
 3 13 1 18.1146 57.2457 5
 3 13 1 -165.673 86.0969 2
 -3 13 -1 -14.7505 65.9664 2
 3 -13 2 6478.71 315.56 3
 3 13 2 6001.28 356.563 5
 -3 13 -2 5992.21 308.464 2
 3 -13 3 690.814 112.859 3
 3 13 3 763.435 145.8 5
 -3 13 -3 832.09 125.179 2
 3 -13 4 6684.33 326.798 3
 3 13 4 6501.8 374.164 5
 -3 13 -4 6858.59 344.848 2
 3 -13 5 4420.58 267.133 3
 3 13 5 4747.72 322.825 5
 -3 13 -5 4004.89 268.385 2
 -3 13 -6 3377.72 253.935 2
 3 -13 6 3178.98 226.298 3
 3 13 6 3509.63 283.904 5
 3 13 7 8735.09 446.552 5
 -3 13 -7 9018.56 414.104 2
 3 -13 7 8828.6 378.749 3
 3 13 8 728.156 139.417 5
 3 -13 8 456.829 102.694 3
 -3 13 -8 658.813 132.29 2
 3 -13 9 5629.29 315.199 3
 3 13 9 5784.99 371.4 5
 -3 13 -9 5509.33 341.871 2
 3 -13 10 440.361 104.988 3
 3 13 10 548.647 136.508 5
 -3 13 -10 550.454 128.546 2
 3 -13 11 3138.59 243.57 3
 3 13 11 3083.2 277.46 5
 -3 13 -11 3014.42 265.78 2
 3 13 12 1780.52 216.862 5
 -3 13 -12 1796.96 215.525 2
 -3 13 -13 14.5873 80.3188 2
 3 13 13 103.858 60.3076 5
 3 13 14 3133.92 290.674 5
 3 -14 -15 170.796 83.6744 3
 3 -14 -14 485.022 112.582 3
 3 14 -14 226.839 95.4778 2
 3 -14 -13 658.679 128.082 3
 3 14 -13 392.73 123.592 2
 3 -14 -12 116.86 66.8317 3
 3 14 -12 338.833 119.995 2
 3 -14 -11 1449.44 167.489 3
 3 14 -11 1303.06 189.571 2
 3 -14 -10 -11.0145 59.885 3
 3 14 -10 -42.3867 71.4268 2
 3 -14 -9 2349.77 209.491 3
 3 14 -9 1726.73 205.775 2
 3 -14 -8 24.3991 51.2248 3
 3 14 -8 34.2586 68.6212 2
 3 14 -7 2325.33 224.308 2
 3 -14 -7 2322.84 201.243 3
 3 -14 -6 -49.0497 58.6442 3
 3 14 -6 -54.6392 78.5678 2
 3 14 -6 -85.8247 73.4988 5
 3 -14 -5 938.777 134.129 3
 3 14 -5 925.246 149.279 5
 3 14 -5 1066.23 158.84 2
 3 14 -4 601.383 125.653 5
 3 14 -4 567.836 123.386 2
 3 -14 -4 525.92 106.651 3
 3 -14 -3 93.1038 58.9826 3
 3 14 -3 199.84 82.2015 2
 3 14 -3 43.3102 57.766 5
 3 -14 -2 741.3 115.973 3
 3 14 -2 880.98 144.176 5
 3 14 -2 646.849 117.565 2
 3 -14 -1 3099.58 224.784 3
 3 14 -1 3248.32 249.617 2
 3 14 -1 3280.98 274.823 5
 3 14 0 22.8576 58.4546 5
 3 14 0 73.3927 60.7397 2
 3 -14 0 -35.2079 59.798 3
 3 -14 1 6405.73 320.605 3
 3 14 1 6682.78 394.778 5
 3 14 1 6771.75 358.195 2
 -3 14 -1 6596.74 333.811 2
 3 -14 2 1683.35 173.625 3
 3 14 2 1314.02 179.286 5
 -3 14 -2 1387.79 168.945 2
 3 -14 3 8678.13 379.552 3
 3 14 3 7879.08 432.952 5
 -3 14 -3 8234.25 388 2
 3 -14 4 4603.3 283.785 3
 3 14 4 4678.58 340.92 5
 -3 14 -4 4559.86 295.883 2
 3 14 5 6357.31 397.503 5
 -3 14 -5 6221.27 351.136 2
 3 -14 5 5796.32 318.422 3
 3 -14 6 5083.65 302.441 3
 3 14 6 5196.75 361.302 5
 -3 14 -6 4878.09 319.224 2
 3 14 7 1022.47 172.825 5
 3 -14 7 1061.49 144.357 3
 -3 14 -7 1134.42 171.384 2
 3 -14 8 2550.6 217.408 3
 3 14 8 2732.03 266.348 5
 -3 14 -8 2609.37 242.542 2
 -3 14 -9 160.934 100.302 2
 3 14 9 131.866 87.4254 5
 3 -14 9 98.0885 70.9422 3
 3 -14 10 1851.12 190.624 3
 3 14 10 1406.66 208.092 5
 -3 14 -10 1540.2 196.563 2
 3 14 11 2031.61 242.473 5
 3 -14 11 1571.11 183.194 3
 -3 14 -11 1763.24 220.277 2
 3 -14 12 464.519 109.262 3
 3 -14 13 4812.79 316.652 3
 3 -15 -13 114.227 74.4669 3
 3 -15 -12 1374.94 174.218 3
 3 -15 -11 -10.8909 57.5433 3
 3 15 -11 -27.9383 96.5215 2
 3 -15 -10 1792.59 184.025 3
 3 15 -10 1942.78 228.475 2
 3 15 -9 -31.7708 69.4539 2
 3 -15 -9 170.679 84.61 3
 3 -15 -8 2184.6 201.856 3
 3 15 -8 2514.02 256.739 2
 3 -15 -7 -62.5197 63.656 3
 3 15 -7 3.00457 77.2073 2
 3 -15 -6 3293.56 244.619 3
 3 15 -6 2819.3 257.562 2
 3 -15 -5 80.2267 66.3058 3
 3 15 -5 61.3877 87.108 2
 3 15 -5 -65.5777 61.6494 5
 3 -15 -4 367.939 99.9633 3
 3 15 -4 196.904 80.8018 5
 3 15 -4 289.609 90.8837 2
 3 15 -3 -76.1783 78.6243 5
 3 15 -3 -93.932 83.2643 2
 3 -15 -3 -60.5 73.9168 3
 3 -15 -2 703.22 116.078 3
 3 15 -2 525.116 122.913 5
 3 15 -2 569.643 116.62 2
 3 15 -1 -130.765 90.3688 2
 3 15 -1 -41.8444 59.6807 5
 3 -15 -1 -81.3119 76.5111 3
 3 15 0 2961.34 254.716 2
 3 -15 0 3059.99 230.571 3
 3 15 0 2497.26 253.591 5
 3 15 1 0.36226 65.5106 5
 3 -15 1 -72.6329 77.4234 3
 -3 15 -2 7361.51 377.116 2
 3 15 2 7818.31 455.057 5
 3 -15 2 7211.19 353.109 3
 3 -15 3 101.468 65.1947 3
 3 15 3 301.101 108.926 5
 -3 15 -3 317.106 104.718 2
 3 -15 4 6560.94 340.481 3
 -3 15 -4 6440.66 367.418 2
 3 15 4 6887.01 428.685 5
 3 -15 5 320.372 89.5924 3
 3 15 5 411.246 126.709 5
 -3 15 -5 311.943 104.862 2
 3 -15 6 3280.71 248.929 3
 3 15 6 3095.02 295.343 5
 -3 15 -6 2870.19 255.45 2
 -3 15 -7 -24.7533 63.011 2
 3 15 7 343.646 112.014 5
 -3 15 -8 34.5902 77.1257 2
 -3 15 -9 217.044 107.289 2
 3 -16 -10 -8.26614 57.8348 3
 3 -16 -9 1729.65 190.472 3
 3 -16 -8 127.766 88.5645 3
 3 -16 -7 1935.24 203.415 3
 3 -16 -6 263.581 85.2895 3
 3 16 -6 100.836 84.5488 2
 3 16 -5 764.732 146.559 2
 3 16 -4 28.6886 76.2961 5
 3 16 -4 25.4865 71.0684 2
 3 16 -3 9.27278 66.5295 2
 3 16 -3 55.2927 73.3529 5
 3 16 -2 -81.764 88.8187 5
 3 16 -2 -235.68 116.471 2
 3 16 -1 1166.2 187.255 5
 3 16 -1 1227.92 172.226 2
 3 16 0 -43.6029 83.4218 5
 -3 16 0 -94.74 66.5987 5
 -3 16 -1 6451.8 410.388 5
 3 16 1 6644.14 435.337 5
 3 16 2 608.806 159.415 5
 3 16 3 6730.7 444.276 5
 -3 16 -4 534.568 118.082 2
 -3 16 -5 2619.01 252.829 2
 -3 16 -6 162.712 91.0746 2
 -3 17 0 1365 204.918 5
 4 0 -27 -122.902 86.7972 3
 4 0 -26 1748.37 209.62 3
 4 0 -25 31.3249 67.7848 3
 4 0 -24 100.899 68.487 3
 4 0 -23 14.565 52.5233 3
 4 0 -22 1458.23 166.19 3
 -4 0 22 1251.36 137.632 4
 -4 0 21 -16.3309 40.866 4
 4 0 -21 52.7314 56.9781 3
 -4 0 20 5303.09 258.578 4
 4 0 -20 5575.9 297.22 3
 4 0 -19 -4.3203 44.1108 3
 -4 0 19 -65.0019 49.3675 4
 4 0 -18 5670.14 231.252 2
 -4 0 18 5057.16 237.025 4
 4 0 -18 5643.05 274.57 3
 4 0 -17 -37.7264 43.2337 2
 -4 0 17 -41.2436 33.0775 4
 4 0 -17 19.3718 36.4066 3
 4 0 -16 6233.77 267.524 3
 -4 0 16 5990.39 242.116 4
 4 0 -16 5626.42 211.691 2
 4 0 -15 -11.0803 25.4715 2
 -4 0 15 -18.2315 36.6163 4
 4 0 -15 -42.0805 44.8953 3
 -4 0 14 1731.38 122.753 4
 4 0 -14 1960.96 113.576 2
 4 0 -14 2050.72 140.587 3
 4 0 -13 36.7931 27.5343 2
 4 0 -13 51.0096 38.5716 3
 4 0 -12 16727.8 303.005 5
 4 0 -12 16905.9 288.361 2
 4 0 -12 16942.2 362.919 3
 4 0 -11 100.872 33.264 5
 4 0 -11 96.342 31.7821 2
 4 0 -11 81.3651 38.247 3
 4 0 -10 46315.5 424.098 2
 4 0 -10 48411.4 541.124 3
 4 0 -10 46895.1 486.842 5
 4 0 -9 9.75963 18.806 2
 4 0 -9 20.802 21.0669 5
 4 0 -9 26.168 29.3267 3
 4 0 -8 74921.4 604.519 5
 4 0 -8 71201.8 450.493 2
 4 0 -8 71412.7 573.211 3
 4 0 -7 26.7228 18.5051 3
 4 0 -7 45.5994 24.5319 5
 4 0 -7 15.254 16.0413 2
 4 0 -6 38169.1 359.797 3
 4 0 -6 37592.3 421.417 5
 4 0 -6 37716.3 292.819 2
 4 0 -5 20.9986 14.8581 3
 4 0 -5 9.58004 20.5888 5
 4 0 -5 -1.3713 13.875 2
 -4 0 5 59.2774 22.3454 1
 -4 0 4 107.235 31.4205 1
 4 0 -4 78.7713 24.4035 5
 4 0 -4 70.3586 16.7433 3
 4 0 -3 27.6701 19.3373 5
 4 0 -3 7.1227 12.6405 3
 -4 0 3 63.5761 26.1815 1
 -4 0 2 101.083 29.1176 1
 4 0 -2 77.5145 19.5623 3
 4 0 -2 105.913 26.6609 5
 -4 0 1 28.6292 25.5183 1
 4 0 -1 -3.26805 17.8342 5
 4 0 0 24972 329.496 5
 4 0 1 9.08609 16.8632 5
 4 0 2 27243.1 345.147 5
 -4 0 -3 26.9184 25.6635 2
 4 0 3 11.7983 16.5261 5
 -4 0 -4 122474 893.265 2
 4 0 4 123458 743.7 5
 -4 0 -5 5.24611 44.1684 2
 4 0 5 1.77261 21.529 5
 -4 0 -6 114944 933.375 3
 4 0 6 117033 741.804 5
 -4 0 -6 118580 980.285 2
 -4 0 -7 -14.2572 43.8636 2
 4 0 7 12.4297 22.7803 5
 -4 0 -7 -23.1965 37.7076 3
 -4 0 -8 13317.5 352.303 3
 -4 0 -8 13109.2 360.031 2
 4 0 8 13789.3 262.026 5
 4 0 9 -4.02488 18.9798 5
 -4 0 -9 9.9362 42.1731 2
 -4 0 -9 -30.5188 37.6169 3
 4 0 10 7632.4 201.049 5
 -4 0 -10 7006.74 281.871 2
 -4 0 -10 7107.13 281.021 3
 -4 0 -11 -18.5639 48.5845 2
 -4 0 -11 -60.7098 51.1522 3
 4 0 11 5.78081 20.2224 5
 -4 0 -12 275.967 65.5297 2
 -4 0 -12 244.271 63.5576 3
 -4 0 -13 -40.0563 54.7069 2
 -4 0 -13 42.189 63.7289 3
 -4 0 -14 11788.6 419.174 3
 -4 0 -14 12545 433.993 2
 -4 0 -15 113.357 84.8932 2
 -4 0 -15 113.087 74.4928 3
 -4 0 -16 10122.7 419.4 2
 -4 0 -16 10213.9 419.301 3
 -4 0 -17 90.8458 76.5611 3
 -4 0 -17 126.713 82.9908 2
 -4 0 -18 5085.2 314.47 2
 -4 0 -18 5029.02 315.933 3
 -4 0 -19 174.907 80.715 3
 -4 0 -19 -58.663 69.2 2
 -4 0 -20 2507.97 236.333 2
 -4 0 -20 2097.84 223.142 3
 -4 0 -21 70.1186 71.6253 2
 -4 0 -21 54.9667 83.3571 3
 -4 0 -22 44.4923 70.1869 2
 -4 0 -22 90.9308 82.1643 3
 -4 0 -23 -122.473 87.8624 2
 -4 0 -24 257.134 101.956 2
 4 1 -27 2548.05 257.79 3
 4 -1 -27 2274.99 244.056 3
 4 -1 -26 140.585 76.0657 3
 4 1 -26 58.6575 62.8504 3
 4 1 -25 202.627 85.5612 3
 4 -1 -25 -44.4817 69.5029 3
 4 -1 -24 53.1987 63.4271 3
 -4 -1 24 103.629 62.7098 4
 4 1 -24 198.455 78.5611 3
 -4 -1 23 741.913 118.677 4
 4 -1 -23 883.5 139.275 3
 4 1 -23 850.248 139.013 3
 -4 -1 22 175.588 58.8499 4
 4 1 -22 242.132 82.2107 3
 4 -1 -22 252.79 78.7788 3
 4 -1 -21 2114.21 193.065 3
 -4 -1 21 2178.35 179.039 4
 -4 1 21 2002.96 160.195 4
 4 1 -21 2140.55 191.305 3
 4 1 -20 422.577 82.5503 2
 -4 1 20 377.774 77.8495 4
 -4 -1 20 338.423 77.3129 4
 4 1 -20 460.321 91.9986 3
 4 -1 -20 463.901 100.858 3
 4 1 -19 8557.39 349.392 3
 4 1 -19 9188.43 313.804 2
 -4 -1 19 8794.06 331.636 4
 -4 1 19 8322.44 302.926 4
 4 -1 -19 8887.21 358.929 3
 4 1 -18 297.755 69.3018 2
 -4 -1 18 319.66 72.1857 4
 -4 1 18 431.619 77.7869 4
 4 1 -18 360.318 81.8079 3
 4 -1 -18 343.548 77.8998 3
 4 -1 -17 6245.63 220.427 2
 4 1 -17 6638.43 247.533 2
 -4 1 17 6550.08 253.904 4
 -4 -1 17 6393.95 268.769 4
 4 1 -17 6212.56 277.075 3
 4 -1 -17 6060.91 276.834 3
 4 -1 -16 56.4226 27.337 2
 4 1 -16 6.73539 41.8657 3
 -4 -1 16 109.079 46.2703 4
 4 1 -16 25.8824 32.922 2
 -4 1 16 72.42 41.0786 4
 4 -1 -16 54.6158 41.4043 3
 4 1 -15 930.623 89.6397 2
 4 -1 -15 1013.67 82.0921 2
 -4 -1 15 930.074 97.0638 4
 4 1 -15 1074.56 108.412 3
 4 -1 -15 1019.04 109.347 3
 -4 1 15 918.047 90.6818 4
 4 1 -14 1276.78 100.231 2
 4 -1 -14 1386.2 90.4994 2
 -4 -1 14 1297.33 110.468 4
 4 1 -14 1465.66 121.493 3
 4 -1 -14 1328.91 117.842 3
 4 1 -13 1677.1 93.075 5
 4 1 -13 1872.15 126.813 3
 -4 -1 13 1708.44 121.062 4
 4 1 -13 1839.04 111.388 2
 4 -1 -13 1968.27 134.278 3
 4 -1 -13 2000.11 99.5027 2
 4 1 -12 1035.31 81.3229 2
 4 1 -12 1048.42 72.4906 5
 4 -1 -12 1022.47 69.9441 2
 4 1 -12 965.083 89.0034 3
 4 -1 -12 1044.49 96.5058 3
 4 1 -11 15587.5 290.916 2
 4 -1 -11 15207.8 233.697 2
 4 1 -11 15207.2 269.233 5
 4 1 -11 16239.4 328.653 3
 4 -1 -11 15813.7 336.393 3
 4 -1 -10 105.593 35.5598 3
 4 1 -10 95.5779 27.7735 5
 4 -1 -10 166.768 40.9866 5
 4 1 -10 90.1158 35.199 2
 4 -1 -10 154.207 27.0691 2
 4 1 -10 148.858 40.7613 3
 4 -1 -9 27839 259.404 2
 4 -1 -9 29107.7 404.102 5
 4 1 -9 27566.9 355.947 5
 4 1 -9 29166.7 384.319 3
 4 1 -9 27552.8 342.114 2
 4 -1 -9 28378.6 403.747 3
 4 -1 -8 3181.05 129.93 3
 4 1 -8 2988.81 119.107 5
 4 -1 -8 3053.9 129.965 5
 4 1 -8 3007.28 109.577 2
 4 1 -8 3031.78 115.969 3
 4 -1 -8 2961.72 74.3376 2
 4 -1 -7 20267.8 304.994 3
 -4 -1 7 19624.6 315.976 1
 4 -1 -7 20432 325.969 5
 4 1 -7 20259.3 305.019 5
 4 1 -7 19866.8 264.857 2
 4 1 -7 19822.2 264.569 3
 4 -1 -7 19039.4 166.976 2
 4 1 -6 20557.2 305.522 5
 4 -1 -6 17758.9 148.984 2
 4 1 -6 19795.2 255.932 2
 4 -1 -6 18902.8 311.147 5
 -4 -1 6 19259.5 301.337 1
 4 -1 -6 19841.7 286.641 3
 4 1 -6 20155 238.468 3
 4 -1 -5 17504.9 293.353 5
 4 1 -5 17942 200.121 3
 4 -1 -5 17868.3 260.097 3
 -4 -1 5 17327 273.537 1
 4 1 -5 18309.3 285.453 5
 4 1 -5 17692.6 239.636 2
 4 1 -4 29339.3 226.24 3
 4 -1 -4 30351.3 378.708 5
 4 -1 -4 29338.3 317.947 3
 4 1 -4 29351 360.81 5
 -4 1 4 28729.9 335.574 1
 4 1 -4 28887.6 307.105 2
 -4 -1 4 29787.5 357.014 1
 4 -1 -3 3669.13 132.255 5
 4 1 -3 3674.81 73.1193 3
 4 1 -3 3837.43 133.314 5
 4 -1 -3 3623.27 111.651 3
 -4 -1 3 3742.16 128.988 1
 -4 1 3 3728.47 118.2 1
 4 -1 -2 3671.16 112.736 3
 -4 -1 2 3842.49 130.897 1
 4 -1 -2 3891.43 133.53 5
 4 1 -2 3890.69 77.9642 3
 4 1 -2 3851.88 133.191 5
 -4 1 2 3836.48 118.331 1
 4 -1 -1 8232.35 192.181 5
 -4 1 1 8157.7 161.214 2
 -4 1 1 8358.06 176.753 1
 4 1 -1 8240.07 193.372 5
 4 -1 0 15302.3 261.557 5
 4 1 0 15352.8 264.051 5
 -4 1 0 14923.5 236.871 2
 -4 1 -1 43434.9 435.319 2
 4 1 1 44799.5 452.014 5
 4 -1 1 43442.1 437.735 5
 4 1 2 8613.87 201.185 5
 4 -1 2 8799.92 193.533 5
 -4 1 -2 8973.89 214.875 2
 4 -1 3 37324.4 398.808 5
 4 1 3 38985.1 434.358 5
 -4 -1 -3 36777.1 422.063 3
 -4 1 -3 37166.5 464.613 2
 -4 1 -4 453.534 60.6897 2
 4 1 4 558.43 56.0217 5
 -4 -1 -4 554.283 57.9019 3
 4 -1 4 489.029 47.7292 5
 4 -1 5 80516.1 587.045 5
 4 1 5 81277.7 643.43 5
 -4 -1 -5 82338.7 709.432 3
 -4 1 -5 79815 756.465 2
 4 -1 6 3708.48 127.224 5
 -4 -1 -6 3395.93 173.223 2
 4 1 6 3793.78 141.904 5
 -4 1 -6 3486.92 171.848 2
 -4 -1 -6 3526.55 160.013 3
 -4 -1 -7 20215.2 428.413 2
 -4 -1 -7 19962.8 395.324 3
 -4 1 -7 20263.2 424.111 2
 4 1 7 20366.6 330.637 5
 4 -1 7 20577.8 300.389 5
 4 -1 8 763.1 61.0108 5
 -4 -1 -8 770.02 89.4863 3
 4 1 8 787.464 69.0032 5
 -4 -1 -8 603.198 83.0053 2
 -4 1 -8 745.257 96.8217 2
 -4 -1 -9 7495.64 287.312 2
 4 1 9 7127.85 203.52 5
 -4 -1 -9 7396.82 266.279 3
 -4 1 -9 7414.86 283.774 2
 4 -1 9 7292.98 180.835 5
 4 1 10 4499.82 165.185 5
 -4 -1 -10 4530.4 218.469 3
 4 -1 10 4561.53 144.751 5
 -4 1 -10 4312.74 226.594 2
 -4 -1 -10 4382.58 225.773 2
 4 1 11 1122.5 85.7931 5
 -4 1 -11 837.253 113.502 2
 -4 -1 -11 1085.33 116.105 3
 -4 -1 -11 1067.06 119.206 2
 -4 -1 -12 13211.7 404.576 3
 4 1 12 13007.8 293.957 5
 -4 1 -12 12244 407.218 3
 -4 1 -12 13037.7 414.708 2
 -4 -1 -12 13080 415.661 2
 -4 1 -13 7966.35 340.033 2
 -4 -1 -13 7485.01 326.727 2
 -4 1 -13 7699.4 335.427 3
 -4 -1 -13 7766.29 322.921 3
 -4 -1 -14 4668.27 272.739 2
 -4 1 -14 4137 255.828 2
 -4 1 -14 4445.17 266.997 3
 -4 -1 -14 4118.65 246.67 3
 -4 -1 -15 14408.8 485.032 2
 -4 -1 -15 15221.6 485.837 3
 -4 1 -15 15364.2 494.378 2
 -4 1 -15 14345.2 487.432 3
 -4 -1 -16 250.501 88.3594 3
 -4 1 -16 140.594 92.1349 2
 -4 1 -16 78.3244 77.7803 3
 -4 -1 -16 182.797 96.1195 2
 -4 -1 -17 6815.69 351.711 2
 -4 1 -17 6330.2 341.29 2
 -4 -1 -17 6032.4 330.085 3
 -4 1 -18 414.059 108.931 2
 -4 -1 -18 348.449 92.0377 3
 -4 -1 -18 314.828 95.424 2
 -4 -1 -19 4027.8 291.475 2
 -4 -1 -19 4149.14 297.453 3
 -4 1 -19 4019.19 295.514 2
 -4 1 -20 -5.71806 80.0492 2
 -4 -1 -20 66.2588 62.7175 3
 -4 -1 -20 100.318 64.1112 2
 -4 1 -21 310.851 107.217 2
 -4 -1 -21 360.742 102.774 2
 -4 -1 -21 304.869 90.1339 3
 -4 1 -22 155.272 87.7544 2
 -4 -1 -22 273.861 100.064 2
 -4 -1 -22 133.701 83.2329 3
 -4 -1 -23 110.257 83.3016 2
 -4 -1 -23 163.138 100.192 3
 -4 -1 -24 329.064 111.463 2
 -4 1 -24 65.6822 73.7454 2
 4 2 -27 617.154 136.54 3
 4 -2 -27 810.738 152.992 3
 4 -2 -26 51.804 64.0781 3
 4 2 -26 57.8084 74.8313 3
 -4 -2 25 2245.56 209.057 4
 4 -2 -25 2640.7 247.758 3
 4 2 -25 2567.15 241.437 3
 -4 -2 24 776.476 124.079 4
 4 2 -24 814.87 138.532 3
 4 -2 -24 966.909 146.737 3
 4 2 -23 349.443 89.9433 3
 -4 -2 23 400.414 90.5947 4
 4 -2 -23 501.224 112.865 3
 -4 -2 22 3187.51 227.536 4
 4 -2 -22 3220.38 244.632 3
 4 2 -22 3129.59 240.418 3
 -4 -2 21 55.827 52.8313 4
 4 2 -21 188.344 71.3281 2
 4 2 -21 208.95 77.4081 3
 4 -2 -21 84.4566 63.2518 3
 4 2 -20 6266.11 280.656 2
 -4 -2 20 6530.17 305.892 4
 4 2 -20 6272.73 313.896 3
 4 -2 -20 6653.4 325.356 3
 4 2 -19 170.767 62.8115 2
 -4 2 19 176.123 58.4408 4
 -4 -2 19 116.664 59.3575 4
 4 2 -19 107.753 52.8338 3
 4 -2 -19 228.237 79.1563 3
 4 2 -18 10938.6 379.801 3
 -4 2 18 11255.9 331.179 4
 4 2 -18 11284.5 351.313 2
 4 -2 -18 10577.1 379.752 3
 -4 -2 18 10985.1 371.028 4
 4 2 -17 231.9 59.9245 2
 -4 2 17 312.197 58.9232 4
 -4 -2 17 198.008 62.2766 4
 4 2 -17 273.144 68.1511 3
 4 -2 -17 412.878 89.568 3
 4 2 -16 2424.89 155.365 2
 4 2 -16 2505.48 170.135 3
 -4 -2 16 2462.35 167.494 4
 -4 2 16 2284.09 139.638 4
 4 -2 -16 2377.74 173.337 3
 4 2 -15 690.101 80.7244 2
 -4 -2 15 719.304 94.8013 4
 4 -2 -15 732.103 68.1513 2
 4 2 -15 715.561 89.3516 3
 4 -2 -15 734.762 95.0317 3
 4 2 -14 224.31 34.6737 5
 4 -2 -14 182.271 35.1329 2
 -4 -2 14 227.425 53.8504 4
 4 2 -14 171.449 46.2424 3
 4 2 -14 256.416 53.3678 2
 4 -2 -14 209.703 52.8299 3
 4 2 -13 788.836 83.3862 2
 4 -2 -13 710.265 58.3612 2
 4 -2 -13 911.167 96.2495 3
 -4 -2 13 919.17 94.6141 4
 4 2 -13 862.352 90.915 3
 4 2 -13 684.066 56.1193 5
 4 -2 -12 11971.4 207.848 2
 4 2 -12 11525.5 225.646 5
 -4 -2 12 12708 322.329 4
 4 2 -12 12344.7 306.75 3
 4 -2 -12 12826.8 325.235 3
 4 2 -12 12525.4 297.41 2
 4 -2 -11 82.3709 41.9103 3
 4 2 -11 16.0516 32.2825 2
 4 -2 -11 53.847 18.4067 2
 -4 -2 11 13.5656 30.6557 4
 4 2 -11 31.5717 19.7631 5
 4 2 -11 9.77634 25.9756 3
 4 -2 -10 24843.2 236.696 2
 4 2 -10 24824.3 380.871 3
 4 2 -10 24064.9 332.264 5
 4 2 -10 24766.2 375.987 2
 4 -2 -10 24962.1 418.509 3
 4 -2 -9 4296.9 166.461 3
 4 -2 -9 4029.44 81.9998 2
 4 2 -9 4007.94 142.144 3
 4 2 -9 4025.09 139.065 5
 4 2 -9 4171.19 152.046 2
 4 -2 -8 22687.9 376.36 5
 4 2 -8 21855.8 319.518 5
 -4 -2 8 21708.9 342.358 1
 4 2 -8 22131 302.722 3
 4 2 -8 21965 327.047 2
 4 -2 -8 22096 356.948 3
 4 -2 -7 16837.9 299.887 3
 4 -2 -7 16808.1 317.607 5
 -4 -2 7 16006.2 284.92 1
 4 2 -7 16295.7 274.049 2
 4 2 -7 15953.2 231.078 3
 4 2 -7 16652.7 276.574 5
 4 -2 -6 18373.4 301.42 3
 4 -2 -6 18928.3 328.146 5
 4 2 -6 18578.9 297.41 5
 -4 -2 6 18194.1 294.752 1
 4 2 -6 18070.6 280.344 2
 4 2 -6 18312.9 217.208 3
 4 -2 -5 15786.1 292.22 5
 4 2 -5 16023.2 275.479 5
 4 2 -5 15999.6 171.128 3
 4 2 -5 16123.5 263.03 2
 4 -2 -5 16212.6 272.654 3
 -4 -2 5 16286.5 276.438 1
 -4 -2 4 88.6812 28.2215 1
 4 -2 -4 46.9138 22.341 5
 4 2 -4 84.2925 11.1206 3
 4 -2 -4 50.555 25.6666 3
 4 2 -4 81.304 25.7426 2
 4 2 -4 103.969 27.2662 5
 4 -2 -3 44477.6 440.694 3
 -4 -2 3 45781 460.93 1
 4 2 -3 44439.3 434.688 2
 -4 2 3 44077.1 395.61 1
 4 2 -3 46095.3 467.723 5
 -4 2 3 44840.1 272.461 2
 4 -2 -3 43921.9 470.686 5
 -4 2 2 14.6673 14.6869 2
 4 2 -2 9.75324 19.3281 5
 4 -2 -2 15.2397 23.0367 3
 4 -2 -2 34.0674 19.7959 5
 -4 2 2 19.2781 24.7509 1
 -4 -2 2 41.1989 28.3847 1
 4 -2 -1 26058.3 352.474 5
 -4 2 1 26246.2 293.538 1
 4 -2 -1 27512.3 361.224 3
 4 2 -1 27190.7 366.425 5
 -4 2 1 25834.8 278.976 2
 4 2 0 32897.3 403.835 5
 4 -2 0 32584.1 390.748 5
 -4 2 0 32995.7 338.845 1
 -4 2 0 31905.7 343.588 2
 -4 2 -1 15874.9 265.9 2
 4 -2 1 15625.5 265.582 5
 4 2 1 16018.7 285.885 5
 -4 -2 -1 17526 221.851 3
 -4 -2 -2 22722.4 287.384 3
 -4 2 -2 22904.3 343.845 2
 4 2 2 23824.7 352.729 5
 4 -2 2 22793.4 317.81 5
 4 -2 3 11100.2 221.185 5
 4 2 3 11489.2 247.544 5
 -4 -2 -3 11090.3 219.246 3
 -4 2 -3 11056.1 255.405 2
 4 -2 4 49677.4 465.84 5
 -4 2 -4 49715.6 570.551 2
 -4 -2 -4 49183.3 499.457 3
 4 2 4 50395.2 521.708 5
 4 2 5 85.9156 36.9573 5
 4 -2 5 190.1 33.8776 5
 -4 -2 -5 119.409 38.6529 3
 -4 2 -5 117.946 48.424 2
 4 -2 6 34296.4 377.312 5
 4 2 6 33620.9 440.944 5
 -4 2 -6 33748.8 522.028 2
 -4 -2 -6 33899.3 473.779 3
 4 2 7 12350.6 272.497 5
 4 -2 7 12178 223.421 5
 -4 2 -7 12014.3 328.668 2
 -4 -2 -7 12022.7 300.393 3
 -4 -2 -8 7697.94 256.393 3
 4 -2 8 8053.79 180.781 5
 -4 -2 -8 8103.05 284.634 2
 -4 2 -8 8019.44 283.589 2
 4 2 8 8192.8 227.596 5
 -4 -2 -9 23152.8 499.003 2
 4 -2 9 22815.5 301.141 5
 -4 2 -9 23037.9 495.272 2
 4 2 9 22492.1 383.781 5
 -4 -2 -9 21878 450.49 3
 -4 -2 -10 924.982 111.98 2
 -4 2 -10 1015.98 117.147 2
 4 2 10 1041.25 87.7127 5
 -4 -2 -10 969.91 104.129 3
 4 2 11 22562.4 400.979 5
 -4 2 -11 23408.6 533.969 2
 -4 -2 -11 22729.9 534.171 2
 -4 -2 -11 22863.6 501.831 3
 4 2 12 2756.74 146.229 5
 -4 2 -12 2479.08 186.134 2
 -4 -2 -12 2910.57 194.057 3
 -4 -2 -12 2469.62 192.492 2
 -4 2 -13 20799.2 539.371 2
 -4 -2 -13 20827.8 520.747 3
 -4 -2 -13 20821.9 542.782 2
 -4 -2 -14 14149.1 448.087 3
 -4 2 -14 14914.9 476.699 2
 -4 -2 -14 15040.6 478.701 2
 -4 2 -15 2424.23 208.281 2
 -4 -2 -15 2236.04 190.906 3
 -4 -2 -15 1953.75 189.175 2
 -4 2 -16 6560.01 345.845 2
 -4 -2 -16 6677.04 334.058 3
 -4 -2 -16 6501.48 335.31 2
 -4 2 -17 157.647 92.1403 2
 -4 -2 -17 240.047 87.5802 3
 -4 -2 -17 277.842 97.1753 2
 -4 -2 -18 6139.34 346.839 2
 -4 -2 -18 6210.63 344.343 3
 -4 2 -18 5703.82 343.182 2
 -4 2 -19 259.285 90.137 2
 -4 -2 -19 158.753 85.372 2
 -4 -2 -19 365.422 103.114 3
 -4 -2 -20 2988.52 261.093 2
 -4 2 -20 3115.66 271.313 2
 -4 -2 -20 2954.42 256.694 3
 -4 2 -21 616.672 131.756 2
 -4 -2 -21 401.801 105.792 3
 -4 -2 -21 561.032 138.654 2
 -4 -2 -22 56.3208 72.417 3
 -4 2 -22 -126.354 85.7183 2
 -4 -2 -22 -150.096 88.767 2
 -4 -2 -23 611.192 147.78 3
 -4 -2 -23 383.838 118.405 2
 -4 2 -23 552.976 147.274 2
 4 3 -27 124.667 79.5507 3
 4 3 -26 3521.5 296.241 3
 4 -3 -26 3660.91 296.349 3
 4 -3 -25 683.483 132.298 3
 -4 -3 25 584.07 120.415 4
 4 3 -25 592.911 130.413 3
 -4 -3 24 4053.97 277.533 4
 4 3 -24 4374.28 307.491 3
 4 -3 -24 4666.23 312.835 3
 4 3 -23 1970.85 201.703 3
 -4 -3 23 2021.8 193.808 4
 4 -3 -23 2415.6 223.416 3
 4 3 -22 3085.7 225.337 2
 -4 -3 22 2976.75 229.454 4
 4 3 -22 3083.52 237.967 3
 4 -3 -22 3460.47 256.869 3
 4 3 -21 9529.31 376.324 2
 -4 -3 21 8658.62 372.054 4
 4 3 -21 8534.25 380.86 3
 4 -3 -21 9183.52 399.065 3
 4 3 -20 2288.72 184.588 2
 -4 -3 20 2143.75 187.207 4
 4 3 -20 2412.61 201.763 3
 4 -3 -20 2553.64 207.819 3
 4 3 -19 8356.47 330.274 2
 -4 -3 19 8065.61 338.19 4
 4 3 -19 7743.02 338.251 3
 4 -3 -19 8359.76 354.466 3
 4 3 -18 477.976 86.79 2
 -4 -3 18 434.181 85.4688 4
 4 3 -18 407.829 86.9552 3
 4 -3 -18 407.098 88.126 3
 4 3 -17 3505.8 201.958 2
 -4 3 17 3182.91 162.551 4
 4 3 -17 3687.91 216.962 3
 4 -3 -17 3516.73 218.436 3
 -4 -3 17 3573.18 215.271 4
 4 3 -16 1008.58 109.495 2
 -4 -3 16 995.903 113.984 4
 4 3 -16 1203.08 121.283 3
 4 -3 -16 1196.4 123.315 3
 4 3 -15 2775.96 168.204 2
 4 3 -15 2715.6 171.486 3
 4 -3 -15 2308.05 163.23 3
 -4 -3 15 2614.99 174.169 4
 -4 -3 14 7801.63 283.716 4
 4 3 -14 7872.75 273.242 3
 4 -3 -14 7723.55 283.989 3
 4 3 -14 7984.83 271.405 2
 4 -3 -13 353.167 62.8493 3
 4 -3 -13 416.647 44.5035 2
 4 3 -13 297.736 53.87 2
 4 3 -13 364.302 40.9743 5
 -4 -3 13 318.504 61.4898 4
 4 3 -13 462.592 66.4905 3
 4 -3 -12 6112.43 140.809 2
 4 3 -12 6060.68 215.074 3
 -4 -3 12 6473.5 241.769 4
 4 3 -12 5548.1 157.699 5
 4 3 -12 5960.98 217.324 2
 4 -3 -12 6279.98 236.315 3
 4 -3 -11 17359.7 211.294 2
 4 3 -11 17483.2 285.934 5
 -4 -3 11 18385 385.24 4
 4 3 -11 17792.5 347.109 3
 4 3 -11 17620.1 356.557 2
 4 -3 -11 17445.1 379.413 3
 4 3 -10 23.6707 32.1754 2
 4 -3 -10 57.1041 38.6939 3
 4 -3 -10 46.7039 14.2055 2
 4 3 -10 92.2461 29.3085 5
 -4 -3 10 63.9304 34.2494 4
 -4 -3 10 63.6844 35.5491 1
 4 3 -10 86.867 35.761 3
 4 3 -9 6766.49 182.579 5
 4 -3 -9 7104.47 226.382 3
 4 3 -9 6568.9 184.494 3
 -4 -3 9 7364.8 208.421 1
 4 -3 -9 5813.24 87.5463 2
 4 3 -9 7308.76 217.172 2
 4 -3 -8 1075.58 89.4818 3
 -4 -3 8 996.675 78.5366 1
 4 3 -8 960.156 67.5302 3
 4 3 -8 1000.37 82.3786 2
 4 3 -8 1160.01 80.4237 5
 -4 -3 7 11975.4 251.878 1
 4 3 -7 12337.7 265.233 2
 4 3 -7 11867.4 245.646 5
 4 -3 -7 11916.5 271.044 3
 4 3 -7 11757.8 202.393 3
 4 3 -6 3708.33 138.725 5
 4 3 -6 3971.09 103.587 3
 4 3 -6 4153.18 152.924 2
 -4 -3 6 4126.15 146.237 1
 4 -3 -6 3935.9 150.65 3
 -4 -3 5 7692.73 198.164 1
 4 3 -5 7949.78 204.776 2
 4 -3 -5 7882.43 221.032 5
 4 3 -5 7766.03 201.987 5
 4 -3 -5 7624.12 204.914 3
 -4 3 4 2912.62 65.4295 2
 4 -3 -4 2933.51 126.023 3
 4 -3 -4 2990.02 135.385 5
 4 3 -4 2933.99 126.016 2
 -4 -3 4 2910.98 122.018 1
 4 3 -4 2844.07 124.645 5
 4 -3 -3 3209.03 133.317 3
 4 -3 -3 3225.29 137.958 5
 -4 -3 3 3341.68 134.363 1
 4 3 -3 3086.24 128.838 5
 4 3 -3 3410.91 136.768 2
 -4 3 3 3067.9 106.389 1
 -4 3 3 3265.68 81.4402 2
 -4 3 2 32283.2 320.885 1
 -4 3 2 32071.3 292.019 2
 4 -3 -2 33028.3 418.709 3
 4 3 -2 33557.6 424.602 2
 4 3 -2 33890.8 428.605 5
 4 -3 -2 32282.7 424.854 5
 4 -3 -1 627.602 61.1146 5
 4 3 -1 631.796 61.494 5
 -4 3 1 636.155 47.2318 1
 -4 3 1 667.226 48.4973 2
 4 -3 -1 647.377 64.1174 3
 -4 3 0 13425.8 202.003 1
 -4 3 0 13366.1 232.102 2
 4 3 0 13922.5 277.583 5
 4 -3 0 12718.7 254 5
 -4 -3 0 13090.4 159.108 3
 4 -3 1 230.038 36.6288 5
 4 3 1 266.953 43.0914 5
 -4 3 -1 270.467 41.7108 2
 -4 -3 -1 284.51 30.4159 3
 4 3 2 12613.9 270.077 5
 4 -3 2 12213.2 241.602 5
 -4 3 -2 12211.5 253.41 2
 -4 -3 -2 12320.4 207.949 3
 4 -3 3 1044.35 73.2428 5
 -4 -3 -3 1011.28 70.0175 3
 -4 3 -3 907.471 79.5238 2
 4 3 3 1014.23 82.2488 5
 4 -3 4 4465.04 143.113 5
 -4 3 -4 4664.59 177.915 2
 4 3 4 4817.1 173.943 5
 -4 -3 -4 4633.96 156.257 3
 4 -3 5 12306.7 231.349 5
 -4 3 -5 12444 304.063 2
 4 3 5 12905.5 287.288 5
 -4 -3 -5 12649.1 274.083 3
 4 3 6 7427.56 222.879 5
 -4 3 -6 7197.19 244.196 2
 4 -3 6 6932.46 169.563 5
 -4 -3 -6 6864.21 216.172 3
 -4 -3 -7 7955.79 246.393 3
 4 3 7 8319.28 241.023 5
 -4 3 -7 7914.31 268.834 2
 4 -3 7 8110.3 179.45 5
 4 -3 8 23357.4 296.373 5
 -4 -3 -8 24087.2 449.874 3
 -4 3 -8 24293.2 487.568 2
 4 3 8 24281.1 414.983 5
 4 3 9 20.7475 23.0517 5
 -4 -3 -9 22.0341 33.2471 3
 -4 3 -9 82.4208 55.9394 2
 4 -3 9 47.8393 17.75 5
 -4 -3 -10 23199.5 518.465 2
 4 3 10 22923.5 419.882 5
 -4 3 -10 22537.4 514.428 2
 -4 -3 -10 23190.4 480.25 3
 -4 3 -11 2030.7 165.268 2
 4 3 11 1960.34 126.671 5
 -4 -3 -11 1906.54 159.294 2
 -4 -3 -11 1934.28 152.433 3
 -4 -3 -12 28341 618.821 2
 -4 3 -12 28474.4 628.137 2
 -4 -3 -12 27483.2 565.899 3
 4 3 12 27466.2 478.523 5
 -4 -3 -13 7563.57 331.527 2
 -4 3 -13 7642.54 340.473 2
 4 3 13 7572.91 258.031 5
 -4 -3 -13 8006.01 325.113 3
 -4 3 -14 5493.9 300.373 2
 -4 -3 -14 5077.52 267.802 3
 -4 -3 -14 5302.07 290.62 2
 -4 3 -15 5820.03 318.464 2
 -4 -3 -15 5509.93 291.471 3
 -4 -3 -15 5101.13 292.76 2
 -4 -3 -16 275.468 86.488 2
 -4 3 -16 221.9 81.6613 2
 -4 -3 -16 416.192 95.7659 3
 -4 3 -17 4792.74 308.293 2
 -4 -3 -17 4442.59 289.58 2
 -4 -3 -17 4642.37 284.095 3
 -4 3 -18 154.731 78.4212 2
 -4 -3 -18 157.5 78.5214 3
 -4 -3 -18 119.75 64.7042 2
 -4 3 -19 3718.81 289.192 2
 -4 -3 -19 3807.78 284.637 3
 -4 -3 -19 3664.39 277.277 2
 -4 -3 -20 2267.31 228.386 2
 -4 3 -20 2231.08 238.087 2
 -4 -3 -20 2296.54 226.02 3
 -4 3 -21 314.015 112.747 2
 -4 -3 -21 298.331 92.4983 3
 -4 -3 -21 314.343 99.6821 2
 -4 -3 -22 2634.08 256.503 2
 -4 3 -22 2922.97 281.143 2
 -4 -3 -22 3272.12 284.399 3
 -4 3 -23 781.997 164.374 2
 4 4 -26 -72.6948 71.2569 3
 4 -4 -26 -119.869 73.3971 3
 4 -4 -25 4074.3 308.478 3
 4 4 -25 3623.7 291.869 3
 -4 -4 25 3578.92 275.641 4
 4 4 -24 1086.52 161.943 3
 4 -4 -24 1119.61 165.455 3
 -4 -4 24 961.705 151.79 4
 -4 -4 23 3130.34 245.695 4
 4 -4 -23 3100.62 251.784 3
 4 4 -23 2920.91 233.379 2
 4 4 -23 2775.08 238.648 3
 4 4 -22 2845.37 225.623 2
 4 -4 -22 3174.94 252.538 3
 -4 -4 22 2638.58 221.373 4
 4 4 -22 2831.84 233.853 3
 4 4 -21 4027.39 262.452 2
 -4 -4 21 3929.46 259.907 4
 4 4 -21 4029.85 269.486 3
 4 -4 -21 3728.08 257.674 3
 4 4 -20 7171.51 330.869 2
 4 4 -20 6655.41 330.33 3
 -4 -4 20 6426.67 320.963 4
 4 -4 -20 6998.61 342.299 3
 4 4 -19 119.312 58.0637 2
 -4 -4 19 248.228 71.0558 4
 4 4 -19 245.37 77.6898 3
 4 -4 -19 257.924 78.2103 3
 -4 -4 18 3651.7 230.102 4
 4 4 -18 3741.91 231.408 3
 4 -4 -18 3841.79 238.038 3
 4 4 -18 3924.53 232.387 2
 -4 -4 17 2245.07 178.251 4
 4 4 -17 2405.88 177.334 3
 4 -4 -17 2355.46 181.296 3
 4 4 -17 2267.52 174.72 2
 -4 -4 16 847.468 110.666 4
 4 4 -16 787.595 104.643 3
 4 -4 -16 778.11 102.351 3
 -4 -4 15 13886.6 401.362 4
 4 4 -15 14047.2 390.708 3
 4 -4 -15 14121.1 406.992 3
 4 4 -15 14625.6 399.214 2
 4 4 -14 1384.19 123.482 3
 -4 -4 14 1636.47 138.478 4
 4 4 -14 1411.41 122.403 2
 4 -4 -14 1580.8 134.55 3
 -4 -4 13 30698.8 560.829 4
 -4 -4 13 30465.4 477.396 1
 4 -4 -13 30905.1 556.311 3
 4 4 -13 31172.6 526.543 3
 4 4 -13 31763.4 545.768 2
 4 4 -12 499.348 70.4556 2
 4 -4 -12 517.141 75.8373 3
 4 4 -12 485.176 51.1255 5
 4 -4 -12 457.742 41.4263 2
 -4 -4 12 361.842 67.8041 4
 4 4 -12 436.355 63.4362 3
 -4 -4 12 515.598 65.1636 1
 4 -4 -11 14640 360.011 3
 -4 -4 11 14140.2 359.093 4
 4 4 -11 13052 256.336 5
 -4 -4 11 13191.8 296.564 1
 4 -4 -11 12030.2 180.081 2
 4 4 -11 13339.6 310.433 3
 4 4 -11 14053.4 343.063 2
 -4 -4 10 56.2331 32.1694 1
 4 -4 -10 6.58589 32.6553 3
 4 4 -10 0.81415 26.1875 3
 4 4 -10 11.9002 20.8858 5
 4 4 -10 -48.3074 42.184 2
 -4 -4 10 45.1942 39.6783 4
 4 -4 -10 13.1321 11.9752 2
 -4 -4 9 6587.71 200.655 1
 -4 -4 9 7058.89 233.093 4
 4 -4 -9 6793.98 232.555 3
 4 4 -9 6503.77 188.996 5
 4 -4 -9 5611.19 100.139 2
 4 4 -9 6934.91 230.033 2
 4 -4 -8 3323.57 159.318 3
 -4 -4 8 3509.81 159.218 4
 4 4 -8 3703.01 146.055 5
 4 4 -8 3623.8 165.049 2
 -4 -4 8 3585.89 148.548 1
 4 -4 -7 3415.33 157.592 3
 4 4 -7 3361.15 153.684 2
 4 4 -7 3350.1 141.197 5
 -4 -4 7 3276.12 137.027 1
 -4 -4 7 3469.58 150.604 4
 4 -4 -6 5347.91 190.112 3
 4 4 -6 5392.67 179.62 5
 -4 -4 6 5393.64 172.812 1
 4 4 -6 5437.78 195.695 2
 -4 -4 5 17345.2 305.595 1
 4 4 -5 17195.2 320.52 5
 4 -4 -5 16830.7 328.666 3
 -4 4 5 15667.5 169.58 2
 4 4 -5 17588.8 335.353 2
 4 4 -4 4073.95 157.933 5
 4 -4 -4 3784.73 156.335 3
 -4 4 4 3891.75 92.259 2
 -4 -4 4 3170.34 65.8426 3
 -4 -4 4 3844 147.406 1
 4 4 -4 3793.62 158.007 2
 -4 4 3 27993.8 276.368 2
 4 4 -3 27948.5 408.626 5
 4 4 -3 28176.2 424.494 2
 4 -4 -3 27186.3 413.502 3
 4 -4 -2 1942.01 113.475 3
 -4 4 2 2197.25 85.5248 2
 -4 4 2 2043.78 82.1379 1
 4 4 -2 2080 116.623 2
 4 4 -2 1964.04 111.808 5
 -4 -4 2 1796.39 46.5638 3
 4 4 -1 32574.5 447.452 5
 4 -4 -1 30977.1 446.549 3
 -4 4 1 31860 351.723 2
 4 4 -1 32684.6 466.858 2
 -4 4 1 31403.3 297.086 1
 -4 -4 1 31339.4 219.803 3
 4 4 0 12565.2 283.613 5
 4 -4 0 12928.4 299.183 3
 -4 4 0 12152.5 234.298 2
 -4 -4 0 13759.9 171.654 3
 -4 4 0 12496.6 181.149 1
 4 -4 1 42410.7 489.178 5
 -4 4 -1 44398.8 476.575 2
 4 4 1 45427.8 545.796 5
 -4 -4 -1 43273.7 354.602 3
 -4 4 -2 5039.08 171.123 2
 4 -4 2 4950.44 167.513 5
 4 4 2 5319.45 192.287 5
 -4 -4 -2 5181.4 136.461 3
 -4 4 -3 13067.5 296.092 2
 4 -4 3 12511.8 257.934 5
 4 4 3 13353 308.067 5
 -4 -4 -3 12925.3 237.659 3
 4 -4 4 11448.8 240.838 5
 4 4 4 12206 299.34 5
 -4 4 -4 11695.7 290.583 2
 -4 -4 -4 11858.6 247.29 3
 4 4 5 154.497 42.8103 5
 4 -4 5 134.858 29.3374 5
 -4 4 -5 160.98 56.6585 2
 -4 -4 -5 135.075 38.1904 3
 4 -4 6 2884.34 115.189 5
 -4 4 -6 3110.14 167.945 2
 4 4 6 3400.74 164.243 5
 -4 -4 -6 3281.76 149.694 3
 -4 -4 -7 19494 384.75 3
 4 4 7 20301.3 403.704 5
 4 -4 7 18872.9 281.332 5
 -4 4 -7 20575.9 442.999 2
 4 4 8 2846.61 157.124 5
 -4 4 -8 2865.16 176.578 2
 -4 -4 -8 2641.45 152.518 3
 -4 4 -9 28921.2 568.073 2
 -4 -4 -9 29269.9 524.781 3
 4 4 9 29972.8 508.887 5
 4 4 10 2237.13 143.643 5
 -4 -4 -10 2237.08 152.701 3
 -4 4 -10 2343.84 179.082 2
 4 4 11 26097.3 493.298 5
 -4 -4 -11 26112.9 540.033 3
 -4 4 -11 27575.3 598.627 2
 -4 -4 -11 26254.4 578.221 2
 -4 -4 -12 2590.86 189.264 2
 -4 4 -12 2564.02 197.496 2
 4 4 12 2891.23 169.792 5
 -4 -4 -12 2804.23 188.749 3
 -4 -4 -13 13651.7 443.779 2
 -4 4 -13 13833.4 459.436 2
 4 4 13 13279 362.141 5
 -4 -4 -13 12981.1 410.679 3
 -4 -4 -14 2352.33 196.13 2
 -4 4 -14 2648.76 215.565 2
 -4 -4 -14 2556.85 194.116 3
 4 4 14 2577.28 164.931 5
 -4 -4 -15 471.238 107.095 2
 -4 4 -15 472.195 100.488 2
 -4 -4 -15 479.823 102.109 3
 -4 4 -16 5670.61 328.557 2
 -4 -4 -16 5582.35 303.604 3
 -4 -4 -16 5566.03 312.41 2
 -4 -4 -17 84.8387 59.4807 2
 -4 -4 -17 151.447 75.4443 3
 -4 4 -17 -35.3204 61.9743 2
 -4 -4 -18 953.656 148.33 2
 -4 4 -18 1364.26 183.508 2
 -4 -4 -18 1110.55 155.465 3
 -4 -4 -19 2024.62 212.852 2
 -4 4 -19 2095.23 220.595 2
 -4 -4 -19 2152.22 210.653 3
 -4 4 -20 -135.387 96.4389 2
 -4 -4 -20 58.9543 70.1521 2
 -4 -4 -20 14.8818 63.9114 3
 -4 4 -21 4686.43 349.426 2
 -4 -4 -21 4682.08 328.938 2
 -4 -4 -21 5180.86 345.02 3
 -4 4 -22 897.841 172.821 2
 -4 -4 -22 784.966 155.928 3
 4 -5 -25 664.798 136.949 3
 -4 -5 24 4165.07 296.934 4
 4 -5 -24 4971.09 331.897 3
 4 5 -24 4313.7 301.042 2
 4 -5 -23 326.345 137.26 3
 4 5 -23 728.167 127.871 2
 -4 -5 23 635.146 122.184 4
 4 5 -22 1081.19 148.847 2
 -4 -5 22 1117.39 152.639 4
 4 -5 -22 594.681 153.565 3
 -4 -5 21 1731.29 181.372 4
 4 5 -21 2128.86 195.874 2
 -4 -5 20 -53.4952 63.4552 4
 4 5 -20 7.39413 54.8308 2
 4 -5 -20 1.46861 62.8282 3
 -4 -5 19 1117.76 139.727 4
 4 -5 -19 1293.75 154.325 3
 4 5 -19 1223.18 144.865 2
 4 -5 -18 6216.41 304.172 3
 -4 -5 18 5805.39 299.08 4
 4 5 -18 5345.05 282.18 2
 4 5 -17 847.487 116.735 2
 -4 -5 17 638.377 102.288 4
 -4 -5 17 943.27 96.3869 1
 4 -5 -17 960.323 125.371 3
 -4 -5 16 10804.8 310.304 1
 -4 -5 16 11262.5 388.233 4
 4 -5 -16 11558.4 390.221 3
 4 5 -16 10640 367.524 2
 4 -5 -15 501.678 87.0916 3
 4 5 -15 478.317 83.5482 2
 -4 -5 15 545.222 72.2741 1
 -4 -5 15 654.367 99.0704 4
 -4 -5 14 23190.7 428.496 1
 -4 -5 14 24108.5 532.153 4
 4 5 -14 23848.9 518.317 2
 4 -5 -14 23552.8 517.685 3
 4 -5 -13 1101.37 115.987 3
 -4 -5 13 1237.82 102.644 1
 -4 -5 13 1339.69 130.976 4
 4 5 -13 1259.96 123.428 2
 4 -5 -12 29611.9 548.156 3
 4 5 -12 30592.4 556.212 2
 -4 -5 12 30336.7 555.825 4
 -4 -5 12 29130.6 453.014 1
 4 5 -12 28073.6 396.265 5
 -4 -5 11 -13.084 30.0328 1
 4 5 -11 31.6753 26.2587 5
 4 -5 -11 82.9803 44.5007 3
 -4 -5 11 84.4595 50.7874 4
 4 5 -11 22.7944 37.2286 2
 4 -5 -10 18249.6 406.076 3
 -4 -5 10 19499.6 355.915 1
 4 5 -10 18134.5 334.001 5
 4 5 -10 18672.9 410.921 2
 -4 -5 10 19159.9 413.178 4
 4 5 -9 65.6656 40.02 2
 4 5 -9 51.5416 27.5202 5
 -4 -5 9 149.971 47.8258 4
 -4 -5 9 132.803 37.0615 1
 4 -5 -9 45.8321 36.3073 3
 -4 -5 8 2097.36 114.874 1
 4 -5 -8 1981.43 130.813 3
 -4 -5 8 2095.27 132.388 4
 4 5 -8 2244.82 124.825 5
 4 5 -8 2047.28 134.463 2
 4 -5 -7 1499.42 113.322 3
 -4 -5 7 1375.1 96.0208 1
 4 5 -7 1274.45 96.5102 5
 4 5 -7 1328.03 110.939 2
 -4 -5 7 1481.21 105.959 4
 4 5 -6 11312.2 275.204 5
 4 -5 -6 11092.2 290.135 3
 -4 -5 6 10966.5 266.698 4
 -4 -5 6 11359.9 258.579 1
 -4 5 6 10986.8 167.409 2
 4 5 -6 10897.7 293.729 2
 4 5 -5 845.627 86.6721 2
 4 -5 -5 853.917 84.36 3
 4 5 -5 742.294 76.0916 5
 -4 -5 5 891.732 80.2218 1
 -4 -5 5 806.64 72.666 4
 -4 5 5 896.483 52.466 2
 -4 -5 4 34527.9 264.846 3
 4 5 -4 36772.2 524.295 2
 4 -5 -4 36003.8 508.659 3
 -4 -5 4 34801.6 430.241 4
 -4 5 4 34971.2 330.173 2
 4 5 -4 34177 483.424 5
 -4 -5 3 1081.47 76.9539 4
 4 -5 -3 1108.21 96.7763 3
 -4 -5 3 977.927 44.2172 3
 4 5 -3 1075.61 96.8886 2
 -4 5 3 1118.6 65.7379 2
 4 5 -3 886.159 84.27 5
 -4 -5 2 38194.6 270.555 3
 4 -5 -2 38969.9 535.159 3
 4 5 -2 38735.5 524.869 5
 4 5 -2 39629.6 537.638 2
 -4 5 2 38943.3 400.477 2
 -4 5 1 2880.36 117.964 2
 4 5 -1 2783.07 146.331 5
 -4 5 1 2772.46 88.925 1
 4 -5 -1 2774.25 149.042 3
 4 5 -1 2931.86 151.116 2
 -4 -5 1 2941.12 81.162 3
 -4 5 0 32356.5 409.703 2
 4 5 0 32374.3 495.435 5
 4 -5 0 32858.5 505.921 3
 -4 -5 0 32647.5 295.574 3
 -4 5 0 32352.5 276.833 1
 -4 -5 -1 15631.3 226.526 3
 -4 5 -1 15492.6 301.324 2
 4 5 1 16108.4 351.749 5
 -4 5 -2 25323.2 405.669 2
 4 5 2 26172 453.881 5
 -4 -5 -2 25775.6 319.621 3
 4 5 3 3193.54 163.235 5
 -4 5 -3 3335.94 156.232 2
 -4 -5 -3 3334.56 126.433 3
 -4 5 -4 3521.98 170.487 2
 -4 -5 -4 3395.98 137.759 3
 4 5 4 3414.12 170.397 5
 -4 5 -5 4374.48 197.07 2
 4 5 5 4308.57 193.246 5
 -4 -5 -5 4440.22 165.189 3
 4 5 6 4094.98 191.816 5
 -4 5 -6 3983.36 195.698 2
 -4 -5 -6 4115.52 171.731 3
 4 5 7 5931.43 233.952 5
 -4 5 -7 5325.95 234.459 2
 -4 -5 -7 5521.36 208.322 3
 -4 -5 -8 21691.8 432.961 3
 -4 5 -8 21540.6 485.29 2
 4 5 8 21865.7 455.403 5
 -4 5 -9 1432.85 141.534 2
 4 5 9 1344.78 120.347 5
 -4 -5 -9 1371.34 121.14 3
 4 5 10 15697.5 400.077 5
 -4 5 -10 15208.2 439.624 2
 -4 -5 -10 15798.5 403.097 3
 -4 5 -11 69.3055 67.1637 2
 4 5 11 -12.2305 33.0058 5
 -4 -5 -11 70.949 57.9237 3
 -4 5 -12 14453.5 461.684 2
 4 5 12 13965.3 392.309 5
 -4 -5 -12 14790.9 426.31 3
 4 5 13 810.476 103.452 5
 -4 5 -13 770.61 125.84 2
 -4 -5 -13 680.901 107.687 2
 -4 -5 -13 589.167 97.7382 3
 -4 -5 -14 1530.11 156.284 3
 -4 -5 -14 1366.9 152.861 2
 4 5 14 1492.49 138.115 5
 -4 5 -14 1550.74 174.847 2
 4 5 15 751.416 103.774 5
 -4 5 -15 651.542 123.066 2
 -4 -5 -15 618.918 111.814 2
 -4 -5 -15 846.812 119.074 3
 -4 -5 -16 504.865 108.137 2
 -4 5 -16 703.178 125.627 2
 -4 -5 -16 547.649 103.024 3
 -4 -5 -17 4.18184 52.0179 3
 -4 -5 -17 89.1275 68.4112 2
 -4 5 -17 -11.064 68.0764 2
 -4 -5 -18 4026.51 277.537 3
 -4 5 -18 4140.45 308.072 2
 -4 -5 -18 3608.47 272.764 2
 -4 -5 -19 -74.224 78.5222 2
 -4 5 -19 -39.9164 68.2941 2
 -4 -5 -19 100.126 84.9461 3
 -4 5 -20 7521.9 434.177 2
 -4 -5 -20 6810.92 383.861 3
 -4 -5 -20 6223.14 371.266 2
 -4 5 -21 703.287 161.03 2
 -4 -5 -21 443.742 116.172 3
 -4 5 -22 7885.51 471.159 2
 -4 -5 -22 7996.35 443.069 3
 4 -6 -25 5047.56 347.343 3
 4 6 -25 4665.95 330.708 2
 4 6 -24 -76.8474 63.056 2
 4 -6 -24 116.281 70.1768 3
 4 6 -23 3366.58 264.333 2
 -4 -6 23 2797.08 246.307 4
 -4 -6 22 28.4677 52.3205 4
 4 -6 -22 -0.27977 58.0231 3
 4 6 -22 100.244 71.4889 2
 4 6 -21 322.682 89.0221 2
 -4 -6 21 449.427 101.191 4
 4 6 -20 -10.8574 55.8632 2
 -4 -6 20 -36.0232 66.2325 4
 4 -6 -20 10.7144 56.2905 3
 -4 -6 19 1412.67 161.746 4
 4 -6 -19 1468.92 161.39 3
 4 6 -19 1413.33 156.985 2
 4 6 -18 341.907 83.2882 2
 -4 -6 18 340.18 93.1731 4
 4 -6 -18 280.983 76.4315 3
 -4 -6 17 8966.78 369.653 4
 4 6 -17 9594.97 374.032 2
 4 -6 -17 9253.39 367.51 3
 4 -6 -16 -13.8202 52.6237 3
 4 6 -16 -0.98707 60.9613 2
 -4 -6 16 -5.84209 57.2223 4
 -4 -6 16 12.0477 46.0297 1
 -4 -6 15 22145.8 545.001 4
 -4 -6 15 21578.2 424.332 1
 4 -6 -15 22163.9 531.97 3
 4 6 -15 22402 543.425 2
 4 6 -14 -8.89077 62.9529 2
 -4 -6 14 -32.081 47.2595 1
 -4 -6 14 -41.2085 58.3885 4
 4 -6 -14 -64.0703 63.1293 3
 4 6 -13 37089.5 663.381 2
 -4 -6 13 35975.4 515.44 1
 4 -6 -13 37084.3 654.687 3
 -4 -6 13 36796.2 657.682 4
 4 -6 -12 12.0864 41.0199 3
 -4 -6 12 42.5579 50.3048 4
 4 6 -12 -40.1087 59.8549 2
 -4 -6 12 29.9346 32.5105 1
 4 -6 -11 28251.4 540.971 3
 4 6 -11 29578.1 563.762 2
 4 6 -11 30140.7 453.923 5
 -4 -6 11 29815.3 553.082 4
 -4 -6 11 28262.5 436.898 1
 4 6 -10 511.93 79.517 2
 4 -6 -10 556.204 83.3269 3
 4 6 -10 496.541 63.158 5
 -4 -6 10 591.714 83.1933 4
 -4 -6 10 580.206 66.2451 1
 4 -6 -9 14000.8 365.36 3
 4 6 -9 14007.8 319.526 5
 -4 -6 9 13937.4 296.499 1
 -4 -6 9 14529.7 360.042 4
 4 6 -9 14455.7 376.971 2
 -4 -6 8 3997.24 158.515 1
 4 -6 -8 4055.55 193.354 3
 4 6 -8 4301.28 206.486 2
 4 6 -8 4166.2 178.446 5
 -4 -6 8 4098.23 187.662 4
 -4 -6 7 595.171 68.1711 1
 4 -6 -7 494.631 74.3705 3
 4 6 -7 428.081 62.6583 5
 4 6 -7 488.637 73.1198 2
 -4 -6 7 505.188 67.7549 4
 4 -6 -6 2887.01 159.896 3
 4 6 -6 2798.8 147.977 5
 4 6 -6 2740.8 162.377 2
 -4 6 6 2706.19 100.925 2
 -4 -6 6 2879.3 144.442 4
 -4 -6 6 2618.26 127.916 1
 4 -6 -5 6182.87 228.023 3
 -4 -6 5 6134.78 137.935 3
 4 6 -5 6331.95 222.084 5
 -4 6 5 6111.61 151.865 2
 -4 -6 5 6380.58 205.116 4
 4 6 -5 6321.5 236.29 2
 4 6 -4 40.6629 41.6422 2
 -4 -6 4 62.7296 20.6758 3
 4 -6 -4 48.9298 34.5802 3
 -4 -6 4 59.1796 30.6099 4
 -4 6 4 55.9836 28.2093 2
 4 6 -4 88.5362 41.8304 5
 -4 6 3 24732.7 333.036 2
 -4 -6 3 25410.7 258.407 3
 -4 -6 3 23351.2 358.735 4
 4 -6 -3 25086.5 454.811 3
 4 6 -3 24772.7 448.283 5
 4 6 -3 25616 466.504 2
 -4 -6 2 214.895 40.9361 4
 4 -6 -2 151.548 49.3832 3
 -4 6 2 130.512 38.5697 2
 4 6 -2 95.5258 43.7954 5
 -4 -6 2 174.603 26.6229 3
 4 6 -2 187.957 50.8979 2
 -4 6 1 21613.5 345.434 2
 4 6 -1 22038.1 433.876 5
 -4 6 1 21337.3 242.092 1
 4 6 -1 21828.9 428.151 2
 4 -6 -1 21754.3 426.109 3
 -4 -6 1 20687.6 302.769 4
 -4 -6 1 22317.6 257.429 3
 -4 -6 0 363.086 38.8455 3
 4 -6 0 350.095 65.7264 3
 4 6 0 337.988 61.1865 5
 4 6 0 335.389 62.0319 2
 -4 6 0 267.572 47.7609 2
 -4 -6 0 277.467 38.3735 4
 -4 6 0 286.249 27.5087 1
 4 6 1 9359.54 290.448 5
 4 -6 1 9773.5 295.328 3
 -4 -6 -1 9081.52 175.545 4
 -4 6 -1 9805.17 253.409 2
 -4 -6 -1 9622.2 192.875 3
 -4 6 -2 594.85 65.2824 2
 4 6 2 653.429 83.3681 5
 -4 -6 -2 617.356 56.5072 3
 -4 -6 -2 586.626 42.16 4
 4 6 3 4075.49 197.348 5
 -4 6 -3 3858.17 176.704 2
 -4 -6 -3 3550.71 90.0922 4
 -4 -6 -3 3894.07 142.8 3
 4 6 4 5240.44 223.492 5
 -4 6 -4 4965.43 207.215 2
 -4 -6 -4 5287.12 94.586 4
 -4 -6 -4 5107.94 172.363 3
 -4 6 -5 43.4534 41.688 2
 4 6 5 11.0202 30.391 5
 -4 -6 -5 38.8683 33.0544 3
 -4 -6 -6 5198.77 197.177 3
 4 6 6 5870.74 243.225 5
 -4 6 -6 5639.29 241.821 2
 -4 6 -7 9942.4 328.982 2
 4 6 7 10462.1 329.911 5
 -4 -6 -7 9798.64 281.605 3
 -4 6 -8 719.467 100.703 2
 4 6 8 459.525 76.5668 5
 -4 -6 -8 624.469 79.7908 3
 -4 6 -9 5980.23 275.846 2
 4 6 9 6453.69 268.257 5
 -4 -6 -9 6160.25 245.208 3
 -4 6 -10 471.023 94.9508 2
 4 6 10 492.008 81.9022 5
 -4 -6 -10 628.913 86.7483 3
 -4 -6 -11 10790.9 351.492 3
 4 6 11 10542.6 355.184 5
 -4 6 -11 10920.9 401.239 2
 -4 -6 -12 528.137 93.9658 3
 -4 6 -12 473.57 104.793 2
 4 6 12 543.4 89.5116 5
 -4 -6 -13 5576.65 275.962 3
 -4 6 -13 5564.72 309.458 2
 4 6 13 5382.24 264.077 5
 -4 6 -14 1236.71 156.695 2
 4 6 14 1311.72 134.725 5
 -4 -6 -14 1304.79 140.187 3
 -4 -6 -14 1373.42 157.123 2
 4 6 15 347.577 77.2135 5
 -4 6 -15 200.122 107.616 2
 -4 -6 -15 196.186 68.6594 2
 -4 -6 -15 324.758 82.2819 3
 -4 -6 -16 545.286 113.882 2
 -4 6 -16 411.18 127.825 2
 -4 -6 -16 446.806 96.0671 3
 -4 6 -17 2981.15 262.687 2
 -4 -6 -17 2727.06 228.564 3
 -4 -6 -17 2151.05 206.5 2
 -4 6 -18 316.316 114.569 2
 -4 -6 -18 434.046 108.024 3
 -4 -6 -18 237.256 84.0007 2
 -4 -6 -19 8653.5 419.553 3
 -4 6 -19 9317.19 480.506 2
 -4 -6 -19 8745 429.912 2
 -4 6 -20 567.436 153.096 2
 -4 -6 -20 671.486 142.754 3
 -4 6 -21 12396.2 582.19 2
 -4 -6 -21 11699.2 518.22 3
 4 7 -26 4228.74 335.486 2
 4 7 -25 36.9762 71.9931 2
 4 -7 -24 2646.28 250.2 3
 4 7 -24 2319.33 237.027 2
 4 7 -23 472.011 119.535 2
 4 -7 -23 554.785 125.98 3
 4 7 -22 1722.86 197.315 2
 -4 -7 22 1670.87 193.68 4
 4 -7 -22 1861.42 202.051 3
 4 7 -21 927.43 143.165 2
 -4 -7 21 1119.64 158.879 4
 4 7 -20 24.5456 56.3255 2
 -4 -7 20 82.6676 60.3104 4
 4 -7 -20 -11.6786 59.5242 3
 4 -7 -19 2884.51 267.1 3
 4 7 -19 3651.64 259.385 2
 -4 -7 19 3338.46 247.424 4
 4 7 -18 1169.48 150.855 2
 4 -7 -18 1068.75 162.193 3
 -4 -7 18 1252.21 153.651 4
 -4 -7 17 5591.47 302.185 4
 4 7 -17 5652.32 307.337 2
 4 -7 -17 5070.47 278.615 3
 -4 -7 16 8103.81 352.867 4
 4 7 -16 8313.57 359.599 2
 4 -7 -16 8160.12 344.808 3
 4 7 -15 2960.34 216.957 2
 -4 -7 15 2719.94 205.641 4
 4 -7 -15 2730.93 195.015 3
 -4 -7 14 24394.7 571.263 4
 4 7 -14 22623.3 560.187 2
 4 -7 -14 22441.8 544.664 3
 4 -7 -13 1410.58 137.491 3
 -4 -7 13 1449.63 145.07 4
 -4 -7 13 1593.82 112.584 1
 4 7 -13 1437.05 147.088 2
 4 -7 -12 32757.7 615.863 3
 -4 -7 12 34342.8 634.886 4
 4 7 -12 32213.8 636.392 2
 -4 -7 12 32925.8 485.918 1
 -4 -7 11 84.9508 34.1855 1
 4 7 -11 116.381 42.2858 5
 4 7 -11 21.0927 54.0167 2
 -4 -7 11 62.3231 47.233 4
 4 -7 -11 23.595 46.3544 3
 4 -7 -10 15455.3 408.307 3
 4 7 -10 15479.5 357.205 5
 -4 -7 10 15843.4 406.522 4
 4 7 -10 15812.9 430.272 2
 -4 -7 10 16041.9 326.431 1
 4 -7 -9 4316.77 213.955 3
 -4 -7 9 4334.74 170.018 1
 4 7 -9 4128.23 189.572 5
 -4 -7 9 4598.8 213.982 4
 4 7 -9 4064.56 220.497 2
 4 7 -8 8950.59 311.4 2
 -4 -7 8 9310.17 290.227 4
 4 7 -8 9495.78 285.612 5
 4 -7 -8 8867.6 299.053 3
 -4 -7 8 9102.08 240.832 1
 4 7 -7 10437.3 333.609 2
 -4 7 7 10542.3 218.884 2
 -4 -7 7 10529.4 297.09 4
 4 7 -7 10894.3 309.22 5
 4 -7 -7 10664.9 321.039 3
 4 -7 -6 567.473 79.2279 3
 -4 -7 6 608.645 52.5353 3
 -4 -7 6 627.341 73.913 4
 -4 7 6 625.344 55.7022 2
 4 7 -6 481.175 77.9829 2
 4 7 -6 548.625 73.4692 5
 4 7 -5 2247.76 144.24 5
 -4 -7 5 2337.77 95.4996 3
 4 7 -5 2136.51 149.348 2
 4 -7 -5 2010.74 139.898 3
 -4 7 5 2201.44 105.09 2
 -4 -7 5 2140.47 125.058 4
 4 7 -4 1959.45 136.707 5
 4 -7 -4 2366.65 152.733 3
 -4 -7 4 2300.73 91.2619 3
 -4 -7 4 2145.93 120.784 4
 4 7 -4 2303.37 154.944 2
 -4 7 4 2368.85 115.019 2
 4 7 -3 2274.67 148.945 5
 -4 -7 3 2354.38 91.8772 3
 4 -7 -3 2236.72 147.076 3
 -4 -7 3 2371.4 122.214 4
 4 7 -3 2303.48 154.216 2
 -4 7 3 2245.09 114.271 2
 4 -7 -2 11888.1 334.57 3
 4 7 -2 11909.2 340.278 5
 4 7 -2 12269.2 345.133 2
 -4 -7 2 11368 251.168 4
 -4 -7 2 12255.4 209.217 3
 -4 7 2 11816.6 265.004 2
 -4 -7 1 3140.69 110.334 3
 -4 7 1 2870.41 92.776 1
 4 -7 -1 3149.91 174.929 3
 -4 7 1 3238.01 148.363 2
 4 7 -1 2863.65 171.77 5
 4 7 -1 2996.64 172.488 2
 -4 -7 1 2940.66 121.334 4
 -4 -7 0 13109 231.802 3
 4 -7 0 13054.6 352.507 3
 4 7 0 13176.4 359.439 5
 -4 -7 0 12743.8 236.962 4
 4 7 0 13090.1 359.363 2
 -4 7 0 12690 298.174 2
 -4 -7 -1 69.3984 26.9215 3
 4 -7 1 84.4082 55.1674 3
 -4 -7 -1 59.4374 23.8628 4
 -4 7 -1 135.09 49.8639 2
 4 7 1 49.3791 38.1917 5
 -4 7 -2 3960.73 181.33 2
 4 -7 2 4016.65 204.699 3
 4 7 2 3812.79 200.214 5
 -4 -7 -2 4610.05 123.566 4
 -4 -7 -2 4041.02 144.064 3
 -4 7 -3 1718.86 125.445 2
 -4 -7 -3 1616.86 98.0199 3
 4 7 3 1793.58 138.277 5
 -4 7 -4 40.8023 39.9235 2
 4 7 4 88.8185 45.5108 5
 -4 -7 -4 74.5101 33.2123 3
 4 7 5 11833.7 362.359 5
 -4 -7 -5 12338.1 291.778 3
 -4 7 -5 12608.9 357.936 2
 4 7 6 1450.35 134.276 5
 -4 7 -6 1464.81 130.663 2
 -4 -7 -6 1569.01 112.308 3
 -4 7 -7 2573.14 178.63 2
 4 7 7 2550.27 175.42 5
 -4 -7 -7 2413.87 146.653 3
 -4 7 -8 5782.55 274.341 2
 4 7 8 6153.95 274.326 5
 -4 -7 -8 6092.79 239.26 3
 -4 7 -9 -10.3187 48.8524 2
 4 7 9 29.9206 42.2153 5
 -4 -7 -9 -3.54739 37.6186 3
 4 7 10 8249.32 326.83 5
 -4 7 -10 8750.74 357.566 2
 -4 -7 -10 9166.05 317.705 3
 4 7 11 448.063 85.952 5
 -4 7 -11 454.903 98.7591 2
 -4 -7 -11 424.53 84.0856 3
 -4 7 -12 6250.01 324.846 2
 4 7 12 6434.2 299.648 5
 -4 -7 -12 6535.61 291.211 3
 4 7 13 6085.42 297.728 5
 -4 7 -13 6167.34 332.884 2
 -4 -7 -13 6426.86 297.659 3
 -4 7 -14 627.697 133.239 2
 4 7 14 801.879 118.639 5
 -4 -7 -14 745.647 111.946 3
 -4 7 -15 4998.75 334.17 2
 4 7 15 5559.88 294.503 5
 -4 -7 -15 5879.89 305.681 3
 -4 -7 -15 5428.28 306.994 2
 -4 -7 -16 560.67 108.849 3
 -4 -7 -16 655.94 122.195 2
 4 7 16 791.484 122.847 5
 -4 -7 -17 2041.64 203.916 2
 -4 7 -17 1883.26 241.759 2
 -4 -7 -17 2547.93 221.923 3
 -4 7 -18 4764.05 342.512 2
 -4 -7 -18 5311.07 323.622 3
 -4 -7 -19 913.334 158.15 3
 -4 7 -19 1142.09 185.812 2
 -4 -7 -20 6938.52 388.904 3
 -4 7 -20 7268.81 441.066 2
 -4 -7 -21 75.1427 71.8748 3
 4 8 -24 1695.55 213.1 2
 4 -8 -23 2278.67 232.463 3
 4 8 -23 1813.03 216.289 2
 4 -8 -22 4382.83 308.093 3
 4 8 -22 3532.04 288.489 2
 4 8 -21 1264.51 169.848 2
 4 -8 -21 544.54 173.811 3
 -4 -8 20 6478.63 361.382 4
 4 8 -20 6461.02 365.225 2
 4 8 -19 -27.2292 67.1067 2
 -4 -8 19 -12.4276 58.5623 4
 4 -8 -19 20.2257 53.9459 3
 4 8 -18 8637.72 401.237 2
 4 -8 -18 7400.52 380.438 3
 4 -8 -17 164.275 75.8887 3
 -4 -8 17 104.43 83.2922 4
 4 8 -17 318.568 93.1949 2
 4 8 -16 6237.23 329.56 2
 -4 -8 16 5999.92 313.219 4
 4 -8 -16 6504.86 316.203 3
 -4 -8 15 2275.39 193.073 4
 4 8 -15 2287.85 198.585 2
 4 -8 -15 2358.06 187.297 3
 4 -8 -14 3229.08 215.739 3
 -4 -8 14 3377.15 224.852 4
 4 8 -14 2951.17 219.422 2
 4 -8 -13 8779.9 338.805 3
 -4 -8 13 8584.71 340.218 4
 4 8 -13 8925.73 364.094 2
 4 -8 -12 73.9179 52.4522 3
 -4 -8 12 64.7548 51.5011 4
 4 8 -12 196.544 63.5899 2
 4 -8 -11 5464.98 258.264 3
 4 8 -11 5191.22 267.471 2
 -4 -8 11 5727.08 262.694 4
 4 -8 -10 2784.75 186.174 3
 4 8 -10 2542.16 159.98 5
 -4 -8 10 2604.66 175.697 4
 4 8 -10 2616.67 193.829 2
 4 8 -9 3134.36 177.27 5
 4 -8 -9 2893.45 183.366 3
 -4 -8 9 3097.56 183.871 4
 4 8 -9 3083.03 200.386 2
 4 8 -8 9180.52 300.822 5
 4 -8 -8 9295.91 321.475 3
 -4 -8 8 9045.36 299.302 4
 4 8 -8 9157.43 335.333 2
 4 -8 -7 5441.06 243.121 3
 -4 8 7 5462.93 174.111 2
 4 8 -7 5065.39 226.015 5
 -4 -8 7 5325.76 222.658 4
 4 8 -7 5554.63 263.151 2
 -4 -8 7 5603.57 174.711 3
 4 -8 -6 17035.6 423.325 3
 -4 -8 6 17752.6 293.117 3
 -4 -8 6 16987.7 382.378 4
 4 8 -6 18641.4 437.426 5
 -4 8 6 17550.5 317.245 2
 4 8 -6 19073.3 468.227 2
 -4 -8 5 281.523 43.952 3
 4 -8 -5 303.22 66.0448 3
 4 8 -5 306.93 63.6229 5
 -4 -8 5 344.19 59.675 4
 -4 8 5 396.545 54.9594 2
 4 8 -5 253.174 64.406 2
 -4 8 4 7874.85 225.175 2
 -4 -8 4 7565.69 236.603 4
 -4 -8 4 8037.98 188.661 3
 4 -8 -4 7602.89 282.008 3
 4 8 -4 7975.58 293.326 5
 4 8 -4 7790.37 295.811 2
 -4 -8 3 1533.95 82.4965 3
 4 -8 -3 1397.24 123.177 3
 -4 -8 3 1408.12 101.519 4
 4 8 -3 1406.92 127.583 2
 4 8 -3 1441.43 129.098 5
 -4 8 3 1453.66 100.597 2
 -4 -8 2 7886.45 223.899 4
 4 -8 -2 8106.35 288.578 3
 4 8 -2 7640.66 289.642 5
 -4 -8 2 8266.92 190.941 3
 4 8 -2 8482.35 308.837 2
 -4 8 2 7975.83 237.421 2
 4 8 -1 3213.02 191.533 5
 4 -8 -1 3421.08 190.881 3
 -4 -8 1 3687.78 131.103 3
 4 8 -1 3243.02 190.179 2
 -4 -8 1 3194.47 137.138 4
 -4 8 1 3357.29 161.064 2
 -4 8 0 10.7306 33.2457 2
 -4 -8 0 83.4188 26.9548 3
 4 -8 0 61.5692 44.2617 3
 4 8 0 64.256 43.0664 5
 4 8 0 91.2313 55.3942 2
 -4 -8 0 66.3757 30.8155 4
 -4 -8 -1 2699.7 121.026 3
 4 8 1 2683.64 175.842 2
 -4 -8 -1 2824.31 114.554 4
 4 -8 1 2788.84 173.386 3
 4 8 1 2464.45 169.582 5
 -4 8 -1 2939.44 159.838 2
 4 8 2 3271.66 199.424 5
 4 -8 2 3229.73 191.797 3
 -4 8 -2 3479.18 181.786 2
 -4 -8 -2 3343.38 143.597 3
 -4 8 -3 115.673 43.9756 2
 4 -8 3 174.606 61.8648 3
 4 8 3 175.741 58.4413 5
 -4 -8 -3 129.083 29.8029 3
 4 8 4 4752.9 242.847 5
 -4 8 -4 4937.32 231.553 2
 -4 -8 -4 5053.13 186.93 3
 -4 8 -5 1488.98 133.716 2
 4 8 5 1447.14 140.526 5
 -4 -8 -5 1534.1 111.069 3
 4 8 6 3823.4 226.323 5
 -4 8 -6 3671.35 212.134 2
 -4 -8 -6 3946.52 181.436 3
 -4 8 -7 3748.66 223.437 2
 4 8 7 3344.17 215.219 5
 -4 -8 -7 3594 181.519 3
 -4 -8 -8 1555.17 126.451 3
 4 8 8 1490.06 147.693 5
 -4 8 -8 1212.44 135.77 2
 -4 8 -9 4238.52 252.11 2
 4 8 9 3832.23 235.274 5
 -4 -8 -9 4192.59 214.853 3
 4 8 10 407.275 86.8921 5
 -4 8 -10 549.515 118.236 2
 -4 -8 -10 435.924 81.6075 3
 -4 8 -11 3551.5 246.568 2
 4 8 11 3482.1 228.503 5
 -4 -8 -11 3417.62 207.627 3
 -4 8 -12 4638.62 287.966 2
 4 8 12 5132.56 283.386 5
 -4 -8 -12 5412.44 270.879 3
 -4 -8 -13 1068.58 134.688 3
 -4 8 -13 930.477 145.493 2
 4 8 13 1089.58 140.068 5
 -4 8 -14 10575 474.053 2
 -4 -8 -14 11012.6 412.491 3
 4 8 14 11370 430.82 5
 4 8 15 37.3265 51.6624 5
 -4 8 -15 52.9315 97.101 2
 -4 -8 -15 163.62 74.4311 3
 -4 8 -16 7946.27 445.043 2
 -4 -8 -16 7891.54 382.119 2
 4 8 16 9543.11 410.603 5
 -4 -8 -16 9265.56 401.366 3
 -4 8 -17 1320.84 186.071 2
 -4 -8 -17 1731.44 187.272 3
 -4 -8 -18 4114.53 287.838 3
 -4 8 -18 4144.29 327.351 2
 -4 8 -19 3105.05 296.073 2
 -4 -8 -19 3102.12 257.808 3
 -4 -8 -20 316.731 104.21 3
 4 9 -23 3976 324.646 2
 4 -9 -22 215.889 87.7716 3
 4 9 -22 396.667 120.743 2
 4 9 -21 6290.83 384.589 2
 4 -9 -21 6424.53 364.665 3
 4 -9 -20 78.8692 57.4877 3
 4 9 -20 172.281 81.0407 2
 4 9 -19 9297.3 444.101 2
 4 -9 -19 9389.99 417.758 3
 4 -9 -18 -11.9977 60.0421 3
 4 9 -18 52.4464 71.7991 2
 -4 -9 18 69.0679 96.8453 4
 4 9 -17 8721.34 408.598 2
 4 -9 -17 9279.44 398.837 3
 4 -9 -16 71.4232 53.3079 3
 -4 -9 16 23.1477 52.3835 4
 4 9 -16 126.052 73.0436 2
 4 9 -15 3758.53 258.307 2
 -4 -9 15 3715.4 250.52 4
 4 -9 -15 3581.52 241.559 3
 4 -9 -14 871.029 120.53 3
 4 9 -14 639.653 111.125 2
 -4 -9 14 573.981 99.5663 4
 -4 -9 13 -11.6888 59.2855 4
 4 -9 -13 13.6575 46.9961 3
 4 9 -13 98.3174 74.6232 2
 4 -9 -12 585.604 100.747 3
 4 9 -12 591.553 107.779 2
 -4 -9 12 662.155 104.794 4
 4 -9 -11 10845.1 379.929 3
 -4 -9 11 10994.9 375.436 4
 4 9 -11 11110.5 411.207 2
 -4 -9 10 276.191 73.2019 4
 4 -9 -10 287.819 70.1124 3
 4 9 -10 320.282 70.2397 5
 4 9 -10 387.527 95.3015 2
 4 9 -9 15929.5 422.616 5
 4 -9 -9 14838.8 430.735 3
 -4 -9 9 14919.2 411.687 4
 4 9 -9 15592.4 469.989 2
 4 9 -8 170.479 60.9835 5
 4 -9 -8 91.3829 47.318 3
 -4 -9 8 21.7131 41.0389 4
 4 9 -8 15.9426 60.4034 2
 4 9 -7 21753.7 500.078 5
 -4 -9 7 21092.8 458.427 4
 4 -9 -7 21601.7 504.038 3
 4 9 -7 22549.7 551.735 2
 4 9 -6 12.0097 33.711 5
 4 -9 -6 53.9368 54.4869 3
 -4 -9 6 0.66606 39.1766 4
 -4 9 6 100.377 48.1095 2
 4 9 -6 77.7237 49.0259 2
 4 -9 -5 17086.4 442.404 3
 -4 9 5 16945.9 349.105 2
 4 9 -5 17659.6 460.711 5
 -4 -9 5 17223.6 389.5 4
 4 9 -5 17646.1 475.037 2
 4 -9 -4 1133.63 121.785 3
 -4 -9 4 1120.11 101.1 4
 4 9 -4 933.357 113.843 5
 -4 9 4 1122.34 95.5577 2
 4 9 -4 1025.44 117.76 2
 4 -9 -3 10003.4 337.457 3
 4 9 -3 9927.86 349.175 5
 -4 -9 3 9890.63 276.165 4
 4 9 -3 10174.4 355.942 2
 -4 9 3 10035.9 281.44 2
 4 -9 -2 4682.33 233.542 3
 -4 9 2 4879.67 201.389 2
 4 9 -2 4651.62 243.613 5
 4 9 -2 4614.91 235.969 2
 -4 -9 2 4675.88 183.457 4
 -4 9 1 1799.52 127.704 2
 4 9 -1 1706.87 154.954 5
 4 9 -1 1875.61 155.546 2
 -4 -9 1 1909.49 114.202 4
 4 -9 -1 1726.35 146.902 3
 -4 -9 0 2658.61 124.71 3
 4 -9 0 2593.33 178.378 3
 4 9 0 2414.65 178.103 5
 4 9 0 2436.27 174.31 2
 -4 -9 0 2641.53 126.007 4
 -4 9 0 2498.67 155.588 2
 -4 -9 -1 1868.65 109.356 3
 4 -9 1 1848.94 149.994 3
 4 9 1 1806.29 156.699 5
 4 9 1 1721.4 146.649 2
 -4 9 -1 1781.79 135.052 2
 -4 9 -2 327.102 75.5074 2
 -4 -9 -2 326.489 51.5769 3
 4 -9 2 212.714 64.1759 3
 4 9 2 180.384 61.8374 5
 -4 -9 -3 5843.24 203.998 3
 4 -9 3 6191.11 277.548 3
 4 9 3 6314.27 295.429 5
 -4 9 -3 5890.17 255.029 2
 -4 -9 -4 250.263 51.977 3
 -4 9 -4 212.475 58.8537 2
 4 -9 4 182.798 62.5366 3
 4 9 4 126.695 55.8223 5
 4 9 5 8178.21 341.601 5
 -4 -9 -5 8944.37 269.646 3
 -4 9 -5 8473.01 325.148 2
 -4 9 -6 1142.84 130.044 2
 4 9 6 1219.2 138.516 5
 -4 -9 -6 1314.11 112.077 3
 4 9 7 6947.34 322.456 5
 -4 9 -7 7253.5 321.375 2
 -4 -9 -7 7286.88 264.488 3
 -4 9 -8 2827.09 209.979 2
 4 9 8 2912.11 213.834 5
 -4 -9 -8 3045.8 178.364 3
 -4 9 -9 1209.64 148.455 2
 4 9 9 956.679 130.63 5
 -4 -9 -9 1162.87 121.733 3
 -4 9 -10 2420.79 208.352 2
 4 9 10 2639.38 210.599 5
 -4 -9 -10 2435 176.779 3
 4 9 11 964.406 134.183 5
 -4 9 -11 1010.34 144.643 2
 -4 -9 -11 1078.94 117.255 3
 -4 9 -12 1955.85 198.983 2
 4 9 12 1903.31 186.366 5
 -4 -9 -12 2260.87 177.04 3
 -4 9 -13 9697.33 435.906 2
 -4 -9 -13 9344.95 375.865 3
 4 9 13 9392.1 409.056 5
 -4 9 -14 633.302 137.795 2
 4 9 14 476.705 99.9065 5
 -4 -9 -14 536.97 110.685 3
 -4 9 -15 9011.26 445.404 2
 4 9 15 9955.24 434.694 5
 -4 -9 -15 9486.98 403.654 3
 4 9 16 191.205 78.5804 5
 -4 -9 -16 100.776 82.2494 3
 -4 9 -16 166.565 101.134 2
 -4 9 -17 6035.37 389.786 2
 4 9 17 6720.35 369.217 5
 -4 -9 -17 6406.41 350.79 3
 -4 9 -18 109.028 78.1122 2
 -4 -9 -18 414.307 116.636 3
 -4 -9 -19 3741.74 285.25 3
 -4 -9 -20 1430.65 185.575 3
 4 10 -22 2664.21 268.152 2
 4 -10 -21 42.4762 69.6038 3
 4 10 -21 93.0007 91.6283 2
 4 10 -20 7155.87 415.295 2
 4 -10 -20 7881.7 405.029 3
 4 10 -19 259.375 100.117 2
 4 -10 -19 84.2701 62.1549 3
 4 10 -18 9271.47 450.802 2
 4 -10 -18 10130.6 433.834 3
 4 -10 -17 44.5305 56.2042 3
 4 10 -17 0.59299 78.5529 2
 4 10 -16 4901.63 321.617 2
 4 -10 -16 5019.97 296.127 3
 4 -10 -15 227.322 82.7233 3
 -4 -10 15 398.729 97.9882 4
 4 10 -15 206.545 75.7308 2
 4 -10 -14 626.453 109.641 3
 -4 -10 14 449.54 97.9247 4
 4 10 -14 545.558 110.051 2
 4 -10 -13 590.815 98.9913 3
 -4 -10 13 451.625 92.2063 4
 4 10 -13 399.029 98.1366 2
 -4 -10 12 937.081 127.059 4
 4 -10 -12 851.789 118.635 3
 4 10 -12 958.293 138.86 2
 4 -10 -11 880.245 118.345 3
 -4 -10 11 816.445 113.426 4
 4 10 -11 1045 139.613 2
 4 -10 -10 8299.45 339.412 3
 -4 -10 10 7792.87 320.812 4
 4 10 -10 8509.46 373.356 2
 -4 -10 9 990.261 116.696 4
 4 -10 -9 1036.49 123.454 3
 4 10 -9 1090.8 141.762 2
 4 10 -9 958.938 116.056 5
 4 -10 -8 21099.8 526.209 3
 4 10 -8 21324.5 575.638 2
 4 10 -8 21556.6 527.314 5
 -4 -10 8 21249.6 497.595 4
 4 10 -7 2045.05 170.716 5
 4 -10 -7 2194.12 173.695 3
 -4 -10 7 2537.97 170.922 4
 4 10 -7 2298.95 192.545 2
 4 -10 -6 16164.8 452.362 3
 4 10 -6 18032.7 498.481 5
 4 10 -6 17551.5 504.95 2
 -4 -10 6 16912.2 418.732 4
 4 -10 -5 6673.6 290.24 3
 4 10 -5 6366.83 299.152 5
 -4 -10 5 6645.7 255.474 4
 4 10 -5 6483.77 306.881 2
 4 -10 -4 11615.8 379.778 3
 4 10 -4 11693.7 404.093 5
 -4 -10 4 11569.1 325.448 4
 4 10 -4 11549 399.684 2
 -4 10 4 11051.9 310.758 2
 4 -10 -3 3588.78 213.124 3
 4 10 -3 3542.15 223.339 2
 4 10 -3 3469.2 222.523 5
 -4 -10 3 3365.59 170.012 4
 -4 10 3 3563.02 183.776 2
 4 -10 -2 6782.59 293.113 3
 4 10 -2 6798.89 312.739 5
 4 10 -2 6916.82 306.235 2
 -4 10 2 6859.25 255.481 2
 4 -10 -1 1042.41 120.273 3
 4 10 -1 1006.48 123.471 5
 4 10 -1 856.709 115.948 2
 -4 10 1 1145.1 110.128 2
 4 -10 0 146.042 66.998 3
 4 10 0 97.1309 57.5685 5
 4 10 0 28.5692 44.0441 2
 -4 10 0 71.213 44.5511 2
 4 10 1 726.912 106.559 2
 4 10 1 719.9 109.322 5
 -4 10 -1 922.977 104.898 2
 4 -10 1 773.062 106.961 3
 -4 10 -2 4456.57 227.893 2
 4 10 2 4580.74 266.879 5
 4 -10 2 4392.25 237.665 3
 4 -10 3 1059.01 123.876 3
 4 10 3 1006.71 131.558 5
 -4 10 -3 1132.8 126.764 2
 4 -10 4 9015.99 353.114 3
 4 10 4 9223.53 380.513 5
 -4 10 -4 9162.2 343.361 2
 -4 10 -5 221.91 79.8957 2
 4 -10 5 168.968 66.0191 3
 4 10 5 172.806 71.3993 5
 4 10 6 10401.9 413.855 5
 -4 10 -6 10710.8 394.569 2
 4 10 7 116.024 53.8317 5
 -4 10 -7 109.464 59.8332 2
 4 10 8 1608.85 168.062 5
 -4 -10 -8 1791.68 141.183 3
 -4 10 -8 1633.52 172.395 2
 -4 10 -9 793.906 130.791 2
 4 10 9 785.281 126.037 5
 -4 -10 -9 1006.27 113.177 3
 4 10 10 -16.6642 56.09 5
 -4 10 -10 -12.3319 65.5263 2
 -4 -10 -10 21.4273 50.9154 3
 -4 10 -11 1325.32 165.59 2
 4 10 11 1307.85 157.564 5
 -4 -10 -11 1625.85 148.95 3
 -4 10 -12 3803.16 279.114 2
 4 10 12 3789.02 272.591 5
 -4 -10 -12 3474.12 223.737 3
 -4 10 -13 1667.42 200.601 2
 -4 -10 -13 1663.04 160.6 3
 4 10 13 1770.43 192.938 5
 -4 10 -14 6776.49 391.639 2
 4 10 14 6882.23 372.118 5
 -4 -10 -14 7188.46 342.733 3
 -4 10 -15 1108.27 172.381 2
 -4 -10 -15 1369.95 160.942 3
 4 10 15 973.722 151.319 5
 -4 10 -16 6442.85 403.559 2
 4 10 16 6927.75 385.677 5
 -4 -10 -16 7034.9 359.689 3
 4 10 17 131.931 68.7292 5
 -4 10 -17 248.315 109.669 2
 -4 -10 -17 289.154 90.186 3
 -4 -10 -18 4893.55 319.893 3
 4 11 -20 61.7526 77.13 2
 4 -11 -20 33.05 78.9007 3
 4 11 -19 5732.45 378.509 2
 4 -11 -19 5578.55 339.41 3
 4 -11 -18 -118.147 79.3595 3
 4 11 -18 50.9899 80.3744 2
 4 11 -17 3052.18 267.64 2
 4 -11 -17 3035.77 241.866 3
 4 -11 -16 879.135 131.338 3
 4 11 -16 639.757 139.375 2
 4 11 -15 2248.76 227.26 2
 4 -11 -15 2213.45 204.23 3
 4 -11 -14 4002.6 263.387 3
 4 11 -14 3267.58 263.509 2
 4 -11 -13 220.622 72.9785 3
 4 11 -13 173.624 86.7705 2
 4 -11 -12 3859.91 247.757 3
 4 11 -12 3993.47 276.602 2
 4 -11 -11 1493.7 157.194 3
 4 11 -11 1283.86 167.83 2
 4 -11 -10 4467.09 260.085 3
 4 11 -10 4348.32 283.825 2
 4 -11 -9 6112.63 301.2 3
 4 11 -9 6105.39 332.006 2
 4 11 -8 569.945 104.941 5
 4 -11 -8 480.02 93.8027 3
 4 11 -8 539.296 109.285 2
 4 11 -7 19721.1 549.849 5
 4 -11 -7 20346.5 533.988 3
 4 11 -7 20899.1 586.624 2
 4 -11 -6 16.3161 56.9449 3
 4 11 -6 284.58 86.0849 5
 4 11 -6 187.947 85.9802 2
 4 -11 -5 13356.7 425.375 3
 4 11 -5 13366.6 456.825 5
 4 11 -5 14059.6 470.746 2
 4 -11 -4 835.144 113.311 3
 4 11 -4 771.61 114.07 5
 4 11 -4 749.288 117.639 2
 4 -11 -3 2126.28 182.571 3
 4 11 -3 2211.9 189.328 5
 -4 11 3 2499.82 166.271 2
 4 11 -3 2387.44 195.263 2
 4 11 -2 15.8033 65.0336 2
 4 11 -2 -18.7826 52.237 5
 -4 11 2 12.6089 40.2261 2
 4 -11 -2 -144.48 82.8103 3
 4 11 -1 42.7922 58.5599 2
 4 11 -1 33.668 54.0991 5
 4 -11 -1 66.0361 62.0226 3
 -4 11 1 171.643 60.9973 2
 4 11 0 44.0505 54.0276 2
 4 -11 0 55.0721 48.0594 3
 4 11 0 109.211 63.2555 5
 -4 11 0 147.525 66.4223 2
 4 11 1 4152.07 266.098 5
 4 11 1 4700.8 266.981 2
 -4 11 -1 4463.4 236.17 2
 4 -11 1 4597.24 253.736 3
 4 -11 2 40.3523 53.942 3
 4 11 2 58.793 52.7855 5
 -4 11 -2 126.819 66.406 2
 4 -11 3 11619.1 401.931 3
 4 11 3 10549.2 425.932 5
 -4 11 -3 11409.9 390.959 2
 4 11 4 58.3448 60.3581 5
 4 -11 4 -37.8221 57.496 3
 -4 11 -4 87.7482 57.5721 2
 4 -11 5 12024.4 420.467 3
 4 11 5 11489.8 453.415 5
 -4 11 -5 12376.2 429.339 2
 4 -11 6 -31.6694 59.0739 3
 -4 11 -6 32.765 58.7745 2
 4 11 6 8.57999 53.2212 5
 4 11 7 6492.73 349.243 5
 4 -11 7 6160.03 314.528 3
 -4 11 -7 6045.7 314.748 2
 -4 11 -8 201.575 72.7342 2
 4 11 8 239.832 73.5335 5
 -4 11 -9 938.219 140.332 2
 4 11 9 1217.08 159.714 5
 4 11 10 -85.8583 72.5988 5
 -4 11 -10 -9.88733 64.3714 2
 -4 11 -11 377.24 116.217 2
 4 11 11 356.976 99.5473 5
 -4 11 -12 -103.766 80.0325 2
 4 11 12 -18.6952 62.2644 5
 4 11 13 3088.9 264.879 5
 -4 11 -13 2684.79 251.613 2
 4 11 14 722.58 136.456 5
 -4 11 -14 476.641 125.466 2
 4 11 15 6785.75 396.807 5
 -4 11 -15 6462.19 407.497 2
 -4 11 -16 381.517 132.151 2
 4 11 16 309.466 105.318 5
 4 11 17 5316.39 362.685 5
 4 -12 -19 363.243 100.058 3
 4 12 -18 2245.59 252.103 2
 4 -12 -18 2190.01 217.231 3
 4 12 -17 1532.66 211.864 2
 4 -12 -17 1774.11 193.774 3
 4 -12 -16 1517.11 181.546 3
 4 12 -16 1768.38 219.632 2
 4 12 -15 1995.42 226.984 2
 4 -12 -15 1841.57 193.594 3
 4 -12 -14 843.716 131.192 3
 4 12 -14 629.285 129.507 2
 4 -12 -13 3121.99 235.445 3
 4 12 -13 2497.76 237.133 2
 4 -12 -12 156.487 65.503 3
 4 12 -12 -38.8136 76.7019 2
 4 -12 -11 2754.53 217.027 3
 4 12 -11 2585.07 234.802 2
 4 -12 -10 1945.57 184.208 3
 4 12 -10 2218.95 217.956 2
 4 -12 -9 2065.72 187.002 3
 4 12 -9 1955.56 196.184 2
 4 12 -8 5008.16 294.627 5
 4 12 -8 5547.21 325.452 2
 4 -12 -8 5565.23 294.928 3
 4 -12 -7 8.05695 61.0632 3
 4 12 -7 101.124 73.1575 5
 4 12 -7 242.036 96.277 2
 4 -12 -6 7188.04 329.994 3
 4 12 -6 7353.04 364.043 5
 4 12 -6 6782.45 351.49 2
 4 12 -5 1472.97 168.942 2
 4 -12 -5 1212.31 136.02 3
 4 12 -5 998.219 144.283 5
 4 12 -4 650.909 120.016 5
 4 12 -4 877.99 136.275 2
 4 -12 -4 727.881 109.949 3
 4 -12 -3 374.975 89.0278 3
 4 12 -3 221.136 75.8925 5
 4 12 -3 325.367 78.9001 2
 4 -12 -2 931.594 123.328 3
 4 12 -2 794.573 134.48 5
 4 12 -2 773.737 121.663 2
 -4 12 2 858.651 110.725 2
 4 -12 -1 228.308 69.7181 3
 4 12 -1 350.99 93.0265 5
 4 12 -1 315.943 84.651 2
 -4 12 1 254.711 66.155 2
 4 -12 0 5842.04 295.707 3
 4 12 0 5063.71 309.903 5
 4 12 0 5532.98 306.464 2
 -4 12 0 5366.56 267.313 2
 4 -12 1 673.778 114.83 3
 4 12 1 946.208 134.954 2
 4 12 1 705.098 121.049 5
 -4 12 -1 773.927 112.382 2
 4 12 2 8798.41 411.907 5
 -4 12 -2 9189.97 362.723 2
 4 -12 2 9193.08 374.21 3
 4 -12 3 -13.1375 55.4509 3
 4 12 3 21.9563 57.7147 5
 -4 12 -3 79.7386 69.2738 2
 -4 12 -4 12720 442.745 2
 4 12 4 12142.1 487.973 5
 4 -12 4 12813.8 445.054 3
 4 -12 5 396.699 97.2646 3
 4 12 5 300.444 93.5218 5
 -4 12 -5 483.008 110.883 2
 4 -12 6 10226.4 406.316 3
 4 12 6 10083.8 453.578 5
 -4 12 -6 9923.72 408.564 2
 -4 12 -7 599.659 117.251 2
 4 -12 7 536.571 110.658 3
 4 12 7 654.676 135.374 5
 4 12 8 6150.95 362.57 5
 -4 12 -8 5863.89 335.595 2
 4 -12 8 5526.76 312.048 3
 4 12 9 2051.88 212.448 5
 4 -12 9 1706 179.449 3
 -4 12 -9 1890.24 199.731 2
 -4 12 -10 169.56 67.462 2
 4 12 10 337.794 94.9758 5
 -4 12 -11 1210.74 163.651 2
 4 12 11 1303.88 173.52 5
 -4 12 -12 264.131 98.7389 2
 4 12 12 398.428 98.3852 5
 -4 12 -13 180.744 93.9994 2
 4 12 13 328.347 103.928 5
 4 12 14 3645.53 307.361 5
 -4 12 -14 3388.91 298.374 2
 4 12 15 -41.3145 99.7958 5
 4 -13 -17 498.627 105.693 3
 4 13 -16 3696.94 311.488 2
 4 -13 -16 3608.84 278.059 3
 4 -13 -15 300.045 102.491 3
 4 13 -15 77.3711 83.1415 2
 4 -13 -14 2901.69 235.257 3
 4 13 -14 2713.95 266.546 2
 4 -13 -13 391.773 97.2031 3
 4 13 -13 244.568 84.8135 2
 4 -13 -12 2209.42 202.342 3
 4 13 -12 2199.84 235.584 2
 4 -13 -11 495.72 99.3701 3
 4 13 -11 409.694 108.587 2
 4 -13 -10 1839.12 186.653 3
 4 13 -10 960.522 194.745 2
 4 -13 -9 1320.29 158.532 3
 4 13 -9 1239.29 171.706 2
 4 13 -8 343.254 90.6825 2
 4 -13 -8 185.889 64.0239 3
 4 -13 -7 1876.15 178.672 3
 4 13 -7 1920.85 203.166 2
 4 13 -7 1648.58 184.637 5
 4 13 -6 2029.74 205.347 5
 4 -13 -6 1990.47 184.274 3
 4 13 -6 2085.91 212.643 2
 4 13 -5 1066.56 156.522 2
 4 -13 -5 855.963 119.667 3
 4 13 -5 964.254 147.577 5
 4 13 -4 3614.68 274.555 5
 4 13 -4 3492.84 261.229 2
 4 -13 -4 3591.44 243.199 3
 4 -13 -3 34.4008 64.018 3
 4 13 -3 48.3409 56.6879 5
 4 13 -3 -61.6995 79.9603 2
 4 -13 -2 5313.2 289.369 3
 4 13 -2 5131.95 326.368 5
 4 13 -2 5403.35 313.073 2
 4 -13 -1 3046.57 221.302 3
 4 13 -1 2744.41 243.39 5
 4 13 -1 2750.72 227.28 2
 4 13 0 5125.48 329.49 5
 4 13 0 5279.19 312.512 2
 4 -13 0 5086.54 288.933 3
 -4 13 0 5134.33 277.161 2
 4 13 1 8515.27 427.025 5
 -4 13 -1 8420.67 358.946 2
 4 -13 1 8680.23 371.47 3
 -4 13 -2 2225.45 201.322 2
 4 -13 2 2133.93 194.088 3
 4 13 2 2418.29 229.4 5
 4 -13 3 9747.78 399.338 3
 4 13 3 9868.65 463.676 5
 -4 13 -3 9829.11 405.247 2
 4 13 4 439.984 119.401 5
 4 -13 4 240.473 90.7879 3
 -4 13 -4 198.302 88.103 2
 4 -13 5 10473.4 421.056 3
 4 13 5 10366.5 481.495 5
 -4 13 -5 9486.55 409.441 2
 4 -13 6 303.486 88.1569 3
 4 13 6 178.252 87.1355 5
 -4 13 -6 366.454 102.851 2
 4 -13 7 5151.41 302.794 3
 -4 13 -7 5410.09 326.984 2
 4 13 7 5491.56 359.872 5
 4 13 8 3017.98 268.604 5
 -4 13 -8 3208.96 261.06 2
 4 -13 8 2923.66 234.688 3
 -4 13 -9 1225.66 169.894 2
 4 -13 9 1199.29 156.212 3
 4 13 9 1384.89 190.385 5
 4 -13 10 3590.06 263.922 3
 4 13 10 4093.38 317.499 5
 -4 13 -10 3694.58 288.594 2
 -4 13 -11 25.5278 71.2498 2
 4 -13 11 -21.8554 69.9514 3
 4 13 11 -48.9185 65.1348 5
 4 13 12 3468.15 300.139 5
 -4 13 -12 2868 269.056 2
 4 13 13 1868.05 226.299 5
 -4 13 -13 1890.99 232.216 2
 4 -14 -15 3095.19 257.907 3
 4 14 -14 59.0954 91.0733 2
 4 -14 -14 -69.1265 76.8676 3
 4 -14 -13 3263.48 254.768 3
 4 14 -13 3407.26 300.131 2
 4 -14 -12 1165.2 157.627 3
 4 14 -12 1110.83 172.378 2
 4 14 -11 1484.56 204.075 2
 4 -14 -11 1281.55 161.409 3
 4 -14 -10 1239.27 159.388 3
 4 14 -10 962.251 169.202 2
 4 14 -9 406.085 123.309 2
 4 -14 -9 321.637 92.0993 3
 4 -14 -8 612.353 111.216 3
 4 14 -8 493.529 115.983 2
 4 -14 -7 690.542 117.586 3
 4 14 -7 700.25 128.618 2
 4 14 -6 865.453 150.348 5
 4 -14 -6 998.524 142.067 3
 4 14 -6 945.713 155.08 2
 4 -14 -5 3855.74 258.36 3
 4 14 -5 3590.54 291.766 5
 4 14 -5 3571.28 280.104 2
 4 14 -4 658.622 138.112 2
 4 -14 -4 546.599 109.592 3
 4 14 -4 618.884 134.985 5
 4 -14 -3 7606.04 357.865 3
 4 14 -3 7545.24 416.206 5
 4 14 -3 7531.62 393.812 2
 4 14 -2 108.344 78.0338 5
 4 -14 -2 42.4434 69.4458 3
 4 -14 -1 8563.73 380.499 3
 4 14 -1 8793.44 454.304 5
 4 14 -1 8813.55 417.1 2
 4 -14 0 1234.44 149.431 3
 4 14 0 1436.16 191.968 5
 4 14 0 1394.37 175.981 2
 4 -14 1 3737.23 257.203 3
 4 14 1 4072.37 314.579 5
 4 -14 2 4537.76 281.841 3
 4 14 2 4019.42 313.631 5
 -4 14 -2 4122.35 272.342 2
 4 -14 3 1222.19 151.078 3
 4 14 3 1040.32 167.596 5
 -4 14 -3 1199.1 157.96 2
 4 14 4 5294.34 367.756 5
 -4 14 -4 5139.28 312.169 2
 4 -14 4 4894.94 296.09 3
 4 -14 5 102.77 69.7328 3
 4 14 5 194.06 87.0905 5
 -4 14 -5 10.9069 70.1893 2
 4 14 6 3552.29 299.579 5
 -4 14 -6 3099.25 252.538 2
 4 -14 6 3097.6 242.234 3
 -4 14 -7 1082.21 168.201 2
 4 -14 7 867.164 131.979 3
 4 14 7 967.665 164.916 5
 4 14 8 1430.4 202.192 5
 4 -14 8 1157.19 158.99 3
 -4 14 -8 1311.71 185.834 2
 -4 14 -9 3213.22 276.817 2
 4 -14 9 3409.22 259.221 3
 4 14 9 3516.13 311.854 5
 4 14 10 259.569 99.1133 5
 -4 14 -10 125.87 101.855 2
 4 -14 11 6790.53 372.375 3
 -4 14 -11 6476.09 403.619 2
 4 -14 12 23.5418 77.8075 3
 4 -15 -12 1279.67 165.95 3
 4 -15 -11 34.2561 65.5952 3
 4 -15 -10 256.046 92.4405 3
 4 15 -10 257.062 112.991 2
 4 -15 -9 -17.1845 66.1658 3
 4 15 -9 -0.71377 75.5249 2
 4 -15 -8 83.9607 73.345 3
 4 15 -8 -0.34571 75.3819 2
 4 15 -7 -60.5864 83.9869 2
 4 -15 -7 -69.6416 71.2974 3
 4 -15 -6 1574.47 175.813 3
 4 15 -6 1383.77 193.195 2
 4 15 -5 -29.8034 55.1585 5
 4 -15 -5 -80.7006 73.45 3
 4 15 -5 -154.547 97.5382 2
 4 15 -4 4882.06 354.194 5
 4 15 -4 5542.2 356.473 2
 4 -15 -4 5710.34 323.938 3
 4 -15 -3 37.2538 60.9812 3
 4 15 -3 102.644 85.3729 5
 4 15 -3 98.8037 82.1836 2
 4 -15 -2 7428.46 368.234 3
 4 15 -2 7351.02 435.478 5
 4 15 -2 7277.08 397.077 2
 4 15 -1 -120.693 84.0172 2
 4 15 -1 42.7052 64.3776 5
 4 -15 -1 96.6129 71.5207 3
 4 15 0 7377.81 438.553 5
 4 15 0 7282.46 396.296 2
 4 -15 0 7259.62 363.844 3
 4 -15 1 15.5125 61.1076 3
 4 15 1 18.3747 79.5094 5
 4 -15 2 2090.34 202.889 3
 4 15 2 2208.83 246.552 5
 4 -15 3 -208.743 86.0001 3
 4 15 3 -80.3334 94.2958 5
 4 15 4 6.98108 70.1337 5
 -4 15 -4 -88.4671 81.5938 2
 4 -15 5 -5.19554 60.2177 3
 4 15 5 -27.0904 63.1046 5
 -4 15 -5 -75.0135 82.2244 2
 4 -15 6 314.047 98.3216 3
 4 15 6 417.842 122.306 5
 -4 15 -6 585.448 131.237 2
 4 -15 7 247.502 92.7222 3
 -4 15 -7 166.402 78.2639 2
 -4 15 -8 3071.47 276.198 2
 4 -15 8 3033.75 251.122 3
 4 -15 9 -68.31 73.1428 3
 4 -16 -9 72.9969 59.3436 3
 4 -16 -8 259.83 93.5164 3
 4 -16 -7 1477.82 180.876 3
 4 -16 -6 -37.9746 86.1331 3
 4 16 -6 -210.865 124.591 2
 4 -16 -5 4714.06 306.08 3
 4 16 -5 4228.64 330.103 2
 4 16 -4 71.9085 73.0351 5
 4 -16 -4 -32.0994 79.2626 3
 4 16 -4 100.514 93.3723 2
 4 -16 -3 5413.6 323.793 3
 4 16 -3 5227.5 391.923 5
 4 16 -3 4996.42 350.138 2
 4 16 -2 155.963 86.7353 2
 4 -16 -2 269.066 88.8491 3
 4 16 -2 219.485 100.629 5
 4 16 -1 8204.22 488.72 5
 4 16 -1 7768.82 430.775 2
 4 -16 -1 8045.82 394.001 3
 4 -16 0 813.215 137.365 3
 4 16 0 1107.29 192.29 5
 4 16 1 6653.32 442.22 5
 4 -16 1 5885.59 339.028 3
 4 16 2 1627.31 229.623 5
 4 -16 2 1554.56 177.829 3
 4 -16 3 1051.07 147.624 3
 4 -16 4 256.894 73.2882 3
 5 0 -27 -47.966 63.1389 3
 5 0 -26 1718.39 201.729 3
 5 0 -25 -24.6356 59.9538 3
 5 0 -24 4906.72 312.257 3
 5 0 -23 -123.198 76.9221 3
 -5 0 23 123.037 70.2197 4
 -5 0 22 7253.34 321.483 4
 5 0 -22 8147.78 379.107 3
 -5 0 21 -32.3601 46.9559 4
 5 0 -21 31.8037 48.0115 3
 -5 0 20 887.254 112.721 4
 5 0 -20 753.362 116.756 3
 -5 0 19 -6.74385 38.7566 4
 5 0 -19 14.4515 45.5297 3
 -5 0 18 5940.48 260.24 4
 5 0 -18 6095.61 283.476 3
 5 0 -17 -23.2029 31.9902 2
 -5 0 17 29.4185 35.3566 4
 5 0 -17 -40.9635 49.6034 3
 5 0 -16 9957.1 264.382 2
 -5 0 16 9176.66 301.847 4
 5 0 -16 10340.9 335.807 3
 5 0 -15 7.77626 27.8784 2
 5 0 -15 -6.47502 35.2622 3
 5 0 -14 46071.1 519.401 2
 5 0 -14 49590.8 668.751 3
 5 0 -13 9.09665 21.2559 5
 5 0 -13 -4.98463 24.2453 2
 5 0 -12 55796.7 636.972 3
 5 0 -12 56232.9 596.221 5
 5 0 -12 55305.3 499.874 2
 5 0 -11 21.9092 22.3211 2
 5 0 -11 23.2423 22.36 5
 5 0 -11 -18.8599 36.7956 3
 5 0 -10 16588.7 319.876 5
 5 0 -10 15919.5 238.194 2
 5 0 -10 16991.3 316.935 3
 5 0 -9 35.2866 30.0924 3
 5 0 -9 2.60193 27.1802 5
 5 0 -9 -10.2353 18.2606 2
 5 0 -8 2225.88 82.6224 2
 5 0 -8 2245.93 117.491 5
 5 0 -8 2359.07 106.254 3
 5 0 -7 20.0539 19.3625 3
 5 0 -7 24.6153 23.3479 5
 5 0 -7 23.9345 14.9032 2
 -5 0 7 16.932 25.9112 1
 5 0 -6 9406.7 185.417 3
 5 0 -6 9421.79 236.644 5
 5 0 -6 9712.45 163.606 2
 -5 0 6 9778.7 229.91 1
 5 0 -5 -2.66987 16.5242 3
 -5 0 5 54.4779 29.9986 1
 5 0 -5 31.0439 22.4432 5
 5 0 -4 31737.7 429.747 5
 5 0 -4 33064.8 319.723 3
 -5 0 4 32573.6 400.151 1
 5 0 -3 15.5341 15.3404 3
 -5 0 3 35.0212 28.2912 1
 5 0 -3 7.702 21.8139 5
 5 0 -2 124484 833.142 5
 -5 0 2 125158 787.476 1
 5 0 -2 127906 653.102 3
 5 0 -1 29.6299 20.2215 5
 -5 0 1 44.8993 29.4805 1
 5 0 0 106027 762.649 5
 5 0 1 44.1614 25.9661 5
 5 0 2 65192.2 602.678 5
 -5 0 -3 111.054 48.6465 2
 5 0 3 36.1331 32.9278 5
 -5 0 -4 9642.93 273.36 2
 5 0 4 9649.27 234.431 5
 -5 0 -5 52.2845 45.6286 2
 5 0 5 22.4626 25.0772 5
 -5 0 -6 1887.81 141.57 2
 5 0 6 2085.19 114.675 5
 -5 0 -7 -2.10905 44.3771 2
 5 0 7 22.447 23.0178 5
 5 0 8 1367.4 95.341 5
 -5 0 -8 1028.94 117.928 2
 -5 0 -9 -2.11754 45.5745 2
 5 0 9 1.86561 18.8011 5
 -5 0 -9 -10.9901 43.6142 3
 5 0 10 1935.96 112.154 5
 -5 0 -10 1672.24 146.699 3
 -5 0 -10 1723.47 152.044 2
 -5 0 -11 7.51588 45.3817 3
 5 0 11 -20.3861 29.0611 5
 -5 0 -11 -33.8802 54.9945 2
 -5 0 -12 2946.89 204.714 3
 -5 0 -12 3071.28 218.31 2
 -5 0 -13 38.4431 47.0331 3
 -5 0 -13 -106.913 63.1781 2
 -5 0 -14 2060.04 186.824 3
 -5 0 -14 2279.95 201.792 2
 -5 0 -15 -27.2612 65.4967 2
 -5 0 -15 -3.66682 57.4953 3
 -5 0 -16 614.555 121.119 2
 -5 0 -16 593.229 111.866 3
 -5 0 -17 40.999 76.0781 2
 -5 0 -17 -51.7839 64.3465 3
 -5 0 -18 2185.09 216.889 2
 -5 0 -19 51.6367 71.8791 2
 -5 0 -20 2736.88 253.537 2
 -5 0 -21 98.1105 79.1372 2
 -5 0 -22 5830.36 395.863 2
 -5 0 -23 143.339 89.3185 2
 5 1 -28 118.481 74.7173 3
 5 1 -27 1204.63 177.96 3
 5 -1 -27 1375.03 190.198 3
 5 1 -26 120.933 76.0073 3
 5 -1 -26 -60.0973 65.6761 3
 5 -1 -25 4247.26 303.024 3
 5 1 -25 4342.85 308.702 3
 5 1 -24 114.633 70.1703 3
 -5 -1 24 -10.4153 44.0205 4
 -5 -1 23 3454.33 240.121 4
 5 1 -23 3479.88 253.487 3
 5 -1 -23 3761.06 268.349 3
 -5 -1 22 158.932 62.2803 4
 5 1 -22 178.264 72.3663 3
 5 -1 -22 233.3 78.8876 3
 -5 1 21 1680.49 150.156 4
 5 1 -21 1984.1 186.036 3
 5 -1 -21 1681.95 171.813 3
 -5 -1 21 1427.66 148.143 4
 -5 -1 20 981.877 123.118 4
 5 1 -20 1049.26 133.674 3
 -5 1 20 1044.53 119.032 4
 5 -1 -20 1148.92 142.193 3
 5 1 -19 57.16 33.2988 2
 -5 -1 19 138.744 53.6105 4
 -5 1 19 98.1498 48.0075 4
 5 1 -19 89.716 44.0415 3
 5 -1 -19 167.024 62.6949 3
 -5 1 18 63.6428 39.164 4
 5 1 -18 113.791 45.9262 2
 -5 -1 18 56.9568 48.0602 4
 5 1 -18 24.9042 39.1369 3
 5 -1 -18 162.078 63.0764 3
 5 1 -17 3741.09 181.863 2
 -5 -1 17 3895.96 211.041 4
 -5 1 17 3432.61 185.862 4
 5 1 -17 3833.86 214.06 3
 5 -1 -17 3860.69 216.576 3
 -5 -1 16 304.155 62.9681 4
 5 1 -16 159.891 43.8436 2
 5 1 -16 309.98 68.6402 3
 5 -1 -16 291.456 68.326 3
 5 -1 -15 18522.4 316.377 2
 -5 -1 15 18447 425.136 4
 5 1 -15 18160.6 336.545 5
 5 1 -15 19076.8 430.088 3
 5 -1 -15 18861.1 440.589 3
 5 1 -15 19024.6 377.085 2
 5 1 -14 2323.58 146.493 3
 5 -1 -14 2205.27 103.932 2
 5 1 -14 2369.45 122.052 5
 5 -1 -14 2458.87 153.829 3
 5 1 -14 2296.09 126.072 2
 5 -1 -13 36814.3 394.674 2
 5 1 -13 37559 470.178 5
 5 -1 -13 38755.7 573.484 3
 5 1 -13 37800.4 548.715 3
 5 1 -13 37540 477.907 2
 5 1 -12 12468.1 272.124 5
 5 1 -12 12809.6 302.275 3
 5 1 -12 12879.6 266.598 2
 5 -1 -12 13601.8 324.331 3
 5 -1 -12 12991.7 303.794 5
 5 -1 -12 12124.6 210.092 2
 5 1 -11 29477.9 422.299 5
 5 -1 -11 31109.4 463.571 5
 5 1 -11 30106 436.432 3
 5 1 -11 29517.3 385.214 2
 5 -1 -11 29430.9 296.73 2
 5 -1 -11 30240.9 461.508 3
 5 -1 -10 13559.8 301.493 5
 5 1 -10 13138.4 277.109 5
 5 1 -10 13058.4 246.073 2
 5 -1 -10 13235.1 182.602 2
 5 1 -10 13800.8 278.008 3
 5 -1 -10 13327.4 293.455 3
 5 -1 -9 14624.6 291.56 3
 5 -1 -9 14468.8 305.283 5
 -5 -1 9 14496.6 308.1 1
 5 1 -9 15008.7 297.508 5
 5 -1 -9 13936.5 171.682 2
 5 1 -9 14326.5 248.521 2
 5 1 -9 14749.7 264.667 3
 5 -1 -8 9935.49 230.009 3
 5 1 -8 9791.72 239.02 5
 5 -1 -8 9822.74 250.144 5
 -5 -1 8 9748.23 243.688 1
 5 1 -8 9645.1 197.223 2
 5 -1 -8 9250.95 130.992 2
 5 1 -8 9763.34 199.877 3
 5 -1 -7 1469.38 86.5526 3
 5 1 -7 1362.43 92.3796 5
 5 -1 -7 1390.71 49.8741 2
 -5 -1 7 1537.57 98.7198 1
 5 1 -7 1356.07 74.4788 2
 5 -1 -7 1477.85 97.4874 5
 5 1 -7 1502.04 74.0834 3
 5 -1 -6 11411.3 265.154 5
 5 1 -6 11713.5 258.869 5
 -5 -1 6 11406.7 250.899 1
 5 -1 -6 10912.4 220.667 3
 -5 1 6 11138.3 244.012 1
 5 1 -6 11102 207.245 2
 5 1 -6 11058.3 177.445 3
 5 1 -5 20958.3 224.249 3
 -5 1 5 21012.9 323.705 1
 5 1 -5 20374.4 345.36 5
 5 -1 -5 21449.1 300.249 3
 5 -1 -5 21241 351.269 5
 5 1 -5 21355.4 285.745 2
 -5 -1 5 21186.3 338.252 1
 -5 -1 4 8585.17 212.644 1
 5 1 -4 8154.49 130.887 3
 5 -1 -4 8596.61 225.131 5
 5 -1 -4 8035.2 180.422 3
 5 1 -4 8529.49 218.206 5
 -5 1 4 8277.18 198.125 1
 5 -1 -3 26777.8 331.956 3
 -5 -1 3 27790.1 385.129 1
 5 -1 -3 28018.2 401.387 5
 5 1 -3 27508.7 239.34 3
 5 1 -3 28549.7 401.281 5
 -5 1 3 26654 348.775 1
 -5 -1 2 325.315 48.123 1
 -5 1 2 286.437 43.2434 1
 5 -1 -2 303.058 44.3068 5
 5 -1 -2 260.944 38.2987 3
 5 1 -2 304.915 47.3899 5
 5 -1 -1 50850.2 533.407 5
 -5 1 1 49968.8 452.367 2
 5 1 -1 51551.6 539.471 5
 -5 1 1 50584.6 493.933 1
 5 1 0 402.658 50.7031 5
 5 -1 0 438.666 51.218 5
 -5 1 0 421.593 47.5184 2
 -5 1 -1 63974.9 589.325 2
 5 -1 1 66115.1 605.182 5
 5 1 1 65390.2 612.086 5
 -5 1 -2 4461.2 167.125 2
 5 -1 2 4476.4 157.349 5
 5 1 2 4552.25 163.956 5
 5 -1 3 19492.9 327.548 5
 5 1 3 20524.5 346.006 5
 -5 1 -3 21122.1 383.435 2
 5 -1 4 14944.6 286.395 5
 -5 1 -4 14694.8 336.277 2
 5 1 4 14639 295.174 5
 5 -1 5 91.5114 30.1632 5
 -5 1 -5 56.4069 38.8169 2
 -5 -1 -5 28.9751 31.2347 3
 5 1 5 75.1501 28.5171 5
 5 -1 6 8861.99 222.017 5
 -5 -1 -6 8362.92 282.713 2
 5 1 6 8770.63 235.881 5
 -5 -1 -6 8827.67 266.825 3
 -5 1 -6 8939.2 287.795 2
 -5 1 -7 49.6984 43.2154 2
 -5 -1 -7 65.3572 37.899 3
 -5 -1 -7 58.3616 46.6661 2
 5 1 7 55.525 30.5937 5
 5 -1 7 66.1238 27.52 5
 -5 -1 -8 3650.46 204.858 2
 5 1 8 3916.85 161.876 5
 5 -1 8 3834.3 147.67 5
 -5 -1 -8 3648.54 190.141 3
 -5 1 -8 3436.41 194.8 2
 -5 1 -9 4757 239.187 2
 5 1 9 4597.05 178.989 5
 5 -1 9 4579.94 161.928 5
 -5 -1 -9 4574.68 222.621 3
 -5 -1 -9 3940.61 219.066 2
 5 -1 10 1386.04 91.0037 5
 5 1 10 1450.45 104.228 5
 -5 1 -10 1231.5 135.409 2
 -5 -1 -10 1127.56 117.663 3
 -5 -1 -10 1203.53 133.623 2
 -5 1 -11 4840.46 258.72 2
 5 1 11 5543.12 202.635 5
 -5 -1 -11 4714.48 243.571 3
 -5 -1 -11 5311.95 272.407 2
 -5 -1 -12 548.418 91.092 3
 -5 1 -12 577.053 108.7 2
 -5 -1 -12 541.837 100.038 2
 -5 -1 -13 1663.21 162.474 3
 -5 1 -13 1907.55 174.713 2
 -5 -1 -13 1710.64 166.726 2
 -5 -1 -14 646.849 120.022 2
 -5 -1 -14 686.755 116.224 3
 -5 1 -14 657.742 115.023 2
 -5 1 -15 2556.2 214.624 2
 -5 -1 -15 2636.1 217.036 3
 -5 -1 -15 2535.2 216.453 2
 -5 -1 -16 350.027 99.5696 3
 -5 1 -16 279.441 89.9551 2
 -5 -1 -16 225.382 87.5068 2
 -5 -1 -17 206.913 86.8244 3
 -5 1 -17 24.8542 65.3219 2
 -5 -1 -17 21.116 59.5963 2
 -5 1 -18 733.113 131.285 2
 -5 -1 -18 530.626 111.933 3
 -5 -1 -18 578.935 114.604 2
 -5 1 -19 900.377 153.268 2
 -5 -1 -19 708.73 133.489 3
 -5 -1 -19 876.524 151.667 2
 -5 1 -20 -14.8831 66.9216 2
 -5 -1 -20 -56.203 67.8235 3
 -5 -1 -20 -4.87991 66.0112 2
 -5 1 -21 2681.48 268.385 2
 -5 -1 -21 2540.74 251.746 2
 -5 -1 -21 2924.05 277.888 3
 -5 -1 -22 142.558 101.083 3
 -5 1 -22 62.9605 86.5229 2
 -5 -1 -22 97.6389 77.8525 2
 -5 1 -23 4710.85 368.605 2
 -5 -1 -23 4575.4 359.593 2
 5 2 -28 765.297 145.201 3
 5 2 -27 105.537 73.8839 3
 5 -2 -27 70.668 61.9237 3
 5 2 -26 4761.64 331.872 3
 -5 -2 26 4741.58 307.397 4
 5 -2 -26 5257.58 349.085 3
 -5 -2 25 146.329 76.0024 4
 5 -2 -25 50.5519 55.7341 3
 5 2 -25 200.636 89.8285 3
 -5 -2 24 4518.77 284.638 4
 5 2 -24 5086.44 320.796 3
 5 -2 -24 5131.87 326.095 3
 -5 -2 23 664.524 115.958 4
 5 2 -23 504.565 106.837 3
 5 -2 -23 778.124 129.898 3
 -5 -2 22 3745.78 248.749 4
 5 2 -22 3731.84 255.915 3
 5 -2 -22 3573.86 255.45 3
 -5 -2 21 2355.82 194.437 4
 5 2 -21 2343.44 198.09 3
 5 -2 -21 2552.49 210.392 3
 -5 -2 20 322.84 79.0361 4
 -5 2 20 316.519 71.931 4
 5 2 -20 340.174 83.8269 3
 5 2 -20 369.264 77.7455 2
 5 -2 -20 348.188 88.3215 3
 5 2 -19 3053.47 187.982 2
 -5 -2 19 2560.84 189.407 4
 -5 2 19 2655.33 169.496 4
 5 2 -19 2907.02 200.652 3
 5 -2 -19 2730.29 202.301 3
 5 2 -18 252.23 67.8633 3
 5 2 -18 225.169 59.2025 2
 -5 -2 18 372.022 80.8811 4
 -5 2 18 247.464 59.2357 4
 5 -2 -18 285.558 73.1642 3
 -5 -2 17 906.694 108.996 4
 5 2 -17 999.092 112.108 3
 5 -2 -17 931.438 116.245 3
 5 2 -17 1006.91 103.733 2
 -5 -2 16 6660.69 276.055 4
 5 2 -16 6281.94 261.124 3
 5 -2 -16 6927.56 282.337 3
 5 2 -16 6898.58 249.798 2
 5 2 -15 -29.5146 33.6514 2
 -5 -2 15 -31.8726 46.7772 4
 5 2 -15 63.41 45.8683 3
 5 -2 -15 -44.9614 48.2276 3
 5 2 -14 16714.8 307.138 5
 5 -2 -14 17233.3 262.932 2
 -5 -2 14 18094.7 420.555 4
 5 2 -14 17755.6 396.789 3
 5 -2 -14 17616.4 414.612 3
 5 2 -14 17382.3 362.389 2
 5 -2 -13 2506.34 91.8063 2
 5 2 -13 2672.9 124.948 5
 5 2 -13 2549.31 144.411 3
 5 2 -13 2670.46 139.4 2
 5 -2 -13 2815.28 161.074 3
 5 -2 -12 22445 248.135 2
 5 2 -12 22968.3 361.107 5
 5 2 -12 23333.3 404.667 3
 5 2 -12 22966.3 387.092 2
 5 -2 -12 23755 441.8 3
 5 2 -11 19209.8 334.296 5
 -5 -2 11 19543.2 377.081 1
 5 2 -11 19232.7 343.818 3
 5 2 -11 19076.4 340.56 2
 5 -2 -11 18106.4 196.569 2
 5 -2 -11 19716.9 390.808 3
 5 -2 -10 12449.6 296.747 3
 5 2 -10 12337.9 269.958 5
 5 2 -10 12328.3 267.056 2
 -5 -2 10 12410.2 290.274 1
 5 -2 -10 10352.6 126.092 2
 5 2 -10 12817.7 262.742 3
 5 -2 -10 12929.9 308.661 5
 5 -2 -9 29207.5 437.471 3
 5 2 -9 28935.7 414.599 5
 5 -2 -9 30026.3 463.44 5
 5 2 -9 28868.6 363.322 3
 -5 -2 9 29065.1 434.821 1
 5 2 -9 29574.8 399.395 2
 5 -2 -8 2917.63 135.567 3
 5 -2 -8 2894.52 144.588 5
 5 2 -8 3037.55 135.545 5
 -5 -2 8 2761.15 133.816 1
 5 2 -8 2806.7 126.738 2
 5 2 -8 2665.46 100.493 3
 5 -2 -7 32511.6 428.453 3
 5 2 -7 32313.1 432.846 5
 -5 -2 7 31283.2 428.587 1
 5 2 -7 33040.1 401.934 2
 5 -2 -7 31156.6 452.712 5
 5 2 -7 31884.5 308.096 3
 5 2 -6 590.551 61.8211 5
 5 -2 -6 564.008 63.9933 5
 5 2 -6 541.768 56.0194 2
 5 -2 -6 586.308 61.4627 3
 -5 -2 6 594.285 64.2801 1
 5 2 -6 593.023 37.5995 3
 -5 -2 5 45516.8 506.304 1
 5 -2 -5 44923.9 533.593 5
 -5 2 5 44737.9 470.894 1
 5 2 -5 44986.1 519.099 5
 5 2 -5 44835.4 462.355 2
 5 -2 -5 44901.9 479.066 3
 5 2 -5 43260.1 262.415 3
 5 -2 -4 28986.6 423.48 5
 5 -2 -4 29431.6 385.57 3
 -5 -2 4 29750.3 410.758 1
 5 2 -4 30294.5 423.858 5
 5 2 -4 30905.1 386.464 2
 -5 2 4 29480.9 368.831 1
 -5 2 4 29101.6 237.44 2
 5 -2 -3 21701.6 363.608 5
 5 -2 -3 21788.8 333.577 3
 5 2 -3 22235.6 361.816 5
 -5 -2 3 22016.4 355.982 1
 -5 2 3 20952 305.98 1
 -5 2 3 21325.5 235.542 2
 -5 2 2 17412.2 274.793 1
 5 -2 -2 17067.1 321.779 5
 5 2 -2 17997.1 326.981 5
 -5 2 2 17505.7 239.892 2
 5 -2 -2 17247.4 300.437 3
 -5 2 1 9951.97 208.559 1
 5 2 -1 10487.2 250.397 5
 5 -2 -1 9738.82 237.261 5
 -5 2 1 10007.1 198.468 2
 5 -2 0 10149.4 240.531 5
 5 2 0 10148.7 250.129 5
 -5 2 0 9761.65 212.429 2
 -5 2 -1 201.902 45.5653 2
 5 -2 1 184.796 38.6049 5
 5 2 1 217.537 42.261 5
 5 -2 2 19739.1 333.257 5
 5 2 2 20115.1 356.286 5
 -5 -2 -2 19590 292.579 3
 -5 2 -2 19337.2 340.063 2
 5 -2 3 9506.33 230.113 5
 5 2 3 9375.97 245.529 5
 -5 -2 -3 8880 215.487 3
 -5 2 -3 8919.46 247.571 2
 5 -2 4 3655.98 142.466 5
 5 2 4 3431.43 150.571 5
 -5 2 -4 3598.72 170.069 2
 -5 -2 -4 3623.07 147.223 3
 5 -2 5 4254.41 152.982 5
 -5 2 -5 3888.88 185.263 2
 5 2 5 4078.1 166.145 5
 -5 -2 -5 4223.69 170.659 3
 5 -2 6 2126.15 108.24 5
 5 2 6 2099.12 122.778 5
 -5 2 -6 2086.33 144.717 2
 -5 -2 -6 2134.74 130.779 3
 5 -2 7 14705.6 278.986 5
 5 2 7 14954 326.233 5
 -5 2 -7 14595 384.004 2
 -5 -2 -7 14723.1 350.108 3
 5 -2 8 8266.49 208.186 5
 5 2 8 8067.68 244.277 5
 -5 2 -8 7960.99 294.113 2
 -5 -2 -8 7828.51 298.01 2
 -5 -2 -8 8147.95 275.977 3
 5 -2 9 14070.9 271.368 5
 5 2 9 13719.8 321.921 5
 -5 -2 -9 13597.4 399.322 2
 -5 2 -9 13415.5 395.288 2
 -5 -2 -9 13533.6 369.272 3
 -5 -2 -10 14916.4 438.827 2
 5 2 10 14992 343.298 5
 -5 2 -10 15270.1 439.71 2
 -5 -2 -10 14741.3 401.631 3
 -5 2 -11 2407.15 185.472 2
 5 2 11 2810.43 152.056 5
 -5 -2 -11 2804.24 185.973 3
 -5 -2 -11 2518.63 192.218 2
 -5 -2 -12 8963.54 339.412 3
 5 2 12 9434.39 283.285 5
 -5 2 -12 8991.18 359.772 2
 -5 -2 -12 9210.81 370.46 2
 -5 -2 -13 162.915 59.4401 2
 -5 -2 -13 228.604 73.5728 3
 -5 2 -13 293.271 87.0713 2
 -5 2 -14 4794.46 284.858 2
 -5 -2 -14 4293.24 255.808 3
 -5 -2 -14 4685.55 283.804 2
 -5 -2 -15 178.481 72.4935 2
 -5 2 -15 233.263 80.9989 2
 -5 -2 -15 342.226 89.1389 3
 -5 -2 -16 1662.2 178.123 2
 -5 2 -16 1958.82 199.051 2
 -5 -2 -16 1718.19 175.45 3
 -5 2 -17 2403.74 228.805 2
 -5 -2 -17 2012.86 197.802 3
 -5 -2 -17 2477.6 226.393 2
 -5 2 -18 785.439 143.389 2
 -5 -2 -18 746.84 131.86 3
 -5 -2 -18 623.482 122.091 2
 -5 2 -19 451.603 121.915 2
 -5 -2 -19 203.479 78.7398 3
 -5 -2 -19 354.587 107.386 2
 -5 -2 -20 312.273 102.583 3
 -5 2 -20 156.054 76.2344 2
 -5 -2 -20 389.851 113.335 2
 -5 2 -21 28.2581 83.6407 2
 -5 -2 -21 49.9174 80.304 2
 -5 -2 -21 155.938 83.7777 3
 -5 2 -22 4196.41 342.387 2
 -5 -2 -22 3827.29 318.581 3
 -5 -2 -22 3898.7 316.098 2
 -5 -2 -23 408.91 130.386 2
 5 3 -28 584.216 135.546 3
 -5 -3 27 2044.95 215.707 4
 5 3 -27 1997.01 226.968 3
 5 -3 -27 2365.01 246.418 3
 5 -3 -26 54.529 71.9601 3
 -5 -3 26 59.8529 59.8643 4
 5 3 -26 42.9151 55.3881 3
 -5 -3 25 3602.37 272.473 4
 5 3 -25 3712.8 287.54 3
 5 -3 -25 4141.72 304.991 3
 -5 -3 24 -9.66182 65.1745 4
 5 3 -24 -21.5626 59.5759 3
 5 -3 -24 129.87 83.2808 3
 5 3 -23 5157.43 314.686 3
 -5 -3 23 5026.8 299.232 4
 5 -3 -23 6044.92 344.073 3
 -5 -3 22 1221.59 155.846 4
 5 3 -22 1300.99 158.423 3
 5 -3 -22 1285.42 160.651 3
 -5 -3 21 4029.75 257.958 4
 5 -3 -21 3846.76 259.644 3
 5 3 -21 4334.97 269.693 3
 5 3 -21 3775.8 235.59 2
 -5 -3 20 5371.74 288.502 4
 5 3 -20 5292.7 285.772 3
 5 -3 -20 5221.1 290.604 3
 5 3 -20 5482.05 270.099 2
 5 3 -19 16.6154 49.594 2
 -5 -3 19 9.74777 58.3341 4
 5 3 -19 107.165 61.2082 3
 5 -3 -19 78.7453 57.844 3
 -5 -3 18 4022.12 235.081 4
 -5 3 18 4234.67 200.345 4
 5 3 -18 4188.31 233.014 3
 5 -3 -18 4673.2 256.183 3
 5 3 -18 4622.01 232.349 2
 5 3 -17 639.577 85.5992 2
 -5 -3 17 595.84 94.4104 4
 5 3 -17 641.964 94.4286 3
 5 -3 -17 496.634 87.0745 3
 -5 -3 16 4661.57 239.83 4
 5 3 -16 4709.83 226.232 3
 5 -3 -16 4749.91 238.789 3
 5 3 -16 4545.1 214.611 2
 -5 -3 15 3194.97 193.868 4
 5 3 -15 3097.22 175.43 3
 5 3 -15 2922.32 166.632 2
 5 -3 -15 3164.96 190.228 3
 5 -3 -14 154.821 49.8305 3
 5 3 -14 80.2759 30.918 2
 5 3 -14 119.883 46.2106 3
 5 3 -14 123.198 31.1456 5
 -5 -3 14 74.9431 37.8298 4
 5 3 -13 10401 286.428 3
 -5 -3 13 11019.6 328.015 4
 5 3 -13 10142.2 242.4 5
 -5 -3 13 10480.1 292.657 1
 5 3 -13 10784.9 297.252 2
 5 -3 -13 10411.9 315.079 3
 5 3 -12 4794.95 167.557 5
 -5 -3 12 4928.66 196.794 1
 -5 -3 12 5127.2 217.848 4
 5 3 -12 4565.43 180.479 3
 5 3 -12 4829.37 194.372 2
 5 -3 -12 5315.51 219.407 3
 5 -3 -11 2546.74 147.331 3
 5 3 -11 2381.09 121.537 5
 -5 -3 11 2464.25 138.778 1
 5 3 -11 2256.86 118.994 3
 5 3 -11 2401.96 136.067 2
 5 -3 -11 1637.09 48.5295 2
 5 -3 -10 38987.4 549.803 3
 5 3 -10 39681.6 491.344 5
 -5 -3 10 38106.2 508.597 1
 5 3 -10 38760.3 451.125 3
 5 3 -10 39987.4 520.526 2
 5 3 -9 628.654 65.8735 5
 5 3 -9 616.173 56.3343 3
 -5 -3 9 675.911 72.4409 1
 5 -3 -9 657.351 73.375 3
 5 3 -9 702.07 73.4653 2
 5 3 -8 19323.1 346.559 2
 5 3 -8 20207.9 357.112 5
 5 -3 -8 20456.1 396.008 5
 5 -3 -8 19603 369.233 3
 5 3 -8 18961.2 261.487 3
 -5 -3 8 19716.9 355.499 1
 5 3 -7 4020.8 161.497 5
 5 -3 -7 3834.28 161.072 3
 5 -3 -7 3968.12 177.139 5
 5 3 -7 3938.16 155.814 2
 5 3 -7 3710.57 102.972 3
 -5 -3 7 3972.84 159.897 1
 -5 -3 6 28480.5 418.215 1
 5 -3 -6 28138.8 452.738 5
 5 -3 -6 28229.1 419.51 3
 5 3 -6 29061.7 429.326 5
 5 3 -6 28142.7 408.958 2
 5 3 -6 26606.8 231.262 3
 -5 3 5 2831.76 60.6965 2
 -5 -3 5 3111.44 139.532 1
 5 -3 -5 2752.2 132.267 3
 5 -3 -5 2922.82 144.704 5
 5 3 -5 3214.61 144.376 5
 5 3 -5 2913.59 132.467 2
 5 3 -4 20780.8 366.595 5
 5 -3 -4 21351.1 358.539 3
 -5 3 4 21802 205.978 2
 5 -3 -4 21598 383.065 5
 -5 -3 4 21915 364.691 1
 -5 3 4 21227.3 312.711 1
 5 3 -4 21798.2 359.386 2
 5 -3 -3 4148.88 164.731 5
 -5 3 3 4291.49 134.598 1
 5 3 -3 4421.71 166.17 2
 -5 -3 3 4266.46 161.582 1
 5 -3 -3 4421.85 165.394 3
 5 3 -3 4538.71 172.672 5
 -5 3 3 4325.61 108.211 2
 5 3 -2 18398.2 347.09 5
 5 -3 -2 18509.2 338.468 3
 5 -3 -2 18024 339.233 5
 -5 3 2 17713 242.724 2
 -5 3 2 18269.3 270.296 1
 -5 3 1 1900.13 89.4311 1
 5 -3 -1 2067.7 115.029 5
 5 -3 -1 2054.6 117.775 3
 5 3 -1 2112.72 118.775 5
 -5 3 1 2099.26 94.0708 2
 5 -3 0 2029.21 114.378 5
 -5 3 0 1953.27 92.9406 1
 5 3 0 2173.78 122.647 5
 -5 3 0 2207.15 104.61 2
 -5 -3 0 2183.61 74.1549 3
 5 -3 1 1883.11 108.095 5
 5 3 1 1780.82 113.24 5
 -5 3 -1 1708.93 101.042 2
 -5 -3 -1 1783.22 75.8431 3
 -5 -3 -2 2361.59 98.5793 3
 5 -3 2 2357.14 119.682 5
 5 3 2 2302.44 129.993 5
 -5 3 -2 2358.23 122.593 2
 5 3 3 804.17 80.8908 5
 5 -3 3 756.522 68.4368 5
 -5 3 -3 665.929 73.8082 2
 -5 -3 -3 863.555 68.9379 3
 5 -3 4 22412.4 354.007 5
 5 3 4 22910.3 405.823 5
 -5 3 -4 21985.1 410.619 2
 -5 -3 -4 22595 354.769 3
 5 3 5 301.543 57.3191 5
 5 -3 5 333.577 46.3756 5
 -5 3 -5 248.162 51.2166 2
 -5 -3 -5 308.653 51.1671 3
 5 -3 6 16644.3 300.542 5
 5 3 6 18060.7 369.434 5
 -5 3 -6 17405.9 400.134 2
 -5 -3 -6 18180.5 361.731 3
 5 -3 7 4506.45 154.649 5
 5 3 7 4810.58 194.767 5
 -5 3 -7 4487.83 214.112 2
 -5 -3 -7 4736.8 198.413 3
 5 -3 8 16616.4 290.932 5
 -5 3 -8 16979 427.007 2
 -5 -3 -8 16784.5 387.093 3
 5 3 8 16968.6 370.353 5
 -5 3 -9 9494.95 331.988 2
 5 3 9 10168.6 292.252 5
 -5 -3 -9 10033.5 314.947 3
 -5 -3 -10 2040.07 170.881 2
 -5 3 -10 1806.94 159.995 2
 5 3 10 2243.5 141.796 5
 -5 -3 -10 2068.56 156.3 3
 -5 -3 -11 15854.4 464.713 2
 5 3 11 15547.2 376.07 5
 -5 3 -11 15988.8 468.158 2
 -5 -3 -11 16013.1 434.986 3
 -5 -3 -12 262.796 89.1196 2
 5 3 12 234.462 54.2232 5
 -5 3 -12 282.884 78.4647 2
 -5 -3 -12 298.228 70.8001 3
 5 3 13 9014.38 297.056 5
 -5 3 -13 8602.28 372.215 2
 -5 -3 -13 8852.81 349.414 3
 -5 -3 -13 7703.98 354.717 2
 -5 3 -14 1078.83 151.943 2
 -5 -3 -14 1342.01 148.17 3
 -5 -3 -14 1301.47 160.019 2
 -5 3 -15 3969.27 276.699 2
 -5 -3 -15 3713.43 248.34 3
 -5 -3 -15 3445.25 250.175 2
 -5 3 -16 1329.83 173.236 2
 -5 -3 -16 1482.18 166.463 3
 -5 -3 -16 1461.33 169.771 2
 -5 -3 -17 519.984 117.312 2
 -5 3 -17 476.968 108.534 2
 -5 -3 -17 492.416 106.452 3
 -5 3 -18 1744.76 210.413 2
 -5 -3 -18 1682.05 187.779 3
 -5 -3 -18 1452.57 181.05 2
 -5 3 -19 47.5185 78.4199 2
 -5 -3 -19 30.3481 57.4697 3
 -5 -3 -19 11.517 63.6625 2
 -5 3 -20 1503.79 203.613 2
 -5 -3 -20 1476.79 194.944 2
 -5 -3 -20 1384.24 190.523 3
 -5 3 -21 984.223 175.419 2
 -5 -3 -21 1551.51 198.809 3
 -5 -3 -21 1090.15 169.654 2
 -5 3 -22 47.7962 83.1285 2
 -5 -3 -22 22.7201 67.6002 3
 -5 -3 -22 206.996 104.245 2
 -5 -3 -23 4149.44 335.232 2
 -5 -4 27 2085.25 226.518 4
 5 4 -27 1648.56 211.52 3
 5 -4 -26 1326.53 182.827 3
 -5 -4 26 1195.13 173.407 4
 5 4 -26 1078.87 173.868 3
 -5 -4 25 -155.15 87.7287 4
 5 4 -25 -147.401 91.5139 3
 5 -4 -25 -29.4055 78.4998 3
 5 -4 -24 2177.2 218.806 3
 -5 -4 24 1805.73 198.52 4
 5 4 -24 1916.54 205.069 3
 5 4 -23 493.298 100.083 2
 5 4 -23 631.508 121.037 3
 5 -4 -23 714.363 134.264 3
 -5 -4 23 535.782 111.182 4
 5 -4 -22 1945.34 192.481 3
 -5 -4 22 1663.57 176.212 4
 5 4 -22 1896.04 189.301 3
 5 4 -22 1661.17 169.919 2
 -5 -4 21 4579.82 281.755 4
 5 4 -21 4394.33 272.825 3
 5 -4 -21 4899.87 294.809 3
 5 4 -21 4474.14 264.301 2
 -5 -4 20 2050.58 187.355 4
 5 4 -20 1873.72 177.822 3
 5 -4 -20 2018.63 190.22 3
 5 4 -20 1852.36 170.453 2
 -5 -4 19 11889.9 425.69 4
 5 4 -19 11824.2 411.234 3
 5 -4 -19 12416.6 433.418 3
 5 4 -19 12535.5 406.582 2
 5 4 -18 797.31 106.314 2
 -5 -4 18 766.321 114.43 4
 5 4 -18 859.982 112.415 3
 5 -4 -18 894.03 122.748 3
 -5 -4 17 11645.4 395.358 4
 5 4 -17 11877.6 378.984 3
 5 -4 -17 12876.1 413.603 3
 5 4 -17 12743.5 386.596 2
 5 4 -16 469.227 82.2008 2
 -5 -4 16 540.603 78.7125 1
 -5 -4 16 523.201 88.8186 4
 5 4 -16 423.598 72.7198 3
 5 -4 -16 461.49 86.437 3
 -5 -4 15 7865.04 266.735 1
 5 -4 -15 8019.64 306.566 3
 -5 -4 15 7970.73 308.974 4
 5 4 -15 7833.9 279.88 3
 5 4 -15 8079.38 290.632 2
 5 4 -14 54.0558 42.7476 2
 5 -4 -14 71.7095 39.4866 3
 -5 -4 14 76.9889 44.2967 4
 5 4 -14 78.9527 33.5383 3
 -5 -4 14 76.2943 41.3825 1
 5 -4 -13 14.1555 35.0426 3
 5 4 -13 77.3965 34.3271 3
 5 4 -13 56.9918 26.774 5
 -5 -4 13 27.1802 39.5256 4
 -5 -4 13 99.6994 39.1108 1
 5 4 -13 -6.07844 39.2698 2
 -5 -4 12 126.818 42.0548 1
 5 4 -12 142.777 35.8789 5
 5 -4 -12 130.926 50.9678 3
 -5 -4 12 130.122 50.4602 4
 5 4 -12 101.758 32.3198 3
 5 4 -12 172.447 44.1659 2
 5 -4 -11 4018.11 193.29 3
 -5 -4 11 3904.56 189.854 4
 -5 -4 11 3705.5 164.809 1
 5 4 -11 3778.25 155.713 5
 5 4 -11 3844.13 160.261 3
 5 4 -11 3856.11 181.484 2
 5 4 -10 63.9156 33.7768 5
 -5 -4 10 20.6389 33.8928 4
 5 4 -10 76.9834 33.7365 3
 5 -4 -10 7.68797 33.7771 3
 5 4 -10 7.98603 35.473 2
 -5 -4 10 40.6383 34.6704 1
 5 4 -9 14704 263.701 3
 5 -4 -9 15434.4 356.171 3
 5 4 -9 14761.7 315.813 5
 5 4 -9 15601.6 345.828 2
 -5 -4 9 15442.9 325.903 1
 -5 -4 8 1.36145 34.804 1
 5 -4 -8 52.1316 39.5252 3
 5 4 -8 27.923 32.714 5
 5 4 -8 19.8765 35.016 2
 -5 -4 7 53985.8 589.978 1
 5 -4 -7 53751.9 630.872 3
 5 4 -7 54735.1 614.864 5
 5 4 -7 54416.1 625.502 2
 5 -4 -6 453.351 67.4725 3
 5 4 -6 447.516 62.4654 5
 -5 -4 6 382.25 61.7493 1
 5 4 -6 422.122 62.514 2
 -5 4 6 278.461 20.4495 2
 5 -4 -5 45971.3 569.21 3
 -5 -4 5 46035.9 544.632 1
 5 4 -5 45952.5 563.987 2
 -5 4 5 44137.9 283.927 2
 -5 4 4 2813.42 84.272 2
 5 -4 -4 2835.81 154.308 5
 -5 4 4 2784.68 117.892 1
 5 -4 -4 2612.7 138.188 3
 5 4 -4 2589.14 139.203 5
 5 4 -4 2555.31 136.115 2
 -5 -4 4 2541.14 132.424 1
 5 -4 -3 15512.2 340.275 5
 -5 4 3 16004.6 224.253 2
 5 -4 -3 15683.8 334.959 3
 5 4 -3 16282.8 340.894 5
 5 4 -3 15863.5 330.329 2
 -5 4 3 15494.6 254.926 1
 -5 4 2 360.215 43.7011 1
 -5 4 2 367.902 42.6794 2
 5 -4 -2 337.275 57.2512 5
 5 4 -2 406.675 61.5287 5
 5 4 -2 367.875 57.0735 2
 5 -4 -2 392.181 63.0776 3
 5 -4 -1 8453.91 252.189 3
 -5 4 1 8367.24 175.835 1
 5 -4 -1 8147.92 239.539 5
 5 4 -1 8475.34 250.093 5
 -5 4 1 8327.44 192.519 2
 -5 -4 1 8188.69 112.859 3
 -5 4 0 856.055 63.8519 1
 5 -4 0 763.191 76.023 5
 5 4 0 776.719 79.067 5
 -5 4 0 806.112 70.4674 2
 -5 -4 0 802.613 44.6936 3
 5 -4 1 491.521 64.2076 5
 5 4 1 624.317 73.8788 5
 -5 4 -1 576.02 64.4119 2
 -5 -4 -1 552.214 44.2701 3
 5 -4 2 16.3929 26.2338 5
 -5 4 -2 -1.58475 38.0251 2
 -5 -4 -2 44.237 28.304 3
 -5 4 -3 26363.3 436.704 2
 5 -4 3 25042 391.373 5
 5 4 3 26664.8 454.275 5
 -5 -4 -3 26654.9 357.654 3
 5 4 4 2361.37 141.344 5
 5 -4 4 2136.86 115.461 5
 -5 4 -4 2382.35 143.686 2
 -5 -4 -4 2133.87 113.328 3
 5 -4 5 25287.1 379.99 5
 5 4 5 26466.2 465.165 5
 -5 4 -5 26546.2 484.529 2
 -5 -4 -5 24072.9 395.795 3
 -5 4 -6 3050.64 176.624 2
 5 4 6 2930.99 158.578 5
 5 -4 6 2751.85 124.584 5
 -5 -4 -6 2720.56 144.226 3
 5 -4 7 16511.3 296.8 5
 -5 4 -7 17306.9 426.993 2
 5 4 7 17186.2 387.093 5
 -5 -4 -7 17222.8 373.481 3
 5 4 8 2990.93 166.487 5
 5 -4 8 2931.12 123.343 5
 -5 -4 -8 2940.23 164.07 3
 -5 4 -8 2620.73 176.281 2
 5 4 9 5769.97 233.363 5
 -5 4 -9 5516.76 264.82 2
 -5 -4 -9 5602.32 234.698 3
 5 4 10 4016.15 198.268 5
 -5 -4 -10 4181.56 214.761 3
 -5 4 -10 3677.56 226.663 2
 5 4 11 1037.04 107.615 5
 -5 -4 -11 966.219 121.28 2
 -5 4 -11 941.119 128.484 2
 -5 -4 -11 1117.92 116.667 3
 5 4 12 5972.9 249.891 5
 -5 4 -12 6566.28 322.736 2
 -5 -4 -12 6034.98 304.558 2
 -5 -4 -12 6018.86 278.085 3
 -5 -4 -13 2874.07 219.771 2
 5 4 13 3294.35 192.285 5
 -5 -4 -13 3263.55 212.411 3
 -5 4 -13 3318.25 242.562 2
 -5 -4 -14 2446.9 208.284 2
 -5 4 -14 3047.15 237.376 2
 -5 -4 -14 2940.7 213.594 3
 -5 4 -15 1913.91 198.822 2
 -5 -4 -15 2093.59 184.9 3
 -5 -4 -15 2230 211.287 2
 -5 -4 -16 390.833 104.088 2
 -5 4 -16 462.104 113.703 2
 -5 -4 -16 480.391 107.571 3
 -5 4 -17 5980.42 361.847 2
 -5 -4 -17 5695.34 325.672 3
 -5 -4 -17 4994.18 320.514 2
 -5 -4 -18 -131.475 79.6954 2
 -5 4 -18 30.0152 77.4491 2
 -5 -4 -18 148.228 88.1465 3
 -5 -4 -19 2880.83 249.645 3
 -5 4 -19 2329.16 242.62 2
 -5 -4 -19 2632.55 245.917 2
 -5 4 -20 281.679 114.67 2
 -5 -4 -20 541.087 124.098 3
 -5 -4 -20 481.919 115.7 2
 -5 -4 -21 1880.27 222.602 2
 -5 4 -21 1738.98 222.577 2
 -5 -4 -21 1927.27 220.65 3
 -5 -4 -22 975.636 175.502 2
 -5 -5 26 1760.43 206.643 4
 5 -5 -26 1903.87 219.052 3
 -5 -5 25 581.713 125.817 4
 5 -5 -25 859.531 155.845 3
 5 5 -24 -56.3181 65.256 2
 -5 -5 24 -19.1532 55.4616 4
 5 -5 -24 -69.5958 77.3278 3
 5 5 -23 1005.94 139.239 2
 -5 -5 23 964.864 150.458 4
 5 -5 -23 1209.4 163.801 3
 -5 -5 22 3013.09 244.52 4
 5 -5 -22 2705.37 242.4 3
 5 5 -22 2652.04 217.936 2
 5 5 -21 540.963 102.047 2
 -5 -5 21 526.949 105.037 4
 5 -5 -21 687.511 127.009 3
 -5 -5 20 11509.6 370.234 1
 -5 -5 20 10882.9 430.404 4
 5 5 -20 10797.2 415.679 3
 5 -5 -20 11304.7 436.84 3
 5 5 -20 10985.1 412.183 2
 5 5 -19 1411.56 148.251 3
 -5 -5 19 1520.37 138.027 1
 -5 -5 19 1356.51 155.766 4
 5 -5 -19 1611.21 166.571 3
 5 5 -19 1394.05 149.962 2
 -5 -5 18 17906.7 434.086 1
 -5 -5 18 17740.5 519.771 4
 5 5 -18 16838.5 479.593 3
 5 5 -18 17363 487.138 2
 5 -5 -18 18203.7 516.193 3
 5 5 -17 514.655 97.4218 2
 5 5 -17 469.682 87.019 3
 -5 -5 17 485.732 96.3124 4
 -5 -5 17 430.638 73.8418 1
 5 -5 -17 565.036 97.2096 3
 -5 -5 16 14742.1 375.455 1
 -5 -5 16 14727.1 445.144 4
 5 5 -16 14815.6 427.312 2
 5 -5 -16 14789.6 438.281 3
 5 5 -15 384.777 75.5415 2
 5 -5 -15 330.813 70.4548 3
 -5 -5 15 351.618 76.49 4
 -5 -5 15 478.273 68.1667 1
 -5 -5 14 8385.02 270.503 1
 -5 -5 14 8558.86 321.152 4
 5 5 -14 8229.94 302.92 2
 5 -5 -14 7751.65 302.998 3
 5 -5 -13 1801.72 145.902 3
 -5 -5 13 1919.8 128.468 1
 -5 -5 13 1742.49 145.071 4
 5 5 -13 1871.5 144.564 2
 5 -5 -12 265.303 62.8977 3
 -5 -5 12 350.17 64.0159 1
 5 5 -12 345.465 53.8942 5
 -5 -5 12 358.314 72.7963 4
 5 5 -12 283.063 62.9409 2
 5 -5 -11 1256.06 113.793 3
 -5 -5 11 1219.22 113.702 4
 -5 -5 11 1196.27 100.031 1
 5 5 -11 1221.63 113.689 2
 5 5 -11 1111.89 91.3394 5
 5 -5 -10 2571.06 158.717 3
 -5 -5 10 2679.85 158.074 4
 5 5 -10 2663.19 141.498 5
 5 5 -10 2864.18 168.323 2
 -5 -5 10 2653.86 142.182 1
 -5 -5 9 984.566 89.7035 1
 5 -5 -9 1005.19 99.4008 3
 5 5 -9 794.059 81.3762 5
 -5 -5 9 1063.74 98.1196 4
 5 5 -9 988.37 97.2505 2
 -5 -5 8 16996.9 341.266 1
 5 5 -8 16766.7 380.854 2
 5 -5 -8 17001.1 384.263 3
 -5 -5 8 17841.8 371.399 4
 5 5 -8 16806.6 360.878 5
 5 5 -7 2870.94 155.327 5
 -5 -5 7 2950.53 146.348 1
 -5 5 7 2365.45 67.1881 2
 -5 -5 7 3182.95 154.699 4
 5 5 -7 2911.92 161.095 2
 5 -5 -7 2932.75 158.528 3
 5 5 -6 29245 490.542 2
 5 -5 -6 29513.6 493.659 3
 5 5 -6 28958.5 468.693 5
 -5 -5 6 29389.1 443.906 1
 5 5 -5 4868.31 197.37 5
 -5 -5 5 4546.83 174.77 1
 5 -5 -5 4819.13 200.147 3
 -5 5 5 4729.62 112.768 2
 5 5 -5 4826.2 200.136 2
 -5 -5 5 3757.5 74.3364 3
 5 5 -4 21736.9 415.672 5
 5 -5 -4 21108.4 410.931 3
 5 5 -4 21525.4 415.914 2
 -5 5 4 20592 257.044 2
 5 5 -3 20.5778 32.519 5
 5 -5 -3 -11.044 47.1961 3
 -5 5 3 27.8127 24.5957 2
 5 5 -3 30.5382 34.8339 2
 -5 5 3 20.051 26.6941 1
 -5 5 2 254.855 37.5886 1
 -5 5 2 328.531 42.254 2
 5 5 -2 256.97 53.9886 5
 5 5 -2 184.627 51.5305 2
 -5 -5 2 202.164 20.005 3
 5 -5 -2 155.827 46.8013 3
 5 -5 -1 243.72 62.2826 3
 5 5 -1 277.29 54.1065 5
 -5 5 1 236.506 35.1003 1
 -5 5 1 273.919 46.0597 2
 -5 -5 1 229.431 23.7363 3
 -5 5 0 1064.77 63.4026 1
 5 -5 0 1223.89 111.121 3
 5 5 0 994.569 98.7037 5
 -5 5 0 979.511 78.5058 2
 -5 -5 0 1008.1 53.5767 3
 -5 5 -1 4591.32 172.28 2
 5 5 1 4677.18 199.208 5
 -5 -5 -1 4623.96 125.714 3
 -5 5 -2 19008.9 364.638 2
 5 5 2 19535.4 410.681 5
 -5 -5 -2 18912.9 280.643 3
 -5 5 -3 1616.06 118.988 2
 5 5 3 1581.57 124.024 5
 -5 -5 -3 1643.6 94.2205 3
 -5 -5 -4 19505.9 332.557 3
 -5 5 -4 19420.1 406.647 2
 5 5 4 19756.6 422.367 5
 5 5 5 1177.91 108.355 5
 -5 5 -5 1203.77 112.161 2
 -5 -5 -5 1087.92 87.0712 3
 -5 5 -6 17105.5 418.037 2
 5 5 6 17221.9 406.465 5
 -5 -5 -6 17205.9 355.184 3
 -5 5 -7 2368.44 162.606 2
 5 5 7 2502.38 159.848 5
 -5 -5 -7 2663.39 150.48 3
 5 5 8 7217.06 271.507 5
 -5 -5 -8 7299.53 260.049 3
 -5 5 -8 7085.3 292.388 2
 -5 5 -9 35.5946 43.7759 2
 5 5 9 86.883 39.4594 5
 -5 -5 -9 46.2863 32.2366 3
 -5 5 -10 998.425 124.616 2
 -5 -5 -10 1315.35 125.114 3
 5 5 10 1280.47 121.185 5
 5 5 11 99.0216 44.6252 5
 -5 5 -11 161.828 72.6855 2
 -5 -5 -11 104.765 42.3991 3
 -5 -5 -12 1041.09 132.232 2
 5 5 12 1176.76 122.153 5
 -5 5 -12 1182.08 145.693 2
 -5 -5 -12 1161.42 123.253 3
 -5 -5 -13 2429.57 204.183 2
 5 5 13 2445.76 173.955 5
 -5 -5 -13 2377.32 186.995 3
 -5 5 -13 2323.01 206.673 2
 -5 -5 -14 2947.75 229.268 2
 5 5 14 3305.75 204.786 5
 -5 5 -14 2735.66 229.037 2
 -5 -5 -14 3051.09 213.206 3
 -5 -5 -15 148.719 79.7116 2
 -5 -5 -15 30.034 56.6876 3
 -5 5 -15 114.224 78.6192 2
 -5 5 -16 12565.7 507.663 2
 -5 -5 -16 11293.3 437.543 3
 -5 -5 -16 12109.8 482.992 2
 -5 -5 -17 16.1432 65.8302 2
 -5 -5 -17 168.514 83.8085 3
 -5 5 -18 8501.86 445.909 2
 -5 -5 -18 8823.36 415.174 3
 -5 -5 -18 8062.31 415.706 2
 -5 -5 -19 -52.4873 74.6686 2
 -5 -5 -19 82.4385 58.7729 3
 -5 5 -20 5541.1 386.946 2
 -5 -5 -20 5285.31 350.441 2
 -5 -5 -20 5989.88 366.789 3
 -5 5 -21 72.2337 83.3703 2
 -5 -5 -21 63.3284 70.3552 3
 -5 -5 -21 122.293 79.4521 2
 -5 -6 26 -136.476 65.0993 4
 5 -6 -25 589.265 135.868 3
 -5 -6 25 402.357 101.276 4
 -5 -6 24 145.358 75.4144 4
 5 -6 -24 84.4396 61.203 3
 5 6 -24 41.4919 70.1398 2
 -5 -6 23 262.055 86.1851 4
 5 -6 -23 112.254 100.21 3
 5 6 -22 49.512 52.9222 2
 -5 -6 22 -78.0995 66.3819 4
 5 -6 -22 -1.69884 66.9338 3
 -5 -6 21 7020.54 367.279 4
 5 -6 -21 5594.03 367.63 3
 5 6 -21 6563.49 344.361 2
 5 6 -20 -47.862 75.1418 2
 -5 -6 20 -56.7002 64.2199 4
 5 -6 -20 10.476 52.1072 3
 -5 -6 19 13025.5 471.523 4
 5 6 -19 13290.7 461.556 2
 5 -6 -19 12335.3 467.625 3
 5 6 -18 595.469 106.741 2
 -5 -6 18 513.798 100.058 4
 5 -6 -18 604.297 104.492 3
 -5 -6 17 15974.1 493.675 4
 -5 -6 17 15518.8 392.578 1
 5 6 -17 15215.9 467.913 2
 5 -6 -17 15581.7 475.349 3
 5 -6 -16 397.276 87.3354 3
 -5 -6 16 412.539 64.2696 1
 -5 -6 16 533.839 103.187 4
 5 6 -16 342.993 80.8485 2
 -5 -6 15 12097.6 403.568 4
 -5 -6 15 11792.3 324.842 1
 5 6 -15 12161.3 398.283 2
 5 -6 -15 12285.5 402.5 3
 5 -6 -14 558.21 86.7735 3
 -5 -6 14 702.685 83.6146 1
 -5 -6 14 484.926 88.53 4
 5 6 -14 606.457 87.8665 2
 5 -6 -13 3123.81 192.952 3
 -5 -6 13 3566.49 175.144 1
 5 6 -13 3331.68 202.553 2
 -5 -6 13 3441.96 205.423 4
 5 -6 -12 509.372 83.2036 3
 5 6 -12 562.456 69.683 5
 -5 -6 12 591.451 76.3411 1
 -5 -6 12 534.523 85.0799 4
 5 6 -12 635.039 97.3359 2
 -5 -6 11 -18.5603 37.9534 1
 5 6 -11 37.1274 26.6278 5
 -5 -6 11 48.8564 44.729 4
 5 -6 -11 49.1279 42.0983 3
 5 6 -11 68.2954 40.1975 2
 -5 -6 10 2045.59 127.8 1
 5 -6 -10 1884.15 143.216 3
 5 6 -10 1807.21 124.776 5
 -5 -6 10 1785.15 135.21 4
 5 6 -10 1876 144.994 2
 -5 -6 9 5148.89 195.959 1
 -5 -6 9 5903.71 235.803 4
 5 -6 -9 5423.77 233.902 3
 5 6 -9 5438.97 216.476 5
 5 6 -9 5394.95 235.108 2
 -5 -6 8 180.193 43.8672 1
 5 6 -8 170.094 44.1137 5
 -5 -6 8 113.708 41.9856 4
 5 6 -8 167.657 56.1617 2
 5 -6 -8 176.223 48.6045 3
 5 -6 -7 7695.35 268.211 3
 5 6 -7 7556.6 256.849 5
 -5 6 7 6995.09 141.8 2
 -5 -6 7 7639.63 233.445 1
 -5 -6 7 7827.64 248.438 4
 5 6 -7 8010.85 278.067 2
 5 6 -6 46.1082 25.8386 5
 5 -6 -6 106.961 46.9604 3
 -5 -6 6 77.5849 19.5939 3
 -5 -6 6 78.9444 33.942 4
 -5 6 6 105.004 24.8247 2
 5 6 -6 28.0407 36.9545 2
 5 6 -5 3596.42 178.683 5
 5 6 -5 3841.05 192.592 2
 -5 -6 5 3670 157.331 4
 5 -6 -5 3682.27 186.253 3
 -5 6 5 3735.65 117.258 2
 -5 -6 5 3646.59 87.9147 3
 5 -6 -4 4460.46 202.048 3
 5 6 -4 4435.65 200.56 5
 -5 -6 4 3895.32 86.6587 3
 5 6 -4 4457.9 206.742 2
 -5 -6 4 4477.18 167.321 4
 -5 6 4 4368.08 134.628 2
 -5 -6 3 2246.71 66.6198 3
 -5 6 3 2061.96 96.7808 1
 5 6 -3 2328.27 148.642 5
 5 -6 -3 2265.65 146.961 3
 5 6 -3 2357.17 151.443 2
 -5 -6 3 2386.31 117.134 4
 -5 6 3 2475.25 108.599 2
 -5 6 2 6254.76 182.273 2
 5 -6 -2 6029.93 237.673 3
 -5 6 2 5858.26 147.557 1
 5 6 -2 5902.81 230.648 5
 5 6 -2 6243.21 239.791 2
 -5 -6 2 5956.47 114.248 3
 -5 6 1 3913.61 151.843 2
 5 6 -1 3467.96 180.382 5
 5 6 -1 3690.16 189.831 2
 5 -6 -1 3744.21 189.36 3
 -5 6 1 3670.35 110.933 1
 -5 -6 1 3753.69 99.1536 3
 -5 6 0 9974.79 254.471 2
 -5 6 0 9269.49 165.411 1
 5 -6 0 9892.45 308.895 3
 5 6 0 10119.7 308.895 5
 -5 -6 0 10343.7 181.178 3
 5 6 1 19314.8 432.805 5
 -5 6 -1 18753.7 365.094 2
 5 -6 1 19001 435.302 3
 -5 -6 -1 19750.5 273.85 3
 -5 6 -2 9284.52 270.94 2
 5 6 2 9650.41 311.098 5
 -5 -6 -2 9127.37 203.678 3
 -5 6 -3 24504.6 457.492 2
 5 6 3 24466.6 498.109 5
 -5 -6 -3 23306.1 350.564 3
 -5 6 -4 2616.09 158.619 2
 5 6 4 2723.85 171.944 5
 -5 -6 -4 2681.54 126.411 3
 -5 6 -5 28829.4 535.266 2
 5 6 5 29537.4 561.117 5
 -5 -6 -5 29230.4 443.457 3
 5 6 6 578.23 89.9063 5
 -5 -6 -6 595.019 72.1761 3
 -5 6 -6 504.55 81.1945 2
 -5 6 -7 5303.95 253.626 2
 5 6 7 5479.44 250.364 5
 -5 -6 -7 5768.93 221.956 3
 5 6 8 813.966 104.127 5
 -5 6 -8 634.894 96.7347 2
 -5 -6 -8 811.635 95.0469 3
 -5 6 -9 1128.47 130.044 2
 5 6 9 1284.15 127.517 5
 -5 -6 -9 1321.32 120.341 3
 -5 6 -10 1744.72 166.384 2
 5 6 10 1819.47 155.015 5
 -5 -6 -10 1877.56 148.164 3
 5 6 11 19.8427 40.4548 5
 -5 6 -11 5.0263 63.9261 2
 -5 -6 -11 95.5696 57.7271 3
 -5 6 -12 -101.188 74.8274 2
 5 6 12 -35.3487 52.6505 5
 -5 -6 -12 -7.24955 46.6547 3
 -5 6 -13 3232.3 242.615 2
 5 6 13 3244.72 211.346 5
 -5 -6 -13 3277.36 216.439 3
 -5 -6 -14 59.158 66.3517 2
 5 6 14 63.8627 42.2425 5
 -5 -6 -14 101.031 63.126 3
 -5 6 -14 35.0009 90.8489 2
 5 6 15 12617.2 424.583 5
 -5 -6 -15 11534.6 457.762 2
 -5 -6 -15 12486.8 451.381 3
 -5 -6 -16 -81.7813 80.5784 2
 -5 6 -16 10.6564 89.5763 2
 -5 -6 -16 95.7889 70.1914 3
 -5 -6 -17 12930.6 487.516 3
 -5 6 -17 11851.1 562.554 2
 -5 -6 -17 12038.7 495.069 2
 -5 -6 -18 16.0456 73.9804 2
 -5 6 -18 278.023 109.605 2
 -5 -6 -18 139.104 82.8452 3
 -5 -6 -19 11027.9 484.987 3
 -5 -6 -19 10424.2 481.541 2
 -5 6 -19 12243.5 558.394 2
 -5 -6 -20 -148.214 75.2198 2
 -5 6 -20 -26.9654 82.6805 2
 -5 -6 -21 5703.59 370.653 3
 5 7 -25 1073.74 169.46 2
 -5 -7 25 1265.75 181.616 4
 5 7 -24 189.695 88.9097 2
 -5 -7 24 212.383 92.8917 4
 5 -7 -24 148.435 88.538 3
 -5 -7 23 1521.15 191.179 4
 5 7 -23 1442.02 186.338 2
 5 -7 -23 1179.09 207.013 3
 -5 -7 22 1619.39 192.033 4
 5 7 -22 2009.23 209.771 2
 -5 -7 21 1731.59 195.251 4
 5 7 -21 1907.9 202.02 2
 -5 -7 20 6625.48 357.709 4
 5 7 -20 6655.91 348.275 2
 -5 -7 19 350.694 90.9583 4
 5 7 -19 541.647 112.607 2
 -5 -7 18 8347.06 401.211 4
 5 7 -18 9316.86 393.39 2
 5 -7 -18 8219.34 392.126 3
 5 -7 -17 328.345 84.851 3
 5 7 -17 402.102 93.4817 2
 -5 -7 17 555.584 109.414 4
 -5 -7 16 12547 438.496 4
 5 7 -16 12131.3 426.633 2
 5 -7 -16 12714.7 426.672 3
 -5 -7 15 3291.61 222.157 4
 5 7 -15 3155.67 218.337 2
 5 -7 -15 3232.26 216.529 3
 5 -7 -14 5620.21 273.505 3
 -5 -7 14 5854.2 284.421 4
 5 7 -14 5072.8 265.969 2
 -5 -7 14 5582.75 220.404 1
 5 -7 -13 2595.37 182.59 3
 -5 -7 13 2446.21 180.717 4
 5 7 -13 2977.52 202.556 2
 -5 -7 13 2855.08 156.738 1
 5 -7 -12 1174.67 130.434 3
 -5 -7 12 1144.53 101.918 1
 -5 -7 12 1245.94 129.598 4
 5 7 -12 944.461 116.225 2
 5 -7 -11 1142.56 120.529 3
 5 7 -11 1178.99 108.43 5
 -5 -7 11 1293.66 105.228 1
 -5 -7 11 1289.14 123.209 4
 5 7 -11 1283.97 135.13 2
 5 -7 -10 42.0681 37.3903 3
 -5 -7 10 68.6899 44.5562 4
 5 7 -10 97.3775 39.9168 5
 -5 -7 10 68.7728 40.425 1
 5 7 -10 132.305 56.4621 2
 5 -7 -9 2845.8 178.206 3
 -5 -7 9 2725.91 147.568 1
 -5 -7 9 2677.97 164.233 4
 5 7 -9 2442.56 153.716 5
 5 7 -9 2726.89 182.746 2
 -5 -7 8 3053.05 151.047 1
 -5 -7 8 3082.37 170.724 4
 5 -7 -8 3208.35 187.454 3
 5 7 -8 3010.95 171.947 5
 5 7 -8 2929.77 185.132 2
 5 -7 -7 189.822 52.8201 3
 5 7 -7 197.525 50.545 5
 -5 7 7 201.083 35.6225 2
 -5 -7 7 144.429 44.5082 4
 5 7 -7 162.393 59.7811 2
 -5 -7 7 160.799 27.0917 3
 -5 -7 6 10124.3 180.999 3
 5 -7 -6 10195.4 323.908 3
 5 7 -6 10029.8 312.462 5
 -5 -7 6 10378.8 286.621 4
 -5 7 6 9771.25 205.087 2
 5 7 -6 10323.8 334.989 2
 5 -7 -5 261.372 66.4729 3
 -5 -7 5 230.24 48.5257 4
 -5 -7 5 225.316 27.5352 3
 5 7 -5 227.965 56.3623 5
 5 7 -5 157.662 50.7277 2
 -5 7 5 245.096 37.2535 2
 5 -7 -4 3006.87 176.014 3
 -5 -7 4 3093.63 146.013 4
 5 7 -4 2918.38 179.672 2
 -5 7 4 2988.78 124.924 2
 -5 -7 4 3147.8 93.1179 3
 5 7 -4 2908.75 176.859 5
 -5 -7 3 4678.17 114.625 3
 5 7 -3 4516.85 215.448 5
 5 -7 -3 4880.63 223.921 3
 5 7 -3 4369.18 214.161 2
 -5 -7 3 4465.17 168.781 4
 -5 7 3 4647.56 161.619 2
 -5 7 2 36.7901 26.1137 2
 -5 -7 2 85.556 23.235 3
 5 7 -2 42.7906 39.4978 5
 5 7 -2 41.5049 45.2947 2
 -5 -7 2 61.9469 29.0836 4
 5 -7 -2 30.9829 47.4628 3
 -5 7 2 38.5289 20.053 1
 5 -7 -1 16873.6 414.021 3
 5 7 -1 16534.9 417.502 5
 5 7 -1 16686.6 423.803 2
 -5 -7 1 15258.4 281.324 4
 -5 7 1 15929.4 225.514 1
 -5 7 1 16877.5 338.779 2
 -5 -7 1 16927.2 237.953 3
 -5 7 0 4959 193.509 2
 5 7 0 4561.44 222.467 5
 -5 -7 0 4521.87 146.076 4
 5 -7 0 4748.21 224.549 3
 -5 -7 0 4825.04 135.392 3
 -5 7 -1 7990.78 252.614 2
 5 -7 1 8381.93 302.803 3
 5 7 1 8413.54 305.154 5
 -5 -7 -1 7218.46 171.888 4
 -5 -7 -1 8316.43 189.663 3
 -5 7 -2 22261.2 433.934 2
 5 -7 2 21682.5 493.086 3
 5 7 2 21472.3 492.551 5
 -5 -7 -2 20801 269.864 4
 -5 -7 -2 22176.7 330.397 3
 5 7 3 2309.61 165.838 5
 -5 7 -3 2284.41 148.598 2
 -5 -7 -3 2592.47 122.977 3
 -5 7 -4 23130.7 481.104 2
 5 7 4 23405.9 522.872 5
 -5 -7 -4 22794 384.967 3
 5 7 5 66.2837 41.3757 5
 -5 7 -5 54.5766 43.4395 2
 -5 -7 -5 68.2601 36.4163 3
 5 7 6 5009.97 248.961 5
 -5 -7 -6 5079.87 201.87 3
 -5 7 -6 4756.18 238.374 2
 5 7 7 3390.93 210.123 5
 -5 7 -7 3588.17 214.014 2
 -5 -7 -7 3464 175.228 3
 -5 7 -8 1395.97 144.672 2
 5 7 8 1512.71 142.654 5
 -5 -7 -8 1632.01 128.735 3
 5 7 9 6263.99 292.021 5
 -5 7 -9 6870.45 315.474 2
 -5 -7 -9 6729.57 268.47 3
 -5 7 -10 623.775 117.197 2
 5 7 10 329.786 74.7735 5
 -5 -7 -10 358.278 70.4051 3
 -5 -7 -11 6400.49 283.122 3
 5 7 11 6339.73 302.45 5
 -5 7 -11 5902.93 314.249 2
 5 7 12 2365.44 190.922 5
 -5 -7 -12 2559.7 192.162 3
 -5 7 -12 2433.12 213.22 2
 -5 7 -13 2408.7 229.782 2
 -5 -7 -13 2659.6 198.739 3
 5 7 13 2516.8 198.899 5
 -5 7 -14 5896.72 387.811 2
 5 7 14 7058.09 332.902 5
 -5 -7 -14 7371.86 341.652 3
 5 7 15 1776.43 172.429 5
 -5 7 -15 1392.6 208.492 2
 -5 -7 -15 1748.62 177.845 3
 -5 -7 -15 1346.83 167.589 2
 -5 -7 -16 9392.8 425.16 2
 -5 7 -16 8391.96 479.382 2
 -5 7 -17 -6.05979 81.1566 2
 -5 -7 -17 -69.302 81.2371 2
 -5 -7 -17 57.7329 56.3336 3
 -5 7 -18 9221.53 481.756 2
 -5 -7 -18 8575.98 411.858 3
 -5 -7 -18 7648.63 408.377 2
 -5 7 -19 1312.75 198.983 2
 -5 -7 -19 1333.8 181.502 3
 -5 -7 -20 3921.27 300.556 3
 5 8 -25 164.453 92.1257 2
 5 8 -24 3806.52 308.988 2
 -5 -8 23 144.056 92.8989 4
 5 -8 -23 132.295 77.1952 3
 5 8 -23 127.477 82.2911 2
 -5 -8 22 4869.85 333.262 4
 5 8 -22 4468.44 316.986 2
 5 -8 -22 4987.71 324.521 3
 -5 -8 21 550.911 118.113 4
 5 8 -21 679.193 141.306 2
 5 8 -20 2627.33 235.478 2
 5 -8 -20 2472.31 216.817 3
 -5 -8 19 2140.75 204.637 4
 5 8 -19 1632.79 180.555 2
 5 -8 -19 1967.27 189.372 3
 5 -8 -18 114.042 105.928 3
 -5 -8 18 107.147 106.117 4
 -5 -8 17 2543.01 248.54 4
 5 -8 -17 2947.8 242.827 3
 5 -8 -16 274.834 75.4338 3
 -5 -8 16 229.215 76.0117 4
 5 8 -16 208.681 71.2365 2
 -5 -8 15 4050.05 253.206 4
 5 8 -15 4376.87 266.633 2
 5 -8 -15 4382.91 257.201 3
 5 -8 -14 6139.52 297.29 3
 -5 -8 14 5920.68 294.848 4
 5 8 -14 5933.89 303.185 2
 5 -8 -13 1321.12 139.263 3
 -5 -8 13 1386.8 147.622 4
 5 8 -13 1508.86 156.878 2
 5 -8 -12 10676.8 376.103 3
 -5 -8 12 11113.7 376.965 4
 5 8 -12 9950 377.394 2
 -5 -8 11 134.611 46.7315 1
 5 -8 -11 89.7811 51.7668 3
 5 8 -11 76.8231 39.2679 5
 -5 -8 11 99.125 47.6739 4
 5 8 -11 27.6575 59.4423 2
 5 -8 -10 4081.94 229.852 3
 5 8 -10 3771.24 201.368 5
 -5 -8 10 4370.26 187.17 1
 -5 -8 10 4161.72 218.126 4
 5 8 -10 4514.63 247.567 2
 5 8 -9 1387.73 127.782 5
 -5 -8 9 1588.92 134.933 4
 5 8 -9 1337.01 141.12 2
 5 -8 -9 1348.02 131.581 3
 5 8 -8 1375.44 126.42 5
 5 -8 -8 1396.35 131.232 3
 -5 -8 8 1493.92 125.577 4
 5 8 -8 1298.24 135.264 2
 5 -8 -7 4027.96 215.587 3
 5 8 -7 3927.17 209.06 5
 -5 -8 7 3838.82 188.723 4
 5 8 -7 3570.97 215.879 2
 5 -8 -6 93.5697 41.5596 3
 5 8 -6 120.135 48.3149 5
 -5 -8 6 27.3067 30.3968 4
 -5 8 6 88.3261 33.7384 2
 5 8 -6 116.992 51.2376 2
 5 -8 -5 3565.16 201.298 3
 5 8 -5 3726.32 213.737 2
 5 8 -5 3461.91 198.124 5
 -5 -8 5 3625.44 170.708 4
 -5 8 5 3538.59 144.45 2
 5 8 -4 1318.18 127.264 5
 5 -8 -4 1502.66 131.611 3
 5 8 -4 1706.18 152.268 2
 -5 -8 4 1478.59 108.234 4
 -5 8 4 1477.46 97.1631 2
 5 -8 -3 263.772 68.0537 3
 5 8 -3 255.829 61.539 5
 5 8 -3 315.348 71.4236 2
 -5 -8 3 274.95 47.3174 4
 -5 8 3 281.242 47.6504 2
 -5 -8 2 4165.27 162.067 4
 5 8 -2 3814.3 215.835 5
 5 -8 -2 4196.22 220.79 3
 5 8 -2 3973.37 216.635 2
 -5 8 2 3883.95 166.462 2
 5 -8 -1 709.387 97.4999 3
 5 8 -1 950.371 112.513 5
 5 8 -1 836.148 104.991 2
 -5 -8 1 784.09 68.6507 4
 -5 8 1 768.289 82.7552 2
 5 -8 0 9412.61 325.068 3
 5 8 0 9367.36 342.237 5
 -5 -8 0 9024.97 214.587 4
 -5 8 0 9617.75 284.252 2
 5 -8 1 1458.14 136.7 3
 5 8 1 1432 139.897 5
 -5 -8 -1 1571.19 89.7299 3
 -5 8 -1 1389.7 114.954 2
 -5 8 -2 3440.32 186.525 2
 5 -8 2 3216.38 197.668 3
 5 8 2 3290.84 208.556 5
 -5 -8 -2 3536.08 141.253 3
 -5 8 -3 5790.01 244.592 2
 5 8 3 5352.19 264.251 5
 5 -8 3 5572.25 264.145 3
 -5 -8 -3 5992.04 193.969 3
 -5 8 -4 536.428 83.5635 2
 5 8 4 535.447 94.0598 5
 -5 -8 -4 632.161 71.6095 3
 -5 8 -5 8135.68 308.263 2
 5 8 5 8299.79 334.469 5
 -5 -8 -5 8184.55 250.643 3
 -5 8 -6 3862.96 222.555 2
 5 8 6 3520.85 223.087 5
 -5 -8 -6 3962.89 183.345 3
 -5 8 -7 2810.41 198.886 2
 5 8 7 2962.45 207.823 5
 -5 -8 -7 3156.39 174.484 3
 -5 -8 -8 8309.07 286.717 3
 -5 8 -8 8280.49 343.292 2
 5 8 8 8228.46 347.849 5
 -5 8 -9 977.269 136.336 2
 5 8 9 1065.6 133.815 5
 -5 -8 -9 1206.42 118.804 3
 -5 8 -10 20795.8 577.628 2
 5 8 10 20201.3 559.558 5
 -5 -8 -10 20221.5 489.066 3
 5 8 11 -0.2273 50.0857 5
 -5 -8 -11 -22.6263 48.4553 3
 -5 8 -11 46.916 78.4389 2
 -5 8 -12 11272.3 454.592 2
 5 8 12 11548.1 438.083 5
 -5 -8 -12 11470.9 397.327 3
 -5 -8 -13 2030.63 177.616 3
 -5 8 -13 1780.1 198.263 2
 5 8 13 1951.39 188.264 5
 -5 8 -14 7604.05 422.811 2
 5 8 14 7964.24 374.051 5
 -5 -8 -14 8457.9 367.074 3
 -5 -8 -15 4278.21 288.421 2
 5 8 15 4997.19 303.515 5
 -5 -8 -15 4418.88 282.227 3
 -5 -8 -16 1430.22 176.818 2
 -5 8 -16 966.043 196.51 2
 5 8 16 1516.99 170.229 5
 -5 -8 -16 1407.42 168.195 3
 -5 -8 -17 2747.85 243.344 2
 -5 8 -17 2817.49 268.114 2
 -5 -8 -17 3115.12 248.784 3
 -5 8 -18 862.93 176.853 2
 -5 -8 -18 578.719 127.103 3
 -5 -8 -19 1871.86 204.398 3
 -5 -8 -20 2007.77 217.152 3
 5 9 -24 51.8979 76.5862 2
 5 9 -23 7304.98 427.717 2
 5 9 -22 189.629 98.9787 2
 5 -9 -22 269.29 93.9281 3
 -5 -9 21 5025.09 337.395 4
 5 9 -21 4623.13 325.336 2
 5 -9 -21 5068.3 327.996 3
 -5 -9 20 300.502 95.0574 4
 5 9 -20 228.888 83.26 2
 5 -9 -20 78.3412 116.758 3
 -5 -9 19 1559.14 182.025 4
 5 9 -19 1771.72 197.564 2
 5 -9 -19 1681.01 179.595 3
 5 -9 -18 46.331 88.2163 3
 -5 -9 18 73.6444 105.109 4
 5 -9 -17 -1.43933 62.603 3
 5 9 -17 223.018 90.5622 2
 -5 -9 17 117.481 72.2079 4
 5 -9 -16 378.317 82.0769 3
 -5 -9 16 379.337 93.3131 4
 5 9 -16 363.339 96.2635 2
 5 -9 -15 2109.62 188.938 3
 -5 -9 15 2136.2 192.36 4
 5 9 -15 2019.51 197.136 2
 5 -9 -14 -6.96996 52.213 3
 -5 -9 14 -22.2842 57.8906 4
 5 9 -14 -62.1246 67.617 2
 5 -9 -13 8215.2 345.227 3
 -5 -9 13 8389.01 350.315 4
 5 9 -13 8679.51 376.935 2
 5 -9 -12 124.664 51.9788 3
 -5 -9 12 211.491 67.9876 4
 5 9 -12 169.509 73.5461 2
 5 -9 -11 10623.4 380.932 3
 -5 -9 11 10901.6 374.468 4
 5 9 -11 10485.4 402.532 2
 5 -9 -10 1548.02 147.875 3
 5 9 -10 1461.37 138.754 5
 -5 -9 10 1436.42 138.84 4
 5 9 -10 1696.9 165.809 2
 5 9 -9 7731.36 338.239 2
 5 9 -9 8242.06 317.728 5
 5 -9 -9 7867.41 320.46 3
 -5 -9 9 7823.47 299.76 4
 5 9 -8 7019.35 293.31 5
 5 -9 -8 7377.12 307.659 3
 -5 -9 8 7093.83 276.096 4
 5 9 -8 7334.61 324.254 2
 5 9 -7 762.328 105.134 5
 -5 -9 7 793.307 96.4053 4
 5 -9 -7 718.607 100.652 3
 5 9 -7 533.748 95.8431 2
 5 9 -6 3783.08 219.768 5
 5 -9 -6 3873.78 221.64 3
 -5 -9 6 3398.38 180.98 4
 5 9 -6 3730.08 226.749 2
 -5 9 5 85.0882 34.5262 2
 5 -9 -5 24.7679 43.2948 3
 -5 -9 5 36.2993 33.1062 4
 5 9 -5 73.6997 46.9606 5
 5 9 -5 53.2729 51.9844 2
 5 9 -4 2957.4 197.828 5
 5 -9 -4 2810.04 188.231 3
 5 9 -4 3244.79 209.699 2
 -5 -9 4 2893.57 156.269 4
 -5 9 4 3113.45 152.343 2
 5 9 -3 2669.13 194.275 5
 5 9 -3 2734.99 192.716 2
 -5 -9 3 2396 138.601 4
 -5 9 3 2823.69 151.095 2
 5 -9 -3 2582.71 180.367 3
 5 -9 -2 1055.88 123.512 3
 5 9 -2 1092.4 125.576 5
 5 9 -2 1126.43 123.307 2
 -5 -9 2 1178 94.3519 4
 -5 9 2 1121.51 100.81 2
 -5 -9 1 6872.84 210.371 4
 5 -9 -1 7233.59 302.287 3
 5 9 -1 7178.47 311.99 5
 5 9 -1 6968.58 300.069 2
 -5 9 1 7228.47 252 2
 -5 9 0 37.0662 37.8268 2
 5 9 0 60.2451 48.177 5
 5 9 0 47.5406 46.6441 2
 5 -9 0 72.3649 47.5914 3
 5 -9 1 8428.56 325.676 3
 5 9 1 8231.85 337.806 5
 -5 9 -1 8038.06 282.096 2
 5 -9 2 28.7855 58.5733 3
 5 9 2 -10.396 54.4149 5
 -5 9 -2 5.63475 42.4974 2
 -5 9 -3 490.27 84.3306 2
 5 -9 3 402.265 81.7944 3
 5 9 3 446.775 88.0162 5
 -5 9 -4 1982.98 161.682 2
 5 -9 4 1611.08 153.982 3
 5 9 4 1715.61 164.765 5
 -5 9 -5 2825.21 195.997 2
 5 9 5 2919.3 214.334 5
 -5 9 -6 4870.18 259.175 2
 5 9 6 4952.3 277.39 5
 -5 9 -7 6726.83 312.223 2
 5 9 7 6763.85 331.441 5
 -5 9 -8 959.27 134.219 2
 5 9 8 812.224 120.775 5
 -5 -9 -8 1145.07 112.786 3
 -5 9 -9 13622.3 471.797 2
 5 9 9 13588.7 476.286 5
 -5 -9 -9 13918.7 396.861 3
 -5 9 -10 1654.17 182.839 2
 5 9 10 1742.36 181.106 5
 -5 -9 -10 1921.55 156.655 3
 -5 9 -11 17010.7 554.638 2
 5 9 11 17814.3 561.067 5
 -5 -9 -11 18968.4 500.562 3
 -5 9 -12 73.6515 75.0183 2
 5 9 12 42.1839 52.088 5
 -5 -9 -12 56.6105 50.7453 3
 -5 9 -13 11896.6 496.122 2
 5 9 13 11821.4 473.54 5
 -5 -9 -13 12194.6 426.65 3
 -5 9 -14 940.345 159.394 2
 5 9 14 935.206 143.294 5
 -5 -9 -14 1075.71 138.264 3
 5 9 15 2696.16 231.804 5
 -5 9 -15 2363.64 243.032 2
 -5 -9 -15 2941.57 230.294 3
 -5 9 -16 296.67 92.369 2
 -5 -9 -16 177.22 80.2393 2
 5 9 16 358.171 97.7059 5
 -5 -9 -16 264.102 88.5028 3
 -5 9 -17 -92.7527 106.847 2
 -5 -9 -17 35.2645 60.6244 3
 -5 -9 -18 195.732 58.1419 3
 5 10 -22 4577.27 346.324 2
 5 10 -21 69.5807 69.2105 2
 5 -10 -21 54.4098 69.9818 3
 5 10 -20 2713 258.192 2
 5 -10 -20 2857.38 246.009 3
 5 -10 -19 -0.83254 68.5459 3
 5 10 -19 -115.19 88.6382 2
 5 -10 -18 351.207 93.3467 3
 -5 -10 18 370.423 100.109 4
 5 10 -18 181.057 85.8466 2
 5 -10 -17 295.148 73.2652 3
 -5 -10 17 438.25 94.397 4
 5 10 -17 508.351 113.595 2
 -5 -10 16 1755.71 187.464 4
 5 10 -16 1994.85 209.676 2
 5 -10 -16 1981.74 195.821 3
 5 -10 -15 659.332 114.672 3
 -5 -10 15 600.215 112.373 4
 5 10 -15 404.651 97.615 2
 5 -10 -14 6569.48 325.153 3
 -5 -10 14 6476.09 329.602 4
 5 10 -14 6391.25 343.75 2
 5 -10 -13 557.728 105.41 3
 -5 -10 13 698.793 118.929 4
 5 10 -13 584.376 120.03 2
 5 -10 -12 4050.46 250.041 3
 -5 -10 12 4150.96 249.831 4
 5 10 -12 4250.41 274.967 2
 5 -10 -11 240.703 77.2847 3
 -5 -10 11 159.928 59.4888 4
 5 10 -11 218.373 83.0886 2
 5 -10 -10 9270.54 368.929 3
 -5 -10 10 9029.06 345.194 4
 5 10 -10 9090.02 392.527 2
 5 10 -10 9169.81 356.955 5
 5 -10 -9 340.745 77.0577 3
 5 10 -9 377.276 81.3565 5
 -5 -10 9 366.654 81.0887 4
 5 10 -9 280.543 86.0563 2
 5 -10 -8 2305.76 184.575 3
 -5 -10 8 2258.77 165.898 4
 5 10 -8 2267.85 183.501 5
 5 10 -8 2326.84 200.068 2
 5 10 -7 2865.84 204.438 5
 5 -10 -7 2850.67 199.25 3
 -5 -10 7 2724.71 175.767 4
 5 10 -7 2702.01 204.694 2
 5 -10 -6 1634.82 161.633 3
 5 10 -6 1320.84 144.463 5
 -5 -10 6 1585.15 131.918 4
 5 10 -6 1356.63 151.954 2
 5 10 -5 3212.17 217.747 5
 5 10 -5 3497.17 233.138 2
 -5 -10 5 3700.02 191.926 4
 5 -10 -5 3626.63 225.144 3
 5 -10 -4 3299.81 213.216 3
 5 10 -4 3459.93 230.553 5
 5 10 -4 3379.3 227.836 2
 -5 -10 4 3284.14 175.825 4
 5 10 -3 1192.5 140.338 5
 5 10 -3 1195.85 135.11 2
 -5 -10 3 1058.7 100.049 4
 5 -10 -3 1158.68 128.901 3
 -5 10 3 1143.29 103.154 2
 5 10 -2 7458.79 337.538 5
 5 10 -2 7585.32 330.834 2
 -5 10 2 7708.24 270.656 2
 5 -10 -2 7431.89 314.242 3
 5 -10 -1 157.704 61.3318 3
 5 10 -1 269.861 74.798 5
 5 10 -1 282.625 74.2437 2
 -5 10 1 300.776 61.5166 2
 5 -10 0 8700.09 343.706 3
 5 10 0 8848.27 370.842 5
 5 10 0 8821.81 359.391 2
 -5 10 0 8710.05 304.509 2
 -5 10 -1 548.751 84.8945 2
 5 -10 1 592.467 95.9834 3
 5 10 1 624.882 106.669 5
 5 -10 2 4279.25 243.712 3
 5 10 2 4063.48 256.01 5
 -5 10 -2 4396.92 229.393 2
 -5 10 -3 363.957 82.0969 2
 5 -10 3 226.945 67.8128 3
 5 10 3 344.82 84.7279 5
 -5 10 -4 88.3702 51.3643 2
 5 -10 4 180.185 75.4229 3
 5 10 4 194.03 75.0914 5
 -5 10 -5 26.3029 56.1551 2
 5 -10 5 -4.83424 57.9239 3
 5 10 5 -10.248 61.244 5
 5 10 6 3835.2 261.835 5
 -5 10 -6 3779.05 240.909 2
 5 10 7 47.5574 62.505 5
 -5 10 -7 28.1534 70.249 2
 -5 10 -8 11531.4 440.008 2
 5 10 8 11002.7 447.11 5
 5 10 9 1047.55 148.063 5
 -5 10 -9 1027.13 149.372 2
 -5 10 -10 12564.4 484.969 2
 5 10 10 12896.2 496.26 5
 5 10 11 789.139 135.758 5
 -5 10 -11 799.598 145.413 2
 -5 10 -12 10104.6 460.178 2
 5 10 12 10427.3 459.446 5
 -5 10 -13 380.11 108.903 2
 5 10 13 187.137 85.705 5
 -5 10 -14 2675.84 251.512 2
 5 10 14 2620.87 238.903 5
 -5 10 -15 -15.9715 79.9689 2
 5 10 15 232.756 77.6578 5
 5 10 16 734.696 142.019 5
 -5 10 -16 1016.6 181.328 2
 5 -11 -20 154.113 75.988 3
 5 11 -20 565.712 164.202 2
 5 -11 -19 98.0843 65.5006 3
 5 11 -19 103.491 81.0828 2
 5 -11 -18 1115.05 154.685 3
 5 11 -18 1023.41 164.657 2
 5 -11 -17 493.556 111.205 3
 5 11 -17 478.386 121.345 2
 -5 -11 16 1398.03 172.081 4
 5 11 -16 1255.07 173.959 2
 5 -11 -16 1655.16 182.286 3
 5 -11 -15 3146.67 239.494 3
 -5 -11 15 2943.65 236.306 4
 5 11 -15 3191.68 264.263 2
 -5 -11 14 908.166 136.183 4
 5 11 -14 619.179 125.142 2
 5 -11 -14 779.106 125.418 3
 5 -11 -13 8508.33 378.368 3
 -5 -11 13 7314.21 348.752 4
 5 11 -13 8244.62 406.678 2
 -5 -11 12 674.516 116.136 4
 5 -11 -12 677.639 113.763 3
 5 11 -12 594.11 123.357 2
 5 11 -11 9521.25 425.124 2
 5 -11 -11 9882.75 398.698 3
 -5 -11 11 9238.58 372.472 4
 5 -11 -10 186.107 65.5218 3
 -5 -11 10 328.332 88.7907 4
 5 11 -10 146.251 84.4205 2
 5 -11 -9 7360.72 335.691 3
 -5 -11 9 6928.45 305.406 4
 5 11 -9 6803.34 349.767 2
 5 11 -9 7048.19 333.024 5
 -5 -11 8 698.612 103.959 4
 5 11 -8 485.56 96.5098 5
 5 -11 -8 493.086 92.4516 3
 5 11 -8 597.256 111.578 2
 5 -11 -7 449.072 97.244 3
 5 11 -7 480.237 98.0422 5
 -5 -11 7 514.287 87.815 4
 5 11 -7 447.402 101.202 2
 -5 -11 6 -38.876 47.3222 4
 5 -11 -6 63.5149 56.6443 3
 5 11 -6 27.55 44.1717 5
 5 11 -6 -29.8298 73.0862 2
 5 -11 -5 4889.15 269.595 3
 5 11 -5 4982.13 290.555 2
 5 11 -5 4357.97 273.111 5
 -5 -11 5 4563.86 221.342 4
 5 -11 -4 105.83 59.0902 3
 5 11 -4 86.2988 52.5503 5
 -5 -11 4 6.45141 39.7736 4
 5 11 -4 2.70236 56.8486 2
 5 -11 -3 14318.9 451.369 3
 5 11 -3 13527.5 479.857 5
 5 11 -3 14148.2 473.976 2
 5 -11 -2 6.46135 64.118 3
 5 11 -2 99.5755 69.7899 5
 -5 11 2 35.4306 45.1945 2
 5 11 -2 27.6901 65.431 2
 5 11 -1 11273 440.81 5
 5 -11 -1 11570.5 411.345 3
 5 11 -1 11396.2 426.929 2
 -5 11 1 11677.4 362.302 2
 5 -11 0 523.7 103.786 3
 5 11 0 528.691 102.864 2
 -5 11 0 513.056 83.9286 2
 5 11 0 528.649 108.682 5
 -5 11 -1 7343.17 302.557 2
 5 11 1 7657.18 368.617 5
 5 -11 1 7199.73 328.914 3
 5 -11 2 3488.92 234.218 3
 5 11 2 3312.08 249.242 5
 -5 11 -2 3429.89 216.284 2
 5 -11 3 3480 230.458 3
 5 11 3 3379.51 250.521 5
 -5 11 -3 3665.92 228.979 2
 5 -11 4 1664.03 167.2 3
 5 11 4 1520.71 182.136 5
 -5 11 -4 1735.78 162.401 2
 -5 11 -5 64.5843 52.7227 2
 5 -11 5 81.4147 67.6434 3
 5 11 5 -101.264 75.1181 5
 -5 11 -6 871.919 124.494 2
 5 11 6 558.745 109.654 5
 5 -11 6 515.664 100.16 3
 5 11 7 1431.99 169.603 5
 5 -11 7 1480.45 163.634 3
 -5 11 -7 1560.07 168.122 2
 5 11 8 17.4103 56.1701 5
 -5 11 -8 21.0307 57.5427 2
 5 11 9 5184.18 329.583 5
 -5 11 -9 5205.98 320.927 2
 5 11 10 106.306 71.493 5
 -5 11 -10 -41.5155 71.1597 2
 -5 11 -11 5662.79 348.282 2
 5 11 11 5778.63 355.365 5
 -5 11 -12 1095.02 167.093 2
 5 11 12 1253.23 173.44 5
 -5 11 -13 3588.37 298.382 2
 5 11 13 3607.04 290.6 5
 -5 11 -14 1146.75 179.909 2
 5 11 14 954.845 154.408 5
 -5 11 -15 1302.99 198.433 2
 5 11 15 1284.94 179.85 5
 5 11 16 903.843 162.23 5
 5 11 17 86.8465 78.4239 5
 5 -12 -18 670.742 124.481 3
 5 12 -18 481.214 118.828 2
 5 12 -17 1382.3 192.462 2
 5 -12 -17 1671.87 191.93 3
 5 12 -16 3358.41 290.163 2
 5 -12 -16 3170.46 255.529 3
 5 -12 -15 667.573 123.756 3
 5 12 -15 548.74 128.024 2
 5 -12 -14 3524.84 257.885 3
 5 12 -14 3564.9 289.78 2
 5 -12 -13 312.145 85.7344 3
 5 12 -13 360.851 106.672 2
 5 -12 -12 6497.54 340.566 3
 5 12 -12 6586.23 376.052 2
 5 -12 -11 36.7567 54.3141 3
 5 12 -11 76447.8 1235.68 2
 5 -12 -10 7230.79 351.04 3
 5 12 -10 5431.26 396.608 2
 5 -12 -9 370.762 90.4526 3
 5 12 -9 136.059 104.806 2
 5 12 -8 3187.03 240.501 5
 5 -12 -8 3310.68 235.772 3
 5 12 -8 3028.71 249.856 2
 5 12 -7 1706.59 177.794 5
 5 -12 -7 1978.93 179.62 3
 5 12 -7 1760.6 190.461 2
 5 -12 -6 49.4547 53.9133 3
 5 12 -6 28.5815 53.8436 5
 5 12 -6 113.634 71.1919 2
 5 -12 -5 841.343 126.117 3
 5 12 -5 738.89 128.21 5
 5 12 -5 742.887 124.192 2
 5 12 -4 6657.93 356.749 5
 5 -12 -4 6339.26 313.917 3
 5 12 -4 6448.84 341.403 2
 5 -12 -3 40.5215 60.1493 3
 5 12 -3 109.995 73.2762 5
 5 12 -3 79.4566 62.2155 2
 5 -12 -2 16800.5 509.636 3
 5 12 -2 16643.4 565.705 5
 5 12 -2 16661.8 530.797 2
 5 -12 -1 210.022 79.9615 3
 5 12 -1 362.199 105.984 5
 5 12 -1 264.064 91.5203 2
 5 12 0 15983.9 560.091 5
 5 -12 0 15535.1 494.39 3
 -5 12 0 15569.7 452.04 2
 5 -12 1 1321.8 155.105 3
 5 12 1 1287.64 166.839 5
 -5 12 -1 1496.28 151.99 2
 5 12 2 6844.87 371.027 5
 5 -12 2 6619.47 331.422 3
 -5 12 -2 6770.16 311.906 2
 5 -12 3 4462.31 272.672 3
 5 12 3 4458.26 304.645 5
 -5 12 -3 4366.07 258.95 2
 5 -12 4 1181.61 149.243 3
 -5 12 -4 1521.64 163.093 2
 5 -12 5 3218 234.932 3
 -5 12 -5 3301.3 239.995 2
 -5 12 -6 110.451 60.4976 2
 5 -12 6 143.579 66.6894 3
 5 12 6 1.51959 68.9436 5
 5 -12 7 2623.54 220.457 3
 5 12 7 2437.47 235.659 5
 -5 12 -7 2252.41 210.521 2
 -5 12 -8 256.433 89.2714 2
 5 12 8 325.057 100.201 5
 5 -12 8 285.149 88.9316 3
 -5 12 -9 530.127 115.457 2
 5 -12 9 607.641 116.687 3
 5 12 9 708.242 139.05 5
 5 12 10 2113.46 231.293 5
 -5 12 -10 1960.15 215.616 2
 -5 12 -11 357.793 108.64 2
 5 12 11 458.032 128.842 5
 5 12 12 2694.29 262.847 5
 -5 12 -12 2723.2 258.478 2
 5 12 13 737.957 149.309 5
 -5 12 -13 454.884 125.794 2
 5 12 14 1632.66 214.82 5
 5 -13 -17 1245.01 170.078 3
 5 13 -16 2673.28 278.44 2
 5 -13 -16 2215.38 222.261 3
 5 -13 -15 4714.9 309.386 3
 5 13 -15 4291.37 333.17 2
 5 -13 -14 82.0275 76.0461 3
 5 13 -14 82.9645 80.9263 2
 5 -13 -13 3861.32 274.834 3
 5 13 -13 4067.08 317.221 2
 5 -13 -12 -62.5622 73.7237 3
 5 13 -12 -4.53618 106.829 2
 5 -13 -11 3228.08 246.205 3
 5 13 -11 2675.84 252.739 2
 5 -13 -10 1077.02 149.959 3
 5 13 -10 254.693 161.247 2
 5 -13 -9 1623.37 175.782 3
 5 13 -9 687.254 208.252 2
 5 -13 -8 4671.6 286.058 3
 5 13 -8 4282.08 303.652 2
 5 13 -7 2.30775 46.015 5
 5 13 -7 54.1279 69.5919 2
 5 -13 -7 66.3022 60.8423 3
 5 13 -6 4973.95 318.457 5
 5 -13 -6 5415.32 305.428 3
 5 13 -6 5841.5 348.62 2
 5 -13 -5 1334.75 158.763 3
 5 13 -5 1443.13 178.897 5
 5 13 -5 1512.26 181.242 2
 5 -13 -4 1714.8 172.666 3
 5 13 -4 1735.88 190.345 2
 5 13 -4 1762.6 198.563 5
 5 -13 -3 7341.7 349.461 3
 5 13 -3 7145.49 391.468 5
 5 13 -3 6954.31 364.971 2
 5 -13 -2 349.717 87.5542 3
 5 13 -2 329.479 102.886 5
 5 13 -2 398.169 109.174 2
 5 13 -1 12927.3 528.263 5
 5 13 -1 13851.7 516.223 2
 5 -13 -1 13391.8 472.95 3
 5 -13 0 318.44 91.3345 3
 5 13 0 589.713 128.522 5
 5 -13 1 8503.42 383.222 3
 5 13 1 9220.35 450.557 5
 -5 13 -1 8983.76 372.391 2
 5 -13 2 2006.75 193.878 3
 5 13 2 1765.43 204.495 5
 -5 13 -2 2040.61 189.663 2
 5 -13 3 5129.39 299.683 3
 5 13 3 4582.16 324.471 5
 -5 13 -3 4817.59 285.281 2
 5 -13 4 2996.98 236.006 3
 5 13 4 2654.31 269.518 5
 -5 13 -4 2729.53 223.85 2
 5 -13 5 848.099 134.508 3
 5 13 5 881.035 156.444 5
 -5 13 -5 824.348 132.242 2
 5 -13 6 3650.91 258.903 3
 5 13 6 2765.45 280.749 5
 -5 13 -6 3645.21 267.78 2
 5 -13 7 68.391 61.9287 3
 5 13 7 59.6668 62.9843 5
 -5 13 -7 152.904 93.4867 2
 5 13 8 2735.61 263.259 5
 -5 13 -8 2536.01 234.45 2
 5 -13 8 2602.89 227.512 3
 -5 13 -9 451.05 114.949 2
 5 -13 9 454.185 112.049 3
 5 13 9 439.23 116.687 5
 -5 13 -10 342.738 109.569 2
 5 -13 10 133.806 74.3171 3
 5 13 10 108.898 67.1156 5
 -5 13 -11 1338.24 181.644 2
 5 13 11 1482.38 206.915 5
 5 -13 11 1236.07 171.623 3
 -5 13 -12 -197.88 101.296 2
 5 13 12 -94.8194 89.0804 5
 5 -14 -14 1932.15 206.229 3
 5 -14 -13 62.6785 63.3033 3
 5 14 -13 185.588 102.075 2
 5 -14 -12 2283.09 219.017 3
 5 14 -12 2115.2 237.497 2
 5 -14 -11 1073.25 156.686 3
 5 14 -11 646.249 129.248 2
 5 14 -10 746.436 149.21 2
 5 -14 -10 681.304 126.53 3
 5 -14 -9 5134.82 314.784 3
 5 14 -9 4719.57 337.661 2
 5 -14 -8 71.9625 54.9502 3
 5 14 -8 171.599 96.5228 2
 5 14 -7 7424.9 411.362 5
 5 -14 -7 7956.62 382.796 3
 5 14 -7 8410.22 439.457 2
 5 -14 -6 24.8757 63.0087 3
 5 14 -6 -90.2309 65.2997 5
 5 14 -6 50.3779 77.5818 2
 5 -14 -5 6523.65 347.779 3
 5 14 -5 6498.02 390.788 5
 5 14 -5 6519.84 375.815 2
 5 -14 -4 1755.28 187.714 3
 5 14 -4 1705.59 207.852 5
 5 14 -4 1865.72 207.828 2
 5 -14 -3 4269.42 282.67 3
 5 14 -3 4058.43 319.378 5
 5 14 -3 4255.86 303.095 2
 5 -14 -2 3042.15 240.14 3
 5 14 -2 2765.57 263.291 5
 5 14 -2 2473.7 233.877 2
 5 -14 -1 289.994 92.1198 3
 5 14 -1 139.427 81.4037 5
 5 14 -1 79.6797 70.1025 2
 5 -14 0 2153.81 199.69 3
 5 14 0 1753.24 211.371 5
 5 -14 1 1147.1 149.669 3
 5 14 1 978.508 167.032 5
 5 -14 2 2165.3 205.012 3
 5 14 2 1737.61 216.254 5
 5 14 3 2144.24 242.202 5
 5 -14 3 2159.19 205.794 3
 -5 14 -3 1962.52 197.254 2
 5 14 4 1207.27 175.562 5
 5 -14 4 1339.2 168.752 3
 -5 14 -4 1309.61 166.164 2
 5 -14 5 2290.8 217.629 3
 5 14 5 2437.65 253.564 5
 -5 14 -5 2454.18 225.116 2
 5 -14 6 321.887 92.9165 3
 5 14 6 405.814 121.737 5
 -5 14 -6 448.416 111.282 2
 5 14 7 2179.88 249.772 5
 5 -14 7 1865.44 195.91 3
 -5 14 -7 1962.76 207.687 2
 5 -14 8 -25.8719 60.6739 3
 5 14 8 77.1844 83.1111 5
 -5 14 -8 -32.3625 71.9925 2
 5 -14 9 1232.9 168.958 3
 -5 14 -9 1368.51 191.134 2
 5 -14 10 -13.4904 64.9381 3
 -5 14 -10 110.097 77.0491 2
 5 -15 -12 899.522 145.61 3
 5 -15 -11 -173.167 86.112 3
 5 -15 -10 4200.51 294.092 3
 5 15 -10 4495.54 344.28 2
 5 -15 -9 -52.4143 76.9977 3
 5 15 -9 82.44 87.1267 2
 5 -15 -8 9836.74 443.832 3
 5 15 -8 9984.85 502.733 2
 5 -15 -7 -31.0798 62.2733 3
 5 15 -7 114.049 98.9543 2
 5 15 -6 8326.27 461.519 5
 5 15 -6 9715.7 483.464 2
 5 -15 -6 8860.04 418.34 3
 5 15 -5 20.2961 58.4978 5
 5 -15 -5 31.1061 67.1241 3
 5 15 -5 -14.1792 80.3855 2
 5 -15 -4 6299.34 352.228 3
 5 15 -4 5813.86 390.009 5
 5 15 -4 6578.17 387.778 2
 5 -15 -3 -19.5633 64.3898 3
 5 15 -3 -27.2824 58.9742 5
 5 15 -3 -106.529 98.8476 2
 5 -15 -2 2776.1 231.993 3
 5 15 -2 2673.69 273.749 5
 5 15 -2 2766.78 256.524 2
 5 -15 -1 -63.3342 79.4628 3
 5 15 -1 -30.4423 78.3884 5
 5 15 0 117.452 92.2729 5
 5 -15 0 213.639 69.8134 3
 5 -15 1 -2.75138 57.2497 3
 5 15 1 -22.6629 82.7944 5
 5 -15 2 1945.27 203.142 3
 5 15 2 2063.57 243.807 5
 5 -15 3 -200.003 88.2046 3
 5 15 3 0.79803 78.929 5
 5 -15 4 4279.28 293.891 3
 5 15 4 4295.64 355.174 5
 5 15 5 50.9061 62.6374 5
 5 -15 5 73.4416 72.447 3
 -5 15 -5 45.236 66.9803 2
 -5 15 -6 3884.48 297.236 2
 5 -15 6 4001.45 290.521 3
 5 -15 7 -26.3465 57.0882 3
 -5 15 -7 37.4906 72.4852 2
 5 -16 -7 10785.5 476.391 3
 5 -16 -6 196.717 90.8065 3
 5 16 -5 7105.94 450.909 5
 5 -16 -5 7081.91 386.136 3
 5 -16 -4 911.341 141.628 3
 5 16 -4 847.384 170.773 5
 5 16 -4 808.405 147.911 2
 5 -16 -3 3608.91 275.918 3
 5 16 -3 3535.41 324.025 5
 5 16 -3 3318.61 292.86 2
 5 -16 -2 701.314 127.235 3
 5 16 -2 665.279 140.122 2
 5 16 -2 583.886 136.013 5
 5 -16 -1 801.901 140.13 3
 5 16 -1 750.326 168.998 5
 5 16 0 533.996 131.4 5
 5 -16 0 913.721 153.03 3
 5 -16 1 287.074 88.2856 3
 5 -16 2 371.695 111.939 3
 5 -16 3 2598.67 240.903 3
 6 0 -28 4458.42 336.047 3
 6 0 -27 -34.8987 71.8667 3
 6 0 -26 973.938 153.698 3
 6 0 -25 44.884 56.669 3
 -6 0 24 456.8 94.5717 4
 6 0 -24 694.27 123.651 3
 -6 0 23 -51.9062 57.3146 4
 6 0 -23 20.1211 50.784 3
 -6 0 22 854.157 118.083 4
 6 0 -22 873.135 128.084 3
 -6 0 21 97.6062 65.3128 4
 6 0 -21 79.6268 60.2489 3
 -6 0 20 17756.8 483.402 4
 6 0 -20 18904.4 523.255 3
 -6 0 19 -38.3736 47.0447 4
 6 0 -19 -96.9286 57.2201 3
 6 0 -18 47258 766.956 3
 -6 0 18 44702.1 718.264 4
 6 0 -17 -53.5569 46.3678 3
 6 0 -16 51952.9 738.067 3
 6 0 -16 50085.8 562.907 2
 6 0 -15 24.149 25.3593 2
 6 0 -15 -17.3878 32.6073 5
 6 0 -15 -8.4388 36.6786 3
 6 0 -14 26314.2 454.167 5
 6 0 -14 25450.7 364.295 2
 6 0 -14 26049.9 481.486 3
 6 0 -13 -3.60552 27.1386 5
 6 0 -13 -27.7212 24.1765 2
 6 0 -13 -8.60007 28.6565 3
 6 0 -12 6380.78 218.368 5
 6 0 -12 5862.68 159.63 2
 6 0 -12 6634.44 220.876 3
 6 0 -11 -17.4226 25.1245 3
 6 0 -11 1.03547 24.8884 5
 6 0 -11 38.119 21.8803 2
 6 0 -10 444.632 57.5679 3
 6 0 -10 438.452 60.1228 5
 6 0 -10 407.001 43.1602 2
 6 0 -9 15.4335 25.1803 3
 6 0 -9 26.4946 29.4738 5
 6 0 -9 6.32872 18.8904 2
 -6 0 9 56.4344 35.6174 1
 6 0 -8 42158.6 446.304 3
 6 0 -8 40810.8 367.44 2
 -6 0 8 41679.6 532.67 1
 6 0 -8 42212.2 546.764 5
 -6 0 7 35.3788 40.6432 1
 6 0 -7 11.6734 21.4891 3
 6 0 -7 -10.5883 21.2072 2
 6 0 -7 28.0245 33.2761 5
 6 0 -6 25849.9 321.599 3
 6 0 -6 26147.2 424.617 5
 -6 0 6 25662.4 399.739 1
 6 0 -5 -1.76465 24.2801 5
 6 0 -5 9.75629 17.6612 3
 -6 0 5 0.92887 34.9804 1
 -6 0 4 52995.9 562.041 1
 6 0 -4 52701.8 443.548 3
 6 0 -4 53262.8 608.356 5
 6 0 -3 19.8456 23.7327 5
 6 0 -3 37.8288 23.6501 3
 -6 0 3 5.04073 32.4335 1
 6 0 -2 21480.5 381.547 5
 -6 0 2 22018.8 365.865 1
 6 0 -1 3.32766 22.564 5
 6 0 0 244.255 49.5502 5
 6 0 1 14.6913 26.2866 5
 6 0 2 33244.2 475.158 5
 -6 0 -3 -7.60364 46.2038 2
 6 0 3 18.4237 28.991 5
 -6 0 -4 76172.5 813.539 2
 6 0 4 75993.6 723.073 5
 6 0 5 37.6405 31.6643 5
 -6 0 -5 -3.32538 45.6531 2
 -6 0 -6 12276.8 360.702 2
 6 0 6 12240.6 294.478 5
 -6 0 -7 -11.8726 55.3779 2
 6 0 7 8.85121 25.6845 5
 -6 0 -8 245.478 65.7248 2
 6 0 8 262.816 46.6738 5
 -6 0 -9 54.3467 58.4702 2
 6 0 9 9.66601 27.4709 5
 -6 0 -10 762.07 113.4 2
 6 0 10 961.526 87.5482 5
 -6 0 -11 49.7452 57.459 2
 -6 0 -12 4142.38 258.962 2
 -6 0 -13 21.0795 61.1694 2
 -6 0 -14 8675.62 393.882 2
 -6 0 -15 56.0733 80.4255 2
 -6 0 -16 16342 568.115 2
 -6 0 -17 72.8619 87.6546 2
 -6 0 -18 16019.7 592.242 2
 -6 0 -19 169.039 88.5819 2
 -6 0 -20 5633.02 372.044 2
 -6 0 -21 -94.6268 83.6626 2
 -6 0 -22 342.666 102.936 2
 6 1 -28 427.242 117.398 3
 6 -1 -28 174.413 88.6532 3
 6 1 -27 2652.93 253.142 3
 6 -1 -27 2931.01 268.973 3
 6 1 -26 601.828 125.616 3
 6 -1 -26 558.334 121.186 3
 -6 -1 25 939.596 137.109 4
 6 1 -25 1252.07 166.902 3
 6 -1 -25 868.459 142.695 3
 -6 -1 24 630.907 115.861 4
 6 1 -24 701.793 123.539 3
 6 -1 -24 701.358 128.84 3
 -6 -1 23 61.7087 45.2477 4
 6 1 -23 131.482 63.6297 3
 6 -1 -23 -64.0367 64.0942 3
 -6 -1 22 881.536 128.581 4
 -6 1 22 855.617 116.318 4
 6 1 -22 924.581 133.752 3
 6 -1 -22 958.895 137.157 3
 6 -1 -21 8230.54 364.562 3
 -6 -1 21 7212.21 326.929 4
 -6 1 21 7456.19 316.748 4
 6 1 -21 8171.39 361.041 3
 -6 -1 20 451.896 95.0999 4
 -6 1 20 400.334 76.7707 4
 6 1 -20 494.825 97.0818 3
 6 -1 -20 440.782 93.2131 3
 -6 -1 19 20715.2 522.307 4
 -6 1 19 21323.1 497.897 4
 6 1 -19 21416.5 533.625 3
 6 -1 -19 20243.1 526.743 3
 -6 -1 18 542.762 88.4027 4
 6 1 -18 633.908 98.2786 3
 6 -1 -18 571.716 97.3727 3
 -6 -1 17 43837.1 708.289 4
 6 1 -17 44013.4 700.188 3
 6 -1 -17 44024.5 727.215 3
 6 1 -17 43650.3 588.865 2
 6 1 -16 5745.31 208.422 5
 6 1 -16 5803.77 246.622 3
 6 -1 -16 5705.72 251.835 3
 6 1 -16 5931.89 210.595 2
 6 1 -15 30303.8 469.458 5
 6 1 -15 31688 547.128 3
 6 1 -15 29894 450.039 2
 6 -1 -15 30168.6 547.005 3
 6 -1 -14 6284.81 242.208 3
 6 -1 -14 5920.72 225.571 5
 6 1 -14 5802.23 222.412 3
 6 1 -14 5905.12 206.605 5
 6 1 -14 5847.74 192.238 2
 6 -1 -14 5512.56 151.52 2
 6 1 -13 6745.23 220.545 5
 6 -1 -13 6795.65 237.169 5
 6 1 -13 6840.72 199.825 2
 6 -1 -13 5852.75 146.106 2
 6 1 -13 6795.69 228.877 3
 6 -1 -13 6733.81 238.952 3
 6 -1 -12 2441.21 142.27 5
 6 1 -12 2349.22 132.635 5
 6 -1 -12 2411.22 88.6245 2
 6 1 -12 2659.2 121.636 2
 6 1 -12 2564.34 137.054 3
 6 -1 -12 2660.64 147.057 3
[truncated: 480,223 more chars]
