# Supplementary material
Source: publisher figshare collection journal article supplement (https://acs.figshare.com/ndownloader/files/4205155)
Supplement: Supplementary file 27 [file 4205155 › CIFs/Cu/CuDy/CuDy.cif]

data_CuDy
_audit_creation_date              2015-02-16
_audit_creation_method
;
Olex2 1.2
(compiled 2015.01.26 svn.r3151 for OlexSys, GUI svn.r4998)
;
_publ_contact_author_address      
;
The University of Manchester
School of Chemistry
Oxford Road, 
Manchester
M13 9PL
United Kingdom
;
_publ_contact_author_email        eufemio.morenopineda@manchester.ac.uk
_publ_contact_author_name         'Eufemio Moreno Pineda'
_publ_contact_author_phone        '+44 074 1192 4293'
_publ_section_references
;
Dolomanov, O.V., Bourhis, L.J., Gildea, R.J, Howard, J.A.K. & Puschmann, H.
 (2009), J. Appl. Cryst. 42, 339-341.

Palatinus, L. & Chapuis, G. (2007). J. Appl. Cryst., 40, 786-790;
Palatinus, L. & van der Lee, A. (2008). J. Appl. Cryst. 41, 975-984;
Palatinus, L., Prathapa, S. J. & van Smaalen, S. (2012). J. Appl. Cryst. 45,
 575-580.

Sheldrick, G.M. (2008). Acta Cryst. A64, 112-122.
;
_chemical_name_common             ?
_chemical_name_systematic         ?
_chemical_formula_moiety          'C50 H90 Cu2 Dy2 O22, 2(C6 H16 N), C2 N2'
_chemical_formula_sum             'C64 H122 Cu2 Dy2 N4 O22'
_chemical_formula_weight          1751.73
_chemical_melting_point           ?
loop_
  _atom_type_symbol
  _atom_type_description
  _atom_type_scat_dispersion_real
  _atom_type_scat_dispersion_imag
  _atom_type_scat_source
 'C' 'C' 0.0033 0.0016 'International Tables Vol C Tables 4.2.6.8 and 6.1.1.4'
 'H' 'H' 0.0000 0.0000 'International Tables Vol C Tables 4.2.6.8 and 6.1.1.4'
 'Cu' 'Cu' 0.3201 1.2651 'International Tables Vol C Tables 4.2.6.8 and 6.1.1.4'
 'Dy' 'Dy' -0.1892 4.4098
 'International Tables Vol C Tables 4.2.6.8 and 6.1.1.4'
 'N' 'N' 0.0061 0.0033 'International Tables Vol C Tables 4.2.6.8 and 6.1.1.4'
 'O' 'O' 0.0106 0.0060 'International Tables Vol C Tables 4.2.6.8 and 6.1.1.4'

_shelx_space_group_comment
;
The symmetry employed for this shelxl refinement is uniquely defined
by the following loop, which should always be used as a source of
symmetry information in preference to the above space-group names.
They are only intended as comments.
;
_space_group_crystal_system       'triclinic'
_space_group_IT_number            2
_space_group_name_H-M_alt         'P -1'
_space_group_name_Hall            '-P 1'
loop_
  _space_group_symop_operation_xyz
 'x, y, z'
 '-x, -y, -z'

_cell_length_a                    11.1732(4)
_cell_length_b                    13.2788(4)
_cell_length_c                    15.5030(6)
_cell_angle_alpha                 102.315(3)
_cell_angle_beta                  97.228(3)
_cell_angle_gamma                 110.072(3)
_cell_volume                      2060.48(14)
_cell_formula_units_Z             1
_cell_measurement_reflns_used     8645
_cell_measurement_temperature     102(1)
_cell_measurement_theta_max       28.6250
_cell_measurement_theta_min       3.1730
_shelx_estimated_absorpt_T_max    ?
_shelx_estimated_absorpt_T_min    ?
_exptl_absorpt_coefficient_mu     2.367
_exptl_absorpt_correction_T_max   1.00000
_exptl_absorpt_correction_T_min   0.55416
_exptl_absorpt_correction_type    multi-scan
_exptl_absorpt_process_details
;
CrysAlisPro, Agilent Technologies,
Version 1.171.36.28 (release 01-02-2013 CrysAlis171 .NET)
(compiled Feb  1 2013,16:14:44)
Empirical absorption correction using spherical harmonics,
 implemented in SCALE3 ABSPACK scaling algorithm.
;
_exptl_absorpt_special_details    ?
_exptl_crystal_colour             'clear blue'
_exptl_crystal_colour_lustre      clear
_exptl_crystal_colour_primary     blue
_exptl_crystal_density_diffrn     1.412
_exptl_crystal_density_meas       ?
_exptl_crystal_density_method     ?
_exptl_crystal_description        'rect. Prism'
_exptl_crystal_F_000              900
_exptl_crystal_size_max           0.2
_exptl_crystal_size_mid           0.15
_exptl_crystal_size_min           0.1
_exptl_transmission_factor_max    ?
_exptl_transmission_factor_min    ?
_diffrn_reflns_av_R_equivalents   0.0286
_diffrn_reflns_av_unetI/netI      0.0429
_diffrn_reflns_Laue_measured_fraction_full 0.998
_diffrn_reflns_Laue_measured_fraction_max 0.998
_diffrn_reflns_limit_h_max        13
_diffrn_reflns_limit_h_min        -13
_diffrn_reflns_limit_k_max        16
_diffrn_reflns_limit_k_min        -16
_diffrn_reflns_limit_l_max        19
_diffrn_reflns_limit_l_min        -19
_diffrn_reflns_number             13972
_diffrn_reflns_point_group_measured_fraction_full 0.998
_diffrn_reflns_point_group_measured_fraction_max 0.998
_diffrn_reflns_theta_full         25.242
_diffrn_reflns_theta_max          26.372
_diffrn_reflns_theta_min          2.973
_diffrn_ambient_temperature       102(1)
_diffrn_detector_area_resol_mean  8.3367
_diffrn_measured_fraction_theta_full 0.998
_diffrn_measured_fraction_theta_max 0.998
_diffrn_measurement_details
;
#__ type_ start__ end____ width___ exp.time_
  1 omega  -51.00   32.00   1.0000    5.0000
omega____ theta____ kappa____ phi______ frames
    -      -21.2308   77.0000    0.0000 83

#__ type_ start__ end____ width___ exp.time_
  2 omega  -13.00  103.00   1.0000    5.0000
omega____ theta____ kappa____ phi______ frames
    -       22.6371   77.0000 -150.0000 116

#__ type_ start__ end____ width___ exp.time_
  3 omega    3.00   47.00   1.0000    5.0000
omega____ theta____ kappa____ phi______ frames
    -       22.6371   77.0000  -60.0000 44

#__ type_ start__ end____ width___ exp.time_
  4 omega   83.00  119.00   1.0000    5.0000
omega____ theta____ kappa____ phi______ frames
    -       22.6371   77.0000  -60.0000 36

#__ type_ start__ end____ width___ exp.time_
  5 omega    0.00  120.00   1.0000    5.0000
omega____ theta____ kappa____ phi______ frames
    -       22.6371   77.0000   90.0000 120
;
_diffrn_measurement_device_type   'Xcalibur, Sapphire2, large Be window'
_diffrn_measurement_method        '\w scans'
_diffrn_orient_matrix_UB_11       0.0137250000
_diffrn_orient_matrix_UB_12       0.0061055000
_diffrn_orient_matrix_UB_13       0.0471843000
_diffrn_orient_matrix_UB_21       -0.0249030000
_diffrn_orient_matrix_UB_22       -0.0588387000
_diffrn_orient_matrix_UB_23       -0.0083875000
_diffrn_orient_matrix_UB_31       0.0631269000
_diffrn_orient_matrix_UB_32       0.0002314000
_diffrn_orient_matrix_UB_33       -0.0021537000
_diffrn_radiation_monochromator   graphite
_diffrn_radiation_type            MoK\a
_diffrn_radiation_wavelength      0.71073
_diffrn_source                    'Enhance (Mo) X-ray Source'
_reflns_Friedel_coverage          0.000
_reflns_Friedel_fraction_full     .
_reflns_Friedel_fraction_max      .
_reflns_number_gt                 7768
_reflns_number_total              8411
_reflns_odcompleteness_completeness 99.86
_reflns_odcompleteness_iscentric  1
_reflns_odcompleteness_theta      26.32
_reflns_special_details
;
 Reflections were merged by SHELXL according to the crystal
 class for the calculation of statistics and refinement.
 
 _reflns_Friedel_fraction is defined as the number of unique
 Friedel pairs measured divided by the number that would be
 possible theoretically, ignoring centric projections and
 systematic absences.
;
_reflns_threshold_expression      'I > 2\s(I)'
_computing_cell_refinement
;
CrysAlisPro, Agilent Technologies,
Version 1.171.36.28 (release 01-02-2013 CrysAlis171 .NET)
(compiled Feb  1 2013,16:14:44)
;
_computing_data_collection
;
CrysAlisPro, Agilent Technologies,
Version 1.171.36.28 (release 01-02-2013 CrysAlis171 .NET)
(compiled Feb  1 2013,16:14:44)
;
_computing_data_reduction
;
CrysAlisPro, Agilent Technologies,
Version 1.171.36.28 (release 01-02-2013 CrysAlis171 .NET)
(compiled Feb  1 2013,16:14:44)
;
_computing_molecular_graphics     'Olex2 (Dolomanov et al., 2009)'
_computing_publication_material   'Olex2 (Dolomanov et al., 2009)'
_computing_structure_refinement   'ShelXL (Sheldrick, 2008)'
_computing_structure_solution
;
Superflip (Palatinus & Chapuis, 2007;Palatinus & van der Lee, 2008;
Palatinus et al., 2012)
;
_refine_diff_density_max          1.771
_refine_diff_density_min          -1.190
_refine_diff_density_rms          0.101
_refine_ls_extinction_coef        .
_refine_ls_extinction_method      none
_refine_ls_goodness_of_fit_ref    1.043
_refine_ls_hydrogen_treatment     constr
_refine_ls_matrix_type            full
_refine_ls_number_parameters      474
_refine_ls_number_reflns          8411
_refine_ls_number_restraints      6
_refine_ls_R_factor_all           0.0336
_refine_ls_R_factor_gt            0.0297
_refine_ls_restrained_S_all       1.047
_refine_ls_shift/su_max           0.001
_refine_ls_shift/su_mean          0.000
_refine_ls_structure_factor_coef  Fsqd
_refine_ls_weighting_details
'w=1/[\s^2^(Fo^2^)+(0.0280P)^2^+1.9060P] where P=(Fo^2^+2Fc^2^)/3'
_refine_ls_weighting_scheme       calc
_refine_ls_wR_factor_gt           0.0683
_refine_ls_wR_factor_ref          0.0706
_refine_special_details           ?
_olex2_refinement_description
;
1. Fixed Uiso
 At 1.2 times of:
  All C(H) groups, All N(H,H) groups
 At 1.5 times of:
  All C(H,H,H) groups
2. Uiso/Uaniso restraints and constraints
Uanis(C19) \\sim Ueq: with sigma of 0.01 and sigma for terminal atoms of 0.02
3. Others
 Sof(C13B)=Sof(H13D)=Sof(H13E)=Sof(H13F)=Sof(C14B)=Sof(H14D)=Sof(H14E)=
 Sof(H14F)=Sof(C15B)=Sof(H15D)=Sof(H15E)=Sof(H15F)=1-FVAR(1)
 Sof(C13)=Sof(H13A)=Sof(H13B)=Sof(H13C)=Sof(C14)=Sof(H14A)=Sof(H14B)=Sof(H14C)=
 Sof(C15)=Sof(H15A)=Sof(H15B)=Sof(H15C)=FVAR(1)
4.a Ternary CH refined with riding coordinates:
 C26(H26), C29(H29)
4.b Secondary CH2 refined with riding coordinates:
 N1(H1A,H1B)
4.c Idealised Me refined as rotating group:
 C3(H3A,H3B,H3C), C4(H4A,H4B,H4C), C5(H5A,H5B,H5C), C8(H8A,H8B,H8C), C9(H9A,
 H9B,H9C), C10(H10A,H10B,H10C), C18(H18A,H18B,H18C), C19(H19A,H19B,H19C),
 C20(H20A,H20B,H20C), C23(H23A,H23B,H23C), C24(H24A,H24B,H24C), C25(H25A,H25B,
 H25C), C13(H13A,H13B,H13C), C14(H14A,H14B,H14C), C15(H15A,H15B,H15C),
 C13B(H13D,H13E,H13F), C14B(H14D,H14E,H14F), C15B(H15D,H15E,H15F), C27(H27A,
 H27B,H27C), C28(H28A,H28B,H28C), C30(H30A,H30B,H30C), C31(H31A,H31B,H31C)
;
_atom_sites_solution_hydrogens    geom
_atom_sites_solution_primary      iterative
_atom_sites_solution_secondary    ?
loop_
  _atom_site_label
  _atom_site_type_symbol
  _atom_site_fract_x
  _atom_site_fract_y
  _atom_site_fract_z
  _atom_site_U_iso_or_equiv
  _atom_site_adp_type
  _atom_site_occupancy
  _atom_site_site_symmetry_order
  _atom_site_calc_flag
  _atom_site_refinement_flags_posn
  _atom_site_refinement_flags_adp
  _atom_site_refinement_flags_occupancy
  _atom_site_disorder_assembly
  _atom_site_disorder_group
 Dy1 Dy 0.47908(2) 0.07293(2) 0.70312(2) 0.01722(5) Uani 1 1 d . . . . .
 Cu1 Cu 0.53715(3) 0.11958(3) 0.49400(2) 0.01409(8) Uani 1 1 d . . . . .
 O1 O 0.3930(2) 0.2493(2) 0.94124(16) 0.0333(6) Uani 1 1 d . . . . .
 O1OH O 0.41397(19) 0.01055(16) 0.54251(13) 0.0152(4) Uani 1 1 d . . . . .
 O2 O 0.3981(2) 0.12609(18) 0.82237(13) 0.0228(5) Uani 1 1 d . . . . .
 O3 O 0.6823(2) 0.23126(19) 0.79013(14) 0.0246(5) Uani 1 1 d . . . . .
 O4 O 0.6641(2) 0.17241(18) 0.64473(14) 0.0280(5) Uani 1 1 d . . . . .
 O5 O 0.4187(2) 0.20870(18) 0.66097(15) 0.0285(5) Uani 1 1 d . . . . .
 O6 O 0.4697(2) 0.23552(17) 0.52990(14) 0.0204(5) Uani 1 1 d . . . . .
 O7 O 0.5727(3) -0.0115(2) 0.80061(16) 0.0462(8) Uani 1 1 d . . . . .
 O8 O 0.5902(2) -0.05027(18) 0.65966(14) 0.0242(5) Uani 1 1 d . . . . .
 O9 O 0.6755(2) 0.21900(16) 0.45076(13) 0.0184(4) Uani 1 1 d . . . . .
 O10 O 0.6927(2) 0.09943(18) 0.33127(15) 0.0325(6) Uani 1 1 d . . . . .
 C1 C 0.3372(3) 0.1689(3) 0.8723(2) 0.0215(7) Uani 1 1 d . . . . .
 C2 C 0.1881(3) 0.1139(3) 0.8490(2) 0.0266(7) Uani 1 1 d . . . . .
 C3 C 0.1287(4) 0.1892(4) 0.8995(4) 0.0676(17) Uani 1 1 d . . . . .
 H3A H 0.1619 0.2068 0.9634 0.101 Uiso 1 1 calc GR . . . .
 H3B H 0.0355 0.1517 0.8861 0.101 Uiso 1 1 calc GR . . . .
 H3C H 0.1513 0.2568 0.8812 0.101 Uiso 1 1 calc GR . . . .
 C4 C 0.1509(4) 0.0060(3) 0.8774(3) 0.0427(10) Uani 1 1 d . . . . .
 H4A H 0.1896 -0.0411 0.8462 0.064 Uiso 1 1 calc GR . . . .
 H4B H 0.0576 -0.0318 0.8624 0.064 Uiso 1 1 calc GR . . . .
 H4C H 0.1819 0.0230 0.9414 0.064 Uiso 1 1 calc GR . . . .
 C5 C 0.1387(4) 0.0845(4) 0.7465(3) 0.0587(13) Uani 1 1 d . . . . .
 H5A H 0.1688 0.1507 0.7266 0.088 Uiso 1 1 calc GR . . . .
 H5B H 0.0451 0.0526 0.7321 0.088 Uiso 1 1 calc GR . . . .
 H5C H 0.1714 0.0315 0.7166 0.088 Uiso 1 1 calc GR . . . .
 C6 C 0.7265(3) 0.2403(2) 0.7199(2) 0.0183(6) Uani 1 1 d . . . . .
 C7 C 0.8536(3) 0.3351(3) 0.7222(2) 0.0265(7) Uani 1 1 d . . . . .
 C8 C 0.9342(3) 0.3918(3) 0.8193(2) 0.0397(10) Uani 1 1 d . . . . .
 H8A H 0.8863 0.4252 0.8549 0.059 Uiso 1 1 calc GR . . . .
 H8B H 1.0152 0.4485 0.8187 0.059 Uiso 1 1 calc GR . . . .
 H8C H 0.9517 0.3373 0.8450 0.059 Uiso 1 1 calc GR . . . .
 C9 C 0.9322(4) 0.2879(4) 0.6630(3) 0.0484(11) Uani 1 1 d . . . . .
 H9A H 0.9515 0.2321 0.6857 0.073 Uiso 1 1 calc GR . . . .
 H9B H 1.0122 0.3469 0.6643 0.073 Uiso 1 1 calc GR . . . .
 H9C H 0.8821 0.2552 0.6020 0.073 Uiso 1 1 calc GR . . . .
 C10 C 0.8144(4) 0.4184(3) 0.6831(3) 0.0415(10) Uani 1 1 d . . . . .
 H10A H 0.7628 0.3818 0.6228 0.062 Uiso 1 1 calc GR . . . .
 H10B H 0.8914 0.4788 0.6818 0.062 Uiso 1 1 calc GR . . . .
 H10C H 0.7643 0.4471 0.7202 0.062 Uiso 1 1 calc GR . . . .
 C11 C 0.4275(3) 0.2588(2) 0.6005(2) 0.0196(6) Uani 1 1 d . . . . .
 C12 C 0.3821(3) 0.3563(3) 0.6113(2) 0.0229(7) Uani 1 1 d . . . . .
 C16 C 0.6083(3) -0.0638(3) 0.7379(2) 0.0253(7) Uani 1 1 d . . . . .
 C17 C 0.6694(3) -0.1452(3) 0.7561(2) 0.0288(8) Uani 1 1 d . . . . .
 C18 C 0.7463(5) -0.1069(5) 0.8525(3) 0.0633(15) Uani 1 1 d . . . . .
 H18A H 0.8097 -0.0325 0.8643 0.095 Uiso 1 1 calc GR . . . .
 H18B H 0.7899 -0.1561 0.8611 0.095 Uiso 1 1 calc GR . . . .
 H18C H 0.6881 -0.1079 0.8931 0.095 Uiso 1 1 calc GR . . . .
 C19 C 0.5583(5) -0.2561(4) 0.7394(6) 0.109(3) Uani 1 1 d . U . . .
 H19A H 0.5010 -0.2486 0.7794 0.164 Uiso 1 1 calc GR . . . .
 H19B H 0.5926 -0.3104 0.7503 0.164 Uiso 1 1 calc GR . . . .
 H19C H 0.5108 -0.2797 0.6778 0.164 Uiso 1 1 calc GR . . . .
 C20 C 0.7584(6) -0.1570(5) 0.6919(3) 0.0790(19) Uani 1 1 d . . . . .
 H20A H 0.7075 -0.1909 0.6312 0.119 Uiso 1 1 calc GR . . . .
 H20B H 0.8028 -0.2028 0.7081 0.119 Uiso 1 1 calc GR . . . .
 H20C H 0.8213 -0.0846 0.6958 0.119 Uiso 1 1 calc GR . . . .
 C21 C 0.7240(3) 0.1946(2) 0.38400(19) 0.0181(6) Uani 1 1 d . . . . .
 C22 C 0.8342(3) 0.2912(2) 0.36648(19) 0.0182(6) Uani 1 1 d . . . . .
 C23 C 0.8119(4) 0.2823(3) 0.2661(2) 0.0366(9) Uani 1 1 d . . . . .
 H23A H 0.8099 0.2116 0.2332 0.055 Uiso 1 1 calc GR . . . .
 H23B H 0.8814 0.3413 0.2549 0.055 Uiso 1 1 calc GR . . . .
 H23C H 0.7302 0.2884 0.2468 0.055 Uiso 1 1 calc GR . . . .
 C24 C 0.8361(4) 0.4032(3) 0.4183(3) 0.0426(10) Uani 1 1 d . . . . .
 H24A H 0.7530 0.4075 0.4003 0.064 Uiso 1 1 calc GR . . . .
 H24B H 0.9032 0.4624 0.4053 0.064 Uiso 1 1 calc GR . . . .
 H24C H 0.8532 0.4103 0.4821 0.064 Uiso 1 1 calc GR . . . .
 C25 C 0.9618(4) 0.2795(4) 0.3975(3) 0.0460(11) Uani 1 1 d . . . . .
 H25A H 0.9743 0.2836 0.4608 0.069 Uiso 1 1 calc GR . . . .
 H25B H 1.0326 0.3385 0.3876 0.069 Uiso 1 1 calc GR . . . .
 H25C H 0.9592 0.2088 0.3639 0.069 Uiso 1 1 calc GR . . . .
 C13 C 0.3988(8) 0.4130(6) 0.7109(5) 0.0342(17) Uani 0.581(7) 1 d . . P A 1
 H13A H 0.3534 0.3588 0.7399 0.051 Uiso 0.581(7) 1 calc GR . P A 1
 H13B H 0.3637 0.4701 0.7162 0.051 Uiso 0.581(7) 1 calc GR . P A 1
 H13C H 0.4899 0.4457 0.7394 0.051 Uiso 0.581(7) 1 calc GR . P A 1
 C14 C 0.2353(7) 0.3005(6) 0.5658(5) 0.0412(19) Uani 0.581(7) 1 d . . P A 1
 H14A H 0.2248 0.2629 0.5035 0.062 Uiso 0.581(7) 1 calc GR . P A 1
 H14B H 0.1984 0.3564 0.5694 0.062 Uiso 0.581(7) 1 calc GR . P A 1
 H14C H 0.1914 0.2475 0.5963 0.062 Uiso 0.581(7) 1 calc GR . P A 1
 C15 C 0.4534(7) 0.4382(5) 0.5641(5) 0.0369(19) Uani 0.581(7) 1 d . . P A 1
 H15A H 0.5446 0.4709 0.5923 0.055 Uiso 0.581(7) 1 calc GR . P A 1
 H15B H 0.4191 0.4958 0.5679 0.055 Uiso 0.581(7) 1 calc GR . P A 1
 H15C H 0.4422 0.4005 0.5017 0.055 Uiso 0.581(7) 1 calc GR . P A 1
 C13B C 0.3069(15) 0.3651(12) 0.6859(8) 0.054(4) Uani 0.419(7) 1 d . . P A 2
 H13D H 0.2230 0.3048 0.6677 0.081 Uiso 0.419(7) 1 calc GR . P A 2
 H13E H 0.2955 0.4348 0.6967 0.081 Uiso 0.419(7) 1 calc GR . P A 2
 H13F H 0.3547 0.3613 0.7402 0.081 Uiso 0.419(7) 1 calc GR . P A 2
 C14B C 0.3056(9) 0.3586(7) 0.5216(6) 0.033(2) Uani 0.419(7) 1 d . . P A 2
 H14D H 0.3573 0.3580 0.4766 0.049 Uiso 0.419(7) 1 calc GR . P A 2
 H14E H 0.2868 0.4249 0.5314 0.049 Uiso 0.419(7) 1 calc GR . P A 2
 H14F H 0.2253 0.2942 0.5012 0.049 Uiso 0.419(7) 1 calc GR . P A 2
 C15B C 0.5126(10) 0.4621(7) 0.6402(6) 0.040(3) Uani 0.419(7) 1 d . . P A 2
 H15D H 0.5596 0.4669 0.6981 0.059 Uiso 0.419(7) 1 calc GR . P A 2
 H15E H 0.4931 0.5277 0.6439 0.059 Uiso 0.419(7) 1 calc GR . P A 2
 H15F H 0.5649 0.4565 0.5962 0.059 Uiso 0.419(7) 1 calc GR . P A 2
 N1 N 0.6552(2) 0.3063(2) -0.03197(16) 0.0202(5) Uani 1 1 d . . . . .
 H1A H 0.6714 0.2849 -0.0862 0.024 Uiso 1 1 calc R . . . .
 H1B H 0.5689 0.2814 -0.0384 0.024 Uiso 1 1 calc R . . . .
 C26 C 0.7073(3) 0.2504(3) 0.0294(2) 0.0265(7) Uani 1 1 d . . . . .
 H26 H 0.7199 0.2927 0.0922 0.032 Uiso 1 1 calc R . . . .
 C27 C 0.8375(4) 0.2512(4) 0.0129(3) 0.0517(12) Uani 1 1 d . . . . .
 H27A H 0.8264 0.2075 -0.0477 0.078 Uiso 1 1 calc GR . . . .
 H27B H 0.8732 0.2200 0.0551 0.078 Uiso 1 1 calc GR . . . .
 H27C H 0.8959 0.3265 0.0207 0.078 Uiso 1 1 calc GR . . . .
 C28 C 0.6094(4) 0.1339(3) 0.0153(2) 0.0343(8) Uani 1 1 d . . . . .
 H28A H 0.5272 0.1369 0.0243 0.051 Uiso 1 1 calc GR . . . .
 H28B H 0.6400 0.1003 0.0577 0.051 Uiso 1 1 calc GR . . . .
 H28C H 0.5988 0.0902 -0.0452 0.051 Uiso 1 1 calc GR . . . .
 C29 C 0.7077(3) 0.4315(3) -0.0029(2) 0.0258(7) Uani 1 1 d . . . . .
 H29 H 0.8031 0.4603 0.0068 0.031 Uiso 1 1 calc R . . . .
 C30 C 0.6693(4) 0.4719(3) 0.0853(3) 0.0406(10) Uani 1 1 d . . . . .
 H30A H 0.5767 0.4363 0.0784 0.061 Uiso 1 1 calc GR . . . .
 H30B H 0.6939 0.5512 0.0997 0.061 Uiso 1 1 calc GR . . . .
 H30C H 0.7133 0.4534 0.1332 0.061 Uiso 1 1 calc GR . . . .
 C31 C 0.6533(4) 0.4704(3) -0.0781(3) 0.0395(9) Uani 1 1 d . . . . .
 H31A H 0.6764 0.4416 -0.1330 0.059 Uiso 1 1 calc GR . . . .
 H31B H 0.6891 0.5504 -0.0622 0.059 Uiso 1 1 calc GR . . . .
 H31C H 0.5600 0.4439 -0.0868 0.059 Uiso 1 1 calc GR . . . .
 N2 N 0.8654(7) 0.0141(6) 0.4991(5) 0.117(2) Uani 1 1 d . . . . .
 C32 C 0.9449(6) 0.0059(5) 0.4995(4) 0.0616(15) Uani 1 1 d . . . . .

loop_
  _atom_site_aniso_label
  _atom_site_aniso_U_11
  _atom_site_aniso_U_22
  _atom_site_aniso_U_33
  _atom_site_aniso_U_23
  _atom_site_aniso_U_13
  _atom_site_aniso_U_12
 Dy1 0.02517(9) 0.01185(8) 0.01142(8) 0.00149(5) 0.00591(6) 0.00354(6)
 Cu1 0.01851(18) 0.01009(17) 0.01335(17) 0.00251(13) 0.00625(14) 0.00454(14)
 O1 0.0233(12) 0.0363(14) 0.0282(13) -0.0101(11) 0.0037(10) 0.0088(11)
 O1OH 0.0179(10) 0.0125(10) 0.0164(10) 0.0047(8) 0.0071(8) 0.0056(8)
 O2 0.0274(12) 0.0250(12) 0.0134(10) 0.0020(9) 0.0094(9) 0.0070(9)
 O3 0.0209(11) 0.0308(13) 0.0155(10) 0.0016(9) 0.0053(9) 0.0045(10)
 O4 0.0338(13) 0.0215(12) 0.0161(11) 0.0017(9) 0.0050(10) -0.0025(10)
 O5 0.0550(16) 0.0198(12) 0.0237(12) 0.0106(10) 0.0229(11) 0.0224(11)
 O6 0.0302(12) 0.0174(11) 0.0189(11) 0.0064(9) 0.0119(9) 0.0122(9)
 O7 0.095(2) 0.0460(17) 0.0172(12) 0.0102(11) 0.0142(14) 0.0491(17)
 O8 0.0261(12) 0.0252(12) 0.0178(11) 0.0048(9) 0.0028(9) 0.0070(9)
 O9 0.0225(11) 0.0131(10) 0.0170(10) 0.0032(8) 0.0082(9) 0.0029(8)
 O10 0.0439(15) 0.0148(11) 0.0285(12) -0.0012(10) 0.0237(11) -0.0023(10)
 C1 0.0233(16) 0.0227(16) 0.0188(15) 0.0075(13) 0.0058(13) 0.0075(13)
 C2 0.0207(16) 0.0231(17) 0.0329(18) 0.0057(14) 0.0035(14) 0.0068(13)
 C3 0.024(2) 0.038(3) 0.128(5) -0.007(3) 0.017(3) 0.0140(18)
 C4 0.029(2) 0.037(2) 0.060(3) 0.021(2) 0.0102(19) 0.0048(17)
 C5 0.038(2) 0.078(3) 0.048(3) 0.028(3) -0.011(2) 0.009(2)
 C6 0.0219(16) 0.0167(15) 0.0168(14) 0.0040(12) 0.0021(13) 0.0089(12)
 C7 0.0196(16) 0.0298(18) 0.0204(16) 0.0013(14) 0.0040(13) 0.0012(14)
 C8 0.0237(18) 0.049(2) 0.0255(18) 0.0006(17) 0.0002(15) -0.0037(17)
 C9 0.027(2) 0.068(3) 0.038(2) -0.002(2) 0.0143(18) 0.011(2)
 C10 0.050(2) 0.0258(19) 0.033(2) 0.0103(16) 0.0066(18) -0.0041(17)
 C11 0.0234(16) 0.0145(15) 0.0188(15) 0.0017(12) 0.0051(13) 0.0061(12)
 C12 0.0320(18) 0.0209(16) 0.0216(16) 0.0066(13) 0.0088(14) 0.0155(14)
 C16 0.0331(18) 0.0155(16) 0.0211(16) 0.0023(13) 0.0026(14) 0.0046(13)
 C17 0.0273(18) 0.0261(18) 0.0320(18) 0.0099(15) -0.0003(15) 0.0102(14)
 C18 0.061(3) 0.101(4) 0.038(2) 0.007(3) 0.000(2) 0.055(3)
 C19 0.045(3) 0.037(3) 0.235(8) 0.063(4) -0.020(4) 0.006(2)
 C20 0.122(5) 0.123(5) 0.045(3) 0.029(3) 0.034(3) 0.102(5)
 C21 0.0207(15) 0.0153(15) 0.0151(14) 0.0038(12) 0.0040(12) 0.0033(12)
 C22 0.0190(15) 0.0140(14) 0.0156(14) 0.0028(12) 0.0042(12) -0.0006(12)
 C23 0.044(2) 0.032(2) 0.0188(16) 0.0099(15) 0.0058(16) -0.0059(16)
 C24 0.053(2) 0.0166(18) 0.050(2) 0.0054(16) 0.031(2) -0.0009(16)
 C25 0.0225(19) 0.054(3) 0.067(3) 0.035(2) 0.0100(19) 0.0097(18)
 C13 0.052(5) 0.026(4) 0.032(4) 0.002(3) 0.010(4) 0.026(3)
 C14 0.038(4) 0.043(4) 0.043(4) 0.004(3) -0.002(3) 0.026(3)
 C15 0.062(5) 0.026(3) 0.039(4) 0.017(3) 0.025(4) 0.027(3)
 C13B 0.092(10) 0.072(9) 0.050(7) 0.041(7) 0.050(8) 0.067(8)
 C14B 0.039(5) 0.033(5) 0.032(5) 0.008(4) 0.004(4) 0.024(4)
 C15B 0.065(7) 0.018(4) 0.030(5) 0.003(4) -0.002(5) 0.016(4)
 N1 0.0204(13) 0.0227(14) 0.0150(12) 0.0006(10) 0.0044(11) 0.0078(11)
 C26 0.0332(19) 0.0292(18) 0.0130(14) 0.0039(13) -0.0001(14) 0.0098(15)
 C27 0.032(2) 0.069(3) 0.071(3) 0.044(3) 0.009(2) 0.025(2)
 C28 0.043(2) 0.0301(19) 0.0278(18) 0.0073(15) 0.0066(17) 0.0120(16)
 C29 0.0235(17) 0.0217(17) 0.0273(17) -0.0004(14) 0.0060(14) 0.0069(13)
 C30 0.045(2) 0.031(2) 0.036(2) -0.0102(17) 0.0097(18) 0.0139(18)
 C31 0.047(2) 0.028(2) 0.048(2) 0.0106(18) 0.010(2) 0.0200(18)
 N2 0.115(6) 0.120(6) 0.095(5) 0.014(4) 0.017(5) 0.031(5)
 C32 0.075(4) 0.066(3) 0.049(3) 0.014(3) 0.006(3) 0.037(4)

_geom_special_details
;
 All esds (except the esd in the dihedral angle between two l.s. planes)
 are estimated using the full covariance matrix.  The cell esds are taken
 into account individually in the estimation of esds in distances, angles
 and torsion angles; correlations between esds in cell parameters are only
 used when they are defined by crystal symmetry.  An approximate (isotropic)
 treatment of cell esds is used for estimating esds involving l.s. planes.
;
loop_
  _geom_bond_atom_site_label_1
  _geom_bond_atom_site_label_2
  _geom_bond_distance
  _geom_bond_site_symmetry_2
  _geom_bond_publ_flag
 Dy1 Cu1 3.5251(4) . ?
 Dy1 Cu1 3.4809(4) 2_656 ?
 Dy1 O1OH 2.3803(19) . ?
 Dy1 O2 2.244(2) . ?
 Dy1 O3 2.478(2) . ?
 Dy1 O4 2.438(2) . ?
 Dy1 O5 2.315(2) . ?
 Dy1 O7 2.401(2) . ?
 Dy1 O8 2.410(2) . ?
 Dy1 O10 2.327(2) 2_656 ?
 Dy1 C6 2.830(3) . ?
 Dy1 C16 2.773(3) . ?
 Cu1 Dy1 3.4808(4) 2_656 ?
 Cu1 Cu1 3.0482(7) 2_656 ?
 Cu1 O1OH 1.978(2) 2_656 ?
 Cu1 O1OH 1.9783(19) . ?
 Cu1 O4 2.398(2) . ?
 Cu1 O6 1.946(2) . ?
 Cu1 O8 2.421(2) 2_656 ?
 Cu1 O9 1.955(2) . ?
 O1 C1 1.249(4) . ?
 O1OH Cu1 1.9781(19) 2_656 ?
 O2 C1 1.264(4) . ?
 O3 C6 1.263(4) . ?
 O4 C6 1.254(4) . ?
 O5 C11 1.255(4) . ?
 O6 C11 1.265(4) . ?
 O7 C16 1.258(4) . ?
 O8 Cu1 2.421(2) 2_656 ?
 O8 C16 1.265(4) . ?
 O9 C21 1.260(4) . ?
 O10 Dy1 2.327(2) 2_656 ?
 O10 C21 1.254(4) . ?
 C1 C2 1.530(4) . ?
 C2 C3 1.519(5) . ?
 C2 C4 1.526(5) . ?
 C2 C5 1.531(5) . ?
 C6 C7 1.530(4) . ?
 C7 C8 1.534(4) . ?
 C7 C9 1.530(5) . ?
 C7 C10 1.528(5) . ?
 C11 C12 1.530(4) . ?
 C12 C13 1.523(7) . ?
 C12 C14 1.545(7) . ?
 C12 C15 1.499(7) . ?
 C12 C13B 1.520(10) . ?
 C12 C14B 1.550(9) . ?
 C12 C15B 1.569(10) . ?
 C16 C17 1.517(5) . ?
 C17 C18 1.510(5) . ?
 C17 C19 1.509(6) . ?
 C17 C20 1.514(6) . ?
 C21 C22 1.543(4) . ?
 C22 C23 1.517(4) . ?
 C22 C24 1.525(5) . ?
 C22 C25 1.517(5) . ?
 N1 C26 1.502(4) . ?
 N1 C29 1.501(4) . ?
 C26 C27 1.505(5) . ?
 C26 C28 1.507(5) . ?
 C29 C30 1.527(5) . ?
 C29 C31 1.514(5) . ?
 N2 C32 0.931(8) . ?
 C32 C32 1.291(11) 2_756 ?

loop_
  _geom_angle_atom_site_label_1
  _geom_angle_atom_site_label_2
  _geom_angle_atom_site_label_3
  _geom_angle
  _geom_angle_site_symmetry_1
  _geom_angle_site_symmetry_3
  _geom_angle_publ_flag
 Cu1 Dy1 Cu1 51.576(10) 2_656 . ?
 O1OH Dy1 Cu1 32.34(5) . . ?
 O1OH Dy1 Cu1 33.18(5) . 2_656 ?
 O1OH Dy1 O3 125.11(7) . . ?
 O1OH Dy1 O4 73.17(7) . . ?
 O1OH Dy1 O7 127.00(7) . . ?
 O1OH Dy1 O8 75.73(7) . . ?
 O1OH Dy1 C6 98.90(8) . . ?
 O1OH Dy1 C16 101.36(8) . . ?
 O2 Dy1 Cu1 151.69(6) . 2_656 ?
 O2 Dy1 Cu1 143.81(6) . . ?
 O2 Dy1 O1OH 138.87(7) . . ?
 O2 Dy1 O3 83.60(7) . . ?
 O2 Dy1 O4 132.12(8) . . ?
 O2 Dy1 O5 80.39(8) . . ?
 O2 Dy1 O7 83.63(8) . . ?
 O2 Dy1 O8 136.94(8) . . ?
 O2 Dy1 O10 87.17(8) . 2_656 ?
 O2 Dy1 C6 107.98(8) . . ?
 O2 Dy1 C16 110.14(9) . . ?
 O3 Dy1 Cu1 123.62(5) . 2_656 ?
 O3 Dy1 Cu1 92.99(5) . . ?
 O3 Dy1 C6 26.48(8) . . ?
 O3 Dy1 C16 86.29(9) . . ?
 O4 Dy1 Cu1 42.75(5) . . ?
 O4 Dy1 Cu1 76.00(5) . 2_656 ?
 O4 Dy1 O3 52.67(7) . . ?
 O4 Dy1 C6 26.22(8) . . ?
 O4 Dy1 C16 87.85(9) . . ?
 O5 Dy1 Cu1 63.42(5) . . ?
 O5 Dy1 Cu1 107.51(5) . 2_656 ?
 O5 Dy1 O1OH 74.70(7) . . ?
 O5 Dy1 O3 84.65(8) . . ?
 O5 Dy1 O4 77.40(8) . . ?
 O5 Dy1 O7 157.75(8) . . ?
 O5 Dy1 O8 142.36(7) . . ?
 O5 Dy1 O10 113.44(9) . 2_656 ?
 O5 Dy1 C6 79.12(9) . . ?
 O5 Dy1 C16 165.25(9) . . ?
 O7 Dy1 Cu1 131.05(7) . . ?
 O7 Dy1 Cu1 93.87(6) . 2_656 ?
 O7 Dy1 O3 78.25(9) . . ?
 O7 Dy1 O4 102.64(10) . . ?
 O7 Dy1 O8 54.02(8) . . ?
 O7 Dy1 C6 91.31(10) . . ?
 O7 Dy1 C16 26.92(9) . . ?
 O8 Dy1 Cu1 79.17(5) . . ?
 O8 Dy1 Cu1 44.02(5) . 2_656 ?
 O8 Dy1 O3 93.79(7) . . ?
 O8 Dy1 O4 72.11(8) . . ?
 O8 Dy1 C6 83.00(8) . . ?
 O8 Dy1 C16 27.12(8) . . ?
 O10 Dy1 Cu1 106.06(6) 2_656 . ?
 O10 Dy1 Cu1 64.64(5) 2_656 2_656 ?
 O10 Dy1 O1OH 73.82(7) 2_656 . ?
 O10 Dy1 O3 158.02(9) 2_656 . ?
 O10 Dy1 O4 140.64(7) 2_656 . ?
 O10 Dy1 O7 80.94(10) 2_656 . ?
 O10 Dy1 O8 79.50(8) 2_656 . ?
 O10 Dy1 C6 162.22(9) 2_656 . ?
 O10 Dy1 C16 78.22(10) 2_656 . ?
 C6 Dy1 Cu1 67.26(6) . . ?
 C6 Dy1 Cu1 100.26(6) . 2_656 ?
 C16 Dy1 Cu1 68.35(6) . 2_656 ?
 C16 Dy1 Cu1 105.55(7) . . ?
 C16 Dy1 C6 87.60(9) . . ?
 Dy1 Cu1 Dy1 128.424(10) 2_656 . ?
 Cu1 Cu1 Dy1 64.958(12) 2_656 2_656 ?
 Cu1 Cu1 Dy1 63.465(12) 2_656 . ?
 O1OH Cu1 Dy1 94.41(6) 2_656 . ?
 O1OH Cu1 Dy1 41.19(6) 2_656 2_656 ?
 O1OH Cu1 Dy1 40.06(6) . . ?
 O1OH Cu1 Dy1 95.76(6) . 2_656 ?
 O1OH Cu1 Cu1 39.61(6) 2_656 2_656 ?
 O1OH Cu1 Cu1 39.61(6) . 2_656 ?
 O1OH Cu1 O1OH 79.21(9) 2_656 . ?
 O1OH Cu1 O4 81.45(8) . . ?
 O1OH Cu1 O4 91.98(8) 2_656 . ?
 O1OH Cu1 O8 83.25(8) 2_656 2_656 ?
 O1OH Cu1 O8 96.09(8) . 2_656 ?
 O4 Cu1 Dy1 43.66(5) . . ?
 O4 Cu1 Dy1 131.90(6) . 2_656 ?
 O4 Cu1 Cu1 85.75(6) . 2_656 ?
 O4 Cu1 O8 174.98(8) . 2_656 ?
 O6 Cu1 Dy1 82.59(6) . . ?
 O6 Cu1 Dy1 138.04(6) . 2_656 ?
 O6 Cu1 Cu1 134.43(6) . 2_656 ?
 O6 Cu1 O1OH 94.88(8) . . ?
 O6 Cu1 O1OH 173.49(9) . 2_656 ?
 O6 Cu1 O4 89.82(9) . . ?
 O6 Cu1 O8 94.76(8) . 2_656 ?
 O6 Cu1 O9 91.36(9) . . ?
 O8 Cu1 Dy1 43.78(5) 2_656 2_656 ?
 O8 Cu1 Dy1 134.95(5) 2_656 . ?
 O8 Cu1 Cu1 89.57(5) 2_656 2_656 ?
 O9 Cu1 Dy1 82.35(6) . 2_656 ?
 O9 Cu1 Dy1 137.24(6) . . ?
 O9 Cu1 Cu1 134.18(6) . 2_656 ?
 O9 Cu1 O1OH 94.74(8) . 2_656 ?
 O9 Cu1 O1OH 172.44(9) . . ?
 O9 Cu1 O4 94.34(8) . . ?
 O9 Cu1 O8 87.62(8) . 2_656 ?
 Cu1 O1OH Dy1 107.60(8) . . ?
 Cu1 O1OH Dy1 105.64(8) 2_656 . ?
 Cu1 O1OH Cu1 100.79(9) . 2_656 ?
 C1 O2 Dy1 161.9(2) . . ?
 C6 O3 Dy1 92.51(17) . . ?
 Cu1 O4 Dy1 93.59(8) . . ?
 C6 O4 Dy1 94.59(18) . . ?
 C6 O4 Cu1 153.9(2) . . ?
 C11 O5 Dy1 139.9(2) . . ?
 C11 O6 Cu1 127.8(2) . . ?
 C16 O7 Dy1 93.2(2) . . ?
 Dy1 O8 Cu1 92.20(8) . 2_656 ?
 C16 O8 Dy1 92.64(19) . . ?
 C16 O8 Cu1 148.5(2) . 2_656 ?
 C21 O9 Cu1 128.18(19) . . ?
 C21 O10 Dy1 136.9(2) . 2_656 ?
 O1 C1 O2 123.1(3) . . ?
 O1 C1 C2 119.4(3) . . ?
 O2 C1 C2 117.4(3) . . ?
 C1 C2 C5 109.5(3) . . ?
 C3 C2 C1 110.9(3) . . ?
 C3 C2 C4 109.4(3) . . ?
 C3 C2 C5 111.3(4) . . ?
 C4 C2 C1 107.1(3) . . ?
 C4 C2 C5 108.4(3) . . ?
 O3 C6 Dy1 61.01(15) . . ?
 O3 C6 C7 122.0(3) . . ?
 O4 C6 Dy1 59.19(16) . . ?
 O4 C6 O3 120.1(3) . . ?
 O4 C6 C7 117.8(3) . . ?
 C7 C6 Dy1 174.3(2) . . ?
 C6 C7 C8 111.0(3) . . ?
 C6 C7 C9 109.0(3) . . ?
 C9 C7 C8 110.1(3) . . ?
 C10 C7 C6 106.5(3) . . ?
 C10 C7 C8 110.2(3) . . ?
 C10 C7 C9 109.9(3) . . ?
 O5 C11 O6 125.9(3) . . ?
 O5 C11 C12 118.0(3) . . ?
 O6 C11 C12 116.1(3) . . ?
 C11 C12 C14 103.8(3) . . ?
 C11 C12 C14B 113.3(4) . . ?
 C11 C12 C15B 103.9(4) . . ?
 C13 C12 C11 110.8(3) . . ?
 C13 C12 C14 109.6(5) . . ?
 C15 C12 C11 110.8(3) . . ?
 C15 C12 C13 111.0(4) . . ?
 C15 C12 C14 110.6(5) . . ?
 C13B C12 C11 113.7(5) . . ?
 C13B C12 C14B 110.9(6) . . ?
 C13B C12 C15B 107.6(7) . . ?
 C14B C12 C15B 107.0(5) . . ?
 O7 C16 Dy1 59.84(18) . . ?
 O7 C16 O8 120.0(3) . . ?
 O7 C16 C17 119.6(3) . . ?
 O8 C16 Dy1 60.24(17) . . ?
 O8 C16 C17 120.3(3) . . ?
 C17 C16 Dy1 175.8(2) . . ?
 C18 C17 C16 110.8(3) . . ?
 C18 C17 C20 109.4(4) . . ?
 C19 C17 C16 106.5(3) . . ?
 C19 C17 C18 110.3(4) . . ?
 C19 C17 C20 109.3(5) . . ?
 C20 C17 C16 110.5(3) . . ?
 O9 C21 C22 116.7(3) . . ?
 O10 C21 O9 126.4(3) . . ?
 O10 C21 C22 116.9(3) . . ?
 C23 C22 C21 109.3(2) . . ?
 C23 C22 C24 109.2(3) . . ?
 C24 C22 C21 110.4(3) . . ?
 C25 C22 C21 107.3(3) . . ?
 C25 C22 C23 110.0(3) . . ?
 C25 C22 C24 110.6(3) . . ?
 C29 N1 C26 116.8(2) . . ?
 N1 C26 C27 109.8(3) . . ?
 N1 C26 C28 109.6(3) . . ?
 C27 C26 C28 112.1(3) . . ?
 N1 C29 C30 109.9(3) . . ?
 N1 C29 C31 108.0(3) . . ?
 C31 C29 C30 111.4(3) . . ?
 N2 C32 C32 179.5(13) . 2_756 ?

_shelx_SHELXL_version_number      '2014/7'
_iucr_refine_instructions_details
;

    oejlm1159.res created by SHELXL-2014/7

TITL oejlm1159 in P1
CELL 0.71073 11.173248 13.278768 15.503025 102.3152 97.2281 110.0718
ZERR 1 0.000426 0.000436 0.000554 0.0029 0.0032 0.0033
LATT 1
SFAC C H Cu Dy N O
UNIT 64 122 2 2 4 22
ISOR 0.01 0.02 C19
 
L.S. 10
PLAN  20
fmap 2 53
acta
SHEL 100 0.8
OMIT -1 0 2
REM <olex2.extras>
REM <HklSrc "%./oejlm1159.hkl">
REM </olex2.extras>
 
WGHT    0.028000    1.906000
FVAR       4.16988   0.58086
DY1   4    0.479077    0.072928    0.703122    11.00000    0.02517    0.01185 =
         0.01142    0.00149    0.00591    0.00354
CU1   3    0.537154    0.119584    0.493998    11.00000    0.01851    0.01009 =
         0.01335    0.00251    0.00625    0.00454
O1    6    0.393031    0.249324    0.941244    11.00000    0.02328    0.03626 =
         0.02818   -0.01010    0.00373    0.00878
O1OH  6    0.413974    0.010549    0.542515    11.00000    0.01790    0.01246 =
         0.01641    0.00467    0.00705    0.00563
O2    6    0.398135    0.126089    0.822372    11.00000    0.02739    0.02505 =
         0.01337    0.00197    0.00936    0.00705
O3    6    0.682322    0.231265    0.790130    11.00000    0.02091    0.03081 =
         0.01550    0.00162    0.00532    0.00448
O4    6    0.664101    0.172406    0.644726    11.00000    0.03379    0.02145 =
         0.01612    0.00171    0.00497   -0.00251
O5    6    0.418729    0.208698    0.660968    11.00000    0.05505    0.01981 =
         0.02371    0.01064    0.02290    0.02239
O6    6    0.469682    0.235523    0.529899    11.00000    0.03015    0.01736 =
         0.01891    0.00635    0.01191    0.01217
O7    6    0.572742   -0.011514    0.800609    11.00000    0.09515    0.04604 =
         0.01722    0.01024    0.01415    0.04909
O8    6    0.590244   -0.050266    0.659660    11.00000    0.02609    0.02524 =
         0.01781    0.00480    0.00278    0.00696
O9    6    0.675548    0.219002    0.450765    11.00000    0.02246    0.01310 =
         0.01699    0.00324    0.00822    0.00288
O10   6    0.692741    0.099433    0.331274    11.00000    0.04393    0.01485 =
         0.02853   -0.00116    0.02368   -0.00226
C1    1    0.337184    0.168929    0.872332    11.00000    0.02327    0.02271 =
         0.01876    0.00748    0.00579    0.00747
C2    1    0.188102    0.113928    0.848952    11.00000    0.02069    0.02312 =
         0.03295    0.00565    0.00355    0.00682
C3    1    0.128728    0.189227    0.899546    11.00000    0.02383    0.03847 =
         0.12776   -0.00689    0.01714    0.01401
AFIX 137
H3A   2    0.161866    0.206786    0.963405    11.00000   -1.50000
H3B   2    0.035497    0.151698    0.886051    11.00000   -1.50000
H3C   2    0.151292    0.256791    0.881163    11.00000   -1.50000
AFIX   0
C4    1    0.150855    0.005994    0.877378    11.00000    0.02900    0.03699 =
         0.05965    0.02106    0.01017    0.00485
AFIX 137
H4A   2    0.189633   -0.041078    0.846214    11.00000   -1.50000
H4B   2    0.057621   -0.031826    0.862363    11.00000   -1.50000
H4C   2    0.181873    0.022972    0.941442    11.00000   -1.50000
AFIX   0
C5    1    0.138747    0.084458    0.746531    11.00000    0.03817    0.07787 =
         0.04832    0.02812   -0.01107    0.00853
AFIX 137
H5A   2    0.168820    0.150733    0.726625    11.00000   -1.50000
H5B   2    0.045055    0.052618    0.732137    11.00000   -1.50000
H5C   2    0.171423    0.031549    0.716622    11.00000   -1.50000
AFIX   0
C6    1    0.726534    0.240337    0.719882    11.00000    0.02193    0.01667 =
         0.01685    0.00404    0.00212    0.00894
C7    1    0.853579    0.335132    0.722229    11.00000    0.01956    0.02976 =
         0.02041    0.00133    0.00402    0.00121
C8    1    0.934245    0.391835    0.819318    11.00000    0.02368    0.04893 =
         0.02553    0.00059    0.00021   -0.00370
AFIX 137
H8A   2    0.886267    0.425194    0.854934    11.00000   -1.50000
H8B   2    1.015190    0.448452    0.818724    11.00000   -1.50000
H8C   2    0.951749    0.337338    0.845042    11.00000   -1.50000
AFIX   0
C9    1    0.932162    0.287906    0.663016    11.00000    0.02722    0.06823 =
         0.03813   -0.00155    0.01428    0.01127
AFIX 137
H9A   2    0.951461    0.232059    0.685671    11.00000   -1.50000
H9B   2    1.012180    0.346878    0.664260    11.00000   -1.50000
H9C   2    0.882138    0.255155    0.601973    11.00000   -1.50000
AFIX   0
C10   1    0.814386    0.418436    0.683148    11.00000    0.05037    0.02577 =
         0.03330    0.01032    0.00662   -0.00411
AFIX 137
H10A  2    0.762799    0.381791    0.622813    11.00000   -1.50000
H10B  2    0.891413    0.478811    0.681838    11.00000   -1.50000
H10C  2    0.764317    0.447051    0.720237    11.00000   -1.50000
AFIX   0
C11   1    0.427467    0.258796    0.600490    11.00000    0.02339    0.01449 =
         0.01879    0.00165    0.00509    0.00612
C12   1    0.382068    0.356326    0.611310    11.00000    0.03198    0.02086 =
         0.02155    0.00663    0.00884    0.01549
C16   1    0.608297   -0.063750    0.737933    11.00000    0.03311    0.01549 =
         0.02112    0.00228    0.00261    0.00464
C17   1    0.669384   -0.145164    0.756115    11.00000    0.02727    0.02611 =
         0.03203    0.00985   -0.00029    0.01016
C18   1    0.746292   -0.106936    0.852453    11.00000    0.06082    0.10143 =
         0.03836    0.00680    0.00015    0.05518
AFIX 137
H18A  2    0.809741   -0.032519    0.864343    11.00000   -1.50000
H18B  2    0.789933   -0.156105    0.861127    11.00000   -1.50000
H18C  2    0.688089   -0.107885    0.893124    11.00000   -1.50000
AFIX   0
C19   1    0.558338   -0.256053    0.739395    11.00000    0.04529    0.03710 =
         0.23510    0.06318   -0.01965    0.00553
AFIX 137
H19A  2    0.501022   -0.248608    0.779391    11.00000   -1.50000
H19B  2    0.592556   -0.310432    0.750315    11.00000   -1.50000
H19C  2    0.510791   -0.279665    0.677842    11.00000   -1.50000
AFIX   0
C20   1    0.758392   -0.156966    0.691923    11.00000    0.12213    0.12314 =
         0.04514    0.02943    0.03384    0.10185
AFIX 137
H20A  2    0.707472   -0.190935    0.631187    11.00000   -1.50000
H20B  2    0.802844   -0.202825    0.708080    11.00000   -1.50000
H20C  2    0.821284   -0.084620    0.695809    11.00000   -1.50000
AFIX   0
C21   1    0.724006    0.194628    0.383996    11.00000    0.02068    0.01531 =
         0.01514    0.00376    0.00397    0.00332
C22   1    0.834172    0.291152    0.366476    11.00000    0.01897    0.01403 =
         0.01555    0.00285    0.00425   -0.00061
C23   1    0.811864    0.282275    0.266120    11.00000    0.04363    0.03179 =
         0.01883    0.00987    0.00578   -0.00589
AFIX 137
H23A  2    0.809935    0.211579    0.233154    11.00000   -1.50000
H23B  2    0.881367    0.341270    0.254896    11.00000   -1.50000
H23C  2    0.730169    0.288357    0.246791    11.00000   -1.50000
AFIX   0
C24   1    0.836063    0.403233    0.418342    11.00000    0.05345    0.01664 =
         0.04973    0.00544    0.03103   -0.00088
AFIX 137
H24A  2    0.752970    0.407548    0.400276    11.00000   -1.50000
H24B  2    0.903206    0.462395    0.405344    11.00000   -1.50000
H24C  2    0.853203    0.410313    0.482056    11.00000   -1.50000
AFIX   0
C25   1    0.961796    0.279458    0.397531    11.00000    0.02245    0.05374 =
         0.06690    0.03487    0.01003    0.00969
AFIX 137
H25A  2    0.974281    0.283615    0.460794    11.00000   -1.50000
H25B  2    1.032648    0.338516    0.387589    11.00000   -1.50000
H25C  2    0.959238    0.208840    0.363866    11.00000   -1.50000
AFIX   0
PART 1
C13   1    0.398830    0.412953    0.710903    21.00000    0.05154    0.02641 =
         0.03166    0.00234    0.00959    0.02634
AFIX 137
H13A  2    0.353426    0.358755    0.739872    21.00000   -1.50000
H13B  2    0.363694    0.470051    0.716197    21.00000   -1.50000
H13C  2    0.489935    0.445744    0.739414    21.00000   -1.50000
AFIX   0
C14   1    0.235281    0.300498    0.565846    21.00000    0.03847    0.04346 =
         0.04326    0.00416   -0.00208    0.02594
AFIX 137
H14A  2    0.224811    0.262885    0.503549    21.00000   -1.50000
H14B  2    0.198419    0.356391    0.569416    21.00000   -1.50000
H14C  2    0.191424    0.247534    0.596330    21.00000   -1.50000
AFIX   0
C15   1    0.453408    0.438231    0.564083    21.00000    0.06218    0.02588 =
         0.03900    0.01709    0.02483    0.02668
AFIX 137
H15A  2    0.544602    0.470852    0.592349    21.00000   -1.50000
H15B  2    0.419085    0.495761    0.567947    21.00000   -1.50000
H15C  2    0.442237    0.400548    0.501701    21.00000   -1.50000
AFIX   0
PART 0
PART 2
C13B  1    0.306863    0.365129    0.685869   -21.00000    0.09231    0.07161 =
         0.04961    0.04119    0.04985    0.06670
AFIX 137
H13D  2    0.222979    0.304791    0.667722   -21.00000   -1.50000
H13E  2    0.295450    0.434847    0.696749   -21.00000   -1.50000
H13F  2    0.354659    0.361309    0.740231   -21.00000   -1.50000
AFIX   0
C14B  1    0.305588    0.358580    0.521596   -21.00000    0.03950    0.03290 =
         0.03241    0.00778    0.00408    0.02446
AFIX 137
H14D  2    0.357265    0.357980    0.476625   -21.00000   -1.50000
H14E  2    0.286781    0.424934    0.531358   -21.00000   -1.50000
H14F  2    0.225344    0.294224    0.501231   -21.00000   -1.50000
AFIX   0
C15B  1    0.512593    0.462130    0.640194   -21.00000    0.06460    0.01847 =
         0.03025    0.00256   -0.00198    0.01632
AFIX 137
H15D  2    0.559600    0.466856    0.698148   -21.00000   -1.50000
H15E  2    0.493089    0.527728    0.643912   -21.00000   -1.50000
H15F  2    0.564946    0.456538    0.596194   -21.00000   -1.50000
AFIX   0
 
PART 0
N1    5    0.655189    0.306342   -0.031973    11.00000    0.02038    0.02271 =
         0.01502    0.00063    0.00438    0.00784
AFIX  23
H1A   2    0.671361    0.284889   -0.086206    11.00000   -1.20000
H1B   2    0.568887    0.281406   -0.038360    11.00000   -1.20000
AFIX   0
C26   1    0.707332    0.250364    0.029407    11.00000    0.03316    0.02922 =
         0.01298    0.00389   -0.00012    0.00975
AFIX  13
H26   2    0.719895    0.292729    0.092152    11.00000   -1.20000
AFIX   0
C27   1    0.837485    0.251163    0.012879    11.00000    0.03190    0.06915 =
         0.07077    0.04408    0.00934    0.02536
AFIX 137
H27A  2    0.826364    0.207514   -0.047668    11.00000   -1.50000
H27B  2    0.873166    0.220015    0.055107    11.00000   -1.50000
H27C  2    0.895949    0.326470    0.020655    11.00000   -1.50000
AFIX   0
C28   1    0.609437    0.133880    0.015289    11.00000    0.04268    0.03014 =
         0.02784    0.00732    0.00656    0.01202
AFIX 137
H28A  2    0.527150    0.136882    0.024312    11.00000   -1.50000
H28B  2    0.640000    0.100307    0.057741    11.00000   -1.50000
H28C  2    0.598796    0.090245   -0.045178    11.00000   -1.50000
AFIX   0
C29   1    0.707706    0.431479   -0.002872    11.00000    0.02347    0.02175 =
         0.02727   -0.00038    0.00598    0.00692
AFIX  13
H29   2    0.803102    0.460312    0.006772    11.00000   -1.20000
AFIX   0
C30   1    0.669331    0.471855    0.085290    11.00000    0.04525    0.03109 =
         0.03555   -0.01024    0.00972    0.01393
AFIX 137
H30A  2    0.576664    0.436299    0.078433    11.00000   -1.50000
H30B  2    0.693868    0.551220    0.099655    11.00000   -1.50000
H30C  2    0.713337    0.453428    0.133204    11.00000   -1.50000
AFIX   0
C31   1    0.653322    0.470415   -0.078098    11.00000    0.04725    0.02831 =
         0.04758    0.01060    0.01002    0.02000
AFIX 137
H31A  2    0.676353    0.441571   -0.133021    11.00000   -1.50000
H31B  2    0.689109    0.550437   -0.062206    11.00000   -1.50000
H31C  2    0.560011    0.443930   -0.086778    11.00000   -1.50000
AFIX   0
 
N2    5    0.865374    0.014084    0.499111    11.00000    0.11544    0.11969 =
         0.09493    0.01391    0.01722    0.03077
C32   1    0.944941    0.005897    0.499499    11.00000    0.07502    0.06583 =
         0.04906    0.01357    0.00631    0.03682
HKLF 4
 
REM  oejlm1159 in P1
REM R1 =  0.0297 for    7768 Fo > 4sig(Fo)  and  0.0336 for all    8411 data
REM    474 parameters refined using      6 restraints
 
END  
     
WGHT      0.0276      1.8923 

REM Highest difference peak  1.771,  deepest hole -1.190,  1-sigma level  0.101
Q1    1   0.3927  0.0674  0.7013  11.00000  0.05    1.77
Q2    1   0.4598  0.1198  0.5005  11.00000  0.05    1.22
Q3    1   0.5718  0.0797  0.7028  11.00000  0.05    1.21
Q4    1   0.5585 -0.2216  0.8887  11.00000  0.05    1.03
Q5    1   0.5787 -0.0247  0.0872  11.00000  0.05    0.98
Q6    1   0.4947  0.2654 -0.0997  11.00000  0.05    0.90
Q7    1   0.3260 -0.0178  0.5211  11.00000  0.05    0.82
Q8    1   0.4242  0.0352  0.6565  11.00000  0.05    0.65
Q9    1   0.4587  0.0049  0.7117  11.00000  0.05    0.59
Q10   1   0.5806 -0.2276  0.8025  11.00000  0.05    0.57
Q11   1   0.4910  0.1461  0.6953  11.00000  0.05    0.57
Q12   1   0.6314  0.1296  0.4971  11.00000  0.05    0.56
Q13   1   0.5353  0.1225  0.7573  11.00000  0.05    0.54
Q14   1   0.6824 -0.1997  0.6800  11.00000  0.05    0.45
Q15   1   0.8851  0.3598  0.7587  11.00000  0.05    0.43
Q16   1   0.4652  0.1410  0.7432  11.00000  0.05    0.42
Q17   1   0.4726  0.0575  0.7573  11.00000  0.05    0.42
Q18   1   0.8149  0.0134  0.5899  11.00000  0.05    0.42
Q19   1   0.4639 -0.3016  0.6983  11.00000  0.05    0.41
Q20   1   0.1433  0.1582  0.7790  11.00000  0.05    0.40

REM The information below was added by Olex2.
REM
REM R1 = 0.0297 for 7768 Fo > 4sig(Fo) and 0.0336 for all 14719 data
REM n/a parameters refined using n/a restraints
REM Highest difference peak 1.77, deepest hole -1.19
REM Mean Shift 0, Max Shift 0.001.

REM +++ Tabular Listing of Refinement Information +++
REM R1_all = 0.0336
REM R1_gt = 0.0297
REM wR_ref = 0.0706
REM GOOF = 1.043
REM Shift_max = 0.001
REM Shift_mean = 0
REM Reflections_all = 14719
REM Reflections_gt = 7768
REM Parameters = n/a
REM Hole = -1.19
REM Peak = 1.77
REM Flack = n/a

;
_olex2_date_sample_data_collection 2012-08-22
_olex2_submission_special_instructions 'No special instructions were received'
loop_
  _refln_index_h
  _refln_index_k
  _refln_index_l
  _refln_F_squared_meas
  _refln_F_squared_sigma
  _refln_scale_group_code
 -14 2 0 18432.1 1982.6 3
 -14 2 1 2986.7 699.563 3
 -14 2 2 2632.72 696.724 3
 -14 2 3 14644.4 1857.51 3
 -14 2 4 -648.536 576.233 3
 -14 2 5 49070.5 3536.62 3
 -14 2 7 2991.79 710.902 2
 -14 2 8 8876.17 1280.35 2
 -14 3 -1 2010.85 666.355 3
 -14 3 0 6224.92 1123.03 3
 -14 3 1 -280.958 536.508 3
 -14 3 2 23002.6 2187.77 3
 -14 3 3 31020.9 2621.2 3
 -14 3 4 -881.658 826.449 3
 -14 3 5 23112.9 2387.81 3
 -14 3 6 -154.739 267.242 2
 -14 3 7 16971.5 1762.17 2
 -14 3 8 4907.4 978.059 2
 -14 4 1 647.653 487.258 3
 -14 4 2 18235 1925.48 3
 -14 4 3 12997.4 1659.21 3
 -14 4 4 1123.49 443.139 3
 -14 4 5 5051.32 939.035 2
 -14 4 6 10344.3 1358.4 2
 -14 4 7 19645.7 1985.37 2
 -14 5 3 1303.72 551.17 3
 -14 5 5 484.054 447.28 2
 -14 5 6 16199.5 1773.95 2
 -14 5 7 27802.3 2364.31 2
 -14 6 2 11895.2 1470.6 5
 -14 6 3 -229.287 350.993 5
 -14 6 4 10563.3 1443.78 2
 -14 6 5 135.375 470.139 2
 -14 6 6 11380.6 1520.3 2
 -14 6 7 6361.8 1174 2
 -14 7 0 169.569 463.176 5
 -14 7 1 6850.22 1166.62 5
 -14 7 2 4129.3 840.912 5
 -14 7 3 13460.7 1606.41 2
 -14 7 3 12987.1 1538.57 5
 -14 7 4 5694.76 1071.51 2
 -14 7 5 -542.9 746.678 2
 -14 7 6 10893.9 1570.18 2
 -14 8 -1 7502.35 1309.69 5
 -14 8 0 -261.957 385.207 5
 -14 8 1 4073.55 865.941 5
 -14 8 2 12809.1 1582.91 5
 -14 8 2 15393 1820.13 2
 -14 8 3 36843.4 2863.09 2
 -14 8 3 34179.4 2483.75 5
 -14 8 4 15750 1662.46 5
 -14 8 4 17795 1995.95 2
 -14 8 5 3064.35 735.535 2
 -14 9 0 1520.12 665.879 5
 -14 9 1 735.426 510.476 5
 -14 9 1 844.111 549.242 2
 -14 9 2 32494.9 2657.12 2
 -14 9 2 30464.8 2478.54 5
 -14 9 3 56559.3 3680.34 2
 -14 9 3 40246 2754.86 5
 -14 9 4 7019.79 1171.25 5
 -14 9 4 7249.27 1389.82 2
 -14 10 3 13751.1 1611.1 5
 -14 10 4 1147.9 497.039 5
 -14 10 5 6125.08 1106.01 5
 -13 -1 8 1350.73 604.342 2
 -13 -1 9 17156.6 1728.4 2
 -13 0 -1 4586.38 1078.56 3
 -13 0 0 4791.7 1036.85 3
 -13 0 1 33677.2 2683.19 3
 -13 0 2 13811.9 1760.96 3
 -13 0 3 762.795 525.914 3
 -13 0 4 -629.289 736.271 3
 -13 0 5 11609.3 1618.19 3
 -13 0 6 70553.1 4195.68 3
 -13 0 7 23268.8 1864.56 2
 -13 0 8 4297.96 834.574 2
 -13 0 9 4121.83 728.571 2
 -13 0 10 18511.8 1789.4 2
 -13 1 -3 1055.43 501.159 3
 -13 1 -2 5404.45 1116.53 3
 -13 1 -1 2404.32 832.106 3
 -13 1 0 8814.26 1285.21 3
 -13 1 1 11929 1540.13 3
 -13 1 2 884.399 401.175 3
 -13 1 3 7218.67 1258.95 3
 -13 1 4 -45.0033 361.605 3
 -13 1 5 25524.3 2500.59 3
 -13 1 6 49163.3 2734.16 2
 -13 1 7 3773.53 773.35 2
 -13 1 8 11007.2 1389.09 2
 -13 1 9 743.565 502.013 2
 -13 1 10 13025.3 1552.2 2
 -13 2 -5 7271.33 1186.12 3
 -13 2 -4 1243.01 411.158 3
 -13 2 -3 2385.35 681.384 3
 -13 2 -2 19442.9 1907.81 3
 -13 2 -1 1169.79 551.43 3
 -13 2 0 14705.5 1712.95 3
 -13 2 1 15026.7 1773.32 3
 -13 2 2 7705.97 1212.12 3
 -13 2 3 17708.5 1857.91 3
 -13 2 4 1494.27 598.796 3
 -13 2 5 15320.8 1508.91 2
 -13 2 6 9918.57 1258.62 2
 -13 2 7 9559.97 1282.02 2
 -13 2 8 8664.35 1226.06 2
 -13 2 9 1588.41 636.288 2
 -13 2 10 24038.7 2171.49 2
 -13 3 -3 13816.6 1575.15 3
 -13 3 -2 40312.5 2673.5 3
 -13 3 -1 682.12 369.869 3
 -13 3 0 19664.1 1878.45 3
 -13 3 1 -276.433 533.978 3
 -13 3 2 27385 2252.05 3
 -13 3 3 23940.2 2215.68 3
 -13 3 4 1291.11 433.774 2
 -13 3 5 14057.4 1459.57 2
 -13 3 6 318.274 288.703 2
 -13 3 7 24294 2031.68 2
 -13 3 8 5979.01 1066.35 2
 -13 3 9 723.039 300.507 2
 -13 3 10 17727.8 1871.87 2
 -13 4 -1 373.552 380.633 3
 -13 4 0 2950.18 777.723 3
 -13 4 1 13283.8 1536.97 3
 -13 4 2 32702.8 2421.48 3
 -13 4 3 10049.8 1236.73 2
 -13 4 3 9781.78 1400.94 3
 -13 4 4 1140.19 490.416 2
 -13 4 5 18106.6 1758.23 2
 -13 4 6 6914.3 1112.14 2
 -13 4 7 33718.9 2503.59 2
 -13 4 8 12366 1574.12 2
 -13 4 9 2796.89 830.619 2
 -13 4 10 1449.2 587.371 2
 -13 5 1 24246.6 2009.24 3
 -13 5 2 17509.1 1796.45 3
 -13 5 3 6513.34 1053.31 2
 -13 5 3 6297.21 951.122 5
 -13 5 4 14431.1 1464.14 5
 -13 5 4 12929.4 1480.44 2
 -13 5 5 3924.75 913.222 2
 -13 5 6 11723.6 1505.29 2
 -13 5 7 43149.2 2932.61 2
 -13 5 8 4808.01 983.533 2
 -13 5 9 10637.4 1502.65 2
 -13 6 2 19362.2 1784.24 2
 -13 6 2 19635.8 1803.04 5
 -13 6 3 -641.963 579.775 5
 -13 6 3 -152.455 326.772 2
 -13 6 4 13470.9 1444.68 5
 -13 6 4 15273.8 1676.02 2
 -13 6 5 883.29 418.573 2
 -13 6 6 16233.8 1773.09 2
 -13 6 7 21193.6 2114.75 2
 -13 6 8 5716.58 1129.87 2
 -13 6 9 21674.9 2222.68 2
 -13 7 0 167.133 445.933 5
 -13 7 1 5061.36 976.389 2
 -13 7 1 5267.27 988.637 5
 -13 7 2 2420.39 480.603 5
 -13 7 2 3645.66 845.513 2
 -13 7 3 16088.2 1744.79 2
 -13 7 3 16209.3 1615.57 5
 -13 7 4 22790.1 2146.26 2
 -13 7 4 18508.3 1733.86 5
 -13 7 5 -198.985 267.771 5
 -13 7 5 -399.022 561.225 2
 -13 7 6 15650.9 1822.97 2
 -13 7 7 321.555 378.681 2
 -13 7 8 32777.5 2707.37 2
 -13 8 -1 10392.7 1445.35 5
 -13 8 0 1493.26 551.004 5
 -13 8 1 5897.7 1035.46 5
 -13 8 1 6187.94 1083.44 2
 -13 8 2 9015.4 1254.66 5
 -13 8 2 9145.4 1322.56 2
 -13 8 3 48355.1 2874.71 5
 -13 8 3 49335 3176.68 2
 -13 8 4 24688.6 2003.29 5
 -13 8 4 23723.7 2243.28 2
 -13 8 5 -366.916 696.047 2
 -13 8 5 -50.2571 354.606 5
 -13 8 6 719.88 441.754 2
 -13 8 7 15259.8 1926.18 2
 -13 9 -3 8561.76 1407.38 5
 -13 9 -2 23326 2161.18 5
 -13 9 -1 5974.91 1045.02 5
 -13 9 0 1666.48 662.208 5
 -13 9 1 260.316 454.685 5
 -13 9 2 26410.8 2159.66 5
 -13 9 3 39669.9 2636.3 5
 -13 9 4 7819.88 1137.9 5
 -13 9 4 6062.78 1146.07 2
 -13 9 5 1555.43 557.294 2
 -13 9 5 1429.07 521.928 5
 -13 9 6 -394.69 727.509 2
 -13 9 6 560.999 370.915 5
 -13 10 -3 8511.67 1376.92 5
 -13 10 -2 1445.42 517.702 5
 -13 10 -1 -285.346 541.479 5
 -13 10 0 15798.1 1747.12 5
 -13 10 1 -27.6787 553.641 5
 -13 10 2 25682.8 2184.71 5
 -13 10 3 15184.6 1637.52 5
 -13 10 4 1096.75 412.549 5
 -13 10 5 9290.05 1275.38 5
 -13 10 6 -101.271 497.038 5
 -13 11 -2 -425.873 786.239 5
 -13 11 -1 6837.01 1269.19 5
 -13 11 0 29713.7 2435.42 5
 -13 11 1 228.694 402.958 5
 -13 11 2 4436.97 956.57 5
 -13 11 3 892.748 522.336 5
 -13 11 4 22070.7 2025.21 5
 -13 11 5 15337.7 1657.4 5
 -13 11 6 1413.15 509.988 5
 -12 -3 3 10090.8 1507.91 3
 -12 -3 4 11098.7 1597.91 3
 -12 -3 5 31213.6 2689.98 3
 -12 -3 6 6144.58 1205.72 3
 -12 -3 8 1197.1 416.249 2
 -12 -3 9 9534.56 1243.2 2
 -12 -3 10 43477.8 2568.8 2
 -12 -2 -1 8017.06 1348.8 3
 -12 -2 0 9316.55 1482.24 3
 -12 -2 1 4329.56 967.865 3
 -12 -2 2 29699 2516.59 3
 -12 -2 3 201.31 491.731 3
 -12 -2 4 12986.9 1688.46 3
 -12 -2 5 12442.9 1671.6 3
 -12 -2 6 14700.5 1919.58 3
 -12 -2 7 16827.2 1576.72 2
 -12 -2 8 2355.02 635.431 2
 -12 -2 9 35836.3 2420.66 2
 -12 -2 10 15566.1 1629.29 2
 -12 -2 11 13275.7 1621.76 2
 -12 -1 -3 35761.6 2760.23 3
 -12 -1 -2 -71.6237 468.4 3
 -12 -1 -1 9001.81 1359.73 3
 -12 -1 0 580.702 381.976 3
 -12 -1 1 21953.8 2071.79 3
 -12 -1 2 26208.8 2296.04 3
 -12 -1 3 129.617 491.573 3
 -12 -1 4 6614.54 1198.05 3
 -12 -1 5 -706.128 747.164 3
 -12 -1 6 41215.4 2335.14 2
 -12 -1 7 32932.6 2123.96 2
 -12 -1 8 190.946 253.691 2
 -12 -1 9 13394 1438.99 2
 -12 -1 10 2489.06 634.897 2
 -12 -1 11 31827.9 2364.03 2
 -12 0 -5 -167.352 365.003 3
 -12 0 -4 43285 2898.61 3
 -12 0 -3 11416.8 1477.96 3
 -12 0 -2 230.301 351.487 3
 -12 0 -1 6055.73 1034 3
 -12 0 0 26.0978 523.278 3
 -12 0 1 33639.6 2538.22 3
 -12 0 2 23040.3 2142.93 3
 -12 0 3 -138.337 454.454 3
 -12 0 4 5450.52 1125.88 3
 -12 0 5 15019.4 1391.69 2
 -12 0 6 53888.9 2733.14 2
 -12 0 7 27376.7 2010.85 2
 -12 0 8 646.344 369.603 2
 -12 0 9 758.317 416.225 2
 -12 0 10 19135.8 1825.33 2
 -12 0 11 57909 3263.12 2
 -12 1 -6 10843 1471.07 3
 -12 1 -5 8102.15 1233.99 3
 -12 1 -4 24573 2143.51 3
 -12 1 -3 1420.84 641.002 3
 -12 1 -2 6578.91 1116.34 3
 -12 1 -1 10626.2 1436.2 3
 -12 1 0 6805.96 1141.17 3
 -12 1 1 34849.5 2556.26 3
 -12 1 2 3400.23 860.304 3
 -12 1 3 14880.9 1680.89 3
 -12 1 4 2890.65 612.085 2
 -12 1 4 3102.19 828.738 3
 -12 1 5 15014.6 1440.53 2
 -12 1 6 18057.7 1593.19 2
 -12 1 7 7968.92 1100.56 2
 -12 1 8 14407.9 1519.84 2
 -12 1 9 780.641 441.576 2
 -12 1 10 19182.7 1884.22 2
 -12 1 11 41766.6 2777.76 2
 -12 1 12 429.703 405.072 2
 -12 2 -6 5208.17 995.368 3
 -12 2 -5 7130.32 1138.85 3
 -12 2 -4 9840.98 1330.47 3
 -12 2 -3 4722.05 876.781 3
 -12 2 -2 52280.3 2991.7 3
 -12 2 -1 6654.48 1054.76 3
 -12 2 0 9737.87 1312.43 3
 -12 2 1 17377.3 1747.92 3
 -12 2 2 5375.14 915.623 3
 -12 2 3 32352.4 2585.07 3
 -12 2 3 33643.6 2010.21 2
 -12 2 4 518.033 260.934 2
 -12 2 5 2569.87 593.897 2
 -12 2 6 13360.3 1410.78 2
 -12 2 7 9980.11 1253.26 2
 -12 2 8 17680.7 1704.15 2
 -12 2 9 953.967 396.254 2
 -12 2 10 17118.4 1790.66 2
 -12 2 11 8712.48 1312.05 2
 -12 2 12 2459.9 768.912 2
 -12 3 -5 3908.04 821.609 3
 -12 3 -4 71.3871 300.267 3
 -12 3 -3 24634.5 1990.31 3
 -12 3 -2 56883.2 3029.39 3
 -12 3 -1 -492.359 500.284 3
 -12 3 0 9070.11 1217.99 3
 -12 3 1 -313.456 667.646 3
 -12 3 2 65963.8 3388.26 3
 -12 3 2 58026 2691.2 2
 -12 3 3 40294.7 2312.16 2
 -12 3 4 129.498 228.922 2
 -12 3 5 11446.8 1334.91 2
 -12 3 6 132.981 374.503 2
 -12 3 7 27002 2119.36 2
 -12 3 8 26628.5 2156.89 2
 -12 3 9 385.012 421.669 2
 -12 3 10 20273.8 1952.63 2
 -12 3 11 2535.56 688.558 2
 -12 3 12 16852.3 1846.77 2
 -12 4 -4 326.622 316.26 3
 -12 4 -3 37334 2366.94 3
 -12 4 -2 20730.6 1767.64 3
 -12 4 -1 362.155 392.795 3
 -12 4 0 4711.66 831.844 3
 -12 4 1 7846.42 1088.97 3
 -12 4 2 81208.6 3325.85 2
 -12 4 2 57187.3 3257.88 3
 -12 4 3 13608.6 1380.24 2
 -12 4 4 1929.75 473.292 5
 -12 4 4 2627.9 606.448 2
 -12 4 5 24455.1 1767.32 5
 -12 4 5 23984 1978.9 2
 -12 4 6 1098.78 499.661 2
 -12 4 7 60622.9 3284.36 2
 -12 4 8 26296.4 2229.89 2
 -12 4 9 2638.27 753.929 2
 -12 4 10 5699.39 1085.75 2
 -12 4 11 4289.21 916.59 2
 -12 5 -1 1703.72 473.441 3
 -12 5 0 6966.45 1045.43 3
 -12 5 1 24618.5 1834.22 2
 -12 5 1 25262.9 1962.16 3
 -12 5 2 36449.6 2319.19 2
 -12 5 3 14388 1484.07 2
 -12 5 3 15354.5 1459.52 5
 -12 5 4 11460.3 1334.85 2
 -12 5 4 10011.6 1210.82 5
 -12 5 5 14259.4 1355.87 5
 -12 5 5 13572.3 1547.37 2
 -12 5 6 15455.6 1644.56 2
 -12 5 7 68378.9 3586.92 2
 -12 5 8 2559.12 715.755 2
 -12 5 9 18694.7 1970.82 2
 -12 5 10 1040.16 405.564 2
 -12 5 11 24836.7 2321.33 2
 -12 6 0 1686 437.367 2
 -12 6 1 16068.2 1557.5 3
 -12 6 1 11031.2 1297.89 2
 -12 6 2 29610 2176.69 2
 -12 6 2 29211.2 2105.81 5
 -12 6 3 -303.118 512.525 5
 -12 6 3 539.314 332.347 2
 -12 6 4 22873.2 1779.62 5
 -12 6 4 23961.8 2063.77 2
 -12 6 5 -902.628 593.941 2
 -12 6 5 -273.311 341.082 5
 -12 6 6 29302.7 1948.97 5
 -12 6 6 29436.8 2339.01 2
 -12 6 7 27701.9 2312.55 2
 -12 6 8 8078.56 1268.12 2
 -12 6 9 28961 2468.44 2
 -12 6 10 206.134 367.165 2
 -12 6 11 19203.6 2080.35 2
 -12 7 0 1813.39 632.581 5
 -12 7 1 13825.5 1496.55 5
 -12 7 2 1285.81 526.768 2
 -12 7 2 1217.37 396.68 5
 -12 7 3 19183.1 1847.65 2
 -12 7 3 19598.4 1684.44 5
 -12 7 4 41538.4 2767.02 2
 -12 7 4 37255.3 2319.44 5
 -12 7 5 194.464 275.833 5
 -12 7 5 -171.997 555.62 2
 -12 7 6 8265.62 1108.8 5
 -12 7 6 6680.67 1163.71 2
 -12 7 7 -239.759 472.448 2
 -12 7 8 18654.9 1986.51 2
 -12 7 9 24589.8 2338.06 2
 -12 7 10 -355.2 590.916 2
 -12 8 -1 22571.2 1968.77 5
 -12 8 0 -256.705 392.369 5
 -12 8 1 1447.42 561.236 5
 -12 8 2 1686.78 565.423 5
 -12 8 3 52273.7 2830.63 5
 -12 8 4 30228.3 2112.9 5
 -12 8 5 -212.22 783.286 2
 -12 8 5 1458.28 474.93 5
 -12 8 6 730.532 408.569 5
 -12 8 6 -166.404 433.207 2
 -12 8 7 7562.17 1305.56 2
 -12 8 8 42728.9 3178.99 2
 -12 8 9 25690.5 2471.64 2
 -12 9 -3 1009.48 546.028 5
 -12 9 -2 35532.4 2544.68 5
 -12 9 -1 6264.39 1031.62 5
 -12 9 0 5072.14 966.176 5
 -12 9 1 3146.61 772.071 5
 -12 9 2 11657.6 1359.5 5
 -12 9 3 46689.4 2747.78 5
 -12 9 4 9656.02 1256.28 5
 -12 9 5 2303.51 631.794 5
 -12 9 6 -65.5439 303.203 5
 -12 9 6 -48.6559 553.429 2
 -12 9 7 25135.6 1935.69 5
 -12 9 7 22383.1 2291.16 2
 -12 9 8 44981.8 3293.92 2
 -12 10 -6 -767.016 667.278 5
 -12 10 -5 15084.8 1807.96 5
 -12 10 -4 6941.3 1238.51 5
 -12 10 -3 7715.79 1230.96 5
 -12 10 -2 9607.7 1364.94 5
 -12 10 -1 567.493 473.811 5
 -12 10 0 33643.1 2447.06 5
 -12 10 1 5606.58 1015.11 5
 -12 10 2 7222.34 1121.69 5
 -12 10 3 12814.6 1478.5 5
 -12 10 4 3163.57 751.206 5
 -12 10 5 13713.1 1507.98 5
 -12 10 6 347.396 297.028 5
 -12 10 7 21882.3 1877.71 5
 -12 10 7 19322.3 2190.65 2
 -12 11 -6 17829.2 1995.49 5
 -12 11 -5 47132.8 3113.26 5
 -12 11 -4 2435.17 704.21 5
 -12 11 -3 4551.69 1063.24 5
 -12 11 -2 619.925 518.56 5
 -12 11 -1 19200 1907.93 5
 -12 11 0 31372.5 2422.32 5
 -12 11 1 396.509 361.063 5
 -12 11 2 11649.4 1416.3 5
 -12 11 3 -766.316 466.895 5
 -12 11 4 23555.3 2054.12 5
 -12 11 5 40139.1 2624.04 5
 -12 11 6 2726.99 731.371 5
 -12 11 7 15003.6 1636.68 5
 -12 12 -4 470.086 338.814 5
 -12 12 -3 3553.97 931.153 5
 -12 12 -2 3753.92 935.822 5
 -12 12 -1 39896.7 2779.1 5
 -12 12 0 32881.6 2507.48 5
 -12 12 1 1329.51 667.434 5
 -12 12 2 11642.8 1476.11 5
 -12 12 3 4614.56 925.221 5
 -12 12 4 45444.1 2922.43 5
 -12 12 5 24320.9 2141.95 5
 -12 12 6 2496.15 800.687 5
 -12 12 7 13647.3 1610.48 5
 -12 13 -1 36488 2742.96 5
 -12 13 0 20930.2 2057.58 5
 -12 13 1 5270.73 1102.95 5
 -12 13 2 7080.01 1238.21 5
 -11 -5 4 -349.19 558.906 3
 -11 -5 5 47816.6 3269.84 3
 -11 -5 6 36822.1 2908.65 3
 -11 -5 7 1645.21 672.91 3
 -11 -5 9 840.413 354.064 2
 -11 -5 10 4441.57 872.255 2
 -11 -4 0 42303.7 2999.46 3
 -11 -4 1 25856.4 2357.94 3
 -11 -4 2 -210.165 379.792 3
 -11 -4 3 10103.6 1449.41 3
 -11 -4 4 5443.04 1155.72 3
 -11 -4 5 42939.1 3064.22 3
 -11 -4 6 40076.8 2972.01 3
 -11 -4 7 672.207 600.052 3
 -11 -4 7 982.716 427.256 2
 -11 -4 8 7445.03 1035.32 2
 -11 -4 9 3158.51 755.312 2
 -11 -4 10 53906.7 2956.34 2
 -11 -4 11 23406.9 1998.79 2
 -11 -3 -3 7877.85 1287.08 3
 -11 -3 -2 16829.8 1883.06 3
 -11 -3 -1 11920.3 1593.42 3
 -11 -3 0 31049.1 2500.34 3
 -11 -3 1 4937.15 1043.49 3
 -11 -3 2 18222.3 1900.55 3
 -11 -3 3 3925.21 929.515 3
 -11 -3 4 11094.5 1506.77 3
 -11 -3 5 39043.5 2829.64 3
 -11 -3 6 1580.06 421.465 2
 -11 -3 6 990.721 523.965 3
 -11 -3 7 23955.6 1783.7 2
 -11 -3 8 6766.07 970.141 2
 -11 -3 9 34650.3 2318.49 2
 -11 -3 10 66403.1 3332.51 2
 -11 -3 11 2198.53 652.952 2
 -11 -3 12 16959.7 1760.03 2
 -11 -2 -5 7150.65 1232.33 3
 -11 -2 -4 -210.935 427.905 3
 -11 -2 -3 43472 2953 3
 -11 -2 -2 9391.13 1377.45 3
 -11 -2 -1 5542.92 1061.16 3
 -11 -2 0 6758.94 1219.05 3
 -11 -2 1 929.359 477.988 3
 -11 -2 2 50593.1 3099.58 3
 -11 -2 3 4941.75 984.649 3
 -11 -2 4 11850 1545.83 3
 -11 -2 5 26365.9 1773.7 2
 -11 -2 5 32697.8 2701.34 3
 -11 -2 6 8693.5 1087.65 2
 -11 -2 7 39927.4 2325.1 2
 -11 -2 8 1718.74 565.923 2
 -11 -2 9 21705.3 1801.44 2
 -11 -2 10 10675 1319.86 2
 -11 -2 11 11665.5 1390.67 2
 -11 -2 12 31749.2 2397.81 2
 -11 -2 13 854.085 462.298 2
 -11 -1 -6 9983.17 1469.27 3
 -11 -1 -5 257.156 452.85 3
 -11 -1 -4 18042 1846.86 3
 -11 -1 -3 42387.5 2813.48 3
 -11 -1 -2 324.822 378.798 3
 -11 -1 -1 5850.94 1031.38 3
 -11 -1 0 10163.8 1354.28 3
 -11 -1 1 15678.6 1716.69 3
 -11 -1 2 60380.4 3360.16 3
 -11 -1 3 3871.28 858.974 3
 -11 -1 4 13491.5 1688.46 3
 -11 -1 4 10915.5 1087.92 2
 -11 -1 5 1192.3 382.156 2
 -11 -1 6 30010.7 1914.85 2
 -11 -1 7 45377.4 2437.52 2
 -11 -1 8 3774.85 747.679 2
 -11 -1 9 7130.17 1021.66 2
 -11 -1 10 116.968 384.672 2
 -11 -1 11 41455.7 2638.6 2
 -11 -1 12 41660.8 2656.67 2
 -11 -1 13 -88.0672 285.774 2
 -11 0 -6 4216.12 911.734 3
 -11 0 -5 -308.608 424.529 3
 -11 0 -4 36324.1 2559.67 3
 -11 0 -3 21510.4 1960.37 3
 -11 0 -2 70.8748 319.691 3
 -11 0 -1 23706.3 2021.43 3
 -11 0 0 533.899 504.158 3
 -11 0 1 59427 3215.09 3
 -11 0 2 33255.2 2408.42 3
 -11 0 3 2872.09 548.539 2
 -11 0 3 1709.4 653.897 3
 -11 0 4 17365.5 1384.97 2
 -11 0 5 4178.01 692.796 2
 -11 0 6 45030.4 2424.04 2
 -11 0 7 40921.8 2379.21 2
 -11 0 8 360.276 338.925 2
 -11 0 9 1023.61 449.371 2
 -11 0 10 15262.8 1587.3 2
 -11 0 11 62910.2 3324.03 2
 -11 0 12 21054.2 1969.11 2
 -11 0 13 2550.69 781.613 2
 -11 1 -6 5047.56 973.913 3
 -11 1 -5 1648.46 483.719 3
 -11 1 -4 21280.3 1904.68 3
 -11 1 -3 4720.86 870.901 3
 -11 1 -2 8829.31 1230.2 3
 -11 1 -1 23967.4 1982.84 3
 -11 1 0 2684.58 680.196 3
 -11 1 1 41716.8 2646.19 3
 -11 1 2 5524.88 939.026 3
 -11 1 2 6546.99 848.748 2
 -11 1 3 19093.9 1904.9 3
 -11 1 3 17125 1359.53 2
 -11 1 4 13162.9 1255.84 2
 -11 1 5 6743.25 925.133 2
 -11 1 6 26255.7 1870.08 2
 -11 1 7 5361.16 895.409 2
 -11 1 8 14987.8 1503.04 2
 -11 1 9 1333.33 421.226 2
 -11 1 10 15791 1638.77 2
 -11 1 11 29430.8 2283.19 2
 -11 1 12 479.386 354.478 2
 -11 1 13 14761.2 1716.32 2
 -11 2 -6 12996.5 1410.9 3
 -11 2 -5 3728.04 766.796 3
 -11 2 -4 4880.1 931.822 3
 -11 2 -3 1215.1 468.143 3
 -11 2 -2 37925.4 2386.15 3
 -11 2 -1 9322.97 1241.04 3
 -11 2 0 2002.79 670.92 3
 -11 2 1 6036.71 1021.75 3
 -11 2 2 6453.92 1058.64 3
 -11 2 2 4896.89 722.166 2
 -11 2 3 34432.5 1989.92 2
 -11 2 4 4025.17 713.781 2
 -11 2 5 2374.12 551.644 2
 -11 2 6 7455.61 1052.74 2
 -11 2 7 10426.8 1243.62 2
 -11 2 8 50761.8 2816.76 2
 -11 2 9 13740.4 1509.21 2
 -11 2 10 22095.8 1944.58 2
 -11 2 11 19777.8 1886.77 2
 -11 2 12 2498.35 752.243 2
 -11 2 13 36426.5 2699.53 2
 -11 3 -6 21342.6 1770.39 3
 -11 3 -5 789.133 310.376 3
 -11 3 -4 -123.531 412.118 3
 -11 3 -3 18851.4 1642.29 3
 -11 3 -2 91658.6 3668.81 3
 -11 3 -1 3962.32 766.297 3
 -11 3 0 5713.27 917.699 3
 -11 3 1 261.533 307.381 2
 -11 3 1 427.943 320.23 3
 -11 3 2 62446.8 2754.35 2
 -11 3 3 65969 2908.37 2
 -11 3 4 5638.12 932.734 2
 -11 3 5 16247.9 1344.74 5
 -11 3 5 16033.5 1521.64 2
 -11 3 6 384.786 303.927 2
 -11 3 7 34844.2 2337.73 2
 -11 3 8 88827.4 3861.22 2
 -11 3 9 -180.606 381.948 2
 -11 3 10 30031.8 2335.13 2
 -11 3 11 2801.67 765.871 2
 -11 3 12 27115.3 2305.43 2
 -11 3 13 24201.4 2234.54 2
 -11 4 -6 1054.22 440.562 3
 -11 4 -5 1488.51 449.517 3
 -11 4 -4 2387.49 544.649 3
 -11 4 -3 63676.5 2927.68 3
 -11 4 -2 52853.1 2673.24 3
 -11 4 -1 19.6558 454.132 3
 -11 4 0 11839.5 1149.72 2
 -11 4 0 12661.4 1304.66 3
 -11 4 1 15443.8 1341.77 2
 -11 4 1 20068.6 1806.72 3
 -11 4 2 96185.2 3577.73 2
 -11 4 3 92549.9 3588.77 2
 -11 4 4 2501.87 601.26 2
 -11 4 4 2262.53 554.435 5
 -11 4 5 41850.3 2199.99 5
 -11 4 5 41256 2494.55 2
 -11 4 6 -233.12 431.418 5
 -11 4 6 400.853 338.424 2
 -11 4 7 75832 3584.55 2
 -11 4 8 20785.1 1899.2 2
 -11 4 9 2643.91 739.51 2
 -11 4 10 11547.8 1483.97 2
 -11 4 11 9192.81 1353.59 2
 -11 4 12 51288.3 3272.17 2
 -11 4 13 25358.1 2340.33 2
 -11 5 -3 35033.4 2063.86 3
 -11 5 -2 7978.94 962.609 3
 -11 5 -1 16193.1 1354.83 2
 -11 5 -1 15136.3 1367.86 3
 -11 5 0 10370.8 1138.61 2
 -11 5 0 8499.34 1054.1 3
 -11 5 1 20084 1692.97 3
 -11 5 1 18640 1546.42 2
 -11 5 2 57774 2849.64 2
 -11 5 3 22140.6 1685.83 5
 -11 5 3 24875.1 1938.13 2
 -11 5 4 25127.1 1747.24 5
 -11 5 4 24274.2 1939.71 2
 -11 5 5 19028.3 1475.99 5
 -11 5 5 15602.3 1597.69 2
 -11 5 6 46060 2277.77 5
 -11 5 6 46780.4 2789.86 2
 -11 5 7 76114.6 3680.28 2
 -11 5 8 6983.18 1155.77 2
 -11 5 9 9971.59 1381.32 2
 -11 5 10 7087.35 1202.83 2
 -11 5 11 8522.66 1364.07 2
 -11 5 12 30750.4 2556.5 2
 -11 5 13 9817.67 1507.52 2
 -11 6 -1 45026.6 2289.9 3
 -11 6 0 9886.94 1130.35 3
 -11 6 2 16035.6 1473.57 5
 -11 6 2 14731.1 1474.72 2
 -11 6 3 776.381 261.083 5
 -11 6 3 1148.17 304.967 2
 -11 6 4 41928.8 2595.94 2
 -11 6 4 42191.2 2311.28 5
 -11 6 5 2414.93 572.779 5
 -11 6 5 1174.7 425.377 2
 -11 6 6 38977.9 2643.25 2
 -11 6 6 36943.5 2104.56 5
 -11 6 7 39170.7 2118.54 5
 -11 6 7 41090.3 2790.66 2
 -11 6 8 2497.76 835.41 2
 -11 6 9 24519.2 2216.19 2
 -11 6 10 2400.48 668.274 2
 -11 6 11 8919.98 1399.22 2
 -11 6 12 14407.7 1820.58 2
 -11 7 0 7193.57 1045.26 5
 -11 7 1 8414.32 1104.44 5
 -11 7 2 2543.11 584.138 5
 -11 7 3 8080.44 1081.47 5
 -11 7 4 49965.2 2567.37 5
 -11 7 5 5481.6 878.116 5
 -11 7 5 4837.77 956.36 2
 -11 7 6 9183.94 1059.87 5
 -11 7 6 8398.05 1267.49 2
 -11 7 7 -377.324 551.761 5
 -11 7 7 15.6602 290.792 2
 -11 7 8 33406.6 2676.21 2
 -11 7 9 44044.2 3029.04 2
 -11 7 10 -1593.15 648.316 2
 -11 7 11 17823.2 2007.8 2
 -11 7 12 1207.89 614.568 2
 -11 8 -1 34143.7 2343.83 5
 -11 8 0 1099.69 461.024 5
 -11 8 1 6059.18 951.673 5
 -11 8 2 -102.514 407.056 5
 -11 8 3 49823.9 2652.37 5
 -11 8 4 42351.7 2413.8 5
 -11 8 5 1495.77 499.5 5
 -11 8 6 1681.94 518.937 5
 -11 8 7 9465.24 1371.43 2
 -11 8 7 9590.49 1142.97 5
 -11 8 8 63511.3 2894.78 5
 -11 8 8 60660 3595.81 2
 -11 8 9 34032 2792.44 2
 -11 8 10 -32.0367 654.798 2
 -11 8 11 9993.88 1567.41 2
 -11 9 -4 31651.5 2362.36 5
 -11 9 -3 2169.03 726.566 5
 -11 9 -2 67036 3341.14 5
 -11 9 -1 11104.5 1335.59 5
 -11 9 0 7305.18 1116.57 5
 -11 9 1 16507.5 1579.98 5
 -11 9 2 5230.91 912.717 5
 -11 9 3 49196.5 2726.85 5
 -11 9 4 12112.5 1313.93 5
 -11 9 5 3936.51 773.823 5
 -11 9 6 7644.64 1039.99 5
 -11 9 7 19245.9 1664.21 5
 -11 9 8 39641.4 2365.31 5
 -11 9 8 42195 3103.14 2
 -11 9 9 13220.4 1774.33 2
 -11 9 10 7450.77 1364.11 2
 -11 10 -6 -393.535 596.666 5
 -11 10 -5 22396 2053.96 5
 -11 10 -4 20989.7 1946.99 5
 -11 10 -3 9542.26 1297.89 5
 -11 10 -2 18080.4 1776.6 5
 -11 10 -1 -479.666 646.073 5
 -11 10 0 37146.1 2468.99 5
 -11 10 1 12269.8 1380.9 5
 -11 10 2 1617.42 567.695 5
 -11 10 3 18568.4 1692.15 5
 -11 10 4 -1.73997 359.94 5
 -11 10 5 41470.1 2508.77 5
 -11 10 6 10567.1 1341.6 5
 -11 10 7 10909.3 1284.08 5
 -11 10 8 20253 1767.19 5
 -11 10 9 -530.788 768.742 2
 -11 11 -8 794.683 652.241 5
 -11 11 -7 2707.54 736.999 5
 -11 11 -6 12341.3 1568.59 5
 -11 11 -5 42085 2854.01 5
 -11 11 -4 8179.89 1257.38 5
 -11 11 -3 2608.45 711.3 5
 -11 11 -2 489.114 378.973 5
 -11 11 -1 29395 2240.8 5
 -11 11 0 41235.4 2639.17 5
 -11 11 1 7085.35 1085.28 5
 -11 11 2 17960.6 1719.27 5
 -11 11 3 839.395 434.502 5
 -11 11 4 24085.3 2031.13 5
 -11 11 5 69578.6 3402.41 5
 -11 11 6 467.402 427.949 5
 -11 11 7 8231.12 1189.38 5
 -11 11 8 5056.26 934.924 5
 -11 12 -8 901.395 486.674 5
 -11 12 -7 -688.665 642.713 5
 -11 12 -6 26019.6 2283.53 5
 -11 12 -5 45055.2 2953.8 5
 -11 12 -4 -711.757 468.344 5
 -11 12 -3 4032.99 962.393 5
 -11 12 -2 3113.48 807.137 5
 -11 12 -1 32066.6 2428.72 5
 -11 12 0 47461.8 2918.81 5
 -11 12 1 747.681 499.332 5
 -11 12 2 9110.7 1294.5 5
 -11 12 3 1725.67 634.027 5
 -11 12 4 62499.2 3340.67 5
 -11 12 5 19373.8 1893.59 5
 -11 12 6 1642.27 588.727 5
 -11 12 7 13323.1 1606.15 5
 -11 12 8 -14.8978 363.89 5
 -11 12 9 31505.6 2425.4 5
 -11 13 -6 14959.9 1772.77 5
 -11 13 -5 13252.4 1663.03 5
 -11 13 -4 5424.66 1069.62 5
 -11 13 -3 2468.79 722.634 5
 -11 13 -2 2349.42 778.724 5
 -11 13 -1 39721.2 2751.4 5
 -11 13 0 18386.9 1860.15 5
 -11 13 1 1152.33 623.033 5
 -11 13 2 11963.6 1500.93 5
 -11 13 3 8606.75 1252.69 5
 -11 13 4 25964.5 2233.53 5
 -11 13 5 799.958 499.765 5
 -11 13 6 2769.37 773.494 5
 -11 14 -3 3248.75 880.762 5
 -11 14 -2 2206.72 778.69 5
 -11 14 -1 11027.1 1498.04 5
 -11 14 0 650.05 415.437 5
 -11 14 1 16002.4 1804.62 5
 -10 -7 9 19114.8 1737.35 2
 -10 -7 10 184.093 306.713 2
 -10 -6 1 48385.9 3218.89 3
 -10 -6 2 9003.73 1430.67 3
 -10 -6 3 1146.11 412.332 3
 -10 -6 4 2578.34 778.581 3
 -10 -6 5 11491.6 1580.2 3
 -10 -6 6 45262.5 3132.56 3
 -10 -6 7 15243.2 1842.72 3
 -10 -6 8 3958.05 1013.8 3
 -10 -6 8 3065.36 668.469 2
 -10 -6 9 8858.47 1165.34 2
 -10 -6 9 10437.3 1624.32 3
 -10 -6 10 2351.23 623.454 2
 -10 -6 11 31942.7 2322.77 2
 -10 -5 -2 766.674 379.869 3
 -10 -5 -1 2606.87 723.193 3
 -10 -5 0 21998.5 2136.71 3
 -10 -5 1 50584.6 3245.39 3
 -10 -5 2 4244.21 932.247 3
 -10 -5 3 4540.69 959.549 3
 -10 -5 4 -356.509 496.171 3
 -10 -5 5 39506.3 2852.44 3
 -10 -5 6 53664.1 3337.98 3
 -10 -5 7 11286 1659.89 3
 -10 -5 7 9878.04 1130.26 2
 -10 -5 8 14463.4 1425.57 2
 -10 -5 9 302.837 249.855 2
 -10 -5 10 36157 2352.02 2
 -10 -5 11 49369.7 2853.78 2
 -10 -5 12 1358.27 489.581 2
 -10 -4 -4 15407.2 1831.98 3
 -10 -4 -3 3638.7 881.212 3
 -10 -4 -2 23741.1 2193.28 3
 -10 -4 -1 212.752 509.44 3
 -10 -4 0 31899.2 2507.68 3
 -10 -4 1 18679.1 1920.66 3
 -10 -4 2 128.269 462.157 3
 -10 -4 3 6293.98 1161.89 3
 -10 -4 4 5079.31 1021.16 3
 -10 -4 5 42865.3 2905.2 3
 -10 -4 6 23316 1667.53 2
 -10 -4 6 32122.1 2668.05 3
 -10 -4 7 6980.81 942.97 2
 -10 -4 8 15623.7 1466.73 2
 -10 -4 9 4737.31 829.506 2
 -10 -4 10 64936.6 3144.14 2
 -10 -4 11 33267.6 2305.26 2
 -10 -4 12 1301.85 496.375 2
 -10 -4 13 10154.6 1333.29 2
 -10 -3 -6 804.254 534.634 3
 -10 -3 -5 21235.8 2093.6 3
 -10 -3 -4 142.927 429.37 3
 -10 -3 -3 22527.5 2096.05 3
 -10 -3 -2 30036.2 2380.14 3
 -10 -3 -1 1817.47 626.883 3
 -10 -3 0 21466.8 2004.11 3
 -10 -3 1 2961.1 741.917 3
 -10 -3 2 27219.8 2266.31 3
 -10 -3 3 36507.6 2615.96 3
 -10 -3 4 4984.33 984.653 3
 -10 -3 5 66663.4 3740.55 3
 -10 -3 5 54609.5 2435.57 2
 -10 -3 6 2445.44 564.761 2
 -10 -3 7 12830.8 1301.2 2
 -10 -3 8 15602.1 1499.8 2
 -10 -3 9 14440.3 1486.03 2
 -10 -3 10 41055.9 2568.23 2
 -10 -3 11 3616.07 738.465 2
 -10 -3 12 12133.6 1461.99 2
 -10 -3 13 6322.51 1097.4 2
 -10 -3 14 9471.67 1381.14 2
 -10 -2 -6 8824.39 1352.95 3
 -10 -2 -5 2014.02 657.702 3
 -10 -2 -4 5422.67 1036.89 3
 -10 -2 -3 49592.4 3030.74 3
 -10 -2 -2 12910.5 1529.71 3
 -10 -2 -1 6478.61 1089.39 3
 -10 -2 0 19716.5 1875.52 3
 -10 -2 1 670.994 336.441 3
 -10 -2 2 101340 4255.42 3
 -10 -2 3 35724.8 2498.08 3
 -10 -2 4 16070.1 1769.45 3
 -10 -2 4 12695.5 1124.36 2
 -10 -2 5 19899.9 1493.05 2
 -10 -2 6 3133.53 639.576 2
 -10 -2 7 52789.1 2564.5 2
 -10 -2 8 19247.6 1603.69 2
 -10 -2 9 10468.2 1223.48 2
 -10 -2 10 25127.4 1924.2 2
 -10 -2 11 9778.08 1278.2 2
 -10 -2 12 41966.3 2640.08 2
 -10 -2 13 6600.17 1076 2
 -10 -2 14 8685.87 1320.58 2
 -10 -1 -6 4675.3 888.252 3
 -10 -1 -5 524.455 327.919 3
 -10 -1 -4 29395.1 2247.34 3
 -10 -1 -3 52474 2986.22 3
 -10 -1 -2 7747.97 1161.32 3
 -10 -1 -1 13942.3 1547.56 3
 -10 -1 0 1826.86 532.26 3
 -10 -1 1 32796.4 2296.44 3
 -10 -1 2 63440.2 3255.17 3
 -10 -1 3 156.983 495.528 3
 -10 -1 3 753.76 233.159 2
 -10 -1 4 23414.7 1536.78 2
 -10 -1 5 1084.86 384.262 2
 -10 -1 6 42347.2 2249.78 2
 -10 -1 7 69484.4 2994.44 2
 -10 -1 8 22561.5 1732.71 2
 -10 -1 9 8382.44 1108.97 2
 -10 -1 10 616.858 351.62 2
 -10 -1 11 53144.4 2889.7 2
 -10 -1 12 43328.4 2698.08 2
 -10 -1 13 4557.39 945.393 2
 -10 -1 14 6581.33 1103.07 2
 -10 0 -6 9326.3 1289.17 3
 -10 0 -5 216.575 427.197 3
 -10 0 -4 27566.1 2111.83 3
 -10 0 -3 49424.1 2794.25 3
 -10 0 -2 15.8973 486.952 3
 -10 0 -1 18033.1 1678.33 3
 -10 0 0 -166.922 467.198 3
 -10 0 1 63096 3173.86 3
 -10 0 2 55908.3 3007.4 3
 -10 0 2 52245.6 2174.08 2
 -10 0 3 -415.589 612.877 3
 -10 0 3 366.694 276.019 2
 -10 0 4 25168.8 1630 2
 -10 0 5 2887.88 590.495 2
 -10 0 6 18465 1492.07 2
 -10 0 7 38258.4 2243.46 2
 -10 0 8 -251.167 317.611 2
 -10 0 9 5271.36 900.008 2
 -10 0 10 8986.04 1168.08 2
 -10 0 11 90791.3 3906.96 2
 -10 0 12 29245.2 2242.24 2
 -10 0 13 1592.69 544.489 2
 -10 0 14 7413.85 1203.41 2
 -10 0 15 15850.3 1793.62 2
 -10 1 -6 16658 1617.93 3
 -10 1 -5 2304.62 633.787 3
 -10 1 -4 24713.1 1927.84 3
 -10 1 -3 17879.5 1638.41 3
 -10 1 -2 6458.29 990.516 3
 -10 1 -1 35570.9 2251.26 3
 -10 1 0 660.549 307.6 3
 -10 1 1 48795.4 2674.8 3
 -10 1 1 49333.6 2064.21 2
 -10 1 2 5892.63 1050.66 3
 -10 1 2 11955.7 1056.38 2
 -10 1 3 10171.3 1016.69 2
 -10 1 4 12370.4 1148.64 2
 -10 1 5 1630.91 413.658 2
 -10 1 6 32022.1 2015.91 2
 -10 1 7 12051.3 1273.36 2
 -10 1 8 13448.4 1372.66 2
 -10 1 9 30481.8 2145.73 2
 -10 1 10 18572.3 1734.04 2
 -10 1 11 61189.2 3238.33 2
 -10 1 12 3166.16 778.544 2
 -10 1 13 30931.5 2389.69 2
 -10 1 14 8226.05 1327.06 2
 -10 1 15 15925.4 1811.23 2
 -10 2 -6 35041.6 2246.11 3
 -10 2 -5 3977.61 737.759 3
 -10 2 -4 7808.58 1082.61 3
 -10 2 -3 -77.4134 445.304 3
 -10 2 -2 44432.3 2472.63 3
 -10 2 -1 37298.9 2249.45 3
 -10 2 0 779.84 353.749 3
 -10 2 0 1384.04 376.178 2
 -10 2 1 15200.1 1466.73 3
 -10 2 1 13774.8 1151.24 2
 -10 2 2 10901.9 1036.58 2
 -10 2 3 48291.5 2313.66 2
 -10 2 4 16176.5 1394.03 2
 -10 2 5 5918.13 860.839 2
 -10 2 6 34772.7 1749.2 5
 -10 2 6 35560.7 2174.29 2
 -10 2 7 2179.34 602.793 2
 -10 2 8 124000 4372.63 2
 -10 2 9 21105.7 1831.54 2
 -10 2 10 12917.1 1456.09 2
 -10 2 11 13243.6 1517.27 2
 -10 2 12 5080.04 969.103 2
 -10 2 13 33339.2 2521.65 2
 -10 2 14 634.803 482.349 2
 -10 2 15 18343.8 1955.95 2
 -10 3 -6 17497.8 1537.53 3
 -10 3 -5 9249.37 1109.05 3
 -10 3 -4 2642.16 606.062 3
 -10 3 -3 47979.3 2460.66 3
 -10 3 -2 75713.3 3123.84 3
 -10 3 -1 17787.8 1504.28 3
 -10 3 -1 21918.2 1378.87 2
 -10 3 0 12556.6 1095.58 2
 -10 3 0 12390.6 1254.87 3
 -10 3 1 84.4441 179.777 2
 -10 3 1 -206.735 364.962 3
 -10 3 2 76789.3 2979.26 2
 -10 3 3 123548 3932.37 2
 -10 3 4 20244.4 1595.1 2
 -10 3 5 7216.59 982.551 2
 -10 3 5 6310.93 812.55 5
 -10 3 6 9981.85 1186.69 2
 -10 3 6 10090.1 966.863 5
 -10 3 7 59923.3 3009.7 2
 -10 3 8 77120.2 3500.47 2
 -10 3 9 950.863 489.749 2
 -10 3 10 20452.7 1874.24 2
 -10 3 11 3073.59 752.447 2
 -10 3 12 31518 2417.24 2
 -10 3 13 33335.6 2532.49 2
 -10 3 14 1147.51 540.399 2
 -10 3 15 18344.9 1960.99 2
 -10 4 -6 882.915 389.924 3
 -10 4 -5 24962.5 1722.99 3
 -10 4 -4 627.92 281.929 3
 -10 4 -3 53044.1 2515.75 3
 -10 4 -2 27640 1598.65 2
 -10 4 -2 26582.3 1762.92 3
 -10 4 -1 152.194 186.784 2
 -10 4 -1 -393.508 436.443 3
 -10 4 0 27737.1 1732.05 2
 -10 4 0 27856.8 1851.43 3
 -10 4 1 8356.75 975.105 2
 -10 4 2 122771 3960.87 2
 -10 4 3 68698.4 2991.88 2
 -10 4 4 -175.511 381.708 5
 -10 4 4 -31.6803 282.84 2
 -10 4 5 11526.5 1070.43 5
 -10 4 5 11961.1 1291.49 2
 -10 4 6 789.357 336.297 2
 -10 4 6 1690.61 431.113 5
 -10 4 7 89946.3 3819.89 2
 -10 4 7 91066.5 2944.04 5
 -10 4 8 24197.9 1971.63 2
 -10 4 9 1716.24 539.533 2
 -10 4 10 38916.1 2672.75 2
 -10 4 11 -147.53 464.409 2
 -10 4 12 34528.8 2589.61 2
 -10 4 13 56737.5 3401.19 2
 -10 4 14 236.412 415.08 2
 -10 5 -5 39993.6 2076.49 3
 -10 5 -4 -188.386 321.495 3
 -10 5 -3 11504.8 1112.15 3
 -10 5 -2 13990.4 1198.68 3
 -10 5 -1 14009.9 1235.87 3
 -10 5 0 32171.8 2005.34 3
 -10 5 2 49652.6 2542.75 2
 -10 5 3 39.9595 267.053 2
 -10 5 3 474.86 246.077 5
 -10 5 4 18165.2 1405.04 5
 -10 5 4 19395.6 1664.11 2
 -10 5 5 36192.2 1954.97 5
 -10 5 5 37924.5 2386.55 2
 -10 5 6 27653.2 1676.56 5
 -10 5 6 26872.8 2092.37 2
 -10 5 7 74009.5 3521.16 2
 -10 5 7 74811.4 2760.63 5
 -10 5 8 16402.1 1661.51 2
 -10 5 9 6331.91 1063.7 2
 -10 5 10 11543.3 1467.09 2
 -10 5 11 4315.88 937.211 2
 -10 5 12 38872.2 2830.1 2
 -10 5 13 11661.1 1578.23 2
 -10 5 14 15420.2 1821.68 2
 -10 6 -3 22634.6 1468.97 3
 -10 6 -2 -59.1263 340.072 3
 -10 6 -1 56400.9 2402.62 3
 -10 6 1 6763.33 950.328 5
 -10 6 2 8848.98 1065.35 5
 -10 6 3 -286.489 432.012 5
 -10 6 4 65990.8 2763 5
 -10 6 5 33557.4 1924.73 5
 -10 6 5 34554.4 2337.6 2
 -10 6 6 19875.8 1798.65 2
 -10 6 6 16464.3 1334.09 5
 -10 6 7 29221.8 1762.28 5
 -10 6 7 28832.9 2255.97 2
 -10 6 8 2003.06 608.312 2
 -10 6 8 1958.4 440.859 5
 -10 6 9 39679.1 2718.39 2
 -10 6 10 3480.18 803.551 2
 -10 6 11 11538.7 1538.77 2
 -10 6 12 31527.3 2562.68 2
 -10 6 13 5284.89 1113.75 2
 -10 6 14 37215.5 2924.78 2
 -10 7 0 18560.9 1609.68 5
 -10 7 1 11024.6 1186.56 5
 -10 7 2 2543.17 594.289 5
 -10 7 3 6059.8 889.379 5
 -10 7 4 70765.5 2934.49 5
 -10 7 5 12441.9 1223.24 5
 -10 7 6 12768.6 1224.23 5
 -10 7 7 1017.2 374.016 5
 -10 7 7 1158.61 475.178 2
 -10 7 8 50819.8 2440.34 5
 -10 7 8 50266 3092.08 2
 -10 7 9 82501.8 4107.48 2
 -10 7 10 4372.88 979.973 2
 -10 7 11 7323.6 1279.66 2
 -10 7 12 2481.14 751.188 2
 -10 7 13 52582 3484.56 2
 -10 8 -2 42919.3 2514.6 5
 -10 8 -1 51017.9 2706.19 5
 -10 8 0 7185 968.074 5
 -10 8 1 11186 1228.39 5
 -10 8 2 1147.86 503.216 5
 -10 8 3 37912.1 2211.6 5
 -10 8 4 55106.3 2667.75 5
 -10 8 5 7131.6 960.068 5
 -10 8 6 7145.67 971.343 5
 -10 8 7 2270.94 568.308 5
 -10 8 8 106662 4647.99 2
 -10 8 8 98627.3 3587.21 5
 -10 8 9 40540.3 2912.89 2
 -10 8 9 39895.1 2266.67 5
 -10 8 10 -197.117 524.944 2
 -10 8 11 8042.05 1390.98 2
 -10 8 12 7351.06 1301.64 2
 -10 9 -4 52113.8 2901.94 5
 -10 9 -3 1286.94 589.591 5
 -10 9 -2 64426.9 3146.96 5
 -10 9 -1 10338.6 1234.12 5
 -10 9 0 12973.8 1363.8 5
 -10 9 1 11766.3 1305.55 5
 -10 9 2 305.302 279.564 5
 -10 9 3 51884.5 2698.88 5
 -10 9 4 17306.3 1536.99 5
 -10 9 5 2089.04 587.915 5
 -10 9 6 34804.3 2174.23 5
 -10 9 7 12249.2 1295.18 5
 -10 9 8 54009.2 2771.73 5
 -10 9 9 10976.8 1261.14 5
 -10 9 9 12419.9 1638.33 2
 -10 9 10 7438.32 1333.3 2
 -10 9 11 4305.35 1031.83 2
 -10 10 -7 24420.9 2094.29 5
 -10 10 -6 -5.95646 382.222 5
 -10 10 -5 29096.5 2232.02 5
 -10 10 -4 40061.6 2568.4 5
 -10 10 -3 7042.96 1096.84 5
 -10 10 -2 42393.1 2589.07 5
 -10 10 -1 1167.79 546.612 5
 -10 10 0 28007.6 2051.59 5
 -10 10 1 25476.6 1939 5
 -10 10 2 5613.5 916.178 5
 -10 10 3 25021.8 1907.59 5
 -10 10 4 -210.542 436.8 5
 -10 10 5 61384.6 3024.62 5
 -10 10 6 15275.1 1522.69 5
 -10 10 7 3945.76 780.366 5
 -10 10 8 14427.1 1525.01 5
 -10 10 9 274.47 328.084 5
 -10 10 10 25018.8 2470.8 2
 -10 11 -11 273.205 349.301 5
 -10 11 -10 35918.5 2710.18 5
 -10 11 -9 13989.6 1648.03 5
 -10 11 -8 7734.42 1243.31 5
 -10 11 -7 1006.52 567.27 5
 -10 11 -6 10134.7 1378.89 5
 -10 11 -5 35221.7 2486.45 5
 -10 11 -4 23734.4 2015.93 5
 -10 11 -3 5421.57 1011.07 5
 -10 11 -2 566.08 386.323 5
 -10 11 -1 41031 2557.96 5
 -10 11 0 56992.3 3005.63 5
 -10 11 1 25288.9 1986.69 5
 -10 11 2 8373.43 1175.52 5
 -10 11 3 2689.89 638.163 5
 -10 11 4 14123.8 1498.81 5
 -10 11 5 70445.9 3336.83 5
 -10 11 6 4508.24 844.756 5
 -10 11 7 2303.82 671.721 5
 -10 11 8 454.782 315.109 5
 -10 11 9 12103.7 1455.47 5
 -10 12 -10 27255.3 2351.36 5
 -10 12 -9 1344 522.801 5
 -10 12 -8 12404 1563.51 5
 -10 12 -7 876.414 479.059 5
 -10 12 -6 13097.1 1551.14 5
 -10 12 -5 44423.6 2830.95 5
 -10 12 -4 3583.6 835.768 5
 -10 12 -3 4715.03 941.405 5
 -10 12 -2 2076.25 654.962 5
 -10 12 -1 38516.2 2578.28 5
 -10 12 0 48759.5 2867.21 5
 -10 12 1 11.2826 422.158 5
 -10 12 2 1279.85 578.314 5
 -10 12 3 24.7541 400.405 5
 -10 12 4 52961.1 2988.37 5
 -10 12 5 36320.4 2501.27 5
 -10 12 6 455.776 469.908 5
 -10 12 7 13599.2 1610.74 5
 -10 12 8 480.339 413.6 5
 -10 12 9 26348.9 2215.56 5
 -10 12 10 30142.9 2364.68 5
 -10 13 -9 475.471 460.866 5
 -10 13 -8 13909.6 1669.67 5
 -10 13 -7 117.63 354.754 5
 -10 13 -6 7094.62 1225.6 5
 -10 13 -5 11655.8 1457.05 5
 -10 13 -4 2817.85 716.973 5
 -10 13 -3 12689.3 1515.57 5
 -10 13 -2 -450.167 569.306 5
 -10 13 -1 37412.6 2577.58 5
 -10 13 0 7626.7 1158.83 5
 -10 13 1 1271.48 499.918 5
 -10 13 2 10297.5 1398.05 5
 -10 13 3 10454.7 1411.19 5
 -10 13 4 42453.8 2789.73 5
 -10 13 5 3182.64 766.516 5
 -10 13 6 15847.3 1735.39 5
 -10 13 7 20405 2012.61 5
 -10 14 -7 2947.75 801.949 5
 -10 14 -6 5454.27 1055.26 5
 -10 14 -5 -640.331 598.489 5
 -10 14 -4 17845.9 1861.68 5
 -10 14 -3 22651.6 2100.01 5
 -10 14 -2 812.483 519.095 5
 -10 14 -1 11982.2 1523.31 5
 -10 14 0 -655.076 418.782 5
 -10 14 1 34744.6 2571.34 5
 -10 14 2 16961 1796.99 5
 -10 14 3 7768.34 1246.04 5
 -10 14 4 26447.4 2308.8 5
 -9 -9 9 19027.4 1786.88 2
 -9 -8 2 16156 1854.11 3
 -9 -8 3 -653.578 703.001 3
 -9 -8 4 30398.2 2541.03 3
 -9 -8 5 18931.3 2044.53 3
 -9 -8 6 3708.82 902.939 3
 -9 -8 7 16177.1 1879.91 3
 -9 -8 8 -83.3173 307.125 2
 -9 -8 8 -87.4376 540.532 3
 -9 -8 9 30934 2227.97 2
 -9 -8 9 33860.9 2739.8 3
 -9 -8 10 28802 2670.61 3
 -9 -8 10 26883.8 2116.78 2
 -9 -8 11 637.316 390.951 2
 -9 -7 -1 11636.7 1591.23 3
 -9 -7 0 3304.4 923.342 3
 -9 -7 1 9254.83 1447.25 3
 -9 -7 2 38144.9 2783.75 3
 -9 -7 3 -478.082 506.387 3
 -9 -7 4 21396.9 2111.66 3
 -9 -7 5 680.286 491.654 3
 -9 -7 6 21680.8 2110.03 3
 -9 -7 7 16961.8 1506.06 2
 -9 -7 7 15691.8 1796.92 3
 -9 -7 8 1113.99 520.504 3
 -9 -7 8 1730.21 507.3 2
 -9 -7 9 27091.2 2060.44 2
 -9 -7 9 28516.7 2585.68 3
 -9 -7 10 149.438 315.072 2
 -9 -7 11 26435.1 2109.76 2
 -9 -7 12 19637.2 1854.69 2
 -9 -6 -3 45352.9 3085.58 3
 -9 -6 -2 1803.86 478.358 3
 -9 -6 -1 6753.77 1261.43 3
 -9 -6 0 300.616 361.095 3
 -9 -6 1 58066.7 3395.49 3
 -9 -6 2 39122.3 2727.25 3
 -9 -6 3 206.101 441.37 3
 -9 -6 4 8308.34 1251.96 3
 -9 -6 5 10408.4 1470.09 3
 -9 -6 6 42476 2311.09 2
 -9 -6 6 57800.5 3349.93 3
 -9 -6 7 33706.1 2076.47 2
 -9 -6 7 37678 2829.89 3
 -9 -6 8 5756.37 1113.83 3
 -9 -6 8 5663.15 911.771 2
 -9 -6 9 2783.85 676.323 2
 -9 -6 10 22141.1 1852.54 2
 -9 -6 11 65845.7 3260.56 2
 -9 -6 12 2298.57 646.342 2
 -9 -6 13 23648.3 2052.49 2
 -9 -5 -5 5303.73 1150.03 3
 -9 -5 -4 77561.3 3993.32 3
 -9 -5 -3 6048.21 1137.65 3
 -9 -5 -2 12287.6 1528.84 3
 -9 -5 -1 2071.3 602.668 3
 -9 -5 0 24838.4 2175.59 3
 -9 -5 1 36935.9 2625.92 3
 -9 -5 2 19544.2 1887.8 3
 -9 -5 3 4540.83 907.184 3
 -9 -5 4 93.8117 431.763 3
 -9 -5 5 44183.2 2195.42 2
 -9 -5 5 44286.8 2853.9 3
 -9 -5 6 100278 4501.25 3
 -9 -5 6 83070 3152.29 2
 -9 -5 7 3615.3 676.857 2
 -9 -5 8 7643.49 1000.25 2
 -9 -5 9 376.214 315.624 2
 -9 -5 10 50983.4 2754.21 2
 -9 -5 11 59472.6 3067.33 2
 -9 -5 12 2040.76 601.961 2
 -9 -5 13 28155.5 2215.14 2
 -9 -5 14 2357.68 682.738 2
 -9 -4 -5 23390.5 2154.71 3
 -9 -4 -4 24931.7 2182.02 3
 -9 -4 -3 6935.93 1145.57 3
 -9 -4 -2 35514 2581.15 3
 -9 -4 -1 -89.219 367.962 3
 -9 -4 0 20876.7 1926.14 3
 -9 -4 1 31393.8 2353.49 3
 -9 -4 2 638.821 378.906 3
 -9 -4 3 36290 2628.47 3
 -9 -4 4 757.007 899.624 3
 -9 -4 4 560.81 312.922 2
 -9 -4 5 95066.1 4236.29 3
 -9 -4 5 77095 2888.81 2
 -9 -4 6 37587.1 2046.12 2
 -9 -4 7 1212.6 407.019 2
 -9 -4 8 11742.1 1213.57 2
 -9 -4 9 648.127 394.128 2
 -9 -4 10 33810.1 2201.58 2
 -9 -4 11 42276.1 2523.04 2
 -9 -4 12 765.442 443.685 2
 -9 -4 13 11485.5 1383.35 2
 -9 -4 14 3328.79 799.885 2
 -9 -4 15 43425.9 2859.97 2
 -9 -3 -6 1008.63 408.809 3
 -9 -3 -5 17359.6 1786.55 3
 -9 -3 -4 -502.088 556.16 3
 -9 -3 -3 31975.6 2374.81 3
 -9 -3 -2 49020.5 2914.92 3
 -9 -3 -1 15.1929 427.997 3
 -9 -3 0 48985.7 2867.8 3
 -9 -3 1 7705.44 1063.67 3
 -9 -3 2 43319.8 2653.27 3
 -9 -3 3 67310.6 2454.23 2
 -9 -3 3 68703.1 3365.25 3
 -9 -3 4 340.951 255.76 2
 -9 -3 4 -12.0286 460.284 3
 -9 -3 5 57522.1 2444 2
 -9 -3 6 352.057 233.24 2
 -9 -3 7 30301.6 1934.61 2
 -9 -3 8 29039.9 1959.7 2
 -9 -3 9 3341.72 684.853 2
 -9 -3 10 56689.5 2894.51 2
 -9 -3 11 26227.2 2015.54 2
 -9 -3 12 15223.2 1610.23 2
 -9 -3 13 12733.7 1492.46 2
 -9 -3 14 3904.75 917.143 2
 -9 -3 15 24544.7 2207.81 2
 -9 -2 -6 1053.11 424.746 3
 -9 -2 -5 9434.93 1299.5 3
 -9 -2 -4 4840.26 916.971 3
 -9 -2 -3 52922.6 2978.49 3
 -9 -2 -2 36661.5 2429.49 3
 -9 -2 -1 5074.62 904.389 3
 -9 -2 0 18148.9 1671.33 3
 -9 -2 1 4602.04 881.722 3
 -9 -2 2 100560 4015.9 3
 -9 -2 2 106931 3077.11 2
 -9 -2 3 21986.1 1394.43 2
 -9 -2 3 25557 2059.39 3
 -9 -2 4 24612.2 1525.46 2
 -9 -2 5 43379.9 2095.63 2
 -9 -2 6 6872.39 885.385 2
 -9 -2 7 73697.7 2903.79 2
 -9 -2 8 15655.1 1361.33 2
 -9 -2 9 470.618 267.002 2
 -9 -2 10 20906.7 1678.48 2
 -9 -2 11 3958.12 760.445 2
 -9 -2 12 56537.4 2960.02 2
 -9 -2 13 10514.5 1320.95 2
 -9 -2 14 4253.67 894.629 2
 -9 -2 15 10266.5 1394.65 2
 -9 -1 -6 696.229 357.053 3
 -9 -1 -5 7411.14 1150.77 3
 -9 -1 -4 17977.6 1648.21 3
 -9 -1 -3 44865.4 2623.43 3
 -9 -1 -2 11265.3 1306.31 3
 -9 -1 -1 4724.23 846.5 3
 -9 -1 0 9611.01 1184.1 3
 -9 -1 1 48402 1849.61 2
 -9 -1 1 46476 2638.37 3
 -9 -1 2 90831.6 2725.02 2
 -9 -1 2 104021 3940.48 3
 -9 -1 3 15597.5 1571.66 3
 -9 -1 3 14546.7 1139.8 2
 -9 -1 4 30125.8 1696.82 2
 -9 -1 5 11775.9 1119.47 2
 -9 -1 6 21133.5 1525.16 2
 -9 -1 7 50639.6 2453.39 2
 -9 -1 8 14147.4 1338.17 2
 -9 -1 9 2014.06 532.149 2
 -9 -1 10 3539.68 700.312 2
 -9 -1 11 84998.3 3633.8 2
 -9 -1 12 64023.2 3218.29 2
 -9 -1 13 3855.68 817.747 2
 -9 -1 14 4095.78 883.257 2
 -9 -1 15 781.545 457.185 2
 -9 -1 16 34375.1 2563.97 2
 -9 0 -6 30914.1 2188.66 3
 -9 0 -5 164.388 473.79 3
 -9 0 -4 23970.4 1860.58 3
 -9 0 -3 82118.3 3433.14 3
 -9 0 -2 -131.758 401.918 3
 -9 0 -1 25844.6 1907.12 3
 -9 0 0 9930.78 811.533 2
 -9 0 0 7984.89 1039.87 3
 -9 0 1 58689.9 2863.5 3
 -9 0 1 63291.1 2212.46 2
 -9 0 2 64289.7 3141.94 3
 -9 0 2 65260.6 2365.21 2
 -9 0 3 1375.03 404.42 2
 -9 0 4 20632.8 1410.37 2
 -9 0 5 579.073 267.293 2
 -9 0 6 37808.7 2069.5 2
 -9 0 7 60096.8 2733.87 2
 -9 0 8 589.207 410.077 2
 -9 0 9 63954.5 3001.95 2
 -9 0 10 46.0839 261.203 2
 -9 0 11 101902 4013.24 2
 -9 0 12 39247.5 2516.05 2
 -9 0 13 1915.92 597.228 2
 -9 0 14 9670.41 1311.41 2
 -9 0 15 4091.5 914.193 2
 -9 0 16 59356.7 3428.02 2
 -9 1 -6 55672.4 2809.4 3
 -9 1 -5 7005.39 959.897 3
 -9 1 -4 50365.6 2602.86 3
 -9 1 -3 32978.5 2084.67 3
 -9 1 -2 18132.1 1528.62 3
 -9 1 -1 54067.7 1868.27 2
 -9 1 -1 52502.8 2593.05 3
 -9 1 0 -4.87284 180.4 2
 -9 1 0 -552.374 487.901 3
 -9 1 1 67587.9 3057.98 3
 -9 1 1 58602.5 2211.47 2
 -9 1 2 3108.13 549.721 2
 -9 1 3 53086.7 2262.37 2
 -9 1 4 59242.2 2481.19 2
 -9 1 5 6780.05 880.376 2
 -9 1 6 87212.1 3253.63 2
 -9 1 7 8311.13 1016.5 2
 -9 1 8 26945.6 1883.13 2
 -9 1 9 87842.9 3538.23 2
 -9 1 10 14572 1451.4 2
 -9 1 11 42355.8 2552.47 2
 -9 1 12 2710.43 686.138 2
 -9 1 13 29268.8 2244.27 2
 -9 1 14 10271.1 1377.06 2
 -9 1 15 4269.88 911.367 2
 -9 1 16 56401.6 3401.46 2
 -9 2 -6 68556 3002.21 3
 -9 2 -5 27.1575 333.111 3
 -9 2 -4 21529 1628.19 3
 -9 2 -3 4763.96 741.464 3
 -9 2 -2 69826.2 2926.72 3
 -9 2 -2 78508.2 2328.89 2
 -9 2 -1 78402.3 2465.67 2
 -9 2 -1 75181.3 3013.5 3
 -9 2 0 521.674 320.384 3
 -9 2 0 898.784 299.723 2
 -9 2 1 14014.4 1357.1 3
 -9 2 1 15822.8 1180.19 2
 -9 2 2 3133.35 554.608 2
 -9 2 3 165399 4347.25 2
 -9 2 4 56311.6 2515.65 2
 -9 2 5 14546.9 1308.88 2
 -9 2 6 9132.56 838.695 5
 -9 2 6 8068.32 1008.12 2
 -9 2 7 1992.43 543.791 2
 -9 2 7 2136.6 377.231 5
 -9 2 8 133180 4397.65 2
 -9 2 9 19062.2 1655.81 2
 -9 2 10 6293.56 979.075 2
 -9 2 11 12396.1 1397.11 2
 -9 2 12 14967.6 1619.4 2
 -9 2 13 61219.7 3286.22 2
 -9 2 14 11024 1456.38 2
 -9 2 15 10457.9 1442.63 2
 -9 2 16 21849.1 2142.88 2
 -9 3 -6 5409.42 816.293 3
 -9 3 -5 12853.9 1204.35 3
 -9 3 -4 5909.01 821.624 3
 -9 3 -3 51806 2392.39 3
 -9 3 -2 104382 2938.36 2
 -9 3 -2 98940.3 3365.47 3
 -9 3 -1 70309.8 2833.04 3
 -9 3 -1 71298.4 2488.27 2
 -9 3 0 875.18 251.422 3
 -9 3 0 1087.39 386.884 2
 -9 3 1 8263.52 910.315 2
 -9 3 2 40440 2055.73 2
 -9 3 3 184310 4727.3 2
 -9 3 4 13107.5 1228.06 2
 -9 3 5 7854.81 990.038 2
 -9 3 5 9188.74 884.089 5
 -9 3 6 374.67 251.692 5
 -9 3 6 434.95 237.72 2
 -9 3 7 71075.1 3157.6 2
 -9 3 7 73355.9 2413.67 5
 -9 3 8 122844 4299.26 2
 -9 3 9 10707.5 1276.72 2
 -9 3 10 21031.7 1845.72 2
 -9 3 11 16173.4 1882.27 2
 -9 3 12 29958.2 2291.87 2
 -9 3 13 54775.2 3166.77 2
 -9 3 14 10308.2 1410.6 2
 -9 3 15 11514.1 1518.56 2
 -9 3 16 3243.26 898.987 2
 -9 4 -6 2435.2 572.239 3
 -9 4 -5 47227.3 2238.79 3
 -9 4 -4 548.033 265.831 3
 -9 4 -3 25998.1 1616.31 3
 -9 4 -2 74323.8 2773.61 3
 -9 4 -1 1053.1 272.962 3
 -9 4 0 20110.1 1516.05 3
 -9 4 1 7446.16 875.641 2
 -9 4 2 113132 3656.38 2
 -9 4 3 61505.3 2700.57 2
 -9 4 4 411.125 170.659 5
 -9 4 4 614.688 420.61 2
 -9 4 5 593.372 406.103 2
 -9 4 5 995.255 314.074 5
 -9 4 6 145.437 324.341 2
 -9 4 6 194.431 189.01 5
 -9 4 7 76352.3 3330.76 2
 -9 4 7 72747.9 2499.39 5
 -9 4 8 77335.8 2559.03 5
 -9 4 8 79327.5 3504.26 2
 -9 4 9 28.8679 278.099 2
 -9 4 10 19707.9 1818.08 2
 -9 4 11 661.724 270.089 2
 -9 4 12 32633.2 2451.03 2
 -9 4 13 53337.8 3197.42 2
 -9 4 14 1761.38 632.024 2
 -9 4 15 17733.6 1897.33 2
 -9 5 -6 18529.7 1326.63 3
 -9 5 -5 62467.9 2437.19 3
 -9 5 -4 12402.4 1043.85 3
 -9 5 -3 27225 1579.46 3
 -9 5 -2 4671.04 656.658 3
 -9 5 -1 16384.6 1235.79 3
 -9 5 2 123493 3687.64 5
 -9 5 3 2156.51 451.598 5
 -9 5 4 22619.4 1486.3 5
 -9 5 5 30977.4 2107.01 2
 -9 5 5 32667.9 1763.22 5
 -9 5 6 231.669 189.635 5
 -9 5 6 4.9022 335.899 2
 -9 5 7 60931.8 2371.88 5
 -9 5 7 60410.5 3083.85 2
 -9 5 8 16660.4 1219.2 5
 -9 5 8 16473.6 1661.11 2
 -9 5 9 7381.13 1117.53 2
 -9 5 10 13426.8 1529.48 2
 -9 5 11 10786.9 1388.37 2
 -9 5 12 69183.6 3662.95 2
 -9 5 13 11540.3 1520.06 2
 -9 5 14 20224.7 2040.98 2
 -9 5 15 14572.7 1787.25 2
 -9 6 -5 52567.1 2067.29 3
 -9 6 -4 -18.79 278.546 3
 -9 6 -3 39810.4 1779.19 3
 -9 6 -2 5785.24 680.479 3
 -9 6 -1 51716.7 2155.77 3
 -9 6 1 29309.9 1815.24 5
 -9 6 2 26733.7 1721.8 5
 -9 6 3 13534.2 1201.15 5
 -9 6 4 93441.4 3167.52 5
 -9 6 5 34177.1 1854.95 5
 -9 6 6 19284.9 1710.41 2
 -9 6 6 18646.3 1373.02 5
 -9 6 7 44685.4 2687 2
 -9 6 7 43140.6 2085.64 5
 -9 6 8 261.77 212.656 5
 -9 6 8 25.0597 349.508 2
 -9 6 9 98050.1 4281.89 2
 -9 6 9 93685.3 3153.21 5
 -9 6 10 17185.5 1802.24 2
 -9 6 11 10377.4 1398.43 2
 -9 6 12 35880.9 2673.59 2
 -9 6 13 -204.919 493.166 2
 -9 6 14 38336.6 2875.49 2
 -9 6 15 10545.5 1551.39 2
 -9 7 -2 11775.8 918.92 3
 -9 7 -1 78752.8 2803.62 3
 -9 7 -1 139548 4171.92 5
 -9 7 0 13675.1 1307.13 5
 -9 7 1 24191.4 1691.32 5
 -9 7 2 7862.59 948.742 5
 -9 7 3 28368.4 1799.85 5
 -9 7 4 95039.9 3299 5
 -9 7 5 14809.2 1271.06 5
 -9 7 6 36016.3 1998.16 5
 -9 7 7 15252.5 1284.13 5
 -9 7 8 53695.3 3079.22 2
 -9 7 8 51247.8 2415.63 5
 -9 7 9 104472 4462.82 2
 -9 7 9 106282 3559.34 5
 -9 7 10 5163.2 1023.65 2
 -9 7 11 6417.18 1120.88 2
 -9 7 12 3476.91 830.584 2
 -9 7 13 32943.1 2656.16 2
 -9 7 14 53540.2 3455.21 2
 -9 8 -2 31971.4 2068.89 5
 -9 8 -1 112020 3880.9 5
 -9 8 0 846.068 311.485 5
 -9 8 1 24771.1 1756.54 5
 -9 8 2 20215.5 1571.82 5
 -9 8 3 11178.4 1170.19 5
 -9 8 4 74786.9 3031.07 5
 -9 8 5 3865.7 693.087 5
 -9 8 6 30809.1 1927.73 5
 -9 8 7 949.25 494.784 5
 -9 8 8 89212.5 3399.21 5
 -9 8 9 50509.3 3159.08 2
 -9 8 9 45802.1 2439.26 5
 -9 8 10 782.331 348.619 5
 -9 8 10 714.162 391.404 2
 -9 8 11 7852.03 1284.14 2
 -9 8 12 4208.31 1004.76 2
 -9 8 13 40364.9 3012.96 2
 -9 9 -5 25117.5 1911.6 5
 -9 9 -4 43676.4 2530.18 5
 -9 9 -3 836.397 474.59 5
 -9 9 -2 41331.7 2388.53 5
 -9 9 -1 19396.7 1638.96 5
 -9 9 0 26105.8 1874.03 5
 -9 9 1 23997.9 1753.57 5
 -9 9 2 356.802 304.121 5
 -9 9 3 45289.8 2418.51 5
 -9 9 4 28720.1 1914.3 5
 -9 9 5 10603.1 1179.72 5
 -9 9 6 50566.3 2581.5 5
 -9 9 7 101.542 352.625 5
 -9 9 8 37358.7 2274.16 5
 -9 9 9 7249.33 1045.39 5
 -9 9 10 7804.46 1080.49 5
 -9 9 10 6989.99 1232.15 2
 -9 9 11 6902.2 1211.29 2
 -9 9 12 3327.62 1002.07 2
 -9 9 13 37119.3 2976.34 2
 -9 10 -7 20126 1824.24 5
 -9 10 -6 -724.432 636.157 5
 -9 10 -5 58559.7 3022.43 5
 -9 10 -4 32333.5 2222.19 5
 -9 10 -3 1435.85 493.247 5
 -9 10 -2 46629.6 2598.99 5
 -9 10 -1 6126.88 926.802 5
 -9 10 0 61778.1 2942.88 5
 -9 10 1 39110.6 2344.13 5
 -9 10 2 6075.38 942.617 5
 -9 10 3 14364.3 1392.09 5
 -9 10 4 937.453 437.88 5
 -9 10 5 55022.1 2812.97 5
 -9 10 6 25688.2 1943.21 5
 -9 10 7 977.426 474.93 5
 -9 10 8 12253 1368.97 5
 -9 10 9 3000.02 675.942 5
 -9 10 10 24855.9 2389.86 2
 -9 10 10 24715.1 1965.86 5
 -9 10 11 8620.37 1443.8 2
 -9 10 12 2298.95 720.09 2
 -9 11 -12 17204.4 1821.98 5
 -9 11 -11 3809.03 868.366 5
 -9 11 -10 30646.1 2386.98 5
 -9 11 -9 12518 1506.52 5
 -9 11 -8 2158.69 653.769 5
 -9 11 -7 3358.92 815.378 5
 -9 11 -6 13407.7 1479.16 5
 -9 11 -5 42087.3 2616.92 5
 -9 11 -4 42367.3 2571.99 5
 -9 11 -3 1664.9 572.245 5
 -9 11 -2 8195.18 1115.63 5
 -9 11 -1 22439.1 1817.79 5
 -9 11 0 101568 3943.24 5
 -9 11 1 35856.2 2311.16 5
 -9 11 2 421.57 376.623 5
 -9 11 3 3513.03 735.886 5
 -9 11 4 17617.2 1627.74 5
 -9 11 5 68374.5 3241.54 5
 -9 11 6 21170.9 1825.32 5
 -9 11 7 2389.33 689.954 5
 -9 11 8 1937.5 527.173 5
 -9 11 9 15779.4 1660.6 5
 -9 11 10 49583.1 2917.02 5
 -9 12 -12 8165.25 1285.11 5
 -9 12 -11 6355.67 1100.2 5
 -9 12 -10 31068.2 2424.78 5
 -9 12 -9 3585.18 810.958 5
 -9 12 -8 16370.4 1717.16 5
 -9 12 -7 2360.85 694.593 5
 -9 12 -6 10922.7 1384.89 5
 -9 12 -5 51871.1 2959.66 5
 -9 12 -4 14563.9 1543.84 5
 -9 12 -3 6848.58 1086.67 5
 -9 12 -2 580.78 351.745 5
 -9 12 -1 48554.2 2777.51 5
 -9 12 0 66242.9 3241.22 5
 -9 12 1 3166.79 751.795 5
 -9 12 2 1404.24 516.654 5
 -9 12 3 2220.51 613.427 5
 -9 12 4 66711.9 3315.58 5
 -9 12 5 71897.8 3513.95 5
 -9 12 6 943.132 505.053 5
 -9 12 7 20690.7 1940.63 5
 -9 12 8 1968.81 644.498 5
 -9 12 9 37789.4 2635.81 5
 -9 12 10 47809.1 2961.68 5
 -9 13 -11 2796.4 847.46 5
 -9 13 -10 17576.2 1851.6 5
 -9 13 -9 1161.13 482.085 5
 -9 13 -8 25851 2186.82 5
 -9 13 -7 4074.12 916.875 5
 -9 13 -6 13454.7 1548.46 5
 -9 13 -5 18386 1800.2 5
 -9 13 -4 838.164 448.053 5
 -9 13 -3 32979.3 2370.99 5
 -9 13 -2 526.471 453.847 5
 -9 13 -1 46365.1 2826.62 5
 -9 13 0 5879.79 1035.68 5
 -9 13 1 7500 1164.41 5
 -9 13 2 13643.8 1561.37 5
 -9 13 3 5832.19 1034.91 5
 -9 13 4 42405.9 2777.89 5
 -9 13 5 15202.4 1709.32 5
 -9 13 6 15485 1751.74 5
 -9 13 7 24544 2179.09 5
 -9 13 8 2652.04 774.878 5
 -9 14 -10 725.434 370.681 5
 -9 14 -9 19317.9 1963.7 5
 -9 14 -8 30574.7 2417.62 5
 -9 14 -7 1195.33 577.674 5
 -9 14 -6 4990.39 1016.27 5
 -9 14 -5 344.18 370.265 5
 -9 14 -4 33280.4 2479.45 5
 -9 14 -3 27983.5 2227.54 5
 -9 14 -2 750.84 472.753 5
 -9 14 -1 15426.9 1696.64 5
 -9 14 0 -469.667 549.982 5
 -9 14 1 45417.1 2898.45 5
 -9 14 2 19178.7 1892.78 5
 -9 14 3 92.0559 368.218 5
 -9 14 4 15266.1 1747.14 5
 -9 14 5 -587.391 622.327 5
 -9 14 6 20491.2 2031.97 5
 -9 15 -8 20753.6 2049.66 5
 -9 15 -7 1149.39 663.784 5
 -9 15 -6 4844.82 999.575 5
 -9 15 -5 6245.8 1156.84 5
 -9 15 -4 39346.5 2787.95 5
 -9 15 -3 11003 1467.95 5
 -9 15 -2 4903.76 1079.3 5
 -9 15 -1 8334.22 1335.44 5
 -9 15 0 3919.09 945.705 5
 -9 15 1 45381.8 3045.73 5
 -9 15 2 10498.3 1475.17 5
 -8 -10 5 47121.4 3168.54 3
 -8 -10 6 21952.9 2157.13 3
 -8 -10 7 1284.62 560.245 3
 -8 -10 8 14557.3 1817.17 3
 -8 -10 9 1951.29 500.891 2
 -8 -10 9 926.952 397.983 3
 -8 -10 10 30644.6 2333.9 2
 -8 -9 1 8934.95 1389.96 3
 -8 -9 2 2030 701.711 3
 -8 -9 3 1174.33 494.387 3
 -8 -9 4 10368.6 1462.41 3
 -8 -9 5 50128.7 3211.17 3
 -8 -9 6 3145.15 858.963 3
 -8 -9 7 7945.45 1339.12 3
 -8 -9 7 8318.96 1106.62 2
 -8 -9 8 9377.15 1454.92 3
 -8 -9 8 9429.15 1194 2
 -8 -9 9 12476.5 1445.88 2
 -8 -9 9 11533.1 1564.11 3
 -8 -9 10 62594 3715.73 3
 -8 -9 10 61374.8 3229.92 2
 -8 -9 11 5304.7 927.619 2
 -8 -9 11 4910.9 1129.08 3
 -8 -8 -2 16340.9 1888.29 3
 -8 -8 -1 18141 1955.07 3
 -8 -8 0 25092.4 2289.8 3
 -8 -8 1 260.759 504.814 3
 -8 -8 2 23452.1 2171.94 3
 -8 -8 3 73.631 362.544 3
 -8 -8 4 23459.3 2136.05 3
 -8 -8 5 23690.3 2132.22 3
 -8 -8 6 984.355 466.815 3
 -8 -8 6 1197.27 386.569 2
 -8 -8 7 20883.4 2034.25 3
 -8 -8 7 25406.2 1858.29 2
 -8 -8 8 -177.018 478.569 3
 -8 -8 8 -333.479 441.345 2
 -8 -8 9 37129.5 2393.44 2
 -8 -8 9 46999.8 3214.61 3
 -8 -8 10 29573.7 2197.8 2
 -8 -8 11 2621.52 740.797 2
 -8 -8 12 26111.7 2164.99 2
 -8 -8 13 -420.738 400.885 2
 -8 -7 -4 9993.56 1487.89 3
 -8 -7 -3 65653.8 3690.51 3
 -8 -7 -2 2743.92 784.354 3
 -8 -7 -1 32889.5 2536.19 3
 -8 -7 0 13554.9 1665.28 3
 -8 -7 1 34683 2564.12 3
 -8 -7 2 43773.4 2865.61 3
 -8 -7 3 9538.13 1294.57 3
 -8 -7 4 16213.3 1730.77 3
 -8 -7 5 3119.62 627.152 2
 -8 -7 5 2830.4 751.221 3
 -8 -7 6 37235.9 2135.4 2
 -8 -7 6 40465.6 2722.76 3
 -8 -7 7 49236.3 3067.93 3
 -8 -7 7 47482.7 2505.81 2
 -8 -7 8 1743.76 658.29 3
 -8 -7 8 2339.31 597.863 2
 -8 -7 9 22897.1 1804.59 2
 -8 -7 10 128.63 269.683 2
 -8 -7 11 43427.5 2624.49 2
 -8 -7 12 20453.5 1860.79 2
 -8 -7 13 2426.35 701.711 2
 -8 -7 14 29463 2327.85 2
 -8 -6 -4 38878.7 2784.88 3
 -8 -6 -3 31075.2 2462.91 3
 -8 -6 -2 1079.31 542.7 3
 -8 -6 -1 12885.6 1564.28 3
 -8 -6 0 4157.54 850.702 3
 -8 -6 1 48435.2 2936.91 3
 -8 -6 2 54703.1 3125.09 3
 -8 -6 3 -207.033 447.413 3
 -8 -6 4 12120.5 1436.54 3
 -8 -6 4 14172.9 1211.14 2
 -8 -6 5 2238.95 507.392 2
 -8 -6 5 1599.07 370.484 3
 -8 -6 6 111381 3683.65 2
 -8 -6 6 115224 4653 3
 -8 -6 7 41479.5 2856.62 3
 -8 -6 7 39740.9 2209.88 2
 -8 -6 8 1927.11 529.609 2
 -8 -6 9 2149.68 569.374 2
 -8 -6 10 23848.6 1858.6 2
 -8 -6 11 81165.4 3565.98 2
 -8 -6 12 29378.3 2189.07 2
 -8 -6 13 8447.38 1254.57 2
 -8 -6 14 29375.7 2285 2
 -8 -6 15 5614.31 1024.45 2
 -8 -5 -5 4027.62 899.265 3
 -8 -5 -4 50015.5 3079.77 3
 -8 -5 -3 5473.8 995.181 3
 -8 -5 -2 6116.24 1040.4 3
 -8 -5 -1 21918 1889.24 3
 -8 -5 0 9049.13 1241.72 3
 -8 -5 1 81883.7 3731.28 3
 -8 -5 2 18975.2 1787.43 3
 -8 -5 3 13909.5 1120.09 2
 -8 -5 3 11277.2 1362.42 3
 -8 -5 4 15428.1 1619.81 3
 -8 -5 4 16532.5 1253.76 2
 -8 -5 5 27146.7 1665.03 2
 -8 -5 5 30022.8 2307.37 3
 -8 -5 6 140283 4048.95 2
 -8 -5 7 13344 1247.69 2
 -8 -5 8 3979.1 732.954 2
 -8 -5 9 643.9 358.288 2
 -8 -5 10 47332.1 2578.78 2
 -8 -5 11 69819.1 3244.28 2
 -8 -5 12 6139.23 1010.7 2
 -8 -5 13 18885.8 1796.13 2
 -8 -5 14 2904.45 741.11 2
 -8 -5 15 49468.5 3018.45 2
 -8 -4 -5 25444.1 2157.3 3
 -8 -4 -4 30680.7 2327.32 3
 -8 -4 -3 119.479 402.381 3
 -8 -4 -2 55959.5 3052.66 3
 -8 -4 -1 8992.04 1233.79 3
 -8 -4 0 11112.6 1342.37 3
 -8 -4 1 52327.3 2891.8 3
 -8 -4 2 -50.7989 368.736 3
 -8 -4 2 988.223 280.968 2
 -8 -4 3 29492.2 1572.29 2
 -8 -4 3 30456.5 2164.82 3
 -8 -4 4 22162.6 1896.12 3
 -8 -4 4 21448.2 1389.5 2
 -8 -4 5 60110.5 2470.48 2
 -8 -4 6 44966.1 2184.38 2
 -8 -4 7 71.2082 219.067 2
 -8 -4 8 53932.2 2553.57 2
 -8 -4 9 283.755 328.005 2
 -8 -4 10 29641.8 2010.8 2
 -8 -4 11 56225.5 2878.21 2
 -8 -4 12 -72.1828 329.531 2
 -8 -4 13 28434.5 2125.53 2
 -8 -4 14 3199.35 759.3 2
 -8 -4 15 54991.3 3168.3 2
 -8 -4 16 22181 2067.41 2
 -8 -3 -6 8739.91 1241.2 3
 -8 -3 -5 14089.8 1550.92 3
 -8 -3 -4 3747.94 781.231 3
 -8 -3 -3 41577 2554.79 3
 -8 -3 -2 64775.6 3213.25 3
 -8 -3 -1 1770.09 521.043 3
 -8 -3 0 15681.9 1522.45 3
 -8 -3 1 1075.37 388.84 3
 -8 -3 1 1957.19 375.213 2
 -8 -3 2 30280.9 1498.58 2
 -8 -3 2 31532.4 2160.08 3
 -8 -3 3 64871.1 3161.7 3
 -8 -3 3 59746.2 2228.5 2
 -8 -3 4 27.0699 194.696 2
 -8 -3 5 32578.2 1827.78 2
 -8 -3 6 3301.48 610.846 2
 -8 -3 7 51531.4 2432.1 2
 -8 -3 8 51720.2 2510.48 2
 -8 -3 9 1622.99 456.565 2
 -8 -3 10 18463 1584.15 2
 -8 -3 11 28965.4 2058.57 2
 -8 -3 12 15006.6 1534.41 2
 -8 -3 13 32938 2347.41 2
 -8 -3 14 10151.2 1341.28 2
 -8 -3 15 34195 2569.7 2
 -8 -3 16 3002.78 768.462 2
 -8 -2 -6 18513.1 1714.18 3
 -8 -2 -5 4590.91 886.853 3
 -8 -2 -4 3509.54 723.596 3
 -8 -2 -3 61508.9 3015.56 3
 -8 -2 -2 67133.5 3143.14 3
 -8 -2 -1 332.486 291.427 3
 -8 -2 0 19478.5 1637.14 3
 -8 -2 0 19881.4 1048.92 2
 -8 -2 1 7524 701.158 2
 -8 -2 1 7428.07 1027.9 3
 -8 -2 2 142877 4588.32 3
 -8 -2 2 145776 3482.64 2
 -8 -2 3 106599 3043.04 2
 -8 -2 3 116745 4261.61 3
 -8 -2 4 12090.6 1011.97 2
 -8 -2 5 31461.5 1687.58 2
 -8 -2 6 3700.88 622.016 2
 -8 -2 7 67322.1 2718.08 2
 -8 -2 8 13502.2 1248.97 2
 -8 -2 9 545.383 324.324 2
 -8 -2 10 25825.3 1823.52 2
 -8 -2 11 1622.79 515.304 2
 -8 -2 12 98775.6 3832.02 2
 -8 -2 13 31968.7 2220.91 2
 -8 -2 14 4019.99 824.424 2
 -8 -2 15 5731.51 995.452 2
 -8 -2 16 4414.85 912.731 2
 -8 -2 17 38188.8 2809.6 2
 -8 -1 -6 1260.03 497.789 3
 -8 -1 -5 2289.26 580.698 3
 -8 -1 -4 5160.42 845.218 3
 -8 -1 -3 105013 3843.07 3
 -8 -1 -2 25907.7 1838.88 3
 -8 -1 -1 4119.8 744.463 3
 -8 -1 0 18242.5 1522.14 3
 -8 -1 0 17837.6 987.995 2
 -8 -1 1 27566.5 1883.5 3
 -8 -1 1 27549.9 1333.61 2
 -8 -1 2 54654.6 3005.63 3
 -8 -1 2 119714 3030.23 2
 -8 -1 3 30509.6 1568.74 2
 -8 -1 4 27899.8 1566.5 2
 -8 -1 5 27391.8 1634.95 2
 -8 -1 6 34209.7 1878.67 2
 -8 -1 7 213386 5197.08 2
 -8 -1 8 8302.64 1010.66 2
 -8 -1 9 28843.9 1908.47 2
 -8 -1 10 34321.2 2152.51 2
 -8 -1 11 50777.6 2706.59 2
 -8 -1 12 133150 4596.21 2
 -8 -1 13 19363.6 1767.63 2
 -8 -1 14 6192.91 1028.03 2
 -8 -1 15 392.281 332.807 2
 -8 -1 16 20391.1 1940.36 2
 -8 -1 17 72674.5 3764.58 2
 -8 0 -6 62732.2 2969.79 3
 -8 0 -5 19809.2 1632.06 3
 -8 0 -4 20028.1 1594.66 3
 -8 0 -3 96352.2 3573.17 3
 -8 0 -2 -268.552 426.908 3
 -8 0 -1 12732 1243.8 3
 -8 0 -1 10990.8 752.234 2
 -8 0 0 830.794 254.294 2
 -8 0 0 631.106 236.077 3
 -8 0 1 42616.6 2330.42 3
 -8 0 1 38241.7 1626.74 2
 -8 0 2 63545.4 2218.61 2
 -8 0 3 7509.61 803.102 2
 -8 0 4 42694.5 1975.73 2
 -8 0 5 3655.12 620.709 2
 -8 0 6 200912 4856.34 2
 -8 0 7 85688.1 3189.08 2
 -8 0 7 91219.4 2320.23 5
 -8 0 8 1170.59 424.284 2
 -8 0 9 88847 3411.99 2
 -8 0 10 967.68 399.766 2
 -8 0 11 66724.6 3112.06 2
 -8 0 12 68536.1 3260.55 2
 -8 0 13 759.477 370.701 2
 -8 0 14 14196.1 1557.97 2
 -8 0 15 -79.8956 394.854 2
 -8 0 16 33909.4 2497.95 2
 -8 0 17 41790 2817.06 2
 -8 1 -6 79083.9 3210.02 3
 -8 1 -5 19331.4 1524.67 3
 -8 1 -4 45727.9 2352.35 3
 -8 1 -3 9362.38 1037.87 3
 -8 1 -2 36144.6 2015.6 3
 -8 1 -2 38409.2 1403.43 2
 -8 1 -1 59129.4 1906.9 2
 -8 1 -1 58672.2 2586.52 3
 -8 1 0 4808.91 558.456 2
 -8 1 0 3947.38 669.934 3
 -8 1 1 83628.9 3232.1 3
 -8 1 1 75513.6 2430.8 2
 -8 1 2 22058.8 1333.48 2
 -8 1 3 32955.3 1725.19 2
 -8 1 4 109827 3336.07 2
 -8 1 5 1479.23 409.038 2
 -8 1 6 53122.2 2458.47 2
 -8 1 6 54012 1876 5
 -8 1 7 1971.92 341.078 5
 -8 1 7 1879.41 511.31 2
 -8 1 8 24099.8 1720.19 2
 -8 1 9 59404.3 2794.25 2
 -8 1 10 4197.82 775.551 2
 -8 1 11 49991.2 2695.31 2
 -8 1 12 665.104 368.518 2
 -8 1 13 43574.7 2676.57 2
 -8 1 14 17686.5 1754.29 2
 -8 1 15 1568.53 573.525 2
 -8 1 16 38054.9 2699.95 2
 -8 1 17 5315.43 1010.66 2
 -8 2 -6 27097.7 1796.46 3
 -8 2 -5 1292.64 367.571 3
 -8 2 -4 38490.5 2054.77 3
 -8 2 -3 422.558 279.085 3
 -8 2 -3 381.715 164.952 2
 -8 2 -2 75819.3 2833.92 3
 -8 2 -2 77987.5 2224.4 2
 -8 2 -1 180925 3804.99 2
 -8 2 -1 184205 4620.29 3
 -8 2 0 5765.86 643.319 2
 -8 2 0 4656.91 685.047 3
 -8 2 1 15698.7 1113.17 2
 -8 2 2 2330.03 466.023 2
 -8 2 3 119814 3473.63 2
 -8 2 4 153239 4133.79 2
 -8 2 5 1694.28 362.984 5
 -8 2 5 1565.82 395.695 2
 -8 2 6 1225.28 299.414 5
 -8 2 6 504.105 269.798 2
 -8 2 7 856.342 350.241 2
 -8 2 7 1522.16 315.569 5
 -8 2 8 93785 3553.06 2
 -8 2 8 93158.1 2420.72 5
 -8 2 9 61607.9 2913.66 2
 -8 2 10 3188.29 667.684 2
 -8 2 11 25829.6 1967.24 2
 -8 2 12 12435.3 1401.55 2
 -8 2 13 64481 3283.91 2
 -8 2 14 29856.3 2280.42 2
 -8 2 15 5512.99 1044.18 2
 -8 2 16 28579.3 2356.13 2
 -8 2 17 1598.06 701.06 2
 -8 3 -6 6506.37 839.83 3
 -8 3 -5 17137.9 1307.19 3
 -8 3 -4 23900.3 1511.63 3
 -8 3 -3 2034.03 376.395 3
 -8 3 -2 151096 3975.88 3
 -8 3 -1 85258.9 2916.08 3
 -8 3 0 1889.76 426.624 2
 -8 3 1 16896.1 1218.88 2
 -8 3 2 8200 873.101 2
 -8 3 3 272160 5726.91 2
 -8 3 4 65249 2745.26 2
 -8 3 4 61274.8 2215.84 5
 -8 3 5 440.58 159.005 5
 -8 3 5 439.952 290.901 2
 -8 3 6 647.086 259.293 5
 -8 3 6 720.014 365.683 2
 -8 3 7 48796.4 1834.42 5
 -8 3 7 52514.8 2592.96 2
 -8 3 8 132649 4337.62 2
 -8 3 8 132493 3132.86 5
 -8 3 9 62141.9 3004.31 2
 -8 3 10 15151.5 1520.3 2
 -8 3 11 6166.06 1001.64 2
 -8 3 12 33371.1 2337.72 2
 -8 3 13 63228.2 3312.74 2
 -8 3 14 1195.74 492.394 2
 -8 3 15 18219.4 1829.15 2
 -8 3 16 5527.07 1101.8 2
 -8 3 17 34736.8 2693.22 2
 -8 4 -6 3146.43 561.67 3
 -8 4 -5 37033.4 1830.39 3
 -8 4 -4 7841.68 826.78 3
 -8 4 -3 8736.06 837.817 3
 -8 4 -2 135570 3565.75 3
 -8 4 -1 1352.14 321.941 3
 -8 4 3 163110 3951.5 5
 -8 4 4 32.0783 192.444 2
 -8 4 4 243.306 166.786 5
 -8 4 5 15340 1357.82 2
 -8 4 5 15886.4 1123.64 5
 -8 4 6 130.709 221.754 2
 -8 4 6 292.201 151.198 5
 -8 4 7 34999.4 1630 5
 -8 4 7 35995.2 2214.47 2
 -8 4 8 98369.7 2820.71 5
 -8 4 8 101148 3836.9 2
 -8 4 9 2395.16 410.126 5
 -8 4 9 2170.16 575.406 2
 -8 4 10 40633.6 2538.94 2
 -8 4 11 335.12 337.909 2
 -8 4 12 91978.3 4016.8 2
 -8 4 13 45227.1 2868.47 2
 -8 4 14 1769.29 696.203 2
 -8 4 15 20663.6 1983.78 2
 -8 4 16 779.359 310.341 2
 -8 4 17 25965.5 2347.6 2
 -8 5 -6 49903.9 2026.28 3
 -8 5 -5 31186.3 1562.82 3
 -8 5 -4 41686.2 1792.95 3
 -8 5 -3 19335.3 1195.22 3
 -8 5 -2 1444.22 356.206 3
 -8 5 -1 42988.5 1955.46 3
 -8 5 2 56103.1 2312.47 5
 -8 5 3 5689.01 730.028 5
 -8 5 4 49410.1 2085.7 5
 -8 5 5 40972.1 1869.68 5
 -8 5 6 6343.38 881.335 2
 -8 5 6 5919.67 713.181 5
 -8 5 7 39552.8 1835.45 5
 -8 5 7 42523.1 2453.66 2
 -8 5 8 30541.3 1624.2 5
 -8 5 8 33904.3 2287.41 2
 -8 5 9 33131.5 1711.52 5
 -8 5 9 32060.2 2262.49 2
 -8 5 10 58892.3 3098.14 2
 -8 5 11 3961.56 906.502 2
 -8 5 12 76189.9 3706.27 2
 -8 5 13 10419.2 1424.33 2
 -8 5 14 11361.2 1501.74 2
 -8 5 15 28725.9 2409.72 2
 -8 5 16 -105.694 388.063 2
 -8 6 -5 132022 3125.3 3
 -8 6 -4 3995.41 519.473 3
 -8 6 -3 9151.61 772.937 3
 -8 6 -2 10289.9 830.342 3
 -8 6 0 49260.4 2264.8 5
 -8 6 1 8580.45 934.158 5
 -8 6 2 42070 2056.31 5
 -8 6 3 27209.6 1613.49 5
 -8 6 4 118979 3504.54 5
 -8 6 5 89911.3 2962.1 5
 -8 6 6 7096.24 799.543 5
 -8 6 7 35631.2 1862.21 5
 -8 6 8 1543.63 614.341 2
 -8 6 8 814.589 334.803 5
 -8 6 9 112715 3483.25 5
 -8 6 9 112868 4413.57 2
 -8 6 10 27226 1665.71 5
 -8 6 10 27428.3 2202.97 2
 -8 6 11 4004.16 869.993 2
 -8 6 12 22286 2061.9 2
 -8 6 13 681.835 375.853 2
 -8 6 14 50885.2 3235.41 2
 -8 6 15 25761.4 2336.8 2
 -8 6 16 5792.5 1108.47 2
 -8 7 -3 6138.16 574.829 3
 -8 7 -2 20256.2 1079.46 3
 -8 7 -1 169506 4555.56 5
 -8 7 0 42865 2171.73 5
 -8 7 1 14790.6 1276.12 5
 -8 7 2 55247 2426.02 5
 -8 7 3 40101.5 2034.03 5
 -8 7 4 139907 3945.8 5
 -8 7 5 9474.85 990.113 5
 -8 7 6 39120.3 2016.77 5
 -8 7 7 26188.8 1660.61 5
 -8 7 8 51498.2 2415.33 5
 -8 7 9 127886 3913.37 5
 -8 7 9 128412 4816.35 2
 -8 7 10 22468.1 1598.88 5
 -8 7 10 24248.2 2090.84 2
 -8 7 11 5523.36 1064.8 2
 -8 7 12 2296.19 653.095 2
 -8 7 13 18361.7 1947.04 2
 -8 7 14 63955.7 3688.92 2
 -8 7 15 6504.21 1244.85 2
 -8 8 -3 96.2757 250.205 5
 -8 8 -2 36556.5 2101.69 5
 -8 8 -1 102781 3545.2 5
 -8 8 0 14773.8 1290.25 5
 -8 8 1 45192.9 2265.89 5
 -8 8 2 7159.88 890.377 5
 -8 8 3 49424.4 2355.24 5
 -8 8 4 100729 3428.76 5
 -8 8 5 271.011 316.258 5
 -8 8 6 58838 2636.86 5
 -8 8 7 2393.42 598.643 5
 -8 8 8 57549.4 2692.1 5
 -8 8 9 71701.4 3052.84 5
 -8 8 10 4932.11 1081.22 2
 -8 8 10 5200.08 805.764 5
 -8 8 11 7799.58 1016.71 5
 -8 8 11 6088.78 1094.03 2
 -8 8 12 -380.102 587.438 2
 -8 8 13 28403.3 2432.32 2
 -8 8 14 47175.3 3228.91 2
 -8 9 -5 10075.3 1156.04 5
 -8 9 -4 18089.9 1550.93 5
 -8 9 -3 6554.62 937.415 5
 -8 9 -2 24510.5 1769.98 5
 -8 9 -1 16809.3 1453.95 5
 -8 9 0 11563.6 1202.97 5
 -8 9 1 53545.4 2562.3 5
 -8 9 2 603.563 351.597 5
 -8 9 3 43299.1 2300.41 5
 -8 9 4 69757.3 2956.87 5
 -8 9 5 3683.4 695.031 5
 -8 9 6 43134 2340.09 5
 -8 9 7 1062.67 427.051 5
 -8 9 8 33531.1 2135.81 5
 -8 9 9 5932.01 968.553 5
 -8 9 10 6001.77 948.684 5
 -8 9 10 5874.94 1155.21 2
 -8 9 11 21763.8 1755.25 5
 -8 9 11 18947.1 2010.36 2
 -8 9 12 -178.669 487.003 2
 -8 9 13 37611.8 2909.94 2
 -8 9 14 9371 1475.43 2
 -8 10 -9 32689.8 2288.01 5
 -8 10 -8 1291.04 549.287 5
 -8 10 -7 17050.6 1615.36 5
 -8 10 -6 1415 536.86 5
 -8 10 -5 48962.9 2644.68 5
 -8 10 -4 72649 3217.44 5
 -8 10 -3 3921.59 780.77 5
 -8 10 -2 30713.8 2027.41 5
 -8 10 -1 4236.5 775.898 5
 -8 10 0 48373.4 2547.48 5
 -8 10 1 82287.2 3307.27 5
 -8 10 2 2032.19 536.678 5
 -8 10 3 6000.72 928.094 5
 -8 10 4 3129.08 683.14 5
 -8 10 5 36660.7 2270.61 5
 -8 10 6 56052.4 2834.1 5
 -8 10 7 4396.62 801.586 5
 -8 10 8 17978.6 1661.91 5
 -8 10 9 982.275 536.573 5
 -8 10 10 47932.6 2742.88 5
 -8 10 11 33966.8 2733.91 2
 -8 10 11 35944.3 2347.82 5
 -8 10 12 11790.9 1576.53 2
 -8 10 13 16181.5 1972.35 2
 -8 11 -15 14786.4 1700.58 5
 -8 11 -14 15368.3 1723.13 5
 -8 11 -13 -333.715 483.177 5
 -8 11 -12 11830.9 1480.33 5
 -8 11 -11 885.698 376.907 5
 -8 11 -10 24446.4 2048.65 5
 -8 11 -9 4921.21 884.149 5
 -8 11 -8 2552.16 667.563 5
 -8 11 -7 17434.9 1644.86 5
 -8 11 -6 3754.47 766.011 5
 -8 11 -5 80534.1 3470.96 5
 -8 11 -4 53427.2 2800.58 5
 -8 11 -3 1576.63 465.472 5
 -8 11 -2 16033.6 1495.22 5
 -8 11 -1 3046.05 739.597 5
 -8 11 0 133690 4436.38 5
 -8 11 1 24776.4 1889.76 5
 -8 11 2 179.183 377.142 5
 -8 11 3 1619.77 483.558 5
 -8 11 4 18313.7 1617.79 5
 -8 11 5 85823 3681.26 5
 -8 11 6 32437.9 2282.74 5
 -8 11 7 7446.4 1131.99 5
 -8 11 8 5606.52 1004.93 5
 -8 11 9 20504.7 1885.18 5
 -8 11 10 77584.4 3667.53 5
 -8 11 11 6634.73 1298.06 2
 -8 11 11 6118.04 1009.47 5
 -8 12 -14 3556.66 847.466 5
 -8 12 -13 10480.9 1401.36 5
 -8 12 -12 13297.6 1548.55 5
 -8 12 -11 8734.64 1227.33 5
 -8 12 -10 30440.5 2295.73 5
 -8 12 -9 297.25 367.583 5
 -8 12 -8 19332.1 1773.92 5
 -8 12 -7 18378.9 1722.74 5
 -8 12 -6 4049.54 876.103 5
 -8 12 -5 57412.2 2975.13 5
 -8 12 -4 4272.36 862.392 5
 -8 12 -3 22252.8 1861.94 5
 -8 12 -2 14741.3 1498.81 5
 -8 12 -1 51629.2 2802.63 5
 -8 12 0 62047.5 3099 5
 -8 12 1 3819.47 786.918 5
 -8 12 2 17815.3 1659.81 5
 -8 12 3 14.2953 331.854 5
 -8 12 4 43915.4 2686.91 5
 -8 12 5 111893 4397.5 5
 -8 12 6 4333.76 884.477 5
 -8 12 7 14302.8 1590.51 5
 -8 12 8 1905.5 573.143 5
 -8 12 9 39709.6 2676.31 5
 -8 12 10 28365.7 2289.91 5
 -8 12 11 -58.5878 462.328 5
 -8 13 -13 27653.2 2320.19 5
 -8 13 -12 5312.13 1038.51 5
 -8 13 -11 8115.61 1247.21 5
 -8 13 -10 12452.8 1495.19 5
 -8 13 -9 4127.85 893.669 5
 -8 13 -8 36147.3 2475.28 5
 -8 13 -7 5556.29 972.922 5
 -8 13 -6 9764.33 1317.11 5
 -8 13 -5 19993.1 1801.58 5
 -8 13 -4 10330.7 1311.44 5
 -8 13 -3 60059.8 3138.11 5
 -8 13 -2 879.098 451.302 5
 -8 13 -1 28135.4 2159.66 5
 -8 13 0 13511.4 1502.97 5
 -8 13 1 8787.22 1214.53 5
 -8 13 2 29496.1 2243.78 5
 -8 13 3 2337.19 644.34 5
 -8 13 4 32552.7 2436.07 5
 -8 13 5 13887 1593.87 5
 -8 13 6 8679.05 1253.31 5
 -8 13 7 34016.4 2553.86 5
 -8 13 8 -561.653 614.38 5
 -8 13 9 44842.5 2958.07 5
 -8 14 -12 6072.17 1059.07 5
 -8 14 -11 5506.31 1097.95 5
 -8 14 -10 502.155 388.656 5
 -8 14 -9 16831.8 1751.75 5
 -8 14 -8 36287.4 2549.62 5
 -8 14 -7 2354.16 700.828 5
 -8 14 -6 2170.18 655.161 5
 -8 14 -5 138.66 386.801 5
 -8 14 -4 31075.8 2336.96 5
 -8 14 -3 42684.1 2736.27 5
 -8 14 -2 95.6511 387.036 5
 -8 14 -1 6832.5 1111.13 5
 -8 14 0 -145.757 435.516 5
 -8 14 1 37293.8 2603.8 5
 -8 14 2 34364.9 2514.78 5
 -8 14 3 -174.697 414.979 5
 -8 14 4 11040.2 1491.32 5
 -8 14 5 3068.32 766.705 5
 -8 14 6 23675.3 2221.72 5
 -8 15 -11 1885.48 631.75 5
 -8 15 -10 751.008 376.058 5
 -8 15 -9 47594.7 3033.42 5
 -8 15 -8 31728.3 2468.54 5
 -8 15 -7 560.786 365.134 5
 -8 15 -6 3679.66 953.353 5
 -8 15 -5 2990.21 755.355 5
 -8 15 -4 37071.1 2641.06 5
 -8 15 -3 36472.2 2611.22 5
 -8 15 -2 886.127 577.65 5
 -8 15 -1 5503.03 1076.04 5
 -8 15 0 1377.03 628.262 5
 -8 15 1 52826.4 3273.44 5
 -8 15 2 20037 2066.84 5
 -8 15 3 5573.56 1144.67 5
 -8 16 -7 4058.4 988.799 5
 -8 16 -6 6434.93 1138.18 5
 -8 16 -5 7620.86 1340.09 5
 -8 16 -4 41066.1 2866.08 5
 -8 16 -3 7157.63 1194.96 5
 -8 16 -2 8225.89 1302.02 5
 -7 -11 3 10747.2 1547.14 3
 -7 -11 4 2761.75 788 3
 -7 -11 5 22181.5 2169.57 3
 -7 -11 6 36657.8 2756.44 3
 -7 -11 7 961.433 406.572 3
 -7 -11 8 12995.7 1633.55 3
 -7 -11 8 13190.9 1491.48 2
 -7 -11 9 3264.67 806.698 2
 -7 -11 9 1831.44 617.662 3
 -7 -11 10 10241.2 1529.78 3
 -7 -11 10 11627 1494.71 2
 -7 -11 11 29507.3 2495.67 3
 -7 -10 0 38773.1 2876.05 3
 -7 -10 1 65253.6 3684.8 3
 -7 -10 2 418.676 386.957 3
 -7 -10 3 4255.34 879.002 3
 -7 -10 4 407.786 471.948 3
 -7 -10 5 45020 2979.15 3
 -7 -10 6 31248.1 2476.59 3
 -7 -10 7 501.776 323.084 2
 -7 -10 7 1073.76 454.521 3
 -7 -10 8 15381 1761.3 3
 -7 -10 8 17545.7 1670.61 2
 -7 -10 9 -285.012 481.2 2
 -7 -10 9 -281.92 468.849 3
 -7 -10 10 54895.2 3313.13 3
 -7 -10 10 61077.8 3252.56 2
 -7 -10 11 30317.2 2572.08 3
 -7 -10 11 28047.7 2241.67 2
 -7 -10 12 4391.97 1021.06 3
 -7 -9 -2 19406.3 2026.98 3
 -7 -9 -1 1223.62 472.792 3
 -7 -9 0 50750.7 3193.94 3
 -7 -9 1 5788.32 1027.48 3
 -7 -9 2 5435.28 1027.18 3
 -7 -9 3 2330.46 689.888 3
 -7 -9 4 11318.4 1493.7 3
 -7 -9 5 54419.3 2650 2
 -7 -9 5 47699.9 2960.84 3
 -7 -9 6 15536 1706.03 3
 -7 -9 6 18720.9 1592.24 2
 -7 -9 7 4076.53 940.113 3
 -7 -9 7 5255.68 847.544 2
 -7 -9 8 7273.22 1219.82 3
 -7 -9 8 10072.6 1233.16 2
 -7 -9 9 21149.5 2035.73 3
 -7 -9 9 21412.3 1825.71 2
 -7 -9 10 62819.7 3223.93 2
 -7 -9 10 55122.7 3420.63 3
 -7 -9 11 3168.48 704.868 2
 -7 -9 12 13414.4 1545.49 2
 -7 -9 13 3200.9 810.66 2
 -7 -8 -3 54606.5 3333.98 3
 -7 -8 -2 12386.5 1591.14 3
 -7 -8 -1 23879.3 2148.92 3
 -7 -8 0 36311.5 2598.87 3
 -7 -8 1 857.596 502.312 3
 -7 -8 2 38221.8 2617.54 3
 -7 -8 3 7428.73 1132.27 3
 -7 -8 4 19587.2 1861.84 3
 -7 -8 4 20251.4 1508.6 2
 -7 -8 5 27670.2 2201.36 3
 -7 -8 5 30192.1 1889.87 2
 -7 -8 6 -1091 714.904 3
 -7 -8 6 -332.088 437.46 2
 -7 -8 7 54035.8 3107.66 3
 -7 -8 7 52420.9 2657.79 2
 -7 -8 8 4858.85 1003.89 3
 -7 -8 8 5223.41 848.38 2
 -7 -8 9 40585.1 2459.5 2
 -7 -8 10 27671.8 2065.17 2
 -7 -8 11 -58.0352 307.884 2
 -7 -8 12 21929.1 1951.26 2
 -7 -8 13 874.178 517.952 2
 -7 -8 14 19987.3 1952.93 2
 -7 -7 -4 22914.9 2142.16 3
 -7 -7 -3 51739.8 3125.48 3
 -7 -7 -2 -256.819 486.833 3
 -7 -7 -1 17962.7 1803.74 3
 -7 -7 0 3306.18 750.498 3
 -7 -7 1 31092.7 2300.65 3
 -7 -7 2 64417.6 3344.09 3
 -7 -7 3 1857.35 428.417 2
 -7 -7 3 1612.85 592.315 3
 -7 -7 4 23874.8 1977.62 3
 -7 -7 4 26914.7 1684.16 2
 -7 -7 5 1792.44 558.763 3
 -7 -7 5 1796.22 410.864 2
 -7 -7 6 44620.9 2731.99 3
 -7 -7 6 44068.2 2297.63 2
 -7 -7 7 106960 4535.3 3
 -7 -7 7 91043.5 3470.11 2
 -7 -7 8 803.755 330.636 2
 -7 -7 9 17334.4 1556.18 2
 -7 -7 10 1440.78 468.644 2
 -7 -7 11 49107.2 2766.39 2
 -7 -7 12 55849.9 3020.3 2
 -7 -7 13 2496.9 711.772 2
 -7 -7 14 34945.7 2494.25 2
 -7 -7 15 5736.62 1086.5 2
 -7 -6 -4 31587.5 2407.63 3
 -7 -6 -3 29080.1 2297.8 3
 -7 -6 -2 341.154 343.272 3
 -7 -6 -1 28780.3 2189.61 3
 -7 -6 0 3343.94 688.226 3
 -7 -6 1 77890.9 3552.96 3
 -7 -6 2 115520 3256.87 2
 -7 -6 2 117472 4373.48 3
 -7 -6 3 2629.64 635.987 3
 -7 -6 3 2931.35 528.62 2
 -7 -6 4 6864.39 1054.68 3
 -7 -6 4 8613.54 919.334 2
 -7 -6 5 2499.89 609.611 3
 -7 -6 5 3430.84 588.068 2
 -7 -6 6 93235 3282.62 2
 -7 -6 6 105368 4299.9 3
 -7 -6 7 59065.5 2630.48 2
 -7 -6 8 972.038 370.49 2
 -7 -6 9 4061.11 732.965 2
 -7 -6 10 19067.5 1632.3 2
 -7 -6 11 90170.5 3672.48 2
 -7 -6 12 48663.1 2758.35 2
 -7 -6 13 241.844 367.108 2
 -7 -6 14 14878.9 1605.8 2
 -7 -6 15 3867.7 846.21 2
 -7 -6 16 46789.9 3009.57 2
 -7 -5 -5 5707.66 1027.79 3
 -7 -5 -4 78829.3 3711.83 3
 -7 -5 -3 42275.9 2668.41 3
 -7 -5 -2 28640.9 2148.93 3
 -7 -5 -1 23041 1910.75 3
 -7 -5 0 99.8718 365.513 3
 -7 -5 1 154564 3545.18 2
 -7 -5 1 158380 4997.79 3
 -7 -5 2 19821.6 1719.68 3
 -7 -5 2 21585.7 1288.92 2
 -7 -5 3 12927.9 1393.16 3
 -7 -5 3 12290.7 1023.92 2
 -7 -5 4 53018.5 2197.84 2
 -7 -5 4 54932.2 2878.51 3
 -7 -5 5 11163.4 1035.69 2
 -7 -5 5 11971.2 1444.59 3
 -7 -5 6 109084 3465.4 2
 -7 -5 7 30584 1835.53 2
 -7 -5 8 8415.1 1008.97 2
 -7 -5 9 1258.81 478.091 2
 -7 -5 10 34830 2163.14 2
 -7 -5 11 71354.5 3208.8 2
 -7 -5 12 14920.1 1496.43 2
 -7 -5 13 10604.9 1311.54 2
 -7 -5 14 6628.93 1057.89 2
 -7 -5 15 48583 2935.42 2
 -7 -5 16 60416.9 3374.56 2
 -7 -4 -5 18819 1748.76 3
 -7 -4 -4 51925.8 2888.36 3
 -7 -4 -3 -29.6031 487.933 3
 -7 -4 -2 37781.6 2374.84 3
 -7 -4 -1 21151.5 1760.1 3
 -7 -4 0 2497.19 593.625 3
 -7 -4 1 44895.1 1730.6 2
 -7 -4 1 39952.3 2373.42 3
 -7 -4 2 912.327 281.424 2
 -7 -4 2 1033.55 465.425 3
 -7 -4 3 58755.9 2867.65 3
 -7 -4 3 55541.3 2113.15 2
 -7 -4 4 26022.3 1492.55 2
 -7 -4 4 27392.4 2050.59 3
 -7 -4 5 38717.2 1888.46 2
 -7 -4 6 52427.2 2286.95 2
 -7 -4 7 3380.29 604.076 2
 -7 -4 8 59046.3 2587.71 2
 -7 -4 9 17866.5 1471.42 2
 -7 -4 10 17218.6 1498.74 2
 -7 -4 11 28230.9 1981 2
 -7 -4 12 2222.74 548.611 2
 -7 -4 13 53500.6 2850.42 2
 -7 -4 14 1215.26 468.869 2
 -7 -4 15 68116.2 3433.85 2
 -7 -4 16 34150.3 2490.4 2
 -7 -4 17 4585.55 980.703 2
 -7 -3 -6 41186.5 2593.81 3
 -7 -3 -5 2902.06 706.873 3
 -7 -3 -4 6218.2 982.865 3
 -7 -3 -3 52354.2 2751.66 3
 -7 -3 -2 81762.6 3410.57 3
 -7 -3 -1 25534.3 1843.25 3
 -7 -3 0 17899 971.346 2
 -7 -3 0 16000.8 1456.03 3
 -7 -3 1 1609.47 335.783 2
 -7 -3 1 1332.83 471.033 3
 -7 -3 2 24700.4 1783.72 3
 -7 -3 2 26096.6 1328.19 2
 -7 -3 3 104464 2883.43 2
 -7 -3 3 90074.5 3649.99 3
 -7 -3 4 2479.85 436.228 2
 -7 -3 5 7675.9 850.69 2
 -7 -3 6 22129.1 1477.42 2
 -7 -3 7 34461.9 1905.77 2
 -7 -3 8 90785.7 3261.16 2
 -7 -3 9 7994.84 984.808 2
 -7 -3 10 35581.2 2147.8 2
 -7 -3 11 11563.8 1252.88 2
 -7 -3 12 25647 1935.66 2
 -7 -3 13 63120.4 3150.23 2
 -7 -3 14 1452.56 549.014 2
 -7 -3 15 45180.5 2866.07 2
 -7 -3 16 624.411 297.128 2
 -7 -3 17 25148.7 2189.13 2
 -7 -2 -6 28272.9 2058.42 3
 -7 -2 -5 16171.4 1534.68 3
 -7 -2 -4 896.526 399.085 3
 -7 -2 -3 133108 4296.24 3
 -7 -2 -2 157296 4643.62 3
 -7 -2 -1 1722.41 270.993 2
 -7 -2 -1 1208.85 395.069 3
 -7 -2 0 27625.5 1837.43 3
 -7 -2 0 28692.1 1209.33 2
 -7 -2 1 20103.5 1115.19 2
 -7 -2 1 18446 1493.62 3
 -7 -2 2 92655.1 3568.52 3
 -7 -2 2 72313.9 2261.24 2
 -7 -2 3 140779 3351.8 2
 -7 -2 4 923.44 298.97 2
 -7 -2 5 17306.6 1203.87 2
 -7 -2 6 1919.61 437.172 2
 -7 -2 7 146033 4026.42 2
 -7 -2 8 56395.3 2503.34 2
 -7 -2 9 32583.7 1952.4 2
 -7 -2 10 78193.1 3118.99 2
 -7 -2 11 14.6125 311.25 2
 -7 -2 12 94149.8 3623.06 2
 -7 -2 13 81026.8 3480.64 2
 -7 -2 14 2651.24 690.833 2
 -7 -2 15 21314.5 1902.04 2
 -7 -2 16 9576.27 1293.81 2
 -7 -2 17 50773.6 3173.1 2
 -7 -2 18 29216.7 2497.41 2
 -7 -1 -6 23932.6 1833.7 3
 -7 -1 -5 39359.1 2260.19 3
 -7 -1 -4 3544.88 653.516 3
 -7 -1 -3 129239 4060.7 3
 -7 -1 -2 38033.9 1153.84 2
 -7 -1 -2 36066.5 2081.5 3
 -7 -1 -1 15449.1 813.665 2
 -7 -1 -1 13317.5 1239.37 3
 -7 -1 0 3855.39 659.167 3
 -7 -1 0 3389.54 397.683 2
 -7 -1 1 40101.6 2164.31 3
 -7 -1 1 37321.3 1494 2
 -7 -1 2 140172 3246.4 2
 -7 -1 3 9795.54 850.338 2
 -7 -1 4 54299.2 2111.88 2
 -7 -1 5 38145.5 1842.15 2
 -7 -1 6 91148.3 3024.26 2
 -7 -1 7 211046 4943.92 2
 -7 -1 8 6308.62 850.539 2
 -7 -1 9 31090.5 1932.8 2
 -7 -1 10 19366.5 1545.14 2
 -7 -1 11 17931.5 1546.19 2
 -7 -1 12 147918 4713.5 2
 -7 -1 13 31690.6 2176.42 2
 -7 -1 14 8846.02 1173.53 2
 -7 -1 15 7453.22 1106.13 2
 -7 -1 16 14392.8 1576.79 2
 -7 -1 17 64935 3482.25 2
 -7 -1 18 12180.6 1554.71 2
 -7 0 -6 118465 3934.23 3
 -7 0 -5 33243.3 1992.58 3
 -7 0 -4 17291 1392.72 3
 -7 0 -3 37763.5 2029.46 3
 -7 0 -3 36578.8 1014.86 2
 -7 0 -2 1654.38 254.343 2
 -7 0 -2 1200.82 380.557 3
 -7 0 -1 59204.3 2514.92 3
 -7 0 -1 60619.5 1734.47 2
 -7 0 0 1888.36 443.235 3
 -7 0 0 2122.54 349.141 2
 -7 0 1 58868.5 2618.7 3
 -7 0 1 53959 1846.86 2
 -7 0 2 121225 3013.5 2
 -7 0 3 -1.69841 131.175 2
 -7 0 4 53437.3 2121.5 2
 -7 0 5 23313.2 1442.21 2
 -7 0 6 143796 3869.42 2
 -7 0 7 73295.2 1842.76 5
 -7 0 7 68679.5 2699.37 2
 -7 0 8 373.824 129.622 5
 -7 0 8 871.459 365.178 2
 -7 0 9 41728 2227.6 2
 -7 0 10 2328.01 596.5 2
 -7 0 11 39421.3 2324.65 2
 -7 0 12 68502 3151.06 2
 -7 0 13 841.925 422 2
 -7 0 14 22719.6 1906.39 2
 -7 0 15 2227.17 576.171 2
 -7 0 16 26665.6 2162.24 2
 -7 0 17 43941.8 2826.41 2
 -7 0 18 2029.86 728.972 2
 -7 1 -6 91800.8 3291.02 3
 -7 1 -5 629.989 242.883 3
 -7 1 -4 40010.2 2037.83 3
 -7 1 -3 25581.4 979.815 2
 -7 1 -3 25525.1 1603.89 3
 -7 1 -2 51422.6 2258.99 3
 -7 1 -2 55483.8 1640.78 2
 -7 1 -1 180228 4449.05 3
 -7 1 -1 183137 3475.45 2
 -7 1 0 52368.7 1814.45 2
 -7 1 0 60067.9 2487.23 3
 -7 1 1 61419.9 2074.34 2
 -7 1 2 20423.9 1240.12 2
 -7 1 3 8190.63 809.853 2
 -7 1 4 190105 4377.9 2
 -7 1 5 12872.4 1099.87 2
 -7 1 6 36447.7 1932.5 2
 -7 1 6 36914.2 1400.73 5
 -7 1 7 40244.6 1385.32 5
 -7 1 7 39528.9 2068.23 2
 -7 1 8 38244.4 2095.53 2
 -7 1 8 40069.6 1322.9 5
 -7 1 9 64602.7 2831.13 2
 -7 1 10 6538.49 913.022 2
 -7 1 11 52575.2 2676.66 2
 -7 1 12 15317.4 1499.55 2
 -7 1 13 34784.8 2339.18 2
 -7 1 14 66699.1 3304.24 2
 -7 1 15 -92.2996 290.184 2
 -7 1 16 24309 2080.64 2
 -7 1 17 9012.89 1321.76 2
 -7 1 18 14553.2 1692.81 2
 -7 2 -6 82347.6 2947.49 3
 -7 2 -5 80.8968 294.879 3
 -7 2 -4 58518.5 2368.3 3
 -7 2 -4 60765.7 1631.83 2
 -7 2 -3 2065.13 338.276 2
 -7 2 -3 1823.37 412.254 3
 -7 2 -2 68197 2481.42 3
 -7 2 -2 69737.7 2008.89 2
 -7 2 -1 184173 3664.55 2
 -7 2 -1 185816 4315.34 3
 -7 2 0 1835.29 371.666 2
 -7 2 1 45013.8 1855.46 2
 -7 2 2 1058.27 309.671 2
 -7 2 3 151202 3788.63 2
 -7 2 4 198645 4568.2 2
 -7 2 5 15314.4 1221.43 2
 -7 2 5 15039.5 940.951 5
 -7 2 6 8713.7 952.662 2
 -7 2 6 8402.11 688.212 5
 -7 2 7 17760.9 969.188 5
 -7 2 7 18201.2 1427 2
 -7 2 8 92570.4 2303.63 5
 -7 2 8 94931 3452.14 2
 -7 2 9 142313 2954.46 5
 -7 2 9 151848 4536.35 2
 -7 2 10 409.52 228.74 2
 -7 2 11 20736.4 1706.86 2
 -7 2 12 5577.63 937.168 2
 -7 2 13 108135 4176.18 2
 -7 2 14 26057.7 2071.55 2
 -7 2 15 5087.61 970.12 2
 -7 2 16 18845.3 1852.07 2
 -7 2 17 3638.92 865.32 2
 -7 2 18 45285.5 3021.25 2
 -7 3 -6 47047.8 2090.65 3
 -7 3 -5 22257.7 1380.24 3
 -7 3 -4 43746.5 1923.46 3
 -7 3 -3 1041.82 277.742 3
 -7 3 -2 149834 3645.18 3
 -7 3 -1 154254 3774.33 3
 -7 3 3 209687 4703.1 2
 -7 3 4 67295.8 2590.67 2
 -7 3 4 63979 2125.05 5
 -7 3 5 782.401 259.698 5
 -7 3 5 719.633 322.874 2
 -7 3 6 739.779 336.899 2
 -7 3 6 722.106 211.678 5
 -7 3 7 42460.7 2255.47 2
 -7 3 7 45092.3 1678.53 5
 -7 3 8 146320 4429.26 2
 -7 3 8 143206 3184.92 5
 -7 3 9 85294.4 3403.98 2
 -7 3 9 83522.4 2375.97 5
 -7 3 10 8431.86 1085.92 2
 -7 3 11 2405.61 661.065 2
 -7 3 12 80643.9 3567.44 2
 -7 3 13 96242.6 3987.85 2
 -7 3 14 580.048 286.337 2
 -7 3 15 15694.6 1660.09 2
 -7 3 16 11771.5 1467.59 2
 -7 3 17 20401.1 2019.65 2
 -7 3 18 77038.2 3988.98 2
 -7 4 -5 41464.6 1789.75 3
 -7 4 -4 38939.5 1690.23 3
 -7 4 -3 21339.5 1221.68 3
 -7 4 -2 141220 3355.96 3
 -7 4 -1 13706.4 1033.59 3
 -7 4 3 99948.8 2844.69 5
 -7 4 4 4716.3 579.441 5
 -7 4 5 42698.3 1753.36 5
 -7 4 5 42911.9 2192.41 2
 -7 4 6 13519.8 971.44 5
 -7 4 6 11873.6 1185.02 2
 -7 4 7 35898.5 1610.99 5
 -7 4 7 37589.3 2184.47 2
 -7 4 8 114825 3031.5 5
 -7 4 8 120151 4086.72 2
 -7 4 9 388.598 259.544 2
 -7 4 9 997.567 336.888 5
 -7 4 10 59313.6 2164.88 5
 -7 4 10 64576.2 3079.49 2
 -7 4 11 2985.31 681.452 2
 -7 4 12 120479 4507.02 2
 -7 4 13 45817.2 2774.31 2
 -7 4 14 38.0732 472.476 2
 -7 4 15 25756.4 2153.9 2
 -7 4 16 -2.17169 310.474 2
 -7 4 17 50244.9 3167.15 2
 -7 5 -5 74545.6 2262.24 3
 -7 5 -4 20297.7 1108.18 3
 -7 5 -3 12615.9 870.367 3
 -7 5 -2 5771.75 592.283 3
 -7 5 1 13783.4 1082.99 5
 -7 5 2 46342.1 1978.04 5
 -7 5 3 20183.1 1287.75 5
 -7 5 4 23684.6 1370.87 5
 -7 5 5 176854 3990.02 5
 -7 5 6 13234.5 1023.84 5
 -7 5 7 27200.9 1500.02 5
 -7 5 7 28173.9 1923.92 2
 -7 5 8 28396.4 1977.38 2
 -7 5 8 28950.7 1561.75 5
 -7 5 9 25419.8 1490.98 5
 -7 5 9 26450.9 1981.05 2
 -7 5 10 74586.1 3424.04 2
 -7 5 10 74910.8 2606.02 5
 -7 5 11 -304.271 428.001 2
 -7 5 11 251.549 200.699 5
 -7 5 12 67850.9 3366.45 2
 -7 5 13 9249.81 1287.89 2
 -7 5 14 11636.6 1448.37 2
 -7 5 15 33867.2 2521.25 2
 -7 5 16 -499.908 441.148 2
 -7 5 17 23815.4 2189.22 2
 -7 6 -5 180196 3415.97 3
 -7 6 -4 1065.98 196.54 3
 -7 6 -3 475.547 166.909 3
 -7 6 -2 4391.51 489.565 3
 -7 6 0 107908 3264.89 5
 -7 6 1 913.254 315.429 5
 -7 6 2 74615.5 2626.43 5
 -7 6 3 1911.92 408.542 5
 -7 6 4 106873 3161.42 5
 -7 6 5 143405 3721.85 5
 -7 6 6 339.83 206.111 5
 -7 6 7 34922.3 1793.41 5
 -7 6 8 1259.11 437.798 2
 -7 6 8 2296.1 521.526 5
 -7 6 9 67871.2 2637.78 5
 -7 6 9 65488.2 3207.49 2
 -7 6 10 87493.3 3060.35 5
 -7 6 10 90786.8 3905.25 2
 -7 6 11 526.513 233.508 5
 -7 6 11 203.492 393.815 2
 -7 6 12 18981.6 1817.28 2
 -7 6 13 -96.2287 315.026 2
 -7 6 14 39138.4 2747.19 2
 -7 6 15 24176.9 2161.14 2
 -7 6 16 33.0328 381.601 2
 -7 6 17 8452.67 1307 2
 -7 7 -4 1211.99 197.733 3
 -7 7 -3 10735.5 648.082 3
 -7 7 -2 14307 788.604 3
 -7 7 -2 12118.1 1109.82 5
 -7 7 -1 99489.3 3240.42 5
 -7 7 0 61856.1 2489.01 5
 -7 7 1 14706.9 1210.02 5
 -7 7 2 7396.84 863.627 5
 -7 7 3 66073.6 2556.51 5
 -7 7 4 153339 4035.27 5
 -7 7 5 4364.99 664.102 5
 -7 7 6 43544.7 2120.5 5
 -7 7 7 69516.9 2734.39 5
 -7 7 8 6546.78 853.992 5
 -7 7 9 115273 4387.74 2
 -7 7 9 112198 3664.56 5
 -7 7 10 53654.4 2490.5 5
 -7 7 10 50872.1 2950.32 2
 -7 7 11 1884.33 637.044 2
 -7 7 11 1546.13 416.831 5
 -7 7 12 9604.82 1372.82 2
 -7 7 13 3716.69 857.612 2
 -7 7 14 84258.9 4120.94 2
 -7 7 15 11575.5 1548.56 2
 -7 7 16 737.957 579.437 2
 -7 8 -4 15194 1331.97 5
 -7 8 -3 14410.4 1276.64 5
 -7 8 -2 12730.8 1194.09 5
 -7 8 -1 44557.3 2210.04 5
 -7 8 0 10669 1076.75 5
 -7 8 1 61661.7 2561.15 5
 -7 8 2 8324.36 947.521 5
 -7 8 3 60340.5 2545.75 5
 -7 8 4 85833.8 3113.33 5
 -7 8 5 340.59 477.293 5
 -7 8 6 33550 1957.11 5
 -7 8 7 2845.33 608.335 5
 -7 8 8 38732.7 2183.35 5
 -7 8 9 71941.2 3051.34 5
 -7 8 10 4.09145 353.407 2
 -7 8 10 -236.214 379.212 5
 -7 8 11 14445.1 1371.07 5
 -7 8 11 13213 1585.22 2
 -7 8 12 9966.88 1409.22 2
 -7 8 12 12466.5 1304.69 5
 -7 8 13 36241.5 2680.42 2
 -7 8 14 47965.8 3179.82 2
 -7 8 15 3672.81 964.451 2
 -7 9 -7 904.644 361.566 5
 -7 9 -6 16111.7 1443.86 5
 -7 9 -5 7959.98 973.261 5
 -7 9 -4 67443.3 2887.36 5
 -7 9 -3 24218.4 1698.52 5
 -7 9 -2 19433.3 1509.63 5
 -7 9 -1 54324.9 2502.59 5
 -7 9 0 368.141 245.709 5
 -7 9 1 101800 3486.63 5
 -7 9 2 39872.8 2141.17 5
 -7 9 3 28477.4 1847.3 5
 -7 9 4 43290.5 2275.97 5
 -7 9 5 7120.37 944.612 5
 -7 9 6 35244.9 2123.52 5
 -7 9 7 4388.12 790.909 5
 -7 9 8 62978.1 2945.79 5
 -7 9 9 9709.16 1161.9 5
 -7 9 10 16803.7 1561.99 5
 -7 9 11 60773.2 3503.27 2
 -7 9 11 65651.1 3091.86 5
 -7 9 12 -280.432 475.32 2
 -7 9 12 -372.993 474.952 5
 -7 9 13 41852.6 3024.47 2
 -7 9 14 13902.8 1725.17 2
 -7 10 -10 32569.8 2208.44 5
 -7 10 -9 63390.9 3038.65 5
 -7 10 -8 -200.52 262.716 5
 -7 10 -7 42555.7 2433.81 5
 -7 10 -6 2443.45 572.156 5
 -7 10 -5 47399.6 2500.37 5
 -7 10 -4 176698 4953.59 5
 -7 10 -3 5152.64 811.702 5
 -7 10 -2 34407.2 2077.57 5
 -7 10 -1 4242.51 717.592 5
 -7 10 0 66864 2901.15 5
 -7 10 1 103848 3655.17 5
 -7 10 2 8815.25 1056.37 5
 -7 10 3 18611 1565.31 5
 -7 10 4 2.99563 314.971 5
 -7 10 5 57923.3 2845.48 5
 -7 10 6 134691 4490.72 5
 -7 10 7 -384.007 511.331 5
 -7 10 8 28304 2068.73 5
 -7 10 9 692.62 329.517 5
 -7 10 10 61778.9 3120.73 5
 -7 10 11 57370.1 3030.59 5
 -7 10 11 52544 3318.21 2
 -7 10 12 6420.19 1159.42 2
 -7 10 12 7043.58 1054.25 5
 -7 10 13 13683.9 1768.08 2
 -7 10 14 -21.0207 464.761 2
 -7 11 -15 20494.3 1916.16 5
 -7 11 -14 26893.4 2165.93 5
 -7 11 -13 -149.07 363.518 5
 -7 11 -12 7602.41 1144.64 5
 -7 11 -11 -149.375 432.541 5
 -7 11 -10 34325.7 2298.78 5
 -7 11 -9 17990 1647.89 5
 -7 11 -8 5609.77 954.119 5
 -7 11 -7 18655.9 1632.33 5
 -7 11 -6 -372.131 451.935 5
 -7 11 -5 92283.6 3622.06 5
 -7 11 -4 45087 2468.9 5
 -7 11 -3 3007.44 637.199 5
 -7 11 -2 29057.6 1979.31 5
 -7 11 -1 30994.7 2028.21 5
 -7 11 0 117861 4065.45 5
 -7 11 1 46343.3 2535.85 5
 -7 11 2 332.54 313.707 5
 -7 11 3 2784.1 664.372 5
 -7 11 4 7391.52 1048.76 5
 -7 11 5 112897 4245.63 5
 -7 11 6 55120.2 2953.55 5
 -7 11 7 2381.1 709.864 5
 -7 11 8 3422.61 728.281 5
 -7 11 9 15718.5 1611.06 5
 -7 11 10 71425.2 3504.56 5
 -7 11 11 9442.23 1251.49 5
 -7 11 12 940.269 377.954 2
 -7 11 12 2027.41 596.495 5
 -7 12 -14 1513.49 533.684 5
 -7 12 -13 13266.8 1488.8 5
 -7 12 -12 13206.3 1512.7 5
 -7 12 -11 8284.52 1207.61 5
 -7 12 -10 27292.2 2093.79 5
 -7 12 -9 2378.38 679.442 5
 -7 12 -8 16471.3 1591.15 5
 -7 12 -7 10645.2 1289.56 5
 -7 12 -6 11779.1 1310.07 5
 -7 12 -5 44724.9 2561.72 5
 -7 12 -4 1349.19 464.093 5
 -7 12 -3 37841.5 2355 5
 -7 12 -2 18691.2 1666.9 5
 -7 12 -1 25976.4 1949.77 5
 -7 12 0 39639.8 2430.1 5
 -7 12 1 10971.5 1320.15 5
 -7 12 2 17541.3 1648.9 5
 -7 12 3 5178.48 926.807 5
 -7 12 4 13727.1 1515.48 5
 -7 12 5 95535.9 4070.88 5
 -7 12 6 15721.8 1623.91 5
 -7 12 7 5966.19 1025.28 5
 -7 12 8 -88.0315 344.599 5
 -7 12 9 25945.4 2174.2 5
 -7 12 10 50266.4 3058.28 5
 -7 12 11 923.601 441.633 5
 -7 13 -13 29070 2260 5
 -7 13 -12 10163.8 1340.84 5
 -7 13 -11 8580.98 1251.53 5
 -7 13 -10 15890.9 1624.35 5
 -7 13 -9 4337.9 889.835 5
 -7 13 -8 44839.3 2682.27 5
 -7 13 -7 6298.71 1037.05 5
 -7 13 -6 12116.8 1401.67 5
 -7 13 -5 16365.1 1604.59 5
 -7 13 -4 3922.12 772.865 5
 -7 13 -3 80169.1 3578.45 5
 -7 13 -2 3225.26 726.062 5
 -7 13 -1 15330.7 1569.51 5
 -7 13 0 46198.7 2713.2 5
 -7 13 1 14849.8 1581.05 5
 -7 13 2 26500.7 2129.33 5
 -7 13 3 13581.5 1568.82 5
 -7 13 4 28311 2256.1 5
 -7 13 5 22192.4 2044.54 5
 -7 13 6 6981.23 1167.41 5
 -7 13 7 36332.1 2621.01 5
 -7 13 8 3034.37 796.714 5
 -7 13 9 27056.8 2327.5 5
 -7 14 -13 41694.2 2781.78 5
 -7 14 -12 11610.4 1477.19 5
 -7 14 -11 8837.69 1285.36 5
 -7 14 -10 3454.5 813.116 5
 -7 14 -9 18802.8 1810.99 5
 -7 14 -8 42967.5 2701.18 5
 -7 14 -7 5736.49 1031.22 5
 -7 14 -6 2004.76 651.374 5
 -7 14 -5 -82.235 425.01 5
 -7 14 -4 26390.3 2111.16 5
 -7 14 -3 68338.3 3425.65 5
 -7 14 -2 1763.07 540.704 5
 -7 14 -1 15370.8 1654.41 5
 -7 14 0 -2042.17 675.499 5
 -7 14 1 31260.2 2390.45 5
 -7 14 2 44433.7 2885.38 5
 -7 14 3 2485.61 737.35 5
 -7 14 4 21098.3 2037.72 5
 -7 14 5 329.571 394.264 5
 -7 14 6 30816.6 2499.05 5
 -7 15 -12 -482.155 464.528 5
 -7 15 -11 6783.44 1157.38 5
 -7 15 -10 -257.648 446.741 5
 -7 15 -9 53857.5 3133.9 5
 -7 15 -8 39803.8 2698.72 5
 -7 15 -7 1178.11 500.72 5
 -7 15 -6 1788.53 578.704 5
 -7 15 -5 923.609 495.382 5
 -7 15 -4 39116.6 2662.67 5
 -7 15 -3 39247.2 2683.79 5
 -7 15 -2 -467.08 620.706 5
 -7 15 -1 7597.82 1240.42 5
 -7 15 0 2711.73 786.627 5
 -7 15 1 36361.3 2695.6 5
 -7 15 2 24642.1 2240.9 5
 -7 15 3 1244.41 542.078 5
 -7 15 4 9422.51 1432.66 5
 -7 16 -10 1322.94 663.403 5
 -7 16 -9 26290.3 2272.97 5
 -7 16 -8 10389.2 1425.9 5
 -7 16 -7 5433.29 1117.12 5
 -7 16 -6 15331.2 1746.03 5
 -7 16 -5 386.076 474.112 5
 -7 16 -4 31738.3 2521.52 5
 -7 16 -3 9459.75 1461.27 5
 -7 16 -2 8799.88 1350.53 5
 -7 16 -1 7550.9 1262.74 5
 -7 16 0 24081.3 2260.26 5
 -6 -12 2 23411.3 2209.03 3
 -6 -12 3 5882.33 1126.89 3
 -6 -12 4 11103.5 1466.65 3
 -6 -12 5 539.578 601.227 3
 -6 -12 6 25521.5 2270.58 3
 -6 -12 7 19081.7 1802.5 2
 -6 -12 7 16092.7 1775.31 3
 -6 -12 8 8477.14 1308.7 3
 -6 -12 8 9627.12 1318.76 2
 -6 -12 9 7482.8 1215.7 3
 -6 -12 9 10507 1482.14 2
 -6 -11 -1 2009.41 657.436 3
 -6 -11 0 17420.6 1912.07 3
 -6 -11 1 113785 4834.2 3
 -6 -11 2 16580.6 1828.8 3
 -6 -11 3 2172.19 615.49 3
 -6 -11 4 2162.23 665.663 3
 -6 -11 5 11297.1 1480.73 3
 -6 -11 6 53561.7 2881.15 2
 -6 -11 6 47810.8 3036.88 3
 -6 -11 7 6745.24 1043.51 2
 -6 -11 7 5265.29 994.375 3
 -6 -11 8 8854.14 1306.98 3
 -6 -11 8 11530 1391.67 2
 -6 -11 9 1208.29 594.168 3
 -6 -11 9 3438.79 802.774 2
 -6 -11 10 26349.6 2168.89 2
 -6 -11 10 24437.7 2148.94 3
 -6 -11 11 45960.3 2957.68 3
 -6 -11 11 48847.4 3043.7 2
 -6 -11 12 -12.1006 459.738 3
 -6 -10 -2 24691.8 2239.47 3
 -6 -10 -1 2634.44 803.727 3
 -6 -10 0 44480.6 2943.97 3
 -6 -10 1 60842.4 3402.56 3
 -6 -10 2 -466.387 593.374 3
 -6 -10 3 4554.95 927.759 3
 -6 -10 4 1385.93 556.105 3
 -6 -10 5 54141 2744.63 2
 -6 -10 5 48316.6 2944.24 3
 -6 -10 6 56754.7 2862.08 2
 -6 -10 6 49173.7 2950.8 3
 -6 -10 7 -259.632 366.18 3
 -6 -10 7 -181.867 395.335 2
 -6 -10 8 10018.2 1342.55 3
 -6 -10 8 9694.05 1221.44 2
 -6 -10 9 2518.16 684.678 2
 -6 -10 9 1667.67 569.643 3
 -6 -10 10 74318.5 3736.71 3
 -6 -10 10 73382.1 3554.8 2
 -6 -10 11 21563.5 1958.97 2
 -6 -10 11 15865.4 1794.46 3
 -6 -10 12 1802.17 632.694 2
 -6 -10 13 21191.7 2062.63 2
 -6 -9 -2 25959.1 2244.52 3
 -6 -9 -1 898.965 370.595 3
 -6 -9 0 49542.4 3040.52 3
 -6 -9 1 8512.71 1261.84 3
 -6 -9 2 13218.2 1526.64 3
 -6 -9 3 18120 1751.2 3
 -6 -9 4 3300.63 642.089 2
 -6 -9 4 2706.58 608.461 3
 -6 -9 5 82680.2 3259.84 2
 -6 -9 5 79305 3673.05 3
 -6 -9 6 14223.4 1539.96 3
 -6 -9 6 17413 1513.72 2
 -6 -9 7 14464.8 1556.66 3
 -6 -9 7 13419.7 1352.7 2
 -6 -9 8 17574.3 1759.83 3
 -6 -9 8 21532.8 1767.62 2
 -6 -9 9 24960.7 1950.15 2
 -6 -9 9 25339.9 2232.12 3
 -6 -9 10 55894.2 2991.69 2
 -6 -9 11 13567.4 1505.09 2
 -6 -9 12 8566.58 1239.74 2
 -6 -9 13 1142.53 386.325 2
 -6 -9 14 12529.9 1525.19 2
 -6 -8 -3 38851.7 2712.49 3
 -6 -8 -2 16444.8 1729.62 3
 -6 -8 -1 6206.43 1052.47 3
 -6 -8 0 24037.6 2043.62 3
 -6 -8 1 5975.24 1003.8 3
 -6 -8 2 36190.4 2416.78 3
 -6 -8 3 22324.1 1537.15 2
 -6 -8 3 19750 1787.31 3
 -6 -8 4 34723.5 1953.39 2
 -6 -8 4 31466.5 2240.53 3
 -6 -8 5 49985.8 2824.56 3
 -6 -8 5 55609.5 2557.68 2
 -6 -8 6 494.463 319.337 3
 -6 -8 6 13.9393 335.908 2
 -6 -8 7 62923.6 2869.04 2
 -6 -8 7 64878.2 3311.09 3
 -6 -8 8 22889.4 1978.52 3
 -6 -8 8 22850 1754.19 2
 -6 -8 9 27278.7 1990.17 2
 -6 -8 10 44022.7 2576.88 2
 -6 -8 11 888.101 350.81 2
 -6 -8 12 46410.4 2789.33 2
 -6 -8 13 4929.37 916.474 2
 -6 -8 14 25819.6 2191.83 2
 -6 -8 15 47739.5 3053.18 2
 -6 -7 -4 14044 1605.27 3
 -6 -7 -3 45447 2821.67 3
 -6 -7 -2 7901.32 1154.72 3
 -6 -7 -1 50539.8 2901.7 3
 -6 -7 0 3727.15 821.29 3
 -6 -7 1 37651.7 2421.52 3
 -6 -7 2 107856 3216.39 2
 -6 -7 2 105740 4098.71 3
 -6 -7 3 6623.84 1009.07 3
 -6 -7 3 9759.07 959.013 2
 -6 -7 4 40222.5 2463.27 3
 -6 -7 4 42081.1 2073.79 2
 -6 -7 5 3444.86 726.544 3
 -6 -7 5 4501.52 702.84 2
 -6 -7 6 42139.9 2591.3 3
 -6 -7 6 39566.2 2141.92 2
 -6 -7 7 114834 3848.14 2
 -6 -7 8 6309.54 883.789 2
 -6 -7 9 14479.2 1408.75 2
 -6 -7 10 5527.9 860.083 2
 -6 -7 11 50814.2 2741.2 2
 -6 -7 12 60332.4 3077.58 2
 -6 -7 13 20758.6 1835.53 2
 -6 -7 14 7522.53 1147.1 2
 -6 -7 15 1214.16 437.144 2
 -6 -7 16 24210.2 2146.13 2
 -6 -6 -4 39000.6 2562.83 3
 -6 -6 -3 100013 4075.48 3
 -6 -6 -2 2048.79 552.013 3
 -6 -6 -1 69941.1 3281.1 3
 -6 -6 0 -350.576 484.935 3
 -6 -6 1 77076.3 2453.15 2
 -6 -6 1 73697.8 3315.54 3
 -6 -6 2 119974 3256.43 2
 -6 -6 2 120999 4209.07 3
 -6 -6 3 131.584 369.7 3
 -6 -6 3 -92.2815 244.295 2
 -6 -6 4 48963.4 2639.92 3
 -6 -6 4 49133.4 2154.99 2
 -6 -6 5 3525.27 618.446 2
 -6 -6 5 3906.6 792.899 3
 -6 -6 6 113764 3556.91 2
 -6 -6 7 101621 3427.49 2
 -6 -6 8 3917.98 696.105 2
 -6 -6 9 8706.35 1053.45 2
 -6 -6 10 1171.33 459.34 2
 -6 -6 11 88001.8 3546.33 2
 -6 -6 12 64925.1 3120.06 2
 -6 -6 13 5052.31 929.166 2
 -6 -6 14 5757.64 987.131 2
 -6 -6 15 3642.92 826.475 2
 -6 -6 16 61262.3 3376.64 2
 -6 -6 17 17904.5 1848.77 2
 -6 -5 -5 -362.525 557.582 3
 -6 -5 -4 44001.9 2618.34 3
 -6 -5 -3 108640 4105.03 3
 -6 -5 -2 14531.3 1457.9 3
 -6 -5 -1 15292.4 1455.49 3
 -6 -5 0 1886.35 356.449 2
 -6 -5 0 1503.49 464.138 3
 -6 -5 1 132820 3192.95 2
 -6 -5 1 133303 4317.08 3
 -6 -5 2 24288.3 1795.79 3
 -6 -5 2 27577.2 1427.13 2
 -6 -5 3 25068.8 1808.44 3
 -6 -5 3 24463.5 1403.16 2
 -6 -5 4 72181.4 3200.31 3
 -6 -5 4 64192.8 2366.51 2
 -6 -5 5 10107 964.676 2
 -6 -5 6 65531 2567.75 2
 -6 -5 7 20899.7 1477.6 2
 -6 -5 8 4056.13 707.604 2
 -6 -5 9 33296.7 1986.38 2
 -6 -5 10 16077.9 1428.05 2
 -6 -5 11 105867 3856.24 2
 -6 -5 12 24421.8 1873.25 2
 -6 -5 13 10651.4 1282.01 2
 -6 -5 14 8930.96 1189.27 2
 -6 -5 15 18166.4 1761.71 2
 -6 -5 16 84183.9 3905.08 2
 -6 -5 17 4014.33 877.212 2
 -6 -4 -5 4539.19 910.381 3
 -6 -4 -4 61285.7 2988.23 3
 -6 -4 -3 11212.1 1252.17 3
 -6 -4 -2 56573.7 2762.58 3
 -6 -4 -1 105112 2382.45 2
 -6 -4 -1 103441 3765.69 3
 -6 -4 0 7358.92 627.091 2
 -6 -4 0 7184.3 988.87 3
 -6 -4 1 35277.5 2106.75 3
 -6 -4 1 40409.8 1578.59 2
 -6 -4 2 1040.48 246.021 2
 -6 -4 2 601.517 219.96 3
 -6 -4 3 114582 3053.62 2
 -6 -4 3 129909 4202.99 3
 -6 -4 4 45350.6 1915.77 2
 -6 -4 5 20210.1 1324.39 2
 -6 -4 6 87127.9 2893.34 2
 -6 -4 7 85.5549 202.894 2
 -6 -4 8 59344.4 2514.54 2
 -6 -4 9 28527.4 1825.21 2
 -6 -4 10 47174.3 2434.3 2
 -6 -4 11 19085.5 1585.15 2
 -6 -4 12 6021.49 905.273 2
 -6 -4 13 60317.8 2977.85 2
 -6 -4 14 971.586 454.972 2
 -6 -4 15 46426.9 2767.78 2
 -6 -4 16 47315.7 2868.67 2
 -6 -4 17 2146.29 692.095 2
 -6 -4 18 25119 2238.18 2
 -6 -3 -5 5159 851.862 3
 -6 -3 -4 47257.9 2547.43 3
 -6 -3 -3 73347.9 3088.77 3
 -6 -3 -2 235866 5709.92 3
 -6 -3 -2 230741 3437.12 2
 -6 -3 -1 98961.4 2196.37 2
 -6 -3 -1 100837 3539.78 3
 -6 -3 0 1907.42 465.08 3
 -6 -3 0 2125.16 327.392 2
 -6 -3 1 8233.91 960.494 3
 -6 -3 1 8215.48 672.467 2
 -6 -3 2 12044.2 1192.15 3
 -6 -3 2 12114.4 858.746 2
 -6 -3 3 156131 3526.53 2
 -6 -3 4 42138 1855.42 2
 -6 -3 5 24001.4 1432.37 2
 -6 -3 6 17958.3 1276.51 2
 -6 -3 7 96193.5 3165 2
 -6 -3 8 155220 4202.82 2
 -6 -3 9 -110.233 292.268 2
 -6 -3 10 66820.7 2881.83 2
 -6 -3 11 11597.2 1244.54 2
 -6 -3 12 56695.2 2820.25 2
 -6 -3 13 81949.3 3506.76 2
 -6 -3 14 873.047 358.315 2
 -6 -3 15 59565.4 3217.92 2
 -6 -3 16 1564.26 543.644 2
 -6 -3 17 23051.2 2058.79 2
 -6 -3 18 37853.7 2685.89 2
 -6 -2 -5 69251.9 2993.52 3
 -6 -2 -4 901.892 337.342 3
 -6 -2 -3 219618 5363.33 3
 -6 -2 -2 148482 2453.05 2
 -6 -2 -2 139934 4174.45 3
 -6 -2 -1 15458.6 762.785 2
 -6 -2 -1 14012.7 1229.69 3
 -6 -2 0 7847.25 934.31 3
 -6 -2 0 7263.23 568.12 2
 -6 -2 1 7281.4 869.688 3
 -6 -2 1 8958.35 692.988 2
 -6 -2 2 116181 2768.68 2
 -6 -2 3 145003 3245.05 2
 -6 -2 4 2151.66 399.288 2
 -6 -2 5 21547.6 1322.63 2
 -6 -2 6 22229.2 1400.96 2
 -6 -2 7 151687 3985.72 2
 -6 -2 8 92984.1 3149.47 2
 -6 -2 9 10231.7 1050.31 2
 -6 -2 10 50803.1 2437.95 2
 -6 -2 11 2489.52 563.034 2
 -6 -2 12 67757.6 2971.91 2
 -6 -2 13 89841.5 3563.37 2
 -6 -2 14 1750.17 566.411 2
 -6 -2 15 30323.2 2188.58 2
 -6 -2 16 1499.9 558.807 2
 -6 -2 17 70039.7 3633.81 2
 -6 -2 18 27900.9 2345.3 2
 -6 -2 19 -94.8193 320.595 2
 -6 -1 -6 7783.79 957.756 3
 -6 -1 -5 75528.6 3008.5 3
 -6 -1 -4 2475.76 527.28 3
 -6 -1 -3 69391.7 1276.66 2
 -6 -1 -3 76563.7 2875.44 3
 -6 -1 -2 21539.1 1482.41 3
 -6 -1 -2 20344.5 771.965 2
 -6 -1 -1 27613 1010.92 2
 -6 -1 -1 29233.3 1699.76 3
 -6 -1 0 12131.3 1100 3
 -6 -1 0 13698.5 780.784 2
 -6 -1 1 12399.3 798.534 2
 -6 -1 1 5885.61 903.432 3
 -6 -1 2 332658 5323 2
 -6 -1 3 59693.8 2037.6 2
 -6 -1 4 20089.2 1212.08 2
 -6 -1 5 43220.2 1890.35 2
 -6 -1 6 28454.9 1580.94 2
 -6 -1 7 157287 2491.32 5
 -6 -1 7 161854 4104.95 2
 -6 -1 8 23063.9 1530.35 2
 -6 -1 8 22583.7 665.438 5
 -6 -1 9 8243.92 948.782 2
 -6 -1 10 15598.9 1351.81 2
 -6 -1 11 2547.24 578.837 2
 -6 -1 12 108476 3864.98 2
 -6 -1 13 45272.8 2534.57 2
 -6 -1 14 3402.93 752.242 2
 -6 -1 15 20838.7 1777.58 2
 -6 -1 16 13210.7 1466.99 2
 -6 -1 17 67317.6 3510.77 2
 -6 -1 18 11103.7 1485.57 2
 -6 -1 19 3011.75 836.475 2
 -6 0 -6 66496.5 2772.21 3
 -6 0 -5 86283.9 3074.17 3
 -6 0 -4 8681.73 931.081 3
 -6 0 -3 51192 2242.24 3
 -6 0 -3 49711.8 1135.37 2
 -6 0 -2 3159.82 555.526 3
 -6 0 -2 2959.66 313.389 2
 -6 0 -1 65964.5 2458.04 3
 -6 0 -1 64067.8 1671.89 2
 -6 0 0 119923 3419.51 3
 -6 0 0 107821 2436.14 2
 -6 0 1 43979.8 1571.37 2
 -6 0 2 111089 2770.3 2
 -6 0 3 8284.1 760.663 2
 -6 0 4 167837 3810.18 2
 -6 0 5 61544.4 2291.3 2
 -6 0 6 100928 2116.7 5
 -6 0 6 101239 3091.98 2
 -6 0 7 147485 2486.34 5
 -6 0 7 143598 3870.11 2
 -6 0 8 870.7 260.622 2
 -6 0 8 888.837 167.07 5
 -6 0 9 28713.7 1771.29 2
 -6 0 10 24634.2 1711.49 2
 -6 0 11 35131.1 2107.73 2
 -6 0 12 97210.7 3692.35 2
 -6 0 13 3942.82 714.334 2
 -6 0 14 57935.3 2965.2 2
 -6 0 15 17481 1684.66 2
 -6 0 16 28811.7 2207.25 2
 -6 0 17 34190.6 2397.08 2
 -6 0 18 3725.13 874.423 2
 -6 0 19 15544 1756.87 2
 -6 1 -16 41179.7 2851.35 4
 -6 1 -6 146411 4011.52 3
 -6 1 -5 35375.5 1830.17 3
 -6 1 -5 28218.1 646.217 2
 -6 1 -4 37992.2 991.97 2
 -6 1 -4 36530.7 977.046 2
 -6 1 -3 45457 1250.55 2
 -6 1 -3 45066.2 1985.53 3
 -6 1 -2 21415 918.014 2
 -6 1 -2 21614.4 1342.19 3
 -6 1 -1 174529 4042.24 3
 -6 1 -1 171648 3162.35 2
 -6 1 0 33786.4 1343.94 2
 -6 1 0 34663.5 1763.15 3
 -6 1 1 63990.5 1988.26 2
 -6 1 2 40186.8 1640.64 2
 -6 1 3 85126.5 2548.52 2
 -6 1 4 277764 5266.93 2
 -6 1 5 24611.2 1450.88 2
 -6 1 5 26497 1098.79 5
 -6 1 6 59066.3 2393.89 2
 -6 1 6 61389.4 1667.17 5
 -6 1 7 13996.3 734.805 5
 -6 1 7 13280.2 1146.42 2
 -6 1 8 63001.4 2608.15 2
 -6 1 8 62231.9 1590.15 5
 -6 1 9 118406 3788.48 2
 -6 1 9 123630 2350.6 5
 -6 1 10 12131.4 1212.82 2
 -6 1 11 52319.6 2606.4 2
 -6 1 12 35296.8 2186.5 2
 -6 1 13 42859.5 2485.52 2
 -6 1 14 81229.4 3549 2
 -6 1 15 622.937 260.848 2
 -6 1 16 18864.9 1786.24 2
 -6 1 17 8414.79 1237.77 2
 -6 1 18 19974.6 1917.34 2
 -6 1 19 38285.6 2690.64 2
 -6 2 -16 38503.7 2659.26 4
 -6 2 -5 16144.5 1161.02 3
 -6 2 -4 89936.2 2759.41 3
 -6 2 -3 5298.51 638.782 3
 -6 2 -2 98407.5 2797.83 3
 -6 2 -1 334053 5715.46 3
 -6 2 1 123826 2980.75 2
 -6 2 2 11002.3 880.744 2
 -6 2 3 141283 3508.22 2
 -6 2 4 99520.1 2432.61 5
 -6 2 4 106688 3141.21 2
 -6 2 5 46645.3 2067.37 2
 -6 2 5 48044.7 1598.62 5
 -6 2 6 30359.1 1707.51 2
 -6 2 6 38011.2 1375.15 5
 -6 2 7 28711.5 1714.38 2
 -6 2 7 27044 1145.31 5
 -6 2 8 122015 3793.45 2
 -6 2 8 119244 2600.99 5
 -6 2 9 205307 5258.52 2
 -6 2 9 211117 3704.4 5
 -6 2 10 1011.1 232.27 5
 -6 2 10 364.15 225.88 2
 -6 2 11 3019.54 676.15 2
 -6 2 12 17116 1532.74 2
 -6 2 13 140951 4650.61 2
 -6 2 14 35493.7 2332.44 2
 -6 2 15 1883.5 580.952 2
 -6 2 16 17307 1722.14 2
 -6 2 17 281.62 276.469 2
 -6 2 18 51301.9 3129.4 2
 -6 2 19 27471.9 2294.99 2
 -6 3 -15 810.073 505.261 4
 -6 3 -5 14448.5 1026.78 3
 -6 3 -4 112336 2920.1 3
 -6 3 -3 354.269 179.766 3
 -6 3 -2 135548 3154.49 3
 -6 3 -1 65160.9 2297.59 3
 -6 3 3 137071 3091.63 5
 -6 3 4 130375 2955.32 5
 -6 3 5 478.922 244.437 2
 -6 3 5 538.285 152.011 5
 -6 3 6 14984.8 916.295 5
 -6 3 6 14367.6 1215.97 2
 -6 3 7 439.122 154.877 5
 -6 3 7 619.903 281.509 2
 -6 3 8 263404 4584.39 5
 -6 3 8 270051 5972.83 2
 -6 3 9 58030.4 2709.49 2
 -6 3 9 55225.9 1892.9 5
 -6 3 10 935.866 270.537 5
 -6 3 10 862.926 308.249 2
 -6 3 11 2554.47 601.329 2
 -6 3 12 45003.4 2551.72 2
 -6 3 13 113606 4219.95 2
 -6 3 14 13339.9 1450.31 2
 -6 3 15 10125.9 1321.77 2
 -6 3 16 9337.69 1301.83 2
 -6 3 17 11595.7 1449.85 2
 -6 3 18 75480.4 3878.73 2
 -6 3 19 6285.05 1144.04 2
 -6 4 -14 48389.7 2545.26 4
 -6 4 -5 51395.8 1819.48 3
 -6 4 -4 70391.3 2104.75 3
 -6 4 -3 33940.9 1400.3 3
 -6 4 -2 85860.5 2292.91 3
 -6 4 2 64634.1 2160.32 5
 -6 4 3 152616 3417.99 5
 -6 4 4 387.292 160.381 5
 -6 4 5 95193.9 2581.49 5
 -6 4 6 48407.4 1819.75 5
 -6 4 7 28092.5 1404.44 5
 -6 4 7 28486.4 1811 2
 -6 4 8 132736 3296.32 5
 -6 4 8 139585 4285.6 2
 -6 4 9 326.363 186.088 5
 -6 4 9 15.9927 226.18 2
 -6 4 10 45183.3 1872.14 5
 -6 4 10 44286.9 2444.54 2
 -6 4 11 26140.9 1417.03 5
 -6 4 11 22593.5 1809.6 2
 -6 4 12 59252.2 3009.73 2
 -6 4 13 33505.4 2306.71 2
 -6 4 14 1085.63 479.555 2
 -6 4 15 23115.2 2002.55 2
 -6 4 16 1316.4 518.331 2
 -6 4 17 42188.5 2826.43 2
 -6 4 18 42631.3 2895.18 2
 -6 5 -4 10957.8 728.146 3
 -6 5 -3 10392.3 702.032 3
 -6 5 -2 36133.5 1326.59 3
 -6 5 1 116092 3087.22 5
 -6 5 2 82451.4 2550.87 5
 -6 5 3 40051 1720.83 5
 -6 5 4 73911 2399.61 5
 -6 5 5 153448 3611.71 5
 -6 5 6 17124.4 1139.82 5
 -6 5 7 24390.9 1407.13 5
 -6 5 8 19924.1 1295.01 5
 -6 5 8 20624.4 1637.2 2
 -6 5 9 37908.9 2293.91 2
 -6 5 9 39938.8 1872.43 5
 -6 5 10 127718 3500.8 5
 -6 5 10 135577 4534.31 2
 -6 5 11 1980.6 426.86 5
 -6 5 11 995.119 327.745 2
 -6 5 12 36068.5 2386.27 2
 -6 5 13 13060.9 1451.29 2
 -6 5 14 6958.26 1143.22 2
 -6 5 15 32479 2390.49 2
 -6 5 16 550.011 341.251 2
 -6 5 17 13660.6 1608.21 2
 -6 6 -4 44619 1291.05 3
 -6 6 -3 1021.16 216.492 3
 -6 6 -2 1780.44 276.487 3
 -6 6 -1 114404 3251.54 5
 -6 6 0 168848 3989.23 5
 -6 6 1 39017 1797.57 5
 -6 6 2 36533.9 1739.41 5
 -6 6 3 5771.53 702.295 5
 -6 6 4 138527 3562.34 5
 -6 6 5 120993 3342.04 5
 -6 6 6 12134.4 1064.15 5
 -6 6 7 58685.4 2371.87 5
 -6 6 8 3992.11 644.249 5
 -6 6 9 35722.6 2270.03 2
 -6 6 9 35759.5 1891.91 5
 -6 6 10 146268 4805.24 2
 -6 6 10 140002 3943.98 5
 -6 6 11 -204.108 424.739 2
 -6 6 11 388.307 226.352 5
 -6 6 12 18043 1708.17 2
 -6 6 12 20933.9 1496.97 5
 -6 6 13 2496.79 641.717 2
 -6 6 14 52828.1 3082.97 2
 -6 6 15 46026.8 2922.88 2
 -6 6 16 322.216 264.675 2
 -6 7 -3 22572.2 682.879 4
 -6 7 -3 21533.8 1429.23 5
 -6 7 -3 22072.6 732.699 3
 -6 7 -2 7629.17 494.133 3
 -6 7 -2 6311.06 380.152 4
 -6 7 -2 6119.21 770.573 5
 -6 7 -1 76292.7 2691.12 5
 -6 7 0 136831 3691.79 5
 -6 7 1 3573.59 575.615 5
 -6 7 2 10339.4 966.492 5
 -6 7 3 49421.7 2149.92 5
 -6 7 4 144772 3876.91 5
 -6 7 5 54303.8 2294.72 5
 -6 7 6 18329.4 1372.03 5
 -6 7 7 28357.6 1745.83 5
 -6 7 8 3347.45 659.993 5
 -6 7 9 86498.9 3189.17 5
 -6 7 10 44990.4 2687.62 2
 -6 7 10 44332.4 2268.36 5
 -6 7 11 6546.49 1084.06 2
 -6 7 11 8365.78 997.344 5
 -6 7 12 28459.9 1849.53 5
 -6 7 12 25235.2 2103.93 2
 -6 7 13 5279.19 1018.73 2
 -6 7 14 104039 4468.3 2
 -6 7 15 14610.6 1679.59 2
 -6 7 16 4055.81 900.972 2
 -6 8 -5 2930.91 585.082 5
 -6 8 -4 35660.9 1945.99 5
 -6 8 -3 73955.5 2780.95 5
 -6 8 -2 1413.62 188.309 3
 -6 8 -2 902.65 330.086 5
 -6 8 -1 156632 4144.28 5
 -6 8 0 39447.8 1995.35 5
 -6 8 1 106425 3328.65 5
 -6 8 2 37046.2 1947.34 5
 -6 8 3 24238 1579.55 5
 -6 8 4 51732 2345.97 5
 -6 8 5 2172.17 524.817 5
 -6 8 6 27320.9 1777.99 5
 -6 8 7 7659.63 947.143 5
 -6 8 8 46098.9 2414.61 5
 -6 8 9 124568 4047.68 5
 -6 8 10 181.727 312.729 5
 -6 8 11 36063 2173.99 5
 -6 8 11 31316 2327.2 2
 -6 8 12 17084.4 1787.97 2
 -6 8 12 19821.2 1643.8 5
 -6 8 13 38310.4 2655.1 2
 -6 8 13 44547.6 2520.77 5
 -6 8 14 41521.8 2872.97 2
 -6 8 15 -425.095 496.385 2
 -6 9 -8 50985.3 2529.94 5
 -6 9 -7 3078.06 628.711 5
 -6 9 -6 12636.9 1215.98 5
 -6 9 -5 11288.3 1142.42 5
 -6 9 -4 128822 3915.56 5
 -6 9 -3 42522 2159.17 5
 -6 9 -2 2973.47 598.941 5
 -6 9 -1 49278.7 2316.15 5
 -6 9 0 22769.7 1557.42 5
 -6 9 1 126277 3825.2 5
 -6 9 2 6551.28 876.382 5
 -6 9 3 38632.4 2112.87 5
 -6 9 4 27843.1 1833.51 5
 -6 9 5 31120.8 1963.12 5
 -6 9 6 55074 2681.35 5
 -6 9 7 6035.97 902.027 5
 -6 9 8 81664.4 3404.6 5
 -6 9 9 16565.1 1516.03 5
 -6 9 10 21899.6 1756.7 5
 -6 9 11 67863.6 3600.01 2
 -6 9 11 79119.8 3420.82 5
 -6 9 12 3417.33 793.809 5
 -6 9 12 1637.67 596.079 2
 -6 9 13 21922.1 1853.94 5
 -6 9 13 14732.1 1734.04 2
 -6 9 14 21764.3 2097.02 2
 -6 10 -13 11189.9 1291.94 5
 -6 10 -12 2179.61 603.653 5
 -6 10 -11 472.438 325.294 5
 -6 10 -10 28131 1955.14 5
 -6 10 -9 104435 3774.72 5
 -6 10 -8 6189.7 954.262 5
 -6 10 -7 33875.5 2077.78 5
 -6 10 -6 24042 1714.83 5
 -6 10 -5 50838.6 2499.85 5
 -6 10 -4 88217.6 3302.13 5
 -6 10 -3 1583.57 413.012 5
 -6 10 -2 36952.7 2083.1 5
 -6 10 -1 2917.73 633.858 5
 -6 10 0 94377.4 3414.17 5
 -6 10 1 98387.9 3557.14 5
 -6 10 2 10689.6 1155.66 5
 -6 10 3 37129.4 2189.41 5
 -6 10 4 128.346 293.52 5
 -6 10 5 86031.7 3488.78 5
 -6 10 6 140451 4585.28 5
 -6 10 7 1777.47 481.767 5
 -6 10 8 20272.3 1757.29 5
 -6 10 9 2253.27 575.682 5
 -6 10 10 63116.4 3171.24 5
 -6 10 11 44090.9 2667.18 5
 -6 10 12 -271.845 555.254 2
 -6 10 12 506.839 364.448 5
 -6 10 13 13524.1 1696.89 2
 -6 10 13 16670.1 1724.67 5
 -6 11 -14 20794.3 1823.21 5
 -6 11 -13 -160.446 323.58 5
 -6 11 -12 6229.22 969.387 5
 -6 11 -11 81.6868 224.627 5
 -6 11 -10 20592.4 1714.54 5
 -6 11 -9 29072.2 2025.2 5
 -6 11 -8 4573.93 821.783 5
 -6 11 -7 30863 2027.88 5
 -6 11 -6 -155.803 371.903 5
 -6 11 -5 114777 3913.28 5
 -6 11 -4 28166.8 1909.52 5
 -6 11 -3 2270.52 624.877 5
 -6 11 -2 86678.9 3367.49 5
 -6 11 -1 2442.82 572.774 5
 -6 11 0 80756.5 3322.1 5
 -6 11 1 95481.4 3644.48 5
 -6 11 2 81.5105 371.131 5
 -6 11 3 20368.5 1722.81 5
 -6 11 4 11.8184 383.509 5
 -6 11 5 114199 4254.79 5
 -6 11 6 99624.5 4027.64 5
 -6 11 7 42.5757 465.836 5
 -6 11 8 2667.94 721.032 5
 -6 11 9 11478.3 1416.65 5
 -6 11 10 68064.2 3453.2 5
 -6 11 11 19865 1898.73 5
 -6 11 12 2818.91 728.94 5
 -6 11 12 2042.85 748.152 2
 -6 12 -13 10023.4 1275.85 5
 -6 12 -12 14923.2 1515.4 5
 -6 12 -11 602.204 477.002 5
 -6 12 -10 20810.8 1767.24 5
 -6 12 -9 2071.36 618.654 5
 -6 12 -8 16488.6 1539.61 5
 -6 12 -7 32468.4 2128.5 5
 -6 12 -6 18892.3 1642.2 5
 -6 12 -5 26307.1 1923.1 5
 -6 12 -4 8595.5 1103.51 5
 -6 12 -3 36529.9 2263.28 5
 -6 12 -2 29998.3 2077.2 5
 -6 12 -1 7746.98 1057.33 5
 -6 12 0 65717.9 3138.21 5
 -6 12 1 3752.82 758.47 5
 -6 12 2 16103.9 1573.74 5
 -6 12 3 32736.1 2288.08 5
 -6 12 4 1228.95 496.52 5
 -6 12 5 65702.4 3367.97 5
 -6 12 6 23022 2000.97 5
 -6 12 7 15128.5 1643.5 5
 -6 12 8 2540.72 749.979 5
 -6 12 9 11677.3 1509.17 5
 -6 12 10 50255.3 3086.7 5
 -6 12 11 8142.31 1314.11 5
 -6 13 -13 31211.4 2279.28 5
 -6 13 -12 29075.2 2155.43 5
 -6 13 -11 1649.6 546.729 5
 -6 13 -10 13472.6 1450.25 5
 -6 13 -9 17.494 376.802 5
 -6 13 -8 47240.2 2685.13 5
 -6 13 -7 25026.8 1930.32 5
 -6 13 -6 4450.73 847.812 5
 -6 13 -5 12361.3 1369.59 5
 -6 13 -4 2697.09 687.335 5
 -6 13 -3 94800.6 3853.05 5
 -6 13 -2 24719.7 1943.91 5
 -6 13 -1 12240.6 1381.73 5
 -6 13 0 37874.1 2482.51 5
 -6 13 1 33655.8 2309.06 5
 -6 13 2 46683.7 2841.38 5
 -6 13 3 22720.2 2016.14 5
 -6 13 4 10320.7 1396.99 5
 -6 13 5 31931.6 2420.94 5
 -6 13 6 6244.7 1081.07 5
 -6 13 7 46311.3 2997.15 5
 -6 13 8 7690.9 1200.75 5
 -6 13 9 9173.71 1356.5 5
 -6 14 -12 10267.3 1342.8 5
 -6 14 -11 7073.26 1109 5
 -6 14 -10 3148.58 708.383 5
 -6 14 -9 21541.8 1869.89 5
 -6 14 -8 59688.4 3121.99 5
 -6 14 -7 12602.8 1440.86 5
 -6 14 -6 4315.99 857.415 5
 -6 14 -5 2048.61 590.027 5
 -6 14 -4 24917.9 2031.71 5
 -6 14 -3 92514.5 3972.8 5
 -6 14 -2 20323.5 1858.55 5
 -6 14 -1 13819.5 1565.07 5
 -6 14 0 -495.311 587.629 5
 -6 14 1 44327.1 2860.14 5
 -6 14 2 52160 3140.1 5
 -6 14 3 2144.99 609.457 5
 -6 14 4 12891.7 1618.33 5
 -6 14 5 1063.07 526.463 5
 -6 14 6 44945.1 3056.57 5
 -6 14 7 57846.7 3467.81 5
 -6 15 -11 17836.4 1785.06 5
 -6 15 -10 985.455 564.726 5
 -6 15 -9 53451.4 3054.91 5
 -6 15 -8 51228.1 3015.34 5
 -6 15 -7 3620.23 860.226 5
 -6 15 -6 1582.09 565.883 5
 -6 15 -5 -684.943 476.753 5
 -6 15 -4 42817.2 2765.69 5
 -6 15 -3 44939.2 2849.07 5
 -6 15 -2 466.476 399.353 5
 -6 15 -1 8848.5 1297.61 5
 -6 15 0 7098.68 1187.82 5
 -6 15 1 47268.8 3076.44 5
 -6 15 2 19387.4 1993.87 5
 -6 15 3 1278.41 613.359 5
 -6 15 4 8128.73 1326.76 5
 -6 16 -11 36229.2 2599.3 5
 -6 16 -10 -158.902 324.686 5
 -6 16 -9 28349.8 2303.6 5
 -6 16 -8 16106.6 1753.45 5
 -6 16 -7 3782.91 858.111 5
 -6 16 -6 27072.1 2283.41 5
 -6 16 -5 1191.77 647.576 5
 -6 16 -4 30550 2472.61 5
 -6 16 -3 9419.66 1419.8 5
 -6 16 -2 18637.2 1971.72 5
 -6 16 -1 8622.89 1412.52 5
 -6 16 0 19902.4 2066.23 5
 -6 16 1 39709.4 2925.98 5
 -6 17 -8 3526.88 970.826 5
 -6 17 -7 38556.5 2832.68 5
 -6 17 -6 14503.1 1773.8 5
 -5 -13 2 29024.8 2443.56 3
 -5 -13 3 708.494 449.14 3
 -5 -13 4 37692.3 2691.23 3
 -5 -13 5 2152 679.122 3
 -5 -13 6 11234.4 1383.61 2
 -5 -13 7 28465.4 2249.24 2
 -5 -13 8 1924.73 754.421 2
 -5 -13 9 35039.5 2642.2 2
 -5 -12 0 232.431 451.227 3
 -5 -12 1 64136.8 3573.35 3
 -5 -12 2 73563 3773.22 3
 -5 -12 3 429.285 390.455 3
 -5 -12 4 18145.3 1837.17 3
 -5 -12 5 -151.429 474.553 2
 -5 -12 5 152.172 336.709 3
 -5 -12 6 26715.9 2094.92 2
 -5 -12 6 23938.3 2074.39 3
 -5 -12 7 33081.7 2382.73 2
 -5 -12 7 29261.4 2299.38 3
 -5 -12 8 6914.36 1101.68 2
 -5 -12 8 4355.13 874.792 3
 -5 -12 9 17342.3 1821.53 2
 -5 -12 10 9592.28 1382.55 2
 -5 -12 11 53990.9 3304.75 2
 -5 -11 -1 3616.9 889.799 3
 -5 -11 0 12940.7 1603.59 3
 -5 -11 1 92499.4 4155.78 3
 -5 -11 2 20772.3 1960.61 3
 -5 -11 3 950.214 383.148 3
 -5 -11 4 -112.716 373.721 3
 -5 -11 4 279.323 238.981 2
 -5 -11 5 13544.8 1528.51 3
 -5 -11 5 16121.9 1532.01 2
 -5 -11 6 73225.5 3366.8 2
 -5 -11 6 66911.4 3396.15 3
 -5 -11 7 12679.5 1434.6 2
 -5 -11 7 10594 1364.13 3
 -5 -11 8 6195.16 1031.93 3
 -5 -11 8 6978.04 1123.3 2
 -5 -11 9 1896.93 587.184 3
 -5 -11 9 1935.26 526.506 2
 -5 -11 10 38624.3 2577.67 3
 -5 -11 10 42842 2748.07 2
 -5 -11 11 39928.7 2686.76 3
 -5 -11 11 40761.1 2776.13 2
 -5 -11 12 -204.742 486.452 2
 -5 -11 13 22586.9 2126.02 2
 -5 -10 -2 23644.4 2119.49 3
 -5 -10 -1 4447.28 928.526 3
 -5 -10 0 29259.7 2311.16 3
 -5 -10 1 58596.2 3199.21 3
 -5 -10 2 506.735 319.916 3
 -5 -10 3 20055.6 1811.01 3
 -5 -10 3 22860.3 1680.71 2
 -5 -10 4 115.068 361.557 3
 -5 -10 4 943.212 341.413 2
 -5 -10 5 58034.2 3058.4 3
 -5 -10 5 61731.5 2913.49 2
 -5 -10 6 75341.9 3306.14 2
 -5 -10 6 68018.1 3320.1 3
 -5 -10 7 1454.91 444.806 3
 -5 -10 7 2614.05 655.23 2
 -5 -10 8 16117.1 1643.26 3
 -5 -10 8 17587.9 1626.41 2
 -5 -10 9 2102.9 668.901 3
 -5 -10 9 1400.92 482.859 2
 -5 -10 10 50688.7 3050.73 3
 -5 -10 10 60235 3176.62 2
 -5 -10 11 33738.8 2415.73 2
 -5 -10 12 -172.139 325.127 2
 -5 -10 13 13340 1584.68 2
 -5 -10 14 4425.58 977.046 2
 -5 -9 -2 27656.6 2222.26 3
 -5 -9 -1 1239.17 557.933 3
 -5 -9 0 32964 2345.72 3
 -5 -9 1 15466.2 1583.17 3
 -5 -9 2 27091 1702.48 2
 -5 -9 2 25532.1 1987.59 3
 -5 -9 3 30285.5 1865.31 2
 -5 -9 3 26716.4 2045.93 3
 -5 -9 4 700.435 346.596 3
 -5 -9 4 318.114 267.653 2
 -5 -9 5 80763.9 3236.97 2
 -5 -9 5 75774.6 3399.2 3
 -5 -9 6 29069.6 1936.38 2
 -5 -9 6 26227.1 1998.05 3
 -5 -9 7 21578.3 1808.94 3
 -5 -9 7 20764.9 1668.64 2
 -5 -9 8 46377.5 2759.77 3
 -5 -9 8 44530.3 2514.21 2
 -5 -9 9 6909.5 1033.43 2
 -5 -9 10 67348.2 3275.82 2
 -5 -9 11 18728.9 1740.5 2
 -5 -9 12 22603.5 1959.67 2
 -5 -9 13 12717.1 1527.28 2
 -5 -9 14 10232.6 1353.05 2
 -5 -9 15 85353.7 4138.06 2
 -5 -8 -3 28938 2227.78 3
 -5 -8 -2 25530 2040.57 3
 -5 -8 -1 1142.85 453.208 3
 -5 -8 0 46981.7 2708.43 3
 -5 -8 1 19855.6 1720.85 3
 -5 -8 1 20017.5 1353.44 2
 -5 -8 2 69532.2 2655.17 2
 -5 -8 2 69343.1 3210.26 3
 -5 -8 3 41638.7 2080.6 2
 -5 -8 3 40423.6 2425.96 3
 -5 -8 4 7583.68 1020.17 3
 -5 -8 4 9605.72 1018.38 2
 -5 -8 5 53258.7 2766.51 3
 -5 -8 5 49250.9 2368.06 2
 -5 -8 6 -38.4308 303.794 3
 -5 -8 6 255.28 252.98 2
 -5 -8 7 108237 4215.95 3
 -5 -8 7 98720.9 3596.05 2
 -5 -8 8 24649.8 1822.82 2
 -5 -8 9 7768.43 1020.07 2
 -5 -8 10 51720.6 2756.13 2
 -5 -8 11 -64.6739 339.454 2
 -5 -8 12 35108.5 2397.28 2
 -5 -8 13 34550.8 2402.28 2
 -5 -8 14 10258.5 1393.43 2
 -5 -8 15 18053.7 1858.12 2
 -5 -8 16 -281.71 470.595 2
 -5 -7 -3 67310.3 3285.9 3
 -5 -7 -2 34471.4 2302.73 3
 -5 -7 -1 32362.4 2185.55 3
 -5 -7 0 28531.5 1488.11 2
 -5 -7 0 24170 1873.89 3
 -5 -7 1 35980.9 1737.06 2
 -5 -7 1 34876.2 2216.01 3
 -5 -7 2 117544 3328.16 2
 -5 -7 2 113082 4005.05 3
 -5 -7 3 10441.2 1183.03 3
 -5 -7 3 11517.4 1030.95 2
 -5 -7 4 40553.8 2307.93 3
 -5 -7 4 43809.5 2072.19 2
 -5 -7 5 39327.9 2289.86 3
 -5 -7 5 38188.8 2004.25 2
 -5 -7 6 44486.2 2578.37 3
 -5 -7 6 40478.1 2117 2
 -5 -7 7 214339 5271.46 2
 -5 -7 8 32476.7 2001.48 2
 -5 -7 9 7836.4 1030.39 2
 -5 -7 10 22102.7 1728.34 2
 -5 -7 11 23261.1 1824.57 2
 -5 -7 12 124178 4398.6 2
 -5 -7 13 19583 1760.1 2
 -5 -7 14 2442.4 690.856 2
 -5 -7 15 940.695 477.809 2
 -5 -7 16 25580.2 2203.38 2
 -5 -7 17 56215.1 3336.81 2
 -5 -6 -4 26268.4 2006.73 3
 -5 -6 -3 95267.7 3804.93 3
 -5 -6 -2 13424 1399.79 3
 -5 -6 -1 22362.8 1178.1 2
 -5 -6 -1 19361.2 1625.08 3
 -5 -6 0 3078.01 630.319 3
 -5 -6 0 3709.31 515.527 2
 -5 -6 1 116113 3044.09 2
 -5 -6 1 120348 4033.44 3
 -5 -6 2 51026.8 2030.75 2
 -5 -6 2 48942.6 2466.93 3
 -5 -6 3 1881.68 513.794 3
 -5 -6 3 1574.94 379.792 2
 -5 -6 4 20197.5 1583.15 3
 -5 -6 4 22305 1417.03 2
 -5 -6 5 2747.5 633.426 3
 -5 -6 5 4068.06 642.233 2
 -5 -6 6 100835 3264.57 2
 -5 -6 7 141260 4061.2 2
 -5 -6 8 5736.59 816.371 2
 -5 -6 9 51467.9 2493.67 2
 -5 -6 10 1763.39 497.043 2
 -5 -6 11 150220 4634.02 2
 -5 -6 12 161455 4949.59 2
 -5 -6 13 3762.3 764.169 2
 -5 -6 14 7029.49 1047.92 2
 -5 -6 15 342.109 281.127 2
 -5 -6 16 73497.1 3644.32 2
 -5 -6 17 39903.5 2746.64 2
 -5 -6 18 -109.229 451.197 2
 -5 -5 -4 32166.1 2135.2 3
 -5 -5 -3 114977 4072.04 3
 -5 -5 -2 2201.69 619.872 3
 -5 -5 -2 3048.59 381.792 2
 -5 -5 -1 102338 2489.69 2
 -5 -5 -1 102640 3660.41 3
 -5 -5 0 11084 815.484 2
 -5 -5 0 9603.54 1109.1 3
 -5 -5 1 121667 2972.27 2
 -5 -5 1 118871 3851.3 3
 -5 -5 2 44437.1 2265 3
 -5 -5 2 43953.9 1774.96 2
 -5 -5 3 2750.09 578.757 3
 -5 -5 3 2764.33 481.54 2
 -5 -5 4 22865.4 1697.12 3
 -5 -5 4 22288.2 1338.93 2
 -5 -5 5 244.781 158.332 2
 -5 -5 6 116658 3391.22 2
 -5 -5 7 21020.5 1442.95 2
 -5 -5 8 19792.8 1448.75 2
 -5 -5 9 42659.5 2214.57 2
 -5 -5 10 16846 1430.46 2
 -5 -5 11 99242.7 3629.03 2
 -5 -5 12 13078.7 1334.31 2
 -5 -5 13 21804.3 1778.93 2
 -5 -5 14 12991.4 1418.39 2
 -5 -5 15 9850.26 1294.37 2
 -5 -5 16 96364.1 4103.69 2
 -5 -5 17 14878.2 1645.66 2
 -5 -5 18 10485.5 1423.33 2
 -5 -4 -5 934.233 385.323 3
 -5 -4 -4 102104 3731.55 3
 -5 -4 -3 13939.7 1314.46 3
 -5 -4 -2 132080 2502.58 2
 -5 -4 -2 132594 4096.9 3
 -5 -4 -1 183858 3276.62 2
 -5 -4 -1 183422 4852.2 3
 -5 -4 0 4606.02 719.905 3
 -5 -4 0 4263.57 483.284 2
 -5 -4 1 47732.5 2300.26 3
 -5 -4 1 53520 1781.65 2
 -5 -4 2 1927.87 462.802 3
 -5 -4 2 2378.65 408.345 2
 -5 -4 3 180326 4794.97 3
 -5 -4 3 166866 3642.98 2
 -5 -4 4 155781 3615.53 2
 -5 -4 5 6135.02 711.3 2
 -5 -4 6 102201 3082.67 2
 -5 -4 7 9445.06 934.364 2
 -5 -4 8 60454.9 2479.51 2
 -5 -4 9 11444.7 1106.21 2
 -5 -4 10 52903.8 2496.5 2
 -5 -4 11 35224.1 2064.72 2
 -5 -4 12 21511.5 1687.56 2
 -5 -4 13 75112.7 3246.91 2
 -5 -4 14 16020.3 1541.87 2
 -5 -4 15 33689.5 2323.61 2
 -5 -4 16 33431.5 2375.56 2
 -5 -4 17 -427.611 452.188 2
 -5 -4 18 30388.1 2389.92 2
 -5 -4 19 2675.67 713.059 2
 -5 -3 -5 19188.7 1560.78 3
 -5 -3 -4 16048.4 1391.62 3
 -5 -3 -3 51413.1 1124.22 2
 -5 -3 -3 56855.9 2554.7 3
 -5 -3 -2 244551 3506.62 2
 -5 -3 -2 252496 5630.01 3
 -5 -3 -1 111034 2266.18 2
 -5 -3 -1 114911 3572.22 3
 -5 -3 0 3632.76 625.58 3
 -5 -3 0 3599.49 401.351 2
 -5 -3 1 2800.47 549.258 3
 -5 -3 1 3390.56 419.668 2
 -5 -3 2 27718.8 1766.73 3
 -5 -3 2 26451.5 1229.93 2
 -5 -3 3 191398 3796.27 2
 -5 -3 4 102658 2867.28 2
 -5 -3 5 28962.7 1515.02 2
 -5 -3 6 3655.18 324.79 5
 -5 -3 6 3043.08 513.363 2
 -5 -3 7 91376.1 2949.42 2
 -5 -3 7 83255.2 1476.59 5
 -5 -3 8 202896 4799.5 2
 -5 -3 9 7492.05 892.725 2
 -5 -3 10 40330.6 2152.63 2
 -5 -3 11 18911.5 1504.23 2
 -5 -3 12 21962.5 1700.16 2
 -5 -3 13 88071.9 3581.67 2
 -5 -3 14 1719.11 493.52 2
 -5 -3 15 35512 2375.12 2
 -5 -3 16 11769.1 1378.78 2
 -5 -3 17 18140.1 1752.05 2
 -5 -3 18 53462.6 3142.88 2
 -5 -3 19 1560.1 598.019 2
 -5 -2 -5 21645.2 1580.94 3
 -5 -2 -4 646.921 231.444 3
 -5 -2 -3 125425 1780.69 2
 -5 -2 -3 147550 3996.94 3
 -5 -2 -2 199923 4718.5 3
 -5 -2 -2 191979 2786.96 2
 -5 -2 -1 18947.6 792.281 2
 -5 -2 -1 18730.3 1333.14 3
 -5 -2 0 10422.1 980.607 3
 -5 -2 0 10951.6 655.469 2
 -5 -2 1 1194.39 362.177 3
 -5 -2 1 1660.26 286.629 2
 -5 -2 2 97385.4 2385.96 2
 -5 -2 3 287507 4778.31 2
 -5 -2 4 42235.5 1664.21 2
 -5 -2 5 36538.3 1634.73 2
 -5 -2 6 669.708 299.024 2
 -5 -2 6 699.165 138.977 5
 -5 -2 7 143403 1863.37 5
 -5 -2 7 134390 1870.9 5
 -5 -2 8 164738 4129.44 2
 -5 -2 9 13.5798 180.699 2
 -5 -2 10 28931.2 1762.85 2
 -5 -2 11 7060.65 881.514 2
 -5 -2 12 53883.6 2561.43 2
 -5 -2 13 106004 3791.71 2
 -5 -2 14 2051.86 595.297 2
 -5 -2 15 34437.1 2304.01 2
 -5 -2 16 -96.0308 372.145 2
 -5 -2 17 90637.1 4101.47 2
 -5 -2 18 32768.4 2447.02 2
 -5 -2 19 217.329 323.684 2
 -5 -1 -5 88594.5 3086.7 3
 -5 -1 -4 6403.99 797.075 3
 -5 -1 -3 104929 3180.59 3
 -5 -1 -3 96243.8 1406.85 2
 -5 -1 -2 31126.8 876.277 2
 -5 -1 -2 30012.9 1643.75 3
 -5 -1 -1 51214.3 2098.29 3
 -5 -1 -1 47592.9 1241.65 2
 -5 -1 0 109083 3114.01 3
 -5 -1 0 108099 2231.13 2
 -5 -1 1 29963.8 1180.3 2
 -5 -1 2 219840 3891.69 2
 -5 -1 3 264122 4556.22 2
 -5 -1 4 26167.1 1325.79 2
 -5 -1 5 90953 2673.28 2
 -5 -1 6 385.143 203.747 2
 -5 -1 6 503.285 117.452 5
 -5 -1 7 167652 2170.78 5
 -5 -1 7 162225 2193.63 5
 -5 -1 8 71160.2 2634.52 2
 -5 -1 9 9748.67 1000.73 2
 -5 -1 10 24373 1629.04 2
 -5 -1 11 10.6198 248.569 2
 -5 -1 12 183320 5016.47 2
 -5 -1 13 52673.8 2657.84 2
 -5 -1 14 29546 2015.93 2
 -5 -1 15 46582.2 2594.98 2
 -5 -1 16 25132.7 1984.63 2
 -5 -1 17 47245.4 2850.84 2
 -5 -1 18 13859.5 1596.64 2
 -5 -1 19 3977.92 885.967 2
 -5 -1 20 1926.31 708.258 2
 -5 0 -16 21074 2074.57 4
 -5 0 -5 198041 4599.11 3
 -5 0 -4 2382.42 456.946 3
 -5 0 -3 46208.6 968.608 2
 -5 0 -3 46785.2 1986.5 3
 -5 0 -2 15331.3 1095.16 3
 -5 0 -2 15120.6 625.149 2
 -5 0 -1 77429.7 1742.38 2
 -5 0 -1 82284.8 2554.2 3
 -5 0 0 89226.9 2080.82 2
 -5 0 0 118604 3200.64 3
 -5 0 1 488.674 210.156 2
 -5 0 2 164852 3292.67 2
 -5 0 3 352.983 205.342 2
 -5 0 4 176631 3740.69 2
 -5 0 5 76796 2441.06 2
 -5 0 6 4994.13 659.467 2
 -5 0 6 4583.79 353.719 5
 -5 0 7 82656.3 1568.89 5
 -5 0 7 86061.6 2805.58 2
 -5 0 8 357.649 103.032 5
 -5 0 8 40.9525 257.123 2
 -5 0 9 34598.1 854.195 5
 -5 0 9 34978.8 1884.74 2
 -5 0 10 46255.7 2267.91 2
 -5 0 11 23632.7 1660.63 2
 -5 0 12 109501 3798.1 2
 -5 0 13 1951.05 543.26 2
 -5 0 14 62369.7 3009.68 2
 -5 0 15 15850.1 1556.32 2
 -5 0 16 26155.7 2010.34 2
 -5 0 17 26392.5 2072.2 2
 -5 0 18 500.9 336.46 2
 -5 0 19 26517.2 2267.69 2
 -5 0 20 1058.21 289.738 2
 -5 1 -17 860.767 412.66 4
 -5 1 -16 76328.5 3835.79 4
 -5 1 -5 125174 1588.73 2
 -5 1 -5 139125 3479.73 3
 -5 1 -4 14996.3 548.851 2
 -5 1 -4 14658.5 551.375 2
 -5 1 -4 15910.5 1101.64 3
 -5 1 -3 72740.6 1515.09 2
 -5 1 -3 73902.8 2366.47 3
 -5 1 -2 46892.8 1811.36 3
 -5 1 -2 44293.3 1252.48 2
 -5 1 -1 247196 4559.31 3
 -5 1 -1 235789 3678.56 2
 -5 1 0 4059.76 441.663 2
 -5 1 1 6644.37 606.021 2
 -5 1 2 136292 3012.12 2
 -5 1 3 142612 3222.52 2
 -5 1 4 163689 3656.47 2
 -5 1 5 93275.9 2765.96 2
 -5 1 5 91509.1 1972.84 5
 -5 1 6 96217.9 2915.36 2
 -5 1 6 89931.1 1902.97 5
 -5 1 7 6862.5 804.269 2
 -5 1 7 6954.58 480.2 5
 -5 1 8 52972.9 2300.46 2
 -5 1 8 54836.6 1447.5 5
 -5 1 9 235207 5296.73 2
 -5 1 9 225246 3437.54 5
 -5 1 10 29987.1 1816.87 2
 -5 1 10 33673.9 1113.67 5
 -5 1 11 14393.4 1300.44 2
 -5 1 12 6817.93 957.132 2
 -5 1 13 26355.9 1879.99 2
 -5 1 14 72432.4 3253.12 2
 -5 1 15 1905.89 543.3 2
 -5 1 16 19914.1 1772.34 2
 -5 1 17 13123.4 1483.74 2
 -5 1 18 19095.7 1803.04 2
 -5 1 19 54351.6 3173.31 2
 -5 2 -17 6716.99 1131.19 4
 -5 2 -16 58990.2 3241.3 4
 -5 2 -15 13668.7 1502.1 4
 -5 2 -6 141785 2223.71 2
 -5 2 -5 62313.7 1386.44 2
 -5 2 -5 60053.6 2132.93 3
 -5 2 -4 94004.3 1869.86 2
 -5 2 -4 96601.5 2640.03 3
 -5 2 -3 38197 1556.44 3
 -5 2 -2 171699 3502.46 3
 -5 2 -1 123582 2950.52 3
 -5 2 3 147392 3397.98 2
 -5 2 4 423461 5765.31 5
 -5 2 4 436080 6806.96 2
 -5 2 5 5545.08 690.014 2
 -5 2 5 5854.74 499.555 5
 -5 2 6 208314 3497.46 5
 -5 2 6 211316 4656.74 2
 -5 2 7 425.172 232.606 2
 -5 2 7 508.946 178.131 5
 -5 2 8 241285 5299.82 2
 -5 2 8 227655 3858.14 5
 -5 2 9 275326 5968.7 2
 -5 2 9 270706 4329.27 5
 -5 2 10 6805.7 890.331 2
 -5 2 10 7408.28 606.358 5
 -5 2 11 14150.5 1308.43 2
 -5 2 11 17247.4 945.509 5
 -5 2 12 7101.52 947.346 2
 -5 2 13 154763 4744.35 2
 -5 2 14 130832 4453.02 2
 -5 2 15 1693.2 551.352 2
 -5 2 16 7948.15 1137.77 2
 -5 2 17 -74.7722 259.925 2
 -5 2 18 56242.2 3179.79 2
 -5 3 -16 18642.5 1737.74 4
 -5 3 -15 837.104 541.319 4
 -5 3 -14 53715.8 2743.84 4
 -5 3 -5 371.176 164.415 3
 -5 3 -4 51250.4 1729.45 3
 -5 3 -3 17206.5 954.375 3
 -5 3 -2 124098 2707.08 3
 -5 3 2 6101.35 577.688 5
 -5 3 3 139997 2953.38 5
 -5 3 4 346454 5184.03 5
 -5 3 5 92897.6 2321.27 5
 -5 3 6 38980.1 1923.17 2
 -5 3 6 41596.1 1509.64 5
 -5 3 7 2563.37 522.046 2
 -5 3 7 2997.16 424.224 5
 -5 3 8 283310 4825.41 5
 -5 3 8 291585 6095.38 2
 -5 3 9 82472.5 3110.24 2
 -5 3 9 80183.8 2303.51 5
 -5 3 10 1499.26 331.876 5
 -5 3 10 1462.1 428.804 2
 -5 3 11 25010.6 1798.57 2
 -5 3 11 29434.6 1400.84 5
 -5 3 12 19572.3 1607.04 2
 -5 3 13 117849 4160.43 2
 -5 3 14 34699.1 2263.11 2
 -5 3 15 1213.13 513.027 2
 -5 3 16 11634.9 1389.06 2
 -5 3 17 4757.47 935 2
 -5 3 18 67285.4 3516.75 2
 -5 4 -15 22820.1 1776.91 4
 -5 4 -14 53100.9 2619.93 4
 -5 4 -13 930.596 373.04 4
 -5 4 -4 115501 2481.72 3
 -5 4 -3 19478.5 913.385 3
 -5 4 -2 204855 3419.94 3
 -5 4 1 134777 3076.61 5
 -5 4 2 2462.06 396.231 5
 -5 4 3 144710 3166.22 5
 -5 4 4 1423.13 289.019 5
 -5 4 5 101287 2627.21 5
 -5 4 6 58045.1 1973.96 5
 -5 4 7 8002.84 747.465 5
 -5 4 7 7391.49 863.113 2
 -5 4 8 93620.2 3305.72 2
 -5 4 8 91488.1 2672.22 5
 -5 4 9 1212.1 323.011 5
 -5 4 9 1061.3 376.067 2
 -5 4 10 53908.4 2593.32 2
 -5 4 10 54347.7 2073.71 5
 -5 4 11 32052 1606.44 5
 -5 4 11 29423.1 1996.25 2
 -5 4 12 17248.9 1569.46 2
 -5 4 12 19795.4 1275.62 5
 -5 4 13 30890.3 2172.77 2
 -5 4 14 1259.29 422.886 2
 -5 4 15 14710.3 1547.15 2
 -5 4 16 10493.9 1350.57 2
 -5 4 17 24762.9 2074.45 2
 -5 5 -13 3507.71 625.357 4
 -5 5 -12 16156.7 1231.74 4
 -5 5 -11 27178.3 1511.71 4
 -5 5 -4 87302.7 1860.06 3
 -5 5 -3 6465.69 446.333 3
 -5 5 -2 85763.1 1808.64 3
 -5 5 0 331797 5571.24 5
 -5 5 1 235330 4461.01 5
 -5 5 2 452.173 216.124 5
 -5 5 3 110975 2877.4 5
 -5 5 3 111252 2018.45 1
 -5 5 4 43538.3 1766.06 5
 -5 5 4 41873.8 1106.39 1
 -5 5 5 119920 3097.71 5
 -5 5 5 115516 2036.36 1
 -5 5 6 33383.3 1615.07 5
 -5 5 6 33941.9 1044.52 1
 -5 5 7 9943.51 898.469 5
 -5 5 8 27922.6 1545.22 5
 -5 5 9 14937.3 1379.2 2
 -5 5 9 17057.5 1217.41 5
 -5 5 10 171302 4187.9 5
 -5 5 10 173288 5088.61 2
 -5 5 11 15153.5 1463.13 2
 -5 5 11 17458.9 1270.65 5
 -5 5 12 21738 1455.73 5
 -5 5 12 20567.1 1722.74 2
 -5 5 13 20125.1 1760.43 2
 -5 5 14 8826.75 1213.75 2
 -5 5 15 50407.8 2898.8 2
 -5 5 16 830.631 408.548 2
 -5 6 -11 50207.6 1936.2 4
 -5 6 -10 94360.9 2570.55 4
 -5 6 -9 908.321 219.633 4
 -5 6 -3 1374.23 173.758 3
 -5 6 -2 1262.12 203.757 3
 -5 6 -2 849.1 132.092 4
 -5 6 -1 124644 3241.11 5
 -5 6 -1 119393 1969.92 4
 -5 6 0 233020 4665.46 5
 -5 6 1 145303 3509.77 5
 -5 6 2 64836.9 2274.39 5
 -5 6 3 4307.26 277.342 1
 -5 6 3 3735.75 542.388 5
 -5 6 4 199691 4361.87 5
 -5 6 5 146587 3746.5 5
 -5 6 6 42198.3 1981.2 5
 -5 6 7 14751.9 1182.37 5
 -5 6 8 10322.2 1016.84 5
 -5 6 9 31008.3 1760.63 5
 -5 6 10 128606 3778.88 5
 -5 6 10 139201 4480.67 2
 -5 6 11 2715.15 543.895 5
 -5 6 11 2066.3 567.856 2
 -5 6 12 45041.8 2259.09 5
 -5 6 12 41414.1 2506.44 2
 -5 6 13 209.961 274.524 2
 -5 6 13 80.5606 204.096 5
 -5 6 14 45707.3 2774.72 2
 -5 6 15 52122.1 3019.72 2
 -5 7 -8 101614 2004.09 4
 -5 7 -7 4320.78 313.816 4
 -5 7 -6 83499.3 1296.6 4
 -5 7 -4 1153.06 342.103 5
 -5 7 -3 96715.9 2989.82 5
 -5 7 -2 1517.44 381.356 5
 -5 7 -1 118773 3314.36 5
 -5 7 0 217129 4650.29 5
 -5 7 1 335.822 256.245 5
 -5 7 2 69673.8 2513.47 5
 -5 7 3 23415.4 1451.94 5
 -5 7 4 156923 3994.02 5
 -5 7 5 106933 3335.5 5
 -5 7 6 5217.8 745.39 5
 -5 7 7 22056.3 1551.16 5
 -5 7 8 4304.86 674.017 5
 -5 7 9 157120 4390.01 5
 -5 7 10 43183.6 2522.56 2
 -5 7 10 44293.6 2297.47 5
 -5 7 11 45114.3 2360 5
 -5 7 11 41259.3 2526.91 2
 -5 7 12 42487.2 2335.16 5
 -5 7 12 36257.1 2449.63 2
 -5 7 13 7611.09 1156.53 2
 -5 7 13 9615.16 1119.21 5
 -5 7 14 65956.4 3414.25 2
 -5 8 -7 1385.41 419.916 5
 -5 8 -6 66261.9 2623.11 5
 -5 8 -5 1896.22 414.317 5
 -5 8 -4 83620 2883.04 5
 -5 8 -3 161743 4107.44 5
 -5 8 -2 1425.27 362.691 5
 -5 8 -1 89178.7 2949.86 5
 -5 8 0 16715 1249.32 5
 -5 8 1 83309.4 2873.98 5
 -5 8 2 29999.8 1722.61 5
 -5 8 3 18588.5 1363.64 5
 -5 8 4 59231.9 2552.66 5
 -5 8 5 8138.88 945.412 5
 -5 8 6 57217.5 2601.48 5
 -5 8 7 55308.4 2600.95 5
 -5 8 8 38606.1 2199.1 5
 -5 8 9 129153 4169.18 5
 -5 8 10 7228.85 984.804 5
 -5 8 11 56846.7 2807.78 5
 -5 8 11 52413.4 2950.31 2
 -5 8 12 21700.5 1749.18 5
 -5 8 12 18954.9 1812.64 2
 -5 8 13 17182.2 1717.24 2
 -5 8 13 17890 1628.02 5
 -5 8 14 52263.2 3108.38 2
 -5 9 -10 -206.164 403.64 5
 -5 9 -9 92300.6 3323.33 5
 -5 9 -8 117972 3746.51 5
 -5 9 -7 101.225 189.831 5
 -5 9 -6 12036.6 1125.05 5
 -5 9 -5 5648.48 771.666 5
 -5 9 -4 126722 3748.08 5
 -5 9 -3 16745.8 1311.06 5
 -5 9 -2 184.076 259.415 5
 -5 9 -1 7570.89 894.138 5
 -5 9 0 20136.9 1452.59 5
 -5 9 1 183971 4743.97 5
 -5 9 2 21161.1 1520.96 5
 -5 9 3 21100.9 1558.94 5
 -5 9 4 9746.14 1110.67 5
 -5 9 5 23915.7 1739.41 5
 -5 9 6 76388.2 3202.34 5
 -5 9 7 5625.77 872.56 5
 -5 9 8 28437.2 1978.05 5
 -5 9 9 23265.4 1823.14 5
 -5 9 10 8849.92 1130.34 5
 -5 9 11 59878.7 3242.52 2
 -5 9 11 69919.9 3280.61 5
 -5 9 12 9995.76 1252.33 5
 -5 9 12 7938.12 1203.91 2
 -5 9 13 7103.39 1126.68 2
 -5 9 13 8371.54 1185.03 5
 -5 9 14 18579.8 1749.43 5
 -5 10 -14 51306.5 2710.22 5
 -5 10 -13 12737.7 1323.36 5
 -5 10 -12 632.8 368.541 5
 -5 10 -11 891.654 375.318 5
 -5 10 -10 18101.8 1493.7 5
 -5 10 -9 106258 3704.81 5
 -5 10 -8 20785.8 1580.92 5
 -5 10 -7 6697.35 909.658 5
 -5 10 -6 25224.8 1715.35 5
 -5 10 -5 71259.4 2858.81 5
 -5 10 -4 66117.3 2754.12 5
 -5 10 -3 3684.08 660.106 5
 -5 10 -2 16243.3 1349.31 5
 -5 10 -1 35518.7 2045.02 5
 -5 10 0 34925.7 2037.14 5
 -5 10 1 175364 4785.15 5
 -5 10 2 12507.3 1277.26 5
 -5 10 3 51938.8 2636.29 5
 -5 10 4 6425.24 958.948 5
 -5 10 5 61919.9 2972.96 5
 -5 10 6 144662 4727.59 5
 -5 10 7 20651.9 1761.27 5
 -5 10 8 12106.7 1348.39 5
 -5 10 9 470.424 362.171 5
 -5 10 10 65363.8 3280.29 5
 -5 10 11 49557.8 2881.7 5
 -5 10 12 6432.16 1104.15 5
 -5 10 12 3459.72 782.11 2
 -5 10 13 18329.1 1815.06 5
 -5 10 14 -284.818 362.448 5
 -5 11 -13 -143.423 391.915 5
 -5 11 -12 10419.5 1212.75 5
 -5 11 -11 1728.06 534.797 5
 -5 11 -10 41302.3 2323.63 5
 -5 11 -9 27046.7 1869.25 5
 -5 11 -8 708.757 389.352 5
 -5 11 -7 48092.4 2449.61 5
 -5 11 -6 1161.26 436.801 5
 -5 11 -5 81223.9 3193.99 5
 -5 11 -4 43939 2327.29 5
 -5 11 -3 2326.34 546.852 5
 -5 11 -2 43154.3 2322.77 5
 -5 11 -1 3200.48 697.686 5
 -5 11 0 86777.3 3420.9 5
 -5 11 1 138552 4469.23 5
 -5 11 2 5788.38 929.267 5
 -5 11 3 68271.5 3219.29 5
 -5 11 4 532.14 328.13 5
 -5 11 5 90591.3 3811.09 5
 -5 11 6 140349 4831.69 5
 -5 11 7 -420.895 507.462 5
 -5 11 8 9954.02 1310.6 5
 -5 11 9 7951.41 1220.03 5
 -5 11 10 76152.8 3763.35 5
 -5 11 11 46858.7 2941.72 5
 -5 11 12 -359.023 443.063 5
 -5 12 -13 12799.5 1373.01 5
 -5 12 -12 39625.9 2387.28 5
 -5 12 -11 2052.6 518.573 5
 -5 12 -10 29378.3 2020.87 5
 -5 12 -9 7097.4 1007.17 5
 -5 12 -8 9013.14 1118.49 5
 -5 12 -7 43668.6 2420.98 5
 -5 12 -6 1738.18 547.324 5
 -5 12 -5 40841 2358.23 5
 -5 12 -4 5668.19 853.588 5
 -5 12 -3 38768.7 2329.64 5
 -5 12 -2 32407.3 2127.06 5
 -5 12 -1 895.592 463.041 5
 -5 12 0 89977.1 3693.97 5
 -5 12 1 13611.3 1474.5 5
 -5 12 2 16375.5 1630.95 5
 -5 12 3 46428.4 2752 5
 -5 12 4 2398.29 624.746 5
 -5 12 5 57316.3 3135.23 5
 -5 12 6 14282.7 1574.57 5
 -5 12 7 21006.3 1943.47 5
 -5 12 8 18618.6 1879.75 5
 -5 12 9 6388.83 1167.07 5
 -5 12 10 38175.5 2751.54 5
 -5 13 -12 32357.4 2204.4 5
 -5 13 -11 6.80561 261.448 5
 -5 13 -10 5877.47 930.792 5
 -5 13 -9 1498.87 464.256 5
 -5 13 -8 58682.6 2932.19 5
 -5 13 -7 45271.4 2574.03 5
 -5 13 -6 2253.86 615.697 5
 -5 13 -5 27366.2 1996.67 5
 -5 13 -4 3921.76 905.231 5
 -5 13 -3 69053 3241.25 5
 -5 13 -2 66650.1 3231.16 5
 -5 13 -1 1845.54 576.247 5
 -5 13 0 29984.3 2225.36 5
 -5 13 1 2915.35 723.536 5
 -5 13 2 77878.7 3731.12 5
 -5 13 3 24586.3 2124.08 5
 -5 13 4 697.049 338.166 5
 -5 13 5 24799.1 2146.42 5
 -5 13 6 1815.83 616.548 5
 -5 13 7 63394.5 3551.24 5
 -5 13 8 21402.2 2103.76 5
 -5 14 -11 10787.4 1328.27 5
 -5 14 -10 7344.42 1116.31 5
 -5 14 -9 18252.7 1723.42 5
 -5 14 -8 78222.9 3522.6 5
 -5 14 -7 25501.6 2024.33 5
 -5 14 -6 3423.56 765.836 5
 -5 14 -5 6728.68 1058.7 5
 -5 14 -4 20932.7 1865.87 5
 -5 14 -3 102342 4187.72 5
 -5 14 -2 23872.3 2036.12 5
 -5 14 -1 10803.9 1372.92 5
 -5 14 0 -159.151 465.117 5
 -5 14 1 61874.7 3394.1 5
 -5 14 2 63626.7 3496.24 5
 -5 14 3 4726.39 1041.23 5
 -5 14 4 10208.4 1447.85 5
 -5 14 5 7196.65 1209.41 5
 -5 14 6 41425.7 2948.62 5
 -5 15 -11 27862.8 2194.73 5
 -5 15 -10 3886.36 849.918 5
 -5 15 -9 15982.2 1660.7 5
 -5 15 -8 36112.3 2474.91 5
 -5 15 -7 1341.2 524.473 5
 -5 15 -6 3739.06 797.122 5
 -5 15 -5 -30.5463 396.889 5
 -5 15 -4 47995.1 2968.27 5
 -5 15 -3 52510 3126.76 5
 -5 15 -2 -427.824 626.502 5
 -5 15 -1 14734.5 1695.18 5
 -5 15 0 4460.89 936.911 5
 -5 15 1 48909.9 3155.24 5
 -5 15 2 32196.9 2601.97 5
 -5 15 3 718.238 578.635 5
 -5 15 4 10683.3 1503.98 5
 -5 16 -10 -620.529 479.845 5
 -5 16 -9 20924.2 1968.69 5
 -5 16 -8 9300.46 1330.01 5
 -5 16 -7 15430.6 1719.86 5
 -5 16 -6 26093.4 2258.09 5
 -5 16 -5 -153.146 438.411 5
 -5 16 -4 22566.2 2139.66 5
 -5 16 -3 9708.28 1463.72 5
 -5 16 -2 14269.3 1699.37 5
 -5 16 -1 19016.6 2023.66 5
 -5 16 0 3173.07 887.354 5
 -5 16 1 30348.6 2568.47 5
 -5 17 -9 11132.2 1508.23 5
 -5 17 -8 1515.05 585.918 5
 -5 17 -7 53857 3357.67 5
 -5 17 -6 31029.5 2550.89 5
 -5 17 -5 1234.64 622.591 5
 -5 17 -4 15906 1876.02 5
 -4 -14 6 -266.616 599.261 2
 -4 -14 7 17637.1 1872.99 2
 -4 -13 1 17049.8 1855.84 3
 -4 -13 2 51378.7 3119.11 3
 -4 -13 3 -171.944 433.73 3
 -4 -13 4 37329.1 2578.66 3
 -4 -13 5 9897.71 1337.7 2
 -4 -13 6 12753 1465.66 2
 -4 -13 7 25977.6 2172.41 2
 -4 -13 8 -82.5576 409.401 2
 -4 -13 9 32524.4 2526.94 2
 -4 -13 10 11392 1524.12 2
 -4 -12 1 52575.9 3100.9 3
 -4 -12 2 61636.9 3312.46 3
 -4 -12 3 4815 863.396 2
 -4 -12 3 2799.27 726.541 3
 -4 -12 4 5079.69 971.743 3
 -4 -12 4 6766.38 1031.36 2
 -4 -12 5 8120.9 1121.41 2
 -4 -12 5 6747.03 1071.42 3
 -4 -12 6 55851.9 3016.95 2
 -4 -12 6 50130.2 2864.23 3
 -4 -12 7 21394.2 1873.54 3
 -4 -12 7 27043.5 2134.78 2
 -4 -12 8 1438.56 451.02 3
 -4 -12 8 2340.32 719.881 2
 -4 -12 9 14702.2 1667.6 2
 -4 -12 10 2617.86 685.516 2
 -4 -12 11 58155.5 3389.72 2
 -4 -12 12 17446.6 1889.84 2
 -4 -11 0 10045.8 1367.15 3
 -4 -11 1 92487.2 3989.69 3
 -4 -11 2 39344.6 2289.72 2
 -4 -11 2 34357.8 2400.38 3
 -4 -11 3 6763.44 1008.25 3
 -4 -11 3 8210.42 1062.42 2
 -4 -11 4 8325.48 1093.47 2
 -4 -11 4 6690.75 1039.74 3
 -4 -11 5 23015.9 1833.6 2
 -4 -11 5 22367.4 1863.5 3
 -4 -11 6 96210.6 3896.7 2
 -4 -11 6 88265.6 3728.58 3
 -4 -11 7 29488.8 2161.41 2
 -4 -11 7 21384.6 1807.86 3
 -4 -11 8 392.882 304.14 3
 -4 -11 8 851.663 302.587 2
 -4 -11 9 531.279 311.38 3
 -4 -11 9 1797.74 611.216 2
 -4 -11 10 31738.4 2232.81 3
 -4 -11 10 33876.5 2436.07 2
 -4 -11 11 58112 3281.74 2
 -4 -11 12 2862.61 751.56 2
 -4 -11 13 9688.26 1393 2
 -4 -11 14 2486.49 633.331 2
 -4 -10 -1 9515.71 1266.15 3
 -4 -10 0 21508.7 1865.8 3
 -4 -10 1 76793 3520.54 3
 -4 -10 1 84932.9 3148.52 2
 -4 -10 2 -189.42 266.805 2
 -4 -10 2 13.9476 351.546 3
 -4 -10 3 54324 2583.61 2
 -4 -10 3 49655.2 2723.94 3
 -4 -10 4 5986.27 947.671 3
 -4 -10 4 6626.02 918.339 2
 -4 -10 5 55566.6 2755.83 2
 -4 -10 5 50131.5 2734.75 3
 -4 -10 6 79663.9 3422.16 3
 -4 -10 6 87250.2 3543.27 2
 -4 -10 7 4429.42 806.956 3
 -4 -10 7 3932.64 744.974 2
 -4 -10 8 31839 2123.6 3
 -4 -10 8 33759.6 2254.46 2
 -4 -10 9 -90.5367 259.656 3
 -4 -10 9 -173.586 360.408 2
 -4 -10 10 67307.2 3355.54 2
 -4 -10 11 59704 3203.43 2
 -4 -10 12 -91.3524 486.716 2
 -4 -10 13 17959.1 1821.79 2
 -4 -10 14 323.556 350.16 2
 -4 -10 15 72713.9 3864.23 2
 -4 -9 -2 37692.2 2476.74 3
 -4 -9 -1 2637.57 676.203 3
 -4 -9 0 27163.6 1651.62 2
 -4 -9 0 25287.6 1966.98 3
 -4 -9 1 18110.2 1385.92 2
 -4 -9 1 16114.1 1552.05 3
 -4 -9 2 31922.5 1854.87 2
 -4 -9 2 29660.9 2067.7 3
 -4 -9 3 57980.3 2580.28 2
 -4 -9 3 57422.8 2833.15 3
 -4 -9 4 1686.29 495.958 3
 -4 -9 4 2994.3 606.573 2
 -4 -9 5 50337.2 2502.61 2
 -4 -9 5 48095.1 2555 3
 -4 -9 6 39439 2316.99 3
 -4 -9 6 41525.6 2312.84 2
 -4 -9 7 20292.1 1646.84 3
 -4 -9 7 21379.8 1672.9 2
 -4 -9 8 47642.4 2676.8 3
 -4 -9 8 47116.3 2568.6 2
 -4 -9 9 509.286 368.396 2
 -4 -9 10 59266.5 3030.89 2
 -4 -9 11 20566.1 1822.97 2
 -4 -9 12 2926.58 699.953 2
 -4 -9 13 38900.5 2596.89 2
 -4 -9 14 877.37 482.816 2
 -4 -9 15 50006.1 3138.3 2
 -4 -9 16 16691.8 1833.17 2
 -4 -8 -3 69763.1 3359.57 3
 -4 -8 -2 57667.6 2977.69 3
 -4 -8 -1 1205.47 309.614 2
 -4 -8 -1 702.691 303.617 3
 -4 -8 0 66405 2435.86 2
 -4 -8 0 63505.3 2997.67 3
 -4 -8 1 162.773 367.386 3
 -4 -8 1 529.818 237.327 2
 -4 -8 2 103190 3236.65 2
 -4 -8 2 99788.6 3687.44 3
 -4 -8 3 53582.7 2381.97 2
 -4 -8 3 54889 2652.97 3
 -4 -8 4 6085.47 869.261 3
 -4 -8 4 6335.22 860.552 2
 -4 -8 5 32330 2014.8 3
 -4 -8 5 36212.2 1995.61 2
 -4 -8 6 708.227 359.87 3
 -4 -8 6 1151.84 345.383 2
 -4 -8 7 90042.6 3385.13 2
 -4 -8 8 83930 3355.24 2
 -4 -8 9 1863.81 513.989 2
 -4 -8 10 56110.7 2829.17 2
 -4 -8 11 8.48128 427.686 2
 -4 -8 12 46914.8 2744.06 2
 -4 -8 13 58377.8 3176.29 2
 -4 -8 14 6262.65 1057.98 2
 -4 -8 15 19252.1 1884.33 2
 -4 -8 16 -175.097 461.194 2
 -4 -8 17 41556.4 2924.61 2
 -4 -7 -3 124208 4344.8 3
 -4 -7 -2 102993 3844.39 3
 -4 -7 -1 446.17 275.484 3
 -4 -7 -1 600.501 228.561 2
 -4 -7 0 33722.5 1604.14 2
 -4 -7 0 34168.6 2089.05 3
 -4 -7 1 21927.6 1338.08 2
 -4 -7 1 18342 1516.53 3
 -4 -7 2 149835 3812.8 2
 -4 -7 2 147840 4366.7 3
 -4 -7 3 6432.24 882.162 3
 -4 -7 3 7131.06 792.37 2
 -4 -7 4 13402.3 1263.49 3
 -4 -7 4 16294.2 1240.18 2
 -4 -7 5 33737.7 1997.83 3
 -4 -7 5 31385.2 1777.58 2
 -4 -7 6 4264.13 687.074 2
 -4 -7 7 190083 4861.98 2
 -4 -7 8 43661.9 2292.11 2
 -4 -7 9 58012.9 2730.96 2
 -4 -7 10 22670.3 1734.81 2
 -4 -7 11 26611.2 1932.88 2
 -4 -7 12 215657 5868.9 2
 -4 -7 13 26881.3 2040.98 2
 -4 -7 14 4213.87 882.83 2
 -4 -7 15 6389.07 1070.81 2
 -4 -7 16 32662.3 2461.42 2
 -4 -7 17 91543.9 4239.93 2
 -4 -7 18 9113.5 1373.18 2
 -4 -6 -4 26410.4 1953.45 3
 -4 -6 -3 129221 4276.73 3
 -4 -6 -2 12207.1 834.286 2
 -4 -6 -2 11829.1 1237.11 3
 -4 -6 -1 28382.5 1332.68 2
 -4 -6 -1 25733.9 1770.77 3
 -4 -6 0 14069.4 976.304 2
 -4 -6 0 11187.6 1158.6 3
 -4 -6 1 119546 3084.22 2
 -4 -6 1 124882 3869.91 3
 -4 -6 2 64734.4 2258.55 2
 -4 -6 2 62246.8 2645.97 3
 -4 -6 3 854.69 372.405 3
 -4 -6 3 853.649 309.79 2
 -4 -6 4 9254.97 1029.61 3
 -4 -6 4 8900.74 864.853 2
 -4 -6 5 2875.07 519.869 2
 -4 -6 6 93863.5 3113.76 2
 -4 -6 7 202272 4845.9 2
 -4 -6 8 212.381 244.058 2
 -4 -6 9 72055.4 2905.73 2
 -4 -6 10 574.259 299.982 2
 -4 -6 11 85547.7 3376.42 2
 -4 -6 12 107570 3933.32 2
 -4 -6 13 2047.47 514.354 2
 -4 -6 14 9202.57 1208.35 2
 -4 -6 15 386.94 260.319 2
 -4 -6 16 79619.9 3724.12 2
 -4 -6 17 66163.2 3498.55 2
 -4 -6 18 -99.8062 370.179 2
 -4 -6 19 19030.5 1960.02 2
 -4 -5 -4 86219.7 3408.61 3
 -4 -5 -3 36864.4 2126.96 3
 -4 -5 -2 22190.2 1022.59 2
 -4 -5 -2 21018.1 1564.44 3
 -4 -5 -1 166427 3273.31 2
 -4 -5 -1 168538 4519.98 3
 -4 -5 0 8250.28 689.562 2
 -4 -5 0 7092.65 875.878 3
 -4 -5 1 112984 2789.42 2
 -4 -5 1 111114 3480 3
 -4 -5 2 71598.9 2726.6 3
 -4 -5 2 70034.3 2220.02 2
 -4 -5 3 52010.9 2335.47 3
 -4 -5 3 49442.9 1911.88 2
 -4 -5 4 31207.2 1548.26 2
 -4 -5 5 6566.11 740.688 2
 -4 -5 6 95080.3 2972.73 2
 -4 -5 7 58259.8 2376.68 2
 -4 -5 8 35063.7 1885.21 2
 -4 -5 9 38852.3 2047.39 2
 -4 -5 10 14056 1285.15 2
 -4 -5 11 114404 3833.85 2
 -4 -5 12 19764.3 1606.33 2
 -4 -5 13 23402.1 1813.4 2
 -4 -5 14 54124.2 2828.75 2
 -4 -5 15 -14.2891 341.384 2
 -4 -5 16 50600.9 2912.88 2
 -4 -5 17 31346.4 2335.85 2
 -4 -5 18 3737.73 833.554 2
 -4 -5 19 11023 1509.1 2
 -4 -4 -4 35927.6 2064.97 3
 -4 -4 -3 284.137 265.9 3
 -4 -4 -2 148517 2667.01 2
 -4 -4 -2 151032 4147.8 3
 -4 -4 -1 168166 3067.47 2
 -4 -4 -1 166350 4313.12 3
 -4 -4 0 408.646 227.947 3
 -4 -4 0 329.046 160.841 2
 -4 -4 1 84666.8 2891.8 3
 -4 -4 1 84437.2 2228.4 2
 -4 -4 2 17252 1264.12 3
 -4 -4 2 16310 970.411 2
 -4 -4 3 166743 3537.22 2
 -4 -4 4 90018.6 2612.26 2
 -4 -4 5 9197.99 826.339 2
 -4 -4 6 38419.2 1119.58 5
 -4 -4 6 39340.2 1808.29 2
 -4 -4 7 9934.85 431.201 5
 -4 -4 7 11089.6 980.894 2
 -4 -4 8 121222 3513.97 2
 -4 -4 9 71077.5 2722.34 2
 -4 -4 10 17204.4 1359.42 2
 -4 -4 11 68401.9 2859.46 2
 -4 -4 12 57.7824 281.797 2
 -4 -4 13 63562.8 2922.2 2
 -4 -4 14 92513 3667.8 2
 -4 -4 15 9837.62 1221.82 2
 -4 -4 16 52517.9 2921.58 2
 -4 -4 17 -103.497 517.772 2
 -4 -4 18 46524.2 2887.56 2
 -4 -4 19 10163 1420.21 2
 -4 -4 20 7858.42 1253.82 2
 -4 -3 -4 37522.8 1996.55 3
 -4 -3 -3 6162.52 809.282 3
 -4 -3 -2 302405 3995.81 2
 -4 -3 -2 303959 6006.04 3
 -4 -3 -1 301702 4216.59 2
 -4 -3 -1 311706 5919.71 3
 -4 -3 0 2052.27 446.177 3
 -4 -3 0 3140.96 360.075 2
 -4 -3 1 4975.74 668.4 3
 -4 -3 1 5186.11 486.416 2
 -4 -3 2 69269 1948.09 2
 -4 -3 3 319986 5124.46 2
 -4 -3 4 250469 4597.16 2
 -4 -3 5 12423.8 598.103 5
 -4 -3 5 10741.5 902.339 2
 -4 -3 6 4286.06 293.678 5
 -4 -3 6 3695.4 546.39 2
 -4 -3 7 54738 2204.13 2
 -4 -3 8 209149 4737.45 2
 -4 -3 9 92225.9 3118.03 2
 -4 -3 10 2282.18 520.301 2
 -4 -3 11 449.272 278.03 2
 -4 -3 12 6556.01 909.149 2
 -4 -3 13 108068 3932.9 2
 -4 -3 14 2627.85 572.868 2
 -4 -3 15 41438.1 2469.39 2
 -4 -3 16 27519.6 2059.05 2
 -4 -3 17 28614.3 2190.74 2
 -4 -3 18 57120.2 3174.77 2
 -4 -3 19 6602.03 1103.88 2
 -4 -3 20 13375.1 1619.39 2
 -4 -2 -5 36869.8 1955.2 3
 -4 -2 -4 37108.7 1890.55 3
 -4 -2 -3 74553 1142.77 2
 -4 -2 -3 92657.6 2928.86 3
 -4 -2 -2 388356 4521.83 2
 -4 -2 -2 397696 6725.02 3
 -4 -2 -1 51160.7 1252.94 2
 -4 -2 -1 51014 2056.28 3
 -4 -2 0 108831 3050.6 3
 -4 -2 0 107459 2118.92 2
 -4 -2 1 64508.2 1747.58 2
 -4 -2 1 68739 2461.12 3
 -4 -2 2 123051 2625.19 2
 -4 -2 3 660877 8291.13 2
 -4 -2 4 185254 3670.25 2
 -4 -2 4 192474 2835.42 5
 -4 -2 5 42515 1699.66 2
 -4 -2 5 45079.9 1024.78 5
 -4 -2 6 904.2 110.697 5
 -4 -2 6 944.3 295.285 2
 -4 -2 7 87453.5 2719.79 2
 -4 -2 8 217105 4690.94 2
 -4 -2 9 13275.5 1101.6 2
 -4 -2 10 11813.4 1062.74 2
 -4 -2 11 2736.61 556.096 2
 -4 -2 12 101179 3487.02 2
 -4 -2 13 80840.1 3242.57 2
 -4 -2 14 3387.49 711.299 2
 -4 -2 15 50718.7 2763.99 2
 -4 -2 16 2211.73 608.409 2
 -4 -2 17 76771.5 3576.75 2
 -4 -2 18 36269 2481.19 2
 -4 -2 19 1153.31 475.576 2
 -4 -2 20 15367.8 1714.75 2
 -4 -1 -16 954.557 683.598 4
 -4 -1 -5 84621.9 2861.24 3
 -4 -1 -4 592.806 229.827 3
 -4 -1 -3 83084.5 2648.52 3
 -4 -1 -2 144510 2023.69 2
 -4 -1 -2 153089 3578.06 3
 -4 -1 -1 99539.9 2761.52 3
 -4 -1 -1 96533.8 1725.91 2
 -4 -1 0 408634 6320.82 3
 -4 -1 0 393155 5009.41 2
 -4 -1 1 754.411 187.712 2
 -4 -1 2 82471.2 2052.98 2
 -4 -1 3 243036 4146.4 2
 -4 -1 4 12100.4 535.847 5
 -4 -1 4 12309.3 857.709 2
 -4 -1 5 115385 1745.17 5
 -4 -1 5 119405 2952.54 2
 -4 -1 6 2528.76 176.317 5
 -4 -1 6 3165.37 503.123 2
 -4 -1 6 2868.71 182.396 5
 -4 -1 7 90005.9 2757.56 2
 -4 -1 8 156236 3891.22 2
 -4 -1 9 12862.2 1088.64 2
 -4 -1 10 49599.2 2287.51 2
 -4 -1 11 1611.29 443.764 2
 -4 -1 12 193453 5014.24 2
 -4 -1 13 64853 2851.92 2
 -4 -1 14 13493.5 1298.57 2
 -4 -1 15 33563.8 2171.3 2
 -4 -1 16 25420.4 1956.6 2
 -4 -1 17 44653.4 2717.52 2
 -4 -1 18 10886.6 1427.43 2
 -4 -1 19 18035.1 1788.69 2
 -4 0 -17 4094.41 931.333 4
 -4 0 -16 24882.9 2236.58 4
 -4 0 -15 83710.8 3960.56 4
 -4 0 -5 206668 4461.27 3
 -4 0 -4 16515 1114.6 3
 -4 0 -3 27856.9 602.247 2
 -4 0 -3 31941 1488.85 3
 -4 0 -2 9572.17 436.232 2
 -4 0 -2 8791.33 759.969 3
 -4 0 -1 464266 6774.68 3
 -4 0 -1 469452 5501.89 2
 -4 0 0 18890 1097.7 3
 -4 0 0 18331.5 790.432 2
 -4 0 1 465.004 157.446 2
 -4 0 2 99517.1 2304.77 2
 -4 0 3 4219.61 484.248 2
 -4 0 4 92271.1 2450.46 2
 -4 0 5 127527 3082.09 2
 -4 0 5 126229 1998.73 5
 -4 0 6 4710.87 589.331 2
 -4 0 6 4838.37 311.231 5
 -4 0 7 168067 2368.53 5
 -4 0 7 170664 3951.28 2
 -4 0 8 746.884 136.658 5
 -4 0 8 475.301 245.86 2
 -4 0 9 68936.8 2573.42 2
 -4 0 9 67826.9 1349.03 5
 -4 0 10 78075 1563.31 5
 -4 0 10 77876.2 2859.28 2
 -4 0 11 1105.08 344.501 2
 -4 0 12 73799.1 2975.94 2
 -4 0 13 7101.27 954.571 2
 -4 0 14 65595.4 2986.64 2
 -4 0 15 21968.7 1741.04 2
 -4 0 16 19361 1631.92 2
 -4 0 17 35090.9 2344.92 2
 -4 0 18 -177.292 383.116 2
 -4 0 19 22811.6 2083.92 2
 -4 1 -17 -2.28056 438.852 4
 -4 1 -16 65374.9 3480.73 4
 -4 1 -15 78411.1 3688.39 4
 -4 1 -14 1115.41 562.752 4
 -4 1 -7 1276.59 136.035 2
 -4 1 -6 229277 2673.83 2
 -4 1 -5 299492 3347.57 2
 -4 1 -4 389.386 192.283 3
 -4 1 -4 828.936 122.375 2
 -4 1 -3 87985.3 1535.08 2
 -4 1 -3 87455.1 2373.02 3
 -4 1 -2 37645.1 1454.27 3
 -4 1 -1 83888.7 2185.95 3
 -4 1 1 571.537 167.903 2
 -4 1 2 55229.1 1704.41 2
 -4 1 3 95504.1 2428.65 2
 -4 1 4 248973 4433.73 2
 -4 1 4 241238 3457.53 5
 -4 1 5 111212 2045.59 5
 -4 1 5 115491 2970.34 2
 -4 1 6 228437 4569.48 2
 -4 1 6 220371 3259.99 5
 -4 1 7 78226.8 2606.86 2
 -4 1 7 77331.9 1720.84 5
 -4 1 8 45132.8 2021.7 2
 -4 1 8 46925.8 1326.29 5
 -4 1 9 266089 5549.77 2
 -4 1 9 267542 3935.7 5
 -4 1 10 78362.8 2882.61 2
 -4 1 10 78247 1880.26 5
 -4 1 11 8188.32 607.374 5
 -4 1 11 6624.24 853.26 2
 -4 1 12 25459.6 1726.05 2
 -4 1 13 11228.2 1201.29 2
 -4 1 14 192172 5292.14 2
 -4 1 15 25679.9 1906.33 2
 -4 1 16 10849.3 1304.25 2
 -4 1 17 12574.7 1381.03 2
 -4 1 18 5696.73 996.299 2
 -4 2 -18 25685.5 2226.19 4
 -4 2 -17 -479.596 456.712 4
 -4 2 -16 47518.5 2867.73 4
 -4 2 -15 13914 1511.31 4
 -4 2 -14 29850.2 2079.44 4
 -4 2 -7 21255.2 781.812 2
 -4 2 -6 290067 3792.07 2
 -4 2 -5 63851.3 1414.26 2
 -4 2 -4 24045.7 840.154 2
 -4 2 -4 23589.1 1128.75 3
 -4 2 -3 23334.7 855.33 2
 -4 2 -3 22393.4 1048.66 3
 -4 2 -2 199626 3458.82 3
 -4 2 -1 2975.69 366.409 3
 -4 2 3 108129 2229.2 5
 -4 2 4 300821 5120.49 2
 -4 2 4 292220 4247.55 5
 -4 2 5 46315.5 1845.45 2
 -4 2 5 45102.4 1365.94 5
 -4 2 6 184059 3226.91 5
 -4 2 6 197230 4261.82 2
 -4 2 7 642.831 199.268 5
 -4 2 7 799.045 304.665 2
 -4 2 8 315084 6034.91 2
 -4 2 8 310236 4722.41 5
 -4 2 9 192427 4638.33 2
 -4 2 9 183279 3457.04 5
 -4 2 10 13116.4 1183.29 2
 -4 2 10 13426.3 856.676 5
 -4 2 11 38070.7 2071.83 2
 -4 2 11 38734.1 1522.28 5
 -4 2 12 2778.91 605.121 2
 -4 2 12 3051.43 434.134 5
 -4 2 13 92877.2 3481.31 2
 -4 2 14 184477 5204.47 2
 -4 2 15 12987.3 1383.4 2
 -4 2 16 6139.82 951.42 2
 -4 2 17 1317.25 490.485 2
 -4 3 -17 3250.22 807.583 4
 -4 3 -16 13189.9 1475.5 4
 -4 3 -15 4500.46 843.712 4
 -4 3 -14 67150.8 3034.32 4
 -4 3 -13 24225.5 1718.9 4
 -4 3 -12 18819 1440.12 4
 -4 3 -4 218300 3616.91 3
 -4 3 -3 13330.3 717.814 3
 -4 3 -2 239889 3608.98 3
 -4 3 1 81053 2034.14 5
 -4 3 2 488.567 175.304 5
 -4 3 3 44894.2 1268.08 1
 -4 3 3 42082.9 1431.44 5
 -4 3 4 213905 3721.28 5
 -4 3 4 222609 3388.02 1
 -4 3 5 31997.7 1280.43 5
 -4 3 6 142613 3069.36 5
 -4 3 6 147531 3704.57 2
 -4 3 7 20628.8 1094.72 5
 -4 3 7 20326.5 1350.17 2
 -4 3 8 121572 2901.12 5
 -4 3 8 125699 3659 2
 -4 3 9 50121 1828.06 5
 -4 3 9 48462.8 2246.03 2
 -4 3 10 598.761 293.062 2
 -4 3 10 444.24 206.898 5
 -4 3 11 24853.7 1727.26 2
 -4 3 11 28932.7 1436.46 5
 -4 3 12 1960.95 414.919 5
 -4 3 12 1211.91 419.704 2
 -4 3 13 91608.1 3536.25 2
 -4 3 14 46307 2544.81 2
 -4 3 15 556.927 338.753 2
 -4 3 16 20197.9 1751.12 2
 -4 3 17 1942.95 596.673 2
 -4 4 -16 2101.61 609.83 4
 -4 4 -15 17095.2 1507.16 4
 -4 4 -14 51865 2524.14 4
 -4 4 -13 17446.9 1382.04 4
 -4 4 -12 25191.6 1592.98 4
 -4 4 -11 781.301 301.293 4
 -4 4 -3 736.535 157.763 3
 -4 4 -2 156284 2444.97 3
 -4 4 0 149840 2430.84 4
 -4 4 0 151019 3138.08 5
 -4 4 1 200313 3064.18 1
 -4 4 1 191059 3620.65 5
 -4 4 2 43900.9 1550.3 5
 -4 4 2 36556.2 1020.76 1
 -4 4 3 97764.9 1733.58 1
 -4 4 3 98359.3 2455.77 5
 -4 4 4 140567 3095.04 5
 -4 4 4 141037 2217.17 1
 -4 4 5 125213 2163.57 1
 -4 4 5 125776 2983.68 5
 -4 4 6 187375 3865.96 5
 -4 4 7 295.098 168.495 5
 -4 4 8 58534.3 2133.89 5
 -4 4 8 58735.9 2491.73 2
 -4 4 9 12450.3 1191.87 2
 -4 4 9 12733.8 988.769 5
 -4 4 10 48867 2393.07 2
 -4 4 10 53006.3 2102.99 5
 -4 4 11 135628 3571.64 5
 -4 4 11 124278 4024.85 2
 -4 4 11 132510 3125.79 1
 -4 4 12 889.693 407.564 2
 -4 4 12 1079.99 382.069 5
 -4 4 13 75549.6 3249.63 2
 -4 4 13 76965.4 2753.6 5
 -4 4 14 -24.528 311.568 2
 -4 4 15 25741.2 1953.61 2
 -4 4 16 14415.8 1504.46 2
 -4 5 -15 23568.2 1681.12 4
 -4 5 -14 60214.1 2584.58 4
 -4 5 -13 276.965 230.725 4
 -4 5 -12 22375.8 1403.89 4
 -4 5 -11 6536.58 721.73 4
 -4 5 -10 94073.2 2658.53 4
 -4 5 -9 57816.6 1897.84 4
 -4 5 -8 8577.34 659.854 4
 -4 5 -3 7574.98 352.043 3
 -4 5 -2 112283 1718.56 3
 -4 5 -2 114519 2838.45 5
 -4 5 -1 23027.7 1205.65 5
 -4 5 -1 24886.5 699.103 4
 -4 5 0 819986 10147.9 5
 -4 5 0 805747 8561.89 4
 -4 5 1 420205 4959.51 1
 -4 5 1 408497 6227.73 5
 -4 5 2 19544.5 605.238 1
 -4 5 2 18637.7 1098.28 5
 -4 5 3 20291.7 1191.84 5
 -4 5 4 23308.7 1277.96 5
 -4 5 5 269810 5042 5
 -4 5 6 114201 1849.11 1
 -4 5 6 111856 1719.39 1
 -4 5 7 9604.01 495.306 1
 -4 5 7 10937.8 959.024 5
 -4 5 8 20870.5 1340.21 5
 -4 5 8 21351.1 850.198 1
 -4 5 9 1891.04 283.872 1
 -4 5 9 1855.67 425.432 5
 -4 5 9 1607.77 428.242 2
 -4 5 10 167248 4222.19 5
 -4 5 10 164353 4707.34 2
 -4 5 11 49187.3 2227.45 5
 -4 5 11 46798.5 2459.4 2
 -4 5 12 34202.4 2152.29 2
 -4 5 12 36180.6 1952.09 5
 -4 5 13 11599.5 1285.53 2
 -4 5 13 15949.5 1327.14 5
 -4 5 14 31353 2156.28 2
 -4 5 15 53264.7 2864.63 2
 -4 6 -13 18373.8 1304.44 4
 -4 6 -12 47654.6 1958.59 4
 -4 6 -11 15550.9 1030.2 4
 -4 6 -10 113911 2743.4 4
 -4 6 -9 6013.9 538.85 4
 -4 6 -8 11820.4 681.244 4
 -4 6 -7 45969.8 1215.56 4
 -4 6 -6 48272 1071.97 4
 -4 6 -5 199049 2336.69 4
 -4 6 -3 10183 854.136 5
 -4 6 -2 37897.5 1654.87 5
 -4 6 -1 185599 3934.79 5
 -4 6 0 534245 7737.95 5
 -4 6 1 86545.1 2583.63 5
 -4 6 2 24165.1 1344.26 5
 -4 6 3 5471.34 661.873 5
 -4 6 4 91624.7 2831.37 5
 -4 6 5 227795 4853.28 5
 -4 6 6 57852.7 2355.48 5
 -4 6 7 1605.84 449.139 5
 -4 6 8 1317.57 427.366 5
 -4 6 9 85462.6 3047.11 5
 -4 6 10 98531.8 3341.69 5
 -4 6 10 97565.3 3644.15 2
 -4 6 11 3934.94 668.675 5
 -4 6 11 3226.02 716.076 2
 -4 6 12 61977 2742.24 5
 -4 6 12 57779.6 2878.34 2
 -4 6 13 517.715 292.169 2
 -4 6 13 374.13 250.269 5
 -4 6 14 41531.4 2560.58 2
 -4 6 14 52026.2 2611.16 5
 -4 7 -10 56101.2 1736.28 4
 -4 7 -9 19288.8 895.555 4
 -4 7 -8 58650 1412.7 4
 -4 7 -6 98582.9 2967.03 5
 -4 7 -5 72261 2514.04 5
 -4 7 -4 5782.27 686.613 5
 -4 7 -3 119041 3213.47 5
 -4 7 -2 92.1643 183.988 5
 -4 7 -1 68800.8 2378.11 5
 -4 7 0 99002.7 2917.71 5
 -4 7 1 -9.28442 210.789 5
 -4 7 2 23920 1440.93 5
 -4 7 3 472.438 246.398 5
 -4 7 4 129926 3675.67 5
 -4 7 5 114718 3515.78 5
 -4 7 6 424.616 268.367 5
 -4 7 7 28079 1750.4 5
 -4 7 8 425.574 306.946 5
 -4 7 9 110299 3679.12 5
 -4 7 10 74551.8 3071.23 5
 -4 7 11 24558.9 1878.4 2
 -4 7 11 25383.6 1801.49 5
 -4 7 12 37738.7 2399.6 2
 -4 7 12 37790.1 2249.62 5
 -4 7 13 3713.4 719.166 5
 -4 7 13 3080.19 729.019 2
 -4 7 14 59014.7 2952.15 5
 -4 8 -8 117914 3480.59 5
 -4 8 -7 1033.28 341.242 5
 -4 8 -6 57803.1 2326.42 5
 -4 8 -5 59.6492 231.268 5
 -4 8 -4 112942 3267.74 5
 -4 8 -3 124147 3435.31 5
 -4 8 -2 3218.13 518.255 5
 -4 8 -1 33346.7 997.468 3
 -4 8 -1 32695.3 1718.57 5
 -4 8 0 1706.88 411.512 5
 -4 8 1 57383.8 2357.32 5
 -4 8 2 84304.6 2935.85 5
 -4 8 3 4777.3 720.62 5
 -4 8 4 113905 3633.88 5
 -4 8 5 -84.1685 406.504 5
 -4 8 6 51234.8 2511.94 5
 -4 8 7 95992.2 3478.31 5
 -4 8 8 230.347 277.805 5
 -4 8 9 94703.5 3593.24 5
 -4 8 10 28255.4 1977.05 5
 -4 8 11 46799.6 2614.92 5
 -4 8 11 42529.7 2572.54 2
 -4 8 12 21401.5 1766.65 5
 -4 8 12 16711.1 1650.39 2
 -4 8 13 5764.41 966.732 5
 -4 8 14 52170.5 2956.08 5
 -4 9 -13 75808.1 3060.73 5
 -4 9 -12 4880.42 802.101 5
 -4 9 -11 11445.7 1136.58 5
 -4 9 -10 1641.52 423.136 5
 -4 9 -9 120753 3669.55 5
 -4 9 -8 169259 4369.74 5
 -4 9 -7 811.145 341.74 5
 -4 9 -6 3940.52 645.171 5
 -4 9 -5 2693.1 537.17 5
 -4 9 -4 142097 3874.7 5
 -4 9 -3 52443.7 2284.87 5
 -4 9 -2 5393.94 752.679 5
 -4 9 -1 21496.2 1485.78 5
 -4 9 0 4345.04 676.318 5
 -4 9 1 161434 4368.64 5
 -4 9 2 108163 3581.02 5
 -4 9 3 22770.9 1655.89 5
 -4 9 4 24101.1 1732.86 5
 -4 9 5 16631.5 1478.88 5
 -4 9 6 128667 4275.29 5
 -4 9 7 38273.3 2309.09 5
 -4 9 8 1446.73 535.878 5
 -4 9 9 66235.7 3130.83 5
 -4 9 10 4690.25 933.785 5
 -4 9 11 62824.8 3182.17 5
 -4 9 12 28036.2 2193.62 5
 -4 9 13 9133.95 1270.33 5
 -4 9 14 13419.5 1549.16 5
 -4 10 -13 15323.5 1375.97 5
 -4 10 -12 521.022 301.211 5
 -4 10 -11 9456.45 1049.43 5
 -4 10 -10 15345.6 1316.19 5
 -4 10 -9 199631 5003.74 5
 -4 10 -8 54409.9 2455.58 5
 -4 10 -7 4048.15 666.566 5
 -4 10 -6 21870.1 1532.47 5
 -4 10 -5 22214 1536.23 5
 -4 10 -4 72165.9 2811.99 5
 -4 10 -3 16375.4 1341.7 5
 -4 10 -2 16147.6 1347.12 5
 -4 10 -1 10607.2 1121.62 5
 -4 10 0 23531.1 1662.24 5
 -4 10 1 136342 4257.12 5
 -4 10 2 15868.8 1455.43 5
 -4 10 3 75831.2 3219.99 5
 -4 10 4 17158.3 1566.37 5
 -4 10 5 59708.7 2946.45 5
 -4 10 6 66900.1 3167.02 5
 -4 10 7 23293.2 1886.72 5
 -4 10 8 12737.8 1450.93 5
 -4 10 9 1253.28 541.3 5
 -4 10 10 54611.9 3057.08 5
 -4 10 11 95835.9 4157.37 5
 -4 10 12 22702.6 2050.76 5
 -4 10 13 19061.6 1915.15 5
 -4 11 -13 -517.452 332.468 5
 -4 11 -12 29770.8 1963.25 5
 -4 11 -11 20396 1579.36 5
 -4 11 -10 18205 1491.77 5
 -4 11 -9 73981 3018.06 5
 -4 11 -8 1014.42 337.24 5
 -4 11 -7 69889.3 2890.68 5
 -4 11 -6 7528.15 945.476 5
 -4 11 -5 20551.3 1571.04 5
 -4 11 -4 93419.4 3410.05 5
 -4 11 -3 1821.99 536.356 5
 -4 11 -2 35740.8 2132.14 5
 -4 11 -1 11095.3 1215.85 5
 -4 11 0 49242.6 2582.75 5
 -4 11 1 122133 4220.31 5
 -4 11 2 2988.5 664.334 5
 -4 11 3 103818 4012.88 5
 -4 11 4 2053.4 574.333 5
 -4 11 5 47217.1 2740.38 5
 -4 11 6 64480 3283.74 5
 -4 11 7 768.995 469.86 5
 -4 11 8 19353.7 1819.12 5
 -4 11 9 743.618 457.476 5
 -4 11 10 60603.8 3379.14 5
 -4 11 11 54888.8 3265.78 5
 -4 11 12 823.228 507.503 5
 -4 12 -12 47098.4 2521.61 5
 -4 12 -11 10610.1 1194 5
 -4 12 -10 15593.6 1425.08 5
 -4 12 -9 3304.85 628.633 5
 -4 12 -8 36935.3 2184.85 5
 -4 12 -7 51331.8 2590.21 5
 -4 12 -6 895.783 372.828 5
 -4 12 -5 66261.4 2983.72 5
 -4 12 -4 26593.6 1884.83 5
 -4 12 -3 27845.1 1933.43 5
 -4 12 -2 70887.1 3200.15 5
 -4 12 -1 12307.5 1367.96 5
 -4 12 0 43989.3 2591.73 5
 -4 12 1 25485.7 2022.64 5
 -4 12 2 31322.6 2243.42 5
 -4 12 3 55946.5 3056.33 5
 -4 12 4 1625.87 512.176 5
 -4 12 5 48897.2 2936.73 5
 -4 12 6 15318.1 1653.56 5
 -4 12 7 18290.2 1861.6 5
 -4 12 8 43400.9 2881.01 5
 -4 12 9 5178.25 972.012 5
 -4 12 10 40444.1 2889.66 5
 -4 13 -11 101.701 277.919 5
 -4 13 -10 16428.5 1522.7 5
 -4 13 -9 2557.24 650.807 5
 -4 13 -8 72142.9 3218.87 5
 -4 13 -7 80563 3422.53 5
 -4 13 -6 -95.133 285.741 5
 -4 13 -5 19064.1 1676.65 5
 -4 13 -4 3541.17 708.026 5
 -4 13 -3 102762 4007.99 5
 -4 13 -2 48359.7 2776.38 5
 -4 13 -1 2820.74 714.26 5
 -4 13 0 13222.4 1508.81 5
 -4 13 1 109.397 421.703 5
 -4 13 2 98434.6 4227.56 5
 -4 13 3 35467.6 2541.31 5
 -4 13 4 1312.02 580.238 5
 -4 13 5 23269.6 2119.25 5
 -4 13 6 961.704 526.313 5
 -4 13 7 86842.9 4216.52 5
 -4 13 8 33464.6 2643.61 5
 -4 14 -11 5852.14 944.364 5
 -4 14 -10 16717.8 1609.62 5
 -4 14 -9 2289.02 569.058 5
 -4 14 -8 55468.2 2928.66 5
 -4 14 -7 23161.5 1907.7 5
 -4 14 -6 4158.34 843.204 5
 -4 14 -5 8575.53 1209.61 5
 -4 14 -4 46040.1 2784.82 5
 -4 14 -3 117859 4552.17 5
 -4 14 -2 17019.3 1759.64 5
 -4 14 -1 4863.56 926.929 5
 -4 14 0 1125.56 434.864 5
 -4 14 1 52566.8 3154.83 5
 -4 14 2 94468.8 4300.22 5
 -4 14 3 15394.8 1764.74 5
 -4 14 4 4019.78 940.076 5
 -4 14 5 9595.82 1455.36 5
 -4 14 6 34861.6 2718.11 5
 -4 15 -10 1293.25 501.89 5
 -4 15 -9 9069.27 1231.31 5
 -4 15 -8 24020.3 2011.22 5
 -4 15 -7 -328.603 614.295 5
 -4 15 -6 22241.9 1976.04 5
 -4 15 -5 1251.85 501.226 5
 -4 15 -4 38933.8 2672.18 5
 -4 15 -3 51740.8 3133.5 5
 -4 15 -2 3969.39 883.031 5
 -4 15 -1 17111.5 1834.36 5
 -4 15 0 -387.336 517.954 5
 -4 15 1 33204.6 2613.86 5
 -4 15 2 40612.9 2924.47 5
 -4 15 3 4525.9 982.807 5
 -4 15 4 8259.07 1384.13 5
 -4 16 -9 14288.3 1637.58 5
 -4 16 -8 9533.24 1336.77 5
 -4 16 -7 11500.6 1529.87 5
 -4 16 -6 34520.4 2600.63 5
 -4 16 -5 1618.99 591.083 5
 -4 16 -4 13868.1 1702.36 5
 -4 16 -3 6118.76 1164.5 5
 -4 16 -2 8432.97 1378.53 5
 -4 16 -1 35088.3 2750.58 5
 -4 16 0 -601.261 521.936 5
 -4 16 1 22946.7 2265.97 5
 -4 17 -8 1537.01 650.194 5
 -4 17 -7 37437.2 2824.54 5
 -4 17 -6 61461.2 3646.77 5
 -4 17 -5 -454.111 655.057 5
 -4 17 -4 11327.9 1628.9 5
 -3 -15 5 65748.4 3629.04 2
 -3 -14 4 27090.7 2215.76 2
 -3 -14 5 76023.6 3797.58 2
 -3 -14 6 2117.99 724.03 2
 -3 -14 7 22019.4 2095.09 2
 -3 -14 8 4174.37 918.193 2
 -3 -14 9 15166.7 1793.78 2
 -3 -13 2 36675.3 2525.31 3
 -3 -13 3 5477.59 962.32 3
 -3 -13 3 7123.43 1098.8 2
 -3 -13 4 15917.6 1625.58 2
 -3 -13 5 5483.48 1039.93 2
 -3 -13 6 23949.1 2095.97 2
 -3 -13 7 45056 2867.17 2
 -3 -13 8 296.081 408.844 2
 -3 -13 9 23474.2 2141.45 2
 -3 -13 10 17326.3 1872.38 2
 -3 -13 11 10671.5 1495.61 2
 -3 -13 12 43838.9 3093.93 2
 -3 -12 1 52667.5 2976.74 3
 -3 -12 2 63869.7 3036.22 2
 -3 -12 2 56250.6 3017.76 3
 -3 -12 3 299.176 294.776 3
 -3 -12 3 77.1221 294.704 2
 -3 -12 4 21272.4 1840.14 2
 -3 -12 4 16337.1 1583.4 3
 -3 -12 5 5973.46 969.059 3
 -3 -12 5 7439.27 1076.19 2
 -3 -12 6 110135 4308.55 2
 -3 -12 6 105119 3985.85 3
 -3 -12 7 72207.6 3506.96 2
 -3 -12 7 63596.9 3069.9 3
 -3 -12 8 2255.48 655.827 2
 -3 -12 9 6710.06 1102.87 2
 -3 -12 10 813.076 401.29 2
 -3 -12 11 57673.3 3407.65 2
 -3 -12 12 41405.9 2907.66 2
 -3 -12 13 -21.7619 474.619 2
 -3 -12 14 8121.81 1348.38 2
 -3 -11 0 15847 1589.7 3
 -3 -11 1 99369.5 3626.49 2
 -3 -11 1 93950.6 3863.11 3
 -3 -11 2 67762.5 3028.42 2
 -3 -11 2 63105.5 3108.73 3
 -3 -11 3 13404.2 1352.85 2
 -3 -11 3 11359.8 1271.97 3
 -3 -11 4 18627.4 1619.58 2
 -3 -11 4 16011.1 1503.57 3
 -3 -11 5 31223.5 2135.47 2
 -3 -11 5 30922.5 2073.54 3
 -3 -11 6 106103 4069.92 2
 -3 -11 6 101085 3795.43 3
 -3 -11 7 23456.8 1914.6 2
 -3 -11 7 22688.4 1763.68 3
 -3 -11 8 7117.76 980.694 3
 -3 -11 8 7530.31 1103.96 2
 -3 -11 9 2922.57 629.451 3
 -3 -11 9 3425.98 792.255 2
 -3 -11 10 31175.8 2338.25 2
 -3 -11 11 110444 4542.28 2
 -3 -11 12 27899.7 2302.95 2
 -3 -11 13 7744.18 1213.18 2
 -3 -11 14 5196.26 1055.17 2
 -3 -11 15 11924.6 1580 2
 -3 -10 -1 7156.68 1083.85 3
 -3 -10 0 8266.29 1149 3
 -3 -10 0 9784.33 1017.82 2
 -3 -10 1 67491.5 2805.41 2
 -3 -10 1 60611.1 2965.1 3
 -3 -10 2 1404.88 463.44 3
 -3 -10 2 2267.26 504.856 2
 -3 -10 3 74076.5 3051.95 2
 -3 -10 3 71255.2 3117.5 3
 -3 -10 4 7679.65 1024.23 3
 -3 -10 4 9912.61 1143.43 2
 -3 -10 5 54186.2 2697.86 2
 -3 -10 5 45505.3 2459.92 3
 -3 -10 6 75031.6 3118.71 3
 -3 -10 6 80024.2 3405.55 2
 -3 -10 7 426.745 246.713 3
 -3 -10 7 327.852 343.732 2
 -3 -10 8 17551.6 1486.19 3
 -3 -10 8 19583.9 1699.55 2
 -3 -10 9 2517.65 651.619 3
 -3 -10 9 3215.14 722.087 2
 -3 -10 10 36654.9 2431.14 2
 -3 -10 11 75556.8 3592.9 2
 -3 -10 12 433.392 328.475 2
 -3 -10 13 18380.9 1801.41 2
 -3 -10 14 505.039 307.917 2
 -3 -10 15 50146.9 3206.27 2
 -3 -10 16 47841.4 3182.23 2
 -3 -9 -1 23843.3 1847.82 3
 -3 -9 0 21527 1717.35 3
 -3 -9 0 25386.3 1586.42 2
 -3 -9 1 62754.2 2563.82 2
 -3 -9 1 59971.5 2846.34 3
 -3 -9 2 16704.7 1346.05 2
 -3 -9 2 14862.6 1381.82 3
 -3 -9 3 157602 4347.39 2
 -3 -9 3 148973 4449.16 3
 -3 -9 4 2547.03 556.777 3
 -3 -9 4 3394.09 639.796 2
 -3 -9 5 41954.3 2247.43 3
 -3 -9 5 45633.1 2357.21 2
 -3 -9 6 44116.8 2300.94 3
 -3 -9 6 50307.6 2525.51 2
 -3 -9 7 5514.34 825.627 3
 -3 -9 7 8143.07 1050.97 2
 -3 -9 8 56476.2 2794.01 2
 -3 -9 9 7620.42 1049.38 2
 -3 -9 10 78032.7 3448.89 2
 -3 -9 11 12015.1 1370.8 2
 -3 -9 12 10137.3 1277.4 2
 -3 -9 13 45443.2 2820.72 2
 -3 -9 14 1645.39 554.65 2
 -3 -9 15 39241.4 2729.44 2
 -3 -9 16 11092.2 1457.28 2
 -3 -9 17 5386.96 1066.8 2
 -3 -8 -2 210634 5650.54 3
 -3 -8 -1 16421.6 1162.76 2
 -3 -8 -1 12935.3 1304.05 3
 -3 -8 0 39530 1883.43 2
 -3 -8 0 37099.8 2177.49 3
 -3 -8 1 20563.1 1368.09 2
 -3 -8 1 17252 1431.85 3
 -3 -8 2 77660.9 2787.35 2
 -3 -8 2 78832.7 3065.22 3
 -3 -8 3 86924.3 3018.99 2
 -3 -8 3 81218.3 3102.73 3
 -3 -8 4 52.3461 322.228 3
 -3 -8 4 487.371 302.86 2
 -3 -8 5 41073.6 2133.42 3
 -3 -8 5 42915.9 2169.04 2
 -3 -8 6 1394.76 409.853 3
 -3 -8 6 1496.31 428.195 2
 -3 -8 7 61175.6 2724.71 2
 -3 -8 8 138942 4311.25 2
 -3 -8 9 11813.9 1263.85 2
 -3 -8 10 76981 3332.43 2
 -3 -8 11 -89.3344 332.158 2
 -3 -8 12 92664.5 3804.62 2
 -3 -8 13 57554.8 3106.15 2
 -3 -8 14 1861.58 641.425 2
 -3 -8 15 31045.7 2362.55 2
 -3 -8 16 201.28 358.885 2
 -3 -8 17 54226.1 3275.27 2
 -3 -8 18 23374.7 2242.34 2
 -3 -7 -3 217146 5677.41 3
 -3 -7 -2 91700.6 3450.76 3
 -3 -7 -1 206.217 302.84 3
 -3 -7 -1 1284.33 324.821 2
 -3 -7 0 26394.8 1424.1 2
 -3 -7 0 24548.7 1701.94 3
 -3 -7 1 34716.6 1672.59 2
 -3 -7 1 31620 1874.86 3
 -3 -7 2 148474 3785 2
 -3 -7 2 150850 4160.55 3
 -3 -7 3 68190.1 2679.45 3
 -3 -7 3 70835.8 2549.56 2
 -3 -7 4 31872.7 1795.51 3
 -3 -7 4 30787.6 1691.53 2
 -3 -7 5 17836.7 1424.45 3
 -3 -7 5 16945.6 1283.73 2
 -3 -7 6 24109.9 1575.49 2
 -3 -7 7 137926 4010.27 2
 -3 -7 8 59372.6 2647.06 2
 -3 -7 9 57457.3 2671.13 2
 -3 -7 10 18118.1 1524.82 2
 -3 -7 11 20912.5 1693.72 2
 -3 -7 12 100372 3878.7 2
 -3 -7 13 16866.9 1608.87 2
 -3 -7 14 3209.23 755.396 2
 -3 -7 15 7780.01 1141.26 2
 -3 -7 16 26794.2 2212.71 2
 -3 -7 17 101446 4434.97 2
 -3 -7 18 24047.2 2205.94 2
 -3 -7 19 8792.45 1374.45 2
 -3 -6 -3 65077.5 2846.36 3
 -3 -6 -2 9236.74 715.014 2
 -3 -6 -2 9314.04 1050.66 3
 -3 -6 -1 49938 1788.42 2
 -3 -6 -1 48196.6 2313.09 3
 -3 -6 0 10864.6 852.586 2
 -3 -6 0 9038.75 959.038 3
 -3 -6 1 57406 2072.07 2
 -3 -6 1 55161.4 2379.77 3
 -3 -6 2 164792 4187.36 3
 -3 -6 2 172489 3831.41 2
 -3 -6 3 4393.16 627.962 3
 -3 -6 3 4831.55 620.156 2
 -3 -6 4 89918.6 3095.01 3
 -3 -6 4 77745.7 2614.65 2
 -3 -6 5 2839.85 505.43 2
 -3 -6 6 83127.7 2860.09 2
 -3 -6 7 195239 4702.98 2
 -3 -6 8 1540.31 453.669 2
 -3 -6 9 69940.3 2826.28 2
 -3 -6 10 628.127 341.541 2
 -3 -6 11 97860.7 3578.24 2
 -3 -6 12 77803.5 3262.37 2
 -3 -6 13 1734.24 471.963 2
 -3 -6 14 15227.6 1493.16 2
 -3 -6 15 9981.24 1295.59 2
 -3 -6 16 31764 2320.8 2
 -3 -6 17 85561.2 3962.5 2
 -3 -6 18 6831.52 1157.21 2
 -3 -6 19 7335.63 1262.17 2
 -3 -5 -3 5423.86 782.015 3
 -3 -5 -2 7129.29 581.242 2
 -3 -5 -2 7101.93 864.947 3
 -3 -5 -1 176522 3378.74 2
 -3 -5 -1 179770 4422.33 3
 -3 -5 0 1950.91 431.906 3
 -3 -5 0 2130.33 351.942 2
 -3 -5 1 25588.8 1239.46 2
 -3 -5 1 25998.8 1540.23 3
 -3 -5 2 98428.7 3006.1 3
 -3 -5 2 97717 2618.75 2
 -3 -5 3 27208.5 1601.17 3
 -3 -5 3 24564.3 1306.47 2
 -3 -5 4 22019.8 1279.93 2
 -3 -5 5 8585.12 819.767 2
 -3 -5 6 61220.3 2306.4 2
 -3 -5 7 50991.6 1232.65 5
 -3 -5 7 53028.4 2203.32 2
 -3 -5 8 67298.5 2582.51 2
 -3 -5 9 140457 3966.35 2
 -3 -5 10 499.794 317.949 2
 -3 -5 11 166674 4631.54 2
 -3 -5 12 77887.4 3164.41 2
 -3 -5 13 2658.82 622.863 2
 -3 -5 14 72694 3246.47 2
 -3 -5 15 7043.22 1026.74 2
 -3 -5 16 48392 2803.33 2
 -3 -5 17 37041.5 2501.9 2
 -3 -5 18 11993.5 1467.49 2
 -3 -5 19 25957.6 2251.95 2
 -3 -5 20 1230.39 559.352 2
 -3 -4 -4 40473.9 2085.05 3
 -3 -4 -3 18274.4 1349.86 3
 -3 -4 -2 166455 2895.92 2
 -3 -4 -2 179780 4322.88 3
 -3 -4 -1 259021 4019.94 2
 -3 -4 -1 270246 5350.6 3
 -3 -4 0 6992.94 574.042 2
 -3 -4 0 6645.26 758.818 3
 -3 -4 1 123807 3277.71 3
 -3 -4 1 121165 2664.67 2
 -3 -4 2 15678.6 1137.84 3
 -3 -4 2 16888 968.742 2
 -3 -4 3 344127 5458.79 2
 -3 -4 4 224267 4264.56 2
 -3 -4 5 15202.9 693.596 5
 -3 -4 5 14944.2 1042.39 2
 -3 -4 6 68268.3 1362.27 5
 -3 -4 6 69110.8 2365.27 2
 -3 -4 7 363.92 211.021 2
 -3 -4 8 104612 3175.92 2
 -3 -4 9 175166 4355.9 2
 -3 -4 10 1662.72 452.36 2
 -3 -4 11 39647.6 2112.38 2
 -3 -4 12 436.771 304.486 2
 -3 -4 13 69513.5 3001.79 2
 -3 -4 14 78441.2 3311.99 2
 -3 -4 15 4793.22 841.121 2
 -3 -4 16 58184.2 3014.9 2
 -3 -4 17 -378.995 483.944 2
 -3 -4 18 56315.1 3134.9 2
 -3 -4 19 21439.4 2000.91 2
 -3 -4 20 5090.01 1000.76 2
 -3 -3 -15 314.638 374.428 4
 -3 -3 -4 114572 3434.1 3
 -3 -3 -3 1751.43 433.254 3
 -3 -3 -2 319621 4115.82 2
 -3 -3 -2 330484 5909.83 3
 -3 -3 -1 390119 4973.9 2
 -3 -3 -1 400504 6534.04 3
 -3 -3 0 25021 973.997 2
 -3 -3 0 25256.7 1354.02 3
 -3 -3 1 352027 5812.49 3
 -3 -3 1 346160 4875.16 2
 -3 -3 2 168992 3147.38 2
 -3 -3 3 842851 10048 2
 -3 -3 4 498403 7026.12 2
 -3 -3 4 514690 5961.96 5
 -3 -3 5 445.566 106.612 5
 -3 -3 5 332.287 205.26 2
 -3 -3 6 11488.2 927.191 2
 -3 -3 7 10656.7 955.902 2
 -3 -3 8 212113 4688.64 2
 -3 -3 9 192611 4616.37 2
 -3 -3 10 84.6763 180.013 2
 -3 -3 11 248.001 229.947 2
 -3 -3 12 48742.6 2421.61 2
 -3 -3 13 111208 3805.26 2
 -3 -3 14 9920.55 1117.41 2
 -3 -3 15 20808.4 1709.78 2
 -3 -3 16 23161.8 1845.73 2
 -3 -3 17 14181.4 1523.11 2
 -3 -3 18 48840.8 2870.67 2
 -3 -3 19 6630.37 1106.77 2
 -3 -3 20 7364.71 1196.91 2
 -3 -2 -16 6060.08 1242.58 4
 -3 -2 -15 18561.4 1953.1 4
 -3 -2 -4 45210.2 1988.04 3
 -3 -2 -3 36490.5 1705.83 3
 -3 -2 -2 377535 4297.54 2
 -3 -2 -2 387479 6217.07 3
 -3 -2 -1 81773.1 1550.12 2
 -3 -2 -1 80335.3 2403.96 3
 -3 -2 0 226999 4260.16 3
 -3 -2 0 223471 3229.31 2
 -3 -2 1 271460 4725.65 3
 -3 -2 1 239769 3628.95 2
 -3 -2 2 190377 3278.98 2
 -3 -2 3 202248 2850.23 5
 -3 -2 3 193462 3454.76 2
 -3 -2 4 127523 1882.38 5
 -3 -2 4 123024 2722.75 2
 -3 -2 5 24578.9 1187.81 2
 -3 -2 6 4631.31 563.653 2
 -3 -2 7 49501.4 1906.29 2
 -3 -2 8 324022 5713.26 2
 -3 -2 9 39259.9 1820.5 2
 -3 -2 10 17447.3 1267.72 2
 -3 -2 11 5103.48 729.987 2
 -3 -2 12 76278.4 2947.56 2
 -3 -2 13 37769.9 2153.01 2
 -3 -2 14 3902.05 771.932 2
 -3 -2 15 33003.4 2191.11 2
 -3 -2 16 53.8233 272.259 2
 -3 -2 17 50320.5 2804.68 2
 -3 -2 18 52544.8 2949.12 2
 -3 -2 19 525.393 347.416 2
 -3 -2 20 16585.2 1821.01 1
 -3 -1 -17 11034 1573.15 4
 -3 -1 -16 1812.85 657.805 4
 -3 -1 -15 46581.7 2984.3 4
 -3 -1 -4 59317.8 2138.86 3
 -3 -1 -3 48588.7 1842.47 3
 -3 -1 -2 102294 1461.71 2
 -3 -1 -2 225797 3798.3 3
 -3 -1 -1 1908.88 343.82 3
 -3 -1 -1 2209.23 205.425 2
 -3 -1 0 544947 7182.22 3
 -3 -1 0 525724 5994.58 2
 -3 -1 1 4908.57 389.285 2
 -3 -1 2 17522.6 669.127 5
 -3 -1 2 17187.4 807.119 2
 -3 -1 3 90507 1523.68 5
 -3 -1 3 90008 2130.29 2
 -3 -1 4 25624.5 607.069 5
 -3 -1 4 25697.7 1152.17 2
 -3 -1 5 273826 4649.79 2
 -3 -1 6 3536.73 495.287 2
 -3 -1 7 115279 3026.31 2
 -3 -1 8 69420.8 2385.72 2
 -3 -1 9 31111.5 1656.76 2
 -3 -1 10 109471 3316.44 2
 -3 -1 11 3006.97 561.228 2
 -3 -1 12 86664.4 3104.2 2
 -3 -1 13 48969.4 2342.39 2
 -3 -1 14 5986.34 894.344 2
 -3 -1 15 21046 1676.54 2
 -3 -1 16 10732.1 1269.54 2
 -3 -1 17 75477.4 3464.01 2
 -3 -1 18 11613.3 1358.73 2
 -3 -1 19 9360.49 1277.18 1
 -3 0 -17 10417.5 1461.95 4
 -3 0 -16 26547.8 2286.61 4
 -3 0 -15 81953.9 3851.06 4
 -3 0 -14 12672.2 1415.18 4
 -3 0 -4 51666.3 1842.11 3
 -3 0 -3 2697.15 410.654 3
 -3 0 -2 26722 610.288 2
 -3 0 -2 28932.8 1224.86 3
 -3 0 -1 358991 5141.83 3
 -3 0 -1 347608 4066.98 2
 -3 0 0 176198 2639.83 2
 -3 0 1 32564.9 1055.34 2
 -3 0 2 134382 2551.35 2
 -3 0 3 23691 1045.22 2
 -3 0 4 220921 3862.62 2
 -3 0 4 216294 2709.61 5
 -3 0 5 263772 4466.29 2
 -3 0 5 248192 3024.36 5
 -3 0 6 10320.1 820.515 2
 -3 0 6 10428.6 439.726 5
 -3 0 7 216347 2862.94 5
 -3 0 7 218616 4354.85 2
 -3 0 8 3056.13 504.09 2
 -3 0 8 3330.9 288.684 5
 -3 0 9 186083 2861.45 5
 -3 0 9 185880 4270.12 2
 -3 0 10 106960 2145.22 5
 -3 0 10 107238 3269.93 2
 -3 0 11 4138.37 416.659 5
 -3 0 11 4206.78 672.19 2
 -3 0 12 93817.1 2232.8 5
 -3 0 12 94776.8 3260.06 2
 -3 0 13 879.683 401.717 2
 -3 0 14 93200.6 3445.27 2
 -3 0 15 53648.4 2622.36 2
 -3 0 16 4713.35 825.009 2
 -3 0 17 38054.1 2412.57 2
 -3 0 17 44316 2603.55 1
 -3 0 18 -58.638 340.01 2
 -3 1 -18 38936.1 2825.8 4
 -3 1 -17 2003.91 742.753 4
 -3 1 -16 44400.2 2820.34 4
 -3 1 -15 60661.2 3185.73 4
 -3 1 -14 829.16 421.16 4
 -3 1 -13 22730.3 1783.24 4
 -3 1 -8 44957.4 1205.89 2
 -3 1 -7 3915.35 313.737 2
 -3 1 -6 542300 5904.56 2
 -3 1 -5 386590 4329.47 2
 -3 1 -4 9716.48 393.668 2
 -3 1 -3 3943.67 258.771 2
 -3 1 -3 4001.92 433.785 3
 -3 1 -2 54869.4 1562.77 3
 -3 1 -1 105098 2175.68 3
 -3 1 2 1721.6 244.806 1
 -3 1 2 1883.36 281.114 2
 -3 1 3 49960.2 1571.52 2
 -3 1 3 46997.4 1143.66 5
 -3 1 4 243445 4173.26 2
 -3 1 4 232335 3189.1 5
 -3 1 5 142811 2364.37 5
 -3 1 5 150940 3230.78 2
 -3 1 6 100872 2702.88 2
 -3 1 6 96992.9 1933.37 5
 -3 1 7 117532 3126.88 2
 -3 1 7 131525 2386.59 5
 -3 1 8 32738.4 1625.96 2
 -3 1 8 30828.6 1107.43 5
 -3 1 9 206831 4603.83 2
 -3 1 9 212684 3520.56 5
 -3 1 10 105703 2415.54 5
 -3 1 10 102023 3175.06 2
 -3 1 11 3509.36 448.682 5
 -3 1 11 2477.15 505.723 2
 -3 1 12 39223.6 1547.41 5
 -3 1 12 36522 2006.77 2
 -3 1 13 775.508 372.831 2
 -3 1 14 213153 5463.22 2
 -3 1 15 73310.9 3150.27 2
 -3 1 16 5163.11 864.114 2
 -3 1 16 7515.33 1028.95 1
 -3 1 17 7050.31 1029.49 2
 -3 2 -18 20525.8 1988.87 4
 -3 2 -17 2264.44 730.759 4
 -3 2 -16 41100.1 2601.24 4
 -3 2 -15 15006.8 1567.66 4
 -3 2 -14 37470.3 2311.14 4
 -3 2 -13 37864.5 2200.47 4
 -3 2 -12 1215.97 450.158 4
 -3 2 -6 312609 4145.53 2
 -3 2 -5 93708 1816.22 2
 -3 2 -4 35428.4 1016.77 2
 -3 2 -3 57266.7 1330.51 2
 -3 2 -3 54552 1466.97 3
 -3 2 -2 164019 2552.32 2
 -3 2 -2 161031 2655.51 3
 -3 2 0 58343 1448.26 1
 -3 2 1 59885.5 1408.64 1
 -3 2 2 28255.2 972.595 5
 -3 2 2 27898.8 902.051 1
 -3 2 3 92507 1793.4 1
 -3 2 3 84007.2 1814.57 5
 -3 2 4 252607 3730.34 5
 -3 2 5 3950.52 404.48 5
 -3 2 5 3736.52 508.634 2
 -3 2 6 116824 3026.4 2
 -3 2 6 107920 2384.94 5
 -3 2 7 47853.1 1546.37 5
 -3 2 7 48467.5 1954.23 2
 -3 2 8 183752 4185.32 2
 -3 2 8 183730 3448.99 5
 -3 2 9 119980 3446.05 2
 -3 2 9 120253 2776.21 5
 -3 2 10 39833.8 1967.78 2
 -3 2 10 39783 1573.45 5
 -3 2 11 4070.87 534.515 5
 -3 2 11 3698.65 623.113 2
 -3 2 12 32205.5 1532.51 5
 -3 2 12 30121.6 1804.7 2
 -3 2 13 37615.9 1926.76 1
 -3 2 13 37184.4 1735.28 5
 -3 2 13 31816.6 1941.56 2
 -3 2 14 232661 5349.95 1
 -3 2 14 227608 5717.98 2
 -3 2 15 20755.9 1688.78 2
 -3 2 16 11664.5 1294.36 2
 -3 3 -19 36675.1 2723.49 4
 -3 3 -18 19959.2 1924.79 4
 -3 3 -17 975.915 443 4
 -3 3 -16 18295.3 1665.22 4
 -3 3 -15 2325.25 577.594 4
 -3 3 -14 60281.7 2789.37 4
 -3 3 -13 63185.7 2757.01 4
 -3 3 -12 8912.75 984.575 4
 -3 3 -11 35920.7 1846.24 4
 -3 3 -10 4947.63 679.489 4
 -3 3 -3 45988.9 1132.91 3
 -3 3 -2 99973.2 1693.43 3
 -3 3 0 47569.6 1438.91 5
 -3 3 0 52359.9 1299.56 1
 -3 3 1 314826 4555.99 5
 -3 3 1 323402 4104.81 4
 -3 3 1 325631 3950.3 1
 -3 3 2 39304.9 1284.95 5
 -3 3 2 33665.2 844.498 1
 -3 3 3 288095 4349.75 5
 -3 3 3 287162 3494.32 1
 -3 3 4 215691 3711.16 5
 -3 3 5 1965.84 338.008 5
 -3 3 6 174796 3489.99 5
 -3 3 7 12790 860.638 5
 -3 3 7 12119 985.208 2
 -3 3 8 140840 3269.79 5
 -3 3 8 155226 3883.54 2
 -3 3 9 84729.4 2506.95 5
 -3 3 9 82566.1 2837.04 2
 -3 3 10 6249 792.983 2
 -3 3 10 7931.22 765.93 5
 -3 3 11 67180.7 2734.06 2
 -3 3 11 71877 2435.59 5
 -3 3 11 70340.9 2341.24 1
 -3 3 12 8860.5 1003.56 2
 -3 3 12 11241.5 963.348 1
 -3 3 12 11269.8 978.703 5
 -3 3 13 110314 3302.91 5
 -3 3 13 107452 3274.49 1
 -3 3 13 104351 3625.52 2
 -3 3 14 90524.3 3459.99 2
 -3 3 15 4656.88 835.275 2
 -3 4 -17 472.451 377.161 4
 -3 4 -16 15694.4 1517.88 4
 -3 4 -15 15287 1410.47 4
 -3 4 -14 61669.8 2720.37 4
 -3 4 -13 32571.6 1852.22 4
 -3 4 -12 27025.5 1609.94 4
 -3 4 -11 4081.4 611.967 4
 -3 4 -10 44736.8 1855.02 4
 -3 4 -9 240230 4449.6 4
 -3 4 -8 374.647 166.07 4
 -3 4 -1 23625.1 1070.68 5
 -3 4 -1 22629.8 565.54 4
 -3 4 0 74005.7 1356.46 4
 -3 4 0 71317.3 1935.73 5
 -3 4 1 227772 3885.57 5
 -3 4 1 232537 3250.84 4
 -3 4 2 4355.06 483.878 5
 -3 4 3 56106.8 1812.36 5
 -3 4 4 5816.92 603.641 5
 -3 4 5 146860 3337 5
 -3 4 6 145721 3411.8 5
 -3 4 6 147804 2347.28 1
 -3 4 7 215.222 99.308 1
 -3 4 7 497.027 234.309 5
 -3 4 8 124756 2552.86 1
 -3 4 8 121800 3516.88 2
 -3 4 8 129695 3318.26 5
 -3 4 9 3849.79 578.853 5
 -3 4 9 4170.23 656.072 2
 -3 4 9 4434.21 479.747 1
 -3 4 10 81511.3 2978.49 2
 -3 4 10 87744.3 2831.23 5
 -3 4 10 84830.1 2375.94 1
 -3 4 11 59344.6 2613.75 2
 -3 4 11 60328.1 2102.56 1
 -3 4 11 63399.8 2456.97 5
 -3 4 12 573.789 311.377 5
 -3 4 12 361.857 197.716 2
 -3 4 13 68111.1 2967.39 2
 -3 4 13 77663.1 2918.32 5
 -3 4 14 1159.6 420.714 2
 -3 4 14 2244.79 491.654 5
 -3 5 -16 2063.32 546.189 4
 -3 5 -15 42924.3 2318.63 4
 -3 5 -14 103983 3483.27 4
 -3 5 -13 1080.69 379.451 4
 -3 5 -12 47320.3 2046.74 4
 -3 5 -11 1628.07 369.574 4
 -3 5 -10 98339 2645.23 4
 -3 5 -9 77629.1 2145.11 4
 -3 5 -8 712.15 192.642 4
 -3 5 -7 132655 2457.87 4
 -3 5 -6 6287.26 407.899 4
 -3 5 -5 236204 2937.33 4
 -3 5 -3 86022.2 2335.64 5
 -3 5 -2 397162 5885.02 5
 -3 5 -1 25456.4 1208.89 5
 -3 5 0 695837 8864.58 5
 -3 5 1 400774 6025.2 5
 -3 5 2 5802.03 615.607 5
 -3 5 3 15833.1 1047.91 5
 -3 5 4 25734.8 1407.86 5
 -3 5 5 236561 4747.03 5
 -3 5 6 234293 3048.24 1
 -3 5 6 306945 5435.08 5
 -3 5 7 2135.52 459.107 5
 -3 5 7 2045.23 239.964 1
 -3 5 8 2255.08 475.057 5
 -3 5 8 3024.21 348.675 1
 -3 5 9 44139 1485.44 1
 -3 5 9 44693.8 2095.92 5
 -3 5 9 42234.8 2143.72 2
 -3 5 10 89134.1 3253.87 2
 -3 5 10 88292.8 3055.44 5
 -3 5 11 21090.9 1492.35 5
 -3 5 11 17725.4 1436.25 2
 -3 5 12 25378.8 1769.63 2
 -3 5 12 30607.4 1852.89 5
 -3 5 13 14755.4 1393.78 2
 -3 5 13 17234.5 1436.17 5
 -3 5 14 26014.8 1878.22 2
 -3 5 14 29408.2 1949.8 5
 -3 6 -14 32378.5 1840.17 4
 -3 6 -13 30331.8 1662.96 4
 -3 6 -12 12898.2 1029.18 4
 -3 6 -11 12525.9 940.075 4
 -3 6 -10 73988.5 2153.3 4
 -3 6 -9 3862.86 434.298 4
 -3 6 -8 10626.4 640.366 4
 -3 6 -7 55949.8 1350.62 4
 -3 6 -5 203805 4111.86 5
 -3 6 -4 49857.7 1850.51 5
 -3 6 -3 138292 3200.03 5
 -3 6 -2 26285 1317.65 5
 -3 6 -1 226886 2946.17 3
 -3 6 -1 226330 4335.64 5
 -3 6 0 672485 9053.86 5
 -3 6 1 116503 3045.53 5
 -3 6 2 8488.38 803.941 5
 -3 6 3 40522.1 1817.34 5
 -3 6 4 19656 1328.16 5
 -3 6 5 266393 5459.15 5
 -3 6 6 68541.2 2600.82 5
 -3 6 7 6769.52 826.787 5
 -3 6 7 6605.59 380.583 1
 -3 6 8 109.382 210.444 5
 -3 6 9 85646.9 3124.52 5
 -3 6 10 110706 3655.11 5
 -3 6 10 101413 3586.29 2
 -3 6 11 15749.5 1436.96 2
 -3 6 11 17718 1449.24 5
 -3 6 12 36192.2 2173.99 2
 -3 6 12 40863.5 2280.08 5
 -3 6 13 2856.48 605.327 2
 -3 6 13 3102.61 681.952 5
 -3 6 14 27176.2 1994.37 5
 -3 7 -12 20643.9 1242.92 4
 -3 7 -7 26283.8 1448.06 5
 -3 7 -6 44049.1 1838.53 5
 -3 7 -5 29613.1 1486.1 5
 -3 7 -4 4361.78 567.036 5
 -3 7 -3 83322.8 2549.28 5
 -3 7 -2 23340.1 1324.39 5
 -3 7 -1 28376.9 1487.04 5
 -3 7 -1 29411.3 938.922 3
 -3 7 0 52852.3 2086.72 5
 -3 7 1 16295.7 1168.42 5
 -3 7 2 91485.5 2939.65 5
 -3 7 3 8348.57 908.722 5
 -3 7 4 119349 3571.87 5
 -3 7 5 142475 4040 5
 -3 7 6 4048.83 695.683 5
 -3 7 7 99330.2 3418.03 5
 -3 7 8 991.542 385.761 5
 -3 7 9 29956.9 1927.37 5
 -3 7 10 92661.7 3537.72 5
 -3 7 11 2609.17 596.224 5
 -3 7 11 1651.12 491.786 2
 -3 7 12 29682.7 2068.77 5
 -3 7 12 27912.9 1990.66 2
 -3 7 13 761.987 359.975 5
 -3 7 14 39108.9 2509.41 5
 -3 7 15 34981.4 2425.25 5
 -3 8 -11 8305.11 897.842 5
 -3 8 -10 6209.33 773.979 5
 -3 8 -9 23304.7 1436.97 5
 -3 8 -8 191861 4394.06 5
 -3 8 -7 9606.61 899.698 5
 -3 8 -6 28479.3 1535.15 5
 -3 8 -5 11572.5 974.813 5
 -3 8 -4 67822.7 2420.23 5
 -3 8 -3 172777 4053.19 5
 -3 8 -2 27389.1 1548.69 5
 -3 8 -1 51364.6 2156.3 5
 -3 8 0 6050.08 751.863 5
 -3 8 1 107265 3349.4 5
 -3 8 2 220929 5110.29 5
 -3 8 3 379.379 334.077 5
 -3 8 4 93985.1 3381.8 5
 -3 8 5 28675.9 1857.25 5
 -3 8 6 121522 3978.31 5
 -3 8 7 113008 3873.32 5
 -3 8 8 5776.8 871.018 5
 -3 8 9 59544.5 2892.65 5
 -3 8 10 16323.8 1554.1 5
 -3 8 11 34121.9 2214.26 2
 -3 8 11 35656.8 2330.02 5
 -3 8 12 27044.7 2068.48 5
 -3 8 13 2821.65 754.692 5
 -3 8 14 48068.5 2914.19 5
 -3 8 15 1986.11 607.423 5
 -3 9 -13 76092.3 2901.72 5
 -3 9 -12 -92.9559 317.042 5
 -3 9 -11 24401.3 1560.76 5
 -3 9 -10 -136.373 232.693 5
 -3 9 -9 177427 4386.87 5
 -3 9 -8 221553 4900.39 5
 -3 9 -7 5153.04 689.613 5
 -3 9 -6 14735.6 1167.6 5
 -3 9 -5 19773 1354.19 5
 -3 9 -4 132923 3684.26 5
 -3 9 -3 149398 3968.61 5
 -3 9 -2 -10.0658 242.508 5
 -3 9 -1 28882.2 1718.44 5
 -3 9 0 965.663 367.768 5
 -3 9 1 145589 4234.64 5
 -3 9 2 83411.9 3195.15 5
 -3 9 3 8595.79 1036.09 5
 -3 9 4 49023.2 2521.25 5
 -3 9 5 16141.3 1476.22 5
 -3 9 6 162199 4871.58 5
 -3 9 7 44335.2 2523.81 5
 -3 9 8 489.727 373.263 5
 -3 9 9 65252.5 3221.13 5
 -3 9 10 3384.54 736.306 5
 -3 9 11 101057 4174.54 5
 -3 9 12 65693.5 3406.34 5
 -3 9 13 9700.4 1374.09 5
 -3 9 14 11625.7 1542.34 5
 -3 10 -12 6006.52 820.692 5
 -3 10 -11 29989.1 1791.74 5
 -3 10 -10 1956.06 497.307 5
 -3 10 -9 225314 5188.5 5
 -3 10 -8 158408 4225.63 5
 -3 10 -7 6381.23 835.378 5
 -3 10 -6 16294.7 1315.85 5
 -3 10 -5 15970.8 1312.08 5
 -3 10 -4 99080.8 3328.64 5
 -3 10 -3 53301.5 2440.47 5
 -3 10 -2 8032.72 962.432 5
 -3 10 -1 35641.9 2048.15 5
 -3 10 0 30049.8 1936.14 5
 -3 10 1 108580 3804.11 5
 -3 10 2 19191.7 1619.56 5
 -3 10 3 22184.4 1739.91 5
 -3 10 4 12515.4 1347.59 5
 -3 10 5 52085.2 2780.76 5
 -3 10 6 36262.4 2347.11 5
 -3 10 7 11251.6 1334.34 5
 -3 10 8 8973.16 1255.01 5
 -3 10 9 16813.3 1705.18 5
 -3 10 10 37641.7 2591.31 5
 -3 10 11 121152 4828.23 5
 -3 10 12 17817 1844.92 5
 -3 10 13 9228.88 1417.93 5
 -3 11 -12 28697 1823.33 5
 -3 11 -11 36500 2054.53 5
 -3 11 -10 2458.87 547.482 5
 -3 11 -9 69072.4 2827.87 5
 -3 11 -8 2978.08 602.811 5
 -3 11 -7 111855 3679.34 5
 -3 11 -6 33858.6 1999.12 5
 -3 11 -5 7687.67 963.436 5
 -3 11 -4 150285 4392.94 5
 -3 11 -3 7740.84 1035.81 5
 -3 11 -2 58179.5 2766.47 5
 -3 11 -1 38477.3 2288.93 5
 -3 11 0 68389.3 3108.93 5
 -3 11 1 62450.6 3009.12 5
 -3 11 2 284.406 461.029 5
 -3 11 3 91831.2 3775.27 5
 -3 11 4 -172.499 357.016 5
 -3 11 5 54355.5 2981.38 5
 -3 11 6 40434.2 2609.73 5
 -3 11 7 -53.7344 338.58 5
 -3 11 8 33010.6 2445.4 5
 -3 11 9 -6.50359 408.838 5
 -3 11 10 50930.4 3172.69 5
 -3 11 11 51932.7 3261.89 5
 -3 12 -11 9903.98 1124.65 5
 -3 12 -10 9789.78 1136.76 5
 -3 12 -9 4395.89 757.801 5
 -3 12 -8 36802.4 2164.91 5
 -3 12 -7 106119 3741.85 5
 -3 12 -6 12324.3 1279.72 5
 -3 12 -5 45845.4 2480.14 5
 -3 12 -4 21319.6 1715.61 5
 -3 12 -3 10030.4 1198.82 5
 -3 12 -2 93244.4 3767.17 5
 -3 12 -1 1795.29 611.236 5
 -3 12 0 31781.1 2219.6 5
 -3 12 1 11505.4 1363.92 5
 -3 12 2 37179.3 2497.91 5
 -3 12 3 77137.5 3631.15 5
 -3 12 4 1640.22 526.8 5
 -3 12 5 61903.2 3330.45 5
 -3 12 6 7661.75 1179.4 5
 -3 12 7 28721.7 2359.66 5
 -3 12 8 46213.8 3036.83 5
 -3 12 9 1555.02 590.747 5
 -3 13 -10 20530.2 1675.7 5
 -3 13 -9 936.59 412.421 5
 -3 13 -8 39839.8 2361.95 5
 -3 13 -7 54032 2784.81 5
 -3 13 -6 1096.05 444.329 5
 -3 13 -5 13190.4 1408.94 5
 -3 13 -4 10595.1 1279.57 5
 -3 13 -3 104830 4138.19 5
 -3 13 -2 72778.5 3456.25 5
 -3 13 -1 551.462 460.947 5
 -3 13 0 11150.6 1411.43 5
 -3 13 1 625.823 447.512 5
 -3 13 2 101835 4318.91 5
 -3 13 3 58469.1 3269.46 5
 -3 13 4 367.621 324.339 5
 -3 13 5 18025 1899.29 5
 -3 13 6 -410.985 567.998 5
 -3 13 7 67598.4 3795.67 5
 -3 13 8 27846.3 2486.07 5
 -3 14 -10 10942.5 1275.18 5
 -3 14 -9 1156.87 476.053 5
 -3 14 -8 54101.5 2901.09 5
 -3 14 -7 10009.7 1264.21 5
 -3 14 -6 10217.6 1295.25 5
 -3 14 -5 24232.2 1998.16 5
 -3 14 -4 21693.2 1940.31 5
 -3 14 -3 117528 4591.32 5
 -3 14 -2 32028.7 2404.29 5
 -3 14 -1 2328.55 683.695 5
 -3 14 0 15093.5 1677.21 5
 -3 14 1 15199.2 1690.41 5
 -3 14 2 131195 5148.31 5
 -3 14 3 49348.2 3171.5 5
 -3 14 4 -9.48477 363.705 5
 -3 14 5 13439.3 1718.59 5
 -3 14 6 20540 2171.9 5
 -3 15 -9 7421.95 1152.48 5
 -3 15 -8 22368.7 1977.79 5
 -3 15 -7 146.324 430.602 5
 -3 15 -6 31855.7 2397.44 5
 -3 15 -5 9300.95 1341.95 5
 -3 15 -4 23446.1 2098.96 5
 -3 15 -3 58357 3357.66 5
 -3 15 -2 803.464 511.747 5
 -3 15 -1 19217.5 1969.88 5
 -3 15 0 10544.1 1500.94 5
 -3 15 1 26900.9 2359.02 5
 -3 15 2 57582 3519.4 5
 -3 15 3 3056.49 886.126 5
 -3 16 -8 9523.09 1363.59 5
 -3 16 -7 5619.6 1053.72 5
 -3 16 -6 37335.1 2705.5 5
 -3 16 -5 11601.4 1556.1 5
 -3 16 -4 14457.9 1720.27 5
 -3 16 -3 5594.16 1134.26 5
 -3 16 -2 8545.61 1350.63 5
 -3 16 -1 54536.2 3481.33 5
 -3 16 0 1519.4 595.423 5
 -3 17 -7 26519.9 2366.12 5
 -3 17 -6 68774.8 3832.14 5
 -3 17 -5 403.044 490.349 5
 -3 17 -4 10777.1 1577.04 5
 -2 -15 5 61590 3516.33 2
 -2 -15 6 58593.1 3516.93 2
 -2 -15 7 7713.37 1291.14 2
 -2 -14 4 5024.27 1004.45 2
 -2 -14 5 54493.4 3247.11 2
 -2 -14 6 3156.89 840.845 2
 -2 -14 7 24061 2216.45 2
 -2 -14 8 6287.69 1187.97 2
 -2 -14 9 23669.9 2230.94 2
 -2 -14 10 45945.1 3135.24 2
 -2 -14 11 -151.827 631.353 2
 -2 -13 3 4047.79 788.261 2
 -2 -13 4 26480.4 2119.56 2
 -2 -13 5 16542.4 1707.37 2
 -2 -13 6 23428.3 2078.99 2
 -2 -13 7 91435.1 4133.57 2
 -2 -13 8 15203.5 1709.48 2
 -2 -13 9 17145.1 1844.4 2
 -2 -13 10 13723.3 1674.03 2
 -2 -13 11 5653.65 1146.48 2
 -2 -13 12 51067.2 3331.63 2
 -2 -13 13 2736.54 865.165 2
 -2 -12 2 51962.5 2724.51 2
 -2 -12 2 49706.4 2710.38 3
 -2 -12 3 798.63 361.665 3
 -2 -12 3 550.017 324.287 2
 -2 -12 4 31279.2 2100.82 3
 -2 -12 4 33734 2279.74 2
 -2 -12 5 -87.7308 393.142 3
 -2 -12 5 289.646 320.85 2
 -2 -12 6 121657 4538.84 2
 -2 -12 7 78637.4 3698.29 2
 -2 -12 8 992.013 340.799 2
 -2 -12 9 29867.1 2338.74 2
 -2 -12 10 585.455 501.958 2
 -2 -12 11 76620 3907.94 2
 -2 -12 12 122610 5113.44 2
 -2 -12 13 1587.92 638.398 2
 -2 -12 14 15429.3 1844.84 2
 -2 -11 1 43486.4 2494.91 3
 -2 -11 1 48760.1 2473.59 2
 -2 -11 2 55029.8 2775.05 2
 -2 -11 2 52175.8 2679.56 3
 -2 -11 3 3067.05 650.889 3
 -2 -11 3 3408.02 685.854 2
 -2 -11 4 19095.5 1643.64 2
 -2 -11 4 16412.2 1444.39 3
 -2 -11 5 37282.7 2316.22 2
 -2 -11 5 30446.4 1940.93 3
 -2 -11 6 87534.9 3656.71 2
 -2 -11 6 73918.6 3033.62 3
 -2 -11 7 40368.8 2517.25 2
 -2 -11 7 34198.4 2016.03 3
 -2 -11 8 3203.75 634.738 3
 -2 -11 8 4267 861.563 2
 -2 -11 9 16950.3 1713.98 2
 -2 -11 10 1600.86 580.698 2
 -2 -11 11 122456 4809.35 2
 -2 -11 12 60565.1 3378.98 2
 -2 -11 13 5403.57 1049.02 2
 -2 -11 14 17567.7 1898.41 2
 -2 -11 15 8882.91 1430.07 2
 -2 -11 16 72979.6 4030.39 2
 -2 -10 0 18098.9 1558.18 3
 -2 -10 1 115030 3808.19 2
 -2 -10 1 118167 3991.27 3
 -2 -10 2 10202.9 1145.86 3
 -2 -10 2 12356.1 1221.71 2
 -2 -10 3 119707 3921.15 2
 -2 -10 3 105975 3661.17 3
 -2 -10 4 62009.8 2837.44 2
 -2 -10 4 61011.9 2679.09 3
 -2 -10 5 5006.27 748.217 3
 -2 -10 5 5923.65 896.373 2
 -2 -10 6 63556.9 2701.22 3
 -2 -10 6 72725.9 3198.32 2
 -2 -10 7 1059.06 324.034 3
 -2 -10 7 1433.01 473.229 2
 -2 -10 8 9629.93 1051.97 3
 -2 -10 8 11903.3 1310.32 2
 -2 -10 9 21068.7 1804.8 2
 -2 -10 10 22754.8 1916.58 2
 -2 -10 11 75697.5 3625.79 2
 -2 -10 12 144.521 976.228 2
 -2 -10 13 33162.6 2446.38 2
 -2 -10 14 8197.66 1313.37 2
 -2 -10 15 27883.8 2349.36 2
 -2 -10 16 45155.1 3058.97 2
 -2 -10 17 385.875 407.012 2
 -2 -9 -1 93572.2 3549.82 3
 -2 -9 0 12106.2 1098.6 2
 -2 -9 0 10044.7 1111.05 3
 -2 -9 1 49340.9 2454.99 3
 -2 -9 1 55282 2419.73 2
 -2 -9 2 2759.61 577.097 3
 -2 -9 2 3083.81 609.363 2
 -2 -9 3 165153 4476.03 2
 -2 -9 3 162115 4393.85 3
 -2 -9 4 44981.9 2286.94 2
 -2 -9 4 41402.1 2103.03 3
 -2 -9 5 40623.7 2073.65 3
 -2 -9 5 46748.3 2393.13 2
 -2 -9 6 40013.9 2059.35 3
 -2 -9 6 45192.7 2388.55 2
 -2 -9 7 30281.7 1837.95 3
 -2 -9 7 31179.6 2023.5 2
 -2 -9 8 92504.7 3602.14 2
 -2 -9 9 10319.5 1231.2 2
 -2 -9 10 79719.1 3479.48 2
 -2 -9 11 14346.5 1496.01 2
 -2 -9 12 28678.1 2157.2 2
 -2 -9 13 66392.6 3394.38 2
 -2 -9 14 982.615 527.101 2
 -2 -9 15 36195.3 2600.86 2
 -2 -9 16 6922.62 1180.1 2
 -2 -9 17 14990.7 1771.81 2
 -2 -9 18 24241.2 2301.17 2
 -2 -8 -1 41915.4 2251.32 3
 -2 -8 0 620.48 273.092 3
 -2 -8 0 774.105 301.885 2
 -2 -8 1 513.849 272.705 3
 -2 -8 1 1888.5 425.704 2
 -2 -8 2 82249.4 2853.3 2
 -2 -8 2 84189.8 2987.45 3
 -2 -8 3 126391 3685.59 2
 -2 -8 3 125631 3651.81 3
 -2 -8 4 13746 1151.35 3
 -2 -8 4 15229.5 1277.65 2
 -2 -8 5 41973.3 2005.11 3
 -2 -8 5 45938.6 2269.96 2
 -2 -8 6 -61.7332 257.933 3
 -2 -8 6 458.112 257.01 2
 -2 -8 7 68753.5 2883.26 2
 -2 -8 8 89839.7 3404.07 2
 -2 -8 9 1046.07 394.324 2
 -2 -8 10 32626.5 2133.44 2
 -2 -8 11 225.702 270.163 2
 -2 -8 12 89370 3727.14 2
 -2 -8 13 31792.4 2267.15 2
 -2 -8 14 1816 563.348 2
 -2 -8 15 24426.3 2086.16 2
 -2 -8 16 3219.44 781.353 2
 -2 -8 17 59707.1 3425.17 2
 -2 -8 18 40777.9 2916.97 2
 -2 -8 19 -25.01 418.37 2
 -2 -7 -2 61447.3 2684.57 3
 -2 -7 -1 828.839 293.711 3
 -2 -7 -1 1994.4 383.125 2
 -2 -7 0 62370.5 2236.39 2
 -2 -7 0 61957.2 2529.81 3
 -2 -7 1 35065.9 1683.37 2
 -2 -7 1 32511.5 1762.23 3
 -2 -7 2 197362 4428.12 2
 -2 -7 2 199285 4583.9 3
 -2 -7 3 174239 4142.75 3
 -2 -7 3 175870 4190.69 2
 -2 -7 4 388.68 218.989 3
 -2 -7 4 680.54 283.924 2
 -2 -7 5 46581.2 2103.41 3
 -2 -7 5 47641.1 2161.19 2
 -2 -7 6 20673.7 1446.74 2
 -2 -7 7 119833 3712.29 2
 -2 -7 8 77614.6 3000.77 2
 -2 -7 9 13832.7 1294.59 2
 -2 -7 10 16021.5 1425.14 2
 -2 -7 11 29465.6 2013.84 2
 -2 -7 12 119416 4198.15 2
 -2 -7 13 32937.3 2222.78 2
 -2 -7 14 8875.82 1181.15 2
 -2 -7 15 25326.5 2049.26 2
 -2 -7 16 11443.1 1457.81 2
 -2 -7 17 111397 4603.3 2
 -2 -7 18 49717.3 3144.55 2
 -2 -7 19 1087.56 594.413 2
 -2 -6 -2 33087.4 1861.14 3
 -2 -6 -1 79643.6 2318.06 2
 -2 -6 -1 75770.9 2761.26 3
 -2 -6 0 25413.2 1516.31 3
 -2 -6 0 25099 1287.44 2
 -2 -6 1 3387.88 545.997 3
 -2 -6 1 3484.06 535.278 2
 -2 -6 2 242708 4731.46 2
 -2 -6 2 237920 4854.86 3
 -2 -6 3 35478.9 1696.7 3
 -2 -6 3 35263.9 1666.53 2
 -2 -6 4 46560.5 2002.08 3
 -2 -6 4 43614.8 1909.36 2
 -2 -6 5 37657.3 1808.4 2
 -2 -6 6 107520 3244.1 2
 -2 -6 7 266149 5572.4 2
 -2 -6 8 11761.4 1105.72 2
 -2 -6 9 88375.5 3190.03 2
 -2 -6 10 15391.9 1339.77 2
 -2 -6 11 75347.5 3080.51 2
 -2 -6 12 204937 5435.6 2
 -2 -6 13 11636.8 1266.16 2
 -2 -6 14 29608.4 2079.79 2
 -2 -6 15 19067.3 1741.13 2
 -2 -6 16 38962.4 2555.75 2
 -2 -6 17 93084.7 4121.31 2
 -2 -6 18 656.099 309.394 2
 -2 -6 19 16306.1 1795.97 2
 -2 -6 20 -378.089 480.997 2
 -2 -5 -3 9670.65 978.477 3
 -2 -5 -2 4219.85 640.458 3
 -2 -5 -1 133200 2861.95 2
 -2 -5 -1 134853 3556.36 3
 -2 -5 0 24324.2 1393.61 3
 -2 -5 0 24630.2 1170.42 2
 -2 -5 1 45023.6 1667.27 2
 -2 -5 1 45166.8 1855.13 3
 -2 -5 2 80503.5 2470.34 3
 -2 -5 2 82052.9 2347.05 2
 -2 -5 3 10914 914.896 3
 -2 -5 3 13743.9 966.166 2
 -2 -5 4 174353 3817.19 2
 -2 -5 5 25002.9 1386.85 2
 -2 -5 6 123265 3329.11 2
 -2 -5 7 113702 3279.39 2
 -2 -5 8 15493.9 1195.59 2
 -2 -5 9 165922 4276.38 2
 -2 -5 10 50250.8 2331.32 2
 -2 -5 11 68934.3 2858.43 2
 -2 -5 12 57183.6 2667.28 2
 -2 -5 13 2057.3 491.884 2
 -2 -5 14 38083.4 2300.74 2
 -2 -5 15 -77.274 341.829 2
 -2 -5 16 39242.1 2493.81 2
 -2 -5 17 30029.7 2222.98 2
 -2 -5 18 13174.1 1529.9 2
 -2 -5 19 33020.9 2489.09 2
 -2 -5 20 153.868 447.601 2
 -2 -4 -15 37701.9 2923.64 4
 -2 -4 -3 47743 2076.68 3
 -2 -4 -2 72381 1742.54 2
 -2 -4 -2 78346.1 2575.17 3
 -2 -4 -1 198780 4159.01 3
 -2 -4 -1 188077 3246.46 2
 -2 -4 0 6559.52 554.75 2
 -2 -4 0 5630.25 634.167 3
 -2 -4 1 341718 5551.81 3
 -2 -4 1 335596 5020.15 2
 -2 -4 2 16036.7 1032.74 3
 -2 -4 2 14471.5 871.184 2
 -2 -4 3 452247 6479.4 2
 -2 -4 4 552657 7636.96 2
 -2 -4 5 73153.1 1506.96 5
 -2 -4 5 69395.3 2225.38 2
 -2 -4 6 36946.3 1653.63 2
 -2 -4 6 37064.2 911.956 5
 -2 -4 7 19059.7 1223.5 2
 -2 -4 8 138128 3600.05 2
 -2 -4 9 255652 5323.91 2
 -2 -4 10 4965.03 711.564 2
 -2 -4 11 68361.1 2749.54 2
 -2 -4 12 93.7693 279.882 2
 -2 -4 13 113837 3864.07 2
 -2 -4 14 56346.7 2740.4 2
 -2 -4 15 992.68 425.376 2
 -2 -4 16 23394.4 1862.19 2
 -2 -4 17 2240.82 651.277 2
 -2 -4 18 38878.1 2559.01 2
 -2 -4 19 23719.8 2063.34 2
 -2 -3 -16 49520.3 3393.39 4
 -2 -3 -15 256.013 434.45 4
 -2 -3 -14 19159.5 1944.41 4
 -2 -3 -3 20417.8 1266.27 3
 -2 -3 -2 270108 3628.23 2
 -2 -3 -2 284270 5043.6 3
 -2 -3 -1 212781 3187.36 2
 -2 -3 -1 221610 4174.58 3
 -2 -3 0 38538.3 1176.3 2
 -2 -3 0 37309.3 1495.85 3
 -2 -3 1 240108 4192.37 3
 -2 -3 1 239192 3691.99 2
 -2 -3 2 153365 2876.78 2
 -2 -3 3 199199 3558.21 2
 -2 -3 3 204817 3042.26 5
 -2 -3 4 184973 2578.78 5
 -2 -3 4 194343 3603.06 2
 -2 -3 5 7300.82 320.319 5
 -2 -3 5 7216.53 657.904 2
 -2 -3 6 52922.9 1893.15 2
 -2 -3 7 17136.8 1108.08 2
 -2 -3 8 455143 7243.7 2
 -2 -3 9 237072 4971.92 2
 -2 -3 10 1003.26 339.741 2
 -2 -3 11 23200.1 1518.38 2
 -2 -3 12 72855.7 2845.7 2
 -2 -3 13 169978 4651.91 2
 -2 -3 14 47699.1 2458.07 2
 -2 -3 15 9776.22 1173.09 2
 -2 -3 16 21863.3 1779.38 2
 -2 -3 17 2776.66 647.3 2
 -2 -3 18 73617.9 3490.75 2
 -2 -3 19 5606.08 994.906 2
 -2 -3 20 16782.4 1890.41 1
 -2 -2 -16 5778.3 1197.8 4
 -2 -2 -15 42709.4 2911.05 4
 -2 -2 -14 35627.1 2563.51 4
 -2 -2 -3 9441.99 799.604 3
 -2 -2 -2 362486 4093.07 2
 -2 -2 -2 376184 5739.09 3
 -2 -2 -1 199350 2672.92 2
 -2 -2 -1 195395 3648.73 3
 -2 -2 0 35487.6 1337.51 3
 -2 -2 0 35826.2 983.576 2
 -2 -2 1 88925.8 1786.82 5
 -2 -2 1 84304 1746.62 2
 -2 -2 2 32488.8 1099.52 2
 -2 -2 2 33770.9 923.486 5
 -2 -2 3 106287 1640.72 5
 -2 -2 3 109771 2361.59 2
 -2 -2 4 28914.3 1197.12 2
 -2 -2 5 26447.5 1202.32 2
 -2 -2 6 77581.3 2235.96 2
 -2 -2 7 22692.2 1242.73 2
 -2 -2 8 249434 4777.99 2
 -2 -2 9 40235.1 1839.8 2
 -2 -2 10 23448.9 1458.82 2
 -2 -2 11 2550.36 516.858 2
 -2 -2 12 48349.4 2318.65 2
 -2 -2 13 62501.1 2765.84 2
 -2 -2 14 1072.77 396.346 2
 -2 -2 15 23088.3 1711.54 2
 -2 -2 16 2871.92 668.494 2
 -2 -2 17 33471.4 2224.4 2
 -2 -2 18 85069.5 3968.09 1
 -2 -2 18 83339.5 3648.63 2
 -2 -2 19 1122.33 492.521 1
 -2 -2 20 21316.5 2092.29 1
 -2 -1 -17 31015.6 2566.28 4
 -2 -1 -16 4070.01 923.482 4
 -2 -1 -15 52875.9 3171.26 4
 -2 -1 -14 36701.8 2499.81 4
 -2 -1 -13 5575.92 988.821 4
 -2 -1 -3 49385.2 1698.82 3
 -2 -1 -2 177726 3323.75 3
 -2 -1 -1 1487.85 288.413 3
 -2 -1 -1 1705.71 146.596 2
 -2 -1 0 730820 8400.03 3
 -2 -1 0 719882 7889.88 5
 -2 -1 0 714554 7435.77 2
 -2 -1 1 607762 6533.6 5
 -2 -1 1 602890 6661.82 2
 -2 -1 2 74145.1 1215.67 5
 -2 -1 2 70499.7 1587.3 2
 -2 -1 3 273203 4003.94 2
 -2 -1 4 20537.1 959.836 2
 -2 -1 5 180409 3404.93 2
 -2 -1 6 39581.1 1532.43 2
 -2 -1 7 85540.7 2438.41 2
 -2 -1 8 73307.1 2366.7 2
 -2 -1 9 61051.6 2237.92 2
 -2 -1 10 186930 4270.6 2
 -2 -1 11 873.393 323.6 2
 -2 -1 12 35209.9 1884.64 2
 -2 -1 13 28066.7 1753.25 2
 -2 -1 14 6977.8 918.234 2
 -2 -1 15 17409.5 1512.78 2
 -2 -1 16 1211.58 461.383 2
 -2 -1 17 68121.1 3354.59 1
 -2 -1 17 60081.8 2951.35 2
 -2 -1 18 20268.9 1891.38 1
 -2 -1 19 2458.28 700.712 1
 -2 0 -18 19328.1 2071.63 4
 -2 0 -17 34848.1 2645.2 4
 -2 0 -16 10177.9 1366.73 4
 -2 0 -15 52349.9 3046.18 4
 -2 0 -14 9874.67 1275.69 4
 -2 0 -13 3206.58 748.424 4
 -2 0 -12 1269.4 542.496 4
 -2 0 -6 243436 3152.37 2
 -2 0 -5 256367 3042.12 2
 -2 0 -3 7351.18 576.201 3
 -2 0 -2 4267.72 407.216 3
 -2 0 -1 354977 4509.26 1
 -2 0 -1 340784 4205.53 5
 -2 0 -1 346240 4410.13 3
 -2 0 0 104236 1713.26 2
 -2 0 0 179417 2578.42 1
 -2 0 1 226658 3205.17 2
 -2 0 1 274124 3577.1 1
 -2 0 2 152340 2540.46 2
 -2 0 3 13910.3 720.035 2
 -2 0 3 14535.3 412.767 5
 -2 0 4 208586 3478.99 2
 -2 0 4 200468 2454.61 5
 -2 0 5 324945 4939.63 2
 -2 0 5 326301 3753.68 5
 -2 0 6 1334.37 177.866 5
 -2 0 6 1045.66 280.047 2
 -2 0 7 135556 2256.68 5
 -2 0 7 132724 3111.23 2
 -2 0 8 17361.6 774.743 5
 -2 0 8 17511.5 1111.33 2
 -2 0 9 214509 3481.19 5
 -2 0 9 217563 4502.37 2
 -2 0 10 131076 2697.43 5
 -2 0 10 134922 3539.64 2
 -2 0 11 57.0061 171.343 5
 -2 0 11 239.025 191.345 2
 -2 0 12 72196.7 2145.69 5
 -2 0 12 70538.4 2728.37 2
 -2 0 13 3972.35 542.97 5
 -2 0 13 3199.93 606.513 2
 -2 0 14 54710.6 2466.62 2
 -2 0 15 95332 3619.35 1
 -2 0 15 90828.8 3426.14 2
 -2 0 16 71.9193 364.627 1
 -2 0 16 -142.798 205.185 2
 -2 0 17 36719.1 2398.64 1
 -2 0 18 1745.5 562.254 1
 -2 1 -18 41737.1 2924.07 4
 -2 1 -17 513.329 361.327 4
 -2 1 -16 25666.5 2088.51 4
 -2 1 -15 62606.2 3157.22 4
 -2 1 -14 -94.2619 293.223 4
 -2 1 -13 20496 1673.93 4
 -2 1 -12 2603.16 605.886 4
 -2 1 -11 80033.8 3018.14 4
 -2 1 -6 253810 3472.03 2
 -2 1 -5 306141 3767.88 2
 -2 1 -4 88135.2 1470.41 2
 -2 1 -3 4107.92 256.283 2
 -2 1 -2 236690 2854.05 2
 -2 1 -2 235892 3319.44 3
 -2 1 -1 60192.3 1317.85 3
 -2 1 -1 82490.7 1657.98 1
 -2 1 0 83336.7 1597.15 1
 -2 1 1 181.547 92.7497 1
 -2 1 2 11485.9 474.57 5
 -2 1 2 13702.7 614.948 4
 -2 1 3 11165.8 491.562 5
 -2 1 3 11214.6 661.496 2
 -2 1 4 571477 6527.51 5
 -2 1 4 605647 7445.27 2
 -2 1 5 191322 3532.95 2
 -2 1 5 191405 2939.73 5
 -2 1 6 3415.16 338.254 5
 -2 1 6 1512.76 322.873 2
 -2 1 7 140683 3265.1 2
 -2 1 7 144721 2685.13 5
 -2 1 8 8313.61 772.48 2
 -2 1 8 8477.69 611.697 5
 -2 1 9 94488.1 2799.3 2
 -2 1 9 99167.1 2400.67 5
 -2 1 10 155351 3278.86 5
 -2 1 10 155942 3828.52 2
 -2 1 11 9928.05 797.008 5
 -2 1 11 9196.43 945.91 2
 -2 1 12 55520.6 2037.08 5
 -2 1 12 52421.3 2327.95 2
 -2 1 13 2305.22 538.686 2
 -2 1 13 2143.26 515.3 1
 -2 1 13 2193.87 462.773 5
 -2 1 14 186633 4938.93 1
 -2 1 14 185513 4879.44 2
 -2 1 15 93545.3 3542.35 1
 -2 1 15 85020.4 3267.54 2
 -2 1 16 10088.3 1240.64 1
 -2 1 16 8114.69 1058.41 2
 -2 2 -19 14846.4 1792.38 4
 -2 2 -18 21839.1 2058.22 4
 -2 2 -17 1268.26 604.155 4
 -2 2 -16 43031.4 2648.59 4
 -2 2 -15 29788.5 2103.79 4
 -2 2 -14 33648 2129.49 4
 -2 2 -13 48656.9 2465.69 4
 -2 2 -12 3037.89 642.416 4
 -2 2 -11 98596 3228.21 4
 -2 2 -10 42093.4 1948.22 4
 -2 2 -9 28596 1502.89 4
 -2 2 -5 64388.2 1525.61 2
 -2 2 -4 35056.7 1048.85 2
 -2 2 -3 314321 4039.98 2
 -2 2 -2 35495 992.7 2
 -2 2 -2 34549.5 830.497 3
 -2 2 -1 725129 7912.14 1
 -2 2 0 413474 4701.97 1
 -2 2 1 3855.27 236.368 1
 -2 2 1 4586.86 301.551 4
 -2 2 1 4760.1 367.956 5
 -2 2 2 229177 2697.52 1
 -2 2 2 226858 3266.13 5
 -2 2 2 231645 3217.14 4
 -2 2 3 62198.2 1520.48 5
 -2 2 4 502610 6307.83 5
 -2 2 5 17073.3 867.77 5
 -2 2 5 17139.2 973.818 2
 -2 2 6 107219 2752.67 2
 -2 2 6 108022 2430.26 5
 -2 2 7 74001 2304.76 2
 -2 2 7 75501.5 2068.25 5
 -2 2 8 69885.8 2332.35 2
 -2 2 8 68071.7 2046.93 5
 -2 2 9 232424 4812.5 2
 -2 2 9 240711 4411.48 5
 -2 2 10 35499.9 1774 2
 -2 2 10 41099.4 1714.1 5
 -2 2 10 40042 1751.82 1
 -2 2 11 82750 2588.76 5
 -2 2 11 77976.5 2614.74 1
 -2 2 11 77956.1 2765.13 2
 -2 2 12 54665.1 2296.34 1
 -2 2 12 55584.5 2179.12 5
 -2 2 12 48385.3 2224.16 2
 -2 2 13 56054.4 2305.25 5
 -2 2 13 57148 2473.88 1
 -2 2 13 57300.5 2515.85 2
 -2 2 14 232438 5498.53 1
 -2 2 14 231246 5141.99 5
 -2 2 14 222972 5431.92 2
 -2 2 15 21887.6 1671.24 1
 -2 2 15 18158.2 1518.62 2
 -2 3 -19 42694 2948.35 4
 -2 3 -18 41242.5 2798.11 4
 -2 3 -17 648.669 477.931 4
 -2 3 -16 45011.1 2650.03 4
 -2 3 -15 1544.94 503.381 4
 -2 3 -14 82276.1 3258.71 4
 -2 3 -13 152707 4319.99 4
 -2 3 -12 14264 1213.58 4
 -2 3 -11 47991.5 2086.29 4
 -2 3 -10 1152.49 365.839 4
 -2 3 -9 221318 4389.12 4
 -2 3 -8 64950.2 2029 4
 -2 3 -7 2933.74 406.267 4
 -2 3 -6 126043 2500.39 4
 -2 3 -1 88971.8 1924.35 5
 -2 3 0 21936.8 893.853 5
 -2 3 0 23348.9 605.263 4
 -2 3 1 427527 5490.04 5
 -2 3 2 63934.5 1684.41 5
 -2 3 3 53521.6 1617.22 5
 -2 3 4 47028.1 1589.47 5
 -2 3 5 1963.01 357.747 5
 -2 3 5 1937.48 231.804 1
 -2 3 6 167942 3457.01 5
 -2 3 6 166274 2806.1 1
 -2 3 7 2270.84 424.021 2
 -2 3 7 3017.74 379.893 1
 -2 3 8 128012 3179.33 5
 -2 3 8 126049 2777.88 1
 -2 3 8 127725 3342.21 2
 -2 3 9 151583 3609.64 5
 -2 3 9 150585 3298.26 1
 -2 3 9 146835 3741.38 2
 -2 3 10 13519.9 1116.07 2
 -2 3 10 15248.7 1047.02 1
 -2 3 10 15431 1128.08 5
 -2 3 11 48956.8 2206.98 2
 -2 3 11 50620.5 2163.16 5
 -2 3 11 51025.3 2065.48 1
 -2 3 12 3471.22 606.044 2
 -2 3 12 4272.49 639.665 1
 -2 3 12 4634.05 680.339 5
 -2 3 13 54346.5 2400.93 5
 -2 3 13 57176 2425.23 1
 -2 3 13 52058.3 2420.96 2
 -2 3 14 76661.1 2987.54 5
 -2 3 14 68646.9 2912.76 2
 -2 4 -18 37717 2563.01 4
 -2 4 -17 1172.11 429.787 4
 -2 4 -16 18458.4 1650.86 4
 -2 4 -15 22773.2 1719.28 4
 -2 4 -14 168178 4697.17 4
 -2 4 -13 56903.5 2487.95 4
 -2 4 -12 40211.7 1963.07 4
 -2 4 -11 38654.6 1798.41 4
 -2 4 -10 80488.7 2482.56 4
 -2 4 -9 186366 3736.25 4
 -2 4 -8 49635.1 1642.88 4
 -2 4 -7 12536.1 734.428 4
 -2 4 -6 107054 2083.6 4
 -2 4 -5 38485.6 1007.8 4
 -2 4 -4 499099 5264.08 4
 -2 4 -3 14478.1 793.566 5
 -2 4 -2 55411.4 1594.13 5
 -2 4 -1 4361.59 445.379 5
 -2 4 0 153141 2916.21 5
 -2 4 1 62325.9 1790.61 5
 -2 4 2 45433.9 1583.9 5
 -2 4 3 54266.8 1835.15 5
 -2 4 4 24181.9 615.874 1
 -2 4 4 28184.4 1361.47 5
 -2 4 5 136532 3220.85 5
 -2 4 5 130769 2077.73 1
 -2 4 6 190467 4049.03 5
 -2 4 6 194398 3039.38 1
 -2 4 7 12008.8 969.986 5
 -2 4 7 12139 714.647 1
 -2 4 8 19973 1299.13 2
 -2 4 8 21863.2 1065.43 1
 -2 4 8 22935.4 1387.81 5
 -2 4 9 286.639 174.965 1
 -2 4 9 503.069 307.151 5
 -2 4 9 664.019 306.234 2
 -2 4 10 84336.9 2899.85 2
 -2 4 10 88186.4 2962.85 5
 -2 4 10 87260.6 2563.67 1
 -2 4 11 9319.73 988.586 2
 -2 4 11 9528.84 991.823 5
 -2 4 11 11599.7 953.934 1
 -2 4 12 841.34 289.501 2
 -2 4 12 1739.69 473.865 5
 -2 4 12 1780.35 436.574 1
 -2 4 13 39876.3 2140.77 2
 -2 4 13 47010.2 2360.25 5
 -2 4 14 1023.44 448.881 5
 -2 4 15 49773.9 2607.22 5
 -2 5 -17 27824.3 2049.85 4
 -2 5 -16 3476.22 708.636 4
 -2 5 -15 51153.2 2523.29 4
 -2 5 -14 127122 3883.43 4
 -2 5 -13 2617.97 534.251 4
 -2 5 -12 34863 1751.42 4
 -2 5 -11 86.9886 167.424 4
 -2 5 -10 92321.7 2563.62 4
 -2 5 -9 42169.9 1555.95 4
 -2 5 -8 13523.6 795.72 4
 -2 5 -7 99031.4 2086.04 4
 -2 5 -4 222997 3897.92 5
 -2 5 -3 192887 3567.63 5
 -2 5 -2 87722.2 2247.07 5
 -2 5 -1 48579.2 1641.98 5
 -2 5 -1 47644.5 1057.6 3
 -2 5 0 360848 5492.01 5
 -2 5 0 359200 4585.54 3
 -2 5 1 372170 5742.11 5
 -2 5 2 51964.8 1898.82 5
 -2 5 3 80452.9 2502.94 5
 -2 5 4 3593.35 216.352 1
 -2 5 4 3383.1 549.467 5
 -2 5 5 317328 3902.52 1
 -2 5 5 341287 5962.01 5
 -2 5 6 257856 3637.51 1
 -2 5 6 266397 5256.22 5
 -2 5 7 2739.63 321.435 1
 -2 5 7 3807.84 595.314 5
 -2 5 8 36107.4 1873.72 5
 -2 5 8 33550.3 1244.63 1
 -2 5 9 56947.7 2444.93 5
 -2 5 9 52863.8 2288 2
 -2 5 9 54136.8 1770.32 1
 -2 5 10 179821 4620.51 2
 -2 5 10 166380 3593.63 1
 -2 5 10 175107 4586.01 5
 -2 5 11 95173.3 3395.83 5
 -2 5 11 93532.1 3246.66 2
 -2 5 12 2314.44 604.466 5
 -2 5 12 1922.43 507.035 2
 -2 5 13 22046.9 1716.12 5
 -2 5 14 3517.01 741.691 5
 -2 5 15 57358.3 2968.64 5
 -2 6 -15 42083.1 2219.34 4
 -2 6 -14 32350.4 1872.15 4
 -2 6 -13 19498.2 1354.48 4
 -2 6 -12 43826.7 1906.16 4
 -2 6 -11 527.297 234.047 4
 -2 6 -7 22402.7 1193.43 5
 -2 6 -6 677.731 209.551 5
 -2 6 -5 221449 4110.93 5
 -2 6 -4 7697.49 686.552 5
 -2 6 -3 83864.1 2338.74 5
 -2 6 -2 64052.7 2047.43 5
 -2 6 -1 78165.2 2323.19 5
 -2 6 -1 73823.3 1620.65 3
 -2 6 0 382628 6131.45 5
 -2 6 1 46635.5 1904.86 5
 -2 6 2 3942.75 588.032 5
 -2 6 3 80930.1 2685.5 5
 -2 6 4 91965.8 2956.67 5
 -2 6 5 368966 4413.91 1
 -2 6 5 415173 7040.58 5
 -2 6 6 101636 3246.81 5
 -2 6 6 96176.1 1878.82 1
 -2 6 7 24988.7 982.691 1
 -2 6 7 25711.2 1632.41 5
 -2 6 8 35456.6 1300.84 1
 -2 6 8 36116.8 1997.04 5
 -2 6 9 64717.5 2798.24 5
 -2 6 10 147873 4433.37 5
 -2 6 10 143985 4125.73 2
 -2 6 11 40363.5 2185.64 2
 -2 6 11 40766.5 2309.08 5
 -2 6 12 10466.4 1203.95 5
 -2 6 13 9993.49 1227.72 5
 -2 6 14 15982.7 1574.57 5
 -2 6 15 65108.1 3297.63 5
 -2 7 -10 18453.4 1195.15 5
 -2 7 -9 846.023 256.475 5
 -2 7 -8 63595.9 2180.26 5
 -2 7 -7 83345.2 2518.03 5
 -2 7 -6 30305.3 1476.3 5
 -2 7 -5 148716 3421.44 5
 -2 7 -4 1628.48 360.68 5
 -2 7 -3 96016.1 2743.97 5
 -2 7 -2 98891.3 2845.8 5
 -2 7 -1 78131.5 2535.61 5
 -2 7 0 80764 2663.95 5
 -2 7 1 3172.36 600.914 5
 -2 7 2 277441 5649.07 5
 -2 7 3 120150 3577.26 5
 -2 7 4 81044.4 2966.51 5
 -2 7 5 144128 4132.28 5
 -2 7 6 8284.74 992.185 5
 -2 7 7 141371 4245.93 5
 -2 7 8 1872.5 531.559 5
 -2 7 9 13247.4 1320.02 5
 -2 7 10 49676.6 2417.99 2
 -2 7 10 54234.7 2750.57 5
 -2 7 11 -146.927 271.359 2
 -2 7 11 -267.171 406.737 5
 -2 7 12 36276.2 2384.89 5
 -2 7 13 1695.31 550.784 5
 -2 7 14 37970 2580.32 5
 -2 7 15 29052.8 2318.03 5
 -2 8 -12 18819.4 1291.64 5
 -2 8 -11 17760.1 1220.99 5
 -2 8 -10 1075.06 361.24 5
 -2 8 -9 72136.2 2457.35 5
 -2 8 -8 176851 4018.72 5
 -2 8 -7 55857.5 2111.47 5
 -2 8 -6 30583.4 1574.33 5
 -2 8 -5 8818.47 846.347 5
 -2 8 -4 64150.6 2347.64 5
 -2 8 -3 221740 4699.13 5
 -2 8 -2 77467.6 2650.07 5
 -2 8 -1 31166 1710.98 5
 -2 8 0 57813.5 2422.26 5
 -2 8 1 60784.1 2560.94 5
 -2 8 2 289063 6154.16 5
 -2 8 3 6386.1 880.534 5
 -2 8 4 30183.8 1890.8 5
 -2 8 5 61413.8 2759.9 5
 -2 8 6 107093 3780.66 5
 -2 8 7 115802 4019.18 5
 -2 8 8 26061 1904.38 5
 -2 8 9 36249.1 2322.21 5
 -2 8 10 13198.1 1425.65 5
 -2 8 11 28645.7 2157.59 5
 -2 8 12 59453.2 3190.48 5
 -2 8 13 1276.2 481.215 5
 -2 8 14 39634.2 2761.55 5
 -2 8 15 3463.34 854.528 5
 -2 9 -12 418.921 235.946 5
 -2 9 -11 52680.4 2203.36 5
 -2 9 -10 170.29 220.196 5
 -2 9 -9 127162 3476.53 5
 -2 9 -8 166412 4045.83 5
 -2 9 -7 28411.5 1590.7 5
 -2 9 -6 23286 1442.39 5
 -2 9 -5 21709.6 1402.64 5
 -2 9 -4 117625 3438.98 5
 -2 9 -3 246363 5296.68 5
 -2 9 -2 28644.6 1736.22 5
 -2 9 -1 15306.1 1291.62 5
 -2 9 0 3374.07 673.087 5
 -2 9 1 158279 4506.96 5
 -2 9 2 74454.4 3053.44 5
 -2 9 3 2631.75 619.02 5
 -2 9 4 28577.3 1928.78 5
 -2 9 5 796.962 391.128 5
 -2 9 6 101692 3893.74 5
 -2 9 7 67938.5 3212.58 5
 -2 9 8 1505.52 454.251 5
 -2 9 9 60762.1 3168.99 5
 -2 9 10 364.796 361.647 5
 -2 9 11 94122.5 4151.55 5
 -2 9 12 62724.1 3438.1 5
 -2 9 13 3524.34 851.02 5
 -2 9 14 6459.26 1153.24 5
 -2 10 -11 71259.4 2721.38 5
 -2 10 -10 4659.4 680.135 5
 -2 10 -9 107370 3328.54 5
 -2 10 -8 144014 3945.34 5
 -2 10 -7 9713.06 996.431 5
 -2 10 -6 14046.6 1218.95 5
 -2 10 -5 1611.82 469.658 5
 -2 10 -4 214996 5149.12 5
 -2 10 -3 43145.2 2256.25 5
 -2 10 -2 1016.92 391.451 5
 -2 10 -1 60972.9 2746.48 5
 -2 10 0 5861.97 897.356 5
 -2 10 1 111418 3921.07 5
 -2 10 2 17585.1 1575.45 5
 -2 10 3 7444.87 1060.96 5
 -2 10 4 9032.28 1140.59 5
 -2 10 5 18273.7 1683.33 5
 -2 10 6 82006.1 3635.3 5
 -2 10 7 7229.79 1129.68 5
 -2 10 8 28310.8 2240.69 5
 -2 10 9 20511.4 1920.19 5
 -2 10 10 26436.4 2224.13 5
 -2 10 11 119993 4977.65 5
 -2 10 12 10476.8 1457.86 5
 -2 11 -11 34959.9 1943.97 5
 -2 11 -10 3584.86 658.537 5
 -2 11 -9 67580.2 2747.16 5
 -2 11 -8 1688.8 439.225 5
 -2 11 -7 123988 3854.56 5
 -2 11 -6 106444 3599.54 5
 -2 11 -5 7456.96 967.122 5
 -2 11 -4 73707.6 3069.51 5
 -2 11 -3 138.38 318.247 5
 -2 11 -2 28809.5 1973.34 5
 -2 11 -1 27477.9 1955.53 5
 -2 11 0 43573.6 2517.98 5
 -2 11 1 43233.1 2523.5 5
 -2 11 2 2166.37 645.734 5
 -2 11 3 49842.4 2813.61 5
 -2 11 4 7275.79 1102.97 5
 -2 11 5 49847.6 2926.32 5
 -2 11 6 28078.8 2227.01 5
 -2 11 7 216.133 492.219 5
 -2 11 8 52762.9 3182.33 5
 -2 11 9 2829.39 787.167 5
 -2 11 10 40307.5 2897.27 5
 -2 11 11 62168.7 3666.68 5
 -2 12 -10 2404.48 574.637 5
 -2 12 -9 16807 1429.61 5
 -2 12 -8 22135 1702.95 5
 -2 12 -7 126006 4149.79 5
 -2 12 -6 32790.4 2080.9 5
 -2 12 -5 24609.7 1838.09 5
 -2 12 -4 4792.79 845.523 5
 -2 12 -3 10910.2 1261.21 5
 -2 12 -2 111888 4159.15 5
 -2 12 -1 10802.8 1306.35 5
 -2 12 0 18032.7 1684.92 5
 -2 12 1 14478.8 1573.21 5
 -2 12 2 40752.3 2619.76 5
 -2 12 3 86161.8 3914.63 5
 -2 12 4 1607.83 565.289 5
 -2 12 5 28423 2303.74 5
 -2 12 6 10593.1 1468.95 5
 -2 12 7 21069.7 2062.34 5
 -2 12 8 32765.8 2628.85 5
 -2 12 9 1149.53 449.684 5
 -2 13 -9 2375.28 610.765 5
 -2 13 -8 37002.8 2296.18 5
 -2 13 -7 35571 2289.57 5
 -2 13 -6 897.451 538.649 5
 -2 13 -5 27774.4 2080.28 5
 -2 13 -4 539.638 380.281 5
 -2 13 -3 69243.4 3397.74 5
 -2 13 -2 122343 4570.56 5
 -2 13 -1 4514.02 917.848 5
 -2 13 0 26381 2166.25 5
 -2 13 1 4097.89 884.525 5
 -2 13 2 97256.3 4297.04 5
 -2 13 3 128525 5016.9 5
 -2 13 4 2786.69 731.176 5
 -2 13 5 19823.7 2010.73 5
 -2 13 6 476.58 394 5
 -2 13 7 49449.2 3297.12 5
 -2 14 -9 195.87 322.756 5
 -2 14 -8 44233.8 2662.67 5
 -2 14 -7 16036.5 1614.2 5
 -2 14 -6 15095.9 1600.88 5
 -2 14 -5 20757.9 1904.03 5
 -2 14 -4 6068.75 1039.48 5
 -2 14 -3 89526.3 4038.7 5
 -2 14 -2 37282.2 2611.93 5
 -2 14 -1 4173.64 903.306 5
 -2 14 0 30420.5 2406.06 5
 -2 14 1 4066.53 948.602 5
 -2 14 2 136305 5353.27 5
 -2 14 3 57226.9 3461.56 5
 -2 14 4 4258.43 1033.7 5
 -2 14 5 15716.9 1933.12 5
 -2 15 -8 36298.2 2526.22 5
 -2 15 -7 235.022 335.967 5
 -2 15 -6 31782.4 2414.5 5
 -2 15 -5 18253.5 1857.43 5
 -2 15 -4 7966.85 1248.59 5
 -2 15 -3 50695.8 3142.86 5
 -2 15 -2 1274.54 564.371 5
 -2 15 -1 27560 2355.1 5
 -2 15 0 16435.4 1891.89 5
 -2 15 1 23774.3 2276.09 5
 -2 15 2 57534.7 3560.54 5
 -2 16 -7 5950.84 1097.63 5
 -2 16 -6 30112.7 2443.54 5
 -2 16 -5 16940.8 1876.73 5
 -2 16 -4 6582.63 1209.78 5
 -2 16 -3 4997.22 1085.97 5
 -2 16 -2 15723.6 1856.77 5
 -2 16 -1 67554.7 3869.74 5
 -2 16 0 5539.75 1215.17 5
 -2 17 -6 58139.5 3526.93 5
 -2 17 -5 2631.87 749.25 5
 -2 17 -4 5480.23 1205.7 5
 -1 -15 5 38773.3 2810.1 2
 -1 -15 6 35214.2 2699.33 2
 -1 -15 7 2790.11 816.056 2
 -1 -15 8 8156.31 1400.89 2
 -1 -15 9 6386.49 1239.04 2
 -1 -14 4 4532.92 944.156 2
 -1 -14 5 45075.8 2939.73 2
 -1 -14 6 855.579 410.915 2
 -1 -14 7 41602.5 2883.68 2
 -1 -14 8 22838.7 2174.35 2
 -1 -14 9 9941.59 1438.92 2
 -1 -14 10 32460.1 2674.57 2
 -1 -14 11 -64.397 654.64 2
 -1 -14 12 18292.7 2050.86 2
 -1 -13 3 10025.8 1288.35 2
 -1 -13 4 18897.4 1806.8 2
 -1 -13 5 26283.6 2161.52 2
 -1 -13 6 33891.5 2470.6 2
 -1 -13 7 101237 4387.18 2
 -1 -13 8 17325.8 1809.52 2
 -1 -13 9 15873.3 1769.71 2
 -1 -13 10 13755.6 1682.14 2
 -1 -13 11 17142.5 1893.68 2
 -1 -13 12 90620.4 4513.92 2
 -1 -13 13 15526.9 1906.63 2
 -1 -13 14 15719.1 1933.09 2
 -1 -12 2 54344 2825.99 2
 -1 -12 2 48633.4 2577.52 3
 -1 -12 3 2415.52 576.815 3
 -1 -12 3 1694.44 548.068 2
 -1 -12 4 22777.5 1897.54 2
 -1 -12 4 18841.8 1515.29 3
 -1 -12 5 268.405 370.899 2
 -1 -12 6 100855 4159.5 2
 -1 -12 7 127802 4766.38 2
 -1 -12 8 10754.5 1379.09 2
 -1 -12 9 26087.6 2201.4 2
 -1 -12 10 5193.85 969.675 2
 -1 -12 11 75120.9 3891.6 2
 -1 -12 12 151085 5684.24 2
 -1 -12 13 3337.89 900.72 2
 -1 -12 14 13635.4 1747.01 2
 -1 -12 15 528.354 557.408 2
 -1 -11 1 129312 4191.42 3
 -1 -11 2 66484 3021.32 2
 -1 -11 2 62565.4 2777.03 3
 -1 -11 3 955.306 444.531 2
 -1 -11 3 978.039 351.486 3
 -1 -11 4 36082.5 2274.49 2
 -1 -11 4 30504 1844.98 3
 -1 -11 5 2737.58 581.547 3
 -1 -11 5 3267.97 736.149 2
 -1 -11 6 88466.3 3699.25 2
 -1 -11 6 81186 2983.81 3
 -1 -11 7 80187.3 3563.13 2
 -1 -11 7 70030.5 2741.81 3
 -1 -11 8 1132.4 560.263 2
 -1 -11 9 17436.5 1722.93 2
 -1 -11 10 2683.86 767.598 2
 -1 -11 11 152392 5418.78 2
 -1 -11 12 79827.3 3938.06 2
 -1 -11 13 2867.87 837.298 2
 -1 -11 14 18853.9 1975.32 2
 -1 -11 15 3365.75 931.3 2
 -1 -11 16 58965.5 3648.6 2
 -1 -11 17 23195.4 2329.43 2
 -1 -10 1 134359 4126.62 2
 -1 -10 1 138878 4142.54 3
 -1 -10 2 32591.1 1905.54 3
 -1 -10 2 37250.4 2133.97 2
 -1 -10 3 57734.3 2702.09 2
 -1 -10 3 53957.9 2402.08 3
 -1 -10 4 36285.2 2180.33 2
 -1 -10 4 34951.7 1882.8 3
 -1 -10 5 4165.29 651.267 3
 -1 -10 5 5122.41 873.043 2
 -1 -10 6 80032.7 3381.43 2
 -1 -10 6 76948.2 2770.9 3
 -1 -10 7 1160.66 337.256 3
 -1 -10 7 1591.34 480.619 2
 -1 -10 8 22328.6 1501.6 3
 -1 -10 8 26983.9 2020.58 2
 -1 -10 9 27801.1 2099.89 2
 -1 -10 10 33978.9 2344.93 2
 -1 -10 11 84498.8 3820.62 2
 -1 -10 12 3541.72 817.503 2
 -1 -10 13 48586.6 2970.08 2
 -1 -10 14 11161.4 1455.14 2
 -1 -10 15 17300.9 1876.57 2
 -1 -10 16 54369.3 3383.97 2
 -1 -10 17 1313.13 522.861 2
 -1 -10 18 11958 1645.28 2
 -1 -9 0 539.146 283.978 3
 -1 -9 0 543.794 309.715 2
 -1 -9 1 11786.5 1141.15 2
 -1 -9 1 10301.1 1047.74 3
 -1 -9 2 13288.4 1154.69 3
 -1 -9 2 15808.1 1312.42 2
 -1 -9 3 168711 4572.89 2
 -1 -9 3 169247 4224.13 3
 -1 -9 4 48236.2 2382.49 2
 -1 -9 4 47955.8 2111.94 3
 -1 -9 5 35193.5 2069.82 2
 -1 -9 5 32538.9 1696.7 3
 -1 -9 6 20537.9 1357.09 3
 -1 -9 6 23695.6 1738.9 2
 -1 -9 7 7414.21 858.335 3
 -1 -9 7 7875.48 1021.97 2
 -1 -9 8 50544.3 2651.76 2
 -1 -9 9 5283.81 890.291 2
 -1 -9 10 15927.4 1548.15 2
 -1 -9 11 17755 1667.38 2
 -1 -9 12 18186.5 1704.87 2
 -1 -9 13 42392.1 2710.02 2
 -1 -9 14 731.525 403.692 2
 -1 -9 15 37298.9 2641.75 2
 -1 -9 16 15473.6 1747.66 2
 -1 -9 17 8963.27 1352.46 2
 -1 -9 18 47990.4 3208.62 2
 -1 -9 19 762.909 304.523 2
 -1 -8 -1 31903.7 1849.84 3
 -1 -8 0 8308.21 853.941 2
 -1 -8 0 6212.36 784.64 3
 -1 -8 1 15248.7 1193.51 2
 -1 -8 1 15020.7 1186.69 3
 -1 -8 2 113213 3420.18 2
 -1 -8 2 104899 3160.89 3
 -1 -8 3 286468 5857.28 2
 -1 -8 3 282061 5464.22 3
 -1 -8 4 83651.3 3006.39 2
 -1 -8 4 79828.9 2607.04 3
 -1 -8 5 22100.9 1320.79 3
 -1 -8 5 21165.6 1537.71 2
 -1 -8 6 6357.84 742.3 3
 -1 -8 6 5861.54 841.442 2
 -1 -8 7 38328.1 2129.06 2
 -1 -8 8 77233.1 3125.57 2
 -1 -8 9 164.922 241.285 2
 -1 -8 10 9698.26 1144.62 2
 -1 -8 11 3078.34 717.97 2
 -1 -8 12 45725.7 2639.06 2
 -1 -8 13 26512.2 2060.09 2
 -1 -8 14 1170.75 541.88 2
 -1 -8 15 47381.3 2888.06 2
 -1 -8 16 581.916 310.723 2
 -1 -8 17 43801.6 2936.86 2
 -1 -8 18 61631.8 3567.1 2
 -1 -8 19 -113.773 478.527 2
 -1 -7 -1 4732.87 651.595 3
 -1 -7 0 82845.5 2623.63 2
 -1 -7 0 80672.7 2740.98 3
 -1 -7 1 5601.92 686.52 2
 -1 -7 1 5297.27 683.198 3
 -1 -7 2 217118 4711.07 2
 -1 -7 2 229044 4620.54 3
 -1 -7 3 170429 4129.24 2
 -1 -7 3 167902 3772.38 3
 -1 -7 4 210.953 167.777 3
 -1 -7 4 2044.42 463.674 2
 -1 -7 5 122054 3545.64 2
 -1 -7 6 2635.63 542.152 2
 -1 -7 7 151627 4192.47 2
 -1 -7 8 104822 3508.14 2
 -1 -7 9 10086.7 1109.29 2
 -1 -7 10 44753.9 2373.43 2
 -1 -7 11 2510.38 628.386 2
 -1 -7 12 130677 4365.7 2
 -1 -7 13 87803.9 3667.87 2
 -1 -7 14 17374.6 1676.16 2
 -1 -7 15 33242 2323.58 2
 -1 -7 16 11978.5 1435.47 2
 -1 -7 17 83690.8 3954.12 2
 -1 -7 18 25182.2 2219.97 2
 -1 -7 19 3663.04 899.769 2
 -1 -7 20 5201.29 1034.9 2
 -1 -6 -14 5587.17 1094.78 4
 -1 -6 -1 103984 2684.23 2
 -1 -6 -1 105922 3085.59 3
 -1 -6 0 102718 2726.04 2
 -1 -6 0 101162 2929.92 3
 -1 -6 1 246.092 170.99 3
 -1 -6 1 563.305 237.118 2
 -1 -6 2 300425 5344.49 2
 -1 -6 2 291551 5124.43 3
 -1 -6 3 1065.7 300.405 3
 -1 -6 3 1535.3 394.385 2
 -1 -6 4 196005 4326.25 2
 -1 -6 5 64030.6 2375.93 2
 -1 -6 6 30072 1663.03 2
 -1 -6 7 287229 5797.37 2
 -1 -6 8 37721.5 1971 2
 -1 -6 9 63153.3 2637.21 2
 -1 -6 10 58340.3 2607.26 2
 -1 -6 11 6900.55 960.08 2
 -1 -6 12 149355 4531.12 2
 -1 -6 13 20483.4 1667.72 2
 -1 -6 14 45106.8 2563.38 2
 -1 -6 15 7346.65 1080.31 2
 -1 -6 16 28874.5 2165.95 2
 -1 -6 17 73068.5 3582.51 2
 -1 -6 18 258.038 293.914 2
 -1 -6 19 22764.7 2096.83 2
 -1 -5 -15 93091.7 4717.94 4
 -1 -5 -14 -338.363 619.811 4
 -1 -5 -2 29985.2 1573.74 3
 -1 -5 -1 113673 2637.19 2
 -1 -5 -1 117398 3087.03 3
 -1 -5 0 217310 3980.05 2
 -1 -5 0 220585 4255.37 3
 -1 -5 1 173251 3528.36 2
 -1 -5 1 175628 3594.91 3
 -1 -5 2 57500.4 1875.7 3
 -1 -5 2 58370.1 1946.69 2
 -1 -5 3 73353.2 2181.99 3
 -1 -5 3 69013.1 2200.54 2
 -1 -5 4 312292 5393.91 2
 -1 -5 5 74409.5 2434.1 2
 -1 -5 6 12067.9 986.577 2
 -1 -5 7 142051 3682.28 2
 -1 -5 8 21882.3 1411.23 2
 -1 -5 9 250427 5372.9 2
 -1 -5 10 65493.4 2642.89 2
 -1 -5 11 20420.6 1504.42 2
 -1 -5 12 30503.2 1898.45 2
 -1 -5 13 4967.2 821.482 2
 -1 -5 14 75442.8 3247.48 2
 -1 -5 15 11747.1 1311.79 2
 -1 -5 16 19115.2 1727.87 2
 -1 -5 17 22041.1 1910.87 2
 -1 -5 18 2901.46 748.759 2
 -1 -5 19 36429 2602.94 2
 -1 -4 -16 64941.4 3965.05 4
 -1 -4 -15 43748.5 3136.61 4
 -1 -4 -14 17157.8 1874.2 4
 -1 -4 -13 3035.41 803.189 4
 -1 -4 -2 45280.9 1805.87 3
 -1 -4 -1 171429 3085.04 2
 -1 -4 -1 172223 3589.88 3
 -1 -4 0 366.413 209.199 3
 -1 -4 0 552.724 179.739 2
 -1 -4 1 50957 1597.38 2
 -1 -4 1 47530.6 1596.77 3
 -1 -4 2 361.638 165.39 3
 -1 -4 2 504.517 191.842 2
 -1 -4 3 143175 3075.81 2
 -1 -4 4 224316 4126.48 2
 -1 -4 4 219747 3216.67 5
 -1 -4 5 97979.1 2639.34 2
 -1 -4 5 98594.6 1818.58 5
 -1 -4 6 1467.18 368.544 2
 -1 -4 7 9614.78 849.443 2
 -1 -4 8 390936 6600.22 2
 -1 -4 9 458484 7534.62 2
 -1 -4 10 18275.6 1320.41 2
 -1 -4 11 40420.4 2048.4 2
 -1 -4 12 3276.85 594.186 2
 -1 -4 13 115061 3790.4 2
 -1 -4 14 121466 4053.64 2
 -1 -4 15 12105.5 1290.28 2
 -1 -4 16 15755 1531.89 2
 -1 -4 17 1161.51 408.456 2
 -1 -4 18 36326.6 2454.55 2
 -1 -4 19 44464 3114.06 1
 -1 -4 20 3676.18 955.596 1
 -1 -3 -16 74798.7 4108.15 4
 -1 -3 -15 308.212 458.725 4
 -1 -3 -14 42925.5 2882.73 4
 -1 -3 -13 9719.27 1339.38 4
 -1 -3 -2 280867 4730.87 3
 -1 -3 -1 172625 2769.7 2
 -1 -3 -1 177282 3376.46 3
 -1 -3 0 2458.69 323.16 2
 -1 -3 0 2466.04 352.004 3
 -1 -3 1 10606.2 667.099 3
 -1 -3 1 10809.6 627.615 2
 -1 -3 2 151531 2503.55 5
 -1 -3 2 150459 2790.82 2
 -1 -3 3 229010 3093.1 5
 -1 -3 3 231418 3801.45 2
 -1 -3 4 80112.3 2099.1 2
 -1 -3 4 79911.8 1404.36 5
 -1 -3 5 20141.2 1066.51 2
 -1 -3 6 52677.4 1840.37 2
 -1 -3 7 21036.6 1213.84 2
 -1 -3 8 342677 5866.59 2
 -1 -3 9 200101 4398.04 2
 -1 -3 10 1279.25 364.362 2
 -1 -3 11 24632.6 1535.26 2
 -1 -3 12 91708.1 3160.55 2
 -1 -3 13 174544 4665.41 2
 -1 -3 14 126642 4031.67 2
 -1 -3 15 703.863 355.719 2
 -1 -3 16 9055.08 1127.55 2
 -1 -3 17 1300.17 467.718 2
 -1 -3 18 96331.4 4357.84 1
 -1 -3 19 18953.3 2031.76 1
 -1 -3 20 16425.6 1924.64 1
 -1 -2 -17 23480.5 2295.9 4
 -1 -2 -16 12369 1637.63 4
 -1 -2 -15 29719.3 2424.1 4
 -1 -2 -14 73740.7 3670.2 4
 -1 -2 -13 2181.74 716.859 4
 -1 -2 -12 31932.3 2222.52 4
 -1 -2 -2 450727 6133 3
 -1 -2 -1 230469 3388.57 1
 -1 -2 -1 222023 3593.47 3
 -1 -2 -1 220470 2892.98 2
 -1 -2 0 387213 4788.37 5
 -1 -2 0 372290 4461.4 2
 -1 -2 0 376354 4814.03 1
 -1 -2 0 376010 4951.79 3
 -1 -2 1 17990.8 668.906 5
 -1 -2 1 19009.4 723.097 2
 -1 -2 2 217997 2774.93 5
 -1 -2 2 220596 3250.56 2
 -1 -2 3 226458 2589.68 5
 -1 -2 3 224884 3498.02 2
 -1 -2 4 90389.7 2079.17 2
 -1 -2 5 25064.5 1128.82 2
 -1 -2 6 37601 1493.51 2
 -1 -2 7 50105 1843.1 2
 -1 -2 8 218232 4390.47 2
 -1 -2 9 42473.8 1863.96 2
 -1 -2 10 75992.2 2657.82 2
 -1 -2 11 5168.67 712.382 2
 -1 -2 12 19884.5 1406.58 2
 -1 -2 13 115651 3612.03 2
 -1 -2 14 8327.47 987.51 2
 -1 -2 15 7496.03 983.936 2
 -1 -2 16 15157.9 1576.15 1
 -1 -2 16 15548.2 1418.96 2
 -1 -2 17 19020.4 1824.84 1
 -1 -2 17 16836.6 1544.61 2
 -1 -2 18 95283.4 4311.28 1
 -1 -2 19 5057.52 1054.67 1
 -1 -2 20 13001.7 1704.95 1
 -1 -1 -18 84.1844 372.986 4
 -1 -1 -17 42218.4 3003.59 4
 -1 -1 -16 748.281 570.321 4
 -1 -1 -15 32604.5 2437.6 4
 -1 -1 -14 26820.1 2141.31 4
 -1 -1 -13 -229.076 397.85 4
 -1 -1 -12 32721 2148.27 4
 -1 -1 -11 1074.91 480.537 4
 -1 -1 -2 696481 8151.7 3
 -1 -1 -2 714493 7910.92 1
 -1 -1 -1 22941.6 789.843 5
 -1 -1 -1 24091.1 813.105 1
 -1 -1 -1 24396.1 868.206 3
 -1 -1 0 3380.16 227.278 2
 -1 -1 0 64593.5 1072.37 5
 -1 -1 1 45362.9 1006.92 2
 -1 -1 2 42365.4 1042.88 2
 -1 -1 3 7245.14 453.236 4
 -1 -1 3 6606.51 445.164 2
 -1 -1 4 7411.38 527.156 2
 -1 -1 5 350930 5009.46 2
 -1 -1 6 48518.9 1602.35 2
 -1 -1 7 94658.4 2457.94 2
 -1 -1 8 195718 3867.36 2
 -1 -1 9 2444.54 427.254 2
 -1 -1 10 137704 3448.17 2
 -1 -1 11 52563.9 2170.49 2
 -1 -1 12 18346 1333.38 2
 -1 -1 13 72219.1 2833 2
 -1 -1 14 2917.46 625.264 1
 -1 -1 14 1690.2 466.788 2
 -1 -1 15 53874.9 2839.91 1
 -1 -1 15 55171.3 2567.9 2
 -1 -1 16 18104.9 1694.81 1
 -1 -1 16 16381.3 1445.98 2
 -1 -1 17 59208.8 3182.89 1
 -1 -1 18 27987.5 2289 1
 -1 -1 19 1279.66 544.925 1
 -1 0 -18 9650.12 1461.44 4
 -1 0 -17 16131 1797.18 4
 -1 0 -16 1421.83 594.686 4
 -1 0 -15 40167.6 2622.9 4
 -1 0 -14 21283.4 1829.97 4
 -1 0 -13 6407.2 955.017 4
 -1 0 -12 31722 2054.42 4
 -1 0 -11 16629.6 1419.78 4
 -1 0 -10 173089 4491.25 4
 -1 0 -6 173017 2831.06 2
 -1 0 -5 457615 5319.28 2
 -1 0 -4 280912 3407.26 2
 -1 0 -3 20767.4 523.611 2
 -1 0 -2 2598.51 253.916 5
 -1 0 -2 3048.56 297.242 1
 -1 0 3 542942 5517.22 2
 -1 0 3 537411 5471.81 4
 -1 0 4 150195 2628.09 2
 -1 0 4 145742 2077.46 5
 -1 0 5 223831 3056.64 5
 -1 0 5 224401 3632.14 2
 -1 0 6 20040.6 791.465 5
 -1 0 6 19228 983.389 2
 -1 0 7 11086.1 643.963 5
 -1 0 7 8710.51 702.651 2
 -1 0 8 36492.3 1293.71 5
 -1 0 8 35321.3 1509.09 2
 -1 0 9 35174 1363.71 5
 -1 0 9 36367.6 1607.88 2
 -1 0 10 128314 2947.76 5
 -1 0 10 129434 3365.31 2
 -1 0 11 1092.29 331.878 2
 -1 0 11 1304.4 350.487 5
 -1 0 12 71515.5 2824.44 1
 -1 0 12 69442.3 2302.24 5
 -1 0 12 70144.5 2547.57 2
 -1 0 13 17390.1 1451.27 1
 -1 0 13 12897.7 1149.21 2
 -1 0 14 60113.2 2596.17 2
 -1 0 14 59702.3 2797.73 1
 -1 0 15 83691.8 3487.77 1
 -1 0 15 84247.9 3285.1 2
 -1 0 16 1022.46 537.163 1
 -1 0 17 30825.8 2281.05 1
 -1 0 18 1839.1 573.646 1
 -1 1 -19 3102.89 934.825 4
 -1 1 -18 34926.5 2708.05 4
 -1 1 -17 8490.21 1327.71 4
 -1 1 -16 13568.3 1527.23 4
 -1 1 -15 45134.5 2674.47 4
 -1 1 -14 2096.37 552.045 4
 -1 1 -13 19842.8 1604.39 4
 -1 1 -12 13646.9 1276.32 4
 -1 1 -11 34557.5 1938.85 4
 -1 1 -10 164440 4215.92 4
 -1 1 -9 601.139 281.865 4
 -1 1 -8 126123 3254.92 4
 -1 1 -5 56122.9 1359.23 2
 -1 1 -4 52594.5 1170.59 2
 -1 1 -3 136223 1993.85 2
 -1 1 -2 1448.59 148.993 2
 -1 1 2 56677 1243.94 5
 -1 1 2 124037 1790.93 4
 -1 1 3 279621 3774.5 2
 -1 1 3 271456 3572.28 5
 -1 1 4 546377 6701.42 2
 -1 1 4 544225 6339.87 5
 -1 1 5 58334.2 1649.92 2
 -1 1 5 57477 1507.15 5
 -1 1 6 51253.5 1644.46 2
 -1 1 6 50226 1506.05 5
 -1 1 7 97252.6 2455.66 2
 -1 1 7 96733.1 2291.88 5
 -1 1 8 314.96 137.128 2
 -1 1 8 924.935 244.213 5
 -1 1 9 101807 2849.12 1
 -1 1 9 96688.2 2582.22 5
 -1 1 9 99418 2732.57 2
 -1 1 10 101010 2759.56 5
 -1 1 10 102419 3042.57 1
 -1 1 10 99834.3 2878.57 2
 -1 1 11 42193 1807.51 5
 -1 1 11 42977.4 2031.48 1
 -1 1 11 40605.2 1856.15 2
 -1 1 12 77239.3 2599.76 5
 -1 1 12 78577 2926.31 1
 -1 1 12 78439.6 2743.34 2
 -1 1 13 18372.8 1484.03 1
 -1 1 13 18010.7 1278.18 5
 -1 1 13 15441.5 1241.34 2
 -1 1 14 90695.8 3486.33 1
 -1 1 14 83286.9 2983.4 2
 -1 1 14 91880 3090.18 5
 -1 1 15 58689.9 2896.35 1
 -1 1 16 7501.03 1068.95 1
 -1 2 -19 12272.5 1621.14 4
 -1 2 -18 53669.2 3246.13 4
 -1 2 -17 6554.02 1107.72 4
 -1 2 -16 53809.3 2992.79 4
 -1 2 -15 31444.3 2201.96 4
 -1 2 -14 10264.2 1213.6 4
 -1 2 -13 119907 3928.16 4
 -1 2 -12 10182.8 1067.1 4
 -1 2 -11 41377 2005.4 4
 -1 2 -10 75018.6 2614.29 4
 -1 2 -9 144109 3493.39 4
 -1 2 -8 161110 3519.57 4
 -1 2 -7 36577.6 1444.09 4
 -1 2 -6 242742 3951.11 4
 -1 2 -5 1258.76 234.184 4
 -1 2 -4 93258 1898.83 2
 -1 2 -4 89146.7 1722.77 4
 -1 2 -3 821407 9080.77 2
 -1 2 -3 855351 8534.08 4
 -1 2 -2 2184.92 245.194 2
 -1 2 -1 304908 4401.45 2
 -1 2 -1 495490 4721.54 5
 -1 2 0 4033.47 304.962 5
 -1 2 1 896.125 173.766 5
 -1 2 2 20816.4 843.157 5
 -1 2 3 54070.4 1058.85 1
 -1 2 3 52148.7 1459.17 5
 -1 2 4 160295 2964.37 5
 -1 2 4 164638 2509.96 1
 -1 2 5 118538 2623.42 5
 -1 2 5 122710 2311.57 1
 -1 2 6 120531 2721.35 5
 -1 2 6 116540 2476.9 1
 -1 2 6 118199 2721.8 2
 -1 2 7 55483.7 1846.04 2
 -1 2 7 59257.9 1915.69 5
 -1 2 7 55994.6 1778.83 1
 -1 2 8 4187.69 531.935 2
 -1 2 8 4806.13 553.211 1
 -1 2 8 4679.94 563.904 5
 -1 2 9 193509 4075.17 2
 -1 2 9 194899 4130.23 5
 -1 2 9 190510 4039.15 1
 -1 2 10 32489 1599.71 2
 -1 2 10 33645.8 1680.54 5
 -1 2 10 34710.9 1713.57 1
 -1 2 11 65954.1 2505.27 1
 -1 2 11 68705.5 2504.9 5
 -1 2 11 66153.4 2406.13 2
 -1 2 12 27946.2 1634.44 5
 -1 2 12 27428 1688.09 1
 -1 2 12 23813.9 1490.39 2
 -1 2 13 35766.2 1929.27 5
 -1 2 13 35658.9 2003.26 1
 -1 2 13 33682.7 1844.15 2
 -1 2 14 107855 3769.89 1
 -1 2 14 110978 3617.38 5
 -1 2 15 6961.44 1015.33 1
 -1 2 15 7934.13 997.626 5
 -1 3 -19 54395.8 3306.75 4
 -1 3 -18 55447.7 3240.24 4
 -1 3 -17 754.909 489.43 4
 -1 3 -16 52195.5 2860.77 4
 -1 3 -15 2135.92 684.823 4
 -1 3 -14 159466 4694.43 4
 -1 3 -13 186199 4872.73 4
 -1 3 -12 2124.71 521.82 4
 -1 3 -11 83333.9 2833.3 4
 -1 3 -10 5634.34 676.577 4
 -1 3 -9 274842 4970.01 4
 -1 3 -8 286664 4807.27 4
 -1 3 -7 487.42 206.599 4
 -1 3 -6 157116 2826.31 4
 -1 3 -5 129.762 79.6944 4
 -1 3 -4 285286 3560.89 4
 -1 3 -2 182122 2835.04 5
 -1 3 -1 56408.6 1392.71 5
 -1 3 0 276525 3918.59 5
 -1 3 0 276954 3412.12 3
 -1 3 1 209564 3435.29 5
 -1 3 2 105373 2359.67 5
 -1 3 3 34665.4 835.315 1
 -1 3 3 33568.1 1325.58 5
 -1 3 4 53715 1773.59 5
 -1 3 4 54336.2 1243.51 1
 -1 3 5 4400.13 559.807 5
 -1 3 5 5425.04 440.812 1
 -1 3 6 327650 5477.68 5
 -1 3 6 327178 4777.3 1
 -1 3 7 13812.6 933.175 2
 -1 3 7 16118.7 1078.88 5
 -1 3 7 14998.2 889.554 1
 -1 3 8 12692 938.013 2
 -1 3 8 12608 889.115 1
 -1 3 8 13216.2 1011.6 5
 -1 3 9 75220.9 2460.39 2
 -1 3 9 75451.6 2395.29 1
 -1 3 9 76262.8 2607.06 5
 -1 3 10 166.729 242.616 5
 -1 3 10 112.293 150.036 2
 -1 3 10 164.376 161.588 1
 -1 3 11 53577.7 2190.88 2
 -1 3 11 55166.7 2270.98 1
 -1 3 11 55642.6 2395 5
 -1 3 12 12224.5 1118.93 1
 -1 3 12 11935.9 1135.1 5
 -1 3 12 10693.6 992.485 2
 -1 3 13 47961.6 2411.5 5
 -1 3 13 44510.6 2256.77 1
 -1 3 13 41411.9 2058.96 2
 -1 3 14 70914.6 3048.53 5
 -1 3 14 65880.9 2887.12 1
 -1 3 15 6116.2 920.809 5
 -1 4 -19 76923.3 3894.28 4
 -1 4 -18 46319.3 2871.59 4
 -1 4 -17 4012.83 838.208 4
 -1 4 -16 6825.98 1038.68 4
 -1 4 -15 54202.2 2711.6 4
 -1 4 -14 241555 5762.58 4
 -1 4 -13 37763.7 2021.37 4
 -1 4 -12 2732.1 538.521 4
 -1 4 -11 47282.6 2023.35 4
 -1 4 -10 53459.3 2033.14 4
 -1 4 -9 193509 3884.51 4
 -1 4 -8 273151 4523.1 4
 -1 4 -7 22633.2 1020.47 4
 -1 4 -6 12438.5 676.048 4
 -1 4 -4 295776 4242.17 5
 -1 4 -3 1467.86 240.552 5
 -1 4 -2 707.474 201.358 5
 -1 4 -1 5404.5 351.485 3
 -1 4 -1 5467.71 486.674 5
 -1 4 0 145209 2893.16 5
 -1 4 0 147462 2468.69 3
 -1 4 1 249475 4246.36 5
 -1 4 2 45078.6 1662.22 5
 -1 4 3 2660.46 432.541 5
 -1 4 3 2793.62 251.349 1
 -1 4 4 29331.6 927.023 1
 -1 4 4 30174.7 1441.64 5
 -1 4 5 148555 2659.33 1
 -1 4 5 149392 3526.22 5
 -1 4 6 341275 5869.23 5
 -1 4 6 305810 4533.37 1
 -1 4 7 7367.6 784.905 5
 -1 4 7 7396.38 611.746 1
 -1 4 8 27848.6 1602.36 5
 -1 4 8 28399.4 1454.18 2
 -1 4 8 28232.4 1305.89 1
 -1 4 9 2515.55 452.852 2
 -1 4 9 2749.81 544.301 5
 -1 4 9 3121.89 465.763 1
 -1 4 10 112578 3542.16 5
 -1 4 10 112532 3077.51 1
 -1 4 10 111776 3247.45 2
 -1 4 11 151701 4340.87 5
 -1 4 11 144261 3714.07 1
 -1 4 12 24043.3 1522.26 2
 -1 4 12 23619 1740.4 5
 -1 4 12 25816.7 1564.32 1
 -1 4 13 43805.9 2433.67 5
 -1 4 14 18897.5 1641.38 5
 -1 4 15 24710 1934.56 5
 -1 5 -18 9169.23 1279.74 4
 -1 5 -17 24651.2 2006.87 4
 -1 5 -16 6544.78 987.334 4
 -1 5 -15 45197.9 2433.54 4
 -1 5 -14 109966 3630.17 4
 -1 5 -13 30512.4 1771.53 4
 -1 5 -12 37141.4 1868.52 4
 -1 5 -11 15313.8 1111.09 4
 -1 5 -10 83565.7 2526.77 4
 -1 5 -6 38520.4 1386.52 5
 -1 5 -5 65226.9 1802.33 5
 -1 5 -4 211543 3626.14 5
 -1 5 -3 43621 1471.18 5
 -1 5 -2 33824.9 1333.01 5
 -1 5 -1 774.713 212.012 3
 -1 5 -1 212.25 133.846 5
 -1 5 0 60835.1 1970.34 5
 -1 5 1 137834 3229.77 5
 -1 5 2 8920.49 823.465 5
 -1 5 3 3492.86 587.399 5
 -1 5 4 2177.62 436.461 5
 -1 5 4 2680.66 309.079 1
 -1 5 5 475230 7622.83 5
 -1 5 5 470636 5962.26 1
 -1 5 6 256546 4078.5 1
 -1 5 6 265987 5420.98 5
 -1 5 7 1512.05 285.311 1
 -1 5 7 1323.32 409.372 5
 -1 5 8 54937.8 1881.5 1
 -1 5 8 56270.8 2469.85 5
 -1 5 9 26932.4 1367.19 1
 -1 5 9 26451.9 1717.68 5
 -1 5 9 24239.5 1459.97 2
 -1 5 10 136772 3434.47 1
 -1 5 10 139040 4218.99 5
 -1 5 10 139308 3749.06 2
 -1 5 11 149330 3998.56 2
 -1 5 11 150956 4612.87 5
 -1 5 12 7897.12 1068.85 5
 -1 5 13 15726 1538.41 5
 -1 5 14 1140.42 480.811 5
 -1 5 15 92843.9 3987.65 5
 -1 5 16 46564.9 2858.53 5
 -1 6 -9 48630.9 1730.45 5
 -1 6 -8 31468.3 1354.65 5
 -1 6 -7 50642.7 1716.03 5
 -1 6 -6 14555 887.938 5
 -1 6 -5 492181 6832.33 5
 -1 6 -4 123751 2865.04 5
 -1 6 -3 139146 3104.03 5
 -1 6 -2 43497.6 1679.6 5
 -1 6 -1 8807.27 805.881 5
 -1 6 0 375455 6257.71 5
 -1 6 1 35406.8 1698.17 5
 -1 6 2 19423.8 1295.35 5
 -1 6 3 248930 5171.13 5
 -1 6 4 40195.7 1963.72 5
 -1 6 5 305010 6108.4 5
 -1 6 5 308034 4496.05 1
 -1 6 6 113077 3608.11 5
 -1 6 6 114501 2521.73 1
 -1 6 7 19199.4 1474.54 5
 -1 6 7 19843.1 1039.81 1
 -1 6 8 10288.3 808.974 1
 -1 6 8 9540.36 1087.68 5
 -1 6 9 23470.2 1723.52 5
 -1 6 10 119951 3589.78 2
 -1 6 10 122179 4157.52 5
 -1 6 11 49666.5 2678.41 5
 -1 6 12 1175.85 412.201 5
 -1 6 13 8993.59 1189.1 5
 -1 6 14 17409.4 1738.92 5
 -1 6 15 63542.2 3414.39 5
 -1 6 16 926.747 459.886 5
 -1 7 -12 45042.8 1827.05 5
 -1 7 -11 6145.67 666.355 5
 -1 7 -10 57620.4 2007.79 5
 -1 7 -9 20410.1 1157.75 5
 -1 7 -8 99456.8 2640.64 5
 -1 7 -7 71949.6 2208.5 5
 -1 7 -6 8278.86 728.588 5
 -1 7 -5 164344 3576.16 5
 -1 7 -4 2497.8 459.021 5
 -1 7 -3 227164 4502.08 5
 -1 7 -2 98494.2 2879.15 5
 -1 7 -1 93775.8 2911.07 5
 -1 7 0 153300 3901.66 5
 -1 7 1 17141.2 1269.32 5
 -1 7 2 215135 4948.33 5
 -1 7 3 126063 3743.59 5
 -1 7 4 30908.8 1834.59 5
 -1 7 5 103608 3547.43 5
 -1 7 6 2813.72 370.608 1
 -1 7 6 3197.92 669.302 5
 -1 7 7 91795.1 3483.65 5
 -1 7 8 39221.5 2300.63 5
 -1 7 9 15549.4 1510.31 5
 -1 7 10 58584 3009.69 5
 -1 7 11 422.924 363.538 5
 -1 7 12 66970 3417.75 5
 -1 7 13 6500.14 1133.6 5
 -1 7 14 19062.7 1891.98 5
 -1 7 15 32595.7 2566.29 5
 -1 8 -11 9125.64 832.876 5
 -1 8 -10 20434 1226.08 5
 -1 8 -9 106792 2914.83 5
 -1 8 -8 133384 3306.96 5
 -1 8 -7 114723 3056.24 5
 -1 8 -6 4873.9 611.998 5
 -1 8 -5 40233.9 1811.4 5
 -1 8 -4 46968.1 1999.34 5
 -1 8 -3 411049 7014.66 5
 -1 8 -2 87757.7 2927.32 5
 -1 8 -1 19197.6 1383.47 5
 -1 8 0 15836.2 1286.04 5
 -1 8 1 72412.6 2859.31 5
 -1 8 2 249507 5674.14 5
 -1 8 3 12327.6 1219.1 5
 -1 8 4 17545.9 1495.17 5
 -1 8 5 56646.8 2736.84 5
 -1 8 6 46911.7 2544.67 5
 -1 8 7 110040 4064.49 5
 -1 8 8 29716.6 2132.47 5
 -1 8 9 25525.6 2011.89 5
 -1 8 10 7894.48 1162.88 5
 -1 8 11 31353.4 2342.88 5
 -1 8 12 73454.1 3714.8 5
 -1 8 13 -395.597 652.05 5
 -1 8 14 27342.1 2388.73 5
 -1 9 -11 84011.9 2707.79 5
 -1 9 -10 359.996 227.015 5
 -1 9 -9 64614.2 2370.32 5
 -1 9 -8 161379 3941.3 5
 -1 9 -7 28632.8 1600.52 5
 -1 9 -6 24397.3 1497.58 5
 -1 9 -5 7733.02 855.898 5
 -1 9 -4 200932 4736.4 5
 -1 9 -3 367835 6975.51 5
 -1 9 -2 34094.8 1925.93 5
 -1 9 -1 34879.5 1995.65 5
 -1 9 0 552.479 334.067 5
 -1 9 1 92343 3415.54 5
 -1 9 2 155016 4588.87 5
 -1 9 3 1021.45 389.13 5
 -1 9 4 25348.2 1885.8 5
 -1 9 5 729.25 432.003 5
 -1 9 6 86017.5 3654.51 5
 -1 9 7 64985.1 3235.45 5
 -1 9 8 9022.82 1238.08 5
 -1 9 9 43580.2 2791.21 5
 -1 9 10 -204.989 464.756 5
 -1 9 11 64630.1 3542.15 5
 -1 9 12 35732.6 2705.58 5
 -1 9 13 2542.16 812.141 5
 -1 10 -10 2462.93 527.792 5
 -1 10 -9 47779.2 2160.19 5
 -1 10 -8 70297 2670.65 5
 -1 10 -7 27406.7 1665.19 5
 -1 10 -6 17796.7 1377.21 5
 -1 10 -5 1306.99 479.147 5
 -1 10 -4 198197 5044.84 5
 -1 10 -3 38051 2149.31 5
 -1 10 -2 1593.28 450.78 5
 -1 10 -1 21809.6 1684.94 5
 -1 10 0 609.877 417.692 5
 -1 10 1 67796.7 3077.39 5
 -1 10 2 32017.7 2156.21 5
 -1 10 3 6570.2 1014.79 5
 -1 10 4 12478.8 1401.7 5
 -1 10 5 9025.63 1246.98 5
 -1 10 6 74912.7 3582.07 5
 -1 10 7 13906.9 1563.24 5
 -1 10 8 27022 2235.87 5
 -1 10 9 33489.1 2540.31 5
 -1 10 10 10105.6 1463.79 5
 -1 10 11 103456 4717.49 5
 -1 11 -10 -100.122 327.413 5
 -1 11 -9 80395.6 3033.72 5
 -1 11 -8 619.848 306.085 5
 -1 11 -7 69074.2 2871.52 5
 -1 11 -6 128441 4060.36 5
 -1 11 -5 3091.67 652.413 5
 -1 11 -4 10281 1173.35 5
 -1 11 -3 3465.74 702.868 5
 -1 11 -2 57379.5 2837.57 5
 -1 11 -1 12523.6 1365.91 5
 -1 11 0 10778.3 1267.94 5
 -1 11 1 53760.2 2885.1 5
 -1 11 2 295.005 301.54 5
 -1 11 3 45760.7 2774.52 5
 -1 11 4 31063.9 2309.18 5
 -1 11 5 25094 2448.6 5
 -1 11 6 26820.2 2233.77 5
 -1 11 7 4259.13 924.588 5
 -1 11 8 41296.8 2891.1 5
 -1 11 9 14865.2 1779.26 5
 -1 11 10 20404.3 2121.59 5
 -1 12 -9 26589.4 1837.77 5
 -1 12 -8 9682.68 1145.12 5
 -1 12 -7 135022 4359.81 5
 -1 12 -6 48443.2 2608.3 5
 -1 12 -5 16154.8 1529.33 5
 -1 12 -4 22314.8 1827.78 5
 -1 12 -3 21337.8 1805.54 5
 -1 12 -2 157553 5072.35 5
 -1 12 -1 29715.3 2214.39 5
 -1 12 0 8928.73 1227 5
 -1 12 1 32443.6 2348.82 5
 -1 12 2 28103.8 2234.15 5
 -1 12 3 146557 5267.04 5
 -1 12 4 13425.3 1656.99 5
 -1 12 5 13840.6 1648.33 5
 -1 12 6 13162.2 1638.13 5
 -1 12 7 13228.2 1708.97 5
 -1 12 8 43252.5 3102.06 5
 -1 13 -8 39549.1 2424.76 5
 -1 13 -7 71435.8 3292.92 5
 -1 13 -6 -617.65 494.127 5
 -1 13 -5 38139 2452.48 5
 -1 13 -4 3618.12 772.355 5
 -1 13 -3 51268.2 2928.32 5
 -1 13 -2 102761 4222.16 5
 -1 13 -1 8200.38 1221.04 5
 -1 13 0 37381.1 2611.59 5
 -1 13 1 6640.61 1172.5 5
 -1 13 2 81090.5 3992.28 5
 -1 13 3 110616 4758.54 5
 -1 13 4 -340.207 594.591 5
 -1 13 5 16322.9 1908.73 5
 -1 13 6 2361.31 735.143 5
 -1 14 -8 36975.1 2434.59 5
 -1 14 -7 34602.5 2393.05 5
 -1 14 -6 16451.8 1677.48 5
 -1 14 -5 28519.5 2225.2 5
 -1 14 -4 75.4041 310.403 5
 -1 14 -3 54585.1 3171.52 5
 -1 14 -2 31731.8 2475.04 5
 -1 14 -1 6129.28 1098.84 5
 -1 14 0 27905.3 2384.73 5
 -1 14 1 4069.12 993.431 5
 -1 14 2 94237.9 4549.04 5
 -1 14 3 34825.7 2766.11 5
 -1 14 4 8712.82 1432.46 5
 -1 15 -7 712.229 385.697 5
 -1 15 -6 26630.6 2217.57 5
 -1 15 -5 31602 2452.91 5
 -1 15 -4 4548.43 964.296 5
 -1 15 -3 31505.1 2532.78 5
 -1 15 -2 998.13 606.274 5
 -1 15 -1 34153.9 2671.82 5
 -1 15 0 27901.1 2472.29 5
 -1 15 1 8880.94 1429.63 5
 -1 15 2 51497.1 3473.8 5
 -1 16 -6 44591.7 2982.02 5
 -1 16 -5 7216.32 1233.25 5
 -1 16 -4 5833.76 1138.56 5
 -1 16 -3 5615.83 1126.5 5
 -1 16 -2 9167.18 1485.92 5
 -1 16 -1 47307.5 3304.94 5
 -1 17 -5 5319.17 1112.85 5
 0 -15 5 35767.5 2696.99 2
 0 -15 6 21324.4 2149.32 2
 0 -15 7 1640.66 648.949 2
 0 -15 8 19239.6 2105.85 2
 0 -15 9 2945.53 698.378 2
 0 -15 10 44948.5 3274.79 2
 0 -14 4 4262.47 888.075 2
 0 -14 5 47641.7 3022.23 2
 0 -14 6 2333.17 621.423 2
 0 -14 7 45041.7 3064.33 2
 0 -14 8 23254.6 2230.02 2
 0 -14 9 6131.45 1128.8 2
 0 -14 10 34853.5 2791.72 2
 0 -14 11 966.567 549.318 2
 0 -14 12 35475.3 2906.84 2
 0 -13 4 14427.5 1566.68 2
 0 -13 5 36480.8 2593.35 2
 0 -13 6 7300.11 1164.19 2
 0 -13 7 100321 4404.94 2
 0 -13 8 34307.4 2601.29 2
 0 -13 9 12811.3 1581.06 2
 0 -13 10 22072.6 2127.08 2
 0 -13 11 14859 1775.2 2
 0 -13 12 95369.4 4625.47 2
 0 -13 13 20654.3 2207.44 2
 0 -13 14 12228.7 1682.02 2
 0 -12 3 4480.23 824.279 2
 0 -12 3 3976.57 688.631 3
 0 -12 4 49329.8 2844.3 2
 0 -12 5 13112.2 1471.3 2
 0 -12 6 53088.3 3003.89 2
 0 -12 7 162697 5469.76 2
 0 -12 8 5703.27 1023.22 2
 0 -12 9 27409.5 2268.26 2
 0 -12 10 2230.67 635.533 2
 0 -12 11 60965.3 3492.3 2
 0 -12 12 111606 4874.48 2
 0 -12 13 1762.42 628.77 2
 0 -12 14 10194.4 1503.76 2
 0 -12 15 -469.4 740.49 2
 0 -12 16 38789.2 3096.72 2
 0 -11 2 96277.2 3682.86 2
 0 -11 3 57.4605 188.235 3
 0 -11 3 -121.672 458.43 2
 0 -11 4 15024.4 1492.94 2
 0 -11 4 14907.7 1200.75 3
 0 -11 5 1052.16 349.577 3
 0 -11 5 1140.58 448.745 2
 0 -11 6 117276 4324.95 2
 0 -11 7 29249.3 2172.67 2
 0 -11 8 12119.9 1450.08 2
 0 -11 9 60327.2 3241.65 2
 0 -11 10 2511.09 714.063 2
 0 -11 11 115180 4700.35 2
 0 -11 12 68294.9 3665.53 2
 0 -11 13 10408.8 1474.9 2
 0 -11 14 15876.3 1835.16 2
 0 -11 15 4476.48 992.217 2
 0 -11 16 38624.4 2968.61 2
 0 -11 17 23471.5 2338.64 2
 0 -10 1 22398.8 1618.79 2
 0 -10 2 6768.62 821.135 3
 0 -10 2 5873.74 870.221 2
 0 -10 3 59881.6 2772.37 2
 0 -10 3 51327.2 2179.59 3
 0 -10 4 45648 2470.39 2
 0 -10 4 42138.5 1914.31 3
 0 -10 5 345.978 233.476 3
 0 -10 5 377.721 342.752 2
 0 -10 6 36974.5 2283 2
 0 -10 6 33369.5 1657.4 3
 0 -10 7 1327.03 303.426 3
 0 -10 7 2361.4 581.221 2
 0 -10 8 21924.2 1355.24 3
 0 -10 8 24995.2 1949.63 2
 0 -10 9 36006.5 2388.03 2
 0 -10 10 4589.49 920.044 2
 0 -10 11 54433.1 3081.71 2
 0 -10 12 4826.88 930.231 2
 0 -10 13 52086.1 3128.38 2
 0 -10 14 23513.1 2154.81 2
 0 -10 15 5685.45 1119.46 2
 0 -10 16 39945.8 2891.53 2
 0 -10 17 2544.12 772.687 2
 0 -10 18 29856.4 2628.67 2
 0 -9 -12 30294.6 2726.82 4
 0 -9 1 28984.3 1759.94 2
 0 -9 1 26001.2 1549.77 3
 0 -9 2 54155.3 2178.04 3
 0 -9 2 58626.6 2590.93 2
 0 -9 3 384553 7395.58 2
 0 -9 3 376219 6425.98 3
 0 -9 4 215592 5354.62 2
 0 -9 4 212723 4422.52 3
 0 -9 5 6483.47 903.786 2
 0 -9 5 7535.12 739.382 3
 0 -9 6 8720.38 800.7 3
 0 -9 6 10627.1 1177.66 2
 0 -9 7 3199.48 529.733 3
 0 -9 7 3612.62 718.311 2
 0 -9 8 105946 3934.36 2
 0 -9 9 18515.1 1649.22 2
 0 -9 10 780.999 472.098 2
 0 -9 11 29896.1 2174.82 2
 0 -9 12 16993.4 1689.33 2
 0 -9 13 48302.1 2885.62 2
 0 -9 14 25967.3 2150.08 2
 0 -9 15 29870 2354.95 2
 0 -9 16 25617.7 2230.11 2
 0 -9 17 5441.08 1047.66 2
 0 -9 18 63120.8 3683.26 2
 0 -9 19 6889.71 1269.7 2
 0 -8 -13 2608.05 835.477 4
 0 -8 -12 64453.4 3880.05 4
 0 -8 1 41230.4 1997.06 2
 0 -8 1 40955.1 1830.86 3
 0 -8 2 104362 3301.97 2
 0 -8 2 100774 2860.95 3
 0 -8 3 566492 9025.68 2
 0 -8 3 552611 7934.93 3
 0 -8 4 82983.2 3006.53 2
 0 -8 4 80632.4 2401.27 3
 0 -8 5 60395.4 2035.13 3
 0 -8 5 63764.1 2684.02 2
 0 -8 6 218.026 189.85 3
 0 -8 6 523.443 298.093 2
 0 -8 7 136816 4173.93 2
 0 -8 8 180835 4956.54 2
 0 -8 9 35166.1 2143.51 2
 0 -8 10 17206.6 1535.22 2
 0 -8 11 3030.31 656.739 2
 0 -8 12 56956.7 2921.9 2
 0 -8 13 78522.9 3578.18 2
 0 -8 14 306.299 309.49 2
 0 -8 15 42601.8 2733.29 2
 0 -8 16 1550.42 468.405 2
 0 -8 17 32221 2468.67 2
 0 -8 18 39171.8 2810.46 2
 0 -8 19 642.084 326.369 2
 0 -7 -14 10392.9 1606.05 4
 0 -7 -13 24110.2 2354.99 4
 0 -7 -12 78963 4165.96 4
 0 -7 0 30871 1577.7 2
 0 -7 0 31601.4 1570.78 3
 0 -7 1 21561.4 1355.19 2
 0 -7 1 19753.7 1172.32 3
 0 -7 2 268967 5317.32 2
 0 -7 2 259628 4670.22 3
 0 -7 3 286077 5620.02 2
 0 -7 3 284665 4818.1 3
 0 -7 4 6698.56 615.87 3
 0 -7 4 6359.7 765.374 2
 0 -7 5 91618.1 3104.93 2
 0 -7 6 10176.7 1035.76 2
 0 -7 7 109080 3513.46 2
 0 -7 8 151302 4287.59 2
 0 -7 9 4591.62 764.535 2
 0 -7 10 62239.6 2791.54 2
 0 -7 11 2139 585.662 2
 0 -7 12 80283.2 3412.96 2
 0 -7 13 76296.5 3378.66 2
 0 -7 14 1958.73 592.33 2
 0 -7 15 6112.76 1027.34 2
 0 -7 16 8433.24 1199.54 2
 0 -7 17 66275.7 3483.8 2
 0 -7 18 19617 1928.38 2
 0 -7 19 1917.29 679.39 2
 0 -6 -15 52166.2 3611.35 4
 0 -6 -14 5585.19 1142.27 4
 0 -6 -13 20768.6 2132.86 4
 0 -6 -12 4541.57 994.926 4
 0 -6 0 269720 4916.87 2
 0 -6 0 278980 4867.65 3
 0 -6 1 4340.84 565.08 2
 0 -6 1 4510.66 538.199 3
 0 -6 2 207430 4289.56 2
 0 -6 2 208665 3794.06 3
 0 -6 3 58818.2 1763.85 3
 0 -6 3 62707.6 2266.64 2
 0 -6 4 251192 5022.89 2
 0 -6 5 90170.4 2874.49 2
 0 -6 6 11020.7 1005.17 2
 0 -6 7 165983 4230.02 2
 0 -6 8 76953.9 2855.6 2
 0 -6 9 45826.4 2220.66 2
 0 -6 10 49422.1 2377.83 2
 0 -6 11 22508.5 1649.6 2
 0 -6 12 86246.4 3376.57 2
 0 -6 13 18564.7 1593 2
 0 -6 14 22565.8 1798.87 2
 0 -6 15 8321.37 1143.04 2
 0 -6 16 21984.6 1893.65 2
 0 -6 17 59520.1 3230.68 2
 0 -6 18 2622.38 724.886 2
 0 -6 19 10654.3 1608.2 1
 0 -5 -15 79569 4381.47 4
 0 -5 -14 -278.946 581.09 4
 0 -5 -13 25928 2281.56 4
 0 -5 -12 22861.8 2060.91 4
 0 -5 0 100732 2550.22 2
 0 -5 0 100726 2463.03 3
 0 -5 1 42773.2 1627.6 2
 0 -5 1 44565.4 1483.03 3
 0 -5 2 151322 3337.52 2
 0 -5 2 151346 2848.23 3
 0 -5 3 1713.99 290.798 3
 0 -5 3 4484.82 564.765 2
 0 -5 4 320887 5484.94 2
 0 -5 5 41992.7 1786.7 2
 0 -5 6 59858.4 2215.47 2
 0 -5 7 112138 3220.9 2
 0 -5 8 14164.1 1126.75 2
 0 -5 9 368169 6778.78 2
 0 -5 10 32896.1 1861.28 2
 0 -5 11 25294.8 1678.63 2
 0 -5 12 44166.4 2292.45 2
 0 -5 13 12008.9 1242.11 2
 0 -5 14 86166.6 3479.23 2
 0 -5 15 25949.5 1929.23 2
 0 -5 16 30727.6 2164.31 2
 0 -5 17 17874.3 1718.37 2
 0 -5 18 2532.23 812.714 1
 0 -5 19 35611.6 2876.73 1
 0 -4 -16 79191.1 4326.24 4
 0 -4 -15 37359.8 2860.05 4
 0 -4 -14 28773.3 2434.29 4
 0 -4 -13 25525.5 2205.3 4
 0 -4 -12 56195.6 3132.18 4
 0 -4 -11 184429 5615.67 4
 0 -4 -2 5581.28 442.412 1
 0 -4 -1 118224 2218.92 1
 0 -4 0 545.371 152.775 3
 0 -4 0 664.629 195.82 2
 0 -4 1 3293.71 423.466 2
 0 -4 1 2255.13 289.122 3
 0 -4 2 146538 2544.56 3
 0 -4 2 149509 3051.57 2
 0 -4 3 96931.7 2434.53 2
 0 -4 4 136091 3043.45 2
 0 -4 5 1268.76 288.016 2
 0 -4 6 7171.9 707.319 2
 0 -4 7 49686.9 1947.13 2
 0 -4 8 274090 5237.12 2
 0 -4 9 329325 6035.4 2
 0 -4 10 19853.4 1359.33 2
 0 -4 11 34115.9 1866.04 2
 0 -4 12 584.547 231.907 2
 0 -4 13 51564 2467.29 2
 0 -4 14 162063 4680.48 2
 0 -4 15 32382.5 2118.44 2
 0 -4 16 7472.61 1043.1 2
 0 -4 17 4241.24 836.794 2
 0 -4 17 4618.72 1019.66 1
 0 -4 18 29902.5 2490.05 1
 0 -4 19 55130.3 3526.06 1
 0 -4 20 -388.454 421.26 1
 0 -3 -17 9592.83 1554.12 4
 0 -3 -16 65107.5 3813.95 4
 0 -3 -15 795.944 707.787 4
 0 -3 -14 87331.6 4101.7 4
 0 -3 -13 46962 2903.91 4
 0 -3 -12 31865.4 2281.99 4
 0 -3 -11 112523 4175.79 4
 0 -3 -3 72103.6 1672.91 1
 0 -3 -2 140639 2331.61 1
 0 -3 -1 96981.1 1774.25 1
 0 -3 0 5622.58 443.993 2
 0 -3 0 5454.12 424.191 3
 0 -3 1 338471 4685.49 2
 0 -3 1 343036 4505.64 5
 0 -3 1 349238 4313.09 3
 0 -3 2 4698.6 437.036 2
 0 -3 2 5035.02 367.554 5
 0 -3 3 281069 4276.03 2
 0 -3 3 277832 3604.96 5
 0 -3 4 52590 1635.57 2
 0 -3 4 50466.5 1267.82 4
 0 -3 5 408.677 179.828 2
 0 -3 6 102924 2586.68 2
 0 -3 7 5757.86 623.756 2
 0 -3 8 349074 5829.56 2
 0 -3 9 101681 2910.76 2
 0 -3 10 16752.8 1200.26 2
 0 -3 11 74788.5 2672.07 2
 0 -3 12 15355 1255.13 2
 0 -3 13 87390.9 3133.31 2
 0 -3 14 185206 4872.72 2
 0 -3 15 4287.47 880.96 1
 0 -3 15 4247.01 810.366 2
 0 -3 16 22985.1 1993.36 1
 0 -3 16 20836.3 1672.41 2
 0 -3 17 232.948 354.405 1
 0 -3 18 59098.9 3480.7 1
 0 -3 19 33546.1 2721.75 1
 0 -3 20 775.209 499.069 1
 0 -2 -17 18247 2028.19 4
 0 -2 -16 15637.8 1771.5 4
 0 -2 -15 13947.5 1661.83 4
 0 -2 -14 95408.9 4157.44 4
 0 -2 -13 20378.3 1845.63 4
 0 -2 -12 7803.04 1097.11 4
 0 -2 -11 21268.4 1707.58 4
 0 -2 -10 41265.6 2275.91 4
 0 -2 -3 81859.6 1701.79 1
 0 -2 -2 73306 1404.19 1
 0 -2 -1 21894.5 642.649 1
 0 -2 -1 22633.6 865.675 5
 0 -2 0 808.638 135.485 3
 0 -2 0 451.144 114.133 2
 0 -2 0 682.793 143.646 5
 0 -2 1 43877.8 1069.31 2
 0 -2 1 19085.4 645.854 5
 0 -2 2 58652.4 1333.62 2
 0 -2 2 31376.7 779.179 5
 0 -2 3 11641.4 623.52 2
 0 -2 3 11853.1 503.447 4
 0 -2 4 16379 796.489 2
 0 -2 4 16894.9 692.187 4
 0 -2 5 189726 3322.2 2
 0 -2 6 161492 3159.43 2
 0 -2 7 44188.7 1607.74 2
 0 -2 8 189838 3846.82 2
 0 -2 9 51422.9 1945.95 2
 0 -2 10 105577 2976.57 2
 0 -2 11 41378.5 1894.98 2
 0 -2 12 2886.44 537.651 2
 0 -2 13 138725 4449.82 1
 0 -2 13 137987 3891.96 2
 0 -2 14 5017.29 773.915 2
 0 -2 14 5375.38 913.145 1
 0 -2 15 36957.5 2424.3 1
 0 -2 15 30555.7 1905.87 2
 0 -2 16 61287.3 3303.04 1
 0 -2 17 10702.7 1429.52 1
 0 -2 18 70316 3777.81 1
 0 -2 19 12405.9 1643.37 1
 0 -2 20 13377.4 1759.55 1
 0 -1 -18 6355.51 1223.47 4
 0 -1 -17 8550.13 1337.64 4
 0 -1 -16 3303.39 843.376 4
 0 -1 -15 38027.6 2626.8 4
 0 -1 -14 44126.9 2696.78 4
 0 -1 -13 10281.8 1261.41 4
 0 -1 -12 46070.3 2543.38 4
 0 -1 -11 268.138 363.703 4
 0 -1 -10 70762 2879.56 4
 0 -1 -9 170966 4370.86 4
 0 -1 -8 680.056 330.001 4
 0 -1 -3 12888 652.119 5
 0 -1 -2 154614 2378.96 5
 0 -1 -2 150023 2149.83 1
 0 -1 3 1825.83 225.276 2
 0 -1 3 1631.2 210.841 4
 0 -1 4 16754 738.17 2
 0 -1 4 16781.2 736.333 4
 0 -1 5 293448 4237.88 2
 0 -1 6 349961 5015.2 2
 0 -1 7 2567.26 379.28 2
 0 -1 8 32472.6 1397.25 2
 0 -1 9 1302.89 327.193 2
 0 -1 10 121715 3206.47 2
 0 -1 11 65637.3 2702.26 1
 0 -1 11 68821.2 2434.81 2
 0 -1 12 21843.8 1609.84 1
 0 -1 12 21380.5 1361.6 2
 0 -1 13 38320.3 2236.91 1
 0 -1 13 39219.5 1949.73 2
 0 -1 14 15724.6 1493.67 1
 0 -1 14 15855.4 1293.07 2
 0 -1 15 70268.2 3322.58 1
 0 -1 16 26185.8 2110.81 1
 0 -1 17 27482 2236.77 1
 0 -1 18 36084.3 2672.03 1
 0 -1 19 6974.42 1215.22 1
 0 0 -18 2601.42 837.473 4
 0 0 -17 11770.7 1539.31 4
 0 0 -16 3208.33 824.722 4
 0 0 -15 54003 3027.44 4
 0 0 -14 41156 2541.17 4
 0 0 -13 2398.94 597.321 4
 0 0 -12 29935.4 1953.15 4
 0 0 -11 5965.64 846.431 4
 0 0 -10 173902 4464.93 4
 0 0 -9 75150.4 2681.05 4
 0 0 -8 11672.2 982.324 4
 0 0 -7 32549 1512.44 4
 0 0 -6 187153 3716.81 4
 0 0 -5 523145 6269.04 2
 0 0 -5 515243 6814.64 4
 0 0 -4 178867 2781.27 5
 0 0 -4 178087 3072.68 4
 0 0 -3 186161 2566.37 2
 0 0 -3 190339 2621.01 5
 0 0 3 185891 2560.07 5
 0 0 3 187024 2554.06 2
 0 0 4 177358 2715.8 5
 0 0 4 180289 2711.77 2
 0 0 5 491473 6110.05 5
 0 0 5 508424 6125.12 2
 0 0 6 179973 3184.81 5
 0 0 6 186309 3200 2
 0 0 7 30756.8 1254.64 5
 0 0 7 32282.7 1457.76 1
 0 0 7 31059.5 1239.87 2
 0 0 8 11564.4 947.175 1
 0 0 8 11860.6 820.702 5
 0 0 8 10575.3 767.442 2
 0 0 9 87409.3 2463.85 5
 0 0 9 91190.1 2850.5 1
 0 0 9 89910.6 2449.7 2
 0 0 10 170583 4220.6 1
 0 0 10 165877 3699.96 5
 0 0 10 160722 3548.39 2
 0 0 11 7185.45 888.431 1
 0 0 11 6185.91 693.27 2
 0 0 11 6520.64 732.196 5
 0 0 12 31003.7 1891.78 1
 0 0 12 29717.9 1604.44 2
 0 0 13 2713.86 581.56 1
 0 0 13 1978.95 444.733 2
 0 0 14 42117.7 2455.89 1
 0 0 14 42699 2091.98 2
 0 0 15 52678.3 2857.35 1
 0 0 16 2885.93 730.09 1
 0 0 17 12076.3 1486.51 1
 0 0 18 2656.64 852.491 1
 0 1 -19 7369.6 1315.42 4
 0 1 -18 36112.4 2738.05 4
 0 1 -17 28645.9 2330.02 4
 0 1 -16 24110.6 2093.34 4
 0 1 -15 72554.6 3435.57 4
 0 1 -14 18472 1665.16 4
 0 1 -13 38061.1 2265.87 4
 0 1 -12 21889.5 1604.52 4
 0 1 -11 65345.9 2651.02 4
 0 1 -10 113680 3368.46 4
 0 1 -9 1495.93 403.345 4
 0 1 -8 31329.7 1520.91 4
 0 1 -7 2352.29 405.104 4
 0 1 -6 345628 5178.94 4
 0 1 -5 288060 3850.99 5
 0 1 -5 288816 4273.01 4
 0 1 -4 15908.9 588.25 5
 0 1 -4 15280.4 702.336 4
 0 1 -4 17151.6 740.061 2
 0 1 -3 2158.74 231.479 4
 0 1 -3 1347.03 187.652 2
 0 1 2 132852 1989.43 5
 0 1 2 80830.8 1496.28 1
 0 1 3 12026.9 621.579 5
 0 1 3 12879.6 590.471 1
 0 1 4 382697 4727.27 2
 0 1 4 371786 5060.26 5
 0 1 4 389179 5041.4 1
 0 1 5 487426 6487.82 5
 0 1 5 495734 6478.53 1
 0 1 6 60395.3 1634.64 2
 0 1 6 60665.9 1838.02 5
 0 1 6 59221.2 1855 1
 0 1 7 93038.8 2521.14 1
 0 1 7 91877.9 2441.2 5
 0 1 7 88250.9 2180.86 2
 0 1 8 632.325 220.973 2
 0 1 8 1098.41 334.2 1
 0 1 9 165589 3993.44 1
 0 1 9 169234 3814.42 5
 0 1 9 165135 3498.73 2
 0 1 10 65866.4 2366.73 5
 0 1 10 69139.1 2594.31 1
 0 1 10 67466.6 2206.76 2
 0 1 11 527.413 246.762 2
 0 1 11 761.144 354.041 1
 0 1 11 270.535 225.68 5
 0 1 12 43744.6 2230.52 1
 0 1 12 41694 2019.58 5
 0 1 12 37571.2 1721.38 2
 0 1 13 9636.79 1126.96 1
 0 1 13 9571.08 919.92 2
 0 1 13 10765.6 1090.39 5
 0 1 14 42929 2450.94 1
 0 1 14 44247.3 2247.39 5
 0 1 15 36941.3 2398.09 1
 0 1 16 2064.18 571.619 1
 0 1 17 9079.44 1240.78 1
 0 2 -19 13924.2 1773.29 4
 0 2 -18 74424.8 3853.14 4
 0 2 -17 13950.6 1610.57 4
 0 2 -16 66605.3 3347.87 4
 0 2 -15 33906.3 2278 4
 0 2 -14 5140.72 944.882 4
 0 2 -13 144700 4368.25 4
 0 2 -12 2537.34 600.283 4
 0 2 -11 40226 2007.11 4
 0 2 -10 106028 3152.49 4
 0 2 -9 52963.5 2051.5 4
 0 2 -8 196777 3976.59 4
 0 2 -7 44280.6 1614.05 4
 0 2 -6 158580 2563.05 5
 0 2 -6 157969 3035.71 4
 0 2 -5 185529 3097 4
 0 2 -4 16796.2 710.058 4
 0 2 -3 12635.2 652.054 2
 0 2 -2 60764.9 1409.45 2
 0 2 -2 57938.4 1105.67 5
 0 2 -1 63649 1369.57 2
 0 2 -1 60755.3 1223.91 5
 0 2 0 331.791 90.8961 3
 0 2 0 589.275 127.983 2
 0 2 1 22827.1 857.036 5
 0 2 1 23095.1 843.053 3
 0 2 2 68029.2 1677.02 5
 0 2 2 68058 1343.85 1
 0 2 3 78046.6 1947.66 5
 0 2 3 75083.8 1574.87 1
 0 2 4 100958 2374.39 5
 0 2 4 99831.8 2080.05 1
 0 2 5 221394 3984.13 5
 0 2 5 212108 3389.61 2
 0 2 5 214234 3651.62 1
 0 2 6 19368.3 1107.41 5
 0 2 6 19669.7 950.474 2
 0 2 6 20172.3 1055.02 1
 0 2 7 46215.5 1552.45 2
 0 2 7 49232.3 1887.21 5
 0 2 7 48273.3 1778.78 1
 0 2 8 1508.73 341.444 5
 0 2 8 1058.9 262.247 2
 0 2 8 1380.82 337.647 1
 0 2 9 119376 3332.72 5
 0 2 9 121199 3315.4 1
 0 2 9 119469 2875.82 2
 0 2 10 45544.2 2087.2 5
 0 2 10 42427.2 2006.09 1
 0 2 10 42936.7 1721.59 2
 0 2 11 22167.4 1507.84 5
 0 2 11 21535.6 1499.56 1
 0 2 11 22799.9 1309.85 2
 0 2 12 7415.02 939.047 5
 0 2 12 7317.34 910.163 1
 0 2 12 5068.49 642.013 2
 0 2 13 22659.2 1634.55 5
 0 2 13 20863.2 1629.44 1
 0 2 14 93442.4 3522.36 5
 0 2 14 94112.7 3662.08 1
 0 2 15 15363.7 1448.31 5
 0 2 15 14703.2 1487.04 1
 0 3 -20 2906.94 896.417 4
 0 3 -19 37363.9 2789.49 4
 0 3 -18 63023.7 3498.66 4
 0 3 -17 807.36 527.992 4
 0 3 -16 21523.5 1863.63 4
 0 3 -15 4567 928.575 4
 0 3 -14 184214 5108.99 4
 0 3 -13 88742.6 3306.21 4
 0 3 -12 15913.9 1306.9 4
 0 3 -11 71965.9 2638.72 4
 0 3 -10 19062.7 1264.34 4
 0 3 -9 97111.6 2775.74 4
 0 3 -8 348035 5545.53 4
 0 3 -7 6566.24 599.205 4
 0 3 -4 50773.5 1186.84 5
 0 3 -3 291263 3747.46 5
 0 3 -2 4981.63 388.697 5
 0 3 -1 345020 4584.77 5
 0 3 0 5352.53 441.086 2
 0 3 0 5420.6 476.726 5
 0 3 0 5913.66 440.071 3
 0 3 1 99130.1 2257.53 5
 0 3 1 101410 2025.59 2
 0 3 2 138245 2877.69 5
 0 3 2 136777 2299.34 1
 0 3 2 141943 2448.79 2
 0 3 3 68468.5 1595.42 1
 0 3 3 66864.6 2036.39 5
 0 3 4 137512 2638.11 1
 0 3 4 144165 3214.35 5
 0 3 5 4388.09 570.313 5
 0 3 5 4598.19 455.016 1
 0 3 6 255261 4848.25 5
 0 3 6 240143 4189.18 1
 0 3 7 80284.6 2634.43 5
 0 3 7 78939.2 2176.12 2
 0 3 7 76371.8 2276.15 1
 0 3 8 61614.6 2424.21 5
 0 3 8 59918.7 1937.45 2
 0 3 8 60022.5 2107.15 1
 0 3 9 108957 3365.76 5
 0 3 9 99638.3 2923.9 1
 0 3 10 4820.19 585.506 2
 0 3 10 4318.06 707.022 5
 0 3 10 4569.95 643.802 1
 0 3 11 107054 3589.86 5
 0 3 11 105072 3355.89 1
 0 3 11 106860 2964.95 2
 0 3 12 32126.8 1994.4 5
 0 3 12 28270.1 1759.94 1
 0 3 13 46750 2502.94 5
 0 3 13 41176.7 2244.22 1
 0 3 14 81378.7 3446.04 5
 0 3 14 83043.7 3350.34 1
 0 3 15 828.936 498.328 5
 0 3 16 59677 3097.1 5
 0 4 -18 32967.4 2484.17 4
 0 4 -17 4809.74 908.41 4
 0 4 -16 9115.25 1167.62 4
 0 4 -15 32069.5 2117.52 4
 0 4 -14 166017 4745.02 4
 0 4 -13 51919.6 2437.52 4
 0 4 -12 288.282 221.839 4
 0 4 -11 36577 1815.63 4
 0 4 -10 20787.6 1298.63 4
 0 4 -6 6438.7 468.686 5
 0 4 -5 791.16 178.529 5
 0 4 -4 138996 2465.03 5
 0 4 -3 96135.2 2036.13 5
 0 4 -2 146739 2765.08 5
 0 4 -1 3215.44 368.732 3
 0 4 -1 2319.84 339.267 5
 0 4 0 702.925 207.7 5
 0 4 1 119437 2810.39 5
 0 4 2 6171.77 462.932 1
 0 4 2 5542.52 598.652 5
 0 4 3 21788.1 1230.17 5
 0 4 3 21023.9 914.859 1
 0 4 4 30920.9 1535.9 5
 0 4 4 29122.3 1142.88 1
 0 4 5 181180 3402.2 1
 0 4 5 187098 4193.26 5
 0 4 6 372786 5704.57 1
 0 4 6 378493 6670.26 5
 0 4 7 5789.21 609.876 1
 0 4 7 5608.97 740.54 5
 0 4 8 55587.1 2037.2 1
 0 4 8 59729.4 2489.52 5
 0 4 8 56494 1947.73 2
 0 4 9 12637.8 1019.76 1
 0 4 9 14537.3 1259 5
 0 4 9 12554.4 930.08 2
 0 4 10 50927.8 1975.22 2
 0 4 10 53645.7 2562.46 5
 0 4 10 46695.4 2060.14 1
 0 4 11 182055 5052.75 5
 0 4 11 171263 4336.71 1
 0 4 12 54059.9 2755.28 5
 0 4 12 49654.1 2322.9 1
 0 4 13 25000.7 1918.19 5
 0 4 14 27130.3 2069.54 5
 0 4 15 33478.8 2380.33 5
 0 4 16 79205.3 3758.14 5
 0 5 -9 345682 5013.17 5
 0 5 -8 12937.1 744.153 5
 0 5 -7 110652 2336.53 5
 0 5 -6 55747 1573.83 5
 0 5 -5 41236.8 1356.98 5
 0 5 -4 315314 4701.54 5
 0 5 -3 1340.96 284.468 5
 0 5 -2 154852 3216.76 5
 0 5 -1 43132.3 1653.47 5
 0 5 0 104261 2763.2 5
 0 5 1 95739.7 2724.18 5
 0 5 2 582.953 302.186 5
 0 5 3 158140 2980.54 1
 0 5 3 156363 3818.12 5
 0 5 4 2511.95 358.588 1
 0 5 4 3733.76 613.872 5
 0 5 5 263658 5496.25 5
 0 5 5 249114 4298.23 1
 0 5 6 170846 3553.94 1
 0 5 6 182535 4527.54 5
 0 5 7 1167.95 392.44 5
 0 5 7 621.314 222.47 1
 0 5 8 23831 1654.76 5
 0 5 8 25010.1 1373.1 1
 0 5 9 1182.52 399.154 5
 0 5 9 1071.16 319.673 1
 0 5 9 634.718 229.079 2
 0 5 10 69963.7 2610.67 1
 0 5 10 69650.5 3085.95 5
 0 5 11 116389 3575.89 1
 0 5 11 120330 4248.7 5
 0 5 12 20419.2 1781.11 5
 0 5 13 26396.1 2056.66 5
 0 5 14 400.295 434.669 5
 0 5 15 73092.4 3696.94 5
 0 5 16 38636.3 2728.08 5
 0 6 -11 18581.5 999.454 5
 0 6 -10 42361.4 1519.19 5
 0 6 -9 43900.1 1512.49 5
 0 6 -8 74078.3 1992.88 5
 0 6 -7 170739 3268.87 5
 0 6 -6 9918.83 721.13 5
 0 6 -5 84359.1 2255.81 5
 0 6 -4 252280 4442.63 5
 0 6 -3 64064.5 2092.03 5
 0 6 -2 217603 4320.88 5
 0 6 -1 4946 638.987 5
 0 6 0 280667 5331.13 5
 0 6 1 100887 3022.51 5
 0 6 2 24746 1510.65 5
 0 6 3 197263 4655.98 5
 0 6 4 4285.54 484.859 1
 0 6 4 4230.87 682.607 5
 0 6 5 121971 3763.92 5
 0 6 5 117310 2820.24 1
 0 6 6 54161.7 2526.47 5
 0 6 6 55610.2 1942.64 1
 0 6 7 56673.3 2669.41 5
 0 6 7 54638.3 2009.58 1
 0 6 8 57240.9 2760.2 5
 0 6 8 57192.1 2161.83 1
 0 6 9 12052.9 1023.22 1
 0 6 9 12906.6 1322.1 5
 0 6 10 103460 4006.28 5
 0 6 11 50227.7 2872.99 5
 0 6 12 5089.28 974.36 5
 0 6 13 24204.9 2073.45 5
 0 6 14 7496.05 1218.44 5
 0 6 15 54619.3 3321.94 5
 0 6 16 7246.4 1192.87 5
 0 7 -11 1492.29 306.343 5
 0 7 -10 72112.6 2131.76 5
 0 7 -9 3916.4 482.573 5
 0 7 -8 149890 3241.99 5
 0 7 -7 106927 2709.76 5
 0 7 -6 8688.76 753.503 5
 0 7 -5 87964.4 2566.12 5
 0 7 -4 8031.67 792.075 5
 0 7 -3 294104 5454.76 5
 0 7 -2 269790 5300.29 5
 0 7 -1 22055.1 1414.53 5
 0 7 0 31856 1760.6 5
 0 7 1 2659.93 566.749 5
 0 7 2 152382 4195.29 5
 0 7 3 78282 2997.22 5
 0 7 4 710.618 305.414 5
 0 7 5 97720.3 3564.27 5
 0 7 5 100153 2683.65 1
 0 7 6 107.634 301.343 5
 0 7 6 299.325 132.984 1
 0 7 7 64839.3 2282.39 1
 0 7 7 68595.6 3114.99 5
 0 7 8 52889.6 2812.95 5
 0 7 9 29738.1 2134.21 5
 0 7 10 14327.3 1517.63 5
 0 7 11 917.541 437.431 5
 0 7 12 80013.9 3909.37 5
 0 7 13 25056 2204.86 5
 0 7 14 8117.66 1298.87 5
 0 7 15 24517.6 2310.01 5
 0 8 -10 18518.3 1122.24 5
 0 8 -9 35022 1575.69 5
 0 8 -8 180144 3904 5
 0 8 -7 136125 3389.14 5
 0 8 -6 692.917 281.038 5
 0 8 -5 62282.2 2334.4 5
 0 8 -4 80639.9 2728.93 5
 0 8 -3 576143 8987.86 5
 0 8 -2 106871 3335.97 5
 0 8 -1 39483.9 2030.4 5
 0 8 0 4627.09 730.474 5
 0 8 1 68784.8 2851.48 5
 0 8 2 277593 6236.62 5
 0 8 3 99829.2 3654.16 5
 0 8 4 3022.18 655.507 5
 0 8 5 19469.2 1645.33 5
 0 8 6 26419.2 1979.74 5
 0 8 7 106049 4128.67 5
 0 8 8 7027.91 1093.62 5
 0 8 9 6560.07 1088.91 5
 0 8 10 3270.36 819.356 5
 0 8 11 35422.5 2626.65 5
 0 8 12 63522 3612.54 5
 0 8 13 4249.46 970.499 5
 0 9 -10 232.695 157.126 5
 0 9 -9 17656.2 1220.1 5
 0 9 -8 102622 3073.35 5
 0 9 -7 3396.01 585.635 5
 0 9 -6 11456.1 1058.37 5
 0 9 -5 7736.32 889.015 5
 0 9 -4 227078 5207.87 5
 0 9 -3 393309 7357.85 5
 0 9 -2 55906 2554.83 5
 0 9 -1 27361 1821.94 5
 0 9 0 646.788 344.541 5
 0 9 1 88457.6 3430.74 5
 0 9 2 160688 4807.17 5
 0 9 3 12471.2 1382.97 5
 0 9 4 32078.3 2186.79 5
 0 9 5 255.042 315.574 5
 0 9 6 110637 4334.75 5
 0 9 7 111791 4438.17 5
 0 9 8 254.195 346.817 5
 0 9 9 22584.9 2054.46 5
 0 9 10 4441.89 963.803 5
 0 9 11 50811.7 3286.47 5
 0 9 12 29346.1 2528.55 5
 0 10 -9 33839.6 1824.6 5
 0 10 -8 22839.2 1533.39 5
 0 10 -7 1957.36 567.706 5
 0 10 -6 37030.9 2031.11 5
 0 10 -5 369.442 297.315 5
 0 10 -4 44696.3 2311.55 5
 0 10 -3 57866 2724 5
 0 10 -2 5952.52 906.841 5
 0 10 -1 25526.8 1860.44 5
 0 10 0 64.7487 308.332 5
 0 10 1 98989.1 3862.45 5
 0 10 2 56409.7 2944.91 5
 0 10 3 1044.38 514.315 5
 0 10 4 69562.4 3418.73 5
 0 10 5 784.39 487.419 5
 0 10 6 94500.6 4166.82 5
 0 10 7 27422.2 2291.26 5
 0 10 8 8787.79 1358.54 5
 0 10 9 31811.8 2564.68 5
 0 10 10 1205.35 657.508 5
 0 10 11 57083.2 3644.24 5
 0 11 -9 55212.1 2522.56 5
 0 11 -8 10870.1 1140.68 5
 0 11 -7 30867.3 1936.9 5
 0 11 -6 118185 3955.68 5
 0 11 -5 248.956 272.108 5
 0 11 -4 15909.9 1483.15 5
 0 11 -3 22.089 276.544 5
 0 11 -2 98174.6 3819.83 5
 0 11 -1 82408.1 3580.55 5
 0 11 0 2101.08 590.537 5
 0 11 1 75036 3526.33 5
 0 11 2 10727.6 1410.88 5
 0 11 3 49723.3 2954.04 5
 0 11 4 78321.3 3820.59 5
 0 11 5 9301.35 1361.62 5
 0 11 6 42991.5 2915.42 5
 0 11 7 165.001 395.555 5
 0 11 8 22992.3 2254.02 5
 0 11 9 24536.5 2359.75 5
 0 12 -8 5975.88 921.542 5
 0 12 -7 178662 5149.23 5
 0 12 -6 50562.3 2696.72 5
 0 12 -5 12872 1381.66 5
 0 12 -4 47947 2697.49 5
 0 12 -3 4366.68 824.537 5
 0 12 -2 110311 4280.24 5
 0 12 -1 45397.9 2752.36 5
 0 12 0 11340 1424.38 5
 0 12 1 17668.4 1780.79 5
 0 12 2 18801.4 1906.38 5
 0 12 3 125184 5019.76 5
 0 12 4 17396.2 1880.86 5
 0 12 5 13401.4 1714.7 5
 0 12 6 5405.69 1098.13 5
 0 12 7 9634.35 1498.52 5
 0 13 -7 97052.4 3918.88 5
 0 13 -6 9233.31 1234.69 5
 0 13 -5 34350.3 2357.87 5
 0 13 -4 13334.9 1503.14 5
 0 13 -3 18832.6 1812.86 5
 0 13 -2 73159.4 3618.49 5
 0 13 -1 2681.62 791.559 5
 0 13 0 25397.4 2202.87 5
 0 13 1 630.719 427.434 5
 0 13 2 41279 2903.53 5
 0 13 3 63790.6 3697.57 5
 0 13 4 -666.49 656.974 5
 0 13 5 13948.4 1796.05 5
 0 14 -7 40880.1 2603.94 5
 0 14 -6 2722.21 725.653 5
 0 14 -5 48416 2958.15 5
 0 14 -4 6287.69 1132.8 5
 0 14 -3 31005.4 2441.44 5
 0 14 -2 31949.3 2502.99 5
 0 14 -1 11051 1522.2 5
 0 14 0 31884.9 2575.7 5
 0 14 1 302.444 435.301 5
 0 14 2 52643 3458.88 5
 0 14 3 37333.7 2984.82 5
 0 15 -6 19566.7 1934.61 5
 0 15 -5 31790.2 2506.35 5
 0 15 -4 2513.43 721.233 5
 0 15 -3 30353.5 2506.86 5
 0 15 -2 1612.28 661.958 5
 0 15 -1 21334.9 2205.19 5
 0 15 0 39114.1 2990.23 5
 0 15 1 492.62 405.337 5
 0 16 -5 15284.7 1823.56 5
 0 16 -4 259.781 533.291 5
 0 16 -3 10612.5 1597.38 5
 0 16 -2 8017.9 1329.12 5
 1 -16 7 2711.96 906.803 2
 1 -15 6 25746.4 2367.16 2
 1 -15 7 2723.62 864.333 2
 1 -15 8 39252.4 3055.44 2
 1 -15 9 452.826 354.902 2
 1 -15 10 32687.6 2826.94 2
 1 -15 11 27096.1 2611.39 2
 1 -14 5 32125.3 2483.16 2
 1 -14 6 17392 1887.92 2
 1 -14 7 36326 2768.35 2
 1 -14 8 43542.5 3083.03 2
 1 -14 9 3584.91 997.826 2
 1 -14 10 38896.2 2960.37 2
 1 -14 11 1183.54 618.231 2
 1 -14 12 37846 3007.83 2
 1 -14 13 38525.6 3089.57 2
 1 -13 4 3199.01 734.054 2
 1 -13 5 39597.1 2673.99 2
 1 -13 6 -552.537 535.657 2
 1 -13 7 70988.9 3728.32 2
 1 -13 8 44904.6 2998.45 2
 1 -13 9 7281.13 1241.03 2
 1 -13 10 6316.28 1203.92 2
 1 -13 11 11607.3 1614.65 2
 1 -13 12 63407.6 3774.44 2
 1 -13 13 25979.9 2445.35 2
 1 -13 14 3873.85 938.772 2
 1 -13 15 11485.7 1724.52 2
 1 -12 3 19702 1743.36 2
 1 -12 4 24801.4 2007.75 2
 1 -12 5 15548.8 1640.13 2
 1 -12 6 51191.1 3024.89 2
 1 -12 7 138261 5059.01 2
 1 -12 8 10379.5 1377.27 2
 1 -12 9 31328.8 2427.8 2
 1 -12 10 -463.131 636.889 2
 1 -12 11 45691.4 3069.76 2
 1 -12 12 86131.5 4264.41 2
 1 -12 13 4079.54 983.104 2
 1 -12 14 12410.3 1682.77 2
 1 -12 15 348.558 413.896 2
 1 -12 16 34312 2886.45 2
 1 -11 -10 17670.3 2071.54 4
 1 -11 3 3318.48 681.6 2
 1 -11 4 12712.5 1409.19 2
 1 -11 4 10805.1 929.269 3
 1 -11 5 2968.42 719.842 2
 1 -11 6 132255 4671.94 2
 1 -11 7 74066.6 3486.54 2
 1 -11 8 111.697 349.404 2
 1 -11 9 75954.6 3669.15 2
 1 -11 10 222.878 330.153 2
 1 -11 11 70556.2 3643.49 2
 1 -11 12 63147 3518.02 2
 1 -11 13 2372.23 633.026 2
 1 -11 14 22169.8 2160.72 2
 1 -11 15 1058.88 547.847 2
 1 -11 16 37330.9 2939.31 2
 1 -11 17 27461.9 2569.09 2
 1 -11 18 1538.23 471.141 2
 1 -10 -11 92411.4 4757.51 4
 1 -10 2 869.592 305.731 2
 1 -10 3 36855.8 1682.59 3
 1 -10 3 40086.9 2303.12 2
 1 -10 4 208897 5550.65 2
 1 -10 4 199393 4143.56 3
 1 -10 5 1454.63 314.606 3
 1 -10 5 1340.84 499.681 2
 1 -10 6 20157.5 1697.09 2
 1 -10 6 16796.3 1024.86 3
 1 -10 7 28480.4 2065.76 2
 1 -10 8 71337.8 3358.68 2
 1 -10 9 47770.8 2791.3 2
 1 -10 10 1932.96 608.499 2
 1 -10 11 91821.8 4035.68 2
 1 -10 12 23851.1 2071.35 2
 1 -10 13 30698.5 2406.88 2
 1 -10 14 41013.7 2883.21 2
 1 -10 15 5020.27 1008.77 2
 1 -10 16 33347.2 2664.96 2
 1 -10 17 3428.9 877.436 2
 1 -10 18 25709.8 2434.6 2
 1 -10 19 18914.6 2155.73 2
 1 -9 -12 36605.9 2978.98 4
 1 -9 -11 63206.5 3766.56 4
 1 -9 2 33677.9 1946.88 2
 1 -9 3 374203 7337.25 2
 1 -9 3 355597 5757.56 3
 1 -9 4 201902 5193.47 2
 1 -9 4 193728 3785.28 3
 1 -9 5 8033.53 1014.44 2
 1 -9 5 8370.55 681.291 3
 1 -9 6 22971.7 1125.67 3
 1 -9 6 23933.8 1754.89 2
 1 -9 7 28943.7 1297.54 3
 1 -9 7 28363.9 1971.64 2
 1 -9 8 167677 5031.47 2
 1 -9 9 66779.3 3189.5 2
 1 -9 10 427.43 369.456 2
 1 -9 11 86121.8 3743.6 2
 1 -9 12 13103.8 1475.9 2
 1 -9 13 136529 4971.77 2
 1 -9 14 30931 2373.44 2
 1 -9 15 28905.3 2363.12 2
 1 -9 16 31835.7 2523.23 2
 1 -9 17 3347.72 911.417 2
 1 -9 18 30951.3 2594.47 2
 1 -9 19 9967.53 1527.4 2
 1 -8 -13 -122.105 431.914 4
 1 -8 -12 74257.3 4108.85 4
 1 -8 -11 33348.7 2646.81 4
 1 -8 1 16369.3 1241.97 2
 1 -8 2 87943.9 3069.13 2
 1 -8 2 86285 2381.9 3
 1 -8 3 406689 7415.35 2
 1 -8 3 402266 5897.36 3
 1 -8 4 47495.3 2285.54 2
 1 -8 4 45834.7 1551.35 3
 1 -8 5 40740.8 1418.85 3
 1 -8 5 42334.9 2168.01 2
 1 -8 6 3792.43 453.94 3
 1 -8 6 5621.56 809.898 2
 1 -8 7 114828 3859.76 2
 1 -8 8 138989 4366.46 2
 1 -8 9 95401.1 3626.65 2
 1 -8 10 21564.1 1746.44 2
 1 -8 11 9974.94 1262.89 2
 1 -8 12 49708 2747.15 2
 1 -8 13 121538 4485.79 2
 1 -8 14 485.533 316.723 2
 1 -8 15 19822.9 1864.28 2
 1 -8 16 2992.36 731.219 2
 1 -8 17 23593.2 2170.26 2
 1 -8 18 31810.8 2518.82 2
 1 -7 -14 20842.7 2278.69 4
 1 -7 -13 6244.49 1152.63 4
 1 -7 -12 69882.3 3848.88 4
 1 -7 -11 932.291 470.228 4
 1 -7 -10 55937.5 3204.53 4
 1 -7 1 94445.2 2902.6 2
 1 -7 2 94893.3 2297.68 3
 1 -7 2 97924.9 3050.54 2
 1 -7 3 221595 4895.74 2
 1 -7 3 223667 3678.81 3
 1 -7 4 2676.62 544.604 2
 1 -7 4 2543.24 318.826 3
 1 -7 5 159149 2992.37 3
 1 -7 5 158342 4182.43 2
 1 -7 6 8329.61 947.753 2
 1 -7 7 84832.7 3106.68 2
 1 -7 8 99388.9 3466.94 2
 1 -7 9 22670.3 1639.3 2
 1 -7 10 60062.4 2775.76 2
 1 -7 11 6719.31 945.262 2
 1 -7 12 48817.4 2597.26 2
 1 -7 13 30855.1 2132.39 2
 1 -7 14 100.199 372.962 2
 1 -7 15 6611.35 1056.96 2
 1 -7 16 1440.46 366.651 2
 1 -7 17 51916.6 3063.09 2
 1 -7 18 25210.1 2474.61 1
 1 -6 -15 61419.7 3882.87 4
 1 -6 -14 16743 1971.26 4
 1 -6 -13 10463.9 1549.86 4
 1 -6 -12 1272 565.564 4
 1 -6 -11 46920 2932.34 4
 1 -6 -10 119278 4550.94 4
 1 -6 -3 236221 3495.63 1
 1 -6 -2 20053.8 827.687 1
 1 -6 -1 31898.6 1085.18 1
 1 -6 1 9052.73 831.36 2
 1 -6 1 8771.64 647.809 3
 1 -6 2 44780.6 1868.36 2
 1 -6 2 45306.7 1363.06 3
 1 -6 3 136351 3470.61 2
 1 -6 3 137267 2458.18 3
 1 -6 4 90662.9 2012.1 3
 1 -6 4 128703 3345.69 2
 1 -6 5 500003 7958.87 2
 1 -6 6 15109.7 1202.96 2
 1 -6 7 54460.4 2302.8 2
 1 -6 8 34040.4 1850.24 2
 1 -6 9 52312.7 2387.68 2
 1 -6 10 112959 3671.23 2
 1 -6 11 6100.45 885.647 2
 1 -6 12 99370.1 3654.18 2
 1 -6 13 2577.05 624.855 2
 1 -6 14 34202.2 2225.88 2
 1 -6 15 19768.9 1765.75 2
 1 -6 16 5148.13 917.77 2
 1 -6 17 43751.9 2702.5 2
 1 -6 17 43915.1 3102.64 1
 1 -6 18 4524.85 1070.45 1
 1 -6 19 6870.68 1334.63 1
 1 -5 -16 47763.8 3423.3 4
 1 -5 -15 98455.2 4754.19 4
 1 -5 -14 1112.73 472.574 4
 1 -5 -13 14271.2 1696.49 4
 1 -5 -12 6879.58 1178.09 4
 1 -5 -11 153862 5258.95 4
 1 -5 -10 142979 4849.98 4
 1 -5 -4 3012.39 329.004 1
 1 -5 -3 2618.64 280.168 1
 1 -5 -2 7337.31 432.47 1
 1 -5 -1 128354 2162.54 1
 1 -5 1 1431.67 234.454 3
 1 -5 1 180.821 132.551 2
 1 -5 2 34810.6 1512.12 2
 1 -5 2 34359.4 1008.69 3
 1 -5 3 45621.4 1118.43 3
 1 -5 3 45364.6 1778.76 2
 1 -5 4 219921 4402.8 2
 1 -5 5 68030.9 2300.71 2
 1 -5 5 61956.7 1413.95 4
 1 -5 6 43305.3 1885.41 2
 1 -5 7 33565.4 1682.49 2
 1 -5 8 18133.3 1266.51 2
 1 -5 9 239286 5199.13 2
 1 -5 10 84403.7 3007.39 2
 1 -5 11 13404.1 1220.02 2
 1 -5 12 33497.7 1979.25 2
 1 -5 13 28041.6 1874.06 2
 1 -5 14 104236 3809.29 2
 1 -5 15 44466.8 2859.59 1
 1 -5 15 46195.7 2559.68 2
 1 -5 16 6702.33 1170.97 1
 1 -5 16 5401.4 946.301 2
 1 -5 17 20799 2054.75 1
 1 -5 18 10624.3 1583.22 1
 1 -5 19 47964.5 3395.28 1
 1 -4 -16 85991.2 4461.67 4
 1 -4 -15 24471.1 2278.43 4
 1 -4 -14 21141 2069.43 4
 1 -4 -13 44297.7 2863.02 4
 1 -4 -12 21565.7 1934.08 4
 1 -4 -11 160589 5171.19 4
 1 -4 -10 117823 4169.72 4
 1 -4 -9 3151 664.52 4
 1 -4 -4 33214.9 1013.05 1
 1 -4 -3 2744.07 256.944 1
 1 -4 -2 44222.4 976.853 1
 1 -4 -1 247689 3071.63 1
 1 -4 1 4611.7 481.371 2
 1 -4 1 4554.72 324.37 3
 1 -4 2 383.727 184.036 2
 1 -4 2 892.083 132.214 3
 1 -4 3 1469.85 303.223 2
 1 -4 4 304924 5000.99 2
 1 -4 4 300941 3677.19 4
 1 -4 5 1891.67 373.593 2
 1 -4 5 1812.71 228.965 4
 1 -4 6 12494 913.489 2
 1 -4 7 22929.2 1300.35 2
 1 -4 8 279190 5281.02 2
 1 -4 9 199704 4462.19 2
 1 -4 10 52979.1 2237.19 2
 1 -4 11 46812.9 2192.3 2
 1 -4 12 2492.18 588.216 2
 1 -4 13 40250.6 2161.86 2
 1 -4 14 237731 6540.02 1
 1 -4 14 241201 5799.5 2
 1 -4 15 47488.6 2514.33 2
 1 -4 15 50480.6 2994.23 1
 1 -4 16 6754.21 1128.77 1
 1 -4 17 4620.8 1009.69 1
 1 -4 18 43010.6 3074.73 1
 1 -4 19 71893.6 4141.84 1
 1 -3 -17 11329.1 1689.57 4
 1 -3 -16 56506.1 3550.86 4
 1 -3 -15 5014.47 1065.56 4
 1 -3 -14 67392.9 3562.75 4
 1 -3 -13 44142.3 2761.24 4
 1 -3 -12 12478.4 1392.82 4
 1 -3 -11 44533.2 2554.6 4
 1 -3 -10 337.962 340.715 4
 1 -3 -9 77393 3077.95 4
 1 -3 -8 12227.3 1131.39 4
 1 -3 -7 16243.3 1236.48 4
 1 -3 1 53531.1 1496.8 2
 1 -3 1 57990.8 1422.13 5
 1 -3 2 181937 3128.38 2
 1 -3 3 307770 4564.11 2
 1 -3 3 302968 3416.87 4
 1 -3 4 291195 4512.26 2
 1 -3 4 294660 3697.84 4
 1 -3 5 95.4651 117.544 2
 1 -3 6 160993 3331.19 2
 1 -3 7 1060.86 310.502 2
 1 -3 8 251534 4699.6 2
 1 -3 9 293097 5355.71 2
 1 -3 10 6638.51 747.156 2
 1 -3 11 77527.2 2696.5 2
 1 -3 12 1744.75 529.291 1
 1 -3 12 1678.29 434.283 2
 1 -3 13 182133 5408.27 1
 1 -3 13 199632 4859.19 2
 1 -3 14 146679 4909.43 1
 1 -3 14 105974 3610.12 2
 1 -3 15 2094.33 676.042 1
 1 -3 15 1562.41 533.657 2
 1 -3 16 49819.7 3091.18 1
 1 -3 17 106.131 459.823 1
 1 -3 18 53575 3421.4 1
 1 -3 19 50790.9 3434.7 1
 1 -2 -18 34772.4 2962.53 4
 1 -2 -17 2916.34 901.224 4
 1 -2 -16 37306.3 2803.41 4
 1 -2 -15 6492.74 1204.28 4
 1 -2 -14 110550 4457.51 4
 1 -2 -13 35814.6 2400.82 4
 1 -2 -12 28440.2 2031.8 4
 1 -2 -11 70591.6 3094.52 4
 1 -2 -10 35264.9 2078.07 4
 1 -2 -9 184702 4728.93 4
 1 -2 -8 4530.84 689.815 4
 1 -2 -7 55026.5 2192.8 4
 1 -2 -6 115063 3079.68 4
 1 -2 -5 124574 2966.17 4
 1 -2 -4 157450 3156.72 4
 1 -2 -2 20059.5 840.783 5
 1 -2 -1 907.553 168.239 5
 1 -2 0 3760.46 295.38 5
 1 -2 1 478225 5552.88 2
 1 -2 2 2059.71 258.728 2
 1 -2 3 839710 9170.11 2
 1 -2 4 88417.1 1950.77 2
 1 -2 5 1101.27 219.361 2
 1 -2 6 239281 3944.13 2
 1 -2 7 37764.1 1432.51 2
 1 -2 8 145354 3188.92 2
 1 -2 9 145660 3960.51 1
 1 -2 9 141422 3282.7 2
 1 -2 10 78179.9 2964.37 1
 1 -2 10 76907 2456.91 2
 1 -2 11 41828.7 2252.92 1
 1 -2 11 39145.6 1802.16 2
 1 -2 12 10457.3 1199.19 1
 1 -2 12 8336.87 879.567 2
 1 -2 13 116093 4162.87 1
 1 -2 13 117319 3489.72 2
 1 -2 14 8230.54 956.994 2
 1 -2 14 10366 1278.43 1
 1 -2 15 28423.2 2233.17 1
 1 -2 16 47876.5 2968.26 1
 1 -2 17 7645.27 1223.6 1
 1 -2 18 51562.1 3304.67 1
 1 -2 19 7965.93 1322.13 1
 1 -1 -18 9883.19 1543.84 4
 1 -1 -17 6488.59 1199.98 4
 1 -1 -16 9335.36 1354.99 4
 1 -1 -15 62372.9 3393.39 4
 1 -1 -14 91360.2 3948.66 4
 1 -1 -13 16614.2 1609.36 4
 1 -1 -12 79342.8 3317.79 4
 1 -1 -11 40803.3 2229.57 4
 1 -1 -10 99915.7 3384.31 4
 1 -1 -9 98454.6 3190.48 4
 1 -1 -8 743.257 320.305 4
 1 -1 -7 105253 2925.8 4
 1 -1 -6 52794.9 1890.21 4
 1 -1 -5 61881 1881.97 4
 1 -1 -4 555489 6637.14 5
 1 -1 -4 559446 7019.62 4
 1 -1 -3 274621 3688.28 5
 1 -1 -3 279324 3920.36 4
 1 -1 -2 166418 2358.19 5
 1 -1 -2 167674 2473.98 4
 1 -1 2 7002.2 346.12 2
 1 -1 2 6066.36 408.723 1
 1 -1 3 132098 2036.92 2
 1 -1 3 136974 2515.65 1
 1 -1 4 55207.7 1663.01 1
 1 -1 4 54291.4 1272.56 2
 1 -1 5 52920.2 1757.02 1
 1 -1 5 53824.7 1382.33 2
 1 -1 6 310456 5252.57 1
 1 -1 6 310130 4419.09 2
 1 -1 7 5988.82 689.902 1
 1 -1 7 6246.91 527.846 2
 1 -1 8 129707 3473.81 1
 1 -1 8 128750 2808.58 2
 1 -1 9 359.765 265.089 1
 1 -1 9 313.693 185.216 2
 1 -1 10 160007 4337.52 1
 1 -1 10 159328 3516.33 2
 1 -1 11 39192.5 2159.84 1
 1 -1 11 39033.7 1720.91 2
 1 -1 12 13746.7 1351.62 1
 1 -1 12 11952.3 990.677 2
 1 -1 13 18807.1 1291.08 2
 1 -1 13 18328.4 1637.41 1
 1 -1 14 2097.72 579.942 1
 1 -1 15 43368.9 2692.94 1
 1 -1 16 10391.8 1380.96 1
 1 -1 17 8597.91 1313.81 1
 1 -1 18 29809.1 2500.38 1
 1 -1 19 4626.03 1088.95 1
 1 0 -19 36252.7 2964.88 4
 1 0 -18 2901.98 861.553 4
 1 0 -17 32333.9 2580.4 4
 1 0 -16 972.999 523.076 4
 1 0 -15 87121.3 3888.45 4
 1 0 -14 61175.3 3122.22 4
 1 0 -13 15662.5 1531.69 4
 1 0 -12 72614.8 3091.74 4
 1 0 -11 1225.12 470.607 4
 1 0 -10 132355 3816.75 4
 1 0 -9 35079.3 1808.5 4
 1 0 -8 34971.2 1668.46 4
 1 0 -7 10576.2 860.507 4
 1 0 -6 18849.8 1047.68 4
 1 0 -5 228552 3245.25 5
 1 0 -5 224226 3838.29 4
 1 0 -4 152704 2232.5 5
 1 0 -4 149512 2739.08 4
 1 0 -3 552159 6301.48 2
 1 0 -3 533544 5584.72 5
 1 0 -3 537865 6273.82 4
 1 0 -2 33604.1 904.558 2
 1 0 2 2686.15 265.455 5
 1 0 2 2700.26 291.517 1
 1 0 2 2455.64 275.036 3
 1 0 3 24024.2 966.972 1
 1 0 3 25532.6 602.473 2
 1 0 4 283892 4360.5 1
 1 0 4 277076 3362.67 2
 1 0 5 449131 6101.55 5
 1 0 5 454691 6452.1 1
 1 0 5 452504 5289.6 2
 1 0 6 161770 3275.02 5
 1 0 6 169839 3601.05 1
 1 0 6 163659 2705.59 2
 1 0 7 4602.47 543.195 5
 1 0 7 4023.37 553.282 1
 1 0 7 3984.1 397.828 2
 1 0 8 70016.1 2274.32 5
 1 0 8 73139.9 2543.52 1
 1 0 8 73418 1960.31 2
 1 0 9 62249.1 2237.81 5
 1 0 9 63639.9 2516.5 1
 1 0 9 67460.8 2015.95 2
 1 0 10 168446 4449.44 1
 1 0 10 176751 3632.17 2
 1 0 11 18656.8 1473.22 1
 1 0 11 17621.2 1100.58 2
 1 0 12 30699.7 1530.84 2
 1 0 12 31795.6 2029.38 1
 1 0 13 6398.31 955.667 1
 1 0 14 21507.5 1822.85 1
 1 0 15 40502.5 2610.55 1
 1 0 16 2712.92 718.794 1
 1 0 17 17078.2 1809.76 1
 1 0 18 7414.47 1236.51 1
 1 1 -19 983.006 608.249 4
 1 1 -18 31862.7 2609.58 4
 1 1 -17 60314.3 3440.58 4
 1 1 -16 20785 1933.25 4
 1 1 -15 56059.1 3024.2 4
 1 1 -14 3610.18 820.85 4
 1 1 -13 70443 3130.22 4
 1 1 -12 18410.3 1499.3 4
 1 1 -11 53269 2443.75 4
 1 1 -10 145532 3913.23 4
 1 1 -9 2745.22 507.422 4
 1 1 -8 196343 4142.47 4
 1 1 -7 96317.5 1959.84 5
 1 1 -7 95668.6 2587.6 4
 1 1 -6 48823.3 1173.76 5
 1 1 -6 48966.4 1662.82 4
 1 1 -5 348194 5100.67 4
 1 1 -5 363381 4073.78 5
 1 1 -4 7563.44 525.661 4
 1 1 -3 7341.97 496.096 2
 1 1 -2 52379.2 1241.94 2
 1 1 -1 256371 3168.29 2
 1 1 0 306436 3256.79 5
 1 1 0 321005 3005.12 2
 1 1 1 25186.5 840.84 5
 1 1 1 24255.5 903.164 3
 1 1 2 684570 7764.92 1
 1 1 2 688794 7877.03 5
 1 1 3 4639.44 241.077 2
 1 1 3 4746.93 454.051 5
 1 1 3 4713.01 428.32 1
 1 1 4 51114 1057.05 2
 1 1 4 50340.5 1620.65 5
 1 1 4 52293.7 1616.53 1
 1 1 5 271235 4576.94 5
 1 1 5 279087 4655.8 1
 1 1 5 273655 3563.39 2
 1 1 6 92456.4 2538.53 5
 1 1 6 94326.5 2615.42 1
 1 1 6 91536.7 1859.12 2
 1 1 7 48835.3 1896.07 5
 1 1 7 48201.2 1938.7 1
 1 1 7 46838.4 1387.84 2
 1 1 8 25894.5 1438.36 5
 1 1 8 25626.8 1491.6 1
 1 1 8 25742.6 1078.71 2
 1 1 9 114776 3296.05 5
 1 1 9 114953 3455.78 1
 1 1 9 114603 2583.98 2
 1 1 10 72640.4 2681.64 5
 1 1 10 76827.6 2899.94 1
 1 1 10 72179.6 2089.73 2
 1 1 11 1277.86 493.7 1
 1 1 11 1138.56 401.033 5
 1 1 11 775.136 257.871 2
 1 1 12 26717.7 1743.94 5
 1 1 12 30270.4 1994.4 1
 1 1 13 387.552 344.328 1
 1 1 13 -4.14608 252.882 5
 1 1 14 33124.4 2250.12 1
 1 1 15 29632.9 2196.89 1
 1 1 16 91.1615 234.261 1
 1 1 17 36293.6 2588.38 1
 1 2 -19 7719.34 1369.43 4
 1 2 -18 107975 4774.54 4
 1 2 -17 18566.8 1902.37 4
 1 2 -16 16286.2 1670.75 4
 1 2 -15 9551.44 1208.94 4
 1 2 -14 9871.18 1227.96 4
 1 2 -13 118765 3977.65 4
 1 2 -12 21451.4 1566.14 4
 1 2 -11 4790.92 706.057 4
 1 2 -10 66519 2518.24 4
 1 2 -9 41880.1 1860.65 4
 1 2 -8 211424 3193.76 5
 1 2 -8 212648 4269.2 4
 1 2 -7 52489.8 1829.34 4
 1 2 -7 49182.1 1168.96 5
 1 2 -6 35519.6 837.798 5
 1 2 -3 225651 2685.48 5
 1 2 -2 217109 2841.76 5
 1 2 -2 231975 3415.99 2
 1 2 -1 17288.3 678.131 5
 1 2 -1 18276.5 728.657 2
 1 2 0 387184 5074.31 3
 1 2 0 374249 4832.16 5
 1 2 0 370384 4825.48 1
 1 2 0 384262 4599.54 2
 1 2 1 222972 2971.32 2
 1 2 1 226834 3558.68 5
 1 2 1 227151 3399.37 1
 1 2 2 458315 6084.81 5
 1 2 2 456463 5076.71 2
 1 2 2 443582 5796.23 1
 1 2 3 26292.3 1185.41 5
 1 2 3 26795 1092.91 1
 1 2 4 87174.9 2190.46 1
 1 2 4 87974.4 2402.99 5
 1 2 5 154789 2466.59 2
 1 2 5 155338 3524.51 5
 1 2 5 146204 3168.48 1
 1 2 6 45577.9 1296.88 2
 1 2 6 43385.4 1830.79 5
 1 2 6 44037.1 1734.6 1
 1 2 7 315145 4462.03 2
 1 2 7 313978 5767.82 5
 1 2 7 299898 5440.75 1
 1 2 8 515.522 269.303 5
 1 2 8 205.745 152.222 1
 1 2 8 251.033 114.832 2
 1 2 9 112442 3432.32 5
 1 2 9 106545 3259.03 1
 1 2 9 104713 2474.51 2
 1 2 10 18508.8 1404.83 5
 1 2 10 17815.2 1358 1
 1 2 10 15952.8 959.471 2
 1 2 11 39281.4 2175.88 5
 1 2 11 40357.1 2152.36 1
 1 2 12 28296.8 1890.85 5
 1 2 12 27303.5 1836.17 1
 1 2 13 3377.25 723.564 5
 1 2 13 2537.36 568.52 1
 1 2 14 69331.5 3178.93 5
 1 2 14 67989.2 3164.26 1
 1 2 15 29119 2150.79 1
 1 3 -18 99992.3 4473.7 4
 1 3 -17 1233.88 488.557 4
 1 3 -16 7989.85 1149.54 4
 1 3 -15 1487.43 491.813 4
 1 3 -14 133669 4383.79 4
 1 3 -13 181112 4936.19 4
 1 3 -12 96146.2 3383.33 4
 1 3 -11 26449.2 1625.57 4
 1 3 -8 346519 4324.61 5
 1 3 -7 20108.6 662.931 5
 1 3 -6 50864.5 1062.94 5
 1 3 -5 19261.4 613.336 5
 1 3 -4 79269 1487.88 5
 1 3 -3 229243 3241.39 5
 1 3 -2 139410 2469.53 5
 1 3 -1 11013.9 675.421 5
 1 3 0 2726.89 377.908 5
 1 3 0 2266.52 292.067 2
 1 3 1 174815 3075.25 1
 1 3 1 178601 3387.32 5
 1 3 1 173421 2858.2 2
 1 3 2 279068 3878.19 2
 1 3 2 282150 4711.91 5
 1 3 2 271835 4262.16 1
 1 3 3 8959.18 681.697 1
 1 3 3 9033.63 534.008 2
 1 3 3 8607.09 752.719 5
 1 3 4 133179 2337.53 2
 1 3 4 135857 3316.32 5
 1 3 4 126054 2850.41 1
 1 3 5 7987.59 796.255 5
 1 3 5 7948.27 714.546 1
 1 3 6 311130 5410.24 1
 1 3 6 322249 5964.32 5
 1 3 7 175691 3981.14 1
 1 3 7 185655 3264.57 2
 1 3 7 183366 4493.31 5
 1 3 8 18220.8 1230.97 1
 1 3 8 17657 927.208 2
 1 3 8 20908.6 1465.87 5
 1 3 9 106336 2529.82 2
 1 3 9 104373 3521.65 5
 1 3 9 95998.7 3061.33 1
 1 3 10 1606.23 492.156 5
 1 3 10 1353.5 407.452 1
 1 3 11 130539 4218.27 5
 1 3 11 119136 3768.72 1
 1 3 12 78992.8 3139.52 1
 1 3 12 80949.7 3411.51 5
 1 3 13 8900.19 1187.89 5
 1 3 13 7892.83 1021.71 1
 1 3 14 38066.4 2459.23 5
 1 3 14 34219.2 2191.26 1
 1 3 15 -292.536 486.968 5
 1 3 16 66866.6 3450.85 5
 1 4 -9 448081 5426.05 5
 1 4 -9 448485 5421.73 5
 1 4 -8 381294 4701.19 5
 1 4 -7 10717.7 533.04 5
 1 4 -6 3916.82 344.94 5
 1 4 -5 103070 1982.82 5
 1 4 -4 225053 3473.86 5
 1 4 -3 144683 2747.99 5
 1 4 -2 4237.96 444.638 5
 1 4 -1 46196.6 1597.9 5
 1 4 0 363.929 184.176 5
 1 4 1 174391 3667.47 5
 1 4 2 46170 1842.96 5
 1 4 2 45211.6 1554.88 1
 1 4 3 57767.3 1836.71 1
 1 4 3 61939 2255.82 5
 1 4 4 8496.73 722.858 1
 1 4 4 8910.94 874.464 5
 1 4 5 88583.2 2529.65 1
 1 4 5 90101.7 2977.16 5
 1 4 6 266301 5003.11 1
 1 4 6 282682 5790.96 5
 1 4 7 45353.3 2233.36 5
 1 4 7 43411 1890.42 1
 1 4 8 7662.7 945.676 5
 1 4 8 7349.88 641.853 2
 1 4 8 7283.03 808.406 1
 1 4 9 26927.8 1643.48 1
 1 4 9 29737.4 1945.52 5
 1 4 10 47557 2556.43 5
 1 4 10 46944.7 2288.81 1
 1 4 11 245034 6256.73 5
 1 4 11 229345 5569.88 1
 1 4 12 39658.7 2281.13 1
 1 4 12 43367.7 2575.5 5
 1 4 13 2684.53 722.767 5
 1 4 14 16525.7 1693.7 5
 1 4 15 39894.5 2745.86 5
 1 4 16 73565.1 3803.73 5
 1 5 -11 18355.4 837.299 5
 1 5 -10 65160 1595.1 5
 1 5 -9 242847 3598.22 5
 1 5 -8 20505 848.082 5
 1 5 -7 145143 2622.48 5
 1 5 -6 11497.7 688.809 5
 1 5 -5 75747.7 1954.02 5
 1 5 -4 312546 4824.13 5
 1 5 -3 71021.8 2065.46 5
 1 5 -2 53458.9 1852.84 5
 1 5 -1 165579 3616.32 5
 1 5 0 212428 4312.46 5
 1 5 1 116053 3172.89 5
 1 5 2 26761.8 1510.33 5
 1 5 2 26719.9 1285.98 1
 1 5 3 49448.1 2145.88 5
 1 5 3 47302.3 1760.28 1
 1 5 4 3415.66 588.186 5
 1 5 4 3142.9 468.447 1
 1 5 5 124728 3760.57 5
 1 5 5 120336 3097.48 1
 1 5 6 137252 3451.78 1
 1 5 6 144253 4210.41 5
 1 5 7 2674.28 609.571 5
 1 5 7 3123.85 523.886 1
 1 5 8 31119.1 2050.67 5
 1 5 8 28280.9 1321.37 2
 1 5 8 30312.7 1681.63 1
 1 5 9 1688.21 490.909 5
 1 5 9 1534.82 411.26 1
 1 5 10 155291 5013.02 5
 1 5 10 151875 4244.11 1
 1 5 11 123978 4512.49 5
 1 5 11 113791 3757.73 1
 1 5 12 7696.38 1156.64 5
 1 5 13 25935.1 2166.1 5
 1 5 14 698.073 485.436 5
 1 5 15 84631 4165.04 5
 1 5 16 62905.2 3666.8 5
 1 6 -10 58585.9 1628.61 5
 1 6 -9 65705.2 1769.77 5
 1 6 -8 37055.5 1329.44 5
 1 6 -7 291868 4602.58 5
 1 6 -6 29752.9 1292.91 5
 1 6 -5 65314.2 2034.04 5
 1 6 -4 197294 3932.37 5
 1 6 -3 2142.04 412.272 5
 1 6 -2 289975 5309.52 5
 1 6 -1 869.202 316.567 5
 1 6 0 99870.3 3033.57 5
 1 6 1 105097 3234.62 5
 1 6 2 6455.63 795.358 5
 1 6 3 36357.6 1968.95 5
 1 6 3 37116.2 1624.97 1
 1 6 4 3622.72 519.028 1
 1 6 4 3877.49 680.398 5
 1 6 5 133423 4166.19 5
 1 6 5 131457 3388.05 1
 1 6 6 32320.8 2027.61 5
 1 6 6 32095.8 1645.69 1
 1 6 7 11933.4 1289.03 5
 1 6 7 13912.7 1111.81 1
 1 6 8 60869.3 2458.33 1
 1 6 8 64124.6 3080.43 5
 1 6 9 11146.5 1340.25 5
 1 6 9 10609.1 1042.98 1
 1 6 10 63225 3258.15 5
 1 6 11 31135.5 2356.25 5
 1 6 12 10303.9 1367.88 5
 1 6 13 25563.9 2265.5 5
 1 6 14 3615.3 904.61 5
 1 6 15 65463.7 3835.71 5
 1 7 -10 41625.3 1504.64 5
 1 7 -9 11245.7 791.581 5
 1 7 -8 103988 2641.64 5
 1 7 -7 147365 3317.97 5
 1 7 -6 2638.55 437.531 5
 1 7 -5 118075 3130.67 5
 1 7 -4 5.38029 191.451 5
 1 7 -3 172683 4057.96 5
 1 7 -2 228420 4897.67 5
 1 7 -1 4615.13 687.518 5
 1 7 0 77099.4 2846.3 5
 1 7 1 5488.79 796.466 5
 1 7 2 79390.6 3055.56 5
 1 7 3 131809 4110.57 5
 1 7 4 6526.55 942.538 5
 1 7 5 62692.6 2327.59 1
 1 7 5 57160.7 2807.37 5
 1 7 6 150.62 331.685 5
 1 7 6 112.793 207.255 1
 1 7 7 34142.8 2290.91 5
 1 7 7 34143.3 1801.78 1
 1 7 8 27563.2 2146.8 5
 1 7 9 26142 2132.99 5
 1 7 10 18937.3 1848.75 5
 1 7 11 95.4221 428.762 5
 1 7 12 36435 2718.48 5
 1 7 13 27034 2412.5 5
 1 7 14 2524.36 771.823 5
 1 8 -9 723.292 262.511 5
 1 8 -8 74164.3 2414.27 5
 1 8 -7 43010.4 1862.99 5
 1 8 -6 6541.29 764.505 5
 1 8 -5 22338.8 1415.69 5
 1 8 -4 77468.1 2736 5
 1 8 -3 295330 5943.71 5
 1 8 -2 109838 3518.87 5
 1 8 -1 15456.6 1308.91 5
 1 8 0 6408.88 880.617 5
 1 8 1 33733.6 2053.76 5
 1 8 2 182920 5084.71 5
 1 8 3 123577 4213.46 5
 1 8 4 10468.5 1248.8 5
 1 8 5 23464.2 1899.63 5
 1 8 6 1635.13 650.161 5
 1 8 7 209149 6152.84 5
 1 8 8 14309 1640.11 5
 1 8 9 8180.57 1298.56 5
 1 8 10 12710.7 1606.15 5
 1 8 11 9613.81 1445.79 5
 1 8 12 53352.5 3471.32 5
 1 9 -9 6188.25 737.393 5
 1 9 -8 51418 2169.4 5
 1 9 -7 8472.04 892.904 5
 1 9 -6 23609 1524.23 5
 1 9 -5 34010.7 1884.63 5
 1 9 -4 50969.5 2401.85 5
 1 9 -3 177099 4720.07 5
 1 9 -2 14770.6 1344.72 5
 1 9 -1 9354.64 1119.84 5
 1 9 0 606.746 421.833 5
 1 9 1 120530 4184.52 5
 1 9 2 193337 5587.2 5
 1 9 3 11502.2 1345.72 5
 1 9 4 51936.7 2899.44 5
 1 9 5 30939.1 2299.59 5
 1 9 6 75220.8 3689.49 5
 1 9 7 147253 5339.12 5
 1 9 8 2219.56 742.24 5
 1 9 9 15120 1791.05 5
 1 9 10 7251.68 1303.89 5
 1 9 11 23167.7 2316.95 5
 1 10 -8 25070 1619.84 5
 1 10 -7 2260.49 535.318 5
 1 10 -6 82721.7 3115.56 5
 1 10 -5 3939.35 704.414 5
 1 10 -4 34896.1 2088.94 5
 1 10 -3 51383.5 2588.08 5
 1 10 -2 36218.6 2222.43 5
 1 10 -1 141711 4612.81 5
 1 10 0 23572.5 1890.55 5
 1 10 1 99870.9 4003.6 5
 1 10 2 82480.3 3715.78 5
 1 10 3 5727.15 1026.4 5
 1 10 4 79166.3 3794.59 5
 1 10 5 1471.9 657.279 5
 1 10 6 79864.6 3960.45 5
 1 10 7 23930.8 2212.15 5
 1 10 8 9165.98 1438.9 5
 1 10 9 30507.2 2670.34 5
 1 10 10 799.615 617.209 5
 1 11 -8 755.326 360.89 5
 1 11 -7 75210 3082.28 5
 1 11 -6 83733.1 3356.74 5
 1 11 -5 2582.04 597.494 5
 1 11 -4 32220.7 2134.95 5
 1 11 -3 1175.28 497.005 5
 1 11 -2 68752.4 3274.96 5
 1 11 -1 136588 4803.88 5
 1 11 0 3562.35 800.593 5
 1 11 1 52110.4 3021.74 5
 1 11 2 386.907 314.996 5
 1 11 3 50641 3095.3 5
 1 11 4 70843.4 3772.47 5
 1 11 5 261.576 393.779 5
 1 11 6 38789.5 2897.82 5
 1 11 7 213.724 572.162 5
 1 11 8 44719.5 3253.46 5
 1 12 -7 132388 4409.29 5
 1 12 -6 104914 3972.24 5
 1 12 -5 431.766 408.592 5
 1 12 -4 22007.9 1866.5 5
 1 12 -3 2392.45 677.074 5
 1 12 -2 55755.2 3119.74 5
 1 12 -1 35315.6 2514.64 5
 1 12 0 6230.63 1091.62 5
 1 12 1 6068.26 1092.71 5
 1 12 2 15380.6 1744.07 5
 1 12 3 53107.2 3324.52 5
 1 12 4 45138.8 3156.3 5
 1 12 5 3981.65 1021.78 5
 1 12 6 4602.13 1069.58 5
 1 13 -6 29533.5 2201.64 5
 1 13 -5 21493.9 1906.71 5
 1 13 -4 16688.2 1736.09 5
 1 13 -3 9812.38 1364.09 5
 1 13 -2 66505.7 3554.31 5
 1 13 -1 11059.3 1487.33 5
 1 13 0 14017.4 1714.37 5
 1 13 1 1322.96 553.334 5
 1 13 2 18811.4 2036.3 5
 1 13 3 61743.5 3756.5 5
 1 13 4 3758.06 1095.26 5
 1 14 -6 177.124 360.404 5
 1 14 -5 41099.1 2767.85 5
 1 14 -4 4490.82 1007.3 5
 1 14 -3 18235 1896.23 5
 1 14 -2 33906.8 2659.98 5
 1 14 -1 2732.85 896.328 5
 1 14 0 26202.3 2426.04 5
 1 14 1 1649.61 622.382 5
 1 14 2 21340.4 2235.02 5
 1 15 -5 39150 2831.54 5
 1 15 -4 9.76483 401.287 5
 1 15 -3 35986.7 2802.76 5
 1 15 -2 3169.85 956.25 5
 1 15 -1 24705.8 2418.39 5
 1 15 0 32987.5 2790.66 5
 1 16 -4 -376.316 460.849 5
 1 16 -3 20253.3 2189.95 5
 2 -16 8 12937.4 1803.85 2
 2 -15 7 465.745 414.108 2
 2 -15 8 38566 3012.62 2
 2 -15 9 1883.98 717.854 2
 2 -15 10 34946.8 2969.09 2
 2 -15 11 20112.4 2283.16 2
 2 -14 6 16153.8 1801.56 2
 2 -14 7 16248.7 1858.04 2
 2 -14 8 48416.4 3255.28 2
 2 -14 9 271.331 332.655 2
 2 -14 10 23535.8 2356.29 2
 2 -14 11 2361.14 767.661 2
 2 -14 12 19970.1 2248.63 2
 2 -14 13 15790.7 2062.21 2
 2 -14 14 740.413 509.887 2
 2 -13 -9 -14.0647 351.968 4
 2 -13 -8 35217.1 2855.85 4
 2 -13 5 27779.4 2250.65 2
 2 -13 6 318.759 450.058 2
 2 -13 7 38969.5 2794.05 2
 2 -13 8 44472.5 3079.51 2
 2 -13 9 3063.6 855.611 2
 2 -13 10 4312.3 958.449 2
 2 -13 11 6772.28 1266.55 2
 2 -13 12 38495.8 2962.71 2
 2 -13 13 21325.2 2248.38 2
 2 -13 14 -244.875 496.016 2
 2 -13 15 13994 1913.53 2
 2 -12 -10 23785.8 2420.61 4
 2 -12 -9 229.111 430.776 4
 2 -12 -8 30493.6 2596.98 4
 2 -12 4 5060.32 898.964 2
 2 -12 5 25656.1 2089.28 2
 2 -12 6 33222.4 2452.06 2
 2 -12 7 134938 5072.78 2
 2 -12 8 23865 2112.04 2
 2 -12 9 17536.9 1860.55 2
 2 -12 10 3115.25 820.437 2
 2 -12 11 27514.3 2388.85 2
 2 -12 12 61053.6 3613.4 2
 2 -12 13 21083.2 2162.81 2
 2 -12 14 10320 1549.27 2
 2 -12 15 3740.54 888.315 2
 2 -12 16 21692 2299.17 2
 2 -12 17 74019.8 4358.21 2
 2 -11 -11 59709.3 3925.59 4
 2 -11 -10 33780.1 2806.41 4
 2 -11 -9 1938.02 732.062 4
 2 -11 -8 51441.6 3210.43 4
 2 -11 4 78663.1 3468.4 2
 2 -11 5 7106.8 1089.9 2
 2 -11 6 116061 4429.48 2
 2 -11 7 135530 4849.62 2
 2 -11 8 2784.62 692.54 2
 2 -11 9 70906.1 3555.7 2
 2 -11 10 4014.32 841.931 2
 2 -11 11 42316.9 2828.46 2
 2 -11 12 50626.8 3165.1 2
 2 -11 13 69.7942 385.554 2
 2 -11 14 37704.2 2850.33 2
 2 -11 15 -208.494 430.669 2
 2 -11 16 43980 3172.23 2
 2 -11 17 33091.1 2789.45 2
 2 -11 18 1403.42 601.819 2
 2 -10 -12 7298.65 1452.6 4
 2 -10 -11 119800 5355.38 4
 2 -10 -10 24517.9 2307.79 4
 2 -10 -9 19825.5 2046.94 4
 2 -10 -8 24219.8 2122.54 4
 2 -10 3 42218.9 2351.94 2
 2 -10 4 218964 5831.71 2
 2 -10 5 2416.78 649.085 2
 2 -10 6 14314.2 1456.39 2
 2 -10 7 12326.9 1384.13 2
 2 -10 8 151375 4992.91 2
 2 -10 9 116782 4440.08 2
 2 -10 10 5040.26 940.067 2
 2 -10 11 74587.5 3647.55 2
 2 -10 12 15883.3 1711.95 2
 2 -10 13 48820.7 3028.14 2
 2 -10 14 55279.3 3311.42 2
 2 -10 15 1144.51 442.061 2
 2 -10 16 30283.5 2543.04 2
 2 -10 17 4538.52 999.907 2
 2 -10 18 8849 1389.84 2
 2 -9 -13 3077.68 889.906 4
 2 -9 -12 48519.9 3411.23 4
 2 -9 -11 93381.8 4577.5 4
 2 -9 -10 652.165 330.392 4
 2 -9 -9 52506.7 3152.16 4
 2 -9 -8 2041.69 631.792 4
 2 -9 3 246941 5809.43 2
 2 -9 4 114868 3920.6 2
 2 -9 5 20886 1637.67 2
 2 -9 5 20513.5 867.231 3
 2 -9 6 24575.1 1813.76 2
 2 -9 6 22859.1 903.996 3
 2 -9 7 25897.7 1872.96 2
 2 -9 8 162589 4986.92 2
 2 -9 9 132947 4534.77 2
 2 -9 10 54.0985 327.162 2
 2 -9 11 61663.8 3175.5 2
 2 -9 12 612.068 328.9 2
 2 -9 13 157081 5438.37 2
 2 -9 14 55887.9 3219.94 2
 2 -9 15 1103.63 508.37 2
 2 -9 16 14316.9 1687.56 2
 2 -9 17 2014.34 820.541 1
 2 -9 17 1645.1 658.621 2
 2 -8 -14 41445.6 3222.8 4
 2 -8 -13 2109.07 656.258 4
 2 -8 -12 61377.4 3743.01 4
 2 -8 -11 29699.2 2491.67 4
 2 -8 -10 13901.3 1629.86 4
 2 -8 -9 37405.3 2551.51 4
 2 -8 -8 24451.4 1987.7 4
 2 -8 -2 265427 3726.16 1
 2 -8 2 77605.2 2868.43 2
 2 -8 3 227987 5317.04 2
 2 -8 4 67546.1 2791.1 2
 2 -8 4 65271.2 1516.19 3
 2 -8 5 9735.83 1048.24 2
 2 -8 5 9161.2 511.173 3
 2 -8 6 31053.3 981.585 3
 2 -8 6 30352.3 1882.15 2
 2 -8 6 28172.2 878.168 4
 2 -8 7 63594.8 2822.7 2
 2 -8 8 191846 5205.16 2
 2 -8 9 72155.1 3159.09 2
 2 -8 10 208.246 324.551 2
 2 -8 11 20525.7 1744 2
 2 -8 12 19746.3 1778.58 2
 2 -8 13 143197 4933.99 2
 2 -8 14 8364.96 1196.11 2
 2 -8 15 13046 1536.96 2
 2 -8 16 1505.87 683.355 1
 2 -8 16 1141.18 421.264 2
 2 -8 17 13107.2 1584.56 2
 2 -8 17 14896.5 1915.14 1
 2 -8 18 56323.3 3798.55 1
 2 -7 -15 29406.1 2743.06 4
 2 -7 -14 33345.6 2831.27 4
 2 -7 -13 1104.74 455.641 4
 2 -7 -12 38695.2 2838.08 4
 2 -7 -11 -105.302 394.091 4
 2 -7 -10 52612.1 3076.14 4
 2 -7 -9 13388.5 1489.33 4
 2 -7 -8 1674.73 497.163 4
 2 -7 -4 72708.8 1377.16 1
 2 -7 -3 105653 1751.85 1
 2 -7 -2 245261 3265.1 1
 2 -7 -1 2104.47 261.513 1
 2 -7 2 98415.1 3060.82 2
 2 -7 3 98356.1 3153.3 2
 2 -7 4 930.985 151.293 3
 2 -7 4 1029.17 374.315 2
 2 -7 5 139568 2141.86 3
 2 -7 5 136691 2031.45 4
 2 -7 6 31305.4 1828.73 2
 2 -7 6 31531.2 917.503 4
 2 -7 7 85838.2 3165.3 2
 2 -7 8 67869.6 2846.26 2
 2 -7 9 648.49 268.021 2
 2 -7 10 23480.8 1736.36 2
 2 -7 11 12076.8 1272.59 2
 2 -7 12 62983.6 3001.77 2
 2 -7 13 50460.2 2754.01 2
 2 -7 14 2865.89 714.235 2
 2 -7 15 22654 1934.8 2
 2 -7 15 21415.9 2122.96 1
 2 -7 16 524.443 309.259 1
 2 -7 16 536.58 256.233 2
 2 -7 17 36098.4 2914.88 1
 2 -7 18 36690.2 3030.61 1
 2 -6 -15 66744.5 4026.71 4
 2 -6 -14 14678.4 1827.9 4
 2 -6 -13 9454.79 1434.99 4
 2 -6 -12 9853.23 1418.37 4
 2 -6 -11 42419.1 2770.3 4
 2 -6 -10 154904 5201.85 4
 2 -6 -9 64000.4 3109.33 4
 2 -6 -8 33722.2 2153.74 4
 2 -6 -7 26958.8 1822.74 4
 2 -6 -2 3131.14 224.347 1
 2 -6 2 64657.1 2288.68 2
 2 -6 3 91936.1 2828.91 2
 2 -6 4 3200.32 202.333 4
 2 -6 4 5471.02 281.388 3
 2 -6 5 224927 4770.26 2
 2 -6 5 206085 2693.5 4
 2 -6 6 720.657 337.302 2
 2 -6 7 22556.4 1494.28 2
 2 -6 8 5335.05 765.939 2
 2 -6 9 37216.6 2029.85 2
 2 -6 10 76154.6 2999.1 2
 2 -6 11 831.347 364.47 2
 2 -6 12 45440.5 2419.71 2
 2 -6 13 16673.2 1496.23 2
 2 -6 14 30196.5 2066.72 2
 2 -6 14 30964.3 2410.97 1
 2 -6 15 39328.8 2431.04 2
 2 -6 15 39292.8 2806.32 1
 2 -6 16 455.761 429.952 1
 2 -6 16 164.862 310.602 2
 2 -6 17 36072.8 2878.4 1
 2 -6 18 7963.49 1426.15 1
 2 -5 -16 28558 2651.06 4
 2 -5 -15 57528.1 3637.07 4
 2 -5 -14 1881.85 622.412 4
 2 -5 -13 21284.6 2032.5 4
 2 -5 -12 2244.14 695.043 4
 2 -5 -11 102479 4149.16 4
 2 -5 -10 180405 5436.46 4
 2 -5 -9 54998.9 2796.23 4
 2 -5 -8 35076.9 2096.06 4
 2 -5 -7 2968.28 616.774 4
 2 -5 -6 271645 5674.79 4
 2 -5 -5 336123 6148.76 4
 2 -5 2 89129.2 2522.46 2
 2 -5 3 192162 3999.22 2
 2 -5 4 229450 4506.52 2
 2 -5 5 62372.6 2233 2
 2 -5 6 3211.71 507.223 2
 2 -5 7 102044 3081.96 2
 2 -5 8 13043.6 1084.77 2
 2 -5 9 42121.2 2022.04 2
 2 -5 10 97064.2 3216.62 2
 2 -5 11 577.743 315.262 2
 2 -5 12 32332.4 1952.06 2
 2 -5 12 33467 2270.24 1
 2 -5 13 1043.66 397.31 2
 2 -5 13 1604.56 590.094 1
 2 -5 14 125783 4164.05 2
 2 -5 14 121034 4737.04 1
 2 -5 15 48432.3 2605.32 2
 2 -5 15 48774.7 3085.82 1
 2 -5 16 1766.02 608.427 1
 2 -5 17 27759.9 2493.98 1
 2 -5 18 5452.68 1157.29 1
 2 -5 19 46696 3457.56 1
 2 -4 -17 497.012 377.167 4
 2 -4 -16 45688.9 3296.09 4
 2 -4 -15 45211.2 3166.31 4
 2 -4 -14 7702.88 1680.27 4
 2 -4 -13 41604.8 2768.85 4
 2 -4 -12 1378.43 599.693 4
 2 -4 -11 11055.6 1301.3 4
 2 -4 -10 82393.2 3447.27 4
 2 -4 -9 366.069 278.017 4
 2 -4 -8 20266.5 1536.42 4
 2 -4 -7 10937 1074.25 4
 2 -4 -6 194394 4508.29 4
 2 -4 -5 135985 3444.32 4
 2 -4 -4 27621.2 1365.58 4
 2 -4 -3 52587.9 1735.47 4
 2 -4 -2 45372.6 1452.97 4
 2 -4 -1 60480.1 1492.34 4
 2 -4 0 150952 2259.75 4
 2 -4 2 53933.4 1747.05 2
 2 -4 3 15926 945.224 2
 2 -4 4 503893 7070.54 2
 2 -4 5 38601.2 1584 2
 2 -4 6 107773 2867.3 2
 2 -4 7 10685.2 899.846 2
 2 -4 8 49907.3 2001.24 2
 2 -4 9 191688 4321.4 2
 2 -4 10 80321.7 2767.03 2
 2 -4 10 79074.9 3201.53 1
 2 -4 11 37830.4 1932.74 2
 2 -4 11 36888.4 2266.41 1
 2 -4 12 36114.5 1968.37 2
 2 -4 12 39577.5 2432.31 1
 2 -4 13 56518.6 2553.37 2
 2 -4 13 56896.5 3060.11 1
 2 -4 14 164059 4603.98 2
 2 -4 14 157756 5418.73 1
 2 -4 15 20236.5 1942.5 1
 2 -4 16 14629.3 1774.16 1
 2 -4 17 871.454 501.086 1
 2 -4 18 35617.6 2880.08 1
 2 -4 19 77909.8 4447.18 1
 2 -3 -17 2082.07 761.686 4
 2 -3 -16 45413.8 3195.23 4
 2 -3 -15 21084.3 2101.94 4
 2 -3 -14 78122.2 3838.02 4
 2 -3 -13 55788.3 3140.56 4
 2 -3 -12 3991.52 831.574 4
 2 -3 -11 50900.6 2695.06 4
 2 -3 -10 14565.9 1368.21 4
 2 -3 -9 154896 4385.6 4
 2 -3 -8 130647 3810.58 4
 2 -3 -7 2135 477.307 4
 2 -3 -6 169983 3941.19 4
 2 -3 -5 2029.17 415.78 4
 2 -3 -4 46651.9 1664.94 4
 2 -3 -3 55258.7 1645.19 4
 2 -3 -2 64289.5 1595.14 4
 2 -3 -1 433699 5112.74 4
 2 -3 0 22636.6 679.664 1
 2 -3 0 22265.1 615.758 4
 2 -3 1 95793.1 1858.28 1
 2 -3 2 74956 1824.75 1
 2 -3 2 76237.7 1863.22 2
 2 -3 3 407470 5710.56 1
 2 -3 3 398425 5502.07 2
 2 -3 3 402304 4504.5 3
 2 -3 4 231227 3879.76 2
 2 -3 4 236055 4232.36 1
 2 -3 5 779.561 307.671 1
 2 -3 5 1381.14 298.65 2
 2 -3 6 125266 2842.88 2
 2 -3 6 125559 3323.15 1
 2 -3 7 2863.35 575.736 1
 2 -3 7 3151.23 462.491 2
 2 -3 8 62853.1 2105.92 2
 2 -3 8 60774.5 2503.45 1
 2 -3 9 227515 4526.14 2
 2 -3 9 227620 5379.79 1
 2 -3 10 290.285 292.007 1
 2 -3 10 628.915 230.82 2
 2 -3 11 48534 2092.52 2
 2 -3 11 47766.4 2543.46 1
 2 -3 12 11581.8 1051.42 2
 2 -3 12 14095.2 1437.51 1
 2 -3 13 150366 4085.47 2
 2 -3 13 148060 5033.76 1
 2 -3 14 83587.7 3845.42 1
 2 -3 15 1872.26 673.481 1
 2 -3 16 39064.2 2794.69 1
 2 -3 17 -179.9 364.75 1
 2 -3 18 42857.2 3146.43 1
 2 -3 19 40380.4 3159.42 1
 2 -2 -18 25389.3 2508.33 4
 2 -2 -17 308.821 410.006 4
 2 -2 -16 22979.5 2209.54 4
 2 -2 -15 21030.5 2061.45 4
 2 -2 -14 244054 6879.93 4
 2 -2 -13 59026.7 3132.74 4
 2 -2 -12 55644.7 2890.44 4
 2 -2 -11 85729 3418.67 4
 2 -2 -10 35835 2086.67 4
 2 -2 -9 244220 5521.16 4
 2 -2 -8 64454.2 2510.12 4
 2 -2 -7 72307.3 2492.76 4
 2 -2 -6 102529 2825.91 4
 2 -2 -5 17289.2 1031.81 4
 2 -2 -4 521776 6920.81 4
 2 -2 -3 62594 1666.07 4
 2 -2 -2 236812 3423.82 5
 2 -2 -2 236618 3421.44 4
 2 -2 -1 4721.82 372.749 5
 2 -2 -1 4904.83 267.029 1
 2 -2 0 514258 5628.59 1
 2 -2 1 777892 8541.88 1
 2 -2 2 35716.5 886.752 3
 2 -2 2 34141.5 1179 1
 2 -2 3 304347 4091.24 2
 2 -2 3 313999 4711.77 1
 2 -2 4 35332.7 1139.41 2
 2 -2 4 35776.1 1443.97 1
 2 -2 4 34156.2 1189.7 3
 2 -2 5 63686.2 1668.73 2
 2 -2 5 63954.1 2133.51 1
 2 -2 6 246073 3994.18 2
 2 -2 6 255796 4935.68 1
 2 -2 7 4363.93 472.406 2
 2 -2 7 5291.5 722.096 1
 2 -2 8 84177.1 2292.24 2
 2 -2 8 82331.9 2918.78 1
 2 -2 9 27446.5 1327.14 2
 2 -2 9 28582.6 1777.21 1
 2 -2 10 37816.7 1654.43 2
 2 -2 10 42205.7 2275.64 1
 2 -2 11 92290.3 2794.12 2
 2 -2 11 96960.9 3651.85 1
 2 -2 12 3942.94 600.295 2
 2 -2 12 4143.36 823.289 1
 2 -2 13 41703.6 2575.9 1
 2 -2 14 33010.3 2373.15 1
 2 -2 15 29621.7 2352.28 1
 2 -2 16 38463.7 2762.05 1
 2 -2 17 2214.94 777.384 1
 2 -2 18 24118.4 2371 1
 2 -2 19 12228.3 1767.85 1
 2 -1 -18 11143.5 1667.54 4
 2 -1 -17 7023.22 1236.13 4
 2 -1 -16 11439.1 1564.07 4
 2 -1 -15 102340 4393.09 4
 2 -1 -14 199965 6009.61 4
 2 -1 -13 2533.3 706.214 4
 2 -1 -12 55064.1 2802.33 4
 2 -1 -11 9121.05 1092.09 4
 2 -1 -10 157723 4416.66 4
 2 -1 -9 97178.7 3213.05 4
 2 -1 -8 8747 882.488 4
 2 -1 -7 144285 3543.4 4
 2 -1 -6 1601.3 348.434 4
 2 -1 -5 185337 2998.32 5
 2 -1 -5 192952 3656.62 4
 2 -1 -4 591647 6672.58 5
 2 -1 -4 591880 7454.96 4
 2 -1 -3 11421.2 506.809 5
 2 -1 -3 10462.9 634.244 4
 2 -1 -2 13088.7 515.787 5
 2 -1 -1 260.156 97.35 1
 2 -1 0 126228 2109.89 1
 2 -1 1 79932.7 1710.62 1
 2 -1 2 240599 3735.14 1
 2 -1 2 237739 3475.1 3
 2 -1 3 4039.43 277.634 2
 2 -1 3 5658.18 531.173 1
 2 -1 4 86988.5 1591.98 2
 2 -1 4 85879.8 2333.82 1
 2 -1 5 306542 4026.14 2
 2 -1 5 313123 5336.33 1
 2 -1 6 250414 3687.89 2
 2 -1 6 253320 4903.98 1
 2 -1 7 41656.4 1325.05 2
 2 -1 7 38049.9 1838.21 1
 2 -1 8 55433.7 1680.31 2
 2 -1 8 63506 2514.23 1
 2 -1 9 2088.5 548.758 1
 2 -1 9 2076.34 344.081 2
 2 -1 10 192084 3811.35 2
 2 -1 10 189810 5035.36 1
 2 -1 11 83778.1 2495.26 2
 2 -1 11 79629.3 3286.53 1
 2 -1 12 2337.52 666.778 1
 2 -1 13 20239 1773.71 1
 2 -1 14 383.953 378.655 1
 2 -1 15 61082.5 3389.6 1
 2 -1 16 25533.8 2279.28 1
 2 -1 17 580.683 491.903 1
 2 -1 18 35323.6 2825.09 1
 2 -1 19 788.299 656.371 1
 2 0 -19 27731.3 2609.72 4
 2 0 -18 1891.46 771.746 4
 2 0 -17 38577.1 2836.7 4
 2 0 -16 1565.87 718.227 4
 2 0 -15 93498.1 4084.23 4
 2 0 -14 61955.7 3171.96 4
 2 0 -13 5068.86 912.235 4
 2 0 -12 75670.5 3203.56 4
 2 0 -11 172.509 239.05 4
 2 0 -10 133175 3893.48 4
 2 0 -9 217544 4927.54 4
 2 0 -8 17981.9 1230.65 4
 2 0 -7 126173 2426.49 5
 2 0 -7 140550 3369.63 4
 2 0 -6 741.978 155.149 5
 2 0 -6 605.536 233.881 4
 2 0 -5 327820 3874.87 5
 2 0 -5 322325 5066.54 4
 2 0 -4 201036 2442.88 5
 2 0 -2 172015 2841.07 2
 2 0 -1 281442 3883.34 1
 2 0 -1 296947 3773.58 2
 2 0 0 176151 2837.08 1
 2 0 1 372049 4878.49 3
 2 0 1 346070 4780.06 1
 2 0 2 4717.91 452.848 1
 2 0 3 6831.7 557.999 5
 2 0 3 7859.69 635.637 1
 2 0 4 66651.3 1938.55 5
 2 0 4 67195.4 2038.18 1
 2 0 5 261447 3228.48 2
 2 0 5 267968 4620.8 5
 2 0 5 275588 4928.24 1
 2 0 6 253590 4698.19 5
 2 0 6 253581 3368.94 2
 2 0 6 258689 5034.74 1
 2 0 7 33864 1605.79 5
 2 0 7 33277.1 1051.29 2
 2 0 7 33804.1 1767.91 1
 2 0 8 56184.5 1527.26 2
 2 0 8 57632.9 2420.07 1
 2 0 8 56598.9 2200.68 5
 2 0 9 23449.5 1042.84 2
 2 0 9 25288.4 1671.67 1
 2 0 10 237372 4095.36 2
 2 0 10 245492 5838.71 1
 2 0 11 55674.5 2777.73 1
 2 0 12 1087.76 406.866 1
 2 0 13 3790.09 765.468 1
 2 0 14 11011.7 1374 1
 2 0 15 51511 3048.22 1
 2 0 16 10438.1 1426.38 1
 2 0 17 31872.6 2555.66 1
 2 0 18 17534.9 1938.23 1
 2 1 -19 3205.75 980.045 4
 2 1 -18 18284.7 2052.73 4
 2 1 -17 73344.4 3849.24 4
 2 1 -16 1816.25 702.746 4
 2 1 -15 17452.7 1728.79 4
 2 1 -14 7320.55 1094.84 4
 2 1 -13 30302.6 2056.78 4
 2 1 -12 41137.3 2286.41 4
 2 1 -11 1403.36 484.525 4
 2 1 -10 192679 4733.13 4
 2 1 -9 60516.3 2391.69 4
 2 1 -8 69390.3 1563.69 5
 2 1 -8 73789.8 2484.24 4
 2 1 -7 74807.3 1431.54 5
 2 1 -2 74605.8 1717.57 2
 2 1 -1 612217 6754.55 5
 2 1 -1 628140 6947.67 2
 2 1 0 713717 8059.57 5
 2 1 0 731966 8471.23 1
 2 1 0 729443 7599.19 2
 2 1 1 1569.51 263.789 5
 2 1 1 2199.49 175.852 2
 2 1 1 1295.48 247.652 1
 2 1 2 182683 3295.51 5
 2 1 2 175651 3301.85 1
 2 1 3 48882.6 1695.06 1
 2 1 3 49927.5 1689.45 5
 2 1 4 235324 4325.11 1
 2 1 4 247403 4427.11 5
 2 1 5 317447 3548.24 2
 2 1 5 327367 5501.15 1
 2 1 6 4661.74 632.766 5
 2 1 6 4934.24 315.982 2
 2 1 6 4947.88 634.277 1
 2 1 7 48941.6 2091.72 5
 2 1 7 51832.6 1254.5 2
 2 1 7 50472.8 2110.3 1
 2 1 8 24412 1500.4 5
 2 1 8 21225 840.35 2
 2 1 8 22320.4 1460.35 1
 2 1 9 101756 3334.48 5
 2 1 9 100304 2155.4 2
 2 1 9 97279.9 3300.23 1
 2 1 10 139110 4062.22 5
 2 1 10 135006 4101.55 1
 2 1 11 2955.6 636.932 5
 2 1 11 3330.3 681.762 1
 2 1 12 20312.3 1690.44 1
 2 1 13 5637.73 928.802 1
 2 1 14 38600.1 2493.84 1
 2 1 15 51560.6 3018.04 1
 2 1 16 4480.05 937.632 1
 2 1 17 29007.1 2419.18 1
 2 2 -17 36823.5 2690.47 4
 2 2 -16 2590.62 725.671 4
 2 2 -15 22628.4 1956.97 4
 2 2 -14 1971.88 573.425 4
 2 2 -13 63040.5 2975.52 4
 2 2 -12 48574.2 2443.1 4
 2 2 -10 18554.6 802.639 5
 2 2 -9 35743.6 993.984 5
 2 2 -8 186935 2427.06 5
 2 2 -3 105161 1662.07 5
 2 2 -2 32923.5 959.023 5
 2 2 -1 84783.1 1837.35 5
 2 2 -1 83065 1797 2
 2 2 0 34165.8 1293.78 1
 2 2 0 34826.7 1235.41 5
 2 2 0 36587.5 1064.92 2
 2 2 1 191171 3537.45 5
 2 2 1 198583 2749.67 2
 2 2 1 199173 3584.45 1
 2 2 2 377286 5704.29 5
 2 2 2 369564 5577.24 1
 2 2 2 371667 4243.88 2
 2 2 3 8823.07 730.681 1
 2 2 3 8882.33 771.967 5
 2 2 3 9179.91 385.454 2
 2 2 4 236589 4296.95 1
 2 2 4 241163 4512.23 5
 2 2 5 42881.6 1803.53 1
 2 2 5 36751 831.791 2
 2 2 5 40925.7 1833.44 5
 2 2 5 34460.6 830.533 2
 2 2 6 54149.1 2121.83 1
 2 2 6 56656.4 2265.88 5
 2 2 6 51803.5 1115.55 2
 2 2 7 143951 3744.63 1
 2 2 7 149310 3998.66 5
 2 2 7 145957 2325.91 2
 2 2 8 4648.74 708.832 5
 2 2 8 4377.65 363.597 2
 2 2 8 4760.32 670.701 1
 2 2 9 75209.5 2983.51 5
 2 2 9 73694.7 2824.31 1
 2 2 10 37464.5 2144.05 5
 2 2 10 32698.3 1946.29 1
 2 2 11 21460.9 1678.71 5
 2 2 11 22081.3 1658.48 1
 2 2 12 119637 4195.85 5
 2 2 12 111942 3995.26 1
 2 2 13 229.857 322.579 5
 2 2 13 669.525 469.32 1
 2 2 14 32891.2 2261.81 1
 2 2 15 36524.1 2461.66 1
 2 3 -5 6675.14 337.832 5
 2 3 -4 186400 2686.16 5
 2 3 -3 197265 3040.18 5
 2 3 -2 145710 2700.85 5
 2 3 -1 236959 3903.83 5
 2 3 0 38303.9 1456.43 5
 2 3 1 217702 4088.17 5
 2 3 1 210765 3305.58 2
 2 3 1 222685 4022.55 1
 2 3 2 283264 5041.87 5
 2 3 2 283206 3896.84 2
 2 3 2 272269 4796.63 1
 2 3 3 21925.3 1305.3 5
 2 3 3 18862.6 745.195 2
 2 3 3 20015.9 1144.2 1
 2 3 4 47452.6 2032.57 5
 2 3 4 44300.2 1160.01 2
 2 3 4 46166.3 1853.53 1
 2 3 5 374.196 113.311 2
 2 3 5 578.925 218.876 1
 2 3 5 256.553 220.837 5
 2 3 6 112853 2027.59 2
 2 3 6 116102 3531.08 5
 2 3 6 111677 3202.65 1
 2 3 6 109115 2014.77 2
 2 3 7 168521 4461.89 5
 2 3 7 160097 4091.74 1
 2 3 8 -325.578 258.682 1
 2 3 8 -1.34113 232.187 5
 2 3 9 60951.4 2660.36 1
 2 3 9 65051.5 2903.41 5
 2 3 10 5151.94 799.748 1
 2 3 10 6512.75 935.815 5
 2 3 11 87920.2 3479.32 1
 2 3 11 93666.1 3740.84 5
 2 3 12 54044.4 2793.58 1
 2 3 12 55975.6 2964.32 5
 2 3 13 3513.28 754.979 1
 2 3 13 3802.6 792.706 5
 2 3 14 18529.2 1806.34 5
 2 3 14 18119.7 1738.48 1
 2 4 -10 3475.62 224.771 5
 2 4 -8 109808 1619.87 5
 2 4 -7 15490.7 562.42 5
 2 4 -6 34314.5 972.862 5
 2 4 -5 62984 1509.67 5
 2 4 -4 542228 6689.95 5
 2 4 -3 450376 6067.16 5
 2 4 -2 13551 862.802 5
 2 4 -1 329758 5292.73 5
 2 4 0 5335.38 629.46 5
 2 4 1 196919 3952.33 1
 2 4 1 191603 4154.1 5
 2 4 2 75876.5 2547.83 5
 2 4 2 74262.6 2346.22 1
 2 4 3 48046.3 2086.21 5
 2 4 3 46257.6 1872.85 1
 2 4 4 33921.1 1639.36 1
 2 4 4 32400.4 1789.37 5
 2 4 5 244.907 259.501 5
 2 4 5 217.603 161.673 1
 2 4 6 149747 3893.74 1
 2 4 6 161630 4485.83 5
 2 4 7 42527.2 2302.18 5
 2 4 7 41159.9 1290.58 2
 2 4 7 44033.5 2087.73 1
 2 4 8 25345.7 1835.59 5
 2 4 8 24223.2 1604.46 1
 2 4 9 28370.7 2019.62 5
 2 4 9 26911.2 1770.53 1
 2 4 10 28625.5 2115.77 5
 2 4 10 26855.9 1827.5 1
 2 4 11 187640 5287.52 1
 2 4 11 201089 5901.99 5
 2 4 12 13311.3 1503.56 5
 2 4 12 13629.5 1384.49 1
 2 4 13 5371.11 913.857 1
 2 4 13 4518.71 924.288 5
 2 4 14 11586.6 1476.31 5
 2 4 15 35168.2 2675.28 5
 2 5 -9 147496 2298.26 5
 2 5 -8 15468.5 677.479 5
 2 5 -7 107853 2144.35 5
 2 5 -6 109898 2307.68 5
 2 5 -5 23753.1 1070.59 5
 2 5 -4 167667 3325.4 5
 2 5 -3 12650.6 889.934 5
 2 5 -2 74563.3 2320.05 5
 2 5 -1 40295.7 1738.4 5
 2 5 0 24368.1 1405.82 5
 2 5 1 133359 3592.97 5
 2 5 2 3687.22 618.134 5
 2 5 2 3897.57 575.086 1
 2 5 3 8855.21 961.831 5
 2 5 3 10040.4 888.476 1
 2 5 4 19929.4 1488.83 5
 2 5 4 19584.6 1303.59 1
 2 5 5 24844.4 1501.2 1
 2 5 5 25661.4 1761.81 5
 2 5 6 85867.6 3394.74 5
 2 5 6 80063.5 2822.51 1
 2 5 7 4522.06 823.443 5
 2 5 7 4224.36 636.693 1
 2 5 8 19986.2 1730.48 5
 2 5 8 19490.8 1464.39 1
 2 5 9 10082.7 1257.53 5
 2 5 9 9301.36 1054.08 1
 2 5 10 71799.3 3063.22 1
 2 5 10 75908.1 3610.02 5
 2 5 11 89756 4033.77 5
 2 5 11 86962.2 3501.88 1
 2 5 12 -286.571 441.016 5
 2 5 13 27112.4 2342.14 5
 2 5 14 241.629 410.479 5
 2 5 15 50127.8 3349.93 5
 2 6 -9 87847.1 1966.12 5
 2 6 -8 9883.23 659.745 5
 2 6 -7 238544 4033.07 5
 2 6 -6 97534.1 2475.98 5
 2 6 -5 34022.4 1470.03 5
 2 6 -4 38215.9 1639.22 5
 2 6 -3 33264.6 1591.85 5
 2 6 -2 230440 4784.7 5
 2 6 -1 3458.52 560.873 5
 2 6 0 24653.9 1543.3 5
 2 6 1 76739.9 2851.41 5
 2 6 2 34202.4 1947.78 5
 2 6 3 28638.1 1606.01 1
 2 6 3 26520.1 1795.59 5
 2 6 4 25851.3 1534.63 1
 2 6 4 25226.8 1783.97 5
 2 6 5 54617.9 2742.62 5
 2 6 5 55458.8 2329.58 1
 2 6 6 10975.4 1251.61 5
 2 6 6 10889.9 1043.99 1
 2 6 7 2509.87 738.063 5
 2 6 7 1688.98 433.073 1
 2 6 8 58309 3098.74 5
 2 6 8 56358 2576.78 1
 2 6 9 316.633 312.271 1
 2 6 9 -142.231 319.785 5
 2 6 10 38991.6 2711.77 5
 2 6 11 23620.1 2176.05 5
 2 6 12 8853.5 1378.15 5
 2 6 13 33379.4 2703.19 5
 2 6 14 979.394 622.115 5
 2 7 -9 10462 737.211 5
 2 7 -8 73838.7 2159.5 5
 2 7 -7 110470 2825.5 5
 2 7 -6 17667.6 1124.13 5
 2 7 -5 41467.9 1804.74 5
 2 7 -4 666.981 316.341 5
 2 7 -3 167873 4134.43 5
 2 7 -2 187736 4554.39 5
 2 7 -1 32773.1 1867.67 5
 2 7 0 58319.3 2580.58 5
 2 7 1 1268.81 432.072 5
 2 7 2 57377.7 2705.93 5
 2 7 3 189202 5231.45 5
 2 7 4 4735.75 687.234 1
 2 7 4 4652.45 806.309 5
 2 7 5 35902 1953.03 1
 2 7 5 38025.6 2391.12 5
 2 7 6 1350.56 494.466 5
 2 7 6 111.733 227.203 1
 2 7 7 110388 4430.61 5
 2 7 7 105736 3571.11 1
 2 7 8 75468.1 3735.01 5
 2 7 8 77505.3 3135.75 1
 2 7 9 2495.98 781.166 5
 2 7 10 41302.8 2905.88 5
 2 7 11 427.61 396.366 5
 2 7 12 27669.7 2505.14 5
 2 7 13 52178 3516.63 5
 2 8 -8 80569.5 2523.13 5
 2 8 -7 64182.3 2322.28 5
 2 8 -6 191.415 314.102 5
 2 8 -5 40696.3 1951.77 5
 2 8 -4 14138.3 1186.19 5
 2 8 -3 120505 3698.06 5
 2 8 -2 81885.6 3107.18 5
 2 8 -1 704.552 371.176 5
 2 8 0 838.642 342.143 5
 2 8 1 38762 2292.89 5
 2 8 2 231279 6053.83 5
 2 8 3 189793 5547.86 5
 2 8 4 9154.35 1217.63 5
 2 8 5 24893.8 2049.37 5
 2 8 6 4278.15 868.985 5
 2 8 6 3301.88 584.454 1
 2 8 7 177437 5942.16 5
 2 8 8 48388.8 3110.32 5
 2 8 9 2422.11 713.516 5
 2 8 10 9382.12 1433.13 5
 2 8 11 5200.38 1114.5 5
 2 9 -8 89045.2 2895.88 5
 2 9 -7 26562.8 1593.01 5
 2 9 -6 38560.2 1993.72 5
 2 9 -5 43575 2199.65 5
 2 9 -4 44371.2 2278.1 5
 2 9 -3 163076 4659.56 5
 2 9 -2 2540.51 627.748 5
 2 9 -1 49080.4 2614.11 5
 2 9 0 9846.26 1204.47 5
 2 9 1 89206.9 3708.19 5
 2 9 2 268563 6892.87 5
 2 9 3 18902.6 1777.24 5
 2 9 4 28135.4 2234.59 5
 2 9 5 12701.2 1527.08 5
 2 9 6 36289 2657.55 5
 2 9 7 102448 4678.31 5
 2 9 8 13576.5 1716.33 5
 2 9 9 8472.85 1441.07 5
 2 9 10 2597.3 890.422 5
 2 10 -7 1376.85 418.602 5
 2 10 -6 67494.9 2866.71 5
 2 10 -5 6289.12 916.907 5
 2 10 -4 61220 2888.58 5
 2 10 -3 113217 4049.37 5
 2 10 -2 11611.7 1326.2 5
 2 10 -1 120209 4374.97 5
 2 10 0 16915.8 1659.97 5
 2 10 1 37710.2 2534.8 5
 2 10 2 48753.6 2934.57 5
 2 10 3 17836.4 1811.97 5
 2 10 4 54356.5 3255.85 5
 2 10 5 4154.7 954.956 5
 2 10 6 40619.2 2944.29 5
 2 10 7 44805.9 3204.48 5
 2 10 8 4682.47 1069 5
 2 10 9 37665.8 3086.18 5
 2 11 -7 38286.6 2228.73 5
 2 11 -6 82098.9 3381.39 5
 2 11 -5 35602.8 2277.02 5
 2 11 -4 18526.2 1650.56 5
 2 11 -3 3219.72 754.262 5
 2 11 -2 52993.2 2964.37 5
 2 11 -1 48906.9 2901.58 5
 2 11 0 8392.66 1265.45 5
 2 11 1 23593.5 2113.11 5
 2 11 2 1819.51 625.783 5
 2 11 3 31853 2536.95 5
 2 11 4 41076.8 2958.03 5
 2 11 5 2269.24 790.306 5
 2 11 6 23848.6 2426.22 5
 2 11 7 1620.76 684.845 5
 2 12 -6 120028 4356.15 5
 2 12 -5 484.027 472.406 5
 2 12 -4 33924.1 2389.59 5
 2 12 -3 69.8706 403.172 5
 2 12 -2 52488.6 3080.17 5
 2 12 -1 44697.2 2916.37 5
 2 12 0 1155.21 624.968 5
 2 12 1 21295.3 2109.08 5
 2 12 2 293.913 439.095 5
 2 12 3 45183 3174.76 5
 2 12 4 33599.7 2829.32 5
 2 12 5 1025.36 476.945 5
 2 13 -5 14416.4 1610 5
 2 13 -4 22976.2 2064.13 5
 2 13 -3 4602.26 984.219 5
 2 13 -2 38552.1 2792.27 5
 2 13 -1 8902.28 1412.14 5
 2 13 0 12129.5 1658.15 5
 2 13 1 8598.13 1428.11 5
 2 13 2 5045.3 1127.81 5
 2 13 3 46271.9 3360.56 5
 2 14 -4 4798.98 1004.59 5
 2 14 -3 14755.6 1737.2 5
 2 14 -2 20192.3 2112.03 5
 2 14 -1 -437.868 573.987 5
 2 14 0 26878.5 2509.93 5
 2 14 1 3668.61 1047.6 5
 2 15 -3 21548 2227.5 5
 2 15 -2 7327 1394.16 5
 3 -15 8 23342.3 2347.89 2
 3 -15 9 7146.79 1305.15 2
 3 -15 10 8274.59 1463.65 2
 3 -15 11 29106.2 2780.5 2
 3 -15 12 872.245 483.322 2
 3 -14 7 11096 1539.12 2
 3 -14 8 58768.9 3599.57 2
 3 -14 9 1263.7 474.903 2
 3 -14 10 14156.4 1873.38 2
 3 -14 11 2545.5 826.992 2
 3 -14 12 21239 2337.78 2
 3 -14 13 15787.6 2049.16 2
 3 -14 14 1561.18 813.625 2
 3 -13 -9 13.8149 413.439 4
 3 -13 -8 23210.1 2293.91 4
 3 -13 -7 59728.2 3535.57 4
 3 -13 -6 -1121.01 520.28 4
 3 -13 6 1504.36 403.331 2
 3 -13 7 65379.4 3624.85 2
 3 -13 8 40772.5 2934.94 2
 3 -13 9 1165.22 564.33 2
 3 -13 10 22161.8 2223.77 2
 3 -13 11 572.264 478.251 2
 3 -13 12 35747.5 2882.14 2
 3 -13 13 37030.7 2999.08 2
 3 -13 14 550.21 409.961 2
 3 -13 15 10381.8 1666.05 2
 3 -13 16 346.102 420.24 2
 3 -12 -10 37309.8 2989.49 4
 3 -12 -9 1173.89 412.225 4
 3 -12 -8 39911.8 2907.5 4
 3 -12 -7 25856.4 2224.37 4
 3 -12 -6 5757 1090.51 4
 3 -12 -5 57687.8 3080.08 4
 3 -12 6 11795.8 1453.26 2
 3 -12 7 119683 4809.72 2
 3 -12 8 39869.4 2787.84 2
 3 -12 9 5540.88 1076.45 2
 3 -12 10 9896.72 1434.94 2
 3 -12 11 12440 1623.78 2
 3 -12 12 46263 3198.48 2
 3 -12 13 22445.1 2243.42 2
 3 -12 14 5352.04 1202.63 2
 3 -12 15 4933.75 1063.76 2
 3 -12 16 20385.2 2244.5 2
 3 -12 16 20135.2 2326.58 1
 3 -12 17 59715.9 3910.06 2
 3 -11 -12 1406.28 581.543 4
 3 -11 -11 48536.8 3444.62 4
 3 -11 -10 45899.8 3244.05 4
 3 -11 -9 51.2628 427.361 4
 3 -11 -8 34474.8 2601.18 4
 3 -11 -7 -67.5235 446.696 4
 3 -11 -6 36604.5 2468.51 4
 3 -11 -5 47681 2699.67 4
 3 -11 5 7451.06 1103.43 2
 3 -11 6 33778.8 2379.38 2
 3 -11 7 126726 4769.49 2
 3 -11 8 4648.96 901.707 2
 3 -11 9 80924.3 3856.99 2
 3 -11 10 3037.39 730.107 2
 3 -11 11 33967.6 2574.87 2
 3 -11 12 30865 2479.64 2
 3 -11 13 673.78 370.97 2
 3 -11 14 38571.5 2871.83 2
 3 -11 15 2746.13 786.047 2
 3 -11 16 27613.8 2519.97 2
 3 -11 16 27890.1 2723.99 1
 3 -11 17 30869.2 2709.17 2
 3 -10 -12 16373 2006.45 4
 3 -10 -11 116762 5245.17 4
 3 -10 -10 38273.6 2848.21 4
 3 -10 -9 15944.2 1780.55 4
 3 -10 -8 8201.28 1238.77 4
 3 -10 -7 11049.8 1376.36 4
 3 -10 -6 34427 2279.59 4
 3 -10 -5 45809 2533.5 4
 3 -10 4 93337.7 3651.99 2
 3 -10 5 19247.2 1719.36 2
 3 -10 6 16540.7 1605.53 2
 3 -10 7 7244.41 1067.74 2
 3 -10 8 150533 5066.32 2
 3 -10 9 240635 6615.9 2
 3 -10 10 2315.5 614.184 2
 3 -10 11 34369.3 2483.16 2
 3 -10 12 7473.43 1190.38 2
 3 -10 13 28665.9 2336.08 2
 3 -10 14 61683.7 3520.94 2
 3 -10 15 2265.02 793.875 2
 3 -10 15 2870.91 822.038 1
 3 -10 16 13770 1739.35 2
 3 -10 16 15099.2 1939.03 1
 3 -10 17 2076.46 763.1 1
 3 -10 17 2608.88 770.775 2
 3 -9 -13 7232.31 1351.65 4
 3 -9 -12 65022.1 3881.22 4
 3 -9 -11 97761 4606.26 4
 3 -9 -10 3799.69 891.301 4
 3 -9 -9 48253.9 3006.92 4
 3 -9 -8 554.364 432.944 4
 3 -9 -7 43999.9 2615.34 4
 3 -9 -6 138375 4523.74 4
 3 -9 -5 14958.8 1376.51 4
 3 -9 -4 46762.5 2315.96 4
 3 -9 4 132182 4213.42 2
 3 -9 5 20591 1645.32 2
 3 -9 6 13910.1 1386.26 2
 3 -9 7 3956.04 761.552 2
 3 -9 8 226175 6049.22 2
 3 -9 9 190498 5567.53 2
 3 -9 10 -177.53 383.023 2
 3 -9 11 24610.4 2001.66 2
 3 -9 12 69.4482 456.33 2
 3 -9 13 90659.7 4057.18 2
 3 -9 14 68305.9 3559.39 2
 3 -9 14 63778.6 3759.65 1
 3 -9 15 -132.94 548.057 1
 3 -9 15 324.139 327.755 2
 3 -9 16 5141.17 1127.23 1
 3 -9 16 5598.26 1168.26 2
 3 -9 17 364.499 571.187 1
 3 -8 -14 48466.7 3483.04 4
 3 -8 -13 1346.71 536.187 4
 3 -8 -12 24159.2 2288.44 4
 3 -8 -11 33293.4 2620.32 4
 3 -8 -10 15089.4 1659.65 4
 3 -8 -9 58768.3 3194.83 4
 3 -8 -8 6714.64 1041.33 4
 3 -8 -7 110722 4062.48 4
 3 -8 -6 123865 4087.74 4
 3 -8 -5 27602.6 1785.67 4
 3 -8 -4 92879 3155.43 4
 3 -8 -3 565.553 284.872 4
 3 -8 3 147642 1943.81 4
 3 -8 4 67009.4 2796.8 2
 3 -8 5 11417 1170.83 2
 3 -8 6 30029.3 1919.2 2
 3 -8 7 9315.65 1095.57 2
 3 -8 8 192997 5288.04 2
 3 -8 9 25156.8 1842.57 2
 3 -8 10 7341.42 1046.73 2
 3 -8 11 9111.91 1159.84 2
 3 -8 12 42643.1 2588.47 2
 3 -8 13 129433 4693.09 2
 3 -8 13 121185 4955.16 1
 3 -8 14 15774.3 1629.33 2
 3 -8 14 14510.6 1751.33 1
 3 -8 15 14054.7 1591.73 2
 3 -8 15 14524.4 1808.35 1
 3 -8 16 10928.4 1422.13 2
 3 -8 16 11752.5 1702.32 1
 3 -8 17 5468.28 1190.92 1
 3 -8 18 41167.9 3342.4 1
 3 -7 -15 34683.3 3013.82 4
 3 -7 -14 38014.5 3038.29 4
 3 -7 -13 520.752 329.537 4
 3 -7 -12 28053.7 2384.58 4
 3 -7 -11 2094.82 667.971 4
 3 -7 -10 89106 3939.71 4
 3 -7 -9 28232.3 2108.43 4
 3 -7 -8 797.966 327.572 4
 3 -7 -7 98511.1 3671.98 4
 3 -7 -6 3080.01 603.945 4
 3 -7 -5 140821 4006.25 4
 3 -7 -4 107898 3237.37 4
 3 -7 -3 9522.31 853.831 4
 3 -7 -2 89299.3 2543.47 4
 3 -7 -1 16261.7 618.494 1
 3 -7 -1 16775.1 957.381 4
 3 -7 0 49457.2 1492.05 4
 3 -7 1 28363.5 940.736 4
 3 -7 2 21203.5 609.801 4
 3 -7 3 80794 2827.68 2
 3 -7 4 4675.29 720.861 2
 3 -7 5 32890 1863.51 2
 3 -7 6 44582.4 2212.94 2
 3 -7 7 30509.3 1855.94 2
 3 -7 8 35174.9 2035.5 2
 3 -7 9 95.8063 237.749 2
 3 -7 10 31771.2 2037.35 2
 3 -7 11 9163.75 1124.74 2
 3 -7 11 7702.08 1104.54 1
 3 -7 12 16710 1531.36 2
 3 -7 12 18299.4 1831.65 1
 3 -7 13 67502.5 3208.56 2
 3 -7 13 63319 3482.16 1
 3 -7 14 698.545 572.695 1
 3 -7 14 353.761 331.913 2
 3 -7 15 35590.3 2415.61 2
 3 -7 15 31447.2 2612.28 1
 3 -7 16 2123.52 772.061 1
 3 -7 17 34498.2 2916.46 1
 3 -7 18 33136.5 3006.6 1
 3 -6 -16 1682.17 805.295 4
 3 -6 -15 43483.2 3278.05 4
 3 -6 -14 25288.3 2410.64 4
 3 -6 -13 2227.19 778.32 4
 3 -6 -12 38598.2 2702.87 4
 3 -6 -11 17640.1 1768.05 4
 3 -6 -10 107792 4220.39 4
 3 -6 -9 83301.5 3546.52 4
 3 -6 -8 618.345 270.065 4
 3 -6 -7 6349.35 899.492 4
 3 -6 -6 68357.6 2730.59 4
 3 -6 -5 212629 4799.91 4
 3 -6 -4 20202.7 1282.23 4
 3 -6 -3 38691.2 1656.95 4
 3 -6 -2 7380.37 667.862 4
 3 -6 -1 111960 1763.71 1
 3 -6 -1 119225 2504.5 4
 3 -6 0 697395 7834.7 1
 3 -6 0 696261 7869.67 4
 3 -6 1 220380 2913.3 4
 3 -6 3 131024 3439.16 2
 3 -6 4 51718.5 2147.7 2
 3 -6 5 211679 4726.87 2
 3 -6 6 13118.3 1111.47 2
 3 -6 6 12542.5 582.653 3
 3 -6 7 53353.8 2321.24 2
 3 -6 8 8718.56 947.657 2
 3 -6 9 3484.47 630.652 2
 3 -6 9 3041.49 628.981 1
 3 -6 10 72699.2 2958.17 2
 3 -6 10 72076.1 3266.37 1
 3 -6 11 11784.3 1213 2
 3 -6 11 11110.6 1316.17 1
 3 -6 12 11095.8 1222.7 2
 3 -6 12 13413.9 1526.51 1
 3 -6 13 29493.6 2022.19 2
 3 -6 13 27602 2244.46 1
 3 -6 14 29079.1 2053.16 2
 3 -6 14 30256.8 2438.62 1
 3 -6 15 59337.3 3589.79 1
 3 -6 16 -240.044 438.522 1
 3 -6 17 22050.7 2325.95 1
 3 -6 18 11511.5 1753.96 1
 3 -5 -16 17530.3 2110.12 4
 3 -5 -15 58042 3730.48 4
 3 -5 -14 29158.5 2524.59 4
 3 -5 -13 16753.7 1793.59 4
 3 -5 -12 26896.4 2188.92 4
 3 -5 -11 21309.1 1877.06 4
 3 -5 -10 81176.7 3515.64 4
 3 -5 -9 39882.4 2324.38 4
 3 -5 -8 2288.52 541.469 4
 3 -5 -7 1513.35 463.279 4
 3 -5 -6 302811 5954.63 4
 3 -5 -5 225730 4731.87 4
 3 -5 -4 26163.1 1362.74 4
 3 -5 -3 14472.6 928.568 4
 3 -5 -2 5661.91 534.539 4
 3 -5 -1 395995 5107.78 4
 3 -5 -1 368384 4218.79 1
 3 -5 0 731535 8011.26 1
 3 -5 0 717648 7850.46 4
 3 -5 1 25813 1033.83 1
 3 -5 2 394128 5707.25 1
 3 -5 3 86368.9 2536.01 2
 3 -5 3 90095 2466.86 1
 3 -5 4 612502 8648 2
 3 -5 4 603521 8551.93 1
 3 -5 5 245785 4994.68 1
 3 -5 5 241741 3300.26 3
 3 -5 5 245816 4841.77 2
 3 -5 6 6493.67 793.087 1
 3 -5 6 5690.56 474.159 3
 3 -5 6 6405 740.381 2
 3 -5 7 132113 3534.62 2
 3 -5 7 136383 3963.29 1
 3 -5 8 1137 454.684 1
 3 -5 8 638.69 273.586 2
 3 -5 9 75537.3 2756.26 2
 3 -5 9 77370.8 3197.01 1
 3 -5 10 92378.9 3183.14 2
 3 -5 10 94423.2 3703.68 1
 3 -5 11 1859.26 579.146 1
 3 -5 11 1731.89 450.112 2
 3 -5 12 44143.7 2289.77 2
 3 -5 12 44405.6 2741.56 1
 3 -5 13 963.347 446.097 1
 3 -5 13 1326.52 390.294 2
 3 -5 14 103942 4532.69 1
 3 -5 15 36841.7 2802.87 1
 3 -5 16 1954 685.498 1
 3 -5 17 9450.26 1518.23 1
 3 -5 18 1233.48 534.08 1
 3 -4 -17 4645.68 1185.81 4
 3 -4 -16 29361.9 2640.19 4
 3 -4 -15 56092.7 3505.04 4
 3 -4 -14 1342.11 640.703 4
 3 -4 -13 71533.8 3675.15 4
 3 -4 -12 146.597 384.949 4
 3 -4 -11 61718.6 3089.17 4
 3 -4 -10 82367.9 3436.66 4
 3 -4 -9 2956.12 616.194 4
 3 -4 -8 121217 3785.95 4
 3 -4 -7 403.043 210.047 4
 3 -4 -6 144185 3719.62 4
 3 -4 -5 147669 3545.56 4
 3 -4 -4 5954.69 629.082 4
 3 -4 -3 59937.6 1845.81 4
 3 -4 -2 4495.21 444.319 4
 3 -4 -1 227404 2919.57 1
 3 -4 -1 225671 3382.29 4
 3 -4 0 70237 1549.38 1
 3 -4 1 22956.9 971.615 1
 3 -4 2 172600 3302.14 1
 3 -4 3 18212.2 1053.19 1
 3 -4 4 309770 5158.87 2
 3 -4 4 313915 5444.58 1
 3 -4 4 318712 4056.86 3
 3 -4 5 139695 3209.3 2
 3 -4 5 143174 3616.79 1
 3 -4 5 141356 2614.24 3
 3 -4 6 118082 3006.67 2
 3 -4 6 123534 3488.49 1
 3 -4 7 14173.8 1031.51 2
 3 -4 7 14759 1218.22 1
 3 -4 8 592.103 359.918 1
 3 -4 8 227.077 136.622 2
 3 -4 9 234799 4877.02 2
 3 -4 9 232352 5750.44 1
 3 -4 10 44274.8 2033.27 2
 3 -4 10 43415 2458.12 1
 3 -4 11 4147.5 652.023 2
 3 -4 11 3642.95 739.213 1
 3 -4 12 24709.1 1610.69 2
 3 -4 12 26571 2078.47 1
 3 -4 13 35689.5 2509.31 1
 3 -4 14 57692.1 3336.03 1
 3 -4 15 13653 1694.34 1
 3 -4 16 15717.3 1863.56 1
 3 -4 17 997.591 621.395 1
 3 -4 18 20853 2310.06 1
 3 -3 -17 915.797 607.614 4
 3 -3 -16 23554.7 2332.8 4
 3 -3 -15 4438.22 983.008 4
 3 -3 -14 102594 4474.83 4
 3 -3 -13 109854 4456.01 4
 3 -3 -12 10263.8 1301.13 4
 3 -3 -11 67941.6 3203.98 4
 3 -3 -10 7318.95 983.871 4
 3 -3 -9 83962.1 3201.5 4
 3 -3 -8 146649 4102.09 4
 3 -3 -7 13128.6 1116.43 4
 3 -3 -6 176250 4052.7 4
 3 -3 -5 1638.9 361.301 4
 3 -3 -4 218255 4065.52 4
 3 -3 -3 296166 4604.88 4
 3 -3 -2 35014.7 1213.74 4
 3 -3 -1 332587 4120.13 1
 3 -3 0 49581.1 1311.69 1
 3 -3 1 55146.9 1555.1 1
 3 -3 2 105323 2487.77 1
 3 -3 3 46419.1 1241.62 3
 3 -3 3 42942.4 1638.2 1
 3 -3 4 374241 5310.5 2
 3 -3 4 369149 6036.61 1
 3 -3 4 367688 5060.98 3
 3 -3 5 357.992 177.238 2
 3 -3 5 493.847 279.256 1
 3 -3 6 37213.9 1453.27 2
 3 -3 6 41055.6 1957.67 1
 3 -3 7 8028.31 688.976 2
 3 -3 7 8234.67 929.551 1
 3 -3 8 39798.4 1631.63 2
 3 -3 8 39998.9 2142.64 1
 3 -3 9 65998.9 2212.72 2
 3 -3 9 69104.7 2977.53 1
 3 -3 10 4200.66 587.807 2
 3 -3 10 5053.12 869.984 1
 3 -3 11 30782.5 1621.16 2
 3 -3 11 32695 2193.39 1
 3 -3 12 8449.29 886.482 2
 3 -3 12 7945.03 1134.84 1
 3 -3 13 59630.4 3241.4 1
 3 -3 14 58954.3 3341.44 1
 3 -3 15 1755.52 574.025 1
 3 -3 16 17182.7 1942.06 1
 3 -3 17 637.352 387.932 1
 3 -3 18 15844.7 1994.91 1
 3 -2 -18 32684 2896.61 4
 3 -2 -17 839.642 616.99 4
 3 -2 -16 14259.1 1763.48 4
 3 -2 -15 23355.3 2188 4
 3 -2 -14 235611 6865.48 4
 3 -2 -13 36147.1 2468.15 4
 3 -2 -12 32913 2251.97 4
 3 -2 -11 4633.94 838.909 4
 3 -2 -10 38169.4 2181.27 4
 3 -2 -9 118436 3723.2 4
 3 -2 -8 182290 4529.77 4
 3 -2 -7 49151.3 2100.15 4
 3 -2 -6 113640 3064.98 4
 3 -2 -5 3988.5 523.57 4
 3 -2 -4 254562 4358.43 4
 3 -2 -1 60499.9 1455.67 1
 3 -2 0 60700.7 1566.05 1
 3 -2 1 372084 5174.78 1
 3 -2 2 177600 3375.76 1
 3 -2 3 53568.1 1844.31 1
 3 -2 4 34989.2 1609.26 1
 3 -2 5 95055.5 2022.87 2
 3 -2 5 90696.5 2825.98 1
 3 -2 6 313828 5998.72 1
 3 -2 6 301719 4438.95 2
 3 -2 7 3787.39 430.626 2
 3 -2 7 4615.73 715.641 1
 3 -2 8 65663.8 1923.75 2
 3 -2 8 68712.2 2840.09 1
 3 -2 9 8227.62 700.685 2
 3 -2 9 8493.11 1044.98 1
 3 -2 10 26501.1 1313.88 2
 3 -2 10 29276.4 1989.24 1
 3 -2 11 155664 3558.8 2
 3 -2 11 165453 5106.77 1
 3 -2 12 860.589 445.479 1
 3 -2 13 38441.1 2591.45 1
 3 -2 14 33017.3 2513.4 1
 3 -2 15 13772.4 1669.14 1
 3 -2 16 40249.9 2952.19 1
 3 -2 17 2967.56 870.844 1
 3 -2 18 20785.3 2256.48 1
 3 -1 -18 11048.6 1640.92 4
 3 -1 -17 7617.48 1327.98 4
 3 -1 -16 8283.99 1376.44 4
 3 -1 -15 82161.2 3982.32 4
 3 -1 -14 213213 6386.13 4
 3 -1 -13 972.802 543.296 4
 3 -1 -12 36225.9 2284.79 4
 3 -1 -11 3735.15 725.06 4
 3 -1 -10 107472 3651.12 4
 3 -1 -9 215087 5105.38 4
 3 -1 -8 30843.6 1701.5 4
 3 -1 -7 120889 3338.97 4
 3 -1 -6 103080 2861.67 4
 3 -1 -5 147354 2460.47 5
 3 -1 -1 61746.9 1622.85 1
 3 -1 0 88719.2 2075.59 1
 3 -1 1 105964 2414.38 1
 3 -1 2 55244.3 1780.7 1
 3 -1 3 3172 453.85 1
 3 -1 4 12052.6 929.434 1
 3 -1 5 366897 6387.69 1
 3 -1 5 381364 4430.55 2
 3 -1 6 551814 6297.7 2
 3 -1 6 561786 8675.26 1
 3 -1 7 3345.14 342.724 2
 3 -1 7 4110.32 666.58 1
 3 -1 8 42862.5 1333.45 2
 3 -1 8 46972.6 2325.28 1
 3 -1 9 975.003 231.569 2
 3 -1 9 1432.38 488.319 1
 3 -1 10 162398 3208.02 2
 3 -1 10 171944 5024.34 1
 3 -1 11 107833 4066.85 1
 3 -1 12 2427.12 660.72 1
 3 -1 13 22118.7 1948.28 1
 3 -1 14 1203.97 612.219 1
 3 -1 15 55609.6 3321.79 1
 3 -1 16 40949.6 2925.46 1
 3 -1 17 1863.8 635.208 1
 3 -1 18 36081.3 2905.23 1
 3 0 -19 14153.2 1892.3 4
 3 0 -18 70.8024 380.19 4
 3 0 -17 43101.6 3083.75 4
 3 0 -16 5934.04 1178.68 4
 3 0 -15 57978.6 3266.02 4
 3 0 -14 100082 4136.28 4
 3 0 -13 960.244 421.193 4
 3 0 -12 99426.8 3754.26 4
 3 0 -11 3389.35 660.34 4
 3 0 -10 111552 3647.67 4
 3 0 -9 193146 4733.86 4
 3 0 -8 2936.69 298.88 5
 3 0 -7 217926 3000.45 5
 3 0 -6 9751.3 437.461 5
 3 0 -1 32409.3 1244.02 1
 3 0 0 179450 3357.27 1
 3 0 1 364441 5475.84 1
 3 0 2 26975.5 1278.97 1
 3 0 3 2231.64 410.826 1
 3 0 4 48786.6 1922.44 1
 3 0 5 419769 6896.81 1
 3 0 6 153246 3939.62 1
 3 0 7 30099.2 770.492 2
 3 0 7 35290.8 1884.68 1
 3 0 8 24425 811.38 2
 3 0 8 31405 1845.37 1
 3 0 9 34018.3 2019.9 1
 3 0 10 189307 5206.65 1
 3 0 11 71170.7 3208.69 1
 3 0 12 415.124 264.302 1
 3 0 13 15679.8 1601.78 1
 3 0 14 13728.5 1594.69 1
 3 0 15 80631.3 3968.48 1
 3 0 16 18504.2 1969.41 1
 3 0 17 9210.36 1413.83 1
 3 0 18 15632.5 1869.13 1
 3 1 -9 30011.7 805.538 5
 3 1 -1 4798.11 502.704 1
 3 1 0 526833 6870.78 5
 3 1 0 525661 7354.49 1
 3 1 1 1887.42 354.044 1
 3 1 1 2619.96 239.264 2
 3 1 1 2188.26 338.749 5
 3 1 2 225568 4159.47 5
 3 1 2 230294 4341.05 1
 3 1 3 47462.5 1877.57 1
 3 1 3 47568.8 1830.78 5
 3 1 4 57181.7 2167.61 1
 3 1 4 57440.6 2132.25 5
 3 1 5 165040 4065.64 1
 3 1 5 169391 4018.65 5
 3 1 6 1167.44 369.738 1
 3 1 6 793.705 305.327 5
 3 1 7 27996.5 1700.8 1
 3 1 7 27872.2 1682.8 5
 3 1 8 28887.2 1785.83 5
 3 1 8 24836.2 1646.4 1
 3 1 9 82302.3 3167.26 5
 3 1 9 82165 3184.25 1
 3 1 10 137636 4373.78 1
 3 1 11 2848.98 614.855 1
 3 1 12 49318.9 2742.79 1
 3 1 13 18800.3 1774.08 1
 3 1 14 21834.8 1957.82 1
 3 1 15 42171.7 2797.06 1
 3 1 16 2696.63 809.277 1
 3 1 17 12616.5 1690.41 1
 3 2 -3 200428 2982.14 5
 3 2 -2 191411 3169.67 5
 3 2 -1 249504 4013.9 5
 3 2 0 228426 4307.33 1
 3 2 0 227484 4022.58 5
 3 2 0 229891 3495.19 2
 3 2 1 79640.4 2324.56 5
 3 2 1 78529.2 2395.29 1
 3 2 1 81893.3 1668.3 2
 3 2 2 385620 6224.3 5
 3 2 2 391663 6296 1
 3 2 2 385995 4478.27 2
 3 2 3 37241.3 1726.76 5
 3 2 3 36015 1691.7 1
 3 2 4 48814.5 2089.2 5
 3 2 4 48040.8 2026.58 1
 3 2 5 21283 1433.5 5
 3 2 5 21635.7 1393.97 1
 3 2 6 2318.19 511.609 5
 3 2 6 2524.28 509.967 1
 3 2 7 97373.2 3370.53 1
 3 2 7 103210 3519.98 5
 3 2 8 36821.4 2090.36 1
 3 2 8 36190.8 2107.3 5
 3 2 9 29976 1951.26 1
 3 2 9 33634.2 2095.64 5
 3 2 10 13992.9 1378.66 1
 3 2 10 14980.6 1475.18 5
 3 2 11 6683.12 989.585 1
 3 2 11 6256.43 924.606 5
 3 2 12 87419.4 3772.42 1
 3 2 12 97115.8 3985.92 5
 3 2 13 458.718 311.316 1
 3 2 14 9566.4 1306.73 1
 3 2 15 19204.9 1953.64 1
 3 3 -5 315.745 97.2795 5
 3 3 -4 519793 6179.22 5
 3 3 -3 847862 9636.07 5
 3 3 -2 167746 3212.4 5
 3 3 -1 341724 5380.68 5
 3 3 0 24968.7 1298.32 5
 3 3 0 24987.8 1374.34 1
 3 3 1 386873 6391.23 5
 3 3 1 396328 6443.28 1
 3 3 2 328711 5951.22 5
 3 3 2 325069 4341.83 2
 3 3 2 339510 5908.28 1
 3 3 3 1623.11 461.656 5
 3 3 3 1882.28 418.173 1
 3 3 3 1720.81 209.572 2
 3 3 4 114043 3482.28 5
 3 3 4 108984 3278.97 1
 3 3 4 109558 1758.93 2
 3 3 5 11253.7 1033.59 1
 3 3 5 10583.7 1084.54 5
 3 3 6 87082.8 3270.17 5
 3 3 6 84488.2 3022.58 1
 3 3 7 189689 5108.96 5
 3 3 7 185979 4805.85 1
 3 3 8 773.908 401.803 5
 3 3 8 407.59 278.101 1
 3 3 9 12540.6 1359.64 5
 3 3 9 12071 1239.2 1
 3 3 10 1374.83 574.151 5
 3 3 10 1596.31 441.415 1
 3 3 11 74690 3535.2 5
 3 3 11 71962.3 3315.05 1
 3 3 12 30036.9 2206.71 1
 3 3 12 28384.7 2259.59 5
 3 3 13 445.343 351.929 5
 3 3 13 441.702 256.812 1
 3 3 14 17559.5 1785.27 1
 3 4 -7 163.415 62.4714 5
 3 4 -6 71356.7 1503.11 5
 3 4 -5 14996.1 745.865 5
 3 4 -4 213601 3628.48 5
 3 4 -3 337662 5211.02 5
 3 4 -2 15344.9 984.448 5
 3 4 -1 116812 3038.45 5
 3 4 0 7293.73 778.244 5
 3 4 1 267558 5213.54 1
 3 4 1 261897 5327.79 5
 3 4 2 173743 4339.38 5
 3 4 2 171451 4115.14 1
 3 4 3 19742 1444.16 5
 3 4 3 18092.3 1285.3 1
 3 4 4 39926.7 2138.69 5
 3 4 4 35065.2 1111.29 2
 3 4 4 41558.1 1997.49 1
 3 4 5 46.3761 280.397 1
 3 4 5 688.482 361.647 5
 3 4 6 107699 3843.72 5
 3 4 6 103006 3469.49 1
 3 4 7 50007.4 2675.37 5
 3 4 7 50481.4 2437.48 1
 3 4 8 23713 1722.09 1
 3 4 8 25464.3 1956.79 5
 3 4 9 25099.3 1838.59 1
 3 4 9 27668.2 2125.17 5
 3 4 10 9488.49 1295.06 5
 3 4 10 8402.44 1091.41 1
 3 4 11 103675 4409.96 5
 3 4 11 101255 3994.22 1
 3 4 12 18277.4 1845.75 5
 3 4 12 16608.5 1673.14 1
 3 4 13 8330.81 1206.63 1
 3 4 13 9135.69 1387.8 5
 3 4 14 2685.66 793.652 5
 3 5 -8 59193.4 1235.74 5
 3 5 -7 49925 1337.88 5
 3 5 -6 55715.7 1602.99 5
 3 5 -5 8347.04 658.084 5
 3 5 -4 22176.5 1161.03 5
 3 5 -3 22454.4 1243.26 5
 3 5 -2 95789 2798.34 5
 3 5 -1 24855.4 1447.02 5
 3 5 0 1439.15 362.129 5
 3 5 1 173695 4430.22 5
 3 5 2 7473.99 845.377 1
 3 5 2 6847.61 882.211 5
 3 5 3 4739.28 767.622 5
 3 5 3 4992.89 706.312 1
 3 5 4 27114 1871.55 5
 3 5 4 27592.3 1690.49 1
 3 5 5 4476.37 777.743 5
 3 5 5 3025.21 607.103 1
 3 5 6 84259.3 3557.91 5
 3 5 6 87806.5 3261.12 1
 3 5 7 12713.8 1422.65 5
 3 5 7 13830.7 1292.76 1
 3 5 8 24960.7 2038.95 5
 3 5 8 23323 1750.96 1
 3 5 9 6956.93 1123.72 5
 3 5 9 7586.88 1017.63 1
 3 5 10 37006.3 2627.37 5
 3 5 10 31539 2167.89 1
 3 5 11 67463.9 3681.04 5
 3 5 11 65211.3 3212.23 1
 3 5 12 962.413 425.971 5
 3 5 13 15842.2 1884.5 5
 3 5 14 2661.25 807.335 5
 3 6 -8 1641.01 259.203 5
 3 6 -7 186916 3450.71 5
 3 6 -6 73665.3 2160.42 5
 3 6 -5 2139.29 403.028 5
 3 6 -4 71415.7 2391.68 5
 3 6 -3 4514.93 608.725 5
 3 6 -2 159527 4017.97 5
 3 6 -1 53648.6 2336.01 5
 3 6 0 9509.01 1016.18 5
 3 6 1 44768.2 2268.34 5
 3 6 2 9717.94 1129.12 5
 3 6 3 65871.4 3001.11 5
 3 6 3 69418.6 2754.65 1
 3 6 4 31756.6 1902.64 1
 3 6 4 29909.7 2104.01 5
 3 6 5 49840.3 2787.79 5
 3 6 5 45874.9 2321.48 1
 3 6 6 37056.5 2452.89 5
 3 6 6 35387.1 2116.33 1
 3 6 7 10564.9 1339.2 5
 3 6 7 11388.9 1217.32 1
 3 6 8 76571.5 3764.87 5
 3 6 8 79814.3 3361.32 1
 3 6 9 2832.48 791.374 5
 3 6 9 3288.91 724.624 1
 3 6 10 48532.4 3169.53 5
 3 6 11 29573.3 2536.81 5
 3 6 12 2669.49 849.323 5
 3 6 13 49321.9 3442.54 5
 3 7 -8 51573.2 1741.79 5
 3 7 -7 121786 3016.38 5
 3 7 -6 18806.8 1199.05 5
 3 7 -5 14583.3 1106.83 5
 3 7 -4 27693.9 1600.84 5
 3 7 -3 64101.7 2564.75 5
 3 7 -2 136118 3974.14 5
 3 7 -1 31416.4 1910.66 5
 3 7 0 25986 1799.58 5
 3 7 1 277.309 249.533 5
 3 7 2 86074 3522.48 5
 3 7 3 212230 5911.76 5
 3 7 4 294.682 286.1 1
 3 7 4 672.712 336.176 5
 3 7 5 40509.8 2239.21 1
 3 7 5 37648.4 2552.55 5
 3 7 6 273.08 387.513 5
 3 7 6 373.181 312.237 1
 3 7 7 95039.5 4275.67 5
 3 7 7 96395 3655.63 1
 3 7 8 75468.3 3908.2 5
 3 7 8 74920.4 3287.43 1
 3 7 9 2701.78 833.575 5
 3 7 10 30202.5 2590.64 5
 3 7 11 2381.77 729.84 5
 3 7 12 30355.3 2729.01 5
 3 8 -7 53609.5 2152.17 5
 3 8 -6 1247.98 388.714 5
 3 8 -5 38777.6 1968.8 5
 3 8 -4 -15.8263 205.004 5
 3 8 -3 74810.8 2973.74 5
 3 8 -2 71846.8 3023.21 5
 3 8 -1 17323.6 1519.56 5
 3 8 0 34425.6 2191.67 5
 3 8 1 15697.2 1533.65 5
 3 8 2 214372 6013.71 5
 3 8 3 132495 4809.21 5
 3 8 4 1111.63 597.444 5
 3 8 5 16888.9 1773.28 5
 3 8 6 10588.9 1465.94 5
 3 8 6 11601.8 1253.25 1
 3 8 7 78103.7 4095.71 5
 3 8 8 54026.9 3442.77 5
 3 8 9 252.175 429.485 5
 3 8 10 7392.81 1431.24 5
 3 9 -7 6360.16 797.619 5
 3 9 -6 41916.6 2149.35 5
 3 9 -5 42481.1 2237.93 5
 3 9 -4 3061.78 653.055 5
 3 9 -3 150815 4626.64 5
 3 9 -2 13634.8 1406.36 5
 3 9 -1 53765.7 2849.07 5
 3 9 0 22237.9 1862.83 5
 3 9 1 25401.9 2056.01 5
 3 9 2 93377.4 4057.75 5
 3 9 3 15541.3 1715.61 5
 3 9 4 30330.1 2429.24 5
 3 9 5 16895.3 1875.92 5
 3 9 6 21277.2 2179.91 5
 3 9 7 83530.8 4405.19 5
 3 9 8 9068.55 1494.47 5
 3 9 9 10565.8 1647.31 5
 3 10 -6 70498.2 2984.12 5
 3 10 -5 45367.3 2460.08 5
 3 10 -4 8138.43 1087.99 5
 3 10 -3 69359.4 3279.74 5
 3 10 -2 2299.5 663.854 5
 3 10 -1 61893 3214.16 5
 3 10 0 10755.1 1414.46 5
 3 10 1 7793.91 1226.79 5
 3 10 2 21871.9 2065.88 5
 3 10 3 4839.97 1031.36 5
 3 10 4 65551.3 3774.65 5
 3 10 5 9605.31 1543.05 5
 3 10 6 22354.8 2310.36 5
 3 10 7 25158.1 2492.61 5
 3 11 -6 98885.9 3792.76 5
 3 11 -5 30677.9 2150.24 5
 3 11 -4 18759.2 1734.8 5
 3 11 -3 10336.5 1337.72 5
 3 11 -2 64535.4 3393.33 5
 3 11 -1 98094.2 4315.24 5
 3 11 0 16778.3 1777.43 5
 3 11 1 10136.6 1465.06 5
 3 11 2 3697.23 1022.19 5
 3 11 3 21065.3 2219.44 5
 3 11 4 54541.5 3590.42 5
 3 11 5 540.442 409.1 5
 3 11 6 13835 1923.34 5
 3 12 -5 6401.66 1088.17 5
 3 12 -4 17744.9 1791.22 5
 3 12 -3 -185.84 435.867 5
 3 12 -2 64364.6 3557.81 5
 3 12 -1 54617 3355.32 5
 3 12 0 968.229 517.513 5
 3 12 1 18007.3 1999.34 5
 3 12 2 1039.58 568.001 5
 3 12 3 51958.9 3568.46 5
 3 12 4 39709.8 3218.82 5
 3 13 -4 13983.1 1635.44 5
 3 13 -3 7008.95 1263.01 5
 3 13 -2 35159.3 2780.13 5
 3 13 -1 8033.28 1376.89 5
 3 13 0 8278.64 1430.69 5
 3 13 1 20981.7 2279.26 5
 3 13 2 2282.48 842.235 5
 3 14 -3 6492.46 1225.09 5
 3 14 -2 22154.1 2260.28 5
 3 14 -1 419.633 432.713 5
 3 14 0 32290.7 2849.4 5
 4 -15 10 706.655 473.207 2
 4 -15 11 27956.7 2699.74 2
 4 -15 12 -460.84 570.785 2
 4 -14 9 3109.41 919.054 2
 4 -14 10 19581.7 2162.45 2
 4 -14 11 6707.6 1357.6 2
 4 -14 12 10635.8 1687.8 2
 4 -14 13 59627.5 3991.84 2
 4 -14 14 1157.4 533.856 2
 4 -14 14 533.215 467.601 1
 4 -13 -10 17082.6 2062.56 4
 4 -13 -9 3277.38 963.54 4
 4 -13 8 74428.9 3966.05 2
 4 -13 9 3681.55 969.786 2
 4 -13 10 19625.5 2093.59 2
 4 -13 11 -610.031 726.008 2
 4 -13 12 29144.5 2654.63 2
 4 -13 13 31229.6 2784.87 2
 4 -13 13 26499.2 2518.77 1
 4 -13 14 530.715 383.928 1
 4 -13 14 -181.012 525.398 2
 4 -13 15 6927.75 1421.07 2
 4 -13 15 4901.13 1227.17 1
 4 -13 16 615.238 390.042 2
 4 -12 -11 1678.95 685.651 4
 4 -12 -10 35036.6 2856.81 4
 4 -12 -9 3819.89 867.011 4
 4 -12 -8 36330.1 2734.44 4
 4 -12 -7 15558.4 1691.11 4
 4 -12 -6 13863.3 1541.65 4
 4 -12 -5 43139.4 2637.98 4
 4 -12 -4 1809.7 554.87 4
 4 -12 7 46583.3 2963.4 2
 4 -12 8 39191.2 2770.79 2
 4 -12 9 3321 918.609 2
 4 -12 10 17441 1933.99 2
 4 -12 11 11710.6 1594.48 2
 4 -12 12 53487.5 3464.69 2
 4 -12 13 16211.6 1943 2
 4 -12 13 13985.7 1815.12 1
 4 -12 14 1979.34 725.318 1
 4 -12 14 3572.35 915.626 2
 4 -12 15 12600.5 1738.25 2
 4 -12 15 10040.4 1690.94 1
 4 -12 16 9000.27 1505.19 2
 4 -12 17 38868.1 3168.89 2
 4 -11 -12 113.3 464.083 4
 4 -11 -11 47984.2 3386.87 4
 4 -11 -10 52767.9 3407.58 4
 4 -11 -9 1598.57 584.207 4
 4 -11 -8 16602.2 1789.25 4
 4 -11 -7 397.498 291.801 4
 4 -11 -6 57644.2 3036.45 4
 4 -11 -5 43231.6 2508.86 4
 4 -11 -4 1808.38 470.527 4
 4 -11 -3 92204.5 3347.25 4
 4 -11 -2 2284.99 489.187 4
 4 -11 -1 109139 3205.08 4
 4 -11 6 7013.91 1053.18 2
 4 -11 7 73111.2 3584.35 2
 4 -11 8 1430.14 561.27 2
 4 -11 9 79174.4 3909.32 2
 4 -11 10 21685.7 2065.77 2
 4 -11 11 20301.9 2017.48 2
 4 -11 12 32339.5 2587.17 2
 4 -11 12 31759.3 2623.45 1
 4 -11 13 421.475 501.332 1
 4 -11 13 40.9193 421.735 2
 4 -11 14 33055.1 2675.6 2
 4 -11 14 29441 2691.83 1
 4 -11 15 10196.1 1542.23 2
 4 -11 15 9550.23 1573.81 1
 4 -11 16 11980.5 1657.57 2
 4 -11 16 11555.1 1848.4 1
 4 -10 -13 16756.8 2123.9 4
 4 -10 -12 21958.7 2339.09 4
 4 -10 -11 91251.4 4570.92 4
 4 -10 -10 53812.9 3346.13 4
 4 -10 -9 2120.88 689.145 4
 4 -10 -8 13413.5 1527.89 4
 4 -10 -7 23540.3 1948.13 4
 4 -10 -6 67489.9 3151.64 4
 4 -10 -5 52669.4 2654 4
 4 -10 -4 14520.8 1335.27 4
 4 -10 -3 67864.1 2706.05 4
 4 -10 -2 14240 1143.6 4
 4 -10 -1 132145 3351.02 4
 4 -10 0 19931.7 1105.26 4
 4 -10 1 9737.79 664.85 4
 4 -10 6 25668.3 1985.01 2
 4 -10 7 4491.72 821.442 2
 4 -10 8 59315.5 3151.24 2
 4 -10 9 212129 6256.97 2
 4 -10 10 15833.7 1685.35 2
 4 -10 11 11110.3 1443.32 2
 4 -10 11 10646.5 1458.06 1
 4 -10 12 1096.09 568.814 1
 4 -10 12 1020.8 538.471 2
 4 -10 13 17599.8 1873.8 2
 4 -10 13 16422.7 1922.82 1
 4 -10 14 59382.4 3474.74 2
 4 -10 14 55146.9 3619.44 1
 4 -10 15 4812.66 1058.05 2
 4 -10 15 4816.52 1065.48 1
 4 -10 16 9948.83 1656.48 1
 4 -9 -14 11552.2 1859.03 4
 4 -9 -13 6946.17 1313.84 4
 4 -9 -12 24225.8 2343.79 4
 4 -9 -11 60401.7 3589.39 4
 4 -9 -10 3392.84 847.656 4
 4 -9 -9 58608.9 3229.94 4
 4 -9 -8 1944.74 612.545 4
 4 -9 -7 33714.2 2237.42 4
 4 -9 -6 118743 4080.11 4
 4 -9 -5 13369.4 1271.44 4
 4 -9 -4 21147.1 1505.52 4
 4 -9 -3 17788.8 1285.16 4
 4 -9 -2 100455 2925.09 4
 4 -9 -1 160162 2495.45 1
 4 -9 -1 163238 3541.25 4
 4 -9 0 4363.24 436.348 1
 4 -9 0 4534.15 481.366 4
 4 -9 1 19932.5 1080.67 1
 4 -9 1 20522.8 889.051 4
 4 -9 2 5720 647.092 1
 4 -9 2 4258.32 304.679 4
 4 -9 6 3354.88 734.882 2
 4 -9 7 -164.913 361.139 2
 4 -9 8 171882 5262.77 2
 4 -9 9 129651 4586.07 2
 4 -9 9 115698 4418.42 1
 4 -9 10 3286.57 788.005 1
 4 -9 10 2178.73 584.926 2
 4 -9 11 13498.5 1496.84 2
 4 -9 11 12247 1495.54 1
 4 -9 12 5679.96 1142.29 1
 4 -9 12 6759.57 1088.22 2
 4 -9 13 85645.3 3936.23 2
 4 -9 13 78197.5 4103 1
 4 -9 14 68617.7 3597.87 2
 4 -9 14 70893.8 4043.64 1
 4 -9 15 1430.75 471.74 2
 4 -9 15 1945.72 720.996 1
 4 -9 16 12952.1 1834.94 1
 4 -9 17 173.506 543.602 1
 4 -8 -14 51713.4 3651.96 4
 4 -8 -13 5928.59 1218.4 4
 4 -8 -12 21597.3 2184.94 4
 4 -8 -11 45550.9 3045.3 4
 4 -8 -10 27830.6 2257.1 4
 4 -8 -9 90278.7 3920.22 4
 4 -8 -8 8.60421 267.53 4
 4 -8 -7 81741.5 3392.31 4
 4 -8 -6 45989.9 2375.17 4
 4 -8 -5 1052.44 489.206 4
 4 -8 -4 107105 3283.5 4
 4 -8 -3 4998.05 637.446 4
 4 -8 -2 81797.6 2462.34 4
 4 -8 -1 56761.7 1832.49 4
 4 -8 -1 53068.1 1214.68 1
 4 -8 0 2114.92 299.868 1
 4 -8 0 1933.91 295.817 4
 4 -8 1 31770.3 1338.56 1
 4 -8 1 32497.4 1015.47 4
 4 -8 2 3678.63 508.846 1
 4 -8 3 125408 3335.25 1
 4 -8 4 108326 3278.38 1
 4 -8 5 674.317 312.86 1
 4 -8 5 820.816 332.071 2
 4 -8 6 56288.5 2665.6 2
 4 -8 6 55051.7 2548.35 1
 4 -8 7 750.602 334.839 2
 4 -8 7 1443.15 495.252 1
 4 -8 8 120652 4120.53 2
 4 -8 8 112661 4077.44 1
 4 -8 9 34728.6 2208.61 2
 4 -8 9 32316.5 2227.45 1
 4 -8 10 22755 1950.39 1
 4 -8 10 25096 1919.51 2
 4 -8 11 27467.6 2031.63 2
 4 -8 11 27027.2 2223.37 1
 4 -8 12 16224.2 1596.1 2
 4 -8 12 13883.8 1681.66 1
 4 -8 13 103913 4712.33 1
 4 -8 13 107135 4262.37 2
 4 -8 14 25641.6 2093.72 2
 4 -8 14 22326.6 2233.59 1
 4 -8 15 9950.97 1550.07 1
 4 -8 16 30800.6 2812.99 1
 4 -8 17 14386.2 1982.3 1
 4 -7 -15 39948.9 3234.85 4
 4 -7 -14 60474.5 3843.82 4
 4 -7 -13 2946.53 789.293 4
 4 -7 -12 38656.1 2819.88 4
 4 -7 -11 23255.2 2112.09 4
 4 -7 -10 72179.6 3543.38 4
 4 -7 -9 105606 4149.63 4
 4 -7 -8 301.007 392.143 4
 4 -7 -7 25520.4 1817.52 4
 4 -7 -6 785.977 333.523 4
 4 -7 -5 110570 3425.49 4
 4 -7 -4 123271 3389.63 4
 4 -7 -3 73.2745 131.684 4
 4 -7 -2 23402.4 1210.77 4
 4 -7 -1 107.224 138.83 4
 4 -7 -1 405.046 107.755 1
 4 -7 0 95428.1 2064.49 4
 4 -7 0 101629 2181.41 1
 4 -7 1 66283.3 1940.47 1
 4 -7 2 304.21 233.743 1
 4 -7 3 113992 3099.17 1
 4 -7 4 6403.33 759.18 1
 4 -7 5 72181.5 2798.18 2
 4 -7 5 75915.4 2795.03 1
 4 -7 6 101062 3418.78 2
 4 -7 6 97599.3 3369.55 1
 4 -7 7 10539.7 1128.51 2
 4 -7 7 10931 1158.99 1
 4 -7 8 55454 2746.72 1
 4 -7 8 57441.9 2649.67 2
 4 -7 9 17604.8 1486.54 2
 4 -7 9 17053.3 1620.88 1
 4 -7 10 53651.3 2650.74 2
 4 -7 10 53566.3 2944.41 1
 4 -7 11 47757.4 2544.19 2
 4 -7 11 50758.8 2988.94 1
 4 -7 12 12641.3 1317.72 2
 4 -7 12 12556.7 1563.84 1
 4 -7 13 52028.6 2788.45 2
 4 -7 13 55260.5 3371.26 1
 4 -7 14 393.209 324.431 1
 4 -7 15 54759.4 3615.49 1
 4 -7 16 8503.53 1466.9 1
 4 -7 17 17410.6 2158.47 1
 4 -6 -16 228.516 366.444 4
 4 -6 -15 50892.4 3604.63 4
 4 -6 -14 48081.7 3352.54 4
 4 -6 -13 1508.91 689.213 4
 4 -6 -12 55958 3339.22 4
 4 -6 -11 2974.72 791.001 4
 4 -6 -10 101409 4124.42 4
 4 -6 -9 81871.3 3547.02 4
 4 -6 -8 1247.98 486.205 4
 4 -6 -7 1368.97 408.802 4
 4 -6 -6 58478.7 2508.11 4
 4 -6 -5 227584 4966.9 4
 4 -6 -4 90479.4 2771.2 4
 4 -6 -3 4927.4 584.938 4
 4 -6 -2 25697.9 1205.84 4
 4 -6 -1 88531.9 1717.93 1
 4 -6 -1 89611.9 2125.71 4
 4 -6 0 538784 6669.09 1
 4 -6 1 188047 3532.59 1
 4 -6 2 38150.3 1574.08 1
 4 -6 3 9891.19 874.908 1
 4 -6 4 130392 3523.32 1
 4 -6 5 224288 4889.09 2
 4 -6 5 228477 5087.9 1
 4 -6 6 50716.3 1318.63 3
 4 -6 6 48270.1 2162.95 2
 4 -6 6 49153.3 2326.2 1
 4 -6 7 44025.6 2118.82 2
 4 -6 7 48235.8 2409.04 1
 4 -6 8 9671.65 1006.09 2
 4 -6 8 9918.44 1183.11 1
 4 -6 9 4632.99 855.595 1
 4 -6 9 4782.37 748.354 2
 4 -6 10 106029 3587.21 2
 4 -6 10 108272 4214.68 1
 4 -6 11 12637.2 1247.3 2
 4 -6 11 15422 1638.33 1
 4 -6 12 42770.1 2329.21 2
 4 -6 12 49071.2 3018.11 1
 4 -6 13 14048.7 1334.8 2
 4 -6 13 17707.6 1874.38 1
 4 -6 14 23272.6 2231.12 1
 4 -6 15 52786.5 3485.05 1
 4 -6 16 705.993 672.178 1
 4 -6 17 11300.7 1695.61 1
 4 -5 -16 7539.01 1383.17 4
 4 -5 -15 60064.6 3771.87 4
 4 -5 -14 36932.8 2833.75 4
 4 -5 -13 14862.9 1720.02 4
 4 -5 -12 33972.3 2502.05 4
 4 -5 -11 49611.8 2887.84 4
 4 -5 -10 163629 5148.87 4
 4 -5 -9 1617.64 525.404 4
 4 -5 -8 19980.7 1571.84 4
 4 -5 -7 9785.17 1043.2 4
 4 -5 -6 122966 3580.76 4
 4 -5 -5 270324 5312.51 4
 4 -5 -4 24698 1349.34 4
 4 -5 -3 19218.7 1089.77 4
 4 -5 -2 18769.1 989.485 4
 4 -5 -2 18400.4 624.429 1
 4 -5 -1 411663 5106.98 1
 4 -5 0 803947 9123.71 1
 4 -5 1 25203.7 1153.04 1
 4 -5 2 119361 2942.15 1
 4 -5 3 7368.69 746.74 1
 4 -5 4 170388 4054.68 1
 4 -5 5 409999 5289.96 3
 4 -5 5 406276 7180.07 1
 4 -5 6 352.37 190.696 2
 4 -5 6 294.466 314.468 1
 4 -5 7 39971.4 1887.78 2
 4 -5 7 43961.1 2303.28 1
 4 -5 8 6610.91 777.299 2
 4 -5 8 8352.57 1063.34 1
 4 -5 9 54579 2308.57 2
 4 -5 9 54906.4 2825.92 1
 4 -5 10 81471.5 2910.76 2
 4 -5 10 84423 3683.16 1
 4 -5 11 5217.48 739.848 2
 4 -5 11 5482.08 981.265 1
 4 -5 12 19725 1463.49 2
 4 -5 12 21904.5 1985.78 1
 4 -5 13 35.5963 318.882 1
 4 -5 14 57225.3 3486.21 1
 4 -5 15 25697 2411.74 1
 4 -5 16 909.856 532.143 1
 4 -5 17 5829.98 1333.81 1
 4 -5 18 1235.66 525.359 1
 4 -4 -17 10947.5 1722.2 4
 4 -4 -16 18275.4 2158.11 4
 4 -4 -15 26471.9 2436.09 4
 4 -4 -14 -529.568 361.712 4
 4 -4 -13 72054.9 3735.01 4
 4 -4 -12 825.134 508.404 4
 4 -4 -11 129613 4647.27 4
 4 -4 -10 50448.7 2705.31 4
 4 -4 -9 11809.4 1235.01 4
 4 -4 -8 61500.4 2716.55 4
 4 -4 -7 1098.44 377.883 4
 4 -4 -6 187743 4445.28 4
 4 -4 -5 129888 3396.63 4
 4 -4 -4 146225 3381.29 4
 4 -4 -2 41735.7 1135.22 1
 4 -4 -1 189439 3075.99 1
 4 -4 0 156782 2971.9 1
 4 -4 1 72776.8 2023.74 1
 4 -4 2 152636 3347.02 1
 4 -4 3 337.492 280.314 1
 4 -4 4 325366 5984.45 1
 4 -4 5 282085 5705.87 1
 4 -4 6 17569.8 1075.33 2
 4 -4 6 17735.1 1381.88 1
 4 -4 7 43067.9 1780.86 2
 4 -4 7 44029.4 2291.66 1
 4 -4 8 7260.35 736.081 2
 4 -4 8 7909.5 1018.26 1
 4 -4 9 98099.3 2896.51 2
 4 -4 9 105520 3908.99 1
 4 -4 10 52472.9 2132.81 2
 4 -4 10 54652 2918.7 1
 4 -4 11 946.433 271.732 2
 4 -4 11 845.526 455.351 1
 4 -4 12 24573 2110.08 1
 4 -4 13 17931 1862.86 1
 4 -4 14 52170.2 3330.58 1
 4 -4 15 17045.5 1962.4 1
 4 -4 16 3060.57 875.684 1
 4 -4 17 5049.48 1166.51 1
 4 -4 18 3329.36 998.445 1
 4 -3 -17 2977.91 901.173 4
 4 -3 -16 24156.1 2405.45 4
 4 -3 -15 1183.48 526.556 4
 4 -3 -14 51457.3 3222.28 4
 4 -3 -13 98608.9 4262.56 4
 4 -3 -12 2137.15 619.942 4
 4 -3 -11 27106.3 2031.66 4
 4 -3 -10 800.475 348.404 4
 4 -3 -9 52378 2545 4
 4 -3 -8 121896 3792.73 4
 4 -3 -7 19876.2 1400.52 4
 4 -3 -6 149709 3783.64 4
 4 -3 -5 34122.7 1637.54 4
 4 -3 -2 595.949 161.927 1
 4 -3 -1 83649.5 1986.09 1
 4 -3 0 1972.06 318.861 1
 4 -3 1 104870 2584.24 1
 4 -3 2 237286 4360.82 1
 4 -3 3 12546.3 962.292 1
 4 -3 4 218694 4684.15 1
 4 -3 5 2695.22 538.035 1
 4 -3 6 32879.4 1891.32 1
 4 -3 7 70745.8 2046.33 2
 4 -3 7 73219 2988.52 1
 4 -3 8 50306.6 1781.58 2
 4 -3 8 52432.1 2641.36 1
 4 -3 9 118767 2937.48 2
 4 -3 9 121866 4264.89 1
 4 -3 10 7433.4 712.004 2
 4 -3 10 8067.63 1134.44 1
 4 -3 11 80475.1 3714.94 1
 4 -3 12 19819.7 1899.13 1
 4 -3 13 23250.1 2139.89 1
 4 -3 14 63414.2 3662.7 1
 4 -3 15 4507.74 968.714 1
 4 -3 16 11391.7 1693.06 1
 4 -3 17 3162.24 870.225 1
 4 -3 18 17998.4 2168.35 1
 4 -2 -18 66154.2 4215.83 4
 4 -2 -17 -213.301 368.948 4
 4 -2 -16 7355.93 1309.86 4
 4 -2 -15 14685.3 1778.92 4
 4 -2 -14 191270 6192.66 4
 4 -2 -13 98510.9 4181.61 4
 4 -2 -12 3155.76 773.569 4
 4 -2 -11 36217.9 2292.05 4
 4 -2 -10 10760.7 1210.84 4
 4 -2 -9 196043 5063.63 4
 4 -2 -8 319694 6489.52 4
 4 -2 -7 597.943 288.752 4
 4 -2 -2 4958.42 463.461 1
 4 -2 -1 95602.1 2292.35 1
 4 -2 0 1708.63 320.786 1
 4 -2 1 3248.63 455.114 1
 4 -2 2 203583 4106.88 1
 4 -2 3 20444 1220.95 1
 4 -2 4 23292.5 1407.62 1
 4 -2 5 62326.7 2449.73 1
 4 -2 6 290177 6019.36 1
 4 -2 7 21625.7 1580.47 1
 4 -2 8 52038.2 1517.71 2
 4 -2 8 50991.7 2560.56 1
 4 -2 9 19399.2 952.693 2
 4 -2 9 21490.8 1742.77 1
 4 -2 10 30691 2159.85 1
 4 -2 11 142250 4931.83 1
 4 -2 12 13838.6 1573.81 1
 4 -2 13 25345 2182.64 1
 4 -2 14 28036.5 2372.35 1
 4 -2 15 10644.4 1535.54 1
 4 -2 16 49986.9 3356.18 1
 4 -2 17 -354.108 515.651 1
 4 -1 -17 14182.2 1843.5 4
 4 -1 -16 12928.2 1648.79 4
 4 -1 -15 25503.7 2290.89 4
 4 -1 -14 198314 6235.51 4
 4 -1 -13 14330 1573.83 4
 4 -1 -12 29341.3 2149.64 4
 4 -1 -11 8708.19 1111.63 4
 4 -1 -2 55311.2 1776.93 1
 4 -1 -1 1185.04 264.022 1
 4 -1 0 14797.4 937.066 1
 4 -1 1 85120.7 2465.51 1
 4 -1 2 39167.1 1689.12 1
 4 -1 3 89263.6 2784.07 1
 4 -1 4 421.496 205.723 1
 4 -1 5 308903 5958.72 1
 4 -1 6 254724 5600.45 1
 4 -1 7 1408.93 460.473 1
 4 -1 8 7769.1 1001.22 1
 4 -1 9 8518.95 1087.17 1
 4 -1 10 138492 4639.11 1
 4 -1 11 120460 4437.88 1
 4 -1 12 640.832 293.524 1
 4 -1 13 33431.8 2493.85 1
 4 -1 14 777.065 571.039 1
 4 -1 15 51268 3328.68 1
 4 -1 16 61925.6 3755.57 1
 4 -1 17 593.2 532.337 1
 4 0 -9 62033.1 1382.97 5
 4 0 -1 408.197 229.933 1
 4 0 0 17068 1077.69 1
 4 0 1 456456 7003.35 1
 4 0 2 8814.22 835.626 1
 4 0 3 30648.4 1629.66 1
 4 0 4 17799.7 1299.85 1
 4 0 5 204051 4864.66 1
 4 0 6 91945.4 3229.22 1
 4 0 7 8777.5 1027.14 1
 4 0 8 43312.5 2323.68 1
 4 0 9 13903.7 1370.67 1
 4 0 10 169295 5133.14 1
 4 0 11 55840.5 2971.16 1
 4 0 12 9543.73 1277.55 1
 4 0 13 28708.6 2257.85 1
 4 0 14 8240.15 1264.66 1
 4 0 15 83635.9 4175.86 1
 4 0 16 23121 2275.23 1
 4 0 17 2699 858.214 1
 4 1 -1 141.991 192.107 1
 4 1 0 403660 6527.63 1
 4 1 1 103928 2980.84 1
 4 1 2 148107 3715.58 1
 4 1 3 80722.5 2768.04 1
 4 1 3 79214.4 2634.27 5
 4 1 4 679.316 252.101 5
 4 1 4 748.575 279.3 1
 4 1 5 81478.4 2927.57 5
 4 1 5 80442.2 2979.76 1
 4 1 6 8182.4 954.117 5
 4 1 6 9812.68 1060.36 1
 4 1 7 57291.7 2692.65 1
 4 1 8 106549 3859.74 1
 4 1 9 33507.9 2209.5 1
 4 1 10 101762 3972.99 1
 4 1 11 8959.1 1250.09 1
 4 1 12 25829.8 2128.78 1
 4 1 13 17744.3 1831.36 1
 4 1 14 10698.7 1482.06 1
 4 1 15 36212.2 2804.29 1
 4 1 16 832.784 570.861 1
 4 1 17 13255.2 1797.71 1
 4 2 -2 127248 2737.09 5
 4 2 -1 59220.6 1930.44 5
 4 2 -1 64231.7 2319.55 1
 4 2 0 111151 3158.6 1
 4 2 0 105702 2827.55 5
 4 2 1 54023.1 1449.4 2
 4 2 1 50986.4 2017.55 5
 4 2 1 51609.5 2151.92 1
 4 2 2 391591 6743.67 5
 4 2 2 404006 4827.18 2
 4 2 2 394904 6964.49 1
 4 2 3 91616.7 3010.7 5
 4 2 3 91535.7 3038.19 1
 4 2 4 34258.3 1903.68 5
 4 2 4 36329.4 1950.41 1
 4 2 5 37634.2 2047.03 5
 4 2 5 39315.3 2076.96 1
 4 2 6 1621.21 485.317 5
 4 2 6 1424.16 444.64 1
 4 2 7 106480 3806.42 5
 4 2 7 101196 3675.89 1
 4 2 8 49197.9 2645.69 5
 4 2 8 52805 2679.14 1
 4 2 9 23069 1858.19 5
 4 2 9 21864.8 1797.4 1
 4 2 10 14470.3 1513.75 5
 4 2 10 13672.2 1482.64 1
 4 2 11 12030.9 1452.25 1
 4 2 12 59576.6 3291.48 1
 4 2 13 8764.57 1299.7 1
 4 2 14 11641.9 1599.73 1
 4 2 15 7272.12 1268.17 1
 4 3 -4 245089 3896.47 5
 4 3 -3 337147 5156.94 5
 4 3 -2 68632.9 2122.47 5
 4 3 -1 5273.93 634.238 5
 4 3 0 2754.7 507.448 1
 4 3 0 2363.01 455.994 5
 4 3 1 300851 5961.79 1
 4 3 1 307574 5822.63 5
 4 3 2 319530 6227.95 5
 4 3 2 320896 6263.86 1
 4 3 2 317614 4339.88 2
 4 3 3 5872.11 380.881 2
 4 3 3 6056.48 829.573 5
 4 3 3 6770.97 846.774 1
 4 3 4 34600 2026.62 5
 4 3 4 39973.4 2079.32 1
 4 3 5 6034.41 896.599 5
 4 3 5 6231.53 840.66 1
 4 3 6 17957.4 1549.05 5
 4 3 6 18494.3 1501.75 1
 4 3 7 139611 4632.9 5
 4 3 7 139252 4396.83 1
 4 3 8 10528.6 1274.17 5
 4 3 8 9658.88 1172.85 1
 4 3 9 18936.9 1781.03 5
 4 3 9 19833.4 1713.66 1
 4 3 10 1259.84 414.406 5
 4 3 10 1993.72 542.55 1
 4 3 11 61165.9 3373.46 5
 4 3 11 60878.1 3232.8 1
 4 3 12 29103.8 2307.79 1
 4 3 13 2093.83 718.274 1
 4 3 14 14464.1 1766.5 1
 4 4 -6 39092 1186.49 5
 4 4 -5 9102.92 653.1 5
 4 4 -4 92590.5 2396.23 5
 4 4 -3 173251 3682.28 5
 4 4 -2 16957.8 1123.56 5
 4 4 -1 87857.8 2813.25 5
 4 4 0 266.321 259.683 5
 4 4 1 175389 4434.44 1
 4 4 1 169020 4372 5
 4 4 2 149914 4176.13 1
 4 4 2 147943 4255.12 5
 4 4 3 478.945 310.991 5
 4 4 3 489.502 260.741 1
 4 4 4 35885.5 2165.02 5
 4 4 4 37568.7 2090.61 1
 4 4 5 620.257 458.069 5
 4 4 5 169.763 296.351 1
 4 4 6 87743 3674.6 5
 4 4 6 83867 3340.53 1
 4 4 7 96478.8 3961.87 5
 4 4 7 97464.3 3736.74 1
 4 4 8 4452.82 936.493 5
 4 4 8 4862.32 855.319 1
 4 4 9 29034.9 2315.68 5
 4 4 9 27768.8 2097.27 1
 4 4 10 3179.38 782.88 5
 4 4 10 3052.14 723.587 1
 4 4 11 39694.1 2625.99 1
 4 4 11 37127.1 2728.3 5
 4 4 12 17302.4 1947.28 5
 4 4 12 17641.4 1827.26 1
 4 4 13 4856.12 981.522 1
 4 5 -7 58311.4 1549.59 5
 4 5 -6 93437.9 2287.64 5
 4 5 -5 5414.87 581.631 5
 4 5 -4 29160.2 1448.18 5
 4 5 -3 48923.8 2003.9 5
 4 5 -2 67980.8 2528.9 5
 4 5 -1 111917 3433.64 5
 4 5 0 6687.01 893.125 5
 4 5 1 164144 4562.76 5
 4 5 2 22693.8 1623.1 1
 4 5 2 21689.1 1647.37 5
 4 5 3 37819 2129.07 1
 4 5 3 34441 2151.69 5
 4 5 4 85862 3582.36 5
 4 5 4 90690.1 3429.88 1
 4 5 5 6959.21 1072.57 5
 4 5 5 6782.18 939.894 1
 4 5 6 126954 4689.81 5
 4 5 6 130976 4326.94 1
 4 5 7 5993.89 1057.97 5
 4 5 7 5878.44 936.094 1
 4 5 8 47415.7 2995.27 5
 4 5 8 45728.8 2657.68 1
 4 5 9 14681.1 1736.99 5
 4 5 9 15394.2 1563 1
 4 5 10 17035.8 1914.32 5
 4 5 10 19227.1 1794.02 1
 4 5 11 67809.3 3477.61 1
 4 5 11 70098.7 3949.41 5
 4 5 12 2785.62 878.47 5
 4 5 13 14772.4 1878.72 5
 4 6 -7 201638 3735.05 5
 4 6 -6 89101.3 2536.69 5
 4 6 -5 2705.98 464.776 5
 4 6 -4 8247.83 845.879 5
 4 6 -3 1139.83 351.475 5
 4 6 -2 60566.6 2547.44 5
 4 6 -1 116269 3770.82 5
 4 6 0 11825.3 1229.43 5
 4 6 1 27549.2 1906.12 5
 4 6 2 11983.3 1312.58 5
 4 6 3 130515 4522.99 5
 4 6 3 120359 4071.3 1
 4 6 4 26284.9 1883.53 1
 4 6 4 26583.2 2074.81 5
 4 6 5 31412.5 2072.89 1
 4 6 5 35272.5 2464.28 5
 4 6 6 52202.5 3078.52 5
 4 6 6 45736.6 2590.93 1
 4 6 7 12479.9 1582.61 5
 4 6 7 13362.5 1435.91 1
 4 6 8 88999.5 4291.93 5
 4 6 8 87710.2 3789.44 1
 4 6 9 23914.5 2272.26 5
 4 6 9 26454.1 2109.39 1
 4 6 10 36951.1 2920.6 5
 4 6 11 27509.8 2546.76 5
 4 6 12 2757.61 1028.3 5
 4 7 -7 180723 3932.78 5
 4 7 -6 4241.02 609.154 5
 4 7 -5 27007.3 1578.49 5
 4 7 -4 14636.2 1233.29 5
 4 7 -3 6597.04 866.718 5
 4 7 -2 138009 4220.61 5
 4 7 -1 18478.4 1557.48 5
 4 7 0 32009.1 2124.86 5
 4 7 1 657.626 356.366 5
 4 7 2 95707.2 3946.3 5
 4 7 3 120701 4593.22 5
 4 7 4 10080.4 1364.76 5
 4 7 5 7079.8 1173.49 5
 4 7 5 7850.5 1094.13 1
 4 7 6 2822.45 692.019 1
 4 7 6 2401.92 701.778 5
 4 7 7 44056.3 2639.52 1
 4 7 7 46354.9 3170.06 5
 4 7 8 83282.4 4317.56 5
 4 7 8 75149.3 3516.71 1
 4 7 9 8394.46 1406.7 5
 4 7 10 12202.1 1736.91 5
 4 8 -6 748.772 311.146 5
 4 8 -5 28127.6 1740.87 5
 4 8 -4 5378.15 783.192 5
 4 8 -3 47861.4 2492.9 5
 4 8 -2 93198.1 3616.67 5
 4 8 -1 427.119 347.2 5
 4 8 0 59624.8 3079.63 5
 4 8 1 1598.08 555.03 5
 4 8 2 58098.8 3217.19 5
 4 8 3 63136.9 3464.41 5
 4 8 4 1405.77 581.205 5
 4 8 5 13977.1 1712.62 5
 4 8 6 7484.29 1328.31 5
 4 8 7 71192.1 4042.11 5
 4 8 8 51790.7 3545.45 5
 4 8 9 -823.22 687.659 5
 4 9 -6 38249.7 2109.95 5
 4 9 -5 40056.6 2259.63 5
 4 9 -4 1626.75 489.297 5
 4 9 -3 48030.1 2627 5
 4 9 -2 28258 2109.47 5
 4 9 -1 17692.9 1712.46 5
 4 9 0 25614.9 2124.33 5
 4 9 1 3045.12 778.777 5
 4 9 2 35088.7 2633.56 5
 4 9 3 18127.9 1968.51 5
 4 9 4 15929.9 1867.06 5
 4 9 5 17503 1974.21 5
 4 9 6 5093.58 1108.94 5
 4 9 7 64710.1 4026.5 5
 4 9 8 5131.13 1243.78 5
 4 10 -5 45488.6 2548.6 5
 4 10 -4 4803.47 918.99 5
 4 10 -3 46922.3 2754.52 5
 4 10 -2 858.719 369.922 5
 4 10 -1 70771.8 3653.31 5
 4 10 0 23614.5 2153.03 5
 4 10 1 8088.4 1312.39 5
 4 10 2 19321.7 2068.09 5
 4 10 3 1401.58 544.824 5
 4 10 4 48033.9 3364.53 5
 4 10 5 27738.3 2638.39 5
 4 10 6 12804.2 1827.97 5
 4 11 -4 7550.19 1162.49 5
 4 11 -3 5187.05 1011.24 5
 4 11 -2 32742.3 2504.64 5
 4 11 -1 93006 4398.69 5
 4 11 0 8209.63 1327.24 5
 4 11 1 6949.08 1304.29 5
 4 11 2 5194.34 1185.56 5
 4 11 3 16572.3 2012.71 5
 4 11 4 71260.8 4319.29 5
 4 12 -4 4516.02 989.924 5
 4 12 -3 3385.5 849.069 5
 4 12 -2 60484.1 3624.62 5
 4 12 -1 53732.6 3495.65 5
 4 12 0 272.724 379.01 5
 4 12 1 22730.1 2382.58 5
 4 12 2 2596.24 836.283 5
 4 12 3 31388.1 2918.32 5
 4 13 -3 351.424 377.983 5
 4 13 -2 49433.4 3432.7 5
 4 13 -1 18920.2 2204.15 5
 4 13 0 12390.1 1811.64 5
 4 14 -2 10605 1652.88 5
 5 -15 12 23.8591 488.641 1
 5 -15 13 23803.9 2543.5 1
 5 -14 9 14557.9 1709.09 1
 5 -14 10 4872.01 1054.66 1
 5 -14 11 7824.37 1369.02 1
 5 -14 12 3897.69 1085.54 2
 5 -14 12 2834.19 977.602 1
 5 -14 13 40526 3283.2 1
 5 -14 13 47300.9 3546.8 2
 5 -14 14 1790.55 833.034 2
 5 -14 14 1712.11 691.199 1
 5 -13 7 36633 2462.46 1
 5 -13 8 50532.9 3040.77 1
 5 -13 9 1898.74 662.182 1
 5 -13 10 6457.87 1250.01 2
 5 -13 10 6148.63 1131.22 1
 5 -13 11 -802.591 710.548 2
 5 -13 11 187.038 448.833 1
 5 -13 12 38488.1 3017.03 2
 5 -13 12 31308.3 2744.79 1
 5 -13 13 34569.6 2896.72 2
 5 -13 13 29193.5 2765.61 1
 5 -13 14 551.039 487.76 2
 5 -13 14 111.297 462.246 1
 5 -13 15 14053.7 1947.9 2
 5 -13 16 -2626.89 909.699 2
 5 -12 -11 4378.63 1096.51 4
 5 -12 -10 32427 2787.93 4
 5 -12 -9 3391.44 843.314 4
 5 -12 -8 14406.7 1682.01 4
 5 -12 -7 17020.6 1761.05 4
 5 -12 -6 12595.3 1440.24 4
 5 -12 5 30524.8 2021.02 1
 5 -12 6 2169.86 537.085 1
 5 -12 7 35437.1 2387.23 1
 5 -12 8 6591.02 1070.13 1
 5 -12 9 6488.49 1146.06 2
 5 -12 9 6599.47 1184.65 1
 5 -12 10 31110 2557.7 2
 5 -12 10 24525.8 2214.96 1
 5 -12 11 2417.02 729.555 2
 5 -12 11 1727.38 640.223 1
 5 -12 12 40983 3038.48 2
 5 -12 12 37602.7 2973.78 1
 5 -12 13 14315.4 1842.01 2
 5 -12 13 14243.3 1930.05 1
 5 -12 14 1441.14 670.38 2
 5 -12 14 2002.92 760.807 1
 5 -12 15 13546.1 1819.52 2
 5 -12 15 11890.7 1861.3 1
 5 -11 -12 24.1008 484.513 4
 5 -11 -11 41549.6 3181.46 4
 5 -11 -10 65758.7 3851.72 4
 5 -11 -9 6475.1 1201.6 4
 5 -11 -8 7694.44 1226.89 4
 5 -11 -7 272.398 244.873 4
 5 -11 -6 122643 4425.59 4
 5 -11 -5 76852.8 3289.37 4
 5 -11 -4 315.937 203.375 4
 5 -11 -3 62350.9 2624.93 4
 5 -11 3 2339.72 511.068 1
 5 -11 4 42960.8 2219.91 1
 5 -11 5 71795.9 3055.73 1
 5 -11 6 542.451 413.976 1
 5 -11 7 39813 2472.06 1
 5 -11 8 549.075 395.433 1
 5 -11 9 30389.1 2385.41 2
 5 -11 9 26987.4 2236.57 1
 5 -11 10 41301.4 2818.54 2
 5 -11 10 37538.1 2693.83 1
 5 -11 11 1268.84 585.282 2
 5 -11 11 1070.42 503.671 1
 5 -11 12 8931.73 1404.05 2
 5 -11 12 10083.7 1528.64 1
 5 -11 13 493.362 296.792 2
 5 -11 13 257.328 470.188 1
 5 -11 14 22824.5 2258.09 2
 5 -11 14 21807.3 2374.22 1
 5 -11 15 16528 1939.68 2
 5 -11 15 12836.2 1871.83 1
 5 -10 -13 20367.1 2328.99 4
 5 -10 -12 3181.34 855.04 4
 5 -10 -11 44319.6 3206.91 4
 5 -10 -10 58488.6 3535.9 4
 5 -10 -9 324.378 354.784 4
 5 -10 -8 12142.3 1481.63 4
 5 -10 -7 18180.5 1715.12 4
 5 -10 -6 128321 4389.38 4
 5 -10 -5 55732.9 2692.66 4
 5 -10 -4 6194.33 811.904 4
 5 -10 -3 49048.2 2230.38 4
 5 -10 -2 12665.2 1047.63 4
 5 -10 -1 171581 3740.69 4
 5 -10 1 34280.6 1507.41 1
 5 -10 2 13623.9 1066.05 1
 5 -10 3 3100.64 541.577 1
 5 -10 4 58149.3 2539.52 1
 5 -10 5 64240.9 2836.2 1
 5 -10 6 21995.3 1724.8 1
 5 -10 7 6689.34 1024.98 1
 5 -10 8 19372.9 1806.79 2
 5 -10 8 18231.1 1755.26 1
 5 -10 9 114837 4461.23 2
 5 -10 9 97401.3 4206.82 1
 5 -10 10 18288.3 1820.87 2
 5 -10 10 15682.7 1745.42 1
 5 -10 11 608.935 329.122 2
 5 -10 11 565.602 366.468 1
 5 -10 12 792.624 391.676 2
 5 -10 12 -78.1991 404.72 1
 5 -10 13 11931 1520.88 2
 5 -10 13 14225.8 1852.81 1
 5 -10 14 53590.8 3314.79 2
 5 -10 14 51043.2 3599.73 1
 5 -10 15 17616.1 2173.36 1
 5 -10 16 5482.92 1229.01 1
 5 -9 -14 17379.7 2185.77 4
 5 -9 -13 6412.35 1291.95 4
 5 -9 -12 8137.11 1401.88 4
 5 -9 -11 65154.4 3760.44 4
 5 -9 -10 6889.4 1213.44 4
 5 -9 -9 21180.6 1950.82 4
 5 -9 -8 25508.8 2077.33 4
 5 -9 -7 4963.22 913.162 4
 5 -9 -6 73037.9 3178.62 4
 5 -9 -5 19533.5 1530.26 4
 5 -9 -4 8256.79 920.116 4
 5 -9 -3 18151.9 1282.02 4
 5 -9 -2 22347.3 1310.43 4
 5 -9 -1 187538 3763.75 4
 5 -9 0 19439.5 954.154 1
 5 -9 1 7152.81 675.515 1
 5 -9 2 423.255 265.332 1
 5 -9 3 16775.7 1244.12 1
 5 -9 4 120293 3674.01 1
 5 -9 5 6465.75 855.186 1
 5 -9 6 10653.2 1180.3 1
 5 -9 7 162.379 270.44 1
 5 -9 8 109111 4103.12 2
 5 -9 8 112396 4300.22 1
 5 -9 9 85817.8 3702.22 2
 5 -9 9 82071.8 3781.33 1
 5 -9 10 190.925 276.78 2
 5 -9 10 50.854 290.009 1
 5 -9 11 6413.43 1055.72 2
 5 -9 11 5121.63 1044.39 1
 5 -9 12 1244.91 496.131 2
 5 -9 12 800.714 474.474 1
 5 -9 13 58291.1 3261.05 2
 5 -9 13 61384.6 3827.06 1
 5 -9 14 63444.3 3961.3 1
 5 -9 15 5230.2 1179.96 1
 5 -9 16 11187.3 1768.45 1
 5 -8 -14 56564.3 3833.22 4
 5 -8 -13 18723.8 2147.28 4
 5 -8 -12 18630.6 2030.19 4
 5 -8 -11 51854.7 3272.06 4
 5 -8 -10 6671.97 1138.21 4
 5 -8 -9 117217 4575.77 4
 5 -8 -8 36135 2371.36 4
 5 -8 -7 48174.1 2600.46 4
 5 -8 -6 47942.4 2439.35 4
 5 -8 -5 7775.93 930.932 4
 5 -8 -4 57915.7 2376.2 4
 5 -8 -3 16736.1 1174.27 4
 5 -8 -2 27687.3 1398.11 4
 5 -8 -1 80831.8 1738.14 1
 5 -8 -1 83963.2 2284.21 4
 5 -8 0 14447.6 831.726 1
 5 -8 1 83433.7 2399.36 1
 5 -8 2 1828.2 394.51 1
 5 -8 3 163047 4041.59 1
 5 -8 4 86282.3 3045.13 1
 5 -8 5 2119.48 544.299 1
 5 -8 6 64134.7 2913.85 1
 5 -8 7 1451.8 524.255 1
 5 -8 8 104207 3786.89 2
 5 -8 8 103366 4057.25 1
 5 -8 9 27947.6 1988.66 2
 5 -8 9 26778.5 2135.52 1
 5 -8 10 13992.2 1462.1 2
 5 -8 10 14917.6 1674.23 1
 5 -8 11 26736.5 2025.34 2
 5 -8 11 28763.7 2363.95 1
 5 -8 12 5797.72 967.702 2
 5 -8 12 5057.85 1024.8 1
 5 -8 13 80827.2 3666.27 2
 5 -8 13 82414.6 4329.19 1
 5 -8 14 24211.5 2434.5 1
 5 -8 15 10327.7 1668.63 1
 5 -8 16 25295.8 2601.88 1
 5 -7 -15 31696.4 2937.8 4
 5 -7 -14 71316 4206.21 4
 5 -7 -13 8142.74 1440.04 4
 5 -7 -12 40064.2 2945.64 4
 5 -7 -11 39584.6 2752.76 4
 5 -7 -10 41918.1 2736.3 4
 5 -7 -9 144516 4943.81 4
 5 -7 -8 4318.59 803.259 4
 5 -7 -7 21554.8 1661.33 4
 5 -7 -6 4961.57 773.941 4
 5 -7 -5 105428 3360.71 4
 5 -7 -4 159237 3966.49 4
 5 -7 -3 22272.3 1298.48 4
 5 -7 -2 71658.5 2199.76 4
 5 -7 -2 63115 1267.8 1
 5 -7 -1 141.94 129.214 1
 5 -7 0 212091 3675.61 1
 5 -7 1 117015 2841.7 1
 5 -7 2 1546.01 368.826 1
 5 -7 3 97230.2 3035.62 1
 5 -7 4 1224.92 398.755 1
 5 -7 5 91380.7 3276.1 1
 5 -7 6 92663.1 3480.56 1
 5 -7 7 4612.09 834.578 1
 5 -7 8 97082.8 3455.42 2
 5 -7 8 98896.5 3914.63 1
 5 -7 9 375.494 330.7 2
 5 -7 9 802.594 436.1 1
 5 -7 10 71551.8 3079.9 2
 5 -7 10 71951.6 3606.64 1
 5 -7 11 30448.5 2023.74 2
 5 -7 11 32335.4 2486.97 1
 5 -7 12 15137.4 1455.68 2
 5 -7 12 15665.4 1823.96 1
 5 -7 13 45600.5 3183.5 1
 5 -7 14 238.396 357.122 1
 5 -7 15 52961.9 3666.2 1
 5 -7 16 7976.82 1531.77 1
 5 -7 17 3006.8 1046.78 1
 5 -6 -16 736.49 428.597 4
 5 -6 -15 58377.9 3885.5 4
 5 -6 -14 59580.6 3755.85 4
 5 -6 -13 108.76 478.868 4
 5 -6 -12 42199.2 2898.19 4
 5 -6 -11 1998.34 601.86 4
 5 -6 -10 131338 4771.68 4
 5 -6 -9 28897.1 2091.81 4
 5 -6 -8 7386.58 1019.14 4
 5 -6 -7 14008.6 1301.83 4
 5 -6 -6 42095.1 2140.41 4
 5 -6 -5 150917 3987.78 4
 5 -6 -4 211069 4557.84 4
 5 -6 -2 63312.3 1469.97 1
 5 -6 -1 144511 2733.78 1
 5 -6 0 241777 4144.05 1
 5 -6 1 120476 2906.06 1
 5 -6 2 1112.74 313.067 1
 5 -6 3 1818.76 417.81 1
 5 -6 4 89166.2 3087.05 1
 5 -6 5 133382 4002.69 1
 5 -6 6 113253 3843.75 1
 5 -6 7 16321 1505.49 1
 5 -6 8 24199 1573.05 2
 5 -6 8 26370 1988.65 1
 5 -6 9 1048.61 361.519 2
 5 -6 9 1774.26 600.923 1
 5 -6 10 87047.2 3184.6 2
 5 -6 10 84020.9 3878.85 1
 5 -6 11 46409.3 2366.23 2
 5 -6 11 47800.1 3021.84 1
 5 -6 12 8219.58 1294.61 1
 5 -6 13 17605.2 1971.48 1
 5 -6 14 8352.77 1381.86 1
 5 -6 15 30204.5 2763.85 1
 5 -6 16 584.292 345.285 1
 5 -6 17 10401.5 1736.15 1
 5 -5 -16 599.259 402.016 4
 5 -5 -15 56152 3701.12 4
 5 -5 -14 11448.9 1614.18 4
 5 -5 -13 22620.5 2171.56 4
 5 -5 -12 20548.7 1987.13 4
 5 -5 -11 16895.9 1729.85 4
 5 -5 -10 170630 5351.79 4
 5 -5 -9 18569.7 1653.07 4
 5 -5 -8 26556.9 1842.69 4
 5 -5 -7 9901.93 1092.69 4
 5 -5 -6 32169.8 1814.29 4
 5 -5 -5 123052 3487.63 4
 5 -5 -2 876.238 222.595 1
 5 -5 -1 233265 3868.19 1
 5 -5 0 340287 5291.29 1
 5 -5 1 14835.1 976.235 1
 5 -5 2 85173.8 2612.6 1
 5 -5 3 6236.2 742.714 1
 5 -5 4 85974.9 2997.78 1
 5 -5 5 402512 7594.77 1
 5 -5 6 21958.3 1655.59 1
 5 -5 7 5191.83 891.494 1
 5 -5 8 28213.6 2062.38 1
 5 -5 9 10712.9 983.571 2
 5 -5 9 11885.6 1403.69 1
 5 -5 10 72112.6 2659.29 2
 5 -5 10 69756.7 3534.62 1
 5 -5 11 27157.9 2256.19 1
 5 -5 12 14441.4 1714.39 1
 5 -5 13 2953.05 804.938 1
 5 -5 14 30045.7 2690.31 1
 5 -5 15 32294.1 2847.55 1
 5 -5 16 1038.84 336.575 1
 5 -5 17 10166.2 1673.69 1
 5 -4 -17 26741.3 2714.08 4
 5 -4 -16 11541.6 1754.02 4
 5 -4 -15 18480.7 2080.98 4
 5 -4 -14 1405.18 583.26 4
 5 -4 -13 32622 2523.82 4
 5 -4 -12 18065.4 1811.68 4
 5 -4 -11 31558.8 2274.11 4
 5 -4 -10 56665.5 2932.98 4
 5 -4 -9 817.481 318.831 4
 5 -4 -8 99851.8 3573.41 4
 5 -4 -7 8917.12 1012.21 4
 5 -4 -2 292.041 167.55 1
 5 -4 -1 135768 2909.56 1
 5 -4 0 115804 2814.52 1
 5 -4 1 43206.1 1768.96 1
 5 -4 2 198566 4256.81 1
 5 -4 3 18618.2 1268.27 1
 5 -4 4 116592 3480.99 1
 5 -4 5 117150 3678.85 1
 5 -4 6 10142.6 1116.43 1
 5 -4 7 67709.3 3030.5 1
 5 -4 8 5234.8 906.441 1
 5 -4 9 99057.6 4028.58 1
 5 -4 10 36900.7 2537.83 1
 5 -4 11 1269.57 588.249 1
 5 -4 12 44514 3005.12 1
 5 -4 13 554.835 434.859 1
 5 -4 14 50875.5 3412.46 1
 5 -4 15 25059.5 2460.31 1
 5 -4 16 282.764 600.166 1
 5 -4 17 10441.1 1667.46 1
 5 -3 -17 6265.63 1330.26 4
 5 -3 -16 11345.2 1648.73 4
 5 -3 -15 1094.39 608.493 4
 5 -3 -14 39259.8 2848.35 4
 5 -3 -13 118261 4803.02 4
 5 -3 -12 18741.7 1787.36 4
 5 -3 -11 28193.5 2125.43 4
 5 -3 -10 1823.74 519.648 4
 5 -3 -2 5912.84 570.257 1
 5 -3 -1 66257.3 2055.97 1
 5 -3 0 29048.4 1400.43 1
 5 -3 1 25098.6 1374.13 1
 5 -3 2 129058 3447.5 1
 5 -3 3 16637 1223.36 1
 5 -3 4 47678.3 2149.35 1
 5 -3 5 1741.51 482.061 1
 5 -3 6 188815 5015.18 1
 5 -3 7 72760.1 3104.76 1
 5 -3 8 16189.6 1520.71 1
 5 -3 9 48672.4 2753.4 1
 5 -3 10 9088.06 1245.63 1
 5 -3 11 37643.6 2629.68 1
 5 -3 12 34091.2 2540.34 1
 5 -3 13 4453.69 984.611 1
 5 -3 14 52012 3375.32 1
 5 -3 15 466.664 458.353 1
 5 -3 16 19091 2182.21 1
 5 -3 17 3713.88 996.067 1
 5 -2 -2 68.9868 174.273 1
 5 -2 -1 56171.9 1969.67 1
 5 -2 0 9972.29 845.73 1
 5 -2 1 111729 3105.26 1
 5 -2 2 176975 4165.44 1
 5 -2 3 36724.6 1892.81 1
 5 -2 4 94953 3208.21 1
 5 -2 5 59520.4 2601.72 1
 5 -2 6 135595 4117.46 1
 5 -2 7 29762.4 1972.22 1
 5 -2 8 1771.05 613.598 1
 5 -2 9 5993.35 971.06 1
 5 -2 10 12679.2 1465.04 1
 5 -2 11 101765 4342.25 1
 5 -2 12 26037.2 2237.79 1
 5 -2 13 15982.9 1820.74 1
 5 -2 14 13169.1 1695.72 1
 5 -2 15 13579.5 1780.71 1
 5 -2 16 57668.3 3764.23 1
 5 -2 17 5561.44 1256.56 1
 5 -1 -2 133838 3268.98 1
 5 -1 -1 6215 718.809 1
 5 -1 0 4101.91 598.58 1
 5 -1 1 251412 5069.14 1
 5 -1 2 45665.7 2062.94 1
 5 -1 3 70793 2695.45 1
 5 -1 4 15149.4 1279.1 1
 5 -1 5 144274 4295.57 1
 5 -1 6 112697 3852.64 1
 5 -1 7 6944.26 982.41 1
 5 -1 8 1886.52 545.881 1
 5 -1 9 1282.64 466.648 1
 5 -1 10 110861 4273.5 1
 5 -1 11 167287 5508.25 1
 5 -1 12 1118.91 541.2 1
 5 -1 13 19011.5 1933.69 1
 5 -1 14 1068.59 547.67 1
 5 -1 15 55931.7 3568.25 1
 5 -1 16 64571.3 4018.74 1
 5 0 -1 471.596 254.777 1
 5 0 0 89648.4 2880.99 1
 5 0 1 78649.4 2742.25 1
 5 0 2 14115.7 1177.3 1
 5 0 3 48139.9 2268.82 1
 5 0 4 2379.55 550.529 1
 5 0 5 196846 5124.8 1
 5 0 6 65436.2 2935.15 1
 5 0 7 413.735 336.254 1
 5 0 8 20438 1760.27 1
 5 0 9 687.748 389.615 1
 5 0 10 96047.7 4142.67 1
 5 0 11 57543.1 3253.09 1
 5 0 12 2618.89 740.591 1
 5 0 13 17174.9 1877.45 1
 5 0 14 2483.34 826.917 1
 5 0 15 59251.8 3763 1
 5 0 16 18991.5 2213.04 1
 5 1 -1 30074.3 1654.03 1
 5 1 0 106790 3285.06 1
 5 1 1 49056.4 2215.24 1
 5 1 2 30115.8 1779.74 1
 5 1 3 102878 3469.03 1
 5 1 4 6678.76 878.338 1
 5 1 5 86391.4 3351.89 1
 5 1 6 544.056 364.166 1
 5 1 7 32584.3 2164.52 1
 5 1 8 59140.7 3018.61 1
 5 1 9 1052.51 441.014 1
 5 1 10 73513.9 3612.86 1
 5 1 11 3520.59 869.131 1
 5 1 12 26931.6 2330.61 1
 5 1 13 11805.1 1571.34 1
 5 1 14 2612.77 713.924 1
 5 1 15 25364.9 2483.48 1
 5 1 16 1207.48 360.245 1
 5 2 -1 879.427 312.683 1
 5 2 0 10734 1056.48 1
 5 2 1 17992.4 1275.25 5
 5 2 1 18187.2 1391.28 1
 5 2 2 196499 4804.4 5
 5 2 2 205621 5041.61 1
 5 2 3 148006 4215.02 5
 5 2 3 147844 4321.26 1
 5 2 4 744.93 257.359 1
 5 2 4 798.248 403.295 5
 5 2 5 20441.4 1632.62 5
 5 2 5 22740.7 1729.42 1
 5 2 6 249.796 284.415 5
 5 2 6 569.89 357.523 1
 5 2 7 64829.7 3113.34 1
 5 2 8 39816.5 2518.01 1
 5 2 9 16443.3 1671.21 1
 5 2 10 39596.6 2659.94 1
 5 2 11 14468.1 1695.6 1
 5 2 12 36485.6 2717.41 1
 5 2 13 18749.1 1992.76 1
 5 2 14 9245.25 1420.19 1
 5 2 15 5006.04 1066.27 1
 5 3 -2 26295.5 1427.92 5
 5 3 -1 2559.05 498.24 5
 5 3 0 3120.24 593.083 5
 5 3 0 3517.09 626.706 1
 5 3 1 112118 3682.08 1
 5 3 1 117032 3599.73 5
 5 3 2 245335 5670.03 5
 5 3 2 249105 5839.17 1
 5 3 3 57712 2686.08 5
 5 3 3 58778.7 2717.65 1
 5 3 4 17388.1 1549.8 5
 5 3 4 15798 1425.8 1
 5 3 5 21703.9 1772.47 5
 5 3 5 21624.7 1718.05 1
 5 3 6 8537.57 1158.43 5
 5 3 6 7627.94 1037.76 1
 5 3 7 127178 4501.89 1
 5 3 7 133888 4784.08 5
 5 3 8 34652.3 2489.33 5
 5 3 8 30704.2 2250.35 1
 5 3 9 15080.1 1674.99 5
 5 3 9 15759.4 1660 1
 5 3 10 6540.6 1149.94 1
 5 3 11 11110.3 1467.59 1
 5 3 12 40100.7 2877.97 1
 5 3 13 3526 911.951 1
 5 3 14 13820.6 1768.82 1
 5 4 -4 157847 3525.79 5
 5 4 -3 165581 3895.64 5
 5 4 -2 2384.61 506.448 5
 5 4 -1 49483.7 2234.21 5
 5 4 0 4927.02 770.754 5
 5 4 1 182065 4869.59 5
 5 4 1 185756 5002.24 1
 5 4 2 140536 4327.49 1
 5 4 2 134750 4320.99 5
 5 4 3 12193 1298.74 5
 5 4 3 12312.2 1309.24 1
 5 4 4 104005 4041.15 5
 5 4 4 101429 3862.84 1
 5 4 5 2248.84 660.771 5
 5 4 5 1412.24 511.074 1
 5 4 6 78081.7 3653.76 5
 5 4 6 76587.9 3443.68 1
 5 4 7 83705.4 3908.48 5
 5 4 7 79064.5 3575.43 1
 5 4 8 1530.11 609.595 1
 5 4 8 1959.1 628.066 5
 5 4 9 28297.2 2372.65 5
 5 4 9 29733 2293.28 1
 5 4 10 176.205 400.648 5
 5 4 10 -167.5 419.369 1
 5 4 11 41068.3 2851.8 1
 5 4 12 33360.4 2624.57 1
 5 4 13 2224.38 513.526 1
 5 5 -6 116589 2801.05 5
 5 5 -5 1193.82 313.108 5
 5 5 -4 20047.2 1291.19 5
 5 5 -3 2837.83 505.628 5
 5 5 -2 45197.4 2184.21 5
 5 5 -1 123547 3864.61 5
 5 5 0 9309.92 1079.2 5
 5 5 1 98774 3707.56 5
 5 5 2 2797.66 582.111 1
 5 5 2 2523.06 632.776 5
 5 5 3 120156 4184.64 1
 5 5 3 115274 4341.58 5
 5 5 4 32053.9 2307.14 5
 5 5 4 36498.9 2298.5 1
 5 5 5 11631.1 1432.7 5
 5 5 5 11139.7 1279.39 1
 5 5 6 76156.6 3782.29 5
 5 5 6 71104.8 3438.01 1
 5 5 7 5557.29 980.859 5
 5 5 7 4638.17 854.931 1
 5 5 8 45900.7 3102.61 5
 5 5 8 48952.4 2934.86 1
 5 5 9 39567.5 2964.18 5
 5 5 9 40655.3 2736.69 1
 5 5 10 1406.24 676.115 5
 5 5 10 3244.66 816.284 1
 5 5 11 49759.4 3509.83 5
 5 5 11 43863.7 3007.38 1
 5 6 -6 105645 2945.49 5
 5 6 -5 2672.13 508.36 5
 5 6 -4 18103.4 1338.38 5
 5 6 -3 1686.31 460.363 5
 5 6 -2 48105.9 2432.25 5
 5 6 -1 108017 3861.51 5
 5 6 0 2312.01 614.519 5
 5 6 1 20382.2 1767.86 5
 5 6 2 13791.7 1502.88 5
 5 6 3 91441.8 4022.57 5
 5 6 3 99574.5 3906.02 1
 5 6 4 25638.5 1998.53 1
 5 6 4 28655 2304.05 5
 5 6 5 295.122 424.645 5
 5 6 5 289.688 298.831 1
 5 6 6 31163.5 2521.32 5
 5 6 6 31290.7 2295.22 1
 5 6 7 3867.78 882.509 1
 5 6 7 4993.1 1075.17 5
 5 6 8 44774 3203.14 5
 5 6 8 47970.4 2945.35 1
 5 6 9 32172.9 2790.06 5
 5 6 9 33472.8 2496.89 1
 5 6 10 8918.47 1579.05 5
 5 7 -6 40850.6 1976.83 5
 5 7 -5 39093.8 2025.52 5
 5 7 -4 40016 2151.73 5
 5 7 -3 10640.1 1162.04 5
 5 7 -2 107572 3907.91 5
 5 7 -1 29367.8 2079 5
 5 7 0 25446.1 1999.4 5
 5 7 1 36216.7 2473.07 5
 5 7 2 30158.8 2330.39 5
 5 7 3 65115.7 3553.15 5
 5 7 4 33038.9 2591.95 5
 5 7 5 670.636 434.088 5
 5 7 5 745.477 314.277 1
 5 7 6 1261.56 537.88 5
 5 7 6 1532.78 526.117 1
 5 7 7 31924 2437.36 1
 5 7 7 31308.4 2685.02 5
 5 7 8 78699.1 3846.85 1
 5 7 8 77753.6 4432.05 5
 5 7 9 6140.99 1355.3 5
 5 8 -5 47429.2 2417.23 5
 5 8 -4 8518.4 1081.13 5
 5 8 -3 34577.4 2227.5 5
 5 8 -2 60830.9 3073.3 5
 5 8 -1 17341.9 1691 5
 5 8 0 47787.4 2894.02 5
 5 8 1 1506.25 563.011 5
 5 8 2 25315 2240.72 5
 5 8 3 30034.7 2503.02 5
 5 8 4 2784.74 888.914 5
 5 8 5 8292.72 1354.23 5
 5 8 6 234.027 498.908 5
 5 8 7 43998 3365.75 5
 5 8 8 63105.9 4092.46 5
 5 9 -5 67117.6 3100.25 5
 5 9 -4 556.843 407.379 5
 5 9 -3 24374 1987.07 5
 5 9 -2 22432 1953.11 5
 5 9 -1 15580.2 1675.9 5
 5 9 0 30436.5 2447.49 5
 5 9 1 1330.04 553.989 5
 5 9 2 27070.5 2420.33 5
 5 9 3 11139.3 1626.15 5
 5 9 4 6228.48 1268.66 5
 5 9 5 15952.8 1984.17 5
 5 9 6 -45.3605 519.668 5
 5 10 -4 879.576 506.369 5
 5 10 -3 18237.8 1842.37 5
 5 10 -2 1267.69 517.917 5
 5 10 -1 52042.5 3256.75 5
 5 10 0 28408.2 2456.62 5
 5 10 1 4764.59 984.993 5
 5 10 2 23643.3 2370 5
 5 10 3 397.663 526.795 5
 5 10 4 56967.6 3873.27 5
 5 10 5 22868.5 2514.34 5
 5 11 -3 1466.1 534.339 5
 5 11 -2 20218.1 2061.73 5
 5 11 -1 82453.4 4313.92 5
 5 11 0 9055.53 1499.8 5
 5 11 1 5060.46 1133.25 5
 5 11 2 11955.7 1793.82 5
 5 11 3 22533.1 2497.83 5
 5 12 -2 64018.7 3873.85 5
 5 12 -1 61832.4 3890.9 5
 5 12 0 117.548 375.154 5
 5 12 1 21687.3 2423.98 5
 5 13 -1 5515.04 1253.6 5
 6 -15 13 21033.3 2482.52 1
 6 -14 10 1320.73 623.806 1
 6 -14 11 6574.91 1263.62 1
 6 -14 12 9127.83 1603.06 1
 6 -14 13 44355.1 3511.01 1
 6 -13 7 19664.4 1844.16 1
 6 -13 8 35503.8 2621.18 1
 6 -13 9 -625.732 555.252 1
 6 -13 10 12188.3 1638.55 1
 6 -13 11 959.164 427.374 1
 6 -13 12 24395.7 2505.82 1
 6 -13 13 31795.8 2945.29 1
 6 -13 14 401.056 561.512 1
 6 -12 -11 5967.93 1302.52 4
 6 -12 -10 38579.3 3004.66 4
 6 -12 -9 8643.2 1365.26 4
 6 -12 -8 1308.64 568.202 4
 6 -12 5 24044.4 1837.37 1
 6 -12 6 15501.2 1552.15 1
 6 -12 7 28670.7 2225.88 1
 6 -12 8 14191.6 1626.49 1
 6 -12 9 3098.42 886.076 1
 6 -12 10 17424.1 1966.3 1
 6 -12 11 198.182 345.227 1
 6 -12 12 15140.6 1950.08 1
 6 -12 13 10395 1610.96 1
 6 -12 14 734.674 517.719 1
 6 -11 -12 1100.58 522.712 4
 6 -11 -11 16952.4 2034.23 4
 6 -11 -10 59817 3660.06 4
 6 -11 -9 9330.07 1393.58 4
 6 -11 -8 3209.66 784.928 4
 6 -11 -7 325.643 303.195 4
 6 -11 -6 86108.5 3681.1 4
 6 -11 -5 103721 3847.41 4
 6 -11 -4 409.406 197.681 4
 6 -11 3 1115.67 392.704 1
 6 -11 4 25173.3 1752.98 1
 6 -11 5 99758.6 3754.72 1
 6 -11 6 -223.433 317.528 1
 6 -11 7 27087.2 2117.51 1
 6 -11 8 3708.07 875.768 1
 6 -11 9 27202.7 2327.01 1
 6 -11 10 19465.7 2007.67 1
 6 -11 11 -196.675 493.694 1
 6 -11 12 7441.63 1387.36 1
 6 -11 13 -29.9703 385.231 1
 6 -11 14 24269.6 2604.69 1
 6 -11 15 28125.1 2867.36 1
 6 -10 -13 14788.5 2003.36 4
 6 -10 -12 -86.7902 426.525 4
 6 -10 -11 35610.4 2858.2 4
 6 -10 -10 58065.7 3544.9 4
 6 -10 -9 2682.19 753.007 4
 6 -10 -8 15434.7 1659.83 4
 6 -10 -7 1657.55 569.524 4
 6 -10 -6 123983 4329.18 4
 6 -10 -5 76940.7 3183.77 4
 6 -10 -4 -84.0752 234.672 4
 6 -10 -3 32517.3 1802.22 4
 6 -10 -2 9960.52 916.142 4
 6 -10 1 2689.57 448.504 1
 6 -10 2 35427.7 1795.39 1
 6 -10 3 2045.86 496.995 1
 6 -10 4 88254.9 3321.52 1
 6 -10 5 46975.9 2519.7 1
 6 -10 6 20236.4 1727.78 1
 6 -10 7 29964.8 2215.78 1
 6 -10 8 5928.22 1061.01 1
 6 -10 9 95270 4312.65 1
 6 -10 10 24658.3 2253.61 1
 6 -10 11 -48.2912 281.418 1
 6 -10 12 3597.86 907.643 1
 6 -10 13 9827.52 1383.49 2
 6 -10 13 13294.7 1872.74 1
 6 -10 14 50662.7 3745.45 1
 6 -10 15 12348.2 1928.49 1
 6 -9 -14 26477.4 2694.76 4
 6 -9 -13 17711.2 2141.42 4
 6 -9 -12 1970.63 748.534 4
 6 -9 -11 65954.8 3812.97 4
 6 -9 -10 16334.2 1808.15 4
 6 -9 -9 15090.3 1695 4
 6 -9 -8 75266.6 3563.94 4
 6 -9 -7 5476.37 941.989 4
 6 -9 -6 52683.8 2681.39 4
 6 -9 -5 28072.1 1852.14 4
 6 -9 -4 26751.2 1680.95 4
 6 -9 -3 36917.4 1851.31 4
 6 -9 0 21516.3 1110.72 1
 6 -9 1 43108.1 1787.88 1
 6 -9 2 2800.75 523.175 1
 6 -9 3 42054.4 2111.26 1
 6 -9 4 126565 4010.33 1
 6 -9 5 10044.6 1153.66 1
 6 -9 6 11784.5 1317.96 1
 6 -9 7 2590.11 660.137 1
 6 -9 8 47710.7 2883.73 1
 6 -9 9 82122.7 3935.94 1
 6 -9 10 1520.83 638.439 1
 6 -9 11 8150.45 1362.82 1
 6 -9 12 751.855 501.537 1
 6 -9 13 28379.3 2681.49 1
 6 -9 14 45827.3 3504.83 1
 6 -9 15 3743.11 1035.69 1
 6 -9 16 10733.6 1803.24 1
 6 -8 -14 44664.3 3481.12 4
 6 -8 -13 40406.2 3160.59 4
 6 -8 -12 17318.7 2006.99 4
 6 -8 -11 33617.3 2666.05 4
 6 -8 -10 264.164 420.082 4
 6 -8 -9 117364 4603.95 4
 6 -8 -8 44666.6 2648.35 4
 6 -8 -7 6085 953.936 4
 6 -8 -6 24272.1 1738.71 4
 6 -8 -5 1846.69 483.633 4
 6 -8 -4 53480.8 2329.31 4
 6 -8 -2 36871.7 1073.8 1
 6 -8 -1 98777.8 2281.4 1
 6 -8 0 37318.8 1531.2 1
 6 -8 1 145014 3407.35 1
 6 -8 2 906.981 332.593 1
 6 -8 3 74968.5 2804.77 1
 6 -8 4 39184.1 2156.75 1
 6 -8 5 4528.87 794.271 1
 6 -8 6 34555.3 2238.03 1
 6 -8 7 1754.7 605.915 1
 6 -8 8 88760.7 3965.89 1
 6 -8 9 11880.5 1491.25 1
 6 -8 10 23067.3 2148.67 1
 6 -8 11 18907.8 2023.08 1
 6 -8 12 1886.29 776.998 1
 6 -8 13 32991 2857.86 1
 6 -8 14 29359.6 2805.68 1
 6 -8 15 1963.75 772.88 1
 6 -8 16 9543.53 1657.83 1
 6 -7 -15 17239.6 2197.85 4
 6 -7 -14 108634 5284.26 4
 6 -7 -13 4915.76 1128.74 4
 6 -7 -12 26623.5 2398.72 4
 6 -7 -11 6531.1 1162.45 4
 6 -7 -10 43526.4 2826.77 4
 6 -7 -9 86767.7 3832.9 4
 6 -7 -8 3965.73 811.408 4
 6 -7 -7 29068.1 1982 4
 6 -7 -6 16280.8 1402.13 4
 6 -7 -2 9627.56 615.381 1
 6 -7 -1 4416.77 475.129 1
 6 -7 0 139674 3200.75 1
 6 -7 1 73994.1 2406.59 1
 6 -7 2 6380.32 755.937 1
 6 -7 3 22222.4 1495.59 1
 6 -7 4 10003.2 1086.86 1
 6 -7 5 98656.4 3639.45 1
 6 -7 6 154789 4883.55 1
 6 -7 7 385.001 350.985 1
 6 -7 8 84628.8 3845.76 1
 6 -7 9 689.167 470.642 1
 6 -7 10 71444.6 3779.66 1
 6 -7 11 27467.7 2454.03 1
 6 -7 12 2089.42 869.326 1
 6 -7 13 20783.3 2251.91 1
 6 -7 14 1075.17 617.518 1
 6 -7 15 26173.4 2703.77 1
 6 -7 16 8731.98 1609.36 1
 6 -6 -16 -422.821 727.387 4
 6 -6 -15 52921.6 3721.4 4
 6 -6 -14 48544 3460.97 4
 6 -6 -13 2546.44 745.075 4
 6 -6 -12 19114.2 1971.7 4
 6 -6 -11 553.032 413.282 4
 6 -6 -10 140177 5061.13 4
 6 -6 -9 35218.4 2369.74 4
 6 -6 -8 3322.25 704.616 4
 6 -6 -2 35735.6 1348.37 1
 6 -6 -1 37343.2 1489.79 1
 6 -6 0 167970 3673.6 1
 6 -6 1 114691 3180.44 1
 6 -6 2 1488.86 386.193 1
 6 -6 3 193.288 220.106 1
 6 -6 4 44950.5 2247.48 1
 6 -6 5 177525 4913.94 1
 6 -6 6 198707 5488.65 1
 6 -6 7 828.178 405.677 1
 6 -6 8 58192.3 3130.81 1
 6 -6 9 4649.69 920.145 1
 6 -6 10 100793 4509.71 1
 6 -6 11 27730.5 2410.76 1
 6 -6 12 5808.9 1234.91 1
 6 -6 13 13996.6 1831.93 1
 6 -6 14 2638.02 945.409 1
 6 -6 15 50213.2 3671.7 1
 6 -6 16 9260.14 1608.54 1
 6 -5 -16 463.084 415.48 4
 6 -5 -15 39631.8 3140.78 4
 6 -5 -14 5697.09 1123.61 4
 6 -5 -13 14945.2 1801.03 4
 6 -5 -12 36550.2 2724.28 4
 6 -5 -11 1449.34 617.049 4
 6 -5 -10 133193 4814.55 4
 6 -5 -2 85021.1 2295.76 1
 6 -5 -1 116507 2903.43 1
 6 -5 0 255282 4847.67 1
 6 -5 1 72271.4 2501.4 1
 6 -5 2 32220.9 1749.29 1
 6 -5 3 8383.82 920.193 1
 6 -5 4 12038.1 1157.6 1
 6 -5 5 202656 5290.64 1
 6 -5 6 15472.9 1450.19 1
 6 -5 7 9000.83 1145.12 1
 6 -5 8 10529.1 1321.74 1
 6 -5 9 84136 3875.58 1
 6 -5 10 89510.7 4145.05 1
 6 -5 11 5498.02 1093.91 1
 6 -5 12 19017.6 2032.42 1
 6 -5 13 6881.06 1248.8 1
 6 -5 14 16958 2065.12 1
 6 -5 15 54869.7 3781.88 1
 6 -5 16 838.609 480.016 1
 6 -4 -2 68700.2 2169.29 1
 6 -4 -1 98703.5 2772.72 1
 6 -4 0 109959 3087.79 1
 6 -4 1 2680.02 499.796 1
 6 -4 2 87403.9 2977.58 1
 6 -4 3 29509.5 1770.78 1
 6 -4 4 71550.8 2879.2 1
 6 -4 5 48531 2426.53 1
 6 -4 6 15058.8 1431.76 1
 6 -4 7 68847.9 3239.57 1
 6 -4 8 2209.62 607.443 1
 6 -4 9 37680.6 2565.11 1
 6 -4 10 46506 2930.12 1
 6 -4 11 -62.9242 381.758 1
 6 -4 12 23639.9 2246.08 1
 6 -4 13 1398.5 565.007 1
 6 -4 14 47932.1 3419.34 1
 6 -4 15 11395.1 1728.84 1
 6 -4 16 1086.29 655.876 1
 6 -3 -2 2498.34 441.293 1
 6 -3 -1 61456.9 2234.76 1
 6 -3 0 23935.1 1422.21 1
 6 -3 1 156280 3993.71 1
 6 -3 2 142607 3945.07 1
 6 -3 3 147.369 245.112 1
 6 -3 4 117589 3872.95 1
 6 -3 5 13183.7 1305.04 1
 6 -3 6 108353 3934.43 1
 6 -3 7 66214.4 3104.43 1
 6 -3 8 1295.23 490.498 1
 6 -3 9 7439.08 1171.13 1
 6 -3 10 3217.25 819.036 1
 6 -3 11 20463.3 2005.44 1
 6 -3 12 36917.8 2806.58 1
 6 -3 13 618.214 409.274 1
 6 -3 14 32688.2 2788.19 1
 6 -3 15 208.842 432.594 1
 6 -3 16 11805.1 1792.54 1
 6 -2 -2 9009.44 874.525 1
 6 -2 -1 122793 3383.21 1
 6 -2 0 2544.69 484.456 1
 6 -2 1 340520 6469.88 1
 6 -2 2 98294 3304 1
 6 -2 3 5366.14 796.742 1
 6 -2 4 93406.6 3439.01 1
 6 -2 5 16247.4 1488.25 1
 6 -2 6 144986 4724 1
 6 -2 7 33804.6 2268.47 1
 6 -2 8 19977.3 1799.53 1
 6 -2 9 7753.79 1177.84 1
 6 -2 10 16680.8 1763.85 1
 6 -2 11 91621.1 4284.9 1
 6 -2 12 45137.1 3058.2 1
 6 -2 13 14083.3 1785.27 1
 6 -2 14 7848.35 1402.86 1
 6 -2 15 9845.79 1563.36 1
 6 -2 16 32975.3 3009.74 1
 6 -1 -2 38872 1889.81 1
 6 -1 -1 65873.4 2507.52 1
 6 -1 0 33181 1801.73 1
 6 -1 1 172941 4464.26 1
 6 -1 2 22373.1 1584.23 1
 6 -1 3 45825 2351.69 1
 6 -1 4 35945.4 2145.11 1
 6 -1 5 32592 2113.72 1
 6 -1 6 150608 4860.59 1
 6 -1 7 2480.21 616.473 1
 6 -1 8 9380.18 1310.83 1
 6 -1 9 28.8167 317.641 1
 6 -1 10 30285.7 2431.95 1
 6 -1 11 120188 5004.22 1
 6 -1 12 3890 958.92 1
 6 -1 13 15076.2 1859.01 1
 6 -1 14 -1073.33 734.422 1
 6 -1 15 39776.1 3224.41 1
 6 0 -2 126445 3666.94 1
 6 0 -1 43043 2086.62 1
 6 0 0 108875 3519.41 1
 6 0 1 66686.2 2772.61 1
 6 0 2 2773.41 598.838 1
 6 0 3 48799.6 2480.78 1
 6 0 4 7568.54 1004.44 1
 6 0 5 85631.7 3535.45 1
 6 0 6 66898.6 3181.62 1
 6 0 7 238.875 251.177 1
 6 0 8 6577.62 1067.55 1
 6 0 9 664.94 413.208 1
 6 0 10 31339.9 2495.52 1
 6 0 11 41795.8 2940.71 1
 6 0 12 3347.8 897.324 1
 6 0 13 7791.93 1335.74 1
 6 0 14 46.0568 396.4 1
 6 0 15 31594 2885.65 1
 6 1 -1 13276.4 1217.07 1
 6 1 0 13122 1223.69 1
 6 1 1 27919.3 1841 1
 6 1 2 18142.5 1533.42 1
 6 1 3 75764.1 3181.21 1
 6 1 4 3530.49 702.299 1
 6 1 5 74098.5 3337.64 1
 6 1 6 9143.49 1208.92 1
 6 1 7 57461.3 3102.84 1
 6 1 8 35537.5 2520.14 1
 6 1 9 -121.237 462.426 1
 6 1 10 46854.8 3058.32 1
 6 1 11 4052.84 925.997 1
 6 1 12 19418.8 2084.84 1
 6 1 13 17301.4 2023.06 1
 6 1 14 560.666 427.345 1
 6 1 15 18131 2176.12 1
 6 2 -1 7488.99 987.655 1
 6 2 0 5462.93 836.905 1
 6 2 1 14135 1348.09 1
 6 2 2 138702 4447.91 1
 6 2 3 226276 5887.92 1
 6 2 4 1323.07 491.204 1
 6 2 5 69684.2 3283.77 1
 6 2 6 16105.7 1627.04 1
 6 2 7 109516 4381.45 1
 6 2 8 35431.7 2543.51 1
 6 2 9 1548.46 605.376 1
 6 2 10 34571.6 2642.37 1
 6 2 11 3225.69 851.135 1
 6 2 12 32065.5 2684.5 1
 6 2 13 22690.9 2332.07 1
 6 2 14 11491.3 1683.36 1
 6 3 0 1204.79 378.66 1
 6 3 1 103796 3810.35 1
 6 3 2 231893 5847.18 5
 6 3 2 232235 6045.79 1
 6 3 3 71325.8 3211.44 5
 6 3 3 70346.7 3256.25 1
 6 3 4 44149.7 2601.67 5
 6 3 4 45400.8 2653.33 1
 6 3 5 4957.09 881.752 1
 6 3 6 49262.6 2897.41 1
 6 3 7 85296.1 3944.45 1
 6 3 8 15623.6 1693.24 1
 6 3 9 18464.6 1930.16 1
 6 3 10 5224.71 1083.47 1
 6 3 11 10386.6 1531.2 1
 6 3 12 73722.5 4121.86 1
 6 3 13 870.994 578.368 1
 6 3 14 4785.31 1112.75 1
 6 4 -2 777.531 338.215 5
 6 4 -1 35043 2021.77 5
 6 4 0 6695.32 927.304 5
 6 4 1 97709.3 3705.22 5
 6 4 1 100058 3883.84 1
 6 4 2 58398.1 2977.6 1
 6 4 2 55647.7 2890.04 5
 6 4 3 8447.68 1171 5
 6 4 3 10725.2 1314.07 1
 6 4 4 60927.2 3239.94 5
 6 4 4 59026.3 3091.14 1
 6 4 5 4266.61 909.378 5
 6 4 5 4852.9 877.074 1
 6 4 6 49893.5 2985.19 1
 6 4 6 46858.9 3013.65 5
 6 4 7 59401.9 3494.52 5
 6 4 7 60355.8 3349.34 1
 6 4 8 1304.14 435.055 5
 6 4 8 1327.19 524.736 1
 6 4 9 35454.2 2685.08 1
 6 4 10 1493.32 597.954 1
 6 4 11 33701.6 2728.4 1
 6 4 12 29146.2 2646.02 1
 6 5 -4 64559.6 2540.87 5
 6 5 -3 25772.8 1672.75 5
 6 5 -2 25363 1748 5
 6 5 -1 131364 4274.14 5
 6 5 0 1571.8 539.609 5
 6 5 1 13826.4 1463.54 5
 6 5 2 14698.1 1544.96 5
 6 5 2 13243 1472.96 1
 6 5 3 96859.2 4070.51 1
 6 5 3 99521.9 4220.51 5
 6 5 4 47403.7 2845.71 1
 6 5 4 42692.3 2818.38 5
 6 5 5 692.485 519.258 5
 6 5 5 -107.614 439.785 1
 6 5 6 26791.6 2409.14 5
 6 5 6 30634.5 2374.57 1
 6 5 7 14220.2 1769.37 5
 6 5 7 13722.4 1605.17 1
 6 5 8 6982.6 1235.58 5
 6 5 8 9078.28 1376.77 1
 6 5 9 31313 2752.46 5
 6 5 9 32401.6 2609.97 1
 6 5 10 -171.258 516.791 1
 6 5 11 15773.9 1922.11 1
 6 6 -5 3234.53 587.223 5
 6 6 -4 48428.5 2358.15 5
 6 6 -3 374.755 322.562 5
 6 6 -2 118195 4119.84 5
 6 6 -1 68887.6 3218.03 5
 6 6 0 261.931 311.029 5
 6 6 1 63568.1 3304.87 5
 6 6 2 2509 732.94 5
 6 6 3 101035 4449.26 5
 6 6 4 38325.4 2792.3 5
 6 6 4 37808.1 2591.26 1
 6 6 5 1166.28 622.107 5
 6 6 5 1196.71 564.378 1
 6 6 6 9931.25 1386.78 1
 6 6 6 9149.92 1457.97 5
 6 6 7 2937.31 798.824 5
 6 6 7 2265.33 760.249 1
 6 6 8 46122.7 3405.08 5
 6 6 8 44462.5 3043.95 1
 6 6 9 27452 2707.69 5
 6 6 9 28704.3 2473.84 1
 6 7 -5 3919.74 692.92 5
 6 7 -4 36790 2190.05 5
 6 7 -3 6984.07 1019.44 5
 6 7 -2 98046.8 3944.7 5
 6 7 -1 35201.7 2418.51 5
 6 7 0 4208.82 925.098 5
 6 7 1 50966.4 3117.83 5
 6 7 2 5685.43 1073.28 5
[truncated: 34,227 more chars]
