# Supplementary material
Source: publisher figshare collection journal article supplement (https://acs.figshare.com/ndownloader/files/4205155)
Supplement: Supplementary file 27 [file 4205155 › CIFs/Cu/CuGd/CuGd.cif]

data_CuGd
_audit_creation_date              2015-02-16
_audit_creation_method
;
Olex2 1.2
(compiled 2015.01.26 svn.r3151 for OlexSys, GUI svn.r4998)
;
_publ_contact_author_address      
;
The University of Manchester
School of Chemistry
Oxford Road, 
Manchester
M13 9PL
United Kingdom
;
_publ_contact_author_email        eufemio.morenopineda@manchester.ac.uk
_publ_contact_author_name         'Eufemio Moreno Pineda'
_publ_contact_author_phone        '+44 074 1192 4293'
_publ_section_references
;
Dolomanov, O.V., Bourhis, L.J., Gildea, R.J, Howard, J.A.K. & Puschmann, H.
 (2009), J. Appl. Cryst. 42, 339-341.

Palatinus, L. & Chapuis, G. (2007). J. Appl. Cryst., 40, 786-790;
Palatinus, L. & van der Lee, A. (2008). J. Appl. Cryst. 41, 975-984;
Palatinus, L., Prathapa, S. J. & van Smaalen, S. (2012). J. Appl. Cryst. 45,
 575-580.

Sheldrick, G.M. (2008). Acta Cryst. A64, 112-122.
;
_chemical_name_common             ?
_chemical_name_systematic         ?
_chemical_formula_moiety          'C50 H92 Cu2 Gd2 O22, 2(C6 H16 N), 4(H2 O)'
_chemical_formula_sum             'C62 H132 Cu2 Gd2 N2 O26'
_chemical_formula_weight          1763.27
_chemical_melting_point           ?
loop_
  _atom_type_symbol
  _atom_type_description
  _atom_type_scat_dispersion_real
  _atom_type_scat_dispersion_imag
  _atom_type_scat_source
 'C' 'C' 0.0033 0.0016 'International Tables Vol C Tables 4.2.6.8 and 6.1.1.4'
 'H' 'H' 0.0000 0.0000 'International Tables Vol C Tables 4.2.6.8 and 6.1.1.4'
 'Cu' 'Cu' 0.3201 1.2651 'International Tables Vol C Tables 4.2.6.8 and 6.1.1.4'
 'Gd' 'Gd' -0.1653 3.9035
 'International Tables Vol C Tables 4.2.6.8 and 6.1.1.4'
 'N' 'N' 0.0061 0.0033 'International Tables Vol C Tables 4.2.6.8 and 6.1.1.4'
 'O' 'O' 0.0106 0.0060 'International Tables Vol C Tables 4.2.6.8 and 6.1.1.4'

_shelx_space_group_comment
;
The symmetry employed for this shelxl refinement is uniquely defined
by the following loop, which should always be used as a source of
symmetry information in preference to the above space-group names.
They are only intended as comments.
;
_space_group_crystal_system       'monoclinic'
_space_group_IT_number            14
_space_group_name_H-M_alt         'P 1 21/n 1'
_space_group_name_Hall            '-P 2yn'
loop_
  _space_group_symop_operation_xyz
 'x, y, z'
 '-x+1/2, y+1/2, -z+1/2'
 '-x, -y, -z'
 'x-1/2, -y-1/2, z-1/2'

_cell_length_a                    13.4470(4)
_cell_length_b                    22.2429(6)
_cell_length_c                    14.1737(4)
_cell_angle_alpha                 90
_cell_angle_beta                  103.936(3)
_cell_angle_gamma                 90
_cell_volume                      4114.6(2)
_cell_formula_units_Z             2
_cell_measurement_reflns_used     9513
_cell_measurement_temperature     100.3(6)
_cell_measurement_theta_max       28.6120
_cell_measurement_theta_min       3.0540
_shelx_estimated_absorpt_T_max    ?
_shelx_estimated_absorpt_T_min    ?
_exptl_absorpt_coefficient_mu     2.170
_exptl_absorpt_correction_T_max   1.00000
_exptl_absorpt_correction_T_min   0.64293
_exptl_absorpt_correction_type    multi-scan
_exptl_absorpt_process_details
;
CrysAlisPro, Agilent Technologies,
Version 1.171.36.32 (release 02-08-2013 CrysAlis171 .NET)
(compiled Aug  2 2013,16:46:58)
Empirical absorption correction using spherical harmonics,
 implemented in SCALE3 ABSPACK scaling algorithm.
;
_exptl_absorpt_special_details    ?
_exptl_crystal_colour             'clear blue'
_exptl_crystal_colour_lustre      clear
_exptl_crystal_colour_primary     blue
_exptl_crystal_density_diffrn     1.423
_exptl_crystal_density_meas       ?
_exptl_crystal_density_method     ?
_exptl_crystal_description        block
_exptl_crystal_F_000              1824
_exptl_crystal_size_max           0.1
_exptl_crystal_size_mid           0.1
_exptl_crystal_size_min           0.1
_exptl_transmission_factor_max    ?
_exptl_transmission_factor_min    ?
_diffrn_reflns_av_R_equivalents   0.0339
_diffrn_reflns_av_unetI/netI      0.0469
_diffrn_reflns_Laue_measured_fraction_full 0.999
_diffrn_reflns_Laue_measured_fraction_max 0.999
_diffrn_reflns_limit_h_max        16
_diffrn_reflns_limit_h_min        -13
_diffrn_reflns_limit_k_max        27
_diffrn_reflns_limit_k_min        -19
_diffrn_reflns_limit_l_max        17
_diffrn_reflns_limit_l_min        -14
_diffrn_reflns_number             16495
_diffrn_reflns_point_group_measured_fraction_full 0.999
_diffrn_reflns_point_group_measured_fraction_max 0.999
_diffrn_reflns_theta_full         25.242
_diffrn_reflns_theta_max          26.368
_diffrn_reflns_theta_min          2.962
_diffrn_ambient_temperature       100.3(6)
_diffrn_detector_area_resol_mean  8.3367
_diffrn_measured_fraction_theta_full 0.999
_diffrn_measured_fraction_theta_max 0.999
_diffrn_measurement_details
;
#__ type_ start__ end____ width___ exp.time_
  1 omega   36.00   65.00   0.5000    2.8000
omega____ theta____ kappa____ phi______ frames
    -      -21.2308  179.0000   60.0000 58

#__ type_ start__ end____ width___ exp.time_
  2 omega  -25.00   65.00   0.5000    2.8000
omega____ theta____ kappa____ phi______ frames
    -       22.6371  -99.0000 -150.0000 180

#__ type_ start__ end____ width___ exp.time_
  3 omega  -17.00  103.00   0.5000    2.8000
omega____ theta____ kappa____ phi______ frames
    -       22.6371   37.0000   60.0000 240
;
_diffrn_measurement_device_type   'Xcalibur, Sapphire2, large Be window'
_diffrn_measurement_method        '\w scans'
_diffrn_orient_matrix_UB_11       -0.0402592000
_diffrn_orient_matrix_UB_12       -0.0127712000
_diffrn_orient_matrix_UB_13       -0.0361923000
_diffrn_orient_matrix_UB_21       0.0172166000
_diffrn_orient_matrix_UB_22       -0.0292140000
_diffrn_orient_matrix_UB_23       0.0161446000
_diffrn_orient_matrix_UB_31       -0.0322167000
_diffrn_orient_matrix_UB_32       0.0003094000
_diffrn_orient_matrix_UB_33       0.0329620000
_diffrn_radiation_monochromator   graphite
_diffrn_radiation_type            MoK\a
_diffrn_radiation_wavelength      0.71073
_diffrn_source                    'Enhance (Mo) X-ray Source'
_reflns_Friedel_coverage          0.000
_reflns_Friedel_fraction_full     .
_reflns_Friedel_fraction_max      .
_reflns_number_gt                 7463
_reflns_number_total              8391
_reflns_odcompleteness_completeness 99.84
_reflns_odcompleteness_iscentric  1
_reflns_odcompleteness_theta      26.32
_reflns_special_details
;
 Reflections were merged by SHELXL according to the crystal
 class for the calculation of statistics and refinement.
 
 _reflns_Friedel_fraction is defined as the number of unique
 Friedel pairs measured divided by the number that would be
 possible theoretically, ignoring centric projections and
 systematic absences.
;
_reflns_threshold_expression      'I > 2\s(I)'
_computing_cell_refinement
;
CrysAlisPro, Agilent Technologies,
Version 1.171.36.32 (release 02-08-2013 CrysAlis171 .NET)
(compiled Aug  2 2013,16:46:58)
;
_computing_data_collection
;
CrysAlisPro, Agilent Technologies,
Version 1.171.36.32 (release 02-08-2013 CrysAlis171 .NET)
(compiled Aug  2 2013,16:46:58)
;
_computing_data_reduction
;
CrysAlisPro, Agilent Technologies,
Version 1.171.36.32 (release 02-08-2013 CrysAlis171 .NET)
(compiled Aug  2 2013,16:46:58)
;
_computing_molecular_graphics     'Olex2 (Dolomanov et al., 2009)'
_computing_publication_material   'Olex2 (Dolomanov et al., 2009)'
_computing_structure_refinement   'ShelXL (Sheldrick, 2008)'
_computing_structure_solution
;
Superflip (Palatinus & Chapuis, 2007;Palatinus & van der Lee, 2008;
Palatinus et al., 2012)
;
_refine_diff_density_max          1.934
_refine_diff_density_min          -2.294
_refine_diff_density_rms          0.125
_refine_ls_extinction_coef        .
_refine_ls_extinction_method      none
_refine_ls_goodness_of_fit_ref    1.053
_refine_ls_hydrogen_treatment     mixed
_refine_ls_matrix_type            full
_refine_ls_number_parameters      453
_refine_ls_number_reflns          8391
_refine_ls_number_restraints      0
_refine_ls_R_factor_all           0.0400
_refine_ls_R_factor_gt            0.0347
_refine_ls_restrained_S_all       1.053
_refine_ls_shift/su_max           0.002
_refine_ls_shift/su_mean          0.000
_refine_ls_structure_factor_coef  Fsqd
_refine_ls_weighting_details
'w=1/[\s^2^(Fo^2^)+(0.0480P)^2^+0.3670P] where P=(Fo^2^+2Fc^2^)/3'
_refine_ls_weighting_scheme       calc
_refine_ls_wR_factor_gt           0.0859
_refine_ls_wR_factor_ref          0.0901
_refine_special_details           ?
_olex2_refinement_description
;
1. Fixed Uiso
 At 1.2 times of:
  All C(H) groups, All N(H,H) groups
 At 1.5 times of:
  All C(H,H,H) groups, All O(H,H) groups
2.a Free rotating group:
 O1OH(H1OA,H1OB), O2OH(H2OA,H2OB)
2.b Ternary CH refined with riding coordinates:
 C26(H26), C29(H29)
2.c Secondary CH2 refined with riding coordinates:
 N1(H1A,H1B)
2.d Idealised Me refined as rotating group:
 C3(H3A,H3B,H3C), C4(H4A,H4B,H4C), C5(H5A,H5B,H5C), C8(H8A,H8B,H8C), C9(H9A,
 H9B,H9C), C10(H10A,H10B,H10C), C13(H13A,H13B,H13C), C14(H14A,H14B,H14C),
 C15(H15A,H15B,H15C), C18(H18A,H18B,H18C), C19(H19A,H19B,H19C), C20(H20A,H20B,
 H20C), C23(H23A,H23B,H23C), C24(H24A,H24B,H24C), C25(H25A,H25B,H25C), C27(H27A,
 H27B,H27C), C28(H28A,H28B,H28C), C30(H30A,H30B,H30C), C31(H31A,H31B,H31C)
;
_atom_sites_solution_hydrogens    mixed
_atom_sites_solution_primary      iterative
_atom_sites_solution_secondary    ?
loop_
  _atom_site_label
  _atom_site_type_symbol
  _atom_site_fract_x
  _atom_site_fract_y
  _atom_site_fract_z
  _atom_site_U_iso_or_equiv
  _atom_site_adp_type
  _atom_site_occupancy
  _atom_site_site_symmetry_order
  _atom_site_calc_flag
  _atom_site_refinement_flags_posn
  _atom_site_refinement_flags_adp
  _atom_site_refinement_flags_occupancy
  _atom_site_disorder_assembly
  _atom_site_disorder_group
 Gd1 Gd 0.62726(2) 0.43159(2) 0.18743(2) 0.00934(6) Uani 1 1 d . . . . .
 Cu1 Cu 0.58498(3) 0.48696(2) -0.05212(3) 0.01087(9) Uani 1 1 d . . . . .
 O1 O 0.67741(17) 0.34762(9) 0.29830(15) 0.0142(5) Uani 1 1 d . . . . .
 O2 O 0.55770(18) 0.53891(10) 0.19420(15) 0.0158(5) Uani 1 1 d . . . . .
 O3 O 0.55917(17) 0.32469(10) 0.16690(15) 0.0155(5) Uani 1 1 d . . . . .
 O4 O 0.48788(17) 0.55161(11) -0.03735(16) 0.0106(5) Uani 1 1 d . . . . .
 H4 H 0.519(3) 0.5746(17) -0.011(3) 0.023(13) Uiso 1 1 d . . . . .
 O5 O 0.66481(17) 0.53807(10) -0.11602(15) 0.0163(5) Uani 1 1 d . . . . .
 O7 O 0.46744(18) 0.42586(10) 0.22847(16) 0.0161(5) Uani 1 1 d . . . . .
 O8 O 0.70677(17) 0.37875(10) 0.07802(15) 0.0156(5) Uani 1 1 d . . . . .
 O9 O 0.64164(18) 0.49460(10) 0.32889(16) 0.0198(5) Uani 1 1 d . . . . .
 O10 O 0.66320(18) 0.41742(10) -0.07206(16) 0.0158(5) Uani 1 1 d . . . . .
 O11 O 0.72527(17) 0.50602(10) 0.11515(15) 0.0145(5) Uani 1 1 d . . . . .
 O12 O 0.81091(17) 0.45335(10) 0.24046(16) 0.0165(5) Uani 1 1 d . . . . .
 C1 C 0.6155(2) 0.30986(14) 0.2478(2) 0.0121(6) Uani 1 1 d . . . . .
 C2 C 0.6129(3) 0.24546(14) 0.2848(2) 0.0145(7) Uani 1 1 d . . . . .
 C3 C 0.5141(3) 0.21426(16) 0.2341(3) 0.0245(8) Uani 1 1 d . . . . .
 H3A H 0.4567 0.2370 0.2437 0.037 Uiso 1 1 calc GR . . . .
 H3B H 0.5125 0.1747 0.2607 0.037 Uiso 1 1 calc GR . . . .
 H3C H 0.5106 0.2113 0.1658 0.037 Uiso 1 1 calc GR . . . .
 C4 C 0.6232(3) 0.24579(17) 0.3949(3) 0.0303(9) Uani 1 1 d . . . . .
 H4A H 0.6872 0.2640 0.4268 0.045 Uiso 1 1 calc GR . . . .
 H4B H 0.6212 0.2052 0.4176 0.045 Uiso 1 1 calc GR . . . .
 H4C H 0.5677 0.2683 0.4092 0.045 Uiso 1 1 calc GR . . . .
 C5 C 0.7042(3) 0.21327(17) 0.2602(3) 0.0292(9) Uani 1 1 d . . . . .
 H5A H 0.6996 0.2166 0.1918 0.044 Uiso 1 1 calc GR . . . .
 H5B H 0.7034 0.1716 0.2776 0.044 Uiso 1 1 calc GR . . . .
 H5C H 0.7668 0.2314 0.2958 0.044 Uiso 1 1 calc GR . . . .
 C6 C 0.5914(2) 0.53823(15) 0.2863(2) 0.0146(7) Uani 1 1 d . . . . .
 C7 C 0.5696(3) 0.59147(16) 0.3476(2) 0.0211(8) Uani 1 1 d . . . . .
 C8 C 0.6703(3) 0.60907(19) 0.4196(3) 0.0331(9) Uani 1 1 d . . . . .
 H8A H 0.6944 0.5759 0.4625 0.050 Uiso 1 1 calc GR . . . .
 H8B H 0.6587 0.6432 0.4570 0.050 Uiso 1 1 calc GR . . . .
 H8C H 0.7207 0.6190 0.3844 0.050 Uiso 1 1 calc GR . . . .
 C9 C 0.5284(4) 0.64536(18) 0.2851(3) 0.0393(11) Uani 1 1 d . . . . .
 H9A H 0.5784 0.6586 0.2514 0.059 Uiso 1 1 calc GR . . . .
 H9B H 0.5143 0.6773 0.3256 0.059 Uiso 1 1 calc GR . . . .
 H9C H 0.4665 0.6344 0.2387 0.059 Uiso 1 1 calc GR . . . .
 C10 C 0.4923(4) 0.5693(2) 0.4023(4) 0.0561(16) Uani 1 1 d . . . . .
 H10A H 0.4303 0.5576 0.3567 0.084 Uiso 1 1 calc GR . . . .
 H10B H 0.4778 0.6009 0.4432 0.084 Uiso 1 1 calc GR . . . .
 H10C H 0.5201 0.5353 0.4417 0.084 Uiso 1 1 calc GR . . . .
 C11 C 0.6260(3) 0.56934(13) -0.1909(2) 0.0128(7) Uani 1 1 d . . . . .
 C12 C 0.7015(3) 0.60308(16) -0.2377(2) 0.0191(7) Uani 1 1 d . . . . .
 C13 C 0.7707(4) 0.6423(2) -0.1632(3) 0.0437(12) Uani 1 1 d . . . . .
 H13A H 0.7306 0.6726 -0.1413 0.066 Uiso 1 1 calc GR . . . .
 H13B H 0.8206 0.6612 -0.1918 0.066 Uiso 1 1 calc GR . . . .
 H13C H 0.8050 0.6181 -0.1090 0.066 Uiso 1 1 calc GR . . . .
 C14 C 0.7648(4) 0.5550(2) -0.2752(4) 0.0443(12) Uani 1 1 d . . . . .
 H14A H 0.8002 0.5305 -0.2219 0.066 Uiso 1 1 calc GR . . . .
 H14B H 0.8137 0.5742 -0.3046 0.066 Uiso 1 1 calc GR . . . .
 H14C H 0.7199 0.5302 -0.3225 0.066 Uiso 1 1 calc GR . . . .
 C15 C 0.6436(3) 0.64110(19) -0.3224(3) 0.0301(9) Uani 1 1 d . . . . .
 H15A H 0.5979 0.6159 -0.3683 0.045 Uiso 1 1 calc GR . . . .
 H15B H 0.6914 0.6600 -0.3535 0.045 Uiso 1 1 calc GR . . . .
 H15C H 0.6048 0.6714 -0.2988 0.045 Uiso 1 1 calc GR . . . .
 C16 C 0.7061(2) 0.37876(14) -0.0104(2) 0.0132(6) Uani 1 1 d . . . . .
 C17 C 0.7580(3) 0.32543(15) -0.0491(2) 0.0164(7) Uani 1 1 d . . . . .
 C18 C 0.8494(3) 0.30303(18) 0.0266(3) 0.0329(9) Uani 1 1 d . . . . .
 H18A H 0.9025 0.3329 0.0376 0.049 Uiso 1 1 calc GR . . . .
 H18B H 0.8744 0.2666 0.0043 0.049 Uiso 1 1 calc GR . . . .
 H18C H 0.8296 0.2953 0.0862 0.049 Uiso 1 1 calc GR . . . .
 C19 C 0.7886(3) 0.34226(19) -0.1424(3) 0.0356(10) Uani 1 1 d . . . . .
 H19A H 0.7287 0.3535 -0.1912 0.053 Uiso 1 1 calc GR . . . .
 H19B H 0.8208 0.3084 -0.1649 0.053 Uiso 1 1 calc GR . . . .
 H19C H 0.8356 0.3754 -0.1300 0.053 Uiso 1 1 calc GR . . . .
 C20 C 0.6762(3) 0.27626(17) -0.0700(3) 0.0335(9) Uani 1 1 d . . . . .
 H20A H 0.6533 0.2681 -0.0122 0.050 Uiso 1 1 calc GR . . . .
 H20B H 0.7047 0.2404 -0.0905 0.050 Uiso 1 1 calc GR . . . .
 H20C H 0.6192 0.2895 -0.1206 0.050 Uiso 1 1 calc GR . . . .
 C21 C 0.8092(2) 0.48988(14) 0.1728(2) 0.0117(6) Uani 1 1 d . . . . .
 C22 C 0.9106(2) 0.51394(14) 0.1573(2) 0.0149(7) Uani 1 1 d . . . . .
 C23 C 0.9588(3) 0.46254(16) 0.1110(3) 0.0261(8) Uani 1 1 d . . . . .
 H23A H 0.9710 0.4288 0.1544 0.039 Uiso 1 1 calc GR . . . .
 H23B H 1.0225 0.4758 0.0989 0.039 Uiso 1 1 calc GR . . . .
 H23C H 0.9129 0.4509 0.0508 0.039 Uiso 1 1 calc GR . . . .
 C24 C 0.8929(3) 0.56753(14) 0.0885(3) 0.0193(8) Uani 1 1 d . . . . .
 H24A H 0.8501 0.5556 0.0269 0.029 Uiso 1 1 calc GR . . . .
 H24B H 0.9575 0.5816 0.0795 0.029 Uiso 1 1 calc GR . . . .
 H24C H 0.8600 0.5992 0.1156 0.029 Uiso 1 1 calc GR . . . .
 C25 C 0.9802(3) 0.53151(17) 0.2548(2) 0.0238(8) Uani 1 1 d . . . . .
 H25A H 0.9474 0.5620 0.2845 0.036 Uiso 1 1 calc GR . . . .
 H25B H 1.0438 0.5467 0.2450 0.036 Uiso 1 1 calc GR . . . .
 H25C H 0.9933 0.4969 0.2964 0.036 Uiso 1 1 calc GR . . . .
 N1 N 0.8662(2) 0.34899(12) 0.44526(18) 0.0157(6) Uani 1 1 d . . . . .
 H1A H 0.8783 0.3113 0.4659 0.019 Uiso 1 1 calc R . . . .
 H1B H 0.8065 0.3491 0.4013 0.019 Uiso 1 1 calc R . . . .
 C26 C 0.9484(3) 0.36709(16) 0.3952(2) 0.0191(7) Uani 1 1 d . . . . .
 H26 H 0.9331 0.4076 0.3685 0.023 Uiso 1 1 calc R . . . .
 C27 C 1.0520(3) 0.36813(17) 0.4670(3) 0.0244(8) Uani 1 1 d . . . . .
 H27A H 1.0521 0.3984 0.5153 0.037 Uiso 1 1 calc GR . . . .
 H27B H 1.1042 0.3771 0.4333 0.037 Uiso 1 1 calc GR . . . .
 H27C H 1.0653 0.3296 0.4979 0.037 Uiso 1 1 calc GR . . . .
 C28 C 0.9453(3) 0.32393(17) 0.3120(2) 0.0239(8) Uani 1 1 d . . . . .
 H28A H 0.9609 0.2841 0.3372 0.036 Uiso 1 1 calc GR . . . .
 H28B H 0.9949 0.3360 0.2770 0.036 Uiso 1 1 calc GR . . . .
 H28C H 0.8782 0.3244 0.2690 0.036 Uiso 1 1 calc GR . . . .
 C29 C 0.8549(3) 0.38689(15) 0.5301(2) 0.0202(7) Uani 1 1 d . . . . .
 H29 H 0.9177 0.3829 0.5818 0.024 Uiso 1 1 calc R . . . .
 C30 C 0.7670(3) 0.3621(2) 0.5674(3) 0.0361(10) Uani 1 1 d . . . . .
 H30A H 0.7040 0.3678 0.5191 0.054 Uiso 1 1 calc GR . . . .
 H30B H 0.7634 0.3828 0.6259 0.054 Uiso 1 1 calc GR . . . .
 H30C H 0.7776 0.3200 0.5808 0.054 Uiso 1 1 calc GR . . . .
 C31 C 0.8413(3) 0.45250(17) 0.5024(3) 0.0342(10) Uani 1 1 d . . . . .
 H31A H 0.9016 0.4669 0.4845 0.051 Uiso 1 1 calc GR . . . .
 H31B H 0.8307 0.4753 0.5566 0.051 Uiso 1 1 calc GR . . . .
 H31C H 0.7831 0.4570 0.4483 0.051 Uiso 1 1 calc GR . . . .
 O1OH O 0.9145(2) 0.23005(10) 0.51000(17) 0.0246(6) Uani 1 1 d . . . . .
 H1OA H 0.8893 0.2001 0.4751 0.037 Uiso 1 1 d G . . . .
 H1OB H 0.9616 0.2181 0.5576 0.037 Uiso 1 1 d G . . . .
 O2OH O 0.86389(18) 0.12066(10) 0.41564(17) 0.0190(5) Uani 1 1 d . . . . .
 H2OA H 0.8187 0.0950 0.4211 0.028 Uiso 1 1 d G . . . .
 H2OB H 0.8935 0.1090 0.3722 0.028 Uiso 1 1 d G . . . .

loop_
  _atom_site_aniso_label
  _atom_site_aniso_U_11
  _atom_site_aniso_U_22
  _atom_site_aniso_U_33
  _atom_site_aniso_U_23
  _atom_site_aniso_U_13
  _atom_site_aniso_U_12
 Gd1 0.00842(9) 0.00883(10) 0.00900(10) 0.00160(5) -0.00139(6) 0.00042(6)
 Cu1 0.01063(19) 0.0098(2) 0.01174(19) 0.00254(15) 0.00179(14) 0.00204(15)
 O1 0.0144(11) 0.0101(11) 0.0151(11) 0.0010(9) -0.0020(9) -0.0013(9)
 O2 0.0185(12) 0.0124(12) 0.0145(11) -0.0006(9) 0.0000(9) -0.0001(10)
 O3 0.0168(12) 0.0112(11) 0.0153(11) 0.0016(9) -0.0025(9) -0.0017(10)
 O4 0.0081(11) 0.0102(12) 0.0108(11) -0.0005(10) -0.0026(9) 0.0010(10)
 O5 0.0122(11) 0.0189(12) 0.0174(12) 0.0078(10) 0.0031(9) 0.0017(10)
 O7 0.0129(12) 0.0217(13) 0.0135(12) 0.0040(9) 0.0029(9) 0.0009(10)
 O8 0.0167(12) 0.0147(12) 0.0147(11) -0.0003(9) 0.0020(9) 0.0040(10)
 O9 0.0195(13) 0.0213(13) 0.0137(11) -0.0034(10) -0.0056(9) 0.0062(11)
 O10 0.0177(12) 0.0139(11) 0.0149(11) 0.0008(10) 0.0022(9) 0.0064(10)
 O11 0.0118(11) 0.0141(12) 0.0148(11) 0.0039(9) -0.0024(9) 0.0001(10)
 O12 0.0135(12) 0.0174(12) 0.0161(12) 0.0041(10) -0.0014(9) -0.0030(10)
 C1 0.0116(15) 0.0119(16) 0.0111(15) 0.0009(12) -0.0004(12) -0.0004(13)
 C2 0.0201(17) 0.0071(15) 0.0137(16) 0.0014(12) -0.0010(13) -0.0023(14)
 C3 0.0242(19) 0.0134(18) 0.029(2) 0.0061(15) -0.0070(15) -0.0039(16)
 C4 0.049(3) 0.0161(19) 0.024(2) 0.0050(15) 0.0048(18) -0.0064(18)
 C5 0.029(2) 0.021(2) 0.039(2) 0.0081(17) 0.0084(17) 0.0098(17)
 C6 0.0108(15) 0.0155(17) 0.0163(16) -0.0027(13) 0.0006(12) -0.0011(14)
 C7 0.0211(19) 0.0220(19) 0.0189(18) -0.0066(15) 0.0021(14) 0.0025(16)
 C8 0.044(3) 0.031(2) 0.0206(19) -0.0100(17) -0.0012(17) 0.003(2)
 C9 0.047(3) 0.029(2) 0.033(2) -0.0145(19) -0.0072(19) 0.016(2)
 C10 0.051(3) 0.052(3) 0.082(4) -0.020(3) 0.047(3) -0.009(2)
 C11 0.0144(17) 0.0108(16) 0.0139(16) -0.0032(12) 0.0049(13) -0.0011(13)
 C12 0.0151(17) 0.0212(18) 0.0207(17) 0.0072(15) 0.0037(13) -0.0012(15)
 C13 0.045(3) 0.048(3) 0.033(2) 0.008(2) 0.0002(19) -0.034(2)
 C14 0.035(3) 0.046(3) 0.064(3) 0.021(2) 0.036(2) 0.015(2)
 C15 0.024(2) 0.040(2) 0.026(2) 0.0179(18) 0.0066(16) -0.0025(18)
 C16 0.0123(15) 0.0107(16) 0.0166(16) -0.0013(13) 0.0036(12) -0.0016(13)
 C17 0.0160(17) 0.0131(16) 0.0196(17) -0.0030(14) 0.0035(13) 0.0020(14)
 C18 0.027(2) 0.033(2) 0.033(2) -0.0069(18) -0.0026(17) 0.0176(19)
 C19 0.042(3) 0.037(2) 0.036(2) 0.0041(19) 0.026(2) 0.017(2)
 C20 0.033(2) 0.019(2) 0.047(2) -0.0138(18) 0.0075(19) 0.0003(18)
 C21 0.0102(15) 0.0101(15) 0.0126(15) -0.0024(12) -0.0017(12) -0.0013(13)
 C22 0.0107(15) 0.0142(17) 0.0178(16) -0.0001(13) -0.0003(12) -0.0005(13)
 C23 0.025(2) 0.0190(19) 0.038(2) 0.0002(17) 0.0157(17) 0.0010(16)
 C24 0.0137(17) 0.0193(19) 0.0232(19) 0.0027(14) 0.0010(14) -0.0029(14)
 C25 0.0163(18) 0.028(2) 0.0236(18) -0.0001(16) -0.0011(14) -0.0075(16)
 N1 0.0154(14) 0.0136(14) 0.0145(14) 0.0003(11) -0.0035(11) 0.0034(12)
 C26 0.0157(17) 0.0190(18) 0.0204(17) 0.0044(14) 0.0004(13) 0.0003(15)
 C27 0.0195(19) 0.027(2) 0.0241(19) 0.0004(16) 0.0001(14) -0.0029(16)
 C28 0.0190(18) 0.033(2) 0.0184(18) -0.0016(16) 0.0027(14) 0.0042(17)
 C29 0.0191(18) 0.0219(19) 0.0150(16) -0.0070(14) -0.0052(13) 0.0035(15)
 C30 0.033(2) 0.048(3) 0.028(2) -0.019(2) 0.0089(17) -0.001(2)
 C31 0.044(3) 0.025(2) 0.026(2) -0.0062(17) -0.0089(18) 0.017(2)
 O1OH 0.0324(15) 0.0120(12) 0.0211(13) -0.0015(10) -0.0100(10) 0.0024(11)
 O2OH 0.0181(13) 0.0146(12) 0.0204(13) -0.0030(10) -0.0028(9) -0.0008(10)

_geom_special_details
;
 All esds (except the esd in the dihedral angle between two l.s. planes)
 are estimated using the full covariance matrix.  The cell esds are taken
 into account individually in the estimation of esds in distances, angles
 and torsion angles; correlations between esds in cell parameters are only
 used when they are defined by crystal symmetry.  An approximate (isotropic)
 treatment of cell esds is used for estimating esds involving l.s. planes.
;
loop_
  _geom_bond_atom_site_label_1
  _geom_bond_atom_site_label_2
  _geom_bond_distance
  _geom_bond_site_symmetry_2
  _geom_bond_publ_flag
 Gd1 O1 2.430(2) . ?
 Gd1 O2 2.574(2) . ?
 Gd1 O3 2.539(2) . ?
 Gd1 O4 2.340(2) 3_665 ?
 Gd1 O7 2.361(2) . ?
 Gd1 O8 2.393(2) . ?
 Gd1 O9 2.415(2) . ?
 Gd1 O11 2.485(2) . ?
 Gd1 O12 2.450(2) . ?
 Gd1 C1 2.856(3) . ?
 Gd1 C6 2.854(3) . ?
 Gd1 C21 2.820(3) . ?
 Cu1 Gd1 3.5311(4) 3_665 ?
 Cu1 O4 1.987(2) . ?
 Cu1 O4 1.976(2) 3_665 ?
 Cu1 O5 1.932(2) . ?
 Cu1 O10 1.929(2) . ?
 O1 C1 1.274(4) . ?
 O2 C6 1.274(4) . ?
 O3 C1 1.257(4) . ?
 O4 Gd1 2.340(2) 3_665 ?
 O4 Cu1 1.976(2) 3_665 ?
 O5 C11 1.271(4) . ?
 O7 C11 1.245(4) 3_665 ?
 O8 C16 1.251(4) . ?
 O9 C6 1.252(4) . ?
 O10 C16 1.262(4) . ?
 O11 C21 1.275(4) . ?
 O12 C21 1.253(4) . ?
 C1 C2 1.528(4) . ?
 C2 C3 1.517(5) . ?
 C2 C4 1.533(4) . ?
 C2 C5 1.532(5) . ?
 C6 C7 1.538(4) . ?
 C7 C8 1.538(5) . ?
 C7 C9 1.514(5) . ?
 C7 C10 1.521(5) . ?
 C11 O7 1.245(4) 3_665 ?
 C11 C12 1.537(4) . ?
 C12 C13 1.506(5) . ?
 C12 C14 1.539(5) . ?
 C12 C15 1.521(5) . ?
 C16 C17 1.543(4) . ?
 C17 C18 1.509(5) . ?
 C17 C19 1.524(5) . ?
 C17 C20 1.528(5) . ?
 C21 C22 1.530(4) . ?
 C22 C23 1.537(4) . ?
 C22 C24 1.522(4) . ?
 C22 C25 1.521(5) . ?
 N1 C26 1.506(4) . ?
 N1 C29 1.506(4) . ?
 C26 C27 1.515(5) . ?
 C26 C28 1.513(5) . ?
 C29 C30 1.510(5) . ?
 C29 C31 1.511(5) . ?

loop_
  _geom_angle_atom_site_label_1
  _geom_angle_atom_site_label_2
  _geom_angle_atom_site_label_3
  _geom_angle
  _geom_angle_site_symmetry_1
  _geom_angle_site_symmetry_3
  _geom_angle_publ_flag
 O1 Gd1 O2 137.36(7) . . ?
 O1 Gd1 O3 52.45(7) . . ?
 O1 Gd1 O11 133.36(7) . . ?
 O1 Gd1 O12 81.44(7) . . ?
 O1 Gd1 C1 26.35(8) . . ?
 O1 Gd1 C6 112.01(8) . . ?
 O1 Gd1 C21 106.88(8) . . ?
 O2 Gd1 C1 145.21(8) . . ?
 O2 Gd1 C6 26.51(8) . . ?
 O2 Gd1 C21 84.60(8) . . ?
 O3 Gd1 O2 138.45(8) . . ?
 O3 Gd1 C1 26.11(8) . . ?
 O3 Gd1 C6 137.34(8) . . ?
 O3 Gd1 C21 135.83(8) . . ?
 O4 Gd1 O1 136.93(8) 3_665 . ?
 O4 Gd1 O2 73.68(7) 3_665 . ?
 O4 Gd1 O3 84.49(8) 3_665 . ?
 O4 Gd1 O7 77.90(8) 3_665 . ?
 O4 Gd1 O8 77.90(7) 3_665 . ?
 O4 Gd1 O9 124.41(8) 3_665 . ?
 O4 Gd1 O11 79.60(8) 3_665 . ?
 O4 Gd1 O12 130.14(7) 3_665 . ?
 O4 Gd1 C1 110.59(9) 3_665 . ?
 O4 Gd1 C6 99.23(9) 3_665 . ?
 O4 Gd1 C21 104.81(8) 3_665 . ?
 O7 Gd1 O1 85.78(7) . . ?
 O7 Gd1 O2 71.36(7) . . ?
 O7 Gd1 O3 69.71(7) . . ?
 O7 Gd1 O8 135.09(8) . . ?
 O7 Gd1 O9 73.89(8) . . ?
 O7 Gd1 O11 137.90(7) . . ?
 O7 Gd1 O12 147.67(8) . . ?
 O7 Gd1 C1 75.84(8) . . ?
 O7 Gd1 C6 69.67(8) . . ?
 O7 Gd1 C21 154.17(8) . . ?
 O8 Gd1 O1 86.78(7) . . ?
 O8 Gd1 O2 134.64(7) . . ?
 O8 Gd1 O3 70.79(7) . . ?
 O8 Gd1 O9 149.74(8) . . ?
 O8 Gd1 O11 72.31(7) . . ?
 O8 Gd1 O12 73.81(8) . . ?
 O8 Gd1 C1 78.13(8) . . ?
 O8 Gd1 C6 151.74(8) . . ?
 O8 Gd1 C21 69.35(8) . . ?
 O9 Gd1 O1 87.41(7) . . ?
 O9 Gd1 O2 52.28(7) . . ?
 O9 Gd1 O3 126.36(7) . . ?
 O9 Gd1 O11 90.65(8) . . ?
 O9 Gd1 O12 75.97(8) . . ?
 O9 Gd1 C1 107.47(8) . . ?
 O9 Gd1 C6 25.80(8) . . ?
 O9 Gd1 C21 84.08(8) . . ?
 O11 Gd1 O2 68.36(7) . . ?
 O11 Gd1 O3 142.08(7) . . ?
 O11 Gd1 C1 145.93(8) . . ?
 O11 Gd1 C6 79.50(8) . . ?
 O11 Gd1 C21 26.88(8) . . ?
 O12 Gd1 O2 98.85(7) . . ?
 O12 Gd1 O3 121.94(8) . . ?
 O12 Gd1 O11 53.10(7) . . ?
 O12 Gd1 C1 102.70(8) . . ?
 O12 Gd1 C6 87.84(8) . . ?
 O12 Gd1 C21 26.32(8) . . ?
 C6 Gd1 C1 127.78(8) . . ?
 C21 Gd1 C1 124.72(9) . . ?
 C21 Gd1 C6 84.62(9) . . ?
 Gd1 Cu1 Gd1 128.597(11) . 3_665 ?
 O4 Cu1 Gd1 38.76(6) . 3_665 ?
 O4 Cu1 Gd1 38.76(7) 3_665 . ?
 O4 Cu1 Gd1 96.35(6) 3_665 3_665 ?
 O4 Cu1 Gd1 96.25(6) . . ?
 O4 Cu1 O4 78.85(10) 3_665 . ?
 O5 Cu1 Gd1 132.67(7) . . ?
 O5 Cu1 Gd1 84.90(7) . 3_665 ?
 O5 Cu1 O4 166.86(10) . 3_665 ?
 O5 Cu1 O4 94.41(9) . . ?
 O10 Cu1 Gd1 136.86(7) . 3_665 ?
 O10 Cu1 Gd1 83.91(7) . . ?
 O10 Cu1 O4 172.29(10) . . ?
 O10 Cu1 O4 96.78(9) . 3_665 ?
 O10 Cu1 O5 91.09(10) . . ?
 C1 O1 Gd1 95.84(18) . . ?
 C6 O2 Gd1 89.11(19) . . ?
 C1 O3 Gd1 91.13(19) . . ?
 Cu1 O4 Gd1 109.12(10) . 3_665 ?
 Cu1 O4 Gd1 109.33(10) 3_665 3_665 ?
 Cu1 O4 Cu1 101.15(10) 3_665 . ?
 C11 O5 Cu1 123.4(2) . . ?
 C11 O7 Gd1 140.7(2) 3_665 . ?
 C16 O8 Gd1 138.8(2) . . ?
 C6 O9 Gd1 97.08(18) . . ?
 C16 O10 Cu1 128.2(2) . . ?
 C21 O11 Gd1 91.35(17) . . ?
 C21 O12 Gd1 93.54(18) . . ?
 O1 C1 Gd1 57.82(15) . . ?
 O1 C1 C2 119.4(3) . . ?
 O3 C1 Gd1 62.76(16) . . ?
 O3 C1 O1 120.5(3) . . ?
 O3 C1 C2 120.0(3) . . ?
 C2 C1 Gd1 177.2(2) . . ?
 C1 C2 C4 109.9(3) . . ?
 C1 C2 C5 105.9(3) . . ?
 C3 C2 C1 110.9(3) . . ?
 C3 C2 C4 109.8(3) . . ?
 C3 C2 C5 109.7(3) . . ?
 C5 C2 C4 110.6(3) . . ?
 O2 C6 Gd1 64.37(16) . . ?
 O2 C6 C7 120.0(3) . . ?
 O9 C6 Gd1 57.12(15) . . ?
 O9 C6 O2 121.4(3) . . ?
 O9 C6 C7 118.6(3) . . ?
 C7 C6 Gd1 174.1(2) . . ?
 C8 C7 C6 108.3(3) . . ?
 C9 C7 C6 111.8(3) . . ?
 C9 C7 C8 109.0(3) . . ?
 C9 C7 C10 110.9(4) . . ?
 C10 C7 C6 106.6(3) . . ?
 C10 C7 C8 110.2(4) . . ?
 O5 C11 C12 116.5(3) . . ?
 O7 C11 O5 125.0(3) 3_665 . ?
 O7 C11 C12 118.5(3) 3_665 . ?
 C11 C12 C14 106.7(3) . . ?
 C13 C12 C11 109.9(3) . . ?
 C13 C12 C14 110.2(4) . . ?
 C13 C12 C15 110.1(3) . . ?
 C15 C12 C11 110.2(3) . . ?
 C15 C12 C14 109.6(3) . . ?
 O8 C16 O10 125.9(3) . . ?
 O8 C16 C17 117.5(3) . . ?
 O10 C16 C17 116.6(3) . . ?
 C18 C17 C16 111.2(3) . . ?
 C18 C17 C19 110.7(3) . . ?
 C18 C17 C20 109.1(3) . . ?
 C19 C17 C16 111.1(3) . . ?
 C19 C17 C20 109.9(3) . . ?
 C20 C17 C16 104.7(3) . . ?
 O11 C21 Gd1 61.78(16) . . ?
 O11 C21 C22 119.5(3) . . ?
 O12 C21 Gd1 60.13(16) . . ?
 O12 C21 O11 121.6(3) . . ?
 O12 C21 C22 119.0(3) . . ?
 C22 C21 Gd1 172.2(2) . . ?
 C21 C22 C23 106.4(3) . . ?
 C24 C22 C21 111.0(3) . . ?
 C24 C22 C23 109.0(3) . . ?
 C25 C22 C21 109.5(3) . . ?
 C25 C22 C23 110.4(3) . . ?
 C25 C22 C24 110.4(3) . . ?
 C26 N1 C29 117.0(3) . . ?
 N1 C26 C27 110.4(3) . . ?
 N1 C26 C28 108.2(3) . . ?
 C28 C26 C27 112.4(3) . . ?
 N1 C29 C30 108.2(3) . . ?
 N1 C29 C31 111.2(3) . . ?
 C30 C29 C31 112.8(3) . . ?

_shelx_SHELXL_version_number      '2014/7'
_iucr_refine_instructions_details
;

    oejlm1144.res created by SHELXL-2014/7

TITL oejlm1144 in P2(1)/n
CELL 0.71073 13.446973 22.24287 14.173657 90 103.9358 90
ZERR 2 0.000402 0.000579 0.000389 0 0.0028 0
LATT 1
SYMM 0.5-X,0.5+Y,0.5-Z
SFAC C H Cu Gd N O
UNIT 124 264 4 4 4 52
 
L.S. 10
PLAN  20
fmap 2 53
acta
SHEL 100 0.8
REM <olex2.extras>
REM <HklSrc "%./oejlm1144.hkl">
REM </olex2.extras>
 
WGHT    0.048000    0.367000
FVAR       1.90902
GD1   4    0.627261    0.431593    0.187426    11.00000    0.00842    0.00883 =
         0.00900    0.00160   -0.00139    0.00042
CU1   3    0.584976    0.486959   -0.052125    11.00000    0.01063    0.00978 =
         0.01174    0.00254    0.00179    0.00204
O1    6    0.677405    0.347620    0.298302    11.00000    0.01443    0.01007 =
         0.01512    0.00097   -0.00200   -0.00135
O2    6    0.557699    0.538908    0.194196    11.00000    0.01851    0.01240 =
         0.01454   -0.00059   -0.00003   -0.00011
O3    6    0.559170    0.324690    0.166902    11.00000    0.01684    0.01115 =
         0.01528    0.00158   -0.00246   -0.00175
O4    6    0.487884    0.551610   -0.037351    11.00000    0.00812    0.01025 =
         0.01083   -0.00046   -0.00259    0.00104
H4    2    0.518821    0.574623   -0.011378    11.00000    0.02303
O5    6    0.664806    0.538070   -0.116015    11.00000    0.01224    0.01886 =
         0.01744    0.00782    0.00306    0.00170
O7    6    0.467436    0.425856    0.228470    11.00000    0.01288    0.02169 =
         0.01348    0.00397    0.00291    0.00088
O8    6    0.706769    0.378753    0.078024    11.00000    0.01669    0.01468 =
         0.01467   -0.00033    0.00204    0.00398
O9    6    0.641645    0.494596    0.328888    11.00000    0.01953    0.02133 =
         0.01367   -0.00338   -0.00565    0.00621
O10   6    0.663199    0.417423   -0.072056    11.00000    0.01770    0.01387 =
         0.01492    0.00077    0.00219    0.00639
O11   6    0.725265    0.506024    0.115148    11.00000    0.01181    0.01406 =
         0.01484    0.00390   -0.00240    0.00010
O12   6    0.810909    0.453347    0.240456    11.00000    0.01354    0.01738 =
         0.01613    0.00415   -0.00140   -0.00304
C1    1    0.615495    0.309861    0.247849    11.00000    0.01165    0.01192 =
         0.01108    0.00089   -0.00045   -0.00039
C2    1    0.612889    0.245455    0.284777    11.00000    0.02013    0.00711 =
         0.01371    0.00139   -0.00099   -0.00234
C3    1    0.514117    0.214262    0.234072    11.00000    0.02419    0.01338 =
         0.02905    0.00615   -0.00697   -0.00387
AFIX 137
H3A   2    0.456725    0.237034    0.243710    11.00000   -1.50000
H3B   2    0.512517    0.174676    0.260651    11.00000   -1.50000
H3C   2    0.510615    0.211341    0.165773    11.00000   -1.50000
AFIX   0
C4    1    0.623222    0.245790    0.394890    11.00000    0.04873    0.01605 =
         0.02411    0.00501    0.00480   -0.00641
AFIX 137
H4A   2    0.687165    0.264044    0.426826    11.00000   -1.50000
H4B   2    0.621242    0.205243    0.417574    11.00000   -1.50000
H4C   2    0.567728    0.268294    0.409214    11.00000   -1.50000
AFIX   0
C5    1    0.704208    0.213273    0.260196    11.00000    0.02856    0.02051 =
         0.03870    0.00806    0.00841    0.00985
AFIX 137
H5A   2    0.699623    0.216642    0.191756    11.00000   -1.50000
H5B   2    0.703405    0.171599    0.277618    11.00000   -1.50000
H5C   2    0.766810    0.231413    0.295813    11.00000   -1.50000
AFIX   0
C6    1    0.591383    0.538235    0.286270    11.00000    0.01078    0.01546 =
         0.01627   -0.00268    0.00063   -0.00106
C7    1    0.569573    0.591467    0.347608    11.00000    0.02108    0.02198 =
         0.01890   -0.00663    0.00209    0.00248
C8    1    0.670290    0.609067    0.419649    11.00000    0.04351    0.03063 =
         0.02060   -0.01000   -0.00119    0.00334
AFIX 137
H8A   2    0.694354    0.575937    0.462476    11.00000   -1.50000
H8B   2    0.658661    0.643211    0.457014    11.00000   -1.50000
H8C   2    0.720741    0.619042    0.384439    11.00000   -1.50000
AFIX   0
C9    1    0.528442    0.645360    0.285114    11.00000    0.04684    0.02900 =
         0.03340   -0.01445   -0.00724    0.01619
AFIX 137
H9A   2    0.578436    0.658615    0.251420    11.00000   -1.50000
H9B   2    0.514278    0.677280    0.325560    11.00000   -1.50000
H9C   2    0.466526    0.634361    0.238731    11.00000   -1.50000
AFIX   0
C10   1    0.492308    0.569269    0.402316    11.00000    0.05058    0.05217 =
         0.08152   -0.02041    0.04734   -0.00911
AFIX 137
H10A  2    0.430264    0.557644    0.356663    11.00000   -1.50000
H10B  2    0.477758    0.600857    0.443159    11.00000   -1.50000
H10C  2    0.520126    0.535293    0.441663    11.00000   -1.50000
AFIX   0
C11   1    0.625957    0.569336   -0.190898    11.00000    0.01439    0.01077 =
         0.01389   -0.00321    0.00488   -0.00107
C12   1    0.701528    0.603078   -0.237707    11.00000    0.01510    0.02123 =
         0.02069    0.00721    0.00372   -0.00124
C13   1    0.770696    0.642280   -0.163189    11.00000    0.04549    0.04817 =
         0.03282    0.00790    0.00018   -0.03369
AFIX 137
H13A  2    0.730616    0.672568   -0.141260    11.00000   -1.50000
H13B  2    0.820557    0.661170   -0.191806    11.00000   -1.50000
H13C  2    0.805008    0.618093   -0.108996    11.00000   -1.50000
AFIX   0
C14   1    0.764789    0.554968   -0.275224    11.00000    0.03531    0.04558 =
         0.06429    0.02128    0.03620    0.01450
AFIX 137
H14A  2    0.800200    0.530464   -0.221904    11.00000   -1.50000
H14B  2    0.813691    0.574216   -0.304641    11.00000   -1.50000
H14C  2    0.719931    0.530219   -0.322526    11.00000   -1.50000
AFIX   0
C15   1    0.643574    0.641103   -0.322408    11.00000    0.02394    0.04009 =
         0.02647    0.01790    0.00665   -0.00247
AFIX 137
H15A  2    0.597908    0.615933   -0.368328    11.00000   -1.50000
H15B  2    0.691415    0.659974   -0.353548    11.00000   -1.50000
H15C  2    0.604819    0.671402   -0.298811    11.00000   -1.50000
AFIX   0
C16   1    0.706088    0.378763   -0.010360    11.00000    0.01230    0.01073 =
         0.01659   -0.00135    0.00359   -0.00164
C17   1    0.757952    0.325426   -0.049112    11.00000    0.01599    0.01307 =
         0.01958   -0.00301    0.00347    0.00204
C18   1    0.849418    0.303028    0.026649    11.00000    0.02722    0.03318 =
         0.03337   -0.00692   -0.00259    0.01764
AFIX 137
H18A  2    0.902470    0.332916    0.037648    11.00000   -1.50000
H18B  2    0.874360    0.266582    0.004266    11.00000   -1.50000
H18C  2    0.829603    0.295341    0.086224    11.00000   -1.50000
AFIX   0
C19   1    0.788594    0.342264   -0.142408    11.00000    0.04234    0.03701 =
         0.03589    0.00407    0.02605    0.01724
AFIX 137
H19A  2    0.728662    0.353533   -0.191163    11.00000   -1.50000
H19B  2    0.820801    0.308439   -0.164887    11.00000   -1.50000
H19C  2    0.835628    0.375430   -0.129961    11.00000   -1.50000
AFIX   0
C20   1    0.676194    0.276258   -0.070031    11.00000    0.03296    0.01896 =
         0.04744   -0.01379    0.00751    0.00030
AFIX 137
H20A  2    0.653329    0.268077   -0.012173    11.00000   -1.50000
H20B  2    0.704656    0.240358   -0.090487    11.00000   -1.50000
H20C  2    0.619241    0.289452   -0.120575    11.00000   -1.50000
AFIX   0
C21   1    0.809190    0.489875    0.172798    11.00000    0.01024    0.01012 =
         0.01257   -0.00244   -0.00166   -0.00128
C22   1    0.910645    0.513940    0.157311    11.00000    0.01071    0.01415 =
         0.01784   -0.00013   -0.00026   -0.00046
C23   1    0.958755    0.462542    0.111000    11.00000    0.02517    0.01895 =
         0.03825    0.00017    0.01569    0.00103
AFIX 137
H23A  2    0.970974    0.428756    0.154409    11.00000   -1.50000
H23B  2    1.022457    0.475820    0.098859    11.00000   -1.50000
H23C  2    0.912892    0.450937    0.050797    11.00000   -1.50000
AFIX   0
C24   1    0.892909    0.567534    0.088479    11.00000    0.01373    0.01928 =
         0.02316    0.00269    0.00101   -0.00293
AFIX 137
H24A  2    0.850083    0.555609    0.026903    11.00000   -1.50000
H24B  2    0.957487    0.581615    0.079499    11.00000   -1.50000
H24C  2    0.859974    0.599173    0.115630    11.00000   -1.50000
AFIX   0
C25   1    0.980203    0.531509    0.254786    11.00000    0.01630    0.02847 =
         0.02361   -0.00006   -0.00114   -0.00746
AFIX 137
H25A  2    0.947415    0.562002    0.284525    11.00000   -1.50000
H25B  2    1.043762    0.546732    0.244988    11.00000   -1.50000
H25C  2    0.993328    0.496879    0.296363    11.00000   -1.50000
AFIX   0
 
N1    5    0.866168    0.348990    0.445264    11.00000    0.01544    0.01358 =
         0.01450    0.00033   -0.00348    0.00338
AFIX  23
H1A   2    0.878296    0.311303    0.465932    11.00000   -1.20000
H1B   2    0.806455    0.349142    0.401295    11.00000   -1.20000
AFIX   0
C26   1    0.948399    0.367094    0.395165    11.00000    0.01574    0.01902 =
         0.02041    0.00444    0.00043    0.00029
AFIX  13
H26   2    0.933129    0.407617    0.368462    11.00000   -1.20000
AFIX   0
C27   1    1.052009    0.368132    0.466974    11.00000    0.01950    0.02697 =
         0.02415    0.00039    0.00012   -0.00294
AFIX 137
H27A  2    1.052147    0.398409    0.515274    11.00000   -1.50000
H27B  2    1.104208    0.377069    0.433288    11.00000   -1.50000
H27C  2    1.065336    0.329574    0.497871    11.00000   -1.50000
AFIX   0
C28   1    0.945314    0.323931    0.311984    11.00000    0.01896    0.03334 =
         0.01837   -0.00155    0.00269    0.00421
AFIX 137
H28A  2    0.960906    0.284072    0.337198    11.00000   -1.50000
H28B  2    0.994906    0.335972    0.276998    11.00000   -1.50000
H28C  2    0.878174    0.324366    0.268985    11.00000   -1.50000
AFIX   0
C29   1    0.854913    0.386887    0.530146    11.00000    0.01908    0.02188 =
         0.01503   -0.00697   -0.00515    0.00347
AFIX  13
H29   2    0.917733    0.382850    0.581842    11.00000   -1.20000
AFIX   0
C30   1    0.767008    0.362116    0.567388    11.00000    0.03280    0.04783 =
         0.02845   -0.01861    0.00888   -0.00056
AFIX 137
H30A  2    0.704041    0.367806    0.519147    11.00000   -1.50000
H30B  2    0.763449    0.382809    0.625923    11.00000   -1.50000
H30C  2    0.777647    0.319984    0.580771    11.00000   -1.50000
AFIX   0
C31   1    0.841336    0.452499    0.502365    11.00000    0.04356    0.02461 =
         0.02568   -0.00624   -0.00891    0.01717
AFIX 137
H31A  2    0.901609    0.466862    0.484525    11.00000   -1.50000
H31B  2    0.830693    0.475294    0.556607    11.00000   -1.50000
H31C  2    0.783081    0.457024    0.448315    11.00000   -1.50000
AFIX   6
 
O1OH  6    0.914472    0.230053    0.509997    11.00000    0.03243    0.01197 =
         0.02112   -0.00152   -0.01001    0.00245
H1OA  2    0.889295    0.200127    0.475067    11.00000   -1.50000
H1OB  2    0.961620    0.218097    0.557636    11.00000   -1.50000
AFIX   6
 
O2OH  6    0.863889    0.120658    0.415638    11.00000    0.01814    0.01462 =
         0.02043   -0.00298   -0.00277   -0.00076
H2OA  2    0.818695    0.095044    0.421128    11.00000   -1.50000
H2OB  2    0.893523    0.109030    0.372200    11.00000   -1.50000
AFIX   0
HKLF 4
 
REM  oejlm1144 in P2(1)/n
REM R1 =  0.0347 for    7463 Fo > 4sig(Fo)  and  0.0400 for all    8391 data
REM    453 parameters refined using      0 restraints
 
END  
     
WGHT      0.0480      0.3672 

REM Highest difference peak  1.934,  deepest hole -2.294,  1-sigma level  0.125
Q1    1   0.8747  0.2029  0.3153  11.00000  0.05    1.28
Q2    1   0.6152  0.4593  0.1393  11.00000  0.05    1.11
Q3    1   0.6449  0.4569  0.2374  11.00000  0.05    1.10
Q4    1   0.6195  0.4316  0.1221  11.00000  0.05    1.09
Q5    1   0.6454  0.4033  0.2344  11.00000  0.05    1.08
Q6    1   1.1183  0.4326  0.4378  11.00000  0.05    1.06
Q7    1   0.6037  0.3990  0.1453  11.00000  0.05    1.04
Q8    1   0.9182  0.1442  0.5513  11.00000  0.05    0.90
Q9    1   0.5604  0.4293  0.2032  11.00000  0.05    0.86
Q10   1   0.8370  0.5162  0.3226  11.00000  0.05    0.86
Q11   1   0.6742  0.4827  0.4301  11.00000  0.05    0.72
Q12   1   0.5836  0.3773 -0.0558  11.00000  0.05    0.71
Q13   1   0.4632  0.5659 -0.1080  11.00000  0.05    0.64
Q14   1   0.7181  0.4323  0.2640  11.00000  0.05    0.61
Q15   1   0.7226  0.3019 -0.0601  11.00000  0.05    0.51
Q16   1   0.5855  0.4956  0.0208  11.00000  0.05    0.49
Q17   1   0.6578  0.4969 -0.0687  11.00000  0.05    0.47
Q18   1   0.6179  0.2463  0.3215  11.00000  0.05    0.46
Q19   1   0.7530  0.5591 -0.0431  11.00000  0.05    0.45
Q20   1   0.9397  0.4960  0.1349  11.00000  0.05    0.45

REM The information below was added by Olex2.
REM
REM R1 = 0.0347 for 7463 Fo > 4sig(Fo) and 0.0400 for all 17755 data
REM n/a parameters refined using n/a restraints
REM Highest difference peak 1.93, deepest hole -2.29
REM Mean Shift 0, Max Shift -0.002.

REM +++ Tabular Listing of Refinement Information +++
REM R1_all = 0.0400
REM R1_gt = 0.0347
REM wR_ref = 0.0901
REM GOOF = 1.053
REM Shift_max = -0.002
REM Shift_mean = 0
REM Reflections_all = 17755
REM Reflections_gt = 7463
REM Parameters = n/a
REM Hole = -2.29
REM Peak = 1.93
REM Flack = n/a

;
_olex2_date_sample_data_collection 2012-07-20
_olex2_submission_special_instructions 'No special instructions were received'
loop_
  _refln_index_h
  _refln_index_k
  _refln_index_l
  _refln_F_squared_meas
  _refln_F_squared_sigma
  _refln_scale_group_code
 0 0 -2 11024.5 537.096 2
 0 0 2 71632.8 1110.18 2
 0 0 -3 138.223 69.0391 2
 0 0 3 120.774 34.3645 3
 0 0 3 145.187 84.9584 2
 0 0 4 29740.2 1114.73 2
 0 0 4 32989.8 803.912 3
 0 0 5 35.6233 32.2139 3
 0 0 5 42.3093 89.9406 2
 0 0 6 4310.42 270.516 3
 0 0 6 4591.12 490.1 2
 0 0 7 167.79 59.8774 3
 0 0 7 287.94 183.918 2
 0 0 8 256399 4856.1 3
 0 0 8 257977 5890.2 2
 0 0 9 618.805 249.221 2
 0 0 9 433.179 111.842 3
 0 0 10 10731.8 920.69 2
 0 0 10 10379 515.653 3
 0 0 11 114.189 156.294 2
 0 0 12 260.078 237.157 2
 0 0 13 86.6603 240.674 2
 0 0 14 46500.9 2356.48 2
 0 0 15 361.936 204.407 2
 0 0 16 54218.8 2733.86 2
 0 0 17 462.694 349.464 2
 0 0 18 2847 634.542 2
 0 -1 -2 245.675 83.4799 2
 0 -1 2 399.686 93.1904 2
 0 1 2 223.524 77.6363 2
 0 1 -3 115817 2733.52 2
 0 -1 -3 143814 2508.5 3
 0 -1 3 122148 2762.14 2
 0 -1 -3 120308 2854.77 2
 0 1 3 120896 2860.41 2
 0 1 3 146850 2507.11 3
 0 1 4 49859.4 1552.76 2
 0 1 4 53501.4 1147.89 3
 0 1 5 32441.2 1280.47 2
 0 1 5 33140.1 860.179 3
 0 -1 5 30673.9 1200.78 2
 0 1 6 6652.48 345.226 3
 0 1 6 6630.24 586.51 2
 0 -1 6 7218.97 589.098 2
 0 -1 7 61407.4 1477.92 3
 0 -1 7 60556.9 2059.69 2
 0 1 7 58134.9 1429.43 3
 0 1 7 60491.2 2121.06 2
 0 -1 8 4843.52 328.133 3
 0 1 8 4738.87 319.142 3
 0 1 8 5711.09 641.046 2
 0 -1 8 4991.83 574.45 2
 0 1 9 45050.2 1215.01 3
 0 -1 9 40865.4 1191.34 3
 0 -1 9 42402.2 1829.94 2
 0 1 9 44311.6 1921.27 2
 0 1 10 3221.75 279.256 3
 0 -1 10 2620.58 253.89 3
 0 -1 10 2466.93 445.693 2
 0 1 10 3263.66 522.922 2
 0 1 11 17367.3 1258.61 2
 0 -1 11 18259.3 1249.45 2
 0 -1 12 9214.93 928.519 2
 0 1 12 9331.39 953.218 2
 0 -1 13 64226.9 2709.5 2
 0 1 13 64115.6 2765.27 2
 0 -1 14 236.395 221.976 2
 0 1 14 499.418 286.207 2
 0 -1 15 4095.44 686.264 2
 0 1 15 4707.79 755.579 2
 0 1 16 -30.9256 181.501 2
 0 -1 16 426.724 248.819 2
 0 -1 17 19844.3 1642.49 2
 0 1 17 20920.9 1720.91 2
 0 1 18 5397.42 913.817 2
 0 -1 18 6549.55 991.847 2
 0 2 2 21959.2 725.481 2
 0 -2 2 21951 587.019 2
 0 -2 -2 20811.2 719.341 2
 0 2 3 147075 2613.21 3
 0 -2 3 121558 2737.24 2
 0 2 3 121069 2928.26 2
 0 -2 -3 138179 2586.82 3
 0 -2 -4 6619.56 314.489 3
 0 -2 4 6336.66 436.844 2
 0 2 4 6079.71 485.198 2
 0 2 4 6572.44 316.128 3
 0 -2 -5 34797.3 941.098 3
 0 -2 5 32401.7 1222.87 2
 0 2 5 33547.9 1341.09 2
 0 2 6 9504.53 730.277 2
 0 2 6 10767.1 462.102 3
 0 -2 6 9597.02 670.038 2
 0 2 7 88226 1967 3
 0 2 7 88187.5 2737.07 2
 0 -2 7 87456.3 2578.57 2
 0 -2 8 112248 3183.55 2
 0 2 8 113281 3346.58 2
 0 2 8 114493 2463.9 3
 0 2 9 37281.3 1751.68 2
 0 2 9 36274 1074.04 3
 0 -2 9 34722.9 1607.36 2
 0 2 10 797.181 151.908 3
 0 2 10 920.956 283.161 2
 0 -2 10 739.195 142.838 3
 0 -2 10 967.27 287.446 2
 0 2 11 13180.2 1099.44 2
 0 -2 11 12682.1 1024 2
 0 -2 12 4952.1 671.36 2
 0 2 12 5291.92 730.819 2
 0 2 13 16893.1 1361.37 2
 0 -2 13 15974.6 1258.74 2
 0 2 14 21448.8 1578.52 2
 0 -2 14 21226.6 1507.19 2
 0 2 15 50733.2 2581.03 2
 0 -2 15 44435.7 2334.69 2
 0 -2 16 29905.6 1944.08 2
 0 2 16 29240.2 1994.92 2
 0 2 17 14143.5 1426.16 2
 0 -2 17 13648.6 1341.94 2
 0 -2 18 615.828 322.676 2
 0 3 1 87491.3 1170.92 3
 0 -3 1 109325 1313.8 3
 0 -3 -1 94738.5 1239.27 2
 0 3 2 181595 3797.45 2
 0 3 2 198760 3652.84 3
 0 -3 2 176834 3478.86 2
 0 -3 -2 203851 3662 3
 0 -3 2 217663 3708.7 3
 0 3 -2 200746 3663.58 3
 0 -3 -2 172058 3804.99 2
 0 3 3 19952.6 854.726 2
 0 3 3 21888.8 687.915 3
 0 -3 3 18918.6 668.709 2
 0 -3 3 22644.5 714.51 3
 0 -3 -3 21397.9 671.138 3
 0 3 4 214063 3958.55 3
 0 -3 -4 204604 3910 3
 0 3 4 195337 4396.66 2
 0 -3 4 218253 4019.19 3
 0 -3 4 190463 4100.05 2
 0 3 5 4063.65 442.69 2
 0 -3 -5 4256.78 283.565 3
 0 -3 5 3908.93 367.002 2
 0 3 5 4211.66 293.946 3
 0 -3 5 3986.39 298.204 3
 0 -3 6 67339.5 2003.53 2
 0 -3 -6 64700.9 1598.86 3
 0 3 6 69904 2239.62 2
 0 3 6 70587.8 1654.56 3
 0 -3 7 47842.8 1724.32 2
 0 3 7 46252.2 1890.34 2
 0 -3 -7 47569.2 1303.91 3
 0 3 8 5451.87 374.52 3
 0 3 8 5953.21 659.226 2
 0 -3 8 5383.74 564.48 2
 0 3 9 11695.5 957.307 2
 0 3 9 11348.9 564.697 3
 0 -3 9 11886.2 876.403 2
 0 -3 10 14437.1 688.024 3
 0 -3 10 17181.8 1113.53 2
 0 3 10 14958.2 1136.41 2
 0 3 10 15510.1 682.292 3
 0 -3 11 2158.85 416.269 2
 0 3 11 1746.52 413.035 2
 0 3 12 56749 2527.29 2
 0 -3 12 50954.2 2254.5 2
 0 3 13 45470.4 2319.91 2
 0 -3 13 45284 2168.19 2
 0 -3 14 14055.9 1204.81 2
 0 3 14 16144.4 1384.66 2
 0 -3 15 1577.85 435.013 2
 0 3 15 1676.79 529.624 2
 0 3 16 969.271 399.748 2
 0 -3 16 716.531 316.572 2
 0 -3 17 3553.54 680.997 2
 0 3 17 5964.04 924.592 2
 0 -4 0 471.321 72.5623 2
 0 4 0 445.66 97.1445 3
 0 -4 0 698.931 126.229 3
 0 -4 -1 132943 2879.91 2
 0 4 -1 154273 2971.04 3
 0 4 1 148785 2969.69 3
 0 4 1 129983 2834.46 2
 0 -4 1 157082 3011.68 3
 0 -4 -1 159321 2985.6 3
 0 -4 -2 656.297 116.004 3
 0 4 -2 157.527 62.3276 3
 0 4 2 291.965 81.6441 3
 0 -4 -2 574.367 136.597 2
 0 4 2 210.555 75.6143 2
 0 -4 2 226.808 87.4326 3
 0 -4 3 114873 2453.79 2
 0 -4 -3 128855 2623.02 3
 0 4 3 124757 2618.45 3
 0 -4 3 136356 2684.56 3
 0 4 3 117860 2846.19 2
 0 4 4 7490.23 559.86 2
 0 4 4 8044.84 435.005 3
 0 -4 4 7285.64 429.894 2
 0 -4 -4 7479.63 412.238 3
 0 4 5 13311.8 590.297 3
 0 -4 -5 12740.9 559.929 3
 0 4 5 12032.7 786.889 2
 0 -4 5 12115.3 644.349 2
 0 4 6 284.886 89.5735 3
 0 -4 6 381.556 139.829 2
 0 -4 -6 362.305 96.3123 3
 0 4 6 233.317 126.425 2
 0 4 7 27091.7 937.013 3
 0 4 7 25723.5 1350.18 2
 0 -4 7 24173.8 1136.2 2
 0 4 8 3198.66 490.944 2
 0 4 8 3541.6 314.626 3
 0 -4 8 3830.35 454.714 2
 0 4 9 37477.6 1814.35 2
 0 4 9 38556.5 1216.62 3
 0 -4 9 36600.9 1596.09 2
 0 -4 10 13765.8 980.727 2
 0 4 10 13222.9 1089.28 2
 0 4 10 15009.6 703.035 3
 0 4 11 19285.6 1357.15 2
 0 -4 11 17703.9 1173.95 2
 0 4 12 8368.8 927.547 2
 0 -4 12 6588.16 749.627 2
 0 4 13 8178.67 966.139 2
 0 -4 13 7954.54 846.181 2
 0 -4 14 860.588 290.877 2
 0 4 14 1518.2 450.418 2
 0 -4 15 38376.3 2100.1 2
 0 4 15 42482.3 2387.83 2
 0 4 16 700.907 369.076 2
 0 -4 16 440.126 239.279 2
 0 4 17 22147.6 1823.97 2
 0 5 0 256.752 93.1348 3
 0 5 0 322.891 58.7507 2
 0 -5 0 357.965 113.353 3
 0 -5 -1 75242.7 1712.96 3
 0 5 1 55187.6 1459.53 2
 0 5 1 67281.2 1676.32 3
 0 5 -1 69844.3 1670.09 3
 0 -5 -1 62589 1553.17 2
 0 5 -2 90846.6 2091.47 3
 0 5 2 82492.6 2071 2
 0 -5 -2 93374.6 2097.91 3
 0 5 2 84694.8 2060.29 3
 0 -5 3 91031 1860.9 2
 0 5 3 88855.7 2312.39 2
 0 5 3 89196.1 2139.11 3
 0 5 4 152679 3599.61 2
 0 -5 4 149642 3087.47 2
 0 5 4 155709 3241.74 3
 0 5 5 57828.1 1940.09 2
 0 -5 5 54420.3 1552.61 2
 0 5 5 57385.2 1556.52 3
 0 5 6 46842 1380.36 3
 0 5 6 45484.7 1793.27 2
 0 -5 6 45040.8 1474.1 2
 0 -5 7 13742.6 804.262 2
 0 5 7 15559.4 721.524 3
 0 5 7 16376.1 1059.6 2
 0 5 8 45.8819 102.991 2
 0 -5 8 209.797 136.199 2
 0 5 8 80.6147 50.6822 3
 0 5 9 3367.07 332.21 3
 0 5 9 4014.92 579.861 2
 0 -5 9 2978.04 416.495 2
 0 5 10 2204.4 472.89 2
 0 5 10 2069.6 262.306 3
 0 -5 10 1955.58 347.903 2
 0 5 11 73830.3 2870.98 2
 0 -5 11 67038.2 2470.55 2
 0 -5 12 78914.1 2818.98 2
 0 5 12 83044.9 3220.88 2
 0 5 13 1015.82 323.848 2
 0 -5 13 768.94 256.407 2
 0 5 14 18425.3 1505.12 2
 0 -5 14 15048.2 1197.1 2
 0 -5 15 3249.02 584.283 2
 0 5 15 2670.02 619.371 2
 0 5 16 41.6039 302.856 2
 0 5 17 4.50232 212.846 2
 0 6 0 14878.7 703.315 3
 0 6 0 15450.2 473.983 2
 0 -6 0 14763.6 520.665 2
 0 -6 -1 18401.6 725.219 2
 0 6 -1 20004 819.834 3
 0 6 1 18647.5 810.095 3
 0 6 -2 45109.9 1350.36 3
 0 6 2 43501.6 1333.85 3
 0 6 2 40398 1269.45 2
 0 6 3 2884.25 329.027 2
 0 -6 3 2578.35 162.358 2
 0 6 3 2726.36 289.336 3
 0 6 -3 2942.34 300.805 3
 0 6 4 5085.2 405.085 3
 0 6 4 5412.16 497.085 2
 0 -6 4 5696.65 324.45 2
 0 6 5 16880.7 959.006 2
 0 -6 5 15062.4 664.452 2
 0 6 5 15215 731.458 3
 0 6 6 5438.79 587.661 2
 0 -6 6 4736.79 403.363 2
 0 6 6 5406.76 426.933 3
 0 6 7 14346.3 722.082 3
 0 6 7 12814.4 954.63 2
 0 -6 7 13560.4 766.846 2
 0 6 8 8816.94 563.953 3
 0 6 8 7967.33 783.869 2
 0 -6 8 7397.9 598.125 2
 0 6 9 5089.7 428.878 3
 0 6 9 5447.12 676.549 2
 0 -6 9 5067.39 529.734 2
 0 6 10 109565 3586.91 2
 0 -6 10 103009 3082.2 2
 0 6 10 111070 2675.63 3
 0 -6 11 11881.3 921.263 2
 0 6 11 12843.1 1129.58 2
 0 -6 12 6151.99 684.89 2
 0 6 12 7102.4 870.834 2
 0 6 13 14206.3 1293.64 2
 0 -6 13 13280.7 1065.9 2
 0 -6 14 4080.42 611.165 2
 0 6 14 4828.02 781.585 2
 0 6 15 4646.27 801.594 2
 0 6 16 12203 1319.74 2
 0 6 17 14184 1470.8 2
 0 7 0 223.68 61.7313 2
 0 -7 0 278.623 79.552 2
 0 7 0 147.179 98.3539 3
 0 7 1 41813.4 1359.14 3
 0 7 -1 40706.8 1332.32 3
 0 7 1 39953.5 1108.54 2
 0 -7 -1 36953.6 1167.02 2
 0 7 2 1621.52 241.827 3
 0 7 2 1662.9 226.363 2
 0 7 -2 1828.46 264.87 3
 0 7 -3 125857 2873.13 3
 0 7 3 121134 2850.6 3
 0 -7 4 4614.13 260.079 2
 0 7 4 4342.71 405.307 3
 0 7 4 4758.5 472.504 2
 0 7 -4 4536 404.342 3
 0 -7 5 218519 4242.98 2
 0 7 5 219245 4617.75 3
 0 7 5 216048 4970.07 2
 0 7 6 11341.5 854.157 2
 0 -7 6 12286.9 626.13 2
 0 7 6 13074.1 719.89 3
 0 -7 7 42382.7 1430.69 2
 0 7 7 45541.1 1495.77 3
 0 7 7 45677.3 1892.04 2
 0 7 8 6089.75 681.506 2
 0 7 8 6271.25 505.042 3
 0 -7 8 6674.01 542.087 2
 0 7 9 195.259 94.4643 3
 0 -7 9 358.351 150.42 2
 0 7 9 342.765 199.069 2
 0 7 10 1022.75 202.242 3
 0 -7 10 808.011 238.146 2
 0 7 10 1179.39 362.95 2
 0 -7 11 99759 3055.98 2
 0 7 11 108047 3669.05 2
 0 -7 12 6616.21 686.745 2
 0 7 12 8433.56 963.557 2
 0 -7 13 41961.6 1954.8 2
 0 7 13 50123 2516.54 2
 0 7 14 3031.93 649.605 2
 0 7 15 3501.31 706.19 2
 0 7 16 -168.647 243.22 2
 0 8 0 33817.9 860.101 2
 0 8 0 31906.9 1227.23 3
 0 8 1 640.417 121.973 2
 0 -8 -1 842.435 157.504 2
 0 8 -1 636.415 78.1641 1
 0 8 -1 688.991 178.016 3
 0 8 1 468.041 140.64 3
 0 8 2 254180 5199.51 2
 0 8 2 270931 5492.73 3
 0 8 -2 268555 5461.13 3
 0 8 3 13210.9 741.655 2
 0 8 -3 14865.2 798.623 3
 0 8 3 14494.5 794.315 3
 0 8 4 19485.1 998.891 2
 0 -8 4 19194.2 535.314 2
 0 8 -4 19950.4 937.695 3
 0 8 4 19073 935.907 3
 0 8 5 2086.33 293.847 3
 0 8 5 2544.77 391.087 2
 0 -8 5 2737.28 222.332 2
 0 8 6 62570.4 2212.5 2
 0 -8 6 61217.1 1600.83 2
 0 8 6 61256.8 1896.37 3
 0 8 7 19719.8 1204.53 2
 0 -8 7 17906.6 819.588 2
 0 8 7 20319.1 981.738 3
 0 -8 8 32913.8 1269.63 2
 0 8 8 34221.3 1710.81 2
 0 8 8 35384.1 1367.96 3
 0 -8 9 1141.71 240.922 2
 0 8 9 1143.48 244.696 3
 0 8 9 1222.02 344.812 2
 0 8 10 49420.2 1702.3 3
 0 8 10 53430.8 2352.64 2
 0 -8 10 47766.8 1793.73 2
 0 -8 11 302.089 158.884 2
 0 8 11 279.115 232.358 2
 0 -8 12 434.386 207.659 2
 0 8 12 643.388 318.155 2
 0 8 13 2915.51 608.205 2
 0 8 14 24214.3 1783.96 2
 0 8 15 5848.5 883.815 2
 0 8 16 36974.2 2376.65 2
 0 9 0 108.999 47.2334 2
 0 9 0 60.628 124.548 3
 0 -9 -1 2317.69 157.288 1
 0 9 -1 2353.04 335.271 3
 0 9 1 1981.92 216.21 2
 0 9 -1 1977.9 135.942 1
 0 9 1 2005.82 297.562 3
 0 9 -1 1986.75 131.798 2
 0 9 2 105878 2526.58 2
 0 9 -2 103600 2758.76 3
 0 9 2 109052 2839.99 3
 0 9 3 135090 3263.67 2
 0 9 3 136940 3398.37 3
 0 9 -3 145120 3431.64 3
 0 9 -4 71032.8 2110.17 3
 0 9 4 67748.1 2103.78 3
 0 9 4 69940.9 2146.69 2
 0 9 5 59115.1 1932.81 3
 0 -9 5 60027.6 1345.52 2
 0 9 5 63991 2127.46 2
 0 9 6 79478.3 2623.67 2
 0 -9 6 85484.8 1930.69 2
 0 9 6 83708.4 2423.44 3
 0 9 7 199.883 108.074 3
 0 9 7 200.847 150.129 2
 0 -9 7 198.2 90.2082 2
 0 -9 8 4237.03 393.696 2
 0 9 8 4127.22 453.586 3
 0 9 8 4626.56 611.247 2
 0 9 9 6108.55 745.516 2
 0 9 9 6127.29 564.832 3
 0 -9 9 4869.44 463.919 2
 0 9 10 13162.2 834.367 3
 0 -9 10 12584.1 813.729 2
 0 9 10 14679.5 1193.9 2
 0 9 11 39941.7 2122.53 2
 0 -9 11 36171.7 1557.65 2
 0 9 12 21067.5 1560.81 2
 0 9 13 29633.3 1930.28 2
 0 9 14 19999.3 1639.95 2
 0 9 15 513.134 249.473 2
 0 9 16 3740.29 746.9 2
 0 10 0 49660.9 1752.55 3
 0 10 0 49121.2 1216.79 2
 0 -10 -1 244391 4318.28 1
 0 10 1 236765 5266.2 3
 0 10 -1 238286 4265.16 1
 0 10 -1 237346 4273.98 2
 0 10 1 232344 4642.2 2
 0 10 -1 241469 5248.3 3
 0 10 -2 51202.5 1792.24 3
 0 10 2 52918.4 1831.14 3
 0 10 2 51165.4 1545.03 2
 0 10 -3 62943.9 2010.7 3
 0 10 3 57377.1 1811.35 2
 0 10 3 59589.2 1990.93 3
 0 10 -4 4027.37 452.767 3
 0 10 4 3586.12 421.621 2
 0 10 5 1111.58 276.658 2
 0 -10 5 1198.67 113.389 2
 0 10 5 936.742 230.76 3
 0 10 6 11470.4 877.379 2
 0 10 6 11450.5 800.475 3
 0 -10 6 11312.1 473.868 2
 0 10 7 129249 3339.53 3
 0 10 7 123270 3614.15 2
 0 -10 7 123994 2713.56 2
 0 10 8 4272.36 482.677 3
 0 10 8 4576.05 606.313 2
 0 -10 8 4417.73 378.186 2
 0 10 9 51869.9 2270.52 2
 0 10 9 52736.3 1885.21 3
 0 -10 9 48969.1 1611.04 2
 0 10 10 51161.6 1866.63 3
 0 10 10 52723.2 2386.94 2
 0 -10 10 49037.4 1721.07 2
 0 10 11 3867.48 657.05 2
 0 10 12 2053.67 504.614 2
 0 10 13 1214.83 437.935 2
 0 10 14 885.402 379.289 2
 0 10 15 53479.3 2857.63 2
 0 10 16 4315.66 803.62 2
 0 11 0 245.326 83.5393 2
 0 11 0 380.69 178.959 3
 0 11 -1 7958.66 316.091 2
 0 11 1 9430.76 735.441 3
 0 11 1 7841.98 471.118 2
 0 -11 -1 8148.37 324.306 1
 0 11 -1 8716.44 743.779 3
 0 11 2 56318.6 1678.97 2
 0 11 2 60345 2050.04 3
 0 11 -2 59458.7 2022.9 3
 0 11 3 1143.83 235.986 2
 0 11 -3 963.64 242.096 3
 0 11 3 777.495 219.64 3
 0 11 4 87503.2 2650.21 3
 0 11 4 87244.2 2535.21 2
 0 11 -4 89375.3 2635.02 3
 0 11 5 132.906 117.735 2
 0 11 -5 100.255 91.1297 3
 0 11 5 140.661 123.35 3
 0 -11 6 71643.5 1559.5 2
 0 11 6 76145.2 2406.23 3
 0 11 6 76458.9 2529.39 2
 0 11 7 9005.25 732.682 3
 0 11 7 9103.61 834.766 2
 0 -11 7 8417.22 434.411 2
 0 -11 8 8688.22 507.81 2
 0 11 8 9235.99 878.271 2
 0 11 8 8783.26 730.482 3
 0 11 9 6236.57 619.163 3
 0 11 9 6851.02 794.563 2
 0 11 10 41074 1708.58 3
 0 11 10 45927 2231.15 2
 0 11 11 7587.18 913.499 2
 0 11 12 43924.4 2341.3 2
 0 11 13 92.6178 245.556 2
 0 11 14 35579.3 2227.41 2
 0 11 15 420.292 317.656 2
 0 12 0 20161.6 1137.72 3
 0 12 0 20805.2 726.778 2
 0 -12 -1 115414 2267.44 1
 0 12 1 120810 2667.26 2
 0 12 1 120785 3320.22 3
 0 12 -1 118198 3277.69 3
 0 12 -1 118926 2293.93 2
 0 12 2 15962.3 1010.55 3
 0 12 -2 14946.4 517.759 1
 0 12 -2 16410.1 1032.66 3
 0 12 2 16251.1 783.933 2
 0 12 3 345.649 166.855 3
 0 12 3 464.001 139.799 2
 0 12 -3 317.086 163.668 3
 0 12 4 8998.29 761.214 3
 0 12 -4 9835.45 788.61 3
 0 12 4 9926.81 726.487 2
 0 12 5 968.998 249.108 2
 0 12 5 682.553 216.245 3
 0 12 -5 881.776 228.745 3
 0 12 6 29877.8 1487.21 2
 0 12 6 27977.7 1404.5 3
 0 12 7 162012 4380.72 2
 0 12 7 160095 4153.05 3
 0 12 8 61766.7 2226.26 3
 0 12 8 61877.8 2477.23 2
 0 12 9 39660.9 1998.07 2
 0 12 9 37779.5 1685.97 3
 0 12 10 360.814 151.775 3
 0 12 10 10.556 156.955 2
 0 12 11 7833.8 931.75 2
 0 12 12 1702.85 478.758 2
 0 12 13 92.0611 152.627 2
 0 12 14 3967.5 763.303 2
 0 12 15 49807.4 2794.64 2
 0 13 0 559.082 281.829 3
 0 13 0 531.27 117.862 2
 0 13 -1 22513.5 648.174 2
 0 13 -1 23669.1 1283.39 3
 0 13 1 21613.7 1244.31 3
 0 13 1 23050.6 888.134 2
 0 -13 -2 68659.4 1518.21 1
 0 13 2 62505.7 2285.26 3
 0 13 2 63307.9 1846.56 2
 0 13 -2 63070.9 1408.38 1
 0 13 -2 64399.3 2319.81 3
 0 13 -3 19756 1164.48 3
 0 13 3 19091 956.811 2
 0 13 3 18040.8 1130.93 3
 0 13 -4 5840.16 623.118 3
 0 13 4 5258.23 599.627 3
 0 13 4 5195.47 525.031 2
 0 13 5 48564.2 1968.23 3
 0 13 5 48036.1 1871.86 2
 0 13 -5 48071 1929.51 3
 0 13 6 81206.3 2711.16 2
 0 13 6 82230.7 2717.55 3
 0 13 7 5601.48 635.458 3
 0 13 7 5860.53 692.932 2
 0 13 8 682.589 271.893 2
 0 13 8 945.768 268.917 3
 0 13 9 12132.5 937.746 3
 0 13 9 13639.5 1136.96 2
 0 13 10 9437.39 995.777 2
 0 13 10 9570.52 834.429 3
 0 13 11 16406.2 1349.49 2
 0 13 12 6043.88 859.158 2
 0 13 13 17754.9 1520.65 2
 0 13 14 37710.2 2357.64 2
 0 13 15 3151.62 731.482 2
 0 14 0 128796 3760.81 3
 0 14 0 140051 2882.77 2
 0 14 1 28671.1 1025.66 2
 0 14 -1 26540.5 1424.58 3
 0 14 1 26062.8 1418.5 3
 0 14 -1 27910.1 764.088 2
 0 14 2 32493.8 1600.61 3
 0 14 -2 32351.7 1605 3
 0 -14 -2 33960.8 909.196 1
 0 14 2 34242.5 1249.7 2
 0 14 -2 30349 807.303 1
 0 14 3 11251.8 921.367 3
 0 14 3 11251.9 734.286 2
 0 14 -3 11788.3 929.46 3
 0 14 4 194.836 95.4486 2
 0 14 -4 402.495 220.703 3
 0 14 4 487.16 204.888 3
 0 14 5 15978.6 1107.22 3
 0 14 -5 17300 1136.2 3
 0 14 5 17645.2 1069.54 2
 0 14 6 35832.7 1716.75 3
 0 14 6 35107.2 1658.12 2
 0 14 7 7435.19 759.523 3
 0 14 7 7946.96 799.29 2
 0 14 8 119016 3549.77 3
 0 14 8 118027 3741.07 2
 0 14 9 259.663 111.628 3
 0 14 9 205.748 191.359 2
 0 14 10 13017.5 1186.93 2
 0 14 10 11255.5 928.739 3
 0 14 11 1072.96 360.885 2
 0 14 12 63.1471 165.727 2
 0 14 13 3068.53 656.667 2
 0 14 14 18462.4 1640.03 2
 0 15 0 2271.96 503.059 3
 0 15 0 2040.99 237.339 2
 0 15 -1 13494 1031.97 3
 0 15 -1 15347.1 530.545 2
 0 15 1 13529.8 1032.24 3
 0 15 1 15318.4 739.399 2
 0 15 2 10819.9 939.578 3
 0 15 -2 11932.6 976.369 3
 0 15 2 12650 726.823 2
 0 -15 -2 12181 473.005 1
 0 15 -3 50399.5 2119.29 3
 0 15 3 50422 1732 2
 0 15 3 47702.6 2078.11 3
 0 15 -4 48919.8 2077.86 3
 0 15 4 50235.9 1832.55 2
 0 15 4 49498.2 2118.77 3
 0 15 -5 61239.3 2398.34 3
 0 15 5 64860.7 2249.21 2
 0 15 5 63710.9 2451.29 3
 0 15 6 5541.49 670.313 3
 0 15 6 5748.61 645.019 2
 0 15 7 21053.7 1320.99 2
 0 15 7 19219.8 1267.48 3
 0 15 8 4692.32 613.212 3
 0 15 8 4955.27 655.047 2
 0 15 9 15437.7 1133.96 3
 0 15 9 16239.5 1278.07 2
 0 15 10 -71.8475 113.507 3
 0 15 10 -46.8723 135.366 2
 0 15 11 35036.3 2059.87 2
 0 15 12 10096.6 1136.8 2
 0 15 13 33908.3 2186.57 2
 0 15 14 3271.62 682.339 2
 0 16 0 97416.8 3240.09 3
 0 16 0 100297 2263.91 2
 0 16 1 9612.02 892.604 3
 0 16 -1 9978.04 916.103 3
 0 16 1 11157.6 630.988 2
 0 16 -1 10768.5 440.81 2
 0 16 2 5646.66 693.599 3
 0 16 2 5601.73 483.717 2
 0 16 -2 5371.24 680.013 3
 0 -16 -3 30624.5 954.557 1
 0 16 3 29102 1275.78 2
 0 16 3 27782.2 1581.13 3
 0 16 -3 28044.2 1583.64 3
 0 16 4 314.01 254.041 3
 0 16 4 240.616 92.423 2
 0 16 -4 581.011 296.925 3
 0 16 -5 29579 1626.37 3
 0 16 5 28832 1430.23 2
 0 16 5 29008.5 1622.03 3
 0 16 6 21091.3 1375.37 3
 0 16 6 21992.1 1297.6 2
 0 16 7 15209.4 1122.43 2
 0 16 7 14502.2 1135.75 3
 0 16 8 57601.6 2411.56 3
 0 16 8 60545.4 2504.02 2
 0 16 9 25882.8 1544.76 3
 0 16 9 29125.7 1723.29 2
 0 16 10 21301.3 1535.79 2
 0 16 11 11596.8 1168.25 2
 0 16 12 26.4796 230.975 2
 0 16 13 12202.7 1295.77 2
 0 16 14 25872.4 1979.55 2
 0 17 0 3178.04 603.801 3
 0 17 0 1809.64 227.008 2
 0 17 1 27144.9 1046.83 2
 0 17 -1 27368.8 1612.39 3
 0 17 1 24339.3 1513.36 3
 0 17 2 2210.6 315.06 2
 0 17 -2 2675.19 492.177 3
 0 17 2 1927.03 447.25 3
 0 17 3 12702 811.243 2
 0 17 -3 12673.9 1095.34 3
 0 17 3 10852.5 1014.22 3
 0 17 4 149894 3855.46 2
 0 17 4 155537 4468.53 3
 0 17 -4 147966 4370.98 3
 0 17 5 25885.8 1566.56 3
 0 17 5 24822.6 1334.93 2
 0 17 -5 23301.7 1471.85 3
 0 17 6 9119.95 917.38 3
 0 17 6 9980.23 869.446 2
 0 17 7 8853.18 915.77 3
 0 17 7 8702.15 848.391 2
 0 17 8 766.573 257.105 3
 0 17 8 1303.91 367.994 2
 0 17 9 2917.68 570.681 2
 0 17 9 1817.41 412.379 3
 0 17 10 30730.6 1895.2 2
 0 17 11 6968.52 894.354 2
 0 17 12 46522.3 2540.68 2
 0 17 13 7246.37 1006.26 2
 0 18 0 5512.77 717.772 3
 0 18 1 59250.6 2550.78 3
 0 18 1 61885.6 1769.61 2
 0 18 -1 59899 2553.62 3
 0 18 2 703.358 184.194 2
 0 18 2 508.575 255.548 3
 0 18 -2 633.655 244.133 3
 0 18 3 78061.2 2996.89 3
 0 18 3 82369.5 2437.32 2
 0 18 -3 78557.2 3031.81 3
 0 18 4 1682.87 478.35 3
 0 18 4 1390.9 300.967 2
 0 18 -4 1677.54 534.905 3
 0 18 -5 50181.8 2328.45 3
 0 18 5 51268.3 2355.79 3
 0 18 5 53335.5 2075.56 2
 0 18 6 1582.21 348.046 2
 0 18 6 1451.03 380.166 3
 0 18 7 40270.2 1931.88 2
 0 18 7 36521 1964.4 3
 0 18 8 1177.32 345.38 2
 0 18 8 1065.95 280.7 3
 0 18 9 57489.9 2574.55 2
 0 18 9 55679.2 2475.48 3
 0 18 10 80.7852 176.534 2
 0 18 11 6958.81 915.035 2
 0 18 12 -249.8 370.264 2
 0 18 13 27862.5 2033.85 2
 0 19 0 904.162 346.283 3
 0 19 -1 5964.68 807.88 3
 0 19 1 5172.88 726.418 3
 0 19 2 9205.2 658.025 2
 0 19 -2 7679.91 875.06 3
 0 19 2 8286.12 916.822 3
 0 19 3 6899.41 630.629 2
 0 19 3 7399.69 903.595 3
 0 19 -3 8248.67 972.013 3
 0 19 -4 129604 4191.45 3
 0 19 4 130809 3537.09 2
 0 19 4 133871 4257.01 3
 0 19 5 11464.6 1092.85 3
 0 19 -5 11666 1092.72 3
 0 19 5 12231.2 939.199 2
 0 19 6 14805.8 1089.37 2
 0 19 6 12846.1 1146.99 3
 0 19 7 2574.22 470.724 2
 0 19 7 2798.66 559.505 3
 0 19 8 1861.48 445.007 2
 0 19 8 1843.02 430.482 3
 0 19 9 401.893 194.588 2
 0 19 9 326.435 202.794 3
 0 19 10 27713.9 1819.27 2
 0 19 11 10225.2 1133.91 2
 0 19 12 74866.6 3366.63 2
 0 19 13 -187.001 327.013 2
 0 20 0 29147.7 1812.37 3
 0 20 -1 15948.6 1317.82 3
 0 20 1 16511.5 1345.77 3
 0 20 -2 3426.29 637.511 3
 0 20 2 3407.33 619.167 3
 0 20 3 44427.4 1712.81 2
 0 20 3 40881.6 2192.77 3
 0 20 -3 42456.9 2227.35 3
 0 20 -4 1649.44 518.694 3
 0 20 4 1054.15 457.974 3
 0 20 4 506.564 230.767 2
 0 20 5 27140 1433.33 2
 0 20 5 25266.2 1694.9 3
 0 20 -5 23833.1 1643.87 3
 0 20 6 7382.83 907.529 3
 0 20 6 8273.56 820.903 2
 0 20 7 21847.8 1426.57 2
 0 20 7 19554.9 1484.14 3
 0 20 8 32739.7 1835.52 2
 0 20 8 27657.7 1783.23 3
 0 20 9 51401.8 2458.2 2
 0 20 9 47642.9 2381.92 3
 0 20 10 10047 1097.23 2
 0 20 11 7794.57 1005.19 2
 0 20 12 3570.97 731.769 2
 0 21 0 827.985 345.664 3
 0 21 -1 17359 1420.8 3
 0 21 1 16381.2 1395.31 3
 0 21 -2 621.729 342.458 3
 0 21 2 685.988 337.68 3
 0 21 -3 43392.8 2318.38 3
 0 21 3 45967.4 2361.8 3
 0 21 4 13894.2 1267.81 3
 0 21 -4 13116.6 1233.3 3
 0 21 5 39496.5 1803.98 2
 0 21 5 37636.1 2142.02 3
 0 21 6 1994.9 415.193 2
 0 21 6 1020.17 318.964 3
 0 21 7 10893.3 1126 3
 0 21 7 12543.3 1068.01 2
 0 21 8 685.867 230.127 2
 0 21 8 459.71 295.467 3
 0 21 9 10996.6 1136.15 3
 0 21 9 14415.5 1258.67 2
 0 21 10 4330.71 724.76 2
 0 21 11 41025.4 2366.37 2
 0 21 12 18470.8 1612.15 2
 0 22 0 39150.1 2254.28 3
 0 22 1 1053.54 399.208 3
 0 22 -1 848.381 396.803 3
 0 22 2 22126.3 1678.72 3
 0 22 -2 24169.4 1749.1 3
 0 22 3 12259.9 1252.35 3
 0 22 -3 12978.2 1283.76 3
 0 22 -4 343.167 265.954 3
 0 22 4 106.728 183.59 3
 0 22 5 136.642 318.556 3
 0 22 6 9487.17 1064.37 3
 0 22 7 2034.17 445.758 2
 0 22 7 807.282 346.8 3
 0 22 8 52556.5 2644.04 3
 0 22 8 56610.2 2533.22 2
 0 22 9 88.5137 171.619 3
 0 22 9 11.7424 180.492 2
 0 22 10 19436 1555 2
 0 22 11 308.406 248.039 2
 0 23 0 1316.67 434.504 3
 0 23 -1 10894.2 1183.13 3
 0 23 1 5880.68 871.767 3
 0 23 2 15370.7 1420.02 3
 0 23 -2 16218.9 1448.55 3
 0 23 -3 28516.8 1940.82 3
 0 23 3 27178.3 1915.46 3
 0 23 4 536.843 352.141 3
 0 23 -4 904.949 369.402 3
 0 23 5 36737.9 2235.67 3
 0 23 6 10018.7 1145.56 3
 0 23 7 2244.41 524.217 3
 0 23 8 537.891 327.412 3
 0 23 9 2851.66 603.057 3
 0 23 9 4520.04 753.628 2
 0 23 10 4724.87 771.744 2
 0 23 11 17427.9 1540.75 2
 0 24 0 10521.8 1199.12 3
 0 24 -1 24834.7 1866.35 3
 0 24 1 24032.5 1830.43 3
 0 24 -2 4533.64 795.687 3
 0 24 2 5143.04 865.329 3
 0 24 -3 155.502 340.94 3
 0 24 3 782.448 425.057 3
 0 24 4 1337.35 470.063 3
 0 24 -4 1462.93 462.375 3
 0 24 5 185.426 254.649 3
 0 24 6 6634.75 958.457 3
 0 24 7 27255 1961.14 3
 0 24 8 22473.2 1790.56 3
 0 24 9 10324.4 1187.5 3
 0 25 0 329.985 355.489 3
 0 25 1 1311 589.545 3
 0 25 -1 1103.27 450.662 3
 0 25 -2 38737.6 2416.87 3
 0 25 2 40147.2 2450.96 3
 0 25 -3 204.993 206.156 3
 0 25 3 351.245 199.832 3
 0 25 4 15056 1475.91 3
 0 25 5 4595.11 805.898 3
 0 25 6 29984.4 2121.62 3
 0 25 7 170.008 224.372 3
 0 25 8 604.323 311.213 3
 0 26 0 2186.61 549.637 3
 0 26 -1 40913.8 2537.46 3
 0 26 1 42486.1 2602.74 3
 0 26 -2 2993.74 717.715 3
 0 26 2 2359.01 672.103 3
 0 26 -3 748.636 413.298 3
 0 26 3 669.58 391.941 3
 0 26 4 -18.1452 329.47 3
 0 26 5 2517.66 645.879 3
 0 26 6 723.988 370.505 3
 0 26 7 39308.2 2487.47 3
 0 26 8 -198.934 151.951 3
 0 27 0 -45.0174 302.629 3
 0 27 1 1148.87 514.056 3
 0 27 -1 1339.13 493.205 3
 0 27 2 24264.9 1997.98 3
 0 27 -2 23228.8 1943.18 3
 0 27 3 18112.2 1687.49 3
 0 27 4 14720 1546.8 3
 0 27 5 4301.34 859.176 3
 0 27 6 20543.9 1797.63 3
 0 27 7 1136.79 512.796 3
 -1 0 18 509.182 270.555 2
 -1 0 17 67630 3177.38 2
 -1 0 16 499.351 314.034 2
 -1 0 15 1155.08 373.903 2
 -1 0 14 33.1222 204.309 2
 -1 0 13 4287.98 661.928 2
 -1 0 12 -109.195 147.568 2
 -1 0 11 29261.1 1584.4 2
 -1 0 10 91.5073 144.751 2
 -1 0 9 238344 5459.54 2
 -1 0 9 239565 4174.55 3
 -1 0 8 67.8143 36.1287 3
 -1 0 8 97.3716 38.5752 3
 -1 0 8 180.093 160.088 2
 -1 0 7 14065.3 857.922 2
 -1 0 7 13776.2 418.698 3
 -1 0 6 169.484 110.162 2
 -1 0 5 36876.9 1261.71 2
 -1 0 4 88.0532 73.1422 2
 1 0 -3 52239.9 1301.01 2
 -1 0 3 47830.2 1255.09 2
 -1 0 2 492.028 85.2184 2
 1 0 -2 306.145 65.2876 2
 1 0 2 927.024 120.707 3
 1 0 3 84956 1837.03 3
 1 0 4 58.6001 53.1203 3
 1 0 5 295398 5560.41 3
 1 0 5 294747 6125.93 2
 1 0 6 172.264 75.4715 3
 1 0 6 363.036 199.654 2
 1 0 7 107481 3110.4 2
 1 0 7 104578 2418.59 3
 1 0 8 -123.882 125.843 2
 1 0 8 41.5038 44.765 3
 1 0 9 10511.4 917.326 2
 1 0 9 8868.35 538.671 3
 1 0 10 29.1463 64.8708 3
 1 0 10 238.017 201.491 2
 1 0 11 -12.731 117.087 2
 1 0 12 204.424 211.534 2
 1 0 13 144462 4578.25 2
 1 0 14 652.729 346.975 2
 1 0 15 29133.8 1944.16 2
 1 0 16 262.397 205.002 2
 1 0 17 -31.3367 173.771 2
 -1 1 18 3719.94 744.862 2
 -1 -1 18 3304.4 719.491 2
 -1 1 17 992.271 400.916 2
 -1 -1 17 742.628 363.71 2
 -1 1 16 28033.1 1929.27 2
 -1 -1 16 29182.6 1932.2 2
 -1 -1 15 6326.3 847.341 2
 -1 1 15 6771.27 908.916 2
 -1 -1 14 15308.4 1273.81 2
 -1 1 14 15221 1297.67 2
 -1 -1 13 11773.3 1067.95 2
 -1 1 13 11332.4 1064.58 2
 -1 1 12 19014.6 1330 2
 -1 -1 12 18571 1277.56 2
 -1 1 11 1206.02 315.043 2
 -1 -1 11 1970.2 405.217 2
 -1 1 10 3665.85 527.714 2
 -1 -1 10 3392.09 485.093 2
 -1 -1 10 3049.89 209.827 3
 -1 -1 9 3853.25 234.639 3
 -1 1 9 4346.29 229.047 3
 -1 -1 9 3637.24 240.051 3
 -1 -1 9 4792.41 562.461 2
 -1 -1 8 214006 4937.7 2
 -1 -1 8 204516 3977.7 3
 -1 1 8 215914 5040.71 2
 -1 -1 8 218456 3955.62 3
 -1 1 8 220486 3916.02 3
 -1 -1 7 3894.3 225.73 3
 -1 -1 7 3848.87 216.101 3
 -1 1 7 3521.67 192.112 3
 -1 -1 7 3725.36 425.171 2
 -1 -1 6 41610.8 1440.01 2
 -1 -1 6 41378.5 950.266 3
 -1 1 6 39198.4 1458.12 2
 -1 -1 5 13768.9 415.918 3
 -1 -1 5 15077.3 721.921 2
 -1 1 5 14912.7 761.316 2
 -1 1 4 76470.2 1923.66 2
 -1 -1 4 74836 1830.04 2
 1 1 -3 35265.4 953.724 2
 1 -1 -3 35837.4 1032.08 2
 -1 -1 3 31889.5 913.631 2
 -1 1 3 30540.8 960.265 2
 1 -1 -2 687.97 101.637 2
 1 1 -2 327.34 61.9354 2
 -1 1 2 624.369 97.7476 2
 1 1 2 114758 2106.89 3
 -1 -1 -2 91010 2045.11 3
 -1 -1 -3 82943.9 1811.42 3
 1 1 3 81803.1 1787.25 3
 1 1 4 109695 2742.41 2
 1 1 4 109999 2327.24 3
 1 -1 5 829.406 206.913 2
 1 1 5 762.996 213.304 2
 1 1 5 679.425 122.231 3
 1 -1 6 4265.37 484.624 2
 1 -1 6 4234.97 333.714 3
 1 1 6 3972.71 315.983 3
 1 1 6 4850.49 554.914 2
 1 -1 7 3099.93 439.683 2
 1 -1 7 2680.6 277.138 3
 1 1 7 2548.61 419.129 2
 1 1 7 2342.31 254.461 3
 1 -1 8 125799 2870.42 3
 1 -1 8 130422 3639.88 2
 1 1 8 126310 2853.54 3
 1 1 8 132102 3741.2 2
 1 -1 9 19160.6 842.321 3
 1 1 9 19068.6 829.508 3
 1 1 9 21307 1338.82 2
 1 1 10 35366.2 1214.83 3
 1 -1 10 37815.9 1870.68 2
 1 -1 10 34198.3 1206.44 3
 1 -1 11 6343.81 765.778 2
 1 1 11 7784.92 859.056 2
 1 1 12 102560 3624.74 2
 1 -1 12 99124.2 3501.89 2
 1 1 13 646.96 346.356 2
 1 -1 13 768.623 330.413 2
 1 1 14 2964.85 602.701 2
 1 -1 14 3317.3 623.938 2
 1 -1 15 1101.61 437.798 2
 1 1 15 842.539 318.808 2
 1 -1 16 15448.9 1411.58 2
 1 1 16 15844.8 1465.7 2
 1 1 17 3780.52 730.529 2
 1 -1 17 4854.35 811.88 2
 1 -1 18 15562.4 1522.08 2
 -1 -2 18 11569.5 1279.71 2
 -1 2 18 12932.5 1383.57 2
 -1 2 17 26395.8 1956.79 2
 -1 -2 17 24292.9 1799.04 2
 -1 -2 16 23669 1714.79 2
 -1 2 16 24409.2 1823.1 2
 -1 -2 15 162.262 197.321 2
 -1 2 15 205.417 159.659 2
 -1 -2 14 185.753 171.41 2
 -1 2 14 161.254 234.647 2
 -1 2 13 6639.72 824.793 2
 -1 -2 13 6209.94 761.288 2
 -1 -2 12 18584.1 1264.45 2
 -1 2 12 20656.8 1400.73 2
 -1 2 11 1226.68 346.859 2
 -1 -2 11 1017.62 288.236 2
 -1 -2 10 21386.8 1239.66 2
 -1 -2 10 20717.6 679.62 3
 -1 -2 9 57027.2 1436.24 3
 -1 2 9 62014.9 2274.54 2
 -1 -2 9 61065.9 1416.43 3
 -1 -2 9 60187.2 2127.66 2
 -1 2 9 62117.9 1344.47 3
 -1 2 8 51681.3 1969.51 2
 -1 -2 8 54318.7 1891.84 2
 -1 -2 8 51999.9 1300 3
 -1 2 8 54424.3 1217.81 3
 -1 2 7 4900.72 251.474 3
 -1 -2 7 4752.33 285.676 3
 -1 2 7 5432.86 547.782 2
 -1 -2 7 4298.15 447.164 2
 -1 2 6 680.689 86.4507 3
 -1 2 6 588.418 189.255 2
 -1 -2 6 646.127 99.7894 3
 -1 -2 6 605.917 169.186 2
 -1 -2 5 4463.86 251.195 3
 -1 2 5 3909.71 394.964 2
 1 -2 -5 4136.85 198.204 3
 -1 -2 5 4204.68 358.819 2
 -1 2 5 3828.68 200.549 3
 -1 2 4 100054 1964.74 3
 1 -2 -4 101245 1947.55 3
 -1 -2 4 106527 2065.29 3
 -1 -2 4 105512 2278.46 2
 -1 2 4 98685.2 2436.96 2
 -1 2 3 3697.6 188.081 3
 -1 -2 3 4150.59 224.893 3
 -1 2 3 3895.12 302.874 2
 1 2 -3 4219.42 216.255 3
 1 2 -3 4439.35 269.792 2
 1 -2 -3 4330.54 200.227 3
 -1 -2 3 4276.03 258.67 2
 -1 2 2 66707.4 1026.32 3
 1 -2 -2 71822.4 1249.09 2
 -1 -2 2 63532.4 1078.26 3
 -1 -2 2 66685.1 1029.1 2
 -1 2 2 60076.2 1190.22 2
 -1 -2 -1 285.26 73.3734 3
 1 2 1 744.618 104.705 3
 -1 -2 -2 173503 3413.7 3
 1 2 2 181362 3419.11 3
 1 2 3 1256.16 154.633 3
 -1 -2 -3 1180.08 150.722 3
 1 2 4 33976.4 1280.02 2
 1 2 4 33588 990.936 3
 -1 -2 -4 32490.1 990.354 3
 1 -2 5 198096 4322.47 2
 -1 -2 -5 193433 3927.19 3
 1 2 5 199633 3922.51 3
 1 2 5 198566 4520.71 2
 1 2 6 84373.7 2602.69 2
 1 -2 6 83757.5 2443.64 2
 1 2 6 82006.8 1984.17 3
 1 2 7 141243 3064 3
 1 2 7 141514 3829.57 2
 1 -2 7 139510 3677.14 2
 1 2 8 58860.6 2266.3 2
 1 2 8 55720.7 1571.55 3
 1 -2 8 53992.1 1589.71 3
 1 -2 8 56549.4 2120.47 2
 1 2 9 1461.06 372.922 2
 1 2 9 1099.39 197.444 3
 1 -2 9 1339.63 330.377 2
 1 -2 9 1165.8 200.858 3
 1 -2 10 -62.9758 137.644 2
 1 -2 10 268.664 119.655 3
 1 2 10 41.0781 142.913 2
 1 2 10 3.0808 57.8634 3
 1 2 11 1381.97 386.752 2
 1 -2 11 1480.06 387.663 2
 1 -2 12 13824.4 1164.87 2
 1 2 12 16597.2 1334.49 2
 1 -2 13 89987 3347.82 2
 1 2 13 89069 3462.96 2
 1 2 14 17103.5 1452.71 2
 1 -2 14 15346.4 1311.99 2
 1 -2 15 16507.8 1407.63 2
 1 2 15 17038.2 1499.54 2
 1 -2 16 13131.9 1294.04 2
 1 2 16 14813.9 1432.58 2
 1 2 17 832.374 357.405 2
 1 -2 17 1103.71 367.731 2
 1 -2 18 280.23 192.517 2
 -1 3 17 3793.16 713.802 2
 -1 -3 17 4175.94 691.833 2
 -1 3 16 7854.75 1034.27 2
 -1 -3 16 8381.63 990.374 2
 -1 -3 15 39485.8 2143.72 2
 -1 3 15 43880.4 2391.71 2
 -1 -3 14 5792.68 764.747 2
 -1 3 14 6028.27 832.049 2
 -1 -3 13 37465.5 1902.29 2
 -1 3 13 37081.8 2024.48 2
 -1 -3 12 3462 535.101 2
 -1 3 12 4126.76 627.945 2
 -1 -3 11 5040.01 607.1 2
 -1 3 11 6064.04 734.983 2
 -1 -3 10 1266.61 291.091 2
 -1 3 10 1543.25 354.826 2
 -1 -3 10 1349.39 169.981 3
 -1 -3 9 4510.41 336.515 3
 -1 -3 9 4432.5 502.973 2
 -1 3 9 5373.95 626.098 2
 -1 3 9 4765.31 284.122 3
 -1 -3 8 53211.2 1834.73 2
 -1 3 8 50743.3 1974.49 2
 -1 -3 8 51515.8 1380.36 3
 -1 3 8 54772 1278.21 3
 -1 3 7 149578 2897.51 3
 -1 -3 7 148745 3034.58 3
 -1 -3 7 146821 3484.41 2
 1 -3 -7 149971 2883.56 3
 1 -3 -6 62.7611 37.2722 3
 -1 -3 6 210.241 112.719 2
 -1 -3 6 207.391 79.8312 3
 -1 3 6 100.418 48.2297 3
 -1 3 5 145091 3458.72 2
 -1 -3 5 153396 3008.27 3
 -1 3 5 149807 2899.19 3
 -1 -3 5 150842 3198.16 2
 1 -3 -5 149291 2862.12 3
 1 3 -4 43133.1 1197.53 2
 -1 -3 4 42125.1 1124.7 2
 -1 3 4 37908.5 1296.76 2
 1 3 -4 42553.4 1050.84 3
 -1 -3 4 40727.4 1072.68 3
 -1 3 4 38923.7 995.88 3
 1 -3 -4 41145.1 993.269 3
 1 3 -3 4107.71 252.03 3
 -1 -3 3 3552.76 221.754 2
 -1 3 3 3123.03 284.505 2
 -1 3 3 3334.27 220.767 3
 -1 -3 3 3528.6 249.673 3
 1 -3 -3 3831.36 229.455 3
 1 3 -3 3846.31 235.31 2
 1 3 -2 80700.2 1802.2 3
 -1 -3 2 83964.1 1821.83 3
 -1 -3 2 88292 1630.2 2
 1 -3 -2 91175.7 1795.17 3
 1 3 -2 76335.3 1612.11 2
 1 -3 -2 96935.9 1932.57 2
 -1 3 2 84349 1772.6 3
 -1 3 2 86726.2 1880.62 2
 1 -3 -1 267.017 56.4249 2
 -1 3 1 41.7864 28.3516 2
 1 3 -1 183.486 58.774 3
 -1 3 1 353.951 75.7144 3
 1 -3 -1 125.252 47.1804 3
 -1 -3 1 343.015 79.6428 3
 -1 -3 0 57044.1 1007.94 3
 1 -3 0 53106.6 939.878 3
 1 3 1 60395.5 1385 3
 -1 -3 -1 51170 1334.53 3
 1 3 2 3475.87 268.784 3
 -1 -3 -2 3806.89 273.654 3
 -1 -3 -3 224132 4378.99 3
 1 3 3 227724 4701.31 2
 1 3 3 231523 4398.1 3
 -1 -3 -4 83897.1 2000.19 3
 1 3 4 87155.2 2399.53 2
 1 3 4 90941.3 2046.96 3
 1 3 5 21064.6 799.383 3
 1 3 5 20338.9 1081.23 2
 1 -3 5 20667.5 947.309 2
 1 -3 6 490.219 178.855 2
 1 3 6 500.059 198.033 2
 1 3 6 422.387 111.183 3
 1 -3 7 10928.7 791.247 2
 1 3 7 9875.75 561.237 3
 1 3 7 11007.8 882.514 2
 1 3 8 30737.6 1109.86 3
 1 -3 8 33328.3 1530.39 2
 1 3 8 33562.8 1673.55 2
 1 3 9 67408.7 2600.3 2
 1 -3 9 65178.2 2388.97 2
 1 3 9 62640 1794.68 3
 1 3 10 1944.96 429.205 2
 1 3 10 1759.92 255.545 3
 1 -3 10 1248.57 213.135 3
 1 -3 10 2158.87 423.846 2
 1 3 11 63203.2 2708.63 2
 1 -3 11 63206.9 2541.16 2
 1 -3 12 51641.6 2335.27 2
 1 3 12 53225.3 2508.52 2
 1 3 13 890.533 305.619 2
 1 -3 13 785.118 282.21 2
 1 -3 14 2180.54 522.248 2
 1 3 14 2233.65 536.505 2
 1 -3 15 4591.47 738.436 2
 1 3 15 5793.58 887.051 2
 1 -3 16 1830.67 457.668 2
 1 3 16 1877.54 531.863 2
 1 3 17 33310.3 2242.15 2
 1 -3 17 29794.1 1999.83 2
 -1 4 17 629.629 346.649 2
 -1 -4 16 15071.6 1313.22 2
 -1 4 16 15670 1468.4 2
 -1 -4 15 5128.94 740.851 2
 -1 4 15 5475.85 841.131 2
 -1 4 14 1960.95 509.088 2
 -1 -4 14 1775.72 446.934 2
 -1 4 13 2509.55 532.737 2
 -1 -4 13 2250.93 449.584 2
 -1 -4 12 18824.4 1246.17 2
 -1 4 12 21674.4 1469.76 2
 -1 -4 11 9235.12 808.373 2
 -1 4 11 8837.81 900.396 2
 -1 -4 10 36398.4 1594.6 2
 -1 4 10 37262.7 1813.89 2
 -1 -4 9 1003.16 240.52 2
 -1 4 9 1287.19 164.004 3
 -1 4 9 1341.69 328.305 2
 -1 -4 8 23655.1 1113.31 2
 -1 4 8 24856.8 1316.93 2
 1 -4 -8 23490.7 771.189 3
 -1 4 8 26428.8 836.598 3
 1 -4 -7 2811.33 224.881 3
 -1 4 7 3233.15 258.627 3
 -1 -4 7 2795.72 335.297 2
 -1 4 7 2432.5 387.659 2
 -1 4 6 1673.71 307.298 2
 1 -4 -6 1954.98 185.126 3
 -1 4 6 1688.98 186.782 3
 -1 -4 6 1794.06 238.543 2
 -1 4 5 9568.98 655.199 2
 -1 4 5 9593.89 457.916 3
 1 -4 -5 10537.5 458.515 3
 -1 -4 5 9630.05 505.177 2
 1 -4 -4 111780 2290.51 3
 -1 -4 4 113952 2283.37 2
 -1 -4 4 108342 2386.28 3
 -1 4 4 99939.8 2575.96 2
 1 4 -4 109789 2332.32 3
 1 4 -4 109389 2352.48 2
 -1 4 4 101800 2274.77 3
 -1 4 3 984.695 147.246 3
 1 -4 -3 1061.2 140.398 3
 -1 -4 3 995.551 153.662 3
 1 4 -3 952.449 140.658 3
 -1 4 3 825.735 157.756 2
 -1 -4 3 939 104.834 2
 1 4 -3 1109.1 117.732 2
 -1 -4 2 126983 2756.07 3
 1 -4 -2 143135 2745.69 3
 -1 4 2 128034 2731.04 2
 -1 4 2 125841 2694.06 3
 1 4 -2 131656 2754.71 3
 1 -4 -2 143107 2805.97 2
 1 -4 -1 33662.4 850.744 2
 -1 4 1 30634.6 928.611 3
 1 4 -1 31454.9 952.398 3
 -1 4 1 29453.7 821.059 2
 1 -4 -1 33941.9 946.062 3
 -1 -4 1 30594.4 959.738 3
 1 -4 0 12661.8 387.406 2
 1 4 0 12620.6 548.306 3
 -1 4 0 14047 561.573 3
 -1 4 0 13174.8 416.77 1
 -1 -4 0 12027.9 541.579 3
 1 -4 0 14330.7 566.024 3
 1 4 1 14858.4 621.22 3
 -1 -4 -1 14982.2 628.345 3
 1 -4 1 15638.5 627.087 3
 -1 -4 -2 3157.45 275.674 3
 1 4 2 2783.84 263.721 3
 1 4 3 93840.6 2178.45 3
 1 4 3 92714.9 2389 2
 1 4 4 38327.8 1189.58 3
 1 4 4 39095.9 1464.82 2
 1 4 5 26770 1272.88 2
 1 4 5 25941.8 957.629 3
 1 -4 5 25533.8 1041.13 2
 1 -4 6 124456 3117.85 2
 1 4 6 122633 2817 3
 1 4 6 121322 3405.17 2
 1 4 7 145.057 87.4879 3
 1 4 7 250.724 182.717 2
 1 -4 7 14.2667 97.4732 2
 1 -4 8 67004.5 2274.58 2
 1 4 8 63756.9 2467.7 2
 1 4 8 63247.6 1813.72 3
 1 4 9 30258.9 1678.78 2
 1 -4 9 28849.2 1480.25 2
 1 4 9 28887 1120.68 3
 1 4 10 1129.97 215.175 3
 1 4 10 763.222 300.58 2
 1 -4 10 894.131 263.514 2
 1 -4 11 13997.5 1095.19 2
 1 4 11 14983 1258.31 2
 1 4 12 53684.2 2529.74 2
 1 -4 12 48871.6 2231.2 2
 1 4 13 6432.68 876.12 2
 1 -4 13 7161.39 848.843 2
 1 4 14 33679.2 2091.6 2
 1 -4 14 31782.9 1882.88 2
 1 -4 15 235.799 173.958 2
 1 4 15 735.584 357.208 2
 1 -4 16 27833.3 1852.7 2
 1 4 16 30595.4 2112.25 2
 1 4 17 2143.78 609.969 2
 -1 5 17 2563.97 619.863 2
 -1 -5 16 698.267 307.973 2
 -1 5 16 421.122 329.986 2
 -1 5 15 19476.2 1586.6 2
 -1 -5 15 17147.3 1330.7 2
 -1 -5 14 20432.9 1402.57 2
 -1 5 14 20579.3 1590.75 2
 -1 -5 13 47990.3 2149.53 2
 -1 5 13 52941.9 2487.68 2
 -1 -5 12 20250.6 1275.42 2
 -1 5 12 20963.6 1479.73 2
 -1 -5 11 270.579 180.389 2
 -1 5 11 766.282 316.737 2
 -1 5 10 1236.3 331.671 2
 -1 -5 10 585.627 206.867 2
 -1 5 9 524.496 248.731 2
 -1 -5 9 739.922 187.626 2
 -1 5 9 604.186 135.026 3
 1 -5 -8 292.133 90.7088 3
 -1 5 8 439.293 194.841 2
 -1 5 8 235.554 84.9961 3
 -1 -5 8 594.357 159.015 2
 -1 -5 7 111350 2654.39 2
 -1 5 7 110323 2407.9 3
 -1 5 7 103886 3014.43 2
 -1 5 6 69418.1 1726.38 3
 -1 -5 6 69655.8 1810.48 2
 1 -5 -6 68734 1676.4 3
 -1 5 6 64576.2 2135.41 2
 1 5 -5 35703.2 1092.62 3
 -1 5 5 32977.3 1054.25 3
 1 -5 -5 36221.8 1061.73 3
 1 5 -5 34056.6 1103.2 2
 -1 -5 5 35570.3 1042.36 2
 1 -5 -4 185.986 69.1557 3
 1 5 -4 573.708 106.231 2
 -1 -5 4 285.213 75.4431 2
 -1 5 4 256.169 89.521 3
 -1 5 4 389.538 139.549 2
 1 5 -4 364.513 108.791 3
 -1 5 3 8731.68 475.204 3
 1 -5 -3 9780.56 493.444 3
 -1 5 3 8093.42 500.354 2
 -1 -5 3 9192.63 321.403 2
 1 5 -3 9441.26 501.19 3
 1 5 -3 10118.7 357.66 2
 -1 5 2 27082.2 889.968 2
 1 5 -2 27920.2 954.201 3
 -1 5 2 26810.6 915.108 3
 1 -5 -1 64622 1608.08 3
 1 5 -1 58873.5 1592.58 3
 -1 5 1 58677.8 1565.38 3
 -1 5 1 61033.1 1414.36 2
 1 -5 -1 64399 1427.16 2
 -1 5 0 29166.2 743.139 1
 -1 5 0 27789.2 958.173 3
 -1 5 0 28099.8 717.703 2
 1 -5 0 30115.4 732.016 2
 1 5 0 26874.8 946.285 3
 1 5 1 116378 2685.07 3
 1 -5 1 123321 2264.65 2
 -1 5 -1 121202 2686.7 3
 1 5 2 241603 4715.21 3
 1 5 2 228421 4746.06 2
 1 5 3 111526 2801.57 2
 1 5 3 114264 2628.6 3
 1 5 4 350.016 119.958 3
 1 5 4 343.52 147.997 2
 1 5 5 50381.3 1509.17 3
 1 5 5 48166.3 1847.74 2
 1 -5 5 48484.9 1514.76 2
 1 5 6 15227.7 1008.96 2
 1 5 6 13725.9 724.197 3
 1 -5 6 15720.4 853.502 2
 1 5 7 7229.13 729.495 2
 1 -5 7 6635.83 595.032 2
 1 5 7 7276.59 523.778 3
 1 5 8 5190.05 652.298 2
 1 5 8 4916.63 439.889 3
 1 -5 8 5601.92 581.401 2
 1 -5 9 66154.7 2355.33 2
 1 5 9 65148.8 1940.16 3
 1 5 9 71329.8 2719.84 2
 1 5 10 77692.2 3031.48 2
 1 5 10 74255.1 2138.08 3
 1 -5 10 79047.6 2719.97 2
 1 5 11 43223.4 2220.81 2
 1 -5 11 42344.6 1959.97 2
 1 -5 12 -16.8605 168.438 2
 1 5 12 1194.31 399.926 2
 1 5 13 827.815 354.017 2
 1 -5 13 474.535 193.536 2
 1 -5 14 6827.26 838.007 2
 1 5 14 8451.31 1053.31 2
 1 5 15 1047.94 436.786 2
 1 -5 15 922.042 326.715 2
 1 5 16 3973.36 785.463 2
 1 5 17 18893 1697.21 2
 -1 6 17 5945.94 938.281 2
 -1 6 16 1603.48 484.783 2
 -1 6 15 6243.14 915.568 2
 -1 -6 15 5992.23 768.492 2
 -1 6 14 5961.42 866.59 2
 -1 -6 14 4869.94 664.644 2
 -1 -6 13 5620.47 678.68 2
 -1 6 13 6210.3 825.703 2
 -1 -6 12 8351.6 789.239 2
 -1 6 12 9536.44 984.206 2
 -1 -6 11 57208.5 2122.01 2
 -1 6 11 56775 2458.65 2
 -1 6 10 3144.85 526.907 2
 -1 6 10 2925.95 294.679 3
 -1 -6 10 2631.57 395.22 2
 -1 6 9 12352.2 989.768 2
 -1 6 9 12096.7 626.825 3
 -1 -6 9 12073.6 783.668 2
 -1 6 8 24238.5 1353.65 2
 -1 -6 8 23394 1048.23 2
 -1 6 8 25079.6 945.089 3
 -1 -6 7 34781 1208.07 2
 -1 6 7 32987.9 1129.12 3
 -1 6 7 32379 1495.42 2
 -1 6 6 1233.21 277.368 2
 -1 -6 6 1302.03 190.842 2
 -1 6 6 1732.77 230.608 3
 -1 -6 5 93552.7 1963.51 2
 1 6 -5 80842.9 1999.91 2
 1 6 -5 90605.3 2175.4 3
 -1 6 5 81824.4 2409.6 2
 -1 6 5 84521.5 2128.99 3
 -1 6 4 48781.4 1454.27 3
 -1 6 4 48676.4 1602.19 2
 -1 -6 4 54856 1197.26 2
 1 6 -4 53655.2 1520.57 3
 1 6 -4 50071.8 1241.41 2
 1 6 -3 47811.7 1000.18 2
 1 6 -3 48537.7 1407.35 3
 -1 6 3 43504.3 1345.25 3
 -1 6 3 43476.4 1371.51 2
 -1 -6 3 45217.3 947.62 2
 1 6 -2 20246.3 836.56 3
 -1 6 2 18797.3 793.528 3
 -1 6 2 20217 752.399 2
 1 -6 -1 13229.9 523.407 2
 -1 6 1 11679.9 609.938 3
 1 6 -1 11141.6 616.268 3
 1 -6 -1 12886.8 464.634 1
 -1 6 1 13266.4 519.451 2
 -1 6 0 22657.8 639.743 1
 -1 6 0 20436.2 855.532 3
 1 6 0 20557.9 875.29 3
 -1 6 0 22104.1 622.835 2
 1 -6 0 23833.3 641.921 2
 -1 6 -1 29162 1046.71 3
 1 6 1 26629 1031.7 3
 1 6 1 28832.4 964.305 2
 1 -6 1 29598.7 688.047 2
 1 6 2 355.719 111.985 2
 1 6 2 271.835 112.349 3
 1 6 3 96419.8 2522.17 2
 1 6 3 92876 2372.61 3
 1 6 4 35941.2 1456.01 2
 1 6 4 34364.8 1233.84 3
 1 6 5 138759 3621.36 2
 1 6 5 140232 3233.67 3
 1 -6 5 137863 3117.8 2
 1 -6 6 17235.2 881.093 2
 1 6 6 18117.3 1113.28 2
 1 6 6 16408.8 831.991 3
 1 -6 7 42930.4 1593.13 2
 1 6 7 41738 1466.37 3
 1 -6 8 19870.8 1095.46 2
 1 6 8 19157.6 1293.12 2
 1 6 8 18761.8 931.157 3
 1 6 9 34936.2 1849.26 2
 1 -6 9 32038.3 1521.4 2
 1 6 9 34007 1323.85 3
 1 -6 10 5012.62 608.258 2
 1 6 10 4426.34 457.988 3
 1 6 10 4658.01 691.191 2
 1 -6 11 29710.5 1577.72 2
 1 6 11 31498 1887.64 2
 1 -6 12 28963.1 1603.74 2
 1 6 12 32614.7 1955.38 2
 1 -6 13 4942.8 663.876 2
 1 6 13 6133.51 859.671 2
 1 -6 14 9568.75 972.274 2
 1 6 14 10889 1199.14 2
 1 6 15 29107.5 2054.95 2
 1 6 16 12413.5 1347.72 2
 -1 7 17 16.1869 212.74 2
 -1 7 16 5626.69 903.134 2
 -1 7 15 3224.35 667.511 2
 -1 -7 14 57842.2 2429.3 2
 -1 7 14 68701.6 3041.07 2
 -1 7 13 10720.5 1097.76 2
 -1 -7 13 8648.12 825.758 2
 -1 -7 12 30715.3 1540.17 2
 -1 7 12 35414 1967.63 2
 -1 -7 11 415.86 181.537 2
 -1 7 11 360.29 266.47 2
 -1 7 10 7617.08 811.759 2
 -1 -7 10 7073.31 614.574 2
 -1 7 10 6659.43 485.312 3
 -1 -7 9 1322.1 256.213 2
 -1 7 9 923.552 302.116 2
 -1 7 9 1547.25 237.724 3
 -1 -7 8 7347.41 536.976 2
 -1 7 8 7630.21 527.309 3
 -1 7 8 7691.03 744.05 2
 -1 7 7 826.433 233.309 2
 -1 7 7 844.985 178.412 3
 -1 -7 7 992.571 171.275 2
 -1 7 6 209984 5059.74 2
 -1 7 6 215885 4641.66 3
 1 7 -5 43144.6 1396.97 3
 -1 7 5 37874.2 1497.15 2
 -1 -7 5 44570.8 1112.56 2
 -1 7 5 39269.5 1340.95 3
 1 7 -4 110328 2615.85 3
 -1 -7 4 108368 2060.82 2
 -1 7 4 100661 2647.16 2
 -1 7 4 101549 2567.2 3
 1 7 -3 400.034 138.852 3
 -1 7 3 211.268 119.148 3
 -1 7 3 285.616 105.123 2
 -1 7 2 409.439 128.478 3
 1 7 -2 642.672 161.34 3
 -1 7 2 492.631 111.012 2
 1 7 -1 769.868 168.469 3
 1 7 -1 1049.07 105.45 2
 -1 7 1 747.756 125.953 2
 1 -7 -1 820.523 109.931 1
 1 -7 -1 482.48 105.4 2
 -1 7 1 630.109 154.841 3
 -1 7 0 70578 1964.93 3
 -1 7 0 70591.4 1535.39 2
 1 -7 0 75785 1572.16 2
 1 7 0 69115.7 1971.9 3
 1 7 0 70451.5 1652.88 2
 -1 7 0 73380.4 1543.11 1
 -1 7 -1 473.687 127.891 3
 1 7 1 327.909 96.9712 2
 1 -7 1 356.062 59.6033 2
 1 7 1 546.808 147.229 3
 1 -7 2 129998 2446.01 2
 1 7 2 132309 3123.43 3
 1 7 3 1305.94 246.139 2
 1 7 3 944.66 207.302 3
 1 7 4 78583.6 2362.42 2
 1 7 4 76570.5 2146.87 3
 1 7 5 625.985 164.918 3
 1 -7 5 895.707 176.365 2
 1 7 5 499.043 184.829 2
 1 -7 6 3111.58 355.125 2
 1 7 6 3588.19 517.11 2
 1 7 6 3538.32 389.793 3
 1 -7 7 6830.97 570.842 2
 1 7 7 7166.66 573.391 3
 1 7 7 8071.51 789.875 2
 1 7 8 31024.7 1283.12 3
 1 -7 8 29175.4 1329.5 2
 1 7 8 32795.8 1715.42 2
 1 7 9 204.153 120.747 2
 1 7 9 246.641 122.65 3
 1 -7 9 580.568 198.118 2
 1 7 10 85854.3 3210.63 2
 1 -7 10 81752.3 2716.74 2
 1 7 10 85683.8 2449.61 3
 1 7 11 11676.4 1124.77 2
 1 -7 11 10680.8 894.802 2
 1 -7 12 11759.5 976.246 2
 1 7 12 14216.4 1279.15 2
 1 -7 13 1332.48 345.195 2
 1 7 13 1929.66 509.764 2
 1 7 14 633.188 301.615 2
 1 7 15 450.285 295.15 2
 1 7 16 22935.4 1868.16 2
 -1 8 16 1215.17 391.603 2
 -1 8 15 16835.8 1518.3 2
 -1 8 14 724.37 292.487 2
 -1 8 13 5008.46 757.295 2
 -1 -8 12 773.258 247.369 2
 -1 8 12 1293.71 409.141 2
 -1 -8 11 70517.7 2320.22 2
 -1 8 11 69037.4 2814.01 2
 -1 8 10 25105.4 1057.01 3
 -1 8 10 23204.7 1472.65 2
 -1 -8 10 24626.7 1176.75 2
 -1 8 9 10432.2 661.073 3
 -1 -8 9 9451 653.848 2
 -1 8 9 9949.37 911.076 2
 -1 8 8 1856.96 278.848 3
 -1 8 8 1716.68 364.448 2
 -1 -8 8 1846.62 255.499 2
 -1 -8 7 69511.2 1793.3 2
 -1 8 7 66724.8 2345.8 2
 -1 8 7 67567.9 1982.94 3
 -1 8 6 19.3587 97.7598 2
 1 8 -6 -5.87437 65.4381 3
 -1 8 6 -2.93361 80.2605 3
 -1 -8 6 161.528 79.1235 2
 -1 8 5 158690 3719.75 3
 -1 -8 5 170374 3173.93 2
 -1 8 5 156144 3908.46 2
 1 8 -5 172448 3808.66 3
 -1 8 4 899.072 202.442 2
 -1 8 4 784.948 186.259 3
 -1 -8 4 840.03 80.43 2
 -1 8 3 399430 7756.77 3
 1 8 -3 410954 7773.53 3
 -1 8 3 389280 7601.71 2
 -1 8 2 19762.1 930.015 3
 -1 8 2 21193.5 825.692 2
 1 8 -2 22135.6 987.445 3
 1 -8 -1 20144.7 632.57 1
 1 8 -1 18175 560.392 2
 1 8 -1 19636.3 936.601 3
 -1 8 1 19651.5 704.143 2
 -1 8 1 17401.3 871.459 3
 1 8 0 8232.35 436.307 2
 -1 8 0 8593.98 375.71 2
 1 8 0 7800.68 575.851 3
 -1 8 0 8176.5 584.32 3
 1 -8 0 8870.44 396.04 2
 -1 8 -1 55076.9 1270.43 1
 1 -8 1 52810.3 1130.94 2
 -1 8 -1 52412.9 1682.54 3
 1 8 1 50394.2 1481.27 2
 1 8 2 2436.21 302.586 2
 1 -8 2 2317.76 138.888 2
 -1 8 -2 2880.28 345.901 3
 1 8 2 2584.24 329.083 3
 1 8 3 94743 2565.39 2
 1 8 3 92818.7 2508.06 3
 1 8 4 30038.4 1247.31 3
 1 8 4 32903.4 1415.58 2
 1 -8 5 116570 2629.84 2
 1 8 5 121232 3328.16 2
 1 8 5 113819 2965.99 3
 1 -8 6 32152.4 1179.41 2
 1 8 6 34876.9 1626.29 2
 1 8 6 33693.8 1357.42 3
 1 8 7 106997 2862.35 3
 1 -8 7 103897 2747.22 2
 1 8 7 109198 3368.67 2
 1 8 8 1499 388.848 2
 1 -8 8 996.847 225.867 2
 1 8 8 1363.89 256.88 3
 1 8 9 1872.42 457.39 2
 1 8 9 1646.24 297.091 3
 1 -8 9 1737.85 318.177 2
 1 8 10 830.062 206.614 3
 1 -8 10 942.917 265.298 2
 1 8 10 989.714 346.761 2
 1 8 11 32649.5 1917.95 2
 1 -8 11 28548.7 1471.31 2
 1 8 12 778.605 349.733 2
 1 -8 12 879.118 257.818 2
 1 8 13 30401.6 1975.31 2
 1 8 14 9875.45 1158.9 2
 1 8 15 38859.1 2413.27 2
 1 8 16 112.861 174.001 2
 -1 9 16 971.023 357.187 2
 -1 9 15 35432.9 2267.35 2
 -1 9 14 29463.7 1964.87 2
 -1 9 13 8485.42 1006.12 2
 -1 9 12 6662.83 844.303 2
 -1 9 11 12244.7 1098.52 2
 -1 -9 11 9268.12 724.892 2
 -1 9 10 1194.91 338.414 2
 -1 9 10 1320.85 255.787 3
 -1 -9 10 1002.97 223.767 2
 -1 9 9 9027.02 867.156 2
 -1 -9 9 9028.42 606.284 2
 -1 9 9 8392.09 626.037 3
 -1 9 8 6282.15 693.865 2
 -1 9 8 6142.88 531.427 3
 -1 -9 8 6377.52 463.934 2
 -1 9 7 42128.8 1812.14 2
 -1 -9 7 44805.8 1280.39 2
 -1 9 7 42901.2 1546.4 3
 -1 -9 6 144151 2848.96 2
 -1 9 6 134471 3632.32 2
 -1 9 6 138791 3425.61 3
 1 9 -6 144696 3441.91 3
 -1 9 5 362.064 160.114 2
 1 9 -5 613.267 177.419 3
 -1 -9 5 327.33 62.2551 2
 -1 9 5 594.077 170.752 3
 -1 9 4 29973.8 1247.4 3
 -1 9 4 30992.4 1241.55 2
 1 9 -4 29760.7 1231.66 3
 -1 9 3 20808.8 1013.35 3
 1 9 -3 23731.7 1069.94 3
 -1 9 3 21294.3 938.925 2
 1 9 -2 71969.2 2109.57 3
 -1 9 2 68283.6 1798.06 2
 -1 9 2 66872.1 2042.16 3
 -1 9 1 9038.54 646.813 3
 1 9 -1 9717.5 680.654 3
 1 9 -1 9995.71 397.063 2
 -1 9 1 10670.7 510.592 2
 1 -9 -1 11137.9 453.086 1
 1 9 0 18301.1 706.552 2
 -1 9 0 20224.6 645.138 2
 -1 9 0 17982.9 946.897 3
 1 -9 0 19819.8 680.983 2
 1 9 0 17851.1 947.226 3
 1 -9 1 183943 3315.18 2
 1 9 1 171654 3733.44 2
 1 9 1 174735 4102.16 3
 -1 9 -1 169487 4058.32 3
 -1 9 -1 183232 3426.07 1
 -1 9 -1 173227 3287.09 2
 -1 9 -2 160461 3753.78 3
 1 -9 2 153150 2850.61 2
 1 9 2 165385 3807.8 3
 1 9 2 166470 3619.84 2
 1 9 3 66895 1986.97 2
 1 9 3 64683 1965.47 3
 1 9 4 31884.3 1411.45 2
 1 9 4 30999.6 1322.92 3
 1 9 5 43738.3 1631.79 3
 1 -9 5 43484.6 1262.74 2
 1 9 5 46167 1837.83 2
 1 -9 6 191.753 90.7408 2
 1 9 6 9.86664 82.4638 3
 1 9 7 16506.5 957.702 3
 1 -9 7 15685.2 820.993 2
 1 9 7 16536.5 1168.66 2
 1 9 8 20324.2 1082.54 3
 1 -9 8 20131.4 1015.25 2
 1 9 8 20722 1372.17 2
 1 9 9 25053.5 1228.09 3
 1 -9 9 23705.2 1173.31 2
 1 9 10 74330 2350.52 3
 1 -9 10 69893.3 2341.36 2
 1 9 10 77370.1 3020.81 2
 1 -9 11 28233.7 1431.5 2
 1 9 11 33517.9 1947.47 2
 1 9 12 13094.5 1257.78 2
 1 9 13 10503.4 1152.88 2
 1 9 14 2106.86 563.255 2
 1 9 15 9388.99 1155.99 2
 1 9 16 4018.57 811.127 2
 -1 10 16 32029.2 2241.04 2
 -1 10 15 3017.94 644.202 2
 -1 10 14 355.737 176.574 2
 -1 10 13 17596.4 1562.27 2
 -1 10 12 9618.66 1029.26 2
 -1 10 11 31073.3 1814.06 2
 -1 10 10 100169 3454.08 2
 -1 -10 10 101834 2728.14 2
 -1 10 10 105282 2833.4 3
 -1 -10 9 12867.9 721.812 2
 -1 10 9 13727.9 1098.86 2
 -1 10 9 13677.4 851.515 3
 -1 -10 8 23635.1 907.843 2
 -1 10 8 24220.6 1386.2 2
 -1 10 8 23922.3 1151.89 3
 -1 10 7 31556.3 1341.75 3
 -1 10 7 30400.4 1500.8 2
 -1 -10 7 30602.6 944.668 2
 -1 10 6 6852.74 645.4 2
 1 10 -6 7539.66 611.478 3
 -1 -10 6 6690.92 323.568 2
 -1 10 6 7497.92 617.354 3
 -1 10 5 58769.9 1997.39 2
 1 10 -5 63352.9 2025.95 3
 -1 10 5 61308.1 2004.36 3
 -1 10 4 25862.8 1147.78 2
 -1 10 4 25792.9 1197.6 3
 1 10 -4 25344.3 1174.88 3
 -1 10 3 29753.5 1155.14 2
 -1 10 3 28754.2 1272.15 3
 1 10 -3 31499.2 1330.16 3
 -1 10 2 348973 6614.05 2
 -1 10 2 333952 7025.82 3
 1 10 -2 347876 7115.92 3
 1 10 -1 3790.85 442.3 3
 -1 10 1 3539.35 428.494 3
 1 10 -1 3550.56 223.923 2
 -1 10 1 3981.14 314.24 2
 1 -10 -1 4303.71 273.731 1
 1 10 0 59508.9 1552.37 2
 1 10 0 63071.6 2052.42 3
 -1 10 0 58749.1 1987.03 3
 -1 10 0 60962.5 1445.79 2
 1 10 1 3335.09 327.797 2
 1 10 1 2867.74 399.137 3
 -1 10 -1 3326.72 207.901 2
 1 -10 1 3343.23 223.612 2
 -1 10 -1 3373.73 241.898 1
 -1 10 -1 3536.97 437.612 3
 1 -10 2 4703.8 210.351 2
 -1 10 -2 5486.63 530.032 3
 1 10 2 5068.67 525.447 3
 1 10 2 5302.32 474.583 2
 1 10 3 1018.15 238.055 3
 1 10 3 315.082 131.962 2
 1 10 4 69577.9 2237.59 3
 1 -10 4 66088.2 1486.66 2
 1 10 5 368.738 150.84 3
 1 10 5 554.044 212.805 2
 1 -10 5 639.24 119.917 2
 1 10 6 186396 4761.18 2
 1 10 6 179931 4363.55 3
 1 -10 6 179172 3751.02 2
 1 10 7 498.751 233.204 2
 1 -10 7 392.467 116.534 2
 1 10 7 663.273 189.69 3
 1 -10 8 13822.3 784.477 2
 1 10 8 14736.5 1149.74 2
 1 10 8 13062.9 888.25 3
 1 -10 9 2173.38 326.549 2
 1 10 9 1736.08 318.542 3
 1 10 9 2893.07 532.661 2
 1 -10 10 277.565 146.559 2
 1 10 10 319.563 229.178 2
 1 10 10 274.166 111.603 3
 1 10 11 7297.59 910.969 2
 1 10 12 15950.7 1408.5 2
 1 10 13 682.356 364.818 2
 1 10 14 61427.8 3047.6 2
 1 10 15 8204.1 1102.3 2
 -1 11 16 1174.44 456.752 2
 -1 11 15 35492.9 2308.69 2
 -1 11 14 412.615 351.48 2
 -1 11 13 25340 1785.9 2
 -1 11 12 6948.66 875.453 2
 -1 11 11 3268.72 602.187 2
 -1 11 10 6634.05 610.257 3
 -1 11 10 6871.07 809.211 2
 -1 11 9 30670.4 1388.1 3
 -1 11 9 29440.7 1649.95 2
 -1 -11 8 89.2841 66.7923 2
 -1 11 8 -83.655 177.368 2
 -1 11 8 246.577 131.866 3
 -1 -11 7 72869.2 1668.9 2
 -1 11 7 76009.5 2579.27 2
 -1 11 6 37120.1 1528.14 3
 -1 11 6 37238.4 1586.78 2
 1 11 -6 37385.9 1504.08 3
 -1 11 5 31703.8 1413.32 3
 1 11 -5 32708.6 1418.4 3
 -1 11 5 30813.1 1378.58 2
 -1 11 4 6035.61 578.586 3
 -1 11 4 5768.56 526.069 2
 1 11 -4 6167.41 582.24 3
 -1 11 3 79955.7 2220.2 2
 1 11 -3 84728 2507.52 3
 -1 11 3 79505 2455.87 3
 -1 11 2 497.832 170.498 2
 1 11 -2 672.93 278.785 3
 1 -11 -2 255.324 67.5973 1
 -1 11 1 85628.1 2051.65 2
 1 11 -1 84685.3 1793.23 2
 1 -11 -1 90868.2 1899.85 1
 -1 11 1 80742.1 2511.05 3
 1 11 -1 85528.8 2583.35 3
 1 11 0 12174.5 849.617 3
 -1 11 0 11807.2 835.787 3
 -1 11 0 12654.3 518.315 2
 1 -11 0 12679 604.783 2
 1 11 0 11407.1 547.171 2
 -1 11 -1 95377.9 1997.35 2
 -1 11 -1 102117 2109.99 1
 1 -11 1 101192 2127.53 2
 1 11 1 98205.7 2872.17 3
 -1 11 -1 96486.1 2819.76 3
 1 11 1 101066 2449.59 2
 1 -11 2 903.882 101.942 2
 1 11 2 1424.63 250.144 2
 -1 11 -2 1160.34 255.493 3
 1 11 2 1121.33 260.247 3
 1 11 3 62103.2 2156.7 3
 1 11 3 66909.9 2090.65 2
 -1 11 -3 59437.1 2094.17 3
 1 11 4 2782.12 411.026 2
 1 11 4 2082.74 347.775 3
 1 11 5 31788.5 1463 3
 1 -11 5 30611.3 881.875 2
 1 11 6 574.653 198.342 3
 1 -11 6 936.542 153.463 2
 1 11 6 870.623 267.448 2
 1 11 7 79932.2 2559.51 3
 1 11 7 83580.6 2910.76 2
 1 -11 7 75767.5 1970.82 2
 1 11 8 117.202 151.791 2
 1 11 8 -179.168 127.303 3
 1 -11 8 10.8694 82.6301 2
 1 11 9 72325.8 2869.94 2
 1 11 9 72562.6 2457.83 3
 1 11 10 21995.2 1255.21 3
 1 11 10 25283.9 1649.46 2
 1 11 11 63620.9 2835.78 2
 1 11 12 2003.58 514.096 2
 1 11 13 14373.6 1384.85 2
 1 11 14 2223.77 572.651 2
 1 11 15 17365.2 1607.79 2
 -1 12 15 -441.321 302.074 2
 -1 12 14 8375.29 1068.29 2
 -1 12 13 235.66 148.142 2
 -1 12 12 16960.4 1416.91 2
 -1 12 11 11936.4 1129.3 2
 -1 12 10 49839.1 1906.24 3
 -1 12 10 53262.8 2387.31 2
 -1 12 9 22593.3 1214.54 3
 -1 12 9 22663.2 1442.04 2
 -1 12 8 23001.7 1235.57 3
 -1 12 8 23493.7 1400.34 2
 -1 12 7 402.358 169.701 3
 -1 12 7 928.418 253.332 2
 -1 12 6 26767.8 1342.12 3
 1 12 -6 30379.3 1402.62 3
 -1 12 6 28505.6 1417.95 2
 1 12 -5 9808.97 771.078 3
 -1 12 5 10430.8 775.425 2
 -1 12 5 8584.84 732.755 3
 -1 12 4 1414.49 271.878 2
 1 12 -4 1573.61 318.756 3
 -1 12 4 1114.17 264.417 3
 -1 12 3 9481.77 768.755 3
 1 12 -3 10331.6 798.235 3
 -1 12 3 10444 668.847 2
 1 -12 -2 200347 3888.69 1
 -1 12 2 186471 4648.73 3
 -1 12 2 200006 4209.26 2
 1 12 -2 191731 4706.57 3
 -1 12 1 11033.3 570.736 2
 1 12 -1 10496.3 420.754 2
 1 12 -1 10601.8 815.029 3
 1 -12 -1 11801.4 497.626 1
 1 12 0 21619.5 1190.99 3
 -1 12 0 21835.9 744.825 2
 -1 12 0 21821.5 1200.64 3
 1 12 0 21575.1 789.399 2
 1 12 1 7912.67 521.669 2
 -1 12 -1 7688.52 349.276 2
 -1 12 -1 7307.41 373.443 1
 1 -12 1 7191.01 392.581 2
 1 12 1 7105.75 677.759 3
 -1 12 -1 7519.09 691.364 3
 1 12 2 3434.22 470.812 3
 -1 12 -2 2948.52 428.654 3
 1 12 2 3801.16 398.523 2
 -1 12 -3 217.326 158.592 3
 1 12 3 -8.35008 96.2759 2
 1 12 3 223.018 130.034 3
 1 12 4 7836.78 686.374 2
 1 12 4 6851.48 674.424 3
 1 -12 5 75337.9 1529.75 2
 1 12 5 82498.3 2641.92 3
 1 12 6 126816 3709.05 2
 1 12 6 128901 3581.78 3
 1 -12 6 124629 2543.64 2
 1 12 7 32694.1 1721.17 2
 1 12 7 31898 1552.03 3
 1 12 8 13107 1090.89 2
 1 12 8 11095.8 889.163 3
 1 12 9 449.794 196.237 3
 1 12 9 180.893 160.028 2
 1 12 10 7120.67 860.788 2
 1 12 10 6168.1 669.224 3
 1 12 11 4619.58 752.481 2
 1 12 12 18779 1543.27 2
 1 12 13 16013.5 1473.41 2
 1 12 14 42002.5 2523.71 2
 1 12 15 8830.95 1140.62 2
 -1 13 15 25575.4 1972.51 2
 -1 13 14 24571.4 1876.84 2
 -1 13 13 3280.17 650.225 2
 -1 13 12 19830.4 1545.09 2
 -1 13 11 12133.6 1159.63 2
 -1 13 10 74.9546 100.172 3
 -1 13 10 167.898 242.386 2
 -1 13 9 24656.9 1532.18 2
 -1 13 9 25026.8 1331.57 3
 -1 13 8 30562.6 1486.73 3
 -1 13 8 29937.3 1615.82 2
 -1 13 7 46953.5 1900.21 3
 -1 13 7 44199.6 1939.15 2
 1 13 -6 12145.5 896.827 3
 -1 13 6 10880.2 854.568 2
 -1 13 6 10556.3 841.675 3
 -1 13 5 6534.63 612.793 2
 1 13 -5 6814.78 668.594 3
 -1 13 5 5899.37 626.064 3
 -1 13 4 25612.5 1195.1 2
 1 13 -4 25919.8 1355.81 3
 -1 13 4 24282.1 1312.38 3
 -1 13 3 43441.7 1809.12 3
 -1 13 3 44281.2 1542.23 2
 1 13 -3 45681 1849.85 3
 -1 13 2 1313.65 364.851 3
 -1 13 2 1237.39 243.379 2
 1 -13 -2 762.34 129.434 1
 1 13 -1 25542 1374.2 3
 -1 13 1 26573.2 954.729 2
 1 13 -1 26124 755.45 2
 -1 13 1 23768.8 1319.14 3
 1 13 0 77001.9 1859.16 2
 -1 13 0 77447.1 1800.81 2
 1 13 0 75298 2550.89 3
 -1 13 0 75967 2559.41 3
 1 13 1 13724.5 987.303 3
 1 13 1 14396.5 723.129 2
 -1 13 -1 14811.1 521.13 2
 1 -13 1 13272.3 580.474 2
 -1 13 -1 14726.3 1012.54 3
 1 13 2 12104.4 731.006 2
 1 13 2 11681.4 907.539 3
 -1 13 -2 11851.3 895.703 3
 -1 13 -3 25986.8 1389.45 3
 1 13 3 26211.6 1418.31 3
 1 13 3 29717.5 1296.34 2
 1 13 4 93645.5 2784.68 2
 1 13 4 88429 2908.76 3
 1 13 5 48541.2 2016.92 3
 1 13 5 49620.8 1983.81 2
 1 13 6 17039.6 1138.09 3
 1 13 6 19556.1 1243.96 2
 1 13 7 33891.9 1655.74 3
 1 13 7 35635.5 1796.91 2
 1 13 8 14700.6 1176.93 2
 1 13 8 14298.8 1052.66 3
 1 13 9 1956.44 446.484 2
 1 13 9 1587.06 355.789 3
 1 13 10 14814.7 1266.99 2
 1 13 10 12964.6 1003.31 3
 1 13 11 17451 1436.71 2
 1 13 12 33020.6 2085.33 2
 1 13 13 15557.9 1452.22 2
 1 13 14 696.63 312.561 2
 -1 14 15 7133.45 1046.42 2
 -1 14 14 7030.98 1003.79 2
 -1 14 13 3770.8 700.361 2
 -1 14 12 623.35 299.494 2
 -1 14 11 26231.6 1738.23 2
 -1 14 10 16896.9 1329.59 2
 -1 14 9 28736.5 1679.21 2
 -1 14 9 26394.9 1423.16 3
 -1 14 8 3768.1 576.715 2
 -1 14 8 3295.02 494.894 3
 -1 14 7 189.241 126.042 2
 -1 14 7 467.512 236.362 3
 -1 14 6 4834.4 575.667 2
 1 14 -6 5569.19 636.718 3
 -1 14 6 5286.53 618.972 3
 -1 14 5 611.859 211.151 3
 -1 14 5 810.307 232.377 2
 1 14 -5 384.11 166.192 3
 -1 14 4 1368.36 319.416 3
 1 14 -4 1248.57 307.213 3
 -1 14 4 1128.2 235.399 2
 1 -14 -3 41528.3 1266.67 1
 -1 14 3 39930.1 1802.32 3
 1 14 -3 41213.4 1806.7 3
 -1 14 3 41100.4 1513.12 2
 -1 14 2 23025.4 1331.5 3
 -1 14 2 25910.3 1070.67 2
 1 14 -2 23616.3 1340.6 3
 1 14 -1 82995.8 2783.6 3
 -1 14 1 83693.7 2106.09 2
 1 14 -1 85926.8 1831.64 2
 -1 14 1 83326.4 2795.6 3
 1 14 0 237.129 131.244 3
 -1 14 0 903.481 175.444 2
 -1 14 0 1202.48 416.509 3
 1 14 0 253.45 97.6238 2
 -1 14 -1 4360.64 270.748 2
 -1 14 -1 3870.27 547.388 3
 1 -14 1 3179.22 274.52 2
 1 14 1 4205.21 558.153 3
 1 14 2 1087.05 286.382 3
 1 14 2 731.547 186.063 2
 -1 14 -2 1155.95 331.941 3
 1 14 3 1096.89 314.971 3
 -1 14 -3 832.649 278.141 3
 1 14 3 1067.24 237.418 2
 1 14 4 20240.4 1128.38 2
 1 14 4 17773.6 1195.64 3
 1 14 5 68341.9 2546.39 3
 1 14 5 72667.3 2493.35 2
 1 14 6 39982.8 1881.69 3
 1 14 6 45805.3 1967.9 2
 1 14 7 86057.6 2959.31 3
 1 14 7 89901 3076.89 2
 1 14 8 10245.7 914.685 3
 1 14 8 10554.3 989.211 2
 1 14 9 4705.8 682.143 2
 1 14 9 4157.86 588.58 3
 1 14 10 1014.64 315.429 2
 1 14 10 971.607 327.748 3
 1 14 11 985.272 362.65 2
 1 14 12 2607.45 602.16 2
 1 14 13 45852.5 2577.5 2
 1 14 14 16672.3 1563.71 2
 -1 15 14 40534.1 2468.44 2
 -1 15 13 16260.8 1487.2 2
 -1 15 12 17072.8 1464.58 2
 -1 15 11 943.646 380.517 2
 -1 15 10 1316.1 413.264 2
 -1 15 9 -391.573 225.259 2
 -1 15 9 18.3115 122.82 3
 -1 15 8 42379.9 2021.69 2
 -1 15 8 41241.4 1886.61 3
 -1 15 7 512.707 218.244 3
 -1 15 7 590.712 258.253 2
 -1 15 6 38572 1814.33 3
 1 15 -6 40241.7 1849.85 3
 -1 15 6 40374.3 1775.53 2
 -1 15 5 12641.2 896.775 2
 1 15 -5 13479 1029.55 3
 -1 15 5 12230.5 976.294 3
 1 15 -4 14552.2 1072.56 3
 -1 15 4 14288.5 900.102 2
 -1 15 4 12550.3 994.977 3
 -1 15 3 32881.6 1345.21 2
 1 15 -3 30816 1591.83 3
 1 -15 -3 31750.7 1059.35 1
 -1 15 2 1854.79 406.698 3
 1 15 -2 2506.16 468.493 3
 1 -15 -2 2080.3 213.728 1
 -1 15 2 1816.06 274.347 2
 1 15 -1 2292.74 207.949 2
 -1 15 1 3147.95 539.226 3
 -1 15 1 2813.01 318.868 2
 -1 15 0 50012.7 2145.05 3
 1 15 0 52216.1 2187.42 3
 -1 15 0 54484.4 1429.18 2
 1 15 0 53367.1 1454.93 2
 1 15 1 6189.94 465.156 2
 -1 15 -1 6378.91 712.893 3
 1 15 1 5612.26 668.592 3
 -1 15 -1 6423.07 337.667 2
 -1 15 -2 133197 3930.95 3
 1 15 2 139809 4020.35 3
 1 15 2 140209 3355.58 2
 1 15 3 25842.3 1208.61 2
 -1 15 -3 23295.2 1391.43 3
 1 15 3 22813.6 1404.03 3
 1 15 4 32577.4 1715.79 3
 1 15 4 34154.6 1520.44 2
 1 15 5 17522.2 1228.23 3
 1 15 5 18078.9 1136.93 2
 1 15 6 727.706 250.854 3
 1 15 6 1053.37 275.708 2
 1 15 7 6308.56 721.176 2
 1 15 7 4592.98 632.093 3
 1 15 8 24188.2 1471.93 3
 1 15 8 26441.2 1598.7 2
 1 15 9 14316.3 1124.5 3
 1 15 9 17104.6 1325.27 2
 1 15 10 29057 1638.57 3
 1 15 10 33943.6 1987.55 2
 1 15 11 3166.61 623.963 2
 1 15 12 25447.9 1853.31 2
 1 15 13 603.713 327.152 2
 1 15 14 916.182 384.81 2
 -1 16 14 1180.15 447.024 2
 -1 16 13 2227.07 596.426 2
 -1 16 12 21146.2 1642.32 2
 -1 16 11 14038.6 1285.34 2
 -1 16 10 6719.04 850.017 2
 -1 16 9 49241 2313.05 2
 -1 16 9 47366.6 2103 3
 -1 16 8 7050.67 771.117 3
 -1 16 8 9318.43 920.42 2
 -1 16 7 46.7422 140.159 3
 -1 16 7 42.8244 115.96 2
 1 16 -6 2251.98 438.143 3
 -1 16 6 1930.6 388.035 2
 -1 16 6 2172.12 435.983 3
 1 16 -5 2866.64 493.17 3
 -1 16 5 2178.31 437.905 3
 -1 16 5 1809.84 344.09 2
 -1 16 4 30278 1647.03 3
 -1 16 4 34016.6 1472.57 2
 1 16 -4 31515.5 1683.08 3
 1 -16 -3 16184.9 705.624 1
 -1 16 3 16343.3 922.377 2
 1 16 -3 13801.5 1088.27 3
 -1 16 3 13798.3 1078.68 3
 -1 16 2 1416.06 363.779 3
 -1 16 2 2024.21 290.347 2
 1 16 -2 1602.54 374.529 3
 1 -16 -2 1818.26 207.48 1
 1 16 -1 78184.5 2840.75 3
 -1 16 1 77234.1 2852.46 3
 1 16 -1 81603.7 1779.26 2
 -1 16 1 82218.3 2105.82 2
 -1 16 0 32020.9 1025 2
 1 16 0 29507 1640.43 3
 1 16 0 31162.3 1026.73 2
 -1 16 -1 8323.89 865.673 3
 1 16 1 9408.54 904.999 3
 1 16 1 10098.8 607.526 2
 1 16 2 568.289 177.173 2
 1 16 2 157.411 177.942 3
 1 16 3 21633.1 1106.99 2
 1 16 3 19393.2 1313.97 3
 -1 16 -3 18852.3 1288.17 3
 1 16 4 39129.7 1943.09 3
 1 16 4 43466.8 1752.18 2
 1 16 5 68319.3 2417.74 2
 1 16 5 64903.9 2616.49 3
 1 16 6 110.034 176.996 3
 1 16 6 19.8313 127.902 2
 1 16 7 22020.7 1403.56 2
 1 16 7 20460.7 1388.43 3
 1 16 8 61417.6 2581.62 2
 1 16 8 57681.2 2454.72 3
 1 16 9 7043.82 857.295 2
 1 16 9 6519.18 771.733 3
 1 16 10 144.206 145.401 3
 1 16 10 457.678 210.091 2
 1 16 11 3362.01 666.228 2
 1 16 12 7723.4 1009.64 2
 1 16 13 48499.1 2671.9 2
 -1 17 14 13787.6 1433.96 2
 -1 17 13 47997.7 2663.31 2
 -1 17 12 6888.31 946.784 2
 -1 17 11 2318.43 497.135 2
 -1 17 10 1109.52 336.429 2
 -1 17 9 6738.82 820.553 2
 -1 17 9 5240.32 683.98 3
 -1 17 8 15296.4 1177.92 3
 -1 17 8 16376 1232.62 2
 -1 17 7 16573.4 1176.88 2
 -1 17 7 15184.9 1170.35 3
 -1 17 6 9609.3 848.343 2
 -1 17 6 8864.28 895.911 3
 1 17 -6 9215.95 908.694 3
 1 17 -5 123238 3878.38 3
 -1 17 5 122663 3858.16 3
 -1 17 5 127369 3541.59 2
 -1 17 4 5404.1 715.337 3
 1 17 -4 7484.63 831.907 3
 -1 17 4 7102.72 660.697 2
 -1 17 3 13366.3 835.531 2
 1 17 -3 13806.2 1114.97 3
 1 17 -2 20478.4 1361.06 3
 -1 17 2 19757.6 946.159 2
 -1 17 2 18674.5 1322.57 3
 -1 17 1 4436.83 659.556 3
 -1 17 1 3931.27 379.608 2
 1 17 -1 4213.2 659.304 3
 -1 17 0 25170.2 906.81 2
 1 17 0 25135.4 921.633 2
 1 17 0 24694.8 1523.12 3
 -1 17 0 23770 1509.75 3
 1 17 1 89713.1 2303.88 2
 1 17 1 86071.5 3114.85 3
 -1 17 -1 85090.5 3110.87 3
 1 17 2 22935.6 1063.64 2
 -1 17 -2 22717 1457.19 3
 1 17 2 22302.1 1463.03 3
 -1 17 -3 67818.6 2731.71 3
 1 17 3 74447.4 2294.7 2
 1 17 3 72633.1 2823.27 3
 1 17 4 11872.3 864.532 2
 1 17 4 10528.9 997.745 3
 1 17 5 858.662 291.627 3
 1 17 5 762.839 219.222 2
 1 17 6 -102.135 117.922 2
 1 17 6 -74.2614 198.152 3
 1 17 7 32.9139 167.932 2
 1 17 7 12.737 184.029 3
 1 17 8 607.656 278.595 3
 1 17 8 615.691 296.203 2
 1 17 9 82280.3 3186.88 2
 1 17 9 76734.4 2984.08 3
 1 17 10 4313.07 641.393 3
 1 17 10 4635.19 731.481 2
 1 17 11 22292.3 1672.77 2
 1 17 12 1533.96 463.148 2
 1 17 13 2642.01 611.198 2
 -1 18 13 314.236 306.117 2
 -1 18 12 48215.5 2588.65 2
 -1 18 11 266.43 193.421 2
 -1 18 10 21362.7 1551.96 2
 -1 18 9 3385.95 551.046 3
 -1 18 9 3517.74 603.696 2
 -1 18 8 22617 1473.86 2
 -1 18 8 22018.6 1467.41 3
 -1 18 7 -325.148 191.232 2
 -1 18 7 -175.318 230.491 3
 1 18 -6 2825.48 523.851 3
 -1 18 6 2089.28 482.009 3
 -1 18 6 2438.06 430.613 2
 1 18 -5 596.508 313.613 3
 -1 18 5 650.015 335.253 3
 -1 18 5 476.841 221.044 2
 -1 18 4 110990 3078.02 2
 1 18 -4 108827 3591.58 3
 1 18 -3 21.2253 154.374 3
 -1 18 3 109.841 120.489 2
 -1 18 3 290.393 213.46 3
 -1 18 2 44845.9 1541.38 2
 -1 18 2 42287.8 2114.83 3
 1 18 -2 41897.3 2066.53 3
 1 18 -1 10316.4 1000.86 3
 -1 18 1 11988.1 661.753 2
 -1 18 1 9844.03 974.98 3
 1 18 0 62986.2 2625.09 3
 -1 18 0 61582.1 2598.9 3
 1 18 1 1236.63 350.749 3
 1 18 1 221.839 155.559 2
 1 18 2 155.464 168.211 3
 -1 18 -2 240.341 196.456 3
 1 18 2 423.58 152.243 2
 1 18 3 496.061 163.555 2
 -1 18 -3 1111.42 436.605 3
 1 18 3 499.226 336.845 3
 1 18 4 88409.6 3282.18 3
 1 18 4 90177.5 2771.68 2
 1 18 5 9638.77 837.885 2
 1 18 5 9161.4 964.912 3
 1 18 6 32489.9 1864 3
 1 18 6 35641.6 1756.26 2
 1 18 7 333.39 209.706 3
 1 18 7 247.822 149.523 2
 1 18 8 84030.7 3141.65 2
 1 18 8 81891.9 3158.94 3
 1 18 9 3274.84 573.621 3
 1 18 9 4174.75 684.572 2
 1 18 10 3600.6 670.485 2
 1 18 11 1083.01 401.686 2
 1 18 12 46429.9 2570.11 2
 1 18 13 1947.29 500.535 2
 -1 19 13 52795.3 2862.51 2
 -1 19 12 4786.01 812.67 2
 -1 19 11 999.905 400.764 2
 -1 19 10 1896.22 480.877 2
 -1 19 9 1162.41 328.463 2
 -1 19 9 652.063 267.522 3
 -1 19 8 617.313 247.004 2
 -1 19 8 611.258 240.518 3
 -1 19 7 50538.5 2382.4 3
 -1 19 7 54226.8 2315.96 2
 -1 19 6 5231.73 637.334 2
 1 19 -6 4914.27 694.526 3
 -1 19 6 4578.9 700.745 3
 1 19 -5 81737.4 3107.51 3
 -1 19 5 81100.6 3100.23 3
 -1 19 4 2899.23 623.48 3
 -1 19 4 2403.55 408.306 2
 1 19 -4 2890.66 624.371 3
 -1 19 3 987.657 383.51 3
 1 19 -3 1039.33 334.615 3
 -1 19 3 887.32 248.646 2
 -1 19 2 709.846 320.261 3
 -1 19 2 418.505 192.92 2
 -1 19 1 1888.94 477.583 3
 1 19 -1 1216.41 378.189 3
 1 19 0 5342.99 752.991 3
 -1 19 0 6086.97 820.796 3
 -1 19 -1 99869.6 3556.44 3
 1 19 1 101626 3589.06 3
 -1 19 -2 11184.9 1069.73 3
 1 19 2 12294.3 1130.52 3
 1 19 2 11963.6 764.53 2
 1 19 3 74439.2 2338.29 2
 1 19 3 71478.5 2955.19 3
 -1 19 -3 69847.2 2893.85 3
 1 19 4 6223.78 815.816 3
 1 19 4 7879.18 711.651 2
 1 19 5 77.1387 176.619 3
 1 19 5 134.279 106.681 2
 1 19 6 -111.763 143.256 2
 1 19 6 -53.8678 145.255 3
 1 19 7 290.739 210.434 3
 1 19 7 755.659 285.857 2
 1 19 8 940.684 355.232 3
 1 19 8 1046.12 352.229 2
 1 19 9 61461.9 2721.75 2
 1 19 9 58002.9 2661.94 3
 1 19 10 5430.92 793.969 2
 1 19 11 33874.7 2102.49 2
 1 19 12 -729.417 349.299 2
 -1 20 12 35569.6 2268.5 2
 -1 20 11 15225.2 1415.53 2
 -1 20 10 26082.6 1791.57 2
 -1 20 9 16632.4 1348.93 3
 -1 20 9 18109.7 1406.82 2
 -1 20 8 16821.6 1299.69 2
 -1 20 8 15282.1 1306.9 3
 -1 20 7 55.7599 136.386 2
 -1 20 7 -51.9253 171.431 3
 1 20 -6 16341.4 1325.76 3
 -1 20 6 15168.7 1134.14 2
 -1 20 6 15621.9 1320.92 3
 -1 20 5 3192.77 628.881 3
 1 20 -5 3510.07 640.281 3
 -1 20 5 3691.46 519.29 2
 1 20 -4 35793.3 2033.16 3
 -1 20 4 37150.3 1623.03 2
 -1 20 4 34768.7 2005.79 3
 1 20 -3 43894.5 2261.7 3
 -1 20 3 42356.3 2233.62 3
 -1 20 2 6569.75 846.619 3
 1 20 -2 6705.93 846.059 3
 -1 20 1 24068 1640.49 3
 1 20 -1 24428.3 1643.41 3
 1 20 0 33396.4 1947.78 3
 -1 20 0 32557.1 1945.96 3
 1 20 1 2772.29 649.103 3
 -1 20 -1 2239.72 557.773 3
 -1 20 -2 842.673 388.854 3
 1 20 2 490.443 313.423 3
 1 20 3 9711.01 1066.29 3
 -1 20 -3 8631.12 1002.51 3
 1 20 3 9536.69 740.051 2
 1 20 4 38744 1695.18 2
 1 20 4 39145.7 2148.46 3
 1 20 5 53801.7 2146.46 2
 1 20 5 50837.6 2506.53 3
 1 20 6 22884.5 1406.77 2
 1 20 6 21916.9 1597.28 3
 1 20 7 19874.9 1355.24 2
 1 20 7 16563.3 1391.94 3
 1 20 8 41684 2256.45 3
 1 20 8 44193 2188.02 2
 1 20 9 3420.75 642.749 3
 1 20 9 5640.31 802.259 2
 1 20 10 2705.97 547.734 2
 1 20 11 9652.7 1136.99 2
 1 20 12 6893.9 958.588 2
 -1 21 12 14943.4 1450.98 2
 -1 21 11 2713.16 573.328 2
 -1 21 10 586.81 285.295 2
 -1 21 9 2643.55 545.753 2
 -1 21 9 2516.28 543.002 3
 -1 21 8 18775.6 1501.42 3
 -1 21 8 20098.3 1458.46 2
 -1 21 7 722.061 257.516 3
 -1 21 7 821.287 302.692 2
 -1 21 6 29605.8 1615.53 2
 1 21 -6 26512.6 1777.72 3
 -1 21 6 28895.2 1867 3
 -1 21 5 22085 1628.62 3
 1 21 -5 20553.5 1553.96 3
 -1 21 5 23938.5 1367.4 2
 1 21 -4 25777.7 1765.39 3
 -1 21 4 25990.4 1770.47 3
 -1 21 3 2820.3 603.096 3
 1 21 -3 3239.98 653.048 3
 -1 21 2 1880.78 490.917 3
 1 21 -2 1198.01 403.556 3
 1 21 -1 2549.92 593.468 3
 -1 21 1 2494.62 560.552 3
 -1 21 0 20492.4 1551.64 3
 1 21 0 18874 1485.3 3
 1 21 1 11126.1 1131.83 3
 -1 21 -1 11386.5 1152.01 3
 -1 21 -2 32660.3 1991.24 3
 1 21 2 34463.9 2031.83 3
 1 21 3 9072.12 1027.86 3
 1 21 4 12001 1189.74 3
 1 21 5 1580.71 472.464 3
 1 21 5 2052.82 415.99 2
 1 21 6 137.647 214.302 3
 1 21 6 341.499 159.84 2
 1 21 7 -181.209 145.887 3
 1 21 7 -21.044 201.195 2
 1 21 8 20750.1 1585.58 3
 1 21 8 24753.5 1619.3 2
 1 21 9 17344.5 1401.3 2
 1 21 9 15165.9 1355.82 3
 1 21 10 51201.6 2595.37 2
 1 21 11 14551.3 1388.99 2
 -1 22 11 19145.3 1644.27 2
 -1 22 10 2874.14 622.856 2
 -1 22 9 61771.6 2833.97 2
 -1 22 9 60446.5 2856.93 3
 -1 22 8 221.896 181.76 3
 -1 22 8 312.777 142.191 2
 -1 22 7 3772.98 614.871 2
 -1 22 7 2255.31 573.391 3
 1 22 -6 2382.31 548.949 3
 -1 22 6 1679.28 496.482 3
 1 22 -5 10970.7 1167.24 3
 -1 22 5 9593.25 1076.79 3
 1 22 -4 3881.17 720.195 3
 -1 22 4 3559.83 693.398 3
 1 22 -3 29469.5 1921.51 3
 -1 22 3 26501.1 1836.81 3
 1 22 -2 2105.06 526.809 3
 -1 22 2 1514.69 454.301 3
 -1 22 1 29085.7 1937.66 3
 1 22 -1 31242.2 2002 3
 1 22 0 869.733 359.146 3
 -1 22 0 1837.11 541.063 3
 1 22 1 11137.5 1182.08 3
 -1 22 -1 12566.6 1246.22 3
 1 22 2 2366.46 551.548 3
 -1 22 -2 2028.7 569.182 3
 1 22 3 17094.7 1461.3 3
 1 22 4 103.749 214.351 3
 1 22 5 33360.6 2065.29 3
 1 22 6 2726.34 579.777 3
 1 22 7 40979.4 2345.51 3
 1 22 7 45311.7 2167.14 2
 1 22 8 6296.33 804.058 2
 1 22 8 4950.54 782.034 3
 1 22 9 5859.07 860.352 3
 1 22 9 8083 969.811 2
 1 22 10 138.206 219.806 2
 1 22 11 1994.18 702.956 2
 -1 23 11 9628.34 1152.12 2
 -1 23 10 274.654 193.21 2
 -1 23 9 2813.19 580.281 2
 -1 23 9 2275.95 544.234 3
 -1 23 8 9268.1 1107.05 3
 -1 23 7 1580.6 470.029 3
 1 23 -6 14572.9 1381.95 3
 -1 23 6 14945.1 1389.58 3
 1 23 -5 74.0528 226.142 3
 -1 23 5 15.4151 178.313 3
 -1 23 4 6912.03 926.835 3
 1 23 -4 7067.51 946.382 3
 1 23 -3 5442.34 866.41 3
 -1 23 3 4243.69 734.589 3
 -1 23 2 154.064 141.075 3
 1 23 -2 113.118 197.242 3
 -1 23 1 8062.18 1027.92 3
 1 23 -1 8734.32 1073.49 3
 -1 23 0 18730.5 1580.78 3
 1 23 0 21071.5 1668.55 3
 1 23 1 10755.5 1177.02 3
 -1 23 -1 15073.4 1475.96 3
 -1 23 -2 35693.9 2189.82 3
 1 23 2 35640 2185.19 3
 1 23 3 2922.43 638.243 3
 1 23 4 25577 1846.45 3
 1 23 5 10227.7 1170.77 3
 1 23 6 509.678 317.505 3
 1 23 7 10684.7 1187.96 3
 1 23 8 10767.6 1195.87 3
 1 23 9 998.084 345.893 3
 1 23 9 1314.95 421.496 2
 1 23 10 28670.2 1935.92 2
 1 23 11 6303.09 915.225 2
 -1 24 11 6149.94 926.879 2
 -1 24 8 1166.76 396.493 3
 -1 24 7 1495.61 447.402 3
 -1 24 6 643.757 397.48 3
 -1 24 5 1390.63 467.074 3
 1 24 -5 1252.1 390.802 3
 1 24 -4 3307.02 691.821 3
 -1 24 4 3219.09 687.874 3
 1 24 -3 7733.51 1027.26 3
 -1 24 3 7275.85 1041.05 3
 1 24 -2 40270.8 2417.06 3
 -1 24 2 42789.4 2479.42 3
 1 24 -1 7250.81 1013.5 3
 -1 24 1 8274.53 1067.32 3
 -1 24 0 5771.9 909.321 3
 1 24 0 4919.06 829.922 3
 -1 24 -1 144.284 257.037 3
 1 24 1 685.642 400.044 3
 1 24 2 181.155 265.466 3
 -1 24 -2 390.011 290.941 3
 1 24 3 160.936 269.027 3
 1 24 4 3251.61 721.406 3
 1 24 5 15555.4 1478.59 3
 1 24 6 49091.7 2687.86 3
 1 24 7 13494.3 1366.84 3
 1 24 8 4035.4 749.615 3
 1 24 9 603.962 254.357 3
 -1 25 8 1190.2 428.987 3
 -1 25 7 21815.8 1789.24 3
 -1 25 6 1050.95 452.408 3
 -1 25 5 5851.5 908.021 3
 1 25 -5 6651.02 976.814 3
 -1 25 4 4016.37 786.177 3
 1 25 -4 4082.65 785.186 3
 -1 25 3 15098.4 1486.41 3
 1 25 -3 15038.9 1483.71 3
 -1 25 2 1498.46 569.496 3
 1 25 -2 2076.41 597.43 3
 -1 25 1 18081.4 1616.82 3
 1 25 -1 20668.9 1729.04 3
 -1 25 0 1856.95 512.297 3
 1 25 0 2246.59 563.012 3
 -1 25 -1 23616.9 1856.3 3
 1 25 1 24106.8 1895.25 3
 1 25 2 -153.024 220.844 3
 1 25 3 23172.6 1840.47 3
 1 25 4 6091.83 928.931 3
 1 25 5 10143.9 1223.22 3
 1 25 6 176.197 285.5 3
 1 25 7 13821.7 1405.56 3
 1 25 8 1715.34 509.156 3
 -1 26 8 9821.25 1208.47 3
 -1 26 7 2502.11 614.473 3
 -1 26 6 2220.95 587.934 3
 1 26 -5 3252.45 715.611 3
 -1 26 5 2416.93 631.948 3
 1 26 -4 1726.57 470.803 3
 -1 26 4 2803.76 683.834 3
 -1 26 3 295.519 248.638 3
 1 26 -3 742.471 400.49 3
 1 26 -2 63620.6 3225.63 3
 -1 26 2 58212.1 3092.34 3
 -1 26 1 2159.8 615.916 3
 1 26 -1 1657.04 553.408 3
 1 26 0 5335.61 921.815 3
 -1 26 0 4529.61 855.308 3
 1 26 1 3234.15 737.182 3
 -1 26 -1 3151.13 719.725 3
 1 26 2 687.338 380.851 3
 1 26 3 1616.94 546.775 3
 1 26 4 12727.4 1411.59 3
 1 26 5 75.2473 230.566 3
 1 26 6 42990.1 2614 3
 1 26 7 -29.6117 206.482 3
 1 26 8 6181.02 989.749 3
 -1 27 7 10887.3 1314.68 3
 -1 27 6 10458.2 1280.68 3
 -1 27 5 6211.1 985.83 3
 -1 27 4 1664.12 481.003 3
 1 27 -4 1806.67 556.34 3
 1 27 -3 8869.83 1199.07 3
 -1 27 3 8985.44 1188.19 3
 1 27 -2 7744.16 1125.02 3
 -1 27 2 6869.02 1073.73 3
 1 27 -1 15171.9 1559.68 3
 -1 27 1 14333.4 1531.58 3
 1 27 0 6573.64 1033.07 3
 -1 27 0 7163.4 1073.27 3
 1 27 1 22717.6 1912.91 3
 1 27 2 24852.2 2002.74 3
 1 27 3 12537.9 1435.29 3
 1 27 4 3333.5 715.158 3
 1 27 5 13378 1471 3
 1 27 6 309.157 303.812 3
 -2 0 18 30037.7 2142.49 2
 -2 0 17 37.0111 249.21 2
 -2 0 16 418.451 277.197 2
 -2 0 15 15.278 171.158 2
 -2 0 14 27739.3 1743.97 2
 -2 0 13 -44.0315 143.493 2
 -2 0 12 61415.4 2498.39 2
 -2 0 11 1.15953 93.9344 2
 -2 0 10 97072.2 3029.59 2
 -2 0 9 122.388 138.018 2
 -2 0 8 2109.65 337.576 2
 -2 0 7 19.2789 87.0626 2
 -2 0 6 1785.57 272.655 2
 -2 0 5 69.8957 67.0132 2
 -2 0 4 249788 4898.35 2
 -2 0 3 204.774 65.826 2
 2 0 -3 403.869 93.9857 2
 2 0 -2 6642.95 316.973 2
 -2 0 2 6887.01 334.968 2
 2 0 -1 28.55 19.8081 2
 2 0 -1 7.57243 20.658 3
 -2 0 0 561.354 97.4254 1
 2 0 0 610.876 102.971 3
 2 0 1 52.297 49.074 3
 2 0 2 1305.9 170.034 3
 2 0 3 231.703 84.4605 3
 2 0 4 502275 9200.89 3
 2 0 5 -19.9396 53.896 3
 2 0 6 648.057 151.724 3
 2 0 7 -109.975 163.757 2
 2 0 7 90.3386 77.5663 3
 2 0 8 218.108 104.788 3
 2 0 8 422.359 166.596 2
 2 0 9 136.189 186.688 2
 2 0 9 6.48529 80.4202 3
 2 0 10 43899.2 1538.64 3
 2 0 10 49647.6 2243.15 2
 2 0 11 99.999 193.589 2
 2 0 12 165353 5045.17 2
 2 0 13 -50.9905 181.829 2
 2 0 14 12007.9 1222.71 2
 2 0 15 -228.868 308.255 2
 2 0 16 4751.46 828.449 2
 2 0 17 22.0145 318.189 2
 -2 -1 18 1767.29 566.448 2
 -2 1 18 1690.4 532.147 2
 -2 1 17 38220.7 2355.76 2
 -2 -1 17 35096.9 2222.55 2
 -2 -1 16 6478.25 902.883 2
 -2 1 16 6422.47 894.692 2
 -2 -1 15 3182.72 594.889 2
 -2 1 15 3420.75 637.619 2
 -2 -1 14 5489.35 751.55 2
 -2 1 14 5359.57 758.132 2
 -2 1 13 11370.4 1062.98 2
 -2 -1 13 10683.5 1005.44 2
 -2 1 12 1229.47 377.942 2
 -2 -1 12 1801.28 406.943 2
 -2 1 11 8042.61 802.787 2
 -2 -1 11 8200.01 791.156 2
 -2 1 10 493.719 216.039 2
 -2 -1 10 769.364 243.161 2
 -2 -1 9 175721 4292.68 2
 -2 1 9 169458 4334.45 2
 -2 -1 8 27217.6 1249 2
 -2 1 8 25535.9 1256.61 2
 -2 1 7 42617.5 1587.24 2
 -2 -1 7 43195.5 1540.35 2
 -2 -1 6 1685.79 262.678 2
 -2 1 6 1693 266.768 2
 -2 1 5 49463.1 1530.99 2
 -2 -1 5 51964 1510.29 2
 -2 1 4 2712.7 285.814 2
 -2 -1 4 3069.5 275.684 2
 -2 -1 3 35453 803.704 3
 -2 1 3 33917.3 1024.09 2
 2 1 -3 33532 799.56 3
 -2 -1 3 33613.5 968.819 2
 2 1 -3 36817 989.519 2
 2 -1 -2 103809 1920.88 2
 -2 -1 2 97184.5 1875.62 2
 -2 -1 2 103151 1789.17 3
 -2 1 2 98556.2 1924.11 2
 -2 1 1 66402.1 1451.76 2
 2 -1 -1 72563.4 1475.76 2
 2 1 -1 93387.6 1543.04 1
 2 -1 -1 65356.2 1464.32 1
 -2 -1 1 94451.4 1565.37 3
 2 1 0 9482.27 410.727 3
 -2 -1 0 10542.5 434.842 3
 -2 -1 -1 84164.9 1908.54 3
 2 1 1 86311.4 1904.2 3
 -2 -1 -2 42164.6 1185.54 3
 2 1 2 41923.9 1173.22 3
 2 1 3 203229 4057.51 3
 2 1 4 8296.24 492.584 3
 2 1 5 160535 3421.46 3
 2 -1 5 156830 3433.22 3
 2 1 6 5717.3 436.743 3
 2 -1 6 6265.52 466.2 3
 2 1 7 107464 2675.56 3
 2 1 7 118693 3382.31 2
 2 -1 7 118312 3300.73 2
 2 -1 7 110137 2724.76 3
 2 1 8 22432.3 1345.92 2
 2 -1 8 18755.8 904.549 3
 2 -1 8 21207.1 1278.46 2
 2 1 8 19344.2 899.691 3
 2 -1 9 50458.3 2170.14 2
 2 1 9 48739.4 2153.37 2
 2 -1 9 45741.2 1557.44 3
 2 1 9 46216.8 1545.91 3
 2 -1 10 12549.1 1072.9 2
 2 -1 10 9351.43 644.846 3
 2 1 10 10732.4 687.135 3
 2 1 10 11326.2 1049.98 2
 2 1 11 43287.6 2199.96 2
 2 -1 11 38077.3 1443.47 3
 2 -1 11 44573.5 2193.59 2
 2 1 12 1059.77 407.289 2
 2 -1 12 975.509 392.37 2
 2 1 13 32456.8 2025.57 2
 2 -1 13 33000.4 2001.33 2
 2 -1 14 2149 507.534 2
 2 1 14 3423.99 699.074 2
 2 1 15 7885.26 1034.2 2
 2 -1 15 8286.74 1022.52 2
 2 -1 16 4484.08 795.345 2
 2 1 16 5383.65 880.293 2
 2 1 17 36863.6 2391.37 2
 2 -1 17 34690.2 2276.88 2
 -2 -2 18 8593.02 1105.16 2
 -2 2 18 7964.87 1107.82 2
 -2 2 17 5670.9 900.209 2
 -2 -2 17 5142.27 850.283 2
 -2 2 16 5252.77 862.711 2
 -2 -2 16 5677.91 820.72 2
 -2 -2 15 3073.95 588.722 2
 -2 2 15 3150.01 627.139 2
 -2 -2 14 1524.72 395.881 2
 -2 2 14 2006.77 499.079 2
 -2 2 13 19126 1412.15 2
 -2 -2 13 18977.4 1333.72 2
 -2 2 12 35268.2 1852.19 2
 -2 -2 12 30622.6 1651.98 2
 -2 2 11 29045 1605.45 2
 -2 -2 11 30688.2 1571.02 2
 -2 2 10 19583.8 1233.36 2
 -2 -2 10 20470.4 1186.51 2
 -2 -2 9 55359 1969.53 2
 -2 2 9 52364.4 2039.31 2
 -2 2 8 43879.3 1683.63 2
 -2 -2 8 48406.7 1631.06 2
 -2 -2 7 33836 1290.02 2
 -2 -2 7 31501.3 775.079 3
 -2 2 7 32381 1367.95 2
 -2 -2 6 189.938 45.4982 3
 -2 -2 6 177.71 103.955 2
 -2 2 6 185.791 119.244 2
 2 2 -5 35442.6 840.688 3
 -2 2 5 33579.5 1236.74 2
 -2 -2 5 35086.3 863.834 3
 2 -2 -4 72677 1442.62 3
 -2 2 4 71545.1 1903.02 2
 -2 -2 4 72353.7 1745.77 2
 -2 -2 4 74479.7 1540.84 3
 2 2 -4 72735.6 1524.13 3
 2 2 -3 235777 4442.04 3
 2 2 -3 250693 4539.2 2
 -2 -2 3 242117 4441.13 3
 2 -2 -3 251042 4366.02 3
 -2 2 3 235269 4699.06 2
 -2 -2 3 237460 4529.99 2
 2 2 -2 6995.44 323.787 2
 -2 -2 2 7660.26 352.936 3
 2 2 -2 6190.27 319.762 3
 -2 2 2 7487.95 384.587 2
 -2 -2 2 7746.71 341.553 2
 2 -2 -2 7681.7 379.987 2
 2 -2 -1 216104 3645.89 2
 2 -2 -1 179320 3602.37 1
 -2 2 1 175468 3575.4 2
 2 2 -1 147024 3540.5 3
 2 2 -1 219986 3574.24 1
 -2 -2 1 220189 3698.15 3
 2 2 0 19590.1 655.535 3
 -2 -2 0 20215.5 665.565 3
 2 2 1 54856.9 1387.51 3
 -2 -2 -1 53752.7 1371.88 3
 2 2 2 29837.1 957.725 3
 -2 -2 -2 31116.4 981.516 3
 2 2 3 5347.46 373.88 3
 2 2 4 113312 2591.17 3
 2 2 5 57376.8 1614.49 3
 2 2 6 15600.3 755.09 3
 2 2 6 16394.4 1024.9 2
 2 2 7 6184.19 661.046 2
 2 2 7 4951 432.4 3
 2 -2 7 5453.88 582.188 2
 2 2 8 64.524 86.4933 3
 2 -2 8 126.484 180.818 2
 2 -2 8 7.87411 93.5283 3
 2 2 8 -20.5374 119.347 2
 2 2 9 17388.4 879.279 3
 2 -2 9 16262.2 871.004 3
 2 -2 9 19087 1264.64 2
 2 2 9 20058.8 1340.46 2
 2 2 10 708.473 314.272 2
 2 -2 10 687.999 262.891 2
 2 2 10 244.794 121.235 3
 2 -2 10 207.796 100.366 3
 2 -2 11 46218.8 2227.33 2
 2 2 11 47600.2 2340.83 2
 2 -2 11 43232.9 1568.71 3
 2 -2 12 112609 3881.95 2
 2 2 12 110616 3994.94 2
 2 -2 13 16201.5 1366.29 2
 2 2 13 17558 1489.09 2
 2 -2 14 3072.53 614.654 2
 2 2 14 3375.98 660.651 2
 2 2 15 3276.8 678.843 2
 2 -2 15 4091.35 727.735 2
 2 2 16 7653.46 1058 2
 2 -2 16 7797.55 1037.35 2
 2 -2 17 3096.94 671.414 2
 2 2 17 4342.88 818.187 2
 -2 3 18 9106.69 1187.79 2
 -2 3 17 6912.2 1003.68 2
 -2 -3 17 4793.71 788.601 2
 -2 -3 16 34454 2071.11 2
 -2 3 16 36992.9 2249.65 2
 -2 -3 15 -398.577 227.514 2
 -2 3 15 -52.7191 151.433 2
 -2 -3 14 18529.5 1347.44 2
 -2 3 14 18931.8 1472.86 2
 -2 -3 13 3345.73 545.603 2
 -2 3 13 5613.32 762.831 2
 -2 -3 12 207.248 156.239 2
 -2 3 12 33.4092 131.07 2
 -2 -3 11 1430.14 338.216 2
 -2 3 11 1404.8 375.842 2
 -2 -3 10 10672.8 825.093 2
 -2 3 10 12477.8 975.648 2
 -2 -3 9 36661.4 953.977 3
 -2 -3 9 34300.9 1469.17 2
 -2 -3 8 137186 3390.42 2
 -2 -3 8 137779 2724.05 3
 -2 3 8 128786 3564.34 2
 -2 -3 7 83.0131 62.919 2
 -2 -3 7 40.066 31.8388 3
 -2 -3 6 111832 2562.8 2
 -2 -3 6 109375 2173.94 3
 -2 3 6 98376.3 2698.21 2
 2 -3 -6 97154.9 1958.89 3
 2 -3 -5 9775.54 365.832 3
 -2 -3 5 9074.15 513.186 2
 -2 -3 5 9320.53 424.456 3
 2 3 -5 9876.05 409.693 3
 -2 3 5 9286.17 610.684 2
 -2 -3 4 7004.51 395.929 2
 -2 -3 4 6902.61 361.683 3
 2 3 -4 7871.66 377.721 3
 2 -3 -4 8660.67 351.558 3
 -2 3 4 7105.7 488.116 2
 2 3 -4 8375.78 418.023 2
 -2 3 3 25432.9 912.391 2
 -2 -3 3 25264.3 797.85 3
 2 3 -3 26322.3 797.718 3
 -2 -3 3 25390.2 763.515 2
 2 3 -3 27544.9 768.878 2
 2 -3 -3 28707.9 767.663 3
 -2 3 2 2482.44 224.191 2
 -2 -3 2 2668.3 232.404 3
 2 -3 -2 2892.99 238.821 2
 2 3 -2 2906.13 235.056 3
 2 3 -2 2552.72 185.175 2
 -2 -3 1 51034.5 1324.49 3
 2 -3 -1 52546.2 1239.5 2
 2 3 -1 50942.9 1323.97 3
 2 3 -1 52382.5 1155.55 1
 2 -3 -1 54539.8 1289.04 1
 -2 3 1 51498.8 1255.01 2
 -2 -3 0 26375.1 726.421 1
 2 3 0 27495.4 888.946 3
 2 -3 0 28104 777.618 2
 -2 3 0 30440.2 838.056 1
 -2 -3 0 29155.5 904.674 3
 -2 -3 -1 55223.4 1480.84 3
 2 3 1 60945.6 1518.48 3
 2 3 2 8891.48 491.419 3
 2 3 3 80992.4 1997.77 3
 2 3 4 380.991 115.721 3
 2 3 5 53720.4 1576.03 3
 2 3 6 95282.7 2404.01 3
 2 3 6 96436.6 2926.11 2
 2 3 7 16303.6 1109.76 2
 2 -3 7 17517.6 1041.77 2
 2 3 7 14857 779.001 3
 2 3 8 137506 4010.62 2
 2 -3 8 134342 3716.16 2
 2 3 8 126627 3115.7 3
 2 -3 9 1512.29 256.266 3
 2 3 9 1738.13 401.819 2
 2 3 9 1506.41 261.565 3
 2 -3 9 2253.11 442.05 2
 2 3 10 39031.9 1451.2 3
 2 -3 10 40802.9 1966.47 2
 2 -3 10 37022.9 1455.38 3
 2 3 11 31639.8 1880.69 2
 2 -3 11 28407.1 1692.23 2
 2 -3 11 26913.1 1214.98 3
 2 3 12 242.414 213.11 2
 2 -3 12 66.7885 177.735 2
 2 -3 13 6581.17 856.724 2
 2 3 13 7694.94 987.576 2
 2 -3 14 16418.5 1385.06 2
 2 3 14 18006.8 1534.62 2
 2 3 15 -390.448 267.274 2
 2 -3 15 -3.6476 251.455 2
 2 -3 16 45097.3 2511.24 2
 2 3 16 48150.4 2723.12 2
 2 3 17 5568.08 923.881 2
 2 -3 17 5910.93 919.548 2
 -2 4 17 1843.68 491.476 2
 -2 -4 17 1992.96 491.866 2
 -2 -4 16 12774.3 1222.7 2
 -2 4 16 13724.6 1352.69 2
 -2 4 15 5452.24 833.518 2
 -2 -4 15 4132.67 657.529 2
 -2 4 14 9729.52 1065.93 2
 -2 -4 14 10082.1 980.171 2
 -2 4 13 34365.1 1942.6 2
 -2 -4 13 31442.7 1691.55 2
 -2 4 12 591.866 245.487 2
 -2 -4 12 467.245 204.965 2
 -2 4 11 29281.2 1651.49 2
 -2 -4 11 31471.7 1525.88 2
 -2 -4 10 1025.1 261.691 2
 -2 4 10 616.085 230.809 2
 -2 4 9 23627.5 623.981 3
 -2 4 9 23579.6 1340.14 2
 -2 4 8 19965.4 1152.5 2
 -2 -4 8 21892.2 1032.07 2
 -2 4 8 20736.2 623.744 3
 2 -4 -8 20115.7 593.829 3
 -2 -4 8 21853.4 769.837 3
 -2 -4 7 8442.02 576.38 2
 2 -4 -7 8017.47 345.895 3
 -2 -4 7 7420.17 422.611 3
 -2 4 7 7113.68 348.217 3
 -2 4 7 7225.52 635.761 2
 -2 -4 6 20893.3 875.025 2
 -2 -4 6 19771.2 741.729 3
 -2 4 6 19752.4 1021.17 2
 2 4 -6 21215.5 714.669 3
 -2 4 6 20078.7 659.95 3
 2 -4 -6 21440.9 654.167 3
 -2 -4 5 106312 2390.82 3
 -2 4 5 103827 2725.22 2
 2 -4 -5 115220 2278.69 3
 2 4 -5 111231 2345.4 3
 -2 -4 5 112592 2454.76 2
 -2 4 5 105782 2267.26 3
 -2 -4 4 405.484 96.2526 3
 2 4 -4 418.178 96.5814 3
 2 -4 -4 410.008 91.1861 3
 -2 4 4 361.495 89.3381 3
 -2 -4 4 303.788 78.7354 2
 2 4 -4 300.115 82.9019 2
 -2 4 4 147.82 108.244 2
 2 4 -3 28440.3 750.139 2
 -2 -4 3 26017.3 745.037 2
 2 -4 -3 27628 822.15 3
 -2 4 3 24998 929.089 2
 2 4 -3 24577.8 839.953 3
 -2 -4 3 24826.2 865.361 3
 2 4 -2 72200 1505.59 2
 2 4 -2 70619.6 1737.98 3
 -2 4 2 71162.7 1709.8 2
 -2 -4 1 256650 5011.29 3
 2 4 -1 258255 4992.71 3
 2 -4 -1 263168 4806.21 2
 2 4 -1 269349 4639.87 1
 2 -4 -1 274559 4869.96 1
 2 4 0 52632.1 1480.2 3
 -2 4 0 58437.7 1371.62 1
 -2 -4 0 58803.7 1231.1 1
 2 -4 0 54308.1 1290.45 2
 2 4 1 8375.86 490.852 3
 2 4 2 261726 5152.02 3
 2 4 3 13868.7 678.889 3
 2 4 4 20840 889.994 3
 2 4 5 110143 3087.9 2
 2 4 5 110108 2675.34 3
 2 4 6 4064.93 394.698 3
 2 4 6 4008.96 527.943 2
 2 4 7 14624.8 792.216 3
 2 -4 7 14863.7 947.099 2
 2 4 7 15518.7 1107.5 2
 2 4 8 1634.21 383.032 2
 2 4 8 1530.33 258.157 3
 2 -4 8 1645.83 364.419 2
 2 4 9 17659.2 1280.7 2
 2 -4 9 16515.1 1140.92 2
 2 4 9 15517.5 857.206 3
 2 4 10 21706.5 1053 3
 2 4 10 23705.2 1571.59 2
 2 -4 10 21785.8 1384.35 2
 2 -4 10 19737.6 1027.22 3
 2 4 11 84493.8 3254 2
 2 -4 11 81721.5 2989.44 2
 2 -4 12 66.805 157.047 2
 2 4 12 78.829 244.928 2
 2 4 13 38728.3 2285.06 2
 2 -4 13 41606.2 2185.33 2
 2 4 14 769.954 352.23 2
 2 -4 14 258.56 172.99 2
 2 4 15 22826.7 1789 2
 2 -4 15 19528.2 1534.67 2
 2 4 16 3383.57 730.524 2
 2 -4 16 2303.72 538.132 2
 -2 5 17 2229.6 609.975 2
 -2 -5 16 21015.5 1568.1 2
 -2 5 16 21232.6 1724.96 2
 -2 -5 15 21624.3 1520.68 2
 -2 5 15 24104.4 1765.72 2
 -2 5 14 36188.2 2106.9 2
 -2 -5 14 31795.4 1781.16 2
 -2 5 13 564.329 309.946 2
 -2 -5 13 214.585 113.458 2
 -2 5 12 -37.9658 184.414 2
 -2 -5 12 125.09 90.0141 2
 -2 -5 11 394.228 180.283 2
 -2 5 11 390.496 218.276 2
 -2 -5 10 2684.69 398.26 2
 -2 5 10 2832.14 495.237 2
 -2 5 9 396.757 200.073 2
 -2 -5 9 314.018 122.313 2
 -2 5 9 293.426 77.2793 3
 2 -5 -8 110052 2337.6 3
 -2 5 8 109522 3225.76 2
 -2 5 8 114232 2406.4 3
 2 -5 -7 82567.3 1853.79 3
 -2 5 7 82934.6 1903.17 3
 -2 5 6 4222.92 311.236 3
 2 -5 -6 4470.17 307.216 3
 -2 5 6 3820.12 446.758 2
 2 5 -6 4613.41 340.883 3
 -2 -5 6 4314.19 358.995 2
 2 -5 -5 15397.6 608.306 3
 -2 5 5 13375.8 776.263 2
 -2 -5 5 13580.1 590.502 2
 2 5 -5 14105.7 625.028 3
 -2 5 5 13671.9 593.997 3
 2 5 -4 70998.3 1822.62 3
 -2 -5 4 71885.8 1643.73 2
 -2 5 4 68932.9 1972.58 2
 2 5 -4 77213.7 1659.42 2
 -2 5 4 71975.2 1774.77 3
 2 -5 -4 79453.4 1802.82 3
 -2 -5 3 14010.1 479.895 2
 2 5 -3 14658.1 479.177 2
 2 -5 -3 15141 626.621 3
 -2 5 3 14084.1 679.495 2
 -2 5 3 13416 609.006 3
 2 5 -3 14438.7 655.303 3
 -2 5 2 33998.8 1037.83 2
 2 5 -2 32936.1 1098.24 3
 2 5 -2 34787.4 838.968 2
 2 -5 -1 23796.7 757.275 1
 -2 5 1 22086.7 731.904 2
 2 5 -1 21111.6 858.81 3
 2 5 -1 21910.6 573.903 1
 2 -5 -1 22055.5 716.446 2
 -2 -5 0 207074 3689 1
 -2 5 0 209455 3916.21 1
 2 -5 0 200165 3827.16 2
 -2 5 0 198754 3839.27 2
 2 5 0 196223 4157.94 3
 2 5 1 131800 2973.97 3
 2 5 2 1965.38 253.777 3
 2 5 3 64496.5 1820.7 3
 2 5 4 424.766 135.916 3
 2 5 5 5763.01 477.304 3
 2 5 5 6658.93 641.012 2
 2 5 6 4012.87 521.816 2
 2 5 6 3288.71 362.558 3
 2 5 7 74689 2157.08 3
 2 5 7 75440.9 2711.38 2
 2 -5 7 74984.7 2376.34 2
 2 5 8 175566 4800.73 2
 2 5 8 173093 3998.27 3
 2 -5 8 171853 4405.99 2
 2 5 9 37838.6 1461.99 3
 2 5 9 39205.2 2007.56 2
 2 -5 9 38363.4 1769.6 2
 2 5 10 13996.3 1225.14 2
 2 5 10 13234 819.63 3
 2 -5 10 12501.2 1028.58 2
 2 -5 11 1507.58 383.959 2
 2 -5 11 851.368 194.911 3
 2 5 11 1229.86 366.525 2
 2 5 12 308.681 319.145 2
 2 -5 12 409.999 221.117 2
 2 -5 13 -103.708 192.508 2
 2 5 13 -82.2256 190.473 2
 2 -5 14 6763.9 850.212 2
 2 5 14 7929.31 1042.6 2
 2 -5 15 11776.6 1178.01 2
 2 5 15 12247.7 1329.55 2
 2 5 16 21843.5 1818.52 2
 -2 6 17 1012.57 423.404 2
 -2 6 16 6419.38 937.166 2
 -2 6 15 1065.94 405.978 2
 -2 -6 15 1425.04 399.529 2
 -2 -6 14 39198.7 1978.43 2
 -2 6 14 41374.5 2284.62 2
 -2 -6 13 9326.36 881.911 2
 -2 6 13 10526.8 1073.88 2
 -2 6 12 26849.4 1688.64 2
 -2 -6 12 24969.8 1394.64 2
 -2 6 11 5732.09 737.041 2
 -2 -6 11 6696.94 661.063 2
 -2 -6 10 19079.2 1066.73 2
 -2 6 10 19375.7 1300.35 2
 -2 -6 9 10933.9 740.363 2
 -2 6 9 9867.27 873.769 2
 -2 6 9 10095.9 518.073 3
 -2 6 8 33826.7 1073.51 3
 2 -6 -8 34290.9 1039.07 3
 -2 -6 8 36199.4 1331.98 2
 -2 -6 7 24966.9 987.694 2
 -2 6 7 23845.4 877.234 3
 -2 6 7 22458.2 1210.56 2
 -2 6 6 97052.5 2778.22 2
 2 6 -6 103903 2415.66 3
 -2 6 6 98480 2346.21 3
 -2 -6 6 103762 2343.93 2
 -2 6 5 45523.4 1604.36 2
 -2 6 5 44515.9 1360.2 3
 -2 -6 5 47638.9 1248.47 2
 2 6 -5 47489.1 1409.88 3
 -2 -6 4 143708 2805.82 2
 2 6 -4 141264 3151.21 3
 -2 6 4 135621 3080.81 3
 -2 6 4 137309 3282.74 2
 2 6 -3 19887.8 570.411 2
 2 6 -3 20763.1 862.377 3
 -2 6 3 19564.6 815.821 3
 -2 6 3 20682 860.497 2
 -2 6 2 25082.2 882.743 2
 2 6 -2 24882.1 970.064 3
 2 6 -2 25839.7 672.631 2
 -2 6 2 24342.5 941.333 3
 -2 6 1 17461.4 641.585 2
 2 -6 -1 18514.4 662.123 1
 2 -6 -1 19005.7 660.468 2
 2 6 -1 17827.4 800.861 3
 -2 6 0 1321.55 160.667 1
 2 6 0 1175.38 209.843 3
 2 -6 0 1330.18 145.359 2
 -2 6 0 1512.32 160.864 2
 -2 -6 0 1397.33 111.289 1
 2 6 1 654.74 164.053 3
 2 -6 1 983.082 122.426 2
 2 6 2 31776.4 1187.2 3
 2 6 3 10940 667.773 3
 2 6 4 35428.4 1316.64 3
 2 6 5 12214.6 881.002 2
 2 6 5 12148.1 730.216 3
 2 6 6 47685.3 1639.73 3
 2 6 6 49259 2017.48 2
 2 6 7 14771.7 1104.63 2
 2 6 7 13792.6 822.655 3
 2 -6 7 12993.3 853.245 2
 2 -6 8 1056.42 273.892 2
 2 6 8 636.26 193.617 3
 2 6 8 601.306 270.9 2
 2 -6 9 15898.4 1079.27 2
 2 6 9 15269.1 1236.79 2
 2 6 9 14013.3 872.58 3
 2 6 10 55534.4 2553.74 2
 2 6 10 52340 1851.86 3
 2 -6 10 51669 2193.76 2
 2 6 11 8027.46 961.778 2
 2 -6 11 5736.3 713.133 2
 2 -6 12 30938.6 1766.28 2
 2 6 12 32449.4 2025.83 2
 2 6 13 10160.3 1165.04 2
 2 -6 13 8296.24 904.124 2
 2 -6 14 39388.4 2114.56 2
 2 6 14 43009.3 2480.05 2
 2 6 15 7552.36 1060.16 2
 2 6 16 520.396 316.686 2
 -2 7 17 8996.56 1170.49 2
 -2 7 16 640.142 350.36 2
 -2 7 15 98394.7 3903.13 2
 -2 7 14 4227.42 725.921 2
 -2 -7 14 2125.39 451.691 2
 -2 -7 13 448.876 184.3 2
 -2 7 13 488.285 277.368 2
 -2 -7 12 1190.35 316.203 2
 -2 7 12 1460.3 430.974 2
 -2 7 11 4145.76 639.008 2
 -2 -7 11 4372.36 532.031 2
 -2 7 10 12071 1021.38 2
 -2 -7 10 11309.4 795.889 2
 -2 -7 9 9591.67 673.335 2
 -2 7 9 9375.44 548.975 3
 -2 7 9 9277.05 845.886 2
 -2 -7 8 5590.05 461.975 2
 -2 7 8 5731.81 629.745 2
 -2 -7 7 233310 4390 2
 2 7 -7 229944 4462.23 3
 -2 7 6 2299.19 357.745 2
 -2 -7 6 1977.18 217.627 2
 -2 7 6 1744.68 235.113 3
 2 7 -6 2192.06 275.227 3
 2 7 -5 6729.28 378.947 2
 -2 -7 5 5652.02 327.804 2
 -2 7 5 5568.26 521.081 2
 2 7 -5 5496.39 440.917 3
 -2 7 5 5551.54 434.099 3
 2 7 -4 1585.43 143.154 2
 -2 7 4 1613.03 287.555 2
 -2 7 4 1439.77 218.99 3
 -2 -7 4 1264.18 133.033 2
 2 7 -4 1285.8 217.403 3
 2 7 -3 19036.7 875.571 3
 -2 7 3 17870.6 833.334 3
 -2 7 3 18706.4 834.7 2
 2 7 -3 18251.5 519.612 2
 -2 7 2 3022.77 286.313 2
 -2 7 2 3161.11 337.69 3
 2 7 -2 2576.21 313.193 3
 2 7 -1 70717 2006.05 3
 2 -7 -1 74683.7 1724.8 1
 -2 7 1 70466.9 1979.68 3
 -2 7 1 71562.7 1713.19 2
 2 -7 0 863.762 121.697 2
 -2 7 0 739.838 122.491 1
 -2 -7 0 982.692 86.5828 1
 -2 7 0 892.269 128.927 2
 2 7 0 890.598 191.319 3
 2 7 1 51834.1 1669.71 3
 2 -7 1 52280.4 1246.09 2
 2 7 2 6249.35 512.138 3
 2 7 3 8327.71 610.757 3
 2 7 4 1766.75 334.977 2
 2 7 4 2364.24 329.924 3
 2 7 5 19077.1 1125.18 2
 2 7 5 17487.5 931.658 3
 2 7 6 289.934 143.066 2
 2 7 6 411.103 156.866 3
 2 7 7 105463 3355.76 2
 2 7 7 102409 2823.28 3
 2 -7 7 104119 2871.17 2
 2 7 8 11498.5 785.807 3
 2 7 8 10476.7 984.542 2
 2 -7 8 11065.5 838.685 2
 2 7 9 91973.4 2672.73 3
 2 7 9 98257.5 3443.14 2
 2 -7 9 88179.5 2869.21 2
 2 7 10 3219.69 432.227 3
 2 7 10 4062.54 687.287 2
 2 -7 10 3309.28 510.471 2
 2 -7 11 814.548 271.275 2
 2 7 11 627.554 305.176 2
 2 7 12 516.887 315.136 2
 2 -7 12 556.972 256.268 2
 2 -7 13 713.215 286.795 2
 2 7 13 678.442 391.328 2
 2 7 14 176.588 298.614 2
 2 7 15 62848.9 3151.32 2
 2 7 16 476.987 292.541 2
 -2 8 17 381.251 204.206 2
 -2 8 16 5740.23 943.064 2
 -2 8 15 977.183 466 2
 -2 8 14 41602.5 2338.25 2
 -2 8 13 496.062 288.466 2
 -2 -8 12 64890.7 2321.02 2
 -2 8 12 66476.5 2823.05 2
 -2 -8 11 16271 997.021 2
 -2 8 11 15733.1 1251.15 2
 -2 -8 10 17809.4 972.092 2
 -2 8 10 15319.2 1173.87 2
 -2 -8 9 3702.98 397.91 2
 -2 8 9 4077.11 383.716 3
 -2 8 9 4169.51 587.909 2
 -2 8 8 20529.8 1235.57 2
 -2 8 8 19050.3 881.608 3
 -2 -8 8 21730.5 915.226 2
 -2 -8 7 689.266 146.115 2
 2 8 -7 640.407 156.531 3
 -2 8 7 677.874 242.525 2
 -2 8 7 814.908 196.037 3
 2 8 -6 157402 3402.1 3
 2 8 -6 150858 3083.28 2
 -2 -8 6 154458 2949.07 2
 -2 8 5 7554.95 612.521 2
 -2 -8 5 8289.73 382.42 2
 -2 8 5 7975.48 565.772 3
 2 8 -5 8972.03 426.859 2
 2 8 -5 8346.85 581.53 3
 -2 8 4 199141 4435.98 3
 2 8 -4 208322 4513.83 3
 -2 8 4 201134 4508.61 2
 2 8 -4 212093 3809.55 2
 2 8 -3 17303.1 883.718 3
 2 8 -3 17062.7 474.863 2
 -2 8 3 17331.7 817.895 2
 -2 8 3 15503.8 819.316 3
 -2 8 2 78417.3 1967.03 2
 2 8 -2 80471.5 2238.17 3
 2 -8 -2 81653.9 1923.98 1
 2 8 -1 21178.6 996.494 3
 -2 8 1 21581.5 777.948 2
 -2 8 1 20489.2 968.992 3
 2 -8 -1 21733.2 767.567 1
 2 -8 0 18947.6 654.403 2
 -2 8 0 18119.5 651.106 2
 2 8 0 17327 899.458 3
 2 8 1 9132.38 647.528 3
 2 -8 1 9331.66 404.093 2
 2 -8 2 139649 2749.72 2
 2 8 2 140259 3424.51 3
 2 8 3 102314 2804.37 2
 2 8 3 102819 2778.64 3
 2 8 4 79958.7 2489.92 2
 2 8 4 76071.9 2303.81 3
 2 8 5 5977.56 558.582 3
 2 8 5 6650.86 679.863 2
 2 8 6 118424 3189.06 3
 2 8 6 124654 3650.72 2
 2 -8 7 240.561 123.662 2
 2 8 7 277.921 150.331 3
 2 8 7 144.675 150.912 2
 2 -8 8 14457.8 944.598 2
 2 8 8 13633.9 898.416 3
 2 8 8 13674.2 1134.41 2
 2 8 9 20.8729 95.2486 3
 2 8 9 40.6287 184.188 2
 2 -8 9 54.2104 103.684 2
 2 -8 10 53942.6 2167.78 2
 2 8 10 60176.7 2692.97 2
 2 8 10 54700.4 2011.86 3
 2 8 11 11258.8 1173.49 2
 2 -8 11 8139.19 832.403 2
 2 -8 12 20705.2 1352 2
 2 8 12 20114.9 1607.82 2
 2 8 13 7177.82 987.768 2
 2 8 14 36782 2327.05 2
 2 8 15 -17.6516 194.806 2
 -2 9 16 33487.6 2265.6 2
 -2 9 15 41757.9 2455.75 2
 -2 9 14 11288.8 1199.26 2
 -2 9 13 408.99 163.139 2
 -2 9 12 18255.8 1435.92 2
 -2 9 11 8021.92 909.235 2
 -2 -9 11 7365.74 636.069 2
 -2 -9 10 50618.7 1715.4 2
 -2 9 10 47950.5 2199.11 2
 -2 -9 9 4693.11 427.039 2
 -2 9 9 5193.6 646.303 2
 -2 9 9 4059.69 407.878 3
 -2 -9 8 20395.9 852.506 2
 -2 9 8 18914.7 929.767 3
 -2 9 8 19942.8 1238.91 2
 -2 -9 7 95703.3 2142.44 2
 2 9 -7 98112.8 2539.84 3
 -2 9 7 81862 2374.46 3
 -2 9 7 85740.1 2785.51 2
 2 9 -6 3841.7 412.778 3
 -2 -9 6 3307.99 251.7 2
 2 9 -6 3688.35 294.23 2
 -2 9 6 2993.17 421.308 2
 -2 9 6 2703.17 347.259 3
 -2 -9 5 74.4614 44.392 2
 -2 9 5 215.333 218.082 2
 2 9 -5 189.987 143.291 3
 -2 9 5 186.868 86.423 3
 -2 9 4 14627 830.658 2
 2 9 -4 15821.2 868.478 3
 -2 9 4 13541 802.216 3
 2 9 -4 15159.9 450.614 2
 2 9 -3 39489.4 1465.06 3
 2 9 -3 35912.2 801.746 2
 -2 9 3 38781.1 1331.96 2
 -2 9 3 36508.7 1400.15 3
 -2 9 2 111325 2613.93 2
 2 9 -2 111815 2957.43 3
 2 -9 -2 116848 2545.98 1
 -2 9 2 111096 2925.46 3
 -2 9 1 101840 2302.24 2
 2 9 -1 102195 2761.09 3
 -2 9 1 97488.1 2694.53 3
 2 -9 -1 104168 2282.01 1
 2 9 0 60714.6 1969.91 3
 -2 9 0 60618.6 1957.71 3
 -2 9 0 62258.1 1508.26 2
 2 -9 1 51620.7 1240.78 2
 2 9 1 50397.2 1766.32 3
 2 9 2 10736.4 747.373 3
 2 9 2 10572.3 690.356 2
 2 -9 2 9649.11 412.486 2
 2 9 3 8156.25 664.068 3
 2 9 3 8759.4 686.951 2
 2 9 4 195.266 127.923 3
 2 9 4 351.151 152.393 2
 2 9 5 2805.68 446.151 2
 2 9 5 2914.9 407.749 3
 2 9 6 24812.8 1245.28 3
 2 9 6 24635.7 1407.59 2
 2 9 7 105064 3003.91 3
 2 9 7 107258 3441.3 2
 2 -9 7 102385 2779.91 2
 2 -9 8 9052.07 712.42 2
 2 9 8 8862.88 743.329 3
 2 9 9 47187 1850.84 3
 2 9 9 45458.5 2269.26 2
 2 -9 9 46990.7 1865.11 2
 2 9 10 21562.5 1213.51 3
 2 -9 10 22848.3 1302.53 2
 2 9 10 24415.8 1695.37 2
 2 9 11 1371.65 439.493 2
 2 -9 11 932.108 292.398 2
 2 9 12 -43.7523 211.457 2
 2 9 13 284.261 191.416 2
 2 9 14 12027 1319.64 2
 2 9 15 22309 1836.77 2
 -2 10 16 4275.78 790.524 2
 -2 10 15 7207.52 995.928 2
 -2 10 14 15670.9 1418.31 2
 -2 10 13 22058.2 1753.62 2
 -2 10 12 2317.38 526.155 2
 -2 10 11 137395 4343 2
 -2 -10 10 7101.61 552.96 2
 -2 10 10 7602.79 847.345 2
 -2 10 9 1206.68 233.629 3
 -2 -10 9 1315.29 209.661 2
 -2 10 9 1662.72 378.038 2
 -2 -10 8 33480 1085.98 2
 -2 10 8 29249.4 1268.1 3
 -2 10 8 31421.4 1611.14 2
 -2 -10 7 8977.14 456.725 2
 2 10 -7 9782.76 699.835 3
 -2 10 7 7712.14 619.051 3
 -2 10 7 9018.85 792.884 2
 2 10 -6 25490.9 1169.61 3
 -2 10 6 23200.9 1225.41 2
 -2 -10 6 23870.8 705.609 2
 2 10 -5 32960.1 1355.76 3
 -2 10 5 30734.1 1337.8 2
 2 10 -5 28643.8 774.25 2
 -2 10 5 32648.4 1345.38 3
 -2 10 4 1951.78 313.466 2
 -2 10 4 1723.35 305.3 3
 2 10 -4 2283.72 352.608 3
 -2 10 3 93837.5 2437.88 2
 2 10 -3 95857.4 2684.03 3
 -2 10 3 90496.1 2615.28 3
 -2 10 2 40415.7 1584.58 3
 -2 10 2 41684.3 1330.12 2
 2 10 -2 42084.9 1632.07 3
 2 -10 -2 43561.8 1268.51 1
 2 10 -1 2217.77 342.991 3
 2 -10 -1 2674.49 253.937 1
 -2 10 1 2356.97 249.557 2
 -2 10 1 2287.87 342.124 3
 -2 10 0 271.361 78.9236 2
 2 10 0 139.856 119.462 3
 -2 10 0 274.026 133.151 3
 2 -10 1 42293.2 1093.05 2
 2 10 1 39143.2 1586.54 3
 2 10 1 43631.2 1434.08 2
 2 -10 2 30246.1 836.421 2
 2 10 2 30802.9 1376.06 3
 2 10 3 178642 4248.6 3
 2 10 3 185152 4256.69 2
 2 10 4 2553.4 413.778 2
 2 10 4 1975.97 346.933 3
 2 10 5 109072 3267.15 2
 2 10 5 105090 3043.25 3
 2 10 6 42563.8 1740.52 3
 2 10 6 44344.5 1973.28 2
 2 -10 6 42452.3 1419.77 2
 2 10 7 707.235 257.909 2
 2 -10 7 749.397 195.798 2
 2 10 7 611.716 219.507 3
 2 10 8 11977.5 890.237 3
 2 -10 8 10941 770.436 2
 2 -10 9 1491.72 317.991 2
 2 10 9 2241.83 486.215 2
 2 10 9 1776.43 355.076 3
 2 10 10 41242.7 1770.51 3
 2 10 10 45362.8 2367.98 2
 2 -10 10 41779.2 1788.34 2
 2 10 11 53304.7 2645.9 2
 2 10 12 2073.02 530.159 2
 2 10 13 39586.8 2363.07 2
 2 10 14 3707.44 763.011 2
 2 10 15 950.836 371.545 2
 -2 11 16 20414.5 1788.42 2
 -2 11 15 792.049 377.069 2
 -2 11 14 13637 1334.87 2
 -2 11 13 17990.9 1495.17 2
 -2 11 12 4749.56 733.115 2
 -2 11 11 1448.02 419.595 2
 -2 11 10 103023 3522.8 2
 -2 11 9 1132.39 331.814 2
 -2 11 9 1030.76 256.152 3
 -2 -11 8 57143.4 1439.94 2
 -2 11 8 53247.3 2172.68 2
 -2 -11 7 12011.8 494.477 2
 2 11 -7 12843 846.797 3
 -2 11 7 12049.5 932.896 2
 -2 11 6 12066.8 876.722 2
 2 11 -6 13001.6 853.342 3
 -2 11 6 11579.6 809.366 3
 -2 11 5 17038.5 990.684 2
 2 11 -5 17585.1 1007.58 3
 -2 11 5 16985.1 997.13 3
 -2 11 4 19040 1064.16 3
 -2 11 4 20228.8 1034.72 2
 2 11 -4 19909 1083.17 3
 -2 11 3 2826.63 413.399 3
 -2 11 3 2800.79 342.444 2
 2 11 -3 2626.07 389.938 3
 -2 11 2 160486 4084.26 3
 2 11 -2 169189 4161.49 3
 -2 11 2 168303 3643.81 2
 2 -11 -2 173503 3527.44 1
 2 11 -2 165596 3209.64 2
 -2 11 1 65.7259 91.6809 3
 2 -11 -1 85.2964 65.439 1
 -2 11 1 59.1985 60.1816 2
 2 11 -1 203.655 87.5491 2
 2 11 -1 -3.45523 86.3139 3
 2 11 0 117635 2656.02 2
 2 11 0 112027 3150.36 3
 -2 11 0 110902 2436.24 2
 2 -11 1 1663.76 174.176 2
 2 11 1 2113.78 296.77 2
 2 11 1 1566.36 309.866 3
 2 11 2 22510.3 1092.65 2
 2 -11 2 21546.4 663.052 2
 2 11 2 20789 1154.48 3
 2 -11 3 1420.99 143.131 2
 2 11 3 1532.63 313.249 3
 2 11 3 2053.83 352.366 2
 2 11 4 322.597 170.066 2
 2 11 4 84.8016 117.641 3
 2 -11 4 146.58 65.1962 2
 2 11 5 10629.1 886.429 2
 2 11 5 9591.65 796.528 3
 2 11 6 100949 3273.09 2
 2 11 6 93194.9 2936.36 3
 2 -11 6 97987.8 2418.29 2
 2 11 7 3041.39 461.701 3
 2 -11 7 2501.69 328.454 2
 2 11 7 2999.62 540.062 2
 2 -11 8 44271.9 1628.76 2
 2 11 8 48304.9 2263.51 2
 2 11 8 44531 1875.51 3
 2 11 9 3583.66 613.479 2
 2 11 9 2710.63 440.614 3
 2 11 10 102163 3735.55 2
 2 11 10 92546.8 2987.06 3
 2 11 11 348.483 270.024 2
 2 11 12 395.043 309.842 2
 2 11 13 2005.03 502.605 2
 2 11 14 30978.6 2138.98 2
 2 11 15 296.488 311.62 2
 -2 12 15 4076.62 792.83 2
 -2 12 14 7.998 183.615 2
 -2 12 13 19959.9 1585.2 2
 -2 12 12 31447.1 1952.66 2
 -2 12 11 92155.3 3430.61 2
 -2 12 10 608.465 273.465 2
 -2 12 9 7041.06 788.337 2
 -2 12 9 5288.84 571.243 3
 -2 12 8 212.651 132.844 2
 2 12 -8 21.7934 102.376 3
 2 12 -7 12103.5 857.367 3
 -2 12 7 10160.2 783.213 3
 -2 12 7 10915.9 888.245 2
 2 12 -6 -0.89228 113.291 3
 -2 12 6 125.916 111.406 3
 -2 12 6 -22.199 124.73 2
 -2 12 5 8909.41 745.605 3
 2 12 -5 10419.1 796.809 3
 -2 12 5 10074.6 764.906 2
 -2 12 4 13444 841.394 2
 2 12 -4 14549.5 947.598 3
 -2 12 4 13204.3 918.831 3
 2 -12 -3 144853 3220.43 1
 -2 12 3 146561 3430.69 2
 2 12 -3 149999 3831.95 3
 -2 12 2 241.668 142.529 2
 2 12 -2 200.741 152.116 3
 2 12 -2 230.024 58.354 2
 2 -12 -2 155.391 69.6059 1
 -2 12 2 141.394 174.247 3
 -2 12 1 831.896 234.849 3
 2 12 -1 1193.4 287.32 3
 -2 12 1 1235.66 201.335 2
 2 12 -1 1149.44 166.657 2
 2 12 0 1049.04 273.329 3
 -2 12 0 1657.34 200.659 2
 -2 12 0 800.477 243.493 3
 2 12 0 1252.56 198.27 2
 2 12 1 834.105 255.084 3
 2 -12 1 511.734 102.128 2
 2 12 1 452.677 135.319 2
 2 -12 2 760.862 113.242 2
 2 12 2 684.459 174.749 2
 2 12 3 64607.3 2132.54 2
 2 12 3 62838.8 2239.37 3
 2 -12 4 36689.5 955.514 2
 2 12 4 39440.4 1720.33 3
 2 12 5 95040.3 3034.88 2
 2 12 5 88219.5 2856.52 3
 2 12 6 681.671 238.468 3
 2 12 6 1070.51 324.386 2
 2 -12 6 620.852 144.984 2
 2 12 7 1110.47 333.315 2
 2 12 7 1018.45 282.974 3
 2 12 8 530.088 247.763 2
 2 12 8 130.204 93.3755 3
 2 12 9 743.484 320.133 2
 2 12 9 437.884 209.175 3
 2 12 10 626.222 237.428 2
 2 12 10 196.502 133.841 3
 2 12 11 55178.8 2715 2
 2 12 12 8281.8 1028.59 2
 2 12 13 36929.6 2292.74 2
 2 12 14 5597.96 905.398 2
 -2 13 15 18290.8 1653.93 2
 -2 13 14 2783.06 619.425 2
 -2 13 13 15068.8 1392.09 2
 -2 13 12 3648.67 653.184 2
 -2 13 11 7745.72 926.325 2
 -2 13 10 19480.3 1411.21 2
 -2 13 9 14493.1 1153.87 2
 -2 13 9 14871.9 998.047 3
 -2 13 8 5678.94 612.844 3
 -2 13 8 6133.07 722.998 2
 2 13 -8 6183.87 633.208 3
 -2 13 7 7184.35 731.657 2
 2 13 -7 8061.86 718.219 3
 -2 13 7 7044.23 688.06 3
 -2 13 6 2960.66 451.471 3
 -2 13 6 2577.81 413.654 2
 2 13 -6 3831.4 504.493 3
 2 13 -5 40954.4 1735.2 3
 -2 13 5 39824 1660.83 2
 -2 13 5 37566.7 1688.94 3
 2 13 -4 767.866 231.631 3
 -2 13 4 281.376 117.933 3
 -2 13 4 648.877 199.677 2
 -2 13 3 15669.6 852.656 2
 2 13 -3 15886.6 1057.68 3
 -2 13 3 14617.4 1013.9 3
 2 -13 -3 16203 761.928 1
 -2 13 2 41362.4 1383.09 2
 2 13 -2 39599.5 987.468 2
 2 -13 -2 42100.6 1270.28 1
 2 13 -2 38442.9 1720.16 3
 -2 13 2 36718 1693.7 3
 2 13 -1 29289.1 955.344 2
 2 13 -1 27440.1 1438.79 3
 -2 13 1 28643.6 1029.26 2
 -2 13 1 26222.7 1388.89 3
 -2 13 0 2774.06 263.763 2
 -2 13 0 2497.53 422.112 3
 2 13 0 2148.65 393.535 3
 2 13 0 2754.28 310.68 2
 -2 13 -1 19298.6 1188.62 3
 2 13 1 22377.8 1013.79 2
 2 13 1 20251.2 1232.42 3
 2 13 2 45350.5 1927.54 3
 2 -13 2 43322.8 1106.53 2
 2 -13 3 66590.8 1479.12 2
 2 13 3 71157.8 2523.6 3
 2 13 4 77.8622 113.901 2
 2 13 4 -71.9216 109.011 3
 2 13 5 76026 2654.55 3
 2 -13 5 70632.8 1724.97 2
 2 13 6 59071.8 2330.25 3
 2 13 6 65613.9 2520.73 2
 2 13 7 33998.3 1825.13 2
 2 13 7 28294 1537.35 3
 2 13 8 9678.55 875.809 3
 2 13 8 10914.6 1048.41 2
 2 13 9 22262.6 1569.81 2
 2 13 9 18587.4 1250.57 3
 2 13 10 41876.1 2258.87 2
 2 13 10 37142.5 1831.93 3
 2 13 11 19134.5 1548.87 2
 2 13 12 177.885 273.581 2
 2 13 13 3911.16 730.862 2
 2 13 14 9454.06 1170.66 2
 -2 14 15 3437.64 779.443 2
 -2 14 14 8426.01 1084.31 2
 -2 14 13 339.521 213.867 2
 -2 14 12 41517.3 2317.26 2
 -2 14 11 21010.3 1530.6 2
 -2 14 10 13416.9 1163.58 2
 -2 14 9 1818.65 351.632 3
 -2 14 9 2355.44 472.615 2
 -2 14 8 297.453 184.558 3
 2 14 -8 235.406 170.571 3
 -2 14 8 -41.7419 155.09 2
 -2 14 7 143.293 183.222 3
 -2 14 7 145.677 157.402 2
 2 14 -7 110.724 93.312 3
 -2 14 6 699.747 211.955 2
 2 14 -6 551.879 229.094 3
 -2 14 6 902.08 362.515 3
 -2 14 5 6310.05 627.43 2
 2 14 -5 6172 665.836 3
 -2 14 5 5400.43 625.924 3
 2 14 -4 46220.8 1935.58 3
 -2 14 4 48346.5 1760.26 2
 -2 14 4 44472.2 1927.35 3
 -2 14 3 19560 1216.32 3
 -2 14 3 20846 1015.45 2
 2 14 -3 21231 1263.56 3
 2 -14 -3 20645.4 886.643 1
 -2 14 2 50849.3 1591.47 2
 -2 14 2 46119.1 1980.97 3
 2 14 -2 48473.3 2011.97 3
 2 14 -2 46897.3 1103.33 2
 2 -14 -2 50936.2 1439.59 1
 2 14 -1 5449.41 646.627 3
 -2 14 1 5899.5 440.65 2
 2 14 -1 5776.12 375.502 2
 -2 14 1 5488.95 653.684 3
 2 14 0 307.045 128.988 2
 -2 14 0 446.362 117.434 2
 2 14 0 201.566 145.554 3
 -2 14 0 629.561 254.854 3
 2 14 1 7591.6 574.813 2
 2 14 1 5799.61 665.031 3
 -2 14 -1 5667.33 660.974 3
 2 14 2 8823.33 829.73 3
 2 14 2 10186.1 732.009 2
 2 14 3 2487.75 389.588 2
 2 14 3 2965.47 480.04 3
 2 14 4 121631 3452.74 2
 2 14 4 112967 3551.39 3
 2 14 5 31798.4 1674.12 3
 2 14 5 34043.7 1685.59 2
 2 14 6 32306.9 1716.22 2
 2 14 6 26070.7 1516.58 3
 2 14 7 15057.6 1146.41 3
 2 14 7 22305.9 1465.48 2
 2 14 8 4150.46 601.072 3
 2 14 8 7091.89 851.252 2
 2 14 9 18928.3 1445.36 2
 2 14 9 14702.2 1146.19 3
 2 14 10 3808.39 659.061 2
 2 14 10 2978.87 505.19 3
 2 14 11 22025.5 1666.66 2
 2 14 12 63094.2 3026.49 2
 2 14 13 2739.39 628.706 2
 2 14 14 17645.1 1628.19 2
 -2 15 14 3632.67 745.178 2
 -2 15 13 15850.3 1469.87 2
 -2 15 12 651.298 338.516 2
 -2 15 11 664.963 268.472 2
 -2 15 10 2772.26 547.894 2
 -2 15 9 49127.5 2267.8 2
 -2 15 9 46511.2 2023.43 3
 -2 15 8 398.314 230.81 3
 2 15 -8 292.744 114.559 3
 -2 15 8 260.88 184.527 2
 -2 15 7 18031.1 1201.64 3
 -2 15 7 16652 1172.92 2
 2 15 -7 20399.1 1263.35 3
 2 15 -6 167.533 126.385 3
 -2 15 6 -37.4477 172.239 2
 -2 15 6 227.989 176.187 3
 -2 15 5 10423.4 907.678 3
 2 15 -5 10993.9 916.843 3
 -2 15 5 12456.9 894.054 2
 2 -15 -4 9335.33 613.455 1
 2 15 -4 9090.17 844.097 3
 -2 15 4 8747.18 708.314 2
 -2 15 4 7827.09 784.544 3
 -2 15 3 6988.49 748.313 3
 2 -15 -3 8477.69 545.11 1
 -2 15 3 8290.55 623.186 2
 2 15 -3 9017.46 843.689 3
 -2 15 2 2324.93 317.947 2
 2 15 -2 1749.15 144.118 2
 -2 15 2 1573.96 388.184 3
 2 -15 -2 2264.48 258.886 1
 2 15 -2 2121.19 425.56 3
 -2 15 1 48553.5 1490.12 2
 2 15 -1 49647.3 2120.83 3
 2 15 -1 49872.6 1319.67 2
 -2 15 1 44153.7 2013.5 3
 2 15 0 39360.1 1889.23 3
 2 15 0 42002.8 1344.27 2
 -2 15 0 41557.9 1246.84 2
 -2 15 0 37132.1 1829.61 3
 2 15 1 75790.3 2791.59 3
 -2 15 -1 72957.8 2725.29 3
 2 15 2 3463.27 534.89 3
 2 15 2 4025.73 462.297 2
 2 15 3 21890.3 1399.27 3
 2 15 3 24950.1 1285.99 2
 2 15 4 2764.21 449.821 2
 2 15 4 1979.22 394.053 3
 2 15 5 16354.3 1156.05 2
 2 15 5 14533.4 1137.47 3
 2 15 6 4003.63 588.072 2
 2 15 6 3056.07 532.417 3
 2 15 7 37652.2 1957.83 2
 2 15 7 38475.3 1932.06 3
 2 15 8 62929.4 2671.13 2
 2 15 8 54847.3 2384.65 3
 2 15 9 28650.8 1814.23 2
 2 15 9 27813.5 1632.46 3
 2 15 10 -39.901 137.78 3
 2 15 10 435.417 270.258 2
 2 15 11 26928.9 1868.15 2
 2 15 12 441.122 240.245 2
 2 15 13 6936.08 1007.23 2
 -2 16 14 11122.4 1296.44 2
 -2 16 13 14579.2 1435.8 2
 -2 16 12 17676.7 1510.67 2
 -2 16 11 1097.37 397.517 2
 -2 16 10 23637.2 1613.14 2
 -2 16 9 15400.7 1241.95 2
 -2 16 9 14336.9 1091.34 3
 -2 16 8 4749.98 617.435 3
 2 16 -8 5587.86 672.9 3
 -2 16 8 4929.61 697.923 2
 -2 16 7 188.588 163.854 3
 -2 16 7 148.695 131.329 2
 2 16 -7 266.269 162.026 3
 2 16 -6 6987.15 749.354 3
 -2 16 6 7025.55 774.185 3
 -2 16 6 5580.19 650.281 2
 -2 16 5 5607.92 608.556 2
 -2 16 5 5455.45 680.902 3
 2 16 -5 6534.98 736.871 3
 -2 16 4 49436.4 2185.63 3
 2 -16 -4 53902.4 1666.64 1
 -2 16 4 50411.2 1870.52 2
 2 16 -4 50544.4 2173.58 3
 2 -16 -3 179.384 112.75 1
 -2 16 3 -5.75138 65.7925 2
 -2 16 3 -49.6064 127.357 3
 -2 16 2 29909.3 1652.47 3
 -2 16 2 31036.4 1221.05 2
 2 16 -2 28387 1614.86 3
 2 16 -1 33263.5 998.591 2
 2 16 -1 30839.3 1700.65 3
 -2 16 1 33640.6 1194.11 2
 -2 16 0 652.93 217.18 2
 -2 16 0 882.137 461.822 3
 2 16 0 426.954 209.791 3
 2 16 0 345.594 115.494 2
 -2 16 -1 19449.1 1323.52 3
 2 16 1 21200.8 1395.4 3
 2 16 1 23055.4 1030.92 2
 2 16 2 26662 1230.43 2
 2 16 2 23080.6 1466.49 3
 2 16 3 26186.1 1580.39 3
 2 16 3 27504 1349.28 2
 2 16 4 48704.7 1988.78 2
 2 16 4 50434.8 2268.34 3
 2 16 5 4664.64 611.771 2
 2 16 5 3879.27 597.315 3
 2 16 6 14518.7 1132.28 2
 2 16 6 12198.3 1077.79 3
 2 16 7 58120.6 2510.46 3
 2 16 7 63837.5 2609.76 2
 2 16 8 1375.92 372.485 3
 2 16 8 1389.34 389.189 2
 2 16 9 17438.6 1332.99 3
 2 16 9 21882.9 1561.6 2
 2 16 10 9330.06 956.333 3
 2 16 10 12241.5 1194.52 2
 2 16 11 4560.54 809.55 2
 2 16 12 36986.9 2285.14 2
 2 16 13 7846.67 1072.56 2
 -2 17 14 19861.2 1753.95 2
 -2 17 13 9201.5 1165.61 2
 -2 17 12 1632.55 504.408 2
 -2 17 11 1012.31 375.828 2
 -2 17 10 1050.8 353.685 2
 -2 17 9 13795.4 1110.5 3
 -2 17 9 15599.3 1272.5 2
 2 17 -8 30017.3 1662.42 3
 -2 17 8 31375.4 1754.5 2
 -2 17 8 28691.4 1653.73 3
 -2 17 7 13754.2 1087.29 2
 -2 17 7 10940.1 1002.36 3
 2 17 -7 12355.9 1052.46 3
 -2 17 6 24619.9 1527.13 3
 2 17 -6 28953.8 1630.55 3
 -2 17 6 28096.6 1510.37 2
 -2 17 5 140.716 165.855 2
 -2 17 5 333.152 233.232 3
 2 17 -5 339.901 208.714 3
 -2 17 4 9136 910.595 3
 -2 17 4 11175.4 817.644 2
 2 -17 -4 11263.5 675.572 1
 2 17 -4 10111.5 956.226 3
 2 17 -3 191.956 158.683 3
 -2 17 3 707.189 294.279 3
 2 -17 -3 581.933 142.458 1
 -2 17 3 632.381 193.915 2
 2 17 -2 308.071 258.153 3
 -2 17 2 810.437 212.766 2
 -2 17 2 623.591 333.998 3
 -2 17 1 19320.3 884.581 2
 -2 17 1 17413.2 1281.41 3
 2 17 -1 18565.8 1335.72 3
 2 17 0 204131 4191.66 2
 2 17 0 200198 5399.91 3
 -2 17 0 186989 5264.51 3
 -2 17 0 200506 4100.12 2
 2 17 1 20346.6 1403.15 3
 -2 17 -1 20628.4 1408.67 3
 2 17 1 23694.7 1042 2
 2 17 2 20913.1 1445.07 3
 2 17 2 25017.6 1176.4 2
 2 17 3 307.051 113.893 2
 2 17 3 -112.719 192.43 3
 2 17 4 879.534 309.919 3
 2 17 4 1268.04 281.517 2
 2 17 5 4321.57 654.274 3
 2 17 5 4704.77 603.957 2
 2 17 6 1095.86 347.716 3
 2 17 6 1217 369.559 2
 2 17 7 4063.39 628.459 3
 2 17 7 5382.99 725.827 2
 2 17 8 94124.3 3430.67 3
 2 17 8 99048.8 3527.08 2
 2 17 9 10729 1049.71 3
 2 17 9 11780.7 1157.4 2
 2 17 10 4576.83 691.724 3
 2 17 10 5377.94 809.42 2
 2 17 11 2161.42 535.027 2
 2 17 12 68.2723 328.44 2
 2 17 13 675.417 197.649 2
 -2 18 13 62365.4 3164.33 2
 -2 18 12 74.495 240.029 2
 -2 18 11 7764.35 989.222 2
 -2 18 10 389.722 267.031 2
 -2 18 9 22112.3 1464.97 3
 -2 18 9 24007.9 1613.26 2
 -2 18 8 5755.57 747.936 2
 -2 18 8 4915.4 685.977 3
 2 18 -8 5853.92 738.953 3
 2 18 -7 12818 1100.71 3
 -2 18 7 13189.8 1078.32 2
 -2 18 7 10135.6 999.576 3
 -2 18 6 1208.53 334.195 3
 -2 18 6 2138.91 401.126 2
 2 18 -6 1977.79 439.937 3
 -2 18 5 40193.5 2056.63 3
 -2 18 5 44868.8 1857.63 2
 2 18 -5 43510.7 2131.43 3
 -2 18 4 712.04 220.736 2
 -2 18 4 494.861 278.596 3
 2 18 -4 655.284 285.121 3
 -2 18 3 18930.5 1017.24 2
 -2 18 3 16033 1273.05 3
 2 18 -3 17461.3 1303.19 3
 -2 18 2 5872.8 769.668 3
 2 18 -2 5825.52 761.395 3
 -2 18 2 6156.62 519.122 2
 -2 18 1 20028.7 913.186 2
 -2 18 1 16588.8 1279.99 3
 2 18 -1 17686 1342.52 3
 -2 18 0 6289.77 880.767 3
 2 18 0 3639.89 740.636 3
 -2 18 -1 57404.6 2532.02 3
 2 18 1 61486.3 1854.61 2
 2 18 1 56135.9 2512.68 3
 2 18 2 65.9179 84.8091 2
 2 18 2 182.322 171.901 3
 2 18 3 108594 3072.01 2
 2 18 3 101944 3639.39 3
 2 18 4 325.456 161.776 2
 2 18 4 272.019 221.104 3
 2 18 5 37626.4 1782.66 2
 2 18 5 36651.7 2021.14 3
 2 18 6 1772.5 415.181 2
 2 18 6 1473.57 417.429 3
 2 18 7 32947.9 1927.7 3
 2 18 7 36848.7 1927.85 2
 2 18 8 265.206 210.884 2
 2 18 8 474.007 266.534 3
 2 18 9 17018 1393.81 2
 2 18 9 13538.9 1217.11 3
 2 18 10 447.202 274.574 2
 2 18 10 4.87501 258.812 3
 2 18 11 30780 2043.2 2
 2 18 12 54.2043 251.191 2
 -2 19 13 5727.11 952.983 2
 -2 19 12 3043.92 687.485 2
 -2 19 11 1612.72 463.145 2
 -2 19 10 402.378 151.416 2
 -2 19 9 -46.9768 163.644 2
 -2 19 9 189.943 216.473 3
 2 19 -8 66121.9 2774.52 3
 -2 19 8 66819.6 2770.71 2
 -2 19 8 70309.3 2861.36 3
 2 19 -7 3427.62 592.555 3
 -2 19 7 3316.57 549.762 2
 -2 19 7 3770.44 629.48 3
 -2 19 6 35777.1 1756.03 2
 -2 19 6 34265.6 1937.36 3
 2 19 -6 34586.3 1934.27 3
 -2 19 5 272.283 164.421 2
 -2 19 5 263.178 230.977 3
 -2 19 4 1440.64 426.343 3
 -2 19 4 1566.61 330.977 2
 2 19 -4 1262.48 382.19 3
 -2 19 3 7760.66 905.106 3
 -2 19 3 8898.65 698.903 2
 2 19 -3 7668.95 876.075 3
 -2 19 2 5418.91 501.481 2
 -2 19 2 4455.39 689.126 3
 2 19 -2 5402.06 733.721 3
 2 19 -1 680.343 296.363 3
 -2 19 1 890.521 375.754 3
 2 19 0 145277 4516.57 3
 -2 19 0 140435 4432.91 3
 2 19 1 6625.03 848.913 3
 2 19 2 13704.9 1218.83 3
 2 19 2 15684.5 915.768 2
 2 19 3 107.137 185.913 3
 2 19 3 286.41 133.879 2
 2 19 4 485.385 249.737 3
 2 19 4 789.674 243.57 2
 2 19 5 -3.24445 169.118 3
 2 19 5 -17.5918 184.166 2
 2 19 6 12024.2 1028.45 2
 2 19 6 9740.23 1046.23 3
 2 19 7 1805.91 427.979 2
 2 19 7 1334.3 397.48 3
 2 19 8 80506.8 3287.87 3
 2 19 8 90433.8 3360.81 2
 2 19 9 1779.73 464.539 3
 2 19 9 2870.94 589.69 2
 2 19 10 7478.37 957.921 2
 2 19 11 -100.066 301.227 2
 2 19 12 -54.352 172.406 2
 -2 20 13 33315.9 2282.5 2
 -2 20 12 24723.8 1902.52 2
 -2 20 11 1792.97 402.065 2
 -2 20 10 9364.17 1057.43 2
 -2 20 9 15159 1298.15 2
 -2 20 9 14098.2 1241.14 3
 -2 20 8 515.887 267.151 2
 -2 20 8 580.139 263.051 3
 -2 20 7 2666.58 497.588 2
 -2 20 7 2335.33 519.06 3
 2 20 -7 2723.63 560.097 3
 -2 20 6 9093.07 848.933 2
 2 20 -6 9627.34 1031.25 3
 -2 20 6 7930.6 937.634 3
 -2 20 5 34538.4 1644.47 2
 2 20 -5 34341.6 1987.95 3
 -2 20 5 33638.2 1978.66 3
 -2 20 4 40615.5 2205.19 3
 -2 20 4 43705.3 1783.22 2
 2 20 -4 43662.4 2260.16 3
 -2 20 3 1.62651 172.698 3
 2 20 -3 137.087 160.415 3
 2 20 -2 5685.67 786.775 3
 -2 20 2 4789.44 731.657 3
 2 20 -1 24891.7 1671.46 3
 -2 20 1 24943.7 1683.65 3
 2 20 0 3668.44 746.203 3
 -2 20 0 4648.54 845.416 3
 2 20 1 23872.9 1652.64 3
 2 20 2 41755.4 2244.61 3
 2 20 3 15525.8 1341.6 3
 2 20 3 19234.4 1092.42 2
 2 20 4 45118.5 2360.93 3
 2 20 4 48963.9 1982.55 2
 2 20 5 8331.63 808.963 2
 2 20 5 6336.26 858.53 3
 2 20 6 10246.2 945.134 2
 2 20 6 8133.96 975.224 3
 2 20 7 16673.2 1413.03 3
 2 20 7 19923.9 1407.83 2
 2 20 8 1664.12 456.167 3
 2 20 8 3987.99 652.648 2
 2 20 9 7570 942.867 3
 2 20 9 9807.61 1066.78 2
 2 20 10 11437.5 1191.64 2
 2 20 11 11397.6 1216.98 2
 2 20 12 13602.9 1365.46 2
 -2 21 12 13355.6 1376.52 2
 -2 21 11 3855.11 720.075 2
 -2 21 10 560.582 266.409 2
 -2 21 9 25095.2 1715.2 3
 -2 21 9 27415.9 1777.14 2
 -2 21 8 4905.11 755.267 3
 -2 21 8 5637.27 749.739 2
 2 21 -7 31238.3 1930.89 3
 -2 21 7 32703.1 1787.19 2
 -2 21 7 31684.4 1960.04 3
 -2 21 6 7450.21 777.604 2
 2 21 -6 7602.56 940.38 3
 -2 21 6 6490.82 870.926 3
 -2 21 5 8406.29 788.29 2
 -2 21 5 7553.89 934.661 3
 2 21 -5 7246.88 919.02 3
 2 21 -4 2688.83 594.367 3
 -2 21 4 2267.18 557.331 3
 -2 21 3 5475.2 792.409 3
 2 21 -3 4917.11 753.437 3
 2 21 -2 187.633 223.479 3
 -2 21 2 534.135 285.214 3
 -2 21 1 19620.2 1533.23 3
 2 21 -1 20559.5 1563.72 3
 2 21 0 40193.5 2217.62 3
 -2 21 0 38056.2 2170.59 3
 2 21 1 42742.3 2324.3 3
 2 21 2 4681.8 745.925 3
 2 21 3 140.688 157.283 3
 2 21 4 814.76 375.961 3
 2 21 5 2658.82 582.282 3
 2 21 5 3530.15 523.79 2
 2 21 6 139.117 170.152 2
 2 21 6 151.343 150.626 3
 2 21 7 25005.8 1782.42 3
 2 21 7 28154 1681.14 2
 2 21 8 23370.8 1598.23 2
 2 21 8 20985 1629.5 3
 2 21 9 31340.9 1928.68 2
 2 21 9 27543.3 1902.26 3
 2 21 10 5637.9 833.326 2
 2 21 11 9909.34 1162.77 2
 -2 22 12 27958.7 2044.59 2
 -2 22 11 11589.8 1240.99 2
 -2 22 10 23928.2 1734.83 2
 -2 22 9 1116.11 395.818 2
 -2 22 9 1793.63 473.265 3
 -2 22 8 372.154 135.998 2
 -2 22 8 182.055 175.339 3
 2 22 -7 82.2064 155.341 3
 -2 22 7 293.102 199.604 2
 -2 22 7 -94.9171 159.312 3
 2 22 -6 5671.94 829.386 3
 -2 22 6 4638.33 760.481 3
 -2 22 5 -38.2681 294.781 3
 2 22 -5 399.622 278.405 3
 -2 22 4 38353.2 2233.45 3
 2 22 -4 41897.4 2319.86 3
 -2 22 3 2772.11 593.445 3
 2 22 -3 3842.37 689.259 3
 -2 22 2 14198.7 1327.36 3
 2 22 -2 17164.7 1446.94 3
 -2 22 1 14064.3 1331.56 3
 2 22 -1 13498.7 1288.33 3
 2 22 0 708.104 390.101 3
 -2 22 0 795.843 414.233 3
 2 22 1 490.75 387.225 3
 2 22 2 21221.4 1662.1 3
 2 22 3 877.908 341.598 3
 2 22 4 42817.5 2407.35 3
 2 22 5 4531.71 761.011 3
 2 22 6 27698.7 1927.9 3
 2 22 7 11325.5 1057.73 2
 2 22 7 10167.3 1162.94 3
 2 22 8 59.2349 229.365 2
 2 22 8 -166.024 290.23 3
 2 22 9 2307.82 533.119 2
 2 22 9 741.653 381.994 3
 2 22 10 13384.8 1301.13 2
 2 22 11 2874.46 626.468 2
 -2 23 11 2634.18 598.272 2
 -2 23 10 15582.6 1391.65 2
 -2 23 9 20819.7 1560.76 2
 -2 23 8 338.377 270.863 3
 2 23 -7 5694.08 838.525 3
 -2 23 7 4610.83 757.324 3
 -2 23 6 3595.66 663.486 3
 2 23 -6 4431.69 725.486 3
 -2 23 5 6900.88 954.983 3
 2 23 -5 8371.01 1040.99 3
 -2 23 4 82.6351 268.81 3
 2 23 -4 1022.19 441.305 3
 2 23 -3 7262.17 957.271 3
 -2 23 3 6902.31 965.641 3
 -2 23 2 14481.8 1378.72 3
 2 23 -2 14457.9 1379.58 3
 -2 23 1 38111.8 2282.7 3
 2 23 -1 38646.9 2297.57 3
 2 23 0 948.202 416.701 3
 2 23 1 14490.1 1363.34 3
 2 23 2 8494.14 1075.31 3
 2 23 3 10348.8 1177.02 3
 2 23 4 473.619 401.233 3
 2 23 5 2226.13 571.28 3
 2 23 6 11398.5 1227.81 3
 2 23 7 16237.6 1484.95 3
 2 23 8 -200.374 364.058 3
 2 23 9 28446.5 1853.61 2
 2 23 9 23357.8 1806.55 3
 2 23 10 14406.3 1363.87 2
 -2 24 11 37154.3 2303.88 2
 -2 24 8 -62.3702 211.158 3
 -2 24 7 968.728 384.595 3
 2 24 -7 888.046 326.771 3
 -2 24 6 691.095 298.363 3
 2 24 -6 1817.57 496.183 3
 -2 24 5 12886.5 1333.23 3
 2 24 -5 12388.4 1309.83 3
 2 24 -4 22923.1 1780.27 3
 -2 24 4 21153.9 1714.08 3
 -2 24 3 17888.8 1571.11 3
 2 24 -3 19375.1 1632.15 3
 -2 24 2 14437.9 1430.62 3
 2 24 -2 14984.5 1455.38 3
 2 24 -1 715.429 401.308 3
 -2 24 1 285.287 412.805 3
 2 24 0 521.842 280.107 3
 2 24 1 119.744 172.859 3
 2 24 2 786.811 407.732 3
 2 24 3 26997.5 1957.36 3
 2 24 4 26018.7 1917.65 3
 2 24 5 19777.7 1677.11 3
 2 24 6 4769.09 838.148 3
 2 24 7 538.19 280.624 3
 2 24 8 10.6568 188.656 3
 2 24 9 -142.594 232.086 3
 -2 25 8 10182.8 1211.79 3
 -2 25 7 661.611 363.439 3
 2 25 -6 8326.25 1115.25 3
 -2 25 6 8926.01 1138.05 3
 -2 25 5 4886.37 841.673 3
 2 25 -5 4483.47 830.186 3
 -2 25 4 2064.69 580.038 3
 2 25 -4 1300.22 482.89 3
 -2 25 3 383.419 372.571 3
 2 25 -3 412.858 329.76 3
 2 25 -2 43785.3 2571.36 3
 -2 25 2 38914.6 2430.98 3
 2 25 -1 2630.28 633.615 3
 2 25 0 8882.98 1119.28 3
 2 25 1 72.61 183.627 3
 2 25 2 34342 2269.34 3
 2 25 3 3850.12 755.068 3
 2 25 4 -139.074 276.759 3
 2 25 5 161.843 218.061 3
 2 25 6 25375.3 1946.72 3
 2 25 7 278.583 264.777 3
 2 25 8 13312.4 1410.55 3
 2 25 9 461.023 388.545 3
 -2 26 8 1249.26 419.982 3
 -2 26 7 4198.23 819.939 3
 -2 26 6 1228.79 507.378 3
 2 26 -6 805.68 352.255 3
 2 26 -5 17992.7 1648.98 3
 -2 26 5 15965.7 1559.67 3
 -2 26 4 918.388 476.084 3
 2 26 -4 674.926 347.861 3
 -2 26 3 49525.2 2825.23 3
 2 26 -3 48973.2 2806 3
 2 26 -2 762.444 420.966 3
 2 26 -1 759.617 335.874 3
 2 26 0 1525.35 533.481 3
 2 26 1 1053.91 431.12 3
 2 26 2 4071.39 827.992 3
 2 26 3 34287.9 2320.48 3
 2 26 4 -105.26 432.438 3
 2 26 5 30078.7 2173.81 3
 2 26 6 1402.53 471.437 3
 2 26 7 292.435 298.755 3
 -2 27 8 5993.76 976.77 3
 -2 27 7 14804.9 1529.67 3
 -2 27 6 5493.14 942.142 3
 2 27 -5 197.966 232.979 3
 -2 27 5 -42.7835 267.597 3
 -2 27 4 643.639 325.147 3
 2 27 -4 18.9789 182.271 3
 2 27 -3 3573.11 807.406 3
 2 27 -2 17939.6 1702.16 3
 2 27 -1 11031.1 1300.52 3
 2 27 0 15281.7 1574.63 3
 2 27 1 18382.8 1708.59 3
 2 27 2 14408 1518.78 3
 2 27 3 1221.55 532.792 3
 2 27 4 609.295 428.943 3
 -3 0 18 -1193.82 444.381 2
 -3 0 17 3392.67 692.052 2
 -3 0 16 38.7696 209.914 2
 -3 0 15 30725.7 1932.63 2
 -3 0 14 27.267 180.614 2
 -3 0 13 86428.5 3196.62 2
 -3 0 12 53.3744 154.972 2
 -3 0 11 19156 1251.46 2
 -3 0 10 183.843 129.715 2
 -3 0 9 30436.5 1456.28 2
 -3 0 8 0.83537 98.4215 2
 -3 0 7 83438.8 2424.96 2
 -3 0 6 -1.19914 81.977 2
 -3 0 5 74902.5 1960.18 2
 3 0 -5 68738.5 1386.82 3
 -3 0 4 18.9242 51.8288 2
 3 0 -4 33.6619 21.1057 3
 -3 0 3 32451.2 1034.82 2
 3 0 -3 32852.1 883.87 3
 -3 0 2 580.49 113.86 2
 3 0 -2 142.927 65.8259 3
 -3 0 1 170088 3233.6 1
 3 0 -1 165007 3224.41 1
 -3 0 0 107.803 72.0164 1
 3 0 0 10.5469 43.2425 3
 3 0 1 646950 11636.4 3
 3 0 2 99.1077 86.0215 3
 3 0 3 79938.7 2094.31 3
 3 0 4 -60.2342 78.3319 3
 3 0 5 95254.5 2479.85 3
 3 0 6 57.9753 104.222 3
 3 0 7 2875.52 356.557 3
 3 0 8 -3.54342 164.23 2
 3 0 8 -19.4527 88.9312 3
 3 0 9 94408.8 3230.24 2
 3 0 9 87357.4 2510.96 3
 3 0 10 48.9602 110.781 3
 3 0 10 171.712 188.577 2
 3 0 11 84175.4 3216.62 2
 3 0 11 70272.2 2269.23 3
 3 0 12 630.85 325.907 2
 3 0 13 250.831 171.279 2
 3 0 14 407.362 276.033 2
 3 0 15 7467.62 1034.14 2
 3 0 16 264.562 247.345 2
 3 0 17 31766.8 2222.86 2
 -3 -1 18 25706.3 1952.18 2
 -3 1 18 28985.7 2116.03 2
 -3 -1 17 5579.45 839.977 2
 -3 1 17 5008.39 845.892 2
 -3 -1 16 7853.82 990.645 2
 -3 1 16 9825.62 1147.85 2
 -3 -1 15 5571.44 824.52 2
 -3 1 15 5255.76 800.078 2
 -3 1 14 9063.49 983.632 2
 -3 -1 14 10062.5 1046.34 2
 -3 -1 13 934.742 363.478 2
 -3 1 13 631.927 311.784 2
 -3 1 12 52498.1 2314.87 2
 -3 -1 12 55046.7 2309.31 2
 -3 1 11 13729.8 1068.97 2
 -3 -1 11 15115 1082.39 2
 -3 1 10 107539 3318.62 2
 -3 -1 10 114125 3337.48 2
 -3 -1 9 45965.3 1813.53 2
 -3 1 9 43207 1812.34 2
 -3 1 8 66743.8 2224.03 2
 -3 -1 8 65047.4 2148.5 2
 -3 -1 7 6487.06 553.846 2
 -3 1 7 6318.47 573.758 2
 -3 1 6 9494.5 647.287 2
 -3 -1 6 9432.31 619.046 2
 -3 -1 5 561.725 143.258 2
 3 -1 -5 398.129 59.733 3
 -3 1 5 574.28 145.782 2
 3 1 -5 596.226 82.725 3
 -3 -1 5 452.15 72.3001 3
 3 1 -4 36954.6 945.388 3
 -3 -1 4 40641.6 969.344 3
 -3 1 4 38172 1238.23 2
 3 -1 -4 38412.6 939.395 3
 -3 -1 4 38160.9 1181.28 2
 -3 -1 3 108057 2393.71 2
 3 1 -3 108285 2242.91 3
 -3 -1 3 110857 2243.29 3
 -3 1 3 106146 2428.81 2
 3 1 -2 99054.1 2177.92 3
 -3 -1 2 98741.9 2220.43 2
 -3 1 2 100686 2261.63 2
 3 1 -2 102893 2210.53 2
 3 1 -1 30602.4 918.143 1
 3 -1 -1 31635.8 960.238 1
 3 1 -1 28903.5 926.531 3
 -3 -1 1 31240.4 919.659 1
 -3 -1 1 30443.2 948.712 3
 -3 -1 0 170213 3254.48 1
 3 1 0 149456 3283.42 3
 3 1 1 96849.1 2278.76 3
 3 1 2 23133.1 905.232 3
 3 1 3 843.797 180.111 3
 3 1 4 289736 5801.11 3
 3 1 5 67955.1 1945.04 3
 3 -1 5 67225.7 1968.55 3
 3 1 6 9208.19 623.147 3
 3 -1 6 9306.5 639.361 3
 3 -1 7 7790.21 595.417 3
 3 1 7 6731.52 543.14 3
 3 -1 8 54556.3 2209.66 2
 3 1 8 50075.1 1721.71 3
 3 1 8 55971.6 2273.14 2
 3 -1 8 49461.1 1733.56 3
 3 1 9 157.284 97.6666 3
 3 -1 9 303.327 161.127 3
 3 1 9 63.8097 157.782 2
 3 -1 9 413.177 248.406 2
 3 -1 10 2607.89 366.71 3
 3 1 10 2554.51 368.526 3
 3 1 10 3321.6 586.813 2
 3 -1 10 3085.88 549.849 2
 3 -1 11 1347.03 258.738 3
 3 1 11 2422.86 564.166 2
 3 1 11 1820.27 318.865 3
 3 -1 11 2334.93 507.004 2
 3 -1 12 80951.8 3297.08 2
 3 1 12 77197 3279.24 2
 3 1 13 6145.87 877.637 2
 3 -1 13 5627.58 822.665 2
 3 1 14 12746.8 1324.61 2
 3 -1 14 14158.7 1377.83 2
 3 1 15 5198.8 875.597 2
 3 -1 15 4554.17 806.437 2
 3 -1 16 53774.6 2872.41 2
 3 1 16 53767.4 2913.55 2
 3 -1 17 988.819 405.584 2
 -3 -2 18 2326.58 612.254 2
 -3 2 18 1543.14 540.891 2
 -3 -2 17 7056.82 963.538 2
 -3 2 17 7309.25 1024.52 2
 -3 2 16 10523.9 1201.05 2
 -3 -2 16 11288.2 1178.1 2
 -3 -2 15 1416.28 407.604 2
 -3 2 15 1523.74 480.868 2
 -3 -2 14 68101.1 2837 2
 -3 2 14 63395.2 2839.26 2
 -3 -2 13 67670 2706.87 2
 -3 2 13 61222.3 2676.49 2
 -3 -2 12 9159.04 889.603 2
 -3 2 12 9663.37 945.581 2
 -3 -2 11 554.358 216.611 2
 -3 2 11 317.716 176.907 2
 -3 2 10 4360.52 575.519 2
 -3 -2 10 4885.52 580.445 2
 -3 -2 9 33423.6 1506.4 2
 -3 2 9 36377.2 1642.54 2
 -3 2 8 26292.6 1320.57 2
 -3 -2 8 29544.9 1295.75 2
 -3 -2 7 13240.6 763.293 2
 -3 2 7 14825.7 891.194 2
 -3 -2 6 27901.4 725.072 3
 -3 -2 6 27495.3 1085.67 2
 -3 2 6 27884.2 1194.11 2
 3 2 -6 27508.9 721.43 3
 -3 2 5 105465 2698.79 2
 -3 -2 5 109234 2575.26 2
 3 2 -5 108519 2211.11 3
 3 -2 -5 109787 2117.01 3
 -3 -2 5 113262 2219.12 3
 3 2 -4 50609.7 1250.98 3
 -3 2 4 51299.6 1521.84 2
 -3 -2 4 52929.5 1252.89 3
 -3 -2 4 50631.9 1406.05 2
 -3 -2 3 6820.36 400.319 2
 3 2 -3 7085.54 375.401 3
 -3 -2 3 7366.74 380.932 3
 -3 2 3 6999.92 440.009 2
 3 2 -2 34456.2 1003.32 3
 -3 2 2 32323.3 1032.26 2
 -3 -2 2 35281 1006.27 3
 3 2 -2 32997.1 968.649 2
 -3 -2 1 9554.51 441.631 1
 3 2 -1 8541.8 462.013 3
 -3 -2 1 8784.47 462.957 3
 3 2 -1 9144.36 433.896 1
 3 -2 -1 9262.68 480.405 1
 -3 -2 0 10963 494.043 1
 3 2 0 10520.4 538.866 3
 3 2 1 89870.4 2161.84 3
 3 2 2 67756.8 1818.1 3
 3 2 3 226680 4665.58 3
 3 2 4 29418 1122.4 3
 3 2 5 22184.2 978.218 3
 3 2 6 11258 698.16 3
 3 2 7 1038.92 210.732 3
 3 -2 7 1434.26 270.526 3
 3 -2 8 14874.1 1074.79 2
 3 2 8 14790.6 1123.36 2
 3 2 8 14586.5 846.839 3
 3 -2 8 14235.3 861.867 3
 3 2 9 16855.8 942.304 3
 3 2 9 17089.3 1286.74 2
 3 -2 9 16802.7 1216.92 2
 3 -2 9 15913 933.891 3
 3 2 10 32691.3 1896.53 2
 3 -2 10 31583.4 1789.29 2
 3 -2 10 27915.6 1292.19 3
 3 2 10 29098.1 1306.51 3
 3 -2 11 43240.2 1703.17 3
 3 2 11 51782.6 2490.45 2
 3 2 11 43409 1685.84 3
 3 -2 11 50766.5 2382.96 2
 3 2 12 14212.2 1322.82 2
 3 -2 12 12509.1 1197.49 2
 3 2 13 415.193 300.11 2
 3 -2 13 148.032 244.749 2
 3 2 14 528.031 343.984 2
 3 -2 14 588.785 232.044 2
 3 2 15 6435.45 984.294 2
 3 -2 15 6414.25 918.464 2
 3 -2 16 14713.8 1426.62 2
 3 2 16 13307.8 1431.32 2
 3 -2 17 23845.2 1897.9 2
 -3 3 18 1713.87 568.435 2
 -3 -3 17 32033.6 2055.02 2
 -3 3 17 32944.6 2253.69 2
 -3 -3 16 3078.44 641.968 2
 -3 3 16 2947.26 644.568 2
 -3 3 15 8423.47 1034.12 2
 -3 -3 15 7736.56 926.789 2
 -3 -3 14 4914.01 696.934 2
 -3 3 14 4823.85 740.981 2
 -3 -3 13 5839.48 743.489 2
 -3 3 13 7532.91 885.736 2
 -3 -3 12 22426.1 1383.11 2
 -3 3 12 22046.7 1460.65 2
 -3 -3 11 49324.4 2046.53 2
 -3 3 11 51220.1 2223.12 2
 -3 -3 10 1877.33 349.382 2
 -3 3 10 1910.09 391.114 2
 -3 3 9 104435 2884.05 2
 -3 -3 9 112290 2732.98 2
 -3 3 8 7847.31 706.134 2
 -3 -3 8 9103.68 674.456 2
 -3 -3 8 8825.84 362.303 3
 -3 -3 7 43422.9 1500.54 2
 3 3 -7 44132.5 1064.35 3
 -3 -3 7 44860.2 1102.33 3
 -3 3 7 43353.4 1690.14 2
 3 3 -6 34982.1 936.971 3
 -3 -3 6 32935.8 1194.2 2
 -3 3 6 33509.7 1370.98 2
 3 -3 -6 33678.7 831.992 3
 -3 -3 6 35247 954.232 3
 -3 -3 5 304.903 85.0763 3
 -3 3 5 430.29 144.84 2
 -3 -3 5 202.332 90.5889 2
 3 3 -5 409.701 96.9287 3
 3 -3 -5 371.407 70.3516 3
 -3 -3 4 1809.06 218.273 2
 -3 -3 4 2520.7 224.241 3
 -3 3 4 1912.03 251.452 2
 3 -3 -4 2547.53 201.838 3
 3 3 -4 2162.68 214.53 3
 -3 -3 3 49020.7 1289.44 2
 -3 3 3 48111.4 1404.19 2
 -3 -3 3 51012.7 1324.64 3
 3 3 -3 49032.9 1261.23 2
 3 3 -3 47845.6 1303.95 3
 -3 3 2 8572.58 475.151 2
 3 3 -2 8314.96 414.557 2
 3 3 -2 7845.72 447.941 3
 3 3 -1 207042 4267.33 3
 -3 -3 1 225938 4118.97 1
 3 -3 -1 219342 4250.36 1
 3 3 -1 215567 4102.34 1
 -3 3 1 206684 4202.72 2
 -3 -3 0 3381.39 251.892 1
 3 3 0 1357.02 202.937 3
 3 3 1 13568.8 667.911 3
 3 3 2 29978.6 1090.45 3
 3 3 3 16734.6 802.473 3
 3 3 4 79123.8 2155.16 3
 3 3 5 222681 4757.85 3
 3 3 6 129.082 80.9792 3
 3 3 7 90385.3 2529.48 3
 3 3 7 96548.1 3075.32 2
 3 3 8 18557.2 979.341 3
 3 -3 8 17223.3 966.944 3
 3 3 8 19782.6 1319.47 2
 3 -3 8 18249.9 1188.54 2
 3 3 9 10238.9 722.73 3
 3 3 9 10590.2 1015.62 2
 3 -3 9 11125.1 977.081 2
 3 -3 9 8676.76 700.25 3
 3 -3 10 1258.52 266.163 3
 3 3 10 1322.94 270.956 3
 3 3 10 1983.04 477.605 2
 3 -3 10 2095.8 490.217 2
 3 3 11 233.899 145.78 3
 3 3 11 175.144 308.119 2
 3 -3 11 228.884 195.668 2
 3 -3 11 84.4765 89.139 3
 3 3 12 4945.66 801.101 2
 3 -3 12 6211.5 839.366 2
 3 3 13 57680.5 2886.93 2
 3 -3 13 51626.6 2596.27 2
 3 -3 14 -183.272 308.753 2
 3 3 14 62.9434 208.409 2
 3 -3 15 41821.8 2416.22 2
 3 3 15 41168.2 2520.22 2
 3 -3 16 13689.6 1388.78 2
 3 3 16 16544.3 1600.17 2
 3 -3 17 3687.68 736.894 2
 -3 4 18 1167.26 364.488 2
 -3 -4 17 520.634 322.524 2
 -3 4 17 456.202 234.931 2
 -3 -4 16 20935.3 1570.5 2
 -3 4 16 26339.2 1942.72 2
 -3 4 15 7906.14 1004.88 2
 -3 -4 15 5725.49 773.434 2
 -3 -4 14 62986.1 2630.23 2
 -3 4 14 59183 2774.21 2
 -3 4 13 6441.31 834.126 2
 -3 -4 13 7058.23 786.753 2
 -3 4 12 37365.1 1968.77 2
 -3 -4 12 38756.5 1827.41 2
 -3 4 11 6976.93 781.667 2
 -3 -4 11 7758.19 730.472 2
 -3 4 10 4701.03 615.105 2
 -3 -4 10 5683.68 587.352 2
 -3 -4 9 8796.74 691.763 2
 -3 4 9 9062.96 814.503 2
 -3 -4 8 58133.2 1325.54 3
 -3 -4 8 55897.8 1756.48 2
 -3 4 8 54937.2 2002.81 2
 3 -4 -7 38954.1 960.917 3
 -3 4 7 36363.7 1562.14 2
 3 4 -7 39915.8 1081.7 3
 -3 -4 7 39311.6 1377.15 2
 -3 -4 7 40563.6 1131.82 3
 -3 -4 6 83482.6 2166.3 2
 -3 -4 6 86515.5 1994.55 3
 -3 4 6 80013.4 2437.07 2
 3 4 -6 83650.7 1942.36 3
 -3 -4 5 514.646 122.454 2
 -3 -4 5 639.987 129.311 3
 3 -4 -5 683.692 110.35 3
 -3 4 5 562.591 175.048 2
 3 4 -5 482.024 108.422 3
 -3 -4 4 167268 3434.75 2
 3 4 -4 162099 3454.01 3
 -3 4 4 163936 3691.8 2
 3 4 -3 53700.7 1317.23 2
 3 4 -3 50614.7 1431.58 3
 -3 4 3 51571.9 1493.69 2
 -3 4 2 103585 2434 2
 3 4 -2 102341 2448.23 3
 3 -4 -2 112986 2479.26 1
 3 4 -2 109915 2280.45 2
 3 4 -1 1102.44 184.938 3
 -3 -4 1 1172.38 140.806 1
 3 -4 -1 1126.77 170.404 1
 -3 4 1 1160.58 168.259 2
 3 4 -1 983.653 131.813 1
 -3 -4 0 44765.8 1140.47 1
 3 4 0 40741.6 1315.4 3
 3 4 1 36562.2 1238.65 3
 3 4 2 53202.2 1603.43 3
 3 4 3 32926 1217.34 3
 3 4 4 173288 3873.59 3
 3 4 5 42576.5 1491.94 3
 3 4 6 400.583 146 3
 3 4 7 250.433 134.867 2
 3 4 7 473.449 152.653 3
 3 -4 8 37784.7 1735.02 2
 3 4 8 37032.3 1477.53 3
 3 4 8 39881.6 1967.17 2
 3 4 9 48.7206 76.9821 3
 3 4 9 157.6 205.562 2
 3 -4 9 264.513 206.368 2
 3 4 10 70646 2277.29 3
 3 4 10 78909.5 3100.85 2
 3 -4 10 66753.2 2281.79 3
 3 -4 10 81483.4 2968.39 2
 3 4 11 174.812 171.337 2
 3 4 11 688.82 228.853 3
 3 -4 11 519.693 243.504 2
 3 -4 11 332.813 164.676 3
 3 -4 12 95544 3562.36 2
 3 4 12 99915.4 3846.54 2
 3 -4 13 686.604 311.874 2
 3 4 13 645.582 360.441 2
 3 4 14 2866.7 673.444 2
 3 -4 14 3245.56 642.074 2
 3 4 15 13334.8 1407.38 2
 3 -4 15 14100.7 1342.47 2
 3 4 16 14986.4 1538.66 2
 3 -4 16 12534.4 1296.91 2
 -3 5 17 24631.4 1972.52 2
 -3 5 16 20843.6 1734.2 2
 -3 -5 16 18329.4 1428.5 2
 -3 -5 15 2189.33 485.174 2
 -3 5 15 3001.6 617.286 2
 -3 -5 14 7746.21 850.913 2
 -3 5 14 9044.68 1039.53 2
 -3 -5 13 7166.4 781.692 2
 -3 5 13 7627.38 916.104 2
 -3 -5 12 318.091 164.346 2
 -3 5 12 552.163 259.419 2
 -3 -5 11 27172.7 1387.9 2
 -3 5 11 23536.8 1491.38 2
 -3 -5 10 23074.7 1195.48 2
 -3 5 10 17469.4 1217.13 2
 -3 5 9 114244 3495.71 2
 -3 -5 9 127922 3224.39 2
 -3 -5 8 53880 1729.56 2
 -3 5 8 50066.7 1993.67 2
 3 -5 -8 52380.7 1245.5 3
 -3 -5 7 3461.17 362.796 2
 3 -5 -7 4462.32 296.063 3
 -3 5 7 3682.6 478.815 2
 3 5 -7 4061.75 315.92 3
 3 5 -6 20393.9 790.114 3
 -3 -5 6 18396 810.266 2
 -3 5 6 18236 1018.48 2
 3 -5 -5 44537.6 1208.24 3
 -3 5 5 39595.4 1482.67 2
 -3 -5 5 41082.8 1229.69 2
 3 5 -5 42283.3 1277.2 3
 -3 -5 4 1980.28 212.647 2
 -3 5 4 2102.33 289.191 2
 3 5 -4 1933.01 232.949 3
 3 5 -3 887.959 129.189 2
 -3 5 3 667.31 152.231 2
 3 5 -3 849.542 167.323 3
 3 -5 -2 42223.8 1267.24 1
 3 5 -2 39021 1289.69 3
 -3 5 2 41929.6 1254.83 2
 3 5 -1 39322.8 1301.32 3
 3 5 -1 39401.2 1011.26 1
 3 -5 -1 40746.6 1206.48 1
 -3 5 1 38640.5 1159.52 2
 -3 -5 0 48956.1 1196.82 1
 3 5 0 45107.2 1473.63 3
 3 5 1 211.264 101.141 3
 3 5 2 39948 1378.78 3
 3 5 3 18982 909.411 3
 3 5 4 1087.4 218.98 3
 3 5 5 78837.3 2272.64 3
 3 5 6 85041.5 2432.48 3
 3 5 7 73137.9 2668.17 2
 3 5 7 70168.7 2200.86 3
 3 5 8 20452.2 1072.96 3
 3 5 8 21796.5 1428.02 2
 3 -5 8 20542.2 1236.5 2
 3 -5 9 6846.69 741.797 2
 3 5 9 5702.11 558.731 3
 3 5 10 1766.76 507.857 2
 3 5 10 922.467 247.232 3
 3 -5 10 1058.03 330.512 2
 3 5 11 564.475 289.362 2
 3 -5 11 389.779 212.234 2
 3 -5 11 286.363 167.291 3
 3 -5 12 13819.8 1220.02 2
 3 5 12 13986.5 1337.7 2
 3 5 13 52805.6 2778.03 2
 3 -5 13 49457.5 2490.81 2
 3 5 14 26727.7 1987.23 2
 3 -5 14 25134 1770.54 2
 3 5 15 35642.9 2346.85 2
 3 -5 15 30337.7 1982.8 2
 3 5 16 399.753 335.351 2
 -3 6 17 -80.6673 193.148 2
 -3 6 16 9589.19 1184.63 2
 -3 -6 15 52040.4 2389.02 2
 -3 6 15 55193.6 2817.29 2
 -3 -6 14 16074.8 1208.71 2
 -3 6 14 16777.2 1444.97 2
 -3 -6 13 7760.1 790.855 2
 -3 6 13 9518.71 1032.69 2
 -3 -6 12 14522.1 1035.8 2
 -3 6 12 15064.9 1241.89 2
 -3 -6 11 26146.8 1332.86 2
 -3 6 11 23244.1 1486.45 2
 -3 -6 10 1317.2 270.598 2
 -3 6 10 1470.07 355.69 2
 -3 6 9 409.741 257.805 2
 -3 -6 9 311.415 145.474 2
 -3 -6 8 43305.5 1485.07 2
 3 -6 -8 43821.2 1192.75 3
 -3 6 8 39180.4 1759.69 2
 3 6 -8 43022.8 1287.28 3
 -3 -6 7 46343.9 1469.03 2
 -3 6 7 45114.3 1824.32 2
 3 -6 -7 48836.8 1333.87 3
 3 6 -7 49222.3 1414.46 3
 -3 -6 6 9943.34 548.302 2
 -3 6 6 9373.55 719.252 2
 3 6 -6 10408.4 581.546 3
 -3 -6 5 70336.3 1730.51 2
 3 6 -5 71085.4 1897.95 3
 -3 6 5 67656.9 2093.67 2
 3 6 -4 73577.8 1696.3 2
 -3 6 4 72094.2 2058.62 2
 -3 -6 4 74978.2 1732.14 2
 3 6 -4 76688.4 2001.19 3
 -3 6 3 191031 4059.02 2
 3 6 -3 195647 3701.84 2
 3 6 -3 186074 4071.92 3
 -3 6 2 43519.7 1311.58 2
 3 -6 -2 44074.4 1314.19 1
 3 6 -2 41313.3 1420.43 3
 3 6 -2 42475.4 1093.94 1
 3 6 -1 770.529 111.221 1
 3 6 -1 706.85 167.653 3
 -3 6 1 813.065 141.125 2
 3 -6 -1 700.863 143.963 1
 3 6 0 72869.6 2098.35 3
 -3 -6 0 78856.8 1692.17 1
 3 6 1 129940 3128.64 3
 3 6 2 18413.2 918.558 3
 3 6 3 75903.4 2216.28 3
 3 6 4 58262.4 1888.31 3
 3 6 5 109382 2915.72 3
 3 6 6 420.012 157.494 3
 3 6 6 771.493 281.023 2
 3 6 7 10456.4 757.566 3
 3 6 7 10295.6 941.571 2
 3 6 8 10611.7 778.028 3
 3 6 8 10963.8 1020.5 2
 3 -6 8 11642.7 893.595 2
 3 -6 9 93297.2 3042.55 2
 3 6 9 87110.7 2680.65 3
 3 6 9 92851.8 3435.86 2
 3 6 10 2306.08 362.603 3
 3 -6 10 1746.64 404.938 2
 3 6 10 1593.74 440.464 2
 3 6 11 84782.7 3459.11 2
 3 -6 11 79406.9 3023.27 2
 3 -6 12 24068.6 1600.41 2
 3 6 12 23869.4 1788.96 2
 3 6 13 24212 1870.33 2
 3 -6 13 24105.3 1669.28 2
 3 6 14 240.651 232.175 2
 3 -6 14 108.357 152.631 2
 3 6 15 12392.3 1382.78 2
 3 6 16 6127.74 987.763 2
 -3 7 17 6147.11 1008.08 2
 -3 7 16 56367.1 2993.98 2
 -3 7 15 205.761 218.278 2
 -3 7 14 14224.7 1338.71 2
 -3 -7 14 12765.1 1041.87 2
 -3 -7 13 1117.49 306.439 2
 -3 7 13 1310.03 401.045 2
 -3 -7 12 13982.4 990.491 2
 -3 7 12 14704 1235.79 2
 -3 -7 11 718.523 193.266 2
 -3 7 11 405.846 212.783 2
 -3 7 10 62972.7 2534.86 2
 -3 -7 10 68606 2163 2
 -3 7 9 12251.8 982.943 2
 -3 -7 9 14673.4 829.297 2
 -3 -7 8 75169.5 2066.45 2
 3 7 -8 74063.3 1960.74 3
 -3 -7 7 5042.97 402.902 2
 -3 7 7 5004.2 576.718 2
 3 7 -7 5503.07 431.192 3
 -3 -7 6 3656.02 319.299 2
 3 7 -6 4116.99 383.553 3
 -3 7 6 3413.93 437.113 2
 -3 7 5 20739.6 1039.45 2
 3 7 -5 20588.6 926.381 3
 -3 -7 5 19989.3 736.272 2
 3 7 -4 3611.2 373.578 3
 3 7 -4 3744.93 257.84 2
 -3 7 4 3781.29 392.609 2
 3 7 -3 22268.2 706.871 2
 3 7 -3 21666 967.204 3
 -3 7 3 22603.6 948.742 2
 3 7 -2 239369 4463.73 1
 3 7 -2 238381 5057.63 3
 3 -7 -2 244956 4836.32 1
 -3 7 2 241313 4831.61 2
 3 7 -1 47248.2 1600.18 3
 -3 7 1 46021.2 1338 2
 3 -7 -1 47479.9 1371.03 1
 -3 -7 0 19072.1 610.875 1
 3 7 0 18120.7 924.904 3
 3 7 1 22066 1037.32 3
 3 7 2 6990.56 572.946 3
 3 7 3 549.003 199.846 3
 3 7 4 2094.15 325.131 3
 3 7 5 5670.99 543.095 3
 3 7 6 149506 3758.84 3
 3 7 6 152147 4196.8 2
 3 7 7 5100.41 665.89 2
 3 7 7 4036.01 477.898 3
 3 -7 8 66232.3 2325.24 2
 3 7 8 66809.7 2731.4 2
 3 7 8 63434.7 2191.94 3
 3 7 9 12481.6 884.54 3
 3 7 9 11854.3 1125.79 2
 3 -7 9 11428 936.589 2
 3 -7 10 5502.61 695.584 2
 3 7 10 4104.01 510.356 3
 3 7 10 5651 811.717 2
 3 7 11 892.537 384.46 2
 3 -7 11 668.451 282.93 2
 3 -7 12 15424.9 1261.19 2
 3 7 12 19068.1 1593.14 2
 3 -7 13 123.96 138.361 2
 3 7 13 189.415 181.166 2
 3 7 14 83988.8 3736.84 2
 3 7 15 314.601 240.826 2
 -3 8 17 115.457 185.671 2
 -3 8 16 -201.702 366.061 2
 -3 8 15 68248.6 3254.29 2
 -3 8 14 623.169 307.033 2
 -3 8 13 26891.7 1772.77 2
 -3 -8 12 6392.32 643.764 2
 -3 8 12 5973.65 820.402 2
 -3 -8 11 33776.5 1476.68 2
 -3 8 11 34478.8 1877.61 2
 -3 -8 10 1278.01 262.91 2
 -3 8 10 1131.23 328.286 2
 -3 -8 9 1458.91 246.073 2
 -3 8 9 1595.97 376.359 2
 -3 -8 8 341.449 107.802 2
 -3 8 8 647.005 222.342 2
 3 8 -8 679.007 164.987 3
 -3 8 7 113843 3340.84 2
 3 8 -7 116911 2860.29 3
 -3 -8 7 118217 2687.08 2
 -3 8 6 24467.9 1254.63 2
 -3 -8 6 24354.6 871.33 2
 3 8 -6 27030.5 1108.61 3
 3 8 -5 19781.3 684.419 2
 3 8 -5 19197.2 940.326 3
 -3 8 5 18161.7 991.991 2
 3 8 -4 38472.1 1003.34 2
 3 8 -4 37582.3 1409.64 3
 -3 8 4 37383.2 1395.61 2
 -3 8 3 194097 4186.08 2
 3 8 -3 196755 4346.35 3
 3 8 -3 192988 3691.64 2
 3 8 -2 45532.8 1604.99 3
 3 8 -2 46443.7 1108.13 1
 -3 8 2 46719 1423.32 2
 3 -8 -2 46676 1405.52 1
 3 8 -1 63079 1997.41 3
 -3 8 1 64126.9 1697.81 2
 3 -8 -1 66374.2 1734.06 1
 3 8 0 1446.49 275.166 3
 -3 -8 0 1218.18 133.348 1
 3 8 1 141598 3510.1 3
 3 8 2 67264 2132.1 3
 3 8 3 90774.2 2620.18 3
 3 8 4 66706.5 2175.53 3
 3 8 5 73565.5 2337.15 3
 3 8 5 71812 2528.27 2
 3 8 6 4686.41 524.835 3
 3 8 6 5208.48 644.639 2
 3 8 7 66434.8 2279.51 3
 3 8 7 72178.2 2770.14 2
 3 8 8 56.0633 117.997 3
 3 8 8 400.247 248.327 2
 3 -8 8 264.131 162.843 2
 3 8 9 54270.3 2518.81 2
 3 8 9 48860.4 1943.12 3
 3 -8 9 50153.7 2063.42 2
 3 8 10 18655.5 1478.86 2
 3 8 10 16199.7 1060.87 3
 3 -8 10 16706.9 1180.1 2
 3 8 11 74125.4 3249.03 2
 3 -8 11 73447.9 2806.33 2
 3 -8 12 2020.8 462.72 2
 3 8 12 1682.21 457.541 2
 3 8 13 22370.4 1800.27 2
 3 8 14 646.894 374.216 2
 3 8 15 18704.9 1705.54 2
 -3 9 16 31340.8 2233.83 2
 -3 9 15 9789.87 1186.53 2
 -3 9 14 1383.38 430.908 2
 -3 9 13 1871.74 475.193 2
 -3 9 12 23313.1 1619.63 2
 -3 9 11 29220.6 1747.54 2
 -3 -9 11 27192.6 1277.42 2
 -3 9 10 66159.7 2677.86 2
 -3 -9 10 72943.3 2151.09 2
 -3 -9 9 1930.48 278.228 2
 -3 9 9 2141.16 434.412 2
 -3 9 8 64378.5 2410.02 2
 -3 9 8 60588 1877.13 3
 -3 -9 8 65282.6 1792.45 2
 3 9 -8 65073.6 1971.6 3
 -3 9 7 31854.9 1538.09 2
 -3 9 7 28934.4 1203.91 3
 -3 -9 7 30983 1041.23 2
 3 9 -7 32362.8 1274.72 3
 -3 -9 6 1743.25 192.826 2
 3 9 -6 1917.82 293.146 3
 -3 9 6 2230.09 368.962 2
 -3 9 6 1417.82 258.558 3
 -3 9 5 9190.91 649.038 3
 3 9 -5 10188.6 443.625 2
 3 9 -5 9236.29 666.727 3
 -3 9 5 9913.25 747.941 2
 3 9 -4 121.787 117.35 3
 3 9 -4 258.34 69.1706 2
 -3 9 4 108.183 114.932 2
 3 9 -3 137697 3424.26 3
 -3 9 3 137360 3217.15 2
 3 9 -3 135603 2698.55 2
 3 9 -2 281505 5060.51 1
 3 9 -2 276072 5944.03 3
 3 -9 -2 285203 5563.48 1
 -3 9 2 277570 5575.66 2
 3 9 -1 5283.5 526.858 3
 -3 9 1 5536.43 407.474 2
 3 -9 -1 5562.25 419.914 1
 3 9 0 1706.09 315.004 3
 -3 -9 0 1816.94 149.325 1
 3 9 1 8088.8 674.773 3
 3 9 2 7435.7 649.519 3
 3 9 3 9631.15 750.674 3
 3 9 4 5642.57 583.102 3
 3 9 5 39103.3 1653.43 3
 3 9 5 42483.2 1849.9 2
 3 9 6 136343 3967.02 2
 3 9 6 130452 3582.35 3
 3 9 7 5262.87 579.281 3
 3 9 7 5792.56 740.876 2
 3 9 8 5657.5 747.374 2
 3 9 8 5087.01 584.512 3
 3 -9 8 5222.99 569.284 2
 3 9 9 12093.9 1170.98 2
 3 9 9 11330 894.795 3
 3 -9 9 11328.4 904.36 2
 3 9 10 33.6469 237.369 2
 3 -9 10 72.6694 131.865 2
 3 9 10 -105.298 166.79 3
 3 -9 11 36362.5 1844.56 2
 3 9 11 38882.4 2272.65 2
 3 9 12 8229.3 1396.38 2
 3 9 13 14036 1432.69 2
 3 9 14 57816.3 3054.44 2
 3 9 15 17056.6 1637.83 2
 -3 10 16 10699 1300.36 2
 -3 10 15 16940.1 1570.42 2
 -3 10 14 31526.2 2092.83 2
 -3 10 13 951.564 339.047 2
 -3 10 12 74388.4 3090.93 2
 -3 10 11 2071.9 493.845 2
 -3 -10 10 1905.33 288.098 2
 -3 10 10 1781.13 424.221 2
 3 10 -9 3525.59 412.473 3
 -3 10 9 3031.74 526.753 2
 -3 10 9 2663.43 347.855 3
 -3 -10 9 3129.39 339.278 2
 3 10 -8 3623.09 424.179 3
 -3 -10 8 2954.06 307.119 2
 -3 10 8 2469.63 339.21 3
 -3 10 8 2581.64 452.567 2
 -3 10 7 9336.22 681.101 3
 -3 10 7 10928.6 883.052 2
 -3 -10 7 10662.6 528.644 2
 3 10 -7 11045.8 744.391 3
 3 10 -6 157798 3826.18 3
 -3 10 6 153855 4017.92 2
 3 10 -6 163141 3224.25 2
 -3 10 6 147892 3731.01 3
 3 10 -5 594.921 179.371 3
 -3 10 5 473.813 182.995 2
 -3 10 5 531.168 181.718 3
 3 10 -5 498.322 92.5903 2
 3 10 -4 37319.7 1513.15 3
 -3 10 4 35606.3 1398.08 2
 -3 10 4 34742.2 1438.23 3
 3 10 -4 35865 912.331 2
 3 10 -3 40581.8 1026.57 2
 -3 10 3 40683.8 1422.93 2
 3 10 -3 40621.4 1612.11 3
 3 -10 -3 40730.3 1372.89 1
 3 10 -2 6826.06 285.264 1
 3 -10 -2 7166.31 492.718 1
 -3 10 2 8039.64 535.468 2
 3 10 -2 7283.4 634.164 3
 3 10 -1 28525 1313.34 3
 -3 10 1 28363 1031.49 2
 3 -10 -1 28879.8 1058.41 1
 -3 -10 0 42411 962.296 1
 3 10 0 43068.6 1683.54 3
 3 10 1 46214.3 1805.37 3
 3 10 2 138112 3658.73 3
 3 10 3 583.428 210.364 3
 3 10 4 54305.2 2045.07 3
 3 10 4 54980.7 2089.97 2
 3 10 5 21609.6 1222.91 3
 3 10 5 22956 1340.97 2
 3 10 6 5334.09 691.123 2
 3 10 6 3493.83 490.911 3
 3 10 7 16362.4 1084.3 3
 3 10 7 14313.6 1178.91 2
 3 10 8 37963.2 1740.05 3
 3 10 8 39225.5 2076.31 2
 3 -10 8 37659.6 1599.97 2
 3 -10 9 18076.6 1151.06 2
 3 10 9 19367.1 1223.48 3
 3 10 10 121850 3613.75 3
 3 10 10 124537 4321.89 2
 3 10 11 23806.8 1763.59 2
 3 10 12 11364.4 1245.5 2
 3 10 13 9904.32 1203.35 2
 3 10 14 691.902 346.005 2
 3 10 15 3319.62 753.135 2
 -3 11 16 169.102 319.123 2
 -3 11 15 4789.5 843.768 2
 -3 11 14 5484.12 868.647 2
 -3 11 13 316.487 228.094 2
 -3 11 12 120.802 183.488 2
 -3 11 11 133703 4320.75 2
 -3 11 10 2811.82 538.388 2
 -3 11 9 72138.7 2781.59 2
 -3 11 9 73521 2270.22 3
 3 11 -9 77835.6 2350.12 3
 -3 11 8 1078.87 248.728 3
 -3 11 8 1212.81 320.398 2
 3 11 -8 1265.93 263.776 3
 -3 -11 8 969.325 162.951 2
 -3 11 7 44789.6 1708.87 3
 -3 11 7 40044.9 1836.74 2
 3 11 -6 438.552 171.837 3
 -3 11 6 520.971 196.422 2
 3 11 -6 730.912 121.09 2
 -3 11 6 459.177 175.579 3
 3 11 -5 5878.76 579.345 3
 -3 11 5 5835.49 578.191 3
 -3 11 5 6520.51 608.135 2
 3 11 -5 6056.59 297.283 2
 3 11 -4 13119.8 446.643 2
 3 11 -4 12881.9 883.335 3
 -3 11 4 13794.4 835.11 2
 -3 11 4 12516.7 855.486 3
 3 -11 -3 130900 3051.21 1
 3 11 -3 132848 3492.41 3
 3 11 -3 127037 2537.55 2
 -3 11 3 126981 3129.81 2
 -3 11 2 5413.5 446.198 2
 3 11 -2 5248.34 567.412 3
 3 -11 -2 5374.92 430.276 1
 -3 11 1 61048.7 1713.74 2
 3 -11 -1 64159.5 1776.79 1
 3 11 -1 59256.3 2134.82 3
 3 11 0 1178.65 281.15 3
 -3 11 0 1533.03 208.276 2
 3 11 1 84871 2667.15 3
 3 11 2 9752.87 795.718 3
 3 11 3 27428.4 1342.71 2
 3 11 3 25236.6 1347.69 3
 3 11 4 943.372 259.303 3
 3 11 4 663.86 236.801 2
 3 11 5 116889 3439.83 3
 3 11 5 120493 3611.53 2
 3 11 6 2170.26 401.194 3
 3 11 6 3308.23 537.614 2
 3 11 7 29059.5 1518.77 3
 3 11 7 30588.4 1734.5 2
 3 -11 8 3855.06 473.053 2
 3 11 8 3678.44 639.354 2
 3 11 8 3781.7 534.857 3
 3 11 9 41170.8 2215.07 2
 3 11 9 35214.2 1739.5 3
 3 11 10 5.89976 180.187 3
 3 11 10 -3.60671 255.688 2
 3 11 11 29814.5 2003.11 2
 3 11 12 443.325 280.212 2
 3 11 13 27483.4 2032.16 2
 3 11 14 5290.42 905.534 2
 -3 12 16 3530.01 777.075 2
 -3 12 15 -43.4512 266.522 2
 -3 12 14 29175.1 2044.59 2
 -3 12 13 22961.2 1734.9 2
 -3 12 12 42560.8 2322.46 2
 -3 12 11 1826.27 468.603 2
 -3 12 10 867.596 291.663 2
 -3 12 9 442.717 237.662 2
 3 12 -9 452.584 190.464 3
 -3 12 9 419.078 181.528 3
 -3 12 8 2197.94 439.959 2
 -3 12 8 1773.4 310.601 3
 3 12 -8 1806.21 330.58 3
 -3 12 7 13319.3 1004.87 2
 -3 12 7 11175.6 832.48 3
 3 12 -7 13708.3 910.863 3
 3 12 -6 81745.4 2541.77 3
 -3 12 6 77272 2576.29 2
 -3 12 6 75055 2457.54 3
 -3 12 5 42332.9 1682.59 2
 3 12 -5 42782.1 976.948 2
 -3 12 5 40160.6 1689.18 3
 3 12 -5 42358.3 1749.64 3
 -3 12 4 81652.7 2391.33 2
 3 12 -4 81704.1 2603.7 3
 3 12 -4 78244.8 1591.45 2
 -3 12 4 79022.4 2536.64 3
 3 12 -3 735.639 192.204 3
 -3 12 3 639.712 222.51 3
 -3 12 3 735.27 198.534 2
 3 12 -3 895.136 108.073 1
 3 -12 -3 799.681 177.077 1
 3 12 -3 1268.42 136.187 2
 -3 12 2 7923.04 553.781 2
 3 -12 -2 8150.75 540.234 1
 3 12 -2 7655.88 713.51 3
 3 12 -1 5022.53 583.988 3
 -3 12 1 5976.6 447.38 2
 3 12 0 214.856 109.46 3
 -3 12 0 228.219 93.3968 2
 3 12 1 4067.37 517.804 3
 -3 -12 -1 4733.95 247.758 1
 3 12 2 133154 3427.15 2
 3 12 2 127053 3634.26 3
 3 12 3 15216.4 1001.02 2
 3 12 3 13877.2 1005.01 3
 3 12 4 16479.3 1118.3 3
 3 12 4 17849.2 1154.84 2
 3 12 5 1300.4 336.186 3
 3 12 5 1522.18 347.978 2
 3 12 6 2287.88 418.544 3
 3 12 6 3028.35 502.419 2
 3 12 7 232.104 174.142 2
 3 12 7 345.059 179.995 3
 3 -12 7 157.812 136.544 2
 3 12 8 26363.3 1493.3 3
 3 12 8 29139.9 1799.74 2
 3 12 9 13072 1228.66 2
 3 12 9 10136.3 908.445 3
 3 12 10 78783.5 2842.91 3
 3 12 10 87040.7 3508.5 2
 3 12 11 -77.9719 247.056 2
 3 12 12 17200.3 1556.19 2
 3 12 13 -6.5294 211.92 2
 3 12 14 732.938 423.994 2
 -3 13 15 4410.92 860.405 2
 -3 13 14 4976.58 869.202 2
 -3 13 13 1963.31 533.503 2
 -3 13 12 17198 1460.81 2
 -3 13 11 28228.3 1813.61 2
 -3 13 10 40275.5 2125.85 2
 -3 13 9 20871.3 1422.59 2
 3 13 -9 20204.2 1160.37 3
 -3 13 9 19908.7 1146.32 3
 -3 13 8 26482.4 1359.99 3
 3 13 -8 29344.1 1415.49 3
 -3 13 8 24937.1 1519.53 2
 -3 13 7 18965 1214.71 2
 3 13 -7 18587.5 1115.6 3
 -3 13 7 16443.6 1060.75 3
 -3 13 6 35686.6 1633.69 2
 -3 13 6 32170.7 1550.53 3
 3 13 -6 36799.6 1637.96 3
 -3 13 5 5319.18 569.402 2
 3 13 -5 5984.76 641.972 3
 -3 13 5 4594.5 556.679 3
 3 13 -4 75619.9 1502.55 2
 -3 13 4 80797 2389.16 2
 3 13 -4 82597.1 2668.5 3
 -3 13 4 76471.5 2581.81 3
 3 -13 -4 81475.4 2261.03 1
 -3 13 3 43205.3 1485.76 2
 3 -13 -3 43654.6 1396.38 1
 3 13 -3 42796.1 925.008 2
 -3 13 3 40213.6 1719.33 3
 3 13 -3 43814.9 1817.3 3
 -3 13 2 21532.3 969.382 2
 3 -13 -2 19621 882.305 1
 3 13 -2 20193.8 1224.89 3
 -3 13 1 5116.8 421.913 2
 3 13 -1 5059.42 604.113 3
 3 13 0 29936.8 1174.61 2
 -3 13 0 28861.4 1030.99 2
 3 13 1 31926.1 1593.45 3
 -3 -13 -1 30083 727.62 1
 3 13 2 6876.01 714.703 3
 3 13 2 8782.9 710.849 2
 3 13 3 21068.8 1209.3 2
 3 13 3 18700.6 1207.76 3
 3 13 4 31946.2 1596.52 2
 3 13 4 27614.9 1513.4 3
 3 13 5 63617.7 2494.45 2
 3 13 5 61518.3 2392.15 3
 3 13 6 54371.4 2345.87 2
 3 13 6 52528.5 2202.57 3
 3 13 7 13912.1 1196.13 2
 3 13 7 13563 1064.33 3
 3 13 8 63247.9 2512.09 3
 3 13 8 71600.9 2957.38 2
 3 13 9 27473.2 1583.94 3
 3 13 9 33579.3 2006.66 2
 3 13 10 329.145 231.406 3
 3 13 10 -101.644 258.978 2
 3 13 11 8969.63 1078.26 2
 3 13 12 8261.29 1101.04 2
 3 13 13 15000.9 1498.85 2
 3 13 14 18046.9 1672.95 2
 -3 14 15 20741.3 1815.62 2
 -3 14 14 3392.03 717.598 2
 -3 14 13 47951.8 2665.24 2
 -3 14 12 5167.46 819.431 2
 -3 14 11 18360.7 1473.97 2
 -3 14 10 284.259 241.488 2
 -3 14 9 3687.67 600.527 2
 3 14 -9 3814.46 507.825 3
 -3 14 9 3658.47 499.683 3
 3 14 -8 829.752 266.787 3
 -3 14 8 755.619 248.3 2
 -3 14 8 827.255 251.461 3
 -3 14 7 49295.9 2096.97 2
 -3 14 7 47402.2 1986.29 3
 3 14 -7 52166.4 2063.02 3
 -3 14 6 19649.6 1188.37 2
 -3 14 6 17527.2 1152.89 3
 3 14 -6 19733.8 1207.88 3
 -3 14 5 78799.8 2513.68 2
 3 14 -5 82435.1 2722.76 3
 -3 14 4 14369.5 898.917 2
 3 14 -4 14456.8 1045.65 3
 3 -14 -4 14093.3 811.232 1
 -3 14 4 13327.6 1006.55 3
 -3 14 3 12331.4 777.277 2
 3 14 -3 11879.4 957.971 3
 3 -14 -3 12303.6 715.881 1
 3 14 -3 12628.5 487.196 2
 -3 14 3 10896.7 912.589 3
 3 -14 -2 8411.78 562.277 1
 3 14 -2 9048.87 487.154 2
 -3 14 2 8232.65 590.364 2
 3 14 -2 7493.83 770.539 3
 3 14 -1 238.159 182.174 3
 -3 14 1 626.069 168.516 2
 3 14 -1 339.359 118.091 2
 3 14 0 2523.79 322.529 2
 3 14 0 2132.33 420.694 3
 3 14 1 18143.8 979.561 2
 3 14 1 14946.2 1106.85 3
 3 14 2 48749.2 2131.58 3
 3 14 2 54424.4 1974.74 2
 3 14 3 64726.7 2316.44 2
 3 14 3 58934.2 2385.97 3
 3 14 4 9476.6 885.163 3
 3 14 4 12145 957.581 2
 3 14 5 972.317 289.673 3
 3 14 5 1233.35 362.71 2
 3 14 6 5470.6 686.487 3
 3 14 6 7115.4 828.552 2
 3 14 7 -109.753 168.03 3
 3 14 7 13.5418 170.917 2
 3 14 8 15383.7 1303.05 2
 3 14 8 13126.5 1087 3
 3 14 9 71080.1 3059.25 2
 3 14 9 62457.1 2566.37 3
 3 14 10 33980.3 1828.21 3
 3 14 10 38274.2 2246.86 2
 3 14 11 30153.7 2045.65 2
 3 14 12 127.99 282.812 2
 3 14 13 3728.54 710.135 2
 -3 15 15 795.369 446.782 2
 -3 15 14 4202.82 769.684 2
 -3 15 13 275.876 276.16 2
 -3 15 12 22476.2 1718.38 2
 -3 15 11 447.268 306.421 2
 -3 15 10 47854.8 2377.47 2
 3 15 -9 5686.76 649.248 3
 -3 15 9 5077.8 716.572 2
 -3 15 9 4044.16 553.384 3
 3 15 -8 49701.8 2054.41 3
 -3 15 8 43182.5 1945.99 3
 -3 15 8 48223.8 2187.41 2
 -3 15 7 4694.96 615.069 2
 -3 15 7 3838.85 544.394 3
 3 15 -7 4814.87 621.162 3
 -3 15 6 9994.49 844.983 2
 3 15 -6 9765.65 867.822 3
 -3 15 6 8231.09 807.623 3
 3 15 -5 1344.74 339.697 3
 -3 15 5 1180.78 284.671 2
 -3 15 5 771.161 273 3
 3 15 -4 35482.4 1751.26 3
 -3 15 4 33521.6 1463.42 2
 -3 15 4 30580.7 1630.13 3
 3 -15 -4 35016.1 1353.85 1
 -3 15 3 1540.01 278.559 2
 -3 15 3 1378.12 352.113 3
 3 -15 -3 2199.34 303.018 1
 3 15 -3 964.96 286.366 3
 3 15 -2 42058.8 1965.36 3
 3 -15 -2 43945.8 1468.42 1
 3 15 -2 43866.9 1242.21 2
 -3 15 2 41420.1 1494.57 2
 3 15 -1 37613.3 1269.99 2
 3 15 -1 35653.3 1799.88 3
 -3 15 1 36858.7 1313.06 2
 3 15 0 43866.1 1519.46 2
 3 15 0 38050.9 1890.74 3
 3 15 1 14513.8 879.377 2
 3 15 1 12777.7 1051.87 3
 3 15 2 6383.12 627.499 2
 3 15 2 5184.59 679.835 3
 3 15 3 8659.88 765.55 2
 3 15 3 6327.79 739.62 3
 3 15 4 44883.7 2116.07 3
 3 15 4 51516.6 2114.91 2
 3 15 5 2337.33 469.138 3
 3 15 5 3078.38 505.031 2
 3 15 6 82264.5 3055.58 3
 3 15 6 92774.9 3241.52 2
 3 15 7 26235.4 1604.92 3
 3 15 7 33141.8 1875.19 2
 3 15 8 38050 1981.58 3
 3 15 8 43556.7 2276.3 2
 3 15 9 1664.25 426.747 2
 3 15 9 1684.2 403.849 3
 3 15 10 674.048 290.914 3
 3 15 10 549.747 316.404 2
 3 15 11 2805.36 575.747 2
 3 15 12 28137.6 2027.02 2
 3 15 13 5263.03 890.358 2
 -3 16 14 11819.1 1353.62 2
 -3 16 13 36718.1 2335.15 2
 -3 16 12 411.854 280.48 2
 -3 16 11 5839.3 852.981 2
 -3 16 10 3514.4 639.862 2
 -3 16 9 11130.8 1061.16 2
 3 16 -9 9680.47 895.542 3
 -3 16 9 9377.91 879.364 3
 -3 16 8 8397.05 876.019 2
 -3 16 8 7135.37 763.591 3
 3 16 -8 8592.53 839.769 3
 -3 16 7 31099.4 1664.51 2
 3 16 -7 32658.2 1699.85 3
 -3 16 7 30627.1 1647.18 3
 3 16 -6 9645.52 890.09 3
 -3 16 6 8175.41 839.503 3
 -3 16 6 8814.95 804.89 2
 -3 16 5 52810.8 2028.98 2
 3 16 -5 52177.4 2234.1 3
 -3 16 5 48921.7 2190.32 3
 3 -16 -5 56246.5 1885.18 1
 3 -16 -4 3570.64 403.475 1
 -3 16 4 3435.8 444.972 2
 3 16 -4 2948.81 507.433 3
 -3 16 4 2737.51 483.844 3
 -3 16 3 4406.38 469.981 2
 -3 16 3 3840.1 574.987 3
 3 -16 -3 4323.56 416.82 1
 3 16 -3 3798.33 574.523 3
 3 16 -2 3676.1 582.583 3
 -3 16 2 5143.66 482.434 2
 3 16 -1 7600.43 513.07 2
 -3 16 1 7765.02 564.594 2
 3 16 0 58302.6 1822.18 2
 3 16 0 50639.5 2301.67 3
 3 16 1 28204 1281.84 2
 3 16 1 25315.7 1554.52 3
 3 16 2 1363.75 360.023 3
 3 16 2 1781.11 337.801 2
 3 16 3 70406.9 2456.27 2
 3 16 3 63000.9 2655.9 3
 3 16 4 16812.8 1279.33 3
 3 16 4 20399.6 1277.46 2
 3 16 5 12744.6 1122.51 3
 3 16 5 14050.8 1109.67 2
 3 16 6 4342.82 657.115 3
 3 16 6 6680.73 785.36 2
 3 16 7 57.4361 197.339 3
 3 16 7 619.813 267.802 2
 3 16 8 39495.2 2156.44 2
 3 16 8 31566.8 1850.81 3
 3 16 9 29537.6 1907.5 2
 3 16 9 25791.3 1663.75 3
 3 16 10 2139.99 471.054 3
 3 16 10 2210.35 531.348 2
 3 16 11 36891.5 2276.49 2
 3 16 12 19218.3 1671.33 2
 3 16 13 665.824 310.918 2
 -3 17 14 -2.2986 224.951 2
 -3 17 13 7320.1 1025.45 2
 -3 17 12 766.624 377.475 2
 -3 17 11 2531.17 553.769 2
 -3 17 10 14223.4 1275.35 2
 -3 17 9 92513.2 3393.23 2
 -3 17 9 86659.9 3094.12 3
 3 17 -9 92457.6 3160.16 3
 3 17 -8 10477.6 967.416 3
 -3 17 8 8731.94 881.862 3
 -3 17 8 11178.2 1025.46 2
 -3 17 7 2055.51 418.776 2
 -3 17 7 2285.83 469.62 3
 3 17 -7 1978.5 419.195 3
 3 17 -6 18.0344 137.699 3
 -3 17 6 186.069 155.18 2
 -3 17 6 129.818 180.894 3
 -3 17 5 9793.71 816.515 2
 -3 17 5 9242.6 925.602 3
 3 -17 -5 10843.6 749.084 1
 3 17 -5 11365.4 1007.27 3
 3 17 -4 3941.94 595.259 3
 3 -17 -4 3953.94 422.81 1
 -3 17 4 3475.32 564.852 3
 -3 17 4 4272.49 498.165 2
 -3 17 3 6966.35 605.036 2
 3 -17 -3 7766.61 561.701 1
 -3 17 3 6846.5 802.914 3
 3 17 -3 6921.19 796.852 3
 -3 17 2 14584.3 847.096 2
 3 17 -2 12948.3 1102.23 3
 -3 17 1 110105 2735.99 2
 3 17 -1 102526 3555.89 3
 3 17 0 7465.62 849.8 3
 3 17 0 10604.7 684.924 2
 3 17 1 153.232 106.564 2
 3 17 1 181.555 220.224 3
 3 17 2 361.25 211.051 3
 3 17 2 627.733 232.21 2
 3 17 3 569.622 172.568 2
 3 17 3 150.962 129.778 3
 3 17 4 7121.97 853.602 3
 3 17 4 9379.07 861.196 2
 3 17 5 29478.3 1786.11 3
 3 17 5 31303.8 1709.38 2
 3 17 6 17494.8 1316.49 2
 3 17 6 14921.5 1261.86 3
 3 17 7 52089.6 2478.51 3
 3 17 7 59904.2 2642.56 2
 3 17 8 12828.9 1170.82 3
 3 17 8 12672.4 1201.51 2
 3 17 9 404.313 250.833 2
 3 17 9 -3.21218 174.011 3
 3 17 10 377.025 256.451 3
 3 17 10 450.184 253.756 2
 3 17 11 806.941 342.708 2
 3 17 12 2295.43 507.401 2
 -3 18 13 -91.1671 315.686 2
 -3 18 12 6357.99 950.107 2
 -3 18 11 1224.61 372.814 2
 -3 18 10 7779.05 950.447 2
 3 18 -9 2138.67 448.334 3
 -3 18 9 2155.01 477.142 3
 -3 18 9 2502.31 523.619 2
 -3 18 8 53167 2372.58 2
 -3 18 8 47552.2 2257.83 3
 3 18 -8 55775.5 2412.78 3
 -3 18 7 1711.14 403.552 3
 -3 18 7 2406.22 462.043 2
 3 18 -7 2175.95 458.579 3
 -3 18 6 56542.2 2262.04 2
 3 18 -6 58632.4 2495.35 3
 -3 18 6 52500.5 2407.63 3
 -3 18 5 2486.69 420.501 2
 3 18 -5 2226.15 467.032 3
 -3 18 5 2362.79 493.658 3
 -3 18 4 37763.8 1610.78 2
 -3 18 4 33119 1872.17 3
 3 18 -4 37510.4 1960.19 3
 -3 18 3 753.612 215.662 2
 -3 18 3 866.196 319.008 3
 3 18 -3 1221.59 381.227 3
 3 18 -2 1123.71 352.857 3
 -3 18 2 1909.14 305.633 2
 -3 18 1 1314.64 271.916 2
 3 18 -1 819.467 359.638 3
 3 18 0 63023.3 2692.78 3
 3 18 1 -115.639 177.274 3
 3 18 1 136.001 72.8534 2
 3 18 2 39917.8 2127.95 3
 3 18 2 45896 1795.91 2
 3 18 3 298.383 226.904 3
 3 18 3 431.696 187.874 2
 3 18 4 49039.9 2076.67 2
 3 18 4 41097.7 2193.64 3
 3 18 5 109.861 120.024 2
 3 18 5 83.1819 190.445 3
 3 18 6 1472.38 442.754 3
 3 18 6 2068.72 467.042 2
 3 18 7 1535.77 386.234 2
 3 18 7 1529.98 460.09 3
 3 18 8 56644.5 2623.45 2
 3 18 8 49564.1 2473.28 3
 3 18 9 -60.5879 273.373 2
 3 18 9 -42.26 216.35 3
 3 18 10 18456.1 1465.68 3
 3 18 10 22356.4 1702.94 2
 3 18 11 428.747 391.138 2
 3 18 12 49027.6 2742.51 2
 -3 19 13 16734.7 1566.82 2
 -3 19 12 512.338 170.192 2
 -3 19 11 5112.26 811.641 2
 -3 19 10 469.563 264.244 2
 -3 19 9 51755.6 2459.24 2
 -3 19 9 53718.3 2432.1 3
 3 19 -9 50278.8 2353.75 3
 -3 19 8 2664 532.497 3
 3 19 -8 1988.56 452.34 3
 -3 19 8 2283.39 481.837 2
 -3 19 7 5128.28 670.562 2
 -3 19 7 4705.25 694.649 3
 3 19 -7 4362.53 666.689 3
 -3 19 6 260.058 177.068 2
 -3 19 6 28.8883 135.307 3
 3 19 -6 162.272 201.587 3
 -3 19 5 7425.37 726.67 2
 -3 19 5 6799.34 842.798 3
 3 19 -5 7677.21 871.35 3
 -3 19 4 7244.89 680.274 2
 -3 19 4 5855.91 792.39 3
 3 19 -4 6104.36 800.898 3
 -3 19 3 24956.8 1222.37 2
 -3 19 3 21884.7 1542.04 3
 3 19 -3 23361.6 1590.86 3
 -3 19 2 1542.62 284.397 2
 3 19 -2 1550.57 426.438 3
 3 19 -1 42840.1 2209.45 3
 3 19 0 8595.05 990.129 3
 3 19 1 496.241 193.04 3
 3 19 2 5153.69 547.29 2
 3 19 2 4459.46 709.864 3
 3 19 3 1229.3 292.351 2
 3 19 3 728.902 256.865 3
 3 19 4 1105.05 261.821 2
 3 19 4 887.431 325.948 3
 3 19 5 29938.9 1646.36 2
 3 19 5 24978.6 1719.21 3
 3 19 6 3656.11 655.528 3
 3 19 6 5268.79 710.511 2
 3 19 7 82539.8 3387.93 3
 3 19 7 94764 3405.5 2
 3 19 8 635.229 274.247 3
 3 19 8 982.994 382.553 2
 3 19 9 -590.433 291.349 2
 3 19 9 1.77983 167.982 3
 3 19 10 1504.53 493.754 2
 3 19 10 348.645 131.941 3
 3 19 11 121.846 272.21 2
 3 19 12 2899.42 691 2
 -3 20 13 20888.1 1777.44 2
 -3 20 12 557.759 303.155 2
 -3 20 11 6865.7 930.156 2
 -3 20 10 8281.6 990.734 2
 -3 20 9 1310.2 407.453 2
 -3 20 9 1016.3 373.223 3
 3 20 -9 609.939 280.635 3
 -3 20 8 35182.5 1916.52 2
 -3 20 8 33554.6 1951.46 3
 3 20 -8 33800.3 1948.81 3
 -3 20 7 23484.2 1475.46 2
 -3 20 7 21297.1 1549.16 3
 3 20 -7 21944 1560.67 3
 -3 20 6 24041.6 1424.89 2
 3 20 -6 24388.7 1650.13 3
 -3 20 6 21498.1 1560.69 3
 3 20 -5 29513.2 1809.9 3
 -3 20 5 27604.4 1777.98 3
 -3 20 5 29759.2 1520.73 2
 3 20 -4 3075.48 571.883 3
 -3 20 4 3323.95 460.067 2
 -3 20 4 2773.56 549.69 3
 -3 20 3 6994.59 888.852 3
 3 20 -3 8417.78 974.405 3
 3 20 -2 2683.3 568.341 3
 3 20 -1 99.9246 138.374 3
 3 20 0 51400.5 2527.74 3
 3 20 1 31520.7 1939.1 3
 3 20 2 9362.54 1047.99 3
 3 20 3 18541.8 1509.97 3
 3 20 3 22868.3 1263.54 2
 3 20 4 37568.4 1764.06 2
 3 20 4 31937.7 2012.39 3
 3 20 5 911.208 286.587 2
 3 20 5 704.739 327.671 3
 3 20 6 1785.82 484.423 3
 3 20 6 2647.47 484.855 2
 3 20 7 435.149 255.864 2
 3 20 7 602.514 242.853 3
 3 20 8 24777.4 1783.82 3
 3 20 8 28423.8 1806.88 2
 3 20 9 23174.6 1728.66 3
 3 20 9 27079.9 1843.27 2
 3 20 10 11466.5 1230.75 2
 3 20 11 21428.2 1746.28 2
 -3 21 12 10750.9 1223 2
 -3 21 11 17.5991 231.037 2
 -3 21 10 35057.6 2102.32 2
 -3 21 9 16259.3 1337.72 2
 3 21 -9 14187.6 1264.51 3
 -3 21 9 13082.1 1230.5 3
 -3 21 8 25791.7 1645.21 2
 3 21 -8 25520 1729.35 3
 -3 21 8 24449.8 1692.67 3
 -3 21 7 1758.91 448.174 2
 -3 21 7 953.678 373.811 3
 3 21 -7 1747.96 438.037 3
 -3 21 6 999.456 317.536 2
 -3 21 6 1199.13 377.275 3
 3 21 -6 1074.63 359.156 3
 -3 21 5 1304.34 415.447 3
 -3 21 5 2281.01 428.69 2
 3 21 -5 1995.12 519.104 3
 3 21 -4 23321 1665.42 3
 -3 21 4 21764.2 1617.43 3
 3 21 -3 1185.78 384.212 3
 3 21 -2 37457.5 2150.76 3
 3 21 -1 32836.4 2015.81 3
 3 21 0 40326 2260.28 3
 3 21 1 53.6193 139.29 3
 3 21 2 1001.01 315.899 3
 3 21 3 9630.69 1091.13 3
 3 21 4 9981.4 1124.69 3
 3 21 5 4009.27 705.845 3
 3 21 5 4127.45 596.364 2
 3 21 6 26743.4 1883.44 3
 3 21 6 31016.1 1744.76 2
 3 21 7 13812.3 1351.27 3
 3 21 7 18606.4 1392 2
 3 21 8 18227.6 1444.36 2
 3 21 8 14619.7 1386.26 3
 3 21 9 299.452 255.728 2
 3 21 9 -9.76121 256.311 3
 3 21 10 286.407 174.666 2
 3 21 11 -161.868 314.664 2
 -3 22 12 8058.2 1078.46 2
 -3 22 11 3196.99 679.12 2
 -3 22 10 8300.49 1010.85 2
 -3 22 9 217.208 254.283 2
 -3 22 8 5107.94 718.743 2
 3 22 -8 5501.55 816.146 3
 -3 22 8 4547.75 754.72 3
 -3 22 7 19955.2 1379.26 2
 3 22 -7 20287.5 1594.66 3
 -3 22 6 5397.15 831.248 3
 3 22 -6 6412.96 871.656 3
 3 22 -5 53879.1 2675.59 3
 -3 22 5 49819.3 2609.03 3
 3 22 -4 10354.9 1119.88 3
 3 22 -3 8325.26 1010.4 3
 3 22 -2 3399.38 669.983 3
 3 22 -1 2117.3 578.55 3
 3 22 0 13751.2 1322.82 3
 3 22 1 30432.4 2010.26 3
 3 22 2 11457.3 1207.44 3
 3 22 3 43674.2 2449.7 3
 3 22 4 9.69094 171.679 3
 3 22 5 11936.2 1259.89 3
 3 22 6 3259.43 690.455 3
 3 22 7 1716.05 518.351 3
 3 22 7 2409.4 509.697 2
 3 22 8 1563.06 398.619 2
 3 22 8 955.421 301.926 3
 3 22 9 35490.9 2248.08 3
 3 22 9 43904 2371.71 2
 3 22 10 3615.56 712.276 2
 -3 23 11 19193.9 1606.98 2
 -3 23 10 17013.1 1462.57 2
 -3 23 9 782.594 313.647 2
 3 23 -8 6810.33 910.004 3
 3 23 -7 14800.2 1385.95 3
 3 23 -6 4987.94 820.421 3
 3 23 -5 1442.35 492.182 3
 3 23 -4 38716 2292.05 3
 3 23 -3 5384.3 828.404 3
 3 23 -2 57369.9 2854.54 3
 3 23 -1 -92.8525 149.077 3
 3 23 0 10664 1193.85 3
 3 23 1 21627.6 1745.03 3
 3 23 2 2400.67 625.816 3
 3 23 3 11476.3 1253.75 3
 3 23 4 12749.9 1338.88 3
 3 23 5 11779.7 1280 3
 3 23 6 28158.1 2001.42 3
 3 23 7 287.917 314.216 3
 3 23 8 27885.3 2007.48 3
 3 23 9 7982.28 972.858 2
 3 23 9 5719.88 923.354 3
 3 23 10 710.645 399.795 2
 -3 24 11 1864.86 577.83 2
 3 24 -8 445.952 350.141 3
 3 24 -7 4642.54 803.339 3
 3 24 -6 28102.9 1994.32 3
 3 24 -5 27926.8 1980.52 3
 3 24 -4 17539.3 1567.19 3
 3 24 -3 2659.91 656.581 3
 3 24 -2 2655.59 672.318 3
 3 24 -1 2745.92 621.073 3
 3 24 0 41.0808 199.083 3
 3 24 1 6009.96 936.934 3
 3 24 2 60489.6 3065.26 3
 3 24 3 24901.3 1907.06 3
 3 24 4 8264.57 1096.26 3
 3 24 5 6650.86 993.524 3
 3 24 6 1642.34 521.962 3
 3 24 7 347.464 323.34 3
 3 24 8 3757.54 744.084 3
 3 24 9 6398.04 974.904 3
 3 25 -8 659.52 364.959 3
 3 25 -7 9706.06 1156.81 3
 3 25 -6 1079.48 385.89 3
 3 25 -5 3454.85 689.432 3
 3 25 -4 9674.91 1210.8 3
 3 25 -3 56090.8 2963.91 3
 3 25 -2 2012.14 553.055 3
 3 25 -1 16669.3 1559.92 3
 3 25 0 285.282 300.236 3
 3 25 1 36622.8 2354.63 3
 3 25 2 2705.3 722.672 3
 3 25 3 12850.8 1397.68 3
 3 25 4 984.575 455.278 3
 3 25 5 28122.7 2080.65 3
 3 25 6 542.845 313.511 3
 3 25 7 25245.9 1985.33 3
 3 25 8 1020.78 359.002 3
 3 26 -7 1776.87 453.408 3
 3 26 -6 49156.2 2807.62 3
 3 26 -5 1028.58 395.227 3
 3 26 -4 16426.6 1593.49 3
 3 26 -3 430.264 393.465 3
 3 26 -2 358.839 360.944 3
 3 26 -1 2608.82 720.247 3
 3 26 0 7225.95 1048.88 3
 3 26 1 6684.41 1062.24 3
 3 26 2 74452.6 3559.09 3
 3 26 3 -106.728 255.838 3
 3 26 4 10600.3 1280.68 3
 3 26 5 503.058 322.381 3
 3 26 6 2.38399 261.217 3
 3 27 -4 563.507 355.684 3
 3 27 -3 19268.5 1776.28 3
 3 27 -2 19568.8 1790.6 3
 3 27 -1 13269.5 1460.72 3
 3 27 0 12623 1431.11 3
 3 27 1 13496.4 1483.43 3
 3 27 2 74.9999 472.407 3
 3 27 3 10483.9 1304.89 3
 -4 0 18 21956.8 1812.66 2
 -4 0 17 -116.895 285.504 2
 -4 0 16 35067.2 2161.13 2
 -4 0 15 291.752 233.806 2
 -4 0 14 49038.8 2394.5 2
 -4 0 13 107.446 150.387 2
 -4 0 12 7382.21 814.424 2
 -4 0 11 310.681 182.66 2
 -4 0 10 42330.2 1848.66 2
 -4 0 9 101.962 97.1662 2
 -4 0 8 143187 3664.51 2
 -4 0 7 104.66 109.592 2
 -4 0 6 113791 2798.7 2
 4 0 -6 103727 2103.56 3
 -4 0 5 -42.5115 80.25 2
 4 0 -5 28.8064 33.9577 3
 -4 0 4 26054.8 1024.68 2
 4 0 -4 26030.9 836.138 3
 -4 0 3 161.068 80.6642 2
 4 0 -3 159.958 68.6926 3
 4 0 -2 3627.17 326.196 1
 4 0 -2 3514.03 309.394 3
 4 0 -1 169.5 83.8029 1
 4 0 -1 90.52 57.6767 3
 4 0 0 332342 6468.74 3
 4 0 1 211.204 103.038 3
 4 0 2 10837.5 670.202 3
 4 0 3 116.355 90.3005 3
 4 0 4 41041.4 1492.44 3
 4 0 5 172.859 134.453 3
 4 0 6 60385.1 1988.1 3
 4 0 7 26.9448 109.868 3
 4 0 8 243864 5464.45 3
 4 0 9 40.5661 119.469 3
 4 0 9 197.771 216.682 2
 4 0 10 30135.2 1423.76 3
 4 0 10 36346.7 1997.03 2
 4 0 11 -115.566 193.634 3
 4 0 11 314.051 259.556 2
 4 0 12 6641.23 913.71 2
 4 0 13 -148.456 258.702 2
 4 0 14 7224.87 995.268 2
 4 0 15 -140.134 290.087 2
 4 0 16 58600 3133.84 2
 -4 1 18 3467.22 746.703 2
 -4 -1 18 2791.8 621.391 2
 -4 -1 17 1027.33 324.053 2
 -4 1 17 592.013 323.669 2
 -4 -1 16 -123.785 176.827 2
 -4 1 16 274.316 332.375 2
 -4 -1 15 2168.19 523.152 2
 -4 1 15 2251.87 528.817 2
 -4 1 14 10279.5 1074.74 2
 -4 -1 14 11636.5 1110.6 2
 -4 -1 13 73613.2 2869.68 2
 -4 1 13 70411.8 2887.39 2
 -4 -1 12 18050 1267.5 2
 -4 1 12 18098.6 1298.4 2
 -4 -1 11 33009.6 1657.13 2
 -4 1 11 30013.4 1639.6 2
 -4 -1 10 14913.2 1029.72 2
 -4 1 10 14370.2 1042.19 2
 -4 -1 9 29282.9 1404.67 2
 -4 1 9 29228 1453.81 2
 -4 -1 8 12591.6 832.684 2
 -4 1 8 13074.7 883.616 2
 -4 -1 7 33840.5 1347.45 2
 -4 1 7 32512.7 1372.68 2
 4 1 -7 31556.6 763.908 3
 -4 -1 6 7071.43 547.911 2
 -4 1 6 7495.16 588.135 2
 4 1 -6 7276.34 341.22 3
 4 -1 -6 6595.33 303.953 3
 -4 -1 5 95182.8 2377.14 2
 4 -1 -5 91466.5 1977.71 3
 -4 -1 5 97013.4 2014.83 3
 -4 1 5 90878 2412.97 2
 4 1 -5 88835.6 1988.88 3
 4 1 -4 57417.5 1471 3
 -4 1 4 61365 1744.07 2
 -4 -1 4 61102.1 1705.92 2
 4 -1 -4 55938.7 1466.78 3
 -4 -1 4 63644.4 1507.62 3
 -4 1 3 3963.44 357.054 2
 4 1 -3 4175.51 320.336 3
 4 -1 -3 4305.04 325.435 3
 -4 -1 3 3877.18 341.878 2
 4 1 -2 290.692 97.3495 3
 4 1 -2 174.062 93.0227 1
 4 -1 -2 207.411 99.6421 1
 4 -1 -1 64799.9 1710.69 1
 4 1 -1 64116.7 1666.98 1
 4 1 -1 65015.7 1737.09 3
 4 1 0 6558.39 471.41 3
 4 1 1 16076.2 788.761 3
 4 1 2 7747.1 556.112 3
 4 1 3 281778 5787.61 3
 4 -1 3 280772 5815.59 3
 4 1 4 18953.4 958.567 3
 4 -1 4 20133.9 990.27 3
 4 1 5 11632.9 757.004 3
 4 -1 5 12607.6 792.904 3
 4 1 6 7646.32 624.332 3
 4 -1 6 7725.9 639.721 3
 4 1 7 65503.4 2115.6 3
 4 -1 7 65358.6 2147.15 3
 4 1 8 2463.49 373.036 3
 4 -1 8 2546.21 388.696 3
 4 1 9 11908.1 838.555 3
 4 -1 9 11714 847.897 3
 4 1 9 12425.5 1101.17 2
 4 -1 9 12162.4 1060.86 2
 4 1 10 735.81 216.903 3
 4 -1 10 838.266 235.208 3
 4 1 10 1096.15 368.074 2
 4 -1 10 939.795 356.754 2
 4 1 11 54437.8 2639.91 2
 4 -1 11 52494.6 2541.46 2
 4 1 11 47463.7 1887.41 3
 4 -1 11 46248.7 1862.86 3
 4 -1 12 18699.6 1505.35 2
 4 1 12 18256 1527.85 2
 4 -1 13 15967 1455.3 2
 4 1 13 18810 1612.62 2
 4 -1 14 1565.81 522.498 2
 4 1 14 1794.13 551.23 2
 4 -1 15 20515.7 1752.05 2
 4 1 15 22985.7 1894.9 2
 4 -1 16 554.699 290.41 2
 4 1 16 992.544 353.545 2
 -4 2 18 7080.35 1043.33 2
 -4 -2 18 5387.43 865.358 2
 -4 -2 17 17831.3 1541.68 2
 -4 2 17 21273.7 1756.24 2
 -4 2 16 9090.74 1089.91 2
 -4 -2 16 8616.77 1024.62 2
 -4 2 15 46555.8 2468.04 2
 -4 -2 15 45824.6 2340.07 2
 -4 -2 14 21238.9 1480.95 2
 -4 2 14 19758.4 1511.48 2
 -4 -2 13 623.731 259.11 2
 -4 2 13 575.913 254.153 2
 -4 -2 12 4601.47 619.094 2
 -4 2 12 5619.63 723.441 2
 -4 2 11 1154.16 326.32 2
 -4 -2 11 1446.36 340.286 2
 -4 2 10 868.205 290.349 2
 -4 -2 10 665.181 226.3 2
 -4 -2 9 34318.1 1499.36 2
 -4 2 9 32699 1577.23 2
 -4 -2 8 100523 2662.49 2
 -4 2 8 97444.7 2797.14 2
 -4 -2 7 93148.1 2477.46 2
 -4 2 7 91327.6 2588.68 2
 -4 -2 7 95601.3 1823.34 3
 4 2 -7 95090 1823.55 3
 -4 -2 6 104993 2615.15 2
 -4 -2 6 108787 2170.61 3
 4 2 -6 105801 2183.37 3
 -4 2 6 104831 2766.6 2
 -4 2 5 13810.5 775.343 2
 -4 -2 5 13493.9 720.672 2
 -4 -2 5 14344.4 579.773 3
 4 2 -5 14324.5 581.819 3
 4 2 -4 6437.19 394.052 3
 -4 2 4 6734.61 497.292 2
 -4 -2 4 6417.07 452.342 2
 -4 2 3 183388 3938.19 2
 4 2 -3 184302 3767.76 3
 -4 -2 3 188836 3839.45 2
 4 2 -2 2122.71 244.868 3
 4 -2 -2 1960.92 247.827 1
 4 2 -2 1582.38 207.164 1
 -4 2 2 1934.63 239.7 2
 4 2 -1 56718.7 1489.71 1
 4 2 -1 53113.2 1554.48 3
 4 -2 -1 54438.5 1541.21 1
 4 2 0 85416.2 2182.43 3
 4 2 1 164606 3637.29 3
 4 2 2 73608.2 2063.22 3
 4 2 3 1068.41 217.143 3
 4 2 4 31272.1 1257.62 3
 4 2 5 17398.3 927.027 3
 4 2 6 12337.8 808.526 3
 4 -2 6 12710.6 828.369 3
 4 2 7 53258.2 1861.47 3
 4 -2 7 51834.2 1878.41 3
 4 2 8 123945 3305.02 3
 4 -2 8 123560 3349.33 3
 4 2 9 34436.4 1505.84 3
 4 -2 9 32277.1 1489.39 3
 4 -2 9 34435.5 1820.41 2
 4 2 10 5042.98 558.459 3
 4 2 10 6903.72 876.9 2
 4 -2 10 6934.89 848.452 2
 4 -2 10 5097.71 571.577 3
 4 -2 11 16391.5 1363.74 2
 4 -2 11 13958.9 966.556 3
 4 2 11 15555.6 1378.28 2
 4 2 11 13203.9 931.66 3
 4 2 12 3436.25 702.552 2
 4 -2 12 3834.02 694.04 2
 4 -2 13 4288.93 750.69 2
 4 2 13 5218.57 854.133 2
 4 2 14 412.115 236.115 2
 4 -2 14 447.745 308.926 2
 4 -2 15 24444.8 1916.52 2
 4 2 15 27383.7 2075.44 2
 4 2 16 35373.3 2419.95 2
 4 -2 16 33860.2 2287.6 2
 -4 -3 18 12143 1298.49 2
 -4 3 18 12923.8 1423.24 2
 -4 -3 17 54.9947 232.927 2
 -4 3 17 999.677 460.485 2
 -4 -3 16 566.331 275.563 2
 -4 3 16 361.128 203.386 2
 -4 -3 15 597.618 285.243 2
 -4 3 15 425.378 233.616 2
 -4 -3 14 38616 2010.83 2
 -4 3 14 36424.8 2116.1 2
 -4 -3 13 10222.1 961.222 2
 -4 3 13 11872.8 1130.28 2
 -4 3 12 81243.1 3063.04 2
 -4 -3 12 79142.8 2806.98 2
 -4 3 11 5801.73 716.954 2
 -4 -3 11 5218.72 613.035 2
 -4 -3 10 48834.6 1905.88 2
 -4 3 10 46827.2 2061.3 2
 -4 -3 9 3498.17 458.713 2
 -4 3 9 3364.29 492.298 2
 -4 3 8 1402.46 297.698 2
 -4 -3 8 1398.82 143.568 3
 -4 -3 8 1715.16 294.117 2
 4 3 -8 1909.72 165.903 3
 4 3 -7 80.6303 61.1121 3
 -4 -3 7 2.54769 62.1606 2
 -4 3 7 -13.7074 78.0841 2
 4 -3 -7 183.702 44.898 3
 -4 -3 7 41.0802 44.2561 3
 -4 3 6 23880.5 1133.73 2
 4 3 -6 23233 798.341 3
 -4 -3 6 24646.1 810.493 3
 -4 -3 6 23173.2 998.455 2
 4 -3 -6 24994.8 732.221 3
 4 3 -5 52785.5 1428.62 3
 -4 3 5 56890.1 1767.84 2
 -4 -3 5 54947.5 1626.81 2
 4 3 -4 205738 4191.98 3
 -4 3 4 211245 4461.37 2
 -4 -3 4 212996 4285.95 2
 -4 3 3 1661.45 246.52 2
 4 3 -3 2040.54 238.996 3
 4 3 -2 101488 2446.96 3
 4 3 -2 104338 2368.14 1
 4 -3 -2 103775 2493.73 1
 -4 3 2 104757 2459.05 2
 4 3 -1 9757.23 505.818 1
 4 3 -1 9732.32 575.115 3
 4 -3 -1 9566.8 553.346 1
 4 3 0 2375.34 290.528 3
 4 3 1 12140.4 694.047 3
 4 3 2 2103.29 296.62 3
 4 3 3 30048.9 1217.1 3
 4 3 4 330715 6738.17 3
 4 3 5 398.96 144.469 3
 4 3 6 59372 1980.01 3
 4 3 7 27600.2 1282.89 3
 4 3 8 2940.49 413.113 3
 4 -3 8 2843.79 405.582 3
 4 3 9 53610 1965.94 3
 4 3 9 56971.3 2506.49 2
 4 -3 9 51297.1 1979.08 3
 4 3 10 6251.24 627.868 3
 4 -3 10 8304.85 911.922 2
 4 -3 10 7551.13 699.957 3
 4 3 11 3419.58 480.148 3
 4 -3 11 4357.45 714.081 2
 4 -3 11 4009.51 523.373 3
 4 3 11 4513.27 764.083 2
 4 -3 12 64939.5 2932.2 2
 4 3 12 70943.1 3188.76 2
 4 3 13 1842.46 532.265 2
 4 -3 13 968.997 322.957 2
 4 3 14 21831.6 1810.62 2
 4 -3 14 18731.8 1591.25 2
 4 -3 15 9232.06 1163.32 2
 4 3 15 10175.9 1255.11 2
 4 3 16 24.481 312.893 2
 4 -3 16 335.265 295.912 2
 -4 4 18 1967.23 586.486 2
 -4 -4 17 38586.8 2247.1 2
 -4 4 17 43576.8 2602.59 2
 -4 4 16 4468.48 818.716 2
 -4 -4 16 2363.01 524.739 2
 -4 -4 15 48741.9 2357.63 2
 -4 4 15 51808.9 2672.21 2
 -4 -4 14 340.176 188.3 2
 -4 4 14 326.677 172.445 2
 -4 -4 13 17469.3 1232.91 2
 -4 4 13 16891.5 1380.01 2
 -4 -4 12 2298.28 430.233 2
 -4 4 12 2718.47 545.088 2
 -4 -4 11 1741.37 351.005 2
 -4 4 11 2408.26 476.091 2
 -4 -4 10 806.108 236.366 2
 -4 4 10 802.982 268.633 2
 -4 4 9 107700 3308.63 2
 -4 -4 9 111648 3041.74 2
 4 -4 -8 769.712 97.532 3
 -4 -4 8 728.615 194.843 2
 4 4 -8 730.126 119.934 3
 -4 4 8 654.013 217.351 2
 -4 -4 8 802.146 130.51 3
 4 4 -7 74233.3 1775.99 3
 4 -4 -7 75505.6 1653.41 3
 -4 -4 7 71025.8 2072.79 2
 -4 4 7 70429.1 2329.83 2
 -4 4 6 12787.1 824.688 2
 -4 -4 6 13831.4 729.984 2
 4 4 -6 13336.1 611.738 3
 4 -4 -6 14462.5 556.985 3
 4 4 -5 232031 4707.35 3
 -4 4 5 236073 5076.95 2
 4 -4 -5 243252 4566.07 3
 -4 -4 5 234723 4807.18 2
 -4 4 4 33315.9 1252.18 2
 -4 -4 4 34394.4 1132.14 2
 4 4 -4 33466.2 1127.49 3
 -4 4 3 3819.83 369.155 2
 4 4 -3 4991.57 397.77 3
 4 4 -2 20037.3 760.239 1
 4 -4 -2 19349.8 848.576 1
 4 4 -2 20313 866.059 3
 -4 4 2 18965.6 828.994 2
 4 4 -1 36462.6 1094.34 1
 4 4 -1 34082.8 1238.34 3
 4 -4 -1 35926 1197.22 1
 4 4 0 7891.48 549.553 3
 4 4 1 49376.7 1599.54 3
 4 4 2 2100.96 299.628 3
 4 4 3 77070.5 2238.43 3
 4 4 4 10157.7 702.694 3
 4 4 5 60221.6 1982.72 3
 4 4 6 4209.42 470.219 3
 4 4 7 58436.6 2017.94 3
 4 4 8 325.686 142.41 3
 4 4 8 521.739 264.515 2
 4 4 9 91946.3 2778.62 3
 4 4 9 97041.1 3475.07 2
 4 -4 9 88697.1 2793.96 3
 4 4 10 7238.11 686.352 3
 4 4 10 8895.46 1011.88 2
 4 -4 10 7815.2 873.3 2
 4 -4 10 7489.04 713.631 3
 4 4 11 37314.8 1649.37 3
 4 4 11 36829.5 2197.26 2
 4 -4 11 38290.3 2083.98 2
 4 -4 11 31241.8 1559.4 3
 4 4 12 226.882 191.949 2
 4 -4 12 -82.332 254.159 2
 4 4 13 7465.94 1040.08 2
 4 -4 13 7341.37 956.274 2
 4 4 14 12866.9 1407.74 2
 4 -4 14 12018.3 1270.66 2
 4 -4 15 25747 1921 2
 4 4 15 30155 2191.53 2
 4 -4 16 -17.1823 251.908 2
 -4 5 17 3312.43 748.048 2
 -4 -5 16 1887.86 481.828 2
 -4 5 16 1298.18 401.861 2
 -4 5 15 11084.3 1206.67 2
 -4 -5 15 9576.23 980.196 2
 -4 5 14 23044.6 1697.45 2
 -4 -5 14 23227.5 1484.91 2
 -4 -5 13 1730.04 379.224 2
 -4 5 13 1797.46 458.007 2
 -4 -5 12 36833 1732.42 2
 -4 5 12 36543.5 2002.55 2
 -4 -5 11 55818.5 2106.6 2
 -4 5 11 55570.7 2434.49 2
 -4 -5 10 49473.8 1858.16 2
 -4 5 10 47643.5 2136.54 2
 -4 -5 9 8533.52 673.981 2
 4 5 -9 9488.24 463.282 3
 -4 5 9 8641.64 813.764 2
 4 5 -8 3.2348 54.299 3
 -4 -5 8 190.925 101.628 2
 -4 5 8 71.0096 96.2467 2
 4 -5 -8 138.927 42.4914 3
 4 5 -7 25230.5 919.281 3
 -4 -5 7 23463.3 1031.26 2
 -4 5 7 22643.3 1216.88 2
 4 -5 -7 26428 840.661 3
 -4 -5 6 12746 692.072 2
 4 5 -6 14224 674.973 3
 -4 5 6 12665.7 833.39 2
 4 5 -5 136.849 82.6671 3
 -4 -5 5 319.97 114.112 2
 4 5 -4 180778 3899.51 3
 -4 5 4 182570 4044.09 2
 -4 5 3 165026 3629.15 2
 4 5 -3 156387 3556.27 3
 4 5 -2 54072.2 1664.42 3
 4 -5 -2 55396.8 1633 1
 4 5 -2 54396 1439.65 1
 -4 5 2 56120.9 1617.43 2
 4 5 -1 2378.64 301.764 3
 4 5 -1 1915.03 214.895 1
 4 -5 -1 2023.55 262.56 1
 4 5 0 477.452 153.55 3
 4 5 1 140.594 92.2497 3
 4 5 2 46219.9 1607.14 3
 4 5 3 46815.2 1653.95 3
 4 5 4 187083 4331.7 3
 4 5 5 32353.3 1381.01 3
 4 5 6 58921 2014.08 3
 4 5 7 874.212 242.3 3
 4 5 8 1482.84 295.262 3
 4 5 8 1663.85 429.254 2
 4 5 9 793.886 241.056 3
 4 5 9 898.4 305.886 2
 4 5 10 34250.2 1573.04 3
 4 5 10 37134 2126.8 2
 4 -5 10 31074.1 1542.1 3
 4 -5 10 34951.5 1874.02 2
 4 5 11 27697.8 1429.19 3
 4 -5 11 29068.7 1792.33 2
 4 -5 11 26918.4 1448 3
 4 5 12 59504.9 2957.07 2
 4 -5 12 58899.9 2723.86 2
 4 -5 13 35922.9 2167.42 2
 4 5 13 42196.9 2501.72 2
 4 -5 14 16805.5 1487.88 2
 4 5 14 17950.3 1668 2
 4 5 15 232.001 195.712 2
 4 -5 15 -587.616 307.988 2
 -4 6 17 21053.2 1821.88 2
 -4 6 16 34062.2 2262.28 2
 -4 -6 15 10643.2 1021.32 2
 -4 6 15 10430.8 1179.18 2
 -4 -6 14 1117.21 319.314 2
 -4 6 14 1504.64 460.955 2
 -4 -6 13 10633.2 933.199 2
 -4 6 13 12636.7 1206.4 2
 -4 -6 12 12599.2 961.145 2
 -4 6 12 12572.2 1161.83 2
 -4 6 11 295.911 269.494 2
 -4 -6 11 296.268 178.937 2
 -4 6 10 53596.7 2328.57 2
 -4 -6 10 58592.7 2020.87 2
 -4 -6 9 53501.2 1828.13 2
 -4 6 9 50281.8 2133.43 2
 4 6 -9 52559.7 1459.25 3
 4 -6 -8 60347.1 1522.7 3
 -4 -6 8 59667.1 1861.62 2
 -4 6 8 56527.8 2184.09 2
 4 6 -8 59596 1631.07 3
 4 6 -7 2022.46 253.221 3
 -4 6 7 1559 318.477 2
 -4 -6 7 1397.52 232.094 2
 4 6 -6 22699 947.778 3
 -4 6 6 21975.4 1133.7 2
 -4 -6 6 22631.1 927.343 2
 -4 6 5 16800.4 933.045 2
 4 6 -5 17213.7 817.056 3
 -4 -6 5 16069 725.833 2
 4 6 -4 153423 3508.83 3
 -4 6 4 154279 3590.1 2
 4 6 -3 893.483 192.34 3
 4 -6 -3 1110.67 217.013 1
 -4 6 3 1182.01 229.739 2
 4 -6 -2 80036.9 2116.18 1
 4 6 -2 79074.8 1871.63 1
 4 6 -2 77063 2198.46 3
 -4 6 2 81376.3 2106.68 2
 4 6 -1 127949 3156.39 3
 4 -6 -1 131005 2991.52 1
 4 6 0 115677 2948.45 3
 4 6 1 9003.71 652.372 3
 4 6 2 32924.3 1349.9 3
 4 6 3 28746.3 1278.45 3
 4 6 4 29227.3 1307.33 3
 4 6 5 1211.74 264.851 3
 4 6 6 59763.3 2076.35 3
 4 6 7 6723.78 640.589 3
 4 6 8 26746.6 1351.91 3
 4 6 8 29102.8 1725.96 2
 4 6 9 1207.13 316.004 3
 4 6 9 1319.9 373.13 2
 4 6 10 88169.4 3492.53 2
 4 -6 10 82759.3 3047.59 2
 4 6 10 80246.9 2687.43 3
 4 6 11 6878.67 701.657 3
 4 6 11 8758.44 1046.45 2
 4 -6 11 8947.73 966.776 2
 4 -6 11 6998.34 721.524 3
 4 -6 12 5330.53 767.687 2
 4 6 12 4558 772.173 2
 4 -6 13 12426.7 1233.81 2
 4 6 13 12652.6 1348.71 2
 4 -6 14 26895.6 1870.11 2
 4 6 14 30322.3 2190.92 2
 4 6 15 5319.14 944.105 2
 -4 7 17 10131.8 1278.28 2
 -4 7 16 1722.92 513.523 2
 -4 7 15 13064.2 1359.81 2
 -4 -7 14 68.0971 116.381 2
 -4 7 14 39.6076 261.631 2
 -4 -7 13 12796 998.324 2
 -4 7 13 14463.3 1299.78 2
 -4 7 12 4742.57 716.933 2
 -4 -7 12 4717.12 565.213 2
 -4 -7 11 157015 3979.79 2
 -4 7 11 147529 4556.66 2
 -4 -7 10 13387 867.384 2
 -4 7 10 14918.7 1163.47 2
 4 7 -9 7237.76 490.006 3
 -4 -7 9 6261.94 551.123 2
 -4 -7 8 6697.69 535.551 2
 4 7 -8 7350.06 505.661 3
 -4 7 8 7063.89 722.093 2
 -4 -7 7 8441.13 566.512 2
 -4 7 7 9065.71 763.947 2
 4 7 -7 9331.54 596.827 3
 -4 -7 6 384.663 127.889 2
 4 7 -6 189.982 69.2183 3
 -4 7 6 131.848 130.509 2
 -4 7 5 42029.9 1583.33 2
 4 7 -5 42249.1 1461.25 3
 4 7 -4 17714 896.255 3
 -4 7 4 17614.3 922.937 2
 4 -7 -3 430361 8215.07 1
 -4 7 3 432822 8245.01 2
 4 7 -3 416797 8334.99 3
 4 -7 -2 66148.5 1884.49 1
 4 7 -2 64170.9 1582.91 1
 4 7 -2 64991.7 2009.61 3
 -4 7 2 66814.4 1855.83 2
 4 -7 -1 8917.59 574.964 1
 -4 7 1 9078.45 557.118 2
 4 7 -1 8580.58 644.452 3
 4 7 0 43057.1 1584.44 3
 4 7 1 120315 3132.89 3
 4 7 2 5344.8 536.845 3
 4 7 3 75731.3 2355.67 3
 4 7 4 3027.15 423.407 3
 4 7 5 187851 4522.25 3
 4 7 6 -26.4691 99.9451 3
 4 7 7 3382.6 470.709 3
 4 7 7 3233.29 552.898 2
 4 7 8 14214.2 1206.3 2
 4 7 8 15245.7 1021.03 3
 4 7 9 4364.95 546.391 3
 4 7 9 5588.43 801.273 2
 4 -7 9 4700.58 633.307 2
 4 7 10 4749.38 588.366 3
 4 7 10 6568.03 893.396 2
 4 -7 10 6303.3 768.201 2
 4 7 11 59124.5 2294.69 3
 4 7 11 63563.4 3012.33 2
 4 -7 11 63951.3 2712.27 2
 4 7 12 421.573 302.245 2
 4 -7 12 208.534 210 2
 4 7 13 76130 3523.15 2
 4 -7 13 72893.7 3105.72 2
 4 7 14 -192.185 288.993 2
 4 7 15 106.235 282.631 2
 -4 8 17 332.596 280.373 2
 -4 8 16 62485.4 3201.92 2
 -4 8 15 6056.72 960.386 2
 -4 8 14 5881.68 883.195 2
 -4 8 13 458.963 310.438 2
 -4 -8 13 888.254 282.022 2
 -4 8 12 7545.13 929.864 2
 -4 -8 12 9065.35 775.956 2
 -4 -8 11 7080.65 645.883 2
 -4 8 11 6931.55 853.311 2
 -4 8 10 60447 2544.53 2
 -4 -8 10 65029.7 2076.97 2
 -4 -8 9 20.7505 91.9679 2
 -4 8 9 161.912 111.881 2
 4 8 -9 162.465 80.2224 3
 -4 8 8 61234.3 2358.47 2
 4 8 -8 67048.9 1923.83 3
 -4 -8 8 64835.8 1911.24 2
 4 8 -7 48839.1 1602.68 3
 -4 -8 7 46140.3 1449.88 2
 -4 8 6 13747.1 917.864 2
 4 8 -6 15936.6 859.948 3
 -4 -8 6 14610.6 692.677 2
 4 8 -5 2286.78 326.387 3
 -4 8 5 2525.69 368.151 2
 -4 8 4 19264.9 973.677 2
 4 8 -4 19161.1 975.206 3
 -4 8 3 5881.43 508.995 2
 4 8 -3 6357.07 556.282 3
 4 -8 -3 5992.98 502.501 1
 4 8 -3 5641.03 374.754 1
 4 8 -2 180016 4319.8 3
 4 8 -2 184086 3642.02 1
 4 -8 -2 191699 4091.24 1
 -4 8 2 189267 4059.39 2
 4 -8 -1 16912.2 823.875 1
 -4 8 1 16490.2 777.909 2
 4 8 -1 16240 936.584 3
 4 8 0 41349.4 1600.3 3
 4 8 1 54387.8 1924.46 3
 4 8 2 24998.9 1253.45 3
 4 8 3 3388.24 442.273 3
 4 8 4 7574.41 676.435 3
 4 8 5 185.617 98.7896 3
 4 8 6 99354.8 2998.98 3
 4 8 7 2027.98 438.535 3
 4 8 7 2198.16 468.769 2
 4 8 8 20979.6 1244.47 3
 4 8 8 22918 1550.08 2
 4 8 9 3679.73 519.349 3
 4 -8 9 4637.84 619.445 2
 4 8 9 4112.84 694.411 2
 4 8 10 59483.8 2822.97 2
 4 -8 10 57649.4 2403.13 2
 4 8 10 53442.6 2189.84 3
 4 8 11 -366.856 278.888 2
 4 -8 11 -89.7425 220.181 2
 4 8 11 24.2729 127.269 3
 4 8 12 -162.737 196.771 2
 4 -8 12 -56.614 197.695 2
 4 8 13 774.356 390.816 2
 4 8 14 27801.3 2140.91 2
 4 8 15 1754.98 587.297 2
 -4 9 16 5655.93 969.301 2
 -4 9 15 6231.38 926.205 2
 -4 9 14 14465.7 1372.72 2
 -4 9 13 10963 1157.48 2
 -4 9 12 22510.3 1615.94 2
 -4 -9 11 81444.9 2475.39 2
 -4 9 11 79709.2 3129.35 2
 -4 9 10 1441 420.8 2
 -4 -9 10 1597.9 292.629 2
 -4 9 9 1037.96 328.493 2
 4 9 -9 1326.39 244.917 3
 -4 -9 9 772.6 187.397 2
 -4 9 8 10115.6 887.679 2
 4 9 -8 10095.4 671.748 3
 -4 -9 8 8673.24 577.184 2
 -4 9 7 7519.99 720.794 2
 -4 -9 7 7615.53 499.614 2
 4 9 -7 9227.96 661.957 3
 -4 9 6 82020.3 2616.78 2
 4 9 -6 88165.2 2489.53 3
 -4 9 5 11116.3 785.137 2
 4 9 -5 11369.7 773.976 3
 4 9 -4 34788.3 1415.02 3
 -4 9 4 32380.5 1337.39 2
 -4 9 3 252844 5322.68 2
 4 9 -3 247721 5522.75 3
 4 9 -3 254150 4845.86 1
 4 -9 -3 255990 5312.2 1
 -4 9 2 44948.5 1484.15 2
 4 9 -2 42767 1140.01 1
 4 9 -2 45670.2 1719 3
 4 -9 -2 45198.7 1488.42 1
 4 9 -1 3407.13 450.905 3
 4 -9 -1 3644.31 380.485 1
 -4 9 1 3416.78 350.047 2
 -4 -9 0 13078.7 545.775 1
 4 9 0 11809.3 834.243 3
 4 9 1 2277.1 371.769 3
 4 9 2 100790 2949.65 3
 4 9 3 36196.5 1588.26 3
 4 9 4 35636.1 1606.92 3
 4 9 5 72774.1 2488.75 3
 4 9 6 31066 1534.47 3
 4 9 6 34584.1 1784.64 2
 4 9 7 85.6197 152.551 3
 4 9 7 308.202 203.288 2
 4 9 8 289.877 135.569 3
 4 9 8 942.388 380.317 2
 4 9 9 284.16 160.628 3
 4 9 9 329.133 231.677 2
 4 -9 9 289.038 159.501 2
 4 9 10 76552.3 2729.5 3
 4 9 10 80664.2 3365.59 2
 4 -9 10 77464.8 2853.42 2
 4 9 11 48292.6 2588.03 2
 4 -9 11 38906.1 2005.7 2
 4 9 12 12255 1322.45 2
 4 9 13 32167.5 2247.14 2
 4 9 14 20509.7 1835.55 2
 -4 10 16 13752.1 1469.14 2
 -4 10 15 38078.9 2405.72 2
 -4 10 14 965.221 387.489 2
 -4 10 13 7015.61 942.27 2
 -4 10 12 -123.974 199.455 2
 -4 10 11 22829.5 1579.15 2
 -4 10 10 28317.9 1703.8 2
 4 10 -10 30342.9 1260.18 3
 -4 -10 10 29985.9 1264.2 2
 -4 10 9 44040.6 2074.38 2
 4 10 -9 49133.9 1689.65 3
 -4 -10 9 44085.8 1505.65 2
 -4 -10 8 3695.1 357.682 2
 4 10 -8 4181.25 453.303 3
 -4 10 7 140394 3935.08 2
 4 10 -7 151334 3687.59 3
 -4 10 6 2081.98 365.214 2
 4 10 -6 1952.13 329.958 3
 4 10 -5 142.307 100.659 3
 -4 10 5 207.779 126.953 2
 -4 10 4 6985.23 589.374 2
 4 10 -4 6686.33 615.774 3
 4 10 -3 550.475 233.969 3
 -4 10 3 429.286 161.568 2
 4 10 -3 217.646 77.4036 1
 4 -10 -3 126.205 105.017 1
 -4 10 2 45315.6 1516.66 2
 4 10 -2 41983 1696.46 3
 4 -10 -2 44066.5 1494.79 1
 -4 10 1 96679.2 2427.27 2
 4 10 -1 93949.4 2840.96 3
 -4 -10 0 1744.31 180.763 1
 4 10 0 1504.29 315.648 3
 4 10 1 97723.9 2946.01 3
 4 10 2 9922.7 805.687 3
 4 10 3 127.918 109.846 3
 4 10 4 782.178 258.273 3
 4 10 5 12399.5 952.339 3
 4 10 6 13522.3 1105.64 2
 4 10 6 12040.2 951.782 3
 4 10 7 52299.6 2139.62 3
 4 10 7 57220.8 2494.45 2
 4 10 8 1998.99 396.798 3
 4 10 8 2483.09 546.203 2
 4 10 9 80005.1 2839.79 3
 4 10 9 84942.5 3425.85 2
 4 -10 9 79786.7 2756 2
 4 10 10 28088 1573.53 3
 4 10 10 32131.5 2046.69 2
 4 10 11 -108.15 302.448 2
 4 10 12 789.864 325.922 2
 4 10 13 60.31 255.648 2
 4 10 14 11254.6 1350.6 2
 -4 11 16 2187.79 601.94 2
 -4 11 15 3706.06 763.499 2
 -4 11 14 22243.5 1771.57 2
 -4 11 13 5027.03 796.625 2
 -4 11 12 50460 2532.14 2
 -4 11 11 164.948 142.338 2
 -4 11 10 24332.6 1585.94 2
 4 11 -10 25584.2 1196.93 3
 -4 11 9 3108.89 539.604 2
 4 11 -9 4189.82 468.205 3
 -4 11 8 13963.6 1076.7 2
 4 11 -8 15250.2 927.764 3
 -4 11 7 1596.39 361.385 2
 4 11 -7 1712.13 326.588 3
 -4 11 6 67931 2367.37 2
 4 11 -6 71735.5 2325.95 3
 4 11 -5 23068 1215.79 3
 -4 11 5 21238.3 1150.87 2
 4 -11 -4 138564 3409.15 1
 -4 11 4 134721 3456.47 2
 4 11 -4 138053 3664.45 3
 -4 11 3 5114.76 484.66 2
 4 -11 -3 5034.11 467.335 1
 4 11 -3 3970.8 280.544 1
 4 11 -3 4393.72 523.477 3
 4 11 -2 51746.8 1972.65 3
 -4 11 2 53438.7 1713.81 2
 4 -11 -2 54480.5 1706.45 1
 -4 11 1 7247.32 523.613 2
 4 11 -1 6609.84 656.935 3
 -4 -11 0 27292.8 799.116 1
 4 11 0 26840.6 1393.01 3
 4 11 1 727.064 201.115 3
 4 11 2 68686.3 2441.63 3
 4 11 3 1713.89 364.813 3
 4 11 4 60260.2 2319.59 3
 4 11 5 4533.27 574.447 3
 4 11 5 4907.62 644.205 2
 4 11 6 32362.6 1655.58 3
 4 11 6 34961.6 1831.89 2
 4 11 7 3148.45 581.106 2
 4 11 7 2678.88 455.711 3
 4 11 8 1264.39 337.902 3
 4 11 8 1885.37 509.549 2
 4 11 9 8194.98 982.299 2
 4 11 9 5530.1 690.602 3
 4 11 10 86277.8 3557.8 2
 4 11 10 80126 2941.43 3
 4 11 11 1769.72 531.455 2
 4 11 12 20821.6 1752.12 2
 4 11 13 1819.83 570.004 2
 4 11 14 37735.8 2511.38 2
 -4 12 16 1928.39 593.149 2
 -4 12 15 25715.1 1984.97 2
 -4 12 14 9561.42 1151 2
 -4 12 13 936.497 444.443 2
 -4 12 12 807.001 328.764 2
 -4 12 11 9802.02 1048.47 2
 -4 12 10 11992.4 1111.1 2
 4 12 -10 13455.4 882.569 3
 -4 12 9 18647.3 1339.58 2
 4 12 -9 21188.8 1142.68 3
 -4 12 8 28583.7 1591.57 2
 4 12 -8 31077.8 1430.13 3
 -4 12 7 94566.6 3080.79 2
 4 12 -7 101746 2959.7 3
 4 12 -6 12424.4 897.368 3
 -4 12 6 11167 874.921 2
 -4 12 5 12242.5 867.794 2
 4 12 -5 12922 935.808 3
 4 12 -4 9376.05 439.323 2
 4 -12 -4 8571.76 653.509 1
 4 12 -4 8418.96 755.415 3
 -4 12 4 8322.59 671.492 2
 -4 12 3 4356.5 460.927 2
 4 -12 -3 4779.62 461.055 1
 4 12 -3 3971.49 259.945 1
 4 12 -3 4912.96 581.461 3
 -4 12 2 3309.6 382.952 2
 4 12 -2 3364.78 486.807 3
 4 -12 -2 3227.67 360.236 1
 4 12 -1 17179.9 1114.54 3
 -4 12 1 17545.4 852.391 2
 4 12 0 50614 2043.21 3
 4 12 1 200491 5167.05 3
 -4 -12 -1 211970 4042.12 1
 4 12 2 20119 1245.36 3
 4 12 3 358.35 160.979 3
 4 12 4 326.976 198.649 3
 4 12 4 75.2557 134.781 2
 4 12 5 333.387 174.187 3
 4 12 5 356.792 234.379 2
 4 12 6 1583.44 374.877 3
 4 12 6 2410.71 491.052 2
 4 12 7 86512.5 3059.09 3
 4 12 7 91470.5 3371.53 2
 4 12 8 31217.6 1717.44 3
 4 12 8 35898.9 2068.55 2
 4 12 9 139731 4649.57 2
 4 12 9 132558 4064.13 3
 4 12 10 1517.51 377.914 3
 4 12 10 1942.42 553.403 2
 4 12 11 324.396 391.237 2
 4 12 12 26.7483 189.965 2
 4 12 13 112.784 252.454 2
 -4 13 15 657.478 315.811 2
 -4 13 14 11590.6 1295.46 2
 -4 13 13 27020.4 1915.72 2
 -4 13 12 18115.2 1491.34 2
 -4 13 11 42554.1 2268.27 2
 -4 13 10 1059.32 341.255 2
 4 13 -10 1027.35 287.418 3
 -4 13 9 1303.24 358.385 2
 4 13 -9 1382.34 311.633 3
 -4 13 8 5174.27 675.444 2
 4 13 -8 5797.83 611.112 3
 4 13 -7 2612.95 406.384 3
 -4 13 7 2947.63 485.334 2
 4 13 -6 36820.4 1679.05 3
 -4 13 6 35467.5 1649.46 2
 4 13 -5 68105.4 2422.33 3
 -4 13 5 64733.6 2260.93 2
 4 13 -4 38773.4 1091.55 1
 4 -13 -4 39398.3 1512.28 1
 -4 13 4 40094.9 1592.22 2
 4 13 -4 40070.6 1793.19 3
 -4 13 3 36942.9 1444.84 2
 4 13 -3 37096.3 1726.15 3
 4 -13 -3 35803.9 1384.97 1
 4 13 -3 34539.1 899.339 1
 -4 13 2 12908.1 775.957 2
 4 13 -2 12457.7 969.579 3
 4 -13 -2 12699.1 760.412 1
 4 13 -1 68195.3 2495.22 3
 -4 13 1 70217.4 2008.4 2
 4 13 0 26762.2 1456.81 3
 -4 -13 -1 1098.27 141.66 1
 4 13 1 738.469 262.871 3
 4 13 2 27999.4 1522.41 3
 4 13 3 6754.2 741.617 3
 4 13 3 6670.79 680.232 2
 4 13 4 37421.9 1844.77 3
 4 13 4 38259.7 1816.41 2
 4 13 5 35142 1815.73 3
 4 13 5 40729.1 1955.8 2
 4 13 6 11754.6 1028.7 3
 4 13 6 18467.9 1340.71 2
 4 13 7 23462.4 1481.75 3
 4 13 7 26593.4 1713.02 2
 4 13 8 3677.25 575.034 3
 4 13 8 4090.05 687.832 2
 4 13 9 12340.8 1080.85 3
 4 13 9 15995.6 1403.79 2
 4 13 10 26597.4 1883.51 2
 4 13 10 23117.7 1510.31 3
 4 13 11 12990 1351.62 2
 4 13 12 13289 1430.79 2
 4 13 13 16063.5 1615.03 2
 -4 14 15 8874.86 1180.74 2
 -4 14 14 31014.8 2152.81 2
 -4 14 13 31.9499 254.172 2
 -4 14 12 149.134 228.87 2
 -4 14 11 1112.12 381.056 2
 -4 14 10 12930.8 1186.4 2
 4 14 -10 15685.4 1043.2 3
 -4 14 9 2757.29 520.457 2
 4 14 -9 3141.46 467.68 3
 4 14 -8 93398.7 2948.04 3
 -4 14 8 88394.3 3112.92 2
 -4 14 7 10093.1 893.422 2
 4 14 -7 10899.8 887.992 3
 -4 14 6 74596.2 2593.85 2
 4 14 -6 78848.4 2704.58 3
 -4 14 5 1194.91 283.239 2
 4 -14 -5 1266.67 272.061 1
 4 14 -5 1234.37 295.805 3
 4 14 -4 197.135 64.2391 1
 4 14 -4 536.021 195.14 3
 -4 14 4 470.088 194.242 2
 4 -14 -4 348.456 161.577 1
 -4 14 3 121.309 65.5874 2
 4 14 -3 -56.8103 149.831 3
 4 -14 -3 -70.8782 146.013 1
 4 14 -2 5388.76 658.797 3
 4 -14 -2 5803.35 518.76 1
 -4 14 2 6277.28 539.133 2
 -4 14 1 2110.49 301.857 2
 4 14 -1 2158.02 409.903 3
 4 14 0 79309.9 2811.99 3
 4 14 1 35288.5 1767.75 3
 4 14 2 48305.3 2144.7 3
 4 14 2 52185.2 1991.72 2
 4 14 3 3275.68 499.142 2
 4 14 3 2488.14 463.367 3
 4 14 4 37.3641 141.311 3
 4 14 4 260.064 128.087 2
 4 14 5 1044.33 317.105 3
 4 14 5 1204.86 357.852 2
 4 14 6 31378.8 1746.96 3
 4 14 6 33557.8 1897.59 2
 4 14 7 2308.97 467.945 3
 4 14 7 3368.22 610.43 2
 4 14 8 153623 4810.25 2
 4 14 8 141315 4352.14 3
 4 14 9 20073.9 1421.76 3
 4 14 9 24652 1769.42 2
 4 14 10 10540 1213.54 2
 4 14 10 8030.18 895.843 3
 4 14 11 1679.52 505.24 2
 4 14 12 122.423 279.353 2
 4 14 13 1239.02 481.215 2
 -4 15 15 2752.02 665.462 2
 -4 15 14 -764.43 364.338 2
 -4 15 13 41216.7 2438.03 2
 -4 15 12 1604.24 477.324 2
 -4 15 11 22867.2 1652.74 2
 -4 15 10 3887.11 638.301 2
 4 15 -10 4145.25 553.252 3
 -4 15 9 17633.6 1338 2
 4 15 -9 18973.9 1216.34 3
 -4 15 8 12438.5 1056.43 2
 4 15 -8 13142.9 1012.16 3
 -4 15 7 25007.5 1454.3 2
 4 15 -7 25494.4 1445.83 3
 -4 15 6 5037.82 605.704 2
 4 15 -6 5143.06 632.352 3
 4 -15 -5 55854.3 1979 1
 -4 15 5 58916.3 2156.84 2
 4 15 -5 56718.7 2316.35 3
 4 -15 -4 10941.5 752.776 1
 4 15 -4 9603.19 904.838 3
 -4 15 4 10727.9 801.03 2
 4 15 -3 44924.5 2058.22 3
 -4 15 3 45198.4 1713.81 2
 4 -15 -3 47111.7 1647.22 1
 4 15 -2 5154.63 664.127 3
 -4 15 2 5938.8 533.312 2
 4 15 -1 65634.2 2580.17 3
 -4 15 1 66306.6 1979.55 2
 4 15 0 354.136 198.484 3
 4 15 0 319.312 131.947 2
 4 15 1 2988.09 534.211 3
 4 15 1 3126.09 424.255 2
 4 15 2 14032.4 977.395 2
 4 15 2 12698.9 1068.65 3
 4 15 3 60554.1 2524.91 3
 4 15 3 66847.7 2434.82 2
 4 15 4 1913.6 415.007 3
 4 15 4 2573 476.785 2
 4 15 5 65120.4 2639.56 2
 4 15 5 58573.4 2528.9 3
 4 15 6 4636.19 677.142 2
 4 15 6 4183.03 651.146 3
 4 15 7 19663.5 1408.43 3
 4 15 7 21675.3 1557.36 2
 4 15 8 1499.78 398.472 3
 4 15 8 2183.25 525.074 2
 4 15 9 7359.86 973.372 2
 4 15 9 5707.73 755.773 3
 4 15 10 713.781 292.43 3
 4 15 10 1198.37 437.897 2
 4 15 11 44519.4 2631.44 2
 4 15 12 15535.1 1550.84 2
 4 15 13 33220.5 2324.75 2
 -4 16 14 28324.5 2092.74 2
 -4 16 13 2390.88 622.546 2
 -4 16 12 522.29 285.632 2
 -4 16 11 3638.54 671.217 2
 -4 16 10 8932.69 992.151 2
 4 16 -10 10016.2 894.536 3
 -4 16 9 32285.2 1854.83 2
 4 16 -9 36923.6 1798.66 3
 -4 16 8 56359.5 2432.56 2
 4 16 -8 59598.3 2392.48 3
 -4 16 7 8996.59 867.252 2
 4 16 -7 9568.43 895.1 3
 -4 16 6 32708.6 1641.37 2
 4 16 -6 34606.6 1772.57 3
 4 -16 -6 33643.1 1532.42 1
 4 -16 -5 8674.29 708.491 1
 -4 16 5 9731.5 812.223 2
 4 16 -5 9773.52 929.322 3
 4 16 -4 3409.6 555.277 3
 4 -16 -4 2869.56 398.454 1
 -4 16 4 3140.18 436.35 2
 4 -16 -3 714.821 207.729 1
 4 16 -3 538.926 246.486 3
 -4 16 3 336.568 153.114 2
 4 16 -2 33333.5 1812.91 3
 4 16 -2 36716.5 1245.64 2
 -4 16 2 34167.3 1396.11 2
 4 16 -1 100086 2577.33 2
 4 16 -1 91008.5 3253.43 3
 -4 16 1 91303.5 2513.91 2
 4 16 0 78344.3 2987.44 3
 4 16 0 82830.6 2438.46 2
 4 16 1 2610.11 509.571 3
 4 16 1 2942.46 416.549 2
 4 16 2 68037.5 2793.17 3
 4 16 2 79753.5 2614.54 2
 4 16 3 36596.8 1772.28 2
 4 16 3 34509.9 1882.86 3
 4 16 4 394.916 223.504 2
 4 16 4 -76.5649 211.414 3
 4 16 5 5704.08 724.833 2
 4 16 5 4317.75 655.255 3
 4 16 6 6331.24 800.136 2
 4 16 6 5584.64 751.752 3
 4 16 7 13102 1167.83 3
 4 16 7 13571.5 1234.02 2
 4 16 8 21858.4 1623.41 2
 4 16 8 19702.5 1453.03 3
 4 16 9 6749.49 948.503 2
 4 16 9 5483.53 759.026 3
 4 16 10 17076.6 1530.15 2
 4 16 10 13906.5 1238.4 3
 4 16 11 9118.69 1150.29 2
 4 16 12 1834.63 575.491 2
 -4 17 14 9291.78 1211.41 2
 -4 17 13 9942.15 1184.15 2
 -4 17 12 20286.1 1640.2 2
 -4 17 11 12812.8 1251.76 2
 -4 17 10 26749.2 1755.62 2
 4 17 -10 25885.6 1523.18 3
 4 17 -9 3089.04 531.903 3
 -4 17 9 3147.34 593.968 2
 -4 17 8 7894.77 869.123 2
 4 17 -8 7410.3 819.446 3
 -4 17 7 3128.49 509.872 2
 4 17 -7 4448.71 638.183 3
 -4 17 6 12592.7 995.468 2
 4 -17 -6 12822.5 907.635 1
 4 17 -6 13037 1100.57 3
 -4 17 5 26488.9 1409.78 2
 4 -17 -5 26732.7 1286.53 1
 4 17 -5 26444.4 1601.94 3
 -4 17 4 60209.6 2155.4 2
 4 -17 -4 60444.8 2013.17 1
 4 17 -4 58364.8 2500.44 3
 4 17 -3 8839.76 925.826 3
 -4 17 3 9331.68 740.846 2
 4 -17 -3 8405.14 659.521 1
 4 17 -2 21073.4 1458.34 3
 -4 17 2 21490.2 1080.42 2
 4 17 -1 8021.89 892.26 3
 4 17 -1 9141.2 640.203 2
 -4 17 1 8095.37 613.246 2
 4 17 0 7260.05 854.134 3
 4 17 0 8938.34 690.418 2
 4 17 1 157.627 120.541 3
 4 17 1 451.879 147.66 2
 4 17 2 454.227 228.83 2
 4 17 2 152.183 149.503 3
 4 17 3 40226.9 1847.69 2
 4 17 3 36666.4 2027.28 3
 4 17 4 73542.7 3000.27 3
 4 17 4 77383.2 2829.4 2
 4 17 5 7138.98 885.841 3
 4 17 5 9562.95 949.627 2
 4 17 6 7670.85 912.288 3
 4 17 6 11852.4 1110.76 2
 4 17 7 7496.27 926.565 2
 4 17 7 5063.84 754.602 3
 4 17 8 9115.19 1010.03 3
 4 17 8 11002.9 1151.68 2
 4 17 9 552.023 260.701 2
 4 17 9 236.924 264.091 3
 4 17 10 2405.3 538.82 3
 4 17 10 3681.58 716.604 2
 4 17 11 12507.5 1355.07 2
 4 17 12 83328.4 3750.8 2
 -4 18 13 4537.37 800.518 2
 -4 18 12 404.967 310.36 2
 -4 18 11 7347.07 967.285 2
 4 18 -10 328.92 135.003 3
 -4 18 10 339.751 149.754 2
 -4 18 9 82006.6 3210.47 2
 4 18 -9 87719.6 3173.36 3
 -4 18 8 1971.72 433.528 2
 4 18 -8 2409.81 477.152 3
 -4 18 7 26790.8 1572.27 2
 4 18 -7 27762.8 1651.36 3
 4 -18 -7 26318.5 1411.54 1
 -4 18 6 170.469 108.813 2
 4 18 -6 -42.5448 213.113 3
 -4 18 5 40770.1 1809.34 2
 4 18 -5 41991.1 2114.31 3
 4 -18 -5 41344.8 1669.01 1
 4 18 -4 2888.32 564.041 3
 4 -18 -4 2539.44 363.213 1
 -4 18 4 2869 445.095 2
 4 18 -3 18894.2 1390.13 3
 -4 18 3 19090.5 1094.78 2
 4 18 -2 502.838 274.96 3
 -4 18 2 575.641 188.844 2
 4 18 -1 69564.6 2884.11 3
 -4 18 1 70515.5 2116.39 2
 4 18 0 31.2418 186.669 3
 4 18 1 21179.2 1163.79 2
 4 18 1 17130 1376.3 3
 4 18 2 129.441 127.661 3
 4 18 2 4.19079 152.928 2
 4 18 3 25388 1714.38 3
 4 18 3 31129.4 1608.12 2
 4 18 4 2824.95 596.086 3
 4 18 4 3436.31 539.896 2
 4 18 5 16212.9 1370.1 3
 4 18 5 21248.7 1442.25 2
 4 18 6 5923.9 819.512 2
 4 18 6 3450.95 636.321 3
 4 18 7 68381.5 2936.4 2
 4 18 7 54813 2680.92 3
 4 18 8 445.33 261.532 3
 4 18 8 841.328 349.427 2
 4 18 9 5926.34 861.053 3
 4 18 9 7128.27 958.81 2
 4 18 10 1114.48 364.779 2
 4 18 10 1400.1 427.81 3
 4 18 11 16700.4 1577.74 2
 -4 19 13 1553.81 500.44 2
 -4 19 12 25686.3 1899.44 2
 -4 19 11 3059.73 642.75 2
 -4 19 10 29491.2 1891.97 2
 4 19 -10 28896.7 1730.33 3
 -4 19 9 532.443 299.901 2
 4 19 -9 764.59 288.119 3
 -4 19 8 11190.1 1053.74 2
 4 19 -8 9825.04 988.508 3
 -4 19 7 3397.7 546.434 2
 4 19 -7 2924.45 547.985 3
 -4 19 6 18641.3 1256.73 2
 4 19 -6 20158.9 1459.08 3
 4 19 -5 6584.23 830.229 3
 -4 19 5 7445.6 745.888 2
 -4 19 4 105525 3143.63 2
 4 19 -4 104887 3712.89 3
 -4 19 3 11650.6 845.662 2
 4 19 -3 9529.49 1014.41 3
 4 19 -2 27269.2 1765.54 3
 -4 19 2 29314.4 1315.74 2
 4 19 -1 12941.9 1194.24 3
 4 19 0 7142.67 907.388 3
 4 19 1 6125.9 827.12 3
 4 19 2 10627.9 1113.63 3
 4 19 2 14057.4 993.955 2
 4 19 3 1388.1 353.933 2
 4 19 3 948.764 357.13 3
 4 19 4 70119.2 2675.97 2
 4 19 4 60228.4 2845.89 3
 4 19 5 689.164 309.583 3
 4 19 5 482.125 176.464 2
 4 19 6 20009.9 1574.4 3
 4 19 6 25014 1648.72 2
 4 19 7 243.275 151.8 3
 4 19 7 507.842 219.483 2
 4 19 8 6014.11 866.587 3
 4 19 8 7247.53 934.179 2
 4 19 9 2506.41 587.66 2
 4 19 9 1877.28 516.613 3
 4 19 10 1876.87 503.473 3
 4 19 10 2590.64 592.293 2
 4 19 11 5685.79 876.879 2
 -4 20 13 867.296 393.364 2
 -4 20 12 -746.358 345.536 2
 -4 20 11 3375.07 660.875 2
 -4 20 10 10733.8 1142.69 2
 4 20 -10 10784.2 1067.67 3
 -4 20 9 63284.2 2796.7 2
 4 20 -9 64141.5 2779.33 3
 -4 20 8 24163.6 1581.14 2
 4 20 -8 23278.3 1608.06 3
 -4 20 7 4373.37 621.509 2
 4 20 -7 4656.43 694.961 3
 -4 20 6 24010.4 1453.29 2
 4 20 -6 22804.2 1591.03 3
 -4 20 5 16775.1 1145.84 2
 4 20 -5 16415.7 1351.79 3
 4 20 -4 700.394 393.194 3
 -4 20 4 665.958 226.458 2
 4 20 -3 6553.17 856.679 3
 4 20 -2 8556.77 988.659 3
 4 20 -1 60815.2 2786.58 3
 4 20 0 18797 1495.57 3
 4 20 1 3674.71 663.911 3
 4 20 2 9471.89 1083.95 3
 4 20 3 24075.6 1755.58 3
 4 20 3 28751.1 1548.3 2
 4 20 4 1371.83 316.116 2
 4 20 4 512.818 272.539 3
 4 20 5 20926.6 1650.82 3
 4 20 5 24956 1572.45 2
 4 20 6 3560.17 680.82 3
 4 20 6 5512.19 751.713 2
 4 20 7 24325 1680.45 2
 4 20 7 19296.7 1585.82 3
 4 20 8 20258 1565.62 2
 4 20 8 15916.7 1441.68 3
 4 20 9 4370.6 742.678 3
 4 20 9 5522.47 857.002 2
 4 20 10 8895.39 1104.13 2
 4 20 11 18377.1 1639.97 2
 -4 21 12 4052.94 791.436 2
 -4 21 11 23882.5 1797.28 2
 -4 21 10 10010.7 1107 2
 4 21 -10 8411.54 966.128 3
 -4 21 9 10786.4 1099.56 2
 4 21 -9 10464.4 1082.18 3
 -4 21 8 8272.64 921.781 2
 4 21 -8 8130 974.684 3
 -4 21 7 4708.79 651.937 2
 4 21 -7 4624.83 724.496 3
 -4 21 6 1731.19 408.806 2
 4 21 -6 1569.06 434.58 3
 -4 21 5 44126.5 1960.77 2
 4 21 -5 45516.6 2388.94 3
 4 21 -4 11897.9 1194.49 3
 4 21 -3 49372.6 2524.56 3
 4 21 -2 9424.92 1085.72 3
 4 21 -1 26693.2 1845.76 3
 4 21 0 21817.1 1661.18 3
 4 21 1 2713.78 592.943 3
 4 21 2 4446.05 751.466 3
 4 21 3 46621.8 2540.38 3
 4 21 4 15425.9 1423.69 3
 4 21 5 19978.2 1649.36 3
 4 21 5 23345.2 1507.71 2
 4 21 6 527.846 290.389 3
 4 21 6 1537.28 411.681 2
 4 21 7 5636.39 889.717 3
 4 21 7 5849.41 794.846 2
 4 21 8 817.832 272.905 2
 4 21 8 109.513 261.606 3
 4 21 9 7928.85 1047.79 3
 4 21 9 9965.58 1140.98 2
 4 21 10 193.764 251.896 2
 -4 22 12 3832.28 740.045 2
 -4 22 11 1882.35 519.347 2
 -4 22 10 8142.33 1012.25 2
 4 22 -10 7907.27 955.646 3
 -4 22 9 6803.19 887.109 2
 4 22 -9 6361.75 866.189 3
 -4 22 8 65962.3 2793.65 2
 4 22 -8 62713.7 2941.27 3
 4 22 -7 12943.5 1265.82 3
 -4 22 7 13298.5 1129.5 2
 4 22 -6 18086.9 1504.59 3
 4 22 -5 90.9607 298.395 3
 4 22 -4 47.5608 272.943 3
 4 22 -3 419.918 343.343 3
 4 22 -2 6765.16 940.248 3
 4 22 -1 6811.72 936.566 3
 4 22 0 71712.9 3224.72 3
 4 22 1 12661 1300.61 3
 4 22 2 30004.3 2036.73 3
 4 22 3 1050.13 380.243 3
 4 22 4 -253.227 240.149 3
 4 22 5 1983.8 496.078 3
 4 22 6 9240.31 1125.53 3
 4 22 7 271.657 196.293 3
 4 22 7 598.661 262.369 2
 4 22 8 45624.7 2625.01 3
 4 22 8 54233.8 2641.54 2
 4 22 9 11.6599 303.399 2
 4 22 9 126.346 226.255 3
 4 22 10 35101.1 2240.69 2
 -4 23 11 15363 1452.22 2
 -4 23 10 744.973 277.015 2
 -4 23 9 4480.56 727.362 2
 4 23 -9 4077.1 696.927 3
 4 23 -8 18660.4 1564.31 3
 4 23 -7 1124.91 380.919 3
 4 23 -6 20159.2 1628.42 3
 4 23 -5 37930.2 2272.07 3
 4 23 -4 10115.1 1161.93 3
 4 23 -3 28550.4 1972.67 3
 4 23 -2 2749.7 604.255 3
 4 23 -1 27653.8 1961.36 3
 4 23 0 13192.8 1361.54 3
 4 23 1 1670.96 531.239 3
 4 23 2 13138.5 1359.4 3
 4 23 3 33842.1 2212.75 3
 4 23 4 1922.39 538.2 3
 4 23 5 25232.5 1931.99 3
 4 23 6 6739.02 1003.39 3
 4 23 7 10319.4 1226.96 3
 4 23 8 426.494 227.28 3
 4 23 9 1458.18 500.658 3
 4 23 9 2460.35 579.623 2
 4 24 -9 967.989 407.799 3
 4 24 -8 9398.12 1132.08 3
 4 24 -7 42678.5 2479.38 3
 4 24 -6 11367.6 1259.56 3
 4 24 -5 1635.19 572.464 3
 4 24 -4 533.528 344.531 3
 4 24 -3 1022.49 406.74 3
 4 24 -2 1431.55 444.24 3
 4 24 -1 4225.27 803.728 3
 4 24 0 26774.2 1982.16 3
 4 24 1 54874.2 2922.14 3
 4 24 2 7577.09 1032.23 3
 4 24 3 1981.04 545.821 3
 4 24 4 286.839 214.517 3
 4 24 5 604.687 323.558 3
 4 24 6 2887.15 717.421 3
 4 24 7 25380.6 1981.56 3
 4 24 8 20701.5 1772.06 3
 4 24 9 23586.1 1907.84 3
 4 25 -9 -18.9762 233.207 3
 4 25 -8 8375.88 1094.1 3
 4 25 -7 116.971 253.382 3
 4 25 -6 22376.6 1818.05 3
 4 25 -5 8163.45 1087.56 3
 4 25 -4 41522.5 2500.49 3
 4 25 -3 509.098 311.337 3
 4 25 -2 16216.2 1535.32 3
 4 25 -1 2279.93 636.637 3
 4 25 0 9616.59 1211.89 3
 4 25 1 899.522 450.521 3
 4 25 2 33212.8 2281.68 3
 4 25 3 3826.68 771.498 3
 4 25 4 15543.8 1566.78 3
 4 25 5 349.641 206.11 3
 4 25 6 32536.3 2301.84 3
 4 25 7 3993.62 828.28 3
 4 26 -7 45862 2702.86 3
 4 26 -6 364.391 248.215 3
 4 26 -5 170.163 185.9 3
 4 26 -4 -255.821 372.558 3
 4 26 -3 1190.11 388.876 3
 4 26 -2 1323.4 598.98 3
 4 26 -1 23313.4 1909.86 3
 4 26 0 4597 868.737 3
 4 26 1 78613 3698.44 3
 4 26 2 -42.9766 203.732 3
 4 26 3 3030.32 705.927 3
 4 26 4 2855.41 720.822 3
 4 27 -2 13176.9 1456.55 3
 4 27 -1 140.628 296.791 3
 -5 0 18 -129.08 402.793 2
 -5 0 17 28216.3 1991.5 2
 -5 0 16 -5.6584 148.853 2
 -5 0 15 3041.87 621.82 2
 -5 0 14 -74.679 183.537 2
 -5 0 13 34640.2 1899.09 2
 -5 0 12 35.5886 138.824 2
 -5 0 11 9302.51 880.206 2
 -5 0 10 119.562 96.5129 2
 -5 0 9 152853 4039.5 2
 5 0 -8 83.63 39.9799 3
 -5 0 8 -75.2956 142.07 2
 -5 0 7 29634.8 1322.47 2
 5 0 -7 29815 853.772 3
 -5 0 6 133.918 144.532 2
 5 0 -6 187.004 69.9145 3
 -5 0 5 197605 4351.18 2
 5 0 -5 191771 3899.7 3
 -5 0 4 45.2322 67.6193 2
 5 0 -4 28.1797 70.7641 3
 5 0 -3 62743.2 1837.94 1
 5 0 -3 62121.1 1735.61 3
 5 0 -2 243.061 113.611 1
 5 0 -2 18.4718 62.6459 3
 5 0 -1 187505 4012.65 1
 5 0 -1 185134 4072.5 3
 5 0 0 -9.88162 78.0314 3
 5 0 1 4843.45 470.582 3
 5 0 2 303.272 135.489 3
 5 0 3 10277 734.232 3
 5 0 4 54.1856 84.0307 3
 5 0 5 23294.7 1186.52 3
 5 0 6 -90.7615 146.427 3
 5 0 7 144186 3810.13 3
 5 0 8 -91.6225 180.465 3
 5 0 9 1598.18 332.285 3
 5 0 10 160.842 166.978 3
 5 0 10 -68.2796 203.76 2
 5 0 11 8122.14 774.429 3
 5 0 11 11785.2 1185.82 2
 5 0 12 -21.8707 322.484 2
 5 0 13 51227.5 2774.04 2
 5 0 14 72.5036 242.733 2
 5 0 15 48769 2863.21 2
 5 0 16 178.921 328.757 2
 -5 -1 18 1130.45 408.64 2
 -5 1 18 1507.01 515.747 2
 -5 -1 17 -84.5808 216.879 2
 -5 1 17 2.0909 330.575 2
 -5 -1 16 16925 1460.99 2
 -5 1 16 18372.2 1546.85 2
 -5 -1 15 5135.02 761.8 2
 -5 1 15 5520.71 817.608 2
 -5 1 14 39489.1 2144.91 2
 -5 -1 14 40266.3 2122.68 2
 -5 -1 13 12422.8 1099.9 2
 -5 1 13 11559.8 1084.33 2
 -5 -1 12 5399.99 697.176 2
 -5 1 12 4645.08 656.002 2
 -5 -1 11 2904.89 482.863 2
 -5 1 11 2889.18 501.711 2
 -5 -1 10 15203 1050.43 2
 -5 1 10 15053.5 1078.48 2
 -5 -1 9 4137.95 510.222 2
 -5 1 9 3224.49 473.434 2
 -5 -1 8 59539.8 2023.67 2
 -5 1 8 56064 2027.69 2
 5 1 -8 55938.7 1226.27 3
 5 1 -7 12896.3 521.37 3
 -5 -1 7 11461.5 772.433 2
 -5 1 7 11832.2 811.829 2
 5 -1 -7 11835.9 479.764 3
 -5 1 6 173133 3922.23 2
 5 1 -6 164985 3307.41 3
 5 -1 -6 162975 3270.33 3
 5 1 -5 27862.5 957.805 3
 5 -1 -5 28052.1 953.734 3
 -5 1 5 26815.6 1172.19 2
 -5 -1 5 27481.2 1143.01 2
 5 1 -4 11238.3 591.527 3
 5 -1 -4 11733.2 607.699 3
 -5 -1 4 9505.23 620.996 2
 -5 1 4 10685.9 669.021 2
 5 1 -3 8320.17 561.492 1
 5 -1 -3 7582.83 556.498 1
 5 1 -3 7904.32 509.969 3
 5 -1 -3 7518.49 510.905 3
 -5 1 3 7760.12 547.266 2
 5 -1 -2 34593.3 1238.25 1
 5 1 -2 33076.9 1187.24 1
 5 1 -2 33921.3 1204.76 3
 5 -1 -2 33101.4 1213.67 3
 5 1 -1 3802.77 365.475 1
 5 -1 -1 4467.6 410.371 1
 5 1 -1 3821.8 389.243 3
 5 -1 -1 3763.46 390.292 3
 5 1 0 125212 3068.14 3
 5 -1 0 126777 3095.11 3
 5 1 1 5542.45 502.504 3
 5 -1 1 5445.02 508.217 3
 5 1 2 128612 3249.69 3
 5 -1 2 131489 3290.15 3
 5 1 3 17665.1 970.822 3
 5 -1 3 16269.2 953.039 3
 5 1 4 76999.4 2403.1 3
 5 -1 4 80783.9 2450.67 3
 5 1 5 60.769 104.645 3
 5 -1 5 117.196 81.5414 3
 5 1 6 6724.65 629.283 3
 5 -1 6 6860.11 648.617 3
 5 1 7 2190.7 363.963 3
 5 -1 7 2154.91 366.347 3
 5 1 8 81333 2618.32 3
 5 -1 8 82340.1 2660.36 3
 5 1 9 10317.6 837.779 3
 5 -1 9 9656.78 820.662 3
 5 1 10 7523.72 731.846 3
 5 -1 10 6864.85 701.754 3
 5 1 10 9959.15 1053.19 2
 5 -1 10 8585.64 965.742 2
 5 1 11 22676.6 1318.17 3
 5 1 11 25817.5 1792.2 2
 5 -1 11 24530.1 1728.27 2
 5 -1 11 22072.8 1302.2 3
 5 1 12 18058.8 1577.95 2
 5 -1 12 18432.3 1559.42 2
 5 1 13 257.149 323.015 2
 5 -1 13 341.891 320.539 2
 5 1 14 676.345 412.83 2
 5 -1 14 1588.95 469.843 2
 5 1 15 213.977 341.53 2
 5 -1 15 450.421 409.262 2
 5 -1 16 33912.5 2401.5 2
 -5 -2 18 17700.6 1583.17 2
 -5 2 18 17731.6 1646.84 2
 -5 -2 17 14261.8 1382.74 2
 -5 2 17 14933.9 1459.08 2
 -5 -2 16 5016.23 785.239 2
 -5 2 16 3584.83 681.028 2
 -5 -2 15 3143.48 592.626 2
 -5 2 15 2952.83 582.217 2
 -5 -2 14 221.287 204.115 2
 -5 2 14 457.576 236.223 2
 -5 -2 13 9538.27 942.818 2
 -5 2 13 9573.22 1001.34 2
 -5 2 12 27841.6 1662.47 2
 -5 -2 12 27008.7 1552.42 2
 -5 -2 11 73.4749 147.307 2
 -5 2 11 341.09 185.662 2
 -5 -2 10 35151.1 1634.14 2
 -5 2 10 35333.8 1733.15 2
 -5 -2 9 100060 2815.8 2
 -5 2 9 96471.5 2918.81 2
 5 2 -8 26137.7 747.376 3
 -5 -2 8 24370.7 1190.53 2
 5 -2 -8 21944.5 613.712 3
 -5 2 8 23628.3 1263.03 2
 5 -2 -8 21919.8 597.049 3
 -5 -2 7 1242.41 261.343 2
 5 2 -7 1139.56 155.295 3
 -5 2 7 1071.74 269.01 2
 5 -2 -7 1026.75 141.595 3
 -5 -2 6 2152.15 316.906 2
 5 2 -6 2293.7 240.083 3
 5 -2 -6 2300.45 232.859 3
 -5 2 6 1789.2 318.153 2
 -5 2 5 3618.12 420.872 2
 5 2 -5 4013 337.933 3
 5 -2 -5 3779.25 327.555 3
 -5 -2 5 3824.86 401.609 2
 5 2 -4 268907 5308.75 3
 -5 -2 4 263475 5476.81 2
 -5 2 4 273086 5591.15 2
 5 2 -3 64146.1 1788.81 3
 5 2 -3 62725.6 1814.24 1
 5 -2 -3 63381 1892.03 1
 -5 2 3 62662.1 1855.34 2
 5 -2 -2 119273 2877.86 1
 5 2 -2 116494 2825.47 3
 5 2 -2 119036 2781.42 1
 5 -2 -1 82499.6 2201.8 1
 5 2 -1 84010.8 2154.3 1
 5 2 -1 80898.4 2211.39 3
 5 2 0 64453.7 1935.17 3
 5 2 1 2721.87 353.006 3
 5 2 2 8209.5 631.924 3
 5 2 3 2446.98 348.812 3
 5 2 4 7798.96 637.998 3
 5 2 5 18011.1 1018.18 3
 5 -2 5 18219.2 1052.16 3
 5 2 6 73627.8 2372.48 3
 5 -2 6 71814 2410.22 3
 5 2 7 134132 3581.02 3
 5 -2 7 128792 3605.01 3
 5 2 8 11912.4 887.141 3
 5 -2 8 12056.4 913.002 3
 5 2 9 165.734 120.516 3
 5 -2 9 101.512 114.224 3
 5 2 10 629.526 241.575 3
 5 2 10 898.382 342.825 2
 5 -2 10 722.649 253.943 3
 5 -2 10 611.707 317.023 2
 5 2 11 6718.39 701.976 3
 5 2 11 6431.64 908.385 2
 5 -2 11 6658.9 861.882 2
 5 -2 11 5112.07 614.218 3
 5 2 12 12780.9 1339.59 2
 5 -2 12 12620.7 1271.58 2
 5 2 13 24626.6 1910.57 2
 5 -2 13 24994 1856.94 2
 5 -2 14 15674.2 1517.95 2
 5 2 14 19189.3 1728.16 2
 5 2 15 24041.8 1976.4 2
 5 -2 15 22389.1 1868.35 2
 5 -2 16 10919.5 1340.97 2
 -5 3 18 1347.35 493.367 2
 -5 -3 18 2000.97 553.561 2
 -5 -3 17 3219.87 640.556 2
 -5 3 17 4109.17 783.286 2
 -5 -3 16 5350.2 809.963 2
 -5 3 16 5160.87 841.244 2
 -5 -3 15 25449.6 1687.18 2
 -5 3 15 26582.8 1841.02 2
 -5 -3 14 5309.52 727.48 2
 -5 3 14 4619.24 730.254 2
 -5 3 13 50441.4 2425.03 2
 -5 -3 13 50584.5 2263.02 2
 -5 -3 12 10180.3 911.837 2
 -5 3 12 10538.4 1014.21 2
 -5 -3 11 16321.5 1117.47 2
 -5 3 11 14222.8 1134.12 2
 -5 3 10 7387.18 775.252 2
 -5 -3 10 7997.71 727.447 2
 -5 -3 9 10807.7 807.759 2
 -5 3 9 10248.9 870.727 2
 5 3 -9 11461.9 435.437 3
 5 3 -8 40922.4 1104.67 3
 -5 -3 8 39397.2 1549.45 2
 -5 3 8 38412.5 1691.48 2
 5 -3 -8 39201.2 960.296 3
 5 -3 -8 36742 970.406 3
 -5 -3 8 39375.9 1091.1 3
 -5 -3 7 96261.7 2626.42 2
 5 3 -7 92189.6 2136.43 3
 5 -3 -7 91155.4 2056.92 3
 5 -3 -7 92365.5 1987.13 3
 -5 3 7 87714 2706.97 2
 5 3 -6 18413.9 764.264 3
 -5 3 6 17357.3 973.605 2
 -5 -3 6 18583.6 930.351 2
 -5 3 5 132964 3316.78 2
 5 3 -5 129231 2951.97 3
 -5 -3 5 134362 3142.75 2
 -5 3 4 44154.5 1540.58 2
 5 3 -4 43834.1 1389.97 3
 5 -3 -3 41525.9 1465.91 1
 5 3 -3 42423.4 1389.72 1
 5 3 -3 41823.1 1388.93 3
 -5 3 3 41724.3 1437.97 2
 5 3 -2 2123.93 293.185 3
 5 -3 -2 2041.88 286.04 1
 5 3 -2 1386.04 220.746 1
 5 -3 -1 46691.9 1519.11 1
 5 3 -1 45743 1428.7 1
 5 3 -1 44538.5 1527.16 3
 5 3 0 56494.1 1799.94 3
 5 3 1 32297 1300.01 3
 5 3 2 4792.43 490.525 3
 5 3 3 237425 5239.06 3
 5 3 4 5707.69 561.453 3
 5 3 5 1331.82 281.835 3
 5 3 6 20915 1150.37 3
 5 3 7 174.817 106.366 3
 5 -3 7 349.036 156.601 3
 5 3 8 47911.5 1928.21 3
 5 -3 8 48060.9 1963.08 3
 5 3 9 60396.8 2237.54 3
 5 -3 9 58233 2232.49 3
 5 3 10 1766.02 363.716 3
 5 -3 10 2293.24 416.604 3
 5 3 10 3054.68 626.256 2
 5 -3 10 2518.85 516.275 2
 5 3 11 45936.5 1955.02 3
 5 3 11 48264.3 2562.15 2
 5 -3 11 49404.8 2456.86 2
 5 -3 11 40839.6 1892.51 3
 5 3 12 128.111 264.482 2
 5 -3 12 94.203 187.078 2
 5 3 13 586.984 323.144 2
 5 -3 13 704.831 348.881 2
 5 3 14 1828.4 549.395 2
 5 -3 14 1937.29 546.76 2
 5 3 15 3510.28 786.776 2
 5 -3 15 4394.17 826.125 2
 5 -3 16 5644.32 952.346 2
 -5 4 18 25748 2041.42 2
 -5 -4 17 -116.769 269.538 2
 -5 4 17 51.2091 214.998 2
 -5 -4 16 9643.08 1051.71 2
 -5 4 16 9576.34 1155.47 2
 -5 -4 15 -82.3212 203.653 2
 -5 4 15 -53.3537 167.887 2
 -5 -4 14 474.196 197.088 2
 -5 4 14 799.328 283.801 2
 -5 -4 13 540.319 251.411 2
 -5 4 13 207.144 178.217 2
 -5 -4 12 10168.2 903.84 2
 -5 4 12 13094.6 1143.73 2
 -5 4 11 9676.24 937.329 2
 -5 -4 11 9074.17 809.209 2
 -5 -4 10 82026.7 2620.97 2
 -5 4 10 75571 2776.35 2
 -5 4 9 3294.96 500.292 2
 -5 -4 9 3273.01 435.256 2
 5 -4 -9 2716.59 173.033 3
 5 4 -9 3298.83 255.38 3
 5 -4 -8 60165.1 1416.68 3
 5 4 -8 62689.4 1580.96 3
 -5 -4 8 58275.6 1978.64 2
 -5 4 8 55559.5 2157.34 2
 5 4 -7 744.549 142.429 3
 -5 4 7 579.866 199.653 2
 -5 -4 7 384.028 142.815 2
 5 -4 -7 577.476 115.654 3
 -5 4 6 27634.7 1277.51 2
 -5 -4 6 26946.1 1134.68 2
 5 4 -6 28550.2 1037.94 3
 5 4 -5 311.743 125.402 3
 -5 -4 5 204.279 130.447 2
 -5 4 5 172.966 95.6246 2
 -5 4 4 152603 3570.2 2
 5 4 -4 145471 3362.4 3
 5 4 -3 53914 1594.3 1
 5 -4 -3 54852.5 1743.06 1
 5 4 -3 52024 1644.47 3
 -5 4 3 53817.1 1716.24 2
 5 4 -2 230492 4944.78 3
 5 -4 -2 239995 4969.01 1
 5 4 -2 232532 4738.08 1
 5 4 -1 483.575 155.985 3
 5 -4 -1 374.311 134.899 1
 5 4 0 120312 3047.53 3
 5 4 1 13316.3 818.494 3
 5 4 2 33058.8 1395.84 3
 5 4 3 52936.6 1877.1 3
 5 4 4 82024.6 2513.23 3
 5 4 5 427.156 170.595 3
 5 4 6 77952.8 2510.98 3
 5 4 7 5787.81 610.539 3
 5 4 8 68166.8 2382.87 3
 5 -4 8 67087.4 2428.88 3
 5 4 9 14892.2 1034.17 3
 5 4 9 16556 1353.57 2
 5 -4 9 14252.2 1044.66 3
 5 4 10 34.8298 150.145 3
 5 -4 10 98.6165 142.076 3
 5 4 10 154.214 173.543 2
 5 -4 10 302.855 267.558 2
 5 4 11 503.437 204.469 3
 5 -4 11 494.274 221.826 3
 5 4 11 753.537 367.4 2
 5 -4 11 325.279 176.795 2
 5 4 12 41824.2 2486.26 2
 5 -4 12 38984.7 2252.19 2
 5 4 13 732.668 392.69 2
 5 -4 13 570.022 348.556 2
 5 4 14 29155.8 2175.93 2
 5 -4 14 26854.3 1971.54 2
 5 4 15 -276.653 299.239 2
 5 -4 15 323.114 258.532 2
 -5 5 17 10713.9 1282.24 2
 -5 -5 16 650.535 295.403 2
 -5 5 16 155.938 227.804 2
 -5 -5 15 13245.7 1162.58 2
 -5 5 15 14443.8 1367.98 2
 -5 -5 14 978.077 313.202 2
 -5 5 14 1074.78 351.138 2
 -5 5 13 29435.8 1861.52 2
 -5 -5 13 29865.9 1637.01 2
 -5 -5 12 19038.3 1231.78 2
 -5 5 12 17321.9 1345.02 2
 -5 -5 11 6763.55 688.598 2
 -5 5 11 6019.58 763.899 2
 -5 -5 10 11225.5 838.725 2
 -5 5 10 10513.7 959.946 2
 -5 -5 9 13716.9 889.617 2
 -5 5 9 12952.6 1011.49 2
 5 5 -9 15184.8 645.752 3
 5 -5 -8 4113.15 299.416 3
 -5 5 8 3470.13 495.766 2
 -5 -5 8 3277.84 412.647 2
 5 5 -8 4090.24 344.668 3
 -5 5 7 43574.6 1787.92 2
 -5 -5 7 46269.5 1606.13 2
 5 5 -7 46075.4 1414.47 3
 5 5 -6 35838.1 1254.77 3
 -5 5 6 36680.5 1530.94 2
 -5 -5 6 34656.4 1297.22 2
 5 5 -5 144264 3360.4 3
 -5 5 5 149986 3651.12 2
 -5 5 4 272996 5642.18 2
 5 5 -4 257277 5426.35 3
 5 5 -3 22876.7 1037.57 3
 5 5 -3 22483.8 923.677 1
 5 -5 -3 24005.9 1069.2 1
 -5 5 3 22938.6 1048.31 2
 5 5 -2 267.748 126.956 3
 5 -5 -2 249.385 118.929 1
 -5 5 2 232.332 100.198 2
 5 5 -2 210.421 77.4126 1
 5 -5 -1 30416.3 1218.26 1
 5 5 -1 30216.4 1253.33 3
 5 5 0 43376.4 1576.9 3
 5 5 1 112870 3004.23 3
 5 5 2 93545.5 2668.2 3
 5 5 3 46916.5 1754.18 3
 5 5 4 13247.6 891.111 3
 5 5 5 23045.4 1214.92 3
 5 5 6 41358.1 1722.02 3
 5 5 7 91.0415 87.6481 3
 5 5 8 595.546 211.54 3
 5 5 9 81176.8 2727.98 3
 5 5 9 85332.3 3293.61 2
 5 -5 9 77020.2 2729.26 3
 5 5 10 45260.5 1953.51 3
 5 5 10 48105.4 2485.1 2
 5 -5 10 46949.2 2264.94 2
 5 -5 10 41579.8 1922.29 3
 5 5 11 27086.1 1495.84 3
 5 5 11 33185.7 2117.52 2
 5 -5 11 30885.1 1882.54 2
 5 -5 11 27727 1561.88 3
 5 5 12 20263.3 1713.69 2
 5 -5 12 18346.6 1519.63 2
 5 5 13 1492.78 537.192 2
 5 -5 13 1707.63 477.629 2
 5 5 14 1585.16 512.385 2
 5 -5 14 893.165 423.406 2
 5 5 15 -2.55319 340.598 2
 -5 6 17 11763.9 1360.14 2
 -5 6 16 2305.8 583.078 2
 -5 -6 15 2156.15 492.765 2
 -5 6 15 1486.97 433.767 2
 -5 -6 14 1743.19 402.915 2
 -5 6 14 1790.91 458.704 2
 -5 -6 13 234.345 151.174 2
 -5 6 13 -62.3402 137.378 2
 -5 -6 12 62.7468 119.586 2
 -5 6 12 217.21 165.967 2
 -5 -6 11 133209 3644.61 2
 -5 6 11 127315 4048.93 2
 -5 6 10 39969 1954.83 2
 -5 -6 10 43390.2 1723.58 2
 -5 -6 9 17325 1004.27 2
 -5 6 9 17019.9 1181.66 2
 5 6 -9 20146.8 816.589 3
 -5 -6 8 170.058 105.549 2
 -5 6 8 220.446 141.247 2
 5 6 -8 127.56 74.6383 3
 5 6 -7 11888.2 677.412 3
 -5 6 7 10502.7 838.892 2
 -5 -6 7 11326 710.429 2
 -5 6 6 302.85 171.328 2
 5 6 -6 124.938 58.503 3
 -5 -6 6 146.238 101.778 2
 -5 6 5 3733.03 444.998 2
 5 6 -5 3379.19 379.276 3
 -5 6 4 69921.8 2131.17 2
 5 6 -4 67665.6 2030.16 3
 5 6 -3 192698 4023.12 1
 5 -6 -3 193523 4316.42 1
 5 6 -3 192070 4313.59 3
 -5 6 3 188254 4271.94 2
 5 6 -2 90897.1 2535.56 3
 5 -6 -2 91330.6 2474.31 1
 5 6 -2 89047.4 2194.82 1
 -5 6 2 94217.4 2450.23 2
 5 -6 -1 16656.8 872.472 1
 5 6 -1 15557.2 903.13 3
 5 6 0 56848.7 1913.54 3
 5 6 1 105221 2917.85 3
 5 6 2 2814.42 399.091 3
 5 6 3 182.884 104.803 3
 5 6 4 18064.4 1070.04 3
 5 6 5 99107.2 2953.72 3
 5 6 6 5192.21 581.435 3
 5 6 7 309.784 187.615 3
 5 6 8 29023.3 1499.72 3
 5 6 9 38609.4 1780.17 3
 5 6 9 41330 2225.62 2
 5 6 10 2218.92 423.044 3
 5 6 10 2713.83 596.098 2
 5 -6 10 2022.96 412.707 3
 5 -6 10 2960.65 561.01 2
 5 6 11 8377.24 824.027 3
 5 6 11 10233.4 1198.38 2
 5 -6 11 10488.3 1072.97 2
 5 -6 11 8471.92 848.754 3
 5 6 12 26774.4 1971.98 2
 5 -6 12 24688.9 1745.15 2
 5 6 13 41674.6 2576.29 2
 5 -6 13 36382.2 2193.09 2
 5 6 14 70.4743 215.198 2
 5 -6 14 65.0977 177.7 2
 -5 7 17 7366.78 1088.92 2
 -5 7 16 14892.4 1482.93 2
 -5 7 15 111.785 202.936 2
 -5 -7 14 20585.4 1354.99 2
 -5 7 14 19955.8 1600.8 2
 -5 -7 13 9841.43 882.776 2
 -5 7 13 9372.74 1036.17 2
 -5 7 12 49589.6 2433.99 2
 -5 -7 12 52128.1 2064.64 2
 -5 7 11 13049.8 1144.91 2
 -5 -7 11 13660.2 948.353 2
 -5 -7 10 15399.4 970.317 2
 5 7 -10 17478 774.829 3
 -5 7 10 14379.9 1156.25 2
 -5 -7 9 2177.68 348.438 2
 -5 7 9 2325.2 452.985 2
 5 7 -9 2828.95 313.243 3
 5 7 -8 2546.37 314.393 3
 -5 7 8 2104.38 402.428 2
 -5 -7 8 2108.11 318.729 2
 5 7 -7 8143.39 586.584 3
 -5 7 7 6887.32 678.524 2
 -5 -7 7 6357.64 521.204 2
 -5 7 6 125705 3426.47 2
 5 7 -6 127207 3111.43 3
 -5 7 5 28855.3 1311.79 2
 5 7 -5 29801 1246.45 3
 5 7 -4 63385.7 2021.51 3
 -5 7 4 63938 2083.53 2
 5 -7 -4 65539.4 2070.86 1
 5 -7 -3 3195.59 387.976 1
 5 7 -3 3080.48 311.08 1
 5 7 -3 3402.68 414.453 3
 -5 7 3 3140.73 395.801 2
 -5 7 2 31822.5 1229.71 2
 5 7 -2 29695.7 1314.44 3
 5 -7 -2 30828.9 1250.73 1
 5 7 -2 28646.2 1007.77 1
 5 -7 -1 10822.6 714.317 1
 5 7 -1 10491.4 750.088 3
 5 7 0 32197.6 1406.46 3
 5 7 1 6875.79 628.977 3
 5 7 2 238515 5416.2 3
 5 7 3 27975.7 1368.35 3
 5 7 4 132472 3611.86 3
 5 7 5 1183.11 287.527 3
 5 7 6 2558.78 413.597 3
 5 7 7 3720.13 513.044 3
 5 7 8 3795.05 535.962 3
 5 7 9 -102.925 222.273 3
 5 7 9 234.643 224.591 2
 5 7 10 84097.4 2935.67 3
 5 7 10 89464.2 3604.03 2
 5 -7 10 87258.6 3187.54 2
 5 7 11 -156.589 183.893 3
 5 -7 11 58.6272 145.626 2
 5 -7 11 49.5437 126.175 3
 5 -7 12 17892.1 1464.4 2
 5 7 12 20193.8 1722.04 2
 5 7 13 1021.61 410.952 2
 5 -7 13 555.732 340.45 2
 5 7 14 -41.8172 324.193 2
 -5 8 17 20444.5 1821.54 2
 -5 8 16 3461.15 705.262 2
 -5 8 15 4102.63 825.5 2
 -5 8 14 618.755 364.433 2
 -5 8 13 532.356 260.265 2
 -5 -8 13 -38.6269 113.798 2
 -5 8 12 764.197 362.396 2
 -5 -8 12 790.571 238.441 2
 -5 -8 11 106053 3045.57 2
 -5 8 11 98329.9 3527.34 2
 -5 -8 10 478.822 196.757 2
 -5 8 10 381.67 164.302 2
 -5 8 9 6334.6 717.593 2
 5 8 -9 6795.72 522.608 3
 -5 -8 9 6113.18 552.674 2
 -5 8 8 19691.2 1245.96 2
 -5 -8 8 20784.2 1001.47 2
 5 8 -8 23256 1045.03 3
 -5 8 7 5044.37 587.567 2
 5 8 -7 5504.14 499.688 3
 -5 -8 7 4182.65 406.991 2
 5 8 -6 3477.64 405.524 3
 -5 8 6 3601.32 480.772 2
 -5 8 5 8423.33 691.54 2
 5 8 -5 8824.42 663.163 3
 -5 8 4 10968.5 785.852 2
 5 -8 -4 11162.5 763.381 1
 5 8 -4 11441.5 775.187 3
 5 -8 -3 264306 5637.24 1
 5 8 -3 265940 5225.55 1
 5 8 -3 258938 5764.15 3
 -5 8 3 270502 5643.21 2
 -5 8 2 1388.57 252.892 2
 5 -8 -2 1371.49 251.739 1
 5 8 -2 1027.35 241.923 3
 5 8 -2 1023.89 176.477 1
 5 8 -1 21405.4 1144.09 3
 5 8 0 25739.9 1280.77 3
 5 8 1 29994.4 1415.02 3
 5 8 2 22117.7 1216.57 3
 5 8 3 15940.8 1030.18 3
 5 8 4 338.855 161.078 3
 5 8 5 70376.1 2483.07 3
 5 8 6 9663.33 837.877 3
 5 8 7 9693.62 859.175 3
 5 8 8 136.303 152.627 3
 5 8 8 -30.2401 169.692 2
 5 8 9 17362.3 1211.64 3
 5 8 9 20260.6 1552.2 2
 5 8 10 2047.47 405.769 3
 5 8 10 2168.28 528.599 2
 5 -8 10 2648.75 510.632 2
 5 8 11 9362.39 1152.89 2
 5 8 11 8014.91 837.797 3
 5 -8 11 8769.24 953.822 2
 5 8 12 434.35 302.632 2
 5 -8 12 1203.13 386.981 2
 5 8 13 26458.4 2062.95 2
 5 8 14 15938.2 1638.16 2
 -5 9 16 9221.21 1196.88 2
 -5 9 15 27461.7 1999.24 2
 -5 9 14 7291.41 974.691 2
 -5 9 13 5993.9 863.71 2
 -5 9 12 28340.8 1812.19 2
 -5 9 11 1921.43 447.77 2
 -5 -9 11 1653.33 316.661 2
 -5 -9 10 1418.21 276.648 2
 -5 9 10 1823.13 432.56 2
 5 9 -10 1607.19 253.616 3
 -5 9 9 13309.5 1080.9 2
 5 9 -9 14884.5 832.833 3
 -5 -9 9 13622.3 820.314 2
 5 9 -8 4405.38 455.513 3
 -5 9 8 3729.43 550.486 2
 -5 -9 8 3830.92 403 2
 5 9 -7 102675 2801.62 3
 -5 9 7 97407.4 3067.27 2
 -5 9 6 27127.1 1367.88 2
 5 9 -6 26423.4 1242.56 3
 5 9 -5 2519.06 366.806 3
 -5 9 5 2079.95 338.077 2
 5 9 -4 71401.1 2283.49 3
 -5 9 4 66090.5 2169.17 2
 5 -9 -4 68909.4 2179.47 1
 5 9 -4 70872.6 1881.46 1
 5 9 -3 26407.6 1305.46 3
 5 -9 -3 26515.2 1197.72 1
 5 9 -3 25951.5 944.574 1
 -5 9 3 27157.7 1204.94 2
 5 -9 -2 27110.7 1181.7 1
 5 9 -2 25386 1298.64 3
 -5 9 2 26375 1137.98 2
 5 9 -1 986.414 262.346 3
 5 9 0 8248.95 724.899 3
 5 9 1 100096 3003.93 3
 5 9 2 99394.3 3022.21 3
 5 9 3 354.631 179.599 3
 5 9 4 33489.5 1616.04 3
 5 9 5 32600.4 1606.52 3
 5 9 6 593.985 214.652 3
 5 9 7 1093.6 306.312 3
 5 9 8 340.69 172.938 3
 5 9 8 1245.53 400.132 2
 5 9 9 28540.7 1597.15 3
 5 9 9 31090.8 1965.19 2
 5 9 10 55812 2388.45 3
 5 -9 10 58074.7 2482.53 2
 5 9 11 2908.34 518.916 3
 5 9 11 3829.61 706.622 2
 5 9 12 4100.64 798.018 2
 5 9 13 15597.1 1573.69 2
 5 9 14 1032.9 522.703 2
 -5 10 16 20449.1 1787.58 2
 -5 10 15 202.731 217.025 2
 -5 10 14 4580.86 801.947 2
 -5 10 13 110.424 194.225 2
 -5 10 12 8518.25 983.147 2
 -5 10 11 13282.1 1195.88 2
 5 10 -10 84936.9 2411.32 3
 -5 -10 10 85177.9 2446.22 2
 -5 -10 9 315.448 143.975 2
 -5 10 9 263.698 219.717 2
 5 10 -9 354.606 151.839 3
 -5 10 8 29153.2 1595.86 2
 5 10 -8 34578 1435.44 3
 -5 10 7 5267.23 626.801 2
 5 10 -7 4863.83 519.165 3
 -5 10 6 30336.8 1485.36 2
 5 10 -6 33249 1463.14 3
 -5 10 5 2430.17 392.305 2
 5 10 -5 2509.98 385.056 3
 5 10 -4 1037.46 266.611 3
 5 10 -4 859.573 168.126 1
 5 -10 -4 1153.42 252.975 1
 -5 10 4 1026.18 252.947 2
 5 -10 -3 64209.8 2048.4 1
 5 10 -3 64670.1 2226.96 3
 5 10 -3 61962.8 1637.5 1
 -5 10 3 65051.2 2067.82 2
 5 10 -2 90768.1 2850.02 3
 -5 10 2 93074.2 2535.54 2
 5 -10 -2 95625 2597.88 1
 5 10 -1 589.465 231.991 3
 5 10 0 65042.5 2322.39 3
 5 10 1 15978.5 1065.05 3
 5 10 2 9180.83 816.392 3
 5 10 3 13020.7 983.263 3
 5 10 4 11328.6 924.268 3
 5 10 5 14965.8 1093.71 3
 5 10 6 30583 1616.8 3
 5 10 7 85.6278 95.2502 3
 5 10 7 813.154 337.977 2
 5 10 8 26619.1 1558.55 3
 5 10 8 29891.3 1876.11 2
 5 10 9 8047.84 843.465 3
 5 10 9 9558.38 1104.6 2
 5 10 10 2911.89 524.818 3
 5 10 10 4245.62 764.865 2
 5 10 11 4305.37 806.527 2
 5 10 12 10028.5 1236.5 2
 5 10 13 565.005 374.379 2
 -5 11 16 -125.42 306.879 2
 -5 11 15 39782 2480 2
 -5 11 14 6571.31 946.289 2
 -5 11 13 18453.4 1542.93 2
 -5 11 12 3322.06 627.599 2
 -5 11 11 10344.4 1062.25 2
 -5 11 10 779.479 347.844 2
 5 11 -10 598.296 210.145 3
 -5 11 9 7705.13 853.198 2
 5 11 -9 8167.12 673.599 3
 -5 11 8 8604.97 847.201 2
 5 11 -8 8428.48 703.647 3
 -5 11 7 62697 2389.39 2
 5 11 -7 66328.4 2250.47 3
 -5 11 6 9710.6 823.562 2
 5 11 -6 11008.7 833.362 3
 5 11 -5 11005.2 847.78 3
 -5 11 5 12064.6 864.848 2
 5 -11 -5 11356.3 828.698 1
 5 11 -4 1692.86 221.646 1
 -5 11 4 1943.74 335.961 2
 5 11 -4 1816.06 336.553 3
 5 -11 -4 1800.52 315.837 1
 5 11 -3 22250.5 1241.73 3
 5 -11 -3 22423.6 1099.61 1
 -5 11 3 22579 1118.44 2
 5 11 -3 20427.4 770.431 1
 5 -11 -2 17931 966.51 1
 5 11 -2 17928.8 1135.36 3
 -5 11 2 18267.3 957.018 2
 5 11 -1 20979.5 1244.37 3
 5 11 0 2207.32 401.744 3
 5 11 1 176270 4608.75 3
 5 11 2 8009.48 775.432 3
 5 11 3 32784.4 1645.48 3
 5 11 4 6102.74 701.156 3
 5 11 5 53637.7 2233.59 3
 5 11 6 2925.37 502.621 3
 5 11 7 4143.43 609.947 3
 5 11 7 5395.52 755.619 2
 5 11 8 17300.4 1257.83 3
 5 11 8 19476.2 1506.75 2
 5 11 9 73010 2846.23 3
 5 11 9 81481.6 3404.51 2
 5 11 10 5847.78 747.533 3
 5 11 10 6858.77 957.13 2
 5 11 11 25868.7 1951.91 2
 5 11 12 960.258 282.991 2
 5 11 13 13180.1 1467.18 2
 -5 12 15 3683.06 747.64 2
 -5 12 14 6098.87 922.4 2
 -5 12 13 4413.93 780.621 2
 -5 12 12 12692.7 1244.1 2
 -5 12 11 5539.93 792.97 2
 -5 12 10 42452.3 2181.35 2
 5 12 -10 47848.5 1811.41 3
 -5 12 9 25791.9 1597.99 2
 5 12 -9 29067.9 1376.76 3
 5 12 -8 54691.7 2029.04 3
 -5 12 8 50058.7 2203.43 2
 5 12 -7 916.268 258.733 3
 -5 12 7 896.839 290.969 2
 -5 12 6 22207.9 1288.23 2
 5 12 -6 23760.5 1306.41 3
 5 12 -5 9523.22 816.652 3
 -5 12 5 8228.27 725.529 2
 5 -12 -5 8653.94 719.661 1
 -5 12 4 7587.53 671.391 2
 5 12 -4 8734.24 785.878 3
 5 -12 -4 8475.57 687.801 1
 5 12 -4 8134.03 477.884 1
 5 12 -3 1553 326.708 3
 5 -12 -3 1844.33 320.049 1
 5 12 -3 1592.04 187.243 1
 -5 12 3 2022.51 330.706 2
 5 -12 -2 94502.9 2662.11 1
 -5 12 2 96187.5 2640.9 2
 5 12 -2 95604 3050.74 3
 5 12 -1 78606.5 2719.69 3
 5 12 0 98787.8 3150.74 3
 5 12 1 586.541 210.636 3
 5 12 2 7690.83 800.705 3
 5 12 3 514.433 217.667 3
 5 12 4 262.178 161.348 3
 5 12 5 11686.9 1007.45 3
 5 12 6 99071.6 3340.77 3
 5 12 6 99208.5 3496.18 2
 5 12 7 19391.5 1355.99 3
 5 12 7 21370 1536.9 2
 5 12 8 49807.4 2292.68 3
 5 12 8 54397.5 2654.96 2
 5 12 9 1120.14 438.239 2
 5 12 9 452.725 205.407 3
 5 12 10 1322.93 392.816 3
 5 12 10 2413.72 579.421 2
 5 12 11 592.718 342.259 2
 5 12 12 4539.18 856.727 2
 5 12 13 8121.63 1177.48 2
 -5 13 15 17639 1644.22 2
 -5 13 14 24615.1 1887.2 2
 -5 13 13 4434.71 757.876 2
 -5 13 12 12107.7 1229.9 2
 -5 13 11 2940.37 565.072 2
 5 13 -10 366.236 161.243 3
 -5 13 10 922.295 355.026 2
 5 13 -9 1701.2 335.857 3
 -5 13 9 1529.97 410.464 2
 -5 13 8 28307.6 1622.13 2
 5 13 -8 30212.5 1497.03 3
 5 13 -7 39619.3 1759.06 3
 -5 13 7 36669.4 1793.42 2
 5 13 -6 69471 2487.51 3
 -5 13 6 66213.8 2422.16 2
 5 -13 -5 4219.84 502.987 1
 5 13 -5 3447.5 506.606 3
 -5 13 5 3502.01 475.631 2
 5 13 -5 2505.65 284.915 1
 5 13 -4 45308.9 1947.61 3
 5 -13 -4 43295.5 1679.59 1
 5 13 -4 40141.2 1194.86 1
 -5 13 4 41269.3 1712.12 2
 5 13 -3 21021.2 1307.19 3
 5 -13 -3 23357.5 1156.22 1
 -5 13 3 23458.1 1180.57 2
 5 13 -2 21658.7 1323.83 3
 5 -13 -2 23747.6 1162.66 1
 -5 13 2 22941.5 1111.62 2
 5 13 -1 59.5426 114.951 3
 5 13 0 27931.5 1557.01 3
 5 13 1 58851.3 2381.98 3
 5 13 2 8826.96 868.389 3
 5 13 3 18751.8 1306.48 3
 5 13 4 37352.3 1906.97 3
 5 13 5 23318.3 1488.2 3
 5 13 5 21313.8 1444.14 2
 5 13 6 4191.82 623.945 3
 5 13 6 5186.19 732.231 2
 5 13 7 7017.12 832.053 3
 5 13 7 8447.41 972.976 2
 5 13 8 24037.1 1585.99 3
 5 13 8 28593.8 1902.94 2
 5 13 9 32868 1898.55 3
 5 13 9 37439.3 2242.12 2
 5 13 10 13125.5 1180.18 3
 5 13 10 14064.7 1408.21 2
 5 13 11 5114.48 900.177 2
 5 13 12 13520.5 1478.53 2
 5 13 13 14187.6 1546.73 2
 -5 14 15 8321.81 1159.07 2
 -5 14 14 1024.66 411.273 2
 -5 14 13 5537.53 862.637 2
 -5 14 12 874.367 386.621 2
 -5 14 11 19309.5 1501.63 2
 -5 14 10 87.7364 170.684 2
 5 14 -10 24.9434 168.205 3
 -5 14 9 41070.3 2089.98 2
 5 14 -9 41602.4 1819.99 3
 -5 14 8 6521.99 768.036 2
 5 14 -8 7183.09 725.124 3
 5 14 -7 25450.4 1433.69 3
 -5 14 7 25026.1 1467.16 2
 5 14 -6 1071.98 322.062 3
 -5 14 6 1601.65 368.541 2
 5 -14 -6 1204.32 276.792 1
 5 14 -5 13303.8 1037.76 3
 5 -14 -5 14032.8 939.379 1
 5 14 -5 12464.4 623.013 1
 -5 14 5 13279 954.826 2
 5 -14 -4 4016.07 472.707 1
 5 14 -4 3227.91 532.473 3
 -5 14 4 3890.15 511.447 2
 5 14 -4 2872.58 247.406 1
 5 14 -3 57227.7 2335.36 3
 5 -14 -3 57251.1 1952.96 1
 -5 14 3 57503.7 2013.16 2
 5 14 -2 2204.28 441.903 3
 -5 14 2 2177.24 325.475 2
 5 14 -1 147718 4227.37 3
 5 14 0 1318.07 333.31 3
 5 14 1 17913.2 1267.01 3
 5 14 2 141.413 222.583 3
 5 14 3 4977.7 682.387 3
 5 14 4 5003.6 685.823 3
 5 14 4 5106.25 665.862 2
 5 14 5 80648.9 3069.03 3
 5 14 5 84174.4 3109.03 2
 5 14 6 18081.3 1356.8 3
 5 14 6 21266.9 1495.11 2
 5 14 7 114829 3866.32 3
 5 14 7 117243 4113.88 2
 5 14 8 651.564 270.091 3
 5 14 8 693.439 324.99 2
 5 14 9 4220.25 686.719 3
 5 14 9 5257.97 838.102 2
 5 14 10 291.825 238.628 3
 5 14 10 559.423 229.607 2
 5 14 11 740.9 425.963 2
 5 14 12 4853.53 888.32 2
 -5 15 14 41815.4 2545.32 2
 -5 15 13 2774.53 623.063 2
 -5 15 12 18110.5 1528.62 2
 -5 15 11 743.425 342.639 2
 -5 15 10 3191.14 581.255 2
 5 15 -10 4236.41 568.532 3
 -5 15 9 9645.39 990.086 2
 5 15 -9 10704.9 903.908 3
 -5 15 8 54088.7 2379.3 2
 5 15 -8 57099.8 2274.42 3
 5 15 -7 77.1978 127.448 3
 -5 15 7 -41.9363 141.527 2
 5 15 -6 66657.6 2548.31 3
 -5 15 6 60831 2367.9 2
 5 -15 -6 65980.9 2332.99 1
 5 15 -5 15640.1 1172.29 3
 5 -15 -5 16999.5 1045.62 1
 -5 15 5 16542.1 1094.68 2
 -5 15 4 33510.1 1563.11 2
 5 15 -4 33646 1777.86 3
 5 -15 -4 34687.2 1503.67 1
 -5 15 3 1928.19 348.499 2
 5 -15 -3 1486.76 283.807 1
 5 15 -3 1571.36 389.949 3
 -5 15 2 1957.77 327.054 2
 5 15 -2 1853.89 427.915 3
 5 15 -1 6932.4 785.267 3
 5 15 0 34909.9 1831 3
 5 15 1 136.643 170.657 3
 5 15 2 92262.3 3276.39 3
 5 15 3 401.52 225.784 3
 5 15 3 680.661 221.596 2
 5 15 4 38111.6 2020.26 3
 5 15 4 42796 2032.16 2
 5 15 5 16642 1305.41 3
 5 15 5 16490.2 1289.57 2
 5 15 6 311.705 187.371 3
 5 15 6 460.765 211.046 2
 5 15 7 1974.4 477.739 2
 5 15 7 1220.51 380.474 3
 5 15 8 27363.2 1744.6 3
 5 15 8 28603.7 1922.04 2
 5 15 9 822.331 309.814 3
 5 15 9 1660.89 450.883 2
 5 15 10 33728.8 2244.12 2
 5 15 10 30001 1858.28 3
 5 15 11 9897.22 1223.03 2
 5 15 12 30733.9 2267.58 2
 -5 16 14 4905.39 865.851 2
 -5 16 13 1839.44 521.491 2
 -5 16 12 7599.72 1003.4 2
 -5 16 11 14516.7 1331.17 2
 -5 16 10 20463 1528.28 2
 5 16 -10 22927.2 1386.16 3
 -5 16 9 41635.7 2149.44 2
 5 16 -9 42802.8 1977.83 3
 -5 16 8 4118.03 648.506 2
 5 16 -8 5197.97 654.591 3
 5 16 -7 2628.82 471.297 3
 -5 16 7 2378.71 455.572 2
 5 -16 -7 2797.51 463.232 1
 5 -16 -6 6882.79 686.739 1
 -5 16 6 7090.72 747.008 2
 5 16 -6 7448.76 821.89 3
 5 16 -5 10879.3 996.153 3
 -5 16 5 10661.2 872.382 2
 5 -16 -5 10076.2 808.753 1
 -5 16 4 8775.32 770.524 2
 5 16 -4 8514.74 905.424 3
 5 -16 -4 9280.54 740.869 1
 5 -16 -3 40315.7 1624.52 1
 5 16 -3 39243 1996.12 3
 -5 16 3 39680.1 1653.98 2
 5 16 -2 34823.3 1881.21 3
 -5 16 2 35577.1 1475.65 2
 5 16 -1 65967.5 2734.74 3
 5 16 0 24378.6 1571.29 3
 5 16 1 34801.1 1904.78 3
 5 16 2 2293.08 492.149 3
 5 16 2 2131 399.617 2
 5 16 3 5273.06 722.777 3
 5 16 3 6697.44 752.559 2
 5 16 4 44604.7 2242.45 3
 5 16 4 47757.2 2189.36 2
 5 16 5 19651.4 1459.84 3
 5 16 5 23693.2 1570.64 2
 5 16 6 3012.91 578.354 3
 5 16 6 4346.62 707.334 2
 5 16 7 32442.7 1936.1 3
 5 16 7 35418.9 2088.63 2
 5 16 8 9241.53 1009.87 3
 5 16 8 12460.5 1260.16 2
 5 16 9 1034.56 372.467 3
 5 16 9 1187.82 387.023 2
 5 16 10 314.476 205.074 3
 5 16 10 800.042 431.067 2
 5 16 11 2030.74 558.519 2
 5 16 12 20344.6 1827.83 2
 -5 17 14 17433.5 1646.43 2
 -5 17 13 37839.6 2372.25 2
 -5 17 12 4245.71 748.84 2
 -5 17 11 1551.23 433.293 2
 -5 17 10 -21.9977 145.151 2
 5 17 -10 37.8689 157.108 3
 -5 17 9 12519.6 1164.8 2
 5 17 -9 14912.7 1155.83 3
 -5 17 8 16600.1 1278.33 2
 5 17 -8 17984.8 1277.25 3
 -5 17 7 5430.04 699.633 2
 5 17 -7 5962.55 746.328 3
 5 -17 -7 6235.31 685.788 1
 -5 17 6 32948.3 1697.15 2
 5 -17 -6 32842 1575.55 1
 5 17 -6 32978.6 1823.14 3
 5 17 -5 88959.2 3229.88 3
 -5 17 5 87785.1 2922.86 2
 5 -17 -5 90898.4 2803.29 1
 5 17 -4 196.603 195.282 3
 5 -17 -4 250.346 147.165 1
 -5 17 4 390.646 176.515 2
 -5 17 3 1717.42 335.045 2
 5 17 -3 1444.46 390.084 3
 5 -17 -3 1272.38 259.525 1
 -5 17 2 569.687 208.558 2
 5 17 -2 283.814 158.949 3
 5 17 -1 20753.5 1471.28 3
 5 17 0 4951.12 722.347 3
 5 17 0 4687.72 538.242 2
 5 17 1 70509.8 2956.47 3
 5 17 1 77984.7 2579.05 2
 5 17 2 19546.2 1459.85 3
 5 17 2 22562.7 1339.65 2
 5 17 3 108623 3849.89 3
 5 17 3 119829 3686.51 2
 5 17 4 1505.47 421.033 3
 5 17 4 2201.92 480.463 2
 5 17 5 295.252 235.542 3
 5 17 5 284.043 175.612 2
 5 17 6 192.789 170.467 3
 5 17 6 458.393 219.082 2
 5 17 7 2765.76 590.998 3
 5 17 7 3258.14 599.59 2
 5 17 8 6017.59 881.844 2
 5 17 8 5344.48 787.009 3
 5 17 9 14769.6 1437.78 2
 5 17 9 12870.8 1252.19 3
 5 17 10 8193.55 977.6 3
 5 17 10 10135 1207.27 2
 5 17 11 46726.1 2762.71 2
 -5 18 13 205.835 203.45 2
 -5 18 12 30754.9 2076.39 2
 -5 18 11 -141.072 284.188 2
 5 18 -10 40835.3 2035.78 3
 -5 18 10 38395.2 2199.81 2
 -5 18 9 1985.87 478.647 2
 5 18 -9 2435.29 495.092 3
 -5 18 8 5686.58 747.131 2
 5 18 -8 6670.01 784.653 3
 5 -18 -8 6467.97 731.739 1
 5 18 -7 757.988 261.182 3
 -5 18 7 991.484 378.334 2
 5 -18 -7 87.1288 190.763 1
 -5 18 6 14040.6 1081.88 2
 5 -18 -6 15330.2 1038.72 1
 5 18 -6 14337 1202.74 3
 5 18 -5 -84.1457 177.568 3
 -5 18 5 29.6337 159.604 2
 5 -18 -5 329.573 176.125 1
 -5 18 4 52697.5 2085.68 2
 5 18 -4 53414.9 2484.51 3
 5 -18 -4 51654 1935.92 1
 -5 18 3 1037.94 264.98 2
 5 18 -3 551.441 188.168 3
 5 18 -2 49770.9 2426.77 3
 -5 18 2 53005.5 1909.37 2
 5 18 -1 2376.63 534.634 3
 5 18 0 6094.45 819.237 3
 5 18 0 7584.18 677.975 2
 5 18 1 1122.38 271.805 2
 5 18 1 818.887 313.94 3
 5 18 2 3369.47 622.747 3
 5 18 2 4383.2 593.161 2
 5 18 3 543.307 252.853 3
 5 18 3 535.8 236.992 2
 5 18 4 79340.7 3282.01 3
 5 18 4 87639.5 3163.28 2
 5 18 5 2125.06 518.036 3
 5 18 5 2433.91 465.855 2
 5 18 6 22407.3 1642.83 3
 5 18 6 26368.8 1746.87 2
 5 18 7 95.094 168.823 3
 5 18 7 880.978 328.595 2
 5 18 8 7718.36 993.926 2
 5 18 8 5880.85 858.563 3
 5 18 9 2242.48 533.859 3
 5 18 9 3232.48 700.717 2
 5 18 10 1074.71 348.98 3
 5 18 10 923.646 377.501 2
 5 18 11 683.737 298.588 2
 -5 19 13 39615 2478.8 2
 -5 19 12 2655.08 622.943 2
 -5 19 11 1685.36 460.872 2
 -5 19 10 416.888 309.232 2
 5 19 -10 216.173 201.702 3
 -5 19 9 29852.2 1858.86 2
 5 19 -9 31172.7 1821.33 3
 -5 19 8 5329.22 728.872 2
 5 19 -8 6212.39 789.916 3
 -5 19 7 17803.9 1297.65 2
 5 19 -7 16749.3 1327.67 3
 -5 19 6 6350.95 734.888 2
 5 19 -6 6135.63 808.743 3
 -5 19 5 89598.4 3049.18 2
 5 19 -5 95866.8 3511.48 3
 -5 19 4 4136.4 544.857 2
 5 19 -4 3716.5 639.349 3
 5 19 -3 6664 866.696 3
 -5 19 3 8365.15 736.081 2
 5 19 -2 2488.46 544.297 3
 -5 19 2 3097.21 432.173 2
 5 19 -1 13595.4 1262.02 3
 5 19 0 1840.59 467.059 3
 5 19 1 24328.4 1709.17 3
 5 19 2 5780.43 828.267 3
 5 19 2 6888.39 731.425 2
 5 19 3 84823.3 3485.87 3
 5 19 3 93599.3 3178.34 2
 5 19 4 4083.28 642.771 2
 5 19 4 2747.72 613.193 3
 5 19 5 851.739 346.291 3
 5 19 5 1401.58 406.761 2
 5 19 6 267.947 236.572 2
 5 19 6 202.323 145.354 3
 5 19 7 6684.18 928.17 3
 5 19 7 7643.03 960.134 2
 5 19 8 1432.47 447.093 2
 5 19 8 1618.76 477.945 3
 5 19 9 8415.01 1058.88 3
 5 19 9 10715.8 1244.29 2
 5 19 10 2486.93 548.194 3
 5 19 10 4358.26 822.656 2
 -5 20 12 24193.5 1865.5 2
 -5 20 11 16025.9 1458.45 2
 -5 20 10 31920.9 2019.85 2
 5 20 -10 31158.1 1875.88 3
 -5 20 9 8462.3 981.926 2
 5 20 -9 9478.21 1005.74 3
 -5 20 8 1227.62 324.547 2
 5 20 -8 1040.58 360.672 3
 5 20 -7 3839.19 660.171 3
 -5 20 7 3842.63 613.735 2
 -5 20 6 10352.5 960.964 2
 5 20 -6 9807.09 1053.01 3
 5 20 -5 4115.41 688.026 3
 -5 20 5 4881.47 647.902 2
 5 20 -4 23580 1678.1 3
 -5 20 4 27071.8 1443.48 2
 5 20 -3 15421.8 1348.96 3
 5 20 -2 22943.4 1672.36 3
 5 20 -1 13393.4 1272.18 3
 5 20 0 7799.2 985.178 3
 5 20 1 128.426 211.128 3
 5 20 2 12132 1245.01 3
 5 20 3 4834.33 634.464 2
 5 20 3 3176.93 626.721 3
 5 20 4 65754.6 3102.76 3
 5 20 4 75633.7 2914.28 2
 5 20 5 14045.8 1373.74 3
 5 20 5 17581.4 1365.58 2
 5 20 6 8267.62 1041.28 3
 5 20 6 9424.7 1034.5 2
 5 20 7 10373.5 1133.6 2
 5 20 7 9022.88 1098.93 3
 5 20 8 6051.11 923.619 3
 5 20 8 8079.96 1030.35 2
 5 20 9 1440.58 431.052 2
 5 20 9 1062.97 357.63 3
 5 20 10 2173.48 600.106 2
 -5 21 12 3694.34 724.025 2
 -5 21 11 22.1101 248.454 2
 -5 21 10 188.03 252.426 2
 5 21 -10 134.861 156.952 3
 -5 21 9 7879.25 940.888 2
 5 21 -9 8557.3 984.174 3
 -5 21 8 20916.2 1503.94 2
 5 21 -8 20136.8 1556.7 3
 -5 21 7 5347.94 703.856 2
 5 21 -7 4521.62 748.873 3
 -5 21 6 43261.4 2058.52 2
 5 21 -6 40205.3 2249.73 3
 5 21 -5 19328.6 1546.69 3
 -5 21 5 19498.4 1287.47 2
 5 21 -4 11693.2 1197.15 3
 5 21 -3 -18.2237 141.546 3
 5 21 -2 486.888 180.927 3
 5 21 -1 7023.46 953.912 3
 5 21 0 28582.9 1988.5 3
 5 21 1 1372.47 429.907 3
 5 21 2 59699.6 2962.12 3
 5 21 3 26819.7 1917.25 3
 5 21 4 14563.2 1411.36 3
 5 21 5 4375.46 772.165 3
 5 21 5 7427.28 881.883 2
 5 21 6 918.062 351.328 3
 5 21 6 2445.36 511.764 2
 5 21 7 127.924 149.456 3
 5 21 7 639.729 294.511 2
 5 21 8 17024.6 1504.17 2
 5 21 8 15002.2 1458.52 3
 5 21 9 3902.68 776.773 3
 5 21 9 4891.13 843.01 2
 5 21 10 25745 1951.03 2
 -5 22 11 18001.1 1569.17 2
 -5 22 10 1150.58 425.745 2
 5 22 -10 990.549 348.224 3
 -5 22 9 56206.2 2700.54 2
 5 22 -9 56228.4 2741.31 3
 -5 22 8 6459.56 841.889 2
 5 22 -8 7182.94 950.227 3
 -5 22 7 2773.46 536.414 2
 5 22 -7 2854.46 585.635 3
 5 22 -6 11550.5 1202.83 3
 5 22 -5 687.107 325.744 3
 5 22 -4 1124.55 427.481 3
 5 22 -3 21624.5 1695.03 3
 5 22 -2 -34.9274 167.681 3
 5 22 -1 79123.6 3457.85 3
 5 22 0 100.471 194.958 3
 5 22 1 13831.6 1380.6 3
 5 22 2 1471.18 452.069 3
 5 22 3 9334.29 1136.62 3
 5 22 4 10167.3 1205.76 3
 5 22 5 28814.7 2063.45 3
 5 22 6 1860.26 516.673 3
 5 22 7 39438.4 2218.94 2
 5 22 7 31731.3 2209.69 3
 5 22 8 -155.793 172.37 2
 5 22 8 -182.596 220.072 3
 5 22 9 4653.61 865.103 3
 5 22 9 7483.96 1009.95 2
 -5 23 11 -165.732 345.045 2
 -5 23 10 -15.5276 151.456 2
 -5 23 9 1209.97 387.542 2
 5 23 -9 811.243 380.12 3
 5 23 -8 11026.9 1195.78 3
 5 23 -7 25772 1846.48 3
 5 23 -6 37521.4 2269.89 3
 5 23 -5 1601.81 477.993 3
 5 23 -4 17660.4 1541.35 3
 5 23 -3 8285.88 1063.47 3
 5 23 -2 9048.72 1129.51 3
 5 23 -1 -125.898 283.482 3
 5 23 0 8997.83 1134.81 3
 5 23 1 3010.11 670.929 3
 5 23 2 24139.3 1882.84 3
 5 23 3 -661.388 340.428 3
 5 23 4 11037.5 1280.97 3
 5 23 5 13286.4 1405.7 3
 5 23 6 -54.3859 314.85 3
 5 23 7 4184.27 802.646 3
 5 23 8 16349.8 1587.56 3
 5 23 9 9819.27 1233.08 3
 5 24 -9 8791.83 1088.21 3
 5 24 -8 28512.7 2002.42 3
 5 24 -7 215.83 303.269 3
 5 24 -6 6534.75 960.378 3
 5 24 -5 5330.09 866.24 3
 5 24 -4 5026.19 862.652 3
 5 24 -3 4942.66 841.764 3
 5 24 -2 21674.6 1797.71 3
 5 24 -1 42232.7 2541.2 3
 5 24 0 25516 1941.52 3
 5 24 1 339.613 264.713 3
 5 24 2 799.1 315.056 3
 5 24 3 2752.57 675.314 3
 5 24 4 400.507 191.748 3
 5 24 5 10055.8 1260.73 3
 5 24 6 52748.8 2973.91 3
 5 24 7 15766.4 1603.32 3
 5 25 -9 313.96 200.318 3
 5 25 -8 2601.26 630.888 3
 5 25 -7 35241.1 2309.28 3
 5 25 -6 1665.71 464.6 3
 5 25 -5 10557 1238.52 3
 5 25 -4 -101.02 184.869 3
 5 25 -3 13690.3 1426.87 3
 5 25 -2 5623.01 967.81 3
 5 25 -1 843.658 376.142 3
 5 25 0 5597.4 977.74 3
 5 25 1 43001.4 2659.03 3
 5 25 2 2018.57 602.149 3
 5 25 3 6542.58 1023.36 3
 5 25 4 1371.6 528.377 3
 5 25 5 35407 2438.54 3
 5 26 -6 5339.08 895.096 3
 5 26 -5 -521.411 313.47 3
 5 26 -4 2286.84 570.376 3
 5 26 -3 6852.15 1060.46 3
 5 26 -2 37439.5 2470.62 3
 5 26 -1 64.6952 271.184 3
 5 26 0 22437.1 1919.31 3
 5 26 1 946.95 460.937 3
 5 26 2 1187.33 454.686 3
 -6 0 18 57960.5 3050.23 2
 -6 0 17 113.687 161.82 2
 -6 0 16 161.063 273.497 2
 -6 0 15 -185.776 288.034 2
 -6 0 14 6448.87 841.51 2
 -6 0 13 -128.946 198.079 2
 -6 0 12 5663.35 719.401 2
 -6 0 11 50.966 141.122 2
 -6 0 10 72364.5 2602.48 2
 6 0 -9 28.1479 28.1221 3
 -6 0 9 117.812 134.586 2
 -6 0 8 15046.8 994.715 2
 6 0 -8 14962.6 601.885 3
 6 0 -7 107.118 86.8478 3
 -6 0 7 -27.0564 113.641 2
 6 0 -6 112708 2628.81 3
 -6 0 6 115119 3084.18 2
 6 0 -5 -7.9348 56.0656 3
 -6 0 5 52.0259 99.2551 2
 6 0 -4 122839 3146.2 1
 6 0 -4 121638 2946.65 3
 -6 0 4 124899 3110.93 2
 6 0 -3 167.699 124.426 1
 6 0 -3 192.121 121.705 3
 6 0 -2 61548.3 1913.03 3
 6 0 -2 58851.3 1849.5 1
 6 0 -1 68.4523 115.803 3
 6 0 0 210.324 153.473 3
 6 0 1 209.517 99.3902 3
 6 0 2 187.847 120.941 3
 6 0 3 117.362 116.782 3
 6 0 4 78036.7 2549.19 3
 6 0 5 190.713 141.998 3
 6 0 6 52178.9 2058.39 3
 6 0 7 6.4526 108.355 3
 6 0 8 1013.77 282.169 3
 6 0 9 49.0925 154.371 3
 6 0 10 1386.03 347.381 3
 6 0 11 -5.64301 210.26 2
 6 0 11 -457.744 210.481 3
 6 0 12 56589.9 2911.53 2
 6 0 13 24.9349 258.257 2
 6 0 14 22432.4 1887.55 2
 6 0 15 -280.473 283.313 2
 -6 -1 18 1245.97 499.289 2
 -6 1 18 2614.13 662.321 2
 -6 -1 17 30195 2054.47 2
 -6 1 17 30995 2134.04 2
 -6 -1 16 1473.42 432.669 2
 -6 1 16 2077.48 506.203 2
 -6 1 15 25660.3 1788.29 2
 -6 -1 15 23251.1 1675.24 2
 -6 1 14 4640.18 745.474 2
 -6 -1 14 4468.37 689.797 2
 -6 1 13 9914.91 1023.18 2
 -6 -1 13 11021 1035.49 2
 -6 -1 12 106.344 135.712 2
 -6 1 12 103.773 168.799 2
 -6 -1 11 113.82 142.469 2
 -6 1 11 375.528 203.448 2
 -6 -1 10 21111.1 1276.23 2
 -6 1 10 19622.2 1267.45 2
 -6 -1 9 109014 3174.11 2
 6 -1 -9 100658 2051.72 3
 -6 1 9 104388 3176.19 2
 6 1 -9 105461 2138.19 3
 -6 -1 8 6844.3 650.897 2
 -6 1 8 5918.16 626.679 2
 6 1 -8 6309.05 385.517 3
 6 -1 -8 6616.81 374.819 3
 -6 -1 7 15964.6 969.311 2
 -6 1 7 15740 995.72 2
 6 1 -7 15327.8 681.243 3
 6 -1 -7 15718.2 677.387 3
 -6 1 6 6066 590.269 2
 6 1 -6 6638.06 457.851 3
 6 -1 -6 6286.46 445.874 3
 -6 -1 6 5793.2 554.037 2
 6 1 -5 6240.57 467.374 3
 6 -1 -5 6033.95 461.171 3
 -6 -1 5 5565.53 513.662 2
 -6 1 5 5758.77 537.26 2
 6 1 -4 1365.71 271.457 1
 6 -1 -4 1291.8 275.351 1
 6 1 -4 1075.21 207.31 3
 6 -1 -4 948.11 191.035 3
 -6 1 4 1008.32 227.599 2
 6 -1 -3 34997.7 1377.2 1
 6 1 -3 35908.7 1357.54 1
 6 1 -3 34175.7 1298.48 3
 6 -1 -3 37709 1374.36 3
 6 1 -2 56111.1 1802.74 3
 6 -1 -2 59238.5 1859.33 3
 6 -1 -2 55228.1 1787.3 1
 6 1 -2 54377.2 1750.34 1
 6 1 -1 239574 5213.78 3
 6 -1 -1 242314 5246.51 3
 6 1 0 11426 776.774 3
 6 -1 0 11098.5 778.89 3
 6 1 1 41387.5 1609.92 3
 6 -1 1 40773.3 1619.93 3
 6 1 2 48057.7 1811.74 3
 6 -1 2 48885.4 1830.1 3
 6 1 3 102976 2997.59 3
 6 -1 3 107772 3070.27 3
 6 1 4 3746.6 490.952 3
 6 -1 4 3632.05 488.42 3
 6 1 5 7827.58 713.423 3
 6 -1 5 7448.55 710.042 3
 6 1 6 286.201 149.433 3
 6 -1 6 241.659 175.474 3
 6 1 7 39589 1765.27 3
 6 -1 7 41117.8 1819.39 3
 6 1 8 3881.84 544.575 3
 6 -1 8 3483.36 520.786 3
 6 1 9 3953.41 557.177 3
 6 -1 9 3451.04 517.207 3
 6 1 10 1205.66 310.05 3
 6 -1 10 1255.37 322.268 3
 6 1 11 10603.5 946.146 3
 6 -1 11 9971.56 912.505 3
 6 1 11 11986.2 1257.15 2
 6 -1 11 10767.7 1161.56 2
 6 1 12 809.439 387.604 2
 6 -1 12 1032.51 466.472 2
 6 -1 13 17610.8 1638.52 2
 6 1 13 18960.9 1714.24 2
 6 1 14 2954.56 690.354 2
 6 -1 14 2357.45 628.689 2
 6 -1 15 33060.7 2370.82 2
 6 1 15 34205 2439.86 2
 -6 -2 18 15651.4 1506.72 2
 -6 2 18 14824.6 1523.12 2
 -6 -2 17 2901.83 656.997 2
 -6 2 17 2856.42 652.526 2
 -6 -2 16 159.404 159.914 2
 -6 2 16 -753.968 335.218 2
 -6 -2 15 39.1646 250.153 2
 -6 2 15 147.156 187.648 2
 -6 -2 14 569.834 245.685 2
 -6 2 14 513.402 252.615 2
 -6 2 13 47106.2 2321.6 2
 -6 -2 13 43999 2154.63 2
 -6 -2 12 839.706 278.887 2
 -6 2 12 882.221 302.482 2
 -6 -2 11 12226.6 990.998 2
 -6 2 11 13300.4 1082.26 2
 -6 2 10 38002.6 1835.81 2
 -6 -2 10 39406.1 1769.19 2
 -6 -2 9 2813.45 428.15 2
 6 2 -9 3003.37 238.716 3
 -6 2 9 3237.59 491.811 2
 6 -2 -9 2636.77 191.938 3
 -6 2 8 17206.8 1107.49 2
 -6 -2 8 17765 1079.88 2
 6 2 -8 19084.1 739.535 3
 6 -2 -8 18302 683.745 3
 -6 -2 7 592.626 178.626 2
 -6 2 7 712.958 228.391 2
 6 2 -7 1013.27 166.877 3
 6 -2 -7 883.138 147.053 3
 -6 2 6 2070.18 364.627 2
 -6 -2 6 1755.41 301.294 2
 6 2 -6 2497.48 287.06 3
 6 -2 -6 2418.85 282.946 3
 6 2 -5 94327.1 2438.84 3
 6 -2 -5 100445 2494.1 3
 -6 -2 5 101084 2678.3 2
 -6 2 5 97648 2758.89 2
 6 -2 -4 75138.2 2334.85 1
 6 2 -4 78101.1 2288.62 1
 6 2 -4 80450.8 2189.38 3
 6 -2 -4 80588.9 2202.8 3
 -6 2 4 82545.5 2348.9 2
 6 -2 -3 80255.2 2313.76 1
 6 2 -3 77447.8 2225.07 1
 6 2 -3 79990.7 2231.7 3
 6 2 -2 47495.2 1602.36 3
 6 -2 -2 44079.4 1573.2 1
 6 2 -2 42432.9 1481.07 1
 6 2 -1 17799.6 943.757 3
 6 2 0 1385.88 280.591 3
 6 2 1 187.217 133.532 3
 6 2 2 4419.82 495.332 3
 6 2 3 37044.5 1568.03 3
 6 -2 3 37098.2 1606.83 3
 6 2 4 60684.6 2126.92 3
 6 -2 4 58850.1 2161.75 3
 6 2 5 75320.1 2505.58 3
 6 -2 5 79125.7 2614.78 3
 6 2 6 38083.3 1692.82 3
 6 -2 6 35687.1 1684.45 3
 6 2 7 19475.7 1194.19 3
 6 -2 7 19055.3 1213.9 3
 6 2 8 8200.06 792.852 3
 6 -2 8 8193.49 794.937 3
 6 2 9 2686.46 451.62 3
 6 -2 9 2293.44 429.059 3
 6 2 10 -115.061 121.709 3
 6 -2 10 -22.3758 121.592 3
 6 2 11 4776.64 637.258 3
 6 -2 11 3988.77 580.968 3
 6 2 11 5008.95 830.301 2
 6 -2 11 4841.87 798.511 2
 6 2 12 52957.6 2839.4 2
 6 -2 12 51486.8 2724.66 2
 6 2 13 14884.1 1527.25 2
 6 -2 13 17079.7 1593.5 2
 6 -2 14 7242.2 1065.52 2
 6 2 14 6965.26 1069.87 2
 6 2 15 7093.51 1096.67 2
 6 -2 15 6601.07 1063.9 2
 -6 -3 18 6590.93 971.404 2
 -6 3 18 8404.33 1161.45 2
 -6 -3 17 2272.67 536.644 2
 -6 3 17 3615.82 746.014 2
 -6 -3 16 20583.1 1580.42 2
 -6 3 16 20185.3 1672.12 2
 -6 -3 15 -1.65813 191.972 2
 -6 3 15 -136.813 249.819 2
 -6 -3 14 24668.4 1607.9 2
 -6 3 14 23618 1690.62 2
 -6 -3 13 169.053 158.032 2
 -6 3 13 70.7066 154.275 2
 -6 -3 12 2559.9 493.498 2
 -6 3 12 2464.73 480.97 2
 -6 3 11 6157.2 751.058 2
 -6 -3 11 5888.56 673.535 2
 -6 -3 10 29061.1 1482.17 2
 -6 3 10 29252.7 1611.71 2
 -6 -3 9 38519 1674.59 2
 6 3 -9 39490.1 1107.45 3
 -6 3 9 36514.2 1749.67 2
 6 -3 -9 34941.2 954.188 3
 6 3 -8 54170.7 1488.86 3
 -6 3 8 49768.3 2015.27 2
 -6 -3 8 52725.8 1947.46 2
 6 -3 -8 50607.9 1383.54 3
 6 -3 -8 52619.5 1332.97 3
 -6 3 7 11965.3 874.963 2
 6 3 -7 12927.9 659.553 3
 6 -3 -7 11267 607.304 3
 -6 -3 7 11833.2 803.223 2
 -6 3 6 60342.9 2091.94 2
 6 3 -6 57911.8 1721.96 3
 6 -3 -6 61900.2 1737.81 3
 -6 -3 6 58083.8 1924.89 2
 6 3 -5 31550.5 1201.19 3
 -6 3 5 32105 1383.79 2
 6 3 -4 3522.31 407.822 1
 6 -3 -4 3283.34 418.851 1
 6 3 -4 4682.25 435.029 3
 -6 3 4 4139.33 461.386 2
 6 -3 -3 11661.5 762.635 1
 6 3 -3 10923.4 694.747 1
 6 3 -3 11717 722.636 3
 6 3 -2 77664.9 2264.48 3
 6 -3 -2 80587.9 2289.79 1
 6 3 -2 76370.2 2138.98 1
 6 3 -1 84461.5 2445.87 3
 6 3 0 120352 3182.38 3
 6 3 1 837.318 227.221 3
 6 3 2 171396 4228.91 3
 6 3 3 18241.2 1075.68 3
 6 3 4 1353.07 289.897 3
 6 3 5 266.339 168.167 3
 6 -3 5 462.149 207.559 3
 6 3 6 14365.9 1010.62 3
 6 -3 6 12996.5 982.773 3
 6 3 7 31577.7 1569.6 3
 6 -3 7 31145.7 1596.32 3
 6 3 8 59267.1 2295.61 3
 6 -3 8 57733.7 2326.51 3
 6 3 9 709.155 244.65 3
 6 -3 9 367.228 196.763 3
 6 3 10 11568.2 971.953 3
 6 -3 10 12124.1 1009.98 3
 6 3 10 13640.8 1290.06 2
 6 3 11 895.471 273.209 3
 6 -3 11 682.156 254.207 3
 6 3 11 719.984 343.334 2
 6 -3 11 801.862 347.551 2
 6 3 12 765.201 416.739 2
 6 -3 12 117.272 174.399 2
 6 3 13 895.299 360.038 2
 6 -3 13 512.333 254.654 2
 6 3 14 16949.1 1677.17 2
 6 -3 14 12444.6 1370.09 2
 6 -3 15 3191.66 747.655 2
 -6 -4 17 3610.04 678.847 2
 -6 4 17 5399.24 904.385 2
 -6 -4 16 873.883 321.41 2
 -6 4 16 1262.89 439.457 2
 -6 -4 15 56.5296 122.604 2
 -6 4 15 -3.88956 230.466 2
 -6 -4 14 2129.39 468.164 2
 -6 4 14 2142.79 547.536 2
 -6 -4 13 26911.6 1594.11 2
 -6 4 13 24914 1691.02 2
 -6 4 12 15251.6 1265.71 2
 -6 -4 12 14139.4 1086.89 2
 -6 4 11 52207.3 2361.03 2
 -6 -4 11 55572.2 2202.52 2
 -6 -4 10 1300.73 288.326 2
 -6 4 10 1829.21 405.212 2
 6 4 -9 680.711 132.617 3
 -6 -4 9 393.592 174.531 2
 -6 4 9 368.915 208.995 2
 6 -4 -9 282.114 70.7346 3
 -6 -4 8 10737 789.805 2
 -6 4 8 9908.76 845.611 2
 6 4 -8 12031.1 626.456 3
 6 -4 -8 11356.3 579.172 3
 6 4 -7 11791.9 662.215 3
 -6 4 7 10539.5 839.614 2
 -6 -4 7 10985.4 765.016 2
 -6 4 6 28362.4 1371.9 2
 6 4 -6 29400.6 1151.29 3
 -6 -4 6 30842.8 1280.54 2
 -6 4 5 107171 3006.76 2
 6 4 -5 106855 2724.87 3
 6 -4 -4 28887.7 1300.37 1
 6 4 -4 27324.6 1164.6 3
 6 4 -4 29735.3 1211.71 1
 -6 4 4 29123.9 1279.47 2
 6 4 -3 199242 4391.8 1
 6 4 -3 201041 4496.69 3
 6 -4 -3 205261 4606.18 1
 -6 4 3 203618 4552.83 2
 6 -4 -2 38.8385 100.893 1
 6 4 -2 203.399 152.574 3
 6 4 -2 30.835 100.027 1
 6 4 -1 111462 2989.82 3
 6 4 0 39869.8 1578.66 3
 6 4 1 254.601 112.542 3
 6 4 2 49441.4 1873.21 3
 6 4 3 121940 3365.6 3
 6 4 4 271.769 143.55 3
 6 4 5 119520 3432.51 3
 6 4 6 1808.96 361.901 3
 6 4 7 28545.1 1503.06 3
 6 -4 7 28779 1551.58 3
 6 4 8 12811.6 995.609 3
 6 -4 8 12786.3 1026.04 3
 6 4 9 4214.86 587.234 3
 6 -4 9 3909.66 574.987 3
 6 4 10 335.328 178.797 3
 6 -4 10 385.704 224.562 3
 6 4 10 452.808 299.695 2
 6 4 11 45631.2 2099.13 3
 6 -4 11 44765.5 2111.71 3
 6 -4 11 51139.8 2549.97 2
 6 4 12 1335.19 454.951 2
 6 -4 12 1521.96 444.344 2
 6 4 13 32160.1 2281.23 2
 6 -4 13 31400.8 2153.38 2
 6 4 14 -72.1702 275.277 2
 6 -4 14 -1270.76 451.151 2
 6 -4 15 6828.75 1033.11 2
 -6 5 17 -69.5137 239.253 2
 -6 -5 16 6680.58 866.361 2
 -6 5 16 7038.79 1022.4 2
 -6 -5 15 8591.8 945.846 2
 -6 5 15 7742.19 1012.72 2
 -6 -5 14 28335.1 1682.75 2
 -6 5 14 28872.5 1912.81 2
 -6 5 13 1012.62 343.105 2
 -6 -5 13 1241.55 363.864 2
 -6 5 12 404.62 262.959 2
 -6 -5 12 146.335 128.325 2
 -6 -5 11 39773.9 1802.47 2
 -6 5 11 39398.4 2035.29 2
 -6 -5 10 27967.1 1423.7 2
 -6 5 10 24936.4 1522.76 2
 -6 -5 9 537.113 218.882 2
 -6 5 9 469.717 195.271 2
 6 5 -9 787.159 160.815 3
 6 -5 -9 1045.44 165.335 3
 -6 -5 8 84064.5 2540.96 2
 6 5 -8 85615.6 2210.53 3
 -6 5 8 86660.2 2855.13 2
 -6 5 7 42537.1 1811.56 2
 6 5 -7 44080.6 1474.31 3
 -6 -5 7 43377.6 1608.74 2
 -6 5 6 75855.3 2467.46 2
 6 5 -6 71900.4 2092.95 3
 -6 5 5 4073.5 501.983 2
 6 5 -5 4993.5 464.805 3
 6 5 -4 834.539 208.546 1
 -6 5 4 872.956 221.557 2
 6 -5 -4 1153.32 270.82 1
 6 -5 -3 434.035 169.846 1
 6 5 -3 331.035 132.421 1
 6 5 -3 629.243 182.5 3
 -6 5 3 328.6 167.699 2
 6 -5 -2 821.084 211.562 1
 6 5 -2 908.617 219.864 3
 6 5 -2 784.829 178.066 1
 6 5 -1 4190.39 474.369 3
 6 5 0 236563 5305.94 3
 6 5 1 131926 3497.78 3
 6 5 2 142611 3744.25 3
 6 5 3 204.432 153.693 3
 6 5 4 483.552 203.233 3
 6 5 5 1206.27 295.136 3
 6 5 6 8972.24 802.872 3
 6 5 7 4063.03 555.791 3
 6 5 8 64407.6 2435.63 3
 6 -5 8 61114 2441.09 3
 6 5 9 39577 1879.14 3
 6 -5 9 39510.7 1932.07 3
 6 5 10 25593.4 1501.5 3
 6 5 10 25961 1831.49 2
 6 -5 10 23659 1496.94 3
 6 5 11 372.466 223.991 3
 6 -5 11 371.4 203.229 3
 6 5 11 259.412 288.053 2
 6 -5 11 846.802 315.36 2
 6 5 12 42.622 324.851 2
 6 -5 12 262.046 264.491 2
 6 5 13 705.724 361.578 2
 6 -5 13 542.06 261.038 2
 6 -5 14 7576.39 1051.52 2
 6 5 14 7642.5 1137.23 2
 -6 6 17 -228.542 243.599 2
 -6 6 16 4422.95 828.106 2
 -6 -6 15 275.481 221.667 2
 -6 6 15 261.305 260.978 2
 -6 -6 14 4686.96 678.022 2
 -6 6 14 3846.65 708.325 2
 -6 -6 13 7767.48 810.12 2
 -6 6 13 7259.96 919.831 2
 -6 -6 12 42590.8 1928.96 2
 -6 6 12 42165.3 2204.44 2
 -6 -6 11 34064.7 1661.3 2
 -6 6 11 36483 1946.21 2
 -6 -6 10 607.747 193.205 2
 -6 6 10 835.823 320.612 2
 -6 6 9 1530.72 356.231 2
 -6 -6 9 1240.79 277.451 2
 6 6 -9 1735.28 245.242 3
 6 6 -8 32855.1 1219.5 3
 -6 6 8 28514.1 1530.18 2
 -6 -6 8 29395.2 1325.86 2
 -6 6 7 3591.56 511.077 2
 6 6 -7 3639.84 395.495 3
 -6 -6 7 3382.47 404.237 2
 -6 6 6 57826.4 2113.61 2
 6 6 -6 59204.8 1882.4 3
 -6 6 5 21728.1 1160.88 2
 6 6 -5 21104.4 1044.09 3
 6 6 -4 119550 2942.34 1
 6 6 -4 116156 3079.31 3
 6 -6 -4 117165 3173.63 1
 -6 6 4 119065 3189.31 2
 6 6 -3 12146.6 815.731 3
 6 -6 -3 12682 820.045 1
 6 6 -3 11033.3 664.856 1
 -6 6 3 11864 786.626 2
 6 6 -2 7471.14 537.832 1
 6 6 -2 7346.46 627.956 3
 6 -6 -2 6879.01 586.359 1
 6 6 -1 50899.6 1860.99 3
 6 6 0 51430.5 1910.1 3
 6 6 1 3358.41 458.646 3
 6 6 2 165584 4204.32 3
 6 6 3 118743 3380.2 3
 6 6 4 99040.3 3056.46 3
 6 6 5 1789.4 362.14 3
 6 6 6 2437.03 437.377 3
 6 6 7 29064.6 1558.18 3
 6 6 8 4868.1 627.282 3
 6 6 9 -143.609 258.788 3
 6 6 10 56076.7 2349.41 3
 6 -6 10 54630 2392.71 3
 6 6 11 12957.7 1075.21 3
 6 6 11 13032.6 1344.47 2
 6 -6 11 12096.3 1181.5 2
 6 -6 11 13258.3 1130.41 3
 6 6 12 16233 1587.07 2
 6 -6 12 13457 1298.69 2
 6 6 13 997.387 457.272 2
 6 -6 13 1137.77 416.733 2
 6 6 14 14875.3 1610.28 2
 -6 7 17 11699.7 1375.66 2
 -6 7 16 87.0962 265.865 2
 -6 7 15 33441.4 2194.89 2
 -6 -7 14 5471.87 710.266 2
 -6 7 14 5196.05 841.76 2
 -6 -7 13 8689.03 855.96 2
 -6 7 13 9339.07 1059.93 2
 -6 -7 12 186.382 146.696 2
 -6 7 12 -16.1537 177.585 2
 -6 -7 11 20385.3 1230.9 2
 -6 7 11 21816.4 1505 2
 -6 -7 10 1065.79 271.323 2
 -6 7 10 1287.86 354.801 2
 6 7 -9 3026.74 344.756 3
 -6 7 9 2442.18 461.759 2
 -6 -7 9 2618.96 397.234 2
 -6 -7 8 58.2234 91.0094 2
 -6 7 8 -2.26258 97.3362 2
 6 7 -8 27.9572 59.9096 3
 6 7 -7 119502 3042.44 3
 -6 7 7 118136 3466.59 2
 -6 7 6 8965.05 768.221 2
 6 7 -6 9472.8 695.286 3
 -6 7 5 11126 838.98 2
 6 7 -5 11234.3 771.022 3
 6 -7 -5 10388.9 802.815 1
 6 7 -4 8447.15 591.521 1
 6 7 -4 8811.06 695.56 3
 6 -7 -4 9004.25 718.822 1
 -6 7 4 9484.61 725.999 2
 6 7 -3 13926.1 896.621 3
 6 -7 -3 13825.5 869.138 1
 6 7 -3 12737 710.848 1
 -6 7 3 13791.3 872.019 2
 6 7 -2 26298.6 1273.05 3
 6 7 -2 25470.6 1036.77 1
 6 -7 -2 23789.8 1158.5 1
 6 7 -1 41469.7 1689.2 3
 6 7 0 12265.3 879.795 3
 6 7 1 344695 7396.09 3
 6 7 2 12584.6 929.517 3
 6 7 3 38588.3 1721.86 3
 6 7 4 15125.6 1058.56 3
 6 7 5 -11.0188 125.275 3
 6 7 6 1992.1 409.831 3
 6 7 7 13461.4 1044.23 3
 6 7 8 8953.66 861.259 3
 6 7 9 101797 3366.39 3
 6 7 9 103452 3895.92 2
 6 7 10 1134.81 299.666 3
 6 7 10 1263.72 393.362 2
 6 7 11 331.73 231.005 3
 6 7 11 545.854 364.859 2
 6 -7 11 412.432 205.211 3
 6 -7 11 764.57 296.004 2
 6 7 12 1420.45 526.978 2
 6 -7 12 1289.99 406.852 2
 6 7 13 -209.917 290.025 2
 6 7 14 416.525 253.933 2
 -6 8 16 4008.7 776.485 2
 -6 8 15 1290.08 536.295 2
 -6 8 14 11525.7 1233.35 2
 -6 -8 13 467.633 229.861 2
 -6 8 13 456.365 247.578 2
 -6 -8 12 60245.2 2287.49 2
 -6 8 12 56386.6 2661.47 2
 -6 -8 11 4992.49 588.413 2
 -6 8 11 6325.47 816.067 2
 -6 8 10 2956.62 527.458 2
 -6 -8 10 2331.25 376.974 2
 -6 -8 9 42.3826 84.0147 2
 6 8 -9 167.891 96.3632 3
 -6 8 9 303.57 179.157 2
 -6 8 8 781.338 282.628 2
 6 8 -8 829.376 208.827 3
 -6 -8 8 777.22 203.313 2
 6 8 -7 9315.91 692.634 3
 -6 8 7 8700.29 805.81 2
 -6 8 6 34176.9 1592.01 2
 6 8 -6 35604.2 1472.07 3
 -6 8 5 4572.25 541.466 2
 6 8 -5 5660.02 561.547 3
 6 -8 -5 4448.53 527.686 1
 6 8 -4 124310 2990.36 1
 6 -8 -4 122014 3310.25 1
 6 8 -4 123813 3336.23 3
 -6 8 4 124186 3323.83 2
 6 8 -3 48717.7 1889.17 3
 6 -8 -3 53262.9 1868.26 1
 6 8 -3 51627.9 1581.44 1
 -6 8 3 52677.9 1832.36 2
 6 -8 -2 6983.99 614.03 1
 6 8 -2 7271.71 675.963 3
 6 8 -1 18982.8 1117.91 3
 6 8 0 27301.4 1387.36 3
 6 8 1 13583.5 976.683 3
 6 8 2 134067 3748.14 3
 6 8 3 1906.82 389.463 3
 6 8 4 59842.1 2293.82 3
 6 8 5 43439.1 1930.78 3
 6 8 6 11879.3 977.953 3
 6 8 7 344.603 205.332 3
 6 8 8 4996.39 656.652 3
 6 8 9 785.847 250.227 3
 6 8 9 1073.27 308.787 2
 6 8 10 28913.1 1689.19 3
 6 8 10 37048.6 2268.9 2
 6 8 11 2752.51 518.692 3
 6 8 11 2657.74 635.142 2
 6 -8 11 1364.55 383.203 3
 6 -8 11 2081.35 490.828 2
 6 8 12 15678.3 1561.44 2
 6 8 13 7481.79 1135.13 2
 -6 9 16 26796.5 2081.65 2
 -6 9 15 15908.3 1520.77 2
 -6 9 14 538.149 294.818 2
 -6 9 13 6387.5 896.268 2
 -6 9 12 10875.1 1116.66 2
 -6 9 11 23991.5 1633.86 2
 -6 -9 11 26727.4 1349.42 2
 -6 9 10 4686.24 684.072 2
 -6 -9 10 4568.1 509.462 2
 6 9 -10 5176.64 481.675 3
 6 9 -9 19067.1 996.195 3
 -6 9 9 17086.5 1254.61 2
 -6 -9 9 17818.8 988.711 2
 6 9 -8 54047.5 1872.09 3
 -6 9 8 49410 2161.72 2
 6 9 -7 24964.2 1221.46 3
 -6 9 7 22759.5 1334.89 2
 -6 9 6 8754.76 783.845 2
 6 9 -6 9564.04 740.01 3
 -6 9 5 19380.3 1145.77 2
 6 -9 -5 22243.8 1198.94 1
 6 9 -5 20651.8 1145.25 3
 6 9 -5 19276.7 954.111 1
 6 -9 -4 1896.62 323.324 1
 -6 9 4 2031.08 355.017 2
 6 9 -4 1696.22 322.381 3
 6 9 -4 1836.86 259.375 1
 6 9 -3 15396.1 1002.98 3
 6 -9 -3 16056.4 965.477 1
 6 9 -3 15550 753.526 1
 -6 9 3 15980.2 942.564 2
 6 9 -2 34712.9 1587.97 3
 6 -9 -2 35775.5 1476.8 1
 6 9 -1 2029.1 379.069 3
 6 9 0 52173 2054.95 3
 6 9 1 72874.7 2551.51 3
 6 9 2 1066.55 284.443 3
 6 9 3 1094.26 296.047 3
 6 9 4 22998.6 1381.62 3
 6 9 5 1840.11 396.032 3
 6 9 6 14506.9 1111.74 3
 6 9 7 4919.72 651.646 3
 6 9 8 16860.4 1248.83 3
 6 9 9 36159 1904.4 3
 6 9 9 38712.7 2249.18 2
 6 9 10 4374.66 661.186 3
 6 9 10 5640.06 901.525 2
 6 9 11 -4.43151 144.963 3
 6 9 11 206.139 200.272 2
 6 9 12 131.1 197.425 2
 6 9 13 -37.5715 271.5 2
 -6 10 16 1741.25 554.865 2
 -6 10 15 12756.7 1376.12 2
 -6 10 14 1047.42 378.416 2
 -6 10 13 904.387 359.841 2
 -6 10 12 20925.1 1589.33 2
 -6 10 11 55159.6 2577.54 2
 6 10 -10 -125.508 86.2376 3
 -6 10 10 192.661 154.228 2
 -6 -10 10 113.107 115.76 2
 6 10 -9 2842.23 392.26 3
 -6 10 9 2818.01 514.096 2
 6 10 -8 1178.38 277.109 3
 -6 10 8 1082.96 301.625 2
 6 10 -7 34144.1 1514.08 3
 -6 10 7 32833.6 1648.18 2
 6 10 -6 14359.9 951.326 3
 -6 10 6 15148.3 1057.17 2
 6 10 -5 19816.3 948.08 1
 -6 10 5 20584.1 1200.94 2
 6 -10 -5 20702.3 1177.04 1
 6 10 -5 20860.6 1175.74 3
 6 10 -4 8947.69 772.848 3
 6 -10 -4 9223.5 739.016 1
 6 10 -4 8190.65 554.299 1
 -6 10 4 9171.35 753.527 2
 6 10 -3 92848.5 2313.73 1
 6 10 -3 96027.7 2960.7 3
 6 -10 -3 92765 2732.15 1
 -6 10 3 93250.7 2709.74 2
 6 10 -2 791.863 242.046 3
 6 -10 -2 640.034 192.143 1
 6 10 -1 10325.2 860.636 3
 6 10 0 12372.5 958.82 3
 6 10 1 32556.9 1629.7 3
 6 10 2 26287.7 1468.67 3
 6 10 3 16138.5 1151.76 3
 6 10 4 3801.35 562.894 3
 6 10 5 33587.3 1748.61 3
 6 10 6 7507.91 811.693 3
 6 10 7 6167.11 758.73 3
 6 10 8 219.199 158.906 3
 6 10 8 115.847 190.97 2
 6 10 9 3086.77 558.821 3
 6 10 9 3946.12 709.213 2
 6 10 10 12489.6 1117.42 3
 6 10 10 15897.3 1499.57 2
 6 10 11 20564.9 1461.6 3
 6 10 11 23028.7 1887.97 2
 6 10 12 243.373 259.627 2
 6 10 13 35355.6 2488.81 2
 -6 11 16 28515.2 2172.85 2
 -6 11 15 696.542 326.298 2
 -6 11 14 2025.19 538.882 2
 -6 11 13 2230.16 554.573 2
 -6 11 12 6079.68 840.36 2
 -6 11 11 10270.1 1076.41 2
 -6 11 10 32776.8 1903.32 2
 6 11 -10 36168.4 1503.69 3
 -6 11 9 8288.44 895.442 2
 6 11 -9 9446.58 755.039 3
 6 11 -8 81543.3 2580.67 3
 -6 11 8 75763.6 2830.38 2
 6 11 -7 217.326 125.032 3
 -6 11 7 80.6881 150.257 2
 -6 11 6 3703.6 516.15 2
 6 11 -6 3550.86 482.781 3
 6 -11 -6 3549.65 484.485 1
 -6 11 5 4822.76 590.164 2
 6 11 -5 3869.27 387.985 1
 6 11 -5 4230.4 528.188 3
 6 -11 -5 4717.91 551.52 1
 6 -11 -4 5084.59 562.621 1
 6 11 -4 4902.18 413.34 1
 6 11 -4 5006.57 591.764 3
 -6 11 4 4680.85 542.39 2
 6 -11 -3 152.596 94.4093 1
 6 11 -3 244.976 90.7111 1
 -6 11 3 247.09 164.762 2
 6 11 -3 -62.1917 145.924 3
 6 -11 -2 77392 2435.7 1
 6 11 -2 75812.4 2681.92 3
 6 11 -1 20687.9 1286.6 3
 6 11 0 139356 3988.66 3
 6 11 1 4114.65 567.307 3
 6 11 2 7188.16 762.554 3
 6 11 3 3554.52 562.218 3
 6 11 4 15450.1 1174.3 3
 6 11 5 4554.6 641.693 3
 6 11 6 37356.4 1931.65 3
 6 11 7 16481.3 1255.32 3
 6 11 8 21825.4 1478.82 3
 6 11 8 22163.9 1671.84 2
 6 11 9 1708.4 447.359 3
 6 11 9 1463.72 452.524 2
 6 11 10 27755 1723.48 3
 6 11 10 32182.5 2176.91 2
 6 11 11 4872.4 836.173 2
 6 11 12 1440.88 512.682 2
 6 11 13 2036.66 602.119 2
 -6 12 15 9274.39 1205.22 2
 -6 12 14 7210.6 1033.33 2
 -6 12 13 5649.7 854.458 2
 -6 12 12 1216.16 397.826 2
 -6 12 11 46095.6 2386.62 2
 -6 12 10 27278.5 1733.62 2
 6 12 -10 29264.5 1392.69 3
 -6 12 9 22517.9 1500.76 2
 6 12 -9 23853.2 1278.47 3
 6 12 -8 767.273 220.429 3
 -6 12 8 412.797 213.255 2
 6 12 -7 21537.8 1259.16 3
 -6 12 7 20901.7 1334.15 2
 -6 12 6 6784.89 715.503 2
 6 -12 -6 6388.88 674.909 1
 6 12 -6 7041.9 721.687 3
 -6 12 5 26177.2 1397.13 2
 6 12 -5 27812.1 1464.34 3
 6 12 -5 24532.3 1034.01 1
 6 -12 -5 26684.3 1366.09 1
 6 12 -4 12153.8 956.686 3
 6 -12 -4 13887.5 939.648 1
 6 12 -4 12043.5 647.922 1
 -6 12 4 13961.4 951.899 2
 6 12 -3 148615 4116.12 3
 6 -12 -3 144152 3742.52 1
 -6 12 3 147046 3782.67 2
 6 12 -2 18242.3 1221.34 3
 6 -12 -2 19512 1115.28 1
 6 12 -1 13019.4 1047.7 3
 6 12 0 17359.6 1211.45 3
 6 12 1 14732.9 1130.09 3
 6 12 2 2327.89 446.621 3
 6 12 3 17875.9 1276.06 3
 6 12 4 19126 1345.54 3
 6 12 5 87108.3 3151.59 3
 6 12 6 16631.3 1268.89 3
 6 12 7 1815.01 444.709 3
 6 12 7 3523.95 642.748 2
 6 12 8 611.064 240.342 3
 6 12 8 162.435 170.744 2
 6 12 9 812.399 270.599 3
 6 12 9 2166.09 564.745 2
 6 12 10 40.1474 167.641 3
 6 12 10 -174.266 266.354 2
 6 12 11 24702.2 1954.93 2
 6 12 12 8843.88 1225.25 2
 -6 13 15 15933.6 1578.18 2
 -6 13 14 19.4796 163.457 2
 -6 13 13 369.955 171.688 2
 -6 13 12 4014.18 718.768 2
 -6 13 11 156.46 232.091 2
 -6 13 10 20463.2 1501.27 2
 6 13 -10 22297.5 1242.55 3
 -6 13 9 32119.5 1832.18 2
 6 13 -9 33084.3 1585.51 3
 -6 13 8 35899.2 1874.93 2
 6 13 -8 37286.2 1722.33 3
 6 13 -7 51683.6 2110.76 3
 -6 13 7 48710.1 2146.22 2
 6 13 -6 1941.56 393.048 3
 -6 13 6 1595.42 373.201 2
 6 -13 -6 1439.66 345.427 1
 6 13 -6 1834.47 284.058 1
 -6 13 5 12531.9 961.914 2
 6 13 -5 13443.8 1025.33 3
 6 -13 -5 13285.8 951.75 1
 6 13 -5 11235.7 645.731 1
 6 -13 -4 14386.3 957.864 1
 6 13 -4 14815.6 1081.97 3
 6 13 -4 11925.5 620.397 1
 -6 13 4 14597 990.683 2
 6 13 -3 7855.18 793.045 3
 -6 13 3 8770.05 728.512 2
 6 -13 -3 8041.89 701.545 1
 6 13 -2 29896.6 1624.26 3
 6 13 -1 61480.9 2474.13 3
 6 13 0 4651.5 641.533 3
 6 13 1 2868.74 547.661 3
 6 13 2 4645.18 647.763 3
 6 13 3 9800.21 967.168 3
 6 13 4 7203.02 843.19 3
 6 13 5 14255.4 1199.02 3
 6 13 6 24693.3 1600.82 3
 6 13 6 25680.6 1684.27 2
 6 13 7 53964.3 2503.95 3
 6 13 7 55168 2657.74 2
 6 13 8 8783.82 969.972 3
 6 13 8 9670.87 1101.78 2
 6 13 9 32567.8 1946.91 3
 6 13 9 39800.4 2396.12 2
 6 13 10 5407.07 777.505 3
 6 13 10 7006.63 1021.36 2
 6 13 11 10712 1280.12 2
 6 13 12 3798.34 816.078 2
 -6 14 15 2618.07 648.73 2
 -6 14 14 17514.1 1616.93 2
 -6 14 13 532.935 300.071 2
 -6 14 12 27363.8 1910.29 2
 -6 14 11 5246.63 811.149 2
 -6 14 10 37150.4 2097.88 2
 6 14 -10 42847.3 1842.82 3
 6 14 -9 1004.03 281.702 3
 -6 14 9 1293.62 390.857 2
 6 14 -8 4789.54 616.664 3
 -6 14 8 4358.55 633.479 2
 6 14 -7 4175.97 565.417 3
 -6 14 7 4593.84 635.086 2
 6 -14 -7 3728.11 535.697 1
 6 14 -6 42830.4 1969.22 3
 -6 14 6 43417.5 1959.2 2
 6 -14 -6 40622.5 1831.36 1
 -6 14 5 3189.96 494.55 2
 6 14 -5 3728.33 567.807 3
 6 -14 -5 3379.44 479.114 1
 6 14 -4 97068.3 3247.15 3
 6 -14 -4 96813.2 2947.99 1
 -6 14 4 99366.9 3024.73 2
 6 -14 -3 18635.8 1091.77 1
 6 14 -3 18208.6 1262.4 3
 -6 14 3 19307.1 1115.08 2
 6 14 -2 104824 3465.3 3
 6 14 -1 11695.9 1029 3
 6 14 0 851.768 285.561 3
 6 14 1 89.4751 188.441 3
 6 14 2 6169.03 767.153 3
 6 14 3 384.63 235.225 3
 6 14 4 76550.8 3031.25 3
 6 14 5 20535.1 1502.21 3
 6 14 6 91809.1 3450.24 3
 6 14 6 93680.6 3524.77 2
 6 14 7 2435.57 531.07 3
 6 14 7 2348.01 565.215 2
 6 14 8 2503.07 552.178 3
 6 14 8 2984.3 663.828 2
 6 14 9 -54.772 248.438 3
 6 14 9 694.934 311.656 2
 6 14 10 7635.75 942.293 3
 6 14 10 10436.8 1237.97 2
 6 14 11 -143.115 352.504 2
 6 14 12 40304.2 2650.62 2
 -6 15 14 1704.48 556.125 2
 -6 15 13 3774.15 716.162 2
 -6 15 12 676.291 332.367 2
 -6 15 11 1006.35 368.448 2
 -6 15 10 -58.0904 235.338 2
 6 15 -10 -118.964 126.364 3
 -6 15 9 42242.2 2183.18 2
 6 15 -9 44887.9 1989.4 3
 6 15 -8 41.9963 148.56 3
 -6 15 8 256.969 159.792 2
 6 15 -7 46923.3 2114.82 3
 6 -15 -7 47320.5 2049.06 1
 -6 15 7 44821.1 2089.13 2
 -6 15 6 8999.75 856.971 2
 6 -15 -6 9931.13 857.539 1
 6 15 -6 9900.98 929.471 3
 -6 15 5 37254.4 1763 2
 6 15 -5 37628.9 1910.39 3
 6 -15 -5 37267.9 1698.63 1
 6 -15 -4 530.595 213.008 1
 -6 15 4 555.997 223.183 2
 6 15 -4 344.78 237.309 3
 6 15 -3 20354.1 1382.08 3
 6 -15 -3 21270 1202.47 1
 -6 15 3 20002.9 1149.54 2
 6 15 -2 3514.06 577.063 3
 6 15 -1 70215 2783.12 3
 6 15 0 5632.17 735.954 3
 6 15 1 61007.3 2639.45 3
 6 15 2 900.398 317.967 3
 6 15 3 11280.4 1092.74 3
 6 15 4 7334.43 893.591 3
 6 15 5 3687.76 623.247 3
 6 15 5 4812.88 707.662 2
 6 15 6 1173.29 349.066 3
 6 15 6 1546.72 428.27 2
 6 15 7 46558.9 2398.83 3
 6 15 7 53345.4 2651.73 2
 6 15 8 5161.47 774.513 3
 6 15 8 7597.65 1027.04 2
 6 15 9 36982.3 2139.64 3
 6 15 9 39697.8 2412.06 2
 6 15 10 1196.55 406.03 3
 6 15 10 1085.83 415.323 2
 6 15 11 11721.6 1358.24 2
 -6 16 14 8221.04 1118.01 2
 -6 16 13 14309.3 1450.01 2
 -6 16 12 13169.5 1332.39 2
 -6 16 11 6024.5 872.305 2
 -6 16 10 18665.4 1476.56 2
 6 16 -10 19789.2 1294.93 3
 -6 16 9 8585.43 963.275 2
 6 16 -9 11188 974.191 3
 -6 16 8 780.766 299.108 2
 6 -16 -8 750.076 235.901 1
 6 16 -8 981.159 287.116 3
 6 16 -7 5586.02 721.426 3
 -6 16 7 5301.44 704.272 2
 6 -16 -7 5179.62 641.985 1
 6 16 -6 3447.76 572.906 3
 -6 16 6 2812.21 496.436 2
 6 -16 -6 2824.33 468.44 1
 -6 16 5 27481.2 1505.28 2
 6 16 -5 27675.1 1667.5 3
 6 -16 -5 28048.6 1456.85 1
 6 16 -4 49761.9 2305.93 3
 6 -16 -4 49338.6 1943.47 1
 -6 16 4 46727.2 1962.85 2
 -6 16 3 815.166 243.596 2
 6 16 -3 1309.82 366.574 3
 6 -16 -3 1209.41 283.232 1
 6 16 -2 10330.4 1014.76 3
 6 16 -1 14896.9 1228.23 3
 6 16 0 1999.69 451.153 3
 6 16 1 1000.54 345.899 3
 6 16 2 5598.43 768.038 3
 6 16 3 47287.6 2358.5 3
 6 16 4 50658.8 2482.43 3
 6 16 4 49042.1 2318.35 2
 6 16 5 4533.15 711.514 3
 6 16 5 5612.68 778.626 2
 6 16 6 46604.5 2415.71 3
 6 16 6 49682.9 2484.2 2
 6 16 7 20294.2 1558.66 3
 6 16 7 24366.7 1782.81 2
 6 16 8 211.327 288.63 2
 6 16 8 -123.982 149.5 3
 6 16 9 6020.54 873.769 3
 6 16 9 7183.52 1017.04 2
 6 16 10 4973.91 788.38 3
 6 16 10 6828.6 1026.88 2
 6 16 11 23661.6 1958.04 2
 -6 17 14 28666.4 2149.08 2
 -6 17 13 2108.2 612.952 2
 -6 17 12 603.75 279.866 2
 -6 17 11 945.867 360.814 2
 -6 17 10 9045.68 1036.26 2
 6 17 -10 9882.32 935.937 3
 -6 17 9 15041.5 1289.49 2
 6 17 -9 17703.4 1275.79 3
 6 -17 -8 19144.7 1315.57 1
 -6 17 8 19257.5 1411.99 2
 6 17 -8 19147 1370.89 3
 6 17 -7 34578.8 1884.72 3
 -6 17 7 35143 1868.76 2
 6 -17 -7 32737.2 1705.58 1
 6 17 -6 41993.2 2127.46 3
 6 -17 -6 40948.8 1871.82 1
 -6 17 6 42140.4 2006.32 2
 -6 17 5 12027 986.486 2
 6 17 -5 11326.2 1078.89 3
 6 -17 -5 10075.6 858.171 1
 6 -17 -4 3920.88 520.959 1
 6 17 -4 4293.94 661.09 3
 -6 17 4 4292.5 555.102 2
 -6 17 3 283.258 122.898 2
 6 17 -3 382.202 204.645 3
 6 17 -2 5694.94 772.784 3
 6 17 -1 33028.7 1943.05 3
 6 17 0 63727.8 2777.49 3
 6 17 1 3116.32 572.682 3
 6 17 2 58047.9 2680.17 3
 6 17 3 6885.25 896.804 3
 6 17 3 9282.68 931.438 2
 6 17 4 2599.76 543.076 3
 6 17 4 2700.08 521.82 2
 6 17 5 422.261 268.378 3
 6 17 5 474.604 290.556 2
 6 17 6 354.229 225.339 3
 6 17 6 316.322 180.975 2
 6 17 7 14843.1 1365.47 3
 6 17 7 17736.4 1516.77 2
 6 17 8 46751.8 2587.65 2
 6 17 8 42278.6 2370.47 3
 6 17 9 11689.3 1314.77 2
 6 17 9 10646.1 1167.72 3
 6 17 10 19413 1722.76 2
 6 17 10 13420.5 1317.59 3
 6 17 11 2234.11 614.136 2
 -6 18 13 44225 2641.74 2
 -6 18 12 154.067 175.139 2
 -6 18 11 4104.04 719.045 2
 6 18 -10 -33.043 208.529 3
 -6 18 10 -105.366 244.286 2
 -6 18 9 4203.08 678.549 2
 6 -18 -9 3731.45 587.369 1
 6 18 -9 4333.72 661.259 3
 -6 18 8 1473.4 407.299 2
 6 18 -8 1172.76 318.038 3
 6 -18 -8 1657.69 376.402 1
 6 -18 -7 376.072 228.551 1
 6 18 -7 187.713 183.738 3
 -6 18 7 180.297 215.933 2
 6 18 -6 194.668 176.787 3
 -6 18 6 161.361 190.481 2
 6 -18 -6 84.6586 140.903 1
 -6 18 5 68695.6 2596.62 2
 6 18 -5 71593.1 2956.32 3
 6 -18 -5 70206.4 2493.46 1
 -6 18 4 2182.56 418.072 2
 6 18 -4 1896.54 484.138 3
 6 -18 -4 2110.03 386.022 1
 6 18 -3 17395.5 1392.11 3
 -6 18 3 16600.2 1078.55 2
 6 18 -2 -124.423 253.198 3
 6 18 -1 4021.32 681.729 3
 6 18 0 -54.1851 227.173 3
 6 18 1 997.52 329.615 3
 6 18 1 1282.06 332.696 2
 6 18 2 567.798 286.047 3
 6 18 2 244.814 211.966 2
 6 18 3 79005.7 2943.69 2
 6 18 3 69304.8 3069.12 3
 6 18 4 424.993 243.731 3
 6 18 4 1009.27 322.704 2
 6 18 5 16167.2 1421.51 3
 6 18 5 17830.9 1438.77 2
 6 18 6 170.502 223.848 3
 6 18 6 193.413 197.849 2
 6 18 7 15310.4 1407.38 3
 6 18 7 18437 1554.5 2
 6 18 8 2044.79 506.33 3
 6 18 8 2869.06 646.691 2
 6 18 9 4535.24 790.703 3
 6 18 9 6933.91 998.654 2
 6 18 10 11.9263 149.564 3
 6 18 10 107.773 243.937 2
 -6 19 13 -212.719 206.289 2
 -6 19 12 5179.93 893.249 2
 -6 19 11 269.977 236.624 2
 -6 19 10 3804.05 720.358 2
 6 19 -10 3730.3 593.8 3
 6 19 -9 2504.12 513.03 3
 -6 19 9 2029.89 494.948 2
 -6 19 8 26615.8 1711.31 2
 6 19 -8 28436.6 1757.78 3
 6 19 -7 3457.96 608.562 3
 -6 19 7 3078.21 534.692 2
 6 19 -6 80620 3222.31 3
 -6 19 6 80849.8 3007.83 2
 6 19 -5 322.129 297.543 3
 -6 19 5 93.1689 124.132 2
 -6 19 4 2599.6 458.929 2
 6 19 -4 2754.32 571.058 3
 6 19 -3 597.175 237.246 3
 -6 19 3 202.669 166.271 2
 6 19 -2 1812.79 468.992 3
 6 19 -1 361.309 215.917 3
 6 19 0 31340.1 1985.2 3
 6 19 1 5585.1 823.852 3
 6 19 2 55668.9 2762.79 3
 6 19 2 61490.6 2468.13 2
 6 19 3 393.113 257.818 3
 6 19 3 604.645 285.899 2
 6 19 4 3816.9 707.651 3
 6 19 4 3678.54 604.435 2
 6 19 5 1612.33 470.313 3
 6 19 5 973.475 315.527 2
 6 19 6 6009.62 893.072 3
 6 19 6 7157.06 924.483 2
 6 19 7 27.6999 204.482 3
 6 19 7 981.236 391.637 2
 6 19 8 60389.6 2996.55 3
 6 19 8 68390.4 3229.33 2
 6 19 9 1898.07 526.684 3
 6 19 9 3478.04 737.6 2
 6 19 10 23581 1932.83 2
 6 19 10 15846.4 1492.24 3
 -6 20 12 12108.6 1332.57 2
 -6 20 11 2407.78 574.828 2
 -6 20 10 4734.97 794.056 2
 6 20 -10 4950.6 734.382 3
 -6 20 9 3192.99 603.843 2
 6 20 -9 3961.3 678.758 3
 6 20 -8 219.907 194.578 3
 -6 20 8 -52.9433 190.936 2
 6 20 -7 2321.17 536.958 3
 -6 20 7 2892.7 530.52 2
 -6 20 6 12940.9 1105.31 2
 6 20 -6 12693.8 1220.49 3
 6 20 -5 40125.4 2241.11 3
 -6 20 5 39238.3 1917.75 2
 6 20 -4 8622.81 1020.37 3
 -6 20 4 8661.34 823.57 2
 6 20 -3 5371.79 818.415 3
 6 20 -2 18643.1 1532 3
 6 20 -1 9309.78 1082.03 3
 6 20 0 1866.85 501.202 3
 6 20 1 1141.84 425.589 3
 6 20 2 4254.84 737.228 3
 6 20 3 53039.3 2788.45 3
 6 20 3 60465.3 2559.98 2
 6 20 4 25418.6 1880.83 3
 6 20 4 31083.5 1833.11 2
 6 20 5 4825.65 775.675 2
 6 20 5 3633.24 678.839 3
 6 20 6 3601.04 676.051 2
 6 20 6 2188.33 571.602 3
 6 20 7 14115.7 1419.17 3
 6 20 7 16971.2 1491.64 2
 6 20 8 179.073 202.262 3
 6 20 8 371.475 161.517 2
 6 20 9 6429.22 981.498 2
 6 20 9 4021.28 780.42 3
 -6 21 12 984.943 410.478 2
 -6 21 11 1566.84 497.234 2
 -6 21 10 138.026 250.867 2
 -6 21 9 24775.4 1739.05 2
 6 21 -9 26591.9 1780.82 3
 6 21 -8 299.441 260.413 3
 -6 21 8 139.171 165.853 2
 -6 21 7 30749.1 1832.17 2
 6 21 -7 29381.2 1908.41 3
 -6 21 6 24777.6 1571.11 2
 6 21 -6 24534.8 1756.25 3
 6 21 -5 6912 937.03 3
 6 21 -4 7075.52 938.32 3
 6 21 -3 2517.2 546.61 3
 6 21 -2 38.7937 254.795 3
 6 21 -1 48976.4 2632.13 3
 6 21 0 12460.3 1296.61 3
 6 21 1 35305.8 2234.98 3
 6 21 2 24083.9 1832.56 3
 6 21 3 6760.98 997.88 3
 6 21 4 7870.08 1073.84 3
 6 21 5 640.848 216.456 2
 6 21 5 509.587 277.844 3
 6 21 6 569.133 240.699 3
 6 21 6 656.38 276.954 2
 6 21 7 34727.9 2305.62 3
 6 21 7 42500.7 2416.15 2
 6 21 8 10941.7 1307.72 3
 6 21 8 14156.5 1424.2 2
 6 21 9 16759.9 1591.14 3
 6 21 9 21057 1792.34 2
 -6 22 11 833.188 408.542 2
 -6 22 10 24532 1810.94 2
 -6 22 9 -41.8482 265.972 2
 6 22 -9 137.583 207.929 3
 6 22 -8 108.573 274.876 3
 -6 22 8 97.5609 190.312 2
 6 22 -7 2763.14 592.302 3
 -6 22 7 3276.84 598.777 2
 6 22 -6 12106 1251.95 3
 6 22 -5 3648.87 686.845 3
 6 22 -4 47265.4 2596.28 3
 6 22 -3 4584.31 782.264 3
 6 22 -2 28905.5 2022.03 3
 6 22 -1 7914.51 1054.2 3
 6 22 0 497.691 225.602 3
 6 22 1 231.492 265.508 3
 6 22 2 13399.8 1399.41 3
 6 22 3 4068.61 767.235 3
 6 22 4 41740 2537.85 3
 6 22 5 8306.54 1110.55 3
 6 22 6 25174.2 1970.7 3
 6 22 7 6677.3 1013.89 3
 6 22 7 7307.75 974.945 2
 6 22 8 141.808 309.734 3
 6 22 8 370.733 345.242 2
 6 22 9 -169.2 316.028 3
 -6 23 11 170.259 200.41 2
 -6 23 10 2823.11 573.603 2
 6 23 -9 15528.6 1426.91 3
 6 23 -8 13022.4 1300.84 3
 6 23 -7 15031.5 1403.8 3
 6 23 -6 -96.0299 240.886 3
 6 23 -5 11704.2 1285.83 3
 6 23 -4 8092.69 1052.08 3
 6 23 -3 2085.08 578.776 3
 6 23 -2 8273.63 1083.41 3
 6 23 -1 35533.2 2320.18 3
 6 23 0 1738.43 495.098 3
 6 23 1 7753.92 1065.87 3
 6 23 2 191.022 183.128 3
 6 23 3 5982.35 969.169 3
 6 23 4 2831.8 679.311 3
 6 23 5 1107.74 399.342 3
 6 23 6 19898 1797.21 3
 6 23 7 43349.8 2681.27 3
 6 24 -9 10590 1214.7 3
 6 24 -8 243.702 332.201 3
 6 24 -7 10490.4 1205.13 3
 6 24 -6 6570.36 953.697 3
 6 24 -5 4788.2 836.156 3
 6 24 -4 15303.6 1506.39 3
 6 24 -3 70445.6 3391.21 3
 6 24 -2 25725.1 1980.07 3
 6 24 -1 3340.32 697.434 3
 6 24 0 593.504 316.558 3
 6 24 1 4631.42 883.283 3
 6 24 2 3367.65 738.767 3
 6 24 3 5119.06 895.433 3
 6 24 4 19315.3 1785.48 3
 6 24 5 43409.5 2719.3 3
 6 25 -8 26822.1 2010.24 3
 6 25 -7 -192.776 227.448 3
 6 25 -6 531.609 370.442 3
 6 25 -5 942.917 425.798 3
 6 25 -4 1134.2 435.895 3
 6 25 -3 -201.509 326.013 3
 6 25 -2 34499.1 2361.95 3
 6 25 -1 6679.98 1036.21 3
 6 25 0 25197.8 2020.44 3
 6 25 1 147.924 212.701 3
 6 25 2 8297.5 1169.14 3
 6 25 3 2343.32 635.724 3
 6 26 -4 109.06 327.686 3
 6 26 -3 33560.1 2363.02 3
 6 26 -2 -49.0397 301.231 3
 6 26 -1 1281.66 470.453 3
 -7 0 18 -298.156 356.33 2
 -7 0 17 12323.7 1330.58 2
 -7 0 16 399.507 259.771 2
 -7 0 15 6242.17 865.246 2
 -7 0 14 126.222 159.125 2
 -7 0 13 34534.8 1955.65 2
 -7 0 12 252.139 161.225 2
 -7 0 11 4057.88 593.481 2
 -7 0 10 199.636 179.463 2
 -7 0 9 14641.8 1068.2 2
 7 0 -9 14847.7 645.105 3
 -7 0 8 111.521 154.267 2
 7 0 -8 101.501 80.3416 3
 -7 0 7 2275.63 386.914 2
 7 0 -7 2297.24 281.677 3
 -7 0 6 61.919 132.946 2
 7 0 -6 182.65 113.741 3
 7 0 -5 133014 3593.38 1
 7 0 -5 139870 3323.05 3
 -7 0 5 139110 3575.52 2
 7 0 -4 95.2237 99.5064 3
 7 0 -4 380.264 167.887 1
 7 0 -3 43129.4 1647.04 1
 7 0 -3 45595.6 1659.53 3
 7 0 -2 -168.885 143.068 3
 7 0 -2 209.481 179.072 1
 7 0 -1 29892.2 1367.74 3
 7 0 0 -37.2615 112.272 3
 7 0 1 5395.1 585.233 3
 7 0 2 187.989 146.868 3
 7 0 3 130514 3670.92 3
 7 0 4 80.2724 143.807 3
 7 0 5 4512.73 580.232 3
 7 0 6 27.0618 134.946 3
 7 0 7 15.731 98.3902 3
 7 0 8 -21.3381 200.587 3
 7 0 9 19964.1 1326.8 3
 7 0 10 124.511 130.219 3
 7 0 11 47086.5 2213.07 3
 7 0 12 -333.737 259.004 2
 7 0 13 890.175 370.892 2
 7 0 14 623.288 371.672 2
 -7 1 18 47833.7 2809.81 2
 -7 -1 18 45031.3 2669.21 2
 -7 -1 17 3164.68 681.077 2
 -7 1 17 2918.44 670.835 2
 -7 -1 16 1078.13 407.861 2
 -7 1 16 1719.39 479.861 2
 -7 -1 15 4289.26 717.802 2
 -7 1 15 4120.45 708.91 2
 -7 -1 14 10643.3 1091.68 2
 -7 1 14 10560.1 1113.36 2
 -7 -1 13 2145.67 472.961 2
 -7 1 13 2700.22 544.179 2
 -7 -1 12 3581.75 590.971 2
 -7 1 12 4272.91 651.672 2
 -7 -1 11 15453.5 1166 2
 -7 1 11 15176.3 1185.61 2
 -7 -1 10 84458.6 2930.3 2
 -7 1 10 82675.2 2949.49 2
 -7 -1 9 5401.03 650.152 2
 -7 1 9 5536.54 665.313 2
 7 1 -9 6248.53 406.133 3
 7 -1 -9 6040.04 384.744 3
 -7 -1 8 1420.18 318.029 2
 -7 1 8 964.988 272.692 2
 7 1 -8 1767.28 234.412 3
 7 -1 -8 1865.71 238.085 3
 7 1 -7 6790.95 496.171 3
 7 -1 -7 7038.12 501.358 3
 -7 -1 7 7449.62 684.091 2
 -7 1 7 6070.98 638.954 2
 7 1 -6 24881.1 1084.8 3
 7 -1 -6 29682.3 1156.23 3
 -7 -1 6 28517.3 1350.45 2
 -7 1 6 28503 1392.1 2
 7 1 -5 600.452 215.83 1
 7 -1 -5 638.323 238.346 1
 7 1 -5 467.691 136.714 3
 7 -1 -5 387.577 140.38 3
 -7 1 5 568.347 194.165 2
 7 1 -4 23175.2 1157.59 1
 7 -1 -4 22802.8 1170.9 1
 7 1 -4 23582.4 1101.95 3
 7 -1 -4 24648.6 1128.67 3
 7 -1 -3 54927.1 1908.8 1
 7 1 -3 54412.8 1866.64 1
 7 1 -3 53780.4 1844.02 3
 7 -1 -3 58182.4 1928.33 3
 7 -1 -2 206707 4768.76 1
 7 1 -2 210659 4744.28 1
 7 1 -2 215606 4838.97 3
 7 -1 -2 212160 4890.34 3
 7 1 -1 3469.87 443.286 3
 7 -1 -1 3730.76 469.535 3
 7 1 0 38258.8 1614.39 3
 7 -1 0 35237.1 1586.53 3
 7 1 1 30397.8 1439.06 3
 7 -1 1 28222.1 1415.31 3
 7 1 2 17467.5 1097.73 3
 7 -1 2 18359 1140.44 3
 7 1 3 28.5461 99.0283 3
 7 -1 3 160.786 116.288 3
 7 1 4 97322.4 3054.59 3
 7 -1 4 96266.2 3086.98 3
 7 1 5 26160.7 1429.67 3
 7 -1 5 24913.1 1417.89 3
 7 1 6 37566.1 1782.92 3
 7 -1 6 37307.6 1808.91 3
 7 1 7 11157.4 950.403 3
 7 -1 7 12091.4 1005.06 3
 7 1 8 63845 2503.42 3
 7 -1 8 65763.7 2568.31 3
 7 1 9 898.988 295.985 3
 7 -1 9 958.838 311.569 3
 7 1 10 6828.32 784.198 3
 7 -1 10 7049.85 798.466 3
 7 1 11 490.688 217.373 3
 7 -1 11 553.592 302.354 3
 7 1 11 498.755 286.903 2
 7 1 12 40187.5 2466.48 2
 7 -1 12 37634.3 2368.64 2
 7 1 13 13687.7 1485.32 2
 7 -1 13 13415.5 1426.95 2
 7 1 14 20546 1878.26 2
 7 -1 14 20955.1 1850.3 2
 -7 -2 18 799.888 403.689 2
 -7 2 18 168.668 244.717 2
 -7 -2 17 7198.42 993.887 2
 -7 2 17 9075.75 1180.89 2
 -7 -2 16 5314.22 801.827 2
 -7 2 16 4858.15 833.524 2
 -7 -2 15 594.683 288.548 2
 -7 2 15 724.985 329.045 2
 -7 -2 14 46609.4 2344.48 2
 -7 2 14 49680.4 2513.7 2
 -7 -2 13 16928.3 1306.2 2
 -7 2 13 15759.7 1326.32 2
 -7 -2 12 13337.3 1111.98 2
 -7 2 12 12909.2 1149.48 2
 -7 -2 11 14918.2 1136.26 2
 -7 2 11 13450.5 1127.15 2
 -7 -2 10 4382.69 603.3 2
 -7 2 10 5370.79 687.622 2
 -7 -2 9 24724.1 1376.51 2
 -7 2 9 23829.8 1420.89 2
 7 2 -9 26959.5 953.118 3
 7 -2 -9 25445.8 882.688 3
 -7 2 8 13325.2 1006.16 2
 7 2 -8 14231.5 714.083 3
 7 -2 -8 13630 675.318 3
 -7 -2 8 13973 978.24 2
 -7 2 7 230.3 164.65 2
 7 2 -7 341.983 124.548 3
 7 -2 -7 431.822 139.523 3
 7 2 -6 46604.4 1565.75 3
 7 -2 -6 49185.9 1608.06 3
 -7 -2 6 46364.4 1791.66 2
 -7 2 6 46994.6 1886.61 2
 7 2 -5 149215 3865.59 1
 7 -2 -5 148021 3940.8 1
 7 2 -5 153128 3639.93 3
 -7 2 5 155852 3936.23 2
 7 2 -4 8839.45 685.909 1
 7 -2 -4 8130.53 689.227 1
 7 2 -4 9350.58 669.424 3
 7 -2 -4 9786.06 699.697 3
 7 2 -3 15969.9 914.8 3
 7 -2 -3 14744.6 922.209 1
 7 2 -3 14649.1 877.568 1
 7 -2 -3 16101 933.533 3
 7 -2 -2 1968.74 344.05 1
 7 2 -2 1970.88 322.152 1
 7 2 -2 2032.69 338.812 3
 7 -2 -2 1526.67 291.343 3
 7 2 -1 5722.88 576.366 3
 7 -2 -1 6705.22 624.608 3
 7 2 0 15291.4 972.167 3
 7 -2 0 16926.6 1036.23 3
 7 2 1 15497.4 999.052 3
 7 -2 1 15816.2 1033.55 3
 7 2 2 40167 1711.84 3
 7 -2 2 40824 1771.4 3
 7 2 3 58945.6 2211.65 3
 7 -2 3 62416.4 2305.7 3
 7 2 4 48783 1992.54 3
 7 -2 4 51388.5 2099.14 3
 7 2 5 1495.05 331.055 3
 7 -2 5 1202.16 322.27 3
 7 2 6 6182.03 689.266 3
 7 -2 6 6397.94 723.21 3
 7 2 7 7279.85 766.968 3
 7 -2 7 6687.99 751.774 3
 7 2 8 11245.3 972.298 3
 7 -2 8 12159.1 1031.33 3
 7 2 9 3773.75 581.904 3
 7 -2 9 4361.45 631.671 3
 7 2 10 10746.9 997.21 3
 7 -2 10 12173.9 1063.69 3
 7 2 11 58187.2 2496.57 3
 7 -2 11 55484 2445.39 3
 7 2 11 62287.5 3036.09 2
 7 2 12 18518.9 1686.9 2
 7 -2 12 18414.1 1633.74 2
 7 2 13 -232.066 423.086 2
 7 -2 13 13.6831 254.48 2
 7 2 14 2940.08 702.2 2
 7 -2 14 2777.93 691.156 2
 -7 -3 18 3519.32 702.134 2
 -7 -3 17 23193.6 1782.81 2
 -7 3 17 24401.6 1937.31 2
 -7 -3 16 510.296 270.752 2
 -7 3 16 243.277 176.787 2
 -7 3 15 14583.6 1381.35 2
 -7 -3 15 13276.5 1239.47 2
 -7 3 14 3401.58 662.492 2
 -7 -3 14 2859.92 544.02 2
 -7 3 13 3438.89 628.298 2
 -7 -3 13 2898.07 536.262 2
 -7 -3 12 328.092 187.599 2
 -7 3 12 473.294 189.513 2
 -7 -3 11 46776.3 2100.65 2
 -7 3 11 48631.7 2267.14 2
 -7 -3 10 8454.21 812.691 2
 -7 3 10 7370.79 810.641 2
 -7 -3 9 7875.49 752.555 2
 -7 3 9 8196.45 827.211 2
 7 3 -9 9525.56 552.871 3
 7 -3 -9 8820.71 490.175 3
 -7 -3 8 255.531 166.798 2
 -7 3 8 450.913 219.867 2
 7 3 -8 253.002 105.941 3
 7 -3 -8 510.982 137.118 3
 -7 3 7 61739.9 2259.6 2
 7 3 -7 60310.6 1825.62 3
 7 -3 -7 60110.7 1802.8 3
 -7 -3 7 58578.6 2078.59 2
 7 3 -6 52502.9 1720.43 3
 7 -3 -6 54780.6 1761.56 3
 -7 3 6 53334.7 2026.45 2
 7 3 -5 24266.2 1213.39 1
 7 -3 -5 23915.9 1279.64 1
 7 3 -5 25507.1 1145.5 3
 7 -3 -5 27167.5 1182.69 3
 -7 3 5 25515.1 1273.01 2
 7 -3 -4 5440.4 561.245 1
 7 3 -4 5054.98 510.582 1
 7 3 -4 5721.89 530.806 3
 7 3 -3 117358 3172.76 3
 7 -3 -3 125189 3290.33 1
 7 3 -3 124600 3153.15 1
 7 -3 -2 4959.75 521.192 1
 7 3 -2 4799.31 482.492 1
 7 3 -2 5468.31 554.908 3
 7 3 -1 152543 3874.04 3
 7 3 0 311.176 177.542 3
 7 3 1 52642.6 1998.59 3
 7 3 2 17686.3 1099.37 3
 7 3 3 7008.05 698.24 3
 7 3 4 3905.26 530.16 3
 7 -3 4 3868.57 537.589 3
 7 3 5 95701.2 3096.9 3
 7 -3 5 97406.2 3186.49 3
 7 3 6 1519.12 345.087 3
 7 -3 6 2027.03 412.075 3
 7 3 7 119920 3657.51 3
 7 -3 7 119552 3750.38 3
 7 3 8 810.502 263.252 3
 7 -3 8 828.151 276.589 3
 7 3 9 7750.2 832.974 3
 7 -3 9 8123.89 866.837 3
 7 3 10 1768.51 399.613 3
 7 -3 10 1765.29 407.844 3
 7 3 11 65.1992 151.581 3
 7 -3 11 102.433 189.458 3
 7 3 11 83.1517 236.871 2
 7 3 12 12223.9 1368.81 2
 7 -3 12 11334.3 1254.68 2
 7 3 13 39338.5 2573.21 2
 7 -3 13 36074.4 2366.53 2
 7 3 14 273.029 236.04 2
 7 -3 14 131.471 417.284 2
 -7 -4 17 117.979 181.179 2
 -7 4 17 460.486 262.324 2
 -7 -4 16 6436.77 867.689 2
 -7 4 16 6579.16 971.916 2
 -7 -4 15 8429.31 969.895 2
 -7 4 15 8600.25 1080.81 2
 -7 -4 14 52176.2 2441.81 2
 -7 4 14 50877 2630.22 2
 -7 -4 13 6745.2 808.243 2
 -7 4 13 5608.79 792.664 2
 -7 -4 12 33990.3 1822.4 2
 -7 4 12 38622.7 2081.19 2
 -7 -4 11 146.19 144.973 2
 -7 4 11 -2.86042 158.94 2
 -7 4 10 153.17 174.737 2
 -7 -4 10 127.079 153.342 2
 -7 4 9 31127.1 1660.45 2
 7 4 -9 33173.3 1167.04 3
 7 -4 -9 32630.3 1099.44 3
 -7 -4 9 29431.6 1494.62 2
 -7 4 8 28309.6 1538.33 2
 7 4 -8 30705 1171.54 3
 -7 -4 8 29429.4 1405.18 2
 -7 4 7 19850.5 1209.79 2
 7 4 -7 20183.2 966.986 3
 7 -4 -7 20373.5 955.978 3
 -7 -4 7 17995.7 1055.24 2
 7 4 -6 191403 4371.02 3
 -7 4 6 199058 4808.27 2
 7 4 -5 9139.34 711.068 1
 7 -4 -5 9005.6 771.803 1
 7 4 -5 10018.2 701.302 3
 -7 4 5 9936.68 795.677 2
 7 -4 -4 83819.3 2590.82 1
 7 4 -4 83735.2 2458.57 1
 7 4 -4 86439 2500.12 3
 -7 4 4 84503.2 2596.85 2
 7 4 -3 484.193 159.581 3
 7 -4 -3 618.35 224.409 1
 7 4 -3 509.83 157.882 1
 7 4 -2 15648.1 882.267 1
 7 4 -2 16030.8 977.537 3
 7 -4 -2 14210.7 918.489 1
 7 4 -1 20877.9 1145.11 3
 7 4 0 36102.4 1591.04 3
 7 4 1 23403 1278.19 3
 7 4 2 185031 4649.76 3
 7 4 3 571.023 219.26 3
 7 4 4 44105.2 1907.53 3
 7 4 5 10242.2 890.428 3
 7 4 6 667.11 231.037 3
 7 -4 6 859.479 291.897 3
 7 4 7 924.326 289.802 3
 7 -4 7 1141.8 334.394 3
 7 4 8 44026.2 2044.12 3
 7 -4 8 44849.9 2135.57 3
 7 4 9 3041.36 524.707 3
 7 -4 9 3054.84 554.056 3
 7 4 10 54989.5 2385.96 3
 7 -4 10 52315.9 2388.57 3
 7 4 11 3180.64 568.099 3
 7 -4 11 3299.75 568.586 3
 7 4 11 4467.14 825.65 2
 7 4 12 46927 2738.19 2
 7 -4 12 45338 2565.8 2
 7 4 13 2297.41 620.014 2
 7 -4 13 2737.01 674.4 2
 7 -4 14 1674.46 547.268 2
 7 -4 15 1563.86 526.089 2
 -7 5 17 16579.3 1623.96 2
 -7 -5 16 18134.4 1481.26 2
 -7 5 16 19086.1 1688.73 2
 -7 -5 15 8537.68 976.12 2
 -7 5 15 9569.79 1149.5 2
 -7 -5 14 163.498 193.981 2
 -7 5 14 111.13 268.188 2
 -7 5 13 6930.91 906.99 2
 -7 -5 13 7987.55 881.976 2
 -7 -5 12 9900.21 925.087 2
 -7 5 12 8947.26 992.106 2
 -7 -5 11 12522.7 997.466 2
 -7 5 11 12776.9 1129.42 2
 -7 5 10 12686.7 1092.21 2
 -7 -5 10 13441 998.812 2
 -7 5 9 55256.9 2342.05 2
 7 5 -9 59140.3 1744.72 3
 7 -5 -9 58580.8 1682.49 3
 -7 -5 9 58141.6 2155.67 2
 -7 5 8 50515.6 2134.36 2
 7 5 -8 53944.5 1725.95 3
 -7 -5 8 50506.6 1924.55 2
 -7 5 7 21943.3 1326.82 2
 7 5 -7 22090.6 1049.87 3
 7 5 -6 27738.8 1225.57 3
 -7 5 6 27971 1427.3 2
 7 5 -5 34925 1443.27 1
 7 -5 -5 33377.2 1541.52 1
 7 5 -5 32774.9 1390.95 3
 -7 5 5 33048.8 1532.92 2
 7 -5 -4 735.824 230.474 1
 7 5 -4 769.997 203.008 1
 7 5 -4 657.705 211.432 3
 -7 5 4 724.721 218.476 2
 7 5 -3 27797.6 1294.85 3
 7 -5 -3 25669.3 1274.63 1
 7 5 -3 25302.7 1153.27 1
 7 -5 -2 15873.9 972.699 1
 7 5 -2 17496.2 936.599 1
 7 5 -2 16499.1 1006.09 3
 7 5 -1 178898 4421.79 3
 7 5 0 80714.7 2602.06 3
 7 5 1 75053.7 2536.83 3
 7 5 2 31761.6 1553.21 3
 7 5 3 11769.2 925.078 3
 7 5 4 292.318 169.682 3
 7 5 5 20249.1 1282.35 3
 7 5 6 22699.7 1390.99 3
 7 5 7 49714 2176.15 3
 7 -5 7 49200.9 2234.31 3
 7 5 8 22772.5 1445.88 3
 7 -5 8 23799.7 1521.53 3
 7 5 9 5715.42 726.469 3
 7 -5 9 5508.55 735.024 3
 7 5 10 598.118 226.566 3
 7 -5 10 1086.98 363.246 3
 7 5 11 2121.63 481.539 3
 7 -5 11 2196.46 492.198 3
 7 5 11 2601.9 618.638 2
 7 5 12 -183.53 302.783 2
 7 -5 12 649.359 379.18 2
 7 5 13 8324.47 1196.21 2
 7 -5 13 7433.26 1045.81 2
 7 -5 14 13011.5 1410.26 2
 -7 6 17 1171.67 505.849 2
 -7 6 16 3462.15 737.478 2
 -7 -6 15 20894.9 1524.81 2
 -7 6 15 23978.6 1855.07 2
 -7 -6 14 28399.2 1720.54 2
 -7 6 14 25742.1 1867.47 2
 -7 -6 13 30114.7 1715.81 2
 -7 6 13 29935.5 1933.24 2
 -7 6 12 7048.65 894.391 2
 -7 -6 12 7112.94 775.457 2
 -7 6 11 7505.8 878.268 2
 -7 -6 11 7810.02 771.224 2
 -7 -6 10 2274.98 408.592 2
 -7 6 10 2760.91 535.829 2
 -7 -6 9 -57.5873 128.152 2
 7 6 -9 167.591 77.1921 3
 -7 6 8 9425.85 878.269 2
 7 6 -8 11753.9 737.79 3
 -7 -6 8 9764.46 765.624 2
 -7 6 7 121065 3554.36 2
 7 6 -7 113541 3032.5 3
 7 6 -6 29392 1316.88 3
 -7 6 6 30890 1523.81 2
 7 6 -5 29623.8 1310.72 1
 7 -6 -5 30406.1 1479.34 1
 7 6 -5 29668.3 1343.54 3
 -7 6 5 31717 1492.34 2
 7 6 -4 2466.05 365.379 3
 7 -6 -4 2554.04 406.262 1
 7 6 -4 2185.4 329.441 1
 -7 6 4 3030.22 437.841 2
 7 6 -3 33295.5 1466.21 3
 7 -6 -3 32543.3 1460.43 1
 7 6 -3 31472.7 1273.75 1
 7 -6 -2 12950.6 880.402 1
 7 6 -2 11764.4 863.978 3
 7 6 -1 6644.6 652.507 3
 7 6 0 8172.31 738.878 3
 7 6 1 265858 6101.33 3
 7 6 2 87515.2 2861.23 3
 7 6 3 45511.4 1953.95 3
 7 6 4 775.69 259.805 3
 7 6 5 45951.5 2030.12 3
 7 6 6 4238.42 599.816 3
 7 6 7 4019.06 592.745 3
 7 6 8 5483.87 702.383 3
 7 6 9 95452.9 3332.5 3
 7 -6 9 93855.8 3382.22 3
 7 6 10 13779.6 1161.75 3
 7 6 10 14790.8 1438.9 2
 7 -6 10 12490.7 1135.28 3
 7 6 11 15432.1 1233.58 3
 7 6 11 17400.4 1592.59 2
 7 -6 11 13808.2 1208.36 3
 7 6 12 14798.1 1554.92 2
 7 -6 12 12395.1 1286.56 2
 7 6 13 26336.4 2133.92 2
 7 -6 13 21411.5 1769.07 2
 -7 7 17 1652.21 426.738 2
 -7 7 16 49054.1 2829.6 2
 -7 7 15 -36.046 215.065 2
 -7 7 14 587.852 309.55 2
 -7 -7 14 541.085 238.212 2
 -7 -7 13 3553.92 575.684 2
 -7 7 13 4953.6 792.447 2
 -7 7 12 18811.8 1482.02 2
 -7 -7 12 18142.8 1227.51 2
 -7 -7 11 3.29895 141.171 2
 -7 7 11 -69.4386 176.223 2
 -7 7 10 44697.5 2174.82 2
 -7 -7 10 47616.4 1913.18 2
 7 7 -9 6794.32 562.592 3
 -7 7 9 6018.8 736.734 2
 -7 -7 9 6059.11 621.308 2
 -7 7 8 91300.1 3092.68 2
 7 7 -8 92527.4 2593.18 3
 -7 7 7 7694.46 784.26 2
 7 7 -7 7962.46 649.559 3
 -7 7 6 34763.8 1649.49 2
 7 7 -6 35055.2 1492.13 3
 7 -7 -6 33351.2 1630.34 1
 7 7 -5 31461 1334.02 1
 7 -7 -5 29795.7 1488.16 1
 7 7 -5 30732.1 1413.1 3
 -7 7 5 32119.5 1532.33 2
 7 7 -4 24736.9 1260.89 3
 7 -7 -4 24621 1299.43 1
 7 7 -4 25416.8 1146.93 1
 -7 7 4 23955.1 1265.72 2
 7 7 -3 414.889 186.474 3
 7 7 -3 353.515 129.694 1
 7 -7 -3 173.006 93.6185 1
 7 -7 -2 67788.9 2279.1 1
 7 7 -2 66222.2 2314.3 3
 7 7 -1 58297.5 2164.33 3
 7 7 0 107313 3225.15 3
 7 7 1 130.697 159.261 3
 7 7 2 10734.1 899.405 3
 7 7 3 184.933 145.717 3
 7 7 4 2326.5 447.099 3
 7 7 5 4213.93 598.042 3
 7 7 6 48022.6 2160.17 3
 7 7 7 6232.79 744.846 3
 7 7 8 47041.4 2188.99 3
 7 7 9 2776.27 525.557 3
 7 7 10 4000.07 639.296 3
 7 7 10 5115.78 873.846 2
 7 -7 10 4107.73 661.758 3
 7 7 11 -46.0438 208.958 3
 7 -7 11 264.077 204.788 3
 7 7 11 581.402 278.401 2
 7 7 12 -4.83949 279.99 2
 7 -7 12 270.165 188.028 2
 7 7 13 642.239 427.648 2
 -7 8 16 573.65 300.862 2
 -7 8 15 30367.9 2141.91 2
 -7 8 14 788.823 342.428 2
 -7 8 13 36797.4 2211.1 2
 -7 -8 13 38960.1 1889.57 2
 -7 8 12 16164.2 1378.11 2
 -7 -8 12 14875.7 1085.09 2
 -7 8 11 7684.8 911.813 2
 -7 -8 11 8092.07 763.564 2
 -7 8 10 238.588 209.784 2
 -7 -8 10 159.854 154.549 2
 7 8 -9 5428.9 521.239 3
 -7 8 9 4555.82 653.891 2
 -7 8 8 123.513 114.285 2
 7 8 -8 142.111 128.78 3
 -7 8 7 79758.1 2876.48 2
 7 8 -7 86228.6 2577.61 3
 7 8 -6 372.839 154.904 3
 7 -8 -6 536.498 222.247 1
 -7 8 6 444.972 208.931 2
 7 8 -5 40126.1 1544.44 1
 7 -8 -5 40203.8 1765.04 1
 7 8 -5 41823.1 1728.34 3
 -7 8 5 41923.4 1797.38 2
 7 8 -4 31988.1 1507.57 3
 7 -8 -4 34166.1 1564.11 1
 7 8 -4 32793.6 1314.13 1
 -7 8 4 34075.4 1542.06 2
 7 8 -3 19889.7 958.615 1
 7 8 -3 19710.4 1182.17 3
 7 -8 -3 21169 1172.41 1
 7 -8 -2 56206.3 2057 1
 7 8 -2 55998.3 2130.23 3
 7 8 -1 5752.22 644.284 3
 7 8 0 1425.78 331.425 3
 7 8 1 180863 4726.45 3
 7 8 2 20974.6 1298.82 3
 7 8 3 21425.7 1328.51 3
 7 8 4 32123.6 1681.62 3
 7 8 5 32810.4 1743.26 3
 7 8 6 10774.6 982.516 3
 7 8 7 403.416 211.775 3
 7 8 8 148.625 130.749 3
 7 8 9 55267.2 2471.46 3
 7 8 10 10271.3 1028.71 3
 7 -8 10 8502.64 955.828 3
 7 8 11 10433.7 1039.18 3
 7 8 11 12380 1365.99 2
 7 -8 11 10045.2 1047.63 3
 7 8 12 4087 867.69 2
 7 8 13 16288.5 1673.99 2
 -7 9 16 13399 1459.95 2
 -7 9 15 2572 682.423 2
 -7 9 14 8.17815 178.918 2
 -7 9 13 265.537 224.975 2
 -7 9 12 25932.7 1775.96 2
 -7 9 11 9700.01 1040.55 2
 -7 -9 11 9743.42 821.087 2
 -7 9 10 17161.5 1332.37 2
 -7 -9 10 16115.7 1025.65 2
 -7 9 9 17211.2 1294.93 2
 7 9 -9 21093.5 1105.14 3
 7 9 -8 23790.6 1212.11 3
 -7 9 8 21994.8 1410.2 2
 -7 9 7 5446.76 674.761 2
 7 9 -7 5280.54 569.192 3
 -7 9 6 8412.22 798.031 2
 7 -9 -6 8176.55 785.651 1
 7 9 -6 9168.09 764.937 3
 7 9 -6 8113.43 668.31 1
 -7 9 5 179.575 205.313 2
 7 9 -5 -65.9537 137.652 3
 7 9 -5 63.1707 92.6666 1
 7 -9 -5 -159.175 134.326 1
 7 9 -4 35215.5 1621.45 3
 7 -9 -4 35149.1 1608.1 1
 7 9 -4 34972.8 1345.2 1
 -7 9 4 36007.5 1608.26 2
 7 9 -3 66949.6 1978.3 1
 7 9 -3 64484.1 2366.95 3
 7 -9 -3 65728.7 2274 1
 7 9 -2 11454.7 917.716 3
 7 -9 -2 10869.5 836.674 1
 7 9 -1 6485.5 691.363 3
 7 9 0 115444 3511.41 3
 7 9 1 1213.81 315.523 3
 7 9 2 4585.44 616.16 3
 7 9 3 434.548 210.537 3
 7 9 4 2675.31 476.041 3
 7 9 5 61932.7 2531.06 3
 7 9 6 36406.8 1901.6 3
 7 9 7 8140.99 889.577 3
 7 9 8 15142.8 1232.84 3
 7 9 9 13921.3 1195.1 3
 7 9 9 14270.9 1390.55 2
 7 9 10 116.199 155.571 3
 7 9 10 159.612 200.761 2
 7 9 11 1540.84 423.011 3
 7 -9 11 1380.96 426.617 3
 7 9 12 354.423 301.892 2
 -7 10 16 9336.84 1233.2 2
 -7 10 15 5227.87 897.312 2
 -7 10 14 6133.35 915.541 2
 -7 10 13 5493.34 845.705 2
 -7 10 12 43784.9 2391.01 2
 -7 10 11 435.92 284.192 2
 -7 10 10 164.028 217.404 2
 7 10 -9 576.858 188.871 3
 -7 10 9 477.633 236.047 2
 7 10 -8 20408.9 1159.3 3
 -7 10 8 18903.1 1309.16 2
 -7 10 7 21976.5 1394.47 2
 7 10 -7 22908.6 1246.82 3
 7 10 -6 49488.7 1777.23 1
 -7 10 6 48925 2090.86 2
 7 -10 -6 47528.8 2022.04 1
 7 10 -6 51011.3 1992.83 3
 7 10 -5 5839.44 637.65 3
 7 -10 -5 4038.29 529.63 1
 7 10 -5 5176.35 491.543 1
 -7 10 5 4940.99 592.922 2
 7 10 -4 47830.1 1999.29 3
 7 -10 -4 49619.1 1949.51 1
 7 10 -4 46423.1 1589.26 1
 -7 10 4 50236.3 1961.92 2
 7 10 -3 6743.51 720.821 3
 7 -10 -3 6681.36 656.027 1
 7 10 -2 1927.22 410.06 3
 7 -10 -2 2169.74 372.576 1
 7 10 -1 14312.6 1073.13 3
 7 10 0 22210.1 1368.74 3
 7 10 1 28180.7 1557.94 3
 7 10 2 61498.1 2456.98 3
 7 10 3 709.965 299.011 3
 7 10 4 57856.5 2447.19 3
 7 10 5 2960.64 516.132 3
 7 10 6 177.642 137.522 3
 7 10 7 1762.04 442.547 3
 7 10 8 1080.89 377.781 3
 7 10 9 15403.3 1274.1 3
 7 10 9 16743.2 1511.78 2
 7 10 10 40696.6 2175.17 3
 7 10 10 44897.1 2618.81 2
 7 10 11 -114.687 165.652 3
 7 10 11 556.261 354.529 2
 7 10 12 24546.6 2065.41 2
 -7 11 15 2355.8 631.171 2
 -7 11 14 127.748 223.732 2
 -7 11 13 -168.183 300.052 2
 -7 11 12 672.425 317.412 2
 -7 11 11 57486.2 2701.72 2
 -7 11 10 3472.73 597.297 2
 7 11 -10 4280.15 501.505 3
 7 11 -9 60324.2 2170.24 3
 -7 11 9 55485.4 2494.3 2
 7 11 -8 190.339 107.726 3
 -7 11 8 135.067 230.96 2
 -7 11 7 8274.82 847.533 2
 7 11 -7 8941.78 793.475 3
 7 -11 -7 8900.44 849.539 1
 -7 11 6 4389.62 606.414 2
 7 11 -6 4852.99 498.354 1
 7 11 -6 5015.46 599.024 3
 7 -11 -6 4702.67 617.22 1
 7 11 -5 2977.73 477.249 3
 7 -11 -5 2731.23 438.764 1
 7 11 -5 2279.9 325.05 1
 -7 11 5 2760.95 462.609 2
 7 11 -4 5397.2 637.254 3
 7 -11 -4 5449.25 602.85 1
 7 11 -4 4225.27 410.014 1
 -7 11 4 6391.36 658.355 2
 7 -11 -3 128514 3569.1 1
 7 11 -3 131547 3835 3
 7 11 -2 -41.9739 135.764 3
 7 11 -1 44111.7 2007.74 3
 7 11 0 5512.2 688.76 3
 7 11 1 20082.8 1353.92 3
 7 11 2 4212.45 626.807 3
 7 11 3 837.856 289.454 3
 7 11 4 12.658 173.83 3
 7 11 5 100098 3486.3 3
 7 11 6 1737.57 446.974 3
 7 11 7 20860.4 1484.23 3
 7 11 8 -157.273 153.493 3
 7 11 9 28636.9 1821.37 3
 7 11 9 32058.8 2130.21 2
 7 11 10 5970.59 817.464 3
 7 11 10 7036.86 1078.27 2
 7 11 11 5384.36 913.392 2
 7 11 12 4651.74 885.514 2
 -7 12 15 5516.81 938.001 2
 -7 12 14 8992.63 1144.46 2
 -7 12 13 4445.07 813.473 2
 -7 12 12 33640.3 2106.56 2
 -7 12 11 7359.28 934.1 2
 7 12 -10 60.7093 121.148 3
 -7 12 10 129.596 177.593 2
 -7 12 9 566.741 294.413 2
 7 12 -9 1102.06 280.002 3
 7 12 -8 16200.8 1097.16 3
 -7 12 8 14924.2 1203.57 2
 7 12 -7 469.151 224.515 3
 -7 12 7 461.042 238.79 2
 7 -12 -7 47.2182 191.995 1
 -7 12 6 76976.3 2766.8 2
 7 12 -6 71980 2204.09 1
 7 12 -6 74319.9 2636.03 3
 7 -12 -6 70500.8 2603.86 1
 7 -12 -5 9940.38 854.081 1
 7 12 -5 9678.46 654.105 1
 7 12 -5 11026.7 932.114 3
 -7 12 5 10535.8 895.636 2
 7 12 -4 88455.4 2357.98 1
 7 12 -4 92207.8 3089.1 3
 7 -12 -4 92054.1 2907.69 1
 -7 12 4 90389.5 2878.75 2
 7 -12 -3 99.897 156.13 1
 7 12 -3 334.025 140.28 3
 -7 12 3 90.5567 114.145 2
 7 12 -2 350.008 125.564 3
 7 12 -1 17436.6 1246.63 3
 7 12 0 1312.3 346.418 3
 7 12 1 9624.94 934.913 3
 7 12 2 84979.4 3117.55 3
 7 12 3 20567.9 1439.26 3
 7 12 4 44225.1 2192.83 3
 7 12 5 4394.94 681.523 3
 7 12 6 2206.49 505.89 3
 7 12 7 1255.87 366.719 3
 7 12 8 9141.78 1007.52 3
 7 12 8 10465.8 1187.78 2
 7 12 9 6913.85 890.261 3
 7 12 9 7615.21 1061.1 2
 7 12 10 46013.6 2402.34 3
 7 12 10 53080.5 2918.56 2
 7 12 11 13232.1 1495.18 2
 7 12 12 19905.3 1848.79 2
 -7 13 15 332.962 199.572 2
 -7 13 14 -86.7714 337.416 2
 -7 13 13 2350.03 610.33 2
 -7 13 12 1416.32 466.192 2
 -7 13 11 38411.1 2213.21 2
 -7 13 10 33911.7 2001.71 2
 7 13 -10 38782.9 1729.6 3
 7 13 -9 3338.94 498.713 3
 -7 13 9 2535.02 530.416 2
 7 13 -8 7271.32 756.796 3
 -7 13 8 6775.88 809.106 2
 7 -13 -8 6387.04 762.345 1
 -7 13 7 14099.8 1145.61 2
 7 13 -7 14719.9 1090.2 3
 7 -13 -7 14073.2 1097.98 1
 7 13 -7 12738.6 841.608 1
 7 13 -6 4469.97 605.588 3
 7 13 -6 3876.43 433.524 1
 7 -13 -6 4135.95 563.241 1
 -7 13 6 5244.25 653.225 2
 -7 13 5 1066.26 280.086 2
 7 13 -5 422.833 174.167 3
 7 -13 -5 573.674 225.072 1
 7 13 -5 422.857 142.919 1
 7 13 -4 32136.5 1701.99 3
 7 13 -4 31465.1 1191.25 1
 7 -13 -4 31860.2 1564.6 1
 -7 13 4 32739.7 1590.89 2
 7 13 -3 106654 3506.09 3
 7 -13 -3 103901 3184.46 1
 -7 13 3 109827 3192.52 2
 7 13 -2 93726.8 3266.38 3
 7 13 -1 7879.08 860.194 3
 7 13 0 30973.9 1761.21 3
 7 13 1 19721.1 1402.75 3
 7 13 2 4071.99 642.582 3
 7 13 3 913.479 283.306 3
 7 13 4 22690.4 1549.54 3
 7 13 5 40115.1 2127.09 3
 7 13 6 75313.6 3066.41 3
 7 13 7 4150.08 689.256 3
 7 13 7 4893.46 782.144 2
 7 13 8 36304.7 2102.43 3
 7 13 8 41354.6 2410.66 2
 7 13 9 9724.08 1066.92 3
 7 13 9 13148 1382.52 2
 7 13 10 4445.23 736.723 3
 7 13 10 4046.65 832.844 2
 7 13 11 3813.83 807.402 2
 -7 14 14 281.749 255.615 2
 -7 14 13 22861.6 1815.4 2
 -7 14 12 7371.41 992.757 2
 -7 14 11 23436.4 1716.19 2
 -7 14 10 2462.77 544.649 2
 7 14 -10 3888.74 554.222 3
 7 14 -9 5371.26 647.776 3
 -7 14 9 4232.78 666.156 2
 7 14 -8 11.1284 129.296 3
 -7 14 8 43.7681 229.505 2
 7 -14 -8 -343.028 206.645 1
 -7 14 7 36842.6 1914.55 2
 7 14 -7 36185.7 1827.56 3
 7 -14 -7 34970.6 1798.89 1
 7 -14 -6 2096.59 396.402 1
 -7 14 6 2131.84 446.985 2
 7 14 -6 2875.72 507.535 3
 7 14 -5 80080.7 2895.74 3
 7 -14 -5 75005.7 2665.45 1
 -7 14 5 77444.7 2766.78 2
 7 14 -4 46045.3 2135.95 3
 7 -14 -4 46710.1 1949.48 1
 -7 14 4 48198.2 1997.44 2
 7 14 -3 39220 1987.02 3
 7 -14 -3 41263.6 1826.72 1
 7 14 -2 9835.78 960.586 3
 7 14 -1 11713.9 1067.7 3
 7 14 0 121.028 144.895 3
 7 14 1 25884.9 1669.15 3
 7 14 2 6175.23 816.301 3
 7 14 3 68023.5 2879.55 3
 7 14 4 17263.3 1379.73 3
 7 14 5 18077.1 1437.4 3
 7 14 6 8037.4 963.82 3
 7 14 7 1344.51 393.836 3
 7 14 7 2065.94 551.54 2
 7 14 8 412.871 186.772 3
 7 14 8 1276.47 426.744 2
 7 14 9 33124.4 2061.09 3
 7 14 9 40293.5 2474.7 2
 7 14 10 5546.27 852.666 3
 7 14 10 7256.83 1082.56 2
 7 14 11 31895 2343.2 2
 -7 15 14 3022.52 662.1 2
 -7 15 13 2953.8 648.398 2
 -7 15 12 3651.56 710.531 2
 -7 15 11 4432.98 751.899 2
 -7 15 10 45650.1 2396.62 2
 7 15 -10 47513.1 2067.05 3
 -7 15 9 4514.37 690.505 2
 7 15 -9 5061.89 660.165 3
 7 15 -8 20106.1 1354.96 3
 7 -15 -8 20750.4 1402.3 1
 -7 15 8 19696.5 1431.08 2
 -7 15 7 681.682 301.577 2
 7 -15 -7 397.032 275.502 1
 7 15 -7 316.901 177.016 3
 -7 15 6 5971.35 737.503 2
 7 15 -6 6980.89 801.719 3
 7 -15 -6 6905.11 757.108 1
 7 15 -5 803.156 277.738 3
 -7 15 5 1526.61 368.566 2
 7 -15 -5 1063.82 323.618 1
 7 -15 -4 37178.4 1717.13 1
 7 15 -4 36045.8 1916.94 3
 -7 15 4 35675.2 1714.11 2
 7 15 -3 4820.75 684.92 3
 7 15 -2 116192 3855.75 3
 7 15 -1 8762.29 961.393 3
 7 15 0 72470.5 2958.94 3
 7 15 1 131.084 169.439 3
 7 15 2 9072.48 1002.39 3
 7 15 3 2207.35 500.39 3
 7 15 4 22785.6 1644.18 3
 7 15 5 290.217 261.5 3
 7 15 6 62090 2863.44 3
 7 15 6 61348.3 2842.49 2
 7 15 7 11257.7 1195.07 3
 7 15 7 12538.5 1283 2
 7 15 8 42588 2389.02 3
 7 15 8 45841.4 2604.76 2
 7 15 9 524.032 311.821 2
 7 15 9 209.006 177.487 3
 7 15 10 1212.55 384.634 3
 7 15 10 1517.84 490.635 2
 7 15 11 2291.63 667.549 2
 -7 16 14 17763.5 1684.96 2
 -7 16 13 34832.6 2312.87 2
 -7 16 12 55.2489 223.815 2
 -7 16 11 6169.29 882.333 2
 -7 16 10 6715.01 903.268 2
 7 16 -10 7765.96 805.433 3
 7 16 -9 2275.18 450.52 3
 -7 16 9 1669.74 420.365 2
 7 -16 -9 2222.2 488.496 1
 -7 16 8 3526.7 611.112 2
 7 -16 -8 2635.15 503.471 1
 7 16 -7 14732.8 1198.95 3
 -7 16 7 16008.9 1249.91 2
 7 -16 -7 13497.1 1086.6 1
 -7 16 6 31969.1 1750.8 2
 7 16 -6 33156.5 1844.7 3
 7 -16 -6 30880.9 1659.08 1
 7 16 -5 46215.7 2245.3 3
 7 -16 -5 42797.4 1939.64 1
 -7 16 5 45912.8 2053.65 2
 7 -16 -4 2966.21 474.265 1
 7 16 -4 3074.67 561.996 3
 -7 16 4 3245.61 508.546 2
 7 16 -3 637.561 279.53 3
 7 16 -2 7010 851.619 3
 7 16 -1 32400.7 1909.64 3
 7 16 0 27143.8 1752.8 3
 7 16 1 21333.9 1566.06 3
 7 16 2 32028.8 1962.06 3
 7 16 3 57711 2729.05 3
 7 16 4 13039 1246.18 3
 7 16 5 13656.6 1289.62 3
 7 16 5 14214.1 1259.09 2
 7 16 6 10792.3 1150.98 3
 7 16 6 10357.6 1136.1 2
 7 16 7 -250.563 358.784 3
 7 16 7 389.077 298.747 2
 7 16 8 11158.1 1183.23 3
 7 16 8 12730 1353.76 2
 7 16 9 16599.2 1487.02 3
 7 16 9 19874.2 1762.45 2
 7 16 10 4930.79 831.437 3
 7 16 10 8046.68 1109.5 2
 -7 17 13 4264.58 817.762 2
 -7 17 12 6288.01 950.51 2
 -7 17 11 1853.03 505.899 2
 -7 17 10 7606.21 963.492 2
 7 -17 -10 8175.86 941.736 1
 7 -17 -9 32848.7 1894.85 1
 -7 17 9 34599 2037.75 2
 7 17 -9 34683.5 1876.06 3
 7 17 -8 7793.44 876.759 3
 -7 17 8 7099.79 874.805 2
 7 -17 -8 7558.3 847.82 1
 7 17 -7 13242.5 1171.55 3
 -7 17 7 14404.8 1204.22 2
 7 -17 -7 14241.4 1127.62 1
 7 17 -6 1331.27 414.414 3
 -7 17 6 1472.19 349.484 2
 7 -17 -6 1321.56 338.558 1
 7 17 -5 5233.43 745.311 3
 7 -17 -5 5345.95 641.401 1
 -7 17 5 4778.79 636.901 2
 7 17 -4 9571.66 1016.26 3
 7 -17 -4 8802.05 832.625 1
 -7 17 4 8789.42 834.775 2
 7 17 -3 2753.3 560.175 3
 7 17 -2 24123.8 1658.61 3
 7 17 -1 66364.6 2876.1 3
 7 17 0 6846.35 873.646 3
 7 17 1 14641.7 1310.51 3
 7 17 2 4523.3 746.351 3
 7 17 3 1864.89 447.93 3
 7 17 4 4030.81 699.245 3
 7 17 4 4782.01 707.893 2
 7 17 5 9393.41 1102.2 3
 7 17 5 10528.5 1112.26 2
 7 17 6 4529.66 793.505 3
 7 17 6 5348.63 849.284 2
 7 17 7 58648.9 2909.94 3
 7 17 7 61093.4 3017.94 2
 7 17 8 15593.4 1443.75 3
 7 17 8 20227.2 1752.49 2
 7 17 9 1144.56 448.214 3
 7 17 9 1173.47 461.931 2
 7 17 10 120.957 231.977 3
 7 17 10 -212.913 269.266 2
 -7 18 13 2322.78 610.711 2
 -7 18 12 1173.81 403.579 2
 -7 18 11 466.086 190.198 2
 -7 18 10 2552.77 535.896 2
 7 -18 -10 2980.78 566.252 1
 7 18 -9 565.755 252.809 3
 -7 18 9 532.408 167.108 2
 7 -18 -9 1101.59 369.809 1
 -7 18 8 18359.1 1434.22 2
 7 -18 -8 18308.1 1342.12 1
 7 18 -8 20364.6 1470.57 3
 7 18 -7 227.23 223.439 3
 7 -18 -7 253.606 243.764 1
 -7 18 7 71.5035 158.33 2
 7 18 -6 58662.4 2696.84 3
 7 -18 -6 59142.9 2411.74 1
 -7 18 6 61530.9 2554.15 2
 7 -18 -5 4483.44 605.302 1
 7 18 -5 4538.77 726.953 3
 -7 18 5 4818.12 644.462 2
 7 18 -4 6831.29 868.96 3
 -7 18 4 7467.42 781.946 2
 7 18 -3 334.941 185.296 3
 7 18 -2 5745.14 823.184 3
 7 18 -1 1001.79 301.823 3
 7 18 0 25188.7 1759.48 3
 7 18 1 130.804 164.16 3
 7 18 2 46036.7 2467.23 3
 7 18 3 571.429 289.79 3
 7 18 3 327.745 196.298 2
 7 18 4 35334.2 2177.45 3
 7 18 4 39769 2143.26 2
 7 18 5 -11.6375 148.923 3
 7 18 5 174.446 251.264 2
 7 18 6 6480.99 945.826 3
 7 18 6 7142.64 962.452 2
 7 18 7 607.319 327.389 3
 7 18 7 1054.33 487.449 2
 7 18 8 26436.9 1975.78 2
 7 18 8 24730.4 1859.47 3
 7 18 9 832.757 324.726 3
 7 18 9 1258.34 484.115 2
 7 18 10 9782.88 1157.36 3
 -7 19 12 724.516 332.487 2
 -7 19 11 3932.05 732.954 2
 -7 19 10 4198 761.028 2
 -7 19 9 32498.5 2009.81 2
 7 19 -9 31476.3 1877.7 3
 -7 19 8 3483.95 650.51 2
 7 19 -8 2818.08 543.681 3
 7 19 -7 15339 1319.2 3
 -7 19 7 16226.7 1303.84 2
 7 19 -6 410.801 245.848 3
 -7 19 6 335.202 263.606 2
 7 -19 -6 227.299 159.667 1
 7 19 -5 19126.6 1517.08 3
 7 -19 -5 19409.9 1296.24 1
 -7 19 5 20607.9 1372.51 2
 7 19 -4 259.791 195.77 3
 -7 19 4 299.951 191.994 2
 7 19 -3 7494.74 953.837 3
 7 19 -2 4829.98 756.601 3
 7 19 -1 48981.7 2565.36 3
 7 19 0 3056.21 623.436 3
 7 19 1 3811.72 701.884 3
 7 19 2 -228.095 275.027 3
 7 19 2 133.582 143.52 2
 7 19 3 2348.51 566.464 3
 7 19 3 3443.06 576.658 2
 7 19 4 940.486 356.381 3
 7 19 4 1942.04 460.366 2
 7 19 5 6926.58 984.754 3
 7 19 5 8301.4 1002.44 2
 7 19 6 1990.92 513.562 3
 7 19 6 2119.09 504.506 2
 7 19 7 83281.9 3653.77 3
 7 19 7 89154.1 3736.75 2
 7 19 8 1423.67 514.666 3
 7 19 8 1311.57 468.775 2
 7 19 9 214.877 218.017 3
 7 19 9 938.717 377.657 2
 7 19 10 -166.648 281.77 3
 -7 20 12 1644.56 546.156 2
 -7 20 11 3593.37 710.389 2
 -7 20 10 2669.85 627.087 2
 7 20 -9 3416.92 632.332 3
 -7 20 9 3191.53 630.648 2
 -7 20 8 5403.15 797.034 2
 7 20 -8 6280.76 846.01 3
 7 20 -7 20770.4 1588.08 3
 -7 20 7 19473.4 1452.17 2
 7 20 -6 27373.9 1854.17 3
 -7 20 6 30640.3 1772.31 2
 7 20 -5 10048.5 1120.44 3
 -7 20 5 8741.53 885.566 2
 7 20 -4 676.708 283.574 3
 -7 20 4 269.485 134.768 2
 7 20 -3 7511.48 974.824 3
 7 20 -2 8135.43 1038.88 3
 7 20 -1 8689.68 1076.83 3
 7 20 0 17509.8 1541.64 3
 7 20 1 12365.8 1291.4 3
 7 20 2 21573.4 1717.42 3
 7 20 3 30842.7 2090.97 3
 7 20 4 3939.8 741.595 3
 7 20 4 6405.68 870.251 2
 7 20 5 3499.22 717.142 3
 7 20 5 5699.72 838.672 2
 7 20 6 10430.5 1229.69 3
 7 20 6 11129.4 1212.87 2
 7 20 7 276.519 242.032 3
 7 20 7 450.909 344.711 2
 7 20 8 18117.2 1658.1 3
 7 20 8 25113.5 1945.35 2
 7 20 9 8338.02 1103.09 3
 7 20 9 10547.9 1285.42 2
 -7 21 11 252.133 226.308 2
 -7 21 10 35537.3 2223.46 2
 -7 21 9 12492.1 1290.89 2
 7 21 -9 12219.1 1209.84 3
 -7 21 8 14209.9 1304.21 2
 7 21 -8 14116.6 1324.9 3
 7 21 -7 4236.4 716.609 3
 -7 21 7 4605.97 716.698 2
 7 21 -6 157.388 173.342 3
 -7 21 6 452.219 276.686 2
 7 21 -5 6792.57 933.43 3
 7 21 -4 8215.36 1036.7 3
 7 21 -3 3751.3 704.875 3
 7 21 -2 38866.2 2361.07 3
 7 21 -1 12577.6 1323.33 3
 7 21 0 18152.4 1611.31 3
 7 21 1 950.897 416.008 3
 7 21 2 954.796 438.133 3
 7 21 3 1259.59 455.945 3
 7 21 4 15653.2 1522.17 3
 7 21 5 13.3761 176.612 3
 7 21 5 48.2893 249.26 2
 7 21 6 33955.1 2319.12 3
 7 21 6 40858.7 2365.92 2
 7 21 7 23286.5 1828.5 2
 7 21 7 19226.9 1733.71 3
 7 21 8 9927.96 1230.8 3
 7 21 8 15395.9 1530.77 2
 -7 22 11 8836.42 1139.93 2
 -7 22 10 1657.51 489.512 2
 7 22 -9 1571.68 479.292 3
 -7 22 9 2338.03 592.865 2
 7 22 -8 1311.15 441.229 3
 -7 22 8 2006.08 534.287 2
 7 22 -7 21101.4 1676.28 3
 7 22 -6 748.231 395.529 3
 7 22 -5 47879.8 2631.25 3
 7 22 -4 9657.69 1183.61 3
 7 22 -3 16713.2 1539.29 3
 7 22 -2 15162 1482.72 3
 7 22 -1 4514.05 833.487 3
 7 22 0 -69.7937 361.824 3
 7 22 1 38281.4 2452.77 3
 7 22 2 265.187 172.989 3
 7 22 3 53918 2975.95 3
 7 22 4 8787.39 1177.52 3
 7 22 5 10498.3 1264.73 3
 7 22 6 10504 1295.36 3
 7 22 7 3790.65 815.004 3
 7 22 8 884.997 370.02 2
 -7 23 10 27149.3 1992.15 2
 7 23 -9 3604.33 711.336 3
 7 23 -8 7036.02 970.773 3
 7 23 -7 934.815 359.645 3
 7 23 -6 361.366 293.793 3
 7 23 -5 -246.922 318.055 3
 7 23 -4 13517.9 1401.88 3
 7 23 -3 37444.3 2403.22 3
 7 23 -2 54664.3 2973.16 3
 7 23 -1 397.566 331.9 3
 7 23 0 10021.8 1250.82 3
 7 23 1 1963.17 565.892 3
 7 23 2 2719.92 649.877 3
 7 23 3 358.965 330.454 3
 7 23 4 23321.7 1958.4 3
 7 23 5 18614 1743.47 3
 7 24 -9 273.941 295.087 3
 7 24 -8 4307.77 758.773 3
 7 24 -7 3066.51 673.643 3
 7 24 -6 10516 1237.07 3
 7 24 -5 13684 1438.17 3
 7 24 -4 44541.2 2663.59 3
 7 24 -3 2712.36 670.426 3
 7 24 -2 2129.57 534.63 3
 7 24 -1 3617.56 785.164 3
 7 24 0 6526.51 1046.01 3
 7 24 1 5930.52 1002.76 3
 7 24 2 35438 2460.25 3
 7 24 3 25286.4 2085.91 3
 7 25 -7 4186.34 797.618 3
 7 25 -6 1098.67 443.652 3
 7 25 -5 182.118 294.753 3
 7 25 -4 5181.99 957.972 3
 7 25 -3 72217.1 3549.96 3
 7 25 -2 1932.43 561.93 3
 7 25 -1 11628.3 1403.36 3
 7 25 0 1813.51 558.938 3
 -8 0 18 21015.1 1828.05 2
 -8 0 17 144.193 212.94 2
 -8 0 16 6755.43 959.929 2
 -8 0 15 78.0576 144.253 2
 -8 0 14 45324.2 2407.98 2
 -8 0 13 -142.132 147.079 2
 -8 0 12 1909.34 462.892 2
 -8 0 11 54.3803 163.972 2
 -8 0 10 22433 1432.67 2
 -8 0 9 165.567 170.758 2
 8 0 -9 46.2213 82.4121 3
 8 0 -8 37874.2 1366.26 3
 -8 0 8 38068.1 1780.52 2
 -8 0 7 150.802 93.4319 2
 8 0 -7 199.03 93.3426 3
 8 0 -6 121776 3549.59 1
 8 0 -6 126009 3210.12 3
 -8 0 6 128193 3533.42 2
 8 0 -5 251.493 142.529 3
 8 0 -5 231.452 198.343 1
 8 0 -4 1330.2 306.861 1
 8 0 -4 1153.74 259.839 3
 8 0 -3 70.1196 129.988 1
 8 0 -3 0.88917 98.7134 3
 8 0 -2 30748.7 1445 1
 8 0 -2 30729.5 1458.44 3
 8 0 -1 139.09 136.964 3
 8 0 0 48018.9 1957.69 3
 8 0 1 94.5681 93.6503 3
 8 0 2 59978.1 2327.41 3
 8 0 3 -159.726 152.045 3
 8 0 4 638.547 238.479 3
 8 0 5 274.318 191.453 3
 8 0 6 320.444 160.286 3
 8 0 7 -201.908 261.801 3
 8 0 8 72018.4 2815.65 3
 8 0 9 -40.8332 168.94 3
 8 0 10 38377.8 2042.35 3
 8 0 11 -222.264 322.886 3
 8 0 12 188.931 226.581 2
 8 0 13 46.4319 250.337 2
 -8 -1 18 4631.23 863.865 2
 -8 1 18 3637.39 775.438 2
 -8 -1 17 599.161 204.508 2
 -8 1 17 269.905 150.487 2
 -8 1 16 -195.654 152.011 2
 -8 -1 16 123.137 173.688 2
 -8 -1 15 252.002 237.114 2
 -8 1 15 -56.5362 211.539 2
 -8 -1 14 7840.66 959.888 2
 -8 1 14 8974.6 1043.96 2
 -8 -1 13 52118.7 2519.46 2
 -8 1 13 53710.7 2576.6 2
 -8 -1 12 15528.6 1277.78 2
 -8 1 12 15146.7 1270.04 2
 -8 -1 11 40624.3 2021.81 2
 -8 1 11 38033.8 2037.58 2
 -8 -1 10 2281.09 447.539 2
 -8 1 10 2520.38 497.253 2
 -8 -1 9 1519.93 361.014 2
 8 1 -9 2300.76 284.428 3
 -8 1 9 1973.92 427.111 2
 8 -1 -9 2440.24 285.737 3
 -8 -1 8 336.842 162.519 2
 -8 1 8 37.8623 105.367 2
 8 1 -8 260.347 128.182 3
 8 -1 -8 69.1862 84.6431 3
 8 1 -7 35362 1367.11 3
 8 -1 -7 34978.4 1350.51 3
 -8 -1 7 34698.9 1625.16 2
 -8 1 7 33759.5 1654.06 2
 8 1 -6 5773.55 641.705 1
 8 -1 -6 5697.46 658.852 1
 8 1 -6 5662.52 531.818 3
 8 -1 -6 5912.06 540.812 3
 -8 1 6 5689.32 619.266 2
 8 1 -5 110196 3209.03 1
 8 -1 -5 108235 3224.79 1
 8 1 -5 111277 3024.86 3
 8 -1 -5 116755 3077.72 3
 8 -1 -4 20849.5 1180.49 1
 8 1 -4 20879.8 1161.76 1
 8 1 -4 21302.7 1123.32 3
 8 -1 -4 20682 1117.49 3
 8 1 -3 35009.9 1525.62 3
 8 -1 -3 36480.1 1573.16 3
 8 -1 -3 34445.4 1524.87 1
 8 1 -3 34572.5 1493.94 1
 8 -1 -2 5373.68 570.747 1
 8 1 -2 4751.91 541.829 1
 8 1 -2 5073.35 558.06 3
 8 -1 -2 4748.61 556.367 3
 8 -1 -1 2383.54 405.635 3
 8 1 -1 2277.22 386.559 3
 8 1 0 2244.39 404.14 3
 8 -1 0 2467.4 416.585 3
 8 1 1 2967.26 456.495 3
 8 -1 1 3079.54 471.35 3
 8 1 2 4605.64 588.845 3
 8 -1 2 4885.02 617.707 3
 8 1 3 93469.8 3093.71 3
 8 -1 3 95651.8 3162.82 3
 8 1 4 18687 1246.08 3
 8 -1 4 17701.9 1240.86 3
 8 1 5 15770.6 1166.51 3
 8 -1 5 15930.8 1178.98 3
 8 1 6 17817.6 1258.63 3
 8 -1 6 17066.6 1258.55 3
 8 1 7 50005.9 2237.09 3
 8 -1 7 49492 2263.83 3
 8 1 8 -149.444 222.665 3
 8 -1 8 -182.099 252.148 3
 8 1 9 888.38 281.733 3
 8 -1 9 990.83 335.256 3
 8 1 10 1777.15 434.175 3
 8 -1 10 1507.66 419.398 3
 8 1 11 50933.2 2417.49 3
 8 -1 11 48344.9 2360.85 3
 8 1 12 9836.21 1226.58 2
 8 -1 12 10316.5 1245.88 2
 8 1 13 30221.5 2237.12 2
 8 -1 13 25565.6 2042.71 2
 -8 -2 18 22590.2 1876.87 2
 -8 -2 17 13836.6 1408.85 2
 -8 2 17 11765.7 1353.57 2
 -8 -2 16 3656.29 694.507 2
 -8 2 16 3726.24 749.187 2
 -8 -2 15 19028.6 1545.79 2
 -8 2 15 19624 1625.93 2
 -8 -2 14 23759.4 1678.14 2
 -8 2 14 24841.6 1772.24 2
 -8 -2 13 4300.44 661.365 2
 -8 2 13 3518.68 649.337 2
 -8 -2 12 1125.1 347.903 2
 -8 2 12 1019.88 365.187 2
 -8 -2 11 1003.15 303.159 2
 -8 2 11 1359.09 395.896 2
 -8 2 10 17274.8 1279.03 2
 -8 -2 10 15743.7 1177.72 2
 -8 2 9 14658.1 1137.83 2
 8 2 -9 14384.2 758.469 3
 8 -2 -9 14371.7 729.84 3
 -8 -2 9 12718.4 1020.78 2
 8 2 -8 7391.95 556.574 3
 8 -2 -8 6353.42 510.476 3
 -8 -2 8 6524.24 691.062 2
 -8 2 8 5871.83 690.211 2
 8 2 -7 61217.3 1947.35 3
 8 -2 -7 63544.4 1969.8 3
 -8 -2 7 60715.7 2249.22 2
 -8 2 7 64036.2 2365.92 2
 8 2 -6 140862 3846.68 1
 8 -2 -6 136775 3893.63 1
 8 2 -6 141954 3531.08 3
 8 -2 -6 146109 3564.42 3
 -8 2 6 141086 3888.24 2
 8 2 -5 20547.1 1180.91 1
 8 -2 -5 21229.3 1233.78 1
 8 2 -5 22052.7 1127.54 3
 8 -2 -5 21254.5 1124.85 3
 8 2 -4 2221.21 367.052 1
 8 -2 -4 2705.17 426.039 1
 8 2 -4 2609.61 384.672 3
 8 -2 -4 3007.06 425.411 3
 8 2 -3 15775.2 983.323 3
 8 -2 -3 15183.4 996.081 3
 8 -2 -3 15065.8 980.843 1
 8 2 -3 15653.6 951.276 1
 8 -2 -2 11317.2 854.843 1
 8 2 -2 10728.9 838.554 3
 8 -2 -2 10762.5 847.008 3
 8 2 -1 41031.9 1747.49 3
 8 -2 -1 41576.6 1799.33 3
 8 2 0 17014 1100.62 3
 8 -2 0 17617.6 1157.55 3
 8 2 1 23412 1338.45 3
 8 -2 1 25125 1412.44 3
 8 2 2 31897.8 1611.15 3
 8 -2 2 32734.2 1679.36 3
 8 2 3 12341 970.07 3
 8 -2 3 11426.8 978.012 3
 8 2 4 8690.33 836.417 3
 8 -2 4 9379.02 898.279 3
 8 2 5 3003.89 494.373 3
 8 -2 5 3051.15 520.793 3
 8 2 6 1264.68 342.239 3
 8 -2 6 1347.29 362.689 3
 8 2 7 56365.6 2427.56 3
 8 -2 7 55982.2 2443.45 3
 8 2 8 46233.8 2202.21 3
 8 -2 8 44228 2189.8 3
 8 2 9 26433.3 1635.03 3
 8 -2 9 25677.5 1651.37 3
 8 2 10 31584.4 1836.87 3
 8 -2 10 28893.7 1767.44 3
 8 2 11 3406.84 613.329 3
 8 -2 11 2701.1 520.912 3
 8 2 12 3573.33 766.52 2
 8 -2 12 3498.72 725.933 2
 8 2 13 767.619 548.043 2
 8 -2 13 -35.8358 302.532 2
 8 -2 14 -20.9088 218.818 2
 -8 -3 17 280.206 200.656 2
 -8 3 17 951.52 354.588 2
 -8 -3 16 170.895 176.973 2
 -8 3 16 -132.772 161.42 2
 -8 -3 15 1510.97 476.682 2
 -8 3 15 929.67 400.679 2
 -8 -3 14 23973.5 1682.26 2
 -8 3 14 26024.5 1836.74 2
 -8 -3 13 3557.41 617.048 2
 -8 3 13 3231.34 620.406 2
 -8 -3 12 83886.2 3125.09 2
 -8 3 12 81136.3 3224.34 2
 -8 -3 11 1649.79 400.321 2
 -8 3 11 2140.42 485.957 2
 -8 3 10 22249.3 1474 2
 -8 -3 10 18971 1274.28 2
 -8 -3 9 -20.2349 133.05 2
 -8 3 9 305.296 226.558 2
 8 3 -9 107.433 95.7675 3
 8 -3 -9 -2.6745 77.1605 3
 8 3 -8 6543.5 538.076 3
 8 -3 -8 6790.51 543.936 3
 -8 -3 8 5897.5 649.243 2
 -8 3 8 6713.53 748.017 2
 8 3 -7 42604.9 1579.96 3
 8 -3 -7 46164.6 1635.3 3
 -8 3 7 42265.1 1921.01 2
 8 3 -6 54417.3 2110.82 1
 8 -3 -6 53740.9 2176.01 1
 8 3 -6 58695.3 1960.57 3
 8 -3 -6 62465.7 2030.42 3
 -8 3 6 56837.5 2179.21 2
 8 3 -5 19527.9 1122.43 1
 8 -3 -5 17030.8 1112.07 1
 8 3 -5 18656.7 1041.65 3
 8 -3 -5 20991.9 1114.1 3
 8 3 -4 88484.8 2711.31 3
 8 -3 -4 91591.6 2859.17 1
 8 3 -4 93118.6 2750.28 1
 8 -3 -4 96630.5 2829.5 3
 8 3 -3 10696.4 821.176 3
 8 -3 -3 10892.4 837.647 3
 8 -3 -3 9863.16 799.054 1
 8 3 -3 9887.21 746.043 1
 8 -3 -2 108464 3134.33 1
 8 3 -2 105297 3105.99 3
 8 -3 -2 104421 3144.14 3
 8 3 -1 297.089 180.164 3
 8 -3 -1 38.4365 134.777 3
 8 3 0 4004.55 534.931 3
 8 -3 0 3880.28 536.449 3
 8 3 1 6312.26 695.862 3
 8 -3 1 6338.49 699.415 3
 8 3 2 16842.7 1145.05 3
 8 -3 2 17732.3 1199.6 3
 8 3 3 26294.4 1492.83 3
 8 -3 3 26977 1538.43 3
 8 3 4 80008 2855.49 3
 8 -3 4 80859.4 2923.34 3
 8 3 5 784.579 283.332 3
 8 -3 5 397.475 221.001 3
 8 3 6 57922.2 2430.49 3
 8 -3 6 59225.1 2517.7 3
 8 3 7 13285.8 1111.97 3
 8 -3 7 12970.3 1129.31 3
 8 3 8 -110.335 171.71 3
 8 -3 8 294.513 175.957 3
 8 3 9 -739.225 295.21 3
 8 -3 9 306.145 214.086 3
 8 3 10 18266.4 1376.9 3
 8 -3 10 17462 1373.04 3
 8 3 11 18367.4 1399.86 3
 8 -3 11 18590.1 1430.39 3
 8 3 12 49540.8 2889.07 2
 8 -3 12 49896.1 2793.99 2
 8 3 13 1016.87 478.223 2
 8 -3 13 -113.273 415.144 2
 8 -3 14 35710.8 2507.87 2
 -8 -4 17 19443.3 1665.91 2
 -8 4 17 22023.8 1879.04 2
 -8 -4 16 5396.89 837.387 2
 -8 4 16 4454.51 824.11 2
 -8 -4 15 28391.8 1869.74 2
 -8 4 15 28239.6 2010.32 2
 -8 4 14 -166.542 314.681 2
 -8 -4 14 270.324 201.813 2
 -8 -4 13 2458.43 517.162 2
 -8 4 13 1951.42 475.912 2
 -8 -4 12 6097.36 770.155 2
 -8 4 12 7643.53 922.485 2
 -8 4 11 4724.3 715.579 2
 -8 -4 11 5095.95 668.289 2
 -8 -4 10 1190.56 353.054 2
 -8 4 10 1311.28 391.281 2
 -8 4 9 79637.6 2983.78 2
 8 4 -9 84000.1 2302.47 3
 8 -4 -9 81578.2 2216.64 3
 -8 -4 9 78585.3 2732.09 2
 -8 4 8 30825.8 1647.53 2
 8 4 -8 27001.3 1214.72 3
 8 -4 -8 31476.2 1270.26 3
 -8 -4 8 29590.8 1486.99 2
 8 4 -7 177533 4200.78 3
 8 -4 -7 179041 4204.59 3
 -8 4 7 180445 4749.47 2
 8 4 -6 28694.9 1428.62 1
 8 -4 -6 27939.7 1498.21 1
 8 4 -6 27723 1283.68 3
 8 -4 -6 29612.8 1338.59 3
 -8 4 6 28535.4 1500.89 2
 8 4 -5 38723 1622.43 1
 8 -4 -5 36525.6 1691.11 1
 8 4 -5 37676.5 1564.28 3
 -8 4 5 39223.1 1722.06 2
 8 4 -4 6427.29 620.376 3
 8 -4 -4 6260.19 654.055 1
 8 4 -4 5779.83 585.405 1
 8 4 -3 15668.1 941.536 1
 8 4 -3 16225.2 1025.62 3
 8 -4 -3 17189.2 1062.76 1
 8 -4 -2 333.911 214.084 1
 8 4 -2 284.583 146.206 3
 8 4 -1 147973 3991.42 3
 8 4 0 4288.17 552.575 3
 8 4 1 89941.6 2937.48 3
 8 4 2 7692.94 768.49 3
 8 4 3 4923.17 621.283 3
 8 4 4 6173.8 727.265 3
 8 -4 4 6731.27 769.456 3
 8 4 5 9578.37 908.383 3
 8 -4 5 9077.17 929.684 3
 8 4 6 24544.2 1527.7 3
 8 -4 6 24190.6 1544.92 3
 8 4 7 125930 4009.59 3
 8 -4 7 134680 4198.33 3
 8 4 8 3229.8 569.685 3
 8 -4 8 3363.75 593.285 3
 8 4 9 68512.4 2815.21 3
 8 -4 9 68279.9 2873.86 3
 8 4 10 250.472 186.542 3
 8 -4 10 326.497 215.406 3
 8 4 11 19451.1 1450.93 3
 8 -4 11 19250.2 1474.62 3
 8 4 11 19966.8 1736.65 2
 8 4 12 6637.32 1069.2 2
 8 -4 12 7150.96 1026.59 2
 8 4 13 1204 403.276 2
 8 -4 13 1340.49 515.197 2
 8 -4 14 2483.15 771.33 2
 -8 5 17 9849.69 1262.76 2
 -8 -5 16 748.587 329.532 2
 -8 5 16 928.028 448.59 2
 -8 -5 15 2143.88 504.086 2
 -8 5 15 2060.53 565.091 2
 -8 -5 14 15640.5 1303.29 2
 -8 5 14 16073.8 1462.45 2
 -8 -5 13 683.033 300.985 2
 -8 5 13 768.996 277.878 2
 -8 5 12 12548.2 1195.53 2
 -8 -5 12 12983.3 1101.76 2
 -8 5 11 46530 2340.37 2
 -8 -5 11 48389 2131.38 2
 -8 5 10 74806.7 2957.63 2
 -8 -5 10 71343.7 2620.2 2
 -8 5 9 15955.1 1230.6 2
 8 5 -9 16714.6 897.331 3
 8 -5 -9 16529.5 861.569 3
 -8 -5 9 14647 1046.26 2
 -8 5 8 6707.84 818.058 2
 8 5 -8 6545.43 576.343 3
 8 -5 -8 8342.63 638.802 3
 8 5 -7 31159.6 1366.28 3
 -8 5 7 29903.5 1588.44 2
 8 5 -6 36117.7 1622.18 1
 8 -5 -6 34776.4 1709.77 1
 8 5 -6 37264.9 1552.53 3
 -8 5 6 39314.6 1777.15 2
 8 -5 -5 8395.61 772.208 1
 8 5 -5 9167.82 753.009 1
 8 5 -5 9151.69 731.487 3
 -8 5 5 8665.29 779.036 2
 8 5 -4 45764.4 1798.52 3
 8 -5 -4 41547.6 1817.67 1
 8 5 -4 43076.4 1679.61 1
 8 5 -3 89401.8 2601.56 1
 8 5 -3 87384.5 2764.28 3
 8 -5 -3 88497.2 2765.13 1
 8 -5 -2 47731.3 1918.4 1
 8 5 -2 44564.1 1852.07 3
 8 5 -1 13866.7 997.67 3
 8 5 0 254.15 181.691 3
 8 5 1 28492.6 1522.2 3
 8 5 2 33342.7 1684.41 3
 8 5 3 13550.6 1077.34 3
 8 5 4 24027.7 1459.33 3
 8 5 5 46124.4 2119.57 3
 8 5 6 61968.3 2557.43 3
 8 -5 6 59560.3 2568.4 3
 8 5 7 -184.68 235.301 3
 8 -5 7 142.726 168.904 3
 8 5 8 -14.6079 180.765 3
 8 -5 8 445.058 253.599 3
 8 5 9 11008.5 1060.22 3
 8 -5 9 9591.45 1017.2 3
 8 5 10 20736.6 1493.76 3
 8 -5 10 21411 1549.88 3
 8 5 11 718.801 231.525 3
 8 -5 11 483.071 210.641 3
 8 5 12 32059.8 2321.19 2
 8 -5 12 30250.5 2104.12 2
 8 -5 13 21531.1 1821.93 2
 8 -5 14 24557.3 2026.63 2
 -8 6 17 11521.5 1367.59 2
 -8 6 16 29132.4 2142.63 2
 -8 -6 15 15788.9 1334.99 2
 -8 6 15 14867.6 1460.95 2
 -8 6 14 9102.38 1114.68 2
 -8 -6 14 8343.04 931.323 2
 -8 -6 13 80.4463 148.974 2
 -8 6 13 60.9873 212.283 2
 -8 -6 12 2278.08 461.549 2
 -8 6 12 2800.78 579.724 2
 -8 -6 11 404.417 207.418 2
 -8 6 11 365.561 260.255 2
 -8 6 10 52055.3 2424.1 2
 -8 -6 10 50733.1 2094.53 2
 -8 6 9 22859.9 1499.55 2
 8 6 -9 24270.1 1131.11 3
 8 -6 -9 23633.7 1098.4 3
 -8 -6 9 21414 1265.71 2
 -8 6 8 110346 3581.13 2
 8 6 -8 110603 3013.11 3
 8 6 -7 19710.8 1083.53 3
 8 -6 -7 18031 1247.33 1
 -8 6 7 17746.9 1223.54 2
 8 6 -6 9058.97 764.435 1
 8 6 -6 11379.2 824.974 3
 8 -6 -6 9895.38 881.397 1
 -8 6 6 9386.46 845.098 2
 8 -6 -5 175.516 132.527 1
 8 6 -5 109.131 87.2914 1
 8 6 -5 303.57 172.533 3
 -8 6 5 219.336 180.701 2
 8 6 -4 30718.5 1476.79 3
 8 -6 -4 31480.4 1534.67 1
 8 6 -4 29013.3 1328.42 1
 8 6 -3 3680.7 443.182 1
 8 6 -3 4027.43 526.402 3
 8 -6 -3 4077.87 524.754 1
 8 6 -2 46886.7 1939.5 3
 8 -6 -2 48225.8 1964.8 1
 8 6 -1 45985.2 1948.57 3
 8 6 0 110392 3363.5 3
 8 6 1 26319.5 1470.25 3
 8 6 2 28223.3 1552.24 3
 8 6 3 543.088 231.144 3
 8 6 4 13839.8 1104.44 3
 8 6 5 567.175 179.9 3
 8 6 6 70993.6 2775.61 3
 8 6 7 47055.1 2228.77 3
 8 -6 7 45959.9 2277.23 3
 8 6 8 50333.2 2339.86 3
 8 -6 8 46751.3 2339.43 3
 8 6 9 16540.4 1307.64 3
 8 -6 9 15474.3 1311.57 3
 8 6 10 14641.5 1247.98 3
 8 -6 10 13342.1 1228.57 3
 8 6 11 18456.8 1431.55 3
 8 -6 11 19002.7 1493.59 3
 8 6 12 15320.1 1591.83 2
 8 -6 12 10796.3 1237.19 2
 8 -6 13 526.327 250.95 2
 -8 7 16 5519.51 941.465 2
 -8 7 15 6646.75 993.439 2
 -8 -7 14 2673.9 535.638 2
 -8 7 14 3101.79 677.08 2
 -8 7 13 15985.9 1435.37 2
 -8 -7 13 17870.3 1306.97 2
 -8 -7 12 -26.9224 176.215 2
 -8 7 12 -363.247 242.105 2
 -8 7 11 56907.5 2637.46 2
 -8 -7 11 57452.1 2300.74 2
 -8 7 10 6931.69 845.584 2
 -8 -7 10 7157.93 735.014 2
 -8 7 9 64755.6 2687.27 2
 8 7 -9 63804.8 2076.73 3
 -8 7 8 1323.81 381.732 2
 8 7 -8 1133.16 258.45 3
 8 -7 -7 22423.9 1408.62 1
 8 7 -7 24492.1 1255.64 3
 -8 7 7 24734.9 1472.71 2
 8 7 -6 4047.01 507.1 1
 8 -7 -6 3472.18 518.251 1
 8 7 -6 3877.92 499.386 3
 -8 7 6 3581.27 524.576 2
 8 7 -5 25215.2 1328.3 3
 8 -7 -5 25588 1411.6 1
 8 7 -5 25099.1 1246.19 1
 -8 7 5 26752.2 1437.97 2
 8 7 -4 1359.7 300.236 3
 8 -7 -4 1475.69 329.092 1
 8 7 -4 1130.22 251.726 1
 8 7 -3 96804.7 2737.04 1
 8 7 -3 101518 3096.39 3
 8 -7 -3 96896.7 2993.72 1
 8 7 -2 14710.6 1040.35 3
 8 7 -1 16625.7 1146.75 3
 8 7 0 1194.18 311.445 3
 8 7 1 45640.9 2024.06 3
 8 7 2 -43.1115 126.462 3
 8 7 3 53164 2275.4 3
 8 7 4 692.982 269.029 3
 8 7 5 156824 4585.3 3
 8 7 6 3869.28 610.23 3
 8 7 7 892.756 305.47 3
 8 7 8 471.719 228.224 3
 8 -7 8 197.624 177.845 3
 8 7 9 16770.1 1338.07 3
 8 -7 9 17032.1 1386.49 3
 8 7 10 -155.726 275.524 3
 8 -7 10 132.564 171.024 3
 8 7 11 17076.7 1392.15 3
 8 7 11 18744.5 1730.73 2
 8 -7 11 16528.2 1402.02 3
 8 7 12 1293.6 498.216 2
 8 -7 12 705.95 273.495 2
 -8 8 16 41475 2636.59 2
 -8 8 15 3913.85 786.737 2
 -8 8 14 12486.1 1330.55 2
 -8 8 13 6773.64 928.511 2
 -8 -8 13 5946.88 733.959 2
 -8 -8 12 2950.67 506.754 2
 -8 8 12 2916.12 625.846 2
 -8 8 11 421.184 223.201 2
 -8 -8 11 583.625 229.342 2
 -8 8 10 8586.99 946.947 2
 -8 8 9 535.335 285.826 2
 8 8 -9 662.873 189.286 3
 -8 8 8 98651.7 3408.37 2
 8 8 -8 98468.4 2903.23 3
 8 -8 -7 6916.7 774.364 1
 8 8 -7 7577.4 699.093 3
 8 8 -7 7523.05 725.118 1
 -8 8 7 8132.59 829.003 2
 8 -8 -6 7233.98 760.076 1
 8 8 -6 9088.24 781.559 3
 8 8 -6 8853.83 734.075 1
 -8 8 6 8285.87 815.179 2
 8 8 -5 2727.98 434.261 3
 8 -8 -5 3091.44 489.401 1
 8 8 -5 2763.46 387.664 1
 -8 8 5 3127.21 490.93 2
 8 8 -4 4407.95 558.703 3
 8 -8 -4 4646.8 576.896 1
 8 8 -4 3948.29 446.256 1
 8 -8 -3 5263.85 613.478 1
 8 8 -3 5300.49 630.853 3
 8 8 -3 5611.67 546.138 1
 8 8 -2 14282.6 1054.97 3
 8 8 -1 254.265 157.251 3
 8 8 0 117528 3589.84 3
 8 8 1 36253.5 1798.28 3
 8 8 2 7311.08 803.309 3
 8 8 3 1454.41 358.199 3
 8 8 4 23488.7 1500.32 3
 8 8 5 6059.35 748.459 3
 8 8 6 40578.1 2068.93 3
 8 8 7 -48.1176 206.093 3
 8 8 8 44765.5 2252.81 3
 8 8 9 10870.6 1086.23 3
 8 -8 9 9369.38 1042 3
 8 8 10 16512.1 1376.3 3
 8 8 10 19231 1699.95 2
 8 -8 10 16493.9 1414.43 3
 8 8 11 -236.667 300.853 3
 8 -8 11 281.063 207.025 3
 8 8 11 -35.6371 248.537 2
 8 8 12 8662.49 1230.72 2
 -8 9 16 1061.52 386.716 2
 -8 9 15 6488.8 1004.27 2
 -8 9 14 2220.32 560.008 2
 -8 9 13 14931.9 1406.19 2
 -8 9 12 36274.2 2272.06 2
 -8 9 11 27455.5 1810.53 2
 -8 9 10 7435.18 910.606 2
 -8 9 9 41040.9 2136.96 2
 8 9 -9 43589.9 1746.68 3
 -8 9 8 2267.07 491.034 2
 8 9 -8 2119.26 366.599 3
 8 9 -7 18776.2 1141.57 1
 8 -9 -7 19440.6 1307.85 1
 8 9 -7 20357.5 1195.91 3
 -8 9 7 18415.6 1291.7 2
 8 9 -6 9243.66 744.41 1
 8 -9 -6 9231.9 869.334 1
 8 9 -6 9690.04 826.777 3
 -8 9 6 9618.4 895.892 2
 8 9 -5 26105.2 1421.66 3
 8 -9 -5 26951.2 1479.7 1
 8 9 -5 25577.3 1232.52 1
 -8 9 5 28012.7 1502.81 2
 8 9 -4 22476.5 1325.38 3
 8 -9 -4 21626.6 1293.45 1
 8 9 -4 21350.8 1068.51 1
 8 -9 -3 35531.2 1668.07 1
 8 9 -3 34735 1725.41 3
 8 9 -2 3161.39 501.851 3
 8 9 -1 9696.29 895.002 3
 8 9 0 15433.6 1156.08 3
 8 9 1 38261.6 1904.16 3
 8 9 2 40687.1 2008.31 3
 8 9 3 9729.52 950.02 3
 8 9 4 62136.9 2604.11 3
 8 9 5 113297 3790.62 3
 8 9 6 6537.78 815.418 3
 8 9 7 2076.43 489.731 3
 8 9 8 12430.3 1170.37 3
 8 9 9 1201.47 335.526 3
 8 9 10 13120.6 1226.27 3
 8 9 10 16205.9 1565.24 2
 8 -9 10 12526.3 1235.35 3
 8 9 11 6314.92 872.607 3
 8 9 11 8159.21 1147.83 2
 8 -9 11 6073.82 891.608 3
 8 9 12 17128.5 1715.44 2
 -8 10 15 28393.2 2119.19 2
 -8 10 14 73.3746 195.906 2
 -8 10 13 13828.3 1388.4 2
 -8 10 12 2835.27 648.521 2
 -8 10 11 14568.9 1319.96 2
 -8 10 10 260.355 317.56 2
 -8 10 9 4960.23 723.59 2
 8 10 -9 5823.63 604.998 3
 -8 10 8 43706.2 2139.58 2
 8 10 -8 43455.9 1816.66 3
 8 -10 -8 39553.5 2033.05 1
 8 10 -7 45196.9 1818.97 1
 8 -10 -7 41061.1 2010.72 1
 8 10 -7 45439.9 1915.11 3
 -8 10 7 43257.5 2064.63 2
 -8 10 6 2769.48 493.177 2
 8 10 -6 3069.04 480.411 3
 8 10 -6 2306.34 361.367 1
 8 -10 -6 2409.35 448.422 1
 8 10 -5 7623.52 772.588 3
 8 -10 -5 7288.69 754.779 1
 8 10 -5 7166.13 620.051 1
 -8 10 5 7679.16 765.457 2
 8 -10 -4 1285.87 331.261 1
 8 10 -4 1806.51 384.402 3
 8 10 -4 1216.3 247.99 1
 8 -10 -3 9939.84 855.592 1
 8 10 -3 9124.04 865.825 3
 8 10 -2 399.754 205.605 3
 8 10 -1 15437.8 1160.54 3
 8 10 0 23599.1 1473.68 3
 8 10 1 143178 4317.83 3
 8 10 2 117.111 172.1 3
 8 10 3 12953.3 1122.3 3
 8 10 4 439.63 171.926 3
 8 10 5 6538.13 814.804 3
 8 10 6 4103.78 654.607 3
 8 10 7 4680.43 707.556 3
 8 10 8 12457.9 1171.96 3
 8 10 9 62782.9 2835.21 3
 8 10 10 484.563 189.236 3
 8 10 10 431.59 195.036 2
 8 10 11 3313.48 656.427 3
 8 -10 11 2782.76 569.103 3
 -8 11 15 113.2 223.098 2
 -8 11 14 9439.86 1194.78 2
 -8 11 13 106.531 284.256 2
 -8 11 12 68771.5 3143.44 2
 -8 11 11 2501.48 575.642 2
 -8 11 10 21263.7 1570.06 2
 8 11 -9 1136.5 243.499 3
 -8 11 9 954.451 334.228 2
 8 -11 -8 3666.43 597.079 1
 -8 11 8 5261.23 729.84 2
 8 11 -8 5915.23 644.394 3
 -8 11 7 492.162 279.747 2
 8 11 -7 498.91 188.909 3
 8 11 -7 575.041 228.488 1
 8 -11 -7 270.485 199.006 1
 8 11 -6 12815.3 1013.91 3
 8 -11 -6 13132 1044.13 1
 8 11 -6 11344.4 805.179 1
 -8 11 6 13845.8 1097.07 2
 8 11 -5 72.5589 105.871 3
 8 -11 -5 161.033 108.625 1
 8 11 -4 86592.2 3040.41 3
 8 11 -4 90413 2524.8 1
 8 -11 -4 85792.5 2898.92 1
 -8 11 4 92464.3 2966.8 2
 8 11 -3 1451.16 358.467 3
 8 -11 -3 1041.81 282.794 1
 8 11 -2 6202.83 745.028 3
 8 11 -1 1243.77 360.278 3
 8 11 0 21013 1416.16 3
 8 11 1 3104.46 549.291 3
 8 11 2 107042 3633.75 3
 8 11 3 2897.49 564.356 3
 8 11 4 103795 3659.75 3
 8 11 5 201.324 201.78 3
 8 11 6 19808.1 1472.01 3
 8 11 7 1182.23 405.861 3
 8 11 8 10490.9 1108.16 3
 8 11 9 989.257 349.884 3
 8 11 9 1454.8 474.44 2
 8 11 10 36771.3 2206.94 3
 8 11 10 52481.6 2893.06 2
 8 11 11 3565.02 790.059 2
 -8 12 15 29398.1 2207.17 2
 -8 12 14 14027.3 1475.32 2
 -8 12 13 11274.5 1258.11 2
 -8 12 12 335.651 241.342 2
 -8 12 11 11382.3 1180.13 2
 -8 12 10 8256.63 985.485 2
 8 12 -9 11241.2 917.771 3
 -8 12 9 10194.9 1053.56 2
 8 12 -8 11.673 96.389 3
 -8 12 8 187.345 164.266 2
 8 -12 -8 -11.4597 221.876 1
 8 12 -8 484.493 188.67 1
 8 12 -7 62425.5 2411.82 3
 8 12 -7 61125.5 2140.23 1
 8 -12 -7 58930.6 2493.88 1
 -8 12 7 64705.2 2642.44 2
 8 -12 -6 4508.47 621.173 1
 8 12 -6 3562.65 440.91 1
 8 12 -6 4914.67 632.56 3
 -8 12 6 4618.58 653.043 2
 8 12 -5 30794.9 1679.31 3
 8 -12 -5 30608.8 1624.62 1
 8 12 -5 29819 1284.64 1
 -8 12 5 33348.2 1697.82 2
 8 12 -4 3863.69 581.743 3
 8 -12 -4 3109.63 495.139 1
 -8 12 4 3426.75 530.582 2
 8 12 -3 23517.8 1489.17 3
 8 -12 -3 22159.6 1352.79 1
 8 12 -2 4379.56 630.539 3
 8 12 -1 9234.99 942.296 3
 8 12 0 18165.2 1346.59 3
 8 12 1 131312 4181.89 3
 8 12 2 12312.2 1131.45 3
 8 12 3 5069.29 726.488 3
 8 12 4 4268.76 706.968 3
 8 12 5 6749.17 858.078 3
 8 12 6 618.485 270.585 3
 8 12 7 31896 1972.06 3
 8 12 8 11628.6 1198.81 3
 8 12 9 60330.7 2860.6 3
 8 12 9 63356.6 3179.2 2
 8 12 10 13538.9 1322.1 3
 8 12 10 16094.6 1605.27 2
 8 12 11 1639.47 591.095 2
 -8 13 14 2802.58 659.992 2
 -8 13 13 21896.6 1793.35 2
 -8 13 12 49024.3 2663.78 2
 -8 13 11 30102.5 1973.72 2
 -8 13 10 560.841 319.345 2
 8 13 -9 775.968 251.889 3
 -8 13 9 669.169 315.072 2
 8 -13 -9 252.124 234.375 1
 -8 13 8 11206.7 1090.88 2
 8 -13 -8 9511.33 962.121 1
 8 13 -8 11184.5 967.612 3
 -8 13 7 103.548 139.444 2
 8 13 -7 159.62 122.976 3
 8 13 -7 239.939 147.342 1
 8 -13 -7 360.592 245.666 1
 8 13 -6 11738.3 1007.58 3
 8 -13 -6 9481.32 902.978 1
 -8 13 6 9825.64 942.124 2
 8 13 -5 51838.8 1756.37 1
 8 13 -5 54255 2347.29 3
 8 -13 -5 54724.9 2266.72 1
 -8 13 5 55051.9 2279.5 2
 8 -13 -4 59630.9 2342.71 1
 8 13 -4 61721.5 2557.28 3
 -8 13 4 61137.5 2376.76 2
 8 13 -3 66075.9 2700.15 3
 8 -13 -3 62798.5 2449.53 1
 8 13 -2 8240.06 899.587 3
 8 13 -1 8918.41 934.273 3
 8 13 0 1872.22 442.46 3
 8 13 1 -675.546 290.259 3
 8 13 2 48470.9 2368.07 3
 8 13 3 56538.2 2612.26 3
 8 13 4 32532.6 1955.12 3
 8 13 5 37729 2134.15 3
 8 13 6 7616.87 963.654 3
 8 13 7 8138.68 1002.58 3
 8 13 8 5258.42 826.821 3
 8 13 8 6275.37 935.915 2
 8 13 9 160.858 183.853 3
 8 13 9 -184.981 303.124 2
 8 13 10 12106.6 1259.86 3
 8 13 10 16257.4 1628.73 2
 -8 14 14 28148.3 2118.9 2
 -8 14 13 7482.92 1028.18 2
 -8 14 12 2678.36 621.708 2
 -8 14 11 21417.6 1684.69 2
 -8 14 10 18269.9 1495.43 2
 8 14 -9 1411.44 325.421 3
 -8 14 9 1095.06 348.998 2
 8 -14 -9 650.264 257.238 1
 -8 14 8 39561.8 2127.35 2
 8 14 -8 40244.4 1957.44 3
 8 -14 -8 36259.5 1969.06 1
 8 14 -7 7860.27 847.562 3
 8 -14 -7 8053.75 858.682 1
 -8 14 7 8776.67 922.73 2
 8 14 -6 41652.2 2038.51 3
 8 -14 -6 41320.5 1994.08 1
 -8 14 6 41887.4 2048.67 2
 8 14 -5 10579 999.515 3
 8 -14 -5 10239.5 930.875 1
 -8 14 5 11084.9 965.991 2
 8 -14 -4 1532.18 366.475 1
 8 14 -4 1255.8 341.726 3
 -8 14 4 1638.23 365.485 2
 8 14 -3 16737.4 1311.56 3
 8 14 -2 37189.9 2017.87 3
 8 14 -1 1059.22 377.823 3
 8 14 0 79571.9 3174.87 3
 8 14 1 6656.8 867.353 3
 8 14 2 68158.7 2959.45 3
 8 14 3 9973.67 1065.15 3
 8 14 4 8048.14 967.398 3
 8 14 5 217.77 229.233 3
 8 14 6 28035.9 1883.66 3
 8 14 7 403.647 279.371 3
 8 14 8 61493.3 2976.91 3
 8 14 8 66903.5 3229.55 2
 8 14 9 10092.5 1167.43 3
 8 14 9 14574.6 1506.01 2
 8 14 10 29176.1 2014.82 3
 8 14 10 33684.2 2388.99 2
 -8 15 14 1958.54 577.288 2
 -8 15 13 41744.6 2572.15 2
 -8 15 12 8629.17 1110.2 2
 -8 15 11 37264.7 2268.88 2
 -8 15 10 20908.1 1618.05 2
 8 -15 -10 17728.6 1440.44 1
 8 15 -9 3955.92 606.536 3
 -8 15 9 4354.13 724.895 2
 8 -15 -9 3513.89 606.333 1
 -8 15 8 15882.4 1323.02 2
 8 15 -8 16593.3 1262.77 3
 8 -15 -8 14715.7 1231 1
 -8 15 7 723.714 285.337 2
 8 15 -7 1178.45 376.94 3
 8 -15 -7 1001.35 310.622 1
 -8 15 6 1847.82 421.103 2
 8 15 -6 2060.03 430.135 3
 8 -15 -6 2219.31 436.661 1
 8 15 -5 47380.9 2263.28 3
 8 -15 -5 44343.8 2052.76 1
 -8 15 5 46764.2 2128.02 2
 8 15 -4 1725.04 443.22 3
 8 -15 -4 1829.94 407.924 1
 8 15 -3 38500.5 2078.61 3
 8 15 -2 14077.5 1240.84 3
 8 15 -1 18614.8 1447.39 3
 8 15 0 183.774 186.55 3
 8 15 1 4241.94 717.668 3
 8 15 2 3792.76 667.659 3
 8 15 3 63999.4 2919.4 3
 8 15 4 1286.94 444.438 3
 8 15 5 47915.9 2539.81 3
 8 15 6 3474.08 670.495 3
 8 15 7 15426.5 1426.47 3
 8 15 7 15658.6 1483.02 2
 8 15 8 180.331 174.157 3
 8 15 8 621.099 413.203 2
 8 15 9 505.574 300.638 3
 8 15 9 283.557 380.296 2
 8 15 10 3225.97 687.232 3
 8 15 10 4372.04 897.719 2
 -8 16 13 1884.25 579.439 2
 -8 16 12 -68.1641 173.259 2
 -8 16 11 10147.3 1182.27 2
 8 -16 -11 7578.24 976.224 1
 8 -16 -10 14538.6 1301.84 1
 -8 16 10 15097 1394.13 2
 8 16 -9 27274.9 1635.37 3
 -8 16 9 24155.7 1737.9 2
 8 -16 -9 21831 1556.01 1
 -8 16 8 31296.3 1913.23 2
 8 16 -8 34580.6 1895.17 3
 8 -16 -8 28919.6 1750.04 1
 8 16 -7 12771 1145.21 3
 8 -16 -7 14441.5 1184.13 1
 -8 16 7 12603.9 1142.1 2
 8 16 -6 14638.4 1246.15 3
 8 -16 -6 14967.9 1172.48 1
 -8 16 6 14490.7 1187.64 2
 -8 16 5 928.877 289.996 2
 8 16 -5 438.363 241.262 3
 8 -16 -5 250.784 175.137 1
 8 16 -4 384.669 242.995 3
 8 -16 -4 -163.788 171.38 1
 8 16 -3 3256.79 603.464 3
 8 16 -2 17247.8 1399.54 3
 8 16 -1 82636.1 3320.03 3
 8 16 0 77222.4 3215.88 3
 8 16 1 3744.44 697.895 3
 8 16 2 51646.6 2621.18 3
 8 16 3 12083 1258.12 3
 8 16 4 384.924 180.555 3
 8 16 5 3043.45 643.229 3
 8 16 6 9811.29 1154.39 3
 8 16 6 10147.6 1158.72 2
 8 16 7 23444.6 1828.96 3
 8 16 7 23060 1809.65 2
 8 16 8 29183.9 2042.36 3
 8 16 8 30322.9 2155.58 2
 8 16 9 -33.9721 235.995 3
 8 16 9 186.948 297.161 2
 8 16 10 24545.1 1876.47 3
 -8 17 13 9097.99 1172.71 2
 -8 17 12 9198.53 1172.66 2
 -8 17 11 6632.45 979.192 2
 8 -17 -11 4377.49 724.561 1
 -8 17 10 40716 2366.52 2
 8 -17 -10 38209.3 2183.91 1
 8 17 -9 525.015 245.753 3
 -8 17 9 324.125 223.854 2
 8 -17 -9 299.738 279.725 1
 8 17 -8 684.388 326.623 3
 -8 17 8 291.114 246.095 2
 8 -17 -8 373.971 192.08 1
 -8 17 7 1276.92 369.871 2
 8 17 -7 903.727 325.271 3
 8 -17 -7 1185.61 321.244 1
 8 17 -6 12710.9 1194.21 3
 8 -17 -6 11769 1032.78 1
 -8 17 6 13207.1 1141.88 2
 8 -17 -5 9624.8 922.643 1
 8 17 -5 8942.79 1009.58 3
 -8 17 5 9627.04 956.293 2
 8 17 -4 5610.36 785.547 3
 8 17 -3 2355.32 527.641 3
 8 17 -2 40474.6 2235.52 3
 8 17 -1 11356.7 1159.67 3
 8 17 0 11904 1202 3
 8 17 1 312.842 207.417 3
 8 17 2 14048.2 1338.88 3
 8 17 3 15855.1 1445.42 3
 8 17 4 36035.7 2220.46 3
 8 17 5 2330.44 598.72 3
 8 17 5 3409.87 682.552 2
 8 17 6 34832.4 2238.66 3
 8 17 6 39607.5 2334.52 2
 8 17 7 15733.5 1500.7 3
 8 17 7 19669.1 1670.96 2
 8 17 8 2091.97 545.034 3
 8 17 8 3401.38 742.693 2
 8 17 9 803.606 378.27 3
 8 17 9 1708.4 565.66 2
 8 17 10 864.885 410.029 3
 -8 18 12 2903.38 668.658 2
 8 -18 -12 1945.61 531.134 1
 -8 18 11 -125.11 283.89 2
 8 -18 -11 -49.2583 174.746 1
 -8 18 10 1534.82 447.958 2
 8 -18 -10 1371.43 411.626 1
 -8 18 9 49910 2597.79 2
 8 -18 -9 46367.7 2358.67 1
 8 18 -9 53081.7 2484.51 3
 8 18 -8 632.126 283.405 3
 -8 18 8 354.564 199.999 2
 8 -18 -8 575.276 265.522 1
 8 18 -7 17241.7 1414.84 3
 8 -18 -7 18028.3 1338.47 1
 -8 18 7 17671.3 1391.37 2
 -8 18 6 3355.88 583.107 2
 8 18 -6 3159.4 608.096 3
 8 -18 -6 3034.33 543.377 1
 8 18 -5 4363.14 723.832 3
 8 -18 -5 3639.26 572.664 1
 -8 18 5 4373.03 634.131 2
 8 18 -4 190.736 184.097 3
 8 18 -3 943.164 365.13 3
 8 18 -2 273.839 236.733 3
 8 18 -1 73506 3207.91 3
 8 18 0 61.812 185.13 3
 8 18 1 13730.8 1334.9 3
 8 18 2 111.281 247.496 3
 8 18 3 38572.5 2337.57 3
 8 18 4 372.787 229.126 3
 8 18 4 704.186 335.391 2
 8 18 5 350.831 314.199 3
 8 18 5 258.797 205.415 2
 8 18 6 161.922 212.036 3
 8 18 6 560.263 505.396 2
 8 18 7 45334.3 2643.4 3
 8 18 7 49287 2764.61 2
 8 18 8 1291.96 492.306 3
 8 18 8 1786.18 522.065 2
 8 18 9 5066.11 877.767 3
 8 18 9 6362.33 1051.01 2
 8 18 10 315.187 323.08 3
 -8 19 12 18330.9 1695.48 2
 -8 19 11 3517.23 703.339 2
 -8 19 10 33719.5 2186.38 2
 8 19 -9 171.666 207.567 3
 -8 19 9 458.89 316.728 2
 8 19 -8 1897.68 484.772 3
 -8 19 8 2702.74 545.093 2
 8 -19 -8 2350.2 500.377 1
 -8 19 7 706.648 318.825 2
 8 19 -7 616.445 293.41 3
 8 -19 -7 544.166 297.675 1
 8 -19 -6 7447.76 835.145 1
 8 19 -6 8271.9 1002.06 3
 -8 19 6 7817.49 888.667 2
 8 19 -5 501.315 263.768 3
 8 -19 -5 857.245 260.251 1
 -8 19 5 1074 345.531 2
 8 19 -4 15041.1 1398.03 3
 8 19 -3 5565.87 862.012 3
 8 19 -2 49106.1 2615.96 3
 8 19 -1 -86.6151 347.263 3
 8 19 0 2144.17 537.514 3
 8 19 1 3172.92 676.434 3
 8 19 2 6670.15 952.202 3
 8 19 3 5957.66 907.13 3
 8 19 3 7481.31 914.103 2
 8 19 4 38931.9 2408.84 3
 8 19 4 41919 2294.6 2
 8 19 5 9061.62 1153.71 3
 8 19 5 9109.29 1109.17 2
 8 19 6 51942.6 2854.81 3
 8 19 6 56221.6 2906.53 2
 8 19 7 488.973 187.749 3
 8 19 7 1007.36 435.025 2
 8 19 8 2512.69 623.449 3
 8 19 8 2835.11 643.149 2
 8 19 9 523.188 344.507 3
 -8 20 11 868.012 361.199 2
 -8 20 10 4484.72 799.716 2
 -8 20 9 34651.7 2159.32 2
 8 20 -9 34664.7 2068.92 3
 8 20 -8 8799.6 1043.32 3
 -8 20 8 8098.48 979.418 2
 8 20 -7 9352.95 1090.71 3
 -8 20 7 9719.08 1039.23 2
 8 20 -6 3419.87 678.058 3
 -8 20 6 4594.64 701.958 2
 8 20 -5 1325.61 471.112 3
 -8 20 5 736.841 299.057 2
 8 20 -4 470.187 308.257 3
 8 20 -3 2438.93 578.589 3
 8 20 -2 12643 1310.41 3
 8 20 -1 41420.2 2447.76 3
 8 20 0 12519.7 1324.83 3
 8 20 1 8000.22 1057.4 3
 8 20 2 23406.5 1837.62 3
 8 20 3 7338.41 1024.02 3
 8 20 4 1094.72 450.298 3
 8 20 4 1310.98 405.409 2
 8 20 5 300.624 173.821 3
 8 20 5 275.706 177.549 2
 8 20 6 6200.14 952.691 3
 8 20 6 8303.48 1066.48 2
 8 20 7 28830.7 2125.02 3
 8 20 7 31504.7 2185.91 2
 8 20 8 9966.97 1259.57 3
 8 20 8 15169.5 1599.1 2
 -8 21 11 29048.1 2117.65 2
 -8 21 10 14307.6 1437.14 2
 -8 21 9 6631.67 934.565 2
 8 21 -9 7933.58 993.574 3
 8 21 -8 170.369 206.548 3
 -8 21 8 1779.38 485.842 2
 -8 21 7 3596.13 639.194 2
 8 21 -7 4286.18 763.97 3
 -8 21 6 434.301 266.94 2
 8 21 -6 953.303 417.418 3
 8 21 -5 23180.6 1811.45 3
 8 21 -4 60.1076 207.827 3
 8 21 -3 27847.2 2011.28 3
 8 21 -2 20785.9 1743.14 3
 8 21 -1 5425.97 896.133 3
 8 21 0 5744.73 917.7 3
 8 21 1 1222.27 446.557 3
 8 21 2 800.805 324.53 3
 8 21 3 45227.6 2679.6 3
 8 21 4 9365.19 1191.7 3
 8 21 5 33571.2 2316.66 3
 8 21 6 9297.85 1211.85 3
 8 21 6 11487.1 1270.19 2
 8 21 7 5821.97 966.931 3
 8 21 7 6205.04 929.406 2
 -8 22 10 11702.5 1291.71 2
 8 22 -9 6610.73 902.479 3
 -8 22 9 6052.73 896.816 2
 -8 22 8 35291 2131.64 2
 8 22 -8 31323.6 2079.76 3
 8 22 -7 55.3523 233.099 3
 8 22 -6 17638.8 1579.2 3
 8 22 -5 1850.83 525.313 3
 8 22 -4 229.782 178.535 3
 8 22 -3 8913.33 1153.71 3
 8 22 -2 13582 1423.78 3
 8 22 -1 3655.42 761.354 3
 8 22 0 58903.1 3108.14 3
 8 22 1 -241.513 406.622 3
 8 22 2 37368.3 2463.13 3
 8 22 3 33.3564 278.243 3
 8 22 4 -1225.1 464.697 3
 8 22 5 2732.6 701.353 3
 -8 23 10 428.856 295.236 2
 8 23 -9 5792.48 878.185 3
 8 23 -8 7000.96 988.394 3
 8 23 -7 5025.61 857.906 3
 8 23 -6 1082.54 453.083 3
 8 23 -5 35061.7 2316.2 3
 8 23 -4 28513.4 2096.67 3
 8 23 -3 29639.2 2160.34 3
 8 23 -2 842.315 322.146 3
 8 23 -1 12022.9 1380.04 3
 8 23 0 663.01 362.076 3
 8 23 1 -228.168 330.13 3
 8 23 2 1433.08 484.848 3
 8 23 3 61271.4 3290.98 3
 8 24 -8 6768.15 987.328 3
 8 24 -7 21019.2 1775.24 3
 8 24 -6 8011.54 1098.93 3
 8 24 -5 10136.3 1262.34 3
 8 24 -4 1454.68 456.417 3
 8 24 -3 10915.8 1323.36 3
 8 24 -2 2730.23 645.336 3
 8 24 -1 12338.3 1432.07 3
 8 24 0 17526 1712.92 3
 8 24 1 28655.3 2229.42 3
 -9 0 17 17667.5 1678.38 2
 -9 0 16 -602.151 330.889 2
 -9 0 15 30029.9 2067.06 2
 -9 0 14 519.111 406.597 2
 -9 0 13 11254.9 1147.38 2
 -9 0 12 55.373 179.613 2
 -9 0 11 23053.8 1546.62 2
 -9 0 10 -121.455 170.637 2
 9 0 -9 38350.6 1422.37 3
 -9 0 9 37986.1 1905.35 2
 9 0 -8 321.374 130.045 3
 -9 0 8 22.0834 130.399 2
 9 0 -7 33762 1754.2 1
 9 0 -7 39560.2 1556.29 3
 9 0 -6 -73.9912 122.081 3
 9 0 -6 163.415 198.976 1
 9 0 -5 49406 2036.26 1
 9 0 -5 48796.3 1882.33 3
 9 0 -4 139.782 84.7603 3
 9 0 -4 45.1598 88.8102 1
 9 0 -3 1043.31 293.234 1
 9 0 -3 1464.25 321.268 3
 9 0 -2 -68.5814 156.305 3
 9 0 -1 69069.3 2530.72 3
 9 0 0 3.55614 116.225 3
 9 0 1 24346.8 1461.44 3
 9 0 2 -329.227 198.592 3
 9 0 3 31952 1746.46 3
 9 0 4 9.74507 144.198 3
 9 0 5 11064.4 1043.7 3
 9 0 6 150.573 167.534 3
 9 0 7 87321.8 3262.23 3
 9 0 8 202.61 136.145 3
 9 0 9 3182.09 583.253 3
 9 0 10 -57.7542 285.155 3
 9 0 11 1088.55 315.957 3
 9 0 12 -199.182 324.298 2
 -9 -1 18 107.365 285.757 2
 -9 -1 17 1661.62 542.713 2
 -9 1 17 459.164 327.369 2
 -9 -1 16 4351.25 798.887 2
 -9 1 16 3962.94 761.886 2
 -9 -1 15 1933.53 553.477 2
 -9 1 15 2241.84 615.776 2
 -9 -1 14 103854 3924.78 2
 -9 1 14 95773.8 3869.28 2
 -9 -1 13 8950.64 1022.02 2
 -9 1 13 9291.69 1061.27 2
 -9 1 12 8627.27 987.545 2
 -9 -1 12 9543.52 1019.65 2
 -9 -1 11 3176.85 584.69 2
 -9 1 11 3094.87 581.064 2
 -9 -1 10 938.378 318.618 2
 -9 1 10 501.548 273.765 2
 9 1 -9 3478.94 396.135 3
 9 -1 -9 4022.7 413.383 3
 -9 -1 9 3213.56 550.171 2
 -9 1 9 3643 581.131 2
 -9 1 8 2635.28 486.017 2
 9 1 -8 2573.99 362.94 3
 9 -1 -8 2449.25 355.84 3
 -9 -1 8 1809.09 392.857 2
 9 1 -7 1619.36 373.758 1
 9 -1 -7 1962.12 426.972 1
 9 1 -7 2095.55 333.547 3
 9 -1 -7 2131.18 334.561 3
 -9 1 7 2171.38 431.634 2
 9 1 -6 128389 3776.9 1
 9 -1 -6 127291 3806.37 1
 9 1 -6 133441 3508.55 3
 9 -1 -6 134120 3514.88 3
 9 -1 -5 11146.2 921.292 1
 9 1 -5 10911.6 894.586 1
 9 1 -5 11822.2 864.475 3
 9 -1 -5 11634.4 868.662 3
 9 1 -4 287.831 174.982 3
 9 -1 -4 185.672 174.344 3
 9 -1 -4 311.472 196.756 1
 9 1 -4 222.782 184.857 1
 9 -1 -3 6802.95 688.093 1
 9 1 -3 8005.81 739.464 1
 9 1 -3 7933.27 737.005 3
 9 -1 -3 7785.9 746.993 3
 9 1 -2 29216.3 1502.6 3
 9 -1 -2 30364.5 1561.35 3
 9 1 -1 19652.4 1233.18 3
 9 -1 -1 18835 1235.58 3
 9 1 0 30323.4 1589.65 3
 9 -1 0 29075.9 1584.19 3
 9 1 1 16087.1 1169.75 3
 9 -1 1 16858.6 1202.26 3
 9 1 2 66559.1 2579.68 3
 9 -1 2 65446 2582.7 3
 9 1 3 6109.02 741.477 3
 9 -1 3 5850.07 737.381 3
 9 1 4 5759.34 721.892 3
 9 -1 4 6096.98 758.077 3
 9 1 5 27819.4 1660.56 3
 9 -1 5 28443.2 1714.91 3
 9 1 6 10813.3 1033.98 3
 9 -1 6 10538 1029.19 3
 9 1 7 -730.352 295.627 3
 9 -1 7 -201.347 316.085 3
 9 1 8 17201.5 1350.72 3
 9 -1 8 17483.6 1381.66 3
 9 1 9 3087.09 572.432 3
 9 -1 9 2180.56 493.604 3
 9 1 10 26184.4 1750 3
 9 -1 10 27767.1 1797.86 3
 9 1 11 3304.23 626.499 3
 9 -1 11 3987.54 680.477 3
 9 1 12 19690.5 1789.26 2
 9 -1 13 1625.01 544.973 2
 -9 -2 18 10800.8 1317.11 2
 -9 -2 17 4901.24 877.823 2
 -9 2 17 5335.44 948.013 2
 -9 2 16 5135.74 910.845 2
 -9 -2 16 4390.1 787.783 2
 -9 -2 15 32954.2 2116.33 2
 -9 2 15 33503.4 2216.67 2
 -9 -2 14 647.453 351.73 2
 -9 2 14 288.438 268.911 2
 -9 2 13 14664.4 1370.32 2
 -9 -2 13 13819.1 1261.12 2
 -9 2 12 10814.3 1120.11 2
 -9 -2 12 12213.4 1140.79 2
 -9 -2 11 2626.03 524.409 2
 -9 2 11 3342.63 608.622 2
 -9 -2 10 22715.4 1458.17 2
 -9 2 10 23995.8 1560.7 2
 9 2 -9 27102.4 1192.06 3
 9 -2 -9 27668.8 1178.55 3
 -9 -2 9 26736.7 1550.97 2
 -9 2 9 25978.2 1598.88 2
 9 2 -8 9445.38 704.254 3
 9 -2 -8 9335.79 693.057 3
 -9 2 8 9586.28 916.674 2
 9 2 -7 34077.1 1738.8 1
 9 -2 -7 38152.8 1858.04 1
 9 2 -7 37127.1 1533.6 3
 9 -2 -7 37760.1 1542.43 3
 -9 2 7 36674.8 1826.52 2
 9 2 -6 499.154 199.322 3
 9 -2 -6 121.829 93.3309 3
 9 2 -6 116.201 197.033 1
 9 -2 -6 541.276 292.348 1
 9 -2 -5 24451.4 1394.31 1
 9 2 -5 23195.7 1321.85 1
 9 2 -5 23442 1263.25 3
 9 -2 -5 23983.3 1279.91 3
 9 2 -4 12965.7 932.294 3
 9 -2 -4 12650.3 935.257 3
 9 -2 -4 12103.3 937.261 1
 9 2 -4 10778.6 860.843 1
 9 -2 -3 3489.25 509.648 1
 9 2 -3 3168.81 458.901 1
 9 2 -3 3598.3 502.996 3
 9 -2 -3 4021.83 541.554 3
 9 2 -2 34540.7 1648.65 3
 9 -2 -2 34686.8 1697.91 3
 9 2 -1 44021.7 1932.39 3
 9 -2 -1 46391.3 2034.51 3
 9 2 0 17231.7 1194.77 3
 9 -2 0 18239.1 1249.25 3
 9 2 1 3431.01 517.471 3
 9 -2 1 3719.93 568.48 3
 9 2 2 477.427 235.478 3
 9 -2 2 331.975 186.411 3
 9 2 3 32885.2 1765.08 3
 9 -2 3 33956.3 1820.73 3
 9 2 4 11425.7 1021.4 3
 9 -2 4 11295.6 1041.73 3
 9 2 5 3338.51 581.86 3
 9 -2 5 3640.07 592.454 3
 9 2 6 71334.3 2876.89 3
 9 -2 6 69847.1 2863.77 3
 9 2 7 51588.7 2402.22 3
 9 -2 7 48792.2 2390.85 3
 9 2 8 21532.3 1528.19 3
 9 -2 8 21692.8 1558.3 3
 9 2 9 1479.32 409.858 3
 9 -2 9 880.806 314.92 3
 9 2 10 160.667 150.573 3
 9 -2 10 -270.874 209.458 3
 9 2 11 2537.14 553.857 3
 9 -2 11 2321.92 554.708 3
 9 2 12 2960.1 722.246 2
 9 -2 13 3900.38 864.433 2
 -9 -3 17 4803.48 842.007 2
 -9 3 17 5272.07 902.145 2
 -9 -3 16 1571.21 500.246 2
 -9 3 16 1639.21 534.894 2
 -9 -3 15 18457.3 1555.11 2
 -9 3 15 17072.1 1587.58 2
 -9 3 14 19705.7 1641.96 2
 -9 -3 14 19933.8 1551.68 2
 -9 3 13 51412.2 2634.75 2
 -9 -3 13 47533.1 2394.41 2
 -9 -3 12 2049.73 477.624 2
 -9 3 12 2362.43 546.835 2
 -9 3 11 25894.5 1703.53 2
 -9 -3 11 25569.8 1595.38 2
 -9 -3 10 237.684 202.69 2
 -9 3 10 398.05 267.762 2
 9 3 -9 9001.25 667.877 3
 9 -3 -9 9243.23 649.092 3
 -9 -3 9 7710.98 809.034 2
 -9 3 9 7681.41 870.604 2
 -9 3 8 2936.45 512.665 2
 9 3 -8 3936.46 452.761 3
 9 -3 -8 3546.37 434.601 3
 9 3 -7 57503.1 2293.22 1
 9 -3 -7 56319.7 2362.39 1
 9 3 -7 55795.3 1998.95 3
 9 -3 -7 59452.9 2045.3 3
 -9 3 7 58765.4 2378.66 2
 9 3 -6 38538.5 1788.56 1
 9 -3 -6 38372.9 1856.14 1
 9 3 -6 39638.3 1653.04 3
 9 -3 -6 41241.2 1710.02 3
 9 -3 -5 55034.4 2234.81 1
 9 3 -5 55317.6 2148.19 1
 9 3 -5 56216.8 2089.94 3
 9 -3 -5 58975.1 2171.36 3
 9 3 -4 9062.08 780.406 3
 9 -3 -4 7572.73 756.335 1
 9 -3 -4 8950.81 801.477 3
 9 3 -4 7738.56 716.408 1
 9 -3 -3 61616.9 2316.18 1
 9 3 -3 64562.3 2269.98 1
 9 3 -3 63931.7 2345.83 3
 9 -3 -3 66805 2432.97 3
 9 3 -2 2933.35 462.441 3
 9 -3 -2 2800.73 461.88 3
 9 3 -1 30562 1591.24 3
 9 -3 -1 29777.7 1615.2 3
 9 3 0 9056.4 852.454 3
 9 -3 0 9140.56 890.81 3
 9 3 1 23324.8 1420.46 3
 9 -3 1 22470.2 1432.68 3
 9 3 2 12154.4 1025.93 3
 9 -3 2 12169.2 1062.82 3
 9 3 3 60451.7 2521.03 3
 9 -3 3 62919.3 2626.74 3
 9 3 4 11804.9 1053.5 3
 9 -3 4 12914.9 1133.56 3
 9 3 5 7674.09 857.773 3
 9 -3 5 9202.43 967.638 3
 9 3 6 7614.11 872.172 3
 9 -3 6 7477.8 894.448 3
 9 3 7 8529.42 942.418 3
 9 -3 7 9313.96 996.575 3
 9 3 8 5103.85 749.686 3
 9 -3 8 4827.32 735.39 3
 9 3 9 41335.6 2221.04 3
 9 -3 9 44392.4 2334.95 3
 9 3 10 34.2034 157.542 3
 9 -3 10 565.299 259.406 3
 9 3 11 25760.2 1758.47 3
 9 -3 11 25176.1 1760.16 3
 9 3 12 -87.5566 395.633 2
 9 -3 13 9692.84 1275.71 2
 -9 -4 17 1806.19 506.086 2
 -9 4 17 1333.49 496.645 2
 -9 -4 16 6493.29 950.494 2
 -9 4 16 8404.28 1143.91 2
 -9 4 15 8551.51 1117.43 2
 -9 -4 15 9280.95 1071 2
 -9 -4 14 200.714 222.532 2
 -9 4 14 407.007 188.786 2
 -9 4 13 5695.67 872.141 2
 -9 -4 13 5785.53 790.649 2
 -9 4 12 20743.8 1605.34 2
 -9 -4 12 23381.6 1546.56 2
 -9 4 11 5252.23 770.535 2
 -9 -4 11 5110.75 683.965 2
 -9 4 10 125142 4102.04 2
 -9 -4 10 121761 3797.68 2
 -9 4 9 962.945 306.982 2
 9 4 -9 714.796 199.055 3
 9 -4 -9 942.082 224.238 3
 9 4 -8 34680.2 1472.42 3
 9 -4 -8 34301.5 1454.35 3
 -9 4 8 31734.3 1771.61 2
 9 -4 -8 32509.5 1804.5 1
 9 4 -7 18130.3 1213.91 1
 9 -4 -7 18425.7 1299.62 1
 9 4 -7 21196.1 1145.85 3
 9 -4 -7 21818.5 1176.96 3
 -9 4 7 21466.3 1367.08 2
 9 4 -6 1897.03 342.574 3
 9 -4 -6 2145.98 368.58 3
 -9 4 6 1763.89 381.044 2
 9 4 -6 2130.55 390.773 1
 9 -4 -6 2249.76 440.818 1
 9 4 -5 6099.62 627.612 3
 9 -4 -5 6078.78 689.698 1
 9 4 -5 4998.1 594.626 1
 9 -4 -5 6005.2 632.384 3
 9 4 -4 11138.1 879.513 3
 9 -4 -4 10847.3 903.354 1
 9 4 -4 9222.09 775.522 1
 9 -4 -4 11267.9 904.262 3
 9 -4 -3 33487.4 1649.53 1
 9 4 -3 32678.8 1539.47 1
 9 4 -3 35618.9 1667.51 3
 9 -4 -3 35312.3 1709.29 3
 9 4 -2 144041 4029.59 3
 9 4 -1 465.351 254.591 3
 9 4 0 29103.6 1585.55 3
 9 -4 0 30284.8 1652.88 3
 9 4 1 432.927 186.688 3
 9 -4 1 536.023 257.471 3
 9 4 2 1576.17 378.7 3
 9 -4 2 269.747 243.928 3
 9 4 3 7157.67 794.935 3
 9 -4 3 7042.03 829.659 3
 9 4 4 63556.1 2620.65 3
 9 -4 4 62875.7 2669.37 3
 9 4 5 23244.5 1526.99 3
 9 -4 5 21287.9 1504.84 3
 9 4 6 124886 4026.81 3
 9 -4 6 117491 4040.47 3
 9 4 7 328.876 164.579 3
 9 -4 7 227.905 228.777 3
 9 4 8 30945.3 1867.25 3
 9 -4 8 31350 1930.48 3
 9 4 9 1560.4 414.434 3
 9 -4 9 1333.42 437.4 3
 9 4 10 827.863 321.547 3
 9 -4 10 1133.37 418.854 3
 9 4 11 506.794 312.648 3
 9 -4 11 -221.144 244.892 3
 9 4 12 19061.3 1813.88 2
 9 -4 13 605.416 387.942 2
 -9 -5 16 2906.66 627.075 2
 -9 5 16 4268.98 846.743 2
 -9 5 15 16707 1579.61 2
 -9 -5 15 16694.1 1428.78 2
 -9 -5 14 224.997 239.52 2
 -9 5 14 192.758 217.976 2
 -9 5 13 20775.4 1668.71 2
 -9 -5 13 19667.2 1453.08 2
 -9 5 12 20513.8 1612.71 2
 -9 -5 12 17816.7 1335.05 2
 -9 5 11 17688.5 1441.7 2
 -9 -5 11 15969.9 1211.3 2
 -9 5 10 7.83085 186.412 2
 -9 -5 10 -13.9154 167.293 2
 9 5 -9 9498.47 725.397 3
 9 -5 -9 10235.7 733.552 3
 -9 5 9 9579.2 975.3 2
 9 5 -8 4721.73 531.51 3
 9 -5 -8 4914.36 530.723 3
 -9 5 8 4535.8 653.667 2
 9 -5 -8 4329.23 645.962 1
 9 5 -7 35102.5 1726.41 1
 9 -5 -7 34536.1 1831.75 1
 9 5 -7 39667 1659.43 3
 9 -5 -7 39658.5 1674.16 3
 -9 5 7 38485.6 1896.79 2
 9 -5 -6 6016.41 700.929 1
 9 5 -6 5336.02 619.141 1
 9 5 -6 6380.78 643.681 3
 9 -5 -6 6358.98 652.301 3
 -9 5 6 5755.59 698.516 2
 9 5 -5 32820.6 1560.45 3
 9 -5 -5 31568.8 1647.33 1
 9 5 -5 30789 1497.1 1
 9 5 -4 66620.1 2378.29 3
 9 -5 -4 60882.9 2355.05 1
 9 5 -4 60438.7 2171.22 1
 9 5 -3 1791.56 349.7 1
 9 -5 -3 2335.49 428.906 1
 9 5 -3 1760.11 353.212 3
 9 5 -2 235.026 138.932 3
 9 5 -1 13051.3 1019.77 3
 9 5 0 9004.2 865.946 3
 9 5 1 77715.8 2843.27 3
 9 5 2 26286.6 1573.71 3
 9 5 3 47996.8 2216.44 3
 9 5 4 68091.5 2751.13 3
 9 -5 4 66859 2787.38 3
 9 5 5 4109.21 655.618 3
 9 -5 5 4667.65 711.306 3
 9 5 6 5488.61 745.85 3
 9 -5 6 5956.16 804.623 3
 9 5 7 22806.1 1574.56 3
 9 -5 7 24322.8 1678.12 3
 9 5 8 5747.92 794.044 3
 9 -5 8 4322.43 708.25 3
 9 5 9 27339.3 1777.72 3
 9 -5 9 24963.7 1749.49 3
 9 5 10 16228.2 1377.02 3
 9 -5 10 15525.8 1374.34 3
 9 5 11 33591.5 2037.75 3
 9 -5 11 30494.7 1985.89 3
 9 5 12 11320.4 1390.52 2
 9 -5 13 1783.61 542.455 2
 -9 6 16 300.929 205.071 2
 -9 -6 15 824.499 294.972 2
 -9 6 15 1404.65 548.971 2
 -9 -6 14 159.607 154.275 2
 -9 6 14 589.334 393.449 2
 -9 -6 13 954.676 328.173 2
 -9 6 13 1250.39 446.414 2
 -9 -6 12 2637.37 521.989 2
 -9 6 12 3717.6 731.594 2
 -9 6 11 37468.7 2166.21 2
 -9 -6 11 38424.7 1918.41 2
 -9 6 10 48551.8 2411.56 2
 9 6 -9 82402.4 2539.98 3
 9 -6 -9 82611.7 2507.01 3
 -9 6 9 80542.4 3121.62 2
 9 -6 -8 5257.75 716.135 1
 9 6 -8 6288.96 618.736 3
 9 -6 -8 6136.41 610.701 3
 9 6 -8 5869.6 698.683 1
 -9 6 8 6181.4 776.149 2
 9 6 -7 17498.8 1158.68 1
 9 -6 -7 16401.4 1225.81 1
 9 6 -7 17871.3 1100.61 3
 -9 6 7 18780.4 1295.8 2
 9 -6 -6 1237.2 343.261 1
 9 6 -6 1151.34 287.721 1
 9 6 -6 920.864 235.173 3
 -9 6 6 1645.19 401.183 2
 9 -6 -5 74.1722 152.225 1
 9 6 -5 139.58 91.3578 3
 9 6 -5 67.591 126.219 1
 9 -6 -4 986.419 325.656 1
 9 6 -4 665.834 212.328 3
 9 6 -4 854.231 256.162 1
 9 -6 -3 96210.2 3123.15 1
 9 6 -3 102331 3209.05 3
 9 6 -2 32594 1674.4 3
 9 6 -1 19392.3 1281.27 3
 9 6 0 12076.5 1016.49 3
 9 6 1 11039.3 978.828 3
 9 6 2 1182.85 331.53 3
 9 6 3 520.4 260.668 3
 9 6 4 7734.01 872.722 3
 9 6 5 116316 3864.98 3
 9 6 6 53427.8 2488.64 3
 9 -6 6 56336.8 2625.27 3
 9 6 7 9198.75 994.424 3
 9 -6 7 8649.6 1002.48 3
 9 6 8 4616.91 718.673 3
 9 -6 8 3859.39 675.916 3
 9 6 9 4109.01 694.145 3
 9 -6 9 4491.74 758.377 3
 9 6 10 8376.78 999.207 3
 9 -6 10 7727.2 977.134 3
 9 6 11 67.3577 259.089 3
 9 6 11 215.754 197.499 2
 -9 7 16 19048.8 1762.36 2
 -9 7 15 831.693 382.123 2
 -9 7 14 14717.2 1467.12 2
 -9 -7 14 13395 1193.49 2
 -9 -7 13 1274.04 389.349 2
 -9 7 13 2069.18 518.721 2
 -9 7 12 41653.9 2402.66 2
 -9 -7 12 46938.3 2185.33 2
 -9 7 11 2664.66 574.291 2
 -9 7 10 2484.05 530.793 2
 -9 7 9 788.948 326.947 2
 9 7 -9 884.262 258.96 3
 9 -7 -8 19999.2 1421.48 1
 9 7 -8 23850.8 1277.27 3
 -9 7 8 24762.4 1571.4 2
 9 7 -8 22425.6 1376.02 1
 -9 7 7 2236.55 456.554 2
 9 7 -7 2143.05 385.718 3
 9 7 -7 1594.17 370.205 1
 9 -7 -7 2296.14 479.051 1
 9 7 -6 59362.2 2247.93 3
 9 -7 -6 56194.5 2360.25 1
 9 7 -6 57888.2 2171.53 1
 -9 7 6 60821.3 2455.57 2
 9 7 -5 23.1015 163.146 3
 9 -7 -5 152.12 207.466 1
 9 7 -5 -35.9782 134.226 1
 9 7 -4 72273.4 2393.4 1
 9 7 -4 77495.9 2697.32 3
 9 -7 -4 73715.2 2653.98 1
 9 7 -3 541.813 230.165 3
 9 -7 -3 413.682 162.144 1
 9 7 -2 756.166 280.524 3
 9 7 -1 91.0698 117.837 3
 9 7 0 20393.7 1359.27 3
 9 7 1 1.33056 122.946 3
 9 7 2 83528.7 3059.86 3
 9 7 3 9501.25 963.519 3
 9 7 4 98911.4 3504.02 3
 9 7 5 99.0641 216.307 3
 9 7 6 8785.51 967.108 3
 9 7 7 2042.14 473.074 3
 9 -7 7 2273.97 519.756 3
 9 7 8 27808.9 1810.84 3
 9 -7 8 28020.2 1875.13 3
 9 7 9 716.546 355.19 3
 9 -7 9 1114.28 389.311 3
 9 7 10 41342.9 2297.25 3
 9 -7 10 41062.3 2350.49 3
 9 7 11 2628.91 548.44 3
 9 -7 11 2312.75 538.348 3
 9 7 11 3117.78 735.127 2
 -9 8 16 7425.18 1126.53 2
 -9 8 15 3159.42 724.913 2
 -9 8 14 1959.64 534.955 2
 -9 8 13 581.583 361.519 2
 -9 -8 13 305.109 157.62 2
 -9 8 12 1747.28 493.826 2
 -9 8 11 21876.5 1658.18 2
 -9 8 10 457.694 204.798 2
 -9 8 9 45799.6 2302.83 2
 9 8 -9 46479.3 1855.66 3
 9 8 -8 3751.4 549.839 1
 9 8 -8 5317.16 608.189 3
 9 -8 -8 3462.74 581.101 1
 -9 8 8 3975.12 635.37 2
 9 8 -7 15991.3 1101.35 1
 9 -8 -7 17676.5 1286.86 1
 9 8 -7 17943.9 1151.81 3
 -9 8 7 18691.8 1328.55 2
 9 -8 -6 910.028 347.054 1
 9 8 -6 743.063 235.458 1
 9 8 -6 1152.59 315.367 3
 -9 8 6 1290.03 369.86 2
 9 8 -5 536.199 219.216 3
 9 -8 -5 -2.47263 145.051 1
 9 8 -5 207.832 166.56 1
 9 8 -4 1015.18 264.995 1
 9 -8 -4 1191.53 332.437 1
 9 8 -4 1617.83 375.413 3
 9 -8 -3 63158.6 2455.69 1
 9 8 -3 63742.8 2488.57 3
 9 8 -2 9397.76 889.311 3
 9 8 -1 15078.9 1151.55 3
 9 8 0 26827.3 1585.6 3
 9 8 1 9445.24 950.268 3
 9 8 2 360.005 156.577 3
 9 8 3 139.664 183.308 3
 9 8 4 2189.15 474.611 3
 9 8 5 113944 3912.97 3
 9 8 6 1005.03 354.091 3
 9 8 7 33610.1 1985.9 3
 9 8 8 2882.47 584.052 3
 9 -8 8 2599.9 572.348 3
 9 8 9 12403 1217.4 3
 9 -8 9 11708.2 1219.46 3
 9 8 10 2001.89 506.437 3
 9 -8 10 2165.98 542.54 3
 9 -8 11 562.35 287.587 3
 9 8 11 463.889 440.568 2
 -9 9 15 14540.9 1525.1 2
 -9 9 14 7751.03 1070.94 2
 -9 9 13 14919.5 1469.32 2
 -9 9 12 32140.6 2111.18 2
 -9 9 11 2112.34 541.662 2
 -9 9 10 1974.46 497.022 2
 -9 9 9 1692.6 438.41 2
 9 9 -9 1967.48 380.145 3
 9 -9 -9 1434.33 390.007 1
 9 9 -8 21786.3 1329.87 1
 9 -9 -8 21266.7 1482.88 1
 9 9 -8 24221.2 1348.79 3
 -9 9 8 24344.6 1604.66 2
 9 9 -7 41428.6 1831.8 1
 9 -9 -7 42174.1 2075.42 1
 9 9 -7 45330 1948.21 3
 -9 9 7 44748.3 2157.61 2
 9 9 -6 8792.85 822.26 3
 9 -9 -6 8109.61 848.44 1
 9 9 -6 7773.46 718.507 1
 -9 9 6 8824.66 894.012 2
 9 9 -5 12157.9 1001.97 3
 9 -9 -5 12409.8 1028.67 1
 9 9 -5 12355.8 874.792 1
 9 9 -4 67631.6 2230.12 1
 9 9 -4 63330.7 2506.33 3
 9 -9 -4 60398.6 2414.66 1
 9 9 -3 575.917 224.764 3
 9 -9 -3 229.455 119.958 1
 9 9 -2 982.691 313.854 3
 9 9 -1 1036.63 310.453 3
 9 9 0 5762.85 743.408 3
 9 9 1 83582.5 3096.86 3
 9 9 2 26091.3 1634.63 3
 9 9 3 8666.57 937.181 3
 9 9 4 105928 3703.39 3
 9 9 5 2302.97 491.852 3
 9 9 6 3097.86 614.657 3
 9 9 7 -5.14096 137.19 3
 9 9 8 4587.93 740.063 3
 9 9 9 32823.4 2047.79 3
 9 -9 9 28309.8 1960.69 3
 9 9 10 24016.8 1757.98 3
 9 -9 10 21268.8 1708.93 3
 9 9 10 25789.3 2028.84 2
 9 9 11 4442.18 769.609 3
 9 -9 11 3783.66 733.649 3
 9 9 11 4597 914.679 2
 -9 10 15 349.162 253.666 2
 -9 10 14 869.053 350.523 2
 -9 10 13 -510.366 305.322 2
 -9 10 12 16020.1 1486.62 2
 -9 10 11 7353.81 983.091 2
 -9 10 10 9514.88 1077.03 2
 -9 10 9 12838 1198.58 2
 9 -10 -9 12020.2 1144.79 1
 9 10 -9 12746.3 956.416 3
 9 10 -8 56080.2 2241.86 1
 9 -10 -8 55573 2524.57 1
 9 10 -8 58732.2 2277.07 3
 -9 10 8 62124.7 2663.69 2
 -9 10 7 86.5456 211.533 2
 9 10 -7 8.32157 156.979 3
 9 10 -7 -97.3043 167.025 1
 9 -10 -7 35.2397 201.158 1
 9 -10 -6 557.787 280.597 1
 9 10 -6 873.867 273.56 3
 9 10 -6 669.959 218.641 1
 -9 10 6 484.338 203.821 2
 9 10 -5 1069.21 268.217 1
 9 10 -5 1095.14 316.483 3
 9 -10 -5 947.601 321.552 1
 9 10 -4 5951.64 720.167 3
 9 10 -4 5496.95 572.198 1
 9 -10 -4 5516.82 696.669 1
 9 10 -3 2524.8 509.621 3
 9 -10 -3 2283.82 462.288 1
 9 10 -2 28004.7 1639.56 3
 9 10 -1 561.008 287.68 3
 9 10 0 85452.8 3174.34 3
 9 10 1 2016.42 462.35 3
 9 10 2 8371.35 923.957 3
 9 10 3 37.83 155.774 3
 9 10 4 6234.04 824.571 3
 9 10 5 28245.8 1821.81 3
 9 10 6 16394.8 1386.42 3
 9 10 7 5689.14 830.239 3
 9 10 8 59759.4 2839.99 3
 9 10 9 64.1769 191.904 3
 9 10 10 237.595 254.65 3
 9 -10 10 471.423 292.724 3
 9 10 10 796.822 456.113 2
 9 10 11 -926.635 375.683 3
 9 -10 11 -48.8553 177.729 3
 -9 11 15 30548.7 2275.51 2
 -9 11 14 2584.54 635.698 2
 -9 11 13 33281.1 2254.77 2
 -9 11 12 4169.26 763.006 2
 -9 11 11 3232.57 656.517 2
 -9 11 10 828.758 378.911 2
 -9 11 9 779.195 288.313 2
 9 11 -9 516.643 205.685 3
 9 -11 -9 975.263 343.51 1
 9 11 -9 751.779 291.532 1
 -9 11 8 436.037 293.058 2
 9 11 -8 299.686 193.655 3
 9 11 -8 -72.9336 156.163 1
 9 -11 -8 50.4615 185.178 1
 9 11 -7 81402 2865.02 3
 9 -11 -7 74578 2923.39 1
 9 11 -7 75291.9 2558.93 1
 -9 11 7 82909.6 3097.48 2
 -9 11 6 279.008 230.927 2
 9 11 -6 151.636 153.96 3
 9 -11 -6 308.762 216.946 1
 9 11 -6 375.444 209.817 1
 9 11 -5 65036 2179.64 1
 9 11 -5 65557.3 2616.17 3
 9 -11 -5 63508.5 2544.79 1
 9 -11 -4 4451.34 609.289 1
 9 11 -4 3719.1 591.003 3
 9 11 -3 11078.5 1024.58 3
 9 11 -2 3072.16 549.134 3
 9 11 -1 4409.86 668.087 3
 9 11 0 103.24 145.899 3
 9 11 1 102859 3649.27 3
 9 11 2 2595.85 549.153 3
 9 11 3 19556.5 1479.42 3
 9 11 4 4391.82 701.689 3
 9 11 5 8542.21 988.096 3
 9 11 6 1515.01 430.346 3
 9 11 7 206.612 221.482 3
 9 11 8 46.6957 173.911 3
 9 11 9 61082.9 2940.76 3
 9 11 10 1.99574 160.689 3
 9 11 10 -14.7724 239.956 2
 9 -11 11 36113 2317.3 3
 -9 12 14 23.6497 295.149 2
 -9 12 13 10003.4 1225.23 2
 -9 12 12 20704.9 1713.6 2
 -9 12 11 2210.39 544.542 2
 -9 12 10 21482.6 1658.69 2
 9 -12 -10 17488.4 1452.59 1
 9 12 -9 3258.06 510.934 1
 9 12 -9 4361.6 600.655 3
 -9 12 9 3981.8 663.578 2
 9 -12 -9 3640.79 635.209 1
 9 12 -8 48629.8 2106.01 3
 9 12 -8 42220.9 1862.4 1
 9 -12 -8 43537.6 2214.19 1
 -9 12 8 45125.4 2291.47 2
 9 12 -7 13086 1068.22 3
 9 -12 -7 10953.5 1055.54 1
 9 12 -7 10053.6 822.81 1
 -9 12 7 12051 1118.6 2
 -9 12 6 791.95 271.143 2
 9 12 -6 670.473 284.833 3
 9 -12 -6 610.745 248.371 1
 9 12 -6 535.192 198.93 1
 9 12 -5 8065.52 677.584 1
 9 12 -5 7880.88 863.298 3
 9 -12 -5 8051.78 844.727 1
 9 -12 -4 20239.9 1353.93 1
 9 12 -4 22952.9 1510.91 3
 9 12 -3 8750.98 932.192 3
 9 12 -2 21615.9 1495.98 3
 9 12 -1 10499.6 1037.64 3
 9 12 0 44555.2 2264.6 3
 9 12 1 7018.1 867.57 3
 9 12 2 23463.5 1638.65 3
 9 12 3 5234.97 777.486 3
 9 12 4 14279.4 1301.19 3
 9 12 5 2047.87 516.87 3
 9 12 6 37139.7 2200.34 3
 9 12 7 7198.28 944.82 3
 9 12 8 45138.5 2512.27 3
 9 12 9 1242.23 407.179 3
 9 12 9 3081.58 737.176 2
 9 12 10 414.238 257.798 3
 9 12 10 758.55 365.676 2
 9 -12 11 977.02 410.057 3
 -9 13 14 43945.8 2730 2
 -9 13 13 25420.4 1977.03 2
 -9 13 12 3556.77 724.591 2
 -9 13 11 -124.706 190.04 2
 -9 13 10 264.07 300.082 2
 9 -13 -10 233.397 146.529 1
 -9 13 9 2421.92 537.846 2
 9 13 -9 1910.13 414.547 3
 9 -13 -9 1952.52 472.457 1
 9 13 -8 7408.23 803.763 3
 9 -13 -8 6476 814.15 1
 -9 13 8 6388.22 847.631 2
 9 13 -7 28119.3 1643.15 3
 9 -13 -7 26614.4 1665.21 1
 -9 13 7 30781.5 1810.96 2
 9 13 -6 39900.1 2026.1 3
 9 -13 -6 38794.7 1994.25 1
 -9 13 6 43593.2 2130.45 2
 9 13 -5 22384.2 1506.43 3
 9 -13 -5 20458 1374.12 1
 9 13 -4 20567.8 1461.99 3
 9 -13 -4 20978.3 1383.03 1
 9 13 -3 7831.53 899.248 3
 9 13 -2 43.9345 137.317 3
 9 13 -1 1889.12 444.677 3
 9 13 0 2308.07 525.086 3
 9 13 1 45834.7 2357.96 3
 9 13 2 34580.9 2053.82 3
 9 13 3 7616.51 942.025 3
 9 13 4 2295.99 559.344 3
 9 13 5 14489.1 1350.76 3
 9 13 6 32.5819 328.757 3
 9 13 7 -320.786 273.378 3
 9 13 8 9235.68 1110.05 3
 9 13 9 21302.6 1721.63 3
 9 13 9 24145.1 2004.48 2
 9 13 10 25060.8 1877.06 3
 -9 14 14 1433.21 536.713 2
 -9 14 13 22903.3 1909.32 2
 -9 14 12 13792.4 1439.59 2
 -9 14 11 21891.1 1767.96 2
 9 -14 -11 19239.1 1579.1 1
 -9 14 10 556.502 378.647 2
 9 -14 -10 365.781 295.237 1
 -9 14 9 32654 2020.39 2
 9 14 -9 33239.3 1793.99 3
 9 -14 -9 30210.8 1897.27 1
 9 14 -8 15087 1198.28 3
 9 -14 -8 14700.4 1256.53 1
 -9 14 8 14811 1296.96 2
 9 14 -7 29733.1 1724.08 3
 9 -14 -7 27405.1 1709.63 1
 -9 14 7 28564.1 1759.07 2
 9 14 -6 1325.67 400.04 3
 9 -14 -6 1132.01 326.16 1
 -9 14 6 1193.93 329.801 2
 9 14 -5 28043.5 1728.93 3
 9 -14 -5 24582.6 1529.33 1
 9 14 -4 3738.27 631.295 3
 9 -14 -4 3711.08 581.542 1
 9 14 -3 44571.4 2289.96 3
 9 14 -2 42.8587 139.523 3
 9 14 -1 60164.6 2745.79 3
 9 14 0 12242.9 1201.7 3
 9 14 1 6841.53 892.89 3
 9 14 2 717.849 247.501 3
 9 14 3 27429.3 1858.86 3
 9 14 4 775.304 385.423 3
 9 14 5 42885.6 2421.19 3
 9 14 6 1658.37 449.412 3
 9 14 7 57863.5 2907.04 3
 9 14 8 7644.56 1016.61 3
 9 14 8 8795.08 1166.02 2
 9 14 9 6244.86 959.46 3
 9 14 9 7703.54 1131.86 2
 9 14 10 76.2792 293.256 3
 -9 15 13 45.1289 201.378 2
 -9 15 12 11722.6 1349.69 2
 9 -15 -12 9368.55 1143.29 1
 9 -15 -11 18866.2 1583.6 1
 -9 15 11 21646.1 1745.27 2
 -9 15 10 567.838 315.609 2
 9 -15 -10 1216.81 400.721 1
 9 15 -9 10185.9 984.457 3
 9 -15 -9 10037.1 1063.27 1
 -9 15 9 11701.2 1193.4 2
 9 15 -8 7163.07 849.607 3
 9 -15 -8 5853.28 788.303 1
 -9 15 8 8114.14 966.487 2
 -9 15 7 207.845 233.767 2
 9 15 -7 386.481 200.095 3
 9 -15 -7 616.985 268.885 1
 9 15 -6 56891.6 2557.03 3
 9 -15 -6 53575.7 2421.84 1
 -9 15 6 58389.4 2567.26 2
 9 -15 -5 4806.19 669.552 1
 9 15 -5 4597.41 701.705 3
 9 15 -4 16318 1349.42 3
 9 15 -3 4001.03 650.909 3
 9 15 -2 1278.78 403.934 3
 9 15 -1 4195.48 717.709 3
 9 15 0 51231.6 2603.92 3
 9 15 1 3066.9 648.247 3
 9 15 2 45891.2 2480.98 3
 9 15 3 5748.79 847.109 3
 9 15 4 9489.99 1122.52 3
 9 15 5 98.1434 202.26 3
 9 15 6 1510.28 459.855 3
 9 15 7 1161.68 456.356 3
 9 15 8 20310.1 1710.8 3
 9 15 8 22999.1 1889.73 2
 9 15 9 5841.02 916.758 3
 9 15 9 7329.4 1123.31 2
 9 15 10 35499.8 2331.84 3
 -9 16 13 1350.14 548.933 2
 -9 16 12 -4.59294 235.447 2
 9 -16 -12 -375.379 261.691 1
 -9 16 11 19718.6 1692.96 2
 9 -16 -11 17608.7 1535.59 1
 -9 16 10 41591.4 2415.86 2
 9 -16 -10 38136.2 2228.68 1
 9 16 -9 31484.4 1825.46 3
 9 -16 -9 26249.4 1766.59 1
 -9 16 9 27633.3 1896.37 2
 -9 16 8 414.472 279.158 2
 9 16 -8 275.157 161.222 3
 9 -16 -8 259.601 145.409 1
 9 16 -7 14988.5 1288.26 3
 9 -16 -7 12548 1146.41 1
 -9 16 7 14554.6 1264.67 2
 9 16 -6 1982.18 465.029 3
 9 -16 -6 1699.58 411.877 1
 -9 16 6 2028.8 468.859 2
 9 16 -5 1691.29 450.988 3
 9 -16 -5 1299.48 393.853 1
 9 16 -4 962.413 316.902 3
 9 16 -3 17851.5 1457.85 3
 9 16 -2 35965.7 2127.06 3
 9 16 -1 42539.1 2354.83 3
 9 16 0 329.728 221.872 3
 9 16 1 6361.51 913.205 3
 9 16 2 6603.73 919.584 3
 9 16 3 4286.95 756.714 3
 9 16 4 24854.6 1874.76 3
 9 16 5 18692.4 1623.76 3
 9 16 6 8476.82 1097.68 3
 9 16 7 34405.7 2274.17 3
 9 16 7 33603.9 2271.52 2
 9 16 8 523.203 275.925 3
 9 16 8 -73.2126 277.414 2
 9 16 9 5585.87 956.092 3
 9 16 10 -665.47 354.589 3
 9 -17 -13 10366.1 1240.21 1
 -9 17 12 2235.11 527.498 2
 9 -17 -12 2480.85 593.494 1
 -9 17 11 13130.7 1408.95 2
 9 -17 -11 12439.6 1287.69 1
 -9 17 10 1932.31 550.151 2
 9 -17 -10 830.246 307.979 1
 9 17 -9 11663.3 1115.38 3
 9 -17 -9 9536.96 1058.15 1
 -9 17 9 11045.9 1188.11 2
 9 17 -8 5728.44 794.49 3
 9 -17 -8 4822.28 729.893 1
 -9 17 8 5605.89 846.087 2
 -9 17 7 3508.62 639.422 2
 9 17 -7 3841.01 671.455 3
 9 -17 -7 3610.71 624.734 1
 9 17 -6 17249.2 1422.42 3
 -9 17 6 18690.8 1409.25 2
 9 -17 -6 17324.9 1314.65 1
 9 17 -5 30953.6 1953.77 3
 9 -17 -5 32464.8 1846.44 1
 9 17 -4 778.976 349.634 3
 9 17 -3 16519.4 1435.66 3
 9 17 -2 159.131 182.027 3
 9 17 -1 22377.1 1712.07 3
 9 17 0 19175.5 1609.66 3
 9 17 1 5920.3 895.067 3
 9 17 2 11535.6 1252.93 3
 9 17 3 41773.6 2484.3 3
 9 17 4 1843.59 500.74 3
 9 17 5 6139.95 946.633 3
 9 17 6 2066.09 560.326 3
 9 17 6 2573.72 613.448 2
 9 17 7 8799.36 1148.34 3
 9 17 7 9318.95 1165.68 2
 9 17 8 3229.41 726.958 3
 9 17 8 3690.53 790.073 2
 9 17 9 11813.4 1351.74 3
 9 -18 -13 813.161 327.975 1
 -9 18 12 2780.72 662.474 2
 9 -18 -12 2686.21 644.749 1
 -9 18 11 -729.285 354.247 2
 9 -18 -11 -149.092 284.478 1
 -9 18 10 64793.2 3117.96 2
 9 -18 -10 55777.5 2761.1 1
 9 18 -9 248.587 217.461 3
 -9 18 9 203.743 191.227 2
 9 -18 -9 3.58948 215.088 1
 -9 18 8 3969.03 693.376 2
 9 18 -8 3715.41 657.708 3
 9 -18 -8 3136.79 588.877 1
 -9 18 7 -155.067 157.357 2
 9 18 -7 247.785 163.269 3
 9 -18 -7 -11.1453 202.103 1
 9 -18 -6 11562.1 1096.5 1
 9 18 -6 13048.1 1269.91 3
 -9 18 6 12379.5 1156.35 2
 9 18 -5 220.509 189.038 3
 9 -18 -5 158.743 218.922 1
 9 18 -4 7651.29 970.505 3
 9 18 -3 122.243 160.154 3
 9 18 -2 84421.1 3557.21 3
 9 18 -1 4044.84 779.967 3
 9 18 0 3982.7 742.415 3
 9 18 1 -41.2107 248.921 3
 9 18 2 12371.4 1328.9 3
 9 18 3 227.711 212.9 3
 9 18 4 14551.7 1457.36 3
 9 18 5 -1257.54 450.742 3
 9 18 5 -94.065 215.568 2
 9 18 6 45934.6 2712.96 3
 9 18 6 47071.6 2679.53 2
 9 18 7 3014.6 676.332 3
 9 18 7 4900.53 901.615 2
 9 18 8 7263.11 1071.27 3
 9 18 8 7950.64 1133.76 2
 -9 19 11 10954.2 1287.9 2
 -9 19 10 468.279 369.789 2
 9 19 -9 19504.8 1510.3 3
 9 -19 -9 18244.9 1483.72 1
 -9 19 9 19636.9 1621.93 2
 -9 19 8 1791.13 564.414 2
 9 19 -8 1149.64 412.682 3
 9 -19 -8 862.424 317.752 1
 9 19 -7 9127.86 1069.94 3
 -9 19 7 8532.66 992.9 2
 9 -19 -7 6885.67 852.824 1
 9 19 -6 2163.85 558.973 3
 9 -19 -6 2282.15 526.786 1
 -9 19 6 1702.13 429.698 2
 9 19 -5 38320.8 2299.54 3
 9 19 -4 2163.55 534.626 3
 9 19 -3 17882.6 1554.18 3
 9 19 -2 389.225 199.537 3
 9 19 -1 16741.3 1520.33 3
 9 19 0 1024.29 360.372 3
 9 19 1 4384.11 823.302 3
 9 19 2 8102.98 1081.09 3
 9 19 3 44636.5 2633.9 3
 9 19 4 2326.61 587.34 3
 9 19 4 2429.03 571.739 2
 9 19 5 6322.05 1024.69 3
 9 19 5 8088.38 1045.63 2
 9 19 6 505.234 370.928 3
 9 19 6 37.2533 269.969 2
 9 19 7 10619.4 1287.83 3
 9 19 7 12690.9 1424.64 2
 -9 20 11 11693.5 1329.04 2
 -9 20 10 26251.4 1961.46 2
 9 20 -9 12397.3 1235.15 3
 -9 20 9 11469.3 1247.82 2
 9 20 -8 4756.17 785.284 3
 -9 20 8 4527.92 739.498 2
 9 20 -7 4907.2 801.006 3
 -9 20 7 5437.01 798.995 2
 9 20 -6 3982.65 707.156 3
 -9 20 6 3496.52 608.02 2
 9 20 -5 265.438 170.831 3
 9 20 -4 4354.44 799.055 3
 9 20 -3 14548.8 1446.15 3
 9 20 -2 55690.7 2923.58 3
 9 20 -1 6564.95 972.36 3
 9 20 0 738.326 305.979 3
 9 20 1 8006.1 1100.72 3
 9 20 2 6199.37 981.259 3
 9 20 3 733.915 344.705 3
 9 20 4 9529.17 1221.3 3
 9 20 4 10778.1 1180.69 2
 9 20 5 17221.8 1650.35 3
 9 20 5 17807.7 1581.17 2
 9 20 6 18771.6 1736.88 3
 9 20 6 22539.8 1842.31 2
 9 20 7 7044.42 1068.02 2
 -9 21 10 -141.162 223.205 2
 -9 21 9 8662.51 1099.2 2
 9 21 -9 7826.73 1007 3
 9 21 -8 16268 1472.15 3
 -9 21 8 16012.3 1428.88 2
 9 21 -7 1235.06 446.519 3
 -9 21 7 1921.25 514.523 2
 9 21 -6 39369.2 2398.17 3
 9 21 -5 12329.5 1342.08 3
 9 21 -4 18241 1645.39 3
 9 21 -3 3956.57 744.455 3
 9 21 -2 391.598 297.387 3
 9 21 -1 9066.57 1175.35 3
 9 21 0 8042.84 1095.94 3
 9 21 1 792.351 356.018 3
 9 21 2 31219.3 2223.7 3
 9 21 3 20522.7 1815.13 3
 9 21 4 8520.96 1176.56 3
 9 21 5 315.145 298.105 3
 9 21 6 401.735 253.298 2
 -9 22 10 177.79 225.824 2
 -9 22 9 28974.8 2042.36 2
 9 22 -9 28472.5 1992 3
 9 22 -8 3585.94 716.525 3
 9 22 -7 7079.9 1005.06 3
 9 22 -6 81.3306 212.592 3
 9 22 -5 6941.49 1009.53 3
 9 22 -4 724.576 186.413 3
 9 22 -3 23247.8 1910.35 3
 9 22 -2 77.3604 237.583 3
 9 22 -1 45423.5 2761.03 3
 9 22 0 1424.74 510.364 3
 9 22 1 7134.14 1075.56 3
 9 22 2 265.092 275.915 3
 9 22 3 2622.63 656.969 3
 9 23 -9 1107.61 369.42 3
 9 23 -8 10461.7 1230.17 3
 9 23 -7 7916.4 1096.04 3
 9 23 -6 36594.4 2395.12 3
 9 23 -5 3109.63 703.811 3
 9 23 -4 9755.71 1243.13 3
 9 23 -3 1114.45 463.18 3
 9 23 -2 476.034 310.448 3
 9 23 -1 233.117 263.849 3
 9 23 0 7810.18 1154.62 3
 -10 0 17 -166.628 291.019 2
 -10 0 16 3617.37 764.787 2
 -10 0 15 -177.128 192.623 2
 -10 0 14 23133.5 1787.78 2
 -10 0 13 -724.039 326.879 2
 -10 0 12 18995.6 1515.85 2
 -10 0 11 -225.086 238.028 2
 -10 0 10 85951.4 3227.75 2
 10 0 -9 -29.7511 140.807 3
 10 0 -9 19.9914 171.235 1
 -10 0 9 -61.8282 204.797 2
 10 0 -8 13478.8 1136.32 1
 10 0 -8 14910.1 955.286 3
 10 0 -7 54.1142 110.584 3
 10 0 -7 -61.1175 151.034 1
 10 0 -6 20672.7 1349.42 1
 10 0 -6 23278.7 1295.33 3
 10 0 -5 372.348 202.065 1
 10 0 -5 -180.048 134.263 3
 10 0 -4 438.995 227.38 1
 10 0 -4 471.347 197.664 3
 10 0 -3 355.988 220.455 1
 10 0 -3 7.0623 126.418 3
 10 0 -2 150469 4305.61 3
 10 0 -1 18.0869 145.874 3
 10 0 0 382.232 210.205 3
 10 0 1 124.846 167.136 3
 10 0 2 92346.1 3321.17 3
 10 0 3 173.152 119.405 3
 10 0 4 35409.2 1978.43 3
 10 0 5 135.566 153.794 3
 10 0 6 110027 3882.2 3
 10 0 7 -151.567 272.661 3
 10 0 8 233.589 186.262 3
 10 0 9 -103.978 210.05 3
 10 0 10 4996.94 773.653 3
 10 0 11 -116.016 132.41 3
 -10 -1 17 11182.8 1334.89 2
 -10 1 17 12019.9 1406.94 2
 -10 -1 16 3703.81 745.484 2
 -10 1 16 5116.64 888.792 2
 -10 1 15 63235.2 3177.81 2
 -10 -1 15 65242.9 3150.02 2
 -10 1 14 4707.43 806.779 2
 -10 -1 14 5299.98 857.081 2
 -10 -1 13 2655.16 589.484 2
 -10 1 13 2685.73 625.92 2
 -10 -1 12 806.058 356.657 2
 -10 1 12 964.714 393.244 2
 -10 -1 11 2330.87 512.849 2
 -10 1 11 2165.71 518.798 2
 -10 -1 10 8950.98 950.479 2
 -10 1 10 8722.52 951.572 2
 10 1 -9 61276.9 2045.87 3
 10 -1 -9 61830.3 2055.14 3
 -10 1 9 60804.4 2596.74 2
 10 1 -9 55266.6 2530.32 1
 10 -1 -9 54130.9 2536.64 1
 10 1 -8 -7.98906 117.311 3
 10 1 -8 44.7695 136.869 1
 10 -1 -8 97.4044 86.3386 3
 10 -1 -8 238.317 204.28 1
 10 1 -7 68280.5 2704.81 1
 10 -1 -7 70722.8 2775.04 1
 10 1 -7 76464.2 2510.03 3
 10 -1 -7 77666.4 2511.85 3
 10 -1 -6 3505.42 549.215 1
 10 1 -6 3631.44 567.532 1
 10 1 -6 3503.08 479.438 3
 10 -1 -6 4304.13 546.518 3
 10 1 -5 -184.236 137.287 3
 10 -1 -5 71.7934 146.421 1
 10 1 -5 102.488 110.174 1
 10 -1 -5 -20.5316 172.005 3
 10 -1 -4 728.772 268.843 1
 10 1 -4 819.387 250.833 3
 10 1 -4 497.91 222.056 1
 10 -1 -4 1005.59 293.372 3
 10 -1 -3 26086.1 1482.28 1
 10 1 -3 23402.9 1388.18 1
 10 1 -3 24839.5 1432.63 3
 10 -1 -3 25644.5 1470.92 3
 10 1 -2 11651.5 979.975 3
 10 -1 -2 10407.7 946.519 3
 10 1 -1 141893 4197.39 3
 10 -1 -1 148652 4305.92 3
 10 1 0 12275.5 1060.05 3
 10 -1 0 12155.7 1055.46 3
 10 1 1 29338.4 1692.64 3
 10 -1 1 30625.8 1744.22 3
 10 1 2 9177.85 954.209 3
 10 -1 2 9315.01 956.975 3
 10 1 3 1150.14 330.017 3
 10 -1 3 1396.94 394.033 3
 10 1 4 2306.34 506.117 3
 10 -1 4 2625.85 534.912 3
 10 1 5 89.7343 186.113 3
 10 -1 5 223.672 157.586 3
 10 1 6 4775.04 738.784 3
 10 -1 6 4629.81 714.309 3
 10 1 7 49849.6 2474.97 3
 10 -1 7 47532.8 2432.46 3
 10 1 8 2663.12 578.51 3
 10 -1 8 1812.66 463.97 3
 10 1 9 7634.54 971.521 3
 10 -1 9 6849.99 906.43 3
 10 1 10 3373.34 637.071 3
 10 -1 10 3718.42 696.349 3
 10 1 11 5682.4 860.397 3
 10 -1 11 5520.43 835.15 3
 -10 -2 17 832.151 428.156 2
 -10 2 17 1089.73 485.812 2
 -10 2 16 5289.21 913.285 2
 -10 -2 16 7184.28 1036.52 2
 -10 -2 15 757.152 383.01 2
 -10 2 15 986.958 450.173 2
 -10 2 14 21683.2 1744.04 2
 -10 -2 14 21705.5 1680.07 2
 -10 -2 13 18421.2 1501.76 2
 -10 2 13 21627.8 1684.92 2
 -10 -2 12 4200.59 694.621 2
 -10 2 12 4790.12 761.224 2
 -10 -2 11 43995.1 2243.6 2
 -10 2 11 43730.6 2319.84 2
 -10 -2 10 41229 2115.12 2
 -10 2 10 42141.9 2190.55 2
 10 2 -9 5296.95 543.817 3
 10 -2 -9 5607.41 552.54 3
 -10 2 9 4696.53 701.862 2
 10 2 -9 4525.51 681.43 1
 10 -2 -9 5206.4 768.894 1
 10 2 -8 583.755 195.278 3
 10 2 -8 418.345 225.048 1
 10 -2 -8 530.741 268.308 1
 10 -2 -8 989.115 231.249 3
 -10 2 8 421.9 252.194 2
 10 2 -7 451.321 187.133 3
 10 -2 -7 404.346 201.204 3
 10 2 -7 528.036 271.716 1
 10 -2 -7 582.213 275.323 1
 10 -2 -6 14271.7 1137.78 1
 10 2 -6 14173.6 1096.38 1
 10 2 -6 16224.2 1077.09 3
 10 -2 -6 17309.6 1120.62 3
 10 2 -5 22232.9 1300.37 3
 10 -2 -5 20748 1342.98 1
 10 -2 -5 21661.6 1310.37 3
 10 2 -5 20868.1 1310.47 1
 10 2 -4 3103.82 478.409 1
 10 2 -4 3475.7 514.654 3
 10 -2 -4 3335.39 506.295 3
 10 -2 -4 2983.83 498.753 1
 10 -2 -3 38698.4 1866.31 1
 10 2 -3 39576.6 1857.63 3
 10 -2 -3 38995.8 1879.27 3
 10 2 -2 111170 3515.65 3
 10 -2 -2 111949 3595.55 3
 10 2 -1 14191.3 1117.96 3
 10 -2 -1 14079.2 1138.7 3
 10 2 0 1045.05 342.621 3
 10 -2 0 1023.35 321.222 3
 10 2 1 617.681 260.534 3
 10 -2 1 629.568 281.738 3
 10 2 2 16728.6 1269.18 3
 10 -2 2 16181.2 1288.96 3
 10 2 3 24437.4 1589.99 3
 10 -2 3 25403.9 1650.09 3
 10 2 4 7021.78 854.158 3
 10 -2 4 9036.15 979.449 3
 10 2 5 65346.8 2831.37 3
 10 -2 5 67241.9 2902.23 3
 10 2 6 29708 1855.8 3
 10 -2 6 29996.2 1883.24 3
 10 2 7 8650.78 998.933 3
 10 -2 7 9190.44 1048.12 3
 10 2 8 4625.94 746.716 3
 10 -2 8 3678.8 641.238 3
 10 2 9 1454.14 462.394 3
 10 -2 9 2040.8 521.404 3
 10 2 10 179.159 213.587 3
 10 -2 10 -159.704 197.576 3
 10 2 11 8247.68 1026.31 3
 10 -2 11 7787.64 1004.12 3
 -10 -3 17 -729.977 350.014 2
 -10 3 16 19501.6 1799.07 2
 -10 -3 16 17873.2 1608.26 2
 -10 3 15 17565.4 1648.36 2
 -10 -3 15 18005.1 1556.76 2
 -10 3 14 26919.2 1992.86 2
 -10 -3 14 27771.5 1891.37 2
 -10 -3 13 55.4667 162.774 2
 -10 3 13 321.074 176.933 2
 -10 -3 12 3032.58 578.01 2
 -10 3 12 2588.1 587.873 2
 -10 3 11 1622.97 494.83 2
 -10 -3 11 1437.05 420.29 2
 -10 3 10 19875.1 1483.58 2
 10 3 -9 20866.3 1130 3
 -10 3 9 19624.3 1424.54 2
 10 3 -9 18837.1 1393.91 1
 10 -3 -9 18491.2 1425.92 1
 10 3 -8 25029.8 1550.09 1
 10 -3 -8 25013.4 1624.37 1
 10 3 -8 28989.5 1395.61 3
 10 -3 -8 29546.2 1400.98 3
 -10 3 8 27788.8 1669.36 2
 10 3 -7 18262.8 1268.45 1
 10 -3 -7 18178.5 1320.2 1
 10 3 -7 19449.2 1158.76 3
 10 -3 -7 20387.5 1190.87 3
 10 -3 -6 31162.7 1731.92 1
 10 3 -6 31862.2 1679.52 1
 10 3 -6 32845.2 1587.45 3
 10 -3 -6 35781.7 1674.02 3
 10 3 -5 638.344 222.311 3
 10 -3 -5 607.295 272.191 1
 10 3 -5 660.136 252.854 1
 10 -3 -5 725.839 241.547 3
 10 3 -4 3382.64 503.108 1
 10 3 -4 3033.98 493.731 3
 10 -3 -4 4171.96 588.769 3
 10 -3 -4 3420.42 538.015 1
 10 -3 -3 10662.3 948.975 1
 10 3 -3 9846.58 909.025 3
 10 -3 -3 9997.45 928.2 3
 10 3 -2 36312 1818.31 3
 10 -3 -2 34044.8 1818.96 3
 10 3 -1 29441.1 1649.74 3
 10 -3 -1 26440.5 1599.4 3
 10 3 0 57706.3 2430.8 3
 10 -3 0 54886 2442.2 3
 10 3 1 8358.54 897.577 3
 10 -3 1 7869.26 892.349 3
 10 3 2 34390.2 1897.76 3
 10 -3 2 35953 1973.36 3
 10 3 3 367.286 139.508 3
 10 -3 3 257.3 149.688 3
 10 3 4 54.1368 194.038 3
 10 -3 4 -1.62343 203.715 3
 10 3 5 196.313 160.368 3
 10 -3 5 -119.178 277.378 3
 10 3 6 34123.7 1991.88 3
 10 -3 6 34093.9 2028.37 3
 10 3 7 14090.9 1281.38 3
 10 -3 7 15504.7 1351.48 3
 10 3 8 53032.4 2610.3 3
 10 -3 8 50963.2 2614.31 3
 10 3 9 1923.8 509.408 3
 10 -3 9 2600.64 562.013 3
 10 3 10 17460 1496.32 3
 10 -3 10 16288.3 1449.41 3
 10 3 11 2559.73 582.049 3
 10 -3 11 1485.35 478.575 3
 -10 -4 16 2907.07 649.113 2
 -10 4 16 3711.84 794.028 2
 -10 -4 15 604.092 312.41 2
 -10 4 15 132.241 177.859 2
 -10 -4 14 3496.43 662.612 2
 -10 4 14 4340.3 826.735 2
 -10 4 13 50997.4 2716.57 2
 -10 -4 13 47159 2417.92 2
 -10 -4 12 9568.53 1013.3 2
 -10 4 12 11073.1 1175.15 2
 -10 -4 11 62178.5 2668.05 2
 -10 4 11 60901.5 2823.54 2
 -10 4 10 208.281 242.169 2
 10 -4 -9 16706.2 1365.79 1
 10 4 -9 19971.6 1119.03 3
 -10 4 9 18837.2 1421.95 2
 10 4 -9 17706.8 1342.05 1
 10 4 -8 978.636 262.941 3
 10 4 -8 915.293 340.207 1
 10 -4 -8 707.397 264.107 1
 10 -4 -8 1369.07 300.797 3
 -10 4 8 1016.63 347.476 2
 10 4 -7 3275.27 540.609 1
 10 4 -7 3981.05 517.585 3
 10 -4 -7 3382.97 493.494 3
 10 -4 -7 3026.83 535.771 1
 10 -4 -6 142.638 220.732 1
 10 4 -6 256.333 213.116 1
 10 4 -6 209.339 158.416 3
 10 -4 -6 -5.56966 135.149 3
 10 4 -5 46783.7 1992.23 3
 10 -4 -5 41802 2016.66 1
 10 4 -5 43431.7 1929.27 1
 10 -4 -5 49446.3 2086.83 3
 10 4 -4 26659.3 1435.14 1
 10 4 -4 27166.7 1503.99 3
 10 -4 -4 28171.2 1573.24 3
 10 -4 -4 26357 1527.78 1
 10 -4 -3 54149.2 2284.48 1
 10 4 -3 52323.3 2221.44 3
 10 -4 -3 56296.3 2348.45 3
 10 4 -2 2943.5 501.981 3
 10 -4 -2 3062.69 522.139 3
 10 4 -1 4878.05 659.209 3
 10 -4 -1 4490.5 662.468 3
 10 4 0 21097.6 1408.11 3
 10 -4 0 19395.2 1392.84 3
 10 4 1 3239.27 565.015 3
 10 -4 1 3337.69 589.024 3
 10 4 2 1239 370.33 3
 10 -4 2 647.156 302.961 3
 10 4 3 67552.2 2805.09 3
 10 -4 3 66981.6 2862.57 3
 10 4 4 5819.44 772.31 3
 10 -4 4 5831.84 813.98 3
 10 4 5 43047 2245.74 3
 10 -4 5 42933 2297.93 3
 10 4 6 1909.24 472.383 3
 10 -4 6 2094.62 497.554 3
 10 4 7 1602 443.125 3
 10 -4 7 1756.23 477.227 3
 10 4 8 7694.54 956.811 3
 10 -4 8 9279.05 1075.79 3
 10 4 9 1025.2 310.245 3
 10 -4 9 1497.59 457.524 3
 10 4 10 11189.5 1192.57 3
 10 -4 10 10585.4 1188.81 3
 10 4 11 24309.2 1796.22 3
 10 -4 11 25390.5 1856.98 3
 -10 5 16 6806.4 1077.42 2
 -10 -5 15 2164.6 514.297 2
 -10 5 15 1303.63 359.632 2
 -10 5 14 22838.2 1853.33 2
 -10 -5 14 20619.7 1581.2 2
 -10 5 13 10057.6 1195.78 2
 -10 -5 13 8292.37 969.092 2
 -10 5 12 256.144 210.546 2
 -10 -5 12 184.346 184.24 2
 -10 5 11 4854.83 763.955 2
 -10 5 10 17228.7 1409.48 2
 10 5 -9 5676.89 600.418 3
 10 -5 -9 3956.81 658.37 1
 -10 5 9 5019.92 734.187 2
 10 5 -9 4087.04 631.94 1
 10 5 -8 30105.9 1706.18 1
 10 -5 -8 30772.4 1820.81 1
 10 5 -8 33308.2 1561.02 3
 10 -5 -8 34016.1 1579.33 3
 -10 5 8 33506.9 1870.96 2
 10 -5 -7 12179.1 1080.32 1
 10 5 -7 11713.5 988.513 1
 10 5 -7 12777.3 959.995 3
 10 -5 -7 13882.6 1016.19 3
 -10 5 7 12755.9 1109.64 2
 10 5 -6 24970.2 1393.44 3
 10 -5 -6 24845.1 1532.38 1
 10 5 -6 22385.9 1376.82 1
 10 -5 -6 24657 1409.02 3
 10 5 -5 13405.9 1021.02 3
 10 -5 -5 13162.6 1086.64 1
 10 5 -5 13108.6 995.18 1
 10 -5 -5 14898.8 1103.94 3
 10 -5 -4 4009.34 589.678 1
 10 5 -4 3641.87 504.593 1
 10 5 -4 4489.7 602.818 3
 10 -5 -4 4283.2 613.76 3
 10 -5 -3 12165.9 1046.01 1
 10 5 -3 12655.5 1027.98 3
 10 -5 -3 13511.2 1096.68 3
 10 5 -2 22531 1421.71 3
 10 5 -1 2013.67 449.592 3
 10 5 0 107806 3602.42 3
 10 -5 0 112960 3755.99 3
 10 5 1 12495.5 1101.87 3
 10 -5 1 10492.7 1037.56 3
 10 5 2 68095.7 2821.56 3
 10 -5 2 69069.5 2904.73 3
[truncated: 111,598 more chars]
