# Supplementary material
Source: publisher figshare collection journal article supplement (https://acs.figshare.com/ndownloader/files/4205155)
Supplement: Supplementary file 27 [file 4205155 › CIFs/Mg/MgDy/MgDy.cif]

data_MgDy
_audit_creation_date              2015-02-16
_audit_creation_method
;
Olex2 1.2
(compiled 2015.01.26 svn.r3151 for OlexSys, GUI svn.r4998)
;
_publ_contact_author_address      
;
The University of Manchester
School of Chemistry
Oxford Road, 
Manchester
M13 9PL
United Kingdom
;
_publ_contact_author_email        eufemio.morenopineda@manchester.ac.uk
_publ_contact_author_name         'Eufemio Moreno Pineda'
_publ_contact_author_phone        '+44 074 1192 4293'
_publ_section_references
;
Dolomanov, O.V., Bourhis, L.J., Gildea, R.J, Howard, J.A.K. & Puschmann, H.
 (2009), J. Appl. Cryst. 42, 339-341.

Sheldrick, G.M. (2008). Acta Cryst. A64, 112-122.
;
_chemical_name_common             ?
_chemical_name_systematic         ?
_chemical_formula_moiety          'C50 H90 Dy2 Mg2 O22, 2(C6 H15 N)'
_chemical_formula_sum             'C62 H120 Dy2 Mg2 N2 O22'
_chemical_formula_weight          1619.21
_chemical_melting_point           ?
loop_
  _atom_type_symbol
  _atom_type_description
  _atom_type_scat_dispersion_real
  _atom_type_scat_dispersion_imag
  _atom_type_scat_source
 'C' 'C' 0.0033 0.0016 'International Tables Vol C Tables 4.2.6.8 and 6.1.1.4'
 'H' 'H' 0.0000 0.0000 'International Tables Vol C Tables 4.2.6.8 and 6.1.1.4'
 'Dy' 'Dy' -0.1892 4.4098
 'International Tables Vol C Tables 4.2.6.8 and 6.1.1.4'
 'Mg' 'Mg' 0.0486 0.0363 'International Tables Vol C Tables 4.2.6.8 and 6.1.1.4'
 'N' 'N' 0.0061 0.0033 'International Tables Vol C Tables 4.2.6.8 and 6.1.1.4'
 'O' 'O' 0.0106 0.0060 'International Tables Vol C Tables 4.2.6.8 and 6.1.1.4'

_shelx_space_group_comment
;
The symmetry employed for this shelxl refinement is uniquely defined
by the following loop, which should always be used as a source of
symmetry information in preference to the above space-group names.
They are only intended as comments.
;
_space_group_crystal_system       'monoclinic'
_space_group_IT_number            14
_space_group_name_H-M_alt         'P 1 21/c 1'
_space_group_name_Hall            '-P 2ybc'
loop_
  _space_group_symop_operation_xyz
 'x, y, z'
 '-x, y+1/2, -z+1/2'
 '-x, -y, -z'
 'x, -y-1/2, z-1/2'

_cell_length_a                    15.4531(3)
_cell_length_b                    19.5753(4)
_cell_length_c                    14.0907(3)
_cell_angle_alpha                 90
_cell_angle_beta                  109.082(2)
_cell_angle_gamma                 90
_cell_volume                      4028.19(15)
_cell_formula_units_Z             2
_cell_measurement_reflns_used     14491
_cell_measurement_temperature     150.1(2)
_cell_measurement_theta_max       28.8360
_cell_measurement_theta_min       3.3920
_shelx_estimated_absorpt_T_max    ?
_shelx_estimated_absorpt_T_min    ?
_exptl_absorpt_coefficient_mu     1.920
_exptl_absorpt_correction_T_max   1.00000
_exptl_absorpt_correction_T_min   0.77261
_exptl_absorpt_correction_type    multi-scan
_exptl_absorpt_process_details
;
CrysAlisPro, Agilent Technologies,
Version 1.171.36.28 (release 01-02-2013 CrysAlis171 .NET)
(compiled Feb  1 2013,16:14:44)
Empirical absorption correction using spherical harmonics,
 implemented in SCALE3 ABSPACK scaling algorithm.
;
_exptl_absorpt_special_details    ?
_exptl_crystal_colour             'clear colourless'
_exptl_crystal_colour_lustre      clear
_exptl_crystal_colour_primary     colourless
_exptl_crystal_density_diffrn     1.335
_exptl_crystal_density_meas       ?
_exptl_crystal_density_method     ?
_exptl_crystal_description        ''
_exptl_crystal_F_000              1676
_exptl_crystal_size_max           0.4
_exptl_crystal_size_mid           0.3
_exptl_crystal_size_min           0.2
_exptl_transmission_factor_max    ?
_exptl_transmission_factor_min    ?
_diffrn_reflns_av_R_equivalents   0.0471
_diffrn_reflns_av_unetI/netI      0.0446
_diffrn_reflns_Laue_measured_fraction_full 0.998
_diffrn_reflns_Laue_measured_fraction_max 0.998
_diffrn_reflns_limit_h_max        19
_diffrn_reflns_limit_h_min        -19
_diffrn_reflns_limit_k_max        24
_diffrn_reflns_limit_k_min        -24
_diffrn_reflns_limit_l_max        17
_diffrn_reflns_limit_l_min        -17
_diffrn_reflns_number             32394
_diffrn_reflns_point_group_measured_fraction_full 0.998
_diffrn_reflns_point_group_measured_fraction_max 0.998
_diffrn_reflns_theta_full         25.242
_diffrn_reflns_theta_max          26.372
_diffrn_reflns_theta_min          3.098
_diffrn_ambient_temperature       150.1(2)
_diffrn_detector_area_resol_mean  16.1428
_diffrn_measured_fraction_theta_full 0.998
_diffrn_measured_fraction_theta_max 0.998
_diffrn_measurement_details
;
#__ type_ start__ end____ width___ exp.time_
  1 omega   40.00   66.00   1.0000    1.0000
omega____ theta____ kappa____ phi______ frames
    -       20.8673  -99.0000   30.0000 26

#__ type_ start__ end____ width___ exp.time_
  2 omega   54.00  103.00   1.0000    1.0000
omega____ theta____ kappa____ phi______ frames
    -       20.8673 -178.0000 -150.0000 49

#__ type_ start__ end____ width___ exp.time_
  3 omega   35.00   66.00   1.0000    1.0000
omega____ theta____ kappa____ phi______ frames
    -       20.8673  -99.0000 -120.0000 31

#__ type_ start__ end____ width___ exp.time_
  4 omega  -64.00   10.00   1.0000    1.0000
omega____ theta____ kappa____ phi______ frames
    -      -21.1798  -73.0000  -27.0000 74

#__ type_ start__ end____ width___ exp.time_
  5 omega  -83.00  -36.00   1.0000    1.0000
omega____ theta____ kappa____ phi______ frames
    -      -21.1798 -178.0000  -30.0000 47

#__ type_ start__ end____ width___ exp.time_
  6 omega  -67.00  -42.00   1.0000    1.0000
omega____ theta____ kappa____ phi______ frames
    -      -21.1798 -178.0000 -120.0000 25

#__ type_ start__ end____ width___ exp.time_
  7 omega  -53.00   43.00   1.0000    1.0000
omega____ theta____ kappa____ phi______ frames
    -      -21.1798   37.0000  -60.0000 96

#__ type_ start__ end____ width___ exp.time_
  8 omega   17.00   44.00   1.0000    1.0000
omega____ theta____ kappa____ phi______ frames
    -      -21.1798   77.0000    0.0000 27

#__ type_ start__ end____ width___ exp.time_
  9 omega  -95.00   -1.00   1.0000    1.0000
omega____ theta____ kappa____ phi______ frames
    -      -21.1798  -37.0000  120.0000 94
;
_diffrn_measurement_device_type   'SuperNova, Single source at offset, Eos'
_diffrn_measurement_method        '\w scans'
_diffrn_orient_matrix_UB_11       0.0306101000
_diffrn_orient_matrix_UB_12       -0.0239681000
_diffrn_orient_matrix_UB_13       -0.0096170000
_diffrn_orient_matrix_UB_21       -0.0374657000
_diffrn_orient_matrix_UB_22       -0.0172718000
_diffrn_orient_matrix_UB_23       -0.0345346000
_diffrn_orient_matrix_UB_31       0.0039117000
_diffrn_orient_matrix_UB_32       0.0210025000
_diffrn_orient_matrix_UB_33       -0.0394099000
_diffrn_radiation_monochromator   mirror
_diffrn_radiation_type            MoK\a
_diffrn_radiation_wavelength      0.71073
_diffrn_source                    'SuperNova (Mo) X-ray Source'
_reflns_Friedel_coverage          0.000
_reflns_Friedel_fraction_full     .
_reflns_Friedel_fraction_max      .
_reflns_number_gt                 7274
_reflns_number_total              8225
_reflns_odcompleteness_completeness 99.75
_reflns_odcompleteness_iscentric  1
_reflns_odcompleteness_theta      26.32
_reflns_special_details
;
 Reflections were merged by SHELXL according to the crystal
 class for the calculation of statistics and refinement.
 
 _reflns_Friedel_fraction is defined as the number of unique
 Friedel pairs measured divided by the number that would be
 possible theoretically, ignoring centric projections and
 systematic absences.
;
_reflns_threshold_expression      'I > 2\s(I)'
_computing_cell_refinement
;
CrysAlisPro, Agilent Technologies,
Version 1.171.36.28 (release 01-02-2013 CrysAlis171 .NET)
(compiled Feb  1 2013,16:14:44)
;
_computing_data_collection
;
CrysAlisPro, Agilent Technologies,
Version 1.171.36.28 (release 01-02-2013 CrysAlis171 .NET)
(compiled Feb  1 2013,16:14:44)
;
_computing_data_reduction
;
CrysAlisPro, Agilent Technologies,
Version 1.171.36.28 (release 01-02-2013 CrysAlis171 .NET)
(compiled Feb  1 2013,16:14:44)
;
_computing_molecular_graphics     'Olex2 (Dolomanov et al., 2009)'
_computing_publication_material   'Olex2 (Dolomanov et al., 2009)'
_computing_structure_refinement   'ShelXL (Sheldrick, 2008)'
_computing_structure_solution     'ShelXS (Sheldrick, 2008)'
_refine_diff_density_max          1.365
_refine_diff_density_min          -1.619
_refine_diff_density_rms          0.101
_refine_ls_extinction_coef        .
_refine_ls_extinction_method      none
_refine_ls_goodness_of_fit_ref    1.093
_refine_ls_hydrogen_treatment     constr
_refine_ls_matrix_type            full
_refine_ls_number_parameters      400
_refine_ls_number_reflns          8225
_refine_ls_number_restraints      9
_refine_ls_R_factor_all           0.0457
_refine_ls_R_factor_gt            0.0385
_refine_ls_restrained_S_all       1.108
_refine_ls_shift/su_max           0.002
_refine_ls_shift/su_mean          0.000
_refine_ls_structure_factor_coef  Fsqd
_refine_ls_weighting_details
'w=1/[\s^2^(Fo^2^)+(0.0259P)^2^+8.2584P] where P=(Fo^2^+2Fc^2^)/3'
_refine_ls_weighting_scheme       calc
_refine_ls_wR_factor_gt           0.0825
_refine_ls_wR_factor_ref          0.0860
_refine_special_details           ?
_olex2_refinement_description
;
1. Fixed Uiso
 At 1.2 times of:
  All C(H) groups, All N(H,H) groups
 At 1.5 times of:
  All C(H,H,H) groups
2. Restrained distances
 C29-C31
 1.6 with sigma of 0.02
 C29-C30
 1.6 with sigma of 0.02
 C29-C32
 1.6 with sigma of 0.02
3. Uiso/Uaniso restraints and constraints
Uanis(C23) \\sim Ueq: with sigma of 0.01 and sigma for terminal atoms of 0.02
Uanis(C31) = Uanis(C32) = Uanis(C30) = Uanis(C27) = Uanis(C28)
Uanis(C29) = Uanis(C26)
Uanis(C28) = Uanis(C26) = Uanis(C27)
4. Others
 Sof(C32)=Sof(H32A)=Sof(H32B)=Sof(H32C)=1-FVAR(1)
 Sof(C30)=Sof(H30A)=Sof(H30B)=Sof(H30C)=FVAR(1)
5.a Ternary CH refined with riding coordinates:
 C26(H26)
5.b Secondary CH2 refined with riding coordinates:
 N1(H1A,H1B)
5.c Idealised Me refined as rotating group:
 C3(H3A,H3B,H3C), C4(H4A,H4B,H4C), C5(H5A,H5B,H5C), C8(H8A,H8B,H8C), C9(H9A,
 H9B,H9C), C10(H10A,H10B,H10C), C13(H13A,H13B,H13C), C14(H14A,H14B,H14C),
 C15(H15A,H15B,H15C), C18(H18A,H18B,H18C), C19(H19A,H19B,H19C), C20(H20A,H20B,
 H20C), C23(H23A,H23B,H23C), C24(H24A,H24B,H24C), C25(H25A,H25B,H25C), C27(H27A,
 H27B,H27C), C28(H28A,H28B,H28C), C31(H31A,H31B,H31C), C30(H30A,H30B,H30C),
 C32(H32A,H32B,H32C)
;
_atom_sites_solution_hydrogens    geom
_atom_sites_solution_primary      direct
_atom_sites_solution_secondary    ?
loop_
  _atom_site_label
  _atom_site_type_symbol
  _atom_site_fract_x
  _atom_site_fract_y
  _atom_site_fract_z
  _atom_site_U_iso_or_equiv
  _atom_site_adp_type
  _atom_site_occupancy
  _atom_site_site_symmetry_order
  _atom_site_calc_flag
  _atom_site_refinement_flags_posn
  _atom_site_refinement_flags_adp
  _atom_site_refinement_flags_occupancy
  _atom_site_disorder_assembly
  _atom_site_disorder_group
 Dy1 Dy 0.20920(2) 0.51177(2) 0.58070(2) 0.01834(6) Uani 1 1 d . . . . .
 Mg1 Mg 0.00196(8) 0.44792(6) 0.58737(8) 0.0174(3) Uani 1 1 d . . . . .
 O1 O 0.5030(2) 0.51040(17) 0.7275(3) 0.0462(9) Uani 1 1 d . . . . .
 O1OH O 0.06088(16) 0.54004(13) 0.56645(17) 0.0167(5) Uani 1 1 d . . . . .
 O2 O 0.35705(18) 0.53430(16) 0.6617(2) 0.0294(6) Uani 1 1 d . . . . .
 O3 O 0.2592(2) 0.4926(2) 0.4374(2) 0.0662(13) Uani 1 1 d . . . . .
 O4 O 0.11195(18) 0.50046(14) 0.40348(19) 0.0222(6) Uani 1 1 d . . . . .
 O5 O 0.2014(2) 0.62319(16) 0.5264(2) 0.0336(7) Uani 1 1 d . . . . .
 O6 O -0.06493(19) 0.35825(14) 0.5877(2) 0.0270(6) Uani 1 1 d . . . . .
 O7 O 0.20945(19) 0.49332(14) 0.74305(19) 0.0257(6) Uani 1 1 d . . . . .
 O8 O 0.07472(18) 0.44835(14) 0.73669(18) 0.0251(6) Uani 1 1 d . . . . .
 O9 O 0.2648(2) 0.39168(16) 0.5976(3) 0.0441(9) Uani 1 1 d . . . . .
 O10 O 0.11800(17) 0.40551(14) 0.56378(19) 0.0230(6) Uani 1 1 d . . . . .
 C1 C 0.4354(3) 0.5462(2) 0.7214(3) 0.0265(9) Uani 1 1 d . . . . .
 C2 C 0.4486(3) 0.6070(2) 0.7930(3) 0.0282(9) Uani 1 1 d . . . . .
 C3 C 0.5368(3) 0.6434(3) 0.7989(4) 0.0433(12) Uani 1 1 d . . . . .
 H3A H 0.5847 0.6104 0.8074 0.065 Uiso 1 1 calc GR . . . .
 H3B H 0.5533 0.6742 0.8549 0.065 Uiso 1 1 calc GR . . . .
 H3C H 0.5282 0.6685 0.7380 0.065 Uiso 1 1 calc GR . . . .
 C4 C 0.4599(4) 0.5774(3) 0.8974(4) 0.0640(18) Uani 1 1 d . . . . .
 H4A H 0.4063 0.5515 0.8946 0.096 Uiso 1 1 calc GR . . . .
 H4B H 0.4678 0.6139 0.9448 0.096 Uiso 1 1 calc GR . . . .
 H4C H 0.5126 0.5481 0.9179 0.096 Uiso 1 1 calc GR . . . .
 C5 C 0.3678(4) 0.6546(3) 0.7625(4) 0.0633(17) Uani 1 1 d . . . . .
 H5A H 0.3584 0.6710 0.6956 0.095 Uiso 1 1 calc GR . . . .
 H5B H 0.3792 0.6926 0.8081 0.095 Uiso 1 1 calc GR . . . .
 H5C H 0.3141 0.6306 0.7642 0.095 Uiso 1 1 calc GR . . . .
 C6 C 0.1805(3) 0.4923(3) 0.3745(3) 0.0355(11) Uani 1 1 d . . . . .
 C7 C 0.1653(3) 0.4830(3) 0.2625(3) 0.0483(15) Uani 1 1 d . . . . .
 C8 C 0.2514(3) 0.4525(4) 0.2478(4) 0.074(2) Uani 1 1 d . . . . .
 H8A H 0.3021 0.4829 0.2756 0.111 Uiso 1 1 calc GR . . . .
 H8B H 0.2413 0.4464 0.1774 0.111 Uiso 1 1 calc GR . . . .
 H8C H 0.2646 0.4092 0.2813 0.111 Uiso 1 1 calc GR . . . .
 C9 C 0.0833(3) 0.4365(3) 0.2176(4) 0.0557(16) Uani 1 1 d . . . . .
 H9A H 0.0945 0.3931 0.2512 0.084 Uiso 1 1 calc GR . . . .
 H9B H 0.0740 0.4300 0.1474 0.084 Uiso 1 1 calc GR . . . .
 H9C H 0.0298 0.4569 0.2258 0.084 Uiso 1 1 calc GR . . . .
 C10 C 0.1463(4) 0.5545(4) 0.2152(4) 0.0651(19) Uani 1 1 d . . . . .
 H10A H 0.0939 0.5739 0.2274 0.098 Uiso 1 1 calc GR . . . .
 H10B H 0.1347 0.5511 0.1441 0.098 Uiso 1 1 calc GR . . . .
 H10C H 0.1986 0.5833 0.2444 0.098 Uiso 1 1 calc GR . . . .
 C11 C -0.1445(3) 0.3401(2) 0.5373(3) 0.0283(9) Uani 1 1 d . . . . .
 C12 C -0.1744(3) 0.2672(2) 0.5523(4) 0.0396(11) Uani 1 1 d . . . . .
 C13 C -0.1113(5) 0.2359(3) 0.6487(5) 0.082(2) Uani 1 1 d . . . . .
 H13A H -0.0507 0.2318 0.6447 0.123 Uiso 1 1 calc GR . . . .
 H13B H -0.1336 0.1914 0.6580 0.123 Uiso 1 1 calc GR . . . .
 H13C H -0.1097 0.2646 0.7045 0.123 Uiso 1 1 calc GR . . . .
 C14 C -0.2729(4) 0.2688(3) 0.5518(5) 0.0638(17) Uani 1 1 d . . . . .
 H14A H -0.2761 0.2940 0.6090 0.096 Uiso 1 1 calc GR . . . .
 H14B H -0.2939 0.2229 0.5548 0.096 Uiso 1 1 calc GR . . . .
 H14C H -0.3109 0.2904 0.4914 0.096 Uiso 1 1 calc GR . . . .
 C15 C -0.1709(4) 0.2250(3) 0.4621(4) 0.0572(15) Uani 1 1 d . . . . .
 H15A H -0.2099 0.2455 0.4012 0.086 Uiso 1 1 calc GR . . . .
 H15B H -0.1914 0.1793 0.4675 0.086 Uiso 1 1 calc GR . . . .
 H15C H -0.1091 0.2237 0.4609 0.086 Uiso 1 1 calc GR . . . .
 C16 C 0.1539(3) 0.4681(2) 0.7831(3) 0.0219(8) Uani 1 1 d . . . . .
 C17 C 0.1883(3) 0.4620(2) 0.8977(3) 0.0269(9) Uani 1 1 d . . . . .
 C18 C 0.2789(3) 0.4231(3) 0.9296(3) 0.0457(13) Uani 1 1 d . . . . .
 H18A H 0.2689 0.3776 0.9026 0.068 Uiso 1 1 calc GR . . . .
 H18B H 0.3029 0.4209 1.0016 0.068 Uiso 1 1 calc GR . . . .
 H18C H 0.3218 0.4463 0.9047 0.068 Uiso 1 1 calc GR . . . .
 C19 C 0.1192(3) 0.4250(3) 0.9350(3) 0.0411(12) Uani 1 1 d . . . . .
 H19A H 0.0645 0.4519 0.9205 0.062 Uiso 1 1 calc GR . . . .
 H19B H 0.1448 0.4180 1.0062 0.062 Uiso 1 1 calc GR . . . .
 H19C H 0.1047 0.3815 0.9019 0.062 Uiso 1 1 calc GR . . . .
 C20 C 0.2039(4) 0.5344(3) 0.9414(3) 0.0446(13) Uani 1 1 d . . . . .
 H20A H 0.2480 0.5574 0.9183 0.067 Uiso 1 1 calc GR . . . .
 H20B H 0.2262 0.5320 1.0134 0.067 Uiso 1 1 calc GR . . . .
 H20C H 0.1471 0.5592 0.9200 0.067 Uiso 1 1 calc GR . . . .
 C21 C 0.1863(3) 0.3664(2) 0.5824(3) 0.0328(10) Uani 1 1 d . . . . .
 C22 C 0.1722(4) 0.2904(3) 0.5886(5) 0.0614(17) Uani 1 1 d . . . . .
 C23 C 0.2576(4) 0.2506(3) 0.5863(7) 0.102(3) Uani 1 1 d . U . . .
 H23A H 0.2659 0.2569 0.5223 0.153 Uiso 1 1 calc GR . . . .
 H23B H 0.2495 0.2029 0.5969 0.153 Uiso 1 1 calc GR . . . .
 H23C H 0.3105 0.2673 0.6385 0.153 Uiso 1 1 calc GR . . . .
 C24 C 0.1531(5) 0.2776(3) 0.6884(6) 0.088(2) Uani 1 1 d . . . . .
 H24A H 0.2052 0.2917 0.7438 0.132 Uiso 1 1 calc GR . . . .
 H24B H 0.1419 0.2299 0.6947 0.132 Uiso 1 1 calc GR . . . .
 H24C H 0.1003 0.3034 0.6887 0.132 Uiso 1 1 calc GR . . . .
 C25 C 0.0901(4) 0.2683(3) 0.5009(6) 0.092(3) Uani 1 1 d . . . . .
 H25A H 0.0363 0.2912 0.5045 0.138 Uiso 1 1 calc GR . . . .
 H25B H 0.0821 0.2198 0.5037 0.138 Uiso 1 1 calc GR . . . .
 H25C H 0.0999 0.2800 0.4391 0.138 Uiso 1 1 calc GR . . . .
 N1 N 0.4599(2) 0.38660(19) 0.6492(3) 0.0324(8) Uani 1 1 d . . . . .
 H1A H 0.4694 0.4299 0.6693 0.039 Uiso 1 1 calc R . . . .
 H1B H 0.3997 0.3798 0.6277 0.039 Uiso 1 1 calc R . . . .
 C26 C 0.5006(4) 0.3422(3) 0.7386(4) 0.0633(7) Uani 1 1 d . . . . .
 H26 H 0.4914 0.2942 0.7177 0.076 Uiso 1 1 calc R . . . .
 C27 C 0.6033(4) 0.3557(3) 0.7854(4) 0.0633(7) Uani 1 1 d . . . . .
 H27A H 0.6339 0.3427 0.7388 0.095 Uiso 1 1 calc GR . . . .
 H27B H 0.6271 0.3295 0.8459 0.095 Uiso 1 1 calc GR . . . .
 H27C H 0.6132 0.4034 0.8007 0.095 Uiso 1 1 calc GR . . . .
 C28 C 0.4513(4) 0.3561(3) 0.8128(4) 0.0633(7) Uani 1 1 d . . . . .
 H28A H 0.4610 0.4028 0.8347 0.095 Uiso 1 1 calc GR . . . .
 H28B H 0.4745 0.3263 0.8697 0.095 Uiso 1 1 calc GR . . . .
 H28C H 0.3869 0.3481 0.7814 0.095 Uiso 1 1 calc GR . . . .
 C29 C 0.4933(4) 0.3778(3) 0.5613(5) 0.0633(7) Uani 1 1 d D . . . .
 C31 C 0.4857(4) 0.3080(3) 0.5215(4) 0.0633(7) Uani 1 1 d D . . . .
 H31A H 0.5180 0.2772 0.5741 0.095 Uiso 1 1 calc GR . . . .
 H31B H 0.5117 0.3060 0.4683 0.095 Uiso 1 1 calc GR . . . .
 H31C H 0.4223 0.2950 0.4960 0.095 Uiso 1 1 calc GR . . . .
 C30 C 0.4353(7) 0.4217(5) 0.4772(7) 0.0633(7) Uani 0.623(7) 1 d D . P A 1
 H30A H 0.3784 0.3990 0.4442 0.095 Uiso 0.623(7) 1 calc GR . P A 1
 H30B H 0.4670 0.4297 0.4299 0.095 Uiso 0.623(7) 1 calc GR . P A 1
 H30C H 0.4235 0.4646 0.5037 0.095 Uiso 0.623(7) 1 calc GR . P A 1
 C32 C 0.5630(10) 0.4194(8) 0.5511(12) 0.0633(7) Uani 0.377(7) 1 d D . P A 2
 H32A H 0.5575 0.4643 0.5761 0.095 Uiso 0.377(7) 1 calc GR . P A 2
 H32B H 0.5581 0.4223 0.4816 0.095 Uiso 0.377(7) 1 calc GR . P A 2
 H32C H 0.6213 0.4003 0.5888 0.095 Uiso 0.377(7) 1 calc GR . P A 2

loop_
  _atom_site_aniso_label
  _atom_site_aniso_U_11
  _atom_site_aniso_U_22
  _atom_site_aniso_U_33
  _atom_site_aniso_U_23
  _atom_site_aniso_U_13
  _atom_site_aniso_U_12
 Dy1 0.01304(10) 0.02484(11) 0.01629(9) -0.00334(7) 0.00364(7) -0.00139(7)
 Mg1 0.0158(6) 0.0201(7) 0.0155(6) 0.0011(5) 0.0040(5) -0.0013(5)
 O1 0.0227(17) 0.038(2) 0.067(2) -0.0146(17) 0.0010(16) 0.0047(15)
 O1OH 0.0158(13) 0.0182(14) 0.0162(12) 0.0019(10) 0.0054(10) 0.0011(10)
 O2 0.0182(15) 0.0371(18) 0.0287(15) -0.0075(13) 0.0020(12) -0.0053(13)
 O3 0.0188(17) 0.153(4) 0.0283(17) -0.033(2) 0.0098(14) -0.005(2)
 O4 0.0196(14) 0.0311(17) 0.0182(12) -0.0049(11) 0.0094(11) -0.0031(11)
 O5 0.0265(16) 0.0354(19) 0.0303(15) 0.0077(13) -0.0023(13) -0.0110(13)
 O6 0.0250(16) 0.0257(17) 0.0268(14) 0.0035(12) 0.0036(12) -0.0071(12)
 O7 0.0224(15) 0.0359(18) 0.0166(13) 0.0023(11) 0.0036(11) -0.0034(12)
 O8 0.0210(15) 0.0349(18) 0.0161(12) 0.0011(11) 0.0015(11) -0.0068(12)
 O9 0.0175(16) 0.031(2) 0.080(2) -0.0172(17) 0.0115(16) 0.0016(13)
 O10 0.0191(14) 0.0204(15) 0.0267(14) -0.0048(11) 0.0035(11) 0.0019(11)
 C1 0.017(2) 0.032(3) 0.029(2) 0.0006(17) 0.0056(17) -0.0043(17)
 C2 0.023(2) 0.031(3) 0.026(2) -0.0052(17) 0.0035(17) -0.0044(18)
 C3 0.040(3) 0.037(3) 0.051(3) -0.010(2) 0.013(2) -0.016(2)
 C4 0.080(4) 0.079(5) 0.034(3) -0.007(3) 0.020(3) -0.033(4)
 C5 0.048(3) 0.063(4) 0.066(4) -0.033(3) 0.001(3) 0.017(3)
 C6 0.022(2) 0.061(3) 0.025(2) -0.013(2) 0.0104(18) -0.007(2)
 C7 0.022(2) 0.102(5) 0.023(2) -0.015(3) 0.0110(19) 0.000(3)
 C8 0.032(3) 0.163(7) 0.032(3) -0.035(4) 0.018(2) 0.003(4)
 C9 0.037(3) 0.094(5) 0.034(3) -0.037(3) 0.009(2) -0.004(3)
 C10 0.051(4) 0.116(6) 0.033(3) 0.005(3) 0.020(3) -0.014(4)
 C11 0.031(2) 0.024(2) 0.027(2) -0.0003(17) 0.0067(18) -0.0102(18)
 C12 0.038(3) 0.030(3) 0.044(3) 0.011(2) 0.005(2) -0.014(2)
 C13 0.091(5) 0.052(4) 0.073(4) 0.035(3) -0.014(4) -0.033(4)
 C14 0.061(4) 0.054(4) 0.086(4) 0.011(3) 0.037(3) -0.026(3)
 C15 0.052(4) 0.037(3) 0.077(4) -0.006(3) 0.014(3) -0.013(3)
 C16 0.023(2) 0.025(2) 0.0156(17) 0.0027(15) 0.0033(15) 0.0027(17)
 C17 0.029(2) 0.031(2) 0.0150(17) 0.0016(16) -0.0007(16) -0.0062(18)
 C18 0.041(3) 0.059(4) 0.030(2) 0.015(2) 0.003(2) 0.012(2)
 C19 0.044(3) 0.055(3) 0.019(2) 0.009(2) 0.0049(19) -0.013(2)
 C20 0.062(3) 0.046(3) 0.025(2) -0.008(2) 0.013(2) -0.015(3)
 C21 0.026(2) 0.027(3) 0.042(2) -0.0127(19) 0.0054(19) 0.0004(18)
 C22 0.032(3) 0.022(3) 0.115(5) -0.014(3) 0.004(3) 0.006(2)
 C23 0.045(4) 0.034(4) 0.207(9) -0.033(4) 0.013(5) 0.016(3)
 C24 0.072(5) 0.028(4) 0.146(7) 0.033(4) 0.012(5) -0.002(3)
 C25 0.043(4) 0.051(4) 0.169(8) -0.066(5) 0.018(4) -0.006(3)
 N1 0.0218(19) 0.034(2) 0.040(2) -0.0051(16) 0.0088(16) 0.0005(16)
 C26 0.0680(18) 0.0603(18) 0.0609(16) -0.0020(13) 0.0203(14) 0.0007(14)
 C27 0.0680(18) 0.0603(18) 0.0609(16) -0.0020(13) 0.0203(14) 0.0007(14)
 C28 0.0680(18) 0.0603(18) 0.0609(16) -0.0020(13) 0.0203(14) 0.0007(14)
 C29 0.0680(18) 0.0603(18) 0.0609(16) -0.0020(13) 0.0203(14) 0.0007(14)
 C31 0.0680(18) 0.0603(18) 0.0609(16) -0.0020(13) 0.0203(14) 0.0007(14)
 C30 0.0680(18) 0.0603(18) 0.0609(16) -0.0020(13) 0.0203(14) 0.0007(14)
 C32 0.0680(18) 0.0603(18) 0.0609(16) -0.0020(13) 0.0203(14) 0.0007(14)

_geom_special_details
;
 All esds (except the esd in the dihedral angle between two l.s. planes)
 are estimated using the full covariance matrix.  The cell esds are taken
 into account individually in the estimation of esds in distances, angles
 and torsion angles; correlations between esds in cell parameters are only
 used when they are defined by crystal symmetry.  An approximate (isotropic)
 treatment of cell esds is used for estimating esds involving l.s. planes.
;
loop_
  _geom_bond_atom_site_label_1
  _geom_bond_atom_site_label_2
  _geom_bond_distance
  _geom_bond_site_symmetry_2
  _geom_bond_publ_flag
 Dy1 Mg1 3.4390(12) 3_566 ?
 Dy1 Mg1 3.4674(12) . ?
 Dy1 O1OH 2.302(2) . ?
 Dy1 O2 2.239(3) . ?
 Dy1 O3 2.415(3) . ?
 Dy1 O4 2.468(3) . ?
 Dy1 O5 2.301(3) . ?
 Dy1 O7 2.315(2) . ?
 Dy1 O9 2.487(3) . ?
 Dy1 O10 2.480(3) . ?
 Dy1 C6 2.818(4) . ?
 Dy1 C21 2.869(5) . ?
 Mg1 Dy1 3.4390(12) 3_566 ?
 Mg1 Mg1 3.182(2) 3_566 ?
 Mg1 O1OH 2.079(3) 3_566 ?
 Mg1 O1OH 2.084(3) . ?
 Mg1 O4 2.070(3) 3_566 ?
 Mg1 O6 2.038(3) . ?
 Mg1 O8 2.036(3) . ?
 Mg1 O10 2.099(3) . ?
 O1 C1 1.237(5) . ?
 O1OH Mg1 2.079(3) 3_566 ?
 O2 C1 1.250(5) . ?
 O3 C6 1.249(5) . ?
 O4 Mg1 2.070(3) 3_566 ?
 O4 C6 1.264(5) . ?
 O5 C11 1.257(5) 3_566 ?
 O6 C11 1.254(5) . ?
 O7 C16 1.271(5) . ?
 O8 C16 1.246(5) . ?
 O9 C21 1.262(5) . ?
 O10 C21 1.260(5) . ?
 C1 C2 1.531(6) . ?
 C2 C3 1.515(6) . ?
 C2 C4 1.537(6) . ?
 C2 C5 1.504(6) . ?
 C6 C7 1.528(6) . ?
 C7 C8 1.533(6) . ?
 C7 C9 1.520(7) . ?
 C7 C10 1.537(8) . ?
 C11 O5 1.257(5) 3_566 ?
 C11 C12 1.535(6) . ?
 C12 C13 1.519(7) . ?
 C12 C14 1.520(7) . ?
 C12 C15 1.532(7) . ?
 C16 C17 1.531(5) . ?
 C17 C18 1.527(6) . ?
 C17 C19 1.519(6) . ?
 C17 C20 1.533(6) . ?
 C21 C22 1.510(7) . ?
 C22 C23 1.541(7) . ?
 C22 C24 1.549(10) . ?
 C22 C25 1.516(8) . ?
 N1 C26 1.490(7) . ?
 N1 C29 1.500(7) . ?
 C26 C27 1.529(8) . ?
 C26 C28 1.507(8) . ?
 C29 C31 1.468(8) . ?
 C29 C30 1.500(10) . ?
 C29 C32 1.393(13) . ?

loop_
  _geom_angle_atom_site_label_1
  _geom_angle_atom_site_label_2
  _geom_angle_atom_site_label_3
  _geom_angle
  _geom_angle_site_symmetry_1
  _geom_angle_site_symmetry_3
  _geom_angle_publ_flag
 Mg1 Dy1 Mg1 54.87(3) 3_566 . ?
 O1OH Dy1 Mg1 35.61(7) . . ?
 O1OH Dy1 Mg1 36.02(6) . 3_566 ?
 O1OH Dy1 O3 123.08(10) . . ?
 O1OH Dy1 O4 70.96(8) . . ?
 O1OH Dy1 O7 78.68(9) . . ?
 O1OH Dy1 O9 122.58(9) . . ?
 O1OH Dy1 O10 71.03(9) . . ?
 O1OH Dy1 C6 97.24(11) . . ?
 O1OH Dy1 C21 96.73(11) . . ?
 O2 Dy1 Mg1 152.40(8) . 3_566 ?
 O2 Dy1 Mg1 148.76(7) . . ?
 O2 Dy1 O1OH 144.91(10) . . ?
 O2 Dy1 O3 84.52(10) . . ?
 O2 Dy1 O4 135.70(9) . . ?
 O2 Dy1 O5 85.20(11) . . ?
 O2 Dy1 O7 81.69(10) . . ?
 O2 Dy1 O9 82.80(11) . . ?
 O2 Dy1 O10 131.88(10) . . ?
 O2 Dy1 C6 110.02(11) . . ?
 O2 Dy1 C21 107.42(12) . . ?
 O3 Dy1 Mg1 121.14(9) . . ?
 O3 Dy1 Mg1 87.18(9) . 3_566 ?
 O3 Dy1 O4 52.81(10) . . ?
 O3 Dy1 O9 74.80(14) . . ?
 O3 Dy1 O10 96.66(12) . . ?
 O3 Dy1 C6 26.18(11) . . ?
 O3 Dy1 C21 85.80(14) . . ?
 O4 Dy1 Mg1 36.57(6) . 3_566 ?
 O4 Dy1 Mg1 74.50(6) . . ?
 O4 Dy1 O9 95.10(10) . . ?
 O4 Dy1 O10 71.85(9) . . ?
 O4 Dy1 C6 26.62(10) . . ?
 O4 Dy1 C21 83.31(11) . . ?
 O5 Dy1 Mg1 67.60(7) . 3_566 ?
 O5 Dy1 Mg1 113.72(8) . . ?
 O5 Dy1 O1OH 78.51(10) . . ?
 O5 Dy1 O3 82.30(14) . . ?
 O5 Dy1 O4 78.48(9) . . ?
 O5 Dy1 O7 117.34(10) . . ?
 O5 Dy1 O9 155.00(11) . . ?
 O5 Dy1 O10 142.81(9) . . ?
 O5 Dy1 C6 79.17(13) . . ?
 O5 Dy1 C21 161.76(11) . . ?
 O7 Dy1 Mg1 67.67(7) . . ?
 O7 Dy1 Mg1 114.27(7) . 3_566 ?
 O7 Dy1 O3 154.71(13) . . ?
 O7 Dy1 O4 142.17(9) . . ?
 O7 Dy1 O9 82.49(11) . . ?
 O7 Dy1 O10 77.38(9) . . ?
 O7 Dy1 C6 161.21(12) . . ?
 O7 Dy1 C21 78.30(11) . . ?
 O9 Dy1 Mg1 120.19(8) . 3_566 ?
 O9 Dy1 Mg1 87.13(7) . . ?
 O9 Dy1 C6 84.46(13) . . ?
 O9 Dy1 C21 26.02(11) . . ?
 O10 Dy1 Mg1 75.21(6) . 3_566 ?
 O10 Dy1 Mg1 36.82(6) . . ?
 O10 Dy1 O9 51.98(9) . . ?
 O10 Dy1 C6 83.94(11) . . ?
 O10 Dy1 C21 25.97(10) . . ?
 C6 Dy1 Mg1 61.77(9) . 3_566 ?
 C6 Dy1 Mg1 98.27(9) . . ?
 C6 Dy1 C21 84.04(14) . . ?
 C21 Dy1 Mg1 98.14(9) . 3_566 ?
 C21 Dy1 Mg1 61.62(9) . . ?
 Dy1 Mg1 Dy1 125.13(3) 3_566 . ?
 Mg1 Mg1 Dy1 63.02(4) 3_566 3_566 ?
 Mg1 Mg1 Dy1 62.11(4) 3_566 . ?
 O1OH Mg1 Dy1 40.64(7) 3_566 3_566 ?
 O1OH Mg1 Dy1 40.02(7) . . ?
 O1OH Mg1 Dy1 92.96(7) 3_566 . ?
 O1OH Mg1 Dy1 93.68(8) . 3_566 ?
 O1OH Mg1 Mg1 40.08(7) . 3_566 ?
 O1OH Mg1 Mg1 40.20(7) 3_566 3_566 ?
 O1OH Mg1 O1OH 80.28(11) 3_566 . ?
 O1OH Mg1 O10 83.36(11) . . ?
 O1OH Mg1 O10 90.68(10) 3_566 . ?
 O4 Mg1 Dy1 129.60(9) 3_566 . ?
 O4 Mg1 Dy1 45.26(7) 3_566 3_566 ?
 O4 Mg1 Mg1 86.21(9) 3_566 3_566 ?
 O4 Mg1 O1OH 83.84(10) 3_566 3_566 ?
 O4 Mg1 O1OH 90.35(11) 3_566 . ?
 O4 Mg1 O10 172.29(12) 3_566 . ?
 O6 Mg1 Dy1 141.65(10) . . ?
 O6 Mg1 Dy1 80.30(8) . 3_566 ?
 O6 Mg1 Mg1 132.25(10) . 3_566 ?
 O6 Mg1 O1OH 92.05(11) . 3_566 ?
 O6 Mg1 O1OH 172.33(11) . . ?
 O6 Mg1 O4 88.74(12) . 3_566 ?
 O6 Mg1 O10 96.89(12) . . ?
 O8 Mg1 Dy1 79.84(8) . . ?
 O8 Mg1 Dy1 142.18(9) . 3_566 ?
 O8 Mg1 Mg1 131.41(10) . 3_566 ?
 O8 Mg1 O1OH 171.56(12) . 3_566 ?
 O8 Mg1 O1OH 91.34(11) . . ?
 O8 Mg1 O4 97.31(11) . 3_566 ?
 O8 Mg1 O6 96.33(12) . . ?
 O8 Mg1 O10 87.34(11) . . ?
 O10 Mg1 Dy1 45.07(8) . . ?
 O10 Mg1 Dy1 130.47(8) . 3_566 ?
 O10 Mg1 Mg1 86.10(9) . 3_566 ?
 Mg1 O1OH Dy1 103.34(10) 3_566 . ?
 Mg1 O1OH Dy1 104.37(11) . . ?
 Mg1 O1OH Mg1 99.72(11) 3_566 . ?
 C1 O2 Dy1 169.2(3) . . ?
 C6 O3 Dy1 95.2(2) . . ?
 Mg1 O4 Dy1 98.17(10) 3_566 . ?
 C6 O4 Dy1 92.3(2) . . ?
 C6 O4 Mg1 154.4(3) . 3_566 ?
 C11 O5 Dy1 136.7(3) 3_566 . ?
 C11 O6 Mg1 130.3(3) . . ?
 C16 O7 Dy1 135.8(2) . . ?
 C16 O8 Mg1 131.3(2) . . ?
 C21 O9 Dy1 94.1(3) . . ?
 Mg1 O10 Dy1 98.11(11) . . ?
 C21 O10 Dy1 94.5(3) . . ?
 C21 O10 Mg1 155.2(3) . . ?
 O1 C1 O2 123.5(4) . . ?
 O1 C1 C2 117.9(4) . . ?
 O2 C1 C2 118.7(4) . . ?
 C1 C2 C4 106.6(4) . . ?
 C3 C2 C1 109.0(3) . . ?
 C3 C2 C4 107.9(4) . . ?
 C5 C2 C1 112.0(4) . . ?
 C5 C2 C3 111.9(4) . . ?
 C5 C2 C4 109.4(4) . . ?
 O3 C6 Dy1 58.6(2) . . ?
 O3 C6 O4 119.6(4) . . ?
 O3 C6 C7 121.3(4) . . ?
 O4 C6 Dy1 61.0(2) . . ?
 O4 C6 C7 119.1(4) . . ?
 C7 C6 Dy1 179.0(4) . . ?
 C6 C7 C8 109.8(4) . . ?
 C6 C7 C10 106.5(4) . . ?
 C8 C7 C10 110.3(5) . . ?
 C9 C7 C6 109.1(4) . . ?
 C9 C7 C8 110.6(5) . . ?
 C9 C7 C10 110.5(4) . . ?
 O5 C11 C12 117.3(4) 3_566 . ?
 O6 C11 O5 124.7(4) . 3_566 ?
 O6 C11 C12 118.0(4) . . ?
 C13 C12 C11 111.4(4) . . ?
 C13 C12 C14 111.2(5) . . ?
 C13 C12 C15 109.8(5) . . ?
 C14 C12 C11 109.0(4) . . ?
 C14 C12 C15 108.3(4) . . ?
 C15 C12 C11 107.0(4) . . ?
 O7 C16 C17 116.6(3) . . ?
 O8 C16 O7 125.2(3) . . ?
 O8 C16 C17 118.2(3) . . ?
 C16 C17 C20 107.8(3) . . ?
 C18 C17 C16 108.5(3) . . ?
 C18 C17 C20 109.6(4) . . ?
 C19 C17 C16 111.2(3) . . ?
 C19 C17 C18 109.9(4) . . ?
 C19 C17 C20 109.8(4) . . ?
 O9 C21 Dy1 59.8(2) . . ?
 O9 C21 C22 121.7(4) . . ?
 O10 C21 Dy1 59.5(2) . . ?
 O10 C21 O9 119.3(4) . . ?
 O10 C21 C22 119.0(4) . . ?
 C22 C21 Dy1 176.6(4) . . ?
 C21 C22 C23 110.9(5) . . ?
 C21 C22 C24 106.5(5) . . ?
 C21 C22 C25 109.4(5) . . ?
 C23 C22 C24 110.8(6) . . ?
 C25 C22 C23 109.5(5) . . ?
 C25 C22 C24 109.7(6) . . ?
 C26 N1 C29 117.9(4) . . ?
 N1 C26 C27 110.8(5) . . ?
 N1 C26 C28 108.1(5) . . ?
 C28 C26 C27 111.0(5) . . ?
 N1 C29 C30 108.0(6) . . ?
 C31 C29 N1 114.6(5) . . ?
 C31 C29 C30 106.2(6) . . ?
 C32 C29 N1 120.2(8) . . ?
 C32 C29 C31 118.3(9) . . ?

_shelx_SHELXL_version_number      '2014/7'
_iucr_refine_instructions_details
;

    arepw88.res created by SHELXL-2014/7

TITL arepw88 in P21/c #14
REM reset to P21/c #14
CELL 0.71073 15.453081 19.575264 14.090677 90 109.0818 90
ZERR 2 0.000333 0.000408 0.000273 0 0.0023 0
LATT 1
SYMM -X,0.5+Y,0.5-Z
SFAC C H Dy Mg N O
UNIT 124 240 4 4 4 44
DFIX 1.6 C29 C31
DFIX 1.6 C29 C30
DFIX 1.6 C29 C32
ISOR 0.01 0.02 C23
EADP C31 C32 C30 C27 C28
EADP C29 C26
EADP C28 C26 C27
 
L.S. 10
PLAN  20
BOND
fmap 2
acta
SHEL 8 0.8
OMIT 4 4 1
OMIT 4 2 1
OMIT -5 3 2
REM <olex2.extras>
REM <HklSrc "%./arepw88.hkl">
REM </olex2.extras>
 
WGHT    0.025900    8.258400
FVAR       2.28616   0.62257
DY1   3    0.209198    0.511767    0.580704    11.00000    0.01304    0.02484 =
         0.01629   -0.00334    0.00364   -0.00139
MG1   4    0.001963    0.447921    0.587373    11.00000    0.01577    0.02015 =
         0.01555    0.00113    0.00398   -0.00135
O1    6    0.502953    0.510400    0.727472    11.00000    0.02271    0.03843 =
         0.06736   -0.01461    0.00101    0.00473
O1OH  6    0.060885    0.540040    0.566449    11.00000    0.01585    0.01823 =
         0.01623    0.00188    0.00543    0.00113
O2    6    0.357053    0.534305    0.661658    11.00000    0.01817    0.03710 =
         0.02870   -0.00755    0.00204   -0.00529
O3    6    0.259186    0.492563    0.437410    11.00000    0.01883    0.15299 =
         0.02826   -0.03261    0.00980   -0.00485
O4    6    0.111952    0.500458    0.403479    11.00000    0.01962    0.03111 =
         0.01823   -0.00495    0.00938   -0.00311
O5    6    0.201414    0.623190    0.526423    11.00000    0.02648    0.03545 =
         0.03027    0.00774   -0.00234   -0.01098
O6    6   -0.064930    0.358246    0.587729    11.00000    0.02498    0.02571 =
         0.02679    0.00351    0.00362   -0.00713
O7    6    0.209445    0.493317    0.743054    11.00000    0.02245    0.03590 =
         0.01661    0.00230    0.00355   -0.00340
O8    6    0.074720    0.448349    0.736689    11.00000    0.02104    0.03492 =
         0.01609    0.00113    0.00153   -0.00681
O9    6    0.264774    0.391682    0.597551    11.00000    0.01746    0.03136 =
         0.08027   -0.01715    0.01153    0.00162
O10   6    0.118003    0.405513    0.563776    11.00000    0.01908    0.02040 =
         0.02666   -0.00477    0.00353    0.00192
C1    1    0.435388    0.546152    0.721447    11.00000    0.01693    0.03230 =
         0.02891    0.00058    0.00559   -0.00430
C2    1    0.448616    0.607030    0.793030    11.00000    0.02347    0.03135 =
         0.02630   -0.00517    0.00350   -0.00435
C3    1    0.536793    0.643371    0.798873    11.00000    0.03985    0.03694 =
         0.05144   -0.00960    0.01267   -0.01638
AFIX 137
H3A   2    0.584683    0.610353    0.807432    11.00000   -1.50000
H3B   2    0.553342    0.674245    0.854885    11.00000   -1.50000
H3C   2    0.528217    0.668537    0.738002    11.00000   -1.50000
AFIX   0
C4    1    0.459901    0.577353    0.897362    11.00000    0.07963    0.07948 =
         0.03404   -0.00703    0.02007   -0.03297
AFIX 137
H4A   2    0.406323    0.551512    0.894568    11.00000   -1.50000
H4B   2    0.467816    0.613932    0.944832    11.00000   -1.50000
H4C   2    0.512613    0.548074    0.917865    11.00000   -1.50000
AFIX   0
C5    1    0.367783    0.654611    0.762453    11.00000    0.04807    0.06295 =
         0.06583   -0.03301    0.00092    0.01652
AFIX 137
H5A   2    0.358395    0.671026    0.695628    11.00000   -1.50000
H5B   2    0.379233    0.692553    0.808062    11.00000   -1.50000
H5C   2    0.314120    0.630629    0.764150    11.00000   -1.50000
AFIX   0
C6    1    0.180508    0.492277    0.374493    11.00000    0.02239    0.06147 =
         0.02472   -0.01348    0.01044   -0.00716
C7    1    0.165274    0.483012    0.262532    11.00000    0.02190    0.10219 =
         0.02338   -0.01512    0.01099    0.00047
C8    1    0.251359    0.452518    0.247841    11.00000    0.03185    0.16304 =
         0.03234   -0.03480    0.01828    0.00297
AFIX 137
H8A   2    0.302113    0.482920    0.275564    11.00000   -1.50000
H8B   2    0.241262    0.446371    0.177444    11.00000   -1.50000
H8C   2    0.264624    0.409161    0.281315    11.00000   -1.50000
AFIX   0
C9    1    0.083336    0.436462    0.217602    11.00000    0.03670    0.09376 =
         0.03444   -0.03667    0.00860   -0.00413
AFIX 137
H9A   2    0.094539    0.393093    0.251231    11.00000   -1.50000
H9B   2    0.073952    0.429957    0.147414    11.00000   -1.50000
H9C   2    0.029766    0.456935    0.225785    11.00000   -1.50000
AFIX   0
C10   1    0.146332    0.554539    0.215160    11.00000    0.05127    0.11569 =
         0.03280    0.00462    0.01968   -0.01422
AFIX 137
H10A  2    0.093888    0.573890    0.227415    11.00000   -1.50000
H10B  2    0.134653    0.551108    0.144096    11.00000   -1.50000
H10C  2    0.198628    0.583279    0.244389    11.00000   -1.50000
AFIX   0
C11   1   -0.144528    0.340080    0.537317    11.00000    0.03112    0.02440 =
         0.02723   -0.00031    0.00670   -0.01022
C12   1   -0.174386    0.267206    0.552298    11.00000    0.03843    0.03032 =
         0.04362    0.01081    0.00475   -0.01374
C13   1   -0.111285    0.235877    0.648740    11.00000    0.09137    0.05222 =
         0.07255    0.03498   -0.01381   -0.03273
AFIX 137
H13A  2   -0.050689    0.231818    0.644664    11.00000   -1.50000
H13B  2   -0.133573    0.191438    0.657979    11.00000   -1.50000
H13C  2   -0.109712    0.264573    0.704529    11.00000   -1.50000
AFIX   0
C14   1   -0.272896    0.268794    0.551832    11.00000    0.06108    0.05402 =
         0.08562    0.01119    0.03675   -0.02641
AFIX 137
H14A  2   -0.276117    0.294040    0.608991    11.00000   -1.50000
H14B  2   -0.293915    0.222949    0.554822    11.00000   -1.50000
H14C  2   -0.310854    0.290396    0.491389    11.00000   -1.50000
AFIX   0
C15   1   -0.170854    0.225003    0.462050    11.00000    0.05226    0.03746 =
         0.07695   -0.00563    0.01423   -0.01309
AFIX 137
H15A  2   -0.209886    0.245498    0.401210    11.00000   -1.50000
H15B  2   -0.191357    0.179330    0.467514    11.00000   -1.50000
H15C  2   -0.109106    0.223740    0.460886    11.00000   -1.50000
AFIX   0
C16   1    0.153926    0.468115    0.783138    11.00000    0.02275    0.02517 =
         0.01561    0.00268    0.00333    0.00268
C17   1    0.188260    0.461999    0.897733    11.00000    0.02869    0.03129 =
         0.01498    0.00163   -0.00071   -0.00618
C18   1    0.278888    0.423069    0.929603    11.00000    0.04145    0.05894 =
         0.03016    0.01498    0.00292    0.01205
AFIX 137
H18A  2    0.268945    0.377618    0.902614    11.00000   -1.50000
H18B  2    0.302880    0.420868    1.001562    11.00000   -1.50000
H18C  2    0.321806    0.446250    0.904666    11.00000   -1.50000
AFIX   0
C19   1    0.119229    0.424954    0.935046    11.00000    0.04450    0.05541 =
         0.01933    0.00940    0.00495   -0.01302
AFIX 137
H19A  2    0.064521    0.451893    0.920543    11.00000   -1.50000
H19B  2    0.144812    0.418015    1.006233    11.00000   -1.50000
H19C  2    0.104725    0.381541    0.901948    11.00000   -1.50000
AFIX   0
C20   1    0.203861    0.534430    0.941435    11.00000    0.06175    0.04613 =
         0.02469   -0.00791    0.01252   -0.01469
AFIX 137
H20A  2    0.248048    0.557445    0.918261    11.00000   -1.50000
H20B  2    0.226159    0.531986    1.013430    11.00000   -1.50000
H20C  2    0.147147    0.559212    0.919976    11.00000   -1.50000
AFIX   0
C21   1    0.186287    0.366364    0.582425    11.00000    0.02558    0.02705 =
         0.04159   -0.01272    0.00542    0.00045
C22   1    0.172204    0.290380    0.588588    11.00000    0.03235    0.02232 =
         0.11466   -0.01444    0.00359    0.00553
C23   1    0.257573    0.250601    0.586338    11.00000    0.04474    0.03376 =
         0.20734   -0.03263    0.01294    0.01561
AFIX 137
H23A  2    0.265890    0.256865    0.522299    11.00000   -1.50000
H23B  2    0.249524    0.202895    0.596860    11.00000   -1.50000
H23C  2    0.310485    0.267264    0.638453    11.00000   -1.50000
AFIX   0
C24   1    0.153097    0.277641    0.688446    11.00000    0.07208    0.02847 =
         0.14638    0.03299    0.01243   -0.00220
AFIX 137
H24A  2    0.205190    0.291717    0.743788    11.00000   -1.50000
H24B  2    0.141918    0.229880    0.694687    11.00000   -1.50000
H24C  2    0.100345    0.303433    0.688733    11.00000   -1.50000
AFIX   0
C25   1    0.090110    0.268332    0.500929    11.00000    0.04274    0.05135 =
         0.16909   -0.06606    0.01793   -0.00590
AFIX 137
H25A  2    0.036287    0.291168    0.504509    11.00000   -1.50000
H25B  2    0.082114    0.219822    0.503675    11.00000   -1.50000
H25C  2    0.099928    0.280038    0.439076    11.00000   -1.50000
AFIX   0
 
N1    5    0.459927    0.386597    0.649211    11.00000    0.02175    0.03395 =
         0.04044   -0.00508    0.00883    0.00054
AFIX  23
H1A   2    0.469428    0.429869    0.669311    11.00000   -1.20000
H1B   2    0.399662    0.379838    0.627729    11.00000   -1.20000
AFIX   0
C26   1    0.500643    0.342161    0.738599    11.00000    0.06804    0.06027 =
         0.06090   -0.00205    0.02031    0.00070
AFIX  13
H26   2    0.491375    0.294225    0.717671    11.00000   -1.20000
AFIX   0
C27   1    0.603275    0.355706    0.785367    11.00000    0.06804    0.06027 =
         0.06090   -0.00205    0.02031    0.00070
AFIX 137
H27A  2    0.633906    0.342709    0.738836    11.00000   -1.50000
H27B  2    0.627137    0.329484    0.845913    11.00000   -1.50000
H27C  2    0.613239    0.403433    0.800726    11.00000   -1.50000
AFIX   0
C28   1    0.451281    0.356100    0.812838    11.00000    0.06804    0.06027 =
         0.06090   -0.00205    0.02031    0.00070
AFIX 137
H28A  2    0.460982    0.402768    0.834681    11.00000   -1.50000
H28B  2    0.474492    0.326343    0.869679    11.00000   -1.50000
H28C  2    0.386935    0.348065    0.781434    11.00000   -1.50000
AFIX   0
C29   1    0.493335    0.377817    0.561250    11.00000    0.06804    0.06027 =
         0.06090   -0.00205    0.02031    0.00070
C31   1    0.485699    0.307971    0.521473    11.00000    0.06804    0.06027 =
         0.06090   -0.00205    0.02031    0.00070
AFIX 137
H31A  2    0.518042    0.277169    0.574142    11.00000   -1.50000
H31B  2    0.511716    0.306015    0.468293    11.00000   -1.50000
H31C  2    0.422345    0.295044    0.495967    11.00000   -1.50000
AFIX   0
PART 1
C30   1    0.435330    0.421718    0.477185    21.00000    0.06804    0.06027 =
         0.06090   -0.00205    0.02031    0.00070
AFIX 137
H30A  2    0.378381    0.398966    0.444163    21.00000   -1.50000
H30B  2    0.466973    0.429712    0.429855    21.00000   -1.50000
H30C  2    0.423519    0.464567    0.503745    21.00000   -1.50000
AFIX   0
PART 0
PART 2
C32   1    0.562960    0.419414    0.551150   -21.00000    0.06804    0.06027 =
         0.06090   -0.00205    0.02031    0.00070
AFIX 137
H32A  2    0.557461    0.464272    0.576116   -21.00000   -1.50000
H32B  2    0.558075    0.422312    0.481576   -21.00000   -1.50000
H32C  2    0.621319    0.400320    0.588797   -21.00000   -1.50000
AFIX   0
HKLF 4
 
REM  arepw88 in P21/c #14
REM R1 =  0.0385 for    7274 Fo > 4sig(Fo)  and  0.0457 for all    8225 data
REM    400 parameters refined using      9 restraints
 
END  
     
WGHT      0.0259      8.2571 

REM Highest difference peak  1.365,  deepest hole -1.619,  1-sigma level  0.101
Q1    1   0.4233  0.3204  0.4967  11.00000  0.05    1.06
Q2    1   0.0652  0.5974  0.6388  11.00000  0.05    0.99
Q3    1   0.5018  0.3543  0.5782  11.00000  0.05    0.69
Q4    1   0.5023  0.4241  0.5067  11.00000  0.05    0.68
Q5    1   0.1666  0.5419  0.5832  11.00000  0.05    0.67
Q6    1   0.4771  0.3931  0.5333  11.00000  0.05    0.58
Q7    1   0.5867  0.3524  0.8221  11.00000  0.05    0.55
Q8    1   0.1620  0.4848  0.5806  11.00000  0.05    0.54
Q9    1   0.6163  0.3562  0.7526  11.00000  0.05    0.52
Q10   1   0.1865  0.4818  0.5967  11.00000  0.05    0.51
Q11   1   0.2691  0.5419  0.6012  11.00000  0.05    0.50
Q12   1   0.2683  0.4834  0.5982  11.00000  0.05    0.50
Q13   1   0.3694  0.4808  0.2477  11.00000  0.05    0.49
Q14   1   0.5687  0.3934  0.5926  11.00000  0.05    0.46
Q15   1   0.2466  0.5200  0.4374  11.00000  0.05    0.46
Q16   1   0.6276  0.4585  0.7397  11.00000  0.05    0.43
Q17   1   0.1391  0.2648  0.6219  11.00000  0.05    0.39
Q18   1   0.4319  0.3679  0.8223  11.00000  0.05    0.39
Q19   1   0.0545  0.5428  0.5272  11.00000  0.05    0.38
Q20   1   0.1449  0.4352  0.5524  11.00000  0.05    0.37

REM The information below was added by Olex2.
REM
REM R1 = 0.0385 for 7274 Fo > 4sig(Fo) and 0.0457 for all 35242 data
REM n/a parameters refined using n/a restraints
REM Highest difference peak 1.37, deepest hole -1.62
REM Mean Shift 0, Max Shift 0.002.

REM +++ Tabular Listing of Refinement Information +++
REM R1_all = 0.0457
REM R1_gt = 0.0385
REM wR_ref = 0.0860
REM GOOF = 1.093
REM Shift_max = 0.002
REM Shift_mean = 0
REM Reflections_all = 35242
REM Reflections_gt = 7274
REM Parameters = n/a
REM Hole = -1.62
REM Peak = 1.37
REM Flack = n/a

;
_olex2_date_sample_data_collection 2013-04-20
_olex2_submission_special_instructions 'No special instructions were received'
loop_
  _refln_index_h
  _refln_index_k
  _refln_index_l
  _refln_F_squared_meas
  _refln_F_squared_sigma
  _refln_scale_group_code
 -4 0 0 115294 2847.92 3
 4 0 0 117879 3459.68 9
 5 0 0 127954 3919.65 9
 -5 0 0 121934 3187.09 3
 6 0 0 420.566 258.083 9
 -6 0 0 382.544 129.085 3
 -7 0 0 217714 5107.85 5
 -7 0 0 208200 5291.35 3
 7 0 0 212763 6342.25 9
 -8 0 0 23047.8 1222.37 3
 8 0 0 25347.6 1801.3 9
 -8 0 0 23920.6 1100.79 5
 -9 0 0 46248 1710.73 5
 9 0 0 47397.5 2699.72 9
 -10 0 0 90123.1 2763.44 5
 10 0 0 87912.8 4111.69 9
 -11 0 0 7932.69 677.032 5
 11 0 0 9612.06 1298.99 9
 12 0 0 61584 3641.21 9
 13 0 0 6717.47 1246.49 9
 14 0 0 84215 4697.68 9
 15 0 0 45477.3 3528.22 9
 16 0 0 1852.43 745.854 9
 17 0 0 42475 3651.84 9
 18 0 0 4483.73 1206.52 9
 3 1 0 53.3611 81.7185 9
 -3 -1 0 142.672 100.566 9
 3 -1 0 -34.6438 85.1914 9
 3 1 0 72.9777 72.7778 3
 -3 1 0 72.7585 46.1058 8
 -3 1 0 145.351 107.594 9
 -3 -1 0 10.5397 70.468 3
 -4 1 0 626.919 111.102 5
 4 -1 0 258.819 143.978 9
 -4 -1 0 560.004 134.935 3
 4 1 0 317.76 169.268 9
 4 1 0 541.552 139.458 3
 -5 1 0 24279.2 853.527 5
 5 -1 0 23252.3 1409.28 9
 5 1 0 21189.2 1337.43 9
 -5 -1 0 23914.3 1055.09 3
 -6 -1 0 51662.8 1840.68 3
 6 1 0 53933.9 2422.57 9
 -6 1 0 54350.3 1577.16 5
 6 -1 0 50850.8 2393.41 9
 -7 1 0 1848.97 251.863 5
 7 1 0 1949.72 466.451 9
 -7 -1 0 2112.66 337.166 3
 7 -1 0 2141.69 508.415 9
 -8 1 0 164.815 141.808 3
 -8 -1 0 114.636 108.936 3
 8 1 0 134.658 208.348 9
 8 -1 0 77.7123 184.641 9
 -8 1 0 222.294 107.511 5
 9 -1 0 4618.72 825.733 9
 9 1 0 3621.07 723.747 9
 -9 1 0 3925.6 387.933 5
 -10 -1 0 1350.79 289.009 5
 -10 1 0 1284.39 233.799 5
 10 1 0 1078.44 469.912 9
 10 -1 0 612.187 314.336 9
 -11 -1 0 691.379 225.007 5
 11 -1 0 -107.659 240.479 9
 11 1 0 906.01 425.145 9
 -11 1 0 640.349 170.466 5
 12 1 0 808.46 461.932 9
 -12 -1 0 1273.07 290.656 5
 12 -1 0 465.339 284.602 9
 13 1 0 7820.75 1297.23 9
 13 -1 0 6842.38 1234.86 9
 14 1 0 661.457 550.451 9
 14 -1 0 450.613 530.432 9
 15 -1 0 450.037 337.307 9
 15 1 0 790.992 523.384 9
 16 1 0 459.091 507.466 9
 16 -1 0 -313.835 457.287 9
 17 1 0 -189.829 404.956 9
 17 -1 0 -206.695 430.149 9
 18 1 0 347.389 477.505 9
 18 -1 0 336.432 403.516 9
 2 2 0 183125 4416.22 7
 2 -2 0 175579 4416.63 9
 3 2 0 174482 4268.38 4
 3 2 0 171067 4413.36 7
 3 -2 0 169196 3754.5 5
 -3 2 0 158381 4445.2 9
 -3 2 0 170761 4030.18 8
 3 -2 0 166026 4006.97 8
 -3 -2 0 161510 4406.55 9
 3 -2 0 178103 4296.62 4
 3 -2 0 163502 4429.18 9
 4 -2 0 154106 3473.41 5
 4 2 0 147293 3826.88 3
 4 2 0 151716 4302.21 9
 -4 2 0 157294 3844.4 8
 4 -2 0 151356 4348.19 9
 5 -2 0 269109 7089.65 9
 -5 2 0 285646 6418.69 8
 5 2 0 271180 7017.74 9
 5 2 0 257195 6295.57 3
 6 2 0 1540.8 285.004 3
 -6 2 0 1151.31 251.348 8
 6 -2 0 1371.95 375.127 9
 6 2 0 1174.24 365.959 9
 7 -2 0 242119 7001.5 9
 7 2 0 233409 6819.88 9
 8 2 0 25694.1 1805.41 9
 8 -2 0 23724.1 1786.12 9
 9 -2 0 143761 5290.34 9
 9 2 0 132626 5047.82 9
 10 2 0 100596 4438.62 9
 10 -2 0 108153 4619.49 9
 11 2 0 3133.57 739.626 9
 11 -2 0 4650.71 901.662 9
 -12 -2 0 82101 2996.99 5
 12 -2 0 89194.6 4492.75 9
 12 2 0 82731.4 4313.03 9
 13 2 0 4270.09 995.449 9
 13 -2 0 4110.95 964.641 9
 14 2 0 101589 5165.85 9
 14 -2 0 89331.8 4965.8 9
 15 2 0 44689.1 3443.83 9
 15 -2 0 39742.1 3293.79 9
 16 -2 0 5558.87 1272.21 9
 16 2 0 4600.17 1173.08 9
 17 2 0 28188 3015.31 7
 17 2 0 32651 3167.99 9
 17 -2 0 36754 3385.41 9
 18 -2 0 2255.1 927.915 9
 18 2 0 2747.33 1019.04 9
 18 2 0 4013.95 1219.07 7
 -1 3 0 8109.39 605.899 7
 1 -3 0 7251.65 352.203 4
 1 -3 0 7756.56 565.332 9
 1 3 0 7666.91 569.927 7
 2 3 0 13948.2 661.574 4
 2 3 0 15142.4 879.933 7
 2 -3 0 13241.7 837.473 9
 2 3 0 12423.2 590.25 6
 -2 -3 0 12966 818.651 7
 -2 3 0 13015.9 835.903 9
 2 -3 0 15374.2 702.037 4
 3 -3 0 5.41109 68.3392 9
 3 3 0 230.276 118.193 4
 -3 -3 0 155.937 97.3156 7
 3 3 0 142.212 148.901 7
 -3 3 0 245.682 149.246 9
 3 -3 0 56.4598 67.8204 8
 3 -3 0 197.259 111.336 4
 4 -3 0 28686.8 1529.88 9
 4 -3 0 28683.9 1213.05 8
 4 3 0 29818.1 1525.21 7
 4 -3 0 30230.1 1025.47 5
 5 -3 0 129.024 184.324 9
 -5 3 0 134.106 112.599 8
 5 3 0 202.704 102.782 7
 5 3 0 77.9885 93.3085 3
 5 -3 0 26.2374 40.6069 5
 6 -3 0 88446.1 3414.06 9
 6 3 0 81795.7 3236.12 9
 6 3 0 90256.1 2775.31 3
 -6 3 0 90321.6 2776.15 8
 6 -3 0 83443.2 2254.04 5
 7 -3 0 10514.6 1107.54 9
 7 3 0 9578.81 772.528 3
 7 3 0 10367.6 1088.13 9
 8 3 0 13435.9 1321.14 9
 8 -3 0 16007.8 1466.91 9
 9 3 0 7591.73 1038.45 9
 9 -3 0 5767.67 940.445 9
 10 3 0 6838.51 1046.2 9
 10 -3 0 7752.1 1120.37 9
 11 3 0 737.603 516.733 9
 11 -3 0 769.818 439.184 9
 12 3 0 3971.78 875.15 9
 12 -3 0 2233.39 727.53 9
 13 -3 0 17165.1 1946.36 9
 13 3 0 15558.4 1853.46 9
 14 -3 0 -206.786 427.75 9
 14 3 0 -259.806 475.901 9
 15 3 0 3221.44 913.973 7
 15 -3 0 2565.21 920.241 9
 15 3 0 3156.72 907.226 9
 16 3 0 2526.85 961.387 7
 16 -3 0 1022.3 614.729 9
 17 3 0 258.242 367.21 7
 17 -3 0 845.197 696.406 9
 18 3 0 4134.95 1226.99 7
 18 -3 0 3947.8 1119.68 9
 0 -4 0 560316 12189.7 7
 0 4 0 539688 12146 7
 -1 -4 0 359436 8268.43 7
 1 -4 0 367000 8336.75 7
 -1 4 0 352111 8318.69 7
 1 4 0 339607 8213.2 7
 2 4 0 640294 14219.7 7
 -2 -4 0 646805 14213.3 7
 -2 4 0 639089 14237.5 9
 2 -4 0 653084 14384.8 7
 3 4 0 179076 4974.85 7
 3 4 0 176059 4362.44 6
 3 -4 0 195171 4628.84 4
 3 4 0 180929 4536.39 4
 3 -4 0 187896 5057.07 9
 4 -4 0 47989 2122.06 9
 4 4 0 44859.5 2026.31 7
 4 -4 0 43728.2 1674.57 8
 5 -4 0 222874 6075.81 9
 5 4 0 206620 5909.22 7
 5 -4 0 205479 4843.39 5
 5 -4 0 203172 5244.33 8
 6 -4 0 5801.07 595.866 8
 6 -4 0 6612.81 475.187 5
 6 4 0 5745.58 627.898 3
 6 -4 0 7725.99 918.071 9
 6 4 0 7497.34 879.029 7
 7 -4 0 176162 5725.75 9
 7 4 0 181330 5657.51 7
 7 4 0 167578 4788.62 3
 7 -4 0 171217 4130.26 5
 8 4 0 15723.6 1085.74 3
 8 -4 0 14673 1436.75 9
 8 4 0 14939 1437.6 7
 9 4 0 42527.3 2022.12 3
 9 4 0 48566.2 2773.85 7
 9 -4 0 51082.4 2913.67 9
 10 -4 0 99268.8 4530.08 9
 10 4 0 97992 4407.77 7
 11 -4 0 5942.14 1054.68 9
 11 4 0 7499.59 1166.62 7
 12 -4 0 33681.5 2717.37 9
 12 4 0 30481.2 2514.23 7
 13 -4 0 4974.83 1106.89 9
 13 4 0 5152.49 1072.42 7
 14 4 0 49572.1 3571.78 7
 14 -4 0 54434.9 3785.18 9
 15 -4 0 9263.01 1602.47 9
 15 4 0 4997.62 1089.87 7
 16 4 0 11614.1 1838.42 7
 16 -4 0 14742.7 2100.91 9
 17 4 0 34643.8 3321.24 7
 17 -4 0 35483.5 3385.8 9
 18 -4 0 1303.22 817.783 9
 18 4 0 1459.54 806.849 7
 0 -5 0 574.367 246.695 7
 0 5 0 86.3802 117.988 7
 0 -5 0 366.632 122.039 2
 -1 5 0 1396.88 312.646 7
 -1 5 0 873.885 153.07 2
 1 5 0 1315.35 311.198 7
 1 -5 0 782.663 229.804 7
 -1 -5 0 1055.94 272.154 7
 2 -5 0 11951.6 636.08 4
 2 -5 0 10754.2 872.305 9
 2 5 0 12437.6 619.197 4
 -2 -5 0 11526.2 554.497 1
 -2 -5 0 13081.4 627.275 6
 2 5 0 11023.1 908.447 7
 3 5 0 13969 1052.41 7
 3 5 0 14600.7 796.268 4
 3 -5 0 12239.9 769.856 4
 4 5 0 102008 2940.31 6
 4 5 0 101870 3556.3 7
 4 -5 0 107892 3673.06 9
 5 -5 0 7070.96 851.902 9
 5 5 0 6723.66 627.536 6
 5 -5 0 5278.05 563.147 8
 5 5 0 5351.13 739.617 7
 6 -5 0 5638.8 610.811 8
 6 -5 0 5530.51 474.885 5
 6 5 0 6800.3 857.624 7
 6 5 0 6157.4 682.628 3
 6 -5 0 6038.03 849.018 9
 7 5 0 26031 1812.02 7
 7 -5 0 23910.8 1817.53 9
 7 5 0 23721.2 1413.82 3
 7 -5 0 24386.3 1064.22 5
 8 -5 0 27594.7 2051.32 9
 8 5 0 30963.7 1658.21 3
 8 5 0 28051 2018.69 7
 8 -5 0 27975.8 1146.71 5
 9 5 0 2871.59 664.073 7
 9 5 0 2409.04 449.349 3
 9 -5 0 1976.52 563.386 9
 10 5 0 6872.27 1091.11 7
 10 -5 0 8244.02 1219.38 9
 10 5 0 7986.96 843.414 3
 11 -5 0 15928.5 1804.23 9
 11 5 0 17539.6 1795.23 7
 12 5 0 2472.78 760.644 7
 12 -5 0 1618.57 588.509 9
 13 5 0 16338.7 1912.2 7
 13 -5 0 17383.3 2035.1 9
 14 -5 0 4153.43 1095.35 9
 14 5 0 2410.38 776.855 7
 15 5 0 1502.07 613.941 7
 15 -5 0 2541.26 903.393 9
 16 -5 0 1416.06 805.392 9
 16 5 0 518.893 562.692 7
 17 5 0 2230.2 952.059 7
 17 -5 0 4191.96 1313.54 9
 18 -5 0 4737.65 1313.58 9
 0 6 0 148804 4446.36 7
 0 -6 0 144310 3569.39 2
 1 6 0 5998.34 706.896 7
 -1 6 0 4679.16 640.438 7
 -1 6 0 4328.62 383.055 2
 2 -6 0 132122 4180.53 9
 2 6 0 133375 4233.51 7
 -2 6 0 133612 3496.92 2
 2 -6 0 140333 3350.35 4
 -2 6 0 135675 4365 7
 2 6 0 138566 3285.03 4
 -2 -6 0 128614 3319.01 1
 3 6 0 145837 4692.21 7
 3 6 0 148036 3916.16 4
 3 -6 0 159451 4802.79 9
 -3 -6 0 163784 3843.11 6
 3 -6 0 150287 4008.05 4
 4 -6 0 59324.1 2613.49 9
 4 6 0 58421.8 2571.14 7
 4 6 0 52233.1 1877.33 6
 5 -6 0 247118 7095.28 9
 5 -6 0 253736 6370.25 8
 5 6 0 242760 6134.01 6
 5 6 0 247903 7066.71 7
 6 6 0 20632.3 1238.1 6
 6 -6 0 21060.3 1266.6 8
 6 6 0 21213.7 1603.87 7
 6 -6 0 19811 1585.49 9
 7 6 0 296117 7557.13 6
 7 -6 0 287531 8454.32 9
 7 6 0 306197 7701.39 3
 7 6 0 307337 8502.74 7
 7 -6 0 305814 7498.68 8
 8 6 0 22003.7 1805.93 7
 8 6 0 23551.1 1521.34 3
 8 -6 0 20547.7 1802.04 9
 9 -6 0 23043.6 1991.29 9
 9 6 0 23919.7 1537.8 3
 9 -6 0 20817.7 1009.41 5
 9 6 0 25306.2 2023.65 7
 10 6 0 79930.9 4025.7 7
 10 6 0 80851.1 3198.54 3
 10 -6 0 85386.5 4229.71 9
 11 6 0 26991.9 1706.35 3
 11 -6 0 32064.7 2571.4 9
 11 6 0 27115.8 2316.47 7
 12 6 0 73168.9 4135.11 7
 12 -6 0 73337.6 4239.66 9
 13 -6 0 2448.24 781.809 9
 13 6 0 4257.49 1033.73 7
 14 -6 0 51656.4 3772.92 9
 14 6 0 48939.1 3576.83 7
 15 -6 0 10739.8 1711.18 9
 15 6 0 11330.3 1749.92 7
 16 -6 0 12470.8 1947.14 9
 16 6 0 9928.57 1708.26 7
 17 6 0 33006.7 3275.27 7
 17 -6 0 36405.9 3504.11 9
 18 -6 0 -33.4878 572.013 9
 0 7 0 490.135 273.768 7
 0 -7 0 163.563 95.9844 2
 -1 7 0 74904.2 2167.82 2
 1 7 0 72049.5 2921.95 7
 -1 7 0 68890.3 2932.25 7
 2 -7 0 138.786 142.569 9
 2 -7 0 306.225 106.494 4
 -2 -7 0 448.935 139.662 1
 -2 7 0 269.494 154.302 7
 2 7 0 486.746 257.342 7
 -2 7 0 116.752 92.3817 2
 2 7 0 301.54 92.0605 4
 -3 -7 0 9177.75 591.097 6
 3 7 0 9136.05 628.29 4
 3 -7 0 10202.1 1021.54 9
 3 7 0 7250.33 865.914 7
 3 -7 0 8733.42 632.154 4
 4 7 0 3127.24 585.832 7
 4 7 0 4678.67 513.461 4
 4 -7 0 4933.04 741.188 9
 5 -7 0 3684.93 649.844 9
 5 7 0 3706.86 654.823 7
 5 7 0 3575.62 459.14 6
 6 -7 0 22846.7 1747.52 9
 6 -7 0 21926.1 1363.03 8
 6 7 0 22790.9 1301.16 6
 6 7 0 23373.2 1758.42 7
 7 7 0 4066.03 575.068 6
 7 7 0 5709.56 895.245 7
 7 -7 0 5415.97 935.688 9
 7 -7 0 4456.68 625.759 8
 8 -7 0 27111.4 1289.93 5
 8 7 0 27935.8 1669.15 6
 8 -7 0 25727.5 1575.09 8
 8 7 0 23952 1950.78 7
 8 7 0 29621.8 1782.31 3
 8 -7 0 24085.4 1998.51 9
 9 7 0 803.284 318.259 3
 9 7 0 468.592 314.43 6
 9 -7 0 798.456 403.023 9
 9 7 0 1429.74 513.893 7
 10 7 0 11921.3 1143.95 3
 10 7 0 11411.5 1182.59 6
 10 -7 0 11562.1 1518.84 9
 10 7 0 11808.4 1492.64 7
 11 7 0 17916 1907.4 7
 11 -7 0 22501.8 2165.48 9
 11 7 0 19225.3 1474.77 3
 11 7 0 18368.4 1600.27 6
 12 -7 0 375.928 470.004 9
 12 7 0 12.3465 188.416 3
 12 7 0 250.51 385.743 7
 12 7 0 215.332 366.183 6
 13 7 0 30109.7 2683.8 7
 13 -7 0 30451.2 2799.48 9
 13 7 0 32733.9 2385.08 6
 14 7 0 9706.04 1561.65 7
 14 -7 0 7671.58 1414.26 9
 14 7 0 10347.2 1379.15 6
 15 -7 0 7416.08 1494.69 9
 15 7 0 6529.25 1340.85 7
 15 7 0 6008.44 1143.62 6
 16 7 0 3990.44 1087.55 7
 16 -7 0 3812.31 1221.27 9
 17 7 0 886.868 654.056 7
 17 -7 0 695.23 681.318 9
 0 8 0 309127 8241.71 7
 0 -8 0 296571 6972.08 2
 -1 -8 0 646.817 281.252 2
 -1 8 0 1274.25 266.208 2
 1 8 0 1394 492.155 7
 -2 -8 0 277502 6674.58 1
 -2 8 0 280710 6667.79 2
 -2 8 0 260055 7857.82 7
 2 -8 0 285385 7774.59 9
 2 8 0 287789 6283.02 4
 2 -8 0 298587 6365.28 4
 2 8 0 276242 7842.14 7
 -3 8 0 229553 5837.1 2
 -3 -8 0 222220 5462.91 1
 3 8 0 226393 6864.23 7
 3 -8 0 242793 5663.53 4
 -3 -8 0 251185 5604.13 6
 3 8 0 228320 5564.28 4
 3 -8 0 235910 6844.2 9
 4 -8 0 54333.7 2738.53 9
 4 8 0 55866.2 2065.47 4
 4 8 0 55269.8 2793.24 7
 5 -8 0 101717 4069.42 9
 5 8 0 98936.1 4042.73 7
 6 8 0 1550.83 337.713 6
 6 -8 0 1863.79 575.525 9
 6 8 0 2391.98 590.563 7
 6 -8 0 2844.98 521.34 8
 7 -8 0 154592 4730.74 8
 7 -8 0 156263 5668.16 9
 7 8 0 149126 5532.82 7
 7 8 0 142092 4460.68 6
 8 8 0 21448.5 1462.65 6
 8 -8 0 24619.8 1578.86 8
 8 8 0 22955.4 1644.28 3
 8 -8 0 24679.5 2056.5 9
 8 8 0 23588.7 1970.83 7
 9 -8 0 21978.7 1543.48 8
 9 8 0 24912.9 1734.28 3
 9 8 0 22931.4 1603.05 6
 9 8 0 25057.6 2114.67 7
 9 -8 0 26659.5 2242.06 9
 10 8 0 49573.4 3176.92 7
 10 -8 0 50807.9 3290.88 9
 10 8 0 51081.2 2618.86 6
 10 8 0 48492.5 2554.88 3
 11 -8 0 5849.82 1139.3 9
 11 8 0 6164.88 1157.5 7
 11 8 0 5254.35 866.606 6
 11 8 0 5780.28 847.347 3
 12 -8 0 77606.3 4473.58 9
 12 8 0 71935.4 3288.16 3
 12 8 0 74855.5 3608.14 6
 12 8 0 78236 4390.17 7
 13 8 0 12264.7 1732.45 7
 13 8 0 16770.8 1678.87 6
 13 -8 0 18113.5 2150.41 9
 14 8 0 10364.9 1395.85 6
 14 8 0 9548.04 1601.91 7
 14 -8 0 11183.2 1751.49 9
 15 -8 0 14322.1 2084.81 9
 15 8 0 12481.3 1871.77 7
 16 8 0 9610.53 1730.81 7
 16 -8 0 10084.9 1857.19 9
 17 -8 0 38441.4 3702.11 9
 17 8 0 37310.2 3560.68 7
 0 9 0 -71.6553 227.134 7
 0 -9 0 26.2403 96.6147 2
 -1 -9 0 116790 3415.96 2
 1 9 0 115023 4368.18 7
 -1 9 0 120856 4487.11 7
 -1 9 0 117791 3248.1 2
 -2 9 0 34397.5 1431.52 2
 2 9 0 31403 2055.04 7
 -2 -9 0 30386.1 1434.44 1
 -2 9 0 33963.5 2176.01 7
 2 9 0 34343.6 1121.07 4
 2 -9 0 36176.6 1188.86 4
 -3 -9 0 5626.64 503.619 6
 -3 -9 0 4928.38 490.787 1
 3 9 0 4632.37 436.851 4
 3 -9 0 4628.8 775.209 9
 3 9 0 4533.58 750.638 7
 -3 9 0 5000.59 537.28 2
 3 -9 0 5158.99 476.917 4
 4 9 0 7027.88 629.685 4
 4 9 0 6082.93 925.735 7
 4 -9 0 7312.08 984.227 9
 5 9 0 816.734 384.539 7
 5 -9 0 492.685 388.279 9
 6 9 0 80819.6 3819.63 7
 6 -9 0 85857.9 3909.36 9
 7 -9 0 622.548 302.152 8
 7 -9 0 1389.91 518.207 9
 7 9 0 1154.89 512.491 7
 8 -9 0 29524.4 2333.78 9
 8 9 0 34085.5 1855.26 6
 8 -9 0 33585 1945.24 8
 8 9 0 35836.4 2516.85 7
 9 9 0 21215.3 1541.51 6
 9 -9 0 26227.4 2243.66 9
 9 9 0 25613.4 2199.36 7
 9 -9 0 24470.7 1671.19 8
 9 9 0 22159.8 1713.95 3
 10 9 0 13770.4 1672.4 7
 10 9 0 12769.5 1235.76 6
 10 9 0 13100.4 1316.59 3
 10 -9 0 13378.9 1653.58 9
 11 9 0 27852 1976.79 6
 11 -9 0 26965.4 2491.63 9
 11 9 0 28387.7 1973.55 3
 11 9 0 29849.5 2541.62 7
 12 9 0 357.055 344.891 6
 12 9 0 1364.2 648.287 7
 12 -9 0 1012.06 547.061 9
 12 9 0 238.445 285.055 3
 13 9 0 43997.7 2761.86 6
 13 -9 0 44795.3 3512.76 9
 13 9 0 45374.3 3434.6 7
 14 -9 0 12450.6 1876.06 9
 14 9 0 9582.71 1622.93 7
 15 -9 0 12242.1 1966.38 9
 15 9 0 10222.2 1731.61 7
 16 9 0 9198.05 1698.89 7
 16 -9 0 6942.39 1595.13 9
 17 -9 0 340.119 492.207 9
 17 9 0 2503.62 950.019 7
 0 10 0 23387.3 1811.14 7
 0 -10 0 23297.8 1158.3 2
 -1 10 0 2563.86 666.795 7
 -1 -10 0 2370.84 384.367 2
 1 10 0 2559.56 619.042 7
 -2 -10 0 143136 4130.22 1
 -2 10 0 144233 3973.45 2
 -2 10 0 150727 5462.71 7
 2 -10 0 141041 3443.83 4
 2 10 0 152491 5365.84 7
 2 10 0 147972 3390.51 4
 -3 -10 0 119013 3568.99 1
 3 10 0 126130 4895.59 7
 3 -10 0 136353 4944.19 9
 -3 10 0 122546 3726.69 2
 3 10 0 133575 3425.99 4
 -3 10 0 134287 5134.97 7
 -3 -10 0 132952 3598.53 6
 3 -10 0 137613 3518.1 4
 4 -10 0 25595.6 1957.34 9
 -4 10 0 25978.3 1437.47 2
 4 10 0 26087 1285.62 4
 4 10 0 26421.4 2030 7
 -4 -10 0 26657.9 1229.35 6
 5 10 0 34223.3 2373.4 7
 5 -10 0 34506.4 2354.86 9
 6 -10 0 633.43 494.969 9
 6 10 0 1393.75 543.055 7
 7 -10 0 56041.8 2643.3 8
 7 -10 0 50336.4 3086.12 9
 7 10 0 57430.7 3291.87 7
 8 -10 0 7781.16 944.366 8
 8 -10 0 7500.13 1193.74 9
 8 10 0 7093.08 1171.64 7
 9 10 0 39815.4 2880.32 7
 9 -10 0 38318.6 2837.58 9
 9 10 0 42161.1 2177.93 6
 9 -10 0 37829.8 2211.54 8
 9 10 0 39842.8 2427.95 3
 10 10 0 40919.8 3020.74 7
 10 -10 0 43863.1 2415.96 8
 10 10 0 39982.2 2476.49 3
 10 10 0 41738.8 2294.68 6
 10 -10 0 39322.2 3010.99 9
 11 10 0 9840.95 1141.99 6
 11 -10 0 10350.9 1559.3 9
 11 10 0 13816 1774.12 7
 11 10 0 10333.1 1216.01 3
 12 -10 0 68095.8 4323.18 9
 12 10 0 70279.2 3436.4 3
 12 10 0 72124.8 4348.2 7
 13 10 0 12804 1844.14 7
 13 -10 0 13928.2 1977.06 9
 14 -10 0 5839.33 1352.67 9
 14 10 0 6332.91 1321.21 7
 15 10 0 3140.79 1058.74 7
 15 -10 0 3029.03 1008.6 9
 16 10 0 14402.5 2157.1 7
 16 -10 0 17778.2 2436.89 9
 0 -11 0 135.761 133.024 2
 0 11 0 66.5456 242.688 7
 -1 -11 0 37179.7 1671.3 2
 1 11 0 35351 2395.22 7
 -1 11 0 41043.5 2593.05 7
 -2 11 0 4724.44 514.911 2
 -2 11 0 5649.95 940.625 7
 2 -11 0 3948.4 292.287 4
 2 11 0 5233.62 921.74 7
 -3 11 0 32367.6 2387.67 7
 -3 -11 0 29998 1495.53 1
 3 11 0 39046.1 1350.52 4
 3 -11 0 36727.2 2363.25 9
 3 -11 0 36189.7 1373.49 4
 3 11 0 37811.8 2502.44 7
 -3 -11 0 38691.1 1554.42 6
 4 11 0 17392.7 1014.18 4
 4 11 0 18996.6 1791.14 7
 4 -11 0 19486 1746.65 9
 -4 -11 0 20692.4 1070.71 6
 4 -11 0 18494.8 1097.04 4
 -4 11 0 17023.1 1171.89 2
 5 -11 0 19977.9 1813.31 9
 5 11 0 18858.2 1816.55 7
 -5 11 0 20620 1374.25 2
 6 -11 0 80303.3 3956.18 9
 6 11 0 77459.5 3975.22 7
 7 11 0 1537.97 648.864 7
 7 -11 0 2277.66 723.855 9
 8 11 0 76854.4 4109.42 7
 8 -11 0 80893 4197 9
 8 -11 0 74124.4 3298.36 8
 9 11 0 40654.6 2969.19 7
 9 -11 0 42135.7 2392.77 8
 9 -11 0 40621.1 3004.26 9
 10 -11 0 20076.5 1634.19 8
 10 11 0 19039.4 2052.32 7
 10 11 0 18056.6 1691.44 3
 10 -11 0 25018.8 2358.15 9
 11 -11 0 39801 3169.09 9
 11 11 0 42406.6 3213.44 7
 11 11 0 35575.7 2424.87 3
 11 -11 0 38008.1 2359.22 8
 12 11 0 776.677 497.344 3
 12 11 0 257.722 498.835 7
 12 -11 0 150.265 397.494 9
 13 11 0 38491.1 3291.27 7
 13 -11 0 39801.2 3398.49 9
 14 11 0 4249.37 1136.71 7
 14 -11 0 3463.7 1051.89 9
 15 11 0 13359.5 2056.93 7
 15 -11 0 15755.6 2263.66 9
 16 11 0 17161.2 2392.64 7
 16 -11 0 12743.5 2130.52 9
 0 12 0 18380.7 1771.62 7
 0 -12 0 19575.5 1113.19 2
 -1 12 0 1133.56 649.422 7
 -1 -12 0 804.681 291.789 2
 1 12 0 1867.16 644.34 7
 2 12 0 58006.9 3302.29 7
 -2 12 0 59235.7 3381.76 7
 -2 12 0 60005.3 2189.2 2
 -3 12 0 45822.7 2979.54 7
 -3 -12 0 45739.3 1786.24 6
 3 -12 0 39808.8 1468.25 4
 3 -12 0 41061 2673.78 9
 3 12 0 42341 1437.34 4
 -3 12 0 41804.8 1826.09 2
 3 12 0 39657.2 2712.49 7
 4 12 0 4173.72 872.523 7
 -4 -12 0 5253.11 536.962 6
 -4 12 0 5274.23 636.687 2
 4 12 0 5501.59 535.947 4
 4 -12 0 5378.28 962.398 9
 4 -12 0 3740.13 474.935 4
 -5 12 0 6515.23 764.419 2
 5 12 0 4893.93 961.404 7
 5 -12 0 5673.58 1007 9
 6 12 0 6056.52 1073.62 7
 6 -12 0 5455.7 999.603 9
 -6 12 0 3684.17 644.925 2
 7 12 0 24613.2 2268.3 7
 7 -12 0 26126.8 2301.82 9
 8 12 0 1023.07 574.803 7
 8 -12 0 1341.09 647.847 9
 8 -12 0 1311.36 493.511 8
 9 -12 0 21969.7 1747.86 8
 9 12 0 25125 2384.83 7
 9 -12 0 23626.5 2322.34 9
 10 12 0 19708.3 1822.55 3
 10 12 0 24749.7 2433.42 7
 10 -12 0 23502.8 2383.3 9
 10 -12 0 20917.2 1726.27 8
 11 12 0 15732.4 1637.62 3
 11 12 0 13977.7 1902.66 7
 11 -12 0 13043.3 1367.01 8
 11 -12 0 11950.9 1771.37 9
 12 12 0 38496.2 3239.35 7
 12 12 0 33435.3 2447.72 3
 12 -12 0 39094.1 3309.06 9
 13 12 0 6368.84 1353.64 7
 13 -12 0 6418.56 1367.16 9
 14 -12 0 4920.81 1269.26 9
 14 12 0 4829.6 1222.42 7
 15 12 0 1640.58 915.172 7
 15 -12 0 3226.9 1069.51 9
 16 -12 0 9206.28 1813.76 9
 16 12 0 11770 2009.49 7
 0 13 0 168.942 207.896 7
 0 -13 0 1150.25 281.178 2
 -1 13 0 55643 3345.41 7
 1 13 0 48995.3 3143.36 7
 -2 13 0 16368 1784.87 7
 2 13 0 15079.8 1694.9 7
 -3 13 0 21631.1 2086.61 7
 3 -13 0 22977.6 2028.52 9
 3 13 0 20764.5 808.606 4
 -3 13 0 23378.8 1285.8 2
 3 13 0 20700.9 1990.7 7
 -4 13 0 54341.3 2287.39 2
 4 -13 0 56254.9 3331.27 9
 -4 -13 0 57256.8 2091.69 6
 4 13 0 56271.2 1992.04 4
 4 13 0 52804.2 3323.62 7
 -5 13 0 3255.4 550.965 2
 5 -13 0 5012.45 997.193 9
 5 13 0 3764.13 862.913 7
 6 -13 0 65316.6 3740.35 9
 -6 13 0 60462.3 2776.36 2
 6 13 0 66167.9 3868.17 7
 7 -13 0 12833.5 1648.9 9
 7 13 0 12367.4 1656.52 7
 -7 13 0 9387.29 1080.23 2
 8 -13 0 50100.8 2784.86 8
 8 -13 0 54942.3 3534.84 9
 8 13 0 47505.2 3391.5 7
 9 -13 0 24470.8 1897.12 8
 9 13 0 24361.9 2423.68 7
 9 -13 0 22045.8 2278.31 9
 10 13 0 8238.92 1457.25 7
 10 -13 0 11243.4 1323.16 8
 10 -13 0 10329.4 1628.87 9
 11 13 0 34553.2 3047.18 7
 11 13 0 32443.1 2450.31 3
 11 -13 0 33025.5 2974.17 9
 12 13 0 -117.298 537.533 7
 12 -13 0 1134.1 739.748 9
 13 -13 0 27132.9 2935.55 9
 13 13 0 28867.4 2936.57 7
 14 13 0 824.254 586.834 7
 14 -13 0 760.766 605.809 9
 15 -13 0 14577 2219.49 9
 15 13 0 11243.8 1898.99 7
 0 14 0 32495.2 2621.29 7
 -1 14 0 4595.59 991.015 7
 1 14 0 4312.04 986.965 7
 2 14 0 16554.7 1832.59 7
 -2 14 0 16522.8 1880.99 7
 3 14 0 28127.4 2438.14 7
 3 -14 0 31535 2450.13 9
 -3 14 0 33038 2703.92 7
 -3 14 0 29837.4 1539.7 2
 -4 14 0 2253.44 411.309 2
 4 14 0 1765.57 630.02 7
 5 -14 0 11660.8 1530.81 9
 5 14 0 12994.1 1668.99 7
 -5 14 0 12434.2 1072.89 2
 6 -14 0 2166.77 802.18 9
 6 14 0 991.39 575.962 7
 -6 14 0 741.972 305.214 2
 7 14 0 23177.6 2327.89 7
 -7 14 0 20792.6 1618.73 2
 7 -14 0 26873.6 2418.29 9
 8 -14 0 5413.73 941.88 8
 8 -14 0 7315.44 1292.71 9
 8 14 0 4891.22 1105.64 7
 -8 14 0 4716.2 825.362 2
 9 -14 0 5849.67 958.471 8
 9 14 0 5109.17 1133.24 7
 9 -14 0 5843.55 1206.39 9
 10 -14 0 26629.5 2683.88 9
 10 -14 0 27093.2 2096.96 8
 10 14 0 24157.8 2561.24 7
 11 14 0 2494.46 886.969 7
 11 14 0 4720.03 977.156 3
 11 -14 0 3865.85 1058.4 9
 12 14 0 10205.2 1756.53 7
 12 -14 0 9871.35 1711.12 9
 13 -14 0 -39.044 292.437 9
 13 14 0 512.017 724.986 7
 14 14 0 5132.52 1323.64 7
 14 -14 0 4812.87 1266.42 9
 15 14 0 948.15 682.207 7
 15 -14 0 1862.79 807.055 9
 0 15 0 499.428 402.465 7
 -1 15 0 53627.9 3580.08 7
 1 15 0 55121.7 3587.06 7
 -2 15 0 6247.35 1205.23 7
 2 15 0 8534.17 1377.78 7
 3 15 0 35852.5 2865.86 7
 -3 15 0 31766.7 2752.13 7
 3 -15 0 30512.6 2536.28 9
 4 15 0 21653.9 2229.33 7
 4 -15 0 20267.5 2078.08 9
 -4 15 0 19938.3 1320.09 2
 5 15 0 13597 1769.51 7
 5 -15 0 10933 1578.96 9
 6 -15 0 63687.4 3973.93 9
 6 15 0 62815 3999.93 7
 7 -15 0 800.776 478.88 9
 7 15 0 978.207 544.546 7
 8 15 0 33782.4 3009.54 7
 8 -15 0 38299.5 3121.49 9
 9 -15 0 16416.6 1649.22 8
 9 -15 0 16330.3 2033.44 9
 9 15 0 15367 2038.24 7
 10 -15 0 5531.16 972.026 8
 10 -15 0 5075.39 1205.28 9
 10 15 0 3669.72 1036.24 7
 11 15 0 28028 2463.36 3
 11 15 0 28242.9 2898.21 7
 11 -15 0 27257.4 2810.85 9
 12 15 0 337.074 495.76 7
 12 -15 0 85.5869 539.341 9
 13 15 0 21603.6 2675.1 7
 13 -15 0 22070.6 2672.96 9
 14 -15 0 4205.9 1224.85 9
 14 15 0 5956.5 1501.87 7
 0 16 0 5484.81 1158.18 7
 -1 16 0 1948.47 740.488 7
 1 16 0 2031.18 788.297 7
 -2 16 0 4845.29 1060.2 7
 2 16 0 4447.01 1040.98 7
 -3 16 0 1775.34 730.478 7
 3 16 0 4112.4 1053.95 7
 3 -16 0 4037.82 1043.74 9
 4 16 0 18520.1 2129.83 7
 4 -16 0 22587.2 2269.75 9
 5 16 0 7807.12 1418.86 7
 5 -16 0 10644.9 1559.27 9
 6 16 0 824.719 637.553 7
 6 -16 0 600.339 503.746 9
 7 16 0 11138.1 1695.22 7
 7 -16 0 11311.1 1724.28 9
 8 16 0 -1005.88 607.33 7
 8 -16 0 697.635 526.513 9
 9 16 0 12569.6 1923.43 7
 9 -16 0 16739 2132.58 9
 9 -16 0 16661.1 1717.11 8
 10 -16 0 14044.2 1581.36 8
 10 16 0 15804.2 2175.64 7
 10 -16 0 17484.6 2239.63 9
 11 16 0 605.352 673.675 7
 11 -16 0 49.1346 450.473 9
 11 16 0 1392.06 636.931 3
 12 16 0 5859.38 1393.63 7
 12 -16 0 3826.72 1109.79 9
 13 16 0 985.818 806.629 7
 13 -16 0 160.932 649.455 9
 14 16 0 3760.72 1168.18 7
 0 17 0 -121.359 498.891 7
 1 17 0 37338.2 3115.5 7
 -1 17 0 33863.3 3009.61 7
 2 -17 0 20270.1 2173.6 9
 -2 17 0 19138.2 2242.93 7
 2 17 0 15425.4 2033.73 7
 3 17 0 30816.9 2850.65 7
 3 -17 0 27734.8 2601.93 9
 -3 17 0 27109.4 2750.05 7
 4 -17 0 29146.8 2700.67 9
 4 17 0 27938.1 2753.51 7
 5 -17 0 3750.73 985.312 9
 5 17 0 3913.69 1060.26 7
 6 -17 0 50338.8 3648.74 9
 6 17 0 44973.1 3578.23 7
 7 17 0 2756.93 953.355 7
 7 -17 0 1270.93 680.782 9
 8 -17 0 37734.9 3236.76 9
 8 17 0 33932.8 3196.05 7
 9 -17 0 16670.5 1757.77 8
 9 17 0 15173.2 2168.45 7
 9 -17 0 16934.5 2171.15 9
 10 -17 0 11896.4 1897.35 9
 10 17 0 12775.7 2031.37 7
 11 17 0 32778.9 2812.47 3
 11 -17 0 37339.8 3466.87 9
 11 17 0 32582.1 3320.38 7
 12 17 0 838.096 728.636 7
 12 -17 0 3125.96 1143.69 9
 13 -17 0 18663.7 2551.73 9
 13 17 0 17532.2 2524.84 7
 0 18 0 16047.7 2116.42 7
 1 18 0 4960.6 1158.37 7
 -1 18 0 3760.36 1029.21 7
 2 18 0 783.239 589.504 7
 2 -18 0 329.583 460.524 9
 -2 18 0 1362.87 627.692 7
 3 -18 0 2029.15 823.292 9
 3 18 0 684.524 588.349 7
 -3 18 0 1952.08 772.667 7
 4 -18 0 2662.94 897.507 9
 4 18 0 6571.54 1402.92 7
 5 18 0 1168.6 617.98 7
 5 -18 0 3669.07 1050.86 9
 6 -18 0 242.55 420.701 9
 6 18 0 222.651 334.564 7
 7 -18 0 -439.471 541.61 9
 7 18 0 97.8609 357.594 7
 8 18 0 1849.66 792.51 7
 8 -18 0 -156.599 517.217 9
 9 -18 0 4937.13 980.509 8
 9 -18 0 5619.09 1297.49 9
 9 18 0 6784.11 1482.44 7
 10 18 0 5940.26 1367.22 7
 10 -18 0 5757.99 1413.36 9
 11 18 0 932.46 726.299 7
 11 -18 0 605.202 619.257 9
 12 -18 0 -494.791 608.588 9
 12 18 0 1209.28 776.594 7
 0 19 0 228.832 443.523 7
 -1 19 0 38267.6 3443.37 7
 1 19 0 38953 3449.71 7
 2 19 0 14063.9 2074.33 7
 -2 19 0 14089.6 2089.94 7
 2 -19 0 20555.5 2332.59 9
 3 -19 0 34294.4 3138.62 9
 3 19 0 39547.9 3443.16 7
 -3 19 0 32008.6 3210.16 7
 4 -19 0 48977.1 3715.04 9
 4 19 0 39159.6 3534.58 7
 5 19 0 2766.3 997.624 7
 5 -19 0 2936.61 956.675 9
 6 -19 0 19476.4 2414.46 9
 6 19 0 27589.9 2928.8 7
 7 19 0 32.3025 538.809 7
 7 -19 0 2215.83 930.599 9
 8 19 0 23777.5 2810.6 7
 8 -19 0 26693.2 2834.74 9
 9 -19 0 14071.3 2123.38 9
 9 19 0 13279.2 2149.7 7
 9 -19 0 13230.9 1667.52 8
 10 -19 0 11748.7 1997.21 9
 10 19 0 13934.3 2204.11 7
 11 19 0 31823.9 3422.66 7
 11 -19 0 32344 3382.91 9
 0 20 0 7386.02 1547.76 7
 1 20 0 131.011 466.229 7
 -1 20 0 1723.3 902.621 7
 2 20 0 4498.27 1193.19 7
 -2 20 0 2103.71 845.443 7
 2 -20 0 4181.85 1135.31 9
 3 -20 0 1107.69 746.25 9
 3 20 0 1714.58 915.546 7
 -3 20 0 322.351 388.962 7
 4 20 0 533.577 585.8 7
 4 -20 0 2600.95 1008.04 9
 5 20 0 629.237 554.061 7
 5 -20 0 566.012 475.659 9
 6 20 0 704.907 640.465 7
 6 -20 0 236.272 370.122 9
 7 -20 0 -85.4772 442.417 9
 7 20 0 928.58 677.903 7
 8 20 0 456.726 474.032 7
 8 -20 0 1930.82 834.715 9
 9 -20 0 1717.42 826.303 9
 9 20 0 747.522 541.571 7
 10 20 0 782.635 748.291 7
 10 -20 0 519.235 518.088 9
 0 21 0 594.459 590.957 7
 -1 21 0 19074.1 2569.18 7
 1 21 0 24473.7 2874.33 7
 2 21 0 7213.81 1572.65 7
 2 -21 0 10293.1 1727.16 9
 -2 21 0 6053.77 1449.16 7
 3 21 0 12568.9 2098.94 7
 3 -21 0 13150.8 2041.17 9
 4 21 0 24129.4 2906.4 7
 4 -21 0 33935.4 3275.64 9
 5 21 0 290.656 536.916 7
 5 -21 0 -302.616 503.062 9
 6 21 0 14032.3 2249.87 7
 6 -21 0 21206.4 2600.26 9
 7 -21 0 1974.62 926.139 9
 7 21 0 711.505 565.698 7
 8 -21 0 12019 2003.51 9
 8 21 0 15268 2380.58 7
 9 21 0 10254.9 2041.57 7
 9 -21 0 8624.69 1786.96 9
 0 22 0 2661.61 1001.4 7
 -1 22 0 4390.57 1313.08 7
 1 -22 0 3337.79 1196.99 9
 1 22 0 2324.12 955.744 7
 2 -22 0 265.896 592.945 9
 2 22 0 1007.99 693.319 7
 -2 22 0 2276.98 938.175 7
 3 -22 0 -158.517 603.493 9
 3 22 0 352.02 439.486 7
 4 22 0 1274.45 941.185 7
 4 -22 0 1173.41 818.484 9
 5 -22 0 1289.24 802.013 9
 5 22 0 -1214.78 732.71 7
 6 22 0 591.625 634.223 7
 6 -22 0 137.287 348.481 9
 7 22 0 -402.287 658.503 7
 7 -22 0 -65.579 470.463 9
 8 22 0 1534.25 859.335 7
 8 -22 0 895.922 589.229 9
 0 23 0 304.405 529.638 7
 -1 23 0 17227.6 2606.49 7
 1 23 0 21761 2894.26 7
 1 -23 0 20751.4 2764.73 9
 2 -23 0 4873.7 1347.47 9
 2 23 0 4993.51 1486.81 7
 -2 23 0 3437.21 1167.1 7
 3 23 0 15366.6 2460.27 7
 3 -23 0 19453.1 2600.63 9
 4 23 0 20959.3 2869.16 7
 4 -23 0 20826.6 2712.45 9
 5 23 0 3642.49 1213.43 7
 5 -23 0 2003.06 926.991 9
 6 -23 0 20849.8 2744.91 9
 6 23 0 16774.4 2562.82 7
 0 24 0 852.682 733.864 7
 1 24 0 617.177 582.776 7
 1 -24 0 -838.108 664.667 9
 -1 24 0 -393.631 555.388 7
 2 24 0 609.484 540.215 7
 -2 24 0 -171.064 714.093 7
 2 -24 0 220.946 432.466 9
 3 24 0 64.5916 388.729 7
 3 -24 0 477.486 545.502 9
 4 24 0 1488.8 865.235 7
 19 0 -1 1658.81 797.453 9
 18 0 -1 -529.942 728.139 9
 17 0 -1 107.122 395.965 9
 16 0 -1 -284.48 353.643 9
 15 0 -1 7.64978 398.997 9
 14 0 -1 -111.414 336.254 9
 13 0 -1 63.2329 446.883 9
 12 0 -1 223.789 260.231 9
 11 0 -1 28.1579 330.344 9
 -11 0 1 79.8352 95.0812 5
 10 0 -1 -119.676 294.865 9
 -10 0 1 -24.0139 56.2401 5
 9 0 -1 342.401 248.273 9
 -9 0 1 106.352 84.8363 5
 8 0 -1 7.88717 210.388 9
 -7 0 1 169.868 162.599 4
 7 0 -1 -22.5027 194.906 9
 -6 0 1 74.5421 114.093 3
 6 0 -1 133.836 107.789 9
 -6 0 1 126.521 151.273 4
 -5 0 1 2.46582 68.2297 3
 5 0 -1 258.185 187.388 9
 -5 0 1 308.056 180.738 4
 4 0 -1 338.071 167.668 4
 -4 0 1 472.67 176.233 4
 4 0 -1 181.463 133.609 9
 -4 0 1 7.12411 94.6548 9
 -3 0 1 307.861 144.045 4
 -3 0 1 47.1905 63.3861 9
 3 0 -1 212.122 122.958 4
 3 0 -1 209.8 104.141 9
 2 0 1 68.2322 88.7701 9
 -2 0 -1 45.697 50.4871 5
 -3 0 -1 61.844 76.0306 9
 3 0 1 131.979 122.119 9
 -3 0 -1 -41.152 52.2373 5
 -4 0 -1 150.699 58.3569 3
 -4 0 -1 -26.4796 64.2419 5
 4 0 1 -20.7235 97.446 9
 5 0 1 163.182 158.525 9
 -5 0 -1 16.5293 61.3876 5
 -5 0 -1 175.84 77.2263 3
 6 0 1 -118.231 226.722 9
 -6 0 -1 -13.3471 58.7182 3
 -6 0 -1 116.77 144.515 5
 7 0 1 -88.702 264.869 9
 -7 0 -1 14.0061 92.3729 3
 -7 0 -1 136.041 130.199 5
 8 0 1 -2.05185 163.286 9
 -8 0 -1 119.871 111.648 5
 -8 0 -1 23.8226 67.9657 3
 -9 0 -1 186.1 171.413 5
 9 0 1 20.9126 236.285 9
 -10 0 -1 -67.972 105.151 5
 10 0 1 -74.1407 262.688 9
 -11 0 -1 150.098 97.4336 5
 11 0 1 252.072 210.946 9
 12 0 1 208.356 364.851 9
 13 0 1 867.646 512.662 9
 14 0 1 284.484 428.656 9
 15 0 1 277.051 375.901 9
 16 0 1 13.8353 445.736 9
 17 0 1 -82.5618 314.947 9
 18 0 1 -920.306 662.062 9
 19 -1 -1 35002.2 3498.99 9
 19 1 -1 38587.6 3639.78 9
 18 1 -1 2702.71 879.596 9
 18 -1 -1 3358.79 1029.06 9
 17 -1 -1 34079.5 3164.15 9
 17 1 -1 30643.1 3017.55 9
 16 -1 -1 5883.45 1250.2 9
 16 1 -1 6189.01 1354.59 9
 15 1 -1 92372.5 5041.44 9
 15 -1 -1 94863.2 5156.92 9
 14 -1 -1 35370.6 2904.51 9
 14 1 -1 38677.5 3001.09 9
 13 1 -1 97268.1 4806.24 9
 13 -1 -1 105532 5009.14 9
 12 1 -1 34765.4 2581.89 9
 12 -1 -1 39845.2 2793.12 9
 -11 -1 1 18955.8 1013.62 5
 11 -1 -1 20568 1877.09 9
 11 1 -1 17899.7 1728.26 9
 10 1 -1 142337 4729.43 9
 10 -1 -1 143438 4796.35 9
 9 1 -1 14034.2 1359.85 9
 9 -1 -1 15560.2 1450.38 9
 -9 1 1 12366.1 524.427 5
 8 1 -1 137602 4692.51 9
 -8 1 1 127846 2965.24 5
 7 -1 -1 54272.9 2511.19 9
 -7 1 1 50224.9 2440.55 4
 -7 -1 1 52218.4 2468.65 4
 7 1 -1 51878.1 2434.72 9
 6 1 -1 63998.1 2593.41 9
 -6 -1 1 65153.1 2313.98 3
 6 -1 -1 70276.3 2739.28 9
 -6 -1 1 66279.2 2662.95 4
 -6 1 1 65559.8 2654.31 4
 -5 -1 1 302162 7365.34 4
 5 -1 -1 292272 7340.54 9
 -5 1 1 296517 7342.66 4
 -5 -1 1 282830 6909.83 3
 5 1 -1 292211 7256.35 9
 -4 -1 1 180.659 130.513 4
 4 -1 -1 444.612 163.402 4
 -4 1 1 570.574 178.407 4
 -4 -1 1 211.504 103.916 3
 4 -1 -1 300.249 140.685 9
 4 1 -1 219.999 121.674 9
 -4 1 1 323.466 141.724 9
 -4 -1 1 578.809 183.277 9
 4 1 -1 622.865 168.243 4
 3 -1 -1 160330 4192.97 4
 3 -1 -1 159187 4163.95 9
 -3 -1 1 169810 4152.26 9
 -3 1 1 168212 4237.63 4
 -3 -1 1 172742 4243.9 4
 3 1 -1 172602 4095.53 3
 3 1 -1 165804 4122.45 9
 -3 1 1 170660 4112.56 8
 -3 -1 1 164441 4094.72 3
 3 1 -1 167702 4214.07 4
 -3 1 1 173194 4204.9 9
 2 1 1 98411.4 2761.15 9
 -2 1 -1 92444.5 2720.19 9
 2 -1 1 99543.8 2490.49 5
 -2 -1 -1 98943.5 2785.51 9
 2 -1 1 95372.7 2751.07 9
 -2 1 -1 99021.2 2479.06 5
 -3 -1 -1 37779.8 1615.35 9
 3 -1 1 38758.5 1281.67 5
 -3 1 -1 36185.7 1070 8
 3 -1 1 35643.9 1586.78 9
 -3 1 -1 38434.4 1602.44 9
 3 1 1 35661.2 1562.47 9
 -3 1 -1 39224.7 1284.25 5
 4 1 1 345180 8387.68 9
 -4 1 -1 347638 7661.04 5
 4 -1 1 337572 8425.22 9
 5 -1 1 75344.6 2942.14 9
 -5 1 -1 75802 2250.65 5
 5 1 1 75770.5 2925.72 9
 6 1 1 86943.8 3387.5 9
 6 -1 1 86127.3 3409.04 9
 -6 1 -1 87511.4 2573.08 5
 -7 1 -1 283278 6417.5 5
 7 -1 1 272207 7727.73 9
 -7 1 -1 252421 6085.83 3
 7 1 1 262542 7603.18 9
 8 1 1 29835.1 2064.92 9
 -8 -1 -1 29985.9 1539.89 5
 8 -1 1 32940 2192.21 9
 -8 1 -1 29539.1 1284.56 3
 9 -1 1 146329 5568.04 9
 9 1 1 145566 5489.49 9
 -9 -1 -1 152034 4421.21 5
 -9 1 -1 155777 4164.12 5
 -9 1 -1 150692 4018.66 3
 -10 1 -1 28284.9 1361.05 3
 10 -1 1 32770.1 2413.97 9
 -10 -1 -1 32433.5 1654.91 5
 10 1 1 31568.3 2352.49 9
 -10 1 -1 33351.1 1502.8 5
 11 -1 1 39371.5 2801.93 9
 -11 1 -1 38455.8 1691.33 5
 11 1 1 39630 2784.68 9
 -11 -1 -1 41191.6 1935.87 5
 12 1 1 57971.7 3594.43 9
 -12 -1 -1 60058.7 2464.37 5
 12 -1 1 55081.7 3536.19 9
 13 1 1 23791.5 2342.3 9
 13 -1 1 24531.4 2407.4 9
 14 1 1 84210.5 4809.89 9
 14 -1 1 85475.2 4928.79 9
 15 -1 1 5277.85 1198.33 9
 15 1 1 5388.6 1199.99 9
 16 -1 1 28133.5 2906.07 9
 16 1 1 26641 2831.72 9
 17 1 1 11957 1971.48 9
 17 -1 1 13263.7 2064.92 9
 18 -1 1 23744.3 2904.97 9
 18 1 1 20650.9 2670.83 9
 19 -2 -1 -310.28 412.89 9
 18 -2 -1 -110.717 533.673 9
 18 2 -1 181.978 464.649 7
 18 2 -1 218.659 365.298 9
 17 -2 -1 672.949 654.996 9
 17 2 -1 676.317 681.112 9
 16 2 -1 2250.74 833.527 9
 16 -2 -1 2266.53 839.963 9
 15 -2 -1 6350.86 1247.91 9
 15 2 -1 5870.94 1206.52 9
 14 -2 -1 1959.71 741.242 9
 14 2 -1 795.5 476.343 9
 13 -2 -1 8242.92 1323.41 9
 13 2 -1 10081.1 1443.4 9
 12 2 -1 -177.219 358.902 9
 12 -2 -1 -152.059 244.591 9
 11 2 -1 -76.3247 253.75 9
 11 -2 -1 348.434 265.977 9
 10 -2 -1 2264.33 612.215 9
 10 2 -1 2594.2 607.921 9
 9 -2 -1 36787.7 2318.71 9
 9 2 -1 32501.2 2121.7 9
 8 -2 -1 262.309 165.708 9
 8 2 -1 259.99 248.049 9
 7 -2 -1 19265.1 1443.12 9
 -7 -2 1 17972.5 1375.9 4
 -7 2 1 17150.4 1355.4 4
 7 2 -1 19169.8 1389.47 9
 6 2 -1 45000.5 1813.01 3
 -6 -2 1 44591.7 2111.82 4
 -6 -2 1 46953 1901.09 3
 6 -2 -1 46423.1 2181.56 9
 6 2 -1 43540.6 2078.19 9
 -6 2 1 43632.3 2100.46 4
 -5 -2 1 2454.03 369.363 3
 -5 -2 1 2382.73 414.856 4
 -5 2 1 2409.18 422.183 4
 5 2 -1 2704.91 435.033 9
 5 2 -1 2222.67 342.817 3
 5 -2 -1 2494.09 427.745 9
 -5 2 1 2383.89 362.803 8
 -4 -2 1 6078.2 553.437 3
 -4 -2 1 7262.85 630.191 9
 4 2 -1 6124.26 577.134 9
 -4 -2 1 5836.93 572.671 4
 4 2 -1 6365.78 592.792 4
 4 -2 -1 5866.34 597.872 9
 -4 2 1 5905.46 525.91 8
 -4 2 1 5881.91 599.197 9
 4 2 -1 6561.16 555.687 3
 4 -2 -1 6189.25 595.819 4
 -4 2 1 6152.09 587.833 4
 -3 2 1 25411.7 1065.56 8
 3 2 -1 21013.6 1023.81 4
 3 2 -1 25034.8 1095.59 3
 3 -2 -1 23908 1071.57 4
 3 2 -1 21481.3 1025.1 6
 3 -2 -1 22551.9 1033.54 8
 -3 -2 1 23219 1057.85 4
 -3 -2 1 24692.2 1089.39 9
 3 -2 -1 23312.7 1114.67 9
 -3 2 1 23165.8 1129.44 9
 -3 2 1 22345.4 1049.85 4
 3 2 -1 23746.3 1103.4 7
 -2 2 1 31621.2 1143.65 4
 2 -2 -1 33360.4 1202.76 8
 2 2 -1 29912.4 1151.2 6
 -2 -2 1 33035.6 1145.4 4
 2 -2 -1 32258.2 1222.02 9
 2 2 -1 33937.6 1212.91 7
 1 2 1 891.293 171.644 7
 1 -2 1 940.783 177.465 9
 2 -2 1 4590.88 373.533 5
 2 2 1 5100.95 484.421 7
 -2 2 -1 4937.21 485.041 9
 -2 -2 -1 5325.28 506.137 9
 -2 -2 -1 4404.4 446.432 7
 2 -2 1 5020.61 483.434 9
 3 -2 1 1709.15 317.417 9
 3 2 1 1721.51 321.213 9
 -3 2 -1 1616.29 319.339 9
 3 2 1 1189.88 259.532 7
 3 -2 1 1656.02 233.065 5
 -3 2 -1 1850.23 242.863 5
 -3 -2 -1 2087.14 355.837 9
 3 -2 1 1649.73 184.801 8
 4 -2 1 6168.58 473.396 5
 4 2 1 7133.18 727.905 9
 -4 2 -1 6889.52 489.08 5
 4 -2 1 5255.37 632.129 9
 -4 2 -1 6299.88 426.783 8
 4 2 1 6569.62 448.518 3
 5 -2 1 6038.33 490.329 5
 5 2 1 6736.1 772.412 9
 5 -2 1 7498.59 830.102 9
 5 2 1 6092.56 453.815 3
 -5 2 -1 7436.16 516.537 8
 -5 2 -1 7679.54 538.738 5
 6 2 1 9992.66 631.727 3
 -6 2 -1 11697.3 728.518 8
 6 2 1 11277.5 1075.25 9
 -6 2 -1 12296.4 726.711 5
 6 -2 1 11316.1 1112.89 9
 7 2 1 793.138 374.364 9
 -7 2 -1 731.66 211.757 8
 7 -2 1 700.008 366.296 9
 -7 2 -1 745.332 181.882 5
 8 2 1 13361 1330.64 9
 8 -2 1 12828.4 1334.77 9
 -8 2 -1 10456.3 727.526 5
 -9 2 -1 401.531 149.002 5
 9 2 1 378.777 357.722 9
 9 -2 1 407.437 422.276 9
 -9 2 -1 -94.3063 145.701 3
 -10 2 -1 414.763 180.705 5
 -10 2 -1 1.76512 109.255 3
 10 -2 1 -161.834 259.859 9
 10 2 1 357.937 310.241 9
 -10 -2 -1 216.388 163.127 5
 11 -2 1 741.123 406.014 9
 -11 -2 -1 954.81 320.037 5
 11 2 1 141.356 291.605 9
 12 2 1 8594.91 1354.78 9
 -12 -2 -1 10214.1 976.676 5
 12 -2 1 10186 1488.98 9
 13 -2 1 15370.7 1893.64 9
 13 2 1 11301.7 1644.03 9
 14 -2 1 620.48 634.606 9
 14 2 1 817.819 523.032 9
 15 -2 1 655.761 587.239 9
 15 2 1 -65.1601 385.352 9
 16 2 1 919.318 514.001 9
 16 -2 1 510.904 586.731 9
 17 -2 1 1343.94 613.125 9
 17 2 1 712.333 544.846 7
 17 2 1 -37.2319 503.868 9
 18 -2 1 1950.88 881.139 9
 18 3 -1 2538.82 950.938 7
 18 -3 -1 2637.32 1068.51 9
 17 -3 -1 30316.7 3052.3 9
 17 3 -1 32447.3 3181.91 7
 16 3 -1 85.634 437.273 7
 16 -3 -1 -84.4838 419.412 9
 16 3 -1 372.475 391.94 9
 15 3 -1 79574.8 4618.16 9
 15 -3 -1 83403.3 4820.38 9
 15 3 -1 75669.2 4620.11 7
 14 -3 -1 20814.4 2217.5 9
 14 3 -1 17768.5 2051.46 9
 13 3 -1 56618.4 3533.67 9
 13 -3 -1 55499.3 3577.78 9
 12 3 -1 89036.9 4404.83 9
 12 -3 -1 99783.4 4732.11 9
 11 -3 -1 8634.44 1247.67 9
 11 3 -1 10438.2 1327.58 9
 10 3 -1 130883 5037.29 9
 10 -3 -1 129526 5168.7 9
 9 3 -1 17380.4 1536.06 9
 9 -3 -1 18620.2 1654.77 9
 8 3 -1 81828.8 3467.14 9
 8 -3 -1 84392.8 3606.41 9
 -7 3 1 50756.5 2497.82 4
 7 3 -1 53301.4 2548.12 9
 -7 -3 1 57768.3 2589.69 4
 7 3 -1 53879.2 2197.07 3
 7 -3 -1 59711.8 2733.87 9
 6 -3 -1 86763.5 3262.93 9
 6 3 -1 83707.7 2837.8 3
 -6 3 1 90319 3210.66 4
 -6 -3 1 81000.4 3106.09 4
 6 3 -1 85053.1 3151.84 9
 5 3 -1 272456 6841.14 7
 5 -3 -1 253194 6794.4 9
 5 -3 -1 264566 6449.46 8
 5 3 -1 265331 6501.76 3
 -5 3 1 242689 6607.07 4
 -5 -3 1 262608 6655.4 4
 4 3 -1 2266.67 349.383 6
 4 3 -1 2148.92 368.654 7
 -4 3 1 2420.86 354.9 8
 4 -3 -1 1966.41 317.338 8
 4 3 -1 1976.12 327.947 3
 -4 -3 1 2135.03 342.551 4
 -4 3 1 2423.88 369.888 4
 4 -3 -1 2090.27 380.972 9
 -4 -3 1 2124.49 359.374 9
 4 -3 -1 1868.61 327.433 4
 4 3 -1 2460.64 364.314 4
 3 -3 -1 55619.9 1995.99 9
 -3 -3 1 49163.2 1731.17 6
 -3 -3 1 52327.4 1771.53 4
 3 3 -1 49044 1761.31 6
 3 3 -1 53478.3 1788.37 4
 -3 -3 1 53395.1 1952.9 7
 3 -3 -1 52065.5 1785.56 4
 -3 3 1 55591.5 1827.48 4
 3 -3 -1 53849.5 1832.96 8
 -3 3 1 51091.4 1959.8 9
 3 3 -1 50368.4 1906.9 7
 -2 -3 1 57449.8 1803.58 6
 2 -3 -1 59406.3 1749.31 4
 2 3 -1 58878.3 1936.48 7
 2 3 -1 59258.3 1730.82 4
 -2 3 1 56123.1 1718.88 4
 2 -3 -1 58521.7 2057.7 7
 -2 -3 1 59798.4 1719.85 4
 2 -3 -1 58216 1969.46 9
 -2 -3 1 58374.7 1925.53 7
 -1 -3 1 101699 2811.65 2
 -1 -3 1 110727 2549.37 4
 -1 3 1 104533 2565.58 4
 1 -3 -1 110273 2562.1 4
 1 3 -1 104621 2872.24 7
 1 3 -1 105777 2542.01 4
 -1 -3 1 106241 2790.51 1
 -1 3 1 110154 3036.82 7
 0 -3 1 125233 3141.82 2
 0 3 1 123883 3345.04 7
 0 3 -1 126018 3287.08 7
 -1 -3 -1 6624 546.127 7
 1 -3 1 7049.98 556.914 9
 -1 3 -1 6501.74 538.932 9
 1 3 1 7345.27 578.737 7
 1 -3 1 5703.01 531.069 7
 -1 3 -1 6907.03 503.547 2
 2 3 1 160585 4233.73 7
 2 -3 1 154100 4193.77 9
 -2 3 -1 158859 4248.59 9
 -2 -3 -1 153313 4199.17 7
 3 -3 1 735.647 169.726 5
 3 -3 1 643.144 221.732 9
 3 3 1 327.908 189.203 7
 4 -3 1 149290 4437.22 9
 4 3 1 144656 4351.35 7
 4 -3 1 146368 3704.15 5
 4 -3 1 140685 3548.57 8
 5 3 1 70254.6 2162.87 3
 5 -3 1 68722.7 2859.66 9
 5 -3 1 68122.7 2127.16 5
 5 3 1 66458.1 2759.89 7
 6 -3 1 170549 4406.39 5
 6 3 1 180416 4504.06 3
 6 3 1 177901 5492.52 7
 6 -3 1 172811 5542.84 9
 6 3 1 184383 5573.56 9
 7 -3 1 144075 4999.94 9
 -7 3 -1 139695 3809.63 8
 7 3 1 135642 4813.99 9
 7 3 1 132279 3707.86 3
 8 3 1 20109 1667.17 9
 8 -3 1 20136.3 1728.51 9
 9 3 1 225697 7345.02 9
 9 -3 1 227509 7477.25 9
 10 3 1 16321.3 1678.45 9
 10 -3 1 16702.9 1733.03 9
 11 3 1 39237.5 2753.57 9
 11 -3 1 32600 2585.39 9
 12 -3 1 31816.6 2672.06 9
 -12 -3 -1 31818.6 1920.55 5
 12 3 1 36247.9 2786.9 9
 13 3 1 25242.1 2444.77 9
 13 -3 1 24536.7 2402.85 9
 14 3 1 73519.7 4453.28 7
 14 3 1 76763.5 4521.19 9
 14 -3 1 72714.8 4503.76 9
 15 3 1 352.041 385.412 7
 15 3 1 1081.84 652.694 9
 15 -3 1 236.293 434.852 9
 16 -3 1 44330.5 3740.32 9
 16 3 1 43804.7 3671.21 7
 17 -3 1 12971 2068.96 9
 17 3 1 11153.6 1893.93 7
 19 4 -1 1104.77 754.738 6
 18 -4 -1 2008.67 894.054 9
 18 4 -1 4318.5 1220.95 7
 17 4 -1 374.239 548.462 7
 17 -4 -1 1318.92 770.608 9
 16 -4 -1 1233.23 577.568 9
 16 4 -1 360.566 439.545 7
 15 4 -1 4717.57 1124.46 7
 15 -4 -1 6093.24 1294.6 9
 14 4 -1 1868.29 667.596 7
 14 -4 -1 3161.03 902.898 9
 13 4 -1 382.256 329.498 7
 13 -4 -1 688.554 412.936 9
 12 -4 -1 978.274 492.973 9
 12 4 -1 1469.02 502.397 7
 11 -4 -1 9996.4 1342.02 9
 11 4 -1 9031.87 1253.38 7
 10 -4 -1 606.201 353.353 9
 10 4 -1 296.33 277.732 7
 9 -4 -1 14322.5 1445.27 9
 9 4 -1 12221.1 1067.22 3
 9 4 -1 12570.7 1330.16 7
 8 4 -1 239.752 169.846 3
 8 -4 -1 547.593 300.989 9
 8 4 -1 226.734 148.478 7
 7 4 -1 31390.7 1941.1 7
 7 -4 -1 33386.6 2023.31 9
 7 4 -1 36060.6 1764.95 3
 -7 -4 1 27946.7 1765.99 4
 -7 4 1 32207.6 1900.06 4
 6 4 -1 50888.3 2310.25 7
 6 4 -1 51376.7 2048.16 3
 6 4 -1 46777.6 2004.65 6
 -6 4 1 49964.4 2173.95 4
 6 -4 -1 50637.3 2340.45 9
 -6 -4 1 49864.9 2177.17 4
 5 -4 -1 8924.4 752.077 8
 5 4 -1 7855.27 720.513 6
 -5 -4 1 7723.12 732.396 4
 5 4 -1 7619.25 805.969 7
 5 4 -1 7624.69 723.853 3
 5 -4 -1 8170.96 856.137 9
 -5 4 1 7591.69 731.989 4
 -4 4 1 14968.3 945.097 4
 4 -4 -1 17474.2 1003.77 4
 4 4 -1 15238.2 948.77 4
 4 4 -1 13617.1 893.961 6
 -4 -4 1 16001.3 960.043 4
 4 -4 -1 16758.4 1126.9 9
 4 4 -1 13539.4 1024.14 7
 4 -4 -1 14886.3 960.8 8
 3 -4 -1 7038.38 691.56 9
 -3 -4 1 7640.97 693.527 7
 3 -4 -1 7990.12 596.843 4
 -3 -4 1 9095.57 634.57 6
 3 4 -1 7956.26 587.605 4
 3 4 -1 8676.95 731.856 7
 -3 -4 1 8767.54 605.861 4
 -3 4 1 9191.04 638.709 4
 -2 -4 1 28837.8 1054.46 4
 2 4 -1 31332.2 1102.23 4
 2 4 -1 30557.8 1112.83 1
 -2 4 1 28316.2 1436.24 7
 -2 -4 1 29488.3 1358.95 7
 2 -4 -1 28839.2 1363.74 9
 2 -4 -1 32326.5 1509.49 7
 2 -4 -1 27794.5 1076.2 4
 -2 4 1 28897.5 1075 4
 2 4 -1 25712.6 1300.06 7
 1 4 -1 129075 3589.77 7
 1 -4 -1 134370 3710.46 7
 -1 -4 1 130343 3418.21 2
 -1 -4 1 137035 3633.66 7
 1 -4 -1 126774 3000.74 4
 -1 -4 1 135302 3006.72 4
 -1 4 1 120937 3001.28 4
 -1 4 1 131793 3723.93 7
 -1 -4 1 130499 3377.33 1
 0 4 1 34526.3 1514.53 7
 0 -4 -1 36655.5 1529.15 7
 0 4 -1 35568.6 1487.91 7
 0 -4 1 33564.6 1270.66 2
 0 4 -1 33438.1 1279.02 2
 0 -4 1 36168 1499.69 7
 -1 -4 -1 224.223 130.919 7
 1 -4 1 304.609 160.692 7
 1 -4 1 459.135 183.434 9
 -1 4 -1 449.966 199.543 7
 1 4 1 724.991 268.315 7
 -1 4 -1 301.293 124.185 2
 2 -4 1 6474.12 644.868 9
 2 4 1 6403.45 645.346 7
 -2 4 -1 6596.94 654.887 9
 3 -4 1 21712.5 1315.18 9
 3 4 1 22548.3 1335.9 7
 4 -4 1 2640.83 350.906 5
 4 -4 1 2515.31 476.339 9
 4 -4 1 2804.23 326.286 8
 4 4 1 2289.8 449.026 7
 5 -4 1 1924.3 446 9
 5 -4 1 2010.88 315.719 5
 5 -4 1 2102.5 306.36 8
 5 4 1 1470.63 393.016 7
 6 4 1 25946.3 1734.87 7
 6 4 1 26179.1 1282.24 3
 6 -4 1 24393.5 1736.56 9
 6 -4 1 23951.1 1174.26 5
 7 -4 1 5576.22 889.962 9
 7 -4 1 4414.59 463.168 5
 7 4 1 5544.69 815.279 7
 7 4 1 6334.88 609.704 3
 8 4 1 23583.7 1278.63 3
 8 4 1 25469.4 1909.45 7
 8 -4 1 25708.4 2002.29 9
 9 4 1 14547.7 1007.76 3
 9 4 1 15387.7 1566.13 7
 9 -4 1 16040 1634.71 9
 10 -4 1 63.9097 279.578 9
 10 4 1 -175.738 376.497 7
 11 -4 1 586.945 310.109 9
 11 4 1 38.0694 254.252 7
 12 -4 1 491.516 362.354 9
 12 4 1 329.573 319.574 7
 13 -4 1 15389.6 1940.28 9
 13 4 1 13116.5 1747.03 7
 14 -4 1 -135.455 313.28 9
 14 4 1 716.672 497.367 7
 15 -4 1 49.0024 371.36 9
 15 4 1 -31.9145 390.368 7
 16 -4 1 562.963 580.111 9
 16 4 1 -74.2477 414.417 7
 17 -4 1 3530.99 1149.4 9
 17 4 1 1413.76 627.33 7
 18 5 -1 5421.77 1389.14 7
 18 5 -1 9367.96 1595.42 6
 18 -5 -1 9100.59 1771.2 9
 17 5 -1 21452.4 2402.15 6
 17 5 -1 26519.6 2869.49 7
 16 5 -1 720.435 465.449 7
 16 -5 -1 191.569 357.6 9
 15 -5 -1 64574.8 4282.18 9
 15 5 -1 60425.2 4093.18 7
 14 -5 -1 20646 2286.52 9
 14 5 -1 23364.7 2361.11 7
 13 5 -1 38922.8 2968.99 7
 13 -5 -1 40855.4 3081.83 9
 12 5 -1 79431 4208.02 7
 12 -5 -1 83639 4392.52 9
 11 5 -1 3385.16 796.041 7
 11 -5 -1 4986.74 962.037 9
 10 5 -1 99439 3707.87 3
 10 -5 -1 105801 4621.09 9
 10 5 -1 105060 4549.04 7
 9 -5 -1 1363.04 482.935 9
 9 5 -1 556.278 388.158 7
 9 5 -1 555.429 265.87 3
 8 -5 -1 98872.9 4008.81 9
 8 5 -1 91948.4 3814.81 7
 8 -5 -1 86882.2 2182.9 5
 8 5 -1 91208.2 3301.26 3
 7 -5 -1 59784.7 2514.45 8
 7 5 -1 74867 3150.97 7
 7 5 -1 66058.1 2682.47 6
 7 -5 -1 59157.4 1764.29 5
 7 5 -1 68041.7 2684.7 3
 7 -5 -1 74060 3186.16 9
 -6 5 1 149565 4585.04 4
 6 -5 -1 146404 4360.78 8
 -6 -5 1 142208 4475.16 4
 6 5 -1 145185 4366.17 6
 6 5 -1 148117 4466.98 3
 6 5 -1 141872 4764.69 7
 6 -5 -1 151405 4912.46 9
 5 -5 -1 55236.9 2185.05 8
 5 -5 -1 54220.6 2477.33 9
 5 5 -1 55796.1 2456.37 7
 5 5 -1 50601.7 2079.11 6
 -5 -5 1 56195.7 2204.98 4
 -5 5 1 53098.1 2194.28 4
 -4 5 1 252.222 125.523 4
 4 -5 -1 255.36 153.029 8
 -4 -5 1 403.93 158.323 4
 4 -5 -1 108.667 131.122 9
 4 5 -1 159.715 141.03 6
 4 5 -1 -27.2128 73.173 4
 4 -5 -1 156.377 132.923 4
 4 5 -1 655.838 279.829 7
 -3 -5 1 173984 4432.03 4
 3 5 -1 177395 4468.37 4
 3 -5 -1 189157 5132.49 9
 3 5 -1 178233 5036.46 7
 -3 5 1 175488 4493.42 4
 3 5 -1 188363 4328.96 1
 -3 -5 1 185394 4579.83 6
 3 -5 -1 174884 4509.69 4
 2 5 -1 59288.2 1819.52 1
 2 5 -1 54264 2177.09 7
 -2 -5 1 55226.5 1844.79 1
 -2 -5 1 55381.8 1643.49 4
 -2 -5 1 55685.2 2180.52 7
 -2 5 1 58206.4 1696.73 4
 -2 5 1 53919.8 2283.56 7
 2 -5 -1 52903.8 1675.32 4
 2 5 -1 58664 1699.26 4
 -1 -5 1 94135.3 2804.36 2
 1 -5 -1 103145 3228.46 7
 -1 -5 1 108828 3202.45 7
 -1 -5 1 102407 2341.7 4
 -1 5 1 88361.9 3126.97 7
 1 5 -1 89785.9 3044.75 7
 -1 5 1 98088.3 2359.71 4
 -1 -5 1 88598.4 2761.58 1
 0 5 -1 275534 6457.99 2
 0 5 1 271553 6975.36 7
 0 -5 -1 286565 6984.68 7
 0 5 -1 271720 6886.73 7
 0 -5 1 298279 6997.92 7
 0 -5 1 271333 6444.06 2
 1 -5 1 6243.95 671.144 7
 1 5 1 5920.56 660.566 7
 -1 5 -1 6097.31 521.501 2
 -1 5 -1 6903.62 695.687 7
 1 -5 1 5495.93 596.012 9
 2 5 1 249552 6552.56 7
 2 -5 1 250467 6510.71 9
 3 5 1 8160.8 834.589 7
 3 -5 1 8869.68 881.818 9
 3 5 1 8134.11 482.102 6
 4 -5 1 105048 3738.47 9
 4 5 1 105528 3716.38 7
 5 -5 1 83564.9 2690.78 5
 5 5 1 91133.7 3470.27 7
 5 -5 1 88491.3 2694.77 8
 5 -5 1 90124.5 3524.51 9
 6 -5 1 145218 4972.95 9
 6 -5 1 133064 3790.36 5
 6 5 1 147675 4918.29 7
 6 -5 1 139942 3887.25 8
 7 5 1 107669 4228.32 7
 7 5 1 101831 3357.48 3
 7 -5 1 108943 4344.67 9
 7 -5 1 105705 3162.17 5
 8 -5 1 1922.66 326.854 5
 8 5 1 2906.32 630.489 7
 8 -5 1 1464.76 500.769 9
 8 5 1 2412.94 419.358 3
 9 5 1 113155 3636.31 3
 9 5 1 110635 4714.14 7
 9 -5 1 115352 4918.6 9
 10 -5 1 10001.4 1357.37 9
 10 5 1 7315.92 781.053 3
 10 5 1 8073.61 1199.03 7
 11 -5 1 41616.6 3044.68 9
 11 5 1 43091.2 2968.45 7
 12 5 1 25194.3 2346.14 7
 12 -5 1 29238.7 2593.89 9
 13 -5 1 11217.4 1687.69 9
 13 5 1 11643.1 1651.36 7
 14 5 1 49092.9 3608.82 7
 14 -5 1 43152.3 3497.9 9
 15 5 1 1502.71 702.44 7
 15 -5 1 1100.78 705.789 9
 16 5 1 39916.4 3533.12 7
 16 -5 1 40328 3637.6 9
 17 5 1 13916.3 2133.02 7
 17 -5 1 16634.2 2376.33 9
 18 6 -1 2812.59 996.725 7
 18 -6 -1 2972.52 1101.13 9
 17 -6 -1 550.315 488.984 9
 17 6 -1 804.782 741.146 7
 17 6 -1 986.033 672.173 6
 16 6 -1 4330.21 996.961 6
 16 -6 -1 2672.05 892.939 9
 16 6 -1 4636.13 1156.55 7
 15 6 -1 568.977 584.307 7
 15 6 -1 800.184 533.829 6
 15 -6 -1 1916.17 833.747 9
 14 6 -1 7543.37 1324.99 7
 14 6 -1 10557.7 1413.89 6
 14 -6 -1 9681.87 1549.09 9
 13 -6 -1 953.989 514.401 9
 13 6 -1 2042.94 642.739 7
 13 6 -1 1700.69 642.29 6
 12 6 -1 6999.53 1209.28 7
 12 -6 -1 6968.99 1231.75 9
 12 6 -1 9377.4 1215.91 6
 11 6 -1 16503.4 1387.97 3
 11 6 -1 20411.7 1707.56 6
 11 6 -1 17381.1 1792.45 7
 11 -6 -1 19035.5 1921.51 9
 10 6 -1 302.792 347.076 6
 10 -6 -1 879.918 498.844 9
 10 6 -1 303.506 288.089 3
 10 6 -1 -20.574 233.704 7
 9 -6 -1 5793.77 394.917 5
 9 6 -1 5329.32 757.644 3
 9 6 -1 6384.65 973.814 7
 9 6 -1 5047.12 748.274 6
 9 -6 -1 7221.33 1043.38 9
 8 6 -1 10828.8 1218.26 7
 8 -6 -1 7357.15 509.397 5
 8 6 -1 9712.95 988.222 3
 8 -6 -1 10083.4 1023.32 8
 8 -6 -1 12269 1318.97 9
 8 6 -1 11684.8 1078.56 6
 7 6 -1 32827.4 1784.69 6
 7 6 -1 31882.9 1826.53 3
 7 -6 -1 32328 2094.42 9
 7 6 -1 34663.5 2143.21 7
 7 -6 -1 31538.6 1748.15 8
 6 6 -1 56316.2 2341.45 6
 6 -6 -1 57477.8 2779.61 9
 -6 6 1 57416.4 2483.29 4
 6 6 -1 56198.6 2711.72 7
 -6 -6 1 55983.3 2404.49 4
 6 -6 -1 58848.4 2419.01 8
 5 -6 -1 3543.6 621.711 9
 5 6 -1 2410.34 500.247 7
 5 6 -1 2339.16 398.106 6
 5 -6 -1 1961.29 393.329 8
 -5 6 1 2782.85 439.51 4
 -5 -6 1 2468.66 406.631 4
 -4 -6 1 23427.3 1208.31 6
 4 6 -1 23908.7 1538.35 7
 4 6 -1 21948.5 1165.77 4
 4 6 -1 24649.6 1013.55 1
 4 -6 -1 23391 1204.15 4
 4 -6 -1 20619.2 1435.74 9
 -4 -6 1 21170.4 1134.39 4
 -4 6 1 23715.2 1220.71 4
 3 6 -1 14294.3 1114.49 7
 3 -6 -1 11165.3 983.757 9
 3 -6 -1 11645.1 739.439 4
 3 6 -1 12826.6 715.826 1
 -3 -6 1 11474.1 770.623 6
 3 6 -1 11825.4 719.739 4
 -3 -6 1 11935.7 709.939 4
 -3 6 1 11230.4 722.67 4
 2 -6 -1 659.779 135.786 4
 -2 -6 1 267.466 113.565 1
 2 6 -1 620.316 247.146 7
 -2 6 1 312.086 82.549 2
 -2 6 1 360.408 181.49 7
 2 6 -1 599.59 131.874 4
 -2 6 1 316.353 104.256 4
 -2 -6 1 459.726 114.544 4
 1 6 -1 106225 3512.72 7
 -1 6 1 109494 3648.31 7
 -1 -6 1 105929 3122.35 1
 -1 -6 1 103524 3076.39 2
 -1 6 1 104630 2512.81 4
 -1 -6 1 106778 2468.36 4
 0 6 1 31717.9 1721.91 7
 0 6 -1 33129.7 1707.27 7
 0 6 -1 33120.7 1388.71 2
 0 -6 1 35964.6 1422.72 2
 -1 6 -1 657.873 257.346 7
 1 6 1 1250.33 358.175 7
 1 -6 1 842.832 289.219 9
 -1 6 -1 610.671 199.297 2
 2 6 1 5438.19 703.857 7
 -2 6 -1 5744.48 573.791 2
 2 -6 1 5444.52 670.469 9
 3 6 1 21115.7 1447.96 7
 3 -6 1 19654.5 1392.29 9
 4 6 1 424.317 134.68 6
 4 6 1 770.566 321.932 7
 4 -6 1 417.481 299.867 9
 5 -6 1 10003.3 778.009 8
 5 -6 1 10144.2 1090.56 9
 5 6 1 8592.37 995.841 7
 6 -6 1 499.78 202.575 8
 6 6 1 1050.4 419.521 7
 6 -6 1 283.455 305.616 9
 7 -6 1 21042.5 1759.13 9
 7 6 1 20454.3 1694.48 7
 7 -6 1 17972.7 1133.64 8
 8 6 1 16028.5 1557.8 7
 8 6 1 15162.4 1142.74 3
 8 -6 1 14329.8 1519.46 9
 9 6 1 1055.69 518.712 7
 9 6 1 918.043 320.983 3
 9 -6 1 1508.46 590.382 9
 10 6 1 5861.1 1027.07 7
 10 -6 1 4745.69 977.469 9
 10 6 1 4781.3 639.734 3
 11 6 1 3793.51 884.785 7
 11 -6 1 3413.22 894.936 9
 11 6 1 4026.91 620.791 3
 12 6 1 4108.81 950.334 7
 12 -6 1 2211.21 707.563 9
 13 -6 1 37073.6 3096.12 9
 13 6 1 32184.1 2813.92 7
 14 6 1 2786.11 873.109 7
 14 -6 1 1169.99 768.332 9
 15 6 1 1987.98 753.964 7
 15 -6 1 3615.47 1062.3 9
 16 -6 1 1014.48 700.177 9
 16 6 1 2886.01 1073.57 7
 17 6 1 3858.83 1079.84 7
 17 -6 1 3635.23 1233.74 9
 18 7 -1 9263.72 1772.81 7
 18 -7 -1 11311.1 1945.86 9
 17 7 -1 29293.4 3069.18 7
 17 -7 -1 36363.9 3439.9 9
 16 7 -1 286.736 250.95 6
 16 7 -1 913.034 512.514 7
 16 -7 -1 161.24 359.755 9
 15 7 -1 45299.4 3160 6
 15 -7 -1 54660.9 3984.44 9
 15 7 -1 49930.6 3726.41 7
 14 -7 -1 11699.9 1765.43 9
 14 7 -1 12651.8 1546.85 6
 14 7 -1 15403.7 1948.2 7
 13 -7 -1 58168.3 3841.34 9
 13 7 -1 59921.4 3785.77 7
 13 7 -1 50979.4 3124.08 6
 12 7 -1 59845.1 3679.15 7
 12 -7 -1 68189.5 3983.99 9
 12 7 -1 65435.3 3367.12 6
 12 7 -1 59280.4 2999.28 3
 11 7 -1 1836.39 606.73 7
 11 7 -1 1692.01 473.787 3
 11 -7 -1 1352.75 599.665 9
 11 7 -1 1471.3 474.045 6
 10 7 -1 102593 4525.78 7
 10 -7 -1 96161.8 4492.95 9
 10 7 -1 87961.6 3656.44 3
 10 7 -1 85491.2 3708.17 6
 9 -7 -1 1488.1 237.744 5
 9 -7 -1 2242.69 608.626 9
 9 7 -1 1793.46 564.145 7
 9 7 -1 2857.84 583.567 6
 9 7 -1 2542.86 560.732 3
 8 7 -1 107943 4371.9 7
 8 7 -1 108106 3903.26 3
 8 -7 -1 104720 3757.45 8
 8 7 -1 106822 3789.58 6
 8 -7 -1 115055 4547.52 9
 7 -7 -1 106131 4268.51 9
 7 7 -1 101217 4169.54 7
 7 -7 -1 106172 3733.82 8
 7 7 -1 109289 3693.4 6
 7 7 -1 101702 3830.36 3
 6 7 -1 43524.5 2023.87 6
 6 7 -1 47063.7 2533.29 7
 6 -7 -1 44714.8 2485.94 9
 6 -7 -1 46229.9 2165.94 8
 5 7 -1 85423.4 2376.56 1
 5 -7 -1 88030.9 3526.1 9
 -5 -7 1 79751.8 2846.45 4
 -5 7 1 81847 2913.46 4
 5 7 -1 83336.3 3455.04 7
 -4 -7 1 4649.94 504.139 4
 4 -7 -1 4193.36 711.464 9
 -4 -7 1 4418.44 511.28 6
 4 7 -1 4299.8 502.471 4
 4 7 -1 4299.13 408.449 1
 4 -7 -1 5156.16 565.225 4
 4 7 -1 4788.82 732.149 7
 -4 7 1 4203.29 505.329 4
 -3 -7 1 450588 9759 6
 3 7 -1 395487 10462.2 7
 3 -7 -1 434179 9508.72 4
 3 7 -1 441005 9478.26 4
 -3 7 1 429566 9471.65 4
 3 -7 -1 423103 10571.9 9
 -3 -7 1 399636 9355.4 4
 2 -7 -1 164437 3951.55 4
 -2 -7 1 159754 4389.75 1
 2 7 -1 168383 3939.89 4
 -2 7 1 164631 3815.82 2
 -2 7 1 165938 3946.23 4
 2 7 -1 165115 5059.51 7
 -2 7 1 162023 5199.77 7
 -2 -7 1 170886 3875.88 4
 -1 7 1 107114 3842.16 7
 1 7 -1 107486 3730.26 7
 -1 7 1 110664 2521.61 4
 -1 -7 1 98724.6 3191.34 1
 -1 -7 1 103125 3162.56 2
 0 7 -1 243330 6020.53 2
 0 -7 1 251762 6023.92 2
 0 7 -1 232829 6672.53 7
 0 7 1 249132 6853.16 7
 0 -7 -1 246227 5471.08 2
 -1 7 -1 794.143 265.891 2
 1 7 1 1580.15 453.139 7
 2 7 1 199092 6110.76 7
 -2 7 -1 207800 5467.87 2
 2 -7 1 210876 6090.36 9
 -2 7 -1 213482 6266.85 7
 -2 -7 -1 216982 4673.41 6
 3 7 1 5774.38 541.694 4
 3 -7 1 7400.54 623.131 4
 3 7 1 5758.63 799.194 7
 3 -7 1 8207.98 925.278 9
 4 -7 1 116606 4217.09 9
 4 7 1 114090 4233.4 7
 5 7 1 38788.5 2311.39 7
 5 7 1 41288.1 1607.61 6
 5 -7 1 42456.3 2409.75 9
 6 7 1 87040.7 2866.57 6
 6 7 1 86691.4 3765.32 7
 6 -7 1 95106.4 3943.6 9
 6 -7 1 85369.4 2967.06 8
 7 -7 1 137123 5253.84 9
 7 7 1 150211 5340.39 7
 7 -7 1 143328 4215.06 8
 8 7 1 1507.19 563.256 7
 8 7 1 1564.92 407.192 3
 8 7 1 1318.69 190.008 1
 8 -7 1 636.32 281.975 8
 8 -7 1 2087.83 615.005 9
 9 7 1 67836.1 3591.66 7
 9 -7 1 64290.9 3599.94 9
 9 7 1 61642.1 2710.38 3
 10 -7 1 7730.66 1251.47 9
 10 7 1 6973.6 1169.92 7
 10 7 1 6845.32 831.68 3
 11 7 1 45942.4 2292.4 3
 11 7 1 48530 3238.2 7
 11 -7 1 47407.2 3334.81 9
 12 -7 1 63264.1 4033.8 9
 12 7 1 60102.7 3828.2 7
 13 7 1 4042 1065.16 7
 13 -7 1 4177.32 1058.21 9
 14 -7 1 32928.6 3083.79 9
 14 7 1 30083.3 2878.71 7
 15 -7 1 -231.449 602.295 9
 15 7 1 1386.01 692.682 7
 16 7 1 29943.9 3086.5 7
 16 -7 1 38023.6 3572.18 9
 17 7 1 20330.5 2635.76 7
 17 -7 1 18259.5 2547.37 9
 18 -8 -1 4967.92 1340.03 9
 17 8 -1 411.417 401.537 7
 17 -8 -1 -91.5802 320.71 9
 16 -8 -1 14088 2066.57 9
 16 8 -1 12303.5 1914.11 7
 15 8 -1 2937.17 912.351 7
 15 -8 -1 1883.98 850.953 9
 15 8 -1 3345.63 886.59 6
 14 -8 -1 10190.1 1667.35 9
 14 8 -1 9994.36 1590.53 7
 14 8 -1 9648.35 1350.45 6
 13 8 -1 6275.61 1027.61 6
 13 8 -1 5566.04 924.228 3
 13 -8 -1 6359.09 1288.51 9
 13 8 -1 6196.68 1242.26 7
 12 -8 -1 6314.99 1184.25 9
 12 8 -1 5326.42 853.576 3
 12 8 -1 6071.07 967.962 6
 12 8 -1 7190.98 1227.1 7
 11 -8 -1 8591.21 1315.55 9
 11 8 -1 8050.26 1276.31 7
 11 8 -1 7816.7 1040.55 6
 11 8 -1 9846.84 1147.44 3
 10 8 -1 488.621 327.788 6
 10 8 -1 1106.11 539.002 7
 10 8 -1 837.628 371.127 3
 9 8 -1 14353.9 1293.81 6
 9 -8 -1 13330.2 1522.77 9
 9 8 -1 12743 1486.42 7
 9 -8 -1 14159.9 1263.73 8
 9 8 -1 12998.5 1285.93 3
 8 8 -1 28758.5 2169.76 7
 8 8 -1 26564 1705.73 6
 8 8 -1 28416 1881.72 3
 8 -8 -1 32006.1 2289.86 9
 8 -8 -1 30467.2 1848.11 8
 7 -8 -1 30646.4 1817.99 8
 7 8 -1 28603.1 2086.17 7
 7 8 -1 30153.7 1211.6 1
 7 -8 -1 32035.9 2206.99 9
 7 8 -1 30084.9 1721.2 6
 6 -8 -1 14547.6 1412.37 9
 6 -8 -1 15740.2 1249.96 8
 6 8 -1 17300.9 1523.58 7
 6 8 -1 17050.7 819.272 1
 5 -8 -1 724.045 348.461 9
 5 8 -1 278.178 110.936 1
 5 8 -1 661.499 339.522 7
 4 8 -1 39863.6 1619.05 4
 4 -8 -1 39211.2 2228.19 9
 -4 8 1 33396.7 1570.61 4
 4 8 -1 38277.5 2198.21 7
 4 -8 -1 37956.4 1617.98 4
 -4 -8 1 35080.4 1605.25 6
 -3 -8 1 15131.3 799.99 4
 -3 8 1 16707.2 874.185 4
 3 8 -1 16140.2 872.483 4
 3 -8 -1 16795.9 892.449 4
 -3 8 1 13658.3 1337.6 7
 3 -8 -1 17758.8 1408.74 9
 3 8 -1 14078.9 1280.89 7
 -3 8 1 14884.4 801.253 2
 -2 8 1 184693 4177.92 4
 -2 8 1 166583 4094.86 2
 -2 -8 1 180850 4074.65 4
 -2 -8 1 170017 4758.94 1
 2 8 -1 173523 5502.59 7
 2 8 -1 180913 4157.9 4
 2 -8 -1 179891 4183 4
 -2 8 1 186149 5788.18 7
 -1 8 1 125873 4522.72 7
 1 8 -1 132227 4498.75 7
 -1 -8 1 133413 3817.53 2
 0 -8 1 41698.7 1690.37 2
 0 -8 -1 42027 1351.23 2
 0 8 1 40920 2241.34 7
 0 8 -1 39164.7 1683.27 2
 0 8 -1 42070.4 2239.08 7
 -1 8 -1 73961.3 3141.7 7
 1 8 1 68975.8 3069.63 7
 -1 8 -1 74015 2505.13 2
 2 8 1 188.667 221.154 7
 2 -8 1 390.891 121.031 4
 -2 8 -1 311.043 264.106 7
 2 8 1 645.248 158.302 4
 -2 -8 -1 678.554 133.715 6
 2 -8 1 218.996 301.188 9
 -2 8 -1 486.649 229.642 2
 3 8 1 2209.78 571.953 7
 -3 -8 -1 1685.27 194.238 1
 3 -8 1 1545.67 434.03 9
 3 8 1 1921.18 305.103 4
 3 -8 1 1746.69 308.399 4
 -3 8 -1 1644.06 371.657 2
 4 8 1 8903.38 1060.73 7
 4 -8 1 9012.85 1078.98 9
 5 8 1 19666.4 1657.54 7
 5 -8 1 21784.6 1735.65 9
 6 -8 1 31338.3 2175.86 9
 6 8 1 31859.8 1473.12 6
 6 -8 1 30414.9 1626.13 8
 6 8 1 26344.6 2025.01 7
 7 -8 1 2302.11 665.11 9
 7 8 1 1439.9 337.871 6
 7 -8 1 1566.51 373.796 8
 7 8 1 1384.13 484.916 7
 8 -8 1 30427.7 1706.33 8
 8 8 1 33787.6 2429.14 7
 8 8 1 31841.9 1742.36 6
 8 -8 1 33041.5 2451.51 9
 9 -8 1 1209.6 544.028 9
 9 8 1 1253.87 381.335 3
 9 8 1 1060.28 532.545 7
 9 8 1 1384.93 360.087 6
 10 8 1 5199.99 771.976 3
 10 8 1 4950.97 747.909 6
 10 8 1 6078.77 1094.49 7
 10 -8 1 4614.92 1019.31 9
 11 8 1 10260.1 1509.33 7
 11 -8 1 10870.1 1587.04 9
 11 8 1 9085.33 1011.17 3
 11 8 1 10871.7 1187.53 6
 12 8 1 14381.4 1824.87 7
 12 -8 1 13120.4 1831.25 9
 12 8 1 13022.8 1398.31 6
 13 -8 1 38765.1 3274.41 9
 13 8 1 41152.3 3260.6 7
 13 8 1 37039.9 2524.98 6
 14 8 1 285.543 543.578 7
 14 -8 1 813.528 549.481 9
 15 -8 1 3804.34 1120.39 9
 15 8 1 6591.68 1407.98 7
 16 -8 1 2016.03 1087.28 9
 16 8 1 2430.75 995.766 7
 17 -8 1 2464.59 1099.66 9
 17 9 -1 44014.5 3840.96 7
 17 -9 -1 42924.3 3875.38 9
 16 -9 -1 -259.621 615.139 9
 16 9 -1 478.005 519.702 7
 15 -9 -1 19816.3 2437.87 9
 15 9 -1 23963.1 2638.48 7
 14 9 -1 1365.78 532.466 6
 14 9 -1 2302.76 818.674 7
 14 -9 -1 2368.32 898.034 9
 13 9 -1 49022.6 3515.99 7
 13 9 -1 46383.9 2718.66 3
 13 9 -1 40842.8 2727.89 6
 13 -9 -1 47277.6 3514.59 9
 12 9 -1 62927.3 3907.06 7
 12 -9 -1 67417 4122.89 9
 12 9 -1 59793.9 3229.34 6
 12 9 -1 66634.4 3292.26 3
 11 9 -1 8682.29 1100.18 6
 11 9 -1 10423.3 1492.8 7
 11 9 -1 8912.02 1134.21 3
 11 -9 -1 9380.33 1441.73 9
 10 9 -1 84668.2 3737.22 3
 10 -9 -1 91282.5 4487.15 9
 10 9 -1 77624.5 4143.42 7
 10 -9 -1 81056.4 3562.28 8
 10 9 -1 80892.8 3540.13 6
 9 9 -1 5501.89 806.125 6
 9 -9 -1 7025.76 1146.64 9
 9 9 -1 7385.93 1154.03 7
 9 -9 -1 7439.78 953.329 8
 9 9 -1 6735.93 946.022 3
 8 9 -1 61250.7 3017.98 3
 8 -9 -1 63816.8 3443.06 9
 8 9 -1 58398.2 1833.9 1
 8 -9 -1 65447.3 2932 8
 8 9 -1 63694.3 3415.52 7
 8 9 -1 60336.3 2702.19 6
 7 -9 -1 56946.7 3169.09 9
 7 9 -1 58963.4 3203.9 7
 7 -9 -1 62697 2816.63 8
 7 9 -1 62316.7 1857.85 1
 6 -9 -1 1484.89 500.76 9
 6 9 -1 1321.96 519.59 7
 5 -9 -1 64552.8 3198.43 9
 5 9 -1 69294.6 3310.88 7
 4 9 -1 5084.22 538.844 4
 4 9 -1 5663.95 875.81 7
 4 -9 -1 6509.29 640.223 4
 4 -9 -1 6528.75 940.545 9
 3 9 -1 313265 6898.36 4
 -3 -9 1 288582 7296.37 1
 -3 9 1 309594 8766.88 7
 3 -9 -1 290500 6891.91 4
 3 9 -1 285827 8353.42 7
 3 -9 -1 308160 8455.92 9
 -3 9 1 296804 6801.12 2
 2 9 -1 114659 4276.68 7
 2 -9 -1 105933 2765.61 4
 -2 9 1 113608 2838.73 2
 1 9 -1 53741.4 2680.5 7
 -1 9 1 54454.3 2770.04 7
 -1 -9 1 47313.9 2005.11 2
 0 -9 1 246872 6078.92 2
 0 9 1 235498 7136.81 7
 0 -9 -1 232229 5491.14 2
 0 9 -1 243220 7125.24 7
 1 9 1 23284.8 772.126 4
 1 -9 1 21343.2 794.658 4
 1 9 1 26199.8 1862.85 7
 -1 9 -1 21975.5 1251.89 2
 -1 9 -1 23010.3 1767.32 7
 2 9 1 294878 6357.69 4
 -2 9 -1 271524 7012.69 2
 2 -9 1 284599 6423.64 4
 -2 9 -1 262088 8029.77 7
 2 9 1 266273 8024.46 7
 2 -9 1 272148 7910.36 9
 3 -9 1 42774.5 1647.98 4
 3 9 1 39886.1 2415.92 7
 3 -9 1 42508.7 2403.22 9
 -3 9 -1 41684.3 1918.31 2
 3 9 1 42421.5 1575.26 4
 4 -9 1 116151 4536.71 9
 -4 9 -1 118808 3930.3 2
 4 9 1 110840 4493.27 7
 5 -9 1 9219.08 1184.35 9
 5 9 1 8125.17 1111.18 7
 6 -9 1 29397 2184.85 9
 6 9 1 28673.3 2162.79 7
 7 9 1 96490.1 3206.33 6
 7 9 1 91483.7 4299.43 7
 7 -9 1 100167 3536.47 8
 7 -9 1 101284 4504.36 9
 8 9 1 454.055 231.339 6
 8 -9 1 640.985 269.143 8
 8 -9 1 578.572 424.786 9
 8 9 1 199.166 282.694 7
 9 9 1 33135.2 1883.6 6
 9 9 1 32122.9 2019.7 3
 9 9 1 34497.5 2631.49 7
 9 -9 1 32524.8 1864.96 8
 9 -9 1 34382.4 2673.87 9
 10 9 1 9513.87 1030.82 6
 10 -9 1 9959.65 1474.43 9
 10 9 1 8350.32 1295.45 7
 10 9 1 10545.5 1137.27 3
 11 9 1 25493.7 1847.53 6
 11 -9 1 28842.3 2616.59 9
 11 9 1 24663.8 1792.24 3
 11 9 1 24720.1 2349.45 7
 12 -9 1 31683.6 2872.08 9
 12 9 1 30972.1 2769.9 7
 13 9 1 422.981 531.227 7
 13 -9 1 586.236 557.449 9
 14 -9 1 18630.3 2356.69 9
 14 9 1 15829 2099.2 7
 15 -9 1 2681.43 1002.72 9
 15 9 1 75.3171 443.391 7
 16 -9 1 39569.2 3720.8 9
 16 9 1 39507.8 3613.63 7
 17 10 -1 785.624 679.753 7
 17 -10 -1 228.592 462.949 9
 16 10 -1 9334.3 1693.91 7
 16 -10 -1 10859 1907.09 9
 15 10 -1 5261.47 1224.57 7
 15 -10 -1 5011.3 1259.25 9
 14 -10 -1 25191.8 2662.79 9
 14 10 -1 21644.9 2455.2 7
 13 10 -1 14097.7 1913.05 7
 13 -10 -1 16053.8 2048.52 9
 12 10 -1 4762.16 862.72 3
 12 -10 -1 7005.92 1357.91 9
 12 10 -1 5978.08 968.084 6
 12 10 -1 5391.03 1158.01 7
 11 10 -1 34090.8 2252.85 6
 11 10 -1 35652.6 2841.51 7
 11 -10 -1 36259.3 2907.28 9
 11 10 -1 33876 2333.65 3
 10 10 -1 78.9892 225.553 3
 10 10 -1 14.1725 300.124 7
 10 -10 -1 35.0527 333.805 8
 10 -10 -1 142.266 296.146 9
 10 10 -1 307.253 271.129 6
 9 -10 -1 63471.3 3637.26 9
 9 10 -1 58391.4 3082.08 3
 9 10 -1 55279.8 3410.95 7
 9 -10 -1 60601.4 2977.13 8
 8 10 -1 38394.9 2683.49 7
 8 -10 -1 35987.4 2181.23 8
 8 -10 -1 37014.5 2634.34 9
 7 -10 -1 44353.9 2828.3 9
 7 -10 -1 46109 2448.35 8
 7 10 -1 43804.8 2812.21 7
 6 10 -1 76995 3787.74 7
 6 -10 -1 78282.9 3774.03 9
 5 10 -1 753.089 431.558 7
 5 -10 -1 538.085 367.139 9
 4 10 -1 60168.9 3099.86 7
 -4 10 1 61423 2083.01 2
 4 -10 -1 63113.4 3129.62 9
 4 10 -1 65031.1 2171.49 4
 3 -10 -1 9393.46 634.961 4
 3 -10 -1 8014.88 1068.37 9
 3 10 -1 9547.16 621.646 4
 -3 10 1 10246.9 1259.76 7
 -3 -10 1 10219.9 859.109 1
 -3 10 1 7910.77 580.135 2
 3 10 -1 9781.27 1169.5 7
 2 10 -1 20665.9 1698.57 7
 -2 10 1 19546.1 1740.24 7
 -1 10 1 34182.4 2278.93 7
 1 10 -1 35614.1 2252.37 7
 0 -10 1 14124.4 980.045 2
 0 10 1 15952.4 1490.11 7
 0 10 -1 14703.2 1430.92 7
 0 -10 -1 12283.6 711.997 2
 1 10 1 39025.6 2433.58 7
 -1 10 -1 36906.5 2387.97 7
 -1 10 -1 42019.1 1822.17 2
 1 -10 1 39321.8 1129.04 4
 -1 -10 -1 39498.1 1597.86 2
 2 -10 1 304.038 326.508 9
 2 10 1 45.7482 360.259 7
 -2 10 -1 771.721 275.263 2
 2 10 1 342.763 118.7 4
 2 -10 1 489.176 151.715 4
 -2 10 -1 382.14 346.717 7
 3 -10 1 38364.5 1516.94 4
 -3 10 -1 36925 1814.84 2
 3 -10 1 34797.8 2255.59 9
 -3 -10 -1 29736.7 1254.07 1
 3 10 1 34243.9 2307.21 7
 3 10 1 36853.8 1446.78 4
 4 10 1 14493.2 1504.24 7
 4 -10 1 15275.2 1510.83 9
 -4 10 -1 13274.5 1122.91 2
 5 -10 1 25811 2034.59 9
 5 10 1 25244.1 2050.78 7
 6 10 1 78520.7 3899.94 7
 6 -10 1 79303.9 3899.13 9
 7 10 1 3547.19 830.708 7
 7 -10 1 2650.41 699.295 9
 7 -10 1 3923.34 651.681 8
 8 10 1 37069.1 2745.61 7
 8 10 1 41455.2 1964.16 6
 8 -10 1 39991.9 2145.71 8
 8 -10 1 44948.2 3005.18 9
 9 -10 1 1286.61 603.104 9
 9 -10 1 1598.7 436.011 8
 9 10 1 2108.65 749.266 7
 9 10 1 1803.24 455.284 6
 10 10 1 35418.9 2827.29 7
 10 10 1 34914.5 2027.39 6
 10 10 1 37914 2321.16 3
 10 -10 1 37690.7 2984.62 9
 10 -10 1 34262.9 2038.39 8
 11 10 1 9763.55 1156.07 3
 11 10 1 11556.5 1661.9 7
 11 -10 1 13182.1 1787.09 9
 12 10 1 9213.15 1526.67 7
 12 -10 1 9376.55 1614.12 9
 13 10 1 44767.2 3531.46 7
 13 -10 1 48418.7 3763.89 9
 14 -10 1 404.014 323.138 9
 14 10 1 405.664 383.459 7
 15 -10 1 16340 2339.2 9
 15 10 1 13094.3 2018.95 7
 16 -10 1 4706.03 1396.27 9
 16 10 1 6886.76 1503.56 7
 16 11 -1 580.195 714.083 7
 16 -11 -1 184.637 331.487 9
 15 11 -1 9184.57 1665.16 7
 15 -11 -1 7478.99 1535.5 9
 14 11 -1 499.796 426.872 7
 14 -11 -1 -127.316 444.789 9
 13 11 -1 20820.6 2352.26 7
 13 -11 -1 23831.1 2535.73 9
 12 11 -1 54911.4 3186.88 3
 12 -11 -1 59188.9 3959.47 9
 12 11 -1 52669.9 3717.58 7
 11 -11 -1 1534.83 669.285 9
 11 -11 -1 435.587 299.358 8
 11 11 -1 1275.72 500.126 3
 11 11 -1 338.083 300.419 7
 10 -11 -1 45740.3 3237.63 9
 10 11 -1 42525.1 2695.05 3
 10 11 -1 43998.6 3169.8 7
 10 -11 -1 43811.7 2596.62 8
 9 -11 -1 16848.2 1847.55 9
 9 11 -1 12619.5 1630.67 7
 9 11 -1 16789.9 1621.57 3
 9 -11 -1 16772.8 1512.89 8
 8 -11 -1 20225.9 1969.69 9
 8 11 -1 19936.8 1963.15 7
 8 -11 -1 19101.7 1589.86 8
 7 -11 -1 32281.9 2071.01 8
 7 -11 -1 32438.2 2466.61 9
 7 11 -1 32077.8 2447.4 7
 6 11 -1 4944.86 936.481 7
 6 -11 -1 4958.13 938.081 9
 5 -11 -1 52718.2 3009.26 9
 5 11 -1 49022.7 2974.44 7
 -5 11 1 47995.2 2039.5 2
 4 11 -1 5885.66 986.696 7
 4 -11 -1 7249.56 637.817 4
 4 11 -1 6639.49 599.651 4
 -4 11 1 7568.41 644.316 2
 4 -11 -1 7119.03 1038.76 9
 -3 11 1 168082 6120.9 7
 3 -11 -1 159181 4038.18 4
 3 -11 -1 177689 5926.76 9
 3 11 -1 166760 5910.71 7
 3 11 -1 160010 3992.74 4
 -3 11 1 160010 4102.53 2
 2 11 -1 53247.8 3004.55 7
 -2 11 1 54846.2 3132.81 7
 1 11 -1 4456.06 824.711 7
 -1 11 1 7338.6 1057.76 7
 0 11 1 27378.5 2116.18 7
 0 11 -1 32527.6 2279.56 7
 0 -11 -1 29999.8 1225.45 2
 1 11 1 9884.64 1277.25 7
 -1 11 -1 8462.1 804.519 2
 -1 -11 -1 9164.07 716.599 2
 -1 11 -1 9165.85 1211.9 7
 2 -11 1 79995.8 3705.68 9
 2 -11 1 81975.3 2267.57 4
 2 11 1 83305.6 2193.67 4
 -2 11 -1 82950.4 3931.31 7
 2 11 1 74152.9 3749.9 7
 -2 11 -1 78863.3 2901.29 2
 -3 -11 -1 9014.91 681.604 1
 3 -11 1 10647.2 1277.63 9
 -3 -11 -1 12366.6 653.712 6
 3 -11 1 13217.7 822.495 4
 3 11 1 11407.9 1385.74 7
 -3 11 -1 11372.4 995.513 2
 3 11 1 11735.8 749.902 4
 4 -11 1 21921.6 1890.97 9
 4 11 1 20969.5 1902.68 7
 -4 11 -1 22826.5 1506.99 2
 5 -11 1 4378.64 859.754 9
 -5 11 -1 3661.36 636.039 2
 5 11 1 5420.28 989.814 7
 6 -11 1 23990.9 2082.97 9
 6 11 1 21622.6 2014.58 7
 7 11 1 25680.6 2260.81 7
 7 -11 1 30760.9 2445.22 9
 8 -11 1 2419.74 528.914 8
 8 11 1 1578.9 596.075 7
 8 -11 1 3305.28 792.851 9
 9 -11 1 40719.8 2287.86 8
 9 -11 1 46876.9 3256.7 9
 9 11 1 41895.3 3080.42 7
 10 11 1 3697.54 750.164 3
 10 11 1 3584.49 995.051 7
 10 -11 1 4332.08 717.714 8
 10 -11 1 5381.69 1139.08 9
 11 -11 1 47089.9 3501.05 9
 11 11 1 46610.4 3437.48 7
 11 11 1 41508.7 2572.49 3
 12 11 1 19358.8 2258.19 7
 12 -11 1 23432.5 2544.26 9
 13 11 1 13.0689 388.073 7
 13 -11 1 945.238 707.655 9
 14 11 1 11367.3 1831.91 7
 14 -11 1 10645.1 1845.63 9
 15 -11 1 1047.03 736.283 9
 15 11 1 -25.0648 335.584 7
 16 -11 1 21702.5 2830.11 9
 16 12 -1 10454.1 1859.34 7
 16 -12 -1 10889.1 1947.64 9
 15 -12 -1 6911.94 1558.79 9
 15 12 -1 5315.14 1322.95 7
 14 12 -1 18500.5 2333.05 7
 14 -12 -1 20105.6 2472.82 9
 13 12 -1 16506.8 2143.02 7
 13 -12 -1 16348.5 2181.02 9
 12 -12 -1 1767.48 695.606 9
 12 12 -1 1437.17 530.424 3
 11 -12 -1 37446.5 3098.27 9
 11 12 -1 39721.7 3167.06 7
 11 12 -1 38901.7 2687.28 3
 11 -12 -1 39351.5 2538.85 8
 10 12 -1 298.085 297.861 3
 10 -12 -1 819.715 541.51 9
 10 -12 -1 1287.77 490.447 8
 10 12 -1 679.424 509.214 7
 9 12 -1 31378.8 2647.94 7
 9 -12 -1 37363.2 2856.27 9
 9 -12 -1 36779.1 2365.37 8
 8 -12 -1 16180 1510.41 8
 8 12 -1 18039.2 1950.42 7
 8 -12 -1 15696.1 1809.04 9
 7 12 -1 29366.4 2433.72 7
 7 -12 -1 31682.2 2512.44 9
 6 12 -1 51202.2 3187.85 7
 6 -12 -1 45729 3000.31 9
 -5 12 1 19779.5 1191.5 2
 5 -12 -1 20342.1 1896.15 9
 5 12 -1 15911.1 1736.53 7
 4 12 -1 76465.2 2428.71 4
 4 12 -1 79655.4 3923.03 7
 4 -12 -1 76855 3810.13 9
 -4 12 1 72445 2430.81 2
 4 -12 -1 71929.1 2424.35 4
 3 -12 -1 3169.19 338.844 4
 3 12 -1 6113.34 1045.22 7
 -3 12 1 5899.71 1087.07 7
 -3 12 1 4355.01 432.861 2
 3 -12 -1 4143.89 831.256 9
 2 12 -1 30777.4 2330.06 7
 -2 12 1 32799.9 2473.1 7
 -1 12 1 14947 1635.45 7
 1 12 -1 15613.2 1617.86 7
 0 12 1 48262.1 2987.64 7
 0 12 -1 51708.6 3027.18 7
 0 -12 -1 45638 1675.73 2
 -1 12 -1 54181.3 3171.78 7
 1 12 1 52740.8 3160.16 7
 -1 -12 -1 54652.8 2048.08 2
 -2 12 -1 3278.07 525.114 2
 2 -12 1 2881.05 288.45 4
 2 12 1 2068.89 600.245 7
 2 12 1 2978.81 262.064 4
 -2 12 -1 2391.43 664.04 7
 3 -12 1 65629.5 2133.37 4
 -3 -12 -1 56752.8 2154.02 1
 3 -12 1 66013.1 3449.87 9
 -3 12 -1 61675 2602.6 2
 3 12 1 62804.3 3504.78 7
 3 12 1 68655.7 2085.96 4
 -3 -12 -1 64899.6 1938.86 6
 4 12 1 20353.3 1949.89 7
 -4 12 -1 20661 1444.19 2
 4 -12 1 21358 1915.36 9
 5 12 1 22994.4 2116.66 7
 5 -12 1 18588.3 1865.17 9
 -5 12 -1 19840.8 1494.39 2
 6 12 1 94960.9 4629.34 7
 -6 12 -1 89035.1 3722.97 2
 6 -12 1 90687.2 4489.02 9
 7 12 1 4256.65 979.206 7
 7 -12 1 4534.79 1017.18 9
 8 -12 1 57294.3 3620.62 9
 8 -12 1 55446.2 2762.42 8
 8 12 1 55140.5 3564.48 7
 9 -12 1 12570.1 1270.62 8
 9 12 1 10920.7 1621.07 7
 9 -12 1 13749.8 1779.97 9
 10 -12 1 43692.4 3326.13 9
 10 12 1 45557.7 3367.17 7
 10 -12 1 39064 2343.07 8
 11 12 1 16381.7 1637.3 3
 11 -12 1 19835.6 2314.54 9
 11 12 1 18117.2 2200.49 7
 12 12 1 3985.25 1131.73 7
 13 12 1 19271.7 2391.82 7
 13 -12 1 19649.1 2436.06 9
 14 -12 1 3509.91 1135.6 9
 14 12 1 1874.8 823.78 7
 15 12 1 21534.5 2706.84 7
 15 -12 1 27470.8 3089.86 9
 16 13 -1 1010.99 734.53 7
 16 -13 -1 -295.585 404.791 9
 15 -13 -1 8390.59 1665.82 9
 15 13 -1 5188.93 1320.58 7
 14 -13 -1 4407.15 1247.1 9
 14 13 -1 3056.23 959.333 7
 13 -13 -1 7798.82 1499.66 9
 13 13 -1 8090.43 1522.07 7
 12 13 -1 14700.2 1683.76 3
 12 -13 -1 12686.8 1863.68 9
 12 -13 -1 13931.3 1565.14 8
 12 13 -1 14409.3 1952.61 7
 11 13 -1 2852.43 792.925 3
 11 13 -1 1678.95 734.315 7
 11 -13 -1 2371.87 789.451 9
 11 -13 -1 3931 813.849 8
 10 -13 -1 35350.6 2981.09 9
 10 13 -1 35863.1 2609.56 3
 10 13 -1 36430 3006.55 7
 10 -13 -1 32341.2 2325.46 8
 9 -13 -1 1750.94 655.151 9
 9 -13 -1 2337.59 615.761 8
 9 13 -1 3382.83 959.916 7
 8 -13 -1 24186.7 1918.99 8
 8 13 -1 24909.3 2356.27 7
 8 -13 -1 25815.6 2367.8 9
 7 -13 -1 22325.8 2134.55 9
 7 13 -1 23017.2 2244.14 7
 -6 13 1 6218.58 737.554 2
 6 -13 -1 7351.6 1196.87 9
 6 13 -1 5727.47 1089.13 7
 -5 13 1 17586.3 1112.75 2
 5 13 -1 17298.5 1832.26 7
 5 -13 -1 18215.2 1854.21 9
 4 13 -1 1317.48 249.145 4
 -4 13 1 1799.84 311.955 2
 3 13 -1 85818.9 4295.99 7
 -3 13 1 90415 4537.12 7
 3 -13 -1 90750 4286.33 9
 2 13 -1 27521.7 2287.56 7
 -2 13 1 31409.6 2498.5 7
 1 13 -1 11056.5 1405.31 7
 -1 13 1 9092.87 1313.37 7
 0 -13 -1 18682.7 980.224 2
 0 13 1 15348.3 1721.78 7
 0 13 -1 14770.5 1646.92 7
 -1 -13 -1 3278.92 459.635 2
 1 13 1 3399.79 800.3 7
 -1 13 -1 3377.65 820.216 7
 2 13 1 51512.6 3142 7
 -2 13 -1 55303.2 3254.34 7
 2 -13 1 54467.2 3063.71 9
 -2 13 -1 48811.5 2135.94 2
 3 -13 1 1210.28 463.808 9
 -3 -13 -1 1153.28 294.616 1
 3 13 1 989.357 441.38 7
 -3 13 -1 1726.01 426.025 2
 3 13 1 1245.44 225.638 4
 -3 -13 -1 1203.83 228.107 6
 -4 13 -1 8335.18 899.804 2
 4 -13 1 9197.25 1294.6 9
 4 13 1 7117.46 1230.23 7
 4 13 1 6448.11 610.793 4
 -5 13 -1 21018.3 1554.75 2
 5 -13 1 22866.7 2151.41 9
 5 13 1 19179.5 1997.81 7
 -6 13 -1 14180.7 1340.31 2
 6 13 1 15327.9 1838.68 7
 6 -13 1 15587.7 1761.64 9
 -7 13 -1 13112.6 1352.96 2
 7 13 1 9871.3 1501.57 7
 7 -13 1 11533.3 1560.61 9
 8 -13 1 -83.2016 346.464 9
 8 -13 1 495.647 324.301 8
 8 13 1 368.163 451.189 7
 9 -13 1 19301.7 1616.41 8
 9 13 1 20806.8 2266.55 7
 9 -13 1 22555.2 2342.74 9
 10 13 1 469.856 483.774 7
 10 -13 1 286.689 381.38 9
 11 13 1 23769.7 2555.74 7
 11 -13 1 20633.5 2410.6 9
 11 13 1 21290.1 1934.09 3
 12 -13 1 5844.21 1327.84 9
 12 13 1 7443.28 1493.1 7
 13 13 1 1254.55 670.945 7
 13 -13 1 1310.57 777.162 9
 14 13 1 8984.39 1735.57 7
 14 -13 1 9122.74 1730.08 9
 15 13 1 29.6882 562.476 7
 15 -13 1 540.334 763.852 9
 15 14 -1 4484.26 1220.13 7
 15 -14 -1 1637.36 783.519 9
 14 14 -1 17237.6 2359.95 7
 14 -14 -1 18968.5 2481.89 9
 13 -14 -1 23195.3 2662.64 9
 13 14 -1 21610.6 2578.46 7
 12 -14 -1 2582.81 848.382 9
 12 14 -1 3651.84 880.476 3
 12 14 -1 2693.07 889.492 7
 11 14 -1 17857.7 1891.57 3
 11 14 -1 18215.6 2254.9 7
 11 -14 -1 18445.7 1799.32 8
 11 -14 -1 20496 2351.74 9
 10 14 -1 1707.62 641.681 3
 10 14 -1 888.76 595.861 7
 10 -14 -1 808.403 449.091 8
 10 -14 -1 1637.72 730.027 9
 9 -14 -1 27822 2590.2 9
 9 -14 -1 28980.3 2198.48 8
 9 14 -1 25857 2560.93 7
 8 14 -1 11861.2 1660.66 7
 8 -14 -1 11343.1 1343.93 8
 8 -14 -1 8914.46 1475.32 9
 7 -14 -1 39283.6 2975.32 9
 7 14 -1 44327.7 3227.78 7
 6 -14 -1 28182.6 2449.32 9
 6 14 -1 34511.6 2757.07 7
 -6 14 1 28495.2 1612.75 2
 5 14 -1 5422.24 1068.62 7
 5 -14 -1 4648.05 989.704 9
 -5 14 1 4505.44 547.134 2
 -4 14 1 76870.2 2566.75 2
 4 -14 -1 90215.2 4386.18 9
 4 14 -1 85671.6 4405.06 7
 3 14 -1 18267 1929.26 7
 -3 14 1 15944.7 1898.41 7
 3 -14 -1 18984.7 1912.21 9
 2 14 -1 14554.7 1694.98 7
 -2 14 1 21886.1 2137.97 7
 -1 14 1 27448.7 2397.02 7
 1 14 -1 21572.1 2086.42 7
 0 14 -1 24682.4 2263.6 7
 0 -14 -1 27133.6 1250.41 2
 0 14 1 25356.5 2306.03 7
 -1 14 -1 69568.6 3930.99 7
 1 14 1 68830.2 3929.51 7
 -1 -14 -1 66377.2 2403.14 2
 -2 14 -1 1278.17 385.459 2
 2 14 1 1189.77 573.668 7
 2 -14 1 1683.1 672.071 9
 -2 14 -1 1279.87 660.496 7
 3 14 1 58675.7 3629.25 7
 -3 14 -1 56138.9 2526.86 2
 3 -14 1 64484.2 3645.55 9
 -4 14 -1 16710 1320.2 2
 4 -14 1 17564.6 1869.77 9
 4 14 1 14954.9 1803.18 7
 -5 14 -1 26780.6 1790.58 2
 5 14 1 31435.4 2637.57 7
 5 -14 1 24414.2 2269.56 9
 -6 14 -1 48414.9 2615.36 2
 6 14 1 50089.2 3489.48 7
 6 -14 1 55148.9 3534.31 9
 7 -14 1 4090.39 978.317 9
 -7 14 -1 3286.66 722.941 2
 7 14 1 4700.9 1118.73 7
 8 -14 1 26210.6 1955.27 8
 -8 14 -1 26043.9 2079.45 2
 8 14 1 31524.1 2790.83 7
 8 -14 1 25520.6 2490.41 9
 9 -14 1 251.222 353.591 9
 9 14 1 412.813 358.841 7
 9 -14 1 443.282 332.335 8
 10 14 1 36877.3 3216.79 7
 10 -14 1 33996.6 3053.39 9
 11 14 1 19869.2 2409.9 7
 11 -14 1 24884.7 2666.46 9
 11 14 1 23402.3 2102.49 3
 12 14 1 7373.29 1556.68 7
 12 -14 1 9335.8 1683.19 9
 13 -14 1 16722.5 2335.04 9
 13 14 1 15866 2240.02 7
 14 14 1 783.501 732.414 7
 14 -14 1 648.753 524.396 9
 15 15 -1 4288.29 1315.39 7
 15 -15 -1 4294.3 1254.07 9
 14 15 -1 1085.02 735.788 7
 14 -15 -1 1007.51 659.033 9
 13 15 -1 3519.14 1063.19 7
 13 -15 -1 2926.57 1037.82 9
 12 15 -1 4630.05 1262.15 7
 12 -15 -1 3463.42 1034.98 9
 12 15 -1 4176.23 957.616 3
 11 15 -1 2977.52 1069 7
 11 -15 -1 1486.05 608.214 9
 11 15 -1 2505.35 835.932 3
 11 -15 -1 2259.57 684.437 8
 10 -15 -1 30980.3 2356.89 8
 10 15 -1 23474.2 2570.29 7
 10 -15 -1 31484.5 2908.07 9
 9 15 -1 709.852 563.327 7
 9 -15 -1 258.246 359.309 9
 9 -15 -1 460.765 294.571 8
 8 -15 -1 13944.1 1538.2 8
 8 15 -1 13789.1 1867.9 7
 8 -15 -1 14449.1 1891.6 9
 7 15 -1 11711.5 1679.22 7
 7 -15 -1 12465.2 1688.98 9
 6 -15 -1 17566.9 1979.28 9
 6 15 -1 16377.5 1959.29 7
 5 15 -1 38589.1 3019.36 7
 5 -15 -1 39310.2 2953.16 9
 4 15 -1 -59.9677 257.673 7
 4 -15 -1 995.383 561.42 9
 3 15 -1 51479.7 3499.34 7
 3 -15 -1 58596.6 3550.89 9
 -3 15 1 59398 3833.81 7
 2 15 -1 6492.14 1192.6 7
 -2 15 1 4785.07 1040.87 7
 -1 15 1 3039.8 887.42 7
 1 15 -1 3199.16 856.308 7
 0 15 -1 12368.9 1643.8 7
 0 15 1 12226.6 1652.4 7
 -1 15 -1 1316.22 682.045 7
 1 15 1 334.926 380.87 7
 2 15 1 14405.7 1774.84 7
 -2 15 -1 10788.5 1585.77 7
 2 -15 1 12063 1547.86 9
 3 15 1 366.834 345.543 7
 3 -15 1 951.665 608.704 9
 -3 15 -1 441.108 271.435 2
 4 15 1 23027.5 2298.25 7
 -4 15 -1 23985.4 1628.51 2
 4 -15 1 22496.3 2200.81 9
 5 15 1 15605.4 1933.86 7
 -5 15 -1 15827.9 1361.53 2
 6 -15 1 2717.68 887.446 9
 -6 15 -1 2903.03 636.87 2
 6 15 1 2786.99 828.658 7
 -7 15 -1 21837.1 1775.23 2
 7 -15 1 21326.6 2271.27 9
 7 15 1 19651.9 2228.17 7
 8 -15 1 1347.31 617.807 9
 8 15 1 605.611 468.745 7
 9 -15 1 18637.5 1702.71 8
 9 15 1 16595.4 2146.55 7
 9 -15 1 20669.7 2338.25 9
 10 -15 1 4868.48 1203 9
 10 15 1 4806.61 1189.99 7
 11 -15 1 4066.03 1184.01 9
 11 15 1 8296.92 1577.79 7
 12 15 1 2362.43 960.395 7
 12 -15 1 2995.56 1030.92 9
 13 -15 1 170.496 481.775 9
 13 15 1 248.274 408.206 7
 14 -15 1 3089.72 1127.95 9
 14 15 1 4623.44 1319.11 7
 14 -16 -1 14145.5 2202.48 9
 14 16 -1 15238.4 2301.75 7
 13 -16 -1 24711.1 2829.33 9
 13 16 -1 21048.1 2660.24 7
 12 -16 -1 3438.68 1069.37 9
 12 16 -1 2286.38 704.302 3
 12 16 -1 1827.79 837.382 7
 11 16 -1 30066.8 2652.41 3
 11 -16 -1 29606.7 2407.08 8
 11 -16 -1 28821.9 2921.36 9
 11 16 -1 24554.1 2760.37 7
 10 -16 -1 161.81 360.298 8
 10 16 -1 -103.818 332.374 7
 10 -16 -1 744.574 501.278 9
 9 -16 -1 30720.5 2876.04 9
 9 -16 -1 28264.1 2304.24 8
 9 16 -1 27023.3 2780.97 7
 8 -16 -1 26163.4 2609.74 9
 8 16 -1 28316.5 2762.44 7
 7 16 -1 10477.4 1643.13 7
 7 -16 -1 10381.4 1645.2 9
 6 -16 -1 12039.5 1689.5 9
 6 16 -1 16362.8 2007.15 7
 5 -16 -1 639.404 493.812 9
 5 16 -1 -94.6047 348.522 7
 4 -16 -1 71159.9 4137.02 9
 4 16 -1 58966 3940.84 7
 3 16 -1 3885.77 1031.17 7
 -3 16 1 2681.11 869.83 7
 3 -16 -1 3739.27 982.184 9
 -2 16 1 34854.5 2961.49 7
 2 16 -1 31095.7 2732.94 7
 1 16 -1 32079.4 2783.21 7
 -1 16 1 26094.2 2558.22 7
 0 16 1 15668.3 1989 7
 0 16 -1 17746 2058 7
 1 16 1 64718.8 4072.98 7
 -1 16 -1 58294.6 3868.75 7
 2 16 1 1417.25 680.925 7
 2 -16 1 1537.31 637.737 9
 -2 16 -1 1184.47 759.371 7
 3 -16 1 48676.9 3383.41 9
 3 16 1 49607.5 3550.49 7
 4 16 1 3019.68 961.162 7
 4 -16 1 2164.26 728.773 9
 5 -16 1 32754.3 2788.08 9
 5 16 1 30419.1 2807.71 7
 6 -16 1 50071.2 3557.18 9
 6 16 1 38891.6 3281.43 7
 7 16 1 8719.52 1552.28 7
 7 -16 1 6817.43 1317.41 9
 8 -16 1 36509.8 3150.98 9
 8 16 1 37185.1 3270.97 7
 9 -16 1 2193.65 710.825 8
 9 16 1 2522.09 937.473 7
 9 -16 1 4722.32 1200.81 9
 10 -16 1 34391.9 3238.61 9
 10 16 1 34576.6 3276.45 7
 11 16 1 23082.8 2726.11 7
 11 -16 1 26940.5 2904.19 9
 12 -16 1 4699.72 1339.63 9
 12 16 1 2939.6 1102.8 7
 13 16 1 17552.9 2495.31 7
 13 -16 1 17492.9 2488.05 9
 13 -17 -1 765.656 668.249 9
 13 17 -1 618.93 736.623 7
 12 17 -1 2410.26 979.484 7
 12 -17 -1 3020.01 1004.89 9
 12 17 -1 4011.45 1009.05 3
 11 17 -1 3787.22 1012.78 3
 11 17 -1 4380.84 1191.83 7
 11 -17 -1 4370.57 1205.85 9
 10 -17 -1 9115.93 1616.12 9
 10 17 -1 7421.01 1531.08 7
 10 -17 -1 9637.23 1404.4 8
 9 -17 -1 1543.64 819.871 9
 9 -17 -1 1915.42 618.987 8
 9 17 -1 385.34 372.292 7
 8 -17 -1 2453.64 918.767 9
 8 17 -1 1320.92 656.766 7
 7 -17 -1 790.17 613.538 9
 7 17 -1 531.714 498.609 7
 6 -17 -1 2455.22 869.229 9
 6 17 -1 2930.68 947.56 7
 5 17 -1 28604.9 2772.12 7
 5 -17 -1 29852.5 2737.27 9
 4 17 -1 4333.67 1170.59 7
 4 -17 -1 4408.2 1081.24 9
 3 17 -1 6510.65 1299.42 7
 -3 17 1 5154.3 1158.82 7
 3 -17 -1 6659.49 1297.54 9
 2 17 -1 4434.08 1090.63 7
 -2 17 1 4884.8 1180.39 7
 1 17 -1 3185.77 891.487 7
 -1 17 1 1691.58 731.975 7
 0 17 1 12724.4 1845.6 7
 0 17 -1 15397.1 1969.82 7
 1 17 1 20.0409 364.496 7
 -1 17 -1 -1.99801 273.401 7
 2 -17 1 5423.87 1144.17 9
 -2 17 -1 4495.1 1125.47 7
 2 17 1 3724.69 935.185 7
 3 17 1 1049.15 711.056 7
 3 -17 1 1727.69 704.964 9
 4 -17 1 12372.5 1790.6 9
 4 17 1 13117.4 1901.29 7
 5 -17 1 1474.14 720.305 9
 5 17 1 1345.98 726.374 7
 6 17 1 515.132 476.706 7
 6 -17 1 97.6967 465.618 9
 7 -17 1 1447.17 702.898 9
 7 17 1 821.832 560.242 7
 8 17 1 1532.55 830.019 7
 8 -17 1 2152.78 773.817 9
 9 -17 1 11182.4 1821.14 9
 9 17 1 10315.9 1774.46 7
 10 17 1 3246.53 1082.59 7
 10 -17 1 3126.26 1047.61 9
 11 -17 1 332.286 534.551 9
 11 17 1 2276.56 1023.28 7
 12 17 1 1249.93 955.279 7
 12 -17 1 -101.328 547.9 9
 13 18 -1 10253.3 1951.22 7
 12 -18 -1 3989.95 1240.79 9
 12 18 -1 4945.24 1183.64 3
 12 18 -1 4334.33 1312.05 7
 11 18 -1 44663.1 3922.81 7
 11 -18 -1 38543.2 3596.2 9
 11 18 -1 46181.4 3479.5 3
 10 18 -1 1446.26 825.203 7
 10 -18 -1 828.856 739.776 9
 10 -18 -1 2041.12 668.883 8
 9 -18 -1 23224.4 2215.43 8
 9 18 -1 26473.3 2886.07 7
 9 -18 -1 26629.4 2823.89 9
 8 -18 -1 13610.5 1977.83 9
 8 18 -1 15003.6 2116.72 7
 7 -18 -1 14659.5 2034.89 9
 7 18 -1 10887 1779.16 7
 6 18 -1 18874.3 2335.77 7
 6 -18 -1 23744.1 2546.25 9
 5 -18 -1 4092.32 1090.97 9
 5 18 -1 3538.45 1112.2 7
 4 -18 -1 62304.1 4126.65 9
 4 18 -1 56478.9 4069.67 7
 3 18 -1 6097.19 1306.17 7
 -3 18 1 4508.08 1208.72 7
 3 -18 -1 6047.49 1279.05 9
 2 18 -1 26928.8 2726.72 7
 -2 18 1 28619.6 2871.19 7
 1 18 -1 24430.5 2597.74 7
 -1 18 1 21760.8 2485.85 7
 0 18 -1 16328.7 2144.4 7
 0 18 1 14050.5 1996.74 7
 -1 18 -1 57826.4 4100.35 7
 1 18 1 58373.1 4149.89 7
 2 -18 1 2796.94 972.272 9
 -2 18 -1 2867.08 1054.04 7
 2 18 1 2661.85 1031.4 7
 3 -18 1 73976.3 4497.17 9
 3 18 1 72527.1 4663.69 7
 4 -18 1 16191.9 2052.7 9
 4 18 1 13536.5 1991.9 7
 5 -18 1 16112.5 2048.26 9
 5 18 1 14343.4 2032.78 7
 6 18 1 31452.2 3113.04 7
 6 -18 1 37507.1 3214.53 9
 7 18 1 6193.2 1413.53 7
 7 -18 1 3820.94 1061.92 9
 8 18 1 29377.7 3039.27 7
 8 -18 1 23361.7 2653.93 9
 9 18 1 5848.32 1429.88 7
 9 -18 1 4220.41 1241.36 9
 10 -18 1 35862.7 3442.05 9
 10 18 1 43122.8 3848.34 7
 11 18 1 15261 2318.2 7
 11 -18 1 18293.5 2490.78 9
 12 18 1 2244.95 1066.16 7
 12 -18 1 2025.21 780.215 9
 12 19 -1 153.976 510.592 3
 12 -19 -1 1626.45 853.885 9
 12 19 -1 516.222 676.87 7
 11 19 -1 319.907 388.016 3
 11 -19 -1 -200.409 527.263 9
 11 19 -1 779.547 675.852 7
 10 19 -1 326.547 544.023 7
 10 -19 -1 764.932 651.497 9
 10 -19 -1 1043.59 532.558 8
 9 -19 -1 1012.85 612.203 8
 9 -19 -1 881.186 519.388 9
 9 19 -1 1377.11 853.348 7
 8 19 -1 1163.17 715.975 7
 8 -19 -1 384.836 409.555 9
 7 19 -1 1527.5 791.119 7
 7 -19 -1 1810.73 821.979 9
 6 -19 -1 3293.54 1018.86 9
 6 19 -1 -131.558 623.976 7
 5 -19 -1 6898.88 1385.49 9
 5 19 -1 7450.72 1519.18 7
 4 19 -1 -159.381 381.502 7
 4 -19 -1 396.65 624.522 9
 3 -19 -1 745.517 438.342 9
 3 19 -1 1187.43 697.234 7
 -3 19 1 1070.62 709.837 7
 2 19 -1 647.568 708.659 7
 -2 19 1 472.857 443.438 7
 1 19 -1 7520.73 1520.78 7
 -1 19 1 6749.89 1414.18 7
 0 19 -1 5196.32 1326.62 7
 0 19 1 5333.68 1289.56 7
 -1 19 -1 889.415 653.097 7
 1 19 1 1455.67 734.353 7
 1 -19 1 240.691 444.14 9
 -2 19 -1 -89.0522 351.912 7
 2 19 1 -125.561 392.721 7
 2 -19 1 393.988 542.713 9
 3 19 1 -353.915 459.013 7
 3 -19 1 1733.36 854.674 9
 4 19 1 1553.69 731.264 7
 4 -19 1 2297.98 877.937 9
 5 19 1 217.577 512.057 7
 5 -19 1 1297.98 807.042 9
 6 19 1 -261.41 398.991 7
 6 -19 1 -207.766 432.088 9
 7 19 1 -512.68 654.384 7
 7 -19 1 283.216 378.668 9
 8 -19 1 2338.13 882.471 9
 8 19 1 2423.97 941.677 7
 9 19 1 4836.07 1325.09 7
 9 -19 1 5290.94 1310.12 9
 10 -19 1 1831.67 926.018 9
 10 19 1 1372.03 761.48 7
 11 -19 1 -1260.41 732.023 9
 11 19 1 777.28 794.551 7
 11 20 -1 33331.1 3561.12 7
 11 20 -1 36075.2 3271.23 3
 10 -20 -1 5058.86 1337.02 9
 10 20 -1 4033.01 1217.51 7
 9 20 -1 25010.5 2992.62 7
 9 -20 -1 22949.9 2734.23 9
 9 -20 -1 19303.2 2139.68 8
 8 -20 -1 11180.4 1900.23 9
 8 20 -1 10200.7 1852.29 7
 7 -20 -1 7570.2 1561.5 9
 7 20 -1 7174.3 1518.64 7
 6 20 -1 21109.3 2667.01 7
 6 -20 -1 29379.5 2993.82 9
 5 20 -1 5515.39 1363.99 7
 5 -20 -1 7951.75 1594.85 9
 4 20 -1 35014.8 3356.23 7
 4 -20 -1 37250.7 3318.08 9
 -3 20 1 4872.02 1395.29 7
 3 20 -1 2726.63 936.215 7
 3 -20 -1 3674.04 1077.8 9
 2 20 -1 22134.2 2670.58 7
 -2 20 1 29132.2 3074.25 7
 2 -20 -1 31661 3035.54 9
 -1 20 1 13694.1 2064.64 7
 1 20 -1 15961.2 2257.5 7
 0 20 -1 5042.57 1291.61 7
 0 20 1 5272.74 1327.9 7
 1 -20 1 33131.8 3079.91 9
 -1 20 -1 33865.5 3293.77 7
 1 20 1 27154.1 2976.89 7
 2 -20 1 1478.2 907.604 9
 -2 20 -1 2146.16 916.458 7
 2 20 1 1399.41 831.203 7
 3 -20 1 38619.4 3403.63 9
 3 20 1 42969.6 3770.26 7
 4 -20 1 10315 1777.31 9
 4 20 1 11710.4 1950.01 7
 5 -20 1 9631.9 1735.69 9
 5 20 1 10091.1 1805.31 7
 6 20 1 19802.5 2573.71 7
 6 -20 1 19884.7 2485.46 9
 7 -20 1 7778.07 1652.92 9
 7 20 1 6799.71 1591.25 7
 8 -20 1 39053.3 3618.08 9
 8 20 1 38075.1 3709.36 7
 9 -20 1 7546.3 1650.2 9
 9 20 1 7712.07 1817.36 7
 10 20 1 33840.3 3597.21 7
 10 -20 1 36580.2 3631.51 9
 11 21 -1 500.483 517.566 3
 10 21 -1 1189.54 834.71 7
 9 -21 -1 202.76 339.617 8
 9 21 -1 -73.1591 389.513 7
 8 -21 -1 639.209 533.997 9
 8 21 -1 993.581 685.679 7
 7 21 -1 -964.494 652.164 7
 7 -21 -1 -332.803 554.05 9
 6 -21 -1 -335.773 437.367 9
 6 21 -1 1321.52 982.817 7
 5 21 -1 627.382 433.33 7
 5 -21 -1 707.284 712.415 9
 4 21 -1 481.002 504.608 7
 4 -21 -1 -350.37 581.313 9
 3 21 -1 575.786 606.775 7
 -3 21 1 1511.94 782.503 7
 3 -21 -1 810.106 574.869 9
 2 21 -1 933.282 735.298 7
 -2 21 1 905.551 730.084 7
 2 -21 -1 1341.3 744.138 9
 1 21 -1 1856.4 859.04 7
 -1 21 1 447.375 435.016 7
 0 21 -1 1431.55 822.752 7
 0 21 1 3159.39 1101.49 7
 1 21 1 4172.6 1253.4 7
 1 -21 1 4391.84 1160.75 9
 -1 21 -1 3552.71 1188.06 7
 -2 21 -1 352.703 463.641 7
 2 21 1 1063.8 658.186 7
 2 -21 1 438.907 488.495 9
 3 21 1 993.258 655.465 7
 3 -21 1 1079.85 746.954 9
 4 -21 1 -124.206 331.145 9
 4 21 1 13.5626 460.088 7
 5 -21 1 1747.15 824.766 9
 5 21 1 873.963 645.765 7
 6 21 1 622.345 577.102 7
 6 -21 1 -460.268 390.516 9
 7 -21 1 28.6049 491.291 9
 7 21 1 982.713 633.81 7
 8 21 1 1793.65 943.282 7
 8 -21 1 1424.26 840.308 9
 9 21 1 517.896 681.22 7
 9 -21 1 403.609 481.145 9
 11 22 -1 11758.4 1953.37 3
 9 -22 -1 15164.5 1990.88 8
 8 22 -1 5911.89 1572.94 7
 8 -22 -1 10276.7 1939.69 9
 7 22 -1 9715.83 1923.56 7
 7 -22 -1 10724 1921.69 9
 6 -22 -1 17618.6 2484.62 9
 6 22 -1 17347.5 2537.5 7
 5 22 -1 931.627 719.901 7
 5 -22 -1 521.374 673.735 9
 4 -22 -1 32440.7 3307.09 9
 4 22 -1 27445.5 3177.61 7
 -3 22 1 959.613 754.957 7
 3 -22 -1 808.36 717.065 9
 3 22 -1 1065.44 781.343 7
 2 22 -1 18899.2 2637.56 7
 2 -22 -1 26438.5 2945.29 9
 -2 22 1 22413.8 2879.29 7
 -1 22 1 15476.9 2393.73 7
 1 22 -1 16475.1 2452.67 7
 0 22 -1 4751.13 1361.03 7
 0 22 1 4650.97 1315.3 7
 -1 22 -1 14405.9 2294.92 7
 1 22 1 14564.3 2297.59 7
 1 -22 1 20293.9 2527.53 9
 -2 22 -1 639.03 379.495 7
 2 22 1 1029.9 778.93 7
 2 -22 1 893.074 567.718 9
 3 -22 1 40394.1 3670.93 9
 3 22 1 33623.3 3570.48 7
 4 22 1 8319.48 1752.53 7
 4 -22 1 10861.1 1939.49 9
 5 22 1 10269.6 1955.29 7
 5 -22 1 6138.27 1488.9 9
 6 22 1 23262.2 2992.02 7
 6 -22 1 24008.6 2864.63 9
 7 22 1 69.9876 439.949 7
 7 -22 1 2032.35 878.099 9
 7 23 -1 -72.3725 419.397 7
 6 23 -1 444.534 465.117 7
 6 -23 -1 1084.68 722.346 9
 5 -23 -1 97.7896 392.85 9
 5 23 -1 801.027 715.714 7
 4 23 -1 791.343 744.281 7
 4 -23 -1 82.8214 442.159 9
 3 -23 -1 1076.25 747.114 9
 -3 23 1 1076.4 721.179 7
 3 23 -1 510.96 479.461 7
 2 -23 -1 1515.56 778.382 9
 -2 23 1 2678.46 1019.77 7
 2 23 -1 1395.25 841.836 7
 1 23 -1 829.973 617.367 7
 -1 23 1 602.047 576.04 7
 0 -23 1 1036.58 708.289 9
 0 23 1 -1126.21 955.469 7
 0 23 -1 -1430.56 813.866 7
 1 -23 1 186.643 577.359 9
 -1 23 -1 1233.38 779.953 7
 1 23 1 1441.56 744.379 7
 2 23 1 1205.32 795.178 7
 -2 23 -1 -6.14395 366.979 7
 2 -23 1 1509.61 775.407 9
 3 23 1 152.93 751.901 7
 3 -23 1 974.331 667.526 9
 4 23 1 1935.23 982.595 7
 4 -23 1 926.272 570.186 9
 5 23 1 495.195 677.244 7
 5 -23 1 -182.69 617.078 9
 6 23 1 -341.755 623.8 7
 6 -23 1 1115.15 892.396 9
 5 24 -1 1038.63 796.344 7
 4 24 -1 13903 2399.33 7
 3 24 -1 217.8 493.535 7
 3 -24 -1 2300.07 963.18 9
 -2 24 1 5302.79 1569.95 7
 2 -24 -1 8623.87 1833.32 9
 2 24 -1 6232.17 1683.42 7
 1 -24 -1 14369.9 2341.58 9
 1 24 -1 11222.2 2151.7 7
 -1 24 1 13586.9 2358.82 7
 0 24 -1 1369.14 836.808 7
 0 24 1 2351.58 983.437 7
 1 -24 1 4968.48 1356.45 9
 -1 24 -1 5885.2 1586.56 7
 1 24 1 4332.87 1400.56 7
 2 -24 1 -225.654 344.892 9
 2 24 1 566.28 638.526 7
 3 -24 1 22600.4 2948.85 9
 3 24 1 21222.7 2979.59 7
 19 0 -2 8209.19 1657.7 9
 18 0 -2 17375.2 2266.53 9
 17 0 -2 15476.9 2034.65 9
 16 0 -2 24570.1 2516.97 9
 15 0 -2 125661 5895.44 9
 14 0 -2 337.179 428.399 9
 13 0 -2 144513 5933.95 9
 12 0 -2 47279.7 2965.93 9
 11 0 -2 59063.4 3205.42 9
 -10 0 2 142058 5179.29 4
 10 0 -2 143281 5050.05 9
 -9 0 2 -39.453 229.31 4
 9 0 -2 225.246 196.125 9
 8 0 -2 198422 5951.84 9
 -8 0 2 194387 6080.98 4
 7 0 -2 231.777 180.918 9
 -7 0 2 341.322 203.933 4
 -6 0 2 211553 5997.21 4
 6 0 -2 217874 5798.33 9
 -5 0 2 122654 3718.92 4
 5 0 -2 119949 3462.95 9
 -5 0 2 118729 3453.56 9
 -4 0 2 9749.14 762.616 4
 4 0 -2 9458.08 747.775 4
 4 0 -2 8842.91 623.968 9
 -4 0 2 8847.67 438.293 5
 -4 0 2 8221.79 607.177 9
 3 0 -2 254775 6294.58 6
 -3 0 2 265197 6358.14 4
 3 0 -2 264857 5920.42 9
 3 0 -2 272549 6369.42 4
 -3 0 2 269273 5782.98 5
 -3 0 2 264466 5919.53 9
 2 0 -2 136355 3162 5
 2 0 -2 124758 3392.82 6
 -2 0 2 133591 3460.03 4
 1 0 2 1111.31 194.793 9
 1 0 2 1217.19 230.624 1
 -1 0 -2 943.204 183.386 9
 -1 0 -2 1145.17 204.226 1
 -1 0 -2 1163.71 216.684 5
 1 0 2 1234.71 206.363 5
 2 0 2 355493 8099.62 9
 -2 0 -2 343618 8097.95 9
 2 0 2 352513 8012.19 1
 -2 0 -2 353712 7985.21 5
 3 0 2 27985.5 1454.62 9
 -3 0 -2 32650.4 1374.96 5
 4 0 2 341275 8487.08 9
 -4 0 -2 339826 7991.72 5
 5 0 2 19580.8 1406.93 9
 -5 0 -2 20429.6 1152.97 5
 -6 0 -2 264533 6747.5 5
 6 0 2 276030 7627.09 9
 7 0 2 41609.5 2414.65 9
 -7 0 -2 43324.7 1908.36 5
 -8 0 -2 44050.9 1993.63 5
 8 0 2 43823.5 2617.17 9
 9 0 2 101864 4479.2 9
 -9 0 -2 103659 3540.06 5
 10 0 2 6339.46 1074.76 9
 -10 0 -2 3742.53 602.965 5
 -11 0 -2 64227.4 2711.22 5
 11 0 2 64149.8 3739.66 9
 12 0 2 19221.7 2051.45 9
 13 0 2 19030.6 2147 9
 14 0 2 35078.9 3078.31 9
 15 0 2 1086.64 596.351 9
 16 0 2 38177.3 3504.95 9
 17 0 2 1467.17 841.815 9
 19 1 -2 433.738 313.742 9
 19 -1 -2 305.146 420.409 9
 18 1 -2 115.413 536.607 9
 18 -1 -2 902.193 735.992 9
 17 1 -2 972.053 598.188 9
 17 -1 -2 377.429 469.222 9
 16 1 -2 1828.91 780.25 9
 16 -1 -2 3432 1000.45 9
 15 -1 -2 820.772 554.662 9
 15 1 -2 1943.15 746.71 9
 14 -1 -2 374.44 370.816 9
 14 1 -2 1022.19 516.933 9
 13 -1 -2 -90.8894 282.521 9
 13 1 -2 597.166 465.823 9
 12 -1 -2 39.5548 267.76 9
 12 1 -2 -186.806 287.22 9
 11 1 -2 1588.92 496.215 9
 11 -1 -2 2304.38 578.14 9
 10 1 -2 6011.21 934.308 9
 -10 -1 2 6298.29 973.874 4
 -10 1 2 7377.02 1069.13 4
 10 -1 -2 6139.02 924.889 9
 -9 1 2 4943.17 826.93 4
 9 -1 -2 6201.43 864.758 9
 -9 -1 2 5454.08 851.708 4
 9 1 -2 5002.39 778.322 9
 -8 1 2 1548.21 439.727 4
 -8 -1 2 1388.85 390.133 4
 8 -1 -2 1630.51 447.123 9
 8 1 -2 1555.32 421.437 9
 -7 1 2 57401.8 2625.16 4
 -7 -1 2 56702.4 2609.56 4
 7 -1 -2 55361.1 2491.86 9
 7 1 -2 56738.3 2457.71 9
 6 -1 -2 1133.96 308.978 9
 -6 -1 2 1101.48 328.461 4
 6 1 -2 1073.08 293.503 9
 -6 1 2 1821.91 407.339 4
 -5 1 2 6517.68 692.124 4
 -5 1 2 6313.86 633.065 9
 -5 -1 2 6001.66 603.35 3
 5 -1 -2 6505.25 639.429 9
 -5 -1 2 6563.91 694.309 4
 5 1 -2 7212.11 639.569 9
 -5 -1 2 6573.15 630.549 9
 -4 1 2 1282.48 257.56 9
 -4 -1 2 971.381 209.731 9
 -4 -1 2 1420.48 271.259 3
 -4 1 2 1464.29 288.276 8
 4 1 -2 2001.91 338.369 4
 -4 -1 2 1038.07 247.251 4
 4 -1 -2 1777.63 294.247 9
 4 1 -2 1633.38 261.343 9
 4 1 -2 2128.53 365.474 6
 -4 1 2 1310.26 278.141 4
 -3 -1 2 62898.2 2031.63 4
 3 -1 -2 58917.6 2004.81 4
 3 -1 -2 64997 1794.37 9
 3 1 -2 62529.5 2028.78 4
 -3 1 2 64769.9 1997.01 8
 -3 -1 2 63728 2044.17 6
 3 1 -2 59760.4 2012.07 6
 -3 1 2 63797.3 1811.8 9
 -3 1 2 59329.7 2007.64 4
 3 1 -2 63527.9 1981.73 3
 3 1 -2 62586 1697.86 9
 -3 1 2 63801 1545.71 5
 3 -1 -2 59136.3 1520.5 5
 -3 -1 2 62909.7 1997.49 3
 -2 1 2 58143 1562.12 9
 2 -1 -2 54681.3 1763.47 6
 2 -1 -2 56356.5 1590.91 5
 2 1 -2 54234 1839.16 6
 -2 -1 2 50797.5 1774.69 3
 -2 -1 2 56673.9 1833.55 4
 2 -1 -2 58495.6 1556.11 9
 -2 1 2 56672.5 1837.18 4
 2 -1 -2 56332.5 1804.48 8
 1 -1 -2 17482.7 768.863 5
 -1 -1 2 16350 783.607 3
 1 -1 -2 15121.2 732.675 8
 1 1 -2 16174.5 757.175 5
 0 -1 2 153532 3548.52 9
 0 1 -2 146202 3787.29 5
 0 -1 -2 159558 3871.81 5
 0 -1 2 160879 3938.62 2
 0 1 2 159585 3581.67 7
 -1 -1 -2 354.644 129.565 9
 -1 1 -2 51.9342 65.0036 9
 1 -1 2 38.8331 72.1066 9
 -1 -1 -2 344.193 134.757 1
 -1 1 -2 102.156 49.0597 3
 1 1 2 83.7455 73.4252 7
 -1 1 -2 131.716 88.4024 5
 1 -1 2 135.993 119.199 1
 -1 1 -2 297.487 138.282 1
 1 1 2 144.488 111.074 9
 1 -1 2 135.092 82.1115 5
 2 -1 2 14749.8 894.75 9
 2 1 2 16412.6 944.364 9
 -2 1 -2 14924.2 893.823 9
 2 -1 2 15896.5 933.456 1
 -2 1 -2 15460.8 840.071 5
 2 -1 2 15314.4 837.478 5
 -2 -1 -2 15526.1 929.834 9
 2 1 2 16428.9 824.088 1
 3 1 2 47.6117 76.4173 1
 3 -1 2 135.483 113.799 5
 3 1 2 140.91 156.209 9
 -3 1 -2 -49.1782 69.5495 5
 3 -1 2 289.445 162.784 9
 4 1 2 25166.8 1471.67 9
 4 -1 2 25819.6 1486.4 9
 -4 1 -2 21844 752.196 8
 -4 1 -2 25401.6 1205.82 5
 4 -1 2 26254.2 1220.67 5
 5 -1 2 17686.5 1343.52 9
 -5 1 -2 19932.5 1095 5
 -5 -1 -2 18893.7 1137.48 5
 5 1 2 16635.9 1294.9 9
 -6 1 -2 1046.01 286.277 5
 -6 1 -2 371.466 144.641 8
 -6 -1 -2 594.302 228.769 5
 6 1 2 291.442 252.995 9
 6 -1 2 194.464 253.309 9
 7 1 2 3009.99 614.049 9
 -7 -1 -2 2389.91 424.765 5
 -7 1 -2 2280.09 224.641 3
 -7 1 -2 1441.44 256.952 8
 -7 1 -2 2993.25 443.4 5
 7 -1 2 2725.84 585.188 9
 -8 1 -2 2362.97 250.918 3
 -8 -1 -2 2091.77 418.874 5
 -8 1 -2 2490.74 445.615 5
 8 -1 2 2654.56 689.383 9
 -8 1 -2 2382.49 341.775 8
 8 1 2 2303.73 575.803 9
 -9 1 -2 253.9 176.943 5
 9 1 2 1.23786 204.764 9
 -9 -1 -2 -92.6081 142.624 5
 9 -1 2 -11.3513 222.525 9
 10 1 2 472.359 347.415 9
 -10 -1 -2 89.8704 125.627 5
 -10 1 -2 60.8953 122.142 5
 10 -1 2 -36.5666 321.795 9
 11 -1 2 3803.62 930.024 9
 11 1 2 4201.87 928.903 9
 -11 1 -2 3826.37 556.822 5
 -11 -1 -2 3437.45 600.068 5
 12 -1 2 8457.09 1366.39 9
 -12 -1 -2 5527.58 779.348 5
 12 1 2 7013.16 1238.19 9
 13 1 2 1155.85 510.04 9
 13 -1 2 587.353 390.169 9
 14 -1 2 261.032 335.474 9
 14 1 2 449.645 327.676 9
 15 1 2 150.529 475.807 9
 15 -1 2 -56.0416 490.793 9
 16 -1 2 -445.787 416.43 9
 16 1 2 192.471 384.888 9
 17 1 2 1491.84 700.634 9
 17 -1 2 303.826 399.549 9
 19 2 -2 8681.6 1759.33 7
 19 -2 -2 9736.91 1805.64 9
 18 2 -2 19075.2 2491.85 7
 18 -2 -2 16129.5 2224.31 9
 18 2 -2 20416.1 2491.7 9
 17 2 -2 13809.3 1992.27 9
 17 -2 -2 15762.1 2106.22 9
 16 2 -2 16356.8 2062.41 9
 16 -2 -2 22341.6 2433.59 9
 15 -2 -2 124626 5949.38 9
 15 2 -2 131090 5996.99 9
 14 -2 -2 524.747 381.643 9
 14 2 -2 386.191 470.447 9
 13 -2 -2 139637 5858.09 9
 13 2 -2 132150 5642.38 9
 12 2 -2 83797.8 4134.27 9
 12 -2 -2 91512.5 4359.83 9
 11 2 -2 37967.4 2465.71 9
 11 -2 -2 33260 2393.55 9
 -10 2 2 140629 5344.64 4
 10 -2 -2 139413 5237.5 9
 10 2 -2 138348 5129.65 9
 -10 -2 2 143778 5351 4
 -9 2 2 1801.75 490.518 4
 -9 -2 2 1511.72 466.776 4
 9 -2 -2 1450.34 443.7 9
 9 2 -2 1963.61 495.984 9
 -8 -2 2 132724 4696.98 4
 -8 2 2 132783 4737.79 4
 8 2 -2 135680 4548.33 9
 8 -2 -2 137005 4690.02 9
 7 2 -2 8558.32 878.106 9
 -7 -2 2 6522.13 814.27 4
 7 -2 -2 7367.02 838.567 9
 -7 2 2 7493.25 877.518 4
 6 -2 -2 168765 4822.24 9
 6 2 -2 155970 4625.37 9
 -6 -2 2 157654 4834.65 4
 -6 2 2 166518 4918.98 4
 6 2 -2 156577 4551.52 3
 5 2 -2 194444 5031.3 3
 -5 2 2 183000 5168.25 4
 5 2 -2 181624 5116.54 6
 -5 -2 2 173730 5083.84 4
 -5 -2 2 189002 4990.75 9
 5 2 -2 195063 4998.07 9
 5 -2 -2 188726 5081.87 9
 -4 -2 2 545.947 184.901 3
 4 -2 -2 889.446 221.72 9
 -4 2 2 708.801 201.282 9
 4 2 -2 517.607 198.196 3
 4 -2 -2 713.257 218.321 8
 -4 -2 2 810.738 197.462 9
 4 2 -2 331.094 158.124 6
 4 2 -2 396.041 164.382 4
 -4 2 2 431.379 162.322 4
 -4 2 2 416.714 151.097 8
 -4 -2 2 380.548 149.144 4
 -3 -2 2 17825.3 983.966 4
 3 -2 -2 19754.7 1023.25 4
 -3 2 2 18901.3 957.561 9
 3 -2 -2 18731.6 1014.43 8
 3 2 -2 19618.9 929.855 7
 -3 2 2 19870.2 1021.38 8
 3 2 -2 18825.2 1031.89 3
 3 -2 -2 19947.8 962.726 9
 -3 2 2 19279.8 1025.17 4
 3 2 -2 19663.9 1055.53 6
 -3 -2 2 20909 1088.95 3
 -3 -2 2 19490.2 863.721 9
 3 2 -2 19416.3 1020.23 4
 -3 -2 2 21267.2 1081.96 6
 -2 -2 2 1435.13 254.326 3
 2 -2 -2 1490.27 249.941 8
 -2 -2 2 1858.19 230.401 7
 2 2 -2 1939.02 232.171 7
 -2 2 2 1817.37 276.906 4
 2 2 -2 1751.14 254.383 4
 2 2 -2 2053.14 297.907 3
 -2 -2 2 1919.38 277.829 4
 2 -2 -2 1552.89 229.7 9
 -2 2 2 1823.75 272.025 8
 2 -2 -2 1309.75 234.79 4
 2 -2 -2 1757.44 256.852 7
 1 2 -2 103443 2405.99 7
 1 -2 -2 93612.4 2448.25 6
 -1 -2 2 100908 2389.7 7
 1 -2 -2 95689 2374.72 2
 -1 2 2 97928.8 2572.95 7
 -1 2 2 90430.8 2430.69 6
 -1 -2 2 94386.2 2762.36 2
 -1 2 2 93572.7 2367.82 2
 0 -2 2 1004.96 210.365 2
 0 -2 2 1023.9 168.298 7
 0 -2 2 1281.76 195.493 9
 0 -2 2 1315.77 230.067 5
 0 2 -2 1267.56 238.456 2
 0 -2 2 682.924 206.039 1
 0 2 2 1098.48 195.322 7
 0 2 -2 726.254 158.529 9
 1 -2 2 61785.6 1999.59 9
 1 -2 2 65810.1 2218.52 1
 -1 2 -2 65367.3 2038.09 5
 1 2 2 64214 2011.38 7
 1 -2 2 62062.9 2021.47 5
 -1 2 -2 65621.8 2019.08 9
 -1 -2 -2 64754.5 2026.2 7
 -2 2 -2 84429.7 2663.17 9
 -2 2 -2 85427.3 2517.95 5
 -2 -2 -2 84957.9 2727.09 9
 2 2 2 86596.2 2649.61 7
 -2 -2 -2 79940.6 2264.62 1
 2 -2 2 86266.8 2687.57 9
 2 -2 2 84711.1 2520.89 5
 3 2 2 26253.7 1090.25 1
 3 2 2 25239.7 1333.64 7
 3 -2 2 25931.1 1188.99 5
 -3 2 -2 25725.8 1174.24 5
 3 2 2 25865.4 1397.94 9
 3 -2 2 23763.8 1360.94 9
 4 -2 2 93404 3347.55 9
 4 2 2 94730.3 3350.16 9
 -4 2 -2 98418.5 2879.86 5
 4 2 2 95127 2773.64 1
 4 -2 2 94191.1 2865.98 5
 5 -2 2 11641.5 816.31 5
 5 2 2 11201.1 550.822 3
 5 2 2 12466 1097.59 9
 5 -2 2 10639.6 1045.61 9
 -5 2 -2 11218.8 794.643 5
 6 2 2 227480 6460.52 9
 -6 2 -2 231671 4926.11 8
 -6 2 -2 227506 5481.67 5
 6 -2 2 235679 6611.15 9
 -7 2 -2 43097.3 1546.26 8
 7 2 2 41383.2 2424.68 9
 -7 2 -2 43365.1 1813.08 5
 7 -2 2 46309.8 2581.48 9
 8 2 2 90300.1 3996.33 9
 -8 2 -2 97253.6 3060.46 5
 -8 2 -2 86659.6 2430.3 3
 -8 -2 -2 90839.3 3356.42 5
 8 -2 2 90977.3 4067.27 9
 -8 2 -2 96267.7 2785.87 8
 -9 2 -2 157966 4463.78 5
 9 2 2 156411 5800.91 9
 -9 2 -2 150034 3792.06 3
 9 -2 2 154888 5873.99 9
 -9 -2 -2 151634 4852.38 5
 10 -2 2 37.3228 220.213 9
 10 2 2 -60.9784 255.704 9
 -10 -2 -2 6.30829 106.401 5
 -10 2 -2 36.5826 98.1632 5
 -11 2 -2 85931.8 3040.1 5
 -11 -2 -2 91958.3 3536.93 5
 11 2 2 85506.8 4432.27 9
 11 -2 2 89888.1 4560.38 9
 12 -2 2 30347.2 2638.16 9
 12 2 2 30381 2627.19 9
 -12 -2 -2 28002.1 1821.8 5
 13 2 2 55636.9 3783.26 9
 13 -2 2 63540.9 4079.91 9
 14 -2 2 28761.6 2816.23 9
 14 2 2 32891.8 2936.08 9
 15 2 2 4366.6 1141.75 9
 15 -2 2 4015.6 1080.19 9
 16 2 2 39603.7 3528.89 9
 16 2 2 39230.4 3509.3 7
 16 -2 2 38203.8 3489.58 9
 17 -2 2 231.59 424.841 9
 17 2 2 622.7 676.236 7
 17 2 2 479.202 402.166 9
 19 -3 -2 5869.7 1440.54 9
 19 3 -2 3680.91 1083.14 6
 18 3 -2 560.544 459.472 7
 18 -3 -2 -34.1704 495.041 9
 17 3 -2 2664.02 962.654 7
 17 -3 -2 4249.79 1125.76 9
 16 3 -2 8589.07 1493.25 7
 16 3 -2 9382.29 1573.47 9
 16 -3 -2 10612.9 1697.79 9
 15 -3 -2 3114.6 980.387 9
 15 3 -2 3541.58 953.696 9
 14 -3 -2 2138.91 748.433 9
 14 3 -2 2099.72 714.598 9
 13 3 -2 2451.36 708.571 9
 13 -3 -2 2241.6 760.89 9
 12 -3 -2 166.301 323.234 9
 12 3 -2 67.116 231.456 9
 11 3 -2 6326.32 1009.81 9
 11 -3 -2 6458.71 1058.82 9
 -10 -3 2 1302.44 447.743 4
 10 3 -2 1574.08 519.581 9
 -10 3 2 2545.38 679.94 4
 10 -3 -2 3001.67 718.802 9
 -9 3 2 2375.25 550.651 4
 -9 -3 2 2283.86 574.289 4
 9 -3 -2 2223.08 552.304 9
 9 3 -2 1871.5 514.446 9
 8 3 -2 8759.47 973.015 9
 -8 3 2 8749.95 1010.06 4
 8 -3 -2 7925.54 964.194 9
 -8 -3 2 8374.7 981.101 4
 7 3 -2 11622 978.458 3
 -7 -3 2 11759.6 1094.17 4
 7 -3 -2 10681 1047.31 9
 7 3 -2 13492.2 1109.62 9
 -7 3 2 12374.7 1128.7 4
 6 3 -2 38344.2 1920.55 7
 6 3 -2 38646 1898.38 6
 6 3 -2 38165.1 1821.65 3
 6 -3 -2 39963.5 1978.99 9
 -6 3 2 39472 1969.93 4
 -6 -3 2 38012.2 1924.67 4
 5 -3 -2 24109.9 1356.39 9
 5 3 -2 24151.3 1330.52 3
 -5 -3 2 22813.1 1306.59 4
 5 3 -2 24546.7 1355.81 7
 5 3 -2 21323.6 1271.7 6
 -5 3 2 23314.9 1340.55 4
 4 -3 -2 32228.7 1517.53 8
 -4 3 2 32867.4 1560.91 9
 4 3 -2 32989.2 1577.03 3
 4 3 -2 35589.5 1557.67 4
 -4 -3 2 36212.6 1567.59 4
 -4 3 2 34640.6 1561.56 4
 4 -3 -2 34501 1554.2 9
 4 3 -2 29072.9 1478.7 6
 -4 -3 2 31611.1 1421.98 9
 4 3 -2 35313.6 1546.86 7
 -4 -3 2 33329.9 1538.08 6
 3 3 -2 9800.36 760.057 3
 3 3 -2 9148.98 678.963 4
 -3 3 2 9614.31 700.399 4
 -3 -3 2 9802.64 731.012 6
 3 -3 -2 9901.1 740.497 8
 -3 3 2 9320.62 711.534 9
 -3 -3 2 9270.17 672.379 7
 3 -3 -2 8253.97 664.576 9
 3 3 -2 10056.7 695.534 7
 3 -3 -2 10596.1 719.361 4
 -3 -3 2 9033.79 672.314 4
 2 -3 -2 258490 6079.74 4
 -2 -3 2 252393 6086.09 4
 2 3 -2 258127 6080.93 7
 2 3 -2 269222 6406.08 3
 2 3 -2 263268 6095.5 4
 2 -3 -2 278265 6355.91 7
 -2 3 2 266912 6137.83 4
 -2 -3 2 263302 6079.31 7
 -2 3 2 262911 6349.51 7
 1 3 -2 13719.2 716.696 7
 1 3 -2 12335.2 799.647 2
 -1 3 2 13604.6 816.673 7
 -1 -3 2 13021.6 825.519 2
 1 -3 -2 14979.1 824.337 7
 1 3 -2 13268.7 817.866 1
 -1 -3 2 12483.2 693.209 7
 0 3 -2 24606.2 1187.46 1
 0 -3 2 22295.5 1163.94 1
 0 -3 2 22936.1 1117.78 2
 0 -3 2 21530 997.539 9
 0 3 2 22111.3 1080.15 7
 0 -3 -2 24925.5 1122 7
 0 3 -2 23709.5 1136.31 2
 0 -3 2 24332.5 1044.59 7
 0 3 -2 24549.7 1042.97 7
 1 -3 2 10867.2 818.002 1
 -1 3 -2 10793.2 746.718 9
 -1 -3 -2 11575.2 771.455 7
 1 -3 2 11771.4 772.031 9
 -1 3 -2 13207.5 851.005 2
 1 3 2 12290.9 809.458 7
 -2 -3 -2 32296.2 1494.87 7
 2 -3 2 31586.6 1368.75 5
 -2 3 -2 31732.9 1498.67 9
 2 3 2 31741.4 1479.41 7
 -2 -3 -2 31224.1 1052.59 1
 2 -3 2 31312.5 1479.42 9
 3 3 2 5381 618.769 7
 3 -3 2 5874.45 650.786 9
 3 -3 2 5402.83 543.513 5
 4 -3 2 2203.38 220.159 8
 4 -3 2 2124.72 447.769 9
 4 3 2 3363.39 518.966 7
 4 3 2 2172.48 273.827 1
 4 -3 2 2639.44 376.283 5
 5 -3 2 52592.4 2006.46 5
 5 -3 2 53432.3 2562.91 9
 5 3 2 57194.9 2529.83 7
 5 3 2 54903.9 1886.35 1
 6 -3 2 30863.9 1980.05 9
 -6 3 -2 30718.5 1437.93 5
 6 3 2 30187.4 1914.16 9
 6 3 2 28512.1 1831.03 7
 6 3 2 28648.8 1161.96 3
 7 3 2 7388.89 961.887 7
 7 3 2 7394.78 535.562 3
 -7 3 -2 6922.17 656.754 5
 7 3 2 7632.57 996.642 9
 7 -3 2 7604.88 1017.85 9
 8 -3 2 44947.7 2741.6 9
 8 3 2 48741.7 2778.65 9
 9 -3 2 17226.9 1739.08 9
 9 3 2 18310.9 1737.3 9
 -10 -3 -2 132.415 192.762 5
 10 -3 2 360.198 268.353 9
 10 3 2 535.273 386.622 9
 -11 -3 -2 2390.69 533.68 5
 11 3 2 3615.01 876.569 9
 11 -3 2 2400.86 756.945 9
 12 3 2 16148.1 1843.33 7
 -12 -3 -2 15155.8 1374.18 5
 12 -3 2 15759.4 1910.59 9
 12 3 2 16563.7 1926.52 9
 13 3 2 7807.36 1396.86 7
 13 3 2 7406.23 1382.22 9
 13 -3 2 8864.41 1513.93 9
 14 3 2 1914.34 721.967 9
 14 3 2 277.086 346.958 7
 14 -3 2 1243.98 642.989 9
 15 3 2 1364.18 652.241 7
 15 -3 2 1644.95 808.757 9
 16 3 2 4.78057 376.69 7
 16 -3 2 -410.761 388.905 9
 17 3 2 1060.15 670.418 7
 17 -3 2 1476.78 698.911 9
 19 4 -2 4876.98 1289 6
 19 -4 -2 3373.36 1071.9 9
 18 -4 -2 26186.9 2909.33 9
 18 4 -2 23103.8 2535.26 6
 18 4 -2 22529.8 2692.8 7
 17 -4 -2 16549.2 2304.91 9
 17 4 -2 17188.2 2256.75 7
 17 4 -2 16961.5 2075.81 6
 16 4 -2 8073.99 1490.57 7
 16 -4 -2 9534.18 1654.04 9
 15 4 -2 91296.3 5032.28 7
 15 -4 -2 94934.3 5134.84 9
 14 4 -2 50.4706 301.928 7
 14 -4 -2 149.533 296.967 9
 13 -4 -2 87879.8 4587.96 9
 13 4 -2 86407.5 4471.88 7
 12 -4 -2 58405.2 3460.19 9
 12 4 -2 54799.1 3343.45 7
 11 4 -2 39108.7 2652.45 7
 11 -4 -2 45693.9 2887.14 9
 10 4 -2 83708.6 3875.86 7
 10 -4 -2 88678.3 4002.49 9
 -10 4 2 85302.3 3958.25 4
 -10 -4 2 86871.3 3931.27 4
 9 4 -2 1227.68 417.732 6
 -9 4 2 1920.08 523.75 4
 9 4 -2 1981.3 558.673 7
 9 -4 -2 2346.38 561.896 9
 9 4 -2 1741.42 412.162 3
 -9 -4 2 1386.13 426.52 4
 -8 4 2 137229 4867.29 4
 8 -4 -2 149537 5053.08 9
 8 4 -2 141021 4546.65 3
 8 4 -2 142118 4748.35 6
 -8 -4 2 138732 4848.58 4
 8 4 -2 147276 4974.77 7
 7 4 -2 459.35 253.189 7
 7 4 -2 719.134 266.18 3
 -7 -4 2 659.423 257.737 4
 -7 4 2 1306.54 387.763 4
 7 -4 -2 1369.96 443.114 9
 7 4 -2 812.355 325.05 6
 6 4 -2 96341.7 3428.44 3
 6 4 -2 106181 3659.38 7
 -6 -4 2 100772 3501.74 4
 6 -4 -2 106613 3695.87 9
 6 4 -2 99715.1 3479.02 6
 6 -4 -2 101232 3440.27 8
 -6 4 2 103944 3569.69 4
 5 4 -2 108545 3579.76 6
 -5 -4 2 111711 3587.89 4
 5 -4 -2 111570 3598.5 8
 -5 4 2 115792 3647.56 4
 5 4 -2 121952 3757.32 7
 5 -4 -2 111595 3714.35 9
 5 4 -2 119007 3720.43 3
 -4 -4 2 6458.12 610.977 4
 4 -4 -2 7027.62 714.89 9
 4 4 -2 6690.14 664.237 7
 4 4 -2 6693.6 688.74 3
 4 4 -2 6979.65 667.308 6
 4 4 -2 6024.51 594.637 4
 -4 4 2 6690.03 639.374 4
 4 -4 -2 6710.12 668.764 8
 3 -4 -2 42523.7 1693.56 4
 3 4 -2 42114 1755.35 7
 3 -4 -2 43035.8 1801.87 8
 -3 -4 2 43982.7 1766.57 7
 3 -4 -2 47474.4 1876.94 9
 -3 4 2 43879.1 1691.65 4
 -3 -4 2 45982.7 1795.61 6
 -3 -4 2 44191.2 1649.29 4
 3 4 -2 44799.6 1681.95 4
 2 -4 -2 5698.6 477.262 4
 2 4 -2 6602.79 584.322 7
 -2 4 2 5637.56 603.427 7
 -2 -4 2 5990.25 553.167 7
 -2 -4 2 8115.46 688.96 2
 2 4 -2 6662.57 511.712 4
 2 -4 -2 8029.24 691.052 7
 -2 -4 2 5471.79 471.348 4
 2 4 -2 6348.38 563.01 1
 -2 4 2 5511.11 486.995 4
 1 4 -2 46929.2 1777.32 1
 1 4 -2 45798.6 1693.37 7
 -1 -4 2 47222.7 1715.88 7
 -1 -4 2 44010.6 1755.39 2
 1 4 -2 46270.5 1786.15 2
 -1 4 2 45447.9 1830.7 7
 -1 -4 2 41820.2 1766.84 1
 1 -4 -2 47852.4 1842.26 7
 0 -4 2 57656.2 2038.2 9
 0 4 2 58508.8 2170.11 7
 0 -4 2 58241.2 2191.37 1
 0 -4 2 60831 2106.87 2
 0 4 -2 57972.4 2078.31 2
 0 4 -2 58900.9 2081.4 7
 0 -4 -2 68141.6 2249.63 7
 0 -4 2 65758 2136.11 7
 1 -4 2 88961.8 2879.63 9
 1 4 2 86898 2939.95 7
 1 -4 2 98956 2984.68 7
 -1 -4 -2 92885 2967.39 7
 -1 4 -2 92912.1 2910.17 9
 -1 4 -2 94848 2932.77 2
 2 -4 2 54582.9 2176.79 9
 2 4 2 57221.9 2238.57 7
 3 -4 2 41789.8 1709.81 5
 3 -4 2 39890.1 1945.13 9
 3 4 2 43595.4 1988.51 7
 4 -4 2 135571 3321.74 8
 4 4 2 133678 4310.81 7
 4 -4 2 132525 4369.91 9
 5 -4 2 6117.98 830.714 9
 5 4 2 4508.14 415.078 1
 5 -4 2 5960.6 445.847 8
 5 4 2 6162.07 796.406 7
 6 4 2 286058 8107.44 7
 6 -4 2 276957 8178.93 9
 6 4 2 296726 6820.75 1
 7 -4 2 73462.7 3472.94 9
 7 4 2 70061.4 3268.89 7
 7 4 2 69636.2 2297.17 3
 8 -4 2 40182.9 2590.67 9
 8 4 2 35657.1 2346.93 7
 8 4 2 33513.2 1457.44 3
 9 4 2 100549 4478.91 7
 9 -4 2 107853 4774.99 9
 10 -4 2 2198.52 691.156 9
 10 4 2 3127.49 775.484 7
 11 -4 2 21675.8 2177.21 9
 11 4 2 21324.3 2068.81 7
 12 4 2 4777.97 1047.69 7
 -12 -4 -2 4595.09 789.255 5
 12 -4 2 4806.83 1060.55 9
 13 -4 2 72606.7 4489.49 9
 13 4 2 74156.9 4416.21 7
 14 4 2 10282.9 1625.86 7
 14 -4 2 9165.99 1584.71 9
 15 -4 2 12742 1986.94 9
 15 4 2 10513.4 1743.33 7
 16 -4 2 44728.5 3856.1 9
 16 4 2 43425.9 3742.13 7
 17 -4 2 193.557 471.691 9
 17 4 2 911.863 657.099 7
 19 -5 -2 1542.54 803.213 9
 19 5 -2 -662.992 511.362 6
 18 5 -2 709.095 532.11 6
 18 5 -2 856.817 586.444 7
 18 -5 -2 75.7202 542.884 9
 17 -5 -2 1218.82 572.548 9
 17 5 -2 2634.35 861.117 6
 17 5 -2 2720.63 972.327 7
 16 -5 -2 3999.47 1090.84 9
 16 5 -2 5059.8 1188.65 7
 16 5 -2 3381.72 873.859 6
 15 -5 -2 652.431 607.433 9
 15 5 -2 114.497 567.474 7
 15 5 -2 219.692 260.15 6
 14 -5 -2 7949.55 1371.48 9
 14 5 -2 5975.38 1077.36 6
 14 5 -2 7071.27 1278.65 7
 13 5 -2 2448.36 766.057 7
 13 -5 -2 2611.59 776.4 9
 13 5 -2 2838.54 733.072 6
 12 5 -2 8413.33 1194.36 6
 12 5 -2 9577.64 1334.74 7
 12 -5 -2 10359.8 1412.29 9
 11 -5 -2 7259.97 1133.99 9
 11 5 -2 6007.67 1013.64 7
 11 5 -2 6802.43 1006.89 6
 -10 5 2 1335.07 458.71 4
 10 5 -2 1890.5 490.541 3
 10 5 -2 3024.31 705.018 7
 10 -5 -2 1866.24 559.457 9
 10 5 -2 1945.8 530.504 6
 -9 -5 2 2743.39 606.277 4
 9 -5 -2 4604.17 841.127 9
 9 5 -2 6088.4 907.441 7
 9 5 -2 3415.64 612.318 3
 9 5 -2 4844.26 747.12 6
 -9 5 2 4026.62 714.784 4
 8 -5 -2 19386.6 1596.46 9
 8 5 -2 20783.4 1617.61 7
 -8 5 2 17508.1 1467.91 4
 -8 -5 2 16783 1420.92 4
 8 5 -2 19132.8 1457.17 6
 8 5 -2 18782.5 1397.34 3
 7 -5 -2 78187.6 3299.89 9
 -7 5 2 75152.8 3122.57 4
 7 -5 -2 77058.6 3018 8
 -7 -5 2 78675.9 3133.87 4
 7 5 -2 77459.6 3249.26 7
 7 5 -2 74648.5 3018.92 6
 7 5 -2 74021.9 3014.48 3
 6 5 -2 50697.3 2330.3 3
 -6 -5 2 51356.3 2294.89 4
 6 5 -2 50208.2 2272.12 6
 6 -5 -2 51899 2299.45 8
 -6 5 2 55359.4 2398.29 4
 6 5 -2 54440.8 2490.38 7
 6 -5 -2 52938.9 2486.54 9
 -5 5 2 1833.16 387.351 4
 5 5 -2 2146.4 414.575 6
 5 -5 -2 1631.46 366.616 9
 5 5 -2 2539 466.436 3
 -5 -5 2 1662.58 350.578 4
 5 -5 -2 1579.07 366.098 8
 -4 5 2 378.271 172.893 4
 4 5 -2 90.0812 125.826 7
 4 -5 -2 312.11 166.939 8
 -4 -5 2 219.853 139.584 4
 4 -5 -2 460.614 208.946 9
 4 5 -2 306.173 159.392 4
 3 5 -2 2856.95 389.472 1
 3 5 -2 3458.95 411.341 4
 3 -5 -2 3072.32 467.972 9
 -3 -5 2 3452.9 400.442 4
 -3 5 2 3362.76 401.678 4
 3 5 -2 3229.58 478.627 7
 3 -5 -2 3179.02 403.561 4
 -3 -5 2 3230 447.257 6
 -2 5 2 53023.6 2268.45 7
 2 5 -2 55382.1 2129.38 7
 -2 5 2 53634.1 1811.76 4
 -2 -5 2 56597.1 2126.46 7
 -2 -5 2 50310.6 2072.98 2
 2 -5 -2 55618.1 1782.42 4
 2 5 -2 56479.6 2023.85 1
 -2 -5 2 56065.7 1794.27 4
 -1 -5 2 37891.2 1640.09 7
 1 5 -2 40854.2 1670.21 1
 1 5 -2 36197.1 1599.32 2
 -1 -5 2 34081.6 1602.79 1
 1 5 -2 36467.3 1621.69 7
 -1 5 2 35156.3 1722.51 7
 -1 5 2 36580.8 1304.48 4
 -1 -5 2 36055.9 1610.17 2
 0 5 -2 42116.9 1791.66 7
 0 -5 2 44038 1816.66 7
 0 5 -2 37546.7 1668.4 2
 0 -5 2 45510.1 1769.36 2
 0 5 2 38994.5 1839.71 7
 1 -5 2 30588.8 1547.7 7
 1 5 2 28279.5 1533.47 7
 -1 5 -2 30306.8 1462.14 2
 1 -5 2 28026.7 1479.19 9
 -2 5 -2 3824.78 518.526 2
 2 -5 2 3860.46 543.524 9
 2 5 2 4212.89 591.654 7
 3 5 2 72621.3 2847.08 7
 3 -5 2 69147.2 2791.6 9
 4 -5 2 3341.64 577.524 9
 4 5 2 1778.12 442.214 7
 5 5 2 4390.68 701.031 7
 5 -5 2 5241.51 464.602 8
 5 -5 2 4978.03 752.301 9
 6 5 2 35391.6 1304.05 1
 6 -5 2 34801.9 2232.94 9
 6 -5 2 35083.3 1404 8
 6 5 2 40200.9 2277.33 7
 7 5 2 45863.7 1679.54 1
 7 -5 2 44816.2 2701.88 9
 7 5 2 46906.8 2642.6 7
 7 5 2 46284.9 1902.38 3
 8 5 2 36953.8 2421.37 7
 8 -5 2 30657 2316 9
 8 5 2 36070.7 1633.25 3
 8 5 2 35122.6 1535.7 1
 9 5 2 9555.06 784.331 3
 9 -5 2 10677.6 1395.27 9
 9 5 2 9187.33 1244.96 7
 10 -5 2 2000.36 691.289 9
 10 5 2 1114.81 532.353 7
 11 -5 2 691.744 425.304 9
 11 5 2 1333.08 551.99 7
 12 -5 2 26283.3 2569.49 9
 12 5 2 27876.9 2525.96 7
 13 5 2 5433.92 1169.15 7
 13 -5 2 4798.75 1163.19 9
 14 -5 2 2314.08 843.92 9
 14 5 2 1749.7 776.512 7
 15 -5 2 3750.81 1055.31 9
 15 5 2 3245.65 917.595 7
 16 -5 2 182.487 629.924 9
 16 5 2 794.75 558.678 7
 17 5 2 4163.28 1265.06 7
 17 -5 2 4649.75 1275.73 9
 18 -6 -2 34692.7 3373.19 9
 18 6 -2 33044.4 2983.08 6
 18 6 -2 31384.5 3210.81 7
 17 -6 -2 31886.7 3127.87 9
 17 6 -2 26366.3 2583.93 6
 17 6 -2 27273.1 2897.01 7
 16 6 -2 6029.59 1168.71 6
 16 -6 -2 5735.62 1269.04 9
 16 6 -2 6057.89 1297.76 7
 15 -6 -2 67087.1 4365.53 9
 15 6 -2 70647.2 4057.96 6
 15 6 -2 74010.4 4510 7
 14 -6 -2 1135.6 613.486 9
 14 6 -2 2250.55 740.424 6
 14 6 -2 2273.29 742.027 7
 13 6 -2 54570.2 3542.3 7
 13 6 -2 50718.7 3143.91 6
 13 -6 -2 57267 3699.69 9
 12 6 -2 28178.1 2184.61 6
 12 -6 -2 26745.8 2362.45 9
 12 6 -2 30834.5 2473.89 7
 11 6 -2 37629.5 2252.53 3
 11 6 -2 37918.6 2455.68 6
 11 -6 -2 37254 2685.56 9
 11 6 -2 40926.6 2752.72 7
 10 -6 -2 48330.6 2954.98 9
 10 6 -2 49616.2 2949.71 7
 10 6 -2 50544 2584.16 3
 10 6 -2 46525.6 2633.83 6
 9 -6 -2 4343.9 835.045 9
 -9 -6 2 4552.64 766.732 4
 9 6 -2 3672.43 630.428 3
 9 6 -2 4865.97 848.911 7
 -9 6 2 3861.22 730.545 4
 9 6 -2 3836.86 683.374 6
 8 -6 -2 190723 6124.82 9
 8 6 -2 188587 5694.13 3
 -8 -6 2 184853 5743.2 4
 8 6 -2 183293 5651.4 6
 8 6 -2 192532 6104.14 7
 -8 6 2 179855 5785.7 4
 7 -6 -2 1221.17 413.629 9
 7 6 -2 1026.27 305.342 6
 7 -6 -2 2439.88 485.708 8
 -7 -6 2 1247.91 354.538 4
 7 6 -2 1748.21 463.343 7
 7 6 -2 2049.56 448.97 3
 -7 6 2 2060.23 461.495 4
 -6 6 2 55915.8 2472.32 4
 6 6 -2 61793.6 2683.35 3
 -6 -6 2 57625.1 2440.85 4
 6 6 -2 57175.1 2476.78 6
 6 -6 -2 59218.3 2537.18 8
 6 6 -2 57946.8 2697.65 7
 6 -6 -2 58433.7 2733.37 9
 -5 -6 2 83894.6 2873.9 4
 5 6 -2 79719 3162.87 7
 -5 6 2 81141 2903.72 4
 5 -6 -2 80684.6 3037.52 8
 5 -6 -2 87276.9 3312 9
 4 6 -2 83525.8 2659.94 1
 4 6 -2 82466.1 2746.67 4
 4 6 -2 85290.3 3148.99 7
 4 -6 -2 80044.3 3119.89 9
 -4 6 2 85909.7 2778.9 4
 -4 -6 2 81102.5 2676.75 4
 3 6 -2 109720 3165.27 4
 3 6 -2 109432 3684.26 7
 3 -6 -2 114870 3202.04 4
 3 6 -2 109648 3270.37 1
 -3 -6 2 116113 3159.74 4
 3 -6 -2 114142 3759.76 9
 -3 6 2 114360 3978.62 7
 -3 6 2 109642 3189.35 4
 -2 6 2 32916.8 1320.1 4
 -2 -6 2 34748 1641.99 1
 -2 -6 2 36388.9 1327.45 4
 2 6 -2 36181.6 1766.42 7
 2 6 -2 36907.5 1599.4 1
 -2 6 2 33198.7 1833.38 7
 1 6 -2 205653 5349.17 2
 -1 6 2 215849 5797.44 7
 -1 6 2 197030 4746.42 4
 -1 -6 2 197396 5293.21 2
 1 6 -2 196666 5471.8 7
 -1 -6 2 198980 4708.03 4
 0 6 -2 3291.08 512.52 7
 0 6 2 3285.92 529 7
 0 6 -2 2765.29 437.419 2
 0 -6 2 3240.32 446.9 2
 1 -6 2 2025.8 404.146 9
 -1 6 -2 2114.33 389.408 2
 -1 6 -2 2384.23 451.465 7
 1 6 2 2116.6 458.157 7
 2 -6 2 49662.8 2266.34 9
 -2 6 -2 49940.9 2126.2 2
 2 6 2 50973.9 2344.71 7
 3 6 2 37056.5 2016.25 7
 3 6 2 35432.1 1078.05 6
 3 -6 2 35562.5 1962.83 9
 4 -6 2 150343 4901.13 9
 4 6 2 140071 4813.88 7
 5 6 2 7875.86 978.83 7
 5 -6 2 7747.39 960.962 9
 6 6 2 189852 6128 7
 6 -6 2 184243 4792.71 8
 6 -6 2 188903 6257.46 9
 7 6 2 67529.7 3320.36 7
 7 -6 2 62758.3 2289.7 8
 7 6 2 62744.3 1897.75 1
 8 6 2 14840.6 1549.07 7
 8 6 2 15109.8 852.876 1
 8 6 2 14688 1071.08 3
 9 6 2 114086 4925.99 7
 9 -6 2 114504 5066.11 9
 9 6 2 109786 3594.06 3
 10 6 2 4799.53 605.863 3
 10 -6 2 6205.87 1163.74 9
 10 6 2 7621.35 1215.48 7
 11 -6 2 93987.7 4819.24 9
 11 6 2 76772.8 4284.15 7
 12 -6 2 12008.4 1708.69 9
 12 6 2 11855.4 1635.98 7
 13 -6 2 47372.5 3665.97 9
 13 6 2 50494.7 3609.69 7
 14 6 2 22600.2 2490.07 7
 14 -6 2 22238.7 2553.72 9
 15 6 2 4666.22 1198.82 7
 15 -6 2 3784.03 1087.87 9
 16 -6 2 37093.8 3557.59 9
 16 6 2 36190.2 3430.51 7
 18 -7 -2 2632.98 994.472 9
 18 7 -2 3233.26 1099.91 7
 17 -7 -2 5028.9 1324.04 9
 17 7 -2 7188.82 1366.2 6
 17 7 -2 6399.62 1453.94 7
 16 7 -2 11335.8 1606.04 6
 16 7 -2 12885.3 1924.27 7
 16 -7 -2 10790 1741.62 9
 15 7 -2 86.6725 396.817 7
 15 7 -2 208.135 419.666 6
 15 -7 -2 98.8296 386.474 9
 14 7 -2 9372.4 1462.45 7
 14 -7 -2 9281.16 1515.94 9
 14 7 -2 9788.61 1371.2 6
 13 7 -2 230.913 271.408 6
 13 7 -2 496.89 310.262 7
 13 -7 -2 422.226 430.663 9
 12 7 -2 8081.86 1141.38 6
 12 7 -2 6867.7 1023.53 3
 12 -7 -2 7434.97 1245.33 9
 12 7 -2 10213.4 1441.7 7
 11 7 -2 3259.14 803.318 7
 11 -7 -2 3629.79 846.926 9
 11 7 -2 4912.24 869.131 6
 11 7 -2 4626.74 764.954 3
 10 7 -2 709.601 355.088 7
 10 7 -2 1187.69 440.735 3
 10 7 -2 527.057 316.537 6
 10 -7 -2 490.651 388.659 9
 9 7 -2 10639.6 1273.87 7
 9 -7 -2 13322.3 1248.35 8
 -9 -7 2 13264.1 1305.41 4
 -9 7 2 11766.8 1261.81 4
 9 7 -2 12442 1228.18 6
 9 -7 -2 11351.8 1312.35 9
 9 7 -2 12011.3 1201.92 3
 8 7 -2 52.2438 205.035 6
 8 -7 -2 432.958 318.449 9
 8 -7 -2 150.091 194.248 8
 8 7 -2 275.697 275.816 3
 -8 -7 2 201.705 231.679 4
 8 7 -2 246.775 213.448 7
 -8 7 2 18.5735 167.089 4
 7 -7 -2 27210.8 1935.01 9
 -7 7 2 25904.9 1686.61 4
 7 -7 -2 26997.3 1721.15 8
 -7 -7 2 28140.5 1723.51 4
 7 7 -2 25460.2 1727.56 3
 7 7 -2 24493.8 1824.04 7
 7 7 -2 25517.9 1639.75 6
 6 7 -2 16315.9 1406.75 7
 -6 -7 2 14593.7 1124.47 4
 6 -7 -2 14948.2 1219.38 8
 -6 7 2 15153.3 1180.03 4
 6 -7 -2 15085.5 1375.72 9
 5 7 -2 900.613 410.818 7
 5 7 -2 1357.58 282.328 1
 5 -7 -2 1443.24 433.066 9
 5 -7 -2 1255.27 360.466 8
 -5 -7 2 1389.46 322.764 4
 -5 7 2 1844.39 383.267 4
 -4 7 2 2789.26 409.254 4
 4 7 -2 2610.18 401.067 4
 -4 -7 2 3018.41 413.405 4
 4 7 -2 2254.03 364.426 1
 4 -7 -2 3462.12 613.199 9
 4 7 -2 1962.68 474.787 7
 3 7 -2 37642.5 1638.54 1
 3 -7 -2 36928.4 1506.98 4
 -3 7 2 38570 2159.72 7
 -3 -7 2 37297.8 1457.18 4
 3 7 -2 38853 1531.79 4
 -3 7 2 40274.1 1554.55 4
 -2 7 2 231184 5391.78 4
 2 7 -2 214758 6224.91 7
 -2 7 2 226584 6573.23 7
 -2 -7 2 227624 5305.31 4
 -1 7 2 54387 1748.38 4
 -1 7 2 60545.9 2660.51 7
 -1 -7 2 58950.9 1749.76 4
 1 7 -2 60880.5 2529.33 7
 0 7 -2 214880 6161.06 7
 0 7 2 225748 6389.17 7
 0 7 -2 220360 5816.85 2
 -1 7 -2 26715.3 1460.49 2
 1 7 2 26935.3 1704.61 7
 1 -7 2 26910 1635.93 9
 -1 7 -2 28614.2 1706.79 7
 2 7 2 398.737 264.262 7
 -2 7 -2 604.585 264.685 2
 -3 7 -2 62048.5 2582.16 2
 3 -7 2 61426.8 2792.91 9
 3 7 2 58328.5 2788.42 7
 4 -7 2 661.41 296.725 9
 4 7 2 365.504 228.346 7
 4 7 2 1113.73 181.685 6
 5 -7 2 31175 2072.93 9
 5 7 2 31623.1 2076.84 7
 6 -7 2 562.49 200.154 8
 6 7 2 336.228 302.72 7
 6 -7 2 554.437 383.746 9
 7 7 2 32027.8 2275.82 7
 7 -7 2 33074.1 1561.07 8
 7 -7 2 36156.5 2453.14 9
 8 7 2 40260.9 2652.56 7
 8 -7 2 34895.6 2563.44 9
 9 7 2 272.084 324.799 7
 9 7 2 206.922 145.937 3
 9 -7 2 708.625 500.094 9
 10 7 2 2406.28 732.261 7
 10 -7 2 1388.91 534.125 9
 10 7 2 2193.75 449.828 3
 11 7 2 1417.94 655.309 7
 11 -7 2 3598.22 969.392 9
 12 7 2 34788.9 2901.19 7
 12 -7 2 35773 3053.63 9
 13 -7 2 19249.5 2284.64 9
 13 7 2 19479.6 2219.03 7
 14 7 2 327.34 428.981 7
 14 -7 2 416.073 411.647 9
 15 7 2 9464.13 1690.22 7
 15 -7 2 12391.6 1979.76 9
 16 -7 2 1513.1 848.3 9
 16 7 2 100.721 285.329 7
 18 -8 -2 39615.2 3717.14 9
 18 8 -2 27087.9 3050.26 7
 17 -8 -2 30316.9 3135.81 9
 17 8 -2 26737.4 2922.95 7
 16 -8 -2 10527.4 1758.34 9
 16 8 -2 10362.3 1537.83 6
 16 8 -2 9828.38 1701.34 7
 15 8 -2 34194.4 3045.2 7
 15 -8 -2 39422.8 3356.98 9
 15 8 -2 32235.6 2641.57 6
 14 8 -2 -74.4259 445.169 7
 14 8 -2 506.238 368.012 6
 14 -8 -2 490.816 450.707 9
 13 8 -2 53979 3218.73 6
 13 8 -2 53624.9 3593.46 7
 13 8 -2 51377.1 2978.4 3
 13 -8 -2 57595.4 3785.98 9
 12 -8 -2 13464.6 1696.37 9
 12 8 -2 10038.8 1259.08 6
 12 8 -2 11792.4 1576.1 7
 12 8 -2 10507.6 1228.83 3
 11 8 -2 52178.8 3279.34 7
 11 8 -2 48480.9 2825.13 6
 11 8 -2 47887.1 2757.26 3
 11 -8 -2 56891.3 3456.69 9
 10 -8 -2 43601.9 2893.29 9
 10 8 -2 41084.9 2460.98 6
 10 8 -2 45642.6 2920.34 7
 10 8 -2 40451.7 2465.02 3
 9 8 -2 5067.07 788.013 6
 9 8 -2 3991.64 724.765 3
 9 -8 -2 4499.82 742.328 8
 9 -8 -2 4526.02 856.766 9
 9 8 -2 3915.29 825.935 7
 8 8 -2 106254 4453.65 7
 8 8 -2 107280 4021.43 6
 -8 -8 2 106496 4052.18 4
 8 -8 -2 107456 4088.15 8
 -8 8 2 109400 4177.41 4
 8 -8 -2 115138 4650.09 9
 8 8 -2 105323 4182.51 3
 -7 -8 2 16220.1 1283.61 4
 7 -8 -2 17220.9 1562.47 9
 7 8 -2 17863.7 1586.11 7
 7 -8 -2 14849.9 1293.04 8
 -7 8 2 15534.1 1291.07 4
 7 8 -2 16982.1 1438.74 3
 6 -8 -2 18314.5 1392.18 8
 6 -8 -2 15397.4 1461.02 9
 6 8 -2 17592.6 1038.14 1
 6 8 -2 17831.9 1527.83 7
 -6 -8 2 18453 1260.27 4
 -6 8 2 17161.6 1256.07 4
 -5 8 2 59397 2388.8 4
 -5 -8 2 59236.9 2320.66 4
 5 -8 -2 59964.7 2900.5 9
 5 8 -2 62626.2 2195.63 1
 5 8 -2 60137.6 2907.43 7
 4 -8 -2 99220.5 3826.8 9
 4 8 -2 90275.3 3689.67 7
 -4 8 2 98816.6 3109.23 4
 4 8 -2 96853.7 3051.23 4
 -4 -8 2 96609 2976.55 4
 4 8 -2 100329 3074.37 1
 3 8 -2 213088 5251.67 4
 3 -8 -2 222102 5282.25 4
 -3 8 2 203967 4659.86 2
 3 8 -2 201152 6215.08 7
 -3 8 2 224333 5306.21 4
 -3 -8 2 217995 5208.19 4
 -3 8 2 210662 6580.56 7
 2 8 -2 67413 2884.21 7
 -2 -8 2 65563.4 1942.93 4
 -2 8 2 62772.5 1985.25 4
 -2 8 2 64624.7 3006.01 7
 1 8 -2 241293 6851.63 7
 -1 8 2 252163 7165.04 7
 -1 8 2 240247 5551.61 4
 -1 -8 2 240450 5486.31 4
 0 8 2 42948.2 2326.33 7
 0 8 -2 42792.6 1933.41 2
 0 8 -2 43308.6 2263.68 7
 -1 8 -2 17508.6 1408.26 7
 -1 8 -2 18217.8 1221.8 2
 1 -8 2 16647.9 1355.08 9
 1 8 2 18685.5 1502.51 7
 2 8 2 97418.2 3931.09 7
 -2 8 -2 104827 3553.1 2
 2 -8 2 109127 3956.19 9
 -3 8 -2 46281.2 2219.35 2
 3 8 2 44477.5 2499.44 7
 3 -8 2 47770.9 2524.5 9
 4 8 2 143282 5147.46 7
 4 -8 2 146167 5112.9 9
 5 -8 2 1605.15 543.91 9
 5 8 2 718.134 192.183 6
 5 8 2 759.827 400.263 7
 6 -8 2 133427 5246.31 9
 6 -8 2 144597 4185.18 8
 6 8 2 142913 5342.94 7
 6 8 2 137545 3855.87 6
 7 -8 2 73852.1 2679.4 8
 7 8 2 71854.5 2599.45 6
 7 8 2 76206.4 3729.96 7
 7 -8 2 71805.2 3732.16 9
 8 -8 2 12971.3 1558.7 9
 8 -8 2 12037.2 970.921 8
 8 8 2 13499.1 1544.56 7
 9 8 2 41251.2 2165.19 3
 9 -8 2 44450.4 3052.1 9
 9 8 2 42189.8 2905.77 7
 10 8 2 903.036 324.505 3
 10 -8 2 1508.69 682.335 9
 10 8 2 736.115 581.098 7
 11 8 2 53768.8 3562.17 7
 11 -8 2 56552.2 3820.42 9
 12 8 2 3656.52 969.044 7
 12 -8 2 4857.07 1131.12 9
 13 8 2 20770.9 2345.37 7
 13 -8 2 20879.3 2433.26 9
 14 -8 2 26321.3 2837.63 9
 14 8 2 27223.1 2758.03 7
 15 -8 2 4149.6 1217.33 9
 15 8 2 1734.76 788.942 7
 16 -8 2 32513 3474.26 9
 16 8 2 30837.9 3199.4 7
 18 -9 -2 3152.89 1147.81 9
 17 9 -2 3779.05 1145.29 7
 17 -9 -2 2966.03 1024.89 9
 16 9 -2 14424.5 2076.68 7
 16 -9 -2 15861.4 2203.48 9
 15 9 -2 92.7695 308.794 6
 15 9 -2 817.958 615.225 7
 15 -9 -2 -139.9 286.636 9
 14 9 -2 25355.4 2574.89 7
 14 9 -2 24593.8 2202.54 6
 14 -9 -2 30183.6 2833.35 9
 13 9 -2 4639.58 1078.08 7
 13 -9 -2 3816.32 991.675 9
 13 9 -2 3952.61 778.653 3
 13 9 -2 3348.94 777.493 6
 12 9 -2 14228.7 1788.94 7
 12 -9 -2 14751.5 1826.43 9
 12 9 -2 12328.2 1426.63 6
 12 9 -2 13752.5 1470.49 3
 11 9 -2 15854.6 1570.19 3
 11 9 -2 15541.4 1539.5 6
 11 -9 -2 17315.3 1924.13 9
 11 9 -2 15693.8 1807.22 7
 10 -9 -2 4949.55 841.946 8
 10 9 -2 5640.93 856.993 6
 10 9 -2 3190.2 734.41 3
 10 9 -2 4438.79 949.114 7
 10 -9 -2 4317.05 928.963 9
 9 -9 -2 42216.2 2439.73 8
 9 9 -2 41513 2516.32 3
 9 9 -2 40934 2750.65 7
 9 -9 -2 41195.2 2783.34 9
 8 9 -2 269.872 154.515 1
 8 9 -2 -431.223 341.547 7
 8 9 -2 205.449 267.371 3
 8 -9 -2 1002.34 401.726 8
 8 -9 -2 646.7 421.73 9
 7 -9 -2 85346.1 3903.58 9
 7 9 -2 87068.9 2744.22 1
 7 9 -2 86899.8 3944.97 7
 -7 -9 2 84630.1 3318.65 4
 7 -9 -2 84973.3 3531.86 8
 -7 9 2 85541.9 3408.97 4
 -6 9 2 4098.68 596.934 4
 6 9 -2 4742.35 509.124 1
 -6 -9 2 5204.56 650.578 4
 6 -9 -2 5602.71 799.185 8
 6 9 -2 4544.71 799.81 7
 6 -9 -2 5521.76 900.107 9
 5 9 -2 27181.3 1955.53 7
 5 9 -2 28682.1 1402.18 1
 5 -9 -2 28873.8 2015.27 9
 -5 -9 2 27492.3 1460.09 4
 -5 9 2 30703.9 1584.25 4
 4 9 -2 48848.1 2623.16 7
 -4 -9 2 51529.7 1905.31 4
 -4 9 2 51691 1982.72 4
 4 -9 -2 48776.3 2637.06 9
 4 -9 -2 49545.5 1953.63 4
 4 9 -2 48568.3 1934.61 4
 3 -9 -2 9548.08 687.272 4
 3 9 -2 8939.8 1048.11 7
 -3 9 2 10600.1 722.921 4
 -3 9 2 11037.7 1242.88 7
 -3 -9 2 11464 697.131 4
 -2 9 2 161212 5649.63 7
 2 9 -2 165551 5442.53 7
 -2 9 2 166740 4089.19 4
 -2 -9 2 166367 4000.39 4
 -1 9 2 69459.3 3209.51 7
 -1 -9 2 68474.9 1878.19 4
 1 9 -2 68997.2 3072.4 7
 0 9 -2 58266.2 2843.93 7
 0 9 -2 56856.7 2378.88 2
 0 9 2 56397.4 2891.12 7
 1 -9 2 59493.8 2816.89 9
 -1 9 -2 60980.2 2950.95 7
 1 9 2 65230.2 3092.31 7
 -1 9 -2 59657.3 2496.72 2
 2 -9 2 1167.06 400.8 9
 -2 9 -2 786.524 320.619 2
 2 9 2 448.429 299.642 7
 -3 9 -2 63753.6 2740.08 2
 3 -9 2 68356.6 3201.74 9
 3 9 2 64562.5 3214.93 7
 4 -9 2 14042.4 1409.37 9
 4 9 2 15516.5 1509.88 7
 -4 9 -2 15582.4 1305.11 2
 5 -9 2 79096.8 3739.43 9
 5 9 2 81901.7 3829.15 7
 6 9 2 14712.6 1570.62 7
 6 9 2 15962.1 915.332 6
 6 -9 2 15725.2 1607.81 9
 7 9 2 10608.7 1362.79 7
 7 9 2 10296.1 817.675 6
 7 -9 2 9268.44 868.458 8
 7 -9 2 10117.8 1323.41 9
 8 -9 2 35332.4 2657.11 9
 8 9 2 33101.3 1699.94 6
 8 9 2 29712.2 2395.57 7
 8 -9 2 32031.7 1721.3 8
 9 9 2 1897.73 651.525 7
 9 -9 2 1378.06 382.645 8
 9 -9 2 1776.72 725.124 9
 9 9 2 2440.71 486.454 6
 10 -9 2 21115.1 2215.55 9
 10 9 2 22573 1624.11 3
 10 9 2 21474 1538.58 6
 10 9 2 21568.4 2169.11 7
 11 -9 2 1904.59 626.277 9
 11 9 2 2130.18 759.57 7
 12 -9 2 29875.1 2849.21 9
 12 9 2 28487 2700.53 7
 13 9 2 25061.2 2604.29 7
 13 -9 2 16965.6 2214.94 9
 14 -9 2 2099.44 823.174 9
 14 9 2 2600.4 958.877 7
 15 -9 2 9972.22 1848.66 9
 15 9 2 9511.53 1712.65 7
 16 9 2 1004.31 621.445 7
 16 -9 2 -123.717 372.164 9
 17 -10 -2 15119.8 2266.93 9
 17 10 -2 15598 2254.35 7
 16 -10 -2 5535.99 1328.6 9
 16 10 -2 3884.7 1131.44 7
 15 10 -2 16213.6 2140.56 7
 15 -10 -2 18514.4 2343.99 9
 14 10 -2 381.763 454.239 6
 14 10 -2 121.025 396.77 7
 14 -10 -2 633.196 553.724 9
 13 -10 -2 40066.9 3229.6 9
 13 10 -2 36675.3 2572.25 3
 13 10 -2 38935.4 3132.52 7
 13 10 -2 39358.9 2718.8 6
 12 10 -2 21423.2 1925.64 3
 12 10 -2 22481.9 2258.03 7
 12 -10 -2 20071.8 2203.94 9
 12 10 -2 18175 1714.22 6
 11 10 -2 17476.9 1919.26 7
 11 10 -2 16730 1652.25 3
 11 -10 -2 17588.4 1968.31 9
 11 10 -2 18985.5 1672.34 6
 11 -10 -2 17071.1 1615.28 8
 10 10 -2 23445.9 2166.79 7
 10 10 -2 25041 2009.18 3
 10 -10 -2 22749.9 1840.65 8
 10 -10 -2 26195.2 2307.3 9
 9 10 -2 1704.47 302.17 1
 9 -10 -2 1472.81 601.269 9
 9 -10 -2 1960.61 589.904 8
 9 10 -2 1719.24 599.855 7
 9 10 -2 2013.87 573.831 3
 8 10 -2 38595.3 1584.07 1
 8 -10 -2 33861.7 2191.33 8
 8 -10 -2 37764.1 2619 9
 8 10 -2 36412 2565.11 7
 8 10 -2 37833.5 2422.23 3
 7 10 -2 4776.14 522.687 1
 7 10 -2 4672.45 882.797 7
 7 -10 -2 3607.8 701.481 8
 7 -10 -2 3623.27 813.299 9
 6 10 -2 16535.5 1623.92 7
 -6 10 2 17755.2 1278.61 4
 -6 -10 2 18036.1 1230.2 4
 5 -10 -2 12442.2 1337.43 9
 5 10 -2 12015.8 1333.33 7
 -5 10 2 12496.8 976.333 4
 -5 -10 2 10670.7 855.947 4
 4 10 -2 57331.2 2144.56 4
 -4 10 2 65812.8 2252.43 4
 -4 10 2 57633.4 1803.32 2
 4 -10 -2 59256.8 3059.06 9
 -4 -10 2 59995.1 2101.94 4
 4 10 -2 59276.1 3069.65 7
 4 -10 -2 58694.1 2173.45 4
 -3 -10 2 94786.3 2684.53 4
 -3 10 2 100572 2828.29 4
 3 10 -2 93125.4 3970.46 7
 -3 10 2 87543.3 4094.17 7
 -2 10 2 3481.37 340.888 4
 -2 10 2 2867.88 697.573 7
 -2 -10 2 2609.5 278.816 4
 2 10 -2 2271.8 594.048 7
 -1 10 2 40425 2529.76 7
 1 10 -2 42631.4 2465.54 7
 -1 10 2 43296.6 1357.55 4
 -1 -10 2 41617.2 1287.56 4
 0 10 2 43424.7 1382.44 4
 0 10 2 44579 2653.86 7
 0 -10 -2 42341.8 1347.17 2
 0 10 -2 46335.9 2596.11 7
 0 10 -2 44965 2097.83 2
 1 10 2 71278.6 3538.26 7
 -1 10 -2 73261.2 3499.24 7
 -1 10 -2 85468.1 3091.1 2
 1 -10 2 82062.1 3527.77 9
 2 10 2 67767.3 3383.52 7
 2 -10 2 67973.8 3240.67 9
 -2 10 -2 65536 3303.16 7
 -2 10 -2 68998.3 2815.5 2
 -3 10 -2 9203.71 955.877 2
 3 -10 2 8300.94 1071.45 9
 3 10 2 9320 1187.03 7
 -4 10 -2 43395 2311.71 2
 4 10 2 41419.6 2664.07 7
 4 -10 2 45754.7 2697.44 9
 -5 10 -2 500.415 329.148 2
 5 10 2 -138.902 315.257 7
 5 -10 2 545.878 415.276 9
 6 10 2 86181 4163.92 7
 6 -10 2 79444.9 3979.2 9
 7 -10 2 31354 1759.73 8
 7 10 2 27058.2 2288.94 7
 7 10 2 29620.8 1414.27 6
 8 10 2 19575.5 1958.78 7
 8 -10 2 22077.5 1450.14 8
 8 10 2 18937.5 1221.24 6
 8 -10 2 21371 2089.25 9
 9 10 2 43727 3116.86 7
 9 -10 2 48596.2 3326.08 9
 9 -10 2 43050.4 2162.56 8
 10 -10 2 2521.45 838.917 9
 10 10 2 1147.05 412.304 3
 10 10 2 1413.86 630.479 7
 11 -10 2 38540.5 3214.56 9
 11 10 2 41387.7 3214.88 7
 12 -10 2 3682.51 1016.01 9
 12 10 2 5293.8 1198.04 7
 13 10 2 12734.3 1874.98 7
 13 -10 2 18176.7 2323.64 9
 14 10 2 14789.2 2110.96 7
 14 -10 2 15851.3 2256.51 9
 15 10 2 4911.57 1276.42 7
 15 -10 2 5780.09 1422.57 9
 17 -11 -2 3709.15 1188.99 9
 17 11 -2 4510.91 1249.13 7
 16 -11 -2 11987.9 1986.72 9
 16 11 -2 11226.3 1913.79 7
 15 11 -2 463.07 475.178 7
 15 -11 -2 1416.31 802.035 9
 14 11 -2 35167.4 3139.29 7
 14 -11 -2 35464.5 3202.62 9
 13 11 -2 7248.38 1387.8 7
 13 11 -2 10488.1 1361.95 3
 13 -11 -2 9802.69 1613.84 9
 12 -11 -2 13636.4 1826.58 9
 12 11 -2 12154.8 1469.8 3
 12 11 -2 11328.1 1683.51 7
 11 -11 -2 28730.8 2197.23 8
 11 11 -2 32763.6 2764.39 7
 11 -11 -2 33032.7 2777.94 9
 11 11 -2 33621.3 2451.14 3
 10 -11 -2 3437.57 732.048 8
 10 11 -2 3278.29 761.276 3
 10 -11 -2 4736.44 1006.7 9
 10 11 -2 4008.7 947.384 7
 9 11 -2 49809.7 2981.55 3
 9 -11 -2 50182.6 2827.9 8
 9 -11 -2 50244.8 3250.79 9
 9 11 -2 53147.5 3330.73 7
 8 -11 -2 1999.15 649.03 9
 8 11 -2 455.453 490.51 7
 8 -11 -2 1052.46 465.581 8
 7 -11 -2 65809.6 3146.87 8
 7 11 -2 58888.5 3381.35 7
 7 -11 -2 55104.9 3327.05 9
 6 -11 -2 20347.1 1855.59 9
 6 11 -2 19532.4 1831.93 7
 5 11 -2 48747.5 2962.32 7
 5 -11 -2 55472.4 3086.04 9
 -5 11 2 53029.3 1918.82 2
 -5 11 2 59067.2 2301.52 4
 -5 -11 2 52411.7 2110.27 4
 4 -11 -2 62565.1 2230.72 4
 4 11 -2 66107.2 2277.1 4
 -4 11 2 68040.9 2323.94 4
 -4 11 2 58417.5 1825.26 2
 4 11 -2 62011.8 3286.61 7
 4 -11 -2 67314.9 3362.79 9
 -4 -11 2 69429.3 2218.34 4
 -3 11 2 795.745 398.798 7
 -3 -11 2 942.422 187.365 4
 3 11 -2 369.614 419.541 7
 -3 11 2 678.573 192.97 4
 -2 11 2 68004.1 3544.36 7
 -2 -11 2 63002.2 1813.8 4
 2 11 -2 68429.2 3398.79 7
 -2 11 2 73113.6 1980.5 4
 -1 11 2 3023.8 753.937 7
 -1 11 2 3637.8 293.542 4
 -1 -11 2 3732.36 265.437 4
 1 11 -2 4137.97 806.536 7
 0 -11 -2 66163.2 1769.66 2
 0 11 2 61841.8 1665.52 4
 0 11 -2 65274 3255.87 7
 0 11 2 62835.7 3296.82 7
 -1 11 -2 104251 4436.41 7
 1 11 2 107704 4585.64 7
 1 -11 2 106095 4323.95 9
 -1 11 -2 98604.2 3603.34 2
 -2 11 -2 6299.35 790.419 2
 2 -11 2 8190.22 1106.23 9
 2 11 2 6943.84 1072.34 7
 -2 11 -2 7391.3 1086.92 7
 2 -11 2 7471.48 603.982 4
 3 11 2 60853.3 3336.35 7
 3 -11 2 57431.1 3157.99 9
 3 11 2 62948.4 2217.06 4
 -3 11 -2 56580.2 2647.26 2
 4 -11 2 2281.2 655.149 9
 -4 11 -2 2549.5 567.473 2
 4 11 2 2368.73 626.334 7
 -5 11 -2 47536.6 2627.81 2
 5 11 2 58462.3 3360.06 7
 5 -11 2 54333.7 3179.9 9
 6 11 2 36271.5 2695.12 7
 6 -11 2 43063.9 2855.84 9
 -6 11 -2 38848.1 2436.14 2
 7 11 2 39518.8 2869.44 7
 7 -11 2 38142.2 2795.74 9
 8 11 2 25957.4 2357.91 7
 8 -11 2 25583.5 1651.05 8
 8 -11 2 26505.2 2369.26 9
 9 11 2 1784.23 633.61 7
 9 -11 2 2215.88 801.974 9
 10 11 2 47851.4 2709.52 3
 10 -11 2 57716.3 3834.76 9
 10 11 2 49778 3549.32 7
 11 11 2 6906.36 1358.77 7
 11 -11 2 8365.3 1519.14 9
 12 11 2 17331.9 2193.61 7
 12 -11 2 18429.7 2286.96 9
 13 11 2 11350.2 1814.17 7
 13 -11 2 11828.2 1906.24 9
 14 -11 2 9993.06 1825.76 9
 14 11 2 7088.26 1491 7
 15 -11 2 23135.6 2864.65 9
 15 11 2 20080.6 2609.01 7
 16 -12 -2 2504.1 923.612 9
 16 12 -2 3020.38 1042.86 7
 15 12 -2 14328.6 2098.6 7
 15 -12 -2 14138.6 2134.7 9
 14 12 -2 339.638 487.392 7
 14 -12 -2 -287.942 386.309 9
 13 -12 -2 15635.5 2067.92 9
 13 12 -2 13858.8 1630.54 3
 13 12 -2 12859.9 1874.56 7
 12 12 -2 16090.3 2035.3 7
 12 -12 -2 11917.3 1737.72 9
 12 -12 -2 14179.8 1570.55 8
 12 12 -2 13191.7 1574.22 3
 11 -12 -2 16259.4 1647.83 8
 11 12 -2 14371.9 1629.9 3
 11 -12 -2 18354.8 2078.86 9
 11 12 -2 13543 1808.78 7
 10 -12 -2 5606.81 1111.7 9
 10 -12 -2 6578.67 1008.51 8
 10 12 -2 6945.34 1242.83 7
 10 12 -2 7225.05 1137.05 3
 9 -12 -2 1240.03 611.638 9
 9 -12 -2 475.123 317.329 8
 9 12 -2 1017.93 563.723 7
 9 12 -2 561.938 397.485 3
 8 12 -2 27246 2374.91 7
 8 -12 -2 28380.9 2094.64 8
 8 -12 -2 30864.3 2477.14 9
 7 12 -2 1020.55 518.528 7
 7 -12 -2 1160.77 527.144 9
 6 -12 -2 13081.6 1524.74 9
 6 12 -2 14453.2 1622.12 7
 -5 12 2 8108.75 620.675 2
 5 -12 -2 8350.82 1214.56 9
 5 12 -2 6594.38 1057.68 7
 -4 12 2 33905.3 2607 7
 4 -12 -2 34516 2444.65 9
 4 12 -2 31826.2 2362.76 7
 4 -12 -2 32881.2 1456.46 4
 -4 12 2 29109.8 1110.37 2
 -3 12 2 73727 2212.56 4
 3 12 -2 68575.9 3625.31 7
 -3 12 2 68683.8 3792.72 7
 2 12 -2 1647.36 550.97 7
 -2 12 2 2287.56 242.412 4
 -2 12 2 1194.92 447.137 7
 1 12 -2 17974 1721.55 7
 -1 12 2 18944.8 1818.16 7
 0 12 -2 7511.55 1133.78 7
 0 12 2 7881.48 1202.73 7
 0 -12 -2 9760.86 562.589 2
 1 -12 2 6655.96 1017.67 9
 1 12 2 6442.94 418.318 4
 -1 12 -2 6137.05 775.303 2
 1 -12 2 5113.45 403.175 4
 1 12 2 8092.47 1198.92 7
 -1 12 -2 6196.16 1047.87 7
 -1 -12 -2 6109.44 556.943 2
 2 -12 2 33610.3 2361.96 9
 2 -12 2 34078.4 1374.3 4
 2 12 2 27415.8 2271.13 7
 -2 12 -2 33372.1 2459.5 7
 -2 12 -2 34007.7 1941.88 2
 2 12 2 34941.2 1335.02 4
 3 -12 2 17314 1712.93 9
 3 12 2 17494.1 1805.94 7
 -3 12 -2 16740.4 1372.63 2
 3 12 2 20813.7 1118.1 4
 -4 12 -2 7324.19 914.086 2
 4 12 2 8026.8 1225.78 7
 4 -12 2 9420.34 1259.9 9
 5 -12 2 609.993 533.102 9
 -5 12 -2 382.581 267.045 2
 5 12 2 1194.08 572.744 7
 6 -12 2 80706.3 4185.8 9
 6 12 2 78354.1 4201.29 7
 -6 12 -2 75617 3579.47 2
 7 -12 2 230.746 391.007 9
 7 12 2 883.59 526.34 7
 -7 12 -2 585.806 434.07 2
 8 -12 2 13127.1 1734.28 9
 8 -12 2 13303.4 1233.13 8
 8 12 2 12447.8 1685.6 7
 9 12 2 45565.1 3378.3 7
 9 -12 2 51699.5 3584.13 9
 10 12 2 16397.8 2052.21 7
 10 -12 2 14570.5 1955.8 9
 11 -12 2 19807 2340.45 9
 11 12 2 22271.3 2459.04 7
 12 -12 2 2395.56 919.193 9
 12 12 2 1838.89 719.44 7
 13 12 2 12469.6 1937.06 7
 13 -12 2 14568.1 2155.77 9
 14 12 2 5719.16 1362.36 7
 14 -12 2 7779.32 1590.79 9
 15 -12 2 4696.73 1360.68 9
 15 12 2 3114.82 1055.35 7
 16 13 -2 7174.06 1583.93 7
 16 -13 -2 8328.23 1702.62 9
 15 -13 -2 518.903 595.136 9
 15 13 -2 -47.3676 421.159 7
 14 -13 -2 36137.9 3346.71 9
 14 13 -2 37088.1 3367.65 7
 13 13 -2 6680.77 1384.28 7
 13 -13 -2 8110.72 1537.64 9
 13 13 -2 8427 1316.16 3
 12 13 -2 7259.76 1383.31 7
 12 -13 -2 8514.77 1495.4 9
 12 13 -2 9502.48 1373.42 3
 12 -13 -2 10350.7 1354.61 8
 11 13 -2 14083.3 1652.65 3
 11 -13 -2 14839.6 1614.58 8
 11 -13 -2 14068.5 1883.06 9
 11 13 -2 15960.4 2001.52 7
 10 -13 -2 12451.5 1696.97 9
 10 -13 -2 12857.6 1466.99 8
 10 13 -2 8858.37 1478.32 7
 10 13 -2 11305.6 1460.23 3
 9 13 -2 39963.5 3071.82 7
 9 -13 -2 34830.5 2815.01 9
 9 -13 -2 36339.1 2491.12 8
 8 -13 -2 692.503 493.694 9
 8 13 -2 393.051 438.766 7
 7 -13 -2 82423.2 4269.74 9
 7 13 -2 75833.9 4197.46 7
 6 13 -2 6892.77 1201.25 7
 -6 13 2 3845.74 498.363 2
 6 -13 -2 5684.09 1080.13 9
 5 13 -2 77102.6 4028.48 7
 -5 13 2 65557.2 2168.08 2
 5 -13 -2 78162.5 3965.68 9
 4 13 -2 107525 4921.01 7
 -4 13 2 115804 5316.19 7
 4 -13 -2 113415 4928.99 9
 -3 13 2 968.194 586.208 7
 3 13 -2 731.498 414.141 7
 -2 13 2 38817.6 2822.03 7
 2 13 -2 37055.7 2616.62 7
 1 13 -2 410.208 338.563 7
 -1 13 2 475.283 391.293 7
 0 -13 -2 79692.3 2208.43 2
 0 13 -2 82242.9 4103.99 7
 0 13 2 76405.2 4080.48 7
 -1 13 -2 53942.5 2492.02 2
 1 13 2 51920.5 3266.23 7
 -1 -13 -2 49176.3 1815.46 2
 1 -13 2 54040.3 3093.64 9
 -1 13 -2 56928 3360.75 7
 1 -13 2 45778.6 1371.56 4
 2 13 2 7640.44 1205.06 7
 -2 13 -2 6565.85 1169.18 7
 2 13 2 8478.65 558.328 4
 2 -13 2 6828.38 1107.93 9
 -2 13 -2 7356.62 888.361 2
 3 13 2 70475.2 2319.95 4
 -3 13 -2 63247.8 2958.29 2
 3 -13 2 73095.7 3807.21 9
 3 13 2 67943.3 3876.78 7
 4 13 2 1348.39 629.748 7
 -4 13 -2 705.124 341.359 2
 4 -13 2 1877.97 580.807 9
 5 -13 2 69554.7 3835.51 9
 -5 13 -2 61025.3 3061.42 2
 5 13 2 63693 3800.37 7
 -6 13 -2 44085 2667.69 2
 6 -13 2 51680.8 3333.53 9
 6 13 2 53714.4 3486.55 7
 -7 13 -2 20025.5 1843.45 2
 7 -13 2 25875.4 2403.87 9
 7 13 2 25299.8 2420.09 7
 8 13 2 24003.3 2427.77 7
 8 -13 2 26828 2516.26 9
 8 -13 2 28655.2 1908.35 8
 -8 13 -2 26597.5 2204.53 2
 9 -13 2 1048.95 546.564 9
 9 13 2 1089.9 590.192 7
 10 -13 2 60541.5 4128.13 9
 10 13 2 61267.2 4158.91 7
 11 -13 2 5105.74 1199.94 9
 11 13 2 8362 1552.66 7
 12 13 2 15670.3 2155.21 7
 12 -13 2 15902.4 2188.11 9
 13 13 2 4490 1168.49 7
 13 -13 2 6776.05 1463.17 9
 14 13 2 13371.3 2152.85 7
 14 -13 2 13116.6 2133.98 9
 16 14 -2 2091.89 919.46 7
 15 14 -2 2794.95 974.322 7
 15 -14 -2 5880.32 1445.89 9
 14 -14 -2 2675.57 1009.74 9
 14 14 -2 2556.6 955.293 7
 13 -14 -2 4514.91 1242.33 9
 13 14 -2 5758.8 1339.39 7
 13 14 -2 2376.98 812.05 3
 12 14 -2 7744.82 1488.34 7
 12 14 -2 5682.13 1104.45 3
 12 -14 -2 4946.94 1170.1 9
 12 -14 -2 7049.06 1141.48 8
 11 -14 -2 11812.2 1467.68 8
 11 -14 -2 13258.3 1840.93 9
 11 14 -2 11040.8 1738.88 7
 11 14 -2 12126.9 1588.02 3
 10 -14 -2 8150.3 1439.66 9
 10 -14 -2 6593.54 1082.99 8
 10 14 -2 9855.77 1416.25 3
 10 14 -2 7907.01 1397.35 7
 9 -14 -2 2628.66 859.683 9
 9 14 -2 3149.68 909.181 7
 9 -14 -2 2470.3 677.352 8
 8 -14 -2 16274.5 1665.45 8
 8 -14 -2 17945.6 2017.04 9
 8 14 -2 19061.2 2100.79 7
 7 14 -2 4559.27 1014.27 7
 7 -14 -2 4954.69 1071.23 9
 6 14 -2 24559.4 2304.95 7
 6 -14 -2 27392.8 2402.5 9
 5 -14 -2 1779.3 632.369 9
 5 14 -2 1136.24 594.791 7
 4 14 -2 44983.3 3124.1 7
 4 -14 -2 53391.8 3296.42 9
 -4 14 2 46449.8 3346.93 7
 -3 14 2 32456 2712.03 7
 3 14 -2 30994.8 2537.72 7
 -2 14 2 -148.504 305.258 7
 2 14 -2 85.6276 337.365 7
 1 14 -2 12360.2 1570.57 7
 -1 14 2 10884.3 1525.52 7
 0 14 -2 5302.44 1061.64 7
 0 14 2 4110.35 962.468 7
 1 -14 2 2277.45 691.784 9
 1 14 2 1733.06 614.985 7
 -1 14 -2 2868.51 879.541 7
 2 -14 2 20727.1 1987.18 9
 2 14 2 19799.1 2046.83 7
 -2 14 -2 21161.9 2095.86 7
 -2 14 -2 21540.1 1567.58 2
 -3 14 -2 8560.32 987.887 2
 3 -14 2 10044.5 1405.63 9
 4 -14 2 37445.5 2750.66 9
 4 14 2 32859.3 2704.94 7
 5 14 2 8260.9 1398.87 7
 -5 14 -2 6311.74 924.833 2
 5 -14 2 9354.63 1389.23 9
 6 14 2 22618.5 2324.21 7
 -6 14 -2 23268.4 1881.67 2
 6 -14 2 24280.1 2309.35 9
 7 14 2 8166.24 1420.8 7
 -7 14 -2 7088.46 1089.5 2
 7 -14 2 6435.22 1240.7 9
 -8 14 -2 1214.62 560.816 2
 8 -14 2 1652 794.576 9
 8 14 2 787.533 619.097 7
 8 -14 2 497.693 371.87 8
 9 -14 2 24989.6 2561.22 9
 9 14 2 24836.4 2584.87 7
 -9 14 -2 23996.7 2190.34 2
 10 14 2 5256.95 1251.78 7
 10 -14 2 5079.41 1217.01 9
 11 -14 2 6891.94 1419.98 9
 11 14 2 9244.59 1648.15 7
 12 -14 2 810.154 560.016 9
 12 14 2 720.109 663.361 7
 13 14 2 4660.03 1268.07 7
 13 -14 2 3197.16 1097.95 9
 14 14 2 1096.73 564.704 7
 14 -14 2 2170.67 956.185 9
 15 -15 -2 3403.73 1103.91 9
 15 15 -2 1071.47 628.308 7
 14 -15 -2 21526.3 2674.21 9
 14 15 -2 26445.1 2972.72 7
 13 -15 -2 3686.18 1076.11 9
 13 15 -2 4186.88 1207.17 7
 13 15 -2 4377.3 1056.51 3
 12 -15 -2 13300.1 1630.3 8
 12 15 -2 14225.2 1779.32 3
 12 15 -2 15524.2 2160.71 7
 12 -15 -2 14498.2 2044.5 9
 11 15 -2 10232.6 1664.91 7
 11 -15 -2 7787.08 1466.45 9
 11 15 -2 8824.1 1388.76 3
 11 -15 -2 10183.4 1403.08 8
 10 -15 -2 10065.1 1374.58 8
 10 -15 -2 11828.9 1737.51 9
 10 15 -2 12056.5 1609.63 3
 10 15 -2 10850.3 1740.02 7
 9 15 -2 43666.6 3407.42 7
 9 -15 -2 45213.9 2936.23 8
 9 -15 -2 41787.9 3280.52 9
 8 -15 -2 4351.52 1054.39 9
 8 15 -2 5558.66 1178.1 7
 8 -15 -2 4024.55 851.219 8
 7 15 -2 43150.4 3252.24 7
 7 -15 -2 39502.6 3062.55 9
 6 15 -2 6463.64 1230.03 7
 6 -15 -2 6678.2 1236.31 9
 5 15 -2 30743.7 2661.14 7
 5 -15 -2 34571.7 2752.23 9
 4 -15 -2 122577 5526 9
 -4 15 2 119563 5843.25 7
 4 15 -2 121463 5617.48 7
 -3 15 2 1252.69 741.403 7
 3 15 -2 552.174 496.188 7
 -2 15 2 47967.1 3393.24 7
 2 15 -2 43742.4 3125.9 7
 1 15 -2 8726.36 1374.26 7
 -1 15 2 11903.9 1681.62 7
 0 15 2 61998 3928.85 7
 0 15 -2 72303.6 4109.16 7
 1 -15 2 31538.5 2586.25 9
 1 15 2 36135.9 2882.89 7
 -1 15 -2 30911.5 2647.25 7
 -2 15 -2 9870.35 1068.17 2
 2 15 2 12069.5 1649.18 7
 -2 15 -2 8044.35 1325.89 7
 2 -15 2 8244.72 1311.13 9
 -3 15 -2 45482.5 2458.85 2
 3 -15 2 51850 3326.41 9
 4 -15 2 258.577 459.946 9
 -4 15 -2 325.423 302.202 2
 4 15 2 642.932 517.976 7
 5 -15 2 59604.8 3783.51 9
 5 15 2 60773.5 3958.48 7
 -5 15 -2 57849.1 3008.04 2
 6 15 2 9890 1578.43 7
 6 -15 2 8031.29 1391.69 9
 -6 15 -2 9947.55 1217.14 2
 7 -15 2 4123.56 1024.93 9
 7 15 2 2358.75 852.175 7
 -7 15 -2 4059.5 857.163 2
 8 15 2 10340.4 1674.57 7
 -8 15 -2 9217.41 1301.65 2
 9 15 2 9185.97 1641.06 7
 9 -15 2 11222.8 1747.12 9
 10 15 2 48734.5 3874.59 7
 10 -15 2 53382.5 3984.53 9
 11 -15 2 4958.69 1313.99 9
 11 15 2 4719.51 1264.74 7
 12 -15 2 12374.3 2019 9
 12 15 2 17355 2357.86 7
 13 15 2 12886.2 2104.05 7
 13 -15 2 7584.34 1686.39 9
 14 16 -2 923.063 665.631 7
 14 -16 -2 915.06 599.532 9
 13 16 -2 3352.68 889.262 3
 13 -16 -2 5740.41 1343.65 9
 13 16 -2 3374.79 1136.53 7
 12 -16 -2 926.836 421.561 8
 12 -16 -2 2177.66 850.315 9
 12 16 -2 1761.07 771.44 7
 12 16 -2 1706.83 685.404 3
 11 -16 -2 3051.09 809.332 8
 11 16 -2 3503.4 1037.12 7
 11 16 -2 4154.79 994.684 3
 11 -16 -2 4608.95 1168.11 9
 10 -16 -2 6282.85 1098.02 8
 10 16 -2 6453.83 1374.44 7
 10 -16 -2 4180.28 1094.15 9
 10 16 -2 2861.36 842.845 3
 9 -16 -2 1620.69 724.661 9
 9 -16 -2 1234.23 572.745 8
 9 16 -2 1869.3 804.795 7
 8 16 -2 2338.69 757.296 7
 8 -16 -2 1551.14 674.285 9
 8 -16 -2 1658.95 586.464 8
 7 -16 -2 575.235 436.83 9
 7 16 -2 78.6841 371.556 7
 6 16 -2 17560.1 2090.74 7
 6 -16 -2 17779.8 2070.03 9
 5 16 -2 17594.8 2070.03 7
 5 -16 -2 14927.4 1853.84 9
 4 -16 -2 5780.15 1194.01 9
 4 16 -2 4589.71 1136.16 7
 -4 16 2 3869.21 1062.73 7
 -3 16 2 19339.1 2228.42 7
 3 16 -2 18193.2 2046.78 7
 2 16 -2 586.716 527.474 7
 -2 16 2 3.87411 296.933 7
 1 16 -2 587.961 555.393 7
 -1 16 2 3480.34 981.158 7
 0 16 -2 4083.92 1001.8 7
 0 16 2 4690.51 1161.76 7
 1 -16 2 14595.2 1763.29 9
 1 16 2 12578.3 1754.31 7
 -1 16 -2 13141 1768.42 7
 2 -16 2 4805.89 1059.16 9
 -2 16 -2 2950.48 903.587 7
 2 16 2 4287.28 1025.06 7
 3 16 2 7866.38 1438.04 7
 -3 16 -2 5229.8 821.758 2
 3 -16 2 5246.2 1090.49 9
 4 -16 2 22884.2 2292.62 9
 -4 16 -2 24318.8 1795.87 2
 4 16 2 25040.7 2551.44 7
 5 -16 2 282.453 378 9
 -5 16 -2 106.786 327.858 2
 5 16 2 534.481 540.19 7
 6 16 2 4500.09 1084.28 7
 6 -16 2 4182.2 1080.52 9
 7 16 2 4378.29 1130.77 7
 7 -16 2 5217.65 1197.49 9
 8 -16 2 6789.79 1316.6 9
 8 16 2 5277.44 1216.12 7
 9 16 2 7603.89 1533.88 7
 9 -16 2 9725.24 1683.18 9
 10 16 2 259.055 480.301 7
 10 -16 2 -304.57 442.721 9
 11 -16 2 3048.65 1027.67 9
 11 16 2 3982.77 1196.91 7
 12 -16 2 -664.597 726.031 9
 12 16 2 -32.0657 396.623 7
 13 16 2 3126.32 1060.24 7
 14 17 -2 21560.3 2813.89 7
 14 -17 -2 22584 2827.88 9
 13 17 -2 3409.41 989.356 3
 13 -17 -2 3843.85 1120.64 9
 13 17 -2 5474.83 1420.82 7
 12 -17 -2 27565.4 3004.78 9
 12 17 -2 28191.7 3101.16 7
 12 17 -2 32353.2 2877.85 3
 11 17 -2 23164 2691.46 7
 11 -17 -2 22940.7 2617.38 9
 11 -17 -2 15874.7 1866.12 8
 11 17 -2 22673.2 2353.01 3
 10 -17 -2 9092.4 1623.05 9
 10 -17 -2 10529.9 1499.83 8
 10 17 -2 7943.38 1585.61 7
 9 -17 -2 46829.7 3197.95 8
 9 17 -2 54180.1 4031.31 7
 9 -17 -2 51436.4 3828.65 9
 8 -17 -2 8905.14 1536.1 9
 8 17 -2 10495 1769.89 7
 7 -17 -2 17987.5 2145.58 9
 7 17 -2 19065.6 2278.43 7
 6 17 -2 9549.23 1592.52 7
 6 -17 -2 9175.93 1530.16 9
 5 17 -2 17166 2123.59 7
 5 -17 -2 21238.6 2295.64 9
 4 -17 -2 62217.9 3984.5 9
 -4 17 2 59316.4 4193.7 7
 4 17 -2 60583.7 4067.17 7
 3 17 -2 1697.02 772.178 7
 -3 17 2 3253.63 986.696 7
 -2 17 2 38751.1 3247.69 7
 2 17 -2 38023.5 3113.98 7
 1 17 -2 4770.09 1114.85 7
 -1 17 2 3048.18 975.956 7
 0 17 -2 49137 3605.78 7
 0 17 2 52210 3769.91 7
 -1 17 -2 31608.3 2874.77 7
 1 -17 2 35324.7 2860.41 9
 1 17 2 28993.9 2809.34 7
 2 17 2 22021.7 2416.19 7
 -2 17 -2 19978.2 2300.25 7
 2 -17 2 18970.4 2091.74 9
 3 17 2 47939.8 3658.87 7
 3 -17 2 50425.1 3541.25 9
 4 -17 2 1355.41 677.031 9
 4 17 2 313.594 443.61 7
 5 -17 2 58744.8 3944.91 9
 5 17 2 51352.6 3868.4 7
 6 -17 2 21070.2 2348.15 9
 6 17 2 17818.1 2251.87 7
 7 17 2 9741.01 1682.73 7
 7 -17 2 6498.9 1337.5 9
 8 -17 2 29452.2 2925.49 9
 8 17 2 22801 2655.22 7
 9 -17 2 7564.46 1540.91 9
 9 17 2 7628.27 1576.21 7
 10 17 2 47565.4 4035.78 7
 10 -17 2 48927.3 3996.02 9
 11 17 2 5842.47 1448.34 7
 11 -17 2 5707.86 1414.7 9
 12 17 2 12118.1 2081.08 7
 12 -17 2 14810.4 2265.96 9
 13 18 -2 779.74 672.356 7
 13 18 -2 612.981 572.523 3
 13 -18 -2 187.336 622.64 9
 12 18 -2 2334.69 894.191 3
 12 18 -2 2276.11 1001.59 7
 12 -18 -2 1297.25 823.45 9
 11 18 -2 816.458 790.38 7
 11 18 -2 2501.06 893.968 3
 11 -18 -2 1740.65 816.403 9
 11 -18 -2 86.4202 399.94 8
 10 18 -2 2004.31 920.002 7
 10 -18 -2 1228.47 716.388 9
 10 -18 -2 1216.49 621.967 8
 9 -18 -2 767.023 480.429 8
 9 18 -2 1311.32 830.881 7
 9 -18 -2 49.7856 428.466 9
 8 18 -2 356.27 475.358 7
 8 -18 -2 -1268.52 646.604 9
 7 -18 -2 1796.3 780.179 9
 7 18 -2 1362.95 663.632 7
 6 18 -2 4965.38 1183.3 7
 6 -18 -2 4791.62 1162.76 9
 5 18 -2 7062.23 1433.58 7
 5 -18 -2 7932.42 1417.62 9
 4 -18 -2 2980.41 995.054 9
 4 18 -2 1239.75 731.601 7
 -4 18 2 2440.85 865.66 7
 3 -18 -2 649.261 564.851 9
 -3 18 2 1155.87 600.57 7
 3 18 -2 909.973 510.051 7
 2 18 -2 -108.639 360.441 7
 -2 18 2 137.086 437.482 7
 1 18 -2 4995.09 1164.26 7
 -1 18 2 4230.34 1041.74 7
 0 18 2 373.65 477.664 7
 0 18 -2 -73.9149 472.048 7
 1 -18 2 2003.47 800.229 9
 1 18 2 392.339 323.731 7
 -1 18 -2 1359.6 790.435 7
 2 -18 2 4162.78 1085.56 9
 -2 18 -2 2056.16 943.013 7
 2 18 2 2927.19 987.253 7
 3 -18 2 1940.33 813.231 9
 3 18 2 3095.85 1007.94 7
 4 -18 2 1244.59 605.645 9
 4 18 2 3136.2 1043.38 7
 5 -18 2 -221.286 367.435 9
 5 18 2 266.927 371.654 7
 6 -18 2 268.495 502.725 9
 6 18 2 40.0429 400.164 7
 7 18 2 468.887 506.892 7
 7 -18 2 649.925 513.089 9
 8 18 2 1207.67 683.648 7
 8 -18 2 1513.69 736.281 9
 9 18 2 1458.76 756.693 7
 9 -18 2 771.592 562.664 9
 10 18 2 1614.98 811.01 7
 10 -18 2 -185.101 456.672 9
 11 -18 2 346.896 483.865 9
 11 18 2 -510.126 546.055 7
 12 -19 -2 23785.9 2871.74 9
 12 19 -2 21541.8 2464.71 3
 12 19 -2 19946.3 2682.6 7
 11 19 -2 22797.3 2841.16 7
 11 -19 -2 24160.6 2818.55 9
 11 -19 -2 24236.7 2399.65 8
 11 19 -2 22495.4 2508.7 3
 10 19 -2 7135.1 1583.04 7
 10 -19 -2 7497.11 1508.57 9
 10 -19 -2 4922.7 1080.41 8
 9 -19 -2 31891.4 2713.3 8
 9 -19 -2 32152.9 3184.3 9
 9 19 -2 31142.3 3242.52 7
 8 -19 -2 1562.42 767.736 9
 8 19 -2 1707.94 814.833 7
 7 19 -2 26126 2856.41 7
 7 -19 -2 32190.8 3085.34 9
 6 -19 -2 11676 1838.77 9
 6 19 -2 9993.94 1759.38 7
 5 19 -2 18907.9 2402.46 7
 5 -19 -2 24855.7 2641.01 9
 4 19 -2 46251.5 3753.17 7
 -4 19 2 42345.3 3819.67 7
 4 -19 -2 54327.7 3918.03 9
 -3 19 2 3205.14 1096.89 7
 3 19 -2 1368.42 796.464 7
 3 -19 -2 2563.81 900.745 9
 -2 19 2 39610.1 3536.84 7
 2 19 -2 47611.3 3761.96 7
 -1 19 2 6645.92 1420.87 7
 1 19 -2 7289.09 1459.78 7
 0 19 -2 24868.1 2715.64 7
 0 19 2 25147 2795.82 7
 -1 19 -2 41379.7 3545.1 7
 1 19 2 34222 3300.26 7
 1 -19 2 41046.2 3336.91 9
 2 19 2 9428.56 1669.84 7
 -2 19 -2 9574.73 1766.93 7
 2 -19 2 11254.2 1759.75 9
 3 19 2 46978.3 3868.46 7
 3 -19 2 51339.5 3787.53 9
 4 -19 2 -242.166 446.542 9
 4 19 2 1976.13 881.033 7
 5 -19 2 22805.8 2549.54 9
 5 19 2 23507.6 2743 7
 6 19 2 10581.8 1909.4 7
 6 -19 2 10119.5 1723.16 9
 7 -19 2 18502.3 2401.98 9
 7 19 2 20403.1 2597.67 7
 8 19 2 18390.2 2527.69 7
 8 -19 2 22255.4 2650.33 9
 9 -19 2 4734.36 1330.34 9
 9 19 2 2998.01 1188.93 7
 10 -19 2 31265.1 3325.37 9
 10 19 2 37850.9 3709.07 7
 12 20 -2 -6.94993 349.003 3
 11 20 -2 391.649 539.517 7
 11 20 -2 1892.05 881.619 3
 11 -20 -2 1196.87 831.771 9
 10 20 -2 494.202 505.948 7
 10 -20 -2 -738.742 575.002 9
 10 -20 -2 99.5107 428.217 8
 9 -20 -2 -248.786 486.677 9
 9 -20 -2 325.028 399.649 8
 9 20 -2 413.653 464.314 7
 8 20 -2 2193.14 883.677 7
 8 -20 -2 1390.14 778.971 9
 7 -20 -2 232.6 584.139 9
 7 20 -2 2.58187 499.759 7
 6 -20 -2 595.765 655.75 9
 6 20 -2 149.321 399.692 7
 5 -20 -2 1567.67 808.188 9
 5 20 -2 823.731 574.687 7
 4 -20 -2 470.248 515.71 9
 4 20 -2 280.907 571.566 7
 3 -20 -2 804.522 688.706 9
 -3 20 2 499.496 657.04 7
 3 20 -2 143.263 449.795 7
 2 20 -2 838.924 792.354 7
 -2 20 2 1732.95 853.719 7
 -1 20 2 2709.74 1001.48 7
 1 20 -2 4955.68 1239.7 7
 0 20 2 598.231 593.792 7
 0 20 -2 1027.11 619.938 7
 0 -20 2 1072.86 676.317 9
 1 -20 2 629.523 530.871 9
 1 20 2 924.969 595.919 7
 -1 20 -2 762.679 634.193 7
 -2 20 -2 -302.886 366.214 7
 2 -20 2 662.154 618.715 9
 2 20 2 490.249 584.009 7
 3 -20 2 1963.05 798.51 9
 3 20 2 3131.61 1006.38 7
 4 -20 2 278.784 466.426 9
 4 20 2 -118.945 399.216 7
 5 20 2 1914.64 859.579 7
 5 -20 2 172.211 413.167 9
 6 -20 2 470.529 555.729 9
 6 20 2 64.1937 463.185 7
 7 -20 2 2572.69 880.476 9
 7 20 2 1061.71 747.018 7
 8 20 2 885.162 673.797 7
 8 -20 2 1126.99 642.77 9
 9 20 2 -401.017 481.961 7
 9 -20 2 -277.668 449.596 9
 12 21 -2 12780.2 1969.74 3
 11 21 -2 21292.6 2581.78 3
 10 -21 -2 4483.47 1069.16 8
 10 21 -2 5804.75 1521.68 7
 10 -21 -2 4231.16 1279.19 9
 9 -21 -2 25507.6 2551.18 8
 9 -21 -2 27795.6 3095.84 9
 9 21 -2 20188.9 2745.21 7
 8 21 -2 -200.174 460.87 7
 8 -21 -2 1606.69 868.708 9
 7 -21 -2 22718.2 2730.2 9
 7 21 -2 18461.9 2573.79 7
 6 -21 -2 8911.38 1804.67 9
 6 21 -2 11076.3 1980.55 7
 5 21 -2 11072.9 1936.72 7
 5 -21 -2 12693.5 2028.12 9
 4 21 -2 16264.7 2345.01 7
 4 -21 -2 15525.2 2238.34 9
 3 -21 -2 5911.43 1386.32 9
 -3 21 2 5260.51 1458.48 7
 3 21 -2 4294.81 1212.18 7
 -2 21 2 30817.1 3328.61 7
 2 21 -2 30433.6 3220.81 7
 1 21 -2 3008.83 1049.95 7
 -1 21 2 1730.39 907.489 7
 0 21 2 9724.61 1860.46 7
 0 21 -2 9239.62 1763.68 7
 0 -21 2 9834.9 1729.71 9
 1 21 2 12109 2059.25 7
 1 -21 2 10116.6 1766.15 9
 -1 21 -2 9841.79 1818.95 7
 2 21 2 7776 1665.12 7
 2 -21 2 12550 1965.68 9
 3 -21 2 37450.6 3429.68 9
 3 21 2 31258.3 3316.24 7
 4 -21 2 203.237 495.168 9
 4 21 2 776.877 700.57 7
 5 -21 2 23689 2759.6 9
 5 21 2 23246.7 2887.39 7
 6 21 2 4993.2 1379.23 7
 6 -21 2 5476.52 1367.82 9
 7 -21 2 22190.1 2771.15 9
 7 21 2 23889.5 2990.62 7
 8 21 2 30103.6 3401.34 7
 8 -21 2 27373.5 3108.86 9
 10 -22 -2 476.165 446.892 8
 9 -22 -2 810.817 592.96 8
 9 22 -2 -591.216 623.178 7
 8 22 -2 -284.727 733.017 7
 8 -22 -2 -55.4242 359.398 9
 7 -22 -2 65.5842 490.346 9
 7 22 -2 278.534 474.771 7
 6 22 -2 -183.935 407.294 7
 6 -22 -2 556.589 420.837 9
 5 22 -2 1200.71 633.163 7
 5 -22 -2 1475.84 818.297 9
 4 22 -2 -89.7787 386.1 7
 4 -22 -2 -26.0132 481.151 9
 3 -22 -2 1599.76 861.192 9
 -3 22 2 1662.19 955.835 7
 3 22 -2 -11.1611 441.014 7
 -2 22 2 2211.37 979.367 7
 2 22 -2 1671.09 890.051 7
 1 22 -2 61.4363 515.588 7
 -1 22 2 -423.867 531.351 7
 0 -22 2 -32.1939 418.012 9
 0 22 -2 -44.876 419.278 7
 0 22 2 772.752 630.51 7
 1 22 2 1160.53 774.725 7
 -1 22 -2 2818.15 1041.92 7
 1 -22 2 1274.42 709.147 9
 2 -22 2 457.636 686.471 9
 2 22 2 49.1211 461.82 7
 3 -22 2 1878.21 839.961 9
 3 22 2 533.771 608.347 7
 4 22 2 618.675 538.722 7
 4 -22 2 -257.755 544.495 9
 5 -22 2 911.54 664.485 9
 5 22 2 -473.168 536.809 7
 6 22 2 544.799 594.937 7
 6 -22 2 -56.8006 486.688 9
 7 22 2 43.2391 419.513 7
 7 -22 2 105.546 566.647 9
 9 -23 -2 14674.6 2011.37 8
 7 23 -2 20659.2 2883.21 7
 6 23 -2 8532.56 1793.84 7
 6 -23 -2 10308.9 1982.23 9
 5 23 -2 2949.98 1110.03 7
 5 -23 -2 7537.33 1684.89 9
 4 23 -2 15980.6 2495.33 7
 4 -23 -2 15826.6 2391.64 9
 3 23 -2 1626.86 937.355 7
 -3 23 2 988.328 644.888 7
 3 -23 -2 3042.95 1358.23 9
 -2 23 2 22886.6 3059.53 7
 2 -23 -2 24993.9 2969.67 9
 2 23 -2 22960.9 2975.23 7
 1 23 -2 5747.79 1505.5 7
 -1 23 2 8747.55 1842.37 7
 -1 -23 2 8231.46 1718.44 9
 0 23 2 6795.15 1606.82 7
 0 -23 2 7313.99 1592.36 9
 0 23 -2 4870.37 1415.89 7
 1 -23 2 4377.75 1321.75 9
 -1 23 -2 7313.5 1687.24 7
 1 23 2 6571.27 1633.65 7
 2 -23 2 11217.4 1977.39 9
 2 23 2 11710.5 2161.19 7
 3 23 2 28708.9 3404.07 7
 3 -23 2 30720.4 3294.81 9
 4 -23 2 644.295 639.969 9
 4 23 2 2123.9 1089.45 7
 5 -23 2 18185.6 2617.5 9
 5 23 2 17340.8 2643.72 7
 5 24 -2 244.422 725.6 7
 4 24 -2 1437.49 873.248 7
 3 24 -2 1234.51 871.986 7
 -3 24 2 179.167 481.125 7
 3 -24 -2 816.509 450.029 9
 2 24 -2 1052.63 806.244 7
 2 -24 -2 -117.034 451.205 9
 1 24 -2 168.696 461.709 7
 -1 24 2 1223.91 784.692 7
 -1 -24 2 809.427 657.762 9
 0 -24 2 -22.4421 602.772 9
 0 24 -2 -1069.89 756.917 7
 0 24 2 105.58 463.162 7
 1 24 2 929.695 741.3 7
 -1 24 -2 -48.2215 531.839 7
 1 -24 2 637.628 834.036 9
 2 24 2 1312.98 960.173 7
 2 -24 2 1581.32 874.927 9
 3 -24 2 1193.21 694.725 9
 20 0 -3 300.025 608.414 9
 19 0 -3 27.0468 352 9
 18 0 -3 136.05 326.884 9
 17 0 -3 85.284 336.062 9
 16 0 -3 1033.87 600.243 9
 15 0 -3 -10.3708 364.332 9
 14 0 -3 12.5346 248.826 9
 13 0 -3 254.372 362.198 9
 -13 0 3 1054.2 552.601 4
 -12 0 3 61.807 231.44 4
 12 0 -3 -64.5119 251.488 9
 11 0 -3 -115.821 308.758 9
 -11 0 3 312.543 314.08 4
 -10 0 3 236.275 236.873 4
 10 0 -3 -181.739 154.594 9
 -9 0 3 41.2239 47.5597 5
 9 0 -3 -60.906 144.188 9
 -9 0 3 138.914 283.264 4
 8 0 -3 -112.901 149.236 9
 -8 0 3 105.258 71.0675 5
 7 0 -3 256.963 179.092 9
 -7 0 3 188.347 78.3583 5
 -6 0 3 90.1791 69.5898 5
 6 0 -3 53.5218 86.9386 9
 -6 0 3 55.845 135.201 4
 5 0 -3 -25.6995 108.631 9
 5 0 -3 153.477 171.933 6
 -5 0 3 21.3168 84.6148 9
 -5 0 3 25.7442 54.8604 5
 4 0 -3 -2.81523 54.4738 9
 -4 0 3 166.296 95.6669 5
 -4 0 3 204.162 191.582 4
 -4 0 3 7.64247 49.7245 9
 4 0 -3 7.00748 142.477 6
 -3 0 3 530.622 217.748 4
 -3 0 3 264.431 82.593 9
 3 0 -3 191.145 155.563 6
 3 0 -3 251.258 83.5196 9
 -3 0 3 70.6398 82.5019 5
 -3 0 3 93.6493 123.996 6
 3 0 -3 159.369 183.484 4
 3 0 -3 15.4211 55.0509 5
 -2 0 3 200.457 126.794 5
 -2 0 3 479.202 190.944 2
 2 0 -3 879.932 202.002 5
 -2 0 3 135.524 159.864 6
 -2 0 3 575.885 229.083 4
 2 0 -3 246.015 163.792 2
 1 0 -3 8.27248 75.9163 5
 -1 0 3 63.9407 79.766 5
 -1 0 3 172.429 118.414 8
 -1 0 3 276.111 175.606 2
 1 0 -3 129.958 160.215 2
 0 0 3 305.274 137.014 5
 0 0 3 188.3 100.636 9
 0 0 -3 622.03 201.442 5
 0 0 3 505.9 143.568 8
 0 0 3 265.12 81.9774 7
 0 0 -3 335.555 133.27 9
 0 0 -3 197.863 166.571 2
 -1 0 -3 46.2673 97.2561 5
 1 0 3 5.97884 56.9606 3
 -1 0 -3 42.1237 90.1957 1
 1 0 3 179.827 117.86 9
 -1 0 -3 -21.9702 68.8215 9
 1 0 3 -44.4559 65.4093 5
 -1 0 -3 148.504 74.7813 8
 2 0 3 134.746 133.802 1
 -2 0 -3 97.0775 107.888 1
 -2 0 -3 146.422 111.69 5
 2 0 3 36.0546 110.821 9
 2 0 3 16.8936 31.855 3
 -2 0 -3 94.1461 98.1988 9
 3 0 3 313.578 159.877 9
 3 0 3 431.287 195.108 1
 -3 0 -3 179.918 128.724 5
 -4 0 -3 51.8311 116.812 5
 4 0 3 8.12197 155.539 9
 -5 0 -3 -0.58409 120.625 5
 5 0 3 248.635 269.928 9
 -6 0 -3 133.257 174.936 5
 6 0 3 -67.667 191.778 9
 -7 0 -3 75.3451 149.695 5
 7 0 3 22.2068 180.607 9
 -8 0 -3 -40.0663 207.659 5
 8 0 3 -71.5855 215.011 9
 -9 0 -3 -41.6018 190.773 5
 9 0 3 317.862 361.55 9
 -10 0 -3 75.3366 166.987 5
 10 0 3 -16.3093 260.217 9
 -11 0 -3 69.359 238.161 5
 11 0 3 197.994 308.153 9
 12 0 3 -225.033 355.917 9
 13 0 3 -388.707 653.403 9
 14 0 3 560.109 481.864 9
 15 0 3 -300.29 581.574 9
 16 0 3 81.4613 658.826 9
 17 0 3 129.093 322.51 9
 20 1 -3 36407.8 3512.46 9
 20 -1 -3 31311 3285.5 9
 19 1 -3 90.3982 449.458 9
 19 -1 -3 2041.54 849.654 9
 18 -1 -3 38098.8 3337.78 9
 18 1 -3 28800.4 2898.05 9
 17 -1 -3 14024.1 1950.92 9
 17 1 -3 13551 1904.04 9
 16 -1 -3 34920 2952.77 9
 16 1 -3 35156.9 2977.92 9
 15 1 -3 48202.3 3373.19 9
 15 -1 -3 53822.2 3567.91 9
 14 1 -3 26277.9 2292.97 9
 14 -1 -3 25914.3 2332.6 9
 13 1 -3 51675.7 3220.13 9
 -13 -1 3 52886.5 3442.53 4
 -13 1 3 61192 3694.71 4
 13 -1 -3 60889.5 3479.29 9
 -12 -1 3 2416.13 640.692 4
 -12 1 3 2028.19 615.44 4
 12 -1 -3 1799.67 612.011 9
 12 1 -3 2717.87 650.525 9
 11 1 -3 127963 4855.93 9
 11 -1 -3 121139 4829.26 9
 -11 1 3 121104 5055.48 4
 -11 -1 3 114847 4929.23 4
 10 1 -3 27395.3 1906.82 9
 -10 -1 3 22828.6 1887.96 4
 10 -1 -3 24904.4 1839.58 9
 -10 1 3 21914.3 1867.72 4
 -9 -1 3 42415.2 2458.92 4
 9 -1 -3 40384 2274.93 9
 -9 1 3 41171.7 2431.76 4
 9 1 -3 39564.9 2228.25 9
 8 1 -3 133245 4422.83 9
 8 -1 -3 136306 4503.57 9
 -8 -1 3 135107 4760.23 4
 -8 1 3 136478 4788.84 4
 7 1 -3 38501.2 1870.33 9
 7 -1 -3 35907.9 1850.58 9
 -7 1 3 38109.5 2113.02 4
 -7 -1 3 40390.2 2145.93 4
 -6 1 3 138956 3137.45 5
 6 -1 -3 124713 3896.63 9
 -6 -1 3 132790 4328.19 4
 6 1 -3 133447 4296.5 6
 -6 1 3 128348 4293.69 4
 6 1 -3 132255 3877 9
 -5 1 3 32103.1 1070.86 5
 -5 -1 3 31135.5 1640.04 4
 -5 -1 3 31720.7 1360.99 9
 -5 1 3 30606.5 1401.86 9
 5 -1 -3 29918.6 1372.83 9
 -5 1 3 31439.9 1658.75 4
 5 1 -3 27366.4 1557.65 6
 5 1 -3 31718 1348.5 9
 -4 -1 3 180674 4514.13 9
 4 -1 -3 193073 4456 5
 -4 1 3 182100 5153.22 4
 -4 1 3 206725 4514.12 5
 4 -1 -3 198412 4659.45 9
 -4 1 3 181121 4656.63 9
 4 -1 -3 201656 5201.34 6
 -4 -1 3 190824 4667.29 5
 4 1 -3 193271 4529.61 9
 4 1 -3 177317 5122.81 6
 -4 -1 3 188766 5173.04 4
 -3 -1 3 306314 7635.83 3
 -3 1 3 341852 7297.86 5
 3 -1 -3 338736 7759.66 4
 -3 -1 3 332064 7794.42 4
 -3 1 3 309063 7730.8 4
 3 1 -3 310936 7748.8 6
 -3 1 3 319465 7104.54 9
 -3 -1 3 327627 7772.66 6
 3 -1 -3 302997 7245.37 5
 -3 1 3 329967 7660.19 8
 3 -1 -3 325417 7684.98 6
 -3 -1 3 338317 7428.59 5
 3 -1 -3 326176 7074.36 9
 3 1 -3 330938 7734.71 4
 2 -1 -3 173853 4295.62 5
 2 1 -3 177130 4339 5
 -2 1 3 165990 4385.87 6
 -2 1 3 169696 4376.74 8
 2 -1 -3 170975 4426.82 6
 -2 -1 3 173604 4561.15 2
 2 1 -3 165485 4514.19 2
 -2 1 3 162932 4332.94 2
 -2 -1 3 157975 4389.53 3
 2 -1 -3 163775 4315.74 2
 -2 1 3 187454 4332.62 5
 2 1 -3 168392 4417.48 3
 -2 -1 3 173200 4521.8 4
 2 -1 -3 167782 4391.74 8
 2 -1 -3 179845 3985.89 7
 -2 -1 3 180492 4372.43 5
 -2 1 3 174896 4533.88 4
 -1 -1 3 464626 10538.5 2
 1 1 -3 464620 10403.7 5
 -1 1 3 470184 10339.4 2
 -1 1 3 502006 10467.1 5
 -1 1 3 476551 10283.7 8
 1 1 -3 469520 10556.6 2
 -1 -1 3 496012 10462.1 5
 -1 -1 3 435911 10307.4 3
 1 -1 -3 455710 10406.6 5
 0 1 -3 16845.1 1044.1 1
 0 1 -3 16500.4 750.188 9
 0 1 -3 16853.2 828.594 3
 0 1 -3 17206.1 965.857 5
 0 -1 3 18062.2 859.686 3
 0 1 3 18393 760.037 7
 0 -1 -3 17322 821.041 9
 0 1 -3 18935.3 1053.16 2
 0 -1 -3 17644.4 747.481 7
 0 -1 3 17633.3 971.406 5
 0 -1 3 16405.9 755.8 9
 0 -1 -3 17890.7 953.359 2
 0 -1 3 17150.5 1001.1 2
 0 -1 -3 17057.6 805.264 8
 0 -1 -3 16284 960.798 5
 1 -1 3 430279 9728.24 5
 -1 1 -3 413381 9479.03 9
 1 1 3 429653 9560.34 9
 -1 1 -3 438408 9887.74 1
 -1 1 -3 409208 9686.97 5
 1 -1 3 430691 9214.54 3
 -1 -1 -3 436849 9809.34 5
 -1 -1 -3 423714 9670.69 1
 -1 -1 -3 434741 9593.31 9
 1 -1 3 429707 9971.49 1
 1 -1 3 421773 9508.02 9
 -2 1 -3 84105.7 2761.57 9
 -2 1 -3 88996.6 2177.34 3
 -2 -1 -3 90216.7 2897.63 5
 2 1 3 78021.5 2691.63 1
 2 -1 3 82689.8 2779.67 9
 2 -1 3 86131.2 2925.75 1
 -2 -1 -3 83752 2826.24 9
 -2 -1 -3 89850.5 2725.88 1
 -2 1 -3 85569.3 2767.26 5
 2 1 3 86670.5 2814.03 9
 3 1 3 93791.2 3201.01 9
 -3 -1 -3 98419.7 3179.05 5
 3 1 3 91402.7 2979.13 1
 3 -1 3 92032.5 3187.95 9
 -3 1 -3 98581.8 3072.59 5
 -4 1 -3 171148 4810.8 5
 4 1 3 175686 5193.79 9
 4 -1 3 176364 5252.72 9
 -4 -1 -3 175348 4980.89 5
 4 1 3 174263 4838.1 1
 -5 1 -3 6496.06 697.103 5
 5 -1 3 7057.62 878.206 9
 -5 -1 -3 8029.67 810.478 5
 5 1 3 6710.07 865.295 9
 6 -1 3 228247 6759.39 9
 6 1 3 226182 6701.27 9
 -6 -1 -3 231131 6149.09 5
 -6 1 -3 229574 5967.31 5
 -7 1 -3 7928.2 509.403 8
 -7 -1 -3 8436.91 899.937 5
 7 -1 3 8059.92 1074.7 9
 -7 1 -3 9040.62 867.439 5
 7 1 3 9859.19 1158.73 9
 -8 1 -3 68371.8 2108.19 8
 8 1 3 70785.5 3503.27 9
 -8 1 -3 68893 2758.85 5
 -8 -1 -3 68956.5 2921.25 5
 8 -1 3 70423 3570.64 9
 -9 1 -3 49880.1 2298.44 5
 -9 1 -3 46711.3 1722.85 8
 9 1 3 45813.9 2922.14 9
 9 -1 3 45596.4 2929.45 9
 -9 -1 -3 46573.2 2362.5 5
 -10 -1 -3 21279.9 1572.86 5
 10 1 3 20235.4 2002.78 9
 -10 1 -3 21812.3 1481.85 5
 10 -1 3 22327.2 2088.14 9
 -11 -1 -3 139296 4772.14 5
 -11 1 -3 128053 4414.45 5
 11 1 3 135313 5922.15 9
 11 -1 3 140456 6002.43 9
 12 1 3 276.381 268.202 9
 12 -1 3 -36.3528 296.419 9
 -12 -1 -3 367.114 138.71 5
 13 -1 3 61065.1 4086.33 9
 13 1 3 64759.2 4181.61 9
 14 -1 3 23055.3 2553.06 9
 14 1 3 21173 2452.27 9
 15 -1 3 16982.5 2267.69 9
 15 1 3 20274.2 2433.2 9
 16 -1 3 29274.9 3125.29 9
 16 1 3 33593.6 3334.56 9
 20 -2 -3 -97.4064 518.273 9
 19 -2 -3 1191.17 647.576 9
 19 2 -3 1497.11 631.352 6
 19 2 -3 594.134 477.568 7
 18 2 -3 65.0587 311.83 6
 18 2 -3 1181.76 601.074 9
 18 -2 -3 606.938 512.592 9
 17 -2 -3 3333.35 1014.38 9
 17 2 -3 1836.26 786.522 9
 16 -2 -3 11586.2 1684.18 9
 16 2 -3 15138.1 1909.14 9
 15 2 -3 15.4343 382.782 9
 15 -2 -3 310.967 438.333 9
 14 2 -3 2649.48 755.27 9
 14 -2 -3 1835.85 591.872 9
 13 2 -3 776.424 458.047 9
 13 -2 -3 513.571 310.818 9
 -12 -2 3 2407.72 668.845 4
 12 -2 -3 2327.32 674.906 9
 12 2 -3 2238.1 656.396 9
 -12 2 3 2341.37 667.531 4
 11 -2 -3 20042.3 1773.32 9
 11 2 -3 20637.3 1764.85 9
 -11 2 3 19820.2 1848.19 4
 -11 -2 3 20084.7 1843.64 4
 10 -2 -3 4081.58 736.163 9
 -10 2 3 3900.27 771.942 4
 -10 -2 3 4333.62 804.57 4
 10 2 -3 3868.87 699.611 9
 9 2 -3 458.668 262.854 9
 9 -2 -3 930.269 327.888 9
 -9 2 3 39.1616 268.506 4
 -9 -2 3 949.808 361.304 4
 8 2 -3 18048.4 1459.83 6
 -8 2 3 20181.5 1596.72 4
 8 2 -3 22626.4 1493.1 9
 -8 -2 3 18664.1 1517.59 4
 8 -2 -3 21900.9 1531.11 9
 -7 -2 3 40170.1 2166.6 4
 -7 2 3 40341.6 2181.59 4
 7 2 -3 44099.2 2234.6 6
 7 -2 -3 41581.5 2049.3 9
 7 2 -3 42859.1 1991.55 9
 6 2 -3 401.305 183.736 9
 -6 2 3 289.549 206.63 4
 6 2 -3 428.026 262.96 6
 6 -2 -3 500.688 198.537 9
 -6 -2 3 360.784 201.193 4
 -5 -2 3 27835.4 1312.67 9
 5 -2 -3 32134.7 1059.13 5
 -5 2 3 31832.2 1517.27 9
 -5 2 3 32146.1 1684.22 4
 5 -2 -3 31143.1 1453.01 9
 -5 -2 3 32801.5 1675.35 4
 5 2 -3 29990.7 1640.17 6
 5 2 -3 31892.9 1386.11 9
 5 2 -3 32750.7 1638.91 3
 -4 2 3 241.672 138.704 9
 4 -2 -3 603.463 214.206 8
 -4 2 3 898.575 276.574 4
 4 2 -3 390.215 147.182 3
 4 2 -3 510.114 162.869 7
 -4 -2 3 978.84 288.52 4
 4 2 -3 355.866 187.249 6
 4 -2 -3 423.458 123.648 5
 -4 -2 3 399.277 123.493 9
 4 -2 -3 556.553 163.835 9
 -3 -2 3 326.011 154.085 3
 3 -2 -3 162.675 104.069 9
 3 -2 -3 421.847 200.215 4
 3 2 -3 512.873 201.179 4
 3 -2 -3 87.9493 119.233 6
 3 2 -3 344.108 157.686 3
 -3 -2 3 816.879 250.277 4
 -3 2 3 420.236 194.771 4
 -3 -2 3 364.489 200.452 6
 -3 -2 3 251.164 98.3659 9
 3 -2 -3 68.7706 120.992 8
 3 2 -3 171.195 100.616 7
 3 -2 -3 250.865 109.945 5
 2 2 -3 8872.69 707.969 3
 -2 2 3 9884.8 678.896 6
 -2 -2 3 9660.21 742.264 3
 -2 2 3 9188.44 612.454 7
 -2 2 3 9839.79 642.608 2
 -2 -2 3 11015.7 743.597 5
 2 2 -3 9734.54 770.152 2
 -2 2 3 10428.1 751.69 4
 -2 -2 3 10169.1 488.678 7
 2 -2 -3 11078.2 639.131 7
 2 -2 -3 8829.95 636.22 5
 -2 -2 3 10823.7 767.827 4
 2 -2 -3 10408.7 699 6
 2 2 -3 10099.3 497.301 7
 -2 2 3 10490.9 730.749 8
 2 -2 -3 10206.5 733.385 8
 -2 -2 3 10122.8 787.951 2
 -1 -2 3 24812.1 1248.5 2
 1 -2 -3 24175.2 1111.92 8
 -1 2 3 22033.6 1002.95 6
 -1 -2 3 24710.6 1185.03 5
 -1 -2 3 22899.2 1134.01 3
 -1 2 3 23135.1 979.096 7
 1 -2 -3 24154.8 972.368 7
 1 2 -3 21474.5 1190.31 2
 -1 2 3 23926.4 1026.17 2
 -1 -2 3 23444.4 805.82 7
 -1 -2 3 23289.4 830.329 9
 1 2 -3 23356 1130.08 3
 1 2 -3 23073.4 794.834 7
 1 -2 -3 22879.6 1022.72 2
 0 2 -3 85202.9 2493.34 3
 0 2 -3 82565.5 2641.66 5
 0 -2 3 84206.5 2748.09 2
 0 2 3 85977 2435.17 7
 0 2 -3 88914.8 2796.36 2
 0 -2 -3 89329.4 2543.76 2
 0 -2 -3 83742.3 2384.7 7
 0 2 -3 86169 2812.15 1
 0 -2 3 78721 2315.72 9
 0 2 -3 82444.5 2332 9
 0 -2 3 86132.1 2661.95 5
 -1 2 -3 389.437 176.444 1
 1 -2 3 665.37 194.13 9
 -1 2 -3 379.532 127.879 3
 -1 2 -3 325.244 129.564 9
 1 -2 3 710.295 231.836 1
 -1 -2 -3 408.195 139.287 7
 1 2 3 539.733 174.747 7
 -1 -2 -3 693.409 200.669 9
 -1 2 -3 554.245 183.02 5
 1 -2 3 483.334 167.055 5
 -1 2 -3 261.894 176.115 2
 2 -2 3 494.744 191.443 9
 -2 -2 -3 417.316 166.984 1
 2 2 3 483.388 200.397 7
 -2 2 -3 124.322 71.6382 3
 -2 2 -3 442.494 161.136 5
 -3 2 -3 10345.2 800.856 5
 3 2 3 11076.7 922.735 9
 3 2 3 9690.61 836.688 7
 3 2 3 9480.7 735.182 1
 3 -2 3 9395.01 862.972 9
 4 -2 3 5025.6 679.637 9
 4 2 3 3552.31 578.701 9
 4 2 3 3578.77 542.225 7
 -4 2 -3 3315.11 471.961 5
 4 2 3 3359.58 443.546 1
 -5 2 -3 10466.3 867.378 5
 5 2 3 9969.89 832.295 1
 5 -2 3 10727.3 1094.46 9
 5 2 3 8444.56 965.179 9
 -6 -2 -3 154.76 245.317 5
 -6 2 -3 -68.7595 120.184 5
 6 2 3 148.75 275.24 9
 6 -2 3 -2.9045 208.969 9
 -7 2 -3 24404.2 1443.97 5
 7 -2 3 23577 1876.48 9
 7 2 3 23611.5 1849.62 9
 -7 -2 -3 24773.9 1619.77 5
 -8 -2 -3 3804.56 644.537 5
 8 2 3 4865.55 889.781 9
 8 -2 3 5591.78 958.731 9
 -8 2 -3 4934.37 642.531 5
 -9 2 -3 -18.2818 156.086 5
 9 2 3 -221.583 343.047 9
 9 -2 3 -55.0704 226.653 9
 -9 -2 -3 -8.74123 180.072 5
 -10 2 -3 839.633 329.155 5
 -10 -2 -3 709.254 304.212 5
 10 -2 3 1013.72 396.62 9
 10 2 3 606.59 343.768 9
 11 -2 3 4190.05 986.791 9
 -11 2 -3 5485.96 731.987 5
 -11 -2 -3 6090.26 874.157 5
 11 2 3 6991.95 1223.97 9
 12 2 3 4426.14 992.823 9
 -12 -2 -3 5572.84 825.665 5
 12 -2 3 5581.91 1182.34 9
 13 2 3 172.594 363.397 9
 13 -2 3 662.009 551.096 9
 14 2 3 -333.297 384.265 7
 14 -2 3 1114.86 636.675 9
 14 2 3 571.465 420.5 9
 15 -2 3 264.374 395.321 9
 15 2 3 824.745 613.27 9
 15 2 3 318.346 423.581 7
 16 2 3 502.549 659.188 9
 16 2 3 2350.48 976.526 7
 16 -2 3 1225.83 813.824 9
 19 -3 -3 -60.7591 406.985 9
 19 3 -3 -339.67 548.89 7
 19 3 -3 400.626 374.519 6
 18 -3 -3 29563.8 3019.58 9
 18 3 -3 34209.1 3094.96 6
 18 3 -3 34651.8 3289.15 7
 17 3 -3 6411.61 1268 6
 17 -3 -3 4478.71 1141.14 9
 17 3 -3 7456.24 1433.94 7
 16 -3 -3 33147.3 2907.89 9
 16 3 -3 26399.2 2509.38 6
 16 3 -3 27329.9 2685.55 7
 15 3 -3 54542.1 3605.82 9
 15 3 -3 54915.5 3654.54 6
 15 -3 -3 58090.6 3791.79 9
 14 -3 -3 8602.65 1347.19 9
 14 3 -3 8651.11 1354.88 9
 13 -3 -3 87246.5 4394.63 9
 13 3 -3 88970.7 4316 9
 12 3 -3 4936.02 902.477 9
 -12 -3 3 5159.41 991.188 4
 12 -3 -3 5824.42 1005.07 9
 -12 3 3 5835.07 1050.51 4
 11 -3 -3 60094.5 3215.81 9
 -11 3 3 52851.9 3127.59 4
 11 3 -3 52897.6 2931.43 9
 11 3 -3 49330.6 2913.46 6
 -11 -3 3 53100.5 3114.54 4
 10 3 -3 17861.8 1597.9 6
 -10 3 3 18714 1697.89 4
 10 -3 -3 22782.1 1798.3 9
 -10 -3 3 18840.9 1687.64 4
 10 3 -3 18547.1 1578.55 9
 9 3 -3 69739.4 3073.01 9
 9 -3 -3 70864.4 3213.24 9
 9 3 -3 68724.3 3183.6 6
 -9 3 3 67302.5 3262.73 4
 -9 -3 3 63219.7 3148 4
 8 -3 -3 102672 3838.89 9
 -8 -3 3 100569 3938.25 4
 -8 3 3 99116.4 3959.83 4
 8 3 -3 104176 3722.66 9
 8 3 -3 101634 3903.83 6
 7 -3 -3 49784 2308.41 9
 7 3 -3 46471.2 2243.79 3
 -7 -3 3 49232.4 2392.57 4
 -7 3 3 46500.5 2369.86 4
 7 3 -3 46678.2 2341.83 6
 6 3 -3 240166 6334.14 3
 6 3 -3 237124 6204.06 7
 6 -3 -3 219629 5013.52 5
 -6 -3 3 237752 6414.96 4
 6 3 -3 215704 6293.52 6
 -6 3 3 227430 6401.56 4
 6 -3 -3 238324 6201.67 9
 5 -3 -3 6484.79 710.776 8
 -5 -3 3 7447.68 648.307 9
 5 -3 -3 7657.18 479.785 5
 5 3 -3 7197 757.097 3
 5 3 -3 6048.53 709.366 6
 -5 -3 3 7668.32 772.06 4
 -5 3 3 7991.73 796.78 4
 5 3 -3 8285.94 728.973 7
 5 -3 -3 6659.44 666.558 9
 -4 3 3 60334.4 2342.04 4
 -4 -3 3 62318 2005.25 9
 -4 3 3 57973.7 2187.45 9
 4 3 -3 59004.7 2109.67 7
 -4 -3 3 62332.3 2333.67 4
 4 3 -3 61889.9 2410.5 3
 4 -3 -3 61163.3 2364.49 8
 4 -3 -3 64019.6 2215.39 9
 3 3 -3 49833.3 2038.54 3
 3 -3 -3 51089.8 1817.94 9
 -3 -3 3 50359.7 1707 7
 3 -3 -3 47177.3 1881.01 4
 3 -3 -3 51505.4 1930.72 7
 3 3 -3 49181 1702.14 7
 3 3 -3 48430.2 1909.18 4
 -3 -3 3 49003.2 1929.07 4
 -3 3 3 45537.9 1903.47 4
 3 -3 -3 50857.5 2006.66 8
 2 3 -3 19977.2 1165.01 3
 -2 -3 3 21850.7 1128.38 4
 -2 3 3 22085.4 1145.79 4
 2 -3 -3 21916.4 1176.99 8
 2 -3 -3 24876.4 1100.72 6
 2 -3 -3 23576 1126.38 7
 -2 3 3 21043.3 1108.97 7
 -2 -3 3 21549.8 1242.36 2
 2 3 -3 24751.7 1320.42 2
 -2 -3 3 20717.3 912.175 7
 2 3 -3 22441.4 955.811 7
 -2 3 3 21547 927.307 2
 -1 3 3 345555 8087.68 6
 1 3 -3 376263 8581.67 3
 -1 -3 3 376330 8111.18 7
 -1 -3 3 353568 8696.33 2
 -1 3 3 376411 8423.82 7
 1 3 -3 350440 8678.06 2
 1 3 -3 364226 8765.26 1
 -1 -3 3 370040 8084.42 9
 1 -3 -3 388782 8392.68 7
 1 -3 -3 376042 8095.68 2
 0 -3 3 64898.2 2037.07 9
 0 -3 3 62019.3 1992.11 7
 0 -3 -3 64863.8 2129.12 7
 0 3 -3 62552.7 2369.03 1
 0 3 -3 65253.1 2375.41 2
 0 -3 3 64321.6 2340.9 2
 0 3 3 61940.5 2132.56 7
 0 3 -3 61349.6 2005.06 9
 1 -3 3 81074.2 2619.55 9
 1 3 3 81842 2668.34 7
 -1 3 -3 84366 2899.34 2
 -1 3 -3 82271.8 2615.29 9
 -1 -3 -3 82112.1 2644.62 7
 2 3 3 99190.5 3097.01 7
 -2 -3 -3 92326.7 2695.52 1
 2 -3 3 89379 3040.26 9
 3 3 3 91540.3 3186.46 7
 3 -3 3 92124.1 3270.96 9
 -3 3 -3 93855.1 3043.19 5
 -4 3 -3 112098 3457.8 5
 4 3 3 109983 3769.05 7
 4 3 3 108617 3230.11 1
 4 -3 3 108720 3869.55 9
 -5 3 -3 13243.2 992.303 5
 5 3 3 13947.4 937.936 1
 5 3 3 13469.1 1182.84 7
 5 -3 3 13600.1 1272.17 9
 6 -3 3 263283 7639.22 9
 6 3 3 244360 5651.68 3
 6 3 3 248945 7313.9 7
 6 3 3 261145 6494.02 1
 6 3 3 250350 7429.96 9
 -6 3 -3 254028 6588.1 5
 7 3 3 15912.7 1513.15 9
 7 3 3 12957 1315.72 7
 -7 3 -3 16857.9 1156.94 5
 7 -3 3 13378 1409.59 9
 7 3 3 12144.6 601.067 3
 8 -3 3 77379.9 3829.23 9
 8 3 3 69820.9 3535.7 7
 8 3 3 77332.1 3737.52 9
 -8 3 -3 77903.1 2905.08 5
 9 -3 3 37346.6 2667.18 9
 9 3 3 34200.5 2512.26 9
 9 3 3 34301.8 2467.08 7
 -9 3 -3 36343.1 1870.45 5
 -9 -3 -3 33209.4 2092.13 5
 -10 -3 -3 25562.4 1864.21 5
 10 3 3 28258 2307.88 7
 10 -3 3 29888.7 2484.96 9
 10 3 3 28312.7 2365.6 9
 11 3 3 59942.3 3736.18 9
 -11 -3 -3 61906.6 3099.77 5
 11 3 3 65312.5 3827.88 7
 11 -3 3 66017.1 4000.15 9
 12 3 3 4052.6 994.928 7
 -12 -3 -3 5730.41 893.081 5
 12 -3 3 5305.33 1174.6 9
 12 3 3 5691.7 1161.44 9
 13 3 3 89433.3 4981.38 7
 13 3 3 87002.4 4943.52 9
 13 -3 3 92551 5214.04 9
 14 3 3 6500.32 1313.9 7
 14 -3 3 5367.31 1199.19 9
 15 -3 3 28561.9 2984.14 9
 15 3 3 23681.8 2651.43 7
 16 3 3 28866.3 3059.59 7
 16 -3 3 31492.1 3254.24 9
 20 4 -3 212.484 415.184 6
 19 -4 -3 4375.84 1237.69 9
 19 4 -3 1522.9 708.095 6
 19 4 -3 2671.72 1004.82 7
 18 4 -3 2696.85 953.618 6
 18 4 -3 1188.66 569.12 7
 18 -4 -3 3831.91 1163.58 9
 17 4 -3 1661.33 702.995 7
 17 -4 -3 3402.17 976.435 9
 17 4 -3 2910.04 922.679 6
 16 4 -3 9202.54 1562.54 7
 16 4 -3 6769.73 1287.44 6
 16 -4 -3 8104.96 1459.66 9
 15 -4 -3 3364.25 1002.35 9
 15 4 -3 4031.91 1010.56 7
 15 4 -3 2820.31 815.595 6
 14 -4 -3 5616.04 1108.19 9
 14 4 -3 4704.92 1004.48 7
 14 4 -3 7023.2 1160.16 6
 13 4 -3 379.798 466.781 7
 13 4 -3 249.463 378.95 6
 13 -4 -3 -112.82 250.215 9
 -12 -4 3 10027.5 1363.01 4
 -12 4 3 9780.45 1355.78 4
 12 4 -3 9323.2 1231.1 6
 12 -4 -3 13567.1 1557.91 9
 12 4 -3 9620.73 1302.98 7
 -11 4 3 10076.4 1325.13 4
 11 4 -3 12057.8 1398.05 7
 11 -4 -3 11208 1338.94 9
 -11 -4 3 11057.1 1364.79 4
 11 4 -3 11987.7 1349.43 6
 -10 4 3 81.0214 206.122 4
 -10 -4 3 95.6522 235.881 4
 10 4 -3 328.782 348.174 6
 10 4 -3 541.904 341.586 7
 10 -4 -3 150.77 228.464 9
 9 4 -3 4324.63 685.117 3
 -9 -4 3 3047.82 652.323 4
 9 4 -3 4740.1 793.875 7
 -9 4 3 4249.14 749.474 4
 9 -4 -3 4367.72 747.581 9
 9 4 -3 4417.47 770.736 6
 8 4 -3 41408 2258.19 6
 -8 4 3 45538.7 2427.58 4
 8 -4 -3 43043.1 2319.31 9
 8 4 -3 47226.1 2385.76 7
 -8 -4 3 47353.3 2430.55 4
 7 4 -3 111033 3968.6 7
 7 4 -3 112327 4064.15 6
 7 4 -3 120116 4041.33 3
 -7 -4 3 111907 4034.59 4
 -7 4 3 120526 4185.21 4
 7 -4 -3 114267 2681.2 5
 7 -4 -3 120597 4101.41 9
 6 -4 -3 4142.53 591.602 9
 6 4 -3 2678.19 512.503 6
 6 4 -3 2604.43 495.581 3
 6 -4 -3 3328.1 558.363 8
 -6 -4 3 2688.57 503.887 4
 -6 4 3 3516.82 582.285 4
 6 4 -3 2772.06 491.431 7
 -5 -4 3 845.177 241.847 9
 -5 4 3 928.47 288.503 4
 5 4 -3 1038.49 352.298 3
 -5 -4 3 734.227 265.346 4
 5 -4 -3 694.808 250.735 9
 5 4 -3 709.415 256.156 7
 5 4 -3 689.848 252.781 6
 5 -4 -3 996.041 299.834 8
 4 4 -3 615.072 235.105 7
 4 4 -3 545.375 221.327 3
 -4 -4 3 953.835 254.192 7
 4 -4 -3 850.019 264.593 8
 -4 -4 3 752.785 240.434 4
 -4 4 3 720.613 240.895 4
 4 -4 -3 936.806 261.345 9
 3 4 -3 39640.5 1634.65 7
 -3 4 3 43588.2 1794.34 4
 3 -4 -3 43841.6 1900.72 7
 3 4 -3 43810.3 1764.7 4
 -3 -4 3 43373.1 1757.5 4
 3 -4 -3 39645.9 1734.35 4
 -3 -4 3 43472.2 1667.46 7
 3 4 -3 41825.4 1900.71 3
 3 -4 -3 41413.1 1740.57 9
 3 -4 -3 38077.5 1785.44 8
 -2 4 3 31786.2 1098.02 2
 -2 -4 3 32955.4 1428.35 4
 2 -4 -3 32155.3 1307.17 6
 2 4 -3 30987.5 1563.2 1
 2 4 -3 34940.1 1393.07 7
 2 4 -3 35528.1 1658.24 3
 2 -4 -3 32791.3 1525.56 7
 -2 4 3 31784.3 1532.18 7
 -2 4 3 32592.7 1437.88 4
 -2 -4 3 31679.2 1342.3 7
 -1 -4 3 11734.6 764.176 7
 1 -4 -3 13260.1 684.424 6
 1 -4 -3 13015.4 878.726 7
 1 4 -3 11836.5 912.44 1
 -1 4 3 11946 868.117 7
 1 4 -3 13465.2 796.282 7
 1 -4 -3 12241.7 612.415 2
 1 4 -3 12863.3 952.029 2
 -1 -4 3 11409.4 735.294 9
 0 -4 3 14561 900.413 7
 0 4 -3 16460.7 1108.28 1
 0 4 3 15251.4 655.546 6
 0 -4 3 14478.2 895.327 9
 0 -4 -3 16376.5 1012.94 7
 0 4 3 13394 946.916 7
 0 4 -3 15096.7 1047.47 2
 -1 4 -3 485.578 196.717 9
 1 4 3 760.883 236.839 7
 1 -4 3 527.807 191.363 7
 -1 4 -3 981.79 268.527 2
 1 -4 3 643.651 200.893 9
 2 4 3 29755 1566.27 7
 2 -4 3 26424 1485.63 9
 3 4 3 34058.5 1783.04 7
 3 -4 3 33102.3 1788.84 9
 -3 -4 -3 30825.7 1221.8 1
 4 -4 3 4613.84 316.65 8
 4 -4 3 4199.7 656.832 9
 4 4 3 5541.86 723.889 7
 5 -4 3 50147.9 2560.41 9
 5 4 3 47856.7 2409.42 7
 5 4 3 43370.6 1738.55 1
 6 4 3 2151.69 562.396 7
 6 4 3 2442.36 386.511 1
 6 -4 3 2581.67 636.604 9
 7 -4 3 41831.8 2652.56 9
 7 4 3 43351.2 1560.71 3
 7 4 3 46273.5 2615.36 7
 7 4 3 41995.7 1866.62 1
 8 -4 3 44778.9 2832.99 9
 8 4 3 38942.1 1441.86 3
 8 4 3 45051.3 2701.89 7
 9 -4 3 3416.69 839.332 9
 9 4 3 2668.84 665.036 7
 -10 -4 -3 302.501 206.511 5
 10 4 3 468.314 365.388 7
 11 -4 3 1364.82 550.059 9
 -11 -4 -3 1575.85 478.136 5
 12 -4 3 19624.8 2211.71 9
 -12 -4 -3 19606 1726.68 5
 12 4 3 19440.8 2107.6 7
 13 -4 3 539.743 562.866 9
 13 4 3 1161.77 647.746 7
 14 4 3 2304.22 844.625 7
 14 -4 3 3665.86 1034.74 9
 15 4 3 -469.167 478.922 7
 15 -4 3 1029.85 727.402 9
 16 -4 3 3930.3 1188.23 9
 16 4 3 1499.8 743.279 7
 20 5 -3 13156.7 2034.55 6
 19 5 -3 653.71 487.501 7
 19 -5 -3 429.42 536.104 9
 19 5 -3 120.274 534.572 6
 18 5 -3 32856.9 3225.18 7
 18 -5 -3 32235.6 3173.2 9
 18 5 -3 32225.3 2993.67 6
 17 5 -3 9185.69 1637.75 7
 17 -5 -3 5460.66 1284.78 9
 17 5 -3 8290.57 1473.89 6
 16 -5 -3 18094.4 2210.48 9
 16 5 -3 16471.4 2090.59 7
 16 5 -3 19103.4 2128.1 6
 15 5 -3 52494 3501.84 6
 15 -5 -3 59137.9 3931.88 9
 15 5 -3 54949.1 3779.66 7
 14 5 -3 2656 766.689 7
 14 5 -3 2959.66 770.753 6
 14 -5 -3 4026.59 978.824 9
 13 5 -3 58425.9 3614.21 7
 13 -5 -3 70848.5 3957.47 9
 13 5 -3 63471.9 3586.38 6
 12 5 -3 8526.11 1253.47 7
 -12 -5 3 8867.64 1300.59 4
 -12 5 3 7074.83 1153.93 4
 12 5 -3 8736.1 1219.96 6
 12 -5 -3 5997.59 1055.03 9
 11 -5 -3 47092 2912.25 9
 11 5 -3 40125.8 2690.28 7
 -11 -5 3 45829.2 2842.81 4
 -11 5 3 45200 2881.51 4
 11 5 -3 39965.7 2594.97 6
 10 5 -3 25262.5 1961.76 7
 10 5 -3 26671 1830.57 3
 -10 -5 3 24436.9 1939.98 4
 10 5 -3 22117.3 1774.35 6
 -10 5 3 20374.8 1819.48 4
 10 -5 -3 24456.2 1950.62 9
 9 5 -3 84557.9 3716.93 6
 9 5 -3 92909.2 3942.6 7
 9 -5 -3 95726.6 3994.35 9
 -9 5 3 96284 4009.27 4
 -9 -5 3 94619.4 3937.99 4
 9 5 -3 93714.5 3720.71 3
 8 -5 -3 77637.4 3357.1 9
 8 5 -3 80996.9 3399.71 7
 8 5 -3 78250.2 3259.29 3
 -8 -5 3 71252.7 3213.36 4
 8 5 -3 73947.9 3261.5 6
 -8 5 3 75221.7 3347.65 4
 -7 5 3 73545 3087.43 4
 -7 -5 3 71860.1 3007.16 4
 7 -5 -3 72165.1 3021.27 8
 7 -5 -3 72366.9 3089.43 9
 7 5 -3 68148.1 3000.19 6
 7 5 -3 72493.7 3062.6 3
 7 5 -3 71621.7 3036.26 7
 6 5 -3 209016 5928 7
 6 -5 -3 199309 5906 8
 -6 -5 3 214833 5906.2 4
 -6 5 3 198613 5887.54 4
 6 -5 -3 214162 6025.34 9
 6 5 -3 211698 6059.36 3
 6 5 -3 186529 5826.31 6
 5 -5 -3 1476.5 378.93 8
 5 5 -3 965.206 374.021 3
 5 -5 -3 1008.71 342.747 9
 -5 -5 3 1741.76 384.331 4
 -5 5 3 566.153 251.927 4
 5 5 -3 1293.72 352.313 7
 4 5 -3 86833.2 3142.32 3
 -4 5 3 81667.4 2827.52 4
 4 5 -3 82263.6 2861.4 7
 -4 -5 3 78467.7 2745.22 4
 4 -5 -3 75302.8 2899.39 8
 4 -5 -3 77937.1 2909.99 9
 3 5 -3 35066.9 1672.57 1
 3 5 -3 31344.7 1477.7 4
 3 -5 -3 33606.6 1521.69 4
 -3 5 3 32507.2 1535.29 4
 3 5 -3 30985.4 1532.06 7
 -3 -5 3 33603.2 1553.17 7
 -3 5 3 33343.3 1759.03 7
 -3 -5 3 32611.8 1494.68 4
 2 5 -3 3592.89 504.201 1
 -2 5 3 3933.07 283.836 2
 2 5 -3 5322.59 559.904 7
 -2 -5 3 4052.38 482.576 7
 -2 -5 3 3893.65 447.83 4
 -2 5 3 4338.19 580.038 7
 -2 5 3 4151.61 484.966 4
 1 5 -3 24902.8 1401.53 1
 1 5 -3 26229.1 1299.53 7
 -1 5 3 22749.1 1358.55 7
 1 5 -3 25009.8 1423.17 2
 1 -5 -3 23428.1 855.094 2
 -1 -5 3 25250.7 1288.81 7
 1 -5 -3 25186 985.339 6
 0 5 -3 6618.75 642.045 7
 0 -5 3 6284.38 637.776 7
 0 5 -3 5992.97 665.339 2
 0 5 3 6068.79 680.5 7
 0 -5 3 5271.85 575.482 9
 1 5 3 11402.1 963.105 7
 1 -5 3 10972.3 896.203 9
 -1 5 -3 12689 1019.11 2
 2 5 3 6614.91 763.971 7
 -2 5 -3 7463.34 809.653 2
 2 -5 3 7917.79 801.329 9
 3 5 3 106902 3752.78 7
 -3 -5 -3 103518 2741.41 1
 3 -5 3 107290 3771.69 9
 4 -5 3 145851 4995.23 9
 4 5 3 156334 4995.38 7
 5 -5 3 19222.2 841.637 8
 5 -5 3 20277.3 1622.52 9
 5 5 3 17755.4 1456.5 7
 6 5 3 257914 7735.79 7
 6 -5 3 264933 7962.18 9
 7 5 3 27637.5 1357.48 1
 7 5 3 28593.6 2074.78 7
 7 -5 3 26847 2096.65 9
 8 5 3 89279.3 2924.34 1
 8 5 3 83300.9 2685.68 3
 8 -5 3 88586.1 4213.98 9
 8 5 3 81324.9 3934.68 7
 9 5 3 55481.6 3231.51 7
 9 5 3 49487.2 1851.05 3
 9 -5 3 56381.3 3395.89 9
 10 -5 3 28499.6 2498.7 9
 10 5 3 27240.5 2331.48 7
 11 5 3 40993.6 3041.1 7
 11 -5 3 45529.4 3298.29 9
 12 5 3 5222.08 1174.55 7
 -12 -5 -3 4409.93 846.101 5
 12 -5 3 2800.71 976.471 9
 13 -5 3 70046 4523.09 9
 13 5 3 67885.9 4303.07 7
 14 5 3 2124.77 808.961 7
 14 -5 3 3231.3 993.529 9
 15 5 3 21405.1 2535.76 7
 15 -5 3 23999.8 2759.37 9
 16 -5 3 21246.7 2723.37 9
 16 5 3 21950.9 2685.12 7
 19 6 -3 1961.49 815.788 6
 19 -6 -3 285.558 437.962 9
 18 6 -3 960.231 661.357 6
 18 -6 -3 898.935 745.255 9
 18 6 -3 1071.11 804.648 7
 17 6 -3 10040.5 1610.39 6
 17 -6 -3 7875.42 1511.67 9
 17 6 -3 6890.5 1432.54 7
 16 -6 -3 2652.04 886.863 9
 16 6 -3 3612.62 902.734 6
 16 6 -3 2794.42 927.159 7
 15 -6 -3 13644 1873.05 9
 15 6 -3 7788.1 1387.92 7
 15 6 -3 12528.9 1661.41 6
 14 -6 -3 15312.4 1867.7 9
 14 6 -3 12177.9 1576.9 6
 14 6 -3 12961.9 1716.71 7
 13 6 -3 638.288 494.675 6
 13 -6 -3 775.657 462.77 9
 13 6 -3 1238.35 536.771 7
 -12 -6 3 16737.8 1769.36 4
 12 6 -3 21790.6 2042.51 7
 12 -6 -3 21874.5 2058.12 9
 -12 6 3 20150 1972.83 4
 12 6 -3 20073.2 1847.4 6
 11 -6 -3 11018.1 1396.61 9
 11 6 -3 11639.3 1357.07 6
 11 6 -3 10512.7 1343.57 7
 11 6 -3 10010.3 1175.31 3
 -11 6 3 12417.1 1465.14 4
 -11 -6 3 11426.7 1377.12 4
 -10 6 3 455.446 281.504 4
 10 6 -3 302.948 332.954 6
 10 6 -3 194.907 198.355 7
 10 6 -3 -21.7532 179.767 3
 10 -6 -3 591.634 396.551 9
 -10 -6 3 10.2892 145.015 4
 -9 6 3 2772.83 609.686 4
 9 6 -3 1828.64 496.467 6
 9 6 -3 2758.06 644.355 7
 9 6 -3 3037.88 636.114 3
 9 -6 -3 2075.06 519.995 9
 -9 -6 3 3123.63 635.248 4
 8 -6 -3 38475.5 2304.91 9
 -8 -6 3 35415.2 2110.04 4
 8 6 -3 37418.2 2189.43 3
 8 6 -3 35802.2 2193.12 7
 -8 6 3 37116.3 2204.06 4
 8 -6 -3 30700.4 1970.64 8
 8 6 -3 34983.9 2125.72 6
 7 6 -3 98314 3779.87 3
 -7 -6 3 98100.2 3633.25 4
 7 -6 -3 93664.9 3739.89 9
 -7 6 3 93282.2 3641.25 4
 7 6 -3 94366 3659.76 6
 7 -6 -3 96047.3 3676.21 8
 7 6 -3 93732.1 3728.6 7
 6 6 -3 11070.3 1089.73 7
 -6 -6 3 12162.4 1036.36 4
 -6 6 3 10721.4 1025.4 4
 6 6 -3 11193.9 1107.28 3
 6 -6 -3 10901.2 1065.34 9
 6 -6 -3 10797 1047.89 8
 5 6 -3 417.234 247.523 3
 5 6 -3 550.427 216.889 7
 5 -6 -3 447.296 270.432 8
 5 -6 -3 813.811 317.301 9
 -5 6 3 353.494 225.873 4
 -5 -6 3 391.13 148.96 4
 4 6 -3 2621.03 498.031 7
 4 -6 -3 2958.39 530.744 8
 4 -6 -3 3663.74 581.335 9
 -4 -6 3 2665.06 426.004 4
 -4 6 3 2444.89 423.932 4
 -3 6 3 41950.9 1286.36 2
 -3 -6 3 44143.3 1776.97 4
 3 6 -3 42435.7 1955.48 7
 -3 6 3 40259.5 1788.47 4
 3 6 -3 45633.5 1973.77 1
 -3 6 3 44996.7 2227.21 7
 2 6 -3 57403.3 2325.06 1
 -2 -6 3 56641.5 2030.11 4
 -2 6 3 56246 2072.79 4
 2 6 -3 59146.4 2341.06 7
 -2 6 3 58713 2540.9 7
 1 6 -3 46611.1 2085.3 2
 1 6 -3 41912 1913.56 7
 -1 6 3 41448.1 2068.2 7
 1 -6 -3 44985.7 1460.33 6
 1 6 -3 47078.9 2081.63 1
 0 6 3 95191.3 3445.19 7
 0 6 -3 104076 3353.59 7
 0 -6 3 93279.2 3219.65 9
 0 6 -3 97752.5 3343.92 2
 1 -6 3 268.113 110.083 9
 -1 6 -3 -9.56949 125.008 2
 2 -6 3 5181.89 677.655 9
 2 6 3 4682.36 686.499 7
 -2 6 -3 5392.32 699.029 2
 -3 -6 -3 25031.7 965.34 1
 3 6 3 29070.7 1809.83 7
 3 -6 3 26976.4 1711.89 9
 4 -6 3 5491.93 781.826 9
 4 6 3 6945.2 903.914 7
 5 6 3 481.066 334.245 7
 5 -6 3 959.613 216.834 8
 5 -6 3 339.421 359.919 9
 6 -6 3 31867.1 2233.82 9
 6 -6 3 32846.1 1306.46 8
 6 6 3 34016.3 2228.27 7
 7 -6 3 75945.3 3750.25 9
 7 6 3 71897.6 3543.92 7
 8 -6 3 12552 1523.92 9
 8 6 3 12986.7 1452.25 7
 8 6 3 9989.48 844.029 3
 9 6 3 1279.91 574.804 7
 9 6 3 929.458 255.304 3
 10 6 3 877.248 520.839 7
 10 -6 3 1295.18 644.258 9
 11 6 3 4546.87 1000.02 7
 11 -6 3 2771.11 881.601 9
 12 6 3 44362.9 3328.65 7
 12 -6 3 46475.9 3547.62 9
 13 -6 3 1080.18 621.4 9
 13 6 3 134.367 287.94 7
 14 -6 3 6594.73 1476.21 9
 14 6 3 4121.52 1068.25 7
 15 6 3 6301.17 1402.98 7
 15 -6 3 7226.86 1523.33 9
 16 6 3 4652.02 1238.64 7
 16 -6 3 4298.7 1238.47 9
 19 -7 -3 278.127 345.906 9
 18 7 -3 33372.4 3274.83 7
 18 -7 -3 32777.5 3283.72 9
 18 7 -3 31726.6 2960.34 6
 17 7 -3 5190.4 1253.56 7
 17 -7 -3 5683.33 1322.28 9
 17 7 -3 3974.62 993.103 6
 16 7 -3 21151.9 2417.77 7
 16 7 -3 19477.4 2178.32 6
 16 -7 -3 26037.6 2716.34 9
 15 7 -3 39928.2 3036.04 6
 15 7 -3 40236.3 3254.63 7
 15 -7 -3 40725 3314.7 9
 14 7 -3 2981.04 851.727 7
 14 -7 -3 4630.96 1048.1 9
 14 7 -3 3494.67 878.651 6
 13 7 -3 35413.3 2788.62 7
 13 7 -3 34963.3 2584.72 6
 13 -7 -3 32775.5 2724.72 9
 12 7 -3 3214.82 782.24 6
 12 -7 -3 4130.53 909.477 9
 12 7 -3 4856.69 862.696 3
 12 7 -3 2585.57 762.183 7
 11 -7 -3 55383.4 3296.66 9
 11 7 -3 54869.5 3235.84 7
 -11 -7 3 52307.3 3089.28 4
 11 7 -3 53367.3 2900.9 3
 11 7 -3 48638.4 2896.14 6
 -11 7 3 49962.6 3112.15 4
 10 7 -3 10713.7 1209.12 3
 10 -7 -3 10364.6 1318.95 9
 -10 7 3 9541.15 1240.45 4
 -10 -7 3 10516.8 1255.14 4
 10 7 -3 10384.3 1219.22 6
 10 7 -3 11098.4 1349.14 7
 -9 7 3 59728.5 3098.47 4
 9 7 -3 61241.6 3045.62 3
 9 -7 -3 59938.2 2995.86 8
 9 7 -3 65989.9 3298.41 7
 9 -7 -3 59641.1 3183.94 9
 9 7 -3 56143.6 2946.83 6
 -9 -7 3 69699 3231.37 4
 8 -7 -3 71803.2 3259.8 8
 8 7 -3 77938.3 3418.33 3
 8 7 -3 82152.5 3576.6 7
 -8 7 3 71985.1 3281.25 4
 8 -7 -3 78520.4 3549.14 9
 -8 -7 3 74480.3 3240.37 4
 8 7 -3 72058 3246.96 6
 7 -7 -3 39040.6 2184.65 8
 7 -7 -3 39821.6 2310.57 9
 7 7 -3 35099 2153.35 3
 7 7 -3 39194.9 2275.57 7
 -7 7 3 34713.1 2038.83 4
 -7 -7 3 37476.2 2058.37 4
 6 7 -3 170354 5570.62 7
 -6 7 3 175362 5318.49 4
 6 -7 -3 183692 5579.84 8
 6 7 -3 179323 5703.53 3
 -6 -7 3 183696 5306.26 4
 6 -7 -3 173902 5706.38 9
 -5 7 3 30861 1681.58 4
 5 7 -3 31965.7 1895.89 7
 5 7 -3 33266.9 1681.89 1
 -5 -7 3 32744.9 1672.45 4
 5 -7 -3 32483.7 1894.48 8
 5 -7 -3 31091 1909.31 9
 -4 -7 3 192453 5115.81 4
 4 7 -3 181062 5565.97 7
 -4 7 3 190480 5211.49 4
 4 7 -3 189699 5269.44 1
 4 -7 -3 194781 5734.88 9
 3 7 -3 130461 3846.52 1
 -3 -7 3 119864 3454.1 4
 -3 7 3 111051 4177.51 7
 3 7 -3 119153 3946.14 7
 -3 7 3 106252 3419 4
 -2 7 3 905.004 379.763 7
 -2 7 3 834.69 237.014 4
 2 7 -3 473.682 246.062 7
 -2 -7 3 247.889 150.448 4
 2 7 -3 684.748 260.133 1
 1 7 -3 42965.5 2059.07 2
 1 7 -3 44507.6 2105.96 7
 -1 7 3 40974.6 2179.07 7
 0 7 3 368.515 265.536 7
 0 -7 3 448.694 250.383 9
 0 7 -3 207.279 201.438 2
 0 -7 -3 229.162 73.48 6
 0 7 -3 303.856 189.706 7
 -1 7 -3 62861.5 2644.65 2
 1 -7 3 60719.7 2652.89 9
 1 7 3 66423.8 2885.4 7
 2 -7 3 13839.9 1205.7 9
 2 7 3 14976.6 1300.28 7
 -2 7 -3 12223.2 1123.21 2
 3 7 3 91532.1 3593.38 7
 -3 7 -3 88229.9 3395.52 2
 3 -7 3 84676.7 3416.4 9
 4 7 3 175508 5798.47 7
 4 -7 3 177114 5802.92 9
 5 7 3 1455.68 488.736 7
 5 -7 3 2419.76 645.558 9
 6 -7 3 115944 3331.64 8
 6 -7 3 122024 4862.68 9
 6 7 3 120407 4756.36 7
 7 -7 3 11159.1 774.518 8
 7 -7 3 12630.2 1466.8 9
 7 7 3 13059 1461.55 7
 8 -7 3 53054.6 3270.64 9
 8 7 3 49450.6 3061.27 7
 9 -7 3 53780 3443.9 9
 9 7 3 51989.1 3251.46 7
 9 7 3 51716.4 2246.3 3
 10 7 3 20416.5 2055.99 7
 10 -7 3 19754.3 2129.16 9
 11 -7 3 52694.3 3682.57 9
 11 7 3 48296.3 3386.19 7
 12 -7 3 834.546 504.411 9
 12 7 3 934.498 489.592 7
 13 7 3 30732.2 2907.15 7
 13 -7 3 39811.7 3404.09 9
 14 -7 3 4018.65 1219.44 9
 14 7 3 5165.72 1191.39 7
 15 7 3 12577.1 1974.5 7
 15 -7 3 15220.6 2257.26 9
 16 7 3 26723.7 3012.87 7
 16 -7 3 24264.1 3004.5 9
 18 -8 -3 1626.57 914.76 9
 18 8 -3 1862.63 790.074 7
 17 8 -3 14589.2 2117.83 7
 17 -8 -3 17174.2 2314.08 9
 17 8 -3 13641.6 1849.06 6
 16 8 -3 9839.41 1673.62 7
 16 -8 -3 6531.84 1374.12 9
 16 8 -3 6296.04 1253.3 6
 15 -8 -3 8873 1562.84 9
 15 8 -3 6693.79 1322.83 7
 15 8 -3 10592.3 1502.57 6
 14 8 -3 11388.3 1661.67 7
 14 -8 -3 15680.7 1993.18 9
 14 8 -3 15252.7 1760.93 6
 13 8 -3 7708.22 1333.59 7
 13 8 -3 7044.65 1147.21 6
 13 8 -3 7573.92 1138.71 3
 13 -8 -3 6582.6 1241.62 9
 12 8 -3 19339.9 1751.45 3
 12 -8 -3 19757.9 2042.72 9
 12 8 -3 18898.5 1976.19 7
 12 8 -3 22452.8 1975.72 6
 -11 -8 3 5193.23 948.135 4
 11 -8 -3 7080.26 1153.93 9
 11 8 -3 5778.3 1033.53 7
 -11 8 3 5789.17 1002.58 4
 11 8 -3 7082.73 1017.66 3
 11 8 -3 5405.1 929.02 6
 -10 -8 3 13376.6 1400.6 4
 10 8 -3 12511 1356.36 3
 10 -8 -3 12266 1472.01 9
 10 8 -3 11784.4 1434.34 7
 10 8 -3 9818.15 1207.66 6
 -10 8 3 12475.8 1401.8 4
 9 8 -3 18272.1 1608.38 3
 9 -8 -3 14527 1531.64 9
 9 -8 -3 17902.3 1573.63 8
 9 8 -3 17133 1650.23 7
 -9 -8 3 18140.1 1549.74 4
 9 8 -3 15401.8 1448.85 6
 -9 8 3 16177.4 1519.74 4
 8 8 -3 18966.4 1610.83 3
 8 -8 -3 19099.7 1579.91 8
 8 8 -3 17582.1 1614.29 7
 -8 -8 3 16785 1418.55 4
 -8 8 3 17549.5 1494.27 4
 8 -8 -3 18614.4 1666.21 9
 7 -8 -3 22043.7 1631.83 8
 7 8 -3 21531.3 1679.9 3
 -7 -8 3 21471 1502.32 4
 7 8 -3 18576.3 1614.96 7
 7 -8 -3 20836.6 1713.2 9
 -7 8 3 21527.1 1548.07 4
 6 8 -3 17651.2 1497.92 3
 6 -8 -3 18570.7 1561.48 9
 6 -8 -3 16858.6 1396.66 8
 -6 -8 3 15919.1 1204.85 4
 6 8 -3 17770.4 1193.73 1
 6 8 -3 15499.5 1397.53 7
 -6 8 3 15150.2 1210.88 4
 5 8 -3 28823.7 1553.63 1
 5 -8 -3 30808.3 1951.49 9
 5 8 -3 29587.5 1906.6 7
 -5 -8 3 27302.3 1516.71 4
 -5 8 3 30111.3 1640.15 4
 4 -8 -3 1805.92 511.18 9
 4 8 -3 1389 393.104 7
 4 8 -3 1721.71 381.796 1
 -4 -8 3 1927.09 342.029 4
 -4 8 3 1630.73 347.424 4
 -3 8 3 61799.5 2999.42 7
 -3 -8 3 65756.7 2235.95 4
 3 8 -3 60718.7 2757.96 7
 -3 8 3 61995.6 2292.85 4
 3 8 -3 61584.5 2520.3 1
 2 8 -3 164237 5167.85 7
 -2 8 3 159311 4389.77 4
 -2 -8 3 169102 4351.34 4
 -2 8 3 168045 5497.4 7
 -1 8 3 23130.5 1157.66 4
 -1 8 3 20847.4 1599.69 7
 1 8 -3 22385.1 1467.19 2
 0 -8 3 130994 4417.73 9
 0 8 3 130369 4674.49 7
 0 8 -3 139265 4579.02 7
 0 8 -3 131846 4328 2
 0 -8 -3 135883 3110.87 6
 -1 8 -3 342.365 245.498 7
 -1 8 -3 539.183 284.621 2
 1 8 3 398.427 242.558 7
 1 -8 3 411.657 295.75 9
 2 8 3 38112.6 2300.21 7
 -2 8 -3 44386.5 2219.85 2
 2 -8 3 39557.6 2231.13 9
 3 -8 3 57227.7 2827.86 9
 -3 8 -3 56348.1 2669.97 2
 3 8 3 52317.3 2800.59 7
 4 8 3 17114.3 1551.22 7
 -4 8 -3 17841.8 1490.7 2
 4 -8 3 17580.8 1536.35 9
 4 8 3 16021.6 633.97 6
 5 8 3 12162.4 1343.99 7
 5 -8 3 12617.3 1358.34 9
 6 -8 3 715.349 213.294 8
 6 8 3 307.377 250.262 7
 7 8 3 47987.1 2958.39 7
 7 -8 3 46317.9 2987.07 9
 7 -8 3 47770.3 1915.84 8
 8 8 3 3586.5 823.724 7
 8 -8 3 4813.07 986.949 9
 9 -8 3 899.873 572.493 9
 9 8 3 916.241 488.976 7
 9 8 3 1101.74 321.248 3
 10 8 3 20388 2109.46 7
 10 -8 3 19664.8 2131.68 9
 11 -8 3 1655.44 679.086 9
 11 8 3 2478.8 782.515 7
 12 -8 3 39613 3333.86 9
 12 8 3 37639.2 3126.24 7
 13 8 3 4298.23 1135.8 7
 13 -8 3 2180.81 828.005 9
 14 -8 3 5638.36 1367.18 9
 14 8 3 6819.95 1442.3 7
 15 8 3 9313.77 1760.95 7
 15 -8 3 7451.66 1628.74 9
 18 9 -3 27231 3019.57 7
 18 -9 -3 25099.9 2942.9 9
 17 9 -3 3327.48 1052.59 7
 17 -9 -3 4267.58 1219.91 9
 16 -9 -3 24430.5 2699.08 9
 16 9 -3 22541 2560.53 7
 16 9 -3 22083.9 2285.57 6
 15 9 -3 18728.1 2249.61 7
 15 9 -3 16406.3 1900.98 6
 15 -9 -3 22095.2 2465.91 9
 14 9 -3 3772.45 893.11 6
 14 -9 -3 2682.72 837.983 9
 14 9 -3 2389.28 849.704 7
 13 9 -3 53744.2 3199.6 3
 13 9 -3 62716.9 3919 7
 13 9 -3 62809.9 3570.93 6
 13 -9 -3 61181.8 3940.24 9
 12 9 -3 1950.95 599.725 3
 12 9 -3 1721.61 706.887 7
 12 -9 -3 2199.87 753.62 9
 12 9 -3 2842.84 703.124 6
 11 9 -3 37564.8 2789.54 7
 11 -9 -3 43191 2986.24 9
 11 9 -3 40222.8 2627.12 3
 11 9 -3 40552.4 2623.21 6
 -10 -9 3 30577.8 2166.79 4
 -10 9 3 29133.9 2183.86 4
 10 -9 -3 24811.1 1954.33 8
 10 9 -3 27431.4 2100.25 3
 10 -9 -3 24908.5 2194.23 9
 10 9 -3 27471.5 2285.96 7
 9 9 -3 11586 1324.27 3
 9 9 -3 12575.5 1473.26 7
 9 -9 -3 12455.5 1456.53 9
 9 -9 -3 13116.3 1355.55 8
 -9 -9 3 9767.95 1143.99 4
 -9 9 3 13094.5 1360.31 4
 -8 -9 3 57427.3 2747.93 4
 8 9 -3 53283.4 3037.56 7
 8 -9 -3 54886 2869.27 8
 8 9 -3 52136.8 2910.1 3
 8 -9 -3 57946.2 3168.13 9
 -8 9 3 53725.1 2765.53 4
 7 -9 -3 781.879 400.26 9
 7 -9 -3 768.31 369.337 8
 -7 9 3 371.18 237.43 4
 -7 -9 3 139.944 183.773 4
 7 9 -3 473.131 250.041 1
 7 9 -3 178.951 226.779 3
 7 9 -3 239.494 288.488 7
 -6 9 3 48043 2286.11 4
 6 9 -3 46785.2 2075.96 1
 6 -9 -3 50014.9 2760.84 9
 6 9 -3 44636.3 2612.06 7
 -6 -9 3 50149.9 2244.66 4
 6 -9 -3 46168.5 2503.18 8
 5 -9 -3 8693.56 1077.13 9
 5 9 -3 11772.6 966.941 1
 -5 -9 3 9857.39 860.976 4
 -5 9 3 8131.75 835.466 4
 5 9 -3 8731.07 1082.15 7
 4 9 -3 44482.1 2061.35 1
 -4 -9 3 46112.1 1884.09 4
 4 -9 -3 48764.1 2562.91 9
 -4 9 3 44796.3 1943.63 4
 4 9 -3 45004.7 2472.55 7
 -4 9 3 45227.7 2678.74 7
 -3 -9 3 14296.5 897.068 4
 -3 9 3 14636.8 966.804 4
 -3 9 3 11999.7 1315.81 7
 3 9 -3 15011.1 1325.51 7
 -2 9 3 4984.53 522.775 4
 -2 9 3 5026.2 839.954 7
 -2 -9 3 5540.71 521.45 4
 2 9 -3 5443.74 804.964 7
 1 9 -3 58976.1 2820.87 7
 -1 9 3 61795.3 3044.46 7
 -1 -9 3 63459.7 2077.17 4
 1 9 -3 63228.4 2720.81 2
 -1 9 3 58432.5 2059.02 4
 0 9 -3 265.842 198.654 2
 0 -9 3 963.503 396.086 9
 0 9 -3 345.766 239.312 7
 0 9 3 805.995 382.525 7
 1 9 3 59161.7 3035.97 7
 -1 9 -3 63592.3 3001.25 7
 -1 9 -3 61028.6 2726.63 2
 1 -9 3 63302.9 2934.37 9
 -2 9 -3 13803.5 1219.47 2
 2 -9 3 13556.3 1305.06 9
 2 9 3 15037.4 1457.99 7
 3 9 3 59085.7 3095.13 7
 3 -9 3 62858.3 3075.38 9
 -3 9 -3 57104.4 2782.09 2
 4 9 3 62852 3308.64 7
 -4 9 -3 69408.6 3182.04 2
 4 -9 3 65611.2 3302.13 9
 5 -9 3 4294.57 865.374 9
 5 9 3 3038.92 714.029 7
 5 9 3 3055.67 293.167 6
 6 -9 3 95877.5 4345.36 9
 6 9 3 89098.1 2639.08 6
 6 9 3 90548.1 4259.76 7
 7 -9 3 9408.33 1323.31 9
 7 9 3 7021.49 1137.86 7
 7 -9 3 7627.7 741.437 8
 7 9 3 6426.6 623.473 6
 8 9 3 40562.1 2877.92 7
 8 -9 3 39435.4 2875.66 9
 8 -9 3 41086.6 1856.18 8
 9 9 3 41801.2 3005.14 7
 9 -9 3 39782.1 3033.36 9
 10 -9 3 4283.89 1025.31 9
 10 9 3 3621.96 941.711 7
 11 9 3 21864.8 2320.04 7
 11 -9 3 22012 2376.72 9
 12 -9 3 1460.52 836.294 9
 12 9 3 629.015 532.345 7
 13 -9 3 28938.4 2982.08 9
 13 9 3 25273.4 2695.09 7
 14 9 3 6556.97 1442.09 7
 14 -9 3 8241.85 1647.65 9
 15 9 3 19080.4 2525.67 7
 15 -9 3 22836.4 2829.75 9
 18 -10 -3 159.369 402.398 9
 18 10 -3 37.5891 408.196 7
 17 -10 -3 10006.1 1832.06 9
 17 10 -3 10195.8 1816.61 7
 16 10 -3 12830.2 1957.77 7
 16 -10 -3 8869.55 1672.86 9
 15 -10 -3 20138.9 2382.57 9
 15 10 -3 16835.4 2149.91 7
 15 10 -3 15195.6 1833.88 6
 14 -10 -3 37219.7 3152.97 9
 14 10 -3 36076.1 2656.23 3
 14 10 -3 34305.4 3024.14 7
 14 10 -3 34786.4 2703.18 6
 13 -10 -3 722.021 519.749 9
 13 10 -3 41.9059 259.375 3
 13 10 -3 663.038 563.385 7
 13 10 -3 125.68 284.974 6
 12 -10 -3 49882.1 3433.42 9
 12 10 -3 49329.3 3065.69 3
 12 10 -3 48717.1 3399.88 7
 11 10 -3 16047.4 1657.48 3
 11 -10 -3 16168.4 1851.43 9
 11 -10 -3 14779.7 1613.34 8
 11 10 -3 16327.8 1850.17 7
 10 -10 -3 31539.5 2284.04 8
 10 10 -3 28731 2393.33 7
 -10 10 3 31716.2 2316.82 4
 10 -10 -3 34709.1 2613.01 9
 10 10 -3 32228 2352.54 3
 -9 10 3 69122.7 3356.5 4
 9 -10 -3 63937 3612.82 9
 9 10 -3 68275.2 3715.19 7
 9 -10 -3 71355.4 3465.78 8
 -9 -10 3 67635.4 3224.33 4
 9 10 -3 65194.8 3442.76 3
 9 10 -3 67751.1 2639.68 1
 8 10 -3 4424.43 577.976 1
 8 10 -3 4562.56 838.119 3
 -8 10 3 4863.17 794.272 4
 8 10 -3 5593.37 987.361 7
 8 -10 -3 4846.99 930.583 9
 -8 -10 3 3215.12 633.97 4
 8 -10 -3 3509.38 724.603 8
 7 10 -3 62398.6 2446.93 1
 7 -10 -3 63983.8 3125.09 8
 -7 10 3 58357.2 2754.01 4
 7 10 -3 62844.4 3346.48 7
 7 -10 -3 62934.7 3328.68 9
 -7 -10 3 62774.6 2734.89 4
 6 10 -3 7621.86 1069.66 7
 6 -10 -3 5985.08 891.539 8
 -6 -10 3 8057.88 829.459 4
 -6 10 3 6040.67 758.273 4
 6 10 -3 7851.33 786.633 1
 6 -10 -3 6962.82 1046.27 9
 -5 10 3 45485 2068.14 4
 -5 -10 3 45018.8 1990.48 4
 5 10 -3 44565.5 2628.08 7
 5 -10 -3 41770.7 2565.32 9
 5 10 -3 47541.6 2114.13 1
 -4 10 3 11362.2 906.967 4
 4 -10 -3 13721.6 1387.56 9
 -4 10 3 13447.5 1490.07 7
 4 10 -3 12195.9 1285.46 7
 -4 -10 3 13820.8 929.285 4
 3 10 -3 7426.99 996.881 7
 -3 -10 3 8215.56 659.042 4
 -3 10 3 6987.8 1034.79 7
 -3 10 3 8014.7 684.461 4
 -2 -10 3 85703.8 2535 4
 -2 10 3 79681.8 2560.66 4
 2 10 -3 79259.6 3521.99 7
 -2 10 3 79455.7 3764.67 7
 -1 -10 3 20732.4 1033.77 4
 -1 10 3 24148.7 1904.7 7
 1 10 -3 20707.6 1667.94 7
 -1 10 3 21779.6 1085.91 4
 0 10 3 50746.7 2886.52 7
 0 10 -3 52601.3 2793.08 7
 0 -10 3 50774.4 2653.52 9
 0 10 -3 51913.8 2483.73 2
 -1 10 -3 26369.3 1941.23 7
 -1 10 -3 29347.9 1806.56 2
 1 10 3 27120.7 2039.41 7
 1 -10 3 30401.9 2013.56 9
 2 -10 3 51125.3 2779.33 9
 -2 10 -3 51615.2 2555.52 2
 2 10 3 55981.2 3048.7 7
 3 10 3 17473.6 1660.68 7
 3 -10 3 18027.2 1620.46 9
 -3 10 -3 16667.8 1423.06 2
 4 -10 3 1192.93 479.205 9
 4 10 3 744.808 367.402 7
 -4 10 -3 545.299 306.914 2
 5 10 3 75341.9 3866.08 7
 5 -10 3 77899.6 3837.01 9
 -5 10 -3 73639.7 3505.51 2
 6 10 3 1916.95 689.212 7
 6 -10 3 966.856 442.088 9
 7 -10 3 30664.4 1661.84 8
 7 10 3 32036.3 2531.15 7
 7 -10 3 32412.1 2547.42 9
 8 -10 3 6060.68 704.536 8
 8 10 3 4655.53 1007.83 7
 8 -10 3 7587.66 1275.29 9
 9 -10 3 24698.7 2398.27 9
 9 10 3 19012.5 2067.59 7
 10 10 3 28793.3 2632.84 7
 10 -10 3 32485.9 2838.9 9
 11 10 3 1979.37 715.798 7
 11 -10 3 4277.8 1131.35 9
 12 10 3 41811.6 3398.16 7
 12 -10 3 41848.3 3509.2 9
 13 10 3 106.094 356.006 7
 13 -10 3 179.482 595.376 9
 14 -10 3 20483.3 2579.9 9
 14 10 3 14907 2184.86 7
 15 10 3 6633.26 1484.94 7
 15 -10 3 9747.82 1880.13 9
 17 -11 -3 3909.14 1123.44 9
 17 11 -3 3590.99 1089.24 7
 16 11 -3 11800.9 1923.84 7
 16 -11 -3 16240.6 2256.93 9
 15 11 -3 18236.5 2299.61 7
 15 -11 -3 16286.6 2188.85 9
 14 -11 -3 1065.79 690.38 9
 14 11 -3 868.337 693.429 7
 14 11 -3 421.163 417.839 3
 13 -11 -3 33145.3 2922.68 9
 13 11 -3 36287.5 2666.75 3
 13 11 -3 31723.1 2865.01 7
 12 11 -3 1533.66 685.651 7
 12 11 -3 1668.67 601.386 3
 12 -11 -3 1413.73 751.204 9
 11 11 -3 8512.44 1236.64 3
 11 11 -3 9609.16 1466.45 7
 11 -11 -3 12388.1 1645.15 9
 11 -11 -3 11200.9 1379.86 8
 10 -11 -3 3083.92 735.962 8
 10 11 -3 3795.82 859.4 7
 10 -11 -3 3398.11 867.797 9
 10 11 -3 4999.27 952.922 3
 9 11 -3 9290.03 1369.39 7
 9 11 -3 6872.4 1090.61 3
 9 -11 -3 8486.34 1139.74 8
 -9 -11 3 7203.71 984.508 4
 9 11 -3 7313.39 743.048 1
 -9 11 3 7096.12 1018.3 4
 9 -11 -3 8787.9 1294.69 9
 8 -11 -3 22367.1 1845.33 8
 8 11 -3 22492.3 1934.28 3
 8 11 -3 22788.3 1354.52 1
 -8 11 3 21867.8 1692.04 4
 8 -11 -3 20419.3 1957.08 9
 8 11 -3 22234.7 2031.63 7
 -8 -11 3 21313.1 1600.99 4
 -7 -11 3 875.867 321.806 4
 7 -11 -3 2469.22 655.754 9
 7 -11 -3 979.883 374.255 8
 7 11 -3 1138.41 306.079 1
 -7 11 3 2257.2 520.496 4
 7 11 -3 805.915 428.023 7
 -6 11 3 31740.2 1784.94 4
 -6 -11 3 29105.3 1639.42 4
 6 11 -3 28181.7 2193.68 7
 6 -11 -3 28524.8 2207.5 9
 -5 11 3 6967.18 510.737 2
 -5 11 3 10812 926.652 4
 5 11 -3 6745.83 1060.01 7
 -5 -11 3 12176.9 920.786 4
 5 -11 -3 9098.11 1208.42 9
 4 -11 -3 21969.5 1843.96 9
 -4 -11 3 23599.3 1243.53 4
 4 11 -3 22608.8 1861.69 7
 -4 11 3 25899.5 1366.74 4
 -4 11 3 20714.1 1947.24 7
 -3 -11 3 9088.64 676.037 4
 3 11 -3 8501.88 1111.42 7
 -3 11 3 9656.99 1292.03 7
 -3 11 3 10063.2 754.544 4
 2 11 -3 14860.7 1473.08 7
 -2 11 3 15251.2 894.615 4
 -2 -11 3 14730.4 826.403 4
 -2 11 3 14542.7 1576 7
 -1 -11 3 29748.1 1229.99 4
 -1 11 3 28055.8 1243.56 4
 -1 11 3 26830.3 2143.52 7
 1 11 -3 32160.4 2190.94 7
 0 -11 3 1025.27 437.757 9
 0 11 3 1024.39 488.59 7
 0 11 -3 1173.44 433.501 7
 0 11 -3 918.418 362.809 2
 0 -11 -3 1088.31 173.306 2
 -1 11 -3 53630.4 2639.42 2
 1 -11 3 62010.1 3098.52 9
 1 11 3 50338.8 3040.93 7
 -1 11 -3 58900.5 3142.17 7
 -2 11 -3 10981 1149.4 2
 2 -11 3 11581.6 1328.16 9
 2 11 3 10623.9 1343.35 7
 3 11 3 23578.5 2020.47 7
 -3 11 -3 21694.8 1676.26 2
 3 -11 3 22684.4 1926.7 9
 -4 11 -3 15726.9 1441.75 2
 4 -11 3 15936 1635.4 9
 4 11 3 15840.7 1680.01 7
 5 11 3 3254.08 824.712 7
 5 -11 3 3090.09 778.232 9
 -5 11 -3 3643.61 772.303 2
 -6 11 -3 18831.2 1757.35 2
 6 11 3 17770.5 1893.87 7
 6 -11 3 18521.4 1879.63 9
 7 11 3 1.5873 347.425 7
 7 -11 3 248.386 331.47 9
 8 11 3 26463.7 2445.1 7
 8 -11 3 27831.6 2497.35 9
 9 11 3 17292.7 2013.02 7
 9 -11 3 20306.9 2202.03 9
 10 -11 3 12413.3 1763.34 9
 10 11 3 13691.3 1841.03 7
 11 -11 3 12106.5 1815.47 9
 11 11 3 12942.2 1859.63 7
 12 11 3 434.799 416.743 7
 12 -11 3 1100.32 747.108 9
 13 -11 3 20684.5 2578.58 9
 13 11 3 18105.3 2362.48 7
 14 -11 3 5203.03 1360.28 9
 14 11 3 4437.11 1238.45 7
 15 11 3 14604.4 2245.97 7
 17 12 -3 8857.4 1730.6 7
 17 -12 -3 8620.62 1703.68 9
 16 12 -3 6214.81 1429.45 7
 16 -12 -3 8397.25 1659.11 9
 15 12 -3 15355.1 2142.77 7
 15 -12 -3 19739.5 2423.49 9
 14 12 -3 30378.3 2530.04 3
 14 -12 -3 26604.5 2783.04 9
 14 12 -3 29144.7 2861.04 7
 13 12 -3 -109.513 299.002 3
 13 12 -3 538.455 526.127 7
 13 -12 -3 153.275 482.681 9
 12 -12 -3 30841.1 2477.21 8
 12 12 -3 31789.4 2526.97 3
 12 -12 -3 31448 2818.77 9
 12 12 -3 31257.7 2792.54 7
 11 -12 -3 1035.21 495.716 8
 11 12 -3 880.528 480.378 7
 11 -12 -3 1958.18 779.552 9
 11 12 -3 1093.88 493.915 3
 10 12 -3 32858.6 2534.96 3
 10 -12 -3 39781.4 2980.63 9
 10 -12 -3 35817.4 2525.56 8
 10 12 -3 33638.9 2766.95 7
 9 12 -3 44910.7 2911.33 3
 9 -12 -3 41751.6 2983.77 9
 9 -12 -3 41928 2698.21 8
 9 12 -3 41463.3 3010.02 7
 8 12 -3 9453.64 1356.4 7
 8 -12 -3 9287.58 1241.17 8
 -8 -12 3 7672.24 950.395 4
 8 -12 -3 7968.6 1228.45 9
 8 12 -3 7120.6 1154.91 3
 -8 12 3 10622.4 1159.52 4
 -7 12 3 75755.5 3124.83 4
 -7 -12 3 67362 2879.37 4
 7 12 -3 68855.9 3771.5 7
 7 -12 -3 72840.6 3533.4 8
 -6 -12 3 1865.92 416.245 4
 6 12 -3 2335.01 747.5 7
 6 -12 -3 2754.37 736.983 9
 -5 -12 3 66448.2 2405.31 4
 5 12 -3 63993.5 3458.41 7
 5 -12 -3 65665.9 3500.75 9
 -5 12 3 72117 2600.87 4
 -4 12 3 39273.4 2845.34 7
 4 12 -3 40806.9 2691.36 7
 4 -12 -3 36808.8 2565.75 9
 -4 12 3 44677.6 1866.57 4
 -4 -12 3 43945.3 1746.66 4
 -3 12 3 17412.2 1822.79 7
 -3 12 3 19744.6 1058.89 4
 3 12 -3 16639.4 1685.24 7
 -3 -12 3 16454.3 908.705 4
 -2 12 3 60838.4 2003.58 4
 2 12 -3 58478.9 3214.71 7
 -2 -12 3 61109.7 1917.52 4
 -2 12 3 60966 3484.05 7
 -1 12 3 35012.2 1379.8 4
 -1 -12 3 34993.3 1334.33 4
 -1 12 3 37250.3 2642.63 7
 1 12 -3 35991.3 2472.85 7
 0 -12 -3 89626.7 2312.02 2
 0 12 3 100351 2771.06 4
 0 12 -3 101405 3822.52 2
 0 -12 3 97079.1 4174.89 9
 0 12 3 94240 4443.33 7
 0 12 -3 99150.5 4386.34 7
 1 12 3 23614.3 2086.8 7
 1 -12 3 23842 1939.16 9
 -1 12 -3 25328.2 1743.65 2
 -1 12 -3 25279.2 2083.4 7
 2 -12 3 74346.3 3706.45 9
 2 12 3 70738.9 3809.36 7
 -2 12 -3 73462.2 3265.75 2
 -3 12 -3 13239.8 1298.9 2
 3 -12 3 14803.8 1585.22 9
 3 12 3 15685.3 1700.26 7
 4 -12 3 15003.5 1648.84 9
 -4 12 -3 11419.2 1255.54 2
 4 12 3 12269.2 1543.91 7
 -5 12 -3 144926 5545.54 2
 5 -12 3 166922 6347.3 9
 5 12 3 162283 6413.48 7
 6 -12 3 2660.57 795.655 9
 -6 12 -3 744.523 423.595 2
 6 12 3 2697.45 850.558 7
 7 -12 3 26544.5 2409.59 9
 7 12 3 27380.5 2473.55 7
 -7 12 -3 23332.1 2079.65 2
 8 -12 3 33732.6 2807.42 9
 8 12 3 32553.8 2790.96 7
 9 -12 3 17208.3 2081.95 9
 9 12 3 17936.4 2096.77 7
 10 -12 3 30927.6 2865.07 9
 10 12 3 26536.1 2630.28 7
 11 -12 3 -228.566 493.83 9
 11 12 3 233.437 296.337 7
 12 -12 3 21818.2 2588.23 9
 12 12 3 23464.8 2635.39 7
 13 -12 3 884.449 663.189 9
 13 12 3 87.6682 663.475 7
 14 -12 3 34620.1 3473.96 9
 14 12 3 28856 3126.88 7
 16 13 -3 2910.38 1015.63 7
 16 -13 -3 5155.62 1296.32 9
 15 13 -3 13356.9 2031.4 7
 15 -13 -3 15334 2181.77 9
 14 13 -3 -95.9101 416.026 7
 14 13 -3 221.869 352.109 3
 14 -13 -3 -6.83584 425.822 9
 13 -13 -3 8453.37 1500.11 9
 13 13 -3 11156.5 1521.56 3
 13 13 -3 13107 1912.41 7
 12 -13 -3 2447.32 832.216 9
 12 -13 -3 3186.95 832.093 8
 12 13 -3 2402.7 780.907 3
 12 13 -3 4066.41 1067.47 7
 11 13 -3 25636.5 2550.3 7
 11 13 -3 28559.8 2425.84 3
 11 -13 -3 29755.4 2712.24 9
 11 -13 -3 29337.4 2369.21 8
 10 13 -3 8280.52 1283.56 3
 10 -13 -3 10020.8 1530.48 9
 10 -13 -3 7832.82 1195.81 8
 10 13 -3 8221.78 1397.39 7
 9 -13 -3 2074.4 653.381 8
 9 13 -3 1567.74 720.907 7
 9 13 -3 804.863 535.473 3
 9 -13 -3 2784.26 827.418 9
 8 -13 -3 16144 1823.11 9
 8 13 -3 16074.7 1860.29 7
 8 -13 -3 17031.7 1696.52 8
 7 13 -3 1113.45 619.733 7
 -7 13 3 1236.32 417.031 4
 7 -13 -3 493.115 422.025 9
 -6 13 3 2311.66 481.59 4
 6 13 -3 1376.35 566.65 7
 -6 -13 3 2561.22 456.173 4
 -5 -13 3 1077.91 294.783 4
 5 -13 -3 1454.65 676.966 9
 5 13 -3 1881.38 652.045 7
 -5 13 3 1221.6 368.676 4
 -4 13 3 21226.2 2141.79 7
 4 13 -3 21246.6 1975.08 7
 4 -13 -3 23436.2 2069.4 9
 -4 13 3 26418.5 1317.94 4
 -4 -13 3 20262.3 1087.67 4
 -3 -13 3 2681.78 319.968 4
 3 13 -3 1513.94 508.298 7
 -3 13 3 2167.32 690.993 7
 -3 13 3 2442.59 350.726 4
 -2 13 3 2074.19 283.75 4
 -2 13 3 2087 663.634 7
 -2 -13 3 1491.01 213.259 4
 2 13 -3 1254.9 526.259 7
 1 13 -3 1733.52 613.519 7
 -1 -13 3 1157.61 189.881 4
 -1 13 3 1398.6 228.434 4
 -1 13 3 2432.72 749.189 7
 0 -13 3 1029.39 194.457 4
 0 13 3 1067.13 569.358 7
 0 13 -3 1045.82 478.912 7
 0 13 3 916.67 191.12 4
 0 -13 3 808.425 408.398 9
 -1 13 -3 11767.4 1194.52 2
 1 13 3 10583.3 1441.67 7
 -1 13 -3 9608.47 1339.05 7
 1 -13 3 12169.5 1432.36 9
 2 13 3 458.037 423.047 7
 -2 13 -3 693.455 352.987 2
 2 -13 3 139.125 306.029 9
 3 13 3 16776.9 1870.67 7
 -3 13 -3 14273.1 1371.96 2
 3 -13 3 15216.1 1664.08 9
 -4 13 -3 13643.9 1387.78 2
 4 -13 3 13819 1602.52 9
 4 13 3 13798.8 1695.47 7
 5 -13 3 2783.1 835.469 9
 -5 13 -3 2663.48 681.759 2
 6 13 3 17176.9 1974.56 7
 6 -13 3 16081.2 1887.75 9
 -6 13 -3 17199.5 1707 2
 7 13 3 45.3705 360.527 7
 -7 13 -3 -25.3873 212.349 2
 8 13 3 20772.4 2249.98 7
 -8 13 -3 17895.8 1914.52 2
 8 -13 3 22918 2366.12 9
 9 -13 3 12074.3 1782.41 9
 -9 13 -3 9749.9 1498.81 2
 9 13 3 11919.9 1770.3 7
 10 -13 3 15745.2 2130.91 9
 10 13 3 17891.7 2224.74 7
 11 13 3 7344.77 1471.33 7
 11 -13 3 7810.94 1531.66 9
 12 13 3 -246.289 509.4 7
 12 -13 3 1023.4 644.79 9
 13 13 3 11152.7 1923.7 7
 13 -13 3 13669.7 2140.63 9
 14 13 3 1292.82 760.616 7
 14 -13 3 1554.87 801.989 9
 16 -14 -3 5227.11 1348.53 9
 16 14 -3 5555.12 1447.07 7
 15 14 -3 8936.67 1704.99 7
 15 -14 -3 8283.27 1676.74 9
 14 14 -3 29824.1 3065.91 7
 14 -14 -3 30835.5 3085.25 9
 14 14 -3 27537.7 2532.1 3
 13 14 -3 21.0235 356.419 3
 13 -14 -3 874.917 466.087 8
 13 14 -3 -137.934 483.382 7
 13 -14 -3 -415.284 559.894 9
 12 -14 -3 20365.8 2035.69 8
 12 -14 -3 18824.4 2274.87 9
 12 14 -3 19935.2 2379.29 7
 12 14 -3 23377.6 2271.97 3
 11 14 -3 2041.66 796.751 7
 11 14 -3 1847.93 698.672 3
 11 -14 -3 425.945 401.637 8
 11 -14 -3 583.332 473.398 9
 10 14 -3 46367.4 3184.03 3
 10 -14 -3 47434.7 3082.34 8
 10 -14 -3 41465.1 3213.76 9
 10 14 -3 44646 3405.65 7
 9 -14 -3 50993.3 3165.44 8
 9 14 -3 52591.5 3395.65 3
 9 14 -3 49447 3508.99 7
 9 -14 -3 55015.5 3637.56 9
 8 -14 -3 11844.6 1455.7 8
 8 14 -3 11373.7 1614.74 7
 8 -14 -3 12527.4 1670.5 9
 7 14 -3 42622.9 3109.01 7
 7 -14 -3 45059.5 3195.44 9
 6 14 -3 2151.17 731.313 7
 6 -14 -3 2238.78 710.211 9
 5 -14 -3 111795 5218.02 9
 5 14 -3 99367.2 5010.73 7
 4 -14 -3 59837.9 3596.75 9
 -4 14 3 57483.9 3781.62 7
 -4 14 3 69669.2 2324.33 4
 4 14 -3 59638.3 3598.2 7
 -3 14 3 16000.6 1876.71 7
 -3 14 3 17335.4 902.734 4
 3 14 -3 14613.1 1716.28 7
 -2 14 3 26416.1 2446.14 7
 2 14 -3 31053.6 2489.12 7
 -2 14 3 32208.7 1150.72 4
 -1 14 3 2562.51 742.793 7
 1 14 -3 2965.23 823.281 7
 -1 14 3 3613.04 307.048 4
 0 14 3 69906.3 3989.32 7
 0 -14 3 78615 3845.87 9
 0 14 -3 70740.2 3875.85 7
 1 14 3 4298.31 417.609 4
 1 -14 3 4025.55 887.325 9
 -1 14 -3 4860.91 788.768 2
 1 14 3 4754.85 1009 7
 -1 14 -3 5565.54 1044.93 7
 -2 14 -3 24944.1 1847.94 2
 2 -14 3 26616.9 2259.62 9
 3 -14 3 24677.7 2210.18 9
 -3 14 -3 18750.1 1626.28 2
 3 14 3 21336.4 2178.91 7
 4 -14 3 40507.9 2892.17 9
 4 14 3 38867 2986.32 7
 -5 14 -3 83976.3 3942.4 2
 5 -14 3 89630.8 4637.71 9
 5 14 3 82630.5 4622.94 7
 6 -14 3 863.891 531.524 9
 6 14 3 1977.81 768.829 7
 -6 14 -3 1742.76 599.507 2
 7 -14 3 26985.5 2563.66 9
 -7 14 -3 25473.5 2207.57 2
 7 14 3 28923.1 2710.59 7
 -8 14 -3 4467.39 961.936 2
 8 -14 3 3763.61 1019.47 9
 8 14 3 5802.3 1300.96 7
 9 14 3 41002 3406.73 7
 -9 14 -3 36345.8 2883.42 2
 9 -14 3 38229.2 3251.5 9
 -10 14 -3 44039.4 3366.85 2
 10 -14 3 49202.5 3811.26 9
 10 14 3 44592.7 3654.85 7
 11 14 3 1168.97 682.019 7
 11 -14 3 1317.57 692.837 9
 12 -14 3 20844.6 2621.44 9
 12 14 3 15452.5 2231.86 7
 13 14 3 605.792 531.712 7
 13 -14 3 1972.01 953.395 9
 15 -15 -3 6694.8 1479.97 9
 15 15 -3 6009.62 1475.57 7
 14 15 -3 1235.1 626.705 3
 14 15 -3 803.305 624.103 7
 14 -15 -3 333.74 415.153 9
 13 -15 -3 6365.84 1379.2 9
 13 15 -3 3903.33 1044.87 7
 13 15 -3 3735.92 901.388 3
 12 -15 -3 1512.83 706.837 9
 12 -15 -3 1147.41 593.199 8
 12 15 -3 1296.3 595.617 3
 12 15 -3 1131.96 686.011 7
 11 -15 -3 5629.04 1049.74 8
 11 15 -3 7437.75 1302.97 3
 11 -15 -3 5998.55 1225.9 9
 11 15 -3 6551.82 1328.77 7
 10 15 -3 1315.19 575.098 3
 10 -15 -3 833.663 520.146 8
 10 -15 -3 1483.48 711.282 9
 10 15 -3 1064.07 691.628 7
 9 -15 -3 1854.81 663.806 8
 9 15 -3 2746.43 887.106 7
 9 -15 -3 2458.13 833.194 9
 8 -15 -3 3718.21 971.646 9
 8 15 -3 3689.65 969.772 7
 8 -15 -3 3937.84 870.223 8
 7 -15 -3 1314.94 584.042 9
 7 15 -3 1013.36 524.059 7
 6 -15 -3 14837.2 1812.11 9
 6 15 -3 15198.3 1862.92 7
 5 15 -3 2269.17 745.444 7
 5 -15 -3 1001.95 670.782 9
 4 -15 -3 21892.3 2160.82 9
 -4 15 3 23486 2427.87 7
 4 15 -3 20556.3 2147.98 7
 3 15 -3 10807.8 1474.81 7
 -3 15 3 8175.1 1413.37 7
 2 15 -3 541.283 427.622 7
 -2 15 3 976.313 381.212 7
 1 15 -3 3343.8 831.966 7
 -1 15 3 3092.79 831.909 7
 0 -15 3 395.156 381.136 9
 0 15 3 1201.77 699.761 7
 0 15 -3 225.562 478.638 7
 1 -15 3 25698.8 2307.07 9
 -1 15 -3 29739.3 2552.53 7
 1 15 3 25929.1 2470.45 7
 -1 15 -3 25046.1 1858.24 2
 -2 15 -3 280.155 218.613 2
 2 -15 3 213.904 272.012 9
 2 15 3 107.975 337.307 7
 3 -15 3 15922.5 1866.4 9
 -3 15 -3 16802.3 1555.5 2
 3 15 3 17505.5 2064.36 7
 4 -15 3 32790.3 2757.7 9
 4 15 3 30704.2 2768.26 7
 -4 15 -3 29307.8 2141.03 2
 5 -15 3 1310.11 621.225 9
 -5 15 -3 1943.61 625.309 2
 5 15 3 1985.69 801.598 7
 6 -15 3 5611.7 1177.17 9
 6 15 3 6054.04 1241.04 7
 -6 15 -3 4584.98 887.845 2
 7 15 3 7633.04 1479.21 7
 -7 15 -3 6277.25 1112.62 2
 -8 15 -3 2909.35 847.646 2
 8 -15 3 2363.4 885.931 9
 8 15 3 1620.14 759.009 7
 9 15 3 3038.44 966.534 7
 -9 15 -3 2446.1 779.714 2
 9 -15 3 3042.12 1006.66 9
 10 15 3 2681.91 975.512 7
 -10 15 -3 2036.76 728.824 2
 10 -15 3 2746.27 956.65 9
 11 -15 3 4916.2 1256.89 9
 11 15 3 3163.98 1012.53 7
 12 15 3 559.733 558.912 7
 12 -15 3 547.676 581.916 9
 13 -15 3 1763.56 896.834 9
 13 15 3 3300.63 1110.79 7
 15 16 -3 9194.69 1848.59 7
 15 -16 -3 11450.6 2010.06 9
 14 16 -3 17242.2 2452.74 7
 14 16 -3 21974.6 2364.07 3
 14 -16 -3 19279.9 2524.27 9
 13 -16 -3 858.797 632.164 9
 13 16 -3 1563.54 720.334 7
 13 16 -3 278.391 424.545 3
 13 -16 -3 2092.43 703.934 8
 12 16 -3 28778.5 2696.91 3
 12 16 -3 30929 3097.69 7
 12 -16 -3 32647.5 3123.76 9
 12 -16 -3 32755.3 2719.34 8
 11 -16 -3 849.676 646.69 9
 11 -16 -3 759.863 432.998 8
 11 16 -3 2113.4 828.016 3
 11 16 -3 -70.6215 556.636 7
 10 -16 -3 29941.1 2515.13 8
 10 16 -3 21440.7 2487.43 7
 10 16 -3 27503 2562.09 3
 10 -16 -3 31826.6 2928.27 9
 9 16 -3 59688.3 4144.04 7
 9 -16 -3 63555.9 3729.5 8
 9 -16 -3 65287.3 4200.78 9
 8 16 -3 1932.05 828.744 7
 8 -16 -3 2317.73 736.671 8
 8 -16 -3 3911.27 1109.66 9
 7 -16 -3 12611.8 1726.17 9
 7 16 -3 14087.5 1869.65 7
 6 -16 -3 2337.35 884.506 9
 6 16 -3 1519.35 695.112 7
 5 -16 -3 118942 5599.73 9
 5 16 -3 104882 5395.25 7
 4 16 -3 32518.3 2811.72 7
 4 -16 -3 38491.3 2972.55 9
 -4 16 3 35955.1 3153.58 7
 -3 16 3 16211.8 2047.28 7
 3 16 -3 11877.2 1650.19 7
 2 16 -3 49162.7 3436.3 7
 -2 16 3 45050.7 3453.4 7
 1 16 -3 1586.75 744.342 7
 -1 16 3 2015.57 741.498 7
 0 16 3 68527.6 4306.21 7
 0 -16 3 71773.3 4030.17 9
 0 16 -3 68766.9 4163.4 7
 1 16 3 2548.42 899.264 7
 1 -16 3 2640.59 756.803 9
 -1 16 -3 4456.29 1086.11 7
 -2 16 -3 42889.9 2564 2
 2 -16 3 46614.3 3243.16 9
 2 16 3 47198.6 3503.97 7
 -3 16 -3 29557.2 2114.56 2
 3 16 3 25390.4 2571.63 7
 3 -16 3 30656.5 2642.55 9
 -4 16 -3 25696.8 2041.73 2
 4 -16 3 29674.8 2646.8 9
 4 16 3 25581.5 2611.1 7
 5 -16 3 70066.2 4267.86 9
 5 16 3 66502.2 4325.67 7
 -5 16 -3 60944 3365.89 2
 6 16 3 4711.77 1213.88 7
 6 -16 3 3945.45 1023.24 9
 -6 16 -3 3435.72 773.037 2
 7 16 3 17139.2 2225.86 7
 7 -16 3 22399.7 2450.52 9
 8 16 3 3571.21 1090.99 7
 8 -16 3 3350.54 1047.56 9
 9 -16 3 29441.2 2959.12 9
 9 16 3 29012.1 3018.19 7
 10 16 3 29985.5 3113.86 7
 10 -16 3 30736.3 3110.34 9
 11 16 3 594.76 547.844 7
 11 -16 3 -147.086 455.012 9
 12 16 3 19327.5 2629.04 7
 12 -16 3 22200.7 2793.14 9
 14 -17 -3 1250.46 776.274 9
 14 17 -3 779.682 608.882 7
 13 17 -3 3565.4 1142.32 7
 13 -17 -3 5696.47 1373.97 9
 13 17 -3 5683.2 1207.65 3
 12 -17 -3 2518.15 998.285 9
 12 17 -3 1200.52 769.88 7
 12 17 -3 672.508 511.058 3
 12 -17 -3 1083.07 621.491 8
 11 -17 -3 1148.54 644.512 9
 11 17 -3 976.899 525.063 3
 11 17 -3 1328.74 715.342 7
 11 -17 -3 299.1 363.884 8
 10 17 -3 3110.34 966.742 3
 10 -17 -3 3737.97 928.549 8
 10 17 -3 3887.57 1159.26 7
 10 -17 -3 3716.49 1070.45 9
 9 17 -3 383.648 501.299 7
 9 -17 -3 -82.5453 347.774 9
 8 -17 -3 2608.27 755.646 8
 8 -17 -3 914.536 758.905 9
 8 17 -3 1399.26 710.516 7
 7 17 -3 6.2426 391.941 7
 7 -17 -3 538.586 402.432 9
 6 17 -3 3456.07 942.203 7
 6 -17 -3 4948.76 1072.85 9
 5 -17 -3 1844 801.735 9
 5 17 -3 1835.78 795.572 7
 4 17 -3 256.371 452.641 7
 -4 17 3 1326.62 604.751 7
 3 17 -3 1089.37 513.457 7
 -3 17 3 2379.76 905.846 7
 2 17 -3 1317.99 576.89 7
 -2 17 3 1778.14 861.388 7
 -1 17 3 2330.44 878.678 7
 1 17 -3 4092.39 1017.3 7
 0 -17 3 334.177 466.268 9
 0 17 3 737.134 608.74 7
 0 17 -3 1468.28 717.188 7
 1 17 3 386.879 342.555 7
 -1 17 -3 401.929 478.783 7
 1 -17 3 940.145 726.69 9
 2 17 3 752.096 520.024 7
 -2 17 -3 800.3 356.965 2
 2 -17 3 -43.3257 413.352 9
 3 -17 3 5528.33 1149.04 9
 3 17 3 5181.8 1194.56 7
 4 -17 3 -222.462 434.815 9
 4 17 3 191.325 490.93 7
 5 17 3 677.324 478.801 7
 5 -17 3 2328.4 928.987 9
 6 -17 3 5918.61 1281.05 9
 6 17 3 3352.71 990.479 7
 7 -17 3 2521.29 872.92 9
 7 17 3 1244.16 830.281 7
 8 17 3 1064.09 737.253 7
 8 -17 3 1347.17 696.486 9
 9 -17 3 936.285 658.864 9
 9 17 3 1850.73 898.839 7
 10 17 3 1060.51 671.109 7
 10 -17 3 460.718 655.178 9
 11 -17 3 846.715 593.217 9
 11 17 3 849.97 672.578 7
 13 18 -3 1655.51 847.69 3
 13 18 -3 1701.77 807.694 7
 13 -18 -3 34.5742 426.651 9
 12 -18 -3 44028.1 3331.97 8
 12 18 -3 46772.1 4044.14 7
 12 18 -3 42094.2 3447.38 3
 12 -18 -3 46730.3 3955.87 9
 11 -18 -3 4954.11 1075.53 8
 11 -18 -3 4722.1 1284.28 9
 11 18 -3 5212.13 1193.03 3
 11 18 -3 5516.47 1371.85 7
 10 -18 -3 22446.8 2276.93 8
 10 18 -3 20650.6 2557.15 7
 10 -18 -3 20989.2 2489.45 9
 10 18 -3 24787 2574.94 3
 9 18 -3 37922.4 3502.21 7
 9 -18 -3 44112.8 3218.92 8
 9 -18 -3 46152.3 3682.92 9
 8 -18 -3 4926.26 1089.47 8
 8 18 -3 4952.33 1258.5 7
 8 -18 -3 5689.88 1286.8 9
 7 18 -3 28681.5 2878.09 7
 7 -18 -3 28924.6 2863.52 9
 6 -18 -3 215.543 431.77 9
 6 18 -3 869.576 522.95 7
 5 -18 -3 64102.6 4265.27 9
 5 18 -3 61417.6 4241 7
 4 -18 -3 20254 2378.2 9
 -4 18 3 18843.5 2395.23 7
 4 18 -3 18527 2227.17 7
 -3 18 3 13456.8 1999.37 7
 3 18 -3 16400.3 2152.34 7
 2 18 -3 46751.1 3610.06 7
 -2 18 3 45901.5 3720.53 7
 1 18 -3 1557.73 736.874 7
 -1 18 3 1038.8 561.414 7
 0 18 3 45740.9 3719.53 7
 0 18 -3 52811.6 3850.6 7
 0 -18 3 45367.1 3406.59 9
 1 -18 3 13597.3 1826.77 9
 1 18 3 12114.6 1873.09 7
 -1 18 -3 12659.8 1877.56 7
 2 18 3 33221.4 3160.22 7
 2 -18 3 36328.9 3038.39 9
 3 18 3 24439.7 2702.51 7
 3 -18 3 28428.7 2711.25 9
 4 18 3 4229.35 1104.29 7
 4 -18 3 4696.32 1118.13 9
 5 18 3 51865.8 4041.89 7
 5 -18 3 51745.5 3809.25 9
 6 -18 3 -76.2747 283.746 9
 6 18 3 837.552 666.514 7
 7 18 3 18510.3 2431.38 7
 7 -18 3 22140.6 2542.07 9
 8 18 3 11598.7 2001.8 7
 8 -18 3 8788.72 1673.42 9
 9 18 3 30917.2 3289.82 7
 9 -18 3 32303.2 3244.95 9
 10 18 3 22939.4 2848.29 7
 10 -18 3 19488.4 2573.5 9
 11 -18 3 313.164 398.44 9
 13 19 -3 962.066 663.175 3
 13 19 -3 1033.61 727.981 7
 12 -19 -3 1003.77 510.913 8
 12 19 -3 1451.19 752.271 3
 12 19 -3 713.175 578.615 7
 12 -19 -3 1422.78 799.8 9
 11 -19 -3 321.224 596.223 9
 11 19 -3 694.217 573.568 3
 11 -19 -3 93.1633 276.515 8
 11 19 -3 421.726 630.099 7
 10 -19 -3 466.774 414.884 8
 10 -19 -3 284.7 481.898 9
 10 19 -3 749.529 636.344 7
 10 19 -3 43.3757 299.087 3
 9 -19 -3 374.542 465.43 8
 9 19 -3 694.33 601.095 7
 9 -19 -3 351.705 527.904 9
 8 19 -3 286.996 342.36 7
 8 -19 -3 -329.682 467.628 9
 7 -19 -3 587.182 542.167 9
 7 19 -3 -109.98 428.99 7
 6 -19 -3 1374.87 756.377 9
 6 19 -3 1917.42 800.911 7
 5 -19 -3 165.207 365.943 9
 5 19 -3 482.77 678.291 7
 4 19 -3 673.972 441.887 7
 4 -19 -3 451.625 503.409 9
 -4 19 3 1088.9 662.584 7
 3 19 -3 1190.88 728.582 7
 -3 19 3 220.349 466.354 7
 2 19 -3 219.006 540.009 7
 -2 19 3 554.508 684.915 7
 -1 19 3 284.933 308.851 7
 1 19 -3 1206.34 726.357 7
 0 19 -3 1949.15 808.092 7
 0 19 3 1107.27 703.409 7
 0 -19 3 2582.89 772.656 9
 1 19 3 846.479 588.806 7
 -1 19 -3 -248.169 444.103 7
 1 -19 3 1271.2 718.612 9
 2 19 3 379.406 382.555 7
 2 -19 3 -26.9008 394.01 9
 3 -19 3 6519.75 1327.36 9
 3 19 3 2951.84 976.028 7
 4 -19 3 325.293 353.402 9
 4 19 3 889.587 684.272 7
 5 -19 3 -51.4052 304.938 9
 5 19 3 -428.759 653.486 7
 6 -19 3 903.733 628.746 9
 6 19 3 -293.053 450.206 7
 7 19 3 147.527 437.838 7
 7 -19 3 271.359 677.361 9
 8 19 3 1050.28 790.934 7
 8 -19 3 17.5525 442.767 9
 9 19 3 1256.14 687.561 7
 9 -19 3 450.637 621.726 9
 10 -19 3 66.3 598.211 9
 10 19 3 805.282 605.321 7
 13 20 -3 1731.64 795.744 3
 12 20 -3 28157 2930.18 3
 12 20 -3 25915.5 3136.5 7
 11 20 -3 2574.74 1039.82 7
 11 -20 -3 2851.16 840.468 8
 11 -20 -3 2585.13 1046.16 9
 11 20 -3 3965.57 1210.66 3
 10 20 -3 23287.9 2621.99 3
 10 -20 -3 21235.2 2341.91 8
 10 20 -3 21305.5 2757.02 7
 10 -20 -3 24010.6 2782.14 9
 9 -20 -3 19358.8 2530.41 9
 9 20 -3 14743.9 2270.4 7
 9 -20 -3 15416 2008.58 8
 8 -20 -3 5842.58 1416.14 9
 8 20 -3 5755.54 1391.3 7
 7 20 -3 38955 3620.33 7
 7 -20 -3 47461 3898.41 9
 6 -20 -3 1722 821.955 9
 6 20 -3 649.899 590.118 7
 5 -20 -3 29049.7 2964.58 9
 5 20 -3 23315 2727.67 7
 4 -20 -3 19111.7 2382.03 9
 -4 20 3 21684.7 2727.57 7
 4 20 -3 16473.6 2275.5 7
 3 20 -3 22876.4 2685.5 7
 -3 20 3 25635.9 2960.19 7
 2 20 -3 34904.6 3311.12 7
 -2 20 3 33591.9 3372.15 7
 1 20 -3 347.158 387.498 7
 -1 20 3 1002.22 652.162 7
 0 -20 3 31385.2 2982.73 9
 0 20 -3 33131.2 3249.99 7
 0 20 3 33777.4 3363.52 7
 1 20 3 8491.86 1724.45 7
 -1 20 -3 9333.73 1730.08 7
 1 -20 3 10648.1 1754.81 9
 2 20 3 32362.3 3310.36 7
 2 -20 3 34738.8 3196.8 9
 3 -20 3 23882.4 2631.77 9
 3 20 3 20148.6 2596.92 7
 4 20 3 2527.36 1038.44 7
 4 -20 3 3578.39 1053.82 9
 5 20 3 30650.5 3260.91 7
 5 -20 3 33148.1 3227.95 9
 6 -20 3 1347.9 805.403 9
 6 20 3 614.797 634.802 7
 7 20 3 29569.5 3266.67 7
 7 -20 3 28976.8 3087.73 9
 8 -20 3 16277.2 2363.76 9
 8 20 3 14194.7 2326.95 7
 9 20 3 16852.4 2549.12 7
 9 -20 3 15624.6 2413.38 9
 12 21 -3 224.96 503.27 3
 11 -21 -3 474.082 487 8
 11 21 -3 42.5316 619.83 7
 10 -21 -3 176.727 358.475 8
 10 21 -3 144.216 460.768 7
 10 -21 -3 259.919 471.126 9
 10 21 -3 719.489 644.148 3
 9 -21 -3 229.038 480.604 9
 9 -21 -3 1073.76 551.469 8
 9 21 -3 214.543 534.483 7
 8 -21 -3 -99.3951 333.179 9
 8 21 -3 225.698 417.662 7
 7 -21 -3 469.721 644.709 9
 7 21 -3 152.687 576.778 7
 6 -21 -3 978.267 750.715 9
 6 21 -3 138.732 409.653 7
 5 21 -3 1202.25 724.89 7
 5 -21 -3 1511.62 740.291 9
 4 21 -3 -387.091 476.545 7
 4 -21 -3 -375.407 530.793 9
 -3 21 3 254.037 554.784 7
 3 -21 -3 -102.389 495.336 9
 3 21 -3 703.514 523.183 7
 -2 21 3 425.192 448.769 7
 2 21 -3 -20.6576 537.655 7
 -1 -21 3 440.792 566.727 9
 -1 21 3 482.25 736.729 7
 1 21 -3 1532.76 652.06 7
 0 -21 3 -149.401 415.782 9
 0 21 3 289.01 598.981 7
 0 21 -3 311.337 393.152 7
 1 -21 3 -171.894 465.808 9
 -1 21 -3 698.086 760.949 7
 1 21 3 -208.344 434.806 7
 2 -21 3 1310.35 827.814 9
 2 21 3 478.18 475.974 7
 3 -21 3 212.021 416.361 9
 3 21 3 24.8883 558.928 7
 4 -21 3 498.478 388.108 9
 4 21 3 885.666 526.467 7
 5 21 3 575.252 636.245 7
 5 -21 3 67.8267 396.067 9
 6 21 3 -789.981 627.222 7
 6 -21 3 542.378 643.738 9
 7 21 3 -549.814 610.656 7
 7 -21 3 822.261 648.25 9
 8 -21 3 -294.181 437.813 9
 11 -22 -3 3310.38 1016.82 8
 10 22 -3 15613.3 2284 3
 10 -22 -3 14601.9 2030.71 8
 9 22 -3 8593.04 1836.39 7
 9 -22 -3 10750.6 1697.66 8
 8 -22 -3 10354.4 1896.17 9
 8 22 -3 9762.22 1933.84 7
 7 22 -3 22960.1 2927.13 7
 7 -22 -3 29073.3 3158.68 9
 6 -22 -3 1983.48 836.013 9
 6 22 -3 3521.32 1260.08 7
 5 22 -3 30671 3330.27 7
 5 -22 -3 32950.4 3359.58 9
 4 22 -3 5684.73 1420.28 7
 4 -22 -3 6867.69 1555.33 9
 3 -22 -3 17488.6 2525.75 9
 3 22 -3 14604.7 2327.26 7
 -3 22 3 16383.6 2529.9 7
 -2 22 3 28725.9 3311.95 7
 2 22 -3 27244.7 3116.94 7
 -1 -22 3 807.525 670.454 9
 -1 22 3 961.422 757.417 7
 1 22 -3 1369.24 766.676 7
 0 22 -3 12992.7 2136.6 7
 0 -22 3 13444.1 2069.82 9
 0 22 3 9117.77 1837.09 7
 1 -22 3 1646.34 842.324 9
 1 22 3 1503.54 799.177 7
 -1 22 -3 2877.76 1075.72 7
 2 -22 3 32717.7 3244.65 9
 2 22 3 25421.9 3106.38 7
 3 22 3 14028.3 2318.87 7
 3 -22 3 19325.4 2518.24 9
 4 22 3 2407.54 1097.25 7
 4 -22 3 3238.46 1119.48 9
 5 -22 3 19934.9 2591.64 9
 5 22 3 15060.1 2428.12 7
 6 -22 3 971.372 812.596 9
 6 22 3 -693.903 632.79 7
 9 -23 -3 207.967 457.239 8
 8 23 -3 -3.14337 624.37 7
 7 23 -3 -742.322 635.59 7
 6 23 -3 -3.02833 398.965 7
 6 -23 -3 162.199 562.843 9
 5 -23 -3 1393.4 832.097 9
 5 23 -3 -263.587 467.266 7
 4 23 -3 514.262 496.156 7
 4 -23 -3 1603.21 857.848 9
 3 -23 -3 1073.06 776.434 9
 3 23 -3 500.144 540.364 7
 -3 23 3 948.534 693.667 7
 2 23 -3 334.279 691.6 7
 -2 23 3 498.336 536.249 7
 1 23 -3 -947.473 668.605 7
 -1 23 3 -1657.3 870.143 7
 0 -23 3 1380 670.558 9
 0 23 3 -31.3377 598.362 7
 0 23 -3 970.102 661.64 7
 1 -23 3 929.402 686.873 9
 1 23 3 584.04 565.331 7
 2 23 3 1433.84 936.367 7
 2 -23 3 1849.54 910.668 9
 3 23 3 840.901 618.725 7
 3 -23 3 -378 480.838 9
 4 -23 3 207.561 425.597 9
 4 23 3 -1167.67 792.085 7
 5 -23 3 430.728 607.348 9
 6 24 -3 5444.16 1547.11 7
 5 24 -3 14826.1 2437.12 7
 4 24 -3 3941.51 1380.06 7
 -3 24 3 6281.59 1697.97 7
 3 -24 -3 8404.2 1831.94 9
 3 24 -3 7379.96 1744.22 7
 -2 -24 3 21445.7 2780.8 9
 2 24 -3 19460.5 2787.69 7
 2 -24 -3 20521.7 2755.07 9
 -2 24 3 19579.2 2891.63 7
 -1 24 3 533.168 790.873 7
 1 24 -3 672.124 822.569 7
 -1 -24 3 698.369 419.99 9
 0 24 -3 12384.8 2277.4 7
 0 -24 3 10569.8 1908.51 9
 0 24 3 7953.43 1885.24 7
 1 24 3 808.25 846.999 7
 1 -24 3 1528 828.379 9
 2 -24 3 24415.3 2940.37 9
 20 0 -4 17472.5 2398.81 9
 19 0 -4 8756.15 1697.48 6
 19 0 -4 9005.53 1654.95 9
 18 0 -4 48044.4 3704.71 9
 17 0 -4 4510.51 1110.21 9
 16 0 -4 39239.2 3064.34 9
 15 0 -4 13.1356 261.295 9
 14 0 -4 22508.7 2086.44 9
 -14 0 4 22190 2269.79 4
 13 0 -4 38080.8 2640.93 9
 -13 0 4 37431.3 2828.81 4
 12 0 -4 24916.6 1971.68 9
 -12 0 4 22522.6 2062.34 4
 -11 0 4 74232.9 3773.86 4
 11 0 -4 70776.5 3366.62 9
 -10 0 4 6649.74 416.302 5
 10 0 -4 7850.03 953.549 9
 -10 0 4 8862.61 1153.29 4
 -9 0 4 197481 4719.51 5
 -9 0 4 212410 6699.04 4
 9 0 -4 218262 6177.44 9
 8 0 -4 74780 3039.63 6
 -8 0 4 75565.8 3104.9 4
 8 0 -4 75634.8 2631.81 9
 7 0 -4 58784.5 2171.54 9
 -7 0 4 63180.4 2730.02 4
 7 0 -4 61435.5 2644.65 6
 6 0 -4 238935 5958 9
 -6 0 4 251818 5694.29 5
 -6 0 4 231949 6681.08 4
 6 0 -4 255190 6771.68 6
 -5 0 4 18304 1320.32 4
 -5 0 4 20110.4 1018.95 5
 -5 0 4 19432.2 983.751 9
 5 0 -4 22648 1006.81 9
 5 0 -4 21918.2 1411.16 6
 -4 0 4 302504 7005.83 5
 -4 0 4 298053 7619.85 4
 4 0 -4 298928 6977.78 5
 4 0 -4 295039 6503.89 9
 -4 0 4 296794 6548.45 9
 4 0 -4 296048 7584.55 6
 -3 0 4 229816 5776.31 5
 -3 0 4 238650 6197.94 4
 3 0 -4 233917 5779.44 5
 -2 0 4 254295 5992.31 5
 -2 0 4 251469 6117.04 2
 2 0 -4 245604 5958.6 5
 2 0 -4 248029 6104.08 2
 1 0 -4 3612.59 477.542 5
 1 0 -4 4315.73 326.32 9
 1 0 -4 5158.53 576.948 2
 -1 0 4 4696.61 459.056 8
 0 0 4 539.51 120.66 7
 0 0 -4 239.922 101.012 9
 0 0 4 449.487 140.901 9
 0 0 4 387.33 129.316 8
 0 0 4 371.613 133.497 3
 0 0 -4 525.455 196.083 5
 0 0 -4 359.125 166.531 2
 -1 0 -4 173925 4937.96 1
 -1 0 -4 175497 4130.73 8
 1 0 4 173176 4556.33 9
 -1 0 -4 177561 4907.47 5
 -1 0 -4 167393 4566.83 9
 1 0 4 175477 4272.97 3
 -2 0 -4 4996.21 616.388 5
 -2 0 -4 5756.67 371.653 8
 2 0 4 5725.77 414.285 3
 -2 0 -4 6201.41 685.489 1
 2 0 4 4759.37 580.321 9
 3 0 4 117968 3785.69 9
 -3 0 -4 109925 2627.05 8
 -3 0 -4 121367 3808.1 5
 3 0 4 111382 2678.89 3
 -4 0 -4 69858.5 2795.3 5
 4 0 4 71058.5 2958.8 9
 5 0 4 73147.4 3196.75 9
 -5 0 -4 73560.8 2968.93 5
 6 0 4 181795 5920.4 9
 -6 0 -4 168922 5338.59 5
 7 0 4 4805.82 837.323 9
 -7 0 -4 4391.35 692.632 5
 8 0 4 101977 4494.91 9
 -8 0 -4 94725.7 3737.61 5
 9 0 4 2602.64 693.324 9
 -9 0 -4 2616.97 534.577 5
 -10 0 -4 95412.5 3815.29 5
 10 0 4 79142.6 4349.77 9
 11 0 4 94547.7 4899.41 9
 -11 0 -4 91867.4 3796.83 5
 12 0 4 23718.7 2450.19 9
 13 0 4 70641.8 4487.02 9
 14 0 4 3526.47 1032.39 9
 15 0 4 52117.7 4145.08 9
 16 0 4 10435.3 1893.86 9
 20 -1 -4 -136.243 407.894 9
 20 1 -4 940.625 723.046 9
 19 -1 -4 -215.962 554.184 9
 19 1 -4 -222.078 575.82 6
 19 1 -4 -203.46 431.415 9
 18 -1 -4 1135.84 709.05 9
 18 1 -4 2094.75 812.214 9
 18 1 -4 1266.9 679.504 6
 17 -1 -4 418.295 375.673 9
 17 1 -4 -278.035 481.884 9
 17 1 -4 650.633 505.447 6
 16 -1 -4 2304.73 768.829 9
 16 1 -4 1730.04 672.286 9
 15 1 -4 781.315 484.731 9
 15 -1 -4 1203.33 581.819 9
 -14 -1 4 439.14 404.949 4
 -14 1 4 74.355 351.166 4
 14 -1 -4 487.836 397.096 9
 14 1 -4 79.617 328.074 9
 -13 1 4 533.392 365.25 4
 -13 -1 4 416.335 377.319 4
 13 -1 -4 -28.4467 235.035 9
 13 1 -4 239.207 277.142 9
 12 1 -4 8909.01 1156.96 9
 -12 1 4 10876.4 1406.27 4
 12 -1 -4 10179 1257.38 9
 -12 -1 4 10945.7 1424.74 4
 -11 -1 4 613.732 162.076 5
 -11 -1 4 572.577 377.753 4
 11 1 -4 784.788 344.297 9
 11 -1 -4 269.589 181.759 9
 -10 1 4 2181.19 562.051 4
 -10 -1 4 1789.81 271.293 5
 10 1 -4 1891.6 463.73 9
 -10 -1 4 2163.23 566.377 4
 10 1 -4 785.388 420.575 6
 10 -1 -4 1484.75 464.289 9
 9 1 -4 2061.02 499.354 9
 9 -1 -4 2014.68 493.444 9
 9 1 -4 1882.27 524.101 6
 -9 -1 4 1311.99 475.97 4
 -9 1 4 3455.14 738.039 4
 -9 -1 4 2049.45 301.189 5
 8 1 -4 21024.7 1380.26 9
 8 -1 -4 19493.2 1373.58 9
 -8 1 4 21070.2 834.575 5
 -8 -1 4 20836.7 1624.83 4
 -8 1 4 21672.8 1666.06 4
 -8 -1 4 22158.3 1054.94 5
 8 1 -4 22031.9 1638.9 6
 -7 -1 4 16292.6 906.506 5
 -7 1 4 16412.7 771.634 5
 -7 -1 4 15883.8 1340.84 4
 -7 1 4 16350.1 1375.7 4
 7 1 -4 13882.9 1012.24 9
 7 -1 -4 16025.3 1118.15 9
 7 1 -4 16722.5 1366.07 6
 6 1 -4 1108.49 368.493 6
 6 -1 -4 387.793 133.275 9
 -6 -1 4 1203.12 249.898 9
 6 1 -4 528.025 166.306 9
 6 -1 -4 538.163 270.986 6
 -6 -1 4 519.126 183.209 5
 -6 1 4 484.229 143.439 5
 -6 1 4 721.65 216.489 9
 -6 -1 4 398.898 264.12 4
 -6 1 4 758.229 321.691 4
 5 -1 -4 8988.16 651.832 9
 -5 1 4 9178.95 909.267 4
 -5 -1 4 10184.9 723.096 5
 -5 -1 4 9962.33 631.792 9
 5 1 -4 8439.61 869.14 6
 5 1 -4 9565.44 620.848 9
 -5 -1 4 6686.87 790.769 4
 5 -1 -4 9927.35 643.562 5
 -5 1 4 10217.9 711.25 9
 -5 1 4 9580.29 640.343 5
 5 -1 -4 7825.37 825.599 6
 -4 -1 4 8658.04 476.027 9
 4 1 -4 9952.89 498.233 9
 -4 -1 4 10848.5 757.186 5
 4 -1 -4 9392.54 566.355 9
 -4 -1 4 8633.46 835.36 4
 4 -1 -4 9616.18 669.449 5
 4 1 -4 9631.91 887.816 6
 -4 1 4 9906.8 603.098 9
 -4 1 4 9692.45 891.465 4
 4 -1 -4 8844.73 822.581 6
 -4 1 4 9994.59 690.264 5
 -3 1 4 11107.4 916.022 4
 -3 1 4 11408.8 876.915 2
 3 -1 -4 11191.7 635.03 7
 -3 -1 4 10853.8 786.016 5
 3 -1 -4 10736.2 756.191 5
 3 -1 -4 11901.2 911.07 6
 -3 1 4 9840.09 733.378 5
 3 -1 -4 11701.4 549.502 9
 -3 -1 4 10025.6 871.056 4
 3 1 -4 11213.7 804.048 5
 2 -1 -4 6362.35 617.214 2
 2 -1 -4 6291.69 601.154 5
 -2 1 4 6859.67 644.751 6
 -2 1 4 6412.25 599.134 8
 -2 1 4 7157.59 652.459 2
 2 -1 -4 8041.23 673.393 8
 2 1 -4 6627.25 626.018 5
 2 1 -4 7042.58 692.167 2
 2 -1 -4 7262.97 408.16 7
 -2 1 4 6982 628.402 5
 1 1 -4 4638.39 534.556 5
 1 1 -4 5332.78 344.871 9
 1 -1 -4 6367.84 631.378 5
 -1 1 4 6070.35 384.669 7
 -1 -1 4 4769.89 504.603 3
 1 -1 -4 5347.4 350.835 7
 -1 1 4 5905.73 529.462 8
 -1 1 4 5298.66 551.218 2
 -1 -1 4 4780.54 328.42 9
 1 -1 -4 5114.77 500.471 8
 1 1 -4 5420.41 613.766 2
 1 -1 -4 5148.05 552.934 2
 0 -1 -4 8287.68 605.463 8
 0 -1 4 8014.6 623.898 3
 0 -1 -4 9711.28 792.394 2
 0 1 -4 9583.58 609.444 9
 0 1 4 10093.8 585.154 7
 0 1 -4 8631.1 757.304 5
 0 -1 -4 8981.33 630.12 9
 0 -1 -4 11264.4 876.33 5
 0 1 -4 7952.42 791.549 1
 0 -1 4 8854.61 590.416 9
 0 -1 4 8547.6 567.563 8
 0 1 -4 9619.14 837.359 2
 -1 1 -4 10298.7 862.644 5
 -1 -1 -4 10127.2 877.477 5
 -1 1 -4 11054.1 769.506 9
 1 1 4 11070.9 716.064 7
 -1 -1 -4 10737.1 810.483 9
 1 -1 4 10911.9 776.081 9
 -1 -1 -4 10717.2 645.44 8
 1 -1 4 11737.1 571.67 8
 1 -1 4 10350.2 668.191 3
 -1 1 -4 10220.4 937.092 2
 -1 1 -4 10474.7 915.469 1
 -1 -1 -4 11124.3 887.5 1
 1 1 4 10909.6 793.631 9
 2 1 4 2862.94 414.098 7
 2 1 4 4435.92 549.119 9
 -2 -1 -4 3298.66 480.41 1
 -2 1 -4 3922.99 570.825 1
 -2 -1 -4 4461.21 592.248 5
 -2 1 -4 3697.54 524.741 5
 2 -1 4 3527.86 502.582 9
 3 1 4 19659.8 1334.8 9
 -3 -1 -4 18268.9 1287.01 5
 3 -1 4 16377 1215.31 9
 -3 1 -4 21668.4 1336.18 5
 4 -1 4 17943.2 1381.96 9
 4 1 4 19609.1 1411.58 9
 -4 1 -4 17584.6 1261.42 5
 -4 -1 -4 20135 1399.02 5
 -5 -1 -4 2834.15 565.421 5
 5 -1 4 2371.05 543.267 9
 -5 1 -4 3792.62 599.612 5
 5 1 4 3993 675.885 9
 -6 1 -4 765.829 307.35 5
 6 -1 4 543.841 290.082 9
 6 1 4 263.042 209.537 9
 -6 -1 -4 648.427 344.194 5
 7 -1 4 669.846 380.498 9
 -7 -1 -4 694.372 317.866 5
 7 1 4 573.631 330.981 9
 -7 1 -4 635.268 266.604 5
 8 1 4 228.984 298.188 9
 8 -1 4 -79.2265 219.059 9
 -8 -1 -4 30.8449 184.18 5
 -8 1 -4 -47.9947 132.907 5
 -8 1 -4 67.1295 49.4911 8
 9 -1 4 7613.78 1212.35 9
 9 1 4 6834.67 1116.63 9
 -9 1 -4 4592.4 718.218 5
 -9 -1 -4 5665.07 829.224 5
 10 -1 4 114.987 355.075 9
 -10 -1 -4 85.9371 240.301 5
 -10 1 -4 373.878 237.87 5
 11 -1 4 -52.7559 295.127 9
 11 1 4 1.73655 288.272 9
 -11 1 -4 -298.469 231.569 5
 -11 -1 -4 -37.4841 273.955 5
 12 1 4 310.733 433.463 9
 12 -1 4 520.062 436.209 9
 13 1 4 862.682 615.831 9
 13 -1 4 -60.9649 326.229 9
 14 -1 4 400.808 572.814 9
 14 1 4 54.2691 456.656 9
 15 -1 4 368.054 515.794 9
 15 1 4 -221.056 530.454 9
 16 -1 4 -312.512 631.929 9
 16 1 4 444.467 466.523 9
 16 1 4 398.725 364.341 7
 20 -2 -4 11715.9 2003.96 9
 19 2 -4 9024.52 1726.17 7
 19 -2 -4 8323.04 1601.62 9
 19 2 -4 8366.4 1599.33 6
 18 2 -4 38086.4 3255.73 9
 18 -2 -4 34504.6 3157.84 9
 18 2 -4 35582.1 3209.35 6
 17 -2 -4 3345.15 912.658 9
 17 2 -4 1946.21 649.774 6
 17 2 -4 3837.9 978.463 9
 16 2 -4 54799.8 3712.67 6
 16 -2 -4 52350.6 3644.27 9
 16 2 -4 49850.6 3500.38 9
 15 2 -4 12586.5 1620.6 9
 15 -2 -4 11028.5 1562.77 9
 15 2 -4 12821.3 1672.68 6
 14 -2 -4 28812.9 2418.54 9
 14 2 -4 32597.4 2523.63 9
 -14 2 4 33088.9 2775.12 4
 14 2 -4 33085.9 2652.28 6
 -14 -2 4 28550.5 2563.69 4
 13 2 -4 55608.7 3237.43 9
 -13 -2 4 55063 3489.03 4
 13 -2 -4 53129.5 3215.09 9
 -13 2 4 54586.1 3505.57 4
 13 2 -4 59527.6 3477.15 6
 12 2 -4 2116.91 594.048 9
 -12 -2 4 2765.89 715.328 4
 12 -2 -4 2704.5 672.068 9
 12 2 -4 4184.64 889.301 6
 -12 2 4 3684.37 806.838 4
 -11 2 4 64279.1 3487.58 4
 11 2 -4 60837 3292.84 6
 11 2 -4 61107.7 3088.65 9
 -11 -2 4 62732.4 3424.38 4
 11 -2 -4 62826.7 3222.75 9
 10 -2 -4 896.019 383.103 9
 10 2 -4 266.605 192.068 9
 10 2 -4 673.392 265.892 6
 -10 -2 4 735.776 336.591 4
 -10 2 4 429.579 238.878 4
 9 -2 -4 170619 5459.54 9
 9 2 -4 169300 5297.82 9
 -9 -2 4 169198 5808.1 4
 -9 2 4 173103 5903.43 4
 9 2 -4 171588 5780.89 6
 8 -2 -4 44118.3 2187.19 9
 -8 2 4 39253.4 2357.17 4
 8 2 -4 41213.6 2041.35 9
 -8 -2 4 44423.5 2459.57 4
 8 2 -4 46023.5 2462.45 6
 -7 -2 4 105551 4019.95 4
 7 2 -4 116763 3589.25 9
 -7 2 4 111636 4125.02 4
 7 2 -4 109035 4057.29 6
 7 -2 -4 114455 3701.33 9
 6 -2 -4 115317 2899.03 5
 -6 -2 4 107401 3832.59 4
 -6 2 4 111544 3925.67 4
 6 2 -4 109873 3242.68 9
 -6 -2 4 100506 3220.91 9
 6 2 -4 99080 3775.17 6
 6 -2 -4 106765 3375.18 9
 5 -2 -4 16936.1 979.254 9
 -5 -2 4 16424 877.355 9
 -5 -2 4 17450.1 1272.04 4
 -5 2 4 18020.4 1305.79 4
 5 -2 -4 18481.7 921.41 5
 5 -2 -4 19490.8 1294.31 6
 -5 2 4 16176.2 996.423 9
 5 2 -4 16102.6 1248.12 6
 -4 -2 4 140249 3326.3 9
 4 2 -4 145470 4282.73 3
 4 -2 -4 141282 3752.18 5
 4 2 -4 135577 3578.07 7
 -4 2 4 131408 4226.84 4
 4 -2 -4 135339 3613.41 9
 -4 -2 4 138651 4267.3 4
 4 -2 -4 141528 4179.22 6
 -3 -2 4 62686.7 2442.22 4
 3 2 -4 64403.7 2443.09 3
 -3 2 4 64156.6 2259.98 2
 3 -2 -4 64736.3 2416.66 8
 -3 2 4 63084.6 2469.68 4
 3 2 -4 63281.9 1791.23 7
 3 -2 -4 63663.9 1932.39 9
 3 -2 -4 70029.4 2101.31 7
 3 -2 -4 65206.7 2377.29 6
 3 -2 -4 58921 2168.75 5
 -2 2 4 127653 3599.27 2
 2 2 -4 134422 3824.6 3
 2 -2 -4 120710 3659.9 5
 2 -2 -4 126631 3271.01 7
 2 2 -4 132597 3982.62 2
 -2 2 4 120922 3309.31 7
 -2 2 4 132457 3682.43 6
 2 -2 -4 130403 3611.68 2
 2 -2 -4 133081 3776.54 8
 -1 -2 4 45955.6 1431.07 9
 1 -2 -4 47081.4 1822.24 8
 1 2 -4 49263.3 1900.25 3
 1 -2 -4 49240.9 1843.37 2
 1 -2 -4 51059.6 2019.31 5
 -1 -2 4 44967.9 1845.92 3
 1 -2 -4 48820 1575.45 7
 -1 2 4 44636.6 1571.15 7
 1 2 -4 48455.2 1961.51 5
 1 2 -4 49233.2 2081.46 2
 1 2 -4 47127.9 1449.66 9
 -1 2 4 47816.9 1824.68 2
 0 2 -4 43130.7 1951.65 2
 0 2 -4 40723.5 1805.87 5
 0 -2 -4 40147.3 1585.74 8
 0 -2 4 41764.2 1657.41 3
 0 2 -4 42888.4 1991.08 1
 0 -2 -4 38422.9 1472.57 7
 0 2 4 43447.3 1560.06 7
 0 -2 -4 43629.5 1907.91 5
 0 -2 -4 41668.9 1738.57 2
 0 -2 4 39723 1484.2 9
 0 2 -4 39130.3 1473.58 9
 0 2 -4 39876.6 1611.33 3
 1 -2 4 90509.1 2911.78 9
 -1 2 -4 98189.7 3176.04 5
 -1 2 -4 93549.3 2730.84 3
 -1 -2 -4 92511.7 3224.05 5
 -1 2 -4 99031.2 3356.43 1
 -1 2 -4 93951.1 3341.92 2
 1 2 4 99863.9 2914.65 7
 -1 -2 -4 93870.3 3025.28 9
 -1 2 -4 87876.2 2842.48 9
 2 -2 4 10750.7 892.866 9
 2 2 4 10400.5 835.579 7
 -2 -2 -4 10011.5 818.485 1
 -2 -2 -4 10498.3 951.301 5
 -2 2 -4 10315.9 881.828 5
 -2 2 -4 11171 668.54 3
 3 -2 4 102720 3611.06 9
 -3 -2 -4 107878 3680.19 5
 -3 -2 -4 102033 3287.5 1
 3 2 4 102914 3602 9
 3 2 4 108444 3498.26 7
 -3 2 -4 100294 3446.09 5
 -3 2 -4 102980 2687.12 3
 4 2 4 67869 2766.09 7
 -4 2 -4 61304.7 2548.31 5
 4 2 4 63290.6 2819.6 9
 -4 2 -4 67094.6 1747.6 3
 4 -2 4 62444.4 2820.26 9
 -4 -2 -4 60552.4 2710.99 5
 5 -2 4 86284.1 3611.14 9
 -5 2 -4 82721.4 3158.01 5
 5 2 4 86478.4 3554.19 9
 -5 -2 -4 91493 3483.91 5
 6 2 4 185519 6082.99 9
 -6 -2 -4 179601 5707.86 5
 -6 2 -4 187161 5464.45 5
 6 -2 4 182116 6104.83 9
 -7 2 -4 296.785 194.768 5
 7 2 4 371.704 336.796 9
 7 -2 4 333.191 324.296 9
 -7 -2 -4 590.067 333.75 5
 -8 -2 -4 62282.7 2984.15 5
 8 -2 4 58266.8 3339.42 9
 8 2 4 60966.7 3375.31 9
 -8 2 -4 58489 2685.27 5
 -9 2 -4 4976.08 748.716 5
 9 -2 4 5526.81 1044.68 9
 -9 -2 -4 3872.17 729.071 5
 9 2 4 4734.28 946.775 9
 10 -2 4 86205.8 4535.85 9
 10 2 4 89333.1 4555.76 9
 -10 2 -4 86696.3 3492.53 5
 -10 -2 -4 88504.8 3841.29 5
 -11 2 -4 59895.9 2841.04 5
 11 2 4 63207.4 3895.81 9
 -11 -2 -4 64573.7 3246.98 5
 11 -2 4 66388.8 4047.46 9
 12 2 4 45261.9 3411.91 9
 12 -2 4 45452.9 3490.17 9
 -12 -2 -4 50816.5 2869.35 5
 13 -2 4 72900.9 4591.74 9
 13 2 4 66670.4 4309.95 7
 13 2 4 61920.4 4272.32 9
 14 -2 4 1030.69 569.09 9
 14 2 4 -167.39 372.23 9
 14 2 4 -396.189 509.286 7
 15 2 4 52047.2 4067.72 7
 15 2 4 55446.9 4264.01 9
 15 -2 4 47709 3985.75 9
 16 2 4 13571.6 2112.51 7
 16 -2 4 14442.2 2220.08 9
 20 -3 -4 -454.041 531.553 9
 19 3 -4 1296.33 719.723 7
 19 -3 -4 452.209 506.72 9
 19 3 -4 819.919 575.914 6
 18 -3 -4 289.233 406.422 9
 18 3 -4 364.164 368.177 7
 17 -3 -4 2584.47 849.761 9
 17 3 -4 2260.04 767.863 7
 17 3 -4 4307.16 1085.75 6
 16 -3 -4 2846.51 859.431 9
 16 3 -4 2266.73 800.528 7
 16 3 -4 2881.23 862.727 6
 15 -3 -4 4846.41 1083.74 9
 15 3 -4 5431.62 1090.73 6
 15 3 -4 6020.77 1139.06 9
 14 3 -4 84.2329 263.049 9
 -14 3 4 335.243 333.065 4
 14 -3 -4 322.853 384.822 9
 -14 -3 4 532.475 363.251 4
 14 3 -4 841.977 458.097 6
 -13 3 4 1367.43 604.515 4
 13 3 -4 1087.47 470.789 9
 -13 -3 4 1997.65 648.674 4
 13 3 -4 1957.55 675.743 6
 13 -3 -4 1177.58 479.69 9
 12 3 -4 23838.8 1928.01 9
 12 -3 -4 25069.6 2058.45 9
 12 3 -4 25405.5 2115.15 6
 -12 3 4 19199.3 1936.37 4
 -12 -3 4 25883.4 2207.52 4
 11 3 -4 2624.43 698.71 6
 11 -3 -4 2165.36 569.197 9
 11 3 -4 1770.6 561.652 9
 -11 -3 4 3130.7 754.238 4
 -11 3 4 1526.27 548.08 4
 10 -3 -4 366.959 226.751 9
 10 3 -4 234.451 258.813 6
 10 3 -4 71.7677 178.275 9
 -10 3 4 -58.5482 176.284 4
 -10 -3 4 -72.1711 161.035 4
 9 -3 -4 826.516 328.922 9
 9 3 -4 1085.65 386.943 9
 -9 -3 4 1851.6 564.465 4
 -9 3 4 1441.51 491.369 4
 9 3 -4 661.049 394.474 6
 -8 3 4 38250.5 2263.9 4
 -8 -3 4 35615.7 2171.7 4
 8 -3 -4 37125.2 2025.25 9
 8 3 -4 32287.3 2085.07 6
 7 -3 -4 23949.2 1478.1 9
 7 3 -4 23125.4 1459.25 7
 7 3 -4 21503.3 1553.91 3
 -7 -3 4 25034.4 1694.2 4
 -7 3 4 24511.1 1701.86 4
 7 -3 -4 22609.9 905.068 5
 7 3 -4 23445.2 1660.56 6
 6 -3 -4 6284.45 489.087 5
 -6 -3 4 5973.47 600.592 9
 6 -3 -4 5935.95 671.255 9
 6 3 -4 6813.8 704.817 7
 6 3 -4 5646.19 733.899 3
 -6 3 4 6987.64 848.603 4
 -6 -3 4 6505.5 800.407 4
 6 3 -4 6745.66 849.114 6
 5 -3 -4 713.464 253.399 8
 5 -3 -4 946.546 209.488 5
 5 -3 -4 967.385 254.2 9
 5 3 -4 1090.18 306.184 3
 5 3 -4 1133.9 288.202 7
 -5 -3 4 2177.6 457.354 4
 -5 3 4 907.682 318.589 4
 -5 -3 4 1118.82 233.257 9
 -5 3 4 1179.09 284.595 9
 4 3 -4 38963.4 1539.74 7
 4 3 -4 41372.1 1976.4 3
 -4 -3 4 42020.3 1955.27 4
 4 -3 -4 37341 1879.91 8
 -4 3 4 37439.6 1905.31 4
 4 -3 -4 40099.4 1636.33 9
 4 -3 -4 41676.4 1808.8 7
 -4 -3 4 42774.9 1417.55 9
 4 -3 -4 40730.6 1848.23 6
 4 -3 -4 38615 1595.05 5
 3 -3 -4 570.252 191.399 7
 3 -3 -4 394.448 153.445 6
 -3 -3 4 428.871 132.433 7
 3 -3 -4 875.326 261.456 8
 3 -3 -4 370.4 158.674 5
 -3 -3 4 652.457 271.511 4
 3 3 -4 416.769 132.505 7
 -3 3 4 370.356 190.624 4
 3 3 -4 230.827 189.58 3
 -3 3 4 522.132 178.712 2
 -2 3 4 17542.3 973.094 2
 2 3 -4 19078.2 1190.62 3
 2 -3 -4 18607 1143.61 8
 -2 -3 4 18738.2 786.698 9
 2 -3 -4 20787.4 1041.19 7
 2 -3 -4 18662.2 998.092 2
 -2 3 4 17633.2 1006.9 7
 2 -3 -4 19657.2 1081.95 6
 -2 3 4 19135.9 1049.85 6
 2 3 -4 18852.1 1258.67 2
 2 3 -4 20043.4 830.538 7
 -2 -3 4 18609.1 796.618 7
 1 3 -4 288.541 229.126 1
 1 3 -4 263.384 180.356 2
 1 -3 -4 425.651 183.288 8
 1 3 -4 240.985 166.396 3
 -1 3 4 302.711 135.984 7
 1 -3 -4 438.939 165.902 2
 -1 -3 4 431.65 131.761 9
 -1 3 4 502.636 163.946 6
 1 -3 -4 404.706 149.933 7
 0 -3 4 236.784 98.8447 9
 0 -3 -4 285.368 119.374 7
 0 -3 -4 254.391 113.912 2
 0 3 -4 377.487 160.975 3
 0 3 4 511.583 179.486 7
 0 3 -4 205.002 184 1
 0 3 -4 311.446 214.835 2
 0 -3 4 600.919 169.738 7
 0 3 -4 517.001 175.214 9
 1 -3 4 1684.14 328.737 9
 -1 3 -4 2178.23 369.991 9
 -1 3 -4 2085.85 336.028 3
 -1 -3 -4 2438.05 382.334 7
 -1 3 -4 2305.66 408.591 5
 -1 3 -4 1886.6 416.189 2
 -1 3 -4 2347.45 453.422 1
 1 3 4 3052.9 442.85 7
 -2 3 -4 39134.2 1874.26 5
 -2 3 -4 43229.6 1589.17 3
 2 -3 4 40734.8 1890.79 9
 2 3 4 41588.8 1877.74 7
 -3 3 -4 443.099 121.465 3
 -3 -3 -4 607.465 204.061 1
 3 3 4 872.639 315.44 7
 -3 3 -4 881.96 269.011 5
 3 -3 4 663.931 320.261 9
 -4 3 -4 3835.43 567.975 5
 4 -3 4 4196.1 668.578 9
 4 3 4 3838.74 629.791 7
 -4 3 -4 4654.53 400.754 3
 5 3 4 778.121 384.531 7
 -5 3 -4 1146.98 188.349 3
 5 -3 4 244.884 262.267 9
 -5 3 -4 870.208 312.513 5
 6 -3 4 27707.3 2033.28 9
 6 3 4 30738.5 2087.75 9
 6 3 4 28279.6 945.418 3
 -6 3 -4 27216.5 914.728 3
 6 3 4 28812.1 1953.88 7
 -6 3 -4 31279.6 1746.79 5
 -6 -3 -4 28112.5 1857.58 5
 -7 3 -4 17854.9 1351.18 5
 7 3 4 20070.8 1709.59 7
 7 3 4 19439.4 1740.94 9
 7 -3 4 18295.4 1728.06 9
 -7 -3 -4 19016.6 1555.17 5
 8 3 4 11362.8 1340.13 7
 -8 3 -4 12301.7 1131.54 5
 -8 -3 -4 12516.1 1284.11 5
 8 -3 4 9741.28 1295.11 9
 8 3 4 12071.7 1406.92 9
 9 3 4 -137.457 368.524 7
 9 -3 4 12.037 221.219 9
 -9 3 -4 -338.228 212.989 5
 9 3 4 386.532 318.949 9
 -9 -3 -4 15.0252 239.824 5
 10 3 4 1394.81 604.529 9
 10 -3 4 870.956 538.65 9
 -10 3 -4 913.813 334.172 5
 10 3 4 1291.55 605.132 7
 -10 -3 -4 1163.05 448.196 5
 11 -3 4 659.785 432.37 9
 11 3 4 907.422 509.651 9
 -11 -3 -4 612.225 344.837 5
 11 3 4 1377.15 605.457 7
 -12 -3 -4 1713.5 545.694 5
 12 3 4 3820.38 982.276 7
 12 -3 4 1793.36 702.903 9
 12 3 4 2325.04 780.636 9
 13 3 4 276.937 466.399 7
 13 -3 4 306.121 429.275 9
 14 3 4 256.419 303.483 7
 14 -3 4 150.041 388.492 9
 15 3 4 -429.974 498.874 7
 15 -3 4 15.2205 394.945 9
 16 -3 4 150.712 326.024 9
 16 3 4 1392.15 630.365 7
 20 -4 -4 11376.1 1922.77 9
 20 4 -4 10234.2 1816.27 6
 19 4 -4 9473.55 1771.11 7
 19 -4 -4 5959.63 1373.03 9
 19 4 -4 12057.8 1910.66 6
 18 -4 -4 24592.3 2700.49 9
 18 4 -4 23805.1 2606.19 6
 18 4 -4 25331.7 2770.68 7
 17 4 -4 682.327 464.718 7
 17 -4 -4 18.949 361.597 9
 17 4 -4 931.26 595.703 6
 16 4 -4 38793 3176.7 7
 16 4 -4 42444 3258.43 6
 16 -4 -4 39520.2 3201.82 9
 15 -4 -4 18237.8 2072.2 9
 15 4 -4 15326.2 1865.59 6
 15 4 -4 16197.1 1951.52 7
 14 -4 -4 23734.6 2249.51 9
 -14 4 4 23576 2356.2 4
 14 4 -4 20007.5 2080.57 7
 -14 -4 4 19969.6 2142.69 4
 14 4 -4 20909 2099.07 6
 13 4 -4 38002.7 2770.19 7
 -13 -4 4 39813.6 2903 4
 13 4 -4 37848.7 2754.81 6
 13 -4 -4 41031.2 2841.38 9
 -13 4 4 39279.3 2927.14 4
 12 4 -4 694.135 396.639 7
 12 4 -4 1288.96 509.37 6
 -12 -4 4 958.463 401.225 4
 12 -4 -4 526.156 281.745 9
 -12 4 4 1624.84 566.035 4
 -11 4 4 60848.8 3473.86 4
 11 4 -4 74446.9 3581.99 7
 11 4 -4 68880.5 3542.65 6
 -11 -4 4 66280.5 3549.45 4
 11 -4 -4 68299.2 3455.6 9
 -10 -4 4 262.736 331.744 4
 10 4 -4 225.181 150.779 7
 10 -4 -4 443.509 299.396 9
 -10 4 4 249.091 283.129 4
 9 4 -4 166030 5584.33 7
 -9 -4 4 174824 5870.47 4
 -9 4 4 174181 5958.3 4
 9 -4 -4 171866 5619.52 9
 9 4 -4 167294 5799.41 6
 8 -4 -4 58141.1 2578.51 9
 8 4 -4 56025.7 2609.3 3
 -8 -4 4 52434 2624.96 4
 -8 4 4 50727.1 2633.2 4
 8 4 -4 51548.5 2629.75 6
 8 4 -4 55470 2531.22 7
 7 -4 -4 95107.2 2495.97 5
 7 4 -4 85879.9 3297.29 7
 7 -4 -4 95738.4 3412.87 9
 -7 -4 4 85726.9 3478.76 4
 -7 4 4 85466.4 3553.51 4
 7 4 -4 78785.2 3464.13 6
 7 4 -4 90832.3 3551.07 3
 6 4 -4 133689 4029.34 7
 6 -4 -4 115219 4151.07 8
 -6 -4 4 128120 4246.67 4
 6 -4 -4 126500 4011.25 9
 6 -4 -4 129345 3383.81 5
 6 4 -4 126026 4310.23 3
 6 4 -4 111277 4189.87 6
 -6 4 4 125480 4279.54 4
 5 4 -4 12811.7 1105.34 3
 -5 4 4 13937.5 1134.76 4
 -5 -4 4 12760.8 1068.03 4
 5 -4 -4 10392.5 1010.52 8
 5 4 -4 11885.6 910.908 7
 -5 -4 4 11662 810.839 9
 5 -4 -4 12377.3 964.54 9
 4 4 -4 54923.9 2453.55 3
 4 -4 -4 57477.8 2195.07 9
 -4 -4 4 59357.7 2406.89 4
 -4 4 4 57011 2401.24 4
 4 4 -4 57840.5 2110.88 7
 4 -4 -4 52917.1 2375.89 8
 4 -4 -4 61039.8 2334.62 6
 -4 -4 4 60802 2110.79 7
 3 -4 -4 3123.86 500.229 8
 -3 4 4 2977.91 464.051 7
 -3 -4 4 3935.14 526.324 4
 -3 -4 4 3547.94 403.484 7
 3 4 -4 5091.97 489.906 7
 3 4 -4 3132.32 509.623 3
 -3 4 4 3199.31 493.888 4
 3 -4 -4 2953.23 446.719 7
 -3 4 4 3946.63 424.53 2
 3 -4 -4 4207.45 506.106 6
 2 4 -4 153372 3877.6 7
 2 4 -4 149150 4620.68 1
 2 -4 -4 144210 4356.39 8
 2 -4 -4 161376 4246 7
 -2 4 4 154158 3881.37 2
 2 4 -4 147891 4604.91 2
 2 -4 -4 147093 3853.12 2
 -2 4 4 149288 4274.83 7
 -2 -4 4 142680 3835.94 7
 2 -4 -4 151624 4059.56 6
 2 4 -4 152886 4492.18 3
 1 -4 -4 40863.5 1529.49 2
 -1 -4 4 40445.5 1557.78 9
 1 -4 -4 42584.5 1759.6 7
 -1 -4 4 40511.9 1560.1 7
 -1 4 4 36325.9 1694.85 7
 1 4 -4 42438 2031.83 1
 1 4 -4 41373.1 1535.72 7
 1 4 -4 41134.5 1853.83 3
 1 4 -4 40458.6 1987.21 2
 -1 4 4 38591.4 1490.39 6
 0 4 -4 27657.4 1332.8 9
 0 -4 4 27606.4 1329.78 9
 0 4 -4 28280 1658.4 1
 0 -4 -4 28007.2 1410.5 7
 0 4 -4 28441.8 1634.24 2
 0 -4 4 29450.2 1339.68 7
 0 4 -4 26001.8 1389.4 3
 0 4 4 27065 1430.57 7
 1 -4 4 84887 2885.57 9
 -1 4 -4 86249.1 3230.66 2
 1 4 4 81097.6 2927.95 7
 2 4 4 116.023 135.808 7
 2 -4 4 107.86 141.451 9
 -2 4 -4 151.142 146.974 2
 3 4 4 62105.9 2632.6 7
 3 -4 4 58604.3 2635.69 9
 -3 -4 -4 60918.7 2162.73 1
 4 4 4 73667.3 3061.99 7
 4 -4 4 68931.9 3083.88 9
 5 4 4 119136 4328.51 7
 5 -4 4 116656 4463.05 9
 6 4 4 150198 5297.4 7
 6 -4 4 151429 5489.37 9
 7 4 4 1255.43 205.021 3
 7 4 4 711.263 342.179 7
 7 -4 4 1306.27 480.442 9
 8 4 4 66189.3 3299.88 7
 8 -4 4 65780.2 3442.45 9
 9 -4 4 2292.88 684.181 9
 -9 -4 -4 1638.13 528.627 5
 9 4 4 2633.7 711.309 7
 10 4 4 64522 3824.58 7
 10 -4 4 75433.9 4264.27 9
 -10 -4 -4 71254 3551.4 5
 11 -4 4 36379 2985.44 9
 11 4 4 30544.9 2627.64 7
 -11 -4 -4 29722 2238.87 5
 12 -4 4 57867.2 3979.8 9
 12 4 4 53720.9 3746.54 7
 -12 -4 -4 58435.7 3288.98 5
 13 -4 4 61481.9 4265.42 9
 13 4 4 59183.2 4061.59 7
 14 -4 4 740.239 563.403 9
 14 4 4 270.622 495.079 7
 15 4 4 43230.4 3741.78 7
 15 -4 4 50035.9 4099.65 9
 16 4 4 9819.25 1859.95 7
 16 -4 4 11490.2 2016.12 9
 20 5 -4 394.073 488.387 6
 20 -5 -4 -330.061 626.344 9
 19 5 -4 -15.3904 390.29 7
 19 5 -4 16.48 309.718 6
 18 5 -4 1379.48 699.876 7
 18 -5 -4 275.087 380.849 9
 17 5 -4 4260.21 1120.61 7
 17 5 -4 4635.71 1093.98 6
 17 -5 -4 6774.13 1360.24 9
 16 -5 -4 982.681 581.431 9
 16 5 -4 84.4347 452.909 6
 16 5 -4 143.638 332.95 7
 15 5 -4 10847.4 1589.03 7
 15 5 -4 15352.6 1838.03 6
 15 -5 -4 13474.8 1801.11 9
 -14 5 4 2509.27 770.564 4
 -14 -5 4 2521.1 809.583 4
 14 -5 -4 1545.13 665.94 9
 14 5 -4 2263.31 725.411 7
 14 5 -4 1173.84 510.643 6
 -13 5 4 5484.94 1062.44 4
 13 5 -4 6593.78 1108.54 7
 -13 -5 4 4981.93 1021.96 4
 13 -5 -4 5056.17 990.361 9
 13 5 -4 5894.28 1089.66 6
 12 5 -4 17948.6 1785 6
 12 5 -4 16097.6 1678.75 7
 -12 5 4 16993.3 1816.89 4
 12 -5 -4 19137.7 1829.82 9
 -12 -5 4 15145.1 1690.19 4
 11 -5 -4 4635.57 852.583 9
 -11 -5 4 4133.2 844.535 4
 11 5 -4 5090.36 927.5 6
 11 5 -4 4815.44 898.811 7
 -11 5 4 3238.97 758.358 4
 10 5 -4 4183.69 736.721 3
 10 5 -4 3317.6 711.732 7
 10 -5 -4 3110.94 677.05 9
 -10 5 4 3752.16 758.494 4
 -10 -5 4 4420.18 796.457 4
 10 5 -4 2492.05 605.436 6
 9 5 -4 1585.18 467.41 3
 9 5 -4 1767.85 472.757 7
 9 -5 -4 1867.36 516.569 9
 9 5 -4 2582.33 666.465 6
 -9 5 4 2130.94 560.698 4
 -9 -5 4 2087.86 567.269 4
 8 5 -4 86847.4 3578.03 3
 8 5 -4 88321.3 3521.34 7
 8 -5 -4 83834.4 3471.14 9
 -8 -5 4 84474.7 3581.59 4
 -8 5 4 84000.2 3629.22 4
 8 5 -4 75510 3485.6 6
 8 -5 -4 87201.4 2312.22 5
 7 -5 -4 91568.4 3455.05 9
 7 5 -4 89123.3 3385.98 7
 7 5 -4 89070 3558.56 3
 -7 -5 4 85438.6 3438.22 4
 -7 5 4 86074.5 3532.35 4
 7 5 -4 79042.8 3454.96 6
 7 -5 -4 85023.7 2509.33 5
 7 -5 -4 88834.1 3544.45 8
 6 -5 -4 6125.11 747.775 9
 6 5 -4 5904.79 818.016 3
 -6 -5 4 5584.03 743.841 4
 -6 5 4 7730.91 890.232 4
 6 -5 -4 4687.55 729.015 8
 6 5 -4 5759.78 713.143 7
 5 5 -4 886.953 362.334 3
 5 -5 -4 674.273 268.48 9
 5 5 -4 363.312 204.367 7
 5 -5 -4 696.438 321.018 8
 -5 -5 4 475.24 223.419 4
 -5 5 4 649.984 246.119 4
 -4 5 4 1752.29 386.302 4
 4 -5 -4 2136.25 401.199 9
 4 -5 -4 1535.87 412.576 8
 4 5 -4 2133.18 392.355 7
 -4 -5 4 2852.63 466.602 4
 4 5 -4 2313.19 515.73 3
 3 5 -4 6431.97 778.332 3
 3 -5 -4 8079.63 818.942 8
 -3 5 4 7992.13 568.513 2
 -3 -5 4 7824.01 747.305 4
 3 5 -4 7340.58 805.734 1
 3 5 -4 7097.47 665.189 7
 -3 5 4 8364.63 845.025 7
 3 -5 -4 8970.54 741.089 6
 -3 5 4 7440.4 749.408 4
 -3 -5 4 8105.36 684.431 7
 2 5 -4 2721.74 531.094 2
 -2 5 4 1765.71 252.777 2
 2 5 -4 1806.24 423.924 1
 2 -5 -4 1751.41 260.139 2
 -2 -5 4 2062.23 343.788 7
 2 5 -4 2278.67 440.476 3
 2 5 -4 2160.55 357.932 7
 -2 5 4 2143.67 429.908 7
 2 -5 -4 1838.86 313.64 6
 -1 -5 4 142681 4009.63 9
 1 5 -4 149132 4607.95 1
 1 5 -4 142228 4017.47 7
 -1 -5 4 142319 4073.13 7
 -1 5 4 143945 4343.1 7
 1 5 -4 148612 4597.58 2
 1 -5 -4 145192 3713.1 2
 0 -5 4 27174.9 1405.32 9
 0 5 4 25145.7 1008.15 6
 0 5 -4 30733.3 1745.61 1
 0 -5 4 26719.3 1372.04 7
 0 5 4 23089.8 1426.57 7
 0 5 -4 21050.4 1487.93 2
 1 -5 4 2693.92 466.039 9
 -1 5 -4 1552.02 403.855 2
 1 5 4 2649.67 490.032 7
 2 5 4 24772 1551.67 7
 2 -5 4 21389.2 1428.54 9
 -2 5 -4 23981.1 1635.38 2
 -3 -5 -4 20171.2 1067.71 1
 3 -5 4 19838.9 1460.57 9
 3 5 4 20658 1486.56 7
 4 5 4 432.601 199.331 7
 4 -5 4 683.722 348.219 9
 5 -5 4 156.901 294.206 9
 5 -5 4 187.737 68.4066 8
 5 5 4 392.459 336.734 7
 6 -5 4 46380.5 2738.8 9
 6 5 4 41127.6 2496.42 7
 7 -5 4 23133.9 1993.13 9
 7 5 4 23478.1 1922.24 7
 8 -5 4 1274.88 530.202 9
 8 5 4 2032.11 304.577 3
 8 5 4 1251.55 504.191 7
 9 -5 4 -145.892 196.751 9
 9 5 4 447.405 367.89 7
 10 -5 4 5717.93 1170.97 9
 10 5 4 4264.59 927.454 7
 -10 -5 -4 4652.72 901.271 5
 11 -5 4 10847.4 1636.39 9
 11 5 4 13022.2 1696.5 7
 -11 -5 -4 11769.2 1406.45 5
 -12 -5 -4 7020.3 1122.7 5
 12 -5 4 8280.68 1497.27 9
 12 5 4 8475.27 1440.65 7
 13 5 4 443.087 500.821 7
 13 -5 4 261.807 448.762 9
 14 5 4 2622.53 842.648 7
 14 -5 4 2697.8 950.274 9
 15 5 4 623.653 563.513 7
 15 -5 4 599.077 638.66 9
 16 5 4 3424.88 1043.1 7
 20 6 -4 7378.4 1506.15 6
 19 -6 -4 3844.34 1202.91 9
 19 6 -4 6401.05 1420.49 6
 19 6 -4 3374.24 1062.36 7
 18 -6 -4 24149 2718.77 9
 18 6 -4 27643 2908.86 7
 18 6 -4 24903.9 2645.97 6
 17 -6 -4 582.472 424.289 9
 17 6 -4 -77.1709 424.174 7
 17 6 -4 951.852 560.903 6
 16 6 -4 37186.2 3153.93 7
 16 6 -4 33711.2 2921.43 6
 16 -6 -4 40748.8 3309.3 9
 15 6 -4 20827.6 2234.99 7
 15 6 -4 18145 2020.34 6
 15 -6 -4 20346.4 2233.17 9
 14 -6 -4 19015.5 2077.02 9
 14 6 -4 13705 1728.97 7
 -14 -6 4 12558.7 1690.57 4
 -14 6 4 15651.5 1915.14 4
 14 6 -4 16701.9 1854.34 6
 13 -6 -4 43606.4 3051.05 9
 13 6 -4 43535.1 3029.01 7
 -13 -6 4 40913.7 2965.04 4
 -13 6 4 41970.2 3082.85 4
 13 6 -4 38703.4 2810.64 6
 12 -6 -4 7079.13 1139.37 9
 12 6 -4 7143.02 1133.26 6
 12 6 -4 9258.33 1311.39 7
 -12 6 4 6678.51 1154.32 4
 -12 -6 4 6644.46 1136.46 4
 11 6 -4 51368.2 2910.65 3
 11 6 -4 56022.6 3167.97 7
 -11 -6 4 54593.4 3162.86 4
 11 6 -4 49222 3003.32 6
 -11 6 4 55405.6 3255.38 4
 11 -6 -4 54914.6 3170.05 9
 10 -6 -4 195.843 260.091 9
 10 6 -4 780.298 410.781 3
 10 6 -4 875.426 343.941 6
 -10 -6 4 183.398 282.714 4
 -10 6 4 41.5001 243.348 4
 10 6 -4 74.5584 197.473 7
 9 6 -4 137084 5092.5 7
 9 6 -4 147458 5211.07 3
 9 -6 -4 158369 5373.58 9
 -9 6 4 146273 5301.64 4
 -9 -6 4 143580 5168.57 4
 9 -6 -4 140156 3399.24 5
 9 6 -4 137829 5185.08 6
 8 -6 -4 3185.93 665.822 8
 8 -6 -4 6925.13 928.983 9
 8 6 -4 5998.91 888.118 3
 8 6 -4 4850.57 807.086 6
 8 6 -4 6496.11 882.113 7
 8 -6 -4 6711.95 521.238 5
 -8 -6 4 6083.56 865.997 4
 -8 6 4 5940.86 876.801 4
 7 6 -4 103426 4053.42 3
 7 -6 -4 105451 3920.05 9
 7 -6 -4 103700 4004.28 8
 -7 6 4 103453 3953.86 4
 -7 -6 4 99645.2 3817.72 4
 7 6 -4 100898 3838.13 7
 6 -6 -4 208188 6264.8 8
 -6 6 4 202588 6056.67 4
 6 6 -4 209245 6017.34 7
 6 6 -4 201609 6270.18 3
 -6 -6 4 204162 5960.04 4
 6 -6 -4 211218 6101.33 9
 5 6 -4 3199.13 611.984 3
 5 -6 -4 4719.91 680.867 9
 5 -6 -4 3384.46 583.802 8
 5 6 -4 3563.54 561.707 7
 -5 -6 4 2936.31 502.212 4
 -5 6 4 3947.43 600.713 4
 4 6 -4 96354 3368.65 7
 4 -6 -4 98044.8 3523.83 9
 -4 -6 4 99922.2 3397.37 4
 -4 6 4 102368 2857.32 2
 4 6 -4 102073 3768.01 3
 4 -6 -4 104350 3706.26 8
 -4 6 4 104478 3520.32 4
 -3 -6 4 35764.1 1712.31 4
 3 6 -4 39394.2 2043.18 3
 -3 6 4 31054 1860.89 7
 -3 6 4 33994.2 1715.5 4
 -3 6 4 34846.7 1236.52 2
 3 6 -4 35726.4 1717.2 7
 3 6 -4 34622.5 1888.04 1
 -2 6 4 99937.3 3598.76 7
 -2 6 4 96916.1 3241.55 4
 -2 -6 4 103167 3288.74 7
 2 6 -4 100525 3647.1 2
 2 6 -4 101986 3591.78 1
 2 6 -4 101126 3249.36 7
 2 -6 -4 100587 2961.46 6
 1 6 -4 13109.1 1127.09 1
 1 -6 -4 12292.9 679.692 2
 -1 6 4 12046.8 1071.38 7
 1 6 -4 11892.2 935.219 7
 1 6 -4 12570.3 1099.95 2
 -1 -6 4 12012.6 926.061 9
 0 6 -4 6637.82 829.721 2
 0 6 4 7135.84 823.938 7
 0 -6 4 5879.86 678.832 9
 -1 6 -4 238358 6799.11 2
 1 6 4 242946 5299.93 6
 1 6 4 229335 6673 7
 1 -6 4 238999 6522.49 9
 -2 6 -4 2615.39 542.695 2
 2 -6 4 2787.15 541.17 9
 2 6 4 3288.63 598.508 7
 3 -6 4 107230 3972.37 9
 3 6 4 107769 4030.02 7
 -3 6 -4 109122 4126.73 2
 -3 -6 -4 101809 2983.53 1
 4 6 4 115206 4391.94 7
 4 -6 4 124214 4542.3 9
 5 -6 4 40575 1370.18 8
 5 -6 4 41981.4 2529.67 9
 5 6 4 45031.2 2545.65 7
 6 6 4 49303.7 2792.73 7
 6 -6 4 46590.4 2826.86 9
 7 -6 4 879.514 438.965 9
 7 6 4 566.389 444.831 7
 8 6 4 121347 5198.64 7
 8 6 4 127842 3694.32 3
 8 -6 4 129484 5534.9 9
 9 6 4 7227.93 1175.77 7
 9 -6 4 10707.8 1510.85 9
 10 6 4 36162.3 2811.75 7
 10 -6 4 33233.7 2813.57 9
 11 6 4 33518.5 2816.01 7
 -11 -6 -4 34878.4 2583.71 5
 -12 -6 -4 12040.2 1524.21 5
 12 6 4 13248.6 1795.45 7
 12 -6 4 14390.4 2006.53 9
 13 -6 4 48008.5 3841.74 9
 13 6 4 47241.7 3632.65 7
 14 6 4 470.599 429.064 7
 14 -6 4 -182.868 375.047 9
 15 6 4 38717.2 3561.53 7
 15 -6 4 38486.1 3651.84 9
 19 7 -4 2686.96 927.302 6
 19 -7 -4 1954.58 842.336 9
 19 7 -4 4912.13 1310.7 7
 18 7 -4 3357.13 1064.63 7
 18 7 -4 2182.53 851.392 6
 18 -7 -4 1642.27 754.523 9
 17 -7 -4 12635.4 1946.48 9
 17 7 -4 15301.4 2111.4 7
 17 7 -4 11951 1757.13 6
 16 -7 -4 387.326 392.268 9
 16 7 -4 223.727 374.594 7
 16 7 -4 897.995 486.11 6
 15 7 -4 17962.2 2099.04 7
 15 -7 -4 19124.7 2168.16 9
 15 7 -4 19876.3 2125.58 6
 14 -7 -4 533.868 400.898 9
 14 7 -4 233.702 308.442 7
 14 7 -4 610.71 394.814 6
 13 -7 -4 20040.8 2046.99 9
 13 7 -4 16436 1839.08 7
 -13 -7 4 15383.4 1793.25 4
 13 7 -4 18841.6 1926.56 6
 -13 7 4 15824 1876.41 4
 12 7 -4 18539.2 1761.3 3
 -12 -7 4 18045.8 1828.18 4
 12 7 -4 18598.1 1829.16 6
 12 7 -4 19726.8 1917.4 7
 12 -7 -4 15755 1766.65 9
 -12 7 4 18172.9 1906.58 4
 11 7 -4 780.767 413.266 3
 11 -7 -4 321.169 437.501 9
 11 7 -4 821.396 418.106 7
 11 7 -4 728.526 452.326 6
 -11 7 4 832.485 344.184 4
 -11 -7 4 1029.54 485.256 4
 10 7 -4 9239.75 1186.15 6
 10 7 -4 9123.65 1149.19 3
 10 7 -4 11716.9 1355.52 7
 10 -7 -4 7936.12 1138.26 9
 -10 -7 4 10332.5 1243 4
 -10 7 4 8000.22 1116.85 4
 -9 7 4 522.718 236.117 4
 9 7 -4 251.343 296.989 6
 9 -7 -4 682.9 327.781 9
 -9 -7 4 56.1787 183.253 4
 9 -7 -4 473.971 333.002 8
 9 7 -4 332.475 276.521 3
 9 7 -4 1224.21 503.925 7
 8 7 -4 35423.9 2245.88 3
 8 -7 -4 32751.5 2128.1 9
 -8 -7 4 28853.4 1936.77 4
 -8 7 4 31053.7 2055.26 4
 8 -7 -4 33219.2 2135.18 8
 8 7 -4 33913.6 2152.88 7
 7 -7 -4 52708.9 2663.59 9
 7 7 -4 52220.6 2723.65 3
 -7 7 4 45328.4 2453.19 4
 7 7 -4 49654.1 2575.36 7
 -7 -7 4 48127.2 2440.88 4
 7 -7 -4 49405 2608.94 8
 6 -7 -4 7062.98 884.79 9
 -6 -7 4 8770.52 917.586 4
 6 7 -4 7551.4 907.576 7
 -6 7 4 8808.72 974.083 4
 6 7 -4 7944.84 990.924 3
 6 -7 -4 7856.71 945.923 8
 -5 7 4 20434.5 1399.61 4
 5 7 -4 20670 1463.51 7
 -5 -7 4 19880.7 1328.1 4
 5 -7 -4 19647.1 1471.29 9
 5 -7 -4 21787.7 1561.15 8
 5 7 -4 20586 1576.91 3
 -4 -7 4 4267.29 588.531 4
 4 7 -4 4638.86 662.216 7
 -4 7 4 3841.53 595.745 4
 4 7 -4 3811.92 627.542 1
 -4 7 4 3817.77 368.953 2
 4 -7 -4 4383.03 689.321 8
 4 7 -4 4184.7 699.414 3
 -3 7 4 47814.4 2071.64 4
 3 7 -4 43906.9 2123.45 7
 -3 -7 4 47490.1 2012.74 4
 -3 7 4 45333.1 2420.55 7
 3 7 -4 44788.9 2202.63 1
 -3 7 4 47804.8 1379.48 2
 -2 -7 4 36659.2 1694.93 4
 2 7 -4 38806 2025.61 1
 2 7 -4 37702.3 1871.12 7
 -2 7 4 32889.4 1661.91 4
 2 7 -4 38666.9 2083.14 2
 -2 7 4 36917.3 2117.2 7
 2 -7 -4 36407.6 1483.75 6
 1 7 -4 110429 3873.84 1
 1 7 -4 94882 3752.73 2
 -1 7 4 98663.4 3797 7
 1 7 -4 106835 3590.85 7
 -1 -7 4 99751.2 3464.94 9
 1 -7 -4 108682 2854.54 6
 1 -7 -4 104387 2700.85 2
 0 7 -4 21578.1 1435.02 7
 0 7 4 19903.1 1500.5 7
 0 -7 4 22687.6 1456.87 9
 0 7 -4 22824.3 1569.15 2
 -1 7 -4 8149.14 945.979 2
 1 7 4 8483.19 969.251 7
 1 -7 4 7323.33 849.818 9
 -2 7 -4 54637.1 2687.4 2
 2 -7 4 56401.7 2645.6 9
 2 7 4 54444.4 2711.4 7
 3 -7 4 338.648 312.069 9
 -3 -7 -4 363.192 171.004 1
 3 7 4 161.88 290.371 7
 -3 7 -4 689.128 370.975 2
 4 7 4 33798 2191.83 7
 4 -7 4 34503.2 2215.36 9
 5 7 4 2512.05 693.56 7
 5 -7 4 1465.05 502.935 9
 6 -7 4 39132.8 1436.69 8
 6 7 4 36600.7 2473.15 7
 6 -7 4 41973.8 2686.14 9
 7 7 4 55948 3205.42 7
 7 -7 4 56808.3 3349.81 9
 8 7 4 456.872 410.489 7
 8 -7 4 432.618 392.68 9
 9 7 4 856.167 450.486 7
 9 -7 4 695.184 362.376 9
 10 7 4 12869.5 1685.89 7
 10 -7 4 14190.4 1836.32 9
 11 -7 4 9585.41 1603.56 9
 11 7 4 7968.42 1375.74 7
 12 7 4 9990.29 1582.44 7
 12 -7 4 10008.9 1683.76 9
 13 -7 4 376.394 512.545 9
 13 7 4 1318.14 711.172 7
 14 -7 4 4299.52 1201.88 9
 14 7 4 4351.82 1138.77 7
 15 7 4 1455.23 858.095 7
 15 -7 4 3800.88 1282.38 9
 19 -8 -4 5782.81 1434.75 9
 18 -8 -4 26662.1 2909.04 9
 18 8 -4 17843 2404.69 7
 18 8 -4 22183.5 2487.2 6
 17 8 -4 1194.83 569.105 6
 17 8 -4 3359.96 1179.01 7
 17 -8 -4 2183.52 869.857 9
 16 8 -4 25836.8 2690.41 7
 16 8 -4 28437.2 2662.62 6
 16 -8 -4 27963.4 2788.14 9
 15 8 -4 8086.43 1499.26 7
 15 8 -4 8599.67 1384.86 6
 15 -8 -4 11515.9 1738.84 9
 14 8 -4 16115.3 1937.91 7
 14 8 -4 15239.2 1783.68 6
 14 -8 -4 18848.1 2118.97 9
 -13 -8 4 30809.5 2551.5 4
 13 8 -4 30171.4 2579.3 7
 -13 8 4 29328 2580.83 4
 13 -8 -4 32545.9 2695.32 9
 13 8 -4 29877.8 2454.82 6
 13 8 -4 29015.4 2297.62 3
 12 8 -4 12281.7 1568.67 7
 12 8 -4 13816.8 1582.28 6
 12 -8 -4 12111.7 1547.17 9
 -12 8 4 12820.4 1600.12 4
 -12 -8 4 12421.3 1515.46 4
 12 8 -4 11636.2 1408.32 3
 11 8 -4 65491.6 3416.25 3
 11 8 -4 62135 3509.75 7
 -11 8 4 55643.7 3327.95 4
 11 8 -4 55982.7 3265.76 6
 -11 -8 4 64789.6 3453.76 4
 11 -8 -4 66019.8 3631.45 9
 10 8 -4 11583.6 1382.94 7
 -10 -8 4 13657.7 1443.05 4
 10 -8 -4 14220.1 1550.07 9
 -10 8 4 10756.4 1319.48 4
 10 -8 -4 11498.5 1339.6 8
 10 8 -4 13721.1 1449.71 3
 9 8 -4 69640.7 3454.09 3
 9 -8 -4 68684.5 3385.6 8
 -9 -8 4 66727.5 3261.66 4
 -9 8 4 69322.7 3397.33 4
 9 -8 -4 68966.9 3484 9
 9 8 -4 70180.1 3498.71 7
 8 8 -4 37279.9 2351.04 7
 -8 -8 4 36024.3 2158.68 4
 -8 8 4 31846.9 2100.75 4
 8 8 -4 32902.3 2228.81 3
 8 -8 -4 35080.2 2258.18 8
 8 -8 -4 34939.1 2293.65 9
 7 8 -4 34702.1 2260.71 3
 7 8 -4 36144.8 2228.14 7
 7 -8 -4 36080.6 2253.17 9
 -7 -8 4 33843.4 1982.76 4
 -7 8 4 31393.6 2000.38 4
 7 -8 -4 34612.4 2189.73 8
 6 -8 -4 160229 5332.22 8
 6 8 -4 145728 5153.11 7
 -6 -8 4 155285 4865.58 4
 -6 8 4 150084 4952.99 4
 6 8 -4 156139 4899.35 1
 6 -8 -4 156741 5301.58 9
 6 8 -4 163803 5491.43 3
 5 -8 -4 3376.85 644.413 9
 5 -8 -4 5447.4 803.139 8
 5 8 -4 4098.78 678.634 7
 -5 -8 4 4998.93 643.571 4
 -5 8 4 3872.72 597.522 4
 5 8 -4 3777.72 619.061 1
 5 8 -4 4840.48 803.525 3
 -4 8 4 94593.2 3327.12 4
 4 8 -4 94631.7 3591.86 7
 4 8 -4 96124.3 3500.24 1
 -4 8 4 93149.1 2430.13 2
 -4 8 4 86498.3 3844.41 7
 -4 -8 4 99419.8 3298.16 4
 3 8 -4 12769.1 1126.31 1
 -3 -8 4 11200.3 910.101 4
 -3 8 4 11104.7 948.963 4
 -3 8 4 10100.5 1185.38 7
 3 8 -4 13827 1182.66 7
 2 8 -4 87933.9 3350.1 1
 -2 -8 4 78896.2 2762.83 4
 -2 8 4 78004.8 2805.41 4
 2 8 -4 82285.8 3182.01 7
 -2 8 4 78970.2 3470.92 7
 1 8 -4 90725 3575.56 2
 1 -8 -4 87348.8 2303.93 2
 -1 8 4 88660 3678.39 7
 1 8 -4 88339.1 3392.19 7
 1 -8 -4 98932.2 2579.82 6
 -1 -8 4 86479.1 3320.59 9
 0 8 -4 37032 2112.72 2
 0 8 -4 38953.2 2097.6 7
 0 8 4 38805.2 2258.86 7
 0 -8 4 35244.5 1986.55 9
 1 8 4 175677 5872.76 7
 1 -8 4 182665 5688.38 9
 -1 8 -4 189639 5815.87 2
 2 -8 4 1833.35 516.596 9
 2 8 4 1510.12 466.483 7
 -2 8 -4 1600.53 486.985 2
 3 8 4 108901 4311.19 7
 3 -8 4 98246.8 4051.03 9
 -3 8 -4 104829 4153.97 2
 4 -8 4 87381.5 3828.7 9
 4 8 4 87015.2 3868.09 7
 -4 8 -4 78315.7 3654.85 2
 5 -8 4 11436.2 1330.39 9
 5 8 4 8421.57 1152.43 7
 6 -8 4 16165.2 929.652 8
 6 -8 4 14593.7 1576.02 9
 6 8 4 13519.6 1503.97 7
 7 8 4 2188.38 700.335 7
 7 -8 4 1704.75 298.369 8
 8 8 4 90306 4459.52 7
 8 -8 4 83589.5 4424.08 9
 9 -8 4 10500.9 1539.31 9
 9 8 4 10646.9 1502.58 7
 10 8 4 20433.8 2166.24 7
 10 -8 4 22273.8 2334.51 9
 11 8 4 24426.8 2460.04 7
 11 -8 4 28706.3 2772.38 9
 12 -8 4 5109.52 1269.24 9
 12 8 4 4644.7 1134.91 7
 -13 -8 -4 39451.1 2996.66 5
 13 -8 4 43771.6 3728.24 9
 13 8 4 41995.8 3518.26 7
 14 8 4 637.786 335.105 7
 14 -8 4 2102.58 792.083 9
 15 -8 4 24374.2 2948.27 9
 15 8 4 27763.6 3040.33 7
 19 -9 -4 5333.49 1438.41 9
 18 9 -4 2187.28 920.989 7
 18 -9 -4 659.652 532.583 9
 17 -9 -4 13104 2010.16 9
 17 9 -4 13280.6 1831.34 6
 17 9 -4 12709.9 2019.34 7
 16 9 -4 1118.17 626.623 6
 16 9 -4 1944.18 864.747 7
 16 -9 -4 971.222 706.962 9
 15 9 -4 21834 2417.46 7
 15 -9 -4 29770.4 2841 9
 15 9 -4 27648.8 2501.27 6
 14 9 -4 3713.22 884.045 6
 14 9 -4 4835.14 1083.03 7
 14 -9 -4 2867.01 840.369 9
 13 -9 -4 15575.4 1855.32 9
 13 9 -4 13328.9 1720.44 7
 13 9 -4 12730 1591.09 6
 13 9 -4 11420.3 1474.15 3
 12 9 -4 49786.3 3285.63 7
 12 9 -4 46733 3003.27 3
 12 -9 -4 49829.8 3309.4 9
 -12 -9 4 52411.5 3237.11 4
 -12 9 4 49564.6 3244.26 4
 -11 9 4 327.924 254.017 4
 11 9 -4 -27.5869 273.762 3
 11 9 -4 818.776 515.124 7
 -11 -9 4 1322.91 490.285 4
 11 -9 -4 1178.8 595.778 9
 -10 -9 4 32730.3 2294.46 4
 10 -9 -4 31307.4 2306.51 8
 10 -9 -4 38497.9 2681.18 9
 10 9 -4 36489.6 2494.46 3
 10 9 -4 34485.1 2531.12 7
 -10 9 4 35403.6 2445.98 4
 -9 -9 4 15836.6 1487.76 4
 9 9 -4 16457.6 1621.56 3
 9 -9 -4 15750.6 1627.38 9
 9 -9 -4 18917 1686.19 8
 -9 9 4 16697.7 1562.8 4
 9 9 -4 15104.8 1603.48 7
 8 9 -4 39537.7 2527.95 3
 8 -9 -4 38425 2408.28 8
 8 -9 -4 35688.8 2449 9
 -8 -9 4 37963.9 2242.17 4
 8 9 -4 36668.1 2442.24 7
 -8 9 4 40893.4 2391.22 4
 7 9 -4 42436.9 2593.99 3
 7 -9 -4 43015.2 2585.95 9
 7 9 -4 46775.7 2670.26 7
 7 9 -4 44760.1 2220.07 1
 -7 9 4 39562 2271.95 4
 -7 -9 4 41315.1 2226.49 4
 7 -9 -4 45085.9 2578.05 8
 6 9 -4 3809.71 726.174 3
 6 -9 -4 3535.98 683.527 8
 6 9 -4 3202.02 559.628 1
 -6 -9 4 2516.32 477.007 4
 -6 9 4 4580.37 670.923 4
 6 9 -4 3877.33 743.365 7
 6 -9 -4 3188.29 727.135 9
 5 -9 -4 41849.8 2422.94 9
 5 9 -4 42022.4 2396.51 7
 5 9 -4 42274.9 2140.66 1
 -5 -9 4 41017.5 1983.95 4
 -5 9 4 43046.8 2118.03 4
 4 9 -4 12906.6 1128.22 1
 4 9 -4 11583.9 1174.4 7
 -4 9 4 11132.4 1288.32 7
 -4 9 4 11421.2 989.201 4
 -4 -9 4 12353.8 971.37 4
 3 9 -4 45074.2 2261.11 1
 -3 -9 4 42947.4 1891.93 4
 -3 9 4 40259.3 1905.1 4
 3 9 -4 43581.3 2318.62 7
 -3 9 4 36168.7 2375.87 7
 -2 -9 4 9089.16 771.814 4
 2 9 -4 8908.47 987.822 7
 -2 9 4 7640.23 730.456 4
 1 -9 -4 32768.4 1234.06 6
 1 9 -4 29239.3 1892.55 2
 -1 9 4 29510.9 2064.76 7
 1 9 -4 30516.1 1921.59 7
 -1 -9 4 32897.2 1915.05 9
 0 -9 4 19368 1487.27 9
 0 9 4 16371.2 1503.3 7
 0 9 -4 18897.7 1512.5 2
 0 9 -4 18493.1 1493.3 7
 -1 9 -4 39.6471 198.728 2
 1 9 4 435.817 303.918 7
 1 -9 4 203.443 194.105 9
 -2 9 -4 72422.2 3254.09 2
 2 -9 4 71144.3 3268.42 9
 2 9 4 64865.5 3290.3 7
 -3 9 -4 10940.6 1221.86 2
 3 9 4 11464.6 1325.23 7
 3 -9 4 11104.8 1235.22 9
 4 -9 4 17232.7 1598.87 9
 4 9 4 14003.8 1505.13 7
 -4 9 -4 13730.4 1426 2
 5 -9 4 21868.5 1916.98 9
 5 9 4 21940.8 1916.67 7
 -5 9 -4 21615.8 1870.17 2
 5 9 4 19071.6 797.734 6
 6 9 4 11895.7 1457.7 7
 6 -9 4 13070.5 1542.2 9
 7 9 4 32722.7 2545.72 7
 7 -9 4 33097.3 1523.4 8
 7 -9 4 36439 2720.25 9
 8 -9 4 862.053 514.905 9
 8 9 4 -236.78 398.311 7
 9 -9 4 28164.7 2588.77 9
 9 9 4 28110.9 2516.16 7
 10 9 4 9699.27 1549.88 7
 10 -9 4 13215.7 1836.97 9
 11 9 4 11544.3 1684.8 7
 11 -9 4 9361.87 1596.3 9
 12 -9 4 18404.5 2354.83 9
 12 9 4 17019.7 2152.74 7
 13 9 4 530.34 571.14 7
 13 -9 4 1464.53 916.622 9
 14 -9 4 8097.71 1654.39 9
 14 9 4 6530.83 1437.29 7
 15 -9 4 17.1123 364.569 9
 15 9 4 182.498 429.554 7
 18 10 -4 14123.7 2154.84 7
 18 -10 -4 8832.5 1738.92 9
 17 -10 -4 754.843 661.137 9
 17 10 -4 409.844 329.163 7
 16 10 -4 25153 2722.46 7
 16 -10 -4 31392.4 3027.55 9
 16 10 -4 25907.7 2533.72 6
 15 -10 -4 8883.43 1579.53 9
 15 10 -4 9035.94 1436.99 6
 15 10 -4 8006.85 1463.78 7
 14 10 -4 8236.88 1485 7
 14 -10 -4 9258.1 1553.78 9
 14 10 -4 8804.23 1374.11 3
 13 -10 -4 24467.1 2402.2 9
 13 10 -4 24556.1 2405.12 7
 13 10 -4 21917.2 2073.92 3
 12 10 -4 4250.65 961.805 7
 12 10 -4 5211.95 987.5 3
 -12 10 4 6444.19 1144.88 4
 12 -10 -4 8040.67 1344.76 9
 -12 -10 4 4234.94 958.705 4
 11 10 -4 27548.9 2276.84 3
 -11 10 4 28709.8 2322.87 4
 -11 -10 4 28455.1 2215.76 4
 11 10 -4 26917.9 2359.97 7
 11 -10 -4 27709 2233.44 8
 11 -10 -4 29295.8 2444.43 9
 10 10 -4 5172.04 946.361 3
 10 -10 -4 5096.29 971.348 9
 -10 10 4 3862.34 788.183 4
 -10 -10 4 7070.99 1030.5 4
 10 -10 -4 4552.83 904.967 8
 10 10 -4 5936.62 1062.47 7
 9 10 -4 32961.9 2412.75 3
 9 -10 -4 33165.3 2344.44 8
 9 10 -4 31041 1850.85 1
 9 -10 -4 33695.8 2485.34 9
 9 10 -4 33612.5 2498.08 7
 -9 10 4 36954.6 2374.38 4
 -9 -10 4 32296.4 2151.04 4
 8 10 -4 16524.2 1662.49 7
 8 10 -4 19328.5 1389.2 1
 8 -10 -4 15997.5 1633.9 9
 8 -10 -4 20146.2 1744.11 8
 -8 -10 4 18479.1 1515.2 4
 8 10 -4 14590.7 1556.43 3
 -8 10 4 17247.7 1510.28 4
 7 10 -4 22515.7 1898.31 7
 7 -10 -4 23889.7 1866.86 8
 7 10 -4 20315.5 1434.17 1
 -7 -10 4 21359.7 1538.75 4
 -7 10 4 25267.8 1741.5 4
 7 10 -4 23858.9 1943.76 3
 7 -10 -4 19239.8 1759.39 9
 6 -10 -4 102807 4174.65 8
 -6 -10 4 95870.2 3511.12 4
 6 -10 -4 89845.7 4075.32 9
 -6 10 4 95073 3621.41 4
 6 10 -4 95130.5 4141.11 7
 6 10 -4 104671 3658.07 1
 5 10 -4 812.081 404.234 7
 -5 10 4 250.33 105.484 2
 -5 -10 4 822.427 293.656 4
 5 -10 -4 492.474 357.464 9
 -5 10 4 509.318 217.378 4
 5 10 -4 809.602 314.527 1
 -4 -10 4 47124.5 2047.48 4
 -4 10 4 46858 2117.42 4
 4 10 -4 43388.5 2533.89 7
 4 10 -4 49869.7 2409.06 1
 -4 10 4 43585.2 2771.51 7
 -3 10 4 1042.39 427.608 7
 -3 10 4 415.672 248.623 4
 3 10 -4 1370.86 465.932 7
 -3 -10 4 1405.78 320.257 4
 -2 -10 4 71155.8 2530.9 4
 -2 10 4 73173 2623.58 4
 -2 10 4 69841.4 3522.84 7
 2 10 -4 72413.3 3266.46 7
 1 -10 -4 88123 2428.58 6
 1 10 -4 84049.7 3528.42 2
 -1 10 4 76211 3720.92 7
 1 10 -4 83602.7 3609.84 7
 -1 10 4 80273.6 2813 4
 0 -10 4 22163.8 1711.66 9
 0 10 4 28805.7 2122.41 7
 0 10 -4 26638.8 1828.77 2
 0 10 -4 26557.2 1909.04 7
 1 10 4 92182.2 4139.36 7
 -1 10 -4 94106.8 3819.47 2
 1 -10 4 91432.7 3857.24 9
 -2 10 -4 655.189 375.322 2
 2 10 4 827.659 475.465 7
 2 -10 4 54.4316 192.069 9
 3 -10 4 58013.5 3123.07 9
 -3 10 -4 63374.9 3156.96 2
 3 10 4 60878.1 3341.4 7
 4 10 4 55516.4 3256.18 7
 4 -10 4 62546 3321.87 9
 -4 10 -4 57410.4 3091.77 2
 5 -10 4 6137.84 1018.68 9
 5 10 4 8096.83 1229.02 7
 -5 10 -4 7977.4 1145.26 2
 6 10 4 12793.4 1564.16 7
 -6 10 -4 12366.8 1474.85 2
 6 -10 4 12912.5 1566.21 9
 7 10 4 583.931 464.652 7
 7 -10 4 1135.04 573.553 9
 8 10 4 52081.5 3457.99 7
 8 -10 4 52642.5 3518.82 9
 9 10 4 8999.61 1501.64 7
 9 -10 4 8344.92 1410.34 9
 10 -10 4 14803.2 1959.57 9
 10 10 4 12048 1728.95 7
 11 10 4 14906.5 1992.21 7
 11 -10 4 12208.5 1842.73 9
 12 -10 4 7729.27 1554.71 9
 12 10 4 8436.34 1599.14 7
 13 10 4 25831.8 2829.5 7
 13 -10 4 31761.2 3227.2 9
 14 10 4 166.76 418.385 7
 14 -10 4 1142.73 655.913 9
 18 11 -4 2414.9 916.2 7
 18 -11 -4 4447.08 1328.06 9
 17 -11 -4 22399.9 2661.66 9
 17 11 -4 17737.5 2365.98 7
 16 -11 -4 1186.66 697.449 9
 16 11 -4 1351.44 646.681 7
 15 11 -4 42736.1 3530.05 7
 15 11 -4 46842.7 3242.78 3
 15 -11 -4 45402.9 3645.12 9
 14 -11 -4 11135.2 1692.32 9
 14 11 -4 11485.9 1529.7 3
 14 11 -4 13915.1 1897.75 7
 13 11 -4 4327.22 939.2 3
 13 11 -4 5318.92 1144.88 7
 13 -11 -4 5465.74 1169.39 9
 12 11 -4 37526.7 2771.67 3
 12 -11 -4 38258.8 2998.08 9
 12 11 -4 36324.9 2937.18 7
 11 11 -4 593.726 546.798 7
 11 -11 -4 1177.25 487.312 8
 11 11 -4 1448.05 576.47 3
 -11 11 4 1296.68 569.777 4
 -11 -11 4 1551.12 642.201 4
 11 -11 -4 1292.23 655.685 9
 10 -11 -4 40193.8 2701.15 8
 -10 -11 4 36885.5 2430.09 4
 10 11 -4 42839.1 2866.45 3
 10 -11 -4 35556 2729.97 9
 10 11 -4 37663.9 2820.79 7
 10 11 -4 38074.8 2050.79 1
 -10 11 4 43444.7 2730.85 4
 9 -11 -4 23141.8 2115.19 9
 9 11 -4 23454.7 2068 3
 9 11 -4 22435.8 2096.97 7
 9 11 -4 24698.9 1581.66 1
 9 -11 -4 24077.8 2023.21 8
 -9 11 4 23531.7 1875.69 4
 -9 -11 4 27770 1949.85 4
 8 11 -4 28243.5 2244.59 3
 8 -11 -4 29168.7 2192.54 8
 8 -11 -4 27622.7 2251.96 9
 8 11 -4 28143.6 2280.88 7
 -8 11 4 30097.4 2014.38 4
 8 11 -4 28094.6 1702.68 1
 -8 -11 4 26795.1 1849.58 4
 7 11 -4 24055.3 2051.09 7
 7 -11 -4 28448.8 2095.55 8
 7 11 -4 25980.9 1639.52 1
 -7 -11 4 28340 1772.72 4
 7 -11 -4 25269.6 2098.73 9
 -7 11 4 25897.1 1777.6 4
 7 11 -4 30631 2277.5 3
 6 -11 -4 10340.8 1238.66 8
 -6 11 4 9361.03 980.667 4
 6 11 -4 8121.09 1151.38 7
 6 -11 -4 10254.5 1275.15 9
 -6 -11 4 9060.09 903.892 4
 6 11 -4 9764.18 988.892 1
 5 11 -4 58141.1 2624.9 1
 -5 11 4 50822.5 2353.65 4
 5 11 -4 48653.1 2884.99 7
 -5 -11 4 56716.7 2341.7 4
 5 -11 -4 54387.3 3029.31 9
 -4 11 4 5105.54 649.576 4
 -4 11 4 4153.41 891.701 7
 4 11 -4 5177.34 849.484 7
 -4 -11 4 5125.3 596.118 4
 -3 11 4 53439.4 2176.77 4
 -3 -11 4 55740.4 2133.53 4
 3 11 -4 45268.5 2697.66 7
 -3 11 4 46764.4 2991.98 7
 -2 -11 4 20741 1172.95 4
 -2 11 4 18415.7 1159.84 4
 2 11 -4 19891.6 1684.7 7
 -2 11 4 18816.9 1800.13 7
 -1 -11 4 31700.5 1541.92 4
 1 11 -4 30772.8 2047.29 2
 -1 11 4 34796.1 2470.49 7
 1 11 -4 31788.7 2194.19 7
 1 -11 -4 35243 1308.31 6
 -1 11 4 35410.2 1625.55 4
 0 11 -4 58391.3 2904.56 2
 0 11 -4 61892.1 3160.03 7
 0 -11 4 58204.8 3005.02 9
 0 11 4 57668.5 3263.78 7
 -1 11 -4 409.484 277.511 2
 1 -11 4 294.76 411.379 9
 1 11 4 349.808 351.902 7
 2 -11 4 45412.6 2672.26 9
 2 11 4 39857.4 2695.79 7
 3 11 4 3923.72 827.777 7
 -3 11 -4 3397.08 711.929 2
 3 -11 4 4388.08 897.368 9
 -4 11 -4 42846.7 2687.01 2
 4 -11 4 43921.3 2834.79 9
 4 11 4 46786.8 3023.05 7
 5 -11 4 86616.1 4265.93 9
 5 11 4 81394.9 4252.24 7
 -5 11 -4 80331.2 3955.37 2
 -6 11 -4 16047.5 1730.68 2
 6 11 4 21402.7 2098.83 7
 6 -11 4 15981.9 1800.29 9
 7 11 4 22146.3 2176.07 7
 -7 11 -4 18635.4 1928.76 2
 7 -11 4 21667 2171.28 9
 8 -11 4 7888.69 1349.14 9
 8 11 4 4175.12 994.356 7
 9 -11 4 37085.3 3080.6 9
 9 11 4 32041.7 2828.04 7
 10 11 4 3275.25 958.733 7
 10 -11 4 2713.16 897.376 9
 11 11 4 11186.9 1738.89 7
 11 -11 4 10303.2 1724.71 9
 12 11 4 16438 2203.92 7
 12 -11 4 17726 2349.41 9
 13 11 4 5350.11 1309.53 7
 13 -11 4 7105.65 1545.5 9
 14 11 4 13623.5 2146.76 7
 14 -11 4 18301.4 2532.42 9
 17 12 -4 890.325 750.405 7
 17 -12 -4 1281.88 742.054 9
 16 -12 -4 15968.4 2255.79 9
 16 12 -4 14227.3 2092.15 7
 15 -12 -4 3401.29 1075.5 9
 15 12 -4 3408.25 1017.94 7
 15 12 -4 2893.14 861.411 3
 14 12 -4 4263.79 938.785 3
 14 12 -4 4412.14 1082.84 7
 14 -12 -4 4421.84 1123.24 9
 13 -12 -4 12655.2 1794.55 9
 13 12 -4 14261.1 1925.35 7
 13 12 -4 11300.7 1562.91 3
 12 -12 -4 7490.45 1223.92 8
 12 12 -4 6549.23 1296.36 7
 12 -12 -4 6629.89 1259.35 9
 12 12 -4 7236.67 1233.84 3
 11 12 -4 27008.9 2364.51 3
 11 12 -4 29557.9 2632.17 7
 11 -12 -4 33905.7 2566.79 8
 11 -12 -4 33515.7 2758.49 9
 -11 12 4 30704.9 2421.77 4
 10 12 -4 5300.39 1091.62 7
 -10 12 4 3502.31 773.784 4
 -10 -12 4 4630.12 832.249 4
 10 12 -4 2737.49 726.816 3
 10 -12 -4 3973.87 845.127 8
 10 -12 -4 5040.02 1047.3 9
 9 12 -4 32937.6 1826.83 1
 9 12 -4 28831.4 2386.51 3
 9 -12 -4 30086.3 2334.93 8
 -9 -12 4 33959.8 2187.8 4
 9 12 -4 26497.5 2386.83 7
 9 -12 -4 30535.8 2593.41 9
 -9 12 4 36789.3 2379.49 4
 8 12 -4 13855.2 1599.12 3
 -8 -12 4 12915.3 1243.43 4
 8 12 -4 9540.48 1368.42 7
 8 -12 -4 14361.4 1542.88 8
 8 -12 -4 11622.1 1550.55 9
 8 12 -4 16135.7 1247.87 1
 -8 12 4 13374.8 1315.8 4
 7 -12 -4 4977.73 918.563 8
 7 12 -4 4882.85 965.635 7
 7 -12 -4 6296.9 1069.21 9
 -7 -12 4 5820.55 770.179 4
 7 12 -4 5184.39 721.79 1
 -7 12 4 7055.32 898.257 4
 -6 -12 4 64792.3 2718.63 4
 6 -12 -4 64950.3 3556.26 9
 6 12 -4 62770.4 3520.13 7
 -6 12 4 70539.7 2933.78 4
 5 -12 -4 1583.03 581.806 9
 5 12 -4 1180.74 536.931 7
 -5 -12 4 732.613 277.29 4
 -5 12 4 850.298 325.89 4
 -4 12 4 23303.5 1398.95 4
 4 12 -4 23502.1 1981.21 7
 -4 -12 4 21961.4 1287.85 4
 -4 12 4 24187.3 2176.31 7
 -3 12 4 2067.63 382.062 4
 3 12 -4 2026.98 581.776 7
 -3 12 4 1962.12 661.215 7
 -3 -12 4 1754.77 328.798 4
 2 12 -4 23232.5 1919.82 7
 -2 12 4 23212.9 1292.39 4
 -2 12 4 22712.6 2086.09 7
 -2 -12 4 23123.3 1229.17 4
 1 12 -4 12007.6 1354.8 7
 -1 12 4 11097.1 851.047 4
 -1 12 4 8933.52 1297.69 7
 -1 -12 4 9781.34 782.86 4
 0 -12 4 4100.81 806.138 9
 0 12 -4 4736.11 890.852 7
 0 12 4 2846.13 735.734 7
 0 12 -4 3089.97 648.417 2
 1 -12 4 41697.1 2609.46 9
 -1 12 -4 39383.1 2405.34 2
 1 12 4 35001.6 2629.68 7
 2 -12 4 4596.04 886.121 9
 2 12 4 4160.67 903.824 7
 -2 12 -4 4790.79 835.271 2
 3 -12 4 38547.3 2693.56 9
 3 12 4 39766.7 2829.49 7
 -3 12 -4 42510.4 2607.72 2
 4 -12 4 19320.2 1868.61 9
 4 12 4 15170.3 1750.71 7
 -4 12 -4 17155.5 1647.39 2
 5 -12 4 10523.6 1446.2 9
 5 12 4 10824 1520.77 7
 -5 12 -4 8389.48 1208.09 2
 6 -12 4 10565.5 1462.52 9
 6 12 4 9091.39 1413.79 7
 -6 12 -4 9878.2 1357.05 2
 7 -12 4 1972.81 708.279 9
 -7 12 -4 1709.97 656.907 2
 7 12 4 1715.81 712.506 7
 8 -12 4 59430.7 3876.41 9
 8 12 4 50723.9 3610.08 7
 -8 12 -4 53379.2 3515.31 2
 9 -12 4 1359.33 697.981 9
 9 12 4 250.002 433.116 7
 10 -12 4 12511.6 1885.28 9
 10 12 4 11801.9 1775.02 7
 11 12 4 8112.31 1544.38 7
 11 -12 4 7823.85 1534.07 9
 12 12 4 7439.86 1562.34 7
 12 -12 4 5764.95 1369.7 9
 13 -12 4 15111.4 2286.69 9
 13 12 4 14496.1 2175.94 7
 14 12 4 35.1525 516.085 7
 17 -13 -4 15647.4 2336.38 9
 17 13 -4 11290.1 2024.9 7
 16 -13 -4 174.871 479.889 9
 16 13 -4 -40.798 528.257 7
 15 -13 -4 28656.2 3012.73 9
 15 13 -4 30072.5 2674.41 3
 15 13 -4 25478.3 2813.88 7
 14 -13 -4 16715.1 2206.87 9
 14 13 -4 17510.7 2001.25 3
 14 13 -4 16554.2 2170.57 7
 13 -13 -4 6728.79 1301.55 9
 13 13 -4 6571.55 1193.04 3
 13 13 -4 5011.94 1206.04 7
 12 13 -4 19642.1 2082.46 3
 12 -13 -4 18793.2 2183.11 9
 12 13 -4 19936.8 2249.46 7
 12 -13 -4 24269.4 2238.49 8
 11 -13 -4 7193.86 1319.21 9
 11 13 -4 4681.47 1122.57 7
 11 -13 -4 6929.96 1189.87 8
 11 13 -4 4868.44 1043.96 3
 -10 -13 4 69839.5 3491.1 4
 10 -13 -4 70662.7 3869.16 8
 -10 13 4 77231.7 3793.36 4
 10 13 -4 66771.7 4105.41 7
 10 -13 -4 68332.6 4088.13 9
 10 13 -4 67182.1 3909.55 3
 9 -13 -4 9133.97 1303.62 8
 -9 13 4 8744.15 1136.81 4
 9 13 -4 9547.31 1371.33 3
 9 13 -4 7766.42 1302.43 7
 9 -13 -4 7377.05 1262.35 9
 -9 -13 4 8313.42 1079.1 4
 8 -13 -4 36963.8 2601.48 8
 -8 13 4 36583.4 2259.39 4
 8 13 -4 37881.5 2853.31 7
 -8 -13 4 38840.4 2222.5 4
 8 13 -4 34537 2656.14 3
 8 -13 -4 36259.7 2769.44 9
 7 -13 -4 15733.4 1765.56 9
 7 -13 -4 17596.3 1740.12 8
 -7 13 4 18696 1473.44 4
 -7 -13 4 15124.8 1256.98 4
 7 13 -4 15796.4 1776.4 7
 -6 -13 4 22615.4 1454.86 4
 6 13 -4 21698.2 2040.57 7
 6 -13 -4 24156.3 2168.86 9
 -6 13 4 26235.1 1655.44 4
 5 -13 -4 67058.4 3759.9 9
 5 13 -4 63549.9 3630.48 7
 -5 13 4 74892.4 2879.78 4
 -5 -13 4 76727.4 2755.21 4
 4 13 -4 1098.77 550.022 7
 -4 13 4 152.193 263.347 7
 -4 13 4 917.965 296.61 4
 -4 -13 4 465.191 231.465 4
 -3 13 4 39980.6 2984.49 7
 -3 -13 4 46490.4 1852.65 4
 -3 13 4 48568.7 1971.62 4
 3 13 -4 45254.9 2909.13 7
 -2 13 4 9127.35 768.339 4
 -2 -13 4 10952.9 792.046 4
 2 13 -4 10006.1 1351.5 7
 -2 13 4 10161.5 1456.92 7
 -1 13 4 36815.2 1615.49 4
 1 13 -4 37221.1 2609.52 7
 -1 13 4 34937.4 2715.25 7
 -1 -13 4 35498.3 1548.22 4
 0 13 4 52944.9 2054.9 4
 0 13 -4 52113.9 2827.65 2
 0 13 4 50424.9 3271.4 7
 0 13 -4 48610 3064.4 7
 0 -13 4 50238.2 2993.91 9
 -1 13 -4 1183.94 507.745 7
 1 13 4 3293.49 823.364 7
 -1 13 -4 3555.93 737.059 2
 1 -13 4 3012.12 763.334 9
 -2 13 -4 39563.4 2487.11 2
 2 -13 4 39768.6 2716.97 9
 2 13 4 38505.2 2871.64 7
 -3 13 -4 245.627 344.844 2
 3 13 4 743.56 581.578 7
 3 -13 4 867.692 536.601 9
 4 -13 4 98428 4714.04 9
 4 13 4 101986 4979.95 7
 -4 13 -4 91751.6 4265.12 2
 -5 13 -4 81917.2 4092.03 2
 5 13 4 80627.6 4516.46 7
 5 -13 4 90293.8 4548.3 9
 6 -13 4 5344.27 1104.73 9
 6 13 4 8825.71 1486.18 7
 -6 13 -4 7429.75 1172.51 2
 -7 13 -4 41016 2956.76 2
 7 13 4 40655.2 3204.07 7
 7 -13 4 38743.7 3067.71 9
 8 13 4 2058.52 823.465 7
 -8 13 -4 1609.89 718.265 2
 8 -13 4 1850.47 756.883 9
 9 -13 4 41976.8 3400.3 9
 -9 13 -4 40099.4 3161.59 2
 9 13 4 43051.3 3457.78 7
 10 -13 4 9061.99 1639.94 9
 10 13 4 10918.3 1761.59 7
 -10 13 -4 9616.13 1596.29 2
 11 -13 4 13687.4 2059.19 9
 11 13 4 12120.1 1910.27 7
 12 -13 4 17817.8 2438.97 9
 12 13 4 19800.5 2500.64 7
 13 13 4 835.879 582.555 7
 13 -13 4 1087.56 799.922 9
 16 14 -4 2386.7 922.288 7
 16 -14 -4 3270.76 1076.78 9
 15 -14 -4 4435.14 1188.92 9
 15 14 -4 4722.11 1080.12 3
 15 14 -4 2312.98 856.01 7
 14 -14 -4 2549.61 983.58 9
 14 14 -4 1389.17 620.579 3
 14 14 -4 873.724 566.919 7
 13 -14 -4 4457.66 1110.47 9
 13 14 -4 6427.69 1404.3 7
 13 14 -4 4456.83 1039.5 3
 13 -14 -4 6539.03 1228.87 8
 12 14 -4 4877.71 1065.5 3
 12 14 -4 6356.94 1305.61 7
 12 -14 -4 4368.98 999.097 8
 12 -14 -4 2346.78 763.362 9
 11 -14 -4 16753.2 1865.84 8
 11 14 -4 15515.5 2018.29 7
 11 14 -4 16375.9 1909.1 3
 11 -14 -4 16488.6 2021.8 9
 10 14 -4 185.527 338.808 3
 10 -14 -4 2575.49 885.407 9
 10 -14 -4 2420.44 774.399 8
 10 14 -4 1765.29 773.247 7
 9 14 -4 20935.4 2111.95 3
 -9 14 4 22648.1 1827.3 4
 9 -14 -4 20819.2 2014.52 8
 9 14 -4 20812.3 2208.8 7
 9 -14 -4 20430.4 2155.48 9
 -8 14 4 2927.1 615.435 4
 8 -14 -4 2891.83 725.528 8
 8 14 -4 2672.9 786.818 7
 8 14 -4 4038.06 931.419 3
 8 -14 -4 2699.77 822.82 9
 -8 -14 4 4137.97 700.05 4
 -7 -14 4 14631.5 1210.4 4
 7 -14 -4 13152.2 1552.19 8
 -7 14 4 15823.9 1351.7 4
 7 14 -4 13334.3 1686.88 7
 7 -14 -4 13996.5 1697.59 9
 -6 14 4 46991.1 2269.49 4
 6 14 -4 39213.4 2925.04 7
 -6 -14 4 45553.2 2124.88 4
 6 -14 -4 46849.7 3139.68 9
 5 -14 -4 7577.53 1261.68 9
 -5 -14 4 7194.49 712.072 4
 -5 14 4 8739.35 851.261 4
 5 14 -4 5780.66 1092.07 7
 4 14 -4 30572.8 2526.78 7
 -4 -14 4 33385.1 1541.35 4
 -4 14 4 37554.6 1735.05 4
 -4 14 4 29812.1 2639.77 7
 -3 14 4 8701.38 737.505 4
 3 14 -4 7983.23 1231.69 7
 -3 14 4 7702.4 1323.47 7
 -2 14 4 2519.03 773.903 7
 -2 14 4 2566.77 373.675 4
 2 14 -4 2716.13 778.008 7
 -1 14 4 -53.6133 253.17 7
 1 14 -4 104.763 286.984 7
 -1 14 4 302.671 144.27 4
 0 -14 4 1787.6 331.331 4
 0 14 4 2113.44 357.831 4
 0 -14 4 1389.86 527.444 9
 0 14 -4 1950.76 594.198 2
 0 14 4 971.724 597.086 7
 0 14 -4 1249.68 471.995 7
 1 14 4 18850.8 2047.07 7
 -1 14 -4 18291.2 1670.7 2
 -1 14 -4 23756.2 2167.68 7
 1 -14 4 22728.3 2050.27 9
 2 -14 4 1860.02 659.382 9
 2 14 4 1557.04 513.489 7
 -2 14 -4 2126.45 565.159 2
 3 14 4 42669.6 3141.47 7
 3 -14 4 39398.6 2879.53 9
 -3 14 -4 41680 2677.49 2
 -4 14 -4 25456.7 2081.52 2
 4 14 4 25948 2462.6 7
 4 -14 4 24462.5 2305.31 9
 5 -14 4 1055.74 587.272 9
 5 14 4 1366.95 693.172 7
 -5 14 -4 2516.62 713.658 2
 -6 14 -4 19476.2 1944.28 2
 6 14 4 22738.3 2383.7 7
 6 -14 4 25109 2427.52 9
 7 -14 4 2976.14 932.907 9
 7 14 4 1151.38 663.347 7
 -7 14 -4 1576.68 676.007 2
 8 14 4 24312.7 2556.95 7
 -8 14 -4 21378.4 2220.87 2
 8 -14 4 22161.6 2442.05 9
 9 14 4 1234.71 749.327 7
 -9 14 -4 1489.75 695.625 2
 9 -14 4 2215.51 945.085 9
 10 -14 4 9058.86 1639.57 9
 10 14 4 7743.83 1498.89 7
 -10 14 -4 8048.04 1474.39 2
 -11 14 -4 2935.76 909.321 2
 11 14 4 3915.98 1112.51 7
 11 -14 4 1781.6 802.041 9
 -12 14 -4 1471.71 741.005 2
 12 14 4 1566.36 710.933 7
 12 -14 4 564.46 724.12 9
 13 -14 4 3356.13 1106.63 9
 13 14 4 4471.33 1362.55 7
 16 15 -4 52.7982 336.87 7
 16 -15 -4 726.472 664.302 9
 15 -15 -4 25003.7 2870.78 9
 15 15 -4 19464.7 2219.18 3
 15 15 -4 20326.3 2603.51 7
 14 -15 -4 13555.1 2048.84 9
 14 15 -4 11940.5 1746.85 3
 14 15 -4 13614.8 2070.09 7
 13 15 -4 13899.4 2035.7 7
 13 15 -4 13888.9 1850.28 3
 13 -15 -4 16776.8 2230.71 9
 13 -15 -4 13505.5 1751.62 8
 12 -15 -4 12465 1636.99 8
 12 -15 -4 14373.8 1986.14 9
 12 15 -4 13800 2000.69 7
 12 15 -4 11992.6 1687.65 3
 11 -15 -4 7801.7 1437.49 9
 11 -15 -4 5333.11 1096.92 8
 11 15 -4 4459.21 1061.18 3
 11 15 -4 5021.3 1179.44 7
 10 -15 -4 53482.2 3452.95 8
 10 15 -4 54422 3864.33 7
 10 -15 -4 59212.4 3930.37 9
 10 15 -4 52161.6 3566.12 3
 9 -15 -4 14627 1711.02 8
 9 15 -4 14216.9 1865.92 7
 9 15 -4 12323.5 1656.4 3
 9 -15 -4 11491.2 1735.79 9
 8 -15 -4 15121.2 1860.85 9
 8 15 -4 13264.1 1816.14 7
 8 -15 -4 13537.8 1639.16 8
 7 -15 -4 11011.4 1585.82 9
 7 15 -4 9991.17 1484.59 7
 6 -15 -4 17679.1 1966.98 9
 6 15 -4 15293.1 1816.24 7
 5 15 -4 93791 4847.38 7
 5 -15 -4 105576 5072.6 9
 -4 15 4 1630.65 763.431 7
 4 15 -4 1483.83 645.164 7
 3 15 -4 44946.7 3109.87 7
 -3 15 4 38516 3121.79 7
 2 15 -4 22910.5 2218.75 7
 -2 15 4 27343.8 2555.26 7
 -1 -15 4 34542.1 2599.96 9
 -1 15 4 34768.9 2897.16 7
 1 15 -4 31460.2 2631.36 7
 0 -15 4 55058 3356.52 9
 0 15 4 53446.6 3635.78 7
 0 15 -4 48169.8 3306.88 7
 1 -15 4 5629.67 1100.93 9
 1 15 4 2865.97 875.707 7
 -1 15 -4 4808.72 886.726 2
 -1 15 -4 4724.8 1087.37 7
 2 15 4 58354.4 3831.15 7
 -2 15 -4 56814.3 3150 2
 2 -15 4 54301.1 3462.63 9
 3 -15 4 2453.11 855.086 9
 3 15 4 1270.16 773.692 7
 -3 15 -4 1515.5 595.339 2
 4 15 4 69079.1 4321.71 7
 4 -15 4 80623.1 4381.39 9
 -4 15 -4 69883 3713.05 2
 5 15 4 19027.8 2220.92 7
 -5 15 -4 19704.5 1930.74 2
 5 -15 4 21919 2261.68 9
 -6 15 -4 2059.09 712.664 2
 6 -15 4 2729.66 850.708 9
 6 15 4 2127.36 793.165 7
 7 15 4 25001.9 2656.23 7
 7 -15 4 26653.8 2629.12 9
 -7 15 -4 23931.4 2273.5 2
 8 -15 4 5945.6 1299.81 9
 8 15 4 4601.94 1136.77 7
 -8 15 -4 3700.71 988.526 2
 9 -15 4 40310.1 3453.15 9
 -9 15 -4 32259.4 2870.29 2
 9 15 4 37082.1 3370.06 7
 10 -15 4 10698.5 1783.37 9
 -10 15 -4 10256.9 1651.21 2
 10 15 4 9436.84 1728.74 7
 -11 15 -4 8385.2 1561.31 2
 11 15 4 7522.94 1585.11 7
 11 -15 4 7436.95 1577.67 9
 12 15 4 16370.9 2413.84 7
 12 -15 4 15906.8 2358.86 9
 15 -16 -4 2881.43 1012.04 9
 15 16 -4 3180.75 1177.26 7
 14 -16 -4 3026.64 1063.1 9
 14 16 -4 3371.44 1018.9 3
 14 16 -4 2709.47 1072.1 7
 13 16 -4 6590.8 1320.5 3
 13 -16 -4 5773.85 1185.67 8
 13 -16 -4 5545.39 1301.9 9
 13 16 -4 2595.28 916.417 7
 12 -16 -4 837.721 513.248 8
 12 16 -4 244.981 386.314 7
 12 -16 -4 150.753 297.072 9
 12 16 -4 216.408 430.209 3
 11 -16 -4 6470.02 1199.94 8
 11 16 -4 4716.82 1079.39 3
 11 16 -4 8704.39 1554.99 7
 11 -16 -4 5294.8 1234.29 9
 10 16 -4 85.5974 417.46 7
 10 -16 -4 373.049 462.717 8
 10 16 -4 653.68 500.709 3
 10 -16 -4 169.779 355.237 9
 9 16 -4 6800.43 1288.19 3
 9 -16 -4 6834.65 1235.96 8
 9 16 -4 5777.18 1312.98 7
 9 -16 -4 6289.71 1307.87 9
 8 -16 -4 7615.13 1253.05 8
 8 16 -4 7070.81 1344.76 7
 7 -16 -4 1025.11 597.208 9
 7 16 -4 881.982 463.269 7
 6 16 -4 10578.3 1609.75 7
 6 -16 -4 12383.8 1725.35 9
 5 16 -4 115.777 414.05 7
 5 -16 -4 925.474 591.909 9
 4 16 -4 14055.5 1800.49 7
 -4 16 4 14618.3 1986.27 7
 -3 16 4 4475.46 1122.39 7
 3 16 -4 4429.61 1015.16 7
 2 16 -4 1458.77 596.67 7
 -2 16 4 1007.42 658.783 7
 -1 16 4 3604.56 1002.35 7
 1 16 -4 5914.32 1171.52 7
 -1 -16 4 4088.53 965.193 9
 0 16 4 3213.02 936.783 7
 0 16 -4 3812.9 980.562 7
 0 -16 4 4140.54 950.538 9
 1 16 4 10694.7 1640.55 7
 1 -16 4 12811.9 1641.38 9
 -1 16 -4 12404.7 1400.97 2
 -1 16 -4 12468.9 1693.85 7
 -2 16 -4 277.236 338.054 2
 2 -16 4 1277.11 705.267 9
 2 16 4 674.095 514.571 7
 3 16 4 17489.2 2142.03 7
 3 -16 4 19008.1 2089.99 9
 -3 16 -4 17966.1 1780.48 2
 -4 16 -4 5586.56 1023.98 2
 4 16 4 6153.48 1311.31 7
 4 -16 4 6445.41 1301.4 9
 5 16 4 1753.93 832.813 7
 5 -16 4 2666.42 863.965 9
 -5 16 -4 1538.35 561.557 2
 -6 16 -4 15312.9 1767.56 2
 6 16 4 13860.2 1961.62 7
 6 -16 4 16208.8 2051.92 9
 -7 16 -4 1846.47 695.453 2
 7 -16 4 1189.94 635.797 9
 7 16 4 1827.66 865.601 7
 8 16 4 835.53 533.584 7
 -8 16 -4 1841.86 697.154 2
 8 -16 4 599.615 469.465 9
 9 16 4 946.202 664.215 7
 9 -16 4 1123.37 754.659 9
 10 -16 4 1249.21 603.285 9
 10 16 4 2460.61 989.914 7
 11 16 4 3486.55 1114.02 7
 11 -16 4 77.6128 466.672 9
 15 17 -4 22132.6 2843.07 7
 14 17 -4 17541.5 2211.1 3
 14 -17 -4 13745.2 2161.47 9
 14 17 -4 16113.9 2388.6 7
 13 -17 -4 14812.1 1945.53 8
 13 17 -4 14852.6 1996.22 3
 13 17 -4 13282.1 2115.14 7
 13 -17 -4 14792.1 2180.27 9
 12 17 -4 30946.3 2893.4 3
 12 -17 -4 31282.1 2784.22 8
 12 17 -4 29165.1 3070.67 7
 12 -17 -4 34841.1 3245.06 9
 11 -17 -4 1342.78 752.225 9
 11 17 -4 2196.89 751.196 3
 11 17 -4 3170.5 1043.44 7
 11 -17 -4 1641.22 715.316 8
 10 17 -4 47610.4 3773.82 7
 10 -17 -4 46937.4 3343.59 8
 10 17 -4 49030 3600.78 3
 10 -17 -4 43019.1 3664.26 9
 9 -17 -4 21561.9 2207.09 8
 9 -17 -4 20031.8 2395.63 9
 9 17 -4 21483.1 2321 3
 9 17 -4 21787.1 2483.26 7
 8 -17 -4 15869.2 1863.96 8
 8 -17 -4 14735.6 1945.06 9
 8 17 -4 12682.1 1873.25 7
 7 17 -4 9195.03 1548.63 7
 7 -17 -4 6040.69 1311.92 9
 6 -17 -4 8525.41 1452.96 9
 6 17 -4 4868.55 1128.91 7
 5 17 -4 56041 3902.34 7
 5 -17 -4 64224.9 4072.98 9
 4 17 -4 570.176 332.759 7
 -4 17 4 3135.77 992.2 7
 3 17 -4 31573.1 2774.91 7
 -3 17 4 25764.9 2729.15 7
 2 17 -4 25514.6 2511.76 7
 -2 17 4 24827.5 2643.11 7
 -1 -17 4 31097 2662.01 9
 1 17 -4 31947.6 2850.23 7
 -1 17 4 31205 2951.16 7
 0 17 4 47195.1 3656.69 7
 0 17 -4 47495.8 3501.09 7
 0 -17 4 41546.1 3168.64 9
 1 -17 4 3687.75 998.016 9
 1 17 4 3225.77 1029.55 7
 -1 17 -4 2669.1 886.398 7
 2 -17 4 56791 3758.83 9
 2 17 4 52552.8 3903.47 7
 -2 17 -4 51316.7 3062.14 2
 -3 17 -4 3792.13 800.91 2
 3 -17 4 3913.2 975.048 9
 3 17 4 2576.54 814.286 7
 4 17 4 46225.7 3674.93 7
 4 -17 4 43561.9 3360.53 9
 -4 17 -4 42982.2 2887.92 2
 5 -17 4 26264.1 2651.46 9
 5 17 4 26422.4 2764.62 7
 6 17 4 4215.77 1140.72 7
 6 -17 4 2477.83 838.992 9
 7 17 4 24346.6 2732.24 7
 7 -17 4 19414.7 2344.25 9
 8 -17 4 1405.3 654.093 9
 8 17 4 1629.98 906.107 7
 9 -17 4 38653.2 3543.9 9
 9 17 4 38456.5 3612.97 7
 10 -17 4 11155.8 1928.04 9
 10 17 4 6707.17 1518.07 7
 11 -17 4 7058.2 1674.98 9
 11 17 4 8010.46 1696.98 7
 14 18 -4 173.255 471.133 3
 14 18 -4 -83.5108 493.634 7
 13 -18 -4 1357.76 846.356 9
 13 -18 -4 3370.41 969.531 8
 13 18 -4 2144.52 961.137 7
 13 18 -4 1046.13 641.513 3
 12 -18 -4 632.165 567.572 8
 12 18 -4 679.709 540.414 3
 12 -18 -4 686.621 499.639 9
 12 18 -4 -333.118 446.27 7
 11 -18 -4 61.8342 284.848 8
 11 -18 -4 1215.89 696.164 9
 11 18 -4 776.216 449.58 3
 11 18 -4 435.435 394.119 7
 10 18 -4 138.015 528.56 3
 10 -18 -4 788.161 504.646 8
 10 18 -4 -976.226 619.88 7
 10 -18 -4 -29.8467 585.076 9
 9 -18 -4 4739.91 1077.21 8
 9 18 -4 3516.72 1014.75 3
 9 18 -4 4496.18 1156.78 7
 9 -18 -4 4025.53 1160.55 9
 8 -18 -4 5990.07 1179.27 8
 8 -18 -4 4970.4 1225.29 9
 8 18 -4 3122.32 917.387 7
 7 18 -4 -143.328 612.848 7
 7 -18 -4 122.93 433.012 9
 6 18 -4 2552.95 810.413 7
 6 -18 -4 1485.74 671.601 9
 5 -18 -4 475.099 496.246 9
 5 18 -4 -670.471 494.795 7
 4 -18 -4 4778.12 1124.65 9
 4 18 -4 2729.77 866.811 7
 -4 18 4 2963.53 963.883 7
 3 18 -4 2127.92 785.169 7
 -3 18 4 1424.72 683.382 7
 2 18 -4 114.819 398.449 7
 -2 18 4 307.349 391.346 7
 -1 18 4 386.012 469.886 7
 1 18 -4 527.597 555.444 7
 -1 -18 4 338.835 380.408 9
 0 -18 4 -111.675 346.826 9
 0 18 4 429.062 513.291 7
 0 18 -4 1180.71 576.459 7
 -1 18 -4 2363.94 851.16 7
 1 18 4 1000.45 643.437 7
 1 -18 4 2061.08 785.932 9
 2 -18 4 1720.21 756.86 9
 2 18 4 965.947 498.052 7
 3 -18 4 2379.22 837.519 9
 3 18 4 817.113 486.121 7
 4 -18 4 -228.832 291.22 9
 4 18 4 -804.999 577.971 7
 5 -18 4 8336.41 1535.31 9
 5 18 4 4314.64 1228.86 7
 6 18 4 5253.63 1296.01 7
 6 -18 4 4210.59 1129.81 9
 7 -18 4 799.643 631.398 9
 7 18 4 926.811 639.023 7
 8 -18 4 805.682 632.29 9
 8 18 4 1394.98 888.871 7
 9 -18 4 857.328 758.372 9
 9 18 4 338.676 588.719 7
 10 18 4 2886.47 1100.26 7
 10 -18 4 1152.22 777.795 9
 14 19 -4 7312.72 1500.13 3
 13 -19 -4 4126.44 1007.24 8
 13 19 -4 5227.4 1250.82 3
 13 19 -4 5618.76 1509.28 7
 12 19 -4 17942.1 2305.8 3
 12 19 -4 18446.1 2550.65 7
 12 -19 -4 20646.9 2343.23 8
 12 -19 -4 18848.6 2520.5 9
 11 -19 -4 3310.74 935.179 8
 11 19 -4 2369.08 972.362 7
 11 19 -4 484.687 538.303 3
 11 -19 -4 653.699 633.162 9
 10 -19 -4 31936 2862.39 8
 10 -19 -4 28412.8 3016.84 9
 10 19 -4 27260.2 3013.67 7
 10 19 -4 32055.8 3024.44 3
 9 -19 -4 9440.63 1534.09 8
 9 19 -4 5656.28 1371.91 7
 9 -19 -4 8482.67 1659.87 9
 8 -19 -4 22903.1 2646.59 9
 8 19 -4 23649.1 2704.05 7
 8 -19 -4 26186.5 2551.12 8
 7 -19 -4 19489.3 2402.72 9
 7 19 -4 22913.1 2638.18 7
 6 19 -4 6388.55 1384.68 7
 6 -19 -4 5682.48 1368.5 9
 5 -19 -4 41677.9 3466.41 9
 5 19 -4 41474.6 3517.5 7
 4 -19 -4 961.807 680.825 9
 4 19 -4 350.189 528.225 7
 -4 19 4 1296.29 746.842 7
 3 19 -4 42534.8 3556.85 7
 -3 19 4 51097.8 4128.27 7
 2 19 -4 16828.5 2188.14 7
 -2 19 4 10404.8 1855.62 7
 1 19 -4 21732.4 2470.24 7
 -1 19 4 17951.8 2381.29 7
 -1 -19 4 18685 2227.08 9
 0 19 4 52244.3 4109.77 7
 0 -19 4 51688.3 3786.91 9
 0 19 -4 50640.3 3896.93 7
 1 19 4 2212.76 868.856 7
 1 -19 4 1283.51 807.068 9
 2 -19 4 42850.1 3478.65 9
 2 19 4 47299.6 3914.15 7
 3 -19 4 6440.54 1370.27 9
 3 19 4 7172.04 1465.4 7
 4 -19 4 19151.3 2380.36 9
 4 19 4 17376.9 2351.79 7
 5 -19 4 25922.8 2711.23 9
 5 19 4 21379 2684.15 7
 6 19 4 10710.4 1899.47 7
 6 -19 4 8319.38 1619.07 9
 7 -19 4 22239.5 2649.91 9
 7 19 4 17239.4 2437.3 7
 8 -19 4 502.466 598.158 9
 8 19 4 2192.83 968.38 7
 9 19 4 34727.2 3629.35 7
 9 -19 4 39702.5 3698.91 9
 13 20 -4 567.594 575.106 3
 12 -20 -4 805.525 437.614 8
 12 20 -4 569.621 492.356 7
 12 20 -4 -164.974 430.708 3
 11 20 -4 -184.249 491.687 7
 11 -20 -4 875.429 913.947 9
 11 20 -4 459.265 323.836 3
 11 -20 -4 -393.811 383.914 8
 10 -20 -4 460.074 512.428 8
 10 -20 -4 929.173 790.041 9
 10 20 -4 327.239 517.594 3
 10 20 -4 748.743 600.374 7
 9 -20 -4 398.689 375.068 8
 9 20 -4 355.898 484.084 7
 9 -20 -4 -5.01501 316.596 9
 8 -20 -4 457.078 473.125 8
 8 20 -4 564.192 410.862 7
 8 -20 -4 786.017 675.695 9
 7 -20 -4 2104.64 923.003 9
 7 20 -4 1225.36 669.058 7
 6 -20 -4 652.812 536.325 9
 6 20 -4 -103.62 572.053 7
 5 20 -4 588.911 506.717 7
 5 -20 -4 1133.06 660.173 9
 4 20 -4 566.453 493.852 7
 -4 20 4 144.345 442.191 7
 4 -20 -4 785.629 559.102 9
 3 20 -4 1057.89 664.377 7
 -3 20 4 606.151 655.915 7
 2 20 -4 4.77246 364.755 7
 -2 20 4 546.285 502.359 7
 -1 -20 4 -276.238 501.101 9
 -1 20 4 540.846 339.379 7
 1 20 -4 52.5712 384.065 7
 0 20 4 855.548 583.416 7
 0 20 -4 379.1 551.025 7
 0 -20 4 1617.16 686.358 9
 1 20 4 1869.87 823.437 7
 1 -20 4 6400.32 1368.31 9
 2 -20 4 1327.93 718.516 9
 2 20 4 1059.74 748.037 7
 3 20 4 -1257.57 730.588 7
 3 -20 4 328.197 431.676 9
 4 20 4 239.442 411.504 7
 4 -20 4 -276.525 445.686 9
 5 -20 4 928.873 633.212 9
 5 20 4 1714.75 866.286 7
 6 -20 4 513.557 623.45 9
 6 20 4 -1021.08 714.345 7
 7 20 4 -232.073 549.347 7
 7 -20 4 105.941 520.408 9
 8 -20 4 181.119 523.032 9
 8 20 4 -1096.99 728.419 7
 12 -21 -4 25080.7 2701.99 8
 11 -21 -4 1612.7 685.811 8
 11 21 -4 2540.57 925.948 3
 11 21 -4 2976.41 1179.97 7
 10 -21 -4 24145.1 2890.31 9
 10 21 -4 22105.1 2669.62 3
 10 21 -4 26213.2 3141.66 7
 10 -21 -4 23793.2 2566.77 8
 9 -21 -4 3627.24 1045.12 8
 9 21 -4 1790.88 933.387 7
 9 -21 -4 4757.36 1341.96 9
 8 21 -4 22049.4 2798.33 7
 8 -21 -4 25616.6 2654.84 8
 8 -21 -4 26476 2982.06 9
 7 21 -4 18713.8 2551.57 7
 7 -21 -4 20262.3 2558.67 9
 6 -21 -4 8604.24 1706.65 9
 6 21 -4 4627.51 1245.83 7
 5 21 -4 24257.8 2870.5 7
 5 -21 -4 32410.1 3236.39 9
 4 21 -4 728.616 601.049 7
 4 -21 -4 2196.81 905.182 9
 -4 21 4 2030.54 948.554 7
 3 21 -4 37104.1 3496.37 7
 -3 21 4 27293.4 3177.07 7
 -2 21 4 7807.48 1673.58 7
 -2 -21 4 7148.23 1418.87 9
 2 21 -4 8840.59 1684.19 7
 -1 21 4 7927.68 1644.77 7
 1 21 -4 4713.14 1275.13 7
 -1 -21 4 4430.03 1235.65 9
 0 21 4 15484.3 2342.11 7
 0 21 -4 18894.9 2473.78 7
 0 -21 4 18362 2312.52 9
 1 21 4 3496.48 1226.35 7
 1 -21 4 5691.94 1317.6 9
 2 21 4 37067.7 3664.04 7
 2 -21 4 34722.4 3276.45 9
 3 -21 4 3899.5 1088 9
 3 21 4 825.242 701.299 7
 4 -21 4 19185.1 2493.84 9
 4 21 4 18305.5 2602.06 7
 5 -21 4 18102.4 2433.32 9
 5 21 4 12945.5 2195.24 7
 6 -21 4 14302.6 2210.3 9
 6 21 4 10054.8 1947.71 7
 7 21 4 33579.2 3635.24 7
 7 -21 4 34169.2 3485.9 9
 10 -22 -4 838.348 571.267 8
 10 22 -4 348.134 571.111 7
 9 -22 -4 215.028 344.829 8
 9 22 -4 1071.07 821.253 7
 9 -22 -4 126.526 457.062 9
 8 -22 -4 282.134 485.298 8
 8 -22 -4 213.238 542.788 9
 8 22 -4 -278.46 536.145 7
 7 22 -4 464.417 481.078 7
 7 -22 -4 402.882 660.637 9
 6 -22 -4 732.87 651.223 9
 6 22 -4 1983.33 785.101 7
 5 -22 -4 39.7976 336.456 9
 5 22 -4 320.231 427.579 7
 4 -22 -4 1361.42 869.052 9
 -4 22 4 -229.035 400.173 7
 4 22 -4 911.019 676.252 7
 3 22 -4 120.909 591.859 7
 -3 22 4 1038.63 808.639 7
 -2 22 4 241.742 480.105 7
 2 22 -4 57.6592 434.427 7
 -2 -22 4 448.559 500.263 9
 -1 -22 4 1469.26 725.809 9
 -1 22 4 1714.71 919.111 7
 1 22 -4 532.556 486.617 7
 0 -22 4 -34.2075 388.324 9
 0 22 4 345.63 547.622 7
 0 22 -4 604.173 519.847 7
 1 -22 4 1032.96 658.315 9
 1 22 4 74.3436 487.921 7
 2 -22 4 -35.2924 414.664 9
 2 22 4 426.29 543.868 7
 3 -22 4 334.664 551.257 9
 3 22 4 62.9229 381.154 7
 4 22 4 -18.2069 399.688 7
 4 -22 4 979.239 718.478 9
 5 22 4 -1368.43 806.08 7
 5 -22 4 709.297 603.183 9
 6 -22 4 229.041 598.129 9
 8 23 -4 16373.5 2538.26 7
 8 -23 -4 19521.8 2434.46 8
 7 23 -4 13636.1 2283.36 7
 6 -23 -4 4600.56 1333.05 9
 6 23 -4 4147.67 1328.55 7
 5 -23 -4 23231.9 2893.15 9
 5 23 -4 18258.7 2651.97 7
 4 -23 -4 435.178 742.684 9
 4 23 -4 253.69 497.941 7
 -4 23 4 938.216 753.314 7
 3 -23 -4 24507 2963.82 9
 3 23 -4 21810.3 2849.43 7
 -3 23 4 24258 3146.61 7
 -2 -23 4 8694.78 1668.24 9
 2 23 -4 8442.04 1809.98 7
 -2 23 4 7959.54 1824.98 7
 -1 -23 4 10834.4 1936.53 9
 -1 23 4 8800.48 1889.43 7
 1 23 -4 7575.94 1714.79 7
 0 -23 4 13670.9 2122.42 9
 0 23 -4 10114.9 1917.55 7
 0 23 4 11386.8 2149.69 7
 1 -23 4 7198.02 1585.91 9
 1 23 4 7990.37 1855.6 7
 2 23 4 35368.3 3800.89 7
 2 -23 4 35330.6 3509.45 9
 3 -23 4 5663.05 1440.05 9
 3 23 4 2936.33 1176.49 7
 4 -23 4 7870.18 1672.01 9
 6 24 -4 22.4078 609.124 7
 5 24 -4 529.544 573.53 7
 4 24 -4 2715.81 1097.52 7
 -3 -24 4 495.72 518.835 9
 3 24 -4 -100.342 564.36 7
 2 24 -4 -866.757 686.834 7
 -2 -24 4 1888.1 870.092 9
 -1 -24 4 178.156 696.27 9
 1 24 -4 687.439 645.054 7
 0 -24 4 1038.26 678.482 9
 1 -24 4 555.531 484.787 9
 2 -24 4 945.56 779.656 9
 21 0 -5 1350.88 874.058 9
 20 0 -5 -273.065 635.817 9
 19 0 -5 287.775 396.312 9
 19 0 -5 160.064 582.408 6
 18 0 -5 -24.38 425.649 6
 18 0 -5 47.5507 440.028 9
 17 0 -5 -13.2482 347.983 9
 17 0 -5 -213.37 545.891 6
 16 0 -5 -158.275 410.303 9
 -16 0 5 549.457 555.439 4
 16 0 -5 190.033 526.973 6
 -15 0 5 -116.541 496.889 4
 15 0 -5 -35.0805 267.138 6
 15 0 -5 87.206 344.748 9
 14 0 -5 550.409 393.261 9
 -14 0 5 231.955 472.226 4
 14 0 -5 79.2275 382.042 6
 13 0 -5 -6.26189 280.118 9
 -13 0 5 62.9956 352.754 4
 13 0 -5 -35.726 339.492 6
 12 0 -5 16.6356 177.265 9
 -12 0 5 1057.72 492.912 4
 12 0 -5 606.353 453.625 6
 11 0 -5 1.94637 226.994 9
 -11 0 5 47.1797 60.0342 5
 11 0 -5 235.809 277.485 6
 -11 0 5 373.432 364.463 4
 10 0 -5 185.096 196.507 9
 -10 0 5 80.7448 66.4442 5
 -10 0 5 187.124 265.811 4
 10 0 -5 27.5961 252.053 6
 9 0 -5 89.0003 193.363 9
 -9 0 5 355.129 368.335 4
 -9 0 5 15.4068 77.7786 5
 9 0 -5 679.408 431.112 6
 -8 0 5 -16.214 98.6608 5
 -8 0 5 218.478 249.219 4
 8 0 -5 87.1221 157.319 9
 8 0 -5 -162.908 277.981 6
 -7 0 5 130.396 198.526 4
 -7 0 5 120.122 111.712 5
 7 0 -5 93.5071 129.365 9
 -7 0 5 61.1498 135.154 9
 7 0 -5 292.305 246.076 6
 6 0 -5 30.274 127.368 9
 -6 0 5 148.506 139.382 9
 -6 0 5 281.405 157.632 5
 6 0 -5 440.191 246.968 6
 5 0 -5 29.045 67.6754 9
 -5 0 5 -21.5424 190.453 4
 5 0 -5 8.03717 120.911 5
 -5 0 5 80.1382 96.1495 9
 4 0 -5 272.822 152.15 5
 -4 0 5 218.352 218.403 4
 -3 0 5 1751.55 464.099 4
 3 0 -5 972.959 329.7 2
 3 0 -5 674.726 278.463 5
 2 0 -5 24.0695 104.456 5
 2 0 -5 164.695 206.488 2
 2 0 -5 -22.3902 53.1777 9
 1 0 -5 316.198 242.225 5
 1 0 -5 675.383 283.821 2
 -1 0 5 511.215 178.452 8
 1 0 -5 317.501 137.963 9
 0 0 -5 282.555 208.551 5
 0 0 5 46.3132 87.7959 9
 0 0 5 159.572 110.909 8
 0 0 5 73.62 78.5599 3
 0 0 5 212.447 99.3665 7
 0 0 -5 31.0732 128.617 2
 0 0 -5 79.0114 68.9378 9
 -1 0 -5 273.716 174.165 5
 1 0 5 115.15 107.942 9
 1 0 5 54.832 96.7943 3
 -1 0 -5 425.156 282.051 1
 -1 0 -5 259.463 243.985 2
 -2 0 -5 160.982 213.849 5
 2 0 5 333.312 230.813 9
 2 0 5 129.402 84.0442 3
 -2 0 -5 208.729 244.141 1
 3 0 5 -327.76 214.621 9
 -3 0 -5 80.5804 69.0366 8
 -3 0 -5 31.9692 224.751 5
 3 0 5 34.5207 63.6123 3
 -4 0 -5 27.5714 35.1001 8
 -4 0 -5 231.281 255.983 5
 4 0 5 178.692 218.37 9
 5 0 5 -152.21 261.217 9
 -5 0 -5 46.3134 158.818 5
 -6 0 -5 78.8577 146.807 5
 6 0 5 81.1512 171.706 9
 -7 0 -5 195.87 138.003 5
 7 0 5 -37.0657 200.407 9
 -8 0 -5 -100.289 153.917 5
 8 0 5 -55.1575 351.841 9
 -9 0 -5 182.469 225.339 5
 9 0 5 457.26 389.839 9
 10 0 5 3.37452 293.723 9
 -10 0 -5 -20.7813 238.64 5
 11 0 5 459.7 450.435 9
 -11 0 -5 47.675 186.16 5
 12 0 5 740.56 571.684 9
 13 0 5 166.038 477.733 9
 14 0 5 259.837 493.741 9
 15 0 5 -525.056 548.589 9
 16 0 5 -217.215 418.943 7
 21 -1 -5 29558.1 3180.89 9
 20 -1 -5 359.1 393.415 9
 19 -1 -5 31532.8 3069.49 9
 19 1 -5 30909.2 2981.17 9
 19 1 -5 31203.1 3096.65 6
 19 -1 -5 25655.6 2844.1 6
 18 -1 -5 29872.7 2841.42 9
 18 -1 -5 25196.2 2701.19 6
 18 1 -5 26538.6 2791.48 6
 18 1 -5 26776 2655.53 9
 17 -1 -5 7728.78 1388.32 9
 17 1 -5 11912.8 1685.85 9
 17 -1 -5 8805.57 1579.02 6
 17 1 -5 12322.5 1825.85 6
 16 1 -5 43938.7 3342.52 6
 16 1 -5 47831.8 3301.7 9
 -16 -1 5 40695.1 3392.79 4
 16 -1 -5 44002.6 3195.45 9
 -16 1 5 39906.6 3377.33 4
 -15 1 5 4814.56 1032.6 4
 15 1 -5 7676.04 1224.92 9
 15 -1 -5 5928.56 1108.39 9
 -15 -1 5 6787.39 1263.56 4
 15 1 -5 8345.89 1371.21 6
 -14 -1 5 85855.5 4695.4 4
 -14 1 5 83222.2 4654.18 4
 14 1 -5 88698.3 4262.5 9
 14 1 -5 86136.4 4530.88 6
 14 -1 -5 88130.8 4330.24 9
 13 -1 -5 60581.3 3338.82 9
 13 1 -5 61659.9 3616.32 6
 -13 1 5 64763.7 3805.64 4
 -13 -1 5 59175.4 3645.93 4
 13 1 -5 57493.8 3218.91 9
 -12 -1 5 45142.2 2991.58 4
 12 1 -5 41248.2 2523.23 9
 -12 1 5 39285.4 2812.57 4
 12 1 -5 40398.5 2758.28 6
 12 -1 -5 39730.3 2514.2 9
 -11 -1 5 82695.1 2519.68 5
 11 -1 -5 86058.3 3682.94 9
 11 1 -5 82962.3 3577.23 9
 -11 -1 5 79439.1 4008.12 4
 -11 1 5 88190.9 4197.7 4
 11 1 -5 88868.9 4111.19 6
 -10 -1 5 8199.12 649.852 5
 10 1 -5 7425.87 899.997 9
 10 -1 -5 6780.11 998.926 6
 10 -1 -5 8402.69 970.164 9
 -10 -1 5 7024.69 1061.44 4
 -10 1 5 8835.51 1193.21 4
 10 1 -5 8353.44 1135.04 6
 9 1 -5 315893 8252.61 9
 -9 -1 5 314773 7488.39 5
 9 -1 -5 305377 8296.28 9
 -9 1 5 324626 7187.45 5
 -9 -1 5 322654 9253.1 4
 -9 1 5 309987 9188.89 4
 9 -1 -5 328504 9144.84 6
 9 1 -5 314479 9067.16 6
 8 1 -5 36688.5 1779.52 9
 8 -1 -5 34251.4 1795.47 9
 -8 -1 5 37994.9 2295.77 4
 -8 1 5 36134 2251.15 4
 8 -1 -5 37233.2 2247.54 6
 8 1 -5 37724 2291.86 6
 -8 -1 5 34175.1 1537.47 5
 -8 1 5 37720.3 1438.99 5
 7 -1 -5 96323.2 3111.07 9
 -7 -1 5 94401.3 3022.58 9
 -7 -1 5 86517.5 3683.78 4
 7 1 -5 98542.9 3027.02 9
 7 -1 -5 96452.8 3779.29 6
 7 1 -5 90332.3 3742.63 6
 -7 1 5 99555 3890.25 4
 -7 1 5 98188.3 2868.21 5
 6 1 -5 180560 4348.81 9
 6 -1 -5 169951 4475.25 5
 -6 1 5 170222 4510.23 9
 -6 1 5 170512 5434.43 4
 6 -1 -5 176667 4472.22 9
 -6 1 5 174705 4517.47 5
 6 -1 -5 174967 5376.86 6
 6 1 -5 159306 5319.81 6
 -6 -1 5 164278 4309.67 9
 5 1 -5 77561.1 2057.26 9
 5 -1 -5 77318.1 2211.65 9
 -5 1 5 73470.8 3053.74 4
 -5 -1 5 71625.3 2029.68 9
 -5 -1 5 71678.6 3038.26 4
 5 -1 -5 74066.4 2496.3 5
 5 -1 -5 73954.5 3003.34 6
 5 1 -5 68216.7 2967.58 6
 -5 1 5 73089.2 2227.98 9
 -4 -1 5 164984 5006.97 4
 4 -1 -5 158706 4423.3 5
 4 -1 -5 160591 3767.84 9
 -4 1 5 152290 4913.05 4
 4 -1 -5 163053 4887.15 6
 3 -1 -5 673.211 249.476 5
 -3 -1 5 606.087 282.117 4
 -3 1 5 780.274 298.589 4
 3 1 -5 510.441 203.212 5
 3 1 -5 408.674 215.172 2
 3 -1 -5 1012.15 178.997 7
 3 -1 -5 1278.86 322.378 2
 2 -1 -5 382825 9196.91 5
 2 1 -5 369328 9367.81 2
 2 1 -5 368993 9118.31 5
 2 -1 -5 383168 8090.17 7
 2 -1 -5 385856 9200.39 2
 -1 -1 5 666.035 142.777 9
 1 -1 -5 1105.16 326.5 5
 1 1 -5 306.193 181.752 5
 -1 -1 5 351.109 170.822 8
 1 1 -5 843.618 295.39 2
 1 -1 -5 468.42 241.86 2
 1 -1 -5 315.784 127.337 9
 -1 1 5 408.357 118.72 7
 1 -1 -5 359.015 112.002 7
 1 1 -5 484.377 145.606 9
 1 -1 -5 692.652 230.034 8
 0 -1 5 325919 7599.45 9
 0 1 -5 324024 7591.97 9
 0 1 -5 344307 8368.63 5
 0 -1 -5 324285 7716.64 9
 0 -1 5 335751 7569.32 8
 0 1 -5 341120 8538.55 2
 0 -1 -5 346581 8368.07 2
 0 -1 5 300858 7764.41 3
 0 1 5 334884 7475.62 7
 0 -1 -5 331331 7739.85 8
 0 1 -5 332337 8600.89 1
 0 -1 -5 339358 8431.4 5
 1 -1 5 380170 8880.3 9
 -1 1 -5 361327 9283.29 5
 1 -1 5 367590 8606.96 3
 1 1 5 383930 8669.67 7
 -1 1 -5 372283 9555.35 2
 -1 1 -5 392310 9558.46 1
 -1 -1 -5 356987 9311.84 1
 -1 -1 -5 372400 9441.3 5
 -1 -1 -5 373010 8515.26 8
 1 -1 5 384847 8288.68 8
 -2 -1 -5 2206.9 459.543 1
 2 1 5 1971.44 374.851 7
 -2 -1 -5 2611.91 317.645 8
 2 -1 5 2498.18 330.323 3
 2 1 5 1495.48 347.157 9
 2 -1 5 1988.31 413.5 9
 -2 1 -5 971.262 344.698 1
 -2 1 -5 2397.33 471.488 5
 -2 -1 -5 1941.86 463.372 5
 -3 -1 -5 113584 4094.58 5
 3 -1 5 122343 4059.09 9
 3 1 5 111989 3968.93 9
 -3 -1 -5 122668 3992.88 1
 3 1 5 114698 2996.08 3
 -3 -1 -5 120197 3066.76 8
 -3 1 -5 114718 4028.4 5
 -4 1 -5 2313.7 472.133 5
 4 1 5 1941.25 200.394 3
 -4 -1 -5 1487.9 405.54 5
 4 -1 5 2048.68 489.074 9
 4 1 5 2194.28 500.107 9
 5 -1 5 153692 5378.12 9
 5 1 5 162165 5457.59 9
 -5 1 -5 160962 5179.41 5
 -5 -1 -5 159397 5277.93 5
 6 -1 5 65635.2 3304.13 9
 6 1 5 65574.7 3263.65 9
 -6 -1 -5 64388.3 3052.46 5
 -6 1 -5 66289.7 2987.12 5
 7 -1 5 17483.2 1683.55 9
 -7 1 -5 17298.4 1443.18 5
 -7 -1 -5 16710.7 1497.18 5
 7 1 5 16109.3 1603.24 9
 -8 1 -5 72801.4 3272.63 5
 8 -1 5 69430.7 3744.77 9
 8 1 5 69424.1 3756.11 9
 -8 -1 -5 71242.9 3362.33 5
 9 1 5 300.839 316.768 9
 9 -1 5 98.9298 312.919 9
 -9 -1 -5 499.828 363.421 5
 -9 1 -5 305.837 273.089 5
 -10 -1 -5 102276 4359.12 5
 10 1 5 100741 5019.6 9
 -10 1 -5 95955.7 4065.97 5
 10 -1 5 109475 5202.87 9
 11 1 5 31537.7 2790.95 9
 11 -1 5 37376.6 3020.96 9
 -11 1 -5 32443.7 2180.93 5
 -11 -1 -5 31338.9 2273.65 5
 12 1 5 35044.3 3069.17 9
 12 -1 5 40504 3309.96 9
 13 -1 5 31182.1 2987.27 9
 13 1 5 28759.2 2890.03 9
 14 -1 5 4710.59 1242.39 9
 14 1 5 4710.19 1171.69 7
 14 1 5 5895.13 1337.92 9
 15 -1 5 61618.5 4627.72 9
 15 1 5 57678.7 4467.53 9
 15 1 5 56723.6 4350.27 7
 20 -2 -5 321.213 458.432 9
 20 2 -5 644.373 518.073 7
 19 2 -5 1076.09 657.701 7
 19 -2 -5 2196.3 847.925 9
 19 -2 -5 1780.66 932.159 6
 19 2 -5 1892.8 885.85 6
 18 -2 -5 2507.76 862.611 9
 18 2 -5 1367.45 736.683 6
 17 -2 -5 1987.88 663.115 9
 17 2 -5 2414.32 828.412 9
 17 2 -5 3069.72 922.974 6
 -16 -2 5 -84.7047 364.438 4
 16 -2 -5 813.452 544.792 9
 16 2 -5 148.616 343.764 6
 16 2 -5 633.271 531.806 9
 -16 2 5 180.831 501.237 4
 15 -2 -5 1170.11 575.452 9
 -15 -2 5 1693.24 650.812 4
 -15 2 5 1876.69 749.384 4
 15 2 -5 1217.76 527.359 6
 15 2 -5 1797.91 651.314 9
 14 2 -5 929.788 471.301 9
 14 -2 -5 899 512.541 9
 -14 -2 5 885.161 611.872 4
 14 2 -5 1244 595.453 6
 -14 2 5 1225.93 605.279 4
 -13 2 5 1972.43 700.075 4
 13 -2 -5 1401.22 509.056 9
 13 2 -5 3230.32 703.933 9
 13 2 -5 2034.95 703.364 6
 -13 -2 5 1959.67 693.735 4
 12 2 -5 17772.6 1586.57 9
 12 -2 -5 15495 1528.38 9
 -12 -2 5 13286.4 1617.29 4
 -12 2 5 14754.1 1694.94 4
 12 2 -5 14837.7 1648.67 6
 -11 -2 5 354.577 340.71 4
 -11 2 5 415.364 367.948 4
 11 2 -5 488.385 174.081 9
 11 2 -5 477.701 292.962 6
 11 -2 -5 939.707 392.478 9
 10 2 -5 168.034 188.698 9
 10 -2 -5 420.603 271.164 9
 -10 -2 5 385.255 360.26 4
 -10 2 5 507.339 287.685 4
 10 2 -5 24.7037 218.519 6
 9 -2 -5 348.824 277.342 9
 9 2 -5 54.224 221.979 9
 9 2 -5 559.464 456.961 6
 -9 -2 5 890.713 470.963 4
 -9 2 5 590.447 452.03 4
 8 -2 -5 16906.3 1224.71 9
 8 2 -5 18466.8 1213.99 9
 8 2 -5 15480.5 1442.84 6
 8 -2 -5 15824.1 1417.69 6
 -8 2 5 15815.9 1478.46 4
 -8 -2 5 18207.5 1552.03 4
 7 -2 -5 6640.96 687.613 9
 -7 -2 5 5990 615.127 9
 -7 2 5 6031.78 858.172 4
 7 -2 -5 6447.79 543.082 5
 7 2 -5 8033.12 703.475 9
 7 2 -5 5121.22 790.264 6
 -7 -2 5 7674.83 958.214 4
 7 -2 -5 6694.55 876.874 6
 6 -2 -5 682.27 192.098 5
 6 -2 -5 927.643 240.204 9
 -6 2 5 1015.67 272.977 9
 6 2 -5 1293.62 442.729 6
 -6 -2 5 998.237 351.489 4
 -6 2 5 1935.71 477.098 4
 6 -2 -5 1209.77 400.491 6
 -6 -2 5 882.74 199.661 9
 5 -2 -5 29687.6 1427.52 5
 5 2 -5 31198.7 1316.59 7
 -5 -2 5 29108.7 1765.29 4
 -5 2 5 29399.6 1810.18 4
 5 -2 -5 30236.8 1743.12 6
 -5 -2 5 28043.4 1059.29 9
 5 -2 -5 29045.7 1269.65 9
 -4 2 5 34339.3 1893.1 4
 4 -2 -5 31903.9 1552.84 5
 4 -2 -5 32775.6 1424.34 7
 4 -2 -5 34991.3 1805.39 6
 4 2 -5 32717.7 1203.98 7
 4 -2 -5 31671.8 1267.38 9
 -4 -2 5 32133.2 1828.81 4
 -3 2 5 5315.75 682.467 4
 3 2 -5 6622.05 732.128 3
 3 -2 -5 6442.88 706.567 8
 -3 -2 5 5736.36 713.967 4
 3 -2 -5 5547.48 639.239 5
 3 2 -5 7104.04 381.092 7
 3 -2 -5 7192.28 710.786 2
 3 2 -5 6841 797.01 2
 3 -2 -5 6046.65 504.981 7
 2 -2 -5 1584.02 352.937 2
 -2 -2 5 472.984 115.616 9
 2 -2 -5 959.182 308.433 5
 2 2 -5 1794.87 379.024 5
 2 -2 -5 1004.94 198.524 7
 2 -2 -5 1139.91 304.102 8
 -2 2 5 1071.32 212.052 7
 2 2 -5 1143.09 290.848 3
 2 2 -5 961.705 327.412 2
 1 -2 -5 13336.5 981.67 2
 -1 -2 5 10140.2 624.119 9
 1 -2 -5 12554.9 707.353 7
 1 -2 -5 11604.8 880.963 8
 1 -2 -5 12747.8 1024.31 5
 1 2 -5 10510.6 922.696 5
 -1 2 5 11509.7 712.74 7
 1 2 -5 12606.3 664.968 9
 -1 -2 5 10486.4 507.033 7
 1 2 -5 10526.2 857.293 3
 1 2 -5 10418.3 988.954 2
 0 -2 -5 5225.49 557.249 9
 0 2 -5 5017.43 645.009 5
 0 -2 5 4851.59 495.966 9
 0 -2 -5 5275.56 636.233 2
 0 -2 -5 5421.95 498.027 7
 0 2 -5 5347.87 500.125 9
 0 -2 -5 5530.23 568.152 8
 0 2 5 5339.11 517.866 7
 0 2 -5 4920.06 704.909 1
 0 2 -5 4951.1 690.518 2
 0 -2 -5 6304.83 764.202 5
 0 2 -5 5676.68 585.633 3
 1 -2 5 14346.3 745.449 8
 -1 2 -5 16622.9 971.091 3
 1 2 5 15906.1 997.903 7
 -1 2 -5 16074.9 1189.81 5
 -1 2 -5 14705.8 1242.12 2
 -1 -2 -5 15008.1 916.604 8
 1 -2 5 12986.6 952.245 9
 -1 2 -5 15193.4 1251.11 1
 -1 -2 -5 13300.3 1149.56 5
 2 -2 5 7106.21 773.679 9
 -2 2 -5 8293.97 873.898 5
 2 -2 5 6948.94 409.098 8
 2 2 5 6819.98 703.305 7
 -2 -2 -5 6924.59 759.256 1
 -2 2 -5 8516.82 935.654 1
 -2 -2 -5 6728.82 824.843 5
 -3 -2 -5 1816.45 424.637 1
 -3 2 -5 2028.5 461.997 5
 3 2 5 1171.82 323.482 7
 -3 -2 -5 1470.77 435.73 5
 3 -2 5 1134.28 352.615 9
 4 -2 5 1510.76 455.101 9
 -4 2 -5 1169.23 361.411 5
 4 2 5 1256.24 394.357 9
 4 2 5 833.107 329.929 7
 -4 -2 -5 1073.18 392.728 5
 5 2 5 7132.25 902.784 7
 -5 -2 -5 8138.73 1005.16 5
 5 -2 5 6959.31 981.263 9
 5 2 5 6519.93 915.168 9
 -5 2 -5 6923.48 856.518 5
 6 2 5 18359 1635.64 9
 -6 2 -5 16418.1 1358.93 5
 6 2 5 16723.5 1500.88 7
 6 -2 5 16802.6 1594.2 9
 -6 -2 -5 16087.7 1466.51 5
 7 2 5 903.14 381.562 7
 7 -2 5 1268.33 514.732 9
 -7 2 -5 1658.57 442.586 5
 -7 -2 -5 1563.37 472.411 5
 7 2 5 1922.01 547.908 9
 -8 2 -5 4141.25 708.33 5
 8 -2 5 3950.76 844.705 9
 8 2 5 5348.85 957.51 9
 -8 -2 -5 4719.52 839.3 5
 8 2 5 5249.73 936.394 7
 -9 2 -5 9556.6 1095.63 5
 9 -2 5 9740.81 1414.93 9
 9 2 5 9315.56 1306.12 7
 9 2 5 8842.74 1300.67 9
 -9 -2 -5 9822.4 1215.27 5
 10 2 5 1146.39 571.595 7
 10 2 5 704.792 366.427 9
 -10 2 -5 1016.2 410.916 5
 -10 -2 -5 172.481 196.281 5
 10 -2 5 340.075 365.836 9
 11 -2 5 20.8057 323.02 9
 11 2 5 -85.0202 383.027 7
 -11 -2 -5 121.338 254.59 5
 -11 2 -5 18.8668 214.259 5
 11 2 5 68.3073 375.219 9
 12 2 5 84.7755 309.024 9
 12 -2 5 629.823 455.429 9
 12 2 5 -74.3474 351.153 7
 -12 -2 -5 -111.306 192.595 5
 13 2 5 2381.71 822.088 7
 13 -2 5 3410.26 1037.33 9
 13 2 5 2676.81 828.14 9
 14 -2 5 34.1671 391.077 9
 14 2 5 423.682 464.835 7
 14 2 5 916.931 696.893 9
 15 2 5 -69.431 403.925 7
 15 -2 5 105.687 386.678 9
 20 -3 -5 292.441 410.565 9
 19 -3 -5 36863.5 3353.34 9
 19 3 -5 34041.3 3298.09 7
 19 3 -5 37457.7 3415.71 6
 18 -3 -5 15333.2 2047 9
 18 3 -5 14324.2 2016.42 7
 18 3 -5 16878.6 2200.2 6
 17 3 -5 9000.88 1526.4 7
 17 -3 -5 10084 1611.46 9
 17 3 -5 9564.17 1584.52 6
 16 -3 -5 60690.4 3886.36 9
 16 3 -5 65981.9 4138.9 7
 16 3 -5 60537 3995.23 6
 -16 -3 5 61205.3 4205.16 4
 -16 3 5 63843.1 4338.93 4
 -15 -3 5 310.461 382.71 4
 15 3 -5 295.855 358.779 6
 15 -3 -5 245.557 428.201 9
 -15 3 5 446.74 399.182 4
 14 -3 -5 79610.3 4132.63 9
 -14 -3 5 72976.2 4266.74 4
 14 3 -5 73741.5 4159.03 6
 -14 3 5 69429.7 4219.29 4
 13 -3 -5 31094.2 2390.94 9
 -13 3 5 34305.8 2743.93 4
 13 3 -5 34827.7 2660.24 6
 -13 -3 5 35495.2 2754.33 4
 12 3 -5 23940.9 2104.84 6
 -12 -3 5 25629.4 2229.37 4
 -12 3 5 22217 2118.61 4
 12 -3 -5 24251.5 1981.23 9
 11 -3 -5 85171 3754.77 9
 -11 -3 5 78392.6 3971.54 4
 -11 3 5 83080.1 4110.6 4
 11 3 -5 79614.4 3955.88 6
 10 -3 -5 26101.8 1825.46 9
 -10 -3 5 23347.5 1963.39 4
 -10 3 5 27633.5 2147.34 4
 10 3 -5 27662.6 2098.6 6
 9 -3 -5 290592 7901.05 9
 -9 -3 5 282682 8460.05 4
 -9 3 5 286049 8539.12 4
 9 3 -5 279451 8450.17 6
 8 3 -5 30997.7 1792.24 7
 8 -3 -5 32833 1806.18 9
 -8 -3 5 29387.2 2005.04 4
 -8 3 5 29299.1 2043.44 4
 8 3 -5 28865.9 2031.23 6
 8 -3 -5 28576.7 1173.38 5
 7 -3 -5 132563 3601.59 5
 7 3 -5 130396 4147.1 7
 -7 -3 5 133891 4712.82 4
 -7 3 5 130045 4730.7 4
 7 -3 -5 140764 4711.04 6
 7 3 -5 122077 4659.21 6
 7 -3 -5 143949 4224.77 9
 -6 -3 5 60071.5 2786.87 4
 -6 -3 5 59964.6 2093.52 9
 6 -3 -5 59251.2 2165.03 5
 6 -3 -5 64247.1 2351.91 9
 6 3 -5 63479.5 2365.92 7
 -6 3 5 58908.3 2790.49 4
 6 -3 -5 61834.8 2733.69 6
 6 3 -5 65994 2860.43 3
 5 3 -5 28612.7 1757.29 3
 -5 -3 5 29465 1155.41 9
 5 -3 -5 30650.8 1793.65 8
 -5 3 5 31377.8 1852.01 4
 5 -3 -5 31654.9 1439.34 9
 5 -3 -5 31694.9 1769.38 6
 -5 -3 5 26998.5 1717.05 4
 5 -3 -5 29565.1 1451.02 5
 5 3 -5 25805.8 1284.28 7
 4 -3 -5 181842 4568.56 9
 4 3 -5 166970 4323.93 7
 4 -3 -5 178378 5261.56 8
 4 3 -5 180859 5308.68 3
 4 -3 -5 169463 4835.8 5
 -4 -3 5 171484 4015.55 9
 -4 3 5 178501 5319.27 4
 4 -3 -5 186508 4824.67 7
 -4 -3 5 180364 5321.44 4
 4 -3 -5 174230 5108.63 6
 -3 -3 5 25488.8 891.011 9
 3 -3 -5 27254.7 1566.17 8
 -3 -3 5 26537.6 1580.95 4
 3 3 -5 27009.5 1583.3 3
 -3 3 5 25726 1582.51 4
 3 -3 -5 27121.6 1291.12 7
 3 -3 -5 25918.6 1446.13 5
 -3 3 5 28654.4 1422.9 2
 3 3 -5 25678.5 1002.33 7
 3 3 -5 27981.6 1688.33 2
 3 -3 -5 27063.8 1480.35 6
 -3 -3 5 24856.2 946.549 7
 2 3 -5 433703 10096.2 3
 2 -3 -5 420026 9964.49 8
 -2 3 5 418939 9690.87 2
 2 -3 -5 406883 9347.28 7
 -2 3 5 405505 9467.36 7
 2 3 -5 397372 10261.4 2
 2 -3 -5 422785 9718.61 2
 2 3 -5 424493 8887 7
 2 -3 -5 397240 9967.8 5
 1 3 -5 67.0721 155.213 2
 1 3 -5 647.363 166.601 9
 1 -3 -5 974.973 275.396 8
 1 3 -5 545.533 225.542 3
 1 -3 -5 395.105 156.829 7
 1 -3 -5 576.697 209.204 2
 -1 3 5 622.517 204.632 7
 -1 -3 5 780.565 163.513 7
 -1 -3 5 650.269 161.219 9
 1 3 -5 859.791 339.646 1
 1 -3 -5 301.363 186.451 5
 0 3 5 103652 3230.92 7
 0 3 -5 107883 3150.6 9
 0 3 -5 104788 3807.49 2
 0 3 -5 109180 3385.33 3
 0 -3 -5 104968 3309.28 8
 0 -3 5 104537 3135.78 9
 0 -3 -5 106887 3180.99 7
 0 -3 -5 109672 3482.11 2
 0 3 -5 109328 3888.23 1
 0 3 -5 102569 3593.08 5
 0 -3 5 104124 3018.39 7
 0 -3 -5 104688 3694.73 5
 -1 3 -5 316072 8280.67 1
 1 -3 5 301857 7528.57 9
 1 3 5 312745 7579.92 7
 -1 3 -5 304811 7376.33 3
 -1 3 -5 305645 8229.76 2
 -1 -3 -5 286998 8001 5
 -1 3 -5 297064 7861.77 5
 -2 -3 -5 6414.91 720.71 1
 -2 3 -5 7883.15 864.611 5
 -2 3 -5 6768.16 611.973 3
 -2 3 -5 6605.58 929.027 2
 2 3 5 7328.33 762.378 7
 -2 -3 -5 6947.34 855.89 5
 2 -3 5 6042.03 728.111 9
 -3 3 -5 86384.5 2609.86 3
 -3 3 -5 88057.9 3323.42 5
 3 -3 5 85642.5 3371.71 9
 -3 -3 -5 82544.8 3026.38 1
 -3 -3 -5 87987.5 3530.83 5
 3 3 5 89246.8 3273.44 7
 -4 3 -5 4944.15 431.777 3
 -4 -3 -5 3407.44 634.933 5
 4 -3 5 4242.05 709.818 9
 -4 3 -5 5387.95 738.783 5
 4 3 5 4795.96 702.439 7
 5 -3 5 161772 5700.36 9
 -5 3 -5 176371 4042.01 3
 5 3 5 163545 5504.04 7
 -5 3 -5 162729 5286.02 5
 -5 -3 -5 166698 5654.93 5
 -6 3 -5 50745.6 2543.74 5
 -6 -3 -5 52672.9 2802.16 5
 6 -3 5 50115.4 2900.43 9
 6 3 5 52114 2819.75 7
 -7 -3 -5 16020.4 1514.2 5
 -7 3 -5 14952.1 1309.89 5
 7 3 5 14043.5 1472.89 7
 7 -3 5 13680.8 1534.04 9
 -8 3 -5 36427.5 2201.48 5
 8 3 5 43809.1 2898.2 9
 -8 -3 -5 45698.5 2701.16 5
 8 3 5 45816 2839.85 7
 8 -3 5 43549.7 2933.37 9
 -9 -3 -5 3201.49 700.171 5
 9 3 5 3333.22 867.528 9
 9 -3 5 3118.55 768.355 9
 -9 3 -5 2310.87 529.96 5
 9 3 5 2777.31 730.744 7
 -10 3 -5 99152.3 4038.76 5
 10 3 5 92918.4 4773.05 7
 10 -3 5 102382 5170.56 9
 -10 -3 -5 110303 4653.48 5
 11 -3 5 4023.16 1005.77 9
 -11 3 -5 3145.34 690.393 5
 -11 -3 -5 5055.5 922.421 5
 11 3 5 3525.72 963.127 7
 12 3 5 56291.5 3867.63 7
 12 -3 5 61823.9 4201.79 9
 -12 -3 -5 56383.2 3335.29 5
 13 3 5 29345.2 2834.69 7
 13 -3 5 30701 3063.33 9
 14 -3 5 14281.5 2119.31 9
 14 3 5 14007 2028.41 7
 15 -3 5 47984.9 4079.82 9
 15 3 5 40522.3 3698.56 7
 20 -4 -5 585.872 495.513 9
 19 4 -5 366.477 398.301 7
 19 -4 -5 1216.98 758.328 9
 19 4 -5 386.078 449.305 6
 18 4 -5 1040.31 604.136 6
 18 4 -5 1438.27 746.315 7
 18 -4 -5 291.121 486.8 9
 17 -4 -5 7205.15 1386.35 9
 17 4 -5 5031.98 1182.82 7
 17 4 -5 7523.18 1408.25 6
 -16 4 5 941.725 627.701 4
 -16 -4 5 1427.7 672.732 4
 16 -4 -5 2303.57 794.119 9
 16 4 -5 957.515 552.654 7
 16 4 -5 1122.24 597.508 6
 15 -4 -5 1780.38 621.543 9
 15 4 -5 515.844 468.498 7
 -15 4 5 803.259 486.286 4
 -15 -4 5 1842.09 617.631 4
 15 4 -5 1630.31 593.237 6
 -14 -4 5 1059.11 507.666 4
 14 -4 -5 1198.35 618.083 9
 -14 4 5 651.873 337.684 4
 14 4 -5 896.894 491.882 7
 14 4 -5 1442.51 565.712 6
 -13 -4 5 9736.19 1401.75 4
 13 -4 -5 11096.8 1424.37 9
 13 4 -5 11961.5 1499.93 7
 13 4 -5 11676.1 1525.23 6
 -13 4 5 11520.9 1569.03 4
 12 -4 -5 1930.47 597.641 9
 12 4 -5 2802.94 743.796 6
 12 4 -5 2132.97 593.17 7
 -12 -4 5 966.199 447.891 4
 -12 4 5 1266.31 520.318 4
 11 4 -5 699.362 427.897 6
 11 -4 -5 697.814 425.502 9
 -11 4 5 907.946 461.678 4
 -11 -4 5 483.155 378.766 4
 11 4 -5 250.178 272.379 7
 10 4 -5 1880.5 509.07 7
 10 4 -5 1609.14 558.011 6
 -10 -4 5 2280.72 620.374 4
 -10 4 5 2352.81 649.396 4
 10 -4 -5 1843.29 496.532 9
 9 -4 -5 15702.7 1355.58 9
 9 4 -5 14068.2 1286.27 7
 -9 -4 5 16136.6 1526.33 4
 -9 4 5 15275 1517.89 4
 9 4 -5 15052.9 1493.42 6
 8 4 -5 36277.6 2177.55 3
 8 -4 -5 30636.4 1274.39 5
 8 -4 -5 34269.7 1918.17 9
 8 4 -5 34840 1956.44 7
 -8 -4 5 33903.4 2166.18 4
 -8 4 5 32640.7 2150.33 4
 8 4 -5 31649.9 2141.88 6
 7 -4 -5 379.91 230.731 9
 -7 4 5 183.029 236.523 4
 7 -4 -5 56.2647 113.685 5
 7 4 -5 14.3184 230.306 3
 7 4 -5 141.289 220.527 7
 -7 -4 5 335.526 299.447 4
 6 4 -5 9157.17 1029.13 3
 -6 -4 5 9051.54 715.206 9
 6 -4 -5 9070.94 742.93 5
 6 -4 -5 8194.27 950.188 8
 6 4 -5 8983.57 815.871 7
 -6 -4 5 9359.44 1010.38 4
 -6 4 5 9480.44 1033.05 4
 6 -4 -5 8798.92 943.693 6
 6 -4 -5 9282.57 855.099 9
 5 -4 -5 10368 1040.49 8
 5 4 -5 9803.97 1027.17 3
 5 4 -5 10459.6 810.342 7
 5 -4 -5 8389.21 758.81 5
 -5 4 5 10113.6 1021.56 4
 -5 -4 5 9797.6 674.127 9
 5 -4 -5 9243.6 917.372 6
 -5 -4 5 10686.2 1042.56 4
 5 -4 -5 9167.19 812.735 9
 -4 -4 5 2790.46 369.418 7
 4 -4 -5 2756.4 518.02 8
 -4 -4 5 2689.9 505.102 4
 -4 4 5 1839.61 441.068 4
 4 4 -5 2849.58 394.578 7
 4 -4 -5 2222.09 418.034 5
 4 -4 -5 2741.97 425.207 9
 -4 4 5 2352.62 406.885 2
 4 4 -5 3332.22 578.195 3
 4 -4 -5 3045.26 513.892 6
 -3 4 5 86830.2 2857.62 2
 -3 -4 5 92271.3 2592.72 7
 3 -4 -5 83885.6 3239.28 8
 -3 4 5 93116 3346.86 4
 -3 -4 5 86586.7 3265.19 4
 3 4 -5 97914.4 2669.94 7
 3 4 -5 93377.6 3538.83 2
 3 -4 -5 92386.7 3006.07 7
 3 4 -5 92090.6 3376.74 3
 -3 4 5 90263.7 3060.63 7
 3 -4 -5 90500.2 3088.8 6
 -2 4 5 586.432 201.3 2
 2 4 -5 514.762 264.274 3
 2 4 -5 763.027 318.03 1
 -2 -4 5 736.885 196.118 7
 2 -4 -5 878.763 246.379 7
 -2 4 5 566.571 269.228 7
 2 4 -5 373.225 155.837 7
 2 -4 -5 836.932 281.109 2
 2 4 -5 722.905 349.741 2
 2 -4 -5 846.401 275.492 8
 -2 -4 5 559.639 179.262 9
 1 4 -5 4203.17 652.346 2
 1 4 -5 4799.31 716.748 1
 -1 4 5 4704.42 567.701 7
 1 -4 -5 4691.32 540.702 7
 -1 -4 5 4279.58 453.757 7
 1 -4 -5 3503.31 524.018 8
 1 4 -5 3800.36 559.374 3
 -1 -4 5 4367.92 464.384 9
 -1 4 5 4719.67 511.892 6
 0 4 5 13388.3 994.421 7
 0 4 -5 11294.2 1106.24 2
 0 4 -5 14352 1049.91 3
 0 4 -5 12728.1 1165.42 1
 0 4 -5 14203.6 959.116 9
 0 -4 -5 12634.6 960.478 2
 0 -4 5 12547.3 898.186 9
 0 -4 5 12888.7 871.978 7
 -1 4 -5 17625.8 1412.63 2
 -1 4 -5 15368.6 1328.19 1
 1 -4 5 16128.6 1132.71 9
 1 4 5 16863.7 1174.19 7
 -1 4 -5 16311.1 1083.8 3
 2 -4 5 25143.4 1578.85 9
 2 4 5 28173.5 1650.83 7
 -2 4 -5 27837.2 1882.27 2
 -2 -4 -5 25506.9 1480.11 1
 -2 4 -5 29481.5 1441.02 3
 3 4 5 4373.3 644.033 7
 -3 4 -5 4637.19 505.185 3
 -3 -4 -5 3881.3 543.944 1
 -4 4 -5 45244.8 1692.72 3
 4 4 5 40564.9 2268.21 7
 4 -4 5 42946.1 2409.08 9
 -4 4 -5 40185 2169.38 5
 5 -4 5 5153.99 861.97 9
 -5 4 -5 5024.88 467.463 3
 -5 4 -5 5514.58 768.582 5
 5 4 5 5253.32 812.746 7
 -6 4 -5 9146.95 570.338 3
 -6 4 -5 9439.5 1025.77 5
 6 -4 5 9349.24 1219.31 9
 6 4 5 7943.56 1061.71 7
 -6 -4 -5 8285.93 1077.37 5
 7 -4 5 16142.7 1677.97 9
 7 4 5 14505.3 626.526 3
 7 4 5 15945.6 1576.09 7
 -7 4 -5 14418.7 599.102 3
 -7 -4 -5 14609 1483.5 5
 -7 4 -5 15135.7 1333.74 5
 8 4 5 938.222 528.964 7
 -8 -4 -5 498.717 374.415 5
 8 -4 5 455.814 388.138 9
 9 4 5 1662.68 602.07 7
 -9 -4 -5 3141.04 743.873 5
 9 -4 5 4437.74 989.193 9
 -10 -4 -5 -70.0738 298.524 5
 10 4 5 -29.2191 347.697 7
 10 -4 5 271.426 458.783 9
 11 4 5 14091 1777.7 7
 11 -4 5 13843 1885.74 9
 -11 -4 -5 10490.6 1374.42 5
 12 4 5 597.383 506.065 7
 12 -4 5 699.363 543.97 9
 -12 -4 -5 1035.83 507.995 5
 13 -4 5 3420.96 1012.94 9
 13 4 5 3173.42 1015.91 7
 14 4 5 3301.63 1091.05 7
 14 -4 5 2960.82 1012.95 9
 15 -4 5 -229.713 401.938 9
 15 4 5 1458.1 734.291 7
 20 -5 -5 2845.25 1006.42 9
 19 5 -5 32327.3 3253.69 7
 19 -5 -5 33177.5 3277.95 9
 19 5 -5 37224.2 3398.98 6
 18 -5 -5 18113.8 2270.59 9
 18 5 -5 15413.7 2119.51 6
 18 5 -5 13368 1978.55 7
 17 -5 -5 7101.9 1385.86 9
 17 5 -5 5639.03 1238.72 7
 17 5 -5 7082.51 1383.2 6
 -16 5 5 57911.3 4149.26 4
 16 5 -5 56636.5 3867.61 7
 16 -5 -5 57046 3845.7 9
 16 5 -5 56998.4 3864.44 6
 15 5 -5 242.463 351.775 7
 -15 -5 5 -214.338 504.097 4
 15 -5 -5 699.797 446.162 9
 -15 5 5 -313.708 413.66 4
 15 5 -5 351.106 277.158 6
 14 5 -5 36348.6 2784.25 7
 -14 -5 5 32958.1 2779.17 4
 14 5 -5 34459.6 2756.52 6
 -14 5 5 33263.3 2847.64 4
 14 -5 -5 35481 2734.34 9
 13 5 -5 17415.2 1816.64 7
 13 -5 -5 15843.8 1752.04 9
 13 5 -5 16801.7 1856.81 6
 -13 5 5 17634.1 1966.49 4
 -13 -5 5 18489.3 1962.9 4
 12 -5 -5 42410.9 2761.16 9
 12 5 -5 39299.5 2671.33 7
 -12 -5 5 41676.8 2887.38 4
 -12 5 5 36890.7 2781.89 4
 12 5 -5 42610.3 2883.47 6
 11 5 -5 51909.3 2999.7 7
 -11 -5 5 53804.4 3189.69 4
 -11 5 5 56558.7 3330.01 4
 11 -5 -5 57349.5 3105.34 9
 11 5 -5 57782.5 3311.22 6
 -10 5 5 16273.7 1641.71 4
 10 5 -5 13785.2 1392.94 7
 -10 -5 5 14432.9 1520.97 4
 10 5 -5 15650.4 1598.55 6
 10 -5 -5 16102.8 1472.78 9
 9 5 -5 171011 5780.44 3
 9 5 -5 177507 5602.77 7
 -9 -5 5 181746 5985.54 4
 -9 5 5 167371 5902.76 4
 9 5 -5 167996 5903.48 6
 9 -5 -5 180096 5608.98 9
 8 5 -5 8122.78 1046.82 3
 8 -5 -5 5793.21 550.826 5
 -8 -5 5 6559.64 933.06 4
 -8 5 5 6775.73 971.872 4
 8 -5 -5 8149.99 974.476 9
 7 -5 -5 163396 4459.46 5
 7 5 -5 163105 5071.52 7
 -7 -5 5 163909 5435.16 4
 -7 5 5 165779 5531.75 4
 7 5 -5 169203 5587.96 3
 7 -5 -5 169378 5577.06 8
 7 -5 -5 169036 5142.68 9
 6 5 -5 113674 4200.84 3
 6 -5 -5 106938 3368.82 5
 6 5 -5 107759 3659.56 7
 -6 -5 5 113435 4062.11 4
 -6 5 5 108822 4069.21 4
 6 -5 -5 114762 3801.95 9
 6 -5 -5 110495 4123.74 8
 -5 -5 5 37649.3 2039.55 4
 5 5 -5 35597.3 1732.08 7
 5 5 -5 39668.3 2204.3 3
 5 -5 -5 39542.4 2165.6 8
 -5 5 5 36224.8 2067.99 4
 5 -5 -5 40619.3 2004.2 6
 5 -5 -5 40456 1919.46 9
 4 5 -5 160377 5120.58 3
 -4 -5 5 156601 4293.62 7
 4 5 -5 164131 4432.84 7
 4 -5 -5 153940 4957.35 8
 -4 5 5 150890 4265.48 2
 -4 5 5 146155 4833.2 4
 4 -5 -5 160239 4669.66 6
 -4 -5 5 160731 4895.19 4
 -3 -5 5 10440 744.127 7
 -3 5 5 10309.2 744.1 2
 3 -5 -5 10153.6 987.699 8
 3 5 -5 8592.04 929.69 3
 3 -5 -5 11793.4 925.281 6
 3 5 -5 9994.47 746.128 7
 -3 -5 5 9060.69 908.805 4
 -3 5 5 9541.14 913.004 7
 -3 5 5 10589 996.205 4
 3 5 -5 9644.99 1028.76 1
 -2 -5 5 177927 4708.14 9
 2 5 -5 190679 5519.94 3
 -2 -5 5 190256 4751.23 7
 -2 5 5 183778 5225.64 7
 2 5 -5 186282 5704.81 2
 2 5 -5 174987 4706.68 7
 2 -5 -5 180162 4740.21 2
 2 5 -5 182381 5649.22 1
 2 -5 -5 178802 5318.87 8
 -1 5 5 2328.61 464.258 7
 1 5 -5 2119.41 447.952 3
 -1 -5 5 1745.76 350.13 7
 1 -5 -5 2269.7 366.274 2
 1 5 -5 2228.06 506.668 2
 1 5 -5 2215.06 509.086 1
 -1 -5 5 2335.01 385.41 9
 -1 5 5 2259.7 349.241 6
 0 5 -5 73690.6 2863.21 3
 0 5 -5 78848.2 3277.2 1
 0 -5 5 76980.4 2745.98 9
 0 5 5 75458.2 2908.8 7
 0 5 -5 79125.5 3285.58 2
 0 -5 -5 82669.7 2750.96 2
 0 -5 5 71386.1 2679.99 7
 0 5 5 81033.6 2447.4 6
 1 5 5 88318.3 3321.85 7
 -1 5 -5 94589.6 3235.93 3
 1 -5 5 94150.3 3297.29 9
 -1 5 -5 92111.6 3703.95 2
 2 -5 5 100571 3654.41 9
 2 5 5 103097 3716.81 7
 -2 5 -5 100754 3306.24 3
 -2 5 -5 95884.3 3935.87 2
 3 -5 5 133779 4629.54 9
 -3 5 -5 141025 5037.4 2
 3 5 5 138883 4632.62 7
 -3 -5 -5 124735 3897.9 1
 4 5 5 11416.2 1180.79 7
 4 -5 5 10330.5 1145.21 9
 5 5 5 176414 5940.93 7
 5 -5 5 181431 6182.85 9
 6 5 5 58788.8 3114.88 7
 6 -5 5 60832.5 3329.44 9
 -6 5 -5 57457 2010.44 3
 7 -5 5 21594.4 1976.4 9
 -7 5 -5 18993.7 950.109 3
 7 5 5 20896.8 1840.89 7
 8 -5 5 103190 4824.02 9
 8 5 5 95456.8 4486.84 7
 -8 -5 -5 89208.7 4198.7 5
 -9 -5 -5 2324.58 656.995 5
 9 5 5 1923.48 690.148 7
 9 -5 5 3055.62 854.671 9
 10 -5 5 72791.2 4337.61 9
 10 5 5 69893.1 4066.52 7
 -10 -5 -5 70906.8 3801.64 5
 -11 -5 -5 3477.69 809.833 5
 11 -5 5 5074.57 1214.98 9
 11 5 5 4833.96 1069.59 7
 -12 -5 -5 63635.9 3684.55 5
 12 -5 5 60665.8 4235.11 9
 12 5 5 55133.2 3898.55 7
 13 -5 5 36832.1 3356.52 9
 13 5 5 28126.8 2832.17 7
 14 -5 5 10482 1857.95 9
 14 5 5 9268.26 1687.29 7
 15 5 5 35615.4 3430.97 7
 15 -5 5 30328.2 3329.94 9
 20 -6 -5 3418.98 1059.65 9
 20 6 -5 5498.73 1377.69 6
 19 6 -5 -209.968 418.124 7
 19 6 -5 -24.1162 399.964 6
 19 -6 -5 499.263 519.569 9
 18 -6 -5 4237.74 1136.51 9
 18 6 -5 4400.85 1138.16 7
 18 6 -5 1197.51 659.589 6
 17 6 -5 6047.16 1311.13 6
 17 6 -5 7616.65 1441.86 7
 17 -6 -5 8923.95 1574.94 9
 16 -6 -5 6195.32 1271.69 9
 16 6 -5 6521.96 1317.77 7
 16 6 -5 6942.99 1334.89 6
 -15 6 5 5105.97 1113.74 4
 15 6 -5 5614.62 1164.95 7
 15 -6 -5 7089.22 1267.47 9
 -15 -6 5 5342.31 1162.66 4
 15 6 -5 4854.76 1067.21 6
 -14 -6 5 2375.95 781.209 4
 14 6 -5 2024.6 734.993 6
 -14 6 5 2916.27 822.452 4
 14 6 -5 2333.97 775.327 7
 14 -6 -5 2289.46 750.258 9
 13 6 -5 19853.1 1958.8 7
 13 -6 -5 19090.5 1944.31 9
 13 6 -5 18757.3 1985.19 6
 -13 6 5 20223.8 2107.29 4
 -13 -6 5 18198.7 1947.07 4
 12 6 -5 4970.82 1002.32 6
 -12 6 5 3263.9 797.992 4
 12 -6 -5 3618.18 818.158 9
 12 6 -5 3789.8 822.257 7
 -12 -6 5 2371.39 675.906 4
 -11 6 5 174.746 253.574 4
 11 6 -5 485.023 341.002 7
 -11 -6 5 435.145 339.912 4
 11 -6 -5 541.553 395.41 9
 11 6 -5 -81.4251 332.379 6
 10 6 -5 9367.27 1163.31 3
 10 6 -5 9986.32 1196.27 7
 -10 6 5 7992.85 1136.7 4
 10 -6 -5 9577.37 1160.66 9
 -10 -6 5 8726.39 1159.48 4
 10 6 -5 9886.21 1259.97 6
 9 6 -5 6206.87 908.519 7
 9 -6 -5 6824.75 570.501 5
 9 6 -5 7091.5 1029.2 3
 9 -6 -5 5986.38 918.73 9
 -9 -6 5 8379.64 1111.35 4
 -9 6 5 7005.65 1022 4
 8 -6 -5 27120.4 1313.99 5
 8 -6 -5 26974.5 1830.47 9
 -8 -6 5 24875.2 1850.93 4
 8 6 -5 28583 2028.88 3
 8 -6 -5 30606.2 2088.85 8
 8 6 -5 29802.8 1909.6 7
 -8 6 5 28238 2003.76 4
 7 6 -5 2993.49 557.454 7
 7 -6 -5 4331.63 772.782 8
 7 6 -5 2847.41 599.013 3
 -7 -6 5 3616.16 625.959 4
 -7 6 5 2294.66 526.935 4
 7 -6 -5 3421.94 621.984 9
 6 -6 -5 2973.8 602.854 8
 -6 6 5 2189.28 567.323 4
 6 6 -5 3608.83 730.475 3
 6 6 -5 3643.55 611.281 7
 -6 -6 5 4048.61 672.796 4
 6 -6 -5 3758.62 643.966 9
 5 -6 -5 12777 1085.67 9
 5 6 -5 12861.7 1224.01 3
 -5 -6 5 12260 1103.29 4
 -5 6 5 12006.2 1133.38 4
 5 -6 -5 11193.2 1128.01 8
 -5 6 5 9802.22 803.335 2
 5 6 -5 10908.2 951.208 7
 4 6 -5 8361.19 983.965 3
 -4 -6 5 6330.94 779.799 4
 -4 6 5 6945.75 827.892 4
 -4 6 5 6175.2 566.192 2
 4 6 -5 7366.29 746.031 7
 4 -6 -5 6446.6 714.729 6
 4 -6 -5 6106.28 813.312 8
 3 6 -5 69229.1 3030.91 3
 -3 -6 5 73461.8 2832.99 4
 -3 -6 5 68002.8 2497.88 7
 -3 6 5 69204.5 2795.73 4
 3 6 -5 73261 2575.08 7
 -3 6 5 66480.5 2882.62 7
 3 -6 -5 65528.3 2898.9 8
 3 6 -5 72127.9 3082.27 1
 3 -6 -5 73941.6 2608.16 6
 -3 6 5 68602.8 2230.72 2
 -2 -6 5 5718.39 622.445 7
 2 6 -5 6090.04 781.09 3
 2 6 -5 5532.07 793.17 1
 2 -6 -5 6681.38 567.646 2
 2 6 -5 6230.78 638.519 7
 -2 6 5 5575.74 753.408 7
 2 6 -5 5986.87 824.755 2
 2 -6 -5 6472.55 625.702 6
 -2 -6 5 6218.22 629.828 9
 1 -6 -5 65076.7 2259.98 2
 1 6 -5 69477.2 2878.04 3
 1 6 -5 70933.3 3075.27 1
 -1 -6 5 69933.1 2550.37 7
 -1 6 5 67517.7 2845.08 7
 1 6 -5 73048.5 2574.56 7
 1 6 -5 65170.1 2978.86 2
 -1 -6 5 66278.6 2515.5 9
 0 6 -5 2005.25 513.039 1
 0 6 5 1672.6 457.557 7
 0 6 -5 1213.64 411.716 2
 0 -6 -5 1960.66 370.922 2
 0 -6 5 1569.31 403.892 9
 0 6 5 1279.45 236.831 6
 -1 6 -5 37112.2 2192.81 2
 1 6 5 34566 1997.07 7
 1 6 5 37645.3 1371.33 6
 1 -6 5 34231.7 1879.09 9
 2 -6 5 47030 2363 9
 2 6 5 45667.4 2390.17 7
 -2 6 -5 43943.5 2504.85 2
 3 -6 5 4324.71 729.535 9
 -3 -6 -5 5029.37 575.627 1
 -3 6 -5 6287.55 947.793 2
 3 6 5 6204.96 871.342 7
 -4 -6 -5 49951.6 1986.75 1
 4 -6 5 56244.9 2888.01 9
 4 6 5 54273.7 2804.13 7
 5 -6 5 489.466 349.142 9
 5 -6 5 110.104 56.1638 8
 5 6 5 279.46 291.552 7
 6 -6 5 29630.1 2258.64 9
 6 6 5 28413.8 2127.71 7
 7 6 5 20597.4 1876.67 7
 7 -6 5 19095.5 1903.47 9
 8 -6 5 4356.88 931.367 9
 8 6 5 4953.31 968.744 7
 9 -6 5 12557.8 1677.48 9
 9 6 5 7235.39 1215.85 7
 10 -6 5 1090.25 550.656 9
 10 6 5 840.929 570.553 7
 -10 -6 -5 378.95 306.839 5
 11 -6 5 36896.1 3142.84 9
 -11 -6 -5 32293.7 2596.34 5
 11 6 5 34331.2 2903.2 7
 12 6 5 4125.94 1129.48 7
 12 -6 5 4111.1 1095.17 9
 -12 -6 -5 3137.72 854.477 5
 13 6 5 1481.86 719.4 7
 13 -6 5 409.936 553.471 9
 14 -6 5 8790.02 1738.65 9
 14 6 5 9396.2 1695.27 7
 15 6 5 217.486 657.743 7
 15 -6 5 385.444 520.219 9
 20 -7 -5 964.382 537.733 9
 20 7 -5 -540.259 790.569 6
 19 7 -5 19246.4 2545.61 7
 19 7 -5 21587.5 2579.82 6
 19 -7 -5 21117.4 2633.88 9
 18 -7 -5 16962.4 2260.31 9
 18 7 -5 13644.2 2048.22 7
 18 7 -5 13582.7 1971.48 6
 17 -7 -5 8538.54 1570.84 9
 17 7 -5 11498.1 1802.8 7
 17 7 -5 9886.43 1640.91 6
 16 -7 -5 32600.5 2965.63 9
 16 7 -5 28124.6 2731.33 7
 16 7 -5 32153.1 2871.56 6
 -15 -7 5 -85.4594 253.741 4
 -15 7 5 -18.4745 268.005 4
 15 7 -5 -172.128 395.045 6
 15 -7 -5 860.427 609.991 9
 15 7 -5 276.208 442.065 7
 -14 7 5 25344.1 2467.7 4
 14 -7 -5 27368.1 2454.96 9
 -14 -7 5 25336.1 2417.57 4
 14 7 -5 21510.3 2201.25 6
 14 7 -5 25615.8 2387.36 7
 13 -7 -5 6593.87 1167.73 9
 13 7 -5 4741.75 982.475 7
 13 7 -5 4605.99 1003.04 6
 -13 7 5 5275.34 1085.37 4
 -13 -7 5 4867.25 1013.43 4
 12 -7 -5 77357 3980.33 9
 -12 7 5 71557.3 4007.79 4
 -12 -7 5 75159.7 3976.35 4
 12 7 -5 70167.8 3901.57 6
 12 7 -5 77607 3982.29 7
 11 7 -5 51880.4 3099.13 7
 11 -7 -5 56613.4 3206.76 9
 11 7 -5 50662.9 3021.6 3
 -11 -7 5 50194.3 3055.12 4
 -11 7 5 47142 3068.34 4
 11 7 -5 50010.1 3110.01 6
 10 7 -5 2592.09 660.1 7
 10 -7 -5 5073.51 886.668 9
 -10 7 5 5474.24 963.052 4
 10 7 -5 3808.89 773.463 3
 -10 -7 5 3870.31 774.877 4
 9 7 -5 125298 4908.7 3
 9 -7 -5 113034 4760.98 8
 9 7 -5 125642 4746.89 7
 9 -7 -5 119253 4684.74 9
 -9 -7 5 119713 4734.15 4
 -9 7 5 123556 4889.98 4
 9 -7 -5 124113 3459.57 5
 8 -7 -5 470.571 297.413 8
 8 7 -5 869.288 385.341 7
 8 7 -5 1037.23 444.147 3
 8 -7 -5 1254.1 418.75 9
 -8 -7 5 433.208 271.037 4
 -8 7 5 832.315 365.577 4
 7 7 -5 155588 5468.59 3
 7 -7 -5 146190 5279.08 8
 7 7 -5 147137 5024.17 7
 -7 7 5 153894 5255.24 4
 -7 -7 5 149949 5079.78 4
 7 -7 -5 151899 5125.3 9
 6 -7 -5 185490 5729.78 9
 6 7 -5 188453 6116.16 3
 6 -7 -5 184032 5995.6 8
 -6 -7 5 185810 5686.81 4
 6 7 -5 184558 5604.32 7
 -6 7 5 172851 5679.79 4
 5 7 -5 34913.1 2155.54 3
 5 -7 -5 34633.2 2085.96 8
 -5 -7 5 29919.9 1793.93 4
 -5 7 5 32912.4 1934.18 4
 5 7 -5 30152.9 1762.41 7
 -5 7 5 30589.6 1412.94 2
 5 -7 -5 32116.5 1912.46 9
 4 -7 -5 146449 4942.01 8
 -4 7 5 143502 3802.55 2
 -4 -7 5 147223 4620.71 4
 -4 7 5 142735 4664.93 4
 4 7 -5 146734 4549.67 7
 -4 7 5 145467 5010.56 7
 4 7 -5 156012 5019.16 1
 4 -7 -5 148499 4419.95 6
 4 7 -5 146401 5064.43 3
 3 7 -5 2120.11 510.859 1
 3 7 -5 1886.39 520.165 3
 -3 -7 5 2433.72 482.781 4
 -3 7 5 2415.32 501.813 4
 3 7 -5 2404.34 452.353 7
 3 -7 -5 2632.35 426.559 6
 -3 7 5 2081.98 558.204 7
 2 7 -5 116452 4227.55 3
 2 7 -5 117862 4296.33 1
 2 -7 -5 119861 3199.13 2
 2 7 -5 117800 4373.77 2
 -2 7 5 113976 4216.58 7
 2 7 -5 121641 3853.22 7
 -2 -7 5 114100 3731.76 9
 2 -7 -5 123617 3503.14 6
 -1 7 5 48352.2 2463.17 7
 1 -7 -5 50899.9 1813.37 2
 -1 -7 5 50071 2216.45 9
 1 7 -5 45242.7 2495.09 2
 1 7 -5 48853.6 2204.79 7
 1 7 -5 55195.2 2690.52 1
 0 7 5 192602 5978.63 7
 0 -7 5 188429 5619.4 9
 0 7 -5 181081 6008.9 2
 1 7 5 55981.5 2748.55 7
 1 -7 5 53894 2541.51 9
 1 7 5 55752.9 1655.57 6
 -1 7 -5 55775 2826 2
 -2 7 -5 13779.1 1373.21 2
 2 7 5 18062.6 1509.96 7
 2 -7 5 15408.7 1347.54 9
 -3 7 -5 189051 6303.77 2
 3 -7 5 202555 6174.79 9
 3 7 5 205115 6279.87 7
 4 -7 5 21242.6 1773.07 9
 -4 -7 -5 20094.9 1105.34 1
 4 7 5 23065.1 1822.88 7
 -4 7 -5 23701.4 1936.45 2
 5 -7 5 40413.9 2591.69 9
 5 7 5 37174.1 2462.13 7
 6 -7 5 19484.8 1847.4 9
 6 7 5 18857.8 1760.88 7
 7 7 5 27262.9 2211.48 7
 7 -7 5 23951.2 2169.13 9
 8 7 5 92525.1 4571.93 7
 8 -7 5 99978.7 4893.02 9
 9 -7 5 278.248 314.553 9
 9 7 5 45.3377 326.406 7
 10 -7 5 36910 3095.22 9
 10 7 5 36155.9 2901.64 7
 -11 -7 -5 7352.69 1257.22 5
 11 7 5 5718.13 1174.05 7
 11 -7 5 8153.73 1513.22 9
 12 7 5 34353.2 3067.51 7
 -12 -7 -5 31851.5 2666.88 5
 12 -7 5 36412.2 3287.41 9
 13 7 5 23219.7 2581.04 7
 13 -7 5 23580 2736.47 9
 14 -7 5 2561.11 998.315 9
 14 7 5 3739.46 1134.32 7
 15 7 5 27637 3053.87 7
 19 8 -5 7384.89 1598.03 7
 19 -8 -5 6155.94 1446.08 9
 19 8 -5 4957.73 1245.62 6
 18 -8 -5 1909.27 831.899 9
 18 8 -5 2872.7 977.453 7
 18 8 -5 4062.42 1127.42 6
 17 8 -5 5983.44 1363.27 7
 17 -8 -5 4091.11 1062.3 9
 17 8 -5 5394.81 1204.94 6
 16 8 -5 3292.48 951.104 6
 16 8 -5 4764.29 1155.55 7
 15 -8 -5 12560.7 1766.23 9
 -15 -8 5 10555.7 1584.43 4
 15 8 -5 8572.65 1454.64 7
 15 8 -5 9489.84 1488.19 6
 -15 8 5 12134.8 1788.96 4
 -14 8 5 3151.66 924.354 4
 14 -8 -5 3843.9 977.015 9
 14 8 -5 5637 1140.36 7
 -14 -8 5 4462.28 1033.45 4
 14 8 -5 2946.35 772.875 6
 13 -8 -5 37036.6 2832.1 9
 -13 -8 5 35707.1 2758.08 4
 13 8 -5 37912 2857.99 7
 13 8 -5 36502.4 2788.23 6
 -13 8 5 33178.3 2777.55 4
 12 -8 -5 17636.7 1870.33 9
 12 8 -5 18223.6 1844.01 3
 12 8 -5 15672 1756.67 7
 -12 8 5 17342.1 1889.03 4
 -12 -8 5 17269.7 1823.64 4
 11 -8 -5 11083.7 1405.39 9
 11 8 -5 13613.5 1560.28 7
 11 8 -5 13102.1 1510.82 3
 -11 8 5 11128.8 1439.78 4
 -11 -8 5 12095.1 1452.53 4
 10 8 -5 22627.8 1946.36 3
 10 -8 -5 23580.6 1963.21 9
 10 -8 -5 18739.4 1797.14 8
 -10 -8 5 19955.1 1774.53 4
 -10 8 5 21662.4 1908 4
 10 8 -5 20108.9 1813.03 7
 9 -8 -5 8041.38 1099.09 8
 9 8 -5 9298.18 1171.4 7
 9 -8 -5 7422.45 1058.98 9
 -9 -8 5 6713.86 993.077 4
 -9 8 5 7945.82 1085 4
 9 8 -5 7152.99 1069.09 3
 8 8 -5 35688.5 2404.76 3
 8 -8 -5 38640.9 2450.8 8
 8 8 -5 33398.1 2226.08 7
 -8 -8 5 39824 2319.39 4
 -8 8 5 35249.3 2291.59 4
 8 -8 -5 33275.1 2274.03 9
 7 -8 -5 5334.37 878.888 8
 7 8 -5 5352.89 871.374 3
 7 -8 -5 5604.3 866.63 9
 7 8 -5 3851.28 726.93 7
 -7 -8 5 4214.62 680.111 4
 -7 8 5 4012.67 706.944 4
 6 -8 -5 29302 2037.69 8
 6 8 -5 28340.3 1869.55 1
 6 -8 -5 29902.8 1946.24 9
 6 8 -5 29760.3 1923.43 7
 -6 -8 5 29951.5 1834.23 4
 6 8 -5 31096.7 2143.21 3
 -6 8 5 28605.1 1874.44 4
 5 -8 -5 28942 1941.8 8
 5 8 -5 28898.9 2015.07 3
 -5 -8 5 29346.2 1743.94 4
 5 8 -5 24975 1685.64 7
 -5 8 5 25460 1205.19 2
 -5 8 5 30257.5 1821.38 4
 5 8 -5 26987.5 1816.72 1
 5 -8 -5 29340.9 1893.54 9
 4 -8 -5 398.073 289.734 8
 4 8 -5 130.796 192.58 1
 -4 -8 5 -47.9833 144.161 4
 -4 8 5 401.539 235.135 4
 4 8 -5 -81.5891 194.856 3
 4 8 -5 485.687 295.768 7
 -4 8 5 119.635 64.3489 2
 -4 8 5 -92.8567 263.469 7
 3 8 -5 80680.9 3504.84 3
 -3 -8 5 85426.3 3106.79 4
 -3 8 5 77844.5 3096.75 4
 3 8 -5 83491 3217.89 7
 -3 8 5 75450.9 3485.27 7
 3 8 -5 83129 3441.34 1
 3 -8 -5 84533.1 2846.94 6
 2 -8 -5 2457.77 392.125 6
 -2 -8 5 2523.93 493.556 9
 2 8 -5 3702.36 668.177 1
 2 8 -5 2114.21 485.124 7
 -2 8 5 2071.83 443.177 4
 2 8 -5 2599.99 601.382 2
 -2 8 5 1868.04 513.174 7
 1 -8 -5 70602.1 2173.15 2
 1 8 -5 66286.3 2849.19 7
 -1 -8 5 69993.9 2870.71 9
 -1 8 5 68151.7 3170.63 7
 1 8 -5 69524.3 3214.13 2
 0 8 5 40001.8 2371.77 7
 0 -8 -5 42422.9 1716.99 2
 0 8 -5 41587.6 2424.36 2
 0 -8 5 43688.3 2241.67 9
 1 -8 5 11131 1121.85 9
 1 8 5 9914.39 1124.87 7
 -1 8 -5 9112.63 1101.58 2
 -2 8 -5 82488.7 3739.32 2
 2 8 5 83782.7 3721.12 7
 2 -8 5 90080.4 3680.82 9
 3 8 5 -84.8801 272.808 7
 3 -8 5 262.431 240.563 9
 -3 8 -5 171.783 307.798 2
 4 -8 5 18397.8 1677.58 9
 4 8 5 19317.3 1739.77 7
 -4 8 -5 21805.3 1882.19 2
 -4 -8 -5 18395.8 994.669 1
 5 8 5 -36.2529 210.837 7
 5 -8 5 295.357 248.081 9
 -5 8 -5 263.468 280.693 2
 6 -8 5 62610.2 3521.55 9
 6 8 5 56524.8 3306.39 7
 7 -8 5 7787.67 1260.46 9
 7 8 5 7630.97 1217.65 7
 8 8 5 3608.4 860.125 7
 8 -8 5 4848.66 1036.82 9
 9 -8 5 31665.2 2760.46 9
 9 8 5 25055.9 2392.94 7
 10 -8 5 1664.39 760.476 9
 10 8 5 1479.42 667.781 7
 11 8 5 16132.3 2018.82 7
 11 -8 5 15963.5 2104.26 9
 12 -8 5 6932.45 1526.95 9
 12 8 5 5235.6 1195.85 7
 -12 -8 -5 3412.17 896.54 5
 13 8 5 1273.05 819.483 7
 13 -8 5 1002.22 629.857 9
 14 -8 5 8973.78 1775.75 9
 14 8 5 9300.23 1773.75 7
 19 -9 -5 13133.3 2156.77 9
 18 -9 -5 9521.64 1795.35 9
 18 9 -5 13036 2040.17 7
 18 9 -5 10302.1 1703.53 6
 17 9 -5 12232.1 1883.69 7
 17 9 -5 9388.24 1612.04 6
 17 -9 -5 12240.8 1910.02 9
 16 9 -5 21481.4 2424.57 7
 16 -9 -5 23662.2 2560.52 9
 16 9 -5 22738.7 2430.86 6
 15 -9 -5 529.729 379.944 9
 15 9 -5 765.907 605.878 7
 15 9 -5 396.393 393.515 6
 -14 -9 5 18928.7 2105.11 4
 14 9 -5 21806.4 2269.2 7
 14 -9 -5 21702.2 2273.83 9
 -14 9 5 18355 2138.23 4
 -13 -9 5 737.638 438.736 4
 13 9 -5 811.821 433.54 3
 -13 9 5 133.666 264.49 4
 13 9 -5 341.868 339.463 7
 13 -9 -5 877.926 462.492 9
 12 -9 -5 43953.2 3039.86 9
 12 9 -5 35159.5 2632.99 3
 12 9 -5 37719.7 2816.41 7
 -12 9 5 38733 2879.85 4
 -12 -9 5 39341.2 2815.11 4
 -11 -9 5 44404.3 2849.68 4
 11 9 -5 44479.6 2931.43 3
 11 9 -5 43027.5 2927.33 7
 -11 9 5 44471.2 2946.76 4
 11 -9 -5 47605.3 3059.46 9
 10 -9 -5 1826.91 586.51 8
 10 9 -5 579.261 425.409 3
 10 9 -5 1843.54 637.84 7
 10 -9 -5 1492.4 576.386 9
 -10 -9 5 1769.22 551.57 4
 -10 9 5 868.774 427.232 4
 9 9 -5 45501.1 2825.23 7
 9 -9 -5 52636 3021.44 9
 9 -9 -5 54077.5 3074.6 8
 -9 -9 5 48948.7 2767.14 4
 -9 9 5 52485.3 2947.96 4
 9 9 -5 48395.6 2965.76 3
 8 -9 -5 1593.66 567.853 8
 8 9 -5 896.44 482.684 3
 -8 -9 5 1694.76 504.47 4
 -8 9 5 669.987 306.223 4
 8 9 -5 1388.51 503.932 7
 8 -9 -5 522.597 334.176 9
 7 -9 -5 59634.7 3073.65 9
 7 9 -5 55336.2 3090.93 3
 7 -9 -5 58207 3078.16 8
 7 9 -5 61233.1 2871.21 1
 -7 -9 5 56490.1 2750.18 4
 -7 9 5 52598.3 2774.45 4
 7 9 -5 58264.7 3010.14 7
 6 9 -5 82977.2 3845.22 3
 6 -9 -5 82681.4 3732.62 8
 6 9 -5 83005.6 3623.16 7
 -6 -9 5 89371.8 3431.29 4
 -6 9 5 81271.7 3441.28 4
 6 9 -5 85582 3506.71 1
 6 -9 -5 85227.3 3707.47 9
 5 -9 -5 30501.9 2051.28 8
 5 9 -5 30815.7 2148.89 3
 -5 -9 5 27196 1679.23 4
 -5 9 5 28419.4 1784.76 4
 5 9 -5 32315.4 1996.84 7
 -5 9 5 22928.2 1087.91 2
 5 9 -5 28380 1835.06 1
 5 -9 -5 29168 1967.18 9
 4 9 -5 83045 3673.57 3
 -4 -9 5 80218.1 3071.83 4
 4 9 -5 84850.3 3447.19 1
 -4 9 5 71499.4 3030.1 4
 4 9 -5 81489.3 3352.01 7
 -4 9 5 73479.5 3617.99 7
 -3 9 5 4481.58 651.449 4
 -3 -9 5 3800.93 619.87 4
 3 9 -5 4138.23 736.509 1
 3 9 -5 5054.51 755.788 7
 -3 9 5 3710.57 782.761 7
 3 -9 -5 4115.94 534.472 6
 2 9 -5 143640 5042.49 1
 -2 -9 5 150653 4519.46 4
 -2 9 5 137601 4479.29 4
 2 9 -5 138252 5071.7 2
 -2 9 5 139675 5228.19 7
 2 9 -5 146891 4864.48 7
 2 -9 -5 154055 4057.27 6
 1 -9 -5 29504.3 1193.31 2
 -1 -9 5 30456.7 1859.64 9
 -1 9 5 32179.5 2174.7 7
 1 9 -5 31803.7 2085.24 2
 1 9 -5 29795.8 1894.92 7
 0 -9 5 83195.3 3485.8 9
 0 9 5 80917.2 3732.3 7
 0 -9 -5 92823.2 2725.63 2
 0 9 -5 81448.2 3692.56 2
 -1 9 -5 10162.8 1177.07 2
 1 -9 5 13926 1302.14 9
 1 9 5 14682.5 1446.95 7
 -2 9 -5 41228.7 2542.09 2
 2 9 5 45780.4 2739.15 7
 2 -9 5 42823.8 2484.87 9
 -3 9 -5 168226 6133.09 2
 3 9 5 181911 6315.2 7
 3 -9 5 178898 6126.26 9
 -4 9 -5 12209 1400.61 2
 4 9 5 13504.4 1489.3 7
 4 -9 5 13237.3 1438.03 9
 -4 -9 -5 11019.8 705.322 1
 5 -9 5 22185.7 1979.64 9
 5 9 5 21095.9 1942.88 7
 -5 9 -5 21210.6 1958.49 2
 -6 9 -5 7472.09 1206.74 2
 6 -9 5 7567.76 1205.17 9
 6 9 5 10460.5 1386.78 7
 7 -9 5 26133.1 2352.86 9
 7 9 5 25668.6 2279.79 7
 8 9 5 61115.8 3732.45 7
 8 -9 5 61248 3854.79 9
 9 -9 5 2642.22 832.766 9
 9 9 5 1495.01 606.098 7
 10 -9 5 42925.7 3424.13 9
 10 9 5 40324.6 3223.89 7
 11 9 5 6879.57 1349.69 7
 11 -9 5 8088.48 1614.93 9
 12 -9 5 36971 3383.14 9
 12 9 5 28835.8 2889.3 7
 -13 -9 -5 30144.1 2729.62 5
 13 9 5 29421.1 3027.4 7
 13 -9 5 28430.5 3108.69 9
 14 -9 5 1721.33 853.24 9
 14 9 5 1375.01 698.208 7
 19 -10 -5 2906.74 1079.27 9
 18 -10 -5 6926.39 1549.2 9
 18 10 -5 3972.72 1158.79 7
 17 -10 -5 11246.8 1906.69 9
 17 10 -5 12489.8 1935.48 7
 16 10 -5 4674.08 1170.85 7
 16 -10 -5 2283.96 906.626 9
 15 -10 -5 37052.3 3160.68 9
 15 10 -5 30022.2 2848.59 7
 14 10 -5 2453.66 732.07 3
 -14 -10 5 2372.05 733.69 4
 14 -10 -5 3112.39 922.857 9
 -14 10 5 1763.3 671.746 4
 14 10 -5 2580.9 803.416 7
 13 10 -5 16525.1 1825.93 3
 13 -10 -5 20193.8 2153.08 9
 -13 -10 5 21233.5 2105.74 4
 13 10 -5 18844 2077.36 7
 -13 10 5 17932.1 1997.01 4
 12 10 -5 28910.5 2543.34 7
 -12 -10 5 29584.5 2398.62 4
 12 10 -5 28831.8 2414.79 3
 12 -10 -5 35720.3 2776.8 9
 -12 10 5 27859.2 2426.12 4
 11 10 -5 4932.26 972.471 3
 11 -10 -5 5133.5 1014.33 9
 -11 10 5 6426.49 1071.39 4
 -11 -10 5 4000.87 844.252 4
 11 -10 -5 6588.21 1112.81 8
 11 10 -5 3848.95 860.421 7
 10 10 -5 30717.4 2425.32 3
 10 -10 -5 34062.8 2523.06 9
 10 10 -5 33214.9 2502.31 7
 10 -10 -5 29193.5 2322.94 8
 -10 -10 5 32108.9 2261.27 4
 -10 10 5 27715.3 2213.73 4
 9 10 -5 608.64 337.115 7
 -9 10 5 495.557 371.063 4
 -9 -10 5 123.929 239.617 4
 9 10 -5 445.067 361.368 3
 9 10 -5 158.475 223.368 1
 9 -10 -5 171.756 254.064 8
 9 -10 -5 631.659 399.317 9
 8 10 -5 52891 3131.81 3
 8 -10 -5 57798.9 3169.76 9
 8 -10 -5 51153.9 2999 8
 8 10 -5 52965.9 3046.58 7
 -8 -10 5 51494.6 2725.92 4
 -8 10 5 52263.8 2846.15 4
 8 10 -5 56228 2730.12 1
 7 10 -5 4449.43 726.422 1
 7 10 -5 4929.39 885.993 3
 7 -10 -5 3777.21 766.033 8
 -7 -10 5 3888.36 660.686 4
 7 10 -5 3934.87 786.143 7
 -7 10 5 3855.15 669.133 4
 7 -10 -5 4039.39 815.851 9
 6 -10 -5 29300.7 2084.72 9
 6 10 -5 29720.4 2174.57 3
 6 10 -5 23412.8 1851.76 7
 6 10 -5 28213.4 1833.25 1
 -6 -10 5 23585.6 1603.29 4
 -6 10 5 27121 1782.41 4
 -6 10 5 21350.1 1075.2 2
 6 -10 -5 23393 1879.58 8
 -5 10 5 26742.9 931.244 2
 -5 10 5 30025.8 1805.8 4
 5 -10 -5 27432 2026.77 8
 5 -10 -5 27678.3 2030.04 9
 -5 -10 5 29762.5 1725.79 4
 5 10 -5 24080 1855.16 7
 5 10 -5 29200.6 2140.17 3
 5 10 -5 27889.6 1845.01 1
 -4 10 5 630.757 352.456 4
 4 10 -5 -35.7284 198.609 1
 4 10 -5 295.04 348.297 7
 -4 -10 5 315.996 222.164 4
 -4 10 5 318.882 295.555 7
 -3 -10 5 50066.3 2263.89 4
 -3 10 5 52775.1 2362.5 4
 3 10 -5 53863.2 2737.36 1
 3 10 -5 49744.2 2633.76 7
 -3 10 5 42669.7 2757.32 7
 3 -10 -5 50991 2062.06 6
 -2 -10 5 557.614 247.216 4
 2 10 -5 643.159 381.131 2
 -2 10 5 1167.98 484.116 7
 2 10 -5 559.93 337.65 7
 -2 10 5 1073.2 318.461 4
 2 -10 -5 356.805 157.555 6
 -1 10 5 42336.9 2661.65 7
 1 10 -5 45257.8 2605.9 2
 1 10 -5 49387.9 2584.02 7
 1 -10 -5 43587.6 1396.36 2
 -1 -10 5 42170.2 2360.22 9
 0 10 -5 29784.8 2123.15 2
 0 -10 -5 35854.8 1428.98 2
 0 10 5 29264.6 2199.44 7
 0 -10 5 32311.2 2089.15 9
 1 -10 5 13503.2 1351.68 9
 1 10 5 13347 1464.44 7
 -1 10 -5 13467.2 1401.67 2
 -2 10 -5 46653.4 2741.89 2
 2 10 5 45318.2 2825.68 7
 2 -10 5 43819.6 2618.69 9
 3 -10 5 1757.13 542.696 9
 3 10 5 2653.13 744.503 7
 -3 10 -5 1574.05 506.563 2
 -4 -10 -5 39232.2 1439.43 1
 4 -10 5 46686.4 2868.56 9
 4 10 5 50921.7 3093.89 7
 -4 10 -5 47682.7 2938.89 2
 5 -10 5 955.92 497.543 9
 5 10 5 601.436 386.311 7
 -5 10 -5 847.464 408.833 2
 6 -10 5 34767.7 2675.47 9
 6 10 5 33951.9 2669.07 7
 -6 10 -5 37420.8 2760.58 2
 7 -10 5 15022 1795.52 9
 7 10 5 13269.2 1688.46 7
 -7 10 -5 14239.3 1730.18 2
 8 10 5 7696.91 1337.32 7
 8 -10 5 9164.36 1451.63 9
 9 -10 5 37436.9 3135.16 9
 9 10 5 42560.6 3252.33 7
 10 -10 5 1466.3 687.356 9
 10 10 5 2014.76 798.662 7
 11 10 5 26307 2714.77 7
 11 -10 5 23547.6 2632.85 9
 12 -10 5 6577.4 1425.91 9
 12 10 5 6570.08 1465.84 7
 13 -10 5 7106.72 1611.29 9
 13 10 5 6801.01 1518.16 7
 14 -10 5 10969.7 2025.5 9
 14 10 5 13305.7 2118.36 7
 18 11 -5 4428.48 1313.6 7
 18 -11 -5 3423.28 1158.28 9
 17 -11 -5 3786.82 1098.86 9
 17 11 -5 3217.47 1066.21 7
 16 11 -5 17959.7 2304.8 7
 16 -11 -5 14085.3 2075.14 9
 15 11 -5 974.686 596.629 3
 15 -11 -5 790.857 646.779 9
 15 11 -5 748.433 677.522 7
 14 11 -5 13101.6 1681.53 3
 14 -11 -5 12582.9 1786.18 9
 14 11 -5 10415 1649.74 7
 -13 11 5 843.225 456.441 4
 13 11 -5 828.577 499.45 3
 13 11 -5 851.38 587.737 7
 -13 -11 5 -1.63498 313.307 4
 13 -11 -5 494.712 408.251 9
 12 11 -5 38989.5 2902.28 3
 12 11 -5 35878.2 2911.48 7
 12 -11 -5 43450.5 3165.09 9
 -12 11 5 48501.3 3229.41 4
 -12 -11 5 41868.6 2891.04 4
 11 -11 -5 32989.4 2563.66 8
 11 11 -5 28979.5 2470.72 3
 11 11 -5 35335.5 2754.88 7
 11 -11 -5 35293.2 2733.91 9
 -11 11 5 35633 2615.56 4
 -11 -11 5 32757.8 2431.22 4
 -10 -11 5 3300.36 729.302 4
 10 11 -5 4318.28 750.424 1
 10 -11 -5 4701.2 951.438 8
 10 11 -5 4439.24 920.639 3
 10 11 -5 4104.21 926.196 7
 10 -11 -5 5519.75 1051.67 9
 -10 11 5 4238.15 867.837 4
 9 11 -5 39366.9 2754.52 7
 9 -11 -5 40268 2734.87 8
 9 11 -5 39263.3 2233.73 1
 9 11 -5 37140.7 2700.44 3
 9 -11 -5 35541.7 2610.1 9
 -9 -11 5 37210.8 2366.33 4
 -9 11 5 40988.2 2572.59 4
 8 11 -5 943.192 565.481 3
 8 -11 -5 724.942 455.053 8
 8 -11 -5 96.4836 283.318 9
 8 11 -5 580.767 344.508 1
 -8 -11 5 707.355 385.357 4
 -8 11 5 576.546 348.065 4
 8 11 -5 709.89 496.104 7
 7 -11 -5 35443.5 2439.69 8
 7 11 -5 30443.7 2362.82 3
 7 11 -5 31875.9 2346.89 7
 7 11 -5 33454.5 2057.26 1
 -7 -11 5 33471.3 2021.98 4
 -7 11 5 37191.6 2217.62 4
 7 -11 -5 33933.3 2443.91 9
 6 -11 -5 32178.8 2282.8 8
 6 11 -5 34315.2 2068.63 1
 6 11 -5 31575.7 2257.55 7
 6 11 -5 30858.6 2320.89 3
 -6 -11 5 29862.4 1818.61 4
 -6 11 5 29294.2 1901.25 4
 6 -11 -5 31199.9 2279.64 9
 5 11 -5 26585.5 1830.27 1
 -5 -11 5 27541.3 1654.42 4
 -5 11 5 28211.5 1754.86 4
 5 11 -5 27252.3 2042.03 7
 5 -11 -5 24333.4 2042.8 9
 4 11 -5 20372.8 1738.12 7
 -4 -11 5 24400.3 1516.53 4
 -4 11 5 23869.8 1556.05 4
 4 11 -5 26102.8 1839.14 1
 -4 11 5 21720.7 1996.38 7
 -3 -11 5 4551.85 615.401 4
 -3 11 5 3488.12 567.909 4
 3 11 -5 2846.42 648.913 7
 -3 11 5 4242.43 910.782 7
 -2 -11 5 128699 4072.7 4
 -2 11 5 120958 4099.68 4
 -2 11 5 118869 5154.35 7
 2 11 -5 130558 4917.78 7
 1 11 -5 18215.5 1650 2
 -1 11 5 17585.9 1732.43 7
 1 11 -5 15693.7 1508.47 7
 -1 -11 5 18089.6 1572.34 9
 0 -11 5 21773.7 1779.3 9
 0 -11 -5 21860.5 1034.92 2
 0 11 5 22484.9 1989.89 7
 0 11 -5 22015.9 1824.46 2
 0 11 -5 21582.2 1785.46 7
 1 -11 5 47217.4 2753.9 9
 1 11 5 42591.1 2834.89 7
 -1 11 -5 48756.3 2807.69 2
 2 -11 5 39142.8 2533.47 9
 2 11 5 34187.1 2537.73 7
 -2 11 -5 36353.4 2442.5 2
 -3 11 -5 77211 3853.13 2
 3 11 5 83919.5 4189.46 7
 3 -11 5 81848.2 3953.94 9
 4 11 5 9820.49 1395.61 7
 -4 11 -5 10325.6 1378.14 2
 4 -11 5 12632.3 1497.55 9
 5 -11 5 9700.7 1378.8 9
 5 11 5 8371.12 1330.73 7
 -5 11 -5 9025.13 1332.08 2
 6 -11 5 1020.6 434.02 9
 6 11 5 900.972 546.582 7
 -6 11 -5 890.335 503.323 2
 7 -11 5 28998.4 2581.84 9
 7 11 5 30272.5 2621.41 7
 -7 11 -5 26157.8 2432.29 2
 8 11 5 28020.1 2616.89 7
 -8 11 -5 28372 2591.27 2
 8 -11 5 33262.8 2864.32 9
 9 -11 5 7024.78 1371.46 9
 9 11 5 9232.12 1504.71 7
 10 -11 5 26370.4 2752.18 9
 10 11 5 26316.2 2676.28 7
 11 11 5 4405.64 1136 7
 11 -11 5 4777.54 1270.06 9
 12 -11 5 15996 2287.49 9
 12 11 5 15711.2 2188.82 7
 13 11 5 18456.8 2496 7
 13 -11 5 18463.7 2538.2 9
 18 -12 -5 4653.07 1262.22 9
 18 12 -5 3499.39 1089.87 7
 17 -12 -5 9924.63 1818.81 9
 17 12 -5 12469 2021.58 7
 16 12 -5 3194.86 992.485 7
 16 -12 -5 3805.84 1121.22 9
 15 12 -5 26034 2517.1 3
 15 12 -5 25926.4 2755.61 7
 15 -12 -5 27307.3 2795.8 9
 14 12 -5 2143.07 723.046 3
 14 -12 -5 2097.29 832.953 9
 14 12 -5 2516.57 847.438 7
 13 12 -5 17303.1 2111.02 7
 13 12 -5 18588.7 2027.85 3
 -13 -12 5 19129 2001.07 4
 13 -12 -5 18196.7 2123.77 9
 -13 12 5 17088.5 1978.65 4
 12 -12 -5 7438.91 1333.31 9
 12 -12 -5 5321.52 1080.28 8
 12 12 -5 5805.88 1133.22 3
 -12 -12 5 5909.74 1068.63 4
 12 12 -5 5852.44 1240.17 7
 -12 12 5 4518.81 1023.11 4
 11 12 -5 24886.3 2326.94 3
 -11 12 5 31209.1 2443.85 4
 11 -12 -5 29716 2457.9 8
 11 12 -5 29104.2 2575 7
 -11 -12 5 22943.2 2049.18 4
 11 -12 -5 29853.8 2575.51 9
 10 -12 -5 48311 3140.44 8
 10 12 -5 45239.4 3173.76 7
 10 -12 -5 45536.7 3166.52 9
 10 12 -5 50288.4 2527.39 1
 10 12 -5 42636.7 3045.74 3
 -10 12 5 47692.8 2957.08 4
 -10 -12 5 47716.1 2818.56 4
 9 -12 -5 5107.09 1023.58 9
 9 -12 -5 5124.32 974.957 8
 9 12 -5 5757.96 1068.97 3
 -9 -12 5 4383.95 797.924 4
 9 12 -5 4560.83 968.526 7
 9 12 -5 4521.21 730.124 1
 -9 12 5 5649.59 962.923 4
 8 -12 -5 70141.3 3746.38 8
 8 12 -5 71800.6 3897.81 3
 8 12 -5 74288.9 3214.89 1
 8 12 -5 70634.2 3860.29 7
 -8 -12 5 72604 3294.9 4
 -8 12 5 75265.4 3482.73 4
 8 -12 -5 70363.8 3840.45 9
 7 -12 -5 1041.3 499.729 8
 7 12 -5 923.399 490.17 7
 7 -12 -5 953.761 483.92 9
 7 12 -5 1084.91 581.897 3
 -7 -12 5 889.857 353.656 4
 -7 12 5 580.735 364.147 4
 7 12 -5 423.341 335.579 1
 6 12 -5 30085.7 1957.43 1
 6 -12 -5 27668.2 2234.8 9
 6 12 -5 24196.5 2061.25 7
 -6 -12 5 29660.5 1790.57 4
 -6 12 5 30885.6 1926.44 4
 6 12 -5 31305.3 2410.22 3
 6 -12 -5 28649.9 2217.32 8
 5 -12 -5 42267 2742.15 9
 -5 -12 5 42722.1 2113.25 4
 5 12 -5 39611.1 2639.05 7
 -5 12 5 43599.3 2228.03 4
 -4 12 5 13942.9 1152.34 4
 4 12 -5 12987.2 1472.34 7
 -4 12 5 12665.5 1593.25 7
 -4 -12 5 13127.5 1064.5 4
 -3 -12 5 73748.7 2792.85 4
 -3 12 5 73718.7 2890.39 4
 3 12 -5 70279.1 3509.31 7
 -3 12 5 63730.1 3734 7
 -2 -12 5 3096.17 504.176 4
 -2 12 5 3415.31 537.263 4
 -2 12 5 2312.11 708.395 7
 2 12 -5 3538.32 735.751 7
 2 -12 -5 2340.46 380.577 6
 -1 12 5 52938.2 2311.5 4
 1 12 -5 48678 2833.38 2
 -1 12 5 45383.5 3031.73 7
 1 12 -5 49486.2 2918.03 7
 -1 -12 5 54631.8 2923.38 9
 0 -12 -5 55332.1 1769.52 2
 0 -12 5 55226.2 3045.26 9
 0 12 5 56900.9 3403.84 7
 0 12 -5 54981.8 3041.33 2
 0 12 -5 58110.2 3184.79 7
 -1 12 -5 7453.75 1075.92 2
 1 -12 5 6284.45 998.492 9
 1 12 5 7910.35 1201.97 7
 2 -12 5 23850.4 2024.64 9
 2 12 5 26235.2 2287.61 7
 -2 12 -5 25055.6 2041.81 2
 -3 12 -5 510.636 389.984 2
 3 -12 5 1465.91 609.162 9
 3 12 5 1224.1 647.618 7
 4 -12 5 107311 4856.72 9
 -4 12 -5 96659.2 4562 2
 4 12 5 95619.4 4809.36 7
 5 -12 5 2167.36 699.908 9
 5 12 5 2220.7 758.012 7
 -5 12 -5 2022.39 671.259 2
 6 12 5 17917.9 2069.66 7
 -6 12 -5 21771.9 2112.85 2
 6 -12 5 18737.3 2017.55 9
 7 -12 5 43437.3 3220.05 9
 7 12 5 36468.2 3008.98 7
 -7 12 -5 36615.9 2916.85 2
 -8 12 -5 11239.1 1661.54 2
 8 12 5 8158.91 1433.36 7
 8 -12 5 13712.2 1858.16 9
 9 -12 5 22144.9 2450.48 9
 9 12 5 22234.5 2435.35 7
 -9 12 -5 19785.5 2281.52 2
 10 12 5 -316.323 578.225 7
 10 -12 5 -273.69 413.623 9
 -10 12 -5 208.625 367.445 2
 11 -12 5 28694 2993.5 9
 11 12 5 22430.2 2607.69 7
 12 -12 5 5177.48 1344.91 9
 12 12 5 5990.19 1491.3 7
 13 12 5 12225.4 2028.69 7
 13 -12 5 11098.7 2014.2 9
 17 -13 -5 738.373 627.479 9
 17 13 -5 948.15 639.653 7
 16 13 -5 8531.62 1672.83 7
 16 -13 -5 8244.9 1601.18 9
 15 -13 -5 754.68 579.242 9
 15 13 -5 85.4671 299.858 3
 15 13 -5 -4.67921 533.721 7
 14 13 -5 7623.34 1363.19 3
 14 13 -5 6135.43 1319.38 7
 14 -13 -5 5858.14 1259.83 9
 13 -13 -5 1421.23 673.18 9
 13 13 -5 701.511 432.283 3
 13 13 -5 1212.77 550.798 7
 12 -13 -5 24607.6 2328.25 8
 12 13 -5 24362.3 2505.8 7
 12 13 -5 23878.9 2359.08 3
 -12 13 5 26361.3 2369.01 4
 -12 -13 5 25408.3 2221.02 4
 12 -13 -5 24782 2467.72 9
 11 -13 -5 22923.6 2234.43 8
 -11 -13 5 22137.3 1978.04 4
 -11 13 5 23239.3 2113.47 4
 11 -13 -5 23533.5 2320.27 9
 11 13 -5 22568.2 2247.26 3
 11 13 -5 23234.2 2370.26 7
 10 13 -5 2404.89 793.469 7
 10 -13 -5 4290.42 931.902 8
 -10 13 5 4197.01 878.567 4
 10 13 -5 3484.48 881.522 3
 10 -13 -5 3676.54 914.731 9
 -10 -13 5 2980.04 704.165 4
 9 -13 -5 15451.2 1731.22 8
 9 13 -5 13406.4 1238.96 1
 9 13 -5 15592.3 1832.7 7
 9 13 -5 13597.5 1688.46 3
 -9 -13 5 14929.8 1438.22 4
 9 -13 -5 14782 1775.65 9
 -9 13 5 15674.6 1549.65 4
 8 13 -5 311.445 366.687 7
 8 13 -5 553.646 308.558 1
 8 -13 -5 549.595 403.851 8
 -8 13 5 531.846 419.688 4
 8 13 -5 339.421 372.858 3
 -8 -13 5 1584.59 484.575 4
 8 -13 -5 272.455 402.858 9
 7 13 -5 30442.8 1978.49 1
 7 13 -5 29631.7 2452.52 3
 7 13 -5 29053.4 2405.57 7
 7 -13 -5 28098.4 2285.21 8
 -7 -13 5 29685 1869.67 4
 -7 13 5 34644.4 2125.65 4
 7 -13 -5 31985 2521.53 9
 -6 -13 5 14020.1 1187.18 4
 -6 13 5 15294.9 1334.23 4
 6 -13 -5 12325.6 1541.26 9
 6 13 -5 15718.2 1694.24 7
 5 13 -5 24719.3 2149.35 7
 -5 -13 5 24773.5 1527.68 4
 -5 13 5 26514.1 1668.71 4
 -5 13 5 19001.6 2131.38 7
 5 -13 -5 22753.7 2056.15 9
 4 13 -5 8467.23 1202.78 7
 -4 -13 5 10235.1 913.339 4
 -4 13 5 9883.4 962.083 4
 -4 13 5 8630.59 1363.98 7
 -3 -13 5 426.713 227.833 4
 -3 13 5 221.261 145.575 4
 3 13 -5 437.564 340.274 7
 -3 13 5 881.775 483.427 7
 -2 -13 5 11963.4 969.486 4
 -2 13 5 11613.5 1005.98 4
 2 13 -5 12095.9 1448.51 7
 -2 13 5 10917.1 1494.17 7
 2 -13 -5 14343.6 902.828 6
 -1 -13 5 748.24 422.781 9
 -1 -13 5 827.458 293.919 4
 1 13 -5 637.953 359.029 2
 -1 13 5 976.052 310.223 4
 1 13 -5 717.863 402.627 7
 -1 13 5 577.554 387.78 7
 1 -13 -5 830.651 184.797 6
 0 -13 5 21895.6 1906.35 9
 0 13 5 18906.3 1974.96 7
 0 13 -5 19294.4 1766.64 2
 0 13 -5 20804.8 1912.62 7
 1 13 5 4910.94 1030.58 7
 -1 13 -5 7895.39 1131.03 2
 1 -13 5 6502.83 1041.74 9
 2 -13 5 37378.8 2680.94 9
 -2 13 -5 30856.4 2338.48 2
 2 13 5 31766.9 2641.98 7
 3 13 5 45971.6 3235.84 7
 -3 13 -5 36748.4 2643.83 2
 4 -13 5 1674.01 667.906 9
 -4 13 -5 1096.26 480.161 2
 4 13 5 704.098 512.671 7
 5 13 5 21231.4 2214.23 7
 5 -13 5 22088.4 2183.8 9
 -5 13 -5 19298.2 1964.69 2
 6 13 5 3868.82 1034.18 7
 -6 13 -5 3947.73 943.478 2
 6 -13 5 3309.83 923.531 9
 7 -13 5 28849.7 2687.65 9
 -7 13 -5 26068.5 2468.42 2
 7 13 5 30433.9 2790.92 7
 8 -13 5 31837.5 2914.86 9
 8 13 5 28828.5 2766.93 7
 -8 13 -5 28188.7 2634.65 2
 9 -13 5 6859.65 1416.73 9
 9 13 5 5122.19 1224.03 7
 -9 13 -5 5524.22 1235.31 2
 10 -13 5 21957.1 2590.04 9
 10 13 5 25426.3 2749.55 7
 -10 13 -5 19949.7 2421.57 2
 11 -13 5 3046.54 1041.59 9
 -11 13 -5 3364.24 1097.09 2
 11 13 5 2303.63 869.252 7
 12 13 5 9020.48 1721.98 7
 12 -13 5 12480 2084.55 9
 -12 13 -5 9977.47 1841.15 2
 13 13 5 6512.86 1512.66 7
 17 -14 -5 12758.8 2143.52 9
 17 14 -5 10347 1917.65 7
 16 -14 -5 3497 1171.51 9
 16 14 -5 3955.39 1171.22 7
 15 -14 -5 18772.2 2395.22 9
 15 14 -5 19176.3 2455.57 7
 15 14 -5 20778.3 2293.32 3
 14 14 -5 1597.74 659.749 3
 14 -14 -5 3035.21 975.292 9
 14 14 -5 2818.05 990.201 7
 13 -14 -5 13351.3 1858.47 8
 13 14 -5 12538.7 1747.59 3
 13 14 -5 11115.8 1809.08 7
 13 -14 -5 12065.1 1820.64 9
 12 -14 -5 3364.7 938.621 9
 12 14 -5 2332.64 805.438 7
 12 -14 -5 3101.75 834.849 8
 12 14 -5 3051.25 888.929 3
 11 14 -5 13308.9 1857.77 7
 11 -14 -5 16664.6 1932.76 8
 -11 14 5 16607.2 1789.64 4
 11 14 -5 13978.3 1810.35 3
 11 -14 -5 16188.7 1992.41 9
 10 14 -5 41799.8 3143.45 3
 10 -14 -5 46116.3 3182.08 8
 -10 14 5 48749 2983.78 4
 10 14 -5 46838.7 3409.41 7
 -10 -14 5 43411.8 2693.5 4
 10 -14 -5 44112.9 3278.92 9
 9 -14 -5 2691.23 778.879 8
 9 14 -5 3495.52 916.803 7
 9 14 -5 4433.82 1002.31 3
 -9 -14 5 2856.36 647.39 4
 9 -14 -5 3232.08 932.718 9
 -9 14 5 4325.15 812.471 4
 8 -14 -5 37384.6 2904.75 9
 8 -14 -5 40225.7 2853.94 8
 8 14 -5 35289.3 2821.94 3
 8 14 -5 42410.6 3102.08 7
 -8 14 5 44740.9 2561.17 4
 -8 -14 5 46054.8 2461.23 4
 7 -14 -5 11655.2 1499.27 8
 7 -14 -5 12187.1 1592.19 9
 7 14 -5 8083.15 1327.6 7
 7 14 -5 11204.1 1535.72 3
 -7 -14 5 9962.1 1053.83 4
 -7 14 5 10450.3 1131.56 4
 6 -14 -5 56414.6 3514.63 9
 -6 -14 5 56551.5 2551.33 4
 -6 14 5 62888 2815.44 4
 6 14 -5 50829 3330.23 7
 5 -14 -5 47519.4 3157.99 9
 -5 14 5 45035.1 3349.88 7
 -5 -14 5 46290.4 2145.56 4
 5 14 -5 38565.7 2857.66 7
 -5 14 5 51060.1 2374.98 4
 -4 14 5 9410.22 914.105 4
 -4 -14 5 9994.59 873.931 4
 4 14 -5 8760.59 1261.74 7
 -4 14 5 9990.85 1503.13 7
 -3 -14 5 41138.4 1870.66 4
 -3 14 5 43773.4 2022.35 4
 3 14 -5 37462.3 2722.33 7
 -3 14 5 39567.9 3072.6 7
 2 -14 -5 736.222 241.299 6
 -2 -14 5 487.77 209.206 4
 -2 14 5 1249.1 633.489 7
 2 14 -5 700.607 471.167 7
 -2 14 5 925.793 290.756 4
 -1 14 5 61590.8 2445.48 4
 -1 -14 5 55827.6 3287.45 9
 -1 14 5 54318 3600.84 7
 1 14 -5 54443.1 3355.15 7
 -1 -14 5 58121.9 2327.17 4
 0 14 5 8752.08 853.484 4
 0 -14 5 8099.88 1240.64 9
 0 14 5 7817.11 1318.86 7
 0 14 -5 7782.1 1139.99 2
 0 14 -5 8439.52 1288.75 7
 1 -14 5 34150.4 2540.75 9
 1 14 5 28165 2551.01 7
 -1 14 -5 32560.3 2379.24 2
 2 -14 5 26729.7 2342.85 9
 -2 14 -5 27612.2 2220.04 2
 2 14 5 30198.1 2635.17 7
 3 14 5 13697.2 1800.91 7
 -3 14 -5 13415.3 1581.07 2
 3 -14 5 12313.1 1629.72 9
 4 14 5 70489.6 4284.33 7
 4 -14 5 80032.7 4309.14 9
 -4 14 -5 72960.5 3938.66 2
 5 -14 5 5185.84 1111.55 9
 -5 14 -5 4371.35 921.457 2
 5 14 5 5013.49 1131.48 7
 6 -14 5 34655.5 2901.78 9
 6 14 5 26132.3 2627.01 7
 -6 14 -5 29193.5 2541.11 2
 -7 14 -5 27826.6 2567.55 2
 7 14 5 26176.1 2686.81 7
 7 -14 5 34793.6 2993.47 9
 8 -14 5 12222.2 1807.84 9
 8 14 5 9920.68 1714.03 7
 -8 14 -5 10127.4 1584.31 2
 9 -14 5 37658.2 3342.93 9
 9 14 5 33821.5 3200.97 7
 -9 14 -5 30926.4 2912.63 2
 10 -14 5 3195.7 1075.6 9
 10 14 5 1240.85 738.235 7
 -10 14 -5 1128.58 666.835 2
 11 -14 5 25183.7 2901.39 9
 11 14 5 23661.3 2795.54 7
 -11 14 -5 23434.9 2684.87 2
 12 14 5 4296.94 1241.51 7
 12 -14 5 6368.11 1513.37 9
 -12 14 -5 5042.62 1285.68 2
 -13 14 -5 11418 2006.28 2
 -14 14 -5 11573.3 2115.55 2
 16 -15 -5 988.387 636.583 9
 16 15 -5 1830.3 966.257 7
 15 15 -5 389.743 689.989 7
 15 15 -5 676.786 563.835 3
 15 -15 -5 1240.22 781.38 9
 14 15 -5 4100.15 1046.6 3
 14 15 -5 2923.27 1046.15 7
 13 -15 -5 8.87081 422.181 9
 13 -15 -5 -516.164 437.338 8
 13 15 -5 388.119 564.751 7
 13 15 -5 1276.96 706.197 3
 12 -15 -5 9323.16 1589.09 9
 12 -15 -5 5807.54 1171.87 8
 12 15 -5 4923 1088.78 3
 12 15 -5 7105.82 1452.49 7
 11 -15 -5 4052.11 963.207 8
 11 -15 -5 4852.87 1164.85 9
 11 15 -5 4211.14 1011.42 3
 11 15 -5 3592.2 982.2 7
 10 15 -5 6441.45 1274.85 3
 10 -15 -5 8276.81 1378.45 8
 10 15 -5 5873.78 1231.03 7
 10 -15 -5 8402.8 1479.58 9
 9 -15 -5 14763.4 1758.75 8
 9 15 -5 14879.2 1831.27 3
 9 15 -5 13994.9 1839.61 7
 9 -15 -5 13263.3 1761.3 9
 8 -15 -5 -230.202 428.162 9
 8 15 -5 -199.112 259.627 7
 8 -15 -5 -388.3 382.661 8
 7 -15 -5 23733.6 2215.91 8
 7 15 -5 17526 1992.18 7
 7 -15 -5 21246.1 2195.65 9
 6 15 -5 4719.09 1027.8 7
 6 -15 -5 4995.5 1061.8 9
 5 -15 -5 15391 1863.29 9
 5 15 -5 16570.3 1892.98 7
 -5 15 5 20320 2287.09 7
 4 15 -5 14043.3 1712.29 7
 -4 15 5 12427.1 1762.57 7
 3 15 -5 47.4518 295.27 7
 -3 15 5 444.785 436.453 7
 -2 15 5 16395.7 2021.84 7
 2 15 -5 16794.1 1830.91 7
 -1 -15 5 2457.42 734.289 9
 -1 15 5 3005.07 871.905 7
 1 15 -5 1919.67 686.7 7
 0 -15 5 20178.8 1982.4 9
 0 15 -5 21196.3 1913.74 2
 0 15 5 19343.7 2188.93 7
 0 15 -5 22825.4 2179.68 7
 1 -15 5 27641.5 2350.42 9
 1 15 5 22620.6 2366.03 7
 -1 15 -5 27269.3 2210.16 2
 2 -15 5 2250.15 755.448 9
 2 15 5 2847.84 848.768 7
 -2 15 -5 1999.8 690.386 2
 3 15 5 20128.5 2261.29 7
 -3 15 -5 20279.4 1959.18 2
 3 -15 5 20205.1 2172.96 9
 -4 15 -5 6431.03 1145.87 2
 4 15 5 3853.46 1001.46 7
 4 -15 5 3543.33 935.921 9
 -5 15 -5 5139.96 1036.35 2
 5 -15 5 4878.24 1084.93 9
 5 15 5 5045.82 1156.57 7
 -6 15 -5 3961.59 941.938 2
 6 15 5 2461.9 882.978 7
 6 -15 5 3689.17 983.908 9
 7 15 5 6798.74 1404 7
 7 -15 5 4150.49 1063.38 9
 -7 15 -5 3812.11 1020.92 2
 8 -15 5 9705.75 1644.59 9
 8 15 5 7649.61 1560.26 7
 -8 15 -5 7395.14 1368.89 2
 9 -15 5 2025.27 814.74 9
 9 15 5 2023.18 833.539 7
 -9 15 -5 2803.99 920.213 2
 10 -15 5 7516.56 1557.25 9
 10 15 5 9775.26 1795.51 7
 -10 15 -5 5926.97 1289.83 2
 -11 15 -5 1864.09 791.792 2
 11 15 5 2913.73 935.95 7
 11 -15 5 464.783 517.786 9
 16 16 -5 2131.19 935.069 7
 15 -16 -5 30822.7 3171.65 9
 15 16 -5 25608.9 2690.05 3
 15 16 -5 27886.2 3130.44 7
 14 -16 -5 826.506 579.893 9
 14 16 -5 170.755 390.407 3
 14 16 -5 654.609 737.647 7
 13 -16 -5 28326.9 2925.93 9
 13 -16 -5 26401.6 2623.69 8
 13 16 -5 26708.2 2905.19 7
 13 16 -5 27625.8 2748.76 3
 12 -16 -5 4255.7 1124.18 9
 12 16 -5 7185.06 1450.58 7
 12 16 -5 5855.81 1231.88 3
 12 -16 -5 3470.96 891.428 8
 11 16 -5 15118 1961.59 3
 11 -16 -5 19601.3 2143.36 8
 11 16 -5 13814.1 1961.24 7
 11 -16 -5 15295 2039.54 9
 10 16 -5 48577.3 3575.36 3
 10 -16 -5 45877.8 3360.72 8
 10 16 -5 49467.9 3734.59 7
 10 -16 -5 46122.6 3553.39 9
 9 -16 -5 556.707 506.063 8
 9 -16 -5 1778.15 760.182 9
 9 16 -5 7.50743 414.091 3
 9 16 -5 514.902 613.46 7
 8 -16 -5 24404.2 2305.89 8
 8 16 -5 19583.9 2162.64 3
 8 16 -5 18598 2165.2 7
 8 -16 -5 21802.9 2304.68 9
 7 -16 -5 16465.7 1851.28 8
 7 -16 -5 15923.7 1943.96 9
 7 16 -5 14305.6 1879.5 7
 6 16 -5 40366.6 3144.15 7
 6 -16 -5 44272.1 3257.23 9
 5 -16 -5 27820.7 2555.34 9
 5 16 -5 30404.7 2682.08 7
 -5 16 5 32644 3017.79 7
 4 16 -5 3197.75 842.503 7
 -4 16 5 2328.05 831.592 7
 3 16 -5 48686.5 3362.47 7
 -3 16 5 44143.1 3512.76 7
 2 16 -5 2488.05 810.462 7
 -2 -16 5 3853.22 884.641 9
 -2 16 5 1319.58 667.205 7
 -1 -16 5 59491.6 3630.31 9
 -1 16 5 61218.7 4080.98 7
 1 16 -5 55937.7 3670.3 7
 0 16 5 19474.1 2243.11 7
 0 16 -5 20223.9 2189.91 7
 0 -16 5 22318.2 2163.73 9
 -1 16 -5 16375.9 1732.09 2
 1 16 5 14726.1 1991.39 7
 1 -16 5 19957.7 2067.17 9
 2 16 5 32758.9 2968.23 7
 -2 16 -5 33885.4 2547.65 2
 2 -16 5 33520.3 2766.11 9
 -3 16 -5 4773.75 984.001 2
 3 16 5 5392.94 1233.05 7
 3 -16 5 2546.49 846.182 9
 4 16 5 28672 2824.78 7
 -4 16 -5 28415.4 2469.51 2
 4 -16 5 32402.9 2803.88 9
 -5 16 -5 2411.58 702.65 2
 5 16 5 2757.15 902.843 7
 5 -16 5 3261.18 983.104 9
 -6 16 -5 20501.3 2139.12 2
 6 16 5 19791.9 2402.39 7
 6 -16 5 24000.7 2516.94 9
 7 -16 5 9580.07 1633.16 9
 7 16 5 8305.4 1612.48 7
 -7 16 -5 8610.76 1402.76 2
 8 -16 5 8141.71 1562.32 9
 8 16 5 7510.01 1532.05 7
 -8 16 -5 5515.81 1167.03 2
 9 -16 5 28373 2993.41 9
 -9 16 -5 28769 2806.53 2
 9 16 5 27207.4 2975.9 7
 10 -16 5 734.801 596.55 9
 10 16 5 -413.799 495.966 7
 11 -16 5 18921 2579.64 9
 11 16 5 15848.6 2403.61 7
 15 -17 -5 311.751 544.434 9
 15 17 -5 -484.613 563.309 7
 14 -17 -5 520.439 539.359 8
 14 17 -5 3381.63 1018.78 3
 14 -17 -5 1198.53 623.632 9
 14 17 -5 3278.77 1128.03 7
 13 -17 -5 1919.79 842.334 9
 13 17 -5 1282.93 718.301 3
 13 17 -5 546.836 679.859 7
 13 -17 -5 -363.33 486.665 8
 12 -17 -5 442.286 434.538 9
 12 17 -5 707.299 549.244 3
 12 17 -5 359.713 418.864 7
 12 -17 -5 -125.869 325.077 8
 11 -17 -5 1094.86 612.068 8
 11 17 -5 994.744 618.387 7
 11 17 -5 567.155 480.281 3
 11 -17 -5 -287.388 438.482 9
 10 -17 -5 3092.32 997.415 9
 10 -17 -5 3251.91 872.35 8
 10 17 -5 1521.93 663.592 3
 10 17 -5 2613.12 947.995 7
 9 -17 -5 13109.6 1752.64 8
 9 17 -5 13063.8 1852.84 3
 9 17 -5 10375.9 1700.39 7
 9 -17 -5 14182.9 1943.63 9
 8 -17 -5 5066.7 1177.7 9
 8 17 -5 4156.05 1056.06 3
 8 -17 -5 4594.44 1070.62 8
 8 17 -5 4786.8 1102.73 7
 7 -17 -5 713.636 367.219 9
 7 17 -5 307.354 360.014 7
 6 -17 -5 2440.98 861.471 9
 6 17 -5 1096.8 548.222 7
 5 -17 -5 2022.82 792.842 9
 5 17 -5 2501.82 860.382 7
 -5 17 5 2567.02 938.145 7
 4 17 -5 6607.16 1291.74 7
 -4 17 5 6488.28 1404.04 7
 -3 17 5 1319.55 777.383 7
 3 17 -5 1167.08 564.123 7
 -2 17 5 591.743 451.954 7
 2 17 -5 1311.8 673.79 7
 -2 -17 5 387.641 250.078 9
 -1 17 5 547.296 542.634 7
 1 17 -5 585.845 429.778 7
 -1 -17 5 568.398 518.44 9
 0 17 5 3001.91 960.786 7
 0 17 -5 3500.96 950.351 7
 0 -17 5 4346.81 1010.4 9
 1 -17 5 2476.55 778.13 9
 1 17 5 1835.05 777.728 7
 -1 17 -5 2817.25 708.404 2
 2 -17 5 5073.44 1109.61 9
 2 17 5 2924.9 863.414 7
 -2 17 -5 4251.1 917.372 2
 3 17 5 453.804 516.038 7
 -3 17 -5 463.082 411.514 2
 3 -17 5 1528.15 612.887 9
 4 -17 5 1293.91 585.847 9
 4 17 5 906.205 566.479 7
 -4 17 -5 883.766 516.321 2
 -5 17 -5 8885.75 1431.26 2
 5 -17 5 8365.62 1490.74 9
 5 17 5 8416.57 1618.21 7
 -6 17 -5 5030.49 1081.84 2
 6 -17 5 5821.8 1280.31 9
 6 17 5 6494.66 1424 7
 7 -17 5 256.081 514.71 9
 7 17 5 2069.99 923.547 7
 8 17 5 110.261 343.436 7
 8 -17 5 702.541 522.303 9
 9 17 5 1579.75 835.28 7
 9 -17 5 2000.22 821.336 9
 10 -17 5 5484.72 1436.9 9
 10 17 5 5666.1 1388.93 7
 15 18 -5 20209.7 2496.28 3
 14 -18 -5 1127.57 633.244 8
 14 18 -5 1245.13 694.698 3
 14 18 -5 4179.03 1337.11 7
 14 -18 -5 3391.63 1093.2 9
 13 -18 -5 13591.8 2120.74 9
 13 -18 -5 15460.6 2048.69 8
 13 18 -5 15335 2143.9 3
 13 18 -5 15707.5 2351.75 7
 12 -18 -5 8829.39 1643.2 9
 12 18 -5 8517.98 1578.85 3
 12 18 -5 7871.85 1596.41 7
 12 -18 -5 8379.21 1481.51 8
 11 -18 -5 6579.22 1313.22 8
 11 18 -5 4784.53 1233.14 7
 11 18 -5 6019.98 1276.58 3
 11 -18 -5 5694.65 1326.88 9
 10 -18 -5 32690.9 2893.96 8
 10 18 -5 33430.8 3084.5 3
 10 18 -5 29395.6 3038.36 7
 10 -18 -5 37514.2 3318.4 9
 9 -18 -5 1693.75 728.901 8
 9 18 -5 654.443 599.011 3
 9 18 -5 584.876 565.347 7
 9 -18 -5 392.517 608.961 9
 8 -18 -5 25879.8 2712.02 9
 8 -18 -5 25785.6 2515.65 8
 8 18 -5 26803.4 2673.75 3
 8 18 -5 21999.4 2542.2 7
 7 -18 -5 7168.1 1434.42 9
 7 18 -5 6031.8 1257.33 7
 6 -18 -5 23910.8 2519.42 9
 6 18 -5 20276.8 2361.31 7
 5 18 -5 21209.4 2355.57 7
 -5 18 5 17934.8 2401.81 7
 5 -18 -5 19907.7 2345.04 9
 4 18 -5 9842.38 1590.14 7
 -4 18 5 9126.86 1740.13 7
 3 18 -5 44173.3 3460.07 7
 -3 18 5 43789.7 3706.92 7
 -2 18 5 922.79 618.331 7
 2 18 -5 1555.75 720.823 7
 -2 -18 5 2059.37 784.637 9
 -1 -18 5 37292.7 3030.16 9
 -1 18 5 33191 3202.14 7
 1 18 -5 31248.1 2906.52 7
 0 -18 5 17398.3 2034.15 9
 0 18 5 12870.7 2036.03 7
 0 18 -5 12105.4 1805.65 7
 1 18 5 19999.6 2459.24 7
 1 -18 5 24840.8 2484.15 9
 -2 18 -5 22604.8 2120.84 2
 2 18 5 25209.3 2765.09 7
 2 -18 5 26002.9 2548.56 9
 3 -18 5 2501.92 871.859 9
 3 18 5 1465.95 685.639 7
 4 18 5 30625.7 3108.97 7
 4 -18 5 36659.2 3149.5 9
 5 18 5 2174.55 801.359 7
 5 -18 5 3632.95 1060.8 9
 6 18 5 8508.28 1688.62 7
 6 -18 5 8320.33 1572.27 9
 7 -18 5 11384.9 1874.26 9
 7 18 5 10029.2 1834.33 7
 8 -18 5 10223.8 1836.76 9
 8 18 5 12445.6 2060.4 7
 9 18 5 19193.6 2631.88 7
 9 -18 5 25980.7 2969.86 9
 14 19 -5 -1353.82 739.291 3
 14 -19 -5 -507.988 481.796 8
 13 -19 -5 -213.072 541.505 8
 13 19 -5 168.954 343.291 3
 13 -19 -5 371.533 526.923 9
 12 -19 -5 1906.6 861.829 9
 12 -19 -5 757.786 536.191 8
 12 19 -5 616.998 494.329 3
 12 19 -5 1446.03 858.997 7
 11 19 -5 1318.21 530.463 3
 11 -19 -5 2415.65 846.951 8
 11 19 -5 187.331 382.303 7
 11 -19 -5 1358.23 763.982 9
 10 -19 -5 1276.24 643.378 9
 10 -19 -5 2813.91 822.33 8
 10 19 -5 1522.89 766.515 3
 10 19 -5 594.531 597.647 7
 9 -19 -5 5803.21 1234.24 8
 9 -19 -5 4706.37 1206.98 9
 9 19 -5 4064.38 1096.23 3
 9 19 -5 3887.1 1175.69 7
 8 -19 -5 1419.35 775.501 8
 8 19 -5 636.566 351.114 7
 8 -19 -5 2428.15 956.173 9
 7 -19 -5 -481.426 463.809 9
 7 19 -5 -356.454 617.521 7
 6 -19 -5 231.26 531.554 9
 6 19 -5 -1690.41 741.804 7
 5 19 -5 1142.49 537.79 7
 5 -19 -5 1748.99 795.18 9
 4 19 -5 1797.85 609.226 7
 -4 19 5 2071.33 1000.92 7
 3 19 -5 399.169 598.532 7
 -3 19 5 224.265 420.41 7
 -2 -19 5 292.817 420.926 9
 -2 19 5 133.496 353.793 7
 2 19 -5 -111.772 348.057 7
 -1 -19 5 47.2005 534.653 9
 -1 19 5 513.658 406.249 7
 1 19 -5 228.106 366.474 7
 0 -19 5 5478.69 1216.65 9
 0 19 -5 5347.34 1235.31 7
 0 19 5 6833.68 1480.25 7
 1 -19 5 2032.76 706.331 9
 1 19 5 2208.61 847.191 7
 2 -19 5 -6.30347 494.565 9
 2 19 5 506.127 550.135 7
 3 -19 5 -228.203 321.452 9
 3 19 5 523.223 338.192 7
 4 -19 5 647.218 617.045 9
 4 19 5 2272.27 912.197 7
 5 -19 5 1591.08 757.753 9
 5 19 5 1255.02 660.874 7
 6 -19 5 1437.76 736.654 9
 6 19 5 583.167 375.88 7
 7 -19 5 -211.811 430.078 9
 7 19 5 -166.754 495.506 7
 8 -19 5 -243.469 467.088 9
 8 19 5 845.677 767.693 7
 9 -19 5 810.624 660.535 9
 13 -20 -5 17991.4 2322.01 8
 13 20 -5 19958.3 2771.24 7
 12 20 -5 8648.23 1695.88 3
 12 -20 -5 5841.32 1442.87 9
 12 -20 -5 6236.22 1406.01 8
 12 20 -5 9658.37 1894.2 7
 11 20 -5 13119.1 2143.06 7
 11 -20 -5 17315.6 2207.62 8
 11 20 -5 12441.4 1968.77 3
 11 -20 -5 17937.6 2440.34 9
 10 -20 -5 26076.3 2690.78 8
 10 20 -5 25458.1 2783.11 3
 10 -20 -5 26648.2 2972.91 9
 10 20 -5 23239.5 2842.29 7
 9 -20 -5 2549.35 989.633 8
 9 20 -5 1702.54 845.106 3
 9 20 -5 1028.9 617.796 7
 9 -20 -5 1232.27 826.992 9
 8 -20 -5 28303.6 2764.71 8
 8 20 -5 26045.4 2965.49 7
 8 -20 -5 25081.4 2795.83 9
 7 -20 -5 4892.78 1237.86 9
 7 20 -5 3462.5 1043.93 7
 6 20 -5 13728.4 2058.47 7
 6 -20 -5 16902.9 2270.99 9
 5 -20 -5 14605.5 2108.81 9
 5 20 -5 11587.2 1891.14 7
 4 20 -5 15095.4 2131.19 7
 -4 20 5 14515.5 2275.63 7
 4 -20 -5 14895.4 2094.41 9
 3 20 -5 30817.6 3074.28 7
 -3 20 5 25815.7 3044.97 7
 2 20 -5 977.675 533.421 7
 -2 -20 5 1632.54 758.192 9
 1 20 -5 23623.6 2674.7 7
 -1 20 5 19247.5 2579.73 7
 -1 -20 5 21331.3 2398.6 9
 0 -20 5 15601 2074.97 9
 0 20 5 16044.7 2336.3 7
 0 20 -5 11090.1 1863.07 7
 1 -20 5 16419.1 2156.23 9
 1 20 5 15900.3 2325.32 7
 2 20 5 22114.6 2767.81 7
 2 -20 5 21576.7 2497.12 9
 3 -20 5 1090.58 720.548 9
 3 20 5 1282.4 741.013 7
 4 -20 5 30497.9 3057.4 9
 4 20 5 33495.5 3417.8 7
 5 -20 5 2844.48 1065.55 9
 5 20 5 2946.47 987.305 7
 6 -20 5 15630.9 2259.64 9
 6 20 5 12436.7 2151.41 7
 7 20 5 17538.2 2577.3 7
 7 -20 5 14155.4 2256.29 9
 8 -20 5 8278.15 1695.58 9
 11 -21 -5 1308 738.957 8
 11 21 -5 180.913 389.106 7
 10 21 -5 882.455 644.491 3
 10 -21 -5 170.1 556.761 8
 10 21 -5 -290.415 565.559 7
 10 -21 -5 403.145 408.963 9
 9 -21 -5 1178.1 653.008 8
 9 21 -5 380.944 381.861 3
 9 21 -5 1061.7 780.356 7
 9 -21 -5 -125.073 427.979 9
 8 21 -5 803.027 566.372 7
 8 -21 -5 1741.01 721.087 8
 8 -21 -5 1080.73 698.565 9
 7 21 -5 119.546 476.216 7
 7 -21 -5 646.465 457.71 9
 6 -21 -5 445.441 475.926 9
 6 21 -5 574.121 574.17 7
 5 -21 -5 471.343 655.263 9
 5 21 -5 461.24 475.327 7
 4 -21 -5 2.49492 343.525 9
 -4 21 5 769.824 664.475 7
 4 21 -5 750.318 543.248 7
 -3 -21 5 1220.43 597.237 9
 3 21 -5 96.5757 417.441 7
 -3 21 5 81.2737 454.744 7
 -2 -21 5 786.888 579.418 9
 -2 21 5 1351.28 847.901 7
 2 21 -5 649.139 487.611 7
 -1 -21 5 625.157 397.699 9
 -1 21 5 1527.48 749.018 7
 1 21 -5 -526.865 510.239 7
 0 -21 5 2094.16 864.34 9
 0 21 5 1674.64 841.369 7
 1 21 5 726.442 577.057 7
 1 -21 5 1519.73 774.045 9
 2 21 5 1461.57 754.563 7
 2 -21 5 33.3338 515.078 9
 3 21 5 1505 889.132 7
 3 -21 5 972.789 651.207 9
 4 -21 5 -156.478 422.42 9
 4 21 5 1043.67 699.407 7
 5 21 5 300.78 674.833 7
 5 -21 5 289.946 430.786 9
 6 -21 5 424.123 697.616 9
 6 21 5 -333.872 619.889 7
 10 22 -5 9655.18 1918.85 7
 9 -22 -5 1401.9 674.499 8
 9 -22 -5 218.87 568.423 9
 9 22 -5 2165.75 838.84 7
 8 -22 -5 19184.6 2367.96 8
 8 -22 -5 18346.1 2565.74 9
 8 22 -5 19231.8 2663.41 7
 7 22 -5 2109.04 910.502 7
 7 -22 -5 1309.62 795.715 9
 6 22 -5 22954.9 2871.36 7
 6 -22 -5 24450.9 2891.2 9
 5 -22 -5 11324.6 2027.22 9
 5 22 -5 11328 2013.19 7
 4 -22 -5 7634.17 1616.34 9
[truncated: 595,705 more chars]
