# Supplementary material
Source: publisher figshare collection journal article supplement (https://acs.figshare.com/ndownloader/files/4205155)
Supplement: Supplementary file 27 [file 4205155 › CIFs/Mg/MgEr/MgEr.cif]

data_MgEr
_audit_creation_date              2015-02-16
_audit_creation_method
;
Olex2 1.2
(compiled 2015.01.26 svn.r3151 for OlexSys, GUI svn.r4998)
;
_publ_contact_author_address      
;
The University of Manchester
School of Chemistry
Oxford Road, 
Manchester
M13 9PL
United Kingdom
;
_publ_contact_author_email        eufemio.morenopineda@manchester.ac.uk
_publ_contact_author_name         'Eufemio Moreno Pineda'
_publ_contact_author_phone        '+44 074 1192 4293'
_publ_section_references
;
Dolomanov, O.V., Bourhis, L.J., Gildea, R.J, Howard, J.A.K. & Puschmann, H.
 (2009), J. Appl. Cryst. 42, 339-341.

Palatinus, L. & Chapuis, G. (2007). J. Appl. Cryst., 40, 786-790;
Palatinus, L. & van der Lee, A. (2008). J. Appl. Cryst. 41, 975-984;
Palatinus, L., Prathapa, S. J. & van Smaalen, S. (2012). J. Appl. Cryst. 45,
 575-580.

Sheldrick, G.M. (2008). Acta Cryst. A64, 112-122.
;
_chemical_name_common             ?
_chemical_name_systematic         ?
_chemical_formula_moiety          'C50 H90 Er2 Mg2 O22, 2(C6 H16 N)'
_chemical_formula_sum             'C62 H122 Er2 Mg2 N2 O22'
_chemical_formula_weight          1630.75
_chemical_melting_point           ?
loop_
  _atom_type_symbol
  _atom_type_description
  _atom_type_scat_dispersion_real
  _atom_type_scat_dispersion_imag
  _atom_type_scat_source
 'C' 'C' 0.0033 0.0016 'International Tables Vol C Tables 4.2.6.8 and 6.1.1.4'
 'H' 'H' 0.0000 0.0000 'International Tables Vol C Tables 4.2.6.8 and 6.1.1.4'
 'Er' 'Er' -0.2586 4.9576
 'International Tables Vol C Tables 4.2.6.8 and 6.1.1.4'
 'Mg' 'Mg' 0.0486 0.0363 'International Tables Vol C Tables 4.2.6.8 and 6.1.1.4'
 'N' 'N' 0.0061 0.0033 'International Tables Vol C Tables 4.2.6.8 and 6.1.1.4'
 'O' 'O' 0.0106 0.0060 'International Tables Vol C Tables 4.2.6.8 and 6.1.1.4'

_shelx_space_group_comment
;
The symmetry employed for this shelxl refinement is uniquely defined
by the following loop, which should always be used as a source of
symmetry information in preference to the above space-group names.
They are only intended as comments.
;
_space_group_crystal_system       'triclinic'
_space_group_IT_number            2
_space_group_name_H-M_alt         'P -1'
_space_group_name_Hall            '-P 1'
loop_
  _space_group_symop_operation_xyz
 'x, y, z'
 '-x, -y, -z'

_cell_length_a                    12.9581(7)
_cell_length_b                    14.1259(6)
_cell_length_c                    14.2362(6)
_cell_angle_alpha                 98.689(4)
_cell_angle_beta                  107.817(4)
_cell_angle_gamma                 116.987(5)
_cell_volume                      2077.64(19)
_cell_formula_units_Z             1
_cell_measurement_reflns_used     7123
_cell_measurement_temperature     150.0(2)
_cell_measurement_theta_max       28.6810
_cell_measurement_theta_min       3.2670
_shelx_estimated_absorpt_T_max    ?
_shelx_estimated_absorpt_T_min    ?
_exptl_absorpt_coefficient_mu     2.083
_exptl_absorpt_correction_T_max   1.00000
_exptl_absorpt_correction_T_min   0.74304
_exptl_absorpt_correction_type    multi-scan
_exptl_absorpt_process_details
;
CrysAlisPro, Agilent Technologies,
Version 1.171.36.28 (release 01-02-2013 CrysAlis171 .NET)
(compiled Feb  1 2013,16:14:44)
Empirical absorption correction using spherical harmonics,
 implemented in SCALE3 ABSPACK scaling algorithm.
;
_exptl_absorpt_special_details    ?
_exptl_crystal_colour             'clear pink'
_exptl_crystal_colour_lustre      clear
_exptl_crystal_colour_primary     pink
_exptl_crystal_density_diffrn     1.303
_exptl_crystal_density_meas       ?
_exptl_crystal_density_method     ?
_exptl_crystal_description        rhombohedral
_exptl_crystal_F_000              844
_exptl_crystal_size_max           0.1
_exptl_crystal_size_mid           0.08
_exptl_crystal_size_min           0.07
_exptl_transmission_factor_max    ?
_exptl_transmission_factor_min    ?
_diffrn_reflns_av_R_equivalents   0.0391
_diffrn_reflns_av_unetI/netI      0.0801
_diffrn_reflns_Laue_measured_fraction_full 0.993
_diffrn_reflns_Laue_measured_fraction_max 0.989
_diffrn_reflns_limit_h_max        13
_diffrn_reflns_limit_h_min        -16
_diffrn_reflns_limit_k_max        17
_diffrn_reflns_limit_k_min        -16
_diffrn_reflns_limit_l_max        17
_diffrn_reflns_limit_l_min        -16
_diffrn_reflns_number             12575
_diffrn_reflns_point_group_measured_fraction_full 0.993
_diffrn_reflns_point_group_measured_fraction_max 0.989
_diffrn_reflns_theta_full         25.242
_diffrn_reflns_theta_max          26.371
_diffrn_reflns_theta_min          3.158
_diffrn_ambient_temperature       150.0(2)
_diffrn_detector_area_resol_mean  16.1428
_diffrn_measured_fraction_theta_full 0.993
_diffrn_measured_fraction_theta_max 0.989
_diffrn_measurement_details
;
#__ type_ start__ end____ width___ exp.time_
  1 omega   19.00   62.00   1.0000    1.0000
omega____ theta____ kappa____ phi______ frames
    -       20.8673  -99.0000   90.0000 43

#__ type_ start__ end____ width___ exp.time_
  2 omega  -10.00   93.00   1.0000    1.0000
omega____ theta____ kappa____ phi______ frames
    -       20.8673   77.0000  -30.0000 103

#__ type_ start__ end____ width___ exp.time_
  3 omega  -10.00   81.00   1.0000    1.0000
omega____ theta____ kappa____ phi______ frames
    -       20.8673   77.0000 -150.0000 91

#__ type_ start__ end____ width___ exp.time_
  4 omega  -66.00   40.00   1.0000    1.0000
omega____ theta____ kappa____ phi______ frames
    -      -21.1798   19.0000  150.0000 106
;
_diffrn_measurement_device_type   'SuperNova, Single source at offset, Eos'
_diffrn_measurement_method        '\w scans'
_diffrn_orient_matrix_UB_11       0.0620112000
_diffrn_orient_matrix_UB_12       0.0269565000
_diffrn_orient_matrix_UB_13       0.0011768000
_diffrn_orient_matrix_UB_21       0.0260629000
_diffrn_orient_matrix_UB_22       0.0333056000
_diffrn_orient_matrix_UB_23       0.0533498000
_diffrn_orient_matrix_UB_31       0.0090063000
_diffrn_orient_matrix_UB_32       -0.0419410000
_diffrn_orient_matrix_UB_33       0.0159170000
_diffrn_radiation_monochromator   mirror
_diffrn_radiation_type            MoK\a
_diffrn_radiation_wavelength      0.71073
_diffrn_source                    'SuperNova (Mo) X-ray Source'
_reflns_Friedel_coverage          0.000
_reflns_Friedel_fraction_full     .
_reflns_Friedel_fraction_max      .
_reflns_number_gt                 7318
_reflns_number_total              8395
_reflns_odcompleteness_completeness 98.97
_reflns_odcompleteness_iscentric  1
_reflns_odcompleteness_theta      26.32
_reflns_special_details
;
The structure contains large solvent 
accessible voids. However, the location of discrete solvent molecules
could not be determined by simple refinement.
A red alert due to big solvent Voids was encountered during the check cif.

 Reflections were merged by SHELXL according to the crystal
 class for the calculation of statistics and refinement.
 
 _reflns_Friedel_fraction is defined as the number of unique
 Friedel pairs measured divided by the number that would be
 possible theoretically, ignoring centric projections and
 systematic absences.
;
_reflns_threshold_expression      'I > 2\s(I)'
_computing_cell_refinement
;
CrysAlisPro, Agilent Technologies,
Version 1.171.36.28 (release 01-02-2013 CrysAlis171 .NET)
(compiled Feb  1 2013,16:14:44)
;
_computing_data_collection
;
CrysAlisPro, Agilent Technologies,
Version 1.171.36.28 (release 01-02-2013 CrysAlis171 .NET)
(compiled Feb  1 2013,16:14:44)
;
_computing_data_reduction
;
CrysAlisPro, Agilent Technologies,
Version 1.171.36.28 (release 01-02-2013 CrysAlis171 .NET)
(compiled Feb  1 2013,16:14:44)
;
_computing_molecular_graphics     'Olex2 (Dolomanov et al., 2009)'
_computing_publication_material   'Olex2 (Dolomanov et al., 2009)'
_computing_structure_refinement   'ShelXL (Sheldrick, 2008)'
_computing_structure_solution
;
Superflip (Palatinus & Chapuis, 2007;Palatinus & van der Lee, 2008;
Palatinus et al., 2012)
;
_refine_diff_density_max          1.968
_refine_diff_density_min          -1.021
_refine_diff_density_rms          0.132
_refine_ls_extinction_coef        .
_refine_ls_extinction_method      none
_refine_ls_goodness_of_fit_ref    1.077
_refine_ls_hydrogen_treatment     constr
_refine_ls_matrix_type            full
_refine_ls_number_parameters      426
_refine_ls_number_reflns          8395
_refine_ls_number_restraints      12
_refine_ls_R_factor_all           0.0571
_refine_ls_R_factor_gt            0.0473
_refine_ls_restrained_S_all       1.090
_refine_ls_shift/su_max           0.001
_refine_ls_shift/su_mean          0.000
_refine_ls_structure_factor_coef  Fsqd
_refine_ls_weighting_details
'w=1/[\s^2^(Fo^2^)+(0.0380P)^2^+1.7290P] where P=(Fo^2^+2Fc^2^)/3'
_refine_ls_weighting_scheme       calc
_refine_ls_wR_factor_gt           0.1041
_refine_ls_wR_factor_ref          0.1113
_refine_special_details           ?
_olex2_refinement_description
;
1. Fixed Uiso
 At 1.2 times of:
  All C(H) groups, All N(H,H) groups
 At 1.5 times of:
  All C(H,H,H) groups
2. Uiso/Uaniso restraints and constraints
Uanis(C5) \\sim Ueq, Uanis(C3) \\sim Ueq: with sigma of 0.01 and sigma for
terminal atoms of 0.01
Uanis(C15B) = Uanis(C14) = Uanis(C14B) = Uanis(C15) = Uanis(C13B) = Uanis(C13)
3. Others
 Sof(C13B)=Sof(H13D)=Sof(H13E)=Sof(H13F)=Sof(C14B)=Sof(H14D)=Sof(H14E)=
 Sof(H14F)=Sof(C15B)=Sof(H15D)=Sof(H15E)=Sof(H15F)=1-FVAR(1)
 Sof(C13)=Sof(H13A)=Sof(H13B)=Sof(H13C)=Sof(C14)=Sof(H14A)=Sof(H14B)=Sof(H14C)=
 Sof(C15)=Sof(H15A)=Sof(H15B)=Sof(H15C)=FVAR(1)
4.a Ternary CH refined with riding coordinates:
 C26(H26), C29(H29)
4.b Secondary CH2 refined with riding coordinates:
 N1(H1A,H1B)
4.c Idealised Me refined as rotating group:
 C3(H3A,H3B,H3C), C4(H4A,H4B,H4C), C5(H5A,H5B,H5C), C8(H8A,H8B,H8C), C9(H9A,
 H9B,H9C), C10(H10A,H10B,H10C), C18(H18A,H18B,H18C), C19(H19A,H19B,H19C),
 C20(H20A,H20B,H20C), C23(H23A,H23B,H23C), C24(H24A,H24B,H24C), C25(H25A,H25B,
 H25C), C13(H13A,H13B,H13C), C14(H14A,H14B,H14C), C15(H15A,H15B,H15C),
 C13B(H13D,H13E,H13F), C14B(H14D,H14E,H14F), C15B(H15D,H15E,H15F), C27(H27A,
 H27B,H27C), C28(H28A,H28B,H28C), C30(H30A,H30B,H30C), C31(H31A,H31B,H31C)
;
_atom_sites_solution_hydrogens    geom
_atom_sites_solution_primary      iterative
_atom_sites_solution_secondary    ?
loop_
  _atom_site_label
  _atom_site_type_symbol
  _atom_site_fract_x
  _atom_site_fract_y
  _atom_site_fract_z
  _atom_site_U_iso_or_equiv
  _atom_site_adp_type
  _atom_site_occupancy
  _atom_site_site_symmetry_order
  _atom_site_calc_flag
  _atom_site_refinement_flags_posn
  _atom_site_refinement_flags_adp
  _atom_site_refinement_flags_occupancy
  _atom_site_disorder_assembly
  _atom_site_disorder_group
 Er1 Er 0.46388(2) 0.66152(2) 0.13653(2) 0.02311(9) Uani 1 1 d . . . . .
 Mg1 Mg 0.48139(17) 0.42385(14) 0.07243(14) 0.0247(4) Uani 1 1 d . . . . .
 O1 O 0.3950(3) 0.7492(3) 0.2207(3) 0.0313(9) Uani 1 1 d . . . . .
 O2 O 0.3762(4) 0.8414(3) 0.3473(3) 0.0374(10) Uani 1 1 d . . . . .
 O3 O 0.6367(4) 0.8488(3) 0.1754(3) 0.0413(11) Uani 1 1 d . . . . .
 O4 O 0.6302(4) 0.3038(3) 0.0064(3) 0.0321(9) Uani 1 1 d . . . . .
 O5 O 0.3356(4) 0.5176(3) 0.1812(3) 0.0331(9) Uani 1 1 d . . . . .
 O6 O 0.3559(4) 0.3695(3) 0.1383(3) 0.0346(9) Uani 1 1 d . . . . .
 O7 O 0.6266(4) 0.7198(3) 0.3144(3) 0.0328(9) Uani 1 1 d . . . . .
 O8 O 0.5932(3) 0.5781(3) 0.1974(3) 0.0272(8) Uani 1 1 d . . . . .
 O14 O 0.4006(3) 0.5077(3) 0.0019(3) 0.0223(7) Uani 1 1 d . . . . .
 O15 O 0.6246(3) 0.7145(3) 0.0657(3) 0.0282(8) Uani 1 1 d . . . . .
 O30 O 0.5791(4) 0.3526(3) 0.1345(3) 0.0346(9) Uani 1 1 d . . . . .
 C1 C 0.3312(5) 0.7776(4) 0.2553(4) 0.0279(12) Uani 1 1 d . . . . .
 C2 C 0.1936(6) 0.7360(6) 0.1825(5) 0.060(2) Uani 1 1 d . . . . .
 C3 C 0.1137(8) 0.7119(10) 0.2433(8) 0.125(4) Uani 1 1 d . U . . .
 H3A H 0.0254 0.6768 0.1960 0.187 Uiso 1 1 calc GR . . . .
 H3B H 0.1409 0.7814 0.2938 0.187 Uiso 1 1 calc GR . . . .
 H3C H 0.1237 0.6621 0.2791 0.187 Uiso 1 1 calc GR . . . .
 C4 C 0.1379(6) 0.6324(6) 0.0894(5) 0.0504(18) Uani 1 1 d . . . . .
 H4A H 0.1878 0.6505 0.0497 0.076 Uiso 1 1 calc GR . . . .
 H4B H 0.0513 0.6078 0.0457 0.076 Uiso 1 1 calc GR . . . .
 H4C H 0.1392 0.5730 0.1138 0.076 Uiso 1 1 calc GR . . . .
 C5 C 0.1975(10) 0.8325(8) 0.1457(8) 0.125(4) Uani 1 1 d . U . . .
 H5A H 0.2599 0.8583 0.1176 0.187 Uiso 1 1 calc GR . . . .
 H5B H 0.2202 0.8935 0.2040 0.187 Uiso 1 1 calc GR . . . .
 H5C H 0.1148 0.8067 0.0923 0.187 Uiso 1 1 calc GR . . . .
 C6 C 0.6841(5) 0.8189(4) 0.1217(4) 0.0285(12) Uani 1 1 d . . . . .
 C7 C 0.8098(5) 0.9023(4) 0.1221(5) 0.0335(13) Uani 1 1 d . . . . .
 C8 C 0.8896(6) 0.8488(5) 0.1284(6) 0.0496(17) Uani 1 1 d . . . . .
 H8A H 0.8437 0.7804 0.0694 0.074 Uiso 1 1 calc GR . . . .
 H8B H 0.9064 0.8318 0.1922 0.074 Uiso 1 1 calc GR . . . .
 H8C H 0.9692 0.9005 0.1277 0.074 Uiso 1 1 calc GR . . . .
 C9 C 0.7788(7) 0.9267(6) 0.0193(6) 0.0576(19) Uani 1 1 d . . . . .
 H9A H 0.7224 0.9543 0.0135 0.086 Uiso 1 1 calc GR . . . .
 H9B H 0.7379 0.8585 -0.0388 0.086 Uiso 1 1 calc GR . . . .
 H9C H 0.8564 0.9827 0.0188 0.086 Uiso 1 1 calc GR . . . .
 C10 C 0.8821(6) 1.0103(5) 0.2174(6) 0.0520(18) Uani 1 1 d . . . . .
 H10A H 0.9620 1.0627 0.2176 0.078 Uiso 1 1 calc GR . . . .
 H10B H 0.8981 0.9921 0.2806 0.078 Uiso 1 1 calc GR . . . .
 H10C H 0.8315 1.0436 0.2137 0.078 Uiso 1 1 calc GR . . . .
 C11 C 0.6261(5) 0.3067(5) 0.0939(5) 0.0330(13) Uani 1 1 d . . . . .
 C12 C 0.6844(7) 0.2506(6) 0.1577(6) 0.0503(18) Uani 1 1 d . . . . .
 C16 C 0.3103(5) 0.4183(5) 0.1762(4) 0.0287(12) Uani 1 1 d . . . . .
 C17 C 0.2130(5) 0.3515(5) 0.2175(4) 0.0318(13) Uani 1 1 d . . . . .
 C18 C 0.1975(10) 0.4283(7) 0.2909(8) 0.117(5) Uani 1 1 d . . . . .
 H18A H 0.1699 0.4705 0.2548 0.175 Uiso 1 1 calc GR . . . .
 H18B H 0.2779 0.4795 0.3508 0.175 Uiso 1 1 calc GR . . . .
 H18C H 0.1349 0.3835 0.3137 0.175 Uiso 1 1 calc GR . . . .
 C19 C 0.2527(9) 0.2817(11) 0.2704(9) 0.116(5) Uani 1 1 d . . . . .
 H19A H 0.3345 0.3307 0.3295 0.174 Uiso 1 1 calc GR . . . .
 H19B H 0.2588 0.2318 0.2216 0.174 Uiso 1 1 calc GR . . . .
 H19C H 0.1904 0.2381 0.2940 0.174 Uiso 1 1 calc GR . . . .
 C20 C 0.0860(6) 0.2754(7) 0.1250(6) 0.066(2) Uani 1 1 d . . . . .
 H20A H 0.0231 0.2321 0.1483 0.099 Uiso 1 1 calc GR . . . .
 H20B H 0.0921 0.2252 0.0766 0.099 Uiso 1 1 calc GR . . . .
 H20C H 0.0611 0.3202 0.0908 0.099 Uiso 1 1 calc GR . . . .
 C21 C 0.6516(5) 0.6458(4) 0.2903(4) 0.0249(11) Uani 1 1 d . . . . .
 C22 C 0.7522(5) 0.6363(5) 0.3706(4) 0.0297(12) Uani 1 1 d . . . . .
 C23 C 0.8336(6) 0.7413(5) 0.4699(5) 0.0416(15) Uani 1 1 d . . . . .
 H23A H 0.7799 0.7474 0.5011 0.062 Uiso 1 1 calc GR . . . .
 H23B H 0.8740 0.8074 0.4519 0.062 Uiso 1 1 calc GR . . . .
 H23C H 0.8979 0.7348 0.5189 0.062 Uiso 1 1 calc GR . . . .
 C24 C 0.8378(6) 0.6242(5) 0.3225(5) 0.0402(15) Uani 1 1 d . . . . .
 H24A H 0.8779 0.6889 0.3026 0.060 Uiso 1 1 calc GR . . . .
 H24B H 0.7870 0.5570 0.2616 0.060 Uiso 1 1 calc GR . . . .
 H24C H 0.9023 0.6193 0.3731 0.060 Uiso 1 1 calc GR . . . .
 C25 C 0.6777(6) 0.5300(5) 0.3960(5) 0.0439(15) Uani 1 1 d . . . . .
 H25A H 0.7367 0.5217 0.4489 0.066 Uiso 1 1 calc GR . . . .
 H25B H 0.6298 0.4645 0.3337 0.066 Uiso 1 1 calc GR . . . .
 H25C H 0.6201 0.5375 0.4212 0.066 Uiso 1 1 calc GR . . . .
 C13 C 0.6670(17) 0.2597(16) 0.2566(14) 0.090(3) Uani 0.625(9) 1 d . . P A 1
 H13A H 0.7171 0.3375 0.3010 0.135 Uiso 0.625(9) 1 calc GR . P A 1
 H13B H 0.6944 0.2171 0.2923 0.135 Uiso 0.625(9) 1 calc GR . P A 1
 H13C H 0.5783 0.2302 0.2403 0.135 Uiso 0.625(9) 1 calc GR . P A 1
 C14 C 0.6098(16) 0.1298(14) 0.0992(14) 0.090(3) Uani 0.625(9) 1 d . . P A 1
 H14A H 0.5205 0.1015 0.0787 0.135 Uiso 0.625(9) 1 calc GR . P A 1
 H14B H 0.6352 0.0915 0.1425 0.135 Uiso 0.625(9) 1 calc GR . P A 1
 H14C H 0.6244 0.1168 0.0376 0.135 Uiso 0.625(9) 1 calc GR . P A 1
 C15 C 0.8220(15) 0.3063(15) 0.1784(14) 0.090(3) Uani 0.625(9) 1 d . . P A 1
 H15A H 0.8290 0.2909 0.1133 0.135 Uiso 0.625(9) 1 calc GR . P A 1
 H15B H 0.8619 0.2774 0.2241 0.135 Uiso 0.625(9) 1 calc GR . P A 1
 H15C H 0.8639 0.3864 0.2112 0.135 Uiso 0.625(9) 1 calc GR . P A 1
 C13B C 0.750(3) 0.311(3) 0.277(2) 0.090(3) Uani 0.375(9) 1 d . . P A 2
 H13D H 0.7575 0.2602 0.3123 0.135 Uiso 0.375(9) 1 calc GR . P A 2
 H13E H 0.6994 0.3359 0.2975 0.135 Uiso 0.375(9) 1 calc GR . P A 2
 H13F H 0.8334 0.3755 0.2969 0.135 Uiso 0.375(9) 1 calc GR . P A 2
 C14B C 0.735(3) 0.194(3) 0.098(2) 0.090(3) Uani 0.375(9) 1 d . . P A 2
 H14D H 0.7665 0.1559 0.1380 0.135 Uiso 0.375(9) 1 calc GR . P A 2
 H14E H 0.8035 0.2502 0.0869 0.135 Uiso 0.375(9) 1 calc GR . P A 2
 H14F H 0.6671 0.1394 0.0308 0.135 Uiso 0.375(9) 1 calc GR . P A 2
 C15B C 0.561(3) 0.135(2) 0.150(2) 0.090(3) Uani 0.375(9) 1 d . . P A 2
 H15D H 0.4944 0.1001 0.0795 0.135 Uiso 0.375(9) 1 calc GR . P A 2
 H15E H 0.5300 0.1531 0.1982 0.135 Uiso 0.375(9) 1 calc GR . P A 2
 H15F H 0.5867 0.0830 0.1661 0.135 Uiso 0.375(9) 1 calc GR . P A 2
 N1 N 0.3942(4) 0.1252(4) 0.5430(3) 0.0246(9) Uani 1 1 d . . . . .
 H1A H 0.4687 0.1353 0.5833 0.029 Uiso 1 1 calc R . . . .
 H1B H 0.3758 0.1638 0.5833 0.029 Uiso 1 1 calc R . . . .
 C26 C 0.2939(5) 0.0024(4) 0.5076(5) 0.0325(13) Uani 1 1 d . . . . .
 H26 H 0.3147 -0.0405 0.4640 0.039 Uiso 1 1 calc R . . . .
 C27 C 0.3004(7) -0.0325(5) 0.6035(5) 0.0443(16) Uani 1 1 d . . . . .
 H27A H 0.2752 0.0051 0.6451 0.066 Uiso 1 1 calc GR . . . .
 H27B H 0.3864 -0.0118 0.6442 0.066 Uiso 1 1 calc GR . . . .
 H27C H 0.2438 -0.1128 0.5819 0.066 Uiso 1 1 calc GR . . . .
 C28 C 0.1621(6) -0.0216(5) 0.4414(6) 0.0528(18) Uani 1 1 d . . . . .
 H28A H 0.1006 -0.1014 0.4167 0.079 Uiso 1 1 calc GR . . . .
 H28B H 0.1637 0.0033 0.3824 0.079 Uiso 1 1 calc GR . . . .
 H28C H 0.1388 0.0180 0.4832 0.079 Uiso 1 1 calc GR . . . .
 C29 C 0.4124(5) 0.1768(5) 0.4598(4) 0.0332(13) Uani 1 1 d . . . . .
 H29 H 0.3322 0.1688 0.4157 0.040 Uiso 1 1 calc R . . . .
 C30 C 0.5141(6) 0.3010(5) 0.5172(5) 0.0480(17) Uani 1 1 d . . . . .
 H30A H 0.5914 0.3089 0.5634 0.072 Uiso 1 1 calc GR . . . .
 H30B H 0.4849 0.3354 0.5573 0.072 Uiso 1 1 calc GR . . . .
 H30C H 0.5305 0.3375 0.4672 0.072 Uiso 1 1 calc GR . . . .
 C31 C 0.4517(8) 0.1201(6) 0.3925(5) 0.058(2) Uani 1 1 d . . . . .
 H31A H 0.4782 0.1629 0.3490 0.088 Uiso 1 1 calc GR . . . .
 H31B H 0.3805 0.0451 0.3490 0.088 Uiso 1 1 calc GR . . . .
 H31C H 0.5213 0.1161 0.4365 0.088 Uiso 1 1 calc GR . . . .

loop_
  _atom_site_aniso_label
  _atom_site_aniso_U_11
  _atom_site_aniso_U_22
  _atom_site_aniso_U_33
  _atom_site_aniso_U_23
  _atom_site_aniso_U_13
  _atom_site_aniso_U_12
 Er1 0.02248(14) 0.01875(13) 0.02788(15) 0.00179(10) 0.01377(11) 0.01073(10)
 Mg1 0.0308(10) 0.0192(9) 0.0299(10) 0.0088(7) 0.0191(8) 0.0137(8)
 O1 0.025(2) 0.031(2) 0.034(2) -0.0009(17) 0.0109(18) 0.0162(18)
 O2 0.035(2) 0.048(3) 0.024(2) -0.0041(18) 0.0051(18) 0.028(2)
 O3 0.038(2) 0.020(2) 0.054(3) -0.0053(18) 0.029(2) 0.0057(18)
 O4 0.037(2) 0.035(2) 0.033(2) 0.0098(18) 0.0172(19) 0.024(2)
 O5 0.034(2) 0.028(2) 0.037(2) 0.0081(17) 0.0233(19) 0.0121(18)
 O6 0.044(2) 0.025(2) 0.041(2) 0.0142(18) 0.031(2) 0.0137(19)
 O7 0.032(2) 0.028(2) 0.031(2) -0.0014(17) 0.0082(18) 0.0172(18)
 O8 0.030(2) 0.0236(19) 0.027(2) 0.0027(16) 0.0125(17) 0.0144(17)
 O14 0.0248(18) 0.0188(18) 0.027(2) 0.0060(15) 0.0164(16) 0.0118(16)
 O15 0.027(2) 0.0166(18) 0.041(2) 0.0066(16) 0.0210(18) 0.0092(16)
 O30 0.049(2) 0.034(2) 0.037(2) 0.0146(18) 0.024(2) 0.029(2)
 C1 0.025(3) 0.026(3) 0.034(3) 0.004(2) 0.013(3) 0.016(2)
 C2 0.034(4) 0.071(5) 0.045(4) -0.028(4) -0.004(3) 0.033(4)
 C3 0.056(5) 0.159(8) 0.117(7) -0.022(5) 0.052(5) 0.038(5)
 C4 0.029(3) 0.047(4) 0.044(4) -0.014(3) 0.000(3) 0.016(3)
 C5 0.123(7) 0.086(6) 0.124(7) -0.001(5) -0.029(5) 0.086(6)
 C6 0.027(3) 0.018(3) 0.038(3) 0.008(2) 0.015(3) 0.011(2)
 C7 0.032(3) 0.019(3) 0.039(3) 0.005(2) 0.017(3) 0.006(2)
 C8 0.029(3) 0.039(4) 0.072(5) 0.007(3) 0.028(3) 0.010(3)
 C9 0.065(5) 0.040(4) 0.061(5) 0.026(4) 0.032(4) 0.016(4)
 C10 0.039(4) 0.024(3) 0.063(5) -0.002(3) 0.024(4) -0.001(3)
 C11 0.033(3) 0.027(3) 0.038(4) 0.007(3) 0.012(3) 0.018(3)
 C12 0.063(5) 0.057(5) 0.061(5) 0.032(4) 0.032(4) 0.047(4)
 C16 0.025(3) 0.028(3) 0.026(3) 0.005(2) 0.014(2) 0.008(2)
 C17 0.027(3) 0.030(3) 0.029(3) 0.006(2) 0.018(3) 0.005(2)
 C18 0.132(9) 0.044(5) 0.140(9) -0.011(5) 0.123(8) -0.008(5)
 C19 0.086(7) 0.219(13) 0.145(10) 0.155(10) 0.090(7) 0.104(9)
 C20 0.030(4) 0.087(6) 0.050(5) 0.026(4) 0.019(4) 0.007(4)
 C21 0.025(3) 0.016(2) 0.028(3) 0.001(2) 0.016(2) 0.006(2)
 C22 0.028(3) 0.028(3) 0.034(3) 0.006(2) 0.015(3) 0.016(3)
 C23 0.036(3) 0.042(4) 0.038(4) 0.005(3) 0.007(3) 0.022(3)
 C24 0.037(3) 0.046(4) 0.050(4) 0.015(3) 0.024(3) 0.028(3)
 C25 0.051(4) 0.042(4) 0.044(4) 0.023(3) 0.022(3) 0.027(3)
 C13 0.100(7) 0.110(7) 0.115(7) 0.080(6) 0.053(6) 0.081(7)
 C14 0.100(7) 0.110(7) 0.115(7) 0.080(6) 0.053(6) 0.081(7)
 C15 0.100(7) 0.110(7) 0.115(7) 0.080(6) 0.053(6) 0.081(7)
 C13B 0.100(7) 0.110(7) 0.115(7) 0.080(6) 0.053(6) 0.081(7)
 C14B 0.100(7) 0.110(7) 0.115(7) 0.080(6) 0.053(6) 0.081(7)
 C15B 0.100(7) 0.110(7) 0.115(7) 0.080(6) 0.053(6) 0.081(7)
 N1 0.022(2) 0.025(2) 0.024(2) 0.0047(19) 0.010(2) 0.0113(19)
 C26 0.029(3) 0.020(3) 0.040(4) 0.000(2) 0.016(3) 0.010(2)
 C27 0.058(4) 0.030(3) 0.048(4) 0.015(3) 0.030(4) 0.021(3)
 C28 0.028(3) 0.032(4) 0.075(5) 0.004(3) 0.013(3) 0.008(3)
 C29 0.032(3) 0.033(3) 0.029(3) 0.009(3) 0.009(3) 0.015(3)
 C30 0.054(4) 0.024(3) 0.062(5) 0.002(3) 0.038(4) 0.012(3)
 C31 0.085(6) 0.045(4) 0.048(4) 0.012(3) 0.045(4) 0.027(4)

_geom_special_details
;
 All esds (except the esd in the dihedral angle between two l.s. planes)
 are estimated using the full covariance matrix.  The cell esds are taken
 into account individually in the estimation of esds in distances, angles
 and torsion angles; correlations between esds in cell parameters are only
 used when they are defined by crystal symmetry.  An approximate (isotropic)
 treatment of cell esds is used for estimating esds involving l.s. planes.
;
loop_
  _geom_bond_atom_site_label_1
  _geom_bond_atom_site_label_2
  _geom_bond_distance
  _geom_bond_site_symmetry_2
  _geom_bond_publ_flag
 Er1 Mg1 3.4338(17) 2_665 ?
 Er1 Mg1 3.4710(16) . ?
 Er1 O1 2.231(3) . ?
 Er1 O3 2.397(4) . ?
 Er1 O4 2.279(4) 2_665 ?
 Er1 O5 2.296(4) . ?
 Er1 O7 2.462(4) . ?
 Er1 O8 2.481(3) . ?
 Er1 O14 2.287(3) . ?
 Er1 O15 2.452(3) . ?
 Er1 C6 2.807(5) . ?
 Er1 C21 2.853(5) . ?
 Mg1 Er1 3.4337(17) 2_665 ?
 Mg1 Mg1 3.181(3) 2_665 ?
 Mg1 O6 2.032(4) . ?
 Mg1 O8 2.097(4) . ?
 Mg1 O14 2.085(4) . ?
 Mg1 O14 2.086(4) 2_665 ?
 Mg1 O15 2.079(4) 2_665 ?
 Mg1 O30 2.034(4) . ?
 O1 C1 1.256(6) . ?
 O2 C1 1.251(6) . ?
 O3 C6 1.250(6) . ?
 O4 Er1 2.279(4) 2_665 ?
 O4 C11 1.258(7) . ?
 O5 C16 1.272(6) . ?
 O6 C16 1.253(6) . ?
 O7 C21 1.258(6) . ?
 O8 C21 1.259(6) . ?
 O14 Mg1 2.086(4) 2_665 ?
 O15 Mg1 2.079(4) 2_665 ?
 O15 C6 1.281(6) . ?
 O30 C11 1.259(6) . ?
 C1 C2 1.527(8) . ?
 C2 C3 1.503(11) . ?
 C2 C4 1.513(8) . ?
 C2 C5 1.518(12) . ?
 C6 C7 1.515(7) . ?
 C7 C8 1.523(8) . ?
 C7 C9 1.530(9) . ?
 C7 C10 1.531(8) . ?
 C11 C12 1.539(8) . ?
 C12 C13 1.489(18) . ?
 C12 C14 1.456(18) . ?
 C12 C15 1.490(16) . ?
 C12 C13B 1.54(3) . ?
 C12 C14B 1.56(3) . ?
 C12 C15B 1.64(3) . ?
 C16 C17 1.538(7) . ?
 C17 C18 1.514(9) . ?
 C17 C19 1.501(10) . ?
 C17 C20 1.496(9) . ?
 C21 C22 1.522(7) . ?
 C22 C23 1.531(8) . ?
 C22 C24 1.526(7) . ?
 C22 C25 1.543(8) . ?
 N1 C26 1.496(7) . ?
 N1 C29 1.506(7) . ?
 C26 C27 1.511(8) . ?
 C26 C28 1.521(8) . ?
 C29 C30 1.514(8) . ?
 C29 C31 1.500(8) . ?

loop_
  _geom_angle_atom_site_label_1
  _geom_angle_atom_site_label_2
  _geom_angle_atom_site_label_3
  _geom_angle
  _geom_angle_site_symmetry_1
  _geom_angle_site_symmetry_3
  _geom_angle_publ_flag
 Mg1 Er1 Mg1 54.87(5) 2_665 . ?
 O1 Er1 Mg1 153.86(10) . 2_665 ?
 O1 Er1 Mg1 147.02(10) . . ?
 O1 Er1 O3 84.62(13) . . ?
 O1 Er1 O4 86.36(13) . 2_665 ?
 O1 Er1 O5 80.22(13) . . ?
 O1 Er1 O7 83.54(12) . . ?
 O1 Er1 O8 131.42(13) . . ?
 O1 Er1 O14 144.36(12) . . ?
 O1 Er1 O15 136.90(13) . . ?
 O1 Er1 C6 110.73(14) . . ?
 O1 Er1 C21 107.78(13) . . ?
 O3 Er1 Mg1 122.81(10) . . ?
 O3 Er1 Mg1 87.67(9) . 2_665 ?
 O3 Er1 O7 72.67(14) . . ?
 O3 Er1 O8 97.98(13) . . ?
 O3 Er1 O15 53.39(12) . . ?
 O3 Er1 C6 26.32(13) . . ?
 O3 Er1 C21 84.92(15) . . ?
 O4 Er1 Mg1 113.35(9) 2_665 . ?
 O4 Er1 Mg1 67.81(9) 2_665 2_665 ?
 O4 Er1 O3 81.79(15) 2_665 . ?
 O4 Er1 O5 118.40(14) 2_665 . ?
 O4 Er1 O7 153.27(13) 2_665 . ?
 O4 Er1 O8 142.18(12) 2_665 . ?
 O4 Er1 O14 78.21(12) 2_665 . ?
 O4 Er1 O15 79.12(13) 2_665 . ?
 O4 Er1 C6 80.73(15) 2_665 . ?
 O4 Er1 C21 159.60(14) 2_665 . ?
 O5 Er1 Mg1 67.27(9) . . ?
 O5 Er1 Mg1 114.93(9) . 2_665 ?
 O5 Er1 O3 153.57(14) . . ?
 O5 Er1 O7 84.16(13) . . ?
 O5 Er1 O8 76.69(13) . . ?
 O5 Er1 O15 142.02(12) . . ?
 O5 Er1 C6 159.27(14) . . ?
 O5 Er1 C21 79.33(14) . . ?
 O7 Er1 Mg1 117.79(9) . 2_665 ?
 O7 Er1 Mg1 87.71(9) . . ?
 O7 Er1 O8 52.22(11) . . ?
 O7 Er1 C6 79.84(15) . . ?
 O7 Er1 C21 26.09(12) . . ?
 O8 Er1 Mg1 36.72(9) . . ?
 O8 Er1 Mg1 74.38(8) . 2_665 ?
 O8 Er1 C6 83.09(13) . . ?
 O8 Er1 C21 26.14(12) . . ?
 O14 Er1 Mg1 36.23(8) . 2_665 ?
 O14 Er1 Mg1 35.47(9) . . ?
 O14 Er1 O3 123.85(12) . . ?
 O14 Er1 O5 79.33(12) . . ?
 O14 Er1 O7 122.73(12) . . ?
 O14 Er1 O8 70.62(12) . . ?
 O14 Er1 O15 71.44(11) . . ?
 O14 Er1 C6 98.33(14) . . ?
 O14 Er1 C21 96.70(13) . . ?
 O15 Er1 Mg1 74.88(8) . . ?
 O15 Er1 Mg1 36.82(9) . 2_665 ?
 O15 Er1 O7 91.57(13) . . ?
 O15 Er1 O8 71.14(12) . . ?
 O15 Er1 C6 27.14(13) . . ?
 O15 Er1 C21 80.54(13) . . ?
 C6 Er1 Mg1 62.71(11) . 2_665 ?
 C6 Er1 Mg1 98.82(11) . . ?
 C6 Er1 C21 80.50(15) . . ?
 C21 Er1 Mg1 96.33(10) . 2_665 ?
 C21 Er1 Mg1 62.08(10) . . ?
 Er1 Mg1 Er1 125.13(5) 2_665 . ?
 Mg1 Mg1 Er1 63.16(5) 2_665 2_665 ?
 Mg1 Mg1 Er1 61.97(5) 2_665 . ?
 O6 Mg1 Er1 80.24(11) . . ?
 O6 Mg1 Er1 142.25(13) . 2_665 ?
 O6 Mg1 Mg1 131.95(15) . 2_665 ?
 O6 Mg1 O8 88.40(16) . . ?
 O6 Mg1 O14 172.21(17) . 2_665 ?
 O6 Mg1 O14 91.65(15) . . ?
 O6 Mg1 O15 97.70(16) . 2_665 ?
 O6 Mg1 O30 96.07(17) . . ?
 O8 Mg1 Er1 45.03(10) . . ?
 O8 Mg1 Er1 129.34(12) . 2_665 ?
 O8 Mg1 Mg1 85.01(12) . 2_665 ?
 O14 Mg1 Er1 93.13(10) 2_665 . ?
 O14 Mg1 Er1 94.20(10) . 2_665 ?
 O14 Mg1 Er1 40.38(9) 2_665 2_665 ?
 O14 Mg1 Er1 39.52(10) . . ?
 O14 Mg1 Mg1 40.29(10) 2_665 2_665 ?
 O14 Mg1 Mg1 40.31(10) . 2_665 ?
 O14 Mg1 O8 82.60(15) . . ?
 O14 Mg1 O8 89.78(15) 2_665 . ?
 O14 Mg1 O14 80.60(14) . 2_665 ?
 O15 Mg1 Er1 44.99(10) 2_665 2_665 ?
 O15 Mg1 Er1 130.00(12) 2_665 . ?
 O15 Mg1 Mg1 86.44(12) 2_665 2_665 ?
 O15 Mg1 O8 171.43(16) 2_665 . ?
 O15 Mg1 O14 83.38(14) 2_665 2_665 ?
 O15 Mg1 O14 91.17(15) 2_665 . ?
 O30 Mg1 Er1 141.09(13) . . ?
 O30 Mg1 Er1 80.37(11) . 2_665 ?
 O30 Mg1 Mg1 131.95(14) . 2_665 ?
 O30 Mg1 O8 96.45(16) . . ?
 O30 Mg1 O14 91.67(15) . 2_665 ?
 O30 Mg1 O14 172.20(17) . . ?
 O30 Mg1 O15 88.91(16) . 2_665 ?
 C1 O1 Er1 166.6(4) . . ?
 C6 O3 Er1 95.5(3) . . ?
 C11 O4 Er1 136.0(3) . 2_665 ?
 C16 O5 Er1 136.9(3) . . ?
 C16 O6 Mg1 130.3(3) . . ?
 C21 O7 Er1 94.5(3) . . ?
 Mg1 O8 Er1 98.25(14) . . ?
 C21 O8 Er1 93.6(3) . . ?
 C21 O8 Mg1 159.0(3) . . ?
 Mg1 O14 Er1 105.01(15) . . ?
 Mg1 O14 Er1 103.40(14) 2_665 . ?
 Mg1 O14 Mg1 99.40(14) . 2_665 ?
 Mg1 O15 Er1 98.19(14) 2_665 . ?
 C6 O15 Er1 92.0(3) . . ?
 C6 O15 Mg1 156.0(4) . 2_665 ?
 C11 O30 Mg1 129.2(4) . . ?
 O1 C1 C2 119.5(5) . . ?
 O2 C1 O1 122.9(5) . . ?
 O2 C1 C2 117.6(5) . . ?
 C3 C2 C1 109.5(7) . . ?
 C3 C2 C4 110.8(7) . . ?
 C3 C2 C5 108.0(8) . . ?
 C4 C2 C1 111.5(5) . . ?
 C4 C2 C5 110.3(7) . . ?
 C5 C2 C1 106.7(7) . . ?
 O3 C6 Er1 58.2(3) . . ?
 O3 C6 O15 118.8(5) . . ?
 O3 C6 C7 121.8(5) . . ?
 O15 C6 Er1 60.8(3) . . ?
 O15 C6 C7 119.4(5) . . ?
 C7 C6 Er1 174.8(4) . . ?
 C6 C7 C8 108.7(5) . . ?
 C6 C7 C9 107.4(5) . . ?
 C6 C7 C10 109.7(5) . . ?
 C8 C7 C9 110.3(5) . . ?
 C8 C7 C10 109.5(5) . . ?
 C9 C7 C10 111.3(5) . . ?
 O4 C11 O30 125.6(5) . . ?
 O4 C11 C12 117.5(5) . . ?
 O30 C11 C12 116.8(5) . . ?
 C11 C12 C13B 114.3(10) . . ?
 C11 C12 C14B 111.9(9) . . ?
 C11 C12 C15B 105.0(9) . . ?
 C13 C12 C11 109.6(7) . . ?
 C13 C12 C15 112.0(11) . . ?
 C14 C12 C11 108.2(7) . . ?
 C14 C12 C13 104.8(10) . . ?
 C14 C12 C15 113.6(10) . . ?
 C15 C12 C11 108.5(7) . . ?
 C13B C12 C14B 123.9(14) . . ?
 C13B C12 C15B 99.2(15) . . ?
 C14B C12 C15B 97.9(15) . . ?
 O5 C16 C17 117.4(5) . . ?
 O6 C16 O5 125.3(5) . . ?
 O6 C16 C17 117.3(5) . . ?
 C18 C17 C16 111.9(5) . . ?
 C19 C17 C16 109.6(5) . . ?
 C19 C17 C18 111.0(7) . . ?
 C20 C17 C16 107.5(5) . . ?
 C20 C17 C18 107.1(6) . . ?
 C20 C17 C19 109.6(7) . . ?
 O7 C21 Er1 59.4(3) . . ?
 O7 C21 O8 119.6(5) . . ?
 O7 C21 C22 121.7(5) . . ?
 O8 C21 Er1 60.2(3) . . ?
 O8 C21 C22 118.7(4) . . ?
 C22 C21 Er1 178.8(3) . . ?
 C21 C22 C23 110.6(4) . . ?
 C21 C22 C24 109.0(5) . . ?
 C21 C22 C25 105.9(4) . . ?
 C23 C22 C25 110.4(5) . . ?
 C24 C22 C23 109.6(5) . . ?
 C24 C22 C25 111.3(5) . . ?
 C26 N1 C29 117.7(4) . . ?
 N1 C26 C27 108.3(5) . . ?
 N1 C26 C28 111.3(5) . . ?
 C27 C26 C28 112.9(5) . . ?
 N1 C29 C30 106.3(5) . . ?
 C31 C29 N1 110.9(5) . . ?
 C31 C29 C30 111.5(5) . . ?

_shelx_SHELXL_version_number      '2014/7'
_iucr_refine_instructions_details
;

    arepw92.res created by SHELXL-2014/7

TITL arepw92 in P1
CELL 0.71073 12.958121 14.125917 14.236197 98.6892 107.8172 116.9869
ZERR 1 0.000686 0.000616 0.000619 0.0036 0.0044 0.005
LATT 1
SFAC C H Er Mg N O
UNIT 62 122 2 2 2 22
ISOR 0.01 0.01 C5 C3
EADP C15B C14 C14B C15 C13B C13
 
L.S. 10 0 0
PLAN  50
fmap 2 53
acta
SHEL 10 0.8
OMIT -5 5 2
OMIT -2 1 0
OMIT -8 8 5
REM <olex2.extras>
REM <HklSrc "%./arepw92.hkl">
REM </olex2.extras>
 
WGHT    0.038000    1.729000
FVAR       4.47791   0.62511
ER1   3    0.463878    0.661520    0.136535    11.00000    0.02248    0.01875 =
         0.02788    0.00179    0.01377    0.01073
MG1   4    0.481387    0.423854    0.072429    11.00000    0.03082    0.01919 =
         0.02994    0.00879    0.01914    0.01366
O1    6    0.394985    0.749225    0.220748    11.00000    0.02484    0.03106 =
         0.03358   -0.00090    0.01088    0.01620
O2    6    0.376174    0.841409    0.347278    11.00000    0.03526    0.04771 =
         0.02400   -0.00410    0.00514    0.02782
O3    6    0.636688    0.848823    0.175359    11.00000    0.03832    0.01960 =
         0.05364   -0.00528    0.02869    0.00569
O4    6    0.630224    0.303827    0.006415    11.00000    0.03680    0.03502 =
         0.03259    0.00977    0.01717    0.02421
O5    6    0.335611    0.517595    0.181189    11.00000    0.03360    0.02849 =
         0.03704    0.00812    0.02330    0.01209
O6    6    0.355907    0.369521    0.138279    11.00000    0.04395    0.02459 =
         0.04134    0.01417    0.03129    0.01365
O7    6    0.626554    0.719779    0.314435    11.00000    0.03194    0.02777 =
         0.03141   -0.00137    0.00818    0.01724
O8    6    0.593172    0.578125    0.197368    11.00000    0.02995    0.02358 =
         0.02654    0.00271    0.01249    0.01445
O14   6    0.400593    0.507711    0.001916    11.00000    0.02484    0.01880 =
         0.02742    0.00602    0.01636    0.01183
O15   6    0.624636    0.714496    0.065709    11.00000    0.02737    0.01659 =
         0.04123    0.00659    0.02096    0.00917
O30   6    0.579072    0.352576    0.134521    11.00000    0.04868    0.03395 =
         0.03719    0.01464    0.02445    0.02924
C1    1    0.331219    0.777630    0.255338    11.00000    0.02535    0.02589 =
         0.03403    0.00405    0.01346    0.01621
C2    1    0.193635    0.735976    0.182496    11.00000    0.03422    0.07113 =
         0.04509   -0.02765   -0.00443    0.03335
C3    1    0.113693    0.711863    0.243344    11.00000    0.05592    0.15945 =
         0.11727   -0.02207    0.05151    0.03799
AFIX 137
H3A   2    0.025378    0.676752    0.196020    11.00000   -1.50000
H3B   2    0.140910    0.781366    0.293778    11.00000   -1.50000
H3C   2    0.123713    0.662066    0.279110    11.00000   -1.50000
AFIX   0
C4    1    0.137880    0.632361    0.089428    11.00000    0.02940    0.04689 =
         0.04442   -0.01356   -0.00003    0.01623
AFIX 137
H4A   2    0.187791    0.650518    0.049677    11.00000   -1.50000
H4B   2    0.051251    0.607811    0.045722    11.00000   -1.50000
H4C   2    0.139215    0.572996    0.113822    11.00000   -1.50000
AFIX   0
C5    1    0.197489    0.832484    0.145720    11.00000    0.12253    0.08580 =
         0.12389   -0.00126   -0.02947    0.08635
AFIX 137
H5A   2    0.259907    0.858328    0.117622    11.00000   -1.50000
H5B   2    0.220172    0.893489    0.203963    11.00000   -1.50000
H5C   2    0.114826    0.806658    0.092321    11.00000   -1.50000
AFIX   0
C6    1    0.684060    0.818868    0.121736    11.00000    0.02724    0.01783 =
         0.03835    0.00775    0.01472    0.01055
C7    1    0.809843    0.902290    0.122122    11.00000    0.03247    0.01863 =
         0.03908    0.00521    0.01667    0.00634
C8    1    0.889637    0.848804    0.128447    11.00000    0.02893    0.03865 =
         0.07159    0.00722    0.02755    0.01031
AFIX 137
H8A   2    0.843658    0.780374    0.069378    11.00000   -1.50000
H8B   2    0.906355    0.831823    0.192231    11.00000   -1.50000
H8C   2    0.969182    0.900509    0.127718    11.00000   -1.50000
AFIX   0
C9    1    0.778753    0.926716    0.019343    11.00000    0.06454    0.03990 =
         0.06052    0.02631    0.03249    0.01552
AFIX 137
H9A   2    0.722446    0.954294    0.013477    11.00000   -1.50000
H9B   2    0.737900    0.858503   -0.038789    11.00000   -1.50000
H9C   2    0.856402    0.982681    0.018843    11.00000   -1.50000
AFIX   0
C10   1    0.882065    1.010258    0.217380    11.00000    0.03933    0.02428 =
         0.06313   -0.00205    0.02360   -0.00082
AFIX 137
H10A  2    0.961952    1.062745    0.217641    11.00000   -1.50000
H10B  2    0.898066    0.992110    0.280565    11.00000   -1.50000
H10C  2    0.831461    1.043618    0.213667    11.00000   -1.50000
AFIX   0
C11   1    0.626086    0.306731    0.093876    11.00000    0.03324    0.02717 =
         0.03766    0.00727    0.01220    0.01840
C12   1    0.684436    0.250586    0.157694    11.00000    0.06336    0.05679 =
         0.06057    0.03202    0.03195    0.04695
C16   1    0.310283    0.418297    0.176241    11.00000    0.02487    0.02789 =
         0.02615    0.00483    0.01432    0.00773
C17   1    0.212992    0.351468    0.217455    11.00000    0.02665    0.03005 =
         0.02909    0.00643    0.01771    0.00528
C18   1    0.197523    0.428266    0.290909    11.00000    0.13198    0.04352 =
         0.14049   -0.01101    0.12319   -0.00751
AFIX 137
H18A  2    0.169930    0.470498    0.254811    11.00000   -1.50000
H18B  2    0.277949    0.479482    0.350763    11.00000   -1.50000
H18C  2    0.134884    0.383502    0.313716    11.00000   -1.50000
AFIX   0
C19   1    0.252748    0.281728    0.270420    11.00000    0.08635    0.21943 =
         0.14539    0.15504    0.09011    0.10410
AFIX 137
H19A  2    0.334472    0.330660    0.329502    11.00000   -1.50000
H19B  2    0.258804    0.231787    0.221644    11.00000   -1.50000
H19C  2    0.190401    0.238122    0.294000    11.00000   -1.50000
AFIX   0
C20   1    0.085951    0.275429    0.125015    11.00000    0.03040    0.08650 =
         0.04964    0.02577    0.01852    0.00652
AFIX 137
H20A  2    0.023125    0.232075    0.148295    11.00000   -1.50000
H20B  2    0.092113    0.225246    0.076586    11.00000   -1.50000
H20C  2    0.061090    0.320168    0.090844    11.00000   -1.50000
AFIX   0
C21   1    0.651573    0.645755    0.290323    11.00000    0.02506    0.01580 =
         0.02844    0.00054    0.01555    0.00638
C22   1    0.752212    0.636286    0.370592    11.00000    0.02754    0.02841 =
         0.03402    0.00633    0.01479    0.01576
C23   1    0.833601    0.741268    0.469885    11.00000    0.03595    0.04187 =
         0.03841    0.00488    0.00746    0.02214
AFIX 137
H23A  2    0.779944    0.747444    0.501136    11.00000   -1.50000
H23B  2    0.873965    0.807362    0.451912    11.00000   -1.50000
H23C  2    0.897923    0.734819    0.518861    11.00000   -1.50000
AFIX   0
C24   1    0.837817    0.624243    0.322513    11.00000    0.03666    0.04643 =
         0.04992    0.01517    0.02385    0.02825
AFIX 137
H24A  2    0.877917    0.688852    0.302578    11.00000   -1.50000
H24B  2    0.787046    0.556978    0.261642    11.00000   -1.50000
H24C  2    0.902343    0.619323    0.373074    11.00000   -1.50000
AFIX   0
C25   1    0.677656    0.529978    0.396010    11.00000    0.05148    0.04232 =
         0.04433    0.02310    0.02159    0.02652
AFIX 137
H25A  2    0.736730    0.521739    0.448934    11.00000   -1.50000
H25B  2    0.629780    0.464547    0.333669    11.00000   -1.50000
H25C  2    0.620072    0.537507    0.421239    11.00000   -1.50000
AFIX   0
PART 1
C13   1    0.667030    0.259663    0.256607    21.00000    0.10014    0.10993 =
         0.11515    0.07965    0.05272    0.08072
AFIX 137
H13A  2    0.717090    0.337548    0.300953    21.00000   -1.50000
H13B  2    0.694439    0.217100    0.292307    21.00000   -1.50000
H13C  2    0.578338    0.230193    0.240346    21.00000   -1.50000
AFIX   0
C14   1    0.609795    0.129800    0.099160    21.00000    0.10014    0.10993 =
         0.11515    0.07965    0.05272    0.08072
AFIX 137
H14A  2    0.520533    0.101492    0.078735    21.00000   -1.50000
H14B  2    0.635221    0.091460    0.142531    21.00000   -1.50000
H14C  2    0.624423    0.116820    0.037625    21.00000   -1.50000
AFIX   0
C15   1    0.822038    0.306293    0.178408    21.00000    0.10014    0.10993 =
         0.11515    0.07965    0.05272    0.08072
AFIX 137
H15A  2    0.828962    0.290932    0.113318    21.00000   -1.50000
H15B  2    0.861889    0.277407    0.224065    21.00000   -1.50000
H15C  2    0.863916    0.386430    0.211188    21.00000   -1.50000
AFIX   0
PART 0
PART 2
C13B  1    0.749847    0.311261    0.277395   -21.00000    0.10014    0.10993 =
         0.11515    0.07965    0.05272    0.08072
AFIX 137
H13D  2    0.757466    0.260152    0.312339   -21.00000   -1.50000
H13E  2    0.699414    0.335918    0.297528   -21.00000   -1.50000
H13F  2    0.833429    0.375529    0.296923   -21.00000   -1.50000
AFIX   0
C14B  1    0.735280    0.193538    0.097541   -21.00000    0.10014    0.10993 =
         0.11515    0.07965    0.05272    0.08072
AFIX 137
H14D  2    0.766473    0.155935    0.137966   -21.00000   -1.50000
H14E  2    0.803507    0.250164    0.086871   -21.00000   -1.50000
H14F  2    0.667137    0.139422    0.030783   -21.00000   -1.50000
AFIX   0
C15B  1    0.561044    0.134649    0.149512   -21.00000    0.10014    0.10993 =
         0.11515    0.07965    0.05272    0.08072
AFIX 137
H15D  2    0.494397    0.100125    0.079480   -21.00000   -1.50000
H15E  2    0.530030    0.153125    0.198225   -21.00000   -1.50000
H15F  2    0.586669    0.083014    0.166055   -21.00000   -1.50000
AFIX   0
 
PART 0
N1    5    0.394210    0.125171    0.542977    11.00000    0.02213    0.02457 =
         0.02387    0.00467    0.00962    0.01126
AFIX  23
H1A   2    0.468682    0.135276    0.583260    11.00000   -1.20000
H1B   2    0.375815    0.163843    0.583311    11.00000   -1.20000
AFIX   0
C26   1    0.293949    0.002417    0.507591    11.00000    0.02915    0.02025 =
         0.04029    0.00035    0.01591    0.00959
AFIX  13
H26   2    0.314695   -0.040498    0.464046    11.00000   -1.20000
AFIX   0
C27   1    0.300416   -0.032458    0.603455    11.00000    0.05759    0.03041 =
         0.04845    0.01505    0.03006    0.02086
AFIX 137
H27A  2    0.275163    0.005101    0.645116    11.00000   -1.50000
H27B  2    0.386385   -0.011841    0.644248    11.00000   -1.50000
H27C  2    0.243809   -0.112794    0.581910    11.00000   -1.50000
AFIX   0
C28   1    0.162106   -0.021619    0.441379    11.00000    0.02756    0.03156 =
         0.07545    0.00403    0.01275    0.00806
AFIX 137
H28A  2    0.100617   -0.101353    0.416744    11.00000   -1.50000
H28B  2    0.163688    0.003292    0.382435    11.00000   -1.50000
H28C  2    0.138806    0.018034    0.483171    11.00000   -1.50000
AFIX   0
C29   1    0.412427    0.176778    0.459761    11.00000    0.03175    0.03303 =
         0.02852    0.00912    0.00926    0.01526
AFIX  13
H29   2    0.332187    0.168773    0.415660    11.00000   -1.20000
AFIX   0
C30   1    0.514105    0.301025    0.517157    11.00000    0.05353    0.02360 =
         0.06189    0.00177    0.03782    0.01215
AFIX 137
H30A  2    0.591390    0.308913    0.563375    11.00000   -1.50000
H30B  2    0.484895    0.335409    0.557328    11.00000   -1.50000
H30C  2    0.530490    0.337521    0.467155    11.00000   -1.50000
AFIX   0
C31   1    0.451652    0.120136    0.392515    11.00000    0.08483    0.04506 =
         0.04765    0.01242    0.04511    0.02660
AFIX 137
H31A  2    0.478194    0.162875    0.348994    11.00000   -1.50000
H31B  2    0.380527    0.045142    0.349010    11.00000   -1.50000
H31C  2    0.521338    0.116146    0.436508    11.00000   -1.50000
AFIX   0
HKLF 4
 
REM  arepw92 in P1
REM R1 =  0.0473 for    7318 Fo > 4sig(Fo)  and  0.0571 for all    8395 data
REM    426 parameters refined using     12 restraints
 
END  
     
WGHT      0.0383      1.7856 

REM Highest difference peak  1.968,  deepest hole -1.021,  1-sigma level  0.132
Q1    1   0.5410  0.3980  0.1780  11.00000  0.05    1.97
Q2    1   0.5398  0.2796  0.5564  11.00000  0.05    1.36
Q3    1   0.5417  0.4535  0.4948  11.00000  0.05    1.30
Q4    1   0.5241  0.0411  0.4581  11.00000  0.05    1.27
Q5    1   0.5342  0.2267  0.2407  11.00000  0.05    1.18
Q6    1   0.4663  0.8934  0.2236  11.00000  0.05    1.03
Q7    1   0.6000  0.7233  0.1816  11.00000  0.05    1.00
Q8    1   0.5391 -0.0008  0.1422  11.00000  0.05    0.81
Q9    1   0.4674  0.4972  0.1940  11.00000  0.05    0.76
Q10   1   0.1613  0.7944  0.1829  11.00000  0.05    0.75
Q11   1   0.8204  0.2824  0.1734  11.00000  0.05    0.71
Q12   1   0.3917  0.2223  0.5065  11.00000  0.05    0.67
Q13   1   0.3860  0.6564  0.0964  11.00000  0.05    0.66
Q14   1   0.3859  0.3196  0.1235  11.00000  0.05    0.66
Q15   1   0.4617  0.0620  0.1643  11.00000  0.05    0.64
Q16   1   0.5201  0.1602  0.0790  11.00000  0.05    0.63
Q17   1   0.1257  0.7610  0.2116  11.00000  0.05    0.61
Q18   1   0.3801  0.3802  0.4348  11.00000  0.05    0.59
Q19   1   0.6008  0.2000  0.2051  11.00000  0.05    0.57
Q20   1   0.7998  0.3406  0.2396  11.00000  0.05    0.57
Q21   1   0.5808  0.2134 -0.0840  11.00000  0.05    0.56
Q22   1   0.5373  0.1615 -0.0743  11.00000  0.05    0.54
Q23   1   0.2878  0.4132  0.3232  11.00000  0.05    0.54
Q24   1   1.0577  0.5790  0.5005  11.00000  0.05    0.53
Q25   1   0.5818  0.1209  0.1238  11.00000  0.05    0.53
Q26   1   0.3155  0.4611 -0.0357  11.00000  0.05    0.52
Q27   1   0.3988  0.1595  0.1977  11.00000  0.05    0.51
Q28   1   0.5270  0.3363  0.5525  11.00000  0.05    0.50
Q29   1   0.1367  0.6215  0.4424  11.00000  0.05    0.49
Q30   1   0.4756  0.6029  0.0778  11.00000  0.05    0.48
Q31   1   0.6216  0.3974  0.6168  11.00000  0.05    0.47
Q32   1   0.4281  0.0569  0.3806  11.00000  0.05    0.45
Q33   1   1.0017  0.6240  0.5423  11.00000  0.05    0.45
Q34   1   0.9927  0.4440  0.4827  11.00000  0.05    0.45
Q35   1   0.7234  0.6907  0.3381  11.00000  0.05    0.45
Q36   1   0.3969  0.8486  0.4158  11.00000  0.05    0.44
Q37   1   0.4218  0.4605  0.0343  11.00000  0.05    0.44
Q38   1   0.7818  0.7053  0.4749  11.00000  0.05    0.43
Q39   1   0.1404  0.4033  0.2206  11.00000  0.05    0.42
Q40   1   0.3973  0.6075  0.1999  11.00000  0.05    0.42
Q41   1   0.8208  0.3633  0.5175  11.00000  0.05    0.41
Q42   1   0.3786  0.9259  0.1547  11.00000  0.05    0.40
Q43   1   0.1143  0.2410  0.1484  11.00000  0.05    0.39
Q44   1   0.5144  0.3438  0.0808  11.00000  0.05    0.39
Q45   1   0.3007  0.6023  0.1282  11.00000  0.05    0.39
Q46   1   0.1165  0.8576  0.3288  11.00000  0.05    0.39
Q47   1   0.6745  0.9818  0.0297  11.00000  0.05    0.39
Q48   1   0.5032  0.4018  0.5526  11.00000  0.05    0.38
Q49   1   0.3155  0.0599  0.3785  11.00000  0.05    0.38
Q50   1   0.7564  0.9250  0.0882  11.00000  0.05    0.37

REM The information below was added by Olex2.
REM
REM R1 = 0.0473 for 7318 Fo > 4sig(Fo) and 0.0571 for all 13415 data
REM n/a parameters refined using n/a restraints
REM Highest difference peak 1.97, deepest hole -1.02
REM Mean Shift 0, Max Shift 0.001.

REM +++ Tabular Listing of Refinement Information +++
REM R1_all = 0.0571
REM R1_gt = 0.0473
REM wR_ref = 0.1113
REM GOOF = 1.077
REM Shift_max = 0.001
REM Shift_mean = 0
REM Reflections_all = 13415
REM Reflections_gt = 7318
REM Parameters = n/a
REM Hole = -1.02
REM Peak = 1.97
REM Flack = n/a

;
_olex2_date_sample_data_collection 2013-04-20
_olex2_submission_special_instructions 'No special instructions were received'
loop_
  _refln_index_h
  _refln_index_k
  _refln_index_l
  _refln_F_squared_meas
  _refln_F_squared_sigma
  _refln_scale_group_code
 -16 5 2 3701.33 1461.18 2
 -16 5 3 1437.25 731.824 2
 -16 5 4 22264.1 3850.42 2
 -16 5 5 13604.8 3011.01 2
 -16 6 0 22373.2 3701.19 2
 -16 6 1 1763.7 955.198 2
 -16 6 2 11004.5 2692.04 2
 -16 6 3 30006.7 4430.91 2
 -16 6 4 11460.9 2691.03 2
 -16 6 5 332.348 341.014 2
 -16 6 6 11149 2742.13 2
 -16 6 7 53996.1 6157.82 2
 -16 7 0 8847.74 2368.18 2
 -16 7 1 3859.9 1557.11 2
 -16 7 2 39292.2 5071.7 2
 -16 7 3 10257 2594.32 2
 -16 7 4 -454.42 902.34 2
 -16 7 5 10724.7 2718.65 2
 -16 7 6 34402.3 4925.38 2
 -16 7 7 12851.3 2960.99 2
 -16 8 0 6334.66 1998.63 2
 -16 8 1 30754.1 4431.27 2
 -16 8 2 7558.31 2183.51 2
 -16 8 3 -218.718 604.695 2
 -16 8 4 12548.3 2850.5 2
 -16 8 5 18941.5 3595.98 2
 -16 8 6 6057.39 2074.38 2
 -16 8 7 8911.3 2476.05 2
 -16 9 0 30917.1 4453.65 2
 -16 9 1 7905.97 2370 2
 -16 9 2 7946.93 2112.25 2
 -16 9 3 18356.6 3489.79 2
 -16 9 4 21319.5 3807.88 2
 -16 9 5 4180.05 1855 2
 -16 9 6 8736.64 2510.42 2
 -16 9 7 44890.6 5706.9 2
 -16 10 0 1999.95 954.875 2
 -16 10 1 18944.8 3613.3 2
 -16 10 2 29768.3 4553.64 2
 -16 10 3 27773 4411.21 2
 -16 10 4 39.1681 496.022 2
 -16 10 5 15344.3 3276.61 2
 -16 10 6 31281.1 4730.55 2
 -16 11 -1 -668.385 864.639 2
 -16 11 0 18336.2 3422 2
 -16 11 1 27530.2 4378.41 2
 -16 11 2 14827.3 3234.93 2
 -16 11 3 -216.474 287.457 2
 -16 11 4 17841.4 3544.75 2
 -16 12 -1 12703.8 2911.39 2
 -16 12 0 25774.2 4230.72 2
 -16 12 1 13915.9 3220.81 2
 -16 12 2 -2250.03 1278.06 2
 -16 12 3 14736.4 3264.66 2
 -16 13 -1 18574.9 3630.98 2
 -15 2 2 10081.4 2485.09 2
 -15 2 3 599.346 339.25 2
 -15 2 4 18798.2 3407.1 2
 -15 2 5 48558.5 5553.52 2
 -15 2 6 18019.4 3348.12 2
 -15 2 7 7991.02 2273.28 2
 -15 2 8 34959.8 4742.92 2
 -15 2 9 21121.6 3653.94 2
 -15 3 0 8334.37 2147.96 2
 -15 3 1 7685.27 2097.88 2
 -15 3 2 2146.37 1289.33 2
 -15 3 3 10401.7 2467.24 2
 -15 3 4 32106.4 4423.87 2
 -15 3 5 7559.47 2009.58 2
 -15 3 6 13788.1 2929.66 2
 -15 3 7 33855.3 4610.32 2
 -15 3 8 5177.35 1593.59 2
 -15 3 9 3420.06 1578.62 2
 -15 3 10 28862.6 4405.24 2
 -15 3 11 34282 4717.63 2
 -15 4 0 2439.22 1045.81 2
 -15 4 1 7152.47 1967.01 2
 -15 4 2 10053.1 2495.34 2
 -15 4 3 22051.6 3623.59 2
 -15 4 4 1400.74 1062.53 2
 -15 4 5 10777.1 2631.99 2
 -15 4 6 25388.8 3992.58 2
 -15 4 7 1483.56 922.317 2
 -15 4 8 13780.2 2934.19 2
 -15 4 9 28819.7 4333.42 2
 -15 4 10 37506.1 4963.21 2
 -15 4 11 3819.79 1620.79 2
 -15 4 12 5582.09 1898.17 2
 -15 5 -1 2520.06 1052.78 2
 -15 5 0 6000.21 1777.08 2
 -15 5 1 8383.13 2136.56 2
 -15 5 2 11382.2 2589.49 2
 -15 5 3 -2150.6 1145.13 2
 -15 5 4 15115.1 3022.33 2
 -15 5 5 32477.7 4500.86 2
 -15 5 6 7963.45 2188.84 2
 -15 5 7 16124.7 3179.85 2
 -15 5 8 28298.8 4200.23 2
 -15 5 9 27763.5 4294.14 2
 -15 5 10 437.917 598.578 2
 -15 5 11 7934.01 2266.04 2
 -15 5 12 36109.3 4894.61 2
 -15 6 -1 3142.27 1468.81 2
 -15 6 0 17845.7 3192.48 2
 -15 6 1 7524.58 1995.09 2
 -15 6 2 1272.64 1025.06 2
 -15 6 3 24872.3 3893.79 2
 -15 6 4 34250.9 4599.27 2
 -15 6 5 8407.91 2357.31 2
 -15 6 6 14288.3 2938.22 2
 -15 6 7 42888.8 5289.72 2
 -15 6 8 27491 4227.11 2
 -15 6 9 403.303 450.079 2
 -15 6 10 14501.4 3025.88 2
 -15 6 11 23459 3920.42 2
 -15 6 12 17482 3369.03 2
 -15 7 -1 22058 3495.94 2
 -15 7 0 12048 2624.4 2
 -15 7 1 865.494 799.731 2
 -15 7 2 29591.9 4199.53 2
 -15 7 3 44732.6 5261.84 2
 -15 7 4 8365.09 2190.34 2
 -15 7 5 10835.4 2606.21 2
 -15 7 6 62972.4 6417.27 2
 -15 7 7 24510.5 3980.39 2
 -15 7 8 274.886 457.386 2
 -15 7 9 18046.1 3392.96 2
 -15 7 10 24795.8 3994.8 2
 -15 7 11 9350.31 2441.98 2
 -15 7 12 23633.1 3932.84 2
 -15 8 -1 12181.5 2606.79 2
 -15 8 0 1395.51 871.931 2
 -15 8 1 26014.4 3959.22 2
 -15 8 2 19769.1 3473.32 2
 -15 8 3 511.911 436.186 2
 -15 8 4 6612.24 1972.63 2
 -15 8 5 48240.5 5586.53 2
 -15 8 6 16008.4 3215.88 2
 -15 8 7 4159.81 1597.99 2
 -15 8 8 25238.8 4087.66 2
 -15 8 9 18134.3 3458.58 2
 -15 8 10 2112.61 1145.43 2
 -15 8 11 28903.6 4382.02 2
 -15 9 -1 5908.81 1761.07 2
 -15 9 0 30468.9 4264.28 2
 -15 9 1 9117.66 2416.08 2
 -15 9 2 3461.22 1371.08 2
 -15 9 3 22647.5 3830.01 2
 -15 9 4 37538.5 4942.37 2
 -15 9 5 10719.5 2638.78 2
 -15 9 6 17619.2 3437.16 2
 -15 9 7 43463.5 5387.98 2
 -15 9 8 25943.9 4222.43 2
 -15 9 9 194.509 352.895 2
 -15 9 10 19175.3 3601.83 2
 -15 10 -1 26411.2 3954.18 2
 -15 10 0 6761.37 2001.59 2
 -15 10 1 13292.1 2866.56 2
 -15 10 2 26088.8 4090.69 2
 -15 10 3 33671.6 4674.5 2
 -15 10 4 3672.67 1621.76 2
 -15 10 5 9272.57 2445.95 2
 -15 10 6 54796.6 6146.76 2
 -15 10 7 22657.2 3940.87 2
 -15 10 8 294.348 350.093 2
 -15 10 9 16820.1 3396.54 2
 -15 10 12 1358.17 1076.48 4
 -15 11 -1 2814.7 1271.62 2
 -15 11 0 17773.7 3314.55 2
 -15 11 1 26995.1 4214.22 2
 -15 11 2 26698.2 4179.97 2
 -15 11 3 -100.482 606.315 2
 -15 11 4 7115.36 2140.44 2
 -15 11 5 31062.8 4600.62 2
 -15 11 6 15561.5 3323.44 2
 -15 11 7 -608.871 884.9 2
 -15 11 8 15731.7 3340.38 2
 -15 12 -1 15847.3 3183.59 2
 -15 12 0 30046.6 4430.48 2
 -15 12 1 21032.2 3750.61 2
 -15 12 2 -407.27 701.54 2
 -15 12 3 19206.4 3591.89 2
 -15 12 4 23634.2 4096.78 2
 -15 12 5 7828.85 2315.31 2
 -15 12 6 1662.23 1128.63 2
 -15 12 7 25571.8 4363.52 2
 -15 13 -1 32705.4 4698.02 2
 -15 13 0 15239.3 3251.79 2
 -15 13 1 -377.847 573.056 2
 -15 13 2 23527 4051.84 2
 -15 13 3 20780.4 3852.46 2
 -15 13 4 1988.75 1457.37 2
 -15 13 5 12538.3 3071.73 2
 -15 14 -2 10408.3 2630.42 2
 -15 14 -1 4049.21 1734.24 2
 -15 14 0 1914.19 1317.31 2
 -15 14 1 19968.2 3810.6 2
 -15 14 2 18673.3 3693.18 2
 -15 15 -2 -14.1554 791.645 2
 -15 15 -1 4040.83 1621.45 2
 -14 0 5 -401.129 966.692 2
 -14 0 6 5958.2 1931.2 2
 -14 0 7 37100.1 4802.31 2
 -14 0 8 20404.4 3527.63 2
 -14 0 9 -698.591 461.993 2
 -14 0 10 29527.2 4307.07 2
 -14 0 11 29916 4300.99 2
 -14 0 12 18648.8 3417.04 2
 -14 1 2 25312.4 3844.03 2
 -14 1 3 17256.7 3172.96 2
 -14 1 4 -653.001 928.71 2
 -14 1 5 18352.1 3280.09 2
 -14 1 6 45206.6 5162.13 2
 -14 1 7 18273.7 3354.04 2
 -14 1 8 -208.214 524.97 2
 -14 1 9 66005.5 6400.68 2
 -14 1 10 54934.6 5810.65 2
 -14 1 11 17608.8 3251.9 2
 -14 1 12 14852.9 2992.1 2
 -14 1 13 32717 4486.85 2
 -14 1 14 11421.9 2573.66 2
 -14 2 1 38390.5 4617.46 2
 -14 2 2 13395.1 2770.96 2
 -14 2 3 -226.297 679.391 2
 -14 2 4 17479.8 3112.21 2
 -14 2 5 39892.4 4772.61 2
 -14 2 6 17835.6 3241.66 2
 -14 2 7 -288.346 750.034 2
 -14 2 8 23853.5 3783.15 2
 -14 2 9 28752 4156.34 2
 -14 2 10 7710.26 2162.77 2
 -14 2 11 7720.61 2130.09 2
 -14 2 12 46194.6 5379.45 2
 -14 2 13 19613.3 3466.59 2
 -14 2 14 2125.16 965.299 2
 -14 2 15 11252.2 2611.57 2
 -14 3 -1 7364.51 2009.11 2
 -14 3 0 27287.6 3786.05 2
 -14 3 1 12670.8 2634.08 2
 -14 3 2 3395.15 1254.9 2
 -14 3 3 14549 2836.66 2
 -14 3 4 27454.5 3926.27 2
 -14 3 5 17163.3 3081.29 2
 -14 3 6 -88.8337 326.222 2
 -14 3 7 20125.4 3407.17 2
 -14 3 8 12347.8 2700.54 2
 -14 3 9 413.1 729.93 2
 -14 3 10 28908.2 4178.83 2
 -14 3 11 33211.7 4474.85 2
 -14 3 12 24791.3 3938.46 2
 -14 3 13 -126.608 529.211 2
 -14 3 14 14369.4 2970.98 2
 -14 3 15 28429.6 4246.61 2
 -14 4 -1 23003.7 3419.47 2
 -14 4 0 4960.53 1579.29 2
 -14 4 1 9994.22 2246.19 2
 -14 4 2 18171.1 3148.66 2
 -14 4 3 29424.6 4052.76 2
 -14 4 4 6241.31 1823.21 2
 -14 4 5 4674.51 1576.53 2
 -14 4 6 29294.2 4073.05 2
 -14 4 7 9112.49 2269.09 2
 -14 4 8 881.835 368.985 2
 -14 4 9 28839.8 4159.8 2
 -14 4 10 50825 5567.69 2
 -14 4 11 15606.3 3082.73 2
 -14 4 12 58.0328 534.222 2
 -14 4 13 25662.5 3932.84 2
 -14 4 14 30586.9 4362.07 2
 -14 4 15 6410.23 2033.88 2
 -14 5 -1 11788.5 2391.4 2
 -14 5 0 8095.68 2001.97 2
 -14 5 1 32150.9 4140.57 2
 -14 5 2 30347.9 4048.84 2
 -14 5 3 155.725 547.269 2
 -14 5 4 11965 2560.75 2
 -14 5 5 59854 5914.41 2
 -14 5 6 15832.6 3004.52 2
 -14 5 7 4887.49 1754.38 2
 -14 5 8 48607.1 5376.11 2
 -14 5 9 61179.2 6109.94 2
 -14 5 10 8906.91 2328.84 2
 -14 5 11 5583.52 1803.55 2
 -14 5 12 36488 4764.51 2
 -14 5 13 31449.2 4389.73 2
 -14 5 14 1366.26 711.96 2
 -14 5 15 14916.4 3054.35 2
 -14 6 -2 -280.936 755.608 2
 -14 6 -1 3360.49 1342.73 2
 -14 6 0 23267.3 3497.12 2
 -14 6 1 13626.6 2634.07 2
 -14 6 2 1158.81 872.074 2
 -14 6 3 21416.7 3447.78 2
 -14 6 4 84322 7020.89 2
 -14 6 5 27729.2 4008.45 2
 -14 6 6 6457.23 1893.81 2
 -14 6 7 58564.6 5924.77 2
 -14 6 8 46424.2 5281.11 2
 -14 6 9 5291.14 1623.19 2
 -14 6 10 11410.6 2652.98 2
 -14 6 11 32720 4480.95 2
 -14 6 12 18518.7 3402.65 2
 -14 6 13 1414.11 693.996 2
 -14 6 14 7945.63 2167.62 2
 -14 6 15 21423.2 3720.49 2
 -14 7 -2 18663.8 3044.06 2
 -14 7 -1 34919.6 4241.93 2
 -14 7 0 6242.19 1720.83 2
 -14 7 1 -475.064 930.159 2
 -14 7 2 29582.4 4051.06 2
 -14 7 3 66267.4 6201.91 2
 -14 7 4 24544.2 3733.36 2
 -14 7 5 11694.8 2530.02 2
 -14 7 6 74191.9 6729.64 2
 -14 7 7 42110.4 5073.78 2
 -14 7 8 951.829 1317.29 2
 -14 7 9 21034.5 3592.18 2
 -14 7 10 27986.7 4132.67 2
 -14 7 11 11929 2725.99 2
 -14 7 12 11442.7 2570.26 2
 -14 7 13 18049.2 3287.96 2
 -14 7 14 25009.9 3984.13 2
 -14 8 -2 35198.9 4225.57 2
 -14 8 -1 7704.41 1949.85 2
 -14 8 0 482.142 499.869 2
 -14 8 1 37553.1 4573.67 2
 -14 8 2 29690 4102.73 2
 -14 8 3 2746.11 1198.42 2
 -14 8 4 14343 2891.68 2
 -14 8 5 66679.9 6367.92 2
 -14 8 6 22232.9 3668.72 2
 -14 8 7 -2.99759 892.14 2
 -14 8 8 25865.2 3961.67 2
 -14 8 9 34823.1 4663.93 2
 -14 8 10 9196.01 2334.26 2
 -14 8 11 15167.2 3048.19 2
 -14 8 12 41808.9 5195.5 2
 -14 8 13 40344.6 5094.89 2
 -14 8 13 55972.5 7489.96 4
 -14 9 -2 3959.98 1563.33 2
 -14 9 -1 598.737 847.908 2
 -14 9 0 13175.4 2680.9 2
 -14 9 1 10251.9 2539.66 2
 -14 9 2 323.71 464.653 2
 -14 9 3 16254.3 3075.06 2
 -14 9 4 58287.4 5999.73 2
 -14 9 5 23582.9 3795.99 2
 -14 9 6 2845.35 1311.66 2
 -14 9 7 32474.4 4482.16 2
 -14 9 8 38852.8 4958.14 2
 -14 9 9 11914.7 2675.9 2
 -14 9 10 15628.4 3154.22 2
 -14 9 11 56014.8 6086.15 2
 -14 9 12 36878.4 4900.67 2
 -14 9 13 3016.98 1544.33 4
 -14 9 13 3138.3 1457.65 2
 -14 10 -2 5367.46 1709.26 2
 -14 10 -1 14902 2898.7 2
 -14 10 0 3726.14 1476.09 2
 -14 10 1 5467.72 1818.51 2
 -14 10 2 19388.3 3415.56 2
 -14 10 3 47893.5 5429.08 2
 -14 10 4 20275.7 3665.13 2
 -14 10 5 610.929 539.171 2
 -14 10 6 46892.6 5444.14 2
 -14 10 7 32445.6 4653.96 2
 -14 10 8 17480.5 3316.48 2
 -14 10 9 16484.9 3290.03 2
 -14 10 10 47770.9 5584.25 2
 -14 10 11 19898.3 3575.88 2
 -14 10 12 -661.149 861.404 4
 -14 10 12 927.275 545.543 2
 -14 11 -2 37429.6 4611.15 2
 -14 11 -1 9661.99 2345.61 2
 -14 11 0 5740.78 1896.88 2
 -14 11 1 31399.9 4411.58 2
 -14 11 2 37978 4819.57 2
 -14 11 3 9728.73 2444.17 2
 -14 11 4 4396.1 1642.03 2
 -14 11 5 58322.1 6215.4 2
 -14 11 6 26224 4107.33 2
 -14 11 7 7736.7 2116.38 2
 -14 11 8 8956.95 2526.13 2
 -14 11 9 46465 5543.99 2
 -14 11 10 17390.4 3356.47 2
 -14 11 11 826.672 620.382 4
 -14 12 -2 17053.7 3165.35 2
 -14 12 -1 8643.47 2260.25 2
 -14 12 0 31220.8 4408.41 2
 -14 12 1 33926.1 4695.27 2
 -14 12 2 4349.11 1666.88 2
 -14 12 3 9192.94 2437.22 2
 -14 12 4 45706 5537.6 2
 -14 12 5 14262.5 3069.8 2
 -14 12 6 526.893 820.378 2
 -14 12 7 38562.9 5159.76 2
 -14 12 8 33562.7 4777.25 2
 -14 12 9 10941 2679.98 2
 -14 13 -2 12708.2 2826.35 2
 -14 13 -1 35763 4789.07 2
 -14 13 0 14276.1 3112.85 2
 -14 13 1 468.065 486.128 2
 -14 13 2 16178.6 3257.83 2
 -14 13 3 32451.8 4740.44 2
 -14 13 4 4737.03 1789.65 2
 -14 13 5 5783.67 1966.44 2
 -14 13 6 49868.1 6002.66 2
 -14 13 7 43069.2 5559.94 2
 -14 14 -2 24630.7 3961.03 2
 -14 14 -1 12152.2 2838.65 2
 -14 14 0 877.433 771.586 2
 -14 14 1 16521.8 3386.1 2
 -14 14 2 21464.6 3898.05 2
 -14 14 3 428.868 419.644 2
 -14 14 4 18296.2 3670.78 2
 -14 14 5 46889.2 5941.37 2
 -14 15 -2 2197.35 1029.8 2
 -14 15 -1 105.618 306.286 2
 -14 15 0 30242.6 4699.55 2
 -14 15 1 14224.4 3176.88 2
 -14 15 2 2550.74 1432.12 2
 -14 15 3 15181.2 3700.89 2
 -14 16 -2 5051.64 1904.8 2
 -14 16 -1 18165.8 3637.73 2
 -13 -2 10 37609 4815.43 2
 -13 -2 11 16307.2 3164.59 2
 -13 -2 12 85.4004 576.379 2
 -13 -2 13 19794.6 3471.19 2
 -13 -1 6 20408.7 3429.92 2
 -13 -1 7 1049.72 878.118 2
 -13 -1 8 20999.6 3499.01 2
 -13 -1 9 47567.5 5284.24 2
 -13 -1 10 5931.7 1881.81 2
 -13 -1 11 4729.27 1700.56 2
 -13 -1 12 32708.3 4376.87 2
 -13 -1 13 26898.9 3982.21 2
 -13 -1 14 8746.4 2331.65 2
 -13 -1 15 11046.3 2465.47 2
 -13 0 3 10973.3 2515.9 2
 -13 0 4 28564 3948.7 2
 -13 0 5 4042.26 1382.34 2
 -13 0 6 4346.35 1588.92 2
 -13 0 7 23174.4 3666.27 2
 -13 0 8 28833.3 4006.32 2
 -13 0 9 2966.4 1271.99 2
 -13 0 10 16160.4 2972.57 2
 -13 0 11 48578.1 5273.13 2
 -13 0 12 13448.6 2731.53 2
 -13 0 13 3121.73 1322.38 2
 -13 0 14 8690.31 2164.34 2
 -13 0 15 21753.2 3531.58 2
 -13 0 16 6786.62 1963.13 2
 -13 1 1 -190.841 613.938 2
 -13 1 2 22903 3419.83 2
 -13 1 3 35938.5 4380.17 2
 -13 1 4 2821.07 1294.57 2
 -13 1 5 10549.8 2339.88 2
 -13 1 6 40006 4625.51 2
 -13 1 7 22764.7 3488.17 2
 -13 1 8 958.769 512.723 2
 -13 1 9 19083.2 3226.43 2
 -13 1 10 65853.1 6122.48 2
 -13 1 11 38784.2 4670.34 2
 -13 1 12 5773.19 1753.74 2
 -13 1 13 32027.4 4217.56 2
 -13 1 14 25647 3824.94 2
 -13 1 15 -201.071 754.387 2
 -13 1 16 4306.98 1557.24 2
 -13 2 0 4481.41 1455 2
 -13 2 1 48475.8 4927.53 2
 -13 2 2 34240.2 4130.89 2
 -13 2 3 4371.68 1489.62 2
 -13 2 4 12308.1 2526.6 2
 -13 2 5 51391.8 5242.24 2
 -13 2 6 43919.5 4815.42 2
 -13 2 7 6802.91 1866.71 2
 -13 2 8 17949.5 3092.96 2
 -13 2 9 52323.9 5395.52 2
 -13 2 10 39624.7 4700.35 2
 -13 2 11 588.168 542.902 2
 -13 2 12 36433.9 4556.28 2
 -13 2 13 35300.9 4484.01 2
 -13 2 14 2384.47 1104.02 2
 -13 2 15 7292.36 1958.78 2
 -13 2 16 38753.4 4730.22 2
 -13 3 -2 2928.79 1116.81 2
 -13 3 -1 5944.86 1828.04 2
 -13 3 0 53743.1 5144.92 2
 -13 3 1 27173.1 3648.82 2
 -13 3 2 304.513 504.808 2
 -13 3 3 14916.7 2728.48 2
 -13 3 4 47577.6 4958.17 2
 -13 3 5 22122.2 3369.57 2
 -13 3 6 2727.27 1236.61 2
 -13 3 7 12303.9 2559.06 2
 -13 3 8 22753.7 3474.54 2
 -13 3 9 9768.51 2493.64 2
 -13 3 10 3611.18 1498.16 2
 -13 3 11 37232.1 4552.05 2
 -13 3 12 19360.9 3418.74 2
 -13 3 13 -1759.43 1020.63 2
 -13 3 14 10173.1 2376.21 2
 -13 3 15 46887.9 5252.89 2
 -13 4 -2 8258.64 1891.35 2
 -13 4 -1 45731.8 4593.16 2
 -13 4 0 27561.9 3584.45 2
 -13 4 1 4104 1376.72 2
 -13 4 2 33116.8 4077.29 2
 -13 4 3 50462.2 5057.91 2
 -13 4 4 11780.2 2457.98 2
 -13 4 5 6009.63 1799.07 2
 -13 4 6 39872.9 4555.38 2
 -13 4 7 7782.93 1993.78 2
 -13 4 8 -122.661 435.857 2
 -13 4 9 23393.6 3526.1 2
 -13 4 10 76322 6586.16 2
 -13 4 11 21281.2 3429.23 2
 -13 4 12 145.833 581.663 2
 -13 4 13 30928.7 4201.98 2
 -13 4 14 26576.4 3919.6 2
 -13 4 15 15188.6 2983.01 2
 -13 5 -2 33064.7 3857.94 2
 -13 5 -1 21936.8 3188.04 2
 -13 5 0 2139.28 828.42 2
 -13 5 1 37563.1 4279.41 2
 -13 5 2 70845.8 5992.23 2
 -13 5 3 22308.6 3347.5 2
 -13 5 4 8058.67 2015.3 2
 -13 5 5 111405 7884.33 2
 -13 5 6 40092.8 4591.57 2
 -13 5 7 319.905 332.484 2
 -13 5 8 38055.4 4584.24 2
 -13 5 9 112296 8044.94 2
 -13 5 10 24070.5 3617.44 2
 -13 5 11 335.45 819.361 2
 -13 5 12 28146.4 3987.84 2
 -13 5 13 16789.4 3096.87 2
 -13 5 14 3694.24 1369.08 2
 -13 5 15 4974.16 1889.22 2
 -13 6 -2 6984.73 1747.49 2
 -13 6 -1 2702.33 1043.27 2
 -13 6 0 29344.4 3718.99 2
 -13 6 1 28356.1 3652.74 2
 -13 6 2 8332.46 2055.45 2
 -13 6 3 7540.77 1877.24 2
 -13 6 4 133402 8615.63 2
 -13 6 5 59905 5791.29 2
 -13 6 6 -638.247 769.216 2
 -13 6 7 34099 4289.62 2
 -13 6 8 62209.6 5922.24 2
 -13 6 9 13047.6 2640.35 2
 -13 6 10 2402.7 1090.05 2
 -13 6 11 22510.5 3563.48 2
 -13 6 12 16684.6 3099.71 2
 -13 6 13 -91.4919 395.644 2
 -13 6 14 6846.71 2015.54 2
 -13 6 14 6725 2473.83 4
 -13 6 15 20598.8 3529.18 2
 -13 7 -2 12382 2367.01 2
 -13 7 -1 45926.3 4688.14 2
 -13 7 0 15121.3 2711.39 2
 -13 7 1 53.951 637.809 2
 -13 7 2 36352.9 4280.75 2
 -13 7 3 96907.8 7305.71 2
 -13 7 4 23191.5 3491.38 2
 -13 7 5 7241.31 2020.75 2
 -13 7 6 50997.1 5357.11 2
 -13 7 7 43097.4 4932.87 2
 -13 7 8 4615.2 1928.65 2
 -13 7 9 8994.87 2278.92 2
 -13 7 10 35778.4 4505.36 2
 -13 7 11 19322.2 3304.44 2
 -13 7 12 952.512 474.197 2
 -13 7 13 16372.2 3133.65 2
 -13 7 13 17222.6 3958.43 4
 -13 7 14 30229.4 4218.01 2
 -13 7 14 26080.9 5067.06 4
 -13 7 15 7934.65 2191.54 2
 -13 8 -3 20244.5 2938.97 2
 -13 8 -2 46217.5 4686.72 2
 -13 8 -1 13578.6 2574.99 2
 -13 8 0 779.098 664.505 2
 -13 8 1 34977.1 4235.26 2
 -13 8 2 66928.6 5998.3 2
 -13 8 3 30191.9 4043.21 2
 -13 8 4 14067.9 2731.54 2
 -13 8 5 56979.8 5685.48 2
 -13 8 6 47649 5162.17 2
 -13 8 7 147.936 564.703 2
 -13 8 8 26060.7 3875.52 2
 -13 8 9 55576.6 5680.5 2
 -13 8 10 14328.4 2879.47 2
 -13 8 11 2753.5 1263.78 2
 -13 8 12 43619.7 5130.52 2
 -13 8 13 40054 6138.26 4
 -13 8 13 38540.6 4815.36 2
 -13 8 14 8137.3 2203.43 2
 -13 8 14 4123.93 1797.6 4
 -13 8 15 2980.62 1582.06 2
 -13 9 -3 41446.2 4388.08 2
 -13 9 -2 7453.58 1866.07 2
 -13 9 -1 1481 828.228 2
 -13 9 0 12073.1 2496.18 2
 -13 9 1 20148 3328.2 2
 -13 9 2 9355.05 2280.66 2
 -13 9 3 11366.2 2469.51 2
 -13 9 4 54470.8 5560.18 2
 -13 9 5 37584.7 4634.23 2
 -13 9 6 -271.29 519.193 2
 -13 9 7 23573.1 3653.63 2
 -13 9 8 43565.3 5068.85 2
 -13 9 9 23214.1 3620.17 2
 -13 9 10 2954.44 1296.97 2
 -13 9 11 61024.9 6227.37 2
 -13 9 12 41643.7 4997.13 2
 -13 9 12 36438.8 5724.84 4
 -13 9 13 7306.31 2167.36 2
 -13 9 13 4258.29 1889.94 4
 -13 9 14 2893.26 1676.06 2
 -13 10 -3 2508.96 1040.78 2
 -13 10 -2 1531.75 981.672 2
 -13 10 -1 10877.1 2301.82 2
 -13 10 0 19061.2 3177.44 2
 -13 10 1 3319.61 1525.13 2
 -13 10 2 27773.5 3913.69 2
 -13 10 3 61236.5 5954.05 2
 -13 10 4 23817.3 3783.88 2
 -13 10 5 163.842 704.417 2
 -13 10 6 29825.9 4171.02 2
 -13 10 7 34180.8 4512.38 2
 -13 10 8 31119.4 4309.81 2
 -13 10 9 3972.42 1589.92 2
 -13 10 10 45439.2 5368.73 2
 -13 10 11 37718.3 5620.8 4
 -13 10 11 29841.5 4282.87 2
 -13 10 12 3493.06 1750.7 4
 -13 10 12 3607.52 1543.18 2
 -13 10 13 11638.3 2647.31 2
 -13 10 13 7588.44 2752.22 4
 -13 11 -3 15912.1 2878.43 2
 -13 11 -2 30528.3 4051.69 2
 -13 11 -1 17458.3 3069.72 2
 -13 11 0 500.373 690.174 2
 -13 11 1 34645.7 4518.58 2
 -13 11 2 61504.4 6064.05 2
 -13 11 3 14676.2 2888.63 2
 -13 11 4 4368.1 1810.17 2
 -13 11 5 51246.1 5644.15 2
 -13 11 6 33429.9 4532.24 2
 -13 11 7 17013.3 3203.93 2
 -13 11 8 9893.61 2579.1 2
 -13 11 9 41884.6 5166.65 2
 -13 11 10 16857.4 3640.05 4
 -13 11 10 18368.3 3420.3 2
 -13 11 11 1859.96 1479.39 4
 -13 11 11 2836.56 1621.29 2
 -13 11 12 14717 3055.69 2
 -13 12 -3 47322.7 5079.75 2
 -13 12 -2 20571.7 3393.78 2
 -13 12 -1 491.235 473.399 2
 -13 12 0 27895.9 4033.61 2
 -13 12 1 50730.9 5594.99 2
 -13 12 2 8935.48 2269.59 2
 -13 12 3 5252.28 1746.75 2
 -13 12 4 38091.2 4964.84 2
 -13 12 5 23864.2 3871.52 2
 -13 12 6 719.067 765.939 2
 -13 12 7 19030.1 3983.14 2
 -13 12 8 47024.2 5564.92 2
 -13 12 9 12643.9 2847.34 2
 -13 12 10 4232.45 1900.27 2
 -13 13 -3 13767.5 2742.13 2
 -13 13 -2 1342.21 966.224 2
 -13 13 -1 23748.4 3798.4 2
 -13 13 0 25622.3 4016.8 2
 -13 13 1 4583.91 1747.04 2
 -13 13 2 7448.45 2238.7 2
 -13 13 3 24360 4044.32 2
 -13 13 4 7472.27 2238.99 2
 -13 13 5 -269.281 443.636 2
 -13 13 6 22607.1 3920.95 2
 -13 13 7 45001.1 5569.77 2
 -13 13 8 15587.2 3355.12 2
 -13 13 9 6129.39 2144.2 2
 -13 14 -3 12343.6 2676.76 2
 -13 14 -2 28025.6 4153.39 2
 -13 14 -1 19860.3 3590.58 2
 -13 14 0 -180.478 737.172 2
 -13 14 1 7666.25 2326.68 2
 -13 14 2 25019 4177.7 2
 -13 14 3 5075.48 1886.65 2
 -13 14 4 10302.9 2861.24 2
 -13 14 5 32469.7 4828.76 2
 -13 14 6 55425 6406.7 2
 -13 14 7 16646.4 3698.75 2
 -13 15 -3 33453.3 4723.32 2
 -13 15 -2 15038.2 3164.58 2
 -13 15 -1 -111.971 366.571 2
 -13 15 0 11103.8 2920.28 2
 -13 15 1 28170.2 4435.54 2
 -13 15 2 5342.06 1816.38 2
 -13 15 3 7012.78 2282.02 2
 -13 15 4 34087.5 5060.17 2
 -13 15 5 49315.7 6119.09 2
 -13 16 -3 4546.14 1736.04 2
 -13 16 -2 1284.28 919.004 2
 -13 16 -1 16645 3382.03 2
 -13 16 0 24230 4223.25 2
 -13 16 1 7884.1 2374.68 2
 -13 16 2 5551.53 1946.8 2
 -13 17 -3 3589.76 1711.81 2
 -13 17 -2 21136.5 3989.14 2
 -12 -2 8 550.955 670.851 2
 -12 -2 9 6885.32 1948.42 2
 -12 -2 10 30220.8 4037.38 2
 -12 -2 11 4378.38 1536.08 2
 -12 -2 12 143.946 486.649 2
 -12 -2 13 20406.3 3296.94 2
 -12 -2 14 36469.7 4485.56 2
 -12 -2 15 8982.43 2214.02 2
 -12 -1 4 389.249 425.205 2
 -12 -1 5 30595.4 4010.95 2
 -12 -1 6 49936.8 5156.47 2
 -12 -1 7 766.704 528.581 2
 -12 -1 8 9499.74 2213.63 2
 -12 -1 9 47194.9 4979.76 2
 -12 -1 10 4233.27 1519.76 2
 -12 -1 11 4009.46 1450.07 2
 -12 -1 12 29079.3 3899.04 2
 -12 -1 13 22959.3 3447.64 2
 -12 -1 14 4737.25 1666.94 2
 -12 -1 15 4141.01 1505.49 2
 -12 0 2 5970.68 1733.32 2
 -12 0 3 6070.54 1701.14 2
 -12 0 4 29471.2 3828.64 2
 -12 0 5 20332.8 3149.78 2
 -12 0 6 1870.36 1131.28 2
 -12 0 7 17169.8 2926.41 2
 -12 0 8 30374.4 3936.54 2
 -12 0 9 7192.84 1823.63 2
 -12 0 10 5034.72 1552.15 2
 -12 0 11 63048.2 5727.28 2
 -12 0 12 32773.8 4123.39 2
 -12 0 13 850.496 440.625 2
 -12 0 14 20784.8 3250.52 2
 -12 0 15 24311.4 3521.14 2
 -12 1 0 13774.2 2540.54 2
 -12 1 1 -668.363 846.024 2
 -12 1 2 22682.1 3300.15 2
 -12 1 3 47127.7 4736.72 2
 -12 1 4 16034.5 2718.75 2
 -12 1 5 2820.56 1293.56 2
 -12 1 6 37925 4299.33 2
 -12 1 7 73957.1 6158.71 2
 -12 1 8 6011.42 1752.46 2
 -12 1 9 15468.5 2755.39 2
 -12 1 10 76056.6 6335.53 2
 -12 1 11 39318.8 4498.27 2
 -12 1 12 672.573 327.848 2
 -12 1 13 31800.4 4057.66 2
 -12 1 14 66825.5 5924.97 2
 -12 1 15 8743.63 2095.28 2
 -12 2 -1 3044 1162.36 2
 -12 2 0 1591.05 839.956 2
 -12 2 1 44264 4479.85 2
 -12 2 2 36406.3 4072.7 2
 -12 2 3 15341 2663.52 2
 -12 2 4 14475.4 2578.15 2
 -12 2 5 21690.5 3169.18 2
 -12 2 6 52480.2 5086.95 2
 -12 2 7 25489.2 3532.47 2
 -12 2 8 6301.88 1763.63 2
 -12 2 9 61230.4 5582.56 2
 -12 2 10 45681.2 4816.04 2
 -12 2 11 386.541 396.082 2
 -12 2 12 19237.2 3136.46 2
 -12 2 13 37865.1 4420.29 2
 -12 2 14 8820.99 2056.27 2
 -12 2 15 3867.9 1232.7 2
 -12 3 -2 9898.79 2022.29 2
 -12 3 -1 9868.45 2021.53 2
 -12 3 0 58108.2 5098.31 2
 -12 3 1 51196.3 4766.78 2
 -12 3 2 9047.82 2089.22 2
 -12 3 3 14301 2569.18 2
 -12 3 4 24472.2 3340.97 2
 -12 3 5 14906.3 2615.88 2
 -12 3 6 6491.07 1819.93 2
 -12 3 7 4270.75 1393.54 2
 -12 3 8 30091.2 3811.23 2
 -12 3 9 36247.1 4254.77 2
 -12 3 10 -401.021 711.249 2
 -12 3 11 30517.3 3903.9 2
 -12 3 12 22740.1 3497.69 2
 -12 3 13 -123.055 593.12 2
 -12 3 14 10517.7 2313.76 2
 -12 3 15 53221.6 5337.44 2
 -12 3 15 48917.7 7014.58 4
 -12 4 -3 19781.5 2811.2 2
 -12 4 -2 3630.65 1148.46 2
 -12 4 -1 43547.7 4288.66 2
 -12 4 0 62825.5 5288.6 2
 -12 4 1 2898.33 1128.83 2
 -12 4 2 14459 2521.43 2
 -12 4 3 64285.4 5470.53 2
 -12 4 4 42025 4440.36 2
 -12 4 5 -307.69 616.415 2
 -12 4 6 26311.4 3514.99 2
 -12 4 7 64348.2 5670.27 2
 -12 4 8 9465.16 2092.02 2
 -12 4 9 14766.8 2680.78 2
 -12 4 10 87614.7 6768.85 2
 -12 4 11 36359.1 4333.12 2
 -12 4 12 -652.785 690.217 2
 -12 4 13 21178.7 3301.91 2
 -12 4 14 41481.9 4689.28 2
 -12 4 15 32491.2 4147.83 2
 -12 4 15 30167.8 5498.34 4
 -12 5 -3 4920.03 1408.47 2
 -12 5 -2 35035.6 3775.37 2
 -12 5 -1 37309.1 3974.16 2
 -12 5 0 204.577 357.031 2
 -12 5 1 21994.1 3078.18 2
 -12 5 2 67102.1 5573.09 2
 -12 5 3 47600.8 4704.66 2
 -12 5 4 7009.5 1800.7 2
 -12 5 5 86247.1 6509.81 2
 -12 5 6 110560 7534.66 2
 -12 5 7 3197.03 1122.32 2
 -12 5 8 22505 3372.23 2
 -12 5 9 151123 9169.77 2
 -12 5 10 37565.4 4393.02 2
 -12 5 11 875.469 795.292 2
 -12 5 12 29103.9 3866.96 2
 -12 5 13 22855.2 3425.78 2
 -12 5 14 31463.5 4068.24 2
 -12 5 14 32397.9 5611.62 4
 -12 5 15 8060.19 2251.92 2
 -12 5 15 4187.24 2286.74 4
 -12 6 -3 33966.1 3668.99 2
 -12 6 -2 23991.8 3113.37 2
 -12 6 -1 4186.14 1278.71 2
 -12 6 0 31289.3 3710.83 2
 -12 6 1 29792.2 3627.44 2
 -12 6 2 16293.7 2909.94 2
 -12 6 3 9919.95 2033.82 2
 -12 6 4 98994.5 7031.17 2
 -12 6 5 91106.1 6806.69 2
 -12 6 6 3661.32 1396.79 2
 -12 6 7 21180.3 3233.74 2
 -12 6 8 123751 8231.46 2
 -12 6 9 49863.3 5084.23 2
 -12 6 10 195.586 282.333 2
 -12 6 11 24432.4 3572.51 2
 -12 6 12 22566.7 3474.71 2
 -12 6 13 12679.7 2590.4 2
 -12 6 13 15163.5 3675.94 4
 -12 6 14 8279.27 2747.64 4
 -12 6 14 6863.81 1899.37 2
 -12 6 15 37312.2 4520.22 2
 -12 6 15 36481 6160.19 4
 -12 7 -3 9137.19 1898.32 2
 -12 7 -2 3124.95 1127.95 2
 -12 7 -1 28647.9 3519.53 2
 -12 7 0 16832.4 2717.55 2
 -12 7 1 1445.23 739.897 2
 -12 7 2 13197.2 2432.64 2
 -12 7 3 90736.5 6779.22 2
 -12 7 4 33351.2 4071.82 2
 -12 7 5 752.713 454.793 2
 -12 7 6 32041.1 4004.31 2
 -12 7 7 47023.6 4923.42 2
 -12 7 8 10457.2 2345.45 2
 -12 7 9 8044.05 2001.33 2
 -12 7 10 31481.5 4059.35 2
 -12 7 11 14563.9 2802.73 2
 -12 7 12 1341.68 981.847 2
 -12 7 13 7992.74 2405.85 4
 -12 7 13 9697.97 2297.96 2
 -12 7 14 40347.2 4726.82 2
 -12 7 14 41469.7 6279.64 4
 -12 7 15 17625 3186.63 2
 -12 8 -3 4171.82 1263.25 2
 -12 8 -2 39487.8 4131.78 2
 -12 8 -1 22421.4 3141.73 2
 -12 8 0 1551.75 944.855 2
 -12 8 1 5487.23 1567.03 2
 -12 8 2 95994.7 7005.71 2
 -12 8 3 82298.9 6517.61 2
 -12 8 4 5684.62 1689.92 2
 -12 8 5 50187.3 5107.68 2
 -12 8 6 79360.6 6494.22 2
 -12 8 7 450.934 486.13 2
 -12 8 8 24203.3 3574.44 2
 -12 8 9 69070.4 6125 2
 -12 8 10 31959.6 4134.5 2
 -12 8 11 9514.83 2245.33 2
 -12 8 12 22371.1 3486.8 2
 -12 8 12 22028.4 4235.76 4
 -12 8 13 36370 4506.83 2
 -12 8 13 41437.8 6193.04 4
 -12 8 14 21111.6 4509.61 4
 -12 8 14 19069.8 3318.29 2
 -12 9 -3 36519.5 4024.8 2
 -12 9 -2 37893.3 4365.85 2
 -12 9 -1 7698.59 1893.32 2
 -12 9 0 5827.91 1657.2 2
 -12 9 1 22497.5 3284.46 2
 -12 9 2 51550.1 5128.9 2
 -12 9 3 10365.6 2266.81 2
 -12 9 4 36275.2 4415.51 2
 -12 9 5 75715.8 6401.28 2
 -12 9 6 3419.8 1246.11 2
 -12 9 7 17412.8 3039.19 2
 -12 9 8 84693.4 6945.23 2
 -12 9 9 36796.9 4457.24 2
 -12 9 10 2212.46 1199.42 2
 -12 9 11 39641.9 4857.13 2
 -12 9 11 36400.5 5419.4 4
 -12 9 12 45845.2 5140.58 2
 -12 9 12 49438.4 6499.08 4
 -12 9 13 14709.7 3607.1 4
 -12 9 13 16167.7 3072 2
 -12 9 14 -677.915 990.415 4
 -12 9 14 2423.29 1585.79 2
 -12 10 -3 10912.4 2178.21 2
 -12 10 -2 -255.622 676.124 2
 -12 10 -1 13068.8 2535.91 2
 -12 10 0 25145.4 3555.77 2
 -12 10 1 7603.7 1933.33 2
 -12 10 2 22450.6 3400.01 2
 -12 10 3 76001.8 6482.15 2
 -12 10 4 46168.2 5003.58 2
 -12 10 5 4677.1 1635.61 2
 -12 10 6 36329.9 4486.5 2
 -12 10 7 56787.2 5693.56 2
 -12 10 8 16022.4 2999.83 2
 -12 10 9 2637.29 1192.85 2
 -12 10 10 32540.6 4854.2 4
 -12 10 10 30881.5 4239.42 2
 -12 10 11 47927.1 5339.9 2
 -12 10 11 39260 5556.47 4
 -12 10 12 3887.6 1706.33 4
 -12 10 12 6207.9 1832.08 2
 -12 10 13 558.064 378.166 4
 -12 10 13 408.04 599.565 2
 -12 10 14 11193.7 3251.79 4
 -12 10 14 14602.4 2972.86 2
 -12 11 -3 4214.02 1445.65 2
 -12 11 -2 27232.3 3724.33 2
 -12 11 -1 44277.1 4843.33 2
 -12 11 0 426.948 472.913 2
 -12 11 1 44373.4 5030.1 2
 -12 11 2 103990 7817.68 2
 -12 11 3 46344.7 5108.31 2
 -12 11 4 6895.72 2843.5 2
 -12 11 5 58729.5 5888.56 2
 -12 11 6 50037.2 5431.89 2
 -12 11 7 12769.4 2719.68 2
 -12 11 8 16838.5 3269.95 2
 -12 11 8 12560.7 2739.73 4
 -12 11 9 46399.9 5272.32 2
 -12 11 9 49491.1 5777.43 4
 -12 11 10 32304.9 4460.06 2
 -12 11 10 27070.2 4454.48 4
 -12 11 11 7338.46 2265.06 2
 -12 11 11 1209.53 453.303 4
 -12 11 12 11534.1 2690.01 2
 -12 11 13 22228.7 3771.44 2
 -12 12 -4 13164.6 2514.72 2
 -12 12 -3 45178.8 4831.83 2
 -12 12 -2 41597.8 4740.31 2
 -12 12 -1 2074.62 1121.99 2
 -12 12 0 24052.5 3749.53 2
 -12 12 1 68928.6 6426.6 2
 -12 12 2 24398.3 3743.56 2
 -12 12 3 991.717 830.442 2
 -12 12 4 53540.6 5666.25 2
 -12 12 5 31383.8 4391.91 2
 -12 12 6 2581.55 1192.27 2
 -12 12 7 14180.7 2923.94 2
 -12 12 8 53443.1 5834.22 2
 -12 12 9 27137.6 4106.1 2
 -12 12 10 2927.55 1623.18 2
 -12 12 11 21338.5 3710.35 2
 -12 13 -4 26554.8 3690.07 2
 -12 13 -3 19192.4 3203.78 2
 -12 13 -2 728.197 309.416 2
 -12 13 -1 14569.4 2962.15 2
 -12 13 0 27494.1 4027.37 2
 -12 13 1 2748.73 1242.24 2
 -12 13 2 2330.28 1105.61 2
 -12 13 3 20076 3581.48 2
 -12 13 4 16587.8 3255.93 2
 -12 13 5 -362.991 573.797 2
 -12 13 6 9640.83 2447.18 2
 -12 13 7 48083.8 5686.97 2
 -12 13 8 16728.9 3402.71 2
 -12 13 9 3115.23 1401.1 2
 -12 13 10 37693.2 5081.23 2
 -12 14 -4 3342.35 1346.21 2
 -12 14 -3 829.976 508.439 2
 -12 14 -2 21868 3618.06 2
 -12 14 -1 17416.8 3219.59 2
 -12 14 0 1643.71 958.7 2
 -12 14 1 10126.7 2669.92 2
 -12 14 2 25776.2 4144.59 2
 -12 14 3 8045.96 2210.63 2
 -12 14 4 4724.5 2077.1 2
 -12 14 5 12548.4 2918.11 2
 -12 14 6 51163.8 6033.48 2
 -12 14 7 33589.5 4896.81 2
 -12 14 8 1867.03 1396.79 2
 -12 15 -4 3810.42 1327.82 2
 -12 15 -3 34964.8 4718.94 2
 -12 15 -2 28318.3 4284.08 2
 -12 15 -1 3415.03 1480.74 2
 -12 15 0 16609.2 3301.29 2
 -12 15 1 30427 4587.01 2
 -12 15 2 11382.7 2863.63 2
 -12 15 3 -50.106 809.258 2
 -12 15 4 16027.8 3497.53 2
 -12 15 5 45718.7 5861.75 2
 -12 15 6 10464.8 2778.57 2
 -12 16 -4 23097.6 3819.29 2
 -12 16 -3 17352.7 3393.73 2
 -12 16 -2 2262.13 1310.51 2
 -12 16 -1 12543.7 2945.46 2
 -12 16 0 42469.4 5598.78 2
 -12 16 1 11762.3 2937.87 2
 -12 16 2 1828.73 1173.66 2
 -12 16 3 15947.3 3453.82 2
 -12 17 -4 5326.96 1872.48 2
 -12 17 -3 5659.56 2011.57 2
 -12 17 -2 21761.4 3975.39 2
 -12 17 -1 23628.2 4231.87 2
 -12 17 0 7262.48 2270.79 2
 -11 -2 6 52552 5176.72 2
 -11 -2 7 86172.8 6704.28 2
 -11 -2 8 15333.3 2703.3 2
 -11 -2 9 665.354 635.632 2
 -11 -2 10 19880.4 3119.82 2
 -11 -2 11 10126 2214.14 2
 -11 -2 12 724.223 647.245 2
 -11 -2 13 14504.6 2605.56 2
 -11 -2 14 16555.5 2811.75 2
 -11 -2 15 15684.4 2658.59 2
 -11 -1 3 27441.1 3623.9 2
 -11 -1 4 1464.84 919.766 2
 -11 -1 5 55862.3 5153.05 2
 -11 -1 6 68518.6 5764.6 2
 -11 -1 7 1063.29 754.98 2
 -11 -1 8 3734.34 1243.97 2
 -11 -1 9 40207 4348.67 2
 -11 -1 10 9850.52 2199.57 2
 -11 -1 11 1521.07 774.65 2
 -11 -1 12 46070.6 4673.72 2
 -11 -1 13 38457.7 4279.86 2
 -11 -1 14 5418.15 1565 2
 -11 -1 15 933.279 562.854 2
 -11 0 1 51643.9 4860.67 2
 -11 0 2 7550.99 1818.99 2
 -11 0 3 6923.64 1899.98 2
 -11 0 4 55726.3 5041.73 2
 -11 0 5 72597.5 5803.63 2
 -11 0 6 230.34 785.068 2
 -11 0 7 30659.7 3727.66 2
 -11 0 8 48917.3 4765.13 2
 -11 0 9 15276.6 2604.2 2
 -11 0 10 2180.09 990.914 2
 -11 0 11 44053.4 4583.99 2
 -11 0 12 59865.4 5345.48 2
 -11 0 13 16908.8 2804.3 2
 -11 0 14 11101.4 2263.09 2
 -11 0 15 42648.3 4461.69 2
 -11 0 16 12434.5 3543.58 4
 -11 1 -1 10065.1 2013.88 2
 -11 1 0 32509.2 3720 2
 -11 1 1 2920.77 1119.24 2
 -11 1 2 14294.2 2417.65 2
 -11 1 3 30062.4 3552.82 2
 -11 1 4 24182.1 3188.65 2
 -11 1 5 327.133 331.717 2
 -11 1 6 31594.6 3700.11 2
 -11 1 7 49982.2 4756.96 2
 -11 1 8 29273.3 3594.91 2
 -11 1 9 489.727 375.157 2
 -11 1 10 48638.2 4776.06 2
 -11 1 11 34954.2 4028.1 2
 -11 1 12 16959.2 2761.99 2
 -11 1 13 9727.8 2068.55 2
 -11 1 14 38096.7 4229.99 2
 -11 1 15 15561.7 2671.46 2
 -11 1 16 -514.047 1127.56 4
 -11 2 -2 23550.9 3029.72 2
 -11 2 -1 15719.9 2460.51 2
 -11 2 0 422.86 316.511 2
 -11 2 1 56787.3 4866.52 2
 -11 2 2 58630.6 4954.45 2
 -11 2 3 29777.3 3550.17 2
 -11 2 4 11760.7 2214.79 2
 -11 2 5 26022.7 3292.09 2
 -11 2 6 55642 5046.52 2
 -11 2 7 28424.2 3513.6 2
 -11 2 8 -133.001 612.388 2
 -11 2 9 64989.8 5485.29 2
 -11 2 10 91915.7 6630.99 2
 -11 2 11 9064.95 1965.2 2
 -11 2 12 14823 2770.37 2
 -11 2 13 34818.2 4026.32 2
 -11 2 14 10380.5 2147.57 2
 -11 2 15 2835.04 1886.86 4
 -11 2 15 1190.47 694.204 2
 -11 2 16 22189.7 4770.73 4
 -11 3 -3 42576.8 3958.72 2
 -11 3 -2 22634.2 2901.13 2
 -11 3 -1 1005.77 958.928 2
 -11 3 0 75650.1 5555.46 2
 -11 3 1 115246 7066.28 2
 -11 3 2 57966.6 4914.82 2
 -11 3 3 23047.2 3055.13 2
 -11 3 4 50663 4643.76 2
 -11 3 5 75551.2 5781.8 2
 -11 3 6 18167.2 2752.18 2
 -11 3 7 21147.5 3019.46 2
 -11 3 8 67806.6 5569.38 2
 -11 3 9 72373.2 5833.23 2
 -11 3 10 1415.77 461.72 2
 -11 3 11 12805.1 2401.64 2
 -11 3 12 51044.3 4944.48 2
 -11 3 13 7344.84 1761.6 2
 -11 3 14 8058.48 1899.91 2
 -11 3 15 33070 3978.88 2
 -11 3 15 31281.4 5379.03 4
 -11 3 16 24143.7 4920.44 4
 -11 4 -3 22363.1 2770.11 2
 -11 4 -2 270.726 266.115 2
 -11 4 -1 35629.8 3673.36 2
 -11 4 0 82165.2 5777.93 2
 -11 4 1 37324.4 3852.45 2
 -11 4 2 25671.8 3196.5 2
 -11 4 3 64469.8 5224.76 2
 -11 4 4 34249.5 3780.99 2
 -11 4 5 124.791 411.737 2
 -11 4 6 42903.8 4306.28 2
 -11 4 7 136187 8135.89 2
 -11 4 8 59667.2 5201.62 2
 -11 4 9 19252.2 2919.67 2
 -11 4 10 74711 5973.68 2
 -11 4 11 63514.4 5547.69 2
 -11 4 12 4894.12 1832.5 2
 -11 4 13 25974.9 3502.46 2
 -11 4 14 46374.5 6512.5 4
 -11 4 14 61918 5506.64 2
 -11 4 15 36710.2 5929.42 4
 -11 4 15 38489.8 4332.23 2
 -11 5 -4 26954.3 3008.27 2
 -11 5 -3 3539.77 986.924 2
 -11 5 -2 34163.5 3538.25 2
 -11 5 -1 34508.6 3636.07 2
 -11 5 0 268.226 322.993 2
 -11 5 1 29074.6 3401.2 2
 -11 5 2 47944.2 4594.53 2
 -11 5 3 1747.77 895.123 2
 -11 5 4 10293.8 2043.04 2
 -11 5 5 36597.3 4048.34 2
 -11 5 6 96924.4 6742.79 2
 -11 5 7 31088 3695.5 2
 -11 5 8 10154 2198.06 2
 -11 5 9 139743 8439.35 2
 -11 5 10 111230 7490.72 2
 -11 5 11 5380.21 1548.21 2
 -11 5 12 35239 4185.45 2
 -11 5 13 39599.6 5739.32 4
 -11 5 13 45156 4725.13 2
 -11 5 14 45651.6 6434.75 4
 -11 5 14 47816.1 4857.94 2
 -11 5 15 1514.6 1545.29 4
 -11 6 -4 3735.89 1077.8 2
 -11 6 -3 39108.1 3742.69 2
 -11 6 -2 30164.8 3338.16 2
 -11 6 -1 2767.02 1134.92 2
 -11 6 0 27953.8 3334.01 2
 -11 6 1 66873.9 5306.23 2
 -11 6 2 1720.71 1300.26 2
 -11 6 3 13017.6 2340.1 2
 -11 6 4 38145.6 4086.44 2
 -11 6 5 81605.3 6166.3 2
 -11 6 6 17196.8 2775.99 2
 -11 6 7 3746.72 1269.15 2
 -11 6 8 111417 7442.61 2
 -11 6 9 74976.4 5995.39 2
 -11 6 10 3108.1 1177.14 2
 -11 6 11 5621.75 1804.18 2
 -11 6 12 26661.9 3641.34 2
 -11 6 12 23219.9 4274.76 4
 -11 6 13 33787.5 4072.35 2
 -11 6 13 32388.6 5247.75 4
 -11 6 14 2344.53 1005.3 2
 -11 6 14 2003.29 1441.89 4
 -11 6 15 13536.2 3705.05 4
 -11 7 -4 45693.3 4038.1 2
 -11 7 -3 33282.4 3495.47 2
 -11 7 -2 783.629 577.185 2
 -11 7 -1 17577.5 2590.12 2
 -11 7 0 39327.1 4028.98 2
 -11 7 1 16221 2572.02 2
 -11 7 2 6949.86 1671.49 2
 -11 7 3 68183.1 5589.03 2
 -11 7 4 59211.7 5218.58 2
 -11 7 5 24368.7 3352.65 2
 -11 7 6 5597.83 1601.29 2
 -11 7 7 64809.5 5568.15 2
 -11 7 8 48226.5 4789.93 2
 -11 7 9 901.219 608.239 2
 -11 7 10 29220.6 3778.8 2
 -11 7 11 27981.1 3690.22 2
 -11 7 12 18967.2 3914.19 4
 -11 7 12 18419.4 3038.33 2
 -11 7 13 2244.64 1295.86 4
 -11 7 13 2531.08 1024.99 2
 -11 7 14 35187.2 4304.85 2
 -11 7 14 42486.4 6251.07 4
 -11 7 15 25183 5049.95 4
 -11 8 -4 22615.1 2833.72 2
 -11 8 -3 4512.66 1430.31 2
 -11 8 -2 69151.3 5360.91 2
 -11 8 -1 30107.9 3552.62 2
 -11 8 0 6313.05 1618.93 2
 -11 8 1 7966.09 1850.76 2
 -11 8 2 95401.2 6707.5 2
 -11 8 3 65932.7 5562.63 2
 -11 8 4 3820.66 1372.38 2
 -11 8 5 20262.3 3281.15 2
 -11 8 6 97153.6 6962.97 2
 -11 8 7 32561.4 3932 2
 -11 8 8 15748 2791.74 2
 -11 8 9 86238.8 6721.09 2
 -11 8 10 59357.5 5495.05 2
 -11 8 11 18051.6 3779.45 4
 -11 8 11 32260.8 4006.66 2
 -11 8 12 6075.27 2483.55 4
 -11 8 12 3546.27 1355.37 2
 -11 8 13 63580.6 5857.75 2
 -11 8 13 53804.8 6893.78 4
 -11 8 14 32201 5570.74 4
 -11 8 14 30553.1 4136.91 2
 -11 9 -4 1873.6 747.512 2
 -11 9 -3 44663.5 4285.47 2
 -11 9 -2 39405.9 4093.25 2
 -11 9 -1 9852.66 2041.59 2
 -11 9 0 2555.35 1095.02 2
 -11 9 1 75532.2 6036.9 2
 -11 9 2 106121 7255.82 2
 -11 9 3 2061.42 1006.83 2
 -11 9 4 28931.7 3751.65 2
 -11 9 5 88065.4 6719.84 2
 -11 9 6 20290.8 3160.61 2
 -11 9 7 32012.5 4032.93 2
 -11 9 8 139639 8805.59 2
 -11 9 9 50223.4 5090.57 2
 -11 9 10 3741.32 1553.24 4
 -11 9 10 3591.58 1435.42 2
 -11 9 11 10808.8 2857.13 4
 -11 9 11 15262.1 2851.91 2
 -11 9 12 42472.2 5960.8 4
 -11 9 12 51174.5 5296.49 2
 -11 9 13 31503.6 5280.92 4
 -11 9 13 32813.3 4216.93 2
 -11 9 14 2274.71 1196.6 2
 -11 9 14 3099.24 1737.53 4
 -11 10 -4 26993.4 3312.79 2
 -11 10 -3 16110.4 2592.27 2
 -11 10 -2 26.3973 366.373 2
 -11 10 -1 2060.91 992.903 2
 -11 10 0 28658.8 3677.4 2
 -11 10 1 47929.2 4869.75 2
 -11 10 2 9805.71 2184.88 2
 -11 10 3 85911.1 6741.92 2
 -11 10 4 62962 5725.36 2
 -11 10 5 2108.83 1343.88 2
 -11 10 6 36469.3 4362.26 2
 -11 10 7 111070 7965.76 2
 -11 10 8 23028.3 3696.89 4
 -11 10 8 25825.4 3671.52 2
 -11 10 9 452.05 409.469 2
 -11 10 9 -196.657 528.107 4
 -11 10 10 20871.5 3808.05 4
 -11 10 10 22892.8 3528.23 2
 -11 10 11 32930.7 5096.54 4
 -11 10 11 46144 5120.08 2
 -11 10 12 9943.84 2794.17 4
 -11 10 12 19535.1 3291.14 2
 -11 10 13 -69.1572 661.74 2
 -11 10 13 1098.75 1255.24 4
 -11 10 14 17032.5 4115.5 4
 -11 11 -4 9280.09 1989.44 2
 -11 11 -3 457.003 479.952 2
 -11 11 -2 34828.4 4148.09 2
 -11 11 -1 35026.5 4147.76 2
 -11 11 0 20796.7 3255.25 2
 -11 11 1 34740.6 4372.66 2
 -11 11 2 104854 7617 2
 -11 11 3 89118.6 6994.83 2
 -11 11 4 2712.86 1448.1 2
 -11 11 5 38448.9 4668.56 2
 -11 11 6 93232.4 7375.62 2
 -11 11 7 22319 3501.42 4
 -11 11 7 25390.2 3748.8 2
 -11 11 8 18162.9 3385.22 2
 -11 11 8 7924.04 2132.38 4
 -11 11 9 38348.8 5025.21 4
 -11 11 9 38672.9 4674.23 2
 -11 11 10 42345.4 5467.66 4
 -11 11 10 41158.3 4949.61 2
 -11 11 11 10985.5 2622.92 2
 -11 11 11 4535.68 1857.81 4
 -11 11 12 4795.19 1642.65 2
 -11 11 13 14899.5 3006.47 2
 -11 12 -4 4128.48 1380.43 2
 -11 12 -3 31291.9 3938.39 2
 -11 12 -2 32329.6 4103.68 2
 -11 12 -1 27105.8 3749.4 2
 -11 12 0 6648.53 1885.7 2
 -11 12 1 71302.4 6349.83 2
 -11 12 2 62439.8 5966.2 2
 -11 12 3 3588.53 1453.13 2
 -11 12 4 63213.4 6157.29 2
 -11 12 5 53254.1 5617.8 2
 -11 12 6 24215 3814.9 2
 -11 12 7 2325.34 1672.57 2
 -11 12 8 32116.1 4410.9 2
 -11 12 9 31633.2 4398.73 2
 -11 12 10 1396.89 1204.38 2
 -11 12 11 17037.8 3231.33 2
 -11 12 12 37186.8 4910.57 2
 -11 13 -4 31291.1 3978.68 2
 -11 13 -3 19799.9 3264.91 2
 -11 13 -2 7980.58 2075.83 2
 -11 13 -1 4734.47 1636.62 2
 -11 13 0 30772.8 4256.44 2
 -11 13 1 20359.9 3458.34 2
 -11 13 2 620.21 720.713 2
 -11 13 3 34389.8 4573.52 2
 -11 13 4 23280.3 3816.17 2
 -11 13 5 6779.26 2074.52 2
 -11 13 6 3076.97 1455.14 2
 -11 13 7 36080.2 4851.85 2
 -11 13 8 32033.1 4616.13 2
 -11 13 9 -1605.08 1050.86 2
 -11 13 10 20604.5 3686.75 2
 -11 13 11 54347.2 6211.07 2
 -11 14 -4 9446.91 2237.78 2
 -11 14 -3 2176.35 1114.84 2
 -11 14 -2 20670.4 3540.65 2
 -11 14 -1 29391.5 4227.52 2
 -11 14 0 2883.03 1258.1 2
 -11 14 1 7949.11 2361.96 2
 -11 14 2 39084.2 5038.18 2
 -11 14 3 32368.9 4555.13 2
 -11 14 4 10465.4 2696.48 2
 -11 14 5 6357.53 2133.23 2
 -11 14 6 50010.8 5851.36 2
 -11 14 7 43107.6 5430.16 2
 -11 14 8 -323.836 521.362 2
 -11 14 9 30221.8 4648.69 2
 -11 15 -4 -439.072 475.574 2
 -11 15 -3 33643.1 4581.55 2
 -11 15 -2 31281.2 4461.99 2
 -11 15 -1 2028.63 1091.22 2
 -11 15 0 23626.2 4129.98 2
 -11 15 1 52969.8 6041.45 2
 -11 15 2 35339 4916.38 2
 -11 15 3 -1551.48 1049.42 2
 -11 15 4 17339.5 3486.63 2
 -11 15 5 49109.9 6011.43 2
 -11 15 6 22672.6 4083.09 2
 -11 15 7 4255.7 1707.27 2
 -11 16 -4 19527.8 3500.26 2
 -11 16 -3 28904.4 4344.27 2
 -11 16 -2 -180.798 1167.59 2
 -11 16 -1 18154.6 3564.56 2
 -11 16 0 45853.1 5733.35 2
 -11 16 1 17477.1 3544.77 2
 -11 16 2 289.168 715.453 2
 -11 16 3 17935.7 3692.26 2
 -11 16 4 40669.6 5588.84 2
 -11 17 -4 7012.76 2156.7 2
 -11 17 -3 5772.24 1983.2 2
 -11 17 -2 19990.3 3762.74 2
 -11 17 -1 27640.4 4519.06 2
 -11 17 0 14533.5 3228.01 2
 -11 17 1 2602.68 1424.67 2
 -11 18 -4 -878.857 971.343 2
 -11 18 -3 16913.1 3545.15 2
 -10 -3 9 72495.6 5954.8 2
 -10 -3 10 1598.19 978.347 2
 -10 -3 11 11271.7 2231.01 2
 -10 -3 12 50215.2 4863.05 2
 -10 -3 16 24625.4 4844.27 4
 -10 -2 5 3322.93 1229.75 2
 -10 -2 6 30988.8 3726.75 2
 -10 -2 7 85092.4 6276.28 2
 -10 -2 8 46457.4 4575.58 2
 -10 -2 9 163.951 553.507 2
 -10 -2 10 12456.1 2327.02 2
 -10 -2 11 27727.7 3493.34 2
 -10 -2 12 1015.54 711.304 2
 -10 -2 13 6722.53 1687.26 2
 -10 -2 14 13832.4 2438.28 2
 -10 -2 15 17198.8 2686.44 2
 -10 -2 16 367.513 1028.4 4
 -10 -1 2 45489.6 4431.27 2
 -10 -1 3 54605.5 4891.04 2
 -10 -1 4 2.05784 315.461 2
 -10 -1 5 80550.2 5941.25 2
 -10 -1 6 98102.7 6626.56 2
 -10 -1 7 20367.3 2927.5 2
 -10 -1 8 5352.73 1432.96 2
 -10 -1 9 21114.4 2967.13 2
 -10 -1 10 7717.02 1809.93 2
 -10 -1 11 -266.338 693.27 2
 -10 -1 12 24584.2 3200.4 2
 -10 -1 13 47192.4 4497.01 2
 -10 -1 14 23369.6 3101.8 2
 -10 -1 15 219.757 340.594 2
 -10 -1 16 25022.7 4838.78 4
 -10 0 0 7275.15 1688.52 2
 -10 0 1 42385.9 4134.79 2
 -10 0 2 23796.4 3070.52 2
 -10 0 3 13477.7 2334.43 2
 -10 0 4 59094.6 4904.39 2
 -10 0 5 113576 7016.36 2
 -10 0 6 17929.5 2713.1 2
 -10 0 7 9890.61 1989.21 2
 -10 0 8 66581 5305.69 2
 -10 0 9 42923.4 4253.29 2
 -10 0 10 1354.68 782.974 2
 -10 0 11 19939.2 2847.7 2
 -10 0 12 55402 4849.34 2
 -10 0 13 43031 4283.76 2
 -10 0 14 548.693 496.125 2
 -10 0 15 29977 3533.97 2
 -10 0 15 25774.7 4716.95 4
 -10 0 16 27556.8 5126.53 4
 -10 1 -1 21164.8 2797.83 2
 -10 1 0 53654.2 4498.58 2
 -10 1 1 6837.62 1582.56 2
 -10 1 2 1126.55 619.342 2
 -10 1 3 65851.6 5093.17 2
 -10 1 4 91659.9 6107.01 2
 -10 1 5 1367.62 658.181 2
 -10 1 6 43099.5 4135.3 2
 -10 1 7 51606.1 4618.19 2
 -10 1 8 83973.5 5957.65 2
 -10 1 9 9630.92 1940.05 2
 -10 1 10 30716.1 3565.34 2
 -10 1 11 63303.1 5193.99 2
 -10 1 12 50503.1 4648.53 2
 -10 1 13 2957.87 1228.59 2
 -10 1 14 20450.6 2886.12 2
 -10 1 15 18965.1 2784.92 2
 -10 1 15 15986.4 3710.97 4
 -10 1 16 2489.42 1441.37 4
 -10 2 -3 457.012 591.027 2
 -10 2 -2 23912.4 2856.41 2
 -10 2 -1 45401.2 4017.1 2
 -10 2 0 3332.08 1076.23 2
 -10 2 1 24312.8 2961.66 2
 -10 2 2 130550 7288.28 2
 -10 2 3 147457 7898.04 2
 -10 2 4 840.841 567.428 2
 -10 2 5 156154 8239.42 2
 -10 2 6 151551 8163.58 2
 -10 2 7 39714.6 3985.92 2
 -10 2 8 6219.86 1531.73 2
 -10 2 9 76941.2 5728.76 2
 -10 2 10 72935.1 5585.95 2
 -10 2 11 22624.6 2998.58 2
 -10 2 12 10423.7 2136.49 2
 -10 2 13 47716.1 4516.17 2
 -10 2 14 15259.4 2479.22 2
 -10 2 14 14145.7 3418.22 4
 -10 2 15 1191.99 1382.14 4
 -10 2 16 11096.6 3248.89 4
 -10 3 -4 4446.8 1312.06 2
 -10 3 -3 22257 2675.46 2
 -10 3 -2 32663.2 3293.93 2
 -10 3 -1 874.175 828.987 2
 -10 3 0 44675.4 3981.99 2
 -10 3 1 135692 7371.55 2
 -10 3 2 102690 6348.44 2
 -10 3 3 315.772 217.286 2
 -10 3 4 130258 7391.4 2
 -10 3 5 115990 6948.97 2
 -10 3 6 28472.1 3321.72 2
 -10 3 7 28548.5 3360.09 2
 -10 3 8 111797 6970.19 2
 -10 3 9 97667.4 6455.61 2
 -10 3 10 601.432 596.173 2
 -10 3 11 14352.6 2396.05 2
 -10 3 12 71760.6 5626.78 2
 -10 3 13 13142.9 2336.2 2
 -10 3 14 9531.39 2052 2
 -10 3 14 8958.22 2751.35 4
 -10 3 15 31677.2 5392.1 4
 -10 3 16 16296.2 3948.25 4
 -10 4 -4 44691.8 3737.57 2
 -10 4 -3 28737 3015.38 2
 -10 4 -2 920.191 519.486 2
 -10 4 -1 47862.6 4059.42 2
 -10 4 0 111593 6521.96 2
 -10 4 1 72013.8 5175.01 2
 -10 4 2 -186.793 525.332 2
 -10 4 3 40069.9 3862.06 2
 -10 4 4 29959 3352.78 2
 -10 4 5 623.021 298.803 2
 -10 4 6 25484.7 3160.85 2
 -10 4 7 106897 6794.53 2
 -10 4 8 82405 5923.97 2
 -10 4 9 3122.76 1201.55 2
 -10 4 10 29805.7 3505.5 2
 -10 4 11 91994.3 6454.83 2
 -10 4 12 22827.8 3122.54 2
 -10 4 13 15087.4 3477.28 4
 -10 4 13 15430.8 2562.35 2
 -10 4 14 48319.2 6515.15 4
 -10 4 14 52287 4860.2 2
 -10 4 15 24389 4689.55 4
 -10 4 16 2957.12 1469.34 4
 -10 5 -4 31001.8 3108.81 2
 -10 5 -3 814.635 376.595 2
 -10 5 -2 31241.8 3190.68 2
 -10 5 -1 77863.4 5321.24 2
 -10 5 0 37167.1 3611.44 2
 -10 5 1 2399.9 821.388 2
 -10 5 2 34167.3 3702.85 2
 -10 5 3 7056.54 1645.16 2
 -10 5 4 -37.4541 609.724 2
 -10 5 5 18118.8 3071.17 2
 -10 5 6 64480.6 5160.5 2
 -10 5 7 49714.5 4516.17 2
 -10 5 8 627.108 545.453 2
 -10 5 9 34500.2 3866.85 2
 -10 5 10 113720 7278.43 2
 -10 5 11 30031.1 3591.95 2
 -10 5 12 7991.23 2570.17 4
 -10 5 12 23319.5 3165.29 2
 -10 5 13 51990.6 4868.77 2
 -10 5 13 47526.6 6252.08 4
 -10 5 14 44413.6 4501.87 2
 -10 5 14 39311.6 5935.1 4
 -10 5 15 4392.82 1872.87 4
 -10 5 16 3454.13 1593.35 4
 -10 6 -4 4008.78 1096.41 2
 -10 6 -3 53030.4 4194.17 2
 -10 6 -2 40311.9 3740.92 2
 -10 6 -1 15844.4 2461.08 2
 -10 6 0 33279 3450.31 2
 -10 6 1 152063 8000.63 2
 -10 6 2 4404.79 1353.87 2
 -10 6 3 116.882 434.655 2
 -10 6 4 71196.1 5425.77 2
 -10 6 5 82731.2 6092.39 2
 -10 6 6 47206.9 4456.23 2
 -10 6 7 1197.71 659.362 2
 -10 6 8 72447.7 5800.76 2
 -10 6 9 111729 7196.09 2
 -10 6 10 27994.3 3499.45 2
 -10 6 11 2435.02 1371.87 4
 -10 6 11 3357.78 1316.89 2
 -10 6 12 64656.7 7041.43 4
 -10 6 12 65382.3 5533.95 2
 -10 6 13 37756.5 4163.76 2
 -10 6 13 40092.3 5713.45 4
 -10 6 14 1349.01 1381.19 4
 -10 6 14 -135.278 569.331 2
 -10 6 15 8784.56 2797.85 4
 -10 7 -4 80333.6 5237.37 2
 -10 7 -3 75142.5 5150.4 2
 -10 7 -2 1028.56 601.097 2
 -10 7 -1 36616.6 3659.71 2
 -10 7 0 228658 10223.8 2
 -10 7 1 16768 2520.39 2
 -10 7 2 479.662 576.844 2
 -10 7 3 77429.5 5696.34 2
 -10 7 4 87629.7 6208.65 2
 -10 7 5 103664 6812.72 2
 -10 7 6 2748.93 1095.41 2
 -10 7 7 79792.1 6039.62 2
 -10 7 8 91451.4 6526.04 2
 -10 7 9 4645.36 1395.34 2
 -10 7 10 24662.3 3322.29 2
 -10 7 10 21988.3 3770.87 4
 -10 7 11 56027.5 5147.57 2
 -10 7 11 60884.7 6602.85 4
 -10 7 12 37168 5367.58 4
 -10 7 12 36928.9 4155.67 2
 -10 7 13 3460.33 1714.29 4
 -10 7 13 1850.11 987.967 2
 -10 7 14 32167.9 5414.33 4
 -10 7 14 36551.6 4188.7 2
 -10 7 15 42749.3 6563.64 4
 -10 8 -5 49565.5 4017.7 2
 -10 8 -4 33696.4 3392 2
 -10 8 -3 342.311 226.593 2
 -10 8 -2 39456.9 3833.38 2
 -10 8 -1 92369.2 6151.24 2
 -10 8 0 31465.5 3543.2 2
 -10 8 1 11688 2125.23 2
 -10 8 2 79643.6 5913.33 2
 -10 8 3 42525.5 4251.48 2
 -10 8 4 29229.8 3543.52 2
 -10 8 5 27526.9 3524.98 2
 -10 8 6 58750.8 5138.86 2
 -10 8 7 24515.7 3305.23 2
 -10 8 8 12121.1 2302.62 2
 -10 8 9 66462.7 5627.19 2
 -10 8 9 69415.6 6526.56 4
 -10 8 10 52046.7 5901.19 4
 -10 8 10 48427.3 4818.08 2
 -10 8 11 25226.8 4304.52 4
 -10 8 11 49352.1 4936.66 2
 -10 8 12 2002.12 1099.1 2
 -10 8 12 1127.71 837.063 4
 -10 8 13 63332.6 7399.99 4
 -10 8 13 50346.6 5088.86 2
 -10 8 14 35041.1 5840.45 4
 -10 8 15 3501.38 2324.23 4
 -10 9 -5 26145.2 2985.9 2
 -10 9 -4 954.916 343.706 2
 -10 9 -3 66765.8 5117.97 2
 -10 9 -2 56104.1 4962.62 2
 -10 9 -1 11933.3 2201.95 2
 -10 9 0 24223.3 3179.25 2
 -10 9 1 136642 8126.29 2
 -10 9 2 61445.4 5262.63 2
 -10 9 3 964.746 674.874 2
 -10 9 4 25465.6 3372.7 2
 -10 9 5 62242.5 5401.95 2
 -10 9 6 12279.7 2374.21 2
 -10 9 7 28001.3 3614.21 2
 -10 9 8 91089.5 7313.66 4
 -10 9 8 95668.9 6928.83 2
 -10 9 9 48144.5 4835.12 2
 -10 9 9 41951.4 5112.23 4
 -10 9 10 10035.2 2680.09 4
 -10 9 10 10328.8 2187.59 2
 -10 9 11 3883.45 1432.13 2
 -10 9 11 1905.13 1459.42 4
 -10 9 12 46980 4974.59 2
 -10 9 12 43701.8 5963.34 4
 -10 9 13 20452.2 4195.18 4
 -10 9 13 27798.4 3809.46 2
 -10 9 14 3072.08 1873.5 4
 -10 10 -5 2401.31 901.952 2
 -10 10 -4 35956.2 3733.55 2
 -10 10 -3 42319.5 4175.96 2
 -10 10 -2 4027.26 1335.85 2
 -10 10 -1 6940.01 1702.6 2
 -10 10 0 71125.1 5749.41 2
 -10 10 1 63044.1 5451.11 2
 -10 10 2 750.816 746.339 2
 -10 10 3 35519 4103.13 2
 -10 10 4 69581.2 5917.58 2
 -10 10 5 63378.4 5691.55 2
 -10 10 6 18857.2 3050.06 2
 -10 10 7 97431.1 7196.38 4
 -10 10 7 89277.8 6899.88 2
 -10 10 8 60096.5 5564.95 2
 -10 10 8 38848.1 4753.8 4
 -10 10 9 6396.82 1764.72 2
 -10 10 9 7907.14 2243.44 4
 -10 10 10 7200.22 2282.92 4
 -10 10 10 7895.59 2025.84 2
 -10 10 11 42428.3 4810.37 2
 -10 10 11 35131.3 5122.47 4
 -10 10 12 13197.9 3373.42 4
 -10 10 12 17270 3070.73 2
 -10 10 13 192.444 534.432 2
 -10 10 13 -1041.74 909.151 4
 -10 10 14 13455.3 3560.72 4
 -10 11 -5 16563.5 2532.88 2
 -10 11 -4 12516.6 2336.92 2
 -10 11 -3 3689.78 1241.45 2
 -10 11 -2 9808 2342.2 2
 -10 11 -1 37694.5 4267.2 2
 -10 11 0 34996.3 4136.72 2
 -10 11 1 7480.06 3056 2
 -10 11 2 63284.1 5725.82 2
 -10 11 3 66937.4 5920.48 2
 -10 11 4 57364 5945.42 2
 -10 11 5 11447.9 2427.83 2
 -10 11 6 102004 7611.34 2
 -10 11 6 100529 7014.9 4
 -10 11 7 32639.8 4103.74 4
 -10 11 7 29332.9 3997.86 2
 -10 11 8 3062.87 1610.24 4
 -10 11 8 16328.7 3181.31 2
 -10 11 9 9315.18 2401.74 4
 -10 11 9 12684.6 2661.3 2
 -10 11 10 33461.1 4934.4 4
 -10 11 10 38330.6 4653.54 2
 -10 11 11 15213 3503.8 4
 -10 11 11 18739.2 3272.4 2
 -10 11 12 5594.65 1772.68 2
 -10 11 13 32204.4 4396.25 2
 -10 12 -5 4310.4 1349.03 2
 -10 12 -4 6321.18 1711.71 2
 -10 12 -3 25294.3 3471.53 2
 -10 12 -2 26130.5 3595.69 2
 -10 12 -1 37945.1 4423.83 2
 -10 12 0 387.938 609.655 2
 -10 12 1 77129 6514.67 2
 -10 12 2 84625.9 6902.46 2
 -10 12 3 27535 3851.36 2
 -10 12 4 9586.35 3488.21 2
 -10 12 5 79460.9 6799.42 2
 -10 12 6 43188.4 4980.54 2
 -10 12 7 3123.6 2120.93 2
 -10 12 8 20781.1 3521.54 2
 -10 12 9 39629.7 4878.83 2
 -10 12 10 10001.4 2559.69 2
 -10 12 11 13836 2979.51 2
 -10 12 12 42642.8 5227.86 2
 -10 12 13 27266.1 4198.28 2
 -10 13 -5 5221.08 1562.82 2
 -10 13 -4 45035.9 4743.5 2
 -10 13 -3 30471.9 3980.15 2
 -10 13 -2 24500.5 3628.33 2
 -10 13 -1 51.2371 287.971 2
 -10 13 0 49449.5 5269.05 2
 -10 13 1 41451.4 4886.85 2
 -10 13 2 12050.5 2621.7 2
 -10 13 3 17370.2 3190.03 2
 -10 13 4 40079.1 4949.81 2
 -10 13 5 41449.1 5067.93 2
 -10 13 6 234.753 357.356 2
 -10 13 7 21986.2 3905.11 2
 -10 13 8 51711.7 5780.32 2
 -10 13 9 618.99 581.56 2
 -10 13 10 17015 3378.93 2
 -10 13 11 57386.8 6325.61 2
 -10 14 -5 27802.4 3822.9 2
 -10 14 -4 28945.3 4015.64 2
 -10 14 -3 10738.5 2912.91 2
 -10 14 -2 6827.78 1965.35 2
 -10 14 -1 39789.6 4867.42 2
 -10 14 0 21415.3 3581.62 2
 -10 14 1 7471.77 2280.67 2
 -10 14 2 66959.7 6579.14 2
 -10 14 3 44206.8 5319.87 2
 -10 14 4 30256.5 4411.27 2
 -10 14 5 10150.5 2595.48 2
 -10 14 6 28326.7 4298.93 2
 -10 14 7 56676.2 6266.51 2
 -10 14 8 1550.17 1226.12 2
 -10 14 9 18120.6 3534.63 2
 -10 15 -5 4828.13 1658.98 2
 -10 15 -4 -146.616 470.203 2
 -10 15 -3 16537.3 3202.92 2
 -10 15 -2 30732.7 4289.52 2
 -10 15 -1 5764.84 1808.51 2
 -10 15 0 6828.56 2058.71 2
 -10 15 1 77019.7 7217.27 2
 -10 15 2 53599.9 6073.69 2
 -10 15 3 3127.8 1707.79 2
 -10 15 4 14596.5 3135.93 2
 -10 15 5 42248.1 5486.98 2
 -10 15 6 29925.3 4680.17 2
 -10 15 7 3752.08 1654.74 2
 -10 16 -5 -203.792 459.705 2
 -10 16 -4 12464.2 2804.23 2
 -10 16 -3 29729.2 4379.15 2
 -10 16 -2 2136.6 1152.72 2
 -10 16 -1 9992.71 2604.94 2
 -10 16 0 40035.6 5238.8 2
 -10 16 1 31894.1 4904.54 2
 -10 16 2 79.1157 667.43 2
 -10 16 3 10301.5 2743.42 2
 -10 16 4 23002.5 4188.9 2
 -10 16 5 18353.8 3683.82 2
 -10 17 -5 5117.46 1852.35 2
 -10 17 -4 27099 4207.07 2
 -10 17 -3 6180.62 2160.49 2
 -10 17 -2 5697.07 1974.49 2
 -10 17 -1 22501.9 4051.25 2
 -10 17 0 16604.2 3683.85 2
 -10 17 1 3134.38 1807.69 2
 -10 17 2 16676.3 3551.65 2
 -10 18 -5 15868.5 3282.71 2
 -10 18 -4 844.724 975.476 2
 -10 18 -3 6756.7 2241.57 2
 -9 -7 16 9055.17 2919.93 4
 -9 -6 16 3708.12 1951.81 4
 -9 -5 16 -585.693 1308.25 4
 -9 -4 16 7339.02 2510.92 4
 -9 -4 17 26121.5 5179.72 4
 -9 -3 8 58957.1 5068.97 2
 -9 -3 9 91851 6377.15 2
 -9 -3 10 3493.33 1242.96 2
 -9 -3 11 11962 2203.71 2
 -9 -3 12 49008.6 4505.75 2
 -9 -3 13 17127.1 2614.66 2
 -9 -3 16 17018 3838.74 4
 -9 -3 17 4861.12 2412.83 4
 -9 -2 4 64196.2 5216.04 2
 -9 -2 5 10512.6 2001.89 2
 -9 -2 6 7603.35 1674.4 2
 -9 -2 7 97840.4 6392.58 2
 -9 -2 8 80142.8 5747.36 2
 -9 -2 9 7224.85 1597.14 2
 -9 -2 10 5317 1526.59 2
 -9 -2 11 36252.8 3766.94 2
 -9 -2 12 4813.72 1326.62 2
 -9 -2 13 1046.09 992.359 2
 -9 -2 14 13828.4 2265.21 2
 -9 -2 15 21883.7 4269.21 4
 -9 -2 16 3297.62 1693.42 4
 -9 -2 17 5862.23 2417.98 4
 -9 -1 2 79293.3 5636.64 2
 -9 -1 3 57458.2 4760.07 2
 -9 -1 4 4036.16 1230.51 2
 -9 -1 5 17080.8 2477.91 2
 -9 -1 6 83185.2 5743.64 2
 -9 -1 7 67625.4 5149.34 2
 -9 -1 8 596.654 455.954 2
 -9 -1 9 6129.18 1498.14 2
 -9 -1 10 28753.4 3286.58 2
 -9 -1 11 5659.27 1425.5 2
 -9 -1 12 5223.39 1425.46 2
 -9 -1 13 36153.4 3712.02 2
 -9 -1 14 32405.9 3478.29 2
 -9 -1 15 5332.89 2029.98 4
 -9 -1 16 21606 4516.81 4
 -9 -1 17 35040.3 5913.42 4
 -9 0 0 3040.14 1016.35 2
 -9 0 1 94801.5 5987.47 2
 -9 0 2 30297.6 3272.65 2
 -9 0 3 4946.94 1545.43 2
 -9 0 4 61834.9 4775.5 2
 -9 0 5 79068.2 5457.9 2
 -9 0 6 62541.8 4833.43 2
 -9 0 7 3219.49 1087.81 2
 -9 0 8 108636 6586.94 2
 -9 0 9 67273.2 5052.64 2
 -9 0 10 9686.91 1861.6 2
 -9 0 11 36611.7 3708.08 2
 -9 0 12 96715.5 6227.35 2
 -9 0 13 60742.7 4827.38 2
 -9 0 14 10480.5 3020.41 4
 -9 0 14 12195.7 2078.6 2
 -9 0 15 16265.5 3728.03 4
 -9 0 16 40979.2 6290.29 4
 -9 0 17 14576.4 3866.73 4
 -9 1 -2 3494.07 1051.23 2
 -9 1 -1 4678.69 1216.46 2
 -9 1 0 67103.4 4776.63 2
 -9 1 1 28020.9 3022.41 2
 -9 1 2 2173.32 878.224 2
 -9 1 3 86061.6 5607.55 2
 -9 1 4 133561 7173.04 2
 -9 1 5 21605.7 2689.18 2
 -9 1 6 29859.3 3263.34 2
 -9 1 7 151780 7829.65 2
 -9 1 8 55585.5 4489.99 2
 -9 1 9 8439.68 1707.47 2
 -9 1 10 28673.6 3242.09 2
 -9 1 11 77527.3 5480.56 2
 -9 1 12 88452.5 5948.08 2
 -9 1 13 9650.11 1953.07 2
 -9 1 14 9633.58 2660.02 4
 -9 1 14 12638.1 2151.79 2
 -9 1 15 34015.9 5467.94 4
 -9 1 16 7473.51 2834.25 4
 -9 1 17 2126.84 1352.24 4
 -9 2 -3 3601.53 980.782 2
 -9 2 -2 12434.1 1919.89 2
 -9 2 -1 50562.6 4021.31 2
 -9 2 0 21387.7 2569.44 2
 -9 2 1 -43.6097 275.887 2
 -9 2 2 61206.8 4569.04 2
 -9 2 3 114148 6478.62 2
 -9 2 4 2074.28 776.725 2
 -9 2 5 103040 6191.64 2
 -9 2 6 183085 8630.91 2
 -9 2 7 51492 4293.81 2
 -9 2 8 14157.1 2191.34 2
 -9 2 9 98501.3 6313.14 2
 -9 2 10 21208.2 2743.99 2
 -9 2 11 8502.3 1662.87 2
 -9 2 12 8353.43 1798.4 2
 -9 2 13 39489 5464.71 4
 -9 2 13 37510.4 3756.93 2
 -9 2 14 10574.3 1989.18 2
 -9 2 14 10719.7 2867.13 4
 -9 2 15 2346.8 1532.7 4
 -9 2 16 12114.1 3348.08 4
 -9 3 -4 1090.38 605.73 2
 -9 3 -3 29577.2 2890.05 2
 -9 3 -2 70189.8 4677.45 2
 -9 3 -1 11756.2 1898.81 2
 -9 3 0 3411.6 984.468 2
 -9 3 1 97213.6 5786.32 2
 -9 3 2 177957 8242.64 2
 -9 3 3 31412.8 3208.1 2
 -9 3 4 59299.5 4526.16 2
 -9 3 5 114306 6572.52 2
 -9 3 6 90547.5 5840.69 2
 -9 3 7 3268.68 1029.43 2
 -9 3 8 147537 7771.39 2
 -9 3 9 139885 7575.54 2
 -9 3 10 1343.36 822.503 2
 -9 3 11 17455.1 2536.93 2
 -9 3 12 97851 6333.2 2
 -9 3 13 24086.8 4239.09 4
 -9 3 13 20720.9 2808.02 2
 -9 3 14 2143.67 939.664 2
 -9 3 14 1593.59 1152.95 4
 -9 3 15 27642.3 4980.86 4
 -9 3 16 25078.4 4938.08 4
 -9 4 -5 5418.29 1119.62 2
 -9 4 -4 48802 3697.2 2
 -9 4 -3 94660.1 5412.95 2
 -9 4 -2 9568.6 1624.06 2
 -9 4 -1 34883.6 3222.32 2
 -9 4 0 103740 5940.9 2
 -9 4 1 152424 7504.29 2
 -9 4 2 69587.3 4866.36 2
 -9 4 3 17632.5 1508.36 3
 -9 4 3 18639.2 2477.64 2
 -9 4 4 52276.3 4296.86 2
 -9 4 5 37491.8 3626.36 2
 -9 4 6 6318.28 1711.12 2
 -9 4 7 73817.7 5269.38 2
 -9 4 8 89477.9 5917 2
 -9 4 9 29854.1 3324.01 2
 -9 4 10 3076.03 1029.51 2
 -9 4 11 102266 6551.6 2
 -9 4 12 64672 5122.15 2
 -9 4 12 54999.2 6302.5 4
 -9 4 13 -277.916 659.743 4
 -9 4 13 409.412 460.917 2
 -9 4 14 37269.1 5585.27 4
 -9 4 14 39376.8 3967.39 2
 -9 4 15 30933.2 5288.3 4
 -9 4 16 22370.2 4725.38 4
 -9 5 -5 68152.6 4297.16 2
 -9 5 -4 52477.3 3850.85 2
 -9 5 -3 4020.6 1023.55 2
 -9 5 -2 48198.8 3778.51 2
 -9 5 -1 131916 6770.48 2
 -9 5 0 69655 4805.5 2
 -9 5 1 2206.58 871.637 2
 -9 5 2 46853.4 4315.47 2
 -9 5 2 37462.8 2234.28 3
 -9 5 3 38242.7 1830.38 3
 -9 5 3 37141.2 3571.79 2
 -9 5 4 554.76 568.021 2
 -9 5 5 5862.23 1459.11 2
 -9 5 6 117858 6876.85 2
 -9 5 7 58011.9 4697.4 2
 -9 5 8 1212.67 591.219 2
 -9 5 9 27600.7 3349.89 2
 -9 5 10 87100 6012.57 2
 -9 5 11 43339.6 4189.66 2
 -9 5 11 48015.6 5601.08 4
 -9 5 12 27707.9 3367.52 2
 -9 5 12 7388.74 2437.48 4
 -9 5 13 66783.6 7258.52 4
 -9 5 13 63676.9 5212.51 2
 -9 5 14 46152.8 4404.35 2
 -9 5 14 39015.7 5784.71 4
 -9 5 15 16819.1 3974.75 4
 -9 5 16 566.057 776.168 4
 -9 6 -5 35114.5 3022.04 2
 -9 6 -4 929.669 531.689 2
 -9 6 -3 49787.2 3876.87 2
 -9 6 -2 71233.5 4777.67 2
 -9 6 -1 30427.1 3210.4 2
 -9 6 0 23016.2 2761.17 2
 -9 6 1 93675.5 5829.57 2
 -9 6 2 31729.8 1711.32 3
 -9 6 2 36071.8 3644.43 2
 -9 6 3 -283.545 179.925 2
 -9 6 4 56000.1 4587.93 2
 -9 6 5 141535 7702.91 2
 -9 6 6 106517 6615.67 2
 -9 6 7 186.336 256.754 2
 -9 6 8 76455.8 5671.5 2
 -9 6 9 141783 7902.34 2
 -9 6 10 36257.7 4707.8 4
 -9 6 10 32075.7 3629.84 2
 -9 6 11 8040.55 2345.65 4
 -9 6 11 9627.92 2002.14 2
 -9 6 12 103294 8967.88 4
 -9 6 12 106142 6881.12 2
 -9 6 13 32233.6 5027.61 4
 -9 6 13 39032.4 4089.2 2
 -9 6 14 2234.57 1714.56 4
 -9 6 15 11259.2 3293.42 4
 -9 7 -5 176.132 362.31 2
 -9 7 -4 37021.6 3291.66 2
 -9 7 -3 69452.2 4737.2 2
 -9 7 -2 20453.4 2544.31 2
 -9 7 -1 37096.9 3534.19 2
 -9 7 0 259292 10737.8 2
 -9 7 1 44373.8 4036.4 2
 -9 7 2 19078.8 2620.95 2
 -9 7 3 63562.5 4948.82 2
 -9 7 4 104420 6564.59 2
 -9 7 5 127374 7371.67 2
 -9 7 6 701.809 587.369 2
 -9 7 7 45605.2 4311.07 2
 -9 7 8 104597 6876.75 2
 -9 7 9 15078.6 2500.78 2
 -9 7 9 12928.9 2685.48 4
 -9 7 10 8025.5 1804.62 2
 -9 7 10 6615.48 2016.18 4
 -9 7 11 66658.4 5489.24 2
 -9 7 11 70670.8 6979.75 4
 -9 7 12 27833.7 4595.4 4
 -9 7 12 30363.5 3695.09 2
 -9 7 13 807.971 1026.04 4
 -9 7 13 -1282.67 752.649 2
 -9 7 14 21349.6 4377.78 4
 -9 7 15 37672.9 6182.26 4
 -9 8 -5 43248.4 3616.8 2
 -9 8 -4 59107 4356.27 2
 -9 8 -3 13704.8 2089.6 2
 -9 8 -2 3750.25 1408.51 2
 -9 8 -1 185986 8903.35 2
 -9 8 0 66930.6 5116.24 2
 -9 8 1 -218.625 207.34 2
 -9 8 2 67466.9 5226.02 2
 -9 8 3 85572.1 5957.84 2
 -9 8 4 59711.9 4960.93 2
 -9 8 5 31142.3 3584.8 2
 -9 8 6 15545.9 2493.4 2
 -9 8 7 25585.2 3303.21 2
 -9 8 8 798.509 1235.57 4
 -9 8 8 19410.1 2815.78 2
 -9 8 9 39565.2 4157.36 2
 -9 8 9 43839.5 5021.82 4
 -9 8 10 41069.7 5185.46 4
 -9 8 10 40238.8 4230.07 2
 -9 8 11 29653.2 4027.3 2
 -9 8 11 25649.3 4234.89 4
 -9 8 12 234.98 889.456 4
 -9 8 12 441.506 227.944 2
 -9 8 13 30549.4 5112.06 4
 -9 8 13 32895.8 3929.15 2
 -9 8 14 45252.1 6540.06 4
 -9 8 15 12258.1 3505.24 4
 -9 9 -5 63925 4660.75 2
 -9 9 -4 1647.09 800.501 2
 -9 9 -3 29320.5 3227.55 2
 -9 9 -2 120571 7084.38 2
 -9 9 -1 24816.7 3088.88 2
 -9 9 0 39245.5 3960.72 2
 -9 9 1 86780.3 6148.98 2
 -9 9 2 70397.8 5505 2
 -9 9 3 18326.1 2764.27 2
 -9 9 4 16068.1 2629.44 2
 -9 9 5 77213.8 5935.91 2
 -9 9 6 16137.2 2665.48 2
 -9 9 7 6185.88 1697.79 2
 -9 9 7 7113.5 1786.86 4
 -9 9 8 83798.6 6327.85 2
 -9 9 8 91327.5 7155.64 4
 -9 9 9 59570.6 5295.93 2
 -9 9 9 50928.8 5537.85 4
 -9 9 10 21600.9 3776.24 4
 -9 9 10 24205 3368.92 2
 -9 9 11 2163.14 1082.26 2
 -9 9 11 -1304.47 990.094 4
 -9 9 12 46277.7 4834.82 2
 -9 9 12 39242.2 5665.75 4
 -9 9 13 28865.4 5008.03 4
 -9 9 13 25623 3596.36 2
 -9 9 14 10588.1 3196.72 4
 -9 10 -5 6282.83 1583.18 2
 -9 10 -4 10381.7 1983.06 2
 -9 10 -3 79041.1 5695.68 2
 -9 10 -2 24952.8 3169.57 2
 -9 10 -1 22145.2 3078.43 2
 -9 10 0 118339 7443.17 2
 -9 10 1 86257.9 6353.26 2
 -9 10 2 7557.95 1926.67 2
 -9 10 3 14869 2573.46 2
 -9 10 4 109820 7357.51 2
 -9 10 5 74787.8 6233.51 2
 -9 10 6 10199.4 2175.38 2
 -9 10 6 11607.2 2254.81 4
 -9 10 7 91983.8 6822.24 4
 -9 10 7 78252.2 6313.86 2
 -9 10 8 91075.7 7307.39 4
 -9 10 8 107891 7497.03 2
 -9 10 9 13433.5 2763.97 4
 -9 10 9 17579.8 2913.52 2
 -9 10 10 1176.06 753.323 4
 -9 10 10 464.594 508.363 2
 -9 10 11 43362.6 4760.92 2
 -9 10 11 35082.5 5157.74 4
 -9 10 12 28031.5 3861.94 2
 -9 10 12 28306.5 4750.07 4
 -9 10 13 2321.29 1066.73 2
 -9 10 13 1254.71 1258.54 4
 -9 10 14 17214.4 4091.53 4
 -9 11 -5 18794.1 2655.51 2
 -9 11 -4 20041.2 2857.05 2
 -9 11 -3 739.751 442.488 2
 -9 11 -2 17063.6 2867.37 2
 -9 11 -1 50066.2 4807.39 2
 -9 11 0 38573.3 4248.87 2
 -9 11 1 16201.1 2731.69 2
 -9 11 2 18421.6 2965.68 2
 -9 11 3 79818.5 6385.11 2
 -9 11 4 84049.9 6714.02 2
 -9 11 5 2727.81 1469.9 2
 -9 11 5 1687.19 962.914 4
 -9 11 6 60385.3 5603.05 2
 -9 11 6 58253.7 5156.76 4
 -9 11 7 38247 4510.13 2
 -9 11 7 44122.3 4727.89 4
 -9 11 8 22710 4078.78 2
 -9 11 8 14524.9 3058.62 4
 -9 11 9 1148.32 868.832 2
 -9 11 9 707.676 806.009 4
 -9 11 10 28838.5 4017.52 2
 -9 11 10 27661.9 4308.4 4
 -9 11 11 29957.1 4129.06 2
 -9 11 12 311.812 507.201 2
 -9 12 -5 20185.3 2920.49 2
 -9 12 -4 4489.69 1399.99 2
 -9 12 -3 14700.4 2633.1 2
 -9 12 -2 52608.9 5113.98 2
 -9 12 -1 16224.2 2785.5 2
 -9 12 0 4020.98 1481.65 2
 -9 12 1 48727.3 5048.86 2
 -9 12 2 67655.3 6046.62 2
 -9 12 3 40346.6 4613.25 2
 -9 12 4 3821.88 1487.57 2
 -9 12 5 75916.8 6581.91 2
 -9 12 6 36899.6 4511.27 2
 -9 12 7 3777.96 1477.22 2
 -9 12 8 6558.89 1867.12 2
 -9 12 9 37617.9 4737.49 2
 -9 12 10 17797.2 3271.21 2
 -9 12 11 4031.87 1474.7 2
 -9 12 12 24989.7 4001.48 2
 -9 13 -5 4485.73 1445.2 2
 -9 13 -4 32871.3 3996.92 2
 -9 13 -3 46288.7 4839.36 2
 -9 13 -2 43666.2 4794.06 2
 -9 13 -1 20.8243 524.007 2
 -9 13 0 52902.2 5392.71 2
 -9 13 1 50836.9 5356.23 2
 -9 13 2 10932.2 2484.39 2
 -9 13 3 10847.6 2423.14 2
 -9 13 4 99692 7826.99 2
 -9 13 5 39306.7 4823.97 2
 -9 13 6 1725.56 1071.77 2
 -9 13 7 24334.3 3868.15 2
 -9 13 8 52134.4 5904.81 2
 -9 13 9 13043 2860.08 2
 -9 13 10 2967.21 1407.07 2
 -9 13 11 57725.2 6462.12 2
 -9 14 -6 1657.4 1187.52 2
 -9 14 -5 23340.5 3422.65 2
 -9 14 -4 28049.2 3840.35 2
 -9 14 -3 17881.7 3118.36 2
 -9 14 -2 740.212 657.894 2
 -9 14 -1 35433 4551.59 2
 -9 14 0 22516.2 3614.78 2
 -9 14 1 6149.39 2415.47 2
 -9 14 2 28779.8 4170.65 2
 -9 14 3 76074.3 6967.04 2
 -9 14 4 38730.3 5017.47 2
 -9 14 5 10065.2 2481.68 2
 -9 14 6 28867.1 4354.95 2
 -9 14 7 58093.2 6355.93 2
 -9 14 8 6663.37 2162.06 2
 -9 14 9 3298.04 1499.2 2
 -9 15 -6 16895 3004.61 2
 -9 15 -5 14903.3 2810.55 2
 -9 15 -4 3457.56 1335.48 2
 -9 15 -3 1636.64 1379.83 2
 -9 15 -2 11985.2 2696.11 2
 -9 15 -1 9672.84 2420.24 2
 -9 15 0 6574.52 2148.75 2
 -9 15 1 43421.7 5317.29 2
 -9 15 2 45270.8 5488.31 2
 -9 15 3 22298 3941.18 2
 -9 15 4 4499.45 1768.65 2
 -9 15 5 33538.9 4863.69 2
 -9 15 6 36924.3 5188.84 2
 -9 15 7 4258.02 1716.3 2
 -9 16 -5 -527.224 728.9 2
 -9 16 -4 8028.56 2222.15 2
 -9 16 -3 22616.8 3798.62 2
 -9 16 -2 4747.14 1792.7 2
 -9 16 -1 1397.6 1086.59 2
 -9 16 0 41179.1 5334.84 2
 -9 16 1 43178.2 5530.78 2
 -9 16 2 6717.45 2256.25 2
 -9 16 3 5812.6 2157.91 2
 -9 16 4 23930.8 4475.32 2
 -9 16 5 26435.5 4445.76 2
 -9 17 -5 4361.27 1605.44 2
 -9 17 -4 37690.2 5002.07 2
 -9 17 -3 14245 3124.75 2
 -9 17 -2 -1593.51 1080.1 2
 -9 17 -1 22593.9 3997.47 2
 -9 17 0 33252.1 5054.89 2
 -9 17 1 1047.61 1181.32 2
 -9 17 2 3184.2 1596.86 2
 -9 18 -5 11064.5 2773.34 2
 -9 18 -4 206.616 665.952 2
 -9 18 -3 1460.3 1075.47 2
 -9 18 -2 17632.6 3665.79 2
 -8 -7 16 1670.17 1457.76 4
 -8 -7 17 7853.3 2859.14 4
 -8 -6 15 19480.1 3913.87 4
 -8 -6 16 19193 4064.01 4
 -8 -6 17 -104.071 726.914 4
 -8 -5 15 16426.7 3663.33 4
 -8 -5 16 1719.98 1582.63 4
 -8 -5 17 4717.79 2154.6 4
 -8 -4 15 655.1 429.964 4
 -8 -4 16 7678.98 2642.74 4
 -8 -4 17 5216.58 1990.77 4
 -8 -3 7 1846.79 810.914 2
 -8 -3 8 45248 4125.43 2
 -8 -3 9 154967 8064.97 2
 -8 -3 10 14924.9 2321.81 2
 -8 -3 11 3419.33 1075.79 2
 -8 -3 12 41696.3 3876.03 2
 -8 -3 13 47797 4178.54 2
 -8 -3 15 6398.21 2312.44 4
 -8 -3 16 21198.6 4292.99 4
 -8 -3 17 3118.65 1595.26 4
 -8 -2 3 74977.2 5333.56 2
 -8 -2 4 96607.5 6078.19 2
 -8 -2 5 11228.1 1955.38 2
 -8 -2 6 2665.2 996.689 2
 -8 -2 7 58724 4645.55 2
 -8 -2 8 96166.9 5966.74 2
 -8 -2 9 36447.9 3552.42 2
 -8 -2 10 6751.1 1503.96 2
 -8 -2 11 42203.9 3833.45 2
 -8 -2 12 21945.5 2675.34 2
 -8 -2 13 8915.59 1727.43 2
 -8 -2 14 9811.69 2701.5 4
 -8 -2 14 9230.02 1748.38 2
 -8 -2 15 24192.6 4451.55 4
 -8 -2 16 2573.61 1539.94 4
 -8 -2 17 448.127 755.217 4
 -8 -1 1 7919.14 1588.81 2
 -8 -1 2 67780.5 4856.55 2
 -8 -1 3 81165 5418.24 2
 -8 -1 4 4048.48 1172.37 2
 -8 -1 5 3165.98 964.63 2
 -8 -1 6 81630.2 5345.66 2
 -8 -1 7 71896.6 4986.76 2
 -8 -1 8 6845.37 1426.87 2
 -8 -1 9 26249.3 2896.87 2
 -8 -1 10 103039 6079.01 2
 -8 -1 11 16512.7 2323.8 2
 -8 -1 12 1206.89 625.183 2
 -8 -1 13 47810.9 3990.16 2
 -8 -1 14 41724.8 3694.66 2
 -8 -1 14 36811 5302.14 4
 -8 -1 15 10508.9 2990.91 4
 -8 -1 16 4734.87 2041.04 4
 -8 -1 17 38842.5 6244.93 4
 -8 0 -1 64456.9 4592.5 2
 -8 0 0 683.39 438.487 2
 -8 0 1 102782 5873.47 2
 -8 0 2 119681 6412.02 2
 -8 0 3 1690.33 982.875 2
 -8 0 4 56996.1 4281.59 2
 -8 0 5 102162 5946.44 2
 -8 0 6 58035 4409.64 2
 -8 0 7 8974.22 1700.28 2
 -8 0 8 57325.5 4375.32 2
 -8 0 9 52482.9 4190.05 2
 -8 0 10 17910.3 2378.08 2
 -8 0 11 16965.3 2360.08 2
 -8 0 12 104922 6166.13 2
 -8 0 13 76429 7458.94 4
 -8 0 13 78719.6 5228.96 2
 -8 0 14 35877.1 3439.12 2
 -8 0 14 38546.8 5482.15 4
 -8 0 15 7820.12 2646.84 4
 -8 0 16 43788.9 6446.39 4
 -8 0 17 24083.4 4878.94 4
 -8 1 -2 35434.7 3176.9 2
 -8 1 -1 8708.37 1548.73 2
 -8 1 0 63623.5 4376.59 2
 -8 1 1 118872 6286.31 2
 -8 1 2 5689.94 1274.8 2
 -8 1 3 64182.1 4542.32 2
 -8 1 4 100445 5796.77 2
 -8 1 5 53817.6 4098.94 2
 -8 1 6 36360.3 3420.75 2
 -8 1 7 174443 8100.93 2
 -8 1 8 52146.5 4130.5 2
 -8 1 9 13775.9 2110.38 2
 -8 1 10 38123.3 3530.75 2
 -8 1 11 63921.3 4661.53 2
 -8 1 12 58006.4 4430.67 2
 -8 1 13 16603.6 2361.07 2
 -8 1 13 15631.1 3442.57 4
 -8 1 14 1912.19 1303.29 4
 -8 1 14 2362.24 820.392 2
 -8 1 15 28508 4909.39 4
 -8 1 16 14115 3702.58 4
 -8 1 17 1276.83 1342.2 4
 -8 2 -4 49644 3642.74 2
 -8 2 -3 727.256 460.529 2
 -8 2 -2 6327.31 1264.63 2
 -8 2 -1 60887.2 4161.77 2
 -8 2 0 87475.5 5147.81 2
 -8 2 1 -142.267 422.185 2
 -8 2 2 55045.4 4021.58 2
 -8 2 3 115905 6189.29 2
 -8 2 4 29051 2915.34 2
 -8 2 5 25189.7 2733.98 2
 -8 2 6 211583 8999.56 2
 -8 2 7 83414.5 5265.6 2
 -8 2 8 4711.32 1217.18 2
 -8 2 9 79260 5226.39 2
 -8 2 10 52035.4 4171.16 2
 -8 2 11 38199.6 3592.08 2
 -8 2 12 2661.81 1289.18 4
 -8 2 12 7245.94 1634.79 2
 -8 2 13 13301.1 3081.23 4
 -8 2 13 10327.1 1798.22 2
 -8 2 14 21270.9 4097.84 4
 -8 2 14 22929.2 2767.41 2
 -8 2 15 4369.81 2222.6 4
 -8 2 16 2992.44 1889.97 4
 -8 2 17 23308.9 5083.02 4
 -8 3 -5 38521.8 3011.4 2
 -8 3 -4 3135.05 986.182 2
 -8 3 -3 42432.9 3282.25 2
 -8 3 -2 93377.5 5154.01 2
 -8 3 -1 60972.3 4105.43 2
 -8 3 0 3897.19 983.036 2
 -8 3 1 112726 5947.21 2
 -8 3 2 264235 10020.2 2
 -8 3 3 41342.8 3492.74 2
 -8 3 4 23176.2 2603.85 2
 -8 3 5 189314 8403.83 2
 -8 3 6 107523 6092.1 2
 -8 3 7 761.914 469.724 2
 -8 3 8 40732.7 3651.69 2
 -8 3 9 95052.7 5852.41 2
 -8 3 10 47763.2 4057.4 2
 -8 3 11 5257.57 1313.06 2
 -8 3 12 95111.4 5976.42 2
 -8 3 12 91354.4 7997.98 4
 -8 3 13 57824.5 6677.76 4
 -8 3 13 65630.7 4862.33 2
 -8 3 14 7181.09 2427.49 4
 -8 3 15 15596.5 3698.9 4
 -8 3 16 34292.9 5703.27 4
 -8 4 -5 3383.19 812.903 2
 -8 4 -4 37858.5 3010.44 2
 -8 4 -3 57703 3875.79 2
 -8 4 -2 26747.3 2602.79 2
 -8 4 -1 19749.8 2339.03 2
 -8 4 0 58167.3 4054.28 2
 -8 4 1 228060 9116.64 2
 -8 4 2 22192.8 2551.02 2
 -8 4 2 24844.7 1739.4 3
 -8 4 3 2978.6 492.592 3
 -8 4 3 6570.32 1491.88 2
 -8 4 4 73077.1 4853.46 2
 -8 4 5 79237 5155.59 2
 -8 4 6 9952.99 1994.29 2
 -8 4 7 32708 3269.06 2
 -8 4 8 86664.3 5553.9 2
 -8 4 9 66230.9 4891.18 2
 -8 4 10 -958.335 580.286 2
 -8 4 11 125002 9145.48 4
 -8 4 11 124148 6978.09 2
 -8 4 12 112776 8981.84 4
 -8 4 12 97157.3 6177.16 2
 -8 4 13 4435.58 1933.57 4
 -8 4 13 5301.95 1316.13 2
 -8 4 14 21275.4 4181.99 4
 -8 4 15 43730.2 6409.44 4
 -8 4 16 38424.6 6203.32 4
 -8 5 -5 63112.4 3882.64 2
 -8 5 -4 54818.4 3716.88 2
 -8 5 -3 4775.07 1053.59 2
 -8 5 -2 66978.7 4309.77 2
 -8 5 -1 97642.2 5507.22 2
 -8 5 0 112940 5975.77 2
 -8 5 1 3604.39 1009.21 2
 -8 5 1 3662.58 672.333 3
 -8 5 2 14578.2 1115.57 3
 -8 5 2 15900.3 2147.18 2
 -8 5 3 34799.5 3278.45 2
 -8 5 4 1095.09 638.859 2
 -8 5 5 1054.78 685.639 2
 -8 5 6 133414 7099.82 2
 -8 5 7 108114 6342.27 2
 -8 5 8 4507.9 1269.1 2
 -8 5 9 11298.8 2023.73 2
 -8 5 10 92431.4 7505.57 4
 -8 5 10 98099.4 6140.79 2
 -8 5 11 63972.5 4913.2 2
 -8 5 11 67571.6 6589.88 4
 -8 5 12 19719.4 2690.74 2
 -8 5 12 6598.3 2195.85 4
 -8 5 13 46277 4175.56 2
 -8 5 13 41998.8 5714.33 4
 -8 5 14 32580.9 5314.45 4
 -8 5 15 24074 4749.84 4
 -8 5 16 306.003 952.968 4
 -8 6 -5 63434.9 3941.93 2
 -8 6 -4 11572.6 1666.25 2
 -8 6 -3 22211.1 2388.1 2
 -8 6 -2 84670.7 5037.93 2
 -8 6 -1 68538.1 4560.48 2
 -8 6 0 364.59 217.166 2
 -8 6 1 78320.1 3254.47 3
 -8 6 1 81303 5184.15 2
 -8 6 2 165822 4372.5 3
 -8 6 2 180564 8182.82 2
 -8 6 3 1031.87 498.607 2
 -8 6 4 13487.5 2115.65 2
 -8 6 5 192370 8965.43 2
 -8 6 6 180596 8591.74 2
 -8 6 7 3949.98 1170.13 2
 -8 6 8 29555.6 3279.84 2
 -8 6 9 145629 9181.27 4
 -8 6 9 140533 7666.46 2
 -8 6 10 92056.7 6066.13 2
 -8 6 10 82683.6 7111.18 4
 -8 6 11 8424.51 1930.01 2
 -8 6 11 6151.5 1990.42 4
 -8 6 12 85695 8028.09 4
 -8 6 12 83233.5 5860.37 2
 -8 6 13 32673.6 5071.37 4
 -8 6 13 35272.2 3695.39 2
 -8 6 14 7802.19 2612.09 4
 -8 6 15 1638.33 930.148 4
 -8 7 -6 27664.2 2495.62 2
 -8 7 -5 48.8345 171.885 2
 -8 7 -4 25917.6 2613.32 2
 -8 7 -3 41881.4 3453.32 2
 -8 7 -2 26059 2772.57 2
 -8 7 -1 27743.6 2986.37 2
 -8 7 0 182937 8422.91 2
 -8 7 1 169999 5363.98 3
 -8 7 1 199028 8752.41 2
 -8 7 2 52610.5 4318.82 2
 -8 7 3 42101.2 3834.06 2
 -8 7 4 162670 8159.03 2
 -8 7 5 205602 9441.05 2
 -8 7 6 8554.55 1728.85 2
 -8 7 7 24846.1 3056.06 2
 -8 7 8 117341 7849.52 4
 -8 7 8 111603 6841.43 2
 -8 7 9 72611.9 6366.27 4
 -8 7 9 70862.8 5375.13 2
 -8 7 10 120.082 495.529 2
 -8 7 10 654.641 577.377 4
 -8 7 11 88472 6223.65 2
 -8 7 11 101045 8394.53 4
 -8 7 12 41029.5 4171.5 2
 -8 7 12 35205.2 5266 4
 -8 7 13 2115.54 841.895 2
 -8 7 13 1494.16 1434.23 4
 -8 7 14 5988.88 2172.22 4
 -8 7 15 37027 6003.03 4
 -8 8 -6 111.7 254.493 2
 -8 8 -5 65513.7 4333.91 2
 -8 8 -4 52422.5 3987.09 2
 -8 8 -3 14328.5 2085.63 2
 -8 8 -2 29025.6 3124.37 2
 -8 8 -1 160585 7995.09 2
 -8 8 0 86797.4 5704.77 2
 -8 8 1 503.601 235.315 3
 -8 8 1 1529.07 643.348 2
 -8 8 2 28859.1 1397.36 3
 -8 8 2 53502.1 4582.76 2
 -8 8 3 97467.2 6257.82 2
 -8 8 4 100783 6456.02 2
 -8 8 5 39441 4026.06 2
 -8 8 6 30029.6 3424.04 2
 -8 8 7 77791 5744.05 2
 -8 8 7 86540.8 6375.77 4
 -8 8 8 14460.6 2919.65 4
 -8 8 8 30699.1 3801.02 2
 -8 8 9 10632.8 2069.44 2
 -8 8 9 10044.7 2377.31 4
 -8 8 10 64605.1 5373.41 2
 -8 8 10 67784.9 6681.56 4
 -8 8 11 31390.4 4701.06 4
 -8 8 11 29551 3616.77 2
 -8 8 12 1439.46 1143.72 4
 -8 8 12 2005.85 961.524 2
 -8 8 13 15258.9 2605.7 2
 -8 8 13 10472.4 2897.7 4
 -8 8 14 36957.4 5925.33 4
 -8 8 15 15113.4 3944.93 4
 -8 9 -6 38780.9 3318.23 2
 -8 9 -5 43469.5 3681.4 2
 -8 9 -4 18195.9 2426.06 2
 -8 9 -3 8191.52 1638.33 2
 -8 9 -2 99607.4 6229.51 2
 -8 9 -1 38267.4 3822.14 2
 -8 9 0 13406.7 1523.95 3
 -8 9 0 15094.8 2365.7 2
 -8 9 1 38609 2323.56 3
 -8 9 1 37150.3 3798.75 2
 -8 9 2 57636.8 2594.37 3
 -8 9 2 58509.9 4877.88 2
 -8 9 3 25225.5 3151.28 2
 -8 9 4 18822 2769.2 2
 -8 9 5 43413.8 4253.77 2
 -8 9 5 43509.5 4009.51 4
 -8 9 6 62437.4 5176.36 2
 -8 9 6 60085.6 5058.31 4
 -8 9 7 -496.379 549.92 4
 -8 9 7 -126.118 400.639 2
 -8 9 8 50426.7 5218.4 4
 -8 9 8 49064.1 4714.3 2
 -8 9 9 84011.7 7218.61 4
 -8 9 9 90109.2 6523.34 2
 -8 9 10 37770.3 4202.34 2
 -8 9 10 42510.1 5351.42 4
 -8 9 11 1200.25 1000.05 4
 -8 9 11 1484.09 791.09 2
 -8 9 12 27374.6 4698.48 4
 -8 9 12 34182.1 4082.73 2
 -8 9 13 29708.6 5077 4
 -8 9 14 6465.71 2412.18 4
 -8 10 -6 55682 4274.09 2
 -8 10 -5 30439.5 3394.42 2
 -8 10 -4 -223.848 500.174 2
 -8 10 -3 65926.9 5115.88 2
 -8 10 -2 30075.4 3475.77 2
 -8 10 -1 16673.8 2605.04 2
 -8 10 0 80490.9 4152.56 3
 -8 10 0 78987 5843.96 2
 -8 10 1 107900 4605.42 3
 -8 10 1 100925 6746.01 2
 -8 10 2 24125 3231.31 2
 -8 10 3 14148.4 2466.31 2
 -8 10 4 114125 7372.79 2
 -8 10 4 110809 6302.74 4
 -8 10 5 84338 5863.65 4
 -8 10 5 101492 7224.36 2
 -8 10 6 4609.24 1344.59 4
 -8 10 6 5073.78 1526.99 2
 -8 10 7 54469.5 5104.2 2
 -8 10 7 57074.2 5300.33 4
 -8 10 8 182424 9944.25 2
 -8 10 8 165511 10125 4
 -8 10 9 59606.1 6139.59 4
 -8 10 9 63324.7 5637.42 2
 -8 10 10 1536.89 963.575 2
 -8 10 10 2466.44 1265.73 4
 -8 10 11 24522.9 4265.16 4
 -8 10 11 30534.6 4004.14 2
 -8 10 12 39871.1 4582.85 2
 -8 10 12 30591.4 4945.51 4
 -8 10 13 2612.75 1374.3 4
 -8 10 14 7461.48 2779.18 4
 -8 11 -6 624.737 542.367 2
 -8 11 -5 29220.2 3368.06 2
 -8 11 -4 41950.5 4124.48 2
 -8 11 -3 23310.6 3083.53 2
 -8 11 -2 24109.1 3238.54 2
 -8 11 -1 48622.1 4645.32 2
 -8 11 -1 45739.6 3454.24 3
 -8 11 0 60838.9 3796.23 3
 -8 11 0 51514.1 4853.5 2
 -8 11 1 12162.4 3104.34 2
 -8 11 2 2849.41 1118.39 2
 -8 11 3 130152 8216.21 2
 -8 11 4 88900.8 6700.5 2
 -8 11 5 15142.9 2668.68 2
 -8 11 6 43920.2 4724.47 2
 -8 11 6 51105.7 4784.93 4
 -8 11 7 98605.2 7369.71 2
 -8 11 7 97227 7265.41 4
 -8 11 8 43117 4985.59 4
 -8 11 8 46443.1 4968.49 2
 -8 11 9 -212.67 647.678 2
 -8 11 9 -3.15125 416.047 4
 -8 11 10 17688.4 3143.03 2
 -8 11 11 30469.8 4141.3 2
 -8 11 12 -547.041 736.783 2
 -8 12 -6 21585.4 2984.6 2
 -8 12 -5 21655.2 2992.62 2
 -8 12 -4 5401.86 1458.92 2
 -8 12 -3 26608.1 2956.6 3
 -8 12 -3 25943.8 3388.45 2
 -8 12 -2 79295.3 6286.21 2
 -8 12 -2 91861.9 5534.15 3
 -8 12 -1 27286.9 3569.69 2
 -8 12 -1 23040.1 2531.17 3
 -8 12 0 3211.56 1148.73 2
 -8 12 1 41167.2 4564.5 2
 -8 12 2 113748 7898.63 2
 -8 12 3 22235.7 3414.34 2
 -8 12 4 7442.39 2077.12 2
 -8 12 5 91371.2 7194.53 2
 -8 12 6 49402.4 5285.84 2
 -8 12 7 3075.21 1274.41 2
 -8 12 8 4594.28 1592.82 2
 -8 12 9 22613.2 3629.31 2
 -8 12 10 18072.7 3281.82 2
 -8 12 11 3175.19 1737.72 2
 -8 12 12 12220.7 2835.2 2
 -8 13 -6 31176.5 3711.14 2
 -8 13 -5 3937.56 1428.86 2
 -8 13 -4 17671.7 2633.54 3
 -8 13 -4 12113.9 2369.29 2
 -8 13 -3 79280.2 6350.18 2
 -8 13 -3 76717.5 5450.37 3
 -8 13 -2 60262.5 4638.58 3
 -8 13 -2 65035.2 5828.61 2
 -8 13 -1 933.111 264.658 2
 -8 13 0 67041 6059.41 2
 -8 13 1 86049.2 6999.93 2
 -8 13 2 19870.7 3323.08 2
 -8 13 3 21083.2 3454.37 2
 -8 13 4 107835 8121.26 2
 -8 13 5 33876.4 4488.11 2
 -8 13 6 1023.6 793.338 2
 -8 13 7 22540.7 3752.92 2
 -8 13 8 56186.5 6199.93 2
 -8 13 9 15881.7 3167.8 2
 -8 13 10 826.519 983.547 2
 -8 13 11 28540.8 4415.19 2
 -8 14 -6 5958.13 2450.31 2
 -8 14 -5 13360.4 2502.75 3
 -8 14 -5 17816.6 2964.97 2
 -8 14 -4 23520.8 3180.44 3
 -8 14 -4 17276.9 2953.1 2
 -8 14 -3 35607.7 4470.44 2
 -8 14 -2 3585.39 1480.64 2
 -8 14 -1 8692.75 2219.54 2
 -8 14 0 19367.7 3310.35 2
 -8 14 1 19765 3468.9 2
 -8 14 2 8038.46 2174.02 2
 -8 14 3 83730.2 7379.88 2
 -8 14 4 36595.9 4829.33 2
 -8 14 5 1447.01 995.183 2
 -8 14 6 25382.8 4100.38 2
 -8 14 7 55058.7 6215.99 2
 -8 14 8 9431.23 2559.41 2
 -8 14 9 -3.58005 454.957 2
 -8 15 -7 409.116 613.64 3
 -8 15 -6 19138.8 3206.65 2
 -8 15 -6 16267.8 2886.12 3
 -8 15 -5 10503.3 2396.31 2
 -8 15 -4 16182.1 2943.29 2
 -8 15 -3 475.358 756.662 2
 -8 15 -2 7041.16 2043.25 2
 -8 15 -1 15627.4 3059.58 2
 -8 15 0 1106.61 1385.26 2
 -8 15 1 9157.5 2407.69 2
 -8 15 2 63840.5 6586.18 2
 -8 15 3 28172.1 4476.69 2
 -8 15 4 5983.35 2195.1 2
 -8 15 5 22127.2 3956.97 2
 -8 15 6 30180.9 4693.2 2
 -8 15 7 8923.68 2510.01 2
 -8 16 -9 2777.3 1313.4 3
 -8 16 -6 7696.76 2084.07 2
 -8 16 -5 2412.43 1146.25 2
 -8 16 -4 10503.4 2531.61 2
 -8 16 -3 23266.2 3861.47 2
 -8 16 -2 29275.8 4365.9 2
 -8 16 -1 -195.93 721.008 2
 -8 16 0 27502 4331.97 2
 -8 16 1 49543.3 6045.89 2
 -8 16 2 31352.4 4696.07 2
 -8 16 3 2792.63 1430.77 2
 -8 16 4 26215 4434.39 2
 -8 16 5 31315.8 4957.01 2
 -8 17 -6 1936.05 957.565 2
 -8 17 -5 8963.13 2452.72 2
 -8 17 -4 31177.6 4640.85 2
 -8 17 -3 22921.9 3949.04 2
 -8 17 -2 615.163 856.667 2
 -8 17 -1 18609.6 3657.69 2
 -8 17 0 48119.1 6070.97 2
 -8 17 1 21025.3 3976.13 2
 -8 17 2 -646.247 1158.1 2
 -8 18 -6 3222.35 1344.41 2
 -8 18 -5 16322.2 3373.56 2
 -8 18 -4 9591.95 2575.56 2
 -8 18 -3 -90.2066 702.668 2
 -8 18 -2 13011.1 3178.59 2
 -7 -8 15 16028.8 3543.52 4
 -7 -8 16 7088.11 2493.66 4
 -7 -7 15 1605.31 1379.14 4
 -7 -7 16 3400.93 1841.72 4
 -7 -7 17 11711.6 3294.82 4
 -7 -6 15 9180.74 2738.42 4
 -7 -6 16 17018.1 3748.22 4
 -7 -6 17 2674.93 1343.71 4
 -7 -6 18 -1058.23 1069.87 4
 -7 -5 14 25131.7 4247.66 4
 -7 -5 15 18202.3 3742.98 4
 -7 -5 16 5354.52 1929.13 4
 -7 -5 17 1444.85 1224.37 4
 -7 -5 18 4826.25 2253.36 4
 -7 -4 14 51884.4 6162.66 4
 -7 -4 15 11669.2 3025.09 4
 -7 -4 16 2568.96 1601.77 4
 -7 -4 17 5768.14 2302.65 4
 -7 -4 18 4392.05 1829.04 4
 -7 -3 6 45884.4 3965.82 2
 -7 -3 7 20029.6 2596.75 2
 -7 -3 8 35600.3 3420.54 2
 -7 -3 9 166952 7983.21 2
 -7 -3 10 70315.6 4864.97 2
 -7 -3 11 1508.31 718.948 2
 -7 -3 12 36549.1 3397.23 2
 -7 -3 13 66799.3 4666.81 2
 -7 -3 14 7557.17 2292.45 4
 -7 -3 15 2464.34 1470.04 4
 -7 -3 16 13383.9 3409.56 4
 -7 -3 17 7497.5 2763 4
 -7 -2 3 35507.5 3386.03 2
 -7 -2 4 118091 6441 2
 -7 -2 5 68703 4745.04 2
 -7 -2 6 4009.83 1082.15 2
 -7 -2 7 50556.5 4005.05 2
 -7 -2 8 160671 7573.62 2
 -7 -2 9 24378.3 2684.7 2
 -7 -2 10 17050.4 2258.93 2
 -7 -2 11 54238.4 4085.38 2
 -7 -2 12 89873.7 5346.86 2
 -7 -2 13 10835 2783.43 4
 -7 -2 13 12621.9 1900.84 2
 -7 -2 14 8047.81 2306.1 4
 -7 -2 15 18114.6 3804.88 4
 -7 -2 16 10867.5 3200.5 4
 -7 -2 17 1600.06 1426.49 4
 -7 -1 1 604.584 371.335 2
 -7 -1 2 118687 6212.14 2
 -7 -1 3 244557 9619.38 2
 -7 -1 4 61232.1 4292.71 2
 -7 -1 5 801.474 464.764 2
 -7 -1 6 57809.9 4153.84 2
 -7 -1 7 143326 6902.51 2
 -7 -1 8 26175.6 2742.57 2
 -7 -1 9 38722.2 3388.16 2
 -7 -1 10 97853.6 5579.09 2
 -7 -1 11 44578.7 3607.93 2
 -7 -1 12 2447.62 791.437 2
 -7 -1 13 49399.1 3783.64 2
 -7 -1 13 50398.9 5881.52 4
 -7 -1 14 54138.1 6377.83 4
 -7 -1 15 11412.7 2986.1 4
 -7 -1 16 1170.32 1186.83 4
 -7 -1 17 34484.4 5898.58 4
 -7 0 -1 149460 6923.93 2
 -7 0 0 11025.6 1685.58 2
 -7 0 1 51615.4 3779.7 2
 -7 0 2 226639 8924.85 2
 -7 0 3 43088 3451.59 2
 -7 0 4 13038 1867.9 2
 -7 0 5 72581.2 4596.61 2
 -7 0 6 90409.3 5237.23 2
 -7 0 7 323.827 300.937 2
 -7 0 8 61722.9 4251.54 2
 -7 0 9 73259.3 4669.06 2
 -7 0 10 14256.4 1974.71 2
 -7 0 11 3484.74 823.85 1
 -7 0 11 3428.13 969.492 2
 -7 0 12 46896.9 5433.91 4
 -7 0 12 47400.5 3712.17 2
 -7 0 13 66734.2 6859.98 4
 -7 0 13 71036.8 4607.36 2
 -7 0 14 18746.6 3772.62 4
 -7 0 15 2638.65 1655.06 4
 -7 0 16 27612.3 5088.93 4
 -7 0 17 23253.4 4805.49 4
 -7 1 -3 102200 5282.86 2
 -7 1 -2 76984.1 4507.25 2
 -7 1 -1 180.582 215.809 2
 -7 1 0 81770.2 4750.16 2
 -7 1 1 210859 8370.1 2
 -7 1 2 19625.5 2231.21 2
 -7 1 3 72926.2 4651.56 2
 -7 1 4 149936 6859.8 2
 -7 1 5 132339 6390.56 2
 -7 1 6 19573.1 2625.15 2
 -7 1 7 183547 7884.7 2
 -7 1 8 130639 6526.72 2
 -7 1 9 29193.7 2987.56 2
 -7 1 10 44085.1 2660.36 1
 -7 1 10 58854 4137.78 2
 -7 1 11 53637.6 4022.53 2
 -7 1 12 53344.9 3977.65 2
 -7 1 12 54670.4 5979.09 4
 -7 1 13 18432.9 3593.12 4
 -7 1 13 21011.7 2469.65 2
 -7 1 14 731.518 1066.14 4
 -7 1 15 24186.5 4567.93 4
 -7 1 16 21353.5 4557.11 4
 -7 1 17 -1019.69 1099.6 4
 -7 2 -4 60634.7 3756.64 2
 -7 2 -3 2820.04 775.963 2
 -7 2 -2 5914.65 1098.64 2
 -7 2 -1 105111 5310.78 2
 -7 2 0 180321 7392.28 2
 -7 2 1 2945.32 818.986 2
 -7 2 2 71773.4 4404.76 2
 -7 2 3 244087 9160.12 2
 -7 2 4 190689 7924.31 2
 -7 2 5 22834.2 2455.64 2
 -7 2 6 137096 6624.77 2
 -7 2 7 120494 6145.14 2
 -7 2 8 61198.4 4264.06 2
 -7 2 9 24871.4 2777.18 2
 -7 2 10 51826.8 3944.34 2
 -7 2 11 93071 5488.5 2
 -7 2 11 92566.6 7524.61 4
 -7 2 12 7095.67 1557.14 2
 -7 2 12 2820.34 1776.18 4
 -7 2 13 575.895 251.4 2
 -7 2 13 1947.43 1419.36 4
 -7 2 14 48785.6 6265.01 4
 -7 2 15 16292.4 3721.52 4
 -7 2 16 1308.53 1178.13 4
 -7 2 17 15718.3 4079.1 4
 -7 3 -5 39057.4 2817.4 2
 -7 3 -4 7106.51 1176.43 2
 -7 3 -3 51072.6 3399.55 2
 -7 3 -2 136457 6038.79 2
 -7 3 -1 93209.5 4887.97 2
 -7 3 0 3978.03 953.408 2
 -7 3 1 102780 5302.23 2
 -7 3 2 101902 3939.98 3
 -7 3 2 104181 5373.17 2
 -7 3 3 110717 3873.8 3
 -7 3 3 123373 5991.12 2
 -7 3 4 10846.3 1660.76 2
 -7 3 5 192238 8035.37 2
 -7 3 6 106255 5747.41 2
 -7 3 7 14686.9 1982.88 2
 -7 3 8 789.559 478.534 2
 -7 3 9 19664.5 1241 1
 -7 3 9 25144.9 2695.71 2
 -7 3 10 43385.6 4894.47 4
 -7 3 10 43838 3653.99 2
 -7 3 11 -443.441 714.122 4
 -7 3 11 357.515 283.204 2
 -7 3 12 18367 3449.76 4
 -7 3 12 21185.9 2551.82 2
 -7 3 13 117592 9542.22 4
 -7 3 13 118262 6420.87 2
 -7 3 14 16334.3 3657.62 4
 -7 3 15 7095.16 2646.91 4
 -7 3 16 46096.5 6914.24 4
 -7 4 -6 33575.4 2435.2 2
 -7 4 -5 1204.41 492.521 2
 -7 4 -4 64367.5 3761.18 2
 -7 4 -3 107805 5152.85 2
 -7 4 -2 66584.2 3971.03 2
 -7 4 -1 16418.5 1966.06 2
 -7 4 0 107964 5452.63 2
 -7 4 1 224899 6829.57 3
 -7 4 1 220781 8533.04 2
 -7 4 2 61189.7 2436.79 3
 -7 4 2 54155.5 3820.22 2
 -7 4 3 6501.08 1626.61 2
 -7 4 4 245490 9440.04 2
 -7 4 5 143155 6853.13 2
 -7 4 6 21962.3 2796.24 2
 -7 4 7 15881.1 2143.6 2
 -7 4 8 91627.3 5490.36 2
 -7 4 9 69091.9 4767.77 2
 -7 4 10 4511.62 1116.55 2
 -7 4 10 6116.22 1821.88 4
 -7 4 11 28244.3 3044.25 2
 -7 4 11 34243.1 4542.42 4
 -7 4 12 122709 6673.47 2
 -7 4 12 106794 8783.65 4
 -7 4 13 19174.2 3841.84 4
 -7 4 13 22031.3 2649.27 2
 -7 4 14 2983.17 1644.02 4
 -7 4 15 49587.2 6884.07 4
 -7 4 16 41756.2 6569.88 4
 -7 5 -6 196.132 199.418 2
 -7 5 -5 32028.6 2512.49 2
 -7 5 -4 54087.2 3448.95 2
 -7 5 -3 63213.7 3832.91 2
 -7 5 -2 22443.8 2255.06 2
 -7 5 -1 106457 5426.44 2
 -7 5 0 243080 9145.77 2
 -7 5 1 36300.8 3105.46 2
 -7 5 1 37120.3 1991.15 3
 -7 5 2 1959.94 300.691 3
 -7 5 2 4458.97 2271.07 2
 -7 5 3 245811 9569.83 2
 -7 5 4 70952.8 4650.17 2
 -7 5 5 748.463 494.519 2
 -7 5 6 89724.7 5424.57 2
 -7 5 7 71484.6 4829.52 2
 -7 5 8 37384.4 3478.53 2
 -7 5 9 189.2 486.321 4
 -7 5 9 2928.41 1093.91 2
 -7 5 10 73783.1 5071.14 2
 -7 5 10 73551.5 6507.89 4
 -7 5 11 73931 5140.33 2
 -7 5 11 70833.5 6763.29 4
 -7 5 12 7650.6 2336.56 4
 -7 5 12 14572.2 2244.56 2
 -7 5 13 12561.4 2069.25 2
 -7 5 13 10286.5 2779.01 4
 -7 5 14 32651.9 5270.56 4
 -7 5 15 21695.4 4485.28 4
 -7 5 16 498.01 950.198 4
 -7 6 -6 56319.9 3337.65 2
 -7 6 -5 39453.9 2875.67 2
 -7 6 -4 47499.3 3301.17 2
 -7 6 -3 17739.4 2028.18 2
 -7 6 -2 101943 5388.44 2
 -7 6 -1 115038 5883.63 2
 -7 6 0 808.744 435.365 2
 -7 6 0 1662.89 471.876 3
 -7 6 1 142611 6852.72 2
 -7 6 1 132649 4299.82 3
 -7 6 2 287021 10721.3 2
 -7 6 3 34035.8 3218.96 2
 -7 6 4 22306.2 2596.08 2
 -7 6 5 337413 12250.5 2
 -7 6 6 144323 4073.34 1
 -7 6 6 149661 7406.19 2
 -7 6 7 13953 2107.07 2
 -7 6 8 1350.62 657.233 2
 -7 6 8 1604.05 1083.48 4
 -7 6 9 104377 6328.96 2
 -7 6 9 111911 7983.91 4
 -7 6 10 79997 5472.66 2
 -7 6 10 82183.1 7066.27 4
 -7 6 11 146.049 501.52 2
 -7 6 11 865.183 696.846 4
 -7 6 12 53013 4483.68 2
 -7 6 12 44181.9 5766.82 4
 -7 6 13 47360.3 6215.72 4
 -7 6 14 13579.9 3498.89 4
 -7 6 15 4554.57 2311.17 4
 -7 7 -6 53727.2 3404.57 2
 -7 7 -5 4251.58 954.267 2
 -7 7 -4 25336.4 2521.32 2
 -7 7 -3 67799.5 4374.81 2
 -7 7 -2 18696.7 2260.33 2
 -7 7 -1 20118.8 2489.31 2
 -7 7 0 134668 6827.41 2
 -7 7 1 180117 8243.42 2
 -7 7 1 176591 5437.4 3
 -7 7 2 42098.7 1718.79 3
 -7 7 2 136535 6617.11 2
 -7 7 3 19893.6 2534.3 2
 -7 7 4 189004 5956.95 1
 -7 7 4 200657 8940.7 2
 -7 7 5 209377 6324.71 1
 -7 7 5 229683 9721.54 2
 -7 7 6 17901.1 2573.63 4
 -7 7 6 16484.3 2370.19 2
 -7 7 7 11846.2 2247.34 4
 -7 7 7 9688.76 1825.69 2
 -7 7 8 79053.3 5461.97 2
 -7 7 8 56291.9 5362.02 4
 -7 7 9 114432 6789.52 2
 -7 7 9 108559 8001.49 4
 -7 7 10 -415.493 685.133 4
 -7 7 10 767.857 680.367 2
 -7 7 11 51357.4 6075.67 4
 -7 7 11 49028 4443.48 2
 -7 7 12 35944.6 5387.75 4
 -7 7 12 35226.2 3724.48 2
 -7 7 13 4216.08 1891.86 4
 -7 7 14 2039.17 1901.91 4
 -7 7 15 38353.2 6228.18 4
 -7 8 -6 4672.81 1042.61 2
 -7 8 -5 36021 3152 2
 -7 8 -4 46091.8 3618.22 2
 -7 8 -3 25983.9 2780.48 2
 -7 8 -2 22682.4 2654.5 2
 -7 8 -1 140238 7157.48 2
 -7 8 0 140191 7257.99 2
 -7 8 1 15620.1 1352 3
 -7 8 1 13958.3 2153.63 2
 -7 8 2 10324.8 999.345 3
 -7 8 2 26013.7 3041.84 2
 -7 8 3 49589.9 2207.12 3
 -7 8 3 46986 4107.19 2
 -7 8 4 75497.8 5366.6 2
 -7 8 4 74856.9 2928.47 3
 -7 8 5 51836.1 4275.1 2
 -7 8 5 14904.4 2247.68 4
 -7 8 6 19293.7 2636.37 2
 -7 8 6 14157.9 2380.55 4
 -7 8 7 26835.9 3437.63 4
 -7 8 7 28523.7 3293.05 2
 -7 8 8 77121.2 6436.97 4
 -7 8 8 102930 6524.87 2
 -7 8 9 391.269 553.145 4
 -7 8 9 78.3858 329.832 2
 -7 8 10 42819.6 5314.79 4
 -7 8 10 55081.4 4829.19 2
 -7 8 11 33430.5 3836.62 2
 -7 8 11 28952.5 4495.5 4
 -7 8 12 1255.65 1295.91 4
 -7 8 12 841.261 680.069 2
 -7 8 13 6768.54 2524.22 4
 -7 8 14 42332.7 6261.17 4
 -7 8 15 6554.24 2491.75 4
 -7 9 -6 80428.3 4875.57 2
 -7 9 -5 42028.1 3568.42 2
 -7 9 -4 31601.9 3172.5 2
 -7 9 -3 6302.88 1440.25 2
 -7 9 -2 68332.7 4922.82 2
 -7 9 -1 113394 6613.9 2
 -7 9 0 2793.14 981.458 2
 -7 9 0 5191.53 930.246 3
 -7 9 1 16567.7 1588.35 3
 -7 9 1 15338.1 2370.86 2
 -7 9 2 50592.5 2772.07 3
 -7 9 2 51520.2 4498.65 2
 -7 9 3 64456.7 3179.05 3
 -7 9 3 59443.9 4872.11 2
 -7 9 4 463.269 575.795 2
 -7 9 4 -55.7 281.748 4
 -7 9 4 572.876 289.887 3
 -7 9 5 25556.1 3221.77 2
 -7 9 5 24992.3 2012.11 3
 -7 9 5 19670.5 2648.78 4
 -7 9 6 77634.7 5755.42 4
 -7 9 6 73965.3 5609.48 2
 -7 9 7 54068.1 5156.99 4
 -7 9 7 58049 4993.62 2
 -7 9 8 525.837 703.579 2
 -7 9 8 599.548 458.147 4
 -7 9 9 117771 7462.7 2
 -7 9 9 109550 8367.46 4
 -7 9 10 93753.3 6697.17 2
 -7 9 10 91721.5 8016.51 4
 -7 9 11 61.9435 405.636 2
 -7 9 11 121.607 791.166 4
 -7 9 12 16664.9 3704.04 4
 -7 9 12 17575.6 2918.31 2
 -7 9 13 39950.5 5959.1 4
 -7 9 14 12327.9 3330.71 4
 -7 10 -6 72063.4 4910.36 2
 -7 10 -5 46980.4 4071.87 2
 -7 10 -4 6709.19 1509.95 2
 -7 10 -3 73565.9 5318.03 2
 -7 10 -2 43573.2 4046.37 2
 -7 10 -1 1230.23 628.588 2
 -7 10 -1 1005.86 472.98 3
 -7 10 0 35599.9 2772.13 3
 -7 10 0 33318.7 3632.8 2
 -7 10 1 50550.7 3228.35 3
 -7 10 1 49881.1 4524.51 2
 -7 10 2 69117.8 4049.62 4
 -7 10 2 75400.7 3950.67 3
 -7 10 2 62635.9 5252.14 2
 -7 10 3 3715.24 1278.45 2
 -7 10 3 3655.96 812.891 3
 -7 10 3 3031.42 825.645 4
 -7 10 4 95102.2 5663.14 4
 -7 10 4 83867.9 6247.76 2
 -7 10 4 99979.2 4783.55 3
 -7 10 5 165712 9067.3 2
 -7 10 5 165457 8426.69 4
 -7 10 6 37042 4058.73 4
 -7 10 6 40278.5 4266.72 2
 -7 10 7 8818.56 2019.09 2
 -7 10 7 9042 2093.43 4
 -7 10 8 190163 10025.1 2
 -7 10 8 156998 9916.96 4
 -7 10 9 122248 8938.78 4
 -7 10 9 126424 8156.43 2
 -7 10 10 1465.31 1014.43 4
 -7 10 10 2223.25 1118.33 2
 -7 10 11 26451.9 3721.27 2
 -7 10 11 28630.8 4666.6 4
 -7 10 12 38370.8 5604.98 4
 -7 10 12 40451.4 4673.75 2
 -7 10 13 12291.6 3238.95 4
 -7 10 14 1422.24 1378.35 4
 -7 11 -7 30908.5 3218.19 2
 -7 11 -6 2057.67 908.2 2
 -7 11 -5 21203.1 2914.09 2
 -7 11 -4 59451.6 4872.42 2
 -7 11 -3 37391.3 3906.9 2
 -7 11 -2 20400.4 2875.06 2
 -7 11 -2 9103.89 1603.92 3
 -7 11 -1 81581.2 6073.08 2
 -7 11 -1 87367.6 5036.8 3
 -7 11 0 77812.8 4574.69 3
 -7 11 0 77188.1 5931.87 2
 -7 11 1 24306.1 2415.41 3
 -7 11 1 41199.4 4290.08 2
 -7 11 2 8212.72 1869.5 2
 -7 11 2 7158.92 1289.09 3
 -7 11 3 107640 5543.43 3
 -7 11 3 101836 7155.32 2
 -7 11 4 72332.4 6090.85 2
 -7 11 5 24234.4 3593.86 2
 -7 11 6 37138.5 4304.28 2
 -7 11 7 98147.7 7354.44 2
 -7 11 8 80084.9 6607.07 2
 -7 11 9 876.489 568.777 2
 -7 11 10 13463.7 2741.77 2
 -7 11 11 43843.5 5009.4 2
 -7 12 -7 1447.66 785.807 2
 -7 12 -6 12331.3 2202.41 2
 -7 12 -5 38088.7 3996.68 2
 -7 12 -4 32813.1 3793.38 2
 -7 12 -3 12718.3 2082.24 3
 -7 12 -3 16851.5 2692.69 2
 -7 12 -2 82616.4 5308.14 3
 -7 12 -2 74444 6011.36 2
 -7 12 -1 51704 4946.83 2
 -7 12 -1 49553 3957.43 3
 -7 12 0 4817.03 1159.19 3
 -7 12 0 5790.8 1656.02 2
 -7 12 1 21595.1 3217.65 2
 -7 12 1 24905 2647.03 3
 -7 12 2 96317 7174.81 2
 -7 12 2 105964 5912.51 3
 -7 12 3 13191.9 2591.06 2
 -7 12 4 1221.54 840.145 2
 -7 12 5 58303 5657.68 2
 -7 12 6 32490.1 4235.89 2
 -7 12 7 13711.5 2796.42 2
 -7 12 8 9134.46 2310.88 2
 -7 12 9 18855.5 3325.12 2
 -7 12 10 25560.6 3991.58 2
 -7 12 11 4542.43 1763.39 2
 -7 13 -7 21480.1 3016.09 2
 -7 13 -6 33864.9 3845.48 2
 -7 13 -5 25404.5 3405.69 2
 -7 13 -5 29078.6 3572.94 3
 -7 13 -4 5528.18 1538.54 2
 -7 13 -4 6380.94 1603.55 3
 -7 13 -3 87120.2 5933.33 3
 -7 13 -3 87979.9 6668.09 2
 -7 13 -2 50808.4 4369.89 3
 -7 13 -2 62476.8 5666.22 2
 -7 13 -1 5104.26 1512.9 2
 -7 13 -1 4226.3 1201.36 3
 -7 13 0 22043.5 2729.81 3
 -7 13 0 20145.4 3224.71 2
 -7 13 1 102713 7681 2
 -7 13 2 51326.3 5383.1 2
 -7 13 3 2338.04 1360.38 2
 -7 13 4 84806.3 7199.69 2
 -7 13 5 40385.2 4956.69 2
 -7 13 6 1275.44 1022.61 2
 -7 13 7 34846.2 4798.98 2
 -7 13 8 39679.9 5127.24 2
 -7 13 9 17150.9 3412.11 2
 -7 13 10 64.646 328.059 2
 -7 13 11 11903.4 2766.02 2
 -7 14 -7 28675.5 3635.41 2
 -7 14 -6 10396.3 2247.09 2
 -7 14 -6 9489.29 2173.44 3
 -7 14 -5 4510.59 1462.34 3
 -7 14 -5 3823.7 1296.76 2
 -7 14 -4 40523.2 4206.87 3
 -7 14 -4 32746 4106.61 2
 -7 14 -3 59955.4 5084.49 3
 -7 14 -3 54741.5 5495.98 2
 -7 14 -2 6547.82 1628.97 3
 -7 14 -2 7288.51 2012.47 2
 -7 14 -1 2957.3 1247.71 2
 -7 14 -1 4661.84 1335.45 3
 -7 14 0 38292.7 4731.78 2
 -7 14 1 62331.5 6125.59 2
 -7 14 2 867.644 755.153 2
 -7 14 3 47922.4 5476.82 2
 -7 14 4 47680.2 5548.93 2
 -7 14 5 5300.83 1813.85 2
 -7 14 6 23106.8 3927.92 2
 -7 14 7 46161 5650.04 2
 -7 14 8 22135.2 3969.29 2
 -7 14 9 393.972 617.428 2
 -7 15 -8 8032.94 2273.52 3
 -7 15 -7 1411.19 889.5 2
 -7 15 -7 626.492 419.355 3
 -7 15 -6 9907.22 2301.95 3
 -7 15 -6 13318.8 2642.32 2
 -7 15 -5 19250.9 3063.52 3
 -7 15 -5 16463.4 3051.33 2
 -7 15 -4 16420 3043.96 2
 -7 15 -4 18593.5 2975.96 3
 -7 15 -3 451.39 597.179 3
 -7 15 -3 14.4804 601.994 2
 -7 15 -2 13363.1 2835.08 2
 -7 15 -1 22237.7 3685.07 2
 -7 15 0 7073.37 2147.34 2
 -7 15 1 3884.06 1549.38 2
 -7 15 2 53728.4 6029.31 2
 -7 15 3 32789.3 4727.66 2
 -7 15 4 905.159 964.371 2
 -7 15 5 22946.4 4001.14 2
 -7 15 6 32106.9 4827.59 2
 -7 15 7 15471.4 3490.71 2
 -7 16 -10 11415.2 2870.01 3
 -7 16 -9 3643.28 1558.05 3
 -7 16 -8 -178.66 296.445 3
 -7 16 -7 11640.1 2533.21 2
 -7 16 -7 12032.3 2645.66 3
 -7 16 -6 12220.7 2648.42 2
 -7 16 -6 10295.4 2368.1 3
 -7 16 -5 6516.99 1949.29 2
 -7 16 -5 6516.37 1931.13 3
 -7 16 -4 6066.09 1919.27 2
 -7 16 -3 16011.3 3218.71 2
 -7 16 -2 30558.2 4450.25 2
 -7 16 -1 1249.45 903.245 2
 -7 16 0 6365.12 2180.38 2
 -7 16 1 75598.6 7388.89 2
 -7 16 2 60149.8 6617.71 2
 -7 16 3 -282.434 846.149 2
 -7 16 4 33534.3 5034.92 2
 -7 17 -10 2147.54 1280.17 3
 -7 17 -9 751.25 580.463 3
 -7 17 -8 11097.3 2632.65 3
 -7 17 -7 11650 2654.71 2
 -7 17 -6 2413.01 1185.18 2
 -7 17 -5 8482.76 2424.99 2
 -7 17 -4 29218.6 4436.72 2
 -7 17 -3 34330.3 4948.85 2
 -7 17 -2 3405.29 1552.52 2
 -7 17 -1 11008.8 2821.25 2
 -7 17 0 47212.4 6012.11 2
 -7 17 1 37490.3 5352.4 2
 -7 18 -6 2497.42 1226.65 2
 -7 18 -5 16760.9 3494.69 2
 -7 18 -4 17741.8 3573.55 2
 -7 18 -3 -1227.14 992.863 2
 -6 -8 14 4980.57 1821.98 4
 -6 -8 15 18086.3 3634.56 4
 -6 -8 16 7916.38 2534.62 4
 -6 -7 14 17736.7 3460.31 4
 -6 -7 15 7073.34 2375.45 4
 -6 -7 16 -1510.07 1144.62 4
 -6 -7 17 12831.1 3422.15 4
 -6 -7 18 4003.86 2048.5 4
 -6 -6 14 108.549 703.733 4
 -6 -6 15 6219.89 2199.99 4
 -6 -6 16 8832.66 2700.73 4
 -6 -6 17 8872.95 2904.5 4
 -6 -6 18 -1412.34 1753.5 4
 -6 -5 13 1562.03 1084.23 4
 -6 -5 14 21414.2 3861.78 4
 -6 -5 14 17361 2860.39 1
 -6 -5 15 44078.5 5824.94 4
 -6 -5 16 20274.3 4077.44 4
 -6 -5 17 602.725 1186.21 4
 -6 -5 18 893.64 1133.13 4
 -6 -4 13 4839.21 1632.33 4
 -6 -4 13 4768.52 1381.36 1
 -6 -4 14 47257.8 4561.44 1
 -6 -4 14 45583.5 5719.57 4
 -6 -4 15 33458.3 5150.4 4
 -6 -4 16 367.543 870.049 4
 -6 -4 17 2222.2 1190.56 4
 -6 -4 18 9082.77 2917.28 4
 -6 -3 6 153827 7290.32 2
 -6 -3 7 15488.5 2088.83 2
 -6 -3 8 62908.3 4352.35 2
 -6 -3 9 89488.8 5241.49 2
 -6 -3 10 103350 5642.58 2
 -6 -3 11 515.953 426.131 2
 -6 -3 12 42247.3 3393.95 2
 -6 -3 12 40612.5 3755.26 1
 -6 -3 13 65154.1 5054.11 1
 -6 -3 13 71521.6 6899.56 4
 -6 -3 14 13625.3 3269.61 4
 -6 -3 15 23.5065 1045.94 4
 -6 -3 16 9440.43 2814.93 4
 -6 -3 17 10386.6 3173.69 4
 -6 -3 18 2041.52 1610.92 4
 -6 -2 2 209.32 194.216 2
 -6 -2 3 29631.4 2889.78 2
 -6 -2 4 148296 6906.89 2
 -6 -2 5 131940 6442.98 2
 -6 -2 6 69056.6 4399.39 2
 -6 -2 7 43450.3 3426.8 2
 -6 -2 8 148506 6802.17 2
 -6 -2 9 43926.4 3408.63 2
 -6 -2 10 12249 1868.21 2
 -6 -2 11 62953.6 4068.13 2
 -6 -2 11 57210.5 4105.67 1
 -6 -2 12 138288 6349.91 2
 -6 -2 12 133495 9254.43 4
 -6 -2 12 127144 6797.53 1
 -6 -2 13 10680.2 2831.1 4
 -6 -2 13 7877.17 1652.49 1
 -6 -2 14 11967 2977.64 4
 -6 -2 15 35438.4 5295.31 4
 -6 -2 16 14432.5 3530.85 4
 -6 -2 17 -269.232 1081.8 4
 -6 -2 18 6624.82 2597.42 4
 -6 -1 0 181111 7634.23 2
 -6 -1 1 10625.6 1609.69 2
 -6 -1 2 69626 4333.98 2
 -6 -1 3 213004 8359.9 2
 -6 -1 4 115540 5747.78 2
 -6 -1 5 29718.9 2726.86 2
 -6 -1 6 10935.5 1726.15 2
 -6 -1 7 133688 6259.87 2
 -6 -1 8 16127.4 1984.74 2
 -6 -1 9 13177.1 1776.87 2
 -6 -1 10 72710.5 4376.36 2
 -6 -1 10 68730 4098.17 1
 -6 -1 11 42579.4 3363.13 1
 -6 -1 11 45583.5 3363.45 2
 -6 -1 12 5514.27 1121.99 2
 -6 -1 12 8520.28 2314.95 4
 -6 -1 12 6420.21 1335.11 1
 -6 -1 13 32701.5 4665.78 4
 -6 -1 13 25736.7 2886.7 1
 -6 -1 14 27488.3 4429.62 4
 -6 -1 15 10889.1 2975.7 4
 -6 -1 16 1061.8 1151.95 4
 -6 -1 17 13203.6 3600.61 4
 -6 0 -2 124881 5820.62 2
 -6 0 -1 120248 5661.67 2
 -6 0 0 34879.9 2855.82 2
 -6 0 1 67312.4 4057.46 2
 -6 0 2 235656 8660.56 2
 -6 0 3 219312 8287.37 2
 -6 0 4 28599.5 2579.56 2
 -6 0 5 14949.8 1862.79 2
 -6 0 6 168670 7056.81 2
 -6 0 7 17664.3 2047.04 2
 -6 0 8 69445.6 4240.28 2
 -6 0 9 126367 5206.35 1
 -6 0 9 134496 6150.67 2
 -6 0 10 30312.9 2487.84 1
 -6 0 10 36667.4 2999.11 2
 -6 0 11 -86.2256 214.908 1
 -6 0 11 62.4911 204.579 2
 -6 0 11 -678.354 777.925 4
 -6 0 12 58687.9 3878.44 2
 -6 0 12 57406.9 5943.51 4
 -6 0 12 51984.9 3803.49 1
 -6 0 13 42071.5 3226.61 2
 -6 0 13 37149.2 5004.31 4
 -6 0 14 4820.9 1924.42 4
 -6 0 15 1042.3 1424.42 4
 -6 0 16 17213.8 3959.36 4
 -6 0 17 21949.1 4611.15 4
 -6 1 -3 148216 6137.03 2
 -6 1 -2 113079 5226.19 2
 -6 1 -1 21285.2 2098.53 2
 -6 1 0 85054.1 4542.01 2
 -6 1 1 218699 8027.67 2
 -6 1 2 56668 3590.83 2
 -6 1 3 28791.6 2733.48 2
 -6 1 4 49364.6 3401.76 2
 -6 1 5 150514 6492.62 2
 -6 1 6 69360 4252.51 2
 -6 1 7 74159.3 4349.75 2
 -6 1 8 104974 4018.79 1
 -6 1 8 118781 5667.27 2
 -6 1 9 86185.9 4785.15 2
 -6 1 9 71256.9 3497.43 1
 -6 1 10 2857.73 913.293 2
 -6 1 10 1574.65 506.366 1
 -6 1 11 63558.6 6055.25 4
 -6 1 11 60111.8 3774.71 1
 -6 1 11 69600.2 4273.96 2
 -6 1 12 109081 8379.05 4
 -6 1 12 108745 5568.01 2
 -6 1 12 104307 5459.68 1
 -6 1 13 19452.4 2234.01 2
 -6 1 13 19027.1 3752.75 4
 -6 1 14 1376.63 857.157 4
 -6 1 15 26275 4728.3 4
 -6 1 16 30740 5393.28 4
 -6 1 17 196.184 1009.79 4
 -6 2 -4 87959.9 4263.85 2
 -6 2 -3 27762.1 2291.24 2
 -6 2 -2 1464.28 535.742 2
 -6 2 -1 123413 5424.73 2
 -6 2 0 184553 7046.62 2
 -6 2 1 17289.4 1878.6 2
 -6 2 2 66260 3927.91 2
 -6 2 2 72948.5 3126.68 3
 -6 2 3 170776 5241.19 3
 -6 2 3 165697 6796.15 2
 -6 2 4 149842 6421.54 2
 -6 2 5 37273.2 2946.93 2
 -6 2 6 83359.1 4662.38 2
 -6 2 7 200313 7918.76 2
 -6 2 8 123649 4175.82 1
 -6 2 8 127085 6040.59 2
 -6 2 9 13392.2 1951.47 2
 -6 2 9 2232.94 662.694 1
 -6 2 10 32690.1 2382.96 1
 -6 2 10 34200.7 2993.68 2
 -6 2 10 33211.7 4172.21 4
 -6 2 11 105112 5038.33 1
 -6 2 11 117900 5913.15 2
 -6 2 11 111852 8196.52 4
 -6 2 12 19444.7 2304.1 2
 -6 2 12 20360.1 3582.05 4
 -6 2 13 2756.84 1510.01 4
 -6 2 13 1733.37 699.861 2
 -6 2 14 55935 6699.94 4
 -6 2 15 32709.6 5353.64 4
 -6 2 16 -734.173 1663.32 4
 -6 2 17 12721.1 3652.49 4
 -6 3 -5 61605.7 3287.22 2
 -6 3 -4 1015.36 399.409 2
 -6 3 -3 17736.3 1767.17 2
 -6 3 -2 219106 7661.86 2
 -6 3 -1 161385 6375.72 2
 -6 3 0 37581.2 2805.98 2
 -6 3 1 113997 4196.97 3
 -6 3 1 116628 5344.41 2
 -6 3 2 110473 5281.29 2
 -6 3 2 113594 3625.32 3
 -6 3 3 283647 9710.81 2
 -6 3 4 1671.74 566.677 2
 -6 3 5 80465.3 4590.84 2
 -6 3 6 310472 10609.4 2
 -6 3 7 106139 5378.19 2
 -6 3 7 90895.7 2774.83 1
 -6 3 8 738.407 438.414 2
 -6 3 8 207.682 115.433 1
 -6 3 9 27431.6 3601.43 4
 -6 3 9 34666.8 3034.65 2
 -6 3 10 25786.6 2639.51 2
 -6 3 10 29070.6 3919.16 4
 -6 3 11 817.75 395.769 2
 -6 3 11 445.254 718.762 4
 -6 3 12 3166.51 982.043 2
 -6 3 12 2133.07 1187.17 4
 -6 3 13 59761.7 6742.29 4
 -6 3 14 44470.2 6019.05 4
 -6 3 15 -371.534 725.636 4
 -6 3 16 33212.4 5660.42 4
 -6 4 -6 64029.9 3211.42 2
 -6 4 -5 3461.07 710.398 2
 -6 4 -4 42061.8 2739.73 2
 -6 4 -3 200009 7117.91 2
 -6 4 -2 144435 5873.97 2
 -6 4 -1 84915 4405.5 2
 -6 4 0 244745 8517.4 2
 -6 4 0 234635 7339.69 3
 -6 4 1 165212 6886.68 2
 -6 4 1 177296 5182.43 3
 -6 4 2 183428 7373.23 2
 -6 4 3 21675 2546.98 2
 -6 4 4 344148 11437.7 2
 -6 4 5 130209 6232.86 2
 -6 4 6 41977.3 3595.53 2
 -6 4 7 9167.71 1539.54 2
 -6 4 8 99625.6 6830.65 4
 -6 4 8 102064 5592.67 2
 -6 4 9 18939.6 3091.58 4
 -6 4 9 36173.8 3167.41 2
 -6 4 10 19870.4 2392.52 2
 -6 4 10 20168.2 3346.72 4
 -6 4 11 35935.7 4740.38 4
 -6 4 11 28929.7 2924.81 2
 -6 4 12 105582 5870.34 2
 -6 4 12 88352.9 8027.99 4
 -6 4 13 29070.6 4700.53 4
 -6 4 14 67.991 1076.16 4
 -6 4 15 43488.4 6381.66 4
 -6 4 16 29173.2 5346.61 4
 -6 5 -6 2648.03 595.43 2
 -6 5 -5 8688.98 1161.98 2
 -6 5 -4 100508 4606.33 2
 -6 5 -3 128863 5526.67 2
 -6 5 -2 19792.6 2020.17 2
 -6 5 -1 134992 6095.74 2
 -6 5 0 126394 5866.15 2
 -6 5 1 39784.1 3101 2
 -6 5 1 36794 1776.02 3
 -6 5 2 28623.2 2774.38 2
 -6 5 3 588160 17054.5 2
 -6 5 4 127632 6251.45 2
 -6 5 5 601.86 1201.34 2
 -6 5 5 227.77 97.544 1
 -6 5 6 111219 5891.88 2
 -6 5 7 94498.5 5472.58 2
 -6 5 7 94832.6 6335.37 4
 -6 5 8 44931.5 4496.53 4
 -6 5 8 45389.2 3717.99 2
 -6 5 9 24753.2 2709.15 2
 -6 5 9 27323.2 3784.11 4
 -6 5 10 50070.7 5400.77 4
 -6 5 10 58015.1 4308.11 2
 -6 5 11 69637.7 6850.66 4
 -6 5 11 79941.8 5162.24 2
 -6 5 12 27165.5 2931.64 2
 -6 5 12 24278.6 4169.19 4
 -6 5 13 1011.96 1043.97 4
 -6 5 14 41191.9 6025.09 4
 -6 5 15 28512.1 5172.28 4
 -6 5 16 1488.04 1393.2 4
 -6 6 -7 111.816 98.7325 2
 -6 6 -6 20704.4 1834.62 2
 -6 6 -5 52191 3181.09 2
 -6 6 -4 92939.3 4619.77 2
 -6 6 -3 1373.69 558.03 2
 -6 6 -2 49627.8 3456.74 2
 -6 6 -1 107081 5503.9 2
 -6 6 0 42440.7 3340.19 2
 -6 6 1 3941.32 974.493 2
 -6 6 2 193298 4844.74 3
 -6 6 2 189403 8066.67 2
 -6 6 3 87794.3 5142.41 2
 -6 6 3 84972.1 3397.51 1
 -6 6 4 715.167 450.415 2
 -6 6 4 377.558 203.008 1
 -6 6 5 252242 9997.96 2
 -6 6 5 264465 7297.84 1
 -6 6 6 115113 6725.58 4
 -6 6 6 107949 6010.05 2
 -6 6 7 54087.3 4766.75 4
 -6 6 7 57022.2 4280.81 2
 -6 6 8 16580.3 2795.59 4
 -6 6 8 10144 1778.54 2
 -6 6 9 65252.3 4736.74 2
 -6 6 9 54784.6 5471.06 4
 -6 6 10 18700.3 2465.69 2
 -6 6 10 19220.3 3382.97 4
 -6 6 11 22647.1 3823.75 4
 -6 6 11 19062 2561.61 2
 -6 6 12 16070.3 2799.42 2
 -6 6 12 13468.9 3061.36 4
 -6 6 13 21152.8 4131.67 4
 -6 6 14 23856.8 4569.08 4
 -6 6 15 428.151 1051.9 4
 -6 7 -7 24533.3 1996.97 2
 -6 7 -6 63783.4 3632.06 2
 -6 7 -5 62943.8 3819.35 2
 -6 7 -4 814.386 735.206 2
 -6 7 -3 71264 4400.83 2
 -6 7 -2 42687.4 3385.43 2
 -6 7 -1 55552 4028.46 2
 -6 7 0 31128 2954.96 2
 -6 7 1 159675 5094.28 3
 -6 7 1 152638 7308.63 2
 -6 7 2 181958 7816.74 2
 -6 7 2 133543 4378.55 3
 -6 7 3 2986.4 894.882 2
 -6 7 3 2340.95 445.752 3
 -6 7 4 129115 6774.74 2
 -6 7 4 134536 4534.95 3
 -6 7 5 135321 7076.99 2
 -6 7 5 107942 6338.2 4
 -6 7 6 62241.1 4883.65 4
 -6 7 6 57408.1 4415.15 2
 -6 7 7 146.552 295.422 4
 -6 7 7 431.638 260.664 2
 -6 7 8 73711.7 6189.37 4
 -6 7 8 86201.8 5616.58 2
 -6 7 9 58332.9 5893.12 4
 -6 7 9 55064.9 4505.85 2
 -6 7 10 10867.7 1945.12 2
 -6 7 10 9809.33 2519.41 4
 -6 7 11 11143.9 3648.12 4
 -6 7 11 12169.1 2346.77 2
 -6 7 12 35609.1 3781.28 2
 -6 7 12 26630.1 4505.57 4
 -6 7 13 17981.6 3869.39 4
 -6 7 14 132.595 1490.11 4
 -6 7 15 24557.3 4988.39 4
 -6 8 -7 62092.2 3663.04 2
 -6 8 -6 8299.62 1357.05 2
 -6 8 -5 14449.8 1966 2
 -6 8 -4 135482 6504.68 2
 -6 8 -3 74267.9 4722.89 2
 -6 8 -2 2710.58 883.024 2
 -6 8 -1 119603 5092.93 4
 -6 8 -1 124412 6526.77 2
 -6 8 0 200497 6993.44 3
 -6 8 0 191990 8674.35 2
 -6 8 0 214440 7091.07 4
 -6 8 1 149675 5278.83 3
 -6 8 1 127690 6928.48 2
 -6 8 2 3435.74 694.509 3
 -6 8 2 13893.7 2219.45 2
 -6 8 3 91715.7 3980.99 3
 -6 8 3 97534.5 5064.9 4
 -6 8 3 93179.7 5869.1 2
 -6 8 4 114193 6170.07 4
 -6 8 4 117069 6713.91 2
 -6 8 4 128346 4993.39 3
 -6 8 5 44578.2 4026.87 2
 -6 8 5 44167.5 2860.13 3
 -6 8 5 34945.2 3458.86 4
 -6 8 6 10806.4 2071.37 4
 -6 8 6 8659.13 1754.81 2
 -6 8 7 59706.3 5292.6 4
 -6 8 7 52250.6 4469.17 2
 -6 8 8 157294 9677.01 4
 -6 8 8 173759 8710.34 2
 -6 8 9 2779.27 1240.11 4
 -6 8 9 1536.01 709.875 2
 -6 8 10 46810.4 4396.09 2
 -6 8 10 49202.1 5713.35 4
 -6 8 11 46951.7 5895.35 4
 -6 8 11 50427.8 4651.67 2
 -6 8 12 15756.1 3487.44 4
 -6 8 12 16690.4 2653.81 2
 -6 8 13 580.102 750.489 4
 -6 8 14 41199.5 6260.19 4
 -6 9 -7 -96.1079 386.551 2
 -6 9 -6 59893 4125.65 2
 -6 9 -5 111536 6028.22 2
 -6 9 -4 44068.7 3703.01 2
 -6 9 -3 4417.57 1151.16 2
 -6 9 -2 83658.4 3809.64 4
 -6 9 -2 79847.8 5284.87 2
 -6 9 -1 142544 5188.66 4
 -6 9 -1 146519 6274.04 3
 -6 9 -1 141958 7502.61 2
 -6 9 0 60731.6 3570.5 3
 -6 9 0 61603.7 3070.62 4
 -6 9 0 63574.8 4799.21 2
 -6 9 1 -29.2896 368.385 2
 -6 9 1 143.428 101.638 3
 -6 9 2 55941.1 3255.11 3
 -6 9 2 50161.1 4341.74 2
 -6 9 2 52772.5 3347.93 4
 -6 9 3 104210 5388.67 4
 -6 9 3 101730 6407.92 2
 -6 9 3 102071 4781.68 3
 -6 9 4 473.155 295.608 2
 -6 9 4 762.389 387.507 3
 -6 9 4 390.367 420.526 4
 -6 9 5 75085.7 5587.91 2
 -6 9 5 62160.8 4897.87 4
 -6 9 5 69936.4 4189.79 3
 -6 9 6 97900.1 6480.7 2
 -6 9 6 96084.9 5155.72 3
 -6 9 6 83130.4 6172.59 4
 -6 9 7 94199.1 6984.23 4
 -6 9 7 102944 6735.7 2
 -6 9 8 8340.19 2229.71 4
 -6 9 8 15517.6 2589.52 2
 -6 9 9 98053.4 7967.06 4
 -6 9 9 108982 7104.29 2
 -6 9 10 84140.9 7597.07 4
 -6 9 10 78097.3 6051.15 2
 -6 9 11 5077.03 2065.3 4
 -6 9 11 5360.84 1478.83 2
 -6 9 12 11407.2 3082.93 4
 -6 9 13 55146.5 7016.4 4
 -6 9 14 29099.5 5252.33 4
 -6 10 -7 43155.3 3567.13 2
 -6 10 -6 78725 5120.9 2
 -6 10 -5 37479 3610.79 2
 -6 10 -4 11067 1921.67 2
 -6 10 -3 74038.6 5261.63 2
 -6 10 -2 58881.9 4128.49 3
 -6 10 -2 78569.3 5437.8 2
 -6 10 -1 2285.84 869.612 2
 -6 10 -1 1700.28 644.956 3
 -6 10 0 19549.9 2106.81 3
 -6 10 0 18620.9 2669.75 2
 -6 10 0 16771.8 1306.92 4
 -6 10 1 16142.4 1922.47 3
 -6 10 1 16344.3 1550.69 4
 -6 10 2 21393.9 2194.75 3
 -6 10 2 19005.7 1943.63 4
 -6 10 2 17430.1 2617.73 2
 -6 10 3 21624.8 2331.43 4
 -6 10 3 19326 2810.33 2
 -6 10 3 24888.7 2442.59 3
 -6 10 4 64837.1 4680.72 4
 -6 10 4 66844.7 5438.49 2
 -6 10 4 71690.4 4448.36 3
 -6 10 5 77312.2 4979.2 3
 -6 10 5 83013 5892.87 4
 -6 10 6 24780.4 3233.84 4
 -6 10 6 24386.3 3313.41 2
 -6 10 6 24890 2756.21 3
 -6 10 7 1079.02 735.71 4
 -6 10 7 312.568 586.742 2
 -6 10 8 135964 8481.58 2
 -6 10 8 122887 8600.1 4
 -6 10 9 108386 7538.84 2
 -6 10 9 113880 8642.07 4
 -6 10 10 3046.08 1124.88 2
 -6 10 10 7046.11 2203.73 4
 -6 10 11 25900.8 4411.07 4
 -6 10 11 26414.6 3798.43 2
 -6 10 12 45724.3 6109.7 4
 -6 10 13 21737.6 4390.8 4
 -6 11 -7 45083.1 3906.76 2
 -6 11 -6 25426.6 2975.84 2
 -6 11 -5 10041.4 2009.81 2
 -6 11 -4 68371.3 5208.62 2
 -6 11 -3 47193.6 3982.32 3
 -6 11 -3 44465.9 4224.48 2
 -6 11 -2 1761.55 755.037 3
 -6 11 -2 10593.9 2173.1 2
 -6 11 -1 86826.7 5180.61 3
 -6 11 -1 81540.8 6027.53 2
 -6 11 0 67155 4463.91 3
 -6 11 0 69331.4 5548.47 2
 -6 11 1 16178.2 2110.87 3
 -6 11 1 27208.4 3475.82 2
 -6 11 2 17734 2209.38 3
 -6 11 2 16434.7 2716.87 2
 -6 11 3 65406.4 5605.34 2
 -6 11 3 69020.2 4665.82 3
 -6 11 4 47686.4 4925.54 2
 -6 11 4 42472.1 3706.02 3
 -6 11 5 12393.2 2441.17 2
 -6 11 5 8513.4 1732.78 3
 -6 11 6 2108.57 925.523 2
 -6 11 7 66501.6 5955.89 2
 -6 11 8 73416.4 6323.27 2
 -6 11 9 165.5 755.078 2
 -6 11 10 9409.03 2298.9 2
 -6 11 11 29395.7 4157.54 2
 -6 12 -7 2078.33 791.266 2
 -6 12 -6 2169.44 855.693 2
 -6 12 -5 71719.1 5531.77 2
 -6 12 -4 52732.5 4562.47 3
 -6 12 -4 56550.3 4951.95 2
 -6 12 -3 411.215 437.787 2
 -6 12 -3 191.062 370.315 3
 -6 12 -2 50744.9 4234.21 3
 -6 12 -2 54476 5007.95 2
 -6 12 -1 71842.2 5877.58 2
 -6 12 -1 73933.7 5119.83 3
 -6 12 0 46751.1 4744.73 2
 -6 12 0 48006.6 3985.56 3
 -6 12 1 -38.2919 458.467 2
 -6 12 1 433.072 285.893 3
 -6 12 2 54043 5269.93 2
 -6 12 2 58994.8 4563.45 3
 -6 12 3 45235.5 4050.34 3
 -6 12 3 43904.2 4764.76 2
 -6 12 4 14886.7 2768.1 2
 -6 12 4 16430 2482.18 3
 -6 12 5 11193.7 2394.4 2
 -6 12 6 27161 3893.94 2
 -6 12 7 44384 5044.14 2
 -6 12 8 2473.44 1444.64 2
 -6 12 9 19688.1 3407.48 2
 -6 12 10 27972.9 4188.5 2
 -6 12 11 9044.62 2723.55 2
 -6 13 -7 12758.8 2294.69 2
 -6 13 -6 62250.4 5453.93 3
 -6 13 -6 48838.1 4698.99 2
 -6 13 -5 34561.9 3933.16 3
 -6 13 -5 36031 4131.61 2
 -6 13 -4 472.334 362.612 2
 -6 13 -4 -102.925 616.858 3
 -6 13 -3 80936 5816.83 3
 -6 13 -3 73103.2 6083.04 2
 -6 13 -2 50385.7 4478.05 3
 -6 13 -2 56966 5373.32 2
 -6 13 -1 24260.1 2983.17 3
 -6 13 -1 24672.1 3539.56 2
 -6 13 0 4519.1 1499.37 2
 -6 13 0 4885.09 1350.8 3
 -6 13 1 73257.5 5472.94 3
 -6 13 1 86938.9 6949.11 2
 -6 13 2 46503.8 4342.35 3
 -6 13 2 37637.9 4611.25 2
 -6 13 3 6121.88 1862.21 2
 -6 13 4 44301.1 5137.51 2
 -6 13 5 41321 4983.05 2
 -6 13 6 23822.8 3834.89 2
 -6 13 7 7687.56 2357.2 2
 -6 13 8 45067.1 5471.94 2
 -6 13 9 48694.8 5775.29 2
 -6 13 10 5679.39 2004.49 2
 -6 14 -7 47739.6 5023.78 3
 -6 14 -7 36782 4218.75 2
 -6 14 -6 15112.6 2744.6 2
 -6 14 -6 17092.8 2902.71 3
 -6 14 -5 309.671 365.832 2
 -6 14 -5 339.616 286.648 3
 -6 14 -4 58636.5 5250.95 3
 -6 14 -4 49315.4 5082.85 2
 -6 14 -3 53600.3 4930.09 3
 -6 14 -3 55521.5 5507.54 2
 -6 14 -2 9963.33 2344.19 2
 -6 14 -2 6792.33 1658.87 3
 -6 14 -1 5516.47 1544.06 3
 -6 14 -1 5944.18 1825.08 2
 -6 14 0 61085.6 5211.62 3
 -6 14 0 56622.8 5796.48 2
 -6 14 1 45358 5246.58 2
 -6 14 1 45508 4555.95 3
 -6 14 2 1025.32 325.165 2
 -6 14 3 15467.8 3144.68 2
 -6 14 4 62597.1 6422.12 2
 -6 14 5 14295.2 3061.91 2
 -6 14 6 22198 3872.5 2
 -6 14 7 54399.5 6220.04 2
 -6 14 8 57607 6458.49 2
 -6 14 9 8158.85 2441.94 2
 -6 15 -9 17181.2 3269.08 3
 -6 15 -8 18593.3 3348.2 3
 -6 15 -7 3839.9 1515.17 3
 -6 15 -7 4152.84 1394.41 2
 -6 15 -6 4044.12 1443.15 2
 -6 15 -6 4258.85 1632.12 3
 -6 15 -5 19549.1 3178.73 3
 -6 15 -5 21212.3 3482.13 2
 -6 15 -4 16875.9 3089.42 2
 -6 15 -4 15466.8 2775.29 3
 -6 15 -3 615.015 619.284 2
 -6 15 -3 -200.577 399.044 3
 -6 15 -2 6566.67 1783.32 3
 -6 15 -2 3761.51 1727.75 2
 -6 15 -1 40263.5 4446.4 3
 -6 15 -1 35071.9 4686.94 2
 -6 15 0 19036.5 3456.35 2
 -6 15 1 7052.63 1966.17 2
 -6 15 2 37399.1 5007.8 2
 -6 15 3 42675.2 5377.09 2
 -6 15 4 7954.62 2417.89 2
 -6 15 5 25575.5 4336 2
 -6 15 6 54012.6 6362.95 2
 -6 16 -11 639.346 962.234 3
 -6 16 -10 12813.3 3038.9 3
 -6 16 -9 8189.66 2297.26 3
 -6 16 -8 313.04 410.152 3
 -6 16 -7 1786.37 941.133 2
 -6 16 -7 3116.42 1320.72 3
 -6 16 -6 25302.3 3786.45 3
 -6 16 -6 27024.4 4012.56 2
 -6 16 -5 8664.86 2242.54 2
 -6 16 -5 10392.9 2353.49 3
 -6 16 -4 -335.595 998.645 2
 -6 16 -4 772.038 579.386 3
 -6 16 -3 23040.8 3846.09 2
 -6 16 -3 14684.8 2834 3
 -6 16 -2 39811.6 5138.71 2
 -6 16 -2 30454.4 4056.14 3
 -6 16 -1 4773.92 1722.71 2
 -6 16 0 6783.36 2221.81 2
 -6 16 1 64263.6 6765.11 2
 -6 16 2 47839.6 5928.96 2
 -6 16 3 2843.97 1460.06 2
 -6 16 4 17371 3990.88 2
 -6 17 -10 5548.44 1934.18 3
 -6 17 -9 657.548 807.938 3
 -6 17 -8 3052.03 1406.89 3
 -6 17 -7 11288.9 2649.14 2
 -6 17 -7 10852.3 2623.97 3
 -6 17 -6 2087.15 1264.17 2
 -6 17 -6 1069.65 851.418 3
 -6 17 -5 4177.66 1659.76 2
 -6 17 -5 2063.36 1152.22 3
 -6 17 -4 28111.6 4450.68 2
 -6 17 -3 27630.8 4450.39 2
 -6 17 -2 1624.4 794.928 2
 -6 17 -1 6147.09 2035.56 2
 -6 17 0 41801.8 5653.2 2
 -6 18 -8 13794.1 3077.22 3
 -6 18 -7 1700.62 914.161 3
 -6 18 -7 2150.5 1340.57 2
 -6 18 -6 3662.42 1766.68 2
 -6 18 -5 17881.4 3649.52 2
 -6 18 -4 14740.9 3353.3 2
 -5 -8 13 21444.8 3651.54 4
 -5 -8 14 4696.27 1937.87 4
 -5 -8 15 12591.9 3024.74 4
 -5 -8 16 12553.2 3136.83 4
 -5 -8 17 2771.14 1533.95 4
 -5 -7 13 3989.5 1638.06 4
 -5 -7 14 12384.9 2795.81 4
 -5 -7 15 7920.48 2134.91 1
 -5 -7 15 12912.8 3064.93 4
 -5 -7 16 846.451 586.463 4
 -5 -7 16 822.455 708.592 1
 -5 -7 17 1388.32 724.767 4
 -5 -7 18 8592.41 2950.97 4
 -5 -6 13 37534.7 4289.85 1
 -5 -6 13 36352.7 4787.3 4
 -5 -6 14 6019.92 1786.82 1
 -5 -6 14 9250.68 2525.2 4
 -5 -6 15 3388.59 1845.05 4
 -5 -6 15 1131.87 616.502 1
 -5 -6 16 10750.4 2973.12 4
 -5 -6 17 21266.8 4447.95 4
 -5 -6 18 2064.8 1610.08 4
 -5 -5 12 55520.7 5660.01 4
 -5 -5 12 47660.2 4525.11 1
 -5 -5 13 9743.63 2137.14 1
 -5 -5 13 11010.9 2580.2 4
 -5 -5 14 5232.85 1971.29 4
 -5 -5 14 4213.02 1329.32 1
 -5 -5 15 33477.2 5061.55 4
 -5 -5 15 35992.2 4299.26 1
 -5 -5 16 45749.9 6203.82 4
 -5 -5 17 6753.31 2463.63 4
 -5 -5 18 984.701 728.99 4
 -5 -4 11 86862.5 5748.54 1
 -5 -4 12 5899.38 1480.97 1
 -5 -4 12 4839.08 1682.43 4
 -5 -4 13 13724.2 2956.94 4
 -5 -4 13 14124.3 2449.67 1
 -5 -4 14 49540.3 4711.47 1
 -5 -4 14 51626.7 6072.47 4
 -5 -4 15 50606.5 6314.19 4
 -5 -4 15 51948.7 5058.19 1
 -5 -4 16 5972.72 2250.4 4
 -5 -4 17 1550.1 1438.48 4
 -5 -4 18 26120 5095.74 4
 -5 -3 6 162314 7099.47 2
 -5 -3 7 13541.2 1831.35 2
 -5 -3 8 20880.6 2245.61 2
 -5 -3 9 66470.7 4162.09 2
 -5 -3 10 87329.5 4745.96 2
 -5 -3 10 76927.6 4983.39 1
 -5 -3 11 2540.47 837.938 2
 -5 -3 11 1957.21 652.167 1
 -5 -3 12 23743.9 3653.5 4
 -5 -3 12 19728.7 2631.65 1
 -5 -3 13 74488.2 6930.17 4
 -5 -3 13 60017.7 4878.44 1
 -5 -3 14 26482.9 4367.52 4
 -5 -3 14 25687.9 3245.75 1
 -5 -3 15 -166.331 503.651 1
 -5 -3 15 -558.198 691.175 4
 -5 -3 16 3752.12 1828.24 4
 -5 -3 17 8313.97 2844.44 4
 -5 -3 18 2692.08 1990.2 4
 -5 -2 2 58448.8 3867.38 2
 -5 -2 3 516.847 554.514 2
 -5 -2 4 202858 7922.05 2
 -5 -2 5 182282 7333.94 2
 -5 -2 6 63369.3 3906.45 2
 -5 -2 7 34599.5 2839.92 2
 -5 -2 8 81289.5 4459.26 2
 -5 -2 9 87637.8 4874.2 1
 -5 -2 9 96835.6 4839.1 2
 -5 -2 10 16401.3 1902.89 2
 -5 -2 10 6980.93 1426.68 1
 -5 -2 11 50155 3339.58 2
 -5 -2 11 50503.6 5205.09 4
 -5 -2 11 46348.1 3764.98 1
 -5 -2 12 50079.7 5520.43 4
 -5 -2 12 49722.8 4085.68 1
 -5 -2 12 54315.7 3437.58 2
 -5 -2 13 10394.5 2517.28 4
 -5 -2 13 8662.75 1766.86 1
 -5 -2 14 1769.61 763.89 1
 -5 -2 14 1196.92 532.802 4
 -5 -2 15 34360.8 5340.49 4
 -5 -2 16 10897 3003.41 4
 -5 -2 17 413.56 774.903 4
 -5 -2 18 2753.09 1360.09 4
 -5 -1 0 146888 6277.34 2
 -5 -1 1 24981.9 2290.59 2
 -5 -1 2 3030.3 789.259 2
 -5 -1 3 319368 10389.7 2
 -5 -1 4 529775 14961.3 2
 -5 -1 5 183593 7147.55 2
 -5 -1 6 30714.8 2561.65 2
 -5 -1 7 87392.8 4544.68 2
 -5 -1 8 29700.4 2356.61 1
 -5 -1 8 31323.5 2556.23 2
 -5 -1 9 2206.51 761.598 2
 -5 -1 9 1226.85 483.283 1
 -5 -1 10 102156 4904.82 2
 -5 -1 10 94971.2 5082.96 1
 -5 -1 11 57621.4 3539.64 2
 -5 -1 11 58116.2 4068.24 1
 -5 -1 11 54048.3 5439.9 4
 -5 -1 12 17153.7 1811.45 2
 -5 -1 12 20587.9 3571.13 4
 -5 -1 12 19122 2404.17 1
 -5 -1 13 6664.24 2161.54 4
 -5 -1 13 6056.22 1410.23 1
 -5 -1 14 22964.3 4070.55 4
 -5 -1 14 20386.5 2738.1 1
 -5 -1 15 20979.7 4181.15 4
 -5 -1 16 2228.95 1020.54 4
 -5 -1 17 3123.03 1970.62 4
 -5 0 -2 131484 5565.65 2
 -5 0 -1 148199 5995.11 2
 -5 0 0 919.755 412.102 2
 -5 0 1 102867 4822.08 2
 -5 0 2 183745 6921.36 2
 -5 0 3 231484 8055.96 2
 -5 0 4 91681.6 4535.84 2
 -5 0 5 5825.35 1039.61 2
 -5 0 6 79928.7 4197.7 2
 -5 0 7 24657.2 1824.33 1
 -5 0 7 29418.6 2436.11 2
 -5 0 8 -77.4289 278.744 1
 -5 0 8 67.0023 242.146 2
 -5 0 9 147755 5968.18 1
 -5 0 9 142510 6060.21 2
 -5 0 10 91371 4593.16 2
 -5 0 10 85944.8 6645.7 4
 -5 0 10 75794.3 4388.62 1
 -5 0 11 43856.2 3005.71 2
 -5 0 11 37041.7 3106.65 1
 -5 0 11 37911.5 4579.49 4
 -5 0 12 62295.1 4316.89 1
 -5 0 12 58685.5 6020.28 4
 -5 0 12 66917.6 3831.97 2
 -5 0 13 35641.5 3403.47 1
 -5 0 13 37675.9 5152.84 4
 -5 0 14 28073.1 4598.28 4
 -5 0 15 -548.87 561.028 4
 -5 0 16 11677.9 3445.6 4
 -5 0 17 20444.5 4504.72 4
 -5 1 -3 148194 5722.87 2
 -5 1 -2 84747.4 4055.03 2
 -5 1 -1 -67.3652 215.317 2
 -5 1 0 82929.9 4141.41 2
 -5 1 1 84417.8 4138.59 2
 -5 1 2 27199.8 1783.73 3
 -5 1 2 30310.6 2352.24 2
 -5 1 3 5422.11 762.38 3
 -5 1 3 16216.1 1719.13 2
 -5 1 4 27310.9 2269.04 2
 -5 1 5 136220 5712.39 2
 -5 1 6 44973.1 3635.51 2
 -5 1 6 37600.7 1862.27 1
 -5 1 7 19680.6 1990.31 2
 -5 1 7 22465.8 1558.42 1
 -5 1 8 128594 4944.41 1
 -5 1 8 129674 5697.25 2
 -5 1 9 153768 6032.09 1
 -5 1 9 170256 9212.03 4
 -5 1 9 176783 6871.54 2
 -5 1 10 49764.1 3303.25 1
 -5 1 10 51904.1 3398.62 2
 -5 1 10 56474.5 5274.9 4
 -5 1 11 76252.5 6626.84 4
 -5 1 11 74479.9 4379.56 1
 -5 1 11 74975 4171.41 2
 -5 1 12 108826 8463.49 4
 -5 1 12 110010 5212.9 2
 -5 1 13 37504 5129.12 4
 -5 1 14 1642.77 1187.16 4
 -5 1 15 34748.6 5450.67 4
 -5 1 16 38659.2 6024.46 4
 -5 1 17 4233.23 2185.68 4
 -5 2 -5 24927.3 1861.86 2
 -5 2 -4 104052 4331.41 2
 -5 2 -3 36232.6 2406.45 2
 -5 2 -2 574.829 286.15 2
 -5 2 -1 81794.9 3915.13 2
 -5 2 0 102624 4536.97 2
 -5 2 1 22272.8 1962.92 2
 -5 2 1 23138.3 1558.59 3
 -5 2 2 62073.9 2417.99 3
 -5 2 2 64208.3 3524.76 2
 -5 2 3 89993.1 4363.12 2
 -5 2 4 167634 6496.41 2
 -5 2 5 116035 5247.43 2
 -5 2 6 115929 5171.89 2
 -5 2 6 91343.8 2966.72 1
 -5 2 7 255824 7018.07 1
 -5 2 7 243529 8640.77 2
 -5 2 8 215327 8019.4 2
 -5 2 8 217237 10207.1 4
 -5 2 9 32641 3971.06 4
 -5 2 9 43210.1 3139.32 2
 -5 2 10 40554.6 3095.69 2
 -5 2 10 43446.8 4740.61 4
 -5 2 11 133560 8975.74 4
 -5 2 11 91851.8 4982.4 2
 -5 2 12 48257.6 5677.27 4
 -5 2 12 48539.4 3443.06 2
 -5 2 13 -267.506 453.784 4
 -5 2 14 36052.7 5345.51 4
 -5 2 15 47025.6 6540.82 4
 -5 2 16 3621.16 1857.64 4
 -5 3 -6 1820.12 445.347 2
 -5 3 -5 62302 3018.27 2
 -5 3 -4 8747.26 1069.97 2
 -5 3 -3 13642.5 1396.89 2
 -5 3 -2 73859.1 3603.16 2
 -5 3 -1 130886 5199.35 2
 -5 3 0 78952.8 3927.58 2
 -5 3 0 79963 3409.86 3
 -5 3 1 92287 4405.46 2
 -5 3 1 95494.4 3226.6 3
 -5 3 2 250358 8407.64 2
 -5 3 3 151887 6199.85 2
 -5 3 4 1156.33 464.83 2
 -5 3 5 26775.2 2389.61 2
 -5 3 6 234728 8490.85 2
 -5 3 7 106783 5236.5 2
 -5 3 8 32997.5 3685.49 4
 -5 3 8 30950.6 2679.31 2
 -5 3 9 31661.9 2748.1 2
 -5 3 9 26726.3 3534.91 4
 -5 3 10 82997.9 4718.03 2
 -5 3 10 77516 6586.93 4
 -5 3 11 6184.63 1926.18 4
 -5 3 11 7377.32 1306.78 2
 -5 3 12 2704.96 1549.8 4
 -5 3 12 2365.47 796.379 2
 -5 3 13 20656.3 4350.7 4
 -5 3 14 35199.7 5420.05 4
 -5 3 15 -355.249 774.808 4
 -5 3 16 22606.9 4701.93 4
 -5 4 -7 16346.9 1224.82 2
 -5 4 -6 54842.2 2627.11 2
 -5 4 -5 5429 802.7 2
 -5 4 -4 19855 1754.98 2
 -5 4 -3 109177 4530.92 2
 -5 4 -2 289655 8927.8 2
 -5 4 -1 115638 5386.01 2
 -5 4 0 108899 4953.05 2
 -5 4 1 95720.4 4651.41 2
 -5 4 1 93831.3 2977.88 3
 -5 4 2 107224 5094.85 2
 -5 4 3 59210.3 3679.16 2
 -5 4 4 226303 8462.18 2
 -5 4 4 234751 5598.92 1
 -5 4 5 288190 9918.26 2
 -5 4 6 17665.8 2283.76 2
 -5 4 7 9644.83 1503.04 2
 -5 4 7 9828.82 1927.32 4
 -5 4 8 74385.8 4441.85 2
 -5 4 8 67726.7 5548.53 4
 -5 4 9 27664 3701.59 4
 -5 4 9 32539.4 2947.23 2
 -5 4 10 3628.81 1466.88 4
 -5 4 10 1972.11 683.716 2
 -5 4 11 53389.5 3884.27 2
 -5 4 11 54309.3 5945.49 4
 -5 4 12 90692.7 5285.27 2
 -5 4 12 81533.1 7747.42 4
 -5 4 13 25092.4 4427.14 4
 -5 4 14 -582.876 1243.75 4
 -5 4 15 31239 5530.47 4
 -5 4 16 24076 4845.43 4
 -5 5 -7 117100 4050.78 2
 -5 5 -6 18290.3 1493.77 2
 -5 5 -5 17391.2 1546.42 2
 -5 5 -4 105519 4548.1 2
 -5 5 -3 246491 8132.97 2
 -5 5 -2 304648 9691.4 2
 -5 5 -1 16644.1 2156.02 2
 -5 5 0 133405 5846.02 2
 -5 5 1 125988 5735.67 2
 -5 5 2 36445.7 3400.46 2
 -5 5 3 376440 11931.7 2
 -5 5 3 357878 8518.96 3
 -5 5 3 393236 9400.63 1
 -5 5 4 306500 8020.57 1
 -5 5 4 305461 10442.6 2
 -5 5 5 25956.8 2548.76 2
 -5 5 6 57009.5 4464.13 4
 -5 5 6 53249.2 3792.33 2
 -5 5 7 234388 9039.49 2
 -5 5 7 228755 10525.4 4
 -5 5 8 51114.8 4960.25 4
 -5 5 8 62137.6 4193.28 2
 -5 5 9 4128.69 1548.82 4
 -5 5 9 3180.87 939.761 2
 -5 5 10 45710.1 3688.6 2
 -5 5 10 39710.3 4896.38 4
 -5 5 11 75165.9 7204.2 4
 -5 5 11 86695.8 5307.94 2
 -5 5 12 59809.5 6683.55 4
 -5 5 12 67950.6 4672.27 2
 -5 5 13 3506.65 1548.95 4
 -5 5 14 20231.9 4174.95 4
 -5 5 15 30862.2 5299.77 4
 -5 6 -7 5169.05 772.352 2
 -5 6 -6 2043.17 509.392 2
 -5 6 -5 120380 5040.94 2
 -5 6 -4 99773.6 4706.98 2
 -5 6 -3 32906.4 2660.73 2
 -5 6 -2 23732.5 2266.2 2
 -5 6 -1 114058 4861.3 4
 -5 6 -1 106723 5312.51 2
 -5 6 0 83467.3 4674.74 2
 -5 6 0 84780.7 3811.36 4
 -5 6 1 426.4 302.846 2
 -5 6 1 957.014 297.49 3
 -5 6 2 237516 8960.34 2
 -5 6 2 233211 6336.02 3
 -5 6 3 130657 4687.68 1
 -5 6 3 121197 6116.81 2
 -5 6 3 128707 4236.18 3
 -5 6 4 4404.68 1027.12 2
 -5 6 4 6659.31 1261.96 4
 -5 6 4 5724.29 810.197 3
 -5 6 5 34576.5 3113.35 2
 -5 6 5 37287.6 3374.13 4
 -5 6 6 118442 6249.98 2
 -5 6 6 133550 7304.48 4
 -5 6 7 124307 6460.13 2
 -5 6 7 134104 7909.09 4
 -5 6 8 325.103 383.094 4
 -5 6 8 325.83 290.375 2
 -5 6 9 45878.2 4262.12 2
 -5 6 9 40082 4798.11 4
 -5 6 10 53725.9 4209.22 2
 -5 6 10 41796.9 5110.79 4
 -5 6 11 76330.4 7388.75 4
 -5 6 11 85960.2 5535.92 2
 -5 6 12 13362.7 3348.38 4
 -5 6 13 9708.5 2831.17 4
 -5 6 14 22127.9 4406.45 4
 -5 6 15 2850.35 1720.05 4
 -5 7 -7 14131.8 1488.67 2
 -5 7 -6 70918.1 3826.42 2
 -5 7 -5 45947.8 3199.05 2
 -5 7 -4 6409.54 1189.22 2
 -5 7 -3 61967.2 3945.56 2
 -5 7 -2 85271.4 4860.46 2
 -5 7 -2 97447.2 4193.48 4
 -5 7 -1 115302 4555.07 4
 -5 7 -1 66496.7 4684.6 2
 -5 7 0 20143.4 1703.87 3
 -5 7 0 18410.2 1514.67 4
 -5 7 0 20266.3 2305.98 2
 -5 7 1 240754 7179.83 3
 -5 7 1 223712 9063.5 2
 -5 7 2 156874 5433.03 3
 -5 7 2 189191 7975.25 2
 -5 7 3 4237.87 1060.32 2
 -5 7 3 4488.09 981.483 4
 -5 7 3 3760.39 701.019 3
 -5 7 4 135373 6536.95 4
 -5 7 4 127334 6631.03 2
 -5 7 4 135954 5320.62 3
 -5 7 5 153412 7725.11 4
 -5 7 5 148019 6129.28 3
 -5 7 6 130127 7517.75 4
 -5 7 6 138164 7078.42 2
 -5 7 7 4342.16 1163.84 2
 -5 7 7 2471.41 1131.81 4
 -5 7 8 114567 6565.33 2
 -5 7 8 114630 7987.53 4
 -5 7 9 59407.2 5899.73 4
 -5 7 9 60864.1 4702.85 2
 -5 7 10 31151.1 3318.98 2
 -5 7 10 24107.6 3981.82 4
 -5 7 11 11200.2 2769.82 4
 -5 7 11 12612.1 2256.39 2
 -5 7 12 36817.7 5317.83 4
 -5 7 13 30290.5 5054.17 4
 -5 7 14 -305.37 1084.91 4
 -5 8 -7 62944.9 3740.18 2
 -5 8 -6 2100.49 696.211 2
 -5 8 -5 17762.2 2119.65 2
 -5 8 -4 86418.1 4944.76 2
 -5 8 -3 50419.6 2892.12 4
 -5 8 -3 50179.4 3746.57 2
 -5 8 -2 498.944 395.529 2
 -5 8 -2 186.858 140.093 4
 -5 8 -1 4861.41 1151.86 2
 -5 8 -1 3291.38 800.853 3
 -5 8 -1 4545.32 668.31 4
 -5 8 0 216675 7368.99 3
 -5 8 0 208619 6137.36 4
 -5 8 0 200497 8754.94 2
 -5 8 1 236227 7897.29 3
 -5 8 1 250886 7504.9 4
 -5 8 1 225723 9593.64 2
 -5 8 2 3075.71 1572.57 2
 -5 8 2 1309.4 674.803 4
 -5 8 2 2088.48 596.467 3
 -5 8 3 118745 5743.02 4
 -5 8 3 117768 6574.36 2
 -5 8 3 119272 5157.03 3
 -5 8 4 187790 7179.25 3
 -5 8 4 184390 8743.45 2
 -5 8 4 195947 8400.58 4
 -5 8 5 55411.6 4501.37 4
 -5 8 5 62644.4 4745.7 2
 -5 8 5 65534.6 4027.98 3
 -5 8 6 14722.6 2390.87 4
 -5 8 6 15250.8 2000.13 3
 -5 8 6 15412.8 2325.62 2
 -5 8 7 127390 8107.5 4
 -5 8 7 130461 7285.94 2
 -5 8 8 103943 7711.55 4
 -5 8 8 104824 6555.95 2
 -5 8 9 6663.08 1561.19 2
 -5 8 9 5049.39 1826.94 4
 -5 8 10 35638.3 3763.74 2
 -5 8 10 29067.4 4366.85 4
 -5 8 11 55953.5 6477.7 4
 -5 8 11 71750.8 5539.88 2
 -5 8 12 33609.1 5191.52 4
 -5 8 13 710.955 767.376 4
 -5 8 14 17877 4122.51 4
 -5 9 -7 18548.8 2130.36 2
 -5 9 -6 2171.83 699.085 2
 -5 9 -5 98645.7 5578.17 2
 -5 9 -4 90982.7 4154.22 4
 -5 9 -4 84089 5235.89 2
 -5 9 -3 355.567 181.533 4
 -5 9 -3 301.338 343.108 2
 -5 9 -2 38172.1 1708.94 4
 -5 9 -2 40860.2 3224.9 3
 -5 9 -2 43656.1 3752.9 2
 -5 9 -1 157344 6643.09 3
 -5 9 -1 150091 7583.77 2
 -5 9 0 146705 6234.38 3
 -5 9 0 144382 4445 4
 -5 9 0 143018 4255.21 4
 -5 9 0 140095 7423.23 2
 -5 9 1 5988.18 1109.72 3
 -5 9 1 4458.37 1256.06 2
 -5 9 1 4518.63 782.096 4
 -5 9 2 18653 1900.6 4
 -5 9 2 23148.4 2966.79 2
 -5 9 2 18415.5 2003.53 3
 -5 9 3 59615.4 4043.7 4
 -5 9 3 67232.3 4090.96 3
 -5 9 3 66646.5 5035.51 2
 -5 9 4 571.056 498.637 4
 -5 9 4 807.428 541.033 2
 -5 9 4 -43.7509 233.938 3
 -5 9 5 15351 2400.38 4
 -5 9 5 14727 2081.36 3
 -5 9 6 132151 7687.25 2
 -5 9 6 121978 7599.28 4
 -5 9 6 134727 6910.85 3
 -5 9 7 77891.1 5317.16 3
 -5 9 7 71349 5614.2 2
 -5 9 7 70790.7 5932.48 4
 -5 9 8 14674.6 2903.06 4
 -5 9 8 22516.9 3153.9 2
 -5 9 9 47615.6 5428.92 4
 -5 9 9 48170.5 4620.73 2
 -5 9 10 53394.8 6033.69 4
 -5 9 10 61123.4 5310.16 2
 -5 9 11 28275.1 3648.48 2
 -5 9 11 28792.1 4695.9 4
 -5 9 12 6660.92 2590.13 4
 -5 9 13 26286.2 4859.19 4
 -5 10 -8 25782.5 2742.95 2
 -5 10 -7 5227.09 1205.34 2
 -5 10 -6 100638 5836.75 2
 -5 10 -5 64776.1 4739.65 2
 -5 10 -4 487.179 197.893 2
 -5 10 -3 56626.9 4232.97 3
 -5 10 -3 57258.3 4525.3 2
 -5 10 -2 145120 7970.34 2
 -5 10 -2 137161 6748.29 3
 -5 10 -1 62157.9 4887.52 2
 -5 10 -1 61891.5 4195.88 3
 -5 10 0 892.091 396.872 3
 -5 10 0 1533.13 805.393 2
 -5 10 1 39669.7 2212.06 4
 -5 10 1 43203.2 3389.35 3
 -5 10 1 46857.8 4339.45 2
 -5 10 2 36617.8 3875.97 2
 -5 10 2 33006.9 2489.48 4
 -5 10 2 43019.5 3418.9 3
 -5 10 3 17036.3 2645.54 2
 -5 10 3 14466.2 1906.25 4
 -5 10 3 17195.6 2183.06 3
 -5 10 4 13682.4 2035.35 4
 -5 10 4 12455.6 1982.5 3
 -5 10 5 93598.5 6088.85 4
 -5 10 5 93955.4 5923.01 3
 -5 10 5 105957 7111.25 2
 -5 10 6 35677.1 3959.88 4
 -5 10 6 45354 4113.1 3
 -5 10 6 39280.7 4234.21 2
 -5 10 7 1398.08 725.386 3
 -5 10 7 2919.75 1329.89 2
 -5 10 7 1181.25 616.813 4
 -5 10 8 76423.8 6641.38 4
 -5 10 8 80109.4 6316.83 2
 -5 10 9 50865.6 5663.36 4
 -5 10 9 56790.5 5374.56 2
 -5 10 10 12512.6 2524.24 2
 -5 10 10 8328.54 2361.54 4
 -5 10 11 5840.37 1971.58 2
 -5 10 11 6053.27 2368.59 4
 -5 10 12 27837.8 4846 4
 -5 10 13 23911.4 4705.25 4
 -5 11 -8 10947 1884.21 2
 -5 11 -7 72130.1 5048.03 2
 -5 11 -6 49207.5 4200.63 2
 -5 11 -5 5759.31 1490.21 2
 -5 11 -4 69927.9 5300.24 2
 -5 11 -4 70629.9 5192.56 3
 -5 11 -3 69059.9 5271.56 2
 -5 11 -3 67017 4862.31 3
 -5 11 -2 14128.2 2343.88 2
 -5 11 -2 3977.58 1100.75 3
 -5 11 -1 28975.3 2995.9 3
 -5 11 -1 27618.7 3409.26 2
 -5 11 0 105636 6015.45 3
 -5 11 0 114690 7234.46 2
 -5 11 1 50263.2 4003.36 3
 -5 11 1 53810 4916.34 2
 -5 11 2 9678.23 1756.97 3
 -5 11 2 8839.13 1986.53 2
 -5 11 3 107885 7356.22 2
 -5 11 3 114295 6617.85 3
 -5 11 4 99611.8 7156.28 2
 -5 11 4 90985 6047.85 3
 -5 11 5 16422 2497.64 3
 -5 11 5 19395.9 3080.59 2
 -5 11 6 1052.65 736.47 3
 -5 11 6 1280.81 766.04 2
 -5 11 7 70316 5771.98 3
 -5 11 7 61553.2 5817.34 2
 -5 11 8 59829.8 5784.33 2
 -5 11 9 1545.97 805.031 2
 -5 11 10 4150.8 1585.93 2
 -5 12 -8 21194.7 2771.63 2
 -5 12 -7 6509.78 1570.65 2
 -5 12 -6 3285.71 1101.14 2
 -5 12 -5 77604.1 5822.65 2
 -5 12 -5 88436 6222.37 3
 -5 12 -4 59055.2 4916.83 3
 -5 12 -4 60834.5 5179.9 2
 -5 12 -3 -143.719 351.328 3
 -5 12 -2 63267.5 4908.7 3
 -5 12 -1 150157 7846.09 3
 -5 12 0 73948 5272.53 3
 -5 12 1 1018.37 824.718 3
 -5 12 2 70101.3 5333.51 3
 -5 12 2 70803 6069.33 2
 -5 12 3 88130.3 6922.86 2
 -5 12 3 104107 6756.65 3
 -5 12 4 21091.1 3293.45 2
 -5 12 4 23180.5 3167.64 3
 -5 12 5 3207.09 1161.41 3
 -5 12 5 5545.27 2731.44 2
 -5 12 6 51179.1 5097.9 3
 -5 12 6 49616.2 5336.59 2
 -5 12 7 64636.8 6228.98 2
 -5 12 8 3261.83 1455.52 2
 -5 12 9 14054.3 2967.74 2
 -5 12 10 34866 4753.58 2
 -5 13 -8 264.937 636.923 2
 -5 13 -7 2800.96 1073.27 2
 -5 13 -7 5075.87 1537.61 3
 -5 13 -6 48240.6 4669.82 2
 -5 13 -6 49810.3 4923.71 3
 -5 13 -5 24206.3 3443.32 2
 -5 13 -5 23940.3 3264.62 3
 -5 13 -4 -239.463 573.942 3
 -5 13 -3 37504.2 3971.68 3
 -5 13 -2 37886.4 3962.78 3
 -5 13 -1 32253.3 3649.02 3
 -5 13 0 563.871 581.513 3
 -5 13 1 27906.7 3460.89 3
 -5 13 2 42494.3 4388.52 3
 -5 13 3 8456.58 2199.32 2
 -5 13 3 12943.6 2463.01 3
 -5 13 4 3249.33 1312.3 3
 -5 13 4 5105.26 1891.22 2
 -5 13 5 31877.9 4379.53 2
 -5 13 6 35235.2 4742.19 2
 -5 13 7 2779.66 1509.87 2
 -5 13 8 40823.4 5267.54 2
 -5 13 9 43927.2 5569.98 2
 -5 13 10 9631.58 2566.69 2
 -5 14 -8 14645 2541.26 2
 -5 14 -8 14211.1 2772.88 3
 -5 14 -7 55287.1 5178.25 2
 -5 14 -7 50176.1 5248.53 3
 -5 14 -6 21970.8 3315.45 2
 -5 14 -6 23545.4 3441.1 3
 -5 14 -5 943.392 830.118 3
 -5 14 -4 40343.6 4410.82 3
 -5 14 -3 22609.3 3257.25 3
 -5 14 -2 10720.3 2206.39 3
 -5 14 -1 7451.68 1851.51 3
 -5 14 0 59677.3 5423.86 3
 -5 14 1 47408.6 4870.7 3
 -5 14 2 2581.38 1047.35 3
 -5 14 3 11014 2440 3
 -5 14 3 9004.04 2348.41 2
 -5 14 4 40461.1 5171.38 2
 -5 14 5 20518.9 3679.84 2
 -5 14 6 2928.87 1461.01 2
 -5 14 7 33388.5 4901.11 2
 -5 14 8 44133.2 5746.17 2
 -5 15 -10 -55.6055 754.028 3
 -5 15 -9 9141.88 2306.79 3
 -5 15 -8 26812 3674.61 2
 -5 15 -8 26436.7 4005.66 3
 -5 15 -7 13997.2 2801.77 3
 -5 15 -7 18484.1 3135.45 2
 -5 15 -6 496.986 673.239 2
 -5 15 -6 -32.4277 248.448 3
 -5 15 -5 20422.1 3268.32 3
 -5 15 -4 24642.8 3599.28 3
 -5 15 -3 148.637 358.418 3
 -5 15 -2 10307.2 2266.05 3
 -5 15 -1 68330 6133.05 3
 -5 15 0 28257.9 3962.15 3
 -5 15 1 1455.78 1257.13 3
 -5 15 2 17515.1 3431.35 2
 -5 15 3 52943.8 6093.3 2
 -5 15 4 19026.7 3617.66 2
 -5 15 5 2675.6 1345.09 2
 -5 15 6 36021.1 5183.8 2
 -5 16 -11 -566.316 930.369 3
 -5 16 -10 5997.23 1958.54 3
 -5 16 -9 9923.63 2533.02 3
 -5 16 -8 8133.44 2097.26 2
 -5 16 -8 8345.15 2277.97 3
 -5 16 -7 -187.835 584.181 3
 -5 16 -7 50.2462 333.938 2
 -5 16 -6 19570.7 3474.84 2
 -5 16 -6 19350.1 3431.98 3
 -5 16 -5 16653.2 3182.63 3
 -5 16 -4 581.605 664.535 3
 -5 16 -3 20095.1 3411.75 3
 -5 16 -2 43372.2 5080.55 3
 -5 16 -1 12063.7 2620.41 3
 -5 16 0 681.458 982.088 3
 -5 16 2 42986.1 5644.69 2
 -5 16 3 9616.56 2694.56 2
 -5 17 -10 4564.86 1803.47 3
 -5 17 -9 72.8035 685.89 3
 -5 17 -8 469.643 857.62 2
 -5 17 -8 1051.71 960.541 3
 -5 17 -7 8900.96 2424.97 3
 -5 17 -7 11184.3 2721.09 2
 -5 17 -6 4508.42 1583.1 2
 -5 17 -6 2365.2 1282.92 3
 -5 17 -5 187.872 767.52 3
 -5 17 -4 13721.4 2985.75 3
 -5 17 -3 19859 3554.66 3
 -5 17 -2 8215.77 2246.7 3
 -5 18 -8 14969 3334.03 3
 -5 18 -7 4553.14 1666.22 3
 -5 18 -7 5491.23 2045.59 2
 -5 18 -6 867.505 997.354 3
 -5 18 -6 1838.16 1439.73 2
 -5 18 -5 13486 3059.63 3
 -5 18 -4 18420.4 3570.78 3
 -4 -9 12 27930 3848.81 4
 -4 -9 13 41363.6 4895.08 4
 -4 -9 16 4738.05 1874.1 1
 -4 -9 17 12060 2981.34 1
 -4 -8 12 53445 5402.47 4
 -4 -8 13 20516.6 3497.26 4
 -4 -8 14 3880.13 1769.24 4
 -4 -8 14 212.947 301.293 1
 -4 -8 15 7695.41 2304.35 4
 -4 -8 15 8222.66 2292.19 1
 -4 -8 16 21990.6 3827.54 1
 -4 -8 16 21447.6 4056.79 4
 -4 -8 17 6795.24 2293.59 4
 -4 -8 17 5818.54 1973.32 1
 -4 -7 12 34586.5 4185.59 1
 -4 -7 12 36940.2 4475.88 4
 -4 -7 13 2017.21 959.228 1
 -4 -7 13 1967.43 1181 4
 -4 -7 14 6834.39 1949.17 1
 -4 -7 14 14197.7 2992.15 4
 -4 -7 15 19559.2 3729.75 4
 -4 -7 15 16043.1 3026.86 1
 -4 -7 16 3689.16 1696.53 4
 -4 -7 16 4036.49 1580.15 1
 -4 -7 17 602.11 834.797 4
 -4 -7 17 1507.38 1019.44 1
 -4 -7 18 11721.4 3363.86 4
 -4 -6 11 42051.2 4279.43 1
 -4 -6 11 49308 4965.87 4
 -4 -6 12 4023.52 1484.4 4
 -4 -6 12 4244.33 1373.34 1
 -4 -6 13 36096.1 4210.12 1
 -4 -6 13 41309.7 4993.55 4
 -4 -6 14 20327.1 3679.08 4
 -4 -6 14 16198.4 2894.22 1
 -4 -6 15 3.72355 660.784 4
 -4 -6 15 -176.218 295.402 1
 -4 -6 16 15281.8 3471.57 4
 -4 -6 16 14147.8 2839.39 1
 -4 -6 17 23060.9 4550.04 4
 -4 -6 18 7787.51 2904.5 4
 -4 -5 10 4328.6 1239.11 1
 -4 -5 11 14656.5 2678.43 4
 -4 -5 11 14524.9 2410.76 1
 -4 -5 12 53025.9 5392.9 4
 -4 -5 12 50572.4 4704.56 1
 -4 -5 13 11606.9 2734.72 4
 -4 -5 13 12478.8 2341.34 1
 -4 -5 14 1777.15 1333.02 4
 -4 -5 14 548.916 237.099 1
 -4 -5 15 23769.1 4168.84 4
 -4 -5 15 20683.3 3253.31 1
 -4 -5 16 48087.7 6457.24 4
 -4 -5 16 48176.9 5104.94 1
 -4 -5 17 17643.7 4029.28 4
 -4 -5 18 1276.28 856.5 4
 -4 -4 9 7403.64 1497.53 1
 -4 -4 10 20194.5 2568.09 1
 -4 -4 11 58745 4666.44 1
 -4 -4 11 56612.4 5386.24 4
 -4 -4 12 17676.7 2595.77 1
 -4 -4 12 16589.1 3012.75 4
 -4 -4 13 10480.1 2061.81 1
 -4 -4 13 13184.6 2826.03 4
 -4 -4 14 36805.3 5058.27 4
 -4 -4 14 38014.9 4131.28 1
 -4 -4 15 31393.1 4869.68 4
 -4 -4 15 41716.5 4490.19 1
 -4 -4 16 16804.1 2948.16 1
 -4 -4 16 19225.9 4050.3 4
 -4 -4 17 275.098 653.448 4
 -4 -4 18 15718.3 3940.01 4
 -4 -3 6 166912 6804.7 2
 -4 -3 7 46105.1 3182.37 2
 -4 -3 8 1644.73 574.675 2
 -4 -3 8 1294.71 608.279 1
 -4 -3 9 80325 4214.33 2
 -4 -3 9 71509.5 4621.82 1
 -4 -3 10 81965.1 6234.19 4
 -4 -3 10 82368.5 5159.29 1
 -4 -3 11 11972.7 1979.95 1
 -4 -3 11 12768.2 2497.16 4
 -4 -3 12 1050.25 651.08 1
 -4 -3 12 1182.2 641.158 4
 -4 -3 13 31576.5 4565.55 4
 -4 -3 13 34553.7 3702.31 1
 -4 -3 14 23965.9 3159.57 1
 -4 -3 14 26489 4249.27 4
 -4 -3 15 2758.77 1129.8 1
 -4 -3 15 2454.73 1499.39 4
 -4 -3 16 1545.99 745.063 4
 -4 -3 16 1867.31 968.661 1
 -4 -3 17 13174.4 3361.15 4
 -4 -3 18 2442.23 1106.45 4
 -4 -2 2 358214 11095 2
 -4 -2 3 15274.3 1876.86 2
 -4 -2 4 451767 12989.3 2
 -4 -2 5 697993 18181.3 2
 -4 -2 6 116094 5132.11 2
 -4 -2 7 45115.5 3090.15 1
 -4 -2 7 54026.9 3254.93 2
 -4 -2 8 150682 5874.99 2
 -4 -2 8 138342 6158.66 1
 -4 -2 9 197161 6997.58 2
 -4 -2 9 194469 7865.5 1
 -4 -2 10 18545 2286.91 1
 -4 -2 10 17397.1 2854.85 4
 -4 -2 11 23225.4 3449.63 4
 -4 -2 11 26270.3 2097.09 2
 -4 -2 11 21819.2 2609.69 1
 -4 -2 12 32933.3 4351.84 4
 -4 -2 12 29647.2 2233.76 2
 -4 -2 12 28799.3 3119.39 1
 -4 -2 13 17259.2 3382.72 4
 -4 -2 13 16906.5 2513.25 1
 -4 -2 14 424.027 271.843 1
 -4 -2 14 1713.43 1377.07 4
 -4 -2 15 12074 2292.59 1
 -4 -2 15 13554.8 3328.72 4
 -4 -2 16 17802.3 4086.72 4
 -4 -2 17 5222.85 2266.47 4
 -4 -1 0 226865 7745.03 2
 -4 -1 1 43666.6 2842.36 2
 -4 -1 2 436.736 327.748 2
 -4 -1 3 220664 7565.52 2
 -4 -1 4 828347 20534.4 2
 -4 -1 5 315664 9653.73 2
 -4 -1 6 5266.45 954.419 2
 -4 -1 6 5216.65 852.188 1
 -4 -1 7 86909.6 4166.85 2
 -4 -1 7 90287.2 4175.59 1
 -4 -1 8 136542 5470.92 2
 -4 -1 8 139352 5797.36 1
 -4 -1 9 32344.4 2350.08 2
 -4 -1 9 33879.7 3777.9 4
 -4 -1 9 32063.8 2705.41 1
 -4 -1 10 57312.7 3911.21 1
 -4 -1 10 56989.2 5225.38 4
 -4 -1 10 58408 3261.89 2
 -4 -1 11 61259.8 3340.95 2
 -4 -1 11 57989.3 4192.36 1
 -4 -1 11 64022 5880.25 4
 -4 -1 12 29950.1 3079.29 1
 -4 -1 12 31758.1 4306.17 4
 -4 -1 12 35968.1 2411.22 2
 -4 -1 13 154.043 373.68 4
 -4 -1 13 708.688 392.368 1
 -4 -1 14 31662.5 3488.88 1
 -4 -1 14 33045.8 4948.65 4
 -4 -1 15 16013.5 2596.99 1
 -4 -1 15 16252.6 3608.72 4
 -4 -1 16 3354.17 1848.72 4
 -4 -1 17 14.7969 1848.16 4
 -4 0 -2 77341 3696.7 2
 -4 0 -1 113024 4667.01 2
 -4 0 0 80688.5 3823.16 2
 -4 0 1 75520.2 3658.7 2
 -4 0 2 19267.7 1724.92 2
 -4 0 2 18009.4 1448 3
 -4 0 3 199981 6331.66 3
 -4 0 3 223234 7151.24 2
 -4 0 4 44920.4 2758.02 2
 -4 0 5 4144.51 805.304 2
 -4 0 5 4874.52 655.451 1
 -4 0 6 52012.7 2627.03 1
 -4 0 6 56116.5 3132.39 2
 -4 0 7 104097 4343.7 1
 -4 0 7 100978 4486.82 2
 -4 0 8 2605.31 611.884 2
 -4 0 8 2045.1 885.141 4
 -4 0 8 2733.78 654.704 1
 -4 0 9 127463 5666.14 1
 -4 0 9 124491 7623.3 4
 -4 0 9 131932 5276.95 2
 -4 0 10 78694 4584.86 1
 -4 0 10 85108.6 6576.49 4
 -4 0 10 97987.5 4378.8 2
 -4 0 11 58913.8 5691.04 4
 -4 0 11 55977.4 3193.11 2
 -4 0 12 15506.8 3087.92 4
 -4 0 12 15212.9 1548.5 2
 -4 0 13 40925.7 5433.95 4
 -4 0 14 23569.4 4237.46 4
 -4 0 15 619.039 661.456 4
 -4 0 16 11704.1 3371.67 4
 -4 0 17 16360.8 4018.5 4
 -4 1 -3 246452 7421.75 2
 -4 1 -2 242134 7382.98 2
 -4 1 -1 195758 6373.23 2
 -4 1 0 91153.9 3823.79 2
 -4 1 0 67563.1 3286.18 3
 -4 1 1 123117 4159.49 3
 -4 1 1 123978 4754.34 2
 -4 1 2 171391 4966.16 3
 -4 1 2 173342 5981.82 2
 -4 1 3 55498.5 3046.34 2
 -4 1 4 120460 4845.03 2
 -4 1 5 170997 4554.38 1
 -4 1 5 131526 5490.65 2
 -4 1 6 52242 2543.54 1
 -4 1 6 85926.8 3906.76 2
 -4 1 7 6509.1 1027.31 2
 -4 1 8 217793 9763.58 4
 -4 1 8 168275 6487.57 2
 -4 1 9 246286 11531.9 4
 -4 1 9 256388 8385.28 2
 -4 1 10 95710.8 7174.54 4
 -4 1 10 97161.1 4547.28 2
 -4 1 11 12696.4 2661.79 4
 -4 1 11 11706.5 1433.09 2
 -4 1 12 53514.5 5968.87 4
 -4 1 12 53808.7 3166.85 2
 -4 1 13 66430.5 6980.6 4
 -4 1 14 146.863 497.774 4
 -4 1 15 22510.3 4566.07 4
 -4 1 16 38219.7 5940.63 4
 -4 1 17 10100.3 3082.41 4
 -4 2 -5 4683.83 668.591 2
 -4 2 -4 107903 4007.01 2
 -4 2 -3 415736 10858.3 2
 -4 2 -2 8512.91 995.611 2
 -4 2 -1 21642.7 1654.08 2
 -4 2 0 111939 4030.52 3
 -4 2 0 114614 4423.82 2
 -4 2 1 34461.6 2248.97 2
 -4 2 1 36157.5 1633.68 3
 -4 2 2 16278.4 818.684 3
 -4 2 2 13818.8 1417.62 2
 -4 2 3 55034.6 3081.74 2
 -4 2 4 387379 11097.4 2
 -4 2 5 54540.3 3149.36 2
 -4 2 6 5516.01 951.261 2
 -4 2 7 164925 6345.4 2
 -4 2 7 166754 8242.67 4
 -4 2 8 264529 8838.85 2
 -4 2 8 274556 11648 4
 -4 2 9 79990.4 6277.38 4
 -4 2 9 86656.8 4397.98 2
 -4 2 10 16071.4 1783.64 2
 -4 2 10 12947.3 2580.02 4
 -4 2 11 74546.5 4039.38 2
 -4 2 11 73644 6765.42 4
 -4 2 12 72867.9 7074.98 4
 -4 2 13 427.333 631.606 4
 -4 2 14 11375.7 2958.72 4
 -4 2 15 32269.1 5340.38 4
 -4 2 16 10198.1 3204.65 4
 -4 3 -6 812.39 244.424 2
 -4 3 -5 36945.6 1935.83 2
 -4 3 -4 129320 4429.26 2
 -4 3 -3 11635.5 1132.65 2
 -4 3 -2 69117.4 3173.05 2
 -4 3 -1 34579.2 2211.26 2
 -4 3 0 62401.7 3204 2
 -4 3 0 66343.6 3409.16 4
 -4 3 1 35395.5 2369.68 2
 -4 3 1 31214.8 1284.82 3
 -4 3 2 88324.1 4125.44 2
 -4 3 3 417121 11842.3 2
 -4 3 4 6422.33 1042.2 2
 -4 3 5 19648.6 1911.79 2
 -4 3 6 297212 9547.54 2
 -4 3 6 257365 10476.2 4
 -4 3 7 101942 4867.72 2
 -4 3 7 97358.2 6208.67 4
 -4 3 8 43110.2 4326.92 4
 -4 3 8 36893.4 2820.14 2
 -4 3 9 22391.5 3397.5 4
 -4 3 9 26186.4 2381.81 2
 -4 3 10 82903 4545.34 2
 -4 3 10 91060.7 7280.02 4
 -4 3 11 12207.4 1650.59 2
 -4 3 11 13152.3 2904.47 4
 -4 3 12 2528.9 1413.27 4
 -4 3 13 22379.7 4119.59 4
 -4 3 14 29524.3 4942.49 4
 -4 3 15 5171.14 2102.77 4
 -4 3 16 6641.32 2441.02 4
 -4 4 -7 34879.2 1521.65 2
 -4 4 -6 79405 2940.77 2
 -4 4 -5 14678.6 1207.21 2
 -4 4 -4 28432.2 2047.5 2
 -4 4 -3 259273 7746.64 2
 -4 4 -2 424800 11549.1 2
 -4 4 -1 128791 5234.94 2
 -4 4 -1 151473 5725.67 4
 -4 4 0 9178.45 1077.16 4
 -4 4 0 9228.43 1224.72 2
 -4 4 1 147393 3988.77 3
 -4 4 1 152814 5874.87 2
 -4 4 2 310219 9835.26 2
 -4 4 2 321800 8042.31 1
 -4 4 3 4071.1 873.848 2
 -4 4 3 3288.05 464.747 1
 -4 4 4 77156.1 4125.06 2
 -4 4 5 474388 13673.2 2
 -4 4 5 472647 14821.5 4
 -4 4 6 31016.6 2706.41 2
 -4 4 6 25202.4 2895.93 4
 -4 4 7 489.224 468.51 4
 -4 4 7 1407.34 556.285 2
 -4 4 8 20639.4 3066.4 4
 -4 4 8 20483.6 2182.81 2
 -4 4 9 67756.9 6059.29 4
 -4 4 9 70402.6 4292.48 2
 -4 4 10 2244.96 1185.31 4
 -4 4 10 1404.6 594.247 2
 -4 4 11 1885.11 627.461 2
 -4 4 11 2742.79 1251.7 4
 -4 4 12 57082.8 6558.01 4
 -4 4 13 45410.3 6083.6 4
 -4 4 14 2502.29 1382.03 4
 -4 4 15 17746.1 4129.73 4
 -4 5 -7 142981 4330.02 2
 -4 5 -6 79063 3178.58 2
 -4 5 -5 29204.9 1954.65 2
 -4 5 -4 168497 5966.82 2
 -4 5 -3 604815 15636.6 2
 -4 5 -2 276543 8822 2
 -4 5 -2 277903 8521.95 4
 -4 5 -1 8753.67 1355.72 2
 -4 5 -1 10918.1 1242.24 4
 -4 5 0 287305 9343.17 2
 -4 5 0 285752 7919.13 4
 -4 5 1 203314 6320.08 1
 -4 5 1 194133 7378.45 2
 -4 5 1 201226 5589.41 3
 -4 5 2 1920.6 1021.54 2
 -4 5 2 775.12 281.252 1
 -4 5 3 137135 6043.72 2
 -4 5 3 140305 4580.44 3
 -4 5 4 275915 9755.8 4
 -4 5 4 279961 9498.96 2
 -4 5 4 261304 7846.5 3
 -4 5 5 71182.6 4714.8 4
 -4 5 5 65883 4081.31 2
 -4 5 6 574.84 730.109 2
 -4 5 6 241.852 698.669 4
 -4 5 7 129873 7793.92 4
 -4 5 7 126236 6067.42 2
 -4 5 8 117471 5908.3 2
 -4 5 8 119357 7949.19 4
 -4 5 9 7892.36 1422.47 2
 -4 5 9 8017.86 2066.64 4
 -4 5 10 30340.6 2906.4 2
 -4 5 10 24947.4 3895.98 4
 -4 5 11 83219.7 5067.75 2
 -4 5 11 73084.4 7191.81 4
 -4 5 12 90011.5 8393.97 4
 -4 5 13 21148 4099.03 4
 -4 5 14 21240.7 4309.47 4
 -4 5 15 28136 5213.57 4
 -4 6 -8 52746.6 2234.38 2
 -4 6 -7 12039.3 1193.01 2
 -4 6 -6 27973.3 2032.94 2
 -4 6 -5 93340.6 4268.93 2
 -4 6 -4 139090 5684.59 2
 -4 6 -3 55209.2 3072.2 4
 -4 6 -3 51485.5 3294.33 2
 -4 6 -2 21074.9 1638.16 4
 -4 6 -2 23463.4 2169.94 2
 -4 6 -1 63728.6 3897.05 2
 -4 6 -1 73711.9 3012.55 4
 -4 6 0 30307.4 2011.93 3
 -4 6 0 30947.1 1683.75 4
 -4 6 0 30173.1 2612.94 2
 -4 6 1 1867.55 692.737 2
 -4 6 1 1885.04 451.617 3
 -4 6 2 172835 7226.98 2
 -4 6 2 173960 6168.78 4
 -4 6 2 165682 5513.85 3
 -4 6 3 319521 10475 4
 -4 6 3 332558 9374.6 3
 -4 6 3 324154 11087.1 2
 -4 6 4 31784.6 2954.38 4
 -4 6 4 33382.5 2396.06 3
 -4 6 4 35556.7 3031.37 2
 -4 6 5 845.79 1100.33 4
 -4 6 5 2621.84 873.774 3
 -4 6 5 792.795 1291.23 2
 -4 6 6 128617 7511.75 4
 -4 6 6 141482 6713.06 2
 -4 6 7 132302 6545.53 2
 -4 6 7 123089 7805.64 4
 -4 6 8 19073.4 3076.56 4
 -4 6 8 21712.2 2495.71 2
 -4 6 9 36473.6 4830.07 4
 -4 6 9 44490.5 3834.77 2
 -4 6 10 91633.1 5573.5 2
 -4 6 10 94392 7863.13 4
 -4 6 11 104610 8707.81 4
 -4 6 11 98839 5902.63 2
 -4 6 12 22032.7 4151.12 4
 -4 6 13 6912.12 2352.78 4
 -4 6 14 31098.3 5420.69 4
 -4 6 15 7266.08 2731.81 4
 -4 7 -8 527.715 388.671 2
 -4 7 -7 23362.4 1952.93 2
 -4 7 -6 58289.6 3441.63 2
 -4 7 -5 5555.81 1043.73 2
 -4 7 -4 8536.38 1698.42 2
 -4 7 -3 58746.4 2956.03 4
 -4 7 -3 56021.4 3698.6 2
 -4 7 -2 91107.1 4951.44 2
 -4 7 -2 95311.3 3391.17 4
 -4 7 -1 75884.5 4465.09 2
 -4 7 -1 75931.1 2725.08 4
 -4 7 0 5602.89 917.555 3
 -4 7 0 6602.24 654.351 4
 -4 7 1 115863 4743.1 3
 -4 7 1 123222 4445.69 4
 -4 7 2 218918 7680.88 4
 -4 7 2 220832 7477.67 3
 -4 7 3 7671.03 1495.92 2
 -4 7 3 8588.67 1243.72 3
 -4 7 3 9857.85 1492.32 4
 -4 7 4 65120.4 4414.11 4
 -4 7 4 62286.6 3732.58 3
 -4 7 4 55978.6 4185.65 2
 -4 7 5 168263 8325.23 4
 -4 7 5 174195 7273.08 3
 -4 7 5 177345 8062.63 2
 -4 7 6 108990 6841.98 4
 -4 7 6 101187 5562.28 3
 -4 7 6 101130 5951.92 2
 -4 7 7 3445.78 962.988 2
 -4 7 7 1925.78 785.474 4
 -4 7 8 45171.8 5002.64 4
 -4 7 8 47076.3 4147.5 2
 -4 7 9 36288.5 4604.04 4
 -4 7 9 39122.9 3689.13 2
 -4 7 10 24487.6 4035.94 4
 -4 7 10 33337.4 3447.83 2
 -4 7 11 1527.15 1002.02 2
 -4 7 11 5433.41 2448.19 4
 -4 7 12 23392.9 4342.87 4
 -4 7 13 31057.8 5187.84 4
 -4 7 14 937.869 996.088 4
 -4 8 -8 12159.8 1485.79 2
 -4 8 -7 53720.5 3438.94 2
 -4 8 -6 4257.6 971.138 2
 -4 8 -5 882.981 487.628 2
 -4 8 -4 73351.8 3443.34 4
 -4 8 -4 64248.1 4208.55 2
 -4 8 -3 99384.3 5419.28 2
 -4 8 -3 100681 3482.96 4
 -4 8 -2 17184.5 1989.71 3
 -4 8 -2 16766.2 2122.7 2
 -4 8 -1 1433.5 532.347 3
 -4 8 0 255387 8653.64 3
 -4 8 0 238114 6332.93 4
 -4 8 0 255767 6174.51 4
 -4 8 1 250228 8559.59 3
 -4 8 1 246572 7377.89 4
 -4 8 2 24033.5 2104.5 4
 -4 8 2 23413.8 2226.54 3
 -4 8 3 37104.1 3020.94 4
 -4 8 3 39817.8 3655.09 2
 -4 8 3 37210 2943.79 3
 -4 8 4 114097 6585.21 2
 -4 8 4 122049 6384.21 4
 -4 8 4 115024 5843.91 3
 -4 8 5 134711 7304.86 2
 -4 8 5 133595 7316.85 4
 -4 8 5 129746 6609.11 3
 -4 8 6 6965.41 1501.35 3
 -4 8 6 7349.37 1583.28 2
 -4 8 6 7260.83 1674.7 4
 -4 8 7 78028.7 6233.44 4
 -4 8 7 79754.3 5491.22 3
 -4 8 7 89804.2 5966.53 2
 -4 8 8 64823.1 5072.63 2
 -4 8 8 62854 5909.19 4
 -4 8 9 9454.4 1946.51 2
 -4 8 9 10637.5 2507.01 4
 -4 8 10 6585.75 1627.08 2
 -4 8 10 8283.21 2417.52 4
 -4 8 11 57156.2 6600.74 4
 -4 8 11 62836.6 5211.96 2
 -4 8 12 35710.3 5366.24 4
 -4 8 13 -323.263 1276.27 4
 -4 8 14 14442.7 3793.18 4
 -4 9 -8 53172.3 3614.79 2
 -4 9 -7 45676.2 3455.98 2
 -4 9 -6 320.522 239.397 2
 -4 9 -5 86699 5163.76 2
 -4 9 -3 10391.2 1687.47 3
 -4 9 -2 15814.7 2009.8 3
 -4 9 -1 225157 8689.89 3
 -4 9 0 266070 9552.41 3
 -4 9 1 27079.8 2585.25 3
 -4 9 1 27908 1820.71 4
 -4 9 2 13398.8 1523.44 4
 -4 9 2 15087.1 1965.48 3
 -4 9 3 73913.9 4724.41 3
 -4 9 3 74242.3 4379.52 4
 -4 9 4 40387.5 3580.67 4
 -4 9 4 46943.5 3833.12 3
 -4 9 5 7310.24 1597.02 3
 -4 9 5 3006.49 1214.68 4
 -4 9 5 7478 1868.06 2
 -4 9 6 77156.6 5792.14 2
 -4 9 6 73734.5 5703.75 4
 -4 9 6 76593.2 5460.31 3
 -4 9 7 46793 4855.23 4
 -4 9 7 46613.9 4393.31 3
 -4 9 7 43182.1 4352.36 2
 -4 9 8 18114 3273.47 4
 -4 9 8 25258.6 3423.06 2
 -4 9 9 11320.3 2219.59 2
 -4 9 9 8738.73 2222.79 4
 -4 9 10 37833.4 5188.27 4
 -4 9 10 49317.8 4847.58 2
 -4 9 11 44905.7 5971.02 4
 -4 9 12 361.931 761.376 4
 -4 9 13 7772.19 2710.43 4
 -4 10 -8 35397.9 3173.81 2
 -4 10 -7 3874.97 993.103 2
 -4 10 -6 70196 4802.63 2
 -4 10 -4 2828.59 953.3 3
 -4 10 -3 32214.5 3185.53 3
 -4 10 -2 145155 7137.04 3
 -4 10 -1 166228 7625.64 3
 -4 10 0 2505.58 864.068 3
 -4 10 1 61173.7 4362.98 3
 -4 10 1 62958.5 2932.85 4
 -4 10 2 86540.5 4354.98 4
 -4 10 2 92061.4 5563.04 3
 -4 10 3 350.219 443.51 3
 -4 10 3 283.774 231.151 4
 -4 10 4 9257.81 1831.05 3
 -4 10 4 5257.04 1292.2 4
 -4 10 5 144325 7984.2 4
 -4 10 5 151757 8717.49 2
 -4 10 5 155804 8316.1 3
 -4 10 6 26322.7 3451.86 2
 -4 10 6 20884.4 3052.08 4
 -4 10 6 21164.4 3019.12 3
 -4 10 7 2162.32 1049.62 3
 -4 10 7 4766.36 1517.22 2
 -4 10 7 2095.14 977.328 4
 -4 10 8 21183.8 3536.8 4
 -4 10 8 19664.1 3282.49 2
 -4 10 9 25408.6 4072.9 4
 -4 10 9 27572.9 3759.08 2
 -4 10 10 16495 2933.99 2
 -4 10 10 16304.4 3416.75 4
 -4 10 11 3453.77 1998.72 4
 -4 10 12 19423.7 4206.13 4
 -4 11 -8 1353.52 664.769 2
 -4 11 -7 38682.7 3633.05 2
 -4 11 -5 5468.38 1455.6 3
 -4 11 -4 48113.7 4253.66 3
 -4 11 -3 72533.3 5171.92 3
 -4 11 -2 35192.1 3477.87 3
 -4 11 -1 5834.83 1395.93 3
 -4 11 0 87217.7 5655.07 3
 -4 11 1 70307.4 5075.57 3
 -4 11 2 212.026 182.998 3
 -4 11 3 37816 3883.51 3
 -4 11 4 148489 8412.89 3
 -4 11 5 64134.6 5481.2 3
 -4 11 6 4029.93 1372.03 3
 -4 11 6 2609.34 1171.5 2
 -4 11 7 42997.5 4880.49 2
 -4 11 7 47631.3 5017.72 3
 -4 11 8 52871.9 5537.91 3
 -4 11 8 45442.2 5114.48 2
 -4 11 9 12518.2 2652.05 2
 -4 11 10 4062.72 1555.21 2
 -4 12 -8 18547.3 2647.38 2
 -4 12 -6 6080.61 1622.51 3
 -4 12 -5 58561.4 5050.86 3
 -4 12 -4 39565.7 4041.04 3
 -4 12 -3 8841.27 1859.89 3
 -4 12 -2 28350.2 3317.58 3
 -4 12 -1 133215 7588.36 3
 -4 12 0 83889 5903.33 3
 -4 12 1 16020.6 2510.33 3
 -4 12 2 32936.5 3760.25 3
 -4 12 3 87691.8 6516.6 3
 -4 12 4 86991 6663.31 3
 -4 12 5 16447.6 2926.64 3
 -4 12 6 43132.7 5070.08 2
 -4 12 6 48295.1 5231.14 3
 -4 12 7 50319 5604.52 2
 -4 12 7 55654 5800.7 3
 -4 12 8 13304.1 3293.43 2
 -4 12 9 2762.87 1281.68 2
 -4 13 -8 6903.99 1817.25 3
 -4 13 -7 3844.78 1393.19 3
 -4 13 -6 43424.8 4622.86 3
 -4 13 -5 25469.2 3427.57 3
 -4 13 -4 4415.22 1354.65 3
 -4 13 -3 11641.3 2228.56 3
 -4 13 -2 47742.9 4643.43 3
 -4 13 -1 75677.9 5942.84 3
 -4 13 0 1458.18 741.353 3
 -4 13 1 26149.4 3542.2 3
 -4 13 2 53196.6 5199.33 3
 -4 13 3 25632.8 3656.36 3
 -4 13 4 10375.6 2426.47 3
 -4 13 5 21693.7 3576.57 3
 -4 13 6 34867.8 4743.58 2
 -4 13 6 42933.1 5239.34 3
 -4 13 7 2353.94 1424.74 2
 -4 13 8 12798.6 3018.46 2
 -4 13 9 30166.2 4682.57 2
 -4 14 -10 17457.2 3343.62 3
 -4 14 -9 954.097 890.453 3
 -4 14 -8 8776.74 2256.56 3
 -4 14 -7 56287.9 5583.66 3
 -4 14 -6 39149.7 4544.92 3
 -4 14 -5 498.512 462.254 3
 -4 14 -4 39119.4 4490.07 3
 -4 14 -3 25315.6 3497.75 3
 -4 14 -2 26931.9 3639.56 3
 -4 14 -1 12424 2472.56 3
 -4 14 0 43245 4747.54 3
 -4 14 1 48592 5164.25 3
 -4 14 2 2148.39 1153.68 3
 -4 14 3 7874.15 2165.44 3
 -4 14 4 32916.6 4595.79 3
 -4 14 5 31938.7 4634.17 2
 -4 14 6 -157.889 847.216 2
 -4 14 7 27078.6 4411.76 2
 -4 15 -12 7745.15 2307.09 3
 -4 15 -11 14950.9 3248.26 3
 -4 15 -10 3964.2 1536.56 3
 -4 15 -9 2730.92 1272.24 3
 -4 15 -8 37183.7 4739.44 3
 -4 15 -7 39847 4844.4 3
 -4 15 -6 4247.03 1503.5 3
 -4 15 -5 19537.5 3288.69 3
 -4 15 -4 28587.9 3931.32 3
 -4 15 -3 7977.03 2039.06 3
 -4 15 -2 15042 2862.45 3
 -4 15 -1 53890.3 5627.71 3
 -4 15 0 39423.4 4868.95 3
 -4 15 1 1115.05 1075.89 3
 -4 15 2 16211.2 3267.91 3
 -4 15 3 38713.1 5171.99 3
 -4 15 5 1460.12 995.637 2
 -4 16 -11 681.537 989.484 3
 -4 16 -10 4745.77 1855.57 3
 -4 16 -9 16186.7 3292.48 3
 -4 16 -8 18769 3480.01 3
 -4 16 -7 1618.78 1018.9 3
 -4 16 -6 5961.08 1934.79 3
 -4 16 -5 9754.95 2414.25 3
 -4 16 -4 2131.82 1205.97 3
 -4 16 -3 5891.95 1929.6 3
 -4 16 -2 30265.9 4364.97 3
 -4 16 -1 27290.5 4176.5 3
 -4 16 0 1531.73 1155.8 3
 -4 16 1 10305.4 2707.47 3
 -4 17 -9 3609.57 1603.56 3
 -4 17 -8 -361.329 601.668 3
 -4 17 -7 10992.6 2807.34 3
 -4 17 -6 15334.2 3226.11 3
 -4 17 -5 67.3962 290.916 3
 -4 17 -4 8837.88 2460.06 3
 -4 17 -3 21299.4 3853.45 3
 -4 17 -2 15903 3351.86 3
 -4 17 -1 421.258 929.292 3
 -4 18 -7 12841.8 3215.09 3
 -4 18 -6 -537.504 1037.99 3
 -4 18 -5 9694.91 2748.62 3
 -4 18 -4 28917.7 4653.2 3
 -4 18 -3 17282.5 3688.04 3
 -4 18 -2 -633.131 760.817 3
 -3 -10 15 8240.21 2376.9 1
 -3 -10 16 872.842 497.017 1
 -3 -10 17 926.646 904.278 1
 -3 -9 11 2323.01 1141.45 4
 -3 -9 12 17000.7 2963.96 4
 -3 -9 13 26544.8 3966.85 1
 -3 -9 13 29191.1 4041.83 4
 -3 -9 14 17027.5 3308.54 1
 -3 -9 14 21689.3 3686.91 4
 -3 -9 15 3577.4 1607.69 1
 -3 -9 16 2720.35 1369.85 1
 -3 -9 17 16797.5 3508.97 1
 -3 -9 18 2324.6 1243.73 1
 -3 -8 11 24576.1 3344.38 4
 -3 -8 11 29900.5 3895.06 1
 -3 -8 12 57627.4 5497.54 4
 -3 -8 12 64802.3 5952 1
 -3 -8 13 27056.5 3962.22 4
 -3 -8 13 35278.6 4470.96 1
 -3 -8 14 2854.04 1385.41 4
 -3 -8 14 2113 1241.04 1
 -3 -8 15 14686.5 3037.29 1
 -3 -8 15 11985.8 2975.62 4
 -3 -8 16 24514.6 4363.61 4
 -3 -8 16 19513.6 3605.25 1
 -3 -8 17 5574.12 2186.28 4
 -3 -8 17 10465.5 2681.31 1
 -3 -8 18 -700.9 1203.49 4
 -3 -8 18 1626.08 1332.35 1
 -3 -7 10 9923.82 2005.21 4
 -3 -7 10 10199.5 2071.02 1
 -3 -7 11 59952.4 5361.42 4
 -3 -7 11 64141.1 5559.49 1
 -3 -7 12 32545.9 3991.2 1
 -3 -7 12 34675.7 4281.88 4
 -3 -7 13 1982.52 986.199 4
 -3 -7 13 62.1587 366.163 1
 -3 -7 14 13104.2 2721.81 1
 -3 -7 14 13667.3 2975.72 4
 -3 -7 15 28017.7 4015.26 1
 -3 -7 15 31405.9 4724.26 4
 -3 -7 16 3091.5 1437.21 4
 -3 -7 16 5226.23 1779.12 1
 -3 -7 17 1305.91 606.765 4
 -3 -7 17 2264.47 1167.6 1
 -3 -7 18 6755.11 2542.65 4
 -3 -7 18 6661.81 2081.95 1
 -3 -6 9 9269.49 1835.41 1
 -3 -6 10 44767.6 4287.45 1
 -3 -6 10 40397.6 4178.21 4
 -3 -6 11 17838.8 2770.99 1
 -3 -6 11 13803.9 2545.41 4
 -3 -6 12 4243.24 1496.92 4
 -3 -6 12 3599.21 1377.77 1
 -3 -6 13 13688.8 2807.48 4
 -3 -6 13 16325 2762.06 1
 -3 -6 14 28722.1 4476.08 4
 -3 -6 14 25477.7 3608.94 1
 -3 -6 15 6120.58 1844.05 1
 -3 -6 15 4598.71 1730.43 4
 -3 -6 16 15245.4 2890.69 1
 -3 -6 16 11597.2 3020.43 4
 -3 -6 17 17819.5 3926.04 4
 -3 -6 17 18637 3410.44 1
 -3 -6 18 5437.48 2468.46 4
 -3 -5 8 17507 2352.76 1
 -3 -5 9 73016.9 5112.44 1
 -3 -5 10 48769.4 4233.27 1
 -3 -5 10 38634 4087.38 4
 -3 -5 11 3096.96 1205.12 4
 -3 -5 11 2145.86 895.533 1
 -3 -5 12 41811.1 4764.53 4
 -3 -5 12 40734.7 4158.47 1
 -3 -5 13 20441 3569.33 4
 -3 -5 13 22109.8 3148.71 1
 -3 -5 14 2643.38 1594.01 4
 -3 -5 14 279.911 279.742 1
 -3 -5 15 10784.6 2357.87 1
 -3 -5 15 8972.56 2556.96 4
 -3 -5 16 32848.7 5343.63 4
 -3 -5 16 36719.1 4523.87 1
 -3 -5 17 14539.1 2919.04 1
 -3 -5 17 16970.9 3991.53 4
 -3 -5 18 1415.88 1408.76 4
 -3 -4 7 70763.8 4466.87 1
 -3 -4 8 120795 6236.59 1
 -3 -4 9 30876.6 3452.02 4
 -3 -4 9 30962.6 3090.19 1
 -3 -4 10 4821.14 1296.63 1
 -3 -4 10 5147.72 1510.45 4
 -3 -4 11 47949.9 4231.09 1
 -3 -4 11 53526.1 5128.09 4
 -3 -4 12 25744 3790.53 4
 -3 -4 12 26994.6 3263.73 1
 -3 -4 13 518.074 672.97 4
 -3 -4 13 4.1995 353.237 1
 -3 -4 14 11817.8 2312.41 1
 -3 -4 14 13622.9 3043.44 4
 -3 -4 15 41925.5 5787.28 4
 -3 -4 15 41237.4 4566.15 1
 -3 -4 16 17236.8 3937.64 4
 -3 -4 16 15305.7 2855.4 1
 -3 -4 17 2809.88 1708.43 4
 -3 -4 17 571.222 289.564 1
 -3 -4 18 4017.66 1922.65 4
 -3 -3 6 180976 7041.38 1
 -3 -3 7 69683.5 4139.09 1
 -3 -3 8 2956.53 830.076 1
 -3 -3 9 44227 4170.35 4
 -3 -3 9 44475.2 3554.66 1
 -3 -3 10 150564 8694.36 4
 -3 -3 10 147593 7278.19 1
 -3 -3 11 18715.7 3057.65 4
 -3 -3 11 21525.1 2708.55 1
 -3 -3 12 94.3132 298.184 1
 -3 -3 12 -619.006 961.757 4
 -3 -3 13 20067.3 2831.14 1
 -3 -3 13 26249.9 4081.35 4
 -3 -3 14 30027.3 3618.18 1
 -3 -3 14 27414.7 4449.11 4
 -3 -3 15 21026.3 3134.02 1
 -3 -3 15 23510.6 4251.96 4
 -3 -3 16 2564.28 1619.34 4
 -3 -3 16 1903.99 885.594 1
 -3 -3 17 16426.1 2979.71 1
 -3 -3 17 19339.7 4151.32 4
 -3 -3 18 2563.8 1753.26 4
 -3 -2 3 36561.7 2644.59 2
 -3 -2 4 212490 7122.45 2
 -3 -2 5 513474 13592.2 1
 -3 -2 5 507365 13497.8 2
 -3 -2 6 311149 9182.39 2
 -3 -2 6 310431 9591.15 1
 -3 -2 7 26134.5 1960.35 2
 -3 -2 7 12895.9 1659.37 1
 -3 -2 8 50220.6 4246.63 4
 -3 -2 8 54451.9 2890.88 2
 -3 -2 8 51022.8 3496.66 1
 -3 -2 9 275680 10078.7 1
 -3 -2 9 288403 12068.9 4
 -3 -2 9 286478 8396.29 2
 -3 -2 10 34419.9 3203.44 1
 -3 -2 10 29509.4 3740.49 4
 -3 -2 10 42160 2424.8 2
 -3 -2 11 468.153 291.922 1
 -3 -2 11 720.28 440.075 4
 -3 -2 11 1532.7 448.899 2
 -3 -2 12 34719.2 4484.95 4
 -3 -2 12 37214 3620.29 1
 -3 -2 13 13701.2 2272.49 1
 -3 -2 13 12783.3 2921.68 4
 -3 -2 14 1027.7 873.875 4
 -3 -2 14 2009.2 901.209 1
 -3 -2 15 3351.42 1600.06 4
 -3 -2 15 6033.38 1624.23 1
 -3 -2 16 20279.5 4192.83 4
 -3 -2 16 15743.3 2763.5 1
 -3 -2 17 5758.99 2239.4 4
 -3 -1 0 199550 6587.4 2
 -3 -1 1 173621 5928.21 2
 -3 -1 2 2624.45 592.751 2
 -3 -1 2 2409.27 520.828 3
 -3 -1 3 4484.81 752.267 2
 -3 -1 4 179804 6006.49 2
 -3 -1 5 267889 7868.8 1
 -3 -1 5 269581 7963.34 2
 -3 -1 6 17393.1 1515.87 2
 -3 -1 6 17292.9 1602.72 1
 -3 -1 7 33650.3 2487.32 1
 -3 -1 7 37590.1 2282.48 2
 -3 -1 8 285938 9432.75 1
 -3 -1 8 290781 11590.5 4
 -3 -1 8 278280 8268.58 2
 -3 -1 9 69652.5 4245.87 1
 -3 -1 9 72765.1 5623.73 4
 -3 -1 9 78887.4 3453.89 2
 -3 -1 10 11515.5 1187.94 2
 -3 -1 10 9354.52 2156.9 4
 -3 -1 11 49142.4 5194.69 4
 -3 -1 11 52653.7 2657.32 2
 -3 -1 12 21295.8 3603.57 4
 -3 -1 13 1473.11 973.527 4
 -3 -1 14 34383.7 5065.34 4
 -3 -1 15 31561.7 5084.76 4
 -3 -1 16 6521.25 2383.48 4
 -3 -1 17 753.348 1329.51 4
 -3 0 -2 35151.3 2097.56 2
 -3 0 -1 113934 4209.97 2
 -3 0 0 89162.2 3582.43 2
 -3 0 0 81562 3483.4 3
 -3 0 1 2644.73 469.141 3
 -3 0 1 2796.89 621.855 4
 -3 0 1 2733.27 560.091 2
 -3 0 2 3981.86 560.649 3
 -3 0 2 4502.81 718.706 2
 -3 0 3 564508 13971.3 2
 -3 0 4 65756.3 2561.5 1
 -3 0 4 66733.5 3052.6 2
 -3 0 5 1624.54 420.067 2
 -3 0 5 1462 367.486 1
 -3 0 6 32309.8 2129.95 1
 -3 0 6 38925.9 2319.67 2
 -3 0 7 163332 7847.39 4
 -3 0 7 157333 5442 2
 -3 0 8 9208.47 1830.11 4
 -3 0 8 8101.91 1011.93 2
 -3 0 9 60523.7 5252.28 4
 -3 0 9 58614 2976.94 2
 -3 0 10 110363 7931.11 4
 -3 0 10 120947 4574.54 2
 -3 0 11 61507.6 2990.97 2
 -3 0 11 62035.4 6067.09 4
 -3 0 12 44.3529 414.317 4
 -3 0 13 38462.4 5391.69 4
 -3 0 14 44683.5 6037.01 4
 -3 0 15 6034.07 2224.38 4
 -3 0 16 9586.13 3354.04 4
 -3 0 17 18785.9 4332.85 4
 -3 1 -3 143013 4567.18 2
 -3 1 -2 533048 12907.2 2
 -3 1 -1 19012.9 1390.47 2
 -3 1 -1 20601.9 1647.5 3
 -3 1 0 31264.2 1911.3 3
 -3 1 0 41042.7 3590.39 4
 -3 1 1 236450 5829.5 3
 -3 1 1 215509 6565.92 2
 -3 1 2 341842 9157.02 2
 -3 1 3 182986 5839.58 2
 -3 1 4 48588.5 2593.71 2
 -3 1 4 52333.5 1943.89 1
 -3 1 5 35748.7 2208.89 2
 -3 1 6 252655 7621.22 2
 -3 1 6 236479 9619.28 4
 -3 1 7 219.879 389.556 4
 -3 1 7 215.896 197.479 2
 -3 1 8 187648 6377.79 2
 -3 1 8 199928 9591.84 4
 -3 1 9 317433 9334.69 2
 -3 1 9 306156 13646.6 4
 -3 1 10 57345.8 5570.33 4
 -3 1 10 57696.7 3105.25 2
 -3 1 11 2494.43 568.95 2
 -3 1 11 2524.21 1185.96 4
 -3 1 12 43719.4 5962.61 4
 -3 1 13 46673 5865.99 4
 -3 1 14 -180.531 1121.5 4
 -3 1 15 1861.95 1064.83 4
 -3 1 16 22120.4 4582.01 4
 -3 2 -4 165417 4789.51 2
 -3 2 -2 7664.56 810.997 2
 -3 2 -1 17853.8 1326.48 2
 -3 2 -1 21158.8 1794.33 4
 -3 2 0 343376 9295.75 2
 -3 2 0 375076 9734.91 4
 -3 2 0 352546 8704.45 3
 -3 2 1 23066.2 1637.31 2
 -3 2 2 52843.5 2675.75 2
 -3 2 3 224711 6969.07 2
 -3 2 4 241417 7450.29 2
 -3 2 5 106282 5496.62 4
 -3 2 5 108806 4448 2
 -3 2 6 2786.91 913.453 4
 -3 2 6 3925.89 755.589 2
 -3 2 7 152886 5803.79 2
 -3 2 7 166641 8305.67 4
 -3 2 8 278082 8727.63 2
 -3 2 8 280625 12216.5 4
 -3 2 9 40659.9 2748.85 2
 -3 2 9 30510.7 3940.55 4
 -3 2 10 2027.03 1119.65 4
 -3 2 10 4532.81 870.521 2
 -3 2 11 61887.4 3422.64 2
 -3 2 11 49990 5684.71 4
 -3 2 12 50745.4 5965.56 4
 -3 2 13 230.184 915.481 4
 -3 2 14 3220.64 1642.26 4
 -3 2 15 22654.8 4443.66 4
 -3 2 16 9554.91 3083.58 4
 -3 3 -6 4000.89 398.996 2
 -3 3 -5 77486.4 2633.29 2
 -3 3 -4 437382 10497.2 2
 -3 3 -3 33344.6 1798.38 2
 -3 3 -2 64860.9 2833.47 2
 -3 3 -2 65002.4 3368.74 4
 -3 3 -1 231013 7013.35 4
 -3 3 -1 225670 6795.8 2
 -3 3 0 434819 11560.9 2
 -3 3 0 451140 11014.6 4
 -3 3 1 11350.3 844.098 1
 -3 3 1 11288.8 1220.88 2
 -3 3 2 151596 5469.72 2
 -3 3 2 155345 4193.59 1
 -3 3 3 373851 10532.3 2
 -3 3 4 55118.7 3559.13 4
 -3 3 4 53844.5 3036.96 2
 -3 3 5 1372.47 485.81 2
 -3 3 5 860.053 422.423 4
 -3 3 6 280103 8767.81 2
 -3 3 6 254142 10565.9 4
 -3 3 7 117636 7104.01 4
 -3 3 7 113140 5023.21 2
 -3 3 8 7174.84 1736.49 4
 -3 3 8 5859.25 1034.44 2
 -3 3 9 21268 2066.56 2
 -3 3 9 14866 2785.5 4
 -3 3 10 46685.2 3142.2 2
 -3 3 10 40350.4 4891.17 4
 -3 3 11 44185.7 5301.28 4
 -3 3 11 37481 2810 2
 -3 3 12 15287.3 3326.92 4
 -3 3 13 7807.67 2345.32 4
 -3 3 14 13875.4 3439.12 4
 -3 3 15 11960.6 3432.71 4
 -3 3 16 1125.82 1326.91 4
 -3 4 -6 88765.6 2859.85 2
 -3 4 -5 131148 4161.57 2
 -3 4 -4 38057.6 2347.49 2
 -3 4 -3 372449 10049.2 2
 -3 4 -3 381259 10913.7 4
 -3 4 -2 63014.8 3057.81 4
 -3 4 -2 64863.5 3118.62 2
 -3 4 -1 161597 5077.49 4
 -3 4 -1 150707 5510.01 2
 -3 4 0 100.535 85.2804 2
 -3 4 0 116.814 97.2546 4
 -3 4 0 -30.1273 78.3002 1
 -3 4 1 245472 6202.71 3
 -3 4 1 233920 6733.93 1
 -3 4 1 239534 7795.74 2
 -3 4 2 177645 6516.66 2
 -3 4 2 188037 5253.03 3
 -3 4 3 19999.4 1892.88 4
 -3 4 3 17777.2 1779 2
 -3 4 3 19432.8 1440.56 3
 -3 4 4 27627.6 2562.35 4
 -3 4 4 23935.8 1855.04 3
 -3 4 4 26566.7 2232.97 2
 -3 4 5 94470.4 5585.69 4
 -3 4 5 93968.3 4578.68 2
 -3 4 6 57990.2 4692.36 4
 -3 4 6 63884.6 3728.28 2
 -3 4 7 13037.6 2302.78 4
 -3 4 7 14517.9 1738.15 2
 -3 4 8 34169.8 4075.89 4
 -3 4 8 37365.1 2893.71 2
 -3 4 9 124164 5804.54 2
 -3 4 9 128538 8681.63 4
 -3 4 10 9846.21 1490.13 2
 -3 4 10 18053 3291.82 4
 -3 4 11 -43.1718 428.588 4
 -3 4 11 260.304 392.155 2
 -3 4 12 53759.9 6364.83 4
 -3 4 13 36086.9 5349.49 4
 -3 4 14 8129.98 2502.45 4
 -3 4 15 6782.03 2673.81 4
 -3 5 -7 107625 3447.79 2
 -3 5 -6 154235 4975.8 2
 -3 5 -5 9685.71 1080.62 2
 -3 5 -4 522821 13530.6 2
 -3 5 -3 645484 15839.6 4
 -3 5 -3 605093 15814.8 2
 -3 5 -2 188785 5524.95 4
 -3 5 -2 173710 6422.63 2
 -3 5 -1 1150.76 469.843 2
 -3 5 -1 1501.11 324.781 4
 -3 5 0 113051 5013.71 2
 -3 5 0 117013 4190.77 3
 -3 5 1 141515 4817.09 3
 -3 5 1 146744 6003.7 2
 -3 5 1 159252 4933.31 4
 -3 5 2 43771.7 3036.27 2
 -3 5 2 42523.1 2670.35 4
 -3 5 2 46454.1 2422.82 3
 -3 5 3 19106.1 2011.73 2
 -3 5 3 20997.6 2084.17 4
 -3 5 3 20612.3 1715.33 3
 -3 5 4 106477 5696.2 4
 -3 5 4 100659 4638.6 3
 -3 5 4 107210 5206.74 2
 -3 5 5 84404.4 5418.42 4
 -3 5 5 81655 4369.11 3
 -3 5 5 79953.5 4519.44 2
 -3 5 6 2494.32 829.356 2
 -3 5 6 1562.75 808.456 4
 -3 5 7 31430.5 2796.85 2
 -3 5 7 38930.3 4127.52 4
 -3 5 8 141970 6615.29 2
 -3 5 8 155082 9248.14 4
 -3 5 9 16076.1 2987.25 4
 -3 5 9 16754 2065.06 2
 -3 5 10 8127.91 1475.37 2
 -3 5 10 8379.91 2169.44 4
 -3 5 11 102318 5618.65 2
 -3 5 11 96159.7 8307.94 4
 -3 5 12 76299.1 7716.17 4
 -3 5 13 25300 4543.65 4
 -3 5 14 10109.5 3038.29 4
 -3 5 15 26323.3 5143.83 4
 -3 6 -8 48055.7 2242.34 2
 -3 6 -7 49580.7 2615.66 2
 -3 6 -6 3572.41 697.877 2
 -3 6 -5 36460.7 2488.86 2
 -3 6 -4 213584 7317.25 2
 -3 6 -4 186850 6949.01 4
 -3 6 -3 263622 7605.64 4
 -3 6 -2 20574 1202.29 4
 -3 6 -1 50139.9 2934.07 3
 -3 6 0 127732 4806.51 3
 -3 6 0 110909 3472.09 4
 -3 6 1 37185.4 2363.67 3
 -3 6 1 35194.2 2107.11 4
 -3 6 2 93661.1 4387.02 4
 -3 6 2 88572.9 4132.57 3
 -3 6 3 154515 6621.93 4
 -3 6 3 154571 6056.86 3
 -3 6 4 109986 5902.85 4
 -3 6 4 106660 5116.43 3
 -3 6 5 17195.3 3305.79 4
 -3 6 5 16641.5 2289.4 3
 -3 6 6 84954.5 5975.56 4
 -3 6 6 76844.1 4856.22 3
 -3 6 6 81373.3 4979.85 2
 -3 6 7 103831 7082.24 4
 -3 6 7 93264 5515.25 2
 -3 6 8 22057.6 3368.89 4
 -3 6 8 26103.9 2789.98 2
 -3 6 9 16269.9 2235.09 2
 -3 6 9 32394.6 4644.8 4
 -3 6 10 66653.4 6651.04 4
 -3 6 10 65985 4670.46 2
 -3 6 11 88533.3 8059.19 4
 -3 6 12 20844.2 4082.02 4
 -3 6 13 12210.8 3280.91 4
 -3 6 14 28804.4 5183.27 4
 -3 7 -8 21096.9 1784.54 2
 -3 7 -7 8731.66 1203.6 2
 -3 7 -6 64400.7 3642.14 2
 -3 7 -4 3059.53 620.478 4
 -3 7 -2 131605 5805.88 3
 -3 7 -1 113993 5120 3
 -3 7 0 1126.19 440.147 3
 -3 7 0 1399.61 260.404 4
 -3 7 1 105918 4823.31 3
 -3 7 1 97964.8 3865.59 4
 -3 7 2 189004 6746.36 4
 -3 7 2 174875 6923.49 3
 -3 7 3 63618.2 3987.68 4
 -3 7 3 65294.8 3984.95 3
 -3 7 4 2981.1 859.883 3
 -3 7 4 2599.9 847.336 4
 -3 7 5 94650.9 6005.2 4
 -3 7 5 91827 5497.11 3
 -3 7 6 112290 6312.75 2
 -3 7 6 104466 6862.41 4
 -3 7 6 113010 6349.92 3
 -3 7 7 2452.08 894.13 2
 -3 7 7 2004.51 863.97 3
 -3 7 7 3626.07 1357.96 4
 -3 7 8 42337.2 4873.82 4
 -3 7 8 38245.4 3716.27 2
 -3 7 9 42053.6 5036.87 4
 -3 7 9 43186.5 3958.43 2
 -3 7 10 32949.8 4707.28 4
 -3 7 10 32464.2 3456.18 2
 -3 7 11 1766.1 1216.86 4
 -3 7 12 13824.4 3364.97 4
 -3 7 13 23282.3 4596.81 4
 -3 7 14 -498.268 506.395 4
 -3 8 -8 10503.6 1458.46 2
 -3 8 -7 67932.5 3990.72 2
 -3 8 -3 287124 10306.2 3
 -3 8 -2 117745 5764.36 3
 -3 8 -1 17800.3 2009.08 3
 -3 8 0 306218 10236.2 3
 -3 8 0 302263 7295.23 4
 -3 8 1 271358 9377.29 3
 -3 8 1 251963 7624.38 4
 -3 8 2 50433.6 3230.07 4
 -3 8 2 63011.5 4038.96 3
 -3 8 3 39522.2 3174.47 4
 -3 8 3 46726.8 3609.17 3
 -3 8 4 65072.1 4607.7 4
 -3 8 4 68937.8 4669.36 3
 -3 8 5 133417 7482.66 4
 -3 8 5 144559 7412.37 3
 -3 8 6 -5.45933 208.964 3
 -3 8 6 471.306 370.957 4
 -3 8 7 34932.7 3705.42 2
 -3 8 7 30176.9 3847.65 4
 -3 8 7 37758.9 3925.79 3
 -3 8 8 45384.3 5064.22 4
 -3 8 8 43122.6 4221.95 2
 -3 8 9 7030.19 1663.45 2
 -3 8 9 3735.9 1551.73 4
 -3 8 10 -27.2754 473.086 2
 -3 8 10 -291.796 320.213 4
 -3 8 11 36808.3 5421.03 4
 -3 8 12 45087.9 6426.87 4
 -3 8 13 1639.68 1231.37 4
 -3 9 -9 7828.92 1303.59 2
 -3 9 -4 173608 8063.17 3
 -3 9 -3 87904.7 5296.57 3
 -3 9 -2 197.728 157.656 3
 -3 9 -1 164344 7377.35 3
 -3 9 0 243716 9114.53 3
 -3 9 0 211875 5537.53 4
 -3 9 1 39583.2 2440.75 4
 -3 9 1 39384.6 3354.04 3
 -3 9 2 36990.3 2888.35 4
 -3 9 2 42512.1 3602.26 3
 -3 9 3 61170.4 4179.09 4
 -3 9 3 56060.7 4358.81 3
 -3 9 4 65155.5 4754.82 4
 -3 9 4 66858.4 4972.08 3
 -3 9 5 7772.65 2632.67 4
 -3 9 5 12563.7 2494.77 3
 -3 9 6 25494.5 3256.3 3
 -3 9 6 20562.7 3081.04 4
 -3 9 7 30563.9 3688.7 2
 -3 9 7 29793.4 3975.76 4
 -3 9 7 33924.7 3930.19 3
 -3 9 8 19292.2 3195.21 2
 -3 9 8 20742.1 3779.85 4
 -3 9 9 677.428 336.472 4
 -3 9 9 491.011 351.793 2
 -3 9 10 31314.9 4867.59 4
 -3 9 10 35097.2 4175.97 2
 -3 9 11 42406.1 6029.98 4
 -3 9 12 5995.23 2223.67 4
 -3 9 13 2665.89 1769.28 4
 -3 10 -5 62404.4 4897.58 3
 -3 10 -4 10625.6 1876.93 3
 -3 10 -3 19985.3 2533.84 3
 -3 10 -2 96371.8 5809.69 3
 -3 10 -1 103197 5982.29 3
 -3 10 0 7422.44 1518.29 3
 -3 10 1 30410.8 3220.54 3
 -3 10 1 33330.5 2324.34 4
 -3 10 2 30478.8 2640.67 4
 -3 10 2 32033.4 3376.87 3
 -3 10 3 27291.8 2819.41 4
 -3 10 3 26385.6 3152.73 3
 -3 10 4 6230 1581.63 3
 -3 10 4 7458.63 1669.62 4
 -3 10 5 92366 6463.89 4
 -3 10 5 97509.7 6824.23 3
 -3 10 6 33387.1 4060.68 4
 -3 10 6 42944.4 4563.95 3
 -3 10 7 7240.38 1968.6 3
 -3 10 7 5977.73 1692.4 2
 -3 10 7 3158.28 1352.31 4
 -3 10 8 5227.26 1731.21 2
 -3 10 8 3962.47 1519.1 4
 -3 10 8 6353.15 2062.51 3
 -3 10 9 23685.4 4150.8 4
 -3 10 9 33585.2 4292.11 2
 -3 10 10 23389.6 4295.03 4
 -3 10 10 30152.3 4128.94 2
 -3 10 11 441.092 919.501 4
 -3 10 12 8068.53 2762.33 4
 -3 11 -6 38075.1 4053.02 3
 -3 11 -5 1833.72 835.982 3
 -3 11 -4 8407.05 1780.94 3
 -3 11 -3 78788.7 5580.8 3
 -3 11 -2 56967.4 4637.91 3
 -3 11 -1 1480.67 851.392 3
 -3 11 0 48735.5 4323.93 3
 -3 11 1 52751.7 4614.3 3
 -3 11 2 21503.3 2982.38 3
 -3 11 3 441.939 293.056 3
 -3 11 4 127860 8107.8 3
 -3 11 5 118196 8047.54 3
 -3 11 6 11167 2459.78 3
 -3 11 7 15389.8 2984.28 3
 -3 11 8 50433.4 5459.11 2
 -3 11 8 41908 5221.1 3
 -3 11 9 32640.9 4385.74 2
 -3 12 -8 26790.9 3687.31 3
 -3 12 -7 39126.7 4345.21 3
 -3 12 -6 7171.34 1819.18 3
 -3 12 -5 15271 2566.9 3
 -3 12 -4 30163.3 3650.45 3
 -3 12 -3 23189.6 3105.2 3
 -3 12 -2 4906.6 1429.07 3
 -3 12 -1 69708.2 5547.26 3
 -3 12 0 75405.6 5857.96 3
 -3 12 1 28026 3597.26 3
 -3 12 2 17321.8 2890.48 3
 -3 12 3 98370.2 7288.2 3
 -3 12 4 134798 8898.42 3
 -3 12 5 20188.1 3368.69 3
 -3 12 6 17673.8 3325.38 3
 -3 12 7 48416.3 5510.38 2
 -3 12 7 38328.3 5059.81 3
 -3 12 8 36451.7 4936.05 2
 -3 12 8 28141.8 4501.69 3
 -3 12 9 -724.768 1309.57 2
 -3 13 -9 18993.2 3231.73 3
 -3 13 -8 25487.4 3740.41 3
 -3 13 -7 3742.19 1368.22 3
 -3 13 -6 48119.7 4946.81 3
 -3 13 -5 37632.7 4299.96 3
 -3 13 -4 12214.9 2373.28 3
 -3 13 -3 10489.4 2182.02 3
 -3 13 -2 64673.7 5639.11 3
 -3 13 -1 53423 5111.41 3
 -3 13 0 4692.06 1505.48 3
 -3 13 1 16881.7 2971.79 3
 -3 13 2 42053 4847.95 3
 -3 13 3 42830 5001.42 3
 -3 13 4 3662.54 1561.59 3
 -3 13 5 18510.7 3498 3
 -3 13 6 31128.1 4661.05 3
 -3 13 7 10039.9 2681.02 3
 -3 13 7 7653.03 2341.45 2
 -3 13 8 4184.84 1791.11 2
 -3 13 9 32150.1 4998.91 2
 -3 14 -11 5705.52 1956.31 3
 -3 14 -10 11570.6 2667.49 3
 -3 14 -9 13755.6 2881.8 3
 -3 14 -8 -187.73 660.56 3
 -3 14 -7 38523.1 4679.8 3
 -3 14 -6 37195.5 4523.2 3
 -3 14 -5 3257.52 1262.04 3
 -3 14 -4 10602.8 2319.24 3
 -3 14 -3 34720.4 4298.84 3
 -3 14 -2 29927.2 4020.28 3
 -3 14 -1 3701.76 1380.49 3
 -3 14 0 13604.4 2793.38 3
 -3 14 1 22258.7 3621.87 3
 -3 14 2 5142.37 1755.09 3
 -3 14 3 6639.27 2101.3 3
 -3 14 4 19619 3669.25 3
 -3 14 5 33884.3 5021.94 3
 -3 14 6 567.149 498.468 3
 -3 14 7 12201.7 3024.88 2
 -3 15 -12 8123.6 2463.74 3
 -3 15 -11 10619.7 2741.76 3
 -3 15 -10 8666.8 2392.51 3
 -3 15 -9 3494.68 1548.24 3
 -3 15 -8 35728.3 4739.25 3
 -3 15 -7 48120.7 5479.57 3
 -3 15 -6 10625 2512 3
 -3 15 -5 2012.61 1209.99 3
 -3 15 -4 23168.5 3649.02 3
 -3 15 -3 21675.5 3547.39 3
 -3 15 -2 2152.18 1332.95 3
 -3 15 -1 31704 4442.87 3
 -3 15 0 33431.8 4664.75 3
 -3 15 1 3434.99 1592.38 3
 -3 15 2 6245.67 2087.8 3
 -3 15 3 15857 3433.18 3
 -3 15 4 31426.6 5021.94 3
 -3 16 -10 300.458 479.496 3
 -3 16 -9 21408.4 3854.42 3
 -3 16 -8 27374.3 4255.46 3
 -3 16 -7 2327.8 1214.1 3
 -3 16 -6 5733.49 1962.33 3
 -3 16 -5 19389 3586.38 3
 -3 16 -4 11030.1 2646.54 3
 -3 16 -3 1749.23 1147.75 3
 -3 16 -2 24891.3 4082.44 3
 -3 16 -1 28466.9 4538.83 3
 -3 16 0 2380.66 1560.15 3
 -3 16 1 2729.79 1365.92 3
 -3 16 2 17021.9 3660.17 3
 -3 16 3 24887.8 4562.15 3
 -3 17 -9 7931.44 2488.09 3
 -3 17 -8 795.521 937.85 3
 -3 17 -7 16188.2 3398.01 3
 -3 17 -6 19365.2 3726.78 3
 -3 17 -5 -589.029 756.538 3
 -3 17 -4 2040.7 1326.44 3
 -3 17 -3 33436.1 4953.41 3
 -3 17 -2 16838.8 3539.21 3
 -3 17 -1 2276.3 1375.6 3
 -3 17 0 8531.6 2560.83 3
 -3 17 1 13856.1 3456.8 3
 -2 -11 14 1890.02 1225.02 1
 -2 -11 15 692.47 575.409 1
 -2 -11 16 2917.34 1647.16 1
 -2 -10 12 19538.2 3449.86 1
 -2 -10 13 438.004 670.49 1
 -2 -10 14 11441.9 2763.29 1
 -2 -10 15 10876.7 2798.53 1
 -2 -10 16 3048.69 1535.46 1
 -2 -10 17 501.077 379.878 1
 -2 -9 9 10559.9 1850.96 4
 -2 -9 10 58276.9 4802.99 4
 -2 -9 11 7841.58 1805.71 4
 -2 -9 11 4678.31 1592.04 1
 -2 -9 12 3456.53 1540.66 1
 -2 -9 12 2188.24 961.147 4
 -2 -9 13 22116.9 3674.73 1
 -2 -9 13 23138.3 3588.29 4
 -2 -9 14 25520.7 3946.38 4
 -2 -9 14 22683.1 3779.44 1
 -2 -9 15 4517.07 1634.46 1
 -2 -9 16 3732.49 1682.62 1
 -2 -9 17 15877.6 3469.07 1
 -2 -8 9 83431.9 5582.38 4
 -2 -8 9 88396.6 6466.75 1
 -2 -8 10 13124.5 2251.2 4
 -2 -8 10 10597.9 2289.78 1
 -2 -8 11 8066.29 1851.04 4
 -2 -8 11 7672.91 1930.82 1
 -2 -8 12 37620 4395.37 4
 -2 -8 12 37114.5 4464.28 1
 -2 -8 13 40139.2 4782.92 4
 -2 -8 13 44733 5029.61 1
 -2 -8 14 3337.38 1502.15 4
 -2 -8 14 1600.09 697.726 1
 -2 -8 15 4415.3 1674.54 4
 -2 -8 15 4716.98 1747.51 1
 -2 -8 16 14838.7 3266.65 4
 -2 -8 16 18806.5 3461.52 1
 -2 -8 17 6213.76 2265.49 4
 -2 -8 17 4854.56 1994.4 1
 -2 -8 18 1532.87 1154.66 1
 -2 -8 18 985.899 1271.65 4
 -2 -7 8 87119.6 5975.41 1
 -2 -7 9 16542.6 2392.47 4
 -2 -7 9 18215.8 2715.6 1
 -2 -7 10 3908.75 1221.74 4
 -2 -7 10 4805.19 1467.81 1
 -2 -7 11 27499.6 3612.14 1
 -2 -7 11 27865.4 3560.34 4
 -2 -7 12 31438.7 4020.77 4
 -2 -7 12 35083.3 4141.64 1
 -2 -7 13 5730.03 1874.15 4
 -2 -7 13 6559.96 1850.78 1
 -2 -7 14 5154.74 1627.22 1
 -2 -7 14 7677.8 2261.05 4
 -2 -7 15 26846 4432.47 4
 -2 -7 15 28905.2 4119.36 1
 -2 -7 16 3903.25 1635.32 1
 -2 -7 16 6928.43 2315.46 4
 -2 -7 17 -1966.68 1137.26 1
 -2 -7 17 848.528 1135.69 4
 -2 -7 18 5664.86 1950.9 1
 -2 -7 18 4481.08 2110.19 4
 -2 -6 7 229435 9759.73 1
 -2 -6 8 70609.2 5113.54 1
 -2 -6 9 459.36 426.205 4
 -2 -6 9 307.054 392.936 1
 -2 -6 10 75777.1 5731.96 4
 -2 -6 10 82502.4 5821.46 1
 -2 -6 11 19933.8 3142.74 4
 -2 -6 11 17474.4 2716.38 1
 -2 -6 12 348.452 268.912 1
 -2 -6 12 31.8292 598.966 4
 -2 -6 13 11116.1 2296.01 1
 -2 -6 13 9428.18 2410.47 4
 -2 -6 14 41402.6 5257.83 4
 -2 -6 14 38950.3 4550.33 1
 -2 -6 15 6834.61 1962.53 1
 -2 -6 15 6595.68 2266.05 4
 -2 -6 16 2627.72 1401.63 4
 -2 -6 16 1388.08 702.882 1
 -2 -6 17 6324.68 2021.3 1
 -2 -6 17 9897.27 2904.3 4
 -2 -6 18 12357.6 2909.04 1
 -2 -6 18 15197.3 3816.7 4
 -2 -5 6 101376 5575.96 1
 -2 -5 7 24804.5 2702.2 1
 -2 -5 8 6313.26 1366.17 4
 -2 -5 8 8818.21 1633.01 1
 -2 -5 9 80304.5 5623.47 4
 -2 -5 9 87186.9 5585.16 1
 -2 -5 10 33331.3 3493.11 1
 -2 -5 10 26973.7 3379.79 4
 -2 -5 11 -285.625 445.933 4
 -2 -5 11 44.4959 265.3 1
 -2 -5 12 22751.7 3509.86 4
 -2 -5 12 24470.7 3224.89 1
 -2 -5 13 42145.7 5212.36 4
 -2 -5 13 46743.3 4703.23 1
 -2 -5 14 4845.32 1946.31 4
 -2 -5 14 5168.27 1537.26 1
 -2 -5 15 12476.7 3041.25 4
 -2 -5 15 11738.1 2482.34 1
 -2 -5 16 17527.5 3812.23 4
 -2 -5 16 15548.7 3032.67 1
 -2 -5 17 12443.8 3578.17 4
 -2 -5 17 14214.6 2939.93 1
 -2 -5 18 2180.18 1473.38 4
 -2 -5 18 -497.617 875.007 1
 -2 -4 5 2351.45 736.054 1
 -2 -4 6 449.162 334.885 1
 -2 -4 7 117384 5892.59 1
 -2 -4 8 93236.3 5735.63 4
 -2 -4 8 90633.6 5295.39 1
 -2 -4 9 6278.32 1366.21 1
 -2 -4 9 5292.51 1433.03 4
 -2 -4 10 20647.5 2991.28 4
 -2 -4 10 18564.2 2506.58 1
 -2 -4 11 36162.4 4227.41 4
 -2 -4 11 43216.8 4031.64 1
 -2 -4 12 42097.2 4148.78 1
 -2 -4 12 43034.2 4914.97 4
 -2 -4 13 3300.11 1142.64 1
 -2 -4 13 6988.51 1963.88 4
 -2 -4 14 4862.86 1784.27 4
 -2 -4 14 3946.66 1448 1
 -2 -4 15 52172.5 5208.87 1
 -2 -4 15 53248.5 6399.02 4
 -2 -4 16 9855.73 2367.33 1
 -2 -4 16 10422.9 2969.81 4
 -2 -4 17 1182.03 1281.49 4
 -2 -4 17 521.51 599.297 1
 -2 -4 18 5406.39 2220.26 4
 -2 -4 18 3361.01 1444.81 1
 -2 -3 2 104352 4362.43 4
 -2 -3 5 49327.9 3132.08 1
 -2 -3 6 98722 4820.05 1
 -2 -3 7 125650 6478.79 4
 -2 -3 7 133697 6046.83 1
 -2 -3 8 24309.8 2875.89 4
 -2 -3 8 23596.8 2471.45 1
 -2 -3 9 16586.6 2165.17 1
 -2 -3 9 14649.6 2383.91 4
 -2 -3 10 128888 6883.7 1
 -2 -3 10 141221 8495.61 4
 -2 -3 11 58700.5 4550.8 1
 -2 -3 11 56876.6 5487.09 4
 -2 -3 12 224.357 520.658 4
 -2 -3 12 2328.11 908.025 1
 -2 -3 13 12469.3 2240.71 1
 -2 -3 13 17824.2 3407.2 4
 -2 -3 14 38868.3 4203.11 1
 -2 -3 14 30596.9 4729.25 4
 -2 -3 15 28391.1 3711.19 1
 -2 -3 15 22977.4 4372.51 4
 -2 -3 16 -671.193 774.735 4
 -2 -3 16 -155.746 693.998 1
 -2 -3 17 4476.7 1617.37 1
 -2 -3 17 7900.93 2642.79 4
 -2 -2 1 151045 5520.05 4
 -2 -2 4 85197.2 3779.94 1
 -2 -2 4 92466 3695.62 2
 -2 -2 5 103189 3928.77 2
 -2 -2 5 99590.1 4357.65 1
 -2 -2 6 201802 6153.6 2
 -2 -2 6 200589 7195.89 1
 -2 -2 7 6038.47 1357.04 4
 -2 -2 7 6198 1159.34 1
 -2 -2 8 21973.4 2282.66 1
 -2 -2 8 23357 2846.47 4
 -2 -2 8 24420.1 1593.02 2
 -2 -2 9 232756 6580.96 2
 -2 -2 9 216656 8794.46 1
 -2 -2 9 243192 10920.2 4
 -2 -2 10 65851.7 5666.77 4
 -2 -2 11 14850.1 2787.37 4
 -2 -2 12 24883.9 3862.02 4
 -2 -2 13 19613.1 3613.11 4
 -2 -2 14 19703.8 3858.05 4
 -2 -2 15 3348.27 1666.52 4
 -2 -2 16 20056.6 4221.96 4
 -2 -2 17 5211.03 1776.49 1
 -2 -2 17 8279.64 2889.35 4
 -2 -1 0 279180 7851.35 3
 -2 -1 0 281132 8491.94 4
 -2 -1 1 650831 15305.7 3
 -2 -1 1 641995 15462.6 2
 -2 -1 1 669177 15737 4
 -2 -1 2 225691 6410.77 2
 -2 -1 2 216512 6317.71 3
 -2 -1 3 258306 6886.57 1
 -2 -1 3 241837 6948.12 2
 -2 -1 4 107613 3767.95 2
 -2 -1 4 103661 3869.88 1
 -2 -1 5 130196 4817.9 1
 -2 -1 5 127301 4262.97 2
 -2 -1 6 -144.366 251.338 4
 -2 -1 6 116.955 167.28 1
 -2 -1 6 375.351 202.155 2
 -2 -1 7 36854.9 3429.02 4
 -2 -1 7 36074 1945.5 2
 -2 -1 8 342576 8869.96 2
 -2 -1 8 342987 13248.4 4
 -2 -1 9 103718 7018.46 4
 -2 -1 9 103302 3608.67 2
 -2 -1 10 4507.41 1473.62 4
 -2 -1 10 8909.82 887.451 2
 -2 -1 11 49199.6 5340.23 4
 -2 -1 12 36435.8 4801.6 4
 -2 -1 13 16338.6 3390.64 4
 -2 -1 14 20675.1 4009.26 4
 -2 -1 15 61706.6 7182.13 4
 -2 -1 16 12474.3 3402.1 4
 -2 -1 17 -968.893 660.943 4
 -2 0 -1 127753 4037.16 2
 -2 0 -1 128775 5032.25 4
 -2 0 -1 134399 4662.96 3
 -2 0 0 14582.1 1062.11 2
 -2 0 0 10894.8 937.174 3
 -2 0 0 12651.4 1211.72 4
 -2 0 1 138951 3913 3
 -2 0 2 8986.09 825.933 2
 -2 0 3 145409 4236.45 1
 -2 0 3 171358 5153.81 2
 -2 0 4 84587.1 3132.32 2
 -2 0 5 1813.64 395.42 2
 -2 0 5 2006.92 657.912 4
 -2 0 6 22321.7 2498.5 4
 -2 0 6 22291 1482.15 2
 -2 0 7 96675.8 5933.26 4
 -2 0 7 94630.1 3509.96 2
 -2 0 8 48026.7 4466.84 4
 -2 0 8 46186.2 2261.49 2
 -2 0 9 32320.3 3872.11 4
 -2 0 9 34986.1 1922.49 2
 -2 0 10 117975 8191.58 4
 -2 0 10 117422 4028.35 2
 -2 0 11 47461.8 5357.86 4
 -2 0 12 2432.85 1200.28 4
 -2 0 13 31284.7 4903.74 4
 -2 0 14 54776.5 6534.5 4
 -2 0 15 18876.4 3994.34 4
 -2 0 16 4182.11 2477.7 4
 -2 1 -3 1313.28 267.592 2
 -2 1 -2 469545 10886.5 2
 -2 1 -2 482975 12830.4 4
 -2 1 -2 468026 12403.9 3
 -2 1 -1 178003 5816.76 4
 -2 1 -1 188793 5537.96 3
 -2 1 -1 176386 4854.82 2
 -2 1 0 60287.4 2161.43 3
 -2 1 2 75205.9 2849.13 2
 -2 1 3 107286 3731.66 2
 -2 1 4 102633 4813.17 4
 -2 1 4 99920 3644.39 2
 -2 1 5 118961 4207.53 2
 -2 1 5 121720 5887.97 4
 -2 1 6 193074 5955.36 2
 -2 1 6 165128 7901.26 4
 -2 1 7 463.979 374.192 4
 -2 1 7 370.586 186.2 2
 -2 1 8 159163 5402.04 2
 -2 1 8 163127 8869.71 4
 -2 1 9 190153 6101.24 2
 -2 1 9 180295 10092 4
 -2 1 10 43554.2 2417.12 2
 -2 1 10 45583.6 5051.25 4
 -2 1 11 -36.4565 315.219 4
 -2 1 12 34646.6 4873.75 4
 -2 1 13 42656.2 5636.81 4
 -2 1 14 8969.72 2571.06 4
 -2 1 15 -622.282 1038.85 4
 -2 1 16 4779.36 1957.4 4
 -2 2 -4 52556 1762.77 2
 -2 2 -3 186137 4782.56 2
 -2 2 -2 276838 6997.55 2
 -2 2 -2 298614 8375 4
 -2 2 -1 395181 9704.52 2
 -2 2 -1 408519 10128.5 4
 -2 2 0 115514 3804.68 2
 -2 2 0 114579 3446.5 4
 -2 2 3 172794 6532.44 4
 -2 2 3 206714 6141.06 2
 -2 2 4 143291 6167.96 4
 -2 2 4 142820 4944.22 2
 -2 2 5 196915 8149.53 4
 -2 2 5 183957 6023.1 2
 -2 2 6 2480.54 561.693 2
 -2 2 6 2104.06 850.468 4
 -2 2 7 155876 8366.73 4
 -2 2 7 161822 5708.64 2
 -2 2 8 247032 7725.16 2
 -2 2 8 234420 11359.7 4
 -2 2 9 67567.3 5987.58 4
 -2 2 9 65298.9 3373.62 2
 -2 2 10 2522.29 1124.64 4
 -2 2 10 2010.34 543.952 2
 -2 2 11 40871.8 5092.08 4
 -2 2 12 46993 5728.67 4
 -2 2 13 3096.51 1416.86 4
 -2 2 14 659.167 735.428 4
 -2 2 15 17596.8 4021.2 4
 -2 2 16 11887.3 3523.72 4
 -2 3 -5 162006 4100.28 2
 -2 3 -4 404276 9560.82 2
 -2 3 -3 40113.2 1882.75 2
 -2 3 -3 40688.5 2562.96 4
 -2 3 -2 24419.5 1597.28 4
 -2 3 -2 23831.9 1494.95 2
 -2 3 -1 349812 8670.01 4
 -2 3 -1 375024 9427.42 2
 -2 3 0 35356 2033 2
 -2 3 0 34638 1799.48 1
 -2 3 1 143705 4013.73 3
 -2 3 1 144266 4987.1 2
 -2 3 1 145514 4410.63 1
 -2 3 2 170511 5601.72 4
 -2 3 2 161256 4762.06 3
 -2 3 3 185350 6232.27 2
 -2 3 3 197495 7038.67 4
 -2 3 3 187785 5993.09 3
 -2 3 4 267028 9600.24 4
 -2 3 4 262439 8081.1 2
 -2 3 5 40049 3498.97 4
 -2 3 5 39457.6 2540.67 2
 -2 3 6 127740 7166.22 4
 -2 3 6 136398 5377.46 2
 -2 3 7 223985 10562 4
 -2 3 7 221183 7497.69 2
 -2 3 8 28667.3 2300.79 2
 -2 3 8 29701.6 3737.44 4
 -2 3 9 8081.13 2148.06 4
 -2 3 9 10893.4 1459.76 2
 -2 3 10 75530.8 6824.87 4
 -2 3 10 73202.7 3955.26 2
 -2 3 11 79808.6 7348.54 4
 -2 3 12 19137.4 3960.2 4
 -2 3 13 5898.47 2186.48 4
 -2 3 14 22160.8 4369.89 4
 -2 3 15 15711.9 3924.32 4
 -2 4 -6 150046 4258.58 2
 -2 4 -5 316132 8165.73 2
 -2 4 -4 14297.7 1298.22 2
 -2 4 -3 202181 6550.03 4
 -2 4 -2 49531.8 2149.7 4
 -2 4 -1 94109.1 3900.3 1
 -2 4 0 27317.3 1675.08 3
 -2 4 0 27831.9 1848.05 1
 -2 4 1 335204 9085.47 3
 -2 4 1 371174 9206.74 4
 -2 4 2 234174 7537.1 4
 -2 4 2 235818 6999.35 3
 -2 4 3 230020 8315.24 4
 -2 4 3 234846 7454.88 3
 -2 4 4 8427.17 1475.53 4
 -2 4 4 7960.57 1190.03 3
 -2 4 5 121278 5285.19 2
 -2 4 5 120981 6612.72 4
 -2 4 5 114096 5464.95 3
 -2 4 6 142927 7836.4 4
 -2 4 6 140454 5949.91 2
 -2 4 7 40279.4 4193.14 4
 -2 4 7 35306.1 2759.7 2
 -2 4 8 47071.8 4829.76 4
 -2 4 8 45573.4 3207.32 2
 -2 4 9 141299 6246.65 2
 -2 4 9 154501 9653.43 4
 -2 4 10 75610.2 6979.86 4
 -2 4 10 83469.1 4567.22 2
 -2 4 11 -2012.01 1181.82 4
 -2 4 12 54056.6 6409.65 4
 -2 4 13 35461.5 5372.47 4
 -2 4 14 15379.4 3626.01 4
 -2 4 15 1028.58 1409.81 4
 -2 5 -8 29582.1 1333.35 2
 -2 5 -8 30080.1 1217.62 2
 -2 5 -7 40942.6 2044.8 2
 -2 5 -6 161343 5304.69 2
 -2 5 -4 277668 8543.61 4
 -2 5 -3 191635 5781.91 4
 -2 5 -1 25974.1 1936.08 3
 -2 5 0 102836 4166.93 3
 -2 5 0 102566 2995.42 4
 -2 5 1 157969 5586.3 3
 -2 5 1 165714 5244.71 4
 -2 5 2 102036 4516.47 4
 -2 5 2 82366.4 3962.02 3
 -2 5 3 3126.96 771.512 3
 -2 5 3 1877.36 647.609 4
 -2 5 4 121682 6258.47 4
 -2 5 4 123489 5673.6 3
 -2 5 5 52899.2 4259.87 4
 -2 5 5 51051.6 3678.97 3
 -2 5 6 1659.73 1334.13 4
 -2 5 6 3302.82 1183.65 3
 -2 5 7 30589.8 2815.31 2
 -2 5 7 34167.3 3921.09 4
 -2 5 8 69088.3 6137.47 4
 -2 5 8 88214.9 4970.63 2
 -2 5 9 72854.1 6625.52 4
 -2 5 9 67345.9 4426.39 2
 -2 5 10 -481.631 515.703 2
 -2 5 10 -3.20624 316.322 4
 -2 5 11 75684.2 7413 4
 -2 5 12 48631 6262.32 4
 -2 5 13 17653.1 3880.07 4
 -2 5 14 4525.63 2147.88 4
 -2 6 -9 12920.2 1026.42 2
 -2 6 -8 51554.6 2607.69 2
 -2 6 -2 16277 1747.28 3
 -2 6 -1 49824.6 3064.73 3
 -2 6 0 145863 5712.8 3
 -2 6 0 145709 4196.14 4
 -2 6 1 411.74 274.623 3
 -2 6 1 1105.73 345.257 4
 -2 6 2 75379.6 3726.15 4
 -2 6 2 35711.3 2824.96 3
 -2 6 3 68929.2 4161.55 4
 -2 6 3 70229.6 4143.8 3
 -2 6 4 100765 5761.77 4
 -2 6 4 112988 5693.62 3
 -2 6 5 49915.1 4065.16 4
 -2 6 5 14714.9 2297.25 3
 -2 6 6 72434.3 5585.66 4
 -2 6 6 80146.9 5279.78 3
 -2 6 7 83397 6437.68 4
 -2 6 8 40843.5 3581.54 2
 -2 6 8 35800.6 4407.4 4
 -2 6 9 7871.28 1644.91 2
 -2 6 9 14562.5 3303.04 4
 -2 6 10 60200.8 6455.06 4
 -2 6 10 66394.2 4783.82 2
 -2 6 11 49719.2 6181 4
 -2 6 12 12976.5 3324.89 4
 -2 6 13 7365.36 2599.11 4
 -2 6 14 10843.5 3350.49 4
 -2 7 -9 51918.8 2857.28 2
 -2 7 -3 1607.96 651.362 3
 -2 7 -2 106084 5235.35 3
 -2 7 -1 159810 6582.62 3
 -2 7 0 715.273 239.873 4
 -2 7 0 83.664 182.446 3
 -2 7 1 179795 7146.16 3
 -2 7 1 173982 6090.28 4
 -2 7 2 267476 9030.39 4
 -2 7 2 254661 9390.01 3
 -2 7 3 177929 7524.08 4
 -2 7 3 185491 7864.28 3
 -2 7 4 749.427 471.78 3
 -2 7 4 1203.29 601.021 4
 -2 7 5 78720.4 5642.47 4
 -2 7 5 72469.2 5131.79 3
 -2 7 6 106039 7083.94 4
 -2 7 6 108043 6642.82 3
 -2 7 7 35293.6 4241.53 4
 -2 7 7 36729.7 3891.02 3
 -2 7 8 4300.01 1392.69 2
 -2 7 8 7609.03 2363.23 4
 -2 7 9 34723.3 4755.93 4
 -2 7 9 46900.3 4232.42 2
 -2 7 10 44317.5 5680.89 4
 -2 7 10 49729.1 4415.32 2
 -2 7 11 10542.3 2986.32 4
 -2 7 12 4920.82 2141.51 4
 -2 7 13 15708.3 3951.75 4
 -2 8 -4 22139 2556.63 3
 -2 8 -3 246315 9471.8 3
 -2 8 -2 225492 8815.19 3
 -2 8 -1 26.9451 202.073 3
 -2 8 0 225866 8759.96 3
 -2 8 0 221261 6394.11 4
 -2 8 1 220082 8855.71 3
 -2 8 1 224436 7464.02 4
 -2 8 2 94497.4 4988.46 4
 -2 8 2 92391.7 5453.6 3
 -2 8 3 49174.3 3819.35 4
 -2 8 3 52423.6 4126.31 3
 -2 8 4 53692 4389.43 4
 -2 8 4 57903 4570.22 3
 -2 8 5 90915.5 6323.81 4
 -2 8 5 97008.1 6329.32 3
 -2 8 6 3798.54 1229.77 3
 -2 8 6 4658.18 1469.18 4
 -2 8 7 477.786 376.769 3
 -2 8 7 273.544 505.132 4
 -2 8 8 14549.7 2992.93 4
 -2 8 9 21653.1 3067.81 2
 -2 8 9 18215.2 3535.13 4
 -2 8 10 2642.42 1498.19 4
 -2 8 11 15821.8 3659.57 4
 -2 8 12 27632.3 5178.3 4
 -2 8 13 12943 3611.91 4
 -2 9 -5 38127.3 3645.27 3
 -2 9 -4 170073 8088.72 3
 -2 9 -3 139956 7058.61 3
 -2 9 -2 5529.24 1268.2 3
 -2 9 -1 147895 7205.95 3
 -2 9 0 187237 8353.55 3
 -2 9 0 184884 5777.42 4
 -2 9 1 42341.1 2873.54 4
 -2 9 1 41314.1 3663.64 3
 -2 9 2 22918.7 2540.13 4
 -2 9 2 29408.2 3159.38 3
 -2 9 3 88465.8 5484.44 4
 -2 9 3 89234.7 5951.24 3
 -2 9 4 109690 6720.96 4
 -2 9 4 112281 7014.15 3
 -2 9 5 5377.45 1975.7 3
 -2 9 5 11613.8 2698.4 4
 -2 9 6 20894.2 3220.62 4
 -2 9 6 23923.5 3374.49 3
 -2 9 7 41479.9 4646.03 3
 -2 9 7 34326.7 4528.82 4
 -2 9 8 21307.1 3814.36 4
 -2 9 8 17583 3548.89 3
 -2 9 9 -478.779 766.038 2
 -2 9 9 570.428 628.249 4
 -2 9 10 23526.6 4379.32 4
 -2 9 11 40646.2 6109.52 4
 -2 9 12 7324.79 2777.11 4
 -2 10 -6 17412.1 2599.85 3
 -2 10 -5 78184.8 5558.28 3
 -2 10 -4 36470.4 3626.44 3
 -2 10 -3 484.704 350.255 3
 -2 10 -2 46750.2 4044.69 3
 -2 10 -1 92380.3 5875.53 3
 -2 10 0 7552.43 1612.38 3
 -2 10 0 7882.02 951.614 4
 -2 10 1 30971 2533.07 4
 -2 10 1 26564.7 3180.39 3
 -2 10 2 63243.9 4308.7 4
 -2 10 2 68222.9 5301.97 3
 -2 10 3 81268.6 5478.63 4
 -2 10 3 82766.8 6134.04 3
 -2 10 4 519.941 619.627 3
 -2 10 4 583.938 745.974 4
 -2 10 5 48442.5 4873.06 4
 -2 10 5 60348.9 5534.1 3
 -2 10 6 83762.3 6894.85 4
 -2 10 6 82033.5 6790.08 3
 -2 10 7 17127.4 3113.16 3
 -2 10 7 12218.4 2749.16 4
 -2 10 8 3739.73 1548.53 3
 -2 10 8 1739.25 1413.82 4
 -2 10 9 37818.5 4611.48 2
 -2 10 9 35960 5336.97 4
 -2 10 10 40335 5920.87 4
 -2 10 11 6371.62 2479.09 4
 -2 11 -8 2039.47 851.165 3
 -2 11 -7 17586.3 2809.05 3
 -2 11 -6 38730.9 4098.63 3
 -2 11 -5 13534.8 2353.27 3
 -2 11 -4 689.706 479.441 3
 -2 11 -3 57132.4 4849.65 3
 -2 11 -2 37928.9 3894.72 3
 -2 11 -1 8353.95 1827.08 3
 -2 11 0 71589.4 5556.04 3
 -2 11 1 60138.1 5205.61 3
 -2 11 2 44803.6 4588.21 3
 -2 11 3 3956.56 1407.43 3
 -2 11 4 92596.4 7137.76 3
 -2 11 5 94256.3 7468.92 3
 -2 11 6 21398.1 3576.75 3
 -2 11 7 2128.4 1146.54 3
 -2 11 8 37541 5135.25 3
 -2 11 9 47852.2 5517.33 2
 -2 12 -9 -157.793 636.362 3
 -2 12 -8 11211.1 2393.14 3
 -2 12 -7 34690.5 4149.27 3
 -2 12 -6 1549.46 870.906 3
 -2 12 -5 1498.29 920.775 3
 -2 12 -4 62417.7 5402.08 3
 -2 12 -3 10375.8 2123.56 3
 -2 12 -2 3353.57 1240.67 3
 -2 12 -1 41933.6 4440.93 3
 -2 12 0 35189.2 4102.82 3
 -2 12 1 19960.5 3124.26 3
 -2 12 2 3389.65 1292.37 3
 -2 12 3 75157 6611.69 3
 -2 12 4 87969.9 7384.92 3
 -2 12 5 12063.7 2807.67 3
 -2 12 6 4244.76 1667.14 3
 -2 12 7 30883.6 4704.02 3
 -2 12 8 44806 5931.22 3
 -2 13 -11 11315.9 2712.46 3
 -2 13 -10 87.1855 536.005 3
 -2 13 -9 24764.2 3791.93 3
 -2 13 -8 35312.8 4444.45 3
 -2 13 -7 -132.962 614.432 3
 -2 13 -6 10903.2 2319.01 3
 -2 13 -5 57239 5465.43 3
 -2 13 -4 24704.8 3512.86 3
 -2 13 -3 3337.62 1212.25 3
 -2 13 -2 47808.9 5028.56 3
 -2 13 -1 39289.6 4540.09 3
 -2 13 0 12434 2587.4 3
 -2 13 1 1752.83 944.144 3
 -2 13 2 29889.5 4233.68 3
 -2 13 3 41352.6 5115.68 3
 -2 13 4 1634.94 1024.37 3
 -2 13 5 15364.9 3327.65 3
 -2 13 6 17340.2 3668.09 3
 -2 13 7 14986.4 3507.34 3
 -2 13 8 137.836 789.096 3
 -2 13 8 876.413 890.503 2
 -2 14 -13 5537.44 2039.58 3
 -2 14 -12 957.37 540.427 3
 -2 14 -11 1334.96 685.114 3
 -2 14 -10 31690.4 4552.33 3
 -2 14 -9 18108.4 3353.58 3
 -2 14 -8 -281.3 489.675 3
 -2 14 -7 29632.2 4168.48 3
 -2 14 -6 42724.8 4971.77 3
 -2 14 -5 24338.8 3722.65 3
 -2 14 -4 -540.379 869.796 3
 -2 14 -3 49714.2 5316.34 3
 -2 14 -2 50278.2 5402.76 3
 -2 14 -1 4341.04 1616.49 3
 -2 14 0 4697.87 1618.05 3
 -2 14 1 26799.1 4148.45 3
 -2 14 2 18834.8 3562.53 3
 -2 14 3 -1924.54 1167.27 3
 -2 14 4 18320.8 3780.89 3
 -2 14 5 32107.7 5052.28 3
 -2 14 6 4128.68 1729.12 3
 -2 15 -12 9947.5 2693.65 3
 -2 15 -11 16691.5 3440.76 3
 -2 15 -10 17375.9 3405.97 3
 -2 15 -9 777.13 816.16 3
 -2 15 -8 38731.5 4997.37 3
 -2 15 -7 49032.3 5626.3 3
 -2 15 -6 9539.53 2441.73 3
 -2 15 -5 -545.57 896.02 3
 -2 15 -4 37538.7 4846.49 3
 -2 15 -3 23503.7 3854.72 3
 -2 15 -2 103.073 609.869 3
 -2 15 -1 13628.7 3039.08 3
 -2 15 0 26239.7 4321.26 3
 -2 15 1 12501.8 3012.45 3
 -2 15 2 2386.67 1252.51 3
 -2 15 3 17207.9 3682.71 3
 -2 15 4 51316.2 6664.7 3
 -2 15 5 5412.04 2460.44 3
 -2 16 -10 109.387 473.265 3
 -2 16 -9 14943.5 3311.07 3
 -2 16 -8 10763.5 2772.44 3
 -2 16 -7 -534.494 913.132 3
 -2 16 -6 3946.27 1682.19 3
 -2 16 -5 23281.3 4010.93 3
 -2 16 -4 7445.56 2228.88 3
 -2 16 -3 708.934 582.577 3
 -2 16 -2 27571.6 4482.96 3
 -2 16 -1 33613.3 5043.64 3
 -2 16 0 5638.37 2310.97 3
 -2 16 1 360.079 432.27 3
 -2 16 2 36248.5 5565.56 3
 -2 17 -7 5868.96 2092.4 3
 -2 17 -6 9448.71 2646.55 3
 -2 17 -5 5895.4 2164.6 3
 -2 17 -4 -326.385 1026.48 3
 -2 17 -3 21906.6 4172.38 3
 -2 17 -2 22437.6 4230.01 3
 -2 17 -1 3338.66 1846.79 3
 -1 -12 14 14051.5 3319.18 1
 -1 -12 15 10120.5 2802.21 1
 -1 -11 12 19355.6 3524.34 1
 -1 -11 13 20855.4 3793.57 1
 -1 -11 14 4796.73 1766.96 1
 -1 -11 15 1231.22 1081.32 1
 -1 -11 16 1727.71 1233.78 1
 -1 -10 10 10257.2 2328.37 1
 -1 -10 11 43309.6 5018.43 1
 -1 -10 12 31350.9 4365.31 1
 -1 -10 13 2388.27 1181.25 1
 -1 -10 14 3731.13 1542.96 1
 -1 -10 15 13648.1 3150.56 1
 -1 -10 16 3860.02 1708.22 1
 -1 -9 8 33127.7 3069.49 4
 -1 -9 9 845.762 492.384 4
 -1 -9 9 2788.21 1145.94 1
 -1 -9 10 28320.5 3280.17 4
 -1 -9 10 28424.9 3804.03 1
 -1 -9 11 24519 3299.76 4
 -1 -9 11 21749 3428.05 1
 -1 -9 12 2005.89 886.6 4
 -1 -9 12 5045.61 1675.08 1
 -1 -9 13 7823.95 2101.06 4
 -1 -9 13 9255.91 2338.84 1
 -1 -9 14 13182 2837.33 4
 -1 -9 14 12997.2 2919.97 1
 -1 -9 15 6505.97 2055.96 1
 -1 -9 16 967.018 662.536 1
 -1 -9 17 8810.92 2551.91 1
 -1 -8 8 17758.8 2246.4 4
 -1 -8 8 26711.3 3306.23 1
 -1 -8 9 51250.8 4158.04 4
 -1 -8 9 51916.1 4848.26 1
 -1 -8 10 3519.83 1159.47 4
 -1 -8 10 3349.86 1229.07 1
 -1 -8 11 1408.05 983.352 4
 -1 -8 11 1354.49 654.885 1
 -1 -8 12 23068.5 3406.57 4
 -1 -8 12 21804 3387.93 1
 -1 -8 13 37366.8 4520.51 1
 -1 -8 13 29163.3 4061.53 4
 -1 -8 14 7779.54 2127.55 1
 -1 -8 14 5556.53 1820.74 4
 -1 -8 15 366.109 426.865 1
 -1 -8 15 -524.965 837.504 4
 -1 -8 16 16582.6 3326.31 1
 -1 -8 16 15086.1 3314.35 4
 -1 -8 17 10132 2645.02 1
 -1 -8 17 8422.7 2918.07 4
 -1 -8 18 -365.908 1226.81 4
 -1 -7 7 105333 5476.37 4
 -1 -7 7 111467 6558.56 1
 -1 -7 8 258458 10095.4 4
 -1 -7 8 273849 11465.6 1
 -1 -7 9 76945.3 5263.61 4
 -1 -7 9 74568.1 5622.23 1
 -1 -7 10 1900.46 716.229 4
 -1 -7 10 2823.02 1135.91 1
 -1 -7 11 40409.5 4329.45 4
 -1 -7 11 42463.8 4396.59 1
 -1 -7 12 53357.5 5305.46 4
 -1 -7 12 53249.6 5151.75 1
 -1 -7 13 10810.4 2398.51 1
 -1 -7 13 10913.4 2548.46 4
 -1 -7 14 1838.15 1012.62 1
 -1 -7 14 3248.93 1581.02 4
 -1 -7 15 21332.1 3957.23 4
 -1 -7 15 21735.8 3585.38 1
 -1 -7 16 8554.49 2286.93 1
 -1 -7 16 12768.8 3129.51 4
 -1 -7 17 341.358 299.224 1
 -1 -7 17 1612.42 779.367 4
 -1 -7 18 2768.98 1484.41 4
 -1 -7 18 3518.01 1604.98 1
 -1 -6 3 119964 4902.03 4
 -1 -6 6 238046 9624.39 1
 -1 -6 7 249984 9439.94 4
 -1 -6 7 264927 10468 1
 -1 -6 8 106021 6035.51 4
 -1 -6 8 124381 6805.8 1
 -1 -6 9 21.4636 372.512 1
 -1 -6 9 425.274 662.077 4
 -1 -6 10 54059.7 4850.54 4
 -1 -6 10 57601.8 4899.42 1
 -1 -6 11 32828.3 4003.32 4
 -1 -6 11 35042.5 3890.15 1
 -1 -6 12 9635.44 2296.51 4
 -1 -6 12 8600.38 1986.76 1
 -1 -6 13 3975.3 1530.98 4
 -1 -6 13 2174.97 1061.35 1
 -1 -6 14 25825.7 4239.31 4
 -1 -6 14 32287.7 4142.45 1
 -1 -6 15 1574.37 809.74 4
 -1 -6 15 3657.77 1314.46 1
 -1 -6 16 113.255 463.305 1
 -1 -6 16 27.8364 946.051 4
 -1 -6 17 6541.93 2476.48 4
 -1 -6 17 2550.18 1159.99 1
 -1 -6 18 6912.46 2542.91 4
 -1 -6 18 8871.75 2489.87 1
 -1 -5 2 129058 5015.9 4
 -1 -5 5 273869 9782.74 1
 -1 -5 6 113281 5849.84 1
 -1 -5 7 35958.8 3121.9 4
 -1 -5 7 38528.3 3392.93 1
 -1 -5 8 11163.3 1839.7 4
 -1 -5 8 12196.7 1923.34 1
 -1 -5 9 49671.8 4352.88 4
 -1 -5 9 50508.2 4195.88 1
 -1 -5 10 13083.2 2443.91 4
 -1 -5 10 13515.4 2245.23 1
 -1 -5 11 417.809 409.24 1
 -1 -5 11 -7.35961 331.103 4
 -1 -5 12 14388 2460.84 1
 -1 -5 12 10051.3 2306.43 4
 -1 -5 13 66160.3 5652.43 1
 -1 -5 13 62344.9 6267.36 4
 -1 -5 14 15626.1 2793.61 1
 -1 -5 14 11919.8 2850.36 4
 -1 -5 15 3948.19 1683.41 4
 -1 -5 15 4197.17 1434.08 1
 -1 -5 16 7999.46 2465.96 4
 -1 -5 16 7519.11 2084.39 1
 -1 -5 17 13840.3 2984.56 1
 -1 -5 17 9059.55 2886.2 4
 -1 -5 18 -543.918 863.511 1
 -1 -4 1 199497 6730.43 4
 -1 -4 2 110169 4135.03 4
 -1 -4 4 334391 10479.5 1
 -1 -4 5 51227.3 3368.71 1
 -1 -4 6 44151.5 3218.21 4
 -1 -4 6 41410.5 3157.44 1
 -1 -4 7 130751 6496.23 4
 -1 -4 7 140605 6574.04 1
 -1 -4 8 61505.2 4691.48 4
 -1 -4 8 69266.5 4579.8 1
 -1 -4 9 28906.8 3025.65 1
 -1 -4 9 32870.4 3611.16 4
 -1 -4 10 9385.64 2267.37 4
 -1 -4 10 8352.97 1697.71 1
 -1 -4 11 39148.9 3863.76 1
 -1 -4 11 40236.2 4608.23 4
 -1 -4 12 80877.6 5910.1 1
 -1 -4 12 77347.1 6818.41 4
 -1 -4 13 17014 3355.46 4
 -1 -4 13 17586.7 2762.66 1
 -1 -4 14 3467.98 1305.16 1
 -1 -4 14 3942.93 1730.83 4
 -1 -4 15 21900.7 3418.63 1
 -1 -4 15 20782 3978.79 4
 -1 -4 16 12577.3 2662.72 1
 -1 -4 16 13186.3 3239.74 4
 -1 -4 17 3091.02 1230.86 1
 -1 -4 17 5646.43 2471.9 4
 -1 -4 18 1357.01 1020.88 1
 -1 -3 0 338711 9671.22 4
 -1 -3 1 382079 10126.1 4
 -1 -3 3 165118 5907.48 1
 -1 -3 4 8602.18 1150.62 1
 -1 -3 5 18734.4 1848.02 1
 -1 -3 6 212816 7778.06 1
 -1 -3 6 202823 8045.08 4
 -1 -3 7 242593 8950.16 1
 -1 -3 7 251925 9829.03 4
 -1 -3 8 102552 5447.4 1
 -1 -3 8 96631.4 6160.27 4
 -1 -3 9 15667.7 2138.53 1
 -1 -3 9 14959.7 2494.91 4
 -1 -3 10 93807.8 6870.17 4
 -1 -3 11 116873 8262.11 4
 -1 -3 12 27209.7 4061.92 4
 -1 -3 13 15380.2 3755.65 4
 -1 -3 14 38910.9 5323.78 4
 -1 -3 15 10854.7 2911.15 4
 -1 -3 16 691.339 679.853 4
 -1 -3 17 4760.53 1807.81 1
 -1 -3 17 4023.49 1906.28 4
 -1 -3 18 9844.63 2583.05 1
 -1 -2 -1 59013.4 3111.61 4
 -1 -2 0 92909.5 3636.39 3
 -1 -2 0 98225.5 3797.2 4
 -1 -2 1 342056 9073.08 3
 -1 -2 1 352828 8813.31 4
 -1 -2 3 2330.33 501.41 1
 -1 -2 4 59234.2 3018.51 1
 -1 -2 5 36547.8 2429.93 1
 -1 -2 5 30088.3 2528.18 4
 -1 -2 6 67888 4337.5 4
 -1 -2 7 63065 4578.83 4
 -1 -2 8 29080.3 3329.68 4
 -1 -2 9 110560 7218.16 4
 -1 -2 10 137342 8662.76 4
 -1 -2 11 57033.9 5686.07 4
 -1 -2 12 13214.9 2835.41 4
 -1 -2 13 49847.5 5866.92 4
 -1 -2 14 35157.4 5124.62 4
 -1 -2 15 626.991 695.931 4
 -1 -2 16 17172.6 3925.03 4
 -1 -2 17 6451.37 2568.9 4
 -1 -1 -2 8398.76 1135.35 4
 -1 -1 -2 6182.56 922.023 3
 -1 -1 -1 273679 7818.26 4
 -1 -1 -1 264569 7476.6 3
 -1 -1 0 239631 6344.39 3
 -1 -1 3 169472 5019.52 1
 -1 -1 3 161207 4481.74 2
 -1 -1 4 95668.8 4448.29 4
 -1 -1 4 96329.6 2985.9 2
 -1 -1 5 48217.6 3361.91 4
 -1 -1 5 48910.1 1877.73 2
 -1 -1 6 11042.7 1757.51 4
 -1 -1 6 9864.52 739.978 2
 -1 -1 7 63677.2 4792.52 4
 -1 -1 7 62519.5 2198.85 2
 -1 -1 8 112099 7025.34 4
 -1 -1 8 111483 3246.9 2
 -1 -1 9 61586.4 5434.93 4
 -1 -1 9 59316.1 1974.41 2
 -1 -1 10 17355 2965.31 4
 -1 -1 11 23630.4 3725.56 4
 -1 -1 12 18045.1 3311.37 4
 -1 -1 13 28053.2 4513.82 4
 -1 -1 14 12682.2 3141.52 4
 -1 -1 15 21760.4 4289.7 4
 -1 -1 16 20328.1 4426.06 4
 -1 0 -2 60748.1 3045.51 4
 -1 0 -2 59776.5 2901.9 3
 -1 0 3 47645.9 1773.42 2
 -1 0 3 45349.9 2606.86 4
 -1 0 4 135837 3833.43 2
 -1 0 4 138571 5774.42 4
 -1 0 5 4641.46 532.082 2
 -1 0 5 5548.36 1192.46 4
 -1 0 6 92480.2 3069.25 2
 -1 0 6 90244.8 5548.85 4
 -1 0 7 145508 4294.82 2
 -1 0 7 151936 7920.77 4
 -1 0 8 60486.5 2360.33 2
 -1 0 8 62805.2 5239.32 4
 -1 0 9 3932.78 1306.89 4
 -1 0 9 3910.18 522.15 2
 -1 0 10 45843.4 4989.2 4
 -1 0 10 45184 1844.55 2
 -1 0 11 22721 3705.39 4
 -1 0 12 13433.1 2946.85 4
 -1 0 13 31382.5 5053.46 4
 -1 0 14 39720.1 5644.23 4
 -1 0 15 23554.6 4488.48 4
 -1 0 16 4145.29 2153.22 4
 -1 1 -3 9568.68 1264.37 4
 -1 1 -2 598095 14586.7 4
 -1 1 2 429151 10918.4 4
 -1 1 3 78590.1 3922.72 4
 -1 1 3 90910.9 3003.38 2
 -1 1 4 3275.93 819.943 4
 -1 1 4 4542.72 579.922 2
 -1 1 5 70904.3 4587.15 4
 -1 1 5 70937.5 2819.42 2
 -1 1 6 197482 5812.76 2
 -1 1 6 196111 8934.44 4
 -1 1 7 30117.9 3418.66 4
 -1 1 7 27892.1 1739.81 2
 -1 1 8 22377.3 3187.77 4
 -1 1 8 27130.9 1741.66 2
 -1 1 9 83822.6 3406.9 2
 -1 1 9 93695.2 7087 4
 -1 1 10 58125.8 2674.99 2
 -1 1 10 55255.6 5607.23 4
 -1 1 11 16829.3 3201.79 4
 -1 1 12 5252.95 2580.62 4
 -1 1 13 49704.8 6200.3 4
 -1 1 14 30819.3 5075.02 4
 -1 1 15 1171.47 1251.03 4
 -1 1 16 -188.477 829.016 4
 -1 2 -3 448008 12095.1 4
 -1 2 -2 77489.5 3053.67 4
 -1 2 -1 1595.92 330.941 1
 -1 2 1 330220 8315.65 4
 -1 2 2 328463 9431.72 4
 -1 2 2 345635 8757.14 3
 -1 2 3 15368.8 1743.03 4
 -1 2 3 46320.2 2758.26 3
 -1 2 4 91555.4 4967.22 4
 -1 2 5 302635 8384.23 2
 -1 2 5 283590 10929.3 4
 -1 2 6 117268 6776.32 4
 -1 2 6 116883 4458.83 2
 -1 2 7 98927.5 6651.58 4
 -1 2 7 109310 4303.88 2
 -1 2 8 201270 10430.7 4
 -1 2 8 207050 6706.67 2
 -1 2 9 97905.9 7325.31 4
 -1 2 9 87194.5 3915.78 2
 -1 2 10 408.243 658.061 4
 -1 2 10 80.385 129.344 2
 -1 2 11 11705.6 2811.21 4
 -1 2 12 57132.5 6497.2 4
 -1 2 13 18034.9 3838.43 4
 -1 2 14 -1055.31 1046.97 4
 -1 2 15 11214.7 3347.53 4
 -1 3 -4 238240 7984.32 4
 -1 3 -3 4831.35 740.354 4
 -1 3 -2 309964 8673.55 1
 -1 3 -2 313968 7738.5 4
 -1 3 -1 141135 4680.39 1
 -1 3 0 2859.08 475.545 3
 -1 3 1 50827.4 2339.93 4
 -1 3 1 48425.3 2299.09 3
 -1 3 2 28957.5 2114.35 4
 -1 3 2 29030.4 1905.41 3
 -1 3 3 455275 13573.9 4
 -1 3 3 492202 12919.2 3
 -1 3 4 302889 10727.4 4
 -1 3 4 310143 9819.79 3
 -1 3 5 205414 8933.4 4
 -1 3 6 107052 6644.76 4
 -1 3 7 256973 8357.58 2
 -1 3 7 255458 11548.3 4
 -1 3 8 86827.1 6723.24 4
 -1 3 8 103953 4711.75 2
 -1 3 9 21652.9 3550.89 4
 -1 3 9 11836.8 1571.45 2
 -1 3 10 61414.7 6134.18 4
 -1 3 10 57851.7 3428.1 2
 -1 3 11 78651.6 7444 4
 -1 3 12 16076.1 3626.49 4
 -1 3 13 5220.8 2143.21 4
 -1 3 14 43035.4 6253.56 4
 -1 3 15 20858.6 4633.9 4
 -1 4 -7 18783.9 1037.19 2
 -1 4 -4 81104.1 3801.55 4
 -1 4 -1 114093 4351.35 3
 -1 4 0 29561.1 1954.39 3
 -1 4 0 32626.3 1500.3 4
 -1 4 1 21234.9 1683.35 3
 -1 4 1 23946.6 1646.88 4
 -1 4 2 211572 7158.01 4
 -1 4 2 211100 7055.57 3
 -1 4 3 353310 11257.5 4
 -1 4 3 355798 10772.3 3
 -1 4 4 117007 6094.62 4
 -1 4 4 114520 5527.22 3
 -1 4 5 5066.53 1187.23 3
 -1 4 5 4947.5 1246.51 4
 -1 4 6 168255 8711.42 4
 -1 4 7 33643.9 3889.08 4
 -1 4 8 -28.4518 296.856 2
 -1 4 8 -271.866 641.472 4
 -1 4 9 56769.6 5806.81 4
 -1 4 9 56948.4 3733.72 2
 -1 4 10 79132.8 7266.68 4
 -1 4 10 79190.1 4500.49 2
 -1 4 11 5045.65 1794.25 4
 -1 4 12 18585.1 3793.18 4
 -1 4 13 27629.4 4906.34 4
 -1 4 14 20913.7 4469.06 4
 -1 5 -9 30880.7 1330.7 2
 -1 5 -9 29428.1 1433.04 2
 -1 5 -8 689.723 225.452 2
 -1 5 -2 6823.7 1053.13 3
 -1 5 -1 2098.6 569.273 3
 -1 5 0 98930.7 4399.25 3
 -1 5 0 102090 3526.65 4
 -1 5 1 188311 6805.85 3
 -1 5 1 196371 6371.04 4
 -1 5 2 261762 8676.39 4
 -1 5 2 259823 8790.59 3
 -1 5 3 112297 5599.65 4
 -1 5 3 114678 5497.66 3
 -1 5 4 22639.3 2583.58 4
 -1 5 4 21366 2357.12 3
 -1 5 5 130989 7271.98 4
 -1 5 5 133690 6767.2 3
 -1 5 6 47105.2 4521.6 4
 -1 5 6 38217.3 3770.52 3
 -1 5 7 29347.9 3771.86 4
 -1 5 8 78540.8 6667.92 4
 -1 5 9 79109.2 4914.58 2
 -1 5 9 72414.4 6927.94 4
 -1 5 10 2084.81 967.774 4
 -1 5 11 30520.7 4829.62 4
 -1 5 12 18883.5 4026.42 4
 -1 5 13 12408.2 3371.99 4
 -1 5 14 -201.076 515.36 4
 -1 6 -3 60528.6 3798.72 3
 -1 6 -2 3558.35 864.534 3
 -1 6 -1 31027.4 2508.34 3
 -1 6 0 266123 9059.36 3
 -1 6 0 273375 7690.17 4
 -1 6 1 18921.5 2014.41 3
 -1 6 1 18617.5 1731.01 4
 -1 6 2 68007.5 3924.54 4
 -1 6 2 19644.6 2419.83 3
 -1 6 3 216074 8736.43 4
 -1 6 3 223827 8803.54 3
 -1 6 4 136425 7155.36 4
 -1 6 4 138100 6910.47 3
 -1 6 5 41667.8 4041.27 4
 -1 6 5 29635.3 3238.55 3
 -1 6 6 48474.6 4327.13 3
 -1 6 6 47987.3 4719.62 4
 -1 6 7 74590.2 6332.15 4
 -1 6 7 84112.3 6082.18 3
 -1 6 8 98657.2 7781.49 4
 -1 6 9 240.719 761.379 2
 -1 6 9 -348.246 672.075 4
 -1 6 10 24172.9 4193.73 4
 -1 6 11 31060.5 5085.31 4
 -1 6 12 12955.7 3433.39 4
 -1 6 13 336.426 806.546 4
 -1 7 -4 102109 5541.67 3
 -1 7 -3 700.023 452.735 3
 -1 7 -2 124298 5955.48 3
 -1 7 -1 267479 9572.17 3
 -1 7 0 1823.89 668.477 3
 -1 7 0 1931.01 472.291 4
 -1 7 1 43686.9 2979.34 4
 -1 7 1 45782.8 3517.48 3
 -1 7 2 365184 11931.7 4
 -1 7 2 364305 12502.8 3
 -1 7 3 159130 7646.98 4
 -1 7 3 168040 7866.47 3
 -1 7 4 510.945 454.915 3
 -1 7 4 19.4926 299.355 4
 -1 7 5 70893.7 5653.15 4
 -1 7 5 75386.1 5498.93 3
 -1 7 6 71473.1 6032.64 4
 -1 7 6 71036.4 5598.22 3
 -1 7 7 77222.7 6105.72 3
 -1 7 7 81458.2 6858.34 4
 -1 7 8 7609.42 2257.52 4
 -1 7 9 23288.2 4018.55 4
 -1 7 10 40064.7 5636.24 4
 -1 7 11 17241.9 3849.88 4
 -1 7 12 1920.8 1750.93 4
 -1 7 13 8523.39 2875.63 4
 -1 8 -5 929.648 639.892 3
 -1 8 -4 1262.35 715.434 3
 -1 8 -3 147709 7096.05 3
 -1 8 -2 170278 7681.06 3
 -1 8 -1 2790.64 986.861 3
 -1 8 0 54632.9 4118.28 3
 -1 8 0 58388.9 3112.4 4
 -1 8 1 177242 7053.72 4
 -1 8 1 170286 8004.92 3
 -1 8 2 148078 6959.46 4
 -1 8 2 148846 7631.72 3
 -1 8 3 -156.24 431.013 3
 -1 8 3 -869.26 548.048 4
 -1 8 4 44286.8 4220.94 4
 -1 8 4 47913.4 4360.7 3
 -1 8 5 101991 7071.41 4
 -1 8 5 103311 6971.71 3
 -1 8 6 15845.2 2728.8 3
 -1 8 6 16846.8 2966.6 4
 -1 8 7 2838.38 1157.27 3
 -1 8 7 1663.86 1068.72 4
 -1 8 8 20222.5 3740.82 4
 -1 8 8 21476.1 3524.84 3
 -1 8 9 21759.7 4104.52 4
 -1 8 10 3470.76 1691.1 4
 -1 8 11 2366.39 1399.67 4
 -1 8 12 9488.72 3109.58 4
 -1 9 -6 5577.31 1438.6 3
 -1 9 -5 24409.1 2919.19 3
 -1 9 -4 124610 6851.64 3
 -1 9 -3 167832 8090.27 3
 -1 9 -2 13984.8 2118.63 3
 -1 9 -1 56136 4404.61 3
 -1 9 0 135795 7250.08 3
 -1 9 0 126065 5158.16 4
 -1 9 1 78986 4558.7 4
 -1 9 1 77786.9 5498.94 3
 -1 9 2 1029.25 1020.36 3
 -1 9 2 1313.91 1177.21 4
 -1 9 3 100692 6735.75 3
 -1 9 3 89357.6 5949.12 4
 -1 9 4 112292 7264.44 4
 -1 9 4 110617 7321.64 3
 -1 9 5 27204.3 3768.17 4
 -1 9 5 20015.3 3198.97 3
 -1 9 6 5733.61 1710.03 3
 -1 9 6 3685.71 1492.35 4
 -1 9 7 46547.2 5536.44 4
 -1 9 7 41268.5 4859.69 3
 -1 9 8 26605.2 4457.92 4
 -1 9 8 25204.2 4043.52 3
 -1 9 9 -512.396 1102.06 4
 -1 9 10 19127.4 4147.57 4
 -1 9 11 27043.6 5256.4 4
 -1 10 -7 5643.82 1561.52 3
 -1 10 -6 20636.7 2869.35 3
 -1 10 -5 51116.5 4525.69 3
 -1 10 -4 99987.5 6425.59 3
 -1 10 -3 28233.4 3242.71 3
 -1 10 -2 15305 2389.69 3
 -1 10 -1 89740.1 6075.9 3
 -1 10 0 10623.1 2039.03 3
 -1 10 0 11700.7 1409.62 4
 -1 10 1 4530.01 1447.97 3
 -1 10 1 5159 1227.7 4
 -1 10 2 127249 6902.66 4
 -1 10 2 138554 8227.23 3
 -1 10 3 63863.6 5135.97 4
 -1 10 3 65175.9 5669.54 3
 -1 10 4 6086.58 1743.26 3
 -1 10 4 4796.3 1542.65 4
 -1 10 5 20930 3283.65 4
 -1 10 5 24676.2 3650.48 3
 -1 10 6 69197 6625.39 4
 -1 10 6 84129.5 7163.21 3
 -1 10 7 25345.1 4160.93 4
 -1 10 7 25469.4 4034.3 3
 -1 10 8 1454.26 1339.15 3
 -1 10 8 1279.14 902.898 4
 -1 10 9 33123.2 5328.91 4
 -1 10 10 43538.6 6458.3 4
 -1 11 -9 25797.5 3634.45 3
 -1 11 -8 648.831 758.281 3
 -1 11 -7 18002.4 2871.69 3
 -1 11 -6 45867.2 4528.31 3
 -1 11 -5 41213.5 4251.63 3
 -1 11 -4 -172.584 516.905 3
 -1 11 -3 34158.4 3817.13 3
 -1 11 -2 53037.1 4837.78 3
 -1 11 -1 7538.29 1775.73 3
 -1 11 0 13895.9 2493.31 3
 -1 11 1 56937.3 5327.77 3
 -1 11 2 63027.2 5768.99 3
 -1 11 3 346.569 276.201 3
 -1 11 4 54400.4 5646.61 3
 -1 11 5 65182 6465.51 3
 -1 11 6 21478.9 3767.9 3
 -1 11 7 602.395 733.946 3
 -1 11 8 24420.8 4405.7 3
 -1 12 -11 36179 4747.55 3
 -1 12 -10 35161.3 4549.84 3
 -1 12 -9 766.488 509.785 3
 -1 12 -8 6750.91 1854.6 3
 -1 12 -7 40148.3 4535.6 3
 -1 12 -6 19329.1 3042.12 3
 -1 12 -5 389.245 321.421 3
 -1 12 -4 55170.3 5187.55 3
 -1 12 -3 36179 4179.95 3
 -1 12 -2 9022 2122.85 3
 -1 12 -1 37001.9 4320.85 3
 -1 12 0 37395.3 4440.57 3
 -1 12 1 35999.4 4581.56 3
 -1 12 2 1221.25 594.925 3
 -1 12 3 53135 5726.14 3
 -1 12 4 48347.1 5723.35 3
 -1 12 5 4531.67 1700.47 3
 -1 12 6 1068.53 704.162 3
 -1 12 7 10200.2 2803.49 3
 -1 12 8 16794.4 3788 3
 -1 13 -13 2186.92 1296.08 3
 -1 13 -12 18340.2 3546.31 3
 -1 13 -11 9010.92 2428.75 3
 -1 13 -10 1430.87 1011.17 3
 -1 13 -9 24652 3812.28 3
 -1 13 -8 30635 4155.69 3
 -1 13 -7 5057.61 1640.4 3
 -1 13 -6 4220.2 1559.41 3
 -1 13 -5 72747.8 6360.7 3
 -1 13 -4 51335.6 5291.06 3
 -1 13 -3 2879.33 1219.58 3
 -1 13 -2 44076.1 4949.27 3
 -1 13 -1 79906.1 6881.13 3
 -1 13 0 20248.2 3466.53 3
 -1 13 1 99.3304 285.28 3
 -1 13 2 39898.3 5144.3 3
 -1 13 3 37426 5099.94 3
 -1 13 4 6813.37 2310.58 3
 -1 13 5 1863.49 1443.44 3
 -1 13 6 9509.65 2744.24 3
 -1 14 -12 461.031 569.031 3
 -1 14 -11 5768.05 1853.52 3
 -1 14 -10 25368 4140.14 3
 -1 14 -9 12221.9 2777.21 3
 -1 14 -8 220.595 383.093 3
 -1 14 -7 21604 3608.17 3
 -1 14 -6 51629 5604.93 3
 -1 14 -5 34905.7 4562.02 3
 -1 14 -4 -1398.47 925.453 3
 -1 14 -3 32221.8 4437.75 3
 -1 14 -2 55647.1 5918.52 3
 -1 14 -1 18062 3445.06 3
 -1 14 0 292.125 344.808 3
 -1 14 1 24081.9 4120.79 3
 -1 14 2 32845.9 4949.13 3
 -1 14 3 1977.8 1358.95 3
 -1 14 4 18029.6 3868.1 3
 -1 14 5 22570.1 4421.61 3
 -1 15 -11 20983.3 3925.42 3
 -1 15 -10 18050.7 3544.25 3
 -1 15 -9 331.266 506.106 3
 -1 15 -8 14171.6 3112.13 3
 -1 15 -7 28124 4311.18 3
 -1 15 -6 11480.4 2779.32 3
 -1 15 -5 1423.73 1024.26 3
 -1 15 -4 20034 3634.8 3
 -1 15 -3 21850.8 3881.26 3
 -1 15 -2 938.131 833.41 3
 -1 15 -1 1762.85 1081.54 3
 -1 15 0 14634.3 3332.09 3
 -1 15 1 11279.3 3003.72 3
 -1 15 2 235.418 606.999 3
 -1 15 3 15455.7 3728.55 3
 -1 16 -9 5390.28 1952.68 3
 -1 16 -8 7737.36 2409.36 3
 -1 16 -7 4943.96 1903.39 3
 -1 16 -6 1695.49 1108.96 3
 -1 16 -5 11780 2940.98 3
 -1 16 -4 14595.8 3318.62 3
 -1 16 -3 734.965 887.378 3
 -1 16 -2 8162.68 2635.63 3
 -1 16 -1 29207.3 4944.45 3
 -1 16 0 5410.88 1942.56 3
 0 -13 14 1577.08 1267.3 1
 0 -12 12 4222.51 1778.6 1
 0 -12 13 2662.27 1659.3 1
 0 -12 14 17276.6 3568.14 1
 0 -12 15 3662.45 1848.91 1
 0 -11 10 39049.2 4777.41 1
 0 -11 11 1235.67 822.242 1
 0 -11 12 12187.3 2819.88 1
 0 -11 13 28382.3 4417.76 1
 0 -11 14 6258.38 2153.35 1
 0 -11 15 182.738 483.775 1
 0 -11 16 5136.56 2086.44 1
 0 -10 9 55031.5 5362.9 1
 0 -10 10 221.557 323.749 1
 0 -10 11 34999.1 4468.21 1
 0 -10 12 36442.3 4717.7 1
 0 -10 13 10094.2 2498.12 1
 0 -10 14 -878.153 794.335 1
 0 -10 15 9410.27 2531.81 1
 0 -10 16 1966.57 1123.6 1
 0 -9 3 162534 5922.59 4
 0 -9 4 73671.9 3565.4 4
 0 -9 5 32695.8 2365.99 4
 0 -9 6 6001.95 997.006 4
 0 -9 7 30143.1 2588.26 4
 0 -9 7 30748.6 3635.76 1
 0 -9 8 58666.6 4053.94 4
 0 -9 8 48562.6 4773.63 1
 0 -9 9 329.753 403.484 4
 0 -9 9 -406.605 571.729 1
 0 -9 10 7143.25 1604.56 4
 0 -9 10 6023.34 1743.45 1
 0 -9 11 38265.8 4520.71 1
 0 -9 11 37914.1 4086.36 4
 0 -9 12 15566.2 2715.82 4
 0 -9 12 14256.9 2812.09 1
 0 -9 13 522.536 582.547 1
 0 -9 13 2080.09 1016.47 4
 0 -9 14 12445.8 2801.9 1
 0 -9 14 15431.3 3172.46 4
 0 -9 15 11592.9 2734.98 1
 0 -9 15 6525.52 1955.46 4
 0 -9 16 -186.76 837.483 1
 0 -9 17 4509.37 1818.76 1
 0 -8 2 76121.3 3667.15 4
 0 -8 3 39166 2406.16 4
 0 -8 4 323.893 311.211 4
 0 -8 6 54938.7 4524.78 1
 0 -8 6 50726.7 3215.15 4
 0 -8 7 37017.5 2950.67 4
 0 -8 7 38721.1 3886.75 1
 0 -8 8 49967.8 3859.88 4
 0 -8 8 54678.7 4789.79 1
 0 -8 9 60227.5 4617.05 4
 0 -8 9 61772.7 5228.42 1
 0 -8 10 15211.2 2605.77 1
 0 -8 10 13254.8 2246.91 4
 0 -8 11 -320.178 231.921 1
 0 -8 11 522.484 843.516 4
 0 -8 12 11195 2450.47 1
 0 -8 12 9152.89 2124.54 4
 0 -8 13 12413.8 2651.42 1
 0 -8 13 12416.5 2645.64 4
 0 -8 14 10253.6 2500.42 1
 0 -8 14 10456.8 2530.73 4
 0 -8 15 -373.87 348.865 1
 0 -8 15 -273.791 712.824 4
 0 -8 16 6459.94 2096.02 1
 0 -8 16 4959.48 2010.46 4
 0 -8 17 7965.99 2422.08 1
 0 -8 17 8715.32 2760.37 4
 0 -8 18 6013.81 2238.82 4
 0 -7 1 195216 6682 4
 0 -7 2 61032.6 3054.11 4
 0 -7 3 3027.19 601.323 4
 0 -7 5 137247 7080.12 1
 0 -7 6 14628.5 1681.77 4
 0 -7 6 18206.6 2421.17 1
 0 -7 7 71540.9 4356.17 4
 0 -7 7 71551.5 5129.61 1
 0 -7 8 277670 10659.1 4
 0 -7 8 290549 11723.9 1
 0 -7 9 88591.2 5803.8 4
 0 -7 9 89168.1 6135.82 1
 0 -7 10 1097.22 706.976 1
 0 -7 10 -119.499 486.75 4
 0 -7 11 49135.8 4824.42 4
 0 -7 11 54838.1 5062.42 1
 0 -7 12 59028.9 5625.95 4
 0 -7 12 63362.2 5697.96 1
 0 -7 13 13634.3 2753.95 4
 0 -7 13 14068.4 2734.32 1
 0 -7 14 1119.14 889.253 4
 0 -7 14 210.902 364.859 1
 0 -7 15 10525.4 2694.78 4
 0 -7 15 9553.04 2452.59 1
 0 -7 16 10791.3 2925.24 4
 0 -7 16 7544.27 2216.02 1
 0 -7 17 4520.52 1988.26 4
 0 -7 17 281.223 545.553 1
 0 -7 18 -121.768 796.335 4
 0 -6 0 278242 8719.76 4
 0 -6 1 77407.3 3675.44 4
 0 -6 2 847.368 312.559 4
 0 -6 3 142913 4606.61 4
 0 -6 4 379655 12416.6 1
 0 -6 5 11923 1386.68 4
 0 -6 5 11219.3 1737.44 1
 0 -6 6 110526 5156.6 4
 0 -6 6 105379 5890.62 1
 0 -6 7 288561 10303 4
 0 -6 7 283473 10965.9 1
 0 -6 8 91110.1 5571.08 4
 0 -6 8 87451.7 5694.6 1
 0 -6 9 3170.04 1065.14 4
 0 -6 9 3934.81 1201.68 1
 0 -6 10 26522.5 3390.2 4
 0 -6 10 27486.8 3319.38 1
 0 -6 11 47359 4585.85 1
 0 -6 11 46337 4753.68 4
 0 -6 12 37634 4234.29 1
 0 -6 12 35868.7 4418.32 4
 0 -6 13 -182.763 564.139 1
 0 -6 13 -218.88 565.002 4
 0 -6 14 23125 3579.19 1
 0 -6 14 25909.8 4149.98 4
 0 -6 15 10912.3 2545.96 1
 0 -6 15 10964.3 2838.22 4
 0 -6 16 1011.36 510.362 4
 0 -6 16 -138.905 833.171 1
 0 -6 17 2837.6 1237.9 1
 0 -6 17 3568.3 1898.87 4
 0 -5 0 60255.9 3034.69 4
 0 -5 1 24617.5 1656.77 4
 0 -5 2 68338.6 2744.65 4
 0 -5 3 89012.6 4592.89 1
 0 -5 4 21791.6 2226.65 1
 0 -5 5 213349 7344.63 4
 0 -5 5 217856 8323.58 1
 0 -5 6 255037 9062.21 4
 0 -5 6 258692 9640.52 1
 0 -5 7 148180 7014.9 4
 0 -5 7 149587 7209.33 1
 0 -5 8 700.629 436.33 1
 0 -5 8 812.223 545.464 4
 0 -5 9 49009.9 4158.04 1
 0 -5 9 48450 4387.85 4
 0 -5 10 15144.1 2375.56 1
 0 -5 10 17746.5 2808.56 4
 0 -5 11 -1042.88 659.722 1
 0 -5 11 -172.935 673.458 4
 0 -5 12 8287.19 1889.77 1
 0 -5 12 9756.44 2278.04 4
 0 -5 13 40243.2 4426.59 1
 0 -5 13 38421.8 4886.41 4
 0 -5 14 12399.7 2852.66 4
 0 -5 14 13645.1 2716.7 1
 0 -5 15 -487.141 619.719 4
 0 -5 15 578.47 634.518 1
 0 -5 16 4775.87 1590.75 1
 0 -5 16 4289.85 1960 4
 0 -5 17 7580.64 2242.66 1
 0 -5 17 9124.66 2859.67 4
 0 -4 -1 10723 1256.11 4
 0 -4 0 104505 3945.45 4
 0 -4 1 235777 6484.47 4
 0 -4 3 57.6501 94.8628 1
 0 -4 4 304657 8916.94 4
 0 -4 4 312222 9768.58 1
 0 -4 5 130452 5514.32 4
 0 -4 5 131870 5825.25 1
 0 -4 6 61520 3939.73 1
 0 -4 6 60872.5 4000.8 4
 0 -4 7 101921 5461.41 1
 0 -4 7 97449.3 5706.38 4
 0 -4 8 69887.1 4642.78 1
 0 -4 8 68941.1 5025.42 4
 0 -4 9 68946.5 4838.43 1
 0 -4 9 72316.9 5530.1 4
 0 -4 10 1893.92 1012.93 4
 0 -4 11 41229.2 4750.95 4
 0 -4 12 120007 8649.86 4
 0 -4 13 26434.3 4114.25 4
 0 -4 14 7174.04 2347.7 4
 0 -4 15 15494.1 3421.34 4
 0 -4 16 13651 2871.31 1
 0 -4 16 13254.4 3394.64 4
 0 -4 17 6680.56 2185.62 1
 0 -4 17 5127.99 2350.91 4
 0 -3 -1 64268 3054.55 4
 0 -3 0 479481 12217.8 3
 0 -3 0 495590 11768.2 4
 0 -3 1 111273 4107.33 3
 0 -3 1 110779 3305.57 4
 0 -3 2 28417.2 1927.39 1
 0 -3 3 186952 5647.18 4
 0 -3 3 179994 6176.63 1
 0 -3 4 55476.8 3112.19 1
 0 -3 4 47659.7 2827.47 4
 0 -3 5 51125 3180.2 1
 0 -3 5 48977.7 3294.34 4
 0 -3 6 68093.3 4440.19 4
 0 -3 7 121381 6609.58 4
 0 -3 8 68869.8 5283.23 4
 0 -3 9 3664.7 1363.12 4
 0 -3 10 53786.5 5214.07 4
 0 -3 11 148169 9368.28 4
 0 -3 12 65402.9 6368.19 4
 0 -3 13 17600.2 3459.65 4
 0 -3 14 47489.4 5907.4 4
 0 -3 15 14775.7 3408.83 4
 0 -3 16 1146.6 996.77 4
 0 -3 17 4151.91 2046.1 4
 0 -2 -2 27635.8 2075.65 4
 0 -2 -2 28970 1949.23 3
 0 -2 -1 226647 6457.63 4
 0 -2 -1 219884 6296.27 3
 0 -2 0 342932 8539.23 3
 0 -2 2 123367 4135.76 1
 0 -2 3 293961 8242.66 1
 0 -2 3 296701 8353.1 4
 0 -2 4 14501.7 1631.38 4
 0 -2 5 9469.22 1460.76 4
 0 -2 6 68840.6 4624.63 4
 0 -2 7 88567 5723.55 4
 0 -2 8 27.2522 378.776 4
 0 -2 9 17654.8 2793.84 4
 0 -2 10 92406.8 7081.87 4
 0 -2 11 31100.2 4272.69 4
 0 -2 12 6447.34 2104.38 4
 0 -2 13 35090.6 4975.41 4
 0 -2 14 19198.7 3843.8 4
 0 -2 15 1686 1195.78 4
 0 -2 16 6801.01 2563.88 4
 0 -1 -3 137931 5223.49 3
 0 -1 -2 291290 8507.16 4
 0 -1 -2 294819 8073.98 3
 0 -1 3 4496.39 820.63 4
 0 -1 4 108980 5088.17 4
 0 -1 5 199536 8044.01 4
 0 -1 6 15379.6 2134.58 4
 0 -1 7 40282.9 3854.38 4
 0 -1 8 18830.9 2808.84 4
 0 -1 9 54509.9 5175.97 4
 0 -1 10 32989.4 4265.82 4
 0 -1 11 7003.64 1938.78 4
 0 -1 12 33190.5 4703.7 4
 0 -1 13 15894.7 3638.44 4
 0 -1 14 -617.714 1071.48 4
 0 -1 15 10156.6 2901.91 4
 0 -1 16 25167.4 4927.88 4
 0 0 -3 700594 17723.8 4
 0 0 3 663759 16973.2 4
 0 0 4 324190 10413.9 4
 0 0 4 309669 7209.25 2
 0 0 5 43560 3500.56 4
 0 0 5 41433.7 1609.2 2
 0 0 6 104872 6160.13 4
 0 0 6 100273 3065.23 2
 0 0 7 141937 4060.66 2
 0 0 7 154579 8152.89 4
 0 0 8 86333.4 2787.96 2
 0 0 8 93825 6581.69 4
 0 0 9 7489.06 604.438 2
 0 0 9 7300.71 1843.25 4
 0 0 10 20915.2 3543.94 4
 0 0 11 41562.4 5115.69 4
 0 0 12 24825.7 4130.56 4
 0 0 13 7871.85 3066.99 4
 0 0 14 23491.8 4499.22 4
 0 0 15 39319.4 6085.6 4
 0 1 -3 4435.96 765.602 4
 0 1 2 293775 8573.08 4
 0 1 2 309698 8235.42 3
 0 1 3 127749 5406.5 4
 0 1 4 11608.6 1619.63 4
 0 1 5 43329.2 3584.24 4
 0 1 6 153334 7861.4 4
 0 1 7 24720.9 3159.05 4
 0 1 7 28742.9 1715.06 2
 0 1 8 -62.8774 140.571 2
 0 1 8 610.956 546.366 4
 0 1 9 77942.5 3158.33 2
 0 1 9 75207.9 6421.02 4
 0 1 10 39820 4820.53 4
 0 1 11 8317.48 2270.49 4
 0 1 12 7209.55 2684.41 4
 0 1 13 36111.6 5404.85 4
 0 1 14 42890.3 6266.65 4
 0 1 15 6653.2 2470.31 4
 0 2 -5 8532.23 561.007 2
 0 2 -4 15458.4 1590.16 4
 0 2 -4 15711.5 864.186 2
 0 2 -2 123497 4131.9 1
 0 2 -1 13959 1074.94 1
 0 2 0 350537 8362.61 4
 0 2 1 220173 6282.03 3
 0 2 1 214661 6342.42 4
 0 2 2 25537.5 1970.62 4
 0 2 2 27104.5 1899.69 3
 0 2 3 22971.4 2175.8 4
 0 2 3 30572.1 2271.04 3
 0 2 4 72106.1 4449.35 4
 0 2 4 70958.8 4015.37 3
 0 2 5 269593 10617.1 4
 0 2 6 32598.1 3528.01 4
 0 2 7 5076.72 1434.28 4
 0 2 8 92392.1 6950.45 4
 0 2 8 99517.4 4208.18 2
 0 2 9 62036.5 6003.19 4
 0 2 9 65545.7 3306.62 2
 0 2 10 -309.648 918.943 4
 0 2 11 4177.1 1554.64 4
 0 2 12 54307.1 6551.66 4
 0 2 13 12864.3 3322.5 4
 0 2 14 -319.26 1017.41 4
 0 2 15 7112.44 2640.92 4
 0 3 -7 110863 3212.99 2
 0 3 -6 69955.7 2457.21 2
 0 3 -5 48244.9 1989.62 2
 0 3 -2 28593.9 1915.15 1
 0 3 -1 113905 4168.06 3
 0 3 -1 113124 4296.73 1
 0 3 0 490270 12230.8 3
 0 3 0 474226 11626.4 4
 0 3 1 57433.6 2943.12 4
 0 3 1 59553.6 2985.05 3
 0 3 2 4740.13 868.701 3
 0 3 2 4923.6 920.337 4
 0 3 3 76230.9 4438.94 4
 0 3 3 87092.2 4391.06 3
 0 3 4 149734 7095.75 4
 0 3 4 162181 6840.66 3
 0 3 5 158263 7980.58 4
 0 3 5 174648 7598.54 3
 0 3 6 5548.35 2879.92 4
 0 3 7 82405.6 6277.65 4
 0 3 8 98075.6 7347.54 4
 0 3 9 35029.7 4560.46 4
 0 3 9 17653.3 1947.65 2
 0 3 10 5657.86 1745.37 4
 0 3 11 61839.5 6881.36 4
 0 3 12 9430.2 2947.38 4
 0 3 13 -197.696 1032.47 4
 0 3 14 28034.3 5311.23 4
 0 4 -9 58263.4 2084.44 2
 0 4 -8 69279.8 2597.91 2
 0 4 -7 110882 3747.19 2
 0 4 -6 57677 2502.75 2
 0 4 -2 59962.2 3210.7 3
 0 4 -1 199136 6674.09 3
 0 4 0 101961 4336.03 3
 0 4 0 97982 3805.4 4
 0 4 1 9006.43 1190.47 4
 0 4 1 10445.3 1315.85 3
 0 4 2 111360 5258.06 4
 0 4 2 120505 5355.36 3
 0 4 3 246243 9355.53 4
 0 4 3 248675 8976.13 3
 0 4 4 316323 11817.7 4
 0 4 4 332245 11388.7 3
 0 4 5 6101.76 1374.44 3
 0 4 5 5577.94 1461.27 4
 0 4 6 133606 8006.43 4
 0 4 6 140165 7376.52 3
 0 4 7 47360.7 4862.22 4
 0 4 8 995.274 735.705 4
 0 4 9 21887.5 3730.92 4
 0 4 10 54986.3 6293.69 4
 0 4 11 4481.1 1687.11 4
 0 4 12 816.089 948.349 4
 0 4 13 22382.5 4691.74 4
 0 4 14 13116.8 3668.69 4
 0 5 -9 46493.4 2249.33 2
 0 5 -3 102955 4920.13 3
 0 5 -2 73467.6 3920.62 3
 0 5 -1 23526.4 2104.93 3
 0 5 0 50877.9 3241 3
 0 5 0 50281.8 2792.65 4
 0 5 1 292759 9396.29 4
 0 5 1 292321 9772.16 3
 0 5 2 196139 7958.13 4
 0 5 2 213231 8138.52 3
 0 5 3 58952.1 4215.99 4
 0 5 3 60378.8 4120.35 3
 0 5 4 3071.62 992.292 3
 0 5 4 2610.9 985.982 4
 0 5 5 151774 8392.75 4
 0 5 5 152255 7751.47 3
 0 5 6 53463.2 5115.39 4
 0 5 6 51515.3 4566.89 3
 0 5 7 7512.95 1946.45 4
 0 5 8 70552.8 6654.3 4
 0 5 9 75229.6 7377.23 4
 0 5 10 5997.75 2157.03 4
 0 5 11 5723.83 2206.89 4
 0 5 12 20002 4310.5 4
 0 5 13 12745.7 3521.37 4
 0 6 -4 379050 12311.3 3
 0 6 -3 145424 6441.91 3
 0 6 -2 919.462 491.478 3
 0 6 -1 45316.8 3293.4 3
 0 6 0 291789 10120 3
 0 6 0 291456 8970.27 4
 0 6 1 30285.9 2600.4 4
 0 6 1 29196.4 2770.09 3
 0 6 2 93109.6 5140.71 4
 0 6 2 10252.5 1759.26 3
 0 6 3 81832.2 5330.39 4
 0 6 3 82159.4 5248.5 3
 0 6 4 74407.5 5435.64 4
 0 6 4 76538.4 5268.05 3
 0 6 5 26695.2 3282.1 3
 0 6 5 25295 3445.01 4
 0 6 6 18629.6 3014.24 4
 0 6 6 26059.2 3318.51 3
 0 6 7 59376.6 5946.4 4
 0 6 7 66257.6 5647.63 3
 0 6 8 101418 8349.12 4
 0 6 9 11056.8 3350.97 4
 0 6 10 12915.6 3183.15 4
 0 6 11 29479.1 5163.5 4
 0 6 12 10963.2 3382.47 4
 0 7 -5 131638 6715.25 3
 0 7 -4 122149 6283.46 3
 0 7 -3 3635.89 991.148 3
 0 7 -2 62790 4212.84 3
 0 7 -1 189523 8061.87 3
 0 7 0 5253.72 1211.51 3
 0 7 0 3811.68 833.513 4
 0 7 1 910.49 542.41 3
 0 7 1 532.333 368.939 4
 0 7 2 148944 7272.4 4
 0 7 2 150650 7591.98 3
 0 7 3 107659 6475.24 4
 0 7 3 108704 6544.59 3
 0 7 4 25359.4 3249.15 4
 0 7 4 25097.8 3124.88 3
 0 7 5 62687.7 5618.74 4
 0 7 5 64958.2 5447.79 3
 0 7 6 78977.8 6692.53 4
 0 7 6 80074.8 6289.97 3
 0 7 7 90922.3 7672.71 4
 0 7 7 102937 7472.35 3
 0 7 8 3883.19 1645.52 4
 0 7 9 13493.6 3272.34 4
 0 7 10 44141.9 6211.3 4
 0 7 11 6902.71 2524.96 4
 0 7 12 5.36336 469.253 4
 0 8 -6 60076.1 4668.88 3
 0 8 -5 20576.3 2599.02 3
 0 8 -4 -43.2536 375.209 3
 0 8 -3 40429 3594.41 3
 0 8 -2 77863.9 5106.53 3
 0 8 -1 17178 2384.25 3
 0 8 0 954.506 593.395 3
 0 8 0 760.298 446.254 4
 0 8 1 126844 6348 4
 0 8 1 135356 7343.05 3
 0 8 2 118511 6645 4
 0 8 2 118850 7048.26 3
 0 8 3 25108.3 3120.69 4
 0 8 3 24413.1 3165.49 3
 0 8 4 12140.2 2312.81 3
 0 8 4 15091.1 2554.53 4
 0 8 5 71698.7 6201.97 4
 0 8 5 76872.2 6234.72 3
 0 8 6 50236.5 5497.9 4
 0 8 6 52820.9 5306 3
 0 8 7 4359.03 1512.9 3
 0 8 7 4919.65 1805.33 4
 0 8 8 30480.3 4757.99 4
 0 8 8 34414.5 4631.82 3
 0 8 9 26957.1 4752.78 4
 0 8 10 3976.86 1672.3 4
 0 8 11 857.439 1090.79 4
 0 9 -8 51417.1 4757.02 3
 0 9 -7 26743.1 3307.63 3
 0 9 -6 6464.53 1528.07 3
 0 9 -5 18953.1 2620.35 3
 0 9 -4 82847.7 5642.58 3
 0 9 -3 152427 7920.64 3
 0 9 -2 15244.3 2345.69 3
 0 9 -1 1083.31 606.448 3
 0 9 0 58346 3714.89 4
 0 9 0 68308.6 5220.55 3
 0 9 1 74150.9 4794.14 4
 0 9 1 73931.3 5654.81 3
 0 9 2 2675.88 1283.37 3
 0 9 2 3078.98 2147.45 4
 0 9 3 35461 3884.02 4
 0 9 3 37181.1 4193.42 3
 0 9 4 45084.6 4738.55 4
 0 9 4 44282.5 4736.66 3
 0 9 5 26674.1 3907.42 4
 0 9 5 27177.4 3862.27 3
 0 9 6 1413.78 965.916 3
 0 9 6 219.325 504.156 4
 0 9 7 41524.3 5102.56 3
 0 9 7 38169 5243.41 4
 0 9 8 39012.2 5659.25 4
 0 9 8 43516.3 5591.29 3
 0 9 9 2335.3 1385.33 4
 0 9 10 19373.7 4412.11 4
 0 9 11 27034.2 5370.46 4
 0 10 -9 51608.4 5054.72 3
 0 10 -8 53648.9 5038.54 3
 0 10 -7 25585 3331.69 3
 0 10 -6 28886.9 3499.15 3
 0 10 -5 47351.6 4456.73 3
 0 10 -4 190958 9536.47 3
 0 10 -3 44780.5 4288.54 3
 0 10 -2 2803.65 1073.65 3
 0 10 -1 30978.5 3642.42 3
 0 10 0 50392.5 3528.83 4
 0 10 0 54066.5 4959.92 3
 0 10 1 3023.12 1263.7 3
 0 10 1 3830.72 1121.95 4
 0 10 2 64991.4 5071.16 4
 0 10 2 59231.2 5569.44 3
 0 10 3 46624 4676.68 4
 0 10 3 51448.3 5229.56 3
 0 10 4 10952.7 2487.13 3
 0 10 4 8687.45 2054.03 4
 0 10 5 4443.54 1678.09 3
 0 10 5 3839.23 1497.53 4
 0 10 6 57765 6270.21 4
 0 10 6 61063.1 6429.24 3
 0 10 7 32436.2 4967.55 4
 0 10 7 33419.7 4816.8 3
 0 10 8 2463.4 1460.03 3
 0 10 8 968.185 841.732 4
 0 11 -11 1703.04 950.192 3
 0 11 -10 32256.7 4217.03 3
 0 11 -9 53443.2 5329.73 3
 0 11 -8 23916.9 3436.82 3
 0 11 -7 17756.5 2879.18 3
 0 11 -6 47033.2 4707.57 3
 0 11 -5 117902 7655.49 3
 0 11 -4 10123.1 2092.12 3
 0 11 -3 11591.7 2266.24 3
 0 11 -2 53723.2 5078.96 3
 0 11 -1 21246.7 3194.74 3
 0 11 0 1613.62 1013.4 3
 0 11 1 59598.8 5751.16 3
 0 11 2 60581.2 5928.01 3
 0 11 3 4903.62 1645.38 3
 0 11 4 7101.52 2239.11 3
 0 11 5 33364.7 4804.36 3
 0 11 6 26829.5 4445.25 3
 0 11 7 1182.56 895.67 3
 0 11 8 12832.4 3306.12 3
 0 12 -13 6961.36 2166.61 3
 0 12 -12 3850.38 1631.72 3
 0 12 -11 20923.1 3603.9 3
 0 12 -10 25896.9 3910.69 3
 0 12 -9 234.419 365.78 3
 0 12 -8 13057.3 2615.61 3
 0 12 -7 31830.5 4074.19 3
 0 12 -6 51703.7 5240.03 3
 0 12 -5 193.8 337.911 3
 0 12 -4 40784.3 4591.34 3
 0 12 -3 88614.4 6949.36 3
 0 12 -2 13966.2 2691.98 3
 0 12 -1 28163.1 3904.5 3
 0 12 0 62529.9 6061.65 3
 0 12 1 58284.9 5980.41 3
 0 12 2 418.684 634.478 3
 0 12 3 22668 3901.82 3
 0 12 4 25595.9 4323.93 3
 0 12 5 10857.7 2954.08 3
 0 12 6 639.678 583.006 3
 0 12 7 14315.8 3468.61 3
 0 13 -13 1772.42 866.098 3
 0 13 -12 21555.5 3829.04 3
 0 13 -11 4906.76 1882.26 3
 0 13 -10 1466.89 1053.95 3
 0 13 -9 15496.9 3053.4 3
 0 13 -8 21882.6 3587.13 3
 0 13 -7 7042.89 2020.55 3
 0 13 -6 7539.78 2166.39 3
 0 13 -5 43771 5074.98 3
 0 13 -4 67228.3 6296.77 3
 0 13 -3 5941.49 1853.08 3
 0 13 -2 16133.8 3131.4 3
 0 13 -1 58867.5 6137.07 3
 0 13 0 42276.9 5231.77 3
 0 13 1 1126.52 555.821 3
 0 13 2 29758 4602.63 3
 0 13 3 29594.1 4712.1 3
 0 13 4 10010.5 2819.99 3
 0 13 5 4650.72 1968.79 3
 0 14 -12 5474.59 1971.61 3
 0 14 -11 2763.55 1240.04 3
 0 14 -10 17528.1 3487.31 3
 0 14 -9 13427.6 3009.01 3
 0 14 -8 3571.91 1484.56 3
 0 14 -7 2748.98 1368.41 3
 0 14 -6 23548 3808.36 3
 0 14 -5 34347.4 4701.76 3
 0 14 -4 2243.33 1191.18 3
 0 14 -3 14126.4 3038.11 3
 0 14 -2 29673 4469.06 3
 0 14 -1 28133.9 4464.14 3
 0 14 0 5186.29 1849.41 3
 0 14 1 10769.3 2905.91 3
 0 14 2 29361.1 4841.88 3
 0 14 3 3675.61 1750.83 3
 0 15 -10 8519.79 2541.25 3
 0 15 -9 3349.28 1316.72 3
 0 15 -8 24.3611 377.649 3
 0 15 -7 13932 3123.13 3
 0 15 -6 20030.6 3707.26 3
 0 15 -5 83.9868 615.019 3
 0 15 -4 11351.8 2817.5 3
 0 15 -3 28019.3 4546.06 3
 0 15 -2 5313.58 1981.63 3
 0 15 -1 468.098 360.576 3
 0 15 0 10222.5 2839.34 3
 0 15 1 15564.7 3640.9 3
 0 16 -6 1608.49 1285.57 3
 0 16 -5 6717.27 2377.27 3
 0 16 -4 25260.1 4440.66 3
 1 -13 11 6824.79 2091.77 1
 1 -13 12 19024.8 3693.97 1
 1 -13 13 2650.96 1553.7 1
 1 -13 14 467.003 732.76 1
 1 -12 10 32767.5 4526.24 1
 1 -12 11 33296 4607.7 1
 1 -12 12 4743.69 1701.98 1
 1 -12 13 2517.56 1512.18 1
 1 -12 14 14676.6 3225.08 1
 1 -12 15 6661.84 2349.42 1
 1 -11 8 1016.38 787.844 1
 1 -11 9 31453.5 4171.2 1
 1 -11 10 63905.5 6155.05 1
 1 -11 11 10023.9 2410.9 1
 1 -11 12 4312.82 1687.08 1
 1 -11 13 22908.8 3914.94 1
 1 -11 14 12418.2 2902.76 1
 1 -11 15 -222.427 623.925 1
 1 -10 7 3808.18 1357.55 1
 1 -10 8 9681.01 2179.2 1
 1 -10 9 51082.4 5169.79 1
 1 -10 10 8132.04 2030.39 1
 1 -10 11 5638.78 1879.63 1
 1 -10 12 23630.4 3793.84 1
 1 -10 13 16211.4 3222.09 1
 1 -10 14 540.381 972.682 1
 1 -10 15 8212.49 2446.96 1
 1 -10 16 8148.66 2509.18 1
 1 -9 1 61711.6 3206.38 4
 1 -9 2 13492.3 1139.28 4
 1 -9 3 153405 4377.71 4
 1 -9 4 105114 3478.71 4
 1 -9 4 109987 3569.79 4
 1 -9 5 27224.5 1840.85 4
 1 -9 5 27818.8 1694.12 4
 1 -9 6 3728.62 1217.86 1
 1 -9 6 6304.57 1021.76 4
 1 -9 7 62565.6 5174.88 1
 1 -9 7 56589.8 3637.82 4
 1 -9 8 60643.4 4147.36 4
 1 -9 8 55276.3 5013.91 1
 1 -9 9 1121.5 629.917 4
 1 -9 9 386.335 595.396 1
 1 -9 10 14273.2 2326.83 4
 1 -9 10 20545.1 3186.3 1
 1 -9 11 49851.5 4656.24 4
 1 -9 11 40032.7 4642.47 1
 1 -9 12 17892.3 3181.87 1
 1 -9 12 18544.1 2972.79 4
 1 -9 13 -139.105 692.66 1
 1 -9 13 -157.304 474.321 4
 1 -9 14 12498.6 2752.54 1
 1 -9 14 10105.1 2702.1 4
 1 -9 15 10652.8 2656.19 4
 1 -9 15 11490.7 2799.09 1
 1 -9 16 2343.19 1387.54 1
 1 -8 0 59470.7 3372.65 4
 1 -8 1 1242.54 388.58 4
 1 -8 2 187637 5297.74 4
 1 -8 3 144828 4203.99 4
 1 -8 4 659.089 222.993 4
 1 -8 4 1064.49 320.053 4
 1 -8 5 192.848 118.508 4
 1 -8 5 1263.65 802.363 1
 1 -8 6 60500.9 3491.23 4
 1 -8 6 72185 5212.26 1
 1 -8 7 35004.8 2923.32 4
 1 -8 7 35927.2 3684.25 1
 1 -8 8 30497 3030.63 4
 1 -8 8 26069.7 3265.06 1
 1 -8 9 36752.6 3546.84 4
 1 -8 9 40547.6 4208.01 1
 1 -8 10 59181.8 4913.64 4
 1 -8 10 58269.3 5250.88 1
 1 -8 11 2815.86 1094.02 4
 1 -8 11 3684.95 1362.29 1
 1 -8 12 5479.63 1491.6 4
 1 -8 12 8100.11 2098.91 1
 1 -8 13 12086 2535.04 4
 1 -8 13 20835.7 3468.23 1
 1 -8 14 8854.05 2342.81 4
 1 -8 14 13187.5 2818.52 1
 1 -8 15 -230.537 482.373 4
 1 -8 15 95.1636 426.488 1
 1 -8 16 1351.65 1112.48 4
 1 -8 16 1157.75 901.01 1
 1 -8 17 7885.48 2454.82 4
 1 -8 18 6303.83 2352.86 4
 1 -7 0 1373.95 466.873 4
 1 -7 1 252005 6960.09 4
 1 -7 2 112666 3380.41 4
 1 -7 3 1476.44 298.927 4
 1 -7 3 1163.19 265.964 4
 1 -7 4 100284 3685.05 4
 1 -7 4 98172.2 5604.95 1
 1 -7 5 123150 6476.74 1
 1 -7 5 116212 4751.34 4
 1 -7 6 33119.7 2619.73 4
 1 -7 6 33529.8 3279.67 1
 1 -7 7 63533.3 4175.26 4
 1 -7 7 68566.8 4999.53 1
 1 -7 8 161136 7695.62 4
 1 -7 8 159508 8268.59 1
 1 -7 9 50371.1 4333.27 4
 1 -7 9 55028.1 4745 1
 1 -7 10 379.185 391.86 4
 1 -7 10 1116.87 711.279 1
 1 -7 11 41235 4415.53 4
 1 -7 11 40070.2 4387.88 1
 1 -7 12 72830.5 6154.99 1
 1 -7 12 62065.5 5875.85 4
 1 -7 13 18793.7 3219.72 1
 1 -7 13 14873.2 3005.9 4
 1 -7 14 844.185 933.424 1
 1 -7 14 6906.71 2175.81 4
 1 -7 15 4628.75 1727.85 1
 1 -7 15 4452.12 1816.52 4
 1 -7 16 10397.2 2627.82 1
 1 -7 16 9445.95 2717.84 4
 1 -7 17 5392.54 1994.71 1
 1 -7 17 8045.07 2774.43 4
 1 -6 -1 20705.5 1867.1 4
 1 -6 0 272396 7842.56 4
 1 -6 1 35266.4 1706.09 4
 1 -6 3 64878.5 2432.36 4
 1 -6 3 70351.7 4182.06 1
 1 -6 4 254795 7415.93 4
 1 -6 4 250825 9335.9 1
 1 -6 5 64481.6 3542.84 4
 1 -6 5 70865.6 4489.6 1
 1 -6 6 11807.7 1606.65 4
 1 -6 6 12806.5 1950.66 1
 1 -6 7 391897 13135.3 4
 1 -6 7 401240 13766.2 1
 1 -6 8 77556.3 5363.87 1
 1 -6 8 83876.6 5433.78 4
 1 -6 9 7594.45 1705.29 1
 1 -6 9 6804.2 1580.08 4
 1 -6 10 28397.7 3411.96 1
 1 -6 10 23667.5 3192.17 4
 1 -6 11 65348 5443.48 1
 1 -6 11 60294.4 5532.46 4
 1 -6 12 28476.2 3703.7 1
 1 -6 12 24490.9 3754.33 4
 1 -6 13 25.8054 509.783 1
 1 -6 13 1220.23 1061.82 4
 1 -6 14 6023.52 1902.38 1
 1 -6 14 7272.38 2254.62 4
 1 -6 15 20936.7 3585.27 1
 1 -6 15 18396 3710.04 4
 1 -6 16 2155.88 1250.36 1
 1 -6 16 3156.09 1681.77 4
 1 -6 17 410.472 581.926 1
 1 -6 17 948.501 1230.83 4
 1 -5 -1 197189 6585.89 4
 1 -5 0 105163 3677.49 4
 1 -5 2 6592.27 1089.92 1
 1 -5 3 89338.6 3205.16 4
 1 -5 3 90928.3 4550.74 1
 1 -5 4 22185.1 1754.34 4
 1 -5 4 20960.5 2119.83 1
 1 -5 5 1196.19 527.394 4
 1 -5 5 1097.98 598.246 1
 1 -5 6 235177 9110.22 1
 1 -5 6 233189 8755.3 4
 1 -5 7 47778 3804.72 1
 1 -5 7 53657.2 4146.43 4
 1 -5 8 1563.54 811.266 4
 1 -5 8 625.69 450.632 1
 1 -5 9 34098.4 3722.89 4
 1 -5 9 35475.8 3538.56 1
 1 -5 10 16678 2525.06 1
 1 -5 10 18455.8 3183.67 4
 1 -5 11 2932.07 1394.67 4
 1 -5 11 2442.93 928.547 1
 1 -5 12 4456.72 1581.77 4
 1 -5 13 21807.1 3720.43 4
 1 -5 14 11244.4 2419.37 1
 1 -5 14 13433.9 3144.82 4
 1 -5 15 390.359 598.635 4
 1 -5 15 1457.58 954.152 1
 1 -5 16 3795.6 1551.51 1
 1 -5 16 3222.01 1662.33 4
 1 -5 17 6895.56 2674.87 4
 1 -5 17 11467.7 2828.02 1
 1 -4 -2 209890 7286.29 4
 1 -4 -1 24403.8 1710.47 4
 1 -4 0 32148.7 2000.34 3
 1 -4 0 32541.6 1553.08 4
 1 -4 2 190188 6520.31 1
 1 -4 3 47883.7 2361.28 4
 1 -4 3 49474 2986.56 1
 1 -4 4 78425 4199.08 1
 1 -4 4 87495.3 4151.61 4
 1 -4 5 214625 7884.48 1
 1 -4 5 202720 7625.91 4
 1 -4 6 59305.4 3947.63 1
 1 -4 6 62559.9 4183.82 4
 1 -4 7 30969.5 3118.07 4
 1 -4 8 51303.2 4415.35 4
 1 -4 9 64258.7 5304.27 4
 1 -4 10 3780.48 1468.25 4
 1 -4 11 38561.4 4607.21 4
 1 -4 12 135981 9416.98 4
 1 -4 13 27308.8 4274.16 4
 1 -4 14 6762 2572.68 4
 1 -4 15 17916 3850.34 4
 1 -4 16 12902.5 3374.32 4
 1 -3 -2 31209.9 2167.73 4
 1 -3 -2 28333.5 1838.84 3
 1 -3 -1 51502.6 2293.66 3
 1 -3 -1 47101.6 2296.05 4
 1 -3 0 2312.64 434.458 3
 1 -3 1 142538 4741.4 1
 1 -3 2 298448 7488.08 4
 1 -3 2 304579 8526.18 1
 1 -3 3 5050.56 841.513 1
 1 -3 3 5003.3 758.797 4
 1 -3 4 232988 7849.06 4
 1 -3 5 276158 9615.53 4
 1 -3 6 1205 575.237 4
 1 -3 7 69134.7 4928.23 4
 1 -3 8 109589 6805.63 4
 1 -3 9 -28.6075 532.285 4
 1 -3 10 31067.6 3964.15 4
 1 -3 11 134935 9090.33 4
 1 -3 12 57842 6118.78 4
 1 -3 13 12451.2 2970.92 4
 1 -3 14 17656.4 3567.92 4
 1 -3 15 18622.3 3986.7 4
 1 -3 16 7699.12 2929.59 4
 1 -2 -3 20012.4 1897.19 4
 1 -2 -3 30294.7 1975.77 3
 1 -2 -2 357811 9596.17 4
 1 -2 -2 344040 8872.64 3
 1 -2 -1 353648 8334.42 3
 1 -2 2 74826.1 2892.19 4
 1 -2 3 410542 11211.8 4
 1 -2 4 371.663 239.196 4
 1 -2 5 24619.9 2473.62 4
 1 -2 6 220275 9225.15 4
 1 -2 7 76852.8 5440.14 4
 1 -2 8 1066.87 664.316 4
 1 -2 9 6863.06 1777.5 4
 1 -2 10 70498.3 6201.49 4
 1 -2 11 42784.2 5007.48 4
 1 -2 12 -185.852 594.196 4
 1 -2 13 28022.3 4520.48 4
 1 -2 14 20477.5 4075.8 4
 1 -2 15 1421.08 1065.5 4
 1 -2 16 3370.36 1807.18 4
 1 -1 -3 74500.5 3630.75 4
 1 -1 -2 410110 9638.4 2
 1 -1 -2 401068 9684.43 3
 1 -1 2 581136 14188.7 4
 1 -1 3 8896.95 1184.95 4
 1 -1 4 143056 6163.47 4
 1 -1 5 211989 8615.83 4
 1 -1 6 38453.6 3551.22 4
 1 -1 7 18438.9 2652.44 4
 1 -1 8 22248.2 3117.56 4
 1 -1 9 67672.2 5897.46 4
 1 -1 10 60953.8 5964.36 4
 1 -1 11 7373.07 2188.37 4
 1 -1 12 55073.2 6285.25 4
 1 -1 13 21464.5 4161.15 4
 1 -1 14 -842.676 1175.61 4
 1 -1 15 13435.7 3448.12 4
 1 0 -5 5130.31 585.16 2
 1 0 -4 137613 3968.9 2
 1 0 -3 45250 1750.01 2
 1 0 2 55357.1 2946.32 4
 1 0 2 57146.4 1916.58 2
 1 0 3 409795 11169 4
 1 0 3 338190 8114.21 2
 1 0 4 359454 11682.1 4
 1 0 5 30694.7 2992.56 4
 1 0 6 39086.1 3755.73 4
 1 0 6 38228.8 1626.17 2
 1 0 7 83271.4 5968.93 4
 1 0 7 79794.9 2631.05 2
 1 0 7 78970.7 2733.95 2
 1 0 8 52258.2 1951.99 2
 1 0 8 54066.1 5112.91 4
 1 0 8 53300.5 2086.31 2
 1 0 9 7090.71 601.911 2
 1 0 9 6469.93 2054.15 4
 1 0 10 12255.2 2734.17 4
 1 0 11 59194.5 6387.91 4
 1 0 12 14191.8 3240.75 4
 1 0 13 8343.53 2895.17 4
 1 0 14 17100.3 3946.53 4
 1 0 15 31017.4 5552.77 4
 1 1 -7 66084.1 2452.15 2
 1 1 -6 8444.71 732.246 2
 1 1 -5 43886.5 1807 2
 1 1 -4 98453.5 3059.11 2
 1 1 -3 153799 4303.47 2
 1 1 -2 28283.2 1392.62 2
 1 1 -2 28179 1438.64 1
 1 1 0 248154 6750.77 4
 1 1 1 261902 7777.49 4
 1 1 1 264843 7418.44 3
 1 1 2 8748.67 1181.74 4
 1 1 2 6093.12 914.873 3
 1 1 3 152502 6534.15 4
 1 1 3 171572 6395.83 3
 1 1 4 38509.7 3236.38 4
 1 1 5 68016.2 4783.47 4
 1 1 6 93920.9 6202.61 4
 1 1 7 68253.1 5573.05 4
 1 1 8 16338.7 1265.35 2
 1 1 8 15549 2759.05 4
 1 1 9 20757.6 3421.78 4
 1 1 9 26571.7 1741.88 2
 1 1 10 55810.1 6028.71 4
 1 1 11 12299.9 2946.77 4
 1 1 12 4411.41 1978.26 4
 1 1 13 21382.8 4345.54 4
 1 1 14 33670.9 5700.34 4
 1 2 -9 97647.6 3108.1 2
 1 2 -8 31731.9 1582.55 2
 1 2 -7 55473.3 2239.51 2
 1 2 -6 71328.7 2654.68 2
 1 2 -5 31947.8 1673.39 2
 1 2 -4 56989.3 2399.79 2
 1 2 -3 2132.25 477.453 1
 1 2 -3 1557.39 348.933 2
 1 2 -2 427320 10950.3 3
 1 2 -2 430400 10870.9 1
 1 2 -1 363032 9459.43 3
 1 2 0 102476 3909.29 3
 1 2 0 102466 3974.44 4
 1 2 1 55949.6 3101.02 4
 1 2 1 55115.4 2888.75 3
 1 2 2 2249.09 599.5 3
 1 2 2 2094.38 674.78 4
 1 2 3 21643.8 2311.51 4
 1 2 3 27721.7 2536.15 3
 1 2 4 140994 6327.68 3
 1 2 4 117933 6433.49 4
 1 2 5 142299 7589.02 4
 1 2 6 77576.7 5869.95 4
 1 2 7 22140 3185.49 4
 1 2 8 38238.5 4574.21 4
 1 2 9 104489 8232.31 4
 1 2 10 23301 4086.76 4
 1 2 11 176.432 604.482 4
 1 2 12 37523.1 5678.12 4
 1 2 13 17904 4256.13 4
 1 2 14 667.049 755.778 4
 1 3 -9 12304.6 985.893 2
 1 3 -8 87048.4 3193.31 2
 1 3 -7 267938 7335.56 2
 1 3 -6 201780 5978.94 2
 1 3 -5 15754.2 1266.55 2
 1 3 -4 23240.2 1654.52 2
 1 3 -3 171849 6102.45 3
 1 3 -2 149751 5388.53 3
 1 3 -1 398627 10877.7 3
 1 3 0 329638 9699.57 3
 1 3 0 341018 9611.01 4
 1 3 1 145423 5899.58 4
 1 3 1 150482 5839.18 3
 1 3 2 1110.29 588.141 3
 1 3 2 1145.39 505.972 4
 1 3 3 190946 8739.32 4
 1 3 3 218576 8420.24 3
 1 3 4 441203 15159.7 4
 1 3 4 471759 14573.9 3
 1 3 5 68158.2 5285.38 4
 1 3 5 68421.3 4760.75 3
 1 3 6 24476.9 3695.41 4
 1 3 7 103745 7566.76 4
 1 3 8 106566 8136.85 4
 1 3 9 18827.6 3684.94 4
 1 3 10 913.073 791.35 4
 1 3 11 34930.1 5299.09 4
 1 3 12 17190.3 4000.18 4
 1 3 13 850.436 447.098 4
 1 4 -9 27156.3 1736.6 2
 1 4 -3 210249 7457.7 3
 1 4 -2 112341 4931.02 3
 1 4 -1 175866 6549.98 3
 1 4 -1 177831 5721.58 4
 1 4 0 290109 9305.37 3
 1 4 0 279084 8858.23 4
 1 4 1 6733.76 1205.24 4
 1 4 1 8873.92 1355.53 3
 1 4 2 144597 6724.95 4
 1 4 2 135386 6305.49 3
 1 4 3 371547 13256.8 4
 1 4 3 398011 12874.5 3
 1 4 4 93722 6127.16 4
 1 4 4 94896.9 5693.6 3
 1 4 5 5948.45 1422.65 3
 1 4 5 4892.07 1534.82 4
 1 4 6 90058.2 6879.44 4
 1 4 6 96934 6354.3 3
 1 4 7 66945.7 6163.35 4
 1 4 8 2409.86 1201.76 4
 1 4 9 21359.6 3898.09 4
 1 4 10 41093.5 5734.14 4
 1 4 11 7221.77 2494.78 4
 1 4 12 347.894 728.862 4
 1 4 13 16778.1 4112.66 4
 1 5 -4 34516.9 2857.84 3
 1 5 -3 41411.3 3054.33 3
 1 5 -2 135025 5947.74 3
 1 5 -1 46273.9 3256.93 3
 1 5 -1 41851.8 2514.63 4
 1 5 0 56272 3714.68 3
 1 5 0 53832.3 3345.88 4
 1 5 1 37213 3071.81 4
 1 5 1 40509.4 3257.81 3
 1 5 2 71991.2 4717.32 4
 1 5 2 66307.1 4474.46 3
 1 5 3 9219.28 1707.48 3
 1 5 3 5832.97 1371.43 4
 1 5 4 15420.4 2307.82 3
 1 5 4 14938.3 2444.67 4
 1 5 5 52656.5 5024.21 4
 1 5 5 48994 4417.11 3
 1 5 6 19474.3 3207.04 4
 1 5 6 21602.5 3042.2 3
 1 5 7 431.014 295.409 4
 1 5 7 2216.71 1012.09 3
 1 5 8 28639.5 4411.8 4
 1 5 9 70468.6 7463.54 4
 1 5 10 16201 3630.74 4
 1 5 11 1312.43 807.667 4
 1 5 12 22279.9 4750.42 4
 1 6 -5 37.7904 169.24 3
 1 6 -4 129354 6306.02 3
 1 6 -3 126586 6160.87 3
 1 6 -2 24770.9 2515.28 3
 1 6 -1 53622.4 3882.68 3
 1 6 -1 63554.3 3401.62 4
 1 6 0 150260 7014.41 3
 1 6 0 140794 6125.38 4
 1 6 1 68070 4446 4
 1 6 1 69797.7 4724.58 3
 1 6 2 45544 4112.66 4
 1 6 2 32944.3 3397 3
 1 6 3 27489 3247.4 4
 1 6 3 29835.4 3255 3
 1 6 4 92417.5 6586.5 4
 1 6 4 96938.7 6371.69 3
 1 6 5 41736.1 4656.53 4
 1 6 5 42279.9 4362.72 3
 1 6 6 26435.6 3878.86 4
 1 6 6 26961.6 3590.06 3
 1 6 7 67125.4 6651.16 4
 1 6 7 66641.2 5989.57 3
 1 6 8 94164 8420.31 4
 1 6 9 24577.6 4469.23 4
 1 6 10 -664.954 1274.96 4
 1 6 11 13111.2 3655.13 4
 1 6 12 18628.4 4544.63 4
 1 7 -6 575.144 510.399 3
 1 7 -5 148922 7373.58 3
 1 7 -4 98136 5708.44 3
 1 7 -3 11112.3 1808.13 3
 1 7 -2 4395.38 1126.11 3
 1 7 -1 108934 6124.65 3
 1 7 0 70029.4 4251.43 4
 1 7 0 77786.3 5176.73 3
 1 7 1 2759.19 1014.69 3
 1 7 1 3141.39 1059.78 4
 1 7 2 40108.4 3826.53 4
 1 7 2 37659.9 3795.3 3
 1 7 3 138813 8044.69 4
 1 7 3 143577 8067.27 3
 1 7 4 58043.3 5302.4 4
 1 7 4 53227.3 4907.78 3
 1 7 5 20163.7 3281.92 4
 1 7 5 18318.9 2966.75 3
 1 7 6 62912.2 6314.83 4
 1 7 6 67223.8 6030.83 3
 1 7 7 107978 8857.41 4
 1 7 7 110644 8171.9 3
 1 7 8 15448.3 3434.27 4
 1 7 9 5512.42 2522.33 4
 1 7 10 26654.4 5016.07 4
 1 7 11 21984.3 4700.65 4
 1 8 -8 23944.5 3140.72 3
 1 8 -7 28.0573 412.483 3
 1 8 -6 59547.2 4715.42 3
 1 8 -5 46124.7 4061.49 3
 1 8 -4 2530.04 946.42 3
 1 8 -3 21791.5 2697.8 3
 1 8 -2 29360.4 3181.55 3
 1 8 -1 63741.2 4928.25 3
 1 8 0 585.023 541.694 3
 1 8 0 603.649 420.286 4
 1 8 1 33632.2 3305.42 4
 1 8 1 36231.8 3854.59 3
 1 8 2 83246.3 5866.39 4
 1 8 2 83888.7 6288.04 3
 1 8 3 33505.2 3880.61 4
 1 8 3 36341.2 4095.63 3
 1 8 4 8256.5 1958.7 3
 1 8 4 9761.52 2219.76 4
 1 8 5 45136.6 5200.31 4
 1 8 5 52372 5372.44 3
 1 8 6 85127.9 7601.97 4
 1 8 6 87389.6 7291.49 3
 1 8 7 4642.29 1674.51 3
 1 8 7 6495.5 2154.16 4
 1 8 8 15361 3632.39 4
 1 8 8 17230.3 3471.53 3
 1 8 9 51948.6 6866.22 4
 1 8 10 5861.76 2194.17 4
 1 9 -9 1861.29 820.997 3
 1 9 -8 33582.7 3866.19 3
 1 9 -7 67255.1 5377.7 3
 1 9 -6 14198.3 2352.38 3
 1 9 -5 16464.1 2535 3
 1 9 -4 87647.9 6005.25 3
 1 9 -3 91633.8 6191.08 3
 1 9 -2 30134.4 3473.21 3
 1 9 -1 121.183 231.856 3
 1 9 0 38818.8 3279.87 4
 1 9 0 44589.7 4428.22 3
 1 9 1 53971.4 4353.48 4
 1 9 1 61049.4 5418.62 3
 1 9 2 20492 2972.51 4
 1 9 2 18602 3097.88 3
 1 9 3 17477.8 3020.28 3
 1 9 3 16549.6 2788.99 4
 1 9 4 36043.8 4446.32 4
 1 9 4 33899.4 4351.65 3
 1 9 5 25977.1 4106.93 4
 1 9 5 40502.3 4948.13 3
 1 9 6 173.431 691.55 3
 1 9 6 -2676.05 1378.11 4
 1 9 7 23459.3 4012.88 3
 1 9 7 27193.5 4590.8 4
 1 9 8 40018.6 5863.66 4
 1 9 8 46067 5922.45 3
 1 9 9 1490.82 975.617 4
 1 9 10 -571.998 915.315 4
 1 10 -11 48112.9 5210.92 3
 1 10 -10 9174.8 2184.58 3
 1 10 -9 41993.1 4577.87 3
 1 10 -8 106392 7304.55 3
 1 10 -7 76295.6 6027.89 3
 1 10 -6 15849.6 2638.92 3
 1 10 -5 73849.1 5824.86 3
 1 10 -4 205209 10249.1 3
 1 10 -3 35142.5 3937.46 3
 1 10 -2 1001.86 828.072 3
 1 10 -1 40902.3 4405.97 3
 1 10 0 77049.4 4923.44 4
 1 10 0 81007.9 6464.18 3
 1 10 1 2072.15 1007.19 3
 1 10 1 1105.04 606.877 4
 1 10 2 21426.2 3036.21 4
 1 10 2 29370.8 4014.9 3
 1 10 3 35052.2 4221.08 4
 1 10 3 28700.2 4083.38 3
 1 10 4 16205.1 3166 3
 1 10 4 16627.8 3137.82 4
 1 10 5 460.784 716.522 3
 1 10 5 -892.945 1006.41 4
 1 10 6 17705.6 3628.21 3
 1 10 6 25348.4 4292.19 4
 1 10 7 26886.4 4473.2 3
 1 10 8 5390.86 1989.29 3
 1 11 -13 22877.4 3907.87 3
 1 11 -12 21955.8 3683.4 3
 1 11 -11 3606.61 1448.72 3
 1 11 -10 9106.25 2289.37 3
 1 11 -9 41648.4 4738.56 3
 1 11 -8 30941.9 3976.2 3
 1 11 -7 3981.86 1330.58 3
 1 11 -6 42499.4 4602 3
 1 11 -5 127577 8212.89 3
 1 11 -4 20350 3140.1 3
 1 11 -3 7278.72 1884.88 3
 1 11 -2 33262.1 4116.56 3
 1 11 -1 34381.4 4300.08 3
 1 11 0 6998.18 1959.86 3
 1 11 1 63713.9 6219.62 3
 1 11 2 40126.3 5004.3 3
 1 11 3 6408.68 2045.15 3
 1 11 4 -13.8587 530.889 3
 1 11 5 21504.8 4042.9 3
 1 11 6 26150.8 4550.44 3
 1 11 7 6538.13 2313.97 3
 1 12 -14 15090.9 3288.7 3
 1 12 -13 4425.74 1728.68 3
 1 12 -12 544.214 622.771 3
 1 12 -11 10279.7 2533.99 3
 1 12 -10 30737.7 4309.38 3
 1 12 -9 1907.71 835.302 3
 1 12 -8 2767.4 1262.6 3
 1 12 -7 26603.5 3815.2 3
 1 12 -6 33619 4273.8 3
 1 12 -5 -199.929 699.232 3
 1 12 -4 24549.4 3645.38 3
 1 12 -3 33599.6 4361.11 3
 1 12 -2 21442.4 3579.15 3
 1 12 -1 4029.91 1525.41 3
 1 12 0 64182.6 6415.94 3
 1 12 1 68077.9 6886.38 3
 1 12 2 2374.89 1378.9 3
 1 12 3 5628.08 2106.3 3
 1 12 4 18507.4 3781.42 3
 1 12 5 29623.6 4949.32 3
 1 13 -13 7.28227 504.393 3
 1 13 -12 16694.7 3351.88 3
 1 13 -11 15005.1 3143.86 3
 1 13 -10 92.8351 688.641 3
 1 13 -9 7423.08 2156.45 3
 1 13 -8 12396.6 2758.83 3
 1 13 -7 9538.63 2416.09 3
 1 13 -6 1385.37 953.33 3
 1 13 -5 30680.5 4320.8 3
 1 13 -4 44380.6 5213.55 3
 1 13 -3 10727.3 2557.07 3
 1 13 -2 3288.62 1391.93 3
 1 13 -1 42530.6 5407.65 3
 1 13 0 70167.7 7192.09 3
 1 13 1 7882.37 2339.91 3
 1 13 2 11804.5 3006.91 3
 1 13 3 21776.4 4233.99 3
 1 14 -11 -496.614 405.39 3
 1 14 -10 8282.82 2397.15 3
 1 14 -9 13537.6 3108.18 3
 1 14 -8 5932.75 1986.86 3
 1 14 -7 470.752 564.449 3
 1 14 -6 13958.1 3042.91 3
 1 14 -5 29274.8 4445.3 3
 1 14 -4 10142.7 2605.54 3
 1 14 -3 1946.01 1122.22 3
 1 14 -2 31832.7 4852.68 3
 1 14 -1 41880.1 5678.61 3
 1 14 0 1630.39 1066.48 3
 1 14 1 3762.56 1902.46 3
 1 15 -9 6653.78 2200.16 3
 1 15 -8 3.66242 733.536 3
 1 15 -7 15184.5 3372.08 3
 1 15 -6 15686.7 3403.08 3
 1 15 -5 3289.85 1527.94 3
 1 15 -4 9602.26 2634.96 3
 1 15 -3 18314 3811.9 3
 1 15 -2 17791.3 3850.37 3
 2 -14 11 397.965 901.853 1
 2 -14 12 -30.5635 430.696 1
 2 -13 10 -921.34 1190.51 1
 2 -13 11 6495.95 2073.39 1
 2 -13 12 14998.4 3339.14 1
 2 -13 13 4236.45 1820.81 1
 2 -12 8 14086.2 2778.99 1
 2 -12 9 355.391 533.041 1
 2 -12 10 18596.1 3361.7 1
 2 -12 11 27449.3 4198.86 1
 2 -12 12 15040.7 3236.01 1
 2 -12 13 233.236 686.787 1
 2 -12 14 13017.6 3175.46 1
 2 -11 7 18330.7 2950.87 1
 2 -11 8 3583.08 1353.98 1
 2 -11 9 29606.9 4047.51 1
 2 -11 10 76672.4 6714.09 1
 2 -11 11 31053.8 4372.87 1
 2 -11 12 1889.96 1329.09 1
 2 -11 13 17622.5 3484.06 1
 2 -11 14 21397.2 3947.44 1
 2 -11 15 4161.57 1816.15 1
 2 -10 6 12722 2313.51 1
 2 -10 7 2015.35 562.995 4
 2 -10 7 1844.45 972.516 1
 2 -10 8 15620.6 1938.1 4
 2 -10 8 13991.4 2573.12 1
 2 -10 9 78075.5 4980.8 4
 2 -10 9 80335.5 6431.11 1
 2 -10 10 16593.5 2918.33 1
 2 -10 11 583.049 723.683 1
 2 -10 12 19856.9 3472.29 1
 2 -10 13 24767 3976.15 1
 2 -10 14 523.922 452.107 1
 2 -10 15 5298.51 1941.26 1
 2 -9 0 190960 6063.05 4
 2 -9 5 33967.4 3655.87 1
 2 -9 5 49011.3 2215.78 4
 2 -9 6 9575.04 1172.92 4
 2 -9 6 8442.59 1781.03 1
 2 -9 7 27874.1 2472.41 4
 2 -9 7 34562.9 3731.31 1
 2 -9 8 74122.8 4583.7 4
 2 -9 8 59551.3 5206.18 1
 2 -9 9 4.53247 361.416 1
 2 -9 9 947.137 543.141 4
 2 -9 10 30587.5 3432.52 4
 2 -9 10 28955.1 3766.12 1
 2 -9 11 37322.8 4100.46 4
 2 -9 11 32434.8 4142.34 1
 2 -9 12 13120.5 2543.17 4
 2 -9 12 15035.1 2871.66 1
 2 -9 13 529.746 776.818 4
 2 -9 13 -373.005 984.41 1
 2 -9 14 10507.8 2748.01 4
 2 -9 14 8666.28 2417.69 1
 2 -9 15 15397.9 3264.59 4
 2 -9 15 14219.3 3200.47 1
 2 -9 16 1115.25 1023.2 1
 2 -8 -1 232966 7600.24 4
 2 -8 0 235650 6741.84 4
 2 -8 4 21333.5 2603.44 1
 2 -8 4 18244.2 1117.14 4
 2 -8 5 14247.7 1308.12 4
 2 -8 5 14854.3 2209.29 1
 2 -8 6 78388.9 4003.2 4
 2 -8 6 80221.1 5481.05 1
 2 -8 7 24662.6 2428.06 4
 2 -8 7 27185.3 3190.26 1
 2 -8 8 1366.99 765.547 1
 2 -8 8 14416.6 2063.71 4
 2 -8 9 30151 3231.21 4
 2 -8 9 28665.1 3514.78 1
 2 -8 10 93474.6 6393.47 4
 2 -8 10 106558 7309.89 1
 2 -8 11 17112.8 2908.28 1
 2 -8 11 21491.3 3156.8 4
 2 -8 12 4964.19 1669.09 1
 2 -8 12 5786.41 1646.14 4
 2 -8 13 37576.3 4679.73 1
 2 -8 13 26763.1 3969.55 4
 2 -8 14 24347.5 3911.62 1
 2 -8 14 22823 3944.12 4
 2 -8 15 2096 1209.39 1
 2 -8 15 1533.42 1259.66 4
 2 -8 16 53.5924 530.947 4
 2 -8 16 -3230.41 1529.7 1
 2 -8 17 10946.2 3097.05 4
 2 -7 -1 184083 6162.37 4
 2 -7 0 486.681 204.372 4
 2 -7 3 824.659 544.894 1
 2 -7 4 19844.9 1365.69 4
 2 -7 4 18826.9 2268.97 1
 2 -7 5 136773 5261.4 4
 2 -7 5 144901 7013 1
 2 -7 6 53918.7 3433.99 4
 2 -7 6 54194.4 4228.71 1
 2 -7 7 21270.1 2349.19 4
 2 -7 7 18932.9 2575.79 1
 2 -7 8 94090.4 5685.34 4
 2 -7 8 76175 5587.5 1
 2 -7 9 48781.3 4525.86 1
 2 -7 9 46847 4236.6 4
 2 -7 10 8583.32 1899.51 4
 2 -7 10 4549.83 1451.05 1
 2 -7 11 22260 3513.78 4
 2 -7 11 11633 2345.34 1
 2 -7 12 36508 4355.05 1
 2 -7 12 33598.5 4324.22 4
 2 -7 13 19463.5 3281.93 1
 2 -7 13 21779.8 3613.12 4
 2 -7 14 5160.52 1739.02 1
 2 -7 14 6751.78 2186.53 4
 2 -7 15 524.18 420.942 1
 2 -7 15 2012.48 1312.45 4
 2 -7 16 11665.4 2869.61 1
 2 -7 16 9287.88 2822.64 4
 2 -7 17 11060.6 3306.72 4
 2 -6 -1 699.326 265.793 4
 2 -6 2 18841.1 1976.54 1
 2 -6 3 104468 3483.95 4
 2 -6 3 133202 5816.62 1
 2 -6 4 111831 4237.66 4
 2 -6 4 111441 5612.31 1
 2 -6 5 43298.7 2871.21 4
 2 -6 5 46120.9 3587.03 1
 2 -6 6 6942.47 1442.89 1
 2 -6 6 6746.26 1218.06 4
 2 -6 7 197093 8797.17 1
 2 -6 7 191596 8283.67 4
 2 -6 8 53639 4428.74 1
 2 -6 8 59454.7 4599.6 4
 2 -6 9 10637.8 1997.89 1
 2 -6 9 13090 2247.66 4
 2 -6 10 35329.5 3853.7 1
 2 -6 10 27890.4 3589.88 4
 2 -6 11 62181.3 5441.2 1
 2 -6 11 65272.1 6091.56 4
 2 -6 12 14311.3 2548.15 1
 2 -6 12 6640.98 1912.76 4
 2 -6 13 532.346 559.267 4
 2 -6 13 -2027.42 1049.58 1
 2 -6 14 1443.92 936.265 1
 2 -6 14 1592.51 1028.6 4
 2 -6 15 13273 3219.21 4
 2 -6 15 15509.9 3202.94 1
 2 -6 16 4619.08 1690.38 1
 2 -6 16 2851.07 1766.04 4
 2 -6 17 1004.18 838.444 4
 2 -5 -2 123827 4918.54 4
 2 -5 0 102537 4136.84 3
 2 -5 1 28256.1 2149.19 1
 2 -5 2 123513 5183.88 1
 2 -5 3 176340 5392.36 4
 2 -5 3 182048 6895.67 1
 2 -5 4 268951 9240.79 1
 2 -5 4 258413 8038.85 4
 2 -5 5 11133.5 1642.85 1
 2 -5 5 9689.35 1374.24 4
 2 -5 6 168473 7406.66 1
 2 -5 6 160254 7149.37 4
 2 -5 7 42950.4 3694.34 4
 2 -5 8 34300.2 3565.37 4
 2 -5 9 12777 2265.73 4
 2 -5 10 51581.7 5046.02 4
 2 -5 11 26174.1 3855.82 4
 2 -5 12 2925.02 1296.39 4
 2 -5 13 10670.1 2711.53 4
 2 -5 14 17067.5 3646.19 4
 2 -5 15 -449.282 743.128 4
 2 -5 16 928.449 577.672 4
 2 -4 -2 228528 6641.99 3
 2 -4 -1 341846 8882.8 3
 2 -4 1 93697.1 3879.85 1
 2 -4 2 43570.2 1984.25 4
 2 -4 2 48987.3 2775.33 1
 2 -4 3 208925 7050.14 1
 2 -4 3 189357 6223.99 4
 2 -4 4 74438 4390.23 4
 2 -4 5 312479 10396.6 4
 2 -4 6 152086 7148.22 4
 2 -4 7 35103.1 3510.55 4
 2 -4 8 31703.4 3516.82 4
 2 -4 9 40440.7 4266.58 4
 2 -4 10 14404.3 2992.56 4
 2 -4 11 13801.7 3047.41 4
 2 -4 12 30106.2 4403.66 4
 2 -4 13 30208.6 4655.68 4
 2 -4 14 5070.03 2095.22 4
 2 -4 15 2210.96 1581.28 4
 2 -4 16 12195.1 3698.4 4
 2 -3 -3 194955 6007.81 3
 2 -3 -2 159538 4616.94 3
 2 -3 -1 140209 3947.42 3
 2 -3 0 34734 1784.45 1
 2 -3 1 359103 9283.52 1
 2 -3 1 348983 8505.26 4
 2 -3 2 25115.9 1673.11 4
 2 -3 3 35870.4 2393.88 4
 2 -3 4 405924 12107.7 4
 2 -3 5 188409 7753.25 4
 2 -3 6 7499.91 1483.81 4
 2 -3 7 101251 6322.71 4
 2 -3 8 113374 7200.23 4
 2 -3 9 18676.7 2940.83 4
 2 -3 10 43862.1 4922.13 4
 2 -3 11 82907.2 7259.01 4
 2 -3 12 42060.7 5362.9 4
 2 -3 13 9581.69 2846.46 4
 2 -3 14 4403.42 1754.56 4
 2 -3 15 21342.6 4417.97 4
 2 -3 16 14333.9 4026.03 4
 2 -2 -4 143409 5170.81 3
 2 -2 -3 192554 6058.93 2
 2 -2 -3 190978 5646.96 3
 2 -2 -2 999999 22709.8 2
 2 -2 -1 250475 5862.05 1
 2 -2 -1 246631 6868.48 2
 2 -2 0 115261 3776.19 2
 2 -2 1 412266 9818.99 2
 2 -2 1 397142 10197.8 4
 2 -2 2 269688 8204.6 4
 2 -2 2 277706 6949.23 2
 2 -2 3 184061 6923.79 4
 2 -2 3 197515 5068.98 2
 2 -2 4 48760.6 3433.78 4
 2 -2 4 49378.3 1744.99 2
 2 -2 5 81891.2 5038.06 4
 2 -2 6 196664 8992.65 4
 2 -2 7 111995 6895.22 4
 2 -2 8 4982.14 1472.1 4
 2 -2 9 5991.41 1713.67 4
 2 -2 10 75958.2 6733.38 4
 2 -2 11 44085.5 5340.28 4
 2 -2 12 2767.95 1280.66 4
 2 -2 13 12813.4 3202.01 4
 2 -2 14 14770 3632.7 4
 2 -2 15 5278.91 2231.93 4
 2 -1 -6 171719 5899.78 2
 2 -1 -5 124983 4434.43 2
 2 -1 -4 92624.8 3536.86 2
 2 -1 -3 109877 3817.98 2
 2 -1 -2 69641.7 2732.88 2
 2 -1 0 74472.5 2564.33 2
 2 -1 0 56555.1 2562.46 4
 2 -1 1 172703 4749.83 2
 2 -1 1 177561 5819.48 4
 2 -1 2 462207 12996.1 4
 2 -1 2 480229 10957.3 2
 2 -1 3 1193.48 270.753 2
 2 -1 3 917.735 362.277 4
 2 -1 4 97508.8 5399.18 4
 2 -1 4 105146 3122.68 2
 2 -1 5 183985 8427.15 4
 2 -1 5 191200 4933.16 2
 2 -1 6 151270 7728.89 4
 2 -1 6 120879 3419.19 2
 2 -1 7 36.4478 41.6942 2
 2 -1 7 17270.6 2625.82 4
 2 -1 8 13710.9 2525.97 4
 2 -1 9 34875.6 4398.41 4
 2 -1 10 50007.4 5710.16 4
 2 -1 11 2787.04 1263.21 4
 2 -1 12 12385 3203.3 4
 2 -1 13 23698.3 4742.81 4
 2 -1 14 586.352 1189.34 4
 2 -1 15 1192.05 1725.22 4
 2 0 -8 51454.4 2611.31 2
 2 0 -7 99379.7 3815.7 2
 2 0 -6 21833.8 1524.62 2
 2 0 -5 1070.26 307.405 2
 2 0 -4 77891.5 3007.81 2
 2 0 -3 212155 5989.59 2
 2 0 -2 9891.99 765.08 3
 2 0 -2 10294 670.816 1
 2 0 -2 8138.56 805.467 2
 2 0 -1 135741 4226.75 2
 2 0 0 13909.7 1235.02 4
 2 0 0 11483.4 985.506 2
 2 0 0 12204.5 1003.56 3
 2 0 1 121987 4970.51 4
 2 0 1 130808 4105.04 2
 2 0 1 126972 4568.92 3
 2 0 2 53875.9 3417.77 4
 2 0 2 62569.4 2517.8 2
 2 0 2 62364.3 3267.13 3
 2 0 3 229220 8399.05 4
 2 0 3 186744 5549.4 2
 2 0 4 240063 9661.19 4
 2 0 4 253996 6822.46 2
 2 0 5 157689 8032.61 4
 2 0 5 175653 5120 2
 2 0 6 3540.3 1350.84 4
 2 0 6 47.696 76.1362 2
 2 0 7 37391.6 4162.77 4
 2 0 7 36461.7 1846.87 2
 2 0 8 47575.2 5019.82 4
 2 0 9 57505.6 5937.88 4
 2 0 10 7668.55 2351.68 4
 2 0 11 50247.9 6141.62 4
 2 0 12 28037.8 4876.13 4
 2 0 13 283.619 735.139 4
 2 0 14 6662.21 2693.94 4
 2 1 -9 106279 3966.79 2
 2 1 -8 334832 8988.97 2
 2 1 -7 33132.5 1937.65 2
 2 1 -6 409.956 187.278 2
 2 1 -5 111405 3939.88 2
 2 1 -4 105882 3722.65 1
 2 1 -4 96078.6 3623.79 2
 2 1 -3 255347 6832.35 1
 2 1 -3 249017 7066.33 2
 2 1 -2 218442 6124.91 3
 2 1 -2 205123 6211.64 2
 2 1 -1 661634 15688.1 2
 2 1 0 278970 7644.1 2
 2 1 0 270411 8173.39 4
 2 1 0 275992 7811.33 3
 2 1 1 37221 2057.09 2
 2 1 1 35961.2 2667.98 4
 2 1 1 36384.9 2358.68 3
 2 1 2 1112.63 461.384 3
 2 1 2 822.79 421.398 4
 2 1 2 1087.17 368.535 2
 2 1 3 52752.1 3875.76 4
 2 1 3 58008.6 2698.8 2
 2 1 3 51096.5 3461.1 3
 2 1 4 83932.7 3451.88 2
 2 1 4 80827 5276.87 4
 2 1 4 88657.5 5005.48 3
 2 1 5 4421.52 1254.28 4
 2 1 6 62530.9 5280.98 4
 2 1 7 109058 7613.97 4
 2 1 8 80252.1 6846.93 4
 2 1 9 1318.71 1042.76 4
 2 1 10 68997.4 7079.95 4
 2 1 11 53723.9 6607.02 4
 2 1 12 -52.6297 1104.98 4
 2 1 13 11973.4 3422.27 4
 2 1 14 38766.7 6374.96 4
 2 2 -10 75257.5 3190.81 2
 2 2 -9 215381 6520.31 2
 2 2 -8 21082.6 1549.27 2
 2 2 -7 7603.69 990.333 2
 2 2 -6 189280 5955.38 2
 2 2 -5 90908.7 3712.07 2
 2 2 -4 89737.3 3759.77 1
 2 2 -3 25260.7 1872.41 3
 2 2 -3 23652.9 1735.31 1
 2 2 -2 60371.2 2973.45 3
 2 2 -1 148799 5306.04 3
 2 2 0 16671.5 2074.63 4
 2 2 0 10447 1326.43 3
 2 2 1 91080.1 4756.29 4
 2 2 1 97950.6 4543.51 3
 2 2 2 70593.7 4413.64 4
 2 2 2 69440.6 4006.08 3
 2 2 3 79813.2 5230.15 4
 2 2 3 33624.9 2972.1 3
 2 2 4 138597 7492.09 4
 2 2 4 137999 6776.36 3
 2 2 5 111350 7048.38 4
 2 2 5 108810 6288.95 3
 2 2 6 149757 8847.14 4
 2 2 7 18429.6 3098.07 4
 2 2 8 20397.4 3463 4
 2 2 9 82127.7 7631.26 4
 2 2 10 48180.1 6058.52 4
 2 2 11 -320.313 1199.69 4
 2 2 12 14779.7 3764.01 4
 2 2 13 32918.4 5834.36 4
 2 3 -4 4667.38 892.734 3
 2 3 -3 361834 10608.4 3
 2 3 -2 104697 4607.46 3
 2 3 -1 99478.8 4541.55 3
 2 3 -1 99757.1 4236.95 4
 2 3 0 233352 8172.33 4
 2 3 0 241639 8190.43 3
 2 3 1 139140 6368.7 4
 2 3 1 138930 6081.45 3
 2 3 2 26954.7 2801.34 4
 2 3 2 24192.8 2436.45 3
 2 3 3 291059 11484.5 4
 2 3 3 291595 10687.4 3
 2 3 4 306482 12540.1 4
 2 3 4 305202 11562.3 3
 2 3 5 96344.6 6854.52 4
 2 3 5 111794 6547.37 3
 2 3 6 27222.9 3835.73 4
 2 3 7 62025.3 6090.72 4
 2 3 8 93317.5 7955.22 4
 2 3 9 35857.1 5232.44 4
 2 3 10 89.6982 937.576 4
 2 3 11 10537.9 3022.24 4
 2 3 12 28614.2 5302.84 4
 2 3 13 3653.7 2013.97 4
 2 4 -5 1159.67 508.223 3
 2 4 -4 388708 11910 3
 2 4 -3 362095 11209.2 3
 2 4 -2 202544 7555.34 3
 2 4 -1 233419 8368.44 3
 2 4 -1 225409 7625.69 4
 2 4 0 306656 10302 4
 2 4 0 327784 10748.4 3
 2 4 1 3867.74 995.711 3
 2 4 1 3634.8 978.522 4
 2 4 2 38032.4 3555.25 4
 2 4 2 36097 3249.7 3
 2 4 3 234777 10384.8 4
 2 4 3 233711 9725.66 3
 2 4 4 49521.6 4676.61 4
 2 4 4 53686.5 4435.62 3
 2 4 5 3230.8 1105.82 3
 2 4 5 5079.49 1584.25 4
 2 4 6 38351.9 4672.46 4
 2 4 6 51056.1 4761.53 3
 2 4 7 85011.9 7405.93 4
 2 4 8 26591.8 4254.8 4
 2 4 9 8156.72 2596.12 4
 2 4 10 13880.3 3402.33 4
 2 4 11 19275.7 4188.03 4
 2 4 12 -3866.76 2037.35 4
 2 5 -6 97276.3 5466.9 3
 2 5 -5 117308 5912.71 3
 2 5 -4 121937 5928.96 3
 2 5 -3 103590 5376.71 3
 2 5 -2 181637 7550.49 3
 2 5 -1 136012 6488.07 3
 2 5 -1 143735 5896.86 4
 2 5 0 5161.1 1182.15 3
 2 5 0 5635.74 1221.39 4
 2 5 1 6369.25 1393.63 3
 2 5 1 8503.46 1576.75 4
 2 5 2 196853 9210.47 4
 2 5 2 201427 8974.02 3
 2 5 3 16101.5 2542.39 4
 2 5 3 18356.4 2544.32 3
 2 5 4 2559.23 924.172 3
 2 5 4 2080.17 932.599 4
 2 5 5 58024.9 5611.72 4
 2 5 5 61873.5 5279.01 3
 2 5 6 43196.7 5111.32 4
 2 5 6 51249.8 5044.33 3
 2 5 7 1047.74 1040.87 4
 2 5 7 778.799 666.585 3
 2 5 8 29278.1 4598.01 4
 2 5 9 33928.3 5529.98 4
 2 5 10 17784.5 4115.09 4
 2 5 11 -726.594 1415.33 4
 2 5 12 7213.25 2781.23 4
 2 6 -7 241173 10055.5 3
 2 6 -6 130893 6793.22 3
 2 6 -5 14338.7 2027.16 3
 2 6 -4 23996.1 2643.61 3
 2 6 -3 182062 7984.72 3
 2 6 -2 72525.1 4736.16 3
 2 6 -1 18398.2 2435.67 3
 2 6 -1 25182.9 2377.03 4
 2 6 0 65369 4278.79 4
 2 6 0 65336.8 4730.8 3
 2 6 1 155078 7694.99 4
 2 6 1 162482 8083.39 3
 2 6 2 41140.3 4033.91 4
 2 6 2 38940.1 3855.73 3
 2 6 3 22104.2 3164.06 4
 2 6 3 18981.1 2809.82 3
 2 6 4 83081.2 6685.32 4
 2 6 4 81408.5 6164.96 3
 2 6 5 78037.7 6786.13 4
 2 6 5 84301.5 6516.85 3
 2 6 6 1588.81 899.833 3
 2 6 6 2300.6 974.756 4
 2 6 7 59722.5 6569.08 4
 2 6 7 63893.3 6092.33 3
 2 6 8 65991.5 7352.18 4
 2 6 9 20715.4 4299.08 4
 2 6 10 -2702.06 1647.71 4
 2 6 11 11097.6 3453.47 4
 2 7 -8 98357.7 6392.09 3
 2 7 -7 68263.6 5050.05 3
 2 7 -6 21596.1 2721.66 3
 2 7 -5 51667.1 4244.16 3
 2 7 -4 77026.4 5191.83 3
 2 7 -3 34310.7 3395.38 3
 2 7 -2 346.375 440.44 3
 2 7 -1 49231.3 4222.86 3
 2 7 0 53848.2 4005.06 4
 2 7 0 58746.1 4784.43 3
 2 7 1 29503.4 3214.02 4
 2 7 1 29055.8 3396.2 3
 2 7 2 9643.04 2065.31 3
 2 7 2 5377.23 1446.33 4
 2 7 3 85770.5 6534.62 4
 2 7 3 76750.8 6087.6 3
 2 7 4 62290.7 5921.65 4
 2 7 4 59440.3 5489.44 3
 2 7 5 844.707 794.667 3
 2 7 5 -1534.86 989.446 4
 2 7 6 44000.3 5483.43 4
 2 7 6 50441.6 5454.22 3
 2 7 7 88574.8 8330.44 4
 2 7 7 86471.6 7527.17 3
 2 7 8 11397.7 3115.21 4
 2 7 9 2016.28 1078.57 4
 2 7 10 14378.8 3820.55 4
 2 8 -9 81109.5 6124.04 3
 2 8 -8 9769.68 2019.88 3
 2 8 -7 7354.49 1643.14 3
 2 8 -6 70748.7 5302.91 3
 2 8 -5 28502.9 3261.87 3
 2 8 -4 13643.3 2238.13 3
 2 8 -3 21305.8 2857.28 3
 2 8 -2 49909.6 4455.45 3
 2 8 -1 88567.6 6175.07 3
 2 8 0 8675.76 1882.37 3
 2 8 0 9696.65 1688.48 4
 2 8 1 2653.08 1064.36 3
 2 8 1 1764.23 768.638 4
 2 8 2 123770 7811.26 4
 2 8 2 120016 7918.62 3
 2 8 3 78418 6420.21 4
 2 8 3 62971.5 5808.41 3
 2 8 4 95.5702 557.924 3
 2 8 4 -1610.66 985.598 4
 2 8 5 41291.7 5231.31 4
 2 8 5 43567.6 5272.31 3
 2 8 6 57757.4 6600.25 4
 2 8 6 60490.5 6246.48 3
 2 8 7 8348.86 2443 3
 2 8 7 9501.29 2717.49 4
 2 8 8 5131.89 2304.76 4
 2 8 9 16679.9 3983.02 4
 2 9 -11 5431.54 1777.04 3
 2 9 -10 58198 5425.25 3
 2 9 -9 11012.7 2281.15 3
 2 9 -8 4205.75 1397.47 3
 2 9 -7 139751 8199.17 3
 2 9 -6 32047.2 3698.09 3
 2 9 -5 634.986 413.321 3
 2 9 -4 75854.6 5771.32 3
 2 9 -3 72115.2 5710.16 3
 2 9 -2 76431.7 5951.89 3
 2 9 -1 306.459 512.649 3
 2 9 0 39842.3 3635.6 4
 2 9 0 39631.9 4414.55 3
 2 9 1 75476 5539.13 4
 2 9 1 72789.5 6235.8 3
 2 9 2 62823 5466.28 4
 2 9 2 55749.4 5651.18 3
 2 9 3 1208.1 1056.08 3
 2 9 3 185.053 434.118 4
 2 9 4 33422.7 4490.38 4
 2 9 4 31503.8 4429.98 3
 2 9 5 34776.1 4894.71 4
 2 9 5 32470 4720.21 3
 2 9 6 3302.42 1589.25 3
 2 9 6 3884.14 1550.28 4
 2 9 7 7580.74 2407.01 3
 2 9 7 1956.07 995.609 4
 2 9 8 21164.1 4485.51 4
 2 9 9 5164.42 2365.35 4
 2 10 -13 -523.369 991.695 3
 2 10 -12 15743.2 3143.78 3
 2 10 -11 29308.5 4049.92 3
 2 10 -10 6068.78 1744.79 3
 2 10 -9 7358.46 1991.88 3
 2 10 -8 96563.1 7085.76 3
 2 10 -7 93008.3 6852.08 3
 2 10 -6 -30.2936 474.568 3
 2 10 -5 105972 7291.76 3
 2 10 -4 168815 9486.93 3
 2 10 -3 42930.6 4570.05 3
 2 10 -2 662.248 549.844 3
 2 10 -1 79402.5 6615.1 3
 2 10 0 54397.1 5524.23 3
 2 10 1 6930.6 2057.11 3
 2 10 1 5469.1 1524.45 4
 2 10 2 12567.8 2733.63 3
 2 10 2 7863.85 1945.49 4
 2 10 3 26282 4105.83 3
 2 10 4 20242.3 3698.54 3
 2 10 5 2457.08 1537.33 3
 2 10 6 13634.7 3197.53 3
 2 10 7 19574.3 4007.17 3
 2 11 -15 1599.04 1286.56 3
 2 11 -14 2842.94 1255.6 3
 2 11 -13 13849.2 3050.42 3
 2 11 -12 30032.4 4354.07 3
 2 11 -11 9761.09 2413.61 3
 2 11 -10 4275.97 1513.89 3
 2 11 -9 30695 4117.44 3
 2 11 -8 33588.7 4279.91 3
 2 11 -7 -354.395 683.528 3
 2 11 -6 33946.4 4191.3 3
 2 11 -5 72642.1 6322.64 3
 2 11 -4 15005.2 2800.67 3
 2 11 -3 571.936 566.361 3
 2 11 -2 29761.1 4128.06 3
 2 11 -1 33749.4 4475.64 3
 2 11 0 310.17 353.801 3
 2 11 1 33443.3 4696.83 3
 2 11 2 55354.7 6193.76 3
 2 11 3 13034.8 3044.7 3
 2 11 4 64.8653 357.124 3
 2 11 5 19931.1 4089.69 3
 2 12 -14 11432.3 2952.05 3
 2 12 -13 13203.7 3079.55 3
 2 12 -12 536.98 935.898 3
 2 12 -11 3786.22 1560.32 3
 2 12 -10 26383.1 4066.18 3
 2 12 -9 5640.75 1868.82 3
 2 12 -8 -26.4433 725.343 3
 2 12 -7 16661.8 3120.63 3
 2 12 -6 12861.3 2704.71 3
 2 12 -5 340.519 509.541 3
 2 12 -4 5876.49 1867.45 3
 2 12 -3 23909.2 3801.99 3
 2 12 -2 24238.2 4019.35 3
 2 12 -1 -340.641 679.342 3
 2 12 0 43513.7 5534.71 3
 2 12 1 63191.6 6841.62 3
 2 12 2 12754.4 3146.26 3
 2 12 3 -1543.81 1120.12 3
 2 13 -12 6165.16 2099.22 3
 2 13 -11 15270.2 3269.62 3
 2 13 -10 2800.94 1395.6 3
 2 13 -9 1209.03 825.691 3
 2 13 -8 20537.2 3653.48 3
 2 13 -7 15701.4 3149.84 3
 2 13 -6 2014.81 1170.55 3
 2 13 -5 13647.3 3079.31 3
 2 13 -4 26659.5 4238.35 3
 2 13 -3 20645.6 3754.04 3
 2 13 -2 -299.01 685.86 3
 2 13 -1 50084.7 6118.01 3
 2 13 0 48805 6211.86 3
 2 13 1 14008.9 3367.12 3
 2 14 -10 2413.36 1174.05 3
 2 14 -9 16480 3461.53 3
 2 14 -8 6784.56 2163.27 3
 2 14 -7 2905.75 1498.47 3
 2 14 -6 17055.8 3505.58 3
 2 14 -5 21500.2 3938.38 3
 2 14 -4 15548 3417.38 3
 2 14 -3 870.748 745.532 3
 2 14 -2 18245 3786.93 3
 2 14 -1 40800.6 5831.63 3
 3 -15 11 17058.8 3655.02 1
 3 -14 10 16783.5 3454.29 1
 3 -14 11 4235.95 1759 1
 3 -14 12 -608.497 973.571 1
 3 -13 8 24450.5 3770.78 1
 3 -13 9 17223.8 3260.71 1
 3 -13 10 2548.37 1342.9 1
 3 -13 11 1839.43 1275.04 1
 3 -13 12 13747.2 3161.73 1
 3 -13 13 7715.68 2528.13 1
 3 -12 7 44384.1 4856.91 1
 3 -12 8 26362.3 3799.82 1
 3 -12 9 5243.26 1754.68 1
 3 -12 10 7522.79 2133.11 1
 3 -12 11 30587.5 4371.52 1
 3 -12 12 35766.2 4912.81 1
 3 -12 13 -35.2887 725.875 1
 3 -12 14 13180.4 3131.29 1
 3 -11 5 2182.2 993.573 1
 3 -11 6 45246.9 4563.12 1
 3 -11 7 34522.2 4088.39 1
 3 -11 8 2597.24 1131.91 1
 3 -11 9 31904.3 4180.24 1
 3 -11 10 42542.8 4902.56 1
 3 -11 11 46527.1 5289.54 1
 3 -11 12 3770.02 1639.73 1
 3 -11 13 6328 1998.96 1
 3 -11 14 16438.2 3535.65 1
 3 -10 4 9786.85 1887.44 1
 3 -10 5 70087.9 5358.74 1
 3 -10 6 23044.8 3110.56 1
 3 -10 6 21039.7 1654.01 4
 3 -10 7 2206.99 622.078 4
 3 -10 7 2056.28 1042.55 1
 3 -10 8 34714.1 3106.5 4
 3 -10 8 29753.4 3707.39 1
 3 -10 9 35478.4 3475.42 4
 3 -10 9 39904.8 4475 1
 3 -10 10 26595.9 3244.7 4
 3 -10 10 34844 4288.65 1
 3 -10 11 2423.31 1299.64 1
 3 -10 12 9791.44 2443.23 1
 3 -10 13 12425.5 2860.83 1
 3 -10 14 -52.1664 927.977 1
 3 -10 15 2007.05 1295.23 1
 3 -9 3 86192.9 5470.93 1
 3 -9 4 183400 8596.45 1
 3 -9 5 53197.8 2569.15 4
 3 -9 5 46860.7 4175.51 1
 3 -9 6 391.684 262.575 4
 3 -9 6 542.66 573.585 1
 3 -9 7 13897.6 1817.5 4
 3 -9 7 17186.3 2592.34 1
 3 -9 8 86666.5 5263.45 4
 3 -9 8 69323.1 5668.04 1
 3 -9 9 11900.8 2347.66 1
 3 -9 9 8694.08 1772.78 4
 3 -9 10 5342.16 1455.77 4
 3 -9 10 6970.24 1911.07 1
 3 -9 11 18355.8 2982.13 4
 3 -9 11 25081.8 3684.17 1
 3 -9 12 18670.7 3225.71 4
 3 -9 12 22934.8 3671.44 1
 3 -9 13 -196.917 899.897 1
 3 -9 13 -451.934 896.188 4
 3 -9 14 11842.8 2833.71 1
 3 -9 14 13797.5 3120.88 4
 3 -9 15 20418.9 3806.89 1
 3 -9 15 13520.6 3217.54 4
 3 -8 2 116612 6019.12 1
 3 -8 3 284187 10601.2 1
 3 -8 4 118814 3983.76 4
 3 -8 4 134834 6748.31 1
 3 -8 5 17313.1 1621.85 4
 3 -8 5 18020.8 2394.37 1
 3 -8 6 46058.9 3234.69 4
 3 -8 6 49889.3 4227.44 1
 3 -8 7 68959.8 4471.19 4
 3 -8 7 72413.9 5367.81 1
 3 -8 8 20618.7 2611.82 4
 3 -8 8 13646.9 2375.53 1
 3 -8 9 14916.6 2591.67 1
 3 -8 9 15290.9 2381.32 4
 3 -8 10 63253.2 5566.23 1
 3 -8 10 58979.4 5185.77 4
 3 -8 11 20989.8 3327.16 1
 3 -8 11 35432.7 4243.83 4
 3 -8 12 -356.063 811.641 4
 3 -8 12 293.494 340.467 1
 3 -8 13 20432.6 3570.79 4
 3 -8 13 21648.7 3549.05 1
 3 -8 14 28304.1 4258.36 1
 3 -8 14 22123.7 4014.01 4
 3 -8 15 4142.98 1701.5 4
 3 -8 15 10406.6 2730.31 1
 3 -8 16 -2665.36 1565.56 4
 3 -8 17 7317.27 2507.49 4
 3 -7 2 125904 5920.27 1
 3 -7 3 63086.6 4116.84 1
 3 -7 3 61269.6 2307.4 4
 3 -7 4 3678.44 1024.49 1
 3 -7 4 6202.22 1389 4
 3 -7 5 41254.2 2833.95 4
 3 -7 5 42966.6 3649.61 1
 3 -7 6 61258.3 4547.56 1
 3 -7 6 55628.5 3774.85 4
 3 -7 7 10157.3 1870.55 1
 3 -7 7 9767.82 1670.43 4
 3 -7 8 25090.4 3127.61 1
 3 -7 8 27401.5 3611.59 4
 3 -7 9 65017.1 5278.83 1
 3 -7 9 54677.2 4831.02 4
 3 -7 10 25430.2 3379.04 1
 3 -7 10 22952.1 3282.92 4
 3 -7 11 670.918 797.366 1
 3 -7 11 16554.5 3229.51 4
 3 -7 12 16514.1 3003.08 1
 3 -7 12 14817.3 2982.43 4
 3 -7 13 26995.2 3907.79 1
 3 -7 13 24104.1 3964.9 4
 3 -7 14 2277.77 1234.22 1
 3 -7 14 6391.27 2206.26 4
 3 -7 15 6.77608 473.781 1
 3 -7 15 628.172 1009.24 4
 3 -7 16 9333.96 2882.39 4
 3 -6 1 54490.3 3299.29 1
 3 -6 2 22963.1 2151.71 1
 3 -6 3 242602 7127.06 4
 3 -6 3 254337 8905.93 1
 3 -6 4 179936 8050.8 1
 3 -6 4 283260 8263.76 4
 3 -6 5 37832.4 3232.69 1
 3 -6 5 29821.3 2664.88 4
 3 -6 6 3970.85 1018.68 4
 3 -6 6 3497.7 955.646 1
 3 -6 7 55584.3 4477.17 1
 3 -6 7 76638.1 5127.6 4
 3 -6 8 48564.3 4351.32 4
 3 -6 9 40250.1 4276.23 4
 3 -6 10 16856.7 2860.67 4
 3 -6 11 39876.9 4791.77 4
 3 -6 12 22322.1 3793.84 4
 3 -6 13 -172.056 628.993 4
 3 -6 14 1889.66 1431.23 4
 3 -6 15 10307.8 2920.05 4
 3 -6 16 4888.39 2179.46 4
 3 -5 -3 16942.8 1459.45 3
 3 -5 -2 44210.3 2283.02 3
 3 -5 -1 148244 4837.56 3
 3 -5 0 114098 4527.82 1
 3 -5 1 773.597 375.699 1
 3 -5 2 178217 5408.4 4
 3 -5 2 182020 6608.54 1
 3 -5 3 603607 16104.4 1
 3 -5 3 574625 14936.3 4
 3 -5 4 531763 14922.3 1
 3 -5 4 496437 14226.8 4
 3 -5 5 8774.08 1426.62 4
 3 -5 6 143299 7103.8 4
 3 -5 7 109636 6665.75 4
 3 -5 8 73035.9 5612.5 4
 3 -5 9 8056.56 1939.95 4
 3 -5 10 50222.3 5210.35 4
 3 -5 11 23064.6 3799.32 4
 3 -5 12 -74.4515 400.635 4
 3 -5 13 177.416 603.456 4
 3 -5 14 18717.3 4135.37 4
 3 -5 15 9061.59 2964.33 4
 3 -5 16 5.06713 1191.74 4
 3 -4 -4 26391 1883.83 3
 3 -4 -3 22600.6 1459.73 3
 3 -4 -2 184329 5078.47 3
 3 -4 0 444.577 234.717 1
 3 -4 1 154006 5513.29 1
 3 -4 1 172776 4941.27 4
 3 -4 2 61547.8 3239.47 1
 3 -4 2 61915.3 3048.27 4
 3 -4 3 355054 10596.9 4
 3 -4 4 165787 7025.45 4
 3 -4 5 123080 6223.02 4
 3 -4 6 94619.7 5793.57 4
 3 -4 7 61377.8 4974.44 4
 3 -4 8 15837.1 2641.92 4
 3 -4 9 42847.8 4670.14 4
 3 -4 10 27860.6 4188.44 4
 3 -4 11 5865.67 1893.36 4
 3 -4 12 3383.51 1550.47 4
 3 -4 13 15760.1 3683.52 4
 3 -4 14 8460.09 2886.74 4
 3 -4 15 58.1665 714.367 4
 3 -3 -4 57006.9 2674.08 3
 3 -3 -3 371970 9014.78 3
 3 -3 -1 11561.9 837.753 1
 3 -3 -1 11800.5 1232.64 2
 3 -3 0 453326 11043.2 1
 3 -3 0 462081 11806.9 2
 3 -3 1 239666 7073.09 4
 3 -3 1 230851 6881.02 2
 3 -3 2 60026.2 3320.86 4
 3 -3 2 61817.7 2743.59 2
 3 -3 3 33602.9 2675.91 4
 3 -3 3 35648.3 1926.81 2
 3 -3 4 344852 12058.9 4
 3 -3 4 396061 9534.08 2
 3 -3 5 77749.2 5022.5 4
 3 -3 5 76554.8 2704.27 2
 3 -3 6 3497.6 1155.94 4
 3 -3 7 56053.8 4919.41 4
 3 -3 8 85228 6534.39 4
 3 -3 9 29254.9 3966.35 4
 3 -3 10 45266.6 5322.74 4
 3 -3 11 25338.7 4076.51 4
 3 -3 12 24710.4 4367.22 4
 3 -3 13 8894.88 2817.2 4
 3 -3 14 -658.546 1116.45 4
 3 -3 15 17310.7 4185.69 4
 3 -2 -3 214792 6757.9 2
 3 -2 -2 49761.8 2602.48 2
 3 -2 -1 26455.1 1771.34 2
 3 -2 0 349211 9363.43 2
 3 -2 0 361508 9426.76 4
 3 -2 1 19185.5 1378.2 2
 3 -2 1 21033.3 1786.38 4
 3 -2 2 7486.86 810.412 2
 3 -2 2 9082.52 1304.95 4
 3 -2 3 696410 16048.5 2
 3 -2 3 698684 19022.8 4
 3 -2 4 153895 4538.48 2
 3 -2 4 139834 6943.36 4
 3 -2 5 36010.9 3483.47 4
 3 -2 5 37846.9 1760.59 2
 3 -2 6 168989 4674.75 2
 3 -2 6 165278 8642.03 4
 3 -2 7 94131.6 6640.08 4
 3 -2 7 81166.2 2536.42 2
 3 -2 8 32681.6 4172.12 4
 3 -2 9 19503.7 3445.69 4
 3 -2 10 38403.7 4981.36 4
 3 -2 11 19481.6 3774.98 4
 3 -2 12 6716.38 2223.06 4
 3 -2 13 3767.72 1729.59 4
 3 -2 14 10168.6 3174.31 4
 3 -1 -4 45177.9 2498.91 2
 3 -1 -3 188606 5949.23 2
 3 -1 -2 341632 9163.2 2
 3 -1 -1 216398 6530.03 2
 3 -1 -1 231915 5818.55 3
 3 -1 0 57225.6 2788.21 2
 3 -1 0 44832.1 2477.41 3
 3 -1 1 18207 1831.9 4
 3 -1 1 21510.6 1691.35 3
 3 -1 1 20171.7 1430.75 2
 3 -1 2 530147 15122.2 4
 3 -1 2 525746 12794.2 2
 3 -1 3 176585 7406.36 4
 3 -1 3 135072 4573.64 2
 3 -1 4 35649.3 3404.11 4
 3 -1 4 37534.9 1968.57 2
 3 -1 5 273534 11264.9 4
 3 -1 5 268630 7245.55 2
 3 -1 6 206459 10096.5 4
 3 -1 6 201331 5737.3 2
 3 -1 7 36056.8 4174.16 4
 3 -1 7 34542.4 1746.53 2
 3 -1 8 2386.12 1091.22 4
 3 -1 9 55871 5891.24 4
 3 -1 10 24677.2 4150.64 4
 3 -1 11 1250.98 782.583 4
 3 -1 12 11027.5 3083.77 4
 3 -1 13 21745 4593.11 4
 3 -1 14 5382.71 2291.89 4
 3 0 -4 72783.2 2648.92 1
 3 0 -3 598335 13973.7 3
 3 0 -3 579142 13419.5 1
 3 0 -3 605306 14682 2
 3 0 -2 5361.05 648.182 3
 3 0 -2 5255.3 784.442 2
 3 0 -1 3002.75 589.634 2
 3 0 -1 2049.68 437.703 3
 3 0 0 93017.3 4218.28 4
 3 0 0 89928.8 3700.97 2
 3 0 0 86166.6 3672.41 3
 3 0 1 109112 5192.64 4
 3 0 1 114628 4276.84 2
 3 0 1 107337 4597.91 3
 3 0 2 30200.6 2851.94 4
 3 0 2 35440.7 2124.71 2
 3 0 2 33505.3 2579.56 3
 3 0 3 9780.93 1166.46 2
 3 0 3 39653.7 3054.3 3
 3 0 4 80428.2 5524.03 4
 3 0 4 92627.6 3720.57 2
 3 0 5 162880 8652.3 4
 3 0 5 168444 5531.11 2
 3 0 6 24563.6 3610.84 4
 3 0 6 19048.9 1508.45 2
 3 0 7 545.521 279.655 4
 3 0 7 1289.43 389.055 2
 3 0 8 51709.6 5537.68 4
 3 0 9 65803.6 6663.33 4
 3 0 10 250.231 382.97 4
 3 0 11 28230 4876.83 4
 3 0 12 32966.4 5540.91 4
 3 0 13 3405.55 1632.19 4
 3 0 14 3555.48 1999.19 4
 3 1 -5 276766 7833.12 1
 3 1 -4 184631 5653.31 1
 3 1 -3 4672.73 728.067 3
 3 1 -2 2595.91 552.788 3
 3 1 -1 163170 5603.45 3
 3 1 0 181685 6901.66 4
 3 1 0 195128 6620.71 3
 3 1 1 33468 2860.35 4
 3 1 1 31979.2 2485.6 3
 3 1 2 62083 4366.71 4
 3 1 2 67052.3 4009.45 3
 3 1 3 115135 6603.81 4
 3 1 3 129824 6252.12 3
 3 1 4 25799.9 3162.93 4
 3 1 4 30788.1 3036.24 3
 3 1 5 275.271 336.074 4
 3 1 6 47885 4938.99 4
 3 1 7 22258.7 3682.57 4
 3 1 8 38222.2 4960.33 4
 3 1 9 1561.19 892.84 4
 3 1 10 35298.8 5270.85 4
 3 1 11 45406.4 6289.53 4
 3 1 12 1688.49 1396.23 4
 3 1 13 3413.74 1890.29 4
 3 2 -4 213395 7243.89 3
 3 2 -3 21371.9 1843.63 3
 3 2 -2 193099 6674.06 3
 3 2 -1 333380 9841.05 3
 3 2 -1 305550 9642.06 4
 3 2 0 95222 4901.69 4
 3 2 0 96876.5 4676.35 3
 3 2 1 64208.4 4294.52 4
 3 2 1 73416.7 4189.85 3
 3 2 2 156314 7677.06 4
 3 2 2 162066 7082.2 3
 3 2 3 45492.1 4145.15 4
 3 2 3 56074.5 4110.64 3
 3 2 4 20902.6 2946.7 4
 3 2 4 19261.8 2537.96 3
 3 2 5 88059 6661.42 4
 3 2 5 89389.1 5939.93 3
 3 2 6 86660.2 7063.27 4
 3 2 7 25294.3 3850.68 4
 3 2 8 -507.738 1151.82 4
 3 2 9 46891.4 6046.71 4
 3 2 10 51933.2 6608.5 4
 3 2 11 -375.621 1262.66 4
 3 2 12 3233.38 1803.74 4
 3 3 -5 252090 8793.18 3
 3 3 -4 7314.96 1372.62 3
 3 3 -3 441089 12770.6 3
 3 3 -2 256410 8749.72 3
 3 3 -1 12093.6 1641.97 3
 3 3 -1 15568.1 1779.26 4
 3 3 0 169053 7217.15 4
 3 3 0 182113 7360.16 3
 3 3 1 90531.9 5488.88 4
 3 3 1 96675.3 5288.65 3
 3 3 2 26775.5 3061.86 4
 3 3 2 25569.7 2735.57 3
 3 3 3 47067.3 4724.11 4
 3 3 3 51494.9 4166.84 3
 3 3 4 70286.3 5758.31 4
 3 3 4 69744.1 5164.02 3
 3 3 5 54417.3 5356.86 4
 3 3 5 61048.6 5011.59 3
 3 3 6 26544 3907 4
 3 3 7 74.9244 509.948 4
 3 3 8 57585.4 6484.76 4
 3 3 9 45927.8 6153.22 4
 3 3 10 1546.22 1199.74 4
 3 3 11 10176.2 3169.98 4
 3 3 12 15076.5 4072.13 4
 3 4 -6 1711.23 603.098 3
 3 4 -5 25956.6 2510.1 3
 3 4 -4 275240 9674.5 3
 3 4 -3 50365.4 3516.88 3
 3 4 -2 47250.3 3445.88 3
 3 4 -1 369834 11965.3 3
 3 4 -1 345213 11186.9 4
 3 4 0 351803 11938.1 4
 3 4 0 357000 12141.2 3
 3 4 1 31338 3176.38 4
 3 4 1 29492.4 2984.09 3
 3 4 2 42868.9 4071.53 4
 3 4 2 42977.8 3805.31 3
 3 4 3 145881 8483.57 4
 3 4 3 155413 8027.54 3
 3 4 4 38002.3 4320.14 4
 3 4 4 41090 4105.99 3
 3 4 5 7712.59 1821.61 3
 3 4 5 7226.01 2095.33 4
 3 4 6 17165.9 3295.37 4
 3 4 6 25490.8 3589.61 3
 3 4 7 47078 5725.07 4
 3 4 8 29297.3 4756.19 4
 3 4 9 2768.04 1703.8 4
 3 4 10 8697.89 2829.4 4
 3 4 11 26438.6 5268.32 4
 3 5 -7 24426 2745.3 3
 3 5 -6 70767.9 4657.81 3
 3 5 -5 168724 7563.98 3
 3 5 -4 92943.8 5317.26 3
 3 5 -3 37872 3266.72 3
 3 5 -2 225638 9133.07 3
 3 5 -1 256321 9926.86 3
 3 5 -1 234637 8932.61 4
 3 5 0 38015.7 3368.49 4
 3 5 0 39387.3 3606.94 3
 3 5 1 9942.49 1842.66 3
 3 5 1 7825.8 1630.43 4
 3 5 2 137832 7942.93 4
 3 5 2 137658 7632.38 3
 3 5 3 7072.22 1685.19 3
 3 5 3 8780.24 2027.08 4
 3 5 4 5213.77 1541.59 3
 3 5 4 6557.18 1891.14 4
 3 5 5 30505.3 4290.69 4
 3 5 5 31885.7 3949.64 3
 3 5 6 44268.3 5518.81 4
 3 5 6 41834.1 4849.43 3
 3 5 7 15382.3 3309.49 4
 3 5 8 14735.1 3394.59 4
 3 5 9 23524.7 4870.16 4
 3 5 10 32373.2 5673.93 4
 3 5 11 -2911.13 1841.3 4
 3 6 -8 4367.72 1260.04 3
 3 6 -7 50130.7 4174.92 3
 3 6 -6 88003.9 5531.14 3
 3 6 -5 75394.7 5061.95 3
 3 6 -4 4047.67 1177.6 3
 3 6 -3 187532 8558.14 3
 3 6 -2 65321.6 4767.59 3
 3 6 -1 23192.3 2822.44 3
 3 6 0 4496.47 1306 3
 3 6 0 3219.99 1015.89 4
 3 6 1 93768 6203.59 4
 3 6 1 104382 6660.9 3
 3 6 2 5141.15 1496.92 3
 3 6 2 5812.99 1569.63 4
 3 6 3 1117.91 740.01 3
 3 6 3 245.514 260.037 4
 3 6 4 29686.4 4156.32 4
 3 6 4 34804.8 4195.82 3
 3 6 5 48677.1 5700.32 4
 3 6 5 53945.3 5474.31 3
 3 6 6 8070.13 2141.84 3
 3 6 6 4492.72 1659.85 4
 3 6 7 29652.3 4852.94 4
 3 6 7 33585.7 4617.83 3
 3 6 8 47850.4 6494 4
 3 6 9 15755.1 3880.8 4
 3 6 10 -489.322 1121.67 4
 3 7 -10 11897.8 2306.89 3
 3 7 -9 16427.3 2596.01 3
 3 7 -8 44171.9 4185.81 3
 3 7 -7 40358.5 3904.4 3
 3 7 -6 34082.7 3542.91 3
 3 7 -5 4220.44 1236.27 3
 3 7 -4 89389.1 5863.64 3
 3 7 -3 44983.2 4095.98 3
 3 7 -2 3095.08 1061.63 3
 3 7 -1 21565.7 2972.03 3
 3 7 0 93191.4 5816 4
 3 7 0 90043.4 6375.59 3
 3 7 1 61838.4 5056.09 4
 3 7 1 68055.2 5624.14 3
 3 7 2 1854.41 970.475 3
 3 7 2 25.5466 304.228 4
 3 7 3 43060.2 4837.16 4
 3 7 3 41683.4 4645.56 3
 3 7 4 68532.1 6553.3 4
 3 7 4 62035.9 5938.84 3
 3 7 5 9633.27 2362.3 3
 3 7 5 8385.45 2427.09 4
 3 7 6 27854.3 4664.23 4
 3 7 6 31330.9 4464.44 3
 3 7 7 48814 6479.5 4
 3 7 7 48772.5 5882.99 3
 3 7 8 13252 3479.95 4
 3 7 9 62.3047 871.608 4
 3 8 -11 30413.4 3926.15 3
 3 8 -10 24552.9 3409.34 3
 3 8 -9 104089 7079.49 3
 3 8 -8 28830.6 3496.41 3
 3 8 -7 7029.02 1648.09 3
 3 8 -6 57327.2 4907.26 3
 3 8 -5 57316.2 4907.95 3
 3 8 -4 24717.1 3158.1 3
 3 8 -3 8630.83 1854.44 3
 3 8 -2 99603.1 6784.51 3
 3 8 -1 90191.8 6609.48 3
 3 8 0 30989.4 3340.97 4
 3 8 0 31139.7 3875.2 3
 3 8 1 5037.03 1594.62 3
 3 8 1 5833.39 1541.62 4
 3 8 2 84011.9 6669.11 4
 3 8 2 97847.9 7525.17 3
 3 8 3 64538.8 6152.54 4
 3 8 3 71837.7 6492.51 3
 3 8 4 15279.1 3013.5 3
 3 8 4 11362.5 2715.31 4
 3 8 5 27653.7 4423.74 4
 3 8 5 29923.1 4429.89 3
 3 8 6 27911.9 4821.43 4
 3 8 6 36773.1 5082.19 3
 3 8 7 7959.73 2397.19 3
 3 8 7 10085.2 2878.8 4
 3 8 8 1373.88 1210.37 4
 3 9 -13 27506.2 4105.78 3
 3 9 -12 15602.6 2917.31 3
 3 9 -11 -18.6665 758.932 3
 3 9 -10 32408 4040.17 3
 3 9 -9 20149.1 3115.43 3
 3 9 -8 529.74 589.526 3
 3 9 -7 88438.6 6542.28 3
 3 9 -6 80601.8 6200.47 3
 3 9 -5 13354.9 2453.95 3
 3 9 -4 56284.5 5146.04 3
 3 9 -3 96136.3 6916.37 3
 3 9 -2 58124.7 5401.62 3
 3 9 -1 -384.784 510.983 3
 3 9 0 27982.1 3898.77 3
 3 9 1 60471.5 5232.2 4
 3 9 1 68032.8 6300.83 3
 3 9 2 40224.4 4599.83 4
 3 9 2 42439.1 5074.34 3
 3 9 3 1554.82 901.959 3
 3 9 3 3387.92 1427.02 4
 3 9 4 19085.4 3611.86 3
 3 9 4 21474.4 3780.22 4
 3 9 5 32799.5 4956.51 4
 3 9 5 33363.8 4977.44 3
 3 9 6 8553.08 2540.18 3
 3 9 6 6958.69 2524.11 4
 3 9 7 4018.01 2034.21 4
 3 9 8 16791.9 4145.34 4
 3 10 -15 8832.56 2576.34 3
 3 10 -14 5631.02 2004.76 3
 3 10 -13 2082.69 1278.39 3
 3 10 -12 8296.88 2271.29 3
 3 10 -11 22495.4 3568.98 3
 3 10 -10 12136.5 2572.49 3
 3 10 -9 4476.29 1551.38 3
 3 10 -8 50328.2 5137.19 3
 3 10 -7 49327.2 5050.3 3
 3 10 -6 4981.45 1504 3
 3 10 -5 42088.7 4638.98 3
 3 10 -4 74557.9 6362.88 3
 3 10 -3 42186 4764.17 3
 3 10 -2 -260.809 733.793 3
 3 10 -1 32356.5 4308.53 3
 3 10 0 41853.3 5098.1 3
 3 10 1 24333.5 3936.88 3
 3 10 2 -187.316 584.266 3
 3 10 3 33638.2 4845.01 3
 3 10 4 20518.8 3964.64 3
 3 10 5 1916.82 1462.55 3
 3 11 -15 3358.34 1640.17 3
 3 11 -14 1576.68 1030.85 3
 3 11 -13 10864.9 2745.07 3
 3 11 -12 26097.2 4106.43 3
 3 11 -11 10125.4 2445.19 3
 3 11 -10 4072.51 1398.61 3
 3 11 -9 39973.6 4834.84 3
 3 11 -8 54570.4 5643.05 3
 3 11 -7 3090.42 1261.53 3
 3 11 -6 5482.61 1753.77 3
 3 11 -5 27231.5 3947.81 3
 3 11 -4 21547.1 3520.28 3
 3 11 -3 -95.1176 605.059 3
 3 11 -2 17012.7 3243.28 3
 3 11 -1 27139.1 4179.52 3
 3 11 0 7778.76 2300.23 3
 3 11 1 4742.09 2249.72 3
 3 11 2 31830.3 4957.31 3
 3 11 3 15469.2 3479.28 3
 3 12 -13 22009.3 3998.39 3
 3 12 -12 1794.27 1181.91 3
 3 12 -11 1578.87 1067.56 3
 3 12 -10 20343.6 3628.44 3
 3 12 -9 26552.8 4072.85 3
 3 12 -8 808.861 957.503 3
 3 12 -7 9691.07 2458.95 3
 3 12 -6 25422.5 3988.42 3
 3 12 -5 5919.51 1995.77 3
 3 12 -4 38.7274 577.536 3
 3 12 -3 22549.6 3862.69 3
 3 12 -2 19334.7 3692.39 3
 3 12 -1 -159.569 683.246 3
 3 12 0 12584.8 3169.54 3
 3 12 1 39921.6 5691.41 3
 3 12 2 26100 4626.72 3
 3 13 -11 22161 3994.14 3
 3 13 -10 12542.1 3004.19 3
 3 13 -9 -171.27 569.434 3
 3 13 -8 17412.1 3460.66 3
 3 13 -7 30108.6 4556.94 3
 3 13 -6 1527.55 1034.08 3
 3 13 -5 822.997 376.647 3
 3 13 -4 32634.8 4920.81 3
 3 13 -3 26737.8 4490.09 3
 3 13 -2 867.735 831.951 3
 3 13 -1 19219.1 3916.09 3
 3 14 -7 1568.83 910.45 3
 3 14 -6 5493.34 2000.08 3
 4 -15 10 3251.84 1648.89 1
 4 -15 11 16932.5 3596.33 1
 4 -14 8 11689 2739.4 1
 4 -14 9 1240.98 760.14 1
 4 -14 10 17834.8 3517.19 1
 4 -14 11 10325.4 2797.09 1
 4 -14 12 1001.8 810.375 1
 4 -13 7 4393.3 1535.18 1
 4 -13 8 6203.8 1974.7 1
 4 -13 9 11636.1 2600.94 1
 4 -13 10 5104.24 1740.54 1
 4 -13 11 1076.38 1180.68 1
 4 -13 12 8199.4 2375.46 1
 4 -13 13 11209.2 2877.43 1
 4 -12 5 52472.6 4990.38 1
 4 -12 6 6865.63 1785.54 1
 4 -12 7 40421.9 4547.83 1
 4 -12 8 19230.2 3174.48 1
 4 -12 9 8326.06 2172.06 1
 4 -12 10 2646.33 1167.15 1
 4 -12 11 27603.1 4190.44 1
 4 -12 12 17076.4 3390.18 1
 4 -12 13 2250.2 1377.77 1
 4 -11 4 47247.4 4419.68 1
 4 -11 5 8240.49 1874.86 1
 4 -11 6 39477.4 4224.41 1
 4 -11 7 52522 5028.21 1
 4 -11 8 1000.92 633.737 1
 4 -11 9 9785.29 2227.95 1
 4 -11 10 27098.5 3866.57 1
 4 -11 11 35549.9 4690.8 1
 4 -11 12 5295.98 1867.01 1
 4 -11 13 4816.31 1739.55 1
 4 -11 14 10042.9 2822.46 1
 4 -10 3 33424 3411.88 1
 4 -10 4 2360.4 903.193 1
 4 -10 5 67173.1 5179.66 1
 4 -10 5 65306.1 2560.88 4
 4 -10 6 74443 3828.09 4
 4 -10 6 77297.8 5729.33 1
 4 -10 7 2233.16 885.17 1
 4 -10 7 3057.86 857.485 4
 4 -10 8 53939 4166.48 4
 4 -10 8 29094.2 3731.52 1
 4 -10 9 29919.5 3431.67 4
 4 -10 9 28705.6 3810.59 1
 4 -10 10 39669.6 4247.44 4
 4 -10 10 43682.5 4875.19 1
 4 -10 11 458.124 742.154 1
 4 -10 12 8345.7 2257.25 1
 4 -10 13 7430.33 2308.04 1
 4 -10 14 2986.05 1486.59 1
 4 -9 2 13436.9 1980.23 1
 4 -9 3 12272.7 1968.27 1
 4 -9 4 161038 7773.11 1
 4 -9 4 143230 4266.83 4
 4 -9 5 84189.9 3931.92 4
 4 -9 5 82403.1 5584.39 1
 4 -9 6 868.822 409.152 1
 4 -9 6 989.415 462.59 4
 4 -9 7 44872 3689.34 4
 4 -9 7 48917.8 4520.37 1
 4 -9 8 60419.5 4662.43 4
 4 -9 8 52479.3 4915.58 1
 4 -9 9 20800.5 2947.88 4
 4 -9 9 28772 3694.56 1
 4 -9 10 480.152 586.194 1
 4 -9 10 -35.474 381.126 4
 4 -9 11 18075.1 3157.93 1
 4 -9 11 17493.5 3078.48 4
 4 -9 12 19076.8 3356.68 1
 4 -9 12 19319.3 3408.28 4
 4 -9 13 1041.74 840.453 1
 4 -9 13 751.232 843.724 4
 4 -9 14 13733.9 3202.1 4
 4 -9 14 11409.5 2847.14 1
 4 -9 15 23497.3 4200 1
 4 -9 15 22292.2 4300.25 4
 4 -8 1 1066.2 544.736 1
 4 -8 2 17542.9 2126.45 1
 4 -8 3 106435 5755.69 1
 4 -8 4 66499.2 3261.36 4
 4 -8 4 75139.4 4864.71 1
 4 -8 5 2676.49 1020.3 1
 4 -8 5 5781.41 1160.89 4
 4 -8 6 4033.85 965.847 4
 4 -8 6 4628.17 1292.36 1
 4 -8 7 52553.8 4549.61 1
 4 -8 7 48486.6 3994.17 4
 4 -8 8 12332.2 2205.91 4
 4 -8 8 10174.5 2024.31 1
 4 -8 9 507.229 242.329 4
 4 -8 9 358.983 357.299 1
 4 -8 10 30347.5 3864.52 1
 4 -8 10 23724.1 3445.68 4
 4 -8 11 25471.8 3695.82 1
 4 -8 11 39064.3 4706.26 4
 4 -8 12 2506.86 1462.29 4
 4 -8 12 3335.4 1455.34 1
 4 -8 13 14546.7 3151.67 4
 4 -8 13 14191 2915.11 1
 4 -8 14 19530.5 3646.83 1
 4 -8 14 24025.3 4371.96 4
 4 -8 15 9039.1 2566.5 1
 4 -8 15 12069.7 3231.23 4
 4 -8 16 444.732 1322.28 4
 4 -7 1 43419.6 3104.4 1
 4 -7 2 92845.5 4863.36 1
 4 -7 3 48084.7 2592.55 4
 4 -7 3 63530.3 4040.62 1
 4 -7 4 4073.88 1064.64 1
 4 -7 4 23733.4 2253.76 4
 4 -7 5 8107.26 1676.85 1
 4 -7 5 6574.92 1316.49 4
 4 -7 6 61525.1 4602.59 1
 4 -7 6 54190.2 4120.4 4
 4 -7 7 26483.9 3084.06 1
 4 -7 7 22796.4 2816.71 4
 4 -7 8 1561.32 977.06 1
 4 -7 8 4822.69 1983.95 4
 4 -7 9 66324.4 5445.04 1
 4 -7 9 60013.6 5390.26 4
 4 -7 10 27627.7 3827.34 4
 4 -7 11 20472.7 3508.8 4
 4 -7 12 19758.1 3704.35 4
 4 -7 13 17937.5 3684.76 4
 4 -7 14 5191.46 1743.48 1
 4 -7 14 10178.1 2910.83 4
 4 -7 15 -976.562 1259.17 1
 4 -7 15 -82.3579 514.619 4
 4 -7 16 2643.13 1042.97 4
 4 -6 -3 313921 8765.87 3
 4 -6 -2 158020 5248.37 3
 4 -6 0 32045 2320.69 1
 4 -6 1 63108.3 3521.56 1
 4 -6 2 23029.7 1583.35 4
 4 -6 2 22782.1 2155.01 1
 4 -6 3 49509.4 3445.46 1
 4 -6 3 49299.9 2982.23 4
 4 -6 4 122741 6219.53 1
 4 -6 4 169605 6689.44 4
 4 -6 5 96281.3 5480.81 1
 4 -6 5 92615.1 5290.32 4
 4 -6 6 25949.4 2921.33 4
 4 -6 7 13866.1 2268.8 4
 4 -6 8 56180.6 5013.7 4
 4 -6 9 33605.4 4142.74 4
 4 -6 10 -625.225 1061.62 4
 4 -6 11 15018.3 3055.83 4
 4 -6 12 34173.3 4892.31 4
 4 -6 13 1099.92 1015.61 4
 4 -6 14 608.816 517.377 4
 4 -6 15 7797.2 2720.51 4
 4 -5 -4 275413 7723.02 3
 4 -5 -3 138072 4327.36 3
 4 -5 -2 777.221 219.526 3
 4 -5 -1 205475 6326.56 1
 4 -5 0 284398 8325.01 1
 4 -5 1 5007.69 877.266 1
 4 -5 2 278324 8882.1 1
 4 -5 2 272557 8361.14 4
 4 -5 3 572455 15706.6 4
 4 -5 4 200442 8059.99 4
 4 -5 5 24993.1 2740.41 4
 4 -5 6 81385 5552.94 4
 4 -5 7 146484 8196.1 4
 4 -5 8 68230.2 5830.98 4
 4 -5 9 8635.55 2137.88 4
 4 -5 10 44747.6 5159.86 4
 4 -5 11 49517.9 5787.15 4
 4 -5 12 1607.71 800.421 4
 4 -5 13 1734.6 767.092 4
 4 -5 14 14361.4 3590.63 4
 4 -5 15 8863.46 2859.67 4
 4 -4 -5 477964 12374.6 3
 4 -4 -4 74704.8 2875.05 3
 4 -4 -3 3650.27 419.438 3
 4 -4 -1 158901 4819.05 1
 4 -4 0 9555.39 1013.22 1
 4 -4 1 148793 5302.64 4
 4 -4 2 395270 11627.4 4
 4 -4 3 236947 9128.14 4
 4 -4 3 279230 7989.52 2
 4 -4 4 129165 6075.8 4
 4 -4 4 8931 1076.49 2
 4 -4 5 14109.5 2118.29 4
 4 -4 5 14424.2 1259.26 2
 4 -4 6 79771.4 5697.08 4
 4 -4 7 63828.8 5472.05 4
 4 -4 8 6187.21 1649.96 4
 4 -4 9 62082.4 5983.51 4
 4 -4 10 47462.4 5507.35 4
 4 -4 11 -110.015 479.406 4
 4 -4 12 2037.44 1332.58 4
 4 -4 13 13785.6 3723.8 4
 4 -4 14 9459.26 3135.58 4
 4 -4 15 -1818.97 1682.18 4
 4 -3 -5 20698.3 1587.77 3
 4 -3 -4 5603.69 630.66 3
 4 -3 -2 95562.5 2705.27 1
 4 -3 1 40413.3 2726.94 4
 4 -3 2 72139.8 3332.96 2
 4 -3 2 72271.3 4175.25 4
 4 -3 3 12431.7 1229.1 2
 4 -3 3 11593.1 1785.36 4
 4 -3 4 139020 4783.33 2
 4 -3 4 133276 6949.68 4
 4 -3 5 38357.8 2087.36 2
 4 -3 5 30729.5 3419.07 4
 4 -3 6 340.355 188.623 2
 4 -3 6 1310.7 662.897 4
 4 -3 7 41772.7 4500.21 4
 4 -3 7 40670.3 1878.13 2
 4 -3 8 81389.5 6718.1 4
 4 -3 9 6747.8 1897.54 4
 4 -3 10 13705.3 3016.76 4
 4 -3 11 7431.61 2380.72 4
 4 -3 12 9926.06 2976.05 4
 4 -3 13 8876.7 2968.1 4
 4 -3 14 -117.303 819.674 4
 4 -2 -3 53335.9 1768.23 3
 4 -2 -2 15493.1 805.474 3
 4 -2 -1 34987.6 1659.01 3
 4 -2 0 111715 4658.04 4
 4 -2 1 20964.3 2078.74 4
 4 -2 2 8030.46 1418.23 4
 4 -2 3 402641 10663.1 2
 4 -2 3 407684 13548.5 4
 4 -2 4 101043 3866.1 2
 4 -2 4 95861.9 6039.59 4
 4 -2 5 3291.01 582.24 2
 4 -2 5 1567.79 797.053 4
 4 -2 6 84356.6 3320.15 2
 4 -2 6 80874.4 6222.2 4
 4 -2 7 222962 11500.6 4
 4 -2 8 50156.9 5458.15 4
 4 -2 9 18898 3493.27 4
 4 -2 10 33059.5 4857.28 4
 4 -2 11 17706.7 3710.41 4
 4 -2 12 5652.37 2213.8 4
 4 -2 13 501.628 698.263 4
 4 -2 14 11135.1 3343.26 4
 4 -1 -3 21630.3 1291.47 3
 4 -1 -2 168354 4893 3
 4 -1 -1 120129 4157.08 3
 4 -1 0 93525.9 4349.35 4
 4 -1 0 62657.2 3204.45 3
 4 -1 1 190550 7616.49 4
 4 -1 1 191732 6795.57 3
 4 -1 2 235487 9333.34 4
 4 -1 3 255897 10680.5 4
 4 -1 4 31748.2 3458.28 4
 4 -1 5 79497 5984.14 4
 4 -1 6 188839 10239.6 4
 4 -1 7 132463 8890.25 4
 4 -1 8 762.48 627.671 4
 4 -1 9 68564 6979.86 4
 4 -1 10 16932.2 3678.39 4
 4 -1 11 10426.7 2927.55 4
 4 -1 12 8389.77 2944.8 4
 4 -1 13 12443 3639.32 4
 4 0 -5 5514.71 677.854 1
 4 0 -4 45396.3 2441.45 3
 4 0 -4 48606.3 2137.76 1
 4 0 -3 204975 6229.88 3
 4 0 -2 20064.7 1526.82 3
 4 0 -1 77393.3 3509.85 3
 4 0 0 89513.2 4586.24 4
 4 0 0 74966.9 3773.85 3
 4 0 1 110148 5785.45 4
 4 0 1 114122 5189.96 3
 4 0 2 74189.8 5010.1 4
 4 0 2 80669.1 4528.99 3
 4 0 3 75200.2 5424.06 4
 4 0 3 14832.7 2903.93 3
 4 0 4 83588.6 6031.43 4
 4 0 5 83136.3 6355.58 4
 4 0 6 38784.9 4548.82 4
 4 0 7 1506.79 1133.89 4
 4 0 8 66333.4 6681.53 4
 4 0 9 5408.99 2047.95 4
 4 0 10 218.739 965.86 4
 4 0 11 9464.45 3048.06 4
 4 0 12 28051.8 5266.41 4
 4 0 13 11446.7 3550.96 4
 4 1 -5 332410 9880.03 3
 4 1 -5 329086 9100.4 1
 4 1 -4 867974 20915.3 3
 4 1 -4 869667 20374.2 1
 4 1 -3 219129 7101.77 3
 4 1 -2 513.231 269.153 3
 4 1 -1 42191.9 2770.27 3
 4 1 0 218081 8293.68 4
 4 1 0 205321 7575.33 3
 4 1 1 135551 6836.17 4
 4 1 1 140704 6214.75 3
 4 1 2 43569.4 3953.15 4
 4 1 2 50199.1 3710.25 3
 4 1 3 238343 10854.2 4
 4 1 3 252898 10005.1 3
 4 1 4 71645.8 5805.52 4
 4 1 4 83412 5494.06 3
 4 1 5 109.693 357.139 4
 4 1 6 36080.8 4532.47 4
 4 1 7 53065.4 5877.53 4
 4 1 8 13379.1 3013.27 4
 4 1 9 1171.96 1143.02 4
 4 1 10 38944.3 5791.68 4
 4 1 11 35114 5853.48 4
 4 1 12 15838.8 3919.52 4
 4 2 -6 114147 5344.38 3
 4 2 -5 718190 18643.1 3
 4 2 -4 437551 12565.2 3
 4 2 -3 5761.78 1033.92 3
 4 2 -2 367126 11126.8 3
 4 2 -1 262299 9263.14 4
 4 2 -1 269673 9212.44 3
 4 2 0 177384 7757.13 4
 4 2 0 172997 7235.06 3
 4 2 1 26564.1 2934.52 4
 4 2 1 29020.6 2760.47 3
 4 2 2 129780 7363.23 4
 4 2 2 133782 6757.22 3
 4 2 3 87111.6 6313.1 4
 4 2 3 72385 5116.69 3
 4 2 4 1262.55 581.354 3
 4 2 4 1080.3 630.753 4
 4 2 5 65034.2 6050.43 4
 4 2 5 72599.7 5565.95 3
 4 2 6 87226.8 7594.29 4
 4 2 7 17911.3 3498.43 4
 4 2 8 524.707 904.219 4
 4 2 9 41388.7 5903.87 4
 4 2 10 43005.5 6358.04 4
 4 2 11 1190.29 818.134 4
 4 2 12 2128.21 1481.58 4
 4 3 -6 168303 7093.05 3
 4 3 -5 79612.3 4457.13 3
 4 3 -4 13837.5 1847.84 3
 4 3 -3 68710.9 4112.88 3
 4 3 -2 82284.1 4653.94 3
 4 3 -1 39060.5 3192.18 4
 4 3 -1 34506 2995.05 3
 4 3 0 85107.7 5211.69 4
 4 3 0 94143.4 5360.14 3
 4 3 1 107155 6381.06 4
 4 3 1 101968 5898.93 3
 4 3 2 35124.9 3825.2 4
 4 3 2 37403.7 3569.06 3
 4 3 3 21861.2 3159.83 4
 4 3 3 28346.5 3279.44 3
 4 3 4 57449.7 5536.14 4
 4 3 4 61537.4 5100.48 3
 4 3 5 28594.9 4071.55 4
 4 3 5 25624.9 3408.78 3
 4 3 6 4498.06 1843.1 4
 4 3 7 -25.4226 761.462 4
 4 3 8 32949 5141.88 4
 4 3 9 33980 5600.46 4
 4 3 10 4626.88 2068.08 4
 4 3 11 2959.46 1766.66 4
 4 4 -8 38661.4 3495.78 3
 4 4 -7 71287.8 4689.33 3
 4 4 -6 13221.1 1876.2 3
 4 4 -5 52090.6 3796.31 3
 4 4 -4 89589.3 5091.34 3
 4 4 -3 15894.8 2046.19 3
 4 4 -2 1417.45 634.041 3
 4 4 -1 146664 6899.27 4
 4 4 -1 146892 7174.8 3
 4 4 0 191801 8658.07 4
 4 4 0 207391 8996.5 3
 4 4 1 32247.5 3476.34 4
 4 4 1 33289.4 3415.82 3
 4 4 2 20596.1 2997.66 4
 4 4 2 19308.6 2722.38 3
 4 4 3 89327.6 6857.81 4
 4 4 3 94672.8 6510 3
 4 4 4 16964.7 3068.5 4
 4 4 4 25305.8 3385.7 3
 4 4 5 851.475 641.692 3
 4 4 5 181.829 455.499 4
 4 4 6 3660.81 1458.76 3
 4 4 6 1582.79 964.907 4
 4 4 7 19065.3 3954.94 4
 4 4 8 17606 3872.92 4
 4 4 9 1746.7 1630.61 4
 4 4 10 17936.1 4274.98 4
 4 5 -9 37330.9 3709.46 3
 4 5 -8 89357.6 5714.04 3
 4 5 -7 9670.87 1795.23 3
 4 5 -6 9642.14 1681.23 3
 4 5 -5 198106 8639.5 3
 4 5 -4 92357.4 5550.19 3
 4 5 -3 28.8908 277.533 3
 4 5 -2 126986 6824.13 3
 4 5 -1 265751 10948.9 3
 4 5 0 96902 6023.86 4
 4 5 0 101353 6399.34 3
 4 5 1 645.375 366.908 3
 4 5 1 45.2783 402.108 4
 4 5 2 53892.5 5057.08 4
 4 5 2 50084.5 4689.1 3
 4 5 3 38470.6 4557.14 4
 4 5 3 36983.7 4138.32 3
 4 5 4 7754.96 2024.9 3
 4 5 4 8286.84 2193.23 4
 4 5 5 6149.61 1847.69 3
 4 5 5 6571.65 2212.23 4
 4 5 6 30245.2 4765.6 4
 4 5 6 33931.9 4549.91 3
 4 5 7 25492.1 4557.03 4
 4 5 8 -298.822 1160.95 4
 4 5 9 20379.5 4599.84 4
 4 5 10 18683.1 4509.31 4
 4 6 -10 59705.2 5078.59 3
 4 6 -9 74392.9 5554.45 3
 4 6 -8 249.788 433.919 3
 4 6 -7 10607.8 1910.2 3
 4 6 -6 105694 6345.9 3
 4 6 -5 70084.7 5024.07 3
 4 6 -4 2650.75 1022.12 3
 4 6 -3 124172 7058.19 3
 4 6 -2 137368 7633.72 3
 4 6 -1 96498.5 6414.35 3
 4 6 0 573.431 566.917 3
 4 6 0 126.271 238.103 4
 4 6 1 70316.5 5597.16 4
 4 6 1 76455.6 6051.5 3
 4 6 2 30471.9 3881.02 4
 4 6 2 27858 3684.09 3
 4 6 3 2531.19 1161.63 3
 4 6 3 4138.69 1586.25 4
 4 6 4 26369.9 4060.17 4
 4 6 4 30506.7 4124.64 3
 4 6 5 40881.6 5427.18 4
 4 6 5 47349.3 5381.94 3
 4 6 6 17057.4 3655.51 4
 4 6 6 26325.8 4100.39 3
 4 6 7 382.213 414.516 4
 4 6 7 1308.29 688.996 3
 4 6 8 27040.6 5051.96 4
 4 6 9 30434.5 5726.39 4
 4 7 -12 37661.2 4410.23 3
 4 7 -11 64144.2 5628.22 3
 4 7 -10 36952.7 4096.35 3
 4 7 -9 10369.5 2045.72 3
 4 7 -8 35350.9 3795.38 3
 4 7 -7 79937.5 5788.02 3
 4 7 -6 26524 3217.78 3
 4 7 -5 -327.678 540.734 3
 4 7 -4 81051.5 5850.85 3
 4 7 -3 61142 5090.63 3
 4 7 -2 5150.92 1481.2 3
 4 7 -1 39071.5 4262.51 3
 4 7 0 127652 7375.63 4
 4 7 0 121039 8027.53 3
 4 7 1 17296.4 2757.09 4
 4 7 1 20282.9 3219.06 3
 4 7 2 1010.75 875.839 3
 4 7 2 1329.31 905.141 4
 4 7 3 45732 5229.45 4
 4 7 3 38584.3 4745.3 3
 4 7 4 71506.5 6982.76 4
 4 7 4 63874.8 6349.22 3
 4 7 5 17098.5 3380.32 3
 4 7 5 12991.8 3057.18 4
 4 7 6 8516.13 2491.6 3
 4 7 6 6904.69 2439.05 4
 4 7 7 29664 5248.32 4
 4 7 7 30445 4805.78 3
 4 7 8 21425 4743.81 4
 4 8 -13 26371.1 3958.36 3
 4 8 -12 50909.2 5298.48 3
 4 8 -11 30754.6 3966.35 3
 4 8 -10 5832.23 1692.02 3
 4 8 -9 33788.4 3966.24 3
 4 8 -8 55558.2 5098.11 3
 4 8 -7 13417.1 2416.73 3
 4 8 -6 40180.6 4219.58 3
 4 8 -5 70184.9 5665.79 3
 4 8 -4 26696.9 3463.81 3
 4 8 -3 23744.4 3322.82 3
 4 8 -2 60202 5522.83 3
 4 8 -1 65322.2 5899.24 3
 4 8 0 5350.8 1693.25 3
 4 8 0 2544.36 1023.6 4
 4 8 1 18018 3170.8 3
 4 8 1 20307.7 3076.15 4
 4 8 2 43707.3 4905.51 4
 4 8 2 51213.9 5594.85 3
 4 8 3 50062 5586.02 4
 4 8 3 47672.2 5529.74 3
 4 8 4 11991.2 2899.16 3
 4 8 4 16767.8 3333.7 4
 4 8 5 13322 3481.33 3
 4 8 5 14625 3381.84 4
 4 8 6 40509.5 5944.3 4
 4 8 6 38532.9 5508.42 3
 4 8 7 11163.2 3305.06 4
 4 9 -16 7142.16 2274.61 3
 4 9 -15 277.366 475.967 3
 4 9 -14 10810.7 2716.32 3
 4 9 -13 48909.9 5508.95 3
 4 9 -12 31252.7 4233.69 3
 4 9 -11 1505.59 1034.15 3
 4 9 -10 22322.9 3403.41 3
 4 9 -9 25638.7 3591.92 3
 4 9 -8 7469.34 1938.19 3
 4 9 -7 16024.8 2828.73 3
 4 9 -6 62648 5607.76 3
 4 9 -5 33552.5 4091.88 3
 4 9 -4 9750.02 2224.11 3
 4 9 -3 46389 4957.42 3
 4 9 -2 55668.5 5576.59 3
 4 9 -1 9997.63 2367.25 3
 4 9 0 10960 2611.09 3
 4 9 1 28367.5 3780.3 4
 4 9 1 34613.4 4668.27 3
 4 9 2 36593.5 4520.73 4
 4 9 2 34141.2 4755.35 3
 4 9 3 2481.24 1338.14 3
 4 9 3 1170.58 603.583 4
 4 9 4 7454.93 2391.78 3
 4 9 4 8595.68 2360.46 4
 4 9 5 26149.7 4669.39 4
 4 9 5 30883.4 4888.45 3
 4 9 6 289.989 453.321 4
 4 9 7 -2688 1658.25 4
 4 10 -15 5328.87 1952.96 3
 4 10 -14 11127.3 2773.02 3
 4 10 -13 6236.13 2002.44 3
 4 10 -12 3438.16 1275.82 3
 4 10 -11 12976.9 2723.6 3
 4 10 -10 16611.4 3063.19 3
 4 10 -9 448.328 563.381 3
 4 10 -8 12728 2598.33 3
 4 10 -7 42648.7 4842.63 3
 4 10 -6 19805.6 3289.18 3
 4 10 -5 154.044 483.508 3
 4 10 -4 12476.3 2627.24 3
 4 10 -3 39092.5 4819 3
 4 10 -2 5398.54 1699.72 3
 4 10 -1 5547.97 1853.69 3
 4 10 0 32051.7 4655.52 3
 4 10 1 31908.2 4751.14 3
 4 10 2 1928.42 1162.18 3
 4 10 3 10969.5 3007.3 3
 4 11 -14 -555.112 820.634 3
 4 11 -13 11191.7 2796.43 3
 4 11 -12 20549 3697.93 3
 4 11 -11 4383.22 1696.96 3
 4 11 -10 3702.72 1485.89 3
 4 11 -9 30698.5 4306.06 3
 4 11 -8 69467.2 6552.88 3
 4 11 -7 8002.91 2060.45 3
 4 11 -6 3695.9 1403.17 3
 4 11 -5 27583.1 4127.23 3
 4 11 -4 24419.3 3942.2 3
 4 11 -3 315.78 717.39 3
 4 11 -2 5415.35 2138.08 3
 4 11 -1 19040.1 3622.03 3
 4 11 0 14440.7 3269.37 3
 4 11 1 769.505 524.495 3
 4 11 2 18507.2 3928.52 3
 4 12 -12 8643.82 2417.79 3
 4 12 -11 958.249 825.8 3
 4 12 -10 25804.2 4226.91 3
 4 12 -9 42156.8 5341.6 3
 4 12 -8 4296.73 1588.56 3
 4 12 -7 2847.33 1420.71 3
 4 12 -6 26857.6 4279.75 3
 4 12 -5 14080.8 3071.68 3
 4 12 -4 648.037 510.585 3
 4 12 -3 9987.42 2703.51 3
 4 12 -2 20151.4 3963.01 3
 4 12 -1 7309.06 2227.84 3
 4 13 -9 1111.05 1104.8 3
 4 13 -8 5015.25 1989.28 3
 4 13 -7 23558.5 4136.87 3
 4 13 -6 4729.63 1810.57 3
 4 13 -5 -320.763 829.899 3
 4 13 -4 22557.8 4240.15 3
 5 -15 8 32978.2 4717.86 1
 5 -15 9 11429.2 2818.51 1
 5 -15 10 515.739 670.655 1
 5 -15 11 12646.4 3121.09 1
 5 -14 7 47606.1 5302.71 1
 5 -14 8 14378.1 2976.23 1
 5 -14 9 2052.85 1184.72 1
 5 -14 10 12628.1 2930.32 1
 5 -14 11 10153.8 2741.86 1
 5 -14 12 102.531 740.237 1
 5 -13 5 20429.8 3164.86 1
 5 -13 6 53811.3 5400.26 1
 5 -13 7 6208.4 1846.41 1
 5 -13 8 471.518 608.086 1
 5 -13 9 17951.2 3310.2 1
 5 -13 10 6773.56 2097.99 1
 5 -13 11 1164.65 767.661 1
 5 -13 12 4547.59 1740.23 1
 5 -12 4 63516.7 5322.22 1
 5 -12 5 84378.2 6359.46 1
 5 -12 6 5007.99 1595.9 1
 5 -12 7 5916.31 1689.3 1
 5 -12 8 18231.6 3115.72 1
 5 -12 9 14352.8 2871.77 1
 5 -12 10 261.654 677.175 1
 5 -12 11 13698.3 3004.85 1
 5 -12 12 13891 3036.54 1
 5 -12 13 3406.32 1733 1
 5 -11 3 70231.2 5243.96 1
 5 -11 4 81666.7 5855.26 1
 5 -11 5 5728.51 1576.6 1
 5 -11 6 55592.4 5075.75 1
 5 -11 7 77111.2 6137.9 1
 5 -11 8 11369 2445.59 1
 5 -11 9 2990.31 1120.09 1
 5 -11 10 40124.1 4859.94 1
 5 -11 11 29306.7 4262.79 1
 5 -11 12 5186.33 1888.96 1
 5 -11 13 3317.21 1487.65 1
 5 -10 2 144317 7376.49 1
 5 -10 3 47719.3 4075.01 1
 5 -10 4 -229.864 343.278 1
 5 -10 5 67326.2 3301.95 4
 5 -10 5 69056.7 5247.4 1
 5 -10 6 107220 5365.07 4
 5 -10 6 111535 7086.41 1
 5 -10 7 5606.68 1534.62 1
 5 -10 7 5133.24 1223.68 4
 5 -10 8 60764.7 4667.21 4
 5 -10 8 8526.75 2048.25 1
 5 -10 9 41189.2 4267.1 4
 5 -10 9 42102.7 4676.61 1
 5 -10 10 43616.5 4756.52 4
 5 -10 10 41134.8 4814.3 1
 5 -10 11 1327.04 771.196 1
 5 -10 12 1111.66 789.71 1
 5 -10 13 5232.2 1741.86 1
 5 -10 14 6912.51 2279.58 1
 5 -9 1 145503 6846.87 1
 5 -9 2 42649.1 3533.74 1
 5 -9 3 -82.6134 233.343 1
 5 -9 4 80887.2 3581.72 4
 5 -9 4 84039.7 5458.62 1
 5 -9 5 103819 5010.21 4
 5 -9 5 106513 6466.32 1
 5 -9 6 1133.61 583.357 4
 5 -9 6 1104.33 683.816 1
 5 -9 7 21153.8 2982.65 1
 5 -9 7 20862 2653.91 4
 5 -9 8 34804.7 3997.83 1
 5 -9 8 29667.2 3507.61 4
 5 -9 9 33365.1 4061.52 1
 5 -9 9 33229.4 3946.25 4
 5 -9 10 1282.58 905.827 4
 5 -9 10 2214.65 1082.18 1
 5 -9 11 7248.16 2048.32 1
 5 -9 11 9299.59 2339.38 4
 5 -9 12 7753.07 2202.85 1
 5 -9 12 11299.8 2806.26 4
 5 -9 13 957.571 856.08 1
 5 -9 13 863.612 797.369 4
 5 -9 14 4334.92 1697.5 1
 5 -9 14 3456.09 1637.93 4
 5 -8 1 5368.44 1131.89 1
 5 -8 2 430.454 456.329 1
 5 -8 3 49422.7 2623.66 4
 5 -8 3 47489.1 3707.36 1
 5 -8 4 83584.7 4282.76 4
 5 -8 4 86696.9 5383.09 1
 5 -8 5 20846.9 2651.83 1
 5 -8 5 26393 2717.09 4
 5 -8 6 2691.14 853.597 4
 5 -8 6 3801.06 1135.86 1
 5 -8 7 52494.7 4666.63 1
 5 -8 7 60903.7 4871.46 4
 5 -8 8 37585.8 4093.24 1
 5 -8 8 41004.7 4292.03 4
 5 -8 9 3468.06 1306.01 1
 5 -8 9 6150.48 1744.39 4
 5 -8 10 21546.6 3308.01 1
 5 -8 10 21859.1 3488.1 4
 5 -8 11 29463.5 4085.47 1
 5 -8 11 36595.4 4843.13 4
 5 -8 12 7422.9 2111.02 1
 5 -8 12 3375.93 1484.29 4
 5 -8 13 2349.27 1142.86 1
 5 -8 13 3389.78 1444.65 4
 5 -8 14 22181.7 4351.95 4
 5 -8 14 22369.9 3964.18 1
 5 -8 15 13137.9 3771.8 4
 5 -7 -3 3998.05 671.581 3
 5 -7 0 20651.9 1966.94 1
 5 -7 1 14368.9 1935.01 1
 5 -7 2 85510.6 4681.47 1
 5 -7 3 60225 4064.24 1
 5 -7 3 62008.9 3436.27 4
 5 -7 4 6455.09 1406.15 1
 5 -7 4 16667.3 2065.11 4
 5 -7 5 41716 3705.21 1
 5 -7 5 43466.7 3660.01 4
 5 -7 6 70038.6 5080.85 1
 5 -7 6 71457.9 5110.96 4
 5 -7 7 14508.7 2558.36 4
 5 -7 8 11357.7 2416.55 4
 5 -7 9 49812.5 5182.33 4
 5 -7 10 36485.4 4703 4
 5 -7 11 36676.3 5045.68 4
 5 -7 12 5539.09 2033.53 4
 5 -7 13 16981.7 3687.44 4
 5 -7 14 22858.3 4530.23 4
 5 -7 15 -416.719 1026.08 4
 5 -6 -5 34234.7 2156.82 3
 5 -6 -4 5403.83 724.934 3
 5 -6 -3 131144 4175.88 3
 5 -6 -1 357.219 265.741 1
 5 -6 0 82718 3911.31 1
 5 -6 1 105260 4803.14 1
 5 -6 2 21782.2 2120.55 1
 5 -6 2 19034 1769.17 4
 5 -6 3 33268.5 2836.25 1
 5 -6 3 33504.4 2735.61 4
 5 -6 4 104367 5697.59 4
 5 -6 5 109290 6356.69 4
 5 -6 6 2935.33 1077.53 4
 5 -6 7 4246.13 1328.45 4
 5 -6 8 85514.7 6736.05 4
 5 -6 9 34218.8 4433.55 4
 5 -6 10 14893.9 3190.25 4
 5 -6 11 7158.56 2240.78 4
 5 -6 12 23127.9 4257.69 4
 5 -6 13 8677.19 2639.42 4
 5 -6 14 -163.126 1060.88 4
 5 -6 15 4011.92 2133.25 4
 5 -5 -5 28483.6 1732.44 3
 5 -5 -4 309650 7662.14 3
 5 -5 -1 129307 4543.29 1
 5 -5 0 131970 4987.32 1
 5 -5 2 296683 9680.29 4
 5 -5 3 239356 9108.55 4
 5 -5 4 129267 6764.44 4
 5 -5 5 16286.6 2415.57 4
 5 -5 6 16727.8 2598.51 4
 5 -5 7 123410 8002.09 4
 5 -5 8 37594.4 4519.69 4
 5 -5 9 -582.638 1152.95 4
 5 -5 10 35896 4895.79 4
 5 -5 11 43975.4 5865.09 4
 5 -5 12 12183 3142.2 4
 5 -5 13 -280.066 435.799 4
 5 -5 14 13018.9 3694.81 4
 5 -4 -6 13034.9 1360.93 3
 5 -4 -5 300881 7871.04 3
 5 -4 -4 227632 5510.88 3
 5 -4 -2 113357 3496.72 1
 5 -4 -1 96753 3524.02 1
 5 -4 1 126531 5493.54 4
 5 -4 2 307077 10481 4
 5 -4 3 117448 6232.83 4
 5 -4 4 37245.2 3977.81 4
 5 -4 5 4335.34 1287.17 4
 5 -4 6 49004.1 4737.49 4
 5 -4 6 56438.9 2835.37 2
 5 -4 7 41897.4 4685.9 4
 5 -4 8 163.098 302.954 4
 5 -4 9 19062.3 3437.87 4
 5 -4 10 57147.8 6598.7 4
 5 -4 11 5326.36 1928.55 4
 5 -4 12 4.40078 510.849 4
 5 -4 13 14588.3 3801.77 4
 5 -4 14 8742.87 3089.93 4
 5 -3 1 117435 5506.61 4
 5 -3 2 75938.5 4714.67 4
 5 -3 3 14587.7 2186.14 4
 5 -3 4 6651.01 1595.2 4
 5 -3 5 57905.7 5019.92 4
 5 -3 6 3850.07 1457.67 4
 5 -3 7 41836.4 4834.98 4
 5 -3 8 71417.3 6693.91 4
 5 -3 9 28179.3 4302.36 4
 5 -3 10 487.119 766.928 4
 5 -3 11 3693.37 1601.02 4
 5 -3 12 11878.1 3334.57 4
 5 -3 13 10218.6 3209.03 4
 5 -2 -4 181175 4970.05 3
 5 -2 -3 86375.8 2797.71 3
 5 -2 -2 60313.5 2432.83 3
 5 -2 -1 26239.3 1744.65 3
 5 -2 0 93709.9 4761.28 4
 5 -2 0 98971.4 4225.36 3
 5 -2 1 81706.2 4828.67 4
 5 -2 2 1180.1 611.766 4
 5 -2 3 34916.8 3566.1 4
 5 -2 4 106182 7002.01 4
 5 -2 5 23025.8 3238.99 4
 5 -2 6 20541.6 3269.85 4
 5 -2 7 206222 11725.9 4
 5 -2 8 65096.7 6587.1 4
 5 -2 9 120.128 854.986 4
 5 -2 10 29565.5 4895.76 4
 5 -2 11 32124.3 5380.78 4
 5 -2 12 12078.2 3390.33 4
 5 -2 13 791.949 1344.39 4
 5 -1 -5 150107 5112.94 3
 5 -1 -5 152898 4250.79 1
 5 -1 -4 29909.3 1785.28 3
 5 -1 -4 28597 1419.77 1
 5 -1 -3 6700.89 808.738 3
 5 -1 -2 28965.4 1862.12 3
 5 -1 -1 88010.1 3849.4 3
 5 -1 0 83852.3 4599.75 4
 5 -1 0 69516.3 3725.09 3
 5 -1 1 398.596 364.162 3
 5 -1 1 171.022 284.021 4
 5 -1 2 83983.1 5533.89 4
 5 -1 2 91651.3 4982.57 3
 5 -1 3 176456 9015.19 4
 5 -1 4 20798.1 3066.31 4
 5 -1 5 3616.83 1274.69 4
 5 -1 6 153152 9751.67 4
 5 -1 7 109282 8506.48 4
 5 -1 8 309.923 733.75 4
 5 -1 9 26561.7 4546.49 4
 5 -1 10 28290.6 4914.11 4
 5 -1 11 20484.1 4382.93 4
 5 -1 12 -156.114 889.8 4
 5 0 -6 86553.3 3406.17 1
 5 0 -5 5130.84 845.572 3
 5 0 -5 4780.82 675.552 1
 5 0 -4 94571.9 3986.9 3
 5 0 -3 242168 7506.91 3
 5 0 -2 184610 6414.08 3
 5 0 -1 99143.4 4555.86 3
 5 0 0 500.211 364.781 3
 5 0 0 836.22 518.477 4
 5 0 1 143587 7239.62 4
 5 0 1 142762 6468 3
 5 0 2 134874 7485.35 4
 5 0 2 134197 6538.36 3
 5 0 3 6617.08 1518.8 3
 5 0 3 11702.4 2294.51 4
 5 0 4 45818.4 4730.51 4
 5 0 5 108091 7834.35 4
 5 0 6 78227 6972.29 4
 5 0 7 222.217 625.067 4
 5 0 8 45881.3 5867.49 4
 5 0 9 5173.99 2039.69 4
 5 0 10 1967.28 899.075 4
 5 0 11 3055.27 1747.55 4
 5 0 12 19819.2 4613.98 4
 5 1 -6 26222.4 2243.53 3
 5 1 -5 184119 6726.75 3
 5 1 -4 559365 14926.2 3
 5 1 -3 326651 10015.2 3
 5 1 -2 2523.67 684.822 3
 5 1 -1 22981.9 2228.52 3
 5 1 0 137977 6801.8 4
 5 1 0 143132 6441 3
 5 1 1 87754.5 5675.22 4
 5 1 1 84990.4 5029.46 3
 5 1 2 2194.82 921.573 3
 5 1 2 2448.35 936.487 4
 5 1 3 91268.3 6695.57 4
 5 1 3 81938.5 5526.66 3
 5 1 4 89950.2 7007.46 4
 5 1 4 95699.2 6304.49 3
 5 1 5 39062.5 4767.97 4
 5 1 6 13858 3154.04 4
 5 1 7 88754 8032.62 4
 5 1 8 8976.29 2674.46 4
 5 1 9 1036.05 925.717 4
 5 1 10 17156.4 4027.66 4
 5 1 11 34256.4 5996.16 4
 5 2 -7 24789.8 2430.46 3
 5 2 -6 63240.9 3875.69 3
 5 2 -5 185638 7262.8 3
 5 2 -4 205319 7736.18 3
 5 2 -3 90.3405 236.105 3
 5 2 -2 57468.2 3827.16 3
 5 2 -1 134685 6412.33 3
 5 2 0 128801 6778.61 4
 5 2 0 128595 6518.63 3
 5 2 1 46297.2 4226.6 4
 5 2 1 54603 4165.03 3
 5 2 2 105871 6977.25 4
 5 2 2 101697 6203.64 3
 5 2 3 126516 8165.31 4
 5 2 3 110989 6871.62 3
 5 2 4 5138.75 1464.3 3
 5 2 4 2378.13 1095.39 4
 5 2 5 13052.7 2811.67 4
 5 2 5 19211.2 3019.85 3
 5 2 6 106460 8765.22 4
 5 2 7 12251.9 2997.38 4
 5 2 8 370.033 595.315 4
 5 2 9 38329.8 6019.34 4
 5 2 10 31851.5 5860.6 4
 5 2 11 12650.2 3746.52 4
 5 3 -8 20859.6 2449.29 3
 5 3 -7 5221.2 1184.47 3
 5 3 -6 163174 7165.92 3
 5 3 -5 73305.2 4481.9 3
 5 3 -4 271.001 150.061 3
 5 3 -3 7680.45 1394.43 3
 5 3 -2 39616.2 3370.87 3
 5 3 -1 98722.5 5739.52 3
 5 3 0 20809.3 2677.79 4
 5 3 0 26658 2931.07 3
 5 3 1 54658.1 4742.25 4
 5 3 1 57319.3 4558.97 3
 5 3 2 112066 7526.58 4
 5 3 2 123396 7242.23 3
 5 3 3 58.4161 451.862 3
 5 3 3 -335.152 911.864 4
 5 3 4 5768.8 1530.75 3
 5 3 4 5077.59 1715.48 4
 5 3 5 73066.9 7020.61 4
 5 3 5 79328.3 6446.13 3
 5 3 6 31330.2 4754.27 4
 5 3 7 -820.05 928.27 4
 5 3 8 18405.7 3970.51 4
 5 3 9 26815.2 5113.37 4
 5 3 10 7363.83 2755.14 4
 5 4 -9 -60.4293 322.739 3
 5 4 -8 2010.06 798.79 3
 5 4 -7 72276 4816.93 3
 5 4 -6 62406.9 4411.01 3
 5 4 -5 31264.3 3035.36 3
 5 4 -4 67635.2 4625.06 3
 5 4 -3 33748.3 3237.73 3
 5 4 -2 1309.63 603.278 3
 5 4 -1 51785.7 4320.02 3
 5 4 0 85403.2 5821.66 4
 5 4 0 89707 6010.47 3
 5 4 1 81679.8 6050.31 4
 5 4 1 79439.4 5795.5 3
 5 4 2 954.16 685.371 3
 5 4 2 -2089.87 1007.31 4
 5 4 3 25069.2 3745.96 4
 5 4 3 31544.6 3928.49 3
 5 4 4 71848.2 6804.1 4
 5 4 4 65756.7 5906.58 3
 5 4 5 19407.5 3267.83 3
 5 4 5 20424.7 3783.49 4
 5 4 6 1691.71 1251.62 4
 5 4 6 3219.36 1323.62 3
 5 4 7 23557.3 4446.73 4
 5 4 8 18497.2 4262.03 4
 5 4 9 1390.45 1616.05 4
 5 5 -11 23005.4 3144.97 3
 5 5 -10 1265.05 747.537 3
 5 5 -9 70475.6 5245.5 3
 5 5 -8 84933.6 5645.25 3
 5 5 -7 32471.5 3351.63 3
 5 5 -6 13981.3 2152.63 3
 5 5 -5 115997 6577.55 3
 5 5 -4 99867.3 6126.64 3
 5 5 -3 750.822 340.995 3
 5 5 -2 108422 6659.74 3
 5 5 -1 363282 14052.4 3
 5 5 0 150893 8143.09 4
 5 5 0 142158 8203.68 3
 5 5 1 -283.808 471.727 3
 5 5 1 135.369 322.273 4
 5 5 2 77498.7 6496.78 4
 5 5 2 77625.6 6340.16 3
 5 5 3 103487 8034.48 4
 5 5 3 113228 7950.23 3
 5 5 4 9329.93 2394.68 3
 5 5 4 8499.43 2359.42 4
 5 5 5 1693.56 980.486 3
 5 5 5 1282.76 971.827 4
 5 5 6 35717.5 5388 4
 5 5 6 38921.8 5087.19 3
 5 5 7 37696.5 5869.56 4
 5 5 8 2991.32 1578.39 4
 5 5 9 7081.03 2734.93 4
 5 6 -12 1395.51 895.447 3
 5 6 -11 15571.8 2649.13 3
 5 6 -10 50552.9 4702.62 3
 5 6 -9 76780.6 5708.81 3
 5 6 -8 7348.42 1678.81 3
 5 6 -7 4402.13 1318.11 3
 5 6 -6 88084.5 5954.25 3
 5 6 -5 53542 4574.15 3
 5 6 -4 9769.6 1921.44 3
 5 6 -3 49123.7 4515.11 3
 5 6 -2 151363 8499.06 3
 5 6 -1 87480.7 6450.15 3
 5 6 0 6794.02 1775.68 3
 5 6 0 4028.99 1273.19 4
 5 6 1 41549.1 4468.59 4
 5 6 1 49502.6 5032.86 3
 5 6 2 54158.9 5492.53 4
 5 6 2 58466.5 5675.71 3
 5 6 3 -178.286 365.66 3
 5 6 3 -1237.75 905.058 4
 5 6 4 10765.9 2480 3
 5 6 4 9697.13 2585.56 4
 5 6 5 31472.6 4941.52 4
 5 6 5 33948.6 4797.59 3
 5 6 6 24115.4 4144.12 3
 5 6 6 29706.1 5019.6 4
 5 6 7 277.023 872.895 4
 5 6 8 10344.2 3301.13 4
 5 7 -14 12584.7 2723.9 3
 5 7 -13 6391.71 1922.09 3
 5 7 -12 12557.7 2503.62 3
 5 7 -11 28538.6 3739.41 3
 5 7 -10 49437.6 4854.22 3
 5 7 -9 4945.93 1450.9 3
 5 7 -8 5034.9 1400.21 3
 5 7 -7 82262.7 6064.5 3
 5 7 -6 14355.9 2435.26 3
 5 7 -5 367.829 503.717 3
 5 7 -4 71242.8 5738.71 3
 5 7 -3 27523 3528.58 3
 5 7 -2 1387.07 870.551 3
 5 7 -1 28825.5 3824.62 3
 5 7 0 37015 4454.36 3
 5 7 1 6099.87 1876.73 3
 5 7 1 7013.98 1848.13 4
 5 7 2 11413.9 2598.7 3
 5 7 2 7769.46 2128.67 4
 5 7 3 29068.7 4322.73 4
 5 7 3 31312.9 4509.82 3
 5 7 4 40194.9 5397.5 4
 5 7 4 36936.2 5096.17 3
 5 7 5 16252.3 3414.43 3
 5 7 5 18429 3828.2 4
 5 7 6 1432.16 1290.67 3
 5 7 6 -1627.02 1228.71 4
 5 7 7 15830.8 4009.84 4
 5 8 -16 16766.1 3480.6 3
 5 8 -15 12884.2 2900.56 3
 5 8 -14 2202.49 1166.66 3
 5 8 -13 24628.1 3811.03 3
 5 8 -12 55470.1 5591.87 3
 5 8 -11 45919.4 4927.28 3
 5 8 -10 1993.08 956.997 3
 5 8 -9 18559.9 2968.37 3
 5 8 -8 63606.1 5609.74 3
 5 8 -7 27258 3591.29 3
 5 8 -6 2.35405 590.724 3
 5 8 -5 54463.2 5192.26 3
 5 8 -4 62001.5 5646.52 3
 5 8 -3 -131.134 424.387 3
 5 8 -2 36002.5 4490.26 3
 5 8 -1 89682.1 7302.25 3
 5 8 0 17216.9 3201.96 3
 5 8 1 8454.08 2304.24 3
 5 8 1 5590.6 1647.67 4
 5 8 2 33890.4 4486.31 4
 5 8 2 41519.9 5346.81 3
 5 8 3 50236.1 5836.02 4
 5 8 3 45818.6 5782.45 3
 5 8 4 7607.89 2299.35 3
 5 8 4 8821.78 2542.82 4
 5 8 5 2397.33 1788.93 3
 5 8 5 1359.41 982.112 4
 5 8 6 10656.9 3157.64 4
 5 9 -16 8250.36 2459.7 3
 5 9 -15 3405.38 1518.49 3
 5 9 -14 10719.8 2641.6 3
 5 9 -13 41070.4 5074.59 3
 5 9 -12 26889 4010.85 3
 5 9 -11 -570.749 761.342 3
 5 9 -10 22754.3 3553.11 3
 5 9 -9 27898.7 3853.56 3
 5 9 -8 12181.5 2526.88 3
 5 9 -7 1208.12 816.788 3
 5 9 -6 31937.3 4125.97 3
 5 9 -5 71241.4 6333.39 3
 5 9 -4 2368.87 1226.62 3
 5 9 -3 19359.2 3369.1 3
 5 9 -2 70727.9 6688.71 3
 5 9 -1 30227.2 4367.54 3
 5 9 0 794.116 672.938 3
 5 9 1 24728.3 4161.43 3
 5 9 2 51996.7 5688.63 4
 5 9 2 46900.7 5903.76 3
 5 9 3 13603.6 3259.06 3
 5 9 3 8995.88 2513.82 4
 5 9 4 -96.8112 929.866 4
 5 9 5 17938.3 3959.17 4
 5 10 -15 12567.6 3006.3 3
 5 10 -14 11498.1 2764.47 3
 5 10 -13 5095.35 1833.36 3
 5 10 -12 1025.99 948.685 3
 5 10 -11 7265.24 2042.92 3
 5 10 -10 7590.31 2133.2 3
 5 10 -9 37.8827 524.305 3
 5 10 -8 16485.5 3089.64 3
 5 10 -7 41895.9 4975.98 3
 5 10 -6 26810.7 3994.33 3
 5 10 -5 1055.3 844.251 3
 5 10 -4 8337.33 2110.27 3
 5 10 -3 26960.9 4163.96 3
 5 10 -2 8711.4 2418.95 3
 5 10 -1 3932.85 1513.37 3
 5 10 0 12684.7 3032.51 3
 5 10 1 33426.5 5175.73 3
 5 10 2 7693.79 2487.32 3
 5 11 -13 14790.1 3255.08 3
 5 11 -12 27431.8 4398.53 3
 5 11 -11 6596.59 2160.58 3
 5 11 -10 1608.81 1026.1 3
 5 11 -9 20375.3 3612.9 3
 5 11 -8 39159.5 5077.36 3
 5 11 -7 6760.99 2027.31 3
 5 11 -6 -612.404 800.199 3
 5 11 -5 19327.1 3607.16 3
 5 11 -4 21144.3 3817.63 3
 5 11 -3 5755.17 2010.48 3
 5 11 -2 8065.13 2512.77 3
 5 11 -1 17632.7 3719.28 3
 5 11 0 13428.7 3193.19 3
 5 12 -11 -151.26 357.716 3
 5 12 -10 20176.1 3794.72 3
 5 12 -9 39370.9 5348.8 3
 5 12 -8 16595 3458.74 3
 5 12 -7 -611.922 1018.62 3
 5 12 -6 19903.9 3814.65 3
 5 12 -5 15772.4 3441.19 3
 5 12 -4 1230.96 1182.57 3
 6 -16 9 9723.89 2630.47 1
 6 -15 7 3919.1 1333.99 1
 6 -15 8 24792.9 4023.2 1
 6 -15 9 15861.5 3317.9 1
 6 -15 10 3130.16 1625.78 1
 6 -14 6 17180.2 3070.07 1
 6 -14 7 43585.8 5062.71 1
 6 -14 8 16979 3227.72 1
 6 -14 9 6827.84 2122.59 1
 6 -14 10 6069.95 2057.01 1
 6 -14 11 14520 3241.82 1
 6 -13 4 -11.4327 718.853 1
 6 -13 5 39537.6 4384.41 1
 6 -13 6 63542.7 5805.11 1
 6 -13 7 12906.1 2621.83 1
 6 -13 8 1485.42 806.244 1
 6 -13 9 10755.6 2587.44 1
 6 -13 10 9746.57 2545 1
 6 -13 11 2965.14 1534.59 1
 6 -13 12 2803.67 1287.1 1
 6 -12 3 340.653 268.529 1
 6 -12 4 62174.7 5229.91 1
 6 -12 5 75148 5956.01 1
 6 -12 6 3132.86 1210.56 1
 6 -12 7 998.535 718.099 1
 6 -12 8 40355.7 4716.88 1
 6 -12 9 10363.1 2385.02 1
 6 -12 10 794.95 475.028 1
 6 -12 11 6163.53 2102.89 1
 6 -12 12 17312.4 3510.18 1
 6 -11 2 3170.24 1016.53 1
 6 -11 3 41171.6 3941.04 1
 6 -11 4 66193.8 5216.9 1
 6 -11 5 2289.02 957.947 1
 6 -11 6 31031.9 3723.96 1
 6 -11 7 47465.9 4816.8 1
 6 -11 8 23139.8 3429.85 1
 6 -11 9 2651.29 1249.08 1
 6 -11 10 15716 3017.33 1
 6 -11 11 17959.9 3435.82 1
 6 -11 12 4294.98 1689.26 1
 6 -11 13 18.4585 636.972 1
 6 -10 1 2105.4 740.898 1
 6 -10 2 71356.8 4896.35 1
 6 -10 3 71387.9 5047.66 1
 6 -10 4 8255.15 1694.37 1
 6 -10 5 44478.2 3015.4 4
 6 -10 5 34064.6 3677.67 1
 6 -10 6 84591.7 5094 4
 6 -10 6 90036.8 6323.6 1
 6 -10 7 39146.6 3752.94 4
 6 -10 7 47082.7 4673.81 1
 6 -10 8 1970.3 1132.44 1
 6 -10 8 42936.7 4361.49 4
 6 -10 9 24994.1 3642.87 1
 6 -10 9 21416.1 3226.71 4
 6 -10 10 34215.6 4436.06 1
 6 -10 10 35746.2 4506.3 4
 6 -10 11 7865.66 2189.76 1
 6 -10 12 -453.097 976.826 1
 6 -10 13 10443.4 2740.78 1
 6 -9 0 57846.9 3855.23 1
 6 -9 1 151719 6918.72 1
 6 -9 2 81641.1 4983.7 1
 6 -9 3 3919.54 1092.22 1
 6 -9 4 52472.6 3251.05 4
 6 -9 4 49145.7 4118.86 1
 6 -9 5 115829 5890.35 4
 6 -9 5 114875 6843.17 1
 6 -9 6 62988.6 5116.34 1
 6 -9 6 64666.9 4775.87 4
 6 -9 7 316.216 340.374 4
 6 -9 7 -501.979 638.901 1
 6 -9 8 37462.3 4213.88 1
 6 -9 8 30434.8 3784.87 4
 6 -9 9 61939.9 5727.83 1
 6 -9 9 68593 6096.59 4
 6 -9 10 6769.32 1950.94 4
 6 -9 10 3543.88 1426.26 1
 6 -9 11 840.916 825.437 1
 6 -9 11 900.068 681.814 4
 6 -9 12 12529.5 2814.38 1
 6 -9 12 10783.4 2891.5 4
 6 -9 13 7689.02 2293.49 1
 6 -9 13 7453.15 2575.21 4
 6 -9 14 -960.371 1834.46 4
 6 -8 0 212332 7895.34 1
 6 -8 1 134014 6105.52 1
 6 -8 2 4013.97 1152.13 1
 6 -8 3 73942.9 3936.21 4
 6 -8 3 77895.4 4899.22 1
 6 -8 4 133889 6950.65 1
 6 -8 4 128740 6172.25 4
 6 -8 5 15735.4 2319.27 1
 6 -8 5 19138.7 2477.12 4
 6 -8 6 11510.9 2054.36 1
 6 -8 6 11699.1 2070.34 4
 6 -8 7 60063 5081.3 1
 6 -8 7 60782.3 5272.23 4
 6 -8 8 60295.4 5340.42 1
 6 -8 8 79049.6 6419.95 4
 6 -8 9 6636.79 1990.34 4
 6 -8 10 10075.4 2467.24 4
 6 -8 11 34641.1 5010.23 4
 6 -8 12 5279.66 2052.27 4
 6 -8 13 227.093 591.34 4
 6 -8 14 21190.6 4449.99 4
 6 -8 15 15556.9 3982.87 4
 6 -7 -5 105559 3990.43 3
 6 -7 -4 142047 4550.49 3
 6 -7 -1 157571 5917.83 1
 6 -7 0 30122 2403.23 1
 6 -7 1 18837.8 2080.43 1
 6 -7 2 46030.1 3377.11 1
 6 -7 3 70104.7 4485.61 1
 6 -7 3 72422.4 4215.04 4
 6 -7 4 50.6208 572.419 1
 6 -7 4 9220.58 1706.53 4
 6 -7 5 59967.3 4674.43 4
 6 -7 6 64386.2 5263.11 4
 6 -7 7 25230 3502.5 4
 6 -7 8 3210.98 1264.89 4
 6 -7 9 54428.7 5726.55 4
 6 -7 10 34322.5 4786.86 4
 6 -7 11 22847.8 4171.17 4
 6 -7 12 552.419 585.998 4
 6 -7 13 31542.1 5325.81 4
 6 -7 14 14681.2 3759.18 4
 6 -6 -6 113650 4175.21 3
 6 -6 -5 277029 7222.36 3
 6 -6 -4 453.38 156.025 3
 6 -6 -2 194468 6088.33 1
 6 -6 -1 4179.46 734.841 1
 6 -6 0 43721.6 2804.38 1
 6 -6 1 90812.7 4497.21 1
 6 -6 2 49523 3340.87 4
 6 -6 3 2203.29 774.635 4
 6 -6 4 84388.9 5482.69 4
 6 -6 5 48391.2 4385.49 4
 6 -6 6 18287.1 2847.39 4
 6 -6 7 157.826 438.541 4
 6 -6 8 76726.9 6721.72 4
 6 -6 9 40591.1 5084.21 4
 6 -6 10 15138 3264.49 4
 6 -6 11 660.65 651.821 4
 6 -6 12 14163.4 3460.84 4
 6 -6 13 14108.8 3636.9 4
 6 -6 14 -833.579 1647.59 4
 6 -5 -6 114135 3966.3 3
 6 -5 -5 157.231 83.7702 3
 6 -5 -2 5572.4 738.704 1
 6 -5 -1 39278.9 2280.46 1
 6 -5 2 23213.3 2413.46 4
 6 -5 3 139218 7044.27 4
 6 -5 4 116634 7015.17 4
 6 -5 5 8654.85 1889.21 4
 6 -5 6 1780.31 938.556 4
 6 -5 7 33933.9 4394.74 4
 6 -5 8 28595 4194.24 4
 6 -5 9 5682.89 1911.06 4
 6 -5 10 4499.19 2009.16 4
 6 -5 11 16877.2 3870.45 4
 6 -5 12 17591 3964.25 4
 6 -5 13 -496.911 1207.83 4
 6 -4 -7 11465.7 1263.02 3
 6 -4 -6 38373.3 2070.9 3
 6 -4 -5 118836 3351.57 3
 6 -4 -3 16246.6 882.74 1
 6 -4 1 100171 5399.33 4
 6 -4 2 143321 6949.26 4
 6 -4 3 199061 9142.37 4
 6 -4 4 52427 4749.73 4
 6 -4 5 1293.73 683.703 4
 6 -4 6 65480.2 5871.36 4
 6 -4 7 46055.7 5220.33 4
 6 -4 8 394.848 596.069 4
 6 -4 9 11022.8 2737.24 4
 6 -4 10 43050 5913.74 4
 6 -4 11 13875.4 3486.57 4
 6 -4 12 -202.877 1130.05 4
 6 -4 13 12972.4 3552.03 4
 6 -3 -5 79939.7 2707.35 3
 6 -3 -4 2070.01 287.354 3
 6 -3 -3 269193 6593.11 3
 6 -3 -2 111607 3710.17 3
 6 -3 1 158103 7156.19 4
 6 -3 2 217012 9332.67 4
 6 -3 3 17543.3 2583.68 4
 6 -3 4 462.406 341.718 4
 6 -3 5 56907 5371.16 4
 6 -3 6 34055.7 4332.37 4
 6 -3 7 2972.88 1386.52 4
 6 -3 8 24863 4059.85 4
 6 -3 9 76059.3 7657.87 4
 6 -3 10 6697.27 2074.92 4
 6 -3 11 412.751 838.707 4
 6 -3 12 20745.3 4527.13 4
 6 -3 13 7521.92 2977.47 4
 6 -2 -5 38720.9 2005.16 3
 6 -2 -4 163203 4896.31 3
 6 -2 -3 158903 4952.74 3
 6 -2 -2 74324 3236.36 3
 6 -2 -1 18557.2 1670.6 3
 6 -2 0 179549 7727.64 4
 6 -2 0 187928 6853.17 3
 6 -2 1 128713 6624.39 4
 6 -2 2 1049.59 598.302 4
 6 -2 3 27123.9 3347.52 4
 6 -2 4 87214.1 6763.16 4
 6 -2 5 33502.1 4192.58 4
 6 -2 6 15609.1 3052.97 4
 6 -2 7 74813.8 7186.94 4
 6 -2 8 51395.8 6130.81 4
 6 -2 9 4717.37 2027.77 4
 6 -2 10 11054.5 3073.03 4
 6 -2 11 23352.4 4735.59 4
 6 -2 12 15734.1 4122.86 4
 6 -1 -6 58445.8 3062.82 3
 6 -1 -5 148594 5183.17 3
 6 -1 -5 144612 4389.42 1
 6 -1 -4 49806.8 2625.2 3
 6 -1 -3 12636.8 1314.28 3
 6 -1 -2 53355.9 3008.55 3
 6 -1 -1 204005 7253.91 3
 6 -1 0 90165.9 5341.49 4
 6 -1 0 81219.2 4447.4 3
 6 -1 1 21252.9 2615.02 4
 6 -1 1 20578 2267.76 3
 6 -1 2 114861 6957.6 4
 6 -1 2 111516 6006.03 3
 6 -1 3 160802 9089.5 4
 6 -1 4 27553.6 3717.5 4
 6 -1 5 6085.57 1799.13 4
 6 -1 6 96994.8 8017.47 4
 6 -1 7 59667.7 6547.3 4
 6 -1 8 5960.8 1988.9 4
 6 -1 9 8256.3 2849.79 4
 6 -1 10 27556.5 5022.61 4
 6 -1 11 11766.8 3331.15 4
 6 0 -7 16744.6 1779.34 3
 6 0 -7 16278.8 1384.58 1
 6 0 -6 170549 6342.94 3
 6 0 -6 171807 5537.82 1
 6 0 -5 14593.5 1542.17 3
 6 0 -5 13553.1 1290.03 1
 6 0 -4 33202.9 2373.43 3
 6 0 -3 232194 7820.96 3
 6 0 -2 238690 8257.14 3
 6 0 -1 64819.5 3912.33 3
 6 0 0 36584.9 3399.98 4
 6 0 0 33175.1 2961.56 3
 6 0 1 111111 6639.4 4
 6 0 1 110009 5941.07 3
 6 0 2 123213 7560.7 4
 6 0 2 124306 6678.97 3
 6 0 3 22196.3 3249.64 4
 6 0 3 23726.6 2951.86 3
 6 0 4 8966.06 2157.51 4
 6 0 5 63336.9 6270.11 4
 6 0 6 55831.9 6183.44 4
 6 0 7 -615.802 481.388 4
 6 0 8 10326.5 2935.98 4
 6 0 9 8811.18 2858.85 4
 6 0 10 3086.95 1840.57 4
 6 0 11 2263.57 1258.79 4
 6 1 -8 18426.1 2092.38 3
 6 1 -7 139778 6104.62 3
 6 1 -6 5136.75 1012.49 3
 6 1 -5 29149.1 2447.44 3
 6 1 -4 127150 5656.86 3
 6 1 -3 212085 7948.86 3
 6 1 -2 64199.8 4044.68 3
 6 1 -1 11140.5 1692.21 3
 6 1 0 170679 8365.28 4
 6 1 0 183232 7972.88 3
 6 1 1 84820.6 5904.49 4
 6 1 1 86403.5 5440.07 3
 6 1 2 4537.04 1281.64 3
 6 1 2 3183.05 1087.6 4
 6 1 3 55606.2 5442.15 4
 6 1 3 47067.4 4354.18 3
 6 1 4 55643.5 5743.15 4
 6 1 4 53681.7 4874.58 3
 6 1 5 54921.3 6017.69 4
 6 1 6 2267.09 1407.68 4
 6 1 7 23778.5 4380.09 4
 6 1 8 8128.47 2573.86 4
 6 1 9 -353.58 694.125 4
 6 1 10 5440.49 2518.27 4
 6 2 -9 47309.9 3771.3 3
 6 2 -8 147997 6875.32 3
 6 2 -7 30219 2761.5 3
 6 2 -6 80331.7 4642.61 3
 6 2 -5 139870 6386.2 3
 6 2 -4 149282 6720.09 3
 6 2 -3 32124.8 2925.43 3
 6 2 -2 911.04 504.631 3
 6 2 -1 78940 5074.1 3
 6 2 0 102731 6408.82 4
 6 2 0 106294 6216.06 3
 6 2 1 518.156 538.004 3
 6 2 1 -186.119 568.618 4
 6 2 2 37571.5 4311.04 4
 6 2 2 44856.7 4268.96 3
 6 2 3 89003.7 7154.47 4
 6 2 3 99360.6 6825.86 3
 6 2 4 80806.3 7194.8 4
 6 2 4 83238.5 6411.13 3
 6 2 5 1296.37 795.026 4
 6 2 5 -1295.77 819.841 3
 6 2 6 46904.4 6053.4 4
 6 2 7 27288.3 4763.19 4
 6 2 8 1303.85 859.207 4
 6 2 9 2866.46 1674.6 4
 6 2 10 24311.1 5103.43 4
 6 3 -10 111620 6518.56 3
 6 3 -9 95570.7 5788.3 3
 6 3 -8 61428.8 4381.07 3
 6 3 -7 12917.1 1929.71 3
 6 3 -6 150218 7099.79 3
 6 3 -5 82150.6 5035.5 3
 6 3 -4 -237.749 301.379 3
 6 3 -3 18159 2348.17 3
 6 3 -2 35020.3 3432.9 3
 6 3 -1 59125.2 4635.25 3
 6 3 0 1886.5 902.711 3
 6 3 0 1722.1 787.155 4
 6 3 1 31267.8 3780.58 4
 6 3 1 35263.7 3814.32 3
 6 3 2 113894 7881.82 4
 6 3 2 112587 7311.99 3
 6 3 3 37848.9 4785.59 4
 6 3 3 33533.1 4109.88 3
 6 3 4 -63.7926 248.592 3
 6 3 4 -2422.67 1267.89 4
 6 3 5 85169.2 7980.14 4
 6 3 5 78657.6 6835.03 3
 6 3 6 44906.2 5990.82 4
 6 3 7 1707.01 1130.23 4
 6 3 8 5453.58 2084.84 4
 6 3 9 19939.2 4567.77 4
 6 4 -11 117601 7226.33 3
 6 4 -10 50459.2 4414.49 3
 6 4 -9 3048.22 1026.46 3
 6 4 -8 15631.8 2281.05 3
 6 4 -7 79543.6 5283.88 3
 6 4 -6 21815.9 2642.68 3
 6 4 -5 10401.6 1824.42 3
 6 4 -4 30299.3 3276.36 3
 6 4 -3 61070.1 4757.01 3
 6 4 -2 22317.1 2885.88 3
 6 4 -1 31886.6 3634.69 3
 6 4 0 103203 6901.62 4
 6 4 0 117148 7310.7 3
 6 4 1 122223 7931.12 4
 6 4 1 126125 7884.51 3
 6 4 2 2032.05 975.073 3
 6 4 2 2700.68 1187.9 4
 6 4 3 11094.8 2558.63 3
 6 4 3 9543.67 2369.15 4
 6 4 4 86821.3 7856.78 4
 6 4 4 92560 7377.54 3
 6 4 5 32409.7 4966.42 4
 6 4 5 36752.3 4736.6 3
 6 4 6 1344.88 1385.51 4
 6 4 7 9262.09 2938.2 4
 6 4 8 22995.3 4902.07 4
 6 5 -13 716.304 423.004 3
 6 5 -12 52783.3 5005.06 3
 6 5 -11 21615.7 3030.42 3
 6 5 -10 2522.24 996.649 3
 6 5 -9 29689.1 3389.23 3
 6 5 -8 72712.3 5352.86 3
 6 5 -7 60806.4 4831.67 3
 6 5 -6 12265.3 2081.99 3
 6 5 -5 71307.4 5326.32 3
 6 5 -4 50292 4462.02 3
 6 5 -3 19156.2 2767.15 3
 6 5 -2 38287.2 4049.52 3
 6 5 -1 170572 9424.74 3
 6 5 0 83762 6275.36 4
 6 5 0 79958.2 6376.7 3
 6 5 1 533.346 650.998 3
 6 5 1 -334.174 723.53 4
 6 5 2 33984.6 4429.15 4
 6 5 2 35685.2 4461.72 3
 6 5 3 65837.5 6594.16 4
 6 5 3 67776.2 6376.57 3
 6 5 4 21039.4 3591.91 3
 6 5 4 21041.9 3839.68 4
 6 5 5 2147.23 1249.27 3
 6 5 5 -703.543 1049.16 4
 6 5 6 16658.1 3843.38 4
 6 5 6 15824.5 3340.33 3
 6 5 7 25072.6 4955.34 4
 6 6 -15 5415.01 1744.53 3
 6 6 -14 1096.56 959.95 3
 6 6 -13 16367.2 2917.08 3
 6 6 -12 9877.78 2209.48 3
 6 6 -11 -249.38 494.164 3
 6 6 -10 30191.9 3634.71 3
 6 6 -9 56142.3 4982.65 3
 6 6 -8 44890.6 4425.7 3
 6 6 -7 623.02 505 3
 6 6 -6 111068 7082.48 3
 6 6 -5 45203.3 4438.99 3
 6 6 -4 12725 2336.54 3
 6 6 -3 12229.2 2327.53 3
 6 6 -2 79650.9 6324.15 3
 6 6 -1 47238.4 4952.5 3
 6 6 0 769.364 521.04 3
 6 6 1 13502.1 2751.85 3
 6 6 1 12584.5 2546.11 4
 6 6 2 22682.7 3669.71 4
 6 6 2 26870.7 4052.71 3
 6 6 3 3325.61 1542.74 3
 6 6 3 4462.06 1787.69 4
 6 6 4 1687.23 1272.91 3
 6 6 4 1615.07 1097.16 4
 6 6 5 19813.9 3766.17 3
 6 6 5 13696.5 3423.93 4
 6 6 6 22576 4219.44 3
 6 6 6 28739.8 5121.47 4
 6 6 7 337.603 975.124 4
 6 7 -17 14432.5 3223.37 3
 6 7 -16 -506.496 703.789 3
 6 7 -15 8899.21 2382.69 3
 6 7 -14 20965.7 3501.27 3
 6 7 -13 4157.11 1517.26 3
 6 7 -12 12771.1 2583.31 3
 6 7 -11 61671.2 5622.5 3
 6 7 -10 74112.2 6129.54 3
 6 7 -9 21544.1 3182.69 3
 6 7 -8 2741.81 1070.04 3
 6 7 -7 83493.1 6374.84 3
 6 7 -6 43578.8 4529.48 3
 6 7 -5 4816.04 1428.13 3
 6 7 -4 40777 4580.01 3
 6 7 -3 59563.7 5620.77 3
 6 7 -2 34935.2 4368.06 3
 6 7 -1 4519.86 1793.15 3
 6 7 0 29618.5 4211.95 3
 6 7 1 13755.2 2985.03 3
 6 7 1 14930.7 2899.57 4
 6 7 2 1881.05 1645.89 3
 6 7 2 1763.76 1108.6 4
 6 7 3 17345.6 3515.71 3
 6 7 3 19984.8 3673.92 4
 6 7 4 16478.9 3548.92 3
 6 7 4 14213.1 3299.23 4
 6 7 5 24613.7 4391.49 3
 6 7 5 19859 4062.48 4
 6 7 6 1843.12 1097.88 4
 6 8 -16 8958.17 2457.59 3
 6 8 -15 26921.1 4266.97 3
 6 8 -14 3393.42 1429.23 3
 6 8 -13 4308.51 1603.77 3
 6 8 -12 46220.1 5157.78 3
 6 8 -11 29743 4067.86 3
 6 8 -10 7460.67 1982.81 3
 6 8 -9 11729.7 2448.55 3
 6 8 -8 48908.1 5045.36 3
 6 8 -7 34086.6 4213.39 3
 6 8 -6 6112.51 1760.62 3
 6 8 -5 38245.5 4575.97 3
 6 8 -4 52417.9 5441.69 3
 6 8 -3 22447.1 3603.23 3
 6 8 -2 15080.8 3002.19 3
 6 8 -1 70460.1 6847.66 3
 6 8 0 32194.3 4662.62 3
 6 8 1 -34.9134 869.749 3
 6 8 2 32766.6 4625.59 4
 6 8 2 34770.4 5062.19 3
 6 8 3 23826 4341.56 3
 6 8 3 30591.5 4639.01 4
 6 8 4 16793 3585.94 4
 6 8 5 -1426.11 1356.84 4
 6 9 -15 2603.78 1434.74 3
 6 9 -14 5411.83 1828.51 3
 6 9 -13 11129.1 2600.03 3
 6 9 -12 12285.1 2691.64 3
 6 9 -11 -204.223 536.882 3
 6 9 -10 8070.64 2082.39 3
 6 9 -9 20957.8 3426.27 3
 6 9 -8 8597.96 2208.77 3
 6 9 -7 3172.86 1390.37 3
 6 9 -6 24505.3 3843.05 3
 6 9 -5 33288 4471.54 3
 6 9 -4 14152.3 2933.75 3
 6 9 -3 4683.11 1688.05 3
 6 9 -2 39734.5 5251.2 3
 6 9 -1 35150.4 5073.75 3
 6 9 0 519.617 803.506 3
 6 9 1 13659.9 3359.63 3
 6 9 2 43371.4 5941.38 3
 6 9 3 19485.1 3778.28 4
 6 9 4 1107.65 630.323 4
 6 10 -14 15777 3333.02 3
 6 10 -13 8792.59 2482.79 3
 6 10 -12 155.84 472.622 3
 6 10 -11 13623.3 2952.09 3
 6 10 -10 9422.1 2403.32 3
 6 10 -9 1009.46 960.059 3
 6 10 -8 4077.33 1551.08 3
 6 10 -7 20215.9 3558.13 3
 6 10 -6 29570.8 4341.21 3
 6 10 -5 2486.15 997.92 3
 6 10 -4 7011.64 2174.34 3
 6 10 -3 33207.6 4887.8 3
 6 10 -2 23604.9 4171.27 3
 6 10 -1 360.48 598.221 3
 6 10 0 9239.35 2831.43 3
 6 11 -12 16768 3489.35 3
 6 11 -11 19059.8 3591.61 3
 6 11 -10 -421.668 757.283 3
 6 11 -9 17798.7 3549.83 3
 6 11 -8 31171.1 4632.63 3
 6 11 -7 33201.5 4874.71 3
 6 11 -6 1374.89 1207.92 3
 6 11 -5 14005.3 3225.42 3
 6 11 -4 30410.2 4909.01 3
 6 11 -3 6684.73 2386.57 3
 7 -16 7 14155.7 3078.97 1
 7 -16 8 268.204 454.201 1
 7 -16 9 7364.04 2245.03 1
 7 -15 6 13395.2 2808 1
 7 -15 7 1647.36 1140.73 1
 7 -15 8 6616.79 2118.49 1
 7 -15 9 18077.9 3597.28 1
 7 -15 10 5179.25 2002.51 1
 7 -14 5 7012.19 1816.37 1
 7 -14 6 12197.1 2603.62 1
 7 -14 7 32686.1 4419.08 1
 7 -14 8 20784.6 3590.47 1
 7 -14 9 5387.85 1834.28 1
 7 -14 10 4725.65 1630.59 1
 7 -14 11 18362.6 3651.24 1
 7 -13 3 88677.9 6401.79 1
 7 -13 4 8467.23 1942.5 1
 7 -13 5 28090.7 3713.14 1
 7 -13 6 36490.4 4356.73 1
 7 -13 7 27947.2 3905.22 1
 7 -13 8 3229.15 1380.45 1
 7 -13 9 3686.38 1476.6 1
 7 -13 10 18134.4 3494.18 1
 7 -13 11 413.568 639.13 1
 7 -12 2 77068.8 5564.63 1
 7 -12 3 14320.1 2394.83 1
 7 -12 4 40921.3 4188.69 1
 7 -12 5 40059.6 4281.62 1
 7 -12 6 10985.6 2310.47 1
 7 -12 7 -92.1249 746.711 1
 7 -12 8 22507.1 3514.7 1
 7 -12 9 11930.1 2696.17 1
 7 -12 10 1004.03 1028.34 1
 7 -12 11 1909.36 916.785 1
 7 -12 12 9306.71 2586.46 1
 7 -11 1 90459.3 5643.45 1
 7 -11 2 13615.1 2158.42 1
 7 -11 3 39049 3791.51 1
 7 -11 4 62139.7 5033.39 1
 7 -11 5 5045.11 1474.62 1
 7 -11 6 3501.77 1251.06 1
 7 -11 7 28034.1 3722.3 1
 7 -11 8 31764.8 4138.35 1
 7 -11 9 414.276 574.209 1
 7 -11 10 7490.6 2203.2 1
 7 -11 11 10137.9 2611.16 1
 7 -11 12 5754.59 2019.61 1
 7 -10 0 37083.9 3186.68 1
 7 -10 1 1394.02 692.921 1
 7 -10 2 37580.1 3466.3 1
 7 -10 3 74714.2 5180.22 1
 7 -10 4 8660.82 1764.96 1
 7 -10 5 48944 3631.36 4
 7 -10 5 38857 4032.76 1
 7 -10 6 67314.3 4900.27 4
 7 -10 6 78536.1 5975.05 1
 7 -10 7 78598.7 6239.58 1
 7 -10 7 73086.7 5634.37 4
 7 -10 8 502.44 435.702 1
 7 -10 8 14006.8 2736.13 4
 7 -10 9 13837 2841.63 4
 7 -10 9 13926.7 2748.14 1
 7 -10 10 34166 4536.81 1
 7 -10 10 39019.8 5010.99 4
 7 -10 11 16338.7 3235.75 1
 7 -10 12 -261.02 800.25 1
 7 -9 0 5186.85 1102.88 1
 7 -9 1 108677 5678.19 1
 7 -9 2 76691.5 4879.65 1
 7 -9 3 5297.99 1260.08 1
 7 -9 4 31671.6 3337.27 1
 7 -9 4 31859.7 2820.18 4
 7 -9 5 47947.7 4388.82 1
 7 -9 5 47553.4 3893.18 4
 7 -9 6 88994.5 6218.87 1
 7 -9 6 76573.6 5647.75 4
 7 -9 7 107.615 364.805 4
 7 -9 7 -113.609 739.767 1
 7 -9 8 9369.64 2155.84 1
 7 -9 8 11557 2515.3 4
 7 -9 9 43854.4 4866.32 1
 7 -9 9 40357.3 4926 4
 7 -9 10 6611.57 1913.39 1
 7 -9 10 4874.4 1798.98 4
 7 -9 11 460.657 641.273 1
 7 -9 11 -636.972 767.816 4
 7 -9 12 8472.53 2382.99 1
 7 -9 12 12934.8 3248.44 4
 7 -9 13 5196.82 2204.77 4
 7 -9 14 672.828 801.507 4
 7 -8 -1 16092.7 1730.97 1
 7 -8 0 139758 6017.71 1
 7 -8 1 141807 6407.81 1
 7 -8 2 26959 2696.91 1
 7 -8 3 34285.7 3232.16 1
 7 -8 3 31288.9 2744.81 4
 7 -8 4 41074.3 3733.68 1
 7 -8 4 48282.4 3825.6 4
 7 -8 5 40477.1 3934.36 1
 7 -8 5 43640.3 4069.19 4
 7 -8 6 4818.92 1360.76 4
 7 -8 7 19728.1 3123.4 4
 7 -8 8 54185.6 5697.77 4
 7 -8 9 3584.35 1542.29 4
 7 -8 10 6834.09 2150.03 4
 7 -8 11 26863.6 4648.37 4
 7 -8 12 4126.65 2140.39 4
 7 -8 13 -1887.91 1732.52 4
 7 -8 14 7003.66 2833.18 4
 7 -7 -6 16844.2 1228.7 3
 7 -7 -2 52084.2 2852.31 1
 7 -7 -1 184166 6515.78 1
 7 -7 0 134865 5715.01 1
 7 -7 1 8791.07 1532.88 1
 7 -7 2 20271.2 2265.18 1
 7 -7 3 68086.3 4491.17 4
 7 -7 4 27874.7 3138.39 4
 7 -7 5 5331.49 1461.12 4
 7 -7 6 57023.4 5240.27 4
 7 -7 7 34997.9 4376.69 4
 7 -7 8 181.601 454.067 4
 7 -7 9 18927.3 3568.27 4
 7 -7 10 32647.6 4938.93 4
 7 -7 11 17446.6 3763.4 4
 7 -7 12 -560.423 922.712 4
 7 -7 13 7793.64 2554.22 4
 7 -6 -7 14262.8 1204.81 3
 7 -6 -6 150071 4204.06 3
 7 -6 -2 275335 7863.4 1
 7 -6 -1 142977 5385.11 1
 7 -6 0 69.395 216.646 1
 7 -6 2 104794 5606.78 4
 7 -6 3 22619.6 2679.72 4
 7 -6 4 46544.3 4254.17 4
 7 -6 5 34511.5 3962.38 4
 7 -6 6 59319.1 5542.27 4
 7 -6 7 -2477.59 1203.67 4
 7 -6 8 29020.3 4340.05 4
 7 -6 9 37906.7 5190.35 4
 7 -6 10 16593.4 3517.46 4
 7 -6 11 1719.78 1441.47 4
 7 -6 12 14794.1 3734.86 4
 7 -6 13 7662.42 2877.7 4
 7 -5 -7 71855.4 2958.23 3
 7 -5 -6 90217.7 2697.69 3
 7 -5 -3 264635 6769.03 1
 7 -5 -2 2223.36 594.756 1
 7 -5 2 22814.7 2626.29 4
 7 -5 3 64741 4944.99 4
 7 -5 4 72441.6 5679.01 4
 7 -5 5 37694.6 4318.75 4
 7 -5 6 461.194 347.086 4
 7 -5 7 32660.4 4593.9 4
 7 -5 8 40795.9 5256.95 4
 7 -5 9 4441.52 1859.33 4
 7 -5 10 33.3528 1001.2 4
 7 -5 11 13786.4 3646.95 4
 7 -5 12 18548.9 4274.65 4
 7 -5 13 -898.385 1579.58 4
 7 -4 -7 14354.3 1257.05 3
 7 -4 -6 6316.27 612.002 3
 7 -4 -6 17325.5 1073.11 3
 7 -4 1 21422 2520.67 4
 7 -4 2 81221.7 5407.64 4
 7 -4 3 112263 6965.44 4
 7 -4 4 75788.6 6050.25 4
 7 -4 5 -85.0698 483.304 4
 7 -4 6 32401.8 4382.08 4
 7 -4 7 43963.2 5392.13 4
 7 -4 8 -39.7556 444.345 4
 7 -4 9 5869.94 2223.57 4
 7 -4 10 24484 4695.45 4
 7 -4 11 16732.3 4180.84 4
 7 -4 12 -465.45 1258.01 4
 7 -3 -6 121182 3960.65 3
 7 -3 -5 203030 5467.25 3
 7 -3 -4 9835.09 825.676 3
 7 -3 -3 116908 4004.05 3
 7 -3 -2 105936 4108.93 3
 7 -3 1 98072.2 5843.05 4
 7 -3 2 141367 7699.93 4
 7 -3 3 53878.8 4872.51 4
 7 -3 4 9017.85 2128.57 4
 7 -3 5 30747.6 4155.24 4
 7 -3 6 32321.5 4491.25 4
 7 -3 7 1883.51 1235.16 4
 7 -3 8 10727.8 2933.01 4
 7 -3 9 44805.3 6122.25 4
 7 -3 10 16352.3 3993.09 4
 7 -3 11 -1093.55 1081.06 4
 7 -3 12 18613.9 4661.02 4
 7 -2 -7 116994 4595.06 3
 7 -2 -6 133475 4718.34 3
 7 -2 -5 22357 1585.37 3
 7 -2 -5 21229.8 1162.57 1
 7 -2 -4 203164 6273.39 3
 7 -2 -3 247475 7528.52 3
 7 -2 -2 70310.7 3557.53 3
 7 -2 -1 2212.21 654.946 3
 7 -2 0 175984 7114.87 3
 7 -2 1 94067.9 5955.06 4
 7 -2 2 7485.22 1688.09 4
 7 -2 3 5834.42 1663.54 4
 7 -2 4 63537.8 5895.62 4
 7 -2 5 36505.4 4652.04 4
 7 -2 6 4370.36 1772.71 4
 7 -2 7 18339.3 3952.99 4
 7 -2 8 51065.7 6479.47 4
 7 -2 9 8942.54 2737.24 4
 7 -2 10 3151.88 2062.8 4
 7 -2 11 19966.4 4793.08 4
 7 -1 -8 135679 5689.41 3
 7 -1 -7 196004 6852.59 3
 7 -1 -6 11802.7 1343.21 3
 7 -1 -6 14444.3 1152.89 1
 7 -1 -5 140062 5315.87 3
 7 -1 -4 158442 5856.51 3
 7 -1 -3 59881.3 3474.72 3
 7 -1 -2 16128.3 1775 3
 7 -1 -1 209431 7945.22 3
 7 -1 0 79146 5495.08 4
 7 -1 0 81654.6 4976.39 3
 7 -1 1 -60.6332 231.529 3
 7 -1 1 77.8382 307.537 4
 7 -1 2 69614.3 5609.31 4
 7 -1 2 72695.8 5011.81 3
 7 -1 3 112338 7802.55 4
 7 -1 4 39661.4 4723.91 4
 7 -1 5 11503.2 2637.84 4
 7 -1 6 43593.6 5575.08 4
 7 -1 7 37065.7 5353.92 4
 7 -1 8 594.706 568.287 4
 7 -1 9 3852.39 1921.37 4
 7 -1 10 20105 4554.93 4
 7 0 -9 77499.6 4539.74 3
 7 0 -8 56424.4 3622 3
 7 0 -7 359.671 280.762 3
 7 0 -6 92928 4538.34 3
 7 0 -5 77111.6 4090.78 3
 7 0 -4 12875.1 1568.03 3
 7 0 -3 46813.5 3262.45 3
 7 0 -2 218762 8355.77 3
 7 0 -1 49973.2 3685.92 3
 7 0 0 10256.5 1902.31 4
 7 0 0 10494.6 1727.47 3
 7 0 1 153765 8389.55 4
 7 0 1 147231 7519.14 3
 7 0 2 118708 7771.14 4
 7 0 2 113766 6761.3 3
 7 0 3 49215.7 5191.48 4
 7 0 3 54296.2 4726.43 3
 7 0 4 6002.1 1747.7 4
 7 0 5 52578 6001.48 4
 7 0 6 26641.7 4393.65 4
 7 0 7 -755.337 589.982 4
 7 0 8 8667.74 2728.38 4
 7 0 9 8039.56 2770.78 4
 7 0 10 -16.5078 1448.99 4
 7 1 -10 98622.4 5673.84 3
 7 1 -9 41453.8 3398.01 3
 7 1 -8 25186.6 2485.16 3
 7 1 -7 143369 6418.62 3
 7 1 -6 56749.4 3730.94 3
 7 1 -5 433.364 315.098 3
 7 1 -4 59600.8 3933.51 3
 7 1 -3 235014 9055.7 3
 7 1 -2 107437 5822.96 3
 7 1 -1 516.391 354.737 3
 7 1 0 119158 7148.82 4
 7 1 0 117837 6635.34 3
 7 1 1 61394 5297.76 4
 7 1 1 70455.4 5200.52 3
 7 1 2 56738 5390.25 4
 7 1 2 57400.9 4906.85 3
 7 1 3 20113.4 3493.11 4
 7 1 3 19672.1 2943.4 3
 7 1 4 46416.5 5515.85 4
 7 1 4 39356.4 4394.75 3
 7 1 5 44503.1 5669.28 4
 7 1 6 1757.63 1349.98 4
 7 1 7 10465.6 2996.68 4
 7 1 8 8079.04 2639.48 4
 7 1 9 4099.64 2039.24 4
 7 2 -11 56599.8 4540.48 3
 7 2 -10 8031.76 1566.88 3
 7 2 -9 27338.8 2856.96 3
 7 2 -8 164660 7467.47 3
 7 2 -7 38942.4 3336.03 3
 7 2 -6 5600.74 1229.96 3
 7 2 -5 73813 4681.43 3
 7 2 -4 117025 6200.26 3
 7 2 -3 37195.5 3407.25 3
 7 2 -2 4291.91 1138.65 3
 7 2 -1 23595 2915.33 3
 7 2 0 23568.8 3159.27 4
 7 2 0 31263.9 3459.4 3
 7 2 1 29478.6 3738.55 4
 7 2 1 33329.5 3729.93 3
 7 2 2 10848.8 2214.21 3
 7 2 2 13722 2647.91 4
 7 2 3 55726.1 5822.75 4
 7 2 3 46618.2 4826.9 3
 7 2 4 76415 7262.44 4
 7 2 4 68273.7 6107.03 3
 7 2 5 1235.06 1032.01 4
 7 2 6 28085 4848.66 4
 7 2 7 21492.9 4410.14 4
 7 2 8 983.104 630.637 4
 7 3 -12 34572.9 3796.25 3
 7 3 -11 1411.41 726.718 3
 7 3 -10 65766.5 4911.87 3
 7 3 -9 175332 8294.77 3
 7 3 -8 32183.5 3229.02 3
 7 3 -7 21725 2627.02 3
 7 3 -6 41441.2 3638.93 3
 7 3 -5 66706.5 4752.33 3
 7 3 -4 18908.6 2495.63 3
 7 3 -3 8143.69 1725.01 3
 7 3 -2 58296.1 4761.9 3
 7 3 -1 22099.9 3050.93 3
 7 3 0 1965.02 979.542 3
 7 3 0 -106.645 365.499 4
 7 3 1 49978.3 5108.08 4
 7 3 1 53938.3 5044.77 3
 7 3 2 56875.7 5729.53 4
 7 3 2 59896.1 5546.98 3
 7 3 3 46433.1 5422.38 4
 7 3 3 47657.6 5104.3 3
 7 3 4 3185.06 1220.35 3
 7 3 4 358.948 633.147 4
 7 3 5 49391.4 6339.28 4
 7 3 5 49688.8 5623.15 3
 7 3 6 27170.8 4820.13 4
 7 3 7 1865.25 1523.52 4
 7 3 8 637.665 766.066 4
 7 4 -14 49171.3 5049.23 3
 7 4 -13 27614.6 3612.68 3
 7 4 -12 -348.625 529.536 3
 7 4 -11 44553.2 4295.05 3
 7 4 -10 62100.4 4981.31 3
 7 4 -9 73431.3 5338.19 3
 7 4 -8 7906.25 1643.55 3
 7 4 -7 80170.8 5510.6 3
 7 4 -6 65021.5 4940.04 3
 7 4 -5 7680.23 1705.12 3
 7 4 -4 5293.05 1429.91 3
 7 4 -3 83887.1 6041.72 3
 7 4 -2 27186.2 3418.19 3
 7 4 -1 1535.56 967.983 3
 7 4 0 71687.7 6009.8 3
 7 4 1 55362 5445.1 4
 7 4 1 50974.8 5256.92 3
 7 4 2 16378.7 3021.79 3
 7 4 2 15446.7 3077.93 4
 7 4 3 4975.95 1924.71 3
 7 4 3 2324.85 1371.37 4
 7 4 4 66980.9 7084.83 4
 7 4 4 52235.5 5853.76 3
 7 4 5 30377.9 4984.96 4
 7 4 5 25727.9 4184.47 3
 7 4 6 1757.12 1206.76 4
 7 4 7 2400.93 1474.27 4
 7 5 -16 6051.68 2014.4 3
 7 5 -15 30431.7 4206.48 3
 7 5 -14 22956.9 3551.82 3
 7 5 -13 1185.77 682.367 3
 7 5 -12 43509.3 4516.21 3
 7 5 -11 36815 4019.79 3
 7 5 -10 26797.9 3367.76 3
 7 5 -9 7787.23 1808.12 3
 7 5 -8 59572.3 4958.07 3
 7 5 -7 61678.1 5084.13 3
 7 5 -6 7394.7 1682.71 3
 7 5 -5 35280.9 3864.12 3
 7 5 -4 64698.2 5432.56 3
 7 5 -3 9327.64 2083.41 3
 7 5 -2 1469.73 816.733 3
 7 5 -1 46788 4912.3 3
 7 5 0 27345.4 3818.82 3
 7 5 1 9731.27 2304.7 3
 7 5 1 7982.38 2109.64 4
 7 5 2 5658.26 2237.55 3
 7 5 2 3691 1482.06 4
 7 5 3 35303.5 4951.89 4
 7 5 3 39998 5164.93 3
 7 5 4 22719 3928.28 3
 7 5 4 18401.5 3811.22 4
 7 5 5 -36.8195 600.418 3
 7 5 5 455.541 429.864 4
 7 5 6 16863.1 3977.43 4
 7 6 -18 -3511.53 1617.62 3
 7 6 -17 6194.95 2021.76 3
 7 6 -16 24809.8 4017 3
 7 6 -15 9710.92 2397.01 3
 7 6 -14 977.223 684.353 3
 7 6 -13 22065.3 3391.53 3
 7 6 -12 16760.2 2884.38 3
 7 6 -11 -16.7052 657.482 3
 7 6 -10 32311.6 3900.24 3
 7 6 -9 78382.1 6112.62 3
 7 6 -8 58193.3 5194.8 3
 7 6 -7 1448.62 780.23 3
 7 6 -6 81865.3 6296.55 3
 7 6 -5 68053.5 5790.67 3
 7 6 -4 27602.5 3715.8 3
 7 6 -3 16227.8 2882.74 3
 7 6 -2 83954 6912.68 3
 7 6 -1 33319.8 4431.46 3
 7 6 0 4065.89 1548.57 3
 7 6 1 11626.3 2725.36 3
 7 6 1 9900.66 2384.33 4
 7 6 2 17558.1 3472.33 3
 7 6 2 12650.3 2888.09 4
 7 6 3 6775.58 2189.78 3
 7 6 3 5234.48 1840.96 4
 7 6 4 2209.23 1508.58 3
 7 6 4 -72.0228 1081.96 4
 7 6 5 9792.5 2882.76 4
 7 7 -17 14243.6 3241.92 3
 7 7 -16 2196.94 1414.33 3
 7 7 -15 1127.95 840.923 3
 7 7 -14 17578.8 3217.62 3
 7 7 -13 9264.16 2268.74 3
 7 7 -12 4484.22 1633.69 3
 7 7 -11 27338.7 3789.92 3
 7 7 -10 49162.5 5057.27 3
 7 7 -9 34350.9 4149.9 3
 7 7 -8 9.92933 718.454 3
 7 7 -7 58095.1 5504.29 3
 7 7 -6 49641.2 5101.92 3
 7 7 -5 20895.4 3362.38 3
 7 7 -4 5403.11 1834.76 3
 7 7 -3 53786.1 5686.69 3
 7 7 -2 26722 4031.63 3
 7 7 -1 2815.07 1485.45 3
 7 7 0 15241.8 3165.73 3
 7 7 1 12708.2 3006.8 3
 7 7 2 7143.26 2377.84 3
 7 7 2 3184.2 1544.47 4
 7 7 3 11913 3044.52 3
 7 7 3 9423.7 2641.85 4
 7 7 4 9446.14 2837.36 4
 7 8 -16 4702.71 1818.76 3
 7 8 -15 20188.9 3701.73 3
 7 8 -14 4521.51 1646.27 3
 7 8 -13 152.788 754.862 3
 7 8 -12 17585.5 3217.24 3
 7 8 -11 23952.6 3708.02 3
 7 8 -10 15475 2986.35 3
 7 8 -9 1064 867.649 3
 7 8 -8 29624.7 4065.86 3
 7 8 -7 26475.8 3841.9 3
 7 8 -6 981.317 801.655 3
 7 8 -5 6865.72 2076.23 3
 7 8 -4 24382.8 3894.66 3
 7 8 -3 20147.9 3672.65 3
 7 8 -2 -100.881 652.156 3
 7 8 -1 23397 4085.68 3
 7 8 0 17705.1 3642.29 3
 7 8 1 6276.71 2219.25 3
 7 8 2 20015.5 4094.73 3
 7 8 3 21238 4106.58 4
 7 9 -15 4737 1818.85 3
 7 9 -14 2415.31 1169.71 3
 7 9 -13 18134 3460.83 3
 7 9 -12 11956 2766.13 3
 7 9 -11 2183.45 1220.56 3
 7 9 -10 1135.82 755.112 3
 7 9 -9 11099.2 2609.55 3
 7 9 -8 21261.3 3640.21 3
 7 9 -7 -183.438 746.244 3
 7 9 -6 10907.4 2576.9 3
 7 9 -5 42408.6 5344.3 3
 7 9 -4 27707.7 4367.2 3
 7 9 -3 1126.45 1067.84 3
 7 9 -2 30060.7 4748.71 3
 7 9 -1 40544 5664.97 3
 7 9 0 3973.2 1746.13 3
 7 10 -13 12443 2969.09 3
 7 10 -12 224.468 592.755 3
 7 10 -11 12464 2859.39 3
 7 10 -10 14873.8 3160.17 3
 7 10 -9 3863.92 1555.25 3
 7 10 -8 2059.93 1215.5 3
 7 10 -7 30243.7 4600.49 3
 7 10 -6 40313.8 5359.38 3
 7 10 -5 6348.81 2246.33 3
 7 10 -4 4655.41 1888.61 3
 7 10 -3 34305 5237.93 3
 8 -16 6 6861.1 2090.5 1
 8 -16 7 25129 4104.26 1
 8 -16 8 1997.58 1134.37 1
 8 -16 9 5836.4 1991.72 1
 8 -15 5 12196.9 2565.17 1
 8 -15 6 18466.3 3295.88 1
 8 -15 7 43.834 472.696 1
 8 -15 8 7036.17 2188.59 1
 8 -15 9 19842.1 3782.25 1
 8 -15 10 4047.94 1674.47 1
 8 -14 4 24170.8 3473.8 1
 8 -14 5 13142.1 2584.39 1
 8 -14 6 4778.61 1658.34 1
 8 -14 7 17960.4 3222.94 1
 8 -14 8 23828.6 3898.48 1
 8 -14 9 5747.61 2054.73 1
 8 -14 10 5254.54 1901.76 1
 8 -13 2 53573.1 4753.21 1
 8 -13 3 92356.9 6544.65 1
 8 -13 4 18258.3 2878.17 1
 8 -13 5 2072.45 1213.08 1
 8 -13 6 28934.2 3892.34 1
 8 -13 7 34947.6 4408.53 1
 8 -13 8 4105.18 1468.66 1
 8 -13 9 2041.59 1296.51 1
 8 -13 10 9862.16 2735.71 1
 8 -13 11 3060.51 1565.74 1
 8 -12 1 23155.6 2827.6 1
 8 -12 2 92889.4 6122.99 1
 8 -12 3 28925.9 3415.82 1
 8 -12 4 5718.74 1570.81 1
 8 -12 5 24134 3336.95 1
 8 -12 6 29920.5 3859.58 1
 8 -12 7 1802.4 693.478 1
 8 -12 8 8451.15 2210.66 1
 8 -12 9 24528.5 3927.56 1
 8 -12 10 4492.98 1758.85 1
 8 -12 11 792.315 798.933 1
 8 -11 1 47323.8 3977.24 1
 8 -11 2 16020 2318.52 1
 8 -11 3 22894 2900.29 1
 8 -11 4 48087.2 4425.64 1
 8 -11 5 10321.3 2210.87 1
 8 -11 6 729.38 434.196 1
 8 -11 7 40564.9 4614.24 1
 8 -11 8 33602 4319.11 1
 8 -11 9 2420.45 1231.14 1
 8 -11 10 5930.46 2006.24 1
 8 -11 11 14524.1 3134.94 1
 8 -10 0 89892.9 5126.19 1
 8 -10 1 16021.6 2140.29 1
 8 -10 2 32420.8 3264.02 1
 8 -10 3 68630.2 5047.66 1
 8 -10 4 599.755 472.185 1
 8 -10 5 17428.6 2774.44 1
 8 -10 5 35380 3338.12 4
 8 -10 6 58865.9 5239.64 1
 8 -10 6 50529.6 4485.35 4
 8 -10 7 53837.2 5216.15 1
 8 -10 7 55594.7 5154.35 4
 8 -10 8 5847.51 1755.2 1
 8 -10 8 7714.54 2001.13 4
 8 -10 9 8562.7 2185.75 1
 8 -10 9 7046.46 2219.1 4
 8 -10 10 17715 3560.63 4
 8 -10 10 16044.8 3202.79 1
 8 -10 11 15988.2 3258.61 1
 8 -10 12 -583.216 1211.87 1
 8 -9 -1 32805.1 2692.51 1
 8 -9 0 14632.2 1853.01 1
 8 -9 1 38217.9 3245.99 1
 8 -9 2 99875.1 5788.44 1
 8 -9 3 5952.84 1377.26 1
 8 -9 4 12588 1932.57 4
 8 -9 4 13078.5 2174.28 1
 8 -9 5 44651.1 4262.45 1
 8 -9 5 46649.1 4183.7 4
 8 -9 6 40734 4245.14 1
 8 -9 6 35265.9 3962.08 4
 8 -9 7 -247.053 502.098 4
 8 -9 7 493.586 479.714 1
 8 -9 8 6412.88 1863.15 4
 8 -9 8 3544.49 1334.08 1
 8 -9 9 17297 3325.06 4
 8 -9 10 3616.3 1561 4
 8 -9 11 -154.109 684.317 4
 8 -9 12 2715.72 1517.73 4
 8 -9 13 4717.29 2125.34 4
 8 -8 -2 30169.5 2351.37 1
 8 -8 -1 226.089 183.267 1
 8 -8 0 97090 4931.97 1
 8 -8 1 158308 7046.41 1
 8 -8 2 29540.1 2931.14 1
 8 -8 3 15699.1 2187.18 1
 8 -8 3 16081.1 2148.47 4
 8 -8 4 60365.5 4654.49 4
 8 -8 5 71993.4 5565.07 4
 8 -8 6 -227.683 691.864 4
 8 -8 7 14487.1 2822.72 4
 8 -8 8 41603.6 5289.04 4
 8 -8 9 972.441 818.031 4
 8 -8 10 1723.25 866.902 4
 8 -8 11 16380.4 3826.37 4
 8 -8 12 4620.61 2191.46 4
 8 -8 13 1999.8 1368.03 4
 8 -7 -2 21685.7 1764.03 1
 8 -7 -1 185537 6775.06 1
 8 -7 0 172649 6860.51 1
 8 -7 1 28546.6 2651.55 1
 8 -7 3 44475.2 3871.2 4
 8 -7 4 30290.8 3517.89 4
 8 -7 5 -382.122 525.63 4
 8 -7 6 27059.4 3757.03 4
 8 -7 7 28201.6 4146.31 4
 8 -7 8 1076.39 855.256 4
 8 -7 9 6477.73 2136.97 4
 8 -7 10 35548.2 5489.13 4
 8 -7 11 8431.41 2776.84 4
 8 -7 12 -1123.01 1053.55 4
 8 -7 13 2716.12 1811.65 4
 8 -6 -3 990.357 298.61 1
 8 -6 -2 181101 5998.61 1
 8 -6 -1 77992 3842.82 1
 8 -6 2 85018.9 5391.11 4
 8 -6 3 23490.5 2942.93 4
 8 -6 4 12144.3 2274.81 4
 8 -6 5 72192.8 6138.88 4
 8 -6 6 31574 4245.24 4
 8 -6 7 -201.15 733.264 4
 8 -6 8 18076.4 3587.09 4
 8 -6 9 35789.3 5326.07 4
 8 -6 10 26957 4785.38 4
 8 -6 11 -1458.76 1168.05 4
 8 -6 12 6556.7 2700.34 4
 8 -5 -7 101778 2889.89 3
 8 -5 -7 95402.8 2875.76 3
 8 -5 -3 35439.9 1862.96 1
 8 -5 2 67854.5 4991.57 4
 8 -5 3 3094.63 1083.34 4
 8 -5 4 59632.1 5422.93 4
 8 -5 5 65098.4 6018.82 4
 8 -5 6 4453.22 1624.7 4
 8 -5 7 29886.5 4570.96 4
 8 -5 8 43174.4 5760.78 4
 8 -5 9 16039 3529.29 4
 8 -5 10 -69.1326 1055.51 4
 8 -5 11 9732.92 3306.87 4
 8 -5 12 12145.8 3560.89 4
 8 -4 -7 32745.6 1640.43 3
 8 -4 -6 178.3 94.7767 3
 8 -4 1 15889.8 2363.6 4
 8 -4 2 27846.5 3282.45 4
 8 -4 3 62465.7 5377.42 4
 8 -4 4 35912.1 4268.7 4
 8 -4 5 1686.47 822.243 4
 8 -4 6 15328.9 3106.33 4
 8 -4 7 48055.1 5942.73 4
 8 -4 8 10846 2916.12 4
 8 -4 9 -57.3922 438.229 4
 8 -4 10 17003.1 4069.64 4
 8 -4 11 18486.6 4317.42 4
 8 -3 -8 39080.9 2360.4 3
 8 -3 -7 360.478 130.12 3
 8 -3 -6 111710 3849.5 3
 8 -3 -5 174349 4590.5 1
 8 -3 -5 206580 5647.37 3
 8 -3 -4 24688 1652.12 3
 8 -3 -3 39588.2 2380.09 3
 8 -3 -2 251844 8124.74 3
 8 -3 -1 111182 5115.78 3
 8 -3 1 66164.7 5053.35 4
 8 -3 2 94874.2 6522.52 4
 8 -3 3 41159.5 4470.49 4
 8 -3 4 7356.47 2191.07 4
 8 -3 5 36490.3 4745.92 4
 8 -3 6 48882 5824.12 4
 8 -3 7 13280.8 3241.39 4
 8 -3 8 3327.15 1489.96 4
 8 -3 9 35820.4 5734.45 4
 8 -3 10 32137.4 5653.16 4
 8 -2 -9 74534.9 3955.73 3
 8 -2 -8 6666.91 1005.12 3
 8 -2 -7 85278.8 3846.58 3
 8 -2 -6 200197 6415.8 3
 8 -2 -6 189615 5204.45 1
 8 -2 -5 27012.9 1962.68 3
 8 -2 -4 28004.1 2092.22 3
 8 -2 -3 119699 5074.85 3
 8 -2 -2 56031.9 3482.39 3
 8 -2 -1 -445.455 324.53 3
 8 -2 0 82773.9 4926.81 3
 8 -2 1 55268.3 4746.23 4
 8 -2 2 7161.15 1872.93 4
 8 -2 3 822.821 710.228 4
 8 -2 4 46675.8 5270.28 4
 8 -2 5 21435.6 3768.92 4
 8 -2 6 -211.522 849.048 4
 8 -2 7 21175.9 4268.62 4
 8 -2 8 21172.6 4359.81 4
 8 -2 9 19154.9 4332.22 4
 8 -2 10 3793.18 2223.32 4
 8 -1 -10 40238.9 3186.97 3
 8 -1 -9 9647.31 1415.21 3
 8 -1 -8 54090.9 3362.65 3
 8 -1 -7 181717 6642.86 3
 8 -1 -7 172039 5397.51 1
 8 -1 -6 34507.3 2545.2 3
 8 -1 -6 35370.1 2099.54 1
 8 -1 -5 49835.4 3127.17 3
 8 -1 -4 109185 5043.96 3
 8 -1 -3 61525.9 3794.49 3
 8 -1 -2 5528.55 1138.95 3
 8 -1 -1 119834 6082.29 3
 8 -1 0 61555.1 4445.71 3
 8 -1 1 8451.91 1698.24 3
 8 -1 1 12560.1 2311.76 4
 8 -1 2 33046.2 4027.44 4
 8 -1 2 35431 3678.52 3
 8 -1 3 75096.2 6586.74 4
 8 -1 4 15253.5 3098.81 4
 8 -1 5 -307.66 948.238 4
 8 -1 6 22340.1 4173.96 4
 8 -1 7 18115.7 3900.78 4
 8 -1 8 10698.3 3136.83 4
 8 -1 9 -2733.04 1825.65 4
 8 0 -11 15740.3 2140.99 3
 8 0 -10 21355.9 2401.37 3
 8 0 -9 55805.9 3770.5 3
 8 0 -8 61756.8 3886.59 3
 8 0 -7 7227.61 1208.43 3
 8 0 -6 58031 3691.87 3
 8 0 -5 104071 5222.83 3
 8 0 -4 60570.3 3960.07 3
 8 0 -3 1228.44 636.612 3
 8 0 -2 121041 6242.18 3
 8 0 -1 99147.5 5816.73 3
 8 0 0 549.775 513.551 3
 8 0 1 70217.9 5800.95 4
 8 0 1 68709.7 5199.14 3
 8 0 2 119785 8163.64 4
 8 0 2 116198 7260.33 3
 8 0 3 78318.5 6932.27 4
 8 0 3 84384.7 6303.24 3
 8 0 4 -2333.93 1255.95 4
 8 0 5 43930.4 5682.6 4
 8 0 6 42159.6 5889.53 4
 8 0 7 16214.2 3838.06 4
 8 0 8 -119.155 732.597 4
 8 0 9 21222.3 4731.24 4
 8 1 -12 1483.94 826.014 3
 8 1 -11 20595.9 2594.44 3
 8 1 -10 110059 6040.7 3
 8 1 -9 25659.7 2674.19 3
 8 1 -8 8850.71 1532.51 3
 8 1 -7 71459.1 4485.57 3
 8 1 -6 81601.9 4843.22 3
 8 1 -5 3168.87 929.675 3
 8 1 -4 5637.4 1267.77 3
 8 1 -3 82477.8 5264 3
 8 1 -2 75949.9 5156.93 3
 8 1 -1 6045.11 1469.87 3
 8 1 0 35754.9 3748.55 3
 8 1 1 56408.1 5313.72 4
 8 1 1 52825.2 4829.09 3
 8 1 2 102377 7714.68 4
 8 1 2 91776.3 6715.3 3
 8 1 3 973.029 1506.79 3
 8 1 3 1696.55 918.982 4
 8 1 4 30390.9 4597.67 4
 8 1 5 39862.9 5581.68 4
 8 1 6 8842.91 2796.38 4
 8 1 7 2457.94 1474.47 4
 8 1 8 22962.4 4884.51 4
 8 2 -13 6176.69 1609.11 3
 8 2 -12 21774.7 2878.08 3
 8 2 -11 40680.5 3788.4 3
 8 2 -10 4818.82 1258.58 3
 8 2 -9 40565.6 3593.54 3
 8 2 -8 88597.4 5411.02 3
 8 2 -7 50289.9 4019.15 3
 8 2 -6 2395.53 860.075 3
 8 2 -5 12674.5 2002.49 3
 8 2 -4 96140.9 5963.29 3
 8 2 -3 71334.9 5193.16 3
 8 2 -2 801.265 610.184 3
 8 2 -1 48066.6 4451.94 3
 8 2 0 33597 3837.05 3
 8 2 1 18365.6 3080.63 4
 8 2 1 18761.8 3019.26 3
 8 2 2 10341.4 2295.62 3
 8 2 2 9348.76 2248.54 4
 8 2 3 46964.6 5545.09 4
 8 2 3 48373.8 5183.8 3
 8 2 4 31553.5 4779.25 4
 8 2 4 31581.2 4320.64 3
 8 2 5 -109.199 710.555 4
 8 2 6 23249.3 4521.43 4
 8 2 7 26107.6 5084.78 4
 8 3 -15 8602.09 2092.47 3
 8 3 -14 5414.43 1591.59 3
 8 3 -13 51142.4 4793.53 3
 8 3 -12 45142.4 4346.51 3
 8 3 -11 2877.35 1084.16 3
 8 3 -10 17353.7 2501.52 3
 8 3 -9 169631 8371.51 3
 8 3 -8 41229 3804.88 3
 8 3 -7 -30.715 442.834 3
 8 3 -6 23997.8 2932.35 3
 8 3 -5 88695.2 5908.24 3
 8 3 -4 64510.9 5094.4 3
 8 3 -3 -220.333 565 3
 8 3 -2 39262.3 4150.22 3
 8 3 -1 44035.8 4506.69 3
 8 3 0 2545.3 1321.59 3
 8 3 1 25466.8 3744.55 4
 8 3 1 22905.4 3435.95 3
 8 3 2 72591.9 6713.14 4
 8 3 2 52157.8 5518.89 3
 8 3 3 31116.7 4627.79 4
 8 3 3 34420.1 4548.84 3
 8 3 4 1021.85 1185.36 3
 8 3 4 346.706 639.757 4
 8 3 5 37025.3 5579.23 4
 8 3 6 31741.9 5433.58 4
 8 4 -17 11868.7 2702.99 3
 8 4 -16 6321.83 1932.6 3
 8 4 -15 -65.4348 455.986 3
 8 4 -14 22644.2 3390.78 3
 8 4 -13 44166.1 4592.81 3
 8 4 -12 6126.57 1597.04 3
 8 4 -11 7395.47 1787.76 3
 8 4 -10 109251 6935.01 3
 8 4 -9 70994.5 5410.72 3
 8 4 -8 1632.76 778.173 3
 8 4 -7 33925.9 3665.57 3
 8 4 -6 68905.4 5397.8 3
 8 4 -5 9618.09 1978.89 3
 8 4 -4 14317.5 2523.6 3
 8 4 -3 61398.4 5400.66 3
 8 4 -2 27719.9 3676.41 3
 8 4 -1 2559.28 1212.71 3
 8 4 0 23473.9 3595.77 3
 8 4 1 41617.7 5026.37 4
 8 4 1 44068 5125.75 3
 8 4 2 31605.8 4541.93 4
 8 4 2 28973.4 4283.29 3
 8 4 3 663.615 1092.26 3
 8 4 3 274.285 825.326 4
 8 4 4 37923.3 5529.05 4
 8 4 4 41060.3 5412.3 3
 8 4 5 32332 5379.6 4
 8 4 5 32271.1 4962.65 3
 8 5 -18 11166.6 2790.83 3
 8 5 -17 4631.17 1668.1 3
 8 5 -16 3816.41 1518 3
 8 5 -15 17654.4 3160.18 3
 8 5 -14 21135.1 3347.78 3
 8 5 -13 2021.92 1085.49 3
 8 5 -12 14838.3 2617.96 3
 8 5 -11 46576.2 4692.52 3
 8 5 -10 37394.3 4128.77 3
 8 5 -9 11308.1 2203.77 3
 8 5 -8 24094.8 3250.22 3
 8 5 -7 37424.9 4076.61 3
 8 5 -6 221.058 502.534 3
 8 5 -5 12278 2393.35 3
 8 5 -4 112589 7747.21 3
 8 5 -3 17910.3 3036.13 3
 8 5 -2 -485.415 543.972 3
 8 5 -1 34351.1 4670.89 3
 8 5 0 30815.2 4308.98 3
 8 5 1 5170.6 1954.6 3
 8 5 2 -133.588 464.585 3
 8 5 2 -135.852 481.067 4
 8 5 3 23965.1 4207.66 3
 8 5 3 29677.5 4672.54 4
 8 5 4 17641.2 3634.19 3
 8 5 4 17934.1 3818.91 4
 8 5 5 1336.57 893.923 4
 8 6 -17 2395.98 1232.48 3
 8 6 -16 19329.9 3499.08 3
 8 6 -15 21531.9 3592.88 3
 8 6 -14 -335.828 912.661 3
 8 6 -13 10814.7 2386.49 3
 8 6 -12 16453.3 2916.81 3
 8 6 -11 6378.61 1749.97 3
 8 6 -10 10501.1 2318.46 3
 8 6 -9 47978.8 4875.14 3
 8 6 -8 36110.9 4236.74 3
 8 6 -7 1725.02 948.211 3
 8 6 -6 20678.6 3234.8 3
 8 6 -5 79854.6 6690.71 3
 8 6 -4 29419 4050.57 3
 8 6 -3 3147.46 1305.19 3
 8 6 -2 35797.7 4705.28 3
 8 6 -1 28518.9 4234.18 3
 8 6 0 2174.5 1314.53 3
 8 6 1 1741.92 1310.89 3
 8 6 2 22433.9 4109.8 3
 8 6 2 16788.4 3497.73 4
 8 6 3 11187.8 3007.73 3
 8 6 3 16255 3548.05 4
 8 6 4 390.145 507.047 4
 8 7 -16 5420.44 1982.4 3
 8 7 -15 1111.54 916.626 3
 8 7 -14 12832 2790.56 3
 8 7 -13 17367.4 3198.04 3
 8 7 -12 -8.52129 699.114 3
 8 7 -11 7680.12 2068.17 3
 8 7 -10 50866.2 5313.4 3
 8 7 -9 32493.5 4213.86 3
 8 7 -8 1765.39 928.817 3
 8 7 -7 31418.4 4183.26 3
 8 7 -6 46754.5 5216.63 3
 8 7 -5 23723.1 3735.8 3
 8 7 -4 -305.407 401.785 3
 8 7 -3 25913 4139.31 3
 8 7 -2 36122.1 5003.67 3
 8 7 -1 7362.69 2495.92 3
 8 7 0 -255.561 679.696 3
 8 7 1 25512.7 4497.79 3
 8 7 3 -2548.7 1461.79 4
 8 8 -15 21127 3782.11 3
 8 8 -14 6195.62 2002.2 3
 8 8 -13 519.956 786.799 3
 8 8 -12 14437.6 2968.42 3
 8 8 -11 26454.9 3973.02 3
 8 8 -10 20616.1 3532.17 3
 8 8 -9 -367.843 417.01 3
 8 8 -8 13072.9 2803.12 3
 8 8 -7 26916 4072.47 3
 8 8 -6 7451.16 2310.94 3
 8 8 -5 1362.75 1287.76 3
 8 8 -4 31305.3 4732.02 3
 8 8 -3 32452.1 4872.17 3
 8 8 -2 2755.87 1641.73 3
 8 8 -1 10344.7 2941.85 3
 8 9 -13 15562.5 3262.89 3
 8 9 -12 5748.66 2015.16 3
 8 9 -11 1774.03 1008.73 3
 8 9 -10 1306.47 827.345 3
 8 9 -9 11610.1 2778.89 3
 8 9 -8 14112.9 3097.96 3
 8 9 -7 92.3513 598.857 3
 8 9 -6 7007.87 2253.97 3
 8 9 -5 31701.6 4843.17 3
 8 9 -4 7669.09 2448.56 3
 8 9 -3 3382.99 1598.32 3
 8 10 -10 26557.6 4344.77 3
 8 10 -9 11381.7 2894.27 3
 8 10 -8 5795.36 2033.28 3
 8 10 -7 18195.4 3631.51 3
 9 -17 7 9055.57 2481.82 1
 9 -16 5 -433.561 996.273 1
 9 -16 6 13504.9 2920.13 1
 9 -16 7 17328 3462.51 1
 9 -16 8 2924.65 1466.57 1
 9 -15 4 4665.37 1473.71 1
 9 -15 5 8810.75 2216.07 1
 9 -15 6 17670.1 3235.53 1
 9 -15 7 545.595 508.929 1
 9 -15 8 7290.31 2215.42 1
 9 -15 9 15708.6 3333.79 1
 9 -14 3 21392.3 3130.6 1
 9 -14 4 26956.9 3705.57 1
 9 -14 5 21870.9 3416.07 1
 9 -14 6 1721.88 1102.73 1
 9 -14 7 11325.9 2585.1 1
 9 -14 8 26854.6 4117.08 1
 9 -14 9 6902.77 2181.16 1
 9 -14 10 -395.247 829.867 1
 9 -13 2 41918.7 4137.67 1
 9 -13 3 43231.2 4385.14 1
 9 -13 4 34316.9 4006.02 1
 9 -13 5 4344.65 1567.79 1
 9 -13 6 20250.1 3310.28 1
 9 -13 7 35830 4540 1
 9 -13 8 7266.45 1997.48 1
 9 -13 9 2563.12 1249.72 1
 9 -13 10 11933 2871.26 1
 9 -12 1 20142 2649.87 1
 9 -12 2 56652.1 4706.24 1
 9 -12 3 15954.7 2543.35 1
 9 -12 4 1784.7 928.115 1
 9 -12 5 20303.3 3073.45 1
 9 -12 6 23329 3504.12 1
 9 -12 7 5981.74 1793.68 1
 9 -12 8 3722.69 1511.14 1
 9 -12 9 23369.9 3954.69 1
 9 -12 10 8284.63 2375.53 1
 9 -11 0 36579.9 3311.94 1
 9 -11 1 49507.8 4060.56 1
 9 -11 2 7317.3 1555.45 1
 9 -11 3 293.96 373.947 1
 9 -11 4 22985.2 3086.26 1
 9 -11 5 11768.2 2348.62 1
 9 -11 6 1438.92 776.226 1
 9 -11 7 18219.3 3088.03 1
 9 -11 8 21029.8 3421.57 1
 9 -11 9 7646.69 2251.29 1
 9 -11 10 -226.698 986.995 1
 9 -11 11 6798.25 2210.77 1
 9 -10 -1 87069.6 4784.32 1
 9 -10 0 121402 6123.44 1
 9 -10 1 21876.8 2560.54 1
 9 -10 2 26396.5 2959.93 1
 9 -10 3 89074.4 5961.02 1
 9 -10 4 12734.6 2254.41 1
 9 -10 5 6938.16 1591.82 4
 9 -10 5 1447.32 823.221 1
 9 -10 6 43019.2 4588.46 1
 9 -10 6 45796.7 4536.78 4
 9 -10 7 55634.7 5455.62 1
 9 -10 7 59323.9 5603.22 4
 9 -10 8 9158.11 2266.44 1
 9 -10 8 7413.04 2036.91 4
 9 -10 9 948.315 742.631 1
 9 -10 9 3471.71 1599.04 4
 9 -10 10 12161.5 2798.29 1
 9 -10 11 10827.2 2655.8 1
 9 -9 -2 62675.5 3564.3 1
 9 -9 -1 78590.5 4333.82 1
 9 -9 0 46218 3450.8 1
 9 -9 1 21379 2461.01 1
 9 -9 2 136070 7074.24 1
 9 -9 3 29574.5 3226.86 1
 9 -9 4 2114.2 856.314 1
 9 -9 4 1850.31 816.838 4
 9 -9 5 60495.3 5242.19 1
 9 -9 5 70506.1 5516.54 4
 9 -9 6 64120.5 5674.45 4
 9 -9 7 9819 2270.97 4
 9 -9 8 3594.68 1491.93 4
 9 -9 9 13156.4 3121.27 4
 9 -9 10 9804.72 2798.79 4
 9 -9 11 -2108.47 1648.4 4
 9 -9 12 3611.07 1934.17 4
 9 -8 -2 51314.1 3064.69 1
 9 -8 -1 183.81 275.961 1
 9 -8 0 64564.4 4095.31 1
 9 -8 1 187463 7970.55 1
 9 -8 2 3353.63 1108.75 1
 9 -8 4 65932.6 5232.13 4
 9 -8 5 44267 4602.72 4
 9 -8 6 210.817 566.634 4
 9 -8 7 10065.7 2566.33 4
 9 -8 8 18706.2 3619.72 4
 9 -8 9 408.592 821.927 4
 9 -8 10 -501.503 1006.64 4
 9 -8 11 14871.2 3725.43 4
 9 -8 12 4577.19 2188.54 4
 9 -7 -3 58577.1 2790.12 1
 9 -7 -2 15996.7 1561.27 1
 9 -7 -1 44817.7 3019.6 1
 9 -7 3 66009.7 5143.57 4
 9 -7 4 43624.7 4402.22 4
 9 -7 5 378.628 494.678 4
 9 -7 6 22258 3558.35 4
 9 -7 7 25886.3 4161.51 4
 9 -7 8 2937.34 1399.59 4
 9 -7 9 -559.697 441.988 4
 9 -7 10 20488.3 4372.48 4
 9 -7 11 2319 1531.61 4
 9 -7 12 2435.21 1341.3 4
 9 -6 -4 51489.1 1952.46 1
 9 -6 -3 229.089 151.2 1
 9 -6 -2 30550.5 2216.43 1
 9 -6 3 53115.8 4802.4 4
 9 -6 4 1376.66 874.262 4
 9 -6 5 33870.3 4310.69 4
 9 -6 6 45431.4 5369.18 4
 9 -6 7 8787.6 2386.72 4
 9 -6 8 -50.9898 587.02 4
 9 -6 9 31110.5 5164.91 4
 9 -6 10 16274.1 3834.27 4
 9 -6 11 4251.14 2269.39 4
 9 -5 -4 691.102 216.555 1
 9 -5 2 45587.3 4314.1 4
 9 -5 3 4512.38 1403.87 4
 9 -5 4 66536.7 6020.47 4
 9 -5 5 67313.5 6411.84 4
 9 -5 6 15467.6 3143.46 4
 9 -5 7 5399.79 2074.33 4
 9 -5 8 26129.4 4635.18 4
 9 -5 9 31467.7 5338.11 4
 9 -5 10 -716.109 1124.8 4
 9 -4 -7 65738.5 2399.64 3
 9 -4 -6 274.624 173.201 3
 9 -4 -5 36025.7 1699.96 3
 9 -4 2 6640.78 1688.38 4
 9 -4 3 79628.8 6399.26 4
 9 -4 4 44093.1 5017.92 4
 9 -4 5 5079.23 1774.71 4
 9 -4 6 13234.7 3068.61 4
 9 -4 7 43970.1 5907.38 4
 9 -4 8 32243.5 5234.73 4
 9 -4 9 -966.282 1551.28 4
 9 -4 10 9212.89 3083.77 4
 9 -3 -9 143129 5370.46 3
 9 -3 -8 142740 5092.62 3
 9 -3 -7 3421.5 613.409 3
 9 -3 -6 98237.5 3820.34 3
 9 -3 -5 116227 4397.76 3
 9 -3 -4 57697.1 3068.77 3
 9 -3 -3 36425.2 2576.81 3
 9 -3 -2 181740 7040.72 3
 9 -3 1 11473.6 2200.39 4
 9 -3 2 71641.8 5916.56 4
 9 -3 3 28956.3 3945.71 4
 9 -3 4 2573.85 1421.02 4
 9 -3 5 15473.3 3209.15 4
 9 -3 6 27826.3 4596.82 4
 9 -3 7 6916.84 2519.74 4
 9 -3 8 -298.741 881.18 4
 9 -3 9 10484.7 3185.8 4
 9 -2 -11 6431.45 1187.7 3
 9 -2 -10 20330.2 2046.79 3
 9 -2 -9 85381.9 4265.09 3
 9 -2 -8 15602.8 1604.91 3
 9 -2 -7 54913.2 3100.32 3
 9 -2 -6 178029 6389.41 3
 9 -2 -5 95507.2 4415.95 3
 9 -2 -4 2525.12 699.019 3
 9 -2 -3 107918 5270.27 3
 9 -2 -2 65307 4145.92 3
 9 -2 -1 596.438 417.081 3
 9 -2 0 24118 2739.31 3
 9 -2 1 52356.1 4981.13 4
 9 -2 2 13483.1 2572.77 4
 9 -2 3 3596.12 1444.73 4
 9 -2 4 28177.4 4343.63 4
 9 -2 5 25068.8 4213.89 4
 9 -2 6 6496.6 2216.12 4
 9 -2 7 3590.15 1961.89 4
 9 -2 8 15531 3874.18 4
 9 -2 9 15789.1 3928.8 4
 9 -1 -12 91749.1 5505.14 3
 9 -1 -11 79300.5 4795.44 3
 9 -1 -10 25720.5 2464.51 3
 9 -1 -9 12472.3 1641.94 3
 9 -1 -8 55803.4 3528.84 3
 9 -1 -7 157189 6402.42 3
 9 -1 -6 29525 2510.69 3
 9 -1 -5 20258 2108.76 3
 9 -1 -4 138099 6273.37 3
 9 -1 -3 83567.4 4873.27 3
 9 -1 -2 2770.02 897.91 3
 9 -1 -1 26397.3 2914.57 3
 9 -1 0 70678.2 5106.94 3
 9 -1 1 3833.03 1259.59 3
 9 -1 1 1043.01 661.108 4
 9 -1 2 2933.7 1305.76 4
 9 -1 3 77507.7 6984.87 4
 9 -1 4 27066.5 4245.72 4
 9 -1 5 3591.12 1636.65 4
 9 -1 6 4796.53 2117.38 4
 9 -1 7 20754.2 4436.75 4
 9 -1 8 27779.2 5278.99 4
 9 0 -13 55865.3 4572.48 3
 9 0 -12 102786 6041.86 3
 9 0 -11 35066.6 3228.51 3
 9 0 -10 12277.2 1796.25 3
 9 0 -9 69200.9 4404.02 3
 9 0 -8 105281 5457.51 3
 9 0 -7 3778.91 965.489 3
 9 0 -6 60282.9 4044.55 3
 9 0 -5 77847.3 4770.54 3
 9 0 -4 57142.9 4144.18 3
 9 0 -3 5750.92 1354.58 3
 9 0 -2 32196 3309.96 3
 9 0 -1 93398.7 6061.45 3
 9 0 0 2889.07 1073.01 3
 9 0 1 3655.33 1201.57 3
 9 0 1 4648.91 1548.63 4
 9 0 2 107917 8087.25 4
 9 0 2 111833 7474.19 3
 9 0 3 68569.8 6672.8 4
 9 0 4 3915.57 1743.13 4
 9 0 5 15130.1 3356.77 4
 9 0 6 26608.6 4795.46 4
 9 0 7 20400.8 4405.59 4
 9 1 -14 34248.1 3829.65 3
 9 1 -13 39475.2 3904.49 3
 9 1 -12 1299.72 674.578 3
 9 1 -11 3959.58 1096.7 3
 9 1 -10 29089.2 2993.66 3
 9 1 -9 7050.45 1428.96 3
 9 1 -8 69.9224 228.153 3
 9 1 -7 68928.9 4642.7 3
 9 1 -6 87464.7 5365.46 3
 9 1 -5 19105.9 2473.48 3
 9 1 -4 3698.37 1122.59 3
 9 1 -3 56956.1 4626.05 3
 9 1 -2 77894 5567.31 3
 9 1 -1 828.992 639.295 3
 9 1 0 17879.3 3065.69 3
 9 1 1 74335.6 6517.51 4
 9 1 1 72654.6 6016.32 3
 9 1 2 71888.6 6710.98 4
 9 1 2 74799.1 6369.4 3
 9 1 3 4171.49 2083.1 4
 9 1 3 5170.08 1909.51 3
 9 1 4 10652.4 2803.67 4
 9 1 5 29090.2 4895.18 4
 9 1 6 11972.9 3357.75 4
 9 1 7 -2655.85 1651.18 4
 9 2 -15 24405.9 3425.98 3
 9 2 -14 16204 2650.31 3
 9 2 -13 511.565 526.439 3
 9 2 -12 5717.19 1453.32 3
 9 2 -11 36406.4 3654.01 3
 9 2 -10 3266.19 1077.39 3
 9 2 -9 7637.37 1572.85 3
 9 2 -8 80208.2 5369.7 3
 9 2 -7 93647.1 5879.33 3
 9 2 -6 7594.35 1585.4 3
 9 2 -5 8750.09 1836.42 3
 9 2 -4 55146.9 4689.36 3
 9 2 -3 99895.9 6632.53 3
 9 2 -2 1240 745.617 3
 9 2 -1 22167.3 3199.44 3
 9 2 0 34897.4 4181.64 3
 9 2 1 32372.5 4406.18 4
 9 2 1 32310 4157.68 3
 9 2 2 3916.22 1589.09 3
 9 2 2 507.637 761.94 4
 9 2 3 17701.2 3280.22 3
 9 2 3 18604.5 3567.95 4
 9 2 4 18947 3810.89 4
 9 2 5 -2487.28 1474 4
 9 2 6 1342.96 1029.85 4
 9 3 -15 6270.31 1742.12 3
 9 3 -14 -239.344 443.059 3
 9 3 -13 18553.5 2855.7 3
 9 3 -12 52875 4767.45 3
 9 3 -11 11424.2 2140.91 3
 9 3 -10 4638.52 1322.71 3
 9 3 -9 92406.8 6154.43 3
 9 3 -8 60863.9 4909.94 3
 9 3 -7 8471.74 1827.47 3
 9 3 -6 30301 3520.06 3
 9 3 -5 52338.3 4764.32 3
 9 3 -4 52446.4 4905.62 3
 9 3 -3 1402.81 921.789 3
 9 3 -2 13362.9 2501.42 3
 9 3 -1 49857.5 5157.28 3
 9 3 0 15505.6 2969.95 3
 9 3 1 2519.29 1254.35 3
 9 3 2 45651 5595.84 4
 9 3 2 50670.8 5669.71 3
 9 3 3 28997.6 4622.83 4
 9 3 3 24698.1 4095.74 3
 9 3 4 190.884 927.89 4
 9 3 4 975.843 983.884 3
 9 3 5 11020.3 3232.5 4
 9 4 -16 11283.2 2522.25 3
 9 4 -15 -1282.76 841.626 3
 9 4 -14 18974.8 3069.72 3
 9 4 -13 37280.9 4234.15 3
 9 4 -12 13531.8 2468.56 3
 9 4 -11 2505.26 1032.8 3
 9 4 -10 83322.4 6155.07 3
 9 4 -9 38951.3 4132.02 3
 9 4 -8 3052.15 1143.15 3
 9 4 -7 17197 2735.94 3
 9 4 -6 48844.3 4791.69 3
 9 4 -5 28630.5 3740.15 3
 9 4 -4 8645.42 2054.32 3
 9 4 -3 49570 5172.89 3
 9 4 -2 61275.8 5856.45 3
 9 4 -1 4419.71 1593.33 3
 9 4 0 3662.93 1414.25 3
 9 4 1 40950.2 5215.69 3
 9 4 2 32915 4841.96 4
 9 4 2 32148.7 4791.68 3
 9 4 3 477.665 1165.36 3
 9 4 3 648.569 657.615 4
 9 4 4 10495.1 2922.55 3
 9 4 4 9541.03 2834.45 4
 9 5 -17 12848.9 2865.56 3
 9 5 -16 438.907 493.741 3
 9 5 -15 22705.4 3582.25 3
 9 5 -14 23910.8 3614.62 3
 9 5 -13 7891.31 1968.92 3
 9 5 -12 3167.2 1296.99 3
 9 5 -11 33378.7 4030.06 3
 9 5 -10 31219.8 3893.37 3
 9 5 -9 33.1728 287.346 3
 9 5 -8 16153.9 2800.76 3
 9 5 -7 27148.8 3674.93 3
 9 5 -6 7173.53 1888.48 3
 9 5 -5 6280.51 1851.5 3
 9 5 -4 60407.2 5907.92 3
 9 5 -3 44430.6 5152.64 3
 9 5 -2 3496.22 1488.02 3
 9 5 -1 10585.6 2613.28 3
 9 5 0 27226.5 4354.64 3
 9 5 1 18649.6 3675.36 3
 9 5 2 2617.45 1726.81 3
 9 5 3 10774.7 2832.3 3
 9 5 3 6872.2 2352.01 4
 9 6 -17 1948.19 952.124 3
 9 6 -16 10712.4 2642.82 3
 9 6 -15 17293.1 3220.2 3
 9 6 -14 -394.995 688.558 3
 9 6 -13 6323.53 1912.67 3
 9 6 -12 36991.6 4528.11 3
 9 6 -11 12357.7 2542.83 3
 9 6 -10 6897.07 1953.95 3
 9 6 -9 27151.9 3823.36 3
 9 6 -8 18371 3132.93 3
 9 6 -7 -713.169 662.265 3
 9 6 -6 21158.2 3482.14 3
 9 6 -5 56122.6 5827.07 3
 9 6 -4 33240.5 4559.97 3
 9 6 -3 2816.52 1449.5 3
 9 6 -2 12369.8 2928 3
 9 6 -1 45688.8 5740.6 3
 9 6 0 16029.3 3425.29 3
 9 6 1 -488.626 857.772 3
 9 7 -16 8480.34 2337.55 3
 9 7 -15 1307.39 916.964 3
 9 7 -14 9021.32 2402.15 3
 9 7 -13 21095.9 3533.5 3
 9 7 -12 6979.98 2048.08 3
 9 7 -11 7942.51 2160.41 3
 9 7 -10 34602.3 4526.99 3
 9 7 -9 14974.5 2956.98 3
 9 7 -8 504.004 498.939 3
 9 7 -7 14027 2921.6 3
 9 7 -6 52410.5 5845.75 3
 9 7 -5 32559.4 4627.6 3
 9 7 -4 466.503 650.115 3
 9 7 -3 20401.5 3815.81 3
 9 7 -2 52501.4 6310.11 3
 9 7 -1 13036.3 3229.14 3
 9 8 -14 8374.81 2308.11 3
 9 8 -13 1019.28 850.799 3
 9 8 -12 4262.18 1696.4 3
 9 8 -11 20147.1 3604.56 3
 9 8 -10 12241.1 2740.52 3
 9 8 -9 -113.678 505.609 3
 9 8 -8 5731.37 1960.1 3
 9 8 -7 16836.5 3380.65 3
 9 8 -6 13047.7 3005.12 3
 9 8 -5 1223.65 977.591 3
 9 8 -4 11165.7 2891.62 3
 9 8 -3 15260.9 3452.85 3
 9 9 -11 14311.8 3200.03 3
 9 9 -10 1072.58 899.247 3
 9 9 -9 17676 3558.37 3
 9 9 -8 4750.21 1846.43 3
 9 9 -7 611.434 315.484 3
 10 -17 6 386.958 638.363 1
 10 -17 7 7112.2 2323.39 1
 10 -16 4 14180.5 2821.37 1
 10 -16 5 666.825 760.779 1
 10 -16 6 6044.49 1970.56 1
 10 -16 7 14926.3 3180.8 1
 10 -16 8 6253.05 2081.53 1
 10 -15 3 15130.2 2751.07 1
 10 -15 4 -90.7962 378.83 1
 10 -15 5 7334.06 2095.59 1
 10 -15 6 12434.7 2752.15 1
 10 -15 7 4101.95 1710.22 1
 10 -15 8 3639.4 1619.95 1
 10 -14 2 5284.87 1465.12 1
 10 -14 3 5598.05 1617.77 1
 10 -14 4 35929.7 4276.95 1
 10 -14 5 30112.2 4045.46 1
 10 -14 6 5640.66 1800.44 1
 10 -14 7 8192.16 2281.71 1
 10 -14 8 30012.1 4443.34 1
 10 -14 9 5247.77 1807.12 1
 10 -13 1 -207.26 356.714 1
 10 -13 2 23198.6 3116.36 1
 10 -13 3 33058.7 3860.18 1
 10 -13 4 46950.1 4760.15 1
 10 -13 5 7609.21 2013.63 1
 10 -13 6 5484.9 1717.13 1
 10 -13 7 39997.2 4933.35 1
 10 -13 8 8057.65 2180.79 1
 10 -13 9 416.969 473.978 1
 10 -12 0 441.063 396.036 1
 10 -12 1 44069.5 3967.98 1
 10 -12 2 26191.6 3158.85 1
 10 -12 3 24036 3194.17 1
 10 -12 4 7853.65 1855.1 1
 10 -12 5 3962.4 1378.74 1
 10 -12 6 20438.8 3322.09 1
 10 -12 7 4098.59 1633.11 1
 10 -12 8 -488.094 554.678 1
 10 -12 9 10817 2667.15 1
 10 -12 10 9938.95 2667.35 1
 10 -11 -1 2690.12 931.121 1
 10 -11 0 37349.8 3345.44 1
 10 -11 1 37360.7 3521.63 1
 10 -11 2 10620.3 1951.03 1
 10 -11 3 3845.94 1309.24 1
 10 -11 4 10591.5 2093.4 1
 10 -11 5 22760.7 3324.52 1
 10 -11 6 4435.42 1574.08 1
 10 -11 7 6711.17 1881.76 1
 10 -11 8 11114.5 2648.76 1
 10 -11 9 9487.52 2564.45 1
 10 -11 10 -306.495 883.617 1
 10 -10 -2 25.1021 148.929 1
 10 -10 -1 56473.9 3805.7 1
 10 -10 0 76065 4750.48 1
 10 -10 1 7113.17 1484.2 1
 10 -10 2 2362.07 909.382 1
 10 -10 3 51981.6 4547.76 1
 10 -10 4 33360.5 3798.34 1
 10 -10 5 507.037 637.447 1
 10 -10 5 2339.45 728.24 4
 10 -10 6 23535.4 3417.42 1
 10 -10 6 24878.2 3465.71 4
 10 -10 7 25323.1 3696.72 1
 10 -10 7 19718.3 3311.55 4
 10 -10 8 10727.5 2501.5 1
 10 -10 8 11406.8 2736.11 4
 10 -10 9 53.8436 539.21 1
 10 -10 9 -1777.49 1174.32 4
 10 -10 10 2779.58 1376.2 1
 10 -9 -2 71251.9 3853.67 1
 10 -9 -1 129319 5945.83 1
 10 -9 0 21960.1 2435.5 1
 10 -9 1 11105.7 1812.62 1
 10 -9 2 47173.7 4101.12 1
 10 -9 3 62960 4996.39 1
 10 -9 5 33180.7 3964.71 4
 10 -9 6 56891 5582.9 4
 10 -9 7 20499.3 3533.87 4
 10 -9 8 2634.11 1383.77 4
 10 -9 9 5733.96 2112.85 4
 10 -9 10 7738.07 2582.77 4
 10 -9 11 1719.5 1351.99 4
 10 -8 -3 45433 2573.04 1
 10 -8 -2 74940.1 3880.12 1
 10 -8 -1 11650.4 1579.07 1
 10 -8 0 37306.8 3143.94 1
 10 -8 1 96893.9 5645.38 1
 10 -8 4 38840 4239.71 4
 10 -8 5 44508.8 4824.64 4
 10 -8 6 14549 2909.67 4
 10 -8 7 762.356 531.832 4
 10 -8 8 7816.89 2415.17 4
 10 -8 9 6720.83 2376.5 4
 10 -8 10 1221.63 1018.84 4
 10 -8 11 3260.83 1822.62 4
 10 -7 -3 72996.5 3319.67 1
 10 -7 -2 599.659 346.445 1
 10 -7 3 80299.5 6127.86 4
 10 -7 4 79743 6422.13 4
 10 -7 5 5794.63 1831.43 4
 10 -7 6 12449.2 2777.72 4
 10 -7 7 18326.1 3593.68 4
 10 -7 8 4345 1862.78 4
 10 -7 9 488.152 804.61 4
 10 -7 10 5952.78 2379.91 4
 10 -6 -3 11.1164 74.0619 1
 10 -6 3 47894.8 4825.72 4
 10 -6 4 5129.63 1692.94 4
 10 -6 5 27342.5 4064.58 4
 10 -6 6 50092 5869.25 4
 10 -6 7 11489.4 2911.45 4
 10 -6 8 -25.3869 435.983 4
 10 -6 9 18168.6 4014.69 4
 10 -6 10 12690 3516.82 4
 10 -5 3 641.485 530.962 4
 10 -5 4 32253 4377.42 4
 10 -5 5 51946.3 5832.64 4
 10 -5 6 5065.92 1889.54 4
 10 -5 7 561.841 594.043 4
 10 -5 8 17560 3907.66 4
 10 -5 9 14947 3787.95 4
 10 -4 -5 1336.4 381.496 3
 10 -4 -4 31294.2 2122.71 3
 10 -4 2 -61.8271 624.726 4
 10 -4 3 26419.7 3794.57 4
 10 -4 4 45284.9 5275.83 4
 10 -4 5 3976.03 1606.27 4
 10 -4 6 3169.86 1484.75 4
 10 -4 7 11144.4 3070.79 4
 10 -4 8 12418.5 3362.91 4
 10 -4 9 -1118.73 1602.49 4
 10 -3 -6 22654.4 1826.4 3
 10 -3 -5 113761 4800.94 3
 10 -3 -4 121768 5288.93 3
 10 -3 -3 210.315 118.77 3
 10 -3 -2 105073 5432.87 3
 10 -3 2 33597.8 4212.79 4
 10 -3 3 18928.2 3298.58 4
 10 -3 4 5164.09 1933.28 4
 10 -3 5 2384.64 1201.44 4
 10 -3 6 20591.5 3997.7 4
 10 -3 7 17335.4 3901.91 4
 10 -3 8 564.526 1042.85 4
 10 -2 -8 5983.61 1036.83 3
 10 -2 -7 42438.5 2875.27 3
 10 -2 -6 141830 5948.14 3
 10 -2 -5 162243 6608.62 3
 10 -2 -4 -226.629 250.66 3
 10 -2 -3 137997 6521.69 3
 10 -2 -2 124851 6422.81 3
 10 -2 -1 27100.2 2981.92 3
 10 -2 0 3288.76 1123.72 3
 10 -2 2 26900.9 3900.56 4
 10 -2 3 553.135 688.979 4
 10 -2 4 14555.1 3175.52 4
 10 -2 5 42541.3 5697.95 4
 10 -2 6 14273.7 3470.11 4
 10 -2 7 3018.16 1618.55 4
 10 -1 -9 5599.58 1085.21 3
 10 -1 -8 83052.2 4601.82 3
 10 -1 -7 55796.6 3713.1 3
 10 -1 -6 38325.9 3119.74 3
 10 -1 -5 2386.93 828.598 3
 10 -1 -4 90008.4 5274.56 3
 10 -1 -3 63104.1 4488.65 3
 10 -1 -2 419.78 270.947 3
 10 -1 -1 9483.98 1875.94 3
 10 -1 0 58412.5 4949.06 3
 10 -1 1 22463 3111.71 3
 10 -1 2 98.4973 429.943 4
 10 -1 3 39478.4 5121.85 4
 10 -1 4 31624.6 4831.82 4
 10 -1 5 9837.66 2807.54 4
 10 -1 6 5085.42 2157.35 4
 10 -1 7 15605.5 3848.11 4
 10 0 -11 19720.6 2423.73 3
 10 0 -10 1458.24 615.478 3
 10 0 -9 42812.6 3486.33 3
 10 0 -8 71237.9 4600.17 3
 10 0 -7 9091.7 1600.02 3
 10 0 -6 14151.7 2041.57 3
 10 0 -5 113851 6295.35 3
 10 0 -4 65866.2 4789.68 3
 10 0 -3 13184.4 2335.13 3
 10 0 -2 27959.6 3276.64 3
 10 0 -1 45954.5 4455.37 3
 10 0 0 8533.07 2007.75 3
 10 0 1 5282.45 1595.24 3
 10 0 2 43419.7 5246.43 4
 10 0 2 43028.5 4780.66 3
 10 0 3 27747.3 4377.51 4
 10 0 4 7064.37 2480.01 4
 10 0 5 6641.02 2319.94 4
 10 0 6 12907.9 3441.21 4
 10 1 -12 28080.6 3156.5 3
 10 1 -11 -26.7322 364.843 3
 10 1 -10 7127.97 1505.72 3
 10 1 -9 22420.1 2673.97 3
 10 1 -8 6642.36 1498.9 3
 10 1 -7 21745 2675.62 3
 10 1 -6 100236 6135.28 3
 10 1 -5 87747 5838.05 3
 10 1 -4 133.848 454.774 3
 10 1 -3 51781.4 4695.43 3
 10 1 -2 46804 4545.97 3
 10 1 -1 9960.03 2144.36 3
 10 1 0 6431.98 2257.18 3
 10 1 1 41471.9 4732.17 3
 10 1 2 26243.9 4212.41 4
 10 1 2 25987.3 3891.37 3
 10 1 3 8413.37 2521.33 4
 10 1 4 2383.4 1334.61 4
 10 1 5 9917.6 2960.18 4
 10 2 -13 9020.5 1897.04 3
 10 2 -12 549.718 398.465 3
 10 2 -11 29730.4 3360.73 3
 10 2 -10 6374.52 1530.81 3
 10 2 -9 644.552 399.557 3
 10 2 -8 49501.4 4348.34 3
 10 2 -7 80974.8 5728.51 3
 10 2 -6 30107.8 3442.34 3
 10 2 -5 3352.78 1190.08 3
 10 2 -4 51788.9 4864.91 3
 10 2 -3 68850.4 5720.02 3
 10 2 -2 2359.36 1076.46 3
 10 2 -1 976.983 595.427 3
 10 2 0 34276.5 4370.39 3
 10 2 1 35255.4 4647.52 3
 10 2 2 492.043 549.823 3
 10 2 2 -901.755 957.829 4
 10 2 3 2561.16 1291.82 4
 10 2 3 7100.49 2153.61 3
 10 2 4 6222.28 2286.25 4
 10 3 -13 10341.5 2124.81 3
 10 3 -12 47531.4 4587.91 3
 10 3 -11 12555.6 2275.81 3
 10 3 -10 111.234 350.911 3
 10 3 -9 70146.8 5530.98 3
 10 3 -8 76135.2 5810.07 3
 10 3 -7 42769.7 4336.56 3
 10 3 -6 11059.2 2254.85 3
 10 3 -5 58093.6 5319.09 3
 10 3 -4 74870.9 6238.48 3
 10 3 -3 -373.636 751.516 3
 10 3 -2 17024 3078.71 3
 10 3 -1 29226.2 4101.17 3
 10 3 0 25608.9 4059.16 3
 10 3 1 -1958.38 1135.87 3
 10 3 2 22221.1 3938.75 3
 10 3 3 16020.9 3497.53 3
 10 3 3 14063.9 3320.59 4
 10 4 -14 13500.9 2658.68 3
 10 4 -13 41027.4 4529.51 3
 10 4 -12 22416.3 3275.08 3
 10 4 -11 -1479.01 835.834 3
 10 4 -10 41800.5 4446.35 3
 10 4 -9 43628.2 4535.81 3
 10 4 -8 18428.5 2940.3 3
 10 4 -7 10831.7 2419.82 3
 10 4 -6 29411.1 3865.16 3
 10 4 -5 39697.4 4609.48 3
 10 4 -4 2346.37 1501.11 3
 10 4 -3 27384.2 4064.16 3
 10 4 -2 25407.4 3964.39 3
 10 4 -1 16718.6 3451.04 3
 10 4 0 -531.894 783.064 3
 10 4 1 20151.6 3810.49 3
 10 4 2 24490.2 4322.67 3
 10 5 -15 8245.97 2231.2 3
 10 5 -14 23785 3665.86 3
 10 5 -13 12501.3 2592.46 3
 10 5 -12 5455.18 1761.23 3
 10 5 -11 19617.7 3173.86 3
 10 5 -10 18375.9 3039.24 3
 10 5 -9 562.715 280.301 3
 10 5 -8 14995.1 2826.09 3
 10 5 -7 16878.5 3023.15 3
 10 5 -6 4949.63 1754.37 3
 10 5 -5 3474.26 1455.32 3
 10 5 -4 32715.2 4519.35 3
 10 5 -3 33694.7 4695.91 3
 10 5 -2 12262 2901.12 3
 10 5 -1 1070.42 1140.7 3
 10 5 0 26326.1 4505.87 3
 10 5 1 27721 4713.39 3
 10 6 -15 10621.5 2603.01 3
 10 6 -14 937.767 933.897 3
 10 6 -13 7239.55 2128.98 3
 10 6 -12 34542.7 4479.49 3
 10 6 -11 10789.7 2449.74 3
 10 6 -10 332.481 832.108 3
 10 6 -9 8455.29 2196.45 3
 10 6 -8 12150.7 2683.75 3
 10 6 -7 5631.21 1813.37 3
 10 6 -6 7341.13 2208.62 3
 10 6 -5 41294.8 5283.48 3
 10 6 -4 34292 4897.4 3
 10 6 -3 8589.61 2471.95 3
 10 6 -2 3198.62 1550.75 3
 10 6 -1 26404.9 4570.6 3
 10 7 -15 532.75 673.062 3
 10 7 -14 3130.51 1321.87 3
 10 7 -13 19925.4 3570.75 3
 10 7 -12 11947.9 2759.64 3
 10 7 -11 1747.29 979.695 3
 10 7 -10 16210.7 3171.52 3
 10 7 -9 9983.88 2498.14 3
 10 7 -8 5295.21 1889.17 3
 10 7 -7 5103.45 1894.05 3
 10 7 -6 24714.9 4191.47 3
 10 7 -5 23272.5 4107.83 3
 10 7 -4 2819.05 1544.7 3
 10 7 -3 4051 1797.17 3
 10 8 -12 1283.37 1053.28 3
 10 8 -11 21853 3864.83 3
 10 8 -10 16124.2 3353.19 3
 10 8 -9 2057.3 1128.53 3
 10 8 -8 4416.42 1756.72 3
 10 8 -7 9548.56 2702.08 3
 11 -17 5 13253.1 2909.64 1
 11 -17 6 2850.36 1446.58 1
 11 -16 4 17109.5 3179.92 1
 11 -16 5 2581.34 1344.44 1
 11 -16 6 7164.83 2194.06 1
 11 -16 7 7259.23 2220.74 1
 11 -15 3 34177.7 4202 1
 11 -15 4 -8.18084 586.85 1
 11 -15 5 7174.2 2032.39 1
 11 -15 6 20181.2 3493.71 1
 11 -15 7 6131.44 1955.45 1
 11 -15 8 2641.6 1282.43 1
 11 -14 2 22552.4 3170.09 1
 11 -14 3 663.505 448.61 1
 11 -14 4 12593.6 2569.29 1
 11 -14 5 18084 3199.13 1
 11 -14 6 11715.3 2654.46 1
 11 -14 7 2393.43 1228.94 1
 11 -14 8 13195 2983.74 1
 11 -13 1 6960.34 1612.5 1
 11 -13 2 6903.87 1694.84 1
 11 -13 3 23892.2 3268.62 1
 11 -13 4 35531.9 4244.72 1
 11 -13 5 8959.78 2175.23 1
 11 -13 6 874.71 723.385 1
 11 -13 7 19777.7 3563.35 1
 11 -13 8 10536.1 2646.95 1
 11 -13 9 549.262 631.447 1
 11 -12 1 23331.8 2880.97 1
 11 -12 2 31827.5 3574.98 1
 11 -12 3 35108.6 3940.6 1
 11 -12 4 6739.71 1791.31 1
 11 -12 5 310.434 561.802 1
 11 -12 6 20614.3 3427.97 1
 11 -12 7 6261.26 1853.47 1
 11 -12 8 -473.039 848.409 1
 11 -12 9 5623.97 2017.7 1
 11 -11 0 18169.8 2350.45 1
 11 -11 1 40112.4 3757.3 1
 11 -11 2 31593.6 3513.44 1
 11 -11 3 2274.23 925.503 1
 11 -11 4 10699.7 2188.2 1
 11 -11 5 33070.5 4132.25 1
 11 -11 6 8087.26 2108.39 1
 11 -11 7 2166.16 1086.03 1
 11 -11 8 11595.6 2695.15 1
 11 -11 9 11418.3 2738.39 1
 11 -10 -1 45102.5 3400.91 1
 11 -10 0 26689.2 2811.26 1
 11 -10 1 5632.5 1345.83 1
 11 -10 2 -70.5023 536.41 1
 11 -10 3 15424.6 2523.16 1
 11 -10 4 27081.8 3500.62 1
 11 -10 5 6822.96 1844.82 1
 11 -10 6 4787.26 1574.88 4
 11 -10 6 4347.82 1503.96 1
 11 -10 7 9005.75 2338.96 1
 11 -10 7 12036.5 2706.82 4
 11 -10 8 21415.1 3863.29 4
 11 -9 -1 75678.4 4495.24 1
 11 -9 0 3029.03 879.146 1
 11 -9 1 5872.25 1405.92 1
 11 -9 2 41569.6 4013.02 1
 11 -9 5 13853.7 2674.84 4
 11 -9 6 28202.6 4106.71 4
 11 -9 7 20558.2 3661.24 4
 11 -9 8 446.161 627.883 4
 11 -9 9 990.365 950.017 4
 11 -9 10 5967.38 2179.09 4
 11 -8 -1 9873.63 1499.02 1
 11 -8 0 5600.05 1279.39 1
 11 -8 5 46727.9 5204.56 4
 11 -8 6 20962.3 3638.55 4
 11 -8 7 -345.298 1095.83 4
 11 -8 8 8903.65 2627.05 4
 11 -8 9 4978.37 2116.54 4
 11 -8 10 3761.54 1902.38 4
 11 -7 -2 5344.03 1026.54 1
 11 -7 4 42341.3 4867.62 4
 11 -7 5 9083.85 2387.84 4
 11 -7 6 2923.6 1340.02 4
 11 -7 7 15453.9 3384.94 4
 11 -7 8 6142.86 2343.53 4
 11 -7 9 -776.433 1174.42 4
 11 -6 4 3137.09 1188.15 4
 11 -6 5 14427.5 3030.63 4
 11 -6 6 24069.2 4226.45 4
 11 -6 7 12123.8 3151.29 4
 11 -6 8 265.361 827.305 4
 11 -6 9 8303.55 2777.75 4
 11 -5 3 3916.35 1330.75 4
 11 -5 4 26858.5 4156 4
 11 -5 5 28936.1 4480.56 4
 11 -5 6 7110.45 2161.31 4
 11 -5 7 -404.228 902.22 4
 11 -5 8 9290.98 2986.15 4
 11 -4 3 19167.8 3399.77 4
 11 -4 4 41961.1 5299.94 4
 11 -4 5 6389.16 2119.82 4
 11 -4 6 -603.83 932.66 4
 11 -4 7 6802.3 2432.57 4
 11 -3 -4 52987.4 3586.39 3
 11 -3 -3 25109.9 2526.31 3
 11 -3 -2 57153.5 4186.06 3
 11 -3 3 34988 4833.65 4
 11 -3 4 4938.92 1862.61 4
 11 -3 5 3020.32 1464.87 4
 11 -3 6 20228.1 4178.06 4
 11 -3 7 16220.9 3919.73 4
 11 -2 -6 51047.1 3584.37 3
 11 -2 -5 21257 2284.38 3
 11 -2 -4 9659.98 1627.27 3
 11 -2 -3 29984.5 3136.27 3
 11 -2 -2 55383.6 4388.93 3
 11 -2 -1 52345.1 4480.17 3
 11 -2 3 191.451 386.407 4
 11 -2 4 13700.3 3191.6 4
 11 -2 5 27834.7 4791.08 4
 11 -2 6 15982.8 3753.69 4
 11 -1 -7 48910.2 3699.68 3
 11 -1 -6 35748.4 3231.48 3
 11 -1 -5 117.028 224.454 3
 11 -1 -4 25575.3 2885.03 3
 11 -1 -3 33452.4 3457.96 3
 11 -1 -2 15467.1 2411.34 3
 11 -1 -1 3774.15 1214.02 3
 11 -1 0 32077.1 3823.29 3
 11 -1 3 15139.1 3343.28 4
 11 -1 4 21761.7 4157.05 4
 11 -1 5 19824.4 4110.68 4
 11 0 -8 44891.3 3789.91 3
 11 0 -7 33087.6 3285.02 3
 11 0 -6 1067.43 624.105 3
 11 0 -5 73799.1 5278.54 3
 11 0 -4 58744.5 4803.58 3
 11 0 -3 10354.4 2219.61 3
 11 0 -2 10190.2 2138.96 3
 11 0 -1 46384.6 4699.21 3
 11 0 0 23210 3406.89 3
 11 0 1 666.069 657.108 3
 11 0 3 16353.7 3565.66 4
 11 0 4 14852 3431.18 4
 11 1 -9 37094.2 3635.78 3
 11 1 -8 5073.17 1286.58 3
 11 1 -7 1182.08 684.126 3
 11 1 -6 69546.3 5346.31 3
 11 1 -5 55638.3 4888.19 3
 11 1 -4 2577 1127.12 3
 11 1 -3 28298.3 3701.42 3
 11 1 -2 53558.4 5237.9 3
 11 1 -1 37779.3 4518.63 3
 11 1 0 2378.76 1269.85 3
 11 1 1 35689 4619.17 3
 11 1 2 17345.1 3331.2 3
 11 1 3 8633.88 2690.83 4
 11 2 -10 19448 2776.72 3
 11 2 -9 509.347 425.051 3
 11 2 -8 11628.2 2162.97 3
 11 2 -7 85330.9 6247.64 3
 11 2 -6 61171.1 5310.28 3
 11 2 -5 1112.59 972.919 3
 11 2 -4 58013.3 5406.3 3
 11 2 -3 39087.6 4513.45 3
 11 2 -2 9559.23 2301.55 3
 11 2 -1 5661.98 1800.04 3
 11 2 0 42947.3 5237.33 3
 11 2 1 27411.8 4236.03 3
 11 2 2 2508.04 1346.68 3
 11 3 -11 23610 3272.73 3
 11 3 -10 1410.17 847.622 3
 11 3 -9 21299.2 3126.85 3
 11 3 -8 58667.3 5313.64 3
 11 3 -7 56553 5316.11 3
 11 3 -6 -198.755 531.845 3
 11 3 -5 30911.6 4077.32 3
 11 3 -4 41576.5 4829.7 3
 11 3 -3 2533.92 1172.12 3
 11 3 -2 4781.06 1722.85 3
 11 3 -1 34381 4731.14 3
 11 3 0 21463.7 3829.11 3
 11 3 1 -725.509 876.969 3
 11 3 2 3148.51 1380.12 3
 11 4 -12 21543.9 3303.25 3
 11 4 -11 1525.07 791.151 3
 11 4 -10 17507.9 2914.09 3
 11 4 -9 29471.9 3909 3
 11 4 -8 20720.7 3289.51 3
 11 4 -7 643.613 471.531 3
 11 4 -6 14634.7 2871.27 3
 11 4 -5 15727.7 3042.62 3
 11 4 -4 1336.2 1079.67 3
 11 4 -3 8060.31 2275.01 3
 11 4 -2 22578 3901.28 3
 11 4 -1 22753.2 4124.82 3
 11 4 0 -453.023 696.507 3
 11 5 -12 -364.441 351.838 3
 11 5 -11 16444.4 2984.55 3
 11 5 -10 18892.2 3252.46 3
 11 5 -9 4480.62 1590.6 3
 11 5 -8 1246.86 919.027 3
 11 5 -7 16352.3 3129.6 3
 11 5 -6 12085.8 2758.46 3
 11 5 -5 220.32 462.7 3
 11 5 -4 27376.5 4312.07 3
 11 5 -3 21974.8 4001.23 3
 11 5 -2 16184 3496.07 3
 11 5 -1 1398.87 1054.65 3
 11 6 -13 1143.16 1060.2 3
 11 6 -12 12709.7 2771.31 3
 11 6 -11 16499.6 3238.85 3
 11 6 -10 885.461 791.049 3
 11 6 -9 4877.27 1653.81 3
 11 6 -8 12584.8 2878.3 3
 11 6 -7 7767.66 2339.17 3
 11 6 -6 542.874 835.374 3
 11 6 -5 21776.6 3939.88 3
 11 6 -4 13795.2 3202.81 3
 11 6 -3 8769.01 2543.74 3
 11 7 -13 29447.9 4480.8 3
 11 7 -12 19054.3 3545.36 3
 11 7 -11 54.6006 525.916 3
 11 7 -10 9437.8 2609.21 3
 11 7 -9 14124.4 3159.61 3
 11 7 -8 3274.15 1543.09 3
 11 7 -7 246.902 729.73 3
 12 -16 6 8172.52 2412 1
 12 -15 5 12400.1 2707.65 1
 12 -15 6 18315.9 3416.54 1
 12 -15 7 7100.89 2276.03 1
 12 -14 4 2008.86 1042.76 1
 12 -14 5 13307.2 2802.33 1
 12 -14 6 4666.45 1731.88 1
 12 -14 7 -584.332 949.201 1
 12 -13 3 17271.7 2862.7 1
 12 -13 4 28363.8 3843.6 1
 12 -13 5 5889.5 1839.63 1
 12 -13 6 -611.444 839.871 1
 12 -13 7 11686.6 2735.96 1
 12 -13 8 6319.42 2129.93 1
 12 -12 2 39577.7 4145.99 1
 12 -12 3 51525.4 4976.02 1
 12 -12 4 15319.6 2821.16 1
 12 -12 5 -47.2872 305.89 1
 12 -12 6 29210.2 4209.31 1
 12 -12 7 13896.9 2945.04 1
 12 -12 8 2595.48 1090.07 1
 12 -11 2 24868.3 3195.54 1
 12 -11 3 4586.21 1399.01 1
 12 -11 4 3674.25 1319.12 1
 12 -11 5 31628.7 4188.34 1
 12 -11 6 6299.97 1875.93 1
 12 -11 7 586.665 467.08 1
 12 -11 8 8302.15 2295.08 1
 12 -10 1 9577.59 1824.9 1
 12 -10 2 -40.0931 292.957 1
 12 -10 3 11635.8 2276.42 1
 12 -10 4 44274.7 4720.43 1
 12 -10 5 12111.5 2510.59 1
 12 -10 7 14891.5 3225.95 4
 12 -9 1 7861.98 1702.63 1
 12 -9 6 23324.3 3910.15 4
 12 -9 7 17922.7 3592.03 4
 12 -9 8 482.164 485.098 4
 12 -9 9 2730.51 1479.8 4
 12 -8 5 25042.4 3974.89 4
 12 -8 6 18484.4 3568.26 4
 12 -8 7 -1452.51 1078.55 4
 12 -8 8 2467.39 1128.25 4
 12 -7 5 11701.5 2821.63 4
 12 -7 6 1199.06 895.765 4
 12 -7 7 13537.8 3350.38 4
 12 -7 8 7215.02 2590.07 4
 12 -6 4 5111.12 1917.97 4
 12 -6 5 248.325 868.766 4
 12 -6 6 13935.2 3313.5 4
 12 -6 7 6072.73 2251.14 4
 12 -5 4 11574.9 2865.46 4
 12 -5 5 30233.1 4749.32 4
 12 -5 6 19363 3950.77 4
 12 -4 4 32639.7 4934.1 4
 12 -4 5 12287.3 3126.25 4
 12 -4 6 -966.801 1067.3 4
 12 -3 4 5585.98 2093.36 4
 12 -3 5 -586.423 1078.32 4
 12 -2 -3 14512.3 2252.57 3
 12 -2 -2 40655.7 3988.6 3
 12 -2 -1 43283.9 4289.85 3
 12 -2 4 -73.944 778.187 4
 12 -1 -4 15463 2421.44 3
 12 -1 -3 41100.6 4128.62 3
 12 -1 -2 29063.9 3543.02 3
 12 -1 -1 313.342 354.043 3
 12 -1 0 13204.6 2539.17 3
 12 0 -5 19795.2 2827.37 3
 12 0 -4 33503.2 3809.63 3
 12 0 -3 12884.7 2436.58 3
 12 0 -2 9466.87 2135.76 3
 12 0 -1 48082.6 5030.76 3
 12 0 0 29238.9 4279.93 3
 12 1 -7 -102.276 346.884 3
 12 1 -6 53891.8 4964.02 3
 12 1 -5 30591.6 3753.34 3
 12 1 -4 -547.331 548.054 3
 12 1 -3 20201.2 3235.46 3
 12 1 -2 47552.8 5178.03 3
 12 1 -1 21457.8 3592.64 3
 12 1 0 24.6785 352.794 3
 12 1 1 16477.8 3301.72 3
 12 2 -7 65238.2 5669.98 3
 12 2 -6 47927.2 4967.89 3
 12 2 -5 2359.33 1033.17 3
 12 2 -4 13527.5 2729.64 3
 12 2 -3 30220.6 4193.17 3
 12 2 -2 17181.1 3278.11 3
 12 2 -1 640.282 766.528 3
 12 2 0 11103.4 2794.06 3
 12 2 1 14670.3 3323.01 3
 12 3 -8 39955.1 4599.12 3
 12 3 -7 35642 4398.36 3
 12 3 -6 -314.103 606.495 3
 12 3 -5 12788.8 2764.19 3
 12 3 -4 22461.3 3742 3
 12 3 -3 12694 2883.09 3
 12 3 -2 -191.526 823.765 3
 12 3 -1 32518 4876.54 3
 12 3 0 17652 3653.82 3
 12 4 -9 29599.2 4112.33 3
 12 4 -8 34823.8 4502.22 3
 12 4 -7 763.431 529.794 3
 12 4 -6 11027 2622.23 3
 12 4 -5 20382.9 3635.31 3
 12 4 -4 1823.01 1181.02 3
 12 4 -3 2043.15 1106.7 3
 12 4 -2 23655.5 4274.67 3
 12 5 -10 13546.8 2861.24 3
 12 5 -9 8749.77 2448.71 3
 12 5 -8 -639.478 302.599 3
 12 5 -7 6764.92 2053.64 3
 12 5 -6 16977.9 3427.58 3
 12 5 -5 10.8588 663.791 3
 12 5 -4 3146.79 1380.45 3
 12 6 -10 304.777 753.341 3
 12 6 -9 2601.78 1548.95 3
 12 6 -8 17944.8 3549.08 3
 12 6 -7 12546.6 3035.56 3
 13 -14 6 6383.28 2128.32 1
 13 -14 7 1751.51 1060.96 1
 13 -13 5 3814.38 1497.91 1
 13 -13 6 -462.93 445.852 1
 13 -13 7 3658.16 1420.67 1
 13 -12 4 3945.56 1421.46 1
 13 -12 5 -291.104 810.275 1
 13 -12 6 15731.4 3228.02 1
 13 -12 7 13531.9 3017.79 1
 13 -11 4 18.7283 601.19 1
 13 -11 5 18111.5 3219.01 1
 13 -11 6 11119.7 2578.75 1
 13 -11 7 2900.56 1128.96 1
 13 -10 3 3771.57 1354.43 1
 13 -10 4 24849.6 3639.69 1
 13 -9 7 17995 3786.16 4
 13 -8 6 16044.2 3488.7 4
 13 -8 7 2090.52 1188.7 4
 13 -7 6 -147.367 455.203 4
 13 -5 5 27274.1 4788.68 4
 13 -1 -1 -280.705 635.735 3
 13 0 -2 4187.75 1445.62 3
 13 0 -1 16172.3 2985.52 3
 13 0 0 34710.3 4667.62 3
 13 1 -3 4160.75 1608.04 3
 13 1 -2 29348.6 4254.21 3
 13 1 -1 19134.6 3552.44 3
 13 1 0 2163 1334.92 3
 13 2 -4 3075.96 1327.64 3
 13 2 -3 39359.2 5049.27 3
 13 2 -2 19906.6 3661.15 3
 13 2 -1 1076.82 671.183 3
 13 2 0 7018.92 2323.87 3
 13 3 -5 4722.07 1795.86 3
 13 3 -4 19457.1 3636.02 3
 13 3 -3 10856.2 2772.03 3
 13 3 -2 400.053 504.997 3
 13 4 -5 12611.5 2985.51 3
 13 4 -4 8714.55 2698.56 3
 14 -11 6 10015.6 2607.63 1
