# Supplementary material
Source: publisher figshare collection journal article supplement (https://acs.figshare.com/ndownloader/files/4205155)
Supplement: Supplementary file 27 [file 4205155 › CIFs/Mg/MgGd/MgGd.cif]

data_MgGd
_audit_creation_date              2015-02-16
_audit_creation_method
;
Olex2 1.2
(compiled 2015.01.26 svn.r3151 for OlexSys, GUI svn.r4998)
;
_publ_contact_author_address      
;
The University of Manchester
School of Chemistry
Oxford Road, 
Manchester
M13 9PL
United Kingdom
;
_publ_contact_author_email        eufemio.morenopineda@manchester.ac.uk
_publ_contact_author_name         'Eufemio Moreno Pineda'
_publ_contact_author_phone        '+44 074 1192 4293'
_publ_section_references
;
Dolomanov, O.V., Bourhis, L.J., Gildea, R.J, Howard, J.A.K. & Puschmann, H.
 (2009), J. Appl. Cryst. 42, 339-341.

Sheldrick, G.M. (2008). Acta Cryst. A64, 112-122.
;
_chemical_name_common             ?
_chemical_name_systematic         ?
_chemical_formula_moiety          'C50 H90 Gd2 Mg2 O22, 2(C6 H16 N), C2 H3 N'
_chemical_formula_sum             'C64 H125 Gd2 Mg2 N3 O22'
_chemical_formula_weight          1651.78
_chemical_melting_point           ?
loop_
  _atom_type_symbol
  _atom_type_description
  _atom_type_scat_dispersion_real
  _atom_type_scat_dispersion_imag
  _atom_type_scat_source
 'C' 'C' 0.0033 0.0016 'International Tables Vol C Tables 4.2.6.8 and 6.1.1.4'
 'H' 'H' 0.0000 0.0000 'International Tables Vol C Tables 4.2.6.8 and 6.1.1.4'
 'Gd' 'Gd' -0.1653 3.9035
 'International Tables Vol C Tables 4.2.6.8 and 6.1.1.4'
 'Mg' 'Mg' 0.0486 0.0363 'International Tables Vol C Tables 4.2.6.8 and 6.1.1.4'
 'N' 'N' 0.0061 0.0033 'International Tables Vol C Tables 4.2.6.8 and 6.1.1.4'
 'O' 'O' 0.0106 0.0060 'International Tables Vol C Tables 4.2.6.8 and 6.1.1.4'

_shelx_space_group_comment
;
The symmetry employed for this shelxl refinement is uniquely defined
by the following loop, which should always be used as a source of
symmetry information in preference to the above space-group names.
They are only intended as comments.
;
_space_group_crystal_system       'monoclinic'
_space_group_IT_number            14
_space_group_name_H-M_alt         'P 1 21/c 1'
_space_group_name_Hall            '-P 2ybc'
loop_
  _space_group_symop_operation_xyz
 'x, y, z'
 '-x, y+1/2, -z+1/2'
 '-x, -y, -z'
 'x, -y-1/2, z-1/2'

_cell_length_a                    15.7351(8)
_cell_length_b                    13.1771(6)
_cell_length_c                    21.9189(11)
_cell_angle_alpha                 90
_cell_angle_beta                  109.951(6)
_cell_angle_gamma                 90
_cell_volume                      4272.0(4)
_cell_formula_units_Z             2
_cell_measurement_reflns_used     5371
_cell_measurement_temperature     150.1(1)
_cell_measurement_theta_max       27.2300
_cell_measurement_theta_min       3.3720
_shelx_estimated_absorpt_T_max    ?
_shelx_estimated_absorpt_T_min    ?
_exptl_absorpt_coefficient_mu     1.616
_exptl_absorpt_correction_T_max   1.00000
_exptl_absorpt_correction_T_min   0.65549
_exptl_absorpt_correction_type    multi-scan
_exptl_absorpt_process_details
;
CrysAlisPro, Agilent Technologies,
Version 1.171.36.28 (release 01-02-2013 CrysAlis171 .NET)
(compiled Feb  1 2013,16:14:44)
Empirical absorption correction using spherical harmonics,
 implemented in SCALE3 ABSPACK scaling algorithm.
;
_exptl_absorpt_special_details    ?
_exptl_crystal_colour             'clear colourless'
_exptl_crystal_colour_lustre      clear
_exptl_crystal_colour_primary     colourless
_exptl_crystal_density_diffrn     1.284
_exptl_crystal_density_meas       ?
_exptl_crystal_density_method     ?
_exptl_crystal_description        rhombohedral
_exptl_crystal_F_000              1716
_exptl_crystal_size_max           0.2
_exptl_crystal_size_mid           0.2
_exptl_crystal_size_min           0.15
_exptl_transmission_factor_max    ?
_exptl_transmission_factor_min    ?
_diffrn_reflns_av_R_equivalents   0.0489
_diffrn_reflns_av_unetI/netI      0.0787
_diffrn_reflns_Laue_measured_fraction_full 0.998
_diffrn_reflns_Laue_measured_fraction_max 0.998
_diffrn_reflns_limit_h_max        15
_diffrn_reflns_limit_h_min        -19
_diffrn_reflns_limit_k_max        16
_diffrn_reflns_limit_k_min        -12
_diffrn_reflns_limit_l_max        27
_diffrn_reflns_limit_l_min        -15
_diffrn_reflns_number             16558
_diffrn_reflns_point_group_measured_fraction_full 0.998
_diffrn_reflns_point_group_measured_fraction_max 0.998
_diffrn_reflns_theta_full         25.242
_diffrn_reflns_theta_max          26.372
_diffrn_reflns_theta_min          3.159
_diffrn_ambient_temperature       150.1(1)
_diffrn_detector_area_resol_mean  16.1428
_diffrn_measured_fraction_theta_full 0.998
_diffrn_measured_fraction_theta_max 0.998
_diffrn_measurement_details
;
#__ type_ start__ end____ width___ exp.time_
  1 omega   40.00   94.00   1.0000    1.0000
omega____ theta____ kappa____ phi______ frames
    -       20.8673  178.0000 -120.0000 54

#__ type_ start__ end____ width___ exp.time_
  2 omega   42.00   80.00   1.0000    1.0000
omega____ theta____ kappa____ phi______ frames
    -       20.8673   37.0000   90.0000 38

#__ type_ start__ end____ width___ exp.time_
  3 omega -101.00  -49.00   1.0000    1.0000
omega____ theta____ kappa____ phi______ frames
    -      -21.2579 -178.0000  120.0000 52

#__ type_ start__ end____ width___ exp.time_
  4 omega  -51.00   36.00   1.0000    1.0000
omega____ theta____ kappa____ phi______ frames
    -      -21.2579   37.0000    0.0000 87
;
_diffrn_measurement_device_type   'SuperNova, Single source at offset, Eos'
_diffrn_measurement_method        '\w scans'
_diffrn_orient_matrix_UB_11       0.0103505000
_diffrn_orient_matrix_UB_12       0.0453370000
_diffrn_orient_matrix_UB_13       -0.0135034000
_diffrn_orient_matrix_UB_21       -0.0248097000
_diffrn_orient_matrix_UB_22       -0.0179722000
_diffrn_orient_matrix_UB_23       -0.0316081000
_diffrn_orient_matrix_UB_31       -0.0396810000
_diffrn_orient_matrix_UB_32       0.0228590000
_diffrn_orient_matrix_UB_33       0.0020274000
_diffrn_radiation_monochromator   mirror
_diffrn_radiation_type            MoK\a
_diffrn_radiation_wavelength      0.71073
_diffrn_source                    'SuperNova (Mo) X-ray Source'
_reflns_Friedel_coverage          0.000
_reflns_Friedel_fraction_full     .
_reflns_Friedel_fraction_max      .
_reflns_number_gt                 6964
_reflns_number_total              8731
_reflns_odcompleteness_completeness 99.74
_reflns_odcompleteness_iscentric  1
_reflns_odcompleteness_theta      26.32
_reflns_special_details
;
 Reflections were merged by SHELXL according to the crystal
 class for the calculation of statistics and refinement.
 
 _reflns_Friedel_fraction is defined as the number of unique
 Friedel pairs measured divided by the number that would be
 possible theoretically, ignoring centric projections and
 systematic absences.
;
_reflns_threshold_expression      'I > 2\s(I)'
_computing_cell_refinement
;
CrysAlisPro, Agilent Technologies,
Version 1.171.36.28 (release 01-02-2013 CrysAlis171 .NET)
(compiled Feb  1 2013,16:14:44)
;
_computing_data_collection
;
CrysAlisPro, Agilent Technologies,
Version 1.171.36.28 (release 01-02-2013 CrysAlis171 .NET)
(compiled Feb  1 2013,16:14:44)
;
_computing_data_reduction
;
CrysAlisPro, Agilent Technologies,
Version 1.171.36.28 (release 01-02-2013 CrysAlis171 .NET)
(compiled Feb  1 2013,16:14:44)
;
_computing_molecular_graphics     'Olex2 (Dolomanov et al., 2009)'
_computing_publication_material   'Olex2 (Dolomanov et al., 2009)'
_computing_structure_refinement   'ShelXL (Sheldrick, 2008)'
_computing_structure_solution     'ShelXS (Sheldrick, 2008)'
_refine_diff_density_max          1.315
_refine_diff_density_min          -0.959
_refine_diff_density_rms          0.124
_refine_ls_extinction_coef        .
_refine_ls_extinction_method      none
_refine_ls_goodness_of_fit_ref    1.053
_refine_ls_hydrogen_treatment     constr
_refine_ls_matrix_type            full
_refine_ls_number_parameters      492
_refine_ls_number_reflns          8731
_refine_ls_number_restraints      29
_refine_ls_R_factor_all           0.0660
_refine_ls_R_factor_gt            0.0502
_refine_ls_restrained_S_all       1.066
_refine_ls_shift/su_max           0.001
_refine_ls_shift/su_mean          0.000
_refine_ls_structure_factor_coef  Fsqd
_refine_ls_weighting_details
'w=1/[\s^2^(Fo^2^)+(0.0527P)^2^+3.3490P] where P=(Fo^2^+2Fc^2^)/3'
_refine_ls_weighting_scheme       calc
_refine_ls_wR_factor_gt           0.1194
_refine_ls_wR_factor_ref          0.1326
_refine_special_details           ?
_olex2_refinement_description
;
1. Fixed Uiso
 At 1.2 times of:
  All C(H,H) groups, All N(H,H) groups
 At 1.5 times of:
  All C(H,H,H) groups
2. Restrained distances
 C26-C1L
 1.5 with sigma of 0.02
 C29-C30B
 1.6 with sigma of 0.02
 C31-C29
 1.6 with sigma of 0.02
 C29-C30
 1.6 with sigma of 0.02
 C29-C31B
 1.6 with sigma of 0.02
 C28-C26
 1.6 with sigma of 0.02
 C27-C26
 1.6 with sigma of 0.02
 C26-C1L
 1.6 with sigma of 0.02
 C32-C33
 1.5 with sigma of 0.02
 C32-N2
 1.1 with sigma of 0.02
 C31-C29 \\sim C29-C30
 with sigma of 0.02
3. Uiso/Uaniso restraints and constraints
Uanis(C32) \\sim Ueq, Uanis(C33) \\sim Ueq, Uanis(N2) \\sim Ueq: with sigma of
0.01 and sigma for terminal atoms of 0.02
Uanis(C3) = Uanis(C3B)
Uanis(C31B) = Uanis(C31) = Uanis(C30B) = Uanis(C30)
Uanis(C4) = Uanis(C4B)
4. Others
 Sof(O11B)=Sof(C1B)=Sof(C3B)=Sof(H3BA)=Sof(H3BB)=Sof(H3BC)=Sof(C4B)=Sof(H4BA)=
 Sof(H4BB)=Sof(H4BC)=Sof(H26A)=Sof(H29A)=Sof(C1L)=Sof(H1LA)=Sof(H1LB)=Sof(H1LC)=
 Sof(C30B)=Sof(H30D)=Sof(H30E)=Sof(H30F)=Sof(C31B)=Sof(H31D)=Sof(H31E)=
 Sof(H31F)=1-FVAR(1)
 Sof(O11)=Sof(C1)=Sof(C3)=Sof(H3A)=Sof(H3B)=Sof(H3C)=Sof(C4)=Sof(H4A)=Sof(H4B)=
 Sof(H4C)=Sof(H26)=Sof(H29)=Sof(C28)=Sof(H28A)=Sof(H28B)=Sof(H28C)=Sof(C30)=
 Sof(H30A)=Sof(H30B)=Sof(H30C)=Sof(C31)=Sof(H31A)=Sof(H31B)=Sof(H31C)=FVAR(1)
 Fixed Sof: N2(0.5) C32(0.5) C33(0.5) H33A(0.5) H33B(0.5) H33C(0.5)
5.a Ternary CH refined with riding coordinates:
 C26(H26A), C26(H26), C29(H29), C29(H29A)
5.b Secondary CH2 refined with riding coordinates:
 N1(H1A,H1B)
5.c Idealised Me refined as rotating group:
 C5(H5A,H5B,H5C), C8(H8A,H8B,H8C), C9(H9A,H9B,H9C), C10(H10A,H10B,H10C),
 C13(H13A,H13B,H13C), C14(H14A,H14B,H14C), C15(H15A,H15B,H15C), C18(H18A,H18B,
 H18C), C19(H19A,H19B,H19C), C20(H20A,H20B,H20C), C23(H23A,H23B,H23C), C24(H24A,
 H24B,H24C), C25(H25A,H25B,H25C), C3(H3A,H3B,H3C), C4(H4A,H4B,H4C), C3B(H3BA,
 H3BB,H3BC), C4B(H4BA,H4BB,H4BC), C27(H27A,H27B,H27C), C28(H28A,H28B,H28C),
 C30(H30A,H30B,H30C), C31(H31A,H31B,H31C), C1L(H1LA,H1LB,H1LC), C30B(H30D,H30E,
 H30F), C31B(H31D,H31E,H31F), C33(H33A,H33B,H33C)
;
_atom_sites_solution_hydrogens    geom
_atom_sites_solution_primary      direct
_atom_sites_solution_secondary    ?
loop_
  _atom_site_label
  _atom_site_type_symbol
  _atom_site_fract_x
  _atom_site_fract_y
  _atom_site_fract_z
  _atom_site_U_iso_or_equiv
  _atom_site_adp_type
  _atom_site_occupancy
  _atom_site_site_symmetry_order
  _atom_site_calc_flag
  _atom_site_refinement_flags_posn
  _atom_site_refinement_flags_adp
  _atom_site_refinement_flags_occupancy
  _atom_site_disorder_assembly
  _atom_site_disorder_group
 Gd1 Gd 0.29398(2) 0.54907(2) 0.45456(2) 0.02425(10) Uani 1 1 d . . . . .
 Mg1 Mg 0.52065(10) 0.61384(13) 0.48179(8) 0.0250(4) Uani 1 1 d . . . . .
 O1 O 0.1358(3) 0.5859(4) 0.40616(19) 0.0474(11) Uani 1 1 d . . . . .
 O1OH O 0.4295(2) 0.4940(3) 0.44326(16) 0.0255(7) Uani 1 1 d . . . . .
 O3 O 0.2887(2) 0.7077(3) 0.51836(18) 0.0359(9) Uani 1 1 d . . . . .
 O4 O 0.4235(2) 0.6588(3) 0.52315(15) 0.0272(8) Uani 1 1 d . . . . .
 O5 O 0.3125(2) 0.6845(3) 0.38792(17) 0.0395(10) Uani 1 1 d . . . . .
 O6 O 0.4591(2) 0.7049(3) 0.40467(16) 0.0306(8) Uani 1 1 d . . . . .
 O7 O 0.2580(2) 0.3744(3) 0.4352(2) 0.0427(10) Uani 1 1 d . . . . .
 O8 O 0.6160(2) 0.7179(3) 0.52872(17) 0.0332(8) Uani 1 1 d . . . . .
 O9 O 0.2504(2) 0.4980(4) 0.54753(19) 0.0426(10) Uani 1 1 d . . . . .
 O10 O 0.6134(2) 0.5471(3) 0.44568(17) 0.0288(8) Uani 1 1 d . . . . .
 C2 C 0.0341(4) 0.5538(6) 0.2958(3) 0.0524(19) Uani 1 1 d . . . . .
 C5 C 0.0471(6) 0.6207(10) 0.2449(4) 0.113(4) Uani 1 1 d . . . . .
 H5A H 0.0427 0.6905 0.2562 0.169 Uiso 1 1 calc GR . . . .
 H5B H 0.0012 0.6064 0.2039 0.169 Uiso 1 1 calc GR . . . .
 H5C H 0.1056 0.6085 0.2418 0.169 Uiso 1 1 calc GR . . . .
 C6 C 0.3728(3) 0.7232(4) 0.5364(2) 0.0269(11) Uani 1 1 d . . . . .
 C7 C 0.4152(4) 0.8181(4) 0.5739(3) 0.0346(12) Uani 1 1 d . . . . .
 C8 C 0.3474(4) 0.8761(5) 0.5965(3) 0.0529(17) Uani 1 1 d . . . . .
 H8A H 0.2982 0.8990 0.5594 0.079 Uiso 1 1 calc GR . . . .
 H8B H 0.3767 0.9335 0.6220 0.079 Uiso 1 1 calc GR . . . .
 H8C H 0.3246 0.8322 0.6223 0.079 Uiso 1 1 calc GR . . . .
 C9 C 0.4983(4) 0.7896(6) 0.6320(3) 0.0513(17) Uani 1 1 d . . . . .
 H9A H 0.4803 0.7463 0.6607 0.077 Uiso 1 1 calc GR . . . .
 H9B H 0.5257 0.8500 0.6547 0.077 Uiso 1 1 calc GR . . . .
 H9C H 0.5410 0.7545 0.6171 0.077 Uiso 1 1 calc GR . . . .
 C10 C 0.4434(4) 0.8846(5) 0.5262(3) 0.0469(15) Uani 1 1 d . . . . .
 H10A H 0.4873 0.8491 0.5129 0.070 Uiso 1 1 calc GR . . . .
 H10B H 0.4690 0.9469 0.5472 0.070 Uiso 1 1 calc GR . . . .
 H10C H 0.3912 0.8993 0.4889 0.070 Uiso 1 1 calc GR . . . .
 C11 C 0.3768(3) 0.7263(4) 0.3756(2) 0.0295(11) Uani 1 1 d . . . . .
 C12 C 0.3534(3) 0.8055(4) 0.3216(2) 0.0338(12) Uani 1 1 d . . . . .
 C13 C 0.2630(5) 0.8528(7) 0.3121(4) 0.079(3) Uani 1 1 d . . . . .
 H13A H 0.2179 0.8006 0.3041 0.118 Uiso 1 1 calc GR . . . .
 H13B H 0.2475 0.8982 0.2756 0.118 Uiso 1 1 calc GR . . . .
 H13C H 0.2656 0.8899 0.3504 0.118 Uiso 1 1 calc GR . . . .
 C14 C 0.3506(6) 0.7505(7) 0.2604(3) 0.079(3) Uani 1 1 d . . . . .
 H14A H 0.4085 0.7203 0.2666 0.119 Uiso 1 1 calc GR . . . .
 H14B H 0.3364 0.7978 0.2250 0.119 Uiso 1 1 calc GR . . . .
 H14C H 0.3052 0.6985 0.2506 0.119 Uiso 1 1 calc GR . . . .
 C15 C 0.4245(6) 0.8873(7) 0.3375(4) 0.091(3) Uani 1 1 d . . . . .
 H15A H 0.4297 0.9176 0.3785 0.137 Uiso 1 1 calc GR . . . .
 H15B H 0.4077 0.9382 0.3042 0.137 Uiso 1 1 calc GR . . . .
 H15C H 0.4815 0.8582 0.3401 0.137 Uiso 1 1 calc GR . . . .
 C16 C 0.7010(3) 0.7078(4) 0.5554(3) 0.0325(12) Uani 1 1 d . . . . .
 C17 C 0.7566(4) 0.8040(5) 0.5772(3) 0.0491(16) Uani 1 1 d . . . . .
 C18 C 0.7625(6) 0.8229(8) 0.6479(5) 0.113(4) Uani 1 1 d . . . . .
 H18A H 0.7029 0.8343 0.6493 0.170 Uiso 1 1 calc GR . . . .
 H18B H 0.7994 0.8815 0.6646 0.170 Uiso 1 1 calc GR . . . .
 H18C H 0.7888 0.7648 0.6739 0.170 Uiso 1 1 calc GR . . . .
 C19 C 0.8499(4) 0.7901(7) 0.5749(5) 0.092(3) Uani 1 1 d . . . . .
 H19A H 0.8794 0.7355 0.6032 0.139 Uiso 1 1 calc GR . . . .
 H19B H 0.8839 0.8515 0.5887 0.139 Uiso 1 1 calc GR . . . .
 H19C H 0.8462 0.7745 0.5313 0.139 Uiso 1 1 calc GR . . . .
 C20 C 0.7068(6) 0.8942(7) 0.5379(6) 0.149(6) Uani 1 1 d . . . . .
 H20A H 0.7192 0.8981 0.4980 0.224 Uiso 1 1 calc GR . . . .
 H20B H 0.7269 0.9554 0.5624 0.224 Uiso 1 1 calc GR . . . .
 H20C H 0.6430 0.8862 0.5286 0.224 Uiso 1 1 calc GR . . . .
 C21 C 0.3229(4) 0.4542(4) 0.5776(3) 0.0336(13) Uani 1 1 d . . . . .
 C22 C 0.3400(5) 0.4038(6) 0.6421(3) 0.0562(19) Uani 1 1 d . . . . .
 C23 C 0.2676(6) 0.4345(7) 0.6707(4) 0.086(3) Uani 1 1 d . . . . .
 H23A H 0.2629 0.5071 0.6708 0.130 Uiso 1 1 calc GR . . . .
 H23B H 0.2840 0.4095 0.7143 0.130 Uiso 1 1 calc GR . . . .
 H23C H 0.2105 0.4060 0.6449 0.130 Uiso 1 1 calc GR . . . .
 C24 C 0.3433(6) 0.2892(6) 0.6324(4) 0.084(3) Uani 1 1 d . . . . .
 H24A H 0.2845 0.2655 0.6063 0.126 Uiso 1 1 calc GR . . . .
 H24B H 0.3618 0.2559 0.6738 0.126 Uiso 1 1 calc GR . . . .
 H24C H 0.3858 0.2743 0.6109 0.126 Uiso 1 1 calc GR . . . .
 C25 C 0.4340(5) 0.4367(7) 0.6883(3) 0.079(3) Uani 1 1 d . . . . .
 H25A H 0.4795 0.4144 0.6713 0.119 Uiso 1 1 calc GR . . . .
 H25B H 0.4449 0.4069 0.7303 0.119 Uiso 1 1 calc GR . . . .
 H25C H 0.4360 0.5093 0.6922 0.119 Uiso 1 1 calc GR . . . .
 O11 O 0.1924(3) 0.5247(5) 0.3403(3) 0.0340(15) Uani 0.661(5) 1 d . . P A 1
 C1 C 0.1251(5) 0.5571(7) 0.3520(4) 0.034(2) Uani 0.661(5) 1 d . . P A 1
 C3 C -0.0399(7) 0.6032(14) 0.3179(6) 0.089(5) Uani 0.661(5) 1 d . . P A 1
 H3A H -0.0495 0.5624 0.3513 0.133 Uiso 0.661(5) 1 calc GR . P A 1
 H3B H -0.0953 0.6077 0.2817 0.133 Uiso 0.661(5) 1 calc GR . P A 1
 H3C H -0.0210 0.6700 0.3345 0.133 Uiso 0.661(5) 1 calc GR . P A 1
 C4 C 0.0065(10) 0.4527(13) 0.2713(8) 0.100(5) Uani 0.661(5) 1 d . . P A 1
 H4A H 0.0559 0.4188 0.2637 0.150 Uiso 0.661(5) 1 calc GR . P A 1
 H4B H -0.0438 0.4570 0.2314 0.150 Uiso 0.661(5) 1 calc GR . P A 1
 H4C H -0.0111 0.4151 0.3026 0.150 Uiso 0.661(5) 1 calc GR . P A 1
 O11B O 0.0111(8) 0.6297(14) 0.3864(7) 0.066(5) Uani 0.339(5) 1 d . . P A 2
 C1B C 0.0676(13) 0.5832(15) 0.3672(9) 0.043(4) Uani 0.339(5) 1 d . . P A 2
 C3B C -0.0665(13) 0.541(3) 0.2745(12) 0.089(5) Uani 0.339(5) 1 d . . P A 2
 H3BA H -0.0817 0.5011 0.3059 0.133 Uiso 0.339(5) 1 calc GR . P A 2
 H3BB H -0.0876 0.5075 0.2332 0.133 Uiso 0.339(5) 1 calc GR . P A 2
 H3BC H -0.0946 0.6065 0.2708 0.133 Uiso 0.339(5) 1 calc GR . P A 2
 C4B C 0.056(2) 0.436(3) 0.2944(17) 0.100(5) Uani 0.339(5) 1 d . . P A 2
 H4BA H 0.1201 0.4263 0.3104 0.150 Uiso 0.339(5) 1 calc GR . P A 2
 H4BB H 0.0312 0.4116 0.2507 0.150 Uiso 0.339(5) 1 calc GR . P A 2
 H4BC H 0.0293 0.3999 0.3214 0.150 Uiso 0.339(5) 1 calc GR . P A 2
 N1 N 0.1024(3) 0.7556(4) -0.0089(2) 0.0475(13) Uani 1 1 d . . . . .
 H1A H 0.0880 0.8038 -0.0392 0.057 Uiso 1 1 calc R . . . .
 H1B H 0.1624 0.7548 0.0089 0.057 Uiso 1 1 calc R . . . .
 C26 C 0.0732(6) 0.6576(7) -0.0410(4) 0.082(3) Uani 1 1 d D . . . .
 H26A H 0.0096 0.6667 -0.0680 0.098 Uiso 0.339(5) 1 calc R . P A 2
 H26 H 0.0946 0.6054 -0.0073 0.098 Uiso 0.661(5) 1 calc R . P A 1
 C27 C 0.1238(5) 0.6411(7) -0.0883(4) 0.077(2) Uani 1 1 d D . . . .
 H27A H 0.1042 0.6903 -0.1225 0.115 Uiso 1 1 calc GR . . . .
 H27B H 0.1115 0.5740 -0.1063 0.115 Uiso 1 1 calc GR . . . .
 H27C H 0.1876 0.6485 -0.0658 0.115 Uiso 1 1 calc GR . . . .
 C29 C 0.0643(5) 0.7845(7) 0.0419(4) 0.071(2) Uani 1 1 d D . . . .
 H29 H 0.0148 0.7387 0.0408 0.085 Uiso 0.661(5) 1 calc R . P A 1
 H29A H -0.0019 0.7853 0.0262 0.085 Uiso 0.339(5) 1 calc R . P A 2
 C28 C -0.0242(8) 0.6423(14) -0.0715(8) 0.125(7) Uani 0.661(5) 1 d D . P A 1
 H28A H -0.0538 0.6588 -0.0410 0.188 Uiso 0.661(5) 1 calc GR . P A 1
 H28B H -0.0360 0.5726 -0.0845 0.188 Uiso 0.661(5) 1 calc GR . P A 1
 H28C H -0.0468 0.6853 -0.1089 0.188 Uiso 0.661(5) 1 calc GR . P A 1
 C30 C 0.0306(12) 0.8917(11) 0.0305(8) 0.108(4) Uani 0.661(5) 1 d D . P A 1
 H30A H 0.0728 0.9323 0.0181 0.161 Uiso 0.661(5) 1 calc GR . P A 1
 H30B H 0.0247 0.9185 0.0696 0.161 Uiso 0.661(5) 1 calc GR . P A 1
 H30C H -0.0272 0.8929 -0.0036 0.161 Uiso 0.661(5) 1 calc GR . P A 1
 C31 C 0.1346(10) 0.7859(15) 0.1091(6) 0.108(4) Uani 0.661(5) 1 d D . P A 1
 H31A H 0.1474 0.7176 0.1248 0.161 Uiso 0.661(5) 1 calc GR . P A 1
 H31B H 0.1121 0.8240 0.1377 0.161 Uiso 0.661(5) 1 calc GR . P A 1
 H31C H 0.1889 0.8170 0.1074 0.161 Uiso 0.661(5) 1 calc GR . P A 1
 C1L C 0.0741(19) 0.5705(16) 0.0041(12) 0.095(10) Uani 0.339(5) 1 d D . P A 2
 H1LA H 0.1199 0.5822 0.0456 0.143 Uiso 0.339(5) 1 calc GR . P A 2
 H1LB H 0.0867 0.5083 -0.0140 0.143 Uiso 0.339(5) 1 calc GR . P A 2
 H1LC H 0.0162 0.5656 0.0095 0.143 Uiso 0.339(5) 1 calc GR . P A 2
 C30B C 0.106(2) 0.8835(19) 0.0758(14) 0.108(4) Uani 0.339(5) 1 d D . P A 2
 H30D H 0.1683 0.8875 0.0782 0.161 Uiso 0.339(5) 1 calc GR . P A 2
 H30E H 0.1035 0.8847 0.1189 0.161 Uiso 0.339(5) 1 calc GR . P A 2
 H30F H 0.0734 0.9403 0.0516 0.161 Uiso 0.339(5) 1 calc GR . P A 2
 C31B C 0.107(2) 0.707(2) 0.1001(12) 0.108(4) Uani 0.339(5) 1 d D . P A 2
 H31D H 0.0939 0.6387 0.0843 0.161 Uiso 0.339(5) 1 calc GR . P A 2
 H31E H 0.0808 0.7188 0.1333 0.161 Uiso 0.339(5) 1 calc GR . P A 2
 H31F H 0.1710 0.7167 0.1178 0.161 Uiso 0.339(5) 1 calc GR . P A 2
 N2 N 0.3083(12) 0.4336(15) 0.2605(9) 0.112(6) Uani 0.5 1 d D U P . .
 C32 C 0.2553(12) 0.4484(14) 0.2105(9) 0.079(5) Uani 0.5 1 d D U P . .
 C33 C 0.1981(12) 0.4712(17) 0.1519(9) 0.099(7) Uani 0.5 1 d D U P . .
 H33A H 0.2299 0.4725 0.1215 0.149 Uiso 0.5 1 calc GR . P . .
 H33B H 0.1718 0.5366 0.1530 0.149 Uiso 0.5 1 calc GR . P . .
 H33C H 0.1511 0.4210 0.1387 0.149 Uiso 0.5 1 calc GR . P . .

loop_
  _atom_site_aniso_label
  _atom_site_aniso_U_11
  _atom_site_aniso_U_22
  _atom_site_aniso_U_33
  _atom_site_aniso_U_23
  _atom_site_aniso_U_13
  _atom_site_aniso_U_12
 Gd1 0.02262(15) 0.02438(15) 0.02357(15) 0.00200(10) 0.00505(10) 0.00149(10)
 Mg1 0.0240(8) 0.0227(9) 0.0249(8) 0.0018(7) 0.0039(6) -0.0012(7)
 O1 0.039(2) 0.062(3) 0.030(2) 0.011(2) -0.0029(18) -0.010(2)
 O1OH 0.0245(16) 0.0175(18) 0.0321(19) -0.0001(16) 0.0064(14) -0.0019(14)
 O3 0.0303(19) 0.036(2) 0.042(2) -0.0060(19) 0.0138(16) 0.0044(16)
 O4 0.0303(17) 0.0245(19) 0.0227(17) -0.0005(15) 0.0037(14) 0.0022(15)
 O5 0.0307(19) 0.049(3) 0.033(2) 0.020(2) 0.0037(16) -0.0021(18)
 O6 0.0269(18) 0.033(2) 0.0282(19) 0.0106(17) 0.0044(14) 0.0035(15)
 O7 0.038(2) 0.026(2) 0.052(2) -0.003(2) -0.0008(17) -0.0064(17)
 O8 0.0286(18) 0.023(2) 0.043(2) -0.0015(17) 0.0052(16) -0.0018(15)
 O9 0.034(2) 0.059(3) 0.040(2) 0.013(2) 0.0186(17) 0.010(2)
 O10 0.0273(18) 0.030(2) 0.0274(19) 0.0037(16) 0.0068(15) 0.0012(15)
 C2 0.031(3) 0.087(6) 0.031(3) 0.007(3) -0.001(2) 0.004(3)
 C5 0.092(6) 0.160(12) 0.080(6) 0.040(7) 0.020(5) -0.019(7)
 C6 0.035(3) 0.024(3) 0.023(3) 0.004(2) 0.011(2) 0.004(2)
 C7 0.044(3) 0.029(3) 0.033(3) -0.005(3) 0.017(2) 0.001(2)
 C8 0.066(4) 0.044(4) 0.058(4) -0.012(3) 0.034(3) 0.001(3)
 C9 0.052(4) 0.062(5) 0.033(3) -0.013(3) 0.005(3) -0.010(3)
 C10 0.066(4) 0.030(3) 0.053(4) -0.003(3) 0.031(3) -0.002(3)
 C11 0.040(3) 0.027(3) 0.018(2) 0.000(2) 0.005(2) -0.002(2)
 C12 0.041(3) 0.033(3) 0.025(3) 0.008(2) 0.007(2) 0.004(2)
 C13 0.081(5) 0.064(6) 0.101(6) 0.052(5) 0.044(5) 0.032(4)
 C14 0.127(7) 0.080(6) 0.028(3) 0.015(4) 0.024(4) 0.040(5)
 C15 0.108(6) 0.066(6) 0.071(5) 0.044(5) -0.009(5) -0.035(5)
 C16 0.032(3) 0.026(3) 0.033(3) 0.006(2) 0.003(2) 0.001(2)
 C17 0.033(3) 0.032(3) 0.067(4) -0.007(3) -0.004(3) -0.008(3)
 C18 0.110(7) 0.111(9) 0.121(8) -0.089(7) 0.042(6) -0.058(7)
 C19 0.044(4) 0.063(6) 0.170(9) -0.029(6) 0.036(5) -0.028(4)
 C20 0.082(7) 0.039(5) 0.256(16) 0.041(8) -0.035(8) -0.026(5)
 C21 0.043(3) 0.029(3) 0.030(3) 0.003(2) 0.015(2) -0.002(2)
 C22 0.075(5) 0.064(5) 0.044(4) 0.025(4) 0.038(3) 0.029(4)
 C23 0.099(6) 0.119(9) 0.063(5) 0.042(5) 0.056(5) 0.040(6)
 C24 0.129(7) 0.044(5) 0.113(7) 0.032(5) 0.085(6) 0.008(5)
 C25 0.080(5) 0.122(9) 0.031(4) 0.014(4) 0.012(4) 0.035(5)
 O11 0.025(3) 0.045(4) 0.027(3) 0.002(3) 0.002(2) 0.001(2)
 C1 0.022(4) 0.045(6) 0.032(5) 0.008(4) 0.005(3) 0.001(4)
 C3 0.035(5) 0.164(16) 0.055(7) -0.006(8) 0.000(5) 0.006(7)
 C4 0.068(11) 0.101(12) 0.097(13) -0.027(9) -0.015(8) -0.018(10)
 O11B 0.047(8) 0.100(14) 0.059(9) -0.016(9) 0.027(7) 0.018(8)
 C1B 0.044(11) 0.035(10) 0.041(10) -0.005(9) 0.004(9) -0.003(8)
 C3B 0.035(5) 0.164(16) 0.055(7) -0.006(8) 0.000(5) 0.006(7)
 C4B 0.068(11) 0.101(12) 0.097(13) -0.027(9) -0.015(8) -0.018(10)
 N1 0.046(3) 0.047(3) 0.054(3) -0.004(3) 0.023(2) -0.008(3)
 C26 0.095(6) 0.067(6) 0.090(6) -0.028(5) 0.040(5) -0.040(5)
 C27 0.096(6) 0.063(6) 0.076(5) -0.032(5) 0.036(5) -0.015(5)
 C29 0.072(5) 0.082(7) 0.076(5) -0.010(5) 0.048(4) -0.013(4)
 C28 0.074(9) 0.142(17) 0.156(15) -0.056(14) 0.035(9) -0.066(10)
 C30 0.160(11) 0.100(9) 0.091(7) 0.008(7) 0.079(7) 0.024(9)
 C31 0.160(11) 0.100(9) 0.091(7) 0.008(7) 0.079(7) 0.024(9)
 C1L 0.13(2) 0.054(16) 0.12(2) -0.011(16) 0.07(2) -0.047(16)
 C30B 0.160(11) 0.100(9) 0.091(7) 0.008(7) 0.079(7) 0.024(9)
 C31B 0.160(11) 0.100(9) 0.091(7) 0.008(7) 0.079(7) 0.024(9)
 N2 0.112(12) 0.125(14) 0.108(12) -0.011(10) 0.047(10) 0.026(10)
 C32 0.078(8) 0.084(9) 0.098(9) -0.009(7) 0.060(7) 0.020(7)
 C33 0.096(11) 0.119(15) 0.118(13) 0.015(11) 0.083(11) 0.013(10)

_geom_special_details
;
 All esds (except the esd in the dihedral angle between two l.s. planes)
 are estimated using the full covariance matrix.  The cell esds are taken
 into account individually in the estimation of esds in distances, angles
 and torsion angles; correlations between esds in cell parameters are only
 used when they are defined by crystal symmetry.  An approximate (isotropic)
 treatment of cell esds is used for estimating esds involving l.s. planes.
;
loop_
  _geom_bond_atom_site_label_1
  _geom_bond_atom_site_label_2
  _geom_bond_distance
  _geom_bond_site_symmetry_2
  _geom_bond_publ_flag
 Gd1 O1 2.398(4) . ?
 Gd1 O1OH 2.344(3) . ?
 Gd1 O3 2.532(4) . ?
 Gd1 O4 2.533(3) . ?
 Gd1 O5 2.386(4) . ?
 Gd1 O7 2.374(4) . ?
 Gd1 O9 2.456(4) . ?
 Gd1 O10 2.518(3) 3_666 ?
 Gd1 C6 2.916(5) . ?
 Gd1 C21 2.864(5) . ?
 Gd1 O11 2.490(5) . ?
 Gd1 C1 2.837(8) . ?
 Mg1 Gd1 3.5051(16) 3_666 ?
 Mg1 Mg1 3.227(3) 3_666 ?
 Mg1 O1OH 2.107(4) . ?
 Mg1 O1OH 2.110(4) 3_666 ?
 Mg1 O4 2.111(4) . ?
 Mg1 O6 2.029(4) . ?
 Mg1 O8 2.033(4) . ?
 Mg1 O10 2.078(4) . ?
 O1 C1 1.201(9) . ?
 O1 C1B 1.121(17) . ?
 O1OH Mg1 2.110(4) 3_666 ?
 O3 C6 1.262(6) . ?
 O4 C6 1.264(6) . ?
 O5 C11 1.259(6) . ?
 O6 C11 1.266(6) . ?
 O7 C16 1.242(7) 3_666 ?
 O8 C16 1.270(6) . ?
 O9 C21 1.247(7) . ?
 O10 Gd1 2.518(3) 3_666 ?
 O10 C21 1.270(6) 3_666 ?
 C2 C5 1.491(11) . ?
 C2 C1 1.538(9) . ?
 C2 C3 1.550(13) . ?
 C2 C4 1.447(16) . ?
 C2 C1B 1.521(19) . ?
 C2 C3B 1.50(2) . ?
 C2 C4B 1.59(4) . ?
 C6 C7 1.520(7) . ?
 C7 C8 1.526(8) . ?
 C7 C9 1.528(8) . ?
 C7 C10 1.539(8) . ?
 C11 C12 1.526(7) . ?
 C12 C13 1.502(8) . ?
 C12 C14 1.513(8) . ?
 C12 C15 1.507(9) . ?
 C16 O7 1.242(7) 3_666 ?
 C16 C17 1.522(8) . ?
 C17 C18 1.540(10) . ?
 C17 C19 1.498(9) . ?
 C17 C20 1.520(10) . ?
 C21 O10 1.270(6) 3_666 ?
 C21 C22 1.501(8) . ?
 C22 C23 1.531(9) . ?
 C22 C24 1.529(10) . ?
 C22 C25 1.542(11) . ?
 O11 C1 1.249(10) . ?
 O11B C1B 1.26(2) . ?
 N1 C26 1.468(9) . ?
 N1 C29 1.484(8) . ?
 C26 C27 1.523(9) . ?
 C26 C28 1.461(11) . ?
 C26 C1L 1.512(13) . ?
 C29 C30 1.499(11) . ?
 C29 C31 1.510(11) . ?
 C29 C30B 1.534(18) . ?
 C29 C31B 1.593(17) . ?
 N2 C32 1.145(15) . ?
 C32 C33 1.327(16) . ?

loop_
  _geom_angle_atom_site_label_1
  _geom_angle_atom_site_label_2
  _geom_angle_atom_site_label_3
  _geom_angle
  _geom_angle_site_symmetry_1
  _geom_angle_site_symmetry_3
  _geom_angle_publ_flag
 O1 Gd1 O3 81.52(14) . . ?
 O1 Gd1 O4 130.55(14) . . ?
 O1 Gd1 O9 83.17(13) . . ?
 O1 Gd1 O10 133.78(13) . 3_666 ?
 O1 Gd1 C6 105.79(15) . . ?
 O1 Gd1 C21 108.20(15) . . ?
 O1 Gd1 O11 50.84(16) . . ?
 O1 Gd1 C1 24.8(2) . . ?
 O1OH Gd1 O1 149.31(13) . . ?
 O1OH Gd1 O3 121.09(11) . . ?
 O1OH Gd1 O4 70.30(11) . . ?
 O1OH Gd1 O5 82.04(12) . . ?
 O1OH Gd1 O7 81.44(12) . . ?
 O1OH Gd1 O9 121.63(12) . . ?
 O1OH Gd1 O10 70.00(11) . 3_666 ?
 O1OH Gd1 C6 95.57(13) . . ?
 O1OH Gd1 C21 96.10(14) . . ?
 O1OH Gd1 O11 98.53(15) . . ?
 O1OH Gd1 C1 124.6(2) . . ?
 O3 Gd1 O4 51.09(11) . . ?
 O3 Gd1 C6 25.57(12) . . ?
 O3 Gd1 C21 82.25(14) . . ?
 O3 Gd1 C1 102.0(2) . . ?
 O4 Gd1 C6 25.60(11) . . ?
 O4 Gd1 C21 81.56(13) . . ?
 O4 Gd1 C1 142.7(2) . . ?
 O5 Gd1 O1 84.42(13) . . ?
 O5 Gd1 O3 75.79(14) . . ?
 O5 Gd1 O4 72.23(12) . . ?
 O5 Gd1 O9 147.15(15) . . ?
 O5 Gd1 O10 138.84(11) . 3_666 ?
 O5 Gd1 C6 70.89(14) . . ?
 O5 Gd1 C21 152.80(15) . . ?
 O5 Gd1 O11 69.58(16) . . ?
 O5 Gd1 C1 76.36(19) . . ?
 O7 Gd1 O1 88.22(15) . . ?
 O7 Gd1 O3 148.04(13) . . ?
 O7 Gd1 O4 138.98(12) . . ?
 O7 Gd1 O5 133.41(14) . . ?
 O7 Gd1 O9 76.43(15) . . ?
 O7 Gd1 O10 72.49(12) . 3_666 ?
 O7 Gd1 C6 153.97(14) . . ?
 O7 Gd1 C21 72.34(15) . . ?
 O7 Gd1 O11 70.30(17) . . ?
 O7 Gd1 C1 78.0(2) . . ?
 O9 Gd1 O3 72.36(14) . . ?
 O9 Gd1 O4 93.43(13) . . ?
 O9 Gd1 O10 51.98(12) . 3_666 ?
 O9 Gd1 C6 83.47(14) . . ?
 O9 Gd1 C21 25.67(14) . . ?
 O9 Gd1 O11 122.31(16) . . ?
 O9 Gd1 C1 102.48(19) . . ?
 O10 Gd1 O3 93.12(12) 3_666 . ?
 O10 Gd1 O4 70.23(11) 3_666 . ?
 O10 Gd1 C6 82.15(12) 3_666 . ?
 O10 Gd1 C21 26.31(13) 3_666 . ?
 O10 Gd1 C1 144.60(19) 3_666 . ?
 C21 Gd1 C6 82.36(15) . . ?
 O11 Gd1 O3 122.11(16) . . ?
 O11 Gd1 O4 141.36(15) . . ?
 O11 Gd1 O10 142.32(17) . 3_666 ?
 O11 Gd1 C6 135.44(17) . . ?
 O11 Gd1 C21 137.06(18) . . ?
 O11 Gd1 C1 26.1(2) . . ?
 C1 Gd1 C6 123.0(2) . . ?
 C1 Gd1 C21 124.5(2) . . ?
 Gd1 Mg1 Gd1 125.26(5) 3_666 . ?
 Mg1 Mg1 Gd1 62.78(5) 3_666 3_666 ?
 Mg1 Mg1 Gd1 62.48(5) 3_666 . ?
 O1OH Mg1 Gd1 93.48(10) . 3_666 ?
 O1OH Mg1 Gd1 40.54(9) 3_666 3_666 ?
 O1OH Mg1 Gd1 93.14(10) 3_666 . ?
 O1OH Mg1 Gd1 40.30(9) . . ?
 O1OH Mg1 Mg1 40.11(10) . 3_666 ?
 O1OH Mg1 Mg1 40.03(10) 3_666 3_666 ?
 O1OH Mg1 O1OH 80.14(14) . 3_666 ?
 O1OH Mg1 O4 83.63(14) . . ?
 O1OH Mg1 O4 89.20(14) 3_666 . ?
 O4 Mg1 Gd1 45.53(9) . . ?
 O4 Mg1 Gd1 128.85(11) . 3_666 ?
 O4 Mg1 Mg1 85.32(12) . 3_666 ?
 O6 Mg1 Gd1 80.45(10) . . ?
 O6 Mg1 Gd1 142.12(12) . 3_666 ?
 O6 Mg1 Mg1 132.58(14) . 3_666 ?
 O6 Mg1 O1OH 92.47(15) . . ?
 O6 Mg1 O1OH 172.54(16) . 3_666 ?
 O6 Mg1 O4 88.98(14) . . ?
 O6 Mg1 O8 94.75(16) . . ?
 O6 Mg1 O10 97.47(15) . . ?
 O8 Mg1 Gd1 80.88(11) . 3_666 ?
 O8 Mg1 Gd1 141.30(12) . . ?
 O8 Mg1 Mg1 132.67(13) . 3_666 ?
 O8 Mg1 O1OH 172.78(16) . . ?
 O8 Mg1 O1OH 92.64(14) . 3_666 ?
 O8 Mg1 O4 96.36(15) . . ?
 O8 Mg1 O10 89.14(15) . . ?
 O10 Mg1 Gd1 45.19(10) . 3_666 ?
 O10 Mg1 Gd1 129.53(12) . . ?
 O10 Mg1 Mg1 85.86(12) . 3_666 ?
 O10 Mg1 O1OH 90.04(15) . . ?
 O10 Mg1 O1OH 83.63(14) . 3_666 ?
 O10 Mg1 O4 171.16(17) . . ?
 C1 O1 Gd1 98.5(5) . . ?
 C1B O1 Gd1 155.5(11) . . ?
 Mg1 O1OH Gd1 104.17(15) . . ?
 Mg1 O1OH Gd1 103.65(14) 3_666 . ?
 Mg1 O1OH Mg1 99.86(14) . 3_666 ?
 C6 O3 Gd1 94.5(3) . . ?
 Mg1 O4 Gd1 97.96(13) . . ?
 C6 O4 Gd1 94.4(3) . . ?
 C6 O4 Mg1 153.2(3) . . ?
 C11 O5 Gd1 137.2(3) . . ?
 C11 O6 Mg1 131.8(3) . . ?
 C16 O7 Gd1 137.5(3) 3_666 . ?
 C16 O8 Mg1 129.9(4) . . ?
 C21 O9 Gd1 95.8(3) . . ?
 Mg1 O10 Gd1 98.97(14) . 3_666 ?
 C21 O10 Gd1 92.3(3) 3_666 3_666 ?
 C21 O10 Mg1 155.7(4) 3_666 . ?
 C5 C2 C1 104.8(6) . . ?
 C5 C2 C3 107.2(9) . . ?
 C5 C2 C1B 122.2(10) . . ?
 C5 C2 C3B 103.4(12) . . ?
 C5 C2 C4B 118.5(17) . . ?
 C1 C2 C3 109.3(7) . . ?
 C4 C2 C5 111.6(10) . . ?
 C4 C2 C1 113.8(8) . . ?
 C4 C2 C3 109.8(10) . . ?
 C1B C2 C4B 105.5(15) . . ?
 C3B C2 C1B 107.9(13) . . ?
 C3B C2 C4B 95.5(17) . . ?
 O3 C6 Gd1 60.0(3) . . ?
 O3 C6 O4 119.7(5) . . ?
 O3 C6 C7 121.5(4) . . ?
 O4 C6 Gd1 60.0(3) . . ?
 O4 C6 C7 118.8(4) . . ?
 C7 C6 Gd1 175.0(3) . . ?
 C6 C7 C8 111.2(5) . . ?
 C6 C7 C9 109.9(5) . . ?
 C6 C7 C10 106.0(4) . . ?
 C8 C7 C9 110.3(5) . . ?
 C8 C7 C10 109.3(5) . . ?
 C9 C7 C10 110.1(5) . . ?
 O5 C11 O6 123.6(5) . . ?
 O5 C11 C12 117.8(4) . . ?
 O6 C11 C12 118.5(4) . . ?
 C13 C12 C11 111.0(5) . . ?
 C13 C12 C14 109.7(6) . . ?
 C13 C12 C15 109.2(7) . . ?
 C14 C12 C11 106.7(5) . . ?
 C15 C12 C11 110.2(5) . . ?
 C15 C12 C14 110.0(6) . . ?
 O7 C16 O8 125.0(5) 3_666 . ?
 O7 C16 C17 117.6(4) 3_666 . ?
 O8 C16 C17 117.4(5) . . ?
 C16 C17 C18 106.4(6) . . ?
 C19 C17 C16 110.6(6) . . ?
 C19 C17 C18 109.3(6) . . ?
 C19 C17 C20 113.4(7) . . ?
 C20 C17 C16 110.1(5) . . ?
 C20 C17 C18 106.6(8) . . ?
 O9 C21 Gd1 58.5(3) . . ?
 O9 C21 O10 120.0(5) . 3_666 ?
 O9 C21 C22 122.7(5) . . ?
 O10 C21 Gd1 61.4(3) 3_666 . ?
 O10 C21 C22 117.3(5) 3_666 . ?
 C22 C21 Gd1 178.8(4) . . ?
 C21 C22 C23 110.5(5) . . ?
 C21 C22 C24 108.0(6) . . ?
 C21 C22 C25 108.6(6) . . ?
 C23 C22 C25 109.7(7) . . ?
 C24 C22 C23 112.5(7) . . ?
 C24 C22 C25 107.4(6) . . ?
 C1 O11 Gd1 92.7(5) . . ?
 O1 C1 Gd1 56.7(4) . . ?
 O1 C1 C2 125.4(7) . . ?
 O1 C1 O11 118.0(7) . . ?
 C2 C1 Gd1 176.1(6) . . ?
 O11 C1 Gd1 61.3(4) . . ?
 O11 C1 C2 116.6(7) . . ?
 O1 C1B C2 134.1(17) . . ?
 O1 C1B O11B 109.3(16) . . ?
 O11B C1B C2 115.5(14) . . ?
 C26 N1 C29 116.4(6) . . ?
 N1 C26 C27 107.5(6) . . ?
 N1 C26 C1L 115.1(12) . . ?
 C28 C26 N1 116.7(10) . . ?
 C28 C26 C27 112.3(9) . . ?
 C1L C26 C27 116.5(14) . . ?
 N1 C29 C30 109.1(8) . . ?
 N1 C29 C31 112.8(7) . . ?
 N1 C29 C30B 111.4(11) . . ?
 N1 C29 C31B 105.7(12) . . ?
 C30 C29 C31 104.6(11) . . ?
 C30B C29 C31B 99.4(18) . . ?
 N2 C32 C33 175(2) . . ?

_shelx_SHELXL_version_number      '2014/7'
_iucr_refine_instructions_details
;

    arepw90.res created by SHELXL-2014/7

TITL arepw90 in P21/c #14
REM reset to P21/c #14
CELL 0.71073 15.735124 13.177114 21.918947 90 109.9513 90
ZERR 2 0.00081 0.000595 0.001113 0 0.0057 0
LATT 1
SYMM -X,0.5+Y,0.5-Z
SFAC C H Gd Mg N O
UNIT 128 250 4 4 6 44
DFIX 1.5 C26 C1L
DFIX 1.6 C29 C30B
DFIX 1.6 C31 C29
DFIX 1.6 C29 C30
DFIX 1.6 C29 C31B
DFIX 1.6 C28 C26
DFIX 1.6 C27 C26
DFIX 1.6 C26 C1L
DFIX 1.5 C32 C33
DFIX 1.1 C32 N2
SADI C31 C29 C29 C30
ISOR 0.01 0.02 C32 C33 N2
EADP C3 C3B
EADP C31B C31 C30B C30
EADP C4 C4B
 
L.S. 12
PLAN  20
FREE C4 C3B
BOND
fmap 2
acta
SHEL 8 0.8
REM <olex2.extras>
REM <HklSrc "%./arepw90.hkl">
REM </olex2.extras>
 
WGHT    0.052700    3.349000
FVAR       3.12350   0.66053
GD1   3    0.293979    0.549070    0.454555    11.00000    0.02262    0.02438 =
         0.02357    0.00200    0.00505    0.00149
MG1   4    0.520646    0.613837    0.481794    11.00000    0.02396    0.02274 =
         0.02494    0.00176    0.00390   -0.00124
O1    6    0.135824    0.585929    0.406163    11.00000    0.03919    0.06210 =
         0.02964    0.01060   -0.00289   -0.00987
O1OH  6    0.429508    0.493983    0.443257    11.00000    0.02446    0.01747 =
         0.03214   -0.00012    0.00643   -0.00188
O3    6    0.288706    0.707715    0.518363    11.00000    0.03029    0.03609 =
         0.04226   -0.00602    0.01377    0.00439
O4    6    0.423472    0.658829    0.523153    11.00000    0.03031    0.02448 =
         0.02272   -0.00052    0.00366    0.00217
O5    6    0.312481    0.684476    0.387924    11.00000    0.03067    0.04883 =
         0.03337    0.02007    0.00371   -0.00210
O6    6    0.459130    0.704865    0.404666    11.00000    0.02686    0.03298 =
         0.02823    0.01058    0.00440    0.00346
O7    6    0.257967    0.374370    0.435188    11.00000    0.03789    0.02560 =
         0.05228   -0.00291   -0.00076   -0.00637
O8    6    0.615978    0.717869    0.528719    11.00000    0.02855    0.02308 =
         0.04268   -0.00155    0.00518   -0.00180
O9    6    0.250393    0.497977    0.547528    11.00000    0.03364    0.05860 =
         0.04015    0.01325    0.01856    0.00973
O10   6    0.613390    0.547137    0.445684    11.00000    0.02734    0.02960 =
         0.02739    0.00373    0.00677    0.00117
C2    1    0.034133    0.553787    0.295831    11.00000    0.03076    0.08651 =
         0.03129    0.00659   -0.00068    0.00423
C5    1    0.047080    0.620744    0.244882    11.00000    0.09195    0.15956 =
         0.07955    0.03976    0.02049   -0.01939
AFIX 137
H5A   2    0.042740    0.690468    0.256175    11.00000   -1.50000
H5B   2    0.001226    0.606370    0.203881    11.00000   -1.50000
H5C   2    0.105612    0.608512    0.241780    11.00000   -1.50000
AFIX   0
C6    1    0.372834    0.723245    0.536366    11.00000    0.03509    0.02380 =
         0.02303    0.00355    0.01144    0.00397
C7    1    0.415199    0.818113    0.573875    11.00000    0.04403    0.02942 =
         0.03326   -0.00475    0.01686    0.00127
C8    1    0.347411    0.876098    0.596496    11.00000    0.06650    0.04421 =
         0.05814   -0.01236    0.03440    0.00116
AFIX 137
H8A   2    0.298231    0.899024    0.559410    11.00000   -1.50000
H8B   2    0.376736    0.933514    0.621989    11.00000   -1.50000
H8C   2    0.324619    0.832237    0.622320    11.00000   -1.50000
AFIX   0
C9    1    0.498268    0.789585    0.631991    11.00000    0.05185    0.06230 =
         0.03271   -0.01257    0.00519   -0.01000
AFIX 137
H9A   2    0.480344    0.746318    0.660697    11.00000   -1.50000
H9B   2    0.525685    0.850022    0.654703    11.00000   -1.50000
H9C   2    0.540951    0.754497    0.617075    11.00000   -1.50000
AFIX   0
C10   1    0.443353    0.884579    0.526231    11.00000    0.06596    0.02988 =
         0.05329   -0.00284    0.03140   -0.00164
AFIX 137
H10A  2    0.487336    0.849051    0.512896    11.00000   -1.50000
H10B  2    0.469032    0.946876    0.547196    11.00000   -1.50000
H10C  2    0.391249    0.899260    0.488888    11.00000   -1.50000
AFIX   0
C11   1    0.376753    0.726350    0.375645    11.00000    0.03960    0.02712 =
         0.01787   -0.00014    0.00491   -0.00231
C12   1    0.353393    0.805455    0.321593    11.00000    0.04110    0.03250 =
         0.02469    0.00765    0.00736    0.00390
C13   1    0.262957    0.852789    0.312060    11.00000    0.08069    0.06433 =
         0.10089    0.05165    0.04443    0.03171
AFIX 137
H13A  2    0.217914    0.800580    0.304071    11.00000   -1.50000
H13B  2    0.247526    0.898184    0.275645    11.00000   -1.50000
H13C  2    0.265613    0.889864    0.350370    11.00000   -1.50000
AFIX   0
C14   1    0.350639    0.750474    0.260352    11.00000    0.12747    0.08034 =
         0.02834    0.01482    0.02383    0.04033
AFIX 137
H14A  2    0.408519    0.720256    0.266607    11.00000   -1.50000
H14B  2    0.336413    0.797816    0.224991    11.00000   -1.50000
H14C  2    0.305236    0.698461    0.250597    11.00000   -1.50000
AFIX   0
C15   1    0.424515    0.887283    0.337545    11.00000    0.10751    0.06597 =
         0.07066    0.04394   -0.00879   -0.03523
AFIX 137
H15A  2    0.429657    0.917559    0.378490    11.00000   -1.50000
H15B  2    0.407655    0.938233    0.304250    11.00000   -1.50000
H15C  2    0.481549    0.858193    0.340060    11.00000   -1.50000
AFIX   0
C16   1    0.700956    0.707802    0.555358    11.00000    0.03213    0.02619 =
         0.03321    0.00553    0.00340    0.00054
C17   1    0.756555    0.803985    0.577239    11.00000    0.03304    0.03177 =
         0.06669   -0.00736   -0.00357   -0.00826
C18   1    0.762464    0.822926    0.647923    11.00000    0.10980    0.11063 =
         0.12081   -0.08900    0.04191   -0.05845
AFIX 137
H18A  2    0.702906    0.834303    0.649343    11.00000   -1.50000
H18B  2    0.799403    0.881484    0.664566    11.00000   -1.50000
H18C  2    0.788766    0.764796    0.673911    11.00000   -1.50000
AFIX   0
C19   1    0.849890    0.790114    0.574877    11.00000    0.04404    0.06290 =
         0.16974   -0.02938    0.03571   -0.02786
AFIX 137
H19A  2    0.879418    0.735491    0.603154    11.00000   -1.50000
H19B  2    0.883874    0.851507    0.588696    11.00000   -1.50000
H19C  2    0.846180    0.774458    0.531267    11.00000   -1.50000
AFIX   0
C20   1    0.706818    0.894246    0.537923    11.00000    0.08217    0.03860 =
         0.25592    0.04084   -0.03485   -0.02600
AFIX 137
H20A  2    0.719169    0.898139    0.498014    11.00000   -1.50000
H20B  2    0.726882    0.955446    0.562364    11.00000   -1.50000
H20C  2    0.642985    0.886170    0.528553    11.00000   -1.50000
AFIX   0
C21   1    0.322895    0.454179    0.577565    11.00000    0.04318    0.02925 =
         0.02996    0.00254    0.01459   -0.00193
C22   1    0.340035    0.403833    0.642091    11.00000    0.07499    0.06363 =
         0.04388    0.02490    0.03819    0.02904
C23   1    0.267588    0.434452    0.670700    11.00000    0.09879    0.11867 =
         0.06324    0.04175    0.05554    0.04005
AFIX 137
H23A  2    0.262870    0.507080    0.670844    11.00000   -1.50000
H23B  2    0.283985    0.409472    0.714343    11.00000   -1.50000
H23C  2    0.210477    0.406005    0.644854    11.00000   -1.50000
AFIX   0
C24   1    0.343327    0.289221    0.632360    11.00000    0.12852    0.04399 =
         0.11326    0.03162    0.08532    0.00778
AFIX 137
H24A  2    0.284453    0.265481    0.606265    11.00000   -1.50000
H24B  2    0.361763    0.255918    0.673790    11.00000   -1.50000
H24C  2    0.385831    0.274283    0.610913    11.00000   -1.50000
AFIX   0
C25   1    0.433977    0.436719    0.688317    11.00000    0.07977    0.12246 =
         0.03065    0.01389    0.01198    0.03521
AFIX 137
H25A  2    0.479489    0.414390    0.671272    11.00000   -1.50000
H25B  2    0.444950    0.406922    0.730279    11.00000   -1.50000
H25C  2    0.435982    0.509322    0.692180    11.00000   -1.50000
AFIX   0
PART 1
O11   6    0.192439    0.524672    0.340268    21.00000    0.02468    0.04501 =
         0.02730    0.00234    0.00247    0.00115
C1    1    0.125077    0.557135    0.352037    21.00000    0.02213    0.04509 =
         0.03233    0.00838    0.00542    0.00090
C3    1   -0.039941    0.603171    0.317942    21.00000    0.03546    0.16360 =
         0.05488   -0.00558   -0.00012    0.00583
AFIX 137
H3A   2   -0.049462    0.562424    0.351343    21.00000   -1.50000
H3B   2   -0.095272    0.607719    0.281656    21.00000   -1.50000
H3C   2   -0.020969    0.669956    0.334520    21.00000   -1.50000
AFIX   0
C4    1    0.006461    0.452688    0.271344    21.00000    0.06789    0.10118 =
         0.09724   -0.02725   -0.01451   -0.01755
AFIX 137
H4A   2    0.055915    0.418841    0.263695    21.00000   -1.50000
H4B   2   -0.043797    0.457021    0.231441    21.00000   -1.50000
H4C   2   -0.011097    0.415115    0.302648    21.00000   -1.50000
AFIX   0
PART 0
PART 2
O11B  6    0.011071    0.629677    0.386402   -21.00000    0.04675    0.09962 =
         0.05932   -0.01606    0.02668    0.01786
C1B   1    0.067560    0.583191    0.367233   -21.00000    0.04385    0.03455 =
         0.04118   -0.00488    0.00384   -0.00298
C3B   1   -0.066482    0.541093    0.274516   -21.00000    0.03546    0.16360 =
         0.05488   -0.00558   -0.00012    0.00583
AFIX 137
H3BA  2   -0.081717    0.501065    0.305906   -21.00000   -1.50000
H3BB  2   -0.087550    0.507545    0.233170   -21.00000   -1.50000
H3BC  2   -0.094600    0.606539    0.270825   -21.00000   -1.50000
AFIX   0
C4B   1    0.055837    0.436296    0.294423   -21.00000    0.06789    0.10118 =
         0.09724   -0.02725   -0.01451   -0.01755
AFIX 137
H4BA  2    0.120131    0.426324    0.310354   -21.00000   -1.50000
H4BB  2    0.031193    0.411623    0.250681   -21.00000   -1.50000
H4BC  2    0.029310    0.399914    0.321382   -21.00000   -1.50000
AFIX   0
 
PART 0
N1    5    0.102408    0.755646   -0.008950    11.00000    0.04621    0.04665 =
         0.05381   -0.00386    0.02250   -0.00844
AFIX  23
H1A   2    0.088008    0.803799   -0.039240    11.00000   -1.20000
H1B   2    0.162395    0.754849    0.008897    11.00000   -1.20000
AFIX   0
C26   1    0.073160    0.657562   -0.041001    11.00000    0.09526    0.06651 =
         0.08975   -0.02785    0.03979   -0.04017
PART 2
AFIX  13
H26A  2    0.009637    0.666737   -0.068016   -21.00000   -1.20000
AFIX  13
PART 0
PART 1
H26   2    0.094649    0.605416   -0.007347    21.00000   -1.20000
AFIX   0
PART 0
C27   1    0.123805    0.641064   -0.088273    11.00000    0.09642    0.06315 =
         0.07618   -0.03155    0.03624   -0.01465
AFIX 137
H27A  2    0.104243    0.690276   -0.122539    11.00000   -1.50000
H27B  2    0.111537    0.574041   -0.106320    11.00000   -1.50000
H27C  2    0.187560    0.648474   -0.065758    11.00000   -1.50000
AFIX   0
C29   1    0.064343    0.784540    0.041911    11.00000    0.07164    0.08227 =
         0.07566   -0.00993    0.04761   -0.01302
PART 1
AFIX  13
H29   2    0.014798    0.738664    0.040759    21.00000   -1.20000
AFIX  13
PART 0
PART 2
H29A  2   -0.001907    0.785269    0.026206   -21.00000   -1.20000
AFIX   0
PART 0
PART 1
C28   1   -0.024202    0.642254   -0.071460    21.00000    0.07427    0.14235 =
         0.15599   -0.05555    0.03537   -0.06650
AFIX 137
H28A  2   -0.053837    0.658788   -0.041043    21.00000   -1.50000
H28B  2   -0.035955    0.572617   -0.084475    21.00000   -1.50000
H28C  2   -0.046775    0.685301   -0.108873    21.00000   -1.50000
AFIX   0
C30   1    0.030645    0.891684    0.030473    21.00000    0.16007    0.09976 =
         0.09095    0.00772    0.07931    0.02375
AFIX 137
H30A  2    0.072776    0.932297    0.018126    21.00000   -1.50000
H30B  2    0.024732    0.918454    0.069563    21.00000   -1.50000
H30C  2   -0.027158    0.892923   -0.003594    21.00000   -1.50000
AFIX   0
C31   1    0.134601    0.785917    0.109094    21.00000    0.16007    0.09976 =
         0.09095    0.00772    0.07931    0.02375
AFIX 137
H31A  2    0.147405    0.717644    0.124839    21.00000   -1.50000
H31B  2    0.112127    0.823962    0.137723    21.00000   -1.50000
H31C  2    0.188940    0.817020    0.107434    21.00000   -1.50000
AFIX   0
PART 0
PART 2
C1L   1    0.074084    0.570459    0.004146   -21.00000    0.13367    0.05409 =
         0.11650   -0.01150    0.06574   -0.04659
AFIX 137
H1LA  2    0.119942    0.582151    0.045566   -21.00000   -1.50000
H1LB  2    0.086726    0.508336   -0.013988   -21.00000   -1.50000
H1LC  2    0.016172    0.565596    0.009518   -21.00000   -1.50000
AFIX   0
C30B  1    0.106316    0.883510    0.075823   -21.00000    0.16007    0.09976 =
         0.09095    0.00772    0.07931    0.02375
AFIX 137
H30D  2    0.168272    0.887458    0.078163   -21.00000   -1.50000
H30E  2    0.103499    0.884684    0.118884   -21.00000   -1.50000
H30F  2    0.073438    0.940306    0.051640   -21.00000   -1.50000
AFIX   0
C31B  1    0.106740    0.706980    0.100123   -21.00000    0.16007    0.09976 =
         0.09095    0.00772    0.07931    0.02375
AFIX 137
H31D  2    0.093931    0.638730    0.084335   -21.00000   -1.50000
H31E  2    0.080844    0.718752    0.133313   -21.00000   -1.50000
H31F  2    0.170999    0.716710    0.117809   -21.00000   -1.50000
AFIX   0
 
PART 0
N2    5    0.308342    0.433632    0.260463    10.50000    0.11165    0.12499 =
         0.10788   -0.01076    0.04743    0.02640
C32   1    0.255292    0.448441    0.210493    10.50000    0.07784    0.08439 =
         0.09791   -0.00926    0.05993    0.01984
C33   1    0.198073    0.471221    0.151882    10.50000    0.09649    0.11948 =
         0.11799    0.01503    0.08250    0.01263
AFIX 137
H33A  2    0.229885    0.472531    0.121506    10.50000   -1.50000
H33B  2    0.171810    0.536634    0.153045    10.50000   -1.50000
H33C  2    0.151142    0.420974    0.138705    10.50000   -1.50000
AFIX   0
HKLF 4
 
REM  arepw90 in P21/c #14
REM R1 =  0.0502 for    6964 Fo > 4sig(Fo)  and  0.0660 for all    8731 data
REM    492 parameters refined using     29 restraints
 
END  
     
WGHT      0.0527      3.3477 

REM Highest difference peak  1.315,  deepest hole -0.959,  1-sigma level  0.124
Q1    1   0.3085  0.4823  0.3475  11.00000  0.05    1.32
Q2    1   0.3921  0.4753  0.3712  11.00000  0.05    1.08
Q3    1   0.2232  0.4447  0.1821  11.00000  0.05    1.07
Q4    1   0.5528  0.5503  0.6677  11.00000  0.05    0.90
Q5    1  -0.0407  0.8496 -0.0067  11.00000  0.05    0.86
Q6    1   0.2638  0.5382  0.4155  11.00000  0.05    0.86
Q7    1   0.1945  0.5193  0.1645  11.00000  0.05    0.84
Q8    1   0.3276  0.5497  0.5001  11.00000  0.05    0.77
Q9    1   0.1513  0.4450  0.1292  11.00000  0.05    0.65
Q10   1   0.1763  0.3975  0.1504  11.00000  0.05    0.64
Q11   1   0.7074  0.8746  0.6108  11.00000  0.05    0.63
Q12   1   0.3419  0.5207  0.4465  11.00000  0.05    0.60
Q13   1   0.7698  0.8632  0.5164  11.00000  0.05    0.60
Q14   1   0.2952  0.5941  0.4060  11.00000  0.05    0.59
Q15   1   0.1131  0.4979  0.1028  11.00000  0.05    0.58
Q16   1   0.2385  0.5160  0.4628  11.00000  0.05    0.51
Q17   1   0.4334  0.4578  0.4130  11.00000  0.05    0.51
Q18   1   0.2220  0.5933  0.4491  11.00000  0.05    0.50
Q19   1   0.7803  0.7698  0.6174  11.00000  0.05    0.49
Q20   1   0.2702  0.4366  0.4487  11.00000  0.05    0.48

REM The information below was added by Olex2.
REM
REM R1 = 0.0502 for 6964 Fo > 4sig(Fo) and 0.0660 for all 18322 data
REM n/a parameters refined using n/a restraints
REM Highest difference peak 1.32, deepest hole -0.96
REM Mean Shift 0, Max Shift -0.001.

REM +++ Tabular Listing of Refinement Information +++
REM R1_all = 0.0660
REM R1_gt = 0.0502
REM wR_ref = 0.1326
REM GOOF = 1.053
REM Shift_max = -0.001
REM Shift_mean = 0
REM Reflections_all = 18322
REM Reflections_gt = 6964
REM Parameters = n/a
REM Hole = -0.96
REM Peak = 1.32
REM Flack = n/a

;
_olex2_date_sample_data_collection 2013-04-20
_olex2_submission_special_instructions 'No special instructions were received'
loop_
  _refln_index_h
  _refln_index_k
  _refln_index_l
  _refln_F_squared_meas
  _refln_F_squared_sigma
  _refln_scale_group_code
 0 0 4 86729.1 3752.51 2
 0 0 -4 90125.2 3903.46 4
 0 0 5 621.076 269.798 2
 0 0 -5 327.132 220.265 4
 0 0 6 17801 1604.13 2
 0 0 7 235.741 315.875 2
 0 0 8 220570 9062.86 2
 0 0 9 -86.0808 263.823 2
 0 0 10 404668 15454.9 2
 0 0 11 726.045 556.264 2
 0 0 12 219060 10266.8 2
 0 0 13 387.566 545.827 2
 0 0 14 160986 8842.07 2
 0 0 15 -35.2003 505.234 2
 0 0 16 7755.51 1721.59 2
 0 0 17 944.686 887.564 2
 0 0 18 11531.3 2403.35 2
 0 0 19 323.201 553.874 2
 0 0 20 59863.7 5993.31 2
 0 0 21 226.153 765.486 2
 0 0 22 59822.3 6427.58 2
 0 0 23 -740.511 837.159 2
 0 0 24 24870.2 4271.35 2
 0 0 25 -916.79 1449.05 2
 0 0 26 2675.67 1796.88 2
 0 -1 -3 222938 7618.01 2
 0 1 3 216825 7686.03 4
 0 -1 -4 150700 5623.83 2
 0 1 4 143648 5723.53 4
 0 1 4 149858 5753.68 2
 0 -1 -4 142665 5641.83 4
 0 1 5 41833.8 2598.93 4
 0 -1 -5 45573.8 2556.68 4
 0 -1 -5 45572.7 2485.66 2
 0 1 5 42775.5 2560.29 2
 0 1 6 20989.5 1804.03 2
 0 1 6 20840.2 1854.55 4
 0 1 7 153560 6763.42 2
 0 1 7 153991 6986.21 4
 0 1 8 7291.87 1243.58 4
 0 1 8 7603.89 1220.33 2
 0 -1 8 8270.7 1202.94 2
 0 1 9 313119 12196.5 2
 0 -1 9 327945 12101.1 2
 0 -1 -10 430.62 182.83 1
 0 1 10 434.08 371.754 2
 0 -1 10 839.352 518.94 2
 0 -1 11 362171 14708.3 2
 0 1 11 357566 14890.7 2
 0 -1 -11 382282 12094.4 1
 0 1 12 2035.98 788.859 2
 0 -1 12 2343.14 782.202 2
 0 -1 -12 1980.58 311.354 1
 0 -1 -13 154022 5304.66 1
 0 1 13 157539 8571.57 2
 0 -1 13 164839 8428.05 2
 0 -1 14 9128.6 1792.72 2
 0 1 14 7737.41 1705.91 2
 0 -1 15 21893.6 2888.56 2
 0 1 15 28774.8 3426.25 2
 0 -1 16 30283.1 3609.2 2
 0 1 16 30435.5 3705.76 2
 0 -1 17 3290.72 1201.96 2
 0 1 17 4278.38 1494.03 2
 0 1 18 5216.38 1637.2 2
 0 -1 18 4482.08 1365.93 2
 0 1 19 62531.5 6047.6 2
 0 -1 19 55100.9 5478.36 2
 0 -1 20 2685.58 1177.82 2
 0 1 20 3295.57 1438.68 2
 0 -1 21 75841.3 6993.92 2
 0 1 21 77790.7 7279.02 2
 0 -1 22 2141.22 1172.99 2
 0 1 22 3424.57 1391.65 2
 0 -1 23 40194.2 5265.6 2
 0 1 23 34783.1 5123.48 2
 0 -1 24 6376.15 2004.7 2
 0 1 24 5289.32 2208.1 2
 0 -1 25 6575.81 2275.95 2
 0 1 25 8961.41 2893.67 2
 0 -1 26 4465.97 1893.1 2
 0 1 26 6202.29 2350.56 2
 0 2 1 189245 6918.4 4
 0 -2 -2 4996.22 519.913 3
 0 2 2 7060.77 800.047 4
 0 2 3 338849 11815.3 4
 0 2 3 331503 11182.8 3
 0 -2 -3 361790 11165.9 3
 0 -2 -3 336060 11821.2 4
 0 -2 -4 83865.8 4057.64 4
 0 2 4 89888.1 3635.82 3
 0 2 4 95477.8 4229.79 4
 0 2 5 39091.2 2163.59 3
 0 2 5 36703 2470.2 4
 0 2 6 966.251 372.067 4
 0 2 6 1637.97 443.147 3
 0 2 7 3234.31 776.194 4
 0 2 8 449535 16323.5 4
 0 2 8 435998 16245.6 2
 0 2 9 44060.2 3454.26 4
 0 2 9 46717.7 3483.32 2
 0 -2 9 38590.3 2038.31 1
 0 2 10 323831 13219.6 4
 0 -2 10 308025 10365.8 1
 0 2 10 328463 13085.2 2
 0 -2 11 4512.64 512.381 1
 0 2 11 4196.89 1137.47 4
 0 2 11 5359.53 1244.93 2
 0 -2 12 134272 7207.6 2
 0 2 12 131375 7846.56 4
 0 2 12 138212 7694.67 2
 0 -2 13 6798.78 1381.91 2
 0 2 13 6965.95 1591.58 2
 0 -2 -13 7187.76 776.291 1
 0 2 14 15049.1 2402.93 2
 0 -2 -14 15948.1 1197.44 1
 0 -2 14 16718.7 2370.06 2
 0 -2 -15 26377.9 1555.76 1
 0 2 15 23392.4 3170.28 2
 0 -2 15 26967.5 3164.46 2
 0 -2 16 849.204 603.717 2
 0 2 16 1854.85 998.941 2
 0 -2 17 28329.9 3525.81 2
 0 2 17 28378.1 3784.16 2
 0 2 18 34939.7 4347.44 2
 0 -2 18 30492.6 3844.48 2
 0 2 19 19610.3 3333.18 2
 0 -2 19 20582.9 3248 2
 0 -2 20 80687.9 6924.32 2
 0 2 20 77126.4 7222.29 2
 0 -2 21 1196.11 855.67 2
 0 2 21 2056.85 1430.25 2
 0 2 22 42313.3 5332.13 3
 0 -2 22 48551.5 5552.86 2
 0 2 22 45493.7 5777.94 2
 0 2 23 1578.79 931.389 3
 0 -2 23 4326.86 1571.47 2
 0 -2 24 17408.8 3607.01 2
 0 -2 25 10695.7 2769.2 2
 0 -2 26 1849.22 1527.39 2
 0 3 0 1685.11 530.073 4
 0 -3 -1 298925 11002.7 4
 0 3 1 307814 10986.2 4
 0 -3 -2 589384 20087.6 4
 0 3 2 614191 20095.2 4
 0 -3 -3 3135.36 498.172 3
 0 3 3 4240.84 778.322 4
 0 -3 -4 232864 7780.38 3
 0 3 4 209964 7789.72 3
 0 3 4 219031 8679.8 4
 0 -3 -5 1245.36 324.526 3
 0 3 5 1300.28 362.21 3
 0 3 6 367214 12974.4 3
 0 3 6 404214 14141.8 4
 0 3 7 200928 7888.98 3
 0 3 7 214062 8880.34 4
 0 3 8 317333 11996.6 3
 0 3 8 353800 13214.1 4
 0 3 9 345611 13208.8 3
 0 3 9 381127 14402.5 4
 0 3 10 7241.86 1201.11 3
 0 3 10 8624.83 1577.74 4
 0 3 11 87642.4 5226.57 3
 0 3 11 104812 6331.37 4
 0 -3 12 2386.36 458.432 1
 0 3 12 2910.23 874.012 3
 0 3 12 2290.18 851.504 4
 0 -3 13 12830.3 1053.25 1
 0 3 13 14301.9 2365.05 4
 0 3 13 11146.6 1833.07 3
 0 3 14 42266.3 4395.72 4
 0 3 14 38146.6 3639.85 3
 0 3 15 1087.14 642.181 3
 0 3 15 159.406 338.215 4
 0 -3 15 1751.47 840.158 2
 0 3 16 39814.2 4058.01 3
 0 -3 16 47169.4 4339.16 2
 0 -3 17 6450.16 1610.58 2
 0 3 17 5613.4 1558.42 3
 0 3 18 59639 5532.56 3
 0 -3 18 79055.7 6216.14 2
 0 -3 19 27127.8 3618.09 2
 0 3 19 23480.1 3432.65 3
 0 3 20 15888.7 2908.7 3
 0 -3 20 14930 2764.39 2
 0 -3 21 46498.8 5175.31 2
 0 3 21 35165.3 4543.46 3
 0 -3 22 524.493 741.412 2
 0 -3 23 36345.1 4914.14 2
 0 -3 24 11411.6 2836.6 2
 0 -3 25 11786.5 2915.02 2
 0 -3 26 15507.8 3436.24 2
 0 4 0 25850.5 2207.41 4
 0 4 1 45732.3 3082.16 4
 0 4 2 16888 1737.52 4
 0 -4 -3 289184 10118.1 3
 0 4 3 280579 11054.2 4
 0 4 4 5547.39 993.52 4
 0 -4 -4 4401.95 667.872 3
 0 -4 -5 672251 21233.7 3
 0 4 5 638393 21411.8 3
 0 4 5 661108 22679.7 4
 0 4 6 11892.5 1661.61 4
 0 4 6 9812.24 1122.88 3
 0 4 7 895250 30001.1 3
 0 4 7 999999 31667.7 4
 0 4 8 34048.9 3001.81 4
 0 4 8 33240 2403.45 3
 0 4 9 120490 6479.74 4
 0 4 9 107550 5371.17 3
 0 4 10 86777.9 5516.41 4
 0 4 10 77574.8 4456.56 3
 0 4 11 4113.86 931.546 3
 0 4 11 4827.73 1256.15 4
 0 4 12 64428.7 4987.12 4
 0 4 12 51476.7 3828.61 3
 0 4 13 16347.1 2092.78 3
 0 4 13 14483.5 2475.54 4
 0 -4 13 14482.1 1443.03 1
 0 4 14 8867.53 1979.69 4
 0 4 14 7812.64 1554.24 3
 0 4 15 82802.7 5760.81 3
 0 4 15 97067.2 7277.32 4
 0 4 16 334.903 479.097 4
 0 4 16 1363.34 799.821 3
 0 4 17 96778.5 7918.54 4
 0 -4 17 100277 6862.81 2
 0 4 17 77291.2 6041.79 3
 0 4 18 12510.4 2319.2 3
 0 -4 18 17436.5 2790.83 2
 0 4 19 49216 4984.33 3
 0 -4 19 62911.4 5637.36 2
 0 -4 20 17215.3 2993.56 2
 0 4 20 16031.5 2860.67 3
 0 -4 21 5022.21 1645.81 2
 0 -4 22 18694.7 3402.75 2
 0 -4 23 8542.98 2332.36 2
 0 -4 24 13745.6 3058.74 2
 0 -4 25 21988.8 4035.63 2
 0 5 0 24.4725 364.252 4
 0 5 -1 97400.9 5367.52 4
 0 5 1 91167.8 5211.61 4
 0 5 2 286071 11497.3 4
 0 5 3 69522.3 4461.06 4
 0 -5 -3 80921.8 3968.28 3
 0 -5 -4 311107 10999.8 3
 0 5 4 298256 12211.6 4
 0 -5 -5 1127.87 374.59 3
 0 5 5 504.685 462.922 4
 0 -5 -6 328999 11649.8 3
 0 5 6 329413 13278.8 4
 0 5 7 65.0505 183.234 3
 0 5 7 516.849 285.776 4
 0 5 8 109452 5368.84 3
 0 5 8 130522 6845.37 4
 0 5 9 485.508 494.179 3
 0 5 9 483.044 346.083 4
 0 5 10 6147.5 1464.43 4
 0 5 10 4087.34 902.264 3
 0 5 11 17607 2026.12 3
 0 5 11 27034.4 3038.68 4
 0 5 12 37303.2 3821.17 4
 0 5 12 38348.9 3174.67 3
 0 5 13 11576.7 1767.45 3
 0 5 13 20976 2890.27 4
 0 5 14 63064.2 4659.2 3
 0 5 14 76659.5 6085.15 4
 0 5 15 8623.67 2014.14 4
 0 5 15 5857.72 1310.19 3
 0 5 16 89191.5 7135.29 4
 0 5 16 70682 5376.52 3
 0 5 17 1778.94 953.583 3
 0 5 17 -608.036 990.549 4
 0 5 18 62508 5331.14 3
 0 5 18 71279.7 7029.55 4
 0 5 19 6667.91 2123.17 4
 0 -5 19 10270 2225.86 2
 0 -5 20 19420 3127.75 2
 0 -5 21 750.258 972.721 2
 0 -5 22 -673.335 889.065 2
 0 -5 23 525.334 680.865 2
 0 -5 24 9024.05 2438.34 2
 0 -5 25 -441.485 883.045 2
 0 6 0 70760.1 4756.86 4
 0 6 1 106691 6008 4
 0 6 -1 98627.7 5950.28 4
 0 6 2 4311.08 1131.94 4
 0 6 3 395132 15518.1 4
 0 6 4 25060.2 2665.29 4
 0 6 5 144814 7606.73 4
 0 6 6 7525.32 1446.9 4
 0 6 7 81305.5 5427.07 4
 0 6 8 5635.31 1305.38 4
 0 6 9 1463.04 542.431 3
 0 6 9 141.102 377.06 4
 0 6 10 2719.87 749.883 3
 0 6 10 2499.72 1053.52 4
 0 6 11 44424.3 4203.35 4
 0 6 11 41682.9 3203.83 3
 0 6 12 6676.59 1624.25 4
 0 6 12 6854.79 1212.18 3
 0 6 13 88480.9 5501.3 3
 0 6 13 108116 7259.45 4
 0 6 14 6656.92 1675.28 4
 0 6 14 4842.29 1144.31 3
 0 6 15 120975 8307.17 4
 0 6 15 97393.6 6223.67 3
 0 6 16 961.887 463.637 3
 0 6 16 1635.56 1037.13 4
 0 6 17 101568 8283.25 4
 0 6 18 1608.79 1007.75 4
 0 6 19 48823 6066.24 4
 0 6 20 1545.84 1111.99 4
 0 -6 20 2982.01 1232.79 2
 0 -6 21 2900.51 1377.33 2
 0 -6 22 3910.45 1546.48 2
 0 -6 23 358.025 577.342 2
 0 -6 24 3000.49 1246.09 2
 0 7 0 2410.98 933.222 4
 0 7 1 218440 10394.3 4
 0 7 -1 219237 10448 4
 0 7 -2 82912.2 5744.96 4
 0 7 2 90326.5 5800.62 4
 0 7 3 13918.3 2101.45 4
 0 7 4 156039 8267.42 4
 0 7 5 1770.3 909.864 4
 0 7 6 195222 9812.32 4
 0 7 7 10009.7 1800.84 4
 0 7 8 51723 4458.74 4
 0 7 9 15233.2 2393.14 4
 0 7 10 -46.0942 265.34 4
 0 7 11 32879.2 3730.48 4
 0 7 12 10487.1 1654.82 3
 0 7 12 11279.3 2237.75 4
 0 7 13 58076 5266.7 4
 0 7 13 46551.8 3801.05 3
 0 7 14 86828.7 5547.62 3
 0 7 14 96349.8 7244.68 4
 0 7 15 27236.8 3815.28 4
 0 7 15 23465.5 2706.66 3
 0 7 16 126135 9159.5 4
 0 7 17 1751.12 1278.75 4
 0 7 18 71388.4 7138.67 4
 0 7 19 9011.9 2547.27 4
 0 7 20 13444.5 3260.11 4
 0 7 21 25441.9 4646.49 4
 0 -7 21 22388.2 3564.88 2
 0 7 22 601.322 1406.61 4
 0 -7 22 1027.15 1036.65 2
 0 -7 23 16178.5 3181.14 2
 0 8 0 120689 7399.83 4
 0 8 -1 -235.778 318.336 4
 0 8 1 44.4318 459.385 4
 0 8 2 22328.5 2864.2 4
 0 8 -2 28354.4 3262.35 4
 0 8 3 25354.5 3021.84 4
 0 8 4 129.737 308.171 4
 0 8 5 102926 6765.13 4
 0 8 6 13315.8 2227.33 4
 0 8 7 124597 7735.98 4
 0 8 8 69144.6 5516.69 4
 0 8 9 21831.1 3032.08 4
 0 8 10 48696.2 4732.8 4
 0 8 11 3744.31 1319.51 4
 0 8 12 73535.9 6173.23 4
 0 8 13 32671.6 4082.94 4
 0 8 14 24385 3547.55 4
 0 8 15 44039.5 5020.4 4
 0 8 16 1940.42 1104.98 4
 0 8 17 46379.5 5546.76 4
 0 8 18 4108.59 1833.15 4
 0 8 19 12460.1 3090.63 4
 0 8 20 19264 3960.52 4
 0 8 21 1405.87 1097 4
 0 8 22 19035.2 4304.37 4
 0 8 23 1624.28 1395.95 4
 0 -8 23 1324.22 898.385 2
 0 9 0 370.705 367.474 4
 0 9 1 43842.1 4360.92 4
 0 9 -1 44562.9 4460.59 4
 0 9 2 3661.17 1186.46 4
 0 9 -2 4408.58 1417.69 4
 0 9 -3 15882.9 2588.12 4
 0 9 3 16688.4 2591.02 4
 0 9 4 37051.3 3931.05 4
 0 9 5 1856.49 1056.32 4
 0 9 6 63693.6 5451.98 4
 0 9 7 29858.7 3653.38 4
 0 9 8 26694.5 3438.67 4
 0 9 9 76828.6 6259.41 4
 0 9 10 1944.75 781.477 4
 0 9 11 74539.8 6349.75 4
 0 9 12 7494.12 1905.31 4
 0 9 13 50588.4 5314.14 4
 0 9 14 6483.55 1936.97 4
 0 9 15 13811 2938.06 4
 0 9 16 3818.88 1552.8 4
 0 9 17 -19.2938 546.494 4
 0 9 18 2354 1215.79 4
 0 9 19 21248.3 4031.94 4
 0 9 20 1529.81 1261.39 4
 0 9 21 29918.5 5187.48 4
 0 9 22 -557.429 1802.14 4
 0 10 0 57880.9 5370.45 4
 0 10 1 91.2419 481.9 4
 0 10 -1 -24.1129 852.526 4
 0 10 2 38543.7 4291.41 4
 0 10 -2 42314.7 4532.12 4
 0 10 -3 802.419 562.858 4
 0 10 3 -185.514 641.274 4
 0 10 4 39479.2 4344.38 4
 0 10 -4 32343.2 4197 4
 0 10 5 379.031 452.176 4
 0 10 6 2174.1 1239.52 4
 0 10 7 -180.301 656.905 4
 0 10 8 53617.9 5260.19 4
 0 10 9 1837.66 1089.42 4
 0 10 10 78487.5 6726.33 4
 0 10 11 5286.96 1699.09 4
 0 10 12 82391.8 7072.57 4
 0 10 13 -33.2572 706.608 4
 0 10 14 27354.1 4106.99 4
 0 10 15 -1103.69 1078.36 4
 0 10 16 1381.9 1263.64 4
 0 10 17 -672.544 1000.51 4
 0 10 18 8589.36 2624.93 4
 0 10 19 -485.899 1348.6 4
 0 10 20 28960.8 4989.29 4
 0 11 0 1122.17 1084.5 4
 0 11 1 163304 10132 4
 0 11 -1 160451 10253.5 4
 0 11 -2 7250.46 2006.57 4
 0 11 2 9226.9 2084.96 4
 0 11 -3 69781.9 6368.99 4
 0 11 3 63251.3 5901.98 4
 0 11 4 18519.1 3077.3 4
 0 11 -4 18917.3 3275.55 4
 0 11 5 8405.13 2148.8 4
 0 11 -5 7016.29 2055.93 4
 0 11 6 18994.9 3110.54 4
 0 11 7 22747.3 3453.03 4
 0 11 8 3361.83 1453.18 4
 0 11 9 76069.3 6730.35 4
 0 11 10 1258.63 1083.09 4
 0 11 11 92027.8 7733.51 4
 0 11 12 3625.74 1581.86 4
 0 11 13 32880.1 4538.87 4
 0 11 14 8270.3 2394.39 4
 0 11 15 3503.01 1649.09 4
 0 11 16 4741.1 1866.11 4
 0 11 17 744.361 692.96 4
 0 11 18 1994.92 1254.88 4
 0 11 19 11252.5 3097.26 4
 0 12 0 180521 11401.1 4
 0 12 -1 1954.41 1398.08 4
 0 12 1 288.835 634.895 4
 0 12 2 91576.9 7617.22 4
 0 12 -2 99432.8 8057.26 4
 0 12 -3 3891.92 1475.53 4
 0 12 3 5942.45 1766.1 4
 0 12 4 16332.2 3032.93 4
 0 12 -4 10832.7 2634.83 4
 0 12 5 4348.24 1497.51 4
 0 12 -5 3778.15 1683.4 4
 0 12 -6 3939.55 1639.48 4
 0 12 6 3713.48 1388.26 4
 0 12 7 12609.2 2743.19 4
 0 12 -7 10454.3 2769.78 4
 0 12 8 31073.9 4334.4 4
 0 12 9 3899.5 1677.68 4
 0 12 10 37393.2 4936.01 4
 0 12 11 2244.25 1358.51 4
 0 12 12 36316.4 4907.28 4
 0 12 13 20734.7 3805.12 4
 0 12 14 20207.2 3828.62 4
 0 12 15 23533.5 4203.1 4
 0 12 16 1769.94 1444.1 4
 0 12 17 12706.1 3343.1 4
 0 13 0 528.404 583.145 4
 0 13 -1 21184.9 3637.76 4
 0 13 1 22870.8 3771.86 4
 0 13 -2 11440.8 2697.68 4
 0 13 2 8106.38 2327.96 4
 0 13 3 11839.4 2782.74 4
 0 13 -3 16635.8 3335.59 4
 0 13 -4 27852 4401 4
 0 13 4 27838.3 4168.02 4
 0 13 -5 610.12 577.713 4
 0 13 5 2015.4 1222.98 4
 0 13 6 28870.3 4269.55 4
 0 13 -6 28830.5 4589.35 4
 0 13 -7 2926.22 1348.21 4
 0 13 7 2989.95 1469.95 4
 0 13 -8 9784.79 2785.51 4
 0 13 8 7369.74 2163.94 4
 0 13 9 10073.3 2657.19 4
 0 13 10 836.43 763.632 4
 0 13 11 16568.2 3340.61 4
 0 13 12 1888.22 1055.09 4
 0 13 13 9236.99 2533.87 4
 0 13 14 21442.3 4178.31 4
 0 13 15 2700.01 1679.33 4
 0 13 16 17959.8 3816.77 4
 0 14 0 8787.96 2397.69 4
 0 14 1 6185.97 2007.38 4
 0 14 -1 7390.62 2180 4
 0 14 2 6782.32 2174.86 4
 0 14 -2 3412.15 1468.35 4
 0 14 3 44232.2 5631.14 4
 0 14 -3 44787.5 5784.18 4
 0 14 -4 5345.62 2135.25 4
 0 14 4 4729.63 1864.53 4
 0 14 5 81550.1 7642.67 4
 0 14 -5 52789.7 6650.82 4
 0 14 6 1386.57 1209.22 4
 0 14 -6 1917.77 1365.29 4
 0 14 -7 43656.1 6035.36 4
 0 14 7 45146.5 5719.29 4
 0 14 -8 1150.34 1673.17 4
 0 14 8 2476.11 1404.11 4
 0 14 9 13695.6 3120.06 4
 0 14 -9 17825.9 3987.04 4
 0 14 -10 4319.32 1884.12 4
 0 14 10 2694.57 1419.28 4
 0 14 11 2725.49 1588.19 4
 0 14 12 1118.7 916.227 4
 0 14 13 3158.02 1607.39 4
 0 15 0 1881.38 1484.61 4
 0 15 -1 148.345 419.836 4
 0 15 1 390.295 889.572 4
 0 15 -2 13823.8 3279.49 4
 0 15 2 17469.8 3572.25 4
 0 15 3 1259.64 840.916 4
 0 15 -3 -3252.89 1666.69 4
 0 15 4 47141.3 6019.22 4
 0 15 -4 55622 6848.81 4
 0 15 5 -48.0919 917.445 4
 0 15 -5 -83.581 1159.67 4
 0 15 -6 74583.4 8233.16 4
 0 15 6 76224.5 7836.59 4
 0 15 7 -53.0501 823.062 4
 0 15 -7 -1385.64 1277.28 4
 0 15 8 43638.4 5877.93 4
 0 15 -8 51095.6 6880.97 4
 0 15 9 1000.93 1232.04 4
 0 15 -9 71.4819 774.844 4
 0 15 10 7421.32 2487.92 4
 0 15 -10 10709.5 3353.05 4
 0 15 -11 -2380.45 1909.52 4
 0 15 -12 844.846 1548.76 4
 0 16 0 2257.78 1408.58 4
 0 16 -1 5115.57 2285.25 4
 0 16 1 7582.87 2466.33 4
 0 16 -2 405.632 660.032 4
 0 16 2 1183.94 1409.13 4
 0 16 -3 24526.6 4692.4 4
 0 16 3 32561.8 5111.54 4
 0 16 -4 2613.39 1721.03 4
 0 16 4 1922.98 1535.56 4
 0 16 -5 54287.2 7130.19 4
 0 16 5 44800.4 6209.89 4
 0 16 6 1413.64 1296.25 4
 0 16 -6 -154.127 809.701 4
 0 16 -7 47434 6890.32 4
 0 16 -8 1928.35 1784.37 4
 -1 0 27 -238.28 1367.81 2
 -1 0 26 29121.9 4916.48 2
 -1 0 25 1151 811.922 2
 -1 0 24 10634.3 2657.31 2
 -1 0 23 77.7772 553.92 2
 -1 0 22 4774.48 1842.94 2
 -1 0 21 86.9919 889.332 2
 -1 0 20 28449.5 3927.18 2
 -1 0 19 146.557 790.354 2
 -1 0 18 101615 7422.37 2
 -1 0 17 1729.07 869.074 2
 -1 0 16 179747 9853.56 2
 -1 0 15 1086.75 796.519 2
 -1 0 14 218981 10595.9 2
 -1 0 13 -37.2285 321.061 2
 -1 0 12 139695 7338.17 2
 -1 0 11 255.879 440.288 2
 -1 0 10 51230.5 3575.32 2
 -1 0 9 757.511 383.603 2
 -1 0 8 40211.2 2741.12 2
 -1 0 7 93.7516 201.468 2
 -1 0 6 524846 17406 2
 -1 0 5 -43.3123 67.3313 2
 1 0 -5 22.5863 259.301 4
 -1 0 4 440953 14216.7 2
 -1 0 -3 165.634 123.521 1
 -1 0 -3 77.8222 141.699 2
 1 0 3 152.614 99.0276 1
 1 0 4 354829 12773 2
 1 0 4 369471 12081.3 1
 -1 0 -4 385718 12692.8 4
 -1 0 -4 387912 12069.2 1
 1 0 5 385.504 258.983 2
 -1 0 -5 111.655 167.015 4
 -1 0 -5 211.484 117.579 1
 1 0 6 166168 7030.43 2
 -1 0 -6 166751 5840.8 1
 1 0 7 204.796 241.714 2
 -1 0 -7 -12.5349 101.335 1
 -1 0 -8 168808 5917.25 1
 1 0 8 159137 7493.65 2
 1 0 9 396.18 436.517 2
 -1 0 -9 170.139 182.354 1
 -1 0 -10 74821.6 3099.43 1
 1 0 10 73582.5 4832.36 2
 1 0 11 278.854 309.682 2
 1 0 12 883.845 531.523 2
 1 0 13 -234.465 472.994 2
 1 0 14 25989.4 3216.7 2
 1 0 15 502.711 547.669 2
 1 0 16 173468 10142.7 2
 1 0 17 -63.8035 805.386 2
 1 0 18 73158.6 6456.21 2
 1 0 19 898.954 750.316 2
 1 0 20 14469.3 2913.11 2
 1 0 21 -408.583 889.05 2
 1 0 22 3316.94 1423.25 2
 1 0 23 662.994 1152.66 2
 1 0 24 10440.9 2924.41 2
 1 0 25 -2654.27 2060.24 2
 -1 -1 27 23066.4 4392.24 2
 -1 -1 26 -2295.69 1418.33 2
 -1 1 26 -1498.48 1632.76 2
 -1 1 25 22519.8 4295.94 2
 -1 1 25 19396.1 3990.53 3
 -1 -1 25 20046 3880.6 2
 -1 -1 24 1704.42 932.877 2
 -1 1 24 2656.86 1699.87 2
 -1 -1 23 8902.19 2370.5 2
 -1 1 23 6520.69 2162.62 2
 -1 1 22 623.238 598.651 2
 -1 -1 22 2174.32 1106.93 2
 -1 -1 21 705.963 785.601 2
 -1 1 21 763.644 504.026 2
 -1 1 20 3495.05 1364.1 2
 -1 -1 20 4270.53 1424.59 2
 -1 1 19 35283.3 4390.92 2
 -1 -1 19 50046.1 5029.95 2
 -1 1 18 2615.36 1230.34 2
 -1 -1 18 1876.41 997.976 2
 -1 -1 17 101791 7151.17 2
 -1 1 17 105720 7442.7 2
 -1 1 16 1364.96 689.035 2
 -1 -1 16 2543.24 1123.06 2
 -1 -1 15 124304 7483.02 2
 -1 1 15 122805 7636.48 2
 -1 1 14 44078.2 4018.74 2
 -1 -1 14 36366.1 3535.07 2
 -1 -1 13 123233 6788.33 2
 -1 1 13 110546 6741.41 2
 -1 1 12 10177.5 1706.22 2
 -1 -1 12 13002.4 1833.22 2
 -1 -1 11 36669.7 3025.47 2
 -1 1 11 34468.5 3080.62 2
 -1 -1 10 8100.37 1287.41 2
 -1 1 10 7909.56 1346.44 2
 -1 -1 9 4025.89 813.613 2
 -1 1 9 2220.56 646.267 2
 -1 1 8 42434.9 3295.44 4
 -1 1 8 47038.5 3071.87 2
 -1 1 7 26057.9 2283.85 4
 -1 1 7 27055.1 2078.65 2
 -1 1 6 6260.51 990.296 4
 -1 1 6 6115.2 870.156 2
 1 -1 -6 6011.87 788.283 2
 1 -1 -5 282958 10245 4
 -1 1 5 284601 10440 4
 -1 1 5 282519 10107.5 2
 1 -1 -5 303617 9994.57 2
 -1 1 4 109927 4411.66 3
 -1 1 4 98820.9 4381.44 4
 1 -1 -4 113437 4184.49 2
 1 -1 -4 99819.5 4312.21 4
 -1 1 3 635649 20588.4 4
 -1 1 3 662877 20555.5 3
 1 1 2 68928.2 2887.69 4
 1 -1 3 691.297 210.921 1
 1 1 3 1613.16 354.923 4
 -1 -1 -3 2025.53 401.397 2
 -1 -1 -3 1502.66 335.705 4
 1 1 3 1934.63 418.348 2
 1 -1 4 2882.91 439.876 1
 1 1 4 2512.19 502.599 4
 -1 -1 -4 3575.62 601.325 2
 1 1 4 2950.58 584.913 2
 -1 -1 -4 2326.69 480.145 4
 1 1 5 280181 10039.8 4
 1 1 5 272455 10163.3 2
 1 -1 5 274858 9203.94 1
 -1 -1 -5 265440 9793.39 4
 1 1 6 7502.53 1136.56 2
 1 1 6 9303.86 1210.41 4
 1 -1 6 10042.7 853.458 1
 1 -1 7 126239 4953.96 1
 1 1 7 119032 6137.36 4
 1 1 7 130890 6311.15 2
 1 -1 8 477.377 284.336 2
 -1 -1 -8 40.0032 130.438 1
 1 1 8 -194.913 259.069 4
 1 -1 8 158.431 169.691 1
 1 1 8 618.087 384.539 2
 1 1 9 148836 8255.47 4
 1 -1 9 192771 8483.14 2
 1 -1 9 175107 6530.97 1
 -1 -1 -9 210940 6804.28 1
 1 1 9 179692 8512.84 2
 1 1 10 940.593 595.9 2
 -1 -1 -10 658.415 292.984 1
 1 -1 10 1983.62 714.687 2
 -1 -1 -11 20611.4 1402.12 1
 1 -1 11 25149.9 2681.57 2
 1 1 11 21558 2573.07 2
 -1 -1 -12 14316.3 1130.4 1
 1 1 12 15740.4 2273.31 2
 1 -1 12 16477.1 2256.54 2
 -1 -1 -13 12409 1025.19 1
 1 -1 13 13688.1 2154.59 2
 1 1 13 13969.8 2295.51 2
 -1 -1 -14 55053.7 2530.37 1
 1 -1 14 53049.1 4617.67 2
 1 1 14 54803.7 4860.38 2
 -1 -1 -15 80100.7 3251.68 1
 1 -1 15 82633.3 6181.42 2
 1 1 15 91519.7 6647.78 2
 1 -1 16 14302.6 2472.04 2
 1 1 16 13965.2 2534.4 2
 1 1 17 173123 10415.5 2
 1 -1 17 157077 9864.07 2
 1 -1 18 1430.42 722.646 2
 1 1 18 2872.9 1289.64 2
 1 1 19 69608.6 6655.63 2
 1 -1 19 70346.8 6448.33 2
 1 1 20 4046.65 1594.86 2
 1 -1 20 5727.79 1867.1 2
 1 -1 21 9057.02 2434.45 2
 1 1 21 12989.6 2983.74 2
 1 -1 22 14532.2 3081.2 2
 1 1 22 14748.4 3266.22 2
 1 -1 23 -581.434 898.972 2
 1 1 23 -2941.3 1527.18 2
 1 -1 24 7921.36 2201.53 2
 1 1 24 9640.9 2894.34 2
 1 -1 25 22244.1 4247.1 2
 1 1 25 23026.4 4438.46 2
 -1 -2 27 -671.235 818.594 2
 -1 -2 26 31086.8 4886.2 2
 -1 -2 25 5804.03 2032.29 2
 -1 -2 24 15707.1 3266.96 2
 -1 2 24 12205.1 3081.71 3
 -1 2 23 4458.14 1763.22 3
 -1 -2 23 7642.94 2209.8 2
 -1 2 22 4231.56 1672.85 3
 -1 -2 22 2769.28 1173.22 2
 -1 2 22 5385.48 1836.25 2
 -1 2 21 22512.9 3788.15 2
 -1 -2 21 25966.1 3803.4 2
 -1 2 21 14610.5 2939.96 3
 -1 -2 20 842.224 654.357 2
 -1 2 20 244.227 419.959 3
 -1 2 20 1704.93 1188.78 2
 -1 2 19 19551.9 3178.37 3
 -1 -2 19 23355.3 3369.91 2
 -1 2 19 21979.3 3423.98 2
 -1 2 18 40809.2 4587.1 2
 -1 -2 18 43402.7 4442.3 2
 -1 -2 17 517.859 446.839 2
 -1 2 17 61.6003 549.273 2
 -1 -2 16 34702.9 3648.55 2
 -1 2 16 41366.5 4309.86 2
 -1 -2 15 13479.4 2132.61 2
 -1 2 15 15433.4 2457.28 2
 1 -2 -15 14070.4 967.427 1
 -1 2 14 52497.4 4519.94 2
 -1 -2 14 47516.8 4017.05 2
 -1 2 13 41201.5 3846.46 2
 -1 -2 13 50532.3 3934.6 2
 -1 2 12 29786.5 3059.52 2
 -1 -2 12 28893.3 2797.3 2
 -1 2 12 29762.7 3296.54 4
 -1 2 11 136454 7180.21 2
 -1 2 11 133833 7571.29 4
 -1 2 10 652.939 473.947 2
 -1 2 10 624.818 369.713 3
 -1 2 10 367.396 356.912 4
 -1 2 9 31027.6 2656.05 2
 -1 2 9 30375.2 2588.77 3
 -1 2 9 30735.9 2859.94 4
 -1 2 8 15258.9 1808.86 4
 -1 2 8 11241.5 1433.44 3
 -1 2 7 13879.2 1474.09 3
 -1 2 7 13132.4 1561.11 4
 -1 2 6 98163.7 4824.79 4
 -1 2 6 100219 4566.95 3
 -1 2 5 90287 4491.59 4
 1 -2 -5 93323.7 4254.65 2
 -1 2 5 98542.8 4301.75 3
 -1 2 4 360348 12632.7 3
 1 -2 -4 394982 12656.7 3
 -1 2 4 372430 12979.8 4
 1 -2 -4 378925 12968.7 4
 -1 2 3 9166.75 900.968 3
 1 -2 -3 11368.7 966.893 3
 -1 2 3 8607.95 943.09 4
 1 -2 -3 8408.35 943.65 4
 -1 2 2 178656 6660.32 4
 1 -2 -2 172182 6634.48 4
 1 -2 -2 189477 6566.09 3
 -1 2 1 69963.4 3134.95 4
 -1 2 0 5187.96 664.492 4
 1 2 0 6253.7 771.57 4
 1 2 1 140944 5530.48 4
 -1 -2 -1 142921 5557.64 4
 -1 -2 -2 108644 4725.28 4
 1 2 2 120505 4801.21 4
 1 2 3 709961 22446.5 4
 -1 -2 -3 673521 22369.7 4
 1 2 4 76166.2 2939.83 3
 1 2 4 68283.9 3553.89 4
 -1 -2 -4 67565.7 3517.54 4
 1 2 5 64215.7 3510.75 4
 1 2 6 153598 6699.28 4
 1 -2 7 9950.55 1051 1
 1 2 7 13936.1 1590.02 4
 1 2 7 14324.1 1722.13 2
 1 2 8 386945 14864.6 2
 1 -2 8 381328 13073.6 1
 1 2 8 400177 14724.2 4
 1 -2 9 1206.02 375.518 1
 1 2 9 1384.56 602.12 2
 1 2 9 1114.83 527.762 4
 1 2 10 130351 7104.96 2
 1 2 10 136684 7138.71 4
 1 -2 10 119639 4952.59 1
 1 -2 11 46637.8 3672.73 2
 1 2 11 37734.9 3636.61 4
 1 -2 11 36554.6 2091.45 1
 1 2 11 37937.4 3573.15 2
 1 -2 12 10.108 468.34 2
 1 2 12 362.705 501.897 2
 -1 -2 -12 297.882 191.837 1
 1 2 12 714.414 544.749 4
 1 -2 12 111.961 124.522 1
 1 2 13 83894.3 6040.86 2
 -1 -2 -13 79141 3679.31 1
 1 -2 13 78345.8 5529.62 2
 1 2 14 25271.9 3276.35 2
 1 -2 14 24424.3 2988.98 2
 -1 -2 -14 26028.7 1751.35 1
 1 -2 15 24086.5 3084.65 2
 -1 -2 -15 22585.8 1584.71 1
 1 2 15 22644 3228.82 2
 1 2 16 79394.4 6660.69 2
 1 -2 16 95323.5 6713.25 2
 1 2 17 2702.29 1543.07 2
 1 -2 17 101.842 571.745 2
 1 2 18 144141 9859.39 2
 1 -2 18 140388 9226.48 2
 1 -2 19 13632.8 2790.54 2
 1 2 19 14585.5 2904 2
 1 -2 20 43906.2 5082.63 2
 1 2 20 40885.4 5213.46 2
 1 -2 21 15831.8 3051.62 2
 1 2 21 16708.5 3454.58 2
 1 2 22 5700.21 2216.84 2
 1 -2 22 5601.56 1938.86 2
 1 -2 23 22893.7 3998.88 2
 1 -2 24 1660.85 1367.28 2
 1 -2 25 15199.6 3487.38 2
 -1 -3 26 1197.05 1247.74 2
 -1 -3 25 18876.6 3660.37 2
 -1 -3 24 12864.1 2889.38 2
 -1 -3 23 13059.2 2799.2 2
 -1 3 23 9708.01 2490.13 3
 -1 -3 22 38977.2 4764.43 2
 -1 3 22 30308.9 4398.45 3
 -1 3 21 312.663 614.173 3
 -1 -3 21 1161.74 860.97 2
 -1 -3 20 45149.1 4818.82 2
 -1 3 20 45649.3 5076.36 3
 -1 3 19 5931.82 1740.7 3
 -1 -3 19 5881.25 1641.46 2
 -1 3 18 9481.27 2091.42 3
 -1 -3 18 8223.66 1817.17 2
 -1 3 17 4256.46 1446.7 3
 -1 -3 17 4838.2 1295.84 2
 -1 -3 16 14933.5 2283.76 2
 -1 3 16 10577.6 2015.36 3
 -1 3 15 3084.29 1061.59 3
 -1 -3 15 3938.32 1159.61 2
 -1 3 15 4246.92 1427.79 4
 -1 3 14 22733.5 3149.46 4
 -1 3 14 22986.5 2764.61 3
 -1 3 13 12286.9 1948.81 3
 -1 -3 13 12522.7 987.157 1
 -1 3 13 14722.2 2366 4
 -1 3 12 77684.4 5100.92 3
 -1 3 12 85778.1 5926.79 4
 -1 3 11 10984.6 1627.2 3
 -1 3 11 8660.35 1590.74 4
 -1 3 10 217587 9717.91 4
 -1 3 10 195052 8799.8 3
 -1 3 9 2184.31 655.816 3
 -1 3 9 971.154 528.588 4
 -1 3 8 412673 15131.9 3
 -1 3 8 445117 16001.3 4
 -1 3 7 138661 6429.17 4
 -1 3 7 127998 5793.25 3
 -1 3 6 226892 8810.33 3
 -1 3 6 215082 9254.7 4
 1 -3 -5 15803 1346.98 3
 -1 3 5 18188 1729.05 4
 -1 3 4 4877.53 734.324 3
 -1 3 4 5704.91 921.969 4
 1 -3 -4 4889.31 707.22 3
 1 -3 -3 32516.2 2318.54 4
 1 -3 -3 31154.6 1995.83 3
 -1 3 3 35797.7 2367.72 4
 -1 3 2 347346 12305.9 4
 1 -3 -2 350139 12356.3 4
 -1 3 1 136070 5734.38 4
 1 -3 -1 135674 5776.45 4
 1 3 0 61527.6 3386.25 4
 -1 3 0 62980.9 3306.75 4
 1 3 1 85378.3 4119.18 4
 -1 -3 -1 78916.3 4055.28 4
 -1 -3 -2 165195 6926.05 4
 1 3 2 170501 6918.59 4
 1 3 3 51926.5 3134.9 4
 -1 -3 -3 53234.6 2204.7 3
 1 3 4 18151.3 1739.57 4
 -1 -3 -4 18456.4 1102.88 3
 1 3 4 15933.2 1073.95 3
 1 3 5 32149.6 1759.31 3
 1 3 5 32470.6 2487.23 4
 1 3 6 51184.1 2616.75 3
 1 3 6 56836.3 3550.06 4
 1 3 7 313462 11685.1 4
 1 3 7 275932 10217.8 3
 1 3 8 1411.26 590.61 4
 1 3 8 607.667 216.351 3
 1 3 9 226739 9727.32 4
 1 3 9 200517 8461.98 3
 1 3 10 55000.1 3576.27 3
 1 3 10 58342.5 4319.86 4
 1 -3 10 52464.9 3058.28 1
 1 3 11 8655.24 1622.54 4
 1 3 11 8295.81 1341.79 3
 1 -3 11 10010.6 1155.04 1
 1 3 12 113993 7052.89 4
 1 3 12 109102 6005.52 3
 1 -3 12 102219 4637.49 1
 1 -3 13 795.843 306.752 1
 1 3 13 279.264 372.148 4
 1 3 13 1340.22 624.309 3
 1 3 14 53412.4 4399.54 3
 1 3 14 55522.9 5265.23 4
 -1 -3 -14 67610.7 3437.64 1
 1 -3 14 65760.3 5076.04 2
 -1 -3 -15 24226.8 1845.75 1
 1 3 15 22356.2 3327.92 4
 1 3 15 21556.4 2750.68 3
 1 -3 15 21141.3 2832.72 2
 1 3 16 13555.8 2255.69 3
 1 -3 16 17822.8 2701 2
 1 -3 17 70040.4 5775.25 2
 1 3 17 62541.1 5352.31 3
 1 3 18 7930.44 1918.32 3
 1 -3 18 8022.75 1920.77 2
 1 3 19 25327.1 3587.72 3
 1 -3 19 37819.7 4480.39 2
 1 -3 20 45067.4 5110.91 2
 1 3 20 43286.4 4851.81 3
 1 -3 21 13767.5 2848.74 2
 1 -3 22 42969.5 5371.58 2
 1 -3 23 1332.48 1332.27 2
 1 -3 24 38756 5326.15 2
 1 -3 25 832.568 806.355 2
 -1 -4 26 2930.23 1500.65 2
 -1 -4 25 9881.52 2612.04 2
 -1 -4 24 3998.21 1643.4 2
 -1 -4 23 39928.5 4967.43 2
 -1 -4 22 10648.1 2522.88 2
 -1 -4 21 73629 6521.47 2
 -1 4 21 75437.4 6742.15 3
 -1 4 20 811.835 531.446 3
 -1 -4 20 678.709 820.94 2
 -1 4 19 43746.7 4715.1 3
 -1 -4 19 47903.7 4764.35 2
 -1 -4 18 3135.42 1168.62 2
 -1 4 18 814.049 555.232 3
 -1 4 17 5899.14 1727.43 4
 -1 4 17 3200.61 1083.78 3
 -1 -4 17 5567.18 1485.05 2
 -1 4 16 937.694 916.157 4
 -1 4 16 870.111 746.964 3
 -1 4 15 2061.23 848.45 3
 -1 4 15 1850.68 962.915 4
 -1 4 14 6565.06 1673.63 4
 -1 4 14 7343.52 1481.93 3
 -1 4 13 121968 7528.43 4
 -1 4 13 97650.8 6092.57 3
 -1 4 12 19145.1 2593.28 4
 -1 4 12 14898.5 1952.71 3
 -1 4 11 190803 8868.98 3
 -1 4 11 214723 10060.5 4
 -1 4 10 2108.89 658.814 3
 -1 4 10 1340.7 638.977 4
 -1 4 9 351198 13618.7 3
 -1 4 9 389253 14819.5 4
 -1 4 8 743.417 395.462 4
 -1 4 8 761.349 396.669 3
 -1 4 7 461729 16662.5 4
 -1 4 7 435383 15699.8 3
 -1 4 6 38880.3 2635 3
 -1 4 6 40304.4 3088.48 4
 -1 4 5 62381.1 3528.07 3
 -1 4 5 60205 3889.81 4
 1 -4 -5 71291.2 3530.24 3
 -1 4 4 2537.48 728.864 4
 1 -4 -4 2789.19 608.526 3
 1 -4 -3 95016.5 4429.89 3
 -1 4 3 88091.3 4712.24 4
 -1 4 2 526.818 327.998 4
 -1 4 1 187741 7901.79 4
 -1 4 0 34670.4 2587.32 4
 1 4 0 34383.8 2683.72 4
 1 4 1 103796 5234.81 4
 1 4 2 2445.7 623.546 4
 -1 -4 -3 105115 4176.46 3
 1 4 3 107975 5438.09 4
 1 4 4 34755.9 2812.55 4
 -1 -4 -4 39872.2 1991.13 3
 -1 -4 -5 225586 7902.18 3
 1 4 5 230009 9537.16 4
 1 4 6 143252 5741.1 3
 1 4 6 166017 7423.17 4
 1 4 7 33951.3 2875.87 4
 1 4 7 24157.6 1788.51 3
 1 4 8 76920.3 4802.83 4
 1 4 8 67623.3 3571.59 3
 1 4 9 78190.9 5022.69 4
 1 4 9 70311.9 3859.37 3
 1 4 10 47713.5 3143.98 3
 1 4 10 52319.8 4170.47 4
 1 4 11 155914 8201.91 4
 1 4 11 137498 6700.83 3
 1 4 12 2773.05 808.757 3
 1 4 12 4143.05 1310.47 4
 1 4 13 120107 7590.15 4
 1 4 13 106643 6092.3 3
 1 4 14 214.52 439.967 4
 1 4 14 601.694 486.291 3
 1 4 15 43281.9 3906.96 3
 1 4 15 49285.4 5019.21 4
 1 4 16 17826.1 2531.81 3
 1 4 16 21067.2 3412.99 4
 1 -4 16 18928.8 2776.1 2
 1 4 17 604.262 586.471 4
 1 -4 17 563.099 589.018 2
 1 4 17 716.511 590.188 3
 1 4 18 5566.23 1589.06 3
 1 -4 18 7943.02 1869.42 2
 1 -4 19 26993.2 3721.23 2
 1 -4 20 8539.12 2132.64 2
 1 -4 21 56102.3 5891.9 2
 1 -4 22 4808.96 1898.1 2
 1 -4 23 65880.7 6839.36 2
 1 -4 24 612.402 610.759 2
 -1 -5 26 1443.89 1304.09 2
 -1 -5 25 118.359 870.359 2
 -1 -5 24 26119 4149.27 2
 -1 -5 23 -27.4723 685.397 2
 -1 -5 22 50701.6 5391.44 2
 -1 -5 21 4179.95 1491.51 2
 -1 5 20 68385.3 6167.64 3
 -1 -5 20 92087.8 6945.49 2
 -1 5 19 4514.62 1415.43 4
 -1 -5 19 3521.91 1540.54 2
 -1 5 19 5490.36 1490.73 3
 -1 5 18 35038.4 3958.56 3
 -1 5 18 38728.3 5013.78 4
 -1 5 17 1946.12 913.376 3
 -1 5 17 1830.73 794.25 4
 -1 5 16 7258.39 1910.92 4
 -1 5 16 5056.3 1263.47 3
 -1 5 15 9715.46 2131.98 4
 -1 5 15 5900.73 1408.59 3
 -1 5 14 4741.62 1126.44 3
 -1 5 14 6529.63 1615.45 4
 -1 5 13 11505.1 2144.86 4
 -1 5 13 10163.4 1715.17 3
 -1 5 12 106256 6798.34 4
 -1 5 12 93228.2 5646.04 3
 -1 5 11 855.459 493.052 4
 -1 5 11 1183.16 594.467 3
 -1 5 10 233102 10685 4
 -1 5 10 212486 9386.1 3
 -1 5 9 1779.4 802.429 4
 -1 5 9 1845.16 660.84 3
 -1 5 8 54610.3 4091.45 4
 -1 5 8 45650 3220.46 3
 -1 5 7 11123.7 1452.97 3
 -1 5 7 11783.7 1767.38 4
 -1 5 6 62884.5 4295.65 4
 -1 5 5 87570.1 5138.54 4
 -1 5 4 2372.99 745.505 4
 -1 5 3 838.703 572.54 4
 -1 5 2 103312 5523.3 4
 -1 5 1 60146.2 3937.03 4
 1 5 -1 61313.9 4057.56 4
 -1 5 0 198545 8784.52 4
 1 5 0 206160 8988.58 4
 -1 5 -1 62694.1 4081.03 4
 1 5 1 61036 4070.65 4
 1 5 2 480235 17574.8 4
 -1 -5 -3 2666.59 546.36 3
 1 5 3 1794.37 641.573 4
 1 5 4 306665 12408.4 4
 -1 -5 -4 309563 10670.6 3
 -1 -5 -5 1941.27 424.417 3
 1 5 5 1661.96 675.054 4
 1 5 6 35266.6 3098.61 4
 -1 -5 -6 32569.2 1980.02 3
 1 5 7 6175.92 872.761 3
 1 5 7 9175.81 1584.5 4
 1 5 8 20375.4 1765.36 3
 1 5 8 31647.9 3032.04 4
 1 5 9 6865.93 1421.47 4
 1 5 9 5688.71 929.996 3
 1 5 10 183856 7964.7 3
 1 5 10 211796 9983.01 4
 1 5 11 964.779 698.488 4
 1 5 11 604.599 355.599 3
 1 5 12 162726 7751.71 3
 1 5 12 194165 9882.36 4
 1 5 13 1496.96 560.917 3
 1 5 13 1446.88 816.703 4
 1 5 14 83570.8 6468.9 4
 1 5 14 74330.6 4923.36 3
 1 5 15 31.7342 367.21 3
 1 5 15 -261.138 400.656 4
 1 5 16 22772.9 2725.34 3
 1 5 16 31186.6 4147.49 4
 1 5 17 76.992 843.826 4
 1 -5 18 3295.14 1196.85 2
 1 5 18 2665.76 1016.31 4
 1 5 19 3873.39 1552.33 4
 1 -5 19 -169.058 874.468 2
 1 -5 20 27171.2 3804.06 2
 1 -5 21 -120.492 533.406 2
 1 -5 22 48756.1 5593.49 2
 1 -5 23 -801.5 1026.61 2
 1 -5 24 34904.3 5027.77 2
 -1 -6 25 4513.39 1809.48 2
 -1 -6 24 1061.77 523.393 2
 -1 -6 23 20246.2 3402.95 2
 -1 -6 22 -1807.42 1050.48 2
 -1 -6 21 59852.9 5747.9 2
 -1 6 21 48939.6 6600.19 4
 -1 6 20 4203.26 1767.83 4
 -1 6 19 66168.1 7000.75 4
 -1 6 18 7275.31 2110.13 4
 -1 6 18 7958.77 1818.55 3
 -1 6 17 19438 3365.87 4
 -1 6 17 13427.7 2306.49 3
 -1 6 16 10525.1 1983.5 3
 -1 6 16 10211.1 2337.93 4
 -1 6 15 995.857 932.094 4
 -1 6 15 2370.32 1004.09 3
 -1 6 14 8857.46 1921.74 4
 -1 6 14 4588.54 1181.06 3
 -1 6 13 15677.9 2166.52 3
 -1 6 13 19349.1 2844.22 4
 -1 6 12 2284.82 757.008 3
 -1 6 12 3651.66 1209.93 4
 -1 6 11 58372.5 4156.98 3
 -1 6 11 74089.1 5455.99 4
 -1 6 10 1145.78 655.322 4
 -1 6 10 148.587 195.455 3
 -1 6 9 81345.9 5518.1 4
 -1 6 9 69671.3 4445.43 3
 -1 6 8 9115.02 1632.59 4
 -1 6 7 4453.33 1173.09 4
 -1 6 6 53269.6 4132.05 4
 -1 6 5 -339.773 348.691 4
 -1 6 4 55144.8 4070.85 4
 -1 6 3 30270 2907.59 4
 -1 6 2 1580.65 632.017 4
 1 6 -1 300653 12795.3 4
 -1 6 1 309212 12649.1 4
 1 6 0 676.797 530.546 4
 -1 6 0 904.677 286.04 4
 -1 6 -1 563836 20725.6 4
 1 6 1 564301 20758.1 4
 1 6 2 2175.9 850.665 4
 1 6 3 174099 8502.38 4
 1 6 4 38305.5 3432.78 4
 -1 -6 -4 39954.3 2451.85 3
 -1 -6 -5 1596.9 411.944 3
 1 6 5 3314.53 938.775 4
 1 6 6 28196.4 2973.75 4
 -1 -6 -6 32284 2084.5 3
 -1 -6 -7 65580.7 3279.54 3
 1 6 7 55476.3 4464.49 4
 1 6 8 3477.77 1054.19 4
 1 6 9 106606 6710.29 4
 1 6 10 32176.3 2515.23 3
 1 6 10 35508.1 3667.58 4
 1 6 11 143285 6964.63 3
 1 6 11 193176 9633.88 4
 1 6 12 1107.33 751.57 4
 1 6 12 1444.68 622 3
 1 6 13 127496 6697.33 3
 1 6 13 151523 8942.16 4
 1 6 14 394.788 576.893 4
 1 6 14 70.7452 325.651 3
 1 6 15 107743 7809.67 4
 1 6 15 89386.8 5690.55 3
 1 6 16 3570.35 1388.44 4
 1 6 17 6668.88 1921.23 4
 1 6 18 1631.02 968.582 4
 1 6 19 10227.4 2730.23 4
 1 6 20 3833.07 1897.64 4
 1 -6 20 4357.17 1513.11 2
 1 -6 21 19130.2 3290.01 2
 1 -6 22 768.568 584.184 2
 1 -6 23 30795.3 4533.66 2
 -1 -7 24 1556.26 1222.3 2
 -1 -7 23 5099.67 1719.02 2
 -1 -7 22 16748.4 3106.21 2
 -1 7 22 18552.7 4135.15 4
 -1 7 21 19.788 910.993 4
 -1 7 20 48141.2 6203.6 4
 -1 7 19 12370.8 2876.37 4
 -1 7 18 38710.2 5069.52 4
 -1 7 17 19871.3 3531.16 4
 -1 7 16 7091.64 2061.43 4
 -1 7 16 8579.67 1794.57 3
 -1 7 15 49700.1 4338.32 3
 -1 7 15 63151.7 5834.05 4
 -1 7 14 8209.6 1889.03 4
 -1 7 14 5327.32 1285.89 3
 -1 7 13 20617.7 2531.72 3
 -1 7 13 28631.3 3603.7 4
 -1 7 12 93776.2 6633.28 4
 -1 7 12 72982.9 5085.77 3
 -1 7 11 4636.81 1368.63 4
 -1 7 10 59698.4 4996.65 4
 -1 7 9 11629 2050.01 4
 -1 7 8 47945.6 4267.16 4
 -1 7 7 36035.8 3599.57 4
 -1 7 6 2604.92 936.834 4
 -1 7 5 59422.6 4603.98 4
 -1 7 4 804.818 489.612 4
 -1 7 3 45536.9 3885.07 4
 1 7 -2 86546.1 5924.25 4
 -1 7 2 95252.4 5912.78 4
 1 7 -1 18090 2410.35 4
 -1 7 1 15356.8 2189.57 4
 -1 7 0 175582 8859.02 4
 1 7 0 166204 8760.67 4
 1 7 1 1088.01 647.437 4
 -1 7 -1 696.609 371.259 4
 1 7 2 147608 8057.3 4
 -1 7 -2 154860 8297.95 4
 1 7 3 20632.5 2566.84 4
 1 7 4 75207.7 5259.5 4
 1 7 5 95014.5 6143.16 4
 1 7 6 5456.95 1336.68 4
 1 7 7 40694.6 3877.42 4
 1 7 8 56963.9 4770.25 4
 1 7 9 29654 3401.02 4
 1 7 10 110475 7278.51 4
 1 7 11 10200.2 2038.06 4
 1 7 12 120526 7990.02 4
 1 7 13 1217.73 919.445 4
 1 7 13 350.561 233.209 3
 1 7 14 91518.9 7176.91 4
 1 7 15 11810.1 2396.19 4
 1 7 16 21545.7 3579.59 4
 1 7 17 27754.3 4196.75 4
 1 7 18 -281.816 1133.53 4
 1 7 19 27368.3 4502.44 4
 1 7 20 6877.56 2370.98 4
 1 7 21 2818.07 968.766 4
 1 -7 21 3099.03 1574.98 2
 1 7 22 15590.2 3982.6 4
 1 -7 22 17676.5 3339.67 2
 1 -7 23 950.602 1021.77 2
 -1 -8 23 6653.49 2162.65 2
 -1 8 23 4887.84 2509.08 4
 -1 8 22 5230.83 2450.61 4
 -1 8 21 12613 3240.95 4
 -1 8 20 4440.84 1609.25 4
 -1 8 19 19010.5 3758.62 4
 -1 8 18 47708.9 5802.95 4
 -1 8 17 12090 2774.84 4
 -1 8 16 46080.4 5280.66 4
 -1 8 15 -260.248 618.017 4
 -1 8 14 63510.8 5931.8 4
 -1 8 13 9931.91 2225.16 4
 -1 8 12 3005.79 1196.99 4
 -1 8 11 41320.6 4392.08 4
 -1 8 10 4944.75 1498.8 4
 -1 8 9 37763.1 3999.71 4
 -1 8 8 13105.3 2237.83 4
 -1 8 7 8533.09 1808.09 4
 -1 8 6 39516.1 3936.95 4
 -1 8 5 2855.82 1040.34 4
 -1 8 4 75905.5 5549.75 4
 -1 8 3 1825.75 824.824 4
 1 8 -2 74614.5 5617.34 4
 -1 8 2 72107.4 5343.89 4
 -1 8 1 43733 4088.8 4
 1 8 -1 47957.3 4368.97 4
 1 8 0 4723.6 1344.75 4
 -1 8 0 5692.72 1419.85 4
 -1 8 -1 48537.9 4357.04 4
 1 8 1 47113.6 4291.62 4
 1 8 2 22984.1 2881.76 4
 -1 8 -2 22503.1 2906.45 4
 1 8 3 25857.1 3079.31 4
 1 8 4 117246 7325.52 4
 1 8 5 55272.8 4757.54 4
 1 8 6 125450 7749.85 4
 1 8 7 4722.17 1375.35 4
 1 8 8 97878.3 6814.26 4
 1 8 9 58997.5 5195.18 4
 1 8 10 32074.2 3758.95 4
 1 8 11 104571 7470.95 4
 1 8 12 421.257 701.914 4
 1 8 13 38789.4 4487.64 4
 1 8 14 16091 2910.26 4
 1 8 15 22278.5 3504.13 4
 1 8 16 61533.3 6264.48 4
 1 8 17 973.131 527.771 4
 1 8 18 59702.7 6603.12 4
 1 8 19 5497.02 2119.84 4
 1 8 20 22132 4279.36 4
 1 8 21 5905.09 2338.11 4
 1 8 22 2611.23 1342.06 4
 1 -8 22 4499.81 1675.08 2
 -1 9 22 8027.47 2631.87 4
 -1 9 21 2126.61 1702.97 4
 -1 9 20 8397.12 2741.12 4
 -1 9 19 15287 3423.67 4
 -1 9 18 1322.16 797.367 4
 -1 9 17 53038.3 6042.65 4
 -1 9 16 1276.89 783.15 4
 -1 9 15 74655.6 6889.29 4
 -1 9 14 336.147 614.094 4
 -1 9 13 51491.3 5350.58 4
 -1 9 12 2214.95 952.965 4
 -1 9 11 3765.63 1473.27 4
 -1 9 10 36821.3 4194.7 4
 -1 9 9 15888.5 2688.75 4
 -1 9 8 13626.9 2493.78 4
 -1 9 7 77423.3 6078.31 4
 -1 9 6 2673.73 1090.42 4
 -1 9 5 110939 7330.36 4
 -1 9 4 295.674 509.949 4
 1 9 -3 83310.8 6453.03 4
 -1 9 3 82187.7 6147.26 4
 -1 9 2 12840.7 2223.09 4
 1 9 -2 13183 2374.17 4
 -1 9 1 24062.5 3119.43 4
 1 9 -1 18290.9 2868.21 4
 1 9 0 21577.9 2983.25 4
 -1 9 0 24477.3 3145.55 4
 -1 9 -1 1271.16 797.489 4
 1 9 1 4750.03 1386.22 4
 1 9 2 8261.5 1771.64 4
 -1 9 -2 3284.58 1142.98 4
 -1 9 -3 41092.2 4315.12 4
 1 9 3 45932.6 4459.63 4
 1 9 4 14812.4 2451.2 4
 1 9 5 96762.3 6868.97 4
 1 9 6 5175.96 1632.57 4
 1 9 7 124569 8158.72 4
 1 9 8 7047.56 1745.39 4
 1 9 9 124876 8306.61 4
 1 9 10 25666.1 3514.35 4
 1 9 11 16782.3 2862.25 4
 1 9 12 13857.5 2715.37 4
 1 9 13 4104.28 1478.88 4
 1 9 14 6344.1 1920.12 4
 1 9 15 27399.1 4067.73 4
 1 9 16 603.482 735.557 4
 1 9 17 62758 6700.57 4
 1 9 18 1400.89 1055.21 4
 1 9 19 41090.7 5777.51 4
 1 9 20 6605.87 2367.39 4
 1 9 21 16934.7 3945.95 4
 -1 10 21 3153.13 1742.3 4
 -1 10 20 7739.57 2543.88 4
 -1 10 19 515.038 853.591 4
 -1 10 18 22775.1 4061.79 4
 -1 10 17 899.174 1083.09 4
 -1 10 16 44253 5514.6 4
 -1 10 15 1988.75 1171.7 4
 -1 10 14 65377.2 6443.03 4
 -1 10 13 623.223 497.452 4
 -1 10 12 23887.7 3643.15 4
 -1 10 11 2800.47 1284.43 4
 -1 10 10 3316.64 1440.2 4
 -1 10 9 2771.3 977.432 4
 -1 10 8 35441.3 4205.6 4
 -1 10 7 1255.96 844.45 4
 -1 10 6 69808.6 5985.55 4
 -1 10 5 2584.33 1072.88 4
 1 10 -4 90413.9 7242.13 4
 -1 10 4 93130.5 6962.02 4
 -1 10 3 2217.17 1141.37 4
 1 10 -3 3583.34 1523.52 4
 1 10 -2 31009.3 3908.21 4
 -1 10 2 33440.6 3901.08 4
 1 10 -1 941.998 561.849 4
 -1 10 1 1634.96 1063.19 4
 -1 10 0 2349.96 1082.46 4
 1 10 0 527.483 830.184 4
 -1 10 -1 1261.61 796.119 4
 1 10 1 442.009 571.086 4
 -1 10 -2 14333.5 2604.44 4
 1 10 2 15736.2 2678.92 4
 -1 10 -3 -474.525 682.047 4
 1 10 3 721.501 603.967 4
 1 10 4 50847.6 5019.45 4
 -1 10 -4 55211.4 5417.91 4
 1 10 5 1439.62 826.253 4
 1 10 6 135621 8844.19 4
 1 10 7 933.185 683.743 4
 1 10 8 144100 9364.38 4
 1 10 9 757.562 812.945 4
 1 10 10 70345.4 6277.62 4
 1 10 11 929.056 754.418 4
 1 10 12 1060.29 716.336 4
 1 10 13 -327.965 1030.75 4
 1 10 14 13694.5 2982.87 4
 1 10 15 1016.96 981.938 4
 1 10 16 51390.9 6001.45 4
 1 10 17 2726.6 1490.7 4
 1 10 18 44679.3 5933.69 4
 1 10 19 -1282.58 1002.2 4
 1 10 20 27654.9 5028 4
 -1 11 19 21673.4 4279.48 4
 -1 11 18 225.927 992.393 4
 -1 11 17 39976.2 5471.08 4
 -1 11 16 4775.94 1892.59 4
 -1 11 15 44935.8 5592.13 4
 -1 11 14 3577.37 1590.71 4
 -1 11 13 45316.7 5369.3 4
 -1 11 12 2105.01 1279.09 4
 -1 11 11 7126.43 2150.31 4
 -1 11 10 4589.33 1705.95 4
 -1 11 9 16591.8 3020.27 4
 -1 11 8 2271.63 1170.79 4
 -1 11 7 73070.8 6438.2 4
 -1 11 6 3972.46 1340.36 4
 -1 11 5 76900.5 6563.29 4
 1 11 -5 85798.6 7365.35 4
 -1 11 4 3342.41 1234.74 4
 1 11 -4 4328.45 1682.1 4
 1 11 -3 87016.8 7292.43 4
 -1 11 3 90554.4 7095.12 4
 1 11 -2 28792.9 3949.23 4
 -1 11 2 24419.5 3609.5 4
 -1 11 1 57459.2 5599.66 4
 1 11 -1 55162.9 5554.77 4
 1 11 0 16762.9 2919.57 4
 -1 11 0 15622.5 2899.05 4
 -1 11 -1 2670.18 1044.82 4
 1 11 1 2889.87 1223.6 4
 -1 11 -2 8460.69 2167.99 4
 1 11 2 5384.43 1628.61 4
 1 11 3 22887 3419.08 4
 -1 11 -3 23017.4 3651.07 4
 1 11 4 3208.26 1473.43 4
 -1 11 -4 4665.58 1869.45 4
 1 11 5 85126.4 6957.6 4
 -1 11 -5 81826.8 7235.41 4
 1 11 6 63.1948 586.105 4
 1 11 7 127922 8985.14 4
 1 11 8 2633.09 1023.03 4
 1 11 9 77145.3 6838.53 4
 1 11 10 17265.7 3178.93 4
 1 11 11 3828.44 1441.86 4
 1 11 12 19227.6 3435.55 4
 1 11 13 5310.59 1800.16 4
 1 11 14 9446.22 2336.26 4
 1 11 15 20137 3743.96 4
 1 11 16 4066.63 1627.01 4
 1 11 17 40488 5598.2 4
 1 11 18 -2314.62 1422.46 4
 1 11 19 16353.7 3758.67 4
 -1 12 18 19810.4 4052.7 4
 -1 12 17 2859.24 1195.6 4
 -1 12 16 48565.2 6097.26 4
 -1 12 15 562.483 1004.59 4
 -1 12 14 40492.7 5429.93 4
 -1 12 13 2870.97 1417.47 4
 -1 12 12 17587 3343.68 4
 -1 12 11 8284.39 2310.37 4
 -1 12 10 539.683 382.914 4
 -1 12 9 3775.96 1541.22 4
 -1 12 8 34825.2 4552.57 4
 -1 12 7 2509.99 1552.39 4
 -1 12 6 81135.2 7099.92 4
 1 12 -6 78205.4 7493.77 4
 -1 12 5 2764.23 1162.31 4
 1 12 -5 2077.74 1082.34 4
 -1 12 4 76722.9 6817.72 4
 1 12 -4 73635.3 7025.58 4
 -1 12 3 13266.1 2793.49 4
 1 12 -3 6372.69 1982.46 4
 1 12 -2 68291.9 6677.66 4
 -1 12 2 79671.4 6924.97 4
 1 12 -1 15361.5 3040.28 4
 -1 12 1 11081.2 2522.11 4
 1 12 0 26250.3 3924.89 4
 -1 12 0 26746.2 3919.04 4
 1 12 1 24138.6 3714.36 4
 -1 12 -1 22392 3637.22 4
 1 12 2 -87.4932 419.273 4
 -1 12 -2 2154 1275.93 4
 -1 12 -3 13269.7 2886.6 4
 1 12 3 15135.2 2906.99 4
 1 12 4 47795 5273.98 4
 -1 12 -4 32010.2 4541 4
 -1 12 -5 1510.3 1162.22 4
 1 12 5 1767.61 1182.34 4
 -1 12 -6 54524.6 6139.3 4
 1 12 6 56699.9 5900.93 4
 -1 12 -7 35.391 645.59 4
 1 12 7 2508.66 1528.73 4
 1 12 8 35434.8 4618.14 4
 1 12 9 15478.9 3121.79 4
 1 12 10 2414.52 1359.37 4
 1 12 11 35558.1 4810.42 4
 1 12 12 174.892 950.606 4
 1 12 13 29070.9 4473.81 4
 1 12 14 10917.7 2790.58 4
 1 12 15 15194.6 3436.87 4
 1 12 16 24842.5 4394.16 4
 1 12 17 4951.01 1952.62 4
 -1 13 16 804.833 825.259 4
 -1 13 15 14644.6 3365.7 4
 -1 13 14 4558.02 1735.67 4
 -1 13 13 8027.94 2345.69 4
 -1 13 12 19616.2 3629.74 4
 -1 13 11 -387.411 749.162 4
 -1 13 10 18743.8 3565.55 4
 -1 13 9 7107.56 2101.49 4
 -1 13 8 13433.5 2918.42 4
 1 13 -8 12428.1 3042.81 4
 -1 13 7 17622.8 3342.18 4
 1 13 -7 19644.2 3860.39 4
 1 13 -6 2444.57 1560.72 4
 -1 13 6 2758.41 1474.48 4
 -1 13 5 34521.8 4656.9 4
 1 13 -5 32131.8 4785.5 4
 1 13 -4 604.289 765.782 4
 -1 13 4 2316.24 1283.68 4
 -1 13 3 28011.6 4274.02 4
 1 13 -3 28809.7 4508.31 4
 1 13 -2 10301.7 2519.22 4
 -1 13 2 11097.8 2677.39 4
 1 13 -1 5381.78 1834.26 4
 -1 13 1 7366.19 2188.23 4
 -1 13 0 22672.7 3883.17 4
 1 13 0 28282.8 4242.72 4
 -1 13 -1 1710.61 759.194 4
 1 13 1 -307.758 954.646 4
 -1 13 -2 43177.4 5409.85 4
 1 13 2 43446.4 5287.06 4
 1 13 3 6928.69 2109.58 4
 -1 13 -3 9760.5 2607.58 4
 -1 13 -4 24135 4136.36 4
 1 13 4 22503.8 3684.02 4
 -1 13 -5 28955.3 4511.79 4
 1 13 5 26087.5 4068.16 4
 -1 13 -6 2587.8 1482.24 4
 1 13 6 5027.67 1760.02 4
 -1 13 -7 22533.1 4111.77 4
 1 13 7 17755 3473.36 4
 -1 13 -8 5332.52 1931.1 4
 1 13 8 3151.65 1302.98 4
 1 13 9 5335.41 1945.92 4
 1 13 10 25225.3 4157.44 4
 1 13 11 2553.23 1523.53 4
 1 13 12 34392.4 5037.48 4
 1 13 13 2460.04 1569.55 4
 1 13 14 24835.2 4367.62 4
 1 13 15 16390.7 3594.4 4
 -1 14 14 2556.44 1294.5 4
 -1 14 13 20586.5 3912.34 4
 -1 14 12 510.329 796.633 4
 -1 14 11 43694.7 5789.51 4
 -1 14 10 2041.7 1338.65 4
 1 14 -10 -784.425 1441.6 4
 1 14 -9 32092.5 5450.47 4
 -1 14 9 36060.8 5114.62 4
 -1 14 8 6084.8 2006.92 4
 1 14 -8 3417.04 1606.34 4
 1 14 -7 25010.1 4593.32 4
 -1 14 7 17124.7 3439.93 4
 1 14 -6 7011.71 2383.9 4
 -1 14 6 4904.24 1685.64 4
 1 14 -5 4542.78 1998.12 4
 -1 14 5 7395.5 2184 4
 -1 14 4 8236.58 2441.93 4
 1 14 -4 6620.41 2189.37 4
 1 14 -3 223.112 904.192 4
 -1 14 3 1320.55 1184.54 4
 -1 14 2 3446.77 1584.15 4
 1 14 -2 5325.05 1887.44 4
 -1 14 1 23952.1 4019.43 4
 1 14 -1 18445.8 3629.8 4
 1 14 0 1938.54 1168.11 4
 -1 14 0 1829.82 1194.08 4
 -1 14 -1 32870.4 4866.01 4
 1 14 1 43444.2 5504.95 4
 1 14 2 -43.8023 672.679 4
 -1 14 -2 2756.54 1554.08 4
 -1 14 -3 50127.9 6290.17 4
 1 14 3 52593.1 6174.01 4
 1 14 4 -134.432 961.283 4
 -1 14 -4 2164.66 1197.46 4
 1 14 5 16149.9 3320.63 4
 -1 14 -5 22861.2 4204.19 4
 -1 14 -6 6771.81 2279.65 4
 1 14 6 4923.22 2001.72 4
 -1 14 -7 1060 1119.17 4
 1 14 7 -44.9844 647.115 4
 -1 14 -8 8938.09 2913.6 4
 1 14 8 8409.77 2411.05 4
 1 14 9 7612.81 2385.06 4
 -1 14 -9 3569.27 1867.32 4
 1 14 10 1582.04 1028.64 4
 -1 14 -10 1881.3 1130 4
 1 14 11 16405.1 3530.84 4
 1 14 12 1158.57 940.488 4
 1 14 13 14436.2 3391.39 4
 1 15 -12 19670.5 4591.61 4
 1 15 -11 -773.624 1374.11 4
 -1 15 11 313.62 1001.91 4
 -1 15 10 48666.9 6328.38 4
 1 15 -10 51096.4 7115.09 4
 -1 15 9 450.024 690.758 4
 1 15 -9 1167.54 1252.08 4
 1 15 -8 37997.6 5991 4
 -1 15 8 38319 5485.16 4
 1 15 -7 2034.86 1192.41 4
 -1 15 7 1081.69 1162.33 4
 1 15 -6 12023.6 3201.94 4
 -1 15 6 18168.2 3749.56 4
 -1 15 5 -87.0546 650.972 4
 1 15 -5 -300.525 909.574 4
 1 15 -4 312.98 661.526 4
 -1 15 4 1315.69 1274.84 4
 -1 15 3 -852.669 1083.34 4
 1 15 -3 846.727 782.692 4
 1 15 -2 16184.3 3419.89 4
 -1 15 2 10750.5 2892.36 4
 -1 15 1 91.8384 740.811 4
 1 15 -1 1226.29 1016.61 4
 -1 15 0 30666.6 4842.83 4
 1 15 0 37470.2 5360.16 4
 -1 15 -1 354.37 1078.52 4
 1 15 1 -383.631 661.636 4
 -1 15 -2 45822.6 6072.53 4
 1 15 2 44652.1 5843.95 4
 1 15 3 240.082 1050.29 4
 -1 15 -3 -1115.23 1263.68 4
 -1 15 -4 20399.6 4169.03 4
 1 15 4 25393.2 4340.48 4
 -1 15 -5 166.903 548.52 4
 1 15 5 1354.84 857.406 4
 -1 15 -6 6378.2 2369.95 4
 1 15 6 8351.5 2513.58 4
 -1 15 -7 650.366 1022.38 4
 1 15 7 -258.297 478.412 4
 -1 15 -8 -239.05 951.269 4
 1 15 8 1819.44 1372.91 4
 1 15 9 -370.006 1153.39 4
 -1 15 -9 553.738 570.002 4
 1 15 10 18940.8 3957.24 4
 -1 15 -10 13799.4 3615.09 4
 -1 15 -11 1095.79 723.955 4
 -1 15 -12 24381.8 4944.94 4
 -1 16 7 18459 3773.75 4
 1 16 -7 18073.7 4200.73 4
 -1 16 6 -547.832 1270.56 4
 1 16 -6 4927.77 2382.76 4
 -1 16 5 697.449 1008.82 4
 1 16 -5 937.039 1029.44 4
 1 16 -4 1235.14 648.331 4
 -1 16 4 2397.36 1396.26 4
 -1 16 3 1282.29 789.806 4
 1 16 -3 2902.02 1658.76 4
 -1 16 2 805.192 1240.76 4
 1 16 -2 -562.011 1198.77 4
 1 16 -1 28285.7 4865.62 4
 -1 16 1 22637.8 4308.47 4
 1 16 0 -112.222 1029.53 4
 -1 16 0 573.109 914.259 4
 -1 16 -1 36408.1 5563.75 4
 1 16 1 28535.3 4906.85 4
 -1 16 -2 -180.012 1403.7 4
 1 16 2 -822.622 1585 4
 1 16 3 29841.9 4974.47 4
 -1 16 -3 33349.9 5466.13 4
 -1 16 -4 2730.35 1631.7 4
 1 16 4 1246.39 1339.59 4
 -1 16 -5 14327.3 3708.01 4
 1 16 5 14649.5 3541.33 4
 -1 16 -6 3432.47 1974.51 4
 -1 16 -7 1025.16 877.867 4
 -1 16 -8 953.584 1153.48 4
 -2 0 28 4157.9 2310.45 3
 -2 0 28 2865.87 1709.13 2
 -2 0 27 -383.19 1145.66 2
 -2 0 27 859.699 713.136 3
 -2 0 26 469.191 918.252 2
 -2 0 25 782.861 446.395 2
 -2 0 24 22081.4 3870.12 2
 -2 0 23 -1082.77 1251.17 2
 -2 0 22 69230.2 6625.12 2
 -2 0 21 -1020.8 1067.16 2
 -2 0 20 115883 8320.26 2
 -2 0 19 -3002.75 1216.23 2
 -2 0 18 120174 7954.68 2
 -2 0 17 -41.0558 609.934 2
 -2 0 16 165144 9127.29 2
 -2 0 15 1131.2 807.814 2
 -2 0 14 8237.91 1566.63 2
 -2 0 13 77.5692 242.669 2
 -2 0 12 54779.9 3969.89 2
 -2 0 11 -34.2073 257.123 2
 -2 0 10 553247 19407.9 2
 -2 0 9 232.226 263.694 2
 -2 0 8 529312 17945.4 2
 2 0 -7 283.383 121.748 1
 -2 0 7 -2.54171 168.789 2
 -2 0 6 165668 6196.44 2
 2 0 -6 163160 5542.16 1
 -2 0 5 226.89 152.595 1
 2 0 -5 125.934 113.123 1
 -2 0 5 29.3778 108.622 2
 2 0 -4 45473.9 2033.72 1
 -2 0 4 44092.4 1933.44 2
 -2 0 4 47747.1 2117.03 1
 -2 0 3 840.541 288.175 3
 -2 0 -1 242.364 168.99 2
 2 0 1 107.742 103.444 1
 -2 0 -2 164106 6103.74 2
 2 0 2 170090 6227.3 1
 -2 0 -2 173674 6201.03 1
 2 0 2 171894 5816.16 4
 -2 0 -2 162255 5654.38 4
 2 0 2 169044 6208.78 2
 -2 0 -3 89.4897 124.776 1
 2 0 3 163.457 135.71 1
 2 0 3 65.7253 138.159 2
 -2 0 -3 -21.1358 105.461 4
 2 0 4 3885.54 592.21 1
 -2 0 -4 2114.44 431.036 4
 -2 0 -4 2257.12 476.766 1
 2 0 4 4995.93 787.324 2
 2 0 5 380.429 220.215 1
 2 0 5 91.0473 132.527 2
 -2 0 -5 159.799 168.678 1
 -2 0 -5 -36.2459 97.5657 4
 2 0 6 7901.64 1193.91 2
 -2 0 -6 8161.85 888.316 1
 -2 0 -7 -43.3009 129.257 1
 2 0 7 214.034 260.314 2
 -2 0 -8 78859.9 3505.61 1
 2 0 8 69493.3 4541.73 2
 -2 0 -9 329.949 238.048 1
 2 0 9 421.688 496.936 2
 2 0 10 201814 9864.72 2
 -2 0 -10 220267 7915.02 1
 2 0 11 -664.521 608.42 2
 -2 0 -11 434.294 280.424 1
 -2 0 -12 198768 7274.16 1
 2 0 12 181898 9728.61 2
 2 0 13 -283.041 458.961 2
 2 0 14 199838 10736.5 2
 2 0 15 470.329 772.589 2
 2 0 16 132036 8752.22 2
 2 0 17 -35.5383 701.951 2
 2 0 18 5652.22 1728.76 2
 2 0 19 -234.272 438.02 2
 2 0 20 23242.2 3856.45 2
 2 0 21 -308.89 581.92 2
 2 0 22 48503.2 6063.19 2
 2 0 23 -258.377 1029.83 2
 2 0 24 60176.7 7210.35 2
 2 0 25 3584.19 1906.21 2
 -2 -1 28 1528.25 1716.7 2
 -2 -1 27 -717.215 906.497 2
 -2 1 27 383.625 1145.1 3
 -2 1 26 29.491 1150.04 3
 -2 1 26 1851.15 1378.7 2
 -2 1 25 3177.35 1303.41 2
 -2 -1 25 4703.56 1684.74 2
 -2 1 25 2476.87 1383.73 3
 -2 1 24 1187.37 979.508 3
 -2 1 24 1511.89 763.004 2
 -2 -1 24 1325.48 1116.44 2
 -2 1 23 43209.8 5403.22 2
 -2 -1 23 53688.5 5773.96 2
 -2 1 22 85.9108 787.394 2
 -2 -1 22 2277.57 967.161 2
 -2 1 21 88202.2 7533.17 2
 -2 -1 21 93761 7447.52 2
 -2 1 20 13397.1 2716.97 2
 -2 -1 20 16107.4 2885.85 2
 -2 1 19 96089.4 7458.09 2
 -2 -1 19 106134 7503.09 2
 -2 1 18 6461.23 1721.66 2
 -2 -1 18 5408.01 1565.31 2
 -2 -1 17 91959.2 6385.1 2
 -2 1 17 71403.9 5900.3 2
 -2 1 16 28377.8 3368.78 2
 -2 -1 16 29936.7 3314.48 2
 -2 1 15 7198.38 1571.72 2
 -2 -1 15 6847.26 1455.38 2
 -2 1 14 72448.2 5225.38 2
 -2 -1 14 79591.8 5238.91 2
 -2 -1 13 8622.67 1469.6 2
 -2 1 13 7809.28 1479.04 2
 -2 1 12 8469.59 1478.22 2
 -2 -1 12 11605.3 1666.84 2
 -2 1 11 276215 11347.4 2
 -2 -1 11 288569 11231.6 2
 2 -1 -11 274030 8987.53 1
 -2 1 10 7723.16 1246.63 2
 2 -1 -10 7255.22 646.377 1
 -2 -1 10 4713.17 940.603 2
 -2 -1 9 456208 15735 2
 -2 1 9 433254 15809.2 2
 -2 1 8 2513.06 582.385 2
 -2 1 8 2980.69 831.255 4
 -2 -1 7 96219.7 3624.51 1
 -2 1 7 99660.9 4998.6 3
 -2 1 7 92361.9 5032.88 4
 2 -1 -7 107276 4379.96 2
 -2 1 7 100539 4543.01 2
 -2 1 6 12.9849 147.01 3
 -2 -1 6 365.346 132.384 1
 2 -1 -6 159.704 63.3834 2
 -2 1 6 336.363 330.163 4
 -2 1 6 501.878 216.788 2
 -2 1 5 519576 17444.4 3
 -2 -1 5 493120 16444.9 1
 2 -1 -5 549307 16687.2 2
 -2 1 5 518485 17449.6 4
 2 -1 -5 526139 17220.4 4
 2 -1 -4 14846.5 1201.19 4
 -2 1 4 11948 1180.55 3
 2 -1 -4 15326.3 997.205 2
 -2 1 4 13947.8 1222.25 4
 -2 1 3 16817 1178.13 4
 2 -1 -3 17888.2 1291.27 3
 2 -1 -3 15502.4 1117.65 4
 -2 1 3 14456.9 1213.28 3
 2 -1 0 8185.74 855.78 1
 2 1 1 157105 5460.27 4
 -2 -1 -1 158501 5508.22 4
 -2 -1 -1 159003 5643.2 2
 2 -1 1 140948 5824.71 1
 2 1 2 7051.34 823.54 2
 -2 -1 -2 8283.79 761.034 4
 -2 -1 -2 7568.08 807.496 2
 2 1 2 7220.68 705.281 4
 -2 1 -2 6101.29 786.734 1
 2 -1 2 5252.62 727.684 1
 2 -1 3 533730 17658.9 1
 2 1 3 520098 17828.3 2
 -2 1 -3 553203 17614.9 1
 2 1 3 550813 17429.3 4
 -2 -1 -3 531044 17376.8 4
 -2 -1 -3 539438 17698.9 2
 -2 -1 -4 3625.96 611.579 4
 2 1 4 3726.16 610.095 4
 2 -1 4 2588.01 501.699 1
 -2 1 -4 4342.67 647.242 1
 2 1 4 4823.82 799.942 2
 -2 -1 -4 4804.56 661.552 1
 2 1 5 104597 5189.26 2
 2 1 5 110051 4927 4
 2 -1 5 110061 4628.93 1
 -2 -1 -5 107245 4768.67 4
 -2 -1 -5 115179 4634.07 1
 2 -1 6 7631.5 886.152 1
 -2 -1 -6 7705.71 900.944 1
 2 1 6 7835.51 1233.33 2
 2 1 6 6483.28 1003.21 4
 2 1 7 1470.31 552.688 4
 2 -1 7 693.585 383.764 2
 2 -1 7 888.346 378.499 1
 -2 -1 -7 2020.17 468.986 1
 2 -1 8 28183.5 1928.92 1
 2 1 8 30380.2 2797.59 2
 -2 -1 -8 32202.9 2002.21 1
 2 -1 8 27863.6 2608.12 2
 2 1 8 27141.3 2590.25 4
 2 1 9 147978 7533.67 2
 2 -1 9 151650 7432.62 2
 -2 -1 -9 161435 5958.49 1
 -2 -1 -10 19832.3 1538.07 1
 2 -1 10 18927.4 2315.2 2
 2 1 10 17434.1 2331.74 2
 2 -1 10 18590.5 1506.62 1
 2 -1 11 199856 9745.8 2
 -2 -1 -11 204093 7617.2 1
 2 1 11 201741 10021.8 2
 2 -1 12 -493.387 441.37 2
 -2 -1 -12 415.057 242.438 1
 2 1 12 647.682 538.44 2
 2 1 13 161294 9206.04 2
 2 -1 13 165491 9055.56 2
 -2 -1 -13 162098 6340.8 1
 -2 -1 -14 3409.39 630.01 1
 2 1 14 1237.01 838.688 2
 2 -1 14 3824.93 1290.49 2
 2 -1 15 149915 9070.18 2
 -2 -1 -15 143115 5701 1
 2 1 15 150800 9264.7 2
 2 -1 16 23710.2 3328.17 2
 2 1 16 18713.7 3082.2 2
 2 -1 17 13099.2 2491.5 2
 2 1 17 13609.5 2611.01 2
 2 1 18 9151.04 2321.59 2
 2 -1 18 14396.4 2747.17 2
 2 1 19 11397.4 2584.86 2
 2 -1 19 7866.12 2018.83 2
 2 1 20 6906.67 2006.21 2
 2 -1 20 3471.54 1464.09 2
 2 -1 21 20344.9 3688.28 2
 2 1 21 21394.2 3857.68 2
 2 -1 22 4437.25 1515.34 2
 2 1 22 6588.25 2164.9 2
 2 -1 23 49213.4 6176.47 2
 2 1 23 49005.9 6444.46 2
 2 1 24 1434.26 726.591 2
 2 -1 24 -920.932 1305.62 2
 -2 -2 27 13645.8 3266 2
 -2 -2 26 -140.333 1142.26 2
 -2 -2 25 17614.4 3613.32 2
 -2 2 25 14971 3383.67 3
 -2 2 24 8775.72 2686.25 3
 -2 -2 24 17743.2 3355.06 2
 -2 2 23 5314.72 1928.25 3
 -2 -2 23 5519.19 1917.22 2
 -2 2 22 48793.9 5763.19 3
 -2 -2 22 60280 5937.79 2
 -2 2 21 421.268 483.329 3
 -2 2 21 -656.965 1225.15 2
 -2 -2 21 467.609 635.161 2
 -2 2 20 47459.8 5439.62 3
 -2 2 20 54352 5624.07 2
 -2 2 19 8431.93 2027.97 2
 -2 -2 19 8938.36 1978.88 2
 -2 2 19 7547.35 2049.22 3
 -2 2 18 46125.3 4754.97 2
 -2 2 18 34782.8 4289.9 3
 -2 -2 18 45972.2 4436.03 2
 -2 -2 17 76403.5 5652.27 2
 -2 2 17 60326.6 5577.41 3
 -2 2 17 69180.9 5788.3 2
 -2 2 16 1006.4 691.966 2
 -2 2 16 24.0287 345.414 3
 -2 -2 16 314.913 327.327 2
 -2 2 15 72713.2 5660.58 3
 2 -2 -15 70420.5 2921.76 1
 -2 -2 15 83442.6 5442.68 2
 -2 2 15 74811.1 5595.76 2
 -2 2 14 7418.02 1551.13 2
 -2 -2 14 8164.04 1536 2
 -2 2 14 7407.93 1686.9 3
 -2 2 13 115150 7072.6 3
 -2 2 13 122930 7067.09 2
 -2 -2 13 137275 6926.12 2
 -2 2 12 36557.5 3407.87 3
 -2 2 12 38108.9 3752.48 4
 -2 2 12 36449.1 3301.31 2
 -2 2 11 63889.3 4799.41 4
 -2 2 11 65136.4 4534.8 3
 -2 2 11 68327.9 4449.29 2
 -2 2 10 266112 11188.2 3
 -2 2 10 270568 11682.8 4
 -2 2 9 31836.2 2745.21 3
 -2 2 9 37233.4 3088.21 4
 -2 2 8 317978 12171.5 4
 -2 2 8 294670 11681 3
 -2 2 7 38326.3 2645.24 3
 -2 2 7 31759 2549.62 4
 -2 2 6 129412 5808.47 4
 -2 2 6 119636 5587.67 3
 2 -2 -6 136200 5340.16 2
 -2 2 5 85076.2 4149.65 4
 2 -2 -5 90790.5 4098.69 3
 -2 2 5 81236.2 4066.56 3
 -2 2 4 75206.2 3684.17 4
 -2 2 4 81208.8 3816.38 3
 2 -2 -4 83015.5 3763.3 3
 2 -2 -4 76758.4 3685.79 4
 -2 2 3 695400 22404.5 4
 2 -2 -3 677916 22369.8 4
 2 -2 -3 728453 22634.5 3
 -2 2 3 696056 22572 3
 2 -2 -2 272617 9533.75 4
 -2 2 2 270221 9478.95 4
 2 -2 -2 286371 9850.11 3
 -2 2 1 14278 1098.99 4
 2 -2 -1 14114.9 1129.56 4
 2 2 0 259467 9157.48 4
 -2 2 0 257564 8866.35 4
 -2 -2 -1 6626.03 842.904 4
 2 2 1 5707.5 766.939 4
 -2 -2 -2 212322 7994.54 4
 2 2 2 221207 7993.05 4
 -2 -2 -3 5073 731.056 4
 2 2 3 5530.04 786.283 4
 -2 -2 -4 142061 6028.36 4
 2 2 4 150789 6115.09 4
 2 -2 5 11312.1 1214.93 1
 2 2 5 7306.81 1043.49 4
 2 2 6 81709.7 4280.37 4
 2 2 6 80292.8 4596.24 2
 2 -2 6 74989.6 3836.96 1
 2 2 7 55030.8 3529.46 4
 2 -2 7 50268.3 2930.5 1
 2 2 7 49731 3626.67 2
 2 2 8 491.342 384.618 4
 2 2 8 28.6645 289.577 2
 2 -2 8 714.283 328.007 1
 2 2 9 27126.9 2702.95 4
 -2 -2 -9 32278.7 2140.7 1
 2 2 9 26500.8 2827.24 2
 2 -2 9 26569 1978.97 1
 2 -2 10 97360.7 4783.62 1
 2 2 10 108803 6442.76 4
 2 -2 10 110742 6311.56 2
 2 2 10 108918 6623.9 2
 -2 -2 -11 8467.31 1065.47 1
 2 2 11 6371.27 1478.11 2
 2 2 11 5689.82 1392.54 4
 2 -2 11 8328.56 1527.13 2
 2 -2 11 7489.47 976.481 1
 2 2 12 128711 7877.4 4
 2 -2 12 115375 5370.05 1
 2 -2 12 134867 7561.96 2
 -2 -2 -12 149370 5840.72 1
 2 2 12 137911 8080.99 2
 2 2 13 -23.3101 375.972 2
 2 -2 13 776.055 448.879 2
 2 -2 13 540.98 304.103 1
 -2 -2 -13 165.052 175.598 1
 2 2 14 99489.7 7176.88 2
 2 -2 14 101767 6835.06 2
 -2 -2 -14 97866.6 4547.23 1
 2 2 15 13446.5 2504.65 2
 2 -2 15 13671.4 2316.37 2
 -2 -2 -15 12777.2 1289.41 1
 2 -2 16 38976.6 4219.69 2
 2 2 16 35106.1 4332.3 2
 2 2 17 86878.1 7337.78 2
 2 -2 17 89260.9 6987.27 2
 2 2 18 -375.464 750.662 2
 2 -2 18 1150 727.38 2
 2 -2 19 46389.6 5176.41 2
 2 2 19 43975.1 5457.19 2
 2 -2 20 16597.8 3120.17 2
 2 2 20 16273.7 3315.74 2
 2 2 21 13810.5 3200.66 2
 2 -2 21 17026.7 3266.02 2
 2 2 22 35029.9 5251.77 2
 2 -2 22 29420.4 4528.8 2
 2 -2 23 8129.56 2457 2
 2 -2 24 40703.4 5641.07 2
 -2 -3 27 -1023.44 1506.11 2
 -2 -3 26 23442.9 4077.58 2
 -2 -3 25 3.88161 789.679 2
 -2 3 24 24096.2 4152.73 3
 -2 -3 24 25041.6 3938.66 2
 -2 3 23 5230.7 1990.22 3
 -2 -3 23 5777.31 1996.99 2
 -2 3 22 4244.91 1801.26 3
 -2 -3 22 3959.14 1493.44 2
 -2 -3 21 35528.9 4295.1 2
 -2 3 21 31828.1 4360.77 3
 -2 3 20 1171.27 888.947 3
 -2 -3 20 701.06 451.605 2
 -2 -3 19 18384.4 2864.11 2
 -2 3 19 18280.6 3093.51 3
 -2 3 18 19752.7 3104.91 3
 -2 -3 18 34835.4 3727.75 2
 -2 -3 17 3196.01 1130.55 2
 -2 3 17 2728.11 1209.4 3
 -2 -3 16 108428 6551.68 2
 -2 3 16 82348.4 6341.31 3
 -2 3 15 5781.44 1611.36 4
 -2 3 15 3227.51 1166.77 3
 -2 3 14 75752 5516.89 3
 -2 3 14 83036.7 6344.36 4
 -2 3 13 19708 2761.55 4
 -2 3 13 16526.7 2284.65 3
 -2 3 12 117547 6726.9 3
 -2 3 12 129159 7489.98 4
 -2 3 11 33552.2 3275.95 4
 -2 3 11 30767.8 2899.07 3
 -2 3 10 15037.2 1862.9 3
 -2 3 10 14030.5 1961.83 4
 -2 3 9 239472 10248.2 4
 -2 3 9 228990 9704.89 3
 -2 3 8 32862.5 2613.51 3
 -2 3 8 34312.7 2826.12 4
 -2 3 7 113861 5688.27 4
 -2 3 7 112094 5435.98 3
 -2 3 6 383084 13560.1 4
 -2 3 6 351393 13156 3
 -2 3 5 343.205 274.741 4
 -2 3 5 361.702 278.289 3
 -2 3 4 308185 11489.1 3
 2 -3 -4 335501 11565.7 3
 -2 3 4 316586 11604.4 4
 2 -3 -3 210334 8090.12 3
 2 -3 -3 201148 8055.36 4
 -2 3 3 215348 8136.63 4
 2 -3 -2 310204 11084.3 3
 -2 3 2 317600 10872.9 4
 2 -3 -1 257795 9520.51 4
 -2 3 1 260484 9462.84 4
 -2 3 0 11866.8 1210.17 4
 2 3 0 10981.4 1257.15 4
 -2 -3 -1 105947 5029.6 4
 2 3 1 113761 5096.67 4
 2 3 2 2535.12 622.833 4
 2 3 3 14539.5 1522.65 4
 2 3 4 34794.9 2539.63 4
 2 3 5 66523.6 2752 3
 2 3 5 82596.8 4256.56 4
 2 3 6 58342 2669.98 3
 2 3 6 57726.1 3697.36 4
 2 3 7 50745 2698.79 3
 2 3 7 55604.5 3696.38 4
 2 3 8 123556 6312.93 4
 2 3 8 116869 5168.42 3
 2 3 9 2389.71 766.394 4
 2 3 10 36524.4 3388.39 4
 2 3 11 22204.5 2747.29 4
 2 3 12 7973.9 1732.4 4
 -2 -3 -13 44736.5 2878.58 1
 2 3 13 45277.7 4450.74 4
 2 -3 13 41698.9 3972.04 2
 2 -3 14 2257.9 962.508 2
 -2 -3 -14 2666.64 608.026 1
 2 3 14 1116.76 854.688 4
 2 3 15 54519.3 5483.5 4
 2 -3 15 60800.7 5188.46 2
 -2 -3 -15 59507.8 3419.93 1
 2 -3 16 53443.2 5000.05 2
 2 -3 17 9225.1 2030.47 2
 2 -3 18 108786 8028.5 2
 2 -3 19 1737.22 942.845 2
 2 -3 20 45180.6 5274.06 2
 2 -3 21 8091.35 2223.01 2
 2 -3 22 13255.6 2962.48 2
 2 -3 23 26372.3 4346.44 2
 2 -3 24 1388.83 1194.44 2
 -2 -4 27 34472.7 5086.96 2
 -2 -4 26 880.74 1200.23 2
 -2 -4 25 46879.8 5665.47 2
 -2 -4 24 -570.207 727.85 2
 -2 -4 23 36825.8 4647.47 2
 -2 4 23 31273.2 4547 3
 -2 4 22 1403.82 950.051 3
 -2 -4 22 -64.3165 891.567 2
 -2 4 21 825.95 567.922 3
 -2 -4 21 1247.47 862.269 2
 -2 4 20 6163.34 1819.68 3
 -2 -4 20 9335.36 2057.1 2
 -2 4 19 9021.22 2035.48 3
 -2 -4 19 16163.8 2610.76 2
 -2 -4 18 2198.06 973.062 2
 -2 4 18 2190.73 969.421 3
 -2 4 17 41600 4324.71 3
 -2 4 17 55078.2 5690.11 4
 -2 4 16 -450.852 658.988 4
 -2 4 16 318.536 469.656 3
 -2 4 15 97768.6 7227.61 4
 -2 4 15 89539.9 6221.82 3
 -2 4 14 14569.3 2502.06 4
 -2 4 14 11296.7 1948.04 3
 -2 4 13 95072.1 6054.33 3
 -2 4 13 110081 7075.56 4
 -2 4 12 13122.6 1915.19 3
 -2 4 12 12828.3 2076.78 4
 -2 4 11 96082.8 6008.52 4
 -2 4 11 81453.2 5154.03 3
 -2 4 10 60005.9 4153.96 3
 -2 4 10 73801.8 4894.59 4
 -2 4 9 3756.82 1032.44 4
 -2 4 9 6227.07 1127.41 3
 -2 4 8 231.263 192.232 3
 -2 4 8 1329.57 606.017 4
 -2 4 7 66909.1 4009.57 3
 -2 4 7 72190.6 4392.14 4
 -2 4 6 4952.95 1001.76 4
 -2 4 6 4475.6 884.914 3
 -2 4 5 388059 14287.8 3
 -2 4 5 407081 14674.3 4
 -2 4 4 196.677 234.503 4
 -2 4 3 573451 19719.9 4
 -2 4 2 7122.49 1066.89 4
 -2 4 1 44832.5 2952.7 4
 2 4 0 160632 7119.88 4
 -2 4 0 158948 6921.22 4
 2 4 1 2493.56 655.862 4
 2 4 2 221567 9132.1 4
 -2 -4 -3 22903.3 1180.83 3
 2 4 3 20622.9 2051.48 4
 2 4 4 287955 11309.1 4
 -2 -4 -4 283311 9163.22 3
 2 4 5 103537 5506.63 4
 2 4 6 53289.9 2487.84 3
 2 4 6 62578.2 4020.33 4
 2 4 7 296880 11618.5 4
 2 4 7 266402 9447.78 3
 2 4 8 45.2843 289.08 4
 2 4 8 335.99 226.991 3
 2 4 9 219384 9563.76 4
 2 4 9 179326 7400.13 3
 2 4 10 1255.31 575.314 4
 2 4 10 1161.6 420.67 3
 2 4 11 23712.3 2859 4
 2 4 11 22517.6 2106.85 3
 2 4 12 3668.9 869.161 3
 2 4 12 3326.56 1190.17 4
 2 4 13 -63.7852 470.199 4
 2 4 13 235.674 366.69 3
 2 4 14 24746.3 3381.96 4
 2 4 14 23018.8 2536.91 3
 -2 -4 -15 45097.1 3086.44 1
 2 -4 15 43024.1 4316.96 2
 2 4 15 45839.4 4909.26 4
 2 4 15 40142.8 3702.08 3
 2 4 16 13332.7 2700.2 4
 2 4 16 5472.15 1327.13 3
 2 -4 16 12512.9 2298.86 2
 2 4 17 90072.3 8027.38 4
 2 -4 17 117732 7940.09 2
 2 -4 18 1072.15 795.622 2
 2 -4 19 59589.3 5862.4 2
 2 -4 20 170.836 843.869 2
 2 -4 21 30720.7 4409.98 2
 2 -4 22 -342.097 721.861 2
 2 -4 23 5281.65 1974.09 2
 2 -4 24 4486.17 1741.85 2
 -2 -5 26 32017 4767.1 2
 -2 -5 25 188.468 691.536 2
 -2 -5 24 56490 6014.24 2
 -2 -5 23 1240.26 1044.34 2
 -2 -5 22 17059.2 2994.5 2
 -2 -5 21 4879.73 1639.18 2
 -2 5 21 -44.8576 634.474 3
 -2 5 20 444.736 436.868 3
 -2 -5 20 78.8814 479.505 2
 -2 5 19 19.9608 821.567 4
 -2 5 19 -113.701 385.914 3
 -2 5 18 38192.3 4950.51 4
 -2 5 18 30368.5 3785.39 3
 -2 5 17 2161.65 1080.18 4
 -2 5 17 81.2343 629.178 3
 -2 5 16 93879.8 6642.04 3
 -2 5 16 108045 7961.91 4
 -2 5 15 1702.71 883.807 3
 -2 5 15 1607.79 921.541 4
 -2 5 14 133271 8363.3 4
 -2 5 14 123301 7328.55 3
 -2 5 13 938.64 657.604 4
 -2 5 13 1082.46 474.146 3
 -2 5 12 191438 9786.78 4
 -2 5 12 169334 8678.45 3
 -2 5 11 1017.01 572.482 3
 -2 5 11 744.884 608.218 4
 -2 5 10 34447.2 3353.65 4
 -2 5 10 30382 2841.98 3
 -2 5 9 2003.28 652.067 3
 -2 5 9 2576.51 902.507 4
 -2 5 8 54173.9 3695.52 3
 -2 5 8 55591.6 4132.13 4
 -2 5 7 38167.2 3051.68 3
 -2 5 7 41645 3412.39 4
 -2 5 6 93781.7 5432.47 4
 -2 5 5 1059.92 491.834 4
 -2 5 4 447347 16523.5 4
 -2 5 3 14450.4 1746.21 4
 -2 5 2 274037 11014.8 4
 -2 5 1 1043.22 541.411 4
 2 5 -1 732.92 457.595 4
 -2 5 0 899.711 463.385 4
 2 5 0 632.062 529.116 4
 2 5 1 73905.5 4661.31 4
 -2 5 -1 82137.7 4721.63 4
 2 5 2 85163.9 5001.96 4
 -2 -5 -3 119269 4601.68 3
 2 5 3 116332 6213.85 4
 -2 -5 -4 138921 5065.32 3
 2 5 4 138786 7016.97 4
 -2 -5 -5 39452.8 1935.83 3
 2 5 5 38635.4 3261.28 4
 2 5 6 312174 12867.4 4
 2 5 7 2938.54 908.303 4
 2 5 8 197028 7511.73 3
 2 5 8 214572 9792.44 4
 2 5 9 3188.94 641.406 3
 2 5 9 2839.55 958.886 4
 2 5 10 99346 6270.6 4
 2 5 10 89867.5 4463.3 3
 2 5 11 2949.68 704.976 3
 2 5 11 1852.87 918.959 4
 2 5 12 3906.57 1333.31 4
 2 5 12 3718.3 846.702 3
 2 5 13 12015.1 1635.48 3
 2 5 13 13605.6 2318.86 4
 2 5 14 4642.99 1470.41 4
 2 5 14 3400.79 871.055 3
 2 5 15 38.6185 233.017 3
 2 5 15 -489.64 695.776 4
 2 5 16 59619.5 5933.88 4
 2 5 17 266.451 619.259 4
 2 -5 17 883.308 600.527 2
 2 -5 18 62241.8 5822.81 2
 2 5 18 61051.8 6594.92 4
 2 -5 19 -929.515 817.998 2
 2 -5 20 40680.7 4916.56 2
 2 -5 21 -624.988 1045.73 2
 2 -5 22 29525.8 4390.11 2
 2 -5 23 -150.467 649.469 2
 -2 -6 26 1183.68 900.899 2
 -2 -6 25 26154.9 4116.28 2
 -2 -6 24 4744.57 1744.2 2
 -2 -6 23 13511 2700.38 2
 -2 -6 22 10147.6 2355.01 2
 -2 6 21 4374.4 1786.3 4
 -2 -6 21 2968.57 1176.9 2
 -2 6 20 3468.7 1480.26 4
 -2 6 19 2181.26 1452.25 4
 -2 6 19 1646.07 930.914 3
 -2 6 18 2130.94 1668.75 4
 -2 6 18 2017.9 1030.05 3
 -2 6 17 36380.6 4032.54 3
 -2 6 17 57765.9 5856.76 4
 -2 6 16 -98.5933 795.411 4
 -2 6 16 22.223 260.583 3
 -2 6 15 117549 7438.86 3
 -2 6 15 138774 8916.68 4
 -2 6 14 1990.91 829.458 3
 -2 6 14 855.74 667.519 4
 -2 6 13 85466.8 5752.72 3
 -2 6 13 93430.5 6656.35 4
 -2 6 12 805.217 295.029 3
 -2 6 12 476.768 448.109 4
 -2 6 11 46258.5 4212.96 4
 -2 6 11 39286.5 3452.5 3
 -2 6 10 38509.4 3308.45 3
 -2 6 10 37077.1 3677.02 4
 -2 6 9 40285.9 3734.65 4
 -2 6 9 35547.5 3113.34 3
 -2 6 8 27375.5 2973.45 4
 -2 6 7 156730 8125.08 4
 -2 6 6 57478.5 4258.51 4
 -2 6 5 241778 10732.7 4
 -2 6 4 601.811 374.945 4
 -2 6 3 329166 13300.4 4
 -2 6 2 30899.4 2867.06 4
 2 6 -1 75361.9 5080.43 4
 -2 6 1 87560.6 5231.15 4
 2 6 0 918.155 488.745 4
 -2 6 0 771.314 371.802 4
 -2 6 -1 869.04 587.774 4
 2 6 1 1851.47 826.955 4
 2 6 2 6397.17 1321.06 4
 2 6 3 45427.9 3727.56 4
 -2 -6 -4 20567.5 1465.7 3
 2 6 4 22215 2517.26 4
 2 6 5 226284 10459.9 4
 -2 -6 -5 224673 7935.85 3
 2 6 6 672.962 548.602 4
 -2 -6 -6 1574.08 406.639 3
 2 6 7 186135 9318.44 4
 2 6 8 -323.595 360.397 4
 2 6 9 77500 5577.68 4
 2 6 10 1594.47 530.126 3
 2 6 10 2824.29 954.417 4
 2 6 11 18148.2 2668.48 4
 2 6 11 15612.1 1599.59 3
 2 6 12 6494.81 1596.48 4
 2 6 12 8441.64 1205.02 3
 2 6 13 6437.13 1656.34 4
 2 6 13 2765.42 731.122 3
 2 6 14 1257.02 559.701 4
 2 6 15 9647.08 2338.16 4
 2 6 16 2361.86 1173.5 4
 2 6 17 40765.2 5122.34 4
 2 6 18 -627.952 1123.58 4
 2 -6 19 38575.3 4661.23 2
 2 6 19 38347.3 5430.57 4
 2 -6 20 -969.889 999.728 2
 2 6 20 1013.28 938.981 4
 2 -6 21 19261.2 3405.29 2
 2 -6 22 382.956 663.567 2
 2 -6 23 3711.87 1576.29 2
 -2 -7 25 -86.1153 627.975 2
 -2 -7 24 17814.2 3280.41 2
 -2 -7 23 12504.2 2656 2
 -2 7 22 8842.04 2850.95 4
 -2 -7 22 5136.47 1581.35 2
 -2 7 21 9543.48 2796 4
 -2 7 20 98.7774 595.761 4
 -2 7 19 5441.82 1901.97 4
 -2 7 18 7103.14 1871.16 3
 -2 7 18 9063.76 2443.55 4
 -2 7 17 8327.27 1835.08 3
 -2 7 17 7787.22 2122.4 4
 -2 7 16 40686.2 4751.78 4
 -2 7 16 36371 3862.13 3
 -2 7 15 496.995 678.79 3
 -2 7 15 3001.02 1331.06 4
 -2 7 14 48648.6 4342.82 3
 -2 7 14 65268.1 5677.6 4
 -2 7 13 18046.2 2822.91 4
 -2 7 13 13404.3 2147.57 3
 -2 7 12 22169.8 2646.31 3
 -2 7 12 27155.1 3385.44 4
 -2 7 11 54016.3 4815.86 4
 -2 7 11 48680.3 4052.21 3
 -2 7 10 2321.92 899.068 4
 -2 7 9 57359.9 4781.72 4
 -2 7 8 57896.4 4712.58 4
 -2 7 7 4513.99 1198.68 4
 -2 7 6 152760 8227.8 4
 -2 7 5 4924.87 1206.97 4
 -2 7 4 238501 10967.7 4
 -2 7 3 22203 2594.3 4
 2 7 -2 289544 13016.2 4
 -2 7 2 290095 12572.9 4
 2 7 -1 80321.9 5605.35 4
 -2 7 1 84089.5 5497.48 4
 2 7 0 65723 4970.13 4
 -2 7 0 71519.8 4996.6 4
 2 7 1 47940.7 4128.88 4
 -2 7 -1 50652.2 4127.73 4
 2 7 2 1526.01 810.903 4
 -2 7 -2 570.604 461.055 4
 2 7 3 65933.6 4870.6 4
 -2 -7 -4 63634.2 3298.11 3
 2 7 4 64165.7 4889.72 4
 2 7 5 45386.2 4000.96 4
 -2 -7 -5 43036 2486.28 3
 2 7 6 150427 8284.14 4
 -2 -7 -6 141209 5657.22 3
 -2 -7 -7 19003.8 1462.78 3
 2 7 7 17089.5 2498.21 4
 2 7 8 117744 7383.73 4
 2 7 9 1865.52 982.286 4
 2 7 10 27325.6 3356.37 4
 2 7 11 23335.3 3200.82 4
 2 7 12 12657.2 2424.73 4
 2 7 13 31010.9 3905.03 4
 2 7 14 2059.16 962.468 4
 2 7 15 18932.6 3225.69 4
 2 7 16 35304.7 4639.23 4
 2 7 17 2568.02 1353.52 4
 2 7 18 15880 3280.33 4
 2 7 19 -673.521 1266.02 4
 2 7 20 9922.08 2900.13 4
 2 -7 20 8142.41 2272.23 2
 2 7 21 3235.15 1794.21 4
 2 -7 21 2742.47 1139.19 2
 2 -7 22 7059.4 2153.42 2
 -2 -8 24 1337.48 1167.83 2
 -2 8 23 7522.88 2910.68 4
 -2 8 22 14644.2 3739.5 4
 -2 8 21 2514.46 1671.35 4
 -2 8 20 24823.5 4427.34 4
 -2 8 19 3198.6 1400.38 4
 -2 8 18 28164.7 4419.53 4
 -2 8 17 16193.7 3124.44 4
 -2 8 16 6646.93 1585.1 3
 -2 8 16 8052.56 2141.98 4
 -2 8 15 34309.8 4353.73 4
 -2 8 15 31121.3 3533.99 3
 -2 8 14 11805.2 2473.71 4
 -2 8 13 20428.1 3162.22 4
 -2 8 12 85936.7 6685.31 4
 -2 8 11 6855.32 1731.68 4
 -2 8 10 124286 7991.77 4
 -2 8 9 10688 2096.81 4
 -2 8 8 49342.4 4491.22 4
 -2 8 7 53117.3 4655.68 4
 -2 8 6 7152.38 1571.56 4
 -2 8 5 121973 7432.32 4
 -2 8 4 771.435 591.659 4
 -2 8 3 165904 8910.37 4
 -2 8 2 85685.7 5844.93 4
 2 8 -2 76119.1 5850.75 4
 -2 8 1 109215 6814.78 4
 2 8 -1 98819.5 6721.18 4
 -2 8 0 151311 8361.08 4
 2 8 0 140077 8318.36 4
 -2 8 -1 17548.6 2533.42 4
 2 8 1 15173.6 2339.52 4
 2 8 2 149432 8501.43 4
 -2 8 -2 149384 8545.24 4
 -2 8 -3 18692.6 2698.96 4
 2 8 3 16481.2 2456.52 4
 2 8 4 92356.3 6358.63 4
 2 8 5 41478.7 4067.95 4
 2 8 6 31019.8 3528.4 4
 2 8 7 60890.1 5150.06 4
 2 8 8 1217.92 657.799 4
 2 8 9 68769.3 5663.92 4
 2 8 10 17392.4 2851.63 4
 2 8 11 29203.3 3736.5 4
 2 8 12 11832.5 2428.72 4
 2 8 13 2668.85 1179.1 4
 2 8 14 42808.7 4887.61 4
 2 8 15 2995.25 1218.5 4
 2 8 16 30621.8 4385.56 4
 2 8 17 6341.8 2056.12 4
 2 8 18 2180.31 1226.17 4
 2 8 19 8275.66 2238.12 4
 2 8 20 -94.7964 1124.96 4
 2 8 21 7811.41 2701.64 4
 2 -8 21 7763.54 2191.88 2
 2 8 22 9831.42 3212.88 4
 -2 9 22 16.5169 1245.45 4
 -2 9 21 33088.7 5359.04 4
 -2 9 20 -409.725 1088.78 4
 -2 9 19 34730.8 5135.49 4
 -2 9 18 4585.41 1769.73 4
 -2 9 17 30960.3 4518.38 4
 -2 9 16 10224.6 2426.83 4
 -2 9 15 363.347 763.947 4
 -2 9 14 11098.7 2468.11 4
 -2 9 13 25041.4 3643.97 4
 -2 9 12 18630.8 3072.83 4
 -2 9 11 48288.8 4929.44 4
 -2 9 10 7510.44 1805.92 4
 -2 9 9 122108 8103.19 4
 -2 9 8 11515.8 2187.72 4
 -2 9 7 59899.9 5209.1 4
 -2 9 6 27612 3406.52 4
 -2 9 5 8438.38 1822.89 4
 -2 9 4 21336 2956.88 4
 2 9 -3 53312.7 5034.61 4
 -2 9 3 53363 4756.52 4
 2 9 -2 14993.2 2540.48 4
 -2 9 2 18850.7 2735.98 4
 2 9 -1 109771 7524.51 4
 -2 9 1 119410 7603.83 4
 -2 9 0 879.063 367.241 4
 2 9 0 649.61 449.416 4
 -2 9 -1 142825 8672.16 4
 2 9 1 146160 8768.87 4
 -2 9 -2 4101.84 1202.4 4
 2 9 2 4786.81 1390.43 4
 2 9 3 128313 8032.94 4
 -2 9 -3 121678 8029.46 4
 2 9 4 7709.86 1776.35 4
 2 9 5 26615.3 3416.22 4
 2 9 6 28435.7 3544.75 4
 2 9 7 673.168 694.223 4
 2 9 8 9103.57 2038.66 4
 2 9 9 9722.91 2171.95 4
 2 9 10 12093.5 2424.44 4
 2 9 11 33821.9 4205.76 4
 2 9 12 2337.47 1169.35 4
 2 9 13 57620.1 5807.07 4
 2 9 14 -20.0042 967.355 4
 2 9 15 47830.2 5599.41 4
 2 9 16 3676.64 1520.73 4
 2 9 17 8988.99 2486.56 4
 2 9 18 4115.81 1544.06 4
 2 9 19 -1812.74 1267.48 4
 2 9 20 8784.3 2888.46 4
 2 9 21 5766.43 2360.6 4
 -2 10 21 -131.327 1285.83 4
 -2 10 20 38317.6 5732.77 4
 -2 10 19 1320.53 810.871 4
 -2 10 18 21180.8 3965.45 4
 -2 10 17 2132.62 1311.04 4
 -2 10 16 3578.86 1425.13 4
 -2 10 15 1440.3 953.487 4
 -2 10 14 7268.65 2107.72 4
 -2 10 13 -90.8278 651.656 4
 -2 10 12 33172 4279.55 4
 -2 10 11 1742.04 1136.62 4
 -2 10 10 92173.4 7242.56 4
 -2 10 9 4045.74 1442.68 4
 -2 10 8 78425.4 6391.93 4
 -2 10 7 2250.31 1117.97 4
 -2 10 6 23404.2 3279.16 4
 -2 10 5 3456.69 1260.4 4
 2 10 -4 324.151 535.629 4
 -2 10 4 963.624 790.297 4
 2 10 -3 4922.44 1601.75 4
 -2 10 3 5022.49 1535.53 4
 2 10 -2 52222.9 5155.05 4
 -2 10 2 52298.3 4966.18 4
 2 10 -1 4933.56 1432.4 4
 -2 10 1 5620.31 1446.34 4
 2 10 0 99930.3 7400.16 4
 -2 10 0 101093 7344.36 4
 -2 10 -1 201.001 779.616 4
 2 10 1 595.765 549.054 4
 -2 10 -2 81418.7 6509.11 4
 2 10 2 77649.9 6348.02 4
 2 10 3 360.812 684.88 4
 -2 10 -3 -133.172 490.091 4
 2 10 4 46377.9 4799.71 4
 -2 10 -4 51299.6 5255.18 4
 2 10 5 713.677 476.536 4
 2 10 6 8408.19 2055.98 4
 2 10 7 523.305 818.754 4
 2 10 8 5317.43 1761.81 4
 2 10 9 2569.58 1162.5 4
 2 10 10 23839.5 3612.3 4
 2 10 11 1221.48 753.35 4
 2 10 12 79225.9 7076.54 4
 2 10 13 1639.55 820.581 4
 2 10 14 52203.6 5818.13 4
 2 10 15 3455.4 1461.4 4
 2 10 16 17839.4 3427.22 4
 2 10 17 1281.04 1041.19 4
 2 10 18 1831.28 856.904 4
 2 10 19 -893.935 984.365 4
 2 10 20 2466.92 1158.15 4
 -2 11 20 -1336.81 1584.26 4
 -2 11 19 29469.4 4938.39 4
 -2 11 18 1482 1068 4
 -2 11 17 23943.8 4141.14 4
 -2 11 16 -144.055 895.807 4
 -2 11 15 1407.49 1249.07 4
 -2 11 14 253.623 486.244 4
 -2 11 13 10687.6 2603.76 4
 -2 11 12 1573.52 959.853 4
 -2 11 11 77272 6941.48 4
 -2 11 10 3896.44 1511.73 4
 -2 11 9 110194 8323.51 4
 -2 11 8 3501.18 1380.75 4
 -2 11 7 67045.3 6158.8 4
 -2 11 6 17069.1 2951.43 4
 -2 11 5 8848.97 2129.6 4
 2 11 -5 7190.55 2138.68 4
 -2 11 4 36705 4349.02 4
 2 11 -4 34000 4422.49 4
 -2 11 3 7041.26 1976.85 4
 2 11 -3 8829.11 2255.1 4
 2 11 -2 16481.7 2896.05 4
 -2 11 2 15470.6 2723.62 4
 -2 11 1 57687.4 5560.14 4
 2 11 -1 51951.1 5429.28 4
 2 11 0 429.992 670.621 4
 -2 11 0 3058.82 1284.72 4
 2 11 1 121344 8624.55 4
 -2 11 -1 123330 8685.04 4
 2 11 2 164.499 726.379 4
 -2 11 -2 2015.8 1039.44 4
 -2 11 -3 98942.8 7795.41 4
 2 11 3 97405.6 7552.47 4
 -2 11 -4 3391.53 1462.47 4
 2 11 4 5178.69 1649.71 4
 2 11 5 24982.1 3658.38 4
 -2 11 -5 24665.3 3812.04 4
 2 11 6 17880.9 3124.81 4
 -2 11 -6 18082.5 3295.98 4
 2 11 7 -295.309 826.993 4
 2 11 8 5469.97 1785.18 4
 2 11 9 20407.9 3391.42 4
 2 11 10 12750.7 2677.05 4
 2 11 11 46055.9 5360.11 4
 2 11 12 12062.4 2675.12 4
 2 11 13 30119.3 4462.02 4
 2 11 14 1544.88 1044.87 4
 2 11 15 18549.3 3582.33 4
 2 11 16 598.953 575.783 4
 2 11 17 2555.73 1415.39 4
 2 11 18 1302.02 1291.08 4
 -2 12 18 20880.3 4201.84 4
 -2 12 17 7541.92 2527.62 4
 -2 12 16 8141.27 2559.55 4
 -2 12 15 11970.2 3081.9 4
 -2 12 14 528.216 874.108 4
 -2 12 13 1584.19 1380.44 4
 -2 12 12 30929.9 4467.98 4
 -2 12 11 1151.1 1170.34 4
 -2 12 10 59182.2 6151.03 4
 -2 12 9 -57.9165 603.452 4
 -2 12 8 79794.8 7083.73 4
 -2 12 7 16620.9 3136.27 4
 2 12 -6 35025.4 4855.05 4
 -2 12 6 35303.5 4566.63 4
 2 12 -5 33270.4 4697.4 4
 -2 12 5 36248 4510.64 4
 2 12 -4 527.308 585.139 4
 -2 12 4 -114.584 502.342 4
 -2 12 3 24252.3 3666.16 4
 2 12 -3 21348 3615.1 4
 -2 12 2 19358.9 3259.95 4
 2 12 -2 21335.8 3519.14 4
 2 12 -1 16792.1 3229.23 4
 -2 12 1 22196.3 3525.94 4
 2 12 0 55376.2 5804.55 4
 -2 12 0 53075.2 5656.83 4
 2 12 1 8810.56 2174.52 4
 -2 12 -1 7725.21 2091.97 4
 -2 12 -2 79702.8 7142.87 4
 2 12 2 79263 6988.61 4
 2 12 3 3837.83 1796.94 4
 -2 12 -3 2955.27 1363.77 4
 -2 12 -4 28763.4 4238.73 4
 2 12 4 37025.7 4736.1 4
 2 12 5 15573.6 2982.2 4
 -2 12 -5 15339.2 3154.55 4
 2 12 6 3747.4 1564.67 4
 -2 12 -6 2672.85 1508.63 4
 2 12 7 25065.3 3873.48 4
 -2 12 -7 17512.8 3505.14 4
 2 12 8 10410.3 2550.58 4
 2 12 9 32505 4476.15 4
 2 12 10 22107.2 3724.56 4
 2 12 11 15952.3 3245.81 4
 2 12 12 19573 3608.55 4
 2 12 13 1717.53 968.761 4
 2 12 14 21489.3 3952.1 4
 2 12 15 1299.23 616.516 4
 2 12 16 6361.77 2053.85 4
 2 12 17 3399.18 1688.42 4
 -2 13 16 14124 3298.05 4
 -2 13 15 891.967 950.97 4
 -2 13 14 27451.5 4582.46 4
 -2 13 13 4850.17 1683.78 4
 -2 13 12 12697.7 3097.68 4
 -2 13 11 29601.9 4519.53 4
 -2 13 10 -712.149 934.706 4
 -2 13 9 29739.6 4440.72 4
 -2 13 8 10203.1 2610.7 4
 2 13 -8 8535.56 2548.66 4
 -2 13 7 21423.6 3650.66 4
 2 13 -7 18684.6 3737.38 4
 2 13 -6 19215.4 3715.39 4
 -2 13 6 15159.7 3038.72 4
 -2 13 5 11292.9 2603.88 4
 2 13 -5 10856.8 2780.6 4
 -2 13 4 20715.3 3460.81 4
 2 13 -4 23121.6 3903.76 4
 2 13 -3 2210.15 1626.73 4
 -2 13 3 1316.43 1031.21 4
 2 13 -2 20324.8 3728.78 4
 -2 13 2 20963.3 3631.78 4
 -2 13 1 12861.6 2910.21 4
 2 13 -1 19592.9 3503.44 4
 2 13 0 10227.2 2627.31 4
 -2 13 0 9025.4 2424.92 4
 -2 13 -1 22803.1 3816.94 4
 2 13 1 20067.5 3557.71 4
 -2 13 -2 1927.54 1107.39 4
 2 13 2 1691.57 1233.11 4
 2 13 3 20656.7 3566.21 4
 -2 13 -3 25532.5 4198.69 4
 2 13 4 5722.4 1929.39 4
 -2 13 -4 4282.38 1690.62 4
 2 13 5 6831.38 2103.53 4
 -2 13 -5 12137.2 2900.13 4
 2 13 6 19777.3 3598.86 4
 -2 13 -6 23251.6 4092.59 4
 2 13 7 2067.88 1119.1 4
 -2 13 -7 -38.8157 641.775 4
 -2 13 -8 34675.8 5212.32 4
 2 13 8 26529.6 4261.38 4
 2 13 9 11067 2797.87 4
 -2 13 -9 11158.1 3033.94 4
 2 13 10 14215.2 3196.7 4
 2 13 11 11913 2904.32 4
 2 13 12 3685.47 1722.65 4
 2 13 13 10382 2693.92 4
 2 13 14 -126.066 693.694 4
 2 13 15 1003.7 695.592 4
 -2 14 14 -1074.09 972.8 4
 -2 14 13 23853.7 4301.45 4
 -2 14 12 3093.93 1629.75 4
 -2 14 11 15078.2 3331.62 4
 -2 14 10 9031.6 2513.1 4
 2 14 -10 7857.44 2743.29 4
 2 14 -9 1450.15 789.64 4
 -2 14 9 1669.03 1245.57 4
 -2 14 8 10278.6 2695.9 4
 2 14 -8 6414.07 2325.95 4
 2 14 -7 11953.7 3115.22 4
 -2 14 7 7245.09 2204.53 4
 2 14 -6 2765.77 1617.99 4
 -2 14 6 4803.96 1932.82 4
 2 14 -5 19731.1 4092.4 4
 -2 14 5 21870.7 3793.28 4
 -2 14 4 1160.73 1152.3 4
 2 14 -4 -79.1615 551.556 4
 2 14 -3 21758.5 4086.78 4
 -2 14 3 26943.1 4162.71 4
 2 14 -2 809.686 828.902 4
 -2 14 2 930.742 784.598 4
 2 14 -1 10457.7 2686.95 4
 -2 14 1 14897.7 3130.61 4
 -2 14 0 3342.64 1431.33 4
 2 14 0 1115.14 677.866 4
 -2 14 -1 1303.21 735.037 4
 2 14 1 1864.78 1561.41 4
 2 14 2 4391.46 1655.87 4
 -2 14 -2 4216.97 1870.06 4
 2 14 3 3473.17 1767.33 4
 -2 14 -3 3114.02 1491.27 4
 -2 14 -4 121.928 577.895 4
 2 14 4 797.462 939.872 4
 -2 14 -5 13956.1 3336.51 4
 2 14 5 20754.1 3770.53 4
 -2 14 -6 613.355 919.491 4
 2 14 6 342.637 806.374 4
 2 14 7 21464 3859.41 4
 -2 14 -7 20155.2 4012.62 4
 2 14 8 337.245 497.997 4
 -2 14 -8 2300.21 1714.95 4
 2 14 9 14806.9 3295.75 4
 -2 14 -9 15089.6 3638.61 4
 -2 14 -10 2441.93 1735.99 4
 2 14 10 4142.7 1637.55 4
 -2 14 -11 7062.33 2546.14 4
 2 14 11 5329.23 1777.2 4
 2 14 12 5888.36 2008.32 4
 2 15 -12 10779.7 3247.59 4
 -2 15 11 -973.16 1191.16 4
 2 15 -11 -3446.57 1904.08 4
 2 15 -10 2717.12 990.357 4
 -2 15 10 4793.75 2060.46 4
 2 15 -9 27.5806 793.429 4
 -2 15 9 1003.57 913.459 4
 -2 15 8 -234.457 602.246 4
 2 15 -8 -331.466 754.326 4
 2 15 -7 1027.66 848.293 4
 -2 15 7 1515.78 1302.85 4
 -2 15 6 20763.3 3947.25 4
 2 15 -6 11935.9 3303.02 4
 2 15 -5 -567.839 1222.41 4
 -2 15 5 1288.83 1345.99 4
 -2 15 4 34604 5151.27 4
 2 15 -4 31404.1 5113.49 4
 -2 15 3 -979.913 1259.74 4
 2 15 -3 -1854.34 1550.33 4
 -2 15 2 28994.6 4624.9 4
 2 15 -2 20513.4 4019.71 4
 2 15 -1 -316.887 1064.11 4
 -2 15 1 -397.131 698.404 4
 -2 15 0 17109.2 3570.27 4
 2 15 0 18863.6 3896.96 4
 2 15 1 1141.88 1034.79 4
 -2 15 -1 -1467.89 1128.75 4
 2 15 2 30.807 774.997 4
 -2 15 -2 882.254 914.211 4
 -2 15 -3 886.05 860.665 4
 2 15 3 812.97 733.608 4
 2 15 4 13060.6 3246.47 4
 -2 15 -4 21278.3 4154.1 4
 -2 15 -5 6569.17 2569.37 4
 2 15 5 3246.13 1448.63 4
 2 15 6 31465.9 4996.64 4
 -2 15 -6 29672.4 5081.89 4
 2 15 7 2220.99 1538.73 4
 -2 15 -7 819.445 680.981 4
 2 15 8 31831.6 4990.7 4
 -2 15 -8 29730.9 5247.88 4
 -2 15 -9 -382.229 1143.24 4
 2 15 9 438.705 1261.72 4
 -2 15 -10 18622.1 4217.83 4
 -2 15 -11 795.648 767.857 4
 -2 15 -12 814.166 854.023 4
 -2 16 7 8586.47 2688.58 4
 2 16 -7 7586.14 2542.3 4
 2 16 -6 977.32 1177.25 4
 -2 16 6 1617.82 838.299 4
 -2 16 5 20585.4 4047.84 4
 2 16 -5 21302.4 4439.8 4
 -2 16 4 678.829 884.519 4
 2 16 -4 -790.146 1414.35 4
 -2 16 3 28848.9 4901.65 4
 2 16 -3 27429.7 5009.34 4
 2 16 -2 1223.03 582.633 4
 -2 16 2 -142.698 616.298 4
 -2 16 1 14265.8 3455.42 4
 2 16 -1 19770.5 4073.38 4
 -2 16 0 1617.17 1287.89 4
 2 16 0 651.535 709.644 4
 2 16 1 398.609 763.421 4
 -2 16 -1 1639.73 1256.83 4
 -2 16 -2 2174.28 1504.53 4
 2 16 2 1958.39 1479.02 4
 2 16 3 4878.27 2038.24 4
 -2 16 -3 5766.23 2377.26 4
 -2 16 -4 297.312 802.038 4
 2 16 4 -347.379 856.89 4
 -2 16 -5 13904.8 3675.25 4
 -2 16 -6 -547.931 1274.67 4
 -2 16 -7 21523.5 4485.02 4
 -2 16 -8 915.644 1144.03 4
 -3 0 29 368.266 973.308 3
 -3 0 28 24744.5 4522.42 2
 -3 0 28 19613.6 4448.33 3
 -3 0 27 -26.8489 689.215 3
 -3 0 27 27.9401 640.736 2
 -3 0 26 31105.2 5263.09 3
 -3 0 26 37020.9 5214.5 2
 -3 0 25 -1605.6 1564.82 2
 -3 0 24 45788 5574.4 2
 -3 0 23 -2427.47 1263.62 2
 -3 0 22 51947.7 5573.35 2
 -3 0 21 1216.83 1239.18 2
 -3 0 20 4516.98 1500.2 2
 -3 0 19 -793.865 632.827 2
 -3 0 18 252.59 500.777 2
 -3 0 17 -10.6537 356.421 2
 -3 0 16 31954.7 3397.86 2
 -3 0 15 -128.453 367.767 2
 -3 0 14 296265 12587.1 2
 -3 0 13 214.936 476.314 2
 -3 0 12 448474 16645.8 2
 -3 0 11 437.414 224.335 2
 3 0 -10 248534 8133.13 1
 -3 0 10 238546 9634.43 2
 -3 0 9 159.838 124.107 2
 3 0 -9 -11.301 94.3041 1
 3 0 -8 1671.75 327.572 1
 -3 0 8 2001.83 503.024 2
 -3 0 7 357.118 198.285 2
 -3 0 7 64.3947 134.519 1
 -3 0 6 137085 6232.93 3
 3 0 -6 142776 5277.25 1
 -3 0 6 139029 5156.99 2
 -3 0 6 136095 5348.5 1
 -3 0 5 261.617 168.872 1
 -3 0 5 147.156 104.476 3
 3 0 -5 405.323 238.755 1
 -3 0 5 86.6679 52.4254 2
 3 0 -3 440.132 244.041 3
 -3 0 3 60.0973 109.538 3
 3 0 -3 617.416 310.16 1
 -3 0 3 57.3883 205.426 1
 -3 0 2 327716 11603.2 1
 3 0 -2 315367 11534.7 1
 3 0 -2 361598 11519.7 3
 -3 0 2 349747 11517.9 3
 3 0 -1 89.4743 100.861 3
 3 0 -1 111.201 164.169 1
 -3 0 1 255.676 179.81 3
 -3 0 1 460.288 221.049 1
 3 0 -1 108.023 62.6298 2
 -3 0 0 837582 27375.5 1
 3 0 0 882381 27498.4 1
 3 0 1 529.909 219.487 1
 -3 0 -1 529.979 364.697 1
 3 0 1 341.249 213.883 2
 3 0 2 3005.59 406.63 4
 -3 0 -2 2750.55 571.541 1
 -3 0 -2 1715.83 288.998 4
 3 0 2 3280.35 608.974 1
 3 0 2 3142.01 565.625 2
 3 0 3 206.033 181.288 2
 3 0 3 230.838 144.008 1
 -3 0 -3 245.163 161.282 1
 -3 0 -3 -22.9053 64.8461 4
 3 0 4 17516.7 1533.04 1
 -3 0 -4 16136.3 1438.99 1
 -3 0 -4 13489 1143.77 4
 3 0 4 15267.5 1552.61 2
 -3 0 -5 122.08 239.645 1
 -3 0 -5 323.749 263.839 4
 3 0 5 43.7491 153.404 2
 3 0 6 509118 18235.8 1
 3 0 6 530120 19163.2 2
 3 0 7 -14.0105 318.603 2
 -3 0 -7 244.447 291.75 1
 -3 0 -8 452000 14833 1
 3 0 8 385519 16101.9 2
 3 0 9 4.76417 387.332 2
 -3 0 -9 499.522 289.568 1
 3 0 10 273349 12317.8 2
 -3 0 -10 282436 10386.9 1
 -3 0 -11 227.646 277.328 1
 3 0 11 -114.58 656.933 2
 -3 0 -12 123958 5381.29 1
 3 0 12 112152 7315.27 2
 3 0 13 78.643 581.443 2
 -3 0 -13 96.8947 361.367 1
 3 0 14 42.6332 681.193 2
 3 0 15 435.049 540.527 2
 3 0 16 64834.1 6018.84 2
 3 0 17 492.124 510.443 2
 3 0 18 72183.2 6746.33 2
 3 0 19 -1122.02 1223.17 2
 3 0 20 60237.1 6549.25 2
 3 0 21 -560.952 1008.71 2
 3 0 22 34599.6 5169.64 2
 3 0 23 -719.516 1139.2 2
 3 0 24 10878.6 3128.77 2
 -3 -1 28 708.259 964.811 2
 -3 1 28 2014.03 1396.56 3
 -3 -1 27 34033.9 5257.87 2
 -3 1 27 28755.2 5138.19 3
 -3 1 26 870.54 998.812 3
 -3 -1 26 -676.138 1227.59 2
 -3 1 25 46688.1 5896.87 2
 -3 -1 25 58983.9 6337.74 2
 -3 1 25 38029.8 5670.79 3
 -3 1 24 284 861.154 3
 -3 -1 24 -1054.7 1246.71 2
 -3 1 24 -196.982 1069.26 2
 -3 1 23 65273.2 6634.54 2
 -3 -1 23 60440 6089.48 2
 -3 1 23 48454.8 6069.85 3
 -3 1 22 8871.4 2281.68 2
 -3 -1 22 4379.06 1580.58 2
 -3 1 22 5285.92 1958.82 3
 -3 -1 21 24690.7 3553.56 2
 -3 1 21 17166 3330.24 3
 -3 1 21 24975.4 3676.28 2
 -3 1 20 9112.73 2147.35 2
 -3 -1 20 12420.5 2386.3 2
 -3 1 20 8410.1 2155.54 3
 -3 1 19 -162.75 675.344 2
 -3 -1 19 553.705 641.217 2
 -3 1 18 717.238 382.336 2
 -3 -1 18 1714.19 950.666 2
 -3 1 17 26149.5 3263.72 2
 -3 -1 17 28480.1 3251.42 2
 -3 1 16 27206.7 3149.73 2
 -3 -1 16 24956.2 2916.08 2
 -3 1 15 77817.4 5524.94 2
 -3 -1 15 87599.6 5610.44 2
 -3 -1 14 28840.5 2861.28 2
 -3 1 14 28791.9 2963.44 2
 -3 -1 13 199058 8735.49 2
 -3 1 13 185699 8767.35 2
 3 -1 -13 179800 6163.8 1
 3 -1 -12 886.177 239.801 1
 -3 -1 12 543.947 294.827 2
 -3 1 12 214.088 466.599 2
 -3 -1 11 231605 9650.12 2
 -3 1 11 228166 9825.71 2
 -3 1 11 215628 10516.7 3
 3 -1 -11 252354 8221.52 1
 -3 -1 10 2875.64 425.661 1
 3 -1 -10 2959.88 491.235 1
 -3 1 10 3575.03 965.134 3
 -3 1 10 2581.93 688.304 2
 -3 -1 10 2439.24 594.265 2
 -3 -1 9 22792.6 1425.66 1
 3 -1 -9 27605 1646.17 1
 -3 -1 9 24023.3 1932.18 2
 -3 1 9 24769 2035.08 2
 -3 1 9 26392.4 2543.13 3
 -3 1 8 7009.06 953.615 2
 -3 -1 8 6510.12 726.134 1
 -3 1 8 5940.75 1121.74 3
 3 -1 -8 7995.47 847.428 1
 3 -1 -8 8632.04 945.675 2
 -3 1 7 44030.6 3189.17 4
 3 -1 -7 50367.6 2578.92 1
 3 -1 -7 51231 2519.03 2
 -3 1 7 50410.8 3301.74 3
 -3 1 7 46196.3 2598.7 2
 -3 -1 7 50179.7 2465.22 1
 3 -1 -6 117229 4342.03 2
 3 -1 -6 110927 4613.03 1
 -3 -1 6 105294 4461.34 1
 -3 1 6 107503 5240.34 4
 -3 1 6 110347 5275.16 3
 -3 1 5 208777 8145.77 3
 3 -1 -5 203285 7641.02 1
 -3 -1 5 197792 7503.31 1
 3 -1 -5 217187 7052.46 2
 -3 1 5 199814 7964.58 4
 3 -1 -5 210144 7767.35 4
 3 -1 -4 59250.2 2838.63 4
 -3 -1 4 59139.4 2962.42 1
 -3 1 4 59110.7 3206.78 3
 3 -1 -4 68237.7 3289.7 3
 -3 1 4 57022.6 2952.9 4
 3 -1 -4 60015.5 3036.65 1
 -3 1 3 175818 6325.48 4
 3 -1 -3 175063 6241.68 4
 3 -1 -3 191729 6898.03 3
 -3 1 3 180090 6872.92 3
 -3 -1 3 164822 6621.08 1
 3 -1 -3 169710 6740.44 1
 3 -1 -2 183415 7460.63 1
 3 -1 -2 195555 6710.25 4
 -3 1 2 199714 7473.41 3
 -3 -1 2 188533 7400.8 1
 -3 1 2 195417 6692.67 4
 3 -1 -2 222961 7648.6 3
 -3 -1 2 217589 7257.32 3
 -3 1 2 199749 7600.07 1
 3 1 -1 458649 14549.9 3
 -3 -1 1 454067 14507.5 3
 -3 1 1 448540 15253.6 1
 -3 -1 1 433228 15086.4 1
 3 -1 -1 490657 15269.4 3
 3 -1 -1 414652 15167.2 1
 3 1 0 306779 9903.26 4
 -3 1 0 297351 10738.2 1
 -3 -1 0 293311 10607.9 1
 -3 -1 0 298113 10004.9 2
 3 1 0 304889 9843.91 3
 -3 -1 0 308527 9840.28 3
 3 -1 0 276758 10668.2 1
 -3 -1 -1 203762 7281.65 2
 3 1 1 208356 6883.33 3
 3 1 1 202638 7367.85 2
 3 -1 1 184449 7686.77 1
 3 1 1 208524 6987.12 4
 -3 -1 -1 202709 7020.45 4
 -3 1 -1 207837 7835.48 1
 -3 -1 -1 193236 7657.82 1
 -3 -1 -2 18625.7 1278.01 4
 -3 1 -2 20947.2 1670.39 1
 -3 -1 -2 23233.3 1734.14 1
 -3 -1 -2 19727.3 1503.51 2
 3 1 2 19582.8 1275.69 4
 3 -1 2 18205.6 1588.17 1
 3 1 2 18572.5 1523.49 2
 3 -1 3 2430.13 550.203 1
 -3 1 -3 2450.04 534.97 1
 3 1 3 2933.45 605.787 2
 -3 -1 -3 2045.03 415.501 4
 3 1 3 1924.12 407.15 4
 -3 -1 -4 1972.76 443.32 4
 -3 1 -4 2791.97 594.879 1
 3 -1 4 1659.26 464.583 1
 3 1 4 1631.31 515.475 2
 -3 -1 -4 969.205 402.11 1
 3 1 4 952.817 300.324 4
 3 1 5 77309.9 3988.23 4
 -3 1 -5 89840.7 4161.68 1
 3 -1 5 83829.5 4105.93 1
 3 1 5 81728.6 4507.8 2
 3 -1 5 87183 4492.21 2
 -3 -1 -5 88753.8 4106.06 1
 3 1 6 -113.577 199.015 2
 3 -1 6 1046.91 432.093 2
 -3 1 -6 339.64 333.945 1
 3 1 6 439.992 148.626 4
 -3 -1 -6 94.6996 268.038 1
 3 -1 6 951.084 392.313 1
 -3 -1 -7 431979 14079.3 1
 -3 1 -7 446521 14154.5 1
 3 1 7 377994 15122 2
 3 -1 7 352708 13865.6 1
 3 -1 7 402683 15088.2 2
 3 1 7 376221 14619.6 4
 3 1 8 247.551 284.457 4
 -3 1 -8 895.266 382.336 1
 3 1 8 1654.76 679.378 2
 3 -1 8 1289.51 602.712 2
 -3 -1 -8 1327.46 455.806 1
 -3 -1 -9 282427 10164.7 1
 3 1 9 254409 11688.1 2
 3 -1 9 259354 11545.7 2
 -3 -1 -10 2701.75 659.936 1
 3 1 10 1845.59 858.751 2
 3 -1 10 1876.18 798.537 2
 3 1 11 190095 9882.36 2
 -3 -1 -11 194941 7689.67 1
 3 -1 11 183815 9555.69 2
 3 -1 12 58878.5 4863.48 2
 -3 -1 -12 57531.5 3302.03 1
 3 1 12 61836.9 5075.09 2
 -3 -1 -13 23090.9 1884.49 1
 3 -1 13 23746.4 3056.56 2
 3 1 13 20905.1 2943.55 2
 3 -1 14 71683.2 5797.17 2
 3 1 14 68611.3 5865.89 2
 -3 -1 -14 65649.3 3595.37 1
 3 -1 15 21679.2 3263.39 2
 3 1 15 28596.1 3762.67 2
 3 1 16 11652.7 2451.72 2
 3 -1 16 18903.8 3088.93 2
 3 1 17 55060.8 5786.56 2
 3 -1 17 57667.6 5738.42 2
 3 1 18 584.56 1127.5 2
 3 -1 18 698.129 558.207 2
 3 -1 19 57724.4 6098.83 2
 3 1 19 55455.4 6210.21 2
 3 -1 20 -447.385 1330.73 2
 3 1 20 -1480.37 1690.91 2
 3 -1 21 42283.4 5489.14 2
 3 1 21 35312.7 5202.68 2
 3 1 22 -378.017 1257.22 2
 3 -1 22 -499.806 1155.1 2
 3 -1 23 13063.7 3220.36 2
 3 1 23 15658.5 3650.84 2
 3 1 24 1217.02 1048.28 2
 3 -1 24 -433.054 1268.37 2
 -3 -2 28 8672.99 2550.48 2
 -3 2 27 5188.21 2178.83 3
 -3 -2 27 2854.46 1526.52 2
 -3 -2 26 22578.3 4001.1 2
 -3 2 26 23185.5 4456.3 3
 -3 -2 25 -694.87 1107.51 2
 -3 2 25 537.277 1128.78 3
 -3 2 24 45981.2 5927.65 3
 -3 -2 24 49430.9 5557.57 2
 -3 -2 23 9294.3 2286.23 2
 -3 2 23 7458.15 2326.15 3
 -3 -2 22 34807.2 4382.34 2
 -3 2 22 34934.6 4898.47 3
 -3 2 21 17740 3374.95 3
 -3 -2 21 25560.4 3546.87 2
 -3 -2 20 3731.04 1217.57 2
 -3 2 20 5247.36 1723.27 3
 -3 2 19 34290.6 4391.78 3
 -3 -2 19 39521.8 4188.73 2
 -3 2 19 42392.8 4586.95 2
 -3 2 18 2065.03 1130.72 3
 -3 2 18 2264.96 960.157 2
 -3 -2 18 2578.72 940.327 2
 -3 2 17 35835.8 4205.09 3
 -3 2 17 42875.7 4331.01 2
 -3 2 16 40012.9 3985.99 2
 -3 2 16 39989.3 4296.5 3
 -3 -2 16 41620.4 3769.21 2
 -3 2 15 34729.5 3522.82 2
 3 -2 -15 31124.3 1750.32 1
 -3 -2 15 32557.3 3142.44 2
 -3 2 15 27495.3 3374.78 3
 -3 2 14 25283 2847.43 2
 -3 2 14 26143.8 3140.36 3
 -3 -2 14 24208.4 2589.68 2
 3 -2 -14 25192.7 1609.2 1
 -3 -2 13 7938.95 1344.06 2
 -3 2 13 5484.02 1391.04 3
 3 -2 -13 10465.5 1005.19 1
 -3 2 12 38140.4 3476.83 3
 -3 2 12 37858.6 3747.2 4
 -3 -2 12 31542.4 1659.26 1
 -3 2 11 14754.2 2148.9 4
 -3 -2 11 18413.6 1244.09 1
 -3 2 11 14033.6 2000.81 3
 -3 2 10 107.226 424.741 4
 -3 -2 10 1210.11 339.267 1
 -3 2 9 42736 3261.18 3
 -3 2 9 40682.8 3335.63 4
 -3 -2 9 41161.8 2268.27 1
 -3 2 8 4296.26 935.716 4
 -3 2 8 4842.8 981.423 3
 3 -2 -7 1324.04 387.125 2
 -3 2 7 959.905 412.524 4
 -3 2 7 973.458 392.31 3
 -3 2 6 4054.55 790.641 4
 -3 2 6 4099.34 783.867 3
 3 -2 -5 12320.3 1262.29 4
 -3 2 5 11753.8 1361.89 3
 -3 2 5 12168.1 1277.48 4
 3 -2 -4 176173 6791.26 4
 -3 2 4 175110 6816.18 4
 -3 2 4 185095 7295.01 3
 3 -2 -3 1317.17 412.181 3
 -3 2 3 924.38 384.92 3
 3 -2 -3 2068.41 440.579 4
 -3 2 3 931.048 314.013 4
 -3 2 2 102514 4109.05 4
 3 -2 -2 111174 4858.82 3
 3 -2 -2 97202 4139.69 4
 3 -2 -1 89333.8 3757.94 4
 -3 2 1 95001.8 3726.02 4
 -3 2 0 90536.7 3665.29 4
 -3 -2 0 94170.7 3378.03 3
 3 2 0 85492.6 3987.38 4
 -3 -2 -1 304215 10591.7 4
 3 -2 1 281404 10964.3 1
 3 2 1 307495 10519.6 4
 3 -2 2 70733.5 3934.67 1
 3 2 2 76271.5 3573.21 4
 -3 -2 -2 72392.1 3622.8 2
 -3 -2 -2 76614.9 3601.96 4
 3 2 3 152346 6145.63 4
 3 -2 3 144027 6517.71 1
 -3 -2 -3 155748 6212.98 4
 -3 -2 -4 13855.3 1398.14 4
 3 2 4 15325.4 1442.21 4
 3 2 5 60920 3860.93 2
 3 2 5 60808.8 3459.65 4
 3 2 6 181814 7728.54 4
 3 2 6 182958 8354.06 2
 -3 -2 -7 625.917 319.073 1
 3 2 7 1237.55 431.487 4
 3 2 7 986.501 492.443 2
 3 2 8 226487 9965.97 4
 3 2 8 218932 10522.1 2
 3 -2 9 12745.1 1907.84 2
 3 2 9 13124.5 1880.61 4
 -3 -2 -9 18636 1714.22 1
 3 2 9 15971.9 2249.57 2
 3 2 10 133040 7859.44 2
 -3 -2 -10 155181 6426.97 1
 3 2 10 131566 7525.4 4
 3 -2 10 145544 7747.66 2
 -3 -2 -11 51955.1 3128.1 1
 3 -2 11 48115.3 4141.18 2
 3 2 11 48914.8 4232.46 4
 3 2 11 43843.7 4229.83 2
 3 2 12 56477.3 4954.2 4
 3 2 12 64423.5 5355.21 2
 -3 -2 -12 65157 3676.27 1
 3 -2 12 69801.7 5237 2
 -3 -2 -13 102597 5018.89 1
 3 2 13 98619.7 7169.08 2
 3 -2 13 112845 7160.13 2
 -3 -2 -14 1759.84 602.088 1
 3 2 14 1619.56 971.318 2
 3 -2 14 507.511 465.987 2
 3 -2 15 101688 7291.26 2
 -3 -2 -15 94862.7 4719.72 1
 3 2 15 96936.8 7573.06 2
 3 2 16 28858.6 4027.22 2
 3 -2 16 23711.2 3418.33 2
 3 2 17 17568.6 3223.3 2
 3 -2 17 17092.9 3055.06 2
 3 -2 18 28504.7 4027.79 2
 3 2 18 27665.9 4184.56 2
 3 2 19 2286.01 1477.03 2
 3 -2 19 3732.51 1552.25 2
 3 -2 20 58943 6267.52 2
 3 2 20 51339.1 6319.51 2
 3 2 21 2147.68 830.966 2
 3 -2 21 1499.87 999.515 2
 3 2 22 23559 4458.49 2
 3 -2 22 24613.2 4268.82 2
 3 -2 23 3633.99 1518.64 2
 3 -2 24 690.871 1203.45 2
 -3 -3 28 16571.7 3627.54 2
 -3 -3 27 9265.78 2698.78 2
 -3 -3 26 408.481 521.912 2
 -3 3 25 5171.02 1928.2 3
 -3 -3 25 8382.36 2246.18 2
 -3 -3 24 1087.71 832.671 2
 -3 3 24 1324.86 1219.76 3
 -3 3 23 9765.77 2460.16 3
 -3 -3 23 11458.8 2461.83 2
 -3 3 22 37098.9 4964.36 3
 -3 -3 22 51842.6 5247.36 2
 -3 3 21 8848.13 2333.38 3
 -3 -3 21 6224.65 1706.87 2
 -3 3 20 62141.9 6131.95 3
 -3 -3 20 68432.2 5734.07 2
 -3 3 19 171.182 550.609 3
 -3 -3 19 62.7684 413.734 2
 -3 3 18 107127 7951.77 3
 -3 -3 18 130365 7715.02 2
 -3 3 17 5609.01 1664.3 3
 -3 -3 17 7879.15 1696.84 2
 -3 -3 16 62995 4757.59 2
 -3 3 16 60659.4 5279.76 3
 -3 3 15 24326.2 3418.96 4
 -3 3 15 28180.1 3326.36 3
 -3 3 14 10801.6 2137.79 4
 -3 -3 14 9187.21 822.082 1
 -3 3 14 11336.1 1962.91 3
 -3 3 13 26898.4 3233.69 4
 -3 3 13 26083.4 2933.92 3
 -3 -3 13 22501.6 1550.78 1
 -3 3 12 22614.1 2587.5 3
 -3 3 12 23331.5 2871.66 4
 -3 3 11 12016.8 1928.7 4
 -3 3 11 11412.4 1751.42 3
 -3 3 10 77694.2 5072.48 4
 -3 3 10 75508.1 4798.04 3
 -3 3 9 24103.5 2511.41 4
 -3 3 9 26897 2516.05 3
 -3 3 8 387605 14803.6 3
 -3 3 8 407539 14987.8 4
 -3 3 7 40663.3 2959.75 3
 -3 3 7 36501.6 2819.95 4
 -3 3 6 387427 14119.9 4
 -3 3 6 389707 14250.3 3
 -3 3 5 26483.1 2232.22 3
 -3 3 5 29457.2 2217.39 4
 -3 3 4 81744.4 4062.64 4
 -3 3 4 80444.4 4309.54 3
 -3 3 3 69361.9 3555.21 4
 3 -3 -3 67635.7 3591.14 4
 3 -3 -2 80762.4 3931.3 4
 -3 3 2 80433.4 3827.39 4
 3 -3 -1 89645.5 4099.75 4
 -3 3 1 84423.2 3967.3 4
 -3 3 0 65409.4 3281.52 4
 3 3 0 61414.2 3508.96 4
 -3 -3 -1 2881.59 649.817 4
 3 3 1 2612.37 623.758 4
 3 3 2 80618.9 4165.31 4
 3 3 3 25289.4 2094.73 4
 3 3 4 278529 10686 4
 3 3 5 328.774 208.707 4
 3 3 6 173080 7682.65 4
 3 3 7 72159.3 4410.47 4
 3 3 8 5701.17 1191.13 4
 3 3 9 49325.9 3872 4
 3 3 10 44835.5 3798.93 4
 -3 -3 -11 10432.4 1367.45 1
 3 3 11 8803.89 1757.9 4
 -3 -3 -12 116652 5678.75 1
 3 3 12 114085 7280.36 4
 3 -3 12 117026 7180.01 2
 3 -3 13 5034.73 1403.53 2
 3 3 13 5421.21 1416.47 4
 -3 -3 -13 4087.71 844.136 1
 -3 -3 -14 155159 6886.39 1
 3 -3 14 171864 9391.17 2
 3 -3 15 1342.33 765.816 2
 -3 -3 -15 151.684 365.143 1
 3 -3 16 27587.2 3641.14 2
 3 -3 17 9925.73 2205.96 2
 3 -3 18 8598.54 2143.33 2
 3 -3 19 32092.9 4413.96 2
 3 -3 20 463.467 774.736 2
 3 -3 21 22996 3877.74 2
 3 -3 22 15601.6 3347.45 2
 3 -3 23 7132.79 2345.26 2
 -3 -4 27 11469.8 2816.21 2
 -3 -4 26 175.797 637.718 2
 -3 -4 25 3589.83 1751.22 2
 -3 -4 24 2210.75 1173.4 2
 -3 4 24 1497.18 1172.6 3
 -3 4 23 4336.57 2023.69 3
 -3 -4 23 8225.05 2161.5 2
 -3 -4 22 1748.33 1069.79 2
 -3 4 22 125.919 767.171 3
 -3 -4 21 86991.7 6696.16 2
 -3 4 21 69472.2 6666.57 3
 -3 -4 20 2008.79 1078.95 2
 -3 4 20 1706.95 1046.36 3
 -3 -4 19 110096 7194.89 2
 -3 4 19 88144.1 7222.19 3
 -3 -4 18 32300.8 3538.06 2
 -3 4 18 27734.4 3697.54 3
 -3 4 17 68737.5 6524.25 4
 -3 4 17 66611.6 5682.69 3
 -3 4 16 24896.4 3209.57 3
 -3 4 16 23941.2 3550.9 4
 -3 4 15 19092.8 3000.09 4
 -3 4 15 23970.4 3021.12 3
 -3 -4 15 18411.1 1473.14 1
 -3 4 14 24533.7 2967.82 3
 -3 4 14 34146 3860.55 4
 -3 4 13 11379.8 2073.54 4
 -3 4 13 9295.04 1694.11 3
 -3 4 12 36086.6 3404.38 3
 -3 4 12 41227.5 3870.49 4
 -3 4 11 103459 6276.31 4
 -3 4 11 89686.2 5650.79 3
 -3 4 10 35523.5 3264.53 4
 -3 4 10 32713.8 3011.78 3
 -3 4 9 179669 8392.74 4
 -3 4 9 164447 8009.85 3
 -3 4 8 6724.33 1226.17 3
 -3 4 8 7970.13 1410.61 4
 -3 4 7 586941 20494 4
 -3 4 7 565882 20266.6 3
 -3 4 6 19731 2016.23 4
 -3 4 6 14689 1757.75 3
 -3 4 5 148385 6875.71 3
 -3 4 5 145877 6706.72 4
 -3 4 4 36831.8 2692.11 4
 -3 4 3 25795.7 2144.97 4
 -3 4 2 14548.3 1541.3 4
 -3 4 1 85500.2 4379.43 4
 -3 4 0 32685 2413.02 4
 3 4 0 30843 2573.42 4
 3 4 1 321142 12297.2 4
 3 4 2 116642 5811.42 4
 3 4 3 552372 19447.7 4
 3 4 4 114923 5851.37 4
 3 4 5 446663 16499.5 4
 3 4 6 9656.25 1489.73 4
 3 4 7 96194.5 3843.38 3
 3 4 7 118457 6077.45 4
 3 4 8 1210.13 352.496 3
 3 4 8 1439.26 566.735 4
 3 4 9 17131.5 2233.7 4
 3 4 9 14134.1 1318.79 3
 3 4 10 1788.52 506.647 3
 3 4 10 1436.94 686.116 4
 3 4 11 115987 5621.34 3
 3 4 11 127106 7396.78 4
 3 4 12 3039.84 1074.6 4
 3 4 12 1040.42 482.92 3
 3 4 13 179162 8567.92 3
 3 4 13 207771 10940.5 4
 -3 -4 -13 206827 8631.07 1
 3 4 14 809.865 475.68 3
 3 4 14 115.638 851.025 4
 -3 -4 -14 -132.227 373.971 1
 3 4 15 83372 5664.28 3
 -3 -4 -15 100368 5305.59 1
 3 4 15 101212 7681.78 4
 3 -4 15 108123 7355.24 2
 3 -4 16 7504.64 1962.1 2
 3 4 16 9417.45 2320.4 4
 3 -4 17 21672.5 3261.18 2
 3 -4 18 15037.7 2833.35 2
 3 -4 19 1261.64 835.608 2
 3 -4 20 4220.28 1712.04 2
 3 -4 21 8281.84 2390.96 2
 3 -4 22 899.851 655.889 2
 3 -4 23 28287.6 4632.06 2
 -3 -5 27 1758 846.62 2
 -3 -5 26 20432.8 3717.78 2
 -3 -5 25 114.667 576.846 2
 -3 -5 24 126.614 961.832 2
 -3 -5 23 1138.86 440.515 2
 -3 -5 22 21169.1 3275.63 2
 -3 5 22 15531.1 3097.34 3
 -3 5 21 967.393 538.045 3
 -3 -5 21 1576.59 931.744 2
 -3 5 20 49022.1 5350.62 3
 -3 -5 20 64440.7 5445.36 2
 -3 5 19 2108.99 1071.22 3
 -3 5 19 426.198 1054.59 4
 -3 5 18 55177.2 6007.83 4
 -3 5 18 50155.8 5033.65 3
 -3 5 17 7138.9 2100.7 4
 -3 5 17 3565.47 1248.72 3
 -3 5 16 29794.3 3554.35 3
 -3 5 16 36411.2 4369.13 4
 -3 5 15 1734.76 946.19 4
 -3 5 15 2175.81 1016.79 3
 -3 5 14 2902.5 1228.96 4
 -3 5 14 3222.97 995.948 3
 -3 5 13 327.231 361.602 3
 -3 5 13 1378.36 738.738 4
 -3 5 12 26639.2 2945.53 3
 -3 5 12 32565.5 3474.49 4
 -3 5 11 -58.5746 455.835 3
 -3 5 11 91.5502 291.631 4
 -3 5 10 244372 10770.9 4
 -3 5 10 207697 9918.95 3
 -3 5 9 20684.6 2444.39 4
 -3 5 9 18981.2 2216.56 3
 -3 5 8 301131 12167.7 4
 -3 5 8 269024 11541.6 3
 -3 5 7 1999.47 706.187 3
 -3 5 7 1063.35 529.776 4
 -3 5 6 294435 11993.5 4
 -3 5 5 32039.8 2776.82 4
 -3 5 4 57379.2 3837.15 4
 -3 5 3 207.104 317.301 4
 -3 5 2 56870.8 3708.46 4
 3 5 -1 60972.8 4122.81 4
 -3 5 1 56577.8 3750.76 4
 -3 5 0 260101 10375.5 4
 3 5 0 242148 10551.6 4
 3 5 1 120234 6341.93 4
 -3 5 -1 123901 6166.62 4
 3 5 2 577362 20686.3 4
 3 5 3 145069 6876.86 4
 -3 -5 -3 121265 4307.99 3
 3 5 4 368893 14467.9 4
 3 5 5 13656.6 1905.06 4
 3 5 6 73766.3 4884.61 4
 3 5 7 11266.7 1802.05 4
 3 5 8 5918.29 674.122 3
 3 5 8 6868.25 1426.88 4
 3 5 9 2177.45 453.69 3
 3 5 9 2898.33 1004.26 4
 3 5 10 83954.2 5694.41 4
 3 5 10 74762.2 3688.63 3
 3 5 11 4077.75 1251.11 4
 3 5 11 2419.83 604.903 3
 3 5 12 107705 5332.79 3
 3 5 12 126230 7732 4
 3 5 13 1231.33 570.96 4
 3 5 13 794.556 448.169 3
 3 5 14 125725 8549.96 4
 -3 -5 -15 897.738 481.768 1
 3 5 15 555.08 650.096 4
 3 5 16 45392.2 5373.06 4
 3 -5 16 60264.4 5538.32 2
 3 5 17 4753.32 1728.21 4
 3 -5 17 3749.55 1487.9 2
 3 5 18 4934.21 1558.96 4
 3 -5 18 6160.76 1786.1 2
 3 -5 19 526.527 755.045 2
 3 -5 20 1000.44 693.131 2
 3 -5 21 682.551 500.786 2
 3 -5 22 13350.4 3118.13 2
 -3 -6 26 6404.75 2203.74 2
 -3 -6 25 669.418 760.762 2
 -3 -6 24 10093.9 2391.6 2
 -3 -6 23 5930.42 1801.75 2
 -3 -6 22 3302.03 1333.68 2
 -3 6 21 25071.6 3793.3 3
 -3 6 21 18440 3936.26 4
 -3 -6 21 24016.2 3356.87 2
 -3 6 20 -492.659 1096.08 4
 -3 6 20 37.3801 412.921 3
 -3 6 19 40419 5326.31 4
 -3 6 19 33136.9 4177.63 3
 -3 6 18 3351.88 1697.51 4
 -3 6 18 2942.72 1141.79 3
 -3 6 17 58898.3 5941.08 4
 -3 6 17 46309.3 4707.49 3
 -3 6 16 26093 3784.46 4
 -3 6 16 27000.4 3374.49 3
 -3 6 15 35239.6 4159.99 4
 -3 6 15 26503.6 3270.34 3
 -3 6 14 36286.5 4070.49 4
 -3 6 14 33050.3 3557.46 3
 -3 6 13 -363.413 675.055 4
 -3 6 13 709.993 667.067 3
 -3 6 12 24094.9 2830.98 3
 -3 6 12 27971.7 3282.95 4
 -3 6 11 100373 6295.99 3
 -3 6 11 126953 7373.65 4
 -3 6 10 31667.5 3343.04 4
 -3 6 10 28064.7 2906.18 3
 -3 6 9 252148 11413.2 3
 -3 6 9 278940 12149.4 4
 -3 6 8 1330.79 717.418 4
 -3 6 7 312950 13201.8 4
 -3 6 6 39689.2 3417.43 4
 -3 6 5 113297 6323.57 4
 -3 6 4 85801.7 5223.74 4
 -3 6 3 1428.72 629.389 4
 -3 6 2 1876.13 692.744 4
 -3 6 1 166721 8070.98 4
 3 6 -1 169509 8409.92 4
 -3 6 0 26492.4 2644.67 4
 3 6 0 23742 2687.22 4
 3 6 1 161580 8236.72 4
 -3 6 -1 168389 8122.44 4
 3 6 2 3172.02 914.47 4
 3 6 3 224332 10166.5 4
 -3 -6 -3 216844 7659.32 3
 -3 -6 -4 8698.21 719.891 3
 3 6 4 5792.47 1246.62 4
 3 6 5 166991 8528.06 4
 3 6 6 53314.9 4273.4 4
 3 6 7 8916.77 1694.74 4
 3 6 8 39936.1 3784.53 4
 3 6 9 20432.8 2690.1 4
 3 6 10 27117.6 3238.43 4
 3 6 11 40669.5 2514.08 3
 3 6 11 47233.8 4434.33 4
 3 6 12 1492.56 863.199 4
 3 6 13 101665 7341.68 4
 3 6 14 6566.87 1726.35 4
 3 6 15 51684.7 5428.87 4
 3 6 16 14611.1 2870.99 4
 3 6 17 7157.1 1928.46 4
 3 6 18 4155.25 1726.47 4
 3 -6 18 5057.1 1646.14 2
 3 6 19 -361.902 1065.66 4
 3 -6 19 580.273 534.774 2
 3 -6 20 6708.41 1898.04 2
 3 -6 21 11666.8 2753.24 2
 3 -6 22 323.403 919.806 2
 -3 -7 26 1209.13 890.983 2
 -3 -7 25 9684.99 2339.39 2
 -3 -7 24 574.372 626.422 2
 -3 -7 23 15220.7 2867.73 2
 -3 7 22 18198.5 3928.32 4
 -3 7 21 1896.72 1533.66 4
 -3 7 20 39443.9 5510.74 4
 -3 7 19 2923.48 1306.5 3
 -3 7 19 3416.73 1538.39 4
 -3 7 18 46579.9 4874.97 3
 -3 7 18 55095.1 6061.94 4
 -3 7 17 16696.1 3082.57 4
 -3 7 17 15265.7 2607.18 3
 -3 7 16 22260.8 3085.1 3
 -3 7 16 28399.4 3901.8 4
 -3 7 15 83182.2 6730.15 4
 -3 7 15 72039.7 5696 3
 -3 7 14 401.416 528.69 3
 -3 7 14 43.0131 435.204 4
 -3 7 13 124087 8114.4 4
 -3 7 13 119488 7348.16 3
 -3 7 12 61130.7 5225.97 4
 -3 7 12 52990 4470.17 3
 -3 7 11 99244.6 6352.98 3
 -3 7 11 109231 7142.94 4
 -3 7 10 128282 7789.88 4
 -3 7 9 4571.46 1280.99 4
 -3 7 8 137024 7884.51 4
 -3 7 7 25976.4 2954.65 4
 -3 7 6 220822 10490.5 4
 -3 7 5 87273.7 5737.34 4
 -3 7 4 92390.3 5817.08 4
 -3 7 3 78872 5286.72 4
 3 7 -2 2456.32 911.493 4
 -3 7 2 562.314 457.822 4
 3 7 -1 151871 8322.38 4
 -3 7 1 157367 8106.16 4
 -3 7 0 136114 7449.99 4
 3 7 0 134789 7613.09 4
 -3 7 -1 118056 6879.41 4
 3 7 1 118967 7022.97 4
 -3 7 -2 258639 11649.8 4
 3 7 2 249555 11622.6 4
 3 7 3 15399.2 2304.11 4
 3 7 4 291378 12539.9 4
 -3 -7 -4 264543 9328.28 3
 -3 -7 -5 16009.2 1130.96 3
 3 7 5 18370.5 2456.37 4
 3 7 6 107240 6771.18 4
 3 7 7 55129.8 4680.95 4
 3 7 8 3570.91 1101.27 4
 3 7 9 49650.4 4544.28 4
 3 7 10 25289.8 3225.24 4
 3 7 11 36695 4067.35 4
 3 7 12 35558.5 4119.34 4
 3 7 13 786.01 652.114 4
 3 7 14 60891.1 5829.74 4
 3 7 15 33653.8 4375.47 4
 3 7 16 21138.7 3606.93 4
 3 7 17 18249.1 3473.32 4
 3 7 18 -1395.04 1626.25 4
 3 -7 19 15420.2 2977.1 2
 3 7 19 14306.6 3256.99 4
 3 7 20 7259.71 2363.71 4
 3 -7 20 7091.07 1973.26 2
 3 7 21 4942.1 2167.34 4
 3 -7 21 5304.52 1767.16 2
 -3 -8 25 574.791 1151.69 2
 -3 -8 24 15838.7 3083.89 2
 -3 8 23 6134.18 2280.31 4
 -3 8 22 7849.41 2679.8 4
 -3 8 21 23255 4485.77 4
 -3 8 20 912.674 838.541 4
 -3 8 19 31942.7 4848.27 4
 -3 8 18 3635.67 1406.78 3
 -3 8 18 5058.85 1784.73 4
 -3 8 17 24320.1 3347.12 3
 -3 8 17 28981.9 4253.24 4
 -3 8 16 32689.6 3856.8 3
 -3 8 16 43059.6 5009.38 4
 -3 8 15 3895.06 1470.74 4
 -3 8 15 4236.48 1290.69 3
 -3 8 14 91956.7 6524.61 3
 -3 8 14 92879.5 7256.51 4
 -3 8 13 10919 2256.89 4
 -3 8 12 116988 7953.9 4
 -3 8 11 78269.8 6140.89 4
 -3 8 10 33040 3742.63 4
 -3 8 9 89691.1 6414.33 4
 -3 8 8 404.387 493.612 4
 -3 8 7 166686 9148.34 4
 -3 8 6 89958 6209.06 4
 -3 8 5 238454 11441.3 4
 -3 8 4 256276 11942.5 4
 -3 8 3 47861.2 4210.15 4
 3 8 -3 47028.7 4525.5 4
 -3 8 2 202296 10175.9 4
 3 8 -2 206883 10675.8 4
 -3 8 1 14487.2 2208.89 4
 3 8 -1 14917.6 2302.77 4
 -3 8 0 138171 7881.06 4
 3 8 0 130997 7969.86 4
 3 8 1 79194.8 5901.23 4
 -3 8 -1 86788.3 5978.63 4
 3 8 2 18483.9 2608.82 4
 -3 8 -2 20569.6 2744.39 4
 -3 8 -3 118849 7505.98 4
 3 8 3 120595 7468.92 4
 -3 -8 -4 7138.05 890.293 3
 3 8 4 4146.54 1296.11 4
 3 8 5 49974.7 4562.85 4
 3 8 6 31510.4 3571.21 4
 3 8 7 5786.64 1551.57 4
 3 8 8 86714.3 6425.4 4
 3 8 9 9064.75 2050.46 4
 3 8 10 44049.9 4551.47 4
 3 8 11 17120.7 2863.65 4
 3 8 12 3612.81 1286.1 4
 3 8 13 21917.8 3394.94 4
 3 8 14 3816.8 1589.22 4
 3 8 15 12688.2 2795.94 4
 3 8 16 22151.4 3728.33 4
 3 8 17 1142.12 865.833 4
 3 8 18 26210.5 4365.24 4
 3 8 19 1602.91 667.473 4
 3 8 20 17184.8 3867.68 4
 3 8 21 4999.55 2498.4 4
 3 8 22 6709.07 2437.67 4
 -3 9 22 2121.27 1573.54 4
 -3 9 21 5457.34 2263.76 4
 -3 9 20 9515.9 2806.44 4
 -3 9 19 647.286 1068.12 4
 -3 9 18 16406.9 3323.58 4
 -3 9 17 20639.6 3680.16 4
 -3 9 16 7685.3 2222.11 4
 -3 9 15 89207.5 7487.19 4
 -3 9 14 937.289 638.422 4
 -3 9 13 52148.2 5335.86 4
 -3 9 12 -293.011 673.431 4
 -3 9 11 8824.65 2038.53 4
 -3 9 10 16722.8 2741.68 4
 -3 9 9 732.758 695.757 4
 -3 9 8 20592.2 2973.19 4
 -3 9 7 12929.1 2357.19 4
 -3 9 6 53459.3 4838.05 4
 -3 9 5 160076 9215.98 4
 -3 9 4 49555.4 4532.88 4
 3 9 -3 245428 12808.5 4
 -3 9 3 256557 12346 4
 -3 9 2 982.263 749.301 4
 3 9 -2 653.076 404.721 4
 -3 9 1 145910 8556.56 4
 3 9 -1 137769 8622.93 4
 3 9 0 13760 2480.86 4
 -3 9 0 16825.3 2590.68 4
 -3 9 -1 45732.1 4389.46 4
 3 9 1 37989.2 4147.5 4
 3 9 2 9376.09 1911.39 4
 -3 9 -2 8774.67 1891.48 4
 3 9 3 1022.21 701.232 4
 -3 9 -3 1591.51 980.497 4
 -3 9 -4 12978.9 2493.27 4
 3 9 4 13778.5 2391.15 4
 3 9 5 75978.3 6057.45 4
 3 9 6 10230.4 2104.33 4
 3 9 7 148651 9189.2 4
 3 9 8 5654.51 1557.05 4
 3 9 9 105120 7591.63 4
 3 9 10 4834.39 1537.52 4
 3 9 11 54201.3 5424.44 4
 3 9 12 2957.62 1293.73 4
 3 9 13 4020.25 1313.62 4
 3 9 14 9236.83 2520.08 4
 3 9 15 9208.08 2345.55 4
 3 9 16 4074.02 1771.48 4
 3 9 17 30373.8 4710.98 4
 3 9 18 -562.047 1269.08 4
 3 9 19 35620.4 5473.42 4
 3 9 20 1838.62 1892.55 4
 -3 10 21 1267.33 1206.76 4
 -3 10 20 2844.02 1574.28 4
 -3 10 19 1239.24 1130.78 4
 -3 10 18 6932.44 2196.96 4
 -3 10 17 -286.534 743.625 4
 -3 10 16 49231.7 5739.88 4
 -3 10 15 -308.679 794.197 4
 -3 10 14 86923.4 7476.69 4
 -3 10 13 4573.66 1614.98 4
 -3 10 12 73112.4 6509.81 4
 -3 10 11 4896.64 1680.66 4
 -3 10 10 17928.5 2971.13 4
 -3 10 9 8273.22 2055.96 4
 -3 10 8 910.662 875.297 4
 -3 10 7 23025.6 3292.44 4
 -3 10 6 29348.3 3684.33 4
 -3 10 5 10572.6 2191.59 4
 3 10 -4 165293 10186.1 4
 -3 10 4 153456 9382.99 4
 3 10 -3 2900.74 1335.98 4
 -3 10 3 2632.27 1130.11 4
 3 10 -2 160555 9998.01 4
 -3 10 2 163649 9622.67 4
 3 10 -1 178.816 783.907 4
 -3 10 1 808.314 389.058 4
 3 10 0 91286.7 7019.83 4
 -3 10 0 92766.6 6898.41 4
 3 10 1 -362 792.777 4
 -3 10 -1 1614.78 831.021 4
 3 10 2 7477.16 1843.22 4
 -3 10 -2 6490.86 1788.16 4
 -3 10 -3 991.909 863.488 4
 3 10 3 1154.68 810.98 4
 -3 10 -4 17686.5 3039.85 4
 3 10 4 16205.3 2750.02 4
 3 10 5 1857.85 802.65 4
 -3 10 -5 2536.02 1274.88 4
 3 10 6 131159 8755.93 4
 3 10 7 1491.15 1025.15 4
 3 10 8 131937 8999.91 4
 3 10 9 2123.08 906.698 4
 3 10 10 61306 5908.22 4
 3 10 11 1574.3 948.213 4
 3 10 12 16859.6 3143.97 4
 3 10 13 3431.77 1489.58 4
 3 10 14 3214.3 1362.25 4
 3 10 15 8508.95 2384.18 4
 3 10 16 21846.1 3946.3 4
 3 10 17 1782.41 970.78 4
 3 10 18 33524.1 5222.96 4
 3 10 19 2216.69 1394.1 4
 -3 11 20 3287.61 1728.52 4
 -3 11 19 2061.32 1140.21 4
 -3 11 18 557.11 828.221 4
 -3 11 17 15355.1 3246.06 4
 -3 11 16 -1029.47 1019.87 4
 -3 11 15 53704.9 6074.51 4
 -3 11 14 4326.14 1646.35 4
 -3 11 13 106993 8546.27 4
 -3 11 12 5931.49 1868.49 4
 -3 11 11 88598.9 7480.21 4
 -3 11 10 19506.2 3267.29 4
 -3 11 9 17950.7 3125.7 4
 -3 11 8 37171.6 4459.46 4
 -3 11 7 10147.1 2248.23 4
 -3 11 6 44505.6 4792.06 4
 -3 11 5 134959 8936.01 4
 3 11 -5 126747 9363.53 4
 -3 11 4 24200.2 3439.7 4
 3 11 -4 23881.6 3733.3 4
 3 11 -3 204545 12205.4 4
 -3 11 3 209655 11762 4
 -3 11 2 2048.74 774.848 4
 3 11 -2 2460.85 1073.88 4
 3 11 -1 159528 10299.3 4
 -3 11 1 156688 9898.37 4
 -3 11 0 3363.56 1534.85 4
 3 11 0 2418.06 1274.51 4
 3 11 1 46169.7 5045.57 4
 -3 11 -1 55866.6 5466.96 4
 -3 11 -2 1845.88 1045.33 4
 3 11 2 1329.85 566.175 4
 3 11 3 4082.73 1498.6 4
 -3 11 -3 1310.14 990.132 4
 3 11 4 7707.19 1939.33 4
 -3 11 -4 6480.63 1815.65 4
 -3 11 -5 63238.1 6343.94 4
 3 11 5 70493.6 6325.29 4
 3 11 6 4138.87 1495.72 4
 -3 11 -6 2433.88 1423.87 4
 3 11 7 106991 8165.2 4
 3 11 8 214.617 559.579 4
 3 11 9 69348.5 6505.31 4
 3 11 10 -369.84 915.644 4
 3 11 11 19623 3402.58 4
 3 11 12 -28.9787 893.539 4
 3 11 13 878.756 985.085 4
 3 11 14 549.1 744.522 4
 3 11 15 4818.21 1790.41 4
 3 11 16 1825.13 1352.2 4
 3 11 17 32982.2 5079.16 4
 3 11 18 284.17 1078.86 4
 -3 12 18 1558.29 1256.66 4
 -3 12 17 5413.69 1930.61 4
 -3 12 16 24371.7 4229.76 4
 -3 12 15 769.657 824.978 4
 -3 12 14 71043.5 7153.39 4
 -3 12 13 9092.93 2439.84 4
 -3 12 12 59451.5 6294.55 4
 -3 12 11 10050.5 2554.13 4
 -3 12 10 26405.3 3970 4
 -3 12 9 19141.4 3420.79 4
 -3 12 8 2843.61 1277.18 4
 3 12 -7 30054.5 4577.63 4
 -3 12 7 32740.3 4350.27 4
 -3 12 6 30565.6 4152.29 4
 3 12 -6 28415.4 4409.35 4
 -3 12 5 12780.1 2636.66 4
 3 12 -5 7435.78 2255.3 4
 -3 12 4 99559.8 7841.74 4
 3 12 -4 85221.4 7744.69 4
 -3 12 3 227.214 521.135 4
 3 12 -3 4607.36 1834.65 4
 -3 12 2 105820 8040.09 4
 3 12 -2 89145 7808.88 4
 3 12 -1 1607.62 1062.66 4
 -3 12 1 -480.05 729.417 4
 3 12 0 39639.5 4892.12 4
 -3 12 0 45838.8 5192.46 4
 -3 12 -1 2986.56 1352.24 4
 3 12 1 3325.25 1487.73 4
 3 12 2 3325.16 1342.82 4
 -3 12 -2 3885.44 1588.61 4
 -3 12 -3 30307.9 4274.15 4
 3 12 3 34323.5 4427.18 4
 3 12 4 23175.5 3608.53 4
 -3 12 -4 21965.3 3689.05 4
 3 12 5 10866.7 2521.02 4
 -3 12 -5 15100 3180.71 4
 -3 12 -6 69744.8 6942.77 4
 3 12 6 58989.3 6125.41 4
 -3 12 -7 5140.58 1903.67 4
 3 12 7 3844.67 1698.9 4
 -3 12 -8 63565.4 6912.55 4
 3 12 8 69717.7 6744.01 4
 3 12 9 -581.816 821.419 4
 3 12 10 28258.6 4334.42 4
 3 12 11 5142.57 1854.43 4
 3 12 12 5360.14 1944.48 4
 3 12 13 6875.38 2172.66 4
 3 12 14 911.768 644.292 4
 3 12 15 6811.44 2257.42 4
 3 12 16 15489.4 3587.35 4
 -3 13 16 1519.04 1198.05 4
 -3 13 15 26440.4 4494.97 4
 -3 13 14 3013.7 1430.62 4
 -3 13 13 33126 4898.87 4
 -3 13 12 3561.09 1607.23 4
 -3 13 11 19438.7 3654.08 4
 -3 13 10 15240.3 3295.73 4
 -3 13 9 5309.26 1821.55 4
 -3 13 8 30858.4 4454.68 4
 3 13 -8 26421.9 4604.18 4
 -3 13 7 931.972 770.545 4
 3 13 -7 784.811 1028.31 4
 3 13 -6 9043.65 2586.16 4
 -3 13 6 10357 2534.1 4
 3 13 -5 7314.13 2387.22 4
 -3 13 5 9088.17 2475.09 4
 -3 13 4 724.552 758.121 4
 3 13 -4 -641.493 672.366 4
 -3 13 3 25530.3 4011.81 4
 3 13 -3 29320.7 4486.65 4
 3 13 -2 1592.42 1107.33 4
 -3 13 2 1680.69 1107.75 4
 -3 13 1 25077.1 4035.4 4
 3 13 -1 24223.3 3940.94 4
 -3 13 0 18366.5 3367.53 4
 3 13 0 19011.6 3520.86 4
 -3 13 -1 1820.15 1128.38 4
 3 13 1 1339.63 942.785 4
 -3 13 -2 40959.2 5219.81 4
 3 13 2 38225.3 4903.05 4
 3 13 3 3124.26 1335.96 4
 -3 13 -3 966.919 791.448 4
 3 13 4 44128.8 5416.24 4
 -3 13 -4 41696.6 5385.44 4
 3 13 5 20278.6 3584.68 4
 -3 13 -5 16654.8 3409.16 4
 -3 13 -6 20088.6 3983.19 4
 3 13 6 20289 3715.66 4
 3 13 7 52370.7 5878.74 4
 -3 13 -7 34566.2 5174.07 4
 3 13 8 2208.98 1098.9 4
 -3 13 -8 2230.99 1561.85 4
 -3 13 -9 24413.2 4377.39 4
 3 13 9 24857.6 4193.49 4
 3 13 10 4168.28 1515.13 4
 3 13 11 5783.69 2165.43 4
 3 13 12 19479.5 3807.43 4
 3 13 13 109.857 941.824 4
 3 13 14 25542.3 4601.99 4
 -3 14 14 4900.49 1914.02 4
 -3 14 13 1342.87 838.061 4
 -3 14 12 3536.48 1770.05 4
 -3 14 11 12182.9 2967.8 4
 -3 14 10 1809.18 1212.98 4
 3 14 -10 3806.08 1864.07 4
 3 14 -9 21111.1 4337.89 4
 -3 14 9 21393.4 3933.99 4
 3 14 -8 93.5477 472.362 4
 -3 14 8 -1377.83 1477.64 4
 -3 14 7 19231.6 3635.59 4
 3 14 -7 23444.9 4416.7 4
 3 14 -6 -671.667 1078.16 4
 -3 14 6 867.806 1025.49 4
 3 14 -5 11402 3153.98 4
 -3 14 5 15609.8 3202.91 4
 -3 14 4 10631.8 2583.76 4
 3 14 -4 10520.6 2853.04 4
 -3 14 3 455.434 1003.22 4
 3 14 -3 281.231 997.636 4
 3 14 -2 6119.66 1972.73 4
 -3 14 2 7015.47 2100.36 4
 3 14 -1 13794.5 3125.88 4
 -3 14 1 15740.9 3297.89 4
 -3 14 0 3392.92 1306.08 4
 3 14 0 1266.13 1121.61 4
 -3 14 -1 47633.4 5802.06 4
 3 14 1 43769.5 5636.28 4
 -3 14 -2 3463.49 1400.22 4
 3 14 2 5355.36 1888.08 4
 3 14 3 49730.6 5909.19 4
 -3 14 -3 49687.5 6153.21 4
 3 14 4 20305.2 3757.54 4
 -3 14 -4 18681.5 3729.67 4
 -3 14 -5 35543 5309.97 4
 3 14 5 46667.8 5770.78 4
 -3 14 -6 22838 4302.46 4
 3 14 6 22454.5 3988.84 4
 3 14 7 4616.13 1824.99 4
 -3 14 -7 5698.71 1992.06 4
 3 14 8 11574.2 2816.19 4
 -3 14 -8 14813.6 3544.27 4
 3 14 9 -567.438 1050.23 4
 -3 14 -9 855.911 799.861 4
 -3 14 -10 4286 1978.73 4
 3 14 10 5064.82 2073.5 4
 3 14 11 12171.2 3123.92 4
 -3 14 -11 8782.31 2881.8 4
 -3 14 -12 1047.05 901.709 4
 3 14 12 808.678 928.784 4
 -3 15 11 -564.002 1257.68 4
 3 15 -11 -811.967 1094.77 4
 -3 15 10 18428.1 3845.14 4
 3 15 -10 24521.6 4890.12 4
 3 15 -9 818.117 1010.15 4
 -3 15 9 956.078 897.533 4
 -3 15 8 21352 4037.69 4
 3 15 -8 28710.2 5254.3 4
 -3 15 7 995.172 1151.02 4
 3 15 -7 181.997 754.683 4
 -3 15 6 39068.3 5485.16 4
 3 15 -6 33525.9 5538.16 4
 3 15 -5 -594.466 808.912 4
 -3 15 5 440.711 962.48 4
 3 15 -4 8711.55 2860.36 4
 -3 15 4 7588.17 2388.48 4
 -3 15 3 -990.887 1464.4 4
 3 15 -3 1279.5 1290.05 4
 -3 15 2 1770.88 1289.23 4
 3 15 -2 -1052.32 1465.84 4
 3 15 -1 1261.05 651.145 4
 -3 15 1 -669.657 1364.48 4
 3 15 0 10391.4 2831.74 4
 -3 15 0 14572.3 3308.75 4
 3 15 1 -869.2 1080.59 4
 -3 15 -1 -881.483 1014.24 4
 3 15 2 44260.7 5897.72 4
 -3 15 -2 45265.1 6038.43 4
 3 15 3 3057.94 1844.76 4
 -3 15 -3 1330.26 1237.62 4
 3 15 4 47225.4 6082.96 4
 -3 15 -4 47441.4 6390.09 4
 -3 15 -5 2571.28 1626.26 4
 3 15 5 4680.34 2045.28 4
 3 15 6 22014.1 4127.03 4
 -3 15 -6 16990.6 3823.88 4
 -3 15 -7 1441.58 977.296 4
 3 15 7 2452.15 1395.49 4
 -3 15 -8 -753.376 1438.82 4
 3 15 8 412.971 487.184 4
 -3 15 -9 -2683.03 1637.15 4
 -3 15 -10 9267.05 2943.98 4
 -3 15 -11 2763.37 2070.34 4
 -3 15 -12 19368.9 4484.7 4
 -3 16 8 1368.14 1058.42 4
 -3 16 7 23297.7 4470.14 4
 3 16 -6 2712.42 2021.2 4
 -3 16 6 314.507 1071.41 4
 -3 16 5 10123.6 2948.72 4
 3 16 -5 9956.7 3015.92 4
 -3 16 4 321.903 650.19 4
 3 16 -4 322.386 1147.54 4
 -3 16 3 1027.59 1260.09 4
 3 16 -3 1413.83 1639.03 4
 3 16 -2 -50.5489 620.672 4
 -3 16 2 -85.1143 996.927 4
 3 16 -1 6036.06 2277.98 4
 -3 16 1 3458.43 1782.62 4
 3 16 0 4945.87 2212.8 4
 -3 16 0 -845.96 995.066 4
 -3 16 -1 27927.7 4888.74 4
 3 16 1 39079 5799.05 4
 -3 16 -2 1022.82 1250.57 4
 3 16 2 -53.3698 1472.45 4
 -3 16 -3 36668.3 5718.85 4
 3 16 3 32962.9 5276.31 4
 -3 16 -4 1921.28 1240.94 4
 -3 16 -5 21207.4 4516.63 4
 -3 16 -6 1817.42 1312.43 4
 -3 16 -7 2197.14 1417.66 4
 -3 16 -8 1805.55 1610.52 4
 -4 0 29 1181.78 1222.32 3
 -4 0 28 43499.1 6608.74 3
 -4 0 28 43022.5 5988.39 2
 -4 0 27 1822.75 1545.79 2
 -4 0 27 266.031 1266.38 3
 -4 0 26 22293.8 3980.76 2
 -4 0 26 21467.2 4406.26 3
 -4 0 25 -791.886 1411.6 3
 -4 0 25 -1051.22 1281.17 2
 -4 0 24 266.511 530.047 2
 -4 0 24 1414.47 1182.88 3
 -4 0 23 -166.977 634.454 3
 -4 0 23 -410.423 787.79 2
 -4 0 22 4071.44 1450.6 2
 -4 0 21 -259.194 369.275 2
 -4 0 20 52946.6 5092.54 2
 -4 0 19 -629.91 1003.15 2
 -4 0 18 89188 6317.89 2
 -4 0 17 -2651.24 970.46 2
 -4 0 16 122431 7125.78 2
 -4 0 15 324.594 500.537 2
 -4 0 14 82955.2 5189.96 2
 -4 0 13 -75.2343 277.684 2
 -4 0 12 43549.6 3181.3 2
 4 0 -11 164.206 219.369 1
 -4 0 11 77.2495 176.032 2
 4 0 -10 351932 11529.5 1
 -4 0 10 324096 12252.7 2
 -4 0 9 357.498 412.61 3
 4 0 -9 109.429 259.309 1
 -4 0 9 476.222 319.747 2
 -4 0 9 163.931 239.849 1
 -4 0 8 628338 20553.1 2
 -4 0 8 633165 22382.9 3
 4 0 -8 647944 20652.7 1
 -4 0 8 637460 20869 1
 -4 0 7 143.217 151.392 1
 4 0 -7 36.9942 144.854 1
 -4 0 7 231.302 187.451 3
 -4 0 7 98.0716 145.255 2
 -4 0 6 333668 10734.4 2
 -4 0 6 335722 12507.1 3
 -4 0 6 332432 11793.1 1
 4 0 -6 330710 11631 1
 -4 0 5 -42.9174 176.804 3
 -4 0 5 315.922 162.309 1
 4 0 -5 133.907 155.104 1
 -4 0 4 24682.5 1948.08 3
 4 0 -4 29019.9 2075.97 3
 -4 0 4 24358.4 1920.72 1
 4 0 -4 25594.7 1899.42 1
 -4 0 3 118.94 95.547 3
 4 0 -3 176.699 241.536 1
 4 0 -3 617.693 279.632 3
 -4 0 3 402.319 242.362 1
 -4 0 2 14221.7 1405.42 1
 4 0 -2 12308.1 1197.97 3
 4 0 -2 10072.6 1194.66 1
 -4 0 2 12214.6 1191.89 3
 4 0 -2 12300.8 731.338 2
 -4 0 1 -48.149 175.013 3
 -4 0 1 -11.7117 204.871 1
 4 0 -1 234.348 122.946 2
 4 0 -1 101.282 94.55 3
 4 0 -1 129.534 117.726 1
 4 0 0 98179.8 4099.31 2
 -4 0 0 97084.6 4782.63 1
 4 0 0 100145 4828.24 1
 -4 0 -1 45.7404 239.817 1
 4 0 1 283.908 192.944 2
 4 0 2 107548 4695.84 2
 -4 0 -2 96260.2 3677.03 4
 -4 0 -2 111723 5021.66 1
 -4 0 -3 8.16609 129.049 4
 4 0 3 279.666 243.926 2
 -4 0 -3 193.35 248.822 1
 -4 0 -4 544613 17653.2 4
 -4 0 -4 553803 18688.6 1
 4 0 4 535690 18852.2 2
 -4 0 -5 334.328 263.883 4
 -4 0 -5 712.67 396.152 1
 4 0 5 718.696 539.49 2
 4 0 6 552420 20402.2 2
 -4 0 -6 591639 19665.1 1
 4 0 7 791.328 542.97 2
 -4 0 -7 531.818 398.006 1
 4 0 8 32152.7 3064.98 2
 -4 0 -8 28757.4 2321.77 1
 -4 0 -9 14.273 228.383 1
 4 0 9 290.093 473.133 2
 -4 0 -10 5165.61 946.719 1
 4 0 10 5496.66 1313.27 2
 -4 0 -11 -267.893 358.579 1
 4 0 11 50.6733 406.141 2
 -4 0 -12 36115.1 2670.24 1
 4 0 12 35299 3852.35 2
 -4 0 -13 100.312 268.88 1
 4 0 13 -453.524 944.945 2
 4 0 14 132331 8734.14 2
 4 0 15 183.569 523.859 2
 4 0 16 80751.8 6947.49 2
 4 0 17 -341.586 962.958 2
 4 0 18 16682.1 3217.56 2
 4 0 19 295.58 751.644 2
 4 0 20 882.503 1035.79 2
 4 0 21 721.839 1063.86 2
 4 0 22 4223.49 1899.7 2
 4 0 23 -895.371 1342.35 2
 -4 -1 29 26640.9 4881.11 2
 -4 1 29 18714.2 4531 3
 -4 -1 28 -1492.8 1323.23 2
 -4 -1 28 1900.19 1532.15 3
 -4 1 28 -763.686 925.155 3
 -4 1 27 25046.5 4788.69 3
 -4 -1 27 28659.1 5223.55 3
 -4 -1 27 28892.5 4602.48 2
 -4 1 26 -171.546 1053.56 3
 -4 -1 26 -80.1582 876.639 2
 -4 -1 25 7453.11 2153.91 2
 -4 1 25 5930.71 1762.63 2
 -4 1 25 5229.8 2031.44 3
 -4 -1 24 1815.61 1033.37 2
 -4 1 24 1114.81 497.47 2
 -4 1 24 386.212 596.114 3
 -4 1 23 1098.02 1003.28 2
 -4 1 23 -1708.51 1152.82 3
 -4 -1 23 1283.28 855.108 2
 -4 -1 22 3445.65 1217.09 2
 -4 1 22 2807.75 1287.91 3
 -4 1 22 5012.36 1696.81 2
 -4 1 21 10752.5 2375.96 2
 -4 1 21 10945.1 2574.97 3
 -4 -1 21 15884.9 2710.55 2
 -4 1 20 6167.62 1697.2 2
 -4 -1 20 2682.38 1048.97 2
 -4 1 20 3816.25 1585.75 3
 -4 -1 19 92894.6 6630.17 2
 -4 1 19 79481.5 7148.22 3
 -4 1 19 99595.8 7065.59 2
 -4 1 18 1921.56 870.052 2
 -4 -1 18 2305.18 782.99 2
 -4 1 18 1318.61 977.315 3
 -4 1 17 101152 6700.47 2
 -4 -1 17 114532 6852.17 2
 -4 1 17 89956 7225.43 3
 -4 1 16 1633.2 690.434 2
 -4 -1 16 1229.11 562.451 2
 -4 1 16 1241.54 903.792 3
 -4 1 15 48859.7 3964.95 2
 -4 -1 15 49810.9 3879.41 2
 4 -1 -15 44007 1970.9 1
 -4 1 14 17542.4 2223.37 2
 4 -1 -14 21008.7 1315.77 1
 -4 1 14 20273.2 2815.42 3
 -4 1 13 385.122 378.869 2
 -4 1 13 474.797 455.029 3
 -4 -1 13 1445.94 559.954 2
 4 -1 -13 741.936 217.432 1
 -4 1 12 199.293 239.387 3
 4 -1 -12 -11.6641 158.588 1
 -4 1 12 1286.27 467.248 2
 -4 -1 12 648.311 277.426 1
 -4 -1 12 1145.67 510.761 2
 -4 1 11 58581.7 4558.47 3
 -4 -1 11 63096.1 3120.52 1
 4 -1 -11 71893.3 3275.3 1
 -4 1 11 67128.4 3976.36 2
 -4 -1 11 75086.9 3999.42 2
 -4 1 10 5667.96 1201.63 3
 -4 -1 10 6356.39 939.88 2
 -4 1 10 4181.05 778.187 2
 4 -1 -10 5141.69 730.741 1
 -4 -1 10 5033.62 732.476 1
 -4 1 9 193468 8872.73 3
 -4 1 9 187414 7580.63 2
 4 -1 -9 202622 7447.57 1
 -4 -1 9 191432 7343.87 1
 -4 -1 9 194290 7511.12 2
 4 -1 -9 197507 7310.94 2
 4 -1 -8 1472.18 347.446 2
 -4 1 8 676.029 388.232 3
 4 -1 -8 1388.19 450.863 1
 -4 -1 8 1145.28 368.818 1
 4 -1 -7 202759 7600.68 1
 -4 1 7 184656 8255.05 3
 -4 -1 7 181547 7424.56 1
 4 -1 -7 201536 6870.11 2
 4 -1 -6 85970.7 3159.81 2
 -4 1 6 80241 4372.95 3
 4 -1 -6 77762.1 3911.49 1
 4 -1 -5 185577 7611.29 1
 -4 -1 5 204880 8066.47 3
 -4 1 5 197426 8011.51 3
 4 -1 -5 198051 7353.31 4
 -4 -1 5 181206 7514 1
 -4 1 5 167042 7447.11 4
 4 -1 -5 205557 6467.5 2
 4 1 -5 202876 7496.53 1
 4 -1 -4 147821 5596.83 4
 4 1 -4 149797 6078.67 1
 -4 1 4 147645 6341.92 3
 -4 -1 4 161498 6357.69 3
 -4 1 4 141439 5791.52 4
 4 -1 -4 140218 6170.42 1
 -4 -1 4 138419 6087.2 1
 -4 1 4 154248 6385.4 1
 4 -1 -3 8349.23 1103.7 1
 4 -1 -3 8578.75 776.639 4
 -4 -1 3 9326.53 1049.17 3
 4 1 -3 7335.4 986 1
 -4 1 3 8772.6 841.495 4
 -4 1 3 9885.06 1214.2 1
 -4 -1 3 10971.9 1303.42 1
 -4 1 3 8635.94 1102.4 3
 -4 1 2 8840.48 1090.28 3
 -4 1 2 8126.12 682.751 4
 4 -1 -2 9682.05 1146.47 3
 4 -1 -2 9118.3 1167.6 1
 -4 -1 2 8487.25 1091.44 1
 4 -1 -2 7476.14 629.894 4
 -4 1 2 9571.36 1199.94 1
 4 1 -2 8717.42 1083.05 1
 -4 -1 2 9951.69 1003.7 3
 4 1 -2 10398 1028.74 3
 4 -1 -1 32328.8 2250.11 3
 -4 1 1 33554.3 2405.6 1
 -4 -1 1 29875.9 2209.57 1
 4 1 -1 31287.5 1854.44 3
 -4 -1 1 31138.7 1848.18 3
 -4 -1 1 30258.7 1663.1 2
 -4 -1 0 78803.5 3555.82 2
 -4 -1 0 89861.2 3634.04 3
 4 1 0 82776.6 3374.09 4
 4 1 0 87837.8 3616.85 3
 -4 1 0 83914.2 4339.44 1
 -4 -1 0 85065.9 4270.35 1
 -4 -1 -1 244790 8184.42 4
 -4 -1 -1 236151 9198.93 1
 4 1 1 231337 8666.63 2
 -4 -1 -1 231248 8534.98 2
 4 1 1 236051 8050.89 4
 -4 1 -1 230574 9239.41 1
 4 1 1 245678 8311.83 3
 -4 -1 -2 49461 3044.98 1
 4 1 2 48749.4 2364.65 4
 -4 -1 -2 52398.8 2460.26 4
 4 1 2 44151.2 2787.95 2
 -4 1 -2 50939.5 3159.38 1
 4 1 3 209465 8472.45 2
 -4 1 -3 224585 7501.79 4
 -4 1 -3 211754 8514.04 1
 4 1 3 200079 7538.84 4
 -4 -1 -3 225493 8566.17 1
 -4 -1 -3 203379 7607.93 4
 -4 -1 -4 4111.85 839.894 1
 4 1 4 2894.4 566.835 4
 4 -1 4 2918.86 670.856 2
 -4 1 -4 3432.92 774.766 1
 -4 1 -4 3951.33 622.617 4
 4 1 4 3387.53 804.562 2
 -4 -1 -4 3453.27 602.609 4
 -4 -1 -5 421188 14325.8 1
 4 1 5 396473 13840.9 4
 -4 1 -5 414198 13703.1 4
 4 -1 5 363977 14427.1 2
 -4 1 -5 415369 14331.7 1
 4 1 5 370474 14616.5 2
 -4 -1 -5 376611 13598 4
 4 -1 6 25893.5 2436.66 2
 -4 -1 -6 23825.9 2082.64 1
 4 1 6 21227.5 1993.9 4
 4 1 6 24680.7 2470.27 2
 -4 1 -6 27197 2209.84 1
 -4 1 -7 65703 3742.41 1
 4 1 7 57774.5 4217.48 2
 4 -1 7 59230.8 4133.09 2
 -4 -1 -7 64323.3 3690.8 1
 4 1 7 53597.6 3739.68 4
 4 1 8 2480.13 769.254 4
 -4 -1 -8 4901.66 952.612 1
 4 1 8 4269.38 1108.31 2
 4 -1 8 4470.96 1055.6 2
 -4 1 -8 5243.7 930.201 1
 -4 -1 -9 6552.01 1049.1 1
 4 1 9 8175.2 1612.24 2
 4 -1 9 7401.14 1502.88 2
 -4 1 -9 7089.18 1170.39 1
 4 1 10 26122.5 3045.95 2
 4 -1 10 26675.3 3002.06 2
 -4 -1 -10 23882.8 2156.63 1
 4 1 11 3504.82 1156.61 2
 -4 -1 -11 3067.33 734.69 1
 4 -1 11 2818.25 988.364 2
 -4 -1 -12 63416.3 3776.14 1
 4 1 12 63116.4 5397.53 2
 4 -1 12 72982.2 5601.1 2
 4 -1 13 105784 7314.55 2
 -4 -1 -13 102235 5199.28 1
 4 1 13 110666 7626.54 2
 4 1 14 15503.3 2740.01 2
 4 -1 14 15534.8 2650.85 2
 -4 -1 -14 16531.3 1751.05 1
 4 -1 15 143733 9328.67 2
 4 1 15 138271 9385.62 2
 4 -1 16 3933.09 1353.45 2
 4 1 16 4404.73 1633.71 2
 4 -1 17 43332.8 5075.91 2
 4 1 17 48784.2 5535.57 2
 4 1 18 15143.6 3137.6 2
 4 -1 18 13225.2 2886.72 2
 4 1 19 10557.1 2811.38 2
 4 -1 19 9117.79 2369.52 2
 4 -1 20 8405.49 2359.12 2
 4 1 20 4074.37 1820.84 2
 4 1 21 162.237 858.927 2
 4 -1 21 1628.52 1100.44 2
 4 -1 22 4287.63 1816.99 2
 4 1 22 4788.75 2281.62 2
 4 1 23 24208.3 4709.01 2
 4 -1 23 16434.7 3759.83 2
 -4 -2 29 2570.29 1654.43 2
 -4 -2 28 12510.6 3160.27 2
 -4 2 28 13074.4 3503.88 3
 -4 2 27 4810.61 2269.59 3
 -4 -2 27 2615.39 1393.63 2
 -4 -2 26 4692.23 1881.32 2
 -4 2 26 5330.35 2230.06 3
 -4 -2 25 21140.2 3575.53 2
 -4 2 25 14178.2 3437.91 3
 -4 -2 24 -188.401 715.123 2
 -4 2 24 -797.136 1181.93 3
 -4 -2 23 8125.36 2053.02 2
 -4 2 23 6274.3 2012.6 3
 -4 -2 22 6319.08 1698.28 2
 -4 2 22 5702.27 1965.06 3
 -4 -2 21 4976.81 1418.61 2
 -4 2 21 2713.65 1320.58 3
 -4 -2 20 47973.6 4640.52 2
 -4 2 20 35379.5 4709.03 3
 -4 2 19 4601.59 1686.04 3
 -4 -2 19 5561.44 1478.01 2
 -4 2 18 85841.6 7178.2 3
 -4 -2 18 111243 6905.94 2
 -4 2 17 683.976 688.341 3
 -4 -2 17 501.85 453.084 2
 -4 2 16 34543.3 4012.39 3
 -4 -2 16 46725.6 3872.78 2
 -4 -2 15 12566.6 1843.16 2
 -4 2 15 11800.7 2190.95 3
 4 -2 -15 15029.3 1234.05 1
 -4 -2 14 1129.39 274.754 1
 -4 -2 14 600.343 437.25 2
 4 -2 -14 266.959 195.678 1
 -4 2 14 1625.05 844.655 3
 -4 -2 13 32634.5 1921.21 1
 -4 -2 13 37003.8 2959 2
 -4 2 13 30325.6 3332.08 3
 4 -2 -13 39797.4 2355.67 1
 -4 -2 12 47382.8 2583.07 1
 -4 2 12 43165.9 3915.68 3
 -4 2 11 20857.8 2516.74 3
 -4 2 11 22897.7 2756.11 4
 -4 -2 11 19711.4 1571.38 1
 4 -2 -11 24574.2 1862.9 1
 -4 2 10 149448 7808.48 4
 -4 2 10 146693 7594.29 3
 -4 -2 10 140708 6046.13 1
 4 -2 -9 520.127 310.106 1
 -4 2 9 1013.99 496.215 3
 -4 2 9 1152.25 540.644 4
 -4 -2 9 950.424 344.67 1
 -4 2 8 177988 8282.46 4
 -4 2 8 185915 8444.85 3
 -4 -2 8 175126 7408.47 1
 4 -2 -8 190789 7701.6 1
 4 -2 -7 36720.5 2057.47 2
 -4 -2 7 31860.1 2266.28 1
 -4 2 7 35966.5 2721.38 4
 4 -2 -7 33239.8 2428.45 1
 -4 2 7 31165.4 2669.78 3
 -4 2 6 137272 6017.45 4
 -4 2 6 134998 6336.08 3
 -4 -2 6 129223 5750.32 1
 -4 -2 5 54272.8 3105.1 1
 -4 2 5 49887.5 2891.04 4
 -4 2 5 53699.7 3362.57 3
 4 -2 -5 48491.4 2826.66 4
 -4 2 4 2944.57 559.195 4
 4 -2 -4 1918.28 472.021 4
 -4 2 4 2163.93 629.732 3
 -4 2 3 211754 8443.92 3
 4 -2 -3 208393 7527.83 4
 -4 2 3 204284 7457.68 4
 -4 2 2 42.7739 111.687 4
 -4 -2 2 251.399 187.425 3
 4 -2 -2 213.78 75.6312 4
 -4 -2 1 159862 5760.45 3
 4 -2 -1 155776 5643.13 4
 -4 2 1 150472 5519.06 4
 -4 2 0 260344 8692.64 4
 4 2 0 260602 9304.54 4
 -4 -2 0 257623 8696.04 3
 4 2 1 106917 4659.97 4
 -4 -2 -1 105028 4761.64 2
 -4 -2 -1 103107 4742.9 4
 4 2 1 116968 4080.62 3
 4 2 2 195955 7453.08 4
 -4 -2 -2 207584 8173.25 1
 -4 -2 -2 191373 7504.21 4
 4 2 2 196559 6618.36 3
 -4 -2 -3 70807.4 4003.52 1
 4 2 3 71832.4 2930.4 3
 4 2 3 74889.7 3666.01 4
 -4 -2 -3 74454.6 3680.13 4
 -4 -2 -4 386334 13632.3 1
 4 2 4 359015 13025 4
 -4 -2 -5 1550.06 494.107 1
 4 2 5 816.29 378.892 4
 4 2 5 848.76 510.675 2
 4 2 6 211809 8678.43 4
 4 2 6 200511 9397.02 2
 -4 -2 -6 221824 8804.61 1
 4 2 7 86881.4 5432.51 2
 4 2 7 80350.8 4720.58 4
 -4 -2 -7 88752.9 4659.5 1
 4 -2 8 32286.7 3015.51 2
 4 2 8 21996.7 2705.19 2
 -4 -2 -8 26934 2322.67 1
 4 2 8 26851.4 2585.92 4
 4 2 9 144391 7698.02 4
 4 2 9 149333 8387.24 2
 4 -2 9 163831 8245.84 2
 -4 -2 -9 164049 7102.54 1
 4 2 10 -87.7376 288.813 4
 -4 -2 -10 -79.2689 249.104 1
 4 2 10 100.079 454.383 2
 4 -2 10 920.567 731.738 2
 4 2 11 126503 7951.59 2
 4 -2 11 141408 7928.66 2
 -4 -2 -11 133698 6197.7 1
 -4 -2 -12 51578.2 3374.46 1
 4 2 12 46774.7 4659.83 2
 4 -2 12 43453.2 4259.03 2
 4 -2 13 82828.8 6221.6 2
 4 2 13 77246.5 6367.97 2
 -4 -2 -13 77704.3 4399.32 1
 4 2 14 126535 8907.85 2
 -4 -2 -14 133445 6334.69 1
 4 -2 14 146063 8903.44 2
 4 -2 15 665.857 410.779 2
 4 2 15 -489.911 1060.75 2
 4 -2 16 48710 5142.07 2
 4 2 16 46361.4 5319.34 2
 4 2 17 8652.65 2327.39 2
 4 -2 17 6246.58 1847.47 2
 4 2 18 32170 4786.57 2
 4 -2 18 40010.6 4940.4 2
 4 2 19 17494.6 3566.85 2
 4 -2 19 16592.8 3221.2 2
 4 2 20 7071.56 2334.03 2
 4 -2 20 8839.54 2384.84 2
 4 2 21 13457.4 3331.84 2
 4 -2 21 12027.5 3007.96 2
 4 -2 22 1756.65 657.799 2
 4 2 22 5196.85 2124.19 2
 4 -2 23 10050 2862.22 2
 -4 -3 28 -959.241 1196.95 2
 -4 -3 27 4819.67 1684.04 2
 -4 3 27 5011.37 2167.1 3
 -4 -3 26 17922.8 3470.82 2
 -4 3 26 17622.1 3795.45 3
 -4 -3 25 934.765 965.323 2
 -4 3 25 503.914 759.546 3
 -4 -3 24 40967.3 4903.77 2
 -4 3 24 32197.1 4960.83 3
 -4 -3 23 2636.42 1227.96 2
 -4 3 23 926.002 856.156 3
 -4 3 22 34846.8 4967 3
 -4 -3 22 43385.7 4675.98 2
 -4 -3 21 34906.7 4024.09 2
 -4 3 21 30637.2 4413.32 3
 -4 -3 20 42102.1 4230.08 2
 -4 3 20 31740.4 4309.09 3
 -4 -3 19 56576.2 4762.89 2
 -4 3 19 38908.7 4719.31 3
 -4 -3 18 13305.4 2161.44 2
 -4 3 18 14536.8 2693.04 3
 -4 -3 17 28828.1 3074.09 2
 -4 3 17 24222.7 3358.07 3
 -4 -3 16 10668.3 1728.92 2
 -4 3 16 5652.78 1523.91 3
 -4 3 15 18923 2739.02 3
 -4 -3 15 15826.2 1218.24 1
 -4 -3 14 72456.1 3483.53 1
 -4 3 14 79815 5752.13 3
 -4 3 14 83341.7 6264.64 4
 -4 3 13 158.352 483.569 4
 -4 -3 13 663.605 256.939 1
 -4 3 13 383.177 380.12 3
 -4 3 12 106820 6742.05 4
 -4 3 12 101032 6305.88 3
 -4 -3 12 104482 4766.27 1
 -4 -3 11 108203 4927.93 1
 -4 3 11 111765 6591.92 4
 -4 3 11 100162 6162 3
 -4 3 10 24909 2690.1 4
 -4 3 10 27118.4 2761.27 3
 -4 3 9 55332.7 3947.93 4
 -4 3 9 55648.8 3991.31 3
 -4 3 8 7203.13 1248.8 4
 -4 3 8 7597.58 1348.32 3
 -4 3 7 90549.6 4786.32 4
 -4 3 7 82067.3 4859.87 3
 -4 3 6 946.107 343.047 3
 -4 3 6 995.596 385.978 4
 -4 3 5 47457.6 3291.32 3
 -4 3 5 48075.5 2961.94 4
 -4 3 4 997.551 339.581 4
 -4 3 4 3572.46 843.192 3
 4 -3 -3 9578.84 1136.19 4
 -4 3 3 10117.1 1111.14 4
 -4 3 2 176370 6908.44 4
 4 -3 -2 185076 7088.48 4
 -4 3 1 19628.1 1518.76 4
 -4 3 0 93565.1 4315.41 4
 -4 -3 0 104207 3840.95 3
 4 3 0 98939.7 4779.05 4
 4 3 1 16538.4 1615.97 4
 -4 -3 -1 15517.7 882.023 3
 4 3 2 59211.7 3441.67 4
 4 3 3 33685.7 2487.55 4
 4 3 4 31784.6 2458.75 4
 4 3 5 144280 6650.51 4
 4 3 6 66627.4 4094.63 4
 4 3 7 80943.9 4805.16 4
 4 3 8 201338 9217.76 4
 -4 -3 -8 211724 8845.62 1
 -4 -3 -9 696.567 448.564 1
 4 3 9 493.816 278.285 4
 4 3 10 139739 7850.74 4
 -4 -3 -10 157200 7140.61 1
 4 -3 11 26321.6 3036.78 2
 -4 -3 -11 23339.4 2253.93 1
 4 3 11 25002.3 2989.82 4
 4 3 12 115812 7585.04 4
 -4 -3 -12 130109 6298.3 1
 4 -3 12 128336 7786.67 2
 4 -3 13 64844.5 5393.5 2
 4 3 13 61247.7 5460.32 4
 -4 -3 -13 70069.1 4202.08 1
 -4 -3 -14 6136.09 1195.01 1
 4 3 14 5278.44 1713.11 4
 4 -3 15 40095.9 4430.67 2
 -4 -3 -15 37367.9 2944.17 1
 4 -3 16 3504.68 1246.15 2
 4 -3 17 26770.8 3852.49 2
 4 -3 18 2957.41 1342.49 2
 4 -3 19 15275.7 3191 2
 4 -3 20 36143.4 4916.19 2
 4 -3 21 556.681 834.848 2
 4 -3 22 36047.3 5170.45 2
 -4 -4 28 1403.03 1325.28 2
 -4 -4 27 7487.63 2295.51 2
 -4 -4 26 2285.07 1328.97 2
 -4 4 25 20292 4107.71 3
 -4 -4 25 27313.2 4055.91 2
 -4 -4 24 -3052.22 1328.39 2
 -4 4 24 963.702 918.878 3
 -4 -4 23 39856.3 4589.56 2
 -4 4 23 31618.5 4739.24 3
 -4 -4 22 8807.04 2085.5 2
 -4 4 22 5410.1 1782.26 3
 -4 -4 21 64818.4 5571.44 2
 -4 4 21 52576 5881.43 3
 -4 -4 20 29160.8 3453.65 2
 -4 4 20 25647.6 3828.78 3
 -4 4 19 13987.1 2734.16 3
 -4 -4 19 16999.8 2560.13 2
 -4 4 18 19839.1 3105.49 3
 -4 -4 18 18553.5 2544.93 2
 -4 4 17 3405.51 1274.6 4
 -4 4 17 3014.18 1129.48 3
 -4 4 16 5308.04 1595.02 4
 -4 4 16 6182.14 1653.95 3
 -4 -4 15 64650.7 3503.07 1
 -4 4 15 70476.7 5589.3 3
 -4 -4 14 7727.9 1064.02 1
 -4 4 14 9077.38 1957.36 4
 -4 4 14 8293.35 1766.6 3
 -4 4 13 241367 11791.1 4
 -4 4 13 228085 11137.2 3
 -4 4 12 6364.87 1379.29 3
 -4 4 12 5396.39 1379.63 4
 -4 4 11 144159 7867.63 3
 -4 4 11 158595 8215.95 4
 -4 4 10 619.036 503.111 4
 -4 4 10 798.774 356.33 3
 -4 4 9 115793 6226.58 4
 -4 4 9 101142 5999.98 3
 -4 4 8 19118.8 2209.74 3
 -4 4 8 22285.6 2299.61 4
 -4 4 7 1428.41 684.501 3
 -4 4 7 1539.71 669.822 4
 -4 4 6 20992.5 2042.84 4
 -4 4 6 18528.5 2097.69 3
 -4 4 5 99629.5 5109.94 4
 -4 4 4 13301 1504.85 4
 -4 4 3 195854 8000.18 4
 -4 4 2 2310.55 545.485 4
 -4 4 1 228767 8976.97 4
 4 4 -1 235377 9572.81 4
 4 4 0 33415.9 2672.08 4
 -4 4 0 33464.8 2409.67 4
 -4 -4 -1 371030 11755.4 3
 4 4 1 360003 13746.4 4
 -4 4 -1 367964 13316.5 4
 4 4 2 5695.92 1068.41 4
 4 4 3 100099 5332.72 4
 4 4 4 28165.5 2532.15 4
 4 4 5 8030.48 1316.22 4
 4 4 6 7268.05 1323.94 4
 4 4 7 188675 8784.48 4
 4 4 8 7633.37 763.856 3
 4 4 8 10735.8 1674.7 4
 4 4 9 191834 7312.62 3
 4 4 9 217645 9774.15 4
 4 4 10 8189.67 1622.23 4
 4 4 10 7345.35 985.157 3
 4 4 11 146349 8207.66 4
 -4 -4 -11 160699 7232.13 1
 4 4 12 18001.2 2664.49 4
 4 4 12 14635.2 1683.72 3
 -4 -4 -12 16422.4 1929.03 1
 4 4 13 50720.4 4797.41 4
 4 4 13 41064.3 3243.13 3
 -4 -4 -13 50957.2 3648.38 1
 4 4 14 17056.7 2867.35 4
 -4 -4 -14 18393.2 2047.17 1
 4 -4 14 15122.7 2523.96 2
 4 -4 15 304.141 499.766 2
 4 4 15 1734.03 1320.55 4
 -4 -4 -15 858.098 478.171 1
 4 -4 16 21985.2 3348.57 2
 4 4 16 23920.6 3716.13 4
 4 -4 17 13169.2 2631.58 2
 4 -4 18 5834.89 1793.78 2
 4 -4 19 38087.2 4922.66 2
 4 -4 20 -464.981 808.145 2
 4 -4 21 38041 5245.53 2
 4 -4 22 6572.73 2262.97 2
 -4 -5 28 4261.12 1703.11 2
 -4 -5 27 256.701 467.081 2
 -4 -5 26 11478 2696.38 2
 -4 -5 25 329.209 463.947 2
 -4 -5 24 33553.7 4337.06 2
 -4 5 24 27978.6 4556.61 3
 -4 5 23 -612.288 882.831 3
 -4 -5 23 2254.13 1019.68 2
 -4 -5 22 23337.6 3316.01 2
 -4 5 22 21385.8 3693.79 3
 -4 -5 21 6681.66 1664.13 2
 -4 5 21 3821.09 1528.96 3
 -4 -5 20 9455.77 1886.74 2
 -4 5 20 10733.5 2454.05 3
 -4 5 19 2257.07 1476.68 4
 -4 5 19 2578.66 1145.81 3
 -4 5 18 4814.68 1590.68 3
 -4 5 18 6392.32 1959.8 4
 -4 5 17 3853.84 1431.91 4
 -4 5 17 1524.71 800.231 3
 -4 5 16 31005.8 4059.83 4
 -4 5 16 29942.6 3654.47 3
 -4 5 15 562.636 324.228 4
 -4 5 15 502.431 431.679 3
 -4 5 14 136025 8409.83 4
 -4 5 14 118247 7578.19 3
 -4 5 13 5664.58 1468.59 4
 -4 5 13 2589.72 991.93 3
 -4 5 12 217178 10491 4
 -4 5 12 187318 9814.07 3
 -4 5 11 235.781 310.484 4
 -4 5 11 1609.96 732.6 3
 -4 5 10 151148 7940.21 4
 -4 5 10 139917 7621.47 3
 -4 5 9 2780.22 974.387 3
 -4 5 9 2344.46 837.851 4
 -4 5 8 19350.3 2294.39 3
 -4 5 8 20175.2 2347.2 4
 -4 5 7 8128.93 1421.14 4
 -4 5 7 5820.3 1236.07 3
 -4 5 6 96169 5405.49 4
 -4 5 5 735.656 473.103 4
 -4 5 4 337606 13010.6 4
 -4 5 3 162.867 421.967 4
 -4 5 2 392008 14506.3 4
 4 5 -1 859.082 486.288 4
 -4 5 1 2321.77 666.485 4
 -4 5 0 307139 11941 4
 4 5 0 302331 12323.2 4
 -4 5 -1 47289.9 3350.94 4
 4 5 1 46903.4 3585 4
 4 5 2 199593 9008.71 4
 4 5 3 3884.26 993.23 4
 4 5 4 15890.4 2018.46 4
 4 5 5 9225.35 1562.78 4
 4 5 6 51174.2 3983.26 4
 4 5 7 19716.6 2415.97 4
 4 5 8 196846 9600.11 4
 4 5 9 946.395 445.832 4
 4 5 9 1466.03 287.922 3
 4 5 10 130392 7310.75 4
 4 5 10 102376 4322.87 3
 4 5 11 2774.22 569.362 3
 4 5 11 2706.79 850.794 4
 4 5 12 92229.8 6606.89 4
 4 5 13 1474.39 997.263 4
 -4 -5 -13 2258.83 644.142 1
 4 5 14 3844.84 1206.07 4
 -4 -5 -14 2019.61 666.389 1
 4 5 15 2427.21 1007.45 4
 -4 -5 -15 4936.65 1163.27 1
 4 -5 16 13642.3 2676.17 2
 4 5 16 14043.2 2884.03 4
 4 5 17 302.674 566.658 4
 4 -5 17 901.422 1084.41 2
 4 -5 18 57782.1 5896 2
 4 -5 19 -516.266 782.641 2
 4 -5 20 45856.5 5578.85 2
 4 -5 21 2975.62 1513.07 2
 4 -5 22 51732.4 6269.94 2
 -4 -6 27 2231.77 1159.4 2
 -4 -6 26 4310.05 1690.84 2
 -4 -6 25 26995.9 4002.21 2
 -4 -6 24 531.688 837.922 2
 -4 -6 23 33531.8 4184.47 2
 -4 -6 22 395.172 691.487 2
 -4 6 22 -722.592 1166.94 3
 -4 6 21 10987.2 2985.29 4
 -4 6 21 12950.4 2792.81 3
 -4 6 20 484.378 589.46 4
 -4 6 20 -268.047 576.266 3
 -4 6 19 -682.257 1192.98 4
 -4 6 19 -300.378 803.877 3
 -4 6 18 7760.48 2080.31 4
 -4 6 18 4107.81 1507.75 3
 -4 6 17 16724.2 3151.47 4
 -4 6 17 15960.3 2735.94 3
 -4 6 16 4231.02 1447.04 4
 -4 6 16 2617.89 1084.52 3
 -4 6 15 92641.3 7014.35 4
 -4 6 15 70704.9 5825.7 3
 -4 6 14 2854.59 1075.69 3
 -4 6 14 3940.29 1395.98 4
 -4 6 13 195126 10199.8 4
 -4 6 13 158117 9069.06 3
 -4 6 12 1077.12 606.187 3
 -4 6 12 1903.9 924.005 4
 -4 6 11 172606 9121.16 3
 -4 6 11 192121 9730.76 4
 -4 6 10 2078.74 914.204 4
 -4 6 10 3551.91 1152.38 3
 -4 6 9 81164.8 5529.87 4
 -4 6 9 80836.8 5406.15 3
 -4 6 8 28793.8 2978.9 4
 -4 6 7 583.272 437.117 4
 -4 6 6 26736.7 2757.75 4
 -4 6 5 96152.3 5655.66 4
 -4 6 4 1411.92 702.389 4
 -4 6 3 285049 11769.8 4
 -4 6 2 1125.65 491.409 4
 -4 6 1 238286 10216.4 4
 4 6 -1 232192 10677.4 4
 -4 6 0 10291.8 1591.91 4
 4 6 0 10892.9 1760.93 4
 -4 6 -1 86114.6 5190.96 4
 4 6 1 78828 5289.88 4
 -4 6 -2 1506.22 698.596 4
 4 6 2 761.473 643.032 4
 4 6 3 20064.5 2430.85 4
 4 6 4 30164.3 3016.43 4
 4 6 5 6390.26 1385.46 4
 4 6 6 34532.7 3415.06 4
 4 6 7 126323 7347.26 4
 4 6 8 318.051 292.611 4
 4 6 9 80733.4 5798.72 4
 4 6 10 -335.851 616.151 4
 4 6 11 98108.3 6836.93 4
 4 6 12 8049.45 1851.87 4
 4 6 13 43344.9 4566.29 4
 4 6 14 14637.8 2740.84 4
 4 6 15 3521.84 1435.78 4
 -4 -6 -15 5222.65 1144.85 1
 4 6 16 4775.36 1791.76 4
 4 6 17 35031.7 4817.49 4
 4 -6 17 30239 4136 2
 4 6 18 470.382 966.531 4
 4 -6 18 3087.05 1362.95 2
 4 -6 19 63492 6441.26 2
 4 6 19 61719.6 7242.36 4
 4 -6 20 4205.58 1758.95 2
 4 -6 21 65529.9 6918.38 2
 -4 -7 26 16055.8 3123.72 2
 -4 -7 25 2047.07 1010.54 2
 -4 -7 24 20786.8 3402.85 2
 -4 -7 23 1182.3 984.466 2
 -4 7 22 29523.1 5193.35 4
 -4 7 21 2906.51 1440.47 3
 -4 7 21 2793.49 1517.73 4
 -4 7 20 10109.3 2400.56 3
 -4 7 20 12502.1 3008.31 4
 -4 7 19 14934.3 2814.6 3
 -4 7 19 19307.9 3637 4
 -4 7 18 655.159 919.332 3
 -4 7 18 -436.612 938.83 4
 -4 7 17 36792.3 4277.47 3
 -4 7 17 43322.1 5099.81 4
 -4 7 16 16522.7 2784.88 3
 -4 7 16 14829.6 2844.1 4
 -4 7 15 33977.9 3934.16 3
 -4 7 15 38070.7 4425.6 4
 -4 7 14 112438 7696.42 4
 -4 7 14 91380.6 6655.27 3
 -4 7 13 29655.9 3608.54 4
 -4 7 13 23611.2 3083.98 3
 -4 7 12 195855 10365.4 4
 -4 7 12 171237 9572.64 3
 -4 7 11 4021.32 1314.88 4
 -4 7 11 3246.68 1066.73 3
 -4 7 10 96894.7 6543.95 4
 -4 7 9 25398.7 3018.62 4
 -4 7 8 43770 3983.52 4
 -4 7 7 85720.6 5744.57 4
 -4 7 6 14042.6 2107.9 4
 -4 7 5 20773.8 2521.21 4
 -4 7 4 43995.6 3764.77 4
 -4 7 3 16768.8 2195.41 4
 -4 7 2 147759 7703.88 4
 4 7 -2 142976 8164.18 4
 4 7 -1 19935.8 2577.64 4
 -4 7 1 20717.8 2469.62 4
 -4 7 0 129164 7102.96 4
 4 7 0 119888 7188.24 4
 -4 7 -1 166.944 536.078 4
 4 7 1 1614.38 792.237 4
 -4 7 -2 29013 3058.2 4
 4 7 2 29781.2 3196.29 4
 -4 -7 -3 24035 1460.2 3
 4 7 3 23803.7 2860.56 4
 4 7 4 2900.65 1046.94 4
 4 7 5 129813 7622.12 4
 4 7 6 31057.5 3371.58 4
 4 7 7 22360.5 2861.13 4
 4 7 8 72641.7 5613.33 4
 4 7 9 -299.026 600.582 4
 4 7 10 92396.7 6692.69 4
 4 7 11 3401.95 1282.03 4
 4 7 12 60964 5539.47 4
 4 7 13 47965.7 5014.21 4
 4 7 14 3907.29 1483.49 4
 4 7 15 40057.5 4858.96 4
 4 7 16 12718.7 2833 4
 4 7 17 9821.36 2446.02 4
 4 7 18 40685 5532.47 4
 4 -7 19 2496.05 978.89 2
 4 7 19 2773.94 1308.96 4
 4 -7 20 43850.5 5424.89 2
 4 7 20 39326.4 6011.91 4
 -4 -8 25 13335 2833.48 2
 -4 -8 24 285.112 568.494 2
 -4 8 23 22469 4719.36 4
 -4 8 22 9174.27 2820.82 4
 -4 8 21 22243.2 4272.2 4
 -4 8 20 20910.6 3974.97 4
 -4 8 19 3456.22 1252.2 3
 -4 8 19 4969.29 1845.33 4
 -4 8 18 39088.4 5150.06 4
 -4 8 18 37792.1 4462.29 3
 -4 8 17 1608.95 905.47 3
 -4 8 17 2685.21 1261.78 4
 -4 8 16 46837 5259.44 4
 -4 8 16 42602.6 4616.25 3
 -4 8 15 8897.92 2010.91 3
 -4 8 15 8274.29 2120.7 4
 -4 8 14 38583.3 4125.83 3
 -4 8 14 41301 4627.52 4
 -4 8 13 51809.5 5107.54 4
 -4 8 12 -143.706 453.73 4
 -4 8 11 43434.8 4380.27 4
 -4 8 10 8259.05 1799.88 4
 -4 8 9 27963.3 3342.81 4
 -4 8 8 51509.6 4580.14 4
 -4 8 7 41543 4015.72 4
 -4 8 6 119864 7316.04 4
 -4 8 5 3061.63 1053.16 4
 -4 8 4 55295.8 4544.47 4
 4 8 -3 24749 3154.47 4
 -4 8 3 20541.1 2637.68 4
 4 8 -2 43816.1 4271.22 4
 -4 8 2 39428.2 3748.07 4
 -4 8 1 37067.3 3637.64 4
 4 8 -1 39321.3 3950 4
 -4 8 0 4950.75 1380.83 4
 4 8 0 4752.38 1361.57 4
 -4 8 -1 26856.3 3098.62 4
 4 8 1 21221.8 2888.5 4
 -4 8 -2 68273.3 5221.24 4
 4 8 2 62457.6 5120.68 4
 4 8 3 1825.77 786.788 4
 -4 8 -3 3507.05 1060.4 4
 4 8 4 73961.5 5681.86 4
 4 8 5 20651.1 2880.19 4
 4 8 6 52672.8 4788.82 4
 4 8 7 41473.9 4219.86 4
 4 8 8 17100.3 2674.08 4
 4 8 9 44743.9 4593.32 4
 4 8 10 2169.74 1059.19 4
 4 8 11 30364.6 3877.56 4
 4 8 12 36175.8 4354.38 4
 4 8 13 2960.48 1054.73 4
 4 8 14 78418.8 6956.04 4
 4 8 15 2211.83 1227.96 4
 4 8 16 62753.8 6576.46 4
 4 8 17 16362.3 3402.85 4
 4 8 18 13032.4 3148.55 4
 4 8 19 19408.6 4121.39 4
 4 8 20 390.607 875.645 4
 4 8 21 16990.2 4112.71 4
 -4 9 22 4196.47 1859.99 4
 -4 9 21 13065.4 3396.95 4
 -4 9 20 3363.98 1921.52 4
 -4 9 19 40787.3 5586.72 4
 -4 9 18 -75.405 701.792 4
 -4 9 17 61319.3 6449.94 4
 -4 9 16 234.642 688.666 4
 -4 9 15 33077.8 4406.91 4
 -4 9 14 5508.9 1815.36 4
 -4 9 13 -327.968 397.815 4
 -4 9 12 10014.2 2193.97 4
 -4 9 11 70140 5981.14 4
 -4 9 10 11178.8 2239.63 4
 -4 9 9 103784 7271.86 4
 -4 9 8 859.846 795.954 4
 -4 9 7 141711 8593.7 4
 -4 9 6 5642.88 1481.07 4
 -4 9 5 125507 7882.85 4
 4 9 -4 2621.15 1254.79 4
 -4 9 4 2989.99 1037.25 4
 4 9 -3 65858.4 5698.95 4
 -4 9 3 59292.1 4994.56 4
 -4 9 2 32887 3689.98 4
 4 9 -2 34371.9 3936.67 4
 4 9 -1 921.418 633.922 4
 -4 9 1 1903.7 921.822 4
 4 9 0 15870.2 2593.89 4
 -4 9 0 16847.5 2585.3 4
 4 9 1 42444.6 4387.54 4
 -4 9 -1 46333.9 4403.29 4
 4 9 2 295.006 544.349 4
 -4 9 -2 1482.37 904.232 4
 -4 9 -3 96125.3 6871.44 4
 4 9 3 98112.1 6964.65 4
 4 9 4 1001.4 604.731 4
 -4 9 -4 2646.28 1090.35 4
 4 9 5 118195 7894.15 4
 4 9 6 9925.46 2108.99 4
 4 9 7 70556.4 5926.36 4
 4 9 8 24518 3482 4
 4 9 9 8180.33 1942.25 4
 4 9 10 16471.7 2941.33 4
 4 9 11 9124.69 2222.88 4
 4 9 12 11389.8 2551.89 4
 4 9 13 68221 6492.63 4
 4 9 14 588.554 1033.55 4
 4 9 15 65595.8 6633.98 4
 4 9 16 379.704 1164.26 4
 4 9 17 29288.5 4772.4 4
 4 9 18 5438.64 2024.74 4
 4 9 19 12424.1 3256.16 4
 4 9 20 7960.47 2597.89 4
 -4 10 21 849.535 1193.94 4
 -4 10 20 31320.9 5096.55 4
 -4 10 19 -641.447 1364.39 4
 -4 10 18 57833.4 6588.66 4
 -4 10 17 2174.22 1090.97 4
 -4 10 16 43778.2 5319.13 4
 -4 10 15 -623.821 794.81 4
 -4 10 14 11159.3 2577.34 4
 -4 10 13 -797.104 932.265 4
 -4 10 12 2212.58 1116.62 4
 -4 10 11 1520.64 1048.36 4
 -4 10 10 64868.8 5897.14 4
 -4 10 9 3741.98 1274.94 4
 -4 10 8 142074 9149.43 4
 -4 10 7 7365.51 1830.9 4
 -4 10 6 137009 8712.59 4
 -4 10 5 26307.2 3454.48 4
 -4 10 4 94009.3 6867.98 4
 4 10 -4 93908.7 7440.67 4
 -4 10 3 19152.3 2858.82 4
 4 10 -3 18971.5 3110.73 4
 -4 10 2 38048.2 4133.42 4
 4 10 -2 37710.3 4382.87 4
 -4 10 1 4137.03 1339.05 4
 4 10 -1 3276.37 1323.09 4
 4 10 0 5714.6 1736.48 4
 -4 10 0 5796.86 1667.2 4
 4 10 1 2218.68 935.132 4
 -4 10 -1 5388.54 1573.24 4
 4 10 2 51367.5 5054.12 4
 -4 10 -2 49405.1 4992.6 4
 4 10 3 7149.06 1794.59 4
 -4 10 -3 6948.48 1962.86 4
 -4 10 -4 97115.6 7414.63 4
 4 10 4 94053.4 7208.21 4
 4 10 5 1428.33 783.288 4
 -4 10 -5 954.241 848.115 4
 4 10 6 97695.9 7455.67 4
 4 10 7 1574.4 813.691 4
 4 10 8 18923.2 3182.26 4
 4 10 9 2230.29 1251.01 4
 4 10 10 -409.502 875.335 4
 4 10 11 5312.94 1736.08 4
 4 10 12 38371.5 4822.77 4
 4 10 13 2497.09 1284.71 4
 4 10 14 60021.6 6404.38 4
 4 10 15 3013.97 1682.01 4
 4 10 16 39506.5 5433.43 4
 4 10 17 -290.987 791.849 4
 4 10 18 18638.8 3966.82 4
 4 10 19 -130.071 1160.84 4
 -4 11 20 696.556 518.599 4
 -4 11 19 42498.5 5826.06 4
 -4 11 18 -777.208 1307.49 4
 -4 11 17 30692.9 4683.67 4
 -4 11 16 2376.83 1114.4 4
 -4 11 15 26834.4 4188.69 4
 -4 11 14 12812.4 2821.79 4
 -4 11 13 10614.2 2524.44 4
 -4 11 12 11354.1 2699.59 4
 -4 11 11 5940.43 1870.76 4
 -4 11 10 17502.7 3104.92 4
 -4 11 9 41509 4823.53 4
 -4 11 8 1680.33 1040.3 4
 -4 11 7 137457 9178.77 4
 4 11 -6 3086.93 1796.53 4
 -4 11 6 2934.25 1485.3 4
 -4 11 5 128132 8567.35 4
 4 11 -5 105521 8531.6 4
 4 11 -4 907.983 983.606 4
 -4 11 4 2522 1086.69 4
 -4 11 3 32951.2 4064.51 4
 4 11 -3 21453.6 3571.45 4
 -4 11 2 1542.22 1095.32 4
 4 11 -2 783.196 714.267 4
 -4 11 1 530.273 670.291 4
 4 11 -1 -130.74 680.798 4
 -4 11 0 5962.6 1785.43 4
 4 11 0 5113.93 1585.3 4
 4 11 1 30968.8 4132.75 4
 -4 11 -1 36403.5 4384.79 4
 4 11 2 -870.34 634.192 4
 -4 11 -2 -1472.81 1070.45 4
 -4 11 -3 86945.8 7139.42 4
 4 11 3 87602.2 7188.32 4
 -4 11 -4 322.138 673.998 4
 4 11 4 -385.614 785.17 4
 4 11 5 80675.6 6978.27 4
 -4 11 -5 81717 7159.71 4
 4 11 6 1653.31 1100.35 4
 -4 11 -6 1644.88 910.807 4
 -4 11 -7 34115.1 4553.81 4
 4 11 7 30252.9 4171.96 4
 4 11 8 1101.46 623.031 4
 4 11 9 -303.205 918.158 4
 4 11 10 2752.73 1194.64 4
 4 11 11 9375.45 2407.54 4
 4 11 12 440.287 918.345 4
 4 11 13 29409.6 4482.7 4
 4 11 14 252.898 783.868 4
 4 11 15 42562.5 5684.67 4
 4 11 16 -928.64 903.54 4
 4 11 17 20961.5 4126.75 4
 -4 12 18 32302.1 5072.68 4
 -4 12 17 2615.87 1256.01 4
 -4 12 16 31948.9 4885.79 4
 -4 12 15 8451.52 2515.71 4
 -4 12 14 15455.5 3230.05 4
 -4 12 13 11292.5 2741.75 4
 -4 12 12 2479.75 1345.65 4
 -4 12 11 13531 2875.21 4
 -4 12 10 12508.1 2808.77 4
 -4 12 9 10496.7 2481.58 4
 -4 12 8 45600.5 5218.7 4
 4 12 -7 1928.52 1360.83 4
 -4 12 7 1305.82 1261.6 4
 -4 12 6 62965.4 6064.49 4
 4 12 -6 54410.6 6204.09 4
 -4 12 5 12710.5 2610.4 4
 4 12 -5 18512.6 3544.34 4
 4 12 -4 12538.1 2891.88 4
 -4 12 4 16506.3 3034.49 4
 4 12 -3 5407.33 1905.74 4
 -4 12 3 5808.64 1864.57 4
 -4 12 2 1330.77 1165.67 4
 4 12 -2 2848.78 1288.72 4
 4 12 -1 2766.32 1106.85 4
 -4 12 1 2750.29 1072.83 4
 -4 12 0 24220.3 3731.34 4
 4 12 0 32271.5 4407.64 4
 4 12 1 8822.19 2183.13 4
 -4 12 -1 8094.84 2117.17 4
 -4 12 -2 48860.8 5428.27 4
 4 12 2 41007.2 4973.76 4
 4 12 3 405.761 849.808 4
 -4 12 -3 -89.286 497.935 4
 4 12 4 62929.2 6288.47 4
 -4 12 -4 68786.9 6712.68 4
 -4 12 -5 3837.61 1746.33 4
 4 12 5 2791.81 1263.3 4
 4 12 6 39751.4 4987.86 4
 -4 12 -6 46118.1 5517.29 4
 4 12 7 8306.4 2168 4
 -4 12 -7 4703.51 1704.86 4
 4 12 8 15357.3 3128.12 4
 -4 12 -8 14616.3 3268.4 4
 4 12 9 22179.7 3785 4
 4 12 10 -143.225 699.54 4
 4 12 11 13653.5 3051.47 4
 4 12 12 11361.2 2950.16 4
 4 12 13 1349.88 1035.99 4
 4 12 14 37300.5 5268.85 4
 4 12 15 1189.96 669.768 4
 4 12 16 22747.9 4295.57 4
 -4 13 17 20750.2 4111.74 4
 -4 13 16 15382.7 3491.87 4
 -4 13 15 10663.1 2995.14 4
 -4 13 14 12794.8 3036.21 4
 -4 13 13 2004.43 1391.07 4
 -4 13 12 12926.5 3033.85 4
 -4 13 11 728.75 811.258 4
 -4 13 10 11757.9 2809.79 4
 -4 13 9 11056 2650.02 4
 -4 13 8 2402.81 1058.79 4
 4 13 -8 1759.4 1492.5 4
 -4 13 7 18761.8 3436.38 4
 4 13 -7 19212.3 3804.63 4
 -4 13 6 14931.2 3054.36 4
 4 13 -6 13732.9 3238.54 4
 -4 13 5 12907.7 2844.67 4
 4 13 -5 12357.1 3034.51 4
 -4 13 4 30571.2 4282.28 4
 4 13 -4 22544.3 3927.68 4
 4 13 -3 1652.62 894.63 4
 -4 13 3 2569.89 1351.93 4
 -4 13 2 39640.7 4937.7 4
 4 13 -2 32326.2 4736.03 4
 -4 13 1 8480.82 2337.42 4
 4 13 -1 10023.3 2671.51 4
 -4 13 0 32159.6 4466.82 4
 4 13 0 34474.5 4714.95 4
 -4 13 -1 35599.2 4766.35 4
 4 13 1 26177.4 4153.11 4
 4 13 2 13957.8 2976.15 4
 -4 13 -2 14241.4 3067.01 4
 4 13 3 37042.9 5005.45 4
 -4 13 -3 42931.4 5370.41 4
 4 13 4 285.331 787.431 4
 -4 13 -4 1594.47 1226.64 4
 4 13 5 40464.6 5202.56 4
 -4 13 -5 37838.8 5165.39 4
 4 13 6 3547.56 1459.54 4
 -4 13 -6 7129.73 2355.52 4
 -4 13 -7 16466.9 3535.38 4
 4 13 7 15823.5 3343.12 4
 4 13 8 24832 4136.11 4
 -4 13 -8 28997.6 4695.38 4
 4 13 9 1586.78 1589.98 4
 -4 13 -9 3676.16 2067.07 4
 -4 13 -10 23845.7 4421.59 4
 4 13 10 31146.4 4708.15 4
 4 13 11 1945.67 1090.38 4
 4 13 12 14615.5 3310.69 4
 4 13 13 26467.4 4548.52 4
 4 13 14 4915.24 1991.7 4
 -4 14 14 174.123 546.438 4
 -4 14 13 23604.7 4283.79 4
 -4 14 12 2459.68 1538.45 4
 -4 14 11 18249.2 3650.74 4
 -4 14 10 4537.07 1854.72 4
 4 14 -10 4107.39 1969.09 4
 4 14 -9 6036.96 2304.12 4
 -4 14 9 12732.9 2976.97 4
 -4 14 8 3408.97 1559.51 4
 4 14 -8 5390.92 2014.99 4
 4 14 -7 1715.93 1531.34 4
 -4 14 7 2509.17 1423.44 4
 -4 14 6 6470.44 2124.26 4
 4 14 -6 4950.93 1999.41 4
 4 14 -5 16754.7 3601 4
 -4 14 5 11355.5 2780.15 4
 -4 14 4 5742.5 1992.53 4
 4 14 -4 7002.8 2270.92 4
 4 14 -3 41590.7 5730.17 4
 -4 14 3 48260.8 5824.25 4
 -4 14 2 -937.266 1453.02 4
 4 14 -2 -162.345 803.638 4
 -4 14 1 44491.8 5584.1 4
 4 14 -1 54463.7 6328.33 4
 -4 14 0 4165.93 1723.97 4
 4 14 0 3115.99 1457.99 4
 -4 14 -1 27387.4 4285.21 4
 4 14 1 26153.9 4374.59 4
 4 14 2 19464.8 3721.64 4
 -4 14 -2 18067.5 3590.06 4
 4 14 3 8331.26 2533.88 4
 -4 14 -3 8753.26 2495.46 4
 4 14 4 20981.7 3839.23 4
 -4 14 -4 22630.5 4093.03 4
 -4 14 -5 -30.9465 791.777 4
 4 14 5 2547.84 1428.75 4
 4 14 6 9799.9 2723.21 4
 -4 14 -6 7076 2459.4 4
 4 14 7 9146.7 2442.2 4
 -4 14 -7 8048.64 2489.85 4
 4 14 8 3012.65 1808.22 4
 -4 14 -8 375.12 651.853 4
 4 14 9 19293.6 3820.82 4
 -4 14 -9 21207.7 4262.07 4
 4 14 10 102.667 872.796 4
 -4 14 -10 742.936 1197.84 4
 -4 14 -11 30975.4 5217.03 4
 4 14 11 25146.9 4471.45 4
 -4 14 -12 2722.94 1907.2 4
 -4 15 12 19695.7 3992.66 4
 4 15 -11 -885.012 1382.22 4
 -4 15 11 1578.25 1447.23 4
 -4 15 10 11353.8 2994.13 4
 4 15 -10 7328.78 2600.38 4
 -4 15 9 -636.356 798.568 4
 4 15 -9 626.519 853.898 4
 4 15 -8 2257.87 1646.25 4
 -4 15 8 3742.92 1798.72 4
 -4 15 7 47.7343 924.687 4
 4 15 -7 -276.595 784.754 4
 -4 15 6 3719.62 1798.76 4
 4 15 -6 2978.03 2014.88 4
 -4 15 5 -21.5088 584.689 4
 4 15 -5 2054.56 1629.48 4
 -4 15 4 17644.2 3640.24 4
 4 15 -4 20144.3 4213.86 4
 -4 15 3 -213.337 718.043 4
 4 15 -3 328.916 902.8 4
 -4 15 2 38023.6 5438.08 4
 4 15 -2 36740.3 5507.09 4
 4 15 -1 534.732 1056.86 4
 -4 15 1 2416.96 1453.75 4
 4 15 0 31106.5 5014.36 4
 -4 15 0 40129.3 5444.42 4
 4 15 1 3139.67 1776.91 4
 -4 15 -1 1124.39 974.66 4
 -4 15 -2 10511.5 2886.6 4
 4 15 2 11350.1 3080.28 4
 4 15 3 -383.612 852.201 4
 -4 15 -3 521.15 613.762 4
 -4 15 -4 2692.55 1546.2 4
 4 15 4 713.462 678.93 4
 4 15 5 122.221 604.363 4
 -4 15 -5 354.246 766.29 4
 4 15 6 4473.62 1927.64 4
 -4 15 -6 4653.89 2222.53 4
 4 15 7 981.925 713.31 4
 -4 15 -7 545.502 790.383 4
 4 15 8 20238.6 3955.85 4
 -4 15 -8 17070.2 3863.9 4
 -4 15 -9 639.659 1030.24 4
 -4 15 -10 35290.5 5801.54 4
 -4 15 -11 1706.17 1680.71 4
 -4 15 -12 14791.5 3889.64 4
 -4 16 8 3639.23 1718.39 4
 -4 16 7 3871.17 1678.55 4
 -4 16 6 2293.24 1321.76 4
 -4 16 5 18032.6 3782.03 4
 4 16 -5 12285.4 3458.88 4
 4 16 -4 1656.64 1275.48 4
 -4 16 4 -137.127 806.751 4
 -4 16 3 20331.1 4126.23 4
 4 16 -3 19950.1 4201.42 4
 4 16 -2 -5.08496 1419.18 4
 -4 16 2 -231.323 1354.93 4
 4 16 -1 41748.1 5953.65 4
 -4 16 1 32349.3 5332.18 4
 4 16 0 5227.04 2038.94 4
 -4 16 0 2320.73 1736.43 4
 4 16 1 23820.9 4512.02 4
 -4 16 -1 23253.5 4447.36 4
 -4 16 -2 6940.16 2513.24 4
 4 16 2 4503.84 1817.61 4
 -4 16 -3 4481.83 2074.57 4
 -4 16 -4 3171.64 1801.34 4
 -4 16 -5 3539.79 1813.11 4
 -4 16 -6 37.9352 911.406 4
 -4 16 -7 13026.2 3566.72 4
 -4 16 -8 -90.956 980.178 4
 -5 0 29 -3172.41 1865.67 3
 -5 0 28 -318.485 947.781 3
 -5 0 27 -1418.9 1192.56 2
 -5 0 27 407.238 717.486 3
 -5 0 26 4217.92 1974.02 3
 -5 0 26 7153.5 2176.3 2
 -5 0 25 -40.5541 638.228 2
 -5 0 25 1974.58 1290.08 3
 -5 0 24 36890.6 5544.2 3
 -5 0 24 52518 5619.59 2
 -5 0 23 -326.048 520.204 2
 -5 0 23 436.182 646.732 3
 -5 0 22 112224 7941.6 2
 -5 0 22 73466.3 7634.89 3
 -5 0 21 -72.4037 433.305 2
 -5 0 21 34.3754 798.965 3
 -5 0 20 60014 5298.69 2
 -5 0 20 55466.6 6069.71 3
 -5 0 19 311.072 588.437 2
 -5 0 19 -289.343 614.269 3
 -5 0 18 495.273 697.496 3
 -5 0 18 1442.82 754.902 2
 -5 0 17 -275.791 273.859 2
 -5 0 16 9622.81 1697.03 2
 -5 0 15 -160.473 554.152 3
 -5 0 15 323.217 255.742 2
 -5 0 14 214113 11327.2 3
 -5 0 14 234513 9909.61 2
 -5 0 13 193.345 346.25 3
 -5 0 13 798.111 484.422 2
 -5 0 12 365012 13656.1 2
 5 0 -12 395521 12814.6 1
 -5 0 11 445.469 215.166 2
 -5 0 11 -155.617 261.228 3
 5 0 -11 234.097 172.037 1
 5 0 -10 200061 7585.81 1
 -5 0 10 195016 7573.63 2
 -5 0 10 193052 9385.26 3
 -5 0 10 194568 7841.14 1
 5 0 -9 555.551 332.338 1
 -5 0 9 377.319 234.697 1
 -5 0 9 51.8983 93.7637 2
 -5 0 9 136.994 299.425 3
 -5 0 8 54947.2 3933.11 3
 5 0 -8 62483.3 3326.7 1
 -5 0 8 60678.3 3481.31 1
 -5 0 8 56611.9 2638.52 2
 -5 0 7 190.572 115.45 2
 -5 0 7 545.108 397.489 1
 -5 0 7 279.422 282.51 3
 -5 0 6 103273 5039.33 1
 -5 0 6 102686 5291.28 3
 -5 0 5 128.391 140.813 3
 -5 0 5 185.695 244.997 1
 -5 0 4 134482 6292.63 1
 -5 0 4 147620 6322.44 3
 -5 0 3 112.829 207.138 3
 -5 0 3 295.705 307.403 1
 5 0 -2 701109 22084.8 2
 -5 0 2 679727 23771.5 1
 5 0 -2 747258 23427 3
 -5 0 2 716163 23327.9 3
 -5 0 1 243.415 336.84 1
 5 0 -1 148.82 172.903 3
 5 0 -1 57.8889 127.524 2
 -5 0 1 141.412 204.402 3
 5 0 0 630676 20929.7 2
 -5 0 0 618432 21987.9 1
 5 0 1 -12.0803 309.123 3
 5 0 1 446.464 254.738 2
 -5 0 -2 307195 11611.3 1
 5 0 2 283419 10985.5 2
 -5 0 -2 302652 9741.14 4
 -5 0 -3 483.188 371.202 1
 5 0 3 511.756 305.914 2
 -5 0 -3 338.759 219.664 4
 -5 0 -4 11061 1038.63 4
 -5 0 -4 12698.5 1555.68 1
 5 0 5 -310.84 271.6 2
 -5 0 -5 135.686 223.498 4
 -5 0 -5 242.006 531.363 1
 5 0 6 4852.43 1101.74 2
 -5 0 -6 5256.02 1004.13 1
 5 0 7 259.356 298.05 2
 -5 0 -7 151.882 230.035 1
 5 0 8 7410.4 1500.55 2
 -5 0 -8 7667.6 1250.85 1
 -5 0 -9 -29.8779 196.642 1
 5 0 9 365.332 358.176 2
 5 0 10 48723.1 4403.37 2
 -5 0 -10 47285.5 3368.72 1
 5 0 11 -404.614 665.482 2
 -5 0 -11 -71.0531 351.769 1
 -5 0 -12 26478.9 2430.02 1
 5 0 12 27385.8 3473.92 2
 -5 0 -13 -187.629 468.25 1
 5 0 13 -274.383 555.741 2
 5 0 14 5907.08 1793.38 2
 -5 0 -14 3635.1 929.302 1
 5 0 15 899.434 486.828 2
 5 0 16 -70.7434 602.453 2
 5 0 17 1303.15 1031.82 2
 5 0 18 54938.9 6180.67 2
 5 0 19 -730.045 1054.16 2
 5 0 20 49676.7 6250.59 2
 5 0 21 -1051.23 1303.67 2
 5 0 22 59667.5 7298.07 2
 -5 1 29 30.041 1347.69 3
 -5 -1 28 1337.57 930.863 3
 -5 1 28 4520.56 2289.32 3
 -5 -1 27 1106.67 1176.6 3
 -5 -1 27 1784.39 747.288 2
 -5 1 27 1282.12 1031.3 3
 -5 -1 26 -479.094 1014.79 2
 -5 -1 26 885.382 1072.87 3
 -5 1 26 86.971 741.842 3
 -5 -1 25 20291.9 4155.66 3
 -5 1 25 14737.7 3539.54 3
 -5 -1 24 -260.274 905.333 2
 -5 1 24 -477.011 1163.89 3
 -5 1 23 47564.2 5317.18 2
 -5 1 23 38992.4 5513.12 3
 -5 -1 23 45253.2 4985.74 2
 -5 1 22 -1083.23 1068.74 2
 -5 -1 22 -1092.7 1083.9 2
 -5 1 22 2312.36 1569.38 3
 -5 1 21 52668.2 5195.38 2
 -5 -1 21 53804.8 5062.89 2
 -5 1 21 41476.6 5362.64 3
 -5 1 20 5359.11 1934.83 3
 -5 1 20 5299.37 1603.07 2
 -5 -1 20 7945.83 1765.82 2
 -5 1 19 13236.2 2277.22 2
 -5 -1 19 16116.7 2498.51 2
 -5 1 19 14387.4 2851.78 3
 -5 1 18 2107.96 1094.89 3
 -5 1 18 2991.67 1102.03 2
 -5 -1 18 4539.96 1227.04 2
 -5 1 17 -206.88 338.948 3
 -5 -1 17 756.968 571.337 2
 -5 1 17 719.396 493.447 2
 -5 1 16 662.657 471.35 2
 -5 1 16 1361.32 940.735 3
 -5 -1 16 -147.017 381.59 2
 -5 1 15 61273.2 4424.73 2
 5 -1 -15 65030.6 3022.38 1
 -5 -1 15 74040.5 4661.66 2
 -5 1 14 1433.92 904.935 3
 -5 1 14 2874.91 770.836 2
 5 -1 -14 2202 452.064 1
 -5 -1 14 2509 695.587 2
 -5 1 13 229854 9531.62 2
 -5 -1 13 239512 9443.07 2
 -5 -1 13 196358 8125.53 1
 -5 1 13 198644 10663.4 3
 5 -1 -13 241230 8335.26 1
 -5 -1 12 39372.9 2586.36 1
 -5 1 12 47484.2 3202.72 2
 5 -1 -12 53499.5 2836.25 1
 -5 1 12 46178.2 4117.11 3
 -5 -1 12 47968.3 3124.47 2
 -5 -1 11 234252 9211.34 1
 -5 -1 11 257650 9506.47 2
 -5 1 11 240548 11204.1 3
 5 -1 -11 252096 9264.08 1
 5 -1 -10 53179.4 3055.72 1
 -5 -1 10 48940.9 3015.06 1
 -5 -1 10 50898.3 2884.42 2
 -5 1 10 53901.5 4121.33 3
 -5 -1 9 157837 6931.18 1
 5 -1 -9 174115 6274.52 2
 -5 -1 9 167568 6439.3 2
 -5 1 9 169865 8174.29 3
 -5 -1 8 31710.3 2405.62 1
 -5 1 8 36154.8 3037.43 3
 -5 -1 8 40254.2 3229.84 3
 5 -1 -8 36949.5 1876.27 2
 5 -1 -7 32725.4 1578.78 2
 -5 -1 7 29554.2 2316.44 1
 -5 -1 7 32563.1 2772.69 3
 -5 1 7 31670.4 2704.63 3
 -5 -1 6 42286.9 3062.29 3
 -5 1 6 43817 3123.33 3
 -5 -1 6 35436.2 2669.25 1
 5 -1 -6 42269.9 1739.71 2
 -5 1 6 41521.9 2945.07 1
 -5 -1 5 78489 4264.45 1
 -5 1 5 78499.3 4380.76 1
 5 -1 -5 83550 3774.83 4
 -5 -1 5 78458.1 4314.2 3
 -5 1 5 81691.1 4467.65 3
 -5 -1 4 18579.2 1847.35 1
 -5 1 4 18430.6 1900.98 1
 5 -1 -4 21895 1450.94 4
 -5 -1 4 22248.8 1879.24 3
 -5 1 4 22099.3 1995 3
 5 -1 -3 152100 5613.07 4
 -5 -1 3 157127 5424.23 2
 -5 1 3 149315 6969.28 1
 5 1 -3 166916 6629.38 3
 -5 -1 3 164587 6554.4 3
 -5 -1 3 155753 6938.69 1
 -5 1 3 155762 6776.53 3
 -5 -1 2 821.142 221.876 2
 -5 1 2 814.752 430.368 1
 5 -1 -2 701.241 185.927 4
 5 1 -2 1817.74 434.97 3
 -5 1 2 1215.28 442.046 3
 -5 -1 2 1279.68 519.351 1
 -5 -1 2 1216.25 374.344 3
 -5 1 1 278966 11283.8 1
 -5 -1 1 293504 9955.54 2
 -5 -1 1 292968 10334.3 3
 5 1 -1 296595 10377.7 3
 -5 -1 1 284706 11180.1 1
 -5 -1 0 489.431 338.475 1
 5 1 0 332.534 193.105 3
 -5 -1 0 544.36 236.678 2
 -5 1 0 271.473 349.84 1
 5 1 0 -541.716 244.277 2
 5 1 0 254.591 156.371 4
 -5 -1 -1 320214 11806.9 2
 -5 1 -1 340172 12896.3 1
 5 1 1 360861 11234.1 4
 5 1 1 326028 12032.9 2
 5 1 1 348316 11798.4 3
 -5 -1 -1 323555 12716.1 1
 5 1 2 54849.9 2861.37 3
 5 1 2 53992 2476.73 4
 5 -1 2 47172.3 3005.65 2
 -5 1 -2 56707.1 3581.81 1
 -5 -1 -2 50037.2 3371.5 1
 -5 -1 -2 53013.1 2573.07 4
 5 1 2 49317.8 3113 2
 -5 1 -2 49966.2 2067.83 4
 -5 -1 -3 67907 3994.5 1
 -5 1 -3 70174.4 4088.87 1
 5 1 3 59511.3 2964.36 4
 5 1 3 62275.3 3777.52 2
 -5 1 -3 63455.5 2727.25 4
 5 -1 3 62550.2 3692.44 2
 -5 -1 -3 63418.2 3056.63 4
 -5 -1 -4 129810 5479.69 4
 5 1 4 124171 5446.99 4
 -5 1 -4 137577 5251.52 4
 5 -1 4 137153 6424.94 2
 -5 1 -4 145739 6610.91 1
 5 1 4 132863 6526.43 2
 -5 -1 -4 140106 6481.01 1
 -5 1 -5 24893.4 1754.08 4
 -5 1 -5 21595.2 2188.23 1
 -5 -1 -5 24215.2 1852.19 4
 -5 -1 -5 30091.8 2500.13 1
 5 1 5 22896.7 1904.62 4
 5 -1 5 22866.1 2296.31 2
 5 1 5 20818.4 2260.3 2
 -5 1 -6 66456 4003.07 1
 5 -1 6 57555.7 4081.27 2
 5 1 6 52732.8 3441.79 4
 -5 -1 -6 60953.4 3822.32 1
 5 1 6 57706.5 4194.58 2
 5 -1 7 19854.4 2378.74 2
 5 1 7 21544.2 2542.27 2
 5 1 7 19719.5 2120.79 4
 -5 -1 -7 24108.3 2260.34 1
 -5 1 -7 26761 2366.97 1
 5 1 8 17411.6 2336.82 2
 5 -1 8 17894.8 2326.9 2
 -5 1 -8 17525.9 1957.34 1
 -5 -1 -8 16188.1 1834.65 1
 5 1 9 85419.2 5921.94 2
 5 -1 9 80438.6 5683.54 2
 -5 -1 -9 85878.5 4809.17 1
 -5 1 -9 81905.1 4763.33 1
 -5 1 -10 3568.35 891.226 1
 5 1 10 3367.15 1128.96 2
 5 -1 10 2777.36 1023.25 2
 -5 -1 -10 2277.84 695.722 1
 -5 -1 -11 66161.9 4122.98 1
 5 1 11 68435.7 5595.06 2
 5 -1 11 66981.3 5408.86 2
 5 1 12 -163.887 595.851 2
 5 -1 12 -495.261 487.778 2
 -5 -1 -12 -116.699 386.006 1
 5 1 13 6508.97 1721.72 2
 5 -1 13 6924.08 1735.39 2
 -5 -1 -13 10075.5 1467.44 1
 -5 -1 -14 1184.36 541.518 1
 5 -1 14 495.334 550.882 2
 5 1 14 341.932 971.287 2
 5 1 15 2697.37 1275.94 2
 5 -1 15 6301.94 1915.89 2
 5 1 16 10528.3 2623.3 2
 5 -1 16 10880.8 2540.3 2
 5 1 17 1321.56 565.501 2
 5 -1 17 3958.23 1517.91 2
 5 -1 18 8409.6 2346.28 2
 5 1 18 9774.76 2566.26 2
 5 1 19 26408.4 4446.91 2
 5 -1 19 27802.4 4535.27 2
 5 1 20 -691.944 914.064 2
 5 -1 20 -64.4966 1082.74 2
 5 1 21 38428.3 5724.73 2
 5 -1 21 42996.6 5816.89 2
 5 1 22 303.638 950.761 2
 5 -1 22 1242.72 1299.04 2
 -5 2 29 439.166 745.535 3
 -5 -2 28 695.36 698.445 3
 -5 2 28 1289.29 1660.16 3
 -5 -2 27 9674.94 2613.28 2
 -5 2 27 3287.88 1405.19 3
 -5 -2 26 23421 3874.97 2
 -5 2 26 14268 3514.49 3
 -5 -2 25 11022.9 2539.35 2
 -5 2 25 8327.93 2674.33 3
 -5 -2 24 37660.6 4590.7 2
 -5 2 24 29109.2 4815.75 3
 -5 2 23 1432.03 996.723 3
 -5 -2 23 615.983 537.48 2
 -5 -2 22 50428.4 4934.8 2
 -5 2 22 29024.9 4514.19 3
 -5 -2 21 8951.24 1933 2
 -5 2 21 8563.64 2392.08 3
 -5 2 20 15501.8 3084.7 3
 -5 -2 20 16251.4 2598.04 2
 -5 -2 19 25068.9 3044.44 2
 -5 2 19 20152.8 3425.4 3
 -5 2 18 3001.43 1235.38 3
 -5 -2 18 2588.5 890.522 2
 -5 -2 17 16897.4 2315.44 2
 -5 2 17 12531.6 2513.66 3
 -5 -2 16 15763.8 2078.15 2
 -5 2 16 11420.2 2280.75 3
 5 -2 -15 15344.9 1395.93 1
 -5 -2 15 12629 1746.06 2
 -5 2 15 15271 2536.91 3
 -5 -2 15 12524.3 1150.1 1
 5 -2 -14 109631 4783.82 1
 -5 -2 14 101405 5537.04 2
 -5 2 14 94911.6 6638.37 3
 -5 -2 14 93541.5 4382.58 1
 -5 -2 13 579.747 346.298 1
 -5 2 13 986.203 597.136 3
 -5 -2 13 981.983 443.621 2
 -5 2 12 148272 8226.83 3
 -5 -2 12 155350 6439.39 1
 -5 2 11 51432.9 4136.89 3
 -5 -2 11 48489.3 3011.81 1
 -5 2 10 120184 6769.68 4
 -5 2 10 124520 6751.35 3
 -5 -2 10 112214 5395.17 1
 -5 -2 9 92127.2 4742.88 1
 -5 2 9 85974.8 5407.7 4
 5 -2 -9 105986 4308.54 2
 -5 2 9 91883.7 5581.03 3
 5 -2 -8 55088.8 2607.13 2
 -5 -2 8 45548 3071.63 1
 -5 2 8 47104.4 3611.33 3
 -5 2 8 44472.3 3406.72 4
 -5 2 7 98913.6 5214.27 4
 -5 -2 7 102527 5100.95 1
 -5 2 7 107147 5674.35 3
 -5 -2 6 3546.44 784.875 1
 -5 2 6 2307.91 648.861 4
 -5 2 6 2685.6 742.821 3
 5 -2 -5 206382 7871.04 4
 -5 2 5 200839 8754.17 3
 -5 2 5 206561 8000.94 4
 -5 -2 5 207253 8594.29 1
 -5 -2 5 215009 8644.27 3
 -5 2 4 202450 7674.6 4
 -5 2 4 210273 8768.75 3
 -5 -2 4 208747 8348.93 3
 5 -2 -4 211978 7719 4
 -5 -2 4 209330 8674.65 1
 -5 -2 3 96608.3 4492.89 3
 5 -2 -3 96058.2 4019.48 4
 -5 -2 3 92883.3 4930.36 1
 -5 2 3 94706.7 3924.2 4
 -5 2 3 88832.7 4866.79 3
 -5 -2 2 126937 6067.22 1
 -5 -2 2 128990 5310.96 3
 -5 2 2 127037 4720.1 4
 5 -2 -2 125136 4839.37 4
 -5 -2 1 20853.2 1571.41 2
 -5 -2 1 17338.1 1905.34 1
 -5 2 1 22200.5 1234.97 4
 -5 -2 1 22661.7 1570.57 3
 -5 -2 0 89949.1 3717.58 3
 5 2 0 85049.9 3939.45 4
 5 2 0 89014.3 3742.88 3
 -5 -2 0 83717.4 3999.85 2
 -5 2 0 82464.6 3244.27 4
 -5 -2 0 86245 4730.11 1
 -5 2 -1 19705.3 1241.48 4
 -5 -2 -1 20949.5 2088.71 1
 5 2 1 23663.3 1699.08 4
 5 2 1 23213.2 1455.15 3
 5 2 2 131632 5210.39 4
 -5 -2 -2 122346 5214.65 4
 5 2 2 112792 4572.76 3
 -5 -2 -2 117957 5930.24 1
 5 2 3 114685 5170.91 4
 5 2 3 124897 4744.53 3
 -5 -2 -3 124772 6067.75 1
 -5 -2 -3 118490 5287.89 4
 5 2 4 10763.7 1535.9 2
 5 2 4 10579.7 1246.62 4
 5 2 5 46190.4 3575.29 2
 5 2 5 46055.2 2979.05 4
 -5 -2 -5 51386.6 3479.37 1
 -5 -2 -6 48881.2 3397.8 1
 5 2 6 43908.3 3038.89 4
 5 2 6 40723.3 3524.73 2
 -5 -2 -7 76502.1 4482.81 1
 5 2 7 69644.8 4969.96 2
 5 2 7 65926.9 4184.92 4
 5 -2 7 74947.5 4917.55 2
 5 2 8 103289 6585.86 2
 5 -2 8 98874.5 6198.77 2
 5 2 8 106717 5857.73 4
 -5 -2 -8 113691 5764.93 1
 5 2 9 57591.4 4848.58 2
 5 2 9 54268.1 4154.82 4
 5 -2 9 57151.4 4558.55 2
 -5 -2 -9 58976 3870.6 1
 5 -2 10 127263 7708.05 2
 5 2 10 136977 8269.14 2
 5 2 10 127134 7392.18 4
 -5 -2 -10 142926 6768.4 1
 5 2 11 2399.98 1046.17 2
 -5 -2 -11 1273.32 561.643 1
 5 -2 11 3685.68 1147.18 2
 5 -2 12 62799.4 5239.79 2
 -5 -2 -12 56978.6 3809.96 1
 5 2 13 3880.13 1464.67 2
 5 -2 13 5270.03 1541.6 2
 -5 -2 -13 4003.28 964.546 1
 -5 -2 -14 13485.6 1720.71 1
 5 2 14 9841.16 2312.71 2
 5 -2 14 13850.3 2563.23 2
 5 2 15 15355.3 2994.59 2
 5 -2 15 15942.9 2870.08 2
 5 2 16 2204.83 1331.37 2
 5 -2 16 4476.06 1564.68 2
 5 -2 17 35204.2 4631.02 2
 5 2 17 26984.9 4341.89 2
 5 2 18 -2761.65 1457.64 2
 5 -2 18 25.9669 863.212 2
 5 2 19 7822.89 2134.23 2
 5 -2 19 3981.15 1545.54 2
 5 2 20 11731.6 3052.41 2
 5 -2 20 9485.95 2720.66 2
 5 2 21 -502.922 988.304 2
 5 -2 21 1406.35 1179 2
 5 -2 22 29877.6 4942.25 2
 -5 3 28 6317.12 2599.83 3
 -5 -3 27 5328.79 1866.49 2
 -5 3 27 4467.19 1949.39 3
 -5 -3 26 9602.62 2429.47 2
 -5 3 26 10412.2 2932.27 3
 -5 -3 25 17779.6 3197.39 2
 -5 3 25 11049.3 3010.33 3
 -5 -3 24 7566.8 1963.29 2
 -5 3 24 4672.82 1683.16 3
 -5 -3 23 34727.4 4216.6 2
 -5 3 23 23404.6 4234.82 3
 -5 -3 22 188.338 371.265 2
 -5 3 22 1109.44 758.905 3
 -5 -3 21 40953.8 4239.29 2
 -5 3 21 27645.1 4237.44 3
 -5 -3 20 29132 3426.3 2
 -5 3 20 23319.7 3742.06 3
 -5 3 19 4291.72 1479.39 3
 -5 -3 19 2969.49 1058.62 2
 -5 -3 18 42995.7 3871.32 2
 -5 3 18 32460.9 4164.38 3
 -5 3 17 2225.96 1169.62 3
 -5 -3 17 1316.74 706.638 2
 -5 -3 16 86238.2 5332.91 2
 -5 3 16 68045.9 5875.27 3
 -5 -3 15 17798.1 1544.31 1
 -5 3 15 18105.3 2751.94 3
 -5 3 14 19212.2 2940.02 4
 -5 3 14 23844.8 3036.93 3
 -5 -3 14 22012.3 1839.01 1
 -5 -3 13 71783.5 3907.23 1
 -5 3 13 75149.6 5567.62 3
 -5 3 13 76256.9 5802.53 4
 -5 -3 12 3663.08 734.8 1
 -5 3 12 1972.19 894.864 3
 -5 3 12 3306.1 1162.26 4
 -5 -3 11 29575.1 2377.18 1
 -5 3 11 27487.4 3021.73 3
 -5 3 10 139421 7436.18 4
 -5 3 10 143784 7596.74 3
 -5 -3 10 144138 6519.1 1
 -5 -3 9 15466.5 1673.89 1
 -5 3 9 13751 1812.48 4
 -5 3 9 12732.9 1872.37 3
 -5 3 8 69922.8 4337.25 4
 -5 -3 8 71585.4 4091.64 1
 -5 3 8 68129.3 4579.42 3
 -5 3 7 22824.2 2414.85 3
 -5 3 7 25223.7 2251.53 4
 -5 3 6 106267 5174.07 4
 -5 3 6 107958 5783.55 3
 -5 3 5 31189 2255.31 4
 -5 3 5 27079.9 2540.55 3
 5 -3 -4 85097.5 4203.3 4
 -5 3 4 86783.7 4962.44 3
 -5 3 4 88131.3 4170.25 4
 -5 3 3 58636 3056.12 4
 5 -3 -3 58000.5 3146.18 4
 -5 3 2 94938.4 4214.41 4
 5 -3 -2 94259.3 4360.21 4
 -5 -3 2 103881 4431.61 3
 -5 3 1 50624.8 2674.96 4
 -5 -3 1 58228.4 2735.56 3
 5 3 -1 49647.1 3204.09 4
 -5 -3 0 918.147 250.826 3
 5 3 0 2040.22 526.242 4
 -5 3 0 1878.11 433.171 4
 -5 -3 -1 44526.7 2047.83 3
 -5 3 -1 44272.7 2475.79 4
 5 3 1 43048.4 2821.29 4
 5 3 2 46631.3 2987.88 4
 5 3 3 16010.2 1666.69 4
 -5 -3 -4 212074 9000.63 1
 5 3 4 201892 8475.33 4
 5 3 5 211.723 134.672 3
 5 3 5 490.518 437.737 4
 -5 -3 -5 240.093 360.829 1
 -5 -3 -6 131942 6528.44 1
 5 3 6 124107 6247.1 4
 5 3 7 30060.6 2737.36 4
 -5 -3 -7 39131.5 3085.83 1
 5 3 8 81417.3 5053.07 4
 -5 -3 -8 83545 4957.88 1
 5 3 9 70371.8 4904.68 4
 -5 -3 -9 77398.4 4672.46 1
 5 -3 10 133.885 353.079 2
 5 3 10 546.797 533.002 4
 -5 -3 -10 589.335 492.019 1
 -5 -3 -11 101643 5640.7 1
 5 -3 11 101647 6786.41 2
 5 3 11 96523.2 6494.94 4
 5 3 12 32533.3 3669.14 4
 -5 -3 -12 29460 2728.28 1
 5 -3 12 35160.9 3811.75 2
 5 -3 13 42788.7 4424.19 2
 5 3 13 29584.9 3751.5 4
 -5 -3 -13 37034.9 3099.21 1
 5 -3 14 39115.1 4379.2 2
 -5 -3 -14 38579.4 3178.13 1
 5 -3 15 8401.47 2071.59 2
 5 -3 16 24159.1 3646.22 2
 5 -3 17 959.879 973.811 2
 5 -3 18 15139.6 3080.7 2
 5 -3 19 3514.89 1436.21 2
 5 -3 20 4253.44 1707.9 2
 5 -3 21 16152.8 3609.08 2
 5 -3 22 -1124.44 1654.24 2
 -5 -4 27 25572.6 4081.7 2
 -5 -4 26 969.767 474.165 2
 -5 4 26 -1169.32 1539.13 3
 -5 4 25 2734.19 1506.29 3
 -5 -4 25 3246.84 1280.2 2
 -5 -4 24 7263.86 1933.44 2
 -5 4 24 4380.73 1742.59 3
 -5 -4 23 414.889 939.861 2
 -5 4 23 65.4263 629.189 3
 -5 -4 22 5534.06 1651.68 2
 -5 4 22 6774.97 2007.62 3
 -5 4 21 8935.15 2340.63 3
 -5 -4 21 14834 2492.26 2
 -5 -4 20 12111 2126.28 2
 -5 4 20 13308.6 2839.18 3
 -5 -4 19 69107.4 5225.03 2
 -5 4 19 50285.2 5457.52 3
 -5 4 18 4848.81 1492.6 3
 -5 -4 18 1584.67 695.969 2
 -5 4 17 93133.7 7130.85 3
 -5 4 16 795.514 406.691 4
 -5 4 16 2024.5 985.797 3
 -5 -4 15 94390.2 4796.92 1
 -5 4 15 97896.9 6929.79 3
 -5 4 15 108864 7651.03 4
 -5 4 14 666.912 330.944 3
 -5 -4 14 438.659 273.769 1
 -5 4 14 442.407 752.914 4
 -5 -4 13 15348.9 1718.31 1
 -5 4 13 18824.1 2713.13 4
 -5 4 13 15092.1 2398.15 3
 -5 4 12 -17.9052 325.409 4
 -5 4 12 -1147.99 641.48 3
 -5 4 11 6846.09 1465.5 3
 -5 4 11 7769.02 1515.42 4
 -5 4 10 884.317 663.252 4
 -5 4 10 133.141 330.619 3
 -5 4 9 81552.6 5051 4
 -5 4 9 76170.5 5134.09 3
 -5 4 8 2478.83 746.765 3
 -5 4 8 3086.68 905.784 4
 -5 4 7 367812 13948.2 4
 -5 4 7 367762 14571.5 3
 -5 4 6 4754.34 1051.37 4
 -5 4 6 5309.81 1177.61 3
 -5 4 5 347511 12915.8 4
 -5 4 4 46062.9 2985.61 4
 -5 4 3 122629 5585.12 4
 -5 4 2 3659.46 723.212 4
 -5 4 1 48825.9 2927.39 4
 5 4 -1 46149.5 3329 4
 -5 4 0 2300.93 614.105 4
 -5 -4 0 2048.63 371.426 3
 5 4 0 1192.76 551.217 4
 -5 4 -1 10837.1 1299.92 4
 -5 -4 -1 10724.6 767.022 3
 5 4 1 11797 1511.41 4
 5 4 2 13268.3 1644.05 4
 5 4 3 248704 10235 4
 5 4 4 4479.88 948.365 4
 5 4 5 214261 9391.3 4
 5 4 6 7789.67 1335.33 4
 5 4 7 99055.9 5757.39 4
 5 4 8 6607.66 1328.14 4
 5 4 8 6932.91 667.908 3
 5 4 9 16033.1 2164.16 4
 5 4 9 13547.2 1157.71 3
 -5 -4 -9 14953.4 1915.51 1
 5 4 10 13400.9 2167.98 4
 5 4 10 13946 1333.04 3
 -5 -4 -10 16444.5 2042.55 1
 5 4 11 36299.1 2534.13 3
 -5 -4 -11 44305.5 3477.25 1
 5 4 11 38100.5 3794.6 4
 5 4 12 24501.4 3133.69 4
 -5 -4 -12 22803 2462.29 1
 -5 -4 -13 69971.4 4621.2 1
 5 4 13 67754.2 5783.3 4
 5 -4 13 62472.6 5511.97 2
 5 -4 14 9371.14 2109.69 2
 -5 -4 -14 8007.24 1397.22 1
 5 4 14 8469.24 2065.75 4
 5 -4 15 30801.9 3957.41 2
 5 4 15 24055.8 3671.39 4
 5 -4 16 -528.791 1157.11 2
 5 -4 17 44696.7 5203.33 2
 5 -4 18 1396.2 791.078 2
 5 -4 19 13644.8 3005.23 2
 5 -4 20 4122.7 1877.93 2
 5 -4 21 631.19 797.433 2
 -5 -5 27 -3095.28 1461.17 2
 -5 -5 26 26020.3 4024.16 2
 -5 -5 25 1677.28 1247.5 2
 -5 5 25 -124.626 537.686 3
 -5 5 24 5261.87 1954.61 3
 -5 -5 24 3659.4 1334.16 2
 -5 5 23 647.073 834.736 3
 -5 -5 23 3130.41 1221.37 2
 -5 -5 22 4193 1400.38 2
 -5 5 22 3488.84 1523.69 3
 -5 -5 21 387.214 638.89 2
 -5 5 21 1359.78 1161.12 3
 -5 -5 20 50162.2 4594.83 2
 -5 5 20 40777.4 5043.08 3
 -5 5 19 3018.16 1500.9 4
 -5 5 19 3076.49 1431.38 3
 -5 5 18 97656.5 7660.03 3
 -5 5 18 106333 8580.66 4
 -5 5 17 1513.18 956.42 4
 -5 5 17 1163.65 798.205 3
 -5 5 16 106644 7934.64 4
 -5 5 16 97932.8 7228.67 3
 -5 -5 15 956.199 442.372 1
 -5 5 15 198.121 473.221 4
 -5 5 15 1645.88 871.643 3
 -5 5 14 92722.2 6714.03 4
 -5 5 14 79406.6 6101.46 3
 -5 5 13 9957.62 1989.52 3
 -5 5 13 11059.7 2047.62 4
 -5 5 12 4613.62 1298.96 3
 -5 5 12 4841.45 1362.28 4
 -5 5 11 3698.71 1165.34 4
 -5 5 11 4243.71 1193.12 3
 -5 5 10 21621.3 2553.02 4
 -5 5 10 17641.6 2402.66 3
 -5 5 9 13734.4 2058.66 3
 -5 5 9 16008.9 2099.6 4
 -5 5 8 171084 8063.31 4
 -5 5 8 148398 8055.93 3
 -5 5 7 19891 2414.65 3
 -5 5 7 21677.4 2368.38 4
 -5 5 6 345455 13464.1 4
 -5 5 5 16040 1856.23 4
 -5 5 4 236392 9769.83 4
 -5 5 3 4702.9 960.495 4
 -5 5 2 1134.95 480.791 4
 5 5 -1 3269.76 870.566 4
 -5 5 1 2610.41 705.605 4
 5 5 0 8737.1 1503.75 4
 -5 5 0 8422.17 1288.98 4
 -5 -5 -1 5648.56 564.232 3
 -5 5 -1 5071.31 993.328 4
 5 5 1 3943.73 968.44 4
 -5 5 -2 162466 7437.06 4
 5 5 2 158636 7740.76 4
 5 5 3 2158.8 729.214 4
 5 5 4 184940 8739.65 4
 5 5 5 208.537 337.358 4
 5 5 6 119742 6699.01 4
 5 5 7 4709.05 1147.22 4
 5 5 8 36478.8 3493.6 4
 5 5 9 5399.67 1385.25 4
 5 5 10 715.635 679.583 4
 5 5 11 403.366 364.362 4
 -5 -5 -11 -243.829 781.005 1
 -5 -5 -12 30623.4 2977.54 1
 5 5 12 25462.3 3307.67 4
 5 5 13 9204.55 2020.99 4
 -5 -5 -13 6244.92 1393.59 1
 5 5 14 32636.7 4078.37 4
 -5 -5 -14 31095 3046.84 1
 5 5 15 -74.7672 728.653 4
 5 -5 15 414.624 661.717 2
 -5 -5 -15 -278.875 493.09 1
 5 -5 16 77640.5 6765.3 2
 5 5 16 75998.8 7125.58 4
 5 5 17 2608.29 1229.76 4
 5 -5 17 2077.5 1070.73 2
 5 -5 18 36146.3 4752.75 2
 5 -5 19 1832.33 1152.56 2
 5 -5 20 15343.1 3180.08 2
 5 -5 21 202.325 715.332 2
 -5 -6 27 24202.6 4060.33 2
 -5 -6 26 -357.147 641.351 2
 -5 -6 25 12123.6 2549.66 2
 -5 6 24 662.831 1101.66 3
 -5 -6 24 699.51 523.527 2
 -5 -6 23 -310.278 663.698 2
 -5 6 23 628.872 853.005 3
 -5 6 22 -77.3522 464.42 3
 -5 -6 22 -316.811 813.803 2
 -5 6 21 22531.9 3722.28 3
 -5 6 20 1606.81 713.953 4
 -5 6 20 1886.93 916.954 3
 -5 6 19 62883.6 6719.76 4
 -5 6 19 51389 5578.16 3
 -5 6 18 804.946 662.323 4
 -5 6 18 663.612 431.65 3
 -5 6 17 104936 8172.97 4
 -5 6 17 91219.7 7228.85 3
 -5 6 16 1243.63 951.406 3
 -5 6 16 978.273 788.259 4
 -5 6 15 109461 7786.44 4
 -5 6 15 96386.1 7086.93 3
 -5 6 14 895.252 447.08 4
 -5 6 14 3036.44 1219.39 3
 -5 6 13 23390.9 3122.36 4
 -5 6 13 20914.6 2882.99 3
 -5 6 12 1094.86 624.601 3
 -5 6 12 1925.84 891.492 4
 -5 6 11 1352.59 730.346 3
 -5 6 11 1397.18 866.394 4
 -5 6 10 10354.9 1856.32 4
 -5 6 10 9872.76 1847.66 3
 -5 6 9 79664.3 5337.6 4
 -5 6 9 70076.3 5254.66 3
 -5 6 8 1868.32 661.277 4
 -5 6 7 130074 7039.95 4
 -5 6 6 833.464 602.533 4
 -5 6 5 76993.1 4860.9 4
 -5 6 4 21490.3 2321.14 4
 -5 6 3 52803.1 3788.68 4
 5 6 -2 35386.9 3373.27 4
 -5 6 2 35892.8 3016.07 4
 5 6 -1 12346.3 1895.71 4
 -5 6 1 12513.7 1731.09 4
 -5 6 0 62133 4214.42 4
 5 6 0 64546.8 4670.77 4
 -5 6 -1 143103 7167.15 4
 5 6 1 140643 7522.75 4
 5 6 2 45392.4 3873.99 4
 -5 6 -2 55572.2 3977.19 4
 5 6 3 128581 7154.29 4
 5 6 4 11574.4 1857.88 4
 5 6 5 212598 10151.2 4
 5 6 6 585.152 539.256 4
 5 6 7 38736.7 3724.76 4
 5 6 8 10780.4 1926.04 4
 5 6 9 4524.69 1286.01 4
 5 6 10 15932.8 2500.03 4
 5 6 11 302.434 476.909 4
 5 6 12 803.964 676.613 4
 5 6 13 33331.2 4064.52 4
 -5 -6 -13 35572.3 3422.72 1
 5 6 14 169.083 467.5 4
 -5 -6 -14 -752.852 651.83 1
 5 6 15 82752.9 7320.41 4
 -5 -6 -15 90964.9 5854.11 1
 5 6 16 613.92 517.467 4
 5 -6 16 288.207 628.016 2
 5 6 17 62105.6 6733.32 4
 5 -6 17 69301.4 6544.31 2
 5 -6 18 263.151 644.004 2
 5 6 18 167.709 967.845 4
 5 -6 19 32772 4746.32 2
 5 -6 20 1213.17 587.339 2
 -5 -7 26 8140.99 2230.77 2
 -5 -7 25 3743.2 1460.11 2
 -5 -7 24 -903.497 768.439 2
 -5 -7 23 9942.61 2214.89 2
 -5 7 22 3153.33 1765.82 4
 -5 7 22 2802.15 1359.62 3
 -5 7 21 16149.8 3582.75 4
 -5 7 21 12446.4 2824.34 3
 -5 7 20 18152 3327.34 3
 -5 7 20 17640.8 3613.14 4
 -5 7 19 5907.72 2019.21 4
 -5 7 19 3410.88 1442.46 3
 -5 7 18 47252.9 5529.66 4
 -5 7 18 40867.2 4764.5 3
 -5 7 17 832.329 531.958 4
 -5 7 17 318.405 554.331 3
 -5 7 16 73055.9 6534 4
 -5 7 16 64298.7 5785.88 3
 -5 7 15 14602.3 2575.73 3
 -5 7 15 18064.7 3021.44 4
 -5 7 14 56129.9 5257.4 4
 -5 7 14 51057.6 4829.59 3
 -5 7 13 17768.5 2691.89 3
 -5 7 13 21142.5 3049.74 4
 -5 7 12 9967.15 1963.26 3
 -5 7 12 9694.7 2133.45 4
 -5 7 11 13642.4 2278.47 4
 -5 7 10 923.643 458.39 4
 -5 7 9 25579.5 3010.72 4
 -5 7 8 45912.7 4068.09 4
 -5 7 7 3234.65 995.174 4
 -5 7 6 161162 8407.64 4
 -5 7 5 452.827 350.108 4
 -5 7 4 66778.9 4730.54 4
 -5 7 3 38471 3420.37 4
 5 7 -2 6681.04 1613.38 4
 -5 7 2 6761.29 1385.93 4
 5 7 -1 143850 8207.09 4
 -5 7 1 154406 7824.34 4
 5 7 0 27035.1 3082.61 4
 -5 7 0 27262.2 2858.3 4
 -5 7 -1 79905.7 5261.58 4
 5 7 1 72074.5 5329.78 4
 -5 7 -2 164627 8481.32 4
 5 7 2 161976 8709.95 4
 -5 7 -3 23454.2 2731.16 4
 5 7 3 24025.9 2893.08 4
 5 7 4 175556 9303.73 4
 5 7 5 66.2187 301.887 4
 5 7 6 35931.7 3720.45 4
 5 7 7 27799.1 3280.43 4
 5 7 8 11931.6 2200.26 4
 5 7 9 42025.7 4229.39 4
 5 7 10 578.507 507.86 4
 5 7 11 38496 4191.71 4
 5 7 12 28326.4 3760.13 4
 5 7 13 14491.9 2745.46 4
 5 7 14 56205.4 5726.46 4
 -5 -7 -15 6096.13 1420.04 1
 5 7 15 3637.13 1624.65 4
 5 7 16 57914.3 6297.94 4
 5 7 17 3308.87 1630.9 4
 5 -7 18 30331.6 4425.22 2
 5 7 18 24048 4364.77 4
 5 7 19 9867.98 2790.12 4
 5 -7 19 17215.1 3368.23 2
 5 7 20 -255.701 1290.83 4
 -5 -8 26 11808.6 2677.16 2
 -5 -8 25 3849.54 1547.4 2
 -5 -8 24 20903 3351.24 2
 -5 8 23 404.12 1046.22 4
 -5 8 22 21240.4 4344.39 4
 -5 8 21 1050.9 1346.93 4
 -5 8 20 12398.2 2681.92 3
 -5 8 20 19731.9 3880.68 4
 -5 8 19 7440.96 2043.48 3
 -5 8 19 7138.64 2210.15 4
 -5 8 18 2714.71 1451.72 4
 -5 8 18 3406.81 1492.76 3
 -5 8 17 13818.9 2686.09 3
 -5 8 17 16817.3 3153.56 4
 -5 8 16 417.521 350.401 3
 -5 8 16 977.264 574.909 4
 -5 8 15 27055.4 3795.14 4
 -5 8 15 27098.5 3621.51 3
 -5 8 14 49847.5 5000.53 4
 -5 8 14 31564.6 3929.71 3
 -5 8 13 12436.4 2384.04 4
 -5 8 12 96482.8 7047.04 4
 -5 8 11 617.537 691.01 4
 -5 8 10 43255.8 4277.7 4
 -5 8 9 10461.2 1957.65 4
 -5 8 8 17862.3 2613.05 4
 -5 8 7 50904.8 4449.91 4
 -5 8 6 1575.17 721.154 4
 -5 8 5 61554.9 4847.4 4
 -5 8 4 17782.3 2490.68 4
 -5 8 3 5113.91 1315.77 4
 5 8 -3 7821.28 1713.08 4
 -5 8 2 54569.8 4436.85 4
 5 8 -2 50891.5 4657.03 4
 -5 8 1 4284.61 1203.91 4
 5 8 -1 3263.91 1142.52 4
 5 8 0 99710 6808.3 4
 -5 8 0 99217 6394.99 4
 5 8 1 10545 2052.96 4
 -5 8 -1 11708.7 1945.87 4
 5 8 2 38033.1 3904.73 4
 -5 8 -2 44936 4059.77 4
 -5 8 -3 47240.6 4290 4
 5 8 3 48964.1 4484.49 4
 -5 8 -4 1671.78 911.5 4
 5 8 4 816.676 652.093 4
 5 8 5 51998.8 4756.21 4
 5 8 6 22259.8 3024.4 4
 5 8 7 18690.8 2789.81 4
 5 8 8 42983.7 4426.08 4
 5 8 9 5920.1 1680.72 4
 5 8 10 113994 7947.26 4
 5 8 11 4601.43 1574.76 4
 5 8 12 55853.7 5519.55 4
 5 8 13 20501.7 3349.5 4
 5 8 14 33441.9 4439.59 4
 5 8 15 31162.8 4441.43 4
 5 8 16 316.369 456.374 4
 5 8 17 13777.2 3225.59 4
 5 8 18 16428 3586.61 4
 5 -8 19 -318.407 891.438 2
 5 8 19 -1253.7 1826.96 4
 5 8 20 12413.6 3375.9 4
 5 8 21 172.211 1254.16 4
 -5 -9 25 31376 4301.21 2
 -5 9 23 29180.6 5468.53 4
 -5 9 22 286.788 1279.22 4
 -5 9 21 27401.8 4836.55 4
 -5 9 20 1523.44 1193.38 4
 -5 9 19 13766.1 3194.49 4
 -5 9 19 8580.59 2250.79 3
 -5 9 18 1059.85 719.535 3
 -5 9 18 5475.46 1881.14 4
 -5 9 17 -103.072 752.672 4
 -5 9 16 6151.37 1901.12 4
 -5 9 15 15811.5 3032.85 4
 -5 9 14 -67.1666 355.25 4
 -5 9 13 71306.1 6276.16 4
 -5 9 12 -30.525 535.07 4
 -5 9 11 104971 7521.96 4
 -5 9 10 6053.77 1652.73 4
 -5 9 9 77711.6 6140.34 4
 -5 9 8 42187.6 4307.82 4
 -5 9 7 7166.22 1685.83 4
 -5 9 6 33590.6 3664.8 4
 -5 9 5 2373.36 1033.17 4
 5 9 -4 16909.7 2772.87 4
 -5 9 4 22147.6 2903.85 4
 5 9 -3 37042.2 4205.42 4
 -5 9 3 28589.4 3416.93 4
 5 9 -2 3607.21 1269.83 4
 -5 9 2 6075.83 1515.4 4
 5 9 -1 85665.8 6585.33 4
 -5 9 1 87363.8 6197.46 4
 -5 9 0 812.501 359.442 4
 5 9 0 728.303 720.861 4
 5 9 1 83478.8 6454.67 4
 -5 9 -1 88573.6 6366.5 4
 -5 9 -2 521.059 337.992 4
 5 9 2 246.559 746.336 4
 -5 9 -3 10388.4 2086.23 4
 5 9 3 14818.2 2500.96 4
 5 9 4 18078.4 2795.29 4
 -5 9 -4 17646.2 2839.31 4
 -5 9 -5 10896.3 2183.6 4
 5 9 5 10509.9 2139.31 4
 5 9 6 45858.8 4755.73 4
 5 9 7 36009.3 4120.1 4
 5 9 8 5223.74 1551.36 4
 5 9 9 91609.8 7129.87 4
 5 9 10 2254.15 1195.91 4
 5 9 11 99901.2 7783.34 4
 5 9 12 -443.684 1002.25 4
 5 9 13 52949.9 5727.26 4
 5 9 14 12587.7 2743.87 4
 5 9 15 4253.77 1796.51 4
 5 9 16 4708.01 1684.26 4
 5 9 17 2801.78 1406.91 4
 5 9 18 -148.638 776.895 4
 5 9 19 7739.22 2691.41 4
 5 9 20 2318.73 1023.43 4
 -5 10 21 3244.96 1918 4
 -5 10 20 28153.5 4742.56 4
 -5 10 19 548.123 1091.86 4
 -5 10 18 4946.82 1900.16 4
 -5 10 17 384.69 1006.01 4
 -5 10 16 8249.73 2244.03 4
 -5 10 15 190.571 646.169 4
 -5 10 14 50145.7 5479.58 4
 -5 10 13 -450.483 782.709 4
 -5 10 12 44805.4 4932.2 4
 -5 10 11 1041.56 671.934 4
 -5 10 10 91218.9 7138.2 4
 -5 10 9 1275.96 734.015 4
 -5 10 8 32946.7 3944.95 4
 -5 10 7 10468.4 2135.1 4
 -5 10 6 8652.8 2045.69 4
 5 10 -5 10912 2447.4 4
 -5 10 5 16080.2 2640.54 4
 5 10 -4 31358.7 4179.09 4
 -5 10 4 41521 4336.49 4
 -5 10 3 704.637 736.698 4
 5 10 -3 3847.13 1446.43 4
 5 10 -2 77677.5 6574.76 4
 -5 10 2 86126.8 6486.62 4
 -5 10 1 172.296 730.763 4
 5 10 -1 -222.882 644.878 4
 5 10 0 86139.1 6873.29 4
 -5 10 0 90309.9 6725.95 4
 5 10 1 920.564 611.762 4
 -5 10 -1 1031.48 464.817 4
 5 10 2 42613.7 4629.04 4
 -5 10 -2 46576.1 4729.01 4
 -5 10 -3 -135 725.468 4
 5 10 3 711.448 602.721 4
 -5 10 -4 1712.37 1150.47 4
 5 10 4 1508.52 727.025 4
 -5 10 -5 879.969 938.452 4
 5 10 5 -48.2782 572.004 4
 5 10 6 28729.8 3830.03 4
 -5 10 -6 25321.8 3724.43 4
 5 10 7 950.889 800.239 4
 5 10 8 84003.4 7020.7 4
 5 10 9 3477.95 1395 4
 5 10 10 83947.8 7201.07 4
 5 10 11 1935.45 993.226 4
 5 10 12 49431.6 5605.69 4
 5 10 13 -1517.24 1280.78 4
 5 10 14 7979.62 2331.28 4
 5 10 15 -760.831 585.312 4
 5 10 16 2291.93 1653.92 4
 5 10 17 -701.267 927.223 4
 5 10 18 4840.87 2087.24 4
 -5 11 20 2148.55 1742.36 4
 -5 11 19 7824.52 2515.32 4
 -5 11 18 3968.87 1713.37 4
 -5 11 17 396.983 694.055 4
 -5 11 16 5082.07 1884.58 4
 -5 11 15 12601.1 2895.04 4
 -5 11 14 2393.01 940.193 4
 -5 11 13 48719.3 5509.88 4
 -5 11 12 426.195 479.949 4
 -5 11 11 67975.4 6416.76 4
 -5 11 10 465.668 619.201 4
 -5 11 9 58352.6 5754.13 4
 -5 11 8 14416.8 2746.93 4
 -5 11 7 7611.22 2031.97 4
 -5 11 6 4626.37 1610.47 4
 5 11 -6 2787.12 1259.03 4
 5 11 -5 34576.8 4552.43 4
 -5 11 5 31350.6 3960.68 4
 -5 11 4 1936.61 1154.81 4
 5 11 -4 1590.18 1282.03 4
 -5 11 3 92301 7047.89 4
 5 11 -3 87530.9 7431.04 4
 -5 11 2 829.824 729.457 4
 5 11 -2 853.604 717.123 4
 -5 11 1 69123.7 5987.42 4
 5 11 -1 63229.5 6133.77 4
 5 11 0 61.9263 795.691 4
 -5 11 0 -958.63 1069.06 4
 -5 11 -1 53690.7 5293.29 4
 5 11 1 45449.1 5078.77 4
 5 11 2 9823.64 2263.59 4
 -5 11 -2 13817.7 2688.7 4
 5 11 3 18902.7 3257.21 4
 -5 11 -3 18832.5 3223.15 4
 -5 11 -4 12321.9 2596.86 4
 5 11 4 10739.7 2382.48 4
 5 11 5 3443.49 1331.8 4
 -5 11 -5 1974.81 1081.14 4
 -5 11 -6 5044.28 1792.09 4
 5 11 6 3502.08 1412.87 4
 5 11 7 23507.2 3654.49 4
 -5 11 -7 32985.8 4441.43 4
 5 11 8 1808.04 1188.37 4
 5 11 9 50083.1 5591.79 4
 5 11 10 1648.26 1095.43 4
 5 11 11 38311.1 5014.68 4
 5 11 12 2183.4 1247.63 4
 5 11 13 12651.5 2938.22 4
 5 11 14 2302.5 1399.23 4
 5 11 15 2075.45 1395.47 4
 5 11 16 13.6779 627.634 4
 5 11 17 4128.09 2001.12 4
 -5 12 19 9582.93 2752.02 4
 -5 12 18 1293.88 1174.52 4
 -5 12 17 6591.35 2057.38 4
 -5 12 16 5548.66 2071.04 4
 -5 12 15 6184.46 2201.09 4
 -5 12 14 16161.4 3359.52 4
 -5 12 13 3200.02 1395.28 4
 -5 12 12 43946.7 5347.04 4
 -5 12 11 59.6541 643.009 4
 -5 12 10 48968.7 5519.96 4
 -5 12 9 5366.46 1750.33 4
 -5 12 8 31999.4 4323.55 4
 -5 12 7 25598.2 3828.05 4
 5 12 -7 25288.5 4244.19 4
 -5 12 6 1579.11 1169.36 4
 5 12 -6 483.176 546.963 4
 5 12 -5 14099.4 3078.19 4
 -5 12 5 16235.9 2965.32 4
 -5 12 4 40435 4765.89 4
 5 12 -4 39843.7 5120.24 4
 -5 12 3 861.758 997.837 4
 5 12 -3 1256.06 867.054 4
 5 12 -2 90584.6 7929.3 4
 -5 12 2 96847.4 7634.16 4
 -5 12 1 2663.71 1238.95 4
 5 12 -1 3572.9 1825.24 4
 5 12 0 79102.5 7209.08 4
 -5 12 0 83034.5 7123.82 4
 5 12 1 4437.82 1500.01 4
 -5 12 -1 4940.72 1591.34 4
 -5 12 -2 36259.4 4672.65 4
 5 12 2 30515.9 4294.22 4
 -5 12 -3 24004.5 3769.3 4
 5 12 3 22273.2 3633.4 4
 5 12 4 1703.46 1174.93 4
 -5 12 -4 2182.34 1375.34 4
 5 12 5 18479.1 3392.74 4
 -5 12 -5 18185.8 3420.83 4
 -5 12 -6 2503.39 1635.9 4
 5 12 6 3708.14 1585.92 4
 5 12 7 14781.5 3040.61 4
 -5 12 -7 13712.7 3041.73 4
 5 12 8 12019.9 2827.64 4
 -5 12 -8 15804.1 3342.47 4
 -5 12 -9 1992.42 867.625 4
 5 12 9 3119.22 1395.65 4
 5 12 10 25880 4187.54 4
 5 12 11 1371.43 1110.77 4
 5 12 12 24244.6 4184.85 4
 5 12 13 3605.27 1439.65 4
 5 12 14 8057.21 2416.65 4
 5 12 15 6277.97 2200.25 4
 -5 13 17 575.701 947.715 4
 -5 13 16 20175.9 3971.53 4
 -5 13 15 11155.1 2814.04 4
 -5 13 14 1966.22 1326.45 4
 -5 13 13 16472.5 3424.75 4
 -5 13 12 130.334 821.114 4
 -5 13 11 18490.1 3583.29 4
 -5 13 10 6553.09 2091.61 4
 -5 13 9 12722.5 2828.48 4
 5 13 -8 26658.3 4628.37 4
 -5 13 8 30735.5 4395.31 4
 -5 13 7 1878.93 1275.56 4
 5 13 -7 -533.478 1141.98 4
 -5 13 6 36339.4 4729.13 4
 5 13 -6 34036.4 5097.68 4
 -5 13 5 4763.86 1753.41 4
 5 13 -5 4494.53 1769.63 4
 -5 13 4 13700.2 2809.94 4
 5 13 -4 12842.4 3030.66 4
 -5 13 3 38152.9 4848.59 4
 5 13 -3 36781.6 5134.98 4
 -5 13 2 2282.8 979.14 4
 5 13 -2 4248.35 1784.87 4
 5 13 -1 64798.2 6785.7 4
 -5 13 1 73496.4 6924.98 4
 -5 13 0 1515.94 986.48 4
 5 13 0 2951.85 1421.66 4
 5 13 1 42064.1 5313.08 4
 -5 13 -1 42050.1 5305.99 4
 5 13 2 11978.2 2763.88 4
 -5 13 -2 17622.6 3297.88 4
 5 13 3 13070.4 2970.47 4
 -5 13 -3 13952.2 3149.86 4
 5 13 4 22215.4 3804.92 4
 -5 13 -4 30996.7 4526.67 4
 5 13 5 -949.189 1046.79 4
 -5 13 -5 -127.256 602.39 4
 5 13 6 23126 3929.92 4
 -5 13 -6 29137.3 4502.36 4
 5 13 7 6409.76 2046.56 4
 -5 13 -7 6970.77 2308.43 4
 5 13 8 10799.4 2708.04 4
 -5 13 -8 11856 2995.14 4
 5 13 9 7634.78 2315.9 4
 -5 13 -9 13046.9 3231.8 4
 -5 13 -10 1118.58 1180.38 4
 5 13 10 309.548 718.873 4
 5 13 11 11958.7 3020.14 4
 -5 13 -11 13778.2 3448.87 4
 5 13 12 1876.43 1243.4 4
 5 13 13 5357.72 2154.41 4
 -5 14 15 9756.44 2805.13 4
 -5 14 14 1578.91 721.728 4
 -5 14 13 2038.27 1444.52 4
 -5 14 12 13338.3 3225.13 4
 -5 14 11 1195.45 1072.63 4
 5 14 -10 2613.36 1593.05 4
 -5 14 10 6933.84 2161.54 4
 5 14 -9 16135.1 3815.71 4
 -5 14 9 18595.8 3693.34 4
 -5 14 8 532.078 781.693 4
 5 14 -8 1648.82 1281.36 4
 -5 14 7 40385.8 5254.55 4
 5 14 -7 39581.3 5801.15 4
 -5 14 6 1497.99 1178.46 4
 5 14 -6 154.384 630.218 4
 -5 14 5 38006.5 5088.35 4
 5 14 -5 31017.4 5005.25 4
 -5 14 4 9830.96 2600.68 4
 5 14 -4 7592.53 2425.71 4
 -5 14 3 18926.2 3634.29 4
 5 14 -3 19278 3879.15 4
 -5 14 2 12309.4 2923.46 4
 5 14 -2 18800.7 3813.19 4
 5 14 -1 -80.1522 860.267 4
 -5 14 1 -315.745 863.896 4
 5 14 0 14064.9 3222.53 4
 -5 14 0 9415 2642.45 4
 -5 14 -1 10697.5 2557.87 4
 5 14 1 10426.7 2733.09 4
 -5 14 -2 6415.08 2046.79 4
 5 14 2 12882.8 3078.08 4
 5 14 3 23413 4037.34 4
 -5 14 -3 19221.3 3713.39 4
 5 14 4 766.097 1144.12 4
 -5 14 -4 1510.45 1296.75 4
 5 14 5 16388.9 3325.94 4
 -5 14 -5 14062.7 3325.89 4
 5 14 6 88.8738 807.542 4
 -5 14 -6 -170.862 763.881 4
 5 14 7 10572.9 2818.78 4
 -5 14 -7 9579.39 2714.18 4
 5 14 8 2120.76 1167.61 4
 -5 14 -8 1224.8 1120.54 4
 5 14 9 3093.33 1482.33 4
 -5 14 -9 4797.39 1998.03 4
 5 14 10 1895.29 1341.68 4
 -5 14 -10 1320.49 1170.49 4
 -5 14 -11 -2269.4 1492.72 4
 -5 14 -12 134.401 942.029 4
 -5 15 12 1352.2 1135.03 4
 -5 15 11 436.403 935.934 4
 5 15 -10 12362 3528.11 4
 -5 15 10 9307.49 2775.81 4
 -5 15 9 17.7895 884.919 4
 5 15 -9 -573.455 735.958 4
 -5 15 8 34827.2 5248.98 4
 5 15 -8 35209.8 5861.67 4
 -5 15 7 -246.111 576.45 4
 5 15 -7 146.856 835.112 4
 -5 15 6 46525.7 5926.73 4
 5 15 -6 39712.7 5968.25 4
 -5 15 5 1109.52 779.347 4
 5 15 -5 2858.17 2028 4
 5 15 -4 26869.6 4765.12 4
 -5 15 4 20514.1 3894.45 4
 5 15 -3 895.612 1255.69 4
 -5 15 3 459.387 1109.28 4
 -5 15 2 8478.06 2483.48 4
 5 15 -2 4812.02 2100.78 4
 5 15 -1 369.065 700.957 4
 -5 15 1 -284.072 831.041 4
 5 15 0 -675.68 943.111 4
 -5 15 0 -247.649 1036.7 4
 5 15 1 781.097 803.207 4
 -5 15 -1 1965.08 1659.63 4
 -5 15 -2 18169 3724.07 4
 5 15 2 10287.9 2855.83 4
 5 15 3 2490.51 1413.03 4
 -5 15 -3 -1131.42 807.277 4
 5 15 4 29499.5 4785.14 4
 -5 15 -4 24959 4382.64 4
 5 15 5 210.751 1253.13 4
 -5 15 -5 1897.92 1290.13 4
 5 15 6 18076.6 3786.86 4
 -5 15 -6 25225.2 4670.3 4
 5 15 7 241.601 1062.58 4
 -5 15 -7 -292.602 800.124 4
 -5 15 -8 7052.91 2511.94 4
 -5 15 -9 435.859 1079.88 4
 -5 15 -10 2833.52 2040.08 4
 -5 16 8 1999.62 1701.47 4
 -5 16 7 44149.7 6037.04 4
 -5 16 6 3664.59 1572.42 4
 -5 16 5 31005.2 5093.78 4
 -5 16 4 3198.69 1651.3 4
 -5 16 3 17186.1 3736.4 4
 -5 16 2 3636.97 2014.33 4
 -5 16 1 1804.86 1548.56 4
 -5 16 0 2830.23 1598.53 4
 -5 16 -1 3165.84 1846.59 4
 -5 16 -2 1974.99 1404.95 4
 -5 16 -3 24976 4601.02 4
 -5 16 -4 487.934 1078.21 4
 -5 16 -5 36309.3 5721.55 4
 -5 16 -6 -1589.42 1417.37 4
 -5 16 -7 16885.8 3978.07 4
 -5 16 -8 218.982 738.581 4
 -6 0 28 38192 6389.55 3
 -6 0 27 611.259 1230.28 3
 -6 0 26 25569.1 4798.33 3
 -6 0 25 -1348.02 1088.44 2
 -6 0 25 2895.23 1702.76 3
 -6 0 24 40659.2 4825.59 2
 -6 0 24 34349.8 5371.88 3
 -6 0 23 -427.035 586.045 2
 -6 0 23 -347.597 836.456 3
 -6 0 22 5314.66 1548.24 2
 -6 0 22 5416.26 1974.1 3
 -6 0 21 -85.7042 323.13 2
 -6 0 21 -158.972 686.945 3
 -6 0 20 56740.3 4890.18 2
 -6 0 20 40557.8 5175.53 3
 -6 0 19 400.098 459.889 2
 -6 0 19 679.143 694.667 3
 -6 0 18 239311 11056.4 2
 -6 0 18 202359 12388.4 3
 -6 0 17 172.766 427.005 2
 -6 0 17 168.025 431.968 3
 -6 0 16 315039 12868.4 2
 -6 0 16 293694 14838.6 3
 -6 0 15 -193.334 232.81 2
 -6 0 15 -405.752 578.383 3
 -6 0 14 179745 10017.5 3
 -6 0 14 178725 7993.28 2
 -6 0 13 -131.382 263.824 2
 -6 0 13 424.668 561.005 3
 -6 0 12 59960.9 3468.25 2
 -6 0 12 63579.6 5006.62 3
 -6 0 11 458.933 236.565 1
 -6 0 11 -249.763 191.732 2
 -6 0 11 -91.3619 555.423 3
 -6 0 10 2165.87 440.723 2
 -6 0 10 3902.62 1059.6 3
 -6 0 10 2799.59 752.723 1
 -6 0 9 239.199 273.868 1
 -6 0 9 303.883 199.597 2
 -6 0 9 871.283 501.304 3
 -6 0 8 278795 11232.4 1
 -6 0 8 296563 12002.2 3
 -6 0 7 298.878 214.792 1
 -6 0 7 728.933 412.939 3
 -6 0 6 186979 8245.31 1
 -6 0 6 191215 8381.15 3
 -6 0 5 144.49 261.474 3
 -6 0 5 -133.233 364.493 1
 -6 0 4 286108 11856.6 1
 -6 0 4 319618 11753.9 3
 6 0 -3 117.317 113.829 2
 -6 0 3 48.2213 338.706 3
 -6 0 3 368.991 307.299 1
 6 0 -2 145217 5389.49 2
 -6 0 2 140136 6853.74 1
 -6 0 2 148598 6464.1 3
 6 0 -1 94.5013 127.661 2
 -6 0 1 107.046 229.278 1
 6 0 0 16444.7 1471.77 2
 -6 0 0 18204 2023.75 1
 6 0 1 602.184 337.509 2
 -6 0 -1 967.498 711.013 1
 -6 0 -2 454206 16308.7 1
 6 0 2 425980 15512.4 2
 -6 0 -2 434824 13843.8 4
 6 0 3 787.9 463.94 2
 -6 0 -3 856.444 543.247 1
 -6 0 -3 550.099 203.884 4
 -6 0 -4 837412 26570.3 4
 -6 0 -4 861178 28647.4 1
 6 0 4 826541 28501 2
 -6 0 -5 400.036 256.998 4
 -6 0 -5 1080.78 692.897 1
 6 0 5 504.583 590.547 2
 -6 0 -6 213053 9232.74 1
 6 0 6 200104 9609.16 2
 6 0 7 -186.242 563.384 2
 -6 0 -7 355.211 492.309 1
 -6 0 -8 3769.55 999.685 1
 6 0 8 6002.03 1405.25 2
 -6 0 -9 -438.871 514.318 1
 6 0 9 29.2905 323.964 2
 -6 0 -10 7652.81 1348.25 1
 6 0 10 8162.84 1821.36 2
 -6 0 -11 314.365 490.376 1
 6 0 11 -168.762 433.464 2
 -6 0 -12 43917.2 3427.28 1
 6 0 12 40645.6 4467.85 2
 -6 0 -13 -199.553 393.436 1
 6 0 13 -2647.03 1185.65 2
 6 0 14 84589.8 7028.95 2
 -6 0 -14 73946.9 4715.59 1
 6 0 15 793.17 620.682 2
 6 0 16 128667 9676.63 2
 6 0 17 1191.2 1235.27 2
 6 0 18 114799 9583.01 2
 6 0 19 -221.681 868.51 2
 6 0 20 30741.2 5034.46 2
 6 0 21 1354.9 1347.46 2
 -6 1 29 21942.4 4797.52 3
 -6 -1 28 -695.761 1002.93 3
 -6 1 28 1944.66 1670.55 3
 -6 -1 27 37983.7 6167.69 3
 -6 1 27 35654.5 5907.34 3
 -6 -1 26 -293.919 1157.1 3
 -6 1 26 -197.271 1109.9 3
 -6 -1 25 41947.8 4976.19 2
 -6 1 25 38390.1 5754.24 3
 -6 -1 25 30174.1 5220.71 3
 -6 -1 24 1233.34 701.877 2
 -6 -1 24 1429.91 1128.5 3
 -6 1 24 3041.91 1830.7 3
 -6 -1 23 11807.8 2966.5 3
 -6 -1 23 6950.31 1819.67 2
 -6 1 23 5765.94 2034.35 3
 -6 -1 22 5322.02 1931.69 3
 -6 -1 22 6652.53 1676.63 2
 -6 1 22 4352.69 1404.53 3
 -6 -1 21 9852.75 2034.97 2
 -6 1 21 10900.5 2748.93 3
 -6 1 20 7596.76 1836.65 2
 -6 -1 20 9291.71 1867.41 2
 -6 1 20 5090.72 1899.72 3
 -6 -1 19 98250.4 6348.14 2
 -6 1 19 88510.8 6255.31 2
 -6 -1 18 619.864 447.323 2
 -6 1 18 -369.314 808.483 3
 -6 1 18 860.098 564.628 2
 -6 1 17 243815 11294.4 2
 -6 -1 17 270761 11420.1 2
 -6 -1 16 23808.4 2508.47 2
 -6 1 16 20125.2 2361.41 2
 -6 1 16 18103.3 2951.84 3
 -6 1 15 211130 9529.89 2
 6 -1 -15 210212 8151.73 1
 -6 1 15 207805 11401.1 3
 -6 -1 15 229824 9618.89 2
 -6 -1 14 23728.3 2214.48 2
 -6 1 14 18057.3 2715.37 3
 -6 -1 14 17287.3 1703.3 1
 -6 -1 13 69813.3 3906.14 1
 -6 1 13 72468.2 5599.54 3
 -6 -1 13 73316.1 4119.04 2
 -6 -1 12 5202.33 925.115 1
 -6 -1 12 6676.55 1538.44 3
 -6 1 12 6507.01 1444.22 3
 -6 -1 12 5745.18 916.04 2
 -6 -1 11 316.231 515.091 3
 -6 1 11 102.07 213.184 3
 -6 -1 11 -27.2169 184.532 2
 -6 -1 10 335.999 334.884 1
 -6 -1 10 576.017 321.789 3
 -6 1 10 -253.507 213.151 3
 -6 -1 10 263.788 218.691 2
 -6 -1 9 175570 7858.95 1
 -6 -1 9 195943 6683.54 2
 -6 -1 9 172583 8764.76 3
 -6 1 9 169279 8631.76 3
 -6 -1 8 3944.51 934.484 1
 -6 1 8 5219.75 1053.46 1
 -6 -1 8 4629.26 1050.86 3
 -6 1 8 6820.21 1333.53 3
 -6 -1 7 301021 12249 1
 -6 -1 7 337572 12919.8 3
 -6 1 7 330194 12915.7 3
 -6 1 7 324356 12611 1
 -6 1 6 1204.84 508.708 1
 -6 -1 6 403.414 373.492 1
 -6 1 6 562.289 347.971 3
 -6 -1 6 544.668 405.111 3
 -6 -1 5 513669 17656.7 3
 -6 -1 5 465702 17696.3 1
 -6 1 5 491951 17884.6 3
 -6 1 5 508426 18064 1
 6 -1 -5 500625 16465.6 4
 6 -1 -4 49148.7 2424.14 4
 -6 -1 4 46188.5 2010.23 2
 -6 1 4 49307 3343.81 3
 -6 1 4 46273.2 3413.86 1
 -6 -1 4 49091.9 3158.08 3
 -6 -1 4 49234.2 3445.9 1
 -6 -1 3 234138 7975.27 2
 -6 1 3 230612 9945.18 1
 -6 -1 3 247981 9299.69 3
 6 -1 -3 231061 7965.45 4
 -6 -1 3 230550 9809.98 1
 -6 1 3 245997 9709.24 3
 -6 1 2 17837.9 2029.69 1
 -6 -1 2 15978 1886.8 1
 -6 -1 2 18566.9 1694.78 3
 6 -1 -2 18982.7 1006.29 4
 -6 -1 2 17124.6 1254.46 2
 -6 -1 1 12742.9 1343.62 3
 6 1 -1 14507.3 1071.01 4
 -6 1 1 13677.3 1788.32 1
 -6 -1 1 11648.7 1103.11 2
 6 -1 -1 12192.6 1140.37 2
 6 1 -1 12009.9 1324.81 3
 -6 -1 1 12054.5 1612.83 1
 6 1 0 75722.3 3914.22 2
 -6 -1 0 76749.6 3800.14 2
 6 -1 0 78701.1 3881.9 2
 6 1 0 79097.2 4011.25 3
 -6 -1 0 81618.5 4799.45 1
 -6 1 0 84759.6 4927.09 1
 6 1 0 88649.7 3391.6 4
 -6 1 -1 10711.2 1568.14 1
 6 1 1 15988.3 1567.17 2
 6 -1 1 11991.1 1329.95 2
 -6 -1 -1 10108.4 1508.26 1
 6 1 1 10777.6 888.74 4
 6 1 1 11905.6 1291.69 3
 -6 1 -2 150574 7242.92 1
 6 1 2 141714 5428.15 4
 6 1 2 133199 6466.96 2
 6 -1 2 141990 6468.61 2
 -6 -1 -2 152037 5652.46 4
 -6 -1 -2 155652 7266.43 1
 6 1 2 155191 6296.32 3
 -6 1 -3 363207 13535.9 1
 -6 1 -3 318290 10968.5 4
 6 1 3 337367 12973.8 2
 6 1 3 328564 11501.1 4
 6 -1 3 327620 12790.6 2
 6 1 3 363645 12456.2 3
 -6 -1 -3 368089 13504.4 1
 -6 -1 -3 356047 11706.6 4
 6 1 4 23139.8 2361.65 2
 -6 1 -4 29765.4 2719.85 1
 -6 1 -4 24151.3 1552.43 4
 6 1 4 23985.1 1831.09 4
 6 -1 4 28703.2 2555.46 2
 -6 -1 -4 28417.7 2633.04 1
 -6 -1 -4 27797.6 1916.21 4
 -6 1 -5 283269 11225.1 1
 6 1 5 250284 11124.3 2
 6 1 5 252167 9897.03 4
 6 -1 5 262191 11096.3 2
 -6 1 -5 258401 9339.04 4
 -6 -1 -5 285890 11165.4 1
 -6 1 -6 4371 1018.39 1
 6 1 6 2863.99 668.018 4
 6 1 6 2593.07 855.061 2
 -6 -1 -6 2573.9 704.331 1
 6 -1 6 1797.51 692.125 2
 6 1 7 91432.7 6040.02 2
 6 -1 7 101026 6162.81 2
 -6 -1 -7 99683 5594.52 1
 -6 1 -7 106764 5787.16 1
 -6 1 -8 130.706 347.342 1
 -6 -1 -8 317.513 247.898 1
 6 1 8 442.192 663.024 2
 6 -1 8 -5.5924 507.671 2
 6 1 9 15046 2369.02 2
 -6 1 -9 14119.6 1866.22 1
 -6 -1 -9 13748.9 1840.36 1
 6 -1 9 12059.2 2047.18 2
 -6 1 -10 39.9873 252.292 1
 6 1 10 229.807 383.338 2
 6 -1 10 158.496 482.622 2
 -6 -1 -10 176.075 265.647 1
 6 1 11 6629.38 1694.41 2
 6 -1 11 6536.78 1646.73 2
 -6 -1 -11 8442.62 1380.63 1
 6 1 12 799.622 610.201 2
 -6 -1 -12 34.5231 263.826 1
 6 -1 12 1012.21 674.154 2
 -6 -1 -13 65703.5 4418.89 1
 6 -1 13 69791.8 6098.51 2
 6 1 13 69501.4 6228.99 2
 -6 -1 -14 897.282 728.696 1
 6 1 14 423.311 624.553 2
 6 -1 14 -805.278 1068.84 2
 6 1 15 92327.9 7802.94 2
 6 -1 15 84211.9 7326.17 2
 6 1 16 2397.99 1340.45 2
 6 -1 16 2532.2 1169.51 2
 6 -1 17 77825.3 7430.13 2
 6 1 17 84495.5 7874.3 2
 6 1 18 1936.48 1198.4 2
 6 -1 18 3166.93 1259.47 2
 6 1 19 41545.3 5756.49 2
 6 -1 19 37097.1 5254.67 2
 6 1 20 7580.6 2612 2
 6 -1 20 11012.2 2816.69 2
 6 1 21 1843.24 1485.71 2
 6 -1 21 4749.91 1828.88 2
 -6 2 29 -381.405 1433.14 3
 -6 -2 28 17861.4 4310.24 3
 -6 2 28 22349.1 4675.36 3
 -6 -2 27 621.573 1244.51 3
 -6 2 27 553.597 1127.4 3
 -6 -2 26 22931.8 4666.58 3
 -6 2 26 41301.6 6024.62 3
 -6 -2 25 4519.39 1591.73 2
 -6 2 25 2672.65 1379.11 3
 -6 -2 24 15062.6 2753.93 2
 -6 2 24 14857.5 3515.42 3
 -6 -2 23 24635.8 3494.18 2
 -6 2 23 15145.1 3395.63 3
 -6 -2 22 -70.1043 558.099 2
 -6 2 22 644.834 754.828 3
 -6 -2 21 39822.9 4119.84 2
 -6 2 21 24881.4 4141.05 3
 -6 -2 20 27502 3267.58 2
 -6 2 20 18470.1 3413.64 3
 -6 -2 19 28317.1 3192.64 2
 -6 2 19 24401.2 3811.18 3
 -6 -2 18 77828.5 5290.71 2
 -6 2 18 58947.8 5910.61 3
 -6 2 17 439.158 698.482 3
 -6 -2 17 -239.148 290.627 2
 -6 2 16 158806 9761.71 3
 -6 -2 16 155489 6614.69 1
 -6 -2 15 31576.6 2323.1 1
 -6 -2 15 34777.5 2911.41 2
 -6 2 15 32098.4 3773.58 3
 -6 2 14 46080.5 4405.82 3
 -6 -2 14 44515.4 3190.25 2
 -6 -2 14 42511.3 2869.88 1
 -6 -2 13 63481.2 3731.25 1
 -6 -2 13 69473.4 3945.48 2
 -6 2 13 59112.9 5002.91 3
 -6 -2 12 3695.21 836.085 1
 -6 2 12 2872.19 1042.37 3
 -6 -2 11 147910 6801.72 1
 -6 2 11 150827 8164.86 3
 6 -2 -10 55826.5 2753.18 2
 -6 2 10 43860.1 3878.61 3
 -6 -2 10 47610.7 3335.87 1
 6 -2 -9 98480.5 3921.05 2
 -6 2 9 83371.9 5466.03 3
 -6 -2 9 82448.5 4812 1
 6 -2 -8 244767 8115.55 2
 -6 2 8 206849 9646.48 4
 -6 -2 8 247230 10492.8 3
 -6 2 8 226846 10290.3 3
 -6 -2 8 223101 9590.23 1
 -6 -2 7 36230.7 2946.15 1
 -6 -2 7 38919.3 3211.23 3
 -6 2 7 45351.1 3140.26 4
 -6 2 7 41297.5 3360.56 3
 -6 2 6 245676 9919.35 4
 -6 -2 6 256254 10500.5 1
 -6 -2 6 267706 10631.2 3
 -6 2 6 262906 10870.9 3
 6 -2 -5 19612.1 1583.18 4
 -6 -2 5 17982.1 2023.03 1
 -6 2 5 20288.3 1717.92 4
 -6 -2 5 20690.7 2005.46 3
 -6 2 5 18160.5 2060.7 3
 6 -2 -4 282479 9826.82 4
 -6 -2 4 274483 11275.1 1
 -6 2 4 273063 9885.29 4
 -6 -2 4 281316 10676.3 3
 -6 2 4 284025 11348.9 3
 6 -2 -3 1493.02 326.613 4
 -6 2 3 1777.89 381.526 4
 -6 -2 3 2100.58 712.265 1
 -6 -2 3 1498.99 480.789 3
 -6 -2 2 127868 5225.49 2
 -6 2 2 126238 4673.86 4
 -6 -2 2 122763 6362.44 1
 -6 -2 2 138718 5666.1 3
 6 -2 -2 128663 4835.88 4
 -6 2 1 56846.1 2313.74 4
 -6 -2 1 60613.9 3115.21 2
 -6 -2 1 56924.4 3857.58 1
 6 2 -1 53869.1 3065.69 3
 -6 -2 1 58826 3094.3 3
 -6 2 1 53575 3954.98 1
 6 2 -1 61457.8 3163.42 4
 -6 -2 0 2848.75 571.542 3
 6 2 0 1921.73 493.213 4
 6 2 0 3816.51 632.067 3
 -6 -2 0 4112.88 1244.52 1
 -6 2 0 2369.74 764.904 1
 -6 -2 -1 216318 9574.97 1
 6 2 1 213043 8071.33 3
 -6 2 -1 215352 7290.54 4
 6 2 1 246075 8367.82 4
 -6 2 -1 230605 9904.42 1
 -6 2 -2 28154.3 2754.9 1
 -6 -2 -2 30564.7 2753.13 1
 6 2 2 26845.3 1811.81 3
 -6 -2 -2 26946 2027.88 4
 6 2 2 27466.6 1950.78 4
 6 2 3 145191 6119.8 4
 -6 -2 -3 161798 7499.65 1
 6 2 3 150491 5941.89 3
 -6 -2 -3 147183 6316.32 4
 -6 2 -3 152029 7473.9 1
 -6 -2 -4 122346 6374.05 1
 6 2 4 116956 5400.24 4
 6 2 4 110431 6245.29 2
 -6 2 -4 135978 5241.52 4
 6 2 4 117702 5095.43 3
 6 2 5 262.785 290.611 4
 6 2 5 136.594 314.364 2
 -6 2 -5 1019.63 479.406 4
 -6 -2 -5 712.779 494.56 1
 6 2 6 144281 7735 2
 6 2 6 138985 6525.96 4
 -6 -2 -6 149707 7214.23 1
 6 -2 6 135642 7332.68 2
 -6 -2 -7 6313.58 1253.2 1
 6 2 7 4036.68 1238.16 2
 6 -2 7 3583.14 1049.83 2
 6 2 7 2484.56 686.662 4
 -6 -2 -8 123055 6364.93 1
 6 2 8 108068 7011.01 2
 6 -2 8 108541 6732.08 2
 6 2 8 113587 6200.44 4
 6 2 9 10531.6 2023.83 2
 6 2 9 9222.7 1638.45 4
 -6 -2 -9 11364.4 1663.38 1
 6 -2 9 10629.9 1938.34 2
 -6 -2 -10 11058.4 1654.8 1
 6 2 10 11188.6 1871.65 4
 6 -2 10 11261.2 2046.6 2
 6 2 10 9193.82 1921.31 2
 6 2 11 14238.1 2546.8 2
 -6 -2 -11 16399.4 2034.35 1
 6 -2 11 15624.5 2475.46 2
 6 2 12 23276.6 3400.13 2
 -6 -2 -12 22167.9 2417 1
 6 -2 12 19582.7 3002.25 2
 -6 -2 -13 19887.8 2264.32 1
 6 2 13 20044.7 3256.63 2
 6 -2 13 23055.2 3344.15 2
 -6 -2 -14 46003.1 3621.88 1
 6 2 14 47493.8 5329.11 2
 6 -2 14 50752.6 5253.11 2
 6 2 15 7847.42 2215.83 2
 6 -2 15 7213.2 2110.74 2
 6 2 16 35912.3 4911.57 2
 6 -2 16 30114.6 4307.62 2
 6 2 17 -254.496 1345.01 2
 6 -2 17 817.284 967.74 2
 6 2 18 14029.4 3237.91 2
 6 -2 18 13123.6 3019.04 2
 6 2 19 12021 3014.86 2
 6 -2 19 13086.7 3070.54 2
 6 2 20 10328.1 2992.74 2
 6 -2 20 6207.69 2220.07 2
 6 -2 21 40224.2 5847.62 2
 -6 3 29 5647.52 2372.83 3
 -6 3 28 371.204 1297.23 3
 -6 3 27 16799.2 3910.11 3
 -6 3 26 3607.95 1805.31 3
 -6 -3 25 15399.5 2936.49 2
 -6 3 25 15965.4 3607.05 3
 -6 -3 24 26993.3 3737.82 2
 -6 3 24 18439.1 3911.97 3
 -6 3 23 3743.26 1856.58 3
 -6 -3 23 6711.95 1771.84 2
 -6 -3 22 80889.5 6263.01 2
 -6 3 22 56003.8 6482.3 3
 -6 -3 21 1718.1 713.117 2
 -6 3 21 -188.615 887.411 3
 -6 3 20 28624.4 4253.31 3
 -6 -3 20 36112.5 3738.27 2
 -6 3 19 15591.9 2955.85 3
 -6 -3 19 17105.7 2382.88 2
 -6 -3 18 11108.1 1835.22 2
 -6 3 18 11193.1 2487.33 3
 -6 3 17 36796.5 4351.32 3
 -6 -3 17 38057.4 3411.62 2
 -6 -3 16 12076.4 1720.02 2
 -6 -3 16 9022.8 1173.54 1
 -6 3 16 9567.55 2076.63 3
 -6 -3 15 38691.5 2717.9 1
 -6 3 15 36675.2 4073.4 3
 -6 -3 14 45057.3 3061.64 1
 -6 3 14 41642.7 4238.04 3
 -6 3 13 9031.6 1800.25 3
 -6 3 13 8220.71 1852.36 4
 -6 -3 13 7471.55 1183.32 1
 -6 3 12 176123 9372.96 4
 -6 3 12 172415 9292.92 3
 -6 -3 12 174914 7783.48 1
 -6 3 11 5441.64 1301.82 4
 -6 -3 11 4940.16 1009 1
 -6 3 11 5030.86 1267.31 3
 -6 3 10 379027 14609.4 4
 -6 -3 10 337887 13400.4 1
 -6 3 10 346697 14678 3
 -6 3 9 80813.1 5026.81 4
 -6 -3 9 84243.8 4840.14 1
 -6 3 9 80309.3 5347.91 3
 -6 3 8 225098 9755.61 4
 -6 -3 8 233124 9827.94 1
 -6 3 8 233864 10498.4 3
 -6 3 7 111003 6325.56 3
 -6 3 7 113135 5691.76 4
 -6 -3 7 121735 6123.88 1
 -6 3 6 36616.2 2626.4 4
 -6 -3 6 36418.9 2988.64 1
 -6 3 6 33708 3042.16 3
 -6 -3 5 294659 11810.5 1
 -6 -3 5 302047 11482.8 3
 -6 3 5 284894 11974.8 3
 -6 3 5 284038 10681.9 4
 6 -3 -4 28384.4 2092.99 4
 -6 3 4 25343.7 1902.84 4
 -6 -3 4 25370 2185.63 3
 -6 -3 4 27916.3 2599.58 1
 -6 3 3 84706.2 3958.54 4
 -6 -3 3 90334.8 5176.4 1
 -6 -3 3 94343.3 4502.18 3
 6 -3 -3 88250 4147.29 4
 -6 3 2 89381.7 3879.88 4
 -6 -3 2 92017.1 5256.92 1
 -6 -3 2 85713.2 4138.29 3
 6 -3 -2 90789 4076.75 4
 6 3 -1 2288.98 583.984 4
 -6 -3 1 2667.62 878.626 1
 -6 3 1 3230.07 530.261 4
 -6 -3 1 2587.61 530.857 3
 -6 -3 0 148145 7241.8 1
 6 3 0 143943 6434.68 4
 -6 3 0 143882 5529.61 4
 -6 -3 0 147595 5627.44 3
 -6 -3 -1 19203.2 2174.24 1
 -6 3 -1 16561.4 1299.64 4
 6 3 1 15193.1 1600.66 4
 -6 -3 -2 131307 6533.52 1
 6 3 2 113035 4517.64 3
 6 3 2 125908 5654.7 4
 6 3 3 57798.1 2616.27 3
 6 3 3 64239.1 3696.71 4
 -6 -3 -3 70491 4444.51 1
 6 3 4 39748.1 2890.11 4
 6 3 4 38468 1940.83 3
 6 3 5 119307 5846.63 4
 -6 -3 -5 128863 6594.79 1
 6 3 5 113325 4483.45 3
 6 3 6 12701.2 1648.09 4
 -6 -3 -6 14849.2 1935.58 1
 6 3 6 12841.7 1109.52 3
 6 3 7 64141.9 4272.99 4
 -6 -3 -7 73676 4691.2 1
 -6 -3 -8 75385.4 4785.59 1
 6 3 8 63103.9 4461.13 4
 -6 -3 -9 37136.6 3253.06 1
 6 3 9 36002.9 3375.13 4
 6 -3 9 37446.3 3750.28 2
 -6 -3 -10 120646 6518.47 1
 6 3 10 111371 6900.91 4
 6 -3 10 113086 7351.87 2
 6 3 11 -215.606 621.784 4
 6 -3 11 -208.41 576.808 2
 -6 -3 -11 879.498 551.144 1
 6 -3 12 98570.1 7020.16 2
 6 3 12 89851.2 6628.18 4
 -6 -3 -12 89062.7 5493.62 1
 -6 -3 -13 14712.7 2025.76 1
 6 -3 13 11918.3 2454 2
 6 -3 14 31932.2 4063 2
 -6 -3 -14 27870.7 2802.05 1
 6 -3 15 14456 2838.58 2
 6 -3 16 1963.08 1033.51 2
 6 -3 17 8372.01 2235.1 2
 6 -3 18 13322.1 3030.02 2
 6 -3 19 4790.79 1856.78 2
 6 -3 20 33378.3 5073.35 2
 6 -3 21 -1963.74 1801.68 2
 -6 4 28 7141.87 2778.6 3
 -6 4 27 -448.382 1104.73 3
 -6 4 26 1404.19 1130.94 3
 -6 -4 25 25096.7 3776.26 2
 -6 4 25 13855 3440.21 3
 -6 -4 24 8057.54 1944.45 2
 -6 4 24 7388.06 2378.44 3
 -6 -4 23 69813 5982.37 2
 -6 4 23 60888.4 6833.41 3
 -6 -4 22 999.694 569.871 2
 -6 4 22 870.802 837.146 3
 -6 -4 21 91303.7 6442.57 2
 -6 4 21 75963.2 7343.26 3
 -6 -4 20 1042.98 704.277 2
 -6 4 20 1011.34 819.155 3
 -6 -4 19 59209.5 4675.92 2
 -6 4 19 40188.4 4958.67 3
 -6 4 18 12209.1 2612.19 3
 -6 -4 18 15997.3 2224.51 2
 -6 4 17 4318.4 1620.02 3
 -6 4 16 8121.92 2034.86 4
 -6 -4 16 6368.92 1069.77 1
 -6 4 16 7140.55 1812.55 3
 -6 -4 15 18402.8 1931.62 1
 -6 4 15 20551.1 3149.28 4
 -6 4 15 18807.1 2871.54 3
 -6 4 14 9090.22 1940.22 3
 -6 -4 14 11114.6 1499.89 1
 -6 4 14 11843 2218.98 4
 -6 4 13 93118 6407.4 4
 -6 -4 13 80578.7 4803.49 1
 -6 4 13 84333.9 6152.6 3
 -6 -4 12 526.431 489.648 1
 -6 4 12 655.878 561.627 4
 -6 4 12 66.2807 341.36 3
 -6 4 11 188292 9368.21 4
 -6 4 11 185472 9598.28 3
 -6 -4 11 178582 8325.91 1
 -6 4 10 3114.07 973.283 3
 -6 4 10 1661.49 744.572 4
 -6 -4 10 3263.65 955.912 1
 -6 4 9 128323 6668.69 4
 -6 4 9 113349 6827.57 3
 -6 4 8 42936.7 3258.71 4
 -6 4 8 33197.3 3278.45 3
 -6 4 7 80478.7 4692.7 4
 -6 4 7 87254.5 5486.32 3
 -6 4 6 76340.6 4314.3 4
 -6 4 6 71708.6 4906.74 3
 -6 4 5 5901.33 1016.94 4
 -6 4 4 45877.1 2932.11 4
 -6 4 3 98055.2 4697.97 4
 -6 -4 3 98861.8 4816.47 3
 -6 4 2 14776.1 1480.97 4
 -6 -4 2 19397.4 1625.74 3
 6 4 -1 176676 7432.83 4
 -6 -4 1 179275 6172.47 3
 -6 -4 0 1445.84 351.66 3
 -6 4 0 798.989 301.911 4
 6 4 0 1406.18 539.971 4
 6 4 1 168314 7631.23 4
 -6 4 -1 175836 6985.83 4
 -6 -4 -1 166713 5974.8 3
 -6 4 -2 27786 2143.97 4
 6 4 2 25740.2 2375.62 4
 6 4 3 154518 7263.22 4
 6 4 4 79041.6 4676.19 4
 6 4 5 -168.78 274.962 4
 -6 -4 -5 -45.9988 444.07 1
 6 4 6 44169.6 3525.55 4
 -6 -4 -6 51122.4 3874.55 1
 -6 -4 -7 43855.8 3569.23 1
 6 4 7 36119.5 3217.66 4
 -6 -4 -8 40166.3 3366.68 1
 6 4 8 40470.8 3410.07 4
 6 4 9 197238 9851.87 4
 -6 -4 -9 218329 9902.79 1
 -6 -4 -10 13350.5 1963.27 1
 6 4 10 12047.6 2073.26 4
 -6 -4 -11 268847 11725.7 1
 6 4 11 266466 12781.6 4
 6 -4 11 271726 13214 2
 6 4 12 3937.51 1415.79 4
 -6 -4 -12 4003.92 1081.12 1
 6 -4 12 4092.99 1446.6 2
 6 4 13 60605.2 5581.06 4
 6 -4 13 63020.2 5694.81 2
 -6 -4 -13 68064 4726.01 1
 6 4 14 5075.95 1678.76 4
 -6 -4 -14 6507.82 1298.04 1
 6 -4 14 8168.78 2075.21 2
 6 -4 15 4790.55 1655.91 2
 6 -4 16 2918.21 1271.09 2
 6 -4 17 -50.3367 720.162 2
 6 -4 18 34.523 696.151 2
 6 -4 19 21120.6 3933.52 2
 6 -4 20 152.954 913.804 2
 -6 5 26 1575.12 1352.92 3
 -6 -5 25 3215.15 1291.99 2
 -6 5 25 3202.18 1624.63 3
 -6 -5 24 25706.4 3640.72 2
 -6 5 24 16564 3625.63 3
 -6 -5 23 968.609 506.278 2
 -6 5 23 1378.07 1358.07 3
 -6 -5 22 62700.4 5425.32 2
 -6 5 22 61909.9 6705.13 3
 -6 -5 21 356.826 428.818 2
 -6 5 21 97.4283 563.152 3
 -6 -5 20 103952 6809.22 2
 -6 5 20 93823.2 8055.91 3
 -6 5 19 1052.29 918.715 3
 -6 5 18 48267 5595.85 4
 -6 5 18 46124.6 5108.49 3
 -6 5 17 796.476 638.509 4
 -6 5 17 98.989 378.153 3
 -6 5 16 1111.59 837.139 4
 -6 -5 16 -41.0082 336.391 1
 -6 5 16 968.151 769.869 3
 -6 5 15 342.288 487.118 4
 -6 -5 15 535.408 335.988 1
 -6 5 15 524.506 301.694 3
 -6 -5 14 35122.1 3020.13 1
 -6 5 14 39466 4219.15 4
 -6 5 14 35278.2 3976.84 3
 -6 5 13 983.772 666.685 3
 -6 5 13 2744.04 1073.83 4
 -6 5 12 132629 7761.86 4
 -6 5 12 123378 7752.98 3
 -6 5 11 2334.79 918.311 3
 -6 5 11 2731.94 881.576 4
 -6 5 10 165401 8376.4 4
 -6 5 10 150980 8449.9 3
 -6 5 9 736.967 487.134 4
 -6 5 9 1233.4 689.883 3
 -6 5 8 54121.3 3975.8 4
 -6 5 8 56016.4 4477.85 3
 -6 5 7 10498.3 1577.78 4
 -6 5 6 2296.23 686.453 4
 -6 5 5 7926.14 1282.7 4
 -6 5 4 84875.6 4713.11 4
 -6 5 3 7116.83 1147.05 4
 -6 5 2 336102 12754.4 4
 6 5 -2 352759 13864 4
 -6 5 1 3230.25 706.884 4
 -6 -5 1 4819.9 741.869 3
 6 5 -1 2883.45 844.015 4
 -6 -5 0 252411 8835.48 3
 6 5 0 249884 10832.9 4
 -6 5 0 261239 10129.9 4
 6 5 1 39138.2 3270.23 4
 -6 -5 -1 38554.9 1823.82 3
 -6 5 -1 36836.7 2801.26 4
 -6 5 -2 239267 9960.2 4
 6 5 2 253551 10703 4
 6 5 3 32138.6 2976.56 4
 6 5 4 59599.8 4265.22 4
 6 5 5 36331.2 3226.08 4
 6 5 6 4124.25 1143.68 4
 6 5 7 5911.15 1356.9 4
 6 5 8 67826.5 4977.06 4
 6 5 9 1335.32 973.88 4
 -6 -5 -9 414.082 381.993 1
 -6 -5 -10 185367 9183.14 1
 6 5 10 183918 9733.1 4
 6 5 11 2013.15 823.667 4
 -6 -5 -11 785.508 563.037 1
 6 5 12 100511 7173.09 4
 -6 -5 -12 99353.3 6229.78 1
 6 5 13 2611.65 1030.27 4
 -6 -5 -13 661.785 558.25 1
 -6 -5 -14 43092.2 3817.38 1
 6 5 14 46247.7 5058.75 4
 6 -5 14 44901.6 4912.39 2
 6 -5 15 1955.43 1118.07 2
 6 5 15 1758.39 1133.29 4
 6 -5 16 7880.23 2132.2 2
 6 5 16 4503.4 1747.95 4
 6 -5 17 -92.7739 702.687 2
 6 -5 18 1128.8 653.86 2
 6 -5 19 -4506.57 1806.16 2
 6 -5 20 26410 4442.45 2
 -6 6 25 517.498 529.543 3
 -6 -6 25 2283.34 1215.63 2
 -6 6 24 407.524 488.782 3
 -6 -6 24 -646.546 804.411 2
 -6 -6 23 37186.8 4239.53 2
 -6 6 23 31791.7 4832.44 3
 -6 -6 22 163.784 367.277 2
 -6 6 22 -949.833 1104.55 3
 -6 6 21 48554.4 5763.15 3
 -6 6 20 2360.56 1344.26 4
 -6 6 20 3062.57 1526.7 3
 -6 6 19 50944.2 5934.35 4
 -6 6 19 30641.8 4312.66 3
 -6 6 18 22832.8 3823.62 4
 -6 6 18 21098.9 3490.92 3
 -6 6 17 3569.07 1338.67 3
 -6 6 17 5115.16 1802.69 4
 -6 6 16 8014.64 2019.15 3
 -6 6 16 10440.9 2268.86 4
 -6 -6 16 8304.27 1460.46 1
 -6 6 15 16132.8 2733.51 3
 -6 6 15 19226.7 3039.22 4
 -6 6 14 2126.23 1022.09 4
 -6 6 14 4125.51 1363.91 3
 -6 6 13 49754.3 4606.08 4
 -6 6 13 42099.9 4316.58 3
 -6 6 12 7802.49 1695.14 4
 -6 6 12 7412.28 1686.81 3
 -6 6 11 147982 8024.58 4
 -6 6 11 114305 7606.47 3
 -6 6 10 6224.92 1520.87 3
 -6 6 10 5007.66 1229.28 4
 -6 6 9 118050 6860.19 4
 -6 6 8 2945.21 1034.98 4
 -6 6 7 12426.9 1829.01 4
 -6 6 6 2561.7 872.769 4
 -6 6 5 17600.9 2096.26 4
 -6 6 4 38561 3149.78 4
 -6 6 3 201263 8984.16 4
 6 6 -2 41539.4 3635.04 4
 -6 6 2 34576.8 2917.65 4
 6 6 -1 406548 16527.3 4
 -6 6 1 417302 15584.9 4
 -6 -6 0 31885.2 1947.2 3
 -6 6 0 28793.2 2670.94 4
 6 6 0 28510.2 3006.84 4
 -6 -6 -1 304994 10124.6 3
 6 6 1 313233 13113.4 4
 -6 6 -1 312269 12454.2 4
 6 6 2 3850.95 1061.95 4
 -6 6 -2 3940 1003.45 4
 -6 6 -3 154347 7777.1 4
 6 6 3 160478 8233.85 4
 6 6 4 3118.53 936.936 4
 6 6 5 4706.44 1236.55 4
 6 6 6 28055.8 3107.84 4
 6 6 7 27951.9 3145.09 4
 6 6 8 24720.3 3009.76 4
 6 6 9 52879.7 4649.69 4
 6 6 10 4403.28 1458.31 4
 6 6 11 80476.8 6207.08 4
 -6 -6 -11 79174.6 5522.26 1
 6 6 12 511.505 827.941 4
 -6 -6 -12 -512.995 464.61 1
 6 6 13 81896.9 6756.9 4
 -6 -6 -13 80290 5668.28 1
 -6 -6 -14 1428.61 878.086 1
 6 6 14 2289.94 1145.01 4
 6 -6 15 36858.4 4539.44 2
 6 6 15 23490.6 3767.57 4
 6 6 16 2390.18 1327.47 4
 6 -6 16 2830.89 1316.03 2
 6 6 17 -787.726 1113.27 4
 6 -6 17 572.542 848.822 2
 6 -6 18 5527.59 1790.08 2
 6 6 18 2969.69 1576.07 4
 6 -6 19 8139.51 2263.06 2
 -6 -7 25 5395.39 1580.02 2
 -6 -7 24 15954.7 2908.41 2
 -6 7 23 362.18 701.684 3
 -6 -7 23 3507 1300.35 2
 -6 7 22 30354.2 5247.16 4
 -6 7 22 31550.4 4752.54 3
 -6 7 21 756.923 581.453 4
 -6 7 21 249.605 675.303 3
 -6 7 20 24072.9 3898.84 3
 -6 7 20 38563.2 5437.73 4
 -6 7 19 9984.46 2533.96 3
 -6 7 19 13176.1 3056.83 4
 -6 7 18 15977.6 2968.53 3
 -6 7 18 17701.8 3387.27 4
 -6 7 17 46206.4 5360.71 4
 -6 7 17 43817.1 4934.97 3
 -6 7 16 1130.99 877.782 4
 -6 7 16 -123.789 398.506 3
 -6 7 15 21613.3 3292.19 4
 -6 7 15 22457.8 3333.17 3
 -6 7 14 46668.4 4754.88 4
 -6 7 14 39294.7 4368.83 3
 -6 7 13 1145.02 743.691 3
 -6 7 13 3365.25 1222.72 4
 -6 7 12 116407 7452.14 4
 -6 7 12 101583 7209.27 3
 -6 7 11 10791 2097.09 4
 -6 7 10 72371.3 5455.8 4
 -6 7 9 1633.23 652.941 4
 -6 7 8 18917.4 2462.7 4
 -6 7 7 5069.72 1235.35 4
 -6 7 6 3416.43 1031.97 4
 -6 7 5 24707.4 2706.92 4
 -6 7 4 28840.5 2925.17 4
 6 7 -3 106988 6976.5 4
 -6 7 3 110155 6265.16 4
 -6 7 2 133335 7074.19 4
 6 7 -2 124081 7592.23 4
 6 7 -1 47281.2 4164.9 4
 -6 7 1 43211.4 3612.97 4
 -6 7 0 217477 10068.9 4
 6 7 0 225947 10871.4 4
 -6 -7 -1 5361.28 663.381 3
 -6 7 -1 2595.76 881.038 4
 6 7 1 3781.54 1088.6 4
 -6 7 -2 221234 10282.9 4
 6 7 2 216735 10705.9 4
 -6 7 -3 32875 3274.97 4
 6 7 3 28614 3212.04 4
 6 7 4 30456.8 3306.06 4
 6 7 5 75935.8 5611.38 4
 6 7 6 15337.8 2392.9 4
 6 7 7 62442.6 5116.79 4
 6 7 8 15347 2463.98 4
 6 7 9 12556.8 2318.4 4
 6 7 10 103380 7301.16 4
 6 7 11 -50.1385 568.179 4
 6 7 12 84730.3 6817.43 4
 6 7 13 4505.1 1630.21 4
 -6 -7 -13 4645.67 1331.41 1
 6 7 14 25503.5 3818.27 4
 -6 -7 -14 24753.1 3081.41 1
 6 7 15 13802.9 2901.56 4
 6 7 16 1885.04 1335.2 4
 6 -7 17 30601.3 4419.72 2
 6 7 17 29250.2 4656.77 4
 6 -7 18 2646.53 1315.37 2
 6 7 18 4674.28 2126.3 4
 6 7 19 19479.1 4144.07 4
 6 -7 19 28216.2 4460.91 2
 -6 8 23 17742.3 4168.5 4
 -6 8 22 1069.68 533.166 3
 -6 8 22 -10.4694 684.806 4
 -6 8 21 10170.7 2692.58 3
 -6 8 21 14494.5 3517.35 4
 -6 8 20 2589.79 1385.21 3
 -6 8 20 2657.56 1517.19 4
 -6 8 19 10480 2679.29 4
 -6 8 19 8391.89 2304.42 3
 -6 8 18 13507.6 2795.99 3
 -6 8 18 16003.1 3178.68 4
 -6 8 17 5524.82 1769.68 3
 -6 8 17 10992.7 2719.19 4
 -6 8 16 38516.3 4697.83 4
 -6 8 16 31578.5 4204.02 3
 -6 8 15 474.341 481.09 3
 -6 8 15 -197.205 612 4
 -6 8 14 39339.8 4473.08 4
 -6 8 13 58271.6 5398.77 4
 -6 8 12 16478.9 2709.48 4
 -6 8 11 113672 7602.57 4
 -6 8 10 8472.67 1869.69 4
 -6 8 9 41961.6 4125.26 4
 -6 8 8 25673 3092.84 4
 -6 8 7 21123.2 2753.61 4
 -6 8 6 46755 4163.91 4
 -6 8 5 133.132 326.443 4
 -6 8 4 113712 6871.32 4
 -6 8 3 55212.2 4420.9 4
 6 8 -3 51855.3 4803.9 4
 6 8 -2 45933.2 4500.42 4
 -6 8 2 51770.7 4251.49 4
 6 8 -1 50305.8 4614.59 4
 -6 8 1 47282.5 4084.04 4
 6 8 0 3589.75 1256.39 4
 -6 8 0 5996.61 1383.67 4
 -6 8 -1 51655.1 4362.68 4
 6 8 1 52079.2 4676.85 4
 -6 8 -2 19736.3 2640.93 4
 6 8 2 17475.7 2582.91 4
 -6 8 -3 36351 3702.85 4
 6 8 3 39520.5 4025.85 4
 6 8 4 105064 7075.81 4
 -6 8 -4 102957 6869.37 4
 6 8 5 6655.94 1596.14 4
 6 8 6 80584.2 6151.99 4
 6 8 7 340.615 437.338 4
 6 8 8 75934.9 6148.83 4
 6 8 9 50666.7 4970.26 4
 6 8 10 32626.5 3992.48 4
 6 8 11 60203.5 5690.73 4
 6 8 12 -112.239 764.854 4
 6 8 13 26860.4 3890.81 4
 -6 -8 -14 13551.5 2324.09 1
 6 8 14 13332.5 2786.48 4
 6 8 15 1621.63 879.095 4
 6 8 16 37698.3 5116.63 4
 6 8 17 4735.5 1830.57 4
 6 -8 18 37993.6 5150.62 2
 6 8 18 33814.8 5180.66 4
 6 8 19 6824.79 2502.4 4
 6 8 20 2892.31 1694.9 4
 -6 9 23 10453.2 3112.16 4
 -6 9 22 7546.28 2893.95 4
 -6 9 21 -54.6012 1124.07 4
 -6 9 20 908.958 598.357 3
 -6 9 20 2028.64 1316.96 4
 -6 9 19 4791.35 1623.21 4
 -6 9 19 4412.83 1641.1 3
 -6 9 18 3924.24 1706.33 4
 -6 9 17 28982 4409.61 4
 -6 9 16 1551.73 986.6 4
 -6 9 15 27775.1 3943.4 4
 -6 9 14 1013.09 618.511 4
 -6 9 13 15436.2 2797.21 4
 -6 9 12 8637.9 2069.43 4
 -6 9 11 942.074 648.361 4
 -6 9 10 29763.5 3664.9 4
 -6 9 9 36577.9 4008.54 4
 -6 9 8 31159.5 3640.52 4
 -6 9 7 32737.3 3649.32 4
 -6 9 6 1172.15 760.625 4
 -6 9 5 68083 5440.74 4
 -6 9 4 8443.38 1726.95 4
 6 9 -4 5482.98 1581.85 4
 6 9 -3 78605.7 6468.09 4
 -6 9 3 89707.6 6219.9 4
 -6 9 2 19588.1 2694.36 4
 6 9 -2 13556.1 2540.86 4
 6 9 -1 24213.2 3300.28 4
 -6 9 1 30300.9 3360.72 4
 6 9 0 7535.52 1775.26 4
 -6 9 0 4303.34 1299.53 4
 6 9 1 1298.35 860.586 4
 -6 9 -1 2729.55 1135.83 4
 6 9 2 9634.43 2082.55 4
 -6 9 -2 11594.7 2103.39 4
 -6 9 -3 71614 5767.42 4
 6 9 3 78245.1 6230.56 4
 6 9 4 15161.1 2524 4
 -6 9 -4 18391.8 2864.4 4
 6 9 5 142778 8945.86 4
 -6 9 -5 143217 8877.18 4
 6 9 6 1004.04 716.388 4
 6 9 7 144021 9216.67 4
 6 9 8 12945.3 2445.92 4
 6 9 9 84866.6 6929.57 4
 6 9 10 10558.7 2398.37 4
 6 9 11 8740.79 2186.35 4
 6 9 12 14772.6 2932.35 4
 6 9 13 7047.14 2065.53 4
 6 9 14 1821.87 1246.39 4
 6 9 15 36169.9 4976.09 4
 6 9 16 1356.97 1124.29 4
 6 9 17 32406.2 5072 4
 6 9 18 2903.55 1859.51 4
 6 9 19 10688.5 3062.47 4
 -6 10 22 -259.503 965.568 4
 -6 10 21 1554.87 944.804 4
 -6 10 20 1325.81 1059.5 4
 -6 10 19 626.578 767.141 4
 -6 10 18 15614.9 3315.92 4
 -6 10 17 812.124 828.052 4
 -6 10 16 45506 5470.29 4
 -6 10 15 701.335 802.528 4
 -6 10 14 26990.7 3971.45 4
 -6 10 13 176.31 583.558 4
 -6 10 12 3858.25 1615.15 4
 -6 10 11 2171.06 1050.96 4
 -6 10 10 3553.42 1381.28 4
 -6 10 9 -478.926 947.869 4
 -6 10 8 63869.8 5629.22 4
 -6 10 7 1706.36 780.985 4
 -6 10 6 67728.4 5717.09 4
 -6 10 5 332.116 562.186 4
 6 10 -5 983.697 1059.37 4
 -6 10 4 94963.8 6858.81 4
 6 10 -4 94654.2 7558.14 4
 -6 10 3 974.667 811.594 4
 6 10 -3 1632.12 918.642 4
 6 10 -2 24896.5 3580.82 4
 -6 10 2 30754.3 3616.05 4
 -6 10 1 9668.62 2081.07 4
 6 10 -1 6562.23 1817.13 4
 -6 10 0 642.393 684.086 4
 6 10 0 993.326 910.06 4
 6 10 1 220.434 666.665 4
 -6 10 -1 52.9404 365.315 4
 6 10 2 21038.8 3243.12 4
 -6 10 -2 27382.6 3484.57 4
 6 10 3 6058.11 1730.03 4
 -6 10 -3 5383.69 1613.11 4
 -6 10 -4 83649.3 6648.47 4
 6 10 4 83062.9 6743.43 4
 6 10 5 -881.681 864.77 4
 -6 10 -5 364.232 729.089 4
 -6 10 -6 161636 10194 4
 6 10 6 152511 9831.81 4
 -6 10 -7 725.022 876.568 4
 6 10 7 958.946 874.777 4
 6 10 8 100594 7889.21 4
 6 10 9 866.895 755.692 4
 6 10 10 24377.6 3706.2 4
 6 10 11 1081.19 523.776 4
 6 10 12 2209.39 1352 4
 6 10 13 -119.263 781.393 4
 6 10 14 31181.8 4651.88 4
 6 10 15 311.948 1076.07 4
 6 10 16 23212.8 4237.17 4
 6 10 17 784.701 585.085 4
 6 10 18 21256.2 4284.07 4
 -6 11 20 5239.01 1993.45 4
 -6 11 19 19965.5 4068.71 4
 -6 11 18 2258.48 1272.73 4
 -6 11 17 42317.3 5532.08 4
 -6 11 16 2638.96 1366.06 4
 -6 11 15 48440 5750.92 4
 -6 11 14 505.132 1084.22 4
 -6 11 13 50914.1 5649.4 4
 -6 11 12 3130.6 1349.5 4
 -6 11 11 5523.71 1891.23 4
 -6 11 10 7048.08 2016.32 4
 -6 11 9 20764.6 3339.01 4
 -6 11 8 1295.16 1033.74 4
 -6 11 7 91868.6 7171.94 4
 6 11 -6 2022.88 1361.61 4
 -6 11 6 3241.27 1309.21 4
 -6 11 5 150106 9428.05 4
 6 11 -5 135833 9839.55 4
 -6 11 4 4399.78 1535.1 4
 6 11 -4 3946.12 1413.27 4
 -6 11 3 40632 4530.54 4
 6 11 -3 43483.1 5049.96 4
 -6 11 2 15091.5 2747.42 4
 6 11 -2 15252.1 2872.3 4
 6 11 -1 1935.15 1164.21 4
 -6 11 1 2845.04 1323.08 4
 6 11 0 12025.9 2520.66 4
 -6 11 0 11625.3 2372.49 4
 6 11 1 1653.13 981.572 4
 -6 11 -1 991.641 890.387 4
 6 11 2 3640.47 1347.87 4
 -6 11 -2 5194.46 1629.26 4
 -6 11 -3 30329.4 3947.14 4
 6 11 3 18790.7 3210.05 4
 6 11 4 2407.35 884.47 4
 -6 11 -4 305.204 655.498 4
 6 11 5 70662.9 6565.4 4
 -6 11 -5 69143.5 6450.12 4
 6 11 6 -895.212 991.822 4
 -6 11 -6 385.871 765.929 4
 6 11 7 82282.5 7217.82 4
 -6 11 -7 85155.1 7380.07 4
 6 11 8 4617.89 1446.38 4
 -6 11 -8 3252.67 1426.55 4
 6 11 9 31945.1 4405.65 4
 6 11 10 2733.96 1321.61 4
 6 11 11 -489.525 762.526 4
 6 11 12 10147.2 2715.14 4
 6 11 13 6574.6 2118.62 4
 6 11 14 2355.41 1277.79 4
 6 11 15 21936.9 4041.49 4
 6 11 16 3675.31 1860.58 4
 -6 12 19 5092.25 2192.97 4
 -6 12 18 28242.6 4754.93 4
 -6 12 17 484.994 1107.24 4
 -6 12 16 43472.2 5706.3 4
 -6 12 15 -658.543 537.182 4
 -6 12 14 26143.9 4203.35 4
 -6 12 13 4900.01 1841.06 4
 -6 12 12 15255.8 3062.2 4
 -6 12 11 20537.2 3555.12 4
 -6 12 10 490.159 569.165 4
 -6 12 9 10464 2376.28 4
 -6 12 8 17069.8 3222.37 4
 -6 12 7 3169.96 1525.66 4
 6 12 -7 2338.53 1273.11 4
 -6 12 6 49870.4 5358.15 4
 6 12 -6 54530.9 6160.39 4
 -6 12 5 -143.808 538.233 4
 6 12 -5 397.23 568.93 4
 -6 12 4 69898.7 6335.39 4
 6 12 -4 62597.4 6630.17 4
 -6 12 3 16704.6 2851.66 4
 6 12 -3 13749 2839.97 4
 -6 12 2 46176.7 5110.11 4
 6 12 -2 45118.5 5356.08 4
 -6 12 1 19726.6 3266.13 4
 6 12 -1 19509.2 3506.49 4
 6 12 0 5317.75 1765.13 4
 -6 12 0 10444 2331.93 4
 6 12 1 23160.2 3696.37 4
 -6 12 -1 28746.8 4059.81 4
 -6 12 -2 6948.42 1906.07 4
 6 12 2 5592.79 1731.3 4
 6 12 3 22263 3626.9 4
 -6 12 -3 21822.2 3560.99 4
 -6 12 -4 40885.1 5001.86 4
 6 12 4 38780.6 4894.46 4
 6 12 5 6969.06 2094.75 4
 -6 12 -5 5934.93 1970.87 4
 6 12 6 33235.6 4567.7 4
 -6 12 -6 36551.1 4832.06 4
 6 12 7 407.375 564.327 4
 -6 12 -7 4593.02 2095.67 4
 6 12 8 17525.9 3375.63 4
 -6 12 -8 14697.9 3247.9 4
 -6 12 -9 10699.9 2719.42 4
 6 12 9 11402.9 2767.89 4
 -6 12 -10 2087.45 1696.59 4
 6 12 10 1725.28 1176.79 4
 6 12 11 13157.5 3045.31 4
 6 12 12 2702.99 1295.43 4
 6 12 13 545.262 619.749 4
 6 12 14 16017.7 3406.63 4
 6 12 15 2804.61 1410.25 4
 -6 13 17 16671.7 3690.93 4
 -6 13 16 2312.31 1530.93 4
 -6 13 15 23565.4 4227.92 4
 -6 13 14 10366.4 2703.11 4
 -6 13 13 6555.88 2118.68 4
 -6 13 12 18428.4 3494 4
 -6 13 11 452.305 758.013 4
 -6 13 10 36564.1 4890.64 4
 -6 13 9 1493.74 1164.59 4
 6 13 -9 1215.86 756.93 4
 6 13 -8 11923.7 3025.6 4
 -6 13 8 11621.9 2607.75 4
 -6 13 7 17113.7 3248.01 4
 6 13 -7 20228.4 3931.76 4
 6 13 -6 -4.31226 953.005 4
 -6 13 6 1919.8 1257.55 4
 6 13 -5 20454.8 3850.02 4
 -6 13 5 33089.9 4465.64 4
 -6 13 4 7358 2195.99 4
 6 13 -4 5005.15 1877.82 4
 -6 13 3 42197.1 5055.22 4
 6 13 -3 40265.4 5348.1 4
 -6 13 2 34844 4667.98 4
 6 13 -2 34543.6 4949.21 4
 6 13 -1 18615 3657.15 4
 -6 13 1 23189.6 3717.67 4
 6 13 0 41428.2 5277.95 4
 -6 13 0 42048.5 5117.23 4
 -6 13 -1 1148.79 717.416 4
 6 13 1 377.244 959.142 4
 -6 13 -2 29700.7 4368.35 4
 6 13 2 30307 4540.51 4
 -6 13 -3 4376.02 1839.89 4
 6 13 3 5877.92 2016.78 4
 6 13 4 13286.3 2920.8 4
 -6 13 -4 10618.7 2657.72 4
 6 13 5 11016.9 2735.31 4
 -6 13 -5 14752.2 3080.55 4
 6 13 6 -102.492 720.163 4
 -6 13 -6 290.243 880.881 4
 6 13 7 6720.79 2143.14 4
 -6 13 -7 8000.28 2419.57 4
 -6 13 -8 9976.3 2817.88 4
 6 13 8 6075.73 2023.06 4
 6 13 9 5251.26 2086.46 4
 -6 13 -9 3069.11 1825.13 4
 6 13 10 23108 4134.43 4
 -6 13 -10 18255.2 3732.87 4
 6 13 11 266.271 1003.88 4
 6 13 12 9642.6 2620.41 4
 -6 14 15 2650.17 1583.26 4
 -6 14 14 10574.4 2958.97 4
 -6 14 13 27336.2 4627.19 4
 -6 14 12 -260.52 1031.12 4
 -6 14 11 40854.2 5490.74 4
 -6 14 10 1388.5 1146.04 4
 6 14 -10 -85.1146 972.844 4
 -6 14 9 19567.1 3716.08 4
 6 14 -9 18162.3 4023.85 4
 -6 14 8 2007.02 1350.98 4
 6 14 -8 2799.09 1621.93 4
 -6 14 7 5659.57 1999.41 4
 6 14 -7 4961.35 2204.19 4
 -6 14 6 10842.2 2722.16 4
 6 14 -6 4582.58 1876.6 4
 -6 14 5 722.216 767.979 4
 6 14 -5 1609 1773.86 4
 -6 14 4 8540.19 2331.07 4
 6 14 -4 13524.6 3277.16 4
 -6 14 3 8288.06 2468.19 4
 6 14 -3 10106.5 2822.96 4
 -6 14 2 4646.55 1711.83 4
 6 14 -2 3670.89 1658.15 4
 6 14 -1 43826.6 5721.75 4
 -6 14 1 43529.4 5476.52 4
 -6 14 0 -233.952 777.045 4
 6 14 0 67.2878 1145.43 4
 6 14 1 32373.4 4898.61 4
 -6 14 -1 34011.1 4887.16 4
 6 14 2 -246.823 479.956 4
 -6 14 -2 668.795 1002.21 4
 6 14 3 13167.6 3142.03 4
 -6 14 -3 7933.43 2247.53 4
 6 14 4 156.124 681.827 4
 -6 14 -4 -142.972 1182.31 4
 6 14 5 -1162.8 970.913 4
 -6 14 -5 406.323 672.675 4
 6 14 6 3830.54 1712.3 4
 -6 14 -6 1737.06 1007.88 4
 -6 14 -7 6705.02 2429.95 4
 6 14 7 9844.82 2664.73 4
 -6 14 -8 2011.48 1283.78 4
 6 14 8 4693.55 1976.76 4
 6 14 9 24316.5 4301.19 4
 6 14 10 3570.37 1944.27 4
 -6 15 12 41503.9 5814.11 4
 -6 15 11 -137.203 1082.71 4
 -6 15 10 46319.9 6051.36 4
 6 15 -10 42434.4 6459.26 4
 -6 15 9 363.324 839.996 4
 6 15 -9 285.28 697.566 4
 -6 15 8 19451.5 3872.84 4
 6 15 -8 18986.9 4198.6 4
 -6 15 7 -524.121 915.678 4
 6 15 -7 63.4148 1192.31 4
 -6 15 6 5878.06 1957.5 4
 6 15 -6 4286.11 1978.94 4
 -6 15 5 2217.46 1588.12 4
 6 15 -5 -196.611 767.264 4
 -6 15 4 1519.25 1355.47 4
 6 15 -4 2747.76 1775.75 4
 -6 15 3 -959.205 850.389 4
 6 15 -3 2596.51 1737.23 4
 -6 15 2 15258.6 3435.48 4
 6 15 -2 18140.6 3747.88 4
 6 15 -1 -833.119 1044.72 4
 -6 15 1 614.273 734.15 4
 6 15 0 29317.6 4861.09 4
 -6 15 0 33358.7 5016.81 4
 -6 15 -1 -1237.32 1067.16 4
 6 15 1 610.075 783.354 4
 -6 15 -2 28027.8 4640.13 4
 6 15 2 27518.3 4647.14 4
 6 15 3 763.156 961.645 4
 -6 15 -3 -929.773 717.911 4
 6 15 4 9605.24 2726.2 4
 -6 15 -4 6999.77 2347.95 4
 6 15 5 1041.26 738.159 4
 -6 15 -5 -1355.07 1115.5 4
 6 15 6 -425.831 785.357 4
 -6 15 -6 679.185 830.638 4
 -6 15 -7 44.7044 1267.81 4
 -6 16 8 2280.82 1350.95 4
 -6 16 7 11269.4 3011.85 4
 -6 16 6 1785.45 1330.44 4
 -6 16 5 788.061 856.354 4
 -6 16 4 2877.36 1535.78 4
 -6 16 3 10419.4 2934.04 4
 -6 16 2 -168.148 583.533 4
 -6 16 1 23578.5 4333.48 4
 -6 16 0 1832.49 1362.83 4
 -6 16 -1 20782.5 4066.7 4
 -6 16 -2 344.447 760.285 4
 -6 16 -3 13831.2 3453.84 4
 -6 16 -4 -1743.79 1295.2 4
 -6 16 -5 2413.47 1534.22 4
 -6 16 -6 1352.29 1262.05 4
 -7 0 28 8391.87 2878.28 3
 -7 0 27 -1019.78 1647.63 3
 -7 0 26 633.975 760.513 3
 -7 0 25 150.662 1024.28 3
 -7 0 24 7066.23 2476.54 3
 -7 0 23 -257.008 663.588 2
 -7 0 23 -2466.04 1393.16 3
 -7 0 22 38983.7 4233.3 2
 -7 0 22 34494.1 5061.54 3
 -7 0 21 -215.262 744.231 2
 -7 0 21 -1547.7 1087.05 3
 -7 0 20 76165.9 5646.08 2
 -7 0 20 64091 6676.95 3
 -7 0 19 -726.716 801.028 2
 -7 0 19 -571.037 487.246 3
 -7 0 18 182954 9054.76 2
 -7 0 18 171554 11040.7 3
 -7 0 17 -78.1109 411.769 2
 -7 0 17 65.7838 535.368 3
 -7 0 16 75545.6 6480.53 3
 -7 0 16 83044.4 4977.72 2
 -7 0 15 -295.828 280.985 2
 -7 0 15 -18.129 422.027 3
 -7 0 14 220.219 237.462 2
 -7 0 14 460.003 496.41 3
 -7 0 13 106.457 183.629 2
 -7 0 13 160.83 283.087 3
 -7 0 12 46089.5 2684.66 2
 -7 0 12 46856.4 4290.12 3
 -7 0 12 44496 3329.96 1
 -7 0 11 -539.613 373.83 1
 -7 0 11 15.1929 454.85 3
 -7 0 10 67294.1 4310.64 1
 -7 0 10 64639.2 4837.77 3
 -7 0 9 -313.933 439.808 1
 -7 0 9 -24.0785 255.92 3
 -7 0 8 256072 10871.1 1
 -7 0 8 262082 11253.4 3
 -7 0 7 484.518 546.368 1
 -7 0 7 706.375 463.383 3
 -7 0 6 206773 9492.73 1
 -7 0 6 225549 9573.29 3
 7 0 -5 144.132 237.526 4
 -7 0 5 -64.9374 269.793 1
 -7 0 5 345.601 254.636 3
 -7 0 4 6453.83 1137.98 3
 -7 0 4 4405.97 1046.33 1
 7 0 -4 7537.17 884.67 4
 -7 0 3 314.392 300.578 3
 7 0 -3 237.347 149.084 2
 7 0 -3 298.075 182.092 4
 -7 0 3 532.095 517.246 1
 -7 0 2 272225 11160.8 1
 7 0 -2 284561 9168.11 2
 -7 0 2 297058 10628.7 3
 7 0 -1 623.673 316.18 2
 -7 0 1 610.56 501.844 1
 -7 0 0 435513 16290.4 1
 7 0 0 414462 14707 2
 7 0 1 -204.302 252.282 2
 -7 0 -1 1066.54 724.201 1
 7 0 2 376212 14225.3 2
 -7 0 -2 395209 15180.8 1
 7 0 3 190.221 294.192 2
 -7 0 -3 -110.794 316.131 1
 -7 0 -3 -61.7422 159.811 4
 -7 0 -4 95760.8 5759.73 1
 7 0 4 88674.9 5470.42 2
 -7 0 -4 103366 4177.26 4
 -7 0 -5 -72.4887 240.547 4
 7 0 5 -70.3401 275.548 2
 -7 0 -5 625.042 332.395 1
 7 0 6 1100.58 646.42 2
 -7 0 -6 1370.48 569.588 1
 7 0 7 -142.951 529.001 2
 -7 0 -7 -224.495 323.909 1
 -7 0 -8 117637 6523.2 1
 7 0 8 113247 7205.21 2
 -7 0 -9 -218.729 306.885 1
 7 0 9 -282.824 600.02 2
 -7 0 -10 93753.3 5668.01 1
 7 0 10 86496.3 6583.99 2
 -7 0 -11 -456.826 544.262 1
 7 0 11 -441.989 804.361 2
 -7 0 -12 132189 7121.26 1
 7 0 12 135765 9070.23 2
 -7 0 -13 -1241.58 517.597 1
 7 0 13 -2992.41 1325.08 2
 7 0 14 120461 8996.18 2
 7 0 15 -559.438 744.535 2
 7 0 16 79598 7537.64 2
 7 0 17 827.932 507.904 2
 7 0 18 3750.71 1647.31 2
 7 0 19 -553.359 920.566 2
 7 0 20 23536.3 4507.13 2
 -7 -1 28 1533.72 1716.6 3
 -7 1 28 -1174.51 1784.94 3
 -7 -1 27 4408.43 2051.39 3
 -7 1 27 1160.96 1463.15 3
 -7 -1 26 -167.24 1210.42 3
 -7 1 26 2434.51 1830.19 3
 -7 -1 25 -2332.24 1491.96 3
 -7 1 25 1147.89 1190.25 3
 -7 -1 24 4087.57 1664.47 3
 -7 1 24 444.409 851.758 3
 -7 -1 23 44795.7 4656.75 2
 -7 -1 23 32779.4 5118.5 3
 -7 1 23 35413.2 5226.54 3
 -7 -1 22 -743.12 582.7 2
 -7 -1 22 412.366 935.922 3
 -7 1 22 174.005 503.091 3
 -7 -1 21 76986.7 5821.03 2
 -7 1 21 64294.3 6844.24 3
 -7 -1 21 62504.5 6826.46 3
 -7 -1 20 769.674 470.494 2
 -7 -1 20 1501.13 1194.79 3
 -7 1 20 -218.227 563.991 3
 -7 -1 19 92339.9 8015.4 3
 -7 1 19 90225.3 7844.31 3
 -7 -1 18 32999.3 3185.86 2
 -7 -1 18 29637.2 4136.62 3
 -7 1 18 21376.3 3585.05 3
 -7 -1 17 117505 6346.32 2
 -7 -1 17 99215.1 7841.17 3
 -7 1 17 95657.9 7640.3 3
 -7 -1 16 58740.3 3982.22 2
 -7 -1 16 48261.8 5080.35 3
 -7 1 16 52517.3 5211.04 3
 -7 -1 15 2641.73 1100.03 3
 -7 -1 15 3589.67 873.991 2
 -7 1 15 2049.45 1073.99 3
 -7 -1 15 1516.27 506.2 1
 -7 -1 14 52768.4 3578.71 1
 -7 -1 14 61550.7 3651.78 2
 -7 -1 14 55362 5077.01 3
 -7 1 14 55705.5 5034.62 3
 -7 -1 13 54334 3689.49 1
 -7 -1 13 61391.2 3416.35 2
 -7 -1 13 51137.5 4754.89 3
 -7 1 13 46502.8 4491.28 3
 -7 -1 12 13176.9 1679.97 1
 -7 -1 12 13632 1337.24 2
 -7 -1 12 11710.9 2100.99 3
 -7 1 12 11565.9 2020.46 3
 -7 -1 11 96217.4 5421.17 1
 -7 -1 11 108312 4430.32 2
 -7 -1 11 96985.9 6413.41 3
 -7 1 11 97548.3 6413.76 3
 -7 -1 10 12669.7 1695.73 1
 -7 -1 10 14971 1123.82 2
 -7 -1 10 15682.4 2236.72 3
 -7 1 10 11138.5 1892.1 3
 -7 -1 9 219873 9529.91 1
 -7 -1 9 236724 10450.8 3
 -7 1 9 221013 10261.8 3
 -7 -1 9 215819 7377.51 2
 -7 1 9 218105 9717.89 1
 -7 1 8 11551.7 1651.3 1
 -7 1 8 13053.2 1896.26 3
 -7 -1 8 12165.4 1784.61 3
 -7 -1 8 9296.86 1503.02 1
 -7 1 7 238815 10292.8 1
 -7 -1 7 219477 9932.25 1
 -7 -1 7 241313 10212.8 3
 -7 1 7 231869 10309.7 3
 -7 -1 6 19860 2240.52 1
 -7 -1 6 23588.4 2319.62 3
 -7 1 6 22532.8 2420.85 3
 -7 1 6 21730.2 2392.87 1
 -7 1 5 39976.6 3319.41 1
 7 -1 -5 36536.3 2180.28 4
 -7 -1 5 33130.2 1554.49 2
 -7 -1 5 38277.1 3161.93 1
 -7 -1 5 44688.5 3151.87 3
 -7 1 5 37785.8 3081.34 3
 -7 1 4 1418.33 610.294 3
 7 -1 -4 1027.69 291.045 4
 -7 1 4 1220.78 718.624 1
 -7 -1 4 1026.6 759.183 1
 -7 -1 4 679.536 370.771 3
 -7 -1 4 1236.24 260.467 2
 7 -1 -4 849.691 209.49 2
 7 -1 -3 13478.9 954.534 4
 -7 -1 3 13955.2 1076.86 2
 7 -1 -3 12813.7 1015.68 2
 -7 1 3 11553.7 1823.64 1
 -7 -1 3 14787.9 1916.2 1
 -7 1 3 15242.1 1811.77 3
 -7 -1 3 12471.1 1520.07 3
 -7 -1 2 8009.36 886.138 2
 7 -1 -2 8395.49 894.622 2
 -7 1 2 9380.18 1565.32 1
 -7 -1 2 9842.59 1578.69 1
 -7 -1 2 9523.77 1274.49 3
 -7 -1 1 148385 6405.62 3
 -7 1 1 130825 7159.25 1
 7 -1 -1 126979 5703.42 2
 -7 -1 1 144111 5793.46 2
 -7 -1 1 140562 7243.67 1
 7 1 -1 151605 5347.49 4
 7 1 0 6616.42 673.782 4
 7 1 0 7077.26 1025.97 2
 7 -1 0 7528.7 1044.61 2
 -7 1 0 8375.63 1547.62 1
 -7 -1 0 8238 1417.34 1
 -7 1 -1 490726 17844 1
 7 1 1 457331 14877 4
 7 1 1 467545 16479.9 2
 7 -1 1 442328 16236 2
 -7 -1 -1 497216 17738.8 1
 7 1 2 852.363 230.368 4
 -7 -1 -2 1334.64 791.189 1
 -7 1 -2 892.203 666.002 1
 7 1 2 1207.82 519.703 2
 7 -1 2 674.479 427.417 2
 -7 1 -3 157413 5612.39 4
 -7 1 -3 177126 8332.3 1
 7 1 3 165109 7747.76 2
 7 1 3 161835 6221.8 4
 7 -1 3 166713 7661.23 2
 -7 -1 -3 168021 6380.13 4
 -7 -1 -3 175010 8223.15 1
 -7 1 -4 7257.28 753.418 4
 -7 -1 -4 7940.38 1456.24 1
 7 1 4 6947.21 932.267 4
 -7 1 -4 10176.3 1714.11 1
 7 1 4 9583.59 1617.11 2
 7 -1 4 10250.3 1577.76 2
 -7 -1 -4 7650.65 988.265 4
 -7 1 -5 45620.1 3676.35 1
 7 -1 5 44384.9 3648.07 2
 7 1 5 39127.2 2736.61 4
 -7 -1 -5 43508.2 3573.6 1
 -7 1 -5 41349.6 2350.31 4
 -7 -1 -5 49869.9 2843.84 4
 7 1 5 37757.6 3437.63 2
 -7 1 -6 14513.8 1360.76 4
 -7 -1 -6 13669.4 1938.65 1
 -7 1 -6 17100.5 2145.67 1
 7 1 6 12644.6 1983.77 2
 7 -1 6 12650.9 1939.67 2
 -7 -1 -7 10197.9 1679.91 1
 -7 1 -7 9805.47 1628.26 1
 7 1 7 9799.48 1819.59 2
 7 -1 7 8937.83 1715.46 2
 -7 1 -8 4759.3 1065.44 1
 7 1 8 5713.31 1486.61 2
 7 -1 8 4842.2 1329.48 2
 -7 -1 -8 4759.98 1217.94 1
 -7 1 -9 51612.4 4047.31 1
 7 1 9 54280.5 4937.34 2
 7 -1 9 57830.3 4956.82 2
 -7 -1 -9 53751 4073.39 1
 -7 1 -10 541.999 359.045 1
 7 1 10 1363.5 770.441 2
 7 -1 10 743.36 350.948 2
 -7 -1 -10 1149.5 438.434 1
 -7 -1 -11 111341 6435.3 1
 7 1 11 113653 7984.99 2
 7 -1 11 111934 7805.66 2
 -7 1 -11 113906 6443.28 1
 7 1 12 41.8806 561.764 2
 -7 -1 -12 -17.5483 359.497 1
 7 -1 12 -473.944 768.697 2
 -7 -1 -13 129235 7082.69 1
 7 1 13 134594 9389.8 2
 7 -1 13 134661 9222.27 2
 -7 -1 -14 428.723 635.562 1
 7 1 14 385.35 584.729 2
 7 -1 14 1253.14 797.273 2
 7 1 15 68583.8 6882.25 2
 7 -1 15 61407.4 6336.37 2
 7 1 16 7077.69 2214.44 2
 7 -1 16 8365.32 2282.07 2
 7 1 17 11022.3 2789.16 2
 7 -1 17 13385.6 3122.56 2
 7 1 18 20748.2 4203.95 2
 7 -1 18 28055.1 4463.97 2
 7 1 19 1947.7 1274.78 2
 7 -1 19 3480.96 1673.44 2
 7 1 20 13682.2 3386.95 2
 7 -1 20 10561.5 2862.3 2
 -7 2 29 7757.24 2834.51 3
 -7 2 28 4775.26 2112.79 3
 -7 -2 27 10819.6 3204.73 3
 -7 2 27 7999.02 2774.44 3
 -7 -2 26 2264.51 1145.41 3
 -7 2 26 1311.87 1222.49 3
 -7 -2 25 13861.7 3553.14 3
 -7 2 25 11634.2 3225.61 3
 -7 -2 24 15191.9 3559.53 3
 -7 2 24 14489 3400.15 3
 -7 -2 23 3478.4 1809.55 3
 -7 -2 23 4555.17 1371.52 2
 -7 2 23 4692.61 1960.77 3
 -7 -2 22 75410.2 5947.78 2
 -7 2 22 64237 6949.34 3
 -7 -2 21 67.2068 597.032 2
 -7 2 21 228.718 741.629 3
 -7 -2 20 46589.4 4225.44 2
 -7 2 20 34430 4727.67 3
 -7 -2 19 5913.41 1407.49 2
 -7 2 19 3625.59 1655.69 3
 -7 -2 18 36204 3384.21 2
 -7 2 18 36147.2 4487.98 3
 -7 -2 17 47390.1 3721.67 2
 -7 2 17 44927.8 4900.37 3
 -7 -2 16 10872.4 1423.44 1
 -7 -2 16 13898.9 1810.98 2
 -7 2 16 13551.5 2544.18 3
 -7 -2 15 107415 5460.63 2
 -7 2 15 90503 6925.05 3
 -7 -2 15 93645.8 5092.56 1
 -7 -2 14 9616.7 1373.48 1
 -7 2 14 8270.51 1873.81 3
 -7 -2 13 73727.6 4435.81 1
 -7 -2 13 79779.2 4098.98 2
 -7 2 13 65068.2 5438.38 3
 -7 -2 12 96239.6 5391.27 1
 -7 -2 12 104657 6831.04 3
 -7 2 12 98730.8 6621.45 3
 -7 -2 11 10280.3 1553.31 1
 7 -2 -11 12737.8 1122 2
 -7 -2 11 11671.1 2070.86 3
 -7 2 11 10868.5 1974.96 3
 7 -2 -10 320181 10491.1 2
 -7 -2 10 307604 13448.6 3
 -7 -2 10 281485 12176.3 1
 -7 2 10 306852 13434.4 3
 7 -2 -9 19424.4 1237.86 2
 -7 -2 9 14561.9 2122.85 3
 -7 2 9 17110.6 2330.48 3
 -7 -2 9 15477.5 1971.75 1
 -7 -2 8 316418 13390.4 1
 -7 -2 8 341924 13969.4 3
 -7 2 8 351304 14298.3 3
 7 -2 -8 349588 11221.4 2
 -7 2 7 4075.65 978.294 3
 -7 -2 7 3302.33 944.182 1
 -7 -2 7 2797.55 800.819 3
 -7 -2 6 130455 6853.3 1
 -7 -2 6 144746 6855.26 3
 -7 2 6 129473 6955.12 3
 7 -2 -5 45795.7 2657.99 4
 -7 2 5 46749.3 2892.48 4
 -7 -2 5 50265 3402.61 3
 -7 -2 5 45431.7 3582.85 1
 -7 2 5 47497.8 3662.02 3
 -7 2 4 410.895 497.1 3
 -7 -2 4 617.417 262.176 2
 -7 -2 4 1684.16 765.832 1
 7 -2 -4 783.539 251.701 4
 -7 -2 4 1207.81 476.873 3
 -7 -2 3 61028.6 4313.45 1
 -7 -2 3 60946 3043.86 2
 -7 2 3 64975.1 2952.62 4
 -7 -2 3 62471.6 3658.05 3
 7 -2 -3 58396.5 2809.25 4
 -7 2 3 72521.1 4733.19 1
 -7 -2 2 27255.6 2690.67 1
 -7 -2 2 27069.3 1889.54 2
 -7 2 2 24950.7 1408.51 4
 -7 -2 2 27757.2 2172.38 3
 7 -2 -2 25723.2 1450.46 4
 -7 2 2 28006.1 2867.58 1
 -7 -2 1 25440.2 2656.04 1
 -7 -2 1 27930.1 2137.52 3
 7 2 -1 30540.6 2078.49 4
 -7 2 1 32804.1 3081.46 1
 -7 2 0 265730 11921.2 1
 -7 -2 0 274961 11828 1
 7 2 0 277507 10317.3 3
 7 2 0 290898 10091.2 4
 7 2 1 6766.71 875.565 4
 -7 2 -1 8296.98 1577.22 1
 -7 -2 -1 6734.53 1411.51 1
 7 2 1 5815.58 883.103 3
 7 2 2 155313 5764.32 4
 -7 2 -2 128664 4575.15 4
 -7 2 -2 156791 7672.41 1
 -7 -2 -2 170674 7700.94 1
 7 2 2 161711 5979.67 3
 -7 -2 -3 30446.3 2931.09 1
 -7 2 -3 31361.6 1659.96 4
 7 2 3 29762.4 2104.59 4
 7 2 3 31893.1 2198.22 3
 -7 -2 -3 30948.2 2283.67 4
 -7 2 -3 32169 3087.24 1
 7 2 4 61589.7 4386.82 2
 7 2 4 61946.8 3454.27 4
 -7 2 -4 68120.1 3033.77 4
 7 -2 4 57868.4 4143.8 2
 7 2 4 59949.9 3371.45 3
 -7 2 -4 60449.3 4497.66 1
 -7 -2 -4 67872.7 4585.67 1
 7 2 5 94330.4 6081.08 2
 -7 -2 -5 119875 6409.66 1
 7 2 5 98764.8 5059.09 4
 -7 2 -5 110694 4631.69 4
 7 -2 5 98424.7 5933.55 2
 -7 2 -5 111903 6348.8 1
 7 2 5 102331 4929.11 3
 7 2 6 30176.6 3241.52 2
 7 2 6 30246.1 2541.6 4
 7 -2 6 34042 3250.35 2
 -7 -2 -6 36483.2 3270.62 1
 7 2 7 88847.9 6279.33 2
 7 2 7 99024.4 5479.35 4
 7 -2 7 98322.6 6277.87 2
 -7 -2 -7 111113 6168.04 1
 7 2 8 1917.81 902.783 2
 7 2 8 3344.03 841.11 4
 -7 -2 -8 3143.06 981.646 1
 7 -2 8 1702.08 652.957 2
 7 2 9 15574.3 2185.96 4
 7 2 9 17522.4 2714.45 2
 -7 -2 -9 18298 2266.18 1
 7 -2 9 16231.8 2536.44 2
 7 2 10 64208.4 5724.54 2
 7 -2 10 76885.2 5893.53 2
 -7 -2 -10 67145.5 4749.2 1
 -7 -2 -11 2911.76 870.268 1
 7 2 11 4694.52 1411.64 2
 7 -2 11 6117.37 1531.3 2
 7 -2 12 120262 8270.02 2
 7 2 12 110494 8317.51 2
 -7 -2 -12 114396 6543.7 1
 7 2 13 -211.581 591.309 2
 7 -2 13 -90.2421 882.755 2
 -7 -2 -13 575.046 341.663 1
 7 2 14 74273.5 7097.82 2
 -7 -2 -14 76613.6 5098.51 1
 7 -2 14 79827.3 6991.8 2
 7 -2 15 36592.6 4745.83 2
 7 2 15 33816.9 4802.78 2
 7 2 16 7759.18 2378.15 2
 7 -2 16 10160 2421.76 2
 7 2 17 49632.9 6232.78 2
 7 -2 17 49957 5983.78 2
 7 2 18 -1147.14 848.849 2
 7 -2 18 -851.607 1243.14 2
 7 2 19 43610.3 6251.49 2
 7 -2 19 43530 5877.89 2
 7 -2 20 16683.8 3671.82 2
 -7 3 29 3131.68 1517.1 3
 -7 3 28 9056.06 3089.89 3
 -7 -3 27 -931.454 1452.86 3
 -7 3 27 2858.53 1840.88 3
 -7 3 26 30579.7 5210.66 3
 -7 3 25 214.228 514.498 3
 -7 3 24 34246.1 5254.87 3
 -7 -3 23 15856 2653 2
 -7 3 23 9844.58 2685.4 3
 -7 -3 22 6726.75 1800.56 2
 -7 3 22 5279.19 1998.84 3
 -7 -3 21 25020.7 3107.34 2
 -7 3 21 20749.6 3728.17 3
 -7 -3 20 922.145 633.834 2
 -7 3 20 556.25 541.097 3
 -7 -3 19 18085.2 2427.24 2
 -7 3 19 12124.3 2691.09 3
 -7 3 18 9625.01 2252.77 3
 -7 -3 18 10727.1 1753.24 2
 -7 3 17 10056.1 2274.17 3
 -7 -3 17 10360.5 1633.42 2
 -7 -3 16 53579.7 3573.99 1
 -7 -3 16 64265.4 4172.31 2
 -7 3 16 53952.7 5309.97 3
 -7 -3 15 1687.5 650.884 1
 -7 3 15 423.51 507.971 3
 -7 -3 14 67683.1 4265.11 1
 -7 3 14 64230.9 5505.59 3
 -7 -3 13 2989.58 829.333 1
 -7 3 13 2765 1170.88 3
 -7 3 12 60070.6 5010.83 4
 -7 3 12 69533.2 5425.77 3
 -7 -3 12 70301 4463.97 1
 -7 -3 11 50904.8 3787.27 1
 -7 3 11 59099.5 4631.02 4
 -7 3 11 55258.4 4652.36 3
 -7 -3 10 36346.2 3195.14 1
 7 -3 -10 45313.6 2507.73 2
 -7 3 10 40004.6 3604.31 4
 -7 3 10 42909.6 3946.73 3
 -7 -3 9 239104 10449.9 1
 -7 3 9 239060 10526.3 4
 -7 3 9 243512 11254.7 3
 -7 3 8 1514.26 624.352 3
 -7 -3 8 2108.25 841.537 1
 -7 3 8 1268.93 526.512 4
 -7 -3 8 3046.99 1002.28 3
 -7 3 7 271677 10882.7 4
 -7 -3 7 274227 11691.8 1
 -7 -3 7 291001 11741 3
 -7 3 7 259870 11805 3
 -7 3 6 69047.8 4820.72 3
 -7 3 6 73349.7 4049.43 4
 -7 -3 6 75070.4 4586.39 3
 -7 -3 6 69926.5 4723.73 1
 -7 -3 5 24841.6 2324.01 3
 -7 -3 5 27250.7 2762.24 1
 -7 3 5 24886.8 1975.35 4
 -7 3 5 24305.7 2654.28 3
 -7 3 4 162653 6373.34 4
 -7 -3 4 152578 6978.4 3
 7 -3 -4 158167 6477.45 4
 -7 -3 4 156876 7910.86 1
 -7 3 3 15085.8 1295.9 4
 -7 -3 3 17485.5 1706.11 3
 -7 -3 3 15763.3 2077.59 1
 7 -3 -3 16490.6 1443.16 4
 -7 3 2 164068 6114.3 4
 -7 -3 2 165544 6862.12 3
 -7 -3 2 166184 8172.14 1
 -7 3 1 81606 3420.5 4
 -7 -3 1 80871.2 5206.32 1
 -7 -3 1 80264.7 3968.3 3
 7 3 -1 87570.9 4461.32 4
 -7 3 0 9627.32 863.194 4
 7 3 0 9233.59 1241.14 4
 -7 -3 0 10451.3 1716.3 1
 -7 -3 0 9455.37 1051.68 3
 7 3 1 81462.4 4283.32 4
 -7 3 -1 79162.2 3376.4 4
 7 3 1 81518.3 3774.37 3
 -7 -3 -1 77842.4 5103.04 1
 7 3 2 24691.7 2124.49 4
 7 3 2 26610.4 1744.63 3
 -7 -3 -2 29538.2 2914.36 1
 -7 3 -2 24708 1646.82 4
 -7 -3 -3 76972.8 5004.8 1
 7 3 3 76306.8 4140.21 4
 7 3 3 66904.3 3190.43 3
 7 3 4 41415.6 2953.4 4
 7 3 4 38551.2 2188.55 3
 7 3 5 39246 2955.57 4
 -7 -3 -5 43210.9 3606.36 1
 7 3 5 38267.1 2205.68 3
 7 3 6 95952.3 5173.92 4
 -7 -3 -6 107182 6086.01 1
 -7 -3 -7 6713.9 1399.6 1
 7 3 7 6512.35 895.355 3
 7 3 7 7827.99 1319.26 4
 7 -3 7 7418.97 1558.66 2
 -7 -3 -8 70093.1 4884.64 1
 7 3 8 64235.4 4492.11 4
 7 -3 8 67956.3 5233.26 2
 7 3 9 14332.6 2113.35 4
 7 -3 9 12924.4 2212.57 2
 -7 -3 -9 16442.8 2257.56 1
 7 3 10 23175.6 2848.7 4
 7 -3 10 25772.6 3234.15 2
 -7 -3 -10 22807.1 2625.77 1
 7 -3 11 61501.1 5455.49 2
 7 3 11 54802.2 4822.93 4
 -7 -3 -11 55775 4342.2 1
 -7 -3 -12 9601.09 1686.5 1
 7 -3 12 6397.02 1676.21 2
 7 -3 13 44898.4 4882.36 2
 -7 -3 -13 39429.1 3614.98 1
 -7 -3 -14 17423.8 2316.58 1
 7 -3 14 17717.8 3107.77 2
 7 -3 15 10354.3 2441.2 2
 7 -3 16 66914.1 6687.92 2
 7 -3 17 620.201 643.043 2
 7 -3 18 60121.3 6758.16 2
 7 -3 19 6585.69 2222.37 2
 7 -3 20 25701.7 4534.28 2
 -7 4 29 7678.3 2895.45 3
 -7 4 28 2085.67 1544.31 3
 -7 4 27 17843.1 4144.13 3
 -7 4 26 2939.16 1783.56 3
 -7 4 25 32909.4 5241.6 3
 -7 4 24 689.22 1087.37 3
 -7 -4 23 37360.7 4154.88 2
 -7 4 23 30778.8 4964.74 3
 -7 4 22 986.943 1093.56 3
 -7 -4 22 2208.96 893.947 2
 -7 -4 21 -486.278 526.268 2
 -7 4 21 3211.51 1573.57 3
 -7 -4 20 20840.8 2681.16 2
 -7 4 20 19489.8 3495.83 3
 -7 4 19 6647.14 1994.92 3
 -7 -4 19 9909.95 1799.19 2
 -7 -4 18 18905.1 2363.22 2
 -7 4 18 15245.8 2934.13 3
 -7 4 17 31850.6 4172.04 3
 -7 -4 16 3995.24 908.666 1
 -7 4 16 2780.24 1209.62 3
 -7 4 15 58649.8 5532.83 4
 -7 4 15 62747.3 5550.39 3
 -7 -4 15 54462.4 3888.76 1
 -7 -4 14 688.478 333.224 1
 -7 4 14 742.709 360.312 4
 -7 4 14 54.8011 533.313 3
 -7 -4 13 74323.5 4845.33 1
 -7 4 13 83098.8 6124.68 4
 -7 4 13 84006 6243.21 3
 -7 4 12 9664.68 1928.5 3
 -7 -4 12 13971.6 1870.56 1
 -7 4 12 11168.6 1962.51 4
 -7 4 11 24865.2 2881.17 4
 -7 -4 11 24113.8 2591.43 1
 -7 4 11 25849.1 3137.23 3
 -7 4 10 11806.9 1977.65 3
 -7 4 10 7398.7 1493.03 4
 -7 -4 10 10973.2 1698.21 1
 -7 4 9 -50.6767 216.856 3
 -7 4 9 662.177 520.292 4
 -7 -4 9 872.093 521.499 1
 -7 -4 8 32061.5 3072.8 1
 -7 4 8 38022.2 3065.69 4
 -7 4 8 32556.1 3323.79 3
 -7 4 7 136150 6560 4
 -7 -4 7 136378 7220.37 1
 -7 4 7 135610 7587.29 3
 -7 4 6 60872 3731.47 4
 -7 -4 6 61001.1 4362.15 1
 -7 4 5 240016 9457.15 4
 -7 -4 5 250046 10792.8 1
 -7 -4 5 233643 9958.17 3
 -7 4 4 2865.44 639.547 4
 -7 -4 4 1566.12 564.2 1
 -7 -4 3 241062 10468.6 1
 -7 4 3 221884 8679.17 4
 -7 -4 3 227698 9068.29 3
 -7 4 2 365.838 253.737 4
 -7 -4 2 46.4339 306.838 1
 -7 -4 2 521.592 301.313 3
 7 4 -2 -275.787 303.501 4
 -7 4 1 49425.5 2807.97 4
 -7 -4 1 47323.2 3839.27 1
 -7 -4 1 51513 2816.64 3
 7 4 -1 48607.4 3494.49 4
 -7 -4 0 5619.8 1256.72 1
 -7 4 0 8055.78 978.623 4
 -7 -4 0 5974.54 774.104 3
 7 4 0 8025.4 1281.76 4
 7 4 1 93.146 245.956 4
 -7 -4 -1 404.015 426.302 1
 -7 4 -1 486.036 256.04 4
 -7 -4 -2 104711 6385.99 1
 -7 4 -2 117109 5196.86 4
 7 4 2 117818 5928.96 4
 7 4 3 48136.6 3464.52 4
 -7 -4 -3 51945.5 4090.1 1
 7 4 4 60947.5 4051.71 4
 -7 -4 -4 61005 4565.18 1
 7 4 5 83687 5041.94 4
 -7 -4 -5 90304.7 5729.14 1
 -7 -4 -6 13147.9 1947.58 1
 7 4 6 10513.4 1641.04 4
 7 4 7 145993 7473.61 4
 -7 -4 -7 144185 7835.76 1
 -7 -4 -8 205.651 561.09 1
 7 4 8 374.97 420.789 4
 7 4 9 144969 7933.76 4
 -7 -4 -9 147063 7910.02 1
 7 -4 10 12857.6 2318.17 2
 7 4 10 12374.1 2160.61 4
 -7 -4 -10 13133 2062.97 1
 -7 -4 -11 47178 3995.89 1
 7 4 11 43958.2 4301.69 4
 7 -4 11 43436.8 4523.73 2
 7 -4 12 10103.5 2145.46 2
 7 4 12 11695.4 2276.59 4
 -7 -4 -12 15243.9 2206.55 1
 7 4 13 1626.51 929.108 4
 -7 -4 -13 849.521 478.695 1
 7 -4 13 1251.03 854.952 2
 -7 -4 -14 355.286 349.233 1
 7 -4 14 -249.498 756.882 2
 7 -4 15 44414.5 5219.07 2
 7 -4 16 1214.99 1003.54 2
 7 -4 17 51961.1 6011.71 2
 7 -4 18 8.27517 785.269 2
 7 -4 19 48753 6125.68 2
 -7 5 27 -27.5618 1028.76 3
 -7 5 26 14525.6 3646.36 3
 -7 5 25 5050.27 1970.68 3
 -7 5 24 22438 4200.45 3
 -7 -5 23 8297.71 1847.15 2
 -7 5 23 5948.37 2223.14 3
 -7 -5 22 2693.7 1006.14 2
 -7 5 22 5646.2 1886.51 3
 -7 -5 21 3047.22 1142.93 2
 -7 5 21 2413.96 1348.06 3
 -7 5 20 2647.07 1481.78 3
 -7 -5 20 6183.14 1497.44 2
 -7 5 19 -286.234 685.129 3
 -7 5 18 48470.8 5725.63 4
 -7 5 18 45582.2 5183.66 3
 -7 5 17 4804.3 1781.64 4
 -7 5 17 3335.18 1420.81 3
 -7 -5 16 90760.1 5453.4 1
 -7 5 16 104861 7887.89 4
 -7 5 16 91457.3 7262.17 3
 -7 -5 15 501.394 494.37 1
 -7 5 15 109.539 426.666 3
 -7 5 15 866.347 486.271 4
 -7 5 14 118673 7792.31 4
 -7 -5 14 101029 6048.37 1
 -7 5 14 108517 7609.31 3
 -7 -5 13 1510.44 762.539 1
 -7 5 13 892.79 439.226 4
 -7 5 13 979.44 699.027 3
 -7 5 12 37210.8 3956.02 3
 -7 -5 12 36549.6 3316.61 1
 -7 5 12 41888.7 4001.7 4
 -7 5 11 662.916 516.744 3
 -7 5 11 374.091 337.766 4
 -7 -5 11 290.693 311.047 1
 -7 5 10 -52.2732 420.399 3
 -7 5 10 297.184 406.473 4
 -7 5 9 1341.89 648.025 4
 -7 5 9 3544.83 1089.75 3
 -7 5 8 48852 3675.67 4
 -7 5 8 39875.5 3907.52 3
 -7 5 7 5634.91 1138.45 4
 -7 5 6 342582 13250.8 4
 -7 5 5 4730.57 1016.14 4
 -7 5 4 378209 14007.4 4
 -7 5 3 11598.5 1456.78 4
 -7 -5 3 15194.7 1628.28 3
 -7 5 2 168841 7049.5 4
 -7 -5 2 153686 6593.56 3
 7 5 -2 147975 7774.81 4
 -7 5 1 4946.05 883.21 4
 -7 -5 1 3519.05 615.299 3
 7 5 -1 2805.56 823.554 4
 -7 5 0 36257.5 2628.33 4
 -7 -5 0 34790.8 2029.24 3
 7 5 0 38186.5 3280.77 4
 7 5 1 42352.8 3423.17 4
 -7 5 -1 42822.8 2946.18 4
 -7 -5 -1 40873.6 2007.49 3
 7 5 2 5262.73 1145.47 4
 -7 5 -2 6436.57 1090.63 4
 7 5 3 31042 2938.5 4
 -7 5 -3 31689.4 2633.43 4
 7 5 4 84951.2 5289.7 4
 7 5 5 12554.6 1896.42 4
 -7 -5 -5 17055.6 2287.22 1
 7 5 6 190440 9362.76 4
 -7 -5 -6 203161 9840.03 1
 7 5 7 3853.76 1063.45 4
 -7 -5 -7 6150.94 1448.04 1
 7 5 8 234559 11091.4 4
 -7 -5 -8 241423 11222.4 1
 7 5 9 1540.52 935.513 4
 -7 -5 -9 1923.67 945.518 1
 7 5 10 50954 4563.59 4
 -7 -5 -10 54761.5 4480.04 1
 7 5 11 2034.15 876.585 4
 -7 -5 -11 832.475 673.54 1
 7 -5 12 7724.29 1942.84 2
 7 5 12 8786.32 2053.63 4
 -7 -5 -12 5881.56 1456.23 1
 7 -5 13 1020.53 890.352 2
 7 5 13 774.962 571.265 4
 -7 -5 -13 -185.463 590.378 1
 -7 -5 -14 9779.18 1771.47 1
 7 5 14 11383 2473.58 4
 7 -5 14 6811.15 1855.1 2
 7 5 15 2606.97 1153.88 4
 7 -5 15 -829.499 1280.93 2
 7 -5 16 17397.3 3273.58 2
 7 -5 17 -990.4 1368.47 2
 7 -5 18 46944.5 5816.77 2
 7 -5 19 -1850.29 1709.96 2
 -7 6 26 -652.266 1349.46 3
 -7 6 25 12974.9 3201.52 3
 -7 6 24 2827.28 1428.58 3
 -7 -6 23 9337.5 2043.73 2
 -7 6 23 11454.9 2921.31 3
 -7 6 22 8889.4 2543.84 3
 -7 -6 22 13515.3 2378.05 2
 -7 6 21 1127.31 1097.04 3
 -7 6 20 10592.3 2763.55 4
 -7 6 20 8515.31 2316.6 3
 -7 6 19 11360.6 2660.46 3
 -7 6 19 20606.7 3723.95 4
 -7 6 18 8944.47 2269.55 3
 -7 6 18 8958.75 2376.74 4
 -7 6 17 80589.3 6974.67 3
 -7 6 17 82802.3 7261.84 4
 -7 6 16 -97.5166 615.631 3
 -7 6 16 -128.957 846.066 4
 -7 -6 16 677.425 269.998 1
 -7 -6 15 135344 7300.98 1
 -7 6 15 139536 9007.43 4
 -7 6 15 116765 8381.43 3
 -7 6 14 1222.25 743.989 3
 -7 -6 14 564.666 607.147 1
 -7 6 14 829.137 765.657 4
 -7 6 13 42748.4 4525.24 3
 -7 6 13 55793.6 4963.55 4
 -7 6 12 -77.5279 292.503 3
 -7 6 12 -80.35 452.139 4
 -7 6 11 12843.4 2289.35 3
 -7 6 11 10569.7 1964.9 4
 -7 6 10 1145.3 589.336 4
 -7 6 10 1789.66 852.097 3
 -7 6 9 6651.08 1403.26 4
 -7 6 8 4536.06 1170.36 4
 -7 6 7 178992 8616.55 4
 -7 6 6 1757.87 662.36 4
 -7 6 5 267336 11176.2 4
 -7 6 4 123.652 352.244 4
 -7 6 3 251018 10565 4
 7 6 -3 261111 11711.7 4
 -7 6 2 6148.99 1134.92 4
 -7 -6 2 9326.96 1191.82 3
 7 6 -2 5242.81 1280.03 4
 7 6 -1 144811 7876.76 4
 -7 6 1 152732 7143.11 4
 -7 -6 1 148925 6130.88 3
 -7 6 0 1556.9 625.457 4
 -7 -6 0 1720.26 392.346 3
 7 6 0 261.65 445.904 4
 7 6 1 6969.57 1422.01 4
 -7 -6 -1 5766.09 583.934 3
 -7 6 -1 7493.38 1337.06 4
 7 6 2 324.914 225.099 4
 -7 6 -2 552.378 387.944 4
 7 6 3 20756.8 2535.46 4
 -7 6 -3 21373 2330.82 4
 7 6 4 1017.71 585.572 4
 7 6 5 100167 6316.25 4
 7 6 6 1442.22 753.933 4
 7 6 7 123576 7412.23 4
 7 6 8 7751.99 1736.18 4
 -7 -6 -8 9846.53 1884.03 1
 7 6 9 23658.8 3060.13 4
 -7 -6 -9 23152.3 2985.87 1
 7 6 10 6836.92 1649.87 4
 -7 -6 -10 8226.75 1712.21 1
 7 6 11 7841.7 1860.99 4
 -7 -6 -11 8949 1801.55 1
 7 6 12 4692.1 1539.83 4
 -7 -6 -12 4666.57 1275.48 1
 7 6 13 2045.35 1252.32 4
 -7 -6 -13 1027.96 369.661 1
 7 6 14 11187.3 2503.16 4
 -7 -6 -14 10750.6 1897.4 1
 7 -6 14 11510 2521.56 2
 7 6 15 14060 2954.56 4
 7 -6 15 9113.69 2276.59 2
 7 6 16 3827.09 1846.67 4
 7 -6 16 2905.63 1288.45 2
 7 -6 17 33465.7 4675.59 2
 7 6 17 26609.2 4430.43 4
 7 -6 18 225.332 788.737 2
 -7 7 25 -763.992 1209.28 3
 -7 7 24 9475.68 2943.99 3
 -7 7 23 7236.78 2281.56 3
 -7 7 22 8536.79 2485.2 3
 -7 7 21 7934.56 2291.52 3
 -7 7 21 12630.5 3233.28 4
 -7 7 20 557.583 1063.12 3
 -7 7 20 1196.94 1261.65 4
 -7 7 19 4351.14 1540.2 3
 -7 7 19 10043.1 2672.92 4
 -7 7 18 7846.62 2140.32 4
 -7 7 18 6332.84 1952.76 3
 -7 7 17 12165.2 2640.95 3
 -7 7 17 11665 2637.83 4
 -7 7 16 37067.6 4479.83 3
 -7 7 16 38230.3 4604.63 4
 -7 7 15 728.42 554.526 4
 -7 7 15 1002.05 671.078 3
 -7 7 14 83954.2 6572.77 4
 -7 7 14 74132 6379.74 3
 -7 7 13 5141 1472.77 4
 -7 7 13 5488.2 1679.24 3
 -7 7 12 35672.2 4026.45 3
 -7 7 12 32933.1 3752.61 4
 -7 7 11 3471.72 1088.06 4
 -7 7 10 9891.13 1868.28 4
 -7 7 9 9042.54 1793.22 4
 -7 7 8 52000.2 4294.07 4
 -7 7 7 11917.1 1884.78 4
 -7 7 6 134753 7342.27 4
 -7 7 5 2272.77 815.694 4
 -7 7 4 112735 6412.63 4
 7 7 -3 2836.18 1080.04 4
 -7 7 3 943.412 550.271 4
 -7 7 2 97058.9 5713.86 4
 7 7 -2 94785 6410.08 4
 -7 -7 1 29041.8 2142.01 3
 7 7 -1 26433.4 3089.09 4
 -7 7 1 29143.6 2832.06 4
 -7 -7 0 64143.1 3175.85 3
 7 7 0 66122.4 5088.95 4
 -7 7 0 69080.1 4592.57 4
 -7 -7 -1 33986.7 1714.3 3
 -7 7 -1 31747.5 3031.79 4
 7 7 1 33407.5 3456.83 4
 7 7 2 580.332 528.999 4
 -7 7 -2 1432.62 780.555 4
 -7 7 -3 15162.6 2135.16 4
 7 7 3 15951.7 2388.06 4
 7 7 4 48122.7 4293.61 4
 -7 7 -4 42228.2 3789.8 4
 7 7 5 24534.6 3037.16 4
 7 7 6 41530.4 4116.16 4
 7 7 7 1416.39 714.254 4
 7 7 8 51299.7 4751.56 4
 7 7 9 15112.8 2487.92 4
 -7 -7 -10 40112 4004.24 1
 7 7 10 38884.5 4257.42 4
 7 7 11 10981 2263.69 4
 -7 -7 -11 10209.5 1997.3 1
 7 7 12 2756.82 1166.74 4
 -7 -7 -12 2597.4 1031 1
 7 7 13 18338.9 3102.4 4
 -7 -7 -13 17029.7 2605.68 1
 -7 -7 -14 9557.88 1986.53 1
 7 7 14 11759.7 2605.19 4
 7 7 15 8744.95 2356.38 4
 7 7 16 20697.1 3771.92 4
 7 -7 16 17699.8 3344.65 2
 7 -7 17 276.578 578.93 2
 7 7 17 2884.37 1424.79 4
 7 7 18 24247.7 4534.3 4
 7 -7 18 25605.6 4287.19 2
 -7 8 23 3785.89 2105.61 4
 -7 8 23 5486.82 1956.73 3
 -7 8 22 7236.58 2258.58 3
 -7 8 22 13901.9 3577.69 4
 -7 8 21 280.334 478.311 3
 -7 8 21 73.1331 947.487 4
 -7 8 20 13615.3 2963.46 3
 -7 8 20 15501.7 3468.17 4
 -7 8 19 2046.37 1188.03 3
 -7 8 19 1353.87 861.965 4
 -7 8 18 3092.91 1368.29 3
 -7 8 18 5704.29 1867.47 4
 -7 8 17 2754.81 1362.47 3
 -7 8 17 6299.5 1969.91 4
 -7 8 16 -2706.02 1248.69 3
 -7 8 16 837.264 789.329 4
 -7 8 15 21837.1 3421.92 4
 -7 8 15 15598.1 2938.53 3
 -7 8 14 15438.5 2812.86 4
 -7 8 13 65409.9 5740.92 4
 -7 8 12 66237.7 5660.79 4
 -7 8 11 13459.1 2364.29 4
 -7 8 10 72577.7 5697.27 4
 -7 8 9 8762.79 1797.27 4
 -7 8 8 37311.2 3767.46 4
 -7 8 7 16809.6 2454.39 4
 -7 8 6 42412.9 3920.36 4
 -7 8 5 28382.9 3083.58 4
 -7 8 4 601.591 455.201 4
 7 8 -4 730.456 601.829 4
 -7 8 3 37866.7 3583.6 4
 7 8 -3 36485.1 3988.45 4
 -7 8 2 14647.2 2148.62 4
 7 8 -2 14663.4 2399.68 4
 7 8 -1 30920.9 3576.37 4
 -7 8 1 32323 3264.79 4
 7 8 0 94495 6659.74 4
 -7 8 0 88939.7 5847.34 4
 7 8 1 2462.97 953.125 4
 -7 8 -1 2783.16 867.646 4
 -7 8 -2 134064 7566.81 4
 7 8 2 122748 7828.76 4
 7 8 3 13891 2286.39 4
 -7 8 -3 9823.73 1806.45 4
 7 8 4 78197.9 5999.71 4
 -7 8 -4 76792.3 5680.09 4
 7 8 5 13783.6 2352.97 4
 -7 8 -5 11530 2170.93 4
 7 8 6 12819.3 2342.91 4
 7 8 7 31515.5 3766.36 4
 7 8 8 333.959 474.513 4
 7 8 9 35227.6 4144.22 4
 7 8 10 9402.24 2098.48 4
 7 8 11 2184.62 1132.94 4
 -7 -8 -12 18852.1 2829.5 1
 7 8 12 21516.7 3409.69 4
 -7 -8 -13 4941.18 1512.06 1
 7 8 13 2357.84 1125.86 4
 7 8 14 25332.9 4012.1 4
 -7 -8 -14 27677.6 3496.79 1
 7 8 15 11543.8 2739.18 4
 7 8 16 10017.2 2593.99 4
 7 8 17 13541.9 3214.75 4
 7 -8 17 16461.2 3340.52 2
 7 8 18 -632.803 1484.27 4
 -7 9 23 15898.9 4112.16 4
 -7 9 22 606.877 616.377 4
 -7 9 21 10106.2 2773.36 3
 -7 9 21 19021.7 3977.17 4
 -7 9 20 222.081 596.994 3
 -7 9 20 777.56 1182.03 4
 -7 9 19 9870.12 2528.39 3
 -7 9 19 7605.72 2441.54 4
 -7 9 18 1182.03 927.218 4
 -7 9 17 1479.43 551.675 4
 -7 9 16 4124.22 1723.65 4
 -7 9 15 5051.38 1610.61 4
 -7 9 14 7658.41 1957.47 4
 -7 9 13 55729.5 5469.75 4
 -7 9 12 9375.67 2126.95 4
 -7 9 11 150841 9333.18 4
 -7 9 10 16964.5 2781.59 4
 -7 9 9 138167 8535.63 4
 -7 9 8 1361.31 816.588 4
 -7 9 7 30714.7 3527.69 4
 -7 9 6 12049.4 2157.36 4
 -7 9 5 645.358 702.348 4
 7 9 -5 -90.8648 401.029 4
 -7 9 4 11495.7 2098.81 4
 7 9 -4 12075.7 2492.51 4
 -7 9 3 15604.4 2424.35 4
 7 9 -3 16414.6 2783.12 4
 7 9 -2 3303.91 1268.22 4
 -7 9 2 3519.02 1110.47 4
 7 9 -1 107227 7530.82 4
 -7 9 1 99092.2 6670.45 4
 -7 9 0 257.382 566.103 4
 7 9 0 1657.51 960.298 4
 7 9 1 184475 10490.7 4
 -7 9 -1 190349 10009.3 4
 7 9 2 5503.55 1615.15 4
 -7 9 -2 3397.5 1226.26 4
 -7 9 -3 123768 7754.19 4
 7 9 3 114884 7896.78 4
 7 9 4 6155.87 1677.48 4
 -7 9 -4 5394.38 1462.82 4
 7 9 5 54125.1 5152.29 4
 -7 9 -5 49621.3 4848.81 4
 7 9 6 14039.4 2601.87 4
 -7 9 -6 14116.3 2572.66 4
 7 9 7 9174.87 2141.07 4
 7 9 8 15396.9 2761.04 4
 7 9 9 7406 1878.93 4
 7 9 10 6788.99 1932.08 4
 7 9 11 28615.4 4040.3 4
 7 9 12 128.007 645.96 4
 7 9 13 46833.9 5552.83 4
 -7 -9 -13 58950.8 5346.81 1
 -7 -9 -14 9161.06 2094.14 1
 7 9 14 3537 1567.55 4
 7 9 15 27578 4371.86 4
 7 9 16 7467.65 2247.27 4
 7 9 17 4374.74 1862.94 4
 7 9 18 4567.83 1909.19 4
 -7 10 22 40469.8 6354.02 4
 -7 10 21 603.883 675.915 4
 -7 10 20 20049.3 4352.73 4
 -7 10 19 1541.11 1541.55 4
 -7 10 18 9826.96 2706.46 4
 -7 10 17 1375.14 1078.29 4
 -7 10 16 1176.9 890.108 4
 -7 10 15 1359.81 857.876 4
 -7 10 14 12364.4 2699.66 4
 -7 10 13 994.275 917.343 4
 -7 10 12 54928.9 5536.6 4
 -7 10 11 370.916 738.877 4
 -7 10 10 109464 7828.68 4
 -7 10 9 2145.86 1037.74 4
 -7 10 8 94751 7060.76 4
 -7 10 7 22.7835 365.052 4
 -7 10 6 16389.2 2693.33 4
 -7 10 5 923.184 595.626 4
 7 10 -5 1131.84 982.293 4
 -7 10 4 1865.47 904.243 4
 7 10 -4 738.383 1060.12 4
 -7 10 3 1952.64 830.743 4
 7 10 -3 1008.19 609.466 4
 -7 10 2 31451.7 3692 4
 7 10 -2 32402.3 4136.9 4
 -7 10 1 1894.64 870.505 4
 7 10 -1 4969.18 1692.55 4
 7 10 0 92305.1 7207.19 4
 -7 10 0 86748.4 6505.33 4
 -7 10 -1 1378.52 759.441 4
 7 10 1 681.928 712.309 4
 -7 10 -2 62803.9 5484.32 4
 7 10 2 54735.1 5462.74 4
 7 10 3 -651.261 799.544 4
 -7 10 -3 -306.753 948.442 4
 -7 10 -4 34691.3 4073.63 4
 7 10 4 31525.5 4055.8 4
 7 10 5 718.713 802.471 4
 -7 10 -5 743.559 633.698 4
 7 10 6 27535.2 3834.33 4
 -7 10 -6 27734.2 3786.58 4
 7 10 7 1789.69 1030.33 4
 -7 10 -7 1192.75 878.176 4
 -7 10 -8 -355.482 606.042 4
 7 10 8 2107.48 1320.37 4
 7 10 9 4535.76 1733.12 4
 7 10 10 18856.4 3296.05 4
 7 10 11 -10.5385 561.764 4
 7 10 12 48031.6 5562.93 4
 7 10 13 1724.66 1204.61 4
 7 10 14 22427.1 3944.5 4
 7 10 15 325.937 702.914 4
 7 10 16 3709.61 1706.03 4
 7 10 17 1399.98 876.994 4
 -7 11 20 140.288 1102.52 4
 -7 11 19 27824.1 4860.37 4
 -7 11 18 -606.446 575.135 4
 -7 11 17 8897.63 2406.54 4
 -7 11 16 -309.324 1064.22 4
 -7 11 15 304.942 637.583 4
 -7 11 14 731.005 1024.35 4
 -7 11 13 19279 3449.85 4
 -7 11 12 272.804 892.39 4
 -7 11 11 52844.9 5539.21 4
 -7 11 10 506.271 538.336 4
 -7 11 9 55127.8 5535.54 4
 -7 11 8 10067.2 2362.46 4
 -7 11 7 40298.8 4584.23 4
 -7 11 6 14456.8 2590.25 4
 7 11 -6 10749.1 2507.35 4
 7 11 -5 5585.43 1898.65 4
 -7 11 5 6873.71 1779.94 4
 -7 11 4 10097.7 2177.13 4
 7 11 -4 9231.61 2277.68 4
 -7 11 3 10086.5 2259.51 4
 7 11 -3 10317 2396.99 4
 -7 11 2 3809.22 1464.77 4
 7 11 -2 6190.51 1976.95 4
 -7 11 1 41089 4515.42 4
 7 11 -1 36594.2 4574.96 4
 -7 11 0 -632.087 872.361 4
 7 11 0 1531.19 945.473 4
 -7 11 -1 56531.5 5372.97 4
 7 11 1 54710 5630.23 4
 -7 11 -2 521.326 582.137 4
 7 11 2 377.742 710.796 4
 -7 11 -3 39913.8 4619.62 4
 7 11 3 42809.8 4945.9 4
 7 11 4 864.139 907.48 4
 -7 11 -4 314.308 507.499 4
 -7 11 -5 16727.5 3017.03 4
 7 11 5 17690.2 3135.67 4
 -7 11 -6 3786.27 1398.54 4
 7 11 6 3826.65 1465.21 4
 -7 11 -7 883.186 1017.65 4
 7 11 7 628.037 668.844 4
 7 11 8 4448.11 1736.47 4
 -7 11 -8 2737.44 1241.42 4
 7 11 9 19560.9 3475.62 4
 7 11 10 3837.2 1578.06 4
 7 11 11 38565.6 5192.61 4
 7 11 12 15.8861 788.468 4
 7 11 13 20693.7 3794.59 4
 7 11 14 -660.161 1005.3 4
 7 11 15 9263.5 2633.05 4
 7 11 16 1725.55 1157.99 4
 -7 12 19 11203 3113.62 4
 -7 12 18 30728.9 5021.2 4
 -7 12 17 15307.9 3548.35 4
 -7 12 16 3897.7 1890.06 4
 -7 12 15 9696.92 2587.22 4
 -7 12 14 3130.98 1437.03 4
 -7 12 13 4576.87 1732.28 4
 -7 12 12 19528.4 3431.06 4
 -7 12 11 2352.7 1157.91 4
 -7 12 10 35915.9 4630.52 4
 -7 12 9 2042.67 1236.92 4
 -7 12 8 23953.6 3681.28 4
 7 12 -8 24655.2 4271.68 4
 -7 12 7 19537.5 3312.12 4
 7 12 -7 13126.1 2979.14 4
 -7 12 6 6762.53 1940.78 4
 7 12 -6 7097.19 2149.41 4
 -7 12 5 35213.9 4363.28 4
 7 12 -5 28861.7 4419.36 4
 -7 12 4 3228.09 1172.04 4
 7 12 -4 2994.87 1465.54 4
 -7 12 3 24920.6 3634.08 4
 7 12 -3 28900.4 4289.39 4
 -7 12 2 15735.2 2934.25 4
 7 12 -2 18391.1 3388.49 4
 -7 12 1 12098.9 2585.72 4
 7 12 -1 12131.4 2747.78 4
 -7 12 0 37765.7 4539.36 4
 7 12 0 36843.4 4807.6 4
 -7 12 -1 471.82 1010.46 4
 7 12 1 1105.28 826.457 4
 -7 12 -2 29578.4 4112.49 4
 7 12 2 29590 4290.95 4
 7 12 3 221.387 616.362 4
 -7 12 -3 200.238 722.205 4
 7 12 4 13472.5 2917.74 4
 -7 12 -4 10971.9 2552.96 4
 -7 12 -5 4584.87 1540.53 4
 7 12 5 7702.23 2124.59 4
 7 12 6 -1501.93 1240.22 4
 -7 12 -6 1026.3 1294.54 4
 7 12 7 22579.1 3850.21 4
 -7 12 -7 19608.6 3632.31 4
 7 12 8 8877.76 2466.08 4
 7 12 9 15870 3309.26 4
 7 12 10 29267.4 4549.08 4
 7 12 11 1580.77 891.428 4
 7 12 12 21045.3 3989.51 4
 7 12 13 890.837 771.739 4
 7 12 14 18685.5 3995.68 4
 -7 13 17 9531.7 2792.9 4
 -7 13 16 20654.7 4078.61 4
 -7 13 15 385.546 763.008 4
 -7 13 14 13366.1 3265.21 4
 -7 13 13 9642.41 2610.3 4
 -7 13 12 8071.07 2399.8 4
 -7 13 11 17370.2 3366.45 4
 -7 13 10 -342.264 710.789 4
 -7 13 9 17035.8 3226.16 4
 7 13 -9 14082.5 3371.33 4
 -7 13 8 7429.2 2220.69 4
 7 13 -8 5836.35 2125.56 4
 -7 13 7 8848.65 2227.35 4
 7 13 -7 7102.78 2330.5 4
 -7 13 6 31332.8 4384.77 4
 7 13 -6 31717.1 4901.83 4
 -7 13 5 2395.41 1180.48 4
 7 13 -5 1414.04 1199.01 4
 -7 13 4 43759.8 5189.41 4
 7 13 -4 42562.8 5599.75 4
 -7 13 3 2569.26 1371.5 4
 7 13 -3 -175.567 1241.29 4
 7 13 -2 44265.1 5651.36 4
 -7 13 2 49966.6 5485.77 4
 7 13 -1 10073.8 2454.62 4
 -7 13 1 5190.74 1873.53 4
 7 13 0 5266.03 1888.21 4
 -7 13 0 11887.8 2675.92 4
 -7 13 -1 13269.5 2840.96 4
 7 13 1 12059 2879.33 4
 7 13 2 -348.164 793.912 4
 -7 13 -2 1051.85 989.053 4
 -7 13 -3 6789.08 2059.54 4
 7 13 3 7669.2 2295.47 4
 7 13 4 8381.01 2395.14 4
 -7 13 -4 11289 2704.44 4
 7 13 5 569.944 593.921 4
 -7 13 -5 284.936 720.537 4
 -7 13 -6 33175.8 4852.68 4
 7 13 6 37110.6 5109.18 4
 7 13 7 6620.58 2265.99 4
 7 13 8 30941.4 4778.48 4
 7 13 9 6416.97 2285.3 4
 7 13 10 8396.87 2457.07 4
 7 13 11 12076.4 3065.49 4
 7 13 12 -498.325 1265.23 4
 -7 14 15 26090.8 4695.14 4
 -7 14 14 2172.35 1787.13 4
 -7 14 13 22386.9 4133.14 4
 -7 14 12 6740.37 2230.29 4
 -7 14 11 1514.06 1437.62 4
 7 14 -11 3709.24 2086.43 4
 7 14 -10 4464.28 2207.61 4
 -7 14 10 7625.54 2390.2 4
 -7 14 9 573.783 727.282 4
 7 14 -9 3250.28 1944.79 4
 7 14 -8 2210.15 1729.87 4
 -7 14 8 1810.71 1036.59 4
 -7 14 7 15491.5 3117.36 4
 7 14 -7 15637.3 3687.67 4
 7 14 -6 -485.95 1023.51 4
 -7 14 6 302.44 730.212 4
 -7 14 5 16320.1 3301.14 4
 7 14 -5 13936.8 3312.32 4
 -7 14 4 38.109 711.229 4
 7 14 -4 -533.862 888.504 4
 -7 14 3 30780.4 4497.94 4
 7 14 -3 29288.9 4813.24 4
 7 14 -2 751.133 738.969 4
 -7 14 2 431.062 627.988 4
 7 14 -1 16587.2 3474.01 4
 -7 14 1 19977.3 3654.55 4
 7 14 0 2420.77 1420.49 4
 -7 14 0 6753.92 2348.39 4
 -7 14 -1 785.336 722.437 4
 7 14 1 2187.84 1595.75 4
 7 14 2 5077.53 2033.38 4
 -7 14 -2 4645.23 1871.6 4
 -7 14 -3 3548.22 1286.18 4
 7 14 3 7635.57 2406.03 4
 -7 14 -4 -315.904 631.587 4
 7 14 4 1632.66 1190.88 4
 7 14 5 21073.2 3996.74 4
 -7 14 -5 19990 3809.57 4
 7 14 6 -609.334 1033.96 4
 7 14 7 41641.6 5696.58 4
 7 14 8 4181.62 1941.98 4
 7 14 9 15956.4 3476.68 4
 -7 15 12 19824.1 4032.92 4
 -7 15 11 -349.767 666.146 4
 -7 15 10 3141.19 1842.64 4
 -7 15 9 570.218 832.07 4
 7 15 -9 2825.59 1690.19 4
 -7 15 8 4694.53 1836.46 4
 7 15 -8 8067.44 2971.63 4
 -7 15 7 -21.3658 701.142 4
 7 15 -7 -415.389 822.547 4
 -7 15 6 13196.8 3102.7 4
 7 15 -6 11141.5 3317.77 4
 -7 15 5 1601.02 1255.31 4
 7 15 -5 -855.004 752.423 4
 7 15 -4 12115.7 3290.88 4
 -7 15 4 24128.9 4245.39 4
 -7 15 3 -201.878 811.081 4
 7 15 -3 744.999 730.828 4
 -7 15 2 20789.9 3815.87 4
 7 15 -2 23975.2 4426.03 4
 7 15 -1 -1021.7 540.982 4
 -7 15 1 1964.91 872.471 4
 7 15 0 4287.96 1980.97 4
 -7 15 0 5605.06 2040.08 4
 -7 15 -1 3477.11 1753.99 4
 7 15 1 -251.279 767.23 4
 -7 15 -2 3359.34 1796.46 4
 7 15 2 2372.2 1335.94 4
 -7 15 -3 1376.28 1277.14 4
 7 15 3 2002.16 1373.33 4
 7 15 4 17479.7 3721.49 4
 -7 15 -4 14275.3 3334.64 4
 -7 16 8 1515.84 1590.6 4
 -7 16 7 7905.71 2445 4
 -7 16 6 -1551.54 853.306 4
 -7 16 5 29175.4 4889.88 4
 -7 16 4 -899.201 1343.05 4
 -7 16 3 24947.7 4490.77 4
 -7 16 2 -529.087 1129.97 4
 -7 16 1 5806.33 2228.96 4
 -7 16 0 1969.38 1562.83 4
 -7 16 -1 2723.71 1619.55 4
 -7 16 -2 339.8 1050.08 4
 -8 0 28 10396.5 3335.08 3
 -8 0 27 996.79 786.808 3
 -8 0 26 36568.7 5830.12 3
 -8 0 25 300.495 657.757 3
 -8 0 24 40490.1 5840.28 3
 -8 0 23 1312.22 980.773 3
 -8 0 22 14146.4 3318.55 3
 -8 0 21 654.59 473.158 3
 -8 0 20 163.954 372.99 2
 -8 0 20 759.865 420.466 3
 -8 0 19 133.106 433.523 2
 -8 0 19 -185.882 651.367 3
 -8 0 18 37294.3 3287.02 2
 -8 0 18 31476.9 4299.28 3
 -8 0 17 99.6997 281.465 2
 -8 0 17 211.345 660.379 3
 -8 0 16 68608.8 4211.98 2
 -8 0 16 64069.7 5920.14 3
 -8 0 15 844.36 430.127 3
 -8 0 14 212605 11438 3
 -8 0 13 566.752 335.205 1
 -8 0 13 208.992 346.932 3
 -8 0 12 132874 7012.9 1
 -8 0 12 135244 8075.3 3
 -8 0 11 423.445 402.813 1
 -8 0 11 3.95574 292.413 3
 -8 0 10 17751.1 2412.89 3
 -8 0 10 20922.6 2393.02 1
 -8 0 9 -213.667 421.058 1
 -8 0 9 394.611 371.384 3
 -8 0 8 7394.68 1482.21 1
 -8 0 8 7789.13 1471.34 3
 -8 0 7 855.138 670.055 1
 -8 0 7 -21.2694 333.194 3
 -8 0 6 145716 7635.02 1
 -8 0 6 146441 7422.81 3
 -8 0 5 189.38 338.49 3
 8 0 -5 22.0985 135.404 4
 -8 0 5 -168.942 414.381 1
 -8 0 4 350972 14462.5 1
 8 0 -4 355137 12084.9 4
 -8 0 4 359454 13843.3 3
 -8 0 3 -119.239 257.4 3
 8 0 -3 672.014 269.994 2
 8 0 -3 287.586 175.878 4
 -8 0 3 203.302 588.725 1
 -8 0 2 197801 9471.13 1
 8 0 -2 196760 7506.27 2
 8 0 -1 270.629 311.64 2
 -8 0 1 942.79 548.136 1
 8 0 0 40965.4 2826.98 2
 -8 0 0 43972 3727.7 1
 8 0 1 -41.8947 284.292 2
 -8 0 -1 377.58 610.539 1
 8 0 2 6569.66 1184.83 2
 -8 0 -2 10121.2 1707.76 1
 -8 0 -3 199.281 112.099 4
 8 0 3 314.173 440.039 2
 -8 0 -3 429.417 307.607 1
 -8 0 -4 58193.7 4387.76 1
 8 0 4 53961.9 4110.8 2
 -8 0 -4 54199.3 2679.58 4
 -8 0 -5 92.8054 168.524 4
 8 0 5 -224.351 566.85 2
 -8 0 -5 -133.44 471.385 1
 -8 0 -6 139440 5950.85 4
 -8 0 -6 150299 7838.13 1
 8 0 6 135464 7833.8 2
 -8 0 -7 189.329 566.947 1
 8 0 7 -633.318 546.953 2
 -8 0 -8 159078 8434 1
 8 0 8 158343 9138.64 2
 -8 0 -9 -360.747 608.856 1
 8 0 9 -1074.48 950.77 2
 -8 0 -10 122104 7033.28 1
 8 0 10 116630 8129.29 2
 -8 0 -11 -934.955 823.728 1
 8 0 11 -389.546 608.177 2
 -8 0 -12 6789.58 1402.98 1
 8 0 12 3721.18 1378.64 2
 -8 0 -13 -475.852 733.878 1
 8 0 13 -158.434 515.426 2
 8 0 14 2775.72 1331.87 2
 8 0 15 -1002.13 1463.3 2
 8 0 16 24347.1 4152.27 2
 8 0 17 -847.698 999.595 2
 8 0 18 77950.2 8192.78 2
 8 0 19 151.412 881.264 2
 -8 -1 28 1781.93 1498.99 3
 -8 1 28 2068.91 1461.87 3
 -8 -1 27 30888.1 5534.35 3
 -8 1 27 34945.9 5828.91 3
 -8 -1 26 304.87 627.501 3
 -8 1 26 1272.01 1126.31 3
 -8 -1 25 44206.4 6356.36 3
 -8 1 25 35187.3 5648.28 3
 -8 -1 24 984.511 1319.32 3
 -8 1 24 543.975 1078.29 3
 -8 -1 23 29491.7 4859.15 3
 -8 1 23 23045.2 4256.46 3
 -8 -1 22 25.7246 762.52 3
 -8 1 22 1263.18 1142.69 3
 -8 -1 21 9683.77 2632.31 3
 -8 1 21 12165.3 2862.63 3
 -8 -1 20 2450.01 904.468 2
 -8 -1 20 2817.55 1536.55 3
 -8 1 20 3410.53 1399.27 3
 -8 -1 19 8476.28 1598.99 2
 -8 -1 19 5400.97 1776.7 3
 -8 1 19 5270.33 1764.63 3
 -8 -1 18 7290.78 1372.06 2
 -8 -1 18 5621.79 1776.54 3
 -8 1 18 4532.83 1534.37 3
 -8 -1 17 32242.6 2831.36 2
 -8 -1 17 28454.8 3998.91 3
 -8 1 17 23756.8 3571.98 3
 -8 -1 16 6693.88 1173.12 2
 -8 -1 16 5597.94 1648.08 3
 -8 1 16 3424.13 1222.6 3
 -8 -1 15 75716.5 4127.49 2
 -8 -1 15 65570.1 5860.71 3
 -8 -1 15 69133.4 4434.04 1
 -8 -1 14 5786.94 1175.31 1
 -8 -1 14 7715.69 1058.58 2
 -8 -1 14 4411.24 1389.35 3
 -8 1 14 4012.54 1366.08 3
 -8 -1 13 159212 8005.57 1
 -8 -1 13 179340 6831.49 2
 -8 -1 13 158680 9403.96 3
 -8 1 13 166352 9526.02 3
 -8 -1 12 8037.4 871.26 2
 -8 -1 12 5925.87 1277.8 1
 -8 -1 12 8983.96 1876.46 3
 -8 1 12 6782.44 1608.49 3
 -8 -1 11 34689.1 3132.59 1
 -8 -1 11 35499.5 1868.03 2
 -8 -1 11 41073.1 3885.68 3
 -8 1 11 34551.8 3592.12 3
 -8 -1 10 11818.4 811.368 2
 -8 -1 10 12831.4 1870.69 1
 -8 -1 10 16578.6 2323.88 3
 -8 1 10 13490.8 2133.43 3
 -8 1 10 14722.4 2049.26 1
 -8 1 9 1791.08 775.86 1
 -8 1 9 873.334 541.915 3
 -8 -1 9 2032.78 810.897 3
 -8 -1 9 531.414 463.125 1
 -8 -1 8 -128.672 266.549 1
 -8 1 8 209.692 322.286 1
 -8 -1 8 621.89 448.104 3
 -8 1 8 1065.98 469.874 3
 -8 1 7 19896.6 2443.43 1
 -8 -1 7 22772.6 2535.28 1
 -8 -1 7 20785.3 2353.8 3
 -8 1 7 22573.1 2553.61 3
 -8 1 6 7946.27 1495.97 3
 -8 -1 6 9252.63 1636.55 1
 8 -1 -6 7972.67 1014.6 4
 -8 1 6 10918.1 1726.19 1
 -8 -1 6 8697.17 1507.18 3
 -8 1 5 241142 10565.5 1
 8 -1 -5 233406 8158.85 4
 8 -1 -5 207703 7262.57 2
 -8 -1 5 232004 10335.9 1
 -8 -1 5 251108 9963.35 3
 -8 1 5 240196 10121.7 3
 -8 -1 4 517.67 407.045 3
 -8 1 4 1716.29 666.864 3
 8 -1 -4 1681.84 365.798 4
 -8 -1 4 1385.54 767.809 1
 -8 1 4 1176.72 592.077 1
 8 -1 -4 1001.93 276.185 2
 -8 -1 4 1359.12 311.637 2
 8 -1 -3 136386 5009.84 4
 8 -1 -3 139738 5506.98 2
 -8 1 3 154857 7882.45 1
 -8 -1 3 147321 5571.56 2
 -8 -1 3 147524 7648.65 1
 -8 -1 3 154484 6906.33 3
 -8 -1 2 284.309 242.019 3
 8 1 -2 188.096 150.066 4
 -8 -1 2 -255.148 333.461 1
 8 -1 -2 181.253 165.658 2
 -8 -1 2 312.564 221.371 2
 -8 1 1 149733 7944.88 1
 8 -1 -1 141290 6186.81 2
 8 1 -1 150036 5412.34 4
 -8 -1 1 147064 7778.84 1
 8 1 0 7948.89 714.621 4
 8 1 0 8026.05 1164.13 2
 -8 -1 0 7807.46 1526.77 1
 8 -1 0 7632.96 1128.92 2
 -8 1 0 7658.83 1528.52 1
 8 1 1 5969.78 625.561 4
 -8 -1 -1 9342.43 1628.7 1
 8 1 1 7311.05 1197.81 2
 -8 1 -1 8679.48 1676.69 1
 8 -1 1 6776.91 1142.09 2
 -8 1 -2 49509.4 3998.36 1
 8 1 2 44123.8 3335.76 2
 8 1 2 39679.1 2095.09 4
 8 -1 2 42221.1 3215.1 2
 -8 -1 -2 41746.9 3690.63 1
 -8 1 -3 57567.6 4394.84 1
 8 -1 3 53270.4 3856.24 2
 8 1 3 47059.2 2619.84 4
 -8 -1 -3 61884.1 4529.06 1
 -8 -1 -3 52556.8 2763.05 4
 8 1 3 53376.2 3921.22 2
 -8 1 -4 33421.5 1766.46 4
 -8 1 -4 36067.1 3409.39 1
 8 -1 4 36373.5 3216.48 2
 -8 -1 -4 31690 3188.77 1
 8 1 4 37545.1 3335.08 2
 -8 -1 -4 32134.1 2170.86 4
 -8 1 -5 134202 7340.46 1
 -8 -1 -5 132740 7300.5 1
 -8 1 -5 126579 5032.61 4
 8 1 5 118877 7057.44 2
 8 -1 5 119658 6973.07 2
 -8 -1 -5 126330 5563.78 4
 -8 -1 -6 6997.08 1533.32 1
 -8 1 -6 7425.02 947.401 4
 -8 1 -6 8165.96 1582.76 1
 8 1 6 6880.57 1528.03 2
 8 -1 6 7328.04 1528.66 2
 -8 1 -7 145939 7805.58 1
 -8 -1 -7 153465 7883.75 1
 8 1 7 128563 8034.53 2
 8 -1 7 134713 8088.62 2
 -8 1 -8 44.4738 381.888 1
 8 1 8 376.973 339.767 2
 8 -1 8 47.2316 527.278 2
 -8 1 -9 117283 6877.13 1
 -8 -1 -9 113833 6730.95 1
 8 1 9 112913 7723.45 2
 8 -1 9 112789 7624.25 2
 -8 1 -10 4798.14 1216.74 1
 8 1 10 4373.86 1454.43 2
 8 -1 10 6126.05 1687.97 2
 -8 -1 -10 6044.74 1294.18 1
 -8 -1 -11 27735.2 3013.05 1
 8 1 11 22397 3500.31 2
 8 -1 11 29191.3 3847.34 2
 -8 1 -11 32904.7 3264.8 1
 8 1 12 13571.3 2686.09 2
 -8 -1 -12 10065.9 1806.09 1
 8 -1 12 16905.2 2922.44 2
 -8 -1 -13 43.3583 390.412 1
 8 -1 13 418.331 461.637 2
 8 1 14 3736.23 1505.97 2
 8 -1 14 5351.31 1835.78 2
 8 1 15 12239.2 2846.81 2
 8 -1 15 11724.6 2793.44 2
 8 1 16 3599.83 1452.28 2
 8 -1 16 9109.45 2533 2
 8 1 17 25188.3 4478.02 2
 8 -1 17 33354.3 4987.54 2
 8 1 18 4452.49 1903.27 2
 8 -1 18 5407.51 2047.93 2
 8 -1 19 44157.9 6141.05 2
 8 1 19 38257.1 5856.21 2
 -8 2 28 8392.92 3296.91 3
 -8 -2 27 3314.75 1861.9 3
 -8 2 27 7312.25 2830.63 3
 -8 -2 26 44308.1 6539.51 3
 -8 2 26 29874.5 5321.28 3
 -8 -2 25 -182.286 602.428 3
 -8 2 25 -1790.57 1288.34 3
 -8 -2 24 39553.9 5861.42 3
 -8 2 24 31145.4 5081.65 3
 -8 -2 23 2472.79 1694.62 3
 -8 2 23 5707.09 2167.1 3
 -8 -2 22 19176.6 3841.96 3
 -8 2 22 16075.1 3430.79 3
 -8 -2 21 20129.9 3791.56 3
 -8 2 21 18139.4 3439.14 3
 -8 -2 20 915.165 808.995 3
 -8 -2 20 630.122 539.97 2
 -8 2 20 2151.28 1161.77 3
 -8 -2 19 20721.3 2537.1 2
 -8 -2 19 23951.8 3883.61 3
 -8 2 19 21285 3546.44 3
 -8 -2 18 27562.7 2754.36 2
 -8 -2 18 20373.3 3450.13 3
 -8 2 18 20363.9 3375.86 3
 -8 -2 17 1586.53 636.893 1
 -8 -2 17 2604.73 1255.43 3
 -8 -2 17 2178.57 694.332 2
 -8 2 17 1747.55 891.481 3
 -8 -2 16 30720 2754.39 1
 -8 -2 16 35526.4 2828.34 2
 -8 -2 16 31186.1 4134.44 3
 -8 2 16 29443.6 3889.9 3
 -8 -2 15 2527.63 1093.24 3
 -8 -2 15 1769.46 793.645 1
 -8 -2 15 5143.45 955.507 2
 -8 2 15 3832.67 1249.27 3
 -8 -2 14 34993.4 3069.21 1
 -8 -2 14 38281.4 2645.43 2
 -8 -2 14 37146.1 4172.21 3
 -8 2 14 37128.3 4135.52 3
 -8 -2 13 9691.87 1136.08 2
 -8 -2 13 7709.12 1853.06 3
 -8 -2 13 7776.31 1420.9 1
 -8 2 13 9564.7 2012.47 3
 -8 -2 12 26547 2699.47 1
 -8 -2 12 26414.7 1835.42 2
 -8 -2 12 28357.2 3345.7 3
 -8 2 12 21352.2 2920.37 3
 8 -2 -11 29168.5 1643.75 2
 -8 -2 11 25588.2 2714.23 1
 -8 -2 11 26331.7 3157.97 3
 -8 2 11 26868.3 3183.41 3
 8 -2 -10 14350.2 997.195 2
 -8 -2 10 13523.2 1917.13 1
 -8 -2 10 18485.3 2475.75 3
 -8 2 10 15417.2 2335.04 3
 -8 -2 9 2325.24 755.287 1
 8 -2 -9 2001.67 311.154 2
 -8 -2 9 1165.05 490.666 3
 -8 2 9 1467.38 706.992 3
 -8 2 8 5465.11 1332.42 3
 8 -2 -8 5971.62 532.598 2
 -8 -2 8 5380.05 1243.84 1
 -8 -2 8 7703.4 1456.79 3
 -8 2 7 7635.37 1540.66 3
 -8 -2 7 7745.2 1409.48 3
 -8 -2 7 6390.57 1352.96 1
 -8 -2 6 167449 7914.48 3
 -8 -2 6 159839 8259.67 1
 -8 2 6 170293 8422.88 3
 8 -2 -5 9129.7 1046.35 4
 -8 2 5 9870.04 1690.49 3
 -8 -2 5 9791.95 910.172 2
 -8 -2 5 9536.99 1467.25 3
 -8 -2 5 9971.82 1691.53 1
 -8 2 5 8138.6 1622.39 1
 -8 -2 4 163913 6137.35 2
 -8 -2 4 162203 7372.46 3
 -8 -2 4 152080 8055.91 1
 -8 2 4 155708 8349.76 1
 8 -2 -4 156449 6054.42 4
 -8 -2 3 32047.4 2056.76 2
 -8 -2 3 29553.6 3030.22 1
 -8 -2 3 30224.5 2508.13 3
 8 -2 -3 29170.2 1698.64 4
 -8 2 3 29184 3089.74 1
 -8 -2 2 179278 7674.27 3
 8 2 -2 187395 7242.8 4
 -8 -2 2 167275 8736.29 1
 -8 2 2 176352 9073.47 1
 -8 -2 1 72492.5 5095.17 1
 8 2 -1 72722.1 3687.76 4
 -8 2 1 72118.1 5145.28 1
 -8 -2 1 79274.8 4195.35 3
 -8 -2 0 107837 6512.13 1
 8 2 0 112346 4779.19 4
 -8 2 0 108000 6619.5 1
 8 2 1 199972 7411.85 4
 8 -2 1 184170 8241.85 2
 -8 -2 -1 191200 9431.06 1
 -8 2 -1 193548 9620.45 1
 8 2 2 10518 1119.9 4
 8 -2 2 10611.7 1518.41 2
 -8 -2 -2 12838.2 1966.38 1
 -8 2 -2 11131.2 1890.97 1
 8 2 3 106031 4584.41 4
 8 -2 3 105193 5709.77 2
 -8 -2 -3 121363 6629.27 1
 -8 2 -3 122950 6768.22 1
 8 2 4 50372.7 2991.56 4
 8 -2 4 46165.2 3763.93 2
 -8 2 -4 47062.7 2282.56 4
 -8 -2 -4 50964.2 4159.38 1
 -8 2 -4 57342.3 4430.47 1
 8 2 5 54894.7 4435.77 2
 -8 2 -5 65215.9 4763.62 1
 -8 2 -5 53148.1 2726.85 4
 8 2 5 53859 3371.42 4
 8 -2 5 51870.1 4152.53 2
 -8 -2 -5 59282 4511.06 1
 8 2 6 73162.2 5435.94 2
 -8 2 -6 66660.6 3457.16 4
 8 2 6 70990 4210.78 4
 8 -2 6 68747.4 5092.73 2
 -8 -2 -6 77818.7 5312.32 1
 -8 2 -6 70993.4 5137.52 1
 -8 -2 -7 7519.02 1498.6 1
 8 2 7 5477.3 1384.37 2
 8 2 7 8301.52 1399.4 4
 8 2 8 79781.3 6187.32 2
 8 -2 8 82862.1 6039.27 2
 8 2 8 70854.1 4892.18 4
 -8 -2 -8 94351.4 5852.22 1
 -8 -2 -9 2565.78 991.188 1
 8 2 9 3454.27 1254.46 2
 8 -2 9 3342.72 1170.92 2
 8 2 10 65712.1 5979.06 2
 -8 -2 -10 68921.5 5038.34 1
 8 -2 10 67494.8 5798.56 2
 8 2 11 22117.8 3553 2
 8 -2 11 27286.4 3667.67 2
 -8 -2 -11 24581.3 2877.81 1
 8 2 12 12848.1 2710.36 2
 8 -2 12 12569.8 2516 2
 -8 -2 -12 16597.3 2254.86 1
 -8 -2 -13 41676.6 3831.78 1
 8 2 13 46454.8 5435.18 2
 8 -2 13 47618.3 5332.9 2
 8 2 14 -181.924 1191.2 2
 8 -2 14 -430.373 887.933 2
 8 2 15 44370.6 5622.53 2
 8 -2 15 36364.1 4977.78 2
 8 2 16 13644.7 3216.12 2
 8 -2 16 12559.8 3039.65 2
 8 2 17 13159.9 3103.68 2
 8 -2 17 12201.9 3216.75 2
 8 -2 18 22759.9 4196.93 2
 8 -2 19 -1145.93 1606.27 2
 -8 3 28 16476.6 4045.13 3
 -8 -3 27 7576.88 2787.46 3
 -8 3 27 7037.36 2829.85 3
 -8 -3 26 2082.59 1548.17 3
 -8 3 26 1898.15 838.503 3
 -8 -3 25 21585.9 4498.75 3
 -8 3 25 16890.9 3877.54 3
 -8 -3 24 2603.31 1824.66 3
 -8 3 24 1117.38 863.005 3
 -8 3 23 5756.28 1993.7 3
 -8 3 22 18357.9 3708.47 3
 -8 3 21 894.686 524.709 3
 -8 -3 20 57608.9 4564.77 2
 -8 3 20 49662.8 5801.93 3
 -8 3 19 7053.6 2059.62 3
 -8 -3 19 8356.36 1570.79 2
 -8 -3 18 16192.3 2106.9 2
 -8 3 18 12996.1 2745.29 3
 -8 -3 17 38173.1 3118.96 2
 -8 3 17 27505.8 3926.06 3
 -8 -3 16 9016.95 1374.32 2
 -8 3 16 4926.76 1651.69 3
 -8 -3 16 8707.14 1467.11 1
 -8 -3 15 26036.4 2635.46 1
 -8 3 15 25116.4 3507.7 3
 -8 -3 14 4187.84 1048.23 1
 -8 3 14 2970.54 1150.53 3
 -8 -3 13 17056.3 2145.61 1
 -8 3 13 15297.6 2544.95 3
 -8 -3 12 6094.35 1593.65 3
 -8 -3 12 5842.9 1307.13 1
 -8 3 12 6288.24 1600.11 3
 8 -3 -11 3629.3 592.181 2
 -8 -3 11 3043.61 1105.58 3
 -8 -3 11 2322.55 802.316 1
 -8 3 11 1790.63 779.036 3
 -8 -3 10 43009.8 3700.29 1
 8 -3 -10 46643.8 2477.38 2
 -8 3 10 46234.6 3918.84 4
 -8 -3 10 53356.7 4423.5 3
 -8 3 10 46450.4 4249.89 3
 -8 3 9 10310.4 1847.15 3
 -8 -3 9 9235.09 1611.85 1
 -8 3 9 9974.18 1623.6 4
 -8 -3 9 11756 1970.68 3
 -8 -3 8 75167.6 5206.97 1
 -8 3 8 88534.5 5111.8 4
 -8 -3 8 85982.1 5476.08 3
 -8 3 8 82483.7 5673.41 3
 -8 3 7 8215.13 1298.8 4
 -8 -3 7 5228.9 1195.99 3
 -8 -3 7 4640.56 1145.53 1
 -8 3 7 8490.08 1667.21 3
 -8 3 6 48414.4 3133.45 4
 -8 -3 6 43573.9 3403.68 3
 -8 -3 6 38851.6 3553.4 1
 -8 3 6 41431.4 3775.31 3
 -8 -3 5 119314 6828.68 1
 -8 3 5 119291 5422.09 4
 -8 -3 5 119606 6113.47 3
 -8 3 4 9776.72 1089.52 4
 8 -3 -4 10497.5 1160.5 4
 -8 -3 4 9017.43 1351.87 3
 -8 -3 4 7683.26 1516.05 1
 -8 3 3 111396 4599.67 4
 -8 -3 3 103831 6449.77 1
 -8 -3 3 108575 5448.03 3
 8 -3 -3 117235 4824.65 4
 -8 3 2 55265.2 2568.45 4
 -8 -3 2 55863.1 4382.06 1
 -8 -3 2 52846.5 3336.77 3
 8 3 -2 58602 3553.13 4
 -8 3 1 26685.1 1479.31 4
 8 3 -1 31012.8 2413.67 4
 -8 -3 1 30176.7 2238.68 3
 -8 3 0 174505 6080.34 4
 8 3 0 194945 7707.99 4
 -8 -3 0 187328 9170.53 1
 -8 3 -1 7389.81 626.718 4
 8 3 1 7354.52 1089.07 4
 8 3 1 5528.41 871.857 3
 -8 -3 -1 5730.64 1385.65 1
 8 3 2 127630 5671.62 4
 -8 -3 -2 125752 7053.11 1
 8 3 2 115523 5061.57 3
 -8 3 -2 109702 4343.26 4
 8 3 3 147.542 213.758 4
 8 3 3 881.147 320.098 3
 -8 3 -3 1067.73 318.296 4
 8 3 4 66901 3979 4
 -8 3 -4 77649.1 3522.06 4
 -8 -3 -4 73336.8 5137.43 1
 8 3 4 63303.5 3368.55 3
 -8 -3 -5 25089.3 2848.74 1
 8 3 5 23147.5 2172.17 4
 -8 3 -5 22567.9 1809.05 4
 8 3 5 20896.5 1676.53 3
 -8 -3 -6 25322.3 2880.73 1
 8 3 6 24409.8 2352.51 4
 8 -3 6 22248 2747.44 2
 8 3 7 42700.9 3403.16 4
 8 -3 7 42566.1 4040.75 2
 -8 -3 -7 48413.2 4167.71 1
 8 3 8 548.606 278.458 4
 -8 -3 -8 266.646 518.55 1
 8 -3 8 103.251 343.527 2
 8 3 9 50070 4198.86 4
 8 -3 9 48512.1 4639.98 2
 -8 -3 -9 48881.7 4169.19 1
 8 -3 10 36636.7 4111 2
 8 3 10 30938.9 3460.08 4
 -8 -3 -10 31961.4 3326.98 1
 8 -3 11 31041.1 3910.77 2
 -8 -3 -11 30336.4 3233.45 1
 8 -3 12 65357.3 6093.89 2
 -8 -3 -12 71700.1 5200.61 1
 -8 -3 -13 84.1615 513.8 1
 8 -3 13 -80.1854 637.639 2
 8 -3 14 86873.5 7490.1 2
 8 -3 15 3924.78 1337.49 2
 8 -3 16 34749.9 4919.68 2
 8 -3 17 13681.2 3235.35 2
 8 -3 18 2253.71 1518.12 2
 8 -3 19 19235.9 3888.98 2
 -8 4 28 -715.089 980.866 3
 -8 4 27 6794.44 2496.38 3
 -8 4 26 567.275 802.394 3
 -8 4 25 1289.83 868.528 3
 -8 4 24 -763.79 887.935 3
 -8 4 23 16094.6 3512.2 3
 -8 4 22 228.766 636.364 3
 -8 4 21 63890.3 6820.08 3
 -8 -4 20 -214.754 489.687 2
 -8 4 20 -326.995 859.383 3
 -8 -4 19 77395 5199.67 2
 -8 4 19 64826.5 6596.06 3
 -8 4 18 946.081 607.806 3
 -8 -4 18 2454.34 807.269 2
 -8 4 17 6317.13 1854.84 3
 -8 -4 16 17364.5 2132.11 1
 -8 4 16 17358.6 3014.82 3
 -8 -4 15 2650.15 818.824 1
 -8 4 15 4361.1 1452.63 3
 -8 4 14 19633.9 3000.05 4
 -8 4 14 22330.9 3207.96 3
 -8 -4 14 20155 2404.71 1
 -8 4 13 1203.86 711.054 3
 -8 -4 13 1715.27 818.421 1
 -8 4 13 545.922 448.366 4
 -8 4 12 4605.93 1395.83 3
 -8 4 12 5175.12 1357.06 4
 -8 -4 12 4707.82 1162.94 1
 -8 4 11 82527 5677.5 4
 -8 -4 11 72482.6 5131.04 1
 -8 4 11 82809.5 6070.9 3
 -8 4 10 3395.52 1169.43 3
 -8 -4 10 2571.69 1007.54 1
 -8 4 10 848.476 603.257 4
 -8 4 9 168123 8074.02 4
 -8 4 9 144205 8485.59 3
 -8 -4 9 155637 8238.68 1
 -8 4 8 2825.82 1030.68 3
 -8 4 8 3011.73 872.242 4
 -8 -4 8 2105.08 820.095 1
 -8 -4 8 4161.2 1143.36 3
 -8 4 7 277048 11025.3 4
 -8 -4 7 283244 11855.7 3
 -8 -4 7 269302 12093.9 1
 -8 4 7 258210 12310.1 3
 -8 4 6 2769.81 701.931 4
 -8 -4 6 3324.72 875.798 3
 -8 -4 6 1826.46 901.576 1
 -8 4 5 96359.7 4741.44 4
 -8 -4 5 93916.3 5263.72 3
 -8 -4 5 88918.3 5896.53 1
 -8 -4 4 4505.11 1169.59 1
 -8 4 4 4824.7 812.717 4
 -8 -4 4 3707.37 819.675 3
 -8 4 3 8865.78 1077.06 4
 -8 -4 3 8858.42 1635.12 1
 -8 -4 3 8207.17 1225 3
 8 -4 -3 8437.23 1145.2 4
 -8 4 2 7185.31 909.013 4
 -8 -4 2 6350.87 1425.64 1
 -8 -4 2 8701.46 1160.99 3
 8 4 -2 6387.51 1167.65 4
 -8 -4 1 97984.7 6156.41 1
 -8 4 1 95346.8 4170.36 4
 -8 -4 1 89899.4 4433.17 3
 8 4 -1 98168.8 5308.82 4
 8 4 0 6092.5 1106.43 4
 -8 4 0 7298.73 845.452 4
 -8 -4 0 6571.37 884.661 3
 -8 -4 0 8850.42 1756.97 1
 -8 -4 -1 196133 9489.4 1
 -8 4 -1 180269 6925.74 4
 8 4 1 178181 8098.42 4
 8 4 2 3112.63 792.586 4
 -8 -4 -2 3213.47 1070.31 1
 -8 4 -2 4229.32 717.666 4
 8 4 3 159369 7391.03 4
 -8 -4 -3 162273 8523.97 1
 -8 4 -3 151327 6409.52 4
 8 4 4 8646.47 1397.79 4
 -8 -4 -4 10626.1 1949.66 1
 8 4 5 54052.2 3811.93 4
 -8 -4 -5 47593 4188.62 1
 8 4 6 26048 2606.89 4
 -8 -4 -6 28231.9 3130.16 1
 8 4 7 3265.01 1017.49 4
 -8 -4 -7 2486.58 835.214 1
 -8 -4 -8 29999.2 3263.79 1
 8 4 8 27327.4 2896.01 4
 -8 -4 -9 6948.29 1571.9 1
 8 4 9 6694.7 1440.03 4
 8 -4 9 6321.67 1633.59 2
 -8 -4 -10 301.333 474.772 1
 8 4 10 332.406 592.026 4
 8 -4 10 761.027 594.958 2
 8 4 11 56558.1 5035.61 4
 8 -4 11 65826 5821.72 2
 -8 -4 -11 66829.8 5109.63 1
 8 4 12 7280.7 1768.82 4
 -8 -4 -12 6376.48 1440.88 1
 8 -4 12 8564.45 2028.35 2
 8 -4 13 95623.9 7619.97 2
 8 4 13 87546.4 7033.13 4
 -8 -4 -13 82398.1 5837.39 1
 -8 -4 -14 15881.6 2339.29 1
 8 -4 14 14959.5 2947.56 2
 8 -4 15 44926 5481.75 2
 8 -4 16 3332.06 1667.78 2
 8 -4 17 12340.5 3018.56 2
 8 -4 18 17343 3688.65 2
 -8 5 28 7818.84 2811.84 3
 -8 5 27 -926.797 1367.22 3
 -8 5 26 -689.862 980.97 3
 -8 5 25 887.411 762.127 3
 -8 5 24 10197.4 2863.53 3
 -8 5 23 4384.53 1569.35 3
 -8 5 22 46349.1 5966.92 3
 -8 5 21 1593.92 902.945 3
 -8 -5 20 102959 6423.7 2
 -8 5 20 85084.8 7943.82 3
 -8 5 19 -309.954 496.199 3
 -8 5 18 56663.6 5956.22 3
 -8 5 17 180.549 877.996 3
 -8 5 17 247.151 901.245 4
 -8 5 16 4202.83 1511.67 3
 -8 -5 16 4210.22 1112.4 1
 -8 5 16 6989.98 1979.95 4
 -8 5 15 11955.6 2465.23 3
 -8 5 15 13462.7 2633.42 4
 -8 -5 15 11454.5 1867.34 1
 -8 -5 14 6707.68 1385.53 1
 -8 5 14 9363.55 1985.63 4
 -8 5 14 4879.98 1553.08 3
 -8 5 13 937.98 803.904 3
 -8 -5 13 1941.88 813.446 1
 -8 5 13 1306.84 769.016 4
 -8 5 12 123707 7480.66 4
 -8 -5 12 115277 6845.15 1
 -8 5 12 107580 7493.95 3
 -8 5 11 163.599 479.935 3
 -8 5 11 543.815 614.962 4
 -8 -5 11 719.894 751.149 1
 -8 -5 10 152807 8098.74 1
 -8 5 10 145385 7825.06 4
 -8 5 10 136434 8504.83 3
 -8 -5 9 2731.49 965.545 1
 -8 5 9 3995.48 1253.1 3
 -8 5 9 1708.27 640.591 4
 -8 5 8 236229 10212.9 4
 -8 -5 8 226475 10841.8 1
 -8 5 7 1831.82 710.62 4
 -8 -5 7 2315.7 906.59 1
 -8 5 6 169669 7749.47 4
 -8 -5 6 170506 8849.61 1
 -8 -5 6 173688 8297.46 3
 -8 5 5 8004.15 1257.68 4
 -8 -5 5 6610.38 1255.09 3
 -8 5 4 26059.6 2247.46 4
 -8 -5 4 26805.5 2412.18 3
 -8 5 3 702.81 393.331 4
 8 5 -3 -1.58261 391.416 4
 -8 -5 3 1257.41 511.51 3
 -8 5 2 17893.9 1722.89 4
 -8 -5 2 17320.6 2394.1 1
 -8 -5 2 17787.8 1699.5 3
 8 5 -2 16930.7 2216.55 4
 -8 5 1 35511.4 2494.33 4
 -8 -5 1 33930.8 2272.65 3
 8 5 -1 32674.1 3034.97 4
 -8 -5 1 34082.7 3404.05 1
 -8 -5 0 99309.2 6262.95 1
 -8 -5 0 98698 4119.41 3
 8 5 0 96487.9 5616.59 4
 -8 -5 -1 23804 2858.59 1
 -8 5 -1 23090.3 1957.6 4
 8 5 1 21305.1 2383.7 4
 -8 -5 -2 143073 8055.14 1
 -8 5 -2 138761 6319 4
 8 5 2 143593 7313.67 4
 8 5 3 1110.54 675.833 4
 -8 5 -3 491.013 303.637 4
 -8 -5 -3 -89.453 397.369 1
 8 5 4 75911.5 5022.65 4
 -8 -5 -4 80771.3 5698.55 1
 -8 -5 -5 691.255 399.22 1
 8 5 5 -105.078 259.968 4
 8 5 6 32150.4 3174.39 4
 -8 -5 -6 34847.5 3576 1
 8 5 7 2826.58 947.43 4
 -8 -5 -7 2725.04 863.083 1
 -8 -5 -8 3014.25 1095.37 1
 8 5 8 1393.38 662.038 4
 8 5 9 1155.54 807.258 4
 -8 -5 -9 1625.86 840.119 1
 -8 -5 -10 22862.4 2862.6 1
 8 5 10 18184.7 2682.98 4
 8 5 11 9633.79 2064.25 4
 -8 -5 -11 9682.33 1867.96 1
 8 -5 11 11682.6 2423.48 2
 -8 -5 -12 52868.8 4659.84 1
 8 5 12 54871.4 5226.16 4
 8 -5 12 55185.3 5510.67 2
 8 5 13 8721.89 2123.52 4
 8 -5 13 8141.01 2113.86 2
 -8 -5 -13 9533.3 1870.86 1
 8 5 14 36501.3 4637.93 4
 8 -5 14 38578.4 4866.2 2
 -8 -5 -14 36672.2 3781.5 1
 8 -5 15 1956.38 1124.53 2
 8 -5 16 18234.9 3496.02 2
 8 -5 17 2117.62 1438.53 2
 8 -5 18 1881.52 1313.6 2
 -8 6 27 177.83 947.633 3
 -8 6 26 -1514.04 1277.19 3
 -8 6 25 4217.45 2233.63 3
 -8 6 24 967.461 1346.42 3
 -8 6 23 22718.9 4220.41 3
 -8 6 22 2972.26 1549.27 3
 -8 6 21 40275.7 5422.06 3
 -8 6 20 750.713 809.232 3
 -8 6 19 66462.9 6967.56 4
 -8 6 19 50280.7 5840.01 3
 -8 6 18 4673.01 1708.1 3
 -8 6 18 6451.48 2071.95 4
 -8 6 17 66550.2 6490.19 4
 -8 6 17 59411.3 6017.09 3
 -8 6 16 -653.745 822.655 3
 -8 -6 16 -262.814 455.154 1
 -8 6 16 198.371 373.735 4
 -8 6 15 4388.65 1551.26 3
 -8 6 15 6391.01 1830.85 4
 -8 -6 15 5666.18 1341.7 1
 -8 6 14 559.324 751.982 3
 -8 -6 14 83.1433 383.527 1
 -8 6 14 -239.746 533.447 4
 -8 -6 13 54773.7 4528.84 1
 -8 6 13 59682.2 5220.49 4
 -8 6 13 56772 5353.12 3
 -8 6 12 2577.01 1071.66 4
 -8 -6 12 1442.26 699.681 1
 -8 6 11 154714 8416.78 4
 -8 6 11 137106 8800.09 3
 -8 6 10 399.685 569.328 4
 -8 6 9 157657 8192.93 4
 -8 6 8 444.481 373.727 4
 -8 6 7 139634 7225.5 4
 -8 6 6 10656.5 1634.53 4
 -8 6 5 18759.3 2133.29 4
 -8 6 4 27532.6 2575.06 4
 -8 -6 4 31569.3 2681.31 3
 8 6 -3 654.021 575.017 4
 -8 -6 3 591.175 431.957 3
 -8 6 2 8478.81 1320.27 4
 -8 -6 2 7545.1 1070.29 3
 8 6 -2 8975.68 1664.75 4
 -8 -6 1 22992.3 1792.69 3
 8 6 -1 21777.1 2655 4
 -8 6 1 24955.5 2292.91 4
 -8 6 0 1959.54 587.242 4
 -8 -6 0 1764.63 429.664 3
 8 6 0 1095.89 638.095 4
 8 6 1 82851.6 5484.38 4
 -8 6 -1 79178.4 4628.54 4
 8 6 2 13436.9 2012.02 4
 -8 6 -2 14142.7 1774.5 4
 8 6 3 57517.8 4473.31 4
 -8 6 -3 58940.2 4018.02 4
 8 6 4 2319.86 784.781 4
 -8 6 -4 3194.28 937.325 4
 8 6 5 58016.3 4563.85 4
 -8 -6 -5 54713 4726.27 1
 -8 -6 -6 7385.74 1528.43 1
 8 6 6 10713.1 1931.77 4
 8 6 7 2238.69 927.563 4
 -8 -6 -7 1323.52 675.247 1
 8 6 8 25111.4 3066.66 4
 -8 -6 -8 22027.4 2922.19 1
 8 6 9 12457.4 2237.67 4
 -8 -6 -9 14360.1 2460.5 1
 8 6 10 5460.23 1497.78 4
 -8 -6 -10 8376.82 1763.04 1
 8 6 11 22910.3 3237.38 4
 -8 -6 -11 20780.4 2917.78 1
 -8 -6 -12 2382.84 824.327 1
 8 6 12 4051.83 1425.27 4
 -8 -6 -13 24203.9 3135.11 1
 8 6 13 29714.2 4114.91 4
 8 -6 13 27535.6 3924.68 2
 -8 -6 -14 528.855 501.239 1
 8 6 14 1081.21 832.634 4
 8 -6 14 -261.119 833.691 2
 8 -6 15 16389.5 3293.97 2
 8 -6 16 2262.12 1534.77 2
 8 -6 17 5954.95 1995.7 2
 -8 7 26 543.828 828.423 3
 -8 7 25 475.25 540.231 3
 -8 7 24 7899.93 2482.01 3
 -8 7 23 9786.7 2766.27 3
 -8 7 22 16829.1 3520.68 3
 -8 7 21 336.496 974.749 3
 -8 7 21 163.709 897.327 4
 -8 7 20 44360.7 5839.77 4
 -8 7 20 36908.3 5133.41 3
 -8 7 19 2694.83 1195.89 3
 -8 7 19 1667.19 1176.72 4
 -8 7 18 18741.7 3406.39 3
 -8 7 18 21354.4 3778.71 4
 -8 7 17 9287.59 2265.97 3
 -8 7 17 8726.52 2290.31 4
 -8 7 16 8423.51 2109.98 3
 -8 -7 16 6400.98 1437.46 1
 -8 7 16 10013.4 2315.83 4
 -8 7 15 19229.3 3261.34 3
 -8 -7 15 21805.4 2753.9 1
 -8 7 15 23571.3 3469.91 4
 -8 7 14 3083.09 1321.9 3
 -8 7 14 2792.4 1125.79 4
 -8 7 13 39495.8 4251.65 4
 -8 7 13 36953.1 4383.66 3
 -8 7 12 51757.8 4773.42 4
 -8 7 11 13977.1 2283.57 4
 -8 7 10 108081 6868.08 4
 -8 7 9 812.945 502.8 4
 -8 7 8 90175.6 5866.8 4
 -8 7 7 2707.41 918.779 4
 -8 7 6 54794.7 4192.3 4
 -8 7 5 15229.3 2083.93 4
 -8 7 4 4676 1134.97 4
 8 7 -4 4557.12 1247.92 4
 -8 7 3 33108 3013.16 4
 -8 -7 3 33500.2 2681.91 3
 8 7 -3 28598.9 3383.7 4
 8 7 -2 4106.17 1257.53 4
 -8 7 2 4646 1067.45 4
 -8 -7 2 5976.88 1010.86 3
 -8 -7 1 40453 2506.33 3
 -8 7 1 34724.3 3110.46 4
 8 7 -1 37321.2 3770.98 4
 8 7 0 59718.1 4888.84 4
 -8 7 0 65540.2 4404.42 4
 -8 7 -1 1466.56 530.295 4
 8 7 1 3517.25 1104.6 4
 -8 7 -2 120052 6557.14 4
 8 7 2 111404 7077.39 4
 8 7 3 -261.706 610.205 4
 -8 7 -3 626.57 308.61 4
 8 7 4 81653.5 5931.6 4
 -8 7 -4 91798.3 5699 4
 8 7 5 10690.4 1934.82 4
 -8 7 -5 13388.7 2015.04 4
 8 7 6 3596.05 1287.84 4
 -8 -7 -7 57726.5 4995.43 1
 8 7 7 50576.6 4694.23 4
 8 7 8 4982.37 1504.28 4
 -8 -7 -8 7104.72 1660.34 1
 -8 -7 -9 23276.2 3118.33 1
 8 7 9 22628 3185.04 4
 -8 -7 -10 14908 2531.2 1
 8 7 10 12320.4 2385.68 4
 8 7 11 6591.92 1756.33 4
 -8 -7 -11 7951.17 1810.47 1
 8 7 12 29729.8 3914.24 4
 -8 -7 -12 30394.2 3657.51 1
 -8 -7 -13 520.612 654.23 1
 8 7 13 -99.9794 947.224 4
 8 7 14 19868.3 3455.49 4
 -8 -7 -14 19189.8 2865.16 1
 8 -7 14 16350.4 3161.61 2
 8 -7 15 6680.84 2175.26 2
 8 -7 16 10408.4 2698.19 2
 8 -7 17 12437.8 3012.1 2
 -8 8 24 6277.19 2374.46 3
 -8 8 23 10118.3 2930.46 3
 -8 8 22 3909.08 1699.62 3
 -8 8 22 5628.6 2309.21 4
 -8 8 21 10533.2 2792.19 3
 -8 8 21 15417.3 3607.13 4
 -8 8 20 1777.08 1372.64 3
 -8 8 20 1749.44 1333.38 4
 -8 8 19 16136.4 3297.06 3
 -8 8 19 17347 3520.36 4
 -8 8 18 15894 3284.31 3
 -8 8 18 17217.9 3409.94 4
 -8 8 17 7293.07 2207.03 3
 -8 8 17 8708.59 2385.4 4
 -8 8 16 32797.7 4402.47 4
 -8 8 16 27425.6 4075.27 3
 -8 8 15 1189.95 887.801 4
 -8 8 14 89803.1 7077.75 4
 -8 8 13 3568.42 1319.53 4
 -8 8 12 63676.5 5516.49 4
 -8 8 11 17512.8 2683.2 4
 -8 8 10 134.5 583.004 4
 -8 8 9 27487.9 3247.5 4
 -8 8 8 2955.7 1133.28 4
 -8 8 7 35074.4 3550.85 4
 -8 8 6 17601.6 2423.4 4
 -8 8 5 2341.01 874.183 4
 -8 8 4 65925.7 4864.55 4
 8 8 -4 65882.3 5696.44 4
 -8 8 3 10.4547 484.793 4
 8 8 -3 1438.4 725.873 4
 -8 -8 2 71185.9 4067.51 3
 8 8 -2 65597.8 5504.6 4
 -8 8 2 68752.4 4920.49 4
 -8 8 1 4139.14 1160.56 4
 8 8 -1 6110.84 1556 4
 8 8 0 54858.3 4972.5 4
 -8 8 0 61467.8 4601.13 4
 -8 8 -1 49075.3 4151.82 4
 8 8 1 53253.3 4755.01 4
 -8 8 -2 21986.2 2701.21 4
 8 8 2 26457.3 3285.62 4
 -8 8 -3 45198.3 4033.57 4
 8 8 3 43826.9 4373.65 4
 8 8 4 3346.13 1196.23 4
 -8 8 -4 2518.34 1033.5 4
 8 8 5 6431.96 1671.12 4
 -8 8 -5 4156.72 1234.26 4
 8 8 6 50006.3 4798.76 4
 -8 8 -6 47044.2 4434 4
 8 8 7 3056.81 1100.95 4
 8 8 8 31511.2 3826.59 4
 8 8 9 11228 2340.86 4
 8 8 10 14645.3 2683.17 4
 -8 -8 -10 18666.5 2887.79 1
 8 8 11 19833 3200.67 4
 -8 -8 -11 23343.5 3217.8 1
 -8 -8 -12 2116.61 1116.17 1
 8 8 12 2967.53 1325.54 4
 8 8 13 25168.6 3895.01 4
 -8 -8 -13 25669.6 3425.51 1
 -8 -8 -14 2396.73 1156.29 1
 8 8 14 2770.02 1449.13 4
 8 8 15 10002.7 2567.12 4
 8 -8 16 12401 2973.75 2
 -8 9 23 6237.14 2466.79 3
 -8 9 23 3343.05 1708.01 4
 -8 9 22 2746.81 1529.49 3
 -8 9 22 5115.84 2331.99 4
 -8 9 21 -244.39 727.106 3
 -8 9 21 -842.36 907.127 4
 -8 9 20 3691.5 1663.8 3
 -8 9 20 7878.95 2512.08 4
 -8 9 19 15210.3 3354.25 4
 -8 9 18 5082.47 1953.13 4
 -8 9 17 57739.6 6271.1 4
 -8 9 16 2991.05 1407.12 4
 -8 9 15 80654.4 7067.37 4
 -8 9 14 3279.03 1192.95 4
 -8 9 13 83122.4 6834.9 4
 -8 9 12 2175.55 1159.9 4
 -8 9 11 29900 3730.31 4
 -8 9 10 1278.36 680.582 4
 -8 9 9 1972.78 898.653 4
 -8 9 8 27523 3370 4
 -8 9 7 23001.3 3003.63 4
 -8 9 6 8506.89 1837.28 4
 8 9 -5 100448 7676.05 4
 -8 9 5 106138 6839.54 4
 -8 9 4 -670.587 585.226 4
 8 9 -4 1137.92 806.164 4
 -8 9 3 135039 7827.35 4
 8 9 -3 121153 8452.3 4
 -8 9 2 2242.23 939.307 4
 8 9 -2 909.662 488.831 4
 8 9 -1 120580 8162.36 4
 -8 9 1 117072 7275.52 4
 8 9 0 4125.42 1389.47 4
 -8 9 0 3892.69 1194.64 4
 -8 9 -1 30713.4 3351.19 4
 8 9 1 25109.6 3410.08 4
 8 9 2 4597.07 1496.18 4
 -8 9 -2 5283.21 1458.07 4
 8 9 3 1629.33 1025.75 4
 -8 9 -3 1503.67 777.652 4
 8 9 4 5415.78 1625.37 4
 -8 9 -4 6682.11 1607.51 4
 8 9 5 16374.4 2732.54 4
 -8 9 -5 15751.8 2599.89 4
 8 9 6 3328.77 1293.98 4
 -8 9 -6 3580.93 1246.82 4
 8 9 7 25341.6 3574.9 4
 -8 9 -7 28505.4 3646.53 4
 8 9 8 1795.13 976.72 4
 8 9 9 17891 3103.17 4
 8 9 10 4291.3 1500.75 4
 8 9 11 13659.8 2789.33 4
 -8 -9 -11 10078.8 2209.46 1
 -8 -9 -12 15935.2 2766.39 1
 8 9 12 12115.2 2665.34 4
 -8 -9 -13 3273.66 1177.45 1
 8 9 13 1440.41 972.042 4
 8 9 14 7145.35 2239.28 4
 -8 -9 -14 6469.7 1679.38 1
 8 9 15 2792.78 1067.06 4
 -8 10 22 6626.89 2636.83 4
 -8 10 21 -1189 1500.3 4
 -8 10 20 2934.11 1624.64 4
 -8 10 19 1729.16 1329.57 4
 -8 10 18 27947.6 4567.86 4
 -8 10 17 1125.29 528.736 4
 -8 10 16 50201 5835.23 4
 -8 10 15 690.694 705.694 4
 -8 10 14 71262.7 6605.41 4
 -8 10 13 1726.73 1124.27 4
 -8 10 12 35289.1 4385.75 4
 -8 10 11 1243.41 871.966 4
 -8 10 10 15916.5 2794.66 4
 -8 10 9 -589.175 740.877 4
 -8 10 8 107.989 744.943 4
 -8 10 7 716.245 712.843 4
 -8 10 6 51815.9 4829.26 4
 8 10 -6 46774.5 5277.78 4
 8 10 -5 2709.47 1297.73 4
 -8 10 5 1488.96 891.609 4
 -8 10 4 82105.2 6142.73 4
 8 10 -4 67882.6 6460.79 4
 -8 10 3 742.396 433.244 4
 8 10 -3 2006.38 1186.03 4
 -8 10 2 74871 5902.63 4
 8 10 -2 87477.7 7023.71 4
 -8 10 1 1831.4 936.737 4
 8 10 -1 667.933 658.414 4
 8 10 0 26399.6 3661.96 4
 -8 10 0 25952.9 3342.5 4
 -8 10 -1 1815.29 1055.06 4
 8 10 1 1817.73 1119.89 4
 8 10 2 2524.23 1170.44 4
 -8 10 -2 2673.74 1091.31 4
 8 10 3 1580.8 942.723 4
 -8 10 -3 3241.11 1272.7 4
 -8 10 -4 5197.37 1526.79 4
 8 10 4 6150.52 1808.03 4
 8 10 5 2947.56 1213.08 4
 -8 10 -5 2853.63 1239.66 4
 8 10 6 32723 4207.37 4
 -8 10 -6 37620.1 4344.43 4
 8 10 7 1362.62 960.074 4
 8 10 8 42836.7 5000.57 4
 8 10 9 -125.981 587.805 4
 8 10 10 12204 2625.13 4
 8 10 11 1889.62 763.005 4
 -8 -10 -12 4316.35 1436.21 1
 8 10 12 4295.19 1506.6 4
 -8 -10 -13 -792.496 1269.76 1
 8 10 13 391.859 624.431 4
 8 10 14 1329.17 1133.23 4
 8 10 15 1424.35 1317.55 4
 -8 11 20 1624.41 809.195 4
 -8 11 19 4064.83 1878.11 4
 -8 11 18 2862.41 1692.19 4
 -8 11 17 31106.2 4770.59 4
 -8 11 16 -1119.22 1372.29 4
 -8 11 15 45654.4 5527.44 4
 -8 11 14 170.349 607.978 4
 -8 11 13 40187.5 5054.54 4
 -8 11 12 2124.34 873.704 4
 -8 11 11 10662.4 2376.17 4
 -8 11 10 6905.9 1878.34 4
 -8 11 9 553.09 795.364 4
 -8 11 8 18872.8 3052.76 4
 -8 11 7 16332.9 2852.35 4
 8 11 -7 8973.4 2350.82 4
 -8 11 6 27963.2 3643.13 4
 8 11 -6 20024.5 3566.73 4
 8 11 -5 64832.1 6582.84 4
 -8 11 5 67898.2 5909.32 4
 -8 11 4 7120.41 1941.73 4
 8 11 -4 5887.57 1860.11 4
 -8 11 3 71618.6 5985.81 4
 8 11 -3 58782.3 6145.51 4
 8 11 -2 849.289 1038.59 4
 -8 11 2 929.279 736.626 4
 -8 11 1 27713.9 3570.71 4
 8 11 -1 26513.3 3899.29 4
 -8 11 0 2793.09 1147.26 4
 8 11 0 2271.95 971.703 4
 -8 11 -1 5911.58 1780.9 4
 8 11 1 5465.98 1810.53 4
 -8 11 -2 713.052 754.794 4
 8 11 2 937.374 401.594 4
 8 11 3 4308.46 1551.62 4
 -8 11 -3 364.61 601.241 4
 8 11 4 1445.26 739.78 4
 -8 11 -4 243.653 401.834 4
 8 11 5 32217 4393.14 4
 -8 11 -5 37168.9 4491.27 4
 8 11 6 2309.51 1150.12 4
 8 11 7 55551.3 5928.35 4
 8 11 8 1847.08 1222.52 4
 8 11 9 40105.8 5103.56 4
 8 11 10 239.458 606.912 4
 8 11 11 9625.45 2532.13 4
 8 11 12 2918.72 1642.97 4
 -8 -11 -13 -1294.54 1212.35 1
 8 11 13 88.5498 805.483 4
 8 11 14 7377.89 2305.09 4
 -8 12 19 12360.7 3473.29 4
 -8 12 18 1548.27 1267.06 4
 -8 12 17 1909.96 1101.52 4
 -8 12 16 20752.8 3883.53 4
 -8 12 15 -1127.51 1065.79 4
 -8 12 14 33402.5 4798.23 4
 -8 12 13 1279.83 917.896 4
 -8 12 12 17048.2 3298.92 4
 -8 12 11 6860.09 2067.2 4
 -8 12 10 1827.01 1009.35 4
 -8 12 9 12252.2 2654.4 4
 -8 12 8 3752.36 1456.86 4
 8 12 -8 4774.06 1951.66 4
 -8 12 7 26843.7 3811.95 4
 8 12 -7 21792.1 4061.39 4
 -8 12 6 26400 3824.09 4
 8 12 -6 31345.7 4721.83 4
 -8 12 5 24023.1 3559.94 4
 8 12 -5 20452.7 3793.69 4
 -8 12 4 54905.5 5583.14 4
 8 12 -4 44983.6 5600.67 4
 -8 12 3 285.861 569.47 4
 8 12 -3 -15.0293 1177.08 4
 8 12 -2 29158.4 4384.47 4
 -8 12 2 34011.2 4249.28 4
 8 12 -1 311.476 473.506 4
 -8 12 1 5679.47 1729.18 4
 8 12 0 5890.06 1939.34 4
 -8 12 0 5072.9 1552.14 4
 8 12 1 5492.82 1885.84 4
 -8 12 -1 6604 1946.52 4
 -8 12 -2 515.037 453.129 4
 8 12 2 913.05 588.015 4
 -8 12 -3 6815.65 2017.88 4
 8 12 3 6632.51 1995.71 4
 8 12 4 19721.3 3528.86 4
 -8 12 -4 19521.9 3380.03 4
 8 12 5 9514.16 2394.59 4
 8 12 6 39096.7 5120.43 4
 8 12 7 1272.6 1212.7 4
 8 12 8 32312.8 4746.01 4
 8 12 9 2808.81 1790.37 4
 8 12 10 13793.9 3109.84 4
 8 12 11 7848.31 2446.54 4
 8 12 12 1357.32 1607.77 4
 8 12 13 2822 1690.01 4
 -8 13 17 1354.74 936.523 4
 -8 13 16 5186.24 2095.64 4
 -8 13 15 8518.26 2530.6 4
 -8 13 14 1651.24 1164.16 4
 -8 13 13 10247.3 2698.57 4
 -8 13 12 11575.1 2788.96 4
 -8 13 11 9921.6 2686.13 4
 8 13 -10 24951.6 4594.87 4
 -8 13 10 20669.1 3633.02 4
 -8 13 9 -198.782 613.75 4
 8 13 -9 -732.319 542.828 4
 -8 13 8 19371.1 3471.97 4
 8 13 -8 16865.5 3558.52 4
 -8 13 7 8765.16 2235.32 4
 8 13 -7 7766.93 2544.93 4
 8 13 -6 16866.5 3636.82 4
 -8 13 6 22176.8 3736.02 4
 -8 13 5 8509.38 2239.08 4
 8 13 -5 10510.7 2823.3 4
 -8 13 4 603.097 573.923 4
 8 13 -4 3461.53 1633.52 4
 -8 13 3 10818.1 2534.87 4
 8 13 -3 8619.02 2491.22 4
 -8 13 2 3829.93 1555.92 4
 8 13 -2 1716.32 1350.31 4
 -8 13 1 15836.9 3086.6 4
 8 13 -1 10875.2 2765.14 4
 -8 13 0 10572.8 2428.71 4
 8 13 0 11610.9 2855.23 4
 -8 13 -1 30.8731 653.629 4
 8 13 1 -78.8076 587.631 4
 -8 13 -2 26024.2 4026.37 4
 8 13 2 19072.4 3604.5 4
 8 13 3 5460.79 1844.43 4
 -8 13 -3 1379.03 1056.33 4
 8 13 4 34551.9 4884.64 4
 8 13 5 19382.7 3736.8 4
 8 13 6 16396.4 3391.68 4
 8 13 7 18381.9 3598.85 4
 8 13 8 -517.249 537.549 4
 8 13 9 7959.69 2403.4 4
 8 13 10 5785.11 2138.75 4
 8 13 11 5880.22 2325.49 4
 -8 14 15 1222.53 1283.85 4
 -8 14 14 3464.13 1701.74 4
 -8 14 13 8723.65 2585.45 4
 -8 14 12 1859.66 1166.91 4
 -8 14 11 19247.4 3689.72 4
 8 14 -11 15402.3 3842.49 4
 8 14 -10 3532.49 2099.48 4
 -8 14 10 621.382 973.379 4
 -8 14 9 22214.8 3994.14 4
 8 14 -9 16933.6 3950.05 4
 -8 14 8 550.305 836.884 4
 8 14 -8 304.757 663.473 4
 -8 14 7 15730.3 3237.79 4
 8 14 -7 17485.8 3769.75 4
 -8 14 6 2582.48 1280.01 4
 8 14 -6 6395.09 2073.53 4
 8 14 -5 4431.08 2009.69 4
 -8 14 5 4933.29 1845 4
 -8 14 4 3728.55 1595.7 4
 8 14 -4 3745.3 1699.23 4
 -8 14 3 -385.96 794.883 4
 8 14 -3 -492.903 986.955 4
 -8 14 2 2638.79 1327.91 4
 8 14 -2 2971.85 1343.8 4
 8 14 -1 14902.9 3326.29 4
 -8 14 1 15734.6 3227.52 4
 8 14 0 1379.02 940.492 4
 -8 14 0 3270.02 1505.5 4
 8 14 1 31394.4 4910.41 4
 -8 14 -1 38301.1 5035.29 4
 8 14 2 -800.769 870.245 4
 8 14 3 34331.3 5090.85 4
 8 14 4 4048.08 1524.59 4
 8 14 5 26851.2 4477.24 4
 8 14 6 5083.45 1978.63 4
 8 14 7 1661.74 1422.72 4
 8 14 8 6664.5 2323.63 4
 -8 15 12 7045.27 2465.58 4
 -8 15 11 -474.124 875.685 4
 -8 15 10 15950.4 3547.35 4
 -8 15 9 842.902 1393.2 4
 -8 15 8 20097.5 3956.54 4
 8 15 -8 15531 3866.48 4
 -8 15 7 -356.442 1150.38 4
 8 15 -7 435.566 1167.52 4
 -8 15 6 14336.6 3144.61 4
 8 15 -6 10210.3 3123.45 4
 -8 15 5 1797.67 1078.62 4
 8 15 -5 637.643 635.881 4
 -8 15 4 -74.5336 980.829 4
 8 15 -4 1612.74 991.44 4
 8 15 -3 -555.069 515.169 4
 -8 15 3 1260.75 1224.47 4
 8 15 -2 5461.34 2128.42 4
 -8 15 2 2819.29 1582.68 4
 8 15 -1 606.961 882.67 4
 -8 15 1 -551.774 1296.59 4
 8 15 0 21474.9 4134.45 4
 -8 15 0 24851 4279.53 4
 8 15 1 47.1721 579.491 4
 8 15 2 36969.4 5530.21 4
 8 15 3 7545.45 2481.18 4
 -8 16 8 -141.566 1425.74 4
 -8 16 7 18979 3955.89 4
 -8 16 6 1710.53 1652.14 4
 -8 16 5 9346.99 2780.64 4
 -8 16 4 2657.8 1737.68 4
 -8 16 3 1348.82 972.165 4
 -8 16 2 -1811.62 1319.55 4
 -9 0 27 1206.17 1451.48 3
 -9 0 26 17677.9 4170.75 3
 -9 0 25 823.456 996.091 3
 -9 0 24 -373.597 926.157 3
 -9 0 23 -2618.23 1468.47 3
 -9 0 22 6595.03 2200.05 3
 -9 0 21 -590.098 583.206 3
 -9 0 20 26130.3 4156.06 3
 -9 0 19 53.4671 506.539 3
 -9 0 18 140319 9813.29 3
 -9 0 17 2169.57 1159.42 3
 -9 0 16 140185 9349.84 3
 -9 0 15 -239.398 418.316 3
 -9 0 14 8757.23 1969.53 3
 -9 0 14 8335.69 1592.72 1
 -9 0 13 -295.193 597.243 1
 -9 0 13 -133.827 455.519 3
 -9 0 12 59054.8 4480.98 1
 -9 0 12 58255.2 5022.88 3
 -9 0 11 373.179 354.972 1
 -9 0 11 124.505 296.646 3
 -9 0 10 321620 14108.3 1
 -9 0 10 359324 14985.9 3
 -9 0 9 163.806 622.913 1
 -9 0 9 1949.01 1018.17 3
 -9 0 8 523536 20277.2 1
 -9 0 8 532619 20249.2 3
 -9 0 7 539.177 663.171 1
 -9 0 7 726.932 697.286 3
 -9 0 6 142579 8055.06 1
 -9 0 6 155562 7862.95 3
 -9 0 5 29.7602 325.26 3
 9 0 -5 32.2027 182.085 4
 -9 0 5 831.197 779.624 1
 -9 0 4 4699.93 1093.14 3
 9 0 -4 4156.85 603.471 4
 -9 0 4 4842.62 1275.25 1
 -9 0 3 75.7654 299.741 3
 9 0 -3 306.423 250.177 2
 9 0 -3 60.8088 45.5171 4
 -9 0 3 521.425 357.495 1
 -9 0 2 26618 3099.11 1
 9 0 -2 28445.7 2081.29 2
 9 0 -1 659.773 257.119 2
 -9 0 1 581.399 651.204 1
 -9 0 0 110973 6807.63 1
 9 0 0 109908 5525.34 2
 9 0 1 230.657 333.584 2
 -9 0 -1 1019.89 693.8 1
 -9 0 -2 235148 11057 1
 9 0 2 222553 9911.94 2
 9 0 3 429.617 398.659 2
 -9 0 -3 -1008.69 649.413 1
 9 0 4 282211 12004.1 2
 -9 0 -4 246551 8921.05 4
 9 0 5 291.383 479.534 2
 -9 0 -5 323.345 739.749 1
 -9 0 -5 6.4617 221.549 4
 -9 0 -6 139768 7890.22 1
 9 0 6 129711 7863.15 2
 -9 0 -7 -278.654 411.848 1
 9 0 7 65.7654 476.36 2
 -9 0 -8 48875.9 4293.6 1
 9 0 8 44679.1 4534.65 2
 -9 0 -9 43.693 608.196 1
 9 0 9 88.6927 288.377 2
 -9 0 -10 11400.5 1982.75 1
 9 0 10 14534.3 2658.71 2
 -9 0 -11 -953.546 875.194 1
 9 0 11 -238.497 770.276 2
 -9 0 -12 100758 6611.98 1
 9 0 12 113756 8650.47 2
 -9 0 -13 -624.999 720.205 1
 9 0 13 -185.434 887.756 2
 9 0 14 101385 8643.72 2
 9 0 15 -342.252 744.615 2
 9 0 16 61557.3 7030.54 2
 9 0 17 100.087 1199.54 2
 9 0 18 14831.8 3690.61 2
 -9 1 28 1522.47 920.418 3
 -9 -1 27 23465.5 4872.34 3
 -9 1 27 30323.7 5418.21 3
 -9 -1 26 4519.48 2067.66 3
 -9 1 26 2116.09 1540.79 3
 -9 -1 25 7093.31 2543.65 3
 -9 1 25 5179.88 2134.8 3
 -9 -1 24 -996.65 1491.2 3
 -9 1 24 560.801 604.359 3
 -9 -1 23 4167.17 1804.04 3
 -9 1 23 4614.11 1918.48 3
 -9 -1 22 -670.91 1210.98 3
 -9 1 22 -1444.51 1080.36 3
 -9 -1 21 22702.7 4070.74 3
 -9 1 21 23892.7 4083.12 3
 -9 -1 20 -80.8013 981.256 3
 -9 1 20 1779.8 1242.86 3
 -9 -1 19 60369.6 6323 3
 -9 1 19 58196.4 6178.91 3
 -9 -1 18 903.526 860.518 3
 -9 1 18 2365.83 1335.52 3
 -9 -1 17 86336.7 4766.98 2
 -9 -1 17 76418.6 6852.08 3
 -9 1 17 75591.4 6785.03 3
 -9 -1 16 7406.76 1382.48 1
 -9 -1 16 8318.59 1188.07 2
 -9 -1 16 7009.12 2015.03 3
 -9 1 16 9961.18 2225.83 3
 -9 -1 15 26450.7 2790.12 1
 -9 -1 15 28028 2118.76 2
 -9 -1 15 32521.7 4002.13 3
 -9 1 15 24648.8 3454.15 3
 -9 -1 14 3197.96 1010.22 1
 -9 -1 14 3205.3 610.818 2
 -9 -1 14 2207.98 959.578 3
 -9 1 14 3781.8 1273.66 3
 -9 -1 13 4463.25 606.496 2
 -9 -1 13 3841.3 1005.65 1
 -9 -1 13 3859.87 1171.6 3
 -9 1 13 3845.08 1240.2 3
 -9 -1 12 8589.48 1584.78 1
 -9 -1 12 10367.1 1978.68 3
 -9 1 12 12983.8 2252.98 3
 -9 -1 11 34174.6 3279.8 1
 -9 -1 11 26764.5 3202.19 3
 -9 1 11 30101.5 3422.17 3
 -9 1 11 33327.7 3280.4 1
 -9 -1 10 17424.9 2330.59 1
 -9 -1 10 25298.8 2978.02 3
 -9 1 10 22165.8 2859.47 3
 -9 1 10 21645.6 2609.81 1
 -9 1 9 292114 13213 1
 -9 -1 9 299655 13119.2 1
 -9 -1 9 310439 13360 3
 -9 1 9 312893 13595.3 3
 -9 1 8 89.9999 297.809 3
 -9 1 8 -38.5569 485.334 1
 -9 -1 8 318.325 266.754 3
 -9 -1 8 1128.32 762.633 1
 -9 1 7 307289 13700 1
 -9 -1 7 304422 13477.8 1
 -9 -1 7 337856 13474.5 3
 -9 1 7 313227 13531.3 3
 -9 1 6 19906.7 2621.27 1
 9 -1 -6 17158.3 1516.9 4
 -9 -1 6 20151 2547.87 1
 -9 -1 6 18773.5 2275.87 3
 -9 1 6 17355 2290.74 3
 -9 1 5 78345.8 5439.41 1
 9 -1 -5 65546.6 3196.05 4
 9 -1 -5 67733.1 2789.28 2
 -9 -1 5 65075.2 4939.49 1
 -9 -1 5 75689.3 4760.15 3
 -9 1 5 68612.5 4766.76 3
 9 -1 -4 14354.8 1093.83 4
 9 -1 -4 16983.4 1254.37 2
 -9 -1 4 17656.1 2342.1 1
 -9 1 4 15389.7 2273.67 1
 -9 -1 4 18183.3 2084.38 3
 -9 1 4 15598.2 2079.67 3
 -9 -1 3 5429.73 1060.37 3
 -9 -1 3 5672.99 1484.78 1
 9 -1 -3 6538.02 864.019 2
 -9 1 3 6102.12 1400.09 1
 -9 1 2 56382 4533.39 1
 9 -1 -2 51292.3 3010.29 2
 -9 -1 2 48328.2 4176.59 1
 9 1 -2 51309.8 2514.28 4
 9 1 -1 33097.3 1695.81 4
 -9 1 1 32901.1 3421.67 1
 9 -1 -1 33949.6 2500.1 2
 -9 -1 1 34212.8 3460.57 1
 -9 1 0 51212 4312.46 1
 9 1 0 41799.8 1978.02 4
 9 -1 0 53792.5 3393.03 2
 -9 -1 0 52710.6 4369.52 1
 -9 1 -1 164697 8345.07 1
 9 1 1 157651 6994.18 2
 9 -1 1 148745 6779.74 2
 -9 -1 -1 169235 8323.66 1
 -9 1 -2 84476.9 5713.63 1
 9 1 2 77777.1 4795.96 2
 9 -1 2 81119.8 4807.34 2
 -9 -1 -2 83330.6 5625.23 1
 -9 1 -3 264237 11910.3 1
 9 1 3 236415 10869.8 2
 9 -1 3 237148 10791.3 2
 -9 -1 -3 256149 11690.9 1
 -9 -1 -4 15747.4 2320.99 1
 -9 1 -4 12065 2055.67 1
 9 1 4 11017.9 1861.37 2
 9 -1 4 13621.9 2007.55 2
 -9 -1 -4 10434.8 1128.09 4
 -9 1 -5 150573 8311.4 1
 9 1 5 130806 7870.76 2
 -9 -1 -5 162240 8465.24 1
 9 -1 5 150106 8175.64 2
 -9 -1 -5 140200 6089.85 4
 -9 1 -6 150.205 663.476 1
 9 1 6 -615.267 448.678 2
 9 -1 6 -734.011 737.985 2
 -9 -1 -6 -247.263 660.1 1
 -9 1 -7 73464.8 5436.36 1
 -9 -1 -7 72580 5321.63 1
 9 1 7 66131.3 5509.79 2
 9 -1 7 70659.1 5590.61 2
 -9 1 -8 4472.02 1386.48 1
 9 1 8 5473.69 1539.76 2
 9 -1 8 4291.63 1360.09 2
 -9 -1 -8 4978.93 1346.08 1
 -9 1 -9 -481.358 688.017 1
 9 1 9 116.319 333.994 2
 9 -1 9 -467.474 774.1 2
 -9 -1 -9 158.689 354.972 1
 -9 1 -10 5876.75 1555.37 1
 9 1 10 6324.21 1809.77 2
 -9 -1 -10 4885.22 1224.88 1
 9 -1 10 4775.97 1588 2
 -9 -1 -11 37312.6 3763.83 1
 9 1 11 35218.8 4525.05 2
 9 -1 11 39259.2 4635.81 2
 -9 1 -11 41444.1 3911.3 1
 -9 -1 -12 -1102.18 891.719 1
 9 1 12 -991.037 1259.65 2
 9 -1 12 -778.718 927.631 2
 -9 -1 -13 72291.8 5395.08 1
 9 1 13 78588.5 7375.07 2
 9 -1 13 74016.7 6962.59 2
 9 1 14 -1712.53 1523.25 2
 9 -1 14 1625.11 733.627 2
 9 1 15 64884 7177.85 2
 9 -1 15 69146 7146.87 2
 9 1 16 1062.56 944.83 2
 9 -1 16 1131.44 1174.62 2
 9 1 17 28021.5 4815.14 2
 9 -1 17 17193.3 3807.57 2
 9 1 18 3530.08 1682.2 2
 9 -1 18 1865.89 1309.87 2
 -9 2 28 11930.3 3597.58 3
 -9 -2 27 3229.93 2139.51 3
 -9 2 27 1490.55 1480.41 3
 -9 -2 26 12753.2 3513.55 3
 -9 2 26 10786.5 3297.74 3
 -9 -2 25 7228.4 2601.62 3
 -9 2 25 9682.29 2922.92 3
 -9 -2 24 812.26 647.838 3
 -9 2 24 -976.824 1194.08 3
 -9 -2 23 9054.09 2723 3
 -9 2 23 7485.76 2547.94 3
 -9 -2 22 12582.3 3227.95 3
 -9 2 22 16526.7 3484.81 3
 -9 -2 21 4578.23 1877.65 3
 -9 2 21 3107.47 1543.93 3
 -9 -2 20 53865.5 6189.33 3
 -9 2 20 52891.2 6006.18 3
 -9 -2 19 325.619 969.053 3
 -9 2 19 1999.25 1226.47 3
 -9 -2 18 70334.5 6761.19 3
 -9 2 18 65541.7 6447.09 3
 -9 -2 17 4214.82 1097.16 1
 -9 -2 17 3415.39 1429.68 3
 -9 -2 17 4733.02 997.612 2
 -9 2 17 4294.41 1603.08 3
 -9 -2 16 42564 3685.47 1
 -9 -2 16 60578.1 3608.76 2
 -9 -2 16 52143.2 5410.2 3
 -9 2 16 45219.4 4997.03 3
 -9 -2 15 55601.6 4253.15 1
 -9 -2 15 61368.1 3485.38 2
 -9 -2 15 56525 5458.11 3
 -9 2 15 52187.8 5271.7 3
 -9 -2 14 1975.06 1060.98 3
 -9 -2 14 1706.53 458.382 2
 -9 -2 14 348.508 296.956 1
 -9 2 14 674.439 726.54 3
 -9 -2 13 60100.1 4599.09 1
 -9 -2 13 68014.4 3304.25 2
 -9 -2 13 71876 5838.86 3
 -9 2 13 70651.4 5808.35 3
 -9 -2 12 3261.41 1154.79 3
 -9 -2 12 1443.27 346.131 2
 -9 2 12 4799.93 1420.12 3
 -9 -2 11 42683.3 3798.95 1
 -9 -2 11 45766.4 2168.19 2
 -9 -2 11 47892.7 4338.7 3
 -9 2 11 46191.5 4389.72 3
 -9 -2 10 27653.8 3036.89 1
 -9 -2 10 34591.7 3513.51 3
 -9 2 10 34468.4 3666.76 3
 -9 2 9 4272.23 1317.67 3
 -9 -2 9 6111.19 1398.72 1
 -9 -2 9 5607.58 1333.09 3
 -9 -2 8 167799 5895.66 2
 -9 -2 8 176704 8976.73 1
 -9 -2 8 193929 9062.66 3
 -9 2 8 182623 9248.97 3
 -9 -2 7 46587 2130.52 2
 -9 -2 7 46565.4 4017.43 1
 -9 -2 7 48514.6 3872.15 3
 -9 2 7 43721.9 3977.7 3
 -9 -2 6 194917 6828.9 2
 -9 -2 6 182840 9550.29 1
 -9 -2 6 192959 9000.51 3
 -9 2 6 195003 9901.99 1
 -9 2 6 184206 9403.46 3
 9 -2 -5 122067 5142.96 4
 -9 -2 5 126416 4943.29 2
 -9 -2 5 119274 7144.7 1
 -9 -2 5 125336 6573.76 3
 -9 2 5 127845 7532.79 1
 -9 2 5 117400 6952.16 3
 -9 -2 4 93093.5 4043.38 2
 -9 -2 4 93118.4 6021.58 1
 -9 -2 4 89155.7 5156.05 3
 9 -2 -4 81262.1 3659.28 4
 -9 2 4 81759.7 5887.52 1
 -9 -2 3 83075.8 5642.37 1
 -9 2 3 86666.1 5859.78 1
 9 -2 -3 69731.8 2949.33 4
 -9 -2 3 85725.2 4718.9 3
 9 2 -2 19884 1682.55 4
 9 -2 -2 18274.4 1702.18 2
 -9 -2 2 18789.3 2545.14 1
 -9 -2 2 21857.4 2137.04 3
 -9 2 2 21752.4 2754.47 1
 9 -2 -1 96177.4 5023.7 2
 -9 -2 1 98477 6492.78 1
 9 2 -1 111872 4720.99 4
 -9 2 1 108122 6829.02 1
 9 2 0 38634 2264.44 4
 9 -2 0 31868.3 2618.48 2
 -9 -2 0 35633.1 3519.67 1
 -9 2 0 32330.2 3484.72 1
 9 2 1 62656.6 3119.01 4
 9 -2 1 57580.8 3919.13 2
 -9 -2 -1 63653.3 4933.65 1
 -9 2 -1 62843.6 5073.43 1
 9 2 2 134511 5548.5 4
 9 -2 2 126367 6783.93 2
 -9 -2 -2 143148 7948.67 1
 -9 2 -2 142094 8065.67 1
 9 2 3 22906.8 1795.23 4
 9 -2 3 24884.7 2647.2 2
 -9 -2 -3 22365.1 2817.14 1
 -9 2 -3 24857.6 3012.53 1
 -9 2 -4 111684 4112.55 4
 9 2 4 121405 5379.63 4
 9 -2 4 126514 6952.78 2
 -9 -2 -4 134879 7532.95 1
 -9 2 -4 134960 7676.37 1
 -9 -2 -5 373.721 573.009 1
 9 2 5 -162.19 267.559 4
 9 -2 5 -171.121 396.414 2
 -9 2 -5 158.93 376.256 1
 9 2 6 57504.3 4974.92 2
 9 -2 6 60990 4914.81 2
 9 2 6 56927.1 3818.58 4
 -9 -2 -6 68830.3 5097.91 1
 -9 2 -6 72315.3 5354.6 1
 9 2 7 15346 2515.03 2
 -9 -2 -7 15255.2 2329.95 1
 9 -2 7 13738.9 2322.3 2
 -9 -2 -8 15483.9 2297.73 1
 9 2 8 11792.8 2272.57 2
 9 -2 8 15086.3 2509.65 2
 9 2 9 36130.1 4295.15 2
 -9 -2 -9 32773.4 3506.57 1
 9 -2 9 43775.2 4523.84 2
 9 2 10 5662.01 1727.43 2
 9 -2 10 4921.71 1619.09 2
 -9 -2 -10 3698.52 1198.58 1
 -9 -2 -11 19163.8 2633.33 1
 9 2 11 16675.6 3080.32 2
 9 -2 11 22740.2 3389.34 2
 -9 -2 -12 32434.9 3448.6 1
 9 -2 12 31763.6 4322.81 2
 9 2 12 25588.5 4055.99 2
 9 2 13 3912.95 1587.5 2
 -9 -2 -13 5828.85 1441.35 1
 9 -2 13 6865.79 1999.61 2
 9 2 14 41817.8 5487.4 2
 9 -2 14 41803.4 5297.96 2
 9 2 15 -1266.2 1513.58 2
 9 -2 15 -572.901 767.99 2
 9 2 16 30080 4992.3 2
 9 -2 16 31734.5 4835.87 2
 9 -2 17 8659.51 2515.75 2
 9 -2 18 979.748 666.427 2
 -9 3 28 2242.36 1791.68 3
 -9 3 27 5932.36 2305.66 3
 -9 -3 26 15770.9 3892.2 3
 -9 3 26 16328.1 3881.14 3
 -9 -3 25 2737.46 1876.17 3
 -9 3 25 3169.59 1715.62 3
 -9 -3 24 45770.7 6341.79 3
 -9 3 24 38248.4 5685.84 3
 -9 -3 23 4286.43 2022.27 3
 -9 3 23 3493.95 1598.93 3
 -9 -3 22 22075.3 4173.61 3
 -9 3 22 16806.8 3594.58 3
 -9 -3 21 11597.4 3002.42 3
 -9 3 21 16353.9 3282.31 3
 -9 -3 20 3222.02 1699.68 3
 -9 3 20 4128.34 1751.84 3
 -9 -3 19 44489 5536.47 3
 -9 3 19 49282.4 5647.15 3
 -9 -3 18 198.919 711.386 3
 -9 3 18 705.428 698.127 3
 -9 -3 17 73993.7 4930.96 1
 -9 -3 17 81788.8 4698.71 2
 -9 -3 17 74531.3 6830.27 3
 -9 3 17 67356.8 6483.33 3
 -9 -3 16 32471.4 3179.27 1
 -9 -3 16 39078.4 2896.12 2
 -9 -3 16 32353.2 4222.12 3
 -9 3 16 34629.1 4390.44 3
 -9 -3 15 17948.1 2348.83 1
 -9 -3 15 25408.4 2117.25 2
 -9 -3 15 23544.9 3425.14 3
 -9 3 15 20236.9 3214.48 3
 -9 -3 14 63666.8 4673.39 1
 -9 -3 14 69587.6 5930.4 3
 -9 3 14 61608 5636.25 3
 -9 -3 13 320.695 468.752 1
 -9 -3 13 979.343 681.594 3
 -9 3 13 -424.695 639.782 3
 -9 -3 12 49044.3 4616.66 3
 -9 -3 12 45477.6 3950.05 1
 -9 3 12 43281.9 4451.81 3
 9 -3 -11 15483.9 1199.8 2
 -9 -3 11 14739.9 2373.59 3
 -9 -3 11 14169.2 2173.13 1
 -9 3 11 17452.5 2667.04 3
 9 -3 -10 36863.9 1971.61 2
 -9 -3 10 32610.6 3508.72 3
 -9 3 10 32526.6 3632.12 3
 -9 -3 10 37340.3 3568.2 1
 -9 3 9 89184.9 6245.18 3
 -9 -3 9 94746.6 6106.15 3
 -9 -3 9 92020.4 6073.7 1
 -9 3 8 7990.32 1676.46 3
 -9 -3 8 8753.32 1694.24 1
 -9 -3 8 6544.58 1400.25 3
 -9 -3 7 102940 6474.73 1
 -9 -3 7 94925.9 5815.8 3
 -9 3 7 103878 6611.58 3
 -9 3 6 186289 9535.46 3
 -9 -3 6 176668 9330.31 1
 -9 -3 6 190010 8746.26 3
 -9 -3 5 105375 6672.35 1
 -9 -3 5 104650 4725.97 2
 -9 3 5 112376 5132.3 4
 -9 -3 5 103509 5768.11 3
 9 -3 -5 99941.6 4777.58 4
 9 -3 -4 191451 7569.48 4
 -9 -3 4 199485 9994.24 1
 -9 3 4 206708 7743.33 4
 -9 -3 4 201171 8805.15 3
 -9 -3 3 38078.7 3759.2 1
 -9 3 3 39264.4 2191.89 4
 -9 -3 3 35201.3 2830.32 3
 -9 -3 2 198924 9791.27 1
 -9 3 2 173883 6472.87 4
 9 3 -2 203870 8114.76 4
 -9 -3 2 201276 8146.41 3
 -9 -3 1 4255.56 1293.8 1
 -9 -3 1 4901.07 925.49 3
 9 3 -1 5386.93 954.428 4
 -9 -3 0 101818 6584.69 1
 9 3 0 105525 5102.79 4
 9 3 1 23385.9 2015.37 4
 -9 -3 -1 21957.2 2816.08 1
 9 3 2 13299 1485.5 4
 -9 -3 -2 10712.4 1946.7 1
 -9 3 -3 53031 2177.52 4
 9 3 3 53390.8 3145.54 3
 -9 3 -3 49259.5 2200.88 4
 -9 -3 -4 7456.53 1671.53 1
 9 3 4 6234.52 1027 4
 -9 3 -4 6507.33 753.509 4
 9 -3 4 6931.36 1449.86 2
 9 3 5 38874.6 2986.64 4
 9 -3 5 41397.8 3843 2
 -9 -3 -5 44893.7 4126.4 1
 9 3 6 48532.6 3601.89 4
 9 -3 6 61351.8 4867.58 2
 -9 -3 -6 59894.4 4838 1
 9 3 7 17048.1 2106.25 4
 9 -3 7 23546.4 3010.33 2
 -9 -3 -7 20439.5 2707.1 1
 9 3 8 101876 6190.34 4
 9 -3 8 113596 7487.26 2
 -9 -3 -8 112917 7050.06 1
 -9 -3 -9 3485.31 1167.46 1
 9 3 9 2281.38 941.066 4
 9 -3 9 2690.55 1138.22 2
 9 -3 10 120672 8356.12 2
 -9 -3 -10 120494 7418.75 1
 -9 -3 -11 19690.9 2709.41 1
 9 -3 11 14179.8 2706.19 2
 -9 -3 -12 34085.2 3627.52 1
 9 -3 12 39693.1 4795.38 2
 -9 -3 -13 31170.7 3427.54 1
 9 -3 13 30859.1 4352.75 2
 9 -3 14 3682.93 1415.23 2
 9 -3 15 28470.4 4458.06 2
 9 -3 16 11779.5 2953.11 2
 9 -3 17 12266.6 3000.24 2
 9 -3 18 27187.4 4756.98 2
 -9 4 28 2806.38 1944.49 3
 -9 4 27 7157.45 2640.48 3
 -9 -4 26 2099.85 1444.92 3
 -9 4 26 1832.54 1811.84 3
 -9 -4 25 40521.2 6182.17 3
 -9 4 25 34770.5 5611.15 3
 -9 -4 24 416.578 1044.74 3
 -9 4 24 1312.89 1388.31 3
 -9 -4 23 51891.7 6744.39 3
 -9 4 23 40314.1 5789.62 3
 -9 4 22 2145.64 1490.55 3
 -9 4 21 18196.9 3640.45 3
 -9 4 20 1163.43 975.283 3
 -9 4 19 1294.77 967.536 3
 -9 4 18 11203.9 2546.25 3
 -9 -4 17 30077 3023.21 1
 -9 4 17 34648.3 4478.46 3
 -9 -4 16 3798.17 1108.55 1
 -9 4 16 6625.53 1927.17 3
 -9 -4 15 85185.2 5731.39 1
 -9 4 15 100293 7586.22 3
 -9 4 14 10149.7 2209.1 3
 -9 -4 14 8703.08 1667.37 1
 -9 -4 13 77397 6187.11 3
 -9 4 13 72522.9 6098.19 3
 -9 -4 13 71325.7 5217.3 1
 -9 4 12 1769.13 871.96 3
 -9 -4 12 1132.93 544.283 1
 -9 4 12 3270.94 1143.3 4
 -9 -4 12 1811.93 860.352 3
 -9 -4 11 88570.1 6033.22 1
 -9 4 11 100606 6464.27 4
 -9 -4 11 97086.6 6675.16 3
 -9 4 11 95912.3 6833.18 3
 -9 4 10 2228.23 914.788 3
 -9 4 10 1815.11 712.171 4
 -9 -4 10 3230.47 1130.11 3
 -9 -4 10 2057.92 769.895 1
 -9 -4 9 28591.8 3180.36 1
 -9 4 9 35200.6 3227.54 4
 -9 -4 9 31826.4 3329.14 3
 -9 4 9 26026.6 3270.03 3
 -9 4 8 15701.2 2472.09 3
 -9 4 8 16905.1 2053.04 4
 -9 -4 8 11941.1 1946.34 3
 -9 -4 8 14188 2182.09 1
 -9 4 7 19493.4 2077.88 4
 -9 -4 7 17439.4 2476.67 1
 -9 -4 7 18953.7 2334.84 3
 -9 4 6 31336.6 2533.6 4
 -9 -4 6 30179.8 3304.34 1
 -9 -4 6 30127.6 2856.98 3
 -9 4 5 103202 4992.93 4
 -9 -4 5 102168 6569.28 1
 -9 -4 5 97677.6 5560.38 3
 -9 4 4 31168.3 2216.85 4
 -9 -4 4 35205.5 3585.01 1
 -9 -4 4 27292.6 2529.91 3
 9 4 -3 274755 11523.4 4
 -9 4 3 281696 9961.95 4
 -9 -4 3 268575 12630.1 1
 -9 -4 3 272696 10903.1 3
 -9 -4 2 1291.74 573.446 3
 -9 -4 2 1529.22 922.356 1
 -9 4 2 329.122 173.843 4
 9 4 -2 510.751 286.697 4
 -9 4 1 190100 6926.2 4
 -9 -4 1 191892 9861.37 1
 -9 -4 1 188901 7781.5 3
 9 4 -1 190068 8567.44 4
 9 4 0 10817.4 1486.29 4
 -9 4 0 9382.52 894.209 4
 -9 -4 0 12392.6 2110.12 1
 -9 4 -1 46497.5 2349.97 4
 9 4 1 48519.8 3420.86 4
 -9 -4 -1 47779.3 4301.18 1
 9 4 2 37767.1 2957.58 4
 -9 -4 -2 36884.1 3729.93 1
 -9 4 -2 33975.1 2003.4 4
 9 4 3 56.7861 221.513 4
 -9 4 -3 433.651 229.049 4
 -9 -4 -3 -229.518 650.548 1
 9 4 4 14695.3 1800.6 4
 -9 -4 -4 12940.1 2171.76 1
 -9 4 -4 15261.3 1440.3 4
 9 4 5 83490.2 5137.99 4
 -9 -4 -5 102800 6611.68 1
 9 4 6 12208.4 1766.17 4
 -9 -4 -6 13527.2 2277.16 1
 -9 -4 -7 145020 8284.63 1
 9 4 7 133543 7187.58 4
 9 -4 7 127714 8083.17 2
 -9 -4 -8 2489.39 1063.61 1
 9 4 8 1146.47 772.045 4
 9 -4 8 2019.99 905.56 2
 9 4 9 143154 8195.38 4
 9 -4 9 156462 9377.41 2
 -9 -4 -9 152576 8755.72 1
 9 4 10 16574.1 2479.41 4
 -9 -4 -10 14016.6 2363.26 1
 9 -4 10 13455.1 2479.94 2
 9 -4 11 82149.6 6863.42 2
 -9 -4 -11 83778.6 6063.06 1
 9 -4 12 31257.1 4210.06 2
 -9 -4 -12 33037.4 3624.55 1
 -9 -4 -13 3293.94 1263.12 1
 9 -4 13 3470.22 1584.08 2
 9 -4 14 18492.2 3408.07 2
 9 -4 15 2745.47 1316.05 2
 9 -4 16 10229.6 2765.72 2
 9 -4 17 38854.2 5542.26 2
 -9 5 28 1049.29 1636.23 3
 -9 5 27 1067.21 1242 3
 -9 5 26 27188.4 5038.75 3
 -9 5 25 -1938.07 1380.11 3
 -9 5 24 46830.6 6437.55 3
 -9 5 23 -868.151 674.669 3
 -9 5 22 33054.4 5043.17 3
 -9 5 21 837.417 1084.98 3
 -9 5 20 14571 3098.66 3
 -9 5 19 287.09 892.709 3
 -9 5 18 -286.525 495.932 3
 -9 5 17 3791.24 1610.9 3
 -9 5 16 81416.4 7041.99 4
 -9 5 16 79627.9 6997.78 3
 -9 -5 16 79512 5524.42 1
 -9 5 15 6228.56 1869.2 3
 -9 -5 15 6063.47 1484.23 1
 -9 5 15 9589.57 2228.7 4
 -9 -5 14 155178 8653.51 1
 -9 5 14 183319 10300.3 4
 -9 5 14 161344 10079.8 3
 -9 5 13 4839.9 1624.47 3
 -9 5 13 5876.8 1635.61 4
 -9 -5 13 8114.66 1704.34 1
 -9 5 12 167167 9041.01 4
 -9 -5 12 138441 8181.88 1
 -9 5 12 143209 9085.3 3
 -9 5 11 10933.8 2212.91 3
 -9 -5 11 10704.6 1956.95 1
 -9 5 11 11801.7 1998.05 4
 -9 5 10 68879.6 5752.16 3
 -9 5 10 73879.5 5165.39 4
 -9 -5 10 69853.4 5381.97 3
 -9 -5 10 61920.9 5083.71 1
 -9 5 9 5287.63 1423.26 3
 -9 5 9 5393.69 1240.88 4
 -9 -5 9 4839.53 1226.6 3
 -9 -5 9 5226.95 1458.46 1
 -9 5 8 7941.23 1427.53 4
 -9 -5 8 10292 1790.01 3
 -9 -5 8 9125.71 1820.24 1
 -9 -5 7 1598.31 726.909 1
 -9 5 7 2219.5 715.63 4
 -9 -5 7 2687.13 876.678 3
 -9 5 6 47997.6 3367.9 4
 -9 -5 6 44680.6 3619.92 3
 -9 -5 6 46779.6 4245.71 1
 -9 5 5 217.405 226.146 4
 -9 -5 5 338.487 543.139 1
 -9 -5 5 717.186 470.569 3
 -9 5 4 120486 5655.52 4
 -9 -5 4 113450 5921.25 3
 -9 -5 4 117012 7281.58 1
 -9 5 3 14938.7 1541.17 4
 -9 -5 3 13796.1 2276.81 1
 -9 -5 3 13894.5 1624.24 3
 9 5 -3 13955.8 2046.02 4
 -9 5 2 132039 5778.71 4
 9 5 -2 120627 6880.25 4
 -9 -5 2 132693 6018.37 3
 -9 -5 2 140391 8027.49 1
 -9 5 1 12558.4 1344.26 4
 -9 -5 1 16125.1 2427.64 1
 -9 -5 1 14164.4 1433.98 3
 9 5 -1 11888 1808.83 4
 -9 5 0 46424.4 2778.31 4
 -9 -5 0 43021.7 4170.64 1
 9 5 0 42405.1 3543.07 4
 9 5 1 8002.77 1440.08 4
 -9 5 -1 10882.5 1212.99 4
 -9 -5 -1 11511 2046.67 1
 -9 5 -2 4849.31 838.4 4
 9 5 2 4070.02 1064.54 4
 -9 -5 -2 3795.51 1203.05 1
 9 5 3 15445.1 1985.89 4
 -9 -5 -3 16349.3 2495.72 1
 -9 5 -3 15083.9 1555.94 4
 9 5 4 8876.81 1552.58 4
 -9 -5 -4 11520.5 2060.17 1
 -9 5 -4 7254.87 1145.79 4
 -9 -5 -5 6832.46 1656.53 1
 9 5 5 5738.35 1288.9 4
 9 5 6 47680.5 3950.95 4
 -9 -5 -6 45737 4328.87 1
 9 5 7 625.826 550.867 4
 -9 -5 -7 1966.23 937.261 1
 -9 -5 -8 72731.7 5729.28 1
 9 5 8 72033.7 5248.87 4
 9 5 9 7529.78 1665.95 4
 -9 -5 -9 7819.03 1730.33 1
 9 -5 9 11093.5 2250.9 2
 -9 -5 -10 58163 5019.93 1
 9 5 10 59984.2 5052.89 4
 9 -5 10 52802.7 5293.38 2
 -9 -5 -11 15078.9 2454.8 1
 9 -5 11 18320.1 3047.82 2
 -9 -5 -12 12175.5 2176.43 1
 9 -5 12 9873.84 2280.41 2
 -9 -5 -13 4840.11 1402.86 1
 9 -5 13 6639.39 2043.83 2
 9 -5 14 575.257 972.814 2
 9 -5 15 4164.09 1768.44 2
 9 -5 16 19714.3 3789.61 2
 9 -5 17 3179.37 1568.49 2
 -9 6 27 13892.1 3871.66 3
 -9 6 26 -727.798 1215.98 3
 -9 6 25 35894 5776.59 3
 -9 6 24 -771.229 826.604 3
 -9 6 23 34397.7 5276.95 3
 -9 6 22 3558.51 1675.67 3
 -9 6 21 16860.1 3465.2 3
 -9 6 20 1904.91 1118.55 3
 -9 6 19 2081.77 1027.5 3
 -9 6 18 2294.89 1201.28 3
 -9 6 18 868.09 553.153 4
 -9 6 17 12166 2711.45 3
 -9 6 17 16896.2 3163.89 4
 -9 6 16 -313.063 469.883 3
 -9 6 16 986.424 956.17 4
 -9 -6 16 908.15 776.528 1
 -9 -6 15 130183 7832.05 1
 -9 6 15 123502 9008.11 3
 -9 6 14 6079.45 1830.67 3
 -9 -6 14 11576.1 2155.58 1
 -9 6 14 7901.1 2136.1 4
 -9 6 13 188523 10446.6 4
 -9 -6 13 188463 9888.13 1
 -9 6 13 177805 10872.8 3
 -9 -6 12 16768 2567.35 1
 -9 6 12 14110.2 2670.08 3
 -9 6 12 14359.8 2483.48 4
 -9 6 11 133503 8728.37 3
 -9 6 11 134127 7886.61 4
 -9 -6 11 128295 7838.85 1
 -9 6 10 13548.7 2141.86 4
 -9 -6 10 14016.8 2315.51 1
 -9 -6 9 40554.8 4056.64 1
 -9 6 9 37727.3 3491.52 4
 -9 6 8 33275.1 3109.6 4
 -9 -6 8 32398.3 3529.37 1
 -9 6 7 25747.2 2569.35 4
 -9 -6 7 19739.9 2479.69 3
 -9 -6 7 18423.4 2635.48 1
 -9 6 6 17702.1 2104.04 4
 -9 -6 6 19346.5 2683.03 1
 -9 -6 6 17427.6 2186.74 3
 -9 6 5 65400.2 4238.78 4
 -9 -6 5 65939.6 4404.78 3
 -9 -6 5 72273.9 5448.34 1
 -9 6 4 698.078 378.618 4
 -9 -6 4 1393.32 746.074 1
 -9 -6 4 1516.73 618.279 3
 9 6 -4 728.195 546.302 4
 -9 6 3 98297.3 5157.9 4
 -9 -6 3 94384.8 5009.47 3
 9 6 -3 86659.3 5967.39 4
 -9 -6 3 93866.4 6464.78 1
 -9 6 2 4493.39 909.13 4
 -9 -6 2 6179.46 1576.54 1
 -9 -6 2 5006.62 913.277 3
 9 6 -2 2544.26 740.843 4
 -9 6 1 54916.3 3544.08 4
 -9 -6 1 54957.5 4784.77 1
 -9 -6 1 54728.5 3125.16 3
 9 6 -1 58402.4 4523.67 4
 9 6 0 13973.5 2035.74 4
 -9 -6 0 16618.1 2502.72 1
 -9 -6 0 14986.1 1291.62 3
 -9 6 0 13001 1595.25 4
 -9 6 -1 9474.65 1318.49 4
 9 6 1 6757.68 1436.38 4
 -9 -6 -1 7593.6 1698.15 1
 9 6 2 10681.1 1776.17 4
 -9 -6 -2 11548.4 2071.94 1
 -9 6 -2 10716.1 1446.31 4
 9 6 3 -139.08 442.647 4
 -9 -6 -3 -328.202 868.299 1
 -9 6 -3 450.08 445.593 4
 9 6 4 3099.59 965.791 4
 -9 -6 -4 5023.71 1448.36 1
 -9 6 -4 6066.5 1165.08 4
 -9 -6 -5 12391.4 2230.75 1
 9 6 5 9886.81 1829.86 4
 -9 6 -5 11795.6 1696.01 4
 9 6 6 7973.44 1670.66 4
 -9 -6 -6 10777.9 2088.11 1
 9 6 7 34991.1 3612.82 4
 -9 -6 -7 32571.9 3749.78 1
 -9 -6 -8 3234.29 1177.63 1
 9 6 8 2852.34 1063.56 4
 9 6 9 75624.8 5803.94 4
 -9 -6 -9 75023 5906.6 1
 9 6 10 603.911 543.28 4
 -9 -6 -10 -420.343 752.403 1
 -9 -6 -11 29528.4 3598.45 1
 9 6 11 29555.4 3772.74 4
 9 -6 11 30172.1 4090.9 2
 -9 -6 -12 2029.57 1000.83 1
 9 -6 12 2370.42 1238.88 2
 -9 -6 -13 281.226 486.854 1
 9 -6 13 -506.62 760.06 2
 9 -6 14 2136.11 1123.85 2
 9 -6 15 2512 1143.71 2
 9 -6 16 531.892 1029.18 2
 -9 7 27 3589.58 1978.08 3
 -9 7 26 18125 4215.18 3
 -9 7 25 -928.448 1024.47 3
 -9 7 24 30002.4 5057.48 3
 -9 7 23 2808.12 1454.47 3
 -9 7 22 25319.7 4483.58 3
 -9 7 21 6096.45 2109.72 3
 -9 7 20 2700.84 1271.45 3
 -9 7 20 4514.67 1877.16 4
 -9 7 19 14199.7 3132.67 3
 -9 7 19 16810.2 3409.56 4
 -9 7 18 7303.35 2188.28 3
 -9 7 18 3868.45 1911 4
 -9 7 17 15618.9 3079.43 3
 -9 7 17 17322.8 3294.43 4
 -9 7 16 46023.5 5206.62 4
 -9 -7 16 44862.9 4265.76 1
 -9 7 16 40471.2 5016.03 3
 -9 7 15 6053.1 1767.44 3
 -9 7 15 5075.39 1617.14 4
 -9 -7 15 7924.33 1811.73 1
 -9 -7 14 90991.4 6482.45 1
 -9 7 14 77063.5 6993.69 3
 -9 -7 13 6835.82 1612.72 1
 -9 7 13 6617.16 1823.44 3
 -9 7 13 7949.11 1967.58 4
 -9 7 12 120641 7828.61 4
 -9 -7 12 125858 7805.81 1
 -9 7 11 16967.4 2548.77 4
 -9 7 10 37478.9 3733.19 4
 -9 7 9 59483.4 4698.82 4
 -9 7 8 -76.5176 339.786 4
 -9 7 7 41108.1 3596.22 4
 -9 7 6 18851.6 2312.73 4
 -9 -7 6 17167.3 2244.4 3
 -9 7 5 5605.34 1210.36 4
 -9 -7 5 9798.63 1570.81 3
 -9 7 4 54181.9 3978.08 4
 9 7 -4 52549 4791.09 4
 -9 -7 4 51859.7 3741.14 3
 -9 7 3 595.548 293.443 4
 -9 -7 3 760.19 450.905 3
 9 7 -3 458.75 379.887 4
 -9 7 2 97581.4 5519.84 4
 -9 -7 2 93013.2 4722.73 3
 9 7 -2 94010.3 6446.41 4
 -9 7 1 17272.7 2038.35 4
 9 7 -1 19802.4 2729.01 4
 9 7 0 61219.2 4960.77 4
 -9 7 0 58125.5 4042.6 4
 -9 7 -1 32638.8 2922.99 4
 9 7 1 37511 3746.74 4
 -9 7 -2 9816.42 1574.67 4
 9 7 2 9070.39 1762.48 4
 9 7 3 58452.6 4885.17 4
 -9 7 -3 61863 4308.26 4
 9 7 4 17735.2 2580.01 4
 -9 -7 -4 21015.9 3007.6 1
 -9 7 -4 16295 2177.64 4
 9 7 5 58620.6 4924.27 4
 -9 -7 -5 57206.9 5145.08 1
 9 7 6 81984.4 6053.44 4
 -9 -7 -6 84460.5 6443.74 1
 9 7 7 10536 2078.97 4
 -9 -7 -7 8234.56 1929.88 1
 9 7 8 61626.6 5251.59 4
 -9 -7 -8 54428.7 5140.96 1
 9 7 9 2273.43 1074.51 4
 -9 -7 -9 2141.45 1171.42 1
 9 7 10 46921.4 4829.37 4
 -9 -7 -10 51026.5 4922.41 1
 -9 -7 -11 18591.3 2887.42 1
 9 7 11 17525.3 2977.11 4
 -9 -7 -12 4182.41 1491.68 1
 -9 -7 -13 25985.9 3472.58 1
 9 -7 13 27724.5 4097.07 2
 9 -7 14 -946.384 1021.94 2
 9 -7 15 18410.1 3623.06 2
 9 -7 16 5045.8 1795.71 2
 -9 8 25 12489.8 3355.2 3
 -9 8 24 -195.732 1198.16 3
 -9 8 23 16825.1 3752.54 3
 -9 8 22 8903.16 2685.18 3
 -9 8 21 9115.25 2643.23 3
 -9 8 21 8651.41 2889.5 4
 -9 8 20 27806.2 4523.27 3
 -9 8 20 30314.7 4954.07 4
 -9 8 19 -159.767 501.196 3
 -9 8 19 -154.932 1203.6 4
 -9 8 18 45586.2 5675.88 4
 -9 8 18 42551 5472.89 3
 -9 8 17 15361.8 3174.31 3
 -9 8 17 15220.5 3030.63 4
 -9 -8 16 26629.5 3382.16 1
 -9 8 16 35178.6 4732.25 3
 -9 8 16 28053.1 4096.41 4
 -9 -8 15 28862.5 3506.93 1
 -9 8 15 23009.4 3577.69 4
 -9 -8 14 8971.65 1903.2 1
 -9 8 14 11420.8 2395.28 4
 -9 8 13 27248.3 3626.72 4
 -9 8 12 5258.68 1447.74 4
 -9 8 11 15364.9 2520.44 4
 -9 8 10 58589.8 4994.62 4
 -9 8 9 2642.44 1007.47 4
 -9 8 8 56589.8 4704.43 4
 -9 8 7 6910.18 1563.81 4
 -9 8 6 26254.2 2944.47 4
 -9 8 5 33127.7 3290.89 4
 9 8 -5 32056 3877.69 4
 -9 8 4 3101.89 965.284 4
 -9 -8 4 5929.17 1206.79 3
 9 8 -4 2590.73 1048.32 4
 -9 8 3 62058 4557.62 4
 9 8 -3 57954 5219.27 4
 -9 8 2 15973.5 2156.79 4
 9 8 -2 11297.1 2223 4
 9 8 -1 50092.6 4709.75 4
 -9 8 1 46726.7 3847.17 4
 9 8 0 26683.3 3320.97 4
 -9 8 0 22715.6 2637.22 4
 9 8 1 12735.8 2289.71 4
 -9 8 -1 15402.2 2087.54 4
 9 8 2 50485.6 4705.61 4
 -9 8 -2 47857.7 3998.65 4
 9 8 3 3608.32 1205.53 4
 -9 8 -3 1049.23 603.365 4
 9 8 4 60745.9 5305.95 4
 9 8 5 52389.3 4900.35 4
 -9 -8 -6 7635.35 1790.48 1
 9 8 6 9345.11 2057.37 4
 9 8 7 50457.6 4911.98 4
 -9 -8 -7 44427.8 4659.37 1
 9 8 8 1391.68 897.891 4
 -9 -8 -8 135.923 461.18 1
 9 8 9 34052 4152.34 4
 -9 -8 -9 37550 4404.25 1
 9 8 10 6305.63 1742.81 4
 -9 -8 -10 7763.62 1951.17 1
 9 8 11 10987.1 2432.45 4
 -9 -8 -11 9525.69 2296.5 1
 -9 -8 -12 35989.7 4281.75 1
 -9 -8 -13 4430.56 1618.04 1
 9 -8 14 41134.3 5269.13 2
 9 -8 15 -600.666 1113.69 2
 -9 9 24 3065.34 1493.72 3
 -9 9 23 7513.88 2569.64 3
 -9 9 23 4444.33 2230.28 4
 -9 9 22 8919.74 2737.74 3
 -9 9 22 5356.86 2456.02 4
 -9 9 21 46253.3 6378.76 4
 -9 9 21 38005.3 5644.78 3
 -9 9 20 1268.66 1251.67 3
 -9 9 20 2929.87 2085.62 4
 -9 9 19 66825.3 7276.38 4
 -9 9 18 2599.62 1481.94 4
 -9 9 17 60269.6 6505.09 4
 -9 9 16 6226.03 1956.75 4
 -9 -9 16 7446.34 1873.79 1
 -9 9 15 29105.6 4086.3 4
 -9 9 14 15403.9 2938.11 4
 -9 9 13 1014.14 734.149 4
 -9 9 12 5327.81 1571.71 4
 -9 9 11 22847.1 3253.92 4
 -9 9 10 2584.14 1165.38 4
 -9 9 9 47575.1 4578.68 4
 -9 9 8 728.365 436.664 4
 -9 9 7 59133.6 4983.54 4
 -9 9 6 13208.8 2226.38 4
 9 9 -6 11811.1 2492.38 4
 9 9 -5 38623.8 4569.32 4
 -9 9 5 41116.7 3960.09 4
 -9 9 4 27065.2 3120.96 4
 9 9 -4 25869 3608.36 4
 -9 9 3 9205.79 1886.91 4
 9 9 -3 8508.16 2130.84 4
 -9 9 2 35776.2 3595.06 4
 9 9 -2 37832.7 4332.84 4
 -9 9 1 4059.72 1257.53 4
 9 9 -1 3515.63 1211.15 4
 9 9 0 7878.81 1895.06 4
 -9 9 0 10551.1 1875.5 4
 -9 9 -1 28976.7 3251.22 4
 9 9 1 28663.9 3690.92 4
 -9 9 -2 -146.6 449.554 4
 9 9 2 469.106 388.107 4
 9 9 3 54589.4 5195.68 4
 -9 9 -3 51420.9 4527.34 4
 9 9 4 738.424 590.239 4
 9 9 5 15803.2 2746.6 4
 9 9 6 4540.24 1508.47 4
 9 9 7 1623.81 890.564 4
 9 9 8 14703.4 2833.14 4
 -9 -9 -8 17959.5 2969.92 1
 9 9 9 4148.02 1564.82 4
 -9 -9 -9 5092.29 1592.08 1
 9 9 10 6247.79 1786.7 4
 -9 -9 -10 6563.53 1911.63 1
 9 9 11 27579.9 3973.31 4
 -9 -9 -11 27458.7 3836.11 1
 -9 -9 -12 5183.04 1717.67 1
 -9 -9 -13 34689.2 4373.04 1
 -9 10 22 20309.3 4657.62 4
 -9 10 21 3427.3 2059.69 4
 -9 10 20 56316 7045.74 4
 -9 10 19 -1028.59 1645.21 4
 -9 10 18 48061.7 6007.23 4
 -9 10 17 275.482 801.769 4
 -9 10 16 27258.8 4260.39 4
 -9 10 15 661.278 698.821 4
 -9 10 14 919.737 719.186 4
 -9 10 13 281.023 397.863 4
 -9 10 12 19544.5 3331.5 4
 -9 10 11 871.898 701.662 4
 -9 10 10 44021.2 4675.29 4
 -9 10 9 889.955 915.492 4
 -9 10 8 87318.9 6647.76 4
 -9 10 7 1186.71 725.681 4
 -9 10 6 62253.8 5330.54 4
 9 10 -6 57232.1 6005.16 4
 -9 10 5 46.7117 431.531 4
 9 10 -5 -527.981 1012.72 4
 -9 10 4 30611.4 3531.61 4
 9 10 -4 23718 3624.41 4
 -9 10 3 1086.75 489.768 4
 9 10 -3 -93.3032 630.07 4
 -9 10 2 1068.16 730.698 4
 9 10 -2 1965.19 1219.77 4
 9 10 -1 3484.64 1248.82 4
 -9 10 1 3310.83 1183.69 4
 9 10 0 26098 3630.13 4
 -9 10 0 24154 3197.23 4
 -9 10 -1 1219.94 417.074 4
 9 10 1 863.593 663.839 4
 -9 10 -2 40543.1 4196.42 4
 9 10 2 44598.2 4871.16 4
 9 10 3 1493.71 665.271 4
 9 10 4 45682.9 4979.71 4
 9 10 5 1867.51 839.42 4
 9 10 6 10551.3 2358.05 4
 9 10 7 375.131 399.839 4
 9 10 8 -646.958 738.212 4
 9 10 9 -118.521 708.995 4
 -9 -10 -10 18600 3175.59 1
 9 10 10 18895.7 3374.36 4
 9 10 11 2467.63 1292.49 4
 -9 -10 -11 1470.55 878.037 1
 -9 -10 -12 30208.7 4202.81 1
 -9 -10 -13 4214.08 1621.07 1
 -9 11 20 -1069.44 1286.77 4
 -9 11 19 54551.8 6773.32 4
 -9 11 18 -749.401 1217.78 4
 -9 11 17 37641.5 5302.57 4
 -9 11 16 2825.61 1355.13 4
 -9 11 15 5427.09 1829.91 4
 -9 11 14 8081.24 2148.77 4
 -9 11 13 9057.45 2511.4 4
 -9 11 12 7901.47 2170.78 4
 -9 11 11 35772.2 4463.45 4
 -9 11 10 1910.39 813.669 4
 -9 11 9 64869.8 5980.63 4
 9 11 -8 809.998 1093.71 4
 -9 11 8 1728.55 1000.96 4
 -9 11 7 74148.4 6177.11 4
 9 11 -7 53835.9 6210.42 4
 -9 11 6 1425.43 981.694 4
 9 11 -6 281.839 708.257 4
 -9 11 5 30798.2 3829.73 4
 9 11 -5 26806.4 4112.02 4
 -9 11 4 4568.07 1448.07 4
 9 11 -4 3899.52 1631.71 4
 -9 11 3 2721.24 1185.83 4
 9 11 -3 4062.89 1674.26 4
 -9 11 2 8467.86 2054.91 4
 9 11 -2 10504.2 2421.24 4
 9 11 -1 36741.4 4672.69 4
 -9 11 1 36330.1 4096.65 4
 9 11 0 2985.8 1218.83 4
 -9 11 0 -566.456 771.667 4
 -9 11 -1 51565.6 4972.17 4
 9 11 1 54641.3 5720.81 4
 9 11 2 -177.263 1001.37 4
 9 11 3 53661.8 5717.28 4
 9 11 4 229.001 827.144 4
 9 11 5 35552.5 4522.44 4
 9 11 6 2412.24 1066.23 4
 9 11 7 4522.68 1747.29 4
 9 11 8 4802.63 1848.36 4
 9 11 9 582.815 667.882 4
 9 11 10 8210.87 2446.63 4
 -9 -11 -11 18307.4 3338.04 1
 9 11 11 14049.7 3141.57 4
 -9 -11 -12 5061.12 1886.74 1
 -9 -11 -13 26071.4 4067.5 1
 -9 12 19 271.389 987.803 4
 -9 12 18 23356.5 4448.64 4
 -9 12 17 5232.68 2013.8 4
 -9 12 16 22556.9 4145.47 4
 -9 12 15 6989.34 2117.68 4
 -9 12 14 1073.33 950.411 4
 -9 12 13 7924.6 2300.65 4
 -9 12 12 14881.4 2997.7 4
 -9 12 11 5976.59 1956.61 4
 -9 12 10 49765.4 5486.11 4
 -9 12 9 3340 1383.72 4
 9 12 -9 6564.98 2281.34 4
 -9 12 8 46726.3 5150.48 4
 9 12 -8 44148.6 5794.91 4
 -9 12 7 1580.28 864.6 4
 9 12 -7 1967.31 1130.52 4
 -9 12 6 28504.9 3902.21 4
 9 12 -6 23168.7 4039.88 4
 -9 12 5 1739.25 720.113 4
 9 12 -5 3434.08 1749.75 4
 9 12 -4 555.969 506.367 4
 -9 12 4 1485.25 981.06 4
 -9 12 3 16626 2890.46 4
 9 12 -3 18881.4 3547.54 4
 -9 12 2 7969.62 2116.26 4
 9 12 -2 9563.76 2543.15 4
 9 12 -1 8674.11 2293.18 4
 -9 12 1 10226.9 2157.92 4
 -9 12 0 29886.3 3997.7 4
 9 12 0 29471.8 4322.74 4
 9 12 1 2595.77 1170.02 4
 9 12 2 52461.4 5884.95 4
 9 12 3 844.245 590.127 4
 9 12 4 40092.8 5107.92 4
 9 12 5 745.319 721.04 4
 9 12 6 18225.3 3441.67 4
 9 12 7 7047.68 2187.33 4
 9 12 8 3701.37 1746.79 4
 9 12 9 9533.78 2680.74 4
 9 12 10 1562.06 1004.23 4
 9 12 11 5952.73 2259.87 4
 -9 -12 -12 17875.3 3406.08 1
 -9 13 17 4689.69 2104.41 4
 -9 13 16 14583 3465.84 4
 -9 13 15 2486.28 1385.81 4
 -9 13 14 20337 3844.92 4
 -9 13 13 5216.33 1949.77 4
 -9 13 12 23356.1 3948.41 4
 -9 13 11 15091.3 3128.32 4
 -9 13 10 6630.68 2257.62 4
 9 13 -10 15001.8 3527.83 4
 -9 13 9 35291.5 4747.34 4
 9 13 -9 43399.1 6113.59 4
 -9 13 8 1444.52 1022.18 4
 9 13 -8 925.655 1315.06 4
 -9 13 7 24502.2 3842 4
 9 13 -7 18848 4005.03 4
 -9 13 6 4723.85 1666.56 4
 9 13 -6 5076.91 1954.8 4
 -9 13 5 3225.9 1565.29 4
 9 13 -5 8358.99 2549.39 4
 -9 13 4 23136.9 3661.73 4
 9 13 -4 25108.9 4361.2 4
 -9 13 3 -125.713 683.501 4
 9 13 -3 -380.552 694.05 4
 9 13 -2 24275.8 4106.37 4
 -9 13 2 23043.5 3611.13 4
 9 13 -1 4727.86 1781.13 4
 9 13 0 8696.54 2552.44 4
 9 13 1 17518.9 3431.64 4
 9 13 2 7854.72 2459.68 4
 9 13 3 26252 4284.19 4
 9 13 4 768.938 1079.25 4
 9 13 5 13126.5 3016.86 4
 9 13 6 11486.6 2897.28 4
 9 13 7 1866.65 1141.85 4
 9 13 8 12662.1 3109.29 4
 9 13 9 850.372 702.592 4
 9 13 10 8256.84 2477.49 4
 -9 14 15 20523.7 4066.91 4
 -9 14 14 275.165 1003.22 4
 -9 14 13 33714.1 5112.19 4
 -9 14 12 7468.22 2283.12 4
 9 14 -12 2207.44 1833.61 4
 -9 14 11 17920.9 3602.7 4
 9 14 -11 10286.9 3173.44 4
 -9 14 10 9764.77 2658.18 4
 9 14 -10 8804.38 2795.57 4
 -9 14 9 275.557 867.728 4
 9 14 -9 26.4463 932.473 4
 -9 14 8 7727.11 2301.94 4
 9 14 -8 16122.7 3716.94 4
 -9 14 7 2167.22 1160.69 4
 9 14 -7 3522.22 1752.23 4
 -9 14 6 5532.7 2015.73 4
 9 14 -6 2039.35 1501.37 4
 -9 14 5 17395.5 3397.68 4
 9 14 -5 17534.5 3864.77 4
 -9 14 4 1216.89 1116.44 4
 9 14 -4 340.949 633.432 4
 9 14 -3 21585.2 4044.81 4
 -9 14 3 29891.4 4307.58 4
 9 14 -2 -170.282 708.815 4
 9 14 -1 29514.6 4788.26 4
 9 14 0 22.0591 1233.45 4
 9 14 1 12372.5 3009.33 4
 9 14 2 6764.15 2227.44 4
 9 14 3 327.426 910.077 4
 9 14 4 2566.48 1581.95 4
 9 14 5 5457.96 2136.35 4
 9 14 6 883.686 1077.34 4
 9 14 7 17482.6 3859.67 4
 -9 15 12 16766.8 3735.59 4
 -9 15 11 1642.84 1315.3 4
 -9 15 10 819.424 1073.23 4
 -9 15 9 1456.63 1290.76 4
 -9 15 8 518.501 1029.69 4
 -9 15 7 -900.333 1227.1 4
 -9 15 6 9249.05 2647.04 4
 9 15 -6 4841.61 2141.29 4
 -9 15 5 -537.689 1032.54 4
 9 15 -5 -1318.69 1207.6 4
 9 15 -4 30952.5 5242.65 4
 9 15 -3 -835.457 769.843 4
 9 15 -2 36905.3 5589.33 4
 9 15 -1 -558.015 1057.61 4
 9 15 0 28262.7 4875.77 4
 9 15 1 -421.086 899.22 4
 -9 16 8 396.605 1239.1 4
 -9 16 7 538.969 966.287 4
 -10 0 27 -1398.32 1659.9 3
 -10 0 26 11133.9 3248.08 3
 -10 0 25 166.456 900.99 3
 -10 0 24 26155.6 4772.64 3
 -10 0 23 69.4335 586.28 3
 -10 0 22 8993.43 2605.69 3
 -10 0 21 -743.364 593.491 3
 -10 0 20 2130.13 1013.48 3
 -10 0 19 -300.756 1049.85 3
 -10 0 18 7032.12 1971.83 3
 -10 0 17 -28.838 654.042 3
 -10 0 16 14806.3 2831.36 3
 -10 0 15 632.653 582.307 3
 -10 0 14 81224.6 6464.34 3
 -10 0 14 70718.2 5278.33 1
 -10 0 13 361.155 457.594 1
 -10 0 13 -88.3822 469.069 3
 -10 0 12 146124 8434.62 1
 -10 0 12 167045 9423.86 3
 -10 0 11 -227.702 554.628 1
 -10 0 11 679.98 714.58 3
 -10 0 10 133749 7963.96 1
 -10 0 10 147447 8434.68 3
 -10 0 9 -77.2782 571.624 1
 -10 0 9 146.921 343.795 3
 -10 0 8 1442.78 763.753 1
 -10 0 8 1719.86 815.869 3
 -10 0 7 421.274 529.052 3
 -10 0 7 -63.9715 288.386 1
 -10 0 6 33473.8 3572.01 1
 10 0 -6 28075.6 2083.1 4
 -10 0 6 31907.1 3181.13 3
 -10 0 5 -429.578 417.064 3
 10 0 -5 329.267 197.005 4
 -10 0 5 622.033 704.837 1
 -10 0 4 134548 7922.99 1
 10 0 -4 126406 4885.95 4
 -10 0 4 140948 7356.85 3
 -10 0 3 348.446 449.62 1
 -10 0 2 248989 11903.7 1
 10 0 -2 243004 9491.5 2
 10 0 -1 58.398 212.824 2
 -10 0 1 526.247 852.233 1
 -10 0 0 123851 7508.94 1
 10 0 0 112747 5916.8 2
 10 0 1 329.115 350.177 2
 -10 0 -1 -579.544 409.339 1
 -10 0 -2 117617 7354.2 1
 10 0 2 108259 6283.82 2
 10 0 3 435.509 479.94 2
 -10 0 -3 -464.295 680.385 1
 10 0 4 5292.53 1264.21 2
 -10 0 -4 8581.14 1795.09 1
 10 0 5 -120.7 454.612 2
 -10 0 -5 238.358 465.676 1
 -10 0 -6 4116.25 1336.88 1
 10 0 6 3702.13 1155.81 2
 -10 0 -7 -313.66 711.849 1
 10 0 7 -590.107 396.38 2
 -10 0 -8 44274.7 4250.41 1
 10 0 8 39935.5 4422.79 2
 -10 0 -9 280.931 727.623 1
 10 0 9 -341.018 864.525 2
 -10 0 -10 84844.4 6173.84 1
 10 0 10 91625.5 7406.57 2
 -10 0 -11 443.971 796.374 1
 10 0 11 -946.041 829.303 2
 10 0 12 74420.7 7010.34 2
 -10 0 -12 64985.1 5333.11 1
 10 0 13 -841.458 1195.27 2
 10 0 14 3721.22 1714.03 2
 10 0 15 -422.064 609.563 2
 10 0 16 3467.79 1901.78 2
 10 0 17 188.694 978.72 2
 -10 -1 27 6255.63 2656.63 3
 -10 1 27 6507.15 2507.11 3
 -10 -1 26 -786.692 1289.11 3
 -10 1 26 -126.572 853.398 3
 -10 -1 25 17829.6 4014.84 3
 -10 1 25 18911.8 4048.21 3
 -10 -1 24 507.309 778.959 3
 -10 1 24 736.236 1399.68 3
 -10 -1 23 21253.6 4153.18 3
 -10 1 23 24977.8 4485.92 3
 -10 -1 22 8081.92 2486.97 3
 -10 1 22 11405.1 2920.38 3
 -10 -1 21 9728.12 2657.94 3
 -10 1 21 8949.25 2531.46 3
 -10 -1 20 497.316 734.846 3
 -10 1 20 1946.47 1367.66 3
 -10 -1 19 2235.88 972.386 3
 -10 1 19 1931.73 1072.72 3
 -10 -1 18 9051.06 2257.35 3
 -10 1 18 8965.76 2297.36 3
 -10 -1 17 1099.17 588.487 1
 -10 -1 17 1630.02 876.387 3
 -10 1 17 777.873 730.13 3
 -10 -1 16 17589.4 2362.6 1
 -10 -1 16 17896.7 3064.88 3
 -10 1 16 16811.1 2981.36 3
 -10 -1 15 53687.7 4436.66 1
 -10 -1 15 60132.4 5680.12 3
 -10 1 15 57518.2 5544.04 3
 -10 -1 14 4305.68 1145.07 1
 -10 -1 14 2333.96 1115.07 3
 -10 1 14 3568.98 1295.2 3
 -10 -1 13 111990 6974.59 1
 -10 -1 13 123040 8003.85 3
 -10 1 13 117811 7965.55 3
 -10 -1 12 2528.76 982.327 1
 -10 -1 12 1458.53 879.644 3
 -10 1 12 716.685 693.307 3
 -10 -1 11 145007 8216.29 1
 -10 -1 11 147549 8609.98 3
 -10 1 11 144974 8692.98 3
 -10 1 11 143676 8290.45 1
 -10 -1 10 19481.8 2592.25 1
 -10 1 10 16998.5 2528.3 1
 -10 -1 10 19280.8 2629.36 3
 -10 1 10 21558.1 2906.29 3
 -10 1 9 43700.2 4144.13 1
 -10 -1 9 41959.9 4029.23 1
 -10 -1 9 45112.1 4120.07 3
 -10 1 9 51678.8 4474.74 3
 -10 1 8 15284.4 2377.05 1
 -10 -1 8 15755.2 2333.31 1
 -10 -1 8 16319.3 2328.25 3
 -10 1 8 16364.1 2406.97 3
 -10 1 7 2094.69 781.844 3
 -10 1 7 1500.18 772.917 1
 -10 -1 7 1823.78 770.103 1
 -10 -1 7 2310.21 859.091 3
 -10 -1 6 12159.2 1907.68 3
 -10 1 6 12770 2007.14 3
 10 -1 -6 14991.3 1355.71 4
 -10 1 6 13574.4 2217.34 1
 -10 -1 6 12229.5 2044.15 1
 10 -1 -5 19357.7 1390.97 4
 10 -1 -5 18010.7 1236.96 2
 -10 -1 5 18752.4 2617.67 1
 -10 1 5 16339.2 2475.59 1
 -10 1 5 15629.1 2245.52 3
 -10 -1 5 18832.1 2303.98 3
 10 -1 -4 45550 2143.84 4
 -10 1 4 47426.9 4372.51 1
 10 -1 -4 48832 2581.2 2
 -10 -1 4 47896.8 4341.07 1
 -10 -1 4 49555 3782.45 3
 -10 1 3 117031 7400.99 1
 10 -1 -3 113334 5142.53 2
 -10 -1 3 113354 7259.16 1
 10 1 -3 119537 4837.5 4
 -10 -1 3 129050 6660.09 3
 -10 -1 2 4288.44 1192.62 1
 -10 1 2 6199.26 1494.63 1
 10 -1 -2 6370.55 1012.86 2
 10 1 -2 4034.73 529.675 4
 -10 1 1 129283 7948.41 1
 10 -1 -1 126461 6139.75 2
 -10 -1 1 139893 8104.05 1
 -10 -1 0 -86.1265 376.947 1
 -10 1 0 315.777 462.949 1
 10 -1 0 147.323 387.364 2
 -10 1 -1 136842 8106.61 1
 10 1 1 128292 6765.54 2
 -10 -1 -1 132759 7914.66 1
 10 -1 1 126644 6673.48 2
 -10 1 -2 -502.465 912.5 1
 10 1 2 205.942 262.06 2
 10 -1 2 744.407 539.8 2
 -10 -1 -2 -749.799 708.246 1
 -10 1 -3 31719.9 3579.61 1
 10 1 3 28141.6 3025.61 2
 -10 -1 -3 30680.3 3426.54 1
 10 -1 3 30747.8 3087.12 2
 10 1 4 14158.4 2184.95 2
 10 -1 4 13663 2171.12 2
 -10 1 -4 15685.3 2457.49 1
 -10 -1 -4 11619.3 2124.76 1
 -10 1 -5 408.505 553.38 1
 10 1 5 888.521 570.476 2
 10 -1 5 -49.5916 449.7 2
 -10 -1 -5 195.488 508.923 1
 -10 1 -6 9422.1 1964.62 1
 10 1 6 6655.78 1621.78 2
 10 -1 6 5977.37 1489.37 2
 -10 -1 -6 7916.66 1810.24 1
 -10 1 -7 30199.4 3501.19 1
 -10 -1 -7 30107.7 3431.82 1
 10 1 7 25766.8 3429.5 2
 10 -1 7 32048.1 3719.4 2
 -10 1 -8 -44.4062 590.566 1
 10 1 8 -265.834 782.464 2
 10 -1 8 -732.602 897.351 2
 -10 -1 -8 428.051 650.583 1
 -10 -1 -9 69075.5 5477.81 1
 10 1 9 59620 5831.29 2
 10 -1 9 66571.7 6022.24 2
 -10 1 -9 69695.7 5498.38 1
 10 1 10 -342.853 561.812 2
 -10 -1 -10 1627.99 854.827 1
 10 -1 10 -736.996 823.484 2
 -10 1 -10 300.343 427.327 1
 -10 -1 -11 61302.5 5198.7 1
 10 1 11 59075 6128.19 2
 10 -1 11 54891.9 5804.62 2
 -10 -1 -12 4596.53 1348.01 1
 10 1 12 5054.69 1868.32 2
 10 -1 12 8486.22 2250.21 2
 -10 -1 -13 11028.3 2133.73 1
 10 1 13 18090.2 3528.28 2
 10 -1 13 16763.2 3323.29 2
 10 1 14 3790.77 1551.4 2
 10 -1 14 4836.3 1828.11 2
 10 1 15 -602.695 842.367 2
 10 -1 15 1663.46 1176.77 2
 10 1 16 2297.11 1153.79 2
 10 -1 16 1448.31 1287.16 2
 10 1 17 8989.48 2702.75 2
 10 -1 17 9006.44 2750.05 2
 -10 2 27 2571.88 1588.66 3
 -10 -2 26 6809.98 2646.01 3
 -10 2 26 17600.1 4141.54 3
 -10 -2 25 -250.037 595.244 3
 -10 2 25 1271.27 1720.94 3
 -10 -2 24 15720.7 3716.87 3
 -10 2 24 20323.1 4166.39 3
 -10 -2 23 3892.17 1733.81 3
 -10 2 23 6233.77 2258.55 3
 -10 -2 22 28660.3 4752.45 3
 -10 2 22 21941.9 4038.6 3
 -10 -2 21 11064.8 2891.08 3
 -10 2 21 14571.5 3243.35 3
 -10 -2 20 11427.4 2864.4 3
 -10 2 20 9980.82 2674.7 3
 -10 -2 19 6158.66 1915.53 3
 -10 2 19 10150.4 2545.58 3
 -10 -2 18 1046.26 1016.54 3
 -10 2 18 122.147 763.034 3
 -10 -2 17 32342.6 3231.84 1
 -10 -2 17 32116.1 4367.34 3
 -10 2 17 36362.3 4571.02 3
 -10 -2 16 17885.8 2403.03 1
 -10 -2 16 19001.3 3170.04 3
 -10 2 16 24678.7 3698.61 3
 -10 -2 15 47511.8 4130.68 1
 -10 -2 15 47052 4986.29 3
 -10 2 15 44220.8 4909.37 3
 -10 -2 14 57852 4646.85 1
 -10 -2 14 60718.6 5549.23 3
 -10 2 14 55397.4 5421.29 3
 -10 -2 13 17388 2761.93 3
 -10 -2 13 12494.5 2080.93 1
 -10 2 13 17233.3 2822.31 3
 -10 -2 12 45722.9 4099.14 1
 -10 -2 12 43034.4 1873.35 2
 -10 -2 12 54210.2 4836.37 3
 -10 2 12 46350.2 4614.01 3
 -10 2 11 10168.7 2024.72 3
 -10 -2 11 7382.42 1703.35 1
 -10 -2 11 6842.52 1678.8 3
 -10 -2 10 89660.3 6256.78 1
 -10 -2 10 98040.6 6539.27 3
 -10 2 10 106953 7043.56 3
 -10 -2 9 49796.4 4447.68 1
 -10 -2 9 53412.8 4455.55 3
 -10 2 9 51129.4 4568.88 3
 -10 -2 8 17600.1 2591.97 1
 -10 -2 8 20944.1 2596.56 3
 -10 2 8 21369.3 2814.12 3
 -10 -2 7 102558 3595.51 2
 -10 -2 7 108111 6685.75 1
 -10 -2 7 112939 6290.92 3
 -10 2 7 106596 6585.48 3
 -10 2 6 742.297 563.797 3
 10 -2 -6 331.106 262.029 4
 -10 -2 6 543.744 578.519 1
 10 -2 -6 402.056 154.98 2
 -10 -2 6 444.174 209.917 2
 -10 -2 6 147.653 217.269 3
 -10 2 6 874.264 741.693 1
 -10 -2 5 86006.5 3761.85 2
 10 -2 -5 79498.8 3592.41 2
 -10 -2 5 86370.2 6067.08 1
 -10 -2 5 84026.6 5242.1 3
 10 -2 -5 79350.4 3725.61 4
 -10 2 5 91849.2 6339.19 1
 10 -2 -4 20251.8 1612.69 2
 -10 -2 4 23544.1 1736.22 2
 -10 -2 4 24444.8 3000.41 1
 -10 -2 4 23838.8 2451.13 3
 10 -2 -4 19698.9 1328.18 4
 -10 2 4 20892.7 2887.53 1
 10 -2 -3 38740.6 2567.72 2
 -10 -2 3 35670.6 3747.66 1
 10 2 -3 42554 2696.58 4
 -10 -2 3 40787 3262.78 3
 -10 2 3 38859.7 4011.96 1
 10 -2 -2 39312 2805.98 2
 -10 -2 2 46629.8 4263.96 1
 10 2 -2 46324 2684.31 4
 -10 2 2 42994 4243.21 1
 10 2 -1 5637.81 795.071 4
 -10 2 1 7048.11 1724.9 1
 -10 -2 1 6374.03 1546.38 1
 10 -2 -1 6207.3 1085.99 2
 10 2 0 83589.8 3720.19 4
 10 -2 0 76091.9 4653.85 2
 -10 -2 0 85105.3 6066.5 1
 -10 2 0 75270.3 5872.96 1
 -10 2 -1 444.182 359.601 1
 10 2 1 173.82 160.987 4
 10 2 2 27499.1 1871.9 4
 10 -2 2 28764.2 2851.82 2
 -10 -2 -2 34427.7 3662.19 1
 -10 2 -2 37991.6 3880.96 1
 10 2 3 19766.8 1637.04 4
 10 -2 3 26272.7 2803.94 2
 -10 -2 -3 25170 3113.08 1
 -10 2 -3 22497.8 3048.42 1
 -10 2 -4 63.2062 825.429 1
 -10 -2 -4 652.539 617.621 1
 10 2 4 -96.2355 235.568 4
 10 -2 4 642.394 353.949 2
 10 -2 5 25253 3030.77 2
 -10 -2 -5 24515.9 3128.87 1
 -10 2 -5 24619 3224.47 1
 -10 -2 -6 17504.3 2602.39 1
 10 -2 6 18200.3 2641.37 2
 -10 -2 -7 20400.9 2854.88 1
 10 -2 7 24302.8 3208.27 2
 10 2 8 60620.3 5695.34 2
 -10 -2 -8 69693.1 5474.97 1
 10 -2 8 65623.9 5750.71 2
 10 2 9 391.971 683.185 2
 10 -2 9 117.117 512.583 2
 -10 -2 -9 -1143.35 774.921 1
 10 2 10 58932.3 6009.39 2
 -10 -2 -10 65137.5 5284.85 1
 10 -2 10 58246.8 5801.9 2
 10 2 11 2005.73 1036.87 2
 10 -2 11 3754.44 1634.31 2
 -10 -2 -11 4338.38 1318.41 1
 10 2 12 19822.7 3631.81 2
 10 -2 12 17739.7 3345.03 2
 -10 -2 -12 19528.7 2776.78 1
 10 2 13 16338.2 3475.26 2
 -10 -2 -13 17418.7 2650.42 1
 10 -2 13 17358.7 3324.44 2
 10 -2 14 5201.18 2029.2 2
 10 -2 15 20937.7 3880.76 2
 10 -2 16 -786.552 1254.57 2
 10 -2 17 7504.01 2590.99 2
 -10 3 27 6419.64 2445.93 3
 -10 -3 26 7176.87 2626.84 3
 -10 3 26 6096.47 2478.18 3
 -10 -3 25 6572.36 2449.45 3
 -10 3 25 7953.29 2803.06 3
 -10 -3 24 1428.36 1249.41 3
 -10 3 24 1220.78 884.797 3
 -10 3 23 13038.4 3124.52 3
 -10 -3 23 7142.18 2293.71 3
 -10 -3 22 1927.49 1116.14 3
 -10 3 22 4812.95 1974.06 3
 -10 -3 21 7928.3 2477.68 3
 -10 3 21 12160 2979.82 3
 -10 -3 20 29454 4554.59 3
 -10 3 20 24799.7 4149.84 3
 -10 -3 19 5989.97 2033.03 3
 -10 3 19 3186.87 1643.04 3
 -10 -3 18 44752.6 5339.78 3
 -10 3 18 39005.4 4982.16 3
 -10 -3 17 2154.19 1217.44 3
 -10 -3 17 1235.54 513.302 1
 -10 3 17 594.408 903.182 3
 -10 -3 16 70615.6 5206.86 1
 -10 -3 16 83006.4 7014.44 3
 -10 3 16 76939 6818.59 3
 -10 -3 15 10011.5 2243.42 3
 -10 3 15 13311.2 2688.62 3
 -10 -3 15 12513.1 2016.04 1
 -10 -3 14 14692.1 2254.14 1
 -10 -3 14 17822 2957.55 3
 -10 3 14 18618.6 3053.99 3
 -10 3 13 10978.8 2240.72 3
 -10 -3 13 10935.4 1946.81 1
 -10 -3 13 9718.56 2048.94 3
 -10 3 12 -2.59193 509.353 3
 -10 -3 12 320.315 461.613 1
 -10 -3 12 1516.88 846.292 3
 -10 -3 11 33948.4 3703.03 3
 -10 -3 11 35772.2 3664.02 1
 -10 3 11 31130 3729.86 3
 -10 -3 10 46237.1 4255.49 3
 -10 -3 10 48798.6 4385.37 1
 -10 3 10 44236.4 4403.65 3
 -10 -3 9 21697.6 2749.63 3
 -10 -3 9 20767.2 2794.36 1
 -10 3 9 20723.3 2890.4 3
 -10 -3 8 152922 8210.49 3
 -10 -3 8 144407 8535.46 1
 -10 3 8 162901 9035.71 3
 -10 3 7 113.168 315.999 3
 -10 -3 7 726.325 193.873 2
 -10 -3 7 1124.98 695.742 3
 -10 -3 7 -464.711 407.538 1
 -10 -3 6 168857 6654.85 2
 -10 -3 6 170142 8399.39 3
 -10 -3 6 170010 9299.73 1
 -10 -3 5 4842.49 1372.14 1
 -10 -3 5 3359.05 966.416 3
 10 -3 -5 4242.24 726.494 4
 -10 -3 4 108382 5967.23 3
 10 -3 -4 107229 4612.04 4
 -10 -3 4 111667 7149.73 1
 10 3 -3 32500.4 2621.68 4
 -10 -3 3 31292 2737.65 3
 -10 -3 3 32883.5 3567.55 1
 10 3 -2 36096.6 2671.88 4
 -10 -3 2 29090.9 3418.59 1
 -10 -3 2 34105.3 2793.66 3
 -10 -3 1 22634.9 3016.62 1
 10 3 -1 25298.4 2131.9 4
 10 3 0 380.439 316.805 4
 -10 -3 0 2563.93 1026.99 1
 10 3 1 18469.8 1737.65 4
 10 -3 1 19697.6 2241.59 2
 -10 -3 -1 22668.4 2942.26 1
 10 3 2 45265.5 2912.46 4
 10 -3 2 38345.1 3430.54 2
 -10 -3 -2 42617.9 4185.67 1
 10 3 3 1819.11 545.13 4
 -10 -3 -3 2016.25 851.429 1
 10 -3 3 3502.03 1042.68 2
 10 3 4 110509 5491.55 4
 10 -3 4 111044 6820.22 2
 -10 -3 -4 117786 7484.93 1
 10 3 5 6284.39 1111.51 4
 -10 -3 -5 9920.06 1981.19 1
 10 -3 5 6200.93 1407.43 2
 10 -3 6 68622.5 5472.55 2
 -10 -3 -6 68528.7 5473.78 1
 -10 -3 -7 20400 2820.48 1
 10 -3 7 17946.1 2760.57 2
 -10 -3 -8 19431.2 2762.12 1
 10 -3 8 16331.1 2783.53 2
 10 -3 9 33714.3 4139.61 2
 -10 -3 -9 35528.8 3857.92 1
 -10 -3 -10 974.655 683.468 1
 10 -3 10 1261.81 878.615 2
 -10 -3 -11 37180.7 3922.48 1
 10 -3 11 37935.8 4703.8 2
 10 -3 12 18183 3336.56 2
 -10 -3 -12 14843.3 2568.79 1
 10 -3 13 8950.91 2416.45 2
 -10 -3 -13 9365.74 2019.9 1
 10 -3 14 34397 4876.37 2
 10 -3 15 -1163.06 1508.99 2
 10 -3 16 26834.7 4564.38 2
 10 -3 17 960.485 1024.69 2
 -10 4 27 12704.2 3729.79 3
 -10 -4 26 1272.42 1428.18 3
 -10 4 26 924.148 1020.73 3
 -10 -4 25 5529.84 2505.62 3
 -10 4 25 7337.36 2654.6 3
 -10 -4 24 -113.449 1258.53 3
 -10 4 24 2157.41 1242.34 3
 -10 -4 23 -97.3336 774.208 3
 -10 4 23 -810.686 862.667 3
 -10 -4 22 3272.5 1508.55 3
 -10 4 22 1131.8 841.184 3
 -10 -4 21 5609.87 2109.92 3
 -10 4 21 7938.48 2484.54 3
 -10 -4 20 4091.03 1479.86 3
 -10 4 20 6639.27 2165.58 3
 -10 -4 19 43099 5436.26 3
 -10 4 19 43150.9 5480.76 3
 -10 -4 18 2538.13 1482.99 3
 -10 4 18 1490.34 723.47 3
 -10 -4 17 69011.1 5177.61 1
 -10 -4 17 72771 6866.09 3
 -10 4 17 84909.3 7363.99 3
 -10 4 16 585.054 405.046 3
 -10 -4 16 -341.794 573.013 1
 -10 -4 16 561.685 505.169 3
 -10 -4 15 24629.9 3003.09 1
 -10 -4 15 23799.9 3602.31 3
 -10 4 15 26242.3 3752.61 3
 -10 4 14 247.589 320.491 3
 -10 -4 14 -428.266 674.335 1
 -10 -4 14 100.983 463.276 3
 -10 4 13 4107.69 1518.06 3
 -10 -4 13 2547.78 1153.26 3
 -10 -4 13 4473.21 1254.89 1
 -10 4 12 228.391 334.288 3
 -10 -4 12 210.201 493.379 3
 -10 -4 12 821.56 628.37 1
 -10 4 11 9934.23 2140.33 3
 -10 -4 11 13169.8 2211.95 1
 -10 -4 11 13824.7 2355.4 3
 -10 4 10 2613.52 1147.9 3
 -10 -4 10 4029.81 1288.1 1
 -10 4 10 2318.4 894.726 4
 -10 -4 10 2852.11 999.345 3
 -10 -4 9 102586 6829.64 1
 -10 4 9 103176 6179.72 4
 -10 -4 9 102971 6556.87 3
 -10 4 9 91631.1 6820.82 3
 -10 4 8 3464.81 1267.98 3
 -10 4 8 4093.65 1142.27 4
 -10 -4 8 2617.09 1181.74 1
 -10 -4 8 2738.02 948.136 3
 -10 -4 7 158141 9187.25 1
 -10 4 7 184741 8092.32 4
 -10 -4 7 160956 8448.27 3
 -10 -4 6 531.701 601.388 1
 -10 -4 6 71.0759 269.924 3
 -10 -4 5 181409 10325.6 1
 -10 -4 5 202683 9429.27 3
 -10 4 4 3538.69 697.587 4
 -10 -4 4 4389.67 1391.95 1
 -10 -4 4 2639.88 799.723 3
 -10 -4 3 74470.7 5715.48 1
 -10 4 3 78615.1 3617.18 4
 -10 -4 3 71360.9 4426.15 3
 10 4 -3 69606.2 4562.36 4
 -10 4 2 17809 1310.34 4
 -10 -4 2 17112.9 2579.88 1
 10 4 -2 17868.7 2084.76 4
 -10 -4 2 20580.4 2011.81 3
 10 4 -1 2093.39 727.321 4
 -10 4 1 1426.3 302.904 4
 -10 -4 1 1922.5 965.083 1
 -10 -4 0 29499.3 3434.53 1
 -10 4 0 27218.1 1342.5 4
 10 4 0 30352.7 2634.83 4
 10 4 1 31605.5 2701.34 4
 -10 -4 -1 32882 3729.01 1
 10 4 2 4429.22 970.772 4
 -10 -4 -2 4669.96 1426.93 1
 -10 -4 -3 151631 8854.37 1
 10 4 3 151828 7189.45 4
 -10 -4 -4 2031.75 1041.8 1
 10 4 4 341.273 316.451 4
 10 4 5 154423 7585.97 4
 10 -4 5 159502 8913.65 2
 -10 -4 -5 167453 9380.51 1
 10 4 6 915.974 498.132 4
 10 -4 6 609.891 508.646 2
 10 -4 7 72177.2 5825.01 2
 -10 -4 -7 64697.5 5436.63 1
 -10 -4 -8 4825.19 1360.21 1
 10 -4 8 5605.73 1579.62 2
 -10 -4 -9 4965.06 1414.19 1
 10 -4 9 5729.94 1632.08 2
 -10 -4 -10 20241.3 2921.79 1
 10 -4 10 16892.9 2934.21 2
 -10 -4 -11 19720.8 2874.61 1
 10 -4 11 10692.9 2412.98 2
 -10 -4 -12 7967.81 1727.56 1
 10 -4 12 9283.74 2336.18 2
 -10 -4 -13 33821.2 3873.44 1
 10 -4 13 34161.4 4715.89 2
 10 -4 14 3342.41 1316.62 2
 10 -4 15 41080.9 5570.52 2
 10 -4 16 -1322.14 1369.15 2
 -10 5 27 1377.93 1659.78 3
 -10 5 26 13158 3573.19 3
 -10 -5 25 -3896.29 1947.46 3
 -10 5 25 496.929 911.842 3
 -10 -5 24 1930.62 1795.53 3
 -10 5 24 853.241 822.258 3
 -10 -5 23 -2754.49 1561.81 3
 -10 5 23 391.468 768.432 3
 -10 -5 22 3208.77 1496.9 3
 -10 5 22 974.868 790.774 3
 -10 -5 21 934.201 882.53 3
 -10 5 21 443.358 633.071 3
 -10 5 20 12299.3 2917.33 3
 -10 5 19 457.736 686.008 3
 -10 5 18 54786.8 6103.63 3
 -10 5 17 3557.93 1430.57 3
 -10 -5 17 1761.19 698.922 1
 -10 -5 17 1559.82 1200.37 3
 -10 -5 16 71138.2 6508.98 3
 -10 -5 16 60327.6 4962.22 1
 -10 5 16 55506.9 5869.36 3
 -10 5 15 8634.01 2222.61 3
 -10 -5 15 8686.55 2182.44 3
 -10 -5 15 8707.59 1791.06 1
 -10 -5 14 21822.1 2885.76 1
 -10 5 14 22778.5 3495.22 3
 -10 5 14 29576.8 3771.53 4
 -10 -5 14 21510.2 3319.71 3
 -10 5 13 11427.9 2414.15 3
 -10 -5 13 14859.8 2387.82 1
 -10 5 13 11972.8 2259.07 4
 -10 -5 13 11253.9 2276.28 3
 -10 5 12 450.264 767.864 3
 -10 5 12 -296.021 531.539 4
 -10 -5 12 344.271 304.729 3
 -10 -5 12 24.3493 381.258 1
 -10 5 11 12123.7 2355.95 3
 -10 5 11 12565.8 2141.77 4
 -10 -5 11 14420.2 2412.1 3
 -10 -5 11 11627.8 2116.14 1
 -10 5 10 29372.7 3698 3
 -10 5 10 28603.3 3094.55 4
 -10 -5 10 26903 3323.74 1
 -10 -5 10 24824.2 3145.55 3
 -10 -5 9 231.341 823.626 1
 -10 5 9 112.011 456.044 4
 -10 -5 9 999.532 690.87 3
 -10 5 8 149507 7350.84 4
 -10 -5 8 129381 8092.45 1
 -10 -5 8 124351 7441.49 3
 -10 -5 7 997.621 772.001 1
 -10 5 7 359.537 281.485 4
 -10 5 6 187376 8089.82 4
 -10 -5 6 179679 9880.77 1
 -10 -5 6 169035 8529.58 3
 -10 5 5 1277.64 534.767 4
 -10 -5 5 1153.17 701.36 1
 -10 -5 5 1801.19 720.508 3
 -10 5 4 79909.8 4137.04 4
 -10 -5 4 78338.6 5971.36 1
 -10 -5 4 73372.5 4565.47 3
 10 5 -4 65722.9 4858.4 4
 -10 -5 3 -3.50045 286.643 3
 -10 5 3 597.577 343.286 4
 -10 -5 3 1288.78 945.152 1
 10 5 -3 386.692 483.92 4
 -10 5 2 1220.12 392.326 4
 -10 -5 2 1911.67 819.95 1
 -10 -5 2 1287.17 500.626 3
 10 5 -2 1929.38 797.067 4
 10 5 -1 2350.7 735.329 4
 -10 -5 1 3592.09 764.365 3
 -10 5 1 3731.43 643.887 4
 -10 -5 1 3805.33 1279.11 1
 -10 5 0 50491.4 2716.18 4
 -10 -5 0 49913.9 4702.1 1
 10 5 0 48725.5 3819.61 4
 10 5 1 2347.47 738.457 4
 -10 5 -1 2324.36 506.265 4
 10 5 2 119463 6620.55 4
 -10 -5 -2 129219 8020.4 1
 10 5 3 551.888 426.528 4
 -10 -5 -3 2696.2 1063.53 1
 10 5 4 123235 6776.19 4
 -10 -5 -4 124652 7985.41 1
 10 5 5 62.9318 430.988 4
 -10 -5 -5 2161.14 1185.6 1
 -10 -5 -6 79838.7 6140.88 1
 10 5 6 69412.3 4978.12 4
 -10 -5 -7 401.687 694.046 1
 -10 -5 -8 36154.1 4022.93 1
 10 -5 8 38360 4285.66 2
 -10 -5 -9 6695.39 1625.38 1
 10 -5 9 3772.82 1147.56 2
 10 -5 10 234.764 405.849 2
 -10 -5 -10 1774.34 970.591 1
 -10 -5 -11 1018.28 622.454 1
 10 -5 11 2848.07 1175.83 2
 -10 -5 -12 20508.6 3095.75 1
 10 -5 12 21852.4 3684.34 2
 -10 -5 -13 1671.39 1017.06 1
 10 -5 13 1250.83 1033.74 2
 10 -5 14 52670.2 6171.61 2
 10 -5 15 455.733 811.518 2
 10 -5 16 51199.1 6361.01 2
 -10 6 27 14868.4 3981.19 3
 -10 6 26 -1472.13 1315.6 3
 -10 6 25 4270.51 2155.92 3
 -10 6 24 2620.31 1320.81 3
 -10 6 23 -664.969 1197.64 3
 -10 6 22 2741.77 1523.44 3
 -10 6 21 11336.6 2946.5 3
 -10 6 20 3168.84 1462.69 3
 -10 6 19 33142.9 4815.49 3
 -10 6 18 1311.1 1012.77 3
 -10 6 17 65508 6598.79 4
 -10 6 17 65817.6 6620.58 3
 -10 6 16 837.452 823.342 3
 -10 -6 16 1818.2 821.832 1
 -10 6 16 1367.19 494.612 4
 -10 -6 15 47038.7 4528.37 1
 -10 6 15 55210.5 5617.35 4
 -10 6 15 52742.8 5595.59 3
 -10 -6 14 21315.6 2945.13 1
 -10 6 14 20478.3 3153.56 4
 -10 6 14 19878.9 3357.22 3
 -10 -6 13 2525.13 1002.63 1
 -10 6 13 4562.29 1676.38 3
 -10 6 13 4363.77 1407.8 4
 -10 6 12 22309.3 3422.76 3
 -10 6 12 25758.5 3208.39 4
 -10 -6 12 22723.4 3196.31 3
 -10 -6 12 22752.7 3074.57 1
 -10 6 11 7586.55 1642.42 4
 -10 -6 11 7694.58 1745.43 3
 -10 -6 11 8248.98 1850.9 1
 -10 6 10 9192.64 1711.78 4
 -10 -6 10 10431.6 1990.27 3
 -10 -6 10 8921.39 1935.85 1
 -10 6 9 72766.7 5052.87 4
 -10 -6 9 69296.9 5312.96 3
 -10 -6 9 62615.2 5391.4 1
 -10 -6 8 14297.4 2416.34 1
 -10 6 8 12171.8 1834.31 4
 -10 -6 8 13999.8 2178.82 3
 -10 6 7 130396 6715.79 4
 -10 -6 7 113614 6867.83 3
 -10 -6 7 122896 7881.39 1
 -10 6 6 971.589 509.44 4
 -10 -6 6 1724.49 1091.94 1
 -10 -6 6 417.51 278.74 3
 -10 6 5 60749.1 3968.81 4
 -10 -6 5 59659.9 4192.3 3
 -10 -6 5 59402.8 5227.01 1
 10 6 -4 15857.4 2349.95 4
 -10 6 4 21574.7 2105.54 4
 -10 -6 4 19043.4 2792.27 1
 -10 -6 4 15667.9 1921.52 3
 -10 6 3 2588.56 728.592 4
 -10 -6 3 3105.32 1253.61 1
 -10 -6 3 2671.22 699.165 3
 10 6 -3 2900.67 1058.36 4
 -10 6 2 21956.2 2037.9 4
 -10 -6 2 19555 1913.14 3
 10 6 -2 21693.9 2697.57 4
 -10 -6 2 22073.2 3076.74 1
 10 6 -1 10908.9 1901.13 4
 -10 6 1 16213.6 1659.43 4
 10 6 0 12838.2 1973.86 4
 -10 6 0 12303.4 1434.18 4
 -10 -6 0 13843.3 2427.56 1
 -10 -6 -1 89384.8 6652.85 1
 10 6 1 88066 5795.73 4
 10 6 2 12961.6 2030.02 4
 -10 -6 -2 10534.7 2258.7 1
 10 6 3 124261 7184.21 4
 -10 -6 -3 128899 8315.6 1
 10 6 4 4812.68 1226.89 4
 -10 -6 -4 5747.85 1625.4 1
 10 6 5 66146.8 5036.77 4
 -10 -6 -5 71666.7 5895.71 1
 -10 -6 -6 -45.6837 583.059 1
 10 6 6 -484.024 823.646 4
 10 6 7 34876.2 3657.87 4
 -10 -6 -7 41424.3 4342.58 1
 -10 -6 -8 6168.1 1703.75 1
 -10 -6 -9 7059.67 1766.66 1
 -10 -6 -10 4812.42 1392.93 1
 10 -6 10 5960.28 1786.59 2
 -10 -6 -11 7274.58 1895.15 1
 10 -6 11 5583.91 1796.68 2
 10 -6 12 3631.02 1525.53 2
 -10 -6 -12 3606.33 1282.95 1
 -10 -6 -13 32150.1 3889.56 1
 10 -6 13 27666 4241.88 2
 10 -6 14 803.93 771.256 2
 10 -6 15 50579.7 6172.41 2
 -10 7 26 10634.5 3314.2 3
 -10 7 25 6339.03 2406.66 3
 -10 7 24 -267.488 934.155 3
 -10 7 23 6870.35 2388.74 3
 -10 7 22 1371.85 1421.21 3
 -10 7 21 7734.75 2315.49 3
 -10 7 20 11207.8 2821.1 3
 -10 7 19 6533.75 2287.02 3
 -10 7 19 5540.51 2028.7 4
 -10 7 18 40157.4 5348.13 4
 -10 7 18 38998.1 5240.08 3
 -10 7 17 1088.75 980.306 4
 -10 7 17 638.501 539.154 3
 -10 7 16 38309.9 4807.42 4
 -10 -7 16 35284.1 3922.7 1
 -10 7 16 37301.3 4864.68 3
 -10 7 15 14548.4 2993.29 3
 -10 -7 15 17901.6 2806.73 1
 -10 7 15 15031.9 2842.29 4
 -10 7 14 16476.3 3094.8 3
 -10 7 14 18629.7 3049.22 4
 -10 -7 14 23104.5 3207.71 1
 -10 7 13 39206.1 4268.15 4
 -10 -7 13 40965 4324.69 1
 -10 -7 12 8749.52 2022.18 1
 -10 7 12 10213.3 2028.85 4
 -10 -7 11 33969.9 3939.63 1
 -10 7 11 42455 4072.79 4
 -10 -7 10 13024.5 2443.17 1
 -10 7 10 15135.7 2282.51 4
 -10 -7 9 31496.2 3747.65 1
 -10 7 9 32411.2 3371.72 4
 -10 -7 9 37355.6 3785.66 3
 -10 7 8 66182.3 4862.18 4
 -10 -7 8 70327.7 5823.32 1
 -10 -7 8 67210 5159.53 3
 -10 7 7 8075.42 1533.38 4
 -10 -7 7 7365 1532.97 3
 -10 -7 7 9451.92 2114.01 1
 -10 7 6 50242.6 3843.98 4
 -10 -7 6 41931.3 4373.13 1
 -10 -7 6 41973.4 3676.27 3
 -10 7 5 14456.8 1956.61 4
 -10 -7 5 13993.2 2450.63 1
 -10 -7 5 14942.5 1958.93 3
 10 7 -5 13294.8 2364.43 4
 -10 7 4 22512.5 2375.7 4
 -10 -7 4 18964.1 2945.58 1
 -10 -7 4 21888.1 2289.6 3
 10 7 -4 22258.3 3003.62 4
 -10 7 3 96325.8 5381.26 4
 -10 -7 3 90467.5 6792.69 1
 10 7 -3 90751 6470.59 4
 -10 -7 2 613.637 913.562 1
 -10 7 2 855.561 515.81 4
 10 7 -2 465.785 854.956 4
 -10 7 1 62268.7 4043.16 4
 -10 -7 1 62063.5 5439.9 1
 10 7 -1 54777.2 4793.57 4
 -10 7 0 24999.3 2399.17 4
 -10 -7 0 28449 3642.76 1
 10 7 0 26188.4 3134.42 4
 -10 -7 -1 34198.9 4008.08 1
 10 7 1 32614.8 3502.07 4
 10 7 2 80091.8 5885.6 4
 -10 -7 -2 93798.1 6874.09 1
 10 7 3 15930.9 2373.73 4
 -10 -7 -3 15771 2715.2 1
 10 7 4 76396.5 5736.93 4
 -10 -7 -4 81517.6 6427.06 1
 10 7 5 415.42 426.491 4
 -10 -7 -5 1036.49 651.039 1
 10 7 6 34389.5 3787.03 4
 -10 -7 -6 36775.3 4192.41 1
 10 7 7 18123.8 2762.92 4
 -10 -7 -7 27628.1 3642.62 1
 -10 -7 -8 9930.29 2157.25 1
 -10 -7 -9 37908.8 4333.1 1
 -10 -7 -10 2166.14 1117.69 1
 -10 -7 -11 23490.8 3447.87 1
 -10 -7 -12 6628.94 1759.16 1
 10 -7 12 9085.74 2447.45 2
 -10 -7 -13 4116.2 1499.26 1
 10 -7 13 8731.2 2459.88 2
 10 -7 14 23409.2 4148.23 2
 10 -7 15 563.517 981.543 2
 -10 8 26 5524.8 2476.97 3
 -10 8 25 6960.96 2732.05 3
 -10 8 24 13028.6 3450.58 3
 -10 8 23 -653.766 1151.17 3
 -10 8 22 18513.3 3984.1 3
 -10 8 21 3033.94 1288.36 3
 -10 8 21 -1420.72 692.375 4
 -10 8 20 8525.78 2565.89 3
 -10 8 20 10984.3 3034.82 4
 -10 8 19 11111.5 2882.25 3
 -10 8 19 15642 3419.81 4
 -10 8 18 3563.44 1611.86 3
 -10 8 18 4030.57 1606.71 4
 -10 8 17 20033.5 3703.63 3
 -10 8 17 22432.3 3887.13 4
 -10 8 16 1687.85 997.741 4
 -10 -8 16 3660.69 1320.3 1
 -10 -8 15 5457.01 1633.18 1
 -10 8 15 9429.03 2332.23 4
 -10 8 14 35329.5 4303.43 4
 -10 -8 14 37324.5 4188.71 1
 -10 8 13 6975.7 1881.32 4
 -10 -8 13 3594.1 1325.9 1
 -10 8 12 60853.8 5365.11 4
 -10 -8 12 57625.2 5309.67 1
 -10 8 11 1442.51 960.617 4
 -10 -8 11 947.22 889.691 1
 -10 8 10 70179 5558.48 4
 -10 8 9 15981.3 2411.89 4
 -10 8 8 8887.99 1776.11 4
 -10 8 7 62087 4744.42 4
 -10 -8 7 54654.6 4534.92 3
 -10 8 6 1332.57 608.199 4
 -10 -8 6 1423.24 613.442 3
 -10 8 5 49960.3 3995.61 4
 -10 -8 5 36346.5 3309.88 3
 10 8 -5 42335.4 4519 4
 -10 8 4 61293.5 4502.46 4
 10 8 -4 60598.2 5430.46 4
 -10 8 3 18676 2303.22 4
 10 8 -3 14672.5 2597.08 4
 -10 8 2 74692 4954.69 4
 10 8 -2 75016.7 6042.04 4
 10 8 -1 1048.82 498.618 4
 -10 8 1 1535.1 596.398 4
 10 8 0 57818.9 5115.91 4
 10 8 1 18528.7 2810.57 4
 -10 -8 -2 31626.9 3933.41 1
 10 8 2 29864.6 3548.2 4
 10 8 3 56483.6 5078.72 4
 -10 -8 -3 61012.4 5548.25 1
 10 8 4 -12.2064 701.191 4
 -10 -8 -4 1365.09 797.692 1
 10 8 5 32622.8 3785.95 4
 -10 -8 -5 25677.3 3696.9 1
 10 8 6 37219.8 4140.68 4
 -10 -8 -6 33749.3 4171.93 1
 -10 -8 -7 12667.1 2639.28 1
 10 8 7 11678.6 2295.54 4
 10 8 8 41658.1 4569.39 4
 -10 -8 -8 44724.3 4869.31 1
 -10 -8 -9 2111.25 1239.72 1
 -10 -8 -10 47227 5038.37 1
 -10 -8 -11 3566.19 1584.02 1
 -10 -8 -12 29522.7 4017.77 1
 -10 -8 -13 3006.66 1281.6 1
 10 -8 13 6342.99 2016.35 2
 10 -8 14 5399.52 1995.31 2
 -10 9 25 12963.8 3564.03 3
 -10 9 24 1492.27 1512.45 3
 -10 9 23 36997.1 5803.16 3
 -10 9 22 1650.63 1177.2 3
 -10 9 22 431.419 1085.78 4
 -10 9 21 26371.2 4753.18 3
 -10 9 21 29283.5 5132.56 4
 -10 9 20 1733.46 927.645 4
 -10 9 19 10747.3 3050.79 4
 -10 9 18 8862.67 2631.96 4
 -10 9 17 549.644 947.934 4
 -10 9 16 3126.98 1414.47 4
 -10 -9 16 3312 1362.54 1
 -10 -9 15 10423.1 2240.97 1
 -10 9 15 13246.7 2791.13 4
 -10 9 14 2334.49 1159.88 4
 -10 -9 14 1144.63 940.695 1
 -10 9 13 41875.1 4708.67 4
 -10 9 12 936.315 633.576 4
 -10 9 11 65380 5675.88 4
 -10 9 10 7262.24 1844.01 4
 -10 9 9 31642.6 3677.15 4
 -10 9 8 23208.8 3038.01 4
 -10 9 7 476.173 558.744 4
 -10 9 6 18249.1 2559.62 4
 10 9 -6 17482.6 2995.96 4
 -10 9 5 31104 3339.15 4
 10 9 -5 25026.7 3662.46 4
 -10 9 4 18693.4 2512.32 4
 10 9 -4 16944.5 2939.14 4
 -10 9 3 60903 4768.01 4
 10 9 -3 57118.9 5517.46 4
 -10 9 2 5654.96 1350.09 4
 10 9 -2 9215.71 2055.87 4
 -10 9 1 74087.7 5307.86 4
 10 9 -1 74718.5 6288.5 4
 10 9 0 1417.57 992.76 4
 10 9 1 57415.2 5437.31 4
 10 9 2 14684.2 2622.87 4
 10 9 3 1581.82 717.23 4
 10 9 4 7976.32 1955.7 4
 10 9 5 20279.9 3191.25 4
 -10 -9 -5 22971.8 3550.97 1
 10 9 6 3933.76 1500.13 4
 -10 -9 -6 2358.33 1294.86 1
 10 9 7 51940.2 5269.09 4
 -10 -9 -7 55515.9 5619.74 1
 10 9 8 1577.39 941.006 4
 -10 -9 -8 570.429 830.037 1
 -10 -9 -9 77556.7 6795.88 1
 -10 -9 -10 1344.72 1318.73 1
 -10 -9 -11 58420.7 5897.18 1
 -10 -9 -12 1455.82 1029.87 1
 -10 -9 -13 24329.2 3719.16 1
 -10 10 22 39308.4 6293.28 4
 -10 10 21 -515.974 1187.33 4
 -10 10 20 18039.7 4015.01 4
 -10 10 19 -2409.37 1432.16 4
 -10 10 18 2434.55 1218.72 4
 -10 10 17 1352.99 1085.91 4
 -10 10 16 7623.35 2342.74 4
 -10 10 15 1128.4 904 4
 -10 10 14 38435.6 4755.3 4
 -10 10 13 191.32 545.761 4
 -10 10 12 38151 4489.57 4
 -10 10 11 161.158 616.484 4
 -10 10 10 50245.1 5043.4 4
 -10 10 9 145.853 400.449 4
 -10 10 8 5235.86 1637.18 4
 -10 10 7 430.752 513.345 4
 10 10 -7 419.525 422.661 4
 -10 10 6 7241.52 1727.64 4
 10 10 -6 7740.28 2201.37 4
 -10 10 5 198.851 612.973 4
 10 10 -5 1230.16 1231.9 4
 -10 10 4 52015.6 4714.59 4
 10 10 -4 54584.1 5659.93 4
 -10 10 3 467.554 426.735 4
 10 10 -3 1764.01 1063.95 4
 -10 10 2 103320 6893.98 4
 10 10 -2 108133 8169.56 4
 10 10 -1 592.333 544.02 4
 10 10 0 79912.1 6773.07 4
 10 10 1 108.542 406.384 4
 10 10 2 26398.1 3772.03 4
 10 10 3 220.229 582.154 4
 10 10 4 1468.29 928.002 4
 10 10 5 883.859 681.187 4
 10 10 6 28313.9 3993.6 4
 -10 -10 -7 876.544 1150.08 1
 10 10 7 258.056 636.763 4
 10 10 8 51862.1 5631.59 4
 -10 -10 -8 57660.4 5883.8 1
 -10 -10 -9 1814.58 1167.57 1
 -10 -10 -10 47679.7 5364.79 1
 -10 -10 -11 2869.4 1466.1 1
 -10 -10 -12 19079 3362.52 1
 -10 -10 -13 -362.124 1151.05 1
 -10 11 20 -619.119 1309.71 4
 -10 11 19 8650.15 2771.51 4
 -10 11 18 1765.29 1212.31 4
 -10 11 17 -565.824 847.361 4
 -10 11 16 1555.54 1111.31 4
 -10 11 15 22986.9 3891.36 4
 -10 11 14 1314.6 1136.24 4
 -10 11 13 45623.9 5255.97 4
 -10 11 12 1183.52 1029.62 4
 -10 11 11 53259.2 5537.82 4
 -10 11 10 606.202 717.829 4
 -10 11 9 34528.1 4281.59 4
 -10 11 8 2949.35 1211.79 4
 10 11 -8 3539.23 1731.65 4
 -10 11 7 2575 1178.26 4
 10 11 -7 2610.33 1376.03 4
 -10 11 6 1234.76 531.447 4
 10 11 -6 1752.14 1087.05 4
 -10 11 5 25264.6 3386.12 4
 10 11 -5 20033.7 3645.37 4
 -10 11 4 562.85 789.187 4
 10 11 -4 -196.987 525.255 4
 -10 11 3 79366.5 6257.1 4
 10 11 -3 84900.8 7462.91 4
 10 11 -2 -1437.52 1201.21 4
 10 11 -1 75509.8 6902.36 4
 10 11 0 -450.132 872.489 4
 10 11 1 33767.1 4558.46 4
 10 11 2 971.222 567.279 4
 10 11 3 722.913 521.29 4
 10 11 4 4635.7 1638.25 4
 10 11 5 5044.38 1793.15 4
 10 11 6 3569.35 1447.73 4
 10 11 7 13131.5 3046.31 4
 10 11 8 1630.23 1165.25 4
 -10 -11 -8 3452.95 1416.69 1
 -10 -11 -9 29156.4 4340.14 1
 -10 -11 -10 791.86 692.232 1
 -10 -11 -11 30860.6 4433.3 1
 -10 -11 -12 1199.6 1094.27 1
 -10 12 19 4273.05 2017.87 4
 -10 12 18 -686.765 928.257 4
 -10 12 17 8267.33 2416.54 4
 -10 12 16 7374.69 2410.91 4
 -10 12 15 3244.13 1769.75 4
 -10 12 14 29704.6 4520.71 4
 -10 12 13 2815.67 1302.65 4
 -10 12 12 59077 6215.83 4
 -10 12 11 2331.14 1306.69 4
 -10 12 10 48599.8 5463.65 4
 -10 12 9 3293.79 1481.61 4
 10 12 -9 2799.46 1575.46 4
 -10 12 8 10243.8 2328.36 4
 10 12 -8 6821.41 2236.28 4
 -10 12 7 13545.2 2650.53 4
 10 12 -7 10801 2756.13 4
 -10 12 6 1305.49 950.246 4
 10 12 -6 2396.86 1339.87 4
 10 12 -5 12134.2 2931.46 4
 -10 12 5 13504.2 2569.46 4
 10 12 -4 30633.7 4697.17 4
 10 12 -3 1727.26 760.172 4
 10 12 -2 38078.5 5058.55 4
 10 12 -1 -309.628 686.236 4
 10 12 0 33533.5 4710.36 4
 10 12 1 4360.3 1745.14 4
 10 12 2 16085 3118.76 4
 10 12 3 10553 2627.74 4
 10 12 4 -177.718 723.185 4
 10 12 5 12434.6 2864.73 4
 10 12 6 1742.71 984.939 4
 10 12 7 9159.24 2528.34 4
 10 12 8 7237.69 2271.47 4
 -10 -12 -9 710.16 615.993 1
 -10 13 17 2345.25 1326.49 4
 -10 13 16 11017.2 2966.94 4
 -10 13 15 18556.1 3680.2 4
 -10 13 14 7270.39 2370.45 4
 -10 13 13 28876.5 4510.34 4
 -10 13 12 555.216 1074.34 4
 -10 13 11 36627.7 4960.41 4
 10 13 -11 32326.1 5435.86 4
 -10 13 10 4683.57 1855.32 4
 10 13 -10 45.8026 810.157 4
 -10 13 9 16910.4 3154.05 4
 10 13 -9 12662.1 3342.42 4
 -10 13 8 13035.3 2811.93 4
 10 13 -8 12770.7 3199.26 4
 -10 13 7 1986.89 1014.19 4
 10 13 -7 -2062.7 1344.25 4
 -10 13 6 23783 3739.23 4
 10 13 -6 23174.6 4266.87 4
 10 13 -5 2619.64 1234.43 4
 10 13 -4 13801.9 3211.93 4
 10 13 -3 10475.1 2668.93 4
 10 13 -2 66.4574 724.003 4
 10 13 -1 27237 4389.27 4
 10 13 0 4663.15 1848.07 4
 10 13 1 14970.5 3231.38 4
 10 13 2 11096.8 2703.87 4
 10 13 3 -1364.13 1115.27 4
 10 13 4 25483.2 4269.43 4
 10 13 5 1634.49 929.182 4
 10 13 6 11567.1 2949.77 4
 10 13 7 4503.15 1889.9 4
 10 13 8 6093.23 2196.83 4
 -10 14 15 6422.89 2296.57 4
 -10 14 14 7632.18 2413.46 4
 -10 14 13 2171.27 1446.56 4
 -10 14 12 8581.49 2525.89 4
 -10 14 11 1946.93 1625.61 4
 10 14 -11 2487.2 1725.58 4
 -10 14 10 6423.02 2192.98 4
 10 14 -10 10286.2 3241.03 4
 -10 14 9 18076.6 3484.36 4
 10 14 -9 12537.1 3424.92 4
 -10 14 8 2113.5 1241.67 4
 10 14 -8 3823.21 1744.91 4
 10 14 -7 27032.3 4854.92 4
 10 14 -6 543.545 956.83 4
 10 14 -5 20610.6 4051.91 4
 10 14 -4 -230.813 1084.92 4
 10 14 -3 3695.17 1627.09 4
 10 14 -2 7222.53 2299.71 4
 10 14 -1 2043.86 1566.37 4
 10 14 0 5566.24 2174.72 4
 10 14 1 6293.9 2097.19 4
 10 14 2 2370.61 1339.43 4
 10 14 3 26202.2 4607.3 4
 10 14 4 -1244.91 1109.78 4
 10 14 5 20400 3966.55 4
 -10 15 12 -1179.63 1136.13 4
 -10 15 11 291.93 973.655 4
 -10 15 10 10178.9 2848.84 4
 -11 0 26 30720.4 5390.81 3
 -11 0 25 1057.66 1044.75 3
 -11 0 24 3452.79 1614.64 3
 -11 0 23 -4024.27 1825.31 3
 -11 0 22 5341.83 2089.3 3
 -11 0 21 -366.235 903.002 3
 -11 0 20 44422.6 5582.75 3
 -11 0 19 -217.161 515.627 3
 -11 0 18 150063 10468.3 3
 -11 0 17 2043.93 1431.71 3
 -11 0 16 94598.3 7641.02 3
 -11 0 15 -442.387 645.227 3
 -11 0 15 -556.637 680.513 1
 -11 0 14 39485.7 4524.03 3
 -11 0 14 37420.7 3890.33 1
 -11 0 13 -106.955 400.53 1
 -11 0 13 -786.224 828.315 3
 -11 0 12 3206.16 1152.28 1
 -11 0 12 3717.13 1257.82 3
 -11 0 11 -206.466 349.327 1
 -11 0 11 -506.214 655.607 3
 -11 0 10 41502.8 4203.54 1
 -11 0 10 52149.6 4701.06 3
 -11 0 9 877.833 932.318 1
 -11 0 9 1017.63 756.734 3
 -11 0 8 100822 7059.96 1
 -11 0 8 117767 7192.3 3
 -11 0 7 -214.902 469.596 3
 -11 0 7 469.266 636.905 1
 -11 0 6 67449.7 5522.11 1
 11 0 -6 58044.1 3152.93 4
 -11 0 6 59579.7 4713.47 3
 -11 0 5 -386.385 593.084 3
 11 0 -5 131.363 82.2085 4
 -11 0 5 549.42 660.569 1
 -11 0 4 60942.9 5183.96 1
 11 0 -4 49202.2 2210.64 4
 -11 0 3 21.1907 578.12 1
 -11 0 2 46245 4486.61 1
 11 0 -2 46462.3 3133.49 2
 11 0 -1 193.856 205.694 2
 -11 0 1 -793.993 1039.55 1
 11 0 0 -155.649 210.766 2
 -11 0 0 -673.006 621.715 1
 11 0 1 -295.048 361.931 2
 -11 0 -1 353.198 432.622 1
 -11 0 -2 84744.5 6276.72 1
 11 0 2 67097.1 4895.43 2
 11 0 3 555.225 606.011 2
 -11 0 -3 829.273 640.058 1
 -11 0 -4 115323 7652.99 1
 11 0 4 107407 6946.14 2
 -11 0 -5 940.123 465.563 1
 11 0 5 365.654 359.392 2
 -11 0 -6 108596 7380.43 1
 11 0 6 106170 7358.03 2
 -11 0 -7 949.648 776.96 1
 11 0 7 -347.343 755.323 2
 -11 0 -8 36150.5 4033.64 1
 11 0 8 32597.8 4126.15 2
 -11 0 -9 -621.25 666.785 1
 11 0 9 689.863 783.219 2
 -11 0 -10 9701.78 2066.2 1
 11 0 10 11075.9 2519.48 2
 -11 0 -11 -161.969 511.922 1
 11 0 11 469.577 586.423 2
 -11 0 -12 4006.47 1406.31 1
 11 0 12 5523 1928.51 2
 11 0 13 -219.19 1055.95 2
 11 0 14 58068.8 6817.47 2
 11 0 15 -1130.48 1228.97 2
 11 0 16 52748.4 6932.15 2
 -11 1 27 31315.3 5739.39 3
 -11 -1 26 6487.63 2774.95 3
 -11 1 26 1564.71 1490.25 3
 -11 -1 25 6574.83 2498.35 3
 -11 1 25 10354.7 3139.68 3
 -11 -1 24 7915.82 2637.06 3
 -11 1 24 11613.8 3229.68 3
 -11 -1 23 -854.739 954.882 3
 -11 1 23 -872.692 1081.97 3
 -11 -1 22 6204.94 2194.59 3
 -11 1 22 4960.42 1918 3
 -11 -1 21 11331 2906.62 3
 -11 1 21 10787.4 2814.47 3
 -11 -1 20 3608.99 1519.4 3
 -11 1 20 4519.42 1771.65 3
 -11 -1 19 76228.9 7266.31 3
 -11 1 19 75242.7 7267.74 3
 -11 -1 18 5823.73 1877.8 3
 -11 1 18 7464.89 2255.4 3
 -11 -1 17 138151 9555.32 3
 -11 1 17 122097 9143.09 3
 -11 -1 17 123935 7509.03 1
 -11 -1 16 797.633 491.525 1
 -11 -1 16 306.48 717.005 3
 -11 1 16 -710.289 573.236 3
 -11 -1 15 79274.7 5884.21 1
 -11 -1 15 91436 7183.37 3
 -11 1 15 78764.6 6814.28 3
 -11 -1 14 497.58 585.126 1
 -11 -1 14 -286.047 449.58 3
 -11 1 14 180.856 591.26 3
 -11 -1 13 41682.4 4191.46 1
 -11 -1 13 38712.6 4316.03 3
 -11 1 13 46738 4801.46 3
 -11 -1 12 11009.2 2046.72 1
 -11 -1 12 14347.1 2521.48 3
 -11 1 12 11859.2 2219.17 1
 -11 1 12 13416.8 2464.52 3
 -11 1 11 -185.59 494.309 1
 -11 -1 11 -457.32 439.449 1
 -11 -1 11 498.187 430.807 3
 -11 1 11 -59.5033 477.712 3
 -11 1 10 8456.03 1921.69 3
[truncated: 142,314 more chars]
