# Supplementary material
Source: publisher figshare collection journal article supplement (https://acs.figshare.com/ndownloader/files/4205155)
Supplement: Supplementary file 27 [file 4205155 › CIFs/Mn/MnDy/MnDy.cif]

data_MnDy
_audit_creation_date              2015-02-16
_audit_creation_method
;
Olex2 1.2
(compiled 2015.01.26 svn.r3151 for OlexSys, GUI svn.r4998)
;
_publ_contact_author_address      
;
The University of Manchester
School of Chemistry
Oxford Road, 
Manchester
M13 9PL
United Kingdom
;
_publ_contact_author_email        eufemio.morenopineda@manchester.ac.uk
_publ_contact_author_name         'Eufemio Moreno Pineda'
_publ_contact_author_phone        '+44 074 1192 4293'
_publ_section_references
;
Dolomanov, O.V., Bourhis, L.J., Gildea, R.J, Howard, J.A.K. & Puschmann, H.
 (2009), J. Appl. Cryst. 42, 339-341.

Palatinus, L. & Chapuis, G. (2007). J. Appl. Cryst., 40, 786-790;
Palatinus, L. & van der Lee, A. (2008). J. Appl. Cryst. 41, 975-984;
Palatinus, L., Prathapa, S. J. & van Smaalen, S. (2012). J. Appl. Cryst. 45,
 575-580.

Sheldrick, G.M. (2008). Acta Cryst. A64, 112-122.
;
_chemical_name_common             ?
_chemical_name_systematic         ?
_chemical_formula_moiety          'C50 H90 Dy2 Mn2 O22, 2(C6 H16 N), 3(C2 N)'
_chemical_formula_sum             'C68 H122 Dy2 Mn2 N5 O22'
_chemical_formula_weight          1796.58
_chemical_melting_point           ?
loop_
  _atom_type_symbol
  _atom_type_description
  _atom_type_scat_dispersion_real
  _atom_type_scat_dispersion_imag
  _atom_type_scat_source
 'C' 'C' 0.0033 0.0016 'International Tables Vol C Tables 4.2.6.8 and 6.1.1.4'
 'H' 'H' 0.0000 0.0000 'International Tables Vol C Tables 4.2.6.8 and 6.1.1.4'
 'Dy' 'Dy' -0.1892 4.4098
 'International Tables Vol C Tables 4.2.6.8 and 6.1.1.4'
 'Mn' 'Mn' 0.3368 0.7283 'International Tables Vol C Tables 4.2.6.8 and 6.1.1.4'
 'N' 'N' 0.0061 0.0033 'International Tables Vol C Tables 4.2.6.8 and 6.1.1.4'
 'O' 'O' 0.0106 0.0060 'International Tables Vol C Tables 4.2.6.8 and 6.1.1.4'

_shelx_space_group_comment
;
The symmetry employed for this shelxl refinement is uniquely defined
by the following loop, which should always be used as a source of
symmetry information in preference to the above space-group names.
They are only intended as comments.
;
_space_group_crystal_system       'triclinic'
_space_group_IT_number            2
_space_group_name_H-M_alt         'P -1'
_space_group_name_Hall            '-P 1'
loop_
  _space_group_symop_operation_xyz
 'x, y, z'
 '-x, -y, -z'

_cell_length_a                    13.2219(2)
_cell_length_b                    13.5495(3)
_cell_length_c                    14.1560(2)
_cell_angle_alpha                 71.5364(15)
_cell_angle_beta                  64.2521(15)
_cell_angle_gamma                 81.4352(15)
_cell_volume                      2166.49(7)
_cell_formula_units_Z             1
_cell_measurement_reflns_used     13307
_cell_measurement_temperature     106(1)
_cell_measurement_theta_max       28.6250
_cell_measurement_theta_min       3.2200
_shelx_estimated_absorpt_T_max    ?
_shelx_estimated_absorpt_T_min    ?
_exptl_absorpt_coefficient_mu     2.055
_exptl_absorpt_correction_T_max   1.00000
_exptl_absorpt_correction_T_min   0.74005
_exptl_absorpt_correction_type    multi-scan
_exptl_absorpt_process_details
;
CrysAlisPro, Agilent Technologies,
Version 1.171.36.28 (release 01-02-2013 CrysAlis171 .NET)
(compiled Feb  1 2013,16:14:44)
Empirical absorption correction using spherical harmonics,
 implemented in SCALE3 ABSPACK scaling algorithm.
;
_exptl_absorpt_special_details    ?
_exptl_crystal_colour             'clear orange'
_exptl_crystal_colour_lustre      clear
_exptl_crystal_colour_primary     orange
_exptl_crystal_density_diffrn     1.377
_exptl_crystal_density_meas       ?
_exptl_crystal_density_method     ?
_exptl_crystal_description        ''
_exptl_crystal_F_000              923
_exptl_crystal_size_max           0.4
_exptl_crystal_size_mid           0.4
_exptl_crystal_size_min           0.3
_exptl_transmission_factor_max    ?
_exptl_transmission_factor_min    ?
_diffrn_reflns_av_R_equivalents   0.0184
_diffrn_reflns_av_unetI/netI      0.0259
_diffrn_reflns_Laue_measured_fraction_full 0.998
_diffrn_reflns_Laue_measured_fraction_max 0.998
_diffrn_reflns_limit_h_max        16
_diffrn_reflns_limit_h_min        -15
_diffrn_reflns_limit_k_max        16
_diffrn_reflns_limit_k_min        -16
_diffrn_reflns_limit_l_max        17
_diffrn_reflns_limit_l_min        -17
_diffrn_reflns_number             14748
_diffrn_reflns_point_group_measured_fraction_full 0.998
_diffrn_reflns_point_group_measured_fraction_max 0.998
_diffrn_reflns_theta_full         25.242
_diffrn_reflns_theta_max          26.372
_diffrn_reflns_theta_min          2.962
_diffrn_ambient_temperature       106(1)
_diffrn_detector_area_resol_mean  8.3367
_diffrn_measured_fraction_theta_full 0.998
_diffrn_measured_fraction_theta_max 0.998
_diffrn_measurement_details
;
#__ type_ start__ end____ width___ exp.time_
  1 omega   26.00   58.00   0.5000   10.0000
omega____ theta____ kappa____ phi______ frames
    -       22.6371  -57.0000  -60.0000 64

#__ type_ start__ end____ width___ exp.time_
  2 omega  -23.00   64.50   0.5000   10.0000
omega____ theta____ kappa____ phi______ frames
    -       22.6371  -99.0000   90.0000 175

#__ type_ start__ end____ width___ exp.time_
  3 omega   -7.00  113.00   0.5000   10.0000
omega____ theta____ kappa____ phi______ frames
    -       22.6371   57.0000 -150.0000 240

#__ type_ start__ end____ width___ exp.time_
  4 omega  -15.00  115.00   0.5000   10.0000
omega____ theta____ kappa____ phi______ frames
    -       22.6371   77.0000  -60.0000 260

#__ type_ start__ end____ width___ exp.time_
  5 omega  -68.00  -40.50   0.5000   10.0000
omega____ theta____ kappa____ phi______ frames
    -       22.6371  -57.0000  -60.0000 55
;
_diffrn_measurement_device_type   'Xcalibur, Sapphire2, large Be window'
_diffrn_measurement_method        '\w scans'
_diffrn_orient_matrix_UB_11       -0.0130541000
_diffrn_orient_matrix_UB_12       -0.0067518000
_diffrn_orient_matrix_UB_13       0.0558269000
_diffrn_orient_matrix_UB_21       0.0093136000
_diffrn_orient_matrix_UB_22       0.0536621000
_diffrn_orient_matrix_UB_23       -0.0119515000
_diffrn_orient_matrix_UB_31       -0.0573652000
_diffrn_orient_matrix_UB_32       0.0110101000
_diffrn_orient_matrix_UB_33       0.0102195000
_diffrn_radiation_monochromator   graphite
_diffrn_radiation_type            MoK\a
_diffrn_radiation_wavelength      0.71073
_diffrn_source                    'Enhance (Mo) X-ray Source'
_reflns_Friedel_coverage          0.000
_reflns_Friedel_fraction_full     .
_reflns_Friedel_fraction_max      .
_reflns_number_gt                 8482
_reflns_number_total              8838
_reflns_odcompleteness_completeness 99.88
_reflns_odcompleteness_iscentric  1
_reflns_odcompleteness_theta      26.32
_reflns_special_details
;
 Reflections were merged by SHELXL according to the crystal
 class for the calculation of statistics and refinement.
 
 _reflns_Friedel_fraction is defined as the number of unique
 Friedel pairs measured divided by the number that would be
 possible theoretically, ignoring centric projections and
 systematic absences.
;
_reflns_threshold_expression      'I > 2\s(I)'
_computing_cell_refinement
;
CrysAlisPro, Agilent Technologies,
Version 1.171.36.28 (release 01-02-2013 CrysAlis171 .NET)
(compiled Feb  1 2013,16:14:44)
;
_computing_data_collection
;
CrysAlisPro, Agilent Technologies,
Version 1.171.36.28 (release 01-02-2013 CrysAlis171 .NET)
(compiled Feb  1 2013,16:14:44)
;
_computing_data_reduction
;
CrysAlisPro, Agilent Technologies,
Version 1.171.36.28 (release 01-02-2013 CrysAlis171 .NET)
(compiled Feb  1 2013,16:14:44)
;
_computing_molecular_graphics     'Olex2 (Dolomanov et al., 2009)'
_computing_publication_material   'Olex2 (Dolomanov et al., 2009)'
_computing_structure_refinement   'ShelXL (Sheldrick, 2008)'
_computing_structure_solution
;
Superflip (Palatinus & Chapuis, 2007;Palatinus & van der Lee, 2008;
Palatinus et al., 2012)
;
_refine_diff_density_max          1.340
_refine_diff_density_min          -0.703
_refine_diff_density_rms          0.098
_refine_ls_extinction_coef        .
_refine_ls_extinction_method      none
_refine_ls_goodness_of_fit_ref    1.049
_refine_ls_hydrogen_treatment     constr
_refine_ls_matrix_type            full
_refine_ls_number_parameters      572
_refine_ls_number_reflns          8838
_refine_ls_number_restraints      44
_refine_ls_R_factor_all           0.0276
_refine_ls_R_factor_gt            0.0260
_refine_ls_restrained_S_all       1.051
_refine_ls_shift/su_max           0.001
_refine_ls_shift/su_mean          0.000
_refine_ls_structure_factor_coef  Fsqd
_refine_ls_weighting_details
'w=1/[\s^2^(Fo^2^)+(0.0393P)^2^+2.2910P] where P=(Fo^2^+2Fc^2^)/3'
_refine_ls_weighting_scheme       calc
_refine_ls_wR_factor_gt           0.0693
_refine_ls_wR_factor_ref          0.0704
_refine_special_details           ?
_olex2_refinement_description
;
1. Fixed Uiso
 At 1.2 times of:
  All C(H,H) groups, All N(H) groups
 At 1.5 times of:
  All C(H,H,H) groups
2. Restrained distances
 C35-C34
 1.52 with sigma of 0.02
 N1A-C26A = C26A-C27A
 1.52 with sigma of 0.02
 C26B-C27B
 1.52 with sigma of 0.02
 N1A-C27A
 2.633 with sigma of 0.04
3. Rigid bond restraints
 N3, C34, C35
 with sigma for 1-2 distances of 0.01 and sigma for 1-3 distances of 0.01
4. Uiso/Uaniso restraints and constraints
N3 \\sim C34 \\sim C35: within 1.7A with sigma of 0.04 and sigma for terminal
atoms of 0.08
Uanis(C1) \\sim Ueq: with sigma of 0.02 and sigma for terminal atoms of 0.01
Uanis(N3) \\sim Ueq, Uanis(C35) \\sim Ueq, Uanis(C34) \\sim Ueq: with sigma of
0.02 and sigma for terminal atoms of 0.01
Uanis(C4A) = Uanis(C3B) = Uanis(C3A) = Uanis(C5B) = Uanis(C5A) = Uanis(C4B)
5. Rigid body (RIGU) restrains
 C27A, C29A, C31A
 with sigma for 1-2 distances of 0.004 and sigma for 1-3 distances of 0.004
 C27B, C29B, C31B
 with sigma for 1-2 distances of 0.004 and sigma for 1-3 distances of 0.004
 N1A, N1B
 with sigma for 1-2 distances of 0.004 and sigma for 1-3 distances of 0.004
 C26A, C28A, C30A
 with sigma for 1-2 distances of 0.004 and sigma for 1-3 distances of 0.004
 C26B, C28B, C30B
 with sigma for 1-2 distances of 0.004 and sigma for 1-3 distances of 0.004
6. Others
 Sof(O2)=Sof(C3B)=Sof(H3BA)=Sof(H3BB)=Sof(H3BC)=Sof(C4B)=Sof(H4BA)=Sof(H4BB)=
 Sof(H4BC)=Sof(C5B)=Sof(H5BA)=Sof(H5BB)=Sof(H5BC)=Sof(N1B)=Sof(H1B)=Sof(C26B)=
 Sof(H26C)=Sof(H26D)=Sof(C27B)=Sof(H27D)=Sof(H27E)=Sof(H27F)=Sof(C28B)=
 Sof(H28C)=Sof(H28D)=Sof(C29B)=Sof(H29D)=Sof(H29E)=Sof(H29F)=Sof(C30B)=
 Sof(H30C)=Sof(H30D)=Sof(C31B)=Sof(H31D)=Sof(H31E)=Sof(H31F)=Sof(N2B)=Sof(C32B)=
 1-FVAR(1)
 Sof(O2A)=Sof(C3A)=Sof(H3AA)=Sof(H3AB)=Sof(H3AC)=Sof(C4A)=Sof(H4AA)=Sof(H4AB)=
 Sof(H4AC)=Sof(C5A)=Sof(H5AA)=Sof(H5AB)=Sof(H5AC)=Sof(N1A)=Sof(H1A)=Sof(C26A)=
 Sof(H26A)=Sof(H26B)=Sof(C27A)=Sof(H27A)=Sof(H27B)=Sof(H27C)=Sof(C28A)=
 Sof(H28A)=Sof(H28B)=Sof(C29A)=Sof(H29A)=Sof(H29B)=Sof(H29C)=Sof(C30A)=
 Sof(H30A)=Sof(H30B)=Sof(C31A)=Sof(H31A)=Sof(H31B)=Sof(H31C)=Sof(N2A)=Sof(C32A)=
 FVAR(1)
 Fixed Sof: N3(0.5) C34(0.5) C35(0.5)
7.a Ternary CH refined with riding coordinates:
 N1A(H1A), N1B(H1B)
7.b Secondary CH2 refined with riding coordinates:
 C26A(H26A,H26B), C28A(H28A,H28B), C30A(H30A,H30B), C26B(H26C,H26D), C28B(H28C,
 H28D), C30B(H30C,H30D)
7.c Idealised Me refined as rotating group:
 C8(H8A,H8B,H8C), C9(H9A,H9B,H9C), C10(H10A,H10B,H10C), C13(H13A,H13B,H13C),
 C14(H14A,H14B,H14C), C15(H15A,H15B,H15C), C18(H18A,H18B,H18C), C19(H19A,H19B,
 H19C), C20(H20A,H20B,H20C), C23(H23A,H23B,H23C), C24(H24A,H24B,H24C), C25(H25A,
 H25B,H25C), C3A(H3AA,H3AB,H3AC), C4A(H4AA,H4AB,H4AC), C5A(H5AA,H5AB,H5AC),
 C3B(H3BA,H3BB,H3BC), C4B(H4BA,H4BB,H4BC), C5B(H5BA,H5BB,H5BC), C27A(H27A,H27B,
 H27C), C29A(H29A,H29B,H29C), C31A(H31A,H31B,H31C), C27B(H27D,H27E,H27F),
 C29B(H29D,H29E,H29F), C31B(H31D,H31E,H31F)
;
_atom_sites_solution_hydrogens    geom
_atom_sites_solution_primary      iterative
_atom_sites_solution_secondary    ?
loop_
  _atom_site_label
  _atom_site_type_symbol
  _atom_site_fract_x
  _atom_site_fract_y
  _atom_site_fract_z
  _atom_site_U_iso_or_equiv
  _atom_site_adp_type
  _atom_site_occupancy
  _atom_site_site_symmetry_order
  _atom_site_calc_flag
  _atom_site_refinement_flags_posn
  _atom_site_refinement_flags_adp
  _atom_site_refinement_flags_occupancy
  _atom_site_disorder_assembly
  _atom_site_disorder_group
 Dy1 Dy 0.13666(2) 0.67360(2) 0.79276(2) 0.01774(5) Uani 1 1 d . . . . .
 Mn1 Mn -0.07687(3) 0.49988(3) 0.95649(3) 0.01663(8) Uani 1 1 d . . . . .
 O1 O 0.19030(17) 0.83532(14) 0.68364(17) 0.0303(5) Uani 1 1 d . . . . .
 O1OH O 0.00563(14) 0.59577(13) 0.96347(14) 0.0169(3) Uani 1 1 d . . . . .
 O3 O 0.1798(2) 0.62507(19) 0.63137(17) 0.0410(6) Uani 1 1 d . . . . .
 O4 O 0.06743(16) 0.51759(15) 0.78078(15) 0.0245(4) Uani 1 1 d . . . . .
 O5 O -0.03209(16) 0.72905(15) 0.77557(17) 0.0290(4) Uani 1 1 d . . . . .
 O6 O -0.15997(15) 0.60489(15) 0.88379(16) 0.0242(4) Uani 1 1 d . . . . .
 O7 O 0.18378(17) 0.73185(15) 0.90658(16) 0.0284(4) Uani 1 1 d . . . . .
 O8 O 0.14964(15) 0.60524(14) 1.06239(15) 0.0230(4) Uani 1 1 d . . . . .
 O9 O 0.33580(17) 0.62821(17) 0.72938(18) 0.0374(5) Uani 1 1 d . . . . .
 O10 O 0.22338(15) 0.51759(14) 0.87571(15) 0.0223(4) Uani 1 1 d . . . . .
 C1 C 0.2080(4) 0.9294(3) 0.6539(4) 0.084(2) Uani 1 1 d . U . . .
 C2 C 0.1225(3) 1.0039(3) 0.7100(3) 0.0555(11) Uani 1 1 d . . . . .
 C6 C 0.1259(2) 0.5418(2) 0.6791(2) 0.0248(6) Uani 1 1 d . . . . .
 C7 C 0.1385(3) 0.4673(3) 0.6129(3) 0.0361(7) Uani 1 1 d . . . . .
 C8 C 0.2494(4) 0.4075(3) 0.6011(4) 0.0602(11) Uani 1 1 d . . . . .
 H8A H 0.3100 0.4558 0.5657 0.090 Uiso 1 1 calc GR . . . .
 H8B H 0.2622 0.3610 0.5579 0.090 Uiso 1 1 calc GR . . . .
 H8C H 0.2455 0.3683 0.6721 0.090 Uiso 1 1 calc GR . . . .
 C9 C 0.1471(3) 0.5291(3) 0.4984(3) 0.0507(10) Uani 1 1 d . . . . .
 H9A H 0.0789 0.5684 0.5044 0.076 Uiso 1 1 calc GR . . . .
 H9B H 0.1584 0.4818 0.4563 0.076 Uiso 1 1 calc GR . . . .
 H9C H 0.2092 0.5757 0.4627 0.076 Uiso 1 1 calc GR . . . .
 C10 C 0.0400(3) 0.3941(3) 0.6708(3) 0.0549(11) Uani 1 1 d . . . . .
 H10A H 0.0354 0.3558 0.7423 0.082 Uiso 1 1 calc GR . . . .
 H10B H 0.0503 0.3464 0.6294 0.082 Uiso 1 1 calc GR . . . .
 H10C H -0.0281 0.4335 0.6772 0.082 Uiso 1 1 calc GR . . . .
 C11 C -0.1246(2) 0.6885(2) 0.8073(2) 0.0246(6) Uani 1 1 d . . . . .
 C12 C -0.2008(3) 0.7386(3) 0.7476(3) 0.0360(7) Uani 1 1 d . . . . .
 C13 C -0.1690(4) 0.8505(3) 0.6827(4) 0.0659(14) Uani 1 1 d . . . . .
 H13A H -0.1848 0.8915 0.7319 0.099 Uiso 1 1 calc GR . . . .
 H13B H -0.2116 0.8773 0.6395 0.099 Uiso 1 1 calc GR . . . .
 H13C H -0.0903 0.8538 0.6354 0.099 Uiso 1 1 calc GR . . . .
 C14 C -0.3236(3) 0.7323(4) 0.8271(3) 0.0570(11) Uani 1 1 d . . . . .
 H14A H -0.3424 0.6611 0.8683 0.086 Uiso 1 1 calc GR . . . .
 H14B H -0.3695 0.7589 0.7871 0.086 Uiso 1 1 calc GR . . . .
 H14C H -0.3366 0.7729 0.8760 0.086 Uiso 1 1 calc GR . . . .
 C15 C -0.1791(4) 0.6746(4) 0.6686(4) 0.0715(14) Uani 1 1 d . . . . .
 H15A H -0.1008 0.6767 0.6205 0.107 Uiso 1 1 calc GR . . . .
 H15B H -0.2226 0.7032 0.6264 0.107 Uiso 1 1 calc GR . . . .
 H15C H -0.2005 0.6038 0.7094 0.107 Uiso 1 1 calc GR . . . .
 C16 C 0.1887(2) 0.6929(2) 0.9972(2) 0.0211(5) Uani 1 1 d . . . . .
 C17 C 0.2435(2) 0.7571(2) 1.0345(2) 0.0265(6) Uani 1 1 d . . . . .
 C18 C 0.3450(3) 0.8138(3) 0.9355(3) 0.0415(8) Uani 1 1 d . . . . .
 H18A H 0.3995 0.7637 0.9066 0.062 Uiso 1 1 calc GR . . . .
 H18B H 0.3780 0.8560 0.9576 0.062 Uiso 1 1 calc GR . . . .
 H18C H 0.3213 0.8572 0.8804 0.062 Uiso 1 1 calc GR . . . .
 C19 C 0.2785(3) 0.6883(3) 1.1243(3) 0.0385(7) Uani 1 1 d . . . . .
 H19A H 0.2133 0.6562 1.1870 0.058 Uiso 1 1 calc GR . . . .
 H19B H 0.3141 0.7300 1.1445 0.058 Uiso 1 1 calc GR . . . .
 H19C H 0.3301 0.6354 1.0980 0.058 Uiso 1 1 calc GR . . . .
 C20 C 0.1552(3) 0.8374(2) 1.0785(3) 0.0347(7) Uani 1 1 d . . . . .
 H20A H 0.1322 0.8794 1.0223 0.052 Uiso 1 1 calc GR . . . .
 H20B H 0.1869 0.8810 1.1003 0.052 Uiso 1 1 calc GR . . . .
 H20C H 0.0914 0.8021 1.1403 0.052 Uiso 1 1 calc GR . . . .
 C21 C 0.3223(2) 0.5463(2) 0.8059(2) 0.0225(5) Uani 1 1 d . . . . .
 C22 C 0.4226(2) 0.4822(2) 0.8189(2) 0.0270(6) Uani 1 1 d . . . . .
 C23 C 0.5271(3) 0.5057(3) 0.7114(3) 0.0508(10) Uani 1 1 d . . . . .
 H23A H 0.5133 0.4898 0.6565 0.076 Uiso 1 1 calc GR . . . .
 H23B H 0.5890 0.4640 0.7214 0.076 Uiso 1 1 calc GR . . . .
 H23C H 0.5448 0.5780 0.6884 0.076 Uiso 1 1 calc GR . . . .
 C24 C 0.3963(3) 0.3664(2) 0.8594(3) 0.0346(7) Uani 1 1 d . . . . .
 H24A H 0.3299 0.3527 0.9267 0.052 Uiso 1 1 calc GR . . . .
 H24B H 0.4582 0.3267 0.8715 0.052 Uiso 1 1 calc GR . . . .
 H24C H 0.3841 0.3470 0.8056 0.052 Uiso 1 1 calc GR . . . .
 C25 C 0.4400(3) 0.5133(3) 0.9059(3) 0.0405(8) Uani 1 1 d . . . . .
 H25A H 0.4534 0.5867 0.8819 0.061 Uiso 1 1 calc GR . . . .
 H25B H 0.5034 0.4758 0.9168 0.061 Uiso 1 1 calc GR . . . .
 H25C H 0.3741 0.4970 0.9734 0.061 Uiso 1 1 calc GR . . . .
 O2A O 0.3206(5) 0.9600(5) 0.6185(5) 0.0460(17) Uani 0.412(3) 1 d . . P A 1
 C3A C 0.1670(9) 1.1170(7) 0.6492(10) 0.0623(10) Uani 0.412(3) 1 d . . P A 1
 H3AA H 0.2337 1.1237 0.6575 0.093 Uiso 0.412(3) 1 calc GR . P A 1
 H3AB H 0.1106 1.1652 0.6796 0.093 Uiso 0.412(3) 1 calc GR . P A 1
 H3AC H 0.1841 1.1318 0.5729 0.093 Uiso 0.412(3) 1 calc GR . P A 1
 C4A C 0.1034(9) 0.9810(8) 0.8199(9) 0.0623(10) Uani 0.412(3) 1 d . . P A 1
 H4AA H 0.0498 0.9261 0.8631 0.093 Uiso 0.412(3) 1 calc GR . P A 1
 H4AB H 0.0747 1.0419 0.8446 0.093 Uiso 0.412(3) 1 calc GR . P A 1
 H4AC H 0.1727 0.9593 0.8275 0.093 Uiso 0.412(3) 1 calc GR . P A 1
 C5A C 0.0152(9) 1.0026(8) 0.6912(10) 0.0623(10) Uani 0.412(3) 1 d . . P A 1
 H5AA H 0.0350 1.0183 0.6143 0.093 Uiso 0.412(3) 1 calc GR . P A 1
 H5AB H -0.0377 1.0537 0.7200 0.093 Uiso 0.412(3) 1 calc GR . P A 1
 H5AC H -0.0178 0.9349 0.7279 0.093 Uiso 0.412(3) 1 calc GR . P A 1
 O2 O 0.2765(4) 0.9704(3) 0.5485(4) 0.0636(17) Uani 0.588(3) 1 d . . P A 2
 C3B C 0.1778(6) 1.0736(5) 0.7446(7) 0.0623(10) Uani 0.588(3) 1 d . . P A 2
 H3BA H 0.2036 1.0304 0.7983 0.093 Uiso 0.588(3) 1 calc GR . P A 2
 H3BB H 0.1233 1.1230 0.7750 0.093 Uiso 0.588(3) 1 calc GR . P A 2
 H3BC H 0.2402 1.1100 0.6817 0.093 Uiso 0.588(3) 1 calc GR . P A 2
 C4B C 0.0313(6) 0.9393(5) 0.8196(6) 0.0623(10) Uani 0.588(3) 1 d . . P A 2
 H4BA H -0.0076 0.8963 0.8040 0.093 Uiso 0.588(3) 1 calc GR . P A 2
 H4BB H -0.0213 0.9859 0.8569 0.093 Uiso 0.588(3) 1 calc GR . P A 2
 H4BC H 0.0669 0.8962 0.8651 0.093 Uiso 0.588(3) 1 calc GR . P A 2
 C5B C 0.0655(6) 1.0638(5) 0.6391(6) 0.0623(10) Uani 0.588(3) 1 d . . P A 2
 H5BA H 0.1198 1.1038 0.5710 0.093 Uiso 0.588(3) 1 calc GR . P A 2
 H5BB H 0.0102 1.1098 0.6749 0.093 Uiso 0.588(3) 1 calc GR . P A 2
 H5BC H 0.0294 1.0167 0.6254 0.093 Uiso 0.588(3) 1 calc GR . P A 2
 N1A N 0.4493(6) 0.8518(5) 0.4786(5) 0.0374(17) Uani 0.412(3) 1 d D U P A 1
 H1A H 0.3985 0.8823 0.5372 0.045 Uiso 0.412(3) 1 calc R . P A 1
 C26A C 0.5238(18) 0.7758(12) 0.5232(15) 0.053(4) Uani 0.412(3) 1 d D U P A 1
 H26A H 0.5915 0.7638 0.4627 0.063 Uiso 0.412(3) 1 calc R . P A 1
 H26B H 0.4854 0.7100 0.5643 0.063 Uiso 0.412(3) 1 calc R . P A 1
 C27A C 0.5561(9) 0.8131(7) 0.5966(8) 0.055(2) Uani 0.412(3) 1 d D U P A 1
 H27A H 0.6039 0.8723 0.5539 0.082 Uiso 0.412(3) 1 calc GR . P A 1
 H27B H 0.5952 0.7583 0.6303 0.082 Uiso 0.412(3) 1 calc GR . P A 1
 H27C H 0.4895 0.8323 0.6523 0.082 Uiso 0.412(3) 1 calc GR . P A 1
 C28A C 0.5180(6) 0.9395(5) 0.3862(6) 0.0326(17) Uani 0.412(3) 1 d . U P A 1
 H28A H 0.5701 0.9130 0.3260 0.039 Uiso 0.412(3) 1 calc R . P A 1
 H28B H 0.5613 0.9698 0.4103 0.039 Uiso 0.412(3) 1 calc R . P A 1
 C29A C 0.4427(8) 1.0218(6) 0.3482(8) 0.044(2) Uani 0.412(3) 1 d . U P A 1
 H29A H 0.4047 0.9932 0.3187 0.065 Uiso 0.412(3) 1 calc GR . P A 1
 H29B H 0.4872 1.0796 0.2928 0.065 Uiso 0.412(3) 1 calc GR . P A 1
 H29C H 0.3884 1.0451 0.4089 0.065 Uiso 0.412(3) 1 calc GR . P A 1
 C30A C 0.3782(15) 0.7987(12) 0.4546(12) 0.058(4) Uani 0.412(3) 1 d . U P A 1
 H30A H 0.3271 0.8493 0.4320 0.069 Uiso 0.412(3) 1 calc R . P A 1
 H30B H 0.3334 0.7477 0.5212 0.069 Uiso 0.412(3) 1 calc R . P A 1
 C31A C 0.4433(11) 0.7438(9) 0.3660(9) 0.078(4) Uani 0.412(3) 1 d . U P A 1
 H31A H 0.4850 0.7941 0.2986 0.117 Uiso 0.412(3) 1 calc GR . P A 1
 H31B H 0.3916 0.7095 0.3560 0.117 Uiso 0.412(3) 1 calc GR . P A 1
 H31C H 0.4941 0.6933 0.3876 0.117 Uiso 0.412(3) 1 calc GR . P A 1
 N1B N 0.3899(8) 0.8426(5) 0.4265(7) 0.052(2) Uani 0.588(3) 1 d . U P A 2
 H1B H 0.3389 0.8761 0.4824 0.062 Uiso 0.588(3) 1 calc R . P A 2
 C26B C 0.4599(8) 0.7653(6) 0.4774(7) 0.067(3) Uani 0.588(3) 1 d D U P A 2
 H26C H 0.5187 0.7376 0.4214 0.080 Uiso 0.588(3) 1 calc R . P A 2
 H26D H 0.4126 0.7079 0.5323 0.080 Uiso 0.588(3) 1 calc R . P A 2
 C27B C 0.5139(13) 0.8099(11) 0.5303(14) 0.081(5) Uani 0.588(3) 1 d D U P A 2
 H27D H 0.5598 0.8678 0.4771 0.121 Uiso 0.588(3) 1 calc GR . P A 2
 H27E H 0.5595 0.7572 0.5575 0.121 Uiso 0.588(3) 1 calc GR . P A 2
 H27F H 0.4563 0.8328 0.5897 0.121 Uiso 0.588(3) 1 calc GR . P A 2
 C28B C 0.4588(6) 0.9285(5) 0.3303(6) 0.057(2) Uani 0.588(3) 1 d . U P A 2
 H28C H 0.4961 0.9654 0.3545 0.069 Uiso 0.588(3) 1 calc R . P A 2
 H28D H 0.4089 0.9775 0.3041 0.069 Uiso 0.588(3) 1 calc R . P A 2
 C29B C 0.5462(8) 0.8901(6) 0.2367(7) 0.088(3) Uani 0.588(3) 1 d . U P A 2
 H29D H 0.5907 0.9475 0.1805 0.132 Uiso 0.588(3) 1 calc GR . P A 2
 H29E H 0.5096 0.8594 0.2075 0.132 Uiso 0.588(3) 1 calc GR . P A 2
 H29F H 0.5938 0.8390 0.2627 0.132 Uiso 0.588(3) 1 calc GR . P A 2
 C30B C 0.3166(7) 0.7890(5) 0.4015(6) 0.064(2) Uani 0.588(3) 1 d . U P A 2
 H30C H 0.2849 0.7286 0.4633 0.077 Uiso 0.588(3) 1 calc R . P A 2
 H30D H 0.3649 0.7633 0.3393 0.077 Uiso 0.588(3) 1 calc R . P A 2
 C31B C 0.2164(9) 0.8522(6) 0.3756(11) 0.110(4) Uani 0.588(3) 1 d . U P A 2
 H31D H 0.2174 0.8408 0.3116 0.165 Uiso 0.588(3) 1 calc GR . P A 2
 H31E H 0.2248 0.9250 0.3629 0.165 Uiso 0.588(3) 1 calc GR . P A 2
 H31F H 0.1464 0.8290 0.4366 0.165 Uiso 0.588(3) 1 calc GR . P A 2
 C33 C 0.8598(4) 0.7687(4) 0.0635(4) 0.0685(13) Uani 1 1 d . . . . .
 N2A N 0.7369(7) 0.9004(6) -0.0316(7) 0.051(2) Uani 0.412(3) 1 d . . P A 1
 C32A C 0.7909(7) 0.8485(7) 0.0038(8) 0.042(2) Uani 0.412(3) 1 d . . P A 1
 N2B N 0.6937(7) 0.8759(6) 0.1440(8) 0.095(3) Uani 0.588(3) 1 d . . P A 2
 C32B C 0.7698(7) 0.8258(7) 0.1043(10) 0.083(3) Uani 0.588(3) 1 d . . P A 2
 N3 N 0.6435(15) 1.0148(14) -0.1231(13) 0.156(5) Uani 0.5 1 d . U P B 1
 C34 C 0.4814(11) 0.9526(11) 0.0734(12) 0.093(3) Uani 0.5 1 d D U P B 1
 C35 C 0.5682(14) 0.9932(14) -0.0402(12) 0.106(4) Uani 0.5 1 d D U P B 1

loop_
  _atom_site_aniso_label
  _atom_site_aniso_U_11
  _atom_site_aniso_U_22
  _atom_site_aniso_U_33
  _atom_site_aniso_U_23
  _atom_site_aniso_U_13
  _atom_site_aniso_U_12
 Dy1 0.01266(7) 0.01482(7) 0.02136(7) -0.00451(5) -0.00277(5) -0.00266(4)
 Mn1 0.01188(17) 0.01433(18) 0.02178(19) -0.00493(15) -0.00463(15)
 -0.00252(14)
 O1 0.0260(10) 0.0155(9) 0.0352(11) -0.0019(8) -0.0028(9) -0.0025(8)
 O1OH 0.0125(8) 0.0144(8) 0.0218(9) -0.0065(7) -0.0038(7) -0.0014(6)
 O3 0.0438(13) 0.0449(13) 0.0255(11) -0.0127(10) 0.0034(10) -0.0256(11)
 O4 0.0227(9) 0.0259(10) 0.0221(9) -0.0083(8) -0.0047(8) -0.0036(8)
 O5 0.0198(10) 0.0238(10) 0.0370(11) 0.0012(8) -0.0114(9) -0.0043(8)
 O6 0.0162(9) 0.0231(9) 0.0295(10) -0.0032(8) -0.0083(8) -0.0027(7)
 O7 0.0328(11) 0.0205(9) 0.0311(11) -0.0052(8) -0.0112(9) -0.0094(8)
 O8 0.0198(9) 0.0225(9) 0.0264(9) -0.0075(8) -0.0070(8) -0.0062(7)
 O9 0.0170(10) 0.0373(12) 0.0341(11) 0.0040(10) 0.0001(9) 0.0028(9)
 O10 0.0125(8) 0.0206(9) 0.0284(10) -0.0074(8) -0.0031(7) -0.0010(7)
 C1 0.053(2) 0.0212(18) 0.096(3) -0.013(2) 0.043(2) -0.0054(17)
 C2 0.044(2) 0.0197(15) 0.064(2) -0.0096(16) 0.0104(18) 0.0030(14)
 C6 0.0178(12) 0.0299(14) 0.0248(13) -0.0099(11) -0.0048(11) -0.0031(11)
 C7 0.0352(17) 0.0398(17) 0.0328(16) -0.0208(14) -0.0046(13) -0.0055(14)
 C8 0.051(2) 0.055(2) 0.061(3) -0.030(2) -0.006(2) 0.011(2)
 C9 0.055(2) 0.069(3) 0.0307(17) -0.0242(18) -0.0077(16) -0.017(2)
 C10 0.057(2) 0.062(2) 0.045(2) -0.0332(19) 0.0005(18) -0.028(2)
 C11 0.0185(13) 0.0222(13) 0.0281(14) -0.0036(11) -0.0074(11) -0.0001(10)
 C12 0.0256(15) 0.0358(17) 0.0420(18) 0.0018(14) -0.0185(14) -0.0015(13)
 C13 0.046(2) 0.057(3) 0.076(3) 0.027(2) -0.038(2) -0.0088(19)
 C14 0.0271(17) 0.070(3) 0.057(2) 0.006(2) -0.0198(17) 0.0024(17)
 C15 0.078(3) 0.096(4) 0.065(3) -0.032(3) -0.049(3) 0.014(3)
 C16 0.0138(12) 0.0212(13) 0.0278(13) -0.0122(11) -0.0043(10) -0.0007(10)
 C17 0.0201(13) 0.0241(14) 0.0377(16) -0.0164(12) -0.0078(12) -0.0036(11)
 C18 0.0280(16) 0.0431(19) 0.051(2) -0.0219(16) -0.0030(15) -0.0167(14)
 C19 0.0361(17) 0.0394(18) 0.057(2) -0.0222(16) -0.0289(16) 0.0002(14)
 C20 0.0320(16) 0.0308(16) 0.0473(18) -0.0251(14) -0.0127(14) 0.0015(13)
 C21 0.0157(12) 0.0236(13) 0.0244(13) -0.0092(11) -0.0025(10) -0.0023(10)
 C22 0.0130(12) 0.0273(14) 0.0326(15) -0.0075(12) -0.0031(11) 0.0010(11)
 C23 0.0187(15) 0.052(2) 0.049(2) -0.0019(17) 0.0038(15) 0.0081(15)
 C24 0.0260(15) 0.0257(15) 0.0477(18) -0.0124(13) -0.0121(14) 0.0065(12)
 C25 0.0304(16) 0.0399(18) 0.064(2) -0.0209(17) -0.0284(16) 0.0050(14)
 O2A 0.034(3) 0.038(3) 0.048(4) -0.028(3) 0.015(3) -0.019(2)
 C3A 0.055(2) 0.0358(17) 0.069(2) -0.0186(16) -0.0012(18) 0.0061(14)
 C4A 0.055(2) 0.0358(17) 0.069(2) -0.0186(16) -0.0012(18) 0.0061(14)
 C5A 0.055(2) 0.0358(17) 0.069(2) -0.0186(16) -0.0012(18) 0.0061(14)
 O2 0.058(3) 0.027(2) 0.059(3) -0.015(2) 0.025(3) -0.014(2)
 C3B 0.055(2) 0.0358(17) 0.069(2) -0.0186(16) -0.0012(18) 0.0061(14)
 C4B 0.055(2) 0.0358(17) 0.069(2) -0.0186(16) -0.0012(18) 0.0061(14)
 C5B 0.055(2) 0.0358(17) 0.069(2) -0.0186(16) -0.0012(18) 0.0061(14)
 N1A 0.038(4) 0.031(4) 0.024(3) -0.012(3) 0.011(3) -0.012(3)
 C26A 0.062(9) 0.034(8) 0.037(6) -0.009(6) 0.003(5) -0.007(6)
 C27A 0.063(6) 0.040(5) 0.048(5) 0.003(4) -0.020(5) -0.006(4)
 C28A 0.025(4) 0.022(3) 0.032(4) -0.004(3) 0.003(3) -0.004(3)
 C29A 0.058(5) 0.035(4) 0.058(5) -0.003(4) -0.047(5) -0.006(4)
 C30A 0.059(8) 0.052(9) 0.039(7) -0.029(7) 0.019(6) -0.027(9)
 C31A 0.089(8) 0.070(7) 0.050(6) -0.039(6) 0.024(6) -0.047(7)
 N1B 0.049(5) 0.028(4) 0.044(4) -0.013(3) 0.012(3) 0.000(4)
 C26B 0.060(5) 0.037(4) 0.059(5) -0.008(3) 0.011(4) 0.004(4)
 C27B 0.051(6) 0.060(10) 0.085(10) 0.004(7) 0.001(6) -0.016(6)
 C28B 0.053(4) 0.029(3) 0.055(4) -0.009(3) 0.008(3) -0.006(3)
 C29B 0.076(6) 0.047(4) 0.070(5) -0.011(4) 0.035(4) -0.018(4)
 C30B 0.074(5) 0.040(4) 0.051(4) -0.016(3) 0.007(4) -0.021(4)
 C31B 0.102(8) 0.033(4) 0.156(11) -0.027(5) -0.022(7) 0.014(5)
 C33 0.037(2) 0.076(3) 0.091(3) -0.050(3) -0.007(2) -0.001(2)
 N2A 0.033(4) 0.037(4) 0.067(5) -0.023(4) -0.001(4) -0.003(3)
 C32A 0.029(4) 0.034(4) 0.048(5) -0.036(4) 0.019(4) -0.013(4)
 N2B 0.067(5) 0.066(5) 0.127(7) -0.052(5) -0.002(5) 0.001(4)
 C32B 0.048(4) 0.061(5) 0.138(9) -0.063(6) -0.009(5) -0.010(4)
 N3 0.160(9) 0.187(10) 0.125(7) -0.061(7) -0.044(6) -0.021(8)
 C34 0.077(7) 0.097(9) 0.120(8) -0.040(7) -0.048(6) 0.002(6)
 C35 0.110(9) 0.133(11) 0.107(8) -0.061(8) -0.047(6) -0.025(8)

_geom_special_details
;
 All esds (except the esd in the dihedral angle between two l.s. planes)
 are estimated using the full covariance matrix.  The cell esds are taken
 into account individually in the estimation of esds in distances, angles
 and torsion angles; correlations between esds in cell parameters are only
 used when they are defined by crystal symmetry.  An approximate (isotropic)
 treatment of cell esds is used for estimating esds involving l.s. planes.
;
loop_
  _geom_bond_atom_site_label_1
  _geom_bond_atom_site_label_2
  _geom_bond_distance
  _geom_bond_site_symmetry_2
  _geom_bond_publ_flag
 Dy1 Mn1 3.4237(4) . ?
 Dy1 Mn1 3.4029(4) 2_567 ?
 Dy1 O1 2.2489(19) . ?
 Dy1 O1OH 2.2903(17) . ?
 Dy1 O3 2.384(2) . ?
 Dy1 O4 2.5046(19) . ?
 Dy1 O5 2.3364(19) . ?
 Dy1 O7 2.330(2) . ?
 Dy1 O9 2.435(2) . ?
 Dy1 O10 2.4571(19) . ?
 Dy1 C6 2.809(3) . ?
 Dy1 C21 2.823(3) . ?
 Mn1 Dy1 3.4029(4) 2_567 ?
 Mn1 Mn1 2.7982(7) 2_567 ?
 Mn1 O1OH 1.8668(17) . ?
 Mn1 O1OH 1.8666(18) 2_567 ?
 Mn1 O4 2.3495(19) . ?
 Mn1 O6 1.9698(19) . ?
 Mn1 O8 1.9746(18) 2_567 ?
 Mn1 O10 2.2877(18) 2_567 ?
 O1 C1 1.232(4) . ?
 O1OH Mn1 1.8666(18) 2_567 ?
 O3 C6 1.255(4) . ?
 O4 C6 1.259(3) . ?
 O5 C11 1.251(3) . ?
 O6 C11 1.271(3) . ?
 O7 C16 1.250(3) . ?
 O8 Mn1 1.9745(18) 2_567 ?
 O8 C16 1.267(3) . ?
 O9 C21 1.252(3) . ?
 O10 Mn1 2.2877(18) 2_567 ?
 O10 C21 1.274(3) . ?
 C1 C2 1.522(5) . ?
 C1 O2A 1.431(8) . ?
 C1 O2 1.344(6) . ?
 C2 C3A 1.559(10) . ?
 C2 C4A 1.400(12) . ?
 C2 C5A 1.555(13) . ?
 C2 C3B 1.574(9) . ?
 C2 C4B 1.568(8) . ?
 C2 C5B 1.481(9) . ?
 C6 C7 1.530(4) . ?
 C7 C8 1.534(5) . ?
 C7 C9 1.534(5) . ?
 C7 C10 1.515(5) . ?
 C11 C12 1.537(4) . ?
 C12 C13 1.515(5) . ?
 C12 C14 1.517(5) . ?
 C12 C15 1.532(6) . ?
 C16 C17 1.539(4) . ?
 C17 C18 1.532(4) . ?
 C17 C19 1.527(5) . ?
 C17 C20 1.534(4) . ?
 C21 C22 1.521(4) . ?
 C22 C23 1.525(4) . ?
 C22 C24 1.526(4) . ?
 C22 C25 1.533(5) . ?
 N1A C26A 1.502(15) . ?
 N1A C28A 1.501(9) . ?
 N1A C30A 1.466(18) . ?
 C26A C27A 1.517(15) . ?
 C28A C29A 1.511(11) . ?
 C30A C31A 1.526(16) . ?
 N1B C26B 1.512(13) . ?
 N1B C28B 1.507(9) . ?
 N1B C30B 1.505(12) . ?
 C26B C27B 1.521(13) . ?
 C28B C29B 1.513(9) . ?
 C30B C31B 1.583(14) . ?
 C33 C32A 1.585(13) . ?
 C33 C32B 1.326(9) . ?
 N2A C32A 1.092(13) . ?
 N2B C32B 1.156(10) . ?
 N3 C35 1.144(19) . ?
 C34 N3 1.54(2) 2_675 ?
 C34 C35 1.493(14) . ?

loop_
  _geom_angle_atom_site_label_1
  _geom_angle_atom_site_label_2
  _geom_angle_atom_site_label_3
  _geom_angle
  _geom_angle_site_symmetry_1
  _geom_angle_site_symmetry_3
  _geom_angle_publ_flag
 Mn1 Dy1 Mn1 48.396(12) 2_567 . ?
 O1 Dy1 Mn1 147.62(6) . 2_567 ?
 O1 Dy1 Mn1 148.17(5) . . ?
 O1 Dy1 O1OH 138.35(7) . . ?
 O1 Dy1 O3 87.23(8) . . ?
 O1 Dy1 O4 136.16(7) . . ?
 O1 Dy1 O5 82.60(7) . . ?
 O1 Dy1 O7 81.45(7) . . ?
 O1 Dy1 O9 86.49(7) . . ?
 O1 Dy1 O10 136.98(7) . . ?
 O1 Dy1 C6 112.39(8) . . ?
 O1 Dy1 C21 111.48(8) . . ?
 O1OH Dy1 Mn1 30.72(4) . . ?
 O1OH Dy1 Mn1 31.14(4) . 2_567 ?
 O1OH Dy1 O3 125.33(7) . . ?
 O1OH Dy1 O4 72.77(6) . . ?
 O1OH Dy1 O5 77.71(7) . . ?
 O1OH Dy1 O7 77.14(6) . . ?
 O1OH Dy1 O9 123.37(7) . . ?
 O1OH Dy1 O10 71.82(6) . . ?
 O1OH Dy1 C6 99.33(7) . . ?
 O1OH Dy1 C21 97.73(7) . . ?
 O3 Dy1 Mn1 123.78(6) . 2_567 ?
 O3 Dy1 Mn1 94.82(5) . . ?
 O3 Dy1 O4 52.97(7) . . ?
 O3 Dy1 O9 75.60(9) . . ?
 O3 Dy1 O10 94.82(8) . . ?
 O3 Dy1 C6 26.38(8) . . ?
 O3 Dy1 C21 85.38(9) . . ?
 O4 Dy1 Mn1 43.33(4) . . ?
 O4 Dy1 Mn1 76.04(4) . 2_567 ?
 O4 Dy1 C6 26.64(7) . . ?
 O4 Dy1 C21 85.59(7) . . ?
 O5 Dy1 Mn1 66.28(5) . . ?
 O5 Dy1 Mn1 108.36(5) . 2_567 ?
 O5 Dy1 O3 82.45(8) . . ?
 O5 Dy1 O4 75.36(7) . . ?
 O5 Dy1 O9 155.91(8) . . ?
 O5 Dy1 O10 140.33(6) . . ?
 O5 Dy1 C6 78.82(8) . . ?
 O5 Dy1 C21 160.93(8) . . ?
 O7 Dy1 Mn1 66.55(5) . 2_567 ?
 O7 Dy1 Mn1 107.53(5) . . ?
 O7 Dy1 O3 153.29(8) . . ?
 O7 Dy1 O4 142.38(6) . . ?
 O7 Dy1 O5 119.57(8) . . ?
 O7 Dy1 O9 79.61(8) . . ?
 O7 Dy1 O10 77.79(7) . . ?
 O7 Dy1 C6 159.21(8) . . ?
 O7 Dy1 C21 76.54(7) . . ?
 O9 Dy1 Mn1 124.83(5) . . ?
 O9 Dy1 Mn1 92.25(5) . 2_567 ?
 O9 Dy1 O4 98.55(7) . . ?
 O9 Dy1 O10 53.02(6) . . ?
 O9 Dy1 C6 85.66(8) . . ?
 O9 Dy1 C21 26.25(7) . . ?
 O10 Dy1 Mn1 42.22(4) . 2_567 ?
 O10 Dy1 Mn1 74.60(4) . . ?
 O10 Dy1 O4 71.79(6) . . ?
 O10 Dy1 C6 81.65(7) . . ?
 O10 Dy1 C21 26.79(7) . . ?
 C6 Dy1 Mn1 99.74(6) . 2_567 ?
 C6 Dy1 Mn1 69.33(6) . . ?
 C6 Dy1 C21 83.75(8) . . ?
 C21 Dy1 Mn1 100.34(5) . . ?
 C21 Dy1 Mn1 66.94(5) . 2_567 ?
 Dy1 Mn1 Dy1 131.605(12) 2_567 . ?
 Mn1 Mn1 Dy1 65.414(14) 2_567 . ?
 Mn1 Mn1 Dy1 66.191(14) 2_567 2_567 ?
 O1OH Mn1 Dy1 99.65(6) . 2_567 ?
 O1OH Mn1 Dy1 39.39(5) 2_567 2_567 ?
 O1OH Mn1 Dy1 98.95(5) 2_567 . ?
 O1OH Mn1 Dy1 38.81(5) . . ?
 O1OH Mn1 Mn1 41.45(5) . 2_567 ?
 O1OH Mn1 Mn1 41.46(5) 2_567 2_567 ?
 O1OH Mn1 O1OH 82.91(8) 2_567 . ?
 O1OH Mn1 O4 98.37(7) 2_567 . ?
 O1OH Mn1 O4 84.21(7) . . ?
 O1OH Mn1 O6 95.41(8) . . ?
 O1OH Mn1 O6 174.90(8) 2_567 . ?
 O1OH Mn1 O8 174.13(8) . 2_567 ?
 O1OH Mn1 O8 95.63(8) 2_567 2_567 ?
 O1OH Mn1 O10 97.90(7) . 2_567 ?
 O1OH Mn1 O10 83.64(7) 2_567 2_567 ?
 O4 Mn1 Dy1 47.02(5) . . ?
 O4 Mn1 Dy1 135.27(5) . 2_567 ?
 O4 Mn1 Mn1 91.70(5) . 2_567 ?
 O6 Mn1 Dy1 82.52(5) . . ?
 O6 Mn1 Dy1 136.81(6) . 2_567 ?
 O6 Mn1 Mn1 136.66(6) . 2_567 ?
 O6 Mn1 O4 86.22(7) . . ?
 O6 Mn1 O8 86.52(8) . 2_567 ?
 O6 Mn1 O10 91.84(7) . 2_567 ?
 O8 Mn1 Dy1 136.44(6) 2_567 . ?
 O8 Mn1 Dy1 82.56(6) 2_567 2_567 ?
 O8 Mn1 Mn1 136.81(6) 2_567 2_567 ?
 O8 Mn1 O4 90.39(7) 2_567 . ?
 O8 Mn1 O10 87.57(7) 2_567 2_567 ?
 O10 Mn1 Dy1 134.63(5) 2_567 . ?
 O10 Mn1 Dy1 46.20(5) 2_567 2_567 ?
 O10 Mn1 Mn1 91.02(5) 2_567 2_567 ?
 O10 Mn1 O4 177.27(7) 2_567 . ?
 C1 O1 Dy1 160.8(3) . . ?
 Mn1 O1OH Dy1 110.48(8) . . ?
 Mn1 O1OH Dy1 109.47(8) 2_567 . ?
 Mn1 O1OH Mn1 97.10(8) 2_567 . ?
 C6 O3 Dy1 96.03(17) . . ?
 Mn1 O4 Dy1 89.65(6) . . ?
 C6 O4 Dy1 90.26(16) . . ?
 C6 O4 Mn1 165.02(19) . . ?
 C11 O5 Dy1 135.80(18) . . ?
 C11 O6 Mn1 129.03(17) . . ?
 C16 O7 Dy1 135.99(17) . . ?
 C16 O8 Mn1 129.22(17) . 2_567 ?
 C21 O9 Dy1 94.41(16) . . ?
 Mn1 O10 Dy1 91.58(6) 2_567 . ?
 C21 O10 Dy1 92.81(16) . . ?
 C21 O10 Mn1 152.38(18) . 2_567 ?
 O1 C1 C2 121.6(3) . . ?
 O1 C1 O2A 117.1(4) . . ?
 O1 C1 O2 116.8(4) . . ?
 O2A C1 C2 111.7(4) . . ?
 O2 C1 C2 116.0(4) . . ?
 C1 C2 C3A 108.8(4) . . ?
 C1 C2 C5A 107.6(5) . . ?
 C1 C2 C3B 111.4(4) . . ?
 C1 C2 C4B 109.0(3) . . ?
 C4A C2 C1 111.8(5) . . ?
 C4A C2 C3A 109.2(7) . . ?
 C4A C2 C5A 114.3(7) . . ?
 C5A C2 C3A 104.8(7) . . ?
 C4B C2 C3B 105.2(5) . . ?
 C5B C2 C1 109.2(5) . . ?
 C5B C2 C3B 114.0(5) . . ?
 C5B C2 C4B 107.9(5) . . ?
 O3 C6 Dy1 57.58(15) . . ?
 O3 C6 O4 120.5(3) . . ?
 O3 C6 C7 118.8(3) . . ?
 O4 C6 Dy1 63.10(14) . . ?
 O4 C6 C7 120.6(3) . . ?
 C7 C6 Dy1 171.6(2) . . ?
 C6 C7 C8 106.4(3) . . ?
 C6 C7 C9 110.0(3) . . ?
 C9 C7 C8 108.4(3) . . ?
 C10 C7 C6 110.5(3) . . ?
 C10 C7 C8 111.3(3) . . ?
 C10 C7 C9 110.1(3) . . ?
 O5 C11 O6 124.9(3) . . ?
 O5 C11 C12 119.1(2) . . ?
 O6 C11 C12 116.0(2) . . ?
 C13 C12 C11 111.2(3) . . ?
 C13 C12 C14 110.3(3) . . ?
 C13 C12 C15 109.1(4) . . ?
 C14 C12 C11 111.2(3) . . ?
 C14 C12 C15 110.0(3) . . ?
 C15 C12 C11 104.9(3) . . ?
 O7 C16 O8 125.0(2) . . ?
 O7 C16 C17 118.0(2) . . ?
 O8 C16 C17 117.1(2) . . ?
 C18 C17 C16 108.9(2) . . ?
 C18 C17 C20 109.3(3) . . ?
 C19 C17 C16 111.4(2) . . ?
 C19 C17 C18 110.7(3) . . ?
 C19 C17 C20 109.8(3) . . ?
 C20 C17 C16 106.7(2) . . ?
 O9 C21 Dy1 59.34(14) . . ?
 O9 C21 O10 119.6(2) . . ?
 O9 C21 C22 120.9(2) . . ?
 O10 C21 Dy1 60.39(14) . . ?
 O10 C21 C22 119.4(2) . . ?
 C22 C21 Dy1 175.52(19) . . ?
 C21 C22 C23 111.0(3) . . ?
 C21 C22 C24 110.0(2) . . ?
 C21 C22 C25 105.7(2) . . ?
 C23 C22 C24 110.2(3) . . ?
 C23 C22 C25 110.4(3) . . ?
 C24 C22 C25 109.4(3) . . ?
 C28A N1A C26A 109.8(10) . . ?
 C30A N1A C26A 111.2(11) . . ?
 C30A N1A C28A 115.8(9) . . ?
 N1A C26A C27A 113.0(10) . . ?
 N1A C28A C29A 110.3(7) . . ?
 N1A C30A C31A 114.2(12) . . ?
 C28B N1B C26B 112.8(7) . . ?
 C30B N1B C26B 111.5(7) . . ?
 C30B N1B C28B 113.3(7) . . ?
 N1B C26B C27B 114.5(8) . . ?
 N1B C28B C29B 113.5(6) . . ?
 N1B C30B C31B 119.0(7) . . ?
 N2A C32A C33 175.1(8) . . ?
 N2B C32B C33 176.1(12) . . ?
 C35 C34 N3 128.7(18) . 2_675 ?
 N3 C35 C34 171(2) . . ?

_shelx_SHELXL_version_number      '2014/7'
_iucr_refine_instructions_details
;

    oejlm1186.res created by SHELXL-2014/7

TITL CF solution in P-1
CELL 0.71073 13.221926 13.549522 14.155962 71.5364 64.2521 81.4352
ZERR 1 0.000217 0.000255 0.000206 0.0015 0.0015 0.0015
LATT 1
SFAC C H Dy Mn N O
UNIT 68 122 2 2 5 22
EQIV $1 1-X,2-Y,-Z
DFIX 1.52 C35 C34
DFIX 1.52 N1A C26A C26A C27A
DFIX 1.52 C26B C27B
DANG 2.633 N1A C27A
DELU N3 C34 C35
SIMU 0.04 0.08 1.7 N3 C34 C35
RIGU C29A C27A C31A
RIGU C29B C31B C27B
RIGU N1B N1A
RIGU C30A C26A C28A
RIGU C26B C30B C28B
ISOR 0.02 0.01 C1
ISOR 0.02 0.01 N3 C35 C34
EADP C4A C3B C3A C5B C5A C4B
 
L.S. 10
PLAN  25
FREE C35 C34_$1
FREE C35 C35_$1
FREE N2B C29B
FREE N3 C34_$1
FREE C34 C34_$1
FREE C34 C35_$1
BOND
fmap 2
acta
SHEL 10 0.8
OMIT 10 1 13
OMIT 10 -1 12
OMIT 9 6 14
OMIT 3 2 3
OMIT 2 4 3
OMIT 1 2 1
OMIT 0 3 1
REM <olex2.extras>
REM <HklSrc "%./oejlm1186.hkl">
REM </olex2.extras>
 
WGHT    0.039300    2.291000
FVAR       3.74019   0.41196
DY1   3    0.136660    0.673595    0.792764    11.00000    0.01266    0.01482 =
         0.02136   -0.00451   -0.00277   -0.00266
MN1   4   -0.076873    0.499879    0.956492    11.00000    0.01188    0.01433 =
         0.02178   -0.00493   -0.00463   -0.00252
O1    6    0.190297    0.835317    0.683643    11.00000    0.02597    0.01551 =
         0.03522   -0.00194   -0.00279   -0.00250
O1OH  6    0.005630    0.595768    0.963469    11.00000    0.01248    0.01438 =
         0.02176   -0.00652   -0.00377   -0.00136
O3    6    0.179839    0.625069    0.631373    11.00000    0.04383    0.04488 =
         0.02546   -0.01274    0.00335   -0.02564
O4    6    0.067434    0.517589    0.780777    11.00000    0.02266    0.02593 =
         0.02211   -0.00829   -0.00469   -0.00360
O5    6   -0.032087    0.729046    0.775566    11.00000    0.01977    0.02382 =
         0.03700    0.00118   -0.01141   -0.00433
O6    6   -0.159968    0.604894    0.883795    11.00000    0.01623    0.02308 =
         0.02947   -0.00322   -0.00830   -0.00269
O7    6    0.183777    0.731847    0.906577    11.00000    0.03281    0.02048 =
         0.03108   -0.00516   -0.01117   -0.00943
O8    6    0.149642    0.605242    1.062391    11.00000    0.01980    0.02252 =
         0.02640   -0.00751   -0.00695   -0.00624
O9    6    0.335801    0.628211    0.729375    11.00000    0.01703    0.03727 =
         0.03413    0.00396    0.00014    0.00279
O10   6    0.223380    0.517586    0.875706    11.00000    0.01251    0.02064 =
         0.02840   -0.00740   -0.00308   -0.00102
C1    1    0.207963    0.929360    0.653912    11.00000    0.05275    0.02123 =
         0.09583   -0.01318    0.04257   -0.00537
C2    1    0.122488    1.003904    0.709965    11.00000    0.04372    0.01969 =
         0.06383   -0.00959    0.01039    0.00299
C6    1    0.125947    0.541819    0.679130    11.00000    0.01781    0.02987 =
         0.02477   -0.00986   -0.00481   -0.00306
C7    1    0.138527    0.467285    0.612904    11.00000    0.03517    0.03980 =
         0.03276   -0.02081   -0.00465   -0.00551
C8    1    0.249444    0.407490    0.601070    11.00000    0.05148    0.05485 =
         0.06084   -0.02973   -0.00563    0.01144
AFIX 137
H8A   2    0.310031    0.455832    0.565737    11.00000   -1.50000
H8B   2    0.262189    0.360967    0.557924    11.00000   -1.50000
H8C   2    0.245516    0.368255    0.672143    11.00000   -1.50000
AFIX   0
C9    1    0.147053    0.529070    0.498353    11.00000    0.05489    0.06908 =
         0.03067   -0.02425   -0.00774   -0.01716
AFIX 137
H9A   2    0.078912    0.568358    0.504359    11.00000   -1.50000
H9B   2    0.158354    0.481850    0.456299    11.00000   -1.50000
H9C   2    0.209231    0.575673    0.462704    11.00000   -1.50000
AFIX   0
C10   1    0.039994    0.394050    0.670766    11.00000    0.05703    0.06169 =
         0.04529   -0.03320    0.00055   -0.02832
AFIX 137
H10A  2    0.035367    0.355844    0.742337    11.00000   -1.50000
H10B  2    0.050314    0.346396    0.629432    11.00000   -1.50000
H10C  2   -0.028127    0.433511    0.677187    11.00000   -1.50000
AFIX   0
C11   1   -0.124593    0.688541    0.807322    11.00000    0.01845    0.02219 =
         0.02805   -0.00363   -0.00740   -0.00010
C12   1   -0.200803    0.738564    0.747615    11.00000    0.02557    0.03582 =
         0.04200    0.00184   -0.01847   -0.00149
C13   1   -0.168975    0.850548    0.682672    11.00000    0.04552    0.05699 =
         0.07630    0.02742   -0.03763   -0.00876
AFIX 137
H13A  2   -0.184806    0.891496    0.731934    11.00000   -1.50000
H13B  2   -0.211639    0.877342    0.639495    11.00000   -1.50000
H13C  2   -0.090312    0.853770    0.635433    11.00000   -1.50000
AFIX   0
C14   1   -0.323616    0.732300    0.827063    11.00000    0.02709    0.07026 =
         0.05672    0.00631   -0.01984    0.00239
AFIX 137
H14A  2   -0.342377    0.661117    0.868344    11.00000   -1.50000
H14B  2   -0.369523    0.758890    0.787137    11.00000   -1.50000
H14C  2   -0.336644    0.772931    0.875968    11.00000   -1.50000
AFIX   0
C15   1   -0.179143    0.674583    0.668611    11.00000    0.07759    0.09604 =
         0.06491   -0.03207   -0.04935    0.01420
AFIX 137
H15A  2   -0.100785    0.676694    0.620481    11.00000   -1.50000
H15B  2   -0.222554    0.703163    0.626404    11.00000   -1.50000
H15C  2   -0.200515    0.603792    0.709433    11.00000   -1.50000
AFIX   0
C16   1    0.188745    0.692927    0.997185    11.00000    0.01375    0.02116 =
         0.02777   -0.01223   -0.00428   -0.00071
C17   1    0.243486    0.757050    1.034545    11.00000    0.02013    0.02407 =
         0.03769   -0.01644   -0.00784   -0.00358
C18   1    0.345045    0.813763    0.935544    11.00000    0.02798    0.04306 =
         0.05086   -0.02185   -0.00305   -0.01666
AFIX 137
H18A  2    0.399490    0.763657    0.906575    11.00000   -1.50000
H18B  2    0.378014    0.856006    0.957638    11.00000   -1.50000
H18C  2    0.321260    0.857157    0.880394    11.00000   -1.50000
AFIX   0
C19   1    0.278491    0.688264    1.124335    11.00000    0.03608    0.03941 =
         0.05705   -0.02223   -0.02887    0.00016
AFIX 137
H19A  2    0.213297    0.656188    1.186975    11.00000   -1.50000
H19B  2    0.314080    0.729995    1.144541    11.00000   -1.50000
H19C  2    0.330107    0.635355    1.097951    11.00000   -1.50000
AFIX   0
C20   1    0.155230    0.837381    1.078467    11.00000    0.03202    0.03083 =
         0.04728   -0.02512   -0.01266    0.00151
AFIX 137
H20A  2    0.132184    0.879377    1.022277    11.00000   -1.50000
H20B  2    0.186914    0.880987    1.100279    11.00000   -1.50000
H20C  2    0.091358    0.802053    1.140333    11.00000   -1.50000
AFIX   0
C21   1    0.322297    0.546287    0.805944    11.00000    0.01567    0.02361 =
         0.02444   -0.00919   -0.00249   -0.00232
C22   1    0.422577    0.482175    0.818913    11.00000    0.01296    0.02726 =
         0.03261   -0.00754   -0.00312    0.00095
C23   1    0.527127    0.505685    0.711362    11.00000    0.01870    0.05169 =
         0.04945   -0.00187    0.00380    0.00807
AFIX 137
H23A  2    0.513336    0.489845    0.656543    11.00000   -1.50000
H23B  2    0.589016    0.463991    0.721418    11.00000   -1.50000
H23C  2    0.544841    0.578020    0.688422    11.00000   -1.50000
AFIX   0
C24   1    0.396277    0.366412    0.859419    11.00000    0.02602    0.02573 =
         0.04775   -0.01240   -0.01206    0.00654
AFIX 137
H24A  2    0.329913    0.352677    0.926675    11.00000   -1.50000
H24B  2    0.458246    0.326741    0.871476    11.00000   -1.50000
H24C  2    0.384130    0.347005    0.805583    11.00000   -1.50000
AFIX   0
C25   1    0.439997    0.513350    0.905866    11.00000    0.03042    0.03991 =
         0.06407   -0.02090   -0.02842    0.00496
AFIX 137
H25A  2    0.453396    0.586731    0.881863    11.00000   -1.50000
H25B  2    0.503418    0.475826    0.916804    11.00000   -1.50000
H25C  2    0.374082    0.497011    0.973369    11.00000   -1.50000
AFIX   0
PART 1
O2A   6    0.320633    0.959993    0.618501    21.00000    0.03368    0.03818 =
         0.04848   -0.02758    0.01513   -0.01882
C3A   1    0.166999    1.117035    0.649153    21.00000    0.05542    0.03576 =
         0.06895   -0.01857   -0.00119    0.00606
AFIX 137
H3AA  2    0.233686    1.123746    0.657548    21.00000   -1.50000
H3AB  2    0.110649    1.165237    0.679579    21.00000   -1.50000
H3AC  2    0.184074    1.131796    0.572882    21.00000   -1.50000
AFIX   0
C4A   1    0.103422    0.981023    0.819927    21.00000    0.05542    0.03576 =
         0.06895   -0.01857   -0.00119    0.00606
AFIX 137
H4AA  2    0.049808    0.926146    0.863078    21.00000   -1.50000
H4AB  2    0.074708    1.041939    0.844614    21.00000   -1.50000
H4AC  2    0.172672    0.959293    0.827505    21.00000   -1.50000
AFIX   0
C5A   1    0.015241    1.002582    0.691245    21.00000    0.05542    0.03576 =
         0.06895   -0.01857   -0.00119    0.00606
AFIX 137
H5AA  2    0.034989    1.018312    0.614333    21.00000   -1.50000
H5AB  2   -0.037691    1.053705    0.719957    21.00000   -1.50000
H5AC  2   -0.017783    0.934914    0.727890    21.00000   -1.50000
AFIX   0
PART 0
PART 2
O2    6    0.276535    0.970367    0.548500   -21.00000    0.05773    0.02672 =
         0.05872   -0.01488    0.02465   -0.01355
C3B   1    0.177769    1.073644    0.744607   -21.00000    0.05542    0.03576 =
         0.06895   -0.01857   -0.00119    0.00606
AFIX 137
H3BA  2    0.203599    1.030407    0.798307   -21.00000   -1.50000
H3BB  2    0.123268    1.123041    0.774985   -21.00000   -1.50000
H3BC  2    0.240152    1.110011    0.681652   -21.00000   -1.50000
AFIX   0
C4B   1    0.031286    0.939299    0.819616   -21.00000    0.05542    0.03576 =
         0.06895   -0.01857   -0.00119    0.00606
AFIX 137
H4BA  2   -0.007562    0.896325    0.803967   -21.00000   -1.50000
H4BB  2   -0.021332    0.985853    0.856901   -21.00000   -1.50000
H4BC  2    0.066897    0.896156    0.865132   -21.00000   -1.50000
AFIX   0
C5B   1    0.065465    1.063794    0.639109   -21.00000    0.05542    0.03576 =
         0.06895   -0.01857   -0.00119    0.00606
AFIX 137
H5BA  2    0.119767    1.103770    0.571035   -21.00000   -1.50000
H5BB  2    0.010226    1.109773    0.674940   -21.00000   -1.50000
H5BC  2    0.029430    1.016670    0.625411   -21.00000   -1.50000
AFIX   0
 
PART 0
PART 1
N1A   5    0.449253    0.851813    0.478592    21.00000    0.03839    0.03079 =
         0.02364   -0.01173    0.01079   -0.01185
AFIX  13
H1A   2    0.398455    0.882324    0.537182    21.00000   -1.20000
AFIX   0
C26A  1    0.523781    0.775820    0.523176    21.00000    0.06210    0.03429 =
         0.03709   -0.00871    0.00274   -0.00748
AFIX  23
H26A  2    0.591520    0.763797    0.462660    21.00000   -1.20000
H26B  2    0.485387    0.710013    0.564282    21.00000   -1.20000
AFIX   0
C27A  1    0.556064    0.813098    0.596644    21.00000    0.06318    0.04007 =
         0.04824    0.00320   -0.02027   -0.00638
AFIX 137
H27A  2    0.603930    0.872318    0.553874    21.00000   -1.50000
H27B  2    0.595168    0.758252    0.630280    21.00000   -1.50000
H27C  2    0.489521    0.832311    0.652269    21.00000   -1.50000
AFIX   0
C28A  1    0.518001    0.939475    0.386228    21.00000    0.02486    0.02211 =
         0.03224   -0.00416    0.00344   -0.00402
AFIX  23
H28A  2    0.570070    0.912983    0.325952    21.00000   -1.20000
H28B  2    0.561297    0.969844    0.410266    21.00000   -1.20000
AFIX   0
C29A  1    0.442681    1.021838    0.348174    21.00000    0.05775    0.03462 =
         0.05792   -0.00265   -0.04709   -0.00571
AFIX 137
H29A  2    0.404657    0.993175    0.318660    21.00000   -1.50000
H29B  2    0.487154    1.079631    0.292761    21.00000   -1.50000
H29C  2    0.388364    1.045055    0.408915    21.00000   -1.50000
AFIX   0
C30A  1    0.378250    0.798661    0.454619    21.00000    0.05924    0.05217 =
         0.03907   -0.02939    0.01908   -0.02681
AFIX  23
H30A  2    0.327101    0.849265    0.432006    21.00000   -1.20000
H30B  2    0.333400    0.747723    0.521221    21.00000   -1.20000
AFIX   0
C31A  1    0.443274    0.743794    0.365976    21.00000    0.08852    0.06964 =
         0.05028   -0.03942    0.02382   -0.04667
AFIX 137
H31A  2    0.485015    0.794053    0.298573    21.00000   -1.50000
H31B  2    0.391617    0.709499    0.356041    21.00000   -1.50000
H31C  2    0.494088    0.693320    0.387560    21.00000   -1.50000
AFIX   0
 
PART 0
PART 2
N1B   5    0.389941    0.842632    0.426469   -21.00000    0.04942    0.02778 =
         0.04411   -0.01294    0.01249   -0.00003
AFIX  13
H1B   2    0.338887    0.876116    0.482404   -21.00000   -1.20000
AFIX   0
C26B  1    0.459908    0.765342    0.477426   -21.00000    0.06016    0.03664 =
         0.05860   -0.00810    0.01112    0.00400
AFIX  23
H26C  2    0.518659    0.737608    0.421358   -21.00000   -1.20000
H26D  2    0.412605    0.707884    0.532346   -21.00000   -1.20000
AFIX   0
C27B  1    0.513864    0.809891    0.530339   -21.00000    0.05112    0.05993 =
         0.08528    0.00353    0.00150   -0.01580
AFIX 137
H27D  2    0.559808    0.867769    0.477127   -21.00000   -1.50000
H27E  2    0.559515    0.757214    0.557543   -21.00000   -1.50000
H27F  2    0.456325    0.832809    0.589745   -21.00000   -1.50000
AFIX   0
C28B  1    0.458799    0.928480    0.330321   -21.00000    0.05323    0.02931 =
         0.05462   -0.00921    0.00818   -0.00573
AFIX  23
H28C  2    0.496145    0.965409    0.354530   -21.00000   -1.20000
H28D  2    0.408859    0.977475    0.304090   -21.00000   -1.20000
AFIX   0
C29B  1    0.546209    0.890087    0.236696   -21.00000    0.07622    0.04729 =
         0.06973   -0.01115    0.03455   -0.01804
AFIX 137
H29D  2    0.590708    0.947492    0.180516   -21.00000   -1.50000
H29E  2    0.509557    0.859440    0.207461   -21.00000   -1.50000
H29F  2    0.593819    0.838971    0.262715   -21.00000   -1.50000
AFIX   0
C30B  1    0.316627    0.788951    0.401482   -21.00000    0.07397    0.03980 =
         0.05087   -0.01574    0.00745   -0.02134
AFIX  23
H30C  2    0.284942    0.728586    0.463336   -21.00000   -1.20000
H30D  2    0.364856    0.763349    0.339337   -21.00000   -1.20000
AFIX   0
C31B  1    0.216448    0.852169    0.375596   -21.00000    0.10200    0.03262 =
         0.15597   -0.02653   -0.02235    0.01385
AFIX 137
H31D  2    0.217394    0.840818    0.311627   -21.00000   -1.50000
H31E  2    0.224810    0.925012    0.362905   -21.00000   -1.50000
H31F  2    0.146405    0.829001    0.436561   -21.00000   -1.50000
AFIX   0
 
PART 0
C33   1    0.859785    0.768714    0.063518    11.00000    0.03737    0.07636 =
         0.09065   -0.04984   -0.00724   -0.00069
PART 1
N2A   5    0.736888    0.900381   -0.031646    21.00000    0.03334    0.03666 =
         0.06734   -0.02277   -0.00071   -0.00343
C32A  1    0.790898    0.848548    0.003788    21.00000    0.02883    0.03419 =
         0.04810   -0.03584    0.01918   -0.01261
PART 0
PART 2
N2B   5    0.693711    0.875928    0.144017   -21.00000    0.06736    0.06642 =
         0.12683   -0.05191   -0.00180    0.00139
C32B  1    0.769803    0.825792    0.104338   -21.00000    0.04770    0.06117 =
         0.13825   -0.06278   -0.00936   -0.01049
 
PART 0
PART 1
N3    5    0.643477    1.014774   -0.123112    10.50000    0.16019    0.18661 =
         0.12480   -0.06124   -0.04364   -0.02079
C34   1    0.481368    0.952610    0.073388    10.50000    0.07696    0.09685 =
         0.12001   -0.03997   -0.04801    0.00179
C35   1    0.568204    0.993215   -0.040181    10.50000    0.11016    0.13262 =
         0.10674   -0.06086   -0.04661   -0.02494
HKLF 4
 
REM  CF solution in P-1
REM R1 =  0.0260 for    8482 Fo > 4sig(Fo)  and  0.0276 for all    8838 data
REM    572 parameters refined using     44 restraints
 
END  
     
WGHT      0.0393      2.2949 

REM Highest difference peak  1.340,  deepest hole -0.703,  1-sigma level  0.098
Q1    1   0.2602  0.8609  0.2735  11.00000  0.05    1.34
Q2    1   0.1067  0.8478  0.4754  11.00000  0.05    1.24
Q3    1   0.1190  1.0667  0.6260  11.00000  0.05    0.85
Q4    1   0.1632  0.6200  0.7940  11.00000  0.05    0.71
Q5    1   0.1953  0.8439  0.5426  11.00000  0.05    0.69
Q6    1   0.1573  0.6801  0.7152  11.00000  0.05    0.66
Q7    1   0.1253  0.6789  0.8620  11.00000  0.05    0.66
Q8    1   0.1796  0.8494  0.3638  11.00000  0.05    0.63
Q9    1   0.8408  0.8143  0.0150  11.00000  0.05    0.57
Q10   1   0.1955  0.9305  0.6220  11.00000  0.05    0.56
Q11   1   0.1762  1.0761  0.6970  11.00000  0.05    0.56
Q12   1   0.8604  0.7242  0.0445  11.00000  0.05    0.55
Q13   1   0.3522  0.8467  0.6272  11.00000  0.05    0.55
Q14   1   0.7806  0.8553  0.0274  11.00000  0.05    0.54
Q15   1   0.1984  0.8770  0.4120  11.00000  0.05    0.51
Q16   1   0.1947  0.7007  0.7441  11.00000  0.05    0.50
Q17   1   0.0177  1.0592  0.6448  11.00000  0.05    0.48
Q18   1   0.7946  0.8683 -0.0443  11.00000  0.05    0.46
Q19   1   0.2217  0.8223  0.4149  11.00000  0.05    0.46
Q20   1   0.1007  0.6881  0.7548  11.00000  0.05    0.45
Q21   1   0.9034  0.7866  0.0736  11.00000  0.05    0.44
Q22   1   0.2229  0.8934  0.3438  11.00000  0.05    0.43
Q23   1  -0.1348  0.7824  0.6340  11.00000  0.05    0.43
Q24   1   0.7388  0.9156 -0.0047  11.00000  0.05    0.43
Q25   1   0.7765  0.8955 -0.0205  11.00000  0.05    0.42

REM The information below was added by Olex2.
REM
REM R1 = 0.0260 for 8482 Fo > 4sig(Fo) and 0.0276 for all 15575 data
REM n/a parameters refined using n/a restraints
REM Highest difference peak 1.34, deepest hole -0.70
REM Mean Shift 0, Max Shift -0.001.

REM +++ Tabular Listing of Refinement Information +++
REM R1_all = 0.0276
REM R1_gt = 0.0260
REM wR_ref = 0.0704
REM GOOF = 1.049
REM Shift_max = -0.001
REM Shift_mean = 0
REM Reflections_all = 15575
REM Reflections_gt = 8482
REM Parameters = n/a
REM Hole = -0.70
REM Peak = 1.34
REM Flack = n/a

;
_olex2_date_sample_data_collection 2012-09-29
_olex2_submission_special_instructions 'No special instructions were received'
loop_
  _refln_index_h
  _refln_index_k
  _refln_index_l
  _refln_F_squared_meas
  _refln_F_squared_sigma
  _refln_scale_group_code
 -15 -1 2 4046.08 466.73 1
 -15 2 -4 10285.1 723.161 2
 -15 2 -3 30791.7 1254.29 2
 -15 2 -2 280.702 163.145 2
 -15 2 -1 27061.4 1168.61 2
 -15 2 0 366.295 177.716 2
 -15 3 -6 12985.8 845.3 2
 -15 3 -5 40960.9 1494.09 2
 -15 3 -4 2735.38 395.955 2
 -15 3 -3 33459.7 1345.64 2
 -15 3 -2 25389.8 1160.96 2
 -15 3 -1 2930.13 399.699 2
 -15 3 0 13087 821.238 2
 -15 3 1 955.215 248.118 2
 -15 4 -7 3386.24 454.174 2
 -15 4 -6 2462.27 397.382 2
 -15 4 -5 13741.6 885.877 2
 -15 4 -4 33284.2 1370.42 2
 -15 4 -3 593.487 201.968 2
 -15 4 -2 29438.2 1279.54 2
 -15 4 -1 8789.71 696.456 2
 -15 4 0 5649.64 552.441 2
 -15 4 1 10113.9 738.216 2
 -14 -2 0 5027.23 458.076 1
 -14 -1 0 49225.8 1459.79 1
 -14 -1 1 801.254 215.424 1
 -14 -1 2 9423.06 681.172 1
 -14 -1 3 499.658 207.312 1
 -14 0 0 30409.3 1113.54 1
 -14 0 1 43099.1 1409.62 1
 -14 0 2 423.941 181.915 1
 -14 0 3 10074.3 733.763 1
 -14 1 -3 16567.8 861.332 2
 -14 1 -2 695.523 224.487 2
 -14 1 -1 10163.1 670.087 2
 -14 1 0 2956.63 363.372 2
 -14 1 1 38398.2 1316.56 1
 -14 1 2 20604.8 995.067 1
 -14 1 3 5745.01 544.546 1
 -14 2 -5 20941.6 1003.47 2
 -14 2 -4 118.351 120.817 2
 -14 2 -3 35043.4 1295.77 2
 -14 2 -2 19021.6 934.904 2
 -14 2 -1 2535.13 345.795 2
 -14 2 0 4470.86 456.529 2
 -14 2 1 5940.99 525.348 2
 -14 2 1 5936.8 513.417 1
 -14 2 2 38945.3 1372.51 1
 -14 2 3 5945.61 546.337 1
 -14 3 -7 4546.53 485.516 2
 -14 3 -6 2950.36 397.978 2
 -14 3 -5 6616.31 576.019 2
 -14 3 -4 26519.8 1152.33 2
 -14 3 -3 334.287 187.819 2
 -14 3 -2 43890.8 1477.14 2
 -14 3 -1 13281.5 791.27 2
 -14 3 0 3407.46 407.727 2
 -14 3 1 1546.33 271.24 1
 -14 3 1 1900.89 307.859 2
 -14 3 2 12653.8 784.018 1
 -14 3 3 31772.8 1305.22 1
 -14 4 -8 18382.6 998.425 2
 -14 4 -7 748.938 218.424 2
 -14 4 -6 7481.96 625.589 2
 -14 4 -5 1498.6 284.654 2
 -14 4 -4 13977.8 830.385 2
 -14 4 -3 20868.5 1025.95 2
 -14 4 -2 8269.09 643.254 2
 -14 4 -1 42051.7 1449.32 2
 -14 4 0 5292.52 509.565 2
 -14 4 1 12003.5 760.424 2
 -14 4 2 2043.55 332.458 1
 -14 4 2 1860.26 318.221 2
 -14 4 3 11340.8 772.18 1
 -14 5 -8 14004.7 872.117 2
 -14 5 -7 18691.1 1017.71 2
 -14 5 -6 327.74 198.218 2
 -14 5 -5 13629.7 839.972 2
 -14 5 -4 214.244 134.919 2
 -14 5 -3 18205 972.636 2
 -14 5 -2 3960.77 446.65 2
 -14 5 -1 19773.6 1022.73 2
 -14 5 0 42865.7 1524.89 2
 -14 5 1 298.517 140.784 2
 -14 5 2 22365.9 1076.72 1
 -14 5 2 23736.1 1123.44 2
 -14 6 -8 -90.8538 130.541 2
 -14 6 -7 28453 1279.88 2
 -14 6 -6 20274.5 1065.84 2
 -14 6 -5 2886.81 408.906 2
 -14 6 -4 11153.7 772.172 2
 -14 6 -3 116.562 115.557 2
 -14 6 -2 13627.2 864.683 2
 -14 6 -1 69.7639 134.744 2
 -14 6 0 26776.6 1224.12 2
 -14 6 1 25071.4 1188.39 2
 -13 -1 -2 18432.4 747.255 1
 -13 -1 -1 212.801 111.851 1
 -13 -1 0 67955.5 1676.59 1
 -13 -1 1 39951.3 1316.05 1
 -13 -1 2 3513.98 405.948 1
 -13 -1 3 18455.3 958.592 1
 -13 -1 4 2738.51 387.852 1
 -13 0 -1 10861.8 641.015 2
 -13 0 -1 10559.5 591.756 1
 -13 0 0 7061.06 509.185 1
 -13 0 0 7442.38 526.781 2
 -13 0 1 66573.7 1715.19 1
 -13 0 2 20257.8 956.891 1
 -13 0 3 11576.5 757.167 1
 -13 0 4 11535.1 789.365 1
 -13 1 -4 7791.32 568.421 2
 -13 1 -3 62725.1 1657.63 2
 -13 1 -2 25095.3 1015.85 2
 -13 1 -1 1010.62 223.424 2
 -13 1 -1 1161.01 205.249 1
 -13 1 0 3175.48 362.368 2
 -13 1 0 3092.15 338.45 1
 -13 1 1 15291.1 775.587 2
 -13 1 1 14984.1 777.694 1
 -13 1 2 52519.2 1561.24 1
 -13 1 3 4108.05 455.318 1
 -13 1 4 12778.2 813.823 1
 -13 2 -6 8338.62 611.685 2
 -13 2 -5 14460.8 796.611 2
 -13 2 -4 12915.3 746.085 2
 -13 2 -3 8580.65 612.152 2
 -13 2 -2 40771.9 1338.45 2
 -13 2 -1 4162.79 377.796 1
 -13 2 -1 4954.51 455.246 2
 -13 2 0 5739.03 483.471 2
 -13 2 0 4991.5 428.884 1
 -13 2 1 1274.71 235.128 2
 -13 2 1 1325.72 240.354 1
 -13 2 2 16428 853.152 1
 -13 2 2 17503.7 844.679 2
 -13 2 3 50265.4 1583.18 1
 -13 2 4 3261.05 416.354 1
 -13 3 -7 4338.48 455.532 2
 -13 3 -6 32374.2 1235.89 2
 -13 3 -5 3081.13 383.266 2
 -13 3 -4 17002.8 880.775 2
 -13 3 -3 14281.9 794.847 2
 -13 3 -2 9361.02 644.549 2
 -13 3 -1 25296.9 1047.34 2
 -13 3 -1 25034.4 939.781 1
 -13 3 0 3933.72 386.815 1
 -13 3 0 3682.69 410.765 2
 -13 3 1 4942.53 447.383 2
 -13 3 1 5440.5 473.176 1
 -13 3 2 1187.71 252.606 1
 -13 3 2 954.789 201.778 2
 -13 3 3 18583.7 947.613 1
 -13 3 4 34742.8 1352.44 1
 -13 4 -8 30448.6 1217.07 2
 -13 4 -7 14507.9 853.971 2
 -13 4 -6 5738.84 524.128 2
 -13 4 -5 34298.5 1272.87 2
 -13 4 -4 1882.67 313.08 2
 -13 4 -3 11164.5 698.235 2
 -13 4 -2 5396.53 496.236 2
 -13 4 -1 10426.3 692.054 2
 -13 4 0 34391.1 1260.85 2
 -13 4 0 32759.9 1143.7 1
 -13 4 1 546.003 188.703 2
 -13 4 1 896.708 209.206 1
 -13 4 2 10567.7 693.521 1
 -13 4 2 11522.8 722.967 2
 -13 4 3 169.261 133.022 1
 -13 4 3 -63.9021 141.174 2
 -13 4 4 18647.2 989.216 1
 -13 5 -9 11304.6 782.307 2
 -13 5 -8 2041.61 341.941 2
 -13 5 -7 30719.8 1262.5 2
 -13 5 -6 6285.48 564.49 2
 -13 5 -5 14503.2 841.168 2
 -13 5 -4 21669.7 1003.3 2
 -13 5 -3 -140.136 172.245 2
 -13 5 -2 21450.5 1008.13 2
 -13 5 -1 4150.55 451.804 2
 -13 5 0 26102 1133.35 2
 -13 5 1 31051.5 1188.71 1
 -13 5 1 33245.6 1283.5 2
 -13 5 2 2110.87 318.403 2
 -13 5 2 1544.31 285.534 1
 -13 5 3 13812.4 830.361 2
 -13 5 3 13408.1 820.456 1
 -13 5 4 17.9461 138.393 1
 -13 6 -9 5335.81 541.611 2
 -13 6 -8 14248.5 874.625 2
 -13 6 -7 2264.43 357.131 2
 -13 6 -6 29829.6 1237.76 2
 -13 6 -5 1392.66 282.661 2
 -13 6 -4 21592.7 1046.34 2
 -13 6 -3 16149.6 898.522 2
 -13 6 -2 1256.99 291.996 2
 -13 6 -1 22697.2 1085.78 2
 -13 6 0 -142.675 170.415 2
 -13 6 1 40582.3 1470.2 2
 -13 6 2 15956 921.474 2
 -13 6 3 7197.77 614.744 1
 -13 6 3 7271.67 618.255 2
 -13 6 4 16940 957.408 2
 -13 7 -9 3356.08 451.912 2
 -13 7 -8 10024.7 735.762 2
 -13 7 -7 12776.6 831.453 2
 -13 7 -6 3437.89 428.796 2
 -13 7 -5 18237.9 984.748 2
 -13 7 -4 69.7171 142.064 2
 -13 7 -3 26036.6 1178.73 2
 -13 7 -2 9609.27 732.31 2
 -13 7 -1 4406.29 491.8 2
 -13 7 0 6960.12 612.592 2
 -13 7 1 4720.29 513.538 2
 -13 7 2 34380.7 1377.48 2
 -13 7 3 5166.74 537.671 2
 -13 8 -6 6821.58 605.492 2
 -13 8 -5 4133.06 486.803 2
 -13 8 -4 12375.6 827.372 2
 -13 8 -3 1984.45 355.914 2
 -13 8 -2 28193 1266.31 2
 -13 8 -1 7040.35 631.091 2
 -13 8 0 2604.4 387.85 2
 -12 -1 -3 30757 873.159 1
 -12 -1 -2 16960.1 678.128 1
 -12 -1 -1 14303.5 659.187 1
 -12 0 -3 108943 1812.76 1
 -12 0 -3 108692 2148.13 2
 -12 0 -2 16881.8 673.322 1
 -12 0 -2 16116.6 759.746 2
 -12 0 -1 8311.75 533.011 2
 -12 0 -1 8077.11 491.322 1
 -12 0 0 3430.38 351.246 2
 -12 0 0 3791.55 365.859 1
 -12 0 1 38693.2 1218.77 1
 -12 0 1 40313.6 1195.59 2
 -12 0 2 58633.9 1604.68 1
 -12 0 3 497.205 182.512 1
 -12 0 4 47507.7 1565.42 1
 -12 0 5 9289.95 705.729 1
 -12 1 -5 13128.2 712.64 2
 -12 1 -4 5903.23 477.777 2
 -12 1 -3 26400.3 804.831 1
 -12 1 -3 27000.8 1016.43 2
 -12 1 -2 82215.9 1838.55 2
 -12 1 -2 81649.3 1603.51 1
 -12 1 -1 3639.86 371.579 2
 -12 1 -1 3653.34 336.876 1
 -12 1 0 6911.6 481.976 1
 -12 1 0 6938.98 501.426 2
 -12 1 1 113.058 87.7918 1
 -12 1 1 116.485 106.504 2
 -12 1 2 37975.5 1179.66 2
 -12 1 2 36318.7 1224.05 1
 -12 1 3 27228.2 1104.56 1
 -12 1 4 4469.42 464.541 1
 -12 1 5 32222.9 1306.25 1
 -12 2 -7 18886.1 876.223 2
 -12 2 -6 34791.7 1200.54 2
 -12 2 -5 9097.44 606.423 2
 -12 2 -4 20591.8 908.185 2
 -12 2 -3 7861.05 555.883 2
 -12 2 -2 39559.8 1074.21 1
 -12 2 -2 41525.5 1278.31 2
 -12 2 -1 55546.8 1488.61 2
 -12 2 -1 56846.1 1375.87 1
 -12 2 0 177.894 129.555 2
 -12 2 0 215.553 109.863 1
 -12 2 1 13642.1 707.636 1
 -12 2 1 13782.2 704.985 2
 -12 2 2 231.362 117.674 2
 -12 2 2 141.021 108.107 1
 -12 2 3 28215.9 1123.39 1
 -12 2 4 19816.3 971.403 1
 -12 2 5 3493.22 432.01 1
 -12 3 -8 36447.6 1286.64 2
 -12 3 -7 5911.52 515.102 2
 -12 3 -6 18684 877.852 2
 -12 3 -5 45387.1 1400.34 2
 -12 3 -4 575.326 185.15 2
 -12 3 -3 21582.6 926.586 2
 -12 3 -2 2230.36 309.507 2
 -12 3 -2 2104.79 253.772 1
 -12 3 -1 42857.3 1333.31 2
 -12 3 -1 40236.8 1150.68 1
 -12 3 0 35925.6 1212.26 2
 -12 3 0 37038.5 1156.59 1
 -12 3 1 1544.35 254.205 1
 -12 3 1 1120.71 223.879 2
 -12 3 2 23968.3 995.841 1
 -12 3 2 22966.7 958.431 2
 -12 3 3 652.186 183.583 1
 -12 3 3 666.029 194.503 2
 -12 3 4 21290.3 1012.08 1
 -12 3 5 15397.3 893.187 1
 -12 4 -8 2857.78 367.722 2
 -12 4 -7 31588.6 1187.81 2
 -12 4 -6 3224.86 376.022 2
 -12 4 -5 32461.7 1188.75 2
 -12 4 -4 43075 1339.26 2
 -12 4 -3 554.792 171.42 2
 -12 4 -2 17872.5 869.671 2
 -12 4 -1 141.448 119.817 2
 -12 4 -1 113.858 99.7613 1
 -12 4 0 29576.5 1049.54 1
 -12 4 0 32798.6 1187.77 2
 -12 4 1 26117.2 1068.56 2
 -12 4 1 22375.8 941.514 1
 -12 4 2 5616.14 504.215 2
 -12 4 2 5325.83 473.732 1
 -12 4 3 20689.8 966.311 2
 -12 4 3 20015.1 954.306 1
 -12 4 4 224.979 137.214 2
 -12 4 4 361.817 175.868 1
 -12 4 5 28896.4 1247.66 1
 -12 5 -9 9274.78 660.9 2
 -12 5 -8 8015.97 621.297 2
 -12 5 -7 5753.58 513.155 2
 -12 5 -6 28842.6 1140.5 2
 -12 5 -5 318.355 143.053 2
 -12 5 -4 47728.8 1483.87 2
 -12 5 -3 20638.4 956.524 2
 -12 5 -2 4198.85 437.701 2
 -12 5 -1 20377.6 980.75 2
 -12 5 0 -13.6635 125.042 2
 -12 5 1 35694.6 1272.38 2
 -12 5 1 33875.6 1189.25 1
 -12 5 2 15037.9 804.254 1
 -12 5 2 14779.3 812.594 2
 -12 5 3 8509.06 623.868 2
 -12 5 3 7956.08 603.205 1
 -12 5 4 18674 924.639 2
 -12 5 4 18999.5 970.804 1
 -12 5 5 2128.51 357.024 1
 -12 6 -9 1740.96 306.034 2
 -12 6 -8 15834.1 868.865 2
 -12 6 -7 6705.36 572.066 2
 -12 6 -6 9901.18 677.338 2
 -12 6 -5 12530.1 760.655 2
 -12 6 -4 8882.33 640.125 2
 -12 6 -3 50784.7 1578.89 2
 -12 6 -2 10840 713.484 2
 -12 6 -1 6311.24 540.15 2
 -12 6 0 17451.5 899.798 2
 -12 6 1 2533.36 345.796 2
 -12 6 2 47491.2 1520.59 2
 -12 6 3 6802.72 573.134 1
 -12 6 3 7187.97 580.877 2
 -12 6 4 28443.6 1168.2 2
 -12 6 4 27796.6 1210.71 1
 -12 6 5 15780.9 931.492 1
 -12 7 -10 15966.9 899.266 2
 -12 7 -9 23063.6 1113.01 2
 -12 7 -8 486.598 183.415 2
 -12 7 -7 29589.4 1203.61 2
 -12 7 -6 3338.18 411.385 2
 -12 7 -5 6897.43 580.206 2
 -12 7 -4 2543.55 361.897 2
 -12 7 -3 13529.4 819.694 2
 -12 7 -2 50483.5 1596.33 2
 -12 7 -1 8784.08 662.076 2
 -12 7 0 10127.9 695.131 2
 -12 7 1 8809.04 657.555 2
 -12 7 2 8586.22 646.141 2
 -12 7 3 39393.6 1427.49 2
 -12 7 4 931.922 244.62 2
 -12 7 5 18576.2 982.382 2
 -12 8 -10 529.016 198.823 2
 -12 8 -9 18253.2 998.671 2
 -12 8 -8 11656.9 794.943 2
 -12 8 -7 4516.6 481.476 2
 -12 8 -6 20828.5 1046.79 2
 -12 8 -5 2623.19 371.472 2
 -12 8 -4 7304.79 639.876 2
 -12 8 -3 1033.12 253.257 2
 -12 8 -2 19436.8 1004.3 2
 -12 8 -1 46210.8 1556.87 2
 -12 8 0 2020.82 345.309 2
 -12 8 1 15315.2 895.72 2
 -12 8 2 3682.93 460.855 2
 -12 8 3 12600.9 822.199 2
 -12 8 4 8105.94 664.306 2
 -12 9 -7 3379.56 414.268 2
 -12 9 -6 5000.43 521.055 2
 -12 9 -5 20895.4 1071.33 2
 -12 9 -4 3525.44 447.94 2
 -12 9 -3 4766.11 507.499 2
 -12 9 -2 172.763 155.098 2
 -12 9 -1 26131.3 1184.65 2
 -12 9 0 31648.1 1332.79 2
 -12 9 1 360.055 216.076 2
 -12 9 2 22310.6 1117.07 2
 -11 -1 -4 143097 1970.65 1
 -11 -1 -3 194772 2586.64 1
 -11 0 -4 3122.77 230.485 1
 -11 0 -4 2895.56 314.749 2
 -11 0 -3 160545 2613.54 2
 -11 0 -3 154541 2195.55 1
 -11 0 -2 109611 1836.96 1
 -11 0 -2 111118 2075.97 2
 -11 0 -1 1884.78 229.625 1
 -11 0 -1 1760.76 238.548 2
 -11 0 0 48630.7 1258.89 1
 -11 0 0 48100.9 1265.89 2
 -11 0 1 463.085 134.286 2
 -11 0 1 636.798 164.621 1
 -11 0 2 44546.9 1198.8 2
 -11 0 2 44308.4 1315.82 1
 -11 0 3 14824 773.452 1
 -11 0 4 19455.7 932.181 1
 -11 0 5 37018.8 1363.12 1
 -11 0 6 1051.67 256.5 1
 -11 1 -6 56877.9 1478.25 2
 -11 1 -5 183.737 109.6 2
 -11 1 -4 67989.2 1603.09 2
 -11 1 -4 62978.3 1174.84 1
 -11 1 -3 2419.69 293.023 2
 -11 1 -3 2578.57 229.464 1
 -11 1 -2 126682 2012.47 1
 -11 1 -2 124778 2256.77 2
 -11 1 -1 24227.1 818.942 1
 -11 1 -1 23819.6 889.624 2
 -11 1 0 18643.7 776.495 2
 -11 1 0 18717.1 751.549 1
 -11 1 1 21666.1 841.131 2
 -11 1 1 22118.4 865.432 1
 -11 1 2 397.575 158.285 1
 -11 1 2 265.982 112.335 2
 -11 1 3 45424.7 1389.28 1
 -11 1 3 48055.6 1271.71 2
 -11 1 4 7359.68 576.489 1
 -11 1 5 18217.8 939.221 1
 -11 1 6 28945.2 1247.29 1
 -11 1 7 75.353 128.729 1
 -11 2 -7 735.025 190.888 2
 -11 2 -6 37351.7 1192.49 2
 -11 2 -5 65525.3 1622.43 2
 -11 2 -4 1938.14 276.979 2
 -11 2 -3 35428.6 913.365 1
 -11 2 -3 36520.1 1157.02 2
 -11 2 -2 8314.5 449.795 1
 -11 2 -2 8966.38 545.881 2
 -11 2 -1 101071 2015.39 2
 -11 2 -1 98077.8 1818.67 1
 -11 2 0 11586.4 625.802 2
 -11 2 0 11329.3 587.005 1
 -11 2 1 10618.7 593.476 1
 -11 2 1 10885.3 606 2
 -11 2 2 21524.1 893.11 1
 -11 2 2 21260.3 853.056 2
 -11 2 3 1055.6 225.787 1
 -11 2 3 843.248 179.013 2
 -11 2 4 33782.9 1233.58 1
 -11 2 5 1432.2 269.039 1
 -11 2 6 27507.3 1202.66 1
 -11 2 7 25073.6 1194.41 1
 -11 3 -8 9905.55 630.78 2
 -11 3 -7 37153.4 1236.86 2
 -11 3 -6 37.2468 108.816 2
 -11 3 -5 73792.5 1759.02 2
 -11 3 -4 60388.5 1529.36 2
 -11 3 -3 8351.14 555.31 2
 -11 3 -2 38683.6 1199.04 2
 -11 3 -2 37099 1020 1
 -11 3 -1 2817.07 325.627 2
 -11 3 -1 2396.25 258.408 1
 -11 3 0 67627.8 1550.54 1
 -11 3 0 71736.5 1691.34 2
 -11 3 1 9997.68 584.906 1
 -11 3 1 11021.1 640.829 2
 -11 3 2 32389.9 1126.87 2
 -11 3 2 29351.1 1057.33 1
 -11 3 3 15299.1 790.93 1
 -11 3 3 16990.5 807.945 2
 -11 3 4 1902.58 277.046 2
 -11 3 4 1284.14 263.541 1
 -11 3 5 18151.9 923.048 1
 -11 3 6 238.299 177.654 1
 -11 3 7 31003.4 1316.78 1
 -11 4 -9 36673.8 1248.22 2
 -11 4 -8 20433.2 924.107 2
 -11 4 -7 3406.04 381.133 2
 -11 4 -6 32915.9 1158.09 2
 -11 4 -5 2863.52 341.804 2
 -11 4 -4 64964.2 1642.22 2
 -11 4 -3 16882.9 807.317 2
 -11 4 -2 30205.9 1095.98 2
 -11 4 -1 47028.9 1383.34 2
 -11 4 -1 41308.1 1165.71 1
 -11 4 0 4784.29 396.789 1
 -11 4 0 4857.58 430.143 2
 -11 4 1 71718.6 1732.5 2
 -11 4 1 67089.9 1620.3 1
 -11 4 2 4619.57 428.581 2
 -11 4 2 4390.15 412.825 1
 -11 4 3 34203.9 1161.88 2
 -11 4 3 33853.7 1207.5 1
 -11 4 4 20335.5 890.106 2
 -11 4 4 20942.7 976.327 1
 -11 4 5 2617.13 358.447 1
 -11 4 6 13177.3 829.929 1
 -11 5 -9 -100.563 129.346 2
 -11 5 -8 40677.3 1353.6 2
 -11 5 -7 21814.8 965.656 2
 -11 5 -6 14062.8 742.665 2
 -11 5 -5 31166.7 1132.89 2
 -11 5 -4 9827.47 624.457 2
 -11 5 -3 77930.4 1881.35 2
 -11 5 -2 5012.27 451.841 2
 -11 5 -1 16524 814.455 2
 -11 5 0 8976.9 596.247 2
 -11 5 1 26102.3 990.849 1
 -11 5 1 25118.2 1004.51 2
 -11 5 2 53387.1 1499.31 2
 -11 5 2 50605.7 1464.33 1
 -11 5 3 222.678 127.598 1
 -11 5 3 119.766 131.987 2
 -11 5 4 34500.9 1273.56 1
 -11 5 4 35350.9 1226.5 2
 -11 5 5 11964.4 770.069 1
 -11 5 5 11056 688.02 2
 -11 5 6 5715.33 563.537 1
 -11 6 -10 10453.3 693.095 2
 -11 6 -9 15253.8 831.781 2
 -11 6 -8 1564.12 282.878 2
 -11 6 -7 50438.3 1501.2 2
 -11 6 -6 10938.3 698.594 2
 -11 6 -5 20343.1 938.029 2
 -11 6 -4 6259.95 531.393 2
 -11 6 -3 38130.6 1293.48 2
 -11 6 -2 56501.1 1581.02 2
 -11 6 -1 1731.31 286.155 2
 -11 6 0 22969 983.684 2
 -11 6 1 9938.11 653.51 2
 -11 6 2 20134.2 937.505 2
 -11 6 3 33777.8 1255.17 1
 -11 6 3 34815.3 1260.51 2
 -11 6 4 4318.42 451.648 1
 -11 6 4 4211.83 442.254 2
 -11 6 5 38764.9 1346.82 2
 -11 6 5 39824.5 1433.6 1
 -11 6 6 2913.97 416.929 1
 -11 7 -10 520.619 182.237 2
 -11 7 -9 11215.7 721.79 2
 -11 7 -8 9202.96 658.533 2
 -11 7 -7 9591.12 651.537 2
 -11 7 -6 53117.3 1595.85 2
 -11 7 -5 3260.61 418.579 2
 -11 7 -4 13162 779.675 2
 -11 7 -3 179.062 132.086 2
 -11 7 -2 35762.4 1265.05 2
 -11 7 -1 31690.6 1203.12 2
 -11 7 0 783.293 216.279 2
 -11 7 1 29751 1175.35 2
 -11 7 2 11129.5 708.622 2
 -11 7 3 10959.4 706.788 2
 -11 7 4 17120.5 898.294 2
 -11 7 5 5206.19 530.037 1
 -11 7 5 5708.64 525.867 2
 -11 7 6 41659 1453.14 2
 -11 7 6 42834.9 1563.23 1
 -11 8 -10 19849 995.875 2
 -11 8 -9 133.779 116.034 2
 -11 8 -8 19255 971.032 2
 -11 8 -7 2581.62 359.281 2
 -11 8 -6 13926.7 819.105 2
 -11 8 -5 39113.2 1410.68 2
 -11 8 -4 3037.1 402.092 2
 -11 8 -3 7025.78 565.396 2
 -11 8 -2 307.022 153.66 2
 -11 8 -1 30681.2 1205.67 2
 -11 8 0 18582.6 943.76 2
 -11 8 1 4713.6 474.715 2
 -11 8 2 41908.1 1445.33 2
 -11 8 3 3070.4 398.72 2
 -11 8 4 10156.3 712.976 2
 -11 8 5 3298.13 428.352 2
 -11 8 6 10607.5 745.706 2
 -11 9 -10 8639.48 690.438 2
 -11 9 -9 13368.5 843.181 2
 -11 9 -8 2620.93 371.521 2
 -11 9 -7 14229.5 854.05 2
 -11 9 -6 269.807 182.728 2
 -11 9 -5 23981.9 1118.36 2
 -11 9 -4 27758.6 1188.85 2
 -11 9 -3 571.252 198.677 2
 -11 9 -2 8977.73 671.037 2
 -11 9 -1 399.205 184.717 2
 -11 9 0 24268.3 1111.64 2
 -11 9 1 14253.9 848.491 2
 -11 9 2 11781.6 781.911 2
 -11 9 3 30597.1 1272.04 2
 -11 9 4 278.131 160.299 2
 -11 9 5 13512 860.682 2
 -11 10 -8 9253.9 703.269 2
 -11 10 -7 830.206 224.401 2
 -11 10 -6 5168.18 537.716 2
 -11 10 -5 3658.03 446.421 2
 -11 10 -4 29228.1 1248.94 2
 -11 10 -3 16271 910.211 2
 -11 10 -2 1523.7 296.808 2
 -11 10 -1 11030.4 761.068 2
 -11 10 0 2058.67 340.233 2
 -11 10 1 34696.4 1378.25 2
 -11 10 2 4862.33 526.995 2
 -11 10 3 9306.81 716.749 2
 -10 -2 -5 1318.02 127.945 1
 -10 -1 -5 10253.6 341.485 1
 -10 -1 -4 9295.39 367.897 1
 -10 -1 -3 106016 1625.43 1
 -10 -1 -1 319.516 120.123 2
 -10 -1 0 57997.6 1304.7 2
 -10 -1 1 233.521 102.555 2
 -10 -1 2 41573.2 1059.9 2
 -10 0 -5 796.944 100.801 1
 -10 0 -4 8775.12 513.74 2
 -10 0 -4 9101.64 365.317 1
 -10 0 -3 9654.84 528.981 2
 -10 0 -3 9977.41 420.846 1
 -10 0 -2 91559.4 1560.4 1
 -10 0 -2 92098 1776.16 2
 -10 0 -1 43307 1063.18 1
 -10 0 -1 42117.8 1121.11 2
 -10 0 0 40153.5 1075.51 1
 -10 0 0 40766.2 1091.9 2
 -10 0 1 83519.3 1636.34 2
 -10 0 2 137.962 77.4108 2
 -10 0 3 27472 865.004 2
 -10 1 -6 76675.3 1691.42 2
 -10 1 -5 26575.4 935.326 2
 -10 1 -4 8088.47 351.195 1
 -10 1 -4 9461.89 535.992 2
 -10 1 -3 18756.1 595.813 1
 -10 1 -3 18889.5 759.623 2
 -10 1 -2 19318.2 759.713 2
 -10 1 -2 20297.4 656.373 1
 -10 1 -1 91580.3 1779.69 2
 -10 1 -1 97732.7 1700.81 1
 -10 1 0 555.417 145.281 2
 -10 1 0 692.428 153.95 1
 -10 1 1 51078.3 1294.68 1
 -10 1 1 50582.3 1264.22 2
 -10 1 2 49784.9 1324.43 1
 -10 1 2 48272.9 1225.54 2
 -10 1 3 4302.7 349.044 2
 -10 1 3 4478.93 407.51 1
 -10 1 4 41444.9 1326.11 1
 -10 1 5 109.238 99.8309 1
 -10 1 6 26506.9 1143.85 1
 -10 1 7 15189.6 906.795 1
 -10 1 8 1480.85 292.975 1
 -10 2 -7 19098.3 816.249 2
 -10 2 -6 1548.38 243.016 2
 -10 2 -5 51344.2 1333.34 2
 -10 2 -4 27137.7 938.76 2
 -10 2 -3 25154.5 872.849 2
 -10 2 -3 26087.5 729.033 1
 -10 2 -2 7932.76 412.178 1
 -10 2 -2 7898.36 494.822 2
 -10 2 -1 69281.3 1542.13 2
 -10 2 -1 67960.6 1394.26 1
 -10 2 0 53859.4 1272.34 1
 -10 2 0 55199.9 1365.15 2
 -10 2 1 2150.39 264.676 2
 -10 2 1 2025.02 249.388 1
 -10 2 2 69951 1619.81 1
 -10 2 2 75310 1637.56 2
 -10 2 3 19674.5 853.92 1
 -10 2 3 20773.7 823.161 2
 -10 2 4 5065.36 442.957 1
 -10 2 4 5312.15 410.816 2
 -10 2 5 23691.8 1014.36 1
 -10 2 6 1430.46 280.189 1
 -10 2 7 42013.1 1486.15 1
 -10 2 8 16251.5 960.775 1
 -10 3 -8 10718.2 623.942 2
 -10 3 -7 9827.45 596.965 2
 -10 3 -6 24506.8 930.1 2
 -10 3 -5 14827.7 710.631 2
 -10 3 -4 81884.9 1780.6 2
 -10 3 -3 9726.31 565.964 2
 -10 3 -2 25808.7 793.122 1
 -10 3 -2 26476.9 945.682 2
 -10 3 -1 4567.64 340.134 1
 -10 3 -1 4761.66 398.256 2
 -10 3 0 36918 1051.1 1
 -10 3 0 39357.5 1150.22 2
 -10 3 1 34064.2 1050.46 1
 -10 3 1 35253.2 1085.38 2
 -10 3 2 23792.3 909.839 1
 -10 3 2 23374.1 876.891 2
 -10 3 3 79744.9 1721.62 2
 -10 3 3 81177.8 1824.99 1
 -10 3 4 13889.7 673.315 2
 -10 3 4 13368.3 733.919 1
 -10 3 5 8100.7 588.788 1
 -10 3 6 20384.6 981.493 1
 -10 3 7 6099.09 562.252 1
 -10 3 8 44325.3 1593.74 1
 -10 4 -9 8506.74 569.287 2
 -10 4 -8 59320.3 1556.22 2
 -10 4 -7 8253.89 545.718 2
 -10 4 -6 35369.2 1137.62 2
 -10 4 -5 28377.7 1015.85 2
 -10 4 -4 35165.3 1123.74 2
 -10 4 -3 74034.5 1719.44 2
 -10 4 -2 123.13 104.225 2
 -10 4 -1 30066.6 1027.86 2
 -10 4 -1 30280.2 927.004 1
 -10 4 0 4463.65 390.567 2
 -10 4 0 3810 336.832 1
 -10 4 1 32575.6 1065.52 2
 -10 4 1 31161.4 1014.04 1
 -10 4 2 28284.8 996.126 2
 -10 4 2 27113.8 990.135 1
 -10 4 3 12584.2 696.182 1
 -10 4 3 13195.2 677.157 2
 -10 4 4 59421.9 1622.93 1
 -10 4 4 61048.9 1536.01 2
 -10 4 5 7506.2 516.591 2
 -10 4 5 7597.84 582.122 1
 -10 4 6 12086.4 762.418 1
 -10 4 7 6907.25 604.891 1
 -10 4 8 12605.8 842.26 1
 -10 5 -9 10684.2 660.464 2
 -10 5 -8 18233.1 852.372 2
 -10 5 -7 70674.6 1727.73 2
 -10 5 -6 592.633 176.307 2
 -10 5 -5 38160.6 1223.02 2
 -10 5 -4 3900.24 396.625 2
 -10 5 -3 65647.9 1628.65 2
 -10 5 -2 58754.7 1518.1 2
 -10 5 -1 1317 226.35 2
 -10 5 0 34854.8 1142.91 2
 -10 5 1 684.352 166.779 1
 -10 5 1 750.144 186.844 2
 -10 5 2 33540.8 1131.2 2
 -10 5 2 33172.4 1122.53 1
 -10 5 3 15241.3 773.637 1
 -10 5 3 15577.6 768.347 2
 -10 5 4 32219.2 1112.23 2
 -10 5 4 33929.1 1206.78 1
 -10 5 5 39974.2 1262.75 2
 -10 5 5 39145.2 1357.35 1
 -10 5 6 855.434 194.587 2
 -10 5 6 784.288 211.885 1
 -10 5 7 9745.98 715.716 1
 -10 6 -10 161.877 127.583 2
 -10 6 -9 15780.8 802.394 2
 -10 6 -8 4451.95 430.633 2
 -10 6 -7 38802.1 1232.61 2
 -10 6 -6 71519.4 1762.8 2
 -10 6 -5 112.908 120.104 2
 -10 6 -4 20637.5 910.164 2
 -10 6 -3 1668.71 260.424 2
 -10 6 -2 60559.4 1576.02 2
 -10 6 -1 33160.2 1147.02 2
 -10 6 0 11554.4 665.758 2
 -10 6 1 69069.7 1705.68 2
 -10 6 2 1152.54 229.224 1
 -10 6 2 1091.56 230.37 2
 -10 6 3 25905.9 1013.3 2
 -10 6 3 24076 1002.92 1
 -10 6 4 1049.1 234.91 1
 -10 6 4 741.634 206.565 2
 -10 6 5 37618.6 1267.97 2
 -10 6 5 35798 1315.13 1
 -10 6 6 27893.8 1188.12 1
 -10 6 6 27400.5 1083.01 2
 -10 6 7 -51.6947 135.99 1
 -10 7 -10 10646.1 675.535 2
 -10 7 -9 98.4111 121.672 2
 -10 7 -8 15478 811.539 2
 -10 7 -7 161.393 117.012 2
 -10 7 -6 60543.6 1649.34 2
 -10 7 -5 54694.6 1577.38 2
 -10 7 -4 2655.77 340.291 2
 -10 7 -3 20161.3 901.485 2
 -10 7 -2 1037.82 217.69 2
 -10 7 -1 45580.4 1396.77 2
 -10 7 0 7958.18 576.179 2
 -10 7 1 38453.4 1274.25 2
 -10 7 2 58676.5 1614.54 2
 -10 7 3 2177.21 314.927 2
 -10 7 4 5560.61 497.132 2
 -10 7 4 5738.48 516.152 1
 -10 7 5 457.83 165.862 2
 -10 7 5 374.839 165.697 1
 -10 7 6 34045.7 1256.84 2
 -10 7 6 37419.1 1419.91 1
 -10 7 7 48496.5 1666.83 1
 -10 8 -10 9015.9 642.219 2
 -10 8 -9 14900.9 816.476 2
 -10 8 -8 36.3194 116.075 2
 -10 8 -7 10823.6 694.48 2
 -10 8 -6 402.695 137.198 2
 -10 8 -5 55872.6 1611.43 2
 -10 8 -4 32591 1186.25 2
 -10 8 -3 7905.95 575.703 2
 -10 8 -2 24476.9 1021.18 2
 -10 8 -1 5360.33 475.81 2
 -10 8 0 44948.9 1420.62 2
 -10 8 1 1991.56 326.253 2
 -10 8 2 36222 1291.78 2
 -10 8 3 34253.3 1259.99 2
 -10 8 4 1074.87 251.766 2
 -10 8 5 4846.87 481.156 2
 -10 8 6 87.1842 125.124 2
 -10 8 7 24074.9 1101.77 2
 -10 9 -9 24566.2 1081.81 2
 -10 9 -8 20287.9 963.572 2
 -10 9 -7 492.88 168.564 2
 -10 9 -6 7971.91 622.568 2
 -10 9 -5 2593.88 367.374 2
 -10 9 -4 51576.1 1561.96 2
 -10 9 -3 24107.2 1064 2
 -10 9 -2 7424.02 578.412 2
 -10 9 -1 16711.3 875.775 2
 -10 9 0 3421.89 407.347 2
 -10 9 1 25907.5 1111.45 2
 -10 9 2 15.2245 122.257 2
 -10 9 3 31758.1 1258.26 2
 -10 9 4 22328.4 1066.76 2
 -10 9 5 2725.3 387.631 2
 -10 9 6 17164.4 955.787 2
 -10 9 7 370.485 192.529 2
 -10 10 -9 1957.81 319.861 2
 -10 10 -8 31614.1 1223.41 2
 -10 10 -7 11511.9 759.832 2
 -10 10 -6 4380.74 476.927 2
 -10 10 -5 5937.98 545.071 2
 -10 10 -4 13446.3 794.483 2
 -10 10 -3 48635.6 1578.23 2
 -10 10 -2 13209.7 791.012 2
 -10 10 -1 10265.6 704.966 2
 -10 10 0 13358.7 805.395 2
 -10 10 1 6429.51 578.346 2
 -10 10 2 16573.5 920.021 2
 -10 10 3 1214.98 255.629 2
 -10 10 4 29875.7 1286.4 2
 -10 10 5 22721.4 1130.47 2
 -10 11 -8 3375.37 412.509 2
 -10 11 -7 22051.6 1071.74 2
 -10 11 -6 1520.79 323.835 2
 -10 11 -5 9421.92 697.994 2
 -10 11 -4 1573.82 302.815 2
 -10 11 -3 20712.9 1036.53 2
 -10 11 -2 47884 1603.17 2
 -10 11 -1 3003.26 405.89 2
 -10 11 0 23401.3 1115.16 2
 -10 11 1 10009.3 741.875 2
 -10 11 2 6586.47 608.931 2
 -10 11 3 10765 787.992 2
 -9 -16 -8 6437.19 595.52 5
 -9 -16 -7 18038.8 1018.75 5
 -9 -16 -6 135.487 155.054 5
 -9 -15 -8 7069.18 593.606 5
 -9 -15 -7 14357.4 866.242 5
 -9 -15 -6 20966.7 1065.52 5
 -9 -14 -9 17139.3 877.56 5
 -9 -14 -8 70770.6 1870.88 5
 -9 -14 -7 9649.3 671.465 5
 -9 -14 -6 13936.5 836.655 5
 -9 -13 -9 1654.66 270.96 5
 -9 -13 -8 29098.5 1110.72 5
 -9 -13 -7 76037.8 1886.65 5
 -9 -13 -6 4770.76 466.907 5
 -9 -12 -9 9529.17 586.802 5
 -9 -12 -8 279.152 124.752 5
 -9 -12 -7 33998.5 1157.79 5
 -9 -12 -6 65476.3 1691.01 5
 -9 -11 -9 952.81 181.504 5
 -9 -11 -8 10329.1 575.849 5
 -9 -11 -7 158.468 111.11 5
 -9 -10 -8 220.742 99.9915 5
 -9 -10 -7 21309.4 808.065 5
 -9 -9 -8 76185.7 1477.29 5
 -9 -9 -7 5860.26 392.091 5
 -9 -8 -8 92959.8 1567.64 5
 -9 -2 -6 4162.02 150.835 1
 -9 -1 -5 9609.28 291.009 1
 -9 -1 -4 31869.9 664.341 1
 -9 -1 -2 68705.2 1390.44 2
 -9 -1 -1 9493.16 475.189 2
 -9 -1 0 43564.5 1051.87 2
 -9 -1 1 67979.8 1350.13 2
 -9 -1 2 3069.33 259.722 2
 -9 -1 3 22048.4 696.896 2
 -9 0 -4 17997.3 689.307 2
 -9 0 -4 17381.1 472.287 1
 -9 0 -3 30603.3 914.925 2
 -9 0 -3 30735.9 714.099 1
 -9 0 -2 1716.02 178.58 1
 -9 0 -2 1495.92 206.921 2
 -9 0 -1 52128.6 1201.02 2
 -9 0 -1 52030.3 1109.46 1
 -9 0 0 723.927 147.181 2
 -9 0 1 47421.6 1110.37 2
 -9 0 2 36971.4 963.225 2
 -9 0 3 7080.61 401.112 2
 -9 1 -6 21202.6 785.31 2
 -9 1 -5 80957.3 1628.86 2
 -9 1 -4 31453.1 952.807 2
 -9 1 -4 29394 659.262 1
 -9 1 -3 40121.3 1069.26 2
 -9 1 -3 38709.2 828.348 1
 -9 1 -2 56959.9 1105.6 1
 -9 1 -2 54950.7 1255.83 2
 -9 1 -1 18176.2 621.588 1
 -9 1 -1 17749.4 686.307 2
 -9 1 0 39881.4 1046.9 2
 -9 1 0 39957.4 1015.64 1
 -9 1 1 209.448 109.592 2
 -9 1 1 334.107 114.039 1
 -9 1 2 46023.8 1134.57 2
 -9 1 2 47878 1240.49 1
 -9 1 3 45872.1 1131.75 2
 -9 1 3 46534.4 1284.36 1
 -9 1 4 11654.7 543.171 2
 -9 1 4 10827.4 630.32 1
 -9 1 5 15321.9 783.721 1
 -9 1 6 10530 684.092 1
 -9 1 7 33831.3 1294.88 1
 -9 1 8 4781.48 500.991 1
 -9 1 9 5322.46 558.857 1
 -9 2 -7 30207.6 973.66 2
 -9 2 -6 2824.59 292.274 2
 -9 2 -5 13889.7 631.06 2
 -9 2 -4 70563 1502.96 2
 -9 2 -3 10462 543.997 2
 -9 2 -3 10844.5 431.808 1
 -9 2 -2 88314.4 1482.9 1
 -9 2 -2 91592.6 1746.75 2
 -9 2 -1 26793.8 883.253 2
 -9 2 -1 25627 758.455 1
 -9 2 0 38259.3 1062.99 2
 -9 2 0 36710.1 973.771 1
 -9 2 1 51955.9 1250.15 1
 -9 2 1 53807.1 1268.55 2
 -9 2 2 10410.3 529.578 2
 -9 2 2 10052.5 550.737 1
 -9 2 3 100891 1996.03 1
 -9 2 3 103127 1861.7 2
 -9 2 4 20057.8 743.745 2
 -9 2 4 20559.6 873.623 1
 -9 2 5 5928.93 400.083 2
 -9 2 5 6236.97 499.29 1
 -9 2 6 8419.12 616.042 1
 -9 2 7 8049.98 625.414 1
 -9 2 8 34116.7 1356.79 1
 -9 2 9 -64.1791 123.193 1
 -9 3 -8 75338.8 1669.78 2
 -9 3 -7 49.8289 96.6703 2
 -9 3 -6 24772.7 895.206 2
 -9 3 -5 15838.7 674.015 2
 -9 3 -4 18858.7 750.573 2
 -9 3 -3 62318.5 1438.84 2
 -9 3 -2 138.961 103.611 2
 -9 3 -2 187.208 85.9835 1
 -9 3 -1 59847.9 1388.11 2
 -9 3 -1 62078.3 1277.03 1
 -9 3 0 2336.26 268.775 2
 -9 3 0 2742.55 262.883 1
 -9 3 1 95641.5 1784.81 1
 -9 3 1 95450.1 1813.92 2
 -9 3 2 20646.6 783.671 2
 -9 3 2 22101.9 829.692 1
 -9 3 3 64752.5 1461.68 2
 -9 3 3 65585.8 1553.29 1
 -9 3 4 80179.3 1662.34 2
 -9 3 4 78998.8 1798.23 1
 -9 3 5 6873.47 454.969 2
 -9 3 5 6115.48 494.457 1
 -9 3 6 18689.9 908.623 1
 -9 3 7 9242.9 660.119 1
 -9 3 8 15861.3 901.118 1
 -9 3 9 19719.7 1050.01 1
 -9 4 -8 55737.4 1434.4 2
 -9 4 -7 61983.1 1500.11 2
 -9 4 -6 234.048 145.008 2
 -9 4 -5 64171.4 1499.87 2
 -9 4 -4 6208.34 445.724 2
 -9 4 -3 63059.1 1472.08 2
 -9 4 -2 43081.3 1178.01 2
 -9 4 -1 4420.45 367.229 2
 -9 4 0 44032.3 1206.4 2
 -9 4 0 44349.2 1132.97 1
 -9 4 1 53.0208 93.5242 1
 -9 4 1 -22.7294 91.5577 2
 -9 4 2 45387.4 1224.3 2
 -9 4 2 44068.8 1225.5 1
 -9 4 3 4409.38 390.304 1
 -9 4 3 3806.79 352.685 2
 -9 4 4 71172 1594.76 2
 -9 4 4 70521.4 1702.78 1
 -9 4 5 47984.8 1421.18 1
 -9 4 5 45679.7 1256.89 2
 -9 4 6 680.776 166.006 2
 -9 4 6 861.416 217.802 1
 -9 4 7 27743.6 1164.53 1
 -9 4 8 1371.64 280.418 1
 -9 4 9 23493.5 1146.22 1
 -9 5 -9 11248.3 640.638 2
 -9 5 -8 77.8435 108.534 2
 -9 5 -7 56587.5 1435.88 2
 -9 5 -6 73596.7 1667.1 2
 -9 5 -5 2647.3 315.082 2
 -9 5 -4 53309.6 1390.28 2
 -9 5 -3 82.77 98.5165 2
 -9 5 -2 66892 1551.9 2
 -9 5 -1 6155.95 454.739 2
 -9 5 0 34488.9 1078.63 2
 -9 5 1 48479.6 1266.6 1
 -9 5 1 47185.3 1288.06 2
 -9 5 2 1449.03 232.304 2
 -9 5 2 889.997 185.744 1
 -9 5 3 9250.31 560.953 2
 -9 5 3 9269.59 572.384 1
 -9 5 4 386.411 148.879 2
 -9 5 4 240.175 143.216 1
 -9 5 5 74568 1858.71 1
 -9 5 5 73166.1 1695.75 2
 -9 5 6 18248 917.105 1
 -9 5 6 17580.8 794.334 2
 -9 5 7 2674.16 369.545 1
 -9 5 8 14658.9 868.668 1
 -9 5 9 549.353 195.828 1
 -9 6 -9 414.638 163.988 2
 -9 6 -8 10070.5 614.588 2
 -9 6 -7 2651.92 310.304 2
 -9 6 -6 76495.8 1744.8 2
 -9 6 -5 33735.6 1136.02 2
 -9 6 -4 10824 613.154 2
 -9 6 -3 36944.4 1152.61 2
 -9 6 -2 1068.63 206.202 2
 -9 6 -1 33765.1 1099.1 2
 -9 6 0 2272.8 286.225 2
 -9 6 1 50814.3 1375.47 2
 -9 6 2 49237.6 1367.98 2
 -9 6 3 142.873 124.107 2
 -9 6 3 214.331 131.962 1
 -9 6 4 2679.91 337.685 1
 -9 6 4 2553.01 313.691 2
 -9 6 5 11029.9 689.666 1
 -9 6 5 11533.5 666.324 2
 -9 6 6 53547.7 1620.41 1
 -9 6 6 55121.8 1521.21 2
 -9 6 7 15336.2 783.601 2
 -9 6 7 16871.7 920.075 1
 -9 6 8 7692.43 643.004 1
 -9 7 -10 34543.9 1191.68 2
 -9 7 -9 26625.8 1035.28 2
 -9 7 -8 1855.01 280.552 2
 -9 7 -7 8317.41 572.354 2
 -9 7 -6 5642.78 474.611 2
 -9 7 -5 50101.3 1404.89 2
 -9 7 -4 5598.32 454.497 2
 -9 7 -3 29535.6 1065.41 2
 -9 7 -2 25018.1 963.308 2
 -9 7 -1 1686.9 274.323 2
 -9 7 0 28689.1 1040.52 2
 -9 7 1 574.041 165.626 2
 -9 7 2 52949 1481.86 2
 -9 7 3 32122.3 1145.1 2
 -9 7 4 190.382 119.928 2
 -9 7 4 178.793 154.479 1
 -9 7 5 2341.55 336.84 1
 -9 7 5 3003.44 358.746 2
 -9 7 6 8791.43 657.574 1
 -9 7 6 9227.61 623.876 2
 -9 7 7 50862.3 1642.55 1
 -9 7 7 51539.6 1540.44 2
 -9 7 8 11749.4 809.77 1
 -9 8 -10 1051.23 218.954 2
 -9 8 -9 42417.8 1347.92 2
 -9 8 -8 21686.1 915.252 2
 -9 8 -7 817.551 212.349 2
 -9 8 -6 1218.71 246.317 2
 -9 8 -5 10994.6 659.861 2
 -9 8 -4 56900.8 1545.16 2
 -9 8 -3 2025.83 301.461 2
 -9 8 -2 49529.1 1432.41 2
 -9 8 -1 31748.6 1129.84 2
 -9 8 0 11394.8 674.756 2
 -9 8 1 26126.9 1049.83 2
 -9 8 2 1984.66 304.67 2
 -9 8 3 48444.3 1473.69 2
 -9 8 4 19376.6 923.538 2
 -9 8 5 482.678 162.08 2
 -9 8 6 5629.82 511.617 2
 -9 8 7 2478.07 360.711 2
 -9 8 7 2154.11 361.926 1
 -9 8 8 26165 1136.1 2
 -9 8 8 27562.4 1275.13 1
 -9 9 -9 5447.81 493.163 2
 -9 9 -8 49247.4 1445.23 2
 -9 9 -7 20198.4 938.158 2
 -9 9 -6 1429.56 266.21 2
 -9 9 -5 1670.48 278.812 2
 -9 9 -4 12118.5 708.732 2
 -9 9 -3 42443 1364.5 2
 -9 9 -2 1140.64 251.32 2
 -9 9 -1 51953.7 1521.93 2
 -9 9 0 14395.7 781.06 2
 -9 9 1 23505.8 1015.23 2
 -9 9 2 22501.4 1011.81 2
 -9 9 3 8297.83 623.172 2
 -9 9 4 30616.9 1204.25 2
 -9 9 5 11395.9 741.69 2
 -9 9 6 9265.44 671.202 2
 -9 9 7 6247.56 567.813 2
 -9 9 8 3972.69 462.898 2
 -9 10 -8 5678.24 511.896 2
 -9 10 -7 44961 1458.53 2
 -9 10 -6 5833.2 524.927 2
 -9 10 -5 12466.5 739.361 2
 -9 10 -4 2955.11 364.494 2
 -9 10 -3 19715.1 935.105 2
 -9 10 -2 27149.6 1109.42 2
 -9 10 -1 2363.38 322.702 2
 -9 10 0 39561.4 1364.84 2
 -9 10 1 2822.5 375.504 2
 -9 10 2 14646.4 842.396 2
 -9 10 3 5069.39 507.679 2
 -9 10 4 14570.8 850.003 2
 -9 10 5 39532.5 1440.27 2
 -9 10 6 7481.06 635.509 2
 -9 10 7 13197.8 855.007 2
 -9 10 8 2192.89 374.914 2
 -9 11 -7 10056.1 692.596 2
 -9 11 -6 35163 1317.38 2
 -9 11 -5 48.7383 124.297 2
 -9 11 -4 28169.8 1171.4 2
 -9 11 -3 1818.45 304.116 2
 -9 11 -2 25897.5 1121.2 2
 -9 11 -1 13703.8 810.54 2
 -9 11 0 12452.3 790.725 2
 -9 11 1 32810 1305.46 2
 -9 11 2 587.987 216.242 2
 -9 11 3 8411.18 668.383 2
 -9 11 4 3648.47 447.967 2
 -9 11 5 21447.2 1092.48 2
 -9 11 6 35402.7 1436.21 2
 -9 12 -7 187.571 140.456 2
 -9 12 -6 23484.1 1107.68 2
 -9 12 -5 14666 861.666 2
 -9 12 -4 3989.69 461.891 2
 -9 12 -3 25376.3 1126.37 2
 -9 12 -2 443.968 198.84 2
 -9 12 -1 23745 1110.01 2
 -9 12 0 8560.84 688.213 2
 -9 12 1 7963.19 661.218 2
 -9 12 2 26874.3 1229.63 2
 -9 12 3 128.592 129.038 2
 -8 -17 -9 3919.63 481.674 5
 -8 -17 -8 8415.2 707.431 5
 -8 -16 -10 2799.14 407.252 5
 -8 -16 -9 25037 1169.21 5
 -8 -16 -8 1897.67 326.88 5
 -8 -16 -7 7905.27 674.161 5
 -8 -16 -6 5429.36 555.544 5
 -8 -16 -5 6491.85 632.414 5
 -8 -15 -10 5345.44 508.805 5
 -8 -15 -9 26946.5 1152.05 5
 -8 -15 -8 50414 1622.34 5
 -8 -15 -7 2102.96 338.747 5
 -8 -15 -6 13852.5 847.652 5
 -8 -15 -5 3258.22 438.434 5
 -8 -14 -10 8454.65 611.036 5
 -8 -14 -9 432.722 163.246 5
 -8 -14 -8 45939.1 1477.14 5
 -8 -14 -7 54285.2 1643.02 5
 -8 -14 -6 50.5341 127.282 5
 -8 -14 -5 27226.4 1177.48 5
 -8 -13 -10 3.91916 85.5877 5
 -8 -13 -9 4893.54 447.131 5
 -8 -13 -8 1040.32 219.618 5
 -8 -13 -7 56018.4 1596.09 5
 -8 -13 -6 50399.7 1511.58 5
 -8 -13 -5 1363.17 262.972 5
 -8 -12 -10 39892.1 1216.47 5
 -8 -12 -9 250.786 134.046 5
 -8 -12 -8 7407.88 524.673 5
 -8 -12 -7 5277.77 457.479 5
 -8 -12 -6 55746.7 1524.51 5
 -8 -12 -5 37513.1 1257.52 5
 -8 -11 -10 55012.3 1359.33 5
 -8 -11 -9 21190.4 828.345 5
 -8 -11 -8 1936.53 262.797 5
 -8 -11 -7 5225.91 425.6 5
 -8 -11 -6 1312.14 229.343 5
 -8 -11 -5 103134 2105.93 5
 -8 -10 -10 5318.22 381.865 5
 -8 -10 -9 79083.3 1612.53 5
 -8 -10 -8 38663.7 1083.08 5
 -8 -10 -7 936.548 185.158 5
 -8 -10 -6 20653.1 800.602 5
 -8 -10 -5 5683.24 437.156 5
 -8 -9 -9 10310.2 498.357 5
 -8 -9 -8 130376 2077.68 5
 -8 -9 -7 48560.3 1170.97 5
 -8 -9 -6 51017.8 1226.66 5
 -8 -9 -5 25675.5 869.761 5
 -8 -8 -9 27681.8 766.456 5
 -8 -8 -8 19359 643.375 5
 -8 -8 -7 140504 2097.2 5
 -8 -8 -6 2047.02 221.656 5
 -8 -7 -9 42988.2 895.394 5
 -8 -7 -8 10262.6 411.797 5
 -8 -7 -7 58321 1112.2 5
 -8 -6 -9 5653.56 253.282 5
 -8 -6 -8 19137.2 503.779 5
 -8 -1 -5 2838.72 132.294 1
 -8 -1 -4 105533 1335.36 1
 -8 -1 -2 6648.99 374.02 2
 -8 -1 -1 10808.3 476.685 2
 -8 -1 0 2794.44 240.248 2
 -8 -1 1 107156 1689.87 2
 -8 -1 2 26122 725.2 2
 -8 -1 3 44878.8 972.981 2
 -8 0 -4 644.499 130.745 2
 -8 0 -4 696.677 84.9829 1
 -8 0 -3 102494 1741.04 2
 -8 0 -3 104314 1424.28 1
 -8 0 -2 24395.9 748.053 2
 -8 0 -2 25934.4 651.421 1
 -8 0 -1 20966.2 678.341 2
 -8 0 0 10005 456.587 2
 -8 0 1 14651.4 557.187 2
 -8 0 2 45177.9 1022.88 2
 -8 0 3 14950.3 553.971 2
 -8 0 4 40465.6 948.374 2
 -8 1 -6 209.837 86.168 2
 -8 1 -5 56990.7 1268.31 2
 -8 1 -4 87619.4 1611.92 2
 -8 1 -3 1325.62 186.613 2
 -8 1 -3 1211.79 129.631 1
 -8 1 -2 107486 1572.72 1
 -8 1 -2 110939 1829.56 2
 -8 1 -1 8215.42 385.638 1
 -8 1 -1 8295.73 436.191 2
 -8 1 0 23086.1 740.942 2
 -8 1 0 22512 696.33 1
 -8 1 1 2813.01 258.576 2
 -8 1 1 2650.15 256.181 1
 -8 1 2 9147.71 453.688 2
 -8 1 3 98850.7 1682.54 2
 -8 1 4 23241.9 732.44 2
 -8 1 5 31709.4 865.027 2
 -8 1 9 1900.31 310.6 1
 -8 1 10 30827 1334.29 1
 -8 2 -7 453.204 120.97 2
 -8 2 -6 25431.8 840.53 2
 -8 2 -5 6066.06 403.269 2
 -8 2 -4 57430.4 1264.81 2
 -8 2 -3 97955.4 1747.84 2
 -8 2 -2 20508.1 597.389 1
 -8 2 -2 20109.1 719.859 2
 -8 2 -1 119561 1967.82 2
 -8 2 -1 119635 1798.76 1
 -8 2 0 5687.37 348.764 1
 -8 2 0 5945.8 381.183 2
 -8 2 1 17479.1 647.157 2
 -8 2 1 18141.2 663.28 1
 -8 2 2 15540.8 642.534 1
 -8 2 2 14302.3 590.027 2
 -8 2 3 19587.2 769.343 1
 -8 2 3 19352.8 691.337 2
 -8 2 4 75848.1 1688.78 1
 -8 2 4 77503.3 1498.09 2
 -8 2 5 3043.09 275.259 2
 -8 2 5 3036.04 351.686 1
 -8 2 6 36636 1224.63 1
 -8 2 7 5315 488.93 1
 -8 2 8 24605.3 1091.26 1
 -8 2 9 20923.1 1055.92 1
 -8 2 10 11321.5 798.082 1
 -8 3 -8 84184.1 1711.59 2
 -8 3 -7 24263.8 847.715 2
 -8 3 -6 3966.93 328.065 2
 -8 3 -5 45909.5 1164.75 2
 -8 3 -4 80.2075 86.2995 2
 -8 3 -3 99423.4 1807.22 2
 -8 3 -2 20724 740.164 2
 -8 3 -1 66499.3 1393.3 2
 -8 3 -1 66582.7 1268.71 1
 -8 3 0 147957 2293.64 2
 -8 3 0 147592 2195.06 1
 -8 3 1 1725.5 215.269 1
 -8 3 1 1878.16 229.219 2
 -8 3 2 124425 2104.08 1
 -8 3 2 124138 2047.9 2
 -8 3 3 10348 522.293 2
 -8 3 3 10555.2 561.813 1
 -8 3 4 36682.1 1014.68 2
 -8 3 4 37371.2 1135.38 1
 -8 3 5 35259.4 1151.56 1
 -8 3 5 34672.2 989.263 2
 -8 3 6 179.127 120.053 1
 -8 3 6 291.504 111.653 2
 -8 3 7 37336.9 1290.79 1
 -8 3 8 343.184 178.353 1
 -8 3 9 23710.2 1106.4 1
 -8 3 10 2625.7 405.51 1
 -8 4 -14 14668.4 898.063 4
 -8 4 -13 -13.6908 128.992 4
 -8 4 -8 4544 380.978 2
 -8 4 -7 86152 1720.99 2
 -8 4 -6 40424.4 1099.83 2
 -8 4 -5 14032.9 638.733 2
 -8 4 -4 22858 825.567 2
 -8 4 -3 17845.7 704.679 2
 -8 4 -2 62646 1392.45 2
 -8 4 -1 1319.07 201.092 2
 -8 4 0 101510 1857.27 2
 -8 4 0 102978 1777.16 1
 -8 4 1 168349 2552.57 2
 -8 4 1 168022 2514.16 1
 -8 4 2 220.56 111.694 2
 -8 4 2 287.833 105.651 1
 -8 4 3 67063.7 1471.3 2
 -8 4 3 67628.7 1533.73 1
 -8 4 4 435.562 138.097 2
 -8 4 4 374.374 143.77 1
 -8 4 5 137429 2304.48 2
 -8 4 5 136803 2501.09 1
 -8 4 6 20149.5 782.883 2
 -8 4 6 19172.5 886.718 1
 -8 4 7 9921.01 654.083 1
 -8 4 8 26638.3 1137.34 1
 -8 4 9 1457.87 284.316 1
 -8 4 10 12640.4 845.635 1
 -8 5 -14 3114.75 432.272 4
 -8 5 -13 14809.1 889.871 4
 -8 5 -12 2895.39 388.372 4
 -8 5 -9 13059.6 660.168 2
 -8 5 -8 11690.3 618.218 2
 -8 5 -7 9752.24 544.361 2
 -8 5 -6 132911 2284.95 2
 -8 5 -5 20402.7 821.152 2
 -8 5 -4 37797.6 1088.25 2
 -8 5 -3 34388.2 1027.65 2
 -8 5 -2 9691.21 533.555 2
 -8 5 -1 20726.5 789.432 2
 -8 5 0 10613.4 557.436 2
 -8 5 1 166744 2581.57 1
 -8 5 1 168165 2622.37 2
 -8 5 2 114276 2076.1 2
 -8 5 2 112934 2058.43 1
 -8 5 3 1796.75 245.639 1
 -8 5 3 1826.78 242.372 2
 -8 5 4 17448.2 752.287 2
 -8 5 4 18084.9 800.882 1
 -8 5 5 17282.4 827.55 1
 -8 5 5 17959.7 763.561 2
 -8 5 6 69462.9 1607.03 2
 -8 5 6 68008.6 1750.08 1
 -8 5 7 3821.31 421.945 1
 -8 5 7 4335.56 387.286 2
 -8 5 8 12825.1 781.194 1
 -8 5 9 22339.8 1080.38 1
 -8 5 10 589.336 214.55 1
 -8 6 -13 6940.85 624.622 4
 -8 6 -12 7568.02 641.269 4
 -8 6 -11 12322.7 766.823 4
 -8 6 -9 8690.76 552.576 2
 -8 6 -8 3472.94 346.952 2
 -8 6 -7 5397.58 428.2 2
 -8 6 -6 15364.6 716.763 2
 -8 6 -5 51564 1327.24 2
 -8 6 -4 198.245 121.742 2
 -8 6 -3 91056.2 1827.63 2
 -8 6 -2 55940.3 1380.29 2
 -8 6 -1 3718.78 351.486 2
 -8 6 0 25520.3 909.716 2
 -8 6 1 6404.26 459.477 2
 -8 6 2 123365 2243.35 2
 -8 6 3 33390.2 1087.57 2
 -8 6 3 33526.4 1093.38 1
 -8 6 4 12691.9 659.818 2
 -8 6 4 11454 652.366 1
 -8 6 5 1915.47 275.643 2
 -8 6 5 2079.68 303.325 1
 -8 6 6 15571.7 753.343 2
 -8 6 6 15148 813.845 1
 -8 6 7 29322.6 1054.28 2
 -8 6 7 28748.3 1162.3 1
 -8 6 8 208.545 159.399 1
 -8 6 9 23673 1125.7 1
 -8 7 -13 2800.87 437.675 4
 -8 7 -12 8989.9 698.265 4
 -8 7 -11 4726.42 494.404 4
 -8 7 -10 18766 950.608 4
 -8 7 -10 19814.7 850.701 2
 -8 7 -9 53146.9 1421.55 2
 -8 7 -8 11042 623.87 2
 -8 7 -7 4082.45 378.949 2
 -8 7 -6 3297.22 342.424 2
 -8 7 -5 12113.8 641.739 2
 -8 7 -4 52922.3 1381.43 2
 -8 7 -3 1436.39 227.016 2
 -8 7 -2 55251.1 1408 2
 -8 7 -1 16681 753.76 2
 -8 7 0 14044.4 696.928 2
 -8 7 1 13636.1 693.771 2
 -8 7 2 9110.35 568.945 2
 -8 7 3 92611.5 1975.26 2
 -8 7 4 11096.7 640.798 2
 -8 7 4 10948 662.395 1
 -8 7 5 6577.93 531.689 1
 -8 7 5 6388.46 493.813 2
 -8 7 6 12474.2 741.092 1
 -8 7 6 11589.7 673.868 2
 -8 7 7 9170.84 665.906 1
 -8 7 7 8428.37 583.852 2
 -8 7 8 23205.7 991.488 2
 -8 7 8 22710.9 1077.78 1
 -8 7 9 2182.3 366.273 1
 -8 8 -12 1663.58 331.216 4
 -8 8 -11 8588.04 687.52 4
 -8 8 -10 2124.48 334.973 4
 -8 8 -9 30940.1 1093 2
 -8 8 -8 49155.5 1351.92 2
 -8 8 -7 5937.88 482.547 2
 -8 8 -6 6289.21 486.866 2
 -8 8 -5 4551.9 408.008 2
 -8 8 -4 31230.7 1081.3 2
 -8 8 -3 58030.9 1498.89 2
 -8 8 -2 3708.36 360.27 2
 -8 8 -1 95081.9 1995.47 2
 -8 8 0 24785.6 967.39 2
 -8 8 1 14625.3 748.379 2
 -8 8 2 6461.31 502.24 2
 -8 8 3 18865.7 862.685 2
 -8 8 4 49601.4 1454.95 2
 -8 8 5 4726.54 455.98 2
 -8 8 6 18081.2 883.923 2
 -8 8 7 5254.32 515.749 1
 -8 8 7 4703.95 460.288 2
 -8 8 8 7494.28 583.36 2
 -8 8 8 7494.68 637.161 1
 -8 8 9 22566.6 1133.65 1
 -8 9 -11 789.245 250.15 4
 -8 9 -10 12201.7 790.005 4
 -8 9 -8 30709.9 1110.15 2
 -8 9 -7 45250 1373.4 2
 -8 9 -6 243.004 123.957 2
 -8 9 -5 14940.7 753.288 2
 -8 9 -4 1476.6 249.297 2
 -8 9 -3 18358.7 836.1 2
 -8 9 -2 33080.2 1150.98 2
 -8 9 -1 13934.5 741.647 2
 -8 9 0 112442 2295.2 2
 -8 9 1 11947 688.586 2
 -8 9 2 31258.9 1147.49 2
 -8 9 3 11160.2 687.867 2
 -8 9 4 22242.9 988.858 2
 -8 9 5 40364.5 1365.07 2
 -8 9 6 1958.5 319.217 2
 -8 9 7 14072.3 821.774 2
 -8 9 8 429.753 184.209 2
 -8 9 9 9671.8 706.081 2
 -8 10 -10 -129.673 170.52 4
 -8 10 -8 1730.06 280.285 2
 -8 10 -7 24700.8 1029.28 2
 -8 10 -6 32712.6 1180.32 2
 -8 10 -5 1651.5 286.878 2
 -8 10 -4 24336.4 1001.43 2
 -8 10 -3 578.509 167.654 2
 -8 10 -2 20513.1 929.21 2
 -8 10 -1 8640.78 611.967 2
 -8 10 0 28904.2 1128.04 2
 -8 10 1 112246 2392.7 2
 -8 10 2 166.309 120.095 2
 -8 10 3 25806.8 1087.64 2
 -8 10 4 1925.18 319.85 2
 -8 10 5 33059 1267.64 2
 -8 10 6 30574.8 1246.24 2
 -8 10 7 805.41 243.361 2
 -8 10 8 15027.3 893.462 2
 -8 10 9 323 179.789 2
 -8 11 -7 231.791 143.349 2
 -8 11 -6 31286.5 1171.27 2
 -8 11 -5 25726.3 1069.55 2
 -8 11 -4 4983.12 477.931 2
 -8 11 -3 26988.2 1101.77 2
 -8 11 -2 132.657 134.346 2
 -8 11 -1 17032.5 881.27 2
 -8 11 0 728.59 216.336 2
 -8 11 1 36678.7 1314.49 2
 -8 11 2 31822 1239.42 2
 -8 11 3 2364.96 351.745 2
 -8 11 4 23804 1097.4 2
 -8 11 5 902.098 251.322 2
 -8 11 6 36231.4 1404 2
 -8 11 7 20708.3 1071.64 2
 -8 11 8 3265.41 445.316 2
 -8 12 -6 792.337 230.563 2
 -8 12 -5 47630.7 1521.72 2
 -8 12 -4 12944 783.89 2
 -8 12 -3 17272.1 905.95 2
 -8 12 -2 22628.1 1044.35 2
 -8 12 -1 1446.24 285.429 2
 -8 12 0 16953.7 918.148 2
 -8 12 1 650.522 207.888 2
 -8 12 2 23832 1111.09 2
 -8 12 3 16864.4 946.501 2
 -8 12 4 3713.31 448.596 2
 -8 12 5 16808.5 973.79 2
 -8 12 6 2717.32 404.783 2
 -8 13 -5 2568.27 372.189 2
 -8 13 -4 38366.7 1389.1 2
 -8 13 -3 3981.65 468.36 2
 -8 13 -2 20864.3 1026.25 2
 -8 13 -1 13449.8 846.534 2
 -8 13 0 1237.54 279.778 2
 -8 13 1 5288.67 539.501 2
 -8 13 2 737.041 228.326 2
 -8 13 3 32909.8 1380.93 2
 -7 -17 -10 3562.41 465.037 5
 -7 -17 -9 15664.3 965.222 5
 -7 -17 -8 258.73 183.989 5
 -7 -17 -7 17759.1 1046.94 5
 -7 -16 -11 4975.61 518.173 5
 -7 -16 -10 3202.9 413.904 5
 -7 -16 -9 22084.5 1104.46 5
 -7 -16 -8 28708.5 1268.9 5
 -7 -16 -7 195.522 181.808 5
 -7 -16 -6 13572.3 883.213 5
 -7 -16 -5 1308.41 289.781 5
 -7 -16 -4 13242.4 893.772 5
 -7 -15 -11 3377.58 410.607 5
 -7 -15 -10 10525.8 717.325 5
 -7 -15 -9 377.774 166.063 5
 -7 -15 -8 36838.6 1387.81 5
 -7 -15 -7 18116.8 963.027 5
 -7 -15 -6 1970.69 334.147 5
 -7 -15 -5 16093.1 925.962 5
 -7 -15 -4 269.179 155.133 5
 -7 -15 -3 10571.1 780.455 5
 -7 -14 -10 1094.53 241.117 5
 -7 -14 -9 11222.5 711.672 5
 -7 -14 -8 440.963 151.502 5
 -7 -14 -7 34453.6 1277.58 5
 -7 -14 -6 16804 896.277 5
 -7 -14 -5 7989.78 627.38 5
 -7 -14 -4 19234.4 986.947 5
 -7 -14 -3 137.57 135.736 5
 -7 -13 -10 19869.8 896.041 5
 -7 -13 -9 361.706 174.785 5
 -7 -13 -8 9190.06 622.849 5
 -7 -13 -7 6248.86 524.2 5
 -7 -13 -6 47565.4 1463.63 5
 -7 -13 -5 18446.1 908.124 5
 -7 -13 -4 15066.1 831.408 5
 -7 -13 -3 21521.9 1021.22 5
 -7 -12 -9 18197.8 817.092 5
 -7 -12 -8 6498.76 495.336 5
 -7 -12 -7 10785.1 639.747 5
 -7 -12 -6 1636.05 262.018 5
 -7 -12 -5 34124.1 1190.67 5
 -7 -12 -4 1472.93 260.084 5
 -7 -12 -3 38622.4 1318.74 5
 -7 -11 -9 93554.2 1873.45 5
 -7 -11 -8 4597.8 386.972 5
 -7 -11 -7 19431.4 820.431 5
 -7 -11 -6 24283.5 920.801 5
 -7 -11 -5 783.231 199.816 5
 -7 -11 -4 29968.2 1067.34 5
 -7 -11 -3 5938.21 487.175 5
 -7 -10 -8 64161.7 1438.62 5
 -7 -10 -7 9264.1 525.575 5
 -7 -10 -6 67713.2 1525.55 5
 -7 -10 -5 9897.84 561.633 5
 -7 -10 -4 39852.5 1180.82 5
 -7 -10 -3 26443.6 976.288 5
 -7 -9 -8 17773.9 671.62 5
 -7 -9 -7 95446 1750.25 5
 -7 -9 -6 2597.93 273.062 5
 -7 -9 -5 61177.1 1382.61 5
 -7 -9 -4 277.845 128.972 5
 -7 -8 -8 9888.55 454.48 5
 -7 -8 -7 52133.5 1145.85 5
 -7 -8 -6 59328.6 1247.43 5
 -7 -8 -5 21707.2 732.469 5
 -7 -8 -4 52988.8 1236.21 5
 -7 -7 -8 38724 870.481 5
 -7 -7 -7 644.573 118.169 5
 -7 -7 -6 104771 1656.77 5
 -7 -7 -5 55222 1135.71 5
 -7 -6 -8 3523.9 219.684 5
 -7 -6 -7 41797.6 837.815 5
 -7 -6 -6 2076.59 185.519 5
 -7 -6 -5 119202 1729.45 5
 -7 -5 -8 54536.2 854.724 5
 -7 -5 -7 20794.6 487.215 5
 -7 -5 -6 59481.5 963.044 5
 -7 -4 -8 112825 1240.82 5
 -7 -4 -7 23512.5 417.974 1
 -7 -1 -5 65260.2 735.325 1
 -7 -1 -4 40909.8 627.61 1
 -7 -1 -2 25791.1 713.184 2
 -7 -1 -1 15312.7 527.847 2
 -7 -1 0 17561.2 558.549 2
 -7 -1 1 39029.2 858.589 2
 -7 -1 2 124221 1750.59 2
 -7 -1 3 1312.28 146.265 2
 -7 -1 4 52146.5 974.682 2
 -7 0 -4 36795.6 590.433 1
 -7 0 -4 37719.9 926.293 2
 -7 0 -3 53030.2 841.329 1
 -7 0 -3 53794.4 1107.69 2
 -7 0 -2 118282 1781.9 2
 -7 0 -2 117594 1564.55 1
 -7 0 -1 3383.19 248.473 2
 -7 0 0 74797.4 1314.56 2
 -7 0 1 9454.99 413.45 2
 -7 0 2 50871 1030.54 2
 -7 0 3 134886 1913.13 2
 -7 0 4 1075.04 147.522 2
 -7 0 5 41130.7 896.157 2
 -7 1 -16 5612.59 558.033 4
 -7 1 -15 1145.19 275.751 4
 -7 1 -14 16611.5 897.824 4
 -7 1 -13 33683.2 1239.48 4
 -7 1 -6 62287.4 1292.49 2
 -7 1 -5 2771.56 252.91 2
 -7 1 -4 51705.2 1116.46 2
 -7 1 -3 24644.7 543.584 1
 -7 1 -3 24179.5 705.297 2
 -7 1 -2 23313.3 572.112 1
 -7 1 -2 23415 704.225 2
 -7 1 -1 112162 1615.74 1
 -7 1 -1 115045 1792.13 2
 -7 1 0 1575.2 176.381 2
 -7 1 0 1590.88 171.214 1
 -7 1 1 60129.1 1199.73 1
 -7 1 1 58803.3 1155.75 2
 -7 1 2 6375.9 345.849 2
 -7 1 3 61352.7 1181.9 2
 -7 1 4 137161 1982.87 2
 -7 1 5 799.413 127.88 2
 -7 1 11 49941.6 1712.44 1
 -7 2 -16 404.664 173.976 4
 -7 2 -15 11597.1 783.162 4
 -7 2 -14 316.463 158.086 4
 -7 2 -13 59508.6 1856.08 4
 -7 2 -12 32023.8 1184.11 4
 -7 2 -11 283.089 143.579 4
 -7 2 -7 30181.9 876.04 2
 -7 2 -6 13363.4 563.442 2
 -7 2 -5 41683.8 1028.12 2
 -7 2 -4 452.6 126.789 2
 -7 2 -3 60068.1 1248.01 2
 -7 2 -2 3517.19 275.468 2
 -7 2 -2 3288.59 216.945 1
 -7 2 -1 154577 2050.5 1
 -7 2 -1 155552 2208.31 2
 -7 2 0 63490.9 1195.36 1
 -7 2 0 65043.8 1267.12 2
 -7 2 1 317.107 103.45 2
 -7 2 1 214.276 91.0651 1
 -7 2 2 65424.2 1342.11 1
 -7 2 2 64399.9 1266.21 2
 -7 2 3 666.735 125.807 2
 -7 2 3 672.651 149.357 1
 -7 2 4 26486.4 766.89 2
 -7 2 4 27306.9 911.658 1
 -7 2 5 22345.8 708.151 2
 -7 2 5 23580.2 892.725 1
 -7 2 6 6140.91 364.682 2
 -7 2 6 6589.31 500.645 1
 -7 2 7 82133.8 1931.88 1
 -7 2 8 105.102 135.293 1
 -7 2 9 44900.6 1501.26 1
 -7 2 10 247.708 141.546 1
 -7 2 11 38496.6 1490.26 1
 -7 3 -15 2115.41 359.01 4
 -7 3 -14 14753 872.924 4
 -7 3 -13 672.892 210.31 4
 -7 3 -12 52011.7 1547.15 4
 -7 3 -11 25272.5 1022.19 4
 -7 3 -10 4766.88 432.476 4
 -7 3 -7 92871.9 1698.15 2
 -7 3 -6 21769.2 742.562 2
 -7 3 -5 24537.1 781.5 2
 -7 3 -4 79058.9 1509.26 2
 -7 3 -3 629.658 137.715 2
 -7 3 -2 53693.3 1168.98 2
 -7 3 -1 6705.29 344.088 1
 -7 3 -1 6919.73 395.126 2
 -7 3 0 140972 2048.56 1
 -7 3 0 142743 2130.19 2
 -7 3 1 105946 1749.78 1
 -7 3 1 106673 1767.71 2
 -7 3 2 3462.37 291.941 1
 -7 3 2 3775.76 293.631 2
 -7 3 3 57103.2 1234.05 2
 -7 3 3 57301.2 1316.96 1
 -7 3 4 609.337 153.81 1
 -7 3 4 511.828 133.816 2
 -7 3 5 43663.2 1232.99 1
 -7 3 5 43732.5 1078.58 2
 -7 3 6 10708.6 634.786 1
 -7 3 6 10284.9 509.086 2
 -7 3 7 17380.1 828.142 1
 -7 3 7 15917.5 640.903 2
 -7 3 8 39310.4 1324.94 1
 -7 3 9 4869.43 489.357 1
 -7 3 10 23081.2 1105.28 1
 -7 3 11 2153.85 369.807 1
 -7 4 -14 4692.9 517.738 4
 -7 4 -13 8561.01 663.303 4
 -7 4 -12 6067.34 542.029 4
 -7 4 -11 64376.7 1736.14 4
 -7 4 -10 14453.9 762.658 4
 -7 4 -9 37141.4 1178.9 4
 -7 4 -8 36265.5 1025.53 2
 -7 4 -7 12102.6 561.339 2
 -7 4 -6 112639 1937.37 2
 -7 4 -5 3778.3 316.99 2
 -7 4 -4 93671.9 1697.03 2
 -7 4 -3 18834.3 684.004 2
 -7 4 -2 16021 626.384 2
 -7 4 -1 2398.78 244.701 2
 -7 4 0 17141.2 619.795 1
 -7 4 0 17514.4 653.521 2
 -7 4 1 185841 2591.67 1
 -7 4 1 183716 2634.35 2
 -7 4 2 123480 2036.63 1
 -7 4 2 119280 2000.97 2
 -7 4 3 4508.08 356.438 1
 -7 4 3 5194.62 365.445 2
 -7 4 4 35714.8 1001.29 2
 -7 4 4 36069.6 1078.96 1
 -7 4 5 13899.4 612.522 2
 -7 4 5 13351.8 670.86 1
 -7 4 6 79171.9 1598.37 2
 -7 4 6 76891.7 1778.95 1
 -7 4 7 2957.35 353.568 1
 -7 4 7 2799.46 285.791 2
 -7 4 8 37594.4 1302.96 1
 -7 4 9 23905.1 1072 1
 -7 4 10 129.057 113.332 1
 -7 4 11 10444 766.997 1
 -7 5 -14 2824.43 426.976 4
 -7 5 -13 5319.34 527.355 4
 -7 5 -12 1898.25 317.905 4
 -7 5 -11 30126.4 1179.73 4
 -7 5 -10 80986.1 1918.75 4
 -7 5 -9 4279.06 413.034 4
 -7 5 -9 4927.51 389.389 2
 -7 5 -8 32860.2 994.991 2
 -7 5 -8 35296 1134.68 4
 -7 5 -7 28927.7 912.678 2
 -7 5 -6 35681.4 1012.14 2
 -7 5 -5 58393.9 1343.07 2
 -7 5 -4 19240.7 718.118 2
 -7 5 -3 114036 1963.51 2
 -7 5 -2 15507.7 636.936 2
 -7 5 -1 5842.56 386.449 2
 -7 5 0 4174.36 336.243 2
 -7 5 1 58375.7 1298.39 1
 -7 5 1 57851 1322.22 2
 -7 5 2 174222 2615.99 2
 -7 5 2 172105 2605.9 1
 -7 5 3 54364.4 1295.91 2
 -7 5 3 51520.3 1299.21 1
 -7 5 4 35847.6 1042.57 2
 -7 5 4 39094.9 1143.27 1
 -7 5 5 29385 1025.28 1
 -7 5 5 28262.8 928.556 2
 -7 5 6 15027.3 679.834 2
 -7 5 6 13799.5 720.775 1
 -7 5 7 26223.2 919.794 2
 -7 5 7 26693.4 1043.98 1
 -7 5 8 69.4573 86.8867 2
 -7 5 8 284.335 149.69 1
 -7 5 9 36811.9 1340.04 1
 -7 5 10 25210.8 1144.45 1
 -7 5 11 2459.96 384.22 1
 -7 6 -13 1912.57 348.314 4
 -7 6 -12 4196.93 463.014 4
 -7 6 -11 49.1028 115.084 4
 -7 6 -10 44447.5 1429.56 4
 -7 6 -9 66016.5 1510.46 2
 -7 6 -9 66409.9 1710.67 4
 -7 6 -8 337.808 161.051 4
 -7 6 -8 298.812 118.401 2
 -7 6 -7 52730.5 1388.49 4
 -7 6 -7 51901.1 1302.27 2
 -7 6 -6 5110.61 395.903 2
 -7 6 -5 27718.1 896.725 2
 -7 6 -4 12751.1 601.404 2
 -7 6 -3 19193.2 733.02 2
 -7 6 -2 86344.9 1701.59 2
 -7 6 -1 23600.6 832.56 2
 -7 6 0 6275.38 422.596 2
 -7 6 1 2615.11 284.907 2
 -7 6 2 35732.6 1062.65 2
 -7 6 3 138429 2343.36 2
 -7 6 3 135204 2369.06 1
 -7 6 4 593.28 142.38 2
 -7 6 4 437.685 153.727 1
 -7 6 5 45121 1320.01 1
 -7 6 5 45731.3 1252.48 2
 -7 6 6 16341.8 803.085 1
 -7 6 6 16342.9 744.605 2
 -7 6 7 12927 749.007 1
 -7 6 7 12237.8 647.178 2
 -7 6 8 24235.5 1058.24 1
 -7 6 8 23461.3 920.204 2
 -7 6 9 3614 434.297 1
 -7 6 10 42176.8 1514.29 1
 -7 7 -13 20794.2 1101.15 4
 -7 7 -12 2165.38 363.804 4
 -7 7 -11 2949.92 399.023 4
 -7 7 -10 330.192 146.201 4
 -7 7 -9 40185.2 1325.68 4
 -7 7 -9 40284.3 1175.7 2
 -7 7 -8 41114.1 1297.86 4
 -7 7 -8 41991.8 1182.44 2
 -7 7 -7 1584.8 229.798 2
 -7 7 -7 1482.82 238.221 4
 -7 7 -6 23413.6 868.106 2
 -7 7 -5 188.654 112.607 2
 -7 7 -4 39618.6 1128.7 2
 -7 7 -3 9123.71 529.571 2
 -7 7 -2 25539.2 897.367 2
 -7 7 -1 64782.3 1491.57 2
 -7 7 0 14137.3 663.718 2
 -7 7 1 30136.2 991.034 2
 -7 7 2 1946.71 269.386 2
 -7 7 3 52684.8 1369.41 2
 -7 7 4 54035.3 1403.92 2
 -7 7 5 2208.82 313.07 1
 -7 7 5 2574.13 300.905 2
 -7 7 6 33448.1 1188.31 1
 -7 7 6 33761 1126.85 2
 -7 7 7 6328.59 493.399 2
 -7 7 7 7008.06 557.951 1
 -7 7 8 21703.1 921.336 2
 -7 7 8 21563 1014.39 1
 -7 7 9 12929.6 719.777 2
 -7 7 9 14658.4 853.891 1
 -7 7 10 15317 902.616 1
 -7 8 -12 25269.5 1208.03 4
 -7 8 -11 614.88 211.515 4
 -7 8 -10 7269.67 599.625 4
 -7 8 -9 769.858 196.71 4
 -7 8 -9 842.475 181.062 2
 -7 8 -8 30479.2 1135.93 4
 -7 8 -8 30094.7 989.913 2
 -7 8 -7 19356.2 852.365 4
 -7 8 -7 20545.5 840.996 2
 -7 8 -6 1548.94 228.307 2
 -7 8 -5 31960.6 1041.04 2
 -7 8 -4 418.984 135.303 2
 -7 8 -3 36246 1112.59 2
 -7 8 -2 4278.18 386.063 2
 -7 8 -1 54181.1 1399.19 2
 -7 8 0 80058.4 1749.89 2
 -7 8 1 967.774 198.109 2
 -7 8 2 39896.9 1216.22 2
 -7 8 3 805.576 189.692 2
 -7 8 4 53447.2 1447.3 2
 -7 8 5 29518.9 1071.4 2
 -7 8 6 2887.01 335.613 2
 -7 8 7 34888.3 1207.79 2
 -7 8 7 37712 1343.45 1
 -7 8 8 1173.03 263.172 2
 -7 8 8 1167.91 271.121 1
 -7 8 9 22958.9 1114.01 1
 -7 8 9 22728.9 1001.08 2
 -7 8 10 12598.4 840.146 1
 -7 9 -11 19781.2 1050.52 4
 -7 9 -10 1097.43 252.688 4
 -7 9 -9 12758.3 790.27 4
 -7 9 -8 1229.24 254.87 4
 -7 9 -8 1577.1 249.75 2
 -7 9 -7 29640 1045.75 2
 -7 9 -7 28443.2 1079.6 4
 -7 9 -6 8076.1 543.53 4
 -7 9 -6 9098.31 564.152 2
 -7 9 -5 19221.1 820.51 2
 -7 9 -4 49823.6 1364.22 2
 -7 9 -3 3456.75 356.452 2
 -7 9 -2 32093.2 1082.2 2
 -7 9 -1 5077.64 443.152 2
 -7 9 0 81790.9 1839.66 2
 -7 9 1 69758.8 1697.12 2
 -7 9 2 4031.38 396.396 2
 -7 9 3 12917.1 704.878 2
 -7 9 4 434.263 175.331 2
 -7 9 5 52149.1 1512.54 2
 -7 9 6 26442.7 1075.49 2
 -7 9 7 6685.91 545.978 2
 -7 9 8 26091.9 1092.27 2
 -7 9 9 122.463 111.552 2
 -7 9 10 9153.11 671.267 2
 -7 10 -11 18255.4 1043.02 4
 -7 10 -10 9518.47 716.046 4
 -7 10 -9 3014.91 384.725 4
 -7 10 -8 13763 797.077 4
 -7 10 -7 3823.66 395.493 2
 -7 10 -7 2747.22 343.613 4
 -7 10 -6 38032.5 1203.42 2
 -7 10 -6 38282.2 1234.21 4
 -7 10 -5 2466.26 309.574 2
 -7 10 -4 33792.1 1145.21 2
 -7 10 -3 34514.5 1151.2 2
 -7 10 -2 1866.66 278.887 2
 -7 10 -1 46356.1 1372.01 2
 -7 10 0 2106.51 307.239 2
 -7 10 1 54106.3 1532.44 2
 -7 10 2 42164.5 1333.78 2
 -7 10 3 9876.2 645.09 2
 -7 10 4 14547.2 795.225 2
 -7 10 5 3287.32 386.997 2
 -7 10 6 34136.7 1260.81 2
 -7 10 7 10422.2 709.807 2
 -7 10 8 20433.4 1003.48 2
 -7 10 9 13565.6 837.631 2
 -7 10 10 558.95 188.624 2
 -7 11 -10 21318.2 1096.92 4
 -7 11 -9 5930.15 548.94 4
 -7 11 -7 8364.52 594.995 2
 -7 11 -6 5753.37 485.265 2
 -7 11 -5 31494.8 1144.24 2
 -7 11 -4 281.76 179.26 2
 -7 11 -3 39995.9 1293.52 2
 -7 11 -2 14362.8 772.593 2
 -7 11 -1 10569.4 662.162 2
 -7 11 0 23787.7 1018.55 2
 -7 11 1 1511.13 290.051 2
 -7 11 2 59678.2 1670.48 2
 -7 11 3 14535.1 816.329 2
 -7 11 4 21491.1 1001.91 2
 -7 11 5 30022.5 1212.89 2
 -7 11 6 9383.26 683.365 2
 -7 11 7 22524 1081.3 2
 -7 11 8 3122.83 415.602 2
 -7 11 9 9905.2 733.397 2
 -7 12 -6 7275.79 560.343 2
 -7 12 -5 11797.6 716.599 2
 -7 12 -4 29482.6 1137.49 2
 -7 12 -3 4.22223 106.951 2
 -7 12 -2 36227.3 1291.2 2
 -7 12 -1 15723.3 852.857 2
 -7 12 0 5614.11 508.811 2
 -7 12 1 13855.3 811.362 2
 -7 12 2 8909.26 650.345 2
 -7 12 3 59486.4 1750.84 2
 -7 12 4 2188.01 366.692 2
 -7 12 5 22361.1 1071.51 2
 -7 12 6 13608.2 855.193 2
 -7 12 7 8635.14 698.422 2
 -7 12 8 16600.9 975.23 2
 -7 13 -5 5069.14 489.041 2
 -7 13 -4 14010.8 809.002 2
 -7 13 -3 24019.7 1056 2
 -7 13 -2 1945 326.017 2
 -7 13 -1 50508.4 1607.92 2
 -7 13 0 17762.3 943.935 2
 -7 13 1 4562.13 477.828 2
 -7 13 2 6510.43 595.962 2
 -7 13 3 8676.72 670.905 2
 -7 13 4 37287.7 1444.48 2
 -7 13 5 62.3811 141.816 2
 -7 13 6 23412.8 1162.85 2
 -7 14 -4 5487.29 533.009 2
 -7 14 -3 8689.24 664.673 2
 -7 14 -2 10322.8 730.794 2
 -7 14 -1 11731.5 782.899 2
 -7 14 0 60440.7 1831.54 2
 -7 14 1 4230.3 482.494 2
 -7 14 2 10981.6 775.339 2
 -6 -17 -11 10119.5 760.928 5
 -6 -17 -10 2155.14 372.027 5
 -6 -17 -9 20009.3 1095.09 5
 -6 -17 -8 24316.6 1212.8 5
 -6 -17 -7 2049.78 372.817 5
 -6 -17 -6 25117.2 1245.96 5
 -6 -16 -10 11284.2 768.78 5
 -6 -16 -9 177.923 147.026 5
 -6 -16 -8 43757.6 1588.37 5
 -6 -16 -7 14856 919.267 5
 -6 -16 -6 9545.89 737.791 5
 -6 -16 -5 31852.4 1375.13 5
 -6 -16 -4 1640.83 336.435 5
 -6 -16 -3 12274.2 863.283 5
 -6 -15 -9 16921.8 914.114 5
 -6 -15 -8 4113.31 464.355 5
 -6 -15 -7 34193.6 1339.24 5
 -6 -15 -6 3018.35 399.169 5
 -6 -15 -5 18554.3 987.299 5
 -6 -15 -4 27392.4 1232.87 5
 -6 -15 -3 29.2895 158.325 5
 -6 -15 -2 9330.03 748.673 5
 -6 -14 -8 13241 779.522 5
 -6 -14 -7 6253.04 551.682 5
 -6 -14 -6 36866.6 1352.84 5
 -6 -14 -5 3284.16 404.891 5
 -6 -14 -4 29516.1 1219.69 5
 -6 -14 -3 17472.8 939.735 5
 -6 -14 -2 297.045 171.527 5
 -6 -13 -8 8411.15 584.539 5
 -6 -13 -7 20393 938.066 5
 -6 -13 -6 5618.74 497.546 5
 -6 -13 -5 26528.1 1081.73 5
 -6 -13 -4 547.916 199.821 5
 -6 -13 -3 54041.3 1613.59 5
 -6 -13 -2 20356.3 1004.54 5
 -6 -12 -7 17706.2 820.041 5
 -6 -12 -6 20915.8 904.585 5
 -6 -12 -5 823.044 192.855 5
 -6 -12 -4 27849.6 1077.82 5
 -6 -12 -3 5033.98 465.553 5
 -6 -12 -2 85235.4 2036.3 5
 -6 -11 -7 137.056 99.2657 5
 -6 -11 -6 49556.5 1350.44 5
 -6 -11 -5 18349.8 810.656 5
 -6 -11 -4 9838.64 605.31 5
 -6 -11 -3 13962.3 723.77 5
 -6 -11 -2 11946.6 691.809 5
 -6 -10 -7 47630.8 1230.38 5
 -6 -10 -6 6433.96 454.039 5
 -6 -10 -5 103201 1973.57 5
 -6 -10 -4 235.15 120.04 5
 -6 -10 -3 46936.9 1297.88 5
 -6 -10 -2 16344.8 766.871 5
 -6 -9 -7 73061.7 1481.26 5
 -6 -9 -6 20829.3 753.481 5
 -6 -9 -5 73734.4 1537.78 5
 -6 -9 -4 32004.5 975.867 5
 -6 -9 -3 660.882 156.006 5
 -6 -9 -2 41212.4 1175.44 5
 -6 -8 -6 71172.1 1388.58 5
 -6 -8 -5 494.157 146.192 5
 -6 -8 -4 127989 2071.68 5
 -6 -8 -3 95326.9 1744.23 5
 -6 -7 -6 421.117 105.322 5
 -6 -7 -5 31510.7 824.283 5
 -6 -7 -4 805.047 143.842 5
 -6 -7 -3 178568 2502.81 5
 -6 -6 -6 29417.1 711.038 5
 -6 -6 -5 11503.1 437.565 5
 -6 -6 -4 69517.4 1230.28 5
 -6 -5 -6 65647.4 1035.04 5
 -6 -5 -5 24274.6 585.031 5
 -6 -5 -4 16664.9 500.425 5
 -6 -4 -7 110326 1290.22 1
 -6 -4 -7 117203 1345.2 5
 -6 -4 -6 2876.05 152.561 5
 -6 -4 -5 132446 1579.61 5
 -6 -4 0 329783 3161.56 3
 -6 -3 -7 45627.2 562.37 5
 -6 -3 -6 55863.9 665.594 1
 -6 -3 -1 9960.16 275.202 3
 -6 -3 0 135358 1400.95 3
 -6 -1 -17 12740.6 834.22 4
 -6 -1 -16 2154.92 349.14 4
 -6 -1 -15 20656.2 973.873 4
 -6 -1 -14 28899.1 1117.03 4
 -6 -1 -13 3370.29 368.662 4
 -6 -1 -4 41367.5 549.573 1
 -6 -1 -2 127815 1769.4 2
 -6 -1 -1 22524.7 603.637 2
 -6 -1 0 64679.6 1100.06 2
 -6 -1 1 33698.2 727.243 2
 -6 -1 2 156030 1950.9 2
 -6 -1 3 75202.3 1153.38 2
 -6 -1 4 28646 625.909 2
 -6 -1 5 47040.1 831.93 2
 -6 0 -16 8219.95 653.913 4
 -6 0 -15 223.832 136.535 4
 -6 0 -14 24002.4 1032.82 4
 -6 0 -13 29427.6 1112.58 4
 -6 0 -12 448.54 171.172 4
 -6 0 -11 9460.92 568.818 4
 -6 0 -10 4642.06 386.719 4
 -6 0 -4 133222 1896.01 2
 -6 0 -3 52216.9 751.573 1
 -6 0 -3 51527.3 1020.76 2
 -6 0 -2 125196 1532.82 1
 -6 0 -2 123924 1768.57 2
 -6 0 -1 83538.5 1340.57 2
 -6 0 0 82368.4 1309.99 2
 -6 0 1 52642.2 1005.34 2
 -6 0 2 11932.5 426.851 2
 -6 0 3 101220 1476.17 2
 -6 0 4 63975.3 1087.23 2
 -6 0 5 28195.3 665.031 2
 -6 1 -16 1330.59 291.342 4
 -6 1 -15 8452.44 665.546 4
 -6 1 -14 534.929 192.583 4
 -6 1 -13 14640.8 796.786 4
 -6 1 -12 16183.8 801.514 4
 -6 1 -11 1482.9 246.735 4
 -6 1 -10 21061.5 841.477 4
 -6 1 -9 2559.17 280.072 4
 -6 1 -5 59428.1 1169.4 2
 -6 1 -4 176.763 81.5397 2
 -6 1 -3 127280 1843.37 2
 -6 1 -2 11791.6 459.312 2
 -6 1 -2 11126.4 351.529 1
 -6 1 -1 317871 3378.62 1
 -6 1 -1 316384 3561.96 2
 -6 1 0 73830.1 1213.14 1
 -6 1 0 70771.5 1222.42 2
 -6 1 1 58611.4 1088.9 2
 -6 1 2 86544.1 1384.83 2
 -6 1 3 302.938 84.8494 2
 -6 1 4 65909.8 1164.83 2
 -6 1 5 17144.4 542.605 2
 -6 1 6 63581.6 1147.04 2
 -6 2 -16 4749.34 536.164 4
 -6 2 -15 2828 393.218 4
 -6 2 -14 8046.59 619.339 4
 -6 2 -13 281.554 140.504 4
 -6 2 -12 21521.3 943.222 4
 -6 2 -11 11898.6 673.622 4
 -6 2 -10 5524.27 443.991 4
 -6 2 -9 34767.6 1066.79 4
 -6 2 -8 23229 829.498 4
 -6 2 -6 3202.18 272.799 2
 -6 2 -5 51319.3 1089.32 2
 -6 2 -4 43701.7 977.147 2
 -6 2 -3 714.216 132.95 2
 -6 2 -2 76479.7 1334.44 2
 -6 2 -2 75529.2 1142.14 1
 -6 2 -1 69290.1 1132.47 1
 -6 2 -1 70502.2 1260.24 2
 -6 2 0 376978 4123.35 2
 -6 2 0 374393 4044.48 1
 -6 2 1 43842.5 962.477 1
 -6 2 1 44065 951.795 2
 -6 2 2 63152 1244.37 1
 -6 2 2 61303.4 1162.03 2
 -6 2 3 101266 1758.81 1
 -6 2 3 102317 1609.87 2
 -6 2 4 10817.2 453.091 2
 -6 2 4 11569 557.078 1
 -6 2 5 71602.2 1547.88 1
 -6 2 5 71771.2 1309.51 2
 -6 2 6 1150.37 218.909 1
 -6 2 6 965.062 144.486 2
 -6 2 7 61639.5 1208.88 2
 -6 2 7 61586.1 1557.66 1
 -6 2 8 75952.1 1839.57 1
 -6 2 9 6653.24 546.88 1
 -6 2 10 19117.4 960.95 1
 -6 2 11 11690.2 778.338 1
 -6 2 12 27816.2 1268.94 1
 -6 3 -15 6490.86 595.309 4
 -6 3 -14 3310.09 415.7 4
 -6 3 -13 3949.99 437.67 4
 -6 3 -12 3510.16 402.995 4
 -6 3 -11 40490.9 1297.81 4
 -6 3 -10 6297.02 479.379 4
 -6 3 -9 30656.6 1024.33 4
 -6 3 -8 22586.8 830.853 4
 -6 3 -7 32841.4 889.793 2
 -6 3 -7 32637.3 975.263 4
 -6 3 -6 48930.7 1094.42 2
 -6 3 -5 2711.91 240.17 2
 -6 3 -4 122432 1900.66 2
 -6 3 -3 83062 1444.14 2
 -6 3 -2 19284.8 629.16 2
 -6 3 -1 2615.54 205.769 1
 -6 3 -1 2614.52 234.038 2
 -6 3 0 72909.2 1266.62 1
 -6 3 0 71951.7 1323.6 2
 -6 3 1 253336 3114.18 1
 -6 3 1 256515 3126.68 2
 -6 3 2 49048.5 1062.69 2
 -6 3 2 48139.1 1083.81 1
 -6 3 3 58377.6 1267.7 1
 -6 3 3 57769.1 1180.05 2
 -6 3 4 21401 763.699 1
 -6 3 4 21174.2 683.12 2
 -6 3 5 41823.7 1149.88 1
 -6 3 5 40938.7 991.044 2
 -6 3 6 30812.1 854.03 2
 -6 3 6 29912.1 1017.19 1
 -6 3 7 680.794 136.896 2
 -6 3 7 825.25 188.232 1
 -6 3 8 87913 1994.92 1
 -6 3 9 17409.3 873.465 1
 -6 3 10 7265.72 583.849 1
 -6 3 11 14556.7 873.944 1
 -6 3 12 8061.03 673.291 1
 -6 4 -15 28712.7 1299.93 4
 -6 4 -14 4428.43 491.503 4
 -6 4 -13 5873.04 546.609 4
 -6 4 -12 1048.37 257.48 4
 -6 4 -11 15790.7 809.635 4
 -6 4 -10 49806.8 1417.87 4
 -6 4 -9 474.025 156.317 4
 -6 4 -8 38214.5 1004.55 2
 -6 4 -8 39173.4 1152.12 4
 -6 4 -7 18284.9 659.697 2
 -6 4 -7 18844.5 747.065 4
 -6 4 -6 16547.3 664.278 4
 -6 4 -6 17242.5 642.555 2
 -6 4 -5 28350 838.013 2
 -6 4 -4 54896 1163.74 2
 -6 4 -3 204930 2719.67 2
 -6 4 -2 23883.8 731.874 2
 -6 4 -1 745.63 148.928 2
 -6 4 0 1811.52 206.915 2
 -6 4 1 86460.4 1508.42 1
 -6 4 1 85719.9 1530.37 2
 -6 4 2 161452 2318.81 2
 -6 4 2 159425 2349.15 1
 -6 4 3 7085.74 427.173 1
 -6 4 3 7775.02 421.232 2
 -6 4 4 75539.3 1557.28 1
 -6 4 4 76296.6 1468.16 2
 -6 4 5 35180.4 955.647 2
 -6 4 5 35057 1059.34 1
 -6 4 6 26560.2 829.762 2
 -6 4 6 27099.4 964.903 1
 -6 4 7 5459.82 374.674 2
 -6 4 7 6459.17 489.031 1
 -6 4 8 13497.3 731.169 1
 -6 4 8 14390.1 618.954 2
 -6 4 9 59377.7 1657.99 1
 -6 4 10 11389.5 741.982 1
 -6 4 11 11165 754.596 1
 -6 4 12 4851.1 534.66 1
 -6 5 -14 22320.8 1117.76 4
 -6 5 -13 720.687 224.804 4
 -6 5 -12 7865.26 618.825 4
 -6 5 -11 461.172 172.632 4
 -6 5 -10 51364.9 1472.87 4
 -6 5 -9 44917.3 1329.99 4
 -6 5 -8 209.156 102.757 2
 -6 5 -8 109.642 103.378 4
 -6 5 -7 41004.9 1038.3 2
 -6 5 -7 41161.8 1162.13 4
 -6 5 -6 18991.4 685.383 2
 -6 5 -6 18607.9 728.645 4
 -6 5 -5 35468.4 945.626 2
 -6 5 -4 13534.8 567.338 2
 -6 5 -3 77792.1 1474.17 2
 -6 5 -2 165768 2397.14 2
 -6 5 -1 9867.45 482.567 2
 -6 5 0 8208.71 442.614 2
 -6 5 1 666.326 136.557 2
 -6 5 2 42416.4 1059.22 2
 -6 5 2 41281.1 1058.01 1
 -6 5 3 81118.1 1561.99 2
 -6 5 3 82758.6 1621.83 1
 -6 5 4 202.902 110.781 1
 -6 5 4 359.927 128.581 2
 -6 5 5 82825.4 1621.2 2
 -6 5 5 82098.3 1737.4 1
 -6 5 6 40239.4 1208.37 1
 -6 5 6 39730 1085.63 2
 -6 5 7 9710.17 597.999 1
 -6 5 7 8708.15 498.132 2
 -6 5 8 9103.67 610.718 1
 -6 5 8 8705.59 510.178 2
 -6 5 9 12322 736.043 1
 -6 5 10 52853.3 1632.11 1
 -6 5 11 4282.87 479.538 1
 -6 5 12 8294.22 682.723 1
 -6 6 -13 20466.5 1065.24 4
 -6 6 -12 0.60909 109.967 4
 -6 6 -11 6009.1 538.247 4
 -6 6 -10 990.895 232.394 4
 -6 6 -9 63321.2 1642.91 4
 -6 6 -9 62257.9 1382.28 2
 -6 6 -8 27957 883.415 2
 -6 6 -8 27707.2 1015.24 4
 -6 6 -7 14477.9 623.273 2
 -6 6 -7 13677.2 672.524 4
 -6 6 -6 55187.2 1353.15 4
 -6 6 -6 55889.6 1287.85 2
 -6 6 -5 1471.88 202.355 2
 -6 6 -5 1155.17 196.853 4
 -6 6 -4 35539.1 971.942 2
 -6 6 -3 15628.4 628.43 2
 -6 6 -2 55418.5 1265.04 2
 -6 6 -1 122689 2030.99 2
 -6 6 0 7564.72 445.48 2
 -6 6 1 12486.2 574.908 2
 -6 6 2 782.269 145.701 2
 -6 6 3 29872.6 962.045 1
 -6 6 3 31191.3 945.141 2
 -6 6 4 56012.6 1325.87 2
 -6 6 4 58586.6 1409.95 1
 -6 6 5 10541 559.381 2
 -6 6 5 10328.8 588.173 1
 -6 6 6 76235.5 1627.75 2
 -6 6 6 74075.2 1744.45 1
 -6 6 7 18655.7 773.799 2
 -6 6 7 19979.3 893.566 1
 -6 6 8 20646.3 833.07 2
 -6 6 8 22432.9 979.491 1
 -6 6 9 14563.5 814.773 1
 -6 6 9 14316.3 697.594 2
 -6 6 10 18715.9 955.384 1
 -6 6 11 23825 1128.63 1
 -6 7 -13 17928.6 1011.52 4
 -6 7 -12 18501.9 992.679 4
 -6 7 -11 111.724 108.19 4
 -6 7 -10 10686.9 690.295 4
 -6 7 -9 905.55 211.898 4
 -6 7 -9 1094.62 196.713 2
 -6 7 -8 60301.2 1380.78 2
 -6 7 -8 60951.4 1576.49 4
 -6 7 -7 6360.82 480.417 4
 -6 7 -7 5896.45 418.255 2
 -6 7 -6 35773.7 1092.3 4
 -6 7 -6 36050.6 1026.69 2
 -6 7 -5 37045.9 1061.11 4
 -6 7 -5 37461.4 1049.62 2
 -6 7 -4 200.631 100.117 2
 -6 7 -3 41379 1100.76 2
 -6 7 -2 239.791 108.835 2
 -6 7 -1 85628.3 1678.85 2
 -6 7 0 96958.9 1840.96 2
 -6 7 1 23715.2 839.189 2
 -6 7 2 29693.5 949.057 2
 -6 7 3 1166.27 199.275 2
 -6 7 4 37490.9 1111.38 2
 -6 7 5 13976.6 666.557 2
 -6 7 5 15079.5 750.714 1
 -6 7 6 18910.8 794.273 2
 -6 7 6 18750.3 848.71 1
 -6 7 7 85020.4 1980.86 1
 -6 7 7 88002.8 1861.54 2
 -6 7 8 704.224 192.168 2
 -6 7 8 936.246 236.164 1
 -6 7 9 44290.6 1318.08 2
 -6 7 9 43735.1 1455.32 1
 -6 7 10 2710.47 383.011 1
 -6 7 11 20047.1 1042.84 1
 -6 8 -12 16854.1 981.913 4
 -6 8 -11 22479.3 1073.19 4
 -6 8 -10 1754.45 311.854 4
 -6 8 -9 15329.5 823.737 4
 -6 8 -8 5433.18 477.396 4
 -6 8 -8 6304.62 419.064 2
 -6 8 -7 29077 1057.07 4
 -6 8 -7 29576.2 962.096 2
 -6 8 -6 578.638 160.637 4
 -6 8 -6 338.762 116.257 2
 -6 8 -5 51841.8 1309.59 4
 -6 8 -5 50595.6 1279.49 2
 -6 8 -4 39605.4 1103.68 2
 -6 8 -4 39054 1065.47 4
 -6 8 -3 2904.06 294.596 2
 -6 8 -2 21007.9 807.03 2
 -6 8 -1 523.731 155.833 2
 -6 8 0 88085.1 1783.5 2
 -6 8 1 62387.3 1467.78 2
 -6 8 2 7266.88 484.285 2
 -6 8 3 17166.8 757.8 2
 -6 8 4 3002.68 323.782 2
 -6 8 5 54254.8 1433.13 2
 -6 8 6 12723 688.858 2
 -6 8 7 45234.6 1427.09 1
 -6 8 7 42530.6 1297.94 2
 -6 8 8 53926.6 1613.12 1
 -6 8 8 50368.3 1454.9 2
 -6 8 9 1002.8 216.4 2
 -6 8 9 1505.87 291.925 1
 -6 8 10 31183.4 1160.73 2
 -6 8 10 30287.9 1262.66 1
 -6 8 11 501.953 227.124 1
 -6 9 -11 25111.5 1179.79 4
 -6 9 -10 7795.81 627.931 4
 -6 9 -9 9872.95 683.939 4
 -6 9 -8 15115.4 804.655 4
 -6 9 -7 7939.42 519.807 2
 -6 9 -7 6060.31 496.251 4
 -6 9 -6 16796.2 786.174 4
 -6 9 -6 17923.6 752.425 2
 -6 9 -5 3086.24 313.352 4
 -6 9 -5 3352.23 330.882 2
 -6 9 -4 44777.7 1182.29 4
 -6 9 -4 46243.2 1254.13 2
 -6 9 -3 13551.6 663.657 2
 -6 9 -2 6335.36 453.544 2
 -6 9 -1 54248 1386.97 2
 -6 9 0 3010.22 327.828 2
 -6 9 1 88838 1876.63 2
 -6 9 2 34046.4 1113.62 2
 -6 9 3 15688.7 751.648 2
 -6 9 4 6652.84 499.489 2
 -6 9 5 6966.26 516.326 2
 -6 9 6 48691 1424.49 2
 -6 9 7 1097.78 246.384 2
 -6 9 8 50407.9 1508.01 2
 -6 9 9 22931.6 1015.57 2
 -6 9 10 4134.24 477.791 1
 -6 9 10 4152.37 435.551 2
 -6 10 -11 5398.6 560.998 4
 -6 10 -10 32466.9 1316.5 4
 -6 10 -9 1975.42 329.525 4
 -6 10 -8 10834.8 698.514 4
 -6 10 -7 7773.76 567.122 4
 -6 10 -7 9018.91 566.429 2
 -6 10 -6 13088.4 662.548 2
 -6 10 -6 11649.8 670.845 4
 -6 10 -5 26937.7 970.716 2
 -6 10 -5 25503.8 951.773 4
 -6 10 -4 3242.82 343.555 2
 -6 10 -4 2896.06 298.696 4
 -6 10 -3 44725.4 1294.28 2
 -6 10 -2 12376.5 665.68 2
 -6 10 -1 8333.48 547.424 2
 -6 10 0 17464.9 806.969 2
 -6 10 1 10238.1 615.786 2
 -6 10 2 42477.7 1298.47 2
 -6 10 3 6438.19 511.108 2
 -6 10 4 20795.9 912.31 2
 -6 10 5 15628.5 806.687 2
 -6 10 6 9895.4 650.9 2
 -6 10 7 11232.6 711.608 2
 -6 10 8 1064.57 234.423 2
 -6 10 9 39555 1399.81 2
 -6 10 10 4477.86 477.801 2
 -6 10 11 4939.18 512.125 2
 -6 11 -10 9408.51 727.129 4
 -6 11 -9 21655 1063.44 4
 -6 11 -8 346.48 147.739 4
 -6 11 -7 10598.3 685.427 4
 -6 11 -6 3699.85 382.271 2
 -6 11 -5 13649.2 712.61 2
 -6 11 -4 16354.7 783.959 2
 -6 11 -3 11451.6 658.739 2
 -6 11 -2 56912.7 1530.85 2
 -6 11 -1 2246.48 302.893 2
 -6 11 0 11239.7 661.469 2
 -6 11 1 7240.2 546.958 2
 -6 11 2 11820.7 690.456 2
 -6 11 3 66444.2 1855.81 2
 -6 11 4 -114.398 125.873 2
 -6 11 5 28241 1133.19 2
 -6 11 6 14678.3 827.706 2
 -6 11 7 7225.16 588.374 2
 -6 11 8 3435.39 424.715 2
 -6 11 9 5290.47 524.704 2
 -6 11 10 19646.3 1025.82 2
 -6 11 11 2975.05 413.097 2
 -6 12 -5 3256.79 366.984 2
 -6 12 -4 13916.8 740.832 2
 -6 12 -3 5763.75 490.346 2
 -6 12 -2 22053.3 965.122 2
 -6 12 -1 41249.6 1340.74 2
 -6 12 0 2640.8 342.558 2
 -6 12 1 13276.1 759.12 2
 -6 12 2 1102.12 229.674 2
 -6 12 3 21548 989.675 2
 -6 12 4 38053.8 1353.17 2
 -6 12 5 1425.84 298.606 2
 -6 12 6 35055.3 1334.22 2
 -6 12 7 12050.1 798.838 2
 -6 12 8 3473.98 443.946 2
 -6 12 9 1746.67 334.624 2
 -6 13 -4 2362.75 336.72 2
 -6 13 -3 9258.26 633.636 2
 -6 13 -2 1438.99 276.562 2
 -6 13 -1 24871.9 1064.81 2
 -6 13 0 43216.5 1440.54 2
 -6 13 1 182.039 122.086 2
 -6 13 2 14960.5 842.745 2
 -6 13 3 2454.01 367.572 2
 -6 13 4 20526.1 1029.06 2
 -6 13 5 16289.9 929.717 2
 -6 13 6 7137.23 623.825 2
 -6 13 7 46258.8 1634.19 2
 -6 13 8 3268.38 440.001 2
 -6 14 -4 28429.4 1153.98 2
 -6 14 -3 2513.72 351.432 2
 -6 14 -2 6796.43 567.466 2
 -6 14 -1 716.834 219.528 2
 -6 14 0 31871.4 1280.08 2
 -6 14 1 36926.5 1394.27 2
 -6 14 2 2163.87 342.815 2
 -6 14 3 17754.1 974.862 2
 -6 14 4 477.56 202.021 2
 -6 14 5 12724.5 839.421 2
 -6 15 -3 21656.5 1046.02 2
 -6 15 -2 -92.5976 121.047 2
 -6 15 -1 11013 766.773 2
 -6 15 0 845.204 252.634 2
 -5 -17 -9 195.807 165.906 5
 -5 -17 -8 27686.8 1281.89 5
 -5 -17 -7 3578.2 473.973 5
 -5 -17 -6 27662.1 1320.8 5
 -5 -16 -8 5202.81 538.018 5
 -5 -16 -7 33292.1 1378.83 5
 -5 -16 -6 376.111 192.143 5
 -5 -16 -5 41507.2 1556.31 5
 -5 -16 -4 34395.4 1427.64 5
 -5 -16 -3 456.06 219.781 5
 -5 -16 -2 9002.73 739.418 5
 -5 -15 -8 17045.3 918.765 5
 -5 -15 -7 8796.03 675.382 5
 -5 -15 -6 27071.6 1195.86 5
 -5 -15 -5 470.436 185.401 5
 -5 -15 -4 54431.1 1742.37 5
 -5 -15 -3 23081.1 1130.93 5
 -5 -15 -2 4673.23 521.335 5
 -5 -15 -1 9356.86 739.792 5
 -5 -14 -7 18012.8 910.7 5
 -5 -14 -6 16534 885.912 5
 -5 -14 -5 20375.7 994.44 5
 -5 -14 -4 9739.1 700.967 5
 -5 -14 -3 63853 1844.51 5
 -5 -14 -2 6550.71 579.862 5
 -5 -14 -1 9313.99 703.996 5
 -5 -13 -6 29226 1122.06 5
 -5 -13 -5 7722.59 587.435 5
 -5 -13 -4 13126.9 761.069 5
 -5 -13 -3 35298.4 1296.25 5
 -5 -13 -2 81305.1 2042.16 5
 -5 -13 -1 4112.22 447.227 5
 -5 -12 -6 59204 1559.84 5
 -5 -12 -5 17674.4 832.142 5
 -5 -12 -4 30141.3 1125.2 5
 -5 -12 -3 28332.8 1084.6 5
 -5 -12 -2 33772.8 1214.52 5
 -5 -12 -1 74050.9 1887.8 5
 -5 -11 -6 4597.9 403.234 5
 -5 -11 -5 67995.7 1627.39 5
 -5 -11 -4 1226.1 235.621 5
 -5 -11 -3 84277.7 1879.9 5
 -5 -11 -2 8453.12 566.477 5
 -5 -11 -1 40357.6 1298.62 5
 -5 -10 -5 89032.5 1790.5 5
 -5 -10 -4 67704.5 1556.23 5
 -5 -10 -3 4260.43 374.275 5
 -5 -10 -2 47212.4 1315.79 5
 -5 -10 -1 6545.1 485.309 5
 -5 -9 -5 1418.78 218.697 5
 -5 -9 -4 98218.2 1841.31 5
 -5 -9 -3 55180.8 1324.23 5
 -5 -9 -2 1660.06 238.803 5
 -5 -9 -1 50720.1 1320.81 5
 -5 -8 -5 22019.3 723.548 5
 -5 -8 -4 27333.6 837.804 5
 -5 -8 -3 167125 2476.43 5
 -5 -8 -2 57875.4 1312.91 5
 -5 -8 -1 809.164 176.802 5
 -5 -7 -5 304.545 94.3756 5
 -5 -7 -4 13639.8 533.404 5
 -5 -7 -3 83067.8 1495.87 5
 -5 -7 -2 166160 2385.68 5
 -5 -6 -5 24725.8 651.766 5
 -5 -6 -4 25139.6 684.213 5
 -5 -6 -3 12281.2 478.352 5
 -5 -6 -2 7982.77 402.247 5
 -5 -5 -5 176383 2114.97 5
 -5 -5 -4 40153.8 802.767 5
 -5 -5 -3 9635.6 383.477 5
 -5 -5 1 14059.7 331.975 3
 -5 -5 3 10275.5 256.06 3
 -5 -4 -5 198597 2178.18 5
 -5 -4 -4 354960 3601.11 5
 -5 -4 -3 119549 1555.14 5
 -5 -4 0 148652 1591.86 3
 -5 -4 1 52067.1 651.848 3
 -5 -4 2 1088.6 56.4703 3
 -5 -3 -6 109517 1186.95 1
 -5 -3 -5 1941.07 105.263 5
 -5 -3 -1 52618 739.204 3
 -5 -3 0 6419.54 176.726 3
 -5 -2 -17 8615.12 669.894 4
 -5 -2 -16 534.126 202.404 4
 -5 -2 -15 43583.6 1407 4
 -5 -2 -14 32868.4 1160.26 4
 -5 -2 -13 7985.45 536.705 4
 -5 -2 -12 19614.6 807.823 4
 -5 -2 -11 8049.26 497.421 4
 -5 -2 -1 193.784 44.3702 3
 -5 -1 -17 1217.25 268.94 4
 -5 -1 -16 12390.7 786.703 4
 -5 -1 -15 1239.97 260.354 4
 -5 -1 -14 52522.8 1522.15 4
 -5 -1 -13 35156.8 1182.52 4
 -5 -1 -12 12539.7 661.896 4
 -5 -1 -11 16667.9 731.477 4
 -5 -1 -10 18161.9 723.674 4
 -5 -1 -9 75551.2 1514.03 4
 -5 -1 -8 3167.75 146.667 5
 -5 -1 -7 127663 1311.73 5
 -5 -1 -1 28241.5 631.465 2
 -5 -1 0 64710.6 1019.36 2
 -5 -1 1 42113 762.897 2
 -5 -1 2 7701.55 282.463 2
 -5 -1 3 155641 1830.8 2
 -5 -1 4 50994.3 820.106 2
 -5 -1 5 76228.3 1057.04 2
 -5 0 -16 2823.69 389.776 4
 -5 0 -15 15034.8 853.645 4
 -5 0 -14 2374.02 351.328 4
 -5 0 -13 56433.6 1550.32 4
 -5 0 -12 18751.3 835.827 4
 -5 0 -11 27370.6 965.515 4
 -5 0 -10 17950.9 736.644 4
 -5 0 -9 23510.6 811.682 4
 -5 0 -8 68871.3 1405.74 4
 -5 0 -4 1641.08 166.104 2
 -5 0 -3 235517 2298.84 1
 -5 0 -3 236084 2727.64 2
 -5 0 -2 274.024 52.5884 1
 -5 0 -2 232.916 68.2178 2
 -5 0 -1 170626 2080.81 2
 -5 0 0 8408.33 333.719 2
 -5 0 1 105756 1442.03 2
 -5 0 2 22395.8 542.343 2
 -5 0 3 7818.27 309.395 2
 -5 0 4 63258.7 1012.02 2
 -5 0 5 443.667 76.8615 2
 -5 0 6 114247 1504.78 2
 -5 1 -16 3782.7 460.913 4
 -5 1 -15 4948.76 509.784 4
 -5 1 -14 19436.5 951.037 4
 -5 1 -13 4915.54 463.253 4
 -5 1 -12 42845.4 1309.95 4
 -5 1 -11 3840.27 382.578 4
 -5 1 -10 48309.9 1279.92 4
 -5 1 -9 25011.4 858.736 4
 -5 1 -8 44728.4 1133.16 4
 -5 1 -7 127142 2017.67 4
 -5 1 -5 189560 2384.81 2
 -5 1 -4 216093 2599 2
 -5 1 -3 12190.9 435.171 2
 -5 1 -2 204091 2433.07 2
 -5 1 -2 195596 2126.7 1
 -5 1 -1 29910.9 601.41 1
 -5 1 -1 29274 677.854 2
 -5 1 0 284702 3079.66 1
 -5 1 0 281743 3126.41 2
 -5 1 1 984.306 127.793 2
 -5 1 2 71558 1147.26 2
 -5 1 3 11904.3 413.066 2
 -5 1 4 23286.3 597.223 2
 -5 1 5 61812.3 1070.26 2
 -5 1 6 15630.3 489.134 2
 -5 1 7 106031 1535.57 2
 -5 2 -16 24679 1175.88 4
 -5 2 -15 2755.89 379.123 4
 -5 2 -14 11999.6 756.62 4
 -5 2 -13 8456.28 615.023 4
 -5 2 -12 6931.59 529.01 4
 -5 2 -11 56113.7 1483.68 4
 -5 2 -10 355.554 150.166 4
 -5 2 -9 62265.8 1444.23 4
 -5 2 -8 20625.9 759.394 4
 -5 2 -7 56409 1251.02 4
 -5 2 -6 46097 1061.13 4
 -5 2 -6 46014.6 984.593 2
 -5 2 -5 30030.6 750.131 2
 -5 2 -4 450744 4743.34 2
 -5 2 -3 202851 2495.76 2
 -5 2 -2 240768 2812.64 2
 -5 2 -1 159629 1934.3 1
 -5 2 -1 162501 2072.81 2
 -5 2 0 176672 2201.71 2
 -5 2 0 173376 2131.99 1
 -5 2 1 151421 2010.36 1
 -5 2 1 153750 2001.93 2
 -5 2 2 2698.41 216.611 2
 -5 2 2 2529.91 225.019 1
 -5 2 3 41663.8 876.957 2
 -5 2 3 41485.4 987.875 1
 -5 2 4 15873.9 521.288 2
 -5 2 4 15920.3 611.949 1
 -5 2 5 24338.8 663.238 2
 -5 2 6 27055.4 714.842 2
 -5 2 7 15882.8 543.182 2
 -5 2 9 18206.8 849.661 1
 -5 2 10 16455.5 852.19 1
 -5 2 11 9040.22 678.179 1
 -5 2 12 11502.5 773.927 1
 -5 3 -15 28787.7 1265.6 4
 -5 3 -14 547.161 200.576 4
 -5 3 -13 13342.2 802.601 4
 -5 3 -12 1400.42 270.827 4
 -5 3 -11 25887.3 1009.14 4
 -5 3 -10 68832 1648.4 4
 -5 3 -9 142.973 105.637 4
 -5 3 -8 105206 1949.26 4
 -5 3 -7 24497.3 819.212 4
 -5 3 -7 25714.3 730.097 2
 -5 3 -6 8642.11 452.057 4
 -5 3 -6 8869.03 407.24 2
 -5 3 -5 15256.1 534.403 2
 -5 3 -5 14782 563.028 4
 -5 3 -4 139006 1959.79 2
 -5 3 -3 484515 5060.48 2
 -5 3 -2 5619.26 311.912 2
 -5 3 -1 101418 1559.25 2
 -5 3 0 2065.5 196.029 2
 -5 3 0 1739.24 175.02 1
 -5 3 1 165645 2181.54 1
 -5 3 1 166501 2201.59 2
 -5 3 2 214058 2720.85 1
 -5 3 2 219405 2688.88 2
 -5 3 3 3905.69 264.119 2
 -5 3 3 3868.82 289.441 1
 -5 3 4 95854.5 1707.74 1
 -5 3 4 95858.9 1542.89 2
 -5 3 5 2518.51 269.311 1
 -5 3 5 2513.77 218.751 2
 -5 3 6 24625.9 717.143 2
 -5 3 6 25460.2 885.314 1
 -5 3 7 1049.21 202.746 1
 -5 3 7 892.049 117.081 3
 -5 3 7 985.615 153.893 2
 -5 3 8 37709.8 1190.42 1
 -5 3 8 37969.1 939.596 2
 -5 3 9 113135 2312.76 1
 -5 3 10 5214.38 482.188 1
 -5 3 11 10691.4 714.016 1
 -5 3 12 6297.15 572.655 1
 -5 3 13 9881.99 741.461 1
 -5 4 -14 26383.1 1191.84 4
 -5 4 -13 107.211 139.244 4
 -5 4 -12 10103.6 678.694 4
 -5 4 -11 89.3715 99.3257 4
 -5 4 -10 30456 1076.02 4
 -5 4 -9 50280.9 1362.69 4
 -5 4 -8 2108.34 258.488 4
 -5 4 -7 99441.6 1638.18 2
 -5 4 -7 99175.5 1853.33 4
 -5 4 -6 29205.7 790.04 2
 -5 4 -6 29804.9 888.957 4
 -5 4 -5 25920.8 738 2
 -5 4 -5 25175.2 771.853 4
 -5 4 -4 193.438 78.2051 2
 -5 4 -4 375.927 106.479 4
 -5 4 -3 215916 2710.33 2
 -5 4 -2 194516 2502.63 2
 -5 4 -1 1381.27 170.549 2
 -5 4 0 10102.5 441.923 2
 -5 4 1 17963.3 600.168 2
 -5 4 1 17627.7 588.047 1
 -5 4 2 91393.9 1524.2 2
 -5 4 2 89243.7 1543.76 1
 -5 4 3 57015.1 1219.82 1
 -5 4 3 55964.7 1152.69 2
 -5 4 4 73754.3 1466.4 1
 -5 4 4 72268.1 1358.15 2
 -5 4 5 136175 2234.71 1
 -5 4 5 136303 2048.6 2
 -5 4 6 2244.57 229.864 2
 -5 4 6 3076.08 308.54 1
 -5 4 7 19024 797.333 1
 -5 4 7 18263.3 660.421 2
 -5 4 8 3281.8 288.98 2
 -5 4 8 2891.43 327.742 1
 -5 4 9 40131.9 1293.07 1
 -5 4 10 57525.8 1635.74 1
 -5 4 11 1946.94 324.279 1
 -5 4 12 25688.9 1163.67 1
 -5 4 13 1201.5 292.302 1
 -5 5 -14 23559.6 1156.98 4
 -5 5 -13 28810.5 1226.62 4
 -5 5 -12 73.6116 136.762 4
 -5 5 -11 8053.79 607.105 4
 -5 5 -10 158.891 142.035 4
 -5 5 -9 29033.4 1045.83 4
 -5 5 -8 18833.9 801.881 4
 -5 5 -8 19255.3 666.68 2
 -5 5 -7 6193.25 430.916 4
 -5 5 -7 5898.48 356.871 2
 -5 5 -6 124543 2087.65 4
 -5 5 -6 123940 1922.63 2
 -5 5 -5 7890.87 433.653 4
 -5 5 -5 7565.1 395.705 2
 -5 5 -4 38758 945.884 4
 -5 5 -4 38633.7 938.254 2
 -5 5 -3 9916.91 448.943 2
 -5 5 -2 136198 2018.76 2
 -5 5 -1 99195.2 1645.64 2
 -5 5 0 9778.9 455.805 2
 -5 5 1 87485.2 1537.76 2
 -5 5 2 6231.74 377.923 1
 -5 5 2 6481.68 378.942 2
 -5 5 3 24599.6 754.069 2
 -5 5 3 24046 783.539 1
 -5 5 4 9175.25 499.838 1
 -5 5 4 8539.12 443.895 2
 -5 5 5 48960.9 1144.74 2
 -5 5 5 47318.2 1215.38 1
 -5 5 6 54177.7 1238.63 2
 -5 5 6 54529.9 1363.25 1
 -5 5 7 755.657 173.559 1
 -5 5 7 651.9 149.167 2
 -5 5 8 17628.1 699.266 2
 -5 5 8 16767.3 794.105 1
 -5 5 9 433.805 127.972 2
 -5 5 9 420.121 144.209 1
 -5 5 10 40151.2 1356.95 1
 -5 5 11 42477.4 1447.69 1
 -5 5 12 117.659 132.776 1
 -5 6 -13 32279.8 1329.33 4
 -5 6 -12 20473.5 1013.28 4
 -5 6 -11 3852.52 425.777 4
 -5 6 -10 16654.3 838.66 4
 -5 6 -9 354.688 149.285 4
 -5 6 -8 23901.2 921.576 4
 -5 6 -8 25043.4 780.535 2
 -5 6 -7 14049.7 578.467 2
 -5 6 -7 12920.6 651.166 4
 -5 6 -6 19555.7 683.891 2
 -5 6 -6 19497.8 754.202 4
 -5 6 -5 78085.6 1460.16 2
 -5 6 -5 76956.5 1540.55 4
 -5 6 -4 7380.67 412.201 4
 -5 6 -4 7838.89 417.714 2
 -5 6 -3 52159.5 1153.97 2
 -5 6 -3 51520.7 1081.55 4
 -5 6 -2 1193.13 174.288 2
 -5 6 -1 178650 2519.64 2
 -5 6 0 63332.7 1303.74 2
 -5 6 1 2416.13 241.76 2
 -5 6 2 60753.6 1297.44 2
 -5 6 3 985.495 165.713 2
 -5 6 4 108283 1875.21 2
 -5 6 4 106032 1947.36 1
 -5 6 5 5035.77 372.931 2
 -5 6 5 4953.74 396.081 1
 -5 6 6 27541 971.149 1
 -5 6 6 27279.9 890.684 2
 -5 6 7 53260.9 1310.68 2
 -5 6 7 55707.7 1460 1
 -5 6 8 2493.97 322.198 1
 -5 6 8 2366.9 275.507 2
 -5 6 9 15636.4 707.543 2
 -5 6 9 17282.2 858.465 1
 -5 6 10 103.706 123.845 1
 -5 6 10 154.275 124.588 2
 -5 6 11 33370.1 1285.59 1
 -5 6 12 11709.5 790.72 1
 -5 7 -13 3051.67 428.115 4
 -5 7 -12 27704.6 1224.46 4
 -5 7 -11 10890.2 738.531 4
 -5 7 -10 12810 757.528 4
 -5 7 -9 22981.8 976.232 4
 -5 7 -8 649.769 170.264 4
 -5 7 -8 630.16 142.128 2
 -5 7 -7 29772.2 1021.28 4
 -5 7 -7 30897.1 897.964 2
 -5 7 -6 1631.73 212.477 2
 -5 7 -6 1273.07 213.316 4
 -5 7 -5 56864 1321.79 4
 -5 7 -5 57793.8 1266.21 2
 -5 7 -4 125120 2024.61 2
 -5 7 -4 125612 2037 4
 -5 7 -3 482.542 129.102 2
 -5 7 -3 306.603 113.249 4
 -5 7 -2 26066.1 816.571 2
 -5 7 -1 2494.57 252.45 2
 -5 7 0 136930 2180.37 2
 -5 7 1 62099.3 1347.79 2
 -5 7 2 3081.41 284.625 2
 -5 7 3 30062.2 924.56 2
 -5 7 4 695.669 153.45 2
 -5 7 5 44427 1252.35 1
 -5 7 5 43271.3 1184.22 2
 -5 7 6 3033.74 319.352 2
 -5 7 6 3064.7 339.727 1
 -5 7 7 62146 1487.4 2
 -5 7 7 60223.4 1577.51 1
 -5 7 8 66767.8 1718.68 1
 -5 7 8 69991.5 1633.08 2
 -5 7 9 885.125 218.673 1
 -5 7 9 1187.53 222.344 2
 -5 7 10 22947.8 924.329 2
 -5 7 10 22267.5 1029.81 1
 -5 7 11 638.218 220.212 1
 -5 7 12 17951 979.175 1
 -5 8 -12 2281.68 363.945 4
 -5 8 -11 26193.9 1167.71 4
 -5 8 -10 5234.72 503.008 4
 -5 8 -9 23328.6 1014.59 4
 -5 8 -8 15893.3 798.302 4
 -5 8 -7 2822.59 328.526 4
 -5 8 -7 3683.25 314.226 2
 -5 8 -6 11069.1 544.688 2
 -5 8 -6 11079.2 610.809 4
 -5 8 -5 2052.46 249.263 4
 -5 8 -5 1958.88 235.178 2
 -5 8 -4 119131 2013.74 2
 -5 8 -4 121757 2045.27 4
 -5 8 -3 47803.1 1108.53 4
 -5 8 -3 47008.3 1174.77 2
 -5 8 -2 32583.9 833.458 4
 -5 8 -2 33134.7 972.708 2
 -5 8 -1 57288.3 1326.26 2
 -5 8 0 2092.4 248.467 2
 -5 8 1 93153.8 1779.2 2
 -5 8 2 23308.4 843.277 2
 -5 8 3 55431.1 1348.64 2
 -5 8 4 6123.23 446.326 2
 -5 8 5 5230.7 419.551 2
 -5 8 6 53458.6 1407.73 2
 -5 8 7 1135.97 221.987 2
 -5 8 8 83972.4 1882.63 2
 -5 8 8 86563 2027.37 1
 -5 8 9 31060.3 1109.45 2
 -5 8 9 31341.5 1205.13 1
 -5 8 10 12793.7 789.534 1
 -5 8 10 12139.9 699.547 2
 -5 8 11 15478.4 801.506 2
 -5 8 11 16048.9 907.981 1
 -5 8 12 4541.17 503.365 1
 -5 9 -11 5052.32 524.584 4
 -5 9 -10 27539.3 1182.71 4
 -5 9 -9 336.7 169.066 4
 -5 9 -8 23922.3 1005.19 4
 -5 9 -7 5842.53 420.092 2
 -5 9 -7 4908.97 443.799 4
 -5 9 -6 12079.8 586.046 2
 -5 9 -6 11452.4 636.621 4
 -5 9 -5 9332.94 550.229 4
 -5 9 -5 10721.6 552.158 2
 -5 9 -4 16995.7 702.43 4
 -5 9 -4 18537.5 738.181 2
 -5 9 -3 52876.9 1218.17 4
 -5 9 -3 55452.6 1331.76 2
 -5 9 -2 3384.1 326.337 2
 -5 9 -2 3222.83 266.213 4
 -5 9 -1 51912.1 1307.53 2
 -5 9 0 56404 1383.02 2
 -5 9 1 31196.5 1007.62 2
 -5 9 2 71076 1603.12 2
 -5 9 3 5644.51 433.646 2
 -5 9 4 44717.5 1275.84 2
 -5 9 5 35604.7 1154.96 2
 -5 9 6 20336.8 873.796 2
 -5 9 7 32614.3 1147.02 2
 -5 9 8 5320.54 461.561 2
 -5 9 9 61589.6 1674.78 2
 -5 9 10 7666.58 589.486 2
 -5 9 11 12681.5 829.163 1
 -5 9 11 11427.1 722.052 2
 -5 10 -10 13379.3 844.512 4
 -5 10 -9 19832.5 985.846 4
 -5 10 -8 480.748 174.032 4
 -5 10 -7 27456.2 1083.79 4
 -5 10 -6 2729.85 330.24 4
 -5 10 -6 2954.75 309.566 2
 -5 10 -5 24795.8 932.734 4
 -5 10 -5 26896.6 918.439 2
 -5 10 -4 3702.01 347.938 2
 -5 10 -4 2868.83 305.89 4
 -5 10 -3 24978.6 832.867 4
 -5 10 -3 26126.7 929.981 2
 -5 10 -2 42114.3 1198.87 2
 -5 10 -1 1624.97 249.577 2
 -5 10 0 12447.7 642.813 2
 -5 10 1 6359.36 465.609 2
 -5 10 2 34584.3 1118.57 2
 -5 10 3 45719.2 1323.43 2
 -5 10 4 1438.7 252.822 2
 -5 10 5 75331.5 1814.87 2
 -5 10 6 14941.5 780.415 2
 -5 10 7 11539.8 701.749 2
 -5 10 8 5375.2 489.407 2
 -5 10 9 17024.1 884.772 2
 -5 10 10 31931.4 1248.49 2
 -5 10 11 763.858 222.015 2
 -5 11 -10 142.09 117.87 4
 -5 11 -9 10232.1 729.092 4
 -5 11 -8 5719.64 521.317 4
 -5 11 -7 3761.73 414.029 4
 -5 11 -6 28730.3 1081.2 4
 -5 11 -5 2207.66 299.03 4
 -5 11 -5 2493.88 292.706 2
 -5 11 -4 13770 685.218 2
 -5 11 -3 694.635 176.372 2
 -5 11 -2 37374.1 1177.96 2
 -5 11 -1 18207.4 808.052 2
 -5 11 0 825.339 201.635 2
 -5 11 1 13164.6 698.86 2
 -5 11 2 10115.4 627.348 2
 -5 11 3 18841.3 857.564 2
 -5 11 4 27436.8 1066.62 2
 -5 11 5 14601.1 794.014 2
 -5 11 6 37955.5 1309.93 2
 -5 11 7 4705.66 474.237 2
 -5 11 8 5382.76 508.975 2
 -5 11 9 115.804 118.087 2
 -5 11 10 24676.3 1129.55 2
 -5 11 11 28779.1 1256.84 2
 -5 11 12 299.287 193.572 2
 -5 12 -9 -117.678 124.276 4
 -5 12 -8 8575.95 660.779 4
 -5 12 -5 35198.2 1144.45 2
 -5 12 -4 2252.77 299.815 2
 -5 12 -3 8842.38 574.114 2
 -5 12 -2 237.335 138.184 2
 -5 12 -1 29137.2 1078.22 2
 -5 12 0 11388.9 671.798 2
 -5 12 1 2363.17 318.169 2
 -5 12 2 25242.7 1026.08 2
 -5 12 3 2380.53 327.342 2
 -5 12 4 22198.4 985.048 2
 -5 12 5 12248.8 754.431 2
 -5 12 6 9485.52 669.089 2
 -5 12 7 47217.7 1558.01 2
 -5 12 8 2854.7 400.007 2
 -5 12 9 1917.38 322.276 2
 -5 12 10 -72.5709 160.432 2
 -5 12 11 10798.3 797.581 2
 -5 13 -4 40721.8 1302.31 2
 -5 13 -3 1955.44 298.56 2
 -5 13 -2 4991.69 450.536 2
 -5 13 -1 98.2163 126.99 2
 -5 13 0 36112.3 1268.35 2
 -5 13 1 16133.2 842.623 2
 -5 13 2 7662.09 590.41 2
 -5 13 3 24261.3 1057.72 2
 -5 13 4 2028.54 328.503 2
 -5 13 5 21861.2 1038.97 2
 -5 13 6 6371.33 589.284 2
 -5 13 7 18489.2 1001.97 2
 -5 13 8 36296 1426.82 2
 -5 13 9 294.935 210.359 2
 -5 14 -3 29106.3 1149.83 2
 -5 14 -2 139.222 110.684 2
 -5 14 -1 8681.01 632.95 2
 -5 14 0 415.157 187.074 2
 -5 14 1 22594.6 1044.31 2
 -5 14 2 5435.55 522.163 2
 -5 14 3 13677.8 824.222 2
 -5 14 4 17224.8 945.958 2
 -5 14 5 435.915 176.616 2
 -5 14 6 16870 963.83 2
 -5 14 7 347.763 196.464 2
 -5 15 -2 16993.1 912.008 2
 -5 15 -1 2397.57 354.069 2
 -5 15 0 11203.4 753.924 2
 -5 15 1 3472.34 425.157 2
 -5 15 2 29850.9 1255.64 2
 -5 15 3 285.697 145.481 2
 -5 15 4 23729.2 1149.87 2
 -4 -17 -8 7196.51 652.552 5
 -4 -17 -7 11884.6 849.917 5
 -4 -17 -6 5309.81 597.994 5
 -4 -17 -5 51171.6 1826.3 5
 -4 -16 -7 10077.1 750.133 5
 -4 -16 -6 5180.82 544.57 5
 -4 -16 -5 19337.3 1057.94 5
 -4 -16 -4 54232.9 1803.46 5
 -4 -16 -3 9324.3 735.831 5
 -4 -16 -2 14450 934.641 5
 -4 -15 -6 5960.85 558.995 5
 -4 -15 -5 2578.68 380.059 5
 -4 -15 -4 24169.1 1148.68 5
 -4 -15 -3 51071.6 1684.46 5
 -4 -15 -2 848.894 267.919 5
 -4 -15 -1 22038.9 1115.8 5
 -4 -15 0 7883.64 678.178 5
 -4 -14 -6 7840.62 605.251 5
 -4 -14 -5 7327.7 582.797 5
 -4 -14 -4 369.572 163.39 5
 -4 -14 -3 60141.8 1781.1 5
 -4 -14 -2 52263.4 1660.24 5
 -4 -14 -1 383.318 216.37 5
 -4 -14 0 26843.1 1209.61 5
 -4 -13 -5 3510.11 398.518 5
 -4 -13 -4 27888.4 1123.79 5
 -4 -13 -3 1032.51 222.994 5
 -4 -13 -2 75420.8 1935.87 5
 -4 -13 -1 40876 1409.67 5
 -4 -13 0 7451.06 608.902 5
 -4 -12 -5 63901.4 1619.13 5
 -4 -12 -4 1076.01 223.513 5
 -4 -12 -3 76335.8 1863.63 5
 -4 -12 -2 899.41 215.093 5
 -4 -12 -1 81629.4 1962.41 5
 -4 -12 0 14309.7 800.676 5
 -4 -11 -4 52267.4 1395.66 5
 -4 -11 -3 20456.3 877.427 5
 -4 -11 -2 47847.3 1369.75 5
 -4 -11 -1 79.8399 105.519 5
 -4 -11 0 66349.7 1692.61 5
 -4 -10 -4 193625 2939.2 5
 -4 -10 -3 20044.5 811.26 5
 -4 -10 -2 29764.3 1005.74 5
 -4 -10 -1 29783.7 1030.01 5
 -4 -10 0 475.38 160.902 5
 -4 -9 -4 67076.7 1440.65 5
 -4 -9 -3 136917 2277.48 5
 -4 -9 -2 23830.4 852.173 5
 -4 -9 -1 28121 942.951 5
 -4 -9 0 45457.2 1254.73 5
 -4 -8 -4 26188.8 804.504 5
 -4 -8 -3 59169.6 1305.36 5
 -4 -8 -2 137606 2190.16 5
 -4 -8 -1 8310.84 475.882 5
 -4 -8 0 26263.9 882.05 5
 -4 -7 -3 6156.29 363.192 5
 -4 -7 -2 120892 1909.08 5
 -4 -7 -1 158164 2339.63 5
 -4 -7 0 6128.34 395.916 5
 -4 -6 -3 5408.79 312.545 5
 -4 -6 -2 6692.22 363.157 5
 -4 -6 -1 64062.6 1242.12 5
 -4 -6 4 40879 751.213 3
 -4 -5 -3 37945 793.824 5
 -4 -5 -2 19268.3 567.552 5
 -4 -5 -1 32579.6 794.166 5
 -4 -5 4 4115.59 191.039 3
 -4 -4 -15 25600 1002.6 4
 -4 -4 -3 294759 3105.14 5
 -4 -4 -2 15707.3 452.196 5
 -4 -4 0 356.273 53.9828 3
 -4 -4 1 116492 1289.47 3
 -4 -4 2 3906.47 145.239 3
 -4 -4 3 52648.9 702.911 3
 -4 -4 3 52223.9 689.263 3
 -4 -4 4 126203 1398.49 3
 -4 -3 -18 2142.97 358.545 4
 -4 -3 -17 4109.73 453.579 4
 -4 -3 -16 1440.56 244.601 4
 -4 -3 -15 57742.4 1583.32 4
 -4 -3 -14 25573.9 988.002 4
 -4 -3 -13 25185 931.789 4
 -4 -3 -12 30799.9 992.975 4
 -4 -3 -11 9246.91 506.863 4
 -4 -3 -10 35354 966.863 4
 -4 -3 -6 37200.5 584.308 1
 -4 -3 -5 50728.1 692.229 1
 -4 -3 -4 77465.8 972.307 5
 -4 -3 -3 127347 1472.31 5
 -4 -3 -1 12445.5 293.341 3
 -4 -3 0 46577.6 607.548 3
 -4 -3 1 1572.55 73.44 3
 -4 -3 4 79491.5 873.926 3
 -4 -3 5 37307.1 532.811 3
 -4 -2 -17 2749.56 389.726 4
 -4 -2 -16 6814.78 571.988 4
 -4 -2 -15 10469.4 670.53 4
 -4 -2 -14 67333.5 1690.55 4
 -4 -2 -13 7732.02 530.125 4
 -4 -2 -12 29275.7 986.535 4
 -4 -2 -11 8050.81 483.695 4
 -4 -2 -10 10975.7 541.106 4
 -4 -2 -9 47982.7 1114.06 4
 -4 -2 -4 43457.5 528.801 5
 -4 -2 -2 81833.8 1046.84 3
 -4 -2 -1 19106.4 358.954 3
 -4 -2 0 79264.7 852.045 3
 -4 -2 5 132650 1356.59 3
 -4 -1 -17 4482.02 500.101 4
 -4 -1 -16 7231.91 596.201 4
 -4 -1 -15 7019.87 565.893 4
 -4 -1 -14 16344.5 823.326 4
 -4 -1 -13 52399 1449.46 4
 -4 -1 -12 19.5315 112.769 4
 -4 -1 -11 43905.2 1208.59 4
 -4 -1 -10 11286.5 558.842 4
 -4 -1 -9 29565.5 885.257 4
 -4 -1 -8 32540.2 882.923 4
 -4 -1 -7 10688.7 461.781 4
 -4 -1 -2 45710.1 705.052 3
 -4 -1 -1 209688 2326.68 2
 -4 -1 -1 217525 2157.39 3
 -4 -1 0 22974.3 488.916 2
 -4 -1 1 177579 1949.88 2
 -4 -1 2 125385 1468.03 2
 -4 -1 3 3918.34 176.103 2
 -4 -1 4 91193 1133.88 2
 -4 -1 5 1046.32 69.7193 3
 -4 -1 5 1490.01 105.51 2
 -4 -1 6 126479 1409.15 3
 -4 -1 6 128774 1422.89 2
 -4 0 -16 545.619 180.522 4
 -4 0 -15 10140 689.285 4
 -4 0 -14 15395.9 819.449 4
 -4 0 -13 16006.5 792.855 4
 -4 0 -12 34179.9 1139.99 4
 -4 0 -11 3024.49 313.739 4
 -4 0 -10 82167 1669.98 4
 -4 0 -9 7022.85 429.311 4
 -4 0 -8 55733.7 1225.23 4
 -4 0 -7 95571.4 1614.73 4
 -4 0 -6 31404.5 503.718 5
 -4 0 -6 32207.3 803.657 4
 -4 0 -3 54754.2 917.105 2
 -4 0 -2 3706.71 136.944 1
 -4 0 -2 3532.4 201.766 2
 -4 0 -1 81547.6 1144.55 2
 -4 0 0 244310 2616.71 2
 -4 0 1 7669.18 275.205 2
 -4 0 2 281316 2916.74 2
 -4 0 3 107769 1356.23 2
 -4 0 4 22130.8 484.455 2
 -4 0 4 20107.6 347.546 3
 -4 0 5 60144.8 905.488 2
 -4 0 5 57529 767.446 3
 -4 0 6 32567.3 619.905 2
 -4 0 6 32176.7 561.389 3
 -4 1 -16 20242.9 1048.84 4
 -4 1 -15 819.359 218.069 4
 -4 1 -14 23460.9 1030.81 4
 -4 1 -13 5912 500.753 4
 -4 1 -12 26719.1 1020.71 4
 -4 1 -11 37251.3 1150.46 4
 -4 1 -10 6428.23 445.371 4
 -4 1 -9 113763 1993.43 4
 -4 1 -8 6696.54 408.498 4
 -4 1 -7 117691 1892.66 4
 -4 1 -6 552.328 78.0052 5
 -4 1 -6 701.96 139.436 4
 -4 1 -5 122769 1773.4 4
 -4 1 -4 172661 2091.02 2
 -4 1 -3 133276 1708.71 2
 -4 1 -2 24681.8 577.546 2
 -4 1 -1 48342.3 843.196 2
 -4 1 -1 49325.5 745.785 1
 -4 1 0 240672 2571.93 1
 -4 1 0 236456 2605.89 2
 -4 1 1 165035 1951.18 2
 -4 1 2 11972.2 377.569 2
 -4 1 3 359508 3698.76 2
 -4 1 4 29408.3 633.539 2
 -4 1 4 28446.9 504.747 3
 -4 1 5 42979.6 690.185 3
 -4 1 5 44116.3 810.014 2
 -4 1 6 39057.3 765.331 2
 -4 1 6 38919.1 687.842 3
 -4 1 7 93604.9 1285.07 3
 -4 1 7 92953.7 1347.07 2
 -4 2 -15 31295.4 1276.86 4
 -4 2 -14 -42.5663 130.814 4
 -4 2 -13 25850.9 1062.81 4
 -4 2 -12 -6.22457 115.387 4
 -4 2 -11 56716.4 1491.58 4
 -4 2 -10 26832.1 954.645 4
 -4 2 -9 38962.1 1110.02 4
 -4 2 -8 188186 2722.87 4
 -4 2 -7 355.584 111.52 4
 -4 2 -6 31241.7 724.566 2
 -4 2 -6 31016.3 841.11 4
 -4 2 -5 5810.08 291.868 2
 -4 2 -5 5886.86 333.719 4
 -4 2 -4 362960 3968.87 4
 -4 2 -4 370303 3875.19 2
 -4 2 -3 301901 3271.96 2
 -4 2 -2 11337.5 388.387 2
 -4 2 -1 332949 3535.43 2
 -4 2 -1 338268 3411.39 1
 -4 2 0 11262 370.634 1
 -4 2 0 11028.6 386.184 2
 -4 2 1 207593 2408.12 2
 -4 2 1 207822 2422.43 1
 -4 2 2 71525.4 1134.4 2
 -4 2 2 71101.8 1208.74 1
 -4 2 3 49985.3 1021.94 1
 -4 2 3 48133.8 892.335 2
 -4 2 4 174049 2353.79 1
 -4 2 4 169998 2100.55 2
 -4 2 5 3376.25 222.718 2
 -4 2 5 3120.88 182.974 3
 -4 2 6 27408 675.427 2
 -4 2 6 27190.3 603.145 3
 -4 2 7 1325.44 147.324 2
 -4 2 7 1336.83 136.037 3
 -4 2 8 52173.1 1014.19 2
 -4 2 11 27736.9 1128.41 1
 -4 2 12 7989.53 630.558 1
 -4 2 13 7981.9 654.715 1
 -4 3 -15 30396.8 1292.02 4
 -4 3 -14 22370.5 1055.28 4
 -4 3 -13 6331.38 543.086 4
 -4 3 -12 40727.4 1342.16 4
 -4 3 -11 2899.25 344.953 4
 -4 3 -10 66924.8 1614.77 4
 -4 3 -9 8574.06 527.017 4
 -4 3 -8 74038.2 1555.72 4
 -4 3 -7 117694 1994.26 4
 -4 3 -6 1454.11 198.41 4
 -4 3 -6 1699.68 172.262 2
 -4 3 -5 42809.6 985.603 4
 -4 3 -5 43645.5 890.279 2
 -4 3 -4 6253.09 311.392 2
 -4 3 -4 6198.76 332.582 4
 -4 3 -3 423720 4396.45 2
 -4 3 -3 419836 4381.18 4
 -4 3 -2 401594 4190.05 2
 -4 3 -1 60665.1 1057.62 2
 -4 3 0 188976 2285.41 2
 -4 3 0 183384 2229.88 1
 -4 3 1 25839.9 657.702 1
 -4 3 1 26290.9 647.681 2
 -4 3 2 173940 2190.14 2
 -4 3 2 176035 2251.53 1
 -4 3 3 40056.8 844.124 2
 -4 3 3 38992.6 907.321 1
 -4 3 4 180304 2475.86 1
 -4 3 4 181098 2295.97 2
 -4 3 5 137405 2119.9 1
 -4 3 5 136890 1899.56 2
 -4 3 5 132895 1751.82 3
 -4 3 6 2496.8 194.445 3
 -4 3 6 2607.91 271.846 1
 -4 3 6 2755.1 226.995 2
 -4 3 7 3250.11 317.219 1
 -4 3 7 2954.84 236.926 2
 -4 3 7 2439.73 197.798 3
 -4 3 8 5870.14 441.723 1
 -4 3 8 5138.1 317.284 2
 -4 3 8 6080.32 316.494 3
 -4 3 9 66101.8 1620.64 1
 -4 3 10 66818.7 1723.36 1
 -4 3 11 163.592 129.065 1
 -4 3 12 26709.5 1140.06 1
 -4 3 13 1242.62 282.661 1
 -4 4 -14 41107.8 1501.55 4
 -4 4 -13 9587.83 692.473 4
 -4 4 -12 16653.5 862.661 4
 -4 4 -11 21164 938.728 4
 -4 4 -10 3749.01 381.897 4
 -4 4 -9 69959.1 1611.48 4
 -4 4 -8 2786.45 297.491 4
 -4 4 -7 72627 1506.88 4
 -4 4 -7 72940.2 1283.4 2
 -4 4 -6 103459 1766.76 4
 -4 4 -6 93883.3 1471.98 2
 -4 4 -5 1374.14 158.936 2
 -4 4 -5 1163.48 163.89 4
 -4 4 -4 40529 924.96 4
 -4 4 -4 39963.9 871.222 2
 -4 4 -3 82972.1 1328.88 2
 -4 4 -3 82169.7 1329.63 4
 -4 4 -2 418349 4436.76 2
 -4 4 -1 69787.9 1209.21 2
 -4 4 0 65187 1159.72 2
 -4 4 1 245599 2901.62 2
 -4 4 2 36745 876.407 1
 -4 4 2 36859.4 837.022 2
 -4 4 3 36265.2 852.521 2
 -4 4 3 37058.3 911.946 1
 -4 4 4 1424.38 167.156 2
 -4 4 4 1638.83 200.405 1
 -4 4 5 126002 2064.36 1
 -4 4 5 130478 1789.91 3
 -4 4 5 128741 1909.63 2
 -4 4 6 61033.3 1214.15 2
 -4 4 6 61728.9 1130.6 3
 -4 4 6 60570.4 1370.81 1
 -4 4 7 905.887 141.956 2
 -4 4 7 795.96 175.313 1
 -4 4 7 792.842 133.862 3
 -4 4 8 15794.2 603.967 2
 -4 4 8 15696 733.321 1
 -4 4 8 15202.5 549.187 3
 -4 4 9 491.18 153.194 1
 -4 4 9 316.949 103.513 2
 -4 4 10 39840 1283.7 1
 -4 4 11 29457.2 1156.62 1
 -4 4 12 6934.76 579.013 1
 -4 4 13 19505.8 1001.06 1
 -4 5 -14 7580.78 656.851 4
 -4 5 -13 34337.4 1344 4
 -4 5 -12 2036.74 332.5 4
 -4 5 -11 19421.1 909.692 4
 -4 5 -10 21751.3 922.713 4
 -4 5 -9 1668.26 253.567 4
 -4 5 -8 40176.3 1168.54 4
 -4 5 -8 42254.8 951.87 2
 -4 5 -7 479.894 106.723 2
 -4 5 -7 314.569 121.432 4
 -4 5 -6 123272 2052.95 4
 -4 5 -6 125077 1835.97 2
 -4 5 -5 102575 1601.73 2
 -4 5 -5 104349 1763.82 4
 -4 5 -4 1652.78 177.241 2
 -4 5 -4 1452.76 179.352 4
 -4 5 -3 22779.2 648.123 4
 -4 5 -3 23264.3 661.842 2
 -4 5 -2 83589.2 1304.88 4
 -4 5 -2 86079.8 1420.81 2
 -4 5 -1 258277 3074.87 2
 -4 5 0 11911 474.567 2
 -4 5 1 166752 2246.17 2
 -4 5 2 107165 1682.56 2
 -4 5 3 475.865 117.112 2
 -4 5 3 256.165 96.5692 1
 -4 5 4 55131.3 1158.91 2
 -4 5 4 54182.2 1218.43 1
 -4 5 5 2006.88 213.831 2
 -4 5 5 2237.29 245.61 1
 -4 5 6 64395.4 1442.31 1
 -4 5 6 63899.8 1305.5 2
 -4 5 6 62027.9 1208.24 3
 -4 5 7 53826.2 1347.4 1
 -4 5 7 53466.7 1207.16 2
 -4 5 7 54953 1144.76 3
 -4 5 8 6672.97 411.022 2
 -4 5 8 7475.83 513.416 1
 -4 5 8 7008.23 394.378 3
 -4 5 9 21698.7 769.858 2
 -4 5 9 22784.4 749.968 3
 -4 5 9 22986.5 925.843 1
 -4 5 10 215.422 87.9988 2
 -4 5 10 130.07 102.953 1
 -4 5 11 46429.3 1456.02 1
 -4 5 12 8167.8 631.118 1
 -4 5 13 5815.21 556.021 1
 -4 6 -13 6429.19 599.779 4
 -4 6 -12 19805.3 999.592 4
 -4 6 -11 794.505 225.921 4
 -4 6 -10 34383.4 1208.53 4
 -4 6 -9 27775.3 1035.97 4
 -4 6 -8 3509.48 269.22 2
 -4 6 -8 3430.37 351.455 4
 -4 6 -7 38350.5 1118.63 4
 -4 6 -7 37735.9 891.452 2
 -4 6 -6 2358.08 262.331 4
 -4 6 -6 2219.5 215.995 2
 -4 6 -5 123766 1864.46 2
 -4 6 -5 122208 2026.17 4
 -4 6 -4 85095.1 1460.8 2
 -4 6 -4 83550.4 1523.11 4
 -4 6 -3 13658.9 524.069 2
 -4 6 -3 13386.1 509.425 4
 -4 6 -2 14575.1 492.412 4
 -4 6 -2 14764.7 547.744 2
 -4 6 -1 31702.7 824.992 2
 -4 6 0 273331 3316.27 2
 -4 6 1 18819.7 639.716 2
 -4 6 2 61431.7 1252.29 2
 -4 6 3 80384.7 1500.95 2
 -4 6 4 14341.2 619.707 1
 -4 6 4 14424.4 586.376 2
 -4 6 5 80979.2 1554.16 2
 -4 6 5 84582.7 1664.07 1
 -4 6 6 5145.04 398.749 1
 -4 6 6 4575.09 344.86 2
 -4 6 7 48954.5 1323.19 1
 -4 6 7 50166.5 1224.04 2
 -4 6 7 50362.2 1150.54 3
 -4 6 8 46000.3 1321.06 1
 -4 6 8 45987.5 1189.85 2
 -4 6 8 46163 1126.54 3
 -4 6 9 1289.15 201.218 2
 -4 6 9 1493.22 246.273 1
 -4 6 9 1511.52 202.111 3
 -4 6 10 18578.3 765.728 2
 -4 6 10 19248 905.559 1
 -4 6 11 10112.8 673.368 1
 -4 6 12 29106.2 1197.37 1
 -4 6 13 4070.02 479.47 1
 -4 7 -13 3261.06 456.616 4
 -4 7 -12 6583.55 588.771 4
 -4 7 -11 24640.7 1103.94 4
 -4 7 -10 301.037 158.454 4
 -4 7 -9 50717.2 1466.43 4
 -4 7 -8 43949.4 1032.32 2
 -4 7 -8 41778.9 1274.26 4
 -4 7 -7 10438.1 476.895 2
 -4 7 -7 9504.05 562.044 4
 -4 7 -6 45190.2 1046.04 2
 -4 7 -6 44191.2 1192.84 4
 -4 7 -5 5806.14 355.026 2
 -4 7 -5 5447.1 379.59 4
 -4 7 -4 128825 2064.29 4
 -4 7 -4 131994 2000.48 2
 -4 7 -3 62543.7 1266.14 2
 -4 7 -3 61364.6 1234.03 4
 -4 7 -2 41959.9 919.809 4
 -4 7 -2 42546.6 1025.65 2
 -4 7 -1 21730.6 705.727 2
 -4 7 -1 21002.2 571.95 4
 -4 7 0 17288.6 629.986 2
 -4 7 1 109110 1830.12 2
 -4 7 2 3569.16 304.456 2
 -4 7 3 141793 2221.02 2
 -4 7 4 14870 631.248 2
 -4 7 5 16063.1 663.467 2
 -4 7 6 29556 936.494 2
 -4 7 6 30581.6 1015.27 1
 -4 7 7 493.191 127.68 3
 -4 7 7 510.981 160.672 2
 -4 7 7 466.946 150.605 1
 -4 7 8 61988.1 1387.73 3
 -4 7 8 60858 1461.19 2
 -4 7 8 59568.4 1558.82 1
 -4 7 9 17446.3 834.594 1
 -4 7 9 17708.1 772.398 2
 -4 7 9 17739.2 725.196 3
 -4 7 10 14888.1 679.745 3
 -4 7 10 14377.8 782.878 1
 -4 7 10 14253.6 705.224 2
 -4 7 11 6072.06 534.147 1
 -4 7 11 6074.43 469.307 2
 -4 7 12 5452.83 523.907 1
 -4 7 13 17961.5 980.241 1
 -4 8 -12 2261.8 370.517 4
 -4 8 -11 9513.78 692.351 4
 -4 8 -10 28394.7 1166.01 4
 -4 8 -9 1413.65 263.84 4
 -4 8 -8 63891.1 1653.05 4
 -4 8 -7 13897 713.102 4
 -4 8 -7 15388.3 613.294 2
 -4 8 -6 14324.4 687.707 4
 -4 8 -6 15343 600.468 2
 -4 8 -5 53447.8 1312.77 4
 -4 8 -5 54097.4 1195.76 2
 -4 8 -4 10727.1 505.452 2
 -4 8 -4 10004.1 510.94 4
 -4 8 -3 164602 2420.66 2
 -4 8 -3 166349 2390.74 4
 -4 8 -2 23372.8 769.487 2
 -4 8 -2 23042.1 691.01 4
 -4 8 -1 50630.9 988.51 4
 -4 8 -1 50532.5 1174.7 2
 -4 8 0 31723.1 916.228 2
 -4 8 1 38349.2 1027.73 2
 -4 8 2 62026.5 1378.07 2
 -4 8 3 29379.4 919.721 2
 -4 8 4 103985 1919.1 2
 -4 8 5 11073.4 578.792 2
 -4 8 6 11410.4 601.355 2
 -4 8 7 38447.9 1154.75 2
 -4 8 8 5861.99 495.153 1
 -4 8 8 5226.08 426.598 2
 -4 8 9 60063.4 1546.04 2
 -4 8 9 63320.8 1501.18 3
 -4 8 9 60943.6 1678.14 1
 -4 8 10 1315.73 242.013 2
 -4 8 10 1233.03 219.712 3
 -4 8 10 1643.51 302.826 1
 -4 8 11 16353 887.185 1
 -4 8 11 16025.2 799.068 2
 -4 8 12 4534.46 492.175 1
 -4 8 13 10800.6 775.563 1
 -4 9 -11 1348.93 277.195 4
 -4 9 -10 15163.8 864.49 4
 -4 9 -9 15501.3 851.112 4
 -4 9 -8 7757.31 567.633 4
 -4 9 -7 41916.6 1301.56 4
 -4 9 -6 154.989 111.738 4
 -4 9 -6 295.632 113.153 2
 -4 9 -5 61012 1325.51 2
 -4 9 -5 56511.7 1406.64 4
 -4 9 -4 26672.2 881.324 4
 -4 9 -4 27139.6 868.978 2
 -4 9 -3 35582.9 1000.52 2
 -4 9 -3 35580.5 971.278 4
 -4 9 -2 160507 2286.4 4
 -4 9 -2 160188 2463.81 2
 -4 9 -1 4218.3 278.574 4
 -4 9 -1 4346.39 354.875 2
 -4 9 0 77192.3 1578.15 2
 -4 9 1 9702.31 537.553 2
 -4 9 2 58533.3 1394.47 2
 -4 9 3 9626.91 544.907 2
 -4 9 4 20114.9 801.346 2
 -4 9 5 90103.7 1873.45 2
 -4 9 6 12467.3 659.013 2
 -4 9 7 21773.2 895.299 2
 -4 9 8 11666.2 667.398 2
 -4 9 9 23172.7 968.646 2
 -4 9 10 45121.1 1327.47 3
 -4 9 10 42015.5 1357.9 2
 -4 9 11 1153.74 243.548 2
 -4 9 11 1308.78 284.731 1
 -4 9 12 19799.1 1045.82 1
 -4 9 12 18688 924.574 2
 -4 10 -10 4.55485 143.878 4
 -4 10 -9 10385 708.524 4
 -4 10 -8 5532.37 507.033 4
 -4 10 -7 10233 647.282 4
 -4 10 -6 58554.9 1348.56 2
 -4 10 -6 56958.6 1515.59 4
 -4 10 -5 75.2054 91.5061 2
 -4 10 -5 61.3544 92.2199 4
 -4 10 -4 56014.2 1328.4 2
 -4 10 -4 52593.9 1329.05 4
 -4 10 -3 149.804 101.184 2
 -4 10 -3 183.385 101.21 4
 -4 10 -2 73750.6 1582.08 2
 -4 10 -2 72411.3 1422.44 4
 -4 10 -1 70082.9 1538.46 2
 -4 10 0 1228.53 211.066 2
 -4 10 1 79349.9 1691.76 2
 -4 10 2 3706.06 364.244 2
 -4 10 3 39946.9 1186.46 2
 -4 10 4 15326.3 730.337 2
 -4 10 5 37215.6 1185.38 2
 -4 10 6 79813.8 1836.63 2
 -4 10 7 5590.07 473.429 2
 -4 10 8 12392 716.818 2
 -4 10 9 1969.81 305.971 2
 -4 10 10 23297.8 1026.84 2
 -4 10 11 18834.1 953.245 2
 -4 10 12 258.074 140.871 2
 -4 11 -10 10388 763.401 4
 -4 11 -9 95.0903 121.822 4
 -4 11 -8 6749.78 565.753 4
 -4 11 -7 889.518 225.992 4
 -4 11 -6 28157.9 1073.72 4
 -4 11 -5 55393.4 1359.93 2
 -4 11 -5 55484.7 1478.18 4
 -4 11 -4 145.943 96.8568 4
 -4 11 -4 174.819 103.264 2
 -4 11 -3 23377.2 873.032 2
 -4 11 -3 22545.5 819.697 4
 -4 11 -2 1036.51 203.546 2
 -4 11 -1 54128.4 1384.83 2
 -4 11 0 5967.08 449.231 2
 -4 11 1 4451.53 393.021 2
 -4 11 2 48626.1 1357.45 2
 -4 11 3 2903.72 344.852 2
 -4 11 4 35477 1179.75 2
 -4 11 5 1156.14 223.774 2
 -4 11 6 48974.2 1458.07 2
 -4 11 7 58407.4 1635.55 2
 -4 11 8 1389.18 272.607 2
 -4 11 9 17878.8 910.332 2
 -4 11 10 120.456 115.78 2
 -4 11 11 20438.8 1018.88 2
 -4 11 12 7581.49 640.734 2
 -4 12 -9 9720.01 738.319 4
 -4 12 -8 -45.8328 102.195 4
 -4 12 -7 7661.24 599.305 4
 -4 12 -6 -182.34 147.05 4
 -4 12 -4 37369.1 1164.02 2
 -4 12 -3 680.93 168.136 2
 -4 12 -2 8141.17 541.67 2
 -4 12 -1 524.928 163.814 2
 -4 12 0 35972.7 1174.13 2
 -4 12 1 5396.74 458.404 2
 -4 12 2 24889.3 984.089 2
 -4 12 3 41594.2 1321.45 2
 -4 12 4 203.595 126.661 2
 -4 12 5 12626.6 736.757 2
 -4 12 6 143.241 111.924 2
 -4 12 7 52319.9 1594.35 2
 -4 12 8 36541.6 1345.8 2
 -4 12 9 3745.6 430.625 2
 -4 12 10 12243.4 802.939 2
 -4 12 11 423.353 184.788 2
 -4 12 12 11913.8 833.292 2
 -4 13 -3 24226.9 967.666 2
 -4 13 -2 1641.31 261.538 2
 -4 13 -1 10307.4 636.991 2
 -4 13 0 638.219 186.086 2
 -4 13 1 35839.5 1234.95 2
 -4 13 2 2523.08 339.145 2
 -4 13 3 36342.3 1273.52 2
 -4 13 4 41378.2 1390.34 2
 -4 13 5 68.5771 117.002 2
 -4 13 6 19725.8 969.307 2
 -4 13 7 1297.1 278.075 2
 -4 13 8 31646.6 1286.11 2
 -4 13 9 11163.8 782.633 2
 -4 13 10 5602.86 571.764 2
 -4 14 -3 34042.6 1204.34 2
 -4 14 -2 15134 798.664 2
 -4 14 -1 3833.06 405.028 2
 -4 14 0 14519.2 794.519 2
 -4 14 1 5218.31 480.139 2
 -4 14 2 18885.6 934.468 2
 -4 14 3 1466.03 279.725 2
 -4 14 4 39476.6 1410.84 2
 -4 14 5 26552.3 1163.06 2
 -4 14 6 514.517 197.921 2
 -4 14 7 13374.6 849.795 2
 -4 14 8 2547.12 391.445 2
 -4 15 -2 35210.1 1290.47 2
 -4 15 -1 6181.11 547.943 2
 -4 15 0 14472.1 828.999 2
 -4 15 1 13800.6 822.53 2
 -4 15 2 3948.02 445.002 2
 -4 15 3 10644.9 741.485 2
 -4 15 4 10135 722.584 2
 -4 15 5 35118.4 1402.96 2
 -4 15 6 10461.3 777.986 2
 -4 16 -1 27005.3 1176.35 2
 -4 16 0 299.974 172.875 2
 -4 16 1 16717.8 934.751 2
 -4 16 2 5482.17 544.551 2
 -3 -17 -7 9391.85 757.578 5
 -3 -17 -6 1956.87 370.914 5
 -3 -17 -5 15362 989.307 5
 -3 -16 -6 7588.21 653.069 5
 -3 -16 -5 189.463 131.919 5
 -3 -16 -4 22433.4 1147.63 5
 -3 -16 -3 30519.4 1342.59 5
 -3 -16 -2 50.9462 166.086 5
 -3 -16 -1 31720.4 1395.38 5
 -3 -15 -5 5607.42 543.364 5
 -3 -15 -4 802.981 235.734 5
 -3 -15 -3 34248.7 1368.54 5
 -3 -15 -2 24837.5 1166.48 5
 -3 -15 -1 1118.71 276.811 5
 -3 -15 0 28112.6 1263.35 5
 -3 -15 1 1665.22 333.113 5
 -3 -14 -5 748.922 214.841 5
 -3 -14 -4 10592.3 710.036 5
 -3 -14 -3 1066.57 255.201 5
 -3 -14 -2 42436.3 1473.96 5
 -3 -14 -1 14093 852.789 5
 -3 -14 0 10210.4 733.576 5
 -3 -14 1 33137 1354.81 5
 -3 -13 -4 4284.83 440.679 5
 -3 -13 -3 46505.3 1474.27 5
 -3 -13 -2 161.808 145.736 5
 -3 -13 -1 56250.4 1665.66 5
 -3 -13 0 1418.78 283.687 5
 -3 -13 1 32704.1 1286.98 5
 -3 -12 -4 40789 1289.12 5
 -3 -12 -3 25592.5 1021.6 5
 -3 -12 -2 54718.4 1554.84 5
 -3 -12 -1 4817.38 468.118 5
 -3 -12 0 62493.9 1706.41 5
 -3 -12 1 129.955 147.827 5
 -3 -11 -3 20270.9 856.606 5
 -3 -11 -2 32061 1110.12 5
 -3 -11 -1 17883.4 816.314 5
 -3 -11 0 8843.05 596.772 5
 -3 -11 1 53316.7 1516.59 5
 -3 -10 -3 113740 2097.32 5
 -3 -10 -2 1652.17 254.113 5
 -3 -10 -1 48218.1 1322.31 5
 -3 -10 0 26353.3 967.596 5
 -3 -10 1 25266.6 974.771 5
 -3 -9 -3 91507.2 1744.06 5
 -3 -9 -2 107729 1978.83 5
 -3 -9 -1 643.254 154.595 5
 -3 -9 0 62884.5 1474.92 5
 -3 -9 1 25480.8 924.273 5
 -3 -8 -2 100250 1786.2 5
 -3 -8 -1 42963.4 1100.87 5
 -3 -8 0 6689.99 439.469 5
 -3 -8 1 75243.1 1591.99 5
 -3 -7 -2 14472.5 560.268 5
 -3 -7 -1 77695.7 1463.8 5
 -3 -7 0 33991 933.795 5
 -3 -7 1 35239.8 992.418 5
 -3 -7 5 2075.3 190.174 3
 -3 -6 -2 64760.9 1209.22 5
 -3 -6 -1 14199 530.279 5
 -3 -6 0 180388 2445.95 5
 -3 -6 1 6234.43 375.5 5
 -3 -6 5 13703.7 456.024 3
 -3 -5 -2 50853.9 957.93 5
 -3 -5 -1 290848 3283.29 5
 -3 -5 0 9874.75 428.886 5
 -3 -5 4 142840 1735.04 3
 -3 -5 5 240.756 67.694 3
 -3 -4 -17 1333.95 248.199 4
 -3 -4 -16 7797.34 574.602 4
 -3 -4 -15 37858.9 1229.95 4
 -3 -4 -14 5095.81 425.481 4
 -3 -4 -13 14596.5 681.703 4
 -3 -4 -12 24961.9 855.084 4
 -3 -4 -11 6478.24 410.448 4
 -3 -4 -10 17862.5 640.837 4
 -3 -4 -2 25628.1 578.896 5
 -3 -4 -1 65801.2 1065.14 5
 -3 -4 0 42349.1 651.488 3
 -3 -4 1 11000.3 283.273 3
 -3 -4 2 209335 2165.24 3
 -3 -4 4 78410.3 1057.64 3
 -3 -4 5 75153.3 1069.91 3
 -3 -4 6 22946.4 538.71 3
 -3 -3 -17 4193.73 455.117 4
 -3 -3 -16 964.244 241.738 4
 -3 -3 -15 13419.8 742.813 4
 -3 -3 -14 49098.4 1385.9 4
 -3 -3 -13 2179.97 287.725 4
 -3 -3 -12 35599.3 1063.85 4
 -3 -3 -11 6923.46 432.64 4
 -3 -3 -10 524.771 135.251 4
 -3 -3 -9 26697.7 775.405 4
 -3 -3 -8 15538.7 547.36 4
 -3 -3 -5 344656 3364.76 1
 -3 -3 -2 305653 3079 5
 -3 -3 -1 9368.17 315.345 5
 -3 -3 -1 9825.91 257.464 3
 -3 -3 0 29281.9 455.033 3
 -3 -3 1 69700.9 809.537 3
 -3 -3 2 31996.3 460.78 3
 -3 -3 3 58602.3 747.373 3
 -3 -3 4 3502.38 152.86 3
 -3 -3 5 107441 1306.19 3
 -3 -3 6 5714.92 239.282 3
 -3 -2 -17 678.358 201.544 4
 -3 -2 -16 8004.6 613.28 4
 -3 -2 -15 712.552 185.557 4
 -3 -2 -14 18698.6 860.635 4
 -3 -2 -13 35651.5 1150.25 4
 -3 -2 -12 1878.65 258.377 4
 -3 -2 -11 34083.5 1004.84 4
 -3 -2 -10 23930.5 787.099 4
 -3 -2 -9 15997.9 604.62 4
 -3 -2 -8 28272.6 772.332 4
 -3 -2 -7 10129.8 424.209 4
 -3 -2 -4 21890.5 345.063 1
 -3 -2 -2 80874 960.225 5
 -3 -2 -2 83025.1 1020.71 3
 -3 -2 -1 58362.6 728.765 3
 -3 -2 0 12323.5 220.538 3
 -3 -2 3 5088.56 137.628 3
 -3 -2 4 11631.5 258.407 3
 -3 -2 5 19630.7 395.689 3
 -3 -2 6 147546 1690.16 3
 -3 -2 7 8056.77 294.843 3
 -3 -1 -17 11199.9 772.834 4
 -3 -1 -16 23.1176 111.355 4
 -3 -1 -15 9644.9 656.87 4
 -3 -1 -14 1820.75 293.084 4
 -3 -1 -13 18021.7 826.505 4
 -3 -1 -12 14856.5 713.694 4
 -3 -1 -11 20619.5 791.309 4
 -3 -1 -10 102264 1847.11 4
 -3 -1 -9 6755.3 401.034 4
 -3 -1 -8 16755.9 609.225 4
 -3 -1 -7 38370.8 886.902 4
 -3 -1 -6 17748 549.691 4
 -3 -1 -5 48586.7 900.255 4
 -3 -1 -2 25146.2 454.384 3
 -3 -1 -1 61031.4 743.681 3
 -3 -1 0 81082.7 982.918 2
 -3 -1 0 75665.9 798.949 3
 -3 -1 1 45386 645.406 2
 -3 -1 2 35895.6 534.896 2
 -3 -1 3 105167 1164.99 2
 -3 -1 4 4428.5 149.641 2
 -3 -1 4 4435.13 145.075 3
 -3 -1 5 39652.6 553.482 2
 -3 -1 5 42031.7 620.279 3
 -3 -1 6 30338.7 551.242 3
 -3 -1 6 27015 420.483 2
 -3 -1 7 80022.7 1133.03 3
 -3 0 -16 11490.4 771.292 4
 -3 0 -15 390.095 172.577 4
 -3 0 -14 14808.8 803.959 4
 -3 0 -13 1585.8 266.624 4
 -3 0 -12 23360.9 913.461 4
 -3 0 -11 9828.85 559.526 4
 -3 0 -10 47383.2 1219.92 4
 -3 0 -9 125725 2078 4
 -3 0 -8 6188.53 372.654 4
 -3 0 -7 100298 1642.67 4
 -3 0 -6 12506.7 475.78 4
 -3 0 -5 22554 401.437 5
 -3 0 -5 23173.9 604.18 4
 -3 0 -4 103767 1381.6 4
 -3 0 -4 92926.1 990.986 5
 -3 0 -2 182036 1926.86 3
 -3 0 -2 182253 1703.49 1
 -3 0 -2 178141 1973.62 2
 -3 0 -1 83381.8 1075.76 2
 -3 0 0 632451 5882.51 2
 -3 0 1 60262.3 822.975 2
 -3 0 2 6429.75 218.557 2
 -3 0 3 161739 1616.75 3
 -3 0 3 167070 1782.05 2
 -3 0 4 40061.7 642.732 2
 -3 0 4 40754.8 577.235 3
 -3 0 5 1153.7 93.1511 3
 -3 0 5 1039.42 94.3022 2
 -3 0 6 29153.3 563.347 3
 -3 0 6 28396 530.427 2
 -3 0 7 95548.8 1298.56 3
 -3 0 7 93003.7 1186.51 2
 -3 0 8 48628.8 887.979 3
 -3 1 -16 17321.5 980.568 4
 -3 1 -15 12965.4 799.253 4
 -3 1 -14 2537.53 354.523 4
 -3 1 -13 13525 752.092 4
 -3 1 -12 424.18 141.908 4
 -3 1 -11 40044.8 1191.12 4
 -3 1 -10 14742 671.363 4
 -3 1 -9 76519.1 1573.51 4
 -3 1 -8 277055 3481.78 4
 -3 1 -7 32.2331 73.8503 4
 -3 1 -6 10761.6 461.143 4
 -3 1 -5 33433.8 582.429 5
 -3 1 -5 32352.4 757.788 4
 -3 1 -4 62530.7 969.232 2
 -3 1 -4 64011 1059.35 4
 -3 1 -3 88718.3 1237.51 4
 -3 1 -3 86314.8 1164.33 2
 -3 1 -2 13409.1 368.087 2
 -3 1 -1 236381 2341.59 1
 -3 1 -1 233070 2472.6 2
 -3 1 0 6114.97 231.482 2
 -3 1 0 5860.17 217.378 1
 -3 1 1 277199 2745.63 4
 -3 1 1 272732 2820.59 2
 -3 1 2 3518.49 177.06 2
 -3 1 3 148040 1723.22 2
 -3 1 3 149277 1592.78 3
 -3 1 4 412792 3961.77 3
 -3 1 4 414607 4084.77 2
 -3 1 5 42114.7 741.042 2
 -3 1 5 41717.9 691.867 3
 -3 1 6 12876.3 383.4 2
 -3 1 6 12897.5 374.089 3
 -3 1 7 2299.74 164.079 2
 -3 1 7 2591.65 178.186 3
 -3 1 8 93449.6 1321.45 2
 -3 1 8 95170 1397.08 3
 -3 1 14 2007.72 338.409 1
 -3 2 -15 26588.2 1181.29 4
 -3 2 -14 11730.3 749.779 4
 -3 2 -13 6480.88 537.861 4
 -3 2 -12 18501.1 861.727 4
 -3 2 -11 4373.1 396.395 4
 -3 2 -10 33918.3 1078.6 4
 -3 2 -9 131.657 83.4515 4
 -3 2 -8 232874 3140.66 4
 -3 2 -7 208005 2793.27 4
 -3 2 -6 2296.55 217.751 4
 -3 2 -5 26929.1 716.247 4
 -3 2 -5 26986.6 606.37 2
 -3 2 -4 10529 398.211 4
 -3 2 -4 11262.1 363.781 2
 -3 2 -3 76486.2 1154.88 4
 -3 2 -3 77363.7 1113.47 2
 -3 2 -2 46404.9 768.756 4
 -3 2 -2 45207 778.376 2
 -3 2 -1 77632.8 1100.93 2
 -3 2 0 118755 1454.88 1
 -3 2 0 118816 1491.75 2
 -3 2 1 48535.8 817.181 2
 -3 2 1 50418.6 843.062 1
 -3 2 2 95002.8 1129.28 4
 -3 2 2 92278.4 1266.85 2
 -3 2 2 91492.1 1345.91 1
 -3 2 3 3593.22 175.065 3
 -3 2 3 4187.6 256.613 1
 -3 2 3 3882.2 212.482 2
 -3 2 4 298179 3137.46 2
 -3 2 4 290197 3006.92 3
 -3 2 4 292204 3381.72 1
 -3 2 5 276108 2912.38 3
 -3 2 5 274751 3005.93 2
 -3 2 6 5378.65 269.268 2
 -3 2 6 5445.25 256.68 3
 -3 2 7 42391.6 847.178 2
 -3 2 7 42418.2 836.394 3
 -3 2 8 6744.02 316.986 2
 -3 2 8 7033.96 331.677 3
 -3 2 9 86958.1 1428.39 3
 -3 2 12 30020.7 1155.56 1
 -3 2 13 478.745 184.482 1
 -3 2 14 4788.26 506.404 1
 -3 3 -15 2810.51 410.034 4
 -3 3 -14 41610.7 1481.7 4
 -3 3 -13 2775.8 367.627 4
 -3 3 -12 22503.3 981.657 4
 -3 3 -11 28492.8 1060.4 4
 -3 3 -10 9195.75 564.799 4
 -3 3 -9 30825.1 1007.97 4
 -3 3 -8 25933.5 864.277 4
 -3 3 -7 165242 2444.06 4
 -3 3 -6 70081.3 1128.96 2
 -3 3 -6 71909.3 1368.64 4
 -3 3 -5 22091.1 542.571 2
 -3 3 -5 23317.2 681.948 4
 -3 3 -4 68915.8 1087.24 2
 -3 3 -4 69167.8 1192.15 4
 -3 3 -3 34287.2 730.869 4
 -3 3 -3 34340.9 690.494 2
 -3 3 -2 136348 1701.95 4
 -3 3 -2 139846 1742.19 2
 -3 3 -1 408.088 78.9951 2
 -3 3 0 60387.4 978.92 2
 -3 3 1 386502 3989.5 1
 -3 3 1 385372 3960.67 2
 -3 3 2 7000.74 302.402 2
 -3 3 2 7605.83 333.427 1
 -3 3 3 50435.3 715.078 4
 -3 3 3 49907.3 903.505 2
 -3 3 3 47119.3 826.308 3
 -3 3 3 49204.8 976.831 1
 -3 3 4 15802 547.807 1
 -3 3 4 15356.4 444.07 3
 -3 3 4 15281.8 479.128 2
 -3 3 5 393293 4067.52 3
 -3 3 5 395189 4191.49 2
 -3 3 5 402623 4458.48 1
 -3 3 6 34151 749.873 3
 -3 3 6 34023.2 940.729 1
 -3 3 6 34684.5 796.046 2
 -3 3 7 10997.8 440.415 2
 -3 3 7 10867.4 537.674 1
 -3 3 7 10964.8 418.281 3
 -3 3 8 26440.4 719.26 2
 -3 3 8 25716.1 694.762 3
 -3 3 8 27260.8 907.496 1
 -3 3 9 4089.86 362.398 1
 -3 3 9 3519.36 261.279 2
 -3 3 9 3596.63 261.866 3
 -3 3 10 47545.3 1361.22 1
 -3 3 11 12320.1 712.917 1
 -3 3 12 17362.6 870.98 1
 -3 3 13 23987.4 1072.31 1
 -3 3 14 21.6018 121.899 1
 -3 4 -14 11724.2 790.022 4
 -3 4 -13 47278.6 1546.53 4
 -3 4 -12 101.878 132.876 4
 -3 4 -11 40371.1 1300.38 4
 -3 4 -10 19715 855.727 4
 -3 4 -9 11944.4 637.092 4
 -3 4 -8 25583.9 902.824 4
 -3 4 -7 33234.3 971.372 4
 -3 4 -6 167918 2099.5 2
 -3 4 -6 167854 2445.94 4
 -3 4 -5 27859.7 785.183 4
 -3 4 -5 29220 693.364 2
 -3 4 -4 2744.89 199.931 2
 -3 4 -4 2678.81 223.85 4
 -3 4 -3 16072.7 502.881 4
 -3 4 -3 15294.4 465.233 2
 -3 4 -2 98350.4 1381.36 4
 -3 4 -2 100826 1430.61 2
 -3 4 -1 156479 1972.25 2
 -3 4 -1 157090 1817.85 4
 -3 4 0 2230.34 177.76 2
 -3 4 1 92128.9 1380.6 2
 -3 4 2 223941 2669.02 1
 -3 4 2 216731 2586.82 2
 -3 4 3 3435.33 254.162 1
 -3 4 3 3408.1 239.707 2
 -3 4 4 60217.4 808.933 4
 -3 4 4 58932.9 1040.24 3
 -3 4 4 59782.3 1117.32 2
 -3 4 4 58224.9 1193 1
 -3 4 5 42127.9 1021.29 1
 -3 4 5 43516.7 884.918 3
 -3 4 5 44948.5 954.246 2
 -3 4 6 177933 2359.19 2
 -3 4 6 177575 2281.21 3
 -3 4 7 18888.4 726.547 1
 -3 4 7 20239.9 623.445 3
 -3 4 7 18975 622.123 2
 -3 4 8 19025.9 765.545 1
 -3 4 8 19219 648.531 2
 -3 4 8 19329.1 624.303 3
 -3 4 9 4073.49 374.473 1
 -3 4 9 3758.87 285.895 3
 -3 4 9 3891.5 299.315 2
 -3 4 10 2785 327.169 1
 -3 4 10 2855.87 261.757 2
 -3 4 10 2929.46 263.95 3
 -3 4 11 35872.9 1218.46 1
 -3 4 12 1706.12 287.032 1
 -3 4 13 23427.4 1056.97 1
 -3 4 14 17792.4 959.775 1
 -3 5 -14 2396.65 379.615 4
 -3 5 -13 15045 872.389 4
 -3 5 -12 26371.8 1125.79 4
 -3 5 -11 5394.39 481.094 4
 -3 5 -10 61487.1 1615.78 4
 -3 5 -9 14865.6 739.051 4
 -3 5 -8 6804.16 472.359 4
 -3 5 -7 2336.7 194.672 2
 -3 5 -7 2248.6 261.226 4
 -3 5 -6 38010.6 1025.56 4
 -3 5 -6 38467.2 828.497 2
 -3 5 -5 124319 1967.28 4
 -3 5 -5 124619 1726.81 2
 -3 5 -4 29227.5 700.84 2
 -3 5 -4 28442.2 776.866 4
 -3 5 -3 38012.3 818.797 2
 -3 5 -3 37192.3 846.462 4
 -3 5 -2 19319.8 566.834 2
 -3 5 -2 18932.5 533.383 4
 -3 5 -1 67284.6 1026.38 4
 -3 5 -1 66999.8 1159.19 2
 -3 5 0 205101 2507.39 2
 -3 5 1 10121.9 413.742 2
 -3 5 2 81139.7 1350.5 2
 -3 5 3 13662.6 503.795 2
 -3 5 3 14372.4 549.548 1
 -3 5 4 36762.9 834.872 3
 -3 5 4 37515 898.443 2
 -3 5 4 36266.1 930.64 1
 -3 5 5 82489.5 1020.65 4
 -3 5 5 83054.2 1568.14 1
 -3 5 5 86031.5 1414 3
 -3 5 5 82098.5 1420.51 2
 -3 5 6 36199.7 871.806 3
 -3 5 6 37846.9 1025.12 1
 -3 5 6 34561.4 859.931 2
 -3 5 7 135130 2243.59 1
 -3 5 7 135934 1981.21 3
 -3 5 8 25081.6 755.741 3
 -3 5 8 24956.4 891.65 1
 -3 5 8 24455.4 766.427 2
 -3 5 9 26200.6 806.134 3
 -3 5 9 25536.9 946.657 1
 -3 5 9 24667.8 799.545 2
 -3 5 10 16609.9 792.077 1
 -3 5 10 16584 653.478 3
 -3 5 10 16330.1 664.671 2
 -3 5 11 7561.29 553.315 1
 -3 5 12 23147.6 1012.73 1
 -3 5 13 90.3077 117.322 1
 -3 5 14 21991 1072.54 1
 -3 6 -13 1323.12 281.707 4
 -3 6 -12 10703.9 738.095 4
 -3 6 -11 11741.3 736.731 4
 -3 6 -10 15135.6 809.695 4
 -3 6 -9 80563.1 1872.09 4
 -3 6 -8 4310.7 391.686 4
 -3 6 -7 12656 468.846 2
 -3 6 -7 11899.6 613.853 4
 -3 6 -6 551.889 148.896 4
 -3 6 -6 581.191 114.436 2
 -3 6 -5 49214.8 989.917 2
 -3 6 -5 47295.8 1144.68 4
 -3 6 -4 106774 1765.26 4
 -3 6 -4 107543 1614.53 2
 -3 6 -3 12174.7 484.945 4
 -3 6 -3 12977.9 482.856 2
 -3 6 -2 141647 1916.4 4
 -3 6 -2 144263 1988.23 2
 -3 6 -1 30819.4 673.13 4
 -3 6 -1 31905.4 780.43 2
 -3 6 0 68485.1 1240.13 2
 -3 6 0 67383.3 980.462 4
 -3 6 1 119970 1790.74 2
 -3 6 2 24922.2 716.879 2
 -3 6 3 209586 2723.81 2
 -3 6 4 9421.42 459.191 2
 -3 6 5 52026.9 1220.03 1
 -3 6 5 49517.9 1106.85 2
 -3 6 5 51836.9 1102.47 3
 -3 6 6 33180.7 881.443 3
 -3 6 6 31318.7 876.295 2
 -3 6 6 33896.2 992.244 1
 -3 6 7 28385.2 939.724 1
 -3 6 7 26671.8 823.607 2
 -3 6 7 28975.2 839.879 3
 -3 6 8 96402 1906.53 1
 -3 6 8 95980 1705.91 3
 -3 6 9 13195.1 685.521 1
 -3 6 9 11877.2 554.232 3
 -3 6 10 41164.1 1288.42 1
 -3 6 10 39071.8 1111.34 2
 -3 6 10 39050.5 1069.57 3
 -3 6 11 10293.9 664.506 1
 -3 6 11 9449.92 547.954 2
 -3 6 11 9312.89 526.365 3
 -3 6 12 13568.7 777.69 1
 -3 6 13 16469.9 898.382 1
 -3 6 14 682.68 218.304 1
 -3 7 -12 507.758 209.74 4
 -3 7 -11 11271.9 737.082 4
 -3 7 -10 16247.4 860.082 4
 -3 7 -9 13435.3 747.728 4
 -3 7 -8 73112.6 1739.12 4
 -3 7 -7 224.913 97.6513 2
 -3 7 -7 254.307 124.47 4
 -3 7 -6 34221.9 834.158 2
 -3 7 -6 31945.1 1011.92 4
 -3 7 -5 3333.05 312.217 4
 -3 7 -5 3480.1 258.965 2
 -3 7 -4 45374 1109.85 4
 -3 7 -4 48795.4 1033.33 2
 -3 7 -3 100579 1671.2 4
 -3 7 -3 102134 1633.19 2
 -3 7 -2 646.699 112.995 4
 -3 7 -2 460.185 102.76 2
 -3 7 -1 154549 2175.2 2
 -3 7 -1 153592 1980.87 4
 -3 7 0 10453.4 469.002 2
 -3 7 0 10060.4 340.123 4
 -3 7 1 51309.4 1109.85 2
 -3 7 2 49366 1112.06 2
 -3 7 3 69255.6 1376.97 2
 -3 7 4 197967 2745.27 2
 -3 7 5 559.431 145.919 2
 -3 7 6 59098 1309.63 2
 -3 7 6 62543.7 1318.41 3
 -3 7 7 28938.9 904.089 2
 -3 7 7 30256 907.97 3
 -3 7 7 31467.8 1024.58 1
 -3 7 8 20904.6 782.729 2
 -3 7 8 23130.5 810.911 3
 -3 7 8 22971.9 891.48 1
 -3 7 9 82002 1845.37 1
 -3 7 9 82608.5 1660.03 3
 -3 7 10 961.412 183.271 2
 -3 7 10 969.152 215.624 1
 -3 7 10 861.958 173.983 3
 -3 7 11 27884.5 962.593 3
 -3 7 11 27280.2 1091.74 1
 -3 7 11 28422.2 1022.66 2
 -3 7 12 973.064 234.603 1
 -3 7 13 10270.3 718.824 1
 -3 7 14 9325.6 711.215 1
 -3 8 -12 14426.6 895.584 4
 -3 8 -11 1008.47 264.13 4
 -3 8 -10 15058.4 850.191 4
 -3 8 -9 11450.1 720.362 4
 -3 8 -8 24893.2 1012.14 4
 -3 8 -7 47488.6 1360.74 4
 -3 8 -6 2931.22 316.831 4
 -3 8 -6 3622.07 274.495 2
 -3 8 -5 53144.5 1316.87 4
 -3 8 -5 54604.1 1142.11 2
 -3 8 -4 6392.16 374.662 2
 -3 8 -4 5912.44 402.235 4
 -3 8 -3 51883.6 1133.26 2
 -3 8 -3 50833.4 1156.05 4
 -3 8 -2 89249.7 1568.57 2
 -3 8 -2 89973.2 1517.11 4
 -3 8 -1 6110.58 362.329 2
 -3 8 -1 5318.62 293.398 4
 -3 8 0 82391.3 1238 4
 -3 8 0 82996.3 1534.54 2
 -3 8 1 253.535 59.9352 4
 -3 8 1 152.125 77.5318 2
 -3 8 2 92252.3 1678.11 2
 -3 8 3 4782.38 352.746 2
 -3 8 4 109898 1951.56 2
 -3 8 5 65774.3 1419.79 2
 -3 8 6 2735.53 287.414 3
 -3 8 6 2625.25 286.442 2
 -3 8 7 43382.7 1159.33 3
 -3 8 7 41389.1 1149.81 2
 -3 8 8 6232.45 447.807 2
 -3 8 8 6580.82 451.608 3
 -3 8 9 66860.3 1698.01 1
 -3 8 9 66763.3 1535.89 3
 -3 8 10 31473.9 1069.65 2
 -3 8 10 32644.7 1073.81 3
 -3 8 10 32344.9 1172.68 1
 -3 8 11 5093.59 482.162 1
 -3 8 11 4577.34 428.61 2
 -3 8 11 5268.6 431.21 3
 -3 8 12 19789.2 897.923 2
 -3 8 12 20497.3 998.836 1
 -3 8 13 1019.26 261.321 1
 -3 8 14 8233.03 684.431 1
 -3 9 -11 23243.7 1142.47 4
 -3 9 -10 -58.054 123.163 4
 -3 9 -9 18600 943.446 4
 -3 9 -8 396.112 151.232 4
 -3 9 -7 42609.3 1322.35 4
 -3 9 -6 35877.6 1162.71 4
 -3 9 -6 37775.3 960.26 2
 -3 9 -5 4413.68 312.288 2
 -3 9 -5 3781.05 359.871 4
 -3 9 -4 76684.9 1598.93 4
 -3 9 -4 78037.1 1495.06 2
 -3 9 -3 909.398 165.469 4
 -3 9 -3 900.744 167.096 2
 -3 9 -2 72629.1 1385.84 4
 -3 9 -2 74159 1457.32 2
 -3 9 -1 70005.6 1267.64 4
 -3 9 -1 70865.3 1437.71 2
 -3 9 0 9730.72 381.81 4
 -3 9 0 10396.8 512.276 2
 -3 9 1 83968.2 1174.58 4
 -3 9 1 85748.7 1643.78 2
 -3 9 2 2084.77 244.363 2
 -3 9 3 38562.2 1081.29 2
 -3 9 4 3033.07 310.711 2
 -3 9 5 110447 2056.58 2
 -3 9 6 88631.1 1809.71 2
 -3 9 7 1757.98 241.887 3
 -3 9 7 2093.75 263.042 2
 -3 9 8 28923.5 997.034 2
 -3 9 8 30799.4 1024.61 3
 -3 9 9 146.775 126.395 2
 -3 9 9 182.044 131.124 3
 -3 9 10 29002.5 1043.27 3
 -3 9 10 28266.8 1049.59 2
 -3 9 11 17666.1 859.532 2
 -3 9 11 16487.4 802.233 3
 -3 9 12 4668.55 457.124 2
 -3 9 12 4397.11 420.577 3
 -3 9 12 5279.41 521.362 1
 -3 9 13 26582.6 1205.57 1
 -3 10 -10 16058.3 930.162 4
 -3 10 -9 696.189 190.6 4
 -3 10 -8 6323.05 542.562 4
 -3 10 -7 1426.39 261.872 4
 -3 10 -6 73259.1 1756.99 4
 -3 10 -5 46820.7 1138.27 2
 -3 10 -5 46169.6 1309.53 4
 -3 10 -4 17584.6 680.098 2
 -3 10 -4 15403.8 695.235 4
 -3 10 -3 64075.8 1417.99 4
 -3 10 -3 64725.2 1411.54 2
 -3 10 -2 778.196 145.976 4
 -3 10 -2 815.108 158.22 2
 -3 10 -1 78992.2 1414.57 4
 -3 10 -1 78169.3 1591.31 2
 -3 10 0 12261.8 458.985 4
 -3 10 0 13630.9 626.941 2
 -3 10 1 43858.8 1176.67 2
 -3 10 2 106177 1970.48 2
 -3 10 3 344.104 140.544 2
 -3 10 4 26870.5 956.431 2
 -3 10 5 76.7378 115.313 2
 -3 10 6 88770.7 1910.09 2
 -3 10 7 29705.1 1063.25 2
 -3 10 8 1287.53 226.819 2
 -3 10 9 21325.9 899.134 3
 -3 10 9 19770.7 881.316 2
 -3 10 10 775.706 211.476 2
 -3 10 10 632.548 179.941 3
 -3 10 11 15267.7 802.99 3
 -3 10 11 15974 866.555 2
 -3 10 12 4342.6 446.968 3
 -3 10 12 3960.74 447.87 2
 -3 10 13 8393.51 647.402 2
 -3 11 -9 13073.7 835.197 4
 -3 11 -8 558.504 181.432 4
 -3 11 -7 4184.69 437.555 4
 -3 11 -6 2936.73 351.616 4
 -3 11 -5 69470.5 1695.46 4
 -3 11 -4 31382.1 966.955 2
 -3 11 -4 29935.4 1022.57 4
 -3 11 -3 34841.2 1036.19 2
 -3 11 -3 31777.6 996.54 4
 -3 11 -2 46322 1152.63 4
 -3 11 -2 49080.2 1258.21 2
 -3 11 -1 8492.58 507.071 2
 -3 11 0 70061 1562.55 2
 -3 11 1 2578.77 301.72 2
 -3 11 2 43207.8 1227.44 2
 -3 11 3 74591.2 1696.64 2
 -3 11 4 1015.52 202.63 2
 -3 11 5 16110.7 778.47 2
 -3 11 6 1743.25 274.599 2
 -3 11 7 59313.8 1602.23 2
 -3 11 8 35098.8 1252.96 2
 -3 11 9 10114.9 678.114 2
 -3 11 10 24837.1 1096.2 2
 -3 11 11 177.114 162.337 2
 -3 11 11 136.126 136.427 3
 -3 11 12 8745.88 641.47 3
 -3 11 12 9666.71 707.221 2
 -3 11 13 414.354 203.569 2
 -3 12 -9 19327.2 1035.21 4
 -3 12 -8 10299.8 736.041 4
 -3 12 -7 1427.08 275.147 4
 -3 12 -6 5144.27 480.057 4
 -3 12 -5 4162.37 408.352 4
 -3 12 -4 53395.9 1350.24 2
 -3 12 -4 51250.5 1409.02 4
 -3 12 -3 15965.7 721.342 2
 -3 12 -2 40683.5 1189.92 2
 -3 12 -1 19876.8 823.514 2
 -3 12 0 17485.4 773.123 2
 -3 12 1 45324.4 1309.57 2
 -3 12 2 3811.88 380.36 2
 -3 12 3 82616.4 1872.07 2
 -3 12 4 55742.4 1525.85 2
 -3 12 5 962.224 219.623 2
 -3 12 6 16046.1 833.542 2
 -3 12 7 2338.35 321.95 2
 -3 12 8 58753.7 1714.28 2
 -3 12 9 7340.79 615.412 2
 -3 12 10 17680.9 951.631 2
 -3 12 11 23423.7 1121.85 2
 -3 12 12 330.887 178.849 2
 -3 12 13 19003.6 1049.64 2
 -3 13 -8 27042 1212.46 4
 -3 13 -7 9523.94 692.192 4
 -3 13 -3 47975.2 1340.62 2
 -3 13 -2 562.795 169.609 2
 -3 13 -1 31498.5 1085.54 2
 -3 13 0 31929.5 1113.76 2
 -3 13 1 12695.3 691.168 2
 -3 13 2 18500.8 864.376 2
 -3 13 3 19441.5 888.28 2
 -3 13 4 74853.5 1870.29 2
 -3 13 5 30036.3 1160.03 2
 -3 13 6 5462.42 499.988 2
 -3 13 7 17994.7 943.078 2
 -3 13 8 19181.1 983.358 2
 -3 13 9 37328.3 1425.51 2
 -3 13 10 1467.92 329.282 2
 -3 13 11 18433.5 1031.25 2
 -3 14 -2 23807.9 975.773 2
 -3 14 -1 829.421 206.954 2
 -3 14 0 42937.8 1350.43 2
 -3 14 1 12513.3 724.781 2
 -3 14 2 18640.9 896.071 2
 -3 14 3 15530.3 834.607 2
 -3 14 4 14013.4 804.699 2
 -3 14 5 48854.3 1551.32 2
 -3 14 6 12838.3 803.326 2
 -3 14 7 5424.33 531.717 2
 -3 14 8 3268.29 436.167 2
 -3 14 9 16530.1 969.174 2
 -3 14 10 36023.3 1461.29 2
 -3 15 -1 21119.4 964.559 2
 -3 15 0 4858.79 468.842 2
 -3 15 1 31488.9 1204.38 2
 -3 15 2 2227.44 339.553 2
 -3 15 3 16572 896.049 2
 -3 15 4 5662.3 546.512 2
 -3 15 5 17895.4 950.423 2
 -3 15 6 24797.1 1161.43 2
 -3 15 7 1684.32 328.406 2
 -3 15 8 8838.09 709.398 2
 -3 16 -1 17056.1 899.212 2
 -3 16 0 11399.5 744.056 2
 -3 16 1 6751.57 571.367 2
 -3 16 2 25991.6 1156.57 2
 -3 16 3 259.078 170.875 2
 -3 16 4 12420.6 815.052 2
 -3 16 5 5820.61 576.16 2
 -2 -17 -5 233.94 143.513 5
 -2 -16 -5 11157.1 797.68 5
 -2 -16 -4 275.455 160.909 5
 -2 -16 -3 22597.3 1155.61 5
 -2 -16 -2 8465.58 708.706 5
 -2 -16 -1 8307.05 709.424 5
 -2 -15 -4 18201.5 968.43 5
 -2 -15 -3 963.715 274.029 5
 -2 -15 -2 28159.4 1238.84 5
 -2 -15 -1 9481.2 723.791 5
 -2 -15 0 15129.1 927.664 5
 -2 -15 1 27892.2 1258.63 5
 -2 -15 2 140.892 122.149 5
 -2 -14 -3 29327.2 1205.81 5
 -2 -14 -2 1170.48 280.014 5
 -2 -14 -1 20544 1014.83 5
 -2 -14 0 169.666 141.38 5
 -2 -14 1 29415.8 1241.07 5
 -2 -14 2 38646.8 1465.25 5
 -2 -13 -3 47623.2 1469.12 5
 -2 -13 -2 41877.4 1398.25 5
 -2 -13 -1 5130.32 499.597 5
 -2 -13 0 72063.7 2153.72 5
 -2 -13 1 2301.07 351.86 5
 -2 -13 2 35512.4 1341.76 5
 -2 -12 -3 4090.87 402.1 5
 -2 -12 -2 74128.9 1794.86 5
 -2 -12 -1 27174.7 1074.92 5
 -2 -12 0 7554.14 573.283 5
 -2 -12 1 36867.7 1286.23 5
 -2 -12 2 2406.88 352.773 5
 -2 -11 -2 568.488 179.225 5
 -2 -11 -1 74423.1 1751.85 5
 -2 -11 0 23500.4 945.603 5
 -2 -11 1 12447.2 704.862 5
 -2 -11 2 11426.8 676.18 5
 -2 -10 -2 76853.5 1667.1 5
 -2 -10 -1 5625.81 449.335 5
 -2 -10 0 89680.6 1882.07 5
 -2 -10 1 24851.6 945.407 5
 -2 -10 2 22555.5 916.982 5
 -2 -9 -1 55068.1 1339.04 5
 -2 -9 0 25954.5 898.344 5
 -2 -9 1 130328 2287.33 5
 -2 -9 2 15000.8 703.351 5
 -2 -8 -1 63415.9 1349.96 5
 -2 -8 0 13156.1 593.257 5
 -2 -8 1 103239 1882.2 5
 -2 -8 2 151652 2454.76 5
 -2 -7 -1 251.378 105.227 5
 -2 -7 0 49552.1 1130.1 5
 -2 -7 1 475.162 137.294 5
 -2 -7 2 170639 2551.67 5
 -2 -7 6 62.4868 52.439 3
 -2 -6 -1 131064 1900.11 5
 -2 -6 0 20859.1 658.647 5
 -2 -6 1 110407 1773.18 5
 -2 -6 2 16050.9 614.07 5
 -2 -6 6 30117.8 762.304 3
 -2 -5 -15 33689.3 1117.11 4
 -2 -5 -14 1788.12 250.67 4
 -2 -5 -13 24027.6 852.773 4
 -2 -5 -12 55075.9 1270.12 4
 -2 -5 -11 17928.8 653.858 4
 -2 -5 -1 134393 1810.79 5
 -2 -5 0 97217.5 1501.89 5
 -2 -5 1 33893.7 824.61 5
 -2 -5 5 48736.8 917.947 3
 -2 -5 6 42650.5 884.916 3
 -2 -5 7 32627.1 783.253 3
 -2 -4 -16 1797.42 285.825 4
 -2 -4 -15 15239.8 763.149 4
 -2 -4 -14 38477.8 1179.27 4
 -2 -4 -13 90.2905 104.658 4
 -2 -4 -12 76812.5 1582.54 4
 -2 -4 -11 4931.33 348.853 4
 -2 -4 -10 21113.6 691.654 4
 -2 -4 -9 21354 652.699 4
 -2 -4 -8 28805.3 718.969 4
 -2 -4 -1 93216.9 1331.94 5
 -2 -4 0 370719 3880.89 5
 -2 -4 1 9987.99 392.543 5
 -2 -4 4 3548.41 194.251 3
 -2 -4 5 132061 1688.83 3
 -2 -4 6 12176 413.137 3
 -2 -4 7 19163.6 556.186 3
 -2 -3 -17 31.9981 132.803 4
 -2 -3 -16 15038.9 816.775 4
 -2 -3 -15 2361.74 315.481 4
 -2 -3 -14 13473 705.265 4
 -2 -3 -13 22006.5 862.98 4
 -2 -3 -12 15857 692.86 4
 -2 -3 -11 37373.2 1032.03 4
 -2 -3 -10 1583.04 202.293 4
 -2 -3 -9 32659.5 849.443 4
 -2 -3 -8 46011.4 967.254 4
 -2 -3 -7 61066.2 1085.23 4
 -2 -3 -6 310324 3324.92 4
 -2 -3 -4 66024.8 903.387 1
 -2 -3 -1 217209 2225.78 3
 -2 -3 -1 221127 2348.12 5
 -2 -3 0 23810.2 413.733 3
 -2 -3 0 24300.5 534.211 5
 -2 -3 1 248847 2444.99 3
 -2 -3 4 2245.63 140.239 3
 -2 -3 5 28290.2 581.113 3
 -2 -3 6 112856 1501.3 3
 -2 -3 7 12238.6 421.341 3
 -2 -3 8 42756.5 887.731 3
 -2 -2 -17 8682.02 669.334 4
 -2 -2 -16 1435.52 279.834 4
 -2 -2 -15 19648.6 920.048 4
 -2 -2 -14 3111.53 354.431 4
 -2 -2 -13 10936.8 619.018 4
 -2 -2 -12 4770.03 392.642 4
 -2 -2 -11 16178.7 682.635 4
 -2 -2 -10 36165.1 979.364 4
 -2 -2 -9 1760.57 201.869 4
 -2 -2 -8 30164.8 795.696 4
 -2 -2 -7 23764.9 647.094 4
 -2 -2 -6 77130 1212.04 4
 -2 -2 -5 193020 2217.1 4
 -2 -2 -4 21451.5 394.338 1
 -2 -2 -3 170705 1720.25 1
 -2 -2 -2 75761.4 937.934 3
 -2 -2 -1 1723.32 103.476 5
 -2 -2 -1 1475.6 84.814 3
 -2 -2 -1 1963.15 112.708 4
 -2 -2 0 5081.78 136.51 3
 -2 -2 1 221783 2081.93 3
 -2 -2 3 129548 1380.68 3
 -2 -2 4 104690 1234.01 3
 -2 -2 5 34982.3 624.797 3
 -2 -2 6 49481.2 839.354 3
 -2 -2 7 83571.8 1248.83 3
 -2 -2 8 1636.44 158.788 3
 -2 -1 -16 7666.42 611.509 4
 -2 -1 -15 2604.01 348.781 4
 -2 -1 -14 18847.1 882.971 4
 -2 -1 -13 1685.41 255.082 4
 -2 -1 -12 10221.6 584.004 4
 -2 -1 -11 6282.58 437.667 4
 -2 -1 -10 46651.9 1174.43 4
 -2 -1 -9 69641.9 1385.35 4
 -2 -1 -8 3820.82 289.647 4
 -2 -1 -7 26603.8 721.769 4
 -2 -1 -6 6503.3 320.289 4
 -2 -1 -5 126500 1659.9 4
 -2 -1 -4 98205.3 1294.89 4
 -2 -1 -3 181853 1969.57 3
 -2 -1 -2 104336 1177.97 3
 -2 -1 -1 38661 500.868 3
 -2 -1 0 51673.6 717.302 4
 -2 -1 1 1600.12 76.6365 2
 -2 -1 2 139129 1365.96 2
 -2 -1 3 323854 2968.05 3
 -2 -1 3 311519 2899.74 2
 -2 -1 4 69537.8 767.456 2
 -2 -1 4 75944 908.748 3
 -2 -1 5 78011.2 999.772 3
 -2 -1 5 71645.6 792.543 2
 -2 -1 6 28366.5 568.297 3
 -2 -1 6 24752.7 364.307 2
 -2 -1 7 107662 1397.89 3
 -2 -1 7 94106.9 1014.68 2
 -2 -1 8 31528.4 716.327 3
 -2 -1 9 7480.8 356.825 3
 -2 0 -16 9430.22 697.27 4
 -2 0 -15 5295.27 511.956 4
 -2 0 -14 3649.96 407.496 4
 -2 0 -13 20785.7 908.615 4
 -2 0 -12 -79.1857 105.127 4
 -2 0 -11 28890.4 971.914 4
 -2 0 -10 691.159 154.019 4
 -2 0 -9 99739.5 1774.3 4
 -2 0 -8 160334 2324.84 4
 -2 0 -7 2241.47 213.85 4
 -2 0 -6 74505.9 1261.86 4
 -2 0 -5 10443.5 386.587 4
 -2 0 -4 61617.6 975.811 4
 -2 0 -3 119986 1459.86 4
 -2 0 -2 15049.8 326.536 3
 -2 0 -2 14394.7 324.609 2
 -2 0 -1 167983 1714.05 2
 -2 0 0 39696.7 546.548 4
 -2 0 0 38552.1 541.293 2
 -2 0 1 293044 2777.52 2
 -2 0 1 291085 2845.57 4
 -2 0 2 30949.5 459.249 2
 -2 0 2 30413.8 385.493 3
 -2 0 3 136970 1452.05 2
 -2 0 3 139853 1425.06 3
 -2 0 4 317739 3051.68 2
 -2 0 4 317323 3077.06 3
 -2 0 5 14671.5 363.152 3
 -2 0 5 13774.2 312.589 2
 -2 0 6 40677.3 724.362 3
 -2 0 6 39153.5 614.359 2
 -2 0 7 5129.64 254.978 3
 -2 0 7 4628.85 187.64 2
 -2 0 8 56168.7 817.619 2
 -2 0 8 58839.3 1033.67 3
 -2 0 9 21542.2 617.279 3
 -2 1 -16 1641.35 320.531 4
 -2 1 -15 11574.6 766.319 4
 -2 1 -14 8111.44 607.085 4
 -2 1 -13 10046.5 651.246 4
 -2 1 -12 31637.8 1116.63 4
 -2 1 -11 734.673 171.331 4
 -2 1 -10 25856.2 901.75 4
 -2 1 -9 2437.32 265.952 4
 -2 1 -8 249096 3229.4 4
 -2 1 -7 126389 1941.1 4
 -2 1 -6 23443.9 677.715 4
 -2 1 -5 17651.8 537.513 4
 -2 1 -4 522.466 68.6537 5
 -2 1 -4 949.67 120.103 4
 -2 1 -3 228247 2509.44 4
 -2 1 -3 229918 2391.43 2
 -2 1 -2 144983 1640.97 4
 -2 1 -2 149479 1619.73 2
 -2 1 -1 284670 2796.97 2
 -2 1 0 147705 1586.18 2
 -2 1 0 146637 1548.94 1
 -2 1 1 29022.2 517.609 1
 -2 1 1 28332 429.638 4
 -2 1 1 27099.9 473.425 2
 -2 1 2 1944.1 114.267 4
 -2 1 2 1668.81 91.1565 3
 -2 1 3 44542.6 679.046 2
 -2 1 3 45053.9 636.502 3
 -2 1 4 213142 2205.76 3
 -2 1 4 208489 2215.38 2
 -2 1 5 205475 2216.81 3
 -2 1 5 200163 2175.42 2
 -2 1 6 1896.51 147.473 3
 -2 1 6 1652.81 128.09 2
 -2 1 7 38515.8 772.743 3
 -2 1 7 37825.1 695.028 2
 -2 1 8 2243.72 185.58 3
 -2 1 8 2158.73 153.897 2
 -2 1 9 61797.6 1148.03 3
 -2 1 10 6869.02 364.964 3
 -2 1 15 394.017 199.218 1
 -2 2 -15 2325.94 369.67 4
 -2 2 -14 23327.5 1058.93 4
 -2 2 -13 333.033 156.018 4
 -2 2 -12 25345.8 1012.01 4
 -2 2 -11 29229.6 1055.45 4
 -2 2 -10 3269.14 329.144 4
 -2 2 -9 21587.6 800.074 4
 -2 2 -8 33867.2 962.416 4
 -2 2 -7 255274 3239.75 4
 -2 2 -6 48983.6 1059.63 4
 -2 2 -5 12102.8 465.47 4
 -2 2 -4 67067.3 1118.01 4
 -2 2 -4 66831 943.949 2
 -2 2 -3 25891.1 504.416 2
 -2 2 -3 25992.7 581.74 4
 -2 2 -2 200443 2122.83 2
 -2 2 -2 200746 2182.05 4
 -2 2 -1 131071 1436.55 4
 -2 2 -1 128053 1491.44 2
 -2 2 0 622716 5816.89 2
 -2 2 1 239733 2515.09 1
 -2 2 1 238324 2480.75 2
 -2 2 2 4307.17 219.477 1
 -2 2 2 4420.56 145.51 4
 -2 2 2 4215.99 194.127 2
 -2 2 2 4195.45 175.113 3
 -2 2 3 26669.1 504.031 3
 -2 2 3 25620.9 604.54 1
 -2 2 3 26341.2 469.595 4
 -2 2 3 24188.9 509.186 2
 -2 2 4 13653.5 460.706 1
 -2 2 4 13407.4 362.662 3
 -2 2 4 12928.7 375.535 2
 -2 2 5 326382 3395.39 2
 -2 2 5 325429 3365.35 3
 -2 2 6 85803 1250.29 3
 -2 2 6 85502.4 1250.99 2
 -2 2 7 15606.8 482.443 3
 -2 2 7 14678.6 458.364 2
 -2 2 8 62894.7 1135.33 3
 -2 2 8 62511.4 1072.74 2
 -2 2 9 782.805 122.787 3
 -2 2 9 594.319 99.9684 2
 -2 2 10 37027.8 917.592 3
 -2 2 12 31650.9 1156.08 1
 -2 2 13 15537 829.26 1
 -2 2 14 2621.35 372.678 1
 -2 2 15 4832.48 516.558 1
 -2 3 -15 5159.96 537.684 4
 -2 3 -14 7606.25 634.612 4
 -2 3 -13 17926.1 925.132 4
 -2 3 -12 3458.29 399.439 4
 -2 3 -11 43467.4 1339.67 4
 -2 3 -10 12645.9 667.09 4
 -2 3 -9 12043 625.29 4
 -2 3 -8 8568.14 497.21 4
 -2 3 -7 71575.8 1450.55 4
 -2 3 -6 219007 2865.4 4
 -2 3 -5 16852.9 430.318 2
 -2 3 -5 17591.6 594.124 4
 -2 3 -4 98427.1 1292.17 2
 -2 3 -4 98159.2 1500.39 4
 -2 3 -3 11968.1 405.717 4
 -2 3 -3 11772 341.871 2
 -2 3 -2 106758 1347.89 2
 -2 3 -2 105980 1385.1 4
 -2 3 -1 85532.5 1156.65 2
 -2 3 -1 87138 1097.04 4
 -2 3 0 31718.9 477.275 4
 -2 3 0 31964.8 616.254 2
 -2 3 1 132374 1612.54 2
 -2 3 2 334283 3462.36 1
 -2 3 2 331972 3332.27 3
 -2 3 3 22157.6 530.669 2
 -2 3 3 21913.4 575.31 1
 -2 3 3 22046 368.95 4
 -2 3 3 22524 509.382 3
 -2 3 4 1319.19 131.792 3
 -2 3 4 1480.88 105.797 4
 -2 3 4 1489.12 145.264 2
 -2 3 4 1422.97 162.587 1
 -2 3 5 63825.9 1195.12 1
 -2 3 5 62964.1 1035.6 3
 -2 3 5 65698.1 1104.42 2
 -2 3 6 183031 2268.74 3
 -2 3 6 179576 2500.76 1
 -2 3 7 5616.77 366.671 1
 -2 3 7 5770.45 321.22 2
 -2 3 7 5408.32 292.961 3
 -2 3 8 35821.1 837.245 3
 -2 3 8 35495.2 833.595 2
 -2 3 8 34198.5 983.012 1
 -2 3 9 52134.3 1313.58 1
 -2 3 9 54262.8 1078.93 2
 -2 3 9 52611.5 1096.96 3
 -2 3 10 324.242 105.344 3
 -2 3 10 180.319 75.6407 2
 -2 3 11 21531.4 734.051 3
 -2 3 11 23087 921.011 1
 -2 3 12 34.6594 108.532 1
 -2 3 13 24858.1 1052.88 1
 -2 3 14 6053.26 550.32 1
 -2 3 15 3017.07 396.458 1
 -2 4 -14 1938.99 342.64 4
 -2 4 -13 10159.2 717.948 4
 -2 4 -12 9933.9 686.084 4
 -2 4 -11 10305.1 654.209 4
 -2 4 -10 54353.1 1486.31 4
 -2 4 -9 21599.2 858.853 4
 -2 4 -8 12353 621.359 4
 -2 4 -7 918.955 176.5 4
 -2 4 -6 118196 1937.03 4
 -2 4 -6 117150 1527.48 2
 -2 4 -5 215272 2814.79 4
 -2 4 -5 218751 2433.98 2
 -2 4 -4 1451.6 176.28 4
 -2 4 -4 1522.86 134.083 2
 -2 4 -3 121513 1540.81 2
 -2 4 -3 118256 1672.3 4
 -2 4 -2 59214.8 943.712 2
 -2 4 -2 59254.9 975.654 4
 -2 4 -1 50087.8 796.382 4
 -2 4 -1 50012 853.394 2
 -2 4 0 8788.45 243.589 4
 -2 4 0 8627.41 320.053 2
 -2 4 1 14504.8 433.421 2
 -2 4 2 3621.18 212.983 2
 -2 4 3 163458 2156.42 1
 -2 4 3 166885 2033.35 3
 -2 4 3 168855 2079.05 2
 -2 4 4 51258.5 668.467 4
 -2 4 4 52983.6 987.674 2
 -2 4 4 51413.8 1032.83 1
 -2 4 4 51842.6 939.074 3
 -2 4 5 27671.8 776.109 1
 -2 4 5 28262.4 687.533 3
 -2 4 6 130433 2044.81 1
 -2 4 6 135532 1871.99 3
 -2 4 7 88027.8 1476.87 2
 -2 4 7 85627.2 1420.53 3
 -2 4 8 726.379 126.096 3
 -2 4 8 730.837 157.782 1
 -2 4 8 811.19 137.518 2
 -2 4 9 42507.5 1163.18 1
 -2 4 9 42391 1012.59 2
 -2 4 9 42243.8 1006.47 3
 -2 4 10 17488.6 771.372 1
 -2 4 10 16873.9 628.108 2
 -2 4 10 18888.5 678.073 3
 -2 4 11 7360.1 437.006 3
 -2 4 11 7479.07 521.099 1
 -2 4 12 23484 987.271 1
 -2 4 13 339.438 165.44 1
 -2 4 14 18042.3 934.649 1
 -2 4 15 8371.7 662.509 1
 -2 5 -13 3342.28 432.915 4
 -2 5 -12 19331.5 972.337 4
 -2 5 -11 6374.15 536.335 4
 -2 5 -10 19534 883.237 4
 -2 5 -9 66933 1631.98 4
 -2 5 -8 18308.3 787.605 4
 -2 5 -7 5647.39 411.583 4
 -2 5 -6 107.861 78.3048 4
 -2 5 -6 261.694 62.0211 2
 -2 5 -5 91031.4 1306.9 2
 -2 5 -5 90314.9 1621.75 4
 -2 5 -4 73852.7 1142.69 2
 -2 5 -4 73498.3 1346.7 4
 -2 5 -3 24084.3 663.346 4
 -2 5 -3 24828.1 595.592 2
 -2 5 -2 143545 1879.17 4
 -2 5 -2 146946 1848.64 2
 -2 5 -1 8838.62 347.147 2
 -2 5 -1 8995.09 322.504 4
 -2 5 0 66650.7 920.43 4
 -2 5 0 67487.2 1104.38 2
 -2 5 1 76578.9 895.03 4
 -2 5 1 80974.6 1265.51 2
 -2 5 2 2138.11 181.841 2
 -2 5 3 74756.4 1224.54 3
 -2 5 3 72648.6 1243.22 2
 -2 5 4 28622 720.6 3
 -2 5 4 28714.4 779.861 1
 -2 5 4 28353.2 741.535 2
 -2 5 5 30679 846.141 1
 -2 5 5 30919.5 477.896 4
 -2 5 5 31686.4 770.257 3
 -2 5 6 12385.9 549.736 1
 -2 5 6 12863.5 495.682 3
 -2 5 6 13373.7 522.57 2
 -2 5 7 98655.9 1770.44 1
 -2 5 7 98370.7 1616.42 3
 -2 5 7 99724.3 1677.02 2
 -2 5 8 57639.6 1354.32 1
 -2 5 8 57744 1212.4 3
 -2 5 9 1060.46 170.844 3
 -2 5 9 938.321 187.553 1
 -2 5 9 999.262 180.137 2
 -2 5 10 30329.8 1029.44 1
 -2 5 10 29703 903.572 2
 -2 5 10 29297 890.571 3
 -2 5 11 7739.12 541.016 1
 -2 5 11 7718.99 457.535 2
 -2 5 11 6751.73 434.523 3
 -2 5 12 13725 747.908 1
 -2 5 13 11443 708.5 1
 -2 5 14 5343.99 512.024 1
 -2 5 15 31108.2 1280.06 1
 -2 6 -13 18783 1019.37 4
 -2 6 -12 61.8743 132.647 4
 -2 6 -11 27774.4 1157.22 4
 -2 6 -10 10612 682.771 4
 -2 6 -9 44112.6 1338.42 4
 -2 6 -8 47330.4 1348.69 4
 -2 6 -7 276.028 127.768 4
 -2 6 -7 111.216 50.2844 2
 -2 6 -6 12057.2 591.995 4
 -2 6 -6 13883.9 452.272 2
 -2 6 -5 997.754 124.76 2
 -2 6 -5 1230.32 183.526 4
 -2 6 -4 64218.3 1102.5 2
 -2 6 -4 64246.3 1286.79 4
 -2 6 -3 103603 1654.41 4
 -2 6 -3 107644 1546.55 2
 -2 6 -2 31174.5 719.037 2
 -2 6 -2 29865.2 726.846 4
 -2 6 -1 146260 1942.67 2
 -2 6 -1 145065 1844.11 4
 -2 6 0 16759.9 426.741 4
 -2 6 0 17472.1 542.464 2
 -2 6 1 30147.9 505.116 4
 -2 6 1 30428 753.864 2
 -2 6 2 20992.1 622.34 2
 -2 6 3 129282 1893.46 2
 -2 6 4 266698 3182.99 3
 -2 6 4 265549 3245.65 2
 -2 6 5 4929.92 315.249 3
 -2 6 5 4559.45 316.76 2
 -2 6 6 66050.8 1378.63 1
 -2 6 6 64110 1252 3
 -2 6 6 67749.6 1355.15 2
 -2 6 7 3051.25 294.237 1
 -2 6 7 3109.32 267.378 3
 -2 6 7 2713.91 265.932 2
 -2 6 8 28642.8 944.982 1
 -2 6 8 29916.1 879.428 3
 -2 6 8 29717.9 910.079 2
 -2 6 9 37254.8 1022.75 3
 -2 6 9 38071 1140.09 1
 -2 6 9 40859.1 1125.85 2
 -2 6 10 12129.4 579.704 3
 -2 6 10 12077.2 598.698 2
 -2 6 10 13294.7 684.894 1
 -2 6 11 64447.4 1643.58 1
 -2 6 11 62020.9 1439.04 3
 -2 6 11 61992.1 1453.28 2
 -2 6 12 1395.93 224.471 3
 -2 6 12 1356.94 266.728 1
 -2 6 13 9164.37 645.464 1
 -2 6 14 5531.01 522.083 1
 -2 6 15 10770.8 754.686 1
 -2 7 -12 20117.1 1043.3 4
 -2 7 -11 96.1318 116.346 4
 -2 7 -10 36204.7 1298.97 4
 -2 7 -9 2320.39 329.987 4
 -2 7 -8 53200.1 1470.06 4
 -2 7 -7 28689.9 1024.3 4
 -2 7 -6 20233.4 582.444 2
 -2 7 -6 17849.9 754.192 4
 -2 7 -5 27731.5 888.101 4
 -2 7 -5 27854.8 696.528 2
 -2 7 -4 214.437 102.033 4
 -2 7 -4 188.979 76.2541 2
 -2 7 -3 80234 1328.32 2
 -2 7 -3 77353.6 1425.67 4
 -2 7 -2 82687.1 1371.65 2
 -2 7 -2 82333.5 1394.52 4
 -2 7 -1 48125.6 932.476 4
 -2 7 -1 48923.1 1010.84 2
 -2 7 0 192994 2243.23 4
 -2 7 0 195742 2501.11 2
 -2 7 1 657.453 131.26 2
 -2 7 1 834.203 90.3406 4
 -2 7 2 53055.1 656.83 4
 -2 7 2 60886.3 1157.41 2
 -2 7 3 8905.75 436.601 2
 -2 7 4 154678 2248.12 3
 -2 7 4 155882 2273.06 2
 -2 7 5 62486.9 1295.53 3
 -2 7 5 63062.2 1341.89 2
 -2 7 6 4980.31 348.537 3
 -2 7 6 5289.52 381.729 2
 -2 7 7 53967.7 1346.06 1
 -2 7 7 54852.6 1243.24 3
 -2 7 8 320.471 123.41 1
 -2 7 8 289.51 132.379 2
 -2 7 8 417.036 124.854 3
 -2 7 9 55642.3 1320.64 3
 -2 7 9 55917.1 1395.68 2
 -2 7 9 55767.5 1436.77 1
 -2 7 10 27610.4 1018.09 1
 -2 7 10 27383.5 957.53 2
 -2 7 10 27882.9 938.073 3
 -2 7 11 18030.4 845.163 1
 -2 7 11 18005.8 770.451 3
 -2 7 11 17766.3 781.447 2
 -2 7 12 18069.1 876.711 1
 -2 7 12 16853.6 776.94 2
 -2 7 12 17540.7 785.353 3
 -2 7 13 138.473 167.354 1
 -2 7 14 10613.9 735.023 1
 -2 7 15 1872.28 329.812 1
 -2 8 -11 24683.4 1144.83 4
 -2 8 -10 1034.26 247.145 4
 -2 8 -9 28517 1136.35 4
 -2 8 -8 157.747 111.175 4
 -2 8 -7 48571.5 1388.12 4
 -2 8 -6 9211.68 406.175 2
 -2 8 -6 8934.19 555.167 4
 -2 8 -5 8066.85 379.964 2
 -2 8 -5 8049.61 489.856 4
 -2 8 -4 50146.1 1050.02 2
 -2 8 -4 49091.3 1205.65 4
 -2 8 -3 5508.72 322.953 2
 -2 8 -3 4842.95 338.624 4
 -2 8 -2 89763.6 1534.41 4
 -2 8 -2 91566.1 1523.1 2
 -2 8 -1 18608.7 578.562 4
 -2 8 -1 18575.2 629.922 2
 -2 8 0 88299.3 1331.44 4
 -2 8 0 89608.5 1537.02 2
 -2 8 1 91851.1 1245.68 4
 -2 8 1 93670.3 1620.77 2
 -2 8 2 8374.17 233.599 4
 -2 8 2 9236.71 448.263 2
 -2 8 3 72600.5 1424.53 2
 -2 8 4 8536.65 460.581 2
 -2 8 5 118031 1974.61 3
 -2 8 5 119354 2035.75 2
 -2 8 6 40185.6 1080.42 3
 -2 8 6 40220.5 1108.15 2
 -2 8 7 6253.22 417.313 3
 -2 8 7 5806.25 422.932 2
 -2 8 8 35028.5 1048.34 3
 -2 8 8 37273.1 1125.86 2
 -2 8 9 6808.97 460.118 3
 -2 8 9 7165.18 497.036 2
 -2 8 10 47765.3 1409.68 1
 -2 8 10 47370 1295.24 3
 -2 8 10 49549.9 1371.38 2
 -2 8 11 216.302 129.808 2
 -2 8 11 231.736 119.924 3
 -2 8 12 28118.4 1027.75 3
 -2 8 12 26501.7 1025.18 2
 -2 8 12 26764.2 1096.25 1
 -2 8 13 24331.4 1079.31 1
 -2 8 14 600.164 219.35 1
 -2 9 -11 23793.5 1155.13 4
 -2 9 -10 15307 897.569 4
 -2 9 -9 2372.05 343.659 4
 -2 9 -8 11228.1 700.237 4
 -2 9 -7 7317.62 540.846 4
 -2 9 -6 57929.8 1514.68 4
 -2 9 -5 16483.4 583.208 2
 -2 9 -5 15193.2 711.869 4
 -2 9 -4 7431.58 393.43 2
 -2 9 -4 6112.48 423.836 4
 -2 9 -3 23068.5 721.494 2
 -2 9 -3 22040.1 770.701 4
 -2 9 -2 13054.8 536.543 2
 -2 9 -2 12811.2 538.84 4
 -2 9 -1 36169.7 875.065 4
 -2 9 -1 36163.3 943.641 2
 -2 9 0 830.65 124.925 4
 -2 9 0 402.379 117.342 2
 -2 9 1 117190 1947.74 2
 -2 9 1 117302 1555.96 4
 -2 9 2 67813.8 940.907 4
 -2 9 2 73257.3 1467.54 2
 -2 9 3 13593.5 585.558 2
 -2 9 4 8790.27 495.371 2
 -2 9 5 27108.7 905.003 2
 -2 9 6 146871 2413.21 3
 -2 9 6 149742 2471.58 2
 -2 9 7 17491.6 746.794 3
 -2 9 7 18355.9 780.869 2
 -2 9 8 29983.5 1001.56 3
 -2 9 8 31548.1 1074.93 2
 -2 9 9 34323.9 1117.28 3
 -2 9 9 35287.6 1155.3 2
 -2 9 10 544.349 169.762 2
 -2 9 10 311.54 120.807 3
 -2 9 11 8408.81 568.005 3
 -2 9 11 8795.46 601.694 2
 -2 9 12 183.239 135.267 2
 -2 9 12 323.131 148.418 3
 -2 9 13 37499.3 1300.01 2
 -2 9 13 38172.5 1291.39 3
 -2 9 14 19752.5 1044.39 1
 -2 10 -10 25674.6 1191.36 4
 -2 10 -9 8871.34 677.706 4
 -2 10 -8 2557.16 349.24 4
 -2 10 -7 4869.01 461.899 4
 -2 10 -6 7242.02 540.167 4
 -2 10 -5 89756.1 1914.33 4
 -2 10 -4 3701.73 350.228 4
 -2 10 -4 4536.67 328.42 2
 -2 10 -3 40752.8 1112.93 4
 -2 10 -3 40681.7 1030.8 2
 -2 10 -2 18508.9 689.562 4
 -2 10 -2 19058.6 697.522 2
 -2 10 -1 3183.18 285.681 2
 -2 10 -1 2608.62 236.629 4
 -2 10 0 11383.8 457.93 4
 -2 10 0 11894.4 557.513 2
 -2 10 1 1033.11 130.072 4
 -2 10 1 899.533 170.891 2
 -2 10 2 110704 1987.94 2
 -2 10 3 59783.5 1379.02 2
 -2 10 4 12791.1 620.083 2
 -2 10 5 13262 653.654 2
 -2 10 6 25496.8 941.126 2
 -2 10 7 50117.8 1360.84 3
 -2 10 7 50207.1 1382.96 2
 -2 10 8 346.264 178.046 2
 -2 10 8 247.082 125.88 3
 -2 10 9 38273.5 1221.78 3
 -2 10 9 37639.3 1238.4 2
 -2 10 10 25303.8 1039.51 2
 -2 10 10 24787 991.621 3
 -2 10 11 651.669 193.512 2
 -2 10 11 516.476 176.445 3
 -2 10 12 10259.2 680.105 3
 -2 10 12 10281.8 680.606 2
 -2 10 13 354.806 151.011 2
 -2 10 13 604.88 187.088 3
 -2 11 -9 26648.3 1213.96 4
 -2 11 -8 5451.75 521.317 4
 -2 11 -7 2922.7 389.258 4
 -2 11 -6 7588.35 560.906 4
 -2 11 -5 8053.5 557.496 4
 -2 11 -4 51079.8 1381.8 4
 -2 11 -4 53317.5 1241.87 2
 -2 11 -3 1879.09 234.873 2
 -2 11 -3 1226.7 215.321 4
 -2 11 -2 73533.9 1524.09 2
 -2 11 -2 70978.6 1503.11 4
 -2 11 -1 17210.3 645.152 4
 -2 11 -1 18652.4 735.106 2
 -2 11 0 7092.92 455.241 2
 -2 11 1 11379.6 590.046 2
 -2 11 2 2919.39 304.98 2
 -2 11 3 108609 2090.35 2
 -2 11 4 63065.8 1470.21 2
 -2 11 5 23643.1 909.506 2
 -2 11 6 8843.04 567.102 2
 -2 11 7 9031.26 590.755 2
 -2 11 8 33412.4 1176.35 2
 -2 11 8 32423.7 1135.41 3
 -2 11 9 376.829 168.692 2
 -2 11 9 538.988 179.884 3
 -2 11 10 38506.2 1344.61 2
 -2 11 10 39116.3 1315.88 3
 -2 11 11 11520.9 718.349 3
 -2 11 11 11707.2 749.811 2
 -2 11 12 2801.53 368.733 3
 -2 11 12 2702.42 377.987 2
 -2 11 13 6695.44 569.752 3
 -2 11 13 7207.82 605.93 2
 -2 11 14 450.865 187.357 2
 -2 12 -8 32580 1325.6 4
 -2 12 -7 2982.76 402.355 4
 -2 12 -6 4989.75 486.395 4
 -2 12 -5 2844.4 349.464 4
 -2 12 -4 11510.2 652.957 4
 -2 12 -3 43560.3 1243.78 4
 -2 12 -3 45666.7 1205.55 2
 -2 12 -2 340.205 129.711 4
 -2 12 -2 383.979 123.987 2
 -2 12 -1 66254.5 1513.83 2
 -2 12 0 14775.5 697.838 2
 -2 12 1 25028.2 917.816 2
 -2 12 2 9137.03 563.342 2
 -2 12 3 38661 1205.15 2
 -2 12 4 128874 2411.26 2
 -2 12 5 30379.8 1071.78 2
 -2 12 6 6446.23 497.473 2
 -2 12 7 13049.9 743.931 2
 -2 12 8 15506.2 826.668 2
 -2 12 9 20007.3 965.599 2
 -2 12 10 2387.5 348.55 3
 -2 12 10 2252.34 337.831 2
 -2 12 11 26401.8 1130.38 3
 -2 12 11 26683.8 1177.02 2
 -2 12 12 11803.8 770.38 3
 -2 12 12 11843.5 784.174 2
 -2 12 13 6076.88 559.746 2
 -2 12 13 7434.34 628.392 3
 -2 13 -7 31092.6 1282.27 4
 -2 13 -6 715.369 198.609 4
 -2 13 -5 13918.7 779.469 4
 -2 13 -2 16210.4 734.773 2
 -2 13 -1 9910.67 583.163 2
 -2 13 0 82112.6 1819 2
 -2 13 1 14827.1 747.222 2
 -2 13 2 42471.6 1287.76 2
 -2 13 3 1483.23 258.882 2
 -2 13 4 65584.4 1700.63 2
 -2 13 5 87265.8 2050.76 2
 -2 13 6 5149.46 466.902 2
 -2 13 7 26437.3 1057.54 2
 -2 13 8 2563.51 363.297 2
 -2 13 9 21890.1 1029.8 2
 -2 13 10 23074.6 1078.52 2
 -2 13 11 2208.25 343.326 2
 -2 13 12 36321 1410.87 3
 -2 13 12 32024.5 1300.9 2
 -2 13 13 3606.21 465.418 3
 -2 14 -2 17325.9 795.339 2
 -2 14 -1 8018.33 551.544 2
 -2 14 0 28403 1056.14 2
 -2 14 1 53518 1509.76 2
 -2 14 2 130.274 146.176 2
 -2 14 3 41391.6 1346.7 2
 -2 14 4 1630.75 293.331 2
 -2 14 5 33049.7 1249.52 2
 -2 14 6 42143.2 1455.45 2
 -2 14 7 405.709 207.382 2
 -2 14 8 25627.4 1151.67 2
 -2 14 9 2405.78 371.342 2
 -2 14 10 26254.2 1186.32 2
 -2 14 11 9101.2 731.401 2
 -2 15 -1 25021.5 1018.12 2
 -2 15 0 3696.51 406.571 2
 -2 15 1 34209.7 1226.55 2
 -2 15 2 23009.5 1022.8 2
 -2 15 3 3134.12 389.177 2
 -2 15 4 21600 1015.25 2
 -2 15 5 62.4822 142.194 2
 -2 15 6 36354 1386.71 2
 -2 15 7 9552.76 714.045 2
 -2 15 8 2878.28 417.895 2
 -2 15 9 25573.7 1223.09 2
 -2 16 0 12206.2 747.348 2
 -2 16 1 874.674 234.819 2
 -2 16 2 22531.9 1040.24 2
 -2 16 3 22201.7 1066.2 2
 -2 16 4 1573.62 293.198 2
 -2 16 5 11030.8 769.582 2
 -2 16 6 880.328 257.83 2
 -2 17 1 7934.33 624.328 2
 -1 -16 -4 16994.9 985.468 5
 -1 -16 -3 3165.09 437.672 5
 -1 -16 -2 19688.3 1075.91 5
 -1 -16 -1 751.788 238.441 5
 -1 -16 0 23312.5 1188.42 5
 -1 -15 -3 25295 1154.52 5
 -1 -15 -2 1751.63 320.48 5
 -1 -15 -1 14089.1 880.525 5
 -1 -15 0 316.598 157.252 5
 -1 -15 1 38074 1486.35 5
 -1 -15 2 18563.6 1033.07 5
 -1 -14 -2 30024.3 1217.96 5
 -1 -14 -1 7438.67 630.309 5
 -1 -14 0 13861 841.632 5
 -1 -14 1 929.74 262.731 5
 -1 -14 2 23995.1 1119.25 5
 -1 -14 3 17190.9 974.019 5
 -1 -13 -2 85021.8 2024.07 5
 -1 -13 -1 9082.12 646.884 5
 -1 -13 0 22949.4 1043.78 5
 -1 -13 1 16947.2 894.901 5
 -1 -13 2 3422.62 419.499 5
 -1 -13 3 34258.5 1312.98 5
 -1 -12 -2 12266.1 695.254 5
 -1 -12 -1 81806 1919.93 5
 -1 -12 0 8593.84 601.183 5
 -1 -12 1 16227.7 837.556 5
 -1 -12 2 6705.71 546.824 5
 -1 -12 3 23356.3 1037.8 5
 -1 -11 -1 29969.1 1056.56 5
 -1 -11 0 88292.4 1949.62 5
 -1 -11 1 21988.9 928.027 5
 -1 -11 2 28809 1088.97 5
 -1 -11 3 143.947 118.363 5
 -1 -10 -1 1541.37 235.079 5
 -1 -10 0 53351.9 1387.01 5
 -1 -10 1 98523 1986.05 5
 -1 -10 2 5915.32 464.496 5
 -1 -10 3 25959.1 994.049 5
 -1 -9 0 298.754 114.13 5
 -1 -9 1 117435 2110.08 5
 -1 -9 2 104962 2004.23 5
 -1 -9 3 1264.45 224.593 5
 -1 -8 0 38269.7 1022.32 5
 -1 -8 1 2656.89 275.549 5
 -1 -8 2 186313 2778.05 5
 -1 -8 3 95048.6 1833.56 5
 -1 -8 7 38157.1 1034.6 3
 -1 -7 0 114167 1862.75 5
 -1 -7 1 108397 1819.92 5
 -1 -7 2 28033.7 861.688 5
 -1 -7 3 210806 2941.88 5
 -1 -7 6 30508.9 834.029 3
 -1 -7 7 527.473 127.014 3
 -1 -6 -13 32790.5 961.427 4
 -1 -6 -12 28300.6 837.42 4
 -1 -6 -11 23311.5 709.92 4
 -1 -6 0 44500.5 981.633 5
 -1 -6 1 213442 2730.59 5
 -1 -6 2 100662 1681.05 5
 -1 -6 3 121319 1969.88 5
 -1 -6 6 26588.6 745.468 3
 -1 -6 7 34772.3 896.865 3
 -1 -6 8 8488.05 441.719 3
 -1 -5 -14 24273.3 897.738 4
 -1 -5 -13 2999.84 304.979 4
 -1 -5 -12 63584.2 1369.68 4
 -1 -5 -11 7232.43 403.708 4
 -1 -5 -10 30510.4 804.517 4
 -1 -5 -9 2069.84 189.692 4
 -1 -5 -8 73594.4 1189.91 4
 -1 -5 -2 26643.4 478.502 4
 -1 -5 0 215674 2583.21 5
 -1 -5 1 4172.39 273.26 5
 -1 -5 2 167307 2231.41 5
 -1 -5 5 145535 1936.66 3
 -1 -5 6 1099.41 147.446 3
 -1 -5 7 42882 961.77 3
 -1 -5 8 2226.71 220.182 3
 -1 -4 -15 1923.62 284.704 4
 -1 -4 -14 22448.3 889.448 4
 -1 -4 -13 13111.7 641.422 4
 -1 -4 -12 25700.2 857.757 4
 -1 -4 -11 66611.2 1378.24 4
 -1 -4 -10 153.174 87.5605 4
 -1 -4 -9 37475.7 878.874 4
 -1 -4 -8 23217.2 623.813 4
 -1 -4 -7 50533.5 910.337 4
 -1 -4 -2 71582.8 871.39 4
 -1 -4 -1 83960.6 1046.04 4
 -1 -4 0 21910.1 548.834 5
 -1 -4 1 386663 4051.05 5
 -1 -4 2 1996.43 180.913 5
 -1 -4 5 89265.8 1339.99 3
 -1 -4 6 89516 1392.19 3
 -1 -4 7 36.2441 47.5665 3
 -1 -4 8 17004.8 578.893 3
 -1 -4 9 1008.6 154.87 3
 -1 -3 -16 9789.67 659.592 4
 -1 -3 -15 37411.4 1254.3 4
 -1 -3 -14 2232.84 293.256 4
 -1 -3 -13 30261.8 1022.73 4
 -1 -3 -12 760.678 178.067 4
 -1 -3 -11 65579.9 1406.96 4
 -1 -3 -10 34351.5 928.839 4
 -1 -3 -9 1255.62 167.178 4
 -1 -3 -8 92361.3 1472.63 4
 -1 -3 -7 25828.9 640.137 4
 -1 -3 -6 154573 1885.19 4
 -1 -3 -5 225111 2417.88 4
 -1 -3 -1 23689.2 406.279 4
 -1 -3 -1 22720.1 435.946 3
 -1 -3 0 67341.6 982.32 5
 -1 -3 0 68807.8 910.323 4
 -1 -3 0 68612.4 879.023 3
 -1 -3 1 213684 2369.79 5
 -1 -3 4 129051 1584.46 3
 -1 -3 5 787.563 100.959 3
 -1 -3 6 71044.8 1141.03 3
 -1 -3 7 42637.6 883.343 3
 -1 -3 8 3244.35 242.597 3
 -1 -3 9 40008.9 952.55 3
 -1 -2 -17 15493.6 885.258 4
 -1 -2 -16 2685.64 364.905 4
 -1 -2 -15 15962.2 834.133 4
 -1 -2 -14 36444 1219.64 4
 -1 -2 -13 -102.664 109.081 4
 -1 -2 -12 25605.7 913.219 4
 -1 -2 -11 311.069 130.665 4
 -1 -2 -10 64703.6 1366.08 4
 -1 -2 -9 47063.2 1072.44 4
 -1 -2 -8 2053.19 206.011 4
 -1 -2 -7 65898.6 1159.25 4
 -1 -2 -6 12665 418.183 4
 -1 -2 -5 237938 2587.83 4
 -1 -2 -4 312139 3125.1 4
 -1 -2 -3 102643 1250.1 3
 -1 -2 -3 102781 1187.15 1
 -1 -2 -2 410693 3877.58 3
 -1 -2 -1 1600.43 88.0494 3
 -1 -2 -1 303.6 38.451 4
 -1 -2 0 77995.4 930.808 5
 -1 -2 0 76409 820.467 3
 -1 -2 1 432154 4151.49 4
 -1 -2 3 77761.5 981.218 3
 -1 -2 4 1883.1 126.18 3
 -1 -2 5 55003.7 879.613 3
 -1 -2 6 1555.25 142.884 3
 -1 -2 7 84615.5 1316.78 3
 -1 -2 8 14226 497.076 3
 -1 -2 9 45822.7 997.327 3
 -1 -2 10 74412.6 1382.81 3
 -1 -1 -16 18059.3 947.54 4
 -1 -1 -15 1934.1 321.485 4
 -1 -1 -14 29529 1118.31 4
 -1 -1 -13 27024.4 1012.46 4
 -1 -1 -12 1636.42 244.326 4
 -1 -1 -11 13133.3 636.757 4
 -1 -1 -10 1111.42 194.654 4
 -1 -1 -9 76707 1492.85 4
 -1 -1 -8 55282.9 1146.29 4
 -1 -1 -7 274.416 101.569 4
 -1 -1 -6 131040 1774.03 4
 -1 -1 -5 1810.59 154.706 4
 -1 -1 -4 276511 2866.1 4
 -1 -1 -3 31951.3 546.901 3
 -1 -1 -3 30752.5 525.949 4
 -1 -1 -2 180861 1722.45 1
 -1 -1 1 367939 3499.91 4
 -1 -1 2 8744.52 188.805 3
 -1 -1 3 250946 2456.65 3
 -1 -1 4 265343 2680.44 3
 -1 -1 5 1560.91 69.9671 2
 -1 -1 5 1703.53 133.758 3
 -1 -1 6 91261.6 1250.34 3
 -1 -1 6 84195.9 925.63 2
 -1 -1 7 196.494 33.5706 2
 -1 -1 7 198.146 68.251 3
 -1 -1 8 91828.3 1430.29 3
 -1 -1 9 11557 464.301 3
 -1 -1 10 74760.6 1369.07 3
 -1 0 -16 6570.11 588.081 4
 -1 0 -15 13076.7 798.399 4
 -1 0 -14 480.017 167.091 4
 -1 0 -13 39035.9 1276.25 4
 -1 0 -12 28224.5 1027.75 4
 -1 0 -11 2642.96 313.839 4
 -1 0 -10 17559.5 724.978 4
 -1 0 -9 7536.2 440.004 4
 -1 0 -8 169134 2405.27 4
 -1 0 -7 132524 1945.11 4
 -1 0 -6 56195.8 1064.49 4
 -1 0 -5 56655.2 996.479 4
 -1 0 -4 5511.84 252.077 4
 -1 0 -3 38157.9 643.781 4
 -1 0 -3 39176.1 615.786 3
 -1 0 -2 19538.3 349.959 3
 -1 0 2 88140.4 917.571 3
 -1 0 2 86738.4 898.878 2
 -1 0 2 89477.9 1070.54 4
 -1 0 3 122796 1250.24 2
 -1 0 3 122921 1314.12 3
 -1 0 4 271747 2598.48 2
 -1 0 4 271503 2719.67 3
 -1 0 5 144490 1530.05 2
 -1 0 5 143964 1681.73 3
 -1 0 6 25543.7 569.701 3
 -1 0 6 25633.7 458.396 2
 -1 0 7 93883.9 1370.68 3
 -1 0 7 95849.1 1168.47 2
 -1 0 8 6118.46 227.11 2
 -1 0 8 5753.54 301.581 3
 -1 0 9 79156.8 1366.15 3
 -1 0 10 1567.43 187.803 3
 -1 1 -15 7440.49 613.025 4
 -1 1 -14 12848 776.031 4
 -1 1 -13 1449.74 269.144 4
 -1 1 -12 63329.1 1640.24 4
 -1 1 -11 37676.9 1167.53 4
 -1 1 -10 3814.65 343.581 4
 -1 1 -9 20746.9 766.689 4
 -1 1 -8 14333.8 603.112 4
 -1 1 -7 300837 3596.46 4
 -1 1 -6 22481.5 659.386 4
 -1 1 -5 78773 1279.33 4
 -1 1 -4 91929.1 1321.75 4
 -1 1 -3 4262.66 205.71 4
 -1 1 -3 4312.5 174.876 5
 -1 1 -2 1591.58 111.7 4
 -1 1 -2 1904.48 98.3361 5
 -1 1 -2 1176.39 72.4023 2
 -1 1 1 169075 1666.94 2
 -1 1 2 54965.5 705.368 2
 -1 1 2 56139.3 695.099 4
 -1 1 2 56668.1 688.811 3
 -1 1 3 24597.6 433.477 3
 -1 1 3 24044.2 427.616 2
 -1 1 3 25346.6 475.613 4
 -1 1 4 38535.2 605.126 2
 -1 1 4 39367.7 638.967 3
 -1 1 5 187327 2101.78 3
 -1 1 6 3860.99 216.374 3
 -1 1 7 108102 1395.48 2
 -1 1 7 110523 1540.64 3
 -1 1 8 60710.3 1098.92 3
 -1 1 8 57954.6 941.569 2
 -1 1 9 17074.8 569.663 3
 -1 1 9 16486.5 466.011 2
 -1 1 10 45566.4 1026.5 3
 -1 1 11 7161.03 409.254 3
 -1 1 15 6769.43 581.417 1
 -1 2 -15 6561.25 603.303 4
 -1 2 -14 9197.34 683.986 4
 -1 2 -13 13209 772.141 4
 -1 2 -12 17089.5 847.832 4
 -1 2 -11 71852.4 1711.66 4
 -1 2 -10 21770.9 866.634 4
 -1 2 -9 8699.77 512.613 4
 -1 2 -8 34628.6 987.147 4
 -1 2 -7 44435.2 1067.14 4
 -1 2 -6 116385 1816.35 4
 -1 2 -5 4294.32 285.898 4
 -1 2 -4 116816 1629.08 4
 -1 2 -4 117026 1307.68 2
 -1 2 -3 9978.22 257.521 2
 -1 2 -3 9665.81 341.448 4
 -1 2 -2 123875 1490.98 4
 -1 2 -2 126112 1357.91 2
 -1 2 -1 1518.8 100.159 4
 -1 2 -1 1230.03 85.0908 2
 -1 2 0 82021.9 862.162 4
 -1 2 0 80271.5 968.058 2
 -1 2 1 51564 735.094 1
 -1 2 1 49298.9 682.654 3
 -1 2 1 49670.2 698.862 2
 -1 2 2 337431 3308.73 2
 -1 2 2 333843 3283.39 3
 -1 2 3 11875.1 323.027 2
 -1 2 3 12542.1 275.785 4
 -1 2 3 12605 371.08 1
 -1 2 3 12056.7 317.529 3
 -1 2 4 18422.2 502.36 1
 -1 2 4 17476 420.427 2
 -1 2 4 18280.8 433.913 3
 -1 2 5 103936 1378.46 3
 -1 2 6 203771 2372.41 3
 -1 2 7 57.1501 45.7866 3
 -1 2 7 160.133 63.4314 2
 -1 2 8 52067.5 1025.38 3
 -1 2 8 51727.9 948.292 2
 -1 2 9 41197.8 943.451 3
 -1 2 9 41275.2 850.214 2
 -1 2 10 6510.23 325.267 2
 -1 2 10 6885.63 384.577 3
 -1 2 11 17602.5 658.02 3
 -1 2 13 58291.1 1588.48 1
 -1 2 14 2962.11 381.208 1
 -1 2 15 8179.04 627.851 1
 -1 2 16 3784.23 459.03 1
 -1 3 -14 1956.41 345.542 4
 -1 3 -13 12195.1 767.521 4
 -1 3 -12 4746.52 463.897 4
 -1 3 -11 30999.4 1117.77 4
 -1 3 -10 80165.3 1808.12 4
 -1 3 -9 12879 650.276 4
 -1 3 -8 11314.5 567.407 4
 -1 3 -7 256.944 106.868 4
 -1 3 -6 58922.6 1238.56 4
 -1 3 -5 155067 1698.27 2
 -1 3 -5 155260 2168.3 4
 -1 3 -4 18395.8 569.827 4
 -1 3 -4 18602.5 392.386 2
 -1 3 -3 135511 1511.98 2
 -1 3 -3 135675 1777.5 4
 -1 3 -2 42750.5 760.223 4
 -1 3 -2 43327.9 656.655 2
 -1 3 -1 51239.8 747.369 2
 -1 3 -1 51969.8 766.972 4
 -1 3 0 86600 972.316 4
 -1 3 0 83391.3 1075.58 2
 -1 3 1 43349.1 706.715 2
 -1 3 2 113784 1417.51 2
 -1 3 2 118569 1484.33 1
 -1 3 2 113528 1407.29 3
 -1 3 3 53542.8 860.839 2
 -1 3 3 54051.8 917.28 1
 -1 3 3 54130.8 629.665 4
 -1 3 3 54329.9 849.389 3
 -1 3 4 76338.6 942.282 4
 -1 3 4 73648.4 1113.46 2
 -1 3 4 75917.3 1190.93 1
 -1 3 4 75478.5 1107.37 3
 -1 3 5 5797.26 307.277 1
 -1 3 5 5509.01 269.073 2
 -1 3 5 5430.61 262.596 3
 -1 3 6 78634.3 1231.35 3
 -1 3 6 75834.7 1337.12 1
 -1 3 6 76766 1207.33 2
 -1 3 7 60815.3 1082.83 2
 -1 3 7 64478.9 1136.45 3
 -1 3 7 62052.8 1239.23 1
 -1 3 8 432.959 110.482 3
 -1 3 8 483.644 126.043 1
 -1 3 8 530.963 109.627 2
 -1 3 9 70806.6 1324.47 3
 -1 3 9 69822.1 1250.81 2
 -1 3 9 70068 1463.47 1
 -1 3 10 47796.5 1097.71 3
 -1 3 10 46623.3 1014.76 2
 -1 3 10 48109.1 1237.49 1
 -1 3 11 7129.49 425.376 3
 -1 3 11 7580.5 501.124 1
 -1 3 12 12566.3 590.701 3
 -1 3 12 13709.3 707.608 1
 -1 3 13 10428.7 642.771 1
 -1 3 14 23616.5 1019.96 1
 -1 3 15 579.358 181.899 1
 -1 3 16 8568.66 673.352 1
 -1 4 -14 18259.8 1010.61 4
 -1 4 -13 351.137 163.333 4
 -1 4 -12 13224.1 781.494 4
 -1 4 -11 522.777 204.637 4
 -1 4 -10 48245.1 1403.94 4
 -1 4 -9 115225 2194.15 4
 -1 4 -8 11652.6 605.348 4
 -1 4 -7 21550 793.815 4
 -1 4 -6 106.541 83.1564 4
 -1 4 -5 77226.6 1028.81 2
 -1 4 -5 78584.2 1450.5 4
 -1 4 -4 13681.9 527.86 4
 -1 4 -4 13951.3 361.883 2
 -1 4 -3 65028.2 926.499 2
 -1 4 -3 64680.2 1137.65 4
 -1 4 -2 237599 2688.24 4
 -1 4 -2 239419 2510.95 2
 -1 4 -1 39582.8 698.583 4
 -1 4 -1 38530.4 675.669 2
 -1 4 0 57111.5 769.567 4
 -1 4 0 50804.7 809.46 2
 -1 4 1 47075.8 581.436 4
 -1 4 1 49343.2 826.25 2
 -1 4 2 2039.73 155.869 2
 -1 4 2 2010.66 154.013 3
 -1 4 3 28880.2 629.669 3
 -1 4 3 28624.2 634.9 2
 -1 4 4 38826.9 828.832 1
 -1 4 4 36303.3 499.385 4
 -1 4 4 36488.6 765.773 2
 -1 4 4 37210.7 754.064 3
 -1 4 5 82519.8 1306.28 2
 -1 4 5 82261.1 1039.57 4
 -1 4 5 82894.4 1384.75 1
 -1 4 5 82810.6 1286.9 3
 -1 4 6 18973.1 572.349 2
 -1 4 6 18491.2 609.362 1
 -1 4 6 18867 566.623 3
 -1 4 7 56067.6 1087.5 2
 -1 4 7 53904.1 1166.47 1
 -1 4 7 56089 1090.56 3
 -1 4 8 65964.2 1245 2
 -1 4 8 67382 1374.29 1
 -1 4 8 64587 1239.87 3
 -1 4 9 836.677 136.263 3
 -1 4 9 729.352 160.129 1
 -1 4 9 796.166 150.131 2
 -1 4 10 64641.2 1341.71 3
 -1 4 10 64461.9 1294.44 2
 -1 4 10 63580.2 1477.05 1
 -1 4 11 23907.2 805.438 3
 -1 4 11 24834.2 784.955 2
 -1 4 11 25685.8 942.012 1
 -1 4 12 20768.7 872.024 1
 -1 4 12 19574.9 754.221 3
 -1 4 13 5515.67 473.657 1
 -1 4 14 7348.93 572.669 1
 -1 4 15 23295.1 1055.68 1
 -1 4 16 810.516 237.499 1
 -1 5 -13 25085.1 1178.29 4
 -1 5 -12 -66.0621 139.521 4
 -1 5 -11 13238.7 774.306 4
 -1 5 -10 2418.01 328.533 4
 -1 5 -9 29258.6 1058.55 4
 -1 5 -8 58601.5 1463.48 4
 -1 5 -7 305.45 129.486 4
 -1 5 -6 56690.5 1312.63 4
 -1 5 -6 58320.7 885.183 2
 -1 5 -5 213.823 102.21 4
 -1 5 -5 292.706 62.5913 2
 -1 5 -4 93741.4 1252.15 2
 -1 5 -4 92929.8 1589.28 4
 -1 5 -3 32374.3 801.155 4
 -1 5 -3 33191.8 647.892 2
 -1 5 -2 151787 1824.31 2
 -1 5 -2 153652 1991.14 4
 -1 5 -1 116920 1538.53 4
 -1 5 -1 115732 1507.42 2
 -1 5 0 8578.1 281.294 4
 -1 5 0 7854.88 305.079 2
 -1 5 1 57865 758.365 4
 -1 5 1 59277.5 994.984 2
 -1 5 2 4801.03 258.048 2
 -1 5 2 4964.7 264.544 3
 -1 5 3 16333.7 501.752 3
 -1 5 3 15701.7 497.145 2
 -1 5 4 187822 2354.73 2
 -1 5 4 185362 2302.19 3
 -1 5 5 4215.77 276.123 2
 -1 5 5 3555.52 136.928 4
 -1 5 5 3800.1 278.219 1
 -1 5 5 3974.01 259.647 3
 -1 5 6 26467 763.389 1
 -1 5 6 25588.7 712.489 2
 -1 5 6 26731 718.71 3
 -1 5 7 1408.41 177.261 2
 -1 5 7 1475.75 200.096 1
 -1 5 7 1248.22 169.124 3
 -1 5 8 83914.2 1505.54 2
 -1 5 8 82022.5 1603.15 1
 -1 5 8 84913.4 1510.18 3
 -1 5 9 44410.2 1166.31 1
 -1 5 9 46399.4 1093.54 2
 -1 5 9 47122.7 1112.1 3
 -1 5 10 22501.3 759.592 2
 -1 5 10 22726.1 835.158 1
 -1 5 10 22190.4 767.229 3
 -1 5 11 87457.9 1834.63 1
 -1 5 11 86305 1661.91 2
 -1 5 11 84868.9 1680.24 3
 -1 5 12 2498 272.06 2
 -1 5 12 2510.21 314.691 1
 -1 5 12 2333.98 279.762 3
 -1 5 13 15422.9 782.259 1
 -1 5 13 12401.5 642.685 3
 -1 5 14 1945.29 305.505 1
 -1 5 15 15102.9 841.06 1
 -1 5 16 17494.3 951.214 1
 -1 6 -13 17424.2 1008.43 4
 -1 6 -12 18680.1 988.888 4
 -1 6 -11 238.963 123.198 4
 -1 6 -10 34085.6 1252.87 4
 -1 6 -9 3607.44 390.883 4
 -1 6 -8 35549.2 1158.87 4
 -1 6 -7 30493.4 1010.96 4
 -1 6 -6 21011.7 790.744 4
 -1 6 -6 21683.9 515.556 2
 -1 6 -5 29594.4 905.041 4
 -1 6 -5 30802.2 642.136 2
 -1 6 -4 1718.1 203.056 4
 -1 6 -4 2116.42 163.488 2
 -1 6 -3 101144 1660.83 4
 -1 6 -3 103506 1425.76 2
 -1 6 -2 758.822 126.38 4
 -1 6 -2 754.195 113.548 2
 -1 6 -1 109050 1540.72 4
 -1 6 -1 108801 1519.39 2
 -1 6 0 96535.3 1291.04 4
 -1 6 0 88568.3 1325.94 2
 -1 6 1 1409.98 156.442 2
 -1 6 1 1710.72 123.093 4
 -1 6 2 146657 1942.96 2
 -1 6 2 139897 1454.46 4
 -1 6 3 9334.42 413.97 2
 -1 6 3 9287.95 411.418 3
 -1 6 4 141456 2016.38 2
 -1 6 4 145187 2027.21 3
 -1 6 5 58434.5 1163.8 2
 -1 6 5 57197.8 1131.59 3
 -1 6 6 986.335 74.9028 4
 -1 6 6 1296.31 170.242 2
 -1 6 6 1260.56 174.764 3
 -1 6 7 66632.2 1335.96 2
 -1 6 7 65758.4 1381.84 1
 -1 6 7 65010.8 1303.37 3
 -1 6 8 1712.91 240.059 1
 -1 6 8 1897.41 223.466 2
 -1 6 8 1716.89 214.731 3
 -1 6 9 59060.9 1402.32 1
 -1 6 9 59512.8 1328.07 2
 -1 6 9 61481.3 1339.22 3
 -1 6 10 19723.8 753.822 2
 -1 6 10 19642.5 807.361 1
 -1 6 10 19365.9 747.217 3
 -1 6 11 73116.4 1578.88 2
 -1 6 11 71777.6 1690.11 1
 -1 6 11 74264 1603.58 3
 -1 6 12 43949.9 1213.6 2
 -1 6 12 45021.1 1354.23 1
 -1 6 12 45514.3 1255.46 3
 -1 6 13 269.031 117.189 3
 -1 6 13 233.42 100.019 1
 -1 6 14 13833.2 799.87 1
 -1 6 15 2064.99 334.899 1
 -1 6 16 12602.3 815.971 1
 -1 7 -12 21701 1106.02 4
 -1 7 -11 20104.5 1026.42 4
 -1 7 -10 1997.84 314.681 4
 -1 7 -9 49983.7 1511.61 4
 -1 7 -8 2279.72 312.751 4
 -1 7 -7 105377 2090.81 4
 -1 7 -6 13126.4 649.274 4
 -1 7 -6 13684.8 433.161 2
 -1 7 -5 41180.4 1124.3 4
 -1 7 -5 41763.2 814.065 2
 -1 7 -4 41967.9 1081.96 4
 -1 7 -4 43025.6 850.79 2
 -1 7 -3 8113.99 431.581 4
 -1 7 -3 9331.16 370.856 2
 -1 7 -2 54759.3 1121.61 4
 -1 7 -2 56634.6 1030.05 2
 -1 7 -1 3194.35 230.649 4
 -1 7 -1 3455.91 236.495 2
 -1 7 0 164421 2025.01 4
 -1 7 0 162535 2138.5 2
 -1 7 1 58889.1 910.543 4
 -1 7 1 59502.1 1123.78 2
 -1 7 2 7859.42 234.621 4
 -1 7 2 8918.65 424.478 2
 -1 7 3 145388 2096 2
 -1 7 3 147605 2121.78 3
 -1 7 4 2242.21 224.978 2
 -1 7 4 2202 219.235 3
 -1 7 5 154022 2250.17 2
 -1 7 5 153774 2235.5 3
 -1 7 6 31021.6 892.838 2
 -1 7 6 30949.1 872.141 3
 -1 7 7 4551.56 339.587 2
 -1 7 7 4688.83 340.153 3
 -1 7 8 42046.6 1100.53 2
 -1 7 8 40877.8 1134.39 1
 -1 7 8 40236.4 1062.03 3
 -1 7 9 25.915 78.7286 3
 -1 7 9 85.6423 99.5639 2
 -1 7 9 259.345 120.609 1
 -1 7 10 39386.4 1125.3 2
 -1 7 10 38506.8 1101.24 3
 -1 7 10 40305.1 1197.67 1
 -1 7 11 1688.41 237.656 3
 -1 7 11 1348.71 226.147 1
 -1 7 11 1428.29 224.753 2
 -1 7 12 46965.2 1316.24 2
 -1 7 12 46367.1 1379.73 1
 -1 7 12 46872.3 1317.99 3
 -1 7 13 19542.3 915.211 1
 -1 7 13 19141.4 847.181 3
 -1 7 13 19397.4 860.137 2
 -1 7 14 1598.16 280.505 1
 -1 7 15 10684.9 723.832 1
 -1 7 16 533.055 185.528 1
 -1 8 -11 38289.5 1457.96 4
 -1 8 -10 11753.8 770.346 4
 -1 8 -9 12313.3 752.765 4
 -1 8 -8 21410.8 956.044 4
 -1 8 -7 22788.8 936.61 4
 -1 8 -6 92369.7 1926.86 4
 -1 8 -5 3221.77 327.005 4
 -1 8 -5 3805.88 246.816 2
 -1 8 -4 43500.2 1155.21 4
 -1 8 -4 45249.3 923.652 2
 -1 8 -3 50751.8 1186.82 4
 -1 8 -3 51328.7 1011.95 2
 -1 8 -2 9023.26 446.226 4
 -1 8 -2 10014.1 419.77 2
 -1 8 -1 38144.2 889.274 4
 -1 8 -1 37380.9 872.527 2
 -1 8 0 5784.38 337.192 2
 -1 8 0 5104.76 280.188 4
 -1 8 1 142175 1777.49 4
 -1 8 1 140032 2041.5 2
 -1 8 2 34649 617.81 4
 -1 8 2 35572.6 904.15 2
 -1 8 3 25863.8 415.574 4
 -1 8 3 30183.5 843.226 2
 -1 8 4 24278.6 777.46 3
 -1 8 4 25731.5 793.209 2
 -1 8 5 19310.3 705.6 2
 -1 8 5 20030.9 712.962 3
 -1 8 6 125317 2108.72 2
 -1 8 6 127219 2097.38 3
 -1 8 7 20650.9 776.273 2
 -1 8 7 21458.8 767.526 3
 -1 8 8 34786.1 1048.58 2
 -1 8 8 33606.5 996.568 3
 -1 8 9 31621.7 1034.26 2
 -1 8 9 34246.7 1049.3 3
 -1 8 10 6796.32 485.364 2
 -1 8 10 7284.56 490.333 3
 -1 8 11 2727.16 324.856 2
 -1 8 11 3432.35 368.478 1
 -1 8 11 2862.73 321.048 3
 -1 8 12 4673.64 427.421 2
 -1 8 12 5538.78 453.553 3
 -1 8 12 6006.07 508.431 1
 -1 8 13 45293.6 1369.9 3
 -1 8 13 45809.1 1450.72 1
 -1 8 13 45911.6 1415.99 2
 -1 8 14 18601.9 950.073 1
 -1 8 14 18026.2 867.649 3
 -1 8 15 1407.27 277.399 1
 -1 9 -10 36853.6 1424.78 4
 -1 9 -9 2288.12 362.026 4
 -1 9 -8 16654 863.59 4
 -1 9 -7 1858.53 290.686 4
 -1 9 -6 22104.8 908.092 4
 -1 9 -5 65081.5 1563.05 4
 -1 9 -4 1040.08 185.677 4
 -1 9 -4 1560.63 168.981 2
 -1 9 -3 64445.7 1223.46 2
 -1 9 -3 63276.4 1403.74 4
 -1 9 -2 23461 769.743 4
 -1 9 -2 24122.3 711.372 2
 -1 9 -1 9821.72 453.78 4
 -1 9 -1 10831.2 472.719 2
 -1 9 0 5061.88 336.768 2
 -1 9 0 4113.54 270.664 4
 -1 9 1 26977.1 649.624 4
 -1 9 1 26519.6 776.336 2
 -1 9 2 196798 2215.23 4
 -1 9 2 194493 2708.94 2
 -1 9 3 11561.4 295.082 4
 -1 9 3 13477.9 597.69 2
 -1 9 4 42405.2 1110.55 2
 -1 9 5 15683 661.001 2
 -1 9 5 15367.9 656.577 3
 -1 9 6 9761.03 535.899 2
 -1 9 6 9398.38 516.823 3
 -1 9 7 33838.8 1055.26 2
 -1 9 7 36199.1 1076.88 3
 -1 9 8 401.929 149.121 2
 -1 9 8 209.515 131.778 3
 -1 9 9 51067.2 1376.41 2
 -1 9 9 49418.2 1325.06 3
 -1 9 10 29368.2 1048.74 2
 -1 9 10 28388.5 1003.51 3
 -1 9 11 410.029 163.861 2
 -1 9 11 453.731 167.565 3
 -1 9 12 2050.09 311.85 2
 -1 9 12 1947.61 294.869 3
 -1 9 13 12784.5 733.505 3
 -1 9 13 14294.6 829.464 2
 -1 9 14 41176.3 1386.81 3
 -1 9 14 42668 1430.7 2
 -1 10 -10 13942.2 893.263 4
 -1 10 -9 29541.6 1260.75 4
 -1 10 -8 186.202 131.918 4
 -1 10 -7 12307.8 729.752 4
 -1 10 -6 5475.93 473.591 4
 -1 10 -5 21202.5 884.854 4
 -1 10 -4 43298.5 1002.15 2
 -1 10 -4 40497.8 1199.53 4
 -1 10 -3 6630.58 444.345 4
 -1 10 -3 7622.04 405.234 2
 -1 10 -2 71925.1 1492.44 4
 -1 10 -2 72808.8 1398.28 2
 -1 10 -1 14931.8 594.897 4
 -1 10 -1 15626.7 607.289 2
 -1 10 0 2046.61 203.28 4
 -1 10 0 2072.78 227.43 2
 -1 10 1 1229.56 191.605 2
 -1 10 1 1534.71 164.341 4
 -1 10 2 47592.9 865.88 4
 -1 10 2 47944.7 1165.68 2
 -1 10 3 151603 2398.7 2
 -1 10 4 3774.13 348.368 2
 -1 10 5 76623.4 1668.53 2
 -1 10 6 10992.7 601.573 2
 -1 10 6 10661.5 592.676 3
 -1 10 7 13611.5 679.167 2
 -1 10 7 12481 643.206 3
 -1 10 8 16629.8 781.761 2
 -1 10 8 17135.1 783.178 3
 -1 10 9 3375.08 360.95 2
 -1 10 9 3379.63 352.718 3
 -1 10 10 41626.7 1320.38 2
 -1 10 10 41352.2 1289.43 3
 -1 10 11 16785.7 850.476 2
 -1 10 11 16014.3 808.895 3
 -1 10 12 3857.1 409.459 3
 -1 10 12 4185.42 454.336 2
 -1 10 13 1617.95 305.374 2
 -1 10 13 1737.4 288.981 3
 -1 10 14 3013.29 378.737 3
 -1 10 14 2832.45 385.509 2
 -1 11 -9 15365.3 925.753 4
 -1 11 -8 26328.8 1177.71 4
 -1 11 -7 154.131 125.399 4
 -1 11 -6 20722.8 940.242 4
 -1 11 -5 6882.15 530.553 4
 -1 11 -4 24400.8 935.115 4
 -1 11 -3 27065.5 826.318 2
 -1 11 -3 26203.5 936.591 4
 -1 11 -2 8647.27 502.711 4
 -1 11 -2 9897.54 496.473 2
 -1 11 -1 83927.2 1627.81 2
 -1 11 -1 83432.3 1602.57 4
 -1 11 0 12260.5 521.609 4
 -1 11 0 12981.8 596.837 2
 -1 11 1 1713.02 185.223 4
 -1 11 1 1810.4 244.498 2
 -1 11 2 289.523 113.718 2
 -1 11 3 36226 1073.55 2
 -1 11 4 113424 2112.74 2
 -1 11 5 3704.37 367.375 2
 -1 11 6 44357.2 1339.77 2
 -1 11 7 6063.49 483.96 3
 -1 11 7 6551.87 514.55 2
 -1 11 8 22603.2 933.069 3
 -1 11 8 22609.8 961.363 2
 -1 11 9 16477.3 807.33 3
 -1 11 9 17786.9 873.669 2
 -1 11 10 12753.5 728.908 3
 -1 11 10 14419.9 794.061 2
 -1 11 11 37074.1 1297.89 3
 -1 11 11 39192.8 1375.2 2
 -1 11 12 4605.67 474.13 3
 -1 11 12 5122.84 520.49 2
 -1 11 13 2104.76 341.221 2
 -1 11 13 2278.19 333.844 3
 -1 11 14 4834.25 500.026 3
 -1 11 14 4539.16 500.093 2
 -1 12 -8 21603.1 1086.11 4
 -1 12 -7 28478.8 1212.26 4
 -1 12 -6 203.094 132.072 4
 -1 12 -5 23388.4 1000.31 4
 -1 12 -4 5357.93 455.681 4
 -1 12 -3 24825.4 935.666 4
 -1 12 -2 8903.55 530.297 4
 -1 12 -2 10758 545.303 2
 -1 12 -1 27044.7 880.161 4
 -1 12 -1 28757.5 929.374 2
 -1 12 0 99852.6 1891.8 2
 -1 12 1 16158.8 717.226 2
 -1 12 2 25275.7 925.775 2
 -1 12 3 303.938 135.135 2
 -1 12 4 44832.8 1287.11 2
 -1 12 5 47197.2 1368 2
 -1 12 6 303.513 153.046 2
 -1 12 7 17875.6 855.811 2
 -1 12 8 289.404 181.781 2
 -1 12 8 224.581 155.011 3
 -1 12 9 29352 1141.61 3
 -1 12 9 29952.9 1200.6 2
 -1 12 10 3431.81 403.521 3
 -1 12 10 4021.34 456.829 2
 -1 12 11 17345.8 903.806 3
 -1 12 11 16877.8 930.182 2
 -1 12 12 32072.9 1311.62 2
 -1 12 12 30729.4 1238.06 3
 -1 12 13 2353.56 400.064 2
 -1 12 13 2328.43 368.197 3
 -1 12 14 9483.69 717.585 3
 -1 12 14 8784.08 705.332 2
 -1 13 -7 31327.9 1308.3 4
 -1 13 -6 18457.8 959.144 4
 -1 13 -5 3111.55 375.435 4
 -1 13 -4 31172.7 1147.53 4
 -1 13 -3 1407.95 248.958 4
 -1 13 -2 12516.7 626.549 2
 -1 13 -1 2845.55 317.289 2
 -1 13 0 31410.6 1048.68 2
 -1 13 1 76002 1708.53 2
 -1 13 2 34.0703 119.935 2
 -1 13 3 78337.8 1804.01 2
 -1 13 4 -22.3491 120.757 2
 -1 13 5 40348.9 1293.76 2
 -1 13 6 34667.3 1218.92 2
 -1 13 7 3503.94 394.378 2
 -1 13 8 29222.4 1166.01 2
 -1 13 9 409.973 202.415 2
 -1 13 9 393.265 154.74 3
 -1 13 10 14274.2 826.333 3
 -1 13 10 13738.7 838.53 2
 -1 13 11 1037.41 267.125 2
 -1 13 11 1199.17 281.192 3
 -1 13 12 16547.2 939.112 3
 -1 13 12 16098.9 943.72 2
 -1 13 13 24362.8 1168.14 3
 -1 13 13 26076.1 1224.81 2
 -1 14 -1 20384.1 847.337 2
 -1 14 0 3240.24 353.692 2
 -1 14 1 57293.4 1514.65 2
 -1 14 2 36277.6 1211 2
 -1 14 3 6022.13 496.379 2
 -1 14 4 27906.8 1098.28 2
 -1 14 5 1190.57 229.376 2
 -1 14 6 39919.1 1350.93 2
 -1 14 7 9431.75 662.091 2
 -1 14 8 13583.5 819.216 2
 -1 14 9 34052.6 1329.97 2
 -1 14 10 237.222 167.643 2
 -1 14 11 16777.2 973.873 2
 -1 14 12 476.14 210.44 3
 -1 15 0 31416.1 1129.1 2
 -1 15 1 1346.24 270.618 2
 -1 15 2 49297.8 1474.47 2
 -1 15 3 16180.8 850.366 2
 -1 15 4 11945.3 739.511 2
 -1 15 5 15467.4 864.196 2
 -1 15 6 5157.16 491.369 2
 -1 15 7 30454.7 1227.13 2
 -1 15 8 2726.66 405.403 2
 -1 15 9 18089.9 998.851 2
 -1 15 10 16427.6 968.956 2
 -1 16 1 12838 753.786 2
 -1 16 2 4009.27 433.629 2
 -1 16 3 36465.5 1329.24 2
 -1 16 4 7398.35 607.249 2
 -1 16 5 9200.72 686.732 2
 -1 16 6 7713.07 651.2 2
 -1 16 7 11896.2 816.896 2
 -1 17 1 1454.64 290.613 2
 -1 17 2 3954.24 459.62 2
 -1 17 3 5935.11 562.047 2
 -1 17 4 25506 1157.03 2
 0 -16 -3 14885.3 919.103 5
 0 -16 -2 14881.3 932.405 5
 0 -16 -1 12125 851.399 5
 0 -16 0 6143.12 615.304 5
 0 -15 -2 21544.1 1063.88 5
 0 -15 -1 9561.83 718.545 5
 0 -15 0 14714 902.211 5
 0 -15 1 12017.5 814.058 5
 0 -15 2 39940.9 1513.08 5
 0 -15 3 1562.08 338.58 5
 0 -14 -2 76093.7 2003.78 5
 0 -14 -1 5066.17 507.715 5
 0 -14 0 22443 1074.9 5
 0 -14 1 12709.4 794.387 5
 0 -14 2 3695.9 460.089 5
 0 -14 3 31238.3 1283.06 5
 0 -14 4 54.6145 134.78 5
 0 -13 -1 85630.6 2041.54 5
 0 -13 0 1120.33 257.558 5
 0 -13 1 21521.4 999.296 5
 0 -13 2 3900.82 436.515 5
 0 -13 3 13332.3 798.53 5
 0 -13 4 29948.7 1236.83 5
 0 -12 -1 65019.9 1668.2 5
 0 -12 0 87286.8 2006.65 5
 0 -12 1 1999.96 318.925 5
 0 -12 2 31975.5 1181.26 5
 0 -12 3 1229.13 244.268 5
 0 -12 4 38501.2 1359 5
 0 -11 0 87400 1903.38 5
 0 -11 1 65127.6 1654.96 5
 0 -11 2 251.882 131.651 5
 0 -11 3 38643 1258.42 5
 0 -11 4 346.191 151.282 5
 0 -10 0 6398.36 459.262 5
 0 -10 1 99325.4 1987.06 5
 0 -10 2 46586.7 1305.57 5
 0 -10 3 7578.47 520.541 5
 0 -10 4 36084.2 1195.86 5
 0 -10 7 8419.45 517.617 3
 0 -9 0 830.627 181.26 5
 0 -9 1 12032.8 599.269 5
 0 -9 2 117530 2114.88 5
 0 -9 3 46883.9 1282.73 5
 0 -9 4 38284.7 1175.26 5
 0 -9 7 35272.6 1050.98 3
 0 -8 1 3824.05 319.045 5
 0 -8 2 20823.9 758.53 5
 0 -8 3 100112 1873.01 5
 0 -8 4 12428.2 616.433 5
 0 -8 7 9184.45 505.897 3
 0 -8 8 34310.7 1030.13 3
 0 -7 1 61896.1 1290.88 5
 0 -7 2 10544.7 501.351 5
 0 -7 3 43970.3 1096.97 5
 0 -7 4 71547.2 1513.41 5
 0 -7 7 45977.4 1130.03 3
 0 -7 8 25160.8 841.728 3
 0 -6 -11 2937.51 246.141 4
 0 -6 -10 84019.2 1387.08 4
 0 -6 -9 272.08 78.8579 4
 0 -6 -2 9814.42 254.519 4
 0 -6 1 457.215 124.509 5
 0 -6 2 147160 2117.36 5
 0 -6 3 5825.35 352.003 5
 0 -6 6 1904.77 199.101 3
 0 -6 7 57853.1 1233.39 3
 0 -6 8 9310.16 482.284 3
 0 -6 9 32735.3 960.745 3
 0 -5 -13 2257.78 259.503 4
 0 -5 -12 31470.7 924.858 4
 0 -5 -11 57605.7 1220.65 4
 0 -5 -10 7284.41 378.046 4
 0 -5 -9 68539.8 1198.48 4
 0 -5 -8 174.978 71.4136 4
 0 -5 -7 128039 1602.15 4
 0 -5 -2 54496.8 674.755 4
 0 -5 -1 6017.21 206.136 4
 0 -5 1 193172 2398.62 5
 0 -5 2 96340.4 1512.22 5
 0 -5 3 158949 2172.4 5
 0 -5 6 69241.6 1273.62 3
 0 -5 7 16540 597.529 3
 0 -5 8 35550.7 933.475 3
 0 -5 9 383.102 117.691 3
 0 -4 -14 156.305 115.552 4
 0 -4 -13 14695 678.832 4
 0 -4 -12 796.69 160.913 4
 0 -4 -11 49933.6 1174.18 4
 0 -4 -10 14162.9 555.66 4
 0 -4 -9 9948.16 428.693 4
 0 -4 -8 49362.5 959.349 4
 0 -4 -7 4521.14 239.737 4
 0 -4 -6 203657 2243.27 4
 0 -4 -5 39110.9 623.852 4
 0 -4 -1 53841.5 686.416 4
 0 -4 0 5529.74 202.909 4
 0 -4 1 250221 2790.5 5
 0 -4 2 110622 1562.76 5
 0 -4 3 38670.6 838.928 5
 0 -4 4 94045.4 1081.46 2
 0 -4 5 3200.14 125.199 2
 0 -4 5 3229.25 220.711 3
 0 -4 6 90725.1 1451.35 3
 0 -4 7 9154.94 414.985 3
 0 -4 8 37790.3 926.29 3
 0 -4 9 65482.8 1331.32 3
 0 -4 10 1354.54 190.695 3
 0 -3 -15 25389.1 1030.38 4
 0 -3 -14 27058.7 1020.18 4
 0 -3 -13 417.117 131.319 4
 0 -3 -12 38202.2 1101.12 4
 0 -3 -11 2119.53 243.899 4
 0 -3 -10 46089.2 1091.21 4
 0 -3 -9 23794.5 713.225 4
 0 -3 -8 18836.7 587.951 4
 0 -3 -7 77799.3 1237.91 4
 0 -3 -6 9117.69 332.286 4
 0 -3 -5 199900 2162.13 4
 0 -3 -4 2301.18 121.339 4
 0 -3 -1 36866.3 460.518 4
 0 -3 -1 36551.6 602.456 3
 0 -3 0 16808.8 330.834 4
 0 -3 0 16666.5 373.253 3
 0 -3 1 8492.32 301.645 5
 0 -3 2 363846 3732.8 5
 0 -3 2 364080 3415.07 2
 0 -3 3 58662.7 711.508 2
 0 -3 4 31193.9 640.329 3
 0 -3 4 30249.2 431.401 2
 0 -3 5 98413.3 1365.73 3
 0 -3 5 88394.9 957.905 2
 0 -3 6 1505.85 155.236 3
 0 -3 6 1169.98 60.3963 2
 0 -3 7 28837.3 734.724 3
 0 -3 8 355.361 90.9497 3
 0 -3 9 66034.2 1306.64 3
 0 -3 10 52318.7 1203.66 3
 0 -2 -16 12572.4 772.514 4
 0 -2 -15 105.685 138.459 4
 0 -2 -14 33171.3 1165.52 4
 0 -2 -13 29281.7 1035.31 4
 0 -2 -12 7869.53 508.22 4
 0 -2 -11 24415.1 858.923 4
 0 -2 -10 7814.99 451.805 4
 0 -2 -9 96272.3 1651.44 4
 0 -2 -8 38908.4 910 4
 0 -2 -7 23701.2 640.756 4
 0 -2 -6 127401 1685.7 4
 0 -2 -5 6268.45 262.556 4
 0 -2 -4 204014 2154.12 4
 0 -2 -3 2594.63 140.829 3
 0 -2 -3 2779.67 120.799 4
 0 -2 -2 176735 1854.34 3
 0 -2 -2 178953 1879.17 1
 0 -2 -1 202252 2018.67 3
 0 -2 0 2.62245 8.56453 4
 0 -2 1 320721 3132.08 5
 0 -2 1 324797 3106.89 4
 0 -2 2 1632.74 71.8341 2
 0 -2 3 287813 2885.7 2
 0 -2 3 321175 3156.57 3
 0 -2 4 29047.1 394.647 2
 0 -2 4 34601.8 629.914 3
 0 -2 5 88140.2 954.233 2
 0 -2 5 95865.6 1301.72 3
 0 -2 6 55006.3 664.77 2
 0 -2 6 57266.8 989.016 3
 0 -2 7 16339.3 520.458 3
 0 -2 8 54005.8 1082.31 3
 0 -2 9 3458.87 268.723 3
 0 -2 10 55578.5 1205.04 3
 0 -2 11 56689.9 1268.85 3
 0 -1 -16 6028.39 550.678 4
 0 -1 -15 10129.1 685.927 4
 0 -1 -14 2562.76 349.785 4
 0 -1 -13 55999 1519.64 4
 0 -1 -12 18069.3 797.336 4
 0 -1 -11 9315.83 547.44 4
 0 -1 -10 30210.6 932.051 4
 0 -1 -9 35197.7 960.345 4
 0 -1 -8 125399 1931.7 4
 0 -1 -7 13713.5 505.958 4
 0 -1 -6 97194.3 1451.61 4
 0 -1 -5 63954.9 1030.7 4
 0 -1 -4 24629.9 520.022 4
 0 -1 -3 497482 4762.25 4
 0 -1 -3 521018 4763.04 3
 0 -1 -2 6308.04 171.214 3
 0 -1 -2 2607.4 106.152 4
 0 -1 2 100648 1116.29 3
 0 -1 2 102479 1221.13 4
 0 -1 3 90548.1 979.543 3
 0 -1 3 65541.5 731.415 2
 0 -1 4 172295 1678.85 2
 0 -1 4 172045 1909.26 3
 0 -1 5 15371.3 423.576 3
 0 -1 5 15871.9 294.521 2
 0 -1 6 113977 1537.79 3
 0 -1 6 113333 1247.52 2
 0 -1 7 79970.6 992.371 2
 0 -1 7 87832.3 1346.15 3
 0 -1 8 28704.9 737.237 3
 0 -1 9 40430 943.396 3
 0 -1 10 491.771 122.579 3
 0 -1 11 90371.8 1653.89 3
 0 0 -15 9657.36 697.335 4
 0 0 -14 4666.08 461.39 4
 0 0 -13 14233.7 769.078 4
 0 0 -12 74554.9 1756.28 4
 0 0 -11 13622.7 682.846 4
 0 0 -10 31797 995.625 4
 0 0 -9 15584.2 641.89 4
 0 0 -8 42167.1 1034.47 4
 0 0 -7 196282 2587.58 4
 0 0 -6 2296.8 208.885 4
 0 0 -5 83657.7 1293.96 4
 0 0 -4 7077.86 290.627 4
 0 0 -3 2845.96 157.05 4
 0 0 -3 2821.98 128.91 3
 0 0 -2 21644.3 381.239 3
 0 0 -2 61936.8 635.345 4
 0 0 2 115850 1219.79 3
 0 0 2 120750 1310.88 4
 0 0 3 2729.64 131.407 3
 0 0 4 7562.44 256.707 3
 0 0 5 83883 1163.09 3
 0 0 6 2312 174.917 3
 0 0 7 196356 2375.83 3
 0 0 8 42041.7 899.047 3
 0 0 9 14954.9 539.189 3
 0 0 10 29655.4 818.889 3
 0 0 11 12404 548.992 3
 0 0 12 73530.5 1526.13 3
 0 1 -15 824.552 236.198 4
 0 1 -14 7840.91 616.586 4
 0 1 -13 400.424 169.104 4
 0 1 -12 42333.3 1314.86 4
 0 1 -11 91523 1939.03 4
 0 1 -10 824.702 182.932 4
 0 1 -9 40840.2 1118.27 4
 0 1 -8 28708.3 878.464 4
 0 1 -7 85743.6 1555.17 4
 0 1 -6 114614 1764 4
 0 1 -5 15791.3 523.346 4
 0 1 -4 175359 2141.07 4
 0 1 -3 88455.8 1222.67 4
 0 1 -2 99609.2 1215.04 4
 0 1 2 20013.4 328.194 3
 0 1 2 21409.2 329.029 4
 0 1 3 505579 4802.4 3
 0 1 3 524439 4848.06 4
 0 1 4 24663.7 492.632 3
 0 1 5 61080.1 936.278 3
 0 1 6 98405.4 1373.32 3
 0 1 7 12783.1 437.038 3
 0 1 8 122545 1764.06 3
 0 1 9 34413.6 855.194 3
 0 1 10 30353.4 845.285 3
 0 1 11 9485.9 485.689 3
 0 1 12 17422.4 693.042 3
 0 1 15 8898.3 638.989 1
 0 1 16 5718.2 535.871 1
 0 2 -14 615.241 227.215 4
 0 2 -13 9266.82 661.235 4
 0 2 -12 2583.79 342.764 4
 0 2 -11 59049.1 1557.34 4
 0 2 -10 55545.6 1439.85 4
 0 2 -9 3855.2 357.897 4
 0 2 -8 55396.7 1302.75 4
 0 2 -7 16942.4 656.877 4
 0 2 -6 58574.9 1215.73 4
 0 2 -5 96644.5 1567.26 4
 0 2 -4 34360.1 774.912 4
 0 2 -3 327330 3472.92 4
 0 2 -3 327464 3004.01 2
 0 2 -2 1469.82 68.3325 2
 0 2 -2 1316.46 116.064 4
 0 2 -1 332179 3039.39 5
 0 2 -1 316649 2984.31 4
 0 2 0 41.735 21.2796 2
 0 2 2 180714 1886.43 1
 0 2 2 177524 1858.34 3
 0 2 3 2413.42 138.081 3
 0 2 3 2778.46 125.29 4
 0 2 3 2634.45 148.567 1
 0 2 4 205229 2300.22 1
 0 2 4 211992 2229.77 4
 0 2 4 205680 2249.86 3
 0 2 5 6221.68 263.676 3
 0 2 5 6416.97 287.842 1
 0 2 6 130865 1716.43 3
 0 2 7 23644.2 625.316 3
 0 2 8 38783.8 878.468 3
 0 2 9 95817.1 1584.57 3
 0 2 10 7091.8 398.942 3
 0 2 11 22493.3 758.426 3
 0 2 12 7160.56 442.972 3
 0 2 13 29267.9 1057.84 1
 0 2 13 28029.5 934.892 3
 0 2 14 34190.5 1213.22 1
 0 2 15 226.795 151.436 1
 0 2 16 13100.4 792.4 1
 0 3 -14 22347.7 1109.41 4
 0 3 -13 341.728 163.945 4
 0 3 -12 8144.49 609.317 4
 0 3 -11 5936.8 508.885 4
 0 3 -10 49185.4 1396.62 4
 0 3 -9 67379.6 1573.03 4
 0 3 -8 424.753 138.975 4
 0 3 -7 30518.7 928.414 4
 0 3 -6 1713.19 221.905 4
 0 3 -5 99854.9 1662.76 4
 0 3 -4 31300.6 788.404 4
 0 3 -4 31662 451.369 2
 0 3 -3 59147.6 716.974 2
 0 3 -3 58425.5 1050.21 4
 0 3 -2 365425 3443.55 2
 0 3 -2 367184 3773.2 4
 0 3 -1 8259.28 269.889 4
 0 3 -1 7966.66 216.9 2
 0 3 0 15743.4 339.845 2
 0 3 0 15951 322.137 4
 0 3 1 36872.2 465.159 4
 0 3 1 35850 600.658 3
 0 3 2 425784 4123.39 3
 0 3 3 203591 1976.17 4
 0 3 3 202855 2263.62 1
 0 3 3 204117 2230.78 3
 0 3 4 1904.11 151.466 3
 0 3 4 2358.24 128.453 4
 0 3 4 2734.02 180.735 1
 0 3 5 202186 2336.04 3
 0 3 5 201616 2380.31 1
 0 3 6 8767.97 359.518 3
 0 3 6 9646.88 393.65 1
 0 3 7 78945.8 1306.16 3
 0 3 7 77951.2 1342.65 1
 0 3 8 19419.1 645.95 1
 0 3 8 18893.6 606.201 3
 0 3 9 23941.8 721.658 3
 0 3 9 24038.4 781.176 1
 0 3 10 48920.6 1128 3
 0 3 10 48431.6 1184.99 1
 0 3 11 1916.86 230.742 3
 0 3 11 2265.52 277.92 1
 0 3 12 36855.6 1051.58 3
 0 3 12 38262.4 1163.66 1
 0 3 13 601.459 157.875 1
 0 3 13 547.4 143.205 3
 0 3 14 26543.7 1044.16 1
 0 3 15 25787.9 1080.37 1
 0 3 16 356.652 182.493 1
 0 4 -13 16830.5 946.432 4
 0 4 -12 1663.07 303.269 4
 0 4 -11 13323.8 759.058 4
 0 4 -10 1520.38 267.797 4
 0 4 -9 65911.6 1623.72 4
 0 4 -8 38939.3 1154.2 4
 0 4 -7 9504.65 533.212 4
 0 4 -6 91065.6 1708.61 4
 0 4 -5 3347.64 286.397 4
 0 4 -5 3757.36 141.92 2
 0 4 -4 99248.2 1127.18 2
 0 4 -4 96255.3 1602.02 4
 0 4 -3 36773 843.824 4
 0 4 -3 37512.7 580.983 2
 0 4 -2 108656 1521.74 4
 0 4 -2 109422 1273.41 2
 0 4 -1 247091 2670.62 4
 0 4 -1 249806 2536.47 2
 0 4 0 5356.85 216.258 2
 0 4 0 5106.54 199.322 4
 0 4 1 50832.2 810.885 2
 0 4 1 52173.8 674.07 4
 0 4 1 51081.8 836.048 3
 0 4 2 7139.69 158.677 4
 0 4 2 7076.7 278.787 3
 0 4 3 31622 420.278 4
 0 4 3 33900.1 669.984 3
 0 4 4 288313 3219.95 1
 0 4 4 295553 2823.79 4
 0 4 4 293137 3179.42 3
 0 4 5 40824.6 847.219 1
 0 4 5 39579.8 652.53 4
 0 4 5 38915.2 805.453 3
 0 4 6 205884 2504.93 3
 0 4 6 203845 2561.19 1
 0 4 7 4993.36 298.321 3
 0 4 7 4216.12 288.795 1
 0 4 8 50803 1074.8 3
 0 4 8 48033.1 1095.18 1
 0 4 9 9894.71 468.618 3
 0 4 9 9765.49 493.417 1
 0 4 10 13368.5 607.506 1
 0 4 10 13469.2 573.379 3
 0 4 11 51960.2 1297.84 1
 0 4 11 50796.8 1229.18 3
 0 4 12 737.708 185.817 1
 0 4 12 504.84 138.123 3
 0 4 12 497.147 130.622 2
 0 4 13 14089.1 676.797 3
 0 4 13 13943.3 715.224 1
 0 4 14 15.6022 117.421 1
 0 4 15 29798.1 1152.22 1
 0 4 16 14299.9 820.552 1
 0 5 -13 24369.5 1174.32 4
 0 5 -12 14971.1 867.727 4
 0 5 -11 5890.36 529.221 4
 0 5 -10 19997.3 939.017 4
 0 5 -9 222.062 121.615 4
 0 5 -8 36846.8 1160.81 4
 0 5 -7 17854.6 774.058 4
 0 5 -6 71423.7 1532.34 4
 0 5 -5 92490.6 1720.9 4
 0 5 -5 95780 1142.34 2
 0 5 -4 4697.31 191.564 2
 0 5 -4 4404.48 319.432 4
 0 5 -3 156920 2182.1 4
 0 5 -3 157707 1766.63 2
 0 5 -2 94724.8 1219.3 2
 0 5 -2 95023.5 1464.42 4
 0 5 -1 192169 2252.58 4
 0 5 -1 189459 2114.99 2
 0 5 0 167338 1950.44 2
 0 5 0 167247 1911.82 4
 0 5 1 5376.84 249.211 2
 0 5 1 5340.7 196.417 4
 0 5 2 54294.4 685.383 4
 0 5 2 55656.5 969.665 3
 0 5 3 842.809 55.6918 4
 0 5 3 960.203 123.761 3
 0 5 4 109685 1167.94 4
 0 5 4 112563 1589.47 3
 0 5 5 112214 1284.13 4
 0 5 5 112208 1652.41 3
 0 5 6 53303.8 1090.42 1
 0 5 6 55516.8 1080.32 3
 0 5 7 123573 1925.34 1
 0 5 7 129474 1899.34 3
 0 5 8 89.2595 63.1058 3
 0 5 8 145.11 92.5377 1
 0 5 9 68064.9 1374.88 3
 0 5 9 69188.7 1421.04 1
 0 5 10 6610.53 413.747 3
 0 5 10 7195.57 445.476 1
 0 5 11 55152.8 1304.53 3
 0 5 11 54888.1 1362.49 1
 0 5 12 29919.7 975.977 3
 0 5 12 30278 938.144 2
 0 5 12 30435.3 1031.75 1
 0 5 13 1681.47 241.938 3
 0 5 13 2309.97 302.51 1
 0 5 14 17188.2 789.465 3
 0 5 14 18601.2 865.074 1
 0 5 15 -44.1122 130.369 1
 0 5 16 14514.5 850.029 1
 0 6 -12 28572.8 1267.09 4
 0 6 -11 10489.2 722.962 4
 0 6 -10 7807.38 590.031 4
 0 6 -9 33568.2 1195.13 4
 0 6 -8 10387.6 633.653 4
 0 6 -7 59580.5 1499.14 4
 0 6 -6 1950.15 256.097 4
 0 6 -5 49080.3 761.43 2
 0 6 -5 48202 1221.82 4
 0 6 -4 47688.3 782.25 2
 0 6 -4 45645.3 1116.15 4
 0 6 -3 5615.12 346.716 4
 0 6 -3 6000.22 249.182 2
 0 6 -2 151407 2073.43 4
 0 6 -2 145675 1787.99 2
 0 6 -1 789.958 126.989 4
 0 6 -1 452.877 88.3565 2
 0 6 0 325408 3488.44 4
 0 6 0 346594 3590.31 2
 0 6 1 110685 1541.52 2
 0 6 1 108989 1357.8 4
 0 6 2 9415.94 384.831 2
 0 6 2 9580.71 258.876 4
 0 6 2 9414.66 391.469 3
 0 6 3 112252 1204.12 4
 0 6 3 116414 1680.43 3
 0 6 4 18130.6 310.932 4
 0 6 4 18850.7 300.279 4
 0 6 5 100541 1129.81 4
 0 6 5 107109 1645.7 3
 0 6 6 21818.4 442.245 4
 0 6 6 22292.2 682.675 3
 0 6 7 29998.7 853.734 1
 0 6 7 29003.2 814.777 3
 0 6 8 112783 1919.84 1
 0 6 8 115576 1902.23 3
 0 6 9 301.208 112.446 1
 0 6 9 172.284 97.1872 3
 0 6 10 84010 1701.64 1
 0 6 10 84978.5 1666.46 3
 0 6 11 2274.89 280.798 1
 0 6 11 2200.91 263.772 3
 0 6 12 76023.7 1632.82 2
 0 6 12 75792.2 1714.28 1
 0 6 12 73057.4 1639.17 3
 0 6 13 13307.7 661.897 2
 0 6 13 15041.7 761.482 1
 0 6 13 14788.1 722.888 3
 0 6 14 8197.29 579.291 1
 0 6 14 7207.68 522.002 3
 0 6 15 15744.2 846.188 1
 0 6 16 26.1836 138.035 1
 0 7 -12 3905.11 473.123 4
 0 7 -11 32583.8 1315.23 4
 0 7 -10 13341.9 799.72 4
 0 7 -9 15874.1 839.301 4
 0 7 -8 27350.2 1074.15 4
 0 7 -7 48404.7 1391.28 4
 0 7 -6 66879.5 1594.51 4
 0 7 -5 619.628 154.683 4
 0 7 -5 1174.15 112.132 2
 0 7 -4 74422 1115.65 2
 0 7 -4 71349.3 1508.36 4
 0 7 -3 43389 1071.82 4
 0 7 -3 45305.8 830.083 2
 0 7 -2 9800.06 450.775 4
 0 7 -2 10174.5 371.731 2
 0 7 -1 66124.3 1191.54 4
 0 7 -1 61098.4 1048.29 2
 0 7 0 34655 752.813 4
 0 7 0 36673.4 798.533 2
 0 7 1 236089 2805.19 2
 0 7 1 237847 2602.07 4
 0 7 2 14267.2 500.661 2
 0 7 2 13629.1 354.666 4
 0 7 3 62482 809.329 4
 0 7 3 62741.9 1191.38 2
 0 7 3 63706.5 1223.95 3
 0 7 4 48484.2 616.272 4
 0 7 4 53080.9 1098.77 3
 0 7 5 15216.8 286.01 4
 0 7 5 15766.8 270.029 4
 0 7 5 17090.3 602.469 3
 0 7 6 97445.4 1135.39 4
 0 7 6 105053 1733.49 3
 0 7 7 8285.38 446.705 3
 0 7 8 91672.2 1699.91 3
 0 7 9 85225.9 1714.64 1
 0 7 9 85529.1 1681.14 3
 0 7 10 5020.6 400.535 1
 0 7 10 4945.11 382.232 3
 0 7 11 10969.4 588.759 2
 0 7 11 11352.3 622.445 1
 0 7 11 10188.8 579.761 3
 0 7 12 23744.8 909.827 2
 0 7 12 23943.7 913.887 3
 0 7 12 24014.4 941.111 1
 0 7 13 52847.2 1489.81 1
 0 7 13 51527.3 1401.82 2
 0 7 13 52558.4 1442.97 3
 0 7 14 12710.7 729.523 1
 0 7 14 11235 673.15 3
 0 7 15 6972.1 564.434 1
 0 7 16 12801.3 806.52 1
 0 8 -11 10211.8 762.538 4
 0 8 -10 40354.8 1456.16 4
 0 8 -9 1737 310.296 4
 0 8 -8 37167.2 1285.28 4
 0 8 -7 10759.7 660.669 4
 0 8 -6 38410.3 1205.61 4
 0 8 -5 63449.7 1526.33 4
 0 8 -4 11245.4 577.824 4
 0 8 -4 12407.1 421.799 2
 0 8 -3 103579 1497.14 2
 0 8 -3 99346.5 1816.72 4
 0 8 -2 20791.5 584.809 2
 0 8 -2 20097.7 693.207 4
 0 8 -1 3461.29 267.745 4
 0 8 -1 4275.66 268.45 2
 0 8 0 494.372 108.934 4
 0 8 0 446.639 93.5496 2
 0 8 1 61449.1 1047.1 4
 0 8 1 63568.4 1200.2 2
 0 8 2 139909 2015.38 2
 0 8 2 135510 1669.42 4
 0 8 3 8066.23 421.444 2
 0 8 3 8566.8 265.985 4
 0 8 3 8758.28 444.176 3
 0 8 4 46187.6 1074.26 2
 0 8 4 43218.8 605.547 4
 0 8 4 46786.9 1084.65 3
 0 8 5 55445.4 1202.18 2
 0 8 5 55812.2 1226.43 3
 0 8 6 10066.9 501.48 2
 0 8 6 8335.13 180.916 4
 0 8 6 9554.07 488.089 3
 0 8 7 42375.9 582.233 4
 0 8 7 49033.2 1184.33 3
 0 8 8 3306.97 304.357 3
 0 8 9 125136 2187.5 2
 0 8 9 120770 2150.28 3
 0 8 10 33275.6 1068.7 2
 0 8 10 33354.7 1054.82 3
 0 8 11 4828.05 413.115 2
 0 8 11 4638.78 403.392 3
 0 8 12 2131.08 295.778 2
 0 8 12 2506.57 324.584 1
 0 8 12 1951.82 278.232 3
 0 8 13 15604.6 785.527 2
 0 8 13 17369.2 848.239 1
 0 8 13 16491 805.711 3
 0 8 14 38970.9 1297.25 2
 0 8 14 40830.7 1367.86 1
 0 8 14 40882.5 1344.36 3
 0 8 15 2706.72 365.823 3
 0 8 15 2789.06 379.37 1
 0 8 16 8512.19 665.944 1
 0 9 -10 21810.3 1090.27 4
 0 9 -9 26542.3 1160.61 4
 0 9 -8 1086.9 247.166 4
 0 9 -7 36617 1274.03 4
 0 9 -6 4163.16 417.28 4
 0 9 -5 36478.8 1177.98 4
 0 9 -4 39549.9 1171.16 4
 0 9 -4 39309 856.365 2
 0 9 -3 48875.8 984.964 2
 0 9 -3 47571 1227.42 4
 0 9 -2 116229 1982.86 4
 0 9 -2 118342 1758.73 2
 0 9 -1 12805.8 541.3 4
 0 9 -1 13208.7 506.84 2
 0 9 0 825.557 137.26 2
 0 9 0 796.186 130.973 4
 0 9 1 640.646 109.664 4
 0 9 1 963.49 150.233 2
 0 9 2 54107 1171.21 2
 0 9 2 51813.3 927.873 4
 0 9 3 102770 1332.56 4
 0 9 3 104668 1789.98 2
 0 9 4 3092.35 287.015 3
 0 9 4 3061.71 146.183 4
 0 9 4 3514.36 299.776 2
 0 9 5 95477.7 1727.88 2
 0 9 5 96448.6 1747.15 3
 0 9 6 55173.7 1318.3 2
 0 9 6 55422.3 1318.31 3
 0 9 7 2745.16 295.765 2
 0 9 7 2671.41 287.179 3
 0 9 8 12062.4 619.105 2
 0 9 8 12063.4 615.327 3
 0 9 9 16198.8 744.903 2
 0 9 9 16961.1 751.375 3
 0 9 10 65391.6 1618.52 2
 0 9 10 65156.5 1585.98 3
 0 9 11 7954.98 559.884 2
 0 9 11 7989.14 546.851 3
 0 9 12 11782.9 687.726 2
 0 9 12 11311.5 657.577 3
 0 9 13 3767.19 414.104 2
 0 9 13 3338.17 383.742 3
 0 9 14 9264.13 648.952 2
 0 9 14 9173.41 635.843 3
 0 9 15 26133.6 1114.87 3
 0 10 -9 22754.3 1100.56 4
 0 10 -8 15788.1 891.286 4
 0 10 -7 9856.29 674.457 4
 0 10 -6 31954.6 1169.82 4
 0 10 -5 722.524 190.142 4
 0 10 -4 34772.7 1127.79 4
 0 10 -3 6388.92 464.15 4
 0 10 -3 7117.41 377.743 2
 0 10 -2 43568.7 1164.83 4
 0 10 -2 48329.9 1058.86 2
 0 10 -1 100082 1678.61 2
 0 10 -1 97151.6 1754.94 4
 0 10 0 5565.23 348.893 4
 0 10 0 6537.4 376.564 2
 0 10 1 876.205 137.282 4
 0 10 1 919.201 155.57 2
 0 10 2 350.764 87.5322 4
 0 10 2 392.173 120.012 2
 0 10 3 65552.8 1399.27 2
 0 10 3 63954.1 1032.9 4
 0 10 4 98611.2 1831.38 2
 0 10 5 5043.9 383.712 2
 0 10 5 4875.75 392.015 3
 0 10 6 88052.7 1781.15 2
 0 10 6 88060.3 1786.91 3
 0 10 7 8419.99 535.394 2
 0 10 7 9567.79 564.308 3
 0 10 8 20892.6 851.683 2
 0 10 8 19501.3 821.203 3
 0 10 9 12122.1 666.687 2
 0 10 9 11578.5 641.448 3
 0 10 10 18128.8 838.56 2
 0 10 10 19244.3 843.958 3
 0 10 11 59915.3 1619.52 2
 0 10 11 59457.5 1604.33 3
 0 10 12 6563.1 540.074 2
 0 10 12 6182.75 520.473 3
 0 10 13 6027.28 536.75 2
 0 10 13 6484.93 540.836 3
 0 10 14 2063.78 338.36 2
 0 10 14 1938.03 319.488 3
 0 10 15 7512.41 619.716 2
 0 10 15 7871.01 626.854 3
 0 11 -9 642.556 213.393 4
 0 11 -8 24897.1 1144.52 4
 0 11 -7 8783.85 659.236 4
 0 11 -6 13345.2 773.41 4
 0 11 -5 33855.6 1203.04 4
 0 11 -4 363.076 166.716 4
 0 11 -3 37311.9 1167.86 4
 0 11 -3 40574.9 983.83 2
 0 11 -2 81.6779 120.493 4
 0 11 -2 230.114 94.1814 2
 0 11 -1 62520 1413.04 4
 0 11 -1 66871.9 1363.98 2
 0 11 0 82626.9 1582.19 4
 0 11 0 88112.5 1643.99 2
 0 11 1 1219.4 171.939 4
 0 11 1 1933.87 230.728 2
 0 11 2 5846.86 323.748 4
 0 11 2 7250.72 444.712 2
 0 11 3 1830.22 245.488 2
 0 11 4 55423.8 1365.23 2
 0 11 5 69514.4 1601.03 2
 0 11 6 10206.8 586.163 2
 0 11 6 10183.3 593.359 3
 0 11 7 73077.3 1709.65 2
 0 11 7 73593.4 1714.01 3
 0 11 8 1899.72 286.809 2
 0 11 8 1865.23 300.256 3
 0 11 9 34201.7 1184.93 2
 0 11 9 34219.5 1178.98 3
 0 11 10 2338.16 341.371 2
 0 11 10 2046.67 304.498 3
 0 11 11 23020.1 1016.85 2
 0 11 11 21719.1 973.029 3
 0 11 12 33631.4 1277.73 2
 0 11 12 33107 1235.48 3
 0 11 13 2027.14 338.586 2
 0 11 13 1852.34 318.551 3
 0 11 14 10198.4 737.189 2
 0 11 14 10090.6 704.347 3
 0 11 15 1918.99 335.815 3
 0 11 15 2833.86 418.379 2
 0 12 -8 2436.84 389.198 4
 0 12 -7 24908.4 1145.24 4
 0 12 -6 3429.98 406.884 4
 0 12 -5 20000.5 940.57 4
 0 12 -4 36816.9 1241.23 4
 0 12 -3 1235.82 244.115 4
 0 12 -2 29499.6 1020.85 4
 0 12 -2 31610.6 924.477 2
 0 12 -1 1699.25 240.122 4
 0 12 -1 2313.24 253.873 2
 0 12 0 84825.4 1660.67 4
 0 12 0 87010.2 1711.5 2
 0 12 1 63413.9 1440.35 2
 0 12 2 895.39 177.645 2
 0 12 3 31809 1037.11 2
 0 12 4 1725.77 254.445 2
 0 12 5 21251.9 876.935 2
 0 12 6 3787.51 387.192 2
 0 12 7 29708.3 1082.54 2
 0 12 7 29030.7 1077.73 3
 0 12 8 66160.8 1700.52 2
 0 12 8 64114.6 1678.58 3
 0 12 9 565.882 194.361 2
 0 12 9 591.163 197.765 3
 0 12 10 34942.6 1284.53 2
 0 12 10 32871 1236.4 3
 0 12 11 439.306 208.865 2
 0 12 11 598.173 200.948 3
 0 12 12 20538.1 1019.37 2
 0 12 12 19664.3 972.033 3
 0 12 13 31108.8 1300.08 2
 0 12 13 32042.6 1302.52 3
 0 12 14 363.312 173.666 2
 0 12 14 412.873 157.216 3
 0 12 15 6198.61 591.912 3
 0 12 15 6965.65 665.993 2
 0 13 -7 2017.82 336.052 4
 0 13 -6 29851.8 1247.31 4
 0 13 -5 -12.0258 130.197 4
 0 13 -4 28184.5 1113.84 4
 0 13 -3 12087.7 697.957 4
 0 13 -2 3012.32 338.202 4
 0 13 -1 21973 823.917 2
 0 13 0 572.967 184.802 2
 0 13 1 86921.6 1820.02 2
 0 13 2 36621.2 1117.74 2
 0 13 3 16091.4 747.131 2
 0 13 4 25115.5 968.556 2
 0 13 5 3411.4 366.855 2
 0 13 6 13621 752.733 2
 0 13 7 1854.65 299.736 2
 0 13 8 76717 1891.34 2
 0 13 8 32734.4 1258.51 3
 0 13 9 24305.8 1071.6 2
 0 13 9 23068.8 1046.3 3
 0 13 10 1921.89 317.371 2
 0 13 10 1846.77 316.029 3
 0 13 11 17075.4 938.053 2
 0 13 11 15920.6 897.762 3
 0 13 12 1485.12 324.864 2
 0 13 12 1277.33 278.903 3
 0 13 13 27192.1 1237.77 3
 0 13 13 31042.4 1358.84 2
 0 13 14 11485.2 824.832 3
 0 13 14 11581.3 847.802 2
 0 14 -6 2144.89 353.842 4
 0 14 -5 27599.7 1183.02 4
 0 14 -4 24.767 115.024 4
 0 14 0 22113.8 874.429 2
 0 14 1 4822.27 425.173 2
 0 14 2 80865.1 1844.98 2
 0 14 3 19407 835.567 2
 0 14 4 11674.5 678.932 2
 0 14 5 11399.4 686.164 2
 0 14 6 3724.54 407.5 2
 0 14 7 24442.1 1080.79 2
 0 14 8 487.011 201.907 2
 0 14 9 37760 1448.92 2
 0 14 10 12124.8 783.536 3
 0 14 10 13516.9 854.88 2
 0 14 11 3953.98 474.212 3
 0 14 11 4023.7 501.689 2
 0 14 12 8664.21 700.946 3
 0 14 12 8531.62 729.083 2
 0 15 0 14176 726.842 2
 0 15 1 9560.37 605.033 2
 0 15 2 22202.3 955.899 2
 0 15 3 49918.2 1501.44 2
 0 15 4 8173.08 584.53 2
 0 15 5 20673.8 970.888 2
 0 15 6 14132.1 811.78 2
 0 15 7 9344.1 682.547 2
 0 15 8 12453.5 803.037 2
 0 15 9 27.9136 156.619 2
 0 15 10 22393 1132.68 2
 0 15 11 6562.13 626.794 2
 0 16 1 12800 734.982 2
 0 16 2 14692.7 802.941 2
 0 16 3 14955 826.579 2
 0 16 4 34825.7 1303.18 2
 0 16 5 460.675 205.854 2
 0 16 6 20624.1 1002.15 2
 0 16 7 6695.94 589.925 2
 0 16 8 12380.9 827.88 2
 0 17 2 13366 796.722 2
 0 17 3 2272.67 343.168 2
 0 17 4 15188.4 883.018 2
 0 17 5 25927.8 1184.92 2
 1 -16 -2 3912.4 497.316 5
 1 -16 -1 12932.5 872.697 5
 1 -16 0 4391.99 530.899 5
 1 -15 -1 1019.46 298.513 5
 1 -15 0 30166.3 1296.51 5
 1 -15 1 4371.73 508.128 5
 1 -15 2 19592.3 1042.49 5
 1 -15 3 12774.1 852.051 5
 1 -14 -1 57023.7 1695.4 5
 1 -14 0 2902.26 407.538 5
 1 -14 1 19674.6 999.189 5
 1 -14 2 276.833 190.5 5
 1 -14 3 21863.7 1076.24 5
 1 -14 4 14035.1 860.675 5
 1 -13 0 32222 1226.55 5
 1 -13 1 2870.93 390.901 5
 1 -13 2 11893.8 736.13 5
 1 -13 3 1522.8 288.661 5
 1 -13 4 32857.8 1270.93 5
 1 -13 5 3755.43 438.743 5
 1 -12 0 102653 2187.42 5
 1 -12 1 29019 1110.23 5
 1 -12 2 9430 632.534 5
 1 -12 3 27360.5 1096.49 5
 1 -12 4 5850.26 517.18 5
 1 -12 5 26088.6 1097.88 5
 1 -11 1 86316 1888.09 5
 1 -11 2 10105.4 624.441 5
 1 -11 3 27048.5 1031.68 5
 1 -11 4 24968.2 1004.2 5
 1 -11 5 7908.16 580.167 5
 1 -10 1 14886 708.225 5
 1 -10 2 74330 1685.88 5
 1 -10 3 7535.09 513.93 5
 1 -10 4 42722.3 1279.28 5
 1 -10 5 23240.7 946.308 5
 1 -10 8 650.922 161.362 3
 1 -9 1 10552.5 557.038 5
 1 -9 2 23891.9 861.171 5
 1 -9 3 64290.5 1490.51 5
 1 -9 4 1421.32 223.784 5
 1 -9 5 68731.1 1613.83 5
 1 -9 8 16192.8 749.817 3
 1 -8 -2 35137.9 578.669 4
 1 -8 2 10281.2 520.647 5
 1 -8 3 49232.7 1228.56 5
 1 -8 4 43376.6 1150.83 5
 1 -8 5 4135.91 360.32 5
 1 -8 7 21492.3 791.602 3
 1 -8 8 19606 795.071 3
 1 -8 9 11462.1 615.985 3
 1 -7 -2 8280.01 220.526 4
 1 -7 2 53320.1 1197.4 5
 1 -7 3 8216.52 445.222 5
 1 -7 4 42831.8 1080.26 5
 1 -7 5 40694.7 1094.25 5
 1 -7 7 101088 1836.59 3
 1 -7 8 2324.16 262.409 3
 1 -7 9 47800.9 1266.17 3
 1 -7 10 1697.09 245.519 3
 1 -6 -10 19982.7 600.31 4
 1 -6 -9 60602.6 1047.77 4
 1 -6 -8 2084.9 158.147 4
 1 -6 -2 138647 1400.51 4
 1 -6 -1 1415.61 101.382 4
 1 -6 2 727.947 143.339 5
 1 -6 3 101375 1663.81 5
 1 -6 4 1835.99 204.947 5
 1 -6 7 30785.5 894.34 3
 1 -6 8 34296.4 987.859 3
 1 -6 9 3051.35 297.779 3
 1 -6 10 30654.3 985.48 3
 1 -5 -12 2607.81 263.823 4
 1 -5 -11 85641.1 1552.49 4
 1 -5 -10 23279.5 692.245 4
 1 -5 -9 46174.6 946.157 4
 1 -5 -8 83738.2 1274.24 4
 1 -5 -7 1433.33 128.128 4
 1 -5 -6 25953.7 494.396 4
 1 -5 -1 59543.6 741.827 4
 1 -5 0 8704.44 266.944 4
 1 -5 2 153054 2056.26 5
 1 -5 3 32468.7 797.117 5
 1 -5 4 94446.3 1542.02 5
 1 -5 6 57798.1 1173.95 3
 1 -5 7 301.038 107.512 3
 1 -5 8 56999.8 1264.49 3
 1 -5 9 27205.8 865.503 3
 1 -5 10 1798.04 230.77 3
 1 -5 11 12356.1 617.591 3
 1 -4 -13 5280.84 406.967 4
 1 -4 -12 21972.5 795.538 4
 1 -4 -11 25404.2 814.06 4
 1 -4 -10 63979.8 1282.96 4
 1 -4 -9 761.146 125.986 4
 1 -4 -8 65967.5 1157.48 4
 1 -4 -7 55176.9 953.351 4
 1 -4 -6 18307.4 449.8 4
 1 -4 -5 81284 1022.69 4
 1 -4 -4 36388.8 497.155 4
 1 -4 -1 47221.1 562.858 4
 1 -4 0 57418.5 759.802 4
 1 -4 2 239238 2718.13 5
 1 -4 3 65628 1119.1 5
 1 -4 4 14789.3 502.968 5
 1 -4 6 297.789 79.795 3
 1 -4 7 21387.1 682.076 3
 1 -4 8 11688 514.262 3
 1 -4 9 109486 1862.04 3
 1 -4 10 46624.2 1171.43 3
 1 -4 11 340.9 125.92 3
 1 -3 -14 23326.2 942.532 4
 1 -3 -13 10275.3 588.829 4
 1 -3 -12 13139.3 643.857 4
 1 -3 -11 7567.22 460.376 4
 1 -3 -10 46743.6 1116.49 4
 1 -3 -9 68014.8 1306.18 4
 1 -3 -8 625.332 120.029 4
 1 -3 -7 62245.8 1085.98 4
 1 -3 -6 76163.6 1145.59 4
 1 -3 -5 5603.47 230.907 4
 1 -3 -4 73819.8 923.332 4
 1 -3 -3 53613.3 629.968 4
 1 -3 0 87166.1 976.513 4
 1 -3 1 53478.7 773.729 4
 1 -3 1 51709.6 748.555 2
 1 -3 2 43230.6 761.663 5
 1 -3 2 44200.9 663.174 2
 1 -3 3 134014 1685.18 5
 1 -3 3 135644 1500.35 2
 1 -3 4 18058.7 376.785 2
 1 -3 5 153545 1677.71 2
 1 -3 5 158473 2013.33 3
 1 -3 6 57738.1 796.681 2
 1 -3 6 57477.2 1087.78 3
 1 -3 7 93.894 32.534 2
 1 -3 7 122.462 70.7553 3
 1 -3 8 11504.4 489.873 3
 1 -3 9 13080.2 554.779 3
 1 -3 10 76361 1522.45 3
 1 -3 11 29339.4 939.207 3
 1 -2 -15 8534.56 620.451 4
 1 -2 -14 2998.89 363.088 4
 1 -2 -13 58447.1 1537.65 4
 1 -2 -12 9702.19 570.562 4
 1 -2 -11 18024.9 738.493 4
 1 -2 -10 7171.58 435.825 4
 1 -2 -9 42289.5 1039.19 4
 1 -2 -8 52973.9 1105.56 4
 1 -2 -7 69.535 64.4478 4
 1 -2 -6 202025 2410.93 4
 1 -2 -5 105482 1408.46 4
 1 -2 -4 17349.1 405.84 4
 1 -2 -3 12505.5 321.088 3
 1 -2 -3 12476.6 282.035 4
 1 -2 -2 328642 3101.49 4
 1 -2 -2 342027 3283.92 3
 1 -2 -1 50017.1 699.577 2
 1 -2 -1 48521.9 677.19 3
 1 -2 0 27057.2 418.301 4
 1 -2 0 82594.2 734.15 2
 1 -2 1 1243.93 84.5179 2
 1 -2 1 1411.34 94.6316 4
 1 -2 2 123994 1434.79 5
 1 -2 2 125232 1345.12 2
 1 -2 3 9953.34 247.125 2
 1 -2 4 118079 1305.69 2
 1 -2 4 115882 1524.27 3
 1 -2 5 4074.51 161.813 2
 1 -2 5 4072.58 237.634 3
 1 -2 6 115683 1324.12 2
 1 -2 6 115889 1641.16 3
 1 -2 7 43296.4 921.566 3
 1 -2 8 32059.3 826.154 3
 1 -2 9 7674.2 409.558 3
 1 -2 10 21174.5 739.432 3
 1 -2 11 72514.2 1504.98 3
 1 -2 12 14371.2 652.174 3
 1 -1 -15 6343.96 552.064 4
 1 -1 -14 6135.99 534.276 4
 1 -1 -13 17699.3 842.083 4
 1 -1 -12 64060.8 1584.53 4
 1 -1 -11 7287.25 490.63 4
 1 -1 -10 44707.8 1175.24 4
 1 -1 -9 16325.6 645.319 4
 1 -1 -8 58615 1228.94 4
 1 -1 -7 107851 1695.41 4
 1 -1 -6 4200.83 267.111 4
 1 -1 -5 186314 2244.86 4
 1 -1 -4 38836.5 716.788 4
 1 -1 -4 42056 660.395 3
 1 -1 -3 24758.9 476.544 4
 1 -1 -3 25604.2 438.998 3
 1 -1 -2 53441.8 657.955 3
 1 -1 -2 50557.1 648.813 4
 1 -1 -1 21986 367.948 2
 1 -1 2 1304.77 79.6594 5
 1 -1 2 1628.55 112.674 4
 1 -1 2 1827.87 89.7029 2
 1 -1 3 4004.8 179.59 3
 1 -1 3 4301.62 148.2 2
 1 -1 4 92510.2 1224.44 3
 1 -1 4 89597.8 1033.45 2
 1 -1 5 76627 1154.48 3
 1 -1 5 78596.7 969.284 2
 1 -1 6 21712.1 572.544 3
 1 -1 6 21327.4 429.556 2
 1 -1 7 296173 3347.42 3
 1 -1 8 13001 500.044 3
 1 -1 9 21115.4 686.026 3
 1 -1 10 3542.93 290.128 3
 1 -1 11 36308.6 1004.61 3
 1 -1 12 57254.3 1340.47 3
 1 0 -15 1963.01 342.753 4
 1 0 -14 6225.59 549.755 4
 1 0 -13 2130.64 305.583 4
 1 0 -12 38897.6 1254.21 4
 1 0 -11 82075.2 1798.1 4
 1 0 -10 1515.99 225.028 4
 1 0 -9 77663.2 1576.83 4
 1 0 -8 6263.99 394.515 4
 1 0 -7 94330.8 1629.62 4
 1 0 -6 25434.5 719.404 4
 1 0 -5 142229 1904.21 4
 1 0 -4 279666 2743.79 3
 1 0 -4 267171 2987.72 4
 1 0 -3 122797 1498.64 4
 1 0 -3 125580 1334.76 3
 1 0 -2 86721 1025.1 4
 1 0 -2 81438.5 880.02 3
 1 0 2 42135.5 627.94 4
 1 0 2 49608 625.357 3
 1 0 3 39901.6 663.422 4
 1 0 3 37680.9 603.259 3
 1 0 4 5215.05 221.775 3
 1 0 5 56848.3 928.591 3
 1 0 6 58824.3 1023.69 3
 1 0 7 135261 1855.7 3
 1 0 8 166639 2226.51 3
 1 0 9 6858.45 374.031 3
 1 0 10 17843.3 649.274 3
 1 0 11 2050.19 231.193 3
 1 0 12 26730.5 874.78 3
 1 0 13 36604.4 1090.21 3
 1 1 -15 19543.2 1030.13 4
 1 1 -14 555.944 205.817 4
 1 1 -13 10399.4 685.786 4
 1 1 -12 232.825 175.702 4
 1 1 -11 113442 2236.86 4
 1 1 -10 75510.7 1697.04 4
 1 1 -9 11600.7 603.536 4
 1 1 -8 89979.5 1713.07 4
 1 1 -7 242.485 99.2651 4
 1 1 -6 86515.5 1521.42 4
 1 1 -5 1726.35 192.173 4
 1 1 -4 260853 2995.18 4
 1 1 -4 268356 2676.44 3
 1 1 -3 253722 2742.49 4
 1 1 -2 8526.94 270.934 4
 1 1 -1 336084 3220.81 4
 1 1 2 58.4384 22.8434 1
 1 1 3 32145.7 547.052 4
 1 1 3 31110 529.906 3
 1 1 4 274321 2830.48 3
 1 1 5 1626.36 139.203 3
 1 1 6 128264 1695.76 3
 1 1 7 429.424 90.4989 3
 1 1 8 55879.9 1087.21 3
 1 1 9 76676.4 1381.89 3
 1 1 10 1350.62 183.348 3
 1 1 11 12233.6 556.698 3
 1 1 12 1197.91 196.192 3
 1 1 13 25930 917.566 3
 1 2 -14 23826.9 1107.71 4
 1 2 -13 932.767 226.422 4
 1 2 -12 10279.9 678.321 4
 1 2 -11 13307.9 736.153 4
 1 2 -10 75704.1 1755.04 4
 1 2 -9 46017.5 1286.09 4
 1 2 -8 13388.2 632.97 4
 1 2 -7 82125.9 1616.31 4
 1 2 -6 1458.53 197.527 4
 1 2 -5 56196.5 1146.69 4
 1 2 -4 1513.82 167.413 4
 1 2 -3 76134.2 1185.89 4
 1 2 -2 326609 3347.96 4
 1 2 -1 436492 4140.28 5
 1 2 -1 419474 4109.07 4
 1 2 0 64691.9 748.102 5
 1 2 0 75803.3 749.12 4
 1 2 1 1598.89 82.7202 4
 1 2 1 1238.52 81.3043 3
 1 2 2 392426 3731.54 3
 1 2 3 103051 1185.22 1
 1 2 3 99792.7 1242.77 3
 1 2 3 103266 1175.68 4
 1 2 4 315707 3228.25 3
 1 2 4 317296 3181.94 4
 1 2 4 313346 3145.59 1
 1 2 5 240034 2659.43 3
 1 2 5 240708 2597 1
 1 2 6 13390.5 436.312 3
 1 2 6 12761.5 410.419 1
 1 2 7 67280.1 1168.59 3
 1 2 8 1840.23 189.85 3
 1 2 9 47949.9 1054.68 3
 1 2 10 66427.2 1353.71 3
 1 2 11 102.633 77.6495 3
 1 2 12 24932.3 854.542 3
 1 2 13 -24.6097 77.405 3
 1 2 13 425.764 138.938 1
 1 2 14 34595.7 1099.55 3
 1 2 14 35434.2 1173.41 1
 1 2 15 15772.7 802 1
 1 2 16 3312.74 396.566 1
 1 3 -14 22776 1115.7 4
 1 3 -13 14309.8 860.634 4
 1 3 -12 4478.05 471.075 4
 1 3 -11 4356.1 440.656 4
 1 3 -10 12410.1 708.295 4
 1 3 -9 42658.4 1283.39 4
 1 3 -8 3354.2 347.499 4
 1 3 -7 44559.1 1172.17 4
 1 3 -6 73313 1473.35 4
 1 3 -5 847.172 155.727 4
 1 3 -4 127884 1867.74 4
 1 3 -3 2404.14 194.594 4
 1 3 -2 90563.3 1264.54 4
 1 3 -2 85302.9 900.955 2
 1 3 -1 206294 2267.52 4
 1 3 0 68265.7 911.868 4
 1 3 1 22711.4 400.905 4
 1 3 1 22559.3 432.38 3
 1 3 2 441097 4037.92 4
 1 3 2 430474 4205.34 3
 1 3 3 385177 3827.07 3
 1 3 4 12246.4 374.386 3
 1 3 4 12547.5 318.783 4
 1 3 4 12189.4 355.679 1
 1 3 5 227725 2566.43 3
 1 3 5 225201 2511.69 1
 1 3 6 158402 1969.85 1
 1 3 6 157717 2006.51 3
 1 3 7 26251.4 685.115 3
 1 3 7 25091.7 659.89 1
 1 3 8 94779.1 1553 3
 1 3 8 97899.2 1542.48 1
 1 3 9 1425.84 176.254 3
 1 3 9 1273.14 172.228 1
 1 3 10 32930.1 911.312 3
 1 3 10 34583.8 938.396 1
 1 3 11 65904.7 1405.92 3
 1 3 11 67491.4 1437.11 1
 1 3 12 668.06 151.591 1
 1 3 12 515.351 130.558 3
 1 3 13 29187.5 978.502 3
 1 3 13 30402 1018.4 1
 1 3 14 2069.52 285.056 1
 1 3 14 1922.64 262.949 3
 1 3 15 38952.6 1273.32 1
 1 3 16 9797.06 651.646 1
 1 4 -13 23627.2 1126.63 4
 1 4 -12 11319 742.411 4
 1 4 -11 4825.76 475.105 4
 1 4 -10 9842.92 654.427 4
 1 4 -9 989.272 215.537 4
 1 4 -8 17396.2 778.194 4
 1 4 -7 1.50082 88.6454 4
 1 4 -6 89125.4 1718.24 4
 1 4 -5 90854.8 1660.39 4
 1 4 -4 9398.69 446.796 4
 1 4 -3 170293 2225.97 4
 1 4 -3 167569 1672.81 2
 1 4 -2 2163.28 107.03 2
 1 4 -2 1997.76 176.907 4
 1 4 -1 369312 3608.01 2
 1 4 -1 379320 3873.25 4
 1 4 0 21496.9 477.552 4
 1 4 1 81955.6 1036.61 4
 1 4 1 82610.7 1121.88 3
 1 4 2 69958.1 871.059 4
 1 4 2 70497.2 1025.79 3
 1 4 3 14006.4 407.431 3
 1 4 4 240391 2678.15 3
 1 4 4 237625 2411.61 4
 1 4 5 41713.3 837.713 3
 1 4 5 41675.6 820.171 1
 1 4 6 291038 3285.91 3
 1 4 6 284915 3216.94 1
 1 4 7 51672.7 1037.34 3
 1 4 7 49840.8 1000.82 1
 1 4 8 22396.4 687.582 3
 1 4 8 23304.2 677.634 1
 1 4 9 38038.5 958.283 3
 1 4 9 37568 933.557 1
 1 4 10 353.682 118.838 1
 1 4 10 60.6234 72.1919 3
 1 4 11 67763.2 1450.27 3
 1 4 11 66061.1 1432.31 1
 1 4 12 25581.7 889.731 3
 1 4 12 26364.6 905.748 1
 1 4 13 12049.3 630.877 3
 1 4 13 13447.4 672.045 1
 1 4 14 22765 910.403 3
 1 4 14 24042.7 943.953 1
 1 4 15 1923.79 283.133 1
 1 4 16 22085.5 981.973 1
 1 5 -12 27272.7 1197.14 4
 1 5 -11 3058.68 403.222 4
 1 5 -10 10020.3 678.09 4
 1 5 -9 10481.8 662.651 4
 1 5 -8 2592.02 328.219 4
 1 5 -7 42903.6 1246.28 4
 1 5 -6 1220.91 212.207 4
 1 5 -5 151886 2376.66 4
 1 5 -4 95788 1691.19 4
 1 5 -4 94765.1 1060.64 2
 1 5 -3 38138.1 925.59 4
 1 5 -3 41543.9 611.153 2
 1 5 -2 164923 2132.09 4
 1 5 -2 159682 1750.79 2
 1 5 -1 4007.32 237.612 4
 1 5 -1 4188.67 189.812 2
 1 5 0 215006 2407.58 4
 1 5 1 7712.61 269.477 4
 1 5 1 7709.32 308.724 3
 1 5 2 26255.3 484.655 4
 1 5 2 26386.6 606.213 3
 1 5 3 68949.9 875.834 4
 1 5 3 68350.1 1108.19 3
 1 5 4 78347.3 1250.11 3
 1 5 5 266982 2727.47 4
 1 5 5 268545 3082.57 3
 1 5 6 20365.6 618.483 3
 1 5 7 224526 2807.23 3
 1 5 7 219289 2766.06 1
 1 5 8 74153.2 1403.1 3
 1 5 8 71546 1360.5 1
 1 5 9 1900.03 218.874 3
 1 5 9 1886.82 214.314 1
 1 5 10 29104.2 888.739 3
 1 5 10 29905.3 896.77 1
 1 5 11 6770.63 435.093 3
 1 5 11 7347.8 451.5 1
 1 5 12 61392.5 1460.01 3
 1 5 12 62428.4 1465.21 1
 1 5 13 2946.08 330.157 3
 1 5 13 3063.45 325.765 1
 1 5 14 23411 939.08 3
 1 5 14 24287.1 951.922 1
 1 5 15 13763.7 737.146 3
 1 5 15 16276.6 809.403 1
 1 5 16 1753.91 293.057 1
 1 6 -12 8835.42 703.438 4
 1 6 -11 28633 1209.7 4
 1 6 -10 4789.84 482.541 4
 1 6 -9 15132.9 821.352 4
 1 6 -8 8740.89 604.312 4
 1 6 -7 35355.3 1166.58 4
 1 6 -6 26637 948.396 4
 1 6 -5 11554.7 583.52 4
 1 6 -5 11952.2 267.09 2
 1 6 -4 148571 1633.79 2
 1 6 -4 145607 2300.25 4
 1 6 -3 121794 1921.85 4
 1 6 -3 121288 1446.82 2
 1 6 -2 100361 1581.89 4
 1 6 -2 94244.7 1230.94 2
 1 6 -1 212385 2354.24 2
 1 6 -1 210391 2571.26 4
 1 6 0 44382.2 847.453 4
 1 6 0 44642.4 807.927 2
 1 6 1 175019 2037 4
 1 6 2 6463.54 247.716 4
 1 6 2 6019.84 303.588 3
 1 6 3 114985 1339.7 4
 1 6 3 112008 1637.6 3
 1 6 4 20449.2 401.938 4
 1 6 4 20294.5 611.199 3
 1 6 5 167629 1842.51 4
 1 6 5 178420 2310.46 3
 1 6 6 70495.8 1310 3
 1 6 7 10351.6 468.581 3
 1 6 8 162286 2343.91 1
 1 6 8 160805 2354.34 3
 1 6 9 56006.9 1267.06 3
 1 6 9 55040.1 1254.87 1
 1 6 10 17983.3 716.997 3
 1 6 10 18046.6 705.371 1
 1 6 11 21529 817.016 3
 1 6 11 21837.3 801.837 1
 1 6 12 26841.6 954.952 3
 1 6 12 27359.2 951.376 1
 1 6 13 31610.6 1071.1 3
 1 6 13 31413.6 1069.91 1
 1 6 14 2095.24 297.486 3
 1 6 14 2882.03 344.313 1
 1 6 15 12726.8 720.979 3
 1 6 15 14651.3 775.431 1
 1 6 16 8199.63 609.286 1
 1 7 -11 8453.4 670.602 4
 1 7 -10 35361.8 1350.66 4
 1 7 -9 75.2641 134.313 4
 1 7 -8 40105.9 1334.04 4
 1 7 -7 385.92 153.387 4
 1 7 -6 31923.4 1085.52 4
 1 7 -5 2557.82 304.122 4
 1 7 -4 35980.6 648.269 2
 1 7 -4 35227.3 1034.56 4
 1 7 -3 213246 2923.3 4
 1 7 -3 211114 2350.46 2
 1 7 -2 29182.1 811.381 4
 1 7 -2 28972.9 629.273 2
 1 7 -1 111281 1700.78 4
 1 7 -1 112817 1541.2 2
 1 7 0 120366 1637.14 2
 1 7 0 116751 1665.14 4
 1 7 1 136242 1837.1 2
 1 7 1 135604 1756.15 4
 1 7 2 196440 2240.22 4
 1 7 2 202639 2527.34 3
 1 7 3 1831.69 130.2 4
 1 7 3 1761.46 186.916 3
 1 7 4 128781 1471.24 4
 1 7 4 125333 1890.46 3
 1 7 5 12165.1 308.933 4
 1 7 5 12673.7 517.687 3
 1 7 6 27745.8 805.526 3
 1 7 7 16394.1 628.117 3
 1 7 8 40094.1 1050.37 3
 1 7 9 161709 2481.32 3
 1 7 10 28282.6 938.716 3
 1 7 11 15495.6 702.73 1
 1 7 11 14955.7 688.174 3
 1 7 12 4034.1 379.202 1
 1 7 12 3326.03 346.115 3
 1 7 13 28941.5 1037.02 1
 1 7 13 28785.8 1042.44 3
 1 7 14 34391.5 1181.74 1
 1 7 14 34824.6 1191.38 3
 1 7 15 1023.05 232.56 3
 1 7 15 1242.16 243.566 1
 1 7 16 13460.6 783.472 1
 1 8 -10 20412.7 1041.95 4
 1 8 -9 20460.2 1014.59 4
 1 8 -8 3094.28 384.499 4
 1 8 -7 39407.5 1311.1 4
 1 8 -6 884.471 205.716 4
 1 8 -5 16428.1 764.498 4
 1 8 -4 5620.78 258.679 2
 1 8 -4 4421.33 377.114 4
 1 8 -3 96940.8 1817.76 4
 1 8 -3 96391.5 1369.28 2
 1 8 -2 187162 2631.96 4
 1 8 -2 185742 2268.3 2
 1 8 -1 1381.13 179.176 4
 1 8 -1 1633.41 165.152 2
 1 8 0 38577 844.398 2
 1 8 0 37148.1 864.173 4
 1 8 1 1472.61 154.748 4
 1 8 1 1641.11 176.144 2
 1 8 2 149347 2071.42 2
 1 8 2 147219 1857.51 4
 1 8 3 129450 1604.72 4
 1 8 3 130597 1998.89 3
 1 8 4 26903.9 530.347 4
 1 8 4 27843.6 810.095 3
 1 8 5 199308 2111.62 4
 1 8 5 198955 2708.44 3
 1 8 6 70486.5 939.726 4
 1 8 6 72586.8 1467.87 3
 1 8 7 9022.89 273.816 4
 1 8 7 9437.79 495.184 3
 1 8 8 211.061 111.511 3
 1 8 9 58810.8 1395.67 3
 1 8 10 113723 2123.58 3
 1 8 11 6360.15 477.519 3
 1 8 12 14802 737.665 3
 1 8 13 6290.54 498.091 3
 1 8 14 13878 751.92 2
 1 8 14 14698.4 780.995 1
 1 8 14 13946.7 769.773 3
 1 8 15 12256.2 737.03 1
 1 8 15 11221 711.61 3
 1 8 16 2158.81 323.931 3
 1 8 16 3047.46 395.493 1
 1 9 -10 1144.56 286.172 4
 1 9 -9 22262.2 1086.83 4
 1 9 -8 6554.43 576.411 4
 1 9 -7 10051.5 681.351 4
 1 9 -6 54543.2 1552.29 4
 1 9 -5 3674.95 381.642 4
 1 9 -4 21759.3 874.867 4
 1 9 -3 904.599 185.709 4
 1 9 -3 1207.37 142.818 2
 1 9 -2 102339 1884.04 4
 1 9 -2 107672 1591.55 2
 1 9 -1 117996 1928.76 4
 1 9 -1 117941 1730.03 2
 1 9 0 173.921 80.5203 4
 1 9 0 224.364 93.046 2
 1 9 1 12478.8 504.236 2
 1 9 1 11993.3 461.828 4
 1 9 2 1108.25 160.843 2
 1 9 2 1074.79 134.088 4
 1 9 3 92021.9 1320.04 4
 1 9 3 94658.9 1634.46 2
 1 9 3 94267.2 1689.19 3
 1 9 4 49640.4 822.302 4
 1 9 4 51860 1217.57 3
 1 9 5 34762.7 613.406 4
 1 9 5 36747.1 1009.15 3
 1 9 6 96769.8 1188.72 4
 1 9 6 99911.2 1836.31 3
 1 9 7 8924.49 508.179 3
 1 9 8 15898.2 700.668 3
 1 9 9 11330.9 602.676 3
 1 9 10 55768.5 1430.92 3
 1 9 11 62601.5 1580.78 3
 1 9 12 225.057 130.297 3
 1 9 13 30056.7 1132.61 2
 1 9 13 29571.5 1118.54 3
 1 9 14 2015.16 321.98 3
 1 9 14 2179.2 327.561 2
 1 9 15 7818.81 605.739 2
 1 9 15 7978.73 617.997 3
 1 9 16 7500.6 620.511 3
 1 10 -9 2222.73 375.737 4
 1 10 -8 19445.7 1011.19 4
 1 10 -7 1703.36 300.113 4
 1 10 -6 26906.8 1115.02 4
 1 10 -5 69890.4 1774.54 4
 1 10 -4 1148.39 212.99 4
 1 10 -3 24245.1 923.286 4
 1 10 -3 27610.7 719.935 2
 1 10 -2 5167.01 398.306 4
 1 10 -2 5734.94 325.366 2
 1 10 -1 97671.6 1801.99 4
 1 10 -1 101308 1639.72 2
 1 10 0 50709.9 1152.76 4
 1 10 0 53967.5 1142.95 2
 1 10 1 1972.92 197.999 4
 1 10 1 1388.39 182.962 2
 1 10 2 38734.1 1008.48 2
 1 10 2 38296.6 855.874 4
 1 10 3 4124.59 323.263 2
 1 10 3 3703.86 230.052 4
 1 10 4 83765.6 1628.19 2
 1 10 4 80976.8 1193.84 4
 1 10 4 84757.9 1667.05 3
 1 10 5 38320 1079.16 2
 1 10 5 37673.1 673.421 4
 1 10 5 38498.6 1092.61 3
 1 10 6 37057.8 1092.25 3
 1 10 7 52014.2 1340.35 3
 1 10 8 7.93718 97.0005 3
 1 10 9 30279.6 1049.12 3
 1 10 10 266.289 132.16 3
 1 10 11 55793.1 1529.26 3
 1 10 12 48542.2 1468.18 2
 1 10 12 47516.9 1436.58 3
 1 10 13 1266.23 249.764 3
 1 10 13 673.386 204.463 2
 1 10 14 15353.6 852.731 2
 1 10 14 15714.6 856.399 3
 1 10 15 1337.18 280.983 3
 1 10 15 1699.52 318.042 2
 1 10 16 16544 932.219 3
 1 11 -8 5958.45 583.073 4
 1 11 -7 20937.6 1040.69 4
 1 11 -6 714.47 218.941 4
 1 11 -5 42865.5 1406.35 4
 1 11 -4 52994.8 1517.51 4
 1 11 -3 221.304 142.231 4
 1 11 -2 29265.1 1008.32 4
 1 11 -2 31429.5 846.372 2
 1 11 -1 22240.7 827.425 4
 1 11 -1 24261.4 756.413 2
 1 11 0 86157.6 1657.29 4
 1 11 0 86937.8 1584.65 2
 1 11 1 28457.7 831.337 4
 1 11 1 30471.5 901.278 2
 1 11 2 6344.34 408.199 2
 1 11 2 5969.69 340.25 4
 1 11 3 45185.8 932.226 4
 1 11 3 47454.8 1202.37 2
 1 11 4 3733.44 344.243 2
 1 11 5 76755.3 1644.78 2
 1 11 5 77195.5 1682.13 3
 1 11 6 11402.5 619.757 2
 1 11 6 12257.2 650.048 3
 1 11 7 78170.8 1743 2
 1 11 7 79450.8 1782.86 3
 1 11 8 77371.9 1780.18 2
 1 11 8 75991.8 1768.78 3
 1 11 9 2073.32 283.997 2
 1 11 9 2094.54 290.358 3
 1 11 10 15477.8 801.736 2
 1 11 10 15145.1 775.556 3
 1 11 11 2581.18 362.304 2
 1 11 11 2581.34 333.859 3
 1 11 12 42534 1418.01 2
 1 11 12 41747.7 1392.97 3
 1 11 13 27907.8 1162.53 2
 1 11 13 26865.2 1143.54 3
 1 11 14 4689.6 494.37 2
 1 11 14 4639.37 482.481 3
 1 11 15 15112.3 898.152 2
 1 11 15 15409.2 906.119 3
 1 11 16 1018.43 271.453 2
 1 11 16 1041.97 249.641 3
 1 12 -7 7583.16 644.13 4
 1 12 -6 20412 1018.41 4
 1 12 -5 1069.18 247.196 4
 1 12 -4 50997.8 1530.02 4
 1 12 -3 22449.2 952.831 4
 1 12 -2 6151.85 476.054 4
 1 12 -1 15769.3 726.393 4
 1 12 -1 17744 676.73 2
 1 12 0 8706.64 505.144 4
 1 12 0 10435.8 528.179 2
 1 12 1 82074.5 1596.64 4
 1 12 1 83377.2 1658.57 2
 1 12 2 10736 493.224 4
 1 12 2 12451 619.597 2
 1 12 3 39613.9 1140.25 2
 1 12 4 39204.6 1154.31 2
 1 12 5 3201.7 334.926 2
 1 12 6 18421.9 810.77 2
 1 12 6 18093.2 817.982 3
 1 12 7 160.202 144.437 2
 1 12 7 21.9585 134.814 3
 1 12 8 82077.8 1897.61 2
 1 12 8 81262.1 1911.51 3
 1 12 9 47428.9 1451.42 2
 1 12 9 45765.9 1425.42 3
 1 12 10 7110.48 561.866 2
 1 12 10 7985.98 593.793 3
 1 12 11 29186.5 1178.83 2
 1 12 11 28816.3 1149.6 3
 1 12 12 3077.45 402.459 2
 1 12 12 2728.22 367.897 3
 1 12 13 24113.6 1121.87 2
 1 12 13 23693.6 1083.21 3
 1 12 14 10975.8 783.103 2
 1 12 14 10950.8 754.314 3
 1 12 15 8557.75 711.487 2
 1 12 15 8399.7 684.746 3
 1 13 -6 7372.19 628.205 4
 1 13 -5 9935.92 710.55 4
 1 13 -4 7815.19 603.579 4
 1 13 -3 29458 1134.99 4
 1 13 -2 2783.51 343.197 4
 1 13 -1 15919 758.472 4
 1 13 -1 17340.4 697.572 2
 1 13 0 19002.6 788.674 4
 1 13 0 24116.1 853.245 2
 1 13 1 8810.87 502.759 2
 1 13 2 84803.2 1781.54 2
 1 13 3 3696.28 372.718 2
 1 13 4 42872.1 1277.01 2
 1 13 5 5538.65 457.66 2
 1 13 6 8125.93 559.068 2
 1 13 7 19080.3 883.356 2
 1 13 7 19897.8 914.781 3
 1 13 8 2808.03 353.951 2
 1 13 8 2935.69 369.726 3
 1 13 9 51863.9 1549.54 2
 1 13 9 50656.1 1541.23 3
 1 13 10 9092.83 655.914 2
 1 13 10 8881.44 654.194 3
 1 13 11 13361.7 820.453 2
 1 13 11 12943.2 801.448 3
 1 13 12 12984.6 828.858 2
 1 13 12 12541 805.746 3
 1 13 13 9256.82 718.871 2
 1 13 13 9468.52 708.947 3
 1 13 14 30993.4 1367.18 2
 1 13 14 30945.7 1328.73 3
 1 14 -5 6983.93 607.403 4
 1 14 -4 5428.18 518.227 4
 1 14 -3 15952.6 848.247 4
 1 14 0 14679.7 690.647 2
 1 14 1 7147.85 497.033 2
 1 14 2 30420.1 1033.34 2
 1 14 3 44165.1 1307.36 2
 1 14 4 469.103 180.491 2
 1 14 5 18361.6 878.435 2
 1 14 6 7187.29 553.43 2
 1 14 7 12881.3 754.824 2
 1 14 8 11321.8 730.978 2
 1 14 8 10927.4 727.077 3
 1 14 9 8101.63 629.969 2
 1 14 9 7410.19 608.306 3
 1 14 10 40705.9 1457.02 2
 1 14 10 41458.2 1465.16 3
 1 14 11 2765.11 412.804 2
 1 14 11 2141.58 363.145 3
 1 14 12 13464.3 865.164 2
 1 14 12 12854.3 840.253 3
 1 14 13 3739.48 484.727 2
 1 14 13 3899.69 485.559 3
 1 15 1 14184.9 723.877 2
 1 15 2 2018.09 289.59 2
 1 15 3 24283.2 972.518 2
 1 15 4 24567.9 1027.92 2
 1 15 5 633.512 179.93 2
 1 15 6 35966.4 1322.49 2
 1 15 7 4219.79 479.926 2
 1 15 8 6930.9 584.083 2
 1 15 9 3310.55 422.424 2
 1 15 10 8955.55 692.97 2
 1 15 10 9086.76 702.095 3
 1 15 11 26942.3 1254.12 2
 1 15 11 25658.7 1213.56 3
 1 16 2 20424.7 929.221 2
 1 16 3 3960.11 421.67 2
 1 16 4 15937.6 828.924 2
 1 16 5 14325.8 815.16 2
 1 16 6 6795.58 576.656 2
 1 16 7 41609.7 1497.55 2
 1 16 8 4876.16 525.477 2
 1 16 9 9506.5 742.285 2
 1 17 3 24217.9 1078.81 2
 1 17 4 1174.98 263.947 2
 1 17 5 13365.7 782.467 2
 1 17 6 4203.48 480.754 2
 2 -16 -1 283.715 168.885 5
 2 -16 0 11412.8 827.534 5
 2 -15 -1 34190.5 1364.5 5
 2 -15 0 3539.32 462.265 5
 2 -15 1 25612.1 1194.5 5
 2 -15 2 247.998 182.452 5
 2 -15 3 11219.8 791.587 5
 2 -14 0 29925.2 1212.94 5
 2 -14 1 7697.28 627.623 5
 2 -14 2 16415.9 915.373 5
 2 -14 3 137.375 136.502 5
 2 -14 4 21084.6 1052.9 5
 2 -14 5 551.314 211.518 5
 2 -13 1 10091.3 669.514 5
 2 -13 2 17407.1 901.802 5
 2 -13 3 16564.6 881.343 5
 2 -13 4 2259.29 341.438 5
 2 -13 5 15283.1 860.8 5
 2 -12 1 67679.3 1721.79 5
 2 -12 2 712.575 204.952 5
 2 -12 3 46098.4 1428.26 5
 2 -12 4 11697.6 716.593 5
 2 -12 5 3332.56 402.102 5
 2 -12 8 29480.3 1155.17 3
 2 -11 1 18352.7 819.409 5
 2 -11 2 72998.5 1753.89 5
 2 -11 3 1582.55 264.226 5
 2 -11 4 51763.6 1469.79 5
 2 -11 5 8347.28 580.103 5
 2 -11 8 5528.14 479.413 3
 2 -10 2 18423.1 790.927 5
 2 -10 3 40619.8 1211.31 5
 2 -10 4 4406.83 408.92 5
 2 -10 5 86960.4 1906.77 5
 2 -10 6 8226.68 555.76 5
 2 -10 8 2320.45 304.58 3
 2 -10 9 7655.39 561.29 3
 2 -9 2 11711.8 582.975 5
 2 -9 3 24143 871.116 5
 2 -9 4 7164.39 471.087 5
 2 -9 5 15484.1 704.536 5
 2 -9 8 9915.03 603.219 3
 2 -9 9 2395.58 305.02 3
 2 -9 10 15348.6 790.131 3
 2 -8 -2 9655.29 230.364 4
 2 -8 2 92065.7 1695.96 5
 2 -8 3 5325.62 381.15 5
 2 -8 4 48744.3 1228.51 5
 2 -8 5 7867.1 474.517 5
 2 -8 8 370.277 126.5 3
 2 -8 9 26929.6 987.031 3
 2 -8 10 840.896 196.465 3
 2 -7 -2 59064.4 674.348 4
 2 -7 -1 1156.55 91.3556 4
 2 -7 3 79690.1 1515.78 5
 2 -7 4 261.753 110.896 5
 2 -7 5 27562.4 859.108 5
 2 -7 7 26954.4 885.011 3
 2 -7 8 50525.4 1299.1 3
 2 -7 9 2512.58 298.229 3
 2 -7 10 33046.5 1094.64 3
 2 -7 11 104.639 84.0913 3
 2 -6 -9 39105.8 810.107 4
 2 -6 -8 30157.7 629.439 4
 2 -6 -7 3230.94 166.646 4
 2 -6 -6 59769.9 758.617 4
 2 -6 -1 31097 488.436 4
 2 -6 3 104846 1690.03 5
 2 -6 4 64947.5 1281.71 5
 2 -6 5 922.068 155.409 5
 2 -6 7 67.9572 79.3068 3
 2 -6 8 45196.3 1168.17 3
 2 -6 9 40613.7 1149.67 3
 2 -6 10 9125.87 544.468 3
 2 -6 11 26132.3 959.462 3
 2 -5 -10 31212.9 823.425 4
 2 -5 -9 1015.17 138.522 4
 2 -5 -8 61750.3 1062.57 4
 2 -5 -7 97610.9 1326.45 4
 2 -5 -6 13389.8 345.025 4
 2 -5 -5 30940.9 477.504 4
 2 -5 -1 78752.4 883.96 4
 2 -5 0 69313.8 918.272 4
 2 -5 3 24777.5 671.241 5
 2 -5 4 75219.4 1320.57 5
 2 -5 5 92428.2 1541.2 5
 2 -5 6 148.629 65.2809 3
 2 -5 7 5697.07 368.872 3
 2 -5 8 18439.4 704.239 3
 2 -5 9 62949.9 1412.75 3
 2 -5 10 18054.2 746.341 3
 2 -5 11 6282.1 457 3
 2 -5 12 17083.2 784.505 3
 2 -4 -12 24818 865.427 4
 2 -4 -11 8118.19 458.976 4
 2 -4 -10 18378.6 655.617 4
 2 -4 -9 42295.3 964.392 4
 2 -4 -8 1055.82 145.44 4
 2 -4 -7 83960.9 1270.63 4
 2 -4 -6 134186 1651.42 4
 2 -4 -5 28965.7 531.608 4
 2 -4 -4 51870.5 677.984 4
 2 -4 -1 14318.5 247.038 4
 2 -4 0 8611.14 239.603 4
 2 -4 3 120533 1645.78 5
 2 -4 4 1704.07 166.3 5
 2 -4 6 120115 1831.7 3
 2 -4 7 827.14 148.897 3
 2 -4 8 11649.2 531.992 3
 2 -4 9 20481.5 743.252 3
 2 -4 10 51987.1 1279.79 3
 2 -4 11 8963.6 525.107 3
 2 -4 12 8806.81 547.706 3
 2 -3 -13 25435.3 966.785 4
 2 -3 -12 73.1324 107.183 4
 2 -3 -11 22985.1 825.335 4
 2 -3 -10 393.721 146.201 4
 2 -3 -9 53676.4 1157.23 4
 2 -3 -8 34695 847.866 4
 2 -3 -7 5481.6 302.579 4
 2 -3 -6 175937 2143.4 4
 2 -3 -5 60113.3 937.404 4
 2 -3 -4 1613.41 116.063 4
 2 -3 -3 22290.1 373.667 4
 2 -3 -2 316148 2892.64 4
 2 -3 -1 131004 1285.58 4
 2 -3 0 33353 485.788 4
 2 -3 1 88590.5 1101.38 4
 2 -3 3 11660.3 365.796 5
 2 -3 4 95487.6 1337.72 5
 2 -3 5 17068.9 546.474 3
 2 -3 6 210739 2646.22 3
 2 -3 7 73133.5 1350.03 3
 2 -3 8 7805.16 416.544 3
 2 -3 9 11541.5 538.245 3
 2 -3 10 12037.1 571.697 3
 2 -3 11 40840.1 1138.93 3
 2 -3 12 3455.27 339.888 3
 2 -3 13 16999.7 770.317 3
 2 -2 -14 3062.47 363.586 4
 2 -2 -13 14926.5 756.443 4
 2 -2 -12 31834.9 1068.42 4
 2 -2 -11 1533.01 227.541 4
 2 -2 -10 36820.2 1037.31 4
 2 -2 -9 562.765 134.665 4
 2 -2 -8 61726 1250.8 4
 2 -2 -7 15553.6 544.601 4
 2 -2 -6 81601.5 1311.89 4
 2 -2 -5 317745 3392.54 4
 2 -2 -4 13137.2 363.643 4
 2 -2 -3 25344 458.362 4
 2 -2 -2 5785.46 164.248 4
 2 -2 -2 4289.24 175.347 3
 2 -2 -1 235179 2265.65 4
 2 -2 -1 242296 2443.39 3
 2 -2 0 635932 5926.44 1
 2 -2 1 130934 1431.28 4
 2 -2 3 25270.6 488.66 5
 2 -2 4 67260.8 1076.11 3
 2 -2 5 12265.9 427.694 3
 2 -2 6 48273 968.461 3
 2 -2 7 252869 3055.82 3
 2 -2 8 33514.9 869.237 3
 2 -2 9 20261.7 692.805 3
 2 -2 10 2885.58 277.055 3
 2 -2 11 27353.9 914.523 3
 2 -2 12 23551.2 866.111 3
 2 -2 13 154.489 110.245 3
 2 -1 -15 710.247 224.78 4
 2 -1 -14 6861.62 552.359 4
 2 -1 -13 1183.95 239.667 4
 2 -1 -12 24080.1 951.48 4
 2 -1 -11 29567 1009.81 4
 2 -1 -10 8186.55 500.706 4
 2 -1 -9 60725.3 1361.25 4
 2 -1 -8 2603.17 255.56 4
 2 -1 -7 37626.3 930.331 4
 2 -1 -6 2024.73 191.369 4
 2 -1 -5 202695 2434.82 4
 2 -1 -4 217894 2239.08 3
 2 -1 -4 212839 2414.9 4
 2 -1 -3 43431.4 711.575 4
 2 -1 -3 45301.7 635.574 3
 2 -1 -2 1729.06 91.4973 3
 2 -1 -2 1836.68 110.748 4
 2 -1 -1 26625.5 415.308 4
 2 -1 -1 28145.9 471.617 2
 2 -1 -1 27160.3 410.069 3
 2 -1 0 140908 1412.73 2
 2 -1 0 112594 1327.66 1
 2 -1 1 302901 2162.53 2
 2 -1 1 155590 1853.51 1
 2 -1 2 147403 1644.81 4
 2 -1 2 147908 1607.33 2
 2 -1 3 224966 2434.14 3
 2 -1 3 225530 2240.76 5
 2 -1 4 572.305 88.4949 3
 2 -1 5 17258.3 489.749 3
 2 -1 6 22493 607.917 3
 2 -1 7 122303 1778.14 3
 2 -1 8 247987 3051.39 3
 2 -1 9 1676.78 194.426 3
 2 -1 10 25013 816.197 3
 2 -1 11 925.214 164.637 3
 2 -1 12 31159 993.855 3
 2 -1 13 9148 548.664 3
 2 0 -15 24145.1 1137.82 4
 2 0 -14 218.92 142.151 4
 2 0 -13 13729 784.262 4
 2 0 -12 222.406 128.288 4
 2 0 -11 66653.4 1622.92 4
 2 0 -10 31201.7 1030.81 4
 2 0 -9 20137.3 787.811 4
 2 0 -8 56699.1 1291.67 4
 2 0 -7 5027.26 346.968 4
 2 0 -6 39332 938.28 4
 2 0 -5 14233.7 494.571 4
 2 0 -4 316959 3431.66 4
 2 0 -4 323647 3116.15 3
 2 0 -3 136993 1700.2 4
 2 0 -3 142737 1448.54 3
 2 0 -2 31004.7 385.114 3
 2 0 -2 30396.9 551.413 4
 2 0 -2 28959.3 432.851 2
 2 0 -1 283821 2784.79 4
 2 0 -1 276195 2694.39 2
 2 0 0 15370.7 308.392 2
 2 0 0 22015.6 355.927 4
 2 0 1 116582 929.396 2
 2 0 1 38211.7 614.699 3
 2 0 2 14696.2 329.37 4
 2 0 2 14208.5 322.084 3
 2 0 2 14853 321.654 2
 2 0 3 117016 1420.51 3
 2 0 3 123840 1388.55 2
 2 0 4 60521.3 927.567 3
 2 0 5 10555.4 369.847 3
 2 0 6 71338.4 1169.35 3
 2 0 7 1962.18 190.185 3
 2 0 8 164999 2279.83 3
 2 0 9 97047.1 1646.47 3
 2 0 10 669.884 140.916 3
 2 0 11 29234.8 904.799 3
 2 0 12 67.4907 76.9899 3
 2 0 13 19298.2 789.174 3
 2 0 14 3264.93 340.617 3
 2 1 -14 22079.1 1078.34 4
 2 1 -13 3531.99 412.483 4
 2 1 -12 22810.3 983.588 4
 2 1 -11 8381.82 576.025 4
 2 1 -10 81703.6 1810.3 4
 2 1 -9 7278.5 484.278 4
 2 1 -8 30381.9 951.627 4
 2 1 -7 104505 1830.2 4
 2 1 -6 27717.2 809.757 4
 2 1 -5 78940.1 1363.3 4
 2 1 -5 79293.8 1026.33 3
 2 1 -4 76394.7 1244.97 4
 2 1 -4 76506.3 929.617 3
 2 1 -3 319910 3388.19 4
 2 1 -2 140915 1683.27 4
 2 1 -2 140508 1372.5 2
 2 1 -1 1762.03 80.4002 2
 2 1 -1 1589.94 114.482 4
 2 1 0 50064.2 619.414 4
 2 1 0 26183.6 432.889 2
 2 1 1 2460.4 97.0128 5
 2 1 1 4190.84 128.24 3
 2 1 2 94470.8 1097.16 3
 2 1 3 180025 1956.11 4
 2 1 3 177839 1692.71 1
 2 1 3 178200 1949.46 3
 2 1 4 97947.6 1297.52 3
 2 1 5 127272 1638.01 3
 2 1 6 6166.58 295.205 3
 2 1 7 25664.8 680.053 3
 2 1 8 3481.65 257.025 3
 2 1 9 68573.6 1319.27 3
 2 1 10 46578.3 1098.19 3
 2 1 11 5931.73 393.08 3
 2 1 12 8761.96 498.863 3
 2 1 13 1730.75 245.078 3
 2 1 14 17807 797.609 3
 2 2 -14 39768.9 1472.02 4
 2 2 -13 10399.9 717.874 4
 2 2 -12 25017.5 1071.99 4
 2 2 -11 20756.5 932.032 4
 2 2 -10 10385.3 643.535 4
 2 2 -9 54035.9 1423.8 4
 2 2 -8 2266.17 286.218 4
 2 2 -7 84277.5 1664.35 4
 2 2 -6 48582 1148.57 4
 2 2 -5 34140.9 883.72 4
 2 2 -4 106190 1611.95 4
 2 2 -3 132067 1772.15 4
 2 2 -2 195615 2263.66 4
 2 2 -1 228868 2466.73 4
 2 2 0 5343.17 203.161 5
 2 2 0 5281.51 207.109 4
 2 2 0 4996.6 135.708 3
 2 2 1 927.547 69.452 3
 2 2 1 1221.9 90.1253 5
 2 2 1 1159 91.9055 4
 2 2 2 73208.6 925.405 3
 2 2 3 167584 1852 3
 2 2 4 20800.4 482.68 3
 2 2 4 22136.5 402.033 1
 2 2 5 190056 2214.98 3
 2 2 5 190541 2033.5 1
 2 2 6 76007.1 1212.64 3
 2 2 6 77810.4 1097.54 1
 2 2 7 22675.3 570.941 1
 2 2 7 23671.5 638.982 3
 2 2 8 28373.8 754.111 3
 2 2 8 29185.1 690.96 1
 2 2 9 1520.82 180.667 3
 2 2 10 34541.3 932.755 3
 2 2 11 16376.8 656.474 3
 2 2 12 4675.18 377.085 3
 2 2 12 5467.03 380.189 1
 2 2 13 11344.8 609.226 3
 2 2 13 11395.2 595.51 1
 2 2 14 3999.37 372.58 1
 2 2 14 3465.49 355.656 3
 2 2 15 18586.4 847.987 3
 2 2 15 20670.9 883.204 1
 2 3 -13 36568 1395.98 4
 2 3 -12 1794.86 317.321 4
 2 3 -11 37650.3 1327.9 4
 2 3 -10 18975.1 880.229 4
 2 3 -9 6922.51 518.088 4
 2 3 -8 40959.7 1210.74 4
 2 3 -7 12128.2 608.009 4
 2 3 -6 115237 1990.88 4
 2 3 -5 30116.8 852.559 4
 2 3 -4 2034.83 207.555 4
 2 3 -3 53662.2 1029.22 4
 2 3 -2 43839 860.186 4
 2 3 -1 248833 2730.66 4
 2 3 0 23469.8 509.876 4
 2 3 0 24248 419.686 3
 2 3 1 217739 2274.91 4
 2 3 1 215599 2206.01 3
 2 3 2 176699 1926.84 3
 2 3 2 179505 1899.63 4
 2 3 3 1240.49 112.152 3
 2 3 4 62993.6 985.036 3
 2 3 5 110.408 61.6105 3
 2 3 5 738.623 89.1975 1
 2 3 6 316896 3457.79 3
 2 3 6 312166 3276.98 1
 2 3 7 62529.3 1146.04 3
 2 3 7 60435.9 1025.26 1
 2 3 8 45731.3 1012.23 3
 2 3 8 46042.7 923.697 1
 2 3 9 32670.1 879.976 3
 2 3 9 33083.1 815.907 1
 2 3 10 1366.65 193.214 3
 2 3 10 1308.1 171.85 1
 2 3 11 38339.4 1049.35 3
 2 3 11 37196 980.361 1
 2 3 12 16501.4 670.58 1
 2 3 12 15005.6 672.743 3
 2 3 13 20876.6 830.996 3
 2 3 13 21686.7 809.411 1
 2 3 14 12138.4 651.456 3
 2 3 14 13579.7 668.587 1
 2 3 15 2374.7 305.655 1
 2 3 15 1940.94 278.828 3
 2 4 -13 6893.78 625.466 4
 2 4 -12 28959.2 1234.24 4
 2 4 -11 -5.73157 159.898 4
 2 4 -10 44430.1 1425.19 4
 2 4 -9 9508.14 626.377 4
 2 4 -8 20344.1 880.61 4
 2 4 -7 20016.7 816.739 4
 2 4 -6 12758.2 619.41 4
 2 4 -5 132968 2144.52 4
 2 4 -4 3663.02 287.648 4
 2 4 -3 79559.2 1324.6 4
 2 4 -3 68583.4 734.001 2
 2 4 -2 47165 945.188 4
 2 4 -1 9187.31 355.932 4
 2 4 0 365442 3750.08 4
 2 4 1 95619.5 1255.6 4
 2 4 1 94547.1 1210.41 3
 2 4 2 149895 1689.97 4
 2 4 2 145883 1733.94 3
 2 4 3 4376.99 220.209 3
 2 4 3 4606.88 190.397 4
 2 4 4 105595 1448.66 3
 2 4 5 179373 2204.65 3
 2 4 6 37351.7 826.645 3
 2 4 7 252511 2896.06 1
 2 4 7 255551 3045.9 3
 2 4 8 27682.7 770.347 3
 2 4 8 28158.2 712.432 1
 2 4 9 20630.4 693.204 3
 2 4 9 21142.5 647.516 1
 2 4 10 19978.3 713.919 3
 2 4 10 20589.3 675.763 1
 2 4 11 4504.33 328.763 1
 2 4 11 3912.9 332.935 3
 2 4 12 78073.7 1644.94 3
 2 4 12 78356.4 1568.64 1
 2 4 13 64.7487 95.5268 3
 2 4 13 347.546 121.958 1
 2 4 14 36573.7 1171.04 3
 2 4 14 37097.3 1129.66 1
 2 4 15 14558 757.472 3
 2 4 15 17196.8 791.969 1
 2 4 16 2142.01 314.783 3
 2 5 -12 15568.4 912.631 4
 2 5 -11 24656.5 1138.76 4
 2 5 -10 311.649 152.775 4
 2 5 -9 28368.5 1120.31 4
 2 5 -8 7097.65 530.381 4
 2 5 -7 33324.9 1105.15 4
 2 5 -6 44640.6 1232.52 4
 2 5 -5 51176.2 1253.54 4
 2 5 -4 97356.8 1731.9 4
 2 5 -3 26358.9 761.803 4
 2 5 -3 25782.7 405.655 2
 2 5 -2 143315 1557.88 2
 2 5 -2 145869 2022.55 4
 2 5 -1 33427.7 770.822 4
 2 5 0 99986.8 1432.66 4
 2 5 1 133747 1669.23 4
 2 5 1 133649 1664.51 3
 2 5 2 4203.03 205.654 4
 2 5 2 4176.93 224.006 3
 2 5 3 235448 2472.79 4
 2 5 3 231845 2658.75 3
 2 5 4 35038.5 765.688 3
 2 5 5 166751 2169.01 3
 2 5 6 647.103 130.991 3
 2 5 7 121185 1837.46 3
 2 5 8 152859 2202.18 3
 2 5 8 149605 2091.65 1
 2 5 9 24410 731.609 1
 2 5 9 24798.3 780.048 3
 2 5 10 42872.5 1034.22 1
 2 5 10 43200.4 1104.05 3
 2 5 11 17693.9 678.349 1
 2 5 11 16618.5 690.797 3
 2 5 12 54380.1 1366.15 3
 2 5 12 54657 1293.06 1
 2 5 13 22351.6 880.854 3
 2 5 13 23273.9 857.708 1
 2 5 14 1283.08 237.891 3
 2 5 14 1884.88 261.227 1
 2 5 15 31471.5 1142.42 3
 2 5 15 33209.8 1121.72 1
 2 5 16 6073.53 513.876 3
 2 6 -11 19861.8 1047.46 4
 2 6 -10 28487.1 1202.09 4
 2 6 -9 965.862 239.05 4
 2 6 -8 47311 1461 4
 2 6 -7 6418.76 505.654 4
 2 6 -6 30131.1 1049.16 4
 2 6 -5 672.197 166.013 4
 2 6 -4 62370 758.299 2
 2 6 -4 64349.2 1402.59 4
 2 6 -3 176632 2485.67 4
 2 6 -3 171851 1832.9 2
 2 6 -2 15557.9 569.534 4
 2 6 -2 16589.7 396.952 2
 2 6 -1 109236 1664.32 4
 2 6 0 20653.5 580.399 4
 2 6 1 138921 1779.73 4
 2 6 1 134376 1788.06 3
 2 6 2 30803.7 642.809 4
 2 6 2 32039.9 725.699 3
 2 6 3 69959.5 1024.5 4
 2 6 3 72195.7 1200.16 3
 2 6 4 241167 2541.49 4
 2 6 4 234974 2851.27 3
 2 6 5 286.707 103.02 3
 2 6 6 6341.58 353.334 3
 2 6 7 1781.27 201.053 3
 2 6 8 80925.9 1524.62 3
 2 6 9 144790 2264.55 3
 2 6 10 107.702 73.6693 3
 2 6 10 257.604 101.321 1
 2 6 11 59915 1409.93 3
 2 6 11 58642.5 1322.94 1
 2 6 12 252.937 110.208 1
 2 6 12 430.913 134.436 3
 2 6 13 41197.8 1242.82 3
 2 6 13 41946.6 1189.8 1
 2 6 14 14524.3 750.552 3
 2 6 14 15417.3 735.655 1
 2 6 15 2582.19 316.249 1
 2 6 15 1933.09 286.329 3
 2 6 16 19150.8 924.509 3
 2 7 -11 545.752 200.703 4
 2 7 -10 19504.5 1024.26 4
 2 7 -9 18801.3 974.75 4
 2 7 -8 20993.6 974.631 4
 2 7 -7 75266.6 1874.28 4
 2 7 -6 193.602 129.669 4
 2 7 -5 17560.6 776.542 4
 2 7 -4 1750.86 239.745 4
 2 7 -3 108949 1905.28 4
 2 7 -3 109504 1352.09 2
 2 7 -2 174585 2462.88 4
 2 7 -2 173611 2006.77 2
 2 7 -1 554.646 116.718 4
 2 7 -1 550.864 84.1154 2
 2 7 0 49235.2 1009.45 4
 2 7 1 169.68 59.1925 4
 2 7 2 114709 1571.98 4
 2 7 2 117062 1715.85 3
 2 7 3 21061.9 522.835 4
 2 7 3 21233.2 631.159 3
 2 7 4 148999 1786.56 4
 2 7 4 152593 2117.1 3
 2 7 5 136108 1646.9 4
 2 7 5 139210 2032.18 3
 2 7 6 8841.61 443.543 3
 2 7 7 5243.67 349.883 3
 2 7 8 10346.9 508.762 3
 2 7 9 90340.5 1724.95 3
 2 7 10 74970.2 1591.31 3
 2 7 11 5204.4 410.267 3
 2 7 12 28563.3 1005.26 3
 2 7 12 29895 981.685 1
 2 7 13 3157.37 355.732 3
 2 7 13 3098.2 337.462 1
 2 7 14 14800.1 765.11 3
 2 7 14 15865.1 761.49 1
 2 7 15 3294.7 384.1 3
 2 7 15 3774.3 392.901 1
 2 7 16 5224.87 491.206 3
 2 7 16 6563.48 521.621 1
 2 7 17 18920 965.555 3
 2 8 -10 199.302 118.698 4
 2 8 -9 18471 977.523 4
 2 8 -8 4491.41 478.363 4
 2 8 -7 24329.6 1051.73 4
 2 8 -6 54290.7 1544.96 4
 2 8 -5 70.4608 124.034 4
 2 8 -4 22168.8 864.545 4
 2 8 -3 3116.84 298.308 4
 2 8 -3 3905.5 207.41 2
 2 8 -2 152756 2343.42 4
 2 8 -2 153809 1897.96 2
 2 8 -1 103166 1473.72 2
 2 8 -1 99897.7 1696.18 4
 2 8 0 13611.7 464.884 2
 2 8 0 12876.7 508.952 4
 2 8 1 63477.2 1163.91 4
 2 8 2 1907.03 173.856 4
 2 8 2 1971.97 210.108 3
 2 8 3 126111 1680.36 4
 2 8 3 128017 1940.27 3
 2 8 4 12473 397.282 4
 2 8 4 13316.4 545.868 3
 2 8 5 97118.2 1312.27 4
 2 8 5 99091.2 1708.39 3
 2 8 6 143747 1736.23 4
 2 8 6 145007 2224.14 3
 2 8 7 3848.2 204.574 4
 2 8 7 4218.15 329.282 3
 2 8 8 1040.4 182.398 3
 2 8 9 5962.73 416.603 3
 2 8 10 83161.5 1732.92 3
 2 8 11 26949.1 961.934 3
 2 8 12 6424.29 478.937 3
 2 8 13 41184.3 1294.16 3
 2 8 14 1412.02 251.106 3
 2 8 15 6383.04 537.245 3
 2 8 16 2683.41 363.722 3
 2 8 17 11231.9 759.826 3
 2 9 -9 2430.49 380.964 4
 2 9 -8 17525.6 965.391 4
 2 9 -7 424.382 174.033 4
 2 9 -6 27884.7 1115.19 4
 2 9 -5 92560.5 2048.63 4
 2 9 -4 643.129 172.779 4
 2 9 -3 4741.25 397.182 4
 2 9 -2 15647.8 671.56 4
 2 9 -2 16204.5 499.908 2
 2 9 -1 132679 2138.27 4
 2 9 -1 138435 1904.31 2
 2 9 0 27207 721.159 2
 2 9 0 25187.5 766.375 4
 2 9 1 55729.4 1119.66 2
 2 9 1 55130.7 1123.87 4
 2 9 2 89465.6 1442.09 4
 2 9 3 385.836 81.6456 4
 2 9 3 366.088 114.543 3
 2 9 4 98360.8 1419.67 4
 2 9 4 102609 1782.72 3
 2 9 5 2723.21 185.584 4
 2 9 5 2782.49 270.224 3
 2 9 6 68228.3 1036.42 4
 2 9 6 70286.1 1473.14 3
 2 9 7 47813.5 821.36 4
 2 9 7 47817.2 1216.94 3
 2 9 8 635.507 182.451 3
 2 9 8 574.972 86.9236 4
 2 9 9 16064.7 722.332 3
 2 9 10 18.0864 98.8652 3
 2 9 11 61245.2 1569.41 3
 2 9 12 13785.3 729.304 3
 2 9 13 11711.4 692.584 3
 2 9 14 27210.7 1104.15 3
 2 9 15 604.907 198.513 3
 2 9 16 14815.2 869.033 3
 2 9 17 961.855 256.879 3
 2 10 -8 4442.35 504.512 4
 2 10 -7 13631.1 834.408 4
 2 10 -6 527.412 182.072 4
 2 10 -5 42612.9 1383.46 4
 2 10 -4 83870.8 1933.73 4
 2 10 -3 583.505 171.086 4
 2 10 -2 21609.3 839.605 4
 2 10 -2 23735.8 661.719 2
 2 10 -1 26842.5 881.367 4
 2 10 -1 26324.1 724.848 2
 2 10 0 89005.2 1651.05 4
 2 10 0 93438.7 1567.67 2
 2 10 1 5390.64 348.18 2
 2 10 1 4928.24 328.951 4
 2 10 2 79226.5 1493.01 2
 2 10 2 79253.9 1393.04 4
 2 10 3 72441.1 1255.71 4
 2 10 4 6628.38 313.979 4
 2 10 4 6835.74 434.213 3
 2 10 5 87121.7 1301.48 4
 2 10 5 90972.8 1775.73 3
 2 10 6 3493.58 202.554 4
 2 10 6 3954.53 350.966 3
 2 10 7 89903.4 1813.03 3
 2 10 8 63540.1 1531.2 3
 2 10 9 4739.91 401.625 3
 2 10 10 16514.5 783.342 3
 2 10 11 2624.28 321.801 3
 2 10 12 47408.8 1425.03 3
 2 10 13 9274.94 637.094 3
 2 10 14 11406.5 726.174 3
 2 10 15 20976.2 1023.62 3
 2 10 16 1292.92 278.777 3
 2 10 16 1215.33 284.826 2
 2 10 17 15688.5 927.209 3
 2 11 -8 7434.8 673.131 4
 2 11 -7 6538.53 605.91 4
 2 11 -6 15855.7 906.823 4
 2 11 -5 1102.77 257.545 4
 2 11 -4 64547.6 1719.47 4
 2 11 -3 30389.8 1109.62 4
 2 11 -2 10918.5 620.925 4
 2 11 -1 11358.6 591.054 4
 2 11 -1 11276.3 471.191 2
 2 11 0 23855.8 822.992 4
 2 11 0 25528.3 782.341 2
 2 11 1 77239 1493.13 2
 2 11 1 74474.3 1474.44 4
 2 11 2 569.367 125.645 4
 2 11 2 755.6 160.571 2
 2 11 3 81270.8 1624.2 2
 2 11 3 83823.9 1421.69 4
 2 11 4 55356.8 1313.78 2
 2 11 4 53763.3 1039.97 4
 2 11 5 4411.43 253.735 4
 2 11 5 4442.94 380.961 3
 2 11 6 24975.8 922.109 3
 2 11 7 13984.2 689.863 3
 2 11 8 133045 2440.47 3
 2 11 9 26891.9 1014.45 3
 2 11 10 15318.6 785.46 3
 2 11 11 17317.6 854.119 3
 2 11 12 12748.7 757.174 3
 2 11 13 34985.2 1285 3
 2 11 14 6689.59 579.201 3
 2 11 15 24811.3 1148.35 2
 2 11 15 23010.2 1090.59 3
 2 11 16 7292.72 639.11 2
 2 11 16 6917.75 632.419 3
 2 12 -7 5711.86 592.965 4
 2 12 -6 7002.14 609.88 4
 2 12 -5 15693.6 894.973 4
 2 12 -4 7304.68 583.587 4
 2 12 -3 62512.2 1682.09 4
 2 12 -2 2652.68 330.948 4
 2 12 -1 34792.2 1129.76 4
 2 12 -1 37337 979.734 2
 2 12 0 6761.8 457.537 4
 2 12 0 8098.99 449.931 2
 2 12 1 26348.1 863.721 4
 2 12 1 30088.4 933.892 2
 2 12 2 74935.6 1566.91 2
 2 12 2 73567.8 1450.26 4
 2 12 3 4889.17 378.586 2
 2 12 3 4282.36 300.57 4
 2 12 4 104973 2004.22 2
 2 12 5 7515.25 498.619 2
 2 12 5 7809.99 538.674 3
 2 12 6 14227.3 699.769 2
 2 12 6 14842 735.427 3
 2 12 7 19986.6 888.105 3
 2 12 8 3797.26 395.55 3
 2 12 9 64322.9 1679.6 3
 2 12 10 6207.2 516.023 3
 2 12 11 24508 1046.6 3
 2 12 12 6492 556.98 3
 2 12 13 14045.6 842.459 2
 2 12 13 15344.8 867.813 3
 2 12 14 19759 1033.37 2
 2 12 14 21061.5 1045.04 3
 2 12 15 400.435 202.586 2
 2 12 15 719.617 222.408 3
 2 12 16 10391.9 786.116 2
 2 13 -6 745.266 220.056 4
 2 13 -5 11160.1 777.818 4
 2 13 -4 5067.47 508.262 4
 2 13 -3 22727.9 1028.78 4
 2 13 -2 34107.7 1210.92 4
 2 13 -1 2347.24 306.121 4
 2 13 0 22697.7 891.259 4
 2 13 0 25675.7 852.012 2
 2 13 1 3989.63 355.867 4
 2 13 1 5423.78 400.436 2
 2 13 2 47800.3 1316.75 2
 2 13 3 48191.5 1305.15 2
 2 13 4 12861.9 670.735 2
 2 13 5 46794.7 1329.82 2
 2 13 6 1988.76 278.869 2
 2 13 6 1661.4 280.017 3
 2 13 7 17451.6 828.618 2
 2 13 7 17800.5 859.04 3
 2 13 8 13307.7 759.17 2
 2 13 8 14201.2 786.097 3
 2 13 9 49546.6 1666.21 2
 2 13 9 20035.5 964.421 3
 2 13 10 56282.4 1652.15 2
 2 13 10 54782.1 1644.18 3
 2 13 11 559.408 198.518 2
 2 13 11 409.118 189.292 3
 2 13 12 20602.9 1021.53 2
 2 13 12 20458.7 1015.2 3
 2 13 13 3321.62 436.48 2
 2 13 13 3333.01 422.266 3
 2 13 14 6930.48 635.627 2
 2 13 14 6999.55 626.655 3
 2 14 -5 125.638 110.301 4
 2 14 -4 10753.3 752.342 4
 2 14 -3 -47.1351 123.766 4
 2 14 -2 36003.2 1293.77 4
 2 14 -1 25517.2 1027.99 4
 2 14 1 20706.4 807.708 2
 2 14 2 1326.06 228.326 2
 2 14 3 32671.7 1126.41 2
 2 14 4 7877.47 547.612 2
 2 14 5 12842.9 712.498 2
 2 14 6 41145.9 1330.98 2
 2 14 7 815.741 234.715 2
 2 14 8 19700.8 941.096 2
 2 14 8 18036.7 919.891 3
 2 14 9 1456.29 285.047 2
 2 14 9 1296.36 261.767 3
 2 14 10 30709.4 1245.55 2
 2 14 10 29429.4 1212.13 3
 2 14 11 26909.8 1203.18 2
 2 14 11 27396.1 1197.13 3
 2 14 12 50.2913 127.451 2
 2 14 12 -72.2414 167.346 3
 2 14 13 19187.4 1055.38 2
 2 14 13 20125.2 1068.43 3
 2 15 2 28829.9 1035.84 2
 2 15 3 1346.77 255.196 2
 2 15 4 20330.3 927.354 2
 2 15 5 3730.53 415.183 2
 2 15 6 22843 1004.08 2
 2 15 7 38393.4 1361.74 2
 2 15 8 361.62 193.248 2
 2 15 9 10505.2 727.982 2
 2 15 9 10264.7 730.903 3
 2 15 10 460.537 226.942 2
 2 15 10 157.787 159.889 3
 2 15 11 23624.6 1138.98 2
 2 15 11 23892 1163.27 3
 2 15 12 10995 810.451 2
 2 15 12 10951.6 793.838 3
 2 16 2 9502.97 632.435 2
 2 16 3 21611.2 949.437 2
 2 16 4 101.074 116.475 2
 2 16 5 12517.2 761.79 2
 2 16 6 276.288 132.967 2
 2 16 7 37606.1 1386.53 2
 2 16 8 54658.5 1719.07 2
 2 16 9 254.116 186.045 2
 2 16 10 10644.3 773.635 2
 2 16 10 11248.1 803.393 3
 2 17 3 11776 746.085 2
 2 17 4 20674.2 972.115 2
 2 17 5 247.779 141.703 2
 2 17 6 7888.62 636.311 2
 2 17 7 1680.9 314.496 2
 3 -16 -1 6635.12 622.302 5
 3 -15 0 4578.34 497.168 5
 3 -15 1 22287.6 1103.94 5
 3 -15 2 12717.8 844.531 5
 3 -15 3 2300.58 374.178 5
 3 -14 1 828.936 215.518 5
 3 -14 2 23740 1107.14 5
 3 -14 3 14963.1 873.781 5
 3 -14 4 2325.83 372.156 5
 3 -14 5 11009.9 755.649 5
 3 -13 1 32171.8 1219.55 5
 3 -13 2 1032.39 260.545 5
 3 -13 3 47187.2 1513.91 5
 3 -13 4 15787.1 865.298 5
 3 -13 5 5283.78 507.678 5
 3 -13 6 5339.44 524.284 5
 3 -13 8 25928.6 1140 3
 3 -12 2 38879.8 1282.76 5
 3 -12 3 16683.1 839.911 5
 3 -12 4 53111.7 1550.53 5
 3 -12 5 5457.2 486.484 5
 3 -12 6 5449.4 497.825 5
 3 -12 8 9417.4 662.529 3
 3 -12 9 19137.5 975.623 3
 3 -11 2 49286.8 1384.03 5
 3 -11 3 34884.5 1169.77 5
 3 -11 4 30769.8 1103.12 5
 3 -11 5 67835.7 1717.2 5
 3 -11 6 3800.98 400.639 5
 3 -11 8 425.169 141.865 3
 3 -11 9 12697.1 766.405 3
 3 -10 2 938.831 184.434 5
 3 -10 3 65785.6 1578.22 5
 3 -10 4 17913.2 789.445 5
 3 -10 5 48381.4 1349.12 5
 3 -10 6 74305.8 1741.98 5
 3 -10 8 5775.97 481.164 3
 3 -10 9 867.277 211.716 3
 3 -10 10 13083.6 766.226 3
 3 -9 3 873.328 181.25 5
 3 -9 4 78652.4 1682.62 5
 3 -9 5 3819.86 346.091 5
 3 -9 6 36696.6 1128.4 5
 3 -9 8 389.051 143.276 3
 3 -9 9 18062.5 850.164 3
 3 -9 10 34.1836 99.279 3
 3 -9 11 19620.2 935.955 3
 3 -8 -1 223.34 51.9914 4
 3 -8 3 50861.9 1211.41 5
 3 -8 4 5985.65 407.857 5
 3 -8 5 53197.5 1291.69 5
 3 -8 6 3133.43 307.358 5
 3 -8 8 24509.4 939.262 3
 3 -8 9 10523.1 620.392 3
 3 -8 10 13216.2 721.909 3
 3 -8 11 1095.2 239.813 3
 3 -7 -1 51710.9 720.538 4
 3 -7 3 101391 1717.49 5
 3 -7 4 47206.2 1121.14 5
 3 -7 5 3422.53 304.1 5
 3 -7 6 33741.2 968.304 5
 3 -7 7 106.074 105.475 3
 3 -7 8 72684.5 1641.32 3
 3 -7 9 12395.9 650.115 3
 3 -7 10 15816.5 767.989 3
 3 -7 11 10335.8 635.645 3
 3 -7 12 578.394 163.668 3
 3 -6 -7 29374.9 567.737 4
 3 -6 -6 33153 526.684 4
 3 -6 -1 118323 1299.39 4
 3 -6 3 12520.1 500.986 5
 3 -6 4 107592 1728.3 5
 3 -6 5 48227.2 1082.42 5
 3 -6 6 588.601 140.155 5
 3 -6 7 11150.3 555.255 3
 3 -6 8 4314.84 363.131 3
 3 -6 9 76747.2 1686.44 3
 3 -6 10 15604.9 733.409 3
 3 -6 11 10240.1 612.553 3
 3 -6 12 9482.42 608.337 3
 3 -5 -9 26468.1 716.45 4
 3 -5 -8 26468 665.296 4
 3 -5 -7 138295 1747.32 4
 3 -5 -6 38568.2 676.274 4
 3 -5 -5 84690.1 1043.99 4
 3 -5 -4 33792.8 476.391 4
 3 -5 -1 9954.36 233.208 4
 3 -5 0 205147 2164.52 4
 3 -5 4 29512.7 748.752 5
 3 -5 5 124673 1829.67 5
 3 -5 7 2365.26 245.277 3
 3 -5 8 5882.03 401.376 3
 3 -5 9 14525.3 666.667 3
 3 -5 10 57898.1 1428.92 3
 3 -5 11 4696.51 400.256 3
 3 -5 12 23941.4 955.724 3
 3 -5 13 14184.8 748.689 3
 3 -4 -11 37615.2 1044.74 4
 3 -4 -10 3202.61 281.958 4
 3 -4 -9 4258.07 296.132 4
 3 -4 -8 20322.6 618.509 4
 3 -4 -7 20508.7 579.28 4
 3 -4 -6 175745 2106.23 4
 3 -4 -5 42165.4 726.978 4
 3 -4 -4 60026 817.3 4
 3 -4 -3 3318.26 127.671 4
 3 -4 -2 207823 1999.73 4
 3 -4 -1 89434.9 1002.95 4
 3 -4 0 2333.88 124.166 4
 3 -4 4 3004.53 211.432 5
 3 -4 5 27331.7 673.078 5
 3 -4 6 165138 2341.53 3
 3 -4 7 32943.1 905.968 3
 3 -4 8 25172.6 819.699 3
 3 -4 9 10305.2 534.496 3
 3 -4 10 18281.3 742.416 3
 3 -4 11 39649.6 1173.59 3
 3 -4 12 270.256 121.405 3
 3 -4 13 45142.9 1350.75 3
 3 -3 -12 17770.1 774.364 4
 3 -3 -11 12417.3 612.144 4
 3 -3 -10 49253.7 1201.45 4
 3 -3 -9 3848.76 302.177 4
 3 -3 -8 25775.3 752.436 4
 3 -3 -7 11098.1 448.978 4
 3 -3 -6 33463.3 752.174 4
 3 -3 -5 396272 4040.52 4
 3 -3 -4 15210 385.388 4
 3 -3 -3 49010.9 705.412 4
 3 -3 -2 7613.62 208.139 4
 3 -3 -1 373889 3497.25 4
 3 -3 0 61717.5 804.741 4
 3 -3 1 411.176 63.8248 4
 3 -3 4 67214.7 1028.84 5
 3 -3 5 22713.7 560.766 5
 3 -3 5 22365.1 640.599 3
 3 -3 6 68662 1278.31 3
 3 -3 7 162316 2325.21 3
 3 -3 8 25258.8 787.012 3
 3 -3 9 28734.2 880.627 3
 3 -3 10 7523.62 466.092 3
 3 -3 11 26435.4 924.987 3
 3 -3 12 20449.5 839.176 3
 3 -3 13 2339.07 303.321 3
 3 -3 14 37128.9 1228.07 3
 3 -2 -13 389.395 152.095 4
 3 -2 -12 28573.2 1034.55 4
 3 -2 -11 10280.2 572.662 4
 3 -2 -10 34220.7 1028.49 4
 3 -2 -9 87639.8 1674.62 4
 3 -2 -8 7569.1 423.387 4
 3 -2 -7 41802.8 973.671 4
 3 -2 -6 5283.44 305.164 4
 3 -2 -5 270886 3023.88 4
 3 -2 -4 294313 3092.31 4
 3 -2 -3 4105.23 191.516 4
 3 -2 -2 90962.4 1106.87 4
 3 -2 -1 48649.1 668.015 4
 3 -2 1 79629.5 1042.64 1
 3 -2 1 77913 1006.55 4
 3 -2 4 10476.4 302.746 5
 3 -2 4 10832.6 390.82 3
 3 -2 5 26980.7 682.677 3
 3 -2 6 2575.84 224.951 3
 3 -2 7 201967 2628.08 3
 3 -2 8 233302 3010.27 3
 3 -2 9 -0.29775 73.546 3
 3 -2 10 33163.6 978.514 3
 3 -2 11 3879.58 341.372 3
 3 -2 12 18373.5 791.939 3
 3 -2 13 6043.63 462.276 3
 3 -2 14 11331.2 658.596 3
 3 -1 -14 2252.09 344.492 4
 3 -1 -13 5696.73 500.643 4
 3 -1 -12 542.906 169.548 4
 3 -1 -11 35898.4 1145.1 4
 3 -1 -10 19738.4 798.907 4
 3 -1 -9 54203.9 1324.71 4
 3 -1 -8 91186.4 1711.02 4
 3 -1 -7 2280.66 230.262 4
 3 -1 -6 14240.2 528.438 4
 3 -1 -5 41895.1 879.992 4
 3 -1 -4 418976 3961.62 3
 3 -1 -4 405000 4232.94 4
 3 -1 -3 152363 1606.16 3
 3 -1 -3 149939 1802.46 4
 3 -1 -2 3860.43 182.086 4
 3 -1 -2 3680.84 139.983 3
 3 -1 -1 268897 2702.41 4
 3 -1 -1 270556 2614.02 3
 3 -1 0 6373.85 206.725 4
 3 -1 1 238778 2377.51 1
 3 -1 2 12663.3 265.632 1
 3 -1 3 87565.6 970.796 5
 3 -1 3 89684.3 1223.28 3
 3 -1 4 61887.5 1014.7 3
 3 -1 5 30740 705.171 3
 3 -1 6 8018.67 369.932 3
 3 -1 7 57.0102 68.8814 3
 3 -1 8 265894 3263.05 3
 3 -1 9 75481.8 1460.4 3
 3 -1 10 13417.5 591.358 3
 3 -1 11 38898.5 1105.96 3
 3 -1 12 444.009 145.04 3
 3 -1 13 13633.1 688.885 3
 3 -1 14 1826.43 269.158 3
 3 -1 15 11312.1 672.943 3
 3 0 -14 8123.12 643.309 4
 3 0 -13 4370.88 445.565 4
 3 0 -12 10751.8 673.787 4
 3 0 -11 4793.46 441.9 4
 3 0 -10 57290.9 1476.31 4
 3 0 -9 466.639 145.628 4
 3 0 -8 47622.7 1214.65 4
 3 0 -7 93079.3 1691.54 4
 3 0 -6 28747.3 797.904 4
 3 0 -5 1582.03 175.635 4
 3 0 -5 1272.92 96.0831 3
 3 0 -4 42250.9 591.278 3
 3 0 -4 40183.1 843.916 4
 3 0 -3 165572 1654.95 3
 3 0 -3 167315 2028.09 4
 3 0 -2 6528.44 142.948 3
 3 0 -2 6345.04 260.47 4
 3 0 -2 6729.79 216.591 2
 3 0 -1 59619.5 871.02 4
 3 0 -1 57544.1 644.247 3
 3 0 0 654761 5967.7 2
 3 0 0 628215 5952.37 4
 3 0 1 86817.5 1090.88 2
 3 0 1 84727.5 1002.76 3
 3 0 2 177847 1911.49 3
 3 0 3 134459 1599.23 3
 3 0 4 98453.9 1346.18 3
 3 0 5 22019.2 565.242 3
 3 0 6 12176.7 447.294 3
 3 0 7 100168 1567.07 3
 3 0 8 6455.38 359.999 3
 3 0 9 128122 2032.27 3
 3 0 10 48729.6 1177.84 3
 3 0 11 9626.16 513.879 3
 3 0 12 21241.3 817.736 3
 3 0 13 1469.62 239.316 3
 3 0 14 13155.8 688.503 3
 3 0 15 296.918 134.877 3
 3 1 -14 28798 1243.62 4
 3 1 -13 3043.38 404.439 4
 3 1 -12 24253.2 1040.42 4
 3 1 -11 18213.3 872.166 4
 3 1 -10 8914.12 593.111 4
 3 1 -9 23223.5 895.58 4
 3 1 -8 3406.96 325.954 4
 3 1 -7 78305 1600.96 4
 3 1 -6 30097.8 857.035 4
 3 1 -5 42068.8 967.893 4
 3 1 -4 4983.42 293.688 4
 3 1 -3 104439 1497.72 4
 3 1 -3 103438 1134.24 2
 3 1 -2 37430.9 540.312 2
 3 1 -2 36405.4 726.584 4
 3 1 -1 48717.4 664.407 2
 3 1 -1 46158.8 790.797 4
 3 1 0 85147.1 1034.9 2
 3 1 0 81936.7 846.792 3
 3 1 0 82576.4 1100.36 4
 3 1 1 60879.9 746.72 3
 3 1 1 62133.4 872.069 4
 3 1 1 63621.1 859.205 2
 3 1 2 23328.3 437.758 3
 3 1 2 24509.9 336.495 5
 3 1 3 192246 2091.15 3
 3 1 4 1241.35 119.714 3
 3 1 5 47510.2 875.245 3
 3 1 6 18307 547.014 3
 3 1 7 37305.2 862.307 3
 3 1 8 16427.2 573.791 3
 3 1 9 6040.36 366.621 3
 3 1 10 101067 1781.42 3
 3 1 11 19020.4 728.894 3
 3 1 12 14263.2 651.672 3
 3 1 13 17147.3 755.351 3
 3 1 14 1569.44 242.274 3
 3 1 15 7823.54 548.857 3
 3 2 -13 30976.9 1267.52 4
 3 2 -12 -56.2778 134.941 4
 3 2 -11 44058.8 1425.06 4
 3 2 -10 16749.9 832.461 4
 3 2 -9 2123.58 290.922 4
 3 2 -8 27988.5 981.641 4
 3 2 -7 8114.96 487.047 4
 3 2 -6 147209 2278.85 4
 3 2 -5 20901.9 686.505 4
 3 2 -4 12298.6 488.868 4
 3 2 -3 5518.77 305.345 4
 3 2 -3 5027.89 132.836 2
 3 2 -2 199530 1952.68 2
 3 2 -2 197163 2375.37 4
 3 2 -1 393859 4063.18 4
 3 2 -1 402831 3762.23 2
 3 2 0 11296 354.736 4
 3 2 0 12233.1 297.664 2
 3 2 0 12153.5 216.958 3
 3 2 1 56589.9 793.785 5
 3 2 1 57510.2 715.399 3
 3 2 1 55718.7 853.406 4
 3 2 2 78117.5 989.44 3
 3 2 2 80781.4 940.614 5
 3 2 3 22294.2 472.42 3
 3 2 4 21968.2 512.51 3
 3 2 5 2058.92 163.914 3
 3 2 5 2305.23 115.541 1
 3 2 6 108373 1568.16 3
 3 2 6 108705 1293.88 1
 3 2 7 10161.6 430.948 3
 3 2 7 10112.7 325.122 1
 3 2 8 28636.6 771.565 3
 3 2 8 28383 633.33 1
 3 2 9 16685.7 515.705 1
 3 2 9 15943.2 597.116 3
 3 2 10 22736.8 759.349 3
 3 2 10 23344.9 666.56 1
 3 2 11 33260.7 972.621 3
 3 2 11 35654.3 895.048 1
 3 2 12 2245.27 234.545 1
 3 2 12 2233.8 268.284 3
 3 2 13 36677.6 1023.79 1
 3 2 13 34169.4 1089 3
 3 2 14 19282.8 844.981 3
 3 2 14 19993.3 782.114 1
 3 2 15 657.924 179.448 3
 3 2 16 6992.18 550.61 3
 3 3 -13 19583.3 1043.34 4
 3 3 -12 26467.1 1165.51 4
 3 3 -11 7146.06 577.486 4
 3 3 -10 47699.1 1474.94 4
 3 3 -9 16349.8 810.206 4
 3 3 -8 17826.9 802.369 4
 3 3 -7 19548.8 797.766 4
 3 3 -6 5248.93 387.201 4
 3 3 -5 109183 1846.39 4
 3 3 -4 3304.5 269.609 4
 3 3 -3 60577.9 1165.84 4
 3 3 -2 33352 769.982 4
 3 3 -2 32221.7 460.877 2
 3 3 -1 69509.7 1135.46 4
 3 3 0 27799.4 623.16 4
 3 3 0 28373.9 444.51 3
 3 3 1 9628.11 326.502 4
 3 3 1 9472.33 252.668 3
 3 3 2 307537 3061.56 3
 3 3 2 304839 3148.81 4
 3 3 3 72351.6 1026.22 3
 3 3 4 7008.02 291.959 3
 3 3 5 349728 3694.89 3
 3 3 6 576.431 111.234 3
 3 3 6 649.137 88.5878 1
 3 3 7 211938 2359.8 1
 3 3 7 209289 2626.63 3
 3 3 8 15612.7 564.525 3
 3 3 8 15366.1 457.756 1
 3 3 9 26516.8 786.199 3
 3 3 9 26936.1 667.865 1
 3 3 10 358.081 96.53 1
 3 3 10 108.125 65.4738 3
 3 3 11 6856.41 379.047 1
 3 3 11 6355.96 418.269 3
 3 3 12 36192.1 959.066 1
 3 3 12 35605 1072.89 3
 3 3 13 2236.45 244.998 1
 3 3 13 2495.74 298.163 3
 3 3 14 48669.3 1244.69 1
 3 3 14 47800.8 1361.22 3
 3 3 15 11626.2 681.854 3
 3 3 16 870.81 216.331 3
 3 4 -12 24685.8 1162.59 4
 3 4 -11 16346.7 903.201 4
 3 4 -10 14824.3 828.894 4
 3 4 -9 68142.2 1770.28 4
 3 4 -8 1505.05 257.368 4
 3 4 -7 46767.3 1309.77 4
 3 4 -6 24055.2 874.168 4
 3 4 -5 78794.8 1577.71 4
 3 4 -4 80368.7 1501 4
 3 4 -3 138.95 77.3824 4
 3 4 -2 208273 2624.71 4
 3 4 -1 10881.5 430.814 4
 3 4 0 43758.6 844.738 4
 3 4 0 42600.8 661.5 3
 3 4 1 64967.7 1039.4 4
 3 4 1 64965.5 916.627 3
 3 4 2 25418.7 563.942 4
 3 4 2 25308 528.098 3
 3 4 3 138388 1714.34 3
 3 4 3 139407 1681.31 4
 3 4 4 41236.7 794.011 3
 3 4 5 196659 2373.57 3
 3 4 6 134464 1872.65 3
 3 4 7 101069 1600.92 3
 3 4 8 179867 2453.23 3
 3 4 8 177348 2199.34 1
 3 4 9 7077.15 404.986 3
 3 4 9 7731.3 358.266 1
 3 4 10 17481.3 672.674 3
 3 4 10 18086.2 592.602 1
 3 4 11 5643.6 401.682 3
 3 4 11 6486.59 375.946 1
 3 4 12 25910.8 797.954 1
 3 4 12 25062.3 892.316 3
 3 4 13 15280.3 720.558 3
 3 4 13 15658.3 649.241 1
 3 4 14 4581.07 407.877 3
 3 4 14 5253.88 395.565 1
 3 4 15 34552.3 1183.79 3
 3 4 16 6799.99 541.875 3
 3 4 17 1133.67 245.265 3
 3 5 -11 25240.9 1174.87 4
 3 5 -10 10236.2 716.114 4
 3 5 -9 25500.8 1078.33 4
 3 5 -8 58807.1 1615.32 4
 3 5 -7 497.845 162.435 4
 3 5 -6 68921.7 1620.62 4
 3 5 -5 137.344 109.589 4
 3 5 -4 150252 2324.72 4
 3 5 -3 61705 1270.15 4
 3 5 -3 57597.1 681.341 2
 3 5 -2 8890.91 429.782 4
 3 5 -1 164450 2211.55 4
 3 5 0 9765.61 404.552 4
 3 5 1 284697 3133.73 4
 3 5 1 280905 2979.93 3
 3 5 2 49953.5 888.596 4
 3 5 2 50805.5 870.506 3
 3 5 3 120166 1553.73 4
 3 5 3 118296 1585.48 3
 3 5 4 464220 4769.15 3
 3 5 4 468430 4631.58 4
 3 5 5 11813.9 444.695 3
 3 5 6 112426 1697.88 3
 3 5 7 2268.62 222.754 3
 3 5 8 126206 1962.69 3
 3 5 9 98693.6 1734.66 3
 3 5 9 99643.4 1584.15 1
 3 5 10 198.027 108.766 3
 3 5 10 197.012 81.258 1
 3 5 11 66997.1 1326.82 1
 3 5 11 65695.5 1458.08 3
 3 5 12 419.527 144.849 3
 3 5 12 283.73 94.9089 1
 3 5 13 21656.5 871.584 3
 3 5 13 22066.9 791.082 1
 3 5 14 4193 401.526 3
 3 5 14 4662.84 379.626 1
 3 5 15 4823.7 441.023 3
 3 5 15 6014.89 440.535 1
 3 5 16 25498.6 1070.82 3
 3 5 17 2857.16 373.554 3
 3 6 -11 71.1143 145.919 4
 3 6 -10 24328.8 1133.38 4
 3 6 -9 2244.36 347.564 4
 3 6 -8 70870.6 1840.72 4
 3 6 -7 67028.1 1723.32 4
 3 6 -6 19198.8 848.64 4
 3 6 -5 13448.8 666.771 4
 3 6 -4 8573.6 489.232 4
 3 6 -3 96983.3 1723.25 4
 3 6 -3 92793 1070.79 2
 3 6 -2 112454 1840.25 4
 3 6 -1 6627.59 364.86 4
 3 6 0 184718 2388.08 4
 3 6 1 14431.7 484.118 4
 3 6 1 14286.1 442.292 3
 3 6 2 65246.5 1102.89 4
 3 6 2 65233.3 1088.26 3
 3 6 3 8368.47 334.328 4
 3 6 3 8971.91 370.455 3
 3 6 4 368582 3826.19 4
 3 6 4 373706 4035.14 3
 3 6 5 339166 3562.89 4
 3 6 5 344361 3823.06 3
 3 6 6 11055.7 476.594 3
 3 6 7 14785.6 575.378 3
 3 6 8 3141.61 271.25 3
 3 6 9 109610 1887.21 3
 3 6 10 61005.1 1380.87 3
 3 6 11 29425 966.661 3
 3 6 11 30076.5 881.118 1
 3 6 12 30243.3 1023.35 3
 3 6 12 30005.4 909.751 1
 3 6 13 66.8242 105.697 3
 3 6 13 -32.3742 98.7485 1
 3 6 14 12110.3 688.09 3
 3 6 14 12254.9 619.847 1
 3 6 15 532.856 177.895 3
 3 6 15 304.94 122.998 1
 3 6 16 17044.3 874.791 3
 3 6 17 26034.2 1137.23 3
 3 7 -10 59.7198 133.081 4
 3 7 -9 21346.9 1073.46 4
 3 7 -8 441.801 157.091 4
 3 7 -7 111028 2357.26 4
 3 7 -6 33298.9 1167.48 4
 3 7 -5 2763.02 320.733 4
 3 7 -4 16567.2 728.264 4
 3 7 -3 2273.84 252.163 4
 3 7 -3 2578.91 139.782 2
 3 7 -2 90266.5 1202.21 2
 3 7 -2 88286.3 1645.6 4
 3 7 -1 34733.2 911.925 4
 3 7 0 33553.2 850.962 4
 3 7 1 79350.3 1350.31 4
 3 7 2 15000 495.762 4
 3 7 2 15516.7 516.389 3
 3 7 3 150569 1957.26 4
 3 7 3 151667 2063 3
 3 7 4 15249.5 464.824 4
 3 7 4 16083.2 550.992 3
 3 7 5 173175 2092.44 4
 3 7 5 173274 2367.79 3
 3 7 6 75155.4 1165.31 4
 3 7 6 75779.5 1413.49 3
 3 7 7 229.742 96.5825 3
 3 7 8 21058.8 733.383 3
 3 7 9 11725.8 564.561 3
 3 7 10 85344.7 1715.34 3
 3 7 11 4465.13 392.238 3
 3 7 12 24246.1 921.537 3
 3 7 13 40936.8 1259.4 3
 3 7 14 91.1901 103.548 3
 3 7 15 3581.5 392.734 3
 3 7 15 4015.9 385.417 1
 3 7 16 192.192 129.57 3
 3 7 17 20188 1001.24 3
 3 7 18 10200.4 735.395 3
 3 8 -9 1860.31 349.375 4
 3 8 -8 12349.7 799.25 4
 3 8 -7 6914.98 574.511 4
 3 8 -6 92841 2137.87 4
 3 8 -5 59821.5 1598.17 4
 3 8 -4 7505.59 508.608 4
 3 8 -3 12306.1 612.767 4
 3 8 -2 13197 600.258 4
 3 8 -2 15687.2 456.529 2
 3 8 -1 77300.9 1196.28 2
 3 8 -1 74715.8 1480.01 4
 3 8 0 6338.49 374.369 4
 3 8 1 42919.8 975.925 4
 3 8 2 94155.3 1511.61 4
 3 8 2 94891.8 1552.02 3
 3 8 3 1203.65 144.802 4
 3 8 3 1468.19 185.012 3
 3 8 4 53038.4 986.407 4
 3 8 4 53484.4 1137.38 3
 3 8 5 1436.85 144.933 4
 3 8 5 1665.55 194.259 3
 3 8 6 131780 1741.67 4
 3 8 6 135627 2113.17 3
 3 8 7 31356 700.844 4
 3 8 7 34336.3 962.109 3
 3 8 8 8731.83 483.507 3
 3 8 9 7636 470.956 3
 3 8 10 1833.65 244.148 3
 3 8 11 55031.7 1407.64 3
 3 8 12 425.877 141.73 3
 3 8 13 36956 1224.44 3
 3 8 14 22529.2 971.046 3
 3 8 15 364.701 188.891 3
 3 8 16 5842.43 525.9 3
 3 8 17 174.194 138.26 3
 3 8 18 12045.7 810.873 3
 3 9 -9 7630.36 675.553 4
 3 9 -8 4901.36 532.841 4
 3 9 -7 8722.16 660.602 4
 3 9 -6 7927.43 617.937 4
 3 9 -5 104874 2254.27 4
 3 9 -4 65051.7 1651.31 4
 3 9 -3 13133.8 669.293 4
 3 9 -2 19093.3 770.385 4
 3 9 -2 20559.2 549.18 2
 3 9 -1 25808.4 660.505 2
 3 9 -1 25321.1 838.582 4
 3 9 0 63978.1 1164.34 2
 3 9 0 64309.7 1344.22 4
 3 9 1 526.095 110.074 4
 3 9 2 107890 1709.51 4
 3 9 3 92681.9 1501.88 4
 3 9 3 94319.6 1652.29 3
 3 9 4 865.77 124.918 4
 3 9 4 799.579 148.448 3
 3 9 5 51404.1 975.765 4
 3 9 5 52359.3 1213.5 3
 3 9 6 5020.96 268.474 4
 3 9 6 4967.98 367.183 3
 3 9 7 92053.4 1372.38 4
 3 9 7 91057 1765.05 3
 3 9 8 42325.4 852.503 4
 3 9 8 43886.1 1183.56 3
 3 9 9 7243.98 474.866 3
 3 9 10 2684.46 324.935 3
 3 9 11 10265.2 608.682 3
 3 9 12 38202 1239.21 3
 3 9 13 540.039 172.854 3
 3 9 14 17456.7 879.475 3
 3 9 15 15918.5 858.074 3
 3 9 16 2655.76 374.131 3
 3 9 17 7559.35 637.822 3
 3 10 -8 7860.15 682.35 4
 3 10 -7 11550.7 784.546 4
 3 10 -6 6370.81 569.168 4
 3 10 -5 8246.72 613.351 4
 3 10 -4 71987.3 1811.03 4
 3 10 -3 29818.9 1066.82 4
 3 10 -2 32427.8 1062.14 4
 3 10 -1 23849.3 858.473 4
 3 10 -1 28779.7 769.421 2
 3 10 0 28549.3 764.545 2
 3 10 0 26458.8 863.754 4
 3 10 1 47647.1 1056.85 2
 3 10 1 46928.7 1121.51 4
 3 10 2 1498.79 183.15 4
 3 10 3 114501 1784.27 4
 3 10 3 117116 1978.83 3
 3 10 4 79164.9 1358.05 4
 3 10 4 79451.8 1584.18 3
 3 10 5 19104.8 574.074 4
 3 10 5 19907 749.534 3
 3 10 6 34143 774.727 4
 3 10 6 35558.4 1037.06 3
 3 10 7 25245.2 640.501 4
 3 10 7 27141.7 929.954 3
 3 10 8 105059 1522.37 4
 3 10 8 106693 2041.65 3
 3 10 9 21689.7 867.094 3
 3 10 10 17005.5 794.657 3
 3 10 11 3675.59 382.299 3
 3 10 12 11256 674.727 3
 3 10 13 14279.8 791.035 3
 3 10 14 343.446 167.737 3
 3 10 15 33693.4 1294.83 3
 3 10 16 7186.92 624.213 3
 3 10 17 5878.79 575.807 3
 3 11 -7 5520.55 583.867 4
 3 11 -6 18424 999.033 4
 3 11 -5 7051.23 587.805 4
 3 11 -4 12863.3 761.788 4
 3 11 -3 71142.8 1788.63 4
 3 11 -2 2086.07 290.699 4
 3 11 -1 54162.6 1399.49 4
 3 11 -1 56035.9 1144.58 2
 3 11 0 8958.44 441.805 2
 3 11 0 7755.77 482.794 4
 3 11 1 17376.4 641.109 2
 3 11 1 16735.4 675.659 4
 3 11 2 34112.9 952.369 2
 3 11 2 32209.2 913.77 4
 3 11 3 20176.9 671.216 4
 3 11 4 113707 1773.94 4
 3 11 4 119037 2093.94 3
 3 11 5 9546.85 421.1 4
 3 11 5 9818.85 556.585 3
 3 11 6 39489.9 859.418 4
 3 11 6 39936.8 1175.67 3
 3 11 7 21242 850.232 3
 3 11 8 26344.9 985.995 3
 3 11 9 77441.9 1787.9 3
 3 11 10 337.046 157.35 3
 3 11 11 24255.8 1000.71 3
 3 11 12 9507.88 640.012 3
 3 11 13 12859.8 768.953 3
 3 11 14 15988.3 889.834 3
 3 11 15 2509.05 370.424 3
 3 11 16 22802 1117.08 3
 3 11 17 521.588 213.421 2
 3 12 -6 981.359 265.728 4
 3 12 -5 17927.3 965.617 4
 3 12 -4 3005.55 393.343 4
 3 12 -3 33420.2 1229.9 4
 3 12 -2 47844.5 1422.92 4
 3 12 -1 127.592 96.9525 4
 3 12 0 61227.4 1490.73 4
 3 12 0 67871.4 1386.71 2
 3 12 1 5838.69 390.314 2
 3 12 1 4618.62 369.27 4
 3 12 2 53417.9 1257.51 4
 3 12 2 56658.2 1307.86 2
 3 12 3 27031.8 896.364 2
 3 12 3 24179.1 786.695 4
 3 12 4 41737 996.603 4
 3 12 5 37024.2 1145.32 3
 3 12 6 1140.28 213.481 3
 3 12 7 30590.7 1080.84 3
 3 12 8 10721.4 652.608 3
 3 12 9 36429.4 1216.4 3
 3 12 10 72214.3 1819.71 3
 3 12 11 496.403 192.516 3
 3 12 12 22450.3 1027.3 3
 3 12 13 677.148 179.956 3
 3 12 14 8056.9 640.519 3
 3 12 15 4631.47 510.314 3
 3 13 -5 525.029 201.714 4
 3 13 -4 14236.1 862.89 4
 3 13 -3 -34.1651 140.494 4
 3 13 -2 38973.4 1334.75 4
 3 13 -1 29350.5 1098.42 4
 3 13 0 957.486 188.533 4
 3 13 1 53070.8 1371.17 4
 3 13 1 61306.4 1416.34 2
 3 13 2 96.8755 99.7741 4
 3 13 2 163.726 124.678 2
 3 13 3 47691.8 1265.89 2
 3 13 3 44658 1124.4 4
 3 13 4 4173.58 380.368 2
 3 13 5 31276.5 1059.21 2
 3 13 6 21200.9 908.953 3
 3 13 7 306.405 173.521 3
 3 13 8 17565.9 869.171 3
 3 13 9 448.628 194.95 3
 3 13 10 43200.5 1439.82 3
 3 13 11 27344.3 1140.88 3
 3 13 12 2578.04 376.891 3
 3 13 13 27866.7 1220.82 3
 3 13 14 914.74 261.857 3
 3 13 15 2738.09 408.291 2
 3 14 -4 889.582 238.889 4
 3 14 -3 17500 946.557 4
 3 14 -2 1298.54 265.404 4
 3 14 -1 31904.3 1191.93 4
 3 14 0 8639.26 590.749 4
 3 14 1 14666.5 675.81 2
 3 14 2 50488 1395.28 2
 3 14 3 710.295 162.245 2
 3 14 4 11507 650.939 2
 3 14 5 647.123 193.667 2
 3 14 6 39987.8 1298.27 2
 3 14 7 35365.3 1231.49 2
 3 14 7 35590.7 1261.64 3
 3 14 8 3184.25 385.913 2
 3 14 8 2756.61 363.545 3
 3 14 9 20235 977.938 3
 3 14 10 201.464 135.757 3
 3 14 11 23113.5 1099.52 3
 3 14 12 5115.24 538.706 3
 3 14 13 4584 515.159 2
 3 14 13 4940.4 532.675 3
 3 14 14 20292.8 1096.37 2
 3 15 -3 3331.89 430.042 4
 3 15 2 25612.7 968.117 2
 3 15 3 37548.7 1238.02 2
 3 15 4 785.168 186.418 2
 3 15 5 6568.43 518.631 2
 3 15 6 2449.67 334.696 2
 3 15 7 42745.6 1406.1 2
 3 15 8 16295.5 877.145 2
 3 15 8 15622 894.69 3
 3 15 9 5404.97 528.906 2
 3 15 9 5845.55 546.057 3
 3 15 10 20482.8 1026.69 2
 3 15 10 19557.1 1034.31 3
 3 15 11 235.754 175.118 2
 3 15 11 268.674 176.085 3
 3 15 12 20815.9 1095.31 2
 3 15 12 21477.8 1119.94 3
 3 16 3 31257.2 1151.49 2
 3 16 4 24225.3 1038.49 2
 3 16 5 202.685 129.902 2
 3 16 6 8087.93 614.3 2
 3 16 7 3668.12 438.52 2
 3 16 8 51280.4 1654.42 2
 3 16 9 14019.5 859.689 2
 3 16 10 7641.54 645.985 2
 3 16 10 7039.05 640.8 3
 3 17 4 36833.9 1320.71 2
 3 17 5 17026.2 916.554 2
 3 17 6 2199.85 358.255 2
 3 17 7 10408.6 751.089 2
 3 17 8 5893.4 578.132 2
 4 -15 1 6496.99 600.858 5
 4 -15 2 36184.3 1431.55 5
 4 -15 3 8017.46 661.564 5
 4 -14 1 3342.56 415.396 5
 4 -14 2 14756.7 855.669 5
 4 -14 3 35369.5 1361.28 5
 4 -14 4 4568.06 479.392 5
 4 -14 5 7515.21 626.731 5
 4 -14 6 2530.9 373.381 5
 4 -13 2 1147.23 248.557 5
 4 -13 3 22690.3 1041.88 5
 4 -13 4 44824.8 1463.11 5
 4 -13 5 2229.6 334.237 5
 4 -13 6 6735.5 576.382 5
 4 -12 2 7667.5 560.281 5
 4 -12 3 1042.14 232.397 5
 4 -12 4 37470.7 1284.08 5
 4 -12 5 38874 1316.77 5
 4 -12 6 18.0302 118.543 5
 4 -12 7 9078.8 646.75 5
 4 -12 8 -59.5282 147.143 3
 4 -12 9 8910.28 676.185 3
 4 -11 3 23650.6 944.536 5
 4 -11 4 65.9785 110.333 5
 4 -11 5 55446.2 1512.63 5
 4 -11 6 31632.2 1134.14 5
 4 -11 7 1295.31 261.363 5
 4 -11 8 6322.1 531.677 3
 4 -11 9 275.382 123.296 3
 4 -11 10 9614.43 704.139 3
 4 -10 3 422.27 136.038 5
 4 -10 4 56045.5 1444.12 5
 4 -10 5 -13.532 125.856 5
 4 -10 6 58336.4 1507.49 5
 4 -10 7 11166 645.962 5
 4 -10 8 5594.97 485.961 3
 4 -10 9 10690.3 688.097 3
 4 -10 10 277.295 156.732 3
 4 -10 11 12900.2 799.758 3
 4 -9 3 36102.6 1057.49 5
 4 -9 4 27225.7 931.981 5
 4 -9 5 59959.5 1422.77 5
 4 -9 6 132.314 96.6809 5
 4 -9 7 43273 1248.84 5
 4 -9 8 8246.92 562.07 3
 4 -9 9 15548.9 815.566 3
 4 -9 10 14039.9 782.952 3
 4 -9 11 841.179 212.246 3
 4 -9 12 8346.76 638.101 3
 4 -8 4 10237.2 524.57 5
 4 -8 5 54004.2 1282.47 5
 4 -8 6 13904.4 629.648 5
 4 -8 7 15369.8 685.21 5
 4 -8 8 63814.3 1593.81 3
 4 -8 9 1351.88 237.563 3
 4 -8 10 28712.7 1106.14 3
 4 -8 11 9692.36 646.432 3
 4 -8 12 1630.5 286.779 3
 4 -7 -2 2840.74 94.8146 4
 4 -7 -2 2953.3 96.7383 4
 4 -7 -1 108710 1268.46 4
 4 -7 4 129730 2028.03 5
 4 -7 5 5839.78 373.476 5
 4 -7 6 44818.8 1108.3 5
 4 -7 7 10363 525.779 5
 4 -7 8 42057.7 1231.86 3
 4 -7 9 51679.4 1411.81 3
 4 -7 10 416.85 160.159 3
 4 -7 11 23040.8 974.313 3
 4 -7 12 6165.72 520.263 3
 4 -7 13 2219.96 318.937 3
 4 -6 -5 79222.6 938.15 4
 4 -6 -4 12200.7 222.853 4
 4 -6 -2 55949.9 660.771 4
 4 -6 -1 18525.3 377.093 4
 4 -6 4 86150 1482.74 5
 4 -6 5 119197 1848.43 5
 4 -6 6 2155.74 213.626 5
 4 -6 7 38083.2 1080.6 3
 4 -6 8 3538.41 343.567 3
 4 -6 9 27304.6 974.555 3
 4 -6 10 34437 1136.66 3
 4 -6 11 566.967 170.718 3
 4 -6 12 17516.7 847.77 3
 4 -6 13 5233.12 479.773 3
 4 -5 -8 8049.79 367.668 4
 4 -5 -7 56354 1002.38 4
 4 -5 -6 63793.2 1008.07 4
 4 -5 -5 2511.21 150.97 4
 4 -5 -4 55004 753.955 4
 4 -5 -3 341.885 46.2544 4
 4 -5 -2 101253 1130.92 4
 4 -5 -2 101670 1117.4 4
 4 -5 -1 163016 1731 4
 4 -5 4 1560.63 165.004 5
 4 -5 5 101400 1577.07 5
 4 -5 6 120150 1792.23 5
 4 -5 7 462.535 126.92 3
 4 -5 8 40835.5 1126.74 3
 4 -5 9 1796.12 251.672 3
 4 -5 10 19927 826.111 3
 4 -5 11 17591.8 800.373 3
 4 -5 12 1403.13 249.558 3
 4 -5 13 30277.1 1135.26 3
 4 -5 14 6002.63 521.256 3
 4 -4 -9 446.041 125.983 4
 4 -4 -8 16152.8 579.362 4
 4 -4 -7 622.673 114.711 4
 4 -4 -6 61192.9 1066.93 4
 4 -4 -5 130482 1642.44 4
 4 -4 -4 1459.96 119.579 4
 4 -4 -3 35939.3 588.503 4
 4 -4 -2 36297.6 563.911 4
 4 -4 -1 241619 2422.94 4
 4 -4 0 66949 925.248 4
 4 -4 4 40331.9 802.292 5
 4 -4 5 1286.55 141.314 5
 4 -4 6 99763.6 1496.26 5
 4 -4 6 98870.4 1694.03 3
 4 -4 7 70022.2 1436.79 3
 4 -4 8 2460.15 269.423 3
 4 -4 9 69323.7 1525.32 3
 4 -4 10 4179.21 366.431 3
 4 -4 11 19567.6 815.637 3
 4 -4 12 15032.4 746.734 3
 4 -4 13 8414.52 581.177 3
 4 -4 14 37199.6 1290.32 3
 4 -3 -11 185.005 120.067 4
 4 -3 -10 70607.3 1522.03 4
 4 -3 -9 66552.8 1406.31 4
 4 -3 -8 6261.47 381.209 4
 4 -3 -7 2816.8 237.776 4
 4 -3 -6 2918.4 224.691 4
 4 -3 -5 136510 1771.72 4
 4 -3 -4 178125 2061.6 4
 4 -3 -3 39657.6 680.715 4
 4 -3 -2 172740 1882.51 4
 4 -3 -1 24967.4 467.045 4
 4 -3 4 6238.43 260.133 5
 4 -3 5 42625.5 777.096 5
 4 -3 5 41385.2 930.275 3
 4 -3 6 1444.73 179.654 3
 4 -3 7 119712 1944.95 3
 4 -3 8 71268.4 1453.39 3
 4 -3 9 7543.38 455.841 3
 4 -3 10 65446.1 1480.84 3
 4 -3 11 2633.81 299.191 3
 4 -3 12 39739.6 1215.61 3
 4 -3 13 5324.17 453.338 3
 4 -3 14 20551.1 942.61 3
 4 -3 15 25829.3 1073.47 3
 4 -2 -12 7517.54 539.737 4
 4 -2 -11 27699.5 991.963 4
 4 -2 -10 565.815 140.198 4
 4 -2 -9 112165 2005.64 4
 4 -2 -8 49964.5 1183.48 4
 4 -2 -7 1394.62 187.228 4
 4 -2 -6 28397.3 749.034 4
 4 -2 -5 3703.37 243.626 4
 4 -2 -4 169737 2074.03 4
 4 -2 -3 47744.1 823.556 4
 4 -2 -2 70530.9 1004.56 4
 4 -2 -1 203207 2182.8 4
 4 -2 2 11267.9 322.036 1
 4 -2 4 353346 3483.78 5
 4 -2 4 360313 3851.46 3
 4 -2 5 5482.07 220.604 5
 4 -2 5 6105.68 329.454 3
 4 -2 6 30917.8 812.47 3
 4 -2 7 269.286 93.4214 3
 4 -2 8 183558 2593.47 3
 4 -2 9 37846.5 1018.88 3
 4 -2 10 25949.8 878.18 3
 4 -2 11 53400.1 1346.09 3
 4 -2 12 70.6866 98.5233 3
 4 -2 13 24998 988.457 3
 4 -2 14 118.96 97.9992 3
 4 -2 15 27763.2 1106.12 3
 4 -1 -13 9837.84 661.818 4
 4 -1 -12 6237.96 503.646 4
 4 -1 -11 15729.2 774.629 4
 4 -1 -10 39171.4 1193.19 4
 4 -1 -9 6816.09 463.906 4
 4 -1 -8 109626 1960.63 4
 4 -1 -7 92933.2 1668.65 4
 4 -1 -6 38542.8 925.652 4
 4 -1 -5 42289.7 912.916 4
 4 -1 -4 29689.6 511.998 3
 4 -1 -4 29638.6 705.081 4
 4 -1 -3 356711 3414.05 3
 4 -1 -3 354602 3731.44 4
 4 -1 -2 12084.1 375.481 4
 4 -1 -2 12521.3 285.837 3
 4 -1 -1 163652 1878.09 4
 4 -1 0 233844 2471.25 4
 4 -1 2 24013.5 431.765 1
 4 -1 3 126987 1355.64 1
 4 -1 3 127767 1645.59 3
 4 -1 4 167043 1698.13 5
 4 -1 4 172015 2097.43 3
 4 -1 5 118256 1689.45 3
 4 -1 6 708.216 138.136 3
 4 -1 7 114375 1775.31 3
 4 -1 8 6682.97 386.784 3
 4 -1 9 108210 1850.46 3
 4 -1 10 5885.87 400.991 3
 4 -1 11 35224.6 1051.51 3
 4 -1 12 25237.3 937.266 3
 4 -1 13 4979.3 427.205 3
 4 -1 14 22481.4 937.48 3
 4 -1 15 603.338 180.613 3
 4 -1 16 17066 871.19 3
 4 0 -14 15391.3 904.476 4
 4 0 -13 10.4031 123.313 4
 4 0 -12 23655.3 1025.02 4
 4 0 -11 7993.91 567.662 4
 4 0 -10 12190.7 684.413 4
 4 0 -9 9269.32 563.799 4
 4 0 -8 32279.9 1022.51 4
 4 0 -7 107433 1885.11 4
 4 0 -6 34539.8 922.716 4
 4 0 -5 59183.7 1170.49 4
 4 0 -5 60283.4 785.17 3
 4 0 -4 22204.4 368.371 3
 4 0 -4 22667.9 641.047 4
 4 0 -3 106166 1101.29 3
 4 0 -3 108028 1539.54 4
 4 0 -2 277757 2589.9 3
 4 0 -2 283535 3041.91 4
 4 0 -1 8260.67 307.239 4
 4 0 0 237779 2557.85 4
 4 0 1 83395.1 1039.04 3
 4 0 2 3599.65 178.562 3
 4 0 3 54277.1 883.238 3
 4 0 4 11518.7 386.273 3
 4 0 5 90735.6 1370.18 3
 4 0 6 30423.3 749.331 3
 4 0 7 92502.9 1526.59 3
 4 0 8 52769.8 1133.22 3
 4 0 9 6867.79 406.471 3
 4 0 10 82539 1645.96 3
 4 0 11 3171.94 311.95 3
 4 0 12 32158.8 1034.71 3
 4 0 13 14571.3 711.05 3
 4 0 14 12911.6 700.448 3
 4 0 15 9681.34 629.516 3
 4 0 16 508.913 171.88 3
 4 1 -13 8679.54 664.176 4
 4 1 -12 4354.52 457.34 4
 4 1 -11 49441.2 1507.39 4
 4 1 -10 4620.41 436.335 4
 4 1 -9 10589.1 622.18 4
 4 1 -8 9474.47 564.034 4
 4 1 -7 30060.7 950.605 4
 4 1 -6 130637 2091.39 4
 4 1 -5 1531.34 190.327 4
 4 1 -4 84008.1 1032.96 2
 4 1 -4 84487.9 1435.27 4
 4 1 -3 3921.64 260.645 4
 4 1 -3 4010.22 170.779 2
 4 1 -2 132674 1501.31 2
 4 1 -2 125474 1747.36 4
 4 1 -1 181313 2163.65 4
 4 1 0 23039 345.438 3
 4 1 0 23353.4 551.497 4
 4 1 1 209664 2111.52 3
 4 1 1 211767 2347.32 4
 4 1 2 42788.1 671.272 3
 4 1 3 8668.53 298.119 3
 4 1 4 19534.8 501.643 3
 4 1 5 3655.37 225.694 3
 4 1 6 196391 2425.83 3
 4 1 6 194243 1919.96 1
 4 1 7 10599 449.534 3
 4 1 8 31559.8 856.857 3
 4 1 9 28823.4 849.397 3
 4 1 10 10632.5 521.98 3
 4 1 11 39927.6 1104.79 3
 4 1 12 -59.6427 97.0329 3
 4 1 13 49334 1335.26 3
 4 1 14 15126.6 745.823 3
 4 1 15 6060.23 494.776 3
 4 1 16 6231.2 526.943 3
 4 2 -13 6487.23 606.442 4
 4 2 -12 6772.2 587.535 4
 4 2 -11 12943.5 784.122 4
 4 2 -10 33833.5 1217.99 4
 4 2 -9 5510.2 470.336 4
 4 2 -8 29473.5 1032.42 4
 4 2 -7 9044.96 532.29 4
 4 2 -6 28367.1 903.487 4
 4 2 -5 144532 2186.79 4
 4 2 -4 4171.98 137.986 2
 4 2 -4 4291.6 301.598 4
 4 2 -3 61030.6 1179.39 4
 4 2 -3 62228.2 787.453 2
 4 2 -2 14986.3 336.814 2
 4 2 -2 14304 497.54 4
 4 2 -1 97392.4 1186.21 2
 4 2 -1 95133.5 1418.54 4
 4 2 0 79105 849.629 3
 4 2 0 79354.5 1203.32 4
 4 2 1 18526.6 348.899 3
 4 2 1 18986.5 492.067 4
 4 2 2 80655.5 997.177 5
 4 2 2 79120.7 1022.66 3
 4 2 2 79526.8 1160.22 4
 4 2 3 13005.4 363.369 3
 4 2 4 43818.1 793.5 3
 4 2 5 62701.8 1056.95 3
 4 2 6 66540.1 1159.53 3
 4 2 7 158523 2170.87 3
 4 2 7 160733 1745.17 1
 4 2 8 4694.59 318.027 3
 4 2 8 5048.38 222.943 1
 4 2 9 45923 1088.24 3
 4 2 9 46411.4 837.576 1
 4 2 10 10389.7 517.815 3
 4 2 10 11018 410.778 1
 4 2 11 7819.64 465.432 3
 4 2 11 8972.71 402.782 1
 4 2 12 26557.8 923.132 3
 4 2 12 28759.6 793.249 1
 4 2 13 6884.71 484.857 3
 4 2 13 7434.85 416.396 1
 4 2 14 63695.7 1594.52 3
 4 2 15 8217.31 580.32 3
 4 2 16 5677.91 503.649 3
 4 2 17 1940.05 308.081 3
 4 3 -12 21102.5 1071.31 4
 4 3 -11 7798.58 629.451 4
 4 3 -10 19882.9 955.864 4
 4 3 -9 36329.1 1255.18 4
 4 3 -8 1100.32 216.644 4
 4 3 -7 35164.7 1117.22 4
 4 3 -6 4481.18 373.511 4
 4 3 -5 41001.1 1078.83 4
 4 3 -4 88409.1 1604.18 4
 4 3 -3 5823.05 165.427 2
 4 3 -3 5592.06 340.092 4
 4 3 -2 231097 2319.32 2
 4 3 -2 229945 2840.77 4
 4 3 -1 1842.55 185.907 4
 4 3 -1 1989.6 124.456 2
 4 3 0 47228.5 908.789 4
 4 3 0 46738.2 612.088 3
 4 3 1 12548.8 296.798 3
 4 3 1 12436.9 413.495 4
 4 3 2 25238.5 492.742 3
 4 3 2 25208.9 589.525 4
 4 3 3 125111 1549.55 3
 4 3 4 74774 1127.01 3
 4 3 5 52245.7 942.97 3
 4 3 6 36021.6 813.114 3
 4 3 7 61723.1 1164.7 3
 4 3 8 57454.6 908.974 1
 4 3 8 56332.8 1160.65 3
 4 3 9 2817.83 258 3
 4 3 9 3193.58 200.597 1
 4 3 10 34156.2 956.695 3
 4 3 10 35735.5 777.607 1
 4 3 11 8170.12 477.71 3
 4 3 11 9778.35 416.055 1
 4 3 12 28722.1 962.808 3
 4 3 12 30799.7 818.294 1
 4 3 13 24910.7 937.719 3
 4 3 13 26510.6 796.166 1
 4 3 14 24997 972.148 3
 4 3 15 56957.4 1576.09 3
 4 3 16 1500.32 269.998 3
 4 3 17 2744.04 364.382 3
 4 4 -11 28081.3 1235.41 4
 4 4 -10 2986.8 391.746 4
 4 4 -9 26804.7 1105.36 4
 4 4 -8 56973.7 1576.07 4
 4 4 -7 189.876 120.259 4
 4 4 -6 80467.4 1722.93 4
 4 4 -5 7554.44 467.923 4
 4 4 -4 133825 2155.5 4
 4 4 -3 51392.7 630.606 2
 4 4 -3 56205.2 1197.56 4
 4 4 -2 4228.5 300.129 4
 4 4 -2 4395.84 170.479 2
 4 4 -1 118535 1770.88 4
 4 4 0 351.521 96.1948 4
 4 4 0 512.868 68.0673 3
 4 4 1 56207.3 1014.12 4
 4 4 1 55735.3 812.402 3
 4 4 2 16061.3 408.881 3
 4 4 2 16090.9 482.674 4
 4 4 3 293666 3104.5 3
 4 4 3 292357 3191.44 4
 4 4 4 364977 3818.25 3
 4 4 5 31611.7 729.831 3
 4 4 6 87050.4 1412.38 3
 4 4 7 6812.21 366.638 3
 4 4 8 72560.2 1370.6 3
 4 4 9 17935 664.667 3
 4 4 9 18837 533.511 1
 4 4 10 995.196 132.177 1
 4 4 10 503.885 129.848 3
 4 4 11 58120.2 1370.62 3
 4 4 11 59709.6 1145.65 1
 4 4 12 415.597 140.842 3
 4 4 12 450.402 119.697 1
 4 4 13 37669.2 1174.81 3
 4 4 13 38118.5 984.152 1
 4 4 14 466.368 155.349 3
 4 4 15 24237.2 1003.98 3
 4 4 16 27323.4 1099.41 3
 4 4 17 345.975 110.695 3
 4 4 18 8280.3 648.396 3
 4 5 -11 1749.99 311.619 4
 4 5 -10 19722.2 1012.43 4
 4 5 -9 859.363 225.824 4
 4 5 -8 74411.9 1899.18 4
 4 5 -7 67891.5 1722.98 4
 4 5 -6 15939.2 748.365 4
 4 5 -5 75401.9 1633.75 4
 4 5 -4 4533.48 358.446 4
 4 5 -3 182769 1824.71 2
 4 5 -3 195317 2692.82 4
 4 5 -2 58022 1239.09 4
 4 5 -1 9629.28 447.591 4
 4 5 0 96994.8 1545.56 4
 4 5 1 34051.5 791.352 4
 4 5 1 32016.8 625.045 3
 4 5 2 18734.9 552.164 4
 4 5 2 19520.7 493.579 3
 4 5 3 38521.6 762.423 3
 4 5 3 38354.4 799.286 4
 4 5 4 404695 4213.14 3
 4 5 4 396982 4163.04 4
 4 5 5 480168 4983.28 3
 4 5 6 646.439 120.933 3
 4 5 7 61651.5 1206.71 3
 4 5 8 645.361 130.162 3
 4 5 9 42334.2 1064.68 3
 4 5 10 29702.5 909.81 3
 4 5 11 34463 1031.69 3
 4 5 11 35453.9 882.462 1
 4 5 12 45011.8 1234.21 3
 4 5 12 45514.6 1057.89 1
 4 5 13 936.06 152.749 1
 4 5 13 704.311 175.605 3
 4 5 14 6417.49 415.769 1
 4 5 14 5225.81 448.129 3
 4 5 15 223.861 140.667 3
 4 5 16 23184.8 1017.99 3
 4 5 17 20838.3 1003.69 3
 4 5 18 -32.4244 164.329 3
 4 6 -10 648.422 223.32 4
 4 6 -9 12122 786.742 4
 4 6 -8 10112.9 689.247 4
 4 6 -7 157310 2897.27 4
 4 6 -6 10671.2 638.606 4
 4 6 -5 47465 1307.5 4
 4 6 -4 43536.2 1181.13 4
 4 6 -3 4196.38 149.892 2
 4 6 -3 4018.93 337.739 4
 4 6 -2 184225 2629.79 4
 4 6 -1 14669.1 577.879 4
 4 6 0 144328 2089.56 4
 4 6 1 65547.9 1211.6 4
 4 6 1 63463.6 1035.21 3
 4 6 2 7160.71 349.604 4
 4 6 2 7198.26 316.77 3
 4 6 3 5255.7 289.118 4
 4 6 3 5644.84 294.099 3
 4 6 4 37301.1 801.478 4
 4 6 4 37954.3 832.684 3
 4 6 5 293398 3386.32 3
 4 6 5 294161 3258.85 4
 4 6 6 75376.7 1363.31 3
 4 6 7 15545.9 593.226 3
 4 6 8 82341.7 1549.47 3
 4 6 9 3200.76 288.145 3
 4 6 10 60459.6 1377.31 3
 4 6 11 1288.19 213.764 3
 4 6 12 45298.7 1254.96 3
 4 6 13 38535.3 1207.47 3
 4 6 14 762.898 204.43 3
 4 6 14 1162.94 206.592 1
 4 6 15 2812.8 350.415 3
 4 6 16 399.783 161.719 3
 4 6 17 22853.5 1063.16 3
 4 6 18 11584.5 778.87 3
 4 7 -10 13116.1 882.095 4
 4 7 -9 4187.24 486.898 4
 4 7 -8 8201.77 643.056 4
 4 7 -7 66658.9 2201.9 4
 4 7 -6 121495 2436.4 4
 4 7 -5 1725.43 272.282 4
 4 7 -4 13155.3 671.613 4
 4 7 -3 12114 610.805 4
 4 7 -2 30559.4 933.415 4
 4 7 -1 82715.8 1578.62 4
 4 7 0 6313.78 376.116 4
 4 7 1 159928 2237.43 4
 4 7 1 158127 2041.48 3
 4 7 2 122822 1813.25 4
 4 7 2 118859 1710.84 3
 4 7 3 6705.25 344.074 4
 4 7 3 6463.07 333.052 3
 4 7 4 29116.2 721.241 4
 4 7 4 28998.9 755.036 3
 4 7 5 84759.9 1349.31 4
 4 7 5 84855.3 1482.6 3
 4 7 6 245541 2860.43 4
 4 7 6 242999 3086.46 3
 4 7 7 18266.2 658.286 3
 4 7 8 30660.3 902.795 3
 4 7 9 36676.9 1028.6 3
 4 7 10 2192.49 261.959 3
 4 7 11 32221.7 1030.12 3
 4 7 12 1273.73 231.997 3
 4 7 13 46333.3 1360.42 3
 4 7 14 28466.7 1085.45 3
 4 7 15 627.705 200.35 3
 4 7 16 4033.34 441.495 3
 4 7 17 234.148 169.161 3
 4 7 18 15051.5 898.107 3
 4 8 -9 7630.28 670.247 4
 4 8 -8 8015.76 652.662 4
 4 8 -7 1786.39 309.385 4
 4 8 -6 41627 1395.01 4
 4 8 -5 89054 2018.72 4
 4 8 -4 4920.29 434.942 4
 4 8 -3 30492.2 1008.84 4
 4 8 -2 6195.81 261.544 2
 4 8 -2 5848.5 419.33 4
 4 8 -1 23226.4 809.942 4
 4 8 0 24216.6 786.045 4
 4 8 1 8673.57 440.861 4
 4 8 2 139016 2041.13 4
 4 8 2 138774 1985.66 3
 4 8 3 60436.6 1177.15 4
 4 8 3 62208.7 1198.25 3
 4 8 4 27882.9 729.366 4
 4 8 4 27113.3 778.992 3
 4 8 5 11827 455.849 4
 4 8 5 12157.5 527.007 3
 4 8 6 70015.4 1212.82 4
 4 8 6 69588.3 1393.16 3
 4 8 7 143293 1953.06 4
 4 8 7 141919 2224.9 3
 4 8 8 94.8804 96.5137 3
 4 8 9 64501.3 1447.52 3
 4 8 10 23865.4 871.98 3
 4 8 11 4936.35 407.354 3
 4 8 12 39798.3 1227.21 3
 4 8 13 458.889 159.022 3
 4 8 14 29323.4 1125.39 3
 4 8 15 7992.29 607.822 3
 4 8 16 1877.77 320.343 3
 4 8 17 6221.11 568.155 3
 4 8 18 2725.09 410.162 3
 4 9 -8 4077.34 512.248 4
 4 9 -7 5630.92 546.143 4
 4 9 -6 2008.87 318.311 4
 4 9 -5 24292.2 1049.68 4
 4 9 -4 57820.7 1572.89 4
 4 9 -3 68.7643 101 4
 4 9 -2 61588.1 1473.42 4
 4 9 -1 19592.9 557.827 2
 4 9 -1 18039.5 743.048 4
 4 9 0 44782 1143.65 4
 4 9 1 27366.5 845.688 4
 4 9 2 25307.3 773.79 4
 4 9 3 133678 2001.07 4
 4 9 3 136029 2064.92 3
 4 9 4 66337.1 1250.03 4
 4 9 4 66752 1360.91 3
 4 9 5 11293.6 455.454 4
 4 9 5 11744.8 550.012 3
 4 9 6 3987.82 269.188 4
 4 9 6 4199.08 335.66 3
 4 9 7 106065 1611.11 4
 4 9 7 106168 1923.18 3
 4 9 8 67035.2 1210.49 4
 4 9 8 68158.9 1521.56 3
 4 9 9 1020.14 200.075 3
 4 9 10 57315.5 1437.19 3
 4 9 11 5327.9 444.195 3
 4 9 12 25874.8 998.742 3
 4 9 13 25966.7 1029.14 3
 4 9 14 511.486 167.364 3
 4 9 15 25072.7 1082.01 3
 4 9 16 6355.2 564.591 3
 4 9 17 6009.25 564.732 3
 4 10 -7 684.817 249.538 4
 4 10 -6 11529.9 779.19 4
 4 10 -5 2505.9 366.72 4
 4 10 -4 18122.4 888.537 4
 4 10 -3 61836.4 1614.01 4
 4 10 -2 5705.55 452.247 4
 4 10 -1 102110 1559.93 2
 4 10 -1 99074.6 1956.09 4
 4 10 0 596.452 152.38 4
 4 10 0 691.248 130.425 2
 4 10 1 30819.9 936.91 4
 4 10 2 30618.1 899.737 4
 4 10 3 20427.4 693.006 4
 4 10 3 21253.7 737.322 3
 4 10 4 191561 2580.51 4
 4 10 4 198825 2817.2 3
 4 10 5 22417.8 681.22 4
 4 10 5 23911.2 828.939 3
 4 10 6 42461.2 951.454 4
 4 10 6 43828.1 1174.55 3
 4 10 7 504.985 160.106 3
 4 10 7 506.037 114.203 4
 4 10 8 40262.6 903.589 4
 4 10 8 39177.3 1161.4 3
 4 10 9 36588 861.415 4
 4 10 9 38329.3 1163.06 3
 4 10 10 9960.52 599.616 3
 4 10 11 36374 1207.2 3
 4 10 12 4078.93 423.309 3
 4 10 13 14490.3 784.089 3
 4 10 14 7628.56 595.504 3
 4 10 15 6415.27 561.754 3
 4 10 16 27954.4 1226.04 3
 4 10 17 -191.377 192.549 3
 4 11 -6 -41.2041 153.267 4
 4 11 -5 22508.5 1088.79 4
 4 11 -4 243.437 154.513 4
 4 11 -3 36859.1 1274.05 4
 4 11 -2 40920.6 1290.54 4
 4 11 -1 15252.8 728.209 4
 4 11 0 66443 1286.84 2
 4 11 0 63588.8 1512.87 4
 4 11 1 250.537 110.731 4
 4 11 1 122.077 77.0409 2
 4 11 2 46806.7 1172.71 4
 4 11 3 18835.4 693.499 4
 4 11 4 53417.6 1179.12 4
 4 11 4 54777.2 1330.03 3
 4 11 5 104646 1726.22 4
 4 11 5 109031 2033.65 3
 4 11 6 235.256 77.9751 4
 4 11 6 442.986 140.966 3
 4 11 7 65506 1235 4
 4 11 7 67477.9 1584.33 3
 4 11 8 2868.93 241.53 4
 4 11 8 3500.52 364.249 3
 4 11 9 36037.3 1164.07 3
 4 11 10 23222.8 952.53 3
 4 11 11 14491.7 763.837 3
 4 11 12 33800.1 1235.45 3
 4 11 13 1701.12 295.718 3
 4 11 14 7148.38 587.622 3
 4 11 15 822.637 227.475 3
 4 11 16 14606.2 896.455 3
 4 12 -6 20579.3 1120.64 4
 4 12 -5 3258.81 437.551 4
 4 12 -4 22551.1 1077.45 4
 4 12 -3 1191.51 253.775 4
 4 12 -2 48898.7 1474.24 4
 4 12 -1 11384.5 661.658 4
 4 12 0 14501.8 712.724 4
 4 12 1 80731.6 1553.3 2
 4 12 1 77222.9 1685.77 4
 4 12 2 1223.07 198.141 4
 4 12 2 1261.31 197.155 2
 4 12 3 73756.6 1529.86 4
 4 12 4 997.874 183.472 4
 4 12 5 64380.9 1316.59 4
 4 12 5 66532.8 1568.84 3
 4 12 6 19614.2 660.379 4
 4 12 6 22036.1 887.58 3
 4 12 7 1807.88 276.403 3
 4 12 8 44651.8 1334.35 3
 4 12 9 104.513 115.155 3
 4 12 10 60884.4 1664.49 3
 4 12 11 22794 1001.38 3
 4 12 12 13245.8 788.391 3
 4 12 13 21591.7 1034.28 3
 4 12 14 158.24 118.755 3
 4 12 15 4290.54 492.085 3
 4 13 -5 8305.13 710.416 4
 4 13 -4 8441.76 690.898 4
 4 13 -3 18074.4 962.675 4
 4 13 -2 4674.43 460.302 4
 4 13 -1 34917.5 1226.53 4
 4 13 0 6616.99 500.803 4
 4 13 1 45580.4 1161.19 2
 4 13 1 41176.1 1232.19 4
 4 13 2 75184.7 1589.04 2
 4 13 2 71705.1 1606.81 4
 4 13 3 1021.28 178.434 4
 4 13 3 1463.75 240.322 2
 4 13 4 27066.3 870.778 4
 4 13 6 72814.2 1756.55 3
 4 13 7 29361.8 1097.06 3
 4 13 8 10395.3 658.29 3
 4 13 9 27066.7 1093.43 3
 4 13 10 130.721 156.05 3
 4 13 11 26788.9 1126.15 3
 4 13 12 1193.1 271.457 3
 4 13 13 14944.3 876.904 3
 4 13 14 26556.5 1213.42 3
 4 13 15 136.526 157.423 3
 4 14 -4 2489.28 397.805 4
 4 14 -3 9802.22 736.815 4
 4 14 -2 16574.5 913.985 4
 4 14 -1 4582.21 463.712 4
 4 14 0 23492 994.466 4
 4 14 1 -63.1818 112.666 4
 4 14 2 54929.3 1379.56 2
 4 14 2 49770.8 1357.42 4
 4 14 3 63001.6 1534.47 2
 4 14 4 437.537 165.569 2
 4 14 5 7146.89 520.378 2
 4 14 7 53816.5 1572.8 3
 4 14 8 8635.64 622.508 3
 4 14 9 20286.6 977.38 3
 4 14 10 33975.7 1292.22 3
 4 14 11 208.396 132.364 3
 4 14 12 9245.35 700.234 3
 4 14 13 68.9117 162.236 3
 4 14 14 23256.9 1163.54 3
 4 15 -3 333.958 206.333 4
 4 15 -2 16127.8 931.907 4
 4 15 -1 14291.2 848.317 4
 4 15 3 53635.9 1459.28 2
 4 15 4 25767.8 1005.15 2
 4 15 5 2968.02 358.55 2
 4 15 6 6679.98 530 2
 4 15 7 10521.9 685.791 2
 4 15 8 39691.3 1409.92 3
 4 15 9 3421.78 434.541 3
 4 15 10 22793.4 1095.21 3
 4 15 11 18472.6 1013.18 3
 4 15 12 2501.54 398.219 3
 4 16 4 56216.3 1583.58 2
 4 16 5 19299.6 924.251 2
 4 16 6 5437.03 512.559 2
 4 16 7 11962.2 759.555 2
 4 16 8 6601.95 584.545 2
 4 16 9 32092.9 1300.65 2
 4 16 9 33847.3 1370.26 3
 4 16 10 1134.6 274.628 2
 4 16 10 1173.95 282.588 3
 4 17 4 17678.3 902.101 2
 4 17 5 52772.3 1635.83 2
 4 17 6 6169.12 552.5 2
 4 17 7 12440.5 791.172 2
 4 17 8 7977.08 663.188 2
 5 -15 1 2050.76 350.827 5
 5 -15 2 15525.8 926.99 5
 5 -14 2 314.307 174.316 5
 5 -14 3 30873.4 1262.46 5
 5 -14 4 34076.2 1319.63 5
 5 -14 5 587.433 193.575 5
 5 -14 6 15063.1 872.207 5
 5 -13 2 4570.19 457.82 5
 5 -13 3 1208.33 259.841 5
 5 -13 4 41358.7 1417.98 5
 5 -13 5 25976.6 1108.16 5
 5 -13 6 533.979 202.26 5
 5 -13 7 14523.6 840.107 5
 5 -12 3 8624.61 599.199 5
 5 -12 4 2316.01 319.912 5
 5 -12 5 35991.4 1258.54 5
 5 -12 6 12383.4 729.154 5
 5 -12 7 1206.88 237.751 5
 5 -12 8 8128.8 645.577 3
 5 -11 3 690.857 175.827 5
 5 -11 4 13913.6 729.396 5
 5 -11 5 2563.44 322.864 5
 5 -11 6 32829.4 1147.37 5
 5 -11 7 3733.59 389.927 5
 5 -11 8 5694.04 512.076 3
 5 -11 9 10219.4 709.842 3
 5 -11 10 -69.157 128.192 3
 5 -10 4 3788.25 365.144 5
 5 -10 5 28236.4 1005.03 5
 5 -10 6 3226.82 340.849 5
 5 -10 7 29650.2 1048.22 5
 5 -10 8 102.842 102.529 3
 5 -10 9 19533.9 959.562 3
 5 -10 10 12595 776.22 3
 5 -10 11 835.354 219.712 3
 5 -9 4 18200.8 745.991 5
 5 -9 5 11123.1 591.729 5
 5 -9 6 12867.2 637.899 5
 5 -9 7 4770.5 395.666 5
 5 -9 8 24425.8 992.553 3
 5 -9 9 172.519 122.573 3
 5 -9 10 26821.9 1118.78 3
 5 -9 11 4873.1 493.213 3
 5 -9 12 1902.88 324.687 3
 5 -8 4 122365 2050.39 5
 5 -8 5 1987.56 241.297 5
 5 -8 6 10536.8 544.002 5
 5 -8 7 3127.36 301.51 5
 5 -8 8 15680.2 766.542 3
 5 -8 9 22190.5 965.698 3
 5 -8 10 4872.6 466.377 3
 5 -8 11 24207.1 1064.17 3
 5 -8 12 1631.63 308.783 3
 5 -8 13 1660.56 307.553 3
 5 -7 -2 3151.38 124.171 4
 5 -7 5 56091.9 1237.28 5
 5 -7 6 1516.45 194.782 5
 5 -7 7 31797.8 920.378 5
 5 -7 8 379.619 137.193 3
 5 -7 9 21557.7 914.329 3
 5 -7 10 12637.1 718.379 3
 5 -7 11 11483.4 706.151 3
 5 -7 12 26714.5 1111.7 3
 5 -7 13 2496.92 355.964 3
 5 -7 14 2228.14 354.35 3
 5 -6 -4 104617 1203.82 4
 5 -6 -3 1265.35 88.1674 4
 5 -6 -2 60208.4 800.496 4
 5 -6 -2 59894.4 787.339 4
 5 -6 -1 2609.66 142.485 4
 5 -6 5 75595.5 1384.74 5
 5 -6 6 19739.9 656.324 5
 5 -6 7 13976.6 559.217 5
 5 -6 7 13411.1 635.355 3
 5 -6 8 24523.1 922.36 3
 5 -6 9 27.4584 103.537 3
 5 -6 10 16306.3 786.272 3
 5 -6 11 2953.05 346.604 3
 5 -6 12 19230 902.213 3
 5 -6 13 29935.8 1186.1 3
 5 -6 14 1771.74 303.768 3
 5 -5 -6 56007 986.922 4
 5 -5 -5 49484.2 836.32 4
 5 -5 -4 9331.56 296.264 4
 5 -5 -3 24692.2 479.693 4
 5 -5 -2 6391.19 220.359 4
 5 -5 -1 86160.6 1104.75 4
 5 -5 5 7848.86 371.697 5
 5 -5 6 122613 1799.06 5
 5 -5 7 6293.21 346.266 5
 5 -5 7 6025.24 422.96 3
 5 -5 8 18174.6 748.48 3
 5 -5 9 29277.3 1012.37 3
 5 -5 10 82.2168 98.9057 3
 5 -5 11 7808.23 545.787 3
 5 -5 12 208.995 119.972 3
 5 -5 13 26451.4 1091.03 3
 5 -5 14 18652.8 936.815 3
 5 -5 15 111.793 114.868 3
 5 -4 -8 3615.96 282.624 4
 5 -4 -7 18997.6 617.834 4
 5 -4 -6 2940.26 221.846 4
 5 -4 -5 138355 1785.5 4
 5 -4 -4 73681.2 1096.77 4
 5 -4 -3 56476.9 877.807 4
 5 -4 -2 89319.9 1167.52 4
 5 -4 -1 17676.3 415.357 4
 5 -4 5 25235.9 625.804 5
 5 -4 6 29378.6 698.103 5
 5 -4 6 29480 870.636 3
 5 -4 7 100338 1836.97 3
 5 -4 8 2191.92 255.22 3
 5 -4 9 48904.8 1277.6 3
 5 -4 10 28600.9 986.121 3
 5 -4 11 3.90151 98.7811 3
 5 -4 12 9830.02 612.198 3
 5 -4 13 166.479 139.888 3
 5 -4 14 22970.5 1017.88 3
 5 -4 15 15256 873.609 3
 5 -3 -10 5216.67 401.748 4
 5 -3 -9 116327 2034.85 4
 5 -3 -8 38195.6 1008.31 4
 5 -3 -7 1107.9 165.019 4
 5 -3 -6 25609 704.742 4
 5 -3 -5 2773.75 212.387 4
 5 -3 -4 96431.4 1387.78 4
 5 -3 -3 4588.75 231.753 4
 5 -3 -2 210472 2329.89 4
 5 -3 -1 162084 1870.98 4
 5 -3 5 15293.7 426.891 5
 5 -3 5 14272.6 544.878 3
 5 -3 6 8877.7 323.64 5
 5 -3 6 8933.91 455.909 3
 5 -3 7 25388.7 803.713 3
 5 -3 8 106995 1900.32 3
 5 -3 9 251.929 105.437 3
 5 -3 10 65490.5 1518.77 3
 5 -3 11 26127.6 961.49 3
 5 -3 12 1635.45 261.405 3
 5 -3 13 11429.6 680.619 3
 5 -3 14 783.8 211.44 3
 5 -3 15 27710 1157.73 3
 5 -3 16 9364.81 678.609 3
 5 -2 -11 9398.34 590.937 4
 5 -2 -10 16609.2 756.215 4
 5 -2 -9 17123.1 730.829 4
 5 -2 -8 132709 2199.74 4
 5 -2 -7 16833.8 638.872 4
 5 -2 -6 25457.2 737.364 4
 5 -2 -5 25236 686.129 4
 5 -2 -4 15788.1 502.198 4
 5 -2 -3 41830.2 819.263 4
 5 -2 -2 2568.64 181.403 4
 5 -2 -1 148281 1798.22 4
 5 -2 0 175585 2028.19 4
 5 -2 4 443687 4680.35 3
 5 -2 5 29865.1 544.407 5
 5 -2 5 30244.8 789.202 3
 5 -2 6 45579.3 1035.55 3
 5 -2 7 54150.6 1188.35 3
 5 -2 8 18904.7 699.164 3
 5 -2 9 59968.7 1359.9 3
 5 -2 10 578.331 151.596 3
 5 -2 11 53843.6 1387.22 3
 5 -2 12 7326.94 513.869 3
 5 -2 13 7426.68 544.035 3
 5 -2 14 12295.5 729.246 3
 5 -2 15 2680.22 354.163 3
 5 -2 16 21798.7 1025.49 3
 5 -1 -12 25226 1051.39 4
 5 -1 -11 7736.84 559.32 4
 5 -1 -10 19827.9 861.843 4
 5 -1 -9 7899.75 513.604 4
 5 -1 -8 50283.4 1285.12 4
 5 -1 -7 103789 1842.06 4
 5 -1 -6 16552.4 618.313 4
 5 -1 -5 61013.4 1193.98 4
 5 -1 -4 24018.4 448.754 3
 5 -1 -4 23486.7 657.56 4
 5 -1 -3 12291.8 296.633 3
 5 -1 -3 11762.7 428.648 4
 5 -1 -2 71972.3 1147.07 4
 5 -1 -2 71261.5 916.603 3
 5 -1 -1 832.243 109.374 4
 5 -1 0 281380 3014.5 4
 5 -1 3 12425.1 296.699 1
 5 -1 3 12363.5 416.239 3
 5 -1 4 214986 2133.84 1
 5 -1 4 213409 2561.89 3
 5 -1 5 181168 1827.88 5
 5 -1 5 188126 2373.56 3
 5 -1 6 224.544 92.0878 3
 5 -1 7 125561 1943.76 3
 5 -1 8 42248.8 1048.7 3
 5 -1 9 24205.5 806.359 3
 5 -1 10 43682.6 1154.81 3
 5 -1 11 3669.63 348.283 3
 5 -1 12 43062.7 1261.65 3
 5 -1 13 4498.4 421.444 3
 5 -1 14 17054.2 833.962 3
 5 -1 15 5009.6 470.705 3
 5 -1 16 2691.18 366.22 3
 5 -1 17 15655.3 886.415 3
 5 0 -13 8748.02 665.11 4
 5 0 -12 12485.2 757.706 4
 5 0 -11 47571.5 1473.09 4
 5 0 -10 124.344 109.329 4
 5 0 -9 4218.15 394.702 4
 5 0 -8 244.199 136.693 4
 5 0 -7 62419.8 1404.63 4
 5 0 -6 115155 1916.43 4
 5 0 -5 544.642 119.591 4
 5 0 -4 63024.1 1207.63 4
 5 0 -3 7468.79 166.377 3
 5 0 -3 8472.53 380.916 4
 5 0 -2 22615.1 602.615 4
 5 0 -2 21038.1 330.864 3
 5 0 -1 106214 1499.35 4
 5 0 0 7928.77 323.376 4
 5 0 0 7849.18 233.38 3
 5 0 1 170124 1881.96 3
 5 0 1 171320 2050.02 4
 5 0 2 213.353 59.1122 3
 5 0 3 235101 2626.2 3
 5 0 4 1592.28 154.098 3
 5 0 5 200485 2467.55 3
 5 0 6 165770 2220.99 3
 5 0 7 254.72 90.3678 3
 5 0 8 66544.3 1327.75 3
 5 0 9 21530.4 743.725 3
 5 0 10 17145.3 705.084 3
 5 0 11 27107.9 935.284 3
 5 0 12 18595.2 805.38 3
 5 0 13 53959.4 1445.85 3
 5 0 14 2262.85 303.977 3
 5 0 15 13364.9 758.177 3
 5 0 16 2567.87 354.952 3
 5 0 17 5462.05 519.874 3
 5 1 -13 10733.8 779.281 4
 5 1 -12 1196.9 248.59 4
 5 1 -11 20398.8 975.198 4
 5 1 -10 24976 1043.42 4
 5 1 -9 143.029 97.5632 4
 5 1 -8 8823.68 550.191 4
 5 1 -7 68.5214 105.382 4
 5 1 -6 39951.2 1068.28 4
 5 1 -5 77165.4 1493.91 4
 5 1 -4 51603.6 1122.96 4
 5 1 -3 161000 2209.58 4
 5 1 -2 8810.19 390.379 4
 5 1 -1 44325.4 895.179 4
 5 1 0 63973.9 776.06 3
 5 1 0 67130.4 1106.54 4
 5 1 1 27948.3 488.407 3
 5 1 1 28213.6 654.452 4
 5 1 2 63127.9 912.686 3
 5 1 3 3820.02 205.112 3
 5 1 4 163121 2006.01 3
 5 1 5 10055.8 392.898 3
 5 1 6 171742 2258.09 3
 5 1 7 144866 2039.15 3
 5 1 7 135798 1382.9 1
 5 1 8 3330.75 276.828 3
 5 1 8 3964.73 163.48 1
 5 1 9 74261.9 1501.6 3
 5 1 10 17944.9 708.81 3
 5 1 11 16216.9 704.315 3
 5 1 12 10132.8 574.304 3
 5 1 13 35039.1 1140.27 3
 5 1 14 48551.6 1401.53 3
 5 1 15 1151 237.144 3
 5 1 16 10255.1 670.791 3
 5 1 17 1137.44 240.993 3
 5 2 -12 11976.6 811.438 4
 5 2 -11 1157.34 237.355 4
 5 2 -10 22411.2 1024.83 4
 5 2 -9 12317.1 720.817 4
 5 2 -8 15.9532 97.095 4
 5 2 -7 18529 795.578 4
 5 2 -6 1365.05 215.708 4
 5 2 -5 40277 1058.04 4
 5 2 -4 51894.2 1163.62 4
 5 2 -4 50997.3 731.696 2
 5 2 -3 134496 2023.61 4
 5 2 -2 257677 3114.9 4
 5 2 -1 9769.1 412.958 4
 5 2 0 48197.6 588.676 3
 5 2 0 48132.8 949.881 4
 5 2 1 202.465 44.1968 3
 5 2 1 207.998 76.3144 4
 5 2 2 78924.2 1052.49 3
 5 2 2 80419.8 1248.64 4
 5 2 3 56303.7 757.639 5
 5 2 3 54263.4 881.18 3
 5 2 4 197.05 65.8239 3
 5 2 5 174553 2189.03 3
 5 2 6 21080.2 615.1 3
 5 2 7 174190 2338.38 3
 5 2 8 102403 1201.01 1
 5 2 8 103212 1702.17 3
 5 2 9 21380.6 725.014 3
 5 2 9 21430.5 468.86 1
 5 2 10 80118 1579.91 3
 5 2 10 79684.4 1169.85 1
 5 2 11 7818.14 336.115 1
 5 2 11 7338.31 471.544 3
 5 2 12 19363.7 584.94 1
 5 2 12 18577.6 773.618 3
 5 2 13 6833.42 484.482 3
 5 2 14 30124.6 1074.95 3
 5 2 15 41507.5 1327.47 3
 5 2 16 584.641 183.21 3
 5 2 17 8061.88 625.825 3
 5 2 18 361.981 187.527 3
 5 3 -11 14395.3 883.115 4
 5 3 -10 130.883 169.764 4
 5 3 -9 21592.8 988.512 4
 5 3 -8 23044.2 975.049 4
 5 3 -7 2287.36 298.604 4
 5 3 -6 37031.6 1104.58 4
 5 3 -5 5829.79 406.591 4
 5 3 -4 84107.2 1628.07 4
 5 3 -3 33291.3 542.92 2
 5 3 -3 32459.4 900.512 4
 5 3 -2 86728.3 1526.63 4
 5 3 -1 147733 2073.26 4
 5 3 0 6914.91 353.957 4
 5 3 0 6394.21 173.466 3
 5 3 1 53329.1 741.181 3
 5 3 1 53125.3 1015.77 4
 5 3 2 1603.47 123.503 3
 5 3 2 1639.2 164.814 4
 5 3 3 117878 1504.44 3
 5 3 3 120756 1668.57 4
 5 3 4 160694 1972.87 3
 5 3 5 1775.06 170.64 3
 5 3 6 109627 1635.62 3
 5 3 7 1191.58 156.589 3
 5 3 8 143893 2118.88 3
 5 3 9 29309.8 865.083 3
 5 3 9 30068.4 598.563 1
 5 3 10 38000.4 743.762 1
 5 3 10 38580.9 1044.8 3
 5 3 11 88778.3 1745.46 3
 5 3 11 90984.4 1371.09 1
 5 3 12 1741.35 253.635 3
 5 3 12 2130.68 195.115 1
 5 3 13 40229.7 1202.71 3
 5 3 14 102.4 111.426 3
 5 3 15 38373.4 1283.57 3
 5 3 16 21112.1 982.369 3
 5 3 17 610.81 171.027 3
 5 3 18 11126.9 759.836 3
 5 4 -11 1658.68 325.001 4
 5 4 -10 11165.8 762.21 4
 5 4 -9 1431.4 291.81 4
 5 4 -8 33109.2 1215.04 4
 5 4 -7 25516 1002.64 4
 5 4 -6 15579 736.441 4
 5 4 -5 37923.7 1105.2 4
 5 4 -4 29417.2 928.476 4
 5 4 -3 82275.1 1583.76 4
 5 4 -2 1911.35 223.269 4
 5 4 -1 54072.8 1144.51 4
 5 4 0 150602 2099.06 4
 5 4 0 146943 1582.94 3
 5 4 1 3882.42 264.575 4
 5 4 1 3655.21 171.096 3
 5 4 2 58954.2 901.107 3
 5 4 2 60293.1 1110.6 4
 5 4 3 117958 1536.08 3
 5 4 3 119345 1692.71 4
 5 4 4 344949 3667.97 3
 5 4 5 185627 2318.79 3
 5 4 6 3425.26 252.344 3
 5 4 7 42031.3 957.855 3
 5 4 8 4395.37 310.314 3
 5 4 9 61009.6 1307.45 3
 5 4 10 3638.52 313.628 3
 5 4 11 79895.2 1663.71 3
 5 4 11 80809.8 1305.17 1
 5 4 12 96503.8 1940.6 3
 5 4 12 100151 1560.77 1
 5 4 13 2845.83 324.175 3
 5 4 14 15138.8 771.47 3
 5 4 15 3450.23 389.745 3
 5 4 16 28914.7 1152.11 3
 5 4 17 9804.7 687.5 3
 5 4 18 2813.56 385.458 3
 5 5 -10 1042.8 271.877 4
 5 5 -9 10236.3 726.253 4
 5 5 -8 13503.1 797.984 4
 5 5 -7 94181.8 2117.33 4
 5 5 -6 13151.3 699.194 4
 5 5 -5 44173.4 1254.15 4
 5 5 -4 16407.3 709.077 4
 5 5 -3 10720.3 544.43 4
 5 5 -2 40527.5 1049.58 4
 5 5 -1 15024 593.567 4
 5 5 0 255865 3167.18 4
 5 5 1 135987 1994.17 4
 5 5 1 137666 1642.22 3
 5 5 2 21326 644.667 4
 5 5 2 21022.9 513.982 3
 5 5 3 10037 367.751 3
 5 5 3 9823.38 418.812 4
 5 5 4 39922.9 830.149 3
 5 5 4 39828.5 876.11 4
 5 5 5 170723 2218.43 3
 5 5 6 14190.1 514.989 3
 5 5 7 18974.1 640.07 3
 5 5 8 63961.2 1306.99 3
 5 5 9 707.009 147.471 3
 5 5 10 40532 1088.47 3
 5 5 11 618.261 156.015 3
 5 5 12 124253 2252.32 3
 5 5 13 27802 1007.09 3
 5 5 14 1223.42 224.358 3
 5 5 15 3324.52 379.984 3
 5 5 16 2752.79 357.71 3
 5 5 17 27202.6 1149.76 3
 5 5 18 3583.4 449.309 3
 5 6 -10 6825.94 634.522 4
 5 6 -9 6419.87 593.026 4
 5 6 -8 4357.12 468.285 4
 5 6 -7 37794.9 1326.77 4
 5 6 -6 132310 2553.64 4
 5 6 -5 122.762 106.142 4
 5 6 -4 37761.8 1148.04 4
 5 6 -3 38162.6 1115.8 4
 5 6 -2 13652.8 613.326 4
 5 6 -1 57528.7 1286.39 4
 5 6 0 49539.5 1131.35 4
 5 6 1 154891 2213.14 4
 5 6 1 152511 1882.23 3
 5 6 2 8048.83 400.823 4
 5 6 2 8125.43 332.163 3
 5 6 3 12509.6 486.261 4
 5 6 3 12821.5 441.967 3
 5 6 4 24526.5 652.823 3
 5 6 4 25298 697.623 4
 5 6 5 25950 712.305 3
 5 6 5 26299.7 701.665 4
 5 6 6 131090 1947.99 3
 5 6 7 5628.49 358.041 3
 5 6 8 16601.6 638.542 3
 5 6 9 73697.3 1489.77 3
 5 6 10 556.102 149.631 3
 5 6 11 34840.6 1051.85 3
 5 6 12 15022.4 706.745 3
 5 6 13 67523.6 1631.81 3
 5 6 14 22702.9 953.979 3
 5 6 15 2036.55 304.243 3
 5 6 16 1544.39 283.907 3
 5 6 17 3386.47 420.061 3
 5 6 18 14664.2 890.537 3
 5 7 -9 2308.96 392.593 4
 5 7 -8 12428.5 822.476 4
 5 7 -7 1756.21 318.654 4
 5 7 -6 103695 2315.83 4
 5 7 -5 81838.6 1897.65 4
 5 7 -4 5067.83 421.46 4
 5 7 -3 92720.5 1882.13 4
 5 7 -2 15916.7 692.036 4
 5 7 -1 47357.7 1188.62 4
 5 7 0 13581.5 584.396 4
 5 7 1 44825.2 1066.68 4
 5 7 1 44562.3 869.534 3
 5 7 2 166512 2334.44 4
 5 7 2 162325 2104.26 3
 5 7 3 81596.6 1423.91 4
 5 7 3 78447.1 1326.21 3
 5 7 4 13064.8 505.643 4
 5 7 4 14015.9 512.948 3
 5 7 5 405.594 97.7209 3
 5 7 5 432.478 96.9593 4
 5 7 6 44274.8 1035.31 3
 5 7 6 44574.9 967.981 4
 5 7 7 92887.1 1664.82 3
 5 7 8 557.222 141.776 3
 5 7 9 56821.1 1318.02 3
 5 7 10 39760.1 1120.4 3
 5 7 11 7822.41 503.071 3
 5 7 12 23121 904.2 3
 5 7 13 4366.8 413.196 3
 5 7 14 46532.9 1417.82 3
 5 7 15 5936.15 509.679 3
 5 7 16 1935.13 316.823 3
 5 7 17 3909.54 462.513 3
 5 7 18 3628.4 443.804 3
 5 8 -8 1663.38 324.159 4
 5 8 -7 12523.8 820.48 4
 5 8 -6 250.913 158.379 4
 5 8 -5 51865.1 1518.28 4
 5 8 -4 46697.7 1377.17 4
 5 8 -3 36600.8 1161.1 4
 5 8 -2 83902.6 1769.97 4
 5 8 -1 5631.7 413.935 4
 5 8 0 36199.3 1028.45 4
 5 8 1 1012.35 166.037 4
 5 8 2 59210.8 1259.5 4
 5 8 2 60574.2 1143.7 3
 5 8 3 169984 2394.25 4
 5 8 3 167320 2281.31 3
 5 8 4 26109.6 755.607 4
 5 8 4 27680.2 780.195 3
 5 8 5 21865.4 679.918 4
 5 8 5 22653.3 725.244 3
 5 8 6 6985.75 369.585 4
 5 8 6 7215.78 409.478 3
 5 8 7 80619.4 1409.27 4
 5 8 7 82839.6 1577.64 3
 5 8 8 45661.5 1173.51 3
 5 8 9 949.588 186.546 3
 5 8 10 87704.1 1816.33 3
 5 8 11 8652.52 558.627 3
 5 8 12 33578.7 1142.94 3
 5 8 13 22377.1 938.764 3
 5 8 14 7048.76 539.734 3
 5 8 15 25341.4 1078.32 3
 5 8 16 5235.44 505.771 3
 5 8 17 7172.54 610.136 3
 5 8 18 1426.44 285.908 3
 5 9 -7 132.623 170.405 4
 5 9 -6 11680.6 767.863 4
 5 9 -5 693.337 204.095 4
 5 9 -4 31039.4 1149.83 4
 5 9 -3 11317.7 659.077 4
 5 9 -2 63124.2 1556.07 4
 5 9 -1 85447.1 1788.62 4
 5 9 0 1093.22 189.797 4
 5 9 1 51866.6 1259.72 4
 5 9 2 1818.19 224.144 4
 5 9 2 1882.9 201.95 3
 5 9 3 54964.6 1218.25 4
 5 9 3 56578.7 1199.35 3
 5 9 4 97662.8 1677.66 4
 5 9 4 95717.4 1666.34 3
 5 9 5 1451.93 184.215 4
 5 9 5 1503.64 214.93 3
 5 9 6 63320.9 1255.45 4
 5 9 6 63678.5 1381.68 3
 5 9 7 1272.44 202.239 3
 5 9 7 1468.87 181.51 4
 5 9 8 66622.8 1282.21 4
 5 9 8 68387.9 1505.4 3
 5 9 9 26299 922.213 3
 5 9 10 23285.1 884.457 3
 5 9 11 63505.6 1584.18 3
 5 9 12 5332.88 473.2 3
 5 9 13 25441.4 1039.1 3
 5 9 14 4841.78 465.613 3
 5 9 15 8807.72 647.173 3
 5 9 16 35935 1356.41 3
 5 9 17 41.2724 118.581 3
 5 10 -7 21391.7 1149.59 4
 5 10 -6 4389.39 504.633 4
 5 10 -5 20135 1013.64 4
 5 10 -4 551.007 187.524 4
 5 10 -3 31527.8 1159.14 4
 5 10 -2 18323 837.411 4
 5 10 -1 61298.5 1530.64 4
 5 10 0 51748.3 1345.18 4
 5 10 1 6636.79 444.922 4
 5 10 2 49227.6 1227.72 4
 5 10 3 4471.48 341.232 4
 5 10 3 5278.72 359.403 3
 5 10 4 67694.5 1386.59 4
 5 10 4 68984.9 1441.35 3
 5 10 5 88903.8 1600.8 4
 5 10 5 88829.6 1690.98 3
 5 10 6 11755.2 504.349 4
 5 10 6 12488.5 603.475 3
 5 10 7 18965.8 648.214 4
 5 10 7 19086.9 764.145 3
 5 10 8 10317.5 470.533 4
 5 10 8 10263.8 575.764 3
 5 10 9 54313.9 1160.85 4
 5 10 9 57291.4 1459 3
 5 10 10 9851.22 465.687 4
 5 10 10 12067.5 667.342 3
 5 10 11 50892.7 1443.23 3
 5 10 12 50805.1 1480.37 3
 5 10 13 169.742 127.581 3
 5 10 14 11571.6 728.979 3
 5 10 15 1471.92 291.62 3
 5 10 16 25177.4 1148.16 3
 5 10 17 11911.9 817.797 3
 5 11 -6 19494.5 1075.54 4
 5 11 -5 8324.09 672.734 4
 5 11 -4 12063.9 773.499 4
 5 11 -3 3274.63 388.76 4
 5 11 -2 32653.1 1175.62 4
 5 11 -1 310.243 150.507 4
 5 11 0 53271.9 1423.24 4
 5 11 1 40393.2 1172.01 4
 5 11 2 8484.76 501.404 4
 5 11 3 84343.3 1678.42 4
 5 11 4 955.128 163.248 4
 5 11 4 1724.23 236.614 3
 5 11 5 67358.9 1391.78 4
 5 11 5 69926.5 1549.25 3
 5 11 6 4187.97 319.523 4
 5 11 6 4912.09 396.706 3
 5 11 7 6156.69 370.491 4
 5 11 7 6765.11 473.354 3
 5 11 8 23940.7 741.872 4
 5 11 8 25752.9 949.755 3
 5 11 9 5195.72 334.813 4
 5 11 9 5685.21 456.578 3
 5 11 10 35683.1 1200.3 3
 5 11 11 790.592 205.879 3
 5 11 12 50619.4 1511.88 3
 5 11 13 17842.7 905.471 3
 5 11 14 1508.05 288.46 3
 5 11 15 8949.36 682.999 3
 5 11 16 987.689 252.478 3
 5 12 -5 12132 850.03 4
 5 12 -4 17590.8 980.122 4
 5 12 -3 20925.3 1012.19 4
 5 12 -2 6357.07 531.209 4
 5 12 -1 13897.7 753.545 4
 5 12 0 1473.9 245.716 4
 5 12 1 74517.5 1474.57 2
 5 12 1 73219.3 1693.6 4
 5 12 2 32548.9 1050.49 4
 5 12 3 27759.8 929.615 4
 5 12 4 28276.9 913.43 4
 5 12 4 31220.4 1015.94 3
 5 12 5 17785.5 692.648 4
 5 12 5 18841.8 797.035 3
 5 12 6 55588.8 1250.47 4
 5 12 6 59544.7 1498.26 3
 5 12 7 12593.4 550.654 4
 5 12 7 13703 696.501 3
 5 12 8 13291.4 706.725 3
 5 12 9 25735.8 1029.52 3
 5 12 10 2121.26 310.051 3
 5 12 11 18265.8 891.725 3
 5 12 12 2839.01 371.869 3
 5 12 13 33725.5 1286.62 3
 5 12 14 13130.4 832.711 3
 5 12 15 2621.29 391.133 3
 5 12 16 2176.3 369.261 3
 5 13 -4 609.818 247.436 4
 5 13 -3 26421.2 1198.83 4
 5 13 -2 17860.4 923.942 4
 5 13 -1 7026.38 566.053 4
 5 13 0 13152.3 731.348 4
 5 13 1 3682.84 375.316 4
 5 13 2 80336.1 1651.61 2
 5 13 2 78640.3 1770.52 4
 5 13 3 34475.9 1083.11 4
 5 13 4 13215.2 631.798 4
 5 13 5 6813 441.685 4
 5 13 5 8664.57 563.173 3
 5 13 6 30788.2 1099.8 3
 5 13 7 64045.5 1672.28 3
 5 13 8 3427.19 388.045 3
 5 13 9 37154.2 1265.04 3
 5 13 10 35252.1 1280.62 3
 5 13 11 668.837 186.075 3
 5 13 12 5424.26 516.421 3
 5 13 13 2759.61 397.595 3
 5 13 14 25359 1166.8 3
 5 13 15 8432.83 685.842 3
 5 14 -3 2672.35 411.322 4
 5 14 -2 31466.5 1303.78 4
 5 14 -1 13193.9 794.885 4
 5 14 0 8861.38 622.523 4
 5 14 1 8681.1 592.117 4
 5 14 2 6469.78 488.563 4
 5 14 3 63233.9 1528.49 2
 5 14 3 61618.7 1535.11 4
 5 14 6 15179.9 787.841 3
 5 14 7 20100.3 935.788 3
 5 14 8 31580.6 1202.93 3
 5 14 9 50.7051 134.636 3
 5 14 10 37006.7 1347.26 3
 5 14 11 13687.8 830.66 3
 5 14 12 3393.72 423.165 3
 5 14 13 3855.92 457.468 3
 5 14 14 6038.51 599.759 3
 5 15 -2 2760.86 408.795 4
 5 15 -1 34687.7 1362.05 4
 5 15 0 9926.66 683.625 4
 5 15 1 8802.29 619.96 4
 5 15 3 24155.8 939.815 2
 5 15 4 57324.2 1534.37 2
 5 15 5 473.309 169.131 2
 5 15 7 8988.29 660.797 3
 5 15 8 19075.5 965.026 3
 5 15 9 32972.2 1300.83 3
 5 15 10 5468.07 535.448 3
 5 15 11 37742.8 1435.68 3
 5 15 12 8482.36 685.952 3
 5 16 4 36781.7 1257.23 2
 5 16 5 42615.3 1378.11 2
 5 16 6 -123.188 155.193 2
 5 16 7 32323.2 1237.35 2
 5 16 8 5707.84 557.131 3
 5 16 9 21693.4 1090.72 3
 5 16 10 7933.98 664.791 3
 5 16 11 17142.4 993.227 3
 5 17 5 30183.4 1197.95 2
 5 17 6 28761.5 1194.2 2
 5 17 7 3246.33 405.641 2
 5 17 8 31253 1289.09 2
 6 -14 2 6231.14 567.724 5
 6 -14 3 2944.24 407.643 5
 6 -14 4 29795.2 1246.82 5
 6 -14 5 12084.9 779.789 5
 6 -13 3 9365.06 655.21 5
 6 -13 4 2420.94 346.196 5
 6 -13 5 26921.8 1131.31 5
 6 -13 6 6087.26 537.857 5
 6 -12 4 15448.8 807.294 5
 6 -12 5 2710.95 340.774 5
 6 -12 6 21522.7 968.66 5
 6 -12 7 1020.58 227.694 5
 6 -12 8 9637.73 706.014 3
 6 -11 4 17855 826.866 5
 6 -11 5 15098.8 761.367 5
 6 -11 6 3677.98 385.126 5
 6 -11 7 11274.6 662.726 5
 6 -11 8 452.265 190.223 3
 6 -11 9 22552.8 1109.14 3
 6 -10 4 3249.76 329.93 5
 6 -10 5 28915.6 1013.06 5
 6 -10 6 13039 671.231 5
 6 -10 7 8036.15 532.846 5
 6 -10 8 12489.5 677.492 5
 6 -10 8 10619.4 690.854 3
 6 -10 9 1856.66 322.681 3
 6 -10 10 30536.3 1248.49 3
 6 -10 11 5154.2 538.15 3
 6 -9 5 3377.74 320.27 5
 6 -9 6 19023.6 772.117 5
 6 -9 7 7398.2 481.459 5
 6 -9 8 17360.3 752.202 5
 6 -9 8 15421.8 807.442 3
 6 -9 9 10135.2 678.446 3
 6 -9 10 8133.77 634.671 3
 6 -9 11 24282.4 1111.44 3
 6 -9 12 976.861 236.297 3
 6 -8 5 50332.8 1217.63 5
 6 -8 6 99.5234 90.952 5
 6 -8 7 28689.3 919.536 5
 6 -8 8 6364.36 430.046 5
 6 -8 8 5792.89 477.197 3
 6 -8 9 14673.7 800.95 3
 6 -8 10 1565.44 279.472 3
 6 -8 11 20387.2 990.136 3
 6 -8 12 14924.6 874.614 3
 6 -8 13 739.246 211.622 3
 6 -7 -1 23456.7 490.837 4
 6 -7 5 36790.1 965.515 5
 6 -7 6 36298.8 968.325 5
 6 -7 7 6336.74 398.5 5
 6 -7 8 58764.1 1305.47 5
 6 -7 8 59622.8 1578.69 3
 6 -7 9 910.534 218.501 3
 6 -7 10 10424.8 665.435 3
 6 -7 11 240.67 155.4 3
 6 -7 12 17324.5 918.522 3
 6 -7 13 15621.2 880.037 3
 6 -7 14 -51.2151 161.01 3
 6 -6 -3 32250.5 579.259 4
 6 -6 -2 1017.52 94.7959 4
 6 -6 -1 12743.8 358.694 4
 6 -6 5 1118.91 160.624 5
 6 -6 6 54029.9 1142.51 5
 6 -6 7 14252.5 553.471 5
 6 -6 7 13927.8 669.812 3
 6 -6 8 28022.1 997.873 3
 6 -6 9 62703.3 1585.39 3
 6 -6 10 909.584 208.373 3
 6 -6 11 6135.98 512.674 3
 6 -6 12 74.4019 101.337 3
 6 -6 13 18927.1 943.206 3
 6 -6 14 12770.5 810.804 3
 6 -5 -5 83365.1 1249.5 4
 6 -5 -4 250.152 65.8616 4
 6 -5 -3 80349 1136.92 4
 6 -5 -2 41644.1 725.142 4
 6 -5 -1 649.812 87.6745 4
 6 -5 6 19734.4 602.726 5
 6 -5 7 40544.9 905.341 5
 6 -5 7 40917.7 1167.48 3
 6 -5 8 80.8996 99.9611 3
 6 -5 9 42841.7 1262.39 3
 6 -5 10 47459.5 1375.62 3
 6 -5 11 219.741 121.764 3
 6 -5 12 7135.31 560.784 3
 6 -5 13 502.279 192.352 3
 6 -5 14 21565.8 1022.62 3
 6 -5 15 6789.25 590.648 3
 6 -4 -7 6777.35 383.064 4
 6 -4 -6 29124 753.941 4
 6 -4 -5 36268.9 800.775 4
 6 -4 -4 78362.6 1222.32 4
 6 -4 -3 7462.09 306.918 4
 6 -4 -2 156929 1898.97 4
 6 -4 -1 84933 1212.29 4
 6 -4 6 16615.6 500.767 5
 6 -4 6 16573.3 660.931 3
 6 -4 7 18969.9 543.682 5
 6 -4 7 17766.4 716.397 3
 6 -4 8 38082.3 1099.21 3
 6 -4 9 738.182 183.54 3
 6 -4 10 46583.8 1309.85 3
 6 -4 11 15323.3 756.576 3
 6 -4 12 948.757 215.953 3
 6 -4 13 6351.08 524.26 3
 6 -4 14 3300.73 391.687 3
 6 -4 15 26106.9 1146.01 3
 6 -4 16 1318.89 293.304 3
 6 -3 -8 91759.7 1740.85 4
 6 -3 -7 1006.28 157.691 4
 6 -3 -6 32148.5 839.755 4
 6 -3 -5 42943.3 933.383 4
 6 -3 -4 20857.9 591.062 4
 6 -3 -3 57440.8 1016.51 4
 6 -3 -2 48592.6 891.937 4
 6 -3 -1 254855 2823.54 4
 6 -3 0 71455.2 1110.81 4
 6 -3 5 1129.68 179.593 3
 6 -3 6 49318.3 838.191 5
 6 -3 6 50947.7 1186.92 3
 6 -3 7 31462.2 932.299 3
 6 -3 8 21220.2 790.006 3
 6 -3 9 29327.7 961.193 3
 6 -3 10 6326.67 459.591 3
 6 -3 11 38818.8 1203.32 3
 6 -3 12 2927.19 342.126 3
 6 -3 13 3264.67 379.488 3
 6 -3 14 3004.13 378.385 3
 6 -3 15 6395.17 570.216 3
 6 -3 16 14820.8 866.477 3
 6 -2 -10 18983.2 840.522 4
 6 -2 -9 7046.88 480.857 4
 6 -2 -8 76383.2 1617.14 4
 6 -2 -7 64803.2 1381.83 4
 6 -2 -6 1538.73 195.963 4
 6 -2 -5 71114.4 1319.44 4
 6 -2 -4 11205.8 448.924 4
 6 -2 -3 102068 1535.21 4
 6 -2 -2 62640.5 1085.14 4
 6 -2 -1 43836.9 849.771 4
 6 -2 0 376543 3927.11 4
 6 -2 4 44638.2 964.213 3
 6 -2 5 52980.4 1114.56 3
 6 -2 5 52443.9 800.791 1
 6 -2 6 3031.36 156.423 5
 6 -2 6 2796.52 256.948 3
 6 -2 7 116765 1943.3 3
 6 -2 8 23109.3 795.539 3
 6 -2 9 31714.7 985.455 3
 6 -2 10 4843.31 391.33 3
 6 -2 11 11521 640.771 3
 6 -2 12 20972.2 889.508 3
 6 -2 13 266.059 133.392 3
 6 -2 14 8064.55 611.775 3
 6 -2 15 2607.28 370.194 3
 6 -2 16 4041.05 459.752 3
 6 -2 17 9463.31 711.1 3
 6 -1 -11 53514.7 1562.09 4
 6 -1 -10 296.628 172.15 4
 6 -1 -9 24879.1 957.573 4
 6 -1 -8 3865.58 357.224 4
 6 -1 -7 82936.7 1651.61 4
 6 -1 -6 62330 1328.97 4
 6 -1 -5 18825.4 660.653 4
 6 -1 -4 65113.6 1247.01 4
 6 -1 -3 261.83 46.8202 3
 6 -1 -3 317.169 86.3901 4
 6 -1 -2 86136.2 1379.74 4
 6 -1 -2 85389.7 1080.15 3
 6 -1 -1 59053.9 1048.11 4
 6 -1 0 70343.9 1158.52 4
 6 -1 1 314281 3423.75 4
 6 -1 2 11018.3 386.278 3
 6 -1 3 125435 1734.46 3
 6 -1 4 219.477 76.9756 3
 6 -1 5 59371.8 1152.2 3
 6 -1 5 58613.1 738.439 1
 6 -1 6 60836.5 1221.89 3
 6 -1 6 59064.3 749.736 1
 6 -1 7 2676.95 253.163 3
 6 -1 8 85892.1 1611.18 3
 6 -1 9 2463.69 259.509 3
 6 -1 10 20058.5 779.955 3
 6 -1 11 1348.07 221.736 3
 6 -1 12 15360.9 749.783 3
 6 -1 13 13794.4 750.808 3
 6 -1 14 296.185 148.1 3
 6 -1 15 8084.58 598.644 3
 6 -1 16 1077.73 255.713 3
 6 -1 17 6960.94 609.161 3
 6 0 -12 244.382 154.406 4
 6 0 -11 30603.8 1201.75 4
 6 0 -10 41133.1 1350.19 4
 6 0 -9 5508.24 467.223 4
 6 0 -8 22719.3 893.842 4
 6 0 -7 3623.82 333.347 4
 6 0 -6 65199.7 1401.54 4
 6 0 -5 30958.8 892.782 4
 6 0 -4 64451.6 1284.32 4
 6 0 -3 103614 1667.16 4
 6 0 -2 12585.7 480.328 4
 6 0 -2 11494.3 244.699 3
 6 0 -2 12272.2 249.134 3
 6 0 -1 48327.4 969.949 4
 6 0 -1 47784.8 674.462 3
 6 0 0 82600.5 1327.75 4
 6 0 0 81391.6 1057.17 3
 6 0 1 80799.9 1115.86 3
 6 0 1 82248.8 1301.9 4
 6 0 2 122982 1584.14 3
 6 0 3 51587.1 929.63 3
 6 0 4 129927 1777.23 3
 6 0 5 28851 742.869 3
 6 0 6 123693 1864.05 3
 6 0 7 40079.3 979.188 3
 6 0 8 19282.1 690.919 3
 6 0 9 78552 1565.14 3
 6 0 10 4126.63 349.01 3
 6 0 11 8865.77 531.179 3
 6 0 12 318.072 133.08 3
 6 0 13 26970.3 1025.67 3
 6 0 14 22091.5 956.448 3
 6 0 15 -57.8305 100.633 3
 6 0 16 7310.66 587.827 3
 6 0 17 274.803 139.109 3
 6 1 -12 16641.9 965.755 4
 6 1 -11 218.529 151.655 4
 6 1 -10 30810.2 1191.89 4
 6 1 -9 15560.4 803.653 4
 6 1 -8 4867.43 430.615 4
 6 1 -7 28207.1 979.962 4
 6 1 -6 6054.24 424.702 4
 6 1 -5 49432.4 1200 4
 6 1 -4 29517.9 859.818 4
 6 1 -3 80174.6 1462.91 4
 6 1 -2 159347 2208.67 4
 6 1 -1 33330.7 429.45 3
 6 1 -1 31415.7 415.522 3
 6 1 0 66501.6 838.179 3
 6 1 0 67659.1 1195.58 4
 6 1 1 22112.7 452.788 3
 6 1 1 23111.9 630.95 4
 6 1 2 126077 1562.33 3
 6 1 2 130566 1792.32 4
 6 1 3 94646.1 1331.62 3
 6 1 4 42157.6 842.877 3
 6 1 5 55917.8 1058.59 3
 6 1 6 12107.1 479.237 3
 6 1 7 107345 1731.52 3
 6 1 8 697.434 133.885 3
 6 1 9 85918.7 1621.37 3
 6 1 9 80649.8 969.542 1
 6 1 10 71884.1 986.273 1
 6 1 10 70713.6 1528.96 3
 6 1 11 1481.45 232.609 3
 6 1 12 14542.2 711.944 3
 6 1 13 3194.64 349.54 3
 6 1 14 26561 1038.9 3
 6 1 15 20582.8 944.259 3
 6 1 16 1841.75 305.073 3
 6 1 17 11101.8 739.629 3
 6 1 18 55.5448 129.901 3
 6 2 -11 18412.1 988.142 4
 6 2 -10 175.964 150.471 4
 6 2 -9 26139.4 1097.02 4
 6 2 -8 11612.2 682.936 4
 6 2 -7 7265.8 514.718 4
 6 2 -6 40299.7 1156.46 4
 6 2 -5 2750.83 289.561 4
 6 2 -4 59899.5 1337.68 4
 6 2 -3 13581.5 574.255 4
 6 2 -2 176076 2438.81 4
 6 2 -1 250901 3083.86 4
 6 2 0 1399.29 79.8269 3
 6 2 0 1240.61 159.39 4
 6 2 1 74840 962.685 3
 6 2 1 76624 1308.58 4
 6 2 2 3541.28 184.152 3
 6 2 2 3943.48 263.006 4
 6 2 3 199073 2291.84 3
 6 2 4 93549.8 1078.49 5
 6 2 4 93405.3 1381.39 3
 6 2 5 29442.5 729.574 3
 6 2 6 153789 2120.44 3
 6 2 7 7460.61 398.386 3
 6 2 8 59648.5 1256.77 3
 6 2 9 751.228 146.748 3
 6 2 10 83977 1089.03 1
 6 2 10 83390.2 1666.06 3
 6 2 11 27742.7 931.009 3
 6 2 12 248.697 135.689 3
 6 2 13 30612.9 1065.53 3
 6 2 14 167.275 133.963 3
 6 2 15 35023.5 1235.42 3
 6 2 16 9147.29 644.564 3
 6 2 17 7162.23 603.532 3
 6 2 18 8661.87 681.374 3
 6 3 -11 12459.2 828.04 4
 6 3 -10 7777.06 628.562 4
 6 3 -9 5551.01 518.216 4
 6 3 -8 21019.8 954.55 4
 6 3 -7 10535.5 634.814 4
 6 3 -6 10504.3 607.747 4
 6 3 -5 66157.8 1518.98 4
 6 3 -4 12862.5 604.703 4
 6 3 -3 102178 1814.56 4
 6 3 -2 6842.35 404.31 4
 6 3 -1 215121 2813.2 4
 6 3 0 147482 2067.27 4
 6 3 0 135785 1406.19 3
 6 3 1 10410.6 278.785 3
 6 3 1 10134.8 446.76 4
 6 3 2 69152.8 989.23 3
 6 3 2 69362.8 1249.36 4
 6 3 3 39770.7 741.747 3
 6 3 3 41526 907.509 4
 6 3 4 202304 2146.39 5
 6 3 4 201480 2381.35 3
 6 3 5 83262.9 1337.11 3
 6 3 6 62490.6 1171.01 3
 6 3 7 48315.9 1051.18 3
 6 3 8 29705.7 844.582 3
 6 3 9 52086.1 1199.52 3
 6 3 10 5014.93 368.592 3
 6 3 11 104703 1964.46 3
 6 3 11 109587 1443.55 1
 6 3 12 57515.9 1429.92 3
 6 3 13 2804.34 317.295 3
 6 3 14 13019.1 707.825 3
 6 3 15 5240.77 474.487 3
 6 3 16 23033.9 1029.65 3
 6 3 17 1242.27 259.421 3
 6 3 18 7594.33 640.131 3
 6 4 -10 3655.27 461.903 4
 6 4 -9 8557.89 671.795 4
 6 4 -8 15022.8 832.113 4
 6 4 -7 49549.1 1470.68 4
 6 4 -6 9531.41 601.25 4
 6 4 -5 44450.2 1263.1 4
 6 4 -4 15480.3 695.268 4
 6 4 -3 10014.8 528.419 4
 6 4 -2 44157 1117.82 4
 6 4 -1 18894.8 674.425 4
 6 4 0 337801 3908.02 4
 6 4 0 326558 3142.99 3
 6 4 1 115371 1809.94 4
 6 4 1 116110 1370.68 3
 6 4 2 51934.9 838.965 3
 6 4 2 52872.7 1098.2 4
 6 4 3 12742.1 398.6 3
 6 4 3 13493.9 506.079 4
 6 4 4 62206.6 1066.86 3
 6 4 4 62187.4 1177.92 4
 6 4 5 125974 1773.85 3
 6 4 6 2719.88 237.339 3
 6 4 7 113215 1766.52 3
 6 4 8 58644.3 1227.02 3
 6 4 9 16347.2 639.909 3
 6 4 10 5142.26 376.094 3
 6 4 11 29782.8 961.808 3
 6 4 12 151963 2564.3 3
 6 4 13 23381.3 918.945 3
 6 4 14 6837.7 519.44 3
 6 4 15 5875.33 508.061 3
 6 4 16 2680.02 353.205 3
 6 4 17 13132.8 809.725 3
 6 4 18 745.027 247.714 3
 6 5 -10 4252.06 506.626 4
 6 5 -9 6051.14 569.56 4
 6 5 -8 6045.39 551.946 4
 6 5 -7 23929 1037.7 4
 6 5 -6 50124.8 1456.9 4
 6 5 -5 93.7108 117.349 4
 6 5 -4 36375.3 1131.77 4
 6 5 -3 17193.1 727.271 4
 6 5 -2 1258.12 203.423 4
 6 5 -1 4403.39 339.829 4
 6 5 0 100275 1745.59 4
 6 5 1 449710 4921.49 4
 6 5 1 435553 4297.31 3
 6 5 2 16879.8 603.163 4
 6 5 2 16738.1 450.37 3
 6 5 3 38923.5 779.251 3
 6 5 3 37382.5 919.773 4
 6 5 4 16855.9 516.079 3
 6 5 4 16369.2 579.793 4
 6 5 5 24173.3 657.759 3
 6 5 5 24506.9 709.43 4
 6 5 6 64026.1 1219.13 3
 6 5 7 8823.84 437.844 3
 6 5 8 113394 1876.51 3
 6 5 9 28739.5 896.196 3
 6 5 10 13738.3 623.132 3
 6 5 11 5969.18 433.001 3
 6 5 12 74924.5 1699.1 3
 6 5 13 76843.6 1766.84 3
 6 5 14 8318.86 576.473 3
 6 5 15 10042.3 654.832 3
 6 5 16 5665.28 512.993 3
 6 5 17 3835.53 443.028 3
 6 5 18 11434.1 776.027 3
 6 6 -9 1477.18 318.091 4
 6 6 -8 17957.6 987.111 4
 6 6 -7 3630.19 432.457 4
 6 6 -6 43921.6 1394.7 4
 6 6 -5 16453 808.291 4
 6 6 -4 2145 295.198 4
 6 6 -3 27051.7 954.859 4
 6 6 -2 23602.4 863.947 4
 6 6 -1 7756.05 465.808 4
 6 6 0 913.431 163.116 4
 6 6 1 151414 2289.6 4
 6 6 1 149380 1824.63 3
 6 6 2 116079 1887.5 4
 6 6 2 116044 1567.18 3
 6 6 3 2375.25 232.9 4
 6 6 3 2649.18 197.998 3
 6 6 4 69293.9 1210.21 3
 6 6 4 71101.2 1336.71 4
 6 6 5 12305.8 481.194 3
 6 6 5 11961.6 495.636 4
 6 6 6 29319.2 794.098 3
 6 6 7 52318 1156.28 3
 6 6 8 6320.86 393.348 3
 6 6 9 60790.1 1340.61 3
 6 6 10 20858.1 784.777 3
 6 6 11 22540.8 848.229 3
 6 6 12 4957.02 415.254 3
 6 6 13 29364.3 1050.08 3
 6 6 14 40385.5 1296.25 3
 6 6 15 854.178 205.38 3
 6 6 16 7264.41 583.476 3
 6 6 17 2720.66 378.989 3
 6 6 18 7137.55 623.774 3
 6 7 -8 66.2525 164.393 4
 6 7 -7 30522.7 1255.97 4
 6 7 -6 1037.47 239.341 4
 6 7 -5 37200.9 1284.28 4
 6 7 -4 20232.8 898.226 4
 6 7 -3 13380.9 693.212 4
 6 7 -2 49648.8 1328.64 4
 6 7 -1 28754.6 949.539 4
 6 7 0 13306 613.216 4
 6 7 1 36.1318 82.2688 4
 6 7 1 212.747 74.638 3
 6 7 2 98266.9 1736.95 4
 6 7 2 95492.2 1438.38 3
 6 7 3 175350 2488.31 4
 6 7 3 178278 2279.09 3
 6 7 4 561.662 128.359 4
 6 7 4 1138.52 156.339 3
 6 7 5 30323.5 810.599 3
 6 7 5 31047.3 850.821 4
 6 7 6 392.313 106.863 3
 6 7 6 427.151 107.315 4
 6 7 7 33087.5 920.864 3
 6 7 8 14458.6 615.848 3
 6 7 9 6950.03 440.51 3
 6 7 10 82807.5 1704.98 3
 6 7 11 3318.94 343.543 3
 6 7 12 28133 1000.72 3
 6 7 13 8062.41 554.738 3
 6 7 14 16960.3 838.274 3
 6 7 15 20768.1 961.033 3
 6 7 16 -32.028 107.447 3
 6 7 17 10089.4 725.108 3
 6 7 18 651.262 229.733 3
 6 8 -8 18492 1054.42 4
 6 8 -7 3502.19 459.506 4
 6 8 -6 22780.8 1065.18 4
 6 8 -5 1132.64 250.773 4
 6 8 -4 33022.6 1189.09 4
 6 8 -3 10627.8 645.962 4
 6 8 -2 60117.9 1527.67 4
 6 8 -1 66970.8 1568 4
 6 8 0 3241.24 323.895 4
 6 8 1 6044.58 411.41 4
 6 8 2 2705.25 275.877 4
 6 8 2 2987.39 227.935 3
 6 8 3 97595.3 1751.31 4
 6 8 3 96896.3 1563.73 3
 6 8 4 126670 2023.6 4
 6 8 4 126518 1917.01 3
 6 8 5 600.322 133.126 3
 6 8 5 566.701 132.516 4
 6 8 6 69370.1 1365.62 4
 6 8 6 69475.7 1392.61 3
 6 8 7 14288.1 613.403 3
 6 8 7 14172.2 566.646 4
 6 8 8 42426 1119.37 3
 6 8 9 7361.08 467.478 3
 6 8 10 33999.5 1058.35 3
 6 8 11 57130 1455.85 3
 6 8 12 1876.41 288.711 3
 6 8 13 33139.8 1160.31 3
 6 8 14 654.773 178.02 3
 6 8 15 17468.1 891.02 3
 6 8 16 21542.8 1028.58 3
 6 8 17 1139.99 265.545 3
 6 9 -7 5173.86 569.906 4
 6 9 -6 9700.69 717.249 4
 6 9 -5 23122 1069.84 4
 6 9 -4 532.715 198.028 4
 6 9 -3 50222.6 1467.91 4
 6 9 -2 3788.24 393.565 4
 6 9 -1 108188 2144.43 4
 6 9 0 30419.3 1020.13 4
 6 9 1 24926.1 890.031 4
 6 9 2 40734.9 1115.62 4
 6 9 2 41957.4 964.891 3
 6 9 3 592.792 142.038 4
 6 9 3 741.143 139.054 3
 6 9 4 31727.8 925.042 4
 6 9 4 32169.9 882.083 3
 6 9 5 70967 1433.62 4
 6 9 5 70415.6 1419.36 3
 6 9 6 19177.9 691.52 4
 6 9 6 19474.7 717.792 3
 6 9 7 72837.1 1437.45 4
 6 9 7 72681.5 1535.78 3
 6 9 8 456.4 128.269 3
 6 9 8 400.623 119.283 4
 6 9 9 58981.1 1418.28 3
 6 9 9 58276 1259.86 4
 6 9 10 4917.33 421.519 3
 6 9 11 57224.4 1490.13 3
 6 9 12 55723.3 1513.88 3
 6 9 13 186.634 144.445 3
 6 9 14 12842.7 773.294 3
 6 9 15 482.47 185.533 3
 6 9 16 28645 1218.97 3
 6 9 17 8617.25 687.164 3
 6 10 -6 3875.73 493.895 4
 6 10 -5 20164.5 1029.29 4
 6 10 -4 11347.8 747.614 4
 6 10 -3 3661.12 407.754 4
 6 10 -2 39588.6 1307.06 4
 6 10 -1 3388.14 368.238 4
 6 10 0 93903.2 1962.15 4
 6 10 1 9879.05 574.167 4
 6 10 2 16930.6 729.407 4
 6 10 3 44942.7 1186.68 4
 6 10 3 48131.1 1134.52 3
 6 10 4 291.558 120.36 4
 6 10 4 116.125 88.4927 3
 6 10 5 101804 1830.41 4
 6 10 5 102270 1848.84 3
 6 10 6 6086.09 398.669 4
 6 10 6 6490.08 434.749 3
 6 10 7 48574.7 1160.59 4
 6 10 7 48904.2 1268.08 3
 6 10 8 46636.5 1123.27 4
 6 10 8 47115.8 1277.75 3
 6 10 9 2593.76 252.47 4
 6 10 9 2427.36 295.912 3
 6 10 10 40081.1 1045.15 4
 6 10 10 41817.3 1265.01 3
 6 10 11 134.869 129.853 3
 6 10 12 63175.7 1656.71 3
 6 10 13 17731.9 880.234 3
 6 10 14 2310.81 333.856 3
 6 10 15 17721.9 934.787 3
 6 10 16 448.178 181.696 3
 6 10 17 21907.1 1097.12 3
 6 11 -5 293.671 179.117 4
 6 11 -4 34270.6 1351.98 4
 6 11 -3 4068.17 455.039 4
 6 11 -2 11027.1 697.106 4
 6 11 -1 13562.8 749.53 4
 6 11 0 15578.8 776.641 4
 6 11 1 79800.3 1798.14 4
 6 11 2 11717.2 631.819 4
 6 11 3 13384.8 645.59 4
 6 11 4 9218.07 517.493 4
 6 11 4 10424.5 546.571 3
 6 11 5 19286.9 738.983 4
 6 11 5 19979.9 778.674 3
 6 11 6 49403 1211.8 4
 6 11 6 49870.1 1296.48 3
 6 11 7 80.7747 85.6959 4
 6 11 7 282.151 144.486 3
 6 11 8 34081.6 963.586 4
 6 11 8 36783.8 1151.86 3
 6 11 9 28328.6 866.425 4
 6 11 9 30086.4 1056.78 3
 6 11 10 8387.9 459.717 4
 6 11 10 9023.87 588.075 3
 6 11 11 21712.9 954.233 3
 6 11 12 7460.72 563.314 3
 6 11 13 42213.4 1406.63 3
 6 11 14 5802.7 529.837 3
 6 11 15 7773.83 626.631 3
 6 11 16 5971.31 573.673 3
 6 12 -4 1242.89 300.003 4
 6 12 -3 35879.4 1366.57 4
 6 12 -2 3144.06 400.98 4
 6 12 -1 10103.7 664.736 4
 6 12 0 2735.58 340.554 4
 6 12 1 14412.6 744.262 4
 6 12 2 83813.4 1846.65 4
 6 12 3 5356.94 428.624 4
 6 12 4 27217.1 946.024 4
 6 12 4 29455.4 976.388 3
 6 12 5 312.274 114.59 4
 6 12 5 486.223 163.053 3
 6 12 6 19730.9 754.117 4
 6 12 6 21965.9 877.514 3
 6 12 7 18511.5 720.617 4
 6 12 7 18912.9 819.237 3
 6 12 8 394.555 125.027 4
 6 12 8 93.8656 115.548 3
 6 12 9 73704.1 1795.82 3
 6 12 10 25212.4 1025.25 3
 6 12 11 3012.95 374.56 3
 6 12 12 844.432 217.847 3
 6 12 13 15918.1 878.252 3
 6 12 14 32898 1323.22 3
 6 12 15 2222.63 363.384 3
 6 13 -3 9038.43 707.861 4
 6 13 -2 34725.5 1343.5 4
 6 13 -1 3158.68 395.724 4
 6 13 0 6268.03 525.647 4
 6 13 1 1072.83 220.918 4
 6 13 2 20750.9 899.9 4
 6 13 3 51438.8 1410.25 4
 6 13 4 234.861 122.437 4
 6 13 5 25474.1 917.894 4
 6 13 5 28835.6 1024.69 3
 6 13 6 5562.37 410.9 4
 6 13 6 6102.4 482.772 3
 6 13 7 17938.4 725.605 4
 6 13 7 20573.6 891.841 3
 6 13 8 8832.32 602.143 3
 6 13 9 2732.27 349.767 3
 6 13 10 43779.6 1431.64 3
 6 13 11 16433.3 886.967 3
 6 13 12 2881.04 380.661 3
 6 13 13 1326.03 281.735 3
 6 13 14 8095.26 662.57 3
 6 13 15 13936.8 881.004 3
 6 14 -2 18187.7 1006.77 4
 6 14 -1 49787.7 1635.2 4
 6 14 0 5888.48 527.483 4
 6 14 1 6194.83 520.558 4
 6 14 2 315.919 137.41 4
 6 14 3 15606 775.259 4
 6 14 4 28282.5 1016.8 4
 6 14 5 3136.95 332.165 4
 6 14 6 37564.3 1264.2 3
 6 14 7 6739.94 539.754 3
 6 14 8 15228.6 824.328 3
 6 14 9 10047.9 676.606 3
 6 14 10 8643.88 634.52 3
 6 14 11 39485.1 1427.77 3
 6 14 12 4967.74 519.152 3
 6 14 13 3932.35 477.408 3
 6 14 14 494.473 186.049 3
 6 15 -1 27015.8 1225.43 4
 6 15 0 47619.5 1588.81 4
 6 15 1 1644.85 299.069 4
 6 15 2 8048.48 588.387 4
 6 15 4 27963.9 1038.21 2
 6 15 7 35370.1 1287.34 3
 6 15 8 4175.23 459.486 3
 6 15 9 18904.6 969.469 3
 6 15 10 2099.13 366.653 3
 6 15 11 33684.7 1343.47 3
 6 15 12 35356.8 1402.19 3
 6 16 5 33142 1212.94 2
 6 16 8 46011.7 1558.78 3
 6 16 9 171.013 187.766 3
 6 16 10 12332.7 835.625 3
 6 16 11 705.867 218.085 3
 6 17 6 26300.7 1129.28 2
 6 17 7 2180.24 354.058 2
 6 17 8 24871.3 1149.02 2
 7 -14 3 8763.39 663.073 5
 7 -14 4 6673.16 590.176 5
 7 -13 4 15060.2 835.103 5
 7 -13 5 5358.16 503.639 5
 7 -12 4 31371.2 1162.85 5
 7 -12 5 12055.9 718.427 5
 7 -12 6 7652.68 568.952 5
 7 -11 4 249.639 127.871 5
 7 -11 5 31767.2 1123.15 5
 7 -11 6 6074.14 482.02 5
 7 -11 8 4199.7 468.361 3
 7 -10 5 3026.49 327.3 5
 7 -10 6 40816.8 1225.57 5
 7 -10 7 3656.34 359.783 5
 7 -10 8 14802.7 849.836 3
 7 -10 9 2618.05 377.153 3
 7 -10 10 8963.33 705.172 3
 7 -9 5 19804.6 776.461 5
 7 -9 6 9354.81 537.713 5
 7 -9 7 30846.4 1000.85 5
 7 -9 8 1200.69 243.298 3
 7 -9 9 13608.5 800.381 3
 7 -9 10 1325.16 260.247 3
 7 -9 11 20073.4 1047.11 3
 7 -8 5 31741.4 945.125 5
 7 -8 6 1904.97 232.312 5
 7 -8 7 19466.5 741.29 5
 7 -8 8 31405.4 1166.71 3
 7 -8 9 691.892 188.244 3
 7 -8 10 5796.19 521.031 3
 7 -8 11 460.443 179.572 3
 7 -8 12 24656.4 1155.93 3
 7 -7 6 23509.2 767.551 5
 7 -7 7 2116.95 226.561 5
 7 -7 7 1582.88 249.156 3
 7 -7 8 41134.4 1048.89 5
 7 -7 8 40546 1294.67 3
 7 -7 9 40536.9 1335.29 3
 7 -7 10 184.728 107.873 3
 7 -7 11 2896.63 391.358 3
 7 -7 12 2043.84 329.633 3
 7 -7 13 18862.7 992.022 3
 7 -6 -2 37101.1 705.273 4
 7 -6 -1 2970.26 190.083 4
 7 -6 6 4753.53 317.743 5
 7 -6 7 50507.2 1091.84 5
 7 -6 7 51116.2 1358.75 3
 7 -6 8 446.013 119.3 5
 7 -6 8 321.737 152.917 3
 7 -6 9 66330.6 1692.27 3
 7 -6 10 44965.5 1408.77 3
 7 -6 11 278.71 133.955 3
 7 -6 12 4634.57 463.986 3
 7 -6 13 1851.83 316.815 3
 7 -6 14 13302.5 844.269 3
 7 -5 -4 39391.5 806.664 4
 7 -5 -3 53799.8 944.954 4
 7 -5 -2 174930 2106.88 4
 7 -5 -1 57926.3 986.378 4
 7 -5 0 3841.32 229.548 4
 7 -5 6 34983.6 814.627 5
 7 -5 6 35610.8 1039.77 3
 7 -5 7 29560.6 748.134 5
 7 -5 7 29753.8 1006.3 3
 7 -5 8 34872 835 5
 7 -5 8 33657 1105.03 3
 7 -5 9 4679.19 420.597 3
 7 -5 10 76330.7 1821.13 3
 7 -5 11 27665.6 1086.04 3
 7 -5 12 2123.23 316.809 3
 7 -5 13 4695.29 478.169 3
 7 -5 14 2009.17 327.091 3
 7 -5 15 13328 844.472 3
 7 -4 -5 13749.5 504.55 4
 7 -4 -4 37348.8 834.421 4
 7 -4 -3 5286.69 281.21 4
 7 -4 -2 117857 1635.42 4
 7 -4 -1 182804 2238.61 4
 7 -4 0 17560.2 512.972 4
 7 -4 6 107661 1521.54 5
 7 -4 6 112767 1985.08 3
 7 -4 7 12334.3 424.05 5
 7 -4 7 11933.1 597.894 3
 7 -4 8 36772.3 1107.14 3
 7 -4 9 35866.4 1133.87 3
 7 -4 10 14884.3 746.174 3
 7 -4 11 64015.9 1665.65 3
 7 -4 12 6178.54 504.133 3
 7 -4 13 8235.89 627.238 3
 7 -4 14 4272.22 455.734 3
 7 -4 15 5740.47 558.184 3
 7 -3 -7 17852.8 681.712 4
 7 -3 -6 11355.8 508.131 4
 7 -3 -5 45535.8 1029.66 4
 7 -3 -4 749.444 121.729 4
 7 -3 -3 58634.5 1101.19 4
 7 -3 -2 3928.58 249.559 4
 7 -3 -1 106135 1549.25 4
 7 -3 0 139250 1861.8 4
 7 -3 5 24735.7 784.062 3
 7 -3 6 21040.9 503.475 5
 7 -3 6 22522.2 774.94 3
 7 -3 7 90166.1 1246.14 5
 7 -3 7 91179.3 1755.12 3
 7 -3 8 8253.79 501.641 3
 7 -3 9 56737.6 1411.46 3
 7 -3 10 5103.69 430.926 3
 7 -3 11 23339 936.286 3
 7 -3 12 46455 1413.59 3
 7 -3 13 285.303 157.939 3
 7 -3 14 13239.5 791.705 3
 7 -3 15 1569.39 289.126 3
 7 -3 16 6383.38 602.111 3
 7 -2 -9 46732.4 1328.51 4
 7 -2 -8 379.937 124.244 4
 7 -2 -7 83327.2 1664.69 4
 7 -2 -6 6831.71 409.759 4
 7 -2 -5 24443.4 760.176 4
 7 -2 -4 28292.2 784.899 4
 7 -2 -3 686.436 127.062 4
 7 -2 -2 65871.6 1195.61 4
 7 -2 -1 316.124 83.0644 4
 7 -2 0 65112.9 1148.81 4
 7 -2 1 154267 2041.09 4
 7 -2 3 58798.4 1122.43 3
 7 -2 4 452.964 111.612 3
 7 -2 5 41673.7 1009.95 3
 7 -2 6 12842 331.206 5
 7 -2 6 13935.7 352.645 1
 7 -2 6 13562.8 571.519 3
 7 -2 7 30685.1 924.155 3
 7 -2 8 90444.8 1744.03 3
 7 -2 9 -23.6791 101.34 3
 7 -2 10 28876.5 987.48 3
 7 -2 11 333.792 144.062 3
 7 -2 12 30227.8 1089.11 3
 7 -2 13 25174.3 1023.53 3
 7 -2 14 712.886 203.952 3
 7 -2 15 11288.7 743.739 3
 7 -2 16 224.79 117.496 3
 7 -1 -10 43094.1 1377.64 4
 7 -1 -9 14423.2 752.432 4
 7 -1 -8 20538.9 847.522 4
 7 -1 -7 381.437 137.308 4
 7 -1 -6 59643.5 1349.11 4
 7 -1 -5 1019.92 177.102 4
 7 -1 -4 138689 2106.66 4
 7 -1 -3 63798.4 1252.56 4
 7 -1 -2 7342.95 374.277 4
 7 -1 -1 59768.9 1131.26 4
 7 -1 0 1707.39 177.128 4
 7 -1 1 110091 1640.71 4
 7 -1 1 108124 1486.67 3
 7 -1 2 23645.1 612.162 3
 7 -1 3 25963.6 678.979 3
 7 -1 4 51808.9 1050.8 3
 7 -1 5 2821.56 248.79 3
 7 -1 6 58067.2 701.505 1
 7 -1 6 60972.2 1246.04 3
 7 -1 7 23264.3 367.746 1
 7 -1 7 24723.6 785.632 3
 7 -1 8 37221.6 1022.87 3
 7 -1 9 42250.8 1150.83 3
 7 -1 10 291.146 117.914 3
 7 -1 11 15048.3 727.54 3
 7 -1 12 198.749 138.102 3
 7 -1 13 31930.6 1165.31 3
 7 -1 14 15007.8 829.644 3
 7 -1 15 1040.56 252.806 3
 7 -1 16 4718.96 489.487 3
 7 -1 17 102.445 129.186 3
 7 0 -11 2351.93 371.407 4
 7 0 -10 46298.8 1475.94 4
 7 0 -9 5972.8 503.015 4
 7 0 -8 29286.4 1055.27 4
 7 0 -7 39716.8 1169.37 4
 7 0 -6 230.826 108.034 4
 7 0 -5 41342.1 1092.34 4
 7 0 -4 1136.71 176.422 4
 7 0 -3 133277 2056.24 4
 7 0 -2 50260.8 1083.99 4
 7 0 -2 48290.6 650.338 3
 7 0 -2 49314.9 640.219 3
 7 0 -1 9434.19 433.538 4
 7 0 -1 9414.74 267.644 3
 7 0 -1 9446.07 259.941 3
 7 0 0 73986.1 1031.24 3
 7 0 0 76325.8 1336.82 4
 7 0 1 3727.2 205.281 3
 7 0 1 3479.96 254.622 4
 7 0 2 116655 1581.97 3
 7 0 2 119513 1754.99 4
 7 0 3 53832.5 991.348 3
 7 0 4 38310.2 847.917 3
 7 0 5 79798.1 1387.69 3
 7 0 6 3275.83 263.236 3
 7 0 7 72105.5 1409.5 3
 7 0 8 3614.89 302.245 3
 7 0 9 55148 1306.66 3
 7 0 10 49394.8 1289.7 3
 7 0 11 514.707 155.742 3
 7 0 12 5391.11 446.566 3
 7 0 13 239.652 139.144 3
 7 0 14 27539.7 1079.94 3
 7 0 15 7974.73 605.277 3
 7 0 16 3942.08 456.185 3
 7 0 17 9954.03 728.049 3
 7 1 -11 18139.5 997.239 4
 7 1 -10 2253.07 330.688 4
 7 1 -9 46634.1 1467.44 4
 7 1 -8 3637.66 386.379 4
 7 1 -7 52529.8 1414.62 4
 7 1 -6 33827.3 1061.05 4
 7 1 -5 10910.3 567.778 4
 7 1 -4 54461.3 1270.84 4
 7 1 -3 1754.83 213.091 4
 7 1 -2 122945 1947.79 4
 7 1 -1 37373.1 494.672 3
 7 1 -1 39369.1 949.817 4
 7 1 -1 36158.4 486.017 3
 7 1 0 17915 375.692 3
 7 1 0 17560.8 609.701 4
 7 1 1 14926.4 384.417 3
 7 1 1 15533.9 552.354 4
 7 1 2 25832.4 575.443 3
 7 1 2 26233.3 719.05 4
 7 1 3 211838 2466.39 3
 7 1 4 41700.2 868.852 3
 7 1 5 69531.8 770.192 5
 7 1 5 78426 1304.89 3
 7 1 6 131965 1951.7 3
 7 1 7 2777.15 252.814 3
 7 1 8 57871.8 1277.37 3
 7 1 9 982.522 173.964 3
 7 1 10 76774 1626.17 3
 7 1 11 29047.5 993.746 3
 7 1 12 207.981 116.469 3
 7 1 13 17590.5 831.795 3
 7 1 14 354.885 182.848 3
 7 1 15 21531.2 991.168 3
 7 1 16 3032.96 394.494 3
 7 1 17 9593.42 699.297 3
 7 2 -11 9589.83 745.877 4
 7 2 -10 5431.71 535.81 4
 7 2 -9 9875.61 687.605 4
 7 2 -8 41075.9 1345.77 4
 7 2 -7 41.2768 119.124 4
 7 2 -6 59868.9 1495.38 4
 7 2 -5 49140.6 1289.23 4
 7 2 -4 32153.3 986.796 4
 7 2 -3 59173.3 1338.01 4
 7 2 -2 13895.6 583.968 4
 7 2 -1 201177 2724.85 4
 7 2 0 43073.9 591.573 3
 7 2 0 43351.2 1016.14 4
 7 2 1 32925.8 573.619 3
 7 2 1 33241.1 868.1 4
 7 2 2 56319.8 893.503 3
 7 2 2 57363.8 1159.5 4
 7 2 3 37317.3 752.076 3
 7 2 3 36474.6 895.809 4
 7 2 4 179303 1928.73 5
 7 2 4 179201 2246.86 3
 7 2 5 18211.3 326.99 5
 7 2 5 20240.2 607.1 3
 7 2 6 201719 2638.51 3
 7 2 7 65161.1 1303.74 3
 7 2 8 45395 1102.14 3
 7 2 9 19951.6 747.575 3
 7 2 10 15441.9 676.703 3
 7 2 11 74399.9 1654.32 3
 7 2 12 33858.9 1097.61 3
 7 2 13 5486.61 462.419 3
 7 2 14 20838.6 930.618 3
 7 2 15 2611.45 346.022 3
 7 2 16 17483.9 910.877 3
 7 2 17 148.511 129.515 3
 7 2 18 9071.79 702.379 3
 7 3 -10 16107.2 939.715 4
 7 3 -9 3788.89 448.292 4
 7 3 -8 26150.2 1084.99 4
 7 3 -7 29042.5 1096.69 4
 7 3 -6 1238.43 228.291 4
 7 3 -5 117223 2198.51 4
 7 3 -4 27870.7 943.955 4
 7 3 -3 24508.3 850.759 4
 7 3 -2 16095.2 661.113 4
 7 3 -1 67001.1 1391.65 4
 7 3 0 306829 3623.52 4
 7 3 0 283937 2710.02 3
 7 3 1 41034.6 643.657 3
 7 3 1 41272.4 1005.09 4
 7 3 2 108220 1390.98 3
 7 3 2 112580 1779.39 4
 7 3 3 48308 864.197 3
 7 3 3 50278.2 1082.7 4
 7 3 4 63492.7 1086.17 3
 7 3 5 136022 1891.3 3
 7 3 6 2046.71 202.009 3
 7 3 7 168113 2349.14 3
 7 3 8 33107.4 917.638 3
 7 3 9 10940.6 542.939 3
 7 3 10 509.776 141.87 3
 7 3 11 32652 1041.41 3
 7 3 12 129612 2329.97 3
 7 3 13 15954.8 761.249 3
 7 3 14 15732.6 791.897 3
 7 3 15 8014.06 593.597 3
 7 3 16 4557.05 470.473 3
 7 3 17 6002.35 554.537 3
 7 3 18 49.176 123.211 3
 7 4 -9 19350.3 1027.01 4
 7 4 -8 2917.2 385.114 4
 7 4 -7 43794.7 1421.3 4
 7 4 -6 48072.2 1412.74 4
 7 4 -5 8506.76 559.497 4
 7 4 -4 118331 2202.68 4
 7 4 -3 15878.2 702.582 4
 7 4 -2 17332.7 711.371 4
 7 4 -1 12232.1 566.983 4
 7 4 0 103373 1784.91 4
 7 4 0 96712.9 1075.11 3
 7 4 1 376898 4368.03 4
 7 4 1 373180 3646.62 3
 7 4 2 2569.72 164.685 3
 7 4 2 2333.6 239.247 4
 7 4 3 182911 2177.18 3
 7 4 3 184227 2521.41 4
 7 4 4 24227.8 624.439 3
 7 4 4 24121.7 734.021 4
 7 4 5 71664.2 1236.32 3
 7 4 6 48348.6 1021.58 3
 7 4 7 26399.2 765.605 3
 7 4 8 117755 1916.83 3
 7 4 9 12667 573.784 3
 7 4 10 582.434 154.987 3
 7 4 11 576.094 160.712 3
 7 4 12 52286.2 1386.31 3
 7 4 13 71570.3 1700.66 3
 7 4 14 970.77 219.406 3
 7 4 15 18773.7 901.634 3
 7 4 16 3015.31 381.861 3
 7 4 17 2874.41 393.599 3
 7 4 18 4667.9 512.577 3
 7 5 -9 1879.32 343.802 4
 7 5 -8 21873.6 1076.55 4
 7 5 -7 204.717 131.925 4
 7 5 -6 47120.2 1456.86 4
 7 5 -5 6850.1 522.1 4
 7 5 -4 26481.4 986.953 4
 7 5 -3 146254 2522.3 4
 7 5 -2 22381.1 850.51 4
 7 5 -1 29935.3 951.772 4
 7 5 0 1434.43 208.584 4
 7 5 1 168401 2488.89 4
 7 5 1 164564 1860.95 3
 7 5 2 123813 1981.92 4
 7 5 2 118913 1545.32 3
 7 5 3 9677.09 363.459 3
 7 5 3 9829.2 481.698 4
 7 5 4 131319 1803.73 3
 7 5 4 132241 2035.12 4
 7 5 5 9827.46 420.786 3
 7 5 5 10525 492.912 4
 7 5 6 58871.6 1173.16 3
 7 5 7 20596 690.956 3
 7 5 8 53056.5 1201.44 3
 7 5 9 83877.6 1650.31 3
 7 5 10 3258.02 316.234 3
 7 5 11 15758.4 714.78 3
 7 5 12 930.828 205.196 3
 7 5 13 37718 1218.86 3
 7 5 14 30970 1149.03 3
 7 5 15 -1.07014 108.743 3
 7 5 16 11873.4 758.732 3
 7 5 17 2133.72 339.081 3
 7 5 18 5446.63 550.493 3
 7 6 -8 2849 407.383 4
 7 6 -7 31964.2 1287.51 4
 7 6 -6 310.709 183.339 4
 7 6 -5 28334.9 1095.28 4
 7 6 -4 904.505 202.385 4
 7 6 -3 41786.8 1261.51 4
 7 6 -2 122242 2238.23 4
 7 6 -1 5138.77 404.924 4
 7 6 0 45610.4 1190.95 4
 7 6 1 18719.9 721.549 4
 7 6 1 19043.3 474.456 3
 7 6 2 217556 2998.17 4
 7 6 2 216742 2492.15 3
 7 6 3 99417.6 1772.23 4
 7 6 3 99795.5 1466.34 3
 7 6 4 7791.74 364.991 3
 7 6 4 7287.18 424.986 4
 7 6 5 116609 1770.1 3
 7 6 5 117807 1914.98 4
 7 6 6 1835.73 210.111 3
 7 6 6 2043.84 226.302 4
 7 6 7 40622.1 1012.67 3
 7 6 8 3509.94 298.061 3
 7 6 9 14456.4 628.969 3
 7 6 10 51073.9 1296.25 3
 7 6 11 281.812 137.313 3
 7 6 12 25842.3 960.645 3
 7 6 13 182.081 143.757 3
 7 6 14 29290.6 1103.88 3
 7 6 15 14571.4 810.259 3
 7 6 16 1812.51 311.847 3
 7 6 17 15618 893.371 3
 7 6 18 1294.68 277.618 3
 7 7 -7 8899.77 703.06 4
 7 7 -6 42760.6 1479.88 4
 7 7 -5 -28.8481 119.071 4
 7 7 -4 24495.5 1011.9 4
 7 7 -3 2447.79 319.644 4
 7 7 -2 37163.1 1173.7 4
 7 7 -1 105199 2059.95 4
 7 7 0 2223.25 278.621 4
 7 7 1 28449.4 926.802 4
 7 7 1 29107.7 645.079 3
 7 7 2 2996.79 292.315 4
 7 7 2 3367.87 219.357 3
 7 7 3 143048 2245.69 4
 7 7 3 138477 1915.89 3
 7 7 4 48669.6 1177.19 4
 7 7 4 49717.4 1027.23 3
 7 7 5 53703.7 1125.19 3
 7 7 5 56650.3 1253.65 4
 7 7 6 100180 1709.68 3
 7 7 6 100913 1780.08 4
 7 7 7 662.532 134.201 3
 7 7 7 828.608 157.803 4
 7 7 8 39418.6 1052.26 3
 7 7 9 905.61 194.459 3
 7 7 10 32474.8 1015.85 3
 7 7 11 43070.5 1235.44 3
 7 7 12 178.802 134.04 3
 7 7 13 16214.4 787.366 3
 7 7 14 684.398 187.317 3
 7 7 15 22005.3 1003.01 3
 7 7 16 5538.19 517.464 3
 7 7 17 5418.37 539.997 3
 7 7 18 14759.7 912.773 3
 7 8 -7 2152.04 377.221 4
 7 8 -6 24636.1 1151.84 4
 7 8 -5 44199 1492.14 4
 7 8 -4 433.465 183.275 4
 7 8 -3 43369.5 1367.86 4
 7 8 -2 2487.53 319.867 4
 7 8 -1 59820.8 1522.76 4
 7 8 0 41677.6 1213.31 4
 7 8 1 2001.51 260.55 4
 7 8 2 46286.4 1215.27 4
 7 8 2 48101.7 973.471 3
 7 8 3 178.105 108.878 4
 7 8 3 253.129 92.7004 3
 7 8 4 51343.1 1242.52 4
 7 8 4 52935.8 1112.92 3
 7 8 5 22032.5 775.367 4
 7 8 5 22234.4 718.455 3
 7 8 6 57289.8 1288.36 4
 7 8 6 59515.4 1271.49 3
 7 8 7 51071.1 1205.73 3
 7 8 7 49505.8 1184.84 4
 7 8 8 9667.74 522.309 3
 7 8 8 9247.66 489.358 4
 7 8 9 64133.2 1463.86 3
 7 8 10 164.943 108.634 3
 7 8 11 48508.3 1334.48 3
 7 8 12 38751.3 1228.9 3
 7 8 13 153.887 156.506 3
 7 8 14 9209.33 632.276 3
 7 8 15 1734.9 287.118 3
 7 8 16 24152.6 1102.3 3
 7 8 17 2032.64 352.946 3
 7 9 -6 766.198 232.285 4
 7 9 -5 26542.1 1174.78 4
 7 9 -4 31310.9 1234.87 4
 7 9 -3 3297.24 400.148 4
 7 9 -2 70002.1 1783.85 4
 7 9 -1 524.607 162.908 4
 7 9 0 117504 2261.85 4
 7 9 1 20683.4 844.313 4
 7 9 2 13648.3 662.209 4
 7 9 2 14427.2 530.483 3
 7 9 3 45875.8 1229.28 4
 7 9 3 47493 1060.13 3
 7 9 4 117.236 81.8876 4
 7 9 4 257.622 101.88 3
 7 9 5 61637.2 1389.41 4
 7 9 5 63827.8 1337.57 3
 7 9 6 2763.28 282.275 4
 7 9 6 2629.63 265.692 3
 7 9 7 92275.2 1723.53 4
 7 9 7 89917.9 1743.12 3
 7 9 8 18374.5 746.944 3
 7 9 8 18337.9 706.269 4
 7 9 9 12263.4 630.746 3
 7 9 9 11554.2 562.39 4
 7 9 10 25061 937.531 3
 7 9 11 1177.39 215.007 3
 7 9 12 62328.4 1616.94 3
 7 9 13 19230.8 889.619 3
 7 9 14 5845.16 522.909 3
 7 9 15 8841.83 659.514 3
 7 9 16 2178.01 346.935 3
 7 9 17 17310.1 978.165 3
 7 10 -5 55.4177 136.588 4
 7 10 -4 40647.9 1458.89 4
 7 10 -3 11591.3 734.159 4
 7 10 -2 11651.5 726.991 4
 7 10 -1 38306.7 1277.77 4
 7 10 0 19652.2 872.856 4
 7 10 1 106867 2144.16 4
 7 10 2 10417.6 599.152 4
 7 10 3 25741 920.136 4
 7 10 3 27682.2 826.503 3
 7 10 4 40024.3 1151.05 4
 7 10 4 39324.2 1035.02 3
 7 10 5 9293.94 521.799 4
 7 10 5 10175.8 519.904 3
 7 10 6 66717.3 1458.96 4
 7 10 6 67020.4 1468.94 3
 7 10 7 9285.67 514.785 4
 7 10 7 9953.39 547.185 3
 7 10 8 65067.9 1438.5 4
 7 10 8 66074.7 1542.67 3
 7 10 9 30216.7 934.495 4
 7 10 9 30228.8 1025.5 3
 7 10 10 3292.69 304.723 4
 7 10 10 3174.89 330.349 3
 7 10 11 26523.3 1020.95 3
 7 10 12 4934.32 451.944 3
 7 10 13 40444.3 1348.83 3
 7 10 14 2354.09 334.566 3
 7 10 15 9241.54 679.59 3
 7 10 16 5608.43 552.046 3
 7 10 17 5879.18 582.313 3
 7 11 -4 10918.9 778.569 4
 7 11 -3 55781.9 1733.05 4
 7 11 -2 4628.6 484.316 4
 7 11 -1 23493.9 1036.67 4
 7 11 0 10946 677.502 4
 7 11 1 25435.9 1002.25 4
 7 11 2 75651.3 1770.65 4
 7 11 3 6276.91 469.931 4
 7 11 4 29035.6 992.046 4
 7 11 4 31217.9 952.588 3
 7 11 5 712.127 160.431 4
 7 11 5 657.881 152.794 3
 7 11 6 25767.8 903.305 4
 7 11 6 26061.3 915.699 3
 7 11 7 18351.8 736.463 4
 7 11 7 20674 824.379 3
 7 11 8 4097.53 344.245 4
 7 11 8 5014.33 416.35 3
 7 11 9 95954.7 1839.04 4
 7 11 9 99424.4 2047.11 3
 7 11 10 13465.9 623.475 4
 7 11 10 15215 786.478 3
 7 11 11 11645.6 589.79 4
 7 11 11 12829.9 714.819 3
 7 11 12 5280.49 484.819 3
 7 11 13 14025.5 802.007 3
 7 11 14 28636.5 1175.84 3
 7 11 15 1045.99 262.861 3
 7 11 16 10922.4 768.464 3
 7 12 -3 16236 938.231 4
 7 12 -2 42991.2 1505.41 4
 7 12 -1 58.2562 127.63 4
 7 12 0 14289.3 800.315 4
 7 12 1 1905.66 294.351 4
 7 12 2 27213.2 1039.15 4
 7 12 3 38096.8 1211.93 4
 7 12 4 1526.71 228.312 4
 7 12 4 1625.77 234.169 3
 7 12 5 33317.9 1077.66 4
 7 12 5 35200.5 1092.13 3
 7 12 6 1540.04 231.845 4
 7 12 6 2017.62 272.304 3
 7 12 7 10502.9 568.8 4
 7 12 7 11577.9 635.898 3
 7 12 8 6099.56 423.652 4
 7 12 8 7306.71 525.599 3
 7 12 9 17655.3 728.986 4
 7 12 9 18934.2 866.806 3
 7 12 10 69844.3 1541.97 4
 7 12 10 73530.4 1813.55 3
 7 12 11 5208.74 481.444 3
 7 12 12 12699.5 760.005 3
 7 12 13 1287.97 274.641 3
 7 12 14 15974.1 901.815 3
 7 12 15 18062 981.65 3
 7 13 -2 28126.7 1239.68 4
 7 13 -1 31222.4 1266.29 4
 7 13 0 264.271 178.532 4
 7 13 1 7298.29 575.46 4
 7 13 2 154.918 106.576 4
 7 13 3 20840.9 908.442 4
 7 13 4 15648.4 772.57 4
 7 13 5 19571.1 835.582 4
 7 13 5 21413 870.762 3
 7 13 6 46535.1 1295.48 4
 7 13 6 48771.1 1380.02 3
 7 13 7 6020.3 443.657 4
 7 13 7 6822.08 514.848 3
 7 13 8 8429.19 516.603 4
 7 13 8 9469.16 611.806 3
 7 13 9 292.639 137.276 3
 7 13 10 21719.4 985.408 3
 7 13 11 51933.8 1590.1 3
 7 13 12 902.016 241.587 3
 7 13 13 10627.4 744.778 3
 7 13 14 529.29 219.229 3
 7 13 15 11632.3 811.097 3
 7 14 -1 24130.3 1147.38 4
 7 14 0 30118.7 1239.63 4
 7 14 1 139.255 142.379 4
 7 14 2 8860.04 628.544 4
 7 14 3 120.831 127.6 4
 7 14 4 17593.8 832.744 4
 7 14 5 7015.95 512.564 4
 7 14 6 15413.3 741.52 4
 7 14 6 17425.3 838.52 3
 7 14 7 36822.3 1269.06 3
 7 14 8 619.601 196.797 3
 7 14 9 12569.7 748.368 3
 7 14 10 1762.64 312.45 3
 7 14 11 32276.2 1285.74 3
 7 14 12 30569.2 1274.53 3
 7 14 13 44.0965 133.448 3
 7 14 14 5129.9 552.997 3
 7 15 0 38050.9 1448.73 4
 7 15 1 19003.4 977.527 4
 7 15 2 654.091 187.834 4
 7 15 3 9445.05 645.189 4
 7 15 7 21351.5 983.274 3
 7 15 8 40971.7 1406.97 3
 7 15 9 329.481 173.674 3
 7 15 10 11938.8 775.32 3
 7 15 11 4264.18 483.698 3
 7 15 12 27163.4 1218.37 3
 7 16 8 32167.7 1295.92 3
 7 16 9 23206.9 1122.51 3
 7 16 10 3466.07 453.876 3
 7 16 11 6098.49 603.726 3
 7 17 6 6902.23 579.932 2
 8 -14 3 19769.3 1005.41 5
 8 -13 4 40396.1 1395.62 5
 8 -12 4 12592.7 735.393 5
 8 -11 5 27152 1031.18 5
 8 -11 8 15770.4 909.309 3
 8 -10 5 1642.65 249.355 5
 8 -10 8 1662.14 325.875 3
 8 -10 9 21812.2 1088.12 3
 8 -9 6 157.246 85.0498 5
 8 -9 8 29539.3 1178.68 3
 8 -9 9 1174.97 294.289 3
 8 -9 10 13131.6 823.822 3
 8 -9 11 647.567 205.842 3
 8 -8 6 6206.83 405.509 5
 8 -8 7 5570.43 482.039 3
 8 -8 8 54812.5 1620.42 3
 8 -8 9 30807.2 1219.79 3
 8 -8 10 2693.65 372.017 3
 8 -8 11 8766.41 676.866 3
 8 -8 12 1699.21 329.712 3
 8 -7 6 3339.86 284.369 5
 8 -7 7 3897.46 395.515 3
 8 -7 8 10731.6 668.215 3
 8 -7 9 53789.6 1574.41 3
 8 -7 10 18446.3 934.605 3
 8 -7 11 4743.04 494.093 3
 8 -7 12 8670.07 670.577 3
 8 -7 13 2698.36 397.533 3
 8 -6 0 25741.9 654.433 4
 8 -6 6 14832.3 552.182 5
 8 -6 7 5928.94 348.618 5
 8 -6 7 5297.58 447.067 3
 8 -6 8 3969.09 408.875 3
 8 -6 9 8879.97 606.344 3
 8 -6 10 41700 1384.64 3
 8 -6 11 10919.4 714.806 3
 8 -6 12 7666.46 608.206 3
 8 -6 13 6709.32 605.442 3
 8 -6 14 5831.82 568.503 3
 8 -5 -2 114334 1639.21 4
 8 -5 -1 169357 2167.07 4
 8 -5 0 11411.7 431.574 4
 8 -5 6 130523 2270.93 3
 8 -5 7 10688.6 431.245 5
 8 -5 7 9979.97 581.288 3
 8 -5 8 11364.5 652.851 3
 8 -5 9 12854 700.416 3
 8 -5 10 6346.88 527.076 3
 8 -5 11 36426.6 1273.35 3
 8 -5 12 2888.59 374.589 3
 8 -5 13 13691.7 810.528 3
 8 -5 14 3144.86 426.548 3
 8 -4 -4 551.674 125.859 4
 8 -4 -3 67945.6 1229.05 4
 8 -4 -2 206.454 79.695 4
 8 -4 -1 170649 2224.76 4
 8 -4 0 103127 1571.4 4
 8 -4 5 14016.4 611.411 3
 8 -4 6 43442.6 1182.19 3
 8 -4 7 85616.1 1297.79 5
 8 -4 7 86464.2 1777.12 3
 8 -4 8 4109.26 387.544 3
 8 -4 9 40662.3 1242.36 3
 8 -4 10 5742.25 479.262 3
 8 -4 11 23885 1013.75 3
 8 -4 12 31318.6 1185.06 3
 8 -4 13 16.0721 100.542 3
 8 -4 14 13346 823.02 3
 8 -4 15 2031.91 354.834 3
 8 -3 -6 271.795 110.815 4
 8 -3 -5 35348.7 944.159 4
 8 -3 -4 38069.8 942.715 4
 8 -3 -3 10686.8 463.506 4
 8 -3 -2 128610 1888.94 4
 8 -3 -1 2093.75 201.087 4
 8 -3 0 148279 2044.78 4
 8 -3 1 69693.8 1255.26 4
 8 -3 4 34.7385 67.5362 3
 8 -3 5 45626.6 1125.21 3
 8 -3 6 4020.89 334.356 3
 8 -3 7 24945.9 543.851 5
 8 -3 7 25923.1 897.715 3
 8 -3 8 84662 1783.85 3
 8 -3 9 197.793 117.611 3
 8 -3 10 45939 1334.87 3
 8 -3 11 464.021 152.195 3
 8 -3 12 33676.9 1213.17 3
 8 -3 13 13893.3 802.309 3
 8 -3 14 1615.01 300.839 3
 8 -3 15 15198.7 896.908 3
 8 -3 16 445.506 199.347 3
 8 -2 -7 5234.1 399.434 4
 8 -2 -6 38343.7 1064.74 4
 8 -2 -5 3413.83 300.173 4
 8 -2 -4 79632.4 1504.41 4
 8 -2 -3 19869.8 665.981 4
 8 -2 -2 15132.1 561.576 4
 8 -2 -1 18684.1 611.458 4
 8 -2 0 6157 344.492 4
 8 -2 1 118576 1791.95 4
 8 -2 2 20839.8 624.952 3
 8 -2 3 96906.9 1599.62 3
 8 -2 4 59753.8 1227 3
 8 -2 5 5947.49 374.216 3
 8 -2 6 25926.2 836.433 3
 8 -2 7 573.639 67.4821 5
 8 -2 7 376.173 120.666 3
 8 -2 8 59114.5 1392.8 3
 8 -2 9 37255.9 1140.57 3
 8 -2 10 3567.47 357.28 3
 8 -2 11 32869 1123.71 3
 8 -2 12 2300.23 319.128 3
 8 -2 13 35770.9 1257.72 3
 8 -2 14 5906.61 536.277 3
 8 -2 15 3952.1 454.745 3
 8 -2 16 8236.34 673.117 3
 8 -1 -9 2024 294.899 4
 8 -1 -8 35889.8 1170.98 4
 8 -1 -7 23299.2 884.376 4
 8 -1 -6 3504.17 335.236 4
 8 -1 -5 32605.2 970.691 4
 8 -1 -4 23640.8 790.762 4
 8 -1 -3 102272 1761.88 4
 8 -1 -2 10898.5 492.847 4
 8 -1 -1 2557.48 233.217 4
 8 -1 -1 2837.25 175.464 3
 8 -1 0 23328.3 705.928 4
 8 -1 0 22783.9 563.217 3
 8 -1 1 8533.14 353.73 3
 8 -1 1 8349.8 408.996 4
 8 -1 2 107955 1602.58 3
 8 -1 2 110176 1737.53 4
 8 -1 3 1214.68 152.61 3
 8 -1 4 89777.4 1527.8 3
 8 -1 5 57361.4 1213.39 3
 8 -1 6 492.122 124.948 3
 8 -1 7 24068.8 811.148 3
 8 -1 8 7679.51 464.94 3
 8 -1 9 42621.3 1185.1 3
 8 -1 10 21907.5 869.472 3
 8 -1 11 12277.4 670.106 3
 8 -1 12 15694.2 780.318 3
 8 -1 13 5124.23 468.08 3
 8 -1 14 32175.5 1248.91 3
 8 -1 15 1411.24 291.896 3
 8 -1 16 5796.15 547.531 3
 8 0 -10 11256.9 748.943 4
 8 0 -9 18252.1 904.636 4
 8 0 -8 2791.26 347.114 4
 8 0 -7 57331 1491.77 4
 8 0 -6 28025.4 973.004 4
 8 0 -5 13942.2 654.351 4
 8 0 -4 43054.1 1127.37 4
 8 0 -3 15516.2 632.513 4
 8 0 -2 45568.5 1090.15 4
 8 0 -1 15273.4 366.376 3
 8 0 -1 15252.4 592.353 4
 8 0 0 10829.3 340.878 3
 8 0 0 11324.6 498.696 4
 8 0 1 21148.2 532.417 3
 8 0 1 21587.5 688.45 4
 8 0 2 25094.3 623.499 3
 8 0 2 24863.7 739.576 4
 8 0 3 104684 1560.88 3
 8 0 4 692.402 117.467 3
 8 0 5 92742.3 1569.53 3
 8 0 6 60572.3 1247.8 3
 8 0 7 405.302 108.729 3
 8 0 8 20542.4 749.779 3
 8 0 9 4547.3 373.179 3
 8 0 10 41992.5 1189.37 3
 8 0 11 5092.94 430.572 3
 8 0 12 18781.9 843.693 3
 8 0 13 10939 692.463 3
 8 0 14 5081.02 484.39 3
 8 0 15 19522.2 960.221 3
 8 0 16 66.7249 138.955 3
 8 0 17 15399.6 910.931 3
 8 1 -10 4652.28 514.225 4
 8 1 -9 13949.8 816.914 4
 8 1 -8 23838.1 1014.4 4
 8 1 -7 7655.37 544.119 4
 8 1 -6 74666.7 1704.78 4
 8 1 -5 19624.4 804.124 4
 8 1 -4 19309.6 764.051 4
 8 1 -3 47017.4 1186.46 4
 8 1 -2 26631.8 840.846 4
 8 1 -1 105447 1139.41 3
 8 1 -1 111650 1867.79 4
 8 1 0 3531.42 165.613 3
 8 1 0 3345.68 285.641 4
 8 1 1 11377.8 348.313 3
 8 1 1 11768.1 513.561 4
 8 1 2 6830.52 292.67 3
 8 1 2 6549.31 377.778 4
 8 1 3 29493.3 696.236 3
 8 1 3 30294.1 833.018 4
 8 1 4 104111 1576.26 3
 8 1 5 3059.23 246.351 3
 8 1 6 227656 2925.12 3
 8 1 7 75524 1456.32 3
 8 1 8 5091.16 363.159 3
 8 1 9 14191.8 640.808 3
 8 1 10 8743.82 520.545 3
 8 1 11 39241.9 1200.3 3
 8 1 12 3549.89 369.299 3
 8 1 13 17080.3 823.622 3
 8 1 14 9233.66 627.843 3
 8 1 15 5775.61 528.674 3
 8 1 16 10369.2 713.463 3
 8 1 17 843.372 244.339 3
 8 2 -10 8705.25 580.841 4
 8 2 -9 268.288 180.004 4
 8 2 -8 27367.6 1125.72 4
 8 2 -7 23482 984.922 4
 8 2 -6 18299.2 822.188 4
 8 2 -5 107964 2120.77 4
 8 2 -4 19126.5 781.226 4
 8 2 -3 42093.6 1156.27 4
 8 2 -2 8459.32 482.074 4
 8 2 -1 73779.4 1507.65 4
 8 2 0 95945.9 1097.3 3
 8 2 0 96124.4 1722.3 4
 8 2 1 2065.41 134.509 3
 8 2 1 1858.16 219.539 4
 8 2 2 38901.2 731.15 3
 8 2 2 39474.6 988.199 4
 8 2 3 8128.29 339.13 3
 8 2 3 7251.39 407.614 4
 8 2 4 38969.1 859.284 3
 8 2 5 62581.8 842.234 5
 8 2 5 64328.5 1203.67 3
 8 2 6 28835.6 805.78 3
 8 2 7 317193 3853.34 3
 8 2 8 50496.4 1202.13 3
 8 2 9 26320.8 878.843 3
 8 2 10 276.244 119.355 3
 8 2 11 30219.9 1006.83 3
 8 2 12 69116.9 1651.66 3
 8 2 13 1094.04 229.745 3
 8 2 14 24849 1035.29 3
 8 2 15 5044.2 476.688 3
 8 2 16 5769.54 531.001 3
 8 2 17 3217.93 416.075 3
 8 3 -9 20821.8 1070.92 4
 8 3 -8 63.5059 121.579 4
 8 3 -7 27372.2 1106 4
 8 3 -6 14364.5 766.467 4
 8 3 -5 67931.2 1664.65 4
 8 3 -4 151975 2604.88 4
 8 3 -3 236.279 116.947 4
 8 3 -2 30576 971.848 4
 8 3 -1 326.475 116.728 4
 8 3 0 83881.2 1595.43 4
 8 3 0 74951.1 838.668 3
 8 3 1 125752 1454.13 3
 8 3 1 125568 2038.49 4
 8 3 2 11515.1 359.442 3
 8 3 2 11902.9 539.594 4
 8 3 3 98671 1404.43 3
 8 3 3 100402 1748.94 4
 8 3 4 4340.65 257.945 3
 8 3 4 3993.04 310.38 4
 8 3 5 43334 936.829 3
 8 3 6 13499.2 525.373 3
 8 3 7 125785 1964.79 3
 8 3 8 253947 3298.94 3
 8 3 9 21843 777.944 3
 8 3 10 20939.9 810.516 3
 8 3 11 513.312 177.902 3
 8 3 12 49852.8 1366.52 3
 8 3 13 40928.5 1273.82 3
 8 3 14 2259.54 314.343 3
 8 3 15 21408.8 975.317 3
 8 3 16 2684.79 374.443 3
 8 3 17 2530.56 370.948 3
 8 4 -9 9056.82 720.335 4
 8 4 -8 33644.9 1336.06 4
 8 4 -7 22.7634 132.383 4
 8 4 -6 42924.4 1385.14 4
 8 4 -5 600.341 182.401 4
 8 4 -4 110734 2207.8 4
 8 4 -3 93745.8 1946.99 4
 8 4 -2 995.918 193.052 4
 8 4 -1 22128.9 819.492 4
 8 4 0 210.035 98.2507 4
 8 4 1 139361 2230.54 4
 8 4 1 136383 1553.24 3
 8 4 2 71670 1063.62 3
 8 4 2 72696.8 1473.2 4
 8 4 3 56817.4 985.211 3
 8 4 3 56885 1271.21 4
 8 4 4 132010 1809.21 3
 8 4 4 130726 2106.75 4
 8 4 5 1868.07 183.36 3
 8 4 5 1902.15 225.336 4
 8 4 6 30308 804.122 3
 8 4 7 562.668 127.515 3
 8 4 8 113955 1922.42 3
 8 4 9 101267 1838.35 3
 8 4 10 345.004 135.425 3
 8 4 11 40412 1173.98 3
 8 4 12 1765.87 271.015 3
 8 4 13 39425.2 1258.48 3
 8 4 14 12024.2 700.537 3
 8 4 15 4245.47 443.099 3
 8 4 16 12153.2 768.556 3
 8 4 17 1001.69 252.392 3
 8 4 18 4927.92 535.867 3
 8 5 -8 20412.9 1064.27 4
 8 5 -7 43414.2 1511.68 4
 8 5 -6 3055.01 397.03 4
 8 5 -5 35721.9 1256.65 4
 8 5 -4 11710.3 685.013 4
 8 5 -3 66002.3 1632.78 4
 8 5 -2 57481.1 1477.33 4
 8 5 -1 532.299 153.81 4
 8 5 0 25817.6 894.639 4
 8 5 1 4453.94 358.852 4
 8 5 1 5283.25 211.414 3
 8 5 2 144016 2298.01 4
 8 5 2 143676 1762.33 3
 8 5 3 27240.1 649.229 3
 8 5 3 28481.8 887.107 4
 8 5 4 55987.2 1045.23 3
 8 5 4 56225.3 1271.05 4
 8 5 5 118107 1774.4 3
 8 5 5 118642 1988.65 4
 8 5 6 2235.02 217.247 3
 8 5 7 40052.6 995.051 3
 8 5 8 2308.93 240.146 3
 8 5 9 58009.9 1337.81 3
 8 5 10 51916.8 1294.7 3
 8 5 11 7102.89 479.613 3
 8 5 12 42119.4 1243.84 3
 8 5 13 22.686 108.329 3
 8 5 14 25052.8 1025.56 3
 8 5 15 5639.55 510.585 3
 8 5 16 5365.36 518.258 3
 8 5 17 14213 868.304 3
 8 5 18 58.0513 134.783 3
 8 6 -7 30493.4 1294.4 4
 8 6 -6 32830.9 1271.34 4
 8 6 -5 6798.79 554.729 4
 8 6 -4 19282.3 901.815 4
 8 6 -3 10148.2 628.432 4
 8 6 -2 88607.3 1923.11 4
 8 6 -1 67576.8 1607.19 4
 8 6 0 8150.22 512.783 4
 8 6 1 23894.5 865.782 4
 8 6 1 25429.9 536.607 3
 8 6 2 30448.8 965.628 4
 8 6 2 30955.8 666.558 3
 8 6 3 149137 2380.08 4
 8 6 3 145046 1921.88 3
 8 6 4 19620.5 595.128 3
 8 6 4 19375.9 739.39 4
 8 6 5 71651.8 1310.54 3
 8 6 5 72407.9 1490.43 4
 8 6 6 76026 1421.27 3
 8 6 6 79539.4 1570.68 4
 8 6 7 2523.14 239.796 3
 8 6 8 20027.9 727.997 3
 8 6 9 6010.2 408.756 3
 8 6 10 71504.1 1589.42 3
 8 6 11 65020.4 1551.08 3
 8 6 12 10522.7 615.769 3
 8 6 13 27104 1046.28 3
 8 6 14 873.118 228.655 3
 8 6 15 16697.9 865.652 3
 8 6 16 1492.42 284.954 3
 8 6 17 7945.2 655.407 3
 8 6 18 13975 876.682 3
 8 7 -7 272.106 153.139 4
 8 7 -6 35255.4 1368.63 4
 8 7 -5 21097.9 1012.95 4
 8 7 -4 7482.92 589.26 4
 8 7 -3 19430.5 906.405 4
 8 7 -2 14323.1 756.465 4
 8 7 -1 88710.7 1943.15 4
 8 7 0 27899.8 999.006 4
 8 7 1 55558.1 1412.85 4
 8 7 2 72968.3 1617.24 4
 8 7 2 73297.7 1176.76 3
 8 7 3 11576.8 584.549 4
 8 7 3 11204.6 430.749 3
 8 7 4 75321.6 1590.17 4
 8 7 4 76261.4 1335.35 3
 8 7 5 545.887 118.708 3
 8 7 5 474.637 131.467 4
 8 7 6 107834 1797.78 3
 8 7 6 107931 1933.54 4
 8 7 7 56991.3 1263.65 3
 8 7 7 57991.5 1336.29 4
 8 7 8 10326.9 524.458 3
 8 7 9 42607.8 1157.46 3
 8 7 10 1310.4 221.885 3
 8 7 11 65443.1 1566.27 3
 8 7 12 20824.6 881.971 3
 8 7 13 6603.28 509.8 3
 8 7 14 16577.3 836.659 3
 8 7 15 2889.17 373.244 3
 8 7 16 16271.8 896.918 3
 8 7 17 1008.24 273.74 3
 8 8 -6 1085.99 267.337 4
 8 8 -5 31988.9 1313.4 4
 8 8 -4 22841.3 1049.91 4
 8 8 -3 13506.8 782.95 4
 8 8 -2 34449.4 1219.63 4
 8 8 -1 21458.6 926.834 4
 8 8 0 82469.8 1868.17 4
 8 8 1 367.518 136.868 4
 8 8 2 54428.8 1399.83 4
 8 8 2 55395.7 1042.66 3
 8 8 3 70113.1 1588.68 4
 8 8 3 72173.9 1286.81 3
 8 8 4 4615.15 375.666 4
 8 8 4 5071.24 319.369 3
 8 8 5 57679.6 1381.41 4
 8 8 5 58681.8 1227.07 3
 8 8 6 2293.16 239.999 3
 8 8 6 1819.33 243.313 4
 8 8 7 138863 2227.83 3
 8 8 7 136699 2296.31 4
 8 8 8 18941.6 741.794 3
 8 8 8 17456.9 715.512 4
 8 8 9 28260.8 943.412 3
 8 8 10 27638.3 965.049 3
 8 8 11 7235.32 510.067 3
 8 8 12 49726 1417.52 3
 8 8 13 7755.99 581.154 3
 8 8 14 13392.2 818.685 3
 8 8 15 6188.34 592.317 3
 8 8 16 4092.41 463.538 3
 8 8 17 17125.2 963.631 3
 8 9 -5 1879.56 336.53 4
 8 9 -4 42779.4 1486.56 4
 8 9 -3 10216.9 709.802 4
 8 9 -2 31301.6 1198.05 4
 8 9 -1 32216.9 1178.5 4
 8 9 0 44288.2 1363.32 4
 8 9 1 95004.1 2035.27 4
 8 9 2 1270.6 242.704 4
 8 9 3 20384.7 836.271 4
 8 9 3 20769.3 665.937 3
 8 9 4 6309.68 452.489 4
 8 9 4 6853 394.525 3
 8 9 5 25301.3 907.529 4
 8 9 5 26156.2 811.752 3
 8 9 6 51063.1 1309.63 4
 8 9 6 50600.9 1211.16 3
 8 9 7 47138.7 1232.47 4
 8 9 7 46866.9 1184.71 3
 8 9 8 129360 2231.35 3
 8 9 8 127388 2205.33 4
 8 9 9 10603 592.043 3
 8 9 9 9413.7 540.423 4
 8 9 10 21654 876.721 3
 8 9 10 21086.2 814.27 4
 8 9 11 20683 872.11 3
 8 9 12 8200.44 567.886 3
 8 9 13 32509.5 1264.62 3
 8 9 14 106.142 128.352 3
 8 9 15 13317.2 798.088 3
 8 9 16 7218.32 623.773 3
 8 9 17 6669.26 601.448 3
 8 10 -4 20561.3 1061.87 4
 8 10 -3 42919.7 1494.01 4
 8 10 -2 1775.76 311.651 4
 8 10 -1 39070.6 1344.02 4
 8 10 0 15627.7 817.744 4
 8 10 1 60151.3 1605.46 4
 8 10 2 110719 2231.64 4
 8 10 3 341.021 151.472 4
 8 10 3 308.767 103.633 3
 8 10 4 69321.3 1637.82 4
 8 10 4 71782.1 1443.17 3
 8 10 5 5603.35 434.92 4
 8 10 5 6697.89 423.62 3
 8 10 6 21253.9 832.166 4
 8 10 6 22302.8 800.191 3
 8 10 7 1009.39 192.288 3
 8 10 7 604.637 150.706 4
 8 10 8 40000.5 1145.98 4
 8 10 8 39369.8 1149.49 3
 8 10 9 76839.4 1663.21 4
 8 10 9 78068.5 1737.67 3
 8 10 10 5341.67 443.058 3
 8 10 10 4554.95 387.949 4
 8 10 11 27430.8 1042.24 3
 8 10 11 26200.6 928.513 4
 8 10 12 10785.9 674.194 3
 8 10 13 19914.2 948.741 3
 8 10 14 14058 820.532 3
 8 10 15 18.3592 133.032 3
 8 10 16 16191.5 927.341 3
 8 11 -3 31699.5 1327.52 4
 8 11 -2 50915.1 1650.74 4
 8 11 -1 823.17 220.883 4
 8 11 0 36855.7 1302.57 4
 8 11 1 9902.08 654.244 4
 8 11 2 43687.9 1358.66 4
 8 11 3 44101.2 1332.41 4
 8 11 4 9970.09 603.876 4
 8 11 4 9676.9 514.658 3
 8 11 5 102916 2054.16 4
 8 11 5 102920 1915.96 3
 8 11 6 1292.68 219.655 4
 8 11 6 1142.22 212.935 3
 8 11 7 5157.04 410.858 4
 8 11 7 6268.91 454.163 3
 8 11 8 1742.1 259.222 3
 8 11 8 1605.79 251.878 4
 8 11 9 22228.8 862.704 4
 8 11 9 23521.9 941.961 3
 8 11 10 56396.8 1410.49 4
 8 11 10 57710 1538.9 3
 8 11 11 496.44 176.208 3
 8 11 11 340.626 151.361 4
 8 11 12 21405.5 850.218 4
 8 11 12 22737.9 1000.08 3
 8 11 13 1261.01 266.978 3
 8 11 14 8438.75 637.816 3
 8 11 15 8097.5 645.018 3
 8 11 16 5271.66 539.215 3
 8 12 -2 41731 1519.92 4
 8 12 -1 36538.4 1386.9 4
 8 12 0 3249.35 399.763 4
 8 12 1 27366.8 1123.89 4
 8 12 2 406.825 178.461 4
 8 12 3 50160.5 1468.2 4
 8 12 4 17702.6 833.158 4
 8 12 4 19111.4 760.837 3
 8 12 5 36579.3 1193.18 4
 8 12 5 40788.1 1172.09 3
 8 12 6 56143.1 1482.7 4
 8 12 6 59029.1 1469.21 3
 8 12 7 5516.17 444.487 4
 8 12 7 6473.94 482.651 3
 8 12 8 7455.9 501.762 4
 8 12 8 8462.83 561.676 3
 8 12 9 14.3032 102.095 3
 8 12 9 81.5424 89.0297 4
 8 12 10 40065.7 1197.18 4
 8 12 10 40493.7 1331.1 3
 8 12 11 45368.6 1274.32 4
 8 12 11 46355.5 1467.79 3
 8 12 12 430.056 173.676 3
 8 12 13 19623.8 976.672 3
 8 12 14 3576.96 446.484 3
 8 12 15 8115.62 668.287 3
 8 13 -1 44395 1570.74 4
 8 13 0 24056.3 1121.92 4
 8 13 1 7144.18 586.495 4
 8 13 2 32327.3 1233.82 4
 8 13 3 14.8371 109.385 4
 8 13 4 32828 1175.13 4
 8 13 5 1324.14 254.368 4
 8 13 5 1721.4 262.916 3
 8 13 6 52921 1460.93 4
 8 13 6 55329.9 1481.99 3
 8 13 7 55754.3 1485.14 4
 8 13 7 57305.1 1538.7 3
 8 13 8 958.478 203.964 4
 8 13 8 1152.42 234.052 3
 8 13 9 4365.03 386.277 4
 8 13 9 5389.52 483.791 3
 8 13 10 77.5975 131.653 3
 8 13 11 39313.6 1372.26 3
 8 13 12 24281.3 1098.05 3
 8 13 13 7319.58 614.288 3
 8 13 14 19614 1030.07 3
 8 14 0 38234.9 1456.91 4
 8 14 1 6673.21 595.813 4
 8 14 2 13930.5 816.414 4
 8 14 3 20528.5 976.867 4
 8 14 4 1971.57 306.342 4
 8 14 5 26386.8 1053.17 4
 8 14 6 83.0428 116.299 4
 8 14 6 -39.4599 137.932 3
 8 14 7 53162.1 1473.89 4
 8 14 7 57129.7 1596.74 3
 8 14 8 49528.5 1522.42 3
 8 14 9 290.914 164.684 3
 8 14 10 10314 693.168 3
 8 14 11 3858.67 450.472 3
 8 14 12 30777 1258.16 3
 8 14 13 4879.41 524.785 3
 8 15 1 26265.5 1199.71 4
 8 15 2 2534.53 381.833 4
 8 15 3 13008.3 796.366 4
 8 15 4 8134.44 618.174 4
 8 15 5 2516.21 342.907 4
 8 15 7 2407.14 337.284 3
 8 15 8 58466 1702.9 3
 8 15 9 30839.1 1247.88 3
 8 15 10 6235.3 563.519 3
 8 15 11 6427.37 590.344 3
 8 15 12 3386.82 428.403 3
 8 16 2 17747.1 976.18 4
 8 16 8 3110.73 409.284 3
 8 16 9 30020.6 1274.62 3
 8 16 10 2940.98 416.674 3
 9 -10 8 5593.96 546.911 3
 9 -9 7 18855.5 938.796 3
 9 -9 8 56593.5 1728.9 3
 9 -9 9 5487.44 556.391 3
 9 -9 10 8690.25 681.514 3
 9 -8 7 993.567 222.182 3
 9 -8 8 22933.8 1040.4 3
 9 -8 9 45315 1528.04 3
 9 -8 10 888.909 249.179 3
 9 -8 11 14388.1 875.994 3
 9 -7 7 8714.23 604.953 3
 9 -7 8 1985.6 305.376 3
 9 -7 9 25562.3 1082.54 3
 9 -7 10 34076.6 1295.34 3
 9 -7 11 271.177 167.878 3
 9 -7 12 13209.9 853.582 3
 9 -6 6 72678.2 1699.93 3
 9 -6 7 2738.45 331.863 3
 9 -6 8 10642.7 657.018 3
 9 -6 9 21.9171 108.208 3
 9 -6 10 26369.5 1105.7 3
 9 -6 11 21181.6 1014.98 3
 9 -6 12 2007.84 342.268 3
 9 -6 13 21988.3 1106.11 3
 9 -5 -1 51488.3 1048.22 4
 9 -5 0 36735.1 872.507 4
 9 -5 1 6561.7 360.656 4
 9 -5 5 2291.36 266.496 3
 9 -5 6 72352.3 1644.99 3
 9 -5 7 56497.4 1477.11 3
 9 -5 8 -99.4434 103.927 3
 9 -5 9 11314.2 674.315 3
 9 -5 10 787.167 199.3 3
 9 -5 11 20853.4 972.877 3
 9 -5 12 13938.7 816.399 3
 9 -5 13 7652.36 618.001 3
 9 -5 14 23647.9 1131.99 3
 9 -4 -3 4425.21 306.286 4
 9 -4 -2 46396.8 1028.09 4
 9 -4 -1 110.218 73.4703 4
 9 -4 0 45067.2 1005.29 4
 9 -4 1 5018.08 320.845 4
 9 -4 5 66214.6 1491.35 3
 9 -4 6 152.902 91.8205 3
 9 -4 7 61596.4 1495.38 3
 9 -4 8 54896.6 1453.3 3
 9 -4 9 281.786 126.478 3
 9 -4 10 19946.8 916.508 3
 9 -4 11 345.701 152.364 3
 9 -4 12 20470.1 970.116 3
 9 -4 13 4630.75 482.306 3
 9 -4 14 9886.95 724.045 3
 9 -4 15 20065.8 1065.46 3
 9 -3 -4 80399.7 1539.25 4
 9 -3 -3 68984.9 1363.99 4
 9 -3 -2 23732.1 736.193 4
 9 -3 -1 99795.9 1659.41 4
 9 -3 0 2817.69 244.548 4
 9 -3 1 62431.1 1246.98 4
 9 -3 3 60042.8 1267.9 3
 9 -3 4 19481.3 713.359 3
 9 -3 5 15681.1 660.381 3
 9 -3 6 25922.2 884.457 3
 9 -3 7 89.0376 100.647 3
 9 -3 8 76042.7 1710.73 3
 9 -3 9 48469.5 1372.6 3
 9 -3 10 5889.69 478.625 3
 9 -3 11 21338.3 945.068 3
 9 -3 12 1028.56 222.756 3
 9 -3 13 19354.6 975.422 3
 9 -3 14 2009.96 330.174 3
 9 -3 15 12156.5 824.733 3
 9 -2 -6 9655.59 545.773 4
 9 -2 -5 7265.37 458.098 4
 9 -2 -4 21898.6 772.18 4
 9 -2 -3 104120 1815.37 4
 9 -2 -2 11378.6 517.161 4
 9 -2 -1 52630.2 1159.98 4
 9 -2 0 38617.6 970.224 4
 9 -2 1 26437.6 779.727 4
 9 -2 1 25830.3 699.398 3
 9 -2 2 92010.4 1541.99 3
 9 -2 2 90564 1603.99 4
 9 -2 3 11337.6 498.235 3
 9 -2 4 73178.7 1425.89 3
 9 -2 5 13636.2 592.243 3
 9 -2 6 1918.34 236.432 3
 9 -2 7 30856.6 981.28 3
 9 -2 8 801.487 170.909 3
 9 -2 9 82997.4 1791.47 3
 9 -2 10 16182.7 763.469 3
 9 -2 11 14206.9 744.536 3
 9 -2 12 16787.3 851.748 3
 9 -2 13 2702.7 364.026 3
 9 -2 14 17812.2 924.653 3
 9 -2 15 213.023 145.011 3
 9 -2 16 14923.4 929.103 3
 9 -1 -7 35578.4 1155.32 4
 9 -1 -6 12900.1 652.652 4
 9 -1 -5 17317.3 733.941 4
 9 -1 -4 12671.5 603.186 4
 9 -1 -3 46401.2 1166.58 4
 9 -1 -2 49126.1 1171.06 4
 9 -1 -1 300.405 118.819 4
 9 -1 -1 217.245 58.5352 3
 9 -1 0 40708.7 1024.95 4
 9 -1 0 41044.2 821.663 3
 9 -1 1 18556.3 553.022 3
 9 -1 1 19051.4 672.917 4
 9 -1 2 57667.4 1106.99 3
 9 -1 2 57954.4 1235 4
 9 -1 3 40783.1 945.776 3
 9 -1 4 30360.2 834.339 3
 9 -1 5 80749.8 1515.74 3
 9 -1 6 21482.4 750.687 3
 9 -1 7 4828.21 374.416 3
 9 -1 8 39151.3 1103.53 3
 9 -1 9 9201.15 554.136 3
 9 -1 10 63291.9 1553.75 3
 9 -1 11 6531.26 500.193 3
 9 -1 12 24144.7 1007.77 3
 9 -1 13 10285.8 678.786 3
 9 -1 14 2737.69 379.537 3
 9 -1 15 10661.3 750.883 3
 9 -1 16 318.382 133.286 3
 9 0 -8 4803.5 459.675 4
 9 0 -7 7730.54 548.218 4
 9 0 -6 53252.7 1427.09 4
 9 0 -5 5128.06 420.368 4
 9 0 -4 28218.2 947.94 4
 9 0 -3 7973.17 483.066 4
 9 0 -2 38167.3 1051.34 4
 9 0 -1 51208.6 1214.54 4
 9 0 0 868.449 101.601 3
 9 0 0 712.4 155.519 4
 9 0 1 53086.2 947.033 3
 9 0 1 53817.1 1213.09 4
 9 0 2 1838.11 170.701 3
 9 0 2 1938.97 219.922 4
 9 0 3 31606.2 780.205 3
 9 0 3 31820.4 898.231 4
 9 0 4 18097.9 607.757 3
 9 0 5 34320.4 896.428 3
 9 0 6 129599 2057.5 3
 9 0 7 17936.7 692.65 3
 9 0 8 9321.52 518.389 3
 9 0 9 15582.1 694.335 3
 9 0 10 29106.8 996.253 3
 9 0 11 46138.8 1330.26 3
 9 0 12 -5.26688 103.715 3
 9 0 13 31220.7 1177.59 3
 9 0 14 16781.3 896.08 3
 9 0 15 2316.05 345.342 3
 9 0 16 6617.77 589.216 3
 9 1 -9 500.988 198.953 4
 9 1 -8 11107.6 713.019 4
 9 1 -7 6153.94 517.53 4
 9 1 -6 31603.4 1117.63 4
 9 1 -5 59516.4 1518.26 4
 9 1 -4 5727.09 434.686 4
 9 1 -3 23218.4 849.953 4
 9 1 -2 3580.62 324.05 4
 9 1 -1 68798.4 1470.92 4
 9 1 0 46015.2 735.577 3
 9 1 0 43540.8 1110.27 4
 9 1 1 11024 358.986 3
 9 1 1 10124.4 514.484 4
 9 1 2 68849.3 1127.15 3
 9 1 2 71682.6 1436.7 4
 9 1 3 13680.3 475.643 3
 9 1 3 13359.8 585.609 4
 9 1 4 31856.1 795.313 3
 9 1 5 9837.01 448.87 3
 9 1 6 48689.7 1108.37 3
 9 1 7 129033 2084.42 3
 9 1 8 15041.8 647.411 3
 9 1 9 9350.36 536.103 3
 9 1 10 128.514 86.3499 3
 9 1 11 31138.2 1087.01 3
 9 1 12 25833.2 1010.35 3
 9 1 13 1046.65 250.847 3
 9 1 14 39869.8 1344.82 3
 9 1 15 5185.77 504.273 3
 9 1 16 9475.68 703.216 3
 9 1 17 2385.24 373.5 3
 9 2 -9 16049.8 887.907 4
 9 2 -8 85.2889 123.955 4
 9 2 -7 14001.7 791.188 4
 9 2 -6 3118.66 366.903 4
 9 2 -5 65918.2 1653.66 4
 9 2 -4 97742.4 2014.54 4
 9 2 -3 511.857 147.792 4
 9 2 -2 32516.8 1023.66 4
 9 2 -1 115.43 110.04 4
 9 2 0 50109.4 1238.5 4
 9 2 1 20177.6 459.953 3
 9 2 1 19179.1 728.634 4
 9 2 2 25658 594.352 3
 9 2 2 25753.4 835.602 4
 9 2 3 102204 1512.03 3
 9 2 3 101943 1814.66 4
 9 2 4 990.079 139.427 3
 9 2 4 823.192 161.939 4
 9 2 5 31628.6 828.431 3
 9 2 6 5061.93 335.691 3
 9 2 7 138973 2175.84 3
 9 2 8 142579 2308.72 3
 9 2 9 8287.49 499.239 3
 9 2 10 7383.04 494.563 3
 9 2 11 2370.2 292.895 3
 9 2 12 21666.1 900.821 3
 9 2 13 17719 877.55 3
 9 2 14 8116.47 589.194 3
 9 2 15 26660.3 1132.91 3
 9 2 16 481.015 171.259 3
 9 2 17 4264.05 493.309 3
 9 3 -8 16664.3 937.655 4
 9 3 -7 1307.69 264.973 4
 9 3 -6 11867.7 715.252 4
 9 3 -5 743.433 180.501 4
 9 3 -4 138426 2532.11 4
 9 3 -3 85364.6 1852 4
 9 3 -2 8449.01 529.261 4
 9 3 -1 38920.5 1132.73 4
 9 3 0 409.916 142.254 4
 9 3 1 86457.9 1105.92 3
 9 3 1 84169.5 1676.63 4
 9 3 2 8367.28 309.89 3
 9 3 2 8463.23 487.509 4
 9 3 3 93045.3 1383.23 3
 9 3 3 94687.4 1761.28 4
 9 3 4 68982.4 1204.09 3
 9 3 4 70324 1479.44 4
 9 3 5 1877.15 192.928 3
 9 3 6 13642.1 539.643 3
 9 3 7 453.111 111.878 3
 9 3 8 154295 2377.12 3
 9 3 9 87493.5 1744.06 3
 9 3 10 2661.44 293.719 3
 9 3 11 32278.8 1069.41 3
 9 3 12 1618.24 261.426 3
 9 3 13 16103.6 806.687 3
 9 3 14 1472.55 285.11 3
 9 3 15 8680.97 639.767 3
 9 3 16 13355.6 812.716 3
 9 3 17 24.9433 119.375 3
 9 4 -8 33729.5 1371.47 4
 9 4 -7 22658 1061.62 4
 9 4 -6 3274.04 392.045 4
 9 4 -5 11484.4 699.266 4
 9 4 -4 37089.2 1240.66 4
 9 4 -3 115569 2274.2 4
 9 4 -2 53427.4 1423 4
 9 4 -1 16197 740.284 4
 9 4 0 64474.1 1502.7 4
 9 4 1 10276.4 557.889 4
 9 4 2 110032 1443.21 3
 9 4 2 109843 1993.71 4
 9 4 3 159.596 54.9324 3
 9 4 3 98.5177 88.8571 4
 9 4 4 60102.3 1104.38 3
 9 4 4 61164 1375.48 4
 9 4 5 69778.2 1268.28 3
 9 4 5 70845.3 1508.61 4
 9 4 6 187.869 85.0061 3
 9 4 7 13158.5 555.526 3
 9 4 8 7978.81 447.391 3
 9 4 9 87610.9 1716.19 3
 9 4 10 21954.9 830.8 3
 9 4 11 27245.4 974.431 3
 9 4 12 39365.8 1217.63 3
 9 4 13 182.491 125.5 3
 9 4 14 11404.7 694.962 3
 9 4 15 894.164 233.926 3
 9 4 16 8203.09 637.165 3
 9 4 17 10573.6 750.759 3
 9 5 -7 49456.8 1672.3 4
 9 5 -6 28669.2 1199.54 4
 9 5 -5 11908.2 747.487 4
 9 5 -4 3407.8 391.436 4
 9 5 -3 27490.9 1063.25 4
 9 5 -2 68488.7 1684.35 4
 9 5 -1 11459.5 638.269 4
 9 5 0 38740.7 1175.3 4
 9 5 1 37788.4 1137.84 4
 9 5 2 16593.3 712.953 4
 9 5 2 17730.6 462.597 3
 9 5 3 76246.9 1215.69 3
 9 5 3 75462.2 1608.91 4
 9 5 4 1982.31 186.972 3
 9 5 4 1533.52 216.966 4
 9 5 5 61794.1 1189.34 3
 9 5 5 61733.4 1418.06 4
 9 5 6 30630.8 844.864 3
 9 5 6 29826.9 946.211 4
 9 5 7 8393.76 445.889 3
 9 5 8 23606.9 794.609 3
 9 5 9 19327.5 749.93 3
 9 5 10 84024.4 1726.18 3
 9 5 11 22542.8 870.968 3
 9 5 12 23593.3 938.117 3
 9 5 13 10484.5 648.525 3
 9 5 14 1366.72 260.879 3
 9 5 15 9606.57 672.427 3
 9 5 16 175.922 118.193 3
 9 5 17 12749.9 835.14 3
 9 6 -6 60126.2 1825.42 4
 9 6 -5 10854.8 729.347 4
 9 6 -4 14132.9 803.33 4
 9 6 -3 2257 328.211 4
 9 6 -2 26042 1034.86 4
 9 6 -1 36397.6 1197.33 4
 9 6 0 1447.35 239.079 4
 9 6 1 92356 1925.25 4
 9 6 2 46928 1280.83 4
 9 6 3 9550.51 548.923 4
 9 6 3 10818.8 402.824 3
 9 6 4 42743.2 924.348 3
 9 6 4 42488.2 1196.01 4
 9 6 5 2272.44 212.55 3
 9 6 5 2460.08 282.563 4
 9 6 6 62547.1 1272.56 3
 9 6 6 63781.3 1455.88 4
 9 6 7 20222.6 713.444 3
 9 6 7 19670 777.115 4
 9 6 8 21735.6 777.851 3
 9 6 9 11078.8 571.576 3
 9 6 10 32247.1 1028 3
 9 6 11 96555.6 1987.31 3
 9 6 12 4530.4 416.554 3
 9 6 13 26460.5 1049.55 3
 9 6 14 47503.2 1618.3 3
 9 6 15 2156.12 338.453 3
 9 6 16 6159.51 558.815 3
 9 6 17 207.733 139.433 3
 9 7 -6 17228.9 978.582 4
 9 7 -5 45564.7 1555.12 4
 9 7 -4 5701.6 533.999 4
 9 7 -3 15760.7 855.067 4
 9 7 -2 2266.89 326.543 4
 9 7 -1 27300.5 1058.65 4
 9 7 0 58387.3 1557.55 4
 9 7 1 3083.35 342.074 4
 9 7 2 114938 2206.17 4
 9 7 3 57995.7 1452.09 4
 9 7 3 58066.1 1077.28 3
 9 7 4 20559.1 828.461 4
 9 7 4 21123.8 639.837 3
 9 7 5 37606.1 929.316 3
 9 7 5 36435.4 1102.4 4
 9 7 6 13280.2 554.996 3
 9 7 6 12819.9 629.511 4
 9 7 7 94698.6 1725.92 3
 9 7 7 94535 1895.02 4
 9 7 8 6826.29 431.202 3
 9 7 8 6362.91 457.7 4
 9 7 9 31756.3 987.327 3
 9 7 10 7424.6 492.139 3
 9 7 11 30113.1 1035.65 3
 9 7 12 40423.2 1256.42 3
 9 7 13 -43.0473 110.703 3
 9 7 14 31961.8 1249.66 3
 9 7 15 6729.5 616.216 3
 9 7 16 5605.16 534.459 3
 9 7 17 9237.35 704.435 3
 9 8 -5 14409.8 898.793 4
 9 8 -4 38363 1414.63 4
 9 8 -3 426.098 184.381 4
 9 8 -2 38728.2 1348.14 4
 9 8 -1 6634.53 539.943 4
 9 8 0 45234 1388.73 4
 9 8 1 32117.6 1123.88 4
 9 8 2 8552.18 561.939 4
 9 8 3 63021.5 1574.33 4
 9 8 3 65270.1 1196.32 3
 9 8 4 20456.5 843.614 4
 9 8 4 20979 662.803 3
 9 8 5 35218.1 1109.28 4
 9 8 5 35802.5 929.323 3
 9 8 6 59077.2 1285.07 3
 9 8 6 57890.5 1442.11 4
 9 8 7 46517.9 1166.64 3
 9 8 7 44308.4 1231.29 4
 9 8 8 91729.2 1797.44 3
 9 8 8 91725.5 1874.13 4
 9 8 9 -24.5288 96.4822 3
 9 8 9 196.654 101.148 4
 9 8 10 30631 1044.15 3
 9 8 11 702.293 171.578 3
 9 8 12 18605.8 853.288 3
 9 8 13 26015.5 1042.8 3
 9 8 14 2719.4 368.377 3
 9 8 15 30545.1 1210.3 3
 9 8 16 4430.67 473.561 3
 9 8 17 11436.8 791.947 3
 9 9 -4 23657.8 1139.58 4
 9 9 -3 36042.6 1385.73 4
 9 9 -2 167.331 144.153 4
 9 9 -1 46074 1479.72 4
 9 9 0 443.07 183.227 4
 9 9 1 66082 1712.51 4
 9 9 2 18135 836.425 4
 9 9 3 19212 851.21 4
 9 9 4 49899.5 1389.08 4
 9 9 4 50354.9 1127 3
 9 9 5 922.557 163.916 3
 9 9 5 639.256 173.386 4
 9 9 6 59787.4 1499.47 4
 9 9 6 61443.1 1357.18 3
 9 9 7 5105.09 428.785 4
 9 9 7 6050.06 417.395 3
 9 9 8 78592.7 1662.82 3
 9 9 8 75821.6 1698.44 4
 9 9 9 72271.9 1644.35 3
 9 9 9 71007.8 1633.05 4
 9 9 10 79.4525 114.65 3
 9 9 10 107.89 119.469 4
 9 9 11 28142.9 1047.86 3
 9 9 12 1009.74 227.319 3
 9 9 13 29574.3 1134.43 3
 9 9 14 4978.19 487.982 3
 9 9 15 8853.77 659.786 3
 9 9 16 29673.6 1267.63 3
 9 9 17 1630.02 332.732 3
 9 10 -3 36898.4 1449.47 4
 9 10 -2 32813.1 1315.45 4
 9 10 -1 2028.64 328.807 4
 9 10 0 35903.9 1297.55 4
 9 10 1 131.358 109.646 4
 9 10 2 44685.2 1395.6 4
 9 10 3 2516.62 323.67 4
 9 10 4 43598.7 1324.91 4
 9 10 4 45331.4 1096.15 3
 9 10 5 81916.2 1853.64 4
 9 10 5 83091.7 1623.72 3
 9 10 6 1451.73 207.993 3
 9 10 6 1355.29 234.004 4
 9 10 7 22284.1 890.462 4
 9 10 7 22399.4 838.391 3
 9 10 8 323.49 133.137 3
 9 10 8 202.342 107.439 4
 9 10 9 54287.3 1430.83 4
 9 10 9 55374.5 1441.92 3
 9 10 10 43399.3 1292.82 3
 9 10 10 43300.4 1276.46 4
 9 10 11 4684.44 433.358 3
 9 10 11 4315.95 400.217 4
 9 10 12 41388.4 1352.16 3
 9 10 13 60.1402 114.94 3
 9 10 14 11138.5 728.732 3
 9 10 15 943.784 241.588 3
 9 10 16 17315.1 970.993 3
 9 11 -2 37634.2 1444.74 4
 9 11 -1 16164.7 917.464 4
 9 11 0 10620.9 722.056 4
 9 11 1 35583.6 1295.68 4
 9 11 2 378.501 186.656 4
 9 11 3 22606.4 978.199 4
 9 11 4 62.3191 100.838 4
 9 11 5 66125.3 1682.49 4
 9 11 5 67460.1 1483.85 3
 9 11 6 50495.7 1423.19 4
 9 11 6 53784.8 1353.58 3
 9 11 7 294.751 133.688 3
 9 11 7 168.317 117.09 4
 9 11 8 11074.7 635.714 4
 9 11 8 11786.1 636.601 3
 9 11 9 1176.97 210.377 3
 9 11 9 1066.8 210.699 4
 9 11 10 57782.1 1497.54 4
 9 11 10 58505.5 1557.99 3
 9 11 11 21997.2 902.741 4
 9 11 11 23402.2 983.619 3
 9 11 12 8966.35 625.285 3
 9 11 12 8190.07 544.247 4
 9 11 13 17410 898.206 3
 9 11 13 15426.2 764.322 4
 9 11 14 300.458 148.251 3
 9 11 15 7520.39 627.361 3
 9 11 16 31.281 142.246 3
 9 12 -1 43000.6 1555.99 4
 9 12 0 5493.26 542.587 4
 9 12 1 15571.8 874.973 4
 9 12 2 40056 1387.2 4
 9 12 3 173.663 154.864 4
 9 12 4 31633.1 1180.64 4
 9 12 5 934.468 212.176 4
 9 12 5 1224.38 209.916 3
 9 12 6 66117.9 1689.64 4
 9 12 6 67094 1578.56 3
 9 12 7 32625.8 1150.92 4
 9 12 7 36331.3 1165.25 3
 9 12 8 419.673 158.142 3
 9 12 8 268.238 113.683 4
 9 12 9 9253.82 590.405 4
 9 12 9 10145 629.24 3
 9 12 10 1064.05 232.724 3
 9 12 10 764.276 179.351 4
 9 12 11 37850.6 1207.79 4
 9 12 11 38566.5 1332.2 3
 9 12 12 4657.18 420.489 4
 9 12 12 6028.47 527.325 3
 9 12 13 15379.3 871.825 3
 9 12 14 19835.3 1021.54 3
 9 12 15 358.461 179.557 3
 9 13 0 34751.5 1395.52 4
 9 13 1 1658.13 314.42 4
[truncated: 62,684 more chars]
