# Supplementary material
Source: publisher figshare collection journal article supplement (https://acs.figshare.com/ndownloader/files/4205155)
Supplement: Supplementary file 27 [file 4205155 › CIFs/Mn/MnGd/MnGd.cif]

data_MnGd
_audit_creation_date              2015-02-16
_audit_creation_method
;
Olex2 1.2
(compiled 2015.01.26 svn.r3151 for OlexSys, GUI svn.r4998)
;
_publ_contact_author_address      
;
The University of Manchester
School of Chemistry
Oxford Road, 
Manchester
M13 9PL
United Kingdom
;
_publ_contact_author_email        eufemio.morenopineda@manchester.ac.uk
_publ_contact_author_name         'Eufemio Moreno Pineda'
_publ_contact_author_phone        '+44 074 1192 4293'
_publ_section_references
;
Dolomanov, O.V., Bourhis, L.J., Gildea, R.J, Howard, J.A.K. & Puschmann, H.
 (2009), J. Appl. Cryst. 42, 339-341.

Palatinus, L. & Chapuis, G. (2007). J. Appl. Cryst., 40, 786-790;
Palatinus, L. & van der Lee, A. (2008). J. Appl. Cryst. 41, 975-984;
Palatinus, L., Prathapa, S. J. & van Smaalen, S. (2012). J. Appl. Cryst. 45,
 575-580.

Sheldrick, G.M. (2008). Acta Cryst. A64, 112-122.
;
_chemical_name_common             ?
_chemical_name_systematic         ?
_chemical_formula_moiety          'C50 H90 Gd2 Mn2 O22, 2(C6 H16 N), 0.67(H2 O)'
_chemical_formula_sum             'C62 H123.33 Gd2 Mn2 N2 O22.67'
_chemical_formula_weight          1684.05
_chemical_melting_point           ?
loop_
  _atom_type_symbol
  _atom_type_description
  _atom_type_scat_dispersion_real
  _atom_type_scat_dispersion_imag
  _atom_type_scat_source
 'C' 'C' 0.0033 0.0016 'International Tables Vol C Tables 4.2.6.8 and 6.1.1.4'
 'H' 'H' 0.0000 0.0000 'International Tables Vol C Tables 4.2.6.8 and 6.1.1.4'
 'Gd' 'Gd' -0.1653 3.9035
 'International Tables Vol C Tables 4.2.6.8 and 6.1.1.4'
 'Mn' 'Mn' 0.3368 0.7283 'International Tables Vol C Tables 4.2.6.8 and 6.1.1.4'
 'N' 'N' 0.0061 0.0033 'International Tables Vol C Tables 4.2.6.8 and 6.1.1.4'
 'O' 'O' 0.0106 0.0060 'International Tables Vol C Tables 4.2.6.8 and 6.1.1.4'

_shelx_space_group_comment
;
The symmetry employed for this shelxl refinement is uniquely defined
by the following loop, which should always be used as a source of
symmetry information in preference to the above space-group names.
They are only intended as comments.
;
_space_group_crystal_system       'triclinic'
_space_group_IT_number            2
_space_group_name_H-M_alt         'P -1'
_space_group_name_Hall            '-P 1'
loop_
  _space_group_symop_operation_xyz
 'x, y, z'
 '-x, -y, -z'

_cell_length_a                    12.9744(11)
_cell_length_b                    13.1470(9)
_cell_length_c                    13.1693(11)
_cell_angle_alpha                 86.455(6)
_cell_angle_beta                  77.910(7)
_cell_angle_gamma                 66.666(7)
_cell_volume                      2016.3(3)
_cell_formula_units_Z             1
_cell_measurement_reflns_used     2595
_cell_measurement_temperature     150.1(2)
_cell_measurement_theta_max       24.5260
_cell_measurement_theta_min       3.1220
_shelx_estimated_absorpt_T_max    ?
_shelx_estimated_absorpt_T_min    ?
_exptl_absorpt_coefficient_mu     1.994
_exptl_absorpt_correction_T_max   1.00000
_exptl_absorpt_correction_T_min   0.80125
_exptl_absorpt_correction_type    multi-scan
_exptl_absorpt_process_details
;
CrysAlisPro, Agilent Technologies,
Version 1.171.36.32 (release 02-08-2013 CrysAlis171 .NET)
(compiled Aug  2 2013,16:46:58)
Empirical absorption correction using spherical harmonics,
 implemented in SCALE3 ABSPACK scaling algorithm.
;
_exptl_absorpt_special_details    ?
_exptl_crystal_colour             'clear orange'
_exptl_crystal_colour_lustre      clear
_exptl_crystal_colour_primary     orange
_exptl_crystal_density_diffrn     1.387
_exptl_crystal_density_meas       ?
_exptl_crystal_density_method     ?
_exptl_crystal_description        plate
_exptl_crystal_F_000              869
_exptl_crystal_size_max           0.03
_exptl_crystal_size_mid           0.02
_exptl_crystal_size_min           0.01
_exptl_transmission_factor_max    ?
_exptl_transmission_factor_min    ?
_diffrn_reflns_av_R_equivalents   0.1057
_diffrn_reflns_av_unetI/netI      0.2352
_diffrn_reflns_Laue_measured_fraction_full 0.990
_diffrn_reflns_Laue_measured_fraction_max 0.990
_diffrn_reflns_limit_h_max        15
_diffrn_reflns_limit_h_min        -14
_diffrn_reflns_limit_k_max        15
_diffrn_reflns_limit_k_min        -13
_diffrn_reflns_limit_l_max        15
_diffrn_reflns_limit_l_min        -15
_diffrn_reflns_number             12221
_diffrn_reflns_point_group_measured_fraction_full 0.990
_diffrn_reflns_point_group_measured_fraction_max 0.990
_diffrn_reflns_theta_full         24.712
_diffrn_reflns_theta_max          24.712
_diffrn_reflns_theta_min          3.133
_diffrn_ambient_temperature       150.1(2)
_diffrn_detector_area_resol_mean  10.3705
_diffrn_measured_fraction_theta_full 0.990
_diffrn_measured_fraction_theta_max 0.990
_diffrn_measurement_details
;
#__ type_ start__ end____ width___ exp.time_
  1 omega  -57.00   37.00   1.0000   20.0000
omega____ theta____ kappa____ phi______ frames
    -       11.6555  -57.0000  120.0000 94

#__ type_ start__ end____ width___ exp.time_
  2 omega  -20.00   54.00   1.0000   20.0000
omega____ theta____ kappa____ phi______ frames
    -       11.6555  -99.0000   30.0000 74

#__ type_ start__ end____ width___ exp.time_
  3 omega  -14.00   81.00   1.0000   20.0000
omega____ theta____ kappa____ phi______ frames
    -       11.6555   57.0000  -90.0000 95
;
_diffrn_measurement_device_type   'SuperNova, Single source at offset, Atlas'
_diffrn_measurement_method        '\w scans'
_diffrn_orient_matrix_UB_11       0.0283091000
_diffrn_orient_matrix_UB_12       0.0248267000
_diffrn_orient_matrix_UB_13       -0.0392424000
_diffrn_orient_matrix_UB_21       -0.0401654000
_diffrn_orient_matrix_UB_22       0.0532640000
_diffrn_orient_matrix_UB_23       0.0191224000
_diffrn_orient_matrix_UB_31       0.0357866000
_diffrn_orient_matrix_UB_32       0.0009488000
_diffrn_orient_matrix_UB_33       0.0336163000
_diffrn_radiation_monochromator   mirror
_diffrn_radiation_type            MoK\a
_diffrn_radiation_wavelength      0.71073
_diffrn_source                    'SuperNova (Mo) X-ray Source'
_reflns_Friedel_coverage          0.000
_reflns_Friedel_fraction_full     .
_reflns_Friedel_fraction_max      .
_reflns_number_gt                 3900
_reflns_number_total              6812
_reflns_odcompleteness_completeness 98.27
_reflns_odcompleteness_iscentric  1
_reflns_odcompleteness_theta      26.32
_reflns_special_details
;
 Reflections were merged by SHELXL according to the crystal
 class for the calculation of statistics and refinement.
 
 _reflns_Friedel_fraction is defined as the number of unique
 Friedel pairs measured divided by the number that would be
 possible theoretically, ignoring centric projections and
 systematic absences.
;
_reflns_threshold_expression      'I > 2\s(I)'
_computing_cell_refinement
;
CrysAlisPro, Agilent Technologies,
Version 1.171.36.32 (release 02-08-2013 CrysAlis171 .NET)
(compiled Aug  2 2013,16:46:58)
;
_computing_data_collection
;
CrysAlisPro, Agilent Technologies,
Version 1.171.36.32 (release 02-08-2013 CrysAlis171 .NET)
(compiled Aug  2 2013,16:46:58)
;
_computing_data_reduction
;
CrysAlisPro, Agilent Technologies,
Version 1.171.36.32 (release 02-08-2013 CrysAlis171 .NET)
(compiled Aug  2 2013,16:46:58)
;
_computing_molecular_graphics     'Olex2 (Dolomanov et al., 2009)'
_computing_publication_material   'Olex2 (Dolomanov et al., 2009)'
_computing_structure_refinement   'ShelXL (Sheldrick, 2008)'
_computing_structure_solution
;
Superflip (Palatinus & Chapuis, 2007;Palatinus & van der Lee, 2008;
Palatinus et al., 2012)
;
_refine_diff_density_max          1.007
_refine_diff_density_min          -1.064
_refine_diff_density_rms          0.187
_refine_ls_extinction_coef        .
_refine_ls_extinction_method      none
_refine_ls_goodness_of_fit_ref    1.024
_refine_ls_hydrogen_treatment     constr
_refine_ls_matrix_type            full
_refine_ls_number_parameters      436
_refine_ls_number_reflns          6812
_refine_ls_number_restraints      24
_refine_ls_R_factor_all           0.1581
_refine_ls_R_factor_gt            0.0813
_refine_ls_restrained_S_all       1.025
_refine_ls_shift/su_max           0.000
_refine_ls_shift/su_mean          0.000
_refine_ls_structure_factor_coef  Fsqd
_refine_ls_weighting_details      'w=1/[\s^2^(Fo^2^)] where P=(Fo^2^+2Fc^2^)/3'
_refine_ls_weighting_scheme       calc
_refine_ls_wR_factor_gt           0.1172
_refine_ls_wR_factor_ref          0.1423
_refine_special_details           ?
_olex2_refinement_description
;
1. Fixed Uiso
 At 1.2 times of:
  All C(H,H) groups, All N(H) groups
 At 1.5 times of:
  All C(H,H,H) groups, All O(H,H) groups
2. Uiso/Uaniso restraints and constraints
Uanis(C23) \\sim Ueq, Uanis(O2) \\sim Ueq: with sigma of 0.01 and sigma for
terminal atoms of 0.02
Uanis(C1) \\sim Ueq: with sigma of 0.01 and sigma for terminal atoms of 0.02
Uanis(C3) \\sim Ueq: with sigma of 0.01 and sigma for terminal atoms of 0.02
3. Others
 Fixed Sof: O12(0.33333) H12A(0.33333) H12B(0.33333)
4.a Free rotating group:
 O12(H12A,H12B)
4.b Ternary CH refined with riding coordinates:
 N1(H1)
4.c Secondary CH2 refined with riding coordinates:
 C26(H26A,H26B), C28(H28A,H28B), C30(H30A,H30B)
4.d Idealised Me refined as rotating group:
 C3(H3A,H3B,H3C), C4(H4A,H4B,H4C), C5(H5A,H5B,H5C), C8(H8A,H8B,H8C), C9(H9A,
 H9B,H9C), C10(H10A,H10B,H10C), C13(H13A,H13B,H13C), C14(H14A,H14B,H14C),
 C15(H15A,H15B,H15C), C18(H18A,H18B,H18C), C19(H19A,H19B,H19C), C20(H20A,H20B,
 H20C), C23(H23A,H23B,H23C), C24(H24A,H24B,H24C), C25(H25A,H25B,H25C), C27(H27A,
 H27B,H27C), C29(H29A,H29B,H29C), C31(H31A,H31B,H31C)
;
_atom_sites_solution_hydrogens    mixed
_atom_sites_solution_primary      iterative
_atom_sites_solution_secondary    ?
loop_
  _atom_site_label
  _atom_site_type_symbol
  _atom_site_fract_x
  _atom_site_fract_y
  _atom_site_fract_z
  _atom_site_U_iso_or_equiv
  _atom_site_adp_type
  _atom_site_occupancy
  _atom_site_site_symmetry_order
  _atom_site_calc_flag
  _atom_site_refinement_flags_posn
  _atom_site_refinement_flags_adp
  _atom_site_refinement_flags_occupancy
  _atom_site_disorder_assembly
  _atom_site_disorder_group
 Gd1 Gd 0.79578(5) 0.63498(5) 0.66979(5) 0.02297(18) Uani 1 1 d . . . . .
 Mn1 Mn 1.04529(14) 0.58035(14) 0.49914(14) 0.0297(5) Uani 1 1 d . . . . .
 O1 O 1.0285(5) 0.4909(5) 0.4042(6) 0.029(2) Uani 1 1 d . . . . .
 O2 O 0.6924(6) 0.6922(6) 0.8285(6) 0.037(2) Uani 1 1 d . U . . .
 O3 O 0.6252(7) 0.6753(7) 0.6098(7) 0.055(3) Uani 1 1 d . . . . .
 O4 O 1.1108(6) 0.6617(6) 0.3932(6) 0.034(2) Uani 1 1 d . . . . .
 O5 O 0.7816(6) 0.4717(6) 0.7291(6) 0.039(2) Uani 1 1 d . . . . .
 O6 O 1.2242(6) 0.4504(6) 0.4852(6) 0.035(2) Uani 1 1 d . . . . .
 O7 O 0.9175(7) 0.6929(6) 0.7317(6) 0.038(2) Uani 1 1 d . . . . .
 O8 O 1.0709(6) 0.6656(6) 0.6030(6) 0.036(2) Uani 1 1 d . . . . .
 O9 O 0.7251(7) 0.8318(6) 0.6290(7) 0.051(3) Uani 1 1 d . . . . .
 O10 O 0.8654(6) 0.7170(6) 0.5161(6) 0.031(2) Uani 1 1 d . . . . .
 O11 O 0.6030(8) 0.8097(8) 0.9616(8) 0.071(3) Uani 1 1 d . . . . .
 C1 C 0.6764(11) 0.7168(11) 0.9242(11) 0.042(3) Uani 1 1 d . U . . .
 C2 C 0.7398(12) 0.6332(11) 0.9990(11) 0.052(4) Uani 1 1 d . . . . .
 C3 C 0.6617(12) 0.5760(13) 1.0493(12) 0.100(6) Uani 1 1 d . U . . .
 H3A H 0.5955 0.6280 1.0938 0.150 Uiso 1 1 calc GR . . . .
 H3B H 0.7021 0.5156 1.0895 0.150 Uiso 1 1 calc GR . . . .
 H3C H 0.6380 0.5483 0.9964 0.150 Uiso 1 1 calc GR . . . .
 C4 C 0.8518(10) 0.5478(10) 0.9389(10) 0.052(4) Uani 1 1 d . . . . .
 H4A H 0.8360 0.5146 0.8842 0.078 Uiso 1 1 calc GR . . . .
 H4B H 0.8872 0.4915 0.9851 0.078 Uiso 1 1 calc GR . . . .
 H4C H 0.9025 0.5837 0.9095 0.078 Uiso 1 1 calc GR . . . .
 C5 C 0.7697(13) 0.6918(13) 1.0758(12) 0.103(7) Uani 1 1 d . . . . .
 H5A H 0.8176 0.7278 1.0393 0.155 Uiso 1 1 calc GR . . . .
 H5B H 0.8098 0.6390 1.1222 0.155 Uiso 1 1 calc GR . . . .
 H5C H 0.7007 0.7461 1.1148 0.155 Uiso 1 1 calc GR . . . .
 C6 C 1.1832(9) 0.6254(10) 0.3071(9) 0.031(3) Uani 1 1 d . . . . .
 C7 C 1.2251(11) 0.7084(10) 0.2408(10) 0.041(3) Uani 1 1 d . . . . .
 C8 C 1.2025(12) 0.8085(11) 0.3081(11) 0.071(5) Uani 1 1 d . . . . .
 H8A H 1.1214 0.8501 0.3281 0.107 Uiso 1 1 calc GR . . . .
 H8B H 1.2377 0.8547 0.2694 0.107 Uiso 1 1 calc GR . . . .
 H8C H 1.2342 0.7836 0.3691 0.107 Uiso 1 1 calc GR . . . .
 C9 C 1.3518(11) 0.6506(11) 0.1953(12) 0.079(6) Uani 1 1 d . . . . .
 H9A H 1.3921 0.6167 0.2499 0.119 Uiso 1 1 calc GR . . . .
 H9B H 1.3804 0.7038 0.1616 0.119 Uiso 1 1 calc GR . . . .
 H9C H 1.3632 0.5948 0.1457 0.119 Uiso 1 1 calc GR . . . .
 C10 C 1.1546(11) 0.7451(11) 0.1544(10) 0.064(4) Uani 1 1 d . . . . .
 H10A H 1.1712 0.6822 0.1110 0.096 Uiso 1 1 calc GR . . . .
 H10B H 1.1743 0.8000 0.1132 0.096 Uiso 1 1 calc GR . . . .
 H10C H 1.0743 0.7758 0.1852 0.096 Uiso 1 1 calc GR . . . .
 C11 C 1.3269(11) 0.3823(10) 0.4731(10) 0.038(3) Uani 1 1 d . . . . .
 C12 C 1.3923(10) 0.3625(10) 0.5602(10) 0.041(3) Uani 1 1 d . . . . .
 C13 C 1.5193(9) 0.3389(11) 0.5135(11) 0.062(5) Uani 1 1 d . . . . .
 H13A H 1.5516 0.2741 0.4689 0.093 Uiso 1 1 calc GR . . . .
 H13B H 1.5609 0.3268 0.5685 0.093 Uiso 1 1 calc GR . . . .
 H13C H 1.5245 0.4012 0.4740 0.093 Uiso 1 1 calc GR . . . .
 C14 C 1.3844(13) 0.2594(11) 0.6160(12) 0.075(5) Uani 1 1 d . . . . .
 H14A H 1.3056 0.2733 0.6450 0.112 Uiso 1 1 calc GR . . . .
 H14B H 1.4269 0.2422 0.6707 0.112 Uiso 1 1 calc GR . . . .
 H14C H 1.4156 0.1980 0.5674 0.112 Uiso 1 1 calc GR . . . .
 C15 C 1.3388(11) 0.4608(11) 0.6364(11) 0.061(4) Uani 1 1 d . . . . .
 H15A H 1.3358 0.5270 0.5998 0.092 Uiso 1 1 calc GR . . . .
 H15B H 1.3843 0.4488 0.6883 0.092 Uiso 1 1 calc GR . . . .
 H15C H 1.2626 0.4685 0.6692 0.092 Uiso 1 1 calc GR . . . .
 C16 C 1.0088(10) 0.7027(8) 0.6915(10) 0.030(3) Uani 1 1 d . . . . .
 C17 C 1.0532(10) 0.7641(10) 0.7575(10) 0.036(3) Uani 1 1 d . . . . .
 C18 C 0.9540(11) 0.8699(11) 0.8047(12) 0.072(5) Uani 1 1 d . . . . .
 H18A H 0.9289 0.9199 0.7503 0.108 Uiso 1 1 calc GR . . . .
 H18B H 0.9790 0.9043 0.8513 0.108 Uiso 1 1 calc GR . . . .
 H18C H 0.8917 0.8519 0.8421 0.108 Uiso 1 1 calc GR . . . .
 C19 C 1.1490(11) 0.7940(10) 0.6911(10) 0.053(4) Uani 1 1 d . . . . .
 H19A H 1.2134 0.7273 0.6649 0.079 Uiso 1 1 calc GR . . . .
 H19B H 1.1720 0.8354 0.7329 0.079 Uiso 1 1 calc GR . . . .
 H19C H 1.1215 0.8379 0.6340 0.079 Uiso 1 1 calc GR . . . .
 C20 C 1.0989(12) 0.6866(11) 0.8455(11) 0.067(5) Uani 1 1 d . . . . .
 H20A H 1.0360 0.6787 0.8938 0.101 Uiso 1 1 calc GR . . . .
 H20B H 1.1376 0.7177 0.8810 0.101 Uiso 1 1 calc GR . . . .
 H20C H 1.1515 0.6152 0.8163 0.101 Uiso 1 1 calc GR . . . .
 C21 C 0.7970(10) 0.8163(10) 0.5455(10) 0.034(3) Uani 1 1 d . . . . .
 C22 C 0.8030(10) 0.9131(9) 0.4774(10) 0.037(3) Uani 1 1 d . . . . .
 C23 C 0.6892(11) 1.0122(9) 0.4973(11) 0.061(4) Uani 1 1 d . U . . .
 H23A H 0.6312 0.9928 0.4794 0.091 Uiso 1 1 calc GR . . . .
 H23B H 0.6960 1.0727 0.4557 0.091 Uiso 1 1 calc GR . . . .
 H23C H 0.6684 1.0339 0.5695 0.091 Uiso 1 1 calc GR . . . .
 C24 C 0.8967(11) 0.9405(10) 0.5130(10) 0.063(4) Uani 1 1 d . . . . .
 H24A H 0.8712 0.9648 0.5846 0.094 Uiso 1 1 calc GR . . . .
 H24B H 0.9100 0.9982 0.4711 0.094 Uiso 1 1 calc GR . . . .
 H24C H 0.9665 0.8754 0.5054 0.094 Uiso 1 1 calc GR . . . .
 C25 C 0.8416(10) 0.8779(9) 0.3633(9) 0.043(3) Uani 1 1 d . . . . .
 H25A H 0.9078 0.8094 0.3546 0.064 Uiso 1 1 calc GR . . . .
 H25B H 0.8603 0.9341 0.3234 0.064 Uiso 1 1 calc GR . . . .
 H25C H 0.7809 0.8680 0.3398 0.064 Uiso 1 1 calc GR . . . .
 N1 N 0.5547(9) 1.0906(9) 1.1558(9) 0.054(3) Uani 1 1 d . . . . .
 H1 H 0.4869 1.1340 1.1269 0.065 Uiso 1 1 calc R . . . .
 C26 C 0.5210(11) 1.0124(12) 1.2330(10) 0.060(4) Uani 1 1 d . . . . .
 H26A H 0.4758 1.0530 1.2970 0.072 Uiso 1 1 calc R . . . .
 H26B H 0.5897 0.9543 1.2489 0.072 Uiso 1 1 calc R . . . .
 C27 C 0.4519(11) 0.9598(12) 1.1904(10) 0.065(4) Uani 1 1 d . . . . .
 H27A H 0.4316 0.9119 1.2413 0.098 Uiso 1 1 calc GR . . . .
 H27B H 0.4973 0.9176 1.1282 0.098 Uiso 1 1 calc GR . . . .
 H27C H 0.3836 1.0171 1.1750 0.098 Uiso 1 1 calc GR . . . .
 C28 C 0.5766(11) 1.1705(12) 1.2145(12) 0.067(5) Uani 1 1 d . . . . .
 H28A H 0.6427 1.1310 1.2457 0.081 Uiso 1 1 calc R . . . .
 H28B H 0.5110 1.2054 1.2700 0.081 Uiso 1 1 calc R . . . .
 C29 C 0.5986(13) 1.2603(13) 1.1433(14) 0.095(6) Uani 1 1 d . . . . .
 H29A H 0.6036 1.3153 1.1845 0.143 Uiso 1 1 calc GR . . . .
 H29B H 0.5368 1.2946 1.1071 0.143 Uiso 1 1 calc GR . . . .
 H29C H 0.6693 1.2271 1.0940 0.143 Uiso 1 1 calc GR . . . .
 C30 C 0.6482(11) 1.0328(12) 1.0659(11) 0.061(4) Uani 1 1 d . . . . .
 H30A H 0.6503 1.0858 1.0117 0.073 Uiso 1 1 calc R . . . .
 H30B H 0.6306 0.9763 1.0381 0.073 Uiso 1 1 calc R . . . .
 C31 C 0.7684(10) 0.9778(12) 1.0941(12) 0.079(5) Uani 1 1 d . . . . .
 H31A H 0.7666 0.9267 1.1491 0.119 Uiso 1 1 calc GR . . . .
 H31B H 0.7893 1.0339 1.1164 0.119 Uiso 1 1 calc GR . . . .
 H31C H 0.8237 0.9387 1.0342 0.119 Uiso 1 1 calc GR . . . .
 O12 O 0.916(3) 0.616(3) 0.250(3) 0.097(11) Uani 0.3333 1 d . . P A -1
 H12A H 0.9594 0.6175 0.2902 0.145 Uiso 0.3333 1 d G . P A -1
 H12B H 0.8920 0.5653 0.2682 0.145 Uiso 0.3333 1 d G . P A -1

loop_
  _atom_site_aniso_label
  _atom_site_aniso_U_11
  _atom_site_aniso_U_22
  _atom_site_aniso_U_33
  _atom_site_aniso_U_23
  _atom_site_aniso_U_13
  _atom_site_aniso_U_12
 Gd1 0.0266(3) 0.0176(3) 0.0137(3) -0.0002(2) 0.0038(2) -0.0010(2)
 Mn1 0.0360(11) 0.0247(10) 0.0216(12) 0.0000(9) 0.0013(9) -0.0084(9)
 O1 0.031(4) 0.021(4) 0.025(5) -0.002(4) 0.001(4) -0.004(4)
 O2 0.049(5) 0.035(5) 0.014(5) 0.006(4) -0.002(4) -0.006(4)
 O3 0.037(5) 0.061(6) 0.038(7) -0.025(5) 0.001(5) 0.009(5)
 O4 0.034(5) 0.030(5) 0.027(6) -0.002(4) 0.009(4) -0.010(4)
 O5 0.056(6) 0.022(5) 0.029(6) 0.001(4) 0.008(4) -0.012(4)
 O6 0.028(5) 0.039(5) 0.026(6) -0.001(4) -0.002(4) -0.003(4)
 O7 0.046(5) 0.049(6) 0.022(5) -0.005(4) 0.007(4) -0.026(5)
 O8 0.040(5) 0.028(5) 0.029(6) -0.005(4) 0.001(4) -0.005(4)
 O9 0.053(6) 0.024(5) 0.035(6) 0.010(4) 0.020(5) 0.013(4)
 O10 0.038(5) 0.022(5) 0.022(5) -0.003(4) 0.007(4) -0.007(4)
 O11 0.073(7) 0.062(7) 0.047(7) -0.017(6) -0.011(6) 0.008(6)
 C1 0.048(7) 0.047(7) 0.029(7) -0.005(6) -0.007(6) -0.015(6)
 C2 0.061(10) 0.044(9) 0.025(9) 0.006(7) -0.013(8) 0.006(8)
 C3 0.063(10) 0.100(12) 0.089(12) 0.065(10) 0.019(9) -0.009(9)
 C4 0.047(9) 0.054(9) 0.033(10) 0.010(8) -0.001(7) -0.001(8)
 C5 0.117(15) 0.101(14) 0.058(13) -0.023(11) -0.058(12) 0.015(12)
 C6 0.026(7) 0.035(8) 0.024(8) -0.001(7) 0.005(6) -0.009(6)
 C7 0.062(9) 0.042(8) 0.029(9) 0.005(7) -0.009(7) -0.030(8)
 C8 0.083(11) 0.070(11) 0.067(13) -0.009(10) 0.009(9) -0.048(10)
 C9 0.055(10) 0.057(10) 0.101(15) -0.010(10) 0.043(9) -0.023(9)
 C10 0.080(11) 0.079(12) 0.033(10) 0.020(9) -0.007(9) -0.036(10)
 C11 0.035(8) 0.037(8) 0.034(9) -0.003(7) -0.007(7) -0.007(7)
 C12 0.028(7) 0.048(9) 0.036(9) -0.013(7) 0.002(7) -0.007(7)
 C13 0.040(8) 0.063(10) 0.075(13) -0.018(9) -0.012(8) -0.009(8)
 C14 0.107(13) 0.059(11) 0.066(13) 0.023(10) -0.022(10) -0.041(10)
 C15 0.058(9) 0.076(11) 0.044(11) -0.009(9) -0.016(8) -0.015(9)
 C16 0.040(8) 0.013(6) 0.029(9) -0.002(6) -0.005(7) -0.005(6)
 C17 0.043(8) 0.043(8) 0.029(9) 0.000(7) -0.005(7) -0.026(7)
 C18 0.066(10) 0.061(11) 0.072(13) -0.025(10) -0.006(9) -0.006(9)
 C19 0.080(10) 0.053(9) 0.039(10) -0.003(8) -0.018(8) -0.037(9)
 C20 0.094(12) 0.069(11) 0.056(12) 0.021(9) -0.044(10) -0.038(10)
 C21 0.031(7) 0.028(8) 0.033(9) -0.010(7) -0.002(7) -0.002(6)
 C22 0.043(8) 0.013(6) 0.043(10) 0.007(6) -0.006(7) 0.002(6)
 C23 0.075(9) 0.021(7) 0.055(10) 0.022(7) -0.007(8) 0.007(7)
 C24 0.101(12) 0.056(10) 0.049(11) 0.013(8) -0.023(9) -0.047(10)
 C25 0.048(8) 0.033(8) 0.038(10) 0.012(7) -0.001(7) -0.012(7)
 N1 0.042(7) 0.074(9) 0.034(8) -0.011(7) -0.013(6) -0.005(7)
 C26 0.054(9) 0.085(12) 0.022(9) 0.003(9) 0.000(7) -0.010(9)
 C27 0.072(10) 0.084(12) 0.031(10) -0.003(9) -0.008(8) -0.023(9)
 C28 0.041(9) 0.088(13) 0.059(12) -0.037(11) 0.001(8) -0.010(9)
 C29 0.087(13) 0.090(14) 0.119(19) -0.018(13) -0.030(12) -0.039(12)
 C30 0.051(9) 0.069(11) 0.030(10) -0.022(8) 0.013(8) 0.004(8)
 C31 0.045(9) 0.103(14) 0.059(13) -0.032(11) 0.002(9) 0.002(9)
 O12 0.10(3) 0.12(3) 0.06(3) 0.03(2) -0.03(2) -0.03(2)

_geom_special_details
;
 All esds (except the esd in the dihedral angle between two l.s. planes)
 are estimated using the full covariance matrix.  The cell esds are taken
 into account individually in the estimation of esds in distances, angles
 and torsion angles; correlations between esds in cell parameters are only
 used when they are defined by crystal symmetry.  An approximate (isotropic)
 treatment of cell esds is used for estimating esds involving l.s. planes.
;
loop_
  _geom_bond_atom_site_label_1
  _geom_bond_atom_site_label_2
  _geom_bond_distance
  _geom_bond_site_symmetry_2
  _geom_bond_publ_flag
 Gd1 Mn1 3.3699(18) . ?
 Gd1 Mn1 3.3835(18) 2_766 ?
 Gd1 O1 2.273(7) 2_766 ?
 Gd1 O2 2.225(8) . ?
 Gd1 O3 2.357(8) . ?
 Gd1 O5 2.301(7) . ?
 Gd1 O6 2.496(7) 2_766 ?
 Gd1 O7 2.304(7) . ?
 Gd1 O9 2.446(8) . ?
 Gd1 O10 2.410(7) . ?
 Gd1 C11 2.779(12) 2_766 ?
 Gd1 C21 2.810(13) . ?
 Mn1 Gd1 3.3835(18) 2_766 ?
 Mn1 Mn1 2.792(3) 2_766 ?
 Mn1 O1 1.862(7) 2_766 ?
 Mn1 O1 1.869(6) . ?
 Mn1 O4 1.963(7) . ?
 Mn1 O6 2.249(8) . ?
 Mn1 O8 1.978(7) . ?
 Mn1 O10 2.288(7) . ?
 O1 Gd1 2.273(7) 2_766 ?
 O1 Mn1 1.862(7) 2_766 ?
 O2 C1 1.275(14) . ?
 O3 C11 1.264(13) 2_766 ?
 O4 C6 1.290(12) . ?
 O5 C6 1.260(12) 2_766 ?
 O6 Gd1 2.496(7) 2_766 ?
 O6 C11 1.259(12) . ?
 O7 C16 1.244(12) . ?
 O8 C16 1.270(13) . ?
 O9 C21 1.251(13) . ?
 O10 C21 1.282(12) . ?
 O11 C1 1.264(14) . ?
 C1 C2 1.532(17) . ?
 C2 C3 1.513(17) . ?
 C2 C4 1.527(16) . ?
 C2 C5 1.505(16) . ?
 C6 O5 1.260(12) 2_766 ?
 C6 C7 1.550(15) . ?
 C7 C8 1.527(15) . ?
 C7 C9 1.514(16) . ?
 C7 C10 1.544(16) . ?
 C11 Gd1 2.779(12) 2_766 ?
 C11 O3 1.264(13) 2_766 ?
 C11 C12 1.517(16) . ?
 C12 C13 1.544(15) . ?
 C12 C14 1.531(16) . ?
 C12 C15 1.522(15) . ?
 C16 C17 1.551(14) . ?
 C17 C18 1.526(16) . ?
 C17 C19 1.534(15) . ?
 C17 C20 1.548(16) . ?
 C21 C22 1.530(16) . ?
 C22 C23 1.517(15) . ?
 C22 C24 1.560(14) . ?
 C22 C25 1.520(16) . ?
 N1 C26 1.525(16) . ?
 N1 C28 1.487(14) . ?
 N1 C30 1.494(14) . ?
 C26 C27 1.531(15) . ?
 C28 C29 1.540(19) . ?
 C30 C31 1.552(16) . ?

loop_
  _geom_angle_atom_site_label_1
  _geom_angle_atom_site_label_2
  _geom_angle_atom_site_label_3
  _geom_angle
  _geom_angle_site_symmetry_1
  _geom_angle_site_symmetry_3
  _geom_angle_publ_flag
 Mn1 Gd1 Mn1 48.84(5) . 2_766 ?
 O1 Gd1 Mn1 31.45(16) 2_766 2_766 ?
 O1 Gd1 Mn1 31.54(17) 2_766 . ?
 O1 Gd1 O3 125.4(3) 2_766 . ?
 O1 Gd1 O5 78.8(3) 2_766 . ?
 O1 Gd1 O6 71.9(2) 2_766 2_766 ?
 O1 Gd1 O7 77.5(2) 2_766 . ?
 O1 Gd1 O9 123.7(3) 2_766 . ?
 O1 Gd1 O10 72.8(2) 2_766 . ?
 O1 Gd1 C11 98.6(3) 2_766 2_766 ?
 O1 Gd1 C21 98.4(3) 2_766 . ?
 O2 Gd1 Mn1 147.74(19) . 2_766 ?
 O2 Gd1 Mn1 148.31(19) . . ?
 O2 Gd1 O1 138.1(3) . 2_766 ?
 O2 Gd1 O3 89.3(3) . . ?
 O2 Gd1 O5 80.9(3) . . ?
 O2 Gd1 O6 136.4(2) . 2_766 ?
 O2 Gd1 O7 80.8(3) . . ?
 O2 Gd1 O9 85.1(3) . . ?
 O2 Gd1 O10 137.0(2) . . ?
 O2 Gd1 C11 114.9(3) . 2_766 ?
 O2 Gd1 C21 110.7(3) . . ?
 O3 Gd1 Mn1 120.2(2) . . ?
 O3 Gd1 Mn1 94.6(2) . 2_766 ?
 O3 Gd1 O6 53.5(3) . 2_766 ?
 O3 Gd1 O9 73.7(3) . . ?
 O3 Gd1 O10 89.1(3) . . ?
 O3 Gd1 C11 26.9(3) . 2_766 ?
 O3 Gd1 C21 81.1(3) . . ?
 O5 Gd1 Mn1 109.82(19) . . ?
 O5 Gd1 Mn1 67.39(19) . 2_766 ?
 O5 Gd1 O3 86.9(3) . . ?
 O5 Gd1 O6 75.7(3) . 2_766 ?
 O5 Gd1 O7 118.5(3) . . ?
 O5 Gd1 O9 156.1(3) . . ?
 O5 Gd1 O10 141.8(3) . . ?
 O5 Gd1 C11 83.4(3) . 2_766 ?
 O5 Gd1 C21 163.0(3) . . ?
 O6 Gd1 Mn1 75.02(17) 2_766 . ?
 O6 Gd1 Mn1 41.66(17) 2_766 2_766 ?
 O6 Gd1 C11 26.9(3) 2_766 2_766 ?
 O6 Gd1 C21 87.5(3) 2_766 . ?
 O7 Gd1 Mn1 108.66(19) . 2_766 ?
 O7 Gd1 Mn1 67.85(19) . . ?
 O7 Gd1 O3 150.4(3) . . ?
 O7 Gd1 O6 142.8(3) . 2_766 ?
 O7 Gd1 O9 77.7(3) . . ?
 O7 Gd1 O10 79.8(3) . . ?
 O7 Gd1 C11 155.8(3) . 2_766 ?
 O7 Gd1 C21 76.6(3) . . ?
 O9 Gd1 Mn1 126.7(2) . 2_766 ?
 O9 Gd1 Mn1 92.15(19) . . ?
 O9 Gd1 O6 102.3(3) . 2_766 ?
 O9 Gd1 C11 85.1(3) . 2_766 ?
 O9 Gd1 C21 26.4(3) . . ?
 O10 Gd1 Mn1 42.74(17) . . ?
 O10 Gd1 Mn1 75.14(17) . 2_766 ?
 O10 Gd1 O6 71.6(2) . 2_766 ?
 O10 Gd1 O9 53.4(2) . . ?
 O10 Gd1 C11 76.3(3) . 2_766 ?
 O10 Gd1 C21 27.1(3) . . ?
 C11 Gd1 Mn1 68.6(3) 2_766 2_766 ?
 C11 Gd1 Mn1 96.2(3) 2_766 . ?
 C11 Gd1 C21 80.5(3) 2_766 . ?
 C21 Gd1 Mn1 67.1(2) . . ?
 C21 Gd1 Mn1 101.5(2) . 2_766 ?
 Gd1 Mn1 Gd1 131.16(5) . 2_766 ?
 Mn1 Mn1 Gd1 65.84(6) 2_766 . ?
 Mn1 Mn1 Gd1 65.33(6) 2_766 2_766 ?
 O1 Mn1 Gd1 98.9(2) . . ?
 O1 Mn1 Gd1 39.7(2) 2_766 . ?
 O1 Mn1 Gd1 98.6(2) 2_766 2_766 ?
 O1 Mn1 Gd1 39.4(2) . 2_766 ?
 O1 Mn1 Mn1 41.7(2) 2_766 2_766 ?
 O1 Mn1 Mn1 41.5(2) . 2_766 ?
 O1 Mn1 O1 83.1(3) 2_766 . ?
 O1 Mn1 O4 175.2(3) 2_766 . ?
 O1 Mn1 O4 95.1(3) . . ?
 O1 Mn1 O6 97.4(3) 2_766 . ?
 O1 Mn1 O6 85.3(3) . . ?
 O1 Mn1 O8 176.0(3) . . ?
 O1 Mn1 O8 95.5(3) 2_766 . ?
 O1 Mn1 O10 96.8(3) . . ?
 O1 Mn1 O10 83.5(3) 2_766 . ?
 O4 Mn1 Gd1 82.7(2) . 2_766 ?
 O4 Mn1 Gd1 136.7(2) . . ?
 O4 Mn1 Mn1 136.4(2) . 2_766 ?
 O4 Mn1 O6 87.0(3) . . ?
 O4 Mn1 O8 86.5(3) . . ?
 O4 Mn1 O10 92.3(3) . . ?
 O6 Mn1 Gd1 134.7(2) . . ?
 O6 Mn1 Gd1 47.53(19) . 2_766 ?
 O6 Mn1 Mn1 91.8(2) . 2_766 ?
 O6 Mn1 O10 177.8(3) . . ?
 O8 Mn1 Gd1 137.6(2) . 2_766 ?
 O8 Mn1 Gd1 82.2(2) . . ?
 O8 Mn1 Mn1 137.0(3) . 2_766 ?
 O8 Mn1 O6 91.2(3) . . ?
 O8 Mn1 O10 86.7(3) . . ?
 O10 Mn1 Gd1 45.64(19) . . ?
 O10 Mn1 Gd1 134.37(19) . 2_766 ?
 O10 Mn1 Mn1 90.21(18) . 2_766 ?
 Mn1 O1 Gd1 109.2(3) . 2_766 ?
 Mn1 O1 Gd1 108.8(3) 2_766 2_766 ?
 Mn1 O1 Mn1 96.9(3) 2_766 . ?
 C1 O2 Gd1 155.4(8) . . ?
 C11 O3 Gd1 95.5(7) 2_766 . ?
 C6 O4 Mn1 129.1(7) . . ?
 C6 O5 Gd1 135.9(8) 2_766 . ?
 Mn1 O6 Gd1 90.8(3) . 2_766 ?
 C11 O6 Gd1 89.1(7) . 2_766 ?
 C11 O6 Mn1 175.8(8) . . ?
 C16 O7 Gd1 133.7(7) . . ?
 C16 O8 Mn1 128.1(7) . . ?
 C21 O9 Gd1 93.3(7) . . ?
 Mn1 O10 Gd1 91.6(3) . . ?
 C21 O10 Gd1 94.1(7) . . ?
 C21 O10 Mn1 148.3(7) . . ?
 O2 C1 C2 121.5(12) . . ?
 O11 C1 O2 120.7(13) . . ?
 O11 C1 C2 117.7(12) . . ?
 C3 C2 C1 106.4(11) . . ?
 C3 C2 C4 109.6(11) . . ?
 C4 C2 C1 110.0(11) . . ?
 C5 C2 C1 109.8(11) . . ?
 C5 C2 C3 113.4(14) . . ?
 C5 C2 C4 107.7(11) . . ?
 O4 C6 C7 117.7(10) . . ?
 O5 C6 O4 124.5(11) 2_766 . ?
 O5 C6 C7 117.7(10) 2_766 . ?
 C8 C7 C6 109.8(11) . . ?
 C8 C7 C10 110.0(11) . . ?
 C9 C7 C6 109.0(10) . . ?
 C9 C7 C8 110.6(10) . . ?
 C9 C7 C10 111.1(12) . . ?
 C10 C7 C6 106.1(9) . . ?
 O3 C11 Gd1 57.6(6) 2_766 2_766 ?
 O3 C11 C12 118.9(11) 2_766 . ?
 O6 C11 Gd1 63.9(6) . 2_766 ?
 O6 C11 O3 120.3(11) . 2_766 ?
 O6 C11 C12 120.7(11) . . ?
 C12 C11 Gd1 164.7(9) . 2_766 ?
 C11 C12 C13 109.3(11) . . ?
 C11 C12 C14 106.5(10) . . ?
 C11 C12 C15 110.8(11) . . ?
 C14 C12 C13 109.0(11) . . ?
 C15 C12 C13 111.6(10) . . ?
 C15 C12 C14 109.5(11) . . ?
 O7 C16 O8 127.0(10) . . ?
 O7 C16 C17 116.7(11) . . ?
 O8 C16 C17 116.3(10) . . ?
 C18 C17 C16 109.1(10) . . ?
 C18 C17 C19 109.3(10) . . ?
 C18 C17 C20 109.5(11) . . ?
 C19 C17 C16 111.2(10) . . ?
 C19 C17 C20 109.9(10) . . ?
 C20 C17 C16 107.8(9) . . ?
 O9 C21 Gd1 60.3(6) . . ?
 O9 C21 O10 119.1(12) . . ?
 O9 C21 C22 121.3(10) . . ?
 O10 C21 Gd1 58.8(6) . . ?
 O10 C21 C22 119.6(11) . . ?
 C22 C21 Gd1 177.6(8) . . ?
 C21 C22 C24 103.4(10) . . ?
 C23 C22 C21 111.0(10) . . ?
 C23 C22 C24 110.3(10) . . ?
 C23 C22 C25 111.5(11) . . ?
 C25 C22 C21 110.8(9) . . ?
 C25 C22 C24 109.6(10) . . ?
 C28 N1 C26 108.3(11) . . ?
 C28 N1 C30 115.0(10) . . ?
 C30 N1 C26 113.8(11) . . ?
 N1 C26 C27 111.9(11) . . ?
 N1 C28 C29 111.4(13) . . ?
 N1 C30 C31 113.6(11) . . ?

_shelx_SHELXL_version_number      '2014/7'
_iucr_refine_instructions_details
;

    arepw341.res created by SHELXL-2014/7

TITL CF solution in P-1
CELL 0.71073 12.974441 13.146953 13.16932 86.4545 77.9095 66.6663
ZERR 1 0.001092 0.000924 0.001098 0.0063 0.0071 0.0073
LATT 1
SFAC C H Gd Mn N O
UNIT 62 123.33 2 2 2 22.67
ISOR 0.01 0.02 C23 O2
ISOR 0.01 0.02 C1
ISOR 0.01 0.02 C3
 
L.S. 10
PLAN  55
BOND
fmap 2
acta
SHEL 100 0.85
OMIT 12 -2 7
OMIT -8 -8 10
OMIT -3 -3 10
REM <olex2.extras>
REM <HklSrc "%./arepw341.hkl">
REM </olex2.extras>
 
WGHT    0.000000
FVAR       0.52424
GD1   3    0.795778    0.634981    0.669787    11.00000    0.02657    0.01760 =
         0.01368   -0.00024    0.00382   -0.00095
MN1   4    1.045288    0.580348    0.499143    11.00000    0.03605    0.02467 =
         0.02165    0.00003    0.00134   -0.00842
O1    6    1.028510    0.490897    0.404186    11.00000    0.03127    0.02128 =
         0.02482   -0.00212    0.00063   -0.00438
O2    6    0.692416    0.692185    0.828457    11.00000    0.04873    0.03492 =
         0.01423    0.00632   -0.00225   -0.00640
O3    6    0.625192    0.675281    0.609835    11.00000    0.03726    0.06120 =
         0.03782   -0.02531    0.00095    0.00865
O4    6    1.110844    0.661735    0.393231    11.00000    0.03436    0.03006 =
         0.02665   -0.00152    0.00925   -0.00960
O5    6    0.781551    0.471740    0.729066    11.00000    0.05639    0.02152 =
         0.02862    0.00087    0.00758   -0.01249
O6    6    1.224180    0.450403    0.485235    11.00000    0.02780    0.03949 =
         0.02562   -0.00138   -0.00181   -0.00341
O7    6    0.917494    0.692936    0.731728    11.00000    0.04570    0.04910 =
         0.02177   -0.00464    0.00654   -0.02620
O8    6    1.070900    0.665640    0.602996    11.00000    0.04009    0.02800 =
         0.02868   -0.00485    0.00065   -0.00471
O9    6    0.725109    0.831812    0.628964    11.00000    0.05273    0.02372 =
         0.03482    0.00990    0.02024    0.01250
O10   6    0.865399    0.716982    0.516098    11.00000    0.03815    0.02181 =
         0.02203   -0.00305    0.00687   -0.00687
O11   6    0.602957    0.809713    0.961594    11.00000    0.07296    0.06244 =
         0.04651   -0.01729   -0.01125    0.00800
C1    1    0.676386    0.716831    0.924235    11.00000    0.04798    0.04652 =
         0.02892   -0.00527   -0.00677   -0.01510
C2    1    0.739838    0.633158    0.999008    11.00000    0.06142    0.04425 =
         0.02502    0.00599   -0.01347    0.00631
C3    1    0.661732    0.576031    1.049290    11.00000    0.06302    0.10039 =
         0.08921    0.06513    0.01929   -0.00909
AFIX 137
H3A   2    0.595535    0.627973    1.093801    11.00000   -1.50000
H3B   2    0.702068    0.515552    1.089546    11.00000   -1.50000
H3C   2    0.638043    0.548324    0.996422    11.00000   -1.50000
AFIX   0
C4    1    0.851766    0.547810    0.938855    11.00000    0.04735    0.05354 =
         0.03336    0.01032   -0.00136   -0.00142
AFIX 137
H4A   2    0.835982    0.514612    0.884214    11.00000   -1.50000
H4B   2    0.887185    0.491499    0.985071    11.00000   -1.50000
H4C   2    0.902486    0.583671    0.909471    11.00000   -1.50000
AFIX   0
C5    1    0.769693    0.691836    1.075789    11.00000    0.11661    0.10143 =
         0.05835   -0.02262   -0.05806    0.01495
AFIX 137
H5A   2    0.817641    0.727810    1.039272    11.00000   -1.50000
H5B   2    0.809766    0.638988    1.122230    11.00000   -1.50000
H5C   2    0.700715    0.746139    1.114843    11.00000   -1.50000
AFIX   0
C6    1    1.183214    0.625353    0.307069    11.00000    0.02586    0.03501 =
         0.02424   -0.00063    0.00508   -0.00887
C7    1    1.225087    0.708435    0.240793    11.00000    0.06199    0.04196 =
         0.02850    0.00523   -0.00917   -0.02963
C8    1    1.202529    0.808510    0.308107    11.00000    0.08304    0.06991 =
         0.06713   -0.00912    0.00927   -0.04764
AFIX 137
H8A   2    1.121420    0.850080    0.328120    11.00000   -1.50000
H8B   2    1.237739    0.854708    0.269377    11.00000   -1.50000
H8C   2    1.234250    0.783640    0.369131    11.00000   -1.50000
AFIX   0
C9    1    1.351808    0.650640    0.195318    11.00000    0.05507    0.05693 =
         0.10069   -0.01028    0.04321   -0.02289
AFIX 137
H9A   2    1.392084    0.616726    0.249896    11.00000   -1.50000
H9B   2    1.380440    0.703779    0.161573    11.00000   -1.50000
H9C   2    1.363231    0.594777    0.145660    11.00000   -1.50000
AFIX   0
C10   1    1.154567    0.745060    0.154394    11.00000    0.08000    0.07943 =
         0.03286    0.02042   -0.00688   -0.03594
AFIX 137
H10A  2    1.171220    0.682173    0.111027    11.00000   -1.50000
H10B  2    1.174283    0.800021    0.113205    11.00000   -1.50000
H10C  2    1.074341    0.775763    0.185221    11.00000   -1.50000
AFIX   0
C11   1    1.326873    0.382341    0.473116    11.00000    0.03507    0.03744 =
         0.03373   -0.00306   -0.00714   -0.00690
C12   1    1.392327    0.362506    0.560219    11.00000    0.02831    0.04801 =
         0.03633   -0.01318    0.00180   -0.00723
C13   1    1.519333    0.338941    0.513480    11.00000    0.03967    0.06279 =
         0.07508   -0.01801   -0.01151   -0.00861
AFIX 137
H13A  2    1.551571    0.274138    0.468939    11.00000   -1.50000
H13B  2    1.560866    0.326834    0.568478    11.00000   -1.50000
H13C  2    1.524521    0.401201    0.473965    11.00000   -1.50000
AFIX   0
C14   1    1.384366    0.259377    0.616008    11.00000    0.10705    0.05871 =
         0.06640    0.02260   -0.02164   -0.04099
AFIX 137
H14A  2    1.305552    0.273306    0.644975    11.00000   -1.50000
H14B  2    1.426940    0.242160    0.670655    11.00000   -1.50000
H14C  2    1.415615    0.198009    0.567370    11.00000   -1.50000
AFIX   0
C15   1    1.338824    0.460776    0.636421    11.00000    0.05757    0.07619 =
         0.04415   -0.00872   -0.01612   -0.01535
AFIX 137
H15A  2    1.335802    0.527041    0.599834    11.00000   -1.50000
H15B  2    1.384310    0.448784    0.688291    11.00000   -1.50000
H15C  2    1.262611    0.468491    0.669207    11.00000   -1.50000
AFIX   0
C16   1    1.008754    0.702666    0.691534    11.00000    0.04043    0.01337 =
         0.02876   -0.00226   -0.00452   -0.00511
C17   1    1.053174    0.764127    0.757530    11.00000    0.04321    0.04254 =
         0.02887    0.00025   -0.00467   -0.02576
C18   1    0.954004    0.869879    0.804665    11.00000    0.06602    0.06060 =
         0.07160   -0.02516   -0.00618   -0.00608
AFIX 137
H18A  2    0.928928    0.919903    0.750259    11.00000   -1.50000
H18B  2    0.978991    0.904328    0.851304    11.00000   -1.50000
H18C  2    0.891710    0.851931    0.842082    11.00000   -1.50000
AFIX   0
C19   1    1.148960    0.793987    0.691139    11.00000    0.08039    0.05319 =
         0.03876   -0.00254   -0.01775   -0.03712
AFIX 137
H19A  2    1.213359    0.727336    0.664950    11.00000   -1.50000
H19B  2    1.171970    0.835377    0.732867    11.00000   -1.50000
H19C  2    1.121509    0.837942    0.634041    11.00000   -1.50000
AFIX   0
C20   1    1.098936    0.686552    0.845519    11.00000    0.09417    0.06923 =
         0.05573    0.02073   -0.04414   -0.03824
AFIX 137
H20A  2    1.036026    0.678741    0.893771    11.00000   -1.50000
H20B  2    1.137608    0.717652    0.880998    11.00000   -1.50000
H20C  2    1.151544    0.615168    0.816337    11.00000   -1.50000
AFIX   0
C21   1    0.796958    0.816283    0.545548    11.00000    0.03062    0.02765 =
         0.03330   -0.01027   -0.00230   -0.00238
C22   1    0.802978    0.913125    0.477384    11.00000    0.04278    0.01259 =
         0.04273    0.00709   -0.00594    0.00186
C23   1    0.689195    1.012221    0.497342    11.00000    0.07500    0.02118 =
         0.05499    0.02158   -0.00690    0.00679
AFIX 137
H23A  2    0.631186    0.992778    0.479437    11.00000   -1.50000
H23B  2    0.695979    1.072705    0.455739    11.00000   -1.50000
H23C  2    0.668425    1.033880    0.569478    11.00000   -1.50000
AFIX   0
C24   1    0.896669    0.940510    0.513039    11.00000    0.10096    0.05637 =
         0.04948    0.01259   -0.02343   -0.04726
AFIX 137
H24A  2    0.871183    0.964784    0.584567    11.00000   -1.50000
H24B  2    0.909973    0.998183    0.471107    11.00000   -1.50000
H24C  2    0.966498    0.875413    0.505381    11.00000   -1.50000
AFIX   0
C25   1    0.841558    0.877923    0.363271    11.00000    0.04845    0.03317 =
         0.03768    0.01193   -0.00103   -0.01159
AFIX 137
H25A  2    0.907842    0.809431    0.354628    11.00000   -1.50000
H25B  2    0.860347    0.934079    0.323364    11.00000   -1.50000
H25C  2    0.780852    0.868026    0.339752    11.00000   -1.50000
AFIX   0
 
N1    5    0.554740    1.090631    1.155823    11.00000    0.04162    0.07367 =
         0.03350   -0.01101   -0.01275   -0.00524
AFIX  13
H1    2    0.486927    1.133967    1.126889    11.00000   -1.20000
AFIX   0
C26   1    0.521018    1.012354    1.232992    11.00000    0.05365    0.08461 =
         0.02220    0.00289    0.00024   -0.00964
AFIX  23
H26A  2    0.475781    1.053048    1.296994    11.00000   -1.20000
H26B  2    0.589718    0.954293    1.248942    11.00000   -1.20000
AFIX   0
C27   1    0.451939    0.959850    1.190424    11.00000    0.07167    0.08424 =
         0.03110   -0.00256   -0.00807   -0.02252
AFIX 137
H27A  2    0.431602    0.911919    1.241337    11.00000   -1.50000
H27B  2    0.497321    0.917637    1.128192    11.00000   -1.50000
H27C  2    0.383565    1.017061    1.175043    11.00000   -1.50000
AFIX   0
C28   1    0.576621    1.170537    1.214539    11.00000    0.04136    0.08764 =
         0.05883   -0.03712    0.00053   -0.01004
AFIX  23
H28A  2    0.642656    1.131023    1.245717    11.00000   -1.20000
H28B  2    0.511011    1.205445    1.270043    11.00000   -1.20000
AFIX   0
C29   1    0.598643    1.260330    1.143336    11.00000    0.08715    0.09037 =
         0.11881   -0.01753   -0.02988   -0.03919
AFIX 137
H29A  2    0.603601    1.315344    1.184533    11.00000   -1.50000
H29B  2    0.536791    1.294554    1.107125    11.00000   -1.50000
H29C  2    0.669262    1.227056    1.093973    11.00000   -1.50000
AFIX   0
C30   1    0.648210    1.032781    1.065871    11.00000    0.05069    0.06856 =
         0.02966   -0.02189    0.01253    0.00449
AFIX  23
H30A  2    0.650304    1.085848    1.011748    11.00000   -1.20000
H30B  2    0.630589    0.976274    1.038117    11.00000   -1.20000
AFIX   0
C31   1    0.768422    0.977780    1.094089    11.00000    0.04516    0.10264 =
         0.05910   -0.03161    0.00200    0.00217
AFIX 137
H31A  2    0.766593    0.926706    1.149104    11.00000   -1.50000
H31B  2    0.789268    1.033880    1.116402    11.00000   -1.50000
H31C  2    0.823748    0.938740    1.034211    11.00000   -1.50000
AFIX   6
 
PART -1
O12   6    0.916181    0.616431    0.250221    10.33333    0.09638    0.12006 =
         0.05975    0.03243   -0.02850   -0.02606
H12A  2    0.959419    0.617548    0.290164    10.33333   -1.50000
H12B  2    0.891957    0.565343    0.268227    10.33333   -1.50000
AFIX   0
HKLF 4
 
REM  CF solution in P-1
REM R1 =  0.0813 for    3900 Fo > 4sig(Fo)  and  0.1581 for all    6812 data
REM    436 parameters refined using     24 restraints
 
END  
     
WGHT      0.0000      0.0000 

REM Highest difference peak  1.007,  deepest hole -1.064,  1-sigma level  0.187
Q1    1   0.8021  0.6552  0.7303  11.00000  0.05    1.01
Q2    1   0.7529  0.6352  0.6628  11.00000  0.05    0.84
Q3    1   0.8281  0.6009  0.6711  11.00000  0.05    0.81
Q4    1   0.6112  1.0886  0.9815  11.00000  0.05    0.78
Q5    1   0.7127  0.7485  0.6805  11.00000  0.05    0.78
Q6    1   0.7765  0.6557  0.6493  11.00000  0.05    0.77
Q7    1   0.8853  0.6067  0.7465  11.00000  0.05    0.76
Q8    1   0.7798  0.4359  1.0010  11.00000  0.05    0.76
Q9    1   0.7636  0.7285  0.7888  11.00000  0.05    0.72
Q10   1   0.7179  1.0199  1.2994  11.00000  0.05    0.69
Q11   1   1.0378  0.6895  1.0114  11.00000  0.05    0.68
Q12   1   1.4410  0.2602  0.6388  11.00000  0.05    0.67
Q13   1   1.2768  0.5941  0.1232  11.00000  0.05    0.67
Q14   1   1.1420  0.5877  0.7274  11.00000  0.05    0.67
Q15   1   1.4959  0.3900  0.4182  11.00000  0.05    0.65
Q16   1   0.6080  0.8657  1.1724  11.00000  0.05    0.65
Q17   1   1.1738  0.8643  0.4034  11.00000  0.05    0.64
Q18   1   1.2404  0.5628  0.5522  11.00000  0.05    0.64
Q19   1   0.3023  0.9580  1.1775  11.00000  0.05    0.63
Q20   1   0.4583  0.8981  1.3326  11.00000  0.05    0.63
Q21   1   0.8984  0.6005  0.8346  11.00000  0.05    0.63
Q22   1   1.1342  0.5564  0.4379  11.00000  0.05    0.63
Q23   1   1.2590  0.6432  0.4474  11.00000  0.05    0.62
Q24   1   0.7846  0.7459  0.6142  11.00000  0.05    0.62
Q25   1   0.6965  0.6811  0.6093  11.00000  0.05    0.62
Q26   1   0.8801  0.6866  0.4413  11.00000  0.05    0.62
Q27   1   0.9163  0.7364  0.8959  11.00000  0.05    0.61
Q28   1   0.8269  0.9434  0.6297  11.00000  0.05    0.61
Q29   1   1.3954  0.4777  0.2662  11.00000  0.05    0.61
Q30   1   1.2393  0.3968  0.4188  11.00000  0.05    0.61
Q31   1   1.3132  0.2018  0.6876  11.00000  0.05    0.61
Q32   1   0.7110  0.6723  1.2173  11.00000  0.05    0.61
Q33   1   0.5033  1.3201  1.2440  11.00000  0.05    0.61
Q34   1   0.5600  1.0537  1.3501  11.00000  0.05    0.61
Q35   1   1.1587  0.4811  0.5193  11.00000  0.05    0.60
Q36   1   0.4695  1.4026  1.2743  11.00000  0.05    0.60
Q37   1   1.6107  0.2838  0.4998  11.00000  0.05    0.60
Q38   1   0.8357  0.8173  0.9315  11.00000  0.05    0.60
Q39   1   0.9797  0.7778  1.0008  11.00000  0.05    0.60
Q40   1   0.5787  0.7019  1.1639  11.00000  0.05    0.60
Q41   1   0.8201  0.5433  0.7467  11.00000  0.05    0.60
Q42   1   0.8829  0.7962  0.3149  11.00000  0.05    0.60
Q43   1   0.5630  1.3676  1.1104  11.00000  0.05    0.60
Q44   1   1.5407  0.4161  0.3383  11.00000  0.05    0.59
Q45   1   1.3163  0.5758  0.5107  11.00000  0.05    0.59
Q46   1   0.5411  1.1477  1.2198  11.00000  0.05    0.59
Q47   1   0.8565  0.6472  0.6159  11.00000  0.05    0.59
Q48   1   1.4349  0.4842  0.6709  11.00000  0.05    0.59
Q49   1   1.1145  0.6036  0.3458  11.00000  0.05    0.59
Q50   1   1.3621  0.5408  0.7574  11.00000  0.05    0.58
Q51   1   0.8340  1.0317  0.6148  11.00000  0.05    0.58
Q52   1   0.9581  0.6035  0.3176  11.00000  0.05    0.58
Q53   1   1.3961  0.6921  0.0349  11.00000  0.05    0.58
Q54   1   0.9369  0.4221  0.8499  11.00000  0.05    0.58
Q55   1   0.2872  1.0445  1.1085  11.00000  0.05    0.58

REM The information below was added by Olex2.
REM
REM R1 = 0.0813 for 3900 Fo > 4sig(Fo) and 0.1581 for all 14703 data
REM n/a parameters refined using n/a restraints
REM Highest difference peak 1.01, deepest hole -1.06
REM Mean Shift 0, Max Shift 0.000.

REM +++ Tabular Listing of Refinement Information +++
REM R1_all = 0.1581
REM R1_gt = 0.0813
REM wR_ref = 0.1423
REM GOOF = 1.024
REM Shift_max = 0.000
REM Shift_mean = 0
REM Reflections_all = 14703
REM Reflections_gt = 3900
REM Parameters = n/a
REM Hole = -1.06
REM Peak = 1.01
REM Flack = n/a

;
_olex2_date_sample_data_collection 2013-10-28
_olex2_submission_special_instructions 'No special instructions were received'
loop_
  _refln_index_h
  _refln_index_k
  _refln_index_l
  _refln_F_squared_meas
  _refln_F_squared_sigma
  _refln_scale_group_code
 0 0 -2 11.3334 26.0364 1
 0 0 -3 294.638 66.3935 1
 0 0 3 325.364 70.666 1
 0 0 4 33.5511 44.9812 1
 0 0 -4 21.6318 39.6299 1
 0 0 5 2628.65 226.6 1
 0 0 -5 2744.68 224.212 1
 0 0 -6 4964.32 329.548 1
 0 0 6 4896.84 340.769 1
 0 0 -7 1987.51 225.813 1
 0 0 7 1880.36 232.423 1
 0 0 8 -5.44219 36.6744 1
 0 0 -8 35.3246 41.0089 1
 0 0 9 31.4733 40.516 1
 0 0 -9 -12.8685 41.8546 1
 0 0 10 -21.5906 29.6683 1
 0 0 11 893.329 215.54 1
 0 0 12 2012.3 326.615 1
 0 0 13 -69.8034 121.316 1
 0 0 14 264.166 179.58 1
 0 0 15 1524.03 375.021 1
 0 0 16 -192.734 194.936 1
 0 -1 16 38.103 176.282 1
 0 -1 15 549.816 256.055 1
 0 -1 14 10.3882 99.8377 1
 0 -1 13 1715.42 330.085 1
 0 -1 12 1529.32 293.176 1
 0 -1 11 -31.4119 53.7103 1
 0 -1 10 187.532 83.0303 1
 0 -1 9 20.644 32.8483 1
 0 1 -9 94.7939 70.3836 1
 0 -1 8 306.847 104.722 1
 0 -1 7 2386.22 263.988 1
 0 1 -7 2598.63 260.794 1
 0 1 -6 1720.12 198.658 1
 0 -1 6 1434.28 191.484 1
 0 1 -5 74.4892 51.7842 1
 0 -1 5 0.30655 45.3187 1
 0 1 -4 1108.62 133.445 1
 0 -1 4 1171.74 154.824 1
 0 1 -3 1726.93 147.925 1
 0 -1 3 1741.63 153.088 1
 0 1 -2 1231.73 108.225 1
 0 -1 2 1247.08 110.875 1
 0 1 2 376.151 62.919 1
 0 -1 -2 356.856 60.5349 1
 0 1 3 1844.3 149.361 1
 0 -1 -3 1948.64 153.221 1
 0 1 4 747.665 112.772 1
 0 1 5 3491.03 259.73 1
 0 -1 -5 3390.38 251.093 1
 0 1 6 961.904 156.913 1
 0 -1 -6 1005.31 154.146 1
 0 -1 -7 749.931 142.23 1
 0 1 7 706.777 142.048 1
 0 1 8 414.912 118.906 1
 0 -1 -8 404.24 114.036 1
 0 -1 -9 19.4425 39.7284 1
 0 1 9 -52.9107 45.1127 1
 0 1 10 464.084 139.185 1
 0 1 11 1737.98 290.169 1
 0 1 12 284.701 135.888 1
 0 1 13 78.715 115.15 1
 0 1 14 319.047 184.281 1
 0 1 15 107.065 172.022 1
 0 1 16 507.057 273.086 1
 0 -2 16 408.282 257.024 1
 0 -2 15 -93.2821 159.659 1
 0 -2 14 861.618 265.419 1
 0 -2 13 4789.77 557.005 1
 0 -2 12 109.298 99.5303 1
 0 -2 11 444.362 154.602 1
 0 -2 10 179.131 93.233 1
 0 2 -9 848.691 178.364 1
 0 -2 9 156.265 88.9973 1
 0 2 -8 1626.91 227.957 1
 0 -2 8 1768.46 252.016 1
 0 2 -7 3072.36 291.291 1
 0 -2 7 3271.77 321.637 1
 0 2 -6 147.269 63.7384 1
 0 -2 6 129 76.5499 1
 0 -2 5 1518.38 191.714 1
 0 2 -5 1481.27 173.81 1
 0 2 -4 378.977 86.2148 1
 0 -2 4 482.731 106.304 1
 0 -2 3 733.669 118.684 1
 0 2 -3 645.14 103.433 1
 0 2 -2 10143.1 342.405 3
 0 2 -2 9839.19 352.027 1
 0 -2 1 2289.21 144.988 3
 0 2 -1 2237.17 142.733 3
 0 -2 0 777.785 81.8107 3
 0 2 0 723.466 58.5296 2
 0 -2 -1 698.718 82.4599 3
 0 2 1 814.909 86.5955 3
 0 2 1 730.884 79.4669 2
 0 -2 -2 395.794 74.7542 3
 0 -2 -2 452.56 84.5748 2
 0 2 2 392.329 71.4523 1
 0 2 3 474.78 87.5143 1
 0 -2 -3 519.332 90.3171 1
 0 2 4 6119.29 316.574 1
 0 -2 -4 6364.24 323.608 1
 0 2 5 4151.92 287.96 1
 0 -2 -5 4050.55 287.99 1
 0 -2 -6 150.254 72.6029 1
 0 2 6 128.571 63.514 1
 0 2 7 671.417 141.557 1
 0 -2 -7 750.203 143.263 1
 0 2 8 387.666 112.433 1
 0 -2 -8 325.612 102.564 1
 0 -2 -9 211.55 90.4442 1
 0 2 9 297.998 106.473 1
 0 2 10 1246 230.271 1
 0 2 11 401.419 151.321 1
 0 2 12 164.888 114.956 1
 0 2 13 2615.21 419.958 1
 0 2 14 62.5364 140.245 1
 0 2 15 231.547 188.176 1
 0 -3 15 674.931 287.542 1
 0 -3 14 558.551 233.076 1
 0 -3 13 85.9424 123.778 1
 0 -3 12 521.067 186.853 1
 0 -3 11 1327.89 280.868 1
 0 -3 10 1564.02 295.3 1
 0 -3 9 491.905 149.955 1
 0 3 -8 1442.1 223.264 1
 0 -3 8 1300.45 229.379 1
 0 3 -7 33.9732 38.4469 1
 0 -3 7 80.2732 68.1513 1
 0 -3 6 1238.22 200.877 1
 0 3 -6 1370.88 190.322 1
 0 3 -5 2739.33 253.258 1
 0 -3 5 3255.57 301.876 1
 0 -3 4 35.0419 59.4148 1
 0 3 -4 40.6298 63.1797 3
 0 3 -4 6.59809 41.4246 1
 0 3 -3 628.347 114.24 3
 0 3 -3 513.267 105.021 1
 0 3 -2 1480.93 151.321 3
 0 -3 2 1400.17 149.866 3
 0 -3 1 213.401 69.3225 3
 0 3 -1 217.473 62.5482 3
 0 -3 0 7809.79 299.191 3
 0 3 0 7616.63 293.325 3
 0 3 0 7847.14 245.265 2
 0 -3 -1 861.443 108.439 3
 0 -3 -1 951.848 97.745 2
 0 3 1 907.913 107.922 3
 0 3 1 1242.99 118.804 2
 0 -3 -2 -1.7857 41.8498 3
 0 -3 -2 40.7943 46.5112 2
 0 3 2 5.81433 42.7826 3
 0 -3 -3 207.442 73.4216 2
 0 -3 -3 237.774 75.9836 3
 0 3 3 169.442 63.3447 1
 0 3 4 1367.59 165.714 1
 0 -3 -4 1269.04 156.145 1
 0 3 5 27.5726 49.1198 1
 0 -3 -5 21.5026 50.7876 1
 0 -3 -6 985.758 159.937 1
 0 3 6 1069.07 169.374 1
 0 -3 -7 1191.02 186.601 1
 0 3 7 1224.04 190.821 1
 0 3 8 21.4523 35.2874 1
 0 -3 -8 -128.087 69.1032 1
 0 3 9 938.582 189.25 1
 0 3 10 516.046 150.843 1
 0 3 11 1360.78 265.155 1
 0 3 12 1305.33 266.064 1
 0 3 13 155.484 132.676 1
 0 3 14 81.1695 137.144 1
 0 3 15 616.84 265.254 1
 0 -4 15 138.069 206.805 1
 0 -4 14 44.3623 188.181 1
 0 -4 13 494.185 213.73 1
 0 -4 12 687.11 222.63 1
 0 -4 11 204.611 122.876 1
 0 -4 10 153.209 97.7057 1
 0 -4 9 1457.27 265.464 1
 0 -4 8 562.442 159.525 1
 0 4 -8 760.002 168.143 1
 0 -4 7 721.919 169.679 1
 0 4 -7 642.39 148.32 1
 0 4 -6 4626.18 362.794 1
 0 4 -6 4764.6 382.85 3
 0 -4 6 4738.26 406.17 1
 0 4 -5 43.8702 67.5254 3
 0 4 -5 47.259 44.5361 1
 0 4 -4 1314.63 184.156 3
 0 4 -4 1165.43 173.431 1
 0 -4 3 3379.28 272.362 3
 0 4 -3 3080.39 265.707 1
 0 4 -3 3527.72 269.612 3
 0 -4 2 33.6827 56.9613 3
 0 4 -2 56.4516 57.6239 3
 0 4 -1 4394.42 263.535 3
 0 -4 1 4268.55 263.586 3
 0 4 0 2520.39 161.151 2
 0 4 0 2584.98 201.845 3
 0 -4 0 2667.76 204.508 3
 0 -4 -1 359.357 68.8295 2
 0 -4 -1 361.508 87.5679 3
 0 4 1 420.949 89.597 3
 0 4 1 366.844 73.1226 2
 0 4 2 830.545 125.884 3
 0 -4 -2 739.625 120.6 3
 0 -4 -2 1029.5 127.408 2
 0 4 3 1391.44 164.328 1
 0 -4 -3 1190.56 158.344 3
 0 -4 -3 1433.94 174.667 2
 0 -4 -4 -113.565 67.7409 2
 0 -4 -4 10.9221 54.0798 3
 0 -4 -5 2074.21 254.838 2
 0 4 5 1801.56 213.35 1
 0 -4 -5 1861.71 221.591 3
 0 -4 -6 2502.08 261.319 1
 0 4 6 2134.42 242.142 1
 0 -4 -6 2348.72 292.331 2
 0 -4 -7 148.662 74.244 1
 0 4 7 86.2021 66.0716 1
 0 4 8 294.511 108.534 1
 0 -4 -8 249.493 101.313 1
 0 4 9 764.205 171.984 1
 0 4 10 108.924 74.998 1
 0 4 11 773.311 198.6 1
 0 4 12 395.064 159.442 1
 0 4 13 -60.6391 106.361 1
 0 4 14 6171.1 642.749 1
 0 4 15 646.682 259.683 1
 0 5 -15 -190.742 174.74 3
 0 -5 15 179.002 259.666 1
 0 -5 14 -118.908 180.795 1
 0 5 -14 428.171 208.036 3
 0 -5 13 766.848 262.864 1
 0 5 -13 1056.3 295.619 3
 0 -5 12 14.8077 118 1
 0 5 -12 186.672 166.649 3
 0 5 -11 -12.1048 100.946 3
 0 -5 11 118.681 112.36 1
 0 5 -10 674.447 201.159 3
 0 -5 10 641.015 194.934 1
 0 5 -9 440.439 156.61 3
 0 -5 9 544.837 166.911 1
 0 5 -8 126.904 113.414 3
 0 5 -7 2549.42 310.389 3
 0 5 -7 2423.93 294.227 1
 0 5 -6 646.693 151.894 3
 0 5 -6 -111.994 67.0925 1
 0 5 -5 196.079 95.6472 3
 0 5 -5 94.2067 36.1 1
 0 5 -4 238.741 98.845 3
 0 5 -4 228.318 83.3886 1
 0 -5 3 706.729 143.342 3
 0 5 -3 701.791 139.502 3
 0 -5 2 2911.41 254.24 3
 0 5 -2 2700.92 242.79 3
 0 5 -1 4137.84 247.013 2
 0 5 -1 4228.39 291.595 3
 0 -5 1 4538.82 305.167 3
 0 -5 0 283.242 89.0777 3
 0 5 0 240.274 59.2376 2
 0 5 0 198.838 76.3301 3
 0 5 1 991.348 148.169 3
 0 -5 -1 907.892 143.864 3
 0 5 1 911.867 118.109 2
 0 -5 -1 964.075 119.531 2
 0 5 2 906.122 144.461 3
 0 -5 -2 996.359 154.208 3
 0 -5 -2 1175.12 142.755 2
 0 5 2 1022.23 139.025 2
 0 5 3 208.809 87.8686 3
 0 -5 -3 257.648 84.2418 2
 0 -5 -3 219.485 86.7357 3
 0 5 4 2566.74 248.888 1
 0 -5 -4 2668.26 262.688 3
 0 -5 -4 2533.99 259.61 2
 0 -5 -5 4926.34 395.9 2
 0 -5 -5 4909.65 372.979 3
 0 5 5 5241.62 376.257 1
 0 5 6 1557.88 216.569 1
 0 -5 -6 1531.73 224.97 3
 0 -5 -6 1360.57 226.426 2
 0 -5 -7 38.9815 64.0548 3
 0 -5 -7 -179.35 104.424 2
 0 -5 -8 701.215 175.06 3
 0 5 8 668.326 156.875 1
 0 5 9 388.031 126.317 1
 0 5 10 722.345 182.35 1
 0 5 11 1280.32 255.955 1
 0 5 12 -6.61604 93.3832 1
 0 5 13 27.427 119.712 1
 0 5 14 383.555 207.54 1
 0 6 -15 -16.4662 140.137 3
 0 6 -14 435.015 209.568 3
 0 6 -13 590.572 241.558 3
 0 6 -11 362.575 176.313 3
 0 6 -10 621.305 215.754 3
 0 6 -9 416.551 171.948 3
 0 6 -8 1849.7 290.081 3
 0 6 -7 1173.51 229.653 3
 0 6 -7 1089.06 225.505 1
 0 6 -6 114.272 98.4712 3
 0 6 -6 75.5661 77.2227 1
 0 6 -5 69.7129 67.1841 1
 0 6 -5 77.5526 77.1459 3
 0 6 -4 257.872 95.7876 1
 0 6 -4 155.126 92.1189 3
 0 -6 4 239.08 105.179 3
 0 6 -3 1776.75 224.641 3
 0 -6 3 1326.76 200.462 3
 0 6 -2 5350.22 365.651 3
 0 -6 2 5076.79 363.927 3
 0 6 -1 505.283 126.978 3
 0 6 -1 457.857 94.3168 2
 0 -6 1 485.602 115.361 3
 0 -6 0 885.869 153.07 3
 0 6 0 923.023 158.966 3
 0 6 0 945.122 120.036 2
 0 6 1 1224.94 174.512 3
 0 -6 -1 1134.69 140.315 2
 0 6 1 1232.77 142.792 2
 0 -6 -1 1116.05 173.878 3
 0 6 2 346.798 90.9384 2
 0 -6 -2 319.491 77.0419 2
 0 -6 -2 358.503 109.944 3
 0 6 2 382.82 109.447 3
 0 6 3 2185.32 239.93 3
 0 -6 -3 2278.63 251.966 3
 0 -6 -3 2617.64 243.654 2
 0 -6 -4 5340.98 401.313 3
 0 6 4 5940.54 398.948 1
 0 -6 -4 5476.45 389.1 2
 0 -6 -5 2108.49 262.957 3
 0 6 5 2134.47 255.473 1
 0 -6 -5 2248.18 273.645 2
 0 6 6 158.415 82.8533 1
 0 -6 -6 176.141 99.8756 2
 0 -6 -6 140.024 80.8062 3
 0 6 7 607.338 151.331 1
 0 -6 -7 265.585 130.552 2
 0 -6 -7 576.522 161.257 3
 0 6 8 58.956 48.6286 1
 0 -6 -8 -187.563 146.844 2
 0 6 9 44.6774 54.41 1
 0 6 10 1268.64 249.289 1
 0 6 11 588.48 183.001 1
 0 6 12 19.5596 99.2625 1
 0 6 13 113.131 128.84 1
 0 7 -14 552.484 243.907 3
 0 7 -13 101.569 140.028 3
 0 7 -12 345.097 185.113 3
 0 7 -11 227.788 152.699 3
 0 7 -10 162.13 142.246 3
 0 7 -9 995.198 240.134 3
 0 7 -8 1817.18 296.776 3
 0 7 -7 395.61 150.531 3
 0 7 -6 246.036 118.068 1
 0 7 -6 210.781 109.807 3
 0 7 -5 153.685 96.4131 1
 0 7 -5 121.752 102.329 3
 0 7 -4 244.185 103.672 1
 0 7 -4 193.222 93.9907 3
 0 -7 4 274.226 112.891 3
 0 -7 3 2098.25 261.698 3
 0 7 -3 2191.24 264.417 3
 0 -7 2 1250.94 199.718 3
 0 7 -2 1333.51 204.553 3
 0 7 -2 1398.73 181.346 2
 0 7 -1 140.494 55.5096 2
 0 7 -1 65.6184 70.8568 3
 0 -7 1 153.908 78.8548 3
 0 7 0 706.687 111.179 2
 0 -7 0 645.629 142.388 3
 0 7 0 665.696 142.43 3
 0 7 1 488.734 123.152 3
 0 7 1 268.642 71.7672 2
 0 -7 -1 338.698 106.274 3
 0 -7 -2 800.892 131.429 2
 0 7 2 823.174 135.168 2
 0 -7 -2 755.784 162.848 3
 0 7 2 657.707 146.083 3
 0 7 3 4820.47 375.359 3
 0 -7 -3 4918.28 344.14 2
 0 -7 -3 4975.43 395.821 3
 0 7 4 2194.89 259.91 1
 0 -7 -4 1940.49 258.897 3
 0 -7 -4 2011.4 241.604 2
 0 -7 -5 148.571 98.2782 3
 0 7 5 113.903 68.881 1
 0 -7 -6 848.898 193.427 3
 0 -7 -6 856.027 196.767 2
 0 7 6 1122.39 204.704 1
 0 -7 -7 -139.228 161.77 2
 0 7 7 -39.5903 46.5309 1
 0 7 8 119.251 70.7586 1
 0 -7 -8 476.887 203.365 2
 0 7 9 1876.46 295.119 1
 0 7 10 761.797 200.787 1
 0 7 11 -184.122 144.59 1
 0 7 12 -82.0376 114.448 1
 0 7 13 -44.9063 144.685 1
 0 7 14 463.208 251.228 1
 0 8 -14 153.971 170.686 3
 0 8 -13 55.3438 119.59 3
 0 8 -12 471.912 208.773 3
 0 8 -11 -148.481 141.942 3
 0 8 -10 838.253 241.733 3
 0 8 -9 1500.22 293.021 3
 0 8 -8 5.27068 106.531 3
 0 8 -7 164.524 102.447 3
 0 8 -6 346.926 137.455 3
 0 8 -5 14.2211 92.8191 3
 0 8 -4 1448.7 237.522 3
 0 -8 4 1666.2 258.877 3
 0 -8 3 1832.22 262.137 3
 0 8 -3 1978.62 235.646 2
 0 8 -3 1587.14 240.843 3
 0 -8 2 230.158 100.429 3
 0 8 -2 284.311 86.7327 2
 0 8 -2 256.723 119.537 3
 0 8 -1 484.551 102.32 2
 0 8 -1 421.74 134.843 3
 0 -8 1 478.565 133.04 3
 0 -8 0 155.559 87.215 3
 0 8 0 195.269 61.2637 2
 0 8 0 286.061 117.717 3
 0 8 1 -39.397 33.5871 2
 0 8 1 -31.101 66.0693 3
 0 -8 -1 33.8086 72.007 3
 0 -8 -2 1425 226.61 3
 0 -8 -2 1467.26 181.793 2
 0 8 2 1685.93 200.846 2
 0 8 3 1707.96 242.91 3
 0 -8 -3 1527.13 238.764 3
 0 -8 -3 1428.75 196.842 2
 0 -8 -4 62.757 82.5725 3
 0 -8 -4 -31.2426 69.9833 2
 0 8 4 131 83.5705 1
 0 -8 -5 714.861 167.565 2
 0 -8 -5 600.609 169.123 3
 0 8 5 530.662 142.731 1
 0 8 6 615.378 158.77 1
 0 -8 -6 506.683 167.117 2
 0 8 7 67.3794 47.3674 1
 0 -8 -7 124.239 143.279 2
 0 -8 -8 795.218 250.419 2
 0 8 8 338.507 123.344 1
 0 8 9 969.313 221.232 1
 0 8 10 14.9991 68.3954 1
 0 8 11 641.388 210.346 1
 0 8 12 360.539 192.549 1
 0 8 13 7.05339 191.961 1
 0 9 -13 212.218 188.391 3
 0 9 -12 51.1707 138.41 3
 0 9 -11 209.463 192.435 3
 0 9 -10 2792.09 522.626 3
 0 9 -9 258.379 150.841 3
 0 9 -8 591.037 206.431 3
 0 9 -7 755.7 218.322 3
 0 9 -6 41.4066 85.7468 3
 0 9 -5 276.522 130.358 3
 0 9 -4 1118.83 226.378 3
 0 -9 3 8.44665 78.1323 3
 0 9 -3 35.0506 77.8631 3
 0 9 -2 185.682 69.1218 2
 0 9 -2 459.785 149.376 3
 0 -9 2 440.821 140.959 3
 0 -9 1 557.033 148.542 3
 0 9 -1 517.332 152.521 3
 0 9 -1 529.705 110.625 2
 0 -9 0 90.3798 76.6037 3
 0 9 0 35 70.1754 3
 0 9 0 64.7511 46.1447 2
 0 9 1 301.673 124.057 3
 0 -9 -1 441.457 138.153 3
 0 9 1 269.918 81.3144 2
 0 -9 -2 1089.86 208.189 3
 0 9 2 1014.09 204.016 3
 0 -9 -2 1069.17 160.266 2
 0 9 3 42.619 65.7491 3
 0 -9 -3 75.0354 94.6654 3
 0 -9 -3 235.621 95.2584 2
 0 -9 -4 834.939 172.835 2
 0 9 4 861.129 198.065 3
 0 9 5 797.705 189.322 1
 0 -9 -5 915.575 195.822 2
 0 9 6 47.2175 62.7924 1
 0 -9 -6 79.3812 119.692 2
 0 -9 -7 458.933 208.198 2
 0 9 7 358.714 133.461 1
 0 9 8 1212.59 243.07 1
 0 -9 -8 1571.74 329.976 2
 0 9 9 19.8124 84.9116 1
 0 9 10 1028.95 255.212 1
 0 9 11 426.965 197.631 1
 0 9 12 -37.1366 138.693 1
 0 9 13 189.576 191.656 1
 0 10 -12 -207.361 172.297 3
 0 10 -11 30.4727 118.938 3
 0 10 -10 -47.0343 107.578 3
 0 10 -9 109.472 131.895 3
 0 10 -8 738.365 224.871 3
 0 10 -7 191.939 140.316 3
 0 10 -6 154.564 115.493 3
 0 10 -5 469.281 169.431 3
 0 10 -4 -107.277 72.1366 2
 0 10 -4 105.012 110.319 3
 0 10 -3 867.183 211.374 3
 0 10 -3 1031.63 179.24 2
 0 10 -2 1137.96 175.527 2
 0 10 -2 921.872 220.225 3
 0 10 -1 83.4681 55.0572 2
 0 10 -1 155.393 106.127 3
 0 10 0 1495.13 186.926 2
 0 10 0 123.41 98.429 3
 0 10 1 672.124 180.454 3
 0 10 1 1658.77 201.893 2
 0 10 2 193.614 114.605 3
 0 10 3 164.527 100.748 3
 0 -10 -3 27.7503 57.9419 2
 0 10 4 1452.55 259.764 3
 0 -10 -4 1076.85 199.033 2
 0 10 5 301.442 123.915 1
 0 -10 -5 342.685 147.65 2
 0 10 6 274.231 118.314 1
 0 -10 -6 254.35 165.248 2
 0 -10 -7 1371.41 299.655 2
 0 10 7 866.466 208.967 1
 0 10 8 303.239 136.562 1
 0 10 9 316.064 157.633 1
 0 10 10 412.06 187.897 1
 0 10 11 174.856 165.922 1
 0 10 12 239.881 194.063 1
 0 11 -12 349.499 195.008 3
 0 11 -11 -185.961 179.14 3
 0 11 -10 64.5145 132.653 3
 0 11 -9 603.313 245.919 3
 0 11 -8 115.549 157.966 3
 0 11 -7 20.6656 95.5837 3
 0 11 -6 577.969 220.559 3
 0 11 -5 192.401 98.5544 2
 0 11 -5 407.284 172.249 3
 0 11 -4 394.553 129.577 2
 0 11 -4 5.46116 92.6993 3
 0 11 -3 1348 206.042 2
 0 11 -3 1250.72 267.812 3
 0 11 -2 149.838 76.4307 2
 0 11 -2 295.549 161.26 3
 0 11 -1 115.518 74.1603 2
 0 11 -1 177.402 119.293 3
 0 11 0 982.659 158.904 2
 0 11 0 1209.43 244.569 3
 0 11 1 365 95.7921 2
 0 11 1 255.339 130.542 3
 0 11 2 126.432 109.53 3
 0 11 3 1234.97 264.576 3
 0 11 4 190.282 126.647 3
 0 -11 -4 45.0738 97.7708 2
 0 -11 -5 344.248 163.195 2
 0 11 5 222.507 137.936 1
 0 11 6 613.651 179.282 1
 0 11 7 245.036 132.97 1
 0 11 8 500.416 184.14 1
 0 11 9 943.164 251.75 1
 0 11 10 318.475 189.474 1
 0 11 11 228.123 203.462 1
 0 12 -11 7.31682 125.046 3
 0 12 -10 593.868 254.805 3
 0 12 -9 601.707 282.927 3
 0 12 -8 16.4981 121.973 3
 0 12 -7 321.875 183.006 3
 0 12 -7 523.479 204.707 2
 0 12 -6 186.117 181.173 3
 0 12 -6 293.145 145.796 2
 0 12 -5 7181.31 688.575 3
 0 12 -5 -74.3164 123.357 2
 0 12 -4 922.451 195.485 2
 0 12 -4 818.093 245.816 3
 0 12 -3 752.599 241.032 3
 0 12 -3 580.091 150.942 2
 0 12 -2 113.85 90.5561 2
 0 12 -2 179.023 139.064 3
 0 12 -1 62.8718 101.27 3
 0 12 -1 237.809 99.3659 2
 0 12 0 82.4257 61.9934 2
 0 12 0 211.618 135.158 3
 0 12 1 198 134.026 3
 0 12 2 1160.37 253.675 3
 0 12 3 795.109 214.078 3
 0 12 4 50.2351 69.0102 1
 0 12 4 126.621 118.835 3
 0 12 5 525.58 177.392 1
 0 12 6 258.332 128.25 1
 0 12 7 407.381 165.417 1
 0 12 8 1546.11 319.436 1
 0 12 9 723.292 250.878 1
 0 12 10 -71.7463 163.023 1
 0 13 -9 213.941 184.149 3
 0 13 -8 51.5109 173.701 3
 0 13 -7 51.8452 145.573 3
 0 13 -6 2.04972 109.256 3
 0 13 -5 534.767 235.37 3
 0 13 -4 465.66 197.237 3
 0 13 -3 8.3033 120.388 3
 0 13 -2 44.8213 98.1191 3
 0 13 -1 50.3308 111.152 3
 0 13 0 54.4265 138.298 3
 0 13 1 496.284 195.981 3
 0 13 2 727.105 222.181 3
 0 13 3 28.0465 109.015 3
 0 13 4 807.718 208.494 1
 0 13 5 221.659 111.5 1
 0 13 6 -11.9151 65.1336 1
 0 13 7 606.753 215.953 1
 0 13 8 486.389 216.901 1
 0 13 9 -15.478 152.883 1
 0 14 -8 102.819 213.77 3
 0 14 -7 -326.805 205.037 3
 0 14 -6 390.153 236.65 3
 0 14 -5 396.399 245.636 3
 0 14 -4 123.732 177.247 3
 0 14 -3 77.0077 156.723 3
 0 14 -2 69.0299 108.736 3
 0 14 -1 -146.074 135.846 3
 0 14 0 109.606 150.071 3
 0 14 1 481.808 203.814 3
 0 14 2 28.111 108.629 3
 0 14 3 112.775 152.669 3
 0 14 4 493.872 182.788 1
 0 14 5 80.3792 89.2972 1
 0 14 6 344.829 185.112 1
 0 14 7 29.0202 138.889 1
 0 15 -5 -234.012 183.752 3
 0 15 -4 49.6161 125.556 3
 0 15 -3 322.791 257.771 3
 0 15 -2 264.027 181.487 3
 0 15 -1 -315.198 168.617 3
 0 15 0 190.63 164.865 3
 0 15 1 -0.52195 155.29 3
 0 15 2 -18.2897 112.376 3
 0 15 3 353.619 195.332 3
 0 15 4 339.418 176.403 1
 0 15 5 242.374 170.726 1
 0 16 -3 222.625 205.447 3
 0 16 -2 -173.235 153.782 3
 0 16 -1 342.928 204.081 3
 0 16 0 163.113 144.238 3
 0 16 1 314.074 172.656 3
 0 16 2 328.16 168.115 3
 0 16 3 -3.44867 135.345 3
 -1 15 3 178.409 158.25 3
 -1 15 2 169.55 185.013 3
 -1 15 1 5.08482 155.744 3
 -1 15 0 127.762 189.477 3
 -1 15 -1 217.911 210.231 3
 -1 15 -2 409.469 246.523 3
 -1 15 -3 8260.92 828.534 3
 -1 15 -4 205.746 189.54 3
 -1 14 5 1057.91 242.056 1
 -1 14 4 335.164 154.287 1
 -1 14 3 98.2339 143.795 3
 -1 14 2 149.385 135.67 3
 -1 14 1 118.365 129.458 3
 -1 14 0 288.813 215.808 3
 -1 14 -1 485.778 236.894 3
 -1 14 -2 -191.59 140.851 3
 -1 14 -3 1.08322 98.7605 3
 -1 14 -4 55.1128 144.827 3
 -1 14 -5 -0.57139 114.34 3
 -1 14 -6 309.203 233.265 3
 -1 14 -7 267.742 208.616 3
 -1 13 7 305.199 191.961 1
 -1 13 6 1416.71 306.88 1
 -1 13 5 137.017 104.203 1
 -1 13 4 299.722 132.562 1
 -1 13 3 195.059 154.726 3
 -1 13 2 -240.868 149.202 3
 -1 13 1 691.721 230.379 3
 -1 13 0 771.659 262.265 3
 -1 13 -1 72.6278 114.692 3
 -1 13 -2 115.997 167.753 3
 -1 13 -3 39.574 109.299 3
 -1 13 -4 -135.038 138.966 3
 -1 13 -5 350.347 225.623 3
 -1 13 -6 670.821 279.451 3
 -1 13 -7 -225.198 176.141 3
 -1 13 -8 156.488 186.524 3
 -1 13 -9 50.8485 154.278 3
 -1 12 9 -75.5697 170.456 1
 -1 12 8 574.96 214.631 1
 -1 12 7 1070.17 277.004 1
 -1 12 6 511.71 180.467 1
 -1 12 5 32.192 50.4293 1
 -1 12 4 326.11 134.219 1
 -1 12 4 230.564 163.278 3
 -1 12 3 -5.65979 102.909 3
 -1 12 2 499.145 212.218 3
 -1 12 1 559.398 197.819 3
 -1 12 0 402.467 189.401 3
 -1 12 -1 -122.021 123.534 3
 -1 12 -2 -54.7829 107.681 3
 -1 12 -3 24.6996 119.815 3
 -1 12 -4 433.504 227.629 3
 -1 12 -5 88.175 145.818 3
 -1 12 -6 75.9104 123.554 3
 -1 12 -7 155.832 167.339 3
 -1 12 -8 154.332 178.342 3
 -1 12 -9 5.66794 173.809 3
 -1 12 -10 156.954 163.05 3
 -1 11 10 280.495 195.084 1
 -1 11 9 8.72329 127.369 1
 -1 11 8 1086.54 274.716 1
 -1 11 7 384.08 157.696 1
 -1 11 6 -106.392 78.6168 1
 -1 11 5 246.938 114.1 1
 -1 11 4 558.567 198.02 3
 -1 11 3 205.443 140.546 3
 -1 11 2 545.145 193.661 3
 -1 11 1 723.313 208.004 3
 -1 11 0 -21.2152 86.1031 3
 -1 11 -1 477.78 184.639 3
 -1 11 -2 275.473 81.3947 2
 -1 11 -2 149.99 141.482 3
 -1 11 -3 135.74 74.3787 2
 -1 11 -3 23.9116 128.848 3
 -1 11 -4 1211 188.763 2
 -1 11 -4 1519.05 306.822 3
 -1 11 -5 52.1424 121.801 3
 -1 11 -5 121.873 89.3128 2
 -1 11 -6 421.56 148.664 2
 -1 11 -6 128.886 150.377 3
 -1 11 -7 319.03 170.585 3
 -1 11 -8 12.939 102.814 3
 -1 11 -9 5.261 156.531 3
 -1 11 -10 231.719 195.744 3
 -1 11 -11 27.7624 107.761 3
 -1 10 11 454.117 233.166 1
 -1 10 10 170.021 152.191 1
 -1 10 9 170.303 136.451 1
 -1 10 8 437.615 171.038 1
 -1 10 7 36.937 48.82 1
 -1 10 6 534.744 170.365 1
 1 -10 -6 484.248 190.494 2
 -1 10 5 572.398 172.775 1
 1 -10 -5 546.573 166.064 2
 -1 10 4 -54.9008 88.1052 3
 1 -10 -4 3.2846 79.8663 2
 -1 10 3 408.275 161.831 3
 1 -10 -3 585.079 120.478 2
 -1 10 2 97.4529 104.256 3
 -1 10 1 103.574 103.231 3
 -1 10 0 1143.22 241.336 3
 -1 10 -1 896.955 214.292 3
 -1 10 -1 729.907 110.114 2
 -1 10 -2 -4.50654 36.0234 2
 -1 10 -2 3.89697 92.6893 3
 -1 10 -3 873.253 225.299 3
 -1 10 -3 512.847 114.196 2
 -1 10 -4 484.712 180.884 3
 -1 10 -4 498.506 126.259 2
 -1 10 -5 2205.07 343.09 2
 -1 10 -5 8.68279 96.3629 3
 -1 10 -6 835.123 238.324 3
 -1 10 -7 624.755 210.45 3
 -1 10 -8 17.5866 112.521 3
 -1 10 -9 617.453 232.358 3
 -1 10 -10 128.04 160.596 3
 -1 10 -11 105.473 174.193 3
 -1 10 -12 1453.91 397.286 3
 -1 9 12 359.068 215.291 1
 -1 9 11 49.1062 133.938 1
 -1 9 10 255.755 157.624 1
 -1 9 9 604.193 197.272 1
 -1 9 8 29.1 72.7499 1
 -1 9 7 905.085 213.102 1
 1 -9 -7 1348.87 285.415 2
 -1 9 6 489.007 154.32 1
 1 -9 -6 783.815 210.405 2
 -1 9 5 -3.02437 64.6511 1
 1 -9 -4 489.512 132.196 2
 -1 9 4 558.491 166.892 3
 1 -9 -3 825.6 141.198 2
 -1 9 3 862.76 205.237 3
 -1 9 2 -4.35512 80.8926 3
 -1 9 1 1249.52 236.305 3
 -1 9 0 1729.68 160.546 2
 -1 9 0 759.204 186.925 3
 -1 9 -1 1355.11 162.951 2
 -1 9 -1 100.295 106.081 3
 -1 9 -2 879.096 210.371 3
 -1 9 -2 1094.27 141.956 2
 -1 9 -3 1577.02 188.448 2
 -1 9 -3 1371.41 251.206 3
 -1 9 -4 186.798 89.934 2
 -1 9 -4 -26.1936 88.9886 3
 -1 9 -5 994.033 230.078 3
 -1 9 -6 874.986 225.718 3
 -1 9 -7 110.453 133.536 3
 -1 9 -8 603.87 203.229 3
 -1 9 -9 491.915 194.265 3
 -1 9 -10 -205.562 147.055 3
 -1 9 -11 507.538 216.901 3
 -1 9 -12 68.7297 116.169 3
 -1 9 -13 -104.338 156.215 3
 -1 8 13 508.178 248.758 1
 -1 8 12 216.255 174.342 1
 -1 8 11 408.101 188.787 1
 -1 8 10 845.316 227.194 1
 -1 8 9 83.7513 81.6079 1
 1 -8 -8 787.922 256.54 2
 -1 8 8 1202.48 244.167 1
 1 -8 -7 1103.35 256.372 2
 -1 8 7 1444.59 260.265 1
 -1 8 6 506.609 152.85 1
 1 -8 -6 485.738 166.897 2
 -1 8 5 -78.6435 77.6714 1
 1 -8 -5 28.7452 79.7449 2
 1 -8 -4 468.38 122.937 2
 -1 8 4 451.555 143.943 1
 -1 8 4 449.405 151.521 3
 1 -8 -3 402.389 98.1164 2
 1 -8 -3 71.521 111.557 3
 1 -8 -2 1221.11 146.975 2
 1 -8 -2 1625.04 255.419 3
 -1 8 2 1553.28 246.24 3
 -1 8 1 1929.37 269.792 3
 1 -8 -1 1872.37 268.899 3
 1 -8 0 67.0438 80.6421 3
 -1 8 0 233.765 56.8024 2
 -1 8 0 184.798 111.442 3
 -1 8 -1 89.6805 38.8905 2
 -1 8 -1 131.735 87.5292 3
 1 -8 1 160.232 79.5485 3
 -1 8 -2 380.79 136.334 3
 -1 8 -2 322.337 73.6615 2
 1 -8 2 267.068 118.022 3
 1 -8 3 170.159 105.349 3
 -1 8 -3 160.343 79.5801 2
 -1 8 -4 2461.74 319.939 3
 1 -8 4 2098.73 306.686 3
 -1 8 -5 2308.67 315.483 3
 -1 8 -6 183.449 116.774 3
 -1 8 -7 476.069 178.636 3
 -1 8 -8 195.709 142.845 3
 -1 8 -9 96.3138 127.23 3
 -1 8 -10 1130.2 273.251 3
 -1 8 -11 690.88 229.885 3
 -1 8 -12 40.3214 130.393 3
 -1 8 -13 30.3948 133.079 3
 -1 7 13 542.661 231.779 1
 -1 7 12 18.5101 108.76 1
 -1 7 11 610.519 213.583 1
 -1 7 10 1162.14 251.232 1
 -1 7 9 508.496 162.142 1
 -1 7 8 1078.58 220.191 1
 1 -7 -8 1149.09 279.938 2
 -1 7 7 802.351 185.937 1
 1 -7 -7 886.842 225.456 2
 1 -7 -6 1.22529 85.8402 2
 -1 7 6 3.03563 43.9297 1
 1 -7 -5 547.641 162.883 3
 -1 7 5 855.983 176.754 1
 1 -7 -5 487.059 134.788 2
 -1 7 4 58.6501 79.3722 1
 1 -7 -4 18.9917 71.7531 3
 1 -7 -4 -39.8225 66.5179 2
 -1 7 3 1804.65 249.029 3
 1 -7 -3 2053.76 276.057 3
 1 -7 -3 1712.48 190.612 2
 1 -7 -2 3987.12 367.591 3
 -1 7 2 4036.97 361.612 3
 1 -7 -2 3677.02 247.644 2
 -1 7 1 801.38 167.388 3
 1 -7 -1 699.59 157.855 3
 1 -7 0 34.4593 66.4286 3
 -1 7 0 112.526 41.0414 2
 -1 7 0 88.0062 80.4777 3
 -1 7 -1 1388.67 132.93 2
 1 -7 1 1242.98 207.027 3
 -1 7 -1 1573.32 229.03 3
 -1 7 -2 -29.4241 84.4069 3
 1 -7 2 18.4483 77.4961 3
 -1 7 -2 35.2187 31.3929 2
 -1 7 -3 1738.09 249.419 3
 1 -7 3 1869.41 259.086 3
 1 -7 4 2802.36 329.129 3
 -1 7 -4 3067.62 336.349 3
 -1 7 -5 1244.78 225.607 3
 1 -7 5 1172.1 230.969 3
 -1 7 -5 1144.25 229.201 1
 -1 7 -6 52.5657 75.8906 3
 -1 7 -7 769.207 206.57 3
 -1 7 -8 -73.5595 131.934 3
 -1 7 -9 801.418 226.968 3
 -1 7 -10 843.44 245.019 3
 -1 7 -11 72.8242 125.847 3
 -1 7 -12 152.068 142.388 3
 -1 7 -13 232.971 178.894 3
 -1 7 -14 12.81 124.212 3
 -1 6 14 949.537 300.928 1
 -1 6 13 -65.5319 149.758 1
 -1 6 12 344.526 180.75 1
 -1 6 11 -69.6705 111.089 1
 -1 6 10 4531.77 516.351 1
 -1 6 9 2145.22 314.428 1
 1 -6 -8 -47.9403 161.493 2
 -1 6 8 533.245 154.348 1
 1 -6 -7 265.097 122.629 2
 -1 6 7 510.166 143.731 1
 1 -6 -6 371.554 136.618 2
 1 -6 -6 526.919 160.409 3
 -1 6 6 463.768 138.518 1
 1 -6 -5 -5.99405 54.8529 2
 1 -6 -5 -17.9503 76.9671 3
 -1 6 5 52.2817 55.7205 1
 -1 6 4 1072.95 185.986 1
 1 -6 -4 1117.38 197.274 3
 1 -6 -4 918.865 166.116 2
 -1 6 3 5627.42 407.9 3
 1 -6 -3 4163.06 359.943 3
 1 -6 -3 4450.17 301.257 2
 1 -6 -2 3013.44 301.176 3
 1 -6 -2 3053.59 214.746 2
 -1 6 2 2949.74 290.909 3
 -1 6 1 205.203 98.8994 3
 1 -6 -1 174.007 93.0806 3
 1 -6 -1 172.475 53.0086 2
 -1 6 0 373.215 126.366 3
 -1 6 0 453.816 70.2105 2
 1 -6 0 327.727 107.867 3
 -1 6 -1 661.707 144.854 3
 -1 6 -1 552.763 77.2786 2
 1 -6 1 715.909 148.246 3
 -1 6 -2 540.633 135.465 3
 1 -6 2 592.689 140.308 3
 1 -6 3 4243.18 360.515 3
 -1 6 -3 4580.77 370.569 3
 1 -6 4 2470.29 290.786 3
 -1 6 -4 2732.23 300.531 3
 -1 6 -5 180.904 97.5296 1
 -1 6 -5 -95.6626 81.7986 3
 -1 6 -6 88.868 91.7975 1
 -1 6 -6 163.768 95.1898 3
 -1 6 -7 151.835 91.2139 3
 -1 6 -8 981.51 223.081 3
 -1 6 -9 1567.99 284.488 3
 -1 6 -10 405.256 167.493 3
 -1 6 -11 0.43917 109.274 3
 -1 6 -13 -14.0115 114.665 3
 -1 6 -14 410.352 211.798 3
 -1 6 -15 954.99 322.047 3
 -1 5 14 -69.3832 162.185 1
 -1 5 13 3.06541 137.858 1
 -1 5 12 377.878 163.212 1
 -1 5 11 190.547 116.402 1
 -1 5 10 1666.86 287.332 1
 -1 5 9 940.554 201.168 1
 -1 5 8 -92.3227 67.8919 1
 1 -5 -8 553.446 179.214 2
 -1 5 7 1099.94 202.776 1
 1 -5 -7 1380.43 240.408 2
 1 -5 -7 1112.04 210.839 3
 1 -5 -6 988.074 190.45 2
 1 -5 -6 727.572 171.035 3
 -1 5 5 922.305 169.803 1
 1 -5 -5 680.292 142.089 2
 1 -5 -5 864.842 171.738 3
 1 -5 -4 1873.63 239.765 3
 -1 5 4 1643.34 213.904 1
 1 -5 -3 1804.88 226.497 3
 1 -5 -3 1907.02 197.97 2
 -1 5 3 1870.92 224.337 3
 1 -5 -2 -51.6106 35.5049 2
 1 -5 -2 23.7312 56.614 3
 -1 5 2 59.5621 76.0666 3
 1 -5 -1 889.558 155.303 3
 -1 5 1 719.36 143.462 3
 1 -5 -1 738.136 89.432 2
 -1 5 0 2297.74 235.212 3
 -1 5 0 2194.92 136.567 2
 1 -5 0 2092.35 226.284 3
 -1 5 -1 104.514 39.7269 2
 1 -5 1 91.4178 74.1538 3
 -1 5 -1 124.343 81.4006 3
 -1 5 -2 3664.28 300.272 3
 1 -5 2 3366.31 292.666 3
 1 -5 3 3048.62 289.754 3
 -1 5 -3 2904.04 280.402 3
 1 -5 4 68.4239 72.1832 3
 -1 5 -4 106.167 59.8123 1
 -1 5 -4 74.9455 88.7288 3
 -1 5 -5 1527.39 259.822 3
 -1 5 -5 1126.5 196.025 1
 -1 5 -6 45.2892 57.2344 1
 -1 5 -6 57.1627 72.2126 3
 -1 5 -7 1356.68 236.406 3
 -1 5 -7 1540.35 246.549 1
 -1 5 -8 1665.64 269.24 3
 -1 5 -9 501.967 174.717 3
 -1 5 -10 27.2808 104.966 3
 -1 5 -11 446.025 197.41 3
 -1 5 -13 0.50456 124.866 3
 -1 5 -14 165.474 169.292 3
 -1 5 -15 252.948 185.199 3
 -1 4 15 -4.8612 168.384 1
 -1 4 14 371.346 198.758 1
 -1 4 13 869.341 255.575 1
 -1 4 12 387.886 167.519 1
 -1 4 11 279.3 135.48 1
 -1 4 10 1080.23 226.645 1
 -1 4 9 68.2537 59.6299 1
 -1 4 8 719.104 163.127 1
 1 -4 -7 616.376 153.333 3
 -1 4 7 634.245 141.396 1
 1 -4 -6 8.81393 63.7865 3
 -1 4 6 25.0782 43.5132 1
 -1 4 5 696.492 141.638 1
 1 -4 -5 617.492 139.836 3
 1 -4 -4 1415.95 195.166 2
 -1 4 4 1551.97 197.62 1
 1 -4 -4 1359.49 193.954 3
 1 -4 -3 -1.95367 57.6348 3
 -1 4 3 27.8985 51.0275 1
 -1 4 3 18.9928 65.6039 3
 1 -4 -3 -11.478 50.231 2
 -1 4 2 1729.55 193.467 3
 1 -4 -2 1770.88 156.804 2
 1 -4 -2 1764.54 200.091 3
 1 -4 -1 2857.63 241.073 3
 -1 4 1 2897.46 239.291 3
 1 -4 -1 2996.58 158.446 2
 -1 4 0 58.0958 60.034 3
 1 -4 0 40.5462 53.891 3
 -1 4 0 23.0351 20.8351 2
 1 -4 1 3034.29 246.074 3
 -1 4 -1 2961.84 156.01 2
 -1 4 -1 3278.71 252.577 3
 1 -4 2 3421.86 269.131 3
 -1 4 -2 3727.51 276.274 3
 1 -4 3 271.194 96.5597 3
 -1 4 -3 225.171 86.0581 3
 -1 4 -4 3198.11 300.627 1
 -1 4 -4 3582.96 303.612 3
 -1 4 -5 2664.04 278.634 3
 -1 4 -5 2610.4 277.817 1
 -1 4 -6 164.168 106.367 3
 -1 4 -6 140.736 71.8324 1
 -1 4 -7 3273.74 332.138 1
 -1 4 -7 2882.84 325.435 3
 -1 4 -8 1370.98 241.879 3
 1 -4 8 1199.85 238.092 1
 -1 4 -8 1323.51 221.31 1
 1 -4 9 106.411 77.4778 1
 -1 4 -9 -60.1628 114.564 3
 1 -4 10 4118.11 480.548 1
 -1 4 -10 1353.26 271.475 3
 -1 4 -11 48.8622 101.568 3
 1 -4 11 284.842 138.043 1
 1 -4 12 126.38 130.35 1
 -1 4 -12 -80.9908 128.345 3
 1 -4 13 541.014 224.781 1
 -1 4 -13 469.535 225.126 3
 1 -4 14 512.137 237.704 1
 -1 4 -14 314.042 199.899 3
 -1 4 -15 161.179 171.531 3
 1 -4 15 166.562 225.713 1
 -1 3 15 477.608 242.944 1
 -1 3 14 953.148 281.996 1
 -1 3 13 511.761 200.912 1
 -1 3 12 220.696 134.432 1
 -1 3 11 621.741 180.39 1
 -1 3 10 -12.8309 36.8484 1
 -1 3 9 1118.03 211.028 1
 1 -3 -8 1179.12 202.404 1
 -1 3 8 1156.89 202.369 1
 -1 3 7 274.94 99.2828 1
 1 -3 -7 310.421 99.2992 1
 -1 3 6 874.422 161.415 1
 1 -3 -6 1031.28 171.695 1
 1 -3 -5 3490.19 291.709 1
 1 -3 -5 3338.74 293.78 3
 -1 3 5 3431.73 290.835 1
 -1 3 4 -1.30658 52.0245 1
 1 -3 -4 -7.04398 54.0991 3
 -1 3 3 941.011 137.984 1
 1 -3 -3 1005.51 147.093 3
 -1 3 2 5998.39 321.47 3
 1 -3 -2 5889.17 272.665 2
 1 -3 -2 6112.61 327.757 3
 -1 3 1 612.353 108.78 3
 1 -3 -1 591.321 68.3357 2
 1 -3 -1 631.432 110.946 3
 -1 3 0 1813.32 167.403 3
 1 -3 0 1966.23 177.788 3
 1 -3 1 3256.33 228.299 3
 -1 3 -1 2818.34 211.383 3
 -1 3 -2 991.758 163.315 3
 1 -3 2 750.244 122.828 3
 -1 3 -3 7475.94 377.506 3
 1 -3 3 7264.93 382.489 3
 -1 3 -4 1812.86 210.855 1
 -1 3 -4 1867.33 208.721 3
 -1 3 -5 105.244 53.8195 1
 -1 3 -5 155.541 84.0481 3
 -1 3 -6 1999.65 250.204 3
 -1 3 -6 2248.4 252.468 1
 1 -3 6 1920.42 257.788 1
 -1 3 -7 941.611 167.967 1
 1 -3 7 849.428 184.481 1
 1 -3 8 -64.7753 59.9373 1
 -1 3 -8 63.0445 53.7802 1
 1 -3 9 1132.26 228.637 1
 1 -3 10 1366.03 267.207 1
 1 -3 11 -7.60921 67.1231 1
 1 -3 12 1449.2 307.033 1
 1 -3 13 753.863 241.935 1
 1 -3 15 178.267 206.229 1
 -1 2 15 634.963 262.149 1
 -1 2 14 710.676 245.546 1
 -1 2 13 87.2182 112.807 1
 -1 2 12 784.194 215.679 1
 -1 2 11 93.5038 79.9265 1
 -1 2 10 885.218 197.278 1
 -1 2 9 2111.73 284.521 1
 1 -2 -8 1242.58 199.079 1
 -1 2 8 1340.98 217.997 1
 -1 2 7 102.55 67.2268 1
 1 -2 -7 167.007 79.726 1
 1 -2 -6 2385.52 250.024 1
 -1 2 6 2451.68 253.198 1
 -1 2 5 805.662 140.089 1
 1 -2 -5 853.428 143.954 1
 1 -2 -4 711.639 122.358 1
 -1 2 4 675.897 117.974 1
 -1 2 3 5251.91 289.864 1
 1 -2 -3 5138.07 295.827 3
 -1 2 2 2364.96 178.182 1
 1 -2 -2 2205.99 180.747 3
 -1 2 1 80.3401 51.1841 3
 1 -2 -1 25.3906 46.0723 3
 1 -2 0 4115.25 216.876 3
 -1 2 0 4177.78 216.52 3
 -1 2 -1 157.71 55.6395 3
 1 -2 1 152.734 55.8157 3
 -1 2 -2 5129.09 264.06 3
 1 -2 2 4821.89 259.166 3
 -1 2 -3 4064.27 260.369 3
 -1 2 -3 3946.76 265.726 1
 -1 2 -4 13.4669 42.6293 1
 -1 2 -4 10.3074 61.9595 3
 1 -2 4 -14.6272 46.1855 1
 -1 2 -5 1009.73 155.754 1
 1 -2 5 1358.79 193.29 1
 -1 2 -6 1139.71 174.927 1
 1 -2 6 1122.13 186.852 1
 1 -2 7 -137.148 79.649 1
 -1 2 -7 8.26438 32.0334 1
 -1 2 -8 1528.77 223.068 1
 1 -2 8 1384.22 231.739 1
 1 -2 9 1858.4 282.047 1
 -1 2 -9 2159.31 281.374 1
 1 -2 10 306.744 121.264 1
 1 -2 11 413.376 153.134 1
 1 -2 12 921.526 240.747 1
 1 -2 13 -49.0709 136.292 1
 1 -2 14 803.967 267.428 1
 1 -2 15 353.415 241.431 1
 1 -2 16 -170.79 292.163 1
 -1 1 15 428.745 231.997 1
 -1 1 14 7.9818 128.879 1
 -1 1 13 523.341 193.685 1
 -1 1 12 321.324 145.125 1
 -1 1 11 868.372 204.361 1
 -1 1 10 1914.54 285.98 1
 -1 1 9 1520.56 238.955 1
 -1 1 8 37.7744 44.4817 1
 1 -1 -8 77.7524 50.592 1
 -1 1 7 2121.33 249.19 1
 1 -1 -7 2366.63 256.77 1
 -1 1 6 2500.36 249.569 1
 1 -1 -6 2330.57 238.09 1
 -1 1 5 52.3701 54.6016 1
 1 -1 -5 42.7693 47.58 1
 -1 1 4 4649.11 280.524 1
 1 -1 -4 4524.42 278.947 1
 1 -1 -3 4025.29 235.854 1
 -1 1 3 4115.24 237.981 1
 -1 1 2 5474.33 240.796 1
 1 -1 -2 5299.41 235.617 1
 -1 1 1 8290.02 265.797 3
 1 -1 -1 8353.35 271.63 3
 1 -1 2 915.31 107.003 3
 -1 1 -2 763.435 100.045 1
 -1 1 -2 867.129 102.334 3
 1 -1 3 1421.36 152.513 1
 -1 1 -3 1494.55 146.391 1
 -1 1 -4 237.391 70.4298 1
 1 -1 4 201.72 76.6552 1
 1 -1 5 546.356 118.271 1
 -1 1 -5 525.697 105.508 1
 -1 1 -6 7.16233 35.1504 1
 1 -1 6 27.7276 51.7596 1
 -1 1 -7 524.071 123.261 1
 1 -1 7 539.685 134.856 1
 -1 1 -8 3308.22 317.673 1
 1 -1 8 3101.13 328.55 1
 -1 1 -9 734.365 162.289 1
 1 -1 9 787.367 171.707 1
 1 -1 10 -190.766 125.255 1
 1 -1 11 66.0436 78.0976 1
 1 -1 12 -0.43822 90.21 1
 1 -1 13 802.386 242.475 1
 1 -1 14 1269.72 317.87 1
 1 -1 15 244.591 214.582 1
 1 -1 16 252.156 248.69 1
 -1 0 15 -77.6163 153.017 1
 -1 0 13 2833.19 408.431 1
 -1 0 12 7.24132 76.3857 1
 -1 0 11 1277.69 250.314 1
 -1 0 10 1340.3 241.203 1
 1 0 -9 29.1745 55.4159 1
 -1 0 9 138.739 79.7769 1
 1 0 -8 140.47 70.9587 1
 -1 0 8 173.416 78.0005 1
 1 0 -7 1372.42 193.622 1
 -1 0 7 1407.11 202.757 1
 1 0 -6 151.264 64.2878 1
 -1 0 6 147.703 70.1955 1
 -1 0 5 4631.55 304.564 1
 1 0 -5 6239.69 362.049 1
 1 0 -4 1907.29 175.6 1
 -1 0 4 2089.04 184.525 1
 -1 0 3 19.1545 39.9373 1
 1 0 -3 14.2618 32.817 1
 1 0 -2 4050.83 187.012 1
 -1 0 2 3945.53 183.548 1
 -1 0 -2 3437.79 162.461 1
 1 0 3 958.606 110.366 1
 -1 0 -3 1059.37 111.756 1
 1 0 4 340.74 81.8713 1
 -1 0 -4 503.518 92.715 1
 -1 0 -5 108.994 56.6853 1
 1 0 5 79.4068 55.1113 1
 1 0 6 1072.68 164.286 1
 -1 0 -6 1114.55 159.941 1
 -1 0 -7 3500.29 295.246 1
 1 0 7 3585.35 313.708 1
 1 0 8 1308.91 209.994 1
 -1 0 -8 1202.75 187.111 1
 1 0 9 172.182 78.8984 1
 -1 0 -9 70.3822 62.7569 1
 1 0 10 97.1288 66.1732 1
 1 0 11 194.617 108.471 1
 1 0 12 590.978 184.968 1
 1 0 13 1271.74 284.761 1
 1 0 14 167.223 149.651 1
 1 0 15 159.634 184.595 1
 1 0 16 533.058 275.468 1
 -1 -1 15 462.597 245.748 1
 -1 -1 14 443.62 202.765 1
 -1 -1 13 34.2003 113.943 1
 -1 -1 12 762.076 210.083 1
 -1 -1 11 969.693 222.825 1
 -1 -1 10 -178.397 89.0948 1
 -1 -1 9 360.944 120.786 1
 1 1 -9 217.882 98.3866 1
 1 1 -8 510.048 127.32 1
 -1 -1 8 460.926 126.351 1
 -1 -1 7 264.188 92.0689 1
 1 1 -7 249.387 81.0778 1
 1 1 -6 2176.25 223.418 1
 -1 -1 6 2373.2 241.544 1
 -1 -1 5 2045.89 207.861 1
 1 1 -5 2125.15 201.773 1
 -1 -1 4 459.723 94.6103 1
 1 1 -4 384.857 81.8181 1
 -1 -1 3 2789.2 185.324 1
 1 1 -3 2630.71 177.377 1
 1 1 -2 415.675 64.5418 1
 -1 -1 2 485.815 68.2373 1
 -1 -1 -2 474.589 59.8628 1
 -1 -1 -2 553.648 89.4345 2
 -1 -1 -3 1257.18 116.087 1
 1 1 3 1118.66 111.667 1
 1 1 4 1312.76 141.724 1
 -1 -1 -4 1396.06 140.274 1
 1 1 5 299.578 84.1525 1
 -1 -1 -5 164.086 61.0248 1
 -1 -1 -6 2279.53 222.472 1
 1 1 6 2334.21 232.655 1
 -1 -1 -7 3037.13 274.709 1
 1 1 7 2975.6 283.528 1
 1 1 8 -120.38 66.196 1
 -1 -1 -8 -6.89457 17.836 1
 -1 -1 -9 239.929 93.7029 1
 1 1 10 1625.79 252.886 1
 1 1 11 24.9461 54.9919 1
 1 1 12 1868.24 319.091 1
 1 1 13 431.676 177.152 1
 1 1 14 46.4753 122.931 1
 1 1 15 514.437 233.193 1
 1 1 16 219.513 274.987 1
 -1 -2 15 334.921 212.346 1
 -1 -2 14 58.6872 144.936 1
 -1 -2 13 368.819 172.262 1
 -1 -2 12 1560.87 302.247 1
 -1 -2 11 43.1159 61.0407 1
 -1 -2 10 180.776 90.0479 1
 -1 -2 9 861.591 186.736 1
 1 2 -8 220.666 91.143 1
 -1 -2 8 82.3053 54.1348 1
 1 2 -7 1999.61 226.609 1
 -1 -2 7 1849.87 238.439 1
 1 2 -6 1704.16 202.071 1
 -1 -2 6 1702.13 213.894 1
 1 2 -5 250.963 75.9796 1
 -1 -2 5 266.735 89.6901 1
 -1 -2 4 1521.75 167.695 1
 1 2 -4 1496.35 159.512 1
 1 2 -3 750.927 102.754 1
 -1 -2 3 794.833 110.158 1
 1 2 -2 865.602 98.5366 1
 -1 -2 2 847.633 101.934 1
 1 2 0 3168.58 177.388 2
 -1 -2 0 3403.85 120.824 3
 -1 -2 -1 886.144 68.529 3
 1 2 1 767.356 93.7707 2
 1 2 2 23.2933 32.7973 1
 -1 -2 -2 28.6823 27.5847 1
 1 2 2 -3.52831 46.2328 2
 1 2 3 4708.51 228.014 1
 -1 -2 -3 4794.81 233.134 1
 -1 -2 -3 4553.81 290.788 2
 -1 -2 -4 96.695 52.292 1
 1 2 4 92.2844 47.7149 1
 1 2 5 2155.14 201.536 1
 -1 -2 -5 2258.67 203.266 1
 -1 -2 -6 2461.42 232.021 1
 1 2 6 2868.1 256.305 1
 -1 -2 -7 -12.7238 38.0847 1
 1 2 7 -69.8193 57.0256 1
 1 2 8 1678 228.225 1
 -1 -2 -8 1183.25 187.395 1
 1 2 9 1136.34 203.68 1
 -1 -2 -9 1191.15 203.019 1
 1 2 10 -25.5768 35.3953 1
 1 2 11 1264.56 240.648 1
 1 2 12 1072.14 242.64 1
 1 2 13 -91.6303 126.263 1
 1 2 14 203.125 161.722 1
 1 2 15 567.487 240.622 1
 1 2 16 173.999 215.47 1
 -1 -3 15 603.323 268.861 1
 -1 -3 14 53.5142 150.886 1
 -1 -3 13 2009.92 375.364 1
 -1 -3 12 186.017 121.898 1
 -1 -3 11 161.719 106.415 1
 -1 -3 10 1578.11 279.969 1
 -1 -3 9 744.681 177.587 1
 -1 -3 8 165.214 79.7625 1
 1 3 -8 430.726 123.653 1
 1 3 -7 2776.04 281.574 1
 -1 -3 7 3012.16 316.641 1
 1 3 -6 130.68 64.8654 1
 -1 -3 6 100.836 69.6152 1
 1 3 -5 2075.52 213.09 1
 -1 -3 5 2004.08 224.93 1
 1 3 -4 992.101 139.938 1
 -1 -3 4 1025.21 152.714 1
 -1 -3 3 85.5143 58.914 1
 1 3 -3 88.5827 52.0521 1
 1 3 -2 1009.64 116.784 1
 1 3 -2 1158.59 126.186 3
 1 3 -1 4272.13 204.204 3
 -1 -3 1 4296.12 208.756 3
 -1 -3 0 2427.82 180.423 2
 1 3 0 2238.85 135.428 3
 -1 -3 0 2230.28 135.67 3
 1 3 0 2166.92 167.588 2
 1 3 1 1199.44 102.807 3
 -1 -3 -1 1103.23 122.012 2
 -1 -3 -1 1160.64 102.697 3
 1 3 1 1148.17 125.217 2
 -1 -3 -2 1544.6 129.376 3
 1 3 2 1353.1 151.736 2
 -1 -3 -2 1534.91 157.989 2
 1 3 2 1595.17 130.643 1
 1 3 3 44.6965 44.3538 1
 -1 -3 -3 90.7072 49.1984 1
 -1 -3 -3 35.4208 44.6381 2
 -1 -3 -4 503.362 97.3692 1
 -1 -3 -4 365.643 98.686 2
 1 3 4 405.165 87.0488 1
 -1 -3 -5 3299.36 316.345 2
 -1 -3 -5 3250.22 253.636 1
 1 3 5 3375.62 259.201 1
 -1 -3 -6 827.882 173.135 2
 -1 -3 -6 862.18 146.435 1
 1 3 6 854.561 147.312 1
 1 3 7 1140.27 178.79 1
 1 3 8 1607.98 226.279 1
 -1 -3 -8 1330.53 202.628 1
 1 3 9 127.492 68.7824 1
 -1 -3 -9 92.1335 60.2191 1
 1 3 10 809.508 187.426 1
 1 3 11 904.371 204.998 1
 1 3 12 25.6291 80.0294 1
 1 3 13 685.609 209.524 1
 1 3 14 771.255 252.898 1
 1 3 15 180.65 190.354 1
 1 3 16 334.919 261.524 1
 -1 -4 15 -68.6577 177.643 1
 -1 -4 14 34.4241 150.731 1
 -1 -4 13 -132.107 176.028 1
 -1 -4 12 160.182 122.952 1
 -1 -4 10 1405.15 271.188 1
 -1 -4 9 73.7875 59.19 1
 1 4 -8 1403.41 217.899 1
 -1 -4 8 1208.38 224.634 1
 1 4 -7 188.148 81.6613 1
 -1 -4 7 150.805 82.3395 1
 1 4 -6 1261.95 183.788 1
 -1 -4 6 1381.58 218.463 1
 1 4 -5 5844.73 373.295 1
 -1 -4 5 5810.09 412.338 1
 1 4 -4 2026.93 215.724 3
 1 4 -4 2084.89 216.562 1
 1 4 -3 1019.64 143.176 1
 1 4 -3 1139.55 151.204 3
 1 4 -2 5645.42 309.006 3
 -1 -4 2 4402 271.092 3
 1 4 -1 284.019 71.7587 3
 -1 -4 1 274.38 69.6114 3
 1 4 0 1514.44 152.635 2
 -1 -4 0 1386.97 131.306 3
 1 4 0 1391.36 132.327 3
 -1 -4 -1 3272.93 222.86 2
 -1 -4 -1 3404.12 205.031 3
 1 4 1 3113.4 220.663 2
 1 4 1 3325.94 201.339 3
 1 4 2 291.517 82.1761 2
 -1 -4 -2 377.505 82.2636 3
 1 4 2 269.508 70.7436 3
 -1 -4 -2 250.423 72.5318 2
 -1 -4 -3 15.1707 45.3881 3
 1 4 3 125.743 77.9185 2
 -1 -4 -3 115.764 56.1845 2
 1 4 3 68.8423 50.8975 1
 1 4 4 2622.89 222.195 1
 -1 -4 -4 2386.29 214.424 3
 -1 -4 -4 2594.62 263.784 2
 -1 -4 -5 229.174 86.9933 2
 1 4 5 294.015 87.8306 1
 -1 -4 -5 267.68 87.7213 1
 -1 -4 -6 845.003 148.038 1
 1 4 6 772.621 142.347 1
 -1 -4 -6 504.956 127.129 2
 -1 -4 -7 2359.63 260.54 1
 -1 -4 -7 2055.76 293.054 2
 1 4 7 2110.62 247.202 1
 1 4 8 668.002 149.611 1
 -1 -4 -8 794.158 193.403 2
 -1 -4 -8 460.835 125.02 1
 1 4 9 358.811 119.913 1
 -1 -4 -9 1019.94 234.091 2
 1 4 10 394.667 132.028 1
 1 4 11 3.68245 61.1625 1
 1 4 12 1043.02 239.669 1
 1 4 13 807.829 235.262 1
 1 4 14 0.51537 123.141 1
 1 4 15 25.7528 154.081 1
 -1 -5 15 42.7142 242.021 1
 -1 -5 14 156.265 186.05 1
 -1 -5 13 146.033 152.592 1
 -1 -5 12 1170.89 294.894 1
 -1 -5 11 -37.013 89.1488 1
 -1 -5 10 40.7487 60.5565 1
 -1 -5 9 1430.95 267.787 1
 1 5 -8 589.417 154.494 1
 -1 -5 8 759.654 192.264 1
 -1 -5 7 37.2987 56.16 1
 1 5 -7 33.1363 77.4269 3
 1 5 -7 -22.1811 60.7286 1
 1 5 -6 6052.45 424.861 1
 1 5 -6 4271.97 372.313 3
 1 5 -5 2200.2 245.75 1
 1 5 -5 2669.71 278.329 3
 1 5 -4 3.67583 63.5584 3
 1 5 -4 -18.9093 46.3086 1
 1 5 -3 2348.18 229.364 3
 1 5 -3 2481.28 244.346 1
 1 5 -2 3291.69 250.633 3
 -1 -5 2 3306.55 256.454 3
 1 5 -1 475.415 100.142 3
 1 5 -1 521.286 116.919 2
 -1 -5 1 432.835 97.3777 3
 1 5 0 1920.33 184.28 2
 -1 -5 0 1809.43 173.422 3
 1 5 0 1860.98 173.299 3
 1 5 1 1044.4 133.826 3
 -1 -5 -1 1074.98 137.885 3
 -1 -5 -1 951.268 134.824 2
 -1 -5 -2 2.99661 45.6338 3
 -1 -5 -2 8.13147 40.1744 2
 1 5 2 9.01946 45.1547 2
 1 5 2 31.6481 44.2479 3
 -1 -5 -3 563.698 112.997 3
 1 5 3 536.255 122.224 2
 1 5 3 540.236 107.041 1
 -1 -5 -3 529.503 117.318 2
 1 5 4 1090.96 156.57 1
 -1 -5 -4 922.227 164.119 2
 -1 -5 -4 1212.36 167.801 3
 1 5 5 477.645 112.121 1
 -1 -5 -5 487.889 118.153 3
 -1 -5 -5 389.878 110.811 2
 -1 -5 -6 2835.98 332.546 2
 1 5 6 2452.01 257.735 1
 -1 -5 -6 2409.7 265.833 3
 1 5 7 654.592 144.055 1
 -1 -5 -7 575.631 163.04 2
 1 5 8 -81.5153 55.8593 1
 -1 -5 -8 105.844 76.6643 1
 -1 -5 -8 -113.746 95.9693 2
 1 5 9 537.866 139.984 1
 1 5 10 425.411 136.887 1
 1 5 11 223.08 114.075 1
 1 5 12 1433.51 281.289 1
 1 5 13 305.976 158.886 1
 1 5 14 1.04567 131.857 1
 1 5 15 5.21317 142.33 1
 -1 -6 15 9.80269 224.365 1
 1 6 -15 239.922 200.93 3
 1 6 -14 -214.667 168.457 3
 1 6 -13 288.964 188.642 3
 -1 -6 13 617.663 272.12 1
 -1 -6 12 875.478 277.276 1
 1 6 -12 343.057 189.567 3
 1 6 -11 65.3246 122.266 3
 -1 -6 11 83.8674 106.022 1
 -1 -6 10 229.103 126.851 1
 1 6 -10 320.61 159.156 3
 1 6 -9 922.022 224.419 3
 1 6 -8 55.1041 85.82 3
 1 6 -7 1501.92 239.866 1
 1 6 -6 1451.61 228.079 3
 1 6 -6 1608.1 229.084 1
 1 6 -5 156.8 74.988 1
 1 6 -5 -14.9929 69.8313 3
 1 6 -4 103.506 83.6758 3
 1 6 -4 47.7006 44.3589 1
 1 6 -3 117.178 81.6229 3
 1 6 -3 111.819 54.0471 1
 -1 -6 3 123.042 83.6533 3
 -1 -6 2 877.533 150.45 3
 1 6 -2 864.857 147.362 3
 1 6 -1 3838.79 286.309 2
 1 6 -1 3794.36 281.511 3
 -1 -6 1 2945.7 238.973 3
 -1 -6 0 1281.97 164.146 3
 1 6 0 1138.37 154.928 2
 1 6 0 1378.37 171.848 3
 1 6 1 34.7054 55.3094 3
 -1 -6 -1 93.2244 63.1751 2
 1 6 1 121.99 58.2872 2
 -1 -6 -1 66.3488 62.0464 3
 -1 -6 -2 1125.02 156.457 2
 -1 -6 -2 1318.35 174.361 3
 1 6 2 1337.6 172.159 3
 1 6 3 139.464 73.6834 3
 -1 -6 -3 190.281 82.959 3
 1 6 3 136.825 67.8919 2
 -1 -6 -3 228.582 83.3721 2
 -1 -6 -4 1409.01 192.155 3
 1 6 4 1448.74 191.567 1
 -1 -6 -4 1488.57 206.023 2
 -1 -6 -5 3536.45 351.186 2
 1 6 5 3649.02 313.609 1
 -1 -6 -5 3442.19 314.436 3
 1 6 6 1689.67 224.921 1
 -1 -6 -6 1777.32 237.926 3
 1 6 7 31.6312 48.0077 1
 -1 -6 -7 3.17789 58.1368 3
 -1 -6 -7 43.091 111.73 2
 -1 -6 -8 330.577 163.373 2
 1 6 8 212.491 88.7363 1
 -1 -6 -8 137.607 93.1396 3
 1 6 9 838.469 185.837 1
 1 6 10 316.398 121.906 1
 1 6 11 1330.36 261.645 1
 1 6 12 655.404 205.418 1
 1 6 13 37.7277 128.784 1
 1 6 14 166.329 177.886 1
 1 6 15 156.434 203.497 1
 1 7 -14 268.671 200.47 3
 1 7 -13 544.776 224.287 3
 1 7 -12 97.2986 152.632 3
 1 7 -11 162.034 147.306 3
 1 7 -10 708.622 216.114 3
 1 7 -9 110.371 131.799 3
 1 7 -8 792.29 199.132 3
 1 7 -7 1128.49 224.145 3
 1 7 -6 69.3244 77.5706 1
 1 7 -6 72.0978 75.9208 3
 1 7 -5 238.951 104.786 1
 1 7 -5 265.492 115.039 3
 1 7 -4 515.67 137.778 1
 1 7 -4 677.742 158.32 3
 -1 -7 3 70.9921 78.3049 3
 1 7 -3 -2.34858 67.3203 3
 1 7 -2 2391.03 257.539 2
 1 7 -2 2258.32 246.855 3
 -1 -7 2 2411.12 256.915 3
 -1 -7 1 2277.02 244.117 3
 1 7 -1 2351.63 245.784 3
 1 7 -1 2198.17 235.059 2
 1 7 0 35.8833 47.3917 2
 -1 -7 0 63.9861 61.5542 3
 1 7 0 92.8785 71.1798 3
 1 7 1 599.435 118.698 2
 -1 -7 -1 601.617 132.061 2
 1 7 1 482.689 121.042 3
 -1 -7 -1 519.477 125.817 3
 -1 -7 -2 1066.72 171.38 3
 1 7 2 1058.09 162.956 2
 1 7 2 997.934 163.933 3
 -1 -7 -2 802.554 141.726 2
 -1 -7 -3 358.365 100.275 2
 1 7 3 204.368 92.8526 3
 -1 -7 -3 272.169 105.189 3
 1 7 3 238.473 91.9366 2
 1 7 4 4514.04 348.12 1
 -1 -7 -4 3198.98 283.754 3
 -1 -7 -4 4087.02 353.175 2
 1 7 5 2420.07 271.278 1
 -1 -7 -5 2254.21 270.763 3
 -1 -7 -5 2338.65 293.575 2
 -1 -7 -6 521.987 157.368 2
 1 7 6 664.854 150.497 1
 -1 -7 -6 507.963 143.056 3
 -1 -7 -7 370.741 130.154 3
 -1 -7 -7 451.76 169.964 2
 1 7 7 318.256 109.602 1
 -1 -7 -8 444.207 194.472 2
 1 7 8 421.95 128.107 1
 1 7 9 24.3373 47.2418 1
 1 7 10 1736.23 283.922 1
 1 7 11 447.146 171.17 1
 1 7 12 -136.414 147.143 1
 1 7 13 -14.9704 146.671 1
 1 7 14 119.561 173.518 1
 1 8 -14 437.017 236.71 3
 1 8 -13 112.221 166.023 3
 1 8 -12 139.781 155.105 3
 1 8 -11 2734.21 426.906 3
 1 8 -10 44.9583 123.679 3
 1 8 -9 375.366 168.714 3
 1 8 -8 879.929 221.852 3
 1 8 -7 398.893 155.646 3
 1 8 -6 200.353 110.648 3
 1 8 -5 849.399 191.308 3
 1 8 -5 916.648 197.55 1
 1 8 -4 180.711 104.197 3
 1 8 -4 234.686 111.524 1
 -1 -8 3 563.919 146.402 3
 1 8 -3 516.142 140.614 3
 1 8 -2 1545.96 212.896 2
 -1 -8 2 1629.63 229.573 3
 1 8 -2 1006.53 162.862 3
 -1 -8 1 242.082 97.144 3
 1 8 -1 280.386 102.407 3
 1 8 -1 178.81 71.3234 2
 -1 -8 0 209.346 91.1111 3
 1 8 0 222.48 87.4477 3
 1 8 0 271.805 81.1477 2
 1 8 1 465.726 129.648 3
 -1 -8 -1 483.152 128.996 3
 1 8 1 440.19 104.428 2
 1 8 2 -15.2703 35.0219 2
 1 8 2 14.543 56.5788 3
 -1 -8 -2 -45.5458 44.2482 2
 -1 -8 -2 73.5203 75.1465 3
 1 8 3 1625.98 222.499 2
 -1 -8 -3 1646.93 227.081 3
 -1 -8 -3 1571.99 217.192 2
 1 8 3 1527.58 216.981 3
 -1 -8 -4 1965.09 254.781 3
 1 8 4 2020.44 250.334 1
 -1 -8 -5 688.692 168.102 3
 1 8 5 783.012 166.511 1
 -1 -8 -5 720.199 172.098 2
 1 8 6 707.321 161.602 1
 -1 -8 -6 851.513 203.032 2
 -1 -8 -6 976.328 202.546 3
 1 8 7 1015.13 200.77 1
 -1 -8 -7 898.915 232.054 2
 -1 -8 -8 -78.0046 140.346 2
 1 8 8 -123.399 78.1852 1
 1 8 9 1016.65 221.082 1
 1 8 10 603.076 181.369 1
 1 8 11 123.509 115.519 1
 1 8 12 438.565 193.388 1
 1 8 13 334.595 196.801 1
 1 8 14 -82.9832 198.056 1
 1 9 -13 42.1969 147.266 3
 1 9 -12 275.748 214.238 3
 1 9 -11 275.699 170.894 3
 1 9 -10 -79.8269 118.668 3
 1 9 -9 1138.44 263.877 3
 1 9 -8 108.678 112.025 3
 1 9 -7 183.615 136.511 3
 1 9 -6 1133.29 236.353 3
 1 9 -5 446.677 158.688 3
 -1 -9 4 34.3711 80.7987 3
 1 9 -4 -4.72737 105.586 1
 1 9 -4 21.2819 77.5522 3
 1 9 -3 1256.21 222.067 3
 1 9 -3 1269.75 213.76 2
 -1 -9 3 1362.33 233.129 3
 1 9 -2 302.669 98.2244 2
 1 9 -2 381.911 135.048 3
 -1 -9 2 360.295 124.724 3
 1 9 -1 353.127 116.88 3
 1 9 -1 468.548 110.357 2
 -1 -9 1 416.95 129.056 3
 -1 -9 0 907.354 183.186 3
 1 9 0 861.37 174.814 3
 1 9 0 1007.28 163.94 2
 1 9 1 733.036 167.308 3
 -1 -9 -1 753.084 163.977 3
 1 9 1 610.553 132.93 2
 -1 -9 -2 181.507 73.894 2
 1 9 2 136.565 73.8503 2
 1 9 2 178.806 97.8583 3
 1 9 3 1708.89 236.089 2
 -1 -9 -3 1270.12 204.49 2
 1 9 3 1347.69 217.874 3
 -1 -9 -3 1597.77 245.895 3
 -1 -9 -4 430.911 134.173 2
 1 9 4 531.375 146.427 1
 -1 -9 -4 314.06 120.413 3
 1 9 5 562.262 143.262 1
 -1 -9 -5 533.874 163.168 2
 -1 -9 -5 577.704 167.025 3
 -1 -9 -6 2130.77 325.611 2
 1 9 6 2136.69 293.674 1
 1 9 7 155.661 86.4779 1
 -1 -9 -7 165.763 145.63 2
 1 9 8 92.4572 69.0802 1
 1 9 9 1003.75 221.378 1
 1 9 10 -22.3857 101.115 1
 1 9 11 605.661 205.36 1
 1 9 12 684.129 237.682 1
 1 9 13 156.537 179.979 1
 1 10 -13 191.237 209.654 3
 1 10 -12 256.598 220.765 3
 1 10 -11 22.367 127.766 3
 1 10 -10 81.0443 119.93 3
 1 10 -9 291.55 176.113 3
 1 10 -8 233.692 171.841 3
 1 10 -7 1123.1 258.756 3
 1 10 -6 1928.68 399.767 3
 1 10 -5 34.8719 99.2017 3
 1 10 -4 686.353 193.185 3
 1 10 -4 676.236 171.858 2
 1 10 -3 27.5875 80.6665 3
 1 10 -3 22.1532 39.614 2
 -1 -10 3 208.392 146.508 3
 -1 -10 2 1188.8 221.779 3
 1 10 -2 1044.61 185.768 2
 -1 -10 1 1912.73 277.451 3
 1 10 -1 2193.25 259.069 2
 1 10 -1 2214.07 293.831 3
 1 10 0 1348.2 227.76 3
 1 10 0 1160.17 183.272 2
 -1 -10 0 1161.67 216.755 3
 -1 -10 -1 132.168 105.264 3
 1 10 1 54.7111 52.8691 2
 1 10 1 58.9108 69.3027 3
 1 10 2 669.041 142.205 2
 -1 -10 -2 386.021 135.869 3
 1 10 2 560.555 152.135 3
 -1 -10 -3 299.014 130.473 3
 -1 -10 -3 -8.95614 66.2288 2
 1 10 3 208.572 106.898 3
 1 10 4 414.694 147.759 3
 -1 -10 -4 500.566 157.322 2
 1 10 4 661.671 162.586 1
 -1 -10 -5 1579 269.287 2
 1 10 5 1855.68 273.91 1
 -1 -10 -6 293.524 176.193 2
 1 10 6 499.658 154.426 1
 -1 -10 -7 19.5871 149.713 2
 1 10 7 161.226 87.7199 1
 1 10 8 479.451 159.607 1
 1 10 9 60.0182 92.4939 1
 1 10 10 393.869 171.257 1
 1 10 11 395.472 186.089 1
 1 10 12 237.994 191.101 1
 1 10 13 10.1374 211.264 1
 1 11 -12 111.668 159.323 3
 1 11 -11 83.6051 162 3
 1 11 -10 75.2721 129.072 3
 1 11 -9 -116.643 134.582 3
 1 11 -8 788.683 240.998 3
 1 11 -7 842.821 237.647 3
 1 11 -6 31.0544 117.977 3
 1 11 -5 530.687 184.733 3
 1 11 -5 805.528 202.356 2
 1 11 -4 152.247 100.306 2
 1 11 -4 638.397 194.763 3
 1 11 -3 296.853 117.746 2
 1 11 -3 112.17 100.912 3
 1 11 -2 1646.28 283.876 3
 1 11 -2 1601.03 238.03 2
 1 11 -1 951.195 174.061 2
 1 11 -1 1260.49 239.948 3
 1 11 0 207.423 94.0024 2
 1 11 0 139.689 103.883 3
 1 11 1 598.571 167.09 3
 1 11 1 1651.99 230.586 2
 1 11 2 302.924 146.837 3
 1 11 2 -12.5214 27.5836 2
 -1 -11 -3 681.36 168.603 2
 1 11 3 352.718 150.233 3
 -1 -11 -4 1251.79 234.77 2
 1 11 4 1269.84 237.121 1
 1 11 4 1220.22 240.929 3
 1 11 5 438.865 145.603 1
 -1 -11 -5 151.522 151.152 2
 1 11 6 43.3413 56.5549 1
 -1 -11 -6 36.3212 176.259 2
 1 11 7 4015.61 450.357 1
 1 11 8 130.509 105.882 1
 1 11 9 243.908 164.077 1
 1 11 11 274.077 189.384 1
 1 11 12 169.946 190.269 1
 1 12 -11 -234.77 169.816 3
 1 12 -10 -230.256 176.154 3
 1 12 -9 571.501 239.012 3
 1 12 -8 508.153 235.237 3
 1 12 -7 0.46687 129.404 3
 1 12 -6 2.98035 127.143 2
 1 12 -6 -120.339 131.25 3
 1 12 -5 260.613 161.079 3
 1 12 -5 207.314 119.615 2
 1 12 -4 -76.7554 107.343 3
 1 12 -4 -57.653 95.6678 2
 1 12 -3 876.331 195.131 2
 1 12 -3 1013.75 262.747 3
 1 12 -2 752.031 172.012 2
 1 12 -2 918.688 251.375 3
 1 12 -1 270.385 150.399 3
 1 12 -1 234.848 105.273 2
 1 12 0 219.558 107.093 2
 1 12 0 237.574 141.747 3
 1 12 1 419.917 154.624 3
 1 12 1 233.219 110.144 2
 1 12 2 156.754 122.842 3
 1 12 2 397.797 129.564 2
 1 12 3 1225.48 251.71 3
 1 12 4 658.479 185.623 1
 1 12 4 626.316 185.15 3
 1 12 5 -22.7467 73.3249 1
 1 12 6 290.608 121.814 1
 1 12 7 369.955 157.926 1
 1 12 8 200.877 142.329 1
 1 12 9 713.353 235.902 1
 1 12 10 375.297 203.608 1
 1 12 11 166.237 200.767 1
 1 13 -10 250.58 228.195 3
 1 13 -9 276.574 230.237 3
 1 13 -8 282.562 208.281 2
 1 13 -8 54.5516 195.359 3
 1 13 -7 52.8686 151.3 2
 1 13 -7 37.1836 128.714 3
 1 13 -6 324.814 216.64 3
 1 13 -6 442.978 197.225 2
 1 13 -5 -131.366 130.135 3
 1 13 -5 182.052 141.78 2
 1 13 -4 110.204 121.485 2
 1 13 -4 39.249 127.766 3
 1 13 -3 747.087 190.919 2
 1 13 -3 956.762 367.024 3
 1 13 -2 304.221 131.864 2
 1 13 -2 -253.836 135.054 3
 1 13 -1 111.752 123.372 3
 1 13 -1 20.4978 86.1142 2
 1 13 0 350.336 152.526 3
 1 13 0 687.489 173.305 2
 1 13 1 -54.7843 91.3176 3
 1 13 1 -65.3474 79.4067 2
 1 13 2 255.898 126.75 3
 1 13 3 924.855 238.332 3
 1 13 4 214.294 111.709 1
 1 13 5 244.489 126.033 1
 1 13 6 280.319 130.543 1
 1 13 7 255.01 144.734 1
 1 13 8 636.473 226.975 1
 1 13 9 644.613 255.314 1
 1 13 10 -110.971 196.668 1
 1 14 -9 103.371 213.121 3
 1 14 -8 -29.542 141.279 3
 1 14 -7 124.411 138.805 3
 1 14 -6 15.3897 122.784 3
 1 14 -5 24.9577 106.572 3
 1 14 -4 689.111 250.312 3
 1 14 -3 2.36664 125.497 3
 1 14 -2 71.6704 149.761 3
 1 14 -1 301.968 167.687 3
 1 14 0 -177.953 136.517 3
 1 14 1 125.562 145.493 3
 1 14 2 260.067 171.522 3
 1 14 3 -3.51415 97.4431 3
 1 14 4 314.786 148.35 1
 1 14 5 122.658 101.504 1
 1 14 6 -104.507 99.3625 1
 1 14 7 331.561 183.502 1
 1 14 8 244.477 193.875 1
 1 15 -7 279.014 246.734 3
 1 15 -6 -306.938 210.891 3
 1 15 -5 333.543 243.634 3
 1 15 -4 26.2565 123.644 3
 1 15 -3 -23.8132 107.944 3
 1 15 -2 260.696 156.903 3
 1 15 -1 198.232 144.288 3
 1 15 0 -65.125 103.439 3
 1 15 1 416.897 188.739 3
 1 15 2 88.0564 117.589 3
 1 15 3 511.033 209.162 3
 1 15 4 208.305 154.378 1
 1 15 5 52.1418 94.7913 1
 1 15 6 -34.084 125.728 1
 1 15 7 13.2496 200.523 1
 1 16 -5 133.876 223.96 3
 1 16 -4 -313.711 195.365 3
 1 16 -3 215.32 178.431 3
 1 16 -2 138.262 124.966 3
 1 16 -1 23.8146 141.454 3
 1 16 0 114.129 132.806 3
 1 16 1 -120.176 125.518 3
 1 16 2 -396.248 182.253 3
 1 16 3 194.981 198.375 3
 1 16 4 1521.03 342.327 1
 1 17 -1 126.339 160.859 3
 1 17 0 278.696 203.112 3
 -2 14 3 62.6953 140.059 3
 -2 14 2 7.86696 136.43 3
 -2 14 1 155.259 168.198 3
 -2 14 0 72.8444 143.384 3
 -2 14 -1 124.266 180.807 3
 -2 14 -2 810.365 288.608 3
 -2 14 -3 8.13954 139.406 3
 -2 14 -4 -186.354 155.483 3
 -2 14 -5 20.0397 127.03 3
 -2 13 6 118.584 134.63 1
 -2 13 5 585.848 211.535 1
 -2 13 4 228.573 132.874 1
 -2 13 3 6.25867 127.911 3
 -2 13 2 1956.5 423.539 3
 -2 13 1 36.7501 146.822 3
 -2 13 0 322.06 187.424 3
 -2 13 -1 966.692 299.441 3
 -2 13 -2 50.6902 139.529 3
 -2 13 -3 -162.917 145.898 3
 -2 13 -4 72.6944 155.685 3
 -2 13 -5 -124.608 156.593 3
 -2 13 -6 349.824 262.175 3
 -2 13 -7 399.273 280.815 3
 -2 13 -8 36.345 134.842 3
 -2 12 8 227.939 185.673 1
 -2 12 7 381.943 200.484 1
 -2 12 6 698.462 215.873 1
 -2 12 5 421.229 171.908 1
 -2 12 4 -160.434 136.649 3
 -2 12 4 160.797 98.8722 1
 -2 12 3 137.466 122.079 3
 -2 12 2 95.78 143.929 3
 -2 12 1 123.634 151.828 3
 -2 12 0 1309.73 302.277 3
 -2 12 -1 372.106 188.148 3
 -2 12 -2 -225.494 146.163 3
 -2 12 -3 270.014 161.241 3
 -2 12 -4 81.5047 117.544 3
 -2 12 -5 207.206 158.9 3
 -2 12 -6 668.122 253.366 3
 -2 12 -7 57.3691 156.426 3
 -2 12 -8 -154.301 158.321 3
 -2 12 -9 -48.2115 120.563 3
 -2 11 9 516.198 233.301 1
 -2 11 8 -228.521 179.131 1
 -2 11 7 793.594 229.256 1
 -2 11 6 868.788 228.821 1
 -2 11 5 129.349 90.1589 1
 -2 11 4 76.981 92.0483 3
 -2 11 3 328.861 173.754 3
 -2 11 2 68.2353 88.7431 3
 -2 11 1 967.662 249.328 3
 -2 11 0 1018.84 250.241 3
 -2 11 -1 17.3841 96.5149 3
 -2 11 -2 329.525 179.013 3
 -2 11 -3 365.139 172.26 3
 -2 11 -4 123.586 65.5209 2
 -2 11 -4 166.992 166.259 3
 -2 11 -5 1135.26 284.469 3
 -2 11 -5 1021.69 170.984 2
 -2 11 -6 1641.76 424.095 3
 -2 11 -6 476.659 144.869 2
 -2 11 -7 80.4146 132.698 3
 -2 11 -8 339.631 214.378 3
 -2 11 -9 294.502 193.193 3
 -2 11 -10 -69.4226 127.144 3
 -2 11 -11 292.495 230.539 3
 -2 10 10 474.205 219.622 1
 -2 10 9 232.357 142.1 1
 -2 10 8 241.249 147.797 1
 -2 10 7 154.499 107.32 1
 -2 10 6 79.7937 67.0796 1
 -2 10 5 529.383 172.69 1
 -2 10 4 853.625 228.911 3
 -2 10 3 25.0628 88.0802 3
 -2 10 2 465.069 173.883 3
 -2 10 1 507.218 191.512 3
 -2 10 0 65.9189 105.492 3
 -2 10 -1 958.968 238.21 3
 -2 10 -2 1103.22 257.922 3
 -2 10 -3 377.108 76.433 2
 -2 10 -3 1830 365.291 3
 -2 10 -4 535.537 191.819 3
 -2 10 -4 523.349 109.869 2
 -2 10 -5 701.739 223.015 3
 -2 10 -5 633.034 132.408 2
 -2 10 -6 54.1764 129.935 3
 -2 10 -7 504.915 197.204 3
 -2 10 -8 613.412 230.542 3
 -2 10 -9 912.202 331.339 3
 -2 10 -10 269.168 175.894 3
 -2 10 -11 -71.2148 141.498 3
 -2 10 -12 178.366 177.978 3
 -2 9 11 799.536 263.804 1
 -2 9 10 152.312 147.361 1
 -2 9 9 60.4971 107.327 1
 -2 9 8 714.275 212.336 1
 -2 9 7 13.9302 46.5622 1
 2 -9 -6 402.853 167.277 2
 -2 9 6 552.272 170.873 1
 -2 9 5 866.419 214.759 1
 2 -9 -5 818.757 174.195 2
 -2 9 4 248.159 137.039 3
 2 -9 -4 387.046 110.29 2
 2 -9 -3 120.355 51.3702 2
 -2 9 3 274.686 145.001 3
 -2 9 2 536.85 169.676 3
 -2 9 1 74.8855 93.776 3
 -2 9 0 1015.08 225.943 3
 -2 9 -1 722.511 192.1 3
 -2 9 -2 86.2086 31.0947 2
 -2 9 -2 105.391 105.2 3
 -2 9 -3 287.978 67.8606 2
 -2 9 -3 1787.42 363.153 3
 -2 9 -4 989.888 146.466 2
 -2 9 -4 1303.51 261.603 3
 -2 9 -5 33.711 128.295 3
 -2 9 -6 694.122 217.716 3
 -2 9 -7 1434.96 297.666 3
 -2 9 -8 148.707 142.455 3
 -2 9 -9 259.582 159.97 3
 -2 9 -10 204.727 147.171 3
 -2 9 -11 48.8757 123.134 3
 -2 9 -12 266.137 184.166 3
 -2 8 12 697.535 251.158 1
 -2 8 11 382.863 188.535 1
 -2 8 10 -80.2571 112.685 1
 -2 8 9 1905.97 367.149 1
 2 -8 -8 345.297 233.697 2
 -2 8 8 412.433 157.582 1
 -2 8 7 420.731 145.834 1
 2 -8 -7 559.219 208.739 2
 2 -8 -6 1713.82 258.318 2
 -2 8 6 1959.07 305.515 1
 2 -8 -5 832.25 172.986 2
 -2 8 5 742.765 188.36 1
 2 -8 -4 -39.0704 69.3154 2
 -2 8 4 60.5108 86.2906 3
 -2 8 3 321.962 128.613 3
 2 -8 -3 635.622 109.363 2
 -2 8 2 86.8852 87.7509 3
 -2 8 1 890.692 200.506 3
 2 -8 0 1168.3 225.056 3
 -2 8 0 1200.05 227.53 3
 -2 8 -1 86.3006 121.081 3
 2 -8 1 66.221 93.5837 3
 -2 8 -2 224.352 123.249 3
 -2 8 -2 171.671 40.5671 2
 -2 8 -3 1315.19 317.01 3
 -2 8 -3 1218.88 136.622 2
 -2 8 -4 82.2276 112.405 3
 -2 8 -5 1903.07 295.906 3
 -2 8 -6 2479.5 357.16 3
 -2 8 -7 286.905 166.454 3
 -2 8 -8 133.83 153.367 3
 -2 8 -9 575.443 213.406 3
 -2 8 -11 386.717 189.87 3
 -2 8 -12 574.339 233.717 3
 -2 8 -13 108.215 177.558 3
 -2 7 13 754.219 277.557 1
 -2 7 12 519 218.091 1
 -2 7 11 -24.2971 106.912 1
 -2 7 10 738.015 214.437 1
 -2 7 9 997.487 233.097 1
 2 -7 -8 -34.7235 169.842 2
 -2 7 8 -74.3966 67.5315 1
 2 -7 -7 922.072 235.717 2
 -2 7 7 1088.89 227.905 1
 -2 7 6 1635.43 266.802 1
 2 -7 -6 1513.86 250.994 2
 -2 7 5 9.99659 78.4998 1
 2 -7 -5 148.927 95.0908 2
 2 -7 -4 344.326 104.297 2
 -2 7 4 375.504 137.244 3
 -2 7 4 386.944 127.34 1
 -2 7 3 126.281 96.5236 3
 2 -7 -3 122.849 56.7507 2
 2 -7 -3 131.836 91.748 3
 2 -7 -2 740.536 178.839 3
 -2 7 2 619.906 158.742 3
 2 -7 -2 590.952 85.2361 2
 2 -7 -1 1995.71 276.333 3
 -2 7 1 2466.83 301.353 3
 -2 7 0 576.662 157.522 3
 2 -7 0 686.457 166.924 3
 -2 7 -1 29.5823 72.3711 3
 2 -7 1 58.6723 73.6568 3
 2 -7 2 1388.06 234.272 3
 -2 7 -2 1095.1 205.35 3
 -2 7 -2 1860.54 136.84 2
 2 -7 3 105.153 92.9258 3
 -2 7 -3 150.171 104.242 3
 2 -7 4 2836.62 343.568 3
 -2 7 -4 2467.11 316.714 3
 -2 7 -5 3630.92 391.822 3
 -2 7 -6 660.164 186.591 3
 -2 7 -7 -94.9119 104.471 3
 -2 7 -8 508.452 188.911 3
 -2 7 -9 189.815 141.984 3
 -2 7 -10 555.183 195.239 3
 -2 7 -11 1228.66 292.61 3
 -2 7 -12 261.116 190.146 3
 -2 7 -13 1.10215 108.47 3
 -2 7 -14 4.74786 165.82 3
 -2 6 13 279.526 198.598 1
 -2 6 12 -13.6248 158.997 1
 -2 6 11 211.384 138.263 1
 -2 6 10 451.35 178.696 1
 -2 6 9 19.67 50.4717 1
 -2 6 8 1325.96 245.197 1
 2 -6 -8 1453.5 281.602 2
 -2 6 7 890.789 193.599 1
 2 -6 -7 432.752 150.98 2
 -2 6 6 2705.07 378.15 1
 2 -6 -6 174.06 95.3981 2
 2 -6 -5 18.9579 76.3691 3
 2 -6 -5 -3.20388 55.7316 2
 -2 6 5 77.5737 78.9654 1
 -2 6 4 319.538 113.024 1
 2 -6 -4 357.333 126.889 3
 2 -6 -4 480.71 112.833 2
 2 -6 -3 2.14932 34.3925 2
 2 -6 -3 -6.5198 59.5131 3
 -2 6 3 -7.59412 63.7249 3
 -2 6 2 3479.08 332.991 3
 2 -6 -2 2665.94 304.596 3
 2 -6 -2 3364.16 204.108 2
 2 -6 -1 2497.95 287.69 3
 -2 6 1 2673.09 292.243 3
 -2 6 0 129.201 86.4079 3
 2 -6 0 128.074 97.0057 3
 -2 6 -1 1573.7 225.262 3
 2 -6 1 1141.88 198.838 3
 -2 6 -2 924.851 183.005 3
 2 -6 2 701.28 158.651 3
 -2 6 -2 830.363 91.4053 2
 -2 6 -3 804.899 173.205 3
 2 -6 3 921.558 185.473 3
 -2 6 -4 3347.72 342.716 3
 2 -6 4 3177.36 348.783 3
 -2 6 -5 1048.55 221.59 1
 2 -6 5 1176.83 223.702 3
 -2 6 -5 1303.89 228.648 3
 -2 6 -6 77.3563 93.0117 3
 -2 6 -6 -45.045 78.5853 1
 -2 6 -7 369.258 137.635 3
 -2 6 -8 209.785 122.799 3
 -2 6 -9 298.186 145.103 3
 -2 6 -10 1212.13 275.597 3
 -2 6 -11 352.626 175.88 3
 -2 6 -12 -8.28044 120.259 3
 -2 6 -13 199.36 140.126 3
 -2 6 -14 23.984 142.959 3
 -2 5 14 394.933 221.62 1
 -2 5 13 86.6848 135.791 1
 -2 5 12 200.237 154.593 1
 -2 5 11 512.718 184.803 1
 -2 5 10 1507.11 280.539 1
 -2 5 9 2045.87 311.426 1
 -2 5 8 1394.16 241.861 1
 -2 5 7 35.3954 50.6278 1
 2 -5 -6 655.169 168.405 3
 -2 5 6 701.387 165.664 1
 2 -5 -5 763.684 175.127 3
 2 -5 -5 1173.78 193.751 2
 -2 5 5 832.023 174.639 1
 2 -5 -4 28.3239 69.6377 3
 2 -5 -4 -100.896 48.9701 2
 -2 5 4 -20.3716 50.6797 1
 2 -5 -3 1895.22 247.471 3
 2 -5 -3 1997.88 193.303 2
 -2 5 3 1991.22 248.06 3
 2 -5 -2 4341.04 230.899 2
 2 -5 -2 4042.36 347.05 3
 -2 5 2 4269.99 347.453 3
 -2 5 1 325.323 108.464 3
 2 -5 -1 201.423 38.2503 2
 2 -5 0 1012.58 174.851 3
 -2 5 0 851.776 157.787 3
 -2 5 -1 1613.15 216.25 3
 2 -5 1 1612.23 214.984 3
 -2 5 -2 128.404 86.7818 3
 2 -5 2 191.114 91.5377 3
 2 -5 3 4201.24 354.012 3
 -2 5 -3 4215.71 350.991 3
 2 -5 4 2276.53 277.206 3
 -2 5 -4 2294.33 270.501 3
 2 -5 5 6.81054 89.0735 3
 -2 5 -5 15.2101 53.424 1
 -2 5 -5 39.8118 79.9568 3
 -2 5 -6 1475.83 238.913 3
 -2 5 -6 1590.22 248.072 1
 -2 5 -7 16.7194 70.5914 1
 -2 5 -7 169.976 104.435 3
 -2 5 -8 181.774 104.314 3
 -2 5 -9 959.159 222.968 3
 -2 5 -10 450.809 170.149 3
 -2 5 -11 50.6288 105.352 3
 -2 5 -12 190.271 134.327 3
 -2 5 -13 95.5262 126.316 3
 -2 5 -14 -83.607 134.579 3
 -2 5 -15 500.729 239.878 3
 -2 4 14 355.748 207.353 1
 -2 4 13 414.724 201.803 1
 -2 4 12 1056.16 265.554 1
 -2 4 11 64.0322 95.7835 1
 -2 4 10 670.997 180.212 1
 -2 4 9 1488.19 257.218 1
 -2 4 8 58.3197 52.3285 1
 2 -4 -7 597.365 155.063 3
 -2 4 7 711.248 163.282 1
 -2 4 6 3635.45 348.69 1
 2 -4 -6 3342.62 351.277 3
 2 -4 -5 538.541 143.446 3
 -2 4 5 608.527 142.234 1
 -2 4 4 225.348 93.0309 1
 2 -4 -4 175.389 88.4845 3
 2 -4 -3 3632.82 315.985 3
 -2 4 3 3421.77 301.909 3
 2 -4 -2 28.8305 65.052 3
 -2 4 2 87.0057 74.7415 3
 2 -4 -2 91.0355 38.5597 2
 -2 4 1 1438.72 190.17 3
 2 -4 -1 1466.33 97.2217 2
 2 -4 -1 1382.76 189.378 3
 2 -4 0 3456.15 286.837 3
 -2 4 0 3389.97 278.433 3
 -2 4 -1 232.455 91.5491 3
 2 -4 1 193.514 86.3532 3
 -2 4 -2 1416.3 189.719 3
 2 -4 2 1297.3 186.882 3
 2 -4 3 3480.61 303.777 3
 -2 4 -3 3276.11 290.707 3
 2 -4 4 407.497 125.59 3
 -2 4 -4 517.772 138.055 3
 -2 4 -5 1514.19 223.715 1
 -2 4 -5 1508.49 220.045 3
 -2 4 -6 1757.24 246.726 3
 -2 4 -6 1647.43 239.737 1
 -2 4 -7 64.1475 84.7006 3
 -2 4 -7 26.7132 59.296 1
 -2 4 -8 910.039 192.655 1
 -2 4 -8 996.548 214.664 3
 -2 4 -9 863.713 212.317 3
 -2 4 -10 -61.0114 110.433 3
 -2 4 -11 766.908 229 3
 -2 4 -12 359.99 172.5 3
 2 -4 12 238.14 159.089 1
 2 -4 13 -39.2086 122.088 1
 -2 4 -13 22.7916 115.319 3
 2 -4 14 418.789 238.818 1
 -2 4 -14 136.703 142.33 3
 -2 4 -15 179.102 190.498 3
 2 -4 15 388.156 263.384 1
 -2 3 14 351.328 206.454 1
 -2 3 13 665.572 229.383 1
 -2 3 12 669.671 209.402 1
 -2 3 11 59.5847 78.2028 1
 -2 3 10 667.388 182.064 1
 -2 3 9 96.8556 64.9558 1
 -2 3 8 499.098 137.43 1
 2 -3 -7 1882.61 250.82 1
 2 -3 -7 1901.95 268.268 3
 -2 3 7 1886.48 254.4 1
 -2 3 6 1155.33 191.485 1
 2 -3 -6 1325.96 212.454 3
 -2 3 5 9.54287 54.7189 1
 2 -3 -5 55.1206 67.7469 3
 2 -3 -4 3071.72 286.874 3
 -2 3 4 2706.63 259.84 1
 -2 3 3 235.876 87.0374 1
 2 -3 -3 209.858 92.9376 3
 2 -3 -2 4077.66 299.494 3
 -2 3 2 3981.75 286.498 3
 2 -3 -1 1127.15 155.429 3
 -2 3 1 1190.54 154.858 3
 2 -3 0 23.9018 55.0289 3
 -2 3 0 -25.6875 53.7337 3
 -2 3 -1 791.403 129.114 3
 2 -3 1 762.389 130.622 3
 -2 3 -2 1540.67 177.789 3
 2 -3 2 1495.71 178.7 3
 -2 3 -3 43.986 60.8224 3
 2 -3 3 18.3439 63.182 3
 -2 3 -4 3397.52 303.541 1
 2 -3 4 4429.02 335.551 3
 -2 3 -4 4061.41 313.848 3
 -2 3 -5 1519.76 211.814 3
 -2 3 -5 1251.43 190.023 1
 -2 3 -6 232.046 107.988 3
 -2 3 -6 230.548 85.9286 1
 -2 3 -7 1203.78 197.054 1
 -2 3 -7 607.678 158.497 3
 -2 3 -8 1493.05 251.437 3
 -2 3 -8 1541.29 239.869 1
 -2 3 -9 329.114 140.847 3
 2 -3 9 218.595 104.381 1
 2 -3 10 1642.64 309.651 1
 -2 3 -10 1422.13 270.777 3
 2 -3 11 1218.59 271.887 1
 -2 3 -11 910.66 234.524 3
 2 -3 12 44.4923 101.674 1
 -2 3 -12 56.5897 106.706 3
 -2 3 -13 55.371 111.825 3
 2 -3 13 54.8341 125.153 1
 2 -3 14 275.49 205.694 1
 -2 3 -14 390.7 198.98 3
 2 -3 15 7.54012 196.955 1
 -2 3 -15 108.307 155.599 3
 2 -3 16 -14.3365 240.514 1
 -2 3 -16 198.808 183.163 3
 -2 2 15 885.471 298.884 1
 -2 2 14 1136.89 305.607 1
 -2 2 13 698.137 222.676 1
 -2 2 12 -22.6689 75.1431 1
 -2 2 11 181.451 109.297 1
 -2 2 10 122.624 73.6729 1
 -2 2 9 668.534 164.676 1
 2 -2 -8 2676.62 303.299 1
 -2 2 8 2950.43 325.499 1
 2 -2 -7 2384.4 276.945 1
 -2 2 7 2609.35 288.494 1
 2 -2 -6 172.394 84.7568 1
 -2 2 6 153.772 71.7738 1
 -2 2 5 4908.79 348.755 1
 2 -2 -5 4520.44 332.26 1
 -2 2 4 447.873 111.346 1
 2 -2 -4 409.185 107.041 3
 -2 2 3 881.067 133.612 1
 2 -2 -3 976.747 148.098 3
 -2 2 2 3862.42 260.862 3
 2 -2 -2 4020.39 271.379 3
 -2 2 1 2577.74 203.523 3
 2 -2 -1 2585.07 208.566 3
 2 -2 0 647.683 108.004 3
 -2 2 0 605.929 102.879 3
 2 -2 1 278.665 80.6131 3
 -2 2 -1 311.894 82.1914 3
 2 -2 2 40.0699 52.1366 3
 -2 2 -2 -2.75428 49.8207 3
 2 -2 3 4242.27 284.947 3
 -2 2 -3 4414.8 285.034 3
 -2 2 -4 92.3402 60.4297 1
 -2 2 -4 97.5651 70.4389 3
 -2 2 -5 174.64 72.4955 1
 -2 2 -5 202.376 96.0428 3
 -2 2 -6 563.605 123.569 1
 2 -2 6 755.891 160.911 1
 -2 2 -6 713.299 157.257 3
 2 -2 7 1531.53 235.739 1
 -2 2 -7 1734.94 226.284 1
 2 -2 8 289.565 114.399 1
 -2 2 -8 396.336 116.385 1
 -2 2 -9 753.939 170.869 1
 2 -2 9 741.495 174.379 1
 2 -2 10 1884.59 315.542 1
 2 -2 11 150.257 103.886 1
 2 -2 12 103.434 115.676 1
 2 -2 13 1317.69 311.062 1
 2 -2 14 108.793 156.7 1
 2 -2 15 20.4283 173.525 1
 2 -2 16 600.878 297.89 1
 -2 1 15 1155.83 327.204 1
 -2 1 14 309.87 187.091 1
 -2 1 12 237.967 144.817 1
 -2 1 11 203.217 107.532 1
 -2 1 10 4136.01 477.795 1
 -2 1 9 2755.81 330.262 1
 2 -1 -8 2299.89 279.991 1
 -2 1 8 2703.05 307.556 1
 2 -1 -7 67.0663 45.5611 1
 -2 1 7 70.5685 56.7346 1
 2 -1 -6 1960.8 229.429 1
 -2 1 6 1847.18 222.932 1
 2 -1 -5 1633.66 194.84 1
 -2 1 5 1945.54 211.783 1
 -2 1 4 45.6556 46.4335 1
 2 -1 -4 114.678 65.0308 1
 2 -1 -3 1521.48 158.461 1
 -2 1 3 1717.11 170.273 1
 2 -1 -2 6055.44 300.107 3
 -2 1 2 5586.32 271.184 1
 2 -1 -1 9.38201 44.0799 3
 -2 1 1 16.0256 44.5235 3
 2 -1 0 739.425 99.2662 3
 -2 1 0 1038.68 126.413 3
 2 -1 0 712.347 66.9844 2
 2 -1 1 1268.63 124.263 3
 -2 1 -1 1856.91 145.173 3
 2 -1 1 1478.16 98.0307 2
 -2 1 -1 1326.75 93.5137 2
 -2 1 -2 4233.04 234.207 3
 -2 1 -2 4280.3 216.64 2
 2 -1 2 4261.33 234.421 3
 -2 1 -3 1078.3 137.611 1
 -2 1 -3 1101.58 136.172 3
 -2 1 -4 454.157 98.5085 1
 2 -1 4 339.106 95.141 1
 -2 1 -4 349.956 97.8037 3
 2 -1 5 41.915 55.6031 1
 -2 1 -5 44.9291 38.9472 1
 2 -1 6 2529.12 268.537 1
 -2 1 -6 2310.57 237.533 1
 -2 1 -7 986.677 163.163 1
 2 -1 7 924.542 176.164 1
 2 -1 8 388.888 119.105 1
 -2 1 -8 445.528 118.394 1
 2 -1 9 3074.32 352.345 1
 -2 1 -9 3020.34 326.122 1
 2 -1 10 908.386 206.695 1
 2 -1 11 106.074 95.7766 1
 2 -1 12 415.145 169.436 1
 2 -1 13 484.984 196.63 1
 2 -1 14 484.193 219.758 1
 2 -1 15 1344.93 355.399 1
 2 -1 16 318.049 266.585 1
 -2 0 15 372.551 214.043 1
 -2 0 14 162.32 141.549 1
 -2 0 13 303.786 163.01 1
 -2 0 12 452.59 167.065 1
 -2 0 11 312.018 123.979 1
 -2 0 10 1261.41 233.55 1
 -2 0 9 1668.08 255.689 1
 -2 0 8 210.717 82.2451 1
 2 0 -8 52.0896 50.0754 1
 -2 0 7 1034.09 177.434 1
 2 0 -7 950.077 163.759 1
 -2 0 6 2677.69 261.867 1
 2 0 -6 2594.18 253.991 1
 -2 0 5 552.686 113.333 1
 2 0 -5 600.496 118.504 1
 2 0 -4 3367.53 243.187 1
 -2 0 4 3421.06 244.982 1
 -2 0 3 5315.1 272.515 1
 2 0 -3 5286.83 273.684 1
 -2 0 2 126.759 49.8979 1
 2 0 -2 138.746 50.1239 1
 -2 0 1 2205.74 133.115 1
 2 0 -1 2306.64 149.283 3
 -2 0 0 3543.94 159.745 3
 -2 0 -1 1767.96 114.871 3
 -2 0 -1 1674.22 121.243 2
 2 0 2 2254.08 151.595 3
 2 0 2 2319.58 173.189 2
 -2 0 -2 2213.1 152.641 1
 -2 0 -2 2422.05 154.601 3
 -2 0 -2 2321.36 171.236 2
 2 0 3 7179.7 313.493 1
 -2 0 -3 7042.77 295.95 1
 -2 0 -3 7125.44 346.077 2
 2 0 4 6.74655 41.547 1
 -2 0 -4 -16.7137 43.3403 1
 2 0 5 2223.59 215.125 1
 -2 0 -5 2087.3 197.639 1
 -2 0 -6 529.18 111.924 1
 2 0 6 343.457 105.264 1
 2 0 7 67.1236 63.1394 1
 -2 0 -7 28.9227 42.5098 1
 -2 0 -8 2497.43 270.809 1
 2 0 8 2590.68 290.847 1
 -2 0 -9 1640.61 235.223 1
 2 0 9 1414.78 231.23 1
 2 0 10 131.683 77.5918 1
 2 0 11 3645.57 418.865 1
 2 0 12 77.7715 82.6315 1
 2 0 13 283.272 151.952 1
 2 0 14 630.599 224.372 1
 2 0 15 468.462 233.432 1
 2 0 16 125.196 246.556 1
 -2 -1 15 235.991 206.828 1
 -2 -1 14 171.735 165.384 1
 -2 -1 13 211.572 138.4 1
 -2 -1 12 -31.5808 94.3287 1
 -2 -1 11 626.937 180.526 1
 -2 -1 10 987.201 208.481 1
 -2 -1 9 1868.14 272.825 1
 -2 -1 8 452.791 122.242 1
 2 1 -8 405.352 117.636 1
 2 1 -7 1143.26 176.53 1
 -2 -1 7 728.158 147.701 1
 2 1 -6 -3.26717 32.05 1
 -2 -1 6 43.7239 47.006 1
 -2 -1 5 3420.22 268.154 1
 2 1 -5 3683.65 268.67 1
 2 1 -4 5549.22 297.339 1
 -2 -1 4 5612.61 306.257 1
 -2 -1 3 231.495 62.8099 1
 2 1 -3 250.003 64.4469 1
 2 1 -2 1845.75 131.551 1
 -2 -1 2 1873.8 131.944 1
 -2 -1 1 27.7561 24.5237 1
 -2 -1 0 1592.35 77.088 3
 -2 -1 -1 3007.8 180.714 2
 2 1 2 13049.3 299.555 1
 -2 -1 -2 12815.5 286.813 1
 2 1 2 13275.7 430.24 2
 -2 -1 -2 13368.9 429.246 2
 2 1 3 3986.18 202.81 1
 -2 -1 -3 3775.23 265.403 2
 -2 -1 -3 3838.5 194.385 1
 2 1 4 1065.73 126.562 1
 -2 -1 -4 1026.02 122.828 1
 -2 -1 -4 946.764 151.141 2
 2 1 5 419.355 93.1171 1
 -2 -1 -5 412.126 87.096 1
 -2 -1 -6 50.6483 43.0378 1
 2 1 6 -16.1932 51.7808 1
 -2 -1 -7 3434.02 288.827 1
 2 1 7 3486.27 304.81 1
 2 1 8 2744.19 293.158 1
 -2 -1 -8 2804.6 279.781 1
 2 1 9 9.909 31.4247 1
 -2 -1 -9 128.813 73.4127 1
 2 1 10 177.148 83.4795 1
 2 1 11 501.094 158.57 1
 2 1 12 -37.2696 70.6247 1
 2 1 13 1291.83 285.158 1
 2 1 14 889.909 266.593 1
 2 1 15 -171.228 181.566 1
 2 1 16 537.639 272.994 1
 -2 -2 15 -39.7779 200.246 1
 -2 -2 14 880.58 278.897 1
 -2 -2 13 377.433 177.219 1
 -2 -2 12 -150.482 123.867 1
 -2 -2 11 1451.69 275.052 1
 -2 -2 10 122.899 91.3245 1
 -2 -2 9 756.794 174.4 1
 -2 -2 8 2535.25 296.196 1
 2 2 -8 2214.03 267.333 1
 2 2 -7 1088.17 171.284 1
 -2 -2 7 1172.49 188.301 1
 -2 -2 6 1056.08 168.219 1
 2 2 -6 901.786 147.525 1
 2 2 -5 1464.68 173.859 1
 -2 -2 5 1591.1 186.276 1
 2 2 -4 795.779 117.136 1
 -2 -2 4 849.56 125.696 1
 2 2 -3 2678.62 184.989 1
 -2 -2 3 2578.97 186.572 1
 2 2 -2 4064.6 191.951 1
 -2 -2 2 4056.79 196.819 1
 -2 -2 1 2912.22 131.365 1
 2 2 -1 2933.8 126.969 1
 2 2 0 -4.13809 57.6212 2
 -2 -2 0 312.743 94.5533 2
 2 2 1 1305.78 136.905 2
 -2 -2 -1 1458.22 143.463 2
 -2 -2 -2 387.567 89.0355 2
 -2 -2 -2 314.641 47.1057 1
 2 2 2 359.447 50.0648 1
 2 2 2 363.478 90.5641 2
 2 2 3 1086.87 104.521 1
 2 2 3 1148.28 159.999 2
 -2 -2 -3 1034.22 148.572 2
 -2 -2 -3 1082.97 102.941 1
 -2 -2 -4 2583.29 183.501 1
 2 2 4 2783.75 195.705 1
 -2 -2 -4 2348.64 244.79 2
 -2 -2 -5 60.9239 57.2374 2
 2 2 5 64.2477 48.7246 1
 -2 -2 -5 45.9074 42.8209 1
 -2 -2 -6 522.582 143.025 2
 2 2 6 389.177 101.331 1
 -2 -2 -6 414.017 95.9149 1
 -2 -2 -7 3117.51 275.266 1
 2 2 7 3078.65 282.781 1
 -2 -2 -8 9.96965 20.1599 1
 2 2 8 -3.01808 31.0483 1
 -2 -2 -9 1260.18 203.381 1
 2 2 9 1113.12 201.56 1
 2 2 10 1090.15 209.875 1
 2 2 11 129.261 83.2466 1
 2 2 12 739.531 198.649 1
 2 2 13 759.817 220.666 1
 2 2 14 -178.773 157.207 1
 2 2 15 337.107 201.145 1
 2 2 16 136.469 201.804 1
 -2 -3 15 493.02 260.565 1
 -2 -3 14 831.78 274.448 1
 -2 -3 13 -14.7577 122.066 1
 -2 -3 12 833.546 233.223 1
 -2 -3 11 455.126 163.794 1
 -2 -3 10 203.633 99.6963 1
 -2 -3 9 1406.13 241.377 1
 -2 -3 8 1765.97 253.671 1
 2 3 -8 1476.56 222.611 1
 2 3 -7 283.047 90.9992 1
 -2 -3 7 193.725 80.6229 1
 -2 -3 6 1898.31 229.555 1
 2 3 -6 1821.95 211.389 1
 -2 -3 5 96.7013 56.5711 1
 2 3 -5 93.9601 51.4874 1
 -2 -3 4 3317.7 254.996 1
 2 3 -4 3177.78 234.934 1
 -2 -3 3 2012.23 180.695 1
 2 3 -3 2084.4 172.98 1
 2 3 -2 546.123 81.595 1
 -2 -3 2 558.764 89.1506 1
 2 3 -1 1291.68 105.312 3
 2 3 -1 1246.56 105.21 1
 2 3 0 4749.91 279.721 2
 -2 -3 0 4778.09 156.734 3
 2 3 0 4690.79 151.911 3
 2 3 1 98.346 63.6274 2
 -2 -3 -1 73.4314 29.0989 3
 2 3 1 49.6992 23.9752 3
 -2 -3 -1 49.2053 54.9664 2
 2 3 2 2375.85 211.919 2
 -2 -3 -2 2520.88 133.959 3
 -2 -3 -2 2399.91 210.691 2
 2 3 2 2627.85 141.626 1
 -2 -3 -3 2837.61 249.379 2
 -2 -3 -3 2705.56 170.491 1
 2 3 3 3000.86 178.538 1
 2 3 3 2892.7 254.458 2
 2 3 4 665.442 101.094 1
 -2 -3 -4 671.78 100.119 1
 -2 -3 -4 600.218 130.57 2
 2 3 5 34.3332 47.2909 1
 -2 -3 -5 -50.984 61.7112 2
 -2 -3 -5 -7.09313 45.1883 1
 2 3 6 1226.2 168.929 1
 -2 -3 -6 1075.34 196.433 2
 -2 -3 -6 1200.54 162.451 1
 -2 -3 -7 302.919 108.859 2
 -2 -3 -7 324.872 98.2379 1
 2 3 7 271.369 90.09 1
 -2 -3 -8 1402.6 255.416 2
 2 3 8 1195.51 190.877 1
 -2 -3 -8 1295.17 193.501 1
 -2 -3 -9 2062.87 334.304 2
 2 3 9 1918.1 257.053 1
 -2 -3 -9 2175.1 269.527 1
 2 3 10 283.583 108.183 1
 2 3 11 562.673 158.458 1
 2 3 12 1431.7 273.43 1
 2 3 13 -40.2816 107.43 1
 2 3 14 338.1 182.814 1
 2 3 15 673.522 251.625 1
 2 3 16 45.4849 193.028 1
 -2 -4 15 -121.311 185.413 1
 -2 -4 14 210.624 194.674 1
 -2 -4 13 186.202 153.392 1
 -2 -4 12 0.49513 93.0587 1
 -2 -4 11 271.295 134.726 1
 -2 -4 10 1837.33 303.231 1
 -2 -4 9 3294.11 383.396 1
 -2 -4 8 106.406 72.9448 1
 2 4 -8 60.2532 63.8024 1
 2 4 -7 654.048 144.482 1
 -2 -4 7 732.267 163.952 1
 -2 -4 6 196.339 89.3853 1
 2 4 -6 107.18 53.0523 1
 -2 -4 5 2524.73 264.702 1
 2 4 -5 2563.69 240.722 1
 -2 -4 4 8538.54 446.681 1
 2 4 -4 8501.24 405.27 1
 2 4 -3 6164.88 318.785 1
 -2 -4 3 5923.65 340.199 1
 2 4 -2 435.642 83.3129 1
 2 4 -2 492.275 90.8176 3
 2 4 -1 727.003 93.6762 3
 2 4 0 17.2562 30.9891 3
 2 4 0 13.654 58.3932 2
 -2 -4 0 29.848 31.9866 3
 2 4 1 72.9326 38.7495 3
 -2 -4 -1 60.6273 60.3821 2
 -2 -4 -1 88.4498 39.1713 3
 2 4 1 153.725 69.5803 2
 -2 -4 -2 3419.51 187.092 3
 2 4 2 3594.46 190.943 1
 2 4 2 3503.17 269.939 2
 -2 -4 -2 3417.9 262.368 2
 2 4 3 1310.89 184.172 2
 2 4 3 1601.46 146.496 1
 -2 -4 -3 1437.96 137.109 3
 -2 -4 -3 1338.93 180.21 2
 -2 -4 -4 117.213 67.5401 2
 2 4 4 325.814 115.938 2
 2 4 4 325.535 79.5021 1
 -2 -4 -4 338.18 80.4196 1
 2 4 5 32.7485 45.0642 1
 -2 -4 -5 76.0436 57.7971 2
 -2 -4 -5 32.0867 45.7107 1
 2 4 6 62.9728 54.8486 1
 -2 -4 -6 -16.9656 54.3806 2
 -2 -4 -7 1693.54 214.562 1
 2 4 7 1755.88 218.786 1
 -2 -4 -7 1841.15 279.495 2
 2 4 8 1800.07 237.011 1
 -2 -4 -8 1592.14 273.87 2
 -2 -4 -8 1987.2 244.828 1
 -2 -4 -9 267.523 95.9783 1
 2 4 9 398.972 120.613 1
 2 4 10 332.063 116.846 1
 2 4 11 802.7 196.402 1
 2 4 12 197.985 123.039 1
 2 4 13 751.156 223.751 1
 2 4 14 1055.63 278.846 1
 2 4 15 259.328 204.317 1
 2 4 16 337.579 243.602 1
 -2 -5 15 340.467 265.93 1
 -2 -5 14 -150.24 208.566 1
 -2 -5 13 380.132 203.6 1
 -2 -5 12 -50.8252 102.402 1
 -2 -5 11 1112.99 263.837 1
 -2 -5 10 480.038 167.732 1
 -2 -5 9 -33.008 43.3683 1
 2 5 -8 267.083 112.827 1
 -2 -5 8 335.739 125.248 1
 -2 -5 7 157.987 85.0409 1
 2 5 -7 192.988 89.8096 1
 -2 -5 6 130.941 63.3868 1
 2 5 -6 36.1074 41.1254 1
 -2 -5 5 2341.7 267.883 1
 2 5 -5 2792.87 264.127 1
 2 5 -4 4519.94 326.488 3
 2 5 -4 4535.48 318.015 1
 2 5 -3 1046.17 148.343 1
 2 5 -3 47.8535 58.8079 3
 2 5 -2 4277.02 267.969 3
 2 5 -2 3985.3 274.095 1
 -2 -5 1 2956.78 208.601 3
 2 5 -1 2800.83 260.561 2
 2 5 -1 2842.82 200.868 3
 2 5 0 26.5661 42.4188 3
 -2 -5 0 46.9562 41.7042 3
 2 5 0 33.4088 56.8388 2
 2 5 1 1567.43 140.181 3
 -2 -5 -1 1671.43 189.809 2
 2 5 1 1591.21 186.598 2
 -2 -5 -1 1559.09 141.315 3
 -2 -5 -2 846.858 111.562 3
 2 5 2 738.371 138.408 2
 -2 -5 -2 765.984 134.955 2
 2 5 2 785.159 106.149 3
 -2 -5 -3 374.508 84.1436 3
 2 5 3 748.65 140.442 1
 -2 -5 -3 349.321 96.1834 2
 2 5 3 328.047 108.99 2
 2 5 4 145.892 64.9346 1
 -2 -5 -4 169.848 69.0736 3
 -2 -5 -4 188.846 85.0136 2
 2 5 4 253.662 107.987 2
 -2 -5 -5 756.747 162.4 2
 2 5 5 824.394 137.016 1
 -2 -5 -5 906.119 142.869 3
 -2 -5 -6 461.846 137.611 2
 -2 -5 -6 440.98 107.99 1
 2 5 6 139.575 61.5086 1
 2 5 7 3198.48 301.271 1
 -2 -5 -7 4319.51 436.809 2
 -2 -5 -7 3535.38 313.461 1
 -2 -5 -8 1609.26 292.289 2
 2 5 8 1506.01 220.761 1
 2 5 9 84.8048 66.0324 1
 2 5 10 1195.28 225.952 1
 2 5 11 650.938 182.168 1
 2 5 12 403.17 161.87 1
 2 5 13 1468.4 299.737 1
 2 5 14 308.497 185.967 1
 2 5 15 183.195 181.081 1
 -2 -6 15 252.853 280.306 1
 -2 -6 14 121.761 202.193 1
 -2 -6 13 -231.457 221.68 1
 -2 -6 12 754.088 255.801 1
 -2 -6 11 853.368 255.225 1
 -2 -6 10 -218.578 117.357 1
 -2 -6 9 248.547 123.819 1
 -2 -6 8 252.177 110.419 1
 2 6 -8 244.326 128.781 3
 2 6 -7 123.122 92.9314 3
 2 6 -7 26.4844 56.0622 1
 2 6 -6 2315.89 270.955 1
 2 6 -6 2138.48 275.966 3
 2 6 -5 3192.12 309.829 3
 2 6 -5 3076.4 292.735 1
 2 6 -4 126.087 59.5986 1
 2 6 -4 2.51806 59.9088 3
 2 6 -3 707.765 139.444 3
 2 6 -2 1960.28 201.345 3
 -2 -6 2 1621.75 189.443 3
 2 6 -1 324.041 109.545 2
 2 6 -1 670.221 117.158 3
 -2 -6 1 563.323 110.889 3
 -2 -6 0 2001.17 184.722 3
 2 6 0 2173.2 190.86 3
 2 6 0 2032.45 225.676 2
 2 6 1 3585.54 295.269 2
 -2 -6 -1 3408.55 239.123 3
 2 6 1 3704.64 244.077 3
 -2 -6 -1 2681.59 263.11 2
 2 6 2 1.53151 56.4649 2
 2 6 2 59.2972 52.8316 3
 -2 -6 -2 -65.2409 57.1951 2
 -2 -6 -2 -10.0573 44.7848 3
 2 6 3 431.989 119.638 2
 -2 -6 -3 292.563 95.6374 2
 -2 -6 -3 356.027 90.276 3
 2 6 3 306.234 84.7063 1
 2 6 4 1092.89 158.359 1
 2 6 4 715.762 154.49 2
 -2 -6 -4 767.845 157.792 2
 -2 -6 -4 1057.59 155.623 3
 -2 -6 -5 124.699 76.6162 2
 -2 -6 -5 11.8374 51.409 3
 2 6 5 14.0487 47.9692 1
 2 6 6 2033.72 236.43 1
 -2 -6 -6 1938.56 236.944 3
 -2 -6 -6 2097.79 294.018 2
 -2 -6 -7 2044.85 250.623 3
 2 6 7 2134.72 253.481 1
 -2 -6 -7 1902.7 304.189 2
 -2 -6 -8 -14.5612 63.7782 3
 2 6 8 -97.2819 60.143 1
 -2 -6 -8 20.2451 115.974 2
 2 6 9 297.558 107.229 1
 2 6 10 343.107 124.668 1
 2 6 11 120.166 84.2008 1
 2 6 12 1078.65 249.093 1
 2 6 13 427.707 188.795 1
 2 6 14 205.745 181.152 1
 2 6 15 272.416 217.019 1
 2 7 -14 96.5809 168.935 3
 2 7 -13 378.462 225.417 3
 2 7 -12 496.934 205.106 3
 2 7 -11 204.504 168.73 3
 2 7 -10 15.7951 102.962 3
 2 7 -9 964.04 231.808 3
 2 7 -8 14.9866 77.5952 3
 2 7 -7 410.239 144.642 3
 2 7 -7 169.065 106.238 1
 2 7 -6 2428.64 297.208 3
 2 7 -6 2488.73 296.036 1
 2 7 -5 81.8032 67.94 1
 2 7 -5 18.1424 62.4903 3
 2 7 -4 861.959 233.683 1
 2 7 -4 199.472 97.5981 3
 2 7 -3 1303.7 188.044 3
 2 7 -3 1151.48 182.759 1
 2 7 -2 234.008 87.6593 3
 2 7 -2 388.51 135.834 2
 2 7 -1 947.589 171.546 2
 2 7 -1 966.412 150.438 3
 -2 -7 1 897.849 148.435 3
 2 7 0 2573.84 230.721 3
 2 7 0 2463.89 259.21 2
 -2 -7 0 2557.46 232.966 3
 -2 -7 -1 627.918 124.263 3
 2 7 1 491.972 106.473 3
 -2 -7 -1 473.7 123.368 2
 2 7 1 400.772 113.978 2
 -2 -7 -2 985.669 164.923 2
 2 7 2 980.77 148.09 3
 -2 -7 -2 1287.17 169.147 3
 2 7 2 1203.74 187.165 2
 -2 -7 -3 3162.53 266.095 3
 -2 -7 -3 3298.44 315.954 2
 2 7 3 3296.34 270.693 3
 2 7 3 3289.34 316.899 2
 -2 -7 -4 406.347 108.376 3
 2 7 4 406.582 93.0884 1
 -2 -7 -4 290.637 102.434 2
 2 7 4 347.281 119.127 2
 2 7 5 1972.69 233.289 1
 -2 -7 -5 1969.36 238.229 3
 -2 -7 -5 2108.78 286.647 2
 2 7 6 2616.9 280.164 1
 -2 -7 -6 2651.43 288.564 3
 -2 -7 -6 2597.24 336.968 2
 -2 -7 -7 18.8732 99.6152 2
 -2 -7 -7 32.9745 72.1142 3
 2 7 7 30.3915 32.7298 1
 2 7 8 334.177 107.913 1
 -2 -7 -8 532.599 203.807 2
 -2 -7 -8 300.084 127.028 3
 2 7 9 532.068 149.851 1
 2 7 10 2.77335 68.498 1
 2 7 11 743.426 196.097 1
 2 7 12 313.531 153.94 1
 2 7 13 220.261 160.942 1
 2 7 14 328.963 207.53 1
 2 7 15 -1.74754 230.036 1
 2 8 -14 -121.474 162.138 3
 2 8 -13 190.092 187.785 3
 2 8 -12 197.385 174.839 3
 2 8 -11 137.235 145.162 3
 2 8 -10 649.676 212.118 3
 2 8 -9 405.338 177.227 3
 2 8 -8 172.787 132.799 3
 2 8 -7 1033.11 223.489 3
 2 8 -6 568.264 163.52 3
 2 8 -6 756.913 184.5 1
 2 8 -5 258.842 114.01 1
 2 8 -5 386.605 132.473 3
 2 8 -4 1096.85 198.343 1
 2 8 -4 1051.61 193.521 3
 2 8 -3 1465.39 261.974 1
 2 8 -3 623.024 144.1 3
 -2 -8 2 340.318 122.035 3
 2 8 -2 232.287 94.1467 3
 2 8 -2 264.129 97.5402 2
 2 8 -1 2395.56 248.179 3
 -2 -8 1 2329.71 246.876 3
 2 8 -1 1890.58 244.341 2
 2 8 0 592.994 133.11 2
 2 8 0 566.442 127.138 3
 -2 -8 0 525.33 122.788 3
 -2 -8 -1 254.819 97.1631 3
 2 8 1 238.418 93.5971 2
 2 8 1 107.512 61.4748 3
 -2 -8 -2 1104.12 171.524 3
 -2 -8 -2 1056.7 176.675 2
 2 8 2 1119.75 185.439 2
 2 8 2 1101.09 170.71 3
 2 8 3 725.412 142.877 3
 2 8 3 663.482 148.422 2
 -2 -8 -3 856.61 154.848 3
 -2 -8 -3 805.037 164.825 2
 -2 -8 -4 936.44 184.031 2
 2 8 4 732.006 145.446 1
 -2 -8 -4 620.254 142.687 3
 2 8 4 654.385 155.201 2
 2 8 5 2022.23 245.079 1
 -2 -8 -5 2102.66 287.205 2
 -2 -8 -6 234.183 131.518 2
 -2 -8 -6 339.026 137.417 3
 2 8 7 734.339 160.678 1
 -2 -8 -7 893.271 194.727 3
 -2 -8 -7 706.521 215.383 2
 2 8 8 631.429 162.04 1
 2 8 9 103.543 78.9122 1
 2 8 10 943.948 214.026 1
 2 8 12 132.321 136.431 1
 2 8 13 91.8812 132.197 1
 2 8 14 71.3226 171.696 1
 2 9 -13 59.8908 161.593 3
 2 9 -12 44.4252 107.199 3
 2 9 -11 690.371 230.643 3
 2 9 -10 699.234 223.048 3
 2 9 -9 4.51092 103.463 3
 2 9 -8 915.133 221.879 3
 2 9 -7 263.887 144.054 3
 2 9 -6 119.648 110.613 3
 2 9 -5 1404.05 243.041 3
 2 9 -5 1490.93 253.26 1
 2 9 -4 763.764 185.943 1
 2 9 -4 720.452 178.39 3
 2 9 -3 49.7896 60.7932 2
 -2 -9 3 -49.0663 74.8554 3
 2 9 -3 23.6959 80.0707 3
 2 9 -2 863.72 170.824 3
 2 9 -2 1240.43 212.452 2
 2 9 -1 929.324 170.878 3
 -2 -9 1 871.999 167.016 3
 2 9 -1 715.749 157.514 2
 2 9 0 248.59 94.4223 2
 -2 -9 0 173.047 83.0321 3
 2 9 0 264.831 103.675 3
 -2 -9 -1 1359.72 199.722 3
 2 9 1 1372.49 202.707 3
 2 9 1 1344.36 207.171 2
 2 9 2 773.668 158.648 2
 2 9 2 1229.46 193.134 3
 -2 -9 -2 1223.56 196.461 3
 -2 -9 -2 883.909 169.87 2
 -2 -9 -3 -12.1806 61.0186 2
 -2 -9 -3 86.4321 78.7396 3
 2 9 3 73.1701 83.3567 3
 2 9 3 99.6154 65.9758 2
 -2 -9 -4 824.497 174.572 3
 2 9 4 1047.97 206.791 2
 2 9 4 1116.01 186.274 1
 -2 -9 -4 1126.4 213.378 2
 -2 -9 -5 273.19 129.112 2
 2 9 5 261.966 108.652 1
 -2 -9 -5 242.538 115.094 3
 -2 -9 -6 528.526 154.048 3
 2 9 6 745.843 170.613 1
 -2 -9 -6 741.909 208.655 2
 -2 -9 -7 1597.9 307.543 2
 2 9 7 1485.03 239.152 1
 2 9 8 350.316 123.737 1
 2 9 9 202.409 111.72 1
 2 9 10 372.895 148.177 1
 2 9 11 121.116 116.884 1
 2 9 12 349.246 180.727 1
 2 9 13 828.653 270.314 1
 2 9 14 60.2459 206.569 1
 2 10 -13 -26.5703 104.021 3
 2 10 -12 605.21 266.884 3
 2 10 -11 849.853 262.758 3
 2 10 -10 76.5172 148.596 3
 2 10 -9 182.996 148.859 3
 2 10 -8 452.031 204.419 3
 2 10 -7 -14.7439 98.9352 3
 2 10 -6 1334.36 259.101 3
 2 10 -5 732.297 197.361 3
 2 10 -4 103.579 86.4676 2
 2 10 -4 9.40361 77.9908 3
 2 10 -3 564.741 158.628 3
 -2 -10 3 489.258 148.615 3
 2 10 -3 366.204 131.585 2
 2 10 -2 321.334 126.477 3
 -2 -10 2 247.3 128.569 3
 2 10 -2 308.797 111.479 2
 2 10 -1 422.768 140.432 3
 -2 -10 1 848.245 189.901 3
 -2 -10 0 2322.54 305.955 3
 2 10 0 1630.73 238.148 3
 2 10 0 1845.08 253.48 2
 2 10 1 1143.75 198.083 3
 -2 -10 -1 1243.11 209.989 3
 2 10 1 1226.16 202.741 2
 2 10 2 -6.90241 49.5 2
 2 10 2 19.7633 69.0824 3
 2 10 3 555.186 143.255 3
 -2 -10 -3 639.985 159.164 3
 -2 -10 -3 724.453 174.363 2
 -2 -10 -4 341.071 141.929 2
 -2 -10 -4 226.593 104.522 3
 2 10 4 363.402 126.448 1
 2 10 5 62.6196 67.2534 1
 -2 -10 -5 59.2032 99.0472 3
 2 10 6 1036.07 206.019 1
 -2 -10 -6 1197.14 262.685 2
 2 10 7 227.738 98.4613 1
 -2 -10 -7 500.72 228.817 2
 2 10 8 164.6 107.93 1
 2 10 9 200.073 114.254 1
 2 10 10 201.029 128.082 1
 2 10 11 95.6928 119.864 1
 2 10 12 495.993 213.784 1
 2 10 13 146.627 182.834 1
 2 11 -12 408.836 271.059 3
 2 11 -11 76.8015 171.421 3
 2 11 -10 27.2594 109.638 3
 2 11 -8 -86.7993 121.871 3
 2 11 -7 612.383 190.754 3
 2 11 -6 1648.33 304.492 3
 2 11 -5 94.1861 93.487 2
 2 11 -5 19.0317 99.1812 3
 2 11 -4 14.3889 26.8283 2
 2 11 -4 278.177 134.654 3
 2 11 -3 383.959 132.714 2
 2 11 -3 335.425 124.566 3
 2 11 -2 287.034 130.389 3
 -2 -11 2 216.558 134.14 3
 2 11 -2 416.223 136.538 2
 2 11 -1 3519.75 372.969 3
 2 11 -1 3095.81 341.964 2
 -2 -11 1 3243.98 358.547 3
 2 11 0 2692.5 322.222 3
 2 11 0 2447.68 301.422 2
 -2 -11 -1 210.464 108.238 3
 2 11 1 83.7576 79.5754 3
 2 11 1 140.906 87.9076 2
 -2 -11 -2 281.297 121.009 3
 2 11 2 299.143 123.979 3
 2 11 2 453.923 142.679 2
 2 11 3 239.253 102.84 2
 -2 -11 -3 309.118 143.476 3
 -2 -11 -3 409.652 152.896 2
 2 11 3 337.312 121.732 3
 -2 -11 -4 86.7103 123.144 2
 2 11 4 126.367 80.4804 1
 2 11 5 896.815 190.028 1
 -2 -11 -5 935.392 239.047 2
 -2 -11 -6 641.643 235.611 2
 2 11 6 756.439 185.947 1
 2 11 7 181.899 101.752 1
 2 11 8 77.3451 86.9613 1
 2 11 9 54.883 95.7698 1
 2 11 10 71.6737 113.069 1
 2 11 11 534.046 216.98 1
 2 11 12 662.391 254.64 1
 2 12 -11 7082.18 771.904 3
 2 12 -10 137.93 184.759 3
 2 12 -9 27.9337 133.095 3
 2 12 -8 423.602 245.03 3
 2 12 -7 713.59 246.802 3
 2 12 -6 139.181 100.383 2
 2 12 -6 96.5764 108.676 3
 2 12 -5 -319.564 151.489 2
 2 12 -5 -21.063 125.022 3
 2 12 -4 483.303 175.822 3
 2 12 -4 276.125 136.959 2
 2 12 -3 72.2205 94.5342 3
 2 12 -3 -33.3577 77.2611 2
 2 12 -2 772.52 188.642 2
 2 12 -2 841.839 213.097 3
 2 12 -1 1746.68 265.901 2
 2 12 -1 1441.57 259.103 3
 2 12 0 372.259 139.415 2
 2 12 0 376.496 150.581 3
 2 12 1 258.954 131.375 3
 2 12 1 237.311 116.471 2
 2 12 2 447.616 149.005 3
 2 12 2 475.208 153.647 2
 2 12 3 -7.70829 87.5997 3
 2 12 3 -158.609 87.4752 2
 2 12 4 786.986 187.587 1
 -2 -12 -4 350.558 178.42 2
 -2 -12 -5 138.415 176.856 2
 2 12 5 296.133 114.383 1
 2 12 6 115.044 83.1354 1
 2 12 7 -103.68 94.0336 1
 2 12 8 122.571 112.492 1
 2 12 9 -4.85682 124.178 1
 2 12 10 271.88 177.278 1
 2 12 11 721.037 258.471 1
 2 12 12 -26.1224 187.313 1
 2 13 -10 151.145 190.023 3
 2 13 -9 85.3573 126.289 3
 2 13 -7 410.512 206.893 2
 2 13 -7 86.3667 155.572 3
 2 13 -6 -49.8911 145.721 2
 2 13 -6 15.1879 142.287 3
 2 13 -5 221.323 164.701 3
 2 13 -5 242.852 170.396 2
 2 13 -4 147.933 134.113 2
 2 13 -4 -0.41716 98.2763 3
 2 13 -3 95.1208 109.314 2
 2 13 -3 135.191 150.446 3
 2 13 -2 652.403 209.109 3
 2 13 -2 912.747 212.307 2
 2 13 -1 286.99 136.164 2
 2 13 -1 195.709 141.813 3
 2 13 0 190.257 125.497 2
 2 13 0 -28.9785 80.4983 3
 2 13 1 571.252 185.06 3
 2 13 1 217.505 129.774 2
 2 13 2 -60.8447 102.856 2
 2 13 2 -147.734 105.449 3
 2 13 3 1137.12 228.924 2
 2 13 3 1346.08 253.861 3
 2 13 4 570.911 177.048 1
 2 13 5 113.18 77.7679 1
 2 13 6 115.264 95.8941 1
 2 13 7 235.53 138.608 1
 2 13 8 1367.58 287.313 1
 2 13 9 141.769 148.748 1
 2 13 10 418.227 214.555 1
 2 13 11 -19.8356 187.636 1
 2 14 -9 14.6021 167.191 3
 2 14 -8 -8.3383 174.665 3
 2 14 -7 107.567 179.525 3
 2 14 -6 505.921 240.4 2
 2 14 -6 3339.81 477.702 3
 2 14 -5 43.6883 119.191 3
 2 14 -5 2919.39 423.904 2
 2 14 -4 162.153 150.52 2
 2 14 -3 292.047 222.369 3
 2 14 -3 435.685 187.088 2
 2 14 -2 77.444 117.272 3
 2 14 -2 157.284 138.477 2
 2 14 -1 180.674 142.545 2
 2 14 -1 61.0692 90.2109 3
 2 14 0 224.385 136.55 3
 2 14 0 258.827 146.833 2
 2 14 1 -11.0878 87.8961 3
 2 14 1 2137.96 316.584 2
 2 14 2 119.733 104.767 2
 2 14 2 -28.7413 91.2597 3
 2 14 3 472.623 179.642 3
 2 14 4 325.976 135.683 1
 2 14 5 185.482 99.3062 1
 2 14 7 -166.632 130.059 1
 2 14 8 241.541 179.848 1
 2 14 9 91.5896 170.628 1
 2 15 -8 110.749 166.906 3
 2 15 -7 244.33 191.49 3
 2 15 -6 203.801 239.279 3
 2 15 -5 -8.89155 128.457 3
 2 15 -4 254.521 213.563 3
 2 15 -3 164.611 152.462 3
 2 15 -2 18.2806 97.2974 3
 2 15 -1 50.4902 89.5803 3
 2 15 0 64.0961 116.881 3
 2 15 1 45.9122 118.233 3
 2 15 2 180.009 122.673 3
 2 15 3 194.32 151.58 3
 2 15 4 404.135 164.017 1
 2 15 5 356.208 165.948 1
 2 15 6 66.8612 151.658 1
 2 15 7 31.5929 140.961 1
 2 15 8 555.422 269.11 1
 2 16 -6 -20.701 139.424 3
 2 16 -5 -54.0237 163.977 3
 2 16 -4 -128.024 135.612 3
 2 16 -3 -76.2217 128.659 3
 2 16 -2 271.814 188.22 3
 2 16 -1 212.071 172.93 3
 2 16 0 -178.292 136.028 3
 2 16 1 35.9742 111.399 3
 2 16 2 7.64155 122.828 3
 2 16 3 -85.3018 125.84 3
 2 16 4 244.241 163.441 1
 2 16 5 483.248 201.206 1
 2 16 6 297.632 215.278 1
 2 17 -3 -140.967 117.551 3
 2 17 -2 358.749 214.945 3
 2 17 -1 -588.336 207.507 3
 2 17 0 24.4342 89.3924 3
 2 17 1 413.239 168.909 3
 2 17 2 130.892 142.987 3
 2 17 3 1087.8 287.655 1
 -3 14 1 -126.947 132.251 3
 -3 14 0 254.615 168.223 3
 -3 14 -1 -133.435 148.162 3
 -3 14 -2 314.406 173.472 3
 -3 14 -3 377.521 223.542 3
 -3 13 4 481.372 193.305 1
 -3 13 3 282.504 211.876 3
 -3 13 2 152.872 143.053 3
 -3 13 1 313.874 182.861 3
 -3 13 0 -8.83928 101.398 3
 -3 13 -1 83.2342 140.958 3
 -3 13 -2 629.217 272.197 3
 -3 13 -3 251.967 190.216 3
 -3 13 -4 -236.034 164.931 3
 -3 13 -5 199.644 200.551 3
 -3 13 -6 44.9877 111.993 3
 -3 12 6 5.99938 97.9168 1
 -3 12 5 393.819 177.617 1
 -3 12 4 391.323 161.847 1
 -3 12 3 147.863 167.716 3
 -3 12 2 -11.1688 112.979 3
 -3 12 1 220.979 161.418 3
 -3 12 0 42.8409 146.626 3
 -3 12 -1 770.752 250.461 3
 -3 12 -2 541.897 228.848 3
 -3 12 -3 -1.03537 113.499 3
 -3 12 -4 59.8154 159.968 3
 -3 12 -6 73.4522 180.615 3
 -3 12 -7 437.682 232.356 3
 -3 12 -8 1254.12 380.807 3
 -3 11 8 706.44 265.54 1
 -3 11 7 -12.2496 89.917 1
 -3 11 6 360.262 160.261 1
 -3 11 5 450.964 171.897 1
 -3 11 4 12.6112 104.701 3
 -3 11 4 36.5982 72.5418 1
 -3 11 3 638.786 222.402 3
 -3 11 2 328.053 177.607 3
 -3 11 1 204.405 156.732 3
 -3 11 0 437.679 211.983 3
 -3 11 -1 761.661 237.076 3
 -3 11 -2 36.6261 117.722 3
 -3 11 -3 78.3002 123.084 3
 -3 11 -4 456.359 204.129 3
 -3 11 -5 62.1782 133.242 3
 -3 11 -6 1443.95 388.707 3
 -3 11 -7 185.611 165.668 3
 -3 11 -8 9.42854 140.863 3
 -3 11 -9 303.596 219.653 3
 -3 11 -10 315.531 233.067 3
 -3 10 9 908.113 266.069 1
 -3 10 8 12.5083 137.428 1
 -3 10 7 169.365 106.292 1
 -3 10 6 2189.27 343.158 1
 -3 10 5 213.168 110.581 1
 -3 10 4 339.985 147.425 1
 -3 10 4 225.019 151.95 3
 -3 10 3 715.359 219.711 3
 -3 10 2 135.013 138.957 3
 -3 10 1 55.6724 100.748 3
 -3 10 0 562.934 185.119 3
 -3 10 -1 -162.151 125.317 3
 -3 10 -2 93.9041 112.692 3
 -3 10 -3 768.202 222.46 3
 -3 10 -4 15.3254 22.3906 2
 -3 10 -4 217.719 156.623 3
 -3 10 -5 394.368 94.4301 2
 -3 10 -5 318.25 171.087 3
 -3 10 -6 949.584 260.975 3
 -3 10 -7 -72.4461 124.769 3
 -3 10 -8 332.406 171.773 3
 -3 10 -9 278.895 180.289 3
 -3 10 -11 117.964 220.375 3
 -3 9 10 864.011 267.014 1
 -3 9 9 2210.47 382.027 1
 -3 9 8 170.59 137.019 1
 -3 9 7 544.689 179.5 1
 -3 9 6 50.5344 61.74 1
 -3 9 5 547.107 174.953 1
 -3 9 4 1352.32 276.686 3
 3 -9 -4 1295.69 158.194 2
 -3 9 3 763.269 211.239 3
 -3 9 2 176.739 129.227 3
 -3 9 1 494.441 167.547 3
 -3 9 0 -11.9215 90.7397 3
 -3 9 -1 922.686 223.809 3
 -3 9 -2 1475.64 284.528 3
 -3 9 -3 709.984 210.368 3
 -3 9 -4 123.756 122.373 3
 -3 9 -4 90.0738 40.0055 2
 -3 9 -5 529.573 195.096 3
 -3 9 -6 -165.162 133.67 3
 -3 9 -7 389.612 175.232 3
 -3 9 -8 1225.91 294.015 3
 -3 9 -9 134.857 133.986 3
 -3 9 -10 53.4909 123.02 3
 -3 9 -11 -437.559 206.71 3
 -3 9 -12 -30.326 122.249 3
 -3 8 11 748.846 261.35 1
 -3 8 10 459.01 193.479 1
 -3 8 9 -1.42701 89.798 1
 -3 8 8 596.897 185.647 1
 3 -8 -7 164.71 160.452 2
 -3 8 7 319.869 143.286 1
 3 -8 -6 257.979 152.161 2
 -3 8 6 291.557 131.034 1
 -3 8 5 1208.39 246.005 1
 3 -8 -5 1330.13 206.828 2
 -3 8 4 1026.49 217.462 1
 3 -8 -4 1228.48 163.971 2
 -3 8 4 868.589 215.503 3
 -3 8 3 190.608 128.126 3
 3 -8 -3 71.8309 37.3756 2
 -3 8 2 750.097 202.335 3
 -3 8 1 540.818 171.723 3
 -3 8 0 220.84 122.272 3
 -3 8 -1 1467.95 264.688 3
 -3 8 -2 264.042 133.896 3
 -3 8 -3 261.898 132.392 3
 -3 8 -4 1911.69 311.641 3
 -3 8 -4 1733.82 167.572 2
 -3 8 -5 101.114 99.0872 3
 -3 8 -6 555.067 194.182 3
 -3 8 -7 1074.37 255.696 3
 -3 8 -8 241.001 152.65 3
 -3 8 -10 357.95 161.098 3
 -3 8 -11 0.52508 120.916 3
 -3 8 -12 129.992 159.175 3
 -3 8 -13 536.412 255.051 3
 -3 7 12 796.822 266.525 1
 -3 7 11 1093 282.842 1
 -3 7 10 -72.8458 130.986 1
 -3 7 9 310.231 146.487 1
 -3 7 8 882.491 216.97 1
 3 -7 -8 590.722 230.8 2
 -3 7 7 -43.2223 72.1768 1
 3 -7 -7 212.277 162.212 2
 -3 7 6 1036.72 223.397 1
 3 -7 -6 626.54 182.251 2
 3 -7 -5 2049.08 255.45 2
 -3 7 5 1936.36 290.953 1
 -3 7 4 224.524 117.567 1
 -3 7 4 141.684 94.6889 3
 3 -7 -4 197.312 84.5759 2
 -3 7 3 554.624 173.28 3
 3 -7 -3 739.059 106.293 2
 -3 7 2 450.109 151.048 3
 3 -7 -1 92.6848 85.7896 3
 -3 7 1 77.5839 71.9676 3
 -3 7 0 1964.97 284.967 3
 3 -7 0 2136.88 300.843 3
 -3 7 -1 797.816 188.417 3
 3 -7 1 904.682 209.998 3
 3 -7 2 -19.8968 85.0715 3
 -3 7 -2 -0.30114 69.9548 3
 -3 7 -3 1082.98 99.4406 2
 -3 7 -3 1325.18 242.716 3
 -3 7 -3 1277.91 112.093 2
 -3 7 -4 135.41 103.663 3
 -3 7 -5 1091.12 232.194 3
 -3 7 -6 3279.13 397.49 3
 -3 7 -7 805.88 221.137 3
 -3 7 -8 34.3595 99.8751 3
 -3 7 -9 228.845 140.835 3
 -3 7 -10 21.6805 104.994 3
 -3 7 -11 -161.063 153.304 3
 -3 7 -12 810.525 258.91 3
 -3 7 -13 307.345 175.537 3
 -3 7 -14 60.175 165.189 3
 -3 6 13 763.652 275.642 1
 -3 6 12 555.554 227.953 1
 -3 6 11 24.4637 121.931 1
 -3 6 10 162.455 122.152 1
 -3 6 9 1236.16 258.13 1
 -3 6 8 57.1704 59.1173 1
 3 -6 -8 944.783 245.285 2
 3 -6 -7 1382.48 255.878 2
 -3 6 7 525.451 157.656 1
 3 -6 -6 730.699 172.736 2
 -3 6 6 620.415 168.195 1
 3 -6 -5 -89.2138 67.7183 2
 -3 6 4 235.555 108.097 1
 3 -6 -4 240.029 90.0509 2
 3 -6 -3 1539.69 251.821 3
 -3 6 3 1367.01 232.446 3
 3 -6 -3 1505.23 168.183 2
 -3 6 2 2.72222 72.6276 3
 3 -6 -2 90.2381 30.4767 2
 -3 6 1 1820.08 258.492 3
 3 -6 -1 1964.75 273.74 3
 -3 6 0 1664.83 248.599 3
 3 -6 0 2034.34 273.54 3
 -3 6 -1 20.1252 84.7146 3
 3 -6 1 7.41485 75.2188 3
 -3 6 -2 1539.2 240.678 3
 3 -6 2 1356.79 227.16 3
 3 -6 3 1211.12 218.32 3
 -3 6 -3 1450.49 233.381 3
 -3 6 -4 446.492 143.823 3
 3 -6 4 281.398 122.487 3
 3 -6 5 1980.22 296.385 3
 -3 6 -5 1674.3 264.436 3
 -3 6 -6 784.275 196.19 3
 -3 6 -7 6.60976 94.2648 3
 -3 6 -8 143.417 114.56 3
 -3 6 -9 662.625 210.523 3
 -3 6 -10 -240.131 150.713 3
 -3 6 -11 769.176 236.956 3
 -3 6 -12 494.205 211.2 3
 -3 6 -13 -106.023 130.518 3
 -3 6 -14 27.9872 135.027 3
 -3 5 13 557.482 234.964 1
 -3 5 12 -6.11515 123.159 1
 -3 5 11 264.983 145.906 1
 -3 5 10 991.728 236.949 1
 -3 5 9 156.683 95.6519 1
 -3 5 8 1289.23 242.036 1
 -3 5 7 1708.6 272.637 1
 -3 5 6 504.107 149.339 1
 -3 5 5 336.351 126.525 1
 3 -5 -5 297.375 125.498 3
 -3 5 4 1113.71 196.496 1
 3 -5 -4 957.849 197.261 3
 -3 5 3 361.227 125.502 3
 3 -5 -3 364.369 117.429 3
 3 -5 -3 312.048 76.2293 2
 3 -5 -2 2591.18 295.936 3
 -3 5 2 2667.97 293.136 3
 3 -5 -2 2451.05 166.898 2
 -3 5 1 3332.85 330.157 3
 3 -5 -1 2954.13 313.15 3
 -3 5 0 332.152 121.311 3
 3 -5 0 352.939 118.758 3
 -3 5 -1 494.226 136.436 3
 3 -5 1 484.328 141.696 3
 -3 5 -2 561.524 146.258 3
 3 -5 2 627.225 155.43 3
 3 -5 3 -125.003 86.8574 3
 -3 5 -3 16.7059 69.1725 3
 -3 5 -4 1410.1 224.976 3
 3 -5 4 1303.91 220.61 3
 3 -5 5 796.788 180.385 3
 -3 5 -5 714.458 174.335 3
 -3 5 -6 54.6399 81.4682 3
 -3 5 -6 -28.4275 78.4986 1
 -3 5 -7 402.59 131.117 3
 -3 5 -8 325.173 141.84 3
 -3 5 -9 288.347 150.816 3
 -3 5 -10 650.298 205.83 3
 -3 5 -11 558.219 204.385 3
 -3 5 -12 9.09779 105.825 3
 -3 5 -13 305.272 172.439 3
 -3 5 -14 196.006 152.902 3
 -3 5 -15 -52.1972 165.697 3
 -3 4 14 239.869 200.238 1
 -3 4 13 -7.59041 147.963 1
 -3 4 12 481.419 195.301 1
 -3 4 11 938.306 234.327 1
 -3 4 10 626.96 181.736 1
 -3 4 9 59.2086 42.9259 1
 -3 4 8 651.392 171.772 1
 -3 4 7 61.9852 74.029 1
 3 -4 -6 405.026 135.335 3
 -3 4 6 394.482 124.585 1
 3 -4 -5 3238.25 347.307 3
 -3 4 5 3468.89 339.713 1
 3 -4 -4 625.602 158.531 3
 -3 4 4 778.991 156.314 1
 3 -4 -3 364.546 82.0142 3
 -3 4 3 466.985 130.439 3
 3 -4 -2 1407.23 214.43 3
 -3 4 2 1535.68 215.564 3
 3 -4 -1 725.492 150.154 3
 -3 4 1 613.878 137.156 3
 3 -4 0 1055.41 176.595 3
 -3 4 0 958.648 168.693 3
 3 -4 1 4426.75 345.059 3
 -3 4 -1 4739.29 351.075 3
 -3 4 -2 809.98 155.94 3
 -3 4 -2 826.076 74.2672 2
 3 -4 2 758.836 155.085 3
 -3 4 -3 1111.68 184.768 3
 3 -4 3 965.725 177.241 3
 -3 4 -3 910.746 114.103 2
 3 -4 4 876.893 179.054 3
 -3 4 -4 976.514 184.237 3
 3 -4 5 66.9666 82.9966 3
 -3 4 -5 21.1621 62.7165 3
 -3 4 -5 41.0505 43.2674 1
 -3 4 -6 1254.31 220.673 3
 -3 4 -6 1095.61 209.035 1
 -3 4 -7 2247.12 305.092 1
 -3 4 -7 2334.65 308.709 3
 -3 4 -8 449.286 160.43 3
 -3 4 -9 390.311 148.673 3
 -3 4 -10 933.933 234.726 3
 -3 4 -11 91.8421 130.786 3
 -3 4 -12 235.734 167.153 3
 -3 4 -13 617.082 228.197 3
 -3 4 -14 67.5935 138.769 3
 -3 4 -15 26.6165 141.12 3
 -3 3 14 375.643 215.161 1
 -3 3 13 159.003 150.417 1
 -3 3 12 918.142 244.548 1
 -3 3 11 1180.37 261.581 1
 -3 3 10 106.365 81.2792 1
 -3 3 9 417.571 126.986 1
 -3 3 8 -19.023 41.3741 1
 -3 3 7 330.869 117.397 1
 -3 3 6 3109.59 322.518 1
 3 -3 -6 2805.55 321.542 3
 -3 3 5 1124.2 189.595 1
 3 -3 -5 1091.61 195.071 3
 -3 3 4 7.37173 51.6813 1
 3 -3 -4 79.2928 77.1714 3
 3 -3 -3 1652.54 218.95 3
 -3 3 3 1604.37 201.165 1
 -3 3 2 134.55 77.6267 3
 3 -3 -2 57.1685 67.7544 3
 3 -3 -1 2988.95 269.296 3
 -3 3 1 2679.56 251.179 3
 -3 3 0 3428.78 276.777 3
 3 -3 0 3500.89 287.863 3
 -3 3 -1 1218.13 172.769 3
 3 -3 1 1192.76 173.493 3
 -3 3 -2 24.4083 25.0325 2
 3 -3 2 15.1403 59.6589 3
 -3 3 -2 -7.66616 61.3728 3
 3 -3 3 1383.83 192.764 3
 -3 3 -3 1488.99 198.223 3
 -3 3 -3 1356.89 140.675 2
 -3 3 -4 59.858 68.2412 3
 3 -3 4 56.5273 86.6742 3
 -3 3 -5 548.692 142.139 3
 -3 3 -5 590.612 136.168 1
 -3 3 -6 3517.06 341.535 3
 -3 3 -6 3520.96 341.094 1
 -3 3 -7 1534.94 245.204 3
 -3 3 -7 1580.76 239.403 1
 -3 3 -8 -26.4881 55.5593 1
 -3 3 -8 -22.6119 71.1228 3
 -3 3 -9 652.289 181.109 3
 -3 3 -10 80.2188 122.933 3
 3 -3 11 676.389 210.568 1
 -3 3 -11 728.17 221.274 3
 -3 3 -12 1149.97 273.055 3
 3 -3 12 1081.64 282.282 1
 -3 3 -13 362.53 177.396 3
 3 -3 13 384.086 205.127 1
 3 -3 14 398.102 238.777 1
 -3 3 -14 231.616 181.872 3
 3 -3 15 721.409 306.25 1
 -3 3 -15 351.43 213.814 3
 -3 3 -16 215.868 193.266 3
 -3 2 14 318.639 203.326 1
 -3 2 13 2553.18 414.382 1
 -3 2 12 702.774 217.398 1
 -3 2 11 389.252 154.891 1
 -3 2 10 254.863 112.64 1
 -3 2 9 213.871 99.6272 1
 -3 2 8 196.802 83.3089 1
 3 -2 -7 3162.91 326.849 1
 -3 2 7 2827.5 311.7 1
 3 -2 -6 3129.5 308.822 1
 -3 2 6 2707.32 288.326 1
 3 -2 -6 2780.07 305.289 3
 -3 2 5 348.771 100.592 1
 3 -2 -5 420.874 126.173 3
 3 -2 -4 1758.03 221.077 3
 -3 2 4 1922.38 222.028 1
 -3 2 3 708.464 130.273 1
 3 -2 -3 635.29 130.5 3
 -3 2 2 2389.91 227.561 3
 3 -2 -2 2600.72 242.839 3
 -3 2 1 4258.27 286.806 3
 3 -2 -1 4248.93 292.888 3
 3 -2 0 3478.07 259.3 3
 -3 2 0 3871.19 265.401 3
 3 -2 0 3635.36 151.967 2
 -3 2 -1 778.764 73.4465 2
 -3 2 -1 768.145 128.354 3
 3 -2 1 826.945 130.102 3
 3 -2 1 799.539 74.03 2
 3 -2 2 12.5259 48.5776 3
 -3 2 -2 30.7158 31.961 2
 -3 2 -2 36.2656 58.2152 3
 -3 2 -3 149.869 58.2026 2
 -3 2 -3 237 86.7719 3
 3 -2 3 141.644 66.7482 3
 -3 2 -4 1835.13 212.411 3
 3 -2 4 1985.81 227.831 3
 -3 2 -4 1728.72 212.743 1
 -3 2 -4 2129.99 210.826 2
 -3 2 -5 2611.08 270.55 1
 -3 2 -5 2510.48 261.905 3
 -3 2 -6 3936.12 343.357 3
 -3 2 -6 3740.59 332.11 1
 -3 2 -7 43.6648 68.3675 3
 -3 2 -7 -82.5529 56.4461 1
 -3 2 -8 558.887 162.984 3
 -3 2 -8 964.505 187.929 1
 3 -2 8 922.368 195.577 1
 3 -2 9 243.672 111.3 1
 -3 2 -9 293.288 133.263 3
 -3 2 -10 807.339 208.518 3
 3 -2 10 895.05 221.841 1
 3 -2 11 3580.67 458.894 1
 -3 2 -11 2056.91 334.894 3
 -3 2 -12 1049.82 268.989 3
 3 -2 12 1310.71 292.901 1
 -3 2 -13 -23.2535 98.8003 3
 3 -2 14 1033.19 322.882 1
 -3 2 -14 573.539 230.811 3
 -3 2 -15 40.3557 144.861 3
 3 -2 15 6.02748 168.244 1
 -3 2 -16 201.426 180.286 3
 3 -2 16 -163.976 255.393 1
 -3 1 15 -40.5186 167.878 1
 -3 1 14 732.658 256.109 1
 -3 1 13 634.182 230.003 1
 -3 1 12 25.8599 101.985 1
 -3 1 11 222.868 118.705 1
 -3 1 10 383.551 138.7 1
 -3 1 9 -134.106 77.7983 1
 -3 1 8 3969.02 385.648 1
 3 -1 -7 3499.61 334.178 1
 -3 1 7 3527.24 337.625 1
 3 -1 -6 1384.97 197.271 1
 -3 1 6 1450.72 203.935 1
 3 -1 -5 1358.98 186.261 1
 -3 1 5 1448.47 192.59 1
 3 -1 -4 2645.46 255.492 3
 -3 1 4 2745.3 246.325 1
 3 -1 -4 2650.57 242.034 1
 3 -1 -3 314.84 94.5129 3
 -3 1 3 290.964 87.2341 1
 -3 1 2 2282.18 192.724 1
 3 -1 -2 2604.83 221.093 3
 -3 1 1 2372.84 195.549 3
 3 -1 -1 2412.12 202.796 3
 3 -1 0 2658.55 161.194 2
 -3 1 0 2444.47 190.028 3
 3 -1 0 2758.49 206.285 3
 3 -1 1 176.053 47.0393 2
 -3 1 -1 229.89 53.8852 2
 3 -1 1 210.624 67.5143 3
 -3 1 -1 165.839 65.5124 3
 3 -1 2 627.831 94.7525 2
 -3 1 -2 717.024 109.993 3
 3 -1 2 619.361 108.843 3
 -3 1 -2 662.425 94.8259 2
 -3 1 -3 2024.21 186.765 2
 3 -1 3 2050.79 196.097 3
 -3 1 -3 2055.63 193.296 3
 -3 1 -4 535.015 116.439 3
 -3 1 -4 669.087 124.27 2
 -3 1 -4 585.125 115.497 1
 -3 1 -5 464.492 112.508 1
 -3 1 -5 364.181 108.94 3
 -3 1 -6 -65.4375 49.5834 1
 -3 1 -6 -84.8083 80.3972 3
 3 -1 6 24.1825 58.7176 1
 3 -1 7 1294.45 210.426 1
 -3 1 -7 1307.08 209.847 3
 -3 1 -7 1260.88 188.748 1
 3 -1 8 669.072 164.041 1
 -3 1 -8 454.118 122.593 1
 -3 1 -9 63.0404 66.3691 1
 3 -1 9 203.213 91.5954 1
 3 -1 10 2345.77 340.033 1
 3 -1 11 982.255 233.002 1
 3 -1 12 -0.46892 62.8819 1
 3 -1 13 848.209 253.268 1
 3 -1 14 342.514 206.334 1
 3 -1 15 2343.53 455.668 1
 3 -1 16 391.683 272.117 1
 -3 0 15 -24.1753 179.612 1
 -3 0 14 754.256 260.123 1
 -3 0 13 186.183 143.521 1
 -3 0 12 497.291 179.562 1
 -3 0 11 902.744 222.224 1
 -3 0 10 284.717 118.329 1
 -3 0 9 1631.85 258.369 1
 -3 0 8 1967.3 265.368 1
 3 0 -8 1868.96 256.911 1
 -3 0 7 646.296 144.848 1
 3 0 -7 576.328 131.915 1
 -3 0 6 480.876 121.39 1
 3 0 -6 748.107 145.368 1
 -3 0 5 4138 309.063 1
 3 0 -5 4057.87 307.619 1
 3 0 -4 98.0919 55.0734 1
 -3 0 4 129.63 64.8224 1
 3 0 -3 748.577 114.613 1
 -3 0 3 909.588 128.232 1
 -3 0 2 7240.97 311.08 1
 3 0 -2 7328.21 335.017 3
 3 0 -1 1217.4 127.496 3
 -3 0 1 1321.9 132.169 3
 3 0 0 1217.85 126.032 2
 3 0 0 1184.47 119.518 3
 -3 0 0 1128.57 115.609 3
 3 0 1 5502.81 241.57 3
 3 0 1 5536.67 256.381 2
 -3 0 -1 5402.32 237.109 3
 -3 0 -1 5480.77 254.253 2
 3 0 2 26.5201 44.5143 2
 -3 0 -2 34.6044 46.7643 2
 -3 0 -2 44.1259 47.7126 3
 3 0 2 23.0613 43.8222 3
 -3 0 -3 3415.35 229.909 1
 -3 0 -3 3419.61 223.229 3
 3 0 3 3892.27 270.309 2
 3 0 3 3487.4 231.402 3
 -3 0 -3 3448.57 254.319 2
 3 0 4 1056.43 148.2 1
 -3 0 -4 2010.48 223.995 2
 -3 0 -4 1862.09 201.146 1
 -3 0 -4 1089.4 146.577 3
 -3 0 -5 21.8732 37.7532 1
 3 0 5 59.8585 64.0747 1
 -3 0 -5 160.305 91.6188 2
 -3 0 -6 2327.84 276.473 2
 -3 0 -6 2128.58 220.076 1
 3 0 6 1990.93 233.426 1
 3 0 7 622.525 141.174 1
 -3 0 -7 778.413 141.826 1
 -3 0 -8 -24.5073 54.3425 1
 3 0 8 -109.795 69.0535 1
 -3 0 -9 1213.88 204.858 1
 3 0 9 1414.41 237.041 1
 3 0 10 1594.82 269.534 1
 3 0 11 166.626 102.882 1
 3 0 12 417.086 162.943 1
 3 0 13 186.661 140.51 1
 3 0 14 380.811 204.295 1
 3 0 15 765.624 269.463 1
 3 0 16 428.136 267.241 1
 -3 -1 15 462.891 251.667 1
 -3 -1 14 -42.0875 127.877 1
 -3 -1 13 88.4379 117.61 1
 -3 -1 12 991.107 244.131 1
 -3 -1 11 226.489 114.084 1
 -3 -1 10 428.229 140.132 1
 -3 -1 9 1197.08 218.677 1
 -3 -1 8 415.199 122.392 1
 3 1 -8 559.156 141.621 1
 3 1 -7 297.977 95.2319 1
 -3 -1 7 422.873 117.229 1
 -3 -1 6 2469.03 275.805 1
 3 1 -6 2233.88 237.486 1
 -3 -1 5 425.006 104.05 1
 3 1 -5 438.215 103.17 1
 -3 -1 4 1100.02 145.39 1
 3 1 -4 1068.73 142.773 1
 3 1 -3 1944.72 169.736 1
 -3 -1 3 1900.78 166.63 1
 -3 -1 2 121.074 48.8865 1
 3 1 -2 148.034 54.1873 1
 3 1 -1 143.721 51.216 3
 -3 -1 1 208.07 49.1311 1
 3 1 0 2477.16 198.228 2
 3 1 0 2704.37 142.888 3
 -3 -1 0 2737.85 140.929 3
 3 1 1 694.777 72.2156 3
 -3 -1 -1 701.607 72.0108 3
 -3 -1 -1 565.586 98.8554 2
 3 1 1 629.141 105.288 2
 3 1 2 1550.7 119.306 3
 3 1 2 1579.54 168.114 2
 -3 -1 -2 1656.82 169.967 2
 -3 -1 -2 1527.01 116.602 3
 -3 -1 -2 1625.57 120.904 1
 -3 -1 -3 1275.21 128.125 3
 -3 -1 -3 1406.06 126.16 1
 3 1 3 1390.34 135.438 1
 3 1 3 1317.35 167.554 2
 -3 -1 -3 1429.29 175.975 2
 -3 -1 -4 749.753 141.983 2
 -3 -1 -4 777.336 106.411 1
 3 1 4 791.129 117.769 1
 -3 -1 -5 1429.76 160.687 1
 3 1 5 1564.18 177.77 1
 -3 -1 -5 1394.89 203.625 2
 -3 -1 -6 2624.46 235.383 1
 3 1 6 2989.7 264.079 1
 -3 -1 -6 2809.2 306.83 2
 3 1 7 336.174 101.159 1
 -3 -1 -7 193.113 71.6267 1
 -3 -1 -7 332.252 130.399 2
 -3 -1 -8 1470.21 254.158 2
 -3 -1 -8 1164.31 180.707 1
 3 1 8 1271.82 204.879 1
 3 1 9 1288.55 216.185 1
 -3 -1 -9 1336.91 212.631 1
 3 1 10 71.9235 54.9796 1
 3 1 11 972.534 218.359 1
 3 1 12 737.067 201.92 1
 3 1 13 -3.74044 110.274 1
 3 1 14 400.385 193.852 1
 3 1 15 668.283 255.321 1
 -3 -2 15 -122.297 212.622 1
 -3 -2 14 123.771 160.646 1
 -3 -2 13 540.996 206.65 1
 -3 -2 12 606.499 199.273 1
 -3 -2 11 -38.3446 69.9572 1
 -3 -2 10 647.829 179.327 1
 -3 -2 9 500.185 148.062 1
 -3 -2 8 579.32 147.436 1
 3 2 -8 498.29 130.893 1
 3 2 -7 2424.6 260.855 1
 -3 -2 7 2371.39 268.973 1
 3 2 -6 649.538 126.451 1
 -3 -2 6 683.774 135.311 1
 3 2 -5 900.557 137.488 1
 -3 -2 5 885.894 144.675 1
 3 2 -4 1519.87 163.573 1
 -3 -2 4 1693.54 177.401 1
 3 2 -3 185.436 57.7123 1
 -3 -2 3 186.677 59.5505 1
 -3 -2 2 505.864 74.2678 1
 3 2 -2 505.721 74.9328 1
 -3 -2 1 3095.26 138.885 1
 3 2 -1 3017.5 136.961 1
 3 2 0 1416.53 166.42 2
 3 2 0 1570.92 82.2351 3
 -3 -2 -1 3731.72 254.571 2
 3 2 1 4137.12 267.039 2
 -3 -2 -2 1368.76 91.3307 3
 3 2 2 1500.78 95.9867 1
 -3 -2 -2 1389.62 86.8605 1
 3 2 2 1444.23 171.234 2
 -3 -2 -2 1289.77 160.772 2
 -3 -2 -3 830.166 87.7461 1
 3 2 3 846.797 92.1179 1
 -3 -2 -3 776.503 135.279 2
 3 2 3 825.943 142.024 2
 -3 -2 -4 403.096 74.3871 1
 3 2 4 364.974 77.3354 1
 -3 -2 -4 489.444 118.686 2
 3 2 4 528.488 129.588 2
 -3 -2 -5 3116.99 223.292 1
 -3 -2 -5 3002.79 305.676 2
 3 2 5 3166.5 237.883 1
 -3 -2 -6 2154.71 206.185 1
 3 2 6 2193.04 217.281 1
 -3 -2 -6 1796.41 253.406 2
 -3 -2 -7 431.216 107.809 1
 -3 -2 -7 166.384 78.5039 2
 3 2 7 290.934 95.894 1
 -3 -2 -8 2246.59 247.429 1
 3 2 8 2352.56 264.193 1
 -3 -2 -8 2125.15 309.742 2
 -3 -2 -9 87.1141 62.0619 1
 3 2 9 83.6488 55.7235 1
 3 2 10 1206.35 225.131 1
 3 2 11 1479.37 256.647 1
 3 2 12 623.5 184.151 1
 3 2 13 47.0155 97.5618 1
 3 2 14 385.126 191.641 1
 3 2 15 -70.6371 168.031 1
 3 2 16 186.254 209.591 1
 -3 -3 15 33.4998 180.466 1
 -3 -3 13 870.14 258.585 1
 -3 -3 12 48.9307 98.7093 1
 -3 -3 11 1333.43 269.193 1
 -3 -3 10 -23.5513 37.9153 1
 -3 -3 9 176.236 95.5708 1
 -3 -3 8 1458.48 240.443 1
 3 3 -8 994.332 184.572 1
 -3 -3 7 2362.25 271.554 1
 3 3 -7 2009.96 241.648 1
 3 3 -6 37.3719 24.6372 1
 -3 -3 6 25.2638 40.5076 1
 3 3 -5 598.834 113.798 1
 -3 -3 5 114.226 44.832 1
 3 3 -4 362.441 81.7211 1
 -3 -3 4 388.739 90.6808 1
 3 3 -3 838.39 108.53 1
 -3 -3 3 949.59 121.86 1
 3 3 -2 1659.59 129.273 1
 -3 -3 2 1594.92 133.068 1
 -3 -3 1 2633.59 139.57 1
 3 3 -1 2690.14 130.399 1
 3 3 0 247.739 91.3877 2
 3 3 1 976.831 147.381 2
 -3 -3 -1 741.948 126.948 2
 -3 -3 -2 398.617 48.2056 1
 3 3 2 414.481 106.396 2
 3 3 2 409.926 49.2046 1
 -3 -3 -2 511.78 115.341 2
 3 3 3 428.619 112.378 2
 -3 -3 -3 390.162 104.174 2
 3 3 3 369.887 62.0914 1
 -3 -3 -3 345.361 59.2474 1
 3 3 4 4515.12 357.208 2
 -3 -3 -4 4588.49 237.029 1
 -3 -3 -4 4232.15 344.17 2
 3 3 4 4401.65 237.053 1
 -3 -3 -5 2879.72 215.151 1
 -3 -3 -5 2935.38 308.747 2
 3 3 5 2793.6 217.667 1
 -3 -3 -6 297.675 79.9508 1
 3 3 6 242.571 77.5898 1
 -3 -3 -6 117.648 64.5061 2
 -3 -3 -7 1588.64 193.866 1
 -3 -3 -7 1461.93 243.955 2
 3 3 7 1404.11 188.289 1
 -3 -3 -8 14.615 24.8083 1
 3 3 8 -62.8728 50.6953 1
 -3 -3 -9 870.234 165.716 1
 3 3 9 1741 252.35 1
 3 3 10 2944.21 339.283 1
 3 3 11 1264.21 239.361 1
 3 3 12 108.439 94.4755 1
 3 3 13 496.94 184.739 1
 3 3 14 -2.48692 112.743 1
 3 3 15 524.868 208.436 1
 3 3 16 4474.5 611.693 1
 -3 -4 15 961.974 342.997 1
 -3 -4 14 430.394 232.68 1
 -3 -4 13 45.8679 122.466 1
 -3 -4 12 267.313 153.429 1
 -3 -4 11 517.936 180.209 1
 -3 -4 10 114.001 91.6059 1
 -3 -4 9 687.491 176.549 1
 3 4 -8 3042.9 320.28 1
 -3 -4 8 2740.63 324.326 1
 3 4 -7 862.146 159.225 1
 -3 -4 7 776.411 164.673 1
 -3 -4 6 552.422 129.544 1
 3 4 -6 484.895 111.555 1
 -3 -4 5 286.038 91.1445 1
 3 4 -5 306.288 81.5457 1
 -3 -4 4 1649.41 192.118 1
 3 4 -4 1629.44 174.453 1
 3 4 -3 10109.4 386.399 1
 -3 -4 3 9967.84 420.173 1
 3 4 -2 3123.08 191.555 1
 -3 -4 2 3296.8 216.845 1
 3 4 -1 1713.5 128.246 3
 3 4 -1 1775.47 128.282 1
 3 4 0 1902.33 216.564 2
 3 4 0 1849.55 103.75 3
 3 4 1 289.319 37.9222 3
 3 4 1 340.144 102.711 2
 -3 -4 -1 268.988 85.8926 2
 -3 -4 -1 266.294 37.9245 3
 3 4 2 312.748 98.8372 2
 -3 -4 -2 395.819 110.605 2
 -3 -4 -2 318.736 48.59 3
 3 4 2 273.189 50.571 1
 -3 -4 -3 2952.09 173.478 1
 -3 -4 -3 3083.01 285.015 2
 3 4 3 2965.13 281.889 2
 3 4 3 3025.73 175.449 1
 -3 -4 -4 8754.52 343.218 1
 3 4 4 8849.44 343.839 1
 3 4 4 8345.99 502.182 2
 -3 -4 -4 8497.76 503.014 2
 -3 -4 -5 139.479 76.7732 2
 3 4 5 215.83 71.9535 1
 -3 -4 -5 225.452 67.1633 1
 3 4 5 174.019 104.821 2
 -3 -4 -6 560.493 147.054 2
 -3 -4 -6 565.682 111.305 1
 3 4 6 484.735 106.467 1
 -3 -4 -7 361.903 98.9477 1
 3 4 7 438.955 109.076 1
 -3 -4 -7 336.484 129.206 2
 -3 -4 -8 1220.24 213.183 2
 -3 -4 -8 827.156 153.814 1
 3 4 8 830.487 157.292 1
 3 4 9 2097.62 267.42 1
 -3 -4 -9 1683.63 234.247 1
 3 4 10 829.841 179.42 1
 3 4 11 -22.1254 51.6186 1
 3 4 12 773.134 198.855 1
 3 4 13 -8.35916 100.036 1
 3 4 14 651.115 229.63 1
 3 4 15 1430.05 337.924 1
 3 4 16 583.958 280.157 1
 -3 -5 15 658.284 325.51 1
 -3 -5 14 601.109 267.199 1
 -3 -5 13 -12.2224 120.431 1
 -3 -5 12 433.271 198.461 1
 -3 -5 11 89.0996 113.646 1
 -3 -5 10 617.585 183.883 1
 -3 -5 9 2238.81 327.604 1
 -3 -5 8 975.697 207.456 1
 3 5 -8 1068.76 198.808 1
 3 5 -7 50.7536 57.4751 1
 -3 -5 7 112.85 64.8192 1
 3 5 -6 587.519 128.256 1
 -3 -5 6 578.51 140.105 1
 3 5 -5 622.736 120.841 1
 -3 -5 5 502.839 116.967 1
 -3 -5 4 3472.47 296.317 1
 3 5 -4 3537.71 267.496 1
 3 5 -3 9291.59 399.246 1
 3 5 -3 9016.36 411.149 3
 3 5 -2 6258.1 307.882 1
 3 5 -2 5707.95 287.684 3
 3 5 -1 519.208 83.719 3
 3 5 -1 535.456 93.8643 1
 -3 -5 0 1923.29 136.89 3
 3 5 0 1906.62 132.918 3
 3 5 0 1749.69 207.066 2
 3 5 1 88.6038 37.3491 3
 3 5 1 80.8336 66.0315 2
 -3 -5 -1 33.2787 55.3705 2
 -3 -5 -1 103.275 38.8362 3
 3 5 2 1185.41 112.027 1
 -3 -5 -2 1164.75 109.293 3
 3 5 2 1147.97 178.149 2
 -3 -5 -2 1209.04 184.937 2
 -3 -5 -3 5353.81 251.45 3
 3 5 3 6208.42 281.551 1
 3 5 3 5623.76 403.521 2
 -3 -5 -3 5613.73 403.181 2
 3 5 4 1580.28 158.865 1
 -3 -5 -4 1450.25 152.553 3
 3 5 4 1359.73 216.772 2
 -3 -5 -4 1421.37 215.426 2
 -3 -5 -5 17.7202 27.5981 2
 -3 -5 -5 198.802 71.0533 1
 3 5 5 135.466 58.4143 1
 3 5 5 234.518 125.501 2
 -3 -5 -6 193.091 96.6705 2
 3 5 6 234.227 77.4863 1
 -3 -5 -6 238.929 75.7399 1
 3 5 7 499.74 121.274 1
 -3 -5 -7 518.497 115.875 1
 -3 -5 -7 552.269 170.126 2
 3 5 8 1615.45 220.941 1
 -3 -5 -8 1715.12 306.339 2
 -3 -5 -8 1569.05 218.057 1
 -3 -5 -9 1257.28 205.685 1
 3 5 9 1333.99 212.906 1
 3 5 10 17.8625 40.2616 1
 3 5 11 788.543 190.95 1
 3 5 12 264.096 128.136 1
 3 5 13 303.153 152.032 1
 3 5 14 510.383 209.133 1
 3 5 15 603.45 256.601 1
 3 5 16 -95.6991 200.788 1
 -3 -6 13 755.732 281.2 1
 -3 -6 12 -1.67702 135.526 1
 -3 -6 11 2563.77 415.568 1
 -3 -6 10 886.266 231.152 1
 -3 -6 9 317.671 127.928 1
 -3 -6 8 475.28 149.229 1
 -3 -6 7 800.464 183.179 1
 3 6 -7 2790.49 299.109 1
 3 6 -6 54.304 53.4285 1
 -3 -6 6 129.925 83.5252 1
 3 6 -5 2160.08 236.127 1
 3 6 -5 2083.7 248.553 3
 3 6 -4 2081.4 231.307 3
 3 6 -4 2071.43 217.957 1
 3 6 -3 1190.71 166.218 3
 3 6 -3 1268.23 166.514 1
 3 6 -2 220.109 76.9009 3
 3 6 -2 240.784 69.2359 1
 3 6 -1 2313.53 269.4 2
 -3 -6 1 2377.79 197.641 3
 3 6 -1 2176.22 183.162 3
 -3 -6 0 437.692 89.5689 3
 3 6 0 358.97 122.539 2
 3 6 0 284.087 71.0915 3
 -3 -6 -1 2400.72 264.707 2
 3 6 1 2457.4 264.178 2
 -3 -6 -1 2230.21 167.217 3
 3 6 1 2058.33 161.579 3
 3 6 2 5024.53 251.356 3
 -3 -6 -2 4917.5 251.892 3
 3 6 2 4977.94 379.113 2
 -3 -6 -2 4918.76 378.17 2
 -3 -6 -3 101.264 69.9617 2
 3 6 3 151.091 80.1086 2
 -3 -6 -3 161.614 63.6246 3
 3 6 3 168.066 63.5154 1
 -3 -6 -4 159.003 73.4649 2
 -3 -6 -4 152.58 63.6862 3
 3 6 4 235.62 69.4724 1
 3 6 4 202.521 94.9028 2
 -3 -6 -5 198.831 103.936 2
 -3 -6 -5 248.434 81.5615 3
 3 6 5 410.178 134.802 2
 -3 -6 -6 57.5827 62.4135 3
 -3 -6 -6 47.6178 72.3925 2
 -3 -6 -7 1672.43 222.805 1
 3 6 7 1477.85 203.759 1
 -3 -6 -7 1819.42 292.913 2
 -3 -6 -8 1272.62 271.538 2
 -3 -6 -8 1187.73 193.836 1
 3 6 8 1546.66 222.089 1
 3 6 9 -19.9805 37.5469 1
 -3 -6 -9 -29.0835 48.2365 1
 3 6 10 470.723 140.289 1
 3 6 11 224.807 118.625 1
 3 6 12 340.826 145.473 1
 3 6 13 223.467 149.844 1
 3 6 14 473.151 202.411 1
 3 6 15 31.0908 165.322 1
 3 6 16 139.595 228.691 1
 -3 -7 14 631.266 308.189 1
 3 7 -14 285.085 227.803 3
 -3 -7 13 454.46 244.911 1
 3 7 -13 346.722 227.041 3
 3 7 -12 4.39986 132.073 3
 -3 -7 12 105.179 152.859 1
 -3 -7 11 890.999 262.827 1
 3 7 -11 456.705 192.513 3
 -3 -7 10 840.709 238.567 1
 3 7 -10 694.206 210.819 3
 3 7 -9 -100.815 115.522 3
 -3 -7 9 89.3723 93.6442 1
 3 7 -8 672.421 191.342 3
 3 7 -7 223.023 111.613 1
 3 7 -7 95.3194 93.5144 3
 3 7 -6 564.394 141.989 1
 3 7 -6 559.551 155.182 3
 3 7 -5 1613.34 223.217 1
 3 7 -5 1630.57 231.221 3
 3 7 -4 495.742 120.242 1
 3 7 -4 519.764 130.357 3
 3 7 -3 204.704 95.3956 3
 3 7 -3 160.469 66.0891 1
 3 7 -2 1331.4 177.49 1
 3 7 -2 1534.49 184.518 3
 3 7 -2 1751.72 258.19 2
 3 7 -1 235.671 72.5346 3
 3 7 -1 217.483 107.382 2
 -3 -7 1 234.14 80.2786 3
 -3 -7 0 1159.35 146.018 3
 3 7 0 1227.98 147.995 3
 3 7 0 1455.8 219.52 2
 -3 -7 -1 3455.29 329.995 2
 3 7 1 3244.52 228.373 3
 -3 -7 -1 3367.64 234.939 3
 3 7 1 3504.17 329.62 2
 3 7 2 641.228 150.971 2
 -3 -7 -2 700.124 113.571 3
 3 7 2 764.669 119.383 3
 -3 -7 -2 515.184 129.893 2
 3 7 3 312.689 108.227 2
 -3 -7 -3 320.77 91.2374 3
 3 7 3 275.53 77.9199 1
 -3 -7 -3 380.642 111.426 2
 -3 -7 -4 2814.97 245.249 3
 3 7 4 2691.85 317.165 2
 -3 -7 -4 2981.91 331.49 2
 3 7 4 3124.99 255.795 1
 -3 -7 -5 -16.2188 57.8681 2
 3 7 5 175.203 63.8704 1
 3 7 5 -2.80184 68.2783 2
 -3 -7 -5 137.162 65.2471 3
 -3 -7 -6 1213.07 188.012 3
 -3 -7 -6 1627.29 272.096 2
 3 7 6 1226.18 180.401 1
 -3 -7 -7 1757.92 238.456 3
 3 7 7 1626.63 218.557 1
 -3 -7 -7 1782.33 303.827 2
 -3 -7 -8 67.4988 164.735 2
 3 7 8 9.03969 26.5404 1
 -3 -7 -8 54.9523 71.393 3
 -3 -7 -9 456.944 142.623 3
 3 7 9 594.542 150.369 1
 3 7 10 558.534 158.864 1
 3 7 11 -67.7664 84.6611 1
 3 7 12 146.155 113.192 1
 3 7 13 341.253 176.781 1
 3 7 14 105.751 165.431 1
 3 7 15 49.5285 170.736 1
 3 8 -14 417.504 255.218 3
 3 8 -13 4.38808 149.607 3
 3 8 -12 232.078 190.232 3
 3 8 -11 175.239 146.558 3
 3 8 -10 23.1079 125.72 3
 3 8 -9 1017.42 241.956 3
 3 8 -8 343.549 152.694 3
 3 8 -7 83.7587 106.756 3
 3 8 -6 963.71 189.206 1
 3 8 -6 926.716 195.004 3
 3 8 -5 104.788 82.8516 1
 3 8 -5 40.3393 66.4433 3
 3 8 -4 252.949 102.881 3
 3 8 -4 83.7929 65.7637 1
 3 8 -3 2015.57 238.554 3
 3 8 -3 1915.54 240.535 1
 3 8 -2 1865.13 268.253 2
 3 8 -2 1985.66 223.681 3
 3 8 -1 138.015 70.8644 3
 3 8 -1 149.711 90.4256 2
 -3 -8 1 123.031 75.0876 3
 3 8 0 1350.93 169.649 3
 -3 -8 0 1423.88 177.03 3
 3 8 0 1332.85 214.913 2
 3 8 1 398.958 118.66 2
 -3 -8 -1 400.212 98.254 3
 3 8 1 372.96 97.1062 3
 3 8 2 150.575 80.5663 2
 3 8 2 132.995 71.5281 3
 -3 -8 -2 181.924 74.4463 3
 -3 -8 -2 204.42 82.2572 2
 3 8 3 1914.87 204.948 3
 3 8 3 1807.62 256.869 2
 -3 -8 -3 1655.37 196.216 3
 -3 -8 -3 1880.57 262.971 2
 3 8 4 749.399 138.215 1
 -3 -8 -4 722.758 169.649 2
 -3 -8 -4 699.742 137.725 3
 3 8 4 1294.55 252.274 2
 3 8 5 441.575 142.444 2
 3 8 5 414.636 110.951 1
 -3 -8 -5 366.072 139.95 2
 -3 -8 -5 348.752 102.46 3
 -3 -8 -6 1508.27 218.408 3
 3 8 6 1734.07 229.488 1
 -3 -8 -6 1767.32 297.129 2
 -3 -8 -7 128.332 93.616 3
 -3 -8 -7 60.04 113.978 2
 3 8 7 78.2673 48.689 1
 -3 -8 -8 260.62 112.308 3
 3 8 8 290.263 99.719 1
 3 8 9 300.663 111.405 1
 3 8 10 532.633 162.386 1
 3 8 11 164.016 105.983 1
 3 8 12 461.95 174.325 1
 3 8 13 182.999 153.164 1
 3 8 14 178.678 180.467 1
 3 8 15 49.3888 230.724 1
 3 9 -13 157.529 185.569 3
 3 9 -12 80.7066 178.758 3
 3 9 -11 -159.856 143.918 3
 3 9 -10 610.225 206.511 3
 3 9 -9 1379.82 295.052 3
 3 9 -8 2.5794 87.3807 3
 3 9 -7 405.585 160.63 3
 3 9 -6 525.179 165.214 3
 3 9 -5 54.0482 93.1026 3
 3 9 -5 32.9673 98.6454 1
 3 9 -4 699.066 166.053 3
 3 9 -4 750.335 172.531 1
 3 9 -3 1502.58 266.032 2
 3 9 -3 1444.17 218.966 3
 3 9 -3 1293.67 215.434 1
 3 9 -2 55.8467 53.0475 2
 3 9 -2 59.5784 72.0982 3
 -3 -9 2 -10.9587 56.7732 3
 3 9 -1 434.17 130.941 2
 -3 -9 1 212.236 87.2712 3
 3 9 -1 271.535 100.109 3
 -3 -9 0 352.132 103.437 3
 3 9 0 389.21 129.844 2
 3 9 0 350.946 103.648 3
 3 9 1 252.859 98.5163 2
 3 9 1 179.896 84.3913 3
 -3 -9 -1 221.339 88.1215 3
 -3 -9 -2 1939.27 267.163 2
 3 9 2 1765.46 210.267 3
 -3 -9 -2 1894.08 218.577 3
 3 9 2 1898.09 265.053 2
 3 9 3 1157.22 177.02 3
 -3 -9 -3 1050.58 203.962 2
 -3 -9 -3 1470.19 198.068 3
 3 9 3 949.166 192.62 2
 3 9 4 55.542 50.2159 1
 3 9 4 14.2934 39.1249 2
 3 9 5 665.142 148.311 1
 -3 -9 -5 635.678 183.266 2
 -3 -9 -5 480.467 128.031 3
 3 9 5 406.983 138.32 2
 -3 -9 -6 209.391 152.752 2
 3 9 6 372.825 115.278 1
 -3 -9 -6 457.447 140.335 3
 -3 -9 -7 422.875 195.24 2
 -3 -9 -7 195.342 96.1918 3
 3 9 7 248.624 94.3452 1
 3 9 8 623.414 156.974 1
 3 9 9 919.679 200.12 1
 3 9 10 66.7182 78.6777 1
 3 9 11 470.007 167.884 1
 3 9 12 24.7421 109.925 1
 3 9 13 262.013 186.049 1
 3 9 14 235.349 198.172 1
 3 10 -13 118.964 157.834 3
 3 10 -12 118.393 186.507 3
 3 10 -11 369.203 190.986 3
 3 10 -10 904.514 275.12 3
 3 10 -9 517.571 201.453 3
 3 10 -8 99.9462 94.9816 3
 3 10 -7 403.366 171.602 3
 3 10 -6 -41.9172 87.6255 3
 3 10 -5 877.296 198.763 3
 3 10 -4 1257.02 266.049 2
 3 10 -4 1364.04 244.137 1
 3 10 -3 199.546 101.331 3
 3 10 -3 44.6374 84.8936 2
 3 10 -3 265.918 133.393 1
 3 10 -2 346.143 119.871 3
 3 10 -2 411.532 131.952 2
 -3 -10 2 604.684 160.481 3
 3 10 -1 343.448 118.22 2
 3 10 -1 262.136 107.786 3
 -3 -10 1 367.159 121.868 3
 3 10 0 366.83 124.803 2
 -3 -10 0 265.841 109.335 3
 3 10 0 327.812 110.708 3
 3 10 1 1612.79 254.431 2
 3 10 1 1567.1 214.606 3
 -3 -10 -1 1722.2 228.024 3
 3 10 2 2190.05 296.793 2
 -3 -10 -2 1864.37 271.451 2
 3 10 2 1894.68 234.618 3
 -3 -10 -2 2091.43 252.085 3
 3 10 3 201.241 97.492 2
 -3 -10 -3 255.742 112.875 2
 3 10 3 302.667 103.148 3
 -3 -10 -3 228.728 100.011 3
 3 10 4 296.793 103.061 1
 -3 -10 -4 264.533 113.418 3
 3 10 4 134.54 86.4812 2
 -3 -10 -4 423.185 165.622 2
 -3 -10 -5 63.561 57.3982 3
 3 10 5 100.152 39.7499 1
 -3 -10 -5 31.8714 120.801 2
 -3 -10 -6 84.3089 174.841 2
 -3 -10 -6 26.4305 77.7996 3
 3 10 6 82.6994 65.4073 1
 3 10 7 839.616 179.472 1
 3 10 8 882.717 199.655 1
 3 10 9 283.666 127.859 1
 3 10 10 87.5814 94.1 1
 3 10 11 5.46923 105.29 1
 3 10 12 16.5915 132.354 1
 3 10 13 464.269 216.448 1
 3 10 14 314.559 229.987 1
 3 11 -12 1064.8 445.218 3
 3 11 -11 583.808 257.055 3
 3 11 -10 204.266 180.22 3
 3 11 -9 -23.8463 138.755 3
 3 11 -8 3275.35 445.296 3
 3 11 -7 -56.5575 111.416 3
 3 11 -6 227.211 131.573 3
 3 11 -5 1608.56 303.318 2
 3 11 -5 1345.64 260.055 3
 3 11 -4 364.994 139.114 3
 3 11 -3 93.8023 80.1558 2
 3 11 -3 -4.13401 82.3234 3
 3 11 -2 850.091 191.533 3
 -3 -11 2 847.341 201.117 3
 3 11 -2 910.348 208.298 2
 3 11 -1 40.6001 61.6644 2
 -3 -11 1 82.5204 93.8594 3
 3 11 -1 1.84727 84.2373 3
 -3 -11 0 2023.05 266.917 3
 3 11 0 2245.4 310.05 2
 3 11 0 2243.92 280.456 3
 3 11 1 2031.91 263.79 3
 -3 -11 -1 2142.31 277.689 3
 3 11 1 2259.84 310.783 2
 3 11 2 401.842 140.818 2
 3 11 2 368.326 125.374 3
 3 11 3 62.0367 80.1036 2
 3 11 3 41.3247 71.5863 3
 -3 -11 -3 61.696 69.0669 3
 -3 -11 -3 34.1838 127.884 2
 -3 -11 -4 -33.5853 157.364 2
 -3 -11 -4 227.93 136.893 3
 3 11 4 101.659 80.3148 1
 3 11 5 20.138 56.5161 1
 -3 -11 -5 37.9311 79.3984 3
 -3 -11 -5 312.354 180.266 2
 3 11 5 292.59 127.655 2
 3 11 6 538.016 147.553 1
 3 11 7 765.511 184.251 1
 3 11 8 56.1755 77.6869 1
 3 11 9 -70.0471 93.9578 1
 3 11 10 88.2861 113.237 1
 3 11 11 -82.7622 128.975 1
 3 11 12 2083.08 377.425 1
 3 11 13 580.062 257.653 1
 3 12 -12 217.613 229.91 3
 3 12 -11 252.975 184.462 3
 3 12 -10 -276.171 171.618 3
 3 12 -9 31.0026 129.063 3
 3 12 -8 -115.952 132.936 3
 3 12 -7 45.9958 128.256 3
 3 12 -6 734.238 230.755 2
 3 12 -6 551.305 191.127 3
 3 12 -5 321.993 159.568 3
 3 12 -5 143.364 110.723 2
 3 12 -4 -18.6099 73.2203 2
 3 12 -4 12.6366 107.228 3
 3 12 -3 613.583 187.164 3
 3 12 -2 -18.9973 70.7103 2
 3 12 -2 18.4732 82.5912 3
 3 12 -1 950.215 212.387 3
 -3 -12 1 689.673 181.251 3
 3 12 -1 930.712 210.559 2
 3 12 0 1700.51 263.654 3
 -3 -12 0 1438.28 247.475 3
 3 12 0 1686.9 275.152 2
 3 12 1 368.148 140.748 2
 3 12 1 348.339 131.777 3
 -3 -12 -1 240.47 126.132 3
 3 12 2 59.1312 84.7061 2
 -3 -12 -2 57.7818 87.0876 3
 3 12 2 85.1284 80.5709 3
 3 12 3 534.32 164.518 3
 3 12 3 430.414 160.061 2
 3 12 4 154.281 105.322 1
 -3 -12 -4 42.4608 169.384 2
 3 12 4 -97.4307 85.6002 2
 3 12 5 467.839 142.393 1
 -3 -12 -5 722.157 255.944 2
 3 12 6 861.872 196.588 1
 3 12 7 344.203 134.028 1
 3 12 8 7.99484 76.8125 1
 3 12 9 290.719 148.284 1
 3 12 11 357.824 196.831 1
 3 12 12 460.47 239.99 1
 3 13 -11 -14.3953 156.166 3
 3 13 -10 114.368 195.639 3
 3 13 -9 898.09 368.116 3
 3 13 -8 -44.9732 115.391 3
 3 13 -7 760.803 264.805 2
 3 13 -6 161.219 134.154 3
 3 13 -6 153.212 150.774 2
 3 13 -5 -29.6066 112.271 3
 3 13 -4 401.451 178.649 2
 3 13 -4 429.973 176.643 3
 3 13 -3 33.5961 121.435 2
 3 13 -3 127.552 147.159 3
 3 13 -2 319.1 149.506 2
 3 13 -2 37.1789 90.487 3
 3 13 -1 474.558 169.101 2
 3 13 -1 392.396 155.95 3
 3 13 0 236.053 131.855 2
 3 13 0 102.793 103.971 3
 3 13 1 149.853 121.205 2
 3 13 1 24.263 87.4091 3
 3 13 2 550.08 165.092 3
 3 13 2 769.645 209.792 2
 3 13 3 398.764 149.349 3
 3 13 3 -112.527 109.888 2
 3 13 4 251.144 119.902 1
 3 13 4 959.978 229.595 2
 3 13 5 654.2 172.385 1
 3 13 6 85.3362 91.5952 1
 3 13 7 -80.4908 125.003 1
 3 13 8 182.473 130.912 1
 3 13 9 259.125 160.909 1
 3 13 10 -123.036 176.699 1
 3 13 11 498.616 242.67 1
 3 14 -10 63.4703 175.033 3
 3 14 -9 279.768 272.893 2
 3 14 -9 -73.784 145.438 3
 3 14 -8 -80.5055 235.2 2
 3 14 -8 133.792 149.7 3
 3 14 -7 442.633 266.414 2
 3 14 -7 -1.00865 121.24 3
 3 14 -6 2423.94 438.779 2
 3 14 -6 119.436 149.805 3
 3 14 -5 70.3605 156.607 2
 3 14 -5 221.542 192.102 3
 3 14 -4 303.317 181.349 2
 3 14 -4 396.62 219.989 3
 3 14 -3 -1.31435 135.723 2
 3 14 -3 61.4767 120.647 3
 3 14 -2 388.018 165.094 3
 3 14 -2 423.319 185.545 2
 3 14 -1 214.508 146.973 2
 3 14 -1 85.3544 85.2259 3
 3 14 0 -108.914 103.2 3
 3 14 0 -55.9672 124.098 2
 3 14 1 497.877 192.232 2
 3 14 1 525.729 172.705 3
 3 14 2 256.246 128.393 3
 3 14 2 219.665 151.256 2
 3 14 3 -282.617 165.717 2
 3 14 3 -32.9945 103.68 3
 3 14 4 547.613 160.414 1
 3 14 5 203.704 112.535 1
 3 14 6 133.868 160.252 1
 3 14 7 324.227 163.428 1
 3 14 8 72.8475 135.49 1
 3 14 9 162.421 176.306 1
 3 15 -9 98.9378 227.637 3
 3 15 -8 88.5387 162.099 3
 3 15 -6 204.936 214.124 3
 3 15 -5 9.37298 189.34 3
 3 15 -4 -352.719 168.504 3
 3 15 -3 112.921 183.155 3
 3 15 -2 100.413 137.74 3
 3 15 -1 797.116 210.501 3
 3 15 0 221.32 139.211 3
 3 15 1 187.437 116.523 3
 3 15 2 41.822 95.529 3
 3 15 3 170.275 121.008 3
 3 15 4 279.934 132.713 1
 3 15 5 50.8705 90.1851 1
 3 15 6 4610.28 512.632 1
 3 15 7 378.566 201.977 1
 3 15 8 -17.8986 166.514 1
 3 15 9 -37.5051 211.574 1
 3 16 -7 -1.17977 217.883 3
 3 16 -6 293.654 214.134 3
 3 16 -5 251.675 190.174 3
 3 16 -4 3.07111 96.8673 3
 3 16 -3 -50.019 122.485 3
 3 16 -2 -0.47283 89.1874 3
 3 16 -1 78.5468 119.573 3
 3 16 0 273.866 153.232 3
 3 16 1 -185.828 123.554 3
 3 16 2 189.085 118.175 3
 3 16 3 450.71 181.87 1
 3 16 4 290.28 160.341 1
 3 16 6 124.103 161.679 1
 3 16 7 49.401 173.156 1
 3 17 3 493.958 201.195 1
 3 17 4 369.488 183.216 1
 -4 13 2 403.111 210.71 3
 -4 13 1 -65.3299 106.834 3
 -4 13 0 186.782 127.279 3
 -4 13 -1 211.114 191.672 3
 -4 13 -2 21.0339 112.378 3
 -4 13 -3 307.387 204.1 3
 -4 13 -4 113.917 225.49 3
 -4 12 4 859.33 241.003 1
 -4 12 3 273.922 152.644 3
 -4 12 2 118.214 155.784 3
 -4 12 1 260.742 208.945 3
 -4 12 0 596.752 248.015 3
 -4 12 -1 81.2518 167.685 3
 -4 12 -2 150.749 183.619 3
 -4 12 -3 192.487 194.819 3
 -4 12 -4 8.49239 113.15 3
 -4 12 -5 155.705 182.648 3
 -4 12 -6 246.876 204.851 3
 -4 12 -7 88.5232 176.954 3
 -4 11 6 152.749 123.131 1
 -4 11 4 2253.12 381.438 1
 -4 11 3 -77.9339 111.392 3
 -4 11 2 208.921 154.71 3
 -4 11 1 1696.86 375.294 3
 -4 11 0 199.98 167.599 3
 -4 11 -1 134.749 126.144 3
 -4 11 -2 766.85 253.914 3
 -4 11 -3 45.1231 136.884 3
 -4 11 -4 313.309 195.433 3
 -4 11 -5 466.69 221.227 3
 -4 11 -6 149.113 188.708 3
 -4 11 -7 155.001 185.427 3
 -4 11 -8 243.313 204.256 3
 -4 11 -9 50.0682 157.525 3
 -4 10 8 574.71 231.584 1
 -4 10 7 784.823 243.501 1
 -4 10 6 267.799 138.599 1
 -4 10 5 358.693 140.777 1
 -4 10 4 30.8875 116.591 3
 -4 10 4 226.237 127.983 1
 -4 10 3 306.661 172.191 3
 -4 10 2 1002.41 259.853 3
 -4 10 1 694.457 219.462 3
 -4 10 0 -167.079 125.848 3
 -4 10 -1 599.755 201.951 3
 -4 10 -2 39.5549 114.23 3
 -4 10 -3 202.846 157.628 3
 -4 10 -4 906.99 267.683 3
 -4 10 -5 584.5 227.888 3
 -4 10 -6 144.486 169.901 3
 -4 10 -7 305.142 190.224 3
 -4 10 -8 111.732 152.335 3
 -4 10 -9 31.7412 153.872 3
 -4 10 -10 270.36 228.986 3
 -4 9 9 476.65 214.883 1
 -4 9 8 1022.11 269.536 1
 -4 9 7 13.7285 97.4256 1
 -4 9 6 287.988 141.452 1
 -4 9 5 -33.1767 57.9485 1
 -4 9 4 570.544 186.26 3
 -4 9 4 1034.64 247.397 1
 -4 9 3 2580.94 386.082 3
 -4 9 2 1697.02 313.1 3
 -4 9 1 -147.318 124.288 3
 -4 9 0 640.878 201.641 3
 -4 9 -1 234.508 147.049 3
 -4 9 -2 466.553 179.594 3
 -4 9 -3 1572.07 302.834 3
 -4 9 -4 1157.08 270.725 3
 -4 9 -5 0.93013 26.7473 2
 -4 9 -5 -116.559 125.225 3
 -4 9 -6 152.181 148.513 3
 -4 9 -7 -1.91438 110.855 3
 -4 9 -8 258.626 139.113 3
 -4 9 -9 469.488 215.125 3
 -4 9 -10 277.324 184.952 3
 -4 9 -11 -92.7594 153.064 3
 -4 8 10 531.964 224.834 1
 -4 8 9 949.883 261.778 1
 -4 8 8 320.086 165.762 1
 -4 8 7 439.597 171.491 1
 -4 8 6 197.179 103.266 1
 -4 8 5 632.748 181.711 1
 4 -8 -5 399.21 131.904 2
 4 -8 -4 1647.13 166.234 2
 -4 8 4 1610.57 301.09 3
 -4 8 4 1880.07 303.037 1
 -4 8 3 2070.12 332.559 3
 -4 8 2 28.553 91.3426 3
 -4 8 1 374.337 154.646 3
 -4 8 0 698.507 207.177 3
 -4 8 -1 312.928 140.96 3
 -4 8 -2 1330.72 269.253 3
 -4 8 -3 797.729 214.64 3
 -4 8 -4 -129.599 119.305 3
 -4 8 -5 336.771 158.295 3
 -4 8 -5 124.759 61.8051 2
 -4 8 -6 67.5258 97.5314 3
 -4 8 -6 50.0027 78.7057 2
 -4 8 -7 766.336 179.832 2
 -4 8 -7 135.504 134.362 3
 -4 8 -8 729.607 232.003 3
 -4 8 -9 487.785 208.935 3
 -4 8 -10 0.51928 115.011 3
 -4 8 -11 347.438 199.317 3
 -4 8 -12 -338.153 187.452 3
 -4 7 11 388.489 189.53 1
 -4 7 10 843.682 259.341 1
 -4 7 9 113.568 121.267 1
 -4 7 8 63.2923 76.0689 1
 -4 7 7 413.84 152.572 1
 4 -7 -7 14.2053 133.737 2
 -4 7 6 82.7193 79.292 1
 4 -7 -6 55.8568 129.284 2
 4 -7 -5 426.728 136.318 2
 -4 7 5 717.575 188.365 1
 -4 7 4 2105.11 323.838 3
 -4 7 4 2150.27 313.456 1
 4 -7 -4 2057.39 208.343 2
 4 -7 -3 124.676 42.2897 2
 -4 7 3 48.3547 76.1842 3
 -4 7 2 812.47 205.531 3
 -4 7 1 1067.47 225.328 3
 -4 7 0 126.236 113.997 3
 -4 7 -1 2538.09 335.504 3
 -4 7 -2 386.191 154.099 3
 -4 7 -3 -13.5933 86.5668 3
 -4 7 -4 872.577 222.713 3
 -4 7 -5 441.448 98.8102 2
 -4 7 -5 581.375 197.215 3
 -4 7 -6 32.4428 110.255 3
 -4 7 -6 504.68 126.894 2
 -4 7 -7 1429.7 290.587 3
 -4 7 -8 711.942 214.034 3
 -4 7 -9 -5.46778 100.132 3
 -4 7 -10 176.844 157.171 3
 -4 7 -11 448.204 207.704 3
 -4 7 -12 2552.79 444.137 3
 -4 7 -13 323.651 207.553 3
 -4 6 12 -19.1461 163.188 1
 -4 6 11 654.704 232.612 1
 -4 6 10 -19.135 100.996 1
 -4 6 9 250.419 135.51 1
 -4 6 8 630.06 183.859 1
 4 -6 -8 2331.15 372.378 2
 -4 6 7 168.289 91.3307 1
 4 -6 -7 1454.23 271.372 2
 4 -6 -6 913.595 200.107 2
 -4 6 6 49.5489 65.7565 1
 -4 6 5 455.64 152.196 1
 4 -6 -5 647.46 148.529 2
 -4 6 4 75.4614 74.8525 1
 4 -6 -4 46.866 59.4742 2
 4 -6 -3 369.524 80.3613 2
 -4 6 3 340.278 138.548 3
 -4 6 2 1409.92 242.002 3
 -4 6 1 81.6306 82.4055 3
 4 -6 -1 307.904 141.253 3
 4 -6 0 1499.53 278.67 3
 -4 6 0 960.156 202.641 3
 4 -6 1 1667.4 269.653 3
 -4 6 -1 1087.01 214.162 3
 -4 6 -2 47.1803 87.5944 3
 4 -6 2 216.307 155.293 3
 4 -6 3 392.208 132.168 3
 -4 6 -3 466.647 150.43 3
 -4 6 -4 918.021 203.697 3
 -4 6 -4 1099.07 132.286 2
 -4 6 -5 -65.1391 42.0812 2
 -4 6 -5 25.027 84.3764 3
 -4 6 -6 1057.94 180.044 2
 -4 6 -6 997.033 224.288 3
 -4 6 -7 976.88 232.63 3
 -4 6 -8 -125.294 118.856 3
 -4 6 -9 163.221 124.861 3
 -4 6 -10 322.169 160.894 3
 -4 6 -11 14.5747 105.783 3
 -4 6 -12 634.142 241.931 3
 -4 6 -13 679.804 254.87 3
 -4 6 -14 11.9841 128.174 3
 -4 5 12 705.305 250.381 1
 -4 5 11 -13.8126 98.9395 1
 -4 5 10 47.4155 118.82 1
 -4 5 9 935.366 231.391 1
 -4 5 8 224.679 104.243 1
 -4 5 7 345.906 134.925 1
 -4 5 6 1176.66 224.702 1
 -4 5 5 65.1767 68.2154 1
 -4 5 4 1184.11 212.22 1
 -4 5 3 1916.16 271.948 3
 4 -5 -3 1739.36 275.891 3
 -4 5 2 572.519 154.56 3
 4 -5 -2 639.059 172.441 3
 4 -5 -2 625.856 83.6941 2
 -4 5 1 793.782 172.662 3
 4 -5 -1 699.418 166.535 3
 4 -5 0 1338.97 223.769 3
 -4 5 0 1413.88 225.486 3
 4 -5 1 253.177 108.94 3
 -4 5 -1 282.073 120.999 3
 -4 5 -2 399.434 133.2 3
 4 -5 2 467.202 142.414 3
 -4 5 -3 1872.66 266.738 3
 4 -5 3 2033.66 280.332 3
 -4 5 -3 1895.62 131.824 2
 -4 5 -4 1009.37 134.875 2
 -4 5 -4 1017.07 205.161 3
 4 -5 4 990.73 208.492 3
 -4 5 -5 220.926 122.652 3
 -4 5 -5 138.745 58.697 2
 4 -5 5 205.886 111.297 3
 -4 5 -6 1043.94 217.714 3
 -4 5 -7 10.9062 93.0849 3
 -4 5 -8 -24.5357 103.142 3
 -4 5 -9 926.344 237.415 3
 -4 5 -10 93.0017 137.297 3
 -4 5 -11 120.324 133.98 3
 -4 5 -12 349.381 186.149 3
 -4 5 -13 17.087 126.063 3
 -4 5 -14 334.285 187.069 3
 -4 5 -15 128.356 169.484 3
 -4 4 13 333.654 207.002 1
 -4 4 12 362.449 193.467 1
 -4 4 11 214.804 140.688 1
 -4 4 10 683.841 202.85 1
 -4 4 9 912.197 218.225 1
 -4 4 8 6.44048 58.7196 1
 -4 4 7 518.517 156.921 1
 -4 4 6 804.947 180.34 1
 -4 4 5 180.231 88.7589 1
 -4 4 4 2946.37 311.293 1
 4 -4 -4 3170.64 350.637 3
 4 -4 -3 1239.57 213.427 3
 -4 4 3 1379.86 220.594 3
 -4 4 2 374.82 118.901 3
 4 -4 -2 500.438 140.449 3
 4 -4 -1 838.619 78.9738 2
 -4 4 1 1046.56 186.859 3
 4 -4 -1 1036.51 191.843 3
 -4 4 0 223.126 99.2914 3
 4 -4 0 329.325 123.193 3
 -4 4 -1 557.965 145.872 3
 4 -4 1 447.342 135.082 3
 -4 4 -2 2426.14 274.299 3
 4 -4 2 2326.37 272.573 3
 -4 4 -3 2871.85 302.569 3
 4 -4 3 2846.61 304.288 3
 -4 4 -3 3003.65 191.127 2
 -4 4 -4 -12.4327 70.4655 3
 4 -4 4 53.0474 87.0479 3
 -4 4 -4 36.9094 37.0953 2
 -4 4 -5 935.629 190.052 3
 4 -4 5 991.159 203.139 3
 -4 4 -6 425.829 150.408 3
 -4 4 -6 665.191 138.939 2
 -4 4 -6 431 138.716 1
 -4 4 -7 383.193 141.701 3
 -4 4 -8 1556.59 271.049 3
 -4 4 -9 289.989 146.934 3
 -4 4 -10 30.4392 91.6851 3
 -4 4 -11 492.531 189.34 3
 -4 4 -12 4.25074 132.772 3
 -4 4 -13 422.082 201.377 3
 -4 4 -14 474.286 232.948 3
 -4 4 -15 363.46 235.082 3
 -4 3 13 185.623 163.112 1
 -4 3 12 39.9366 159.831 1
 -4 3 11 660.185 200.79 1
 -4 3 10 1739.51 305.924 1
 -4 3 9 303.551 120.151 1
 -4 3 8 376.404 136.979 1
 -4 3 7 364.06 124.831 1
 -4 3 6 234.44 100.012 1
 4 -3 -5 3128.03 346.037 3
 -4 3 5 2964.97 317.623 1
 -4 3 4 889.009 168.23 1
 4 -3 -4 872.86 180.134 3
 4 -3 -3 158.825 85.4352 3
 -4 3 3 155.818 74.4125 1
 -4 3 2 866.569 160.064 3
 4 -3 -2 1268.73 202.377 3
 4 -3 -1 9.18636 73.626 3
 -4 3 1 24.8901 80.1144 3
 4 -3 0 1320.04 200.303 3
 -4 3 0 1349.22 193.878 3
 4 -3 0 1281.92 89.8368 2
 4 -3 1 7946.4 458.923 3
 -4 3 -1 7511.7 437.286 3
 -4 3 -2 4658.68 349.677 3
 4 -3 2 4708.91 358.008 3
 -4 3 -2 4412.97 197.195 2
 -4 3 -3 208.536 95.3363 3
 4 -3 3 141.127 93.3823 3
 4 -3 4 1328.01 208.701 3
 -4 3 -4 1346.42 165.775 2
 -4 3 -4 1290.89 203.143 3
 -4 3 -5 244.157 95.2938 1
 -4 3 -5 782.268 167.025 3
 4 -3 5 768.859 170.262 3
 -4 3 -5 673.713 132.888 2
 -4 3 -6 143.695 95.2071 3
 -4 3 -6 68.7186 64.6152 1
 -4 3 -7 1882.47 275.049 3
 -4 3 -7 1878.77 271.921 1
 -4 3 -8 1613.48 267.58 3
 -4 3 -9 145.311 117.853 3
 -4 3 -10 645.94 196.528 3
 -4 3 -11 -39.4755 110.951 3
 -4 3 -12 588.88 210.19 3
 -4 3 -13 821.832 247.534 3
 -4 3 -14 369.115 192.309 3
 -4 3 -15 222.263 148.798 3
 -4 2 14 -62.0892 167.302 1
 -4 2 13 -6.43773 119.807 1
 -4 2 12 374.013 171.563 1
 -4 2 11 1762.66 316.612 1
 -4 2 10 1540.09 280.08 1
 -4 2 9 81.817 69.8304 1
 -4 2 8 216.614 103.206 1
 -4 2 7 6.24264 42.044 1
 4 -2 -6 1430.44 236.212 3
 -4 2 6 1720.03 241.881 1
 -4 2 5 1170.47 187.443 1
 4 -2 -5 1309.24 213.812 3
 4 -2 -4 -22.7506 66.05 3
 -4 2 4 -59.5382 60.511 1
 -4 2 3 200.408 88.977 1
 4 -2 -3 187.696 93.6216 3
 4 -2 -2 1399.7 195.309 3
 -4 2 2 1362.91 190.893 3
 -4 2 1 679.474 133.735 3
 4 -2 -1 793.909 150.608 3
 -4 2 0 5496.73 346.038 3
 4 -2 0 5546.79 357.169 3
 4 -2 0 5829.84 243.844 2
 4 -2 1 3689.54 189.093 2
 4 -2 1 3490.97 281.304 3
 -4 2 -1 3782.27 286.882 3
 -4 2 -2 142.319 47.0558 2
 -4 2 -2 31.9599 83.5108 3
 4 -2 2 157.446 85.8392 3
 -4 2 -3 130.326 86.5955 3
 -4 2 -3 75.1967 38.569 2
 4 -2 3 105.914 73.5537 3
 -4 2 -4 1168.35 185.734 3
 4 -2 4 1106.77 181.333 3
 -4 2 -4 1175.12 160.976 2
 4 -2 5 76.4588 78.2675 3
 -4 2 -5 13.8056 27.1442 1
 -4 2 -5 52.2275 78.0107 3
 -4 2 -6 3491.02 335.335 1
 -4 2 -6 3382.89 327.964 3
 -4 2 -6 3277.12 326.878 2
 -4 2 -7 1724.12 254.28 3
 -4 2 -7 1831.92 251.319 1
 -4 2 -7 1967.87 268.234 2
 -4 2 -8 108.165 77.9725 1
 -4 2 -8 112.248 109.442 3
 -4 2 -9 89.3883 95.1386 3
 -4 2 -10 346.413 159.562 3
 4 -2 11 934.864 242.912 1
 -4 2 -11 452.898 185.592 3
 4 -2 12 1593.58 330.407 1
 -4 2 -12 1343.15 294.364 3
 -4 2 -13 984.402 264.646 3
 4 -2 13 910.974 272.678 1
 -4 2 -14 96.2183 156.042 3
 4 -2 14 373.108 231.762 1
 4 -2 15 323.133 245.594 1
 -4 2 -15 0.57284 160.638 3
 -4 2 -16 47.9536 163.865 3
 4 -2 16 35.8841 254.209 1
 -4 1 14 5.24075 158.519 1
 -4 1 13 792.24 254.156 1
 -4 1 12 1148.78 278.698 1
 -4 1 11 492.24 167.538 1
 -4 1 10 90.9271 77.4235 1
 -4 1 9 453.258 135.133 1
 -4 1 8 18.0895 34.4888 1
 -4 1 7 1169.9 202.874 1
 4 -1 -7 1193.05 201.044 1
 4 -1 -6 3076.57 326.765 3
 4 -1 -6 2863.08 295.812 1
 -4 1 6 2889.36 299.376 1
 -4 1 5 1187.93 185.397 1
 4 -1 -5 1105.04 190.986 3
 4 -1 -4 413.458 121.859 3
 -4 1 4 384.352 99.9561 1
 4 -1 -3 1976.1 225.171 3
 -4 1 3 2077.11 213.865 1
 -4 1 2 349.064 98.1792 3
 4 -1 -2 443.39 108.987 3
 -4 1 2 444.207 101.484 1
 -4 1 1 6193.67 344.698 3
 4 -1 -1 5585.61 324.718 3
 -4 1 0 1778.33 182.936 3
 4 -1 0 1687.5 183 3
 4 -1 0 1785.83 157.388 2
 4 -1 1 754.398 125.616 3
 4 -1 1 665.45 97.9503 2
 -4 1 -1 756.233 105.168 2
 -4 1 -1 872.763 129.324 3
 -4 1 -2 333.136 76.1913 2
 4 -1 2 230.754 84.7402 3
 -4 1 -2 225.943 79.4347 3
 4 -1 2 279.752 73.1931 2
 -4 1 -3 1304.93 167.245 3
 4 -1 3 1342.14 169.494 3
 4 -1 3 1424.14 166.817 2
 -4 1 -3 1545.02 171.277 2
 4 -1 4 966.29 159.607 3
 -4 1 -4 852.744 148.711 3
 -4 1 -4 968.321 158.872 1
 -4 1 -4 1093.95 162.436 2
 -4 1 -5 1584.08 204.459 1
 -4 1 -5 1715.49 221.2 2
 -4 1 -5 1904.56 224.871 3
 -4 1 -6 1895.24 245.402 2
 -4 1 -6 2066.8 241.059 1
 -4 1 -6 2056.92 248.386 3
 -4 1 -7 183.781 74.8012 1
 -4 1 -7 266.116 115.801 3
 -4 1 -7 323.824 115.314 2
 -4 1 -8 542.98 136.149 1
 -4 1 -8 391.534 140.772 3
 4 -1 8 408.653 127.548 1
 -4 1 -8 757.652 177.801 2
 -4 1 -9 951.182 188.23 1
 4 -1 9 1285.99 242.4 1
 -4 1 -9 1007.98 216.974 3
 -4 1 -9 1368.98 252.708 2
 -4 1 -10 -9.09162 84.8081 3
 4 -1 10 -3.52382 53.0926 1
 -4 1 -11 1260.95 270.442 3
 4 -1 11 1156.91 257.957 1
 -4 1 -12 705.593 226.342 3
 4 -1 12 428.318 173.211 1
 4 -1 13 254.258 160.482 1
 -4 1 -13 -75.5842 121.339 3
 -4 1 -14 208.922 151.968 3
 4 -1 14 56.9039 152.355 1
 -4 1 -15 368.482 212.524 3
 4 -1 15 516.658 250.088 1
 -4 1 -16 -6.1262 141.188 3
 4 -1 16 -47.5461 243.762 1
 -4 0 14 177.668 172.358 1
 -4 0 13 746.546 244.771 1
 -4 0 12 816.506 233.773 1
 -4 0 11 70.4591 90.5564 1
 -4 0 10 906.636 213.977 1
 -4 0 9 619.667 163.919 1
 -4 0 8 363.57 117.272 1
 4 0 -7 1764.95 237.722 1
 -4 0 7 1687.32 237.021 1
 4 0 -6 888.925 162.553 1
 -4 0 6 932.761 168.064 1
 4 0 -5 1.54437 47.628 1
 -4 0 5 27.5477 45.026 1
 -4 0 4 1898.87 205.579 1
 4 0 -4 1972.16 210.134 1
 4 0 -4 1887.32 219.292 3
 -4 0 3 313.292 89.1692 1
 4 0 -3 344.485 99.4069 3
 -4 0 2 1124.43 139.08 1
 4 0 -2 1088.93 149.155 3
 -4 0 1 2826.77 213.421 3
 4 0 -1 2908.72 223.533 3
 4 0 0 103.016 60.4285 3
 -4 0 0 121.558 60.9169 3
 4 0 0 69.5797 56.0607 2
 -4 0 -1 373.062 81.9456 3
 4 0 1 393.846 88.1729 2
 -4 0 -1 452.188 91.4526 2
 4 0 1 317.692 78.0503 3
 4 0 2 4648.45 284.509 2
 4 0 2 4534.25 260.227 3
 -4 0 -2 4336.01 248.632 3
 -4 0 -2 4635.44 279.389 2
 -4 0 -3 12.1952 49.1413 3
 4 0 3 -1.27564 48.7813 3
 4 0 3 32.6241 47.228 2
 -4 0 -3 6.4562 40.2245 2
 -4 0 -4 5079.04 314.514 3
 -4 0 -4 4898.21 312.476 1
 -4 0 -4 5475.94 368.126 2
 -4 0 -5 2942.43 253.233 1
 -4 0 -5 2726.46 256.383 3
 -4 0 -5 2496.11 272.367 2
 -4 0 -6 217.687 94.2198 2
 -4 0 -6 302.39 89.6898 1
 -4 0 -6 234.448 100.909 3
 4 0 6 255.826 98.2932 1
 -4 0 -7 187.364 69.3934 1
 -4 0 -7 495.124 131.43 2
 -4 0 -7 687.497 160.56 3
 4 0 7 590.995 142.712 1
 -4 0 -8 689.779 148.408 1
 4 0 8 783.244 177.084 1
 -4 0 -8 801.266 200.975 2
 -4 0 -9 235.63 102.114 1
 -4 0 -9 638.78 179.198 2
 4 0 9 348.456 124.653 1
 4 0 10 1705.21 285.344 1
 4 0 11 941.455 226.985 1
 4 0 12 -39.113 81.1551 1
 4 0 13 393.697 182.453 1
 4 0 14 292.388 184.607 1
 4 0 15 -34.5744 185.46 1
 4 0 16 333.242 244.584 1
 -4 -1 13 4.65408 129.83 1
 -4 -1 12 46.3577 102.317 1
 -4 -1 11 979.147 230.361 1
 -4 -1 10 527.412 160.323 1
 -4 -1 9 265.839 109.799 1
 -4 -1 8 983.029 186.817 1
 4 1 -7 337.605 107.545 1
 -4 -1 7 436.479 124.177 1
 -4 -1 6 49.7935 43.6238 1
 4 1 -6 95.0994 58.0072 1
 4 1 -5 2080.63 223.015 1
 -4 -1 5 2151.71 226.613 1
 4 1 -4 329.26 87.8984 1
 -4 -1 4 359.261 98.4962 1
 4 1 -3 324.582 80.5623 1
 -4 -1 3 339.678 83.6472 1
 4 1 -2 2652.94 207.94 3
 -4 -1 2 2546.5 187.562 1
 4 1 -1 1680.36 153.383 3
 -4 -1 1 1723.21 137.83 1
 -4 -1 0 117.804 48.3778 3
 4 1 0 87.2283 47.108 3
 -4 -1 -1 5550.13 320.239 2
 4 1 1 5349.73 236.257 3
 4 1 1 5268.3 311.844 2
 -4 -1 -1 5471.55 231.242 3
 -4 -1 -2 3987.32 207.038 3
 4 1 2 4065.88 215.156 3
 4 1 2 3508.03 257.28 2
 -4 -1 -2 3839.57 274.424 2
 4 1 3 514.255 110.492 2
 -4 -1 -3 756.822 101.866 1
 -4 -1 -3 891.284 111.59 3
 4 1 3 813.528 112.18 3
 -4 -1 -3 902.038 146.101 2
 -4 -1 -4 4193.57 267.472 3
 -4 -1 -4 4168.35 254.871 1
 4 1 4 3900.51 325.166 2
 -4 -1 -4 3979.58 328.474 2
 4 1 5 3072.78 260.225 1
 -4 -1 -5 2773.1 242.58 3
 -4 -1 -5 3052.34 235.852 1
 -4 -1 -5 2922.38 300.418 2
 -4 -1 -6 -87.3535 46.263 1
 4 1 6 14.1743 57.0261 1
 -4 -1 -6 34.1997 52.6046 2
 4 1 7 2027.18 246.551 1
 -4 -1 -7 1812.02 269.337 2
 4 1 8 384.959 114.642 1
 -4 -1 -8 555.223 126.88 1
 -4 -1 -8 298.386 109.931 2
 -4 -1 -9 17.3431 66.8993 2
 -4 -1 -9 528.576 133.545 1
 4 1 10 1854.57 285.697 1
 4 1 11 98.2493 84.5301 1
 4 1 12 191.534 123.607 1
 4 1 13 556.057 202.815 1
 4 1 14 -26.8903 144.027 1
 4 1 15 358.928 228.909 1
 4 1 16 154.695 217.783 1
 -4 -2 15 409.619 254.596 1
 -4 -2 14 391.256 212.866 1
 -4 -2 13 -18.1626 114.94 1
 -4 -2 12 1873.69 337.956 1
 -4 -2 11 978.526 232.409 1
 -4 -2 10 -44.8253 61.1911 1
 -4 -2 9 476.993 143.82 1
 4 2 -8 848.375 175.737 1
 -4 -2 8 732.387 164.602 1
 4 2 -7 82.3229 58.822 1
 -4 -2 7 59.9857 50.9498 1
 -4 -2 6 2605.4 267.899 1
 4 2 -6 2509.64 255.226 1
 4 2 -5 1193.92 164.15 1
 -4 -2 5 1240.52 170.97 1
 4 2 -4 -6.99526 47.4815 1
 -4 -2 4 36.3938 48.7359 1
 -4 -2 3 1705.29 162.98 1
 4 2 -3 1753.32 165.957 1
 4 2 -2 675.844 92.4944 1
 -4 -2 2 727.661 94.9474 1
 4 2 -1 41.0558 39.4821 3
 -4 -2 1 7.24681 23.0098 1
 4 2 0 1061.79 92.7275 3
 4 2 0 1025.89 160.285 2
 -4 -2 0 1180.95 81.1729 1
 -4 -2 -1 2071.48 209.413 2
 -4 -2 -1 2000.05 111.467 3
 4 2 1 1963.04 112.222 3
 4 2 1 1919.08 208.283 2
 4 2 2 370.332 102.775 2
 -4 -2 -2 319.624 52.352 3
 4 2 2 370.257 60.011 3
 -4 -2 -2 391.138 100.048 2
 -4 -2 -2 321.984 52.4695 1
 -4 -2 -3 2407.07 161.101 3
 4 2 3 2375.74 166.907 1
 -4 -2 -3 2564.85 157.006 1
 4 2 3 2538.46 254.204 2
 -4 -2 -3 2585.71 252.661 2
 -4 -2 -4 1997.56 162.334 1
 4 2 4 2121.61 179.494 1
 4 2 4 1770.05 230.008 2
 -4 -2 -4 1744.14 223.301 2
 -4 -2 -5 457.397 128.44 2
 4 2 5 349.831 90.193 1
 -4 -2 -5 138.972 38.3983 1
 4 2 5 534.984 152.548 2
 -4 -2 -6 2452.42 220.109 1
 4 2 6 2060.32 217.557 1
 -4 -2 -6 2093.52 283.003 2
 -4 -2 -7 2836.58 255.375 1
 4 2 7 2747.88 270.467 1
 -4 -2 -7 2427.46 317.171 2
 -4 -2 -8 400.433 103.989 1
 4 2 8 256.067 90.4008 1
 -4 -2 -8 308.578 132.138 2
 -4 -2 -9 2091 252.936 1
 4 2 9 2034.17 269.02 1
 -4 -2 -9 1739.66 297.597 2
 4 2 10 80.9587 64.856 1
 -4 -2 -10 -40.0008 70.6877 1
 4 2 11 1577.1 269.384 1
 4 2 12 590.022 184.021 1
 4 2 13 251.646 152.715 1
 4 2 15 452.788 230.252 1
 4 2 16 -74.7943 214.16 1
 -4 -3 15 299.681 261.584 1
 -4 -3 14 -85.4959 155.336 1
 -4 -3 13 417.092 196.268 1
 -4 -3 12 1989.14 351.309 1
 -4 -3 11 185.399 125.3 1
 -4 -3 10 401.379 149.847 1
 -4 -3 9 1477.12 252.515 1
 4 3 -8 -71.8895 69.487 1
 -4 -3 8 24.7085 13.0221 1
 4 3 -7 1720.59 225.354 1
 -4 -3 7 1537.49 224.06 1
 4 3 -6 2545.15 253.458 1
 -4 -3 6 2522.39 264.041 1
 -4 -3 5 259.273 83.3326 1
 4 3 -5 244.617 77.5361 1
 -4 -3 4 349.183 88.5578 1
 4 3 -4 221.844 68.0164 1
 4 3 -3 1333.22 136.825 1
 -4 -3 3 1262.24 139.714 1
 4 3 -2 746.131 91.3252 1
 -4 -3 2 685.14 88.8597 1
 4 3 -1 632.877 67.8146 1
 -4 -3 1 623.645 68.0373 1
 4 3 0 1355.53 191.632 2
 4 3 0 1545.39 85.7318 3
 -4 -3 -1 46.3869 54.8075 2
 4 3 1 75.3902 74.9516 2
 -4 -3 -2 1321 71.468 1
 4 3 2 1238.26 79.2844 1
 4 3 2 1302.19 183.686 2
 -4 -3 -2 1215.95 72.1626 3
 -4 -3 -2 1345.19 183.694 2
 -4 -3 -3 1030.41 82.1872 1
 4 3 3 1386.51 109.391 1
 4 3 3 1264.59 189.976 2
 -4 -3 -3 1059.34 170.404 2
 -4 -3 -4 357.01 103.341 2
 4 3 4 279.81 65.3488 1
 -4 -3 -4 379.294 72.1583 1
 4 3 4 573.522 155.223 2
 -4 -3 -5 7507.51 334.481 1
 4 3 5 7618.37 352.838 1
 4 3 5 8197.1 530.781 2
 -4 -3 -5 7521.02 506.493 2
 -4 -3 -6 4101.42 277.575 1
 4 3 6 4007.57 285.821 1
 -4 -3 -6 3658.2 374.922 2
 4 3 7 362.845 96.498 1
 -4 -3 -7 373.118 90.9067 1
 -4 -3 -7 323.071 128.121 2
 4 3 8 772.305 150.186 1
 -4 -3 -8 913.447 157.14 1
 -4 -3 -8 942.609 221.208 2
 4 3 9 241.645 89.4417 1
 -4 -3 -9 497.578 127.642 1
 -4 -3 -9 148.995 123.936 2
 4 3 10 220.952 94.9801 1
 -4 -3 -10 360.477 120.698 1
 4 3 11 882.384 199.323 1
 4 3 12 330.356 139.963 1
 4 3 13 144.192 129.531 1
 4 3 14 -4.47837 121.082 1
 4 3 15 -17.9056 176.52 1
 4 3 16 113.894 194.04 1
 -4 -4 15 19.9025 195.413 1
 -4 -4 14 211.852 198.812 1
 -4 -4 13 4320.07 551.969 1
 -4 -4 12 343.049 180.226 1
 -4 -4 11 197.761 129.27 1
 -4 -4 10 1564.39 285.412 1
 -4 -4 9 143.963 84.4929 1
 4 4 -8 661.497 157.988 1
 -4 -4 8 453.503 132.661 1
 4 4 -7 2286.41 261.103 1
 -4 -4 7 2841.93 324.379 1
 4 4 -6 1396.45 190.288 1
 -4 -4 6 1633.73 219.202 1
 -4 -4 5 150.521 70.465 1
 4 4 -5 103.943 53.9526 1
 -4 -4 4 1557.69 180.589 1
 4 4 -4 1560.76 167.75 1
 -4 -4 3 397.783 87.0346 1
 4 4 -3 348.467 73.9765 1
 4 4 -2 4801.66 225.464 1
 -4 -4 2 5510.9 267.451 1
 4 4 -1 1114.43 89.19 1
 -4 -4 1 1104.99 100.878 1
 4 4 -1 1279.24 208.661 2
 4 4 0 274.077 34.393 3
 4 4 0 445.381 126.092 2
 4 4 0 372.984 37.5549 1
 -4 -4 -1 1085.2 169.462 2
 4 4 1 1076.45 176.78 2
 4 4 2 409.297 43.5711 1
 -4 -4 -2 315.999 102.648 2
 4 4 2 366.203 105.661 2
 -4 -4 -3 1772.56 119.494 1
 4 4 3 1987.34 245.432 2
 4 4 3 1721.25 118.651 1
 4 4 4 8025.03 511.518 2
 -4 -4 -4 7774.8 302.772 1
 -4 -4 -4 7819.68 500.474 2
 4 4 4 7704.89 302.615 1
 -4 -4 -5 4140.88 252.471 1
 4 4 5 4152.39 393.602 2
 -4 -4 -5 4420.56 398.702 2
 4 4 5 4430 267.364 1
 -4 -4 -6 1307.78 159.476 1
 -4 -4 -6 1053.14 208.064 2
 4 4 6 1382.61 171.231 1
 -4 -4 -7 476.848 109.17 1
 -4 -4 -7 468.359 153.62 2
 4 4 7 410.946 102.503 1
 -4 -4 -8 165.392 118.518 2
 -4 -4 -8 58.0801 40.3746 1
 4 4 8 61.7317 52.9322 1
 -4 -4 -9 -255.247 94.8836 1
 4 4 9 846.457 168.252 1
 4 4 10 1750.3 260.482 1
 4 4 11 1034.53 213.173 1
 4 4 12 163.349 112.553 1
 4 4 13 44.6574 105.395 1
 4 4 14 -41.0599 118.245 1
 4 4 15 321.001 196.77 1
 4 4 16 987.349 329.018 1
 -4 -5 14 277.748 214.315 1
 -4 -5 13 314.812 205.035 1
 -4 -5 12 37.4898 130.457 1
 -4 -5 11 683.559 211.022 1
 -4 -5 10 -125.538 107.712 1
 -4 -5 9 231.011 107.942 1
 -4 -5 8 2495.34 321.195 1
 4 5 -8 2440.44 289.436 1
 4 5 -7 1820.07 237.259 1
 -4 -5 7 2582.61 313.367 1
 4 5 -6 34.6237 39.4314 1
 -4 -5 6 24.9887 30.8439 1
 4 5 -5 914.258 158.477 1
 -4 -5 5 651.756 138.698 1
 4 5 -4 23.2811 21.3613 1
 -4 -5 4 9.5654 32.3446 1
 -4 -5 3 2875.57 238.075 1
 4 5 -3 2722.97 207.05 1
 4 5 -2 3433.48 206.836 1
 4 5 -1 3453.85 334.585 2
 4 5 -1 3578.58 190.352 3
 4 5 -1 3450.45 182.24 1
 4 5 0 355.82 51.4404 3
 4 5 0 304.654 51.3287 1
 -4 -5 -1 1667.02 225.035 2
 4 5 1 1571.84 79.539 3
 -4 -5 -1 1612.29 87.0941 3
 4 5 1 1159.15 174.014 2
 4 5 2 237.638 100.842 2
 4 5 2 215.841 43.5725 1
 -4 -5 -2 383.233 117.977 2
 -4 -5 -2 173.228 35.0551 3
 4 5 3 1843.36 133.544 1
 -4 -5 -3 1903.18 128.605 3
 -4 -5 -3 1742.1 237.275 2
 4 5 3 1755.84 242.283 2
 4 5 4 4905.87 250.892 1
 4 5 4 4379.47 391.433 2
 -4 -5 -4 4971.89 413.907 2
 -4 -5 -4 4962.27 250.823 1
 -4 -5 -5 447.606 131.502 2
 -4 -5 -5 625.043 105.797 1
 4 5 5 593.954 101.794 1
 4 5 5 538.656 155.603 2
 -4 -5 -6 65.9966 36.3932 1
 -4 -5 -6 97.195 75.1315 2
 4 5 6 261.569 122.654 2
 4 5 6 128.4 59.442 1
 -4 -5 -7 661.279 184.343 2
 -4 -5 -7 532.869 114.646 1
 4 5 7 494.831 111.588 1
 -4 -5 -8 346.661 166.16 2
 -4 -5 -8 259.763 85.7882 1
 4 5 8 238.103 84.1493 1
 4 5 9 3741.05 357.98 1
 -4 -5 -9 1485.27 217.131 1
 4 5 10 1155.43 209.412 1
 4 5 11 268.943 114.673 1
 4 5 12 54.967 83.5376 1
 4 5 13 277.736 148.78 1
 4 5 14 57.0702 133.513 1
 4 5 15 491.631 227.068 1
 4 5 16 265.696 223.823 1
 -4 -6 14 261.65 232.765 1
 -4 -6 13 -0.61688 206.861 1
 -4 -6 12 965.109 282.617 1
 -4 -6 11 271.784 159.447 1
 -4 -6 10 378.496 162.767 1
 -4 -6 9 1357.47 273.101 1
 -4 -6 8 639.447 165.438 1
 -4 -6 7 213.996 91.4585 1
 4 6 -7 120.292 83.4734 1
 -4 -6 6 922.446 180.855 1
 4 6 -6 958.01 165.474 1
 4 6 -5 -29.9121 40.3948 1
 -4 -6 5 -32.766 37.9095 1
 4 6 -4 799.54 129.917 1
 4 6 -3 1140.46 157.061 3
 4 6 -3 1308.26 152.89 1
 4 6 -2 972.699 129.927 3
 4 6 -2 918.926 120.659 1
 4 6 -1 19.7326 41.2953 3
 4 6 -1 -67.3113 111.697 2
 4 6 -1 19.7451 24.3843 1
 4 6 0 2581.83 157.24 3
 4 6 0 2501.87 294.879 2
 4 6 1 171.927 100.843 2
 4 6 1 169.545 45.1646 3
 -4 -6 -1 156.003 98.4175 2
 -4 -6 -1 202.325 49.9519 3
 -4 -6 -2 1629.16 121.244 3
 4 6 2 1492.03 125.614 1
 4 6 2 1818.77 250.434 2
 -4 -6 -2 1819.99 240.588 2
 4 6 3 3825.39 364.975 2
 4 6 3 4001.05 221.987 1
 -4 -6 -3 3992.72 369.999 2
 4 6 4 420.406 132.427 2
 -4 -6 -4 341.821 75.3692 3
 -4 -6 -4 501.434 137.07 2
 4 6 4 425.603 84.4106 1
 -4 -6 -5 568.251 101.891 3
 4 6 5 620.724 107.841 1
 -4 -6 -5 533.808 149.105 2
 -4 -6 -6 367.099 97.3818 1
 -4 -6 -6 389.502 143.052 2
 4 6 6 277.165 80.0683 1
 4 6 6 464.281 160.412 2
 4 6 7 0.78178 25.0807 1
 -4 -6 -7 62.6082 108.003 2
 -4 -6 -7 97.0289 63.7587 1
 -4 -6 -8 560.285 198.3 2
 -4 -6 -8 553.744 132.23 1
 4 6 8 588.811 132.781 1
 -4 -6 -9 1082.58 190.354 1
 4 6 9 1348.57 214.67 1
 4 6 10 782.503 176.272 1
 4 6 11 11.6709 65.2059 1
 4 6 12 560.367 178.458 1
 4 6 13 -35.2913 114.364 1
 4 6 14 96.8462 138.559 1
 4 6 15 460.554 233.6 1
 4 6 16 21.6445 194.799 1
 -4 -7 14 -79.12 239.72 1
 -4 -7 13 847.732 310.364 1
 -4 -7 12 461.147 218.554 1
 -4 -7 11 30.2361 116.587 1
 -4 -7 10 778.304 232.136 1
 -4 -7 9 354.764 149.089 1
 -4 -7 8 101.276 84.8363 1
 -4 -7 7 767.483 185.85 1
 4 7 -7 497.927 144.477 1
 4 7 -6 789.278 179.067 3
 4 7 -6 950.488 171.835 1
 4 7 -5 189.297 78.5372 1
 4 7 -5 86.018 67.4696 3
 4 7 -4 1058.24 172.191 3
 4 7 -4 1297.64 177.673 1
 4 7 -3 1447.22 185.806 3
 4 7 -3 1480.92 178.199 1
 4 7 -2 -26.8789 33.3284 1
 4 7 -2 107.615 106.772 2
 4 7 -2 24.0171 44.4355 3
 4 7 -1 1314.52 229.145 2
 4 7 -1 1421.94 151.321 3
 4 7 -1 1491.68 164.875 1
 4 7 0 851.253 110.619 3
 4 7 0 728.496 169.784 2
 -4 -7 0 785.676 110.288 3
 4 7 1 230.182 102.992 2
 -4 -7 -1 325.176 125.289 2
 4 7 1 174.862 57.8135 3
 -4 -7 -2 2706.38 312.708 2
 4 7 2 3088.93 193.121 3
 -4 -7 -2 2974.75 192.313 3
 4 7 2 3095.66 332.189 2
 4 7 3 604.349 153.658 2
 -4 -7 -3 648.621 103.437 3
 4 7 3 718.289 109.957 1
 -4 -7 -3 485.901 125.968 2
 4 7 4 348.924 122.558 2
 4 7 4 269.029 73.1918 1
 -4 -7 -4 449.099 134.025 2
 -4 -7 -4 317.329 85.0882 3
 -4 -7 -5 1599.4 182.915 3
 4 7 5 1287.59 150.351 1
 -4 -7 -5 1270.14 242.684 2
 4 7 5 1519.19 257.959 2
 -4 -7 -6 229.534 122.586 2
 4 7 6 520.683 110.685 1
 -4 -7 -6 515.158 115.022 3
 4 7 6 733.869 196.704 2
 -4 -7 -7 83.6829 113.006 2
 -4 -7 -7 290.735 94.3513 3
 4 7 7 263.943 88.8754 1
 -4 -7 -8 663.734 149.07 3
 4 7 8 959.537 168.546 1
 4 7 9 270.378 97.7984 1
 -4 -7 -9 539.652 133.498 1
 4 7 10 95.0186 75.0894 1
 4 7 11 386.776 140.718 1
 4 7 12 339.272 154.25 1
 4 7 13 -40.2059 113.766 1
 4 7 14 -10.8326 151.909 1
 4 7 15 6723.15 672.349 1
 4 7 16 -3.02407 232.853 1
 4 8 -14 234.537 221.871 3
 4 8 -13 705.257 298.477 3
 4 8 -12 121.429 156.714 3
 4 8 -11 128.539 163.763 3
 4 8 -10 243.054 170.434 3
 4 8 -9 109.904 123.14 3
 4 8 -8 902.12 218.093 3
 4 8 -7 554.63 173.224 3
 4 8 -6 9.20558 65.1005 1
 4 8 -6 14.07 76.1951 3
 4 8 -5 574.448 136.694 1
 4 8 -5 533.93 142.984 3
 4 8 -4 1206.36 181.413 1
 4 8 -4 436.054 123.719 3
 4 8 -3 97.5839 70.3684 3
 4 8 -3 36.5249 46.6437 1
 4 8 -2 1016.03 153.536 3
 4 8 -2 939.346 209.675 2
 4 8 -2 1085.98 162.774 1
 4 8 -1 1073.71 210.552 2
 4 8 -1 1039.15 147.36 3
 4 8 0 112.015 70.9783 2
 4 8 0 21.8742 46.2634 3
 -4 -8 0 -11.5553 42.8232 3
 4 8 1 1288.92 145.995 3
 -4 -8 -1 1355.21 153.481 3
 4 8 1 1221.39 221.334 2
 4 8 2 262.804 98.3408 2
 -4 -8 -2 300.438 81.7075 3
 4 8 2 182.569 60.5823 3
 -4 -8 -2 214.683 91.2114 2
 4 8 3 45.0815 47.292 2
 -4 -8 -3 94.0875 71.7856 2
 4 8 4 1461.95 175.749 1
 -4 -8 -4 1223.18 159.987 3
 4 8 4 1148.52 224.357 2
 -4 -8 -4 1401.75 251.411 2
 -4 -8 -5 1033.11 161.384 3
 -4 -8 -5 606.981 175.261 2
 4 8 5 1006.56 155.44 1
 4 8 5 934.566 206.523 2
 4 8 6 7.18414 30.0224 1
 -4 -8 -6 36.3065 56.9885 3
 -4 -8 -7 786.572 230.441 2
 -4 -8 -7 739.621 160.719 3
 4 8 7 996.649 172.219 1
 4 8 8 438.885 122.285 1
 4 8 9 149.19 97.6238 1
 -4 -8 -9 281.781 118.3 3
 4 8 10 689.228 169.36 1
 4 8 11 608.326 178.612 1
 4 8 12 -34.5318 96.2894 1
 4 8 13 439.635 183.162 1
 4 8 14 144.688 167.481 1
 4 8 15 30.5301 190.787 1
 4 9 -13 64.3398 167.733 3
 4 9 -12 87.7186 153.379 3
 4 9 -11 68.052 125.872 3
 4 9 -10 -95.7852 125.718 3
 4 9 -9 423.849 152.249 3
 4 9 -8 917.424 231.826 3
 4 9 -7 79.1808 88.3153 3
 4 9 -6 448.666 149.077 1
 4 9 -6 467.672 154.259 3
 4 9 -5 1669.05 238.239 1
 4 9 -5 1315.54 223.152 3
 4 9 -4 -8.24465 64.865 1
 4 9 -4 32.331 69.2236 3
 4 9 -3 468.053 132.305 3
 4 9 -3 408.282 160.986 2
 4 9 -3 443.424 114.719 1
 4 9 -2 1884.42 220.567 3
 4 9 -2 2575.65 284.907 1
 4 9 -2 1755.85 289.384 2
 4 9 -1 442.729 137.869 2
 4 9 -1 540.17 118.159 3
 -4 -9 1 542.909 123.617 3
 4 9 0 413.732 101.875 3
 4 9 0 331.75 122.245 2
 -4 -9 0 271.19 84.8953 3
 4 9 1 479.767 92.4281 3
 -4 -9 -1 647.522 123.56 3
 4 9 1 412.217 137.427 2
 4 9 2 2.21832 29.9005 2
 -4 -9 -2 -20.8695 48.7868 2
 -4 -9 -2 -21.3837 44.6412 3
 4 9 2 0.29775 44.9485 3
 -4 -9 -3 997.715 149.548 3
 4 9 3 953.336 152.623 1
 -4 -9 -3 957.752 209.229 2
 4 9 3 981.509 206.753 2
 4 9 4 553.164 158.896 2
 -4 -9 -4 557.676 175.127 2
 -4 -9 -4 714.026 135.245 3
 -4 -9 -5 -78.0111 124.092 2
 -4 -9 -5 19.8615 61.666 3
 4 9 5 1.6304 42.4741 1
 4 9 5 41.7583 49.7952 2
 4 9 6 411.001 110.832 1
 -4 -9 -6 304.856 107.847 3
 4 9 6 692.203 199.471 2
 -4 -9 -6 559.375 199.674 2
 -4 -9 -7 1098.55 209.817 3
 4 9 7 668.331 148.951 1
 -4 -9 -8 10.5696 71.2992 3
 4 9 8 55.078 51.362 1
 4 9 9 776.076 176.666 1
 4 9 10 861.324 201.108 1
 4 9 11 15.8533 107.896 1
 4 9 12 206.982 135.926 1
 4 9 13 267.131 177.584 1
 4 9 14 877.433 275.942 1
 4 9 15 194.196 227.376 1
 4 10 -13 121.956 203.827 3
 4 10 -12 54.181 162.051 3
 4 10 -11 -9.47984 126.629 3
 4 10 -10 268.949 188.96 3
 4 10 -9 1029.42 267.994 3
 4 10 -8 567.328 197.942 3
 4 10 -7 57.4858 101.159 3
 4 10 -6 621.193 177.516 3
 4 10 -5 156.333 119.355 1
 4 10 -5 199.112 111.619 3
 4 10 -4 197.548 114.577 1
 4 10 -4 287.364 111.89 3
 4 10 -3 1461.3 280.298 2
 4 10 -3 1503.23 224.083 3
 4 10 -3 1665.04 247.053 1
 4 10 -2 191.439 91.564 2
 4 10 -2 482.335 131.197 3
 4 10 -2 497.749 135.188 1
 4 10 -1 190.957 98.6341 2
 4 10 -1 179.984 88.1339 3
 -4 -10 1 106.616 73.656 3
 4 10 0 62.0536 60.335 2
 4 10 0 52.9 57.296 3
 -4 -10 0 77.222 65.6544 3
 4 10 1 111.186 62.8887 3
 4 10 1 135.684 81.8861 2
 -4 -10 -1 292.722 103.497 3
 4 10 2 773.183 184.668 2
 4 10 2 513.475 117.181 3
 -4 -10 -2 912.035 160.039 3
 -4 -10 -2 795.197 190.184 2
 4 10 3 979.881 160.429 3
 4 10 3 944.57 208.734 2
 -4 -10 -3 858.071 157.723 3
 -4 -10 -3 930.112 213.603 2
 4 10 4 7.8233 46.9114 2
 -4 -10 -4 199.367 135.051 2
 -4 -10 -4 214.918 96.801 3
 4 10 4 59.8064 51.0771 1
 -4 -10 -5 293.349 158.259 2
 -4 -10 -5 178.241 102.804 3
 4 10 5 159.002 71.7976 1
 4 10 5 -26.0029 41.3338 2
 -4 -10 -6 493.581 146.147 3
 4 10 6 707.979 151.124 1
 4 10 6 712.896 201.704 2
 -4 -10 -7 43.2356 74.0699 3
 4 10 7 -47.7033 75.3252 1
 4 10 8 753.171 171.296 1
 4 10 9 1473.69 249.165 1
 4 10 10 361.379 145.744 1
 4 10 11 -2.76021 102.709 1
 4 10 12 19.2146 119.65 1
 4 10 13 218.216 197.022 1
 4 10 14 463.297 254.16 1
 4 11 -12 100.187 149.336 3
 4 11 -11 68.0741 101.398 3
 4 11 -10 359.353 214.121 3
 4 11 -9 330.887 192.842 3
 4 11 -8 37.2585 116.665 3
 4 11 -7 319.218 152.766 3
 4 11 -6 249.76 142.878 3
 4 11 -5 691.065 204.56 2
 4 11 -5 2642.01 331.6 3
 4 11 -4 1338.98 252.299 1
 4 11 -4 1529.88 306.211 2
 4 11 -4 1585.65 253.223 3
 4 11 -3 423.55 156.804 2
 4 11 -3 807.211 185.708 3
 4 11 -3 497.616 169.789 1
 4 11 -2 142.18 95.6763 2
 4 11 -2 139.866 98.3827 3
 4 11 -2 187.163 123.136 1
 4 11 -1 900.675 177.659 3
 4 11 -1 482.388 156.592 2
 -4 -11 1 886.75 188.122 3
 4 11 0 -47.9297 85.5945 2
 4 11 0 19.9592 69.1081 3
 -4 -11 0 33.2636 66.8074 3
 4 11 1 1139.24 186.834 3
 4 11 1 542.255 160.1 2
 -4 -11 -1 951.77 181.142 3
 4 11 2 1192.49 241.493 2
 -4 -11 -2 1594.35 225.041 3
 4 11 2 1376.03 199.807 3
 4 11 3 187.353 112.13 2
 4 11 3 289.665 103.26 3
 -4 -11 -3 434.591 166.389 2
 4 11 4 -3.29964 51.6899 1
 -4 -11 -4 70.4941 119.861 2
 -4 -11 -4 181.673 108.713 3
 4 11 4 118.868 104.592 2
 4 11 5 279.779 100.694 1
 4 11 5 42.0063 58.6433 2
 4 11 6 13.004 28.9595 1
 -4 -11 -6 -141.331 90.2286 3
 4 11 7 316.234 107.51 1
 -4 -11 -7 1800.09 285.191 3
 4 11 8 665.395 169.414 1
 4 11 9 281.407 133.313 1
 4 11 10 -8.74043 86.4379 1
 4 11 11 309.691 164.928 1
 4 11 12 -98.259 144.938 1
 4 11 13 218.605 198.112 1
 4 11 14 1251.59 352.484 1
 4 12 -12 189.179 226.488 3
 4 12 -11 105.88 204.265 3
 4 12 -10 164.07 166.52 3
 4 12 -9 1.91695 122.778 3
 4 12 -8 60.0729 121.659 3
 4 12 -7 3.30773 102.471 3
 4 12 -6 88.6775 97.3234 3
 4 12 -6 295.874 156.445 2
 4 12 -5 939.778 247.757 2
 4 12 -5 961.442 226.435 3
 4 12 -4 139.434 116.904 2
 4 12 -4 566.61 171.884 3
 4 12 -3 134.207 110.532 2
 4 12 -3 48.9857 88.3555 3
 4 12 -2 62.7079 91.7475 2
 4 12 -2 289.626 116.855 3
 4 12 -2 97.9873 136.208 1
 4 12 -1 195.914 124.843 2
 4 12 -1 186.796 100.312 3
 -4 -12 1 154.234 110.222 3
 4 12 0 626.342 187.068 2
 4 12 0 464.782 139.065 3
 -4 -12 0 241.505 126.702 3
 -4 -12 -1 1569.94 242.396 3
 4 12 1 1747.11 243.412 3
 4 12 1 2085.41 334.511 2
 4 12 2 887.807 220.256 2
 4 12 2 752.224 166.244 3
 -4 -12 -2 1148.21 212.121 3
 4 12 3 -88.4274 98.9818 2
 4 12 3 38.0582 73.9917 3
 -4 -12 -3 -113.726 86.0446 3
 -4 -12 -4 295.367 116.464 3
 4 12 4 122.272 66.8708 1
 4 12 4 275.977 147.915 2
 -4 -12 -5 37.2143 76.3842 3
 4 12 5 56.3838 50.0336 1
 4 12 6 300.089 113.922 1
 4 12 7 976.46 205.239 1
 4 12 8 292.447 134.463 1
 4 12 9 -7.08166 88.7674 1
 4 12 10 220.271 156.243 1
 4 12 11 62.3529 140.844 1
 4 12 12 336.414 210.853 1
 4 12 13 588.375 275.741 1
 4 13 -11 71.6257 236.381 3
 4 13 -10 31.3229 132.403 3
 4 13 -9 -130.523 143.415 3
 4 13 -8 243.202 167.381 3
 4 13 -7 -41.4089 114.835 3
 4 13 -7 -79.3765 177.893 2
 4 13 -6 235.555 143.007 3
 4 13 -6 284.484 174.099 2
 4 13 -5 262.822 171.695 2
 4 13 -5 445.547 189.405 3
 4 13 -4 23.8744 84.4938 3
 4 13 -4 3468.09 491.735 2
 4 13 -3 84.942 100.085 3
 4 13 -3 196.923 138.532 2
 4 13 -2 457.321 191.748 2
 4 13 -2 424.165 162.095 3
 4 13 -1 -102.745 87.5551 3
 4 13 -1 -115.621 127.789 2
 -4 -13 1 92.6869 134.998 3
 4 13 0 214.384 107.595 3
 4 13 0 488.599 182.403 2
 -4 -13 0 133.256 104.611 3
 4 13 1 222.378 137.707 2
 4 13 1 384.708 129.948 3
 -4 -13 -1 218.908 127.815 3
 -4 -13 -2 -108.716 97.4546 3
 4 13 2 5.24315 62.2314 3
 4 13 3 415.143 173.078 2
 4 13 3 414.934 129.224 3
 4 13 4 415.39 130.958 1
 4 13 4 497.317 181.795 2
 4 13 5 -108.587 73.865 1
 4 13 5 472.759 179.708 2
 4 13 6 470.577 149.383 1
 4 13 7 305.133 137.223 1
 4 13 8 -33.1538 107.37 1
 4 13 9 403.957 177.107 1
 4 13 10 -249.431 250.014 1
 4 13 11 47.9226 161.281 1
 4 13 12 229.964 237.247 1
 4 14 -10 168.752 225.344 3
 4 14 -8 14.8445 144.224 3
 4 14 -8 126.816 221.72 2
 4 14 -7 31.2873 135.903 3
 4 14 -7 -19.1863 190.817 2
 4 14 -6 211.312 196.921 2
 4 14 -6 69.6037 143.488 3
 4 14 -5 -5.08476 99.6799 3
 4 14 -4 101.027 158.283 2
 4 14 -4 314.882 157.266 3
 4 14 -3 406.734 207.918 2
 4 14 -3 308.557 145.467 3
 4 14 -2 -86.6251 103.171 3
 4 14 -2 5.58692 125.449 2
 4 14 -1 102.364 111.255 3
 4 14 -1 -3.58342 117.098 2
 4 14 0 399.306 156.387 3
 4 14 1 31.2474 129.758 2
 4 14 1 -11.0281 77.2175 3
 4 14 2 424.296 199.446 2
 4 14 2 328.865 126.486 3
 4 14 3 411.198 146.106 3
 4 14 3 539.683 220.727 2
 4 14 4 105.908 74.0226 1
 4 14 4 3649.03 468.032 2
 4 14 5 297.445 121.092 1
 4 14 5 929.772 258.548 2
 4 14 6 162.152 110.33 1
 4 14 7 1852.96 310.574 1
 4 14 8 253.364 168.343 1
 4 14 9 227.478 177.35 1
 4 14 11 214.031 218.345 1
 4 15 -9 -149.792 143.767 3
 4 15 -8 103.348 201.899 3
 4 15 -8 584.907 335.115 2
 4 15 -7 323.407 220.306 3
 4 15 -7 292.478 282.913 2
 4 15 -6 20.3298 257.772 2
 4 15 -6 40.6837 95.3198 3
 4 15 -5 162.734 183.805 3
 4 15 -5 176.375 225.303 2
 4 15 -4 391.136 206.444 3
 4 15 -4 748.678 279.903 2
 4 15 -3 183.561 179.069 2
 4 15 -3 248.082 170.44 3
 4 15 -2 14.5565 137.802 2
 4 15 -2 38.4839 101.347 3
 4 15 -1 244.205 190.058 2
 4 15 -1 249.591 132.617 3
 4 15 0 13.6864 154.988 2
 4 15 0 34.0257 79.4954 3
 4 15 1 170.818 199.666 2
 4 15 1 295.422 122.47 3
 4 15 2 370.236 218.727 2
 4 15 2 235.054 122.135 3
 4 15 3 -74.3597 174.461 2
 4 15 4 -136.136 108.971 1
 4 15 4 598.32 232.881 2
 4 15 5 263.075 135.908 1
 4 15 6 -127.924 113.901 1
 4 15 7 392.289 189.3 1
 4 15 8 201.706 177.238 1
 4 15 9 0.92722 162.986 1
 4 15 10 240.913 216.514 1
 4 16 -6 232.135 169.393 3
 4 16 -5 247.608 209.345 3
 4 16 -4 151.316 219.795 3
 4 16 -3 245.228 169.023 3
 4 16 -2 126.555 126.348 3
 4 16 -1 76.9324 107.848 3
 4 16 0 270.458 162.31 3
 4 16 1 578.277 201.184 3
 4 16 2 90.4245 117.739 3
 4 16 3 232.453 138.619 1
 4 16 4 4.48078 71.4332 1
 4 16 5 -156.896 161.586 1
 4 16 6 365.861 186.161 1
 4 16 7 480.724 219.935 1
 4 16 8 159.029 209.381 1
 4 17 3 551.227 201.152 1
 4 17 4 -61.2382 152.47 1
 -5 12 2 177.521 189.915 3
 -5 12 1 80.9618 139.355 3
 -5 12 0 111.676 117.052 3
 -5 12 -1 296.489 182.417 3
 -5 12 -2 -186.112 158.361 3
 -5 12 -3 116.564 178.375 3
 -5 12 -4 301.514 223.073 3
 -5 12 -5 37.7249 132.073 3
 -5 11 5 311.853 168.912 1
 -5 11 4 111.538 111.313 1
 -5 11 3 666.13 249.465 3
 -5 11 1 267.281 168.511 3
 -5 11 0 1096.96 293.113 3
 -5 11 -1 94.478 113.653 3
 -5 11 -2 59.4902 104.747 3
 -5 11 -3 175.89 156.702 3
 -5 11 -4 11.1092 125.703 3
 -5 11 -5 88.5487 177.776 3
 -5 11 -6 245.553 196.67 3
 -5 11 -7 86.2002 175.363 3
 -5 11 -8 40.4994 165.927 3
 -5 10 7 141.147 138.957 1
 -5 10 6 347.964 169.446 1
 -5 10 5 289.762 135.868 1
 -5 10 4 372.283 154.989 1
 -5 10 3 316.728 178.083 3
 -5 10 2 104.965 129.84 3
 -5 10 1 836.105 250.848 3
 -5 10 0 489.572 212.493 3
 -5 10 -1 17.6235 111.957 3
 -5 10 -2 488.917 203.013 3
 -5 10 -3 91.5991 120.366 3
 -5 10 -4 3.55658 122.668 3
 -5 10 -5 653.747 249.085 3
 -5 10 -6 591.861 241.756 3
 -5 10 -7 -96.5377 144.095 3
 -5 10 -8 37.967 147.594 3
 -5 10 -9 -155.257 181.452 3
 -5 9 8 560.031 219.543 1
 -5 9 7 513.7 199.468 1
 -5 9 6 12.8479 92.5591 1
 -5 9 5 243.547 121.23 1
 -5 9 4 281.179 129.258 1
 -5 9 3 298.715 178.787 3
 -5 9 1 297.962 136.006 3
 -5 9 0 54.2173 107.688 3
 -5 9 -1 532.503 202.114 3
 -5 9 -2 38.4439 108.763 3
 -5 9 -3 136.123 134.483 3
 -5 9 -4 232.651 115.795 3
 -5 9 -5 42.4485 144.203 3
 -5 9 -6 27.5555 132.829 3
 -5 9 -8 -26.6213 116.485 3
 -5 9 -9 111.912 119.986 3
 -5 9 -10 617.25 237.793 3
 -5 9 -11 453.164 229 3
 -5 8 9 166.068 154.695 1
 -5 8 8 758.443 242.637 1
 -5 8 7 130.794 113.677 1
 -5 8 6 154.842 92.9939 1
 -5 8 5 235.597 129.839 1
 -5 8 4 387.636 153.736 1
 -5 8 3 1746.46 320.438 3
 -5 8 2 1667.74 305.305 3
 -5 8 1 115.165 117.3 3
 -5 8 0 320.169 145.854 3
 -5 8 -1 429.681 167.01 3
 -5 8 -2 -37.9651 93.7985 3
 -5 8 -3 609.063 203.812 3
 -5 8 -4 1854.6 337.261 3
 -5 8 -5 452.147 194.37 3
 -5 8 -6 28.781 116.889 3
 -5 8 -7 58.7191 124.057 3
 -5 8 -8 199.482 155.611 3
 -5 8 -9 524.34 236.706 3
 -5 8 -10 532.62 201.423 3
 -5 8 -11 30.062 126.433 3
 -5 8 -12 59.3297 132.339 3
 -5 7 10 -6.49778 146.071 1
 -5 7 9 407.182 180.248 1
 -5 7 8 391.092 162.385 1
 -5 7 7 -11.3365 91.1354 1
 -5 7 6 465.696 161.262 1
 5 -7 -5 -12.6583 99.4438 2
 -5 7 5 54.5079 75.4408 1
 5 -7 -4 560.057 113.283 2
 -5 7 4 427.208 152.287 1
 -5 7 3 2016.52 324.733 3
 -5 7 2 732.972 199.749 3
 -5 7 1 289.709 139.612 3
 -5 7 0 1009.62 232.848 3
 -5 7 -1 17.3902 95.4135 3
 -5 7 -2 510.69 172.489 3
 -5 7 -3 2338.44 349.999 3
 -5 7 -4 158.554 124.373 3
 -5 7 -5 361.592 81.3975 2
 -5 7 -5 7.49061 104.762 3
 -5 7 -6 704.207 146.1 2
 -5 7 -6 659.325 216.12 3
 -5 7 -7 -65.0809 101.028 3
 -5 7 -7 -21.0302 107.096 2
 -5 7 -8 878.38 241.538 3
 -5 7 -8 738.089 202.54 2
 -5 7 -9 758.521 226.464 3
 -5 7 -10 79.251 131.31 3
 -5 7 -11 216.488 166.643 3
 -5 7 -12 270.794 183.257 3
 -5 7 -13 -28.167 126.936 3
 -5 6 11 -99.6576 142.011 1
 -5 6 10 416.486 195.821 1
 -5 6 9 310.276 149.388 1
 -5 6 8 -104.361 77.7084 1
 -5 6 7 537.669 175.972 1
 5 -6 -6 1127.22 225.316 2
 -5 6 6 49.0765 55.0097 1
 -5 6 5 21.5892 80.21 1
 5 -6 -5 655.44 158.167 2
 -5 6 4 1191.84 231.196 1
 5 -6 -4 1005.42 153.55 2
 -5 6 3 784.25 203.163 3
 5 -6 -3 879.792 114.568 2
 -5 6 2 173.482 119.186 3
 -5 6 1 904.713 208.586 3
 -5 6 0 434.571 146.886 3
 -5 6 -1 663.224 181.697 3
 -5 6 -2 725.692 190.06 3
 -5 6 -3 945.658 216.749 3
 -5 6 -4 376.084 154.132 3
 -5 6 -4 342.925 58.2025 2
 -5 6 -5 1008.28 229.932 3
 -5 6 -5 1326.49 163.686 2
 -5 6 -6 312.67 162.636 3
 -5 6 -6 260.742 101.663 2
 -5 6 -7 79.4646 121.856 3
 -5 6 -7 476.972 145.596 2
 -5 6 -8 801.943 222.516 3
 -5 6 -8 674.776 192.721 2
 -5 6 -9 163.731 151.003 3
 -5 6 -9 -146.203 117.585 2
 -5 6 -10 189.101 131.722 3
 -5 6 -11 423.378 189.522 3
 -5 6 -12 -13.0561 123.004 3
 -5 6 -13 294.851 192.159 3
 -5 6 -14 45.991 138.624 3
 -5 5 12 2225.51 413.631 1
 -5 5 11 288.106 173.093 1
 -5 5 10 221.749 147.112 1
 -5 5 9 -17.7712 67.1349 1
 -5 5 8 1216.83 258.533 1
 -5 5 7 651.354 177.951 1
 -5 5 6 16.9217 62.8698 1
 -5 5 5 964.335 211.984 1
 -5 5 4 299.581 121.644 1
 -5 5 3 188.334 111.539 3
 5 -5 -2 1075.12 108.424 2
 -5 5 2 875.387 193.414 3
 5 -5 -2 1065.27 109.357 2
 -5 5 1 838.484 191.851 3
 5 -5 -1 841.305 198.487 3
 -5 5 0 108.826 92.7754 3
 5 -5 0 -4.35532 63.9814 3
 -5 5 -1 917.07 191.194 3
 5 -5 1 855.417 192.041 3
 5 -5 2 451.933 137.504 3
 -5 5 -2 435.231 141.258 3
 -5 5 -3 37.8591 82.9085 3
 5 -5 3 -2.83192 84.8827 3
 -5 5 -4 2455.57 190.308 2
 -5 5 -4 2445.16 317.636 3
 -5 5 -5 595.496 122.161 2
 -5 5 -5 352.653 137.155 3
 -5 5 -6 141.989 119.157 3
 -5 5 -6 81.4974 71.8604 2
 -5 5 -7 1236.15 314.238 3
 -5 5 -7 240.1 113.669 2
 -5 5 -8 62.7999 110.262 3
 -5 5 -8 -183.834 139.043 2
 -5 5 -9 511.563 200.496 3
 -5 5 -9 484.069 173.167 2
 -5 5 -10 759.879 224.735 3
 -5 5 -11 272.039 166.157 3
 -5 5 -12 229.147 162.438 3
 -5 5 -13 627.57 241.487 3
 -5 5 -14 -26.6899 114.296 3
 -5 4 12 218.498 175.316 1
 -5 4 11 294.365 167.008 1
 -5 4 10 -30.1077 68.8807 1
 -5 4 9 1212.47 255.52 1
 -5 4 8 1436.75 270.072 1
 -5 4 7 -145.301 85.5329 1
 -5 4 6 919.021 201.726 1
 -5 4 5 1381.58 243.314 1
 -5 4 4 -17.7865 53.0635 1
 5 -4 -3 1295.59 241.585 3
 -5 4 3 1145.2 216.491 3
 5 -4 -2 1896.81 270.111 3
 -5 4 2 2037.57 273.673 3
 -5 4 1 248.29 106.455 3
 5 -4 -1 179.962 102.322 3
 5 -4 -1 200.949 41.5542 2
 5 -4 0 1012.55 196.362 3
 -5 4 0 977.413 186.282 3
 -5 4 -1 950.496 188.107 3
 5 -4 1 697.24 174.471 3
 -5 4 -2 120.245 76.7066 3
 5 -4 2 121.091 95.7885 3
 -5 4 -3 1797.73 256.87 3
 5 -4 3 1788.47 259.839 3
 -5 4 -3 1756.49 141.161 2
 -5 4 -4 2039.44 276.496 3
 5 -4 4 1969.33 280.181 3
 -5 4 -4 1928.65 186.002 2
 -5 4 -5 -7.49096 48.0502 2
 -5 4 -5 69.0331 85.1828 3
 5 -4 5 36.6907 83.325 3
 -5 4 -6 1277.98 235.931 3
 -5 4 -6 972.757 235.438 1
 -5 4 -6 1206.11 198.746 2
 -5 4 -7 65.7395 63.8822 2
 -5 4 -7 156.481 99.8595 3
 -5 4 -8 221.528 140.342 3
 -5 4 -8 -211.476 111.268 2
 -5 4 -9 1393.25 283.347 3
 -5 4 -9 2005.32 311.941 2
 -5 4 -10 554.597 198.732 3
 -5 4 -11 118.484 139.581 3
 -5 4 -12 64.9771 102.963 3
 -5 4 -13 104.048 163.51 3
 -5 4 -14 367.639 224.42 3
 -5 4 -15 327.871 242.515 3
 -5 3 13 -38.6419 171.044 1
 -5 3 12 353.546 190.45 1
 -5 3 11 -93.354 116.794 1
 -5 3 10 181.666 121.399 1
 -5 3 9 1267.86 252.098 1
 -5 3 8 308.876 119.95 1
 -5 3 7 123.565 83.188 1
 -5 3 6 96.4101 66.8575 1
 -5 3 5 36.9996 46.0013 1
 -5 3 4 1786 246.27 1
 5 -3 -4 1565.92 250.166 3
 -5 3 3 2163.41 273.85 3
 5 -3 -3 2630.66 311.362 3
 -5 3 3 2349.47 269.604 1
 5 -3 -2 74.9839 76.5057 3
 -5 3 2 54.4571 70.9773 3
 5 -3 -1 1067.51 123.679 2
 -5 3 1 1189.91 195.203 3
 5 -3 -1 1081.21 197.255 3
 5 -3 0 -3.77519 9.76961 2
 -5 3 0 39.1314 76.524 3
 5 -3 0 59.2644 77.3742 3
 -5 3 -1 879.567 168.48 3
 5 -3 1 856.896 88.573 2
 5 -3 1 868.929 174.312 3
 -5 3 -2 4293.49 219.401 2
 -5 3 -2 4318.7 357.528 3
 5 -3 2 4153.26 362.063 3
 -5 3 -3 4830.97 387.73 3
 5 -3 3 4679.71 389.579 3
 -5 3 -3 5152.54 275.392 2
 -5 3 -4 443.996 97.5431 2
 5 -3 4 471.329 141.08 3
 -5 3 -4 411.083 126.687 3
 -5 3 -5 1070.68 205.405 3
 5 -3 5 1182.72 214.225 3
 -5 3 -5 1076.33 168.661 2
 -5 3 -6 508.149 153.636 3
 5 -3 6 380.327 132.673 3
 -5 3 -6 522.215 149.899 1
 -5 3 -6 485.499 128.424 2
 -5 3 -7 27.9329 79.9406 3
 -5 3 -7 -99.2074 105.128 2
 -5 3 -7 -5.81505 86.6404 1
 -5 3 -8 1141.38 235.449 3
 -5 3 -8 1492.55 254.696 2
 -5 3 -9 1931.05 311.061 3
 -5 3 -9 1976.11 308.033 2
 -5 3 -10 -53.7572 133.899 3
 -5 3 -11 297.586 164.964 3
 -5 3 -12 29.8947 145.268 3
 -5 3 -13 360.958 209.271 3
 -5 3 -14 672.003 249.572 3
 -5 3 -15 331.858 195.664 3
 -5 2 13 -74.0622 163.791 1
 -5 2 12 153.64 147.569 1
 -5 2 11 506.203 188.617 1
 -5 2 10 1080.96 242.176 1
 -5 2 9 1019.32 226.425 1
 -5 2 8 -26.8081 47.8822 1
 -5 2 7 235.934 97.6994 1
 -5 2 6 -1.40062 44.0742 1
 5 -2 -5 1764.8 264.5 3
 -5 2 5 1834.94 250.264 1
 -5 2 4 1791.41 235.345 1
 5 -2 -4 1823.83 256.098 3
 5 -2 -3 353.136 117.006 3
 -5 2 3 347.348 109.95 1
 -5 2 2 546.131 130.669 3
 5 -2 -2 570.058 143.476 3
 5 -2 -1 482.96 112.749 2
 -5 2 1 425.583 118.074 3
 5 -2 -1 519.006 130.283 3
 -5 2 0 116.885 77.9532 3
 5 -2 0 115.531 47.2708 2
 5 -2 0 69.8906 63.1528 3
 -5 2 -1 3888.2 314.15 3
 5 -2 1 3503.93 304.114 3
 5 -2 1 4055.66 230.344 2
 5 -2 2 6267.18 409.71 3
 -5 2 -2 6419.46 403.306 3
 5 -2 2 6285.19 308.104 2
 -5 2 -3 1195.19 185.227 3
 5 -2 3 1208.44 189.631 3
 -5 2 -3 1216.94 149.838 2
 -5 2 -4 479.558 104.911 2
 -5 2 -4 755.961 157.823 3
 5 -2 4 647.256 149.785 3
 -5 2 -5 745.274 159.524 3
 5 -2 5 735.976 166.702 3
 -5 2 -5 695.607 148.596 1
 -5 2 -5 674.204 139.487 2
 -5 2 -6 52.5364 79.6438 3
 -5 2 -6 238.721 102.944 1
 -5 2 -6 126.032 75.1238 2
 -5 2 -7 1362.34 230.282 1
 -5 2 -7 1494.8 236.71 2
 -5 2 -7 1295.78 230.922 3
 -5 2 -8 2252.53 299.665 1
 -5 2 -8 2286.6 312.757 3
 -5 2 -8 1770.68 277.265 2
 -5 2 -9 624.264 184.342 3
 -5 2 -9 102.64 83.9454 2
 -5 2 -10 -64.744 108.168 3
 -5 2 -11 120.298 127.899 3
 -5 2 -12 83.9306 108.606 3
 -5 2 -13 1230.11 310.801 3
 -5 2 -14 555.439 238.355 3
 -5 2 -15 -146.845 157.013 3
 -5 2 -16 70.7881 191.17 3
 -5 1 14 281.199 220.395 1
 -5 1 12 322.686 181.062 1
 -5 1 11 1072.51 264.264 1
 -5 1 10 1082.89 242.681 1
 -5 1 9 91.6209 71.0241 1
 -5 1 8 376.836 128.025 1
 -5 1 7 63.7175 51.429 1
 5 -1 -6 322.826 123.079 3
 -5 1 6 341.967 109.09 1
 5 -1 -5 2116.91 268.183 3
 -5 1 5 2379.56 269.623 1
 5 -1 -4 1176.64 196.582 3
 -5 1 4 1279.55 189.14 1
 5 -1 -3 132.362 76.4464 3
 -5 1 3 142.127 79.3548 1
 5 -1 -2 1308.69 190.1 3
 -5 1 2 1313.29 173.033 1
 -5 1 2 1149.38 174.546 3
 -5 1 1 460.36 115.677 3
 5 -1 -1 589.174 130.181 3
 -5 1 0 2147.54 220.721 3
 5 -1 0 2228.27 229.823 3
 5 -1 0 2422.48 208.387 2
 -5 1 -1 4606.54 313.445 3
 5 -1 1 4298.21 308.805 3
 5 -1 1 4565.39 276.168 2
 5 -1 2 1167.89 167.457 3
 5 -1 2 1144.08 144.705 2
 -5 1 -2 1211.31 168.887 3
 -5 1 -2 1084.22 140.692 2
 -5 1 -3 161.25 65.2337 2
 -5 1 -3 124.231 72.9784 3
 5 -1 3 151.945 78.954 3
 5 -1 3 198.183 72.2856 2
 -5 1 -4 595.614 125.388 2
 -5 1 -4 681.368 139.592 3
 5 -1 4 689.919 147.231 3
 -5 1 -5 45.8461 38.2179 2
 -5 1 -5 -6.23093 60.5546 3
 5 -1 5 31.0343 65.9417 3
 -5 1 -5 13.4101 30.1469 1
 -5 1 -6 1018.31 185.192 3
 -5 1 -6 825.772 153.925 1
 -5 1 -6 951.95 184.247 2
 -5 1 -7 1995.36 268.825 3
 -5 1 -7 2461.03 285.314 1
 -5 1 -7 2124.75 291.443 2
 -5 1 -8 356.2 119.38 1
 -5 1 -8 390.402 142.445 3
 -5 1 -8 636.978 164.603 2
 -5 1 -9 12.2562 79.9828 3
 -5 1 -9 -124.574 118.94 2
 -5 1 -10 728.817 205.484 3
 5 -1 11 24.8415 70.7323 1
 -5 1 -11 -28.8455 124.012 3
 5 -1 12 697.646 231.406 1
 -5 1 -12 671.053 220.119 3
 -5 1 -13 837.861 253.37 3
 5 -1 13 668.137 246.794 1
 -5 1 -14 -73.0316 135.097 3
 5 -1 14 25.5273 147.576 1
 -5 1 -15 28.9865 134.274 3
 5 -1 15 -179 236.063 1
 5 -1 16 463.176 301.098 1
 -5 1 -16 234.767 196.074 3
 -5 0 14 597.31 259.006 1
 -5 0 13 100.187 142.743 1
 -5 0 12 740.121 229.796 1
 -5 0 11 468.979 174.121 1
 -5 0 10 13.2982 47.6497 1
 -5 0 9 1498.76 260.706 1
 -5 0 8 802.93 176.656 1
 -5 0 7 30.401 33.4209 1
 5 0 -7 73.9056 53.1046 1
 5 0 -6 1694.55 250.321 3
 -5 0 6 1453.95 213.172 1
 5 0 -6 1682.52 230.01 1
 -5 0 5 1202.88 186.596 1
 5 0 -5 1250.79 205.085 3
 -5 0 4 -6.38214 40.4775 1
 5 0 -4 29.0449 59.992 3
 5 0 -3 2099.91 234.622 3
 -5 0 3 1901.64 206.204 1
 5 0 -2 2282.26 228.824 3
 -5 0 2 2364.92 214.245 1
 5 0 -1 416.556 102.653 3
 -5 0 1 465.027 105.097 3
 5 0 0 3506.64 271.737 2
 5 0 0 3478.18 257.533 3
 -5 0 0 3432.4 250.407 3
 -5 0 -1 914.068 147.995 2
 5 0 1 764.975 126.73 3
 -5 0 -1 769.694 124.691 3
 5 0 1 856.456 134.315 2
 -5 0 -2 -6.61678 51.6625 3
 5 0 2 47.5211 65.1653 3
 -5 0 -2 39.3236 54.942 2
 5 0 2 -3.73567 39.471 2
 5 0 3 3649.64 289.771 2
 -5 0 -3 4174.61 285.374 3
 5 0 3 3890.79 279.346 3
 -5 0 -3 3944.95 301.424 2
 -5 0 -4 757.988 135.353 1
 -5 0 -4 735.86 134.92 3
 5 0 4 655.918 129.254 3
 -5 0 -4 679.48 141.876 2
 5 0 4 633.246 138.68 2
 -5 0 -5 660.726 143.226 3
 -5 0 -5 794.94 142.551 1
 -5 0 -5 895.614 167.252 2
 -5 0 -6 993.385 180.88 3
 -5 0 -6 1283.98 183.106 1
 -5 0 -6 1092.35 199.767 2
 -5 0 -7 362.379 107.833 1
 -5 0 -7 251.376 113.557 3
 -5 0 -7 165.211 90.0755 2
 5 0 8 824.258 178.898 1
 -5 0 -8 751.098 178.861 3
 -5 0 -8 2622.85 294.791 1
 -5 0 -8 3320.82 395.016 2
 -5 0 -9 1560.67 244.535 1
 -5 0 -9 1139.1 225.445 3
 5 0 9 1327.27 242.821 1
 -5 0 -9 1097.93 238.246 2
 -5 0 -10 152.495 128.68 3
 5 0 10 328.413 129.806 1
 -5 0 -11 770.907 214.519 3
 5 0 11 665.353 196.016 1
 -5 0 -12 159.001 151.51 3
 5 0 12 244.633 144.643 1
 -5 0 -13 18.1616 108.396 3
 5 0 13 48.8314 122.509 1
 -5 0 -14 122.531 139.556 3
 5 0 14 110.34 158.92 1
 -5 0 -15 386.825 215.208 3
 5 0 15 320.11 236.268 1
 5 0 16 -174.529 262.282 1
 -5 0 -16 -438.69 217.567 3
 -5 -1 14 -273.554 255.088 1
 -5 -1 13 120.95 149.358 1
 -5 -1 12 384.969 176.769 1
 -5 -1 11 -82.0743 116.718 1
 -5 -1 10 767.728 213.69 1
 -5 -1 9 1270.61 236.846 1
 -5 -1 8 -40.8693 42.3605 1
 -5 -1 7 827.637 168.619 1
 5 1 -7 810.158 166.381 1
 5 1 -6 449.452 114.477 1
 -5 -1 6 492.554 123.675 1
 5 1 -5 49.5539 52.0999 1
 -5 -1 5 69.6606 55.2909 1
 5 1 -4 2439.11 249.817 3
 -5 -1 4 2032.17 213.781 1
 5 1 -4 2267.59 226.71 1
 5 1 -3 3017.76 277.81 3
 -5 -1 3 1869.79 191.51 1
 5 1 -2 105.201 63.6673 3
 -5 -1 2 173.662 65.9224 1
 -5 -1 1 1058.38 122.653 1
 5 1 -1 959.169 135.372 3
 5 1 0 536.334 95.7736 3
 -5 -1 0 499.786 90.1307 3
 5 1 0 531.882 119.548 2
 5 1 1 35.5924 43.1574 3
 -5 -1 -1 14.4275 37.4973 3
 5 1 1 72.6874 62.9911 2
 -5 -1 -1 60.3739 64.9092 2
 -5 -1 -2 4243.62 241.819 3
 5 1 2 4359.75 252.58 3
 5 1 2 4108.21 310.751 2
 -5 -1 -2 3874.25 298.057 2
 -5 -1 -3 2664.58 206.093 3
 5 1 3 2724.38 213.452 3
 -5 -1 -3 2779.41 214.529 1
 5 1 3 2342.65 245.335 2
 -5 -1 -3 2617.37 255.547 2
 -5 -1 -4 392.315 118.811 2
 -5 -1 -4 211.658 81.3386 3
 5 1 4 325.211 105.774 2
 -5 -1 -4 143.9 49.6876 1
 -5 -1 -5 2357.55 228.071 3
 -5 -1 -5 2455.7 224.315 1
 5 1 5 2134.22 269.676 2
 -5 -1 -5 2738.88 299.119 2
 5 1 6 1567.62 209.841 1
 -5 -1 -6 1512.83 202.501 3
 -5 -1 -6 1522.78 186.498 1
 -5 -1 -6 1443.89 229.575 2
 -5 -1 -7 1126.4 191.303 3
 5 1 7 1096.29 188.008 1
 -5 -1 -7 940.592 155.515 1
 -5 -1 -7 1182.26 226.58 2
 -5 -1 -8 2184.89 279.77 3
 5 1 8 2161.4 280.396 1
 -5 -1 -8 2448.95 340.348 2
 -5 -1 -8 2232.36 255.574 1
 -5 -1 -9 719.839 158.233 1
 5 1 9 601.968 157.033 1
 -5 -1 -9 421.929 161.914 2
 5 1 10 1356.45 249.337 1
 5 1 11 792.756 202.187 1
 5 1 12 326.795 151.965 1
 5 1 13 2.49786 164.373 1
 5 1 14 674.789 255.4 1
 5 1 15 25.8996 179.9 1
 5 1 16 5.46161 205.624 1
 -5 -2 14 -25.5472 169.82 1
 -5 -2 13 22.4527 125.46 1
 -5 -2 12 -33.0664 115.585 1
 -5 -2 11 985.462 235.455 1
 -5 -2 10 1208.85 245.281 1
 -5 -2 9 163.566 88.3673 1
 -5 -2 8 752.384 174.191 1
 5 2 -7 205.64 83.8138 1
 -5 -2 7 157.208 72.5714 1
 5 2 -6 34.2642 34.8319 1
 -5 -2 6 32.8548 36.5399 1
 5 2 -5 3368.08 285.51 1
 -5 -2 5 3153.25 279.559 1
 -5 -2 4 3909.78 284.539 1
 5 2 -4 3777.8 280.164 1
 -5 -2 3 75.6495 43.3491 1
 5 2 -3 106.096 55.8615 1
 5 2 -2 739.707 119.418 3
 -5 -2 2 746.233 104.046 1
 -5 -2 1 33.9341 33.4728 1
 5 2 -1 38.9995 39.3611 3
 -5 -2 0 349.493 70.5931 3
 5 2 0 377.527 72.4255 3
 -5 -2 0 370.09 60.3186 1
 5 2 0 412.409 115.952 2
 -5 -2 -1 2502.84 256.726 2
 -5 -2 -1 2209.15 146.745 3
 5 2 1 2218.32 240.648 2
 5 2 1 2183.99 148.018 3
 5 2 2 6493.93 260.306 3
 -5 -2 -2 6188.77 246.942 3
 5 2 2 6193.42 400.857 2
 -5 -2 -2 6376.51 402.183 2
 -5 -2 -3 8.08582 24.9903 1
 5 2 3 39.611 70.757 2
 -5 -2 -3 36.6727 53.8871 2
 -5 -2 -3 3.97786 39.0868 3
 -5 -2 -4 1787.47 169.694 3
 -5 -2 -4 1593.04 151.043 1
 5 2 4 1901.52 248.036 2
 -5 -2 -4 1886.41 243.182 2
 -5 -2 -5 941.246 143.526 3
 5 2 5 1277.47 168.241 1
 -5 -2 -5 1177.91 141.658 1
 5 2 5 1133.4 208.904 2
 -5 -2 -5 1125.07 200.508 2
 -5 -2 -6 123.959 72.8379 2
 -5 -2 -6 147.542 73.5692 3
 5 2 6 93.9017 59.0873 1
 5 2 7 2247.49 254.469 1
 -5 -2 -7 1997.98 294.234 2
 -5 -2 -7 2195.63 228.886 1
 -5 -2 -8 1498.61 204.219 1
 5 2 8 1378.21 215.494 1
 -5 -2 -8 1360.9 260.441 2
 5 2 9 -8.38759 27.3826 1
 -5 -2 -9 -78.2261 120.57 2
 5 2 10 766.176 182.643 1
 -5 -2 -10 978.366 188.64 1
 5 2 11 159.674 95.5454 1
 5 2 12 -21.8691 88.9799 1
 5 2 13 859.412 243.129 1
 5 2 14 241.645 173.265 1
 5 2 15 288.656 209.965 1
 5 2 16 159.719 220.402 1
 -5 -3 14 180.103 203.61 1
 -5 -3 13 -128 150.38 1
 -5 -3 12 541.929 201.026 1
 -5 -3 11 1879.44 325.429 1
 -5 -3 10 253.279 121.243 1
 -5 -3 9 305.577 114.4 1
 -5 -3 8 1006.46 197.84 1
 5 3 -7 61.9645 61.3671 1
 -5 -3 7 40.3582 38.4472 1
 5 3 -6 1696.78 212.885 1
 -5 -3 6 1821.52 228.419 1
 5 3 -5 2744.15 251.59 1
 -5 -3 5 2886.67 264.979 1
 5 3 -4 118.179 54.1205 1
 -5 -3 4 79.8571 49.3656 1
 5 3 -3 377.916 82.7352 1
 -5 -3 3 293.152 73.7952 1
 5 3 -2 220.42 57.8814 1
 -5 -3 2 245.015 60.7039 1
 -5 -3 1 54.1628 29.5996 1
 5 3 -1 17.4255 32.5212 3
 5 3 0 508.222 67.6176 3
 -5 -3 0 456.198 49.6875 1
 5 3 0 470.494 131.083 2
 -5 -3 -1 745.927 152.619 2
 -5 -3 -1 668.136 61.951 3
 5 3 1 659.385 63.994 3
 5 3 1 589.095 142.606 2
 -5 -3 -2 92.0217 29.8521 3
 5 3 2 131.216 87.0629 2
 -5 -3 -2 69.507 22.1561 1
 -5 -3 -2 178.494 82.6746 2
 -5 -3 -3 3063.42 165.025 3
 -5 -3 -3 3019.04 155.563 1
 5 3 3 3373.3 321.787 2
 -5 -3 -3 3242.52 309.974 2
 -5 -3 -4 3520.41 217.857 3
 5 3 4 3608.63 224.951 1
 5 3 4 3545.88 347.038 2
 -5 -3 -4 3208.2 322.097 2
 -5 -3 -4 3510.85 198.732 1
 5 3 5 195.411 65.0244 1
 -5 -3 -5 250.896 92.9486 2
 -5 -3 -5 183.086 56.9663 1
 5 3 5 208.535 102.512 2
 -5 -3 -6 1960.41 188.999 1
 5 3 6 2046.37 297.245 2
 -5 -3 -6 2069.53 290.32 2
 5 3 6 2156.52 218.285 1
 -5 -3 -7 2128.56 216.007 1
 5 3 7 1351.16 181.68 1
 -5 -3 -7 1856.17 294.318 2
 -5 -3 -8 44.21 115 2
 5 3 8 -30.054 34.0105 1
 -5 -3 -8 106.339 60.3503 1
 5 3 9 637.419 149.253 1
 -5 -3 -9 558.149 133.083 1
 5 3 10 792.947 180.704 1
 -5 -3 -10 679.973 158.953 1
 5 3 11 -59.3787 79.8208 1
 5 3 12 178.069 120.355 1
 5 3 13 626.735 207.424 1
 5 3 14 15.7358 135.559 1
 5 3 15 83.5226 157.373 1
 5 3 16 -3.79898 205.017 1
 -5 -4 14 -17.4691 193.796 1
 -5 -4 13 262.744 195.754 1
 -5 -4 12 975.777 261.156 1
 -5 -4 11 903.652 236.231 1
 -5 -4 10 180.31 112.56 1
 -5 -4 9 1556.7 267.641 1
 -5 -4 8 683.334 166.072 1
 -5 -4 7 584.888 142.041 1
 5 4 -7 338.518 109.307 1
 5 4 -6 2096.65 233.895 1
 -5 -4 6 1280.25 190.827 1
 -5 -4 5 648.763 131.209 1
 5 4 -5 738.705 126.063 1
 -5 -4 4 -54.326 43.4356 1
 5 4 -4 25.8302 29.9253 1
 5 4 -3 1142.82 131.612 1
 -5 -4 3 1228.01 143.353 1
 -5 -4 2 198.537 53.7866 1
 5 4 -2 265.458 57.1077 1
 5 4 -1 334.683 47.2063 1
 5 4 -1 502.806 168.06 2
 -5 -4 1 335.089 55.8694 1
 5 4 0 2181.06 267.482 2
 5 4 0 2072.8 102.401 3
 5 4 1 316.158 118.882 2
 -5 -4 -1 207.177 106.033 2
 5 4 2 2000.47 255.004 2
 -5 -4 -2 1810.99 241.353 2
 5 4 3 1051.46 91.7874 1
 -5 -4 -3 1129.19 86.5486 1
 5 4 3 1001.35 190.658 2
 -5 -4 -3 927.361 174.861 2
 -5 -4 -3 1045.45 85.1671 3
 5 4 4 398.81 127.058 2
 -5 -4 -4 584.869 145.279 2
 -5 -4 -4 475.487 73.012 1
 5 4 4 471.068 78.2306 1
 -5 -4 -5 4474.14 251.848 1
 5 4 5 4283.96 257.919 1
 5 4 5 4288.77 410.262 2
 -5 -4 -5 4564.83 423.78 2
 -5 -4 -6 1881.53 183.026 1
 5 4 6 2287.32 211.236 1
 5 4 6 1862.59 284.543 2
 -5 -4 -6 2191.84 307.297 2
 -5 -4 -7 1563.83 182.935 1
 -5 -4 -7 1260.03 247.514 2
 5 4 7 1387.54 181.257 1
 5 4 8 127.896 59.7664 1
 -5 -4 -8 174.028 70.1258 1
 -5 -4 -9 221.859 88.4034 1
 5 4 9 304.688 101.219 1
 5 4 10 -33.783 71.8046 1
 -5 -4 -10 86.1776 67.5748 1
 5 4 11 365.91 135.235 1
 5 4 12 796.214 207.221 1
 5 4 13 153.2 123.279 1
 5 4 14 -3.4419 127.617 1
 5 4 15 -129.707 164.482 1
 5 4 16 7.9967 194.858 1
 -5 -5 14 -49.3462 196.027 1
 -5 -5 13 869.816 288.635 1
 -5 -5 12 425.805 198.751 1
 -5 -5 11 -11.6441 104.288 1
 -5 -5 10 697.286 202.796 1
 -5 -5 9 74.4125 69.1428 1
 -5 -5 8 214.557 99.4954 1
 5 5 -7 936.113 174.945 1
 -5 -5 7 910.852 181.891 1
 5 5 -6 1163.25 176.713 1
 -5 -5 6 1134.06 191.318 1
 -5 -5 5 -56.9942 45.026 1
 5 5 -5 27.433 33.6354 1
 5 5 -4 593.499 105.032 1
 -5 -5 4 1308.31 179.781 1
 -5 -5 3 1225.17 150.675 1
 -5 -5 2 605.576 96.9872 1
 5 5 -2 637.903 86.2763 1
 5 5 -1 1923.92 276.193 2
 5 5 -1 1882.7 118.684 1
 5 5 0 2649.35 307.606 2
 5 5 0 2625.13 99.1124 1
 5 5 0 2554.64 108.636 3
 -5 -5 -1 949.901 189.203 2
 5 5 1 995.966 195.244 2
 5 5 2 2595.2 305.74 2
 -5 -5 -2 2530.11 293.576 2
 5 5 3 -22.7608 75.4562 2
 -5 -5 -3 28.2528 49.5876 2
 -5 -5 -3 4.07391 16.2218 3
 5 5 3 17.2606 22.1955 1
 -5 -5 -4 1211.65 115.755 1
 5 5 4 1203.99 216.935 2
 5 5 4 1110.83 112.204 1
 -5 -5 -4 1439.23 231.121 2
 -5 -5 -5 820.06 185.31 2
 5 5 5 921.095 200.324 2
 5 5 5 806.108 112.828 1
 -5 -5 -5 867.961 115.125 1
 5 5 6 1048.49 222.259 2
 5 5 6 1688.09 181.94 1
 -5 -5 -6 1521.99 259.211 2
 -5 -5 -6 1637.74 175.809 1
 -5 -5 -7 4.96272 69.3678 2
 -5 -5 -7 -26.0786 30.6943 1
 5 5 7 0.3604 21.5876 1
 -5 -5 -8 1492.4 291.378 2
 5 5 8 1455.39 202.005 1
 -5 -5 -8 1478.74 195.662 1
 5 5 9 157.211 74.2172 1
 -5 -5 -9 162.763 82.1847 1
 -5 -5 -10 576.057 144.06 1
 5 5 10 433.587 126.645 1
 5 5 11 325.598 124.111 1
 5 5 12 157.308 113.159 1
 5 5 13 163.96 124.879 1
 5 5 14 351.038 182.285 1
 5 5 15 -82.5139 184.899 1
 5 5 16 232.184 227.547 1
 -5 -6 14 472.046 283.717 1
 -5 -6 13 576.31 260.902 1
 -5 -6 12 142.818 151.407 1
 -5 -6 11 1022.02 266.436 1
 -5 -6 10 85.0942 109.857 1
 -5 -6 9 152.373 106.15 1
 -5 -6 8 1140.83 226.826 1
 5 6 -7 1065.16 186.903 1
 -5 -6 7 1001.55 201.02 1
 5 6 -6 104.438 66.8608 1
 -5 -6 6 -33.3513 42.0241 1
 5 6 -5 2352.74 250.995 1
 -5 -6 5 970.166 170.679 1
 5 6 -4 1232.69 156.203 1
 -5 -6 4 1218.8 177.904 1
 -5 -6 3 -49.8452 40.3459 1
 5 6 -3 -23.8521 27.5791 1
 5 6 -2 1024.45 115.055 1
 5 6 -2 1169 140.861 3
 5 6 -1 1685.39 262.855 2
 5 6 -1 1940.88 145.062 3
 5 6 -1 1886.29 136.376 1
 5 6 0 113.828 94.8043 2
 5 6 0 222.941 44.3204 1
 5 6 0 169.971 38.3367 3
 -5 -6 -1 2184.62 291.919 2
 5 6 1 1816.95 263.008 2
 -5 -6 -2 198.278 102.135 2
 5 6 2 213.586 40.7342 1
 5 6 2 116.738 90.8873 2
 5 6 3 331.755 130.01 2
 5 6 3 259.284 52.3384 1
 -5 -6 -3 211.714 42.8966 3
 -5 -6 -3 272.87 101.661 2
 5 6 4 868.584 190.989 2
 5 6 4 973.865 110.146 1
 -5 -6 -4 920.934 102.12 3
 -5 -6 -4 906.876 189.921 2
 5 6 5 694.376 107.23 1
 -5 -6 -5 554.046 156.656 2
 -5 -6 -6 28.4308 36.6523 1
 5 6 6 21.4751 16.8951 1
 -5 -6 -7 897.244 230.37 2
 -5 -6 -7 970.181 151.13 1
 5 6 7 976.056 228.457 2
 5 6 7 814.997 139.813 1
 5 6 8 25.8506 34.7283 1
 -5 -6 -9 122.874 67.6213 1
 5 6 9 117.379 66.977 1
 5 6 10 582.683 153.16 1
 5 6 11 551.916 158.193 1
 5 6 12 -89.2542 100.046 1
 5 6 13 1009.04 245.405 1
 5 6 14 -57.6384 143.482 1
 5 6 15 103.405 187.206 1
 5 6 16 896.493 328.564 1
 -5 -7 14 502.234 319.619 1
 -5 -7 13 491.916 260.476 1
 -5 -7 12 891.692 291.022 1
 -5 -7 11 717.459 244.192 1
 -5 -7 10 306.28 150.779 1
 -5 -7 9 453.975 177.815 1
 -5 -7 8 732.055 195.196 1
 5 7 -7 -30.8475 73.013 1
 -5 -7 6 634.482 155.519 1
 5 7 -6 673.477 142.891 1
 5 7 -5 2008.75 228.528 1
 5 7 -4 167.327 66.5246 1
 5 7 -4 150.831 78.6076 3
 5 7 -3 448.495 107.674 3
 5 7 -3 482.967 98.2739 1
 5 7 -2 369.288 78.8825 1
 5 7 -2 272.545 151.862 2
 5 7 -2 244.053 74.6764 3
 5 7 -1 92.3033 34.6197 1
 5 7 -1 52.811 39.5534 3
 5 7 -1 65.5435 70.8968 2
 5 7 0 2263.04 147.621 3
 5 7 0 2144.72 163.004 1
 -5 -7 -1 1774.27 270.97 2
 5 7 1 1767.17 268.65 2
 5 7 1 1699.24 113.828 3
 -5 -7 -2 58.9932 62.1383 2
 5 7 2 47.8926 33.1274 1
 -5 -7 -3 1249.23 112.923 3
 5 7 3 1373.81 127.748 1
 5 7 3 1373.43 237.722 2
 -5 -7 -3 1352.62 233.696 2
 5 7 4 1211.18 132.627 1
 -5 -7 -4 1066.99 120.852 3
 5 7 4 1061.53 218.209 2
 -5 -7 -4 1279.55 229.743 2
 5 7 5 137.101 84.1771 2
 -5 -7 -5 75.4097 83.2491 2
 5 7 5 134.394 53.6592 1
 -5 -7 -5 183.872 63.1319 3
 -5 -7 -6 1489.86 175.863 3
 5 7 6 1609.22 186.115 1
 5 7 6 1389.75 262.845 2
 -5 -7 -6 1430.73 289.992 2
 -5 -7 -7 428.948 179.073 2
 5 7 7 806.87 142.092 1
 -5 -7 -7 481.534 115.045 3
 5 7 7 642.053 205.861 2
 -5 -7 -8 138.106 75.1773 1
 5 7 8 24.6974 33.7798 1
 -5 -7 -9 713.138 152.915 1
 5 7 9 813.663 164.644 1
 5 7 10 534.286 145.227 1
 5 7 11 -12.8312 60.4361 1
 5 7 12 439.298 166.683 1
 5 7 13 341.931 166.671 1
 5 7 14 -37.3909 144.931 1
 5 7 15 50.5776 167.799 1
 5 7 16 -4.72246 206.224 1
 -5 -8 14 -239.441 286.348 1
 5 8 -13 48.4241 171.531 3
 -5 -8 13 349.48 252.39 1
 -5 -8 12 712.046 291.704 1
 -5 -8 11 257.676 182.239 1
 -5 -8 10 84.7258 120.863 1
 -5 -8 9 197.709 135.408 1
 5 8 -9 74.3814 123.515 3
 5 8 -8 0.34715 91.3288 3
 5 8 -7 620.753 178.07 3
 5 8 -7 623.376 167.129 1
 5 8 -6 1654.71 251.812 3
 5 8 -6 1601.87 227.935 1
 5 8 -5 150.095 78.6647 1
 5 8 -5 164.544 97.1674 3
 5 8 -4 321.381 94.5509 1
 5 8 -4 565.301 135.797 3
 5 8 -3 727.756 210.687 2
 5 8 -3 486.02 103.63 1
 5 8 -3 546.284 122.132 3
 5 8 -2 -10.4154 39.3646 1
 5 8 -2 7.5393 94.2474 2
 5 8 -2 -0.14752 46.6637 3
 5 8 -1 2282.52 319.861 2
 5 8 -1 1920.18 178.346 3
 5 8 -1 2037.58 191.018 1
 5 8 0 2431.13 180.581 3
 5 8 0 2354.9 324.995 2
 5 8 1 173.442 52.342 3
 -5 -8 -1 175.609 55.9467 3
 5 8 1 21.3689 58.0488 2
 -5 -8 -2 556.707 151.084 2
 5 8 2 542.738 156.515 2
 -5 -8 -2 511.537 83.8133 3
 5 8 3 240.035 65.5897 1
 5 8 3 309.463 116.349 2
 -5 -8 -3 318.599 133.621 2
 -5 -8 -3 319.044 71.5549 3
 5 8 4 55.6081 49.9585 2
 -5 -8 -4 131.468 96.1021 2
 -5 -8 -4 41.3204 38.9766 3
 5 8 4 38.698 34.6412 1
 5 8 5 1035.39 143.453 1
 5 8 5 1053.23 227.357 2
 -5 -8 -5 1043.33 231.187 2
 -5 -8 -5 835.242 130.921 3
 5 8 6 1343.97 174.505 1
 -5 -8 -6 1343.39 179.371 3
 -5 -8 -6 1191.07 270.607 2
 5 8 6 1061.92 237.035 2
 -5 -8 -7 -7.91688 68.1105 3
 5 8 7 16.9289 23.9763 1
 5 8 7 136.086 106.983 2
 5 8 8 3846.81 399.991 1
 -5 -8 -8 661.698 151.613 3
 -5 -8 -9 649.732 162.732 3
 5 8 10 76.9361 70.7318 1
 5 8 11 869.76 202.658 1
 5 8 12 409.729 165.335 1
 5 8 13 -73.5449 123.205 1
 5 8 14 2242.83 386.449 1
 5 8 15 169.314 207.642 1
 5 8 16 -75.4859 300.293 1
 5 9 -13 457.881 262.47 3
 5 9 -12 268.333 224.213 3
 5 9 -11 101.732 150.618 3
 5 9 -10 99.2166 133.609 3
 5 9 -9 -35.1864 101.759 3
 5 9 -8 -1.44583 228.486 3
 5 9 -7 1602.56 276.003 3
 5 9 -6 880.619 201.458 1
 5 9 -6 815.026 191.188 3
 5 9 -5 284.117 107.822 1
 5 9 -5 340.997 131.051 3
 5 9 -4 659.435 140.159 1
 5 9 -4 771.801 159.032 3
 5 9 -3 58.1962 90.3199 2
 5 9 -3 52.9948 67.4609 3
 5 9 -3 20.2362 52.2621 1
 5 9 -2 676.765 129.187 1
 5 9 -2 502.896 115.512 3
 5 9 -2 514.39 167.552 2
 5 9 -1 1721.96 187.577 3
 5 9 -1 1489.43 184.828 1
 5 9 -1 1514.34 269.617 2
 5 9 0 1042.36 135.651 3
 5 9 0 2102.56 309.425 2
 5 9 1 115.086 51.731 3
 -5 -9 -1 137.204 59.4201 3
 5 9 2 374.733 82.9512 3
 -5 -9 -2 60.0758 64.864 2
 -5 -9 -2 337.782 79.1648 3
 5 9 3 -3.5916 35.6508 2
 -5 -9 -3 48.9095 51.2932 3
 5 9 3 40.1131 41.8528 1
 5 9 4 854.835 201.67 2
 -5 -9 -4 762.572 203.622 2
 -5 -9 -4 573.639 111.227 3
 5 9 4 669.664 118.541 1
 -5 -9 -5 1114.47 249.775 2
 -5 -9 -5 1040.45 156.317 3
 5 9 5 1243.18 169.927 1
 5 9 5 1154.75 242.907 2
 -5 -9 -6 45.171 54.5715 3
 5 9 6 8.7683 19.5292 1
 -5 -9 -7 540.886 139.51 3
 5 9 7 645.372 139.619 1
 5 9 7 776.792 225.433 2
 -5 -9 -8 775.51 168.889 3
 5 9 8 670.514 148.23 1
 5 9 9 -93.8997 76.4516 1
 -5 -9 -9 3321.01 344.626 3
 5 9 10 264.193 117.134 1
 5 9 11 1246.82 243.21 1
 5 9 12 268.975 150.9 1
 5 9 14 237.491 187.25 1
 5 9 15 -34.3918 197.995 1
 5 10 -12 -31.5285 174.732 3
 5 10 -11 76.4885 149.411 3
 5 10 -10 48.0744 114.134 3
 5 10 -9 102.469 131.154 3
 5 10 -8 931.054 251.142 3
 5 10 -7 604.691 191.927 3
 5 10 -6 5.9153 85.4158 3
 5 10 -5 1096.53 205.109 1
 5 10 -5 1050.06 207.586 3
 5 10 -4 175.693 104.069 3
 5 10 -4 252.492 114.733 1
 5 10 -4 172.279 126.722 2
 5 10 -3 153.546 92.1427 1
 5 10 -3 95.6678 83.0784 2
 5 10 -3 191.998 91.9141 3
 5 10 -2 1176.38 181.623 3
 5 10 -2 1112.81 250.052 2
 5 10 -2 1262.45 201.731 1
 5 10 -1 750.128 140.949 3
 5 10 -1 696.678 191.93 2
 5 10 -1 1087.53 175.647 1
 5 10 0 29.5917 58.9542 3
 5 10 0 22.6024 49.6522 2
 -5 -10 0 40.5863 52.2704 3
 5 10 1 -9.7442 90.5284 2
 5 10 1 85.5839 56.789 3
 5 10 2 33.5167 68.9102 2
 -5 -10 -2 -3.57795 43.2531 3
 5 10 2 12.4424 41.5163 3
 5 10 3 162.758 90.9855 2
 -5 -10 -3 43.923 86.6091 2
 -5 -10 -3 88.0276 59.9336 3
 5 10 3 203.788 77.7334 1
 5 10 4 824.87 207.503 2
 5 10 4 1104.84 163.341 1
 -5 -10 -4 821.947 143.661 3
 -5 -10 -4 934.966 239.268 2
 5 10 5 333.535 96.5863 1
 -5 -10 -5 333.126 109.778 3
 5 10 5 340.355 146.717 2
 5 10 6 60.0313 48.5515 1
 -5 -10 -6 -17.557 65.0159 3
 -5 -10 -7 458.527 127.65 3
 5 10 7 539.862 130.999 1
 5 10 7 601.33 197.335 2
 5 10 8 -156.197 93.7852 1
 -5 -10 -8 -151.953 92.2868 3
 5 10 9 270.772 108.72 1
 5 10 11 481.609 169.547 1
 5 10 12 2537.47 371.41 1
 5 10 14 1.00911 174.965 1
 5 10 15 384.003 279.83 1
 5 11 -12 159.744 204.722 3
 5 11 -11 432.077 335.745 3
 5 11 -10 59.0615 144.782 3
 5 11 -9 419.724 217.993 3
 5 11 -8 580.333 203.224 3
 5 11 -7 78.5038 112.462 3
 5 11 -6 549.291 172.796 3
 5 11 -5 305.959 129.588 3
 5 11 -5 502.367 205.071 2
 5 11 -4 15.22 72.2039 3
 5 11 -4 -134.399 107.99 1
 5 11 -4 36.1293 77.0539 2
 5 11 -3 970.52 245.594 2
 5 11 -3 901.332 194.068 1
 5 11 -3 1108.14 208.998 3
 5 11 -2 1030.08 249.436 2
 5 11 -2 1349.23 207.002 3
 5 11 -1 67.0282 83.6279 1
 5 11 -1 93.6659 73.4583 2
 5 11 -1 95.577 84.9712 3
 5 11 0 816.257 152.682 3
 5 11 0 889.999 221.486 2
 5 11 1 -64.2662 89.5631 2
 5 11 1 27.1817 56.5758 3
 -5 -11 -1 121.64 75.6111 3
 5 11 2 196.628 115.556 2
 5 11 2 100.847 64.5805 3
 -5 -11 -2 105.349 78.3552 3
 -5 -11 -3 762.892 143.937 3
 5 11 3 558.97 176.311 2
 5 11 3 662.744 131.786 1
 -5 -11 -3 714.013 213.189 2
 5 11 4 426.148 160.911 2
 5 11 4 248.527 79.9199 1
 -5 -11 -4 424.432 122.711 3
 -5 -11 -5 42.294 71.4193 3
 5 11 5 -101.028 59.8128 1
 5 11 5 27.0764 85.3703 2
 5 11 6 568.766 134.987 1
 -5 -11 -6 415.488 134.088 3
 5 11 6 167.843 107.139 2
 -5 -11 -7 69.5919 80.8832 3
 5 11 7 -21.1266 58.6406 1
 5 11 8 38.4938 66.3549 1
 5 11 9 699.826 177.089 1
 5 11 10 568.336 177.112 1
 5 11 11 -59.7822 118.716 1
 5 11 12 465.039 203.36 1
 5 11 13 -5.20763 170 1
 5 11 14 333.6 242.363 1
 5 12 -12 -8.25475 198.366 3
 5 12 -11 26.2971 154.963 3
 5 12 -10 20.8129 147.21 3
 5 12 -9 16.9047 93.3632 3
 5 12 -8 79.2432 123.933 3
 5 12 -7 464.309 182.578 3
 5 12 -6 579.978 190.495 3
 5 12 -6 597.615 219.353 2
 5 12 -5 37.7205 92.3736 3
 5 12 -5 -66.3818 108.322 2
 5 12 -4 729.513 224.81 2
 5 12 -4 567.155 168.429 3
 5 12 -3 713.13 220.527 2
 5 12 -3 701.527 176.095 3
 5 12 -3 451.919 178.157 1
 5 12 -2 290.942 149.313 2
 5 12 -2 49.2292 120.196 1
 5 12 -1 535.04 192.179 2
 5 12 -1 402.304 133.329 3
 5 12 0 412.056 120.587 3
 5 12 0 691.033 203.246 2
 -5 -12 0 506.767 133.075 3
 5 12 1 19.2941 68.9515 2
 -5 -12 -1 -29.7981 95.5624 3
 5 12 2 895.505 232.012 2
 5 12 2 842.604 157.687 3
 -5 -12 -2 894.394 168.601 3
 5 12 3 503.725 183.373 2
 5 12 3 788.989 154.236 1
 -5 -12 -3 678.689 143.025 3
 5 12 4 43.6531 86.9879 2
 -5 -12 -4 -97.1764 78.7092 3
 5 12 4 21.8619 48.2229 1
 -5 -12 -5 115.611 98.3818 3
 5 12 5 208.723 86.8089 1
 5 12 5 318.493 157.995 2
 -5 -12 -6 12.4179 76.5016 3
 5 12 6 -36.7272 54.4844 2
 5 12 7 67.671 72.5911 1
 5 12 8 303.088 132.765 1
 5 12 9 409.7 150.628 1
 5 12 10 -105.033 121.677 1
 5 12 11 104.951 149.198 1
 5 12 12 150.543 174.892 1
 5 12 13 2.95263 183.835 1
 5 12 14 142.462 256.079 1
 5 13 -11 95.3795 157.604 3
 5 13 -10 3157.21 471.738 3
 5 13 -9 98.1197 102.751 3
 5 13 -8 271.438 182.822 3
 5 13 -7 2346.14 369.354 3
 5 13 -7 616.356 268.092 2
 5 13 -6 64.653 116.021 3
 5 13 -6 3.78646 119.524 2
 5 13 -5 256.219 147.309 3
 5 13 -5 179.229 161.775 2
 5 13 -4 439.856 194.334 2
 5 13 -4 418.987 160.587 3
 5 13 -3 36.3759 87.3221 3
 5 13 -3 -90.5579 127.435 2
 5 13 -2 360.604 169.906 2
 5 13 -2 295.914 129.365 3
 5 13 -1 304.673 158.692 2
 5 13 -1 477.376 142.881 3
 -5 -13 0 45.1678 72.5748 3
 5 13 0 -117.506 130.923 2
 5 13 1 566.949 199.181 2
 5 13 1 645.541 161.298 3
 -5 -13 -1 207.845 119.593 3
 5 13 2 673.911 218.17 2
 5 13 2 487.443 129.157 3
 -5 -13 -2 366.918 122.641 3
 5 13 3 58.767 110.565 2
 5 13 3 217.601 82.4718 1
 -5 -13 -3 -104.182 87.461 3
 -5 -13 -4 455.019 144.603 3
 5 13 4 606.071 142.127 1
 5 13 4 746.237 233.106 2
 5 13 5 479.048 129.769 1
 5 13 5 -7.07958 106.086 2
 5 13 6 68.9123 72.9677 1
 5 13 6 761.611 240.295 2
 5 13 7 486.866 156.185 1
 5 13 8 268.227 132.631 1
 5 13 9 5.12714 128.346 1
 5 13 10 562.175 214.325 1
 5 13 11 327.891 195.68 1
 5 13 12 85.7705 206.676 1
 5 13 13 -165.844 235.35 1
 5 14 -10 -210.028 174.721 3
 5 14 -9 262.309 162.988 3
 5 14 -9 544.743 344.692 2
 5 14 -8 240.342 271.714 2
 5 14 -8 306.695 216.24 3
 5 14 -7 21.1503 121.076 3
 5 14 -7 -119.274 218.908 2
 5 14 -6 -15.9865 206.609 2
 5 14 -5 96.809 178.481 2
 5 14 -5 89.4612 89.4249 3
 5 14 -4 78.0194 150.261 2
 5 14 -3 560.282 238.852 2
 5 14 -3 101.843 97.487 3
 5 14 -2 755.432 247.668 2
 5 14 -2 1421.83 256.261 3
 5 14 -1 147.735 138.745 2
 5 14 -1 40.0258 79.0817 3
 5 14 0 324.769 176.716 2
 5 14 0 118.492 92.0966 3
 5 14 1 24.0123 55.1256 3
 5 14 1 -135.23 137.884 2
 5 14 2 44.6646 55.9843 3
 5 14 2 -62.2947 119.205 2
 5 14 3 237.587 164.688 2
 5 14 3 351.478 112.481 1
 5 14 4 687.201 160.592 1
 5 14 4 487.963 208.582 2
 5 14 5 -20.703 97.4077 2
 5 14 5 468.13 137.625 1
 5 14 6 150.309 102.13 1
 5 14 6 888.062 264.915 2
 5 14 7 158.05 121.77 1
 5 14 8 -56.3535 129.779 1
 5 14 9 381.957 182.695 1
 5 14 10 547.476 222.157 1
 5 14 11 -114.007 211.503 1
 5 15 -9 638.728 414.085 2
 5 15 -8 87.9821 124.953 3
 5 15 -8 -2.37271 331.215 2
 5 15 -7 -110.235 242.167 2
 5 15 -7 -27.3014 136.253 3
 5 15 -6 554.515 312.25 2
 5 15 -6 63.4617 125.171 3
 5 15 -5 7.12338 222.542 2
 5 15 -5 -100.209 130.844 3
 5 15 -4 492.085 257.244 2
 5 15 -4 -17.7732 143.909 3
 5 15 -3 855.934 230.115 3
 5 15 -3 998.933 312.097 2
 5 15 -2 213.963 118.227 3
 5 15 -2 48.6842 182.05 2
 5 15 -1 -1.04642 144.535 2
 5 15 -1 42.1832 85.5275 3
 5 15 0 281.468 185.16 2
 5 15 0 232.535 116.565 3
 5 15 1 -296.134 123.25 3
 5 15 1 -79.3381 154.519 2
 5 15 2 3.56138 146.624 2
 5 15 3 397.892 210.792 2
 5 15 3 775.29 181.598 1
 5 15 4 209.785 102.037 1
 5 15 4 -35.85 181.788 2
 5 15 5 483.976 223.306 2
 5 15 5 60.0305 83.6558 1
 5 15 6 -46.7372 111.744 1
 5 15 7 -36.7975 138.228 1
 5 15 8 88.2046 174.175 1
 5 15 9 162.162 187.669 1
 5 15 10 -135.26 225.423 1
 5 16 -5 163.2 266.002 2
 5 16 -4 1061.44 373.702 2
 5 16 -3 911.904 328.129 2
 5 16 -1 464.077 259.016 2
 5 16 0 -98.7733 215.563 2
 5 16 1 122.457 244.01 2
 5 16 2 284.77 231.234 2
 5 16 3 590.662 174.54 1
 5 16 3 -8.107 202.556 2
 5 16 4 -113.622 129.01 1
 5 16 5 494.072 185.87 1
 5 16 6 82.234 132.782 1
 -6 11 3 239.807 184.817 3
 -6 11 2 241.824 191.301 3
 -6 11 1 70.8098 135.607 3
 -6 11 0 120.704 165.998 3
 -6 11 -1 429.704 232.986 3
 -6 11 -2 22.1207 153.109 3
 -6 11 -3 10.0035 99.6688 3
 -6 11 -4 -79.0638 142.854 3
 -6 11 -5 113.744 127.671 3
 -6 11 -6 108.862 151.918 3
 -6 10 5 364.179 167.504 1
 -6 10 4 231.665 132.202 1
 -6 10 3 131.478 154.508 3
 -6 10 2 84.1981 123.509 3
 -6 10 -2 -141.138 134.207 3
 -6 10 -3 467.549 201.529 3
 -6 10 -4 205.493 154.16 3
 -6 10 -5 44.706 111.276 3
 -6 10 -6 363.171 219.742 3
 -6 10 -7 230.718 184.863 3
 -6 10 -8 17.7869 146.936 3
 -6 9 7 571.885 217.235 1
 -6 9 6 1026.99 262.469 1
 -6 9 5 70.5544 82.4956 1
 -6 9 4 133.913 107.341 1
 -6 9 3 307.563 164.333 3
 -6 9 2 -9.87518 92.0953 3
 -6 9 1 441.247 192.735 3
 -6 9 0 1060.37 278.38 3
 -6 9 -1 28.0008 103.832 3
 -6 9 -2 213.386 137.589 3
 -6 9 -3 362.298 176.846 3
 -6 9 -4 112.542 133.531 3
 -6 9 -5 186.253 155.202 3
 -6 9 -6 1060.59 288.719 3
 -6 9 -7 196.342 171.26 3
 -6 9 -8 3.39916 140.537 3
 -6 9 -9 200.27 190.765 3
 -6 9 -10 21.0119 158.274 3
 -6 8 8 122.076 143.397 1
 -6 8 7 780.235 244.922 1
 -6 8 6 262.919 134.399 1
 -6 8 5 74.0932 79.4501 1
 -6 8 4 494.62 174.851 1
 -6 8 3 81.5785 127.952 3
 -6 8 2 627.57 210.023 3
 -6 8 1 1063.18 255.452 3
 -6 8 0 142.917 151.15 3
 -6 8 -1 104.443 104.838 3
 -6 8 -2 195.135 119.657 3
 -6 8 -3 -153.136 134.306 3
 -6 8 -4 366.299 190.076 3
 -6 8 -5 1222.78 293.172 3
 -6 8 -6 252.697 145.426 3
 -6 8 -7 2.00993 110.269 3
 -6 8 -8 65.0404 108.213 3
 -6 8 -9 18.1189 101.338 3
 -6 8 -10 208.827 187.132 3
 -6 8 -11 332.879 215.193 3
 -6 7 9 -15.7762 127.369 1
 -6 7 8 542.255 199.037 1
 -6 7 7 288.997 145.553 1
 -6 7 6 50.5814 72.877 1
 -6 7 5 1332.53 279.407 1
 -6 7 4 374.506 145.365 1
 -6 7 3 306.941 155.542 3
 -6 7 2 1299.88 281.353 3
 -6 7 1 331.086 147.868 3
 -6 7 0 52.9462 103.477 3
 -6 7 -1 861.858 225.707 3
 -6 7 -2 16.3118 105.442 3
 -6 7 -3 145.389 107.488 3
 -6 7 -4 1517.98 295.533 3
 -6 7 -6 343.342 96.8611 2
 -6 7 -6 117.381 125.225 3
 -6 7 -7 702.727 222.058 3
 -6 7 -8 -17.4597 114.107 3
 -6 7 -9 302.035 171.271 3
 -6 7 -10 543.308 233.094 3
 -6 7 -11 53.7276 144.842 3
 -6 7 -12 252.993 171.75 3
 -6 6 10 -61.907 167.096 1
 -6 6 9 504.618 196.985 1
 -6 6 8 149.26 129.676 1
 -6 6 7 -49.6636 49.3889 1
 -6 6 6 866.934 218.705 1
 -6 6 5 476.724 155.456 1
 6 -6 -5 1266.09 212.087 2
 -6 6 4 55.0772 74.7338 1
 6 -6 -4 -98.7949 65.0246 2
 -6 6 3 367.943 161.805 3
 6 -6 -3 324.035 64.9328 2
 -6 6 2 310.94 145.166 3
 -6 6 1 41.4061 96.9986 3
 -6 6 0 1179.43 248.957 3
 -6 6 -1 988.732 228.725 3
 -6 6 -2 299.669 165.733 3
 -6 6 -3 487.444 173.774 3
 -6 6 -4 234.169 151.156 3
 -6 6 -5 539.998 94.5431 2
 -6 6 -5 627.343 198.059 3
 -6 6 -6 1033.36 250.627 3
 -6 6 -6 1087.53 172.033 2
 -6 6 -7 350.766 141.07 2
 -6 6 -7 169.219 135.695 3
 -6 6 -8 61.4019 137.648 2
 -6 6 -8 392.966 189.403 3
 -6 6 -9 690.578 231.481 3
 -6 6 -9 702.895 250.535 2
 -6 6 -10 356.317 167.701 3
 -6 6 -11 59.5943 137.17 3
 -6 6 -12 588.315 243.298 3
 -6 6 -13 331.978 224.913 3
 -6 5 11 106.499 167.713 1
 -6 5 10 388.458 182.493 1
 -6 5 9 358.528 164.506 1
 -6 5 8 -5.33799 43.1264 1
 -6 5 7 1269.63 260.355 1
 -6 5 6 1235.43 251.536 1
 -6 5 5 67.1755 81.7622 1
 -6 5 4 449.481 153.129 1
 -6 5 3 608.152 179.394 3
 -6 5 2 138.929 94.3245 3
 6 -5 -2 136.068 43.2721 2
 -6 5 1 953.632 208.1 3
 -6 5 0 1474.57 253.525 3
 -6 5 -1 37.2058 72.2964 3
 -6 5 -2 490.649 168.167 3
 -6 5 -3 562.619 163.487 3
 -6 5 -4 38.5128 29.5114 2
 -6 5 -4 66.0435 94.2487 3
 -6 5 -5 984.108 225.737 3
 -6 5 -5 931.916 146.082 2
 -6 5 -6 441.022 128.68 2
 -6 5 -6 265.629 143.104 3
 -6 5 -7 300.385 131.803 2
 -6 5 -7 232.923 145.39 3
 -6 5 -8 772.162 207.182 2
 -6 5 -8 734.387 219.973 3
 -6 5 -9 489.319 189.953 3
 -6 5 -9 273.45 183.435 2
 -6 5 -10 -122.456 130.975 3
 -6 5 -11 549.998 211.072 3
 -6 5 -12 342.265 192.94 3
 -6 5 -13 -539.66 223.133 3
 -6 5 -14 -183.199 184.954 3
 -6 4 12 396.84 222.352 1
 -6 4 11 324.417 190.753 1
 -6 4 10 304.234 164.97 1
 -6 4 9 459.733 173.01 1
 -6 4 8 1099.44 244.369 1
 -6 4 7 1884.44 304.439 1
 -6 4 6 -0.36218 42.8341 1
 -6 4 5 683.438 180.161 1
 -6 4 4 1399.74 242.098 1
 -6 4 3 -71.3721 91.9082 3
 -6 4 3 22.8561 63.4777 1
 6 -4 -2 760.578 116.614 2
 -6 4 2 635.839 173.357 3
 6 -4 -1 2512.08 329.802 3
 6 -4 -1 2284.12 162.179 2
 -6 4 1 2588.23 317.084 3
 -6 4 0 505.923 169.053 3
 6 -4 0 383.45 132.685 3
 6 -4 0 320.368 43.6331 2
 -6 4 -1 548.95 152.746 3
 6 -4 1 672.423 170.959 3
 -6 4 -2 169.602 100.824 3
 6 -4 2 273.311 117.002 3
 -6 4 -3 77.6406 91.5053 3
 -6 4 -3 -23.9025 23.7023 2
 6 -4 3 14.6236 73.9277 3
 -6 4 -4 1430.47 246.721 3
 6 -4 4 1249.46 242.371 3
 -6 4 -4 1455.89 160.493 2
 -6 4 -5 1023.17 221.562 3
 -6 4 -5 1222.71 178.542 2
 -6 4 -6 92.4585 76.5736 2
 -6 4 -6 58.6303 83.3634 3
 -6 4 -7 819.524 190.523 2
 -6 4 -7 851.408 214.404 3
 -6 4 -8 353.689 162.242 2
 -6 4 -8 343.951 165.028 3
 -6 4 -9 92.2521 132.885 3
 -6 4 -9 100.542 151.687 2
 -6 4 -10 1254.99 285.823 3
 -6 4 -11 627.597 210.154 3
 -6 4 -12 84.2836 154.015 3
 -6 4 -13 282.131 193.234 3
 -6 4 -14 62.4419 160.132 3
 -6 3 12 -201.769 184.982 1
 -6 3 11 491.855 200.123 1
 -6 3 10 61.4388 94.3718 1
 -6 3 9 668.586 197.18 1
 -6 3 8 1770.45 293.327 1
 -6 3 7 256.507 118.486 1
 -6 3 6 674.292 174.935 1
 -6 3 5 1528.34 257.314 1
 -6 3 4 251.713 103.586 1
 6 -3 -3 180.932 108.534 3
 -6 3 3 153.777 87.1788 1
 -6 3 2 2941.03 328.157 3
 6 -3 -2 3178.19 351.78 3
 -6 3 1 135.918 86.1745 3
 6 -3 -1 189.297 59.6546 2
 6 -3 -1 154.418 104.189 3
 -6 3 0 825.599 172.103 3
 6 -3 0 725.58 171.773 3
 6 -3 0 681.616 96.7557 2
 6 -3 1 461.136 136.213 3
 -6 3 -1 536.644 141.788 3
 6 -3 1 502.084 79.8894 2
 -6 3 -2 -16.6641 70.0463 3
 6 -3 2 -39.5993 70.1107 3
 -6 3 -3 660.642 163.966 3
 6 -3 3 645.708 163.029 3
 -6 3 -3 798.322 115.079 2
 -6 3 -4 1916.85 266.46 3
 6 -3 4 1770.06 263.725 3
 -6 3 -4 1865.94 198.761 2
 -6 3 -5 284.391 93.6913 2
 -6 3 -5 363.136 137.529 3
 6 -3 5 513.681 155.558 3
 -6 3 -6 342.441 115.695 2
 -6 3 -6 621.571 176.228 3
 6 -3 6 662.292 185.742 3
 -6 3 -6 545.661 166.934 1
 -6 3 -7 805.479 183.369 2
 -6 3 -7 806.459 199.719 3
 -6 3 -8 -56.4386 106.713 2
 -6 3 -8 0.71034 83.5561 3
 -6 3 -9 717.692 211.405 3
 -6 3 -9 995.59 246.515 2
 -6 3 -10 1100.46 262.404 3
 -6 3 -11 -195.141 127.291 3
 -6 3 -12 160.32 162.628 3
 -6 3 -13 191.489 191.374 3
 -6 3 -14 52.6226 119.989 3
 -6 3 -15 357.614 222.859 3
 -6 2 13 10.5744 160.613 1
 -6 2 12 407.58 207.8 1
 -6 2 11 111.364 138.204 1
 -6 2 10 20.7032 104.79 1
 -6 2 9 1146.4 249.509 1
 -6 2 8 570.073 166.803 1
 -6 2 7 22.2967 36.0484 1
 -6 2 6 817.287 183.705 1
 -6 2 5 353.068 118.44 1
 -6 2 4 646.349 149.886 1
 6 -2 -4 533.129 150.493 3
 6 -2 -3 2157.02 282.654 3
 -6 2 3 2337.55 270.345 1
 -6 2 2 501.772 137.496 3
 6 -2 -2 282.835 112.277 3
 6 -2 -1 773.241 129.655 2
 6 -2 -1 606.451 151.598 3
 -6 2 1 715.509 155.823 3
 -6 2 0 389.646 119.942 3
 6 -2 0 343.371 79.9449 2
 6 -2 0 281.028 111.414 3
 6 -2 1 123.833 45.7798 2
 -6 2 -1 87.7758 71.7155 3
 6 -2 1 150.014 96.9441 3
 -6 2 -2 1541.03 166.404 2
 -6 2 -2 1643.25 260.039 3
 6 -2 2 1024.12 185.373 3
 6 -2 2 1102.72 142.693 2
 6 -2 3 2874.19 305.183 3
 -6 2 -3 3033.48 303.781 3
 6 -2 3 3213.78 261.402 2
 -6 2 -3 3149.06 248.552 2
 -6 2 -4 1678.03 235.28 3
 6 -2 4 1640.44 235.79 3
 -6 2 -4 1606.9 199.96 2
 -6 2 -5 551.446 149.948 3
 6 -2 5 555.121 157.558 3
 -6 2 -5 452.338 125.509 2
 6 -2 6 1239.33 226.098 3
 -6 2 -6 948.19 193.479 3
 -6 2 -6 1188.17 216.29 1
 -6 2 -6 1298.27 211.523 2
 -6 2 -7 100.363 102.089 3
 -6 2 -7 -7.51147 76.1842 1
 -6 2 -8 562.122 177.975 2
 -6 2 -8 661.926 181.695 3
 -6 2 -9 1883.55 305.755 3
 -6 2 -9 1408.39 282.724 2
 -6 2 -10 212.479 139.539 3
 -6 2 -11 35.8011 112.988 3
 -6 2 -12 99.6177 128.695 3
 -6 2 -13 -91.5732 120.862 3
 -6 2 -14 431.649 213.741 3
 -6 2 -15 363.574 208.898 3
 -6 1 13 463.534 233.78 1
 -6 1 12 121.633 153.689 1
 -6 1 11 174.241 131.289 1
 -6 1 10 472.758 169.388 1
 -6 1 9 922.012 220.669 1
 -6 1 8 -62.9028 62.073 1
 -6 1 7 555.63 147.035 1
 -6 1 6 478.282 135.446 1
 6 -1 -5 124.952 93.2623 3
 -6 1 5 118.019 64.5107 1
 6 -1 -4 2149.81 279.787 3
 -6 1 4 1987.4 248.345 1
 -6 1 3 1013.8 172.549 1
 6 -1 -3 993.92 190.146 3
 -6 1 2 337.594 98.2167 1
 -6 1 2 428.719 118.405 3
 6 -1 -2 546.041 142.957 3
 6 -1 -1 2029.47 223.331 2
 -6 1 1 1712.45 215.098 3
 6 -1 -1 1870.58 236.663 3
 6 -1 0 525.004 128.319 3
 -6 1 0 440.746 115.732 3
 6 -1 0 557.249 115.648 2
 6 -1 1 148.431 68.5602 2
 -6 1 -1 93.8709 64.5097 3
 6 -1 1 92.3356 70.0074 3
 -6 1 -2 2007.44 207.213 2
 -6 1 -2 2031.63 231.453 3
 6 -1 2 1831.18 224.604 3
 6 -1 2 1916.72 203.714 2
 6 -1 3 1047.96 175.739 3
 -6 1 -3 882.12 164.391 3
 6 -1 3 854.09 144.339 2
 -6 1 -3 800.7 138.56 2
 -6 1 -4 341.414 94.6454 2
 -6 1 -4 201.293 94.6181 3
 6 -1 4 274.451 100.812 3
 6 -1 4 327.199 102.544 2
 -6 1 -5 479.153 121.194 2
 -6 1 -5 401.067 123.565 3
 6 -1 5 458.645 135.375 3
 -6 1 -5 434.924 121.177 1
 -6 1 -6 -19.5847 65.4384 2
 -6 1 -6 2.00237 76.1743 3
 -6 1 -6 161.106 85.0434 1
 -6 1 -7 626.206 170.724 2
 -6 1 -7 492.623 136.718 1
 -6 1 -7 576.001 165.218 3
 -6 1 -8 1535.46 255.842 3
 -6 1 -8 1683.35 259.41 1
 -6 1 -8 1577.09 277.638 2
 -6 1 -9 76.3953 85.6602 3
 -6 1 -9 1613.37 298.642 2
 -6 1 -10 149.541 134.49 3
 -6 1 -11 546.819 201.168 3
 -6 1 -12 90.7734 136.746 3
 -6 1 -13 398.95 204.919 3
 -6 1 -14 484.737 229.298 3
 -6 1 -15 19.542 103.779 3
 -6 1 -16 1971.26 416.015 3
 -6 0 13 519.377 236.129 1
 -6 0 12 167.421 150.272 1
 -6 0 11 402.588 174.495 1
 -6 0 10 690.955 206.141 1
 -6 0 9 -55.9271 63.6367 1
 -6 0 8 1137.94 216.282 1
 -6 0 7 605.665 152.114 1
 6 0 -6 33.6982 68.4094 3
 -6 0 6 -89.7337 59.7063 1
 6 0 -5 1614.73 244.803 3
 -6 0 5 1617.44 220.803 1
 6 0 -4 867.792 172.568 3
 -6 0 4 1043.36 173.698 1
 6 0 -3 81.574 69.9635 3
 -6 0 3 92.2241 65.3487 1
 -6 0 2 1547.77 186.783 1
 6 0 -2 1575.97 207.378 3
 -6 0 1 1557.36 193.1 3
 6 0 -1 1653.85 216.945 2
 6 0 -1 1639.74 204.963 3
 6 0 0 49.8982 67.5941 3
 6 0 0 -19.5245 56.4188 2
 -6 0 0 22.2856 50.0823 3
 -6 0 -1 2080.16 212.03 3
 6 0 1 1900.96 208.96 3
 6 0 1 2270.2 234.613 2
 -6 0 -2 1789.32 208.792 2
 -6 0 -2 1649.53 189.192 3
 6 0 2 1655.74 196.533 3
 6 0 2 1690.5 204.804 2
 -6 0 -3 640.662 129.169 3
 6 0 3 634.235 131.012 3
 6 0 3 730.324 143.837 2
 -6 0 -3 756.655 143.001 2
 -6 0 -4 2068.05 226.922 3
 6 0 4 1878.07 225.181 3
 6 0 4 1823.65 235.781 2
 -6 0 -4 1898.13 233.785 2
 -6 0 -5 543.44 133.388 2
 -6 0 -5 296.842 103.793 3
 6 0 5 285.302 102.139 3
 6 0 5 345.543 117.618 2
 -6 0 -5 238.969 80.2936 1
 -6 0 -6 648.924 158.526 2
 -6 0 -6 323.086 113.496 3
 -6 0 -7 1230.68 229.788 2
 -6 0 -7 1810.53 250.559 3
 -6 0 -7 1752.63 230.84 1
 -6 0 -8 33.3388 84.8999 2
 -6 0 -8 191.988 95.6907 1
 -6 0 -8 -9.09142 74.1883 3
 -6 0 -9 37.8095 116.999 2
 -6 0 -9 194.212 103.156 1
 -6 0 -9 197.657 126.01 3
 -6 0 -10 1192.67 251.079 3
 -6 0 -11 201.251 145.027 3
 6 0 12 -113.963 115.398 1
 -6 0 -12 12.4892 111.38 3
 6 0 13 452.116 204.567 1
 -6 0 -13 266.997 165.849 3
 6 0 14 190.214 185.545 1
 -6 0 -14 71.8764 125.718 3
 6 0 15 74.0884 201.101 1
 -6 0 -15 152.101 182.19 3
 6 0 16 42.4171 257.213 1
 -6 0 -16 178.125 219.354 3
 -6 -1 14 1101.22 331.309 1
 -6 -1 13 -25.5051 133.475 1
 -6 -1 12 278.345 172.684 1
 -6 -1 11 230.512 142.687 1
 -6 -1 10 -15.6962 81.7696 1
 -6 -1 9 782.922 193.595 1
 -6 -1 8 1467.26 246.149 1
 -6 -1 7 -26.9668 40.3023 1
 6 1 -6 475.619 138.373 3
 -6 -1 6 557.228 137.993 1
 6 1 -5 684.404 158.085 3
 -6 -1 5 745.969 149.721 1
 6 1 -4 254.66 97.7276 3
 -6 -1 4 238.383 79.711 1
 6 1 -3 1503.55 202.923 3
 -6 -1 3 1485.54 180.253 1
 -6 -1 2 1443.06 168.228 1
 6 1 -2 1410.7 183.303 3
 -6 -1 1 535.752 100.696 1
 6 1 -1 395.502 147.081 2
 -6 -1 0 1174.22 158.772 3
 6 1 0 1106.77 153.119 3
 6 1 0 1148.5 186.468 2
 6 1 1 1516.37 170.341 3
 -6 -1 -1 1854.78 179.973 3
 6 1 1 1782.43 222.531 2
 6 1 2 65.7105 65.7246 2
 -6 -1 -2 48.6548 49.4667 3
 -6 -1 -2 3.23012 61.5632 2
 6 1 2 80.7233 58.4918 3
 -6 -1 -3 1990.41 193.562 3
 6 1 3 2108.82 205.384 3
 6 1 3 2413.32 263.621 2
 -6 -1 -3 2387.45 261.054 2
 6 1 4 2945.89 254.35 3
 -6 -1 -4 3316.6 263.841 3
 -6 -1 -4 2940.75 249.696 1
 6 1 4 3039.69 312.401 2
 -6 -1 -4 2729.17 295.482 2
 -6 -1 -5 194.754 65.2376 1
 -6 -1 -5 171.724 85.7612 2
 -6 -1 -5 230.194 93.1793 3
 6 1 5 133.47 86.7865 2
 -6 -1 -6 606.534 156.282 2
 -6 -1 -6 606.275 124.056 1
 -6 -1 -6 700.747 147.403 3
 -6 -1 -7 171.562 107.064 2
 -6 -1 -7 490.821 122.228 1
 -6 -1 -8 544.966 180.554 2
 -6 -1 -8 452.78 122.486 1
 -6 -1 -8 449.089 136.765 3
 -6 -1 -9 822.203 227.105 2
 -6 -1 -9 706.534 162.144 1
 -6 -1 -9 567.002 169.728 3
 6 1 9 693.853 174.53 1
 -6 -1 -10 491.477 171.251 3
 6 1 10 618.382 178.118 1
 -6 -1 -11 -80.9083 107.02 3
 6 1 11 2.92659 87.3852 1
 -6 -1 -12 -28.0639 111.201 3
 6 1 12 28.3497 96.9459 1
 -6 -1 -13 322.905 169.647 3
 6 1 13 298.959 178.742 1
 -6 -1 -14 95.7376 135.061 3
 6 1 14 -21.7188 169.78 1
 -6 -1 -15 299.979 209.792 3
 6 1 15 517.026 253.909 1
 -6 -1 -16 0.60193 168.247 3
 6 1 16 297.095 260.795 1
 -6 -2 14 498.43 253.136 1
 -6 -2 13 -53.0389 165.079 1
 -6 -2 12 161.039 155.441 1
 -6 -2 11 135.133 123.067 1
 -6 -2 10 992.621 232.914 1
 -6 -2 9 1344.19 249.991 1
 -6 -2 8 111.297 71.6249 1
 6 2 -7 534.275 137.991 1
 -6 -2 7 473.506 130.901 1
 -6 -2 6 -34.0573 38.0232 1
 6 2 -6 -5.34514 20.2582 1
 -6 -2 5 81.3779 52.6607 1
 6 2 -5 29.0328 37.8295 1
 6 2 -4 2899.24 277.226 3
 -6 -2 4 2418.8 235.587 1
 6 2 -4 2950.82 257.603 1
 6 2 -3 4920.22 335.238 3
 -6 -2 3 4662.22 298.105 1
 6 2 -2 588.286 115.643 3
 -6 -2 2 652.067 107.952 1
 6 2 -1 702.681 175.346 2
 6 2 -1 576.554 107.304 3
 -6 -2 1 546.119 89.6406 1
 6 2 0 1109.28 195.056 2
 -6 -2 0 1073.26 128.792 3
 -6 -2 0 1098.93 114.976 1
 6 2 0 1129.4 136.128 3
 6 2 1 105.51 76.6362 2
 -6 -2 -1 413.265 140.001 2
 -6 -2 -1 241.851 67.1349 3
 6 2 1 191.643 64.8453 3
 -6 -2 -2 1185.39 192.017 2
 -6 -2 -2 1090.66 123.393 3
 6 2 2 1025.61 123.643 3
 6 2 2 1296.63 199.58 2
 6 2 3 6270.22 312.054 3
 -6 -2 -3 5822.1 291.044 3
 -6 -2 -3 6102.05 302 1
 6 2 3 6574.83 452.117 2
 -6 -2 -3 5942.63 426.513 2
 6 2 4 759.55 169.872 2
 -6 -2 -4 694.565 117.298 3
 -6 -2 -4 869.269 120.903 1
 -6 -2 -4 793.477 170.454 2
 -6 -2 -5 -41.2232 44.9441 2
 -6 -2 -5 3.40191 14.0703 1
 -6 -2 -5 53.3726 61.6793 3
 6 2 5 -88.2943 76.7567 2
 -6 -2 -6 159.076 85.5418 2
 -6 -2 -6 217.137 72.8905 1
 -6 -2 -6 118.329 71.8027 3
 6 2 6 247.961 119.185 2
 -6 -2 -7 -49.5486 95.2292 2
 -6 -2 -7 118.75 60.353 1
 -6 -2 -7 150.567 86.5526 3
 6 2 7 60.1176 41.7079 1
 -6 -2 -8 1115.33 246.32 2
 -6 -2 -8 1270.88 220.743 3
 6 2 8 1139.11 199.619 1
 -6 -2 -8 1023.49 171.191 1
 -6 -2 -9 1119.45 192.044 1
 -6 -2 -9 970.382 210.942 3
 6 2 9 987.67 200.36 1
 -6 -2 -10 80.8386 104.293 3
 6 2 10 159.343 95.8304 1
 -6 -2 -10 101.938 82.3646 1
 6 2 11 482.408 165.564 1
 6 2 12 223.743 130.907 1
 6 2 13 -139.343 138.469 1
 6 2 14 617.447 241.429 1
 6 2 15 477.169 243.701 1
 6 2 16 162.121 239.798 1
 -6 -2 -17 121.099 207.386 3
 -6 -3 14 -16.6791 206.444 1
 -6 -3 13 208.351 188.414 1
 -6 -3 12 -70.6232 139.573 1
 -6 -3 11 442.458 175.653 1
 -6 -3 10 1520.21 295.532 1
 -6 -3 9 521.025 157.569 1
 -6 -3 8 58.6124 59.1571 1
 -6 -3 7 144.994 69.8951 1
 6 3 -7 220.502 100.2 1
 -6 -3 6 -116.336 59.0809 1
 6 3 -6 44.833 45.5019 1
 6 3 -5 1483.98 192.595 1
 -6 -3 5 1454.65 194.159 1
 6 3 -4 3696.86 278.035 1
 -6 -3 4 3321.57 267.666 1
 -6 -3 3 2068.4 191.221 1
 6 3 -3 1866.1 180.525 1
 6 3 -2 -7.79053 41.7019 3
 -6 -3 2 18.7225 28.3549 1
 -6 -3 1 670.679 85.796 1
 6 3 -1 706.393 182.907 2
 6 3 -1 643.062 100.992 3
 6 3 0 402.055 77.1425 3
 6 3 0 253.091 102.917 2
 -6 -3 0 374.96 58.8793 1
 -6 -3 -1 470.379 69.0809 3
 6 3 1 436.376 69.9962 3
 6 3 1 550.708 147.435 2
 -6 -3 -1 787.678 173.705 2
 -6 -3 -2 2476.1 283.759 2
 -6 -3 -2 2446.45 148.127 3
 6 3 2 2450.21 153.563 3
 -6 -3 -2 2373.66 140.371 1
 6 3 2 2694.85 298.857 2
 -6 -3 -3 76.7923 40.6735 3
 -6 -3 -3 55.6458 26.9673 1
 6 3 3 36.238 66.7037 2
 -6 -3 -3 76.6926 52.7157 2
 6 3 4 34.4968 55.8298 2
 -6 -3 -4 125.845 81.361 2
 -6 -3 -4 52.619 34.532 1
 -6 -3 -4 70.6422 47.6301 3
 -6 -3 -5 480.353 101.342 3
 -6 -3 -5 474.511 86.8416 1
 -6 -3 -5 563.116 147.374 2
 6 3 5 331.905 122.335 2
 -6 -3 -6 -0.6654 53.972 2
 -6 -3 -6 19.7177 59.1912 3
 -6 -3 -6 74.308 40.8014 1
 6 3 6 -59.5749 43.7475 1
 6 3 6 -1.33182 65.0977 2
 -6 -3 -7 979.724 151.298 1
 -6 -3 -7 966.562 219.15 2
 -6 -3 -7 927.718 167.169 3
 6 3 7 891.016 156.753 1
 -6 -3 -8 1129.05 264.946 2
 6 3 8 1425.68 214.844 1
 -6 -3 -9 715.638 150.309 1
 6 3 9 664.57 155.031 1
 6 3 10 203.507 95.7623 1
 -6 -3 -10 457.973 139.245 1
 6 3 11 434.363 151.59 1
 6 3 12 38.5984 96.5664 1
 6 3 13 285.775 153.133 1
 6 3 14 1051.08 287.435 1
 6 3 15 372.931 240.836 1
 6 3 16 69.9224 245.151 1
 -6 -4 14 727.544 300.22 1
 -6 -4 13 465.374 232.075 1
 -6 -4 12 0.5085 143.034 1
 -6 -4 11 789.938 223.893 1
 -6 -4 10 869.331 219.375 1
 -6 -4 9 -6.02417 78.1919 1
 -6 -4 8 493.95 142.85 1
 6 4 -7 483.155 132.163 1
 -6 -4 7 363.705 112.734 1
 6 4 -6 27.8496 37.1122 1
 -6 -4 6 125.487 60.4579 1
 -6 -4 5 3102.43 280.788 1
 6 4 -5 3267.83 279.414 1
 -6 -4 4 872.244 135.788 1
 6 4 -4 863.203 129.535 1
 -6 -4 3 19.3581 36.4906 1
 6 4 -3 82.9046 40.1521 1
 6 4 -2 1019.48 112.838 1
 -6 -4 2 968.327 113.482 1
 6 4 -1 185.877 117.519 2
 -6 -4 1 205.176 45.0208 1
 6 4 -1 199.609 52.2184 3
 6 4 0 999.646 205.953 2
 6 4 0 712.626 76.8199 3
 -6 -4 0 633.496 56.0634 1
 -6 -4 -1 4168.76 378.032 2
 6 4 1 3233.72 124.603 3
 6 4 1 3969.07 374.989 2
 -6 -4 -2 245.412 34.5867 3
 -6 -4 -2 224.514 103.91 2
 6 4 2 335.949 129.759 2
 6 4 3 206.867 101.567 2
 -6 -4 -3 225.478 38.2828 1
 -6 -4 -3 276.833 99.691 2
 -6 -4 -3 237.086 42.8408 3
 -6 -4 -4 929.74 95.5465 1
 -6 -4 -4 563.798 64.2641 3
 6 4 4 1195.89 220.635 2
 -6 -4 -4 1057.09 203.213 2
 6 4 5 110.965 70.9558 2
 -6 -4 -5 171.127 95.6155 2
 -6 -4 -5 212.783 57.699 1
 -6 -4 -5 147.348 59.2113 3
 6 4 5 210.182 61.4122 1
 -6 -4 -6 1034.94 132.636 1
 6 4 6 994.068 146.885 1
 6 4 6 981.261 215.751 2
 -6 -4 -6 1299.56 248.539 2
 -6 -4 -7 2350.51 222.194 1
 6 4 7 2286.61 239.371 1
 6 4 7 2590.8 360.955 2
 -6 -4 -7 2360.76 344.493 2
 6 4 8 582.084 134.261 1
 -6 -4 -8 400.1 171.334 2
 -6 -4 -8 698.982 131.572 1
 6 4 9 -59.2636 70.7867 1
 -6 -4 -9 -52.7496 59.5077 1
 6 4 10 489.418 141.668 1
 -6 -4 -10 289.746 116.089 1
 6 4 11 -26.7653 73.85 1
 6 4 12 246.681 124.308 1
 6 4 13 910.003 235.064 1
 6 4 14 168.315 156.073 1
 6 4 15 -39.583 171.805 1
 6 4 16 627.96 299.061 1
 -6 -5 14 -22.8439 225.049 1
 -6 -5 13 -71.1939 217.298 1
 -6 -5 12 350.969 194.917 1
 -6 -5 11 501.87 195.371 1
 -6 -5 10 141.476 103.484 1
 -6 -5 9 13.2323 67.0918 1
 -6 -5 8 844.862 189.257 1
 -6 -5 7 69.2672 59.8793 1
 6 5 -7 23.2549 59.6296 1
 -6 -5 6 706.202 149.494 1
 6 5 -6 710.683 141.164 1
 6 5 -5 1739.82 201.282 1
 -6 -5 5 1927.48 225.989 1
 -6 -5 4 382.724 90.7339 1
 6 5 -4 453.529 91.9999 1
 6 5 -3 784.955 108.655 1
 -6 -5 3 911.168 127.825 1
 6 5 -2 1158 115.383 1
 -6 -5 2 1081.46 121.352 1
 6 5 -1 154.873 124.942 2
 6 5 -1 151.906 37.3447 1
 -6 -5 1 155.63 38.297 1
 6 5 0 2499.23 112.36 3
 6 5 0 2695.87 331.312 2
 -6 -5 -1 2404.68 311.892 2
 6 5 1 2344.32 302.927 2
 6 5 2 27.9199 65.6998 2
 -6 -5 -2 79.7855 71.0956 2
 6 5 3 895.224 195.101 2
 -6 -5 -3 1070.34 205.131 2
 6 5 4 519.323 154.88 2
 -6 -5 -4 497.099 72.9431 3
 -6 -5 -4 611.219 163.419 2
 6 5 4 449.235 69.4855 1
 -6 -5 -4 518.515 70.8101 1
 6 5 5 794.667 191.479 2
 6 5 5 871.168 111.951 1
 -6 -5 -5 941.907 111.572 1
 -6 -5 -5 1082.99 215.937 2
 -6 -5 -6 972.269 218.573 2
 -6 -5 -6 811.129 118.186 1
 6 5 6 888.587 129.02 1
 6 5 6 649.902 178.578 2
 -6 -5 -7 589.075 188.951 2
 -6 -5 -7 1050.22 148.396 1
 6 5 7 1204.16 167.658 1
 6 5 7 1418.45 277.941 2
 -6 -5 -8 201.364 75.8575 1
 6 5 8 -37.0701 26.5859 1
 -6 -5 -9 726.314 153.198 1
 6 5 9 773.172 160.044 1
 -6 -5 -10 209.126 94.8118 1
 6 5 10 230.511 101.151 1
 6 5 11 402.326 137.763 1
 6 5 12 1126.87 235.754 1
 6 5 13 206.438 145.647 1
 6 5 14 -51.4433 139.588 1
 6 5 15 328.043 211.709 1
 6 5 16 200.259 217.847 1
 -6 -6 14 -9.61337 234.007 1
 -6 -6 13 5.57526 180.775 1
 -6 -6 12 370.222 206.757 1
 -6 -6 11 20.8432 110.308 1
 -6 -6 10 477.142 185.117 1
 -6 -6 9 389.419 154.529 1
 -6 -6 8 -24.702 53.6512 1
 -6 -6 7 575.688 151.96 1
 6 6 -7 604.438 146.771 1
 -6 -6 6 754.178 159.039 1
 6 6 -6 958.802 162.899 1
 -6 -6 5 94.15 55.3764 1
 6 6 -5 173.968 71.157 1
 6 6 -4 780.079 123.795 1
 -6 -6 4 738.804 134.628 1
 6 6 -3 1827.53 167.391 1
 -6 -6 3 1716.11 186.154 1
 6 6 -2 19.821 11.1109 1
 6 6 -2 148.319 136.187 2
 6 6 -1 1484.08 262.164 2
 6 6 -1 1349.03 101.248 1
 6 6 -1 1280.84 118.063 3
 6 6 0 1682.98 86.7738 3
 6 6 0 2347.9 318.275 2
 6 6 1 49.0746 72.5398 2
 -6 -6 -1 365.899 158.92 2
 -6 -6 -2 1854.48 272.227 2
 6 6 2 1818.23 276.442 2
 6 6 3 1212.98 83.3109 1
 6 6 3 1082.2 224.146 2
 -6 -6 -3 1264.21 229.22 2
 6 6 4 64.6761 73.95 2
 -6 -6 -4 10.4931 18.8627 3
 -6 -6 -4 4.34531 66.6184 2
 6 6 4 34.25 22.8678 1
 6 6 5 427.496 140.612 2
 -6 -6 -5 540.596 164.295 2
 -6 -6 -5 588.311 90.5503 1
 6 6 5 599.884 92.0643 1
 -6 -6 -6 293.365 75.7017 1
 6 6 6 296.179 73.6499 1
 6 6 6 360.305 136.485 2
 -6 -6 -7 29.4587 104.128 2
 6 6 7 30.7128 26.4723 1
 6 6 7 137.882 126.093 2
 -6 -6 -7 -36.6951 29.6315 1
 6 6 8 1110.33 175.76 1
 -6 -6 -8 1119.46 169.691 1
 6 6 9 692.872 150.197 1
 -6 -6 -9 989.986 175.038 1
 6 6 10 -55.1075 64.93 1
 -6 -6 -10 230.228 97.266 1
 6 6 11 348.975 132.589 1
 6 6 12 267.579 138.295 1
 6 6 13 4.63971 110.783 1
 6 6 14 537.007 219.302 1
 6 6 15 221.14 198.935 1
 6 6 16 -18.4411 220.225 1
 -6 -7 14 444.519 308.939 1
 -6 -7 13 699.93 299.92 1
 -6 -7 12 26.4697 184.592 1
 -6 -7 11 279.545 174.739 1
 -6 -7 10 872.274 248.857 1
 -6 -7 9 198.871 126.236 1
 -6 -7 8 59.0984 83.9256 1
 6 7 -7 741.69 163.022 1
 -6 -7 7 753.49 185.084 1
 6 7 -6 24.7226 65.4973 1
 -6 -7 6 95.2905 72.1742 1
 6 7 -5 983.316 156.518 1
 -6 -7 5 1020.89 178.875 1
 6 7 -4 2044.02 206.134 1
 -6 -7 4 1848.22 224.38 1
 6 7 -3 262.97 85.981 3
 6 7 -3 317.126 75.3223 1
 6 7 -2 664.849 108.703 3
 6 7 -2 254.031 189.698 2
 6 7 -2 632.142 92.3096 1
 6 7 -1 599.267 85.0816 3
 6 7 -1 586.531 176.97 2
 6 7 -1 561.702 74.4641 1
 6 7 0 -36.5172 68.7228 2
 6 7 0 48.2009 18.8031 1
 6 7 0 -2.35789 17.3673 3
 6 7 1 1808.63 91.7474 1
 6 7 1 1731.6 97.3189 1
 6 7 1 2540.93 340.941 2
 -6 -7 -2 2328.96 319.866 2
 6 7 2 2137.26 105.248 1
 6 7 3 316.747 50.4783 1
 6 7 3 208.046 100.049 2
 -6 -7 -3 339.935 129.309 2
 6 7 4 515.505 76.3154 1
 6 7 4 430.582 143.7 2
 -6 -7 -4 494.503 69.0238 3
 -6 -7 -4 666.34 181.192 2
 6 7 5 564.905 91.8921 1
 6 7 5 768.751 195.039 2
 -6 -7 -5 575.26 88.7668 3
 -6 -7 -5 698.965 194.045 2
 -6 -7 -6 157.212 127.3 2
 6 7 6 25.6844 45.2453 2
 -6 -7 -7 1349.71 175.345 1
 6 7 7 1201.89 266.658 2
 6 7 7 1076 156.734 1
 -6 -7 -8 870.557 157.478 1
 6 7 8 899.653 155.775 1
 6 7 9 -7.922 39.7783 1
 -6 -7 -9 23.5239 30.0955 1
 6 7 10 83.6046 75.0348 1
 -6 -7 -10 259.627 101.864 1
 6 7 11 183.375 103.483 1
 6 7 12 -17.4584 73.6491 1
 6 7 13 303.335 155.993 1
 6 7 14 265.61 178.424 1
 6 7 15 17.3255 179.647 1
 6 7 16 445.429 283.144 1
 -6 -8 13 -141.391 272.627 1
 -6 -8 12 5.55718 178.949 1
 -6 -8 11 676.851 256.282 1
 -6 -8 10 464.51 212.242 1
 -6 -8 9 -46.3608 102.796 1
 -6 -8 8 90.8136 99.6694 1
 6 8 -7 63.2012 111.658 1
 -6 -8 7 91.5003 99.847 1
 6 8 -6 1136.38 189.901 1
 6 8 -6 1075.54 210.376 3
 6 8 -5 1900.53 225.244 1
 6 8 -5 1870.18 248.134 3
 6 8 -4 487.646 125.871 3
 6 8 -4 384.718 93.3744 1
 6 8 -3 -1.03181 35.9178 1
 6 8 -3 66.2807 66.3271 3
 6 8 -2 151.712 52.8215 1
 6 8 -2 183.988 65.1366 3
 6 8 -1 75.5625 38.5895 1
 6 8 -1 149.46 96.0383 2
 6 8 -1 95.4626 48.5877 3
 6 8 0 2282.58 144.66 3
 6 8 0 2218.75 159.767 1
 6 8 0 2416.31 340.598 2
 6 8 1 3874.82 208.386 1
 6 8 1 3762.91 420.398 2
 6 8 1 3704.22 150.073 3
 6 8 2 884.854 90.559 1
 6 8 2 652.273 184.387 2
 -6 -8 -2 785.504 192.594 2
 6 8 3 11.5957 18.9727 1
 6 8 3 53.6866 66.2996 2
 -6 -8 -3 -20.7139 73.0531 2
 -6 -8 -3 -10.9684 22.6517 3
 6 8 4 445.411 148.137 2
 -6 -8 -4 545.632 80.8593 3
 6 8 4 623.893 93.6444 1
 -6 -8 -4 721.67 198.901 2
 6 8 5 -58.4383 61.9459 2
 -6 -8 -5 -72.0505 44.1001 3
 6 8 5 78.3931 38.1352 1
 -6 -8 -5 -108.856 124.412 2
 6 8 6 762.69 124.313 1
 -6 -8 -6 763.098 124.385 3
 6 8 6 741.811 207.222 2
 6 8 7 1636.59 198.082 1
 -6 -8 -7 1603.12 193.87 3
 6 8 7 1194.18 263.52 2
 -6 -8 -8 568.369 129.252 3
 6 8 8 847.531 241.795 2
 6 8 8 531.78 122.404 1
 -6 -8 -9 27.377 79.0272 3
 6 8 9 -28.1806 51.7577 1
 6 8 10 2845.43 335.882 1
 6 8 11 55.636 77.0075 1
 6 8 12 609.923 188.227 1
 6 8 13 382.029 186.144 1
 6 8 14 34.3354 157.21 1
 6 8 15 -20.3873 208.307 1
 6 8 16 262.589 267.245 1
 6 9 -13 8.20906 188.621 3
 6 9 -12 247.168 188.121 3
 6 9 -10 87.9967 147.977 3
 6 9 -9 72.705 119.256 3
 6 9 -8 65.8532 102.288 3
 6 9 -7 395.437 159.133 3
 6 9 -6 1427.51 245.731 3
 6 9 -6 1541.74 235.688 1
 6 9 -5 859.065 177.938 3
 6 9 -5 927.221 170.606 1
 6 9 -4 265.846 95.6941 1
 6 9 -4 77.2775 79.0466 3
 6 9 -3 393.002 99.185 1
 6 9 -3 136.224 113.113 2
 6 9 -3 285.234 99.2021 3
 6 9 -2 -3.39961 73.308 2
 6 9 -2 82.6659 60.7318 3
 6 9 -2 -55.0288 58.3152 1
 6 9 -1 930.888 126.141 3
 6 9 -1 591.526 178.797 2
 6 9 -1 919.259 128.988 1
 6 9 0 2134.57 166.164 3
 6 9 0 1634.17 159.807 1
 6 9 0 2285.03 346.063 2
 6 9 1 1195.14 112.901 3
 6 9 1 1290.51 261.85 2
 6 9 2 -59.4555 61.9807 2
 6 9 2 37.6242 27.1199 1
 -6 -9 -2 20.0215 32.4031 3
 -6 -9 -3 227.526 122.705 2
 -6 -9 -3 305.511 64.9061 3
 6 9 3 329.447 69.1881 1
 6 9 3 420.817 147.009 2
 6 9 4 179.14 54.211 1
 6 9 4 -71.5906 82.2129 2
 -6 -9 -4 109.661 142.684 2
 -6 -9 -4 93.45 53.8357 3
 6 9 5 498.18 165.483 2
 -6 -9 -5 339.735 84.1032 3
 6 9 5 319.261 76.2769 1
 6 9 6 1269.59 168.964 1
 -6 -9 -6 1162.81 159.046 3
 6 9 6 1016.62 248.411 2
 6 9 7 508.894 109.584 1
 6 9 7 -133.782 93.5739 2
 -6 -9 -8 78.1125 76.3851 3
 6 9 8 150.088 70.6823 1
 -6 -9 -9 223.471 106.756 3
 6 9 9 310.604 111.448 1
 -6 -9 -10 43.249 76.8617 3
 6 9 10 -51.363 98.2713 1
 6 9 11 308.131 140.01 1
 6 9 12 835.116 215.567 1
 6 9 13 76.4646 147.586 1
 6 9 14 88.9362 160.997 1
 6 9 15 -20.0623 215.151 1
 6 9 16 89.1367 318.171 1
 6 10 -13 229.341 216.7 3
 6 10 -12 215.947 240.165 3
 6 10 -11 54.4351 125.702 3
 6 10 -10 19.2874 130.237 3
 6 10 -9 88.991 140.147 3
 6 10 -8 121.105 129.633 3
 6 10 -7 814.684 205.52 3
 6 10 -6 1081.38 220.498 3
 6 10 -6 1020.21 205.925 1
 6 10 -5 17.8732 85.2854 1
 6 10 -5 -83.2668 88.5986 3
 6 10 -4 548.984 134.771 1
 6 10 -4 357.232 187.586 2
 6 10 -4 585.1 146.053 3
 6 10 -3 278.717 98.7499 1
 6 10 -3 193.118 93.4965 3
 6 10 -2 395.811 105.905 1
 6 10 -2 412.536 160.28 2
 6 10 -2 413.437 111.978 3
 6 10 -1 1359.82 163.134 3
 6 10 -1 1318.96 177.211 1
 6 10 -1 1569.61 301.13 2
 6 10 0 887.214 124.057 3
 6 10 0 997.582 235.623 2
 6 10 0 1031.91 151.456 1
 6 10 1 -104.189 75.8037 2
 6 10 1 106.24 52.2357 3
 6 10 2 311.64 131.893 2
 -6 -10 -2 103.311 54.0772 3
 6 10 3 89.4625 78.9572 2
 6 10 3 64.4014 44.0978 1
 -6 -10 -3 -73.1682 107.118 2
 -6 -10 -3 23.5314 34.7891 3
 6 10 4 77.5938 77.8841 2
 6 10 4 204.367 64.1027 1
 -6 -10 -4 128.666 61.009 3
 6 10 5 788.011 215.813 2
 -6 -10 -5 859.19 135.628 3
 6 10 5 809.294 132.332 1
 -6 -10 -6 404.044 111.607 3
 6 10 6 481.858 110.032 1
 6 10 6 371.872 181.391 2
 -6 -10 -7 44.8586 73.5339 3
 6 10 7 -46.2403 51.1954 1
 6 10 7 -70.3731 68.2004 2
 6 10 8 630.919 144.858 1
 -6 -10 -8 539.092 149.169 3
 6 10 9 115.269 89.8099 1
 -6 -10 -9 230.43 113.649 3
 6 10 10 129.352 104.061 1
 6 10 11 452.721 169.32 1
 6 10 12 611.81 199.493 1
 6 10 13 237.801 171.135 1
 6 10 14 325.81 231.038 1
 6 10 15 2.13885 217.649 1
 6 11 -12 -223.626 189.378 3
 6 11 -11 93.8945 134.657 3
 6 11 -10 244.592 190.19 3
 6 11 -9 2.1877 108.746 3
 6 11 -8 400.429 180.36 3
 6 11 -7 858.158 221.602 3
 6 11 -6 109.628 88.9873 3
 6 11 -5 557.877 166.09 1
 6 11 -5 631.411 224.868 2
 6 11 -5 285.228 115.343 3
 6 11 -4 508.402 150.787 1
 6 11 -4 515.81 207.108 2
 6 11 -3 -0.90915 75.8586 1
 6 11 -3 126.679 100.255 2
 6 11 -2 738.773 154.548 1
 6 11 -2 814.273 230.149 2
 6 11 -2 742.117 144.53 3
 6 11 -1 1039.18 158.187 3
 6 11 -1 1099.49 261.621 2
 6 11 -1 884.814 160.591 1
 6 11 0 19.8636 44.3028 3
 6 11 0 -24.7415 75.4173 1
 6 11 1 792.779 123.923 3
 6 11 1 859.43 221.731 2
 -6 -11 -1 781.633 139.392 3
 6 11 2 68.4385 49.2479 3
 6 11 2 104.233 86.1132 2
 -6 -11 -2 156.021 73.4033 3
 6 11 3 119.793 109.756 2
 -6 -11 -3 122.071 67.0129 3
 6 11 3 127.634 61.822 1
 6 11 4 465.598 174.498 2
 -6 -11 -4 621.329 125.5 3
 6 11 4 564.519 112.365 1
 6 11 5 222.988 132.936 2
 6 11 5 231.173 79.1419 1
 -6 -11 -5 127.487 81.3902 3
 -6 -11 -6 -2.2782 68.1555 3
 6 11 6 16.4672 34.4144 1
 6 11 6 116.816 107.096 2
 6 11 7 517.015 130.777 1
 -6 -11 -7 458.762 140.109 3
 6 11 7 516.897 192.146 2
 6 11 8 262.907 109.413 1
 -6 -11 -8 308.375 110.099 3
 6 11 9 15.7829 84.2989 1
 6 11 10 643.441 179.265 1
 6 11 11 308.513 157.812 1
 6 11 12 129.259 152.172 1
 6 11 13 216.663 193.523 1
 6 11 15 -86.0263 255.117 1
 6 12 -12 33.4972 190.814 3
 6 12 -11 70.1668 149.474 3
 6 12 -10 28.0943 127.129 3
 6 12 -9 207.436 192.68 3
 6 12 -8 417.693 189.261 3
 6 12 -7 -157.706 114.4 3
 6 12 -6 254.746 157.976 2
 6 12 -5 559.349 212.722 2
 6 12 -5 765.967 196.253 3
 6 12 -4 -35.824 117.466 1
 6 12 -4 -272.496 170.028 2
 6 12 -4 -27.4229 94.5222 3
 6 12 -3 285.54 142.464 1
 6 12 -3 396.245 179.864 2
 6 12 -3 412.883 132.955 3
 6 12 -2 702.227 174.353 1
 6 12 -2 998.655 260.415 2
 6 12 -2 789.351 164.71 3
 6 12 -1 0.98877 84.4565 2
 6 12 -1 6.44114 57.3365 3
 6 12 0 578.532 206.159 2
 6 12 0 675.388 134.314 3
 6 12 1 842.747 233.839 2
 6 12 1 848.746 143.292 3
 -6 -12 -1 971.99 173.112 3
 6 12 2 -6.11231 87.1017 2
 6 12 2 28.7001 51.034 3
 -6 -12 -2 5.0398 58.2454 3
 6 12 3 685.684 217.107 2
 6 12 3 764.099 145.458 1
 -6 -12 -3 682.386 138.376 3
 6 12 4 378.705 174.071 2
 -6 -12 -4 575.418 128.63 3
 6 12 4 568.474 125.478 1
 6 12 5 -163.835 154.132 2
 6 12 5 51.1366 50.4459 1
 6 12 6 284.426 101.081 1
 -6 -12 -6 282.531 106.491 3
 6 12 6 322.775 123.775 2
 6 12 7 505.072 138.618 1
 6 12 7 923.685 259.05 2
 6 12 8 -80.5663 84.9171 1
 6 12 9 355.808 132.033 1
 6 12 10 423.728 160.641 1
 6 12 11 -23.6401 120.941 1
 6 12 12 -8.42047 159.666 1
 6 12 13 -39.3706 190.29 1
 6 12 14 -84.3016 258.077 1
 6 13 -11 272.678 211.679 3
 6 13 -10 -328.441 186.097 3
 6 13 -9 281.786 187.93 3
 6 13 -8 1278.62 347.447 3
 6 13 -8 796.818 317.038 2
 6 13 -7 153.448 143.114 3
 6 13 -7 542.211 257.464 2
 6 13 -6 142.89 119.44 3
 6 13 -5 71.2587 95.1132 3
 6 13 -5 220.937 194.223 2
 6 13 -4 1168.85 237.958 3
 6 13 -4 -70.0989 135.976 2
 6 13 -3 297.837 184.604 2
 6 13 -3 542.05 160.528 3
 6 13 -2 -28.8491 103.119 2
 6 13 -2 26.8757 67.6638 3
 6 13 -2 -43.8993 127.394 1
 6 13 -1 277.93 156.056 2
 6 13 -1 440.999 178.413 1
 6 13 0 434.999 188.503 2
 6 13 0 371.624 110.958 3
 6 13 1 61.0929 64.9306 3
 6 13 1 79.9671 139.524 2
 -6 -13 -1 49.0997 82.7101 3
 6 13 2 92.3598 126.443 2
 6 13 2 118.373 66.9901 3
 -6 -13 -2 208.793 91.9643 3
 6 13 3 271.787 166.213 2
 6 13 3 819.832 152.73 1
 6 13 4 -28.0332 111.063 2
 6 13 4 128.787 67.5022 1
 6 13 5 312.983 108.068 1
 6 13 5 323.646 188.672 2
 6 13 6 522.112 145.585 1
 6 13 6 2.82307 118.813 2
 6 13 7 28.7547 73.8564 1
 6 13 7 740.692 249.462 2
 6 13 8 196.682 121.55 1
 6 13 9 339.166 153.975 1
 6 13 10 59.0605 128.142 1
 6 13 11 98.1596 166.698 1
 6 13 12 2.19344 185.249 1
 6 13 13 253.954 240.023 1
 6 14 -9 363.553 201.783 3
 6 14 -9 108.249 318.507 2
 6 14 -8 69.3011 157.373 3
 6 14 -8 81.0925 233.791 2
 6 14 -7 407.092 194.203 3
 6 14 -7 171.503 233.322 2
 6 14 -6 -62.7565 172.498 2
 6 14 -6 138.394 147.779 3
 6 14 -5 434.176 252.434 2
 6 14 -5 16.7511 95.672 3
 6 14 -4 -259.115 197.022 2
 6 14 -4 43.9086 105.21 3
 6 14 -3 21.4191 79.7455 3
 6 14 -3 310.642 208.269 2
 6 14 -2 1837.85 379.063 2
 6 14 -2 44.5481 71.557 3
 6 14 -1 638.77 239.415 2
 6 14 -1 514.549 141.933 3
 6 14 0 61.0525 126.549 2
 6 14 0 91.5104 70.2023 3
 6 14 1 -61.368 137.591 2
 6 14 1 -87.787 66.7455 3
 6 14 2 15.2999 135.685 2
 6 14 3 137.382 177.375 2
 6 14 3 1.74628 34.1725 1
 6 14 4 325.292 205.511 2
 6 14 4 208.814 91.2846 1
 6 14 5 1059.2 199.028 1
 6 14 5 1040.96 299.867 2
 6 14 6 507.031 149.336 1
 6 14 6 -52.0039 117.094 2
 6 14 7 800.533 277.861 2
 6 14 7 -50.669 96.512 1
 6 14 8 35.3784 102.852 1
 6 14 9 89.3237 142.549 1
 6 14 10 24.7843 156.44 1
 6 15 -8 15.1595 315.702 2
 6 15 -7 -27.7441 283.784 2
 6 15 -6 241.195 257.559 2
 6 15 -5 136.622 238.752 2
 6 15 -4 308.03 250.681 2
 6 15 -4 -185.487 123.843 3
 6 15 -3 559.488 264.013 2
 6 15 -3 -82.1228 100.305 3
 6 15 -2 627.544 276.403 2
 6 15 -2 504.076 169.551 3
 6 15 -1 245.011 198.133 2
 6 15 -1 71.0809 52.0549 3
 6 15 0 11.2885 150.791 2
 6 15 0 14.7124 64.4651 3
 6 15 1 -87.923 190.799 2
 6 15 2 82.8653 175.984 2
 6 15 3 29.8624 150.488 2
 6 15 3 155.611 84.4293 1
 6 15 4 477.714 144.192 1
 6 15 4 742.523 279.306 2
 6 15 5 44.8655 85.3576 1
 6 15 5 -192.785 198.283 2
 6 15 6 34.7142 105.699 1
 6 15 6 674.909 263.595 2
 6 15 7 -2.02636 134.144 1
 6 16 -7 115.148 339.382 2
 6 16 -6 -114.576 309.964 2
 6 16 -5 658.527 349.492 2
 6 16 -4 113.337 244.635 2
 6 16 -3 442.026 287.481 2
 6 16 -2 472.17 274.628 2
 6 16 -1 200.159 231.06 2
 6 16 0 141.52 210.237 2
 6 16 1 46.5623 222.881 2
 6 16 2 33.8337 220.615 2
 6 16 3 537.946 280.231 2
 6 16 4 300.57 253.636 2
 6 16 5 -345.906 277.092 2
 6 16 6 1381.26 376.157 2
 -7 10 3 108.18 187.697 3
 -7 10 3 731.486 218.102 1
 -7 10 2 57.2932 135.302 3
 -7 10 1 98.3899 121.969 3
 -7 10 0 -6.28514 119.473 3
 -7 10 -1 539.524 220.706 3
 -7 10 -2 626.757 225.515 3
 -7 10 -3 43.5598 121.077 3
 -7 10 -4 91.7384 124.684 3
 -7 10 -5 66.534 159.713 3
 -7 10 -6 146.801 175.359 3
 -7 9 5 1080.22 287.272 1
 -7 9 4 440.076 168.541 1
 -7 9 3 19.2502 104.249 3
 -7 9 2 2330.04 570.55 3
 -7 9 1 -126 130.671 3
 -7 9 0 213.821 163.308 3
 -7 9 -1 577.595 224.781 3
 -7 9 -2 -66.8307 119.978 3
 -7 9 -3 208.096 152.821 3
 -7 9 -4 325.422 188.278 3
 -7 9 -5 23.157 128.966 3
 -7 9 -6 296.925 192.655 3
 -7 9 -7 1131.89 328.158 3
 -7 9 -8 147.82 171.368 3
 -7 9 -9 110.518 171.995 3
 -7 8 7 383.736 187.857 1
 -7 8 6 691.694 225.424 1
 -7 8 5 259.207 123.844 1
 -7 8 4 79.7377 81.1456 1
 -7 8 3 456.616 185.415 3
 -7 8 2 103.143 111.945 3
 -7 8 1 319.086 169.372 3
 -7 8 0 760.659 233.365 3
 -7 8 -1 193.943 136.006 3
 -7 8 -2 142.157 137.759 3
 -7 8 -3 756.75 230.541 3
 -7 8 -4 176.315 136.749 3
 -7 8 -5 -117.144 123.232 3
 -7 8 -6 469.363 206.561 3
 -7 8 -7 99.9132 136.898 3
 -7 8 -8 5.03835 121.733 3
 -7 8 -9 109.782 159.436 3
 -7 8 -10 -5.50528 112.161 3
 -7 7 8 18.1129 136.88 1
 -7 7 7 404.633 167.974 1
 -7 7 6 458.654 176.091 1
 -7 7 5 40.1365 78.5348 1
 -7 7 4 753.362 211.441 1
 -7 7 3 279.195 156.383 3
 -7 7 2 32.7575 84.0755 3
 -7 7 1 1181.81 270.321 3
 -7 7 0 390.794 169.368 3
 -7 7 -1 -14.3278 92.3877 3
 -7 7 -2 979.056 248.216 3
 -7 7 -3 322.924 149.002 3
 -7 7 -4 38.7105 95.1274 3
 -7 7 -5 437.018 182.903 3
 -7 7 -6 304.772 183.071 3
 -7 7 -7 109.761 137.067 3
 -7 7 -8 573.701 225.189 3
 -7 7 -9 -216.451 171.077 3
 -7 7 -10 38.7436 138.42 3
 -7 7 -11 382.095 195.205 3
 -7 6 9 4.34453 135.636 1
 -7 6 8 162.669 140.882 1
 -7 6 7 518.895 185.971 1
 -7 6 6 8.23935 35.7859 1
 -7 6 5 508.723 166.524 1
 7 -6 -4 906.887 138.066 2
 -7 6 4 726.675 202.219 1
 -7 6 3 13.9807 81.7267 3
 7 -6 -3 -13.2132 30.9851 2
 -7 6 2 359.071 154.392 3
 -7 6 1 293.15 140.257 3
 -7 6 0 88.491 115.404 3
 -7 6 -1 1324.44 276.908 3
 -7 6 -2 459.218 171.061 3
 -7 6 -3 -141.268 121.764 3
 -7 6 -4 428.921 181.556 3
 -7 6 -5 121.76 118.825 3
 -7 6 -5 -114.562 59.0939 2
 -7 6 -6 61.5598 72.0845 2
 -7 6 -6 141.328 135.184 3
 -7 6 -7 1511.48 322.855 3
 -7 6 -8 550.647 231.1 3
 -7 6 -9 -22.6851 118.649 3
 -7 6 -10 114.977 133.363 3
 -7 6 -11 125.558 141.258 3
 -7 6 -12 481.94 246.469 3
 -7 5 10 -40.9307 141.11 1
 -7 5 9 174.114 145.865 1
 -7 5 8 294.209 150.16 1
 -7 5 7 114.228 96.8794 1
 -7 5 6 1168.59 245.932 1
 -7 5 5 1227.58 255.72 1
 -7 5 4 212.182 115.193 1
 -7 5 3 344.484 140.557 1
 -7 5 3 209.339 141.764 3
 7 -5 -3 173.59 63.6117 2
 7 -5 -2 305.311 64.2916 2
 -7 5 2 397.373 166.604 3
 -7 5 1 40.1307 93.979 3
 -7 5 0 1047.22 230.599 3
 -7 5 -1 1438.99 260.973 3
 -7 5 -2 151.092 108.943 3
 -7 5 -3 51.6097 98.839 3
 -7 5 -4 362.468 152.578 3
 -7 5 -5 42.6225 119.555 3
 -7 5 -5 170.116 69.7826 2
 -7 5 -6 920.981 166.612 2
 -7 5 -6 1071.46 260.329 3
 -7 5 -7 973.806 201.994 2
 -7 5 -7 826.072 233.395 3
 -7 5 -8 101.388 140.838 2
 -7 5 -8 26.5475 97.1646 3
 -7 5 -9 224.954 199.055 2
 -7 5 -9 245.093 167.751 3
 -7 5 -10 109.701 124.932 3
 -7 5 -11 112.989 113.478 3
 -7 5 -12 517.5 220.623 3
 -7 5 -13 56.7595 132.445 3
 -7 4 11 810.101 272.923 1
 -7 4 10 -17.0496 139.444 1
 -7 4 9 192.115 145.665 1
 -7 4 8 -167.335 115.127 1
 -7 4 7 1324.9 268.187 1
 -7 4 6 3126.72 396.686 1
 -7 4 5 818.971 199.919 1
 -7 4 4 39.6053 81.5776 1
 -7 4 3 646.242 182.997 3
 -7 4 3 852.625 194.891 1
 -7 4 2 65.6803 97.3093 3
 7 -4 -2 1000.07 141.895 2
 -7 4 1 770.198 191.861 3
 7 -4 -1 796.177 109.092 2
 -7 4 0 1881.75 286.91 3
 7 -4 0 1553.33 122.985 2
 -7 4 -1 677.952 181.972 3
 -7 4 -2 -43.8292 86.4327 3
 -7 4 -3 74.4369 89.0502 3
 -7 4 -4 18.7204 80.6887 3
 -7 4 -4 87.8913 50.7465 2
 -7 4 -5 445.506 167.366 3
 -7 4 -5 843.661 146.241 2
 -7 4 -6 966.705 178.725 2
 -7 4 -6 685.328 198.368 3
 -7 4 -7 -194.514 138.633 2
 -7 4 -7 16.9236 105.162 3
 -7 4 -8 823.325 217.656 2
 -7 4 -8 689.742 208.997 3
 -7 4 -9 417.076 206.923 2
 -7 4 -9 320.35 154.868 3
 -7 4 -10 14.0624 105.393 3
 -7 4 -11 480.548 209.93 3
 -7 4 -12 718.467 258.556 3
 -7 4 -13 -0.57353 128.502 3
 -7 4 -14 5.52507 147.391 3
 -7 3 11 -83.828 150.764 1
 -7 3 10 316.38 171.838 1
 -7 3 9 97.0228 99.1681 1
 -7 3 8 640.928 193.151 1
 -7 3 7 2746.63 369.251 1
 -7 3 6 641.038 179.203 1
 -7 3 5 66.8783 47.6789 1
 -7 3 4 1211.69 230.824 1
 -7 3 3 94.0086 77.5256 1
 -7 3 2 345.224 137.585 3
 7 -3 -2 378.761 98.9396 2
 -7 3 1 1613.61 254.82 3
 7 -3 -1 1708.33 184.662 2
 7 -3 0 1278.09 235.468 3
 -7 3 0 712.62 163.494 3
 7 -3 0 1232.81 145.261 2
 7 -3 1 156.494 54.7672 2
 7 -3 1 105.104 92.8295 3
 -7 3 -2 621.223 165.092 3
 7 -3 2 441.421 147.746 3
 7 -3 2 612.329 101.84 2
 -7 3 -3 23.9239 80.6101 3
 -7 3 -3 155.201 64.2256 2
 7 -3 3 129.245 103.912 3
 -7 3 -4 487.68 107.498 2
 -7 3 -4 705.727 177.704 3
 7 -3 4 545.409 170.853 3
 -7 3 -5 1449.14 255.552 3
 -7 3 -5 816.307 150.631 2
 -7 3 -6 198.885 97.7592 2
 -7 3 -6 181.56 111.33 3
 -7 3 -7 189.228 122.386 3
 -7 3 -7 347.295 140.233 2
 -7 3 -8 728.779 210.086 2
 -7 3 -8 1685.6 316.341 3
 -7 3 -9 69.373 170.106 2
 -7 3 -9 -51.0463 100.195 3
 -7 3 -10 599.06 202.562 3
 -7 3 -11 835.339 242.567 3
 -7 3 -12 324.556 189.824 3
 -7 3 -13 209.684 149.433 3
 -7 3 -14 19.3652 146.831 3
 -7 3 -15 -51.6179 141.497 3
 -7 2 12 0.5626 191.171 1
 -7 2 11 215.697 160.057 1
 -7 2 10 228.553 137.124 1
 -7 2 9 -62.9346 84.9926 1
 -7 2 8 898.908 219.583 1
 -7 2 7 628.844 171.473 1
 -7 2 6 87.7596 72.8385 1
 -7 2 5 1289.07 224.217 1
 -7 2 4 213.855 92.4288 1
 -7 2 3 173.463 96.309 1
 7 -2 -2 1228.71 187.159 2
 7 -2 -2 1643.46 259.694 3
 -7 2 2 1588.9 247.21 3
 -7 2 1 1266.46 212.46 3
 7 -2 -1 1460.26 240.922 3
 7 -2 -1 1514.37 191.714 2
 -7 2 0 248.478 110.978 3
 7 -2 0 134.704 56.1317 2
 7 -2 0 164.787 96.659 3
 -7 2 -1 707.683 159.557 3
 7 -2 1 482.321 134.551 3
 7 -2 1 637.688 116.449 2
 7 -2 2 284.448 82.4527 2
 -7 2 -2 234.554 100.213 3
 7 -2 2 118.835 85.99 3
 -7 2 -3 55.2995 68.0399 3
 -7 2 -3 168.141 60.1487 2
 7 -2 3 124.074 101.404 3
 7 -2 3 82.5901 52.7432 2
 -7 2 -4 1426.72 231.681 3
 7 -2 4 1466.15 241.999 3
 -7 2 -4 1441.49 193.621 2
 -7 2 -5 956.196 195.768 3
 7 -2 5 998.424 211.417 3
 -7 2 -5 837.677 162.711 2
 -7 2 -6 357.725 124.103 2
 -7 2 -6 310.936 128.622 3
 7 -2 6 303.16 141.974 3
 -7 2 -6 316.642 136.138 1
 -7 2 -7 817.747 194.73 2
 -7 2 -7 839.768 200.966 3
 -7 2 -8 100.854 124.151 2
 -7 2 -8 18.9597 102.616 3
 -7 2 -9 37.3965 164.065 2
 -7 2 -9 146.581 114.811 3
 -7 2 -10 797.914 231.113 3
 -7 2 -11 66.4266 101.82 3
 -7 2 -12 443.791 202.043 3
 -7 2 -13 330.419 196.26 3
 -7 2 -14 28.1066 119.209 3
 -7 2 -15 52.2075 113.674 3
 -7 1 11 253.472 168.254 1
 -7 1 10 -20.194 100.01 1
 -7 1 9 361.059 148.274 1
 -7 1 8 415.314 145.231 1
 -7 1 7 175.975 88.7895 1
 -7 1 6 1037.25 202.628 1
 -7 1 5 732.395 166.7 1
 7 -1 -4 77.1177 78.0257 3
 -7 1 4 53.3947 64.9702 1
 -7 1 3 959.052 174.978 1
 7 -1 -3 944.51 194.51 3
 -7 1 2 1712.63 239.177 3
 7 -1 -2 1645.52 240.785 3
 -7 1 2 1586.55 218.613 1
 -7 1 1 243.457 102.114 3
 7 -1 -1 153.738 93.6872 3
 7 -1 -1 124.269 72.8827 2
 -7 1 0 1327.72 204.352 3
 7 -1 0 1488.19 223.174 3
 7 -1 0 1505.76 199.084 2
 -7 1 -1 768.368 157.121 3
 7 -1 1 761.794 165.781 3
 7 -1 1 928.755 152.481 2
 7 -1 2 228.198 75.2421 2
 -7 1 -2 119.413 83.817 3
 7 -1 2 185.406 87.4013 3
 -7 1 -3 855.896 150.497 2
 -7 1 -3 778.262 160.72 3
 7 -1 3 830.752 169.262 3
 7 -1 3 800.796 148.766 2
 -7 1 -4 1220.79 202.292 3
 7 -1 4 976.21 185.251 3
 7 -1 4 1131.79 185.017 2
 -7 1 -4 909.784 162.766 2
 -7 1 -5 17.3237 44.491 2
 -7 1 -5 -0.49866 62.9506 3
 7 -1 5 -1.59795 69.1227 3
 -7 1 -6 1051.13 204.36 3
 7 -1 6 996.861 203.665 3
 -7 1 -6 1017.63 201.634 2
 -7 1 -6 926.185 189.786 1
 -7 1 -7 204.347 105.409 1
 -7 1 -7 87.4847 87.236 3
 -7 1 -8 136.001 98.2589 1
 -7 1 -8 52.135 85.0559 3
 -7 1 -9 508.509 202.293 2
 -7 1 -9 479.805 168.801 3
 -7 1 -10 408.398 163.747 3
 -7 1 -11 -1.6872 101.77 3
 -7 1 -12 376.065 178.732 3
 -7 1 -13 96.0295 128.523 3
 -7 1 -14 18.4477 120.217 3
 -7 1 -15 299.297 214.212 3
 -7 1 -16 125.426 180.176 3
 -7 0 13 560.157 250.436 1
 -7 0 12 298.49 190.443 1
 -7 0 11 -56.3971 146.995 1
 -7 0 10 311.031 153.672 1
 -7 0 9 1020.8 228.92 1
 -7 0 8 2181.22 333.723 1
 -7 0 7 1081.62 208.902 1
 -7 0 6 820.691 170.194 1
 7 0 -5 88.2809 80.54 3
 -7 0 5 66.4412 54.1798 1
 7 0 -4 202.868 103.414 3
 -7 0 4 0.46993 47.6143 1
 -7 0 3 820.719 156.29 1
 7 0 -3 714.969 163.843 3
 7 0 -2 91.9538 80.2751 3
 -7 0 2 97.1849 64.5462 1
 7 0 -1 1867.91 236.213 2
 -7 0 1 1836.37 225.329 3
 7 0 -1 2095.15 250.258 3
 -7 0 0 3063.85 278.263 3
 7 0 0 2916.03 283.135 3
 7 0 0 3374.32 313.863 2
 -7 0 -1 101.138 66.2311 3
 7 0 1 58.4925 37.7151 2
 7 0 1 181.758 80.702 3
 7 0 2 292.098 89.9874 2
 -7 0 -2 329.154 104.146 3
 7 0 2 340.588 105.036 3
 -7 0 -2 484.464 124.65 2
 -7 0 -3 996.141 167.635 3
 7 0 3 1190.39 186.992 3
 7 0 3 927.763 164.705 2
 -7 0 -3 1194.74 187.221 2
 -7 0 -4 -17.4517 36.3059 2
 -7 0 -4 114.507 79.0172 3
 7 0 4 49.366 53.0592 3
 7 0 4 53.7419 43.356 2
 7 0 5 1948.05 253.353 3
 -7 0 -5 1900.22 240.398 1
 7 0 5 2157.28 279.167 2
 -7 0 -5 2089.44 271.617 2
 -7 0 -6 137.298 88.7018 2
 -7 0 -6 124.765 87.3445 3
 -7 0 -6 107.357 71.3421 1
 -7 0 -7 -23.0754 72.7507 1
 -7 0 -7 -3.78237 68.9131 3
 -7 0 -8 167.043 101.814 1
 -7 0 -8 181.813 108.169 3
 -7 0 -9 30.198 136.434 2
 -7 0 -9 24.8293 76.5262 3
 -7 0 -10 31.0888 90.5167 3
 -7 0 -11 656.794 214.372 3
 -7 0 -12 558.814 207.85 3
 -7 0 -13 46.8008 119.163 3
 -7 0 -14 235.75 181.121 3
 -7 0 -15 283.788 207.208 3
 -7 0 -16 -3.09156 161.513 3
 -7 -1 13 1198.41 334.664 1
 -7 -1 12 433.392 210.829 1
 -7 -1 11 -10.8286 123.797 1
 -7 -1 10 470.951 177.346 1
 -7 -1 9 -1.51973 82.2066 1
 -7 -1 8 593.132 165.78 1
 -7 -1 7 1139.76 208.901 1
 -7 -1 6 665.63 155.605 1
 7 1 -5 1084.5 231.675 3
 -7 -1 5 26.6365 53.5364 1
 7 1 -4 245.818 111.284 3
 -7 -1 4 274.293 96.4269 1
 7 1 -3 -114.16 75.9754 3
 -7 -1 3 32.1915 44.6329 1
 -7 -1 2 1376.79 176.175 1
 7 1 -2 1436.66 199.234 3
 7 1 -1 3452.94 345.592 2
 7 1 -1 3589.65 298.284 3
 -7 -1 1 3837.9 273.012 1
 -7 -1 0 1506.1 182.953 3
 7 1 0 1611.05 193.13 3
 7 1 0 1413.71 215.63 2
 -7 -1 -1 32.8017 53.5301 3
 7 1 1 5.44224 39.9538 2
 7 1 1 -22.4869 55.6913 3
 -7 -1 -2 1390.79 211.351 2
 -7 -1 -2 1413.47 175.059 3
 7 1 2 1609.15 193.242 3
 7 1 2 1616.58 229.46 2
 7 1 3 257.213 105.11 2
 -7 -1 -3 192.041 80.3883 3
 7 1 3 181.632 78.0326 3
 -7 -1 -4 1606.81 196.401 3
 7 1 4 1586.12 201.871 3
 -7 -1 -4 1437.55 188.659 1
 7 1 4 1630.37 241.175 2
 -7 -1 -4 1835.5 248.917 2
 -7 -1 -5 1706.38 213.566 3
 -7 -1 -5 1764.23 215.684 1
 -7 -1 -5 1639.81 251.274 2
 -7 -1 -6 223.504 87.5004 1
 -7 -1 -6 321.781 122.232 2
 -7 -1 -6 149.324 76.5885 3
 7 1 6 244.424 119.267 2
 -7 -1 -7 147.533 103.922 2
 -7 -1 -7 159.594 80.3897 1
 -7 -1 -7 168.875 102.804 3
 -7 -1 -8 -73.5476 108.016 2
 -7 -1 -8 43.7517 67.263 1
 -7 -1 -8 55.181 83.3836 3
 -7 -1 -9 1073.64 199.009 1
 -7 -1 -9 6.54278 78.1078 3
 -7 -1 -10 919.999 219.032 3
 -7 -1 -11 1102.18 246.593 3
 -7 -1 -12 129.151 159.231 3
 -7 -1 -13 153.336 155.976 3
 7 1 14 64.8585 145.956 1
 -7 -1 -14 24.5918 109.768 3
 7 1 15 -213.416 268.087 1
 -7 -1 -15 32.9265 136.555 3
 -7 -1 -16 193.344 204.105 3
 -7 -2 13 562.4 265.806 1
 -7 -2 12 327.719 191.08 1
 -7 -2 11 431.907 178.484 1
 -7 -2 10 125.345 105.86 1
 -7 -2 9 229.149 117.497 1
 -7 -2 8 1142.27 222.414 1
 -7 -2 7 314.549 111.242 1
 -7 -2 6 48.1262 46.5128 1
 7 2 -6 0.28985 69.0596 3
 7 2 -5 303.34 106.512 3
 -7 -2 5 388.882 106.64 1
 7 2 -4 19.1694 63.6129 3
 -7 -2 4 -24.677 34.4967 1
 7 2 -3 1428.63 199.937 3
 -7 -2 3 1424.47 178.516 1
 7 2 -2 5230.91 349.72 3
 -7 -2 2 5602.44 326.972 1
 7 2 -1 1710.14 252.516 2
 -7 -2 1 1869.98 176.058 1
 7 2 -1 1718.9 193.241 3
 -7 -2 0 -0.32006 31.4528 1
 7 2 0 16.4866 56.038 3
 -7 -2 0 21.1458 45.2033 3
 7 2 0 70.3137 78.5163 2
 -7 -2 -1 464.971 95.5054 3
 7 2 1 520.167 139.892 2
 7 2 1 417.866 96.1807 3
 7 2 2 216.218 110.664 2
 -7 -2 -2 329.337 82.2096 3
 -7 -2 -2 142.347 84.6237 2
 7 2 2 295.584 82.3731 3
 -7 -2 -3 1052.75 140.326 3
 7 2 3 1364.17 220.228 2
 -7 -2 -3 1303.32 213.333 2
 -7 -2 -4 3572.16 261.947 3
 7 2 4 3678.47 275.534 3
 -7 -2 -4 3487.81 261 1
 7 2 4 3820.48 377.186 2
 -7 -2 -4 4046.74 383.95 2
 -7 -2 -5 1463.57 185.555 3
 -7 -2 -5 1311.58 164.931 1
 7 2 5 1278.74 229.244 2
 -7 -2 -5 1152.83 212.702 2
 -7 -2 -6 -114.108 116.335 2
 -7 -2 -6 -9.98009 41.0136 1
 -7 -2 -6 -15.9551 64.7172 3
 7 2 6 72.9538 71.7113 2
 -7 -2 -7 90.317 99.1949 2
 -7 -2 -7 68.3873 57.6834 1
 -7 -2 -7 202.481 97.7048 3
 -7 -2 -8 8.24131 100.565 2
 -7 -2 -8 41.6941 78.9921 3
 -7 -2 -9 578.967 151.689 1
 -7 -2 -9 635.444 168.004 3
 -7 -2 -10 2201.96 319.179 3
 7 2 10 2014.34 309.071 1
 -7 -2 -11 26.0827 103.369 3
 7 2 11 34.7967 110.394 1
 -7 -2 -12 56.6702 99.5703 3
 7 2 12 10.0319 126.472 1
 -7 -2 -13 350.099 180.814 3
 7 2 13 183.644 142.479 1
 -7 -2 -14 -252.343 175.861 3
 7 2 14 70.254 179.639 1
 -7 -2 -15 648.343 250.736 3
 7 2 15 298.988 236.429 1
 -7 -2 -16 285.974 219.043 3
 7 2 16 455.003 288.15 1
 -7 -2 -17 27.7527 160.583 3
 -7 -3 13 269.383 212.55 1
 -7 -3 12 164.961 162.779 1
 -7 -3 10 278.095 137.164 1
 -7 -3 9 839.933 204.776 1
 -7 -3 8 877.291 188.402 1
 7 3 -7 -112.795 62.68 1
 -7 -3 7 92.1173 63.7289 1
 -7 -3 6 353.576 103.931 1
 7 3 -6 200.987 76.8281 1
 7 3 -5 7.81005 17.658 1
 -7 -3 5 119.348 57.578 1
 7 3 -4 962.587 166.279 3
 -7 -3 4 891.928 144.831 1
 7 3 -3 3525.28 289.053 3
 -7 -3 3 3767.74 271.392 1
 7 3 -2 2897.8 244.667 3
 -7 -3 2 3000.17 218.615 1
 7 3 -1 59.0312 50.3952 3
 7 3 -1 40.2121 88.5978 2
 -7 -3 1 20.23 23.6742 1
 7 3 0 1388.59 149.031 3
 -7 -3 0 1438.38 125.688 1
 7 3 0 1508.98 245.626 2
 -7 -3 -1 122.241 52.0542 3
 7 3 1 109.586 81.9193 2
 7 3 1 111.831 51.2326 3
 7 3 2 298.516 119.612 2
 -7 -3 -2 256.293 118.128 2
 7 3 2 273.411 68.7703 3
 -7 -3 -2 178.424 51.4012 3
 -7 -3 -3 4511.3 243.413 3
 7 3 3 4587 258.818 3
 -7 -3 -3 5053.44 255.033 1
 7 3 3 4760.69 427.764 2
 -7 -3 -3 4267.76 396.128 2
 -7 -3 -4 1470.03 153.471 3
 -7 -3 -4 1286.49 136.585 1
 7 3 4 1498.34 243.328 2
 -7 -3 -4 1080.06 204.74 2
 -7 -3 -5 133.818 79.244 2
 -7 -3 -5 24.7051 24.1452 1
 -7 -3 -5 39.004 44.4439 3
 -7 -3 -6 -35.2974 39.9474 1
 -7 -3 -6 19.9106 45.4876 3
 7 3 6 6.79289 59.8329 2
 -7 -3 -7 -63.8402 90.607 2
 -7 -3 -7 173.088 88.4436 3
 -7 -3 -7 83.763 52.1285 1
 7 3 7 289.754 152.151 2
 -7 -3 -8 164.719 131.316 2
 -7 -3 -8 417.265 127.268 3
 7 3 8 360.253 109.545 1
 -7 -3 -8 251.879 93.9186 1
 -7 -3 -9 1235.09 204.868 1
 -7 -3 -9 1490.07 248.882 3
 7 3 9 1737.23 261.644 1
 -7 -3 -10 801.394 174.477 1
 -7 -3 -10 570.195 177.472 3
 7 3 10 553.431 160.388 1
 -7 -3 -11 314.166 161.363 3
 7 3 11 470.099 164.289 1
 -7 -3 -12 60.3782 103.596 3
 -7 -3 -13 -202.188 142.863 3
 7 3 13 4.35818 116.749 1
 -7 -3 -14 207.844 160.534 3
 7 3 14 60.2897 161.05 1
 -7 -3 -15 673.113 257.863 3
 7 3 15 811.988 295.04 1
 -7 -3 -16 93.8106 155.924 3
 7 3 16 -5.2804 242.745 1
 -7 -3 -17 5.09281 194.383 3
 -7 -4 13 384.734 232.108 1
 -7 -4 12 282.896 189.885 1
 -7 -4 11 -76.5668 137.668 1
 -7 -4 10 539.22 184.057 1
 -7 -4 9 957.717 219.441 1
 -7 -4 8 177.013 99.9674 1
 -7 -4 7 418.981 125.371 1
 7 4 -7 438.487 128.807 1
 7 4 -6 518.026 121.923 1
 -7 -4 6 616.931 137.337 1
 7 4 -5 -2.55499 12.408 1
 -7 -4 5 56.9411 43.559 1
 -7 -4 4 2134.22 218.231 1
 7 4 -4 2302.09 220.176 1
 7 4 -3 1726.59 196.942 3
 7 4 -3 1837.1 180.705 1
 -7 -4 3 1697.7 176.126 1
 7 4 -2 145.453 62.6711 3
 -7 -4 2 138.442 44.2027 1
 7 4 -1 2132.06 301.882 2
 -7 -4 1 2199.92 150.853 1
 7 4 -1 2105.3 173.267 3
 7 4 0 684.75 92.1806 3
 -7 -4 0 651.443 68.9773 1
 7 4 0 633.314 172.904 2
 7 4 1 264.019 109.221 2
 -7 -4 -1 182.819 31.3856 1
 7 4 1 230.027 52.9732 3
 -7 -4 -2 2076.7 286.712 2
 -7 -4 -2 2152.55 127.246 3
 7 4 2 2164.41 134.95 3
 -7 -4 -2 1932.07 98.2218 1
 7 4 2 2130.76 292.702 2
 7 4 3 91.6076 77.1709 2
 -7 -4 -3 196.349 48.1718 3
 -7 -4 -3 92.0253 59.0903 2
 -7 -4 -3 250.279 43.5023 1
 7 4 4 274.902 111.568 2
 -7 -4 -4 1.91951 46.4513 2
 -7 -4 -4 204.96 55.6327 3
 -7 -4 -4 148.665 40.7778 1
 -7 -4 -5 483.324 81.886 1
 7 4 5 485.546 150.067 2
 -7 -4 -5 563.432 161.124 2
 -7 -4 -5 467.648 91.7749 3
 -7 -4 -6 698.836 110.912 1
 -7 -4 -6 758.567 200.549 2
 -7 -4 -6 599.741 118.76 3
 7 4 6 589.056 114.799 1
 7 4 6 590.525 166.639 2
 -7 -4 -7 296.068 80.1069 1
 -7 -4 -7 178.048 129.124 2
 -7 -4 -7 277.814 99.312 3
 7 4 7 145.334 109.913 2
 -7 -4 -8 1441.52 192.192 1
 -7 -4 -8 1344.05 205.335 3
 7 4 8 1275.53 200.872 1
 7 4 9 673.055 159.803 1
 -7 -4 -9 644.124 142.097 1
 -7 -4 -10 124.586 85.0962 1
 7 4 10 108.782 82.2667 1
 7 4 11 388.37 144.272 1
 7 4 12 154.234 118.809 1
 7 4 13 275.274 169.065 1
 7 4 14 303.739 189.433 1
 7 4 15 86.1752 218.331 1
 7 4 16 -4.47215 227.649 1
 7 4 17 31.0755 288.687 1
 -7 -5 14 -21.9445 277.466 1
 -7 -5 13 331.218 227.305 1
 -7 -5 12 15.5498 153.11 1
 -7 -5 11 69.6395 117.268 1
 -7 -5 10 700.664 215.978 1
 -7 -5 9 154.234 102.658 1
 -7 -5 8 229.742 110.822 1
 -7 -5 7 494.758 145.582 1
 7 5 -7 458.789 136.535 1
 -7 -5 6 163.664 76.5398 1
 7 5 -6 382.698 113.323 1
 -7 -5 5 573.848 125.659 1
 7 5 -5 371.893 98.8379 1
 -7 -5 4 1798.16 200.566 1
 7 5 -4 1667.56 184.502 1
 7 5 -3 23.6916 21.9868 1
 -7 -5 3 28.4931 26.3352 1
 7 5 -2 2932.26 369.057 2
 7 5 -2 2545.77 175.069 1
 -7 -5 2 2750.12 191.964 1
 7 5 -1 744.692 94.9107 3
 7 5 -1 654.479 183.067 2
 -7 -5 1 760.654 84.0265 1
 7 5 0 11.5508 20.2562 3
 7 5 0 125.684 76.6967 2
 7 5 1 2030.14 296.477 2
 -7 -5 -2 1765.68 270.078 2
 7 5 2 1871.71 281.548 2
 7 5 3 64.2321 55.5874 2
 -7 -5 -3 -18.04 53.1612 2
 7 5 4 806.637 192.777 2
 -7 -5 -4 657.348 173.001 2
 -7 -5 -4 487.634 48.6824 3
 -7 -5 -4 783.307 78.5077 1
 -7 -5 -5 791.323 195.471 2
 -7 -5 -5 885.976 113.198 3
 -7 -5 -5 961.81 106.507 1
 7 5 5 788.035 108.952 1
 7 5 5 1025.46 219.051 2
 -7 -5 -6 43.7328 88.8049 2
 -7 -5 -6 135.177 66.8794 3
 -7 -5 -6 165.428 54.4679 1
 7 5 6 180.795 58.5911 1
 7 5 6 327.757 127.391 2
 -7 -5 -7 1054.62 144.821 1
 7 5 7 1037.34 158.825 1
 -7 -5 -7 1077.09 267.096 2
 7 5 7 894.159 225.52 2
 -7 -5 -8 783.066 139.211 1
 7 5 8 1005.53 171.447 1
 7 5 8 1014.07 250.71 2
 7 5 9 62.9397 63.3811 1
 -7 -5 -9 45.6348 57.2597 1
 7 5 10 80.3959 80.3961 1
 -7 -5 -10 284.011 111.843 1
 7 5 11 230.873 123.92 1
 7 5 12 -0.3885 120.152 1
 7 5 13 376.381 177.95 1
 7 5 14 5.94657 129.605 1
 7 5 15 -117.582 187.413 1
 7 5 16 -142.63 332.918 1
 7 5 17 -41.6975 296.838 1
 -7 -6 13 7263.59 764.721 1
 -7 -6 12 -58.7364 169.349 1
 -7 -6 11 344.114 185.673 1
 -7 -6 10 123.143 127.156 1
 -7 -6 9 450.725 160.967 1
 -7 -6 8 872.172 202.367 1
 7 6 -7 147.481 97.5651 1
 -7 -6 7 320.633 117.882 1
 7 6 -6 360.979 108.011 1
 -7 -6 6 356.322 114.924 1
 7 6 -5 796.621 139.7 1
 -7 -6 5 1022.9 169.675 1
 -7 -6 4 125.97 57.7609 1
 7 6 -4 119.717 47.5886 1
 -7 -6 3 692.484 117.203 1
 7 6 -3 743.012 107.739 1
 7 6 -2 1426.67 272.062 2
 -7 -6 2 1687.5 157.408 1
 7 6 -2 1661.85 138.194 1
 7 6 -1 -76.3285 93.3813 2
 7 6 -1 82.7674 26.076 1
 7 6 0 151.123 26.5678 3
 7 6 0 277.27 129.271 2
 7 6 0 124.421 27.0056 3
 7 6 1 1586.47 275.031 2
 -7 -6 -2 24.5605 65.6613 2
 7 6 2 10.7092 77.6738 2
 -7 -6 -3 863.122 198.165 2
 7 6 3 978.585 217.465 2
 -7 -6 -4 1408.16 81.91 3
 -7 -6 -4 1429.02 83.719 3
 7 6 4 1673.46 118.092 1
 7 6 4 1660.91 281.863 2
 -7 -6 -4 1860.23 297.862 2
 7 6 5 -59.0845 27.5359 1
 7 6 5 -10.445 34.3035 2
 -7 -6 -5 12.3028 93.7988 2
 -7 -6 -5 10.0949 24.4948 1
 -7 -6 -5 -14.7664 35.5062 3
 7 6 6 123.156 49.5802 1
 -7 -6 -6 241.095 137.857 2
 -7 -6 -6 199.151 57.5122 1
 7 6 7 117.465 53.8444 1
 -7 -6 -7 176.846 58.6061 1
 7 6 7 136.044 90.5873 2
 7 6 8 -17.8664 46.3991 1
 -7 -6 -8 83.83 56.5708 1
 7 6 8 160.509 129.419 2
 7 6 9 362.134 111.557 1
 -7 -6 -9 408.161 114.268 1
 7 6 10 502.848 146.754 1
 -7 -6 -10 637.416 149.432 1
 7 6 11 60.1908 81.6113 1
 7 6 12 397.515 162.802 1
 7 6 13 217.115 160.527 1
 7 6 14 -29.1259 125.915 1
 7 6 15 4823.07 584.186 1
 7 6 16 531.487 289.321 1
 -7 -7 13 88.5959 250.307 1
 -7 -7 12 278.045 231.592 1
 -7 -7 11 -25.3474 141.131 1
 -7 -7 10 423.337 185.824 1
 -7 -7 9 702.157 210.65 1
 -7 -7 8 279.454 129.024 1
 7 7 -7 153.654 107.036 1
 -7 -7 7 231.556 118.823 1
 -7 -7 6 1068.29 199.004 1
 7 7 -6 944.327 168.849 1
 -7 -7 5 1495.64 224.894 1
 7 7 -5 325.714 96.0448 1
 7 7 -4 210.805 69.7006 1
 -7 -7 4 258.067 84.972 1
 7 7 -3 1200.96 137.198 1
 7 7 -3 1830.52 328.826 2
 7 7 -2 -0.39924 80.8414 2
 7 7 -2 129.27 41.8658 1
 7 7 -1 339.189 147.442 2
 7 7 -1 198.367 38.4038 1
 7 7 -1 277.222 60.5381 3
 7 7 0 909.438 214.947 2
 7 7 1 312.045 138.865 2
 -7 -7 -2 1038.25 221.557 2
 7 7 2 863.766 212.183 2
 -7 -7 -3 1608.9 282.83 2
 7 7 3 1449.38 269.796 2
 7 7 4 222.598 107.473 2
 -7 -7 -4 511.736 167.197 2
 7 7 4 379.761 54.5515 1
 7 7 5 545.723 170.229 2
 -7 -7 -5 233.398 50.2796 3
 7 7 5 290.648 63.286 1
 -7 -7 -5 350.499 154.893 2
 7 7 6 510.614 169.772 2
 7 7 6 530.405 95.7619 1
 -7 -7 -7 160.864 64.7281 1
 7 7 7 218.228 71.8789 1
 7 7 7 129.526 80.93 2
 -7 -7 -8 445.77 103.012 1
 7 7 8 742.307 222.203 2
 -7 -7 -9 970.807 167.276 1
 7 7 9 828.862 161.407 1
 -7 -7 -10 117.638 79.1191 1
 7 7 10 149.128 88.8128 1
 7 7 11 215.488 120.55 1
 7 7 12 333.47 152.949 1
 7 7 13 19.4758 105.164 1
 7 7 14 347.147 212.781 1
 7 7 15 355.552 221.954 1
 -7 -8 13 777.245 348.32 1
 -7 -8 12 177.206 227.004 1
 -7 -8 10 920.283 269.741 1
 -7 -8 9 889.843 244.82 1
 -7 -8 8 101.985 106.751 1
 7 8 -7 460.759 144.707 1
 -7 -8 7 328.13 134.6 1
 7 8 -6 108.222 86.3414 1
 -7 -8 6 75.981 76.575 1
 7 8 -5 204.88 83.0649 1
 7 8 -4 1237.54 163.12 1
 7 8 -4 1377.57 199.215 3
 7 8 -3 295.948 161.291 2
 7 8 -3 336.115 93.2703 3
 7 8 -3 480.909 93.7062 1
 7 8 -2 98.7787 39.5874 1
 7 8 -2 67.2765 53.0226 3
 7 8 -1 142.716 96.063 2
 7 8 -1 168.714 48.7514 3
 7 8 -1 221.898 47.0431 1
 7 8 0 5.4209 11.3536 3
 7 8 0 28.0029 68.1651 2
 7 8 0 -8.905 9.52722 1
 7 8 1 1822.65 307.035 2
 -7 -8 -2 4070.38 453.088 2
 7 8 2 3382.36 420.499 2
 -7 -8 -3 1146.73 249.756 2
 7 8 3 1092.34 238.499 2
 7 8 3 1160.81 79.4002 1
 7 8 4 80.7702 66.8628 2
 -7 -8 -4 -10.8206 89.5089 2
 -7 -8 -4 7.56402 11.2804 3
 7 8 4 9.71568 15.0513 1
 7 8 5 326.826 135.87 2
 -7 -8 -5 220.105 53.3437 3
 7 8 5 354.594 70.291 1
 7 8 6 29.2649 52.9521 2
 -7 -8 -6 55.3531 41.584 3
 7 8 6 189.287 61.3695 1
 -7 -8 -7 354.974 90.938 3
 7 8 7 264.748 77.9173 1
 7 8 7 285.477 127.482 2
 -7 -8 -8 1421.44 192.712 3
 7 8 8 1611.44 206.145 1
 7 8 8 1982.8 365.47 2
 7 8 9 651.508 146.712 1
 -7 -8 -9 776.865 149.496 1
 7 8 10 57.3254 80.6083 1
 -7 -8 -10 259.383 112.125 1
 7 8 11 143.625 100.389 1
 7 8 12 43.9572 103.396 1
 7 8 13 745.937 229.954 1
 7 8 14 716.312 249.109 1
 7 8 15 220.6 216.29 1
 7 8 16 -2.29937 239.473 1
 -7 -9 13 -22.6753 265.127 1
 7 9 -13 -8.98433 187.307 3
 -7 -9 12 3987.25 599.739 1
 7 9 -12 -23.0319 154.932 3
 -7 -9 11 540.434 267.28 1
 7 9 -10 161.267 209.233 3
 7 9 -9 11.9088 105.864 3
 7 9 -8 79.3497 97.5427 3
 7 9 -7 144.387 120.44 3
 7 9 -6 101.408 87.73 1
 7 9 -6 220.88 134.986 3
 7 9 -5 1414.36 197.926 1
 7 9 -5 1343.58 223.826 3
 7 9 -4 1015.11 156.407 1
 7 9 -4 931.322 171.105 3
 7 9 -4 779.757 245.936 2
 7 9 -3 11.3778 111.94 2
 7 9 -3 9.18727 57.3535 3
 7 9 -2 461.164 168.273 2
 7 9 -2 538.508 110.403 3
 7 9 -2 490.475 89.7297 1
 7 9 -1 72.8181 81.7555 2
 7 9 -1 220.058 58.5099 3
 7 9 -1 262.786 61.1036 1
 7 9 0 440.618 60.2898 3
 7 9 0 314.174 133.155 2
 7 9 0 483.682 70.199 1
 7 9 1 2610 152.288 1
 7 9 1 3157.78 417.726 2
 7 9 2 890.672 224.302 2
 -7 -9 -2 1418.18 274.111 2
 7 9 2 1163.28 94.0914 1
 7 9 3 -83.6909 73.8709 2
 7 9 3 47.8002 23.4664 1
 7 9 4 302.711 134.082 2
 7 9 4 662.713 88.9227 1
 -7 -9 -4 612.82 77.662 3
 7 9 5 272.645 66.8622 1
 7 9 5 18.8167 50.2831 2
 -7 -9 -5 205.109 56.195 3
 7 9 6 163.979 99.209 2
 -7 -9 -6 182.587 61.3139 3
 7 9 6 252.111 72.623 1
 -7 -9 -7 1355.51 181.975 3
 7 9 7 1657.05 333.034 2
 7 9 7 1381.44 176.034 1
 -7 -9 -8 923.367 157.295 3
 7 9 8 1258.99 301.137 2
 7 9 8 794.418 148.921 1
 -7 -9 -9 -147.919 83.7427 3
 7 9 9 -58.0623 55.774 1
 -7 -9 -10 154.45 98.5774 3
 7 9 10 -10.7962 68.1827 1
 7 9 11 -9.7279 112.903 1
 7 9 12 564.675 186.091 1
 7 9 13 443.169 197.861 1
 7 9 14 25.7883 173.694 1
 7 9 16 170.421 284.348 1
 7 10 -12 316.53 223.841 3
 7 10 -11 271.329 210.749 3
 7 10 -10 12.1373 156.995 3
 7 10 -9 -24.9157 112.766 3
 7 10 -8 255.115 147.765 3
 7 10 -7 65.1298 112.54 3
 7 10 -6 608.705 166.542 3
 7 10 -6 576.016 165.584 1
 7 10 -5 1201.27 320.911 2
 7 10 -5 788.017 172.327 3
 7 10 -4 203.291 134.712 2
 7 10 -4 93.2734 76.1215 3
 7 10 -4 164.905 89.5551 1
 7 10 -3 148.438 107.092 2
 7 10 -3 261.384 97.5422 3
 7 10 -3 321.412 96.1937 1
 7 10 -2 205.465 74.3362 1
 7 10 -2 178.394 95.3228 2
 7 10 -2 169.313 67.2935 3
 7 10 -1 353.482 138.67 2
 7 10 -1 1347.1 149 1
 7 10 0 1341.28 134.279 3
 7 10 0 1139.87 132.091 1
 7 10 0 1424.15 291.191 2
 7 10 1 571.736 69.1761 3
 7 10 1 340.983 144.713 2
 7 10 1 766.003 108.239 1
 7 10 2 24.4381 23.0944 1
 7 10 2 -40.1661 110.288 2
 7 10 3 151.127 45.0494 1
 7 10 3 177.678 115.936 2
 7 10 4 114.053 99.5893 2
 -7 -10 -4 100.879 43.0972 3
 7 10 4 142.892 48.8708 1
 7 10 5 145.306 119.624 2
 7 10 5 97.1463 47.1166 1
 -7 -10 -5 94.8203 49.9954 3
 -7 -10 -6 855.744 134.76 3
 7 10 6 819.077 130.774 1
 7 10 6 749.175 222.068 2
 7 10 7 1021.03 157.789 1
 -7 -10 -7 800.575 142.954 3
 7 10 7 951.207 262.471 2
 -7 -10 -8 150.181 79.079 3
 7 10 8 43.3079 60.9496 1
 7 10 8 267.961 140.265 2
 -7 -10 -9 333.169 116.767 3
 7 10 9 194.88 100.035 1
 7 10 10 75.2989 93.3993 1
 7 10 11 242.344 128.884 1
 7 10 12 251.122 153.374 1
 7 10 13 360.429 194.654 1
 7 10 14 -33.4902 171.414 1
 7 10 15 63.8246 203.605 1
 7 11 -12 349.076 251.206 3
 7 11 -11 79.2878 179.947 3
 7 11 -10 102.702 160.61 3
 7 11 -9 394.877 191.842 3
 7 11 -8 5.13948 115.711 3
 7 11 -7 322.251 157.941 3
 7 11 -6 1545.69 362.319 2
 7 11 -6 1088.64 231.187 3
 7 11 -5 156.938 110.45 2
 7 11 -5 122.674 93.6381 3
 7 11 -5 141.462 117.502 1
 7 11 -4 301.651 159.189 2
 7 11 -4 376.365 125.287 1
 7 11 -4 374.726 125.365 3
 7 11 -3 502.595 126.381 1
 7 11 -3 279.904 145.339 2
 7 11 -3 289.159 101.577 3
 7 11 -2 3.30692 65.1049 1
 7 11 -2 80.5181 81.3414 2
 7 11 -2 7.38327 60.106 3
 7 11 -1 879.721 134.15 3
 7 11 -1 978.914 253.407 2
 7 11 -1 885.746 140.188 1
 7 11 0 842.269 234.726 2
 7 11 0 821.67 113.605 3
 7 11 0 909.657 141.499 1
 7 11 1 41.3861 30.8113 3
 7 11 1 33.5853 60.6123 1
 7 11 2 629.54 200.81 2
 7 11 2 509.213 92.4698 1
 7 11 3 172.117 116.621 2
 7 11 3 188.174 55.2511 1
 -7 -11 -3 237.873 67.8818 3
 7 11 4 -14.3886 59.4181 2
 -7 -11 -4 20.9698 37.4207 3
 7 11 5 424.528 178.817 2
 -7 -11 -5 352.313 93.2585 3
 7 11 5 243.442 74.5778 1
 7 11 6 476.319 108.36 1
 -7 -11 -6 277.477 90.1998 3
 -7 -11 -7 31.7222 52.4605 3
 7 11 7 -40.2943 79.7196 2
 7 11 8 128.041 83.5474 1
 7 11 8 1044.5 285.334 2
 7 11 9 228.819 108.854 1
 7 11 10 -6.07488 79.2913 1
 7 11 11 252.844 141.989 1
 7 11 13 -14.4578 172.496 1
 7 11 14 -36.3812 197.979 1
 7 12 -11 12.514 90.7303 3
 7 12 -10 234.887 219.617 3
 7 12 -9 21.4347 122.304 3
 7 12 -8 113.567 146.848 3
 7 12 -7 1204.66 347.511 2
 7 12 -7 352.514 164.931 3
 7 12 -6 136.576 114.462 2
 7 12 -6 79.3804 95.3282 3
 7 12 -5 208.7 144.461 2
 7 12 -5 55.0706 90.9084 3
 7 12 -4 675.56 172.629 1
 7 12 -4 554.418 220.402 2
 7 12 -4 603.864 153.859 3
 7 12 -3 340.131 128.577 1
 7 12 -3 33.8145 100.144 2
 7 12 -3 148.724 94.8218 3
 7 12 -2 107.329 92.5389 1
 7 12 -2 240.07 149.383 2
 7 12 -2 91.6338 76.3155 3
 7 12 -1 592.974 143.389 1
 7 12 -1 485.546 197.447 2
 7 12 -1 371.597 102.111 3
 7 12 0 71.3316 46.8594 3
 7 12 0 -118.55 120.377 2
 7 12 0 38.3906 81.118 1
 7 12 1 291.285 75.6598 3
 7 12 1 556.463 203.084 2
 7 12 1 285.875 113.245 1
 7 12 2 598.291 208.044 2
 7 12 2 647.649 113.473 1
 7 12 3 109.437 47.0895 1
 -7 -12 -3 92.3949 66.9673 3
 7 12 3 146.897 124.03 2
 7 12 4 122.246 130.288 2
 7 12 4 215.532 72.9867 1
 -7 -12 -4 90.4492 57.7852 3
 7 12 5 435.428 204.398 2
 -7 -12 -5 214.962 87.6176 3
 7 12 5 150.45 70.3792 1
 7 12 6 -16.5077 57.8323 1
 7 12 6 -97.1134 142.461 2
 7 12 7 278.253 108.287 1
 7 12 7 -92.3489 121.712 2
 7 12 8 401.908 126.698 1
 7 12 8 1187.26 314.054 2
 7 12 9 22.925 87.0389 1
 7 12 10 64.5218 109.968 1
 7 12 11 260.613 152.365 1
 7 12 12 5.51143 149.919 1
 7 12 13 102.859 192.041 1
 7 13 -10 23.0173 163.21 3
 7 13 -9 20.6687 119.645 3
 7 13 -8 151.115 164.185 3
 7 13 -8 514.174 296.767 2
 7 13 -7 -19.4363 158.37 2
 7 13 -7 -323.912 154.277 3
 7 13 -6 94.7805 151.72 2
 7 13 -6 103.752 97.1166 3
 7 13 -5 640.092 261.553 2
 7 13 -5 570.816 173.128 3
 7 13 -4 363.185 218.303 2
 7 13 -4 184.4 105.37 3
 7 13 -3 -45.7611 105.636 2
 7 13 -3 13.8155 63.3352 3
 7 13 -2 412.952 201.544 2
 7 13 -2 310.111 110.978 3
 7 13 -1 285.961 164.598 2
 7 13 -1 7.82961 55.2415 3
 7 13 0 50.943 55.1838 3
 7 13 0 -31.3607 104.327 2
 7 13 1 419.935 195.571 2
 7 13 1 228.218 74.5866 3
 7 13 2 226.012 82.112 1
 7 13 2 375.595 196.693 2
 7 13 3 33.5898 28.1229 1
 7 13 3 134.906 152.005 2
 7 13 4 482.489 211.357 2
 7 13 4 361.449 99.0083 1
 7 13 5 32.1725 135.099 2
 7 13 5 92.3822 64.9718 1
 7 13 6 297.31 107.475 1
 7 13 6 288.554 195.363 2
 7 13 7 732.628 160.665 1
 7 13 7 103.667 118.083 2
 7 13 8 -7.36524 85.9511 1
 7 13 8 613.862 244.584 2
 7 13 9 116.893 115.583 1
 7 13 10 3165.29 375.545 1
 7 13 11 -29.9738 154.941 1
 7 14 -8 225.039 264.349 2
 7 14 -7 -61.529 217.721 2
 7 14 -6 498.762 281.551 2
 7 14 -5 -418.684 314.213 2
 7 14 -4 -76.2441 84.0231 3
 7 14 -3 7.14875 136.863 2
 7 14 -3 -7.45797 77.8816 3
 7 14 -2 19.9384 141.815 2
 7 14 -2 -71.1627 77.9329 3
 7 14 -1 121.294 162.693 2
 7 14 -1 3.04719 60.5685 3
 7 14 0 390.98 210.054 2
 7 14 0 55.3995 78.4091 3
 7 14 1 263.809 186.629 2
 7 14 1 185.61 78.1906 3
 7 14 2 79.3036 47.3921 1
 7 14 2 41.3443 138.884 2
 7 14 3 336.134 207.037 2
 7 14 3 291.698 94.3418 1
 7 14 4 -84.9124 157.052 2
 7 14 4 72.7387 65.1623 1
 7 14 5 191.083 96.9263 1
 7 14 5 424.766 225.711 2
 7 14 6 991.466 187.128 1
 7 14 6 246.434 206.101 2
 7 14 7 60.7452 96.7102 1
 7 14 7 547.97 237.173 2
 7 14 8 2.35546 114.588 1
 7 15 -8 10.6853 304.169 2
 7 15 -7 58.1031 320.671 2
 7 15 -6 330.129 292.596 2
 7 15 -5 1996.01 481.34 2
 7 15 -4 265.43 225.093 2
 7 15 -3 -113.225 201.399 2
 7 15 -2 170.858 202.183 2
 7 15 -1 351.812 233.285 2
 7 15 0 468.059 246.287 2
 7 15 1 147.663 196.017 2
 7 15 2 118.509 199.452 2
 7 15 3 70.1147 198.351 2
 7 15 4 84.3459 182.035 2
 7 15 5 644.194 289.534 2
 7 15 6 64.7237 173.922 2
 7 15 7 1301.45 365.137 2
 7 16 -7 122.203 362.565 2
 7 16 -6 333.627 347.909 2
 7 16 -5 206.467 322.239 2
 7 16 -4 645.126 340.426 2
 7 16 -3 31.2318 239.559 2
 7 16 -2 640.344 314.954 2
 7 16 -1 278.819 260.206 2
 7 16 0 136.334 207.336 2
 7 16 1 32.4862 226.854 2
 7 16 2 120.015 201.166 2
 7 16 3 232.404 236.279 2
 7 16 4 458.655 278.38 2
 7 16 5 -13.362 266.665 2
 7 16 6 -45.8846 185.565 2
 7 16 7 1496.91 410.044 2
 7 17 -5 485.795 391.483 2
 7 17 -4 -80.0224 336.36 2
 7 17 -3 -8.06179 280.102 2
 7 17 -2 104.155 268.184 2
 7 17 -1 -26.1274 235.521 2
 7 17 0 -62.6501 250.994 2
 7 17 1 71.022 234.867 2
 7 17 2 -128.038 288.789 2
 7 17 3 -124.031 262.865 2
 7 17 4 383.845 305.905 2
 7 17 5 -556.803 329.926 2
 -8 9 3 1.19046 157.919 3
 -8 9 3 610.482 211.849 1
 -8 9 2 128.593 176.137 3
 -8 9 1 315.576 187.418 3
 -8 9 0 30.027 128.3 3
 -8 9 -1 3.96725 129.369 3
 -8 9 -2 425.433 194.553 3
 -8 9 -3 147.656 156.669 3
 -8 9 -4 -0.58268 109.039 3
 -8 9 -5 308.315 216.291 3
 -8 9 -6 104.523 133.044 3
 -8 9 -7 182.952 195.583 3
 -8 8 5 744.043 239.858 1
 -8 8 4 492.264 202.742 1
 -8 8 3 -291.755 171.072 3
 -8 8 3 201.839 114.821 1
 -8 8 2 264.06 143.336 3
 -8 8 1 76.5433 131.453 3
 -8 8 0 1.55769 104.549 3
 -8 8 -1 518.479 210.167 3
 -8 8 -2 205.683 165.381 3
 -8 8 -3 -75.8274 130.667 3
 -8 8 -4 368.965 179.157 3
 -8 8 -5 217.181 165.482 3
 -8 8 -6 -152.219 145.692 3
 -8 8 -7 477.114 230.325 3
 -8 8 -8 20.4216 109.565 3
 -8 8 -9 -270.187 184.061 3
 -8 7 7 30.2674 121.186 1
 -8 7 6 279.483 150.161 1
 -8 7 5 185.472 114.414 1
 -8 7 4 177.526 108.812 1
 -8 7 3 735.2 203.1 1
 -8 7 3 593.64 216.073 3
 -8 7 2 682.758 226.995 3
 -8 7 1 122.284 126.332 3
 -8 7 0 611.996 217.954 3
 -8 7 -1 283.328 156.675 3
 -8 7 -2 -13.3177 105.716 3
 -8 7 -3 219.225 139.613 3
 -8 7 -4 279.76 163.641 3
 -8 7 -5 0.49996 119.058 3
 -8 7 -6 393.39 207.417 3
 -8 7 -7 350.542 181.052 3
 -8 7 -8 -123.78 144.781 3
 -8 7 -9 205.564 168.337 3
 -8 7 -10 274.35 225.221 3
 -8 7 -11 86.5784 150.651 3
 -8 6 8 140.857 148.09 1
 -8 6 7 -238.85 168.892 1
 -8 6 6 47.9004 89.3066 1
 -8 6 5 -52.2816 69.5964 1
 -8 6 4 364.525 140.191 1
 -8 6 3 181.999 119.326 3
 -8 6 3 576.089 185.584 1
 -8 6 2 93.2763 129.495 3
 -8 6 1 250.672 154.373 3
 -8 6 0 245.274 144.331 3
 -8 6 -1 52.9893 105.315 3
 -8 6 -2 1508.89 308.503 3
 -8 6 -3 1201.14 280.002 3
 -8 6 -6 363.854 184.71 3
 -8 6 -7 33.9712 135.4 3
 -8 6 -8 548.93 242.382 3
 -8 6 -9 306.837 200.023 3
 -8 6 -10 68.5208 133.365 3
 -8 6 -11 -164.962 163.247 3
 -8 6 -12 -90.0177 141.599 3
 -8 5 9 506.059 219.111 1
 -8 5 8 155.662 138.272 1
 -8 5 7 479.392 178.11 1
 -8 5 6 60.1951 78.6008 1
 -8 5 5 70.9959 47.5792 1
 8 -5 -4 465.705 129.567 2
 -8 5 4 476.486 164.18 1
 -8 5 3 151.108 138.358 3
 8 -5 -3 347.26 101.606 2
 -8 5 3 192.766 102.43 1
 -8 5 2 112.167 102.975 3
 8 -5 -2 122.208 50.9892 2
 -8 5 1 142.854 106.527 3
 -8 5 0 -41.5956 92.4643 3
 -8 5 -1 1034.41 248.728 3
 -8 5 -2 1808.12 315.363 3
 -8 5 -3 459.482 169.036 3
 -8 5 -4 88.1509 110.131 3
 -8 5 -5 278.965 151.809 3
 -8 5 -5 261.246 70.7834 2
 -8 5 -6 146.592 95.0813 2
 -8 5 -6 -13.4524 55.3252 3
 -8 5 -7 1272.07 287.691 3
 -8 5 -8 986.588 271.374 3
 -8 5 -9 17.0178 125.203 3
 -8 5 -10 376.291 244.551 3
 -8 5 -11 2425.06 471.574 3
 -8 5 -12 -148.267 148.313 3
 -8 5 -13 130.098 126.786 3
 -8 4 10 452.064 217.243 1
 -8 4 9 -91.9499 135.66 1
 -8 4 8 332.725 160.82 1
 -8 4 7 141.002 102.063 1
 -8 4 6 597.991 183.079 1
 -8 4 5 1346.69 262.863 1
 -8 4 4 690.635 185.96 1
 -8 4 3 27.6771 74.5496 1
 8 -4 -3 -74.0756 62.6001 2
 -8 4 2 418.636 168.965 3
 8 -4 -2 673.102 130.927 2
 8 -4 -1 139.057 61.4459 2
 -8 4 1 6.4933 103.187 3
 -8 4 0 684.198 191.912 3
 8 -4 0 624.227 90.3496 2
 -8 4 -1 2285.9 328.916 3
 -8 4 -2 666.714 186.448 3
 -8 4 -3 84.6215 80.7755 3
 -8 4 -4 371.024 159.496 3
 -8 4 -5 -3.03855 88.5322 3
 -8 4 -6 438.01 135.996 2
 -8 4 -6 522.138 184.762 3
 -8 4 -7 956.177 205.569 2
 -8 4 -7 1008.93 256.313 3
 -8 4 -8 92.0951 132.19 2
 -8 4 -8 84.2024 112.543 3
 -8 4 -9 0.46394 115.222 3
 -8 4 -10 -26.2992 101.336 3
 -8 4 -11 -77.3648 118.966 3
 -8 4 -12 251.279 168.181 3
 -8 4 -13 50.5744 132.136 3
 -8 4 -14 -173.612 170.929 3
 -8 3 10 -84.1736 134.39 1
 -8 3 9 -52.5797 117.768 1
 -8 3 8 110.845 116.118 1
 -8 3 7 -80.613 70.8418 1
 -8 3 6 2049.95 324.662 1
 -8 3 5 711.001 183.155 1
 -8 3 4 -176.889 101.438 1
 8 -3 -3 730.144 154.293 2
 -8 3 3 590.456 163.214 1
 -8 3 2 299.529 142.879 3
 8 -3 -2 326.178 100.735 2
 -8 3 1 257.355 124.778 3
 -8 3 0 1028.36 217.946 3
 8 -3 0 1053.3 147.091 2
 -8 3 -1 1173.77 227.085 3
 8 -3 1 1035.04 144.826 2
 -8 3 -2 32.561 76.1994 3
 8 -3 2 -96.8161 48.4983 2
 -8 3 -3 492.555 161.924 3
 -8 3 -4 14.1576 85.7782 3
 -8 3 -4 6.74256 33.011 2
 -8 3 -5 839.7 161.084 2
 -8 3 -5 755.528 202.895 3
 -8 3 -6 1221.13 215.051 2
 -8 3 -6 1107.71 240.768 3
 -8 3 -7 528.462 168.695 2
 -8 3 -7 384.164 160.48 3
 -8 3 -8 89.0226 142.658 2
 -8 3 -8 21.7987 97.7941 3
 -8 3 -9 233.074 206.036 2
 -8 3 -9 135.306 142.933 3
 -8 3 -10 0.4654 119.918 3
 -8 3 -11 150.039 142.881 3
 -8 3 -12 726.062 259.988 3
 -8 3 -13 378.642 201.793 3
 -8 3 -14 -246.45 175.598 3
 -8 2 11 132.26 185.067 1
 -8 2 10 414.381 195.007 1
 -8 2 9 235.577 146.168 1
 -8 2 8 2.10251 65.7918 1
 -8 2 7 1031.54 227.877 1
 -8 2 6 655.683 177.057 1
 -8 2 5 -14.8771 43.941 1
 -8 2 4 389.645 128.909 1
 8 -2 -3 1271.84 214.663 2
 -8 2 3 886.042 182.631 1
 -8 2 2 30.679 76.808 3
 8 -2 -2 -29.07 37.5451 2
 -8 2 2 67.3903 74.7786 1
 -8 2 1 305.993 115.268 3
 8 -2 -1 601.74 131.858 2
 8 -2 0 1197.06 230.131 3
 -8 2 0 984.334 202.808 3
 8 -2 0 923.845 158.714 2
 8 -2 1 -85.2649 67.5387 2
 -8 2 -1 122.093 106.149 3
 8 -2 1 37.6026 74.384 3
 -8 2 -2 1018.1 204.472 3
 8 -2 2 826.752 189.472 3
 8 -2 2 1182.23 174.785 2
 -8 2 -3 889.808 195.981 3
 8 -2 3 727.739 179.434 3
 8 -2 3 674.547 134.404 2
 8 -2 4 -171.972 110.06 3
 -8 2 -4 62.4754 87.8915 3
 -8 2 -5 1086.18 223.134 3
 -8 2 -5 979.6 186.934 2
 -8 2 -6 336.971 127.218 2
 -8 2 -6 216.545 125.225 3
 -8 2 -7 105.066 115.626 2
 -8 2 -7 46.8288 84.1773 3
 -8 2 -8 566.048 196.439 2
 -8 2 -8 728.233 202.495 3
 -8 2 -9 314.568 195.103 2
 -8 2 -9 440.97 185.508 3
 -8 2 -11 189.242 140.95 3
 -8 2 -12 421.755 211.591 3
 -8 2 -13 21.2111 113.565 3
 -8 2 -14 269.513 197.572 3
 -8 2 -15 84.1234 157.333 3
 -8 1 12 473.467 239.571 1
 -8 1 11 298.778 190.001 1
 -8 1 10 378.416 185.189 1
 -8 1 9 -80.6093 106.831 1
 -8 1 8 280.421 131.989 1
 -8 1 7 380.43 136.208 1
 -8 1 6 318.374 118.9 1
 -8 1 5 216.542 91.0938 1
 -8 1 4 535.196 153.865 1
 -8 1 3 -88.4495 73.261 1
 8 -1 -2 410.466 140.837 3
 8 -1 -2 529.424 142.3 2
 -8 1 2 329.655 118.417 1
 -8 1 1 1545.75 239.048 3
 8 -1 -1 1546.96 246.145 3
 -8 1 0 -21.4068 70.8785 3
 8 -1 0 -23.3479 32.7596 2
 -8 1 -1 1144.49 196.389 3
 8 -1 1 1431.43 229.154 3
 8 -1 1 1363.68 197.936 2
 -8 1 -2 592.951 147.543 3
 8 -1 2 521.85 147.21 3
 8 -1 2 659.912 139.1 2
 8 -1 3 30.4774 41.4666 2
 -8 1 -3 -68.7538 77.0407 3
 -8 1 -3 -82.2819 55.6698 2
 -8 1 -4 615.397 139.879 2
 -8 1 -4 484.334 151.866 3
 8 -1 4 533.492 150.396 3
 8 -1 4 420.795 117.978 2
 -8 1 -5 733.475 162.005 2
 -8 1 -5 836.423 184.892 3
 8 -1 5 502.415 153.985 3
 -8 1 -6 4.33138 70.2116 2
 -8 1 -6 84.3026 93.8824 3
 8 -1 6 -113.092 103.227 3
 -8 1 -6 88.4066 86.9569 1
 -8 1 -7 733.519 195.85 2
 -8 1 -7 820.986 195.859 3
 -8 1 -7 892.319 207.138 1
 -8 1 -8 895.409 236.443 2
 -8 1 -8 775.872 199.931 3
 -8 1 -9 13.5037 104.233 3
 -8 1 -10 299.501 153.099 3
 -8 1 -11 349.583 180.463 3
 -8 1 -12 55.1391 116.429 3
 -8 1 -13 282.944 173.515 3
 -8 1 -14 46.9754 130.483 3
 -8 1 -15 4.82701 147.097 3
 -8 0 12 546.847 250.307 1
 -8 0 11 -87.8225 146.052 1
 -8 0 10 337.671 170.632 1
 -8 0 9 -65.3641 109.129 1
 -8 0 8 892.462 215.553 1
 -8 0 7 137.825 88.8335 1
 -8 0 6 292.058 106.711 1
 -8 0 5 1343.26 222.863 1
 -8 0 4 331.594 118.876 1
 8 0 -3 115.823 94.4609 3
 -8 0 3 42.7225 51.9995 1
 8 0 -2 2021.38 280.024 2
 8 0 -2 1783.33 255.341 3
 -8 0 1 136.51 93.1639 3
 8 0 -1 176.691 102.344 3
 8 0 -1 71.2294 62.2909 2
 8 0 0 956.722 183.316 3
 8 0 0 1220.87 203.841 2
 -8 0 0 865.378 164.5 3
 8 0 1 1946.46 244.22 3
 8 0 1 1945.6 250.869 2
 8 0 2 342.33 105.395 2
 -8 0 -2 206.605 92.3531 3
 8 0 2 260 100.974 3
 8 0 3 400.265 118.627 2
 -8 0 -3 425.107 118.94 2
 8 0 3 466.638 130.945 3
 -8 0 -4 499.615 131.127 2
 -8 0 -4 357.68 118.026 3
 8 0 4 419.435 122.767 3
 8 0 4 387.921 127.611 2
 -8 0 -5 0.29405 72.4023 2
 -8 0 -5 -26.0291 72.8088 3
 -8 0 -5 27.1963 67.8911 1
 8 0 5 45.5628 29.1965 2
 -8 0 -6 1971.31 266.915 3
 -8 0 -6 1976.9 266.397 1
 8 0 6 1766.34 260.524 3
 -8 0 -6 1857.18 284.819 2
 -8 0 -7 1116.88 208.341 1
 -8 0 -7 1385.99 264.374 2
 -8 0 -7 993.979 209.308 3
 -8 0 -8 237.355 124.755 1
 -8 0 -8 37.2036 126.678 2
 -8 0 -8 91.294 105.651 3
 -8 0 -9 229.706 130.147 3
 -8 0 -10 326.756 154.665 3
 -8 0 -11 18.3886 93.5646 3
 -8 0 -12 297.632 171.369 3
 -8 0 -13 154.423 187.452 3
 -8 0 -14 -132.58 146.599 3
 -8 0 -15 57.1788 122.4 3
 -8 0 -16 122.769 182.881 3
 -8 -1 12 719.502 263.039 1
 -8 -1 11 54.4703 122.43 1
 -8 -1 9 323.912 142.639 1
 -8 -1 8 438.833 153.497 1
 -8 -1 7 186.245 95.769 1
 -8 -1 6 747.946 170.199 1
 -8 -1 5 1299.91 213.068 1
 -8 -1 4 16.7266 27.5329 1
 8 1 -4 -50.9702 67.447 3
 8 1 -3 563.685 148.143 3
 -8 -1 3 344.187 100.841 1
 -8 -1 2 184.611 75.1357 1
 8 1 -2 179.091 96.5305 3
 8 1 -2 387.684 141.138 2
 8 1 -1 507.792 131.36 3
 8 1 -1 601.029 155.502 2
 -8 -1 1 490.533 114.021 1
 -8 -1 0 1525.11 199.855 3
 8 1 0 1409.72 199.219 3
 8 1 0 1332.96 220.063 2
 -8 -1 -1 363.982 100.985 3
 8 1 1 485.306 132.47 2
 8 1 1 346.438 104.079 3
 8 1 2 271.159 95.7331 2
 -8 -1 -2 205.454 87.0892 3
 8 1 2 178.049 78.431 3
 -8 -1 -2 516.565 129.489 2
 -8 -1 -3 1023.57 188.361 2
 -8 -1 -3 1094.51 168.126 3
 8 1 3 1153.25 178.948 3
 8 1 3 1082.4 196.502 2
 8 1 4 120.182 71.8456 2
 -8 -1 -4 6.94263 40.347 2
 -8 -1 -4 220.674 90.6667 3
 8 1 4 167.33 84.7533 3
 -8 -1 -5 2041.28 242.881 3
 8 1 5 2126.31 254.343 3
 -8 -1 -5 2007.06 244.649 1
 8 1 5 1744.08 268.394 2
 -8 -1 -5 2398.57 313.667 2
 -8 -1 -6 1132.28 227.535 2
 -8 -1 -6 2051.98 256.97 3
 -8 -1 -6 1916.98 242.622 1
 8 1 6 2101.13 310.95 2
 -8 -1 -7 422.46 125.071 1
 -8 -1 -7 790.633 206.774 2
 -8 -1 -7 569.889 157.593 3
 -8 -1 -8 205.418 149.004 2
 -8 -1 -8 142.947 93.0608 1
 -8 -1 -8 109.737 99.3909 3
 -8 -1 -9 366.227 135.244 1
 -8 -1 -9 309.306 142.477 3
 -8 -1 -10 -16.9069 91.5734 3
 -8 -1 -11 694.577 214.166 3
 -8 -1 -12 574.075 207.145 3
 -8 -1 -13 66.3802 123.866 3
 -8 -1 -14 100.543 155.028 3
 -8 -1 -15 61.0795 138.778 3
 -8 -1 -16 7.95805 130.076 3
 -8 -2 13 730.265 294.202 1
 -8 -2 12 747.811 259.337 1
 -8 -2 11 215.582 158.874 1
 -8 -2 10 224.586 149.232 1
 -8 -2 9 198.805 121.936 1
 -8 -2 8 383.688 139.057 1
 -8 -2 7 1124.59 213.919 1
 -8 -2 6 1182.13 202.957 1
 8 2 -5 193.993 107.771 3
 -8 -2 5 111.376 58.3531 1
 8 2 -4 590.847 148.376 3
 -8 -2 4 605.879 130.618 1
 8 2 -3 149.874 85.104 3
 -8 -2 3 249.563 81.4982 1
 8 2 -2 675.37 139.422 3
 -8 -2 2 835.459 139.335 1
 8 2 -1 4133.55 413.722 2
 -8 -2 1 3765.85 270.3 1
 8 2 -1 3409.2 291.58 3
 -8 -2 0 1236.67 166.637 3
 8 2 0 1330.3 179.239 3
 -8 -2 0 1591.56 165.601 1
 8 2 0 1498.08 247.281 2
 -8 -2 -1 24.2758 39.6027 3
 8 2 1 6.17931 54.3174 2
 8 2 1 -6.21602 51.3372 3
 -8 -2 -2 785.17 129.88 3
 8 2 2 742.81 170.586 2
 8 2 2 814.818 137.255 3
 -8 -2 -2 759.148 171.79 2
 8 2 3 579.579 151.648 2
 -8 -2 -3 473.492 105.488 3
 -8 -2 -3 464.831 131.598 2
 8 2 3 570.088 121.356 3
 8 2 4 560.001 154.588 2
 -8 -2 -4 352.179 98.8531 3
 8 2 4 508.765 124.061 3
 -8 -2 -4 506.089 110.158 1
 -8 -2 -5 1490.58 194.557 3
 -8 -2 -5 1570.8 194.05 1
 8 2 5 1733.33 277.125 2
 -8 -2 -5 1746.7 274.801 2
 -8 -2 -6 1764.08 224.823 3
 -8 -2 -6 1646.18 205.559 1
 8 2 6 1518.49 270.742 2
 -8 -2 -6 1967.92 302.508 2
 -8 -2 -7 107.598 110.897 2
 -8 -2 -7 154.785 101.821 3
 8 2 7 251.712 127.768 2
 -8 -2 -8 367.187 118.041 1
 -8 -2 -8 307.709 122.071 3
 -8 -2 -9 -10.0882 76.4369 1
 -8 -2 -9 45.9047 77.0621 3
 -8 -2 -10 216.428 121.361 3
 -8 -2 -11 984.482 238.741 3
 -8 -2 -12 52.4052 113.648 3
 -8 -2 -13 13.836 113.203 3
 -8 -2 -14 -64.1473 122.148 3
 -8 -2 -15 61.6256 133.04 3
 -8 -2 -16 -117.069 148.074 3
 -8 -3 13 711.04 288.435 1
 -8 -3 12 164.663 178.035 1
 -8 -3 11 -32.2543 118.24 1
 -8 -3 10 413.801 173.136 1
 -8 -3 9 59.5746 85.5167 1
 -8 -3 8 847.198 201.801 1
 -8 -3 7 1465.98 239.545 1
 -8 -3 6 -101.376 76.1141 1
 -8 -3 5 585.761 130.805 1
 8 3 -5 563.144 150.444 3
 -8 -3 4 126.298 58.5526 1
 8 3 -4 126.742 83.2818 3
 -8 -3 3 311.306 82.3148 1
 8 3 -3 354.999 105.926 3
 8 3 -2 3317.69 385.983 2
 8 3 -2 3300.75 281.078 3
 -8 -3 2 3043.98 238.269 1
 8 3 -1 2297.62 316.876 2
 8 3 -1 2246.9 218.8 3
 -8 -3 1 2461.48 198.908 1
 8 3 0 44.7086 51.0794 2
 8 3 0 55.049 48.2189 3
 -8 -3 0 38.0071 29.3061 1
 -8 -3 -1 166.438 60.4755 3
 8 3 1 134.273 76.9538 2
 8 3 1 212.95 75.774 3
 8 3 2 203.448 100.506 2
 -8 -3 -2 213.344 67.0249 3
 -8 -3 -2 256.61 115.133 2
 8 3 2 146.291 60.8002 3
 8 3 3 168.289 84.7744 2
 -8 -3 -3 181.9 64.2517 3
 -8 -3 -3 168.357 79.3673 2
 8 3 3 144.064 62.4286 3
 -8 -3 -3 150.446 46.9692 1
 -8 -3 -4 2115.55 195.05 3
 -8 -3 -4 1780.34 172.64 1
 8 3 4 1851.92 283.592 2
 -8 -3 -4 1849.67 286.924 2
 -8 -3 -5 1447.04 177.576 3
 -8 -3 -5 1576.66 171.253 1
 8 3 5 1430.54 257.03 2
 -8 -3 -5 1383.61 253.918 2
 -8 -3 -6 14.3572 94.5933 2
 -8 -3 -6 79.1358 67.9402 3
 -8 -3 -7 386.155 164.576 2
 -8 -3 -7 258.251 83.8916 1
 -8 -3 -7 310.996 103.843 3
 8 3 7 272.046 134.569 2
 -8 -3 -8 4.97591 65.8979 3
 -8 -3 -8 -57.9979 71.676 1
 -8 -3 -9 175.849 105.936 3
 -8 -3 -9 24.0437 68.0285 1
 -8 -3 -10 1322.86 225.995 1
 -8 -3 -10 1356.24 250.164 3
 8 3 11 624.173 193.979 1
 -8 -3 -11 399.639 169.637 3
 -8 -3 -12 15.4306 91.0141 3
 8 3 12 42.5045 113.85 1
 -8 -3 -13 8.99335 98.4823 3
 8 3 13 -327.149 201.268 1
 -8 -3 -14 -73.5504 120.643 3
 8 3 14 299.974 208.659 1
 -8 -3 -15 56.6421 151.233 3
 8 3 15 -264.885 241.353 1
 8 3 16 225.698 256.642 1
 -8 -3 -17 160.398 215.574 3
 -8 -4 13 -35.8471 207.805 1
 -8 -4 12 -85.2323 191.875 1
 -8 -4 11 651.854 223.163 1
 -8 -4 10 56.4302 111.57 1
 -8 -4 9 386.468 155.78 1
 -8 -4 8 1230.76 239.769 1
 -8 -4 7 281.317 109.658 1
 8 4 -6 437.766 115.407 1
 -8 -4 6 316.813 104.179 1
 8 4 -5 1188.73 200.566 3
 8 4 -5 1202.5 180.337 1
 -8 -4 5 976.168 168.984 1
 8 4 -4 3.87095 48.3927 3
 -8 -4 4 17.2358 20.0676 1
 -8 -4 3 1860.23 191.575 1
 8 4 -3 1901.33 216.064 3
 8 4 -2 1967.73 312.978 2
 -8 -4 2 2000.26 179.833 1
 8 4 -2 1875.41 198.459 3
 -8 -4 1 77.8377 35.0413 1
 8 4 -1 -36.0037 42.2573 3
 8 4 -1 26.1473 69.899 2
 8 4 0 447.358 87.8279 3
 -8 -4 0 479.932 69.0807 1
 8 4 0 752.52 188.479 2
 8 4 1 374.729 133.908 2
 8 4 1 336.141 70.6097 3
 -8 -4 -1 421.047 59.5083 1
 -8 -4 -2 40.226 36.3205 3
 8 4 2 2.68786 41.6945 2
 -8 -4 -2 111.757 75.3112 2
 8 4 2 2.45361 32.8697 3
 -8 -4 -2 14.9 16.3255 1
 -8 -4 -3 1552.25 260.759 2
 -8 -4 -3 1196.15 119.183 3
 -8 -4 -3 1238.81 106.796 1
 8 4 3 1379.83 247.316 2
 8 4 4 633.107 172.941 2
 -8 -4 -4 701.669 100.683 3
 -8 -4 -4 315.486 136.771 2
 -8 -4 -4 642.915 85.4518 1
 8 4 5 143.782 83.8132 2
 -8 -4 -5 204.077 115.578 2
 -8 -4 -5 60.4982 40.4599 3
 -8 -4 -5 113.52 42.217 1
 -8 -4 -6 333.061 150.814 2
 -8 -4 -6 399.257 99.0057 3
 -8 -4 -6 263.051 71.4392 1
 8 4 6 547.589 169.14 2
 -8 -4 -7 363.94 168.501 2
 -8 -4 -7 359.592 107.967 3
 -8 -4 -7 433.619 100.127 1
 8 4 7 386.922 154.116 2
 -8 -4 -8 82.7182 63.7483 1
 -8 -4 -8 -32.0927 64.7778 3
 -8 -4 -9 466.654 131.865 1
 -8 -4 -9 491.89 153.102 3
 8 4 9 641.193 158.667 1
 -8 -4 -10 666.817 178.19 3
 8 4 10 744.104 184.583 1
 -8 -4 -11 -14.7936 81.2084 3
 8 4 11 -13.6116 74.7964 1
 -8 -4 -12 146.215 130.001 3
 8 4 12 359.697 174.598 1
 -8 -4 -13 -34.1645 116.481 3
 8 4 13 285.958 181.707 1
 -8 -4 -14 40.5346 114.344 3
 8 4 14 -120.526 157.491 1
 -8 -4 -15 178.223 163.063 3
 -8 -4 -16 245.179 178.808 3
 8 4 16 149.017 247.395 1
 -8 -4 -17 -91.2416 151.587 3
 8 4 17 89.215 284.962 1
 -8 -5 13 -127.581 199.997 1
 -8 -5 12 473.545 244.645 1
 -8 -5 11 165.678 164.131 1
 -8 -5 10 -123.98 146.843 1
 -8 -5 9 645.444 189.476 1
 -8 -5 8 208.295 112.391 1
 8 5 -7 302.628 112.055 1
 -8 -5 7 252.385 111.369 1
 8 5 -6 557.265 129.953 1
 -8 -5 6 496.483 130.393 1
 8 5 -5 771.64 145.507 1
 -8 -5 5 691.214 139.694 1
 8 5 -4 213.411 71.8501 1
 -8 -5 4 196.985 69.4225 1
 8 5 -3 1314.04 174.008 3
 -8 -5 3 1373.07 160.467 1
 8 5 -2 205.06 72.9908 3
 -8 -5 2 165.437 50.457 1
 8 5 -2 141.55 110.877 2
 8 5 -1 1418.87 272.501 2
 8 5 -1 1064.37 124.73 3
 -8 -5 1 1008.12 101.573 1
 8 5 0 661.991 87.3957 3
 8 5 0 811.902 201.906 2
 -8 -5 0 662.353 62.9331 1
 8 5 1 39.7346 66.8454 2
 8 5 1 93.4711 32.5864 3
 -8 -5 -2 888.793 202.586 2
 8 5 2 1182.89 250.53 2
 -8 -5 -3 1074.05 80.2737 3
 -8 -5 -3 1097.82 227.482 2
 8 5 3 1277.88 245.117 2
 8 5 4 -2.2661 33.863 2
 -8 -5 -4 25.113 19.9304 3
 -8 -5 -4 14.1082 10.5162 1
 -8 -5 -5 476.706 82.2089 3
 -8 -5 -5 590.638 182.5 2
 8 5 6 498.086 166.385 2
 -8 -5 -6 635.782 99.0777 1
 -8 -5 -6 706.801 215.109 2
 -8 -5 -6 674.168 116.673 3
 -8 -5 -7 48.8298 36.711 1
 8 5 7 89.4986 56.2358 1
 -8 -5 -7 -1.93646 49.0108 3
 8 5 7 131.655 92.3062 2
 -8 -5 -8 502.999 110.603 1
 8 5 8 853.688 161.688 1
 -8 -5 -8 821.592 159.772 3
 8 5 8 969.35 261.527 2
 -8 -5 -9 944.429 166.793 1
 -8 -5 -9 874.941 179.05 3
 8 5 9 900.985 173.581 1
 -8 -5 -10 11.1171 79.8491 1
 -8 -5 -10 66.9413 91.3148 3
 8 5 10 27.7593 86.3545 1
 -8 -5 -11 373.607 148.372 3
 8 5 11 380.36 151.954 1
 8 5 12 151.966 128.945 1
 8 5 13 -16.4305 125.045 1
 8 5 14 352.412 202.59 1
 8 5 15 268.397 216.188 1
 -8 -5 -16 -42.4798 137.412 3
 8 5 16 1.88207 241.082 1
 -8 -5 -17 -48.0497 133.545 3
 8 5 17 324.779 330.912 1
 -8 -6 13 314.133 280.36 1
 -8 -6 12 4007.72 553.258 1
 -8 -6 11 -23.8209 129.032 1
 -8 -6 10 561.496 216.575 1
 -8 -6 9 82.7524 114.826 1
 -8 -6 8 421.515 152.03 1
 -8 -6 7 1247.32 232.201 1
 8 6 -7 1337.96 219.879 1
 -8 -6 6 448.184 126.62 1
 8 6 -6 658.367 149.936 1
 -8 -6 5 78.2359 57.82 1
 8 6 -5 32.5719 38.7705 1
 8 6 -4 542.225 106.99 1
 -8 -6 4 645.999 124.784 1
 -8 -6 3 -27.5248 63.4823 1
 8 6 -3 159.385 53.2426 1
 8 6 -3 279.136 175.322 2
 8 6 -2 489.758 93.3842 3
 8 6 -2 622.208 192.97 2
 -8 -6 2 573.085 90.8682 1
 8 6 -1 1720.08 305.427 2
 8 6 -1 1329.72 123.817 3
 -8 -6 1 1305.94 109.903 1
 8 6 0 617.901 64.4839 3
 8 6 0 687.177 195.275 2
 8 6 1 -0.77051 66.2736 2
 -8 -6 -2 1273.92 248.54 2
 8 6 2 1244.24 251.797 2
 8 6 3 60.2854 47.2394 2
 -8 -6 -3 79.1313 77.8962 2
 8 6 4 377.728 143.321 2
 -8 -6 -4 581.752 172.804 2
 -8 -6 -5 968.866 97.3759 1
 8 6 5 982.394 236.52 2
 -8 -6 -5 831.121 91.5169 3
 -8 -6 -5 759.955 211.797 2
 8 6 6 -44.2098 70.5342 2
 -8 -6 -6 84.5252 40.1503 1
 -8 -6 -6 32.562 41.7971 3
 8 6 6 -0.97676 26.352 1
 -8 -6 -7 309.699 74.5112 1
 -8 -6 -7 281.774 91.4866 3
 8 6 7 265.141 84.0479 1
 -8 -6 -8 556.444 114.033 1
 -8 -6 -8 510.902 132.082 3
 8 6 8 581.875 195.565 2
 8 6 8 483.263 118.832 1
 -8 -6 -9 -171.574 81.8672 1
 8 6 9 2.28502 60.8526 1
 8 6 10 356.479 128.809 1
 -8 -6 -10 168.23 99.4436 1
 8 6 11 562.232 169.278 1
 8 6 12 110.545 105.685 1
 8 6 13 -10.0177 131.638 1
 8 6 16 424.795 297.753 1
 8 6 17 0.67146 282.336 1
 -8 -7 13 15.8097 256.333 1
 -8 -7 12 -36.7991 200.722 1
 -8 -7 11 216.313 196.846 1
 -8 -7 10 110.581 151.054 1
 -8 -7 9 434.745 178.013 1
 -8 -7 8 983.226 226.187 1
 -8 -7 7 1102.87 218.366 1
 8 7 -7 1033.99 198.103 1
 -8 -7 6 122.388 87.3539 1
 8 7 -6 6.55871 71.334 1
 8 7 -5 800.93 144.309 1
 -8 -7 5 606.773 138.543 1
 8 7 -4 171.587 54.4272 1
 -8 -7 4 269.623 88.9535 1
 8 7 -3 376.097 75.1813 1
 8 7 -3 622.63 209.485 2
 -8 -7 3 238.779 72.6119 1
 8 7 -2 1405.52 123.818 1
 8 7 -2 1375.9 286.129 2
 8 7 -1 604.412 192.467 2
 8 7 -1 525.381 78.6692 3
 8 7 -1 536.007 72.9582 3
 8 7 0 55.4405 59.0365 2
 8 7 1 898.795 221.044 2
 -8 -7 -2 205.326 108.689 2
 -8 -7 -3 766.219 206.152 2
 -8 -7 -4 1312.68 279.7 2
 8 7 4 1426.09 280.884 2
 8 7 5 269.545 125.869 2
 -8 -7 -5 179.643 33.7904 3
 -8 -7 -5 228.895 40.3008 3
 8 7 5 274.994 55.8824 1
 8 7 6 34.856 58.3397 2
 -8 -7 -6 44.1315 41.9571 3
 8 7 6 64.1963 41.3458 1
 -8 -7 -7 832.93 122.869 1
 8 7 7 866.774 136.158 1
 8 7 7 653.299 206.562 2
 8 7 8 23.2047 45.1586 1
 8 7 8 -68.3265 76.2222 2
 8 7 9 472.279 129.945 1
 8 7 9 711.974 238.015 2
 -8 -7 -9 599.671 129.215 1
 8 7 10 629.147 158.586 1
 -8 -7 -10 595.55 146.173 1
 8 7 11 416.063 150.051 1
 8 7 12 -76.6843 131.194 1
 8 7 13 330.355 181.022 1
 8 7 14 91.7452 187.214 1
 8 7 15 62.7471 201.251 1
 8 7 16 209.73 245.294 1
 -8 -8 13 75.0752 306.241 1
 -8 -8 12 110.136 221.98 1
 -8 -8 11 500.794 257.188 1
 -8 -8 10 6919.29 661.921 1
 -8 -8 9 3060.38 492.697 1
 -8 -8 8 610.873 190.716 1
 -8 -8 7 207.87 125.968 1
 8 8 -7 4.98448 107.547 1
 -8 -8 6 772.834 177.612 1
 8 8 -6 649.876 150.599 1
 -8 -8 5 311.134 108.2 1
 8 8 -5 484.428 116.941 1
 8 8 -4 7577.04 686 2
 8 8 -4 68.3994 49.8867 1
 8 8 -3 1570.98 333.097 2
 8 8 -3 1785.97 201.006 3
 8 8 -3 1767.37 166.56 1
 8 8 -2 771.311 116.322 3
 8 8 -2 653.322 211.399 2
 8 8 -2 819.286 97.0696 1
 8 8 -1 18.6085 25.15 3
 8 8 -1 28.7323 14.2959 1
 8 8 0 54.8995 76.463 2
 8 8 1 116.466 80.1676 2
 8 8 2 643.356 190.483 2
 8 8 3 1376.69 281.056 2
 8 8 4 843.862 228.741 2
 8 8 5 -14.0001 23.3071 1
 8 8 5 -11.6681 48.3331 2
 8 8 6 350.013 75.8273 1
 -8 -8 -6 324.912 65.6321 3
 8 8 7 414.422 96.14 1
 -8 -8 -7 318.178 79.2915 3
 8 8 7 399.585 167.028 2
 8 8 8 24.8046 47.5632 1
 8 8 8 -207.421 119.578 2
 -8 -8 -9 987.639 168.847 1
 8 8 9 972.05 169.328 1
 8 8 9 1215.99 294.724 2
 -8 -8 -10 267.407 92.2857 1
 8 8 10 152.488 103.336 1
 8 8 11 -44.2754 91.5674 1
 8 8 12 119.95 119.194 1
 8 8 13 159.592 155.16 1
 8 8 14 -128.448 191.226 1
 8 8 15 162.018 218.327 1
 8 8 16 -173.656 266.485 1
 -8 -9 13 -101.3 323.097 1
 -8 -9 11 168.556 216.898 1
 -8 -9 10 98.7795 170.243 1
 -8 -9 9 668.062 225.725 1
 -8 -9 8 141.366 128.523 1
 8 9 -6 386.399 134.453 1
 8 9 -6 296.069 124.798 3
 8 9 -5 109.361 81.6311 1
 8 9 -5 16.0823 87.0278 3
 8 9 -4 1082.7 180.73 3
 8 9 -4 1170.55 303.494 2
 8 9 -3 764.621 114.298 1
 8 9 -3 569.083 218.176 2
 8 9 -3 608.388 122.727 3
 8 9 -2 58.5012 38.3836 1
 8 9 -2 65.6554 96.1756 2
 8 9 -1 20.8295 82.5976 2
 8 9 -1 124.597 35.1895 1
 8 9 0 46.1711 63.489 2
 8 9 1 426.867 160.336 2
 8 9 2 1642.27 326.694 2
 8 9 3 1113.53 266.335 2
 8 9 4 341.127 152.431 2
 8 9 4 65.2673 24.0282 1
 8 9 5 372.245 162.038 2
 8 9 5 295.271 59.5025 1
 8 9 6 181.273 121.323 2
 8 9 6 289.12 70.0506 1
 8 9 7 -23.795 43.5118 1
 8 9 7 -42.3632 87.7827 2
 -8 -9 -8 559.781 115.861 3
 8 9 8 288.736 123.289 1
 8 9 8 558.809 209.763 2
 -8 -9 -9 414.439 110.752 3
 8 9 9 463.419 124.025 1
 8 9 10 146.857 100.123 1
 8 9 11 46.5799 90.3417 1
 8 9 12 24.1626 135.347 1
 8 9 13 -114.857 166.788 1
 8 9 14 495.486 233.322 1
 8 9 15 -0.50547 196.489 1
 8 9 16 217.317 303.457 1
 8 10 -12 33.1083 177.572 3
 8 10 -11 272.402 216.259 3
 8 10 -10 325.264 121.353 3
 8 10 -9 90.249 135.713 3
 8 10 -8 148.131 122.685 3
 8 10 -7 388.953 175.941 3
 8 10 -6 109.643 108.695 1
 8 10 -6 110.427 101.112 3
 8 10 -5 538.739 141.35 1
 8 10 -5 577.923 224.485 2
 8 10 -5 316.06 118.936 3
 8 10 -4 559.32 123.167 1
 8 10 -4 851.069 270.946 2
 8 10 -4 586.173 143.428 3
 8 10 -3 62.0956 56.7625 1
 8 10 -3 -136.695 98.9103 2
 8 10 -3 2.09889 59.9724 3
 8 10 -2 79.6082 75.5319 2
 8 10 -2 186.821 65.2829 3
 8 10 -2 184.69 62.1912 1
 8 10 -1 434.303 70.7504 1
 8 10 -1 232.602 127.557 2
 8 10 -1 351.584 67.4412 3
 8 10 0 -278.703 134.071 2
 8 10 0 73.1218 27.5197 1
 8 10 1 350.822 158.588 2
 8 10 1 297.368 38.821 1
 8 10 1 238.607 33.7649 1
 8 10 2 438.477 177.808 2
 8 10 2 312.217 35.5649 1
 8 10 3 108.119 95.4541 2
 8 10 3 15.7307 16.0918 1
 8 10 4 44.8935 78.5826 2
 8 10 4 -7.16181 15.4436 1
 8 10 5 154.807 112.727 2
 -8 -10 -5 137.641 34.6746 3
 8 10 5 368.401 72.0672 1
 -8 -10 -6 21.6396 35.8212 3
 8 10 6 60.2492 45.6052 1
 -8 -10 -7 318.834 85.5129 3
 8 10 7 320.832 88.3791 1
 8 10 7 99.8879 108.277 2
 -8 -10 -8 511.132 117.225 3
 8 10 8 503.448 120.286 1
 8 10 9 -31.1946 64.8913 1
 8 10 9 906.413 273.387 2
 8 10 11 57.8302 103.377 1
 8 10 12 -27.0344 113.257 1
 8 10 13 205.788 174.428 1
 8 10 14 -28.3237 193.589 1
 8 11 -11 107.789 170.399 3
 8 11 -10 57.5993 136.167 3
 8 11 -9 62.7457 154.532 3
 8 11 -8 253.697 158.772 3
 8 11 -7 140.28 127.094 3
 8 11 -6 46.6165 82.8243 3
 8 11 -5 502.669 202.796 2
 8 11 -5 473.821 152.083 3
 8 11 -4 -18.8656 61.8194 2
 8 11 -4 84.7482 91.6812 3
 8 11 -4 27.2918 81.1276 1
 8 11 -3 -64.3549 82.1521 2
 8 11 -3 242.257 99.524 3
 8 11 -3 114.533 80.1887 1
 8 11 -2 195.202 128.944 2
 8 11 -2 419.986 95.8117 3
 8 11 -2 394.331 94.0245 1
 8 11 -1 36.8123 31.6681 3
 8 11 -1 60.7627 50.8586 1
 8 11 0 256.944 47.4328 3
 8 11 0 280.737 153.654 2
 8 11 0 273.269 64.0196 1
 8 11 1 386.043 70.0116 1
 8 11 1 392.096 174.283 2
 8 11 1 407.97 60.9245 1
 8 11 2 -57.8668 105.237 2
 8 11 2 66.7372 28.7343 1
 8 11 2 -24.5969 35.7321 1
 8 11 3 -6.31123 67.0228 2
 8 11 3 99.9209 36.6642 1
 8 11 4 423.342 178.146 2
 8 11 4 312.812 65.3183 1
 8 11 5 3.2899 36.8341 1
 8 11 5 -32.5331 98.6362 2
 -8 -11 -5 -11.1006 26.9638 3
 -8 -11 -6 229.698 71.4107 3
 8 11 6 260.026 81.7239 1
 8 11 7 250.239 90.5183 1
 8 11 7 277.073 174.271 2
 8 11 8 102.422 76.6251 1
 8 11 8 -203.839 153.172 2
 8 11 9 126.465 95.4025 1
 8 11 9 912.605 288.512 2
 8 11 10 746.563 184.846 1
 8 11 11 19.1935 108.08 1
 8 11 12 136.482 146.155 1
 8 11 13 -193.746 182.741 1
 8 12 -10 110.257 128.274 3
 8 12 -9 168.943 160.43 3
 8 12 -8 292.115 187.845 3
 8 12 -7 697.845 296.407 2
 8 12 -7 165.277 128.858 3
 8 12 -6 458.719 226.88 2
 8 12 -6 196.128 126.253 3
 8 12 -5 -60.8758 154.749 2
 8 12 -5 -264.776 117.217 3
 8 12 -4 201.052 159.071 2
 8 12 -4 353.448 121.621 3
 8 12 -3 602.339 221.358 2
 8 12 -3 422.903 118.931 3
 8 12 -2 107.996 123.548 2
 8 12 -2 448.49 108.385 3
 8 12 -1 -26.9071 46.9785 3
 8 12 -1 -20.4095 59.3228 1
 8 12 -1 -84.6316 118.653 2
 8 12 0 159.484 74.9053 1
 8 12 0 237.675 57.6963 3
 8 12 0 366.623 186.929 2
 8 12 1 107.634 64.7526 1
 8 12 1 198.292 148.704 2
 8 12 2 336.627 176.247 2
 8 12 2 241.987 84.4984 1
 8 12 2 233.6 57.0208 1
 8 12 3 918.982 269.908 2
 8 12 3 730.952 102.975 1
 8 12 4 139.288 140.323 2
 8 12 4 393.369 82.7154 1
 8 12 5 170.02 146.175 2
 8 12 5 74.5718 52.5385 1
 8 12 6 371.721 205.344 2
 8 12 6 330.604 94.5532 1
 8 12 7 -1.26149 116.686 2
 8 12 7 23.2744 63.2289 1
 8 12 8 185.147 100.902 1
 8 12 8 46.6765 90.0231 2
 8 12 9 390.855 135.761 1
 8 12 9 1119.77 326.447 2
 8 12 10 1862.3 275.457 1
 8 12 11 -292.69 160.23 1
 8 13 -8 82.2981 221.988 2
 8 13 -7 796.356 322.3 2
 8 13 -6 -42.2557 167.561 2
 8 13 -6 78.5503 105.595 3
 8 13 -5 -0.72073 148.734 2
 8 13 -5 134.431 107.687 3
 8 13 -4 329.597 213.686 2
 8 13 -4 498.459 150.796 3
 8 13 -3 520.884 238.781 2
 8 13 -3 247.534 100.637 3
 8 13 -2 -20.3017 154.901 2
 8 13 -2 -62.6021 70.116 3
 8 13 -1 227.558 74.079 3
 8 13 -1 554.146 229.748 2
 8 13 0 -124.357 53.0152 3
 8 13 0 144.8 146.484 2
 8 13 1 -11.7889 135.564 2
 8 13 2 375.839 80.7806 1
 8 13 2 501.009 227.935 2
 8 13 3 390.387 209.946 2
 8 13 3 339.239 83.3577 1
 8 13 4 -164.053 173.873 2
 8 13 4 -60.2649 53.9386 1
 8 13 5 338.609 197.073 2
 8 13 5 267.23 84.3047 1
 8 13 6 228.513 93.3016 1
 8 13 6 29.8323 154.542 2
 8 13 7 154.365 92.1409 1
 8 13 8 571.716 250.031 2
 8 13 8 492.587 142.108 1
 8 14 -8 74.8694 271.853 2
 8 14 -7 -66.5791 236.431 2
 8 14 -6 -68.9189 260.147 2
 8 14 -5 105.434 208.604 2
 8 14 -4 366.057 235.9 2
 8 14 -3 412.592 256.551 2
 8 14 -2 -48.9638 156.357 2
 8 14 -1 470.154 238.963 2
 8 14 0 -25.927 140.253 2
 8 14 3 71.6439 190.273 2
 8 14 4 311.891 207.575 2
 8 14 5 220.075 204.167 2
 8 14 6 496.876 254.102 2
 8 14 7 54.2035 148.715 2
 8 14 8 1193.95 359.028 2
 8 15 -7 -9.77524 305.41 2
 8 15 -6 -17.7579 278.34 2
 8 15 -5 -770.695 422.945 2
 8 15 -4 -52.9399 221.821 2
 8 15 -3 239.218 251.448 2
 8 15 -2 283.668 233.638 2
 8 15 -1 157.121 185.613 2
 8 15 0 339.295 233.294 2
 8 15 1 329.45 227.777 2
 8 15 2 -109.36 242.617 2
 8 15 3 65.0157 185.605 2
 8 15 4 134.654 207.29 2
 8 15 5 219.089 239.534 2
 8 15 6 -158.651 220.286 2
 8 15 7 -24.6376 238.557 2
 8 15 8 1350.48 390.869 2
 8 16 -6 -73.6022 317.52 2
 8 16 -5 -776.046 466.664 2
 8 16 -4 86.6213 282.336 2
 8 16 -3 367.904 329.84 2
 8 16 -2 143.563 260.146 2
 8 16 -1 -45.9053 193.064 2
 8 16 0 283.018 252.236 2
 8 16 1 222.3 255.062 2
 8 16 2 103.124 224.12 2
 8 16 3 18.6564 234.981 2
 8 16 4 -27.9824 214.855 2
 8 16 5 75.6717 236.237 2
 8 16 6 -125.674 251.12 2
 8 16 7 988.121 373.094 2
 8 17 -4 -258.453 353.632 2
 8 17 -3 409.117 368.875 2
 8 17 -2 -85.6427 304.466 2
 8 17 -1 1028.83 410.593 2
 8 17 2 -107.199 245.778 2
 8 17 3 268.929 286.624 2
 8 17 4 75.9115 306.681 2
 8 17 5 -165.462 303.414 2
 8 17 7 2456.84 559.821 2
 -9 9 -2 62.0144 139.791 3
 -9 9 -3 204.244 178.522 3
 -9 8 3 547.021 199.799 1
 -9 8 2 154.999 144.365 3
 -9 8 1 375.145 179.206 3
 -9 8 0 221.767 145.955 3
 -9 8 -1 -7.3069 123.495 3
 -9 8 -2 360.591 192.609 3
 -9 8 -3 334.89 207.283 3
 -9 8 -4 -9.83014 100.856 3
 -9 8 -5 1082.4 322.123 3
 -9 8 -6 541.38 223.427 3
 -9 8 -7 -119.558 157.657 3
 -9 7 5 110.229 111.984 1
 -9 7 4 594.682 197.214 1
 -9 7 3 -30.6329 63.7866 1
 -9 7 2 267.449 174.91 3
 -9 7 1 559.199 214.62 3
 -9 7 0 54.2259 105.241 3
 -9 7 -1 328.958 157.447 3
 -9 7 -2 451.803 174.803 3
 -9 7 -3 6.26681 90.6294 3
 -9 7 -4 395.988 181.853 3
 -9 7 -5 475.298 194.744 3
 -9 7 -6 6.66475 98.078 3
 -9 7 -7 220.375 157.605 3
 -9 7 -8 251.757 198.186 3
 -9 7 -9 135.013 156.881 3
 -9 6 7 -1.67589 121.799 1
 -9 6 6 -5.34366 105.953 1
 -9 6 5 161.029 114.504 1
 -9 6 4 319.762 176.524 1
 -9 6 3 269.916 135.338 1
 -9 6 2 423.977 185.16 3
 -9 6 1 163.674 154.206 3
 -9 6 -1 465.299 192.231 3
 -9 6 -2 38.6951 100.955 3
 -9 6 -3 337.359 184.505 3
 -9 6 -4 832.263 272.653 3
 -9 6 -5 12.9021 103.288 3
 -9 6 -6 237.969 182.065 3
 -9 6 -7 583.449 239.961 3
 -9 6 -8 9.94519 129.577 3
 -9 6 -9 63.3229 148.975 3
 -9 6 -10 413.421 236.175 3
 -9 6 -11 63.4392 113.435 3
 -9 5 8 380.151 205.514 1
 -9 5 7 -344.739 193.452 1
 -9 5 6 230.563 145.047 1
 -9 5 5 368.489 148.47 1
 -9 5 4 4.36807 35.9851 1
 -9 5 3 332.23 147.934 1
 -9 5 2 132.564 124.136 3
 -9 5 1 69.9394 93.7737 3
 -9 5 0 220.335 151.831 3
 -9 5 -1 -54.8411 112.691 3
 -9 5 -2 319.966 158.042 3
 -9 5 -3 1021.82 264.54 3
 -9 5 -4 441.365 179.625 3
 -9 5 -5 -1.35945 108.593 3
 -9 5 -6 384.583 184.345 3
 -9 5 -7 23.4649 110.487 3
 -9 5 -8 66.2764 124.171 3
 -9 5 -9 647.464 246.113 3
 -9 5 -10 320.593 205.602 3
 -9 5 -11 150.808 188.709 3
 -9 5 -12 65.1183 144.846 3
 -9 4 9 -430.787 204.571 1
 -9 4 7 383.793 170.002 1
 -9 4 6 556.54 188.762 1
 9 -4 -5 310.173 143.788 2
 -9 4 5 1249.45 287.707 1
 -9 4 4 326.277 125.617 1
 9 -4 -4 499.948 148.475 2
 -9 4 3 421.233 155.448 1
 9 -4 -3 1309.1 210.335 2
 -9 4 2 11.0944 89.0666 3
 9 -4 -2 102.086 74.428 2
 9 -4 -1 29.4798 55.7019 2
 -9 4 1 204.637 134.048 3
 -9 4 0 92.2124 102.366 3
 9 -4 0 112.932 56.6387 2
 -9 4 -1 251.367 129.355 3
 -9 4 -2 1564.81 292.368 3
 -9 4 -3 562.307 185.037 3
 -9 4 -4 48.1378 103.068 3
 -9 4 -5 282.589 140.713 3
 -9 4 -5 426.248 110.834 2
 -9 4 -6 86.7048 100.214 2
 -9 4 -6 126.45 133.928 3
 -9 4 -7 125.522 129.561 3
 -9 4 -8 644.425 224.739 3
 -9 4 -9 106.076 129.069 3
 -9 4 -10 2.62799 109.934 3
 -9 4 -11 0.55637 198.802 3
 -9 4 -12 2300.18 426.516 3
 -9 3 10 335.911 195.653 1
 -9 3 9 -11.853 134.849 1
 -9 3 8 248.909 157.797 1
 -9 3 7 390.317 165.814 1
 -9 3 6 -51.1869 68.4044 1
 -9 3 5 572.71 168.463 1
 9 -3 -4 1497.03 245.614 2
 -9 3 4 994.941 220.585 1
 -9 3 3 93.6138 90.9955 1
 9 -3 -3 192.027 107.891 2
 -9 3 2 365.942 159.549 3
 -9 3 2 165.193 106.921 1
 9 -3 -2 218.126 100.523 2
 -9 3 1 289.14 140.689 3
 9 -3 -1 288.771 104.366 2
 -9 3 0 20.1249 83.5641 3
 9 -3 0 1293.09 180.462 2
 -9 3 -1 1369.84 258.102 3
 9 -3 1 1483.03 186.351 2
 -9 3 -2 808.608 212.243 3
 9 -3 2 359.508 94.1211 2
 -9 3 -3 -0.70592 92.0896 3
 -9 3 -4 147.395 121.649 3
 -9 3 -5 92.6164 111.997 3
 -9 3 -5 57.3266 75.7578 2
 -9 3 -6 188.269 119.244 2
 -9 3 -6 82.2517 115.086 3
 -9 3 -7 675.419 196.297 2
 -9 3 -7 524.428 188.478 3
 -9 3 -8 307.164 181.338 2
 -9 3 -8 565.355 199.834 3
 -9 3 -9 53.4684 104.076 3
 -9 3 -10 179.136 159.398 3
 -9 3 -11 154.507 132.567 3
 -9 3 -12 34.8627 119.311 3
 -9 3 -13 515.904 234.751 3
 -9 3 -14 -166.368 172.256 3
 -9 2 10 -23.3024 164.767 1
 -9 2 9 142.187 148.345 1
 -9 2 8 463.032 179.168 1
 -9 2 7 166.197 114.632 1
 -9 2 6 114.308 87.1825 1
 -9 2 5 594.551 169.772 1
 -9 2 4 112.378 84.2911 1
 9 -2 -3 223.445 98.3836 2
 -9 2 3 424.419 143.351 1
 -9 2 2 996.569 222.627 3
 -9 2 2 1137.52 217.13 1
 9 -2 -2 976.15 188.69 2
 9 -2 -1 103.242 79.3409 2
 -9 2 1 65.6942 75.5762 3
 9 -2 0 763.415 153.759 2
 -9 2 0 889.461 205.757 3
 9 -2 1 645.84 141.704 2
 -9 2 -1 689.437 184.854 3
 9 -2 2 114.286 76.628 2
 -9 2 -2 3.44851 83.1102 3
 -9 2 -3 524.883 160.972 3
 9 -2 3 362.693 107.351 2
 -9 2 -4 870.657 207.92 3
 -9 2 -4 760.786 153.092 2
 -9 2 -5 11.1715 88.2763 3
 -9 2 -5 57.2102 87.3096 2
 -9 2 -6 1097.28 220.798 2
 -9 2 -6 1028.53 234.469 3
 -9 2 -7 945.613 224.432 2
 -9 2 -7 1200.88 257.232 3
 -9 2 -8 122.63 160.157 2
 -9 2 -8 126.004 119.218 3
 -9 2 -9 476.273 196.128 3
 -9 2 -10 442.929 194.311 3
 -9 2 -11 -84.1827 124.687 3
 -9 2 -12 177.437 157.697 3
 -9 2 -13 351.961 183.686 3
 -9 2 -14 1.82621 154.854 3
 -9 1 11 215.82 204.302 1
 -9 1 10 265.145 167.371 1
 -9 1 9 622.304 216.301 1
 -9 1 8 172.16 120.001 1
 -9 1 7 150.377 101.671 1
 -9 1 6 372.4 137.307 1
 -9 1 5 79.8883 65.6936 1
 -9 1 4 178.736 90.8663 1
 9 -1 -3 1661.55 266.562 2
 -9 1 3 1466.41 237.235 1
 9 -1 -2 79.6278 69.1485 2
 -9 1 2 207.241 98.1288 1
 -9 1 1 302.533 113.013 3
 9 -1 -1 224.717 96.0842 2
 -9 1 0 858.43 192.006 3
 9 -1 0 886.096 199.005 3
 9 -1 0 942.442 182.46 2
 9 -1 1 63.4275 62.6641 2
 -9 1 -1 76.2134 76.2536 3
 9 -1 1 -127.117 100.02 3
 -9 1 -2 768.561 183.021 3
 9 -1 2 812.52 190.592 3
 9 -1 2 918.142 176.567 2
 9 -1 3 657.035 154.736 2
 -9 1 -3 814.703 188.909 3
 9 -1 3 618.482 180.507 3
 -9 1 -4 46.2607 84.2921 3
 -9 1 -4 -118.551 101.676 2
 9 -1 4 -25.4904 98.4432 3
 9 -1 4 -143.315 73.129 2
 -9 1 -5 496.312 149.937 2
 -9 1 -5 337.323 140.345 3
 9 -1 5 405.518 151.357 3
 9 -1 5 835.865 185.467 2
 -9 1 -6 688.034 183.964 2
 -9 1 -6 855.917 209.852 3
 -9 1 -6 797.172 202.942 1
 -9 1 -7 207.079 136.948 2
 -9 1 -7 -43.8127 95.3665 3
 -9 1 -8 451.389 197.655 2
 -9 1 -8 305.458 142.369 3
 -9 1 -9 515.853 183.96 3
 -9 1 -10 274.142 153.281 3
 -9 1 -11 -250.265 150.798 3
 -9 1 -12 199.533 177.136 3
 -9 1 -13 83.2808 130.697 3
 -9 1 -14 38.4159 128.959 3
 -9 1 -15 336.265 224.843 3
 -9 0 11 205.83 193.365 1
 -9 0 10 717.314 243.603 1
 -9 0 9 401.376 174.799 1
 -9 0 8 281.96 142.326 1
 -9 0 7 537.269 164.595 1
 -9 0 6 396.813 133.201 1
 -9 0 5 181.329 85.6461 1
 -9 0 4 1742.19 254.902 1
 9 0 -3 605.664 176.732 2
 -9 0 3 650.757 157.934 1
 9 0 -2 1.82846 63.8644 3
 9 0 -2 -84.2523 66.8687 2
 -9 0 2 20.2327 45.376 1
 -9 0 1 668.427 161.814 3
 9 0 -1 797.85 181.89 2
 9 0 -1 632.844 172.527 3
 -9 0 1 654.871 150.565 1
 -9 0 0 261.163 122.422 3
 9 0 0 218.338 96.5347 2
 9 0 0 131.744 93.0033 3
 9 0 1 500.885 133.632 2
 -9 0 -1 638.891 155.078 3
 9 0 1 519.238 139.929 3
 9 0 2 1307.1 221.727 3
 -9 0 -2 995.961 187.347 3
 9 0 2 1181.79 208.566 2
 9 0 3 117.15 74.7041 2
 -9 0 -3 84.7628 83.2311 3
 -9 0 -3 186.329 82.8113 2
 9 0 3 79.2005 83.2998 3
 -9 0 -4 496.076 146.94 3
 -9 0 -4 823.828 178.745 2
 9 0 4 539.028 153.012 3
 9 0 4 572.686 154.323 2
 -9 0 -5 542.064 157.921 2
 -9 0 -5 843.751 188.764 3
 9 0 5 1034.61 204.696 3
 9 0 5 781.336 176.472 2
 -9 0 -6 -51.8303 86.7405 2
 -9 0 -6 16.6647 71.4114 3
 9 0 6 122.029 111.285 3
 -9 0 -6 -57.9033 118.17 1
 -9 0 -7 547.802 191.184 2
 -9 0 -7 372.227 145.188 3
 -9 0 -7 536.693 166.66 1
 -9 0 -8 1106.14 267.27 2
 -9 0 -8 968.291 214.45 3
 -9 0 -9 -38.4447 109.8 3
 -9 0 -10 71.1802 119.724 3
 -9 0 -11 266.499 155.97 3
 -9 0 -12 174.036 158.246 3
 -9 0 -13 313.126 189.515 3
 -9 0 -14 111.325 178.469 3
 -9 0 -15 -81.5504 148.277 3
 -9 0 -16 89.585 177.101 3
 -9 -1 12 193.836 219.526 1
 -9 -1 11 400.849 208.396 1
 -9 -1 10 481.773 201.157 1
 -9 -1 9 -106.882 138.428 1
 -9 -1 8 609.472 181.601 1
 -9 -1 7 637.555 181.967 1
 -9 -1 6 -18.2915 67.0727 1
 -9 -1 5 1512.26 233.053 1
 -9 -1 4 916.444 175.273 1
 9 1 -3 229.301 118.187 3
 -9 -1 3 188.748 83.2636 1
 9 1 -3 327.713 137.787 2
 -9 -1 2 390.363 107.089 1
 9 1 -2 430.911 143.308 3
 9 1 -2 400.257 134.667 2
 -9 -1 1 176.782 79.2709 1
 9 1 -1 108.909 77.8555 3
 9 1 -1 -11.8921 36.8006 2
 -9 -1 0 291.95 103.859 3
 9 1 0 346.964 121.562 2
 -9 -1 -1 1045.46 174.702 3
 9 1 1 1003.1 182.915 3
 9 1 1 1078.17 206.718 2
 9 1 2 478.071 140.634 2
 -9 -1 -2 591.313 136.129 3
 9 1 2 620.613 148.292 3
 9 1 3 1.56766 67.3894 2
 -9 -1 -3 -19.3365 57.7886 3
 -9 -1 -3 110.23 70.3178 2
 9 1 3 -23.99 64.4539 3
 9 1 4 497.291 147.412 2
 -9 -1 -4 397.37 124.009 3
 -9 -1 -4 360.152 129.848 2
 9 1 4 257.62 97.6577 3
 -9 -1 -5 176.969 101.433 2
 -9 -1 -5 101.232 82.7201 3
 9 1 5 50.691 64.8603 3
 -9 -1 -5 196.286 99.6307 1
 9 1 5 69.3017 80.1209 2
 -9 -1 -6 1121.68 210.59 3
 -9 -1 -6 1316.12 257.289 2
 9 1 6 905.096 209.757 2
 -9 -1 -7 1746.21 262.723 3
 -9 -1 -7 1778.31 253.465 1
 -9 -1 -8 305.915 124.345 1
 -9 -1 -8 380.659 143.054 3
 -9 -1 -9 93.9797 104.921 3
 -9 -1 -10 393.136 166.889 3
 -9 -1 -11 43.7497 112.615 3
 -9 -1 -12 259.66 162.791 3
 -9 -1 -13 334.139 197.984 3
 -9 -1 -14 89.0421 158.961 3
 -9 -1 -15 -219.145 170.623 3
 -9 -1 -16 126.756 210.998 3
 -9 -2 12 121.01 194.679 1
 -9 -2 11 645.14 253.769 1
 -9 -2 10 -73.2587 153.324 1
 -9 -2 9 482.545 175.634 1
 -9 -2 8 822.967 207.65 1
 -9 -2 7 -11.9754 72.6382 1
 -9 -2 6 721.788 166.141 1
 -9 -2 5 1047.13 188.544 1
 9 2 -4 55.0998 53.2038 3
 -9 -2 4 -58.91 41.731 1
 -9 -2 3 129.921 62.9807 1
 9 2 -3 214.688 106.183 3
 9 2 -2 428.717 126.554 3
 9 2 -2 391.271 148.653 2
 -9 -2 2 567.518 121.037 1
 -9 -2 1 61.7325 48.3323 1
 9 2 -1 43.0349 72.4433 3
 9 2 -1 214.517 99.5678 2
 9 2 0 772.75 153.056 3
 -9 -2 0 879.544 136.569 1
 9 2 0 934.597 199.582 2
 -9 -2 -1 806.092 146.196 3
 9 2 1 820.362 153.599 3
 9 2 1 591.231 157.448 2
 9 2 2 50.1968 53.7484 2
 -9 -2 -2 39.1047 47.5856 3
 9 2 2 95.9628 66.8551 3
 9 2 3 469.161 147.578 2
 -9 -2 -3 425.711 107.997 3
 -9 -2 -3 336.625 120.387 2
 9 2 3 468.225 119.43 3
 9 2 4 34.6001 51.303 2
 -9 -2 -4 167.241 77.3812 3
 9 2 4 120.916 79.6873 3
 -9 -2 -4 178.17 76.1026 1
 9 2 5 295.284 125.128 2
 -9 -2 -5 280.02 130.446 2
 -9 -2 -5 238.184 92.4403 3
 9 2 5 299.313 108.11 3
 -9 -2 -5 303.734 97.5306 1
 -9 -2 -6 1445.46 215.898 3
 -9 -2 -6 1401.09 200.63 1
 -9 -2 -6 1493.24 277.021 2
 9 2 6 754.522 174.08 2
 -9 -2 -7 1294.86 291.968 2
 -9 -2 -7 1314.91 216.106 3
 -9 -2 -7 1203.11 193.864 1
 9 2 7 1191.54 265.532 2
 -9 -2 -8 -42.1036 78.4915 1
 -9 -2 -8 68.8053 79.8731 3
 -9 -2 -9 532.25 156.265 1
 -9 -2 -9 436.778 150.913 3
 -9 -2 -10 139.821 123.444 3
 -9 -2 -11 191.097 128.302 3
 -9 -2 -12 696.427 227.707 3
 -9 -2 -13 101.237 115.752 3
 -9 -2 -14 34.4237 119.112 3
 -9 -2 -15 49.1576 159.952 3
 -9 -2 -16 67.7039 162.938 3
 -9 -3 12 575.246 267.641 1
 -9 -3 11 -26.1475 158.727 1
 -9 -3 10 -143.407 131.802 1
 -9 -3 9 558.908 187.406 1
 -9 -3 8 -113.038 114.383 1
 -9 -3 7 825.735 185.039 1
 -9 -3 6 850.324 179.016 1
 -9 -3 5 168.343 76.139 1
 9 3 -5 102.01 88.5082 3
 9 3 -4 672.129 152.461 3
 -9 -3 4 693.568 139.917 1
 9 3 -3 308.439 112.065 3
 -9 -3 3 401.119 99.3119 1
 9 3 -2 -70.277 63.7335 3
 9 3 -2 -50.5383 75.5748 2
 -9 -3 2 44.8898 43.7829 1
 9 3 -1 1189.43 240.954 2
 9 3 -1 1101.54 172.145 3
 -9 -3 1 1162.02 148.692 1
 -9 -3 0 1418.62 156.232 1
 9 3 0 1385.51 181.835 3
 9 3 0 1338.96 248.865 2
 -9 -3 -1 52.6062 50.4027 3
 9 3 1 -59.808 53.1946 2
 9 3 1 -23.4235 46.9 3
 9 3 2 217.32 97.8584 2
 -9 -3 -2 130.427 64.5237 3
 9 3 2 46.1511 52.627 3
 9 3 3 208.068 100.841 2
 -9 -3 -3 199.799 76.7889 3
 -9 -3 -3 69.3096 36.8405 2
 9 3 3 163.912 73.0703 3
 9 3 4 142.509 89.8488 2
 -9 -3 -4 66.7245 56.3049 3
 -9 -3 -4 164.358 100.88 2
 9 3 4 114.799 72.1856 3
 9 3 5 956.609 221.012 2
 -9 -3 -5 937.97 150.141 3
 -9 -3 -5 939.405 222.302 2
 -9 -3 -5 990.652 147.643 1
 -9 -3 -6 1441.49 198.344 3
 -9 -3 -6 966.563 233.411 2
 9 3 6 1465.15 281.462 2
 -9 -3 -7 329.307 97.3854 1
 -9 -3 -7 341.297 122.56 3
 9 3 7 40.3048 52.0694 2
 -9 -3 -8 386.299 133.262 3
 9 3 8 830.176 229.844 2
 -9 -3 -8 1104.74 182.925 1
 -9 -3 -9 42.5015 78.8765 3
 -9 -3 -9 -0.25321 84.1875 1
 -9 -3 -10 142.29 118.15 3
 -9 -3 -11 770.086 213.405 3
 -9 -3 -12 504.353 196.119 3
 -9 -3 -13 -103.773 121.813 3
 -9 -3 -14 160.777 159.019 3
 -9 -3 -15 -97.5306 154.631 3
 -9 -3 -16 -11.7611 136.467 3
 -9 -3 -17 14.6196 200.005 3
 -9 -4 13 431.476 285.597 1
 -9 -4 12 822.519 297.756 1
 -9 -4 11 237.22 176.744 1
 -9 -4 10 487.919 193.793 1
 -9 -4 9 128.938 119.648 1
 -9 -4 8 159.895 120.595 1
 -9 -4 7 1120.88 214.825 1
 -9 -4 6 -103.821 77.9226 1
 9 4 -5 394.765 126.288 3
 -9 -4 5 619.483 138.095 1
 -9 -4 4 1735.75 213.185 1
 9 4 -4 1451.47 216.102 3
 -9 -4 3 45.853 35.6148 1
 9 4 -3 60.1644 70.6152 3
 9 4 -3 211.775 146.541 2
 -9 -4 2 596.425 103.517 1
 9 4 -2 641.868 129.942 3
 9 4 -2 1000.04 238.353 2
 9 4 -1 1270.72 259.574 2
 9 4 -1 1154.35 162.189 3
 -9 -4 1 1341.05 142.057 1
 9 4 0 44.4378 52.2077 2
 9 4 0 -7.72981 42.5082 3
 -9 -4 0 -25.0495 25.3441 1
 9 4 1 429.238 148.382 2
 9 4 1 430.619 93.7045 3
 -9 -4 -1 361.899 63.1618 1
 -9 -4 -2 629.731 101.06 3
 9 4 2 479.46 158.056 2
 9 4 2 594.893 101.029 3
 -9 -4 -2 947.745 207.063 2
 9 4 3 29.3505 52.4102 2
 -9 -4 -3 47.0444 43.6565 3
 -9 -4 -3 -21.146 82.2687 2
 9 4 3 77.4883 51.2784 3
 -9 -4 -3 46.3017 27.8936 1
 9 4 4 631.435 184.464 2
 -9 -4 -4 567.358 101.432 3
 -9 -4 -4 1006.17 226.238 2
 -9 -4 -4 606.28 90.7818 1
 9 4 5 960.344 224.77 2
 -9 -4 -5 816.25 125.82 3
 -9 -4 -5 1136.43 250.319 2
 -9 -4 -5 823.432 114.881 1
 9 4 6 77.9437 86.0531 2
 -9 -4 -6 -52.2398 113.577 2
 -9 -4 -6 19.6024 33.7593 1
 -9 -4 -7 1050.5 164.752 3
 -9 -4 -7 922.301 146.91 1
 9 4 7 766.517 210.363 2
 -9 -4 -8 227.611 99.6373 3
 -9 -4 -8 194.887 89.2093 1
 9 4 8 467.909 180.518 2
 -9 -4 -9 -219.239 105.312 3
 -9 -4 -9 -4.18237 84.6526 1
 -9 -4 -10 4819.71 388.175 1
 -9 -4 -10 229.741 119.011 3
 -9 -4 -11 1000.88 230.771 3
 -9 -4 -12 93.5064 115.749 3
 9 4 13 273.556 180.855 1
 -9 -4 -13 68.673 150.716 3
 9 4 14 318.975 228.516 1
 -9 -4 -14 98.1232 134.145 3
 9 4 15 27.3935 205.91 1
 -9 -4 -15 -7.91853 172.113 3
 9 4 16 44.549 279.748 1
 -9 -4 -16 184.401 213.232 3
 -9 -4 -17 -191.657 180.697 3
 -9 -5 13 -43.1539 232.221 1
 -9 -5 12 -83.1865 210.842 1
 -9 -5 11 385.17 202.451 1
 -9 -5 10 357.022 182.682 1
 -9 -5 9 -128.713 155.225 1
 -9 -5 8 716.196 196.75 1
 -9 -5 7 331.568 122.998 1
 -9 -5 6 154.233 85.7787 1
 9 5 -6 251.772 96.5384 1
 9 5 -5 927.436 179.641 3
 -9 -5 5 811.62 158.65 1
 9 5 -4 608.157 140.183 3
 -9 -5 4 647.505 134.851 1
 9 5 -3 75.8382 57.4035 3
 -9 -5 3 33.5814 29.7684 1
 9 5 -2 914.723 142.518 3
 9 5 -2 885.619 229.359 2
 -9 -5 2 992.281 127.001 1
 9 5 -1 151.172 64.6942 3
 9 5 -1 306.134 137.279 2
 -9 -5 1 239.029 53.1213 1
 9 5 0 700.915 103.051 3
 9 5 0 531.944 159.78 2
 -9 -5 0 673.382 74.1002 1
 -9 -5 -1 1128.22 72.6314 1
 9 5 1 1224.32 120.957 3
 9 5 1 1398.87 271.015 2
 9 5 2 241.106 107.49 2
 9 5 2 336.289 64.389 3
 9 5 3 81.8447 67.7109 2
 -9 -5 -3 146.354 41.2261 3
 -9 -5 -3 42.1766 85.6122 2
 -9 -5 -4 431.806 58.9773 1
 9 5 4 523.132 164.895 2
 -9 -5 -4 416.348 71.3958 3
 -9 -5 -4 446.949 173.475 2
 -9 -5 -5 -29.4202 23.7429 1
 9 5 5 88.8913 79.3627 2
 -9 -5 -5 88.5572 113.461 2
 -9 -5 -5 0.63503 35.3058 3
 9 5 6 598.073 190.941 2
 -9 -5 -6 826.856 113.944 1
 -9 -5 -6 687.504 116.2 3
 -9 -5 -7 1115.05 146.822 1
 -9 -5 -7 1004.73 157.765 3
 9 5 7 685.921 203.759 2
 -9 -5 -8 313.162 94.5405 1
 9 5 8 145.996 102.768 2
 -9 -5 -9 26.1992 70.3529 1
 -9 -5 -9 42.0957 59.5958 3
 -9 -5 -10 919.315 185.475 1
 9 5 10 1058.49 216.824 1
 -9 -5 -10 782.782 191.396 3
 -9 -5 -11 138.158 100.191 3
 9 5 11 23.5551 97.7647 1
 -9 -5 -12 402.866 169.735 3
 9 5 12 440.153 186.362 1
 -9 -5 -13 3949.65 524.385 3
 9 5 13 458.682 213.734 1
 -9 -5 -14 -25.8394 81.558 3
 9 5 14 -18.1881 179.89 1
 -9 -5 -15 6.71758 167.42 3
 9 5 15 348.432 243.26 1
 -9 -5 -16 154.435 168.724 3
 9 5 16 386.671 301.335 1
 -9 -5 -17 98.8135 176.51 3
 -9 -6 13 -0.64076 252.385 1
 -9 -6 12 202.924 239.844 1
 -9 -6 11 28.5566 214.501 1
 -9 -6 10 -0.46052 121.405 1
 -9 -6 9 255.466 150.997 1
 -9 -6 8 180.606 121.186 1
 -9 -6 7 423.742 146.952 1
 9 6 -6 984.249 171.861 1
 -9 -6 6 902.364 193.414 1
 -9 -6 5 596.27 137.313 1
 9 6 -5 449.893 108.37 1
 9 6 -4 -20.746 52.6302 3
 -9 -6 4 -41.219 46.2268 1
 9 6 -3 333.003 92.139 3
 -9 -6 3 343.514 84.6997 1
 9 6 -3 483.086 193.385 2
 9 6 -2 229.122 69.7701 3
 9 6 -2 99.1858 93.678 2
 -9 -6 2 399.451 78.9348 1
 -9 -6 1 251.966 49.4027 1
 9 6 -1 333.918 73.8266 3
 9 6 -1 461.665 162.67 2
 9 6 0 1504.18 120.087 3
 9 6 0 1731.52 315.408 2
 9 6 1 932.665 229.671 2
 9 6 2 -54.6524 55.4338 2
 -9 -6 -2 316.646 142.238 2
 9 6 3 298.519 130.626 2
 -9 -6 -3 174.407 121.31 2
 9 6 4 -36.3447 54.6551 2
 9 6 5 443.988 166.265 2
 -9 -6 -5 359.865 60.7711 3
 -9 -6 -5 393.162 57.7235 1
 9 6 6 722.123 206.612 2
 -9 -6 -6 613.765 97.6757 3
 -9 -6 -6 720.946 97.2418 1
 -9 -6 -7 224.04 80.407 3
 -9 -6 -7 314.687 75.8429 1
 9 6 7 46.8432 80.2137 2
 -9 -6 -8 33.446 53.7941 3
 -9 -6 -8 77.2973 58.4438 1
 9 6 8 -85.1233 54.287 2
 -9 -6 -9 225.94 109.802 3
 9 6 9 206.446 103.021 1
 9 6 9 589.5 214.468 2
 -9 -6 -9 574.949 130.296 1
 -9 -6 -10 32.7216 87.4855 3
 9 6 10 -16.4644 79.2241 1
 -9 -6 -10 193.332 102.282 1
 -9 -6 -11 290.631 148.408 3
 9 6 11 174.658 125.076 1
 -9 -6 -12 378.436 162.537 3
 9 6 12 457.63 182.539 1
 -9 -6 -13 222.422 166.369 3
 9 6 13 38.3938 160.774 1
 -9 -6 -14 19.7309 116.828 3
 9 6 14 47.9113 197.041 1
 -9 -6 -15 -26.7452 109.299 3
 9 6 15 335.88 242.049 1
 -9 -6 -16 5.51503 172.951 3
 9 6 16 -17.226 275.959 1
 -9 -6 -17 -260.713 181.898 3
 9 6 17 83.4619 378.114 1
 -9 -7 13 46.0965 330.673 1
 -9 -7 12 715.522 316.55 1
 -9 -7 11 0.53971 195.094 1
 -9 -7 10 910.097 273.146 1
 -9 -7 9 144.404 128.278 1
 -9 -7 8 256.7 135.864 1
 -9 -7 7 1339.35 241.043 1
 9 7 -6 1336.33 201.89 1
 -9 -7 6 1756.61 278.119 1
 -9 -7 5 -74.5547 89.5993 1
 9 7 -5 17.7535 47.8064 1
 9 7 -4 663.074 113.626 1
 9 7 -4 953.602 293.044 2
 -9 -7 4 542.657 119.915 1
 9 7 -3 347.325 91.2319 3
 9 7 -3 417.529 82.7942 1
 9 7 -3 420.311 188.406 2
 -9 -7 3 415.36 95.6226 1
 9 7 -2 113.84 50.5714 3
 9 7 -2 157.417 127.433 2
 -9 -7 2 -22.1666 29.7796 1
 9 7 -1 663.006 85.9594 3
 9 7 -1 942.041 244.182 2
 9 7 0 662.315 195.276 2
 9 7 1 336.043 139.109 2
 9 7 2 182.598 107.3 2
 9 7 3 239.108 121.642 2
 9 7 4 299.287 135.385 2
 9 7 5 1691.57 326.733 2
 9 7 6 281.293 148.407 2
 -9 -7 -6 329.968 60.7232 1
 -9 -7 -6 355.779 64.5267 3
 -9 -7 -7 33.4498 19.3123 1
 -9 -7 -7 64.2211 53.6618 3
 9 7 7 145.722 115.09 2
 -9 -7 -8 306.925 97.5776 3
 9 7 8 326.633 104.769 1
 9 7 8 173.129 111.634 2
 -9 -7 -9 48.8171 48.5553 1
 -9 -7 -9 57.4547 73.8719 3
 9 7 9 6.15761 68.9905 1
 -9 -7 -10 377.647 124.005 1
 -9 -7 -10 377.669 140.743 3
 9 7 10 436.61 138.748 1
 -9 -7 -11 721.597 186.357 3
 9 7 11 721.593 191.668 1
 9 7 12 252.638 152.586 1
 9 7 13 224.386 164.099 1
 9 7 14 157.952 200.02 1
 9 7 15 81.932 203.919 1
 -9 -7 -16 15.6722 129.115 3
 9 7 16 -135.324 261.223 1
 -9 -8 12 -67.9431 265.101 1
 -9 -8 11 68.9537 185.481 1
 -9 -8 10 254.208 199.077 1
 -9 -8 9 207.063 165.364 1
 -9 -8 8 773.52 223.723 1
 -9 -8 7 800.214 202.188 1
 9 8 -6 24.6079 80.8689 1
 -9 -8 6 104.794 96.843 1
 9 8 -5 288.709 96.6247 1
 -9 -8 5 403.249 126.215 1
 9 8 -4 438.365 202.037 2
 -9 -8 4 430.854 112.442 1
 9 8 -4 495.632 102.86 1
 9 8 -3 37.4487 26.0484 1
 9 8 -3 -90.4133 112.987 2
 9 8 -2 585.601 90.6886 3
 9 8 -2 772.81 239.628 2
 9 8 -2 685.103 113.5 3
 9 8 -1 311.655 50.7609 3
 9 8 -1 329.614 58.347 3
 9 8 -1 321.467 143.771 2
 9 8 0 -104.008 79.5602 2
 9 8 1 399.617 163.899 2
 9 8 2 41.9782 47.7821 2
 9 8 3 -138.679 95.1379 2
 9 8 4 468.043 175.961 2
 9 8 5 952.258 252.07 2
 9 8 6 -33.0445 73.5845 2
 -9 -8 -6 7.69827 12.5163 3
 -9 -8 -6 2.92237 16.0261 3
 -9 -8 -7 261.777 66.5349 3
 -9 -8 -7 291.24 76.1504 3
 9 8 7 230.955 76.5835 1
 -9 -8 -8 479.817 99.3006 1
 -9 -8 -8 215.46 53.4161 3
 9 8 8 82.1427 83.839 2
 9 8 8 335.129 100.374 1
 9 8 9 43.6211 68.3413 1
 -9 -8 -9 120.977 79.5693 3
 9 8 10 416.634 139.781 1
 -9 -8 -10 445.007 125.429 1
 9 8 11 24.6376 91.4536 1
 9 8 12 -26.0177 125.476 1
 9 8 13 -47.3813 160.805 1
 9 8 14 173.134 196.024 1
 9 8 15 75.5953 224.177 1
 9 8 16 313.932 307.07 1
 -9 -9 12 -111.241 282.34 1
 -9 -9 11 312.402 258.034 1
 -9 -9 10 16.9109 198.371 1
 -9 -9 9 263.725 183.69 1
 -9 -9 8 745.665 225.582 1
 -9 -9 7 155.387 131.073 1
 9 9 -6 400.532 133.22 1
 9 9 -5 192.854 93.3699 1
 9 9 -5 520.722 200.617 2
 9 9 -4 -52.0044 66.4862 1
 9 9 -4 -103.654 115.354 2
 9 9 -4 -34.9879 69.9331 3
 9 9 -3 711.698 236.045 2
 9 9 -3 747.386 135.696 3
 9 9 -3 676.88 102.899 1
 9 9 -2 1006.53 98.4354 1
 9 9 -2 888.055 119.346 3
 9 9 -2 881.287 250.445 2
 9 9 -1 54.395 132.378 2
 9 9 -1 96.3772 28.166 3
 9 9 0 50.5402 60.3416 2
 9 9 1 219.244 125.029 2
 9 9 2 146.886 104.288 2
 9 9 3 418.848 162.902 2
 9 9 4 1250.76 291.787 2
 9 9 5 20.1561 60.7631 2
 9 9 6 186.341 134.358 2
 9 9 6 167.055 52.2974 1
 9 9 7 424.837 95.9411 1
 -9 -9 -7 207.638 54.4006 3
 -9 -9 -7 283.514 68.7224 3
 9 9 7 255.926 152.58 2
 9 9 8 38.9328 72.4508 1
 -9 -9 -8 -81.8213 49.2442 3
 9 9 8 -160.733 145.936 2
 9 9 9 525.538 134.666 1
 9 9 9 1071.37 300.04 2
 9 9 10 308.033 124.595 1
 9 9 11 85.99 113.739 1
 9 9 12 227.363 158.212 1
 9 9 13 -133.31 159.177 1
 9 9 14 -67.2407 179.077 1
 9 10 -11 -359.777 188.36 3
 9 10 -10 -56.3483 115.583 3
 9 10 -9 42.988 127.547 3
 9 10 -8 161.211 145.795 3
 9 10 -7 -14.5782 100.714 3
 9 10 -6 917.989 275.641 2
 9 10 -6 323.485 139.389 3
 9 10 -5 1088.02 290.322 2
 9 10 -5 22.7894 75.3408 3
 9 10 -4 230.469 142.903 2
 9 10 -4 179.745 95.8278 3
 9 10 -4 172.428 79.1654 1
 9 10 -3 208.882 128.694 2
 9 10 -3 759.07 112.778 1
 9 10 -3 612.464 123.831 3
 9 10 -2 99.0303 38.2199 1
 9 10 -2 -70.0858 51.1783 2
 9 10 -2 61.0689 44.0767 3
 9 10 -1 34.9517 16.3175 3
 9 10 -1 15.339 14.4522 3
 9 10 0 527.514 194.782 2
 9 10 1 52.6846 73.092 2
 9 10 2 72.8714 82.4378 2
 9 10 3 471.374 185.105 2
 9 10 4 -43.0401 132.991 2
 9 10 5 133.073 122.646 2
 9 10 5 106.33 30.1098 1
 9 10 6 241.185 147.192 2
 9 10 6 350.562 72.0039 1
 9 10 7 68.0737 52.6421 1
 -9 -10 -7 46.4594 29.7446 3
 9 10 7 143.881 140.162 2
 9 10 8 143.065 77.6095 1
 9 10 8 -13.3712 79.4897 2
 9 10 9 464.533 129.07 1
 9 10 9 1064.65 305.902 2
 9 10 10 40.7856 97.624 1
 9 10 11 116.57 121.859 1
 9 10 12 41.3692 153.1 1
 9 10 13 -96.1987 178.586 1
 9 11 -9 81.4942 130.779 3
 9 11 -7 799.406 292.442 2
 9 11 -7 291.986 154.265 3
 9 11 -6 3136.76 526.404 2
 9 11 -6 308.048 129.171 3
 9 11 -4 342.268 183.764 2
 9 11 -4 320.808 102.49 3
 9 11 -3 26.2193 98.521 2
 9 11 -3 370.545 101.11 3
 9 11 -2 328.52 71.781 1
 9 11 -2 175.643 141.552 2
 9 11 -2 29.7825 32.0482 3
 9 11 -1 378.987 50.9686 3
 9 11 -1 492.361 64.0068 1
 9 11 -1 330.412 179.115 2
 9 11 0 229.762 147.746 2
 9 11 1 297.556 157.666 2
 9 11 2 801.961 247.647 2
 9 11 3 -9.65622 97.2273 2
 9 11 4 125.413 120.977 2
 9 11 5 99.17 128.629 2
 9 11 5 348.452 60.0378 1
 9 11 6 39.6657 122.666 2
 9 11 6 -1.78541 43.6985 1
 9 11 7 1384.26 165.968 1
 9 11 7 198.172 177.871 2
 9 11 8 111.611 74.6326 1
 9 11 8 55.2914 128.391 2
 9 11 9 -37.3674 76.257 1
 9 11 9 569.506 244.491 2
 9 11 10 252.232 123.789 1
 9 12 -8 1256.32 390.368 2
 9 12 -7 702.144 289.168 2
 9 12 -6 14.8488 126.572 2
 9 12 -6 149.969 101.935 3
 9 12 -5 431.964 224.442 2
 9 12 -5 201.906 117.675 3
 9 12 -4 148.58 166.199 2
 9 12 -3 -91.6703 152.663 2
 9 12 -3 90.5874 65.3227 3
 9 12 -2 1057.41 292.195 2
 9 12 -2 375.999 83.8069 3
 9 12 -1 480.413 65.7568 3
 9 12 -1 349.098 198.185 2
 9 12 0 66.8218 131.491 2
 9 12 1 440.22 211.135 2
 9 12 1 244.32 33.8809 1
 9 12 2 363.245 194.627 2
 9 12 3 197.629 160.389 2
 9 12 3 61.3847 22.6327 1
 9 12 4 851.94 273.44 2
 9 12 4 513.167 68.8716 1
 9 12 5 533.606 234.684 2
 9 12 5 208.624 58.9789 1
 9 12 6 -38.5078 140.929 2
 9 12 6 -18.6734 57.8939 1
 9 12 7 57.3471 66.3095 1
 9 12 7 146.836 194.849 2
 9 12 8 -32.7845 158.62 2
 9 12 9 820.79 285.264 2
 9 13 -8 436.086 297.265 2
 9 13 -7 -60.5899 254.714 2
 9 13 -6 -48.5393 206.072 2
 9 13 -5 27.4002 148.865 2
 9 13 -4 -196.076 210.69 2
 9 13 -3 498.31 246.915 2
 9 13 -2 3150.34 540.466 2
 9 13 -1 71.8738 147.705 2
 9 13 0 72.4943 140.454 2
 9 13 1 -188.052 196.202 2
 9 13 2 -86.045 150.171 2
 9 13 3 627.413 256.534 2
 9 13 4 395.456 228.353 2
 9 13 5 100.515 171.629 2
 9 13 6 -1.35012 150.956 2
 9 13 7 -62.3879 200.201 2
 9 13 8 -418.567 259.912 2
 9 13 9 1213.42 358.45 2
 9 14 -7 6.19079 273.27 2
 9 14 -6 402.37 303.636 2
 9 14 -5 143.761 230.227 2
 9 14 -4 210.943 233.326 2
 9 14 -3 857.992 322.408 2
 9 14 -2 98.3431 180.344 2
 9 14 -1 68.8648 175.207 2
 9 14 0 2385.91 464.708 2
 9 14 1 -26.8713 141.382 2
 9 14 2 321.323 218.884 2
 9 14 3 623.169 271.219 2
 9 14 4 15.5897 162.774 2
 9 14 5 -2.76806 191.619 2
 9 14 6 298.71 230.936 2
 9 14 7 -99.3297 212.111 2
 9 14 8 -216.959 282.18 2
 9 14 9 1240.61 378.857 2
 9 15 -6 165.979 292.8 2
 9 15 -5 102.456 290.758 2
 9 15 -4 548.354 312.102 2
 9 15 -3 32.9099 224.918 2
 9 15 -2 7.56617 222.214 2
 9 15 -1 113.421 210.808 2
 9 15 0 10.0738 173.134 2
 9 15 1 -14.2003 200.507 2
 9 15 2 -0.70588 172.134 2
 9 15 3 440.936 265.56 2
 9 15 4 177.153 241.625 2
 9 15 5 46.5494 216.518 2
 9 15 6 11.1864 264.429 2
 9 15 7 -62.4283 219.701 2
 9 15 8 220.536 235.736 2
 9 16 -5 540.154 374.117 2
 9 16 -4 -47.0681 265.559 2
 9 16 -3 596.119 359.76 2
 9 16 0 74.9515 254.296 2
 9 16 1 803.396 355.91 2
 9 16 2 444.935 316.633 2
 9 16 3 68.3598 248.685 2
 9 16 4 62.2922 267.99 2
 9 16 5 176.007 289.78 2
 9 16 6 47.6814 264.295 2
 9 16 7 -167.093 341.386 2
 9 16 8 1923.93 498.955 2
 9 17 -3 245.946 374.755 2
 9 17 -2 4.98629 296.089 2
 9 17 -1 118.165 289.431 2
 9 17 0 219.169 321.777 2
 9 17 1 -79.1137 295.759 2
 9 17 2 92.4347 300.001 2
 9 17 3 164.995 305.37 2
 9 17 4 -9.42027 298.686 2
 9 17 5 6.37711 336.642 2
 9 17 6 -212.934 352.853 2
 9 17 7 -31.5994 316.879 2
 9 18 0 143.074 371.976 2
 9 18 1 99.4067 376.181 2
 9 18 2 42.1399 372.632 2
 9 18 3 -11.3562 398.972 2
 -10 8 -2 71.3857 174.695 3
 -10 8 -3 176.477 168.146 3
 -10 7 3 454.196 192.131 1
 -10 7 2 -43.5152 97.2216 3
 -10 7 2 222.497 122.831 1
 -10 7 1 123.258 137.122 3
 -10 7 0 260.721 193.575 3
 -10 7 -1 207.134 184.108 3
 -10 7 -2 3.36548 142.607 3
 -10 7 -3 138.524 144.326 3
 -10 7 -4 4.01907 115.78 3
 -10 7 -5 28.6241 107.317 3
 -10 7 -6 409.98 239.228 3
 -10 7 -7 -49.3275 131.099 3
 -10 6 5 960.044 260.496 1
 -10 6 4 203.699 145.074 1
 -10 6 3 168.463 101.916 1
 -10 6 2 -213.796 151.907 3
 -10 6 2 277.628 141.422 1
 -10 6 1 342.415 205.819 3
 -10 6 0 274.623 157.154 3
 -10 6 -1 -7.67741 112.266 3
 -10 6 -2 153.214 143.881 3
 -10 6 -3 2.0743 116.14 3
 -10 6 -4 100.146 123.057 3
 -10 6 -5 553.015 245.095 3
 -10 6 -6 157.376 165.107 3
 -10 6 -7 85.4224 144.517 3
 -10 6 -8 410.772 220.851 3
 -10 5 6 218.405 161.626 1
 -10 5 5 58.7124 88.4448 1
 -10 5 4 87.4135 84.0479 1
 -10 5 3 57.3982 56.8209 1
 -10 5 2 136.054 146.308 3
 -10 5 2 392.852 149.52 1
 -10 5 1 169.396 143.654 3
 -10 5 0 3.76312 108.668 3
 -10 5 -1 317.925 162.387 3
 -10 5 -2 38.9455 116.838 3
 -10 5 -3 210.312 158.393 3
 -10 5 -4 728.708 250.297 3
 -10 5 -5 123.037 141.045 3
 -10 5 -6 18.2556 110.212 3
 -10 5 -7 473.989 227.473 3
 -10 5 -8 148.301 167.266 3
 -10 5 -9 6.87218 142.5 3
 -10 5 -10 267.699 211.478 3
 -10 4 8 254.202 188.768 1
 -10 4 7 85.0444 135.951 1
 -10 4 6 91.668 110.884 1
 -10 4 5 478.685 185.272 1
 -10 4 4 -29.4082 67.1105 1
 -10 4 3 535.98 165.745 1
 -10 4 2 449.396 192.026 3
 -10 4 2 443.751 168.824 1
 -10 4 1 104.582 113.284 3
 -10 4 0 111.95 117.425 3
 -10 4 -1 438.485 178.544 3
 -10 4 -2 11.9515 106.084 3
 -10 4 -3 827.337 249.175 3
 -10 4 -4 418.524 204.225 3
 -10 4 -5 50.3762 122.232 3
 -10 4 -6 144.923 137.497 3
 -10 4 -8 3.54763 94.1434 3
 -10 4 -9 554.427 224.027 3
 -10 4 -10 15.1468 139.22 3
 -10 4 -11 -259.427 176.701 3
 -10 4 -12 1541.47 477.99 3
 -10 3 8 59.5643 148.846 1
 -10 3 7 525.994 201.972 1
 -10 3 6 736.149 209.603 1
 10 -3 -5 409.732 171.833 2
 -10 3 5 1621.19 295.077 1
 -10 3 4 317.728 128.168 1
 10 -3 -4 566.077 184.793 2
 10 -3 -3 500.628 165.966 2
 -10 3 3 1013.38 229.148 1
 10 -3 -2 83.2368 95.6617 2
 -10 3 1 362.62 165.478 3
 10 -3 -1 462.658 134.86 2
 10 -3 0 768.314 156.9 2
 -10 3 0 668.027 209.615 3
 10 -3 1 41.7396 71.0313 2
 -10 3 -1 1.54485 88.6962 3
 -10 3 -2 685.406 200.397 3
 10 -3 2 714.75 136.428 2
 -10 3 -3 435.75 182.516 3
 -10 3 -4 3.56994 95.257 3
 -10 3 -5 143.135 137.937 3
 -10 3 -6 165.791 128.345 3
 -10 3 -7 11.5768 100.59 3
 -10 3 -8 274.032 160.312 3
 -10 3 -9 118.463 130.408 3
 -10 3 -10 3.13848 119.382 3
 -10 3 -11 80.8022 169.307 3
 -10 3 -12 2713.39 512.364 3
 -10 3 -13 69.1474 185.943 3
 -10 2 9 208.084 181.794 1
 -10 2 8 -60.9561 147.903 1
 -10 2 7 906.773 239.921 1
 -10 2 6 531.256 180.521 1
 -10 2 5 199.895 112.738 1
 10 -2 -5 496.848 176.714 2
 10 -2 -4 819.688 209.085 2
 -10 2 4 777.919 195.983 1
 10 -2 -3 33.795 92.4519 2
 -10 2 3 197.115 106.506 1
 10 -2 -2 595.917 169.167 2
 -10 2 2 514.054 166.868 1
 -10 2 1 1028.11 235.806 3
 10 -2 -1 1226.67 216.994 2
 10 -2 0 595.274 152.996 2
 -10 2 0 384.433 153.266 3
 10 -2 1 409.639 132.129 2
 -10 2 -1 558.44 175.042 3
 10 -2 2 460.874 137.374 2
 -10 2 -2 437.494 154.938 3
 -10 2 -3 -49.9029 87.8461 3
 10 -2 3 -3.89467 54.8787 2
 -10 2 -4 100.242 111.663 3
 -10 2 -5 713.961 208.138 3
 -10 2 -5 940.326 194.836 2
 -10 2 -6 80.0757 93.9744 3
 -10 2 -6 296.755 158.458 2
 -10 2 -7 -51.5376 168.783 2
 -10 2 -7 113.379 116.934 3
 -10 2 -9 -69.9387 118.913 3
 -10 2 -10 -16.0322 100.483 3
 -10 2 -11 445.282 239.52 3
 -10 2 -12 21.7394 129.44 3
 -10 2 -14 250.349 214.038 3
 -10 1 10 -34.4119 163.361 1
 -10 1 9 166.729 158.384 1
 -10 1 8 780.748 233.205 1
 -10 1 7 616.951 192.689 1
 -10 1 5 369.011 135.888 1
 10 -1 -4 151.578 108.346 2
 -10 1 4 -30.1499 50.7281 1
 -10 1 3 469.22 141.103 1
 10 -1 -3 866.652 205.314 2
 -10 1 2 1530.21 245.356 1
 10 -1 -2 2078.76 306.595 2
 -10 1 1 616.827 160.155 1
 -10 1 1 573.317 168.8 3
 10 -1 -1 510.847 157.183 2
 10 -1 0 157.025 96.0338 2
 10 -1 1 -59.7362 124.064 2
 -10 1 -1 496.405 159.576 3
 10 -1 2 -78.4929 107.916 2
 -10 1 -2 5.28391 74.7027 3
 10 -1 3 359.576 133.811 2
 -10 1 -3 274.082 121.397 3
 -10 1 -4 1379 229.828 2
 -10 1 -4 918.165 208.733 3
 10 -1 4 916.138 194.173 2
 -10 1 -5 690.237 189.265 3
 -10 1 -5 309.018 131.808 2
 10 -1 5 996.395 214.654 2
 -10 1 -6 -29.8554 114.787 2
 -10 1 -6 -26.9408 102.964 3
 -10 1 -7 225.317 198.651 2
 -10 1 -7 114.185 135.36 3
 -10 1 -8 999.286 278.871 2
 -10 1 -8 -6.71148 92.572 3
 -10 1 -9 221.489 148.133 3
 -10 1 -10 405.992 196.749 3
 -10 1 -11 227.5 166.485 3
 -10 1 -12 160.756 151.364 3
 -10 1 -13 62.2403 167.503 3
 -10 1 -14 -363.296 213.437 3
 -10 1 -15 20.7237 142.781 3
 -10 0 11 130.734 239.795 1
 -10 0 10 112.469 177.415 1
 -10 0 9 515.242 205.23 1
 -10 0 8 424.015 176.42 1
 -10 0 7 24.6286 87.4549 1
 -10 0 6 275.391 130.84 1
 -10 0 5 47.7565 65.521 1
 -10 0 4 232.537 95.8174 1
 10 0 -4 652.775 185.358 2
 10 0 -3 1010.28 220.358 2
 -10 0 3 -14.7445 38.0892 1
 10 0 -2 1177.03 233.994 2
 -10 0 2 953.983 185.062 1
 10 0 -1 146.571 102.86 2
 -10 0 1 28.5574 57.2491 1
 -10 0 0 527.939 156.668 3
 10 0 0 402.62 137.677 2
 10 0 0 329.059 142.042 3
 10 0 1 377.481 132.328 2
 -10 0 -1 525.672 157.595 3
 10 0 1 338.288 131.55 3
 10 0 2 133.796 88.5317 2
 -10 0 -2 18.1576 64.791 3
 10 0 2 101.789 82.3906 3
 10 0 3 1104.09 216.538 2
 -10 0 -3 740.167 180.927 3
 10 0 3 844.241 197.897 3
 -10 0 -4 276.772 129.781 3
 -10 0 -4 164.29 97.9782 2
 10 0 4 132.433 89.8696 3
 10 0 4 209.842 113.614 2
 -10 0 -5 16.3022 70.8857 3
 10 0 5 135.094 94.3672 3
 10 0 5 -64.3078 75.2647 2
 -10 0 -6 473.665 178.081 2
 -10 0 -6 341.052 138.107 3
 -10 0 -6 268.443 143.418 1
 -10 0 -7 36.1715 128.776 2
 -10 0 -7 -13.0571 94.1137 3
 -10 0 -8 157.481 125.384 3
 -10 0 -9 252.691 138.353 3
 -10 0 -10 95.9367 123.916 3
 -10 0 -11 6.89577 112.382 3
 -10 0 -12 4280.29 630.83 3
 -10 0 -13 172.959 150.443 3
 -10 0 -14 177.146 157.38 3
 -10 0 -15 122.788 170.061 3
 -10 -1 11 9.88805 189.584 1
 -10 -1 10 613.673 250.421 1
 -10 -1 9 673.645 225.238 1
 -10 -1 8 127.086 120.879 1
 -10 -1 7 319.332 141.048 1
 -10 -1 6 298.607 127.132 1
 -10 -1 5 48.5525 59.1526 1
 10 1 -4 1385.98 280.849 2
 -10 -1 4 1263.17 212.146 1
 10 1 -3 1091.73 237.087 2
 -10 -1 3 1114.17 194.647 1
 10 1 -2 161.564 98.9012 3
 10 1 -2 27.6709 51.1849 2
 -10 -1 2 276.873 103.794 1
 10 1 -1 52.8101 62.363 2
 10 1 -1 249.304 121.329 3
 -10 -1 1 183.752 89.6008 1
 -10 -1 0 293.439 114.657 3
 10 1 0 207.958 110.947 2
 10 1 0 280.19 118.64 3
 -10 -1 -1 183.883 102.524 3
 10 1 1 198.996 101.705 2
 10 1 1 82.8292 85.2984 3
 10 1 2 701.363 181.056 2
 -10 -1 -2 735.697 161.674 3
 10 1 2 655.152 160.324 3
 10 1 3 601.743 170.935 2
 -10 -1 -3 345.322 116.956 3
 10 1 3 330.477 138.903 3
 10 1 4 -66.3474 100.057 2
 -10 -1 -4 4.22811 62.5505 3
 -10 -1 -4 -14.6461 76.38 2
 10 1 4 91.4612 91.3867 3
 -10 -1 -5 459.256 116.507 3
 -10 -1 -5 784.644 207.324 2
 10 1 5 739.269 178.347 3
 -10 -1 -5 641.97 169.444 1
 10 1 5 734.269 197.467 2
 -10 -1 -6 403.08 171.653 2
 -10 -1 -6 282.44 112.887 3
 10 1 6 140.781 100.337 3
 -10 -1 -6 206.525 118.444 1
 -10 -1 -7 254.374 142.175 1
 -10 -1 -7 122.632 147.228 2
 -10 -1 -7 188.584 94.2143 3
 -10 -1 -8 1012.18 216.997 1
 -10 -1 -8 986.597 221.424 3
 -10 -1 -9 444.381 173.183 3
 -10 -1 -10 -116.478 114.512 3
 -10 -1 -11 198.829 149.162 3
 -10 -1 -12 81.0754 144.249 3
 -10 -1 -13 41.2388 107.391 3
 -10 -1 -14 331.059 212.396 3
 -10 -1 -15 -17.8238 217.197 3
 -10 -1 -16 -169.973 171.744 3
 -10 -2 11 190.774 200.801 1
 -10 -2 10 206.272 184.434 1
 -10 -2 9 22.9124 118.785 1
 -10 -2 8 170.115 123.895 1
 -10 -2 7 774.791 195.106 1
 -10 -2 6 4.50484 62.8615 1
 -10 -2 5 731.914 163.612 1
 10 2 -4 933.583 239.982 2
 -10 -2 4 754.767 160.155 1
 10 2 -3 157.008 93.1873 3
 10 2 -3 30.377 89.7595 2
 -10 -2 2 178.033 75.3201 1
 10 2 -2 31.9764 66.4744 3
 10 2 -2 274.961 121.631 2
 -10 -2 1 648.574 129.9 1
 10 2 -1 779.432 169.56 3
 10 2 -1 633.933 177.278 2
 -10 -2 0 10.0113 49.7213 1
 10 2 0 -33.6243 68.834 2
 10 2 0 -6.66926 62.3447 3
 -10 -2 -1 601.859 141.531 3
 10 2 1 632.758 174.521 2
 10 2 1 443.521 136.64 3
 10 2 2 431.177 149.078 2
 10 2 2 481.28 138.064 3
 10 2 3 59.1086 73.8407 2
 -10 -2 -3 13.685 48.5304 3
 10 2 3 12.0106 77.5199 3
 -10 -2 -4 484.447 125.687 3
 -10 -2 -4 187.627 118.767 2
 10 2 4 297.792 110.892 3
 10 2 5 694.191 192.613 2
 -10 -2 -5 840.922 164.494 3
 -10 -2 -5 920.159 227.266 2
 10 2 5 985.29 190.004 3
 -10 -2 -5 904.296 168.282 1
 -10 -2 -6 38.8478 73.9742 1
 -10 -2 -6 166.634 138.624 2
 -10 -2 -6 1.71543 65.6705 3
 10 2 6 -41.1074 93.6962 2
 -10 -2 -7 532.133 146.41 1
 -10 -2 -7 514.954 153.445 3
 10 2 7 686.104 202.315 2
 -10 -2 -8 603.188 171.349 1
 -10 -2 -8 354.467 145.666 3
 -10 -2 -9 102.871 108.047 3
 -10 -2 -10 144.08 119.103 3
 -10 -2 -11 345.539 164.972 3
 -10 -2 -12 44.7547 111.054 3
 -10 -2 -13 304.287 183.855 3
 -10 -2 -14 -155.097 150.169 3
 -10 -2 -15 45.5284 166.984 3
 -10 -2 -16 97.0093 136.122 3
 -10 -3 12 484.79 274.751 1
 -10 -3 11 375.308 224.334 1
 -10 -3 10 167.217 160.855 1
 -10 -3 9 -17.9761 131.659 1
 -10 -3 8 642.127 192.913 1
 -10 -3 7 128.517 102.085 1
 -10 -3 6 585.915 161.187 1
 -10 -3 5 675.718 154.629 1
 -10 -3 4 185.02 79.6927 1
 10 3 -4 461.701 180.897 2
 10 3 -3 86.4585 84.6369 3
 10 3 -3 185.808 119.196 2
 -10 -3 3 222.268 80.3674 1
 10 3 -2 867.134 172.268 3
 10 3 -2 1018.07 252.714 2
 -10 -3 2 1054.93 158.673 1
 -10 -3 1 50.8852 35.3466 1
 10 3 -1 59.3904 63.5671 3
 10 3 -1 64.2169 58.9101 2
 -10 -3 0 569.707 105.709 1
 10 3 0 837.451 212.402 2
 10 3 0 460.39 125.625 3
 -10 -3 -1 796.259 139.532 3
 10 3 1 646.602 183.925 2
 -10 -3 -1 868.735 126.953 1
 10 3 1 790.032 150.149 3
 -10 -3 -2 140.579 71.1921 3
 10 3 2 10.9764 58.5075 2
 10 3 2 99.9072 71.0033 3
 10 3 3 338.17 142.325 2
 -10 -3 -3 296.336 92.5813 3
 -10 -3 -3 441.765 149.071 2
 10 3 3 167.13 84.4103 3
 10 3 4 423.209 158.599 2
 -10 -3 -4 653.038 130.224 3
 -10 -3 -4 556.215 184.336 2
 10 3 4 553.671 135.116 3
 -10 -3 -4 694.133 128.811 1
 -10 -3 -5 27.5115 46.9028 1
 10 3 5 21.6821 68.0718 2
 -10 -3 -5 178.244 138.004 2
 -10 -3 -6 229.239 93.1834 1
 -10 -3 -6 124.096 85.0341 3
 10 3 6 40.749 98.7227 2
 -10 -3 -7 504.31 126.525 1
 -10 -3 -7 336.204 116.117 3
 10 3 7 391.55 151.85 2
 -10 -3 -8 245.866 109.166 1
 -10 -3 -8 45.3198 68.9514 3
 -10 -3 -9 28.2804 83.9435 3
 -10 -3 -9 43.6817 98.4094 1
 -10 -3 -10 392.324 148.223 3
 -10 -3 -11 87.9377 106.807 3
 -10 -3 -12 237.049 172.666 3
 -10 -3 -13 160.503 166.36 3
 -10 -3 -14 112.434 161.127 3
 -10 -3 -15 -147.059 155.29 3
 -10 -3 -16 97.9977 176.113 3
 -10 -4 12 386.214 274.18 1
 -10 -4 11 3036.1 473.353 1
 -10 -4 10 117.884 160.345 1
 -10 -4 9 545.868 194.542 1
 -10 -4 8 193.4 134.149 1
 -10 -4 7 -116.743 103.246 1
 -10 -4 6 681.788 172.308 1
 -10 -4 5 164.724 85.6152 1
 -10 -4 4 345.046 103.057 1
 10 4 -4 274.029 118.928 3
 10 4 -3 1213.81 203.602 3
 -10 -4 3 1481.6 195.038 1
 10 4 -3 1036.84 265.866 2
 10 4 -2 202.317 91.1726 3
 -10 -4 2 438.529 95.5008 1
 10 4 -2 245.305 121.859 2
 10 4 -1 393.879 112.857 3
 10 4 -1 764.617 207.91 2
 -10 -4 1 423.892 86.4632 1
 10 4 0 717.823 132.746 3
 10 4 0 713.349 197.205 2
 -10 -4 0 737.773 106.811 1
 10 4 1 -38.691 64.4203 2
 10 4 1 14.9651 45.6563 3
 -10 -4 -1 31.0367 27.4944 1
 10 4 2 233.674 115.93 2
 10 4 2 95.3646 56.4981 3
 -10 -4 -2 108.241 46.0905 1
 10 4 3 357.274 141.992 2
 -10 -4 -3 372.855 90.1489 3
 -10 -4 -3 315.769 136.956 2
 10 4 3 245.242 87.8056 3
 -10 -4 -3 334.073 76.808 1
 -10 -4 -4 109.104 52.2513 1
 10 4 4 -23.1994 68.4585 2
 -10 -4 -4 73.6256 46.8468 3
 -10 -4 -4 -15.5579 73.5474 2
 10 4 5 399.969 161.116 2
 -10 -4 -5 307.103 80.9581 1
 -10 -4 -5 244.336 80.8705 3
 10 4 6 268.607 136.851 2
 -10 -4 -6 419.099 99.0871 1
 -10 -4 -6 333.279 98.0957 3
 -10 -4 -7 212.559 88.7516 3
 -10 -4 -7 279.012 94.751 1
 10 4 7 62.5712 77.5481 2
 -10 -4 -8 210.746 87.3103 3
 -10 -4 -8 298.009 105.834 1
 -10 -4 -9 375.39 143.046 3
 -10 -4 -9 1202.07 203.592 1
 -10 -4 -10 -19.5969 84.5052 3
 -10 -4 -10 -25.0477 122.173 1
 -10 -4 -11 130.532 104.188 3
 -10 -4 -12 215.154 140.018 3
 -10 -4 -13 66.4649 139.48 3
 -10 -4 -14 224.921 177.94 3
 -10 -4 -15 70.8216 148.133 3
 -10 -4 -16 -349.897 181.065 3
 -10 -5 12 -33.5537 233.609 1
 -10 -5 11 -39.1475 191.244 1
 -10 -5 10 242.781 175.428 1
 -10 -5 9 566.503 202.077 1
 -10 -5 8 7.7786 105.222 1
 -10 -5 7 323.449 136.253 1
 -10 -5 6 112.523 84.819 1
 10 5 -5 -18.4845 52.4225 3
 -10 -5 5 52.3554 59.5253 1
 10 5 -4 1117.6 200.034 3
 10 5 -4 1161.8 281.07 2
 -10 -5 4 870.774 155.792 1
 10 5 -3 478.723 120.628 3
 10 5 -3 453.589 173.114 2
 -10 -5 3 642.417 120.7 1
 10 5 -2 -15.09 50.475 3
 10 5 -2 -66.9875 59.9214 2
 -10 -5 2 -56.3952 41.5984 1
 -10 -5 1 723.349 102.264 1
 10 5 -1 696.743 126.105 3
 10 5 -1 704.342 205.065 2
 -10 -5 0 38.3254 21.6492 1
 10 5 0 115.196 84.6749 2
 10 5 0 21.1454 41.4896 3
 -10 -5 -1 230.771 42.8624 1
 10 5 1 324.333 138.728 2
 10 5 1 197.961 63.149 3
 10 5 2 992.372 122.863 3
 -10 -5 -2 855.92 73.7566 1
 -10 -5 -2 788.523 77.0652 1
 10 5 2 1147.87 254.1 2
 -10 -5 -3 558.005 87.4267 3
 10 5 3 347.61 143.436 2
 -10 -5 -3 585.396 63.8977 1
 -10 -5 -3 542.054 62.8904 1
 10 5 4 -8.15722 58.8146 2
 -10 -5 -4 132.192 55.794 3
 -10 -5 -4 42.286 23.3347 1
 10 5 5 227.464 129.212 2
 -10 -5 -5 246.545 71.4364 3
 -10 -5 -5 349.747 68.8542 1
 10 5 6 516.879 189.535 2
 -10 -5 -6 179.276 68.7855 3
 -10 -5 -6 279.48 71.7724 1
 -10 -5 -7 256.7 77.4565 1
 -10 -5 -7 171.361 75.3015 3
 10 5 7 303.934 157.722 2
 -10 -5 -8 938.79 158.142 1
 -10 -5 -8 622.47 142.192 3
 10 5 8 555.301 203.118 2
 -10 -5 -9 435.239 129.786 1
 -10 -5 -9 392.318 124.279 3
 10 5 9 586.211 194.699 2
 -10 -5 -10 -88.112 104.731 1
 -10 -5 -10 38.6974 71.9722 3
 -10 -5 -11 162.264 106.643 3
 -10 -5 -12 46.1461 79.8903 3
 -10 -5 -13 92.7285 138.465 3
 -10 -5 -14 135.111 179.344 3
 -10 -5 -15 -2.04545 111.637 3
 -10 -5 -16 -21.7157 203.801 3
 -10 -6 12 422.556 303.702 1
 -10 -6 11 524.038 253.784 1
 -10 -6 10 529.974 235.463 1
 -10 -6 9 -2.10791 127.494 1
 -10 -6 8 174.075 126.446 1
 -10 -6 7 165.535 108.049 1
 -10 -6 6 253.425 112.855 1
 10 6 -5 600.526 151.23 3
 -10 -6 5 840.583 164.289 1
 10 6 -4 420.745 119.831 3
 -10 -6 4 410.914 117.786 1
 10 6 -4 811.427 246.916 2
 10 6 -3 68.4861 65.0906 3
 -10 -6 3 89.6641 55.1704 1
 10 6 -2 77.1564 59.3661 3
 -10 -6 2 44.3561 32.8926 1
 10 6 -2 -67.9848 65.6924 2
 10 6 -1 89.9822 51.1602 3
 10 6 -1 29.6986 43.6383 2
 10 6 0 1145.65 124.415 3
 10 6 0 436.372 166.406 2
 10 6 1 897.986 234.01 2
 10 6 1 713.47 82.7601 3
 10 6 2 825.196 222.906 2
 10 6 3 -58.4051 83.4785 2
 -10 -6 -4 126.931 30.9394 3
 10 6 4 -19.1028 96.6746 2
 -10 -6 -5 108.344 28.1367 1
 10 6 5 -23.1294 80.0055 2
 -10 -6 -5 147.934 42.6009 3
 10 6 6 -67.7125 98.4924 2
 -10 -6 -6 225.069 64.2838 3
 -10 -6 -6 191.259 52.0003 1
 -10 -6 -7 832.845 131.169 3
 -10 -6 -7 853.441 120.262 1
 10 6 7 882.974 255.954 2
 -10 -6 -8 373.882 106.836 3
 -10 -6 -8 405.96 97.8436 1
 -10 -6 -9 28.4941 66.8085 3
 -10 -6 -9 220.239 94.3221 1
 -10 -6 -10 352.126 132.1 3
 -10 -6 -10 365.906 128.268 1
 -10 -6 -11 -30.388 82.3606 3
 -10 -6 -12 71.5148 105.622 3
 10 6 13 294.865 194.424 1
 -10 -6 -13 295.102 162.312 3
 -10 -6 -14 250.713 186.385 3
 -10 -6 -15 49.9825 123.591 3
 10 6 15 158.237 253.865 1
 10 6 16 79.5806 267.586 1
 -10 -6 -16 116.041 160.295 3
 -10 -7 12 -55.6494 270.826 1
 -10 -7 11 562.516 289.454 1
 -10 -7 10 440.333 240.085 1
 -10 -7 9 302.131 189.644 1
 -10 -7 8 14.8827 110.301 1
 -10 -7 7 -5.34216 87.299 1
 -10 -7 6 636.532 159.38 1
 10 7 -6 667.467 158.449 1
 10 7 -5 819.717 163.616 3
 -10 -7 5 951.792 176.114 1
 -10 -7 4 285.62 94.2725 1
 10 7 -4 232.046 90.4063 3
 10 7 -4 160.041 120.98 2
 -10 -7 3 134.726 60.557 1
 10 7 -3 231.911 76.4397 3
 10 7 -2 53.7125 39.0422 3
 10 7 -2 47.9068 65.3729 2
 -10 -7 2 135.66 50.185 1
 10 7 -1 115.184 46.9534 3
 10 7 -1 390.244 162.826 2
 10 7 0 514.555 61.1577 3
 10 7 0 5378.65 597.296 2
 10 7 1 1346.59 289.15 2
 10 7 2 616.494 197.408 2
 10 7 3 65.526 76.4419 2
 10 7 4 240.077 138.063 2
 10 7 5 -22.7228 97.6741 2
 10 7 6 650.367 222.173 2
 -10 -7 -6 642.386 75.1852 3
 -10 -7 -6 645.672 76.0256 1
 -10 -7 -7 422.402 86.2414 3
 -10 -7 -7 668.919 97.8982 1
 10 7 7 629.915 229.287 2
 -10 -7 -8 -45.7178 49.1742 1
 10 7 8 -10.0913 106.987 2
 -10 -7 -9 101.019 74.1166 3
 10 7 9 400.904 190.099 2
 -10 -7 -10 38.4818 75.9035 3
 -10 -7 -11 90.2172 87.8972 3
 10 7 11 196.744 134.444 1
 -10 -7 -12 356.917 149.999 3
 10 7 12 283.299 161.932 1
 -10 -7 -13 148.507 112.993 3
 10 7 13 511.983 218.289 1
 -10 -7 -14 37.6595 103.271 3
 10 7 14 90.7828 228.708 1
 10 7 15 217.701 255.583 1
 -10 -8 11 404.163 263.579 1
 -10 -8 10 -15.894 188.578 1
 -10 -8 9 291.852 233.594 1
 -10 -8 8 219.483 155.14 1
 -10 -8 7 405.363 161.854 1
 -10 -8 6 789.315 187.264 1
 10 8 -5 459.706 187.77 2
 -10 -8 5 181.615 99.0206 1
 10 8 -5 221.161 81.8886 1
 10 8 -4 265.957 73.8093 1
 10 8 -4 99.856 73.2492 3
 -10 -8 4 124.467 76.4393 1
 10 8 -3 515.039 105.584 3
 10 8 -3 193.9 116.633 2
 10 8 -2 22.9032 29.1989 3
 10 8 -2 -60.9387 89.7538 2
 10 8 -1 255.275 47.9913 3
 10 8 -1 202.559 131.121 2
 10 8 -1 266.468 56.1181 3
 10 8 0 497.082 183.679 2
 10 8 1 147.545 109.642 2
 10 8 2 53.8197 93.79 2
 10 8 3 335.558 161.588 2
 10 8 4 -5.81745 94.9228 2
 10 8 5 499.318 193.804 2
 10 8 6 373.831 177.152 2
 10 8 7 45.7772 98.1317 2
 -10 -8 -7 58.9515 31.4004 3
 -10 -8 -8 115.722 54.4995 3
 -10 -8 -8 230.372 68.7267 1
 10 8 8 84.0936 109.969 2
 10 8 9 74.0086 78.7102 1
 -10 -8 -9 185.817 84.8106 3
 -10 -8 -10 43.7183 72.6966 3
 10 8 10 -40.9348 105.79 1
 -10 -8 -11 328.406 127.605 3
 10 8 11 331.073 146.883 1
 -10 -8 -12 302.459 149.416 3
 10 8 12 427.109 187.978 1
 -10 -8 -13 11.3912 101.951 3
 10 8 13 40.035 155.131 1
 10 8 14 44.5376 204.35 1
 -10 -9 9 97.76 180.112 1
 -10 -9 8 -59.6314 165.72 1
 -10 -9 7 396.21 177.111 1
 10 9 -6 686.962 247.383 2
 -10 -9 6 34.6459 91.3999 1
 10 9 -5 175.382 122.628 2
 10 9 -4 295.78 160.171 2
 10 9 -3 75.4802 41.8465 3
 10 9 -3 28.9596 63.2597 2
 10 9 -2 90.6524 39.6035 3
 10 9 -2 134.877 52.3863 3
 10 9 -1 880.788 251.642 2
 10 9 0 720.866 227.282 2
 10 9 1 19.5853 50.288 2
 10 9 2 563.077 202.132 2
 10 9 3 0.54775 109.806 2
 10 9 4 623.823 214.699 2
 10 9 5 480.449 197.314 2
 10 9 6 5.90596 83.8159 2
 10 9 7 103.78 135.221 2
 -10 -9 -8 147.49 52.419 3
 10 9 8 148.739 78.626 1
 10 9 8 -40.6478 153.063 2
 -10 -9 -9 65.3526 65.0558 3
 10 9 9 15.7123 71.8081 1
 10 9 9 -132.513 175.574 2
 -10 -9 -10 54.8115 73.7796 3
 10 9 10 69.8763 100.935 1
 -10 -9 -11 247.064 121.525 3
 10 9 11 152.666 130.704 1
 10 9 12 -130.894 159.41 1
 10 10 -8 130.305 136.691 3
 10 10 -7 846.923 313.348 2
 10 10 -6 477.146 211.601 2
 10 10 -6 -24.1928 87.2257 3
 10 10 -5 392.769 201.281 2
 10 10 -5 371.647 132.676 3
 10 10 -4 183.035 143.628 2
 10 10 -4 210.441 96.2646 3
 10 10 -3 -22.2505 64.037 3
 10 10 -2 374.007 62.9278 3
 10 10 -2 691.803 255.486 2
 10 10 -2 356.713 69.8404 3
 10 10 -1 375.005 174.756 2
 10 10 0 -67.6255 114.994 2
 10 10 1 606.799 216.835 2
 10 10 2 210.268 136.035 2
 10 10 3 50.3273 91.8436 2
 10 10 4 591.633 225.044 2
 10 10 5 225.057 155.468 2
 10 10 6 45.8755 116.513 2
 10 10 7 391.648 202.645 2
 10 10 7 135.204 56.3346 1
 10 10 8 158.349 82.353 1
 10 10 8 139.519 153.148 2
 10 10 9 -73.968 160.508 2
 10 10 9 -2.88121 77.0691 1
 10 10 10 1207.54 351.173 2
 10 11 -8 962.604 361.631 2
 10 11 -7 561.472 257.639 2
 10 11 -6 77.2961 148.094 2
 10 11 -5 147.14 153.396 2
 10 11 -4 107.73 136.385 2
 10 11 -4 75.9903 83.0012 3
 10 11 -3 198.671 160.164 2
 10 11 -3 259.206 80.0999 3
 10 11 -2 115.036 127.621 2
 10 11 -1 150.128 140.922 2
 10 11 0 43.1789 116.899 2
 10 11 1 698.549 247.574 2
 10 11 2 4.25024 92.4079 2
 10 11 3 375.98 191.465 2
 10 11 4 -65.605 161.092 2
 10 11 5 352.15 203.259 2
 10 11 6 431.657 216.911 2
 10 11 7 117.268 163.678 2
 10 11 8 -10.5704 131.941 2
 10 11 9 2591.34 502.144 2
 10 11 10 589.93 265.586 2
 10 12 -7 344.852 255.772 2
 10 12 -6 206.015 200.872 2
 10 12 -5 -42.3554 202.766 2
 10 12 -4 221.463 201.57 2
 10 12 -3 474.122 237.287 2
 10 12 -2 -28.6841 130.139 2
 10 12 -1 487.051 237.68 2
 10 12 0 440.932 218.002 2
 10 12 1 134.144 141.751 2
 10 12 2 220.762 165.974 2
 10 12 3 280.858 185.65 2
 10 12 4 121.95 154.24 2
 10 12 5 940.068 317.019 2
 10 12 6 381.232 230.484 2
 10 12 7 283.579 223.18 2
 10 12 8 -345.737 236.581 2
 10 12 9 -194.983 222.43 2
 10 12 10 926.4 330.706 2
 10 13 -7 298.306 271.051 2
 10 13 -6 50.1795 214.293 2
 10 13 -5 -50.5523 179.471 2
 10 13 -4 66.5294 198.198 2
 10 13 -3 -82.8195 194.759 2
 10 13 -2 356.776 270.807 2
 10 13 -1 544.458 251.227 2
 10 13 0 293.457 200.119 2
 10 13 1 -171.183 188.756 2
 10 13 2 188.089 188.85 2
 10 13 3 -33.4178 146.949 2
 10 13 4 623.239 272.031 2
 10 13 5 245.506 208.639 2
 10 13 6 166.884 206.651 2
 10 13 7 320.683 238.709 2
 10 13 8 -51.6987 232.626 2
 10 13 9 517.214 275.628 2
 10 13 10 1226.95 393.071 2
 10 14 -6 457.197 326.783 2
 10 14 -5 526.895 323.443 2
 10 14 -4 -55.7208 234.713 2
 10 14 -3 241.16 241.636 2
 10 14 -2 729.114 304.949 2
 10 14 -1 300.192 235.687 2
 10 14 0 109.03 188.657 2
 10 14 1 170.861 198.949 2
 10 14 2 -12.2081 180.952 2
 10 14 3 467.64 268.503 2
 10 14 4 -7.97916 180.286 2
 10 14 5 161.026 249.018 2
 10 14 6 2.26482 208.66 2
 10 14 7 98.1239 228.084 2
 10 14 8 -429.156 320.603 2
 10 14 9 1816.22 471.893 2
 10 15 -4 91.5202 245.926 2
 10 15 -3 714.804 362.417 2
 10 15 -2 -2.4191 186.879 2
 10 15 -1 38.3241 219.323 2
 10 15 0 -53.1728 219.518 2
 10 15 1 76.8886 238.211 2
 10 15 2 242.357 240.393 2
 10 15 3 -226.236 277.424 2
 10 15 4 237.427 275.679 2
 10 15 5 3.10553 253.4 2
 10 15 6 -34.8495 262.904 2
 10 15 7 -127.267 271.494 2
 10 15 8 -450.159 358.148 2
 10 15 9 1694.74 475.685 2
 10 16 -3 -14.0189 283.266 2
 10 16 -2 -18.611 256.018 2
 10 16 -1 153.759 274.554 2
 10 16 0 53.5492 270.082 2
 10 16 1 8.02186 225.103 2
 10 16 2 -3.98574 253.752 2
 10 16 3 -3.9798 228.882 2
 10 16 4 235.139 287.26 2
 10 16 5 -216.518 325.089 2
 10 16 6 -186.034 340.408 2
 10 16 7 17.9226 230.741 2
 10 17 -1 -24.3082 301.667 2
 10 17 0 -38.3668 315.096 2
 10 17 1 -110.315 334.894 2
 10 17 2 -115.097 330.594 2
 10 17 3 99.3129 315.2 2
 10 17 4 347.203 366.773 2
 10 17 5 205.745 323.401 2
 -11 7 -2 179.846 210.427 3
 -11 7 -3 44.0488 140.586 3
 -11 6 3 236.783 135.648 1
 -11 6 2 453.828 182.471 1
 -11 6 0 479.763 230.96 3
 -11 6 -1 459.029 216.971 3
 -11 6 -2 61.3147 129.636 3
 -11 6 -3 422.293 182.049 3
 -11 6 -4 84.4192 143.573 3
 -11 6 -5 147.866 153.727 3
 -11 6 -6 275.207 189.495 3
 -11 6 -7 2204.29 421.025 3
 -11 6 -8 -242.568 197.087 3
 -11 5 5 -148.001 145.35 1
 -11 5 4 -33.6427 99.3526 1
 -11 5 3 2808.8 499.803 1
 -11 5 2 119.213 89.2871 1
 -11 5 1 348.816 200.142 3
 -11 5 0 412.114 211.476 3
 -11 5 -1 -4.58914 103.321 3
 -11 5 -2 4.6031 109.943 3
 -11 5 -3 -2.5769 84.75 3
 -11 5 -4 73.8105 109.148 3
 -11 5 -5 145.15 150.876 3
 -11 5 -6 54.816 171.602 3
 -11 5 -7 60.5811 154.611 3
 -11 5 -8 12.9394 133.138 3
 -11 5 -9 272.802 243.458 3
 -11 5 -10 29.5139 162.449 3
 -11 4 6 48.1857 142.399 1
 -11 4 5 1466.98 316.301 1
 -11 4 4 572.498 206.818 1
 -11 4 3 130.983 88.4282 1
 -11 4 2 334.061 137.575 1
 -11 4 1 445.609 198.572 3
 -11 4 0 45.1517 95.3474 3
 -11 4 -1 332.613 166.245 3
 -11 4 -2 126.04 131.892 3
 -11 4 -3 -250.779 147.071 3
 -11 4 -4 235.427 144.85 3
 -11 4 -5 162.76 185.08 3
 -11 4 -6 49.8646 109.383 3
 -11 4 -7 143.39 149.962 3
 -11 4 -8 64.3334 161.672 3
 -11 4 -9 36.5047 110.407 3
 -11 4 -10 535.906 268.616 3
 -11 4 -11 168.957 187.299 3
 -11 3 7 128.132 165.041 1
 -11 3 6 176.309 140.501 1
 -11 3 5 370.875 161.971 1
 -11 3 4 108.515 93.5254 1
 -11 3 3 58.7929 55.8662 1
 -11 3 2 627.948 184.704 1
 -11 3 1 10.1102 106.92 3
 -11 3 0 191.392 137.824 3
 -11 3 -1 315.9 168.922 3
 -11 3 -2 -170.248 132.863 3
 11 -3 2 77.6992 83.4565 2
 -11 3 -3 -65.8519 107.425 3
 -11 3 -4 291.385 161.695 3
 -11 3 -5 8.89849 110.152 3
 -11 3 -6 53.8969 137.624 3
 -11 3 -7 90.1531 138.222 3
 -11 3 -8 189.708 150.994 3
 -11 3 -9 139.3 149.34 3
 -11 3 -10 -330.478 192.48 3
 -11 3 -11 31.798 107.743 3
 -11 3 -12 413.06 227.511 3
 -11 2 7 -3.38933 98.9309 1
 -11 2 6 610.86 209.193 1
 11 -2 -6 355.434 211.848 2
 -11 2 5 228.85 110.645 1
 11 -2 -5 212.153 168.221 2
 11 -2 -4 75.4521 141.766 2
 -11 2 4 116.422 82.3129 1
 -11 2 3 184.145 110.228 1
 11 -2 -3 569.256 194.482 2
 -11 2 2 277.904 126.488 1
 11 -2 -2 325.694 158.816 2
 -11 2 1 389.629 146.344 1
 -11 2 1 174.192 120.344 3
 11 -2 -1 243.329 138.425 2
 11 -2 0 426.264 150.992 2
 -11 2 0 448.28 174.996 3
 11 -2 1 670.894 173.211 2
 -11 2 -1 287.834 159.178 3
 11 -2 2 236.756 123.269 2
 -11 2 -2 20.3536 76.298 3
 -11 2 -3 398.931 172.818 3
 11 -2 3 432.67 134.565 2
 -11 2 -4 -13.4029 87.1481 3
 -11 2 -5 138.61 125.662 3
 -11 2 -6 351.475 170.529 3
 -11 2 -7 74.74 123.532 3
 -11 2 -8 -97.6339 117.564 3
 -11 2 -9 93.1641 144.449 3
 -11 2 -10 -3.6276 109.021 3
 -11 2 -11 247.277 182.506 3
 -11 2 -12 91.6656 148.774 3
 -11 2 -13 -0.62201 119.282 3
 -11 1 9 -49.1786 159.703 1
 -11 1 8 1373.3 313.111 1
 -11 1 7 251.204 168.199 1
 11 -1 -6 1149.4 296.039 2
 -11 1 6 545.566 182.098 1
 -11 1 5 -14.3367 57.8605 1
 11 -1 -5 210.833 154.365 2
 -11 1 4 316.201 133.316 1
 11 -1 -4 275.408 164.466 2
 11 -1 -3 50.8844 112.604 2
 -11 1 3 64.651 65.4004 1
 11 -1 -2 678.35 199.921 2
 -11 1 2 381.256 135.39 1
 11 -1 -1 1264.49 248.597 2
 -11 1 1 1155.81 215.987 1
 -11 1 0 882.84 216.218 3
 11 -1 0 875.004 207.391 2
 11 -1 1 57.6291 102.472 2
 -11 1 -1 -131.852 105.637 3
 11 -1 2 544.395 172.298 2
 -11 1 -2 319.886 151.006 3
 11 -1 3 -2.92564 102.726 2
 -11 1 -3 -79.9368 94.0071 3
 -11 1 -4 91.0182 108.785 3
 11 -1 4 42.8345 77.5362 2
 -11 1 -5 498.293 178.205 3
 -11 1 -5 976.069 225.608 2
 11 -1 5 1335.16 248.555 2
 -11 1 -6 459.23 169.259 3
 -11 1 -6 308.59 178.466 2
 -11 1 -7 40.4765 95.4712 3
 -11 1 -8 18.1974 105.663 3
 -11 1 -9 -202.318 141.853 3
 -11 1 -10 -38.4985 107.214 3
 -11 1 -11 313.416 166.922 3
 -11 1 -12 38.4727 147.627 3
 -11 1 -13 82.6193 132.916 3
 -11 1 -14 -195.293 194.246 3
 -11 0 10 471.76 260.393 1
 -11 0 9 347.327 214.163 1
 -11 0 8 633.495 232.177 1
 -11 0 7 731.959 219.833 1
 -11 0 6 -1.97248 111.703 1
 11 0 -5 314.568 171.151 2
 -11 0 5 309.803 136.613 1
 -11 0 4 98.576 68.5184 1
 11 0 -4 -59.5876 136.397 2
 11 0 -3 53.0713 129.116 2
 -11 0 3 463.622 138.8 1
 -11 0 2 1470.87 239.722 1
 11 0 -2 1440.51 278.518 2
 11 0 -1 1297.66 259.347 2
 -11 0 1 1293.27 220.3 1
 -11 0 0 124.145 108.676 3
 11 0 0 3.27257 70.678 2
 11 0 1 601.005 179.908 2
 11 0 2 92.5815 104.013 2
 -11 0 -2 209.262 89.4397 3
 11 0 3 93.6844 105.092 2
 -11 0 -3 59.9993 75.1368 3
 -11 0 -4 1010.34 211.719 3
 11 0 4 1150.41 243.223 2
 -11 0 -5 716.641 189.003 3
 -11 0 -5 748.344 215.019 2
 11 0 5 819.726 205.55 2
 -11 0 -6 42.3814 97.053 3
 -11 0 -6 3.22117 167.883 2
 -11 0 -7 -97.189 106.748 3
 -11 0 -8 -28.5625 101.66 3
 -11 0 -9 130.31 130.057 3
 -11 0 -10 408.381 188.376 3
 -11 0 -11 219.684 177.063 3
 -11 0 -12 -15.5958 115.925 3
 -11 0 -13 141.468 139.717 3
 -11 0 -14 -82.7872 131.394 3
 -11 0 -15 -211.793 167.215 3
 -11 -1 10 1550.88 377.315 1
 -11 -1 9 4650.55 543.142 1
 -11 -1 8 602.89 202.774 1
 -11 -1 7 26.682 101.458 1
 -11 -1 6 5.17236 76.5117 1
 11 1 -5 370.263 179.303 2
 -11 -1 5 -43.7033 70.8738 1
 -11 -1 4 129.176 86.8858 1
 11 1 -4 5.57139 67.4036 2
 -11 -1 3 445.546 121.577 1
 11 1 -3 821.501 227.998 2
 11 1 -2 893.708 229.908 2
 -11 -1 2 1219.61 206.104 1
 11 1 -1 280.585 138.976 2
 -11 -1 1 147.304 80.5323 1
 -11 -1 0 28.7499 60.2596 3
 11 1 0 351.907 152.539 2
 -11 -1 0 201.269 94.5004 1
 -11 -1 -1 201.47 111.01 3
 11 1 1 428.932 160.631 2
 11 1 1 345.266 134.789 3
 11 1 2 221.81 121.932 2
 11 1 2 61.3046 88.8717 3
 11 1 3 633.044 187.723 2
 -11 -1 -3 533.655 149.838 3
 11 1 3 680.517 182.151 3
 11 1 4 923.226 229.507 2
 -11 -1 -4 521.885 113.264 3
 -11 -1 -4 919.551 223.936 2
 11 1 4 941.771 200.593 3
 -11 -1 -5 58.0351 80.8756 3
 -11 -1 -5 144.157 140.32 2
 11 1 5 176.264 123.275 3
 -11 -1 -5 -49.6281 119.559 1
 11 1 5 -24.1164 93.3005 2
 -11 -1 -6 16.1642 62.3676 3
 11 1 6 -16.2471 60.1473 2
 -11 -1 -7 63.6544 130.745 1
 -11 -1 -7 -1.3028 78.7171 3
 -11 -1 -8 -17.1898 92.9469 3
 -11 -1 -9 434.037 180.47 3
 -11 -1 -10 275.171 164.88 3
 -11 -1 -11 -42.3351 100.751 3
 -11 -1 -12 110.881 129.401 3
 -11 -1 -13 176.454 154.6 3
 -11 -1 -14 7.96315 153.406 3
 -11 -1 -15 279.974 182.732 3
 -11 -2 11 -38.1846 226.191 1
 -11 -2 10 -55.4241 173.937 1
 -11 -2 9 724.098 239.027 1
 -11 -2 8 285.09 164.708 1
 -11 -2 7 7.65784 105.78 1
 -11 -2 6 282.388 128.433 1
 -11 -2 5 -1.57598 74.8983 1
 11 2 -5 630.637 209.341 2
 11 2 -4 487.147 182.563 2
 -11 -2 4 359.45 124.019 1
 11 2 -3 723.164 209.718 2
 -11 -2 3 990.717 180.914 1
 -11 -2 2 281.674 89.1744 1
 11 2 -2 93.8091 103.717 2
 11 2 -1 190.87 131.347 2
 11 2 -1 63.3425 85.9567 3
 -11 -2 1 176.933 70.2024 1
 11 2 0 472.847 172.043 2
 11 2 0 201.392 98.0352 3
 -11 -2 0 255.745 90.6933 1
 -11 -2 -1 -21.7028 71.303 3
 11 2 1 116.123 101.294 2
 11 2 1 28.0289 73.7676 3
 11 2 2 697.052 199.872 2
 -11 -2 -2 577.557 143.536 3
 11 2 2 507.848 145.094 3
 11 2 3 684.401 201.671 2
 -11 -2 -3 311.788 115.359 3
 11 2 3 526.948 156.88 3
 11 2 4 204.476 124.163 2
 -11 -2 -4 193.586 87.4343 3
 11 2 4 102.801 87.5811 3
 11 2 5 59.3459 95.5092 2
 -11 -2 -5 -101.258 80.8517 3
 11 2 5 60.0114 99.1228 3
 -11 -2 -5 29.0769 88.9553 1
 -11 -2 -6 329.442 125.723 3
 11 2 6 557.456 192.704 2
 -11 -2 -6 223.634 116.144 1
 -11 -2 -7 -18.2228 103.03 1
 -11 -2 -7 37.9633 84.6521 3
 11 2 7 7.79074 39.6421 2
 -11 -2 -8 400.789 167.993 1
 -11 -2 -8 269.697 121.397 3
 -11 -2 -9 485.263 166.417 3
 -11 -2 -10 47.7305 83.4105 3
 -11 -2 -11 69.2541 123.73 3
 -11 -2 -12 46.7325 98.6261 3
 -11 -2 -13 34.8681 130.451 3
 -11 -2 -14 139.42 148.604 3
 -11 -2 -15 145.443 184.9 3
 -11 -2 -16 -219.268 176.851 3
 -11 -3 11 0.55066 246.634 1
 -11 -3 10 97.9808 181.149 1
 -11 -3 9 125.358 166.122 1
 -11 -3 8 33.5157 115.562 1
 -11 -3 7 211.673 128.323 1
 -11 -3 6 234.094 115.526 1
 -11 -3 5 130.75 88.8016 1
 11 3 -5 571.515 204.566 2
 -11 -3 4 753.53 162.361 1
 11 3 -4 451.077 173.42 2
 11 3 -3 150.29 88.8013 3
 11 3 -3 -30.3585 118.001 2
 -11 -3 3 -23.5031 46.4488 1
 11 3 -2 122.2 101.975 3
 11 3 -2 222.922 130.39 2
 -11 -3 1 304.009 90.0936 1
 11 3 -1 234.529 138.453 2
 11 3 -1 409.083 129.192 3
 11 3 0 -12.3605 90.0305 2
 11 3 0 -18.3876 63.3262 3
 -11 -3 0 67.3219 50.7284 1
 -11 -3 -1 11.3919 45.181 1
 11 3 1 84.3522 102.613 2
 11 3 1 58.5312 49.7832 3
 -11 -3 -2 273.81 94.1717 3
 11 3 2 373.323 155.309 2
 11 3 2 286.808 105.314 3
 11 3 3 174.202 116.491 2
 -11 -3 -3 80.1003 65.4107 3
 11 3 3 111.823 80.5713 3
 11 3 4 338.053 157.413 2
 -11 -3 -4 48.9713 63.8935 3
 11 3 4 225.301 97.3646 3
 -11 -3 -4 125.923 86.6376 1
 11 3 5 1139.04 266.575 2
 -11 -3 -5 892.357 167.51 3
 -11 -3 -5 1115.25 179.685 1
 11 3 5 872.551 179.181 3
 -11 -3 -6 287.592 110.953 1
 -11 -3 -6 67.0988 76.1762 3
 11 3 6 119.532 114.484 2
 -11 -3 -7 -11.2694 83.1337 1
 -11 -3 -7 159.38 110.063 3
 11 3 7 -35.3 74.5293 2
 -11 -3 -8 415.53 143.903 1
 -11 -3 -8 243.8 129.649 3
 -11 -3 -9 1581.78 258.866 3
 -11 -3 -9 400.694 168.919 1
 -11 -3 -10 40.1658 109.497 3
 -11 -3 -11 145.246 115.42 3
 -11 -3 -12 30.4892 100.125 3
 -11 -3 -14 302.194 190.194 3
 -11 -3 -15 6627.89 761.1 3
 -11 -3 -16 -92.0964 135.497 3
 -11 -4 11 -558.095 335.685 1
 -11 -4 10 -8.84146 158.268 1
 -11 -4 9 -19.4617 142.228 1
 -11 -4 8 583.885 202.638 1
 -11 -4 7 252.577 130.829 1
 -11 -4 6 100.01 95.6038 1
 11 4 -5 716.071 224.278 2
 -11 -4 5 763.69 171.288 1
 -11 -4 4 1416.31 209.63 1
 11 4 -4 635.898 213.787 2
 -11 -4 3 343.049 103.484 1
 11 4 -3 233.535 111.034 3
 -11 -4 2 726.82 135.467 1
 11 4 -2 588.415 143.4 3
 11 4 -2 848.229 234.886 2
 11 4 -1 400.081 166.522 2
 11 4 -1 413.204 115.487 3
 -11 -4 0 114.026 45.4473 1
 11 4 0 141.455 111.795 2
 11 4 0 123.722 76.3368 3
 11 4 1 232.709 129.866 2
 11 4 1 421.156 115.111 3
 -11 -4 -1 424.709 84.4702 1
 11 4 2 4.56976 57.6546 2
 11 4 2 26.2055 53.339 3
 11 4 3 202.148 119.456 2
 -11 -4 -3 121.534 72.0292 3
 11 4 3 125.897 68.263 3
 -11 -4 -3 241.139 78.7804 1
 11 4 4 1034.26 254.981 2
 -11 -4 -4 827.149 141.281 3
 -11 -4 -4 823.029 128.436 1
 11 4 4 715.11 143.292 3
 11 4 5 787.214 230.91 2
 -11 -4 -5 549.594 112.264 1
 -11 -4 -5 489.174 119.941 3
 11 4 6 -63.7706 112.588 2
 -11 -4 -6 30.4728 58.8561 3
 -11 -4 -7 149.977 94.8409 3
 -11 -4 -7 482.023 122.303 1
 11 4 7 229.652 153.213 2
 -11 -4 -8 193.617 104.248 3
 -11 -4 -8 106.846 100.631 1
 -11 -4 -9 17.6514 56.8874 3
 -11 -4 -9 272.978 131.946 1
 -11 -4 -10 371.732 140.706 3
 -11 -4 -11 92.6302 106.592 3
 -11 -4 -12 15.3296 94.7769 3
 -11 -4 -13 23.6102 80.7579 3
 -11 -4 -14 10.749 131.281 3
 -11 -4 -16 -238.551 166.164 3
 -11 -5 11 2803.69 476.75 1
 -11 -5 10 9683.28 774.328 1
 -11 -5 9 371.012 203.349 1
 -11 -5 8 665.662 209.953 1
 -11 -5 7 126.642 118.906 1
 -11 -5 6 -19.3403 84.9878 1
 11 5 -5 513.991 196.261 2
 -11 -5 5 232.677 104.955 1
 11 5 -4 15.0512 73.5173 3
 -11 -5 4 -18.3507 56.9795 1
 11 5 -3 413.622 121.327 3
 11 5 -3 616.479 205.707 2
 -11 -5 3 616.815 129.181 1
 -11 -5 2 615.474 112.728 1
 11 5 -2 452.859 174.045 2
 -11 -5 1 174.188 60.8332 1
 11 5 -1 -32.8272 78.4959 2
 -11 -5 0 304.876 66.9462 1
 11 5 0 135.8 65.2219 3
 11 5 1 232.527 124.816 2
 11 5 1 196.489 70.5639 3
 -11 -5 -1 132.516 38.4059 1
 -11 -5 -2 202.748 45.2937 1
 11 5 2 253.084 76.4286 3
 -11 -5 -2 166.665 47.2339 1
 11 5 3 1235.31 270.527 2
 -11 -5 -3 1213.98 106.55 1
 11 5 3 1259.98 158.14 3
 -11 -5 -3 1099.59 107.55 1
 11 5 4 929.281 243.47 2
 -11 -5 -4 979.266 129.772 3
 -11 -5 -4 1194.74 118.1 1
 11 5 5 -109.05 117.615 2
 -11 -5 -5 -9.82462 41.7806 3
 -11 -5 -5 23.587 35.4116 1
 -11 -5 -6 184.178 65.4498 3
 -11 -5 -6 -165.383 65.5018 1
 -11 -5 -7 266.957 104.388 3
 -11 -5 -7 435.917 107.038 1
 11 5 7 244.453 160.268 2
 -11 -5 -8 79.8578 58.8558 3
 11 5 8 -55.5761 62.534 2
 -11 -5 -8 191.128 92.1348 1
 -11 -5 -9 696.616 156.775 1
 -11 -5 -9 719.24 161.988 3
 -11 -5 -10 399.102 144.335 3
 -11 -5 -11 -20.4805 85.4651 3
 -11 -5 -12 6.80616 84.5857 3
 -11 -5 -13 612.75 304.643 3
 -11 -5 -14 160.769 115.535 3
 -11 -5 -15 22.9406 166.65 3
 -11 -6 11 -3.27857 238.511 1
 -11 -6 10 103.487 191.085 1
 -11 -6 9 1380.22 305.185 1
 -11 -6 8 200.032 147.762 1
 -11 -6 7 -73.997 99.7868 1
 -11 -6 6 232.758 120.973 1
 -11 -6 5 -16.6729 71.0822 1
 11 6 -4 224.013 108.501 3
 -11 -6 4 188.67 86.9279 1
 11 6 -4 363.311 165.245 2
 11 6 -3 432.608 118.207 3
 -11 -6 3 225.24 78.7581 1
 11 6 -3 355.976 165.181 2
 11 6 -2 97.0529 58.0603 3
 -11 -6 2 229.649 68.7487 1
 11 6 -2 6.38153 75.7743 2
 -11 -6 1 65.156 35.1787 1
 11 6 -1 -69.8297 94.4581 2
 11 6 0 206.769 128.362 2
 11 6 0 249.036 70.6529 3
 -11 -6 0 274.233 45.2151 1
 11 6 1 -4.03752 67.3236 2
 11 6 1 29.4134 34.6419 3
 11 6 2 1137.39 273.807 2
 11 6 2 799.228 98.9116 3
 11 6 3 2124.73 372.032 2
 11 6 4 72.752 96.4174 2
 11 6 5 365.521 174.587 2
 -11 -6 -5 228.221 58.4199 3
 -11 -6 -5 178.377 34.3587 1
 11 6 6 48.6947 106.984 2
 -11 -6 -6 256.948 66.9692 3
 -11 -6 -6 282.334 60.827 1
 -11 -6 -7 4.23603 41.512 3
 -11 -6 -7 78.5399 51.2373 1
 -11 -6 -8 807.238 144.495 3
 -11 -6 -8 737.617 130.624 1
 11 6 8 693.187 241.245 2
 -11 -6 -9 376.517 112.901 3
 11 6 9 528.324 213.575 2
 -11 -6 -10 104.209 82.0159 3
 -11 -6 -11 -57.7876 79.5904 3
 -11 -6 -12 47.7811 101.64 3
 -11 -6 -13 57.4529 101.83 3
 -11 -6 -14 62.528 101.901 3
 -11 -7 9 9.76986 277.604 1
 -11 -7 8 -77.1032 152.246 1
 -11 -7 7 59.6736 124.307 1
 -11 -7 6 -65.4044 103.998 1
 11 7 -6 497.615 227.602 2
 -11 -7 5 459.732 134.29 1
 11 7 -5 723.931 249.985 2
 11 7 -4 480.096 122.517 3
 11 7 -4 672.527 223.338 2
 -11 -7 4 916.189 162.454 1
 -11 -7 3 346.921 93.1655 1
 11 7 -3 235.572 81.8368 3
 11 7 -3 526.241 201.12 2
 11 7 -2 14.0952 38.6091 3
 11 7 -2 -45.7253 97.5044 2
 -11 -7 2 13.7277 29.6 1
 11 7 -1 205.063 140.539 2
 11 7 -1 240.529 68.1241 3
 -11 -7 1 178.018 36.9774 1
 11 7 0 -3.75269 99.9762 2
 11 7 0 -5.26272 24.2277 3
 11 7 1 489.962 188.086 2
 11 7 2 807.895 236.554 2
 11 7 4 -25.0649 84.9542 2
 11 7 5 320.019 181.063 2
 11 7 6 1847.54 375.31 2
 -11 -7 -6 42.9107 24.5376 3
 11 7 7 881.062 280.112 2
 -11 -7 -7 605.563 87.5761 1
 -11 -7 -8 349.48 86.3664 3
 -11 -7 -9 62.4368 64.3747 3
 11 7 9 -172.912 169.889 2
 -11 -7 -10 97.3901 81.1077 3
 11 7 10 848.305 295.045 2
 -11 -7 -11 214.316 121.329 3
 -11 -7 -12 67.1642 110.177 3
 -11 -8 8 501.71 217.281 1
 11 8 -6 377.057 217.436 2
 -11 -8 6 229.733 137.219 1
 11 8 -5 525.425 220.492 2
 -11 -8 5 462.328 142.89 1
 11 8 -4 244.718 154.467 2
 -11 -8 4 592.079 137.386 1
 11 8 -3 24.2873 43.8778 3
 -11 -8 3 -5.38099 48.7038 1
 11 8 -2 241.827 63.8974 3
 11 8 -2 418.051 191.196 2
 11 8 -1 255.818 153.065 2
 11 8 -1 53.1325 31.9861 3
 11 8 0 621.707 223.251 2
 11 8 1 643.402 222.122 2
 11 8 2 247.452 144.679 2
 11 8 3 126.599 115.264 2
 11 8 4 300.345 166.266 2
 11 8 5 69.0248 116.035 2
 11 8 6 241.934 174.535 2
 11 8 7 362.061 210.589 2
 -11 -8 -7 191.839 35.0598 3
 -11 -8 -7 177.993 33.0005 3
 11 8 8 -123.585 155.412 2
 -11 -8 -9 191.646 80.0262 3
 11 8 9 -101.799 149.288 2
 -11 -8 -10 86.5628 75.5815 3
 11 8 10 1113.48 334.393 2
 11 9 -7 107.457 168.196 2
 11 9 -6 762.562 284.891 2
 11 9 -5 261.344 178.251 2
 11 9 -4 -61.2685 108.105 2
 11 9 -3 252.37 179.487 2
 11 9 -2 353.32 200.387 2
 11 9 -2 108.659 53.6877 3
 11 9 0 367.412 184.398 2
 11 9 1 268.377 160.728 2
 11 9 2 -2.34524 120.819 2
 11 9 3 694.468 239.156 2
 11 9 4 115.365 134.925 2
 11 9 5 323.936 188.359 2
 11 9 6 294.442 188.637 2
 11 9 7 1.31101 142.385 2
 11 9 8 -31.4903 154.928 2
 11 9 9 -118.967 156.209 2
 11 9 10 806.448 300.889 2
 11 10 -8 526.126 298.072 2
 11 10 -7 502.937 277.287 2
 11 10 -6 182.288 190.528 2
 11 10 -5 -43.3679 132.439 2
 11 10 -4 349.39 191.77 2
 11 10 -3 315.169 187.78 2
 11 10 -2 114.704 129.987 2
 11 10 -1 651.375 248.254 2
 11 10 0 -5.01008 102.961 2
 11 10 1 35.7802 98.437 2
 11 10 2 438.571 208.178 2
 11 10 3 1.24607 136.022 2
 11 10 4 90.2911 153.098 2
 11 10 5 372.78 204.528 2
 11 10 6 294.54 200.459 2
 11 10 7 28.7856 140.674 2
 11 10 9 24.6159 80.4194 2
 11 10 10 415.586 228.904 2
 11 11 -7 36.3823 211.838 2
 11 11 -6 -165.173 186.479 2
 11 11 -5 140.092 184.677 2
 11 11 -4 236.363 200.793 2
 11 11 -3 157.541 179.294 2
 11 11 -2 371.633 214.34 2
 11 11 -1 220.009 177.407 2
 11 11 0 274.047 186.713 2
 11 11 1 371.517 204.662 2
 11 11 2 -88.0461 132.912 2
 11 11 3 27.5906 122.05 2
 11 11 4 -71.7875 186.516 2
 11 11 5 -17.5931 153.886 2
 11 11 6 225.321 187.145 2
 11 11 7 258.177 205.731 2
 11 11 8 122.307 188.923 2
 11 11 9 -146.118 222.232 2
 11 11 10 1052.36 341.082 2
 11 12 -6 216.222 257.973 2
 11 12 -5 313.88 226.573 2
 11 12 -4 40.0473 212.638 2
 11 12 -3 20.9335 171.977 2
 11 12 -2 65.9475 162.041 2
 11 12 -1 3.54548 167.988 2
 11 12 0 336.1 212.933 2
 11 12 3 -71.324 189.587 2
 11 12 4 -10.484 152.749 2
 11 12 5 3.55832 175.97 2
 11 12 6 275.785 221.649 2
 11 12 7 120.886 202.693 2
 11 12 8 -206.657 229.95 2
 11 12 9 -98.0573 233.863 2
 11 12 10 1039.57 359.682 2
 11 13 -5 170.547 240.285 2
 11 13 -4 -2.44887 206.035 2
 11 13 -3 691.57 316.514 2
 11 13 -2 -6.89772 219.698 2
 11 13 -1 366.548 252.414 2
 11 13 0 454.645 260.497 2
 11 13 1 358.046 237.599 2
 11 13 2 65.4277 179.608 2
 11 13 3 44.5098 174.124 2
 11 13 4 19.1138 173.656 2
 11 13 5 105.571 198.32 2
 11 13 6 697.743 304.924 2
 11 13 7 221.819 237.834 2
 11 13 8 -119.006 235.879 2
 11 13 9 -494.206 317.84 2
 11 13 10 1032.1 376.187 2
 11 14 -4 12.9255 231.229 2
 11 14 -3 16.6636 224.139 2
 11 14 -2 -21.0896 207.205 2
 11 14 -1 169.912 212.91 2
 11 14 0 100.76 209.204 2
 11 14 1 -0.76957 202.641 2
 11 14 2 -27.6062 189.78 2
 11 14 3 -113.01 230.111 2
 11 14 4 551.6 305.454 2
 11 14 5 -153.452 273.098 2
 11 14 6 365.681 276.765 2
 11 14 8 -140.685 289.587 2
 11 14 9 -51.0127 196.23 2
 11 15 -3 -69.5173 238.518 2
 11 15 -2 -40.1971 263.989 2
 11 15 -1 252.091 267.952 2
 11 15 0 -199.697 277.35 2
 11 15 1 365.642 291.781 2
 11 15 2 26.7091 232.28 2
 11 15 3 -4.04604 242.665 2
 11 15 4 32.5849 252.646 2
 11 15 5 129.852 264.054 2
 11 15 6 -117.031 311.191 2
 11 15 7 -27.6292 322.284 2
 11 16 -1 277.114 315.662 2
 11 16 0 376.67 325.866 2
 11 16 1 59.0629 326.478 2
 11 16 2 47.6926 285.059 2
 11 16 3 659.182 390.791 2
 11 16 4 -31.6976 293.418 2
 11 16 5 18.2153 321.407 2
 -12 5 3 303.353 158.151 1
 -12 5 2 566.519 209.673 1
 -12 5 1 15.9386 117.193 3
 -12 5 1 413.255 176.175 1
 -12 5 0 2483.28 529.672 3
 -12 5 -1 222.864 176.274 3
 -12 5 -2 94.244 157.001 3
 -12 5 -3 54.273 125.392 3
 -12 5 -4 33.438 153.735 3
 -12 5 -5 39.3178 131.682 3
 -12 5 -6 8.28132 165.55 3
 -12 5 -7 449.522 244.159 3
 -12 5 -8 -193.576 180.577 3
 -12 4 4 293.24 177.131 1
 -12 4 3 432.951 178.08 1
 -12 4 2 15.5653 34.2555 1
 -12 4 1 375.785 186.843 3
 -12 4 1 386.174 157.046 1
 -12 4 0 181.533 119.96 3
 -12 4 -1 26.4289 117.079 3
 -12 4 -2 82.2498 129.627 3
 -12 4 -3 268.976 181.354 3
 -12 4 -4 -109.06 125.248 3
 -12 4 -5 55.7432 141.844 3
 -12 4 -6 109.637 182.434 3
 -12 4 -7 9.00296 136.889 3
 -12 4 -8 128.952 152.081 3
 -12 4 -9 108.967 187.901 3
 -12 4 -10 -278.254 189.774 3
 -12 3 6 305.617 204.284 1
 -12 3 5 -58.01 136.649 1
 -12 3 4 556.259 207.84 1
 -12 3 3 138.313 109.267 1
 -12 3 2 -119.405 94.2969 1
 -12 3 1 114.578 162.78 3
 -12 3 1 388.017 165.415 1
 -12 3 0 37.6748 89.3066 3
 -12 3 -1 15.3238 97.0979 3
 -12 3 -2 412.022 181.548 3
 -12 3 -3 4.2082 94.1271 3
 -12 3 -4 176.447 153.687 3
 -12 3 -5 78.6504 118.634 3
 -12 3 -6 109.076 131.129 3
 -12 3 -7 -237.34 152.711 3
 -12 3 -8 188.979 166.95 3
 -12 3 -9 -402.655 188.141 3
 -12 3 -10 75.4223 157.871 3
 -12 3 -11 -143.388 156.351 3
 -12 2 7 294.198 200.776 1
 -12 2 6 389.253 205.106 1
 -12 2 5 301.844 179.401 1
 -12 2 4 687.005 209.391 1
 -12 2 3 -30.6679 99.6556 1
 -12 2 2 322.677 129.496 1
 -12 2 1 422.866 146.318 1
 -12 2 0 58.0528 116.665 3
 12 -2 1 375.521 168.777 2
 -12 2 -1 137.347 139.426 3
 -12 2 -2 42.0735 125.222 3
 12 -2 2 113.711 133.447 2
 -12 2 -3 -11.4581 121.46 3
 12 -2 3 -206.126 120.679 2
 -12 2 -4 238.24 176.832 3
 -12 2 -5 25.5953 88.0555 3
 -12 2 -6 74.5992 128.429 3
 -12 2 -7 8133.71 741.447 3
 -12 2 -8 109.714 143.608 3
 -12 2 -9 133.886 167.256 3
 -12 2 -10 26.9778 155.75 3
 -12 2 -11 5733.26 655.643 3
 -12 2 -12 -304.405 200.673 3
 -12 1 8 6.28257 168.795 1
 -12 1 7 204.743 188.305 1
 -12 1 6 160.804 158.823 1
 -12 1 5 464.576 177.625 1
 12 -1 -5 338.86 223.82 2
 -12 1 4 -53.1179 109.803 1
 12 -1 -4 -40.5231 183.699 2
 12 -1 -3 79.9158 147.209 2
 -12 1 3 201.92 110.483 1
 -12 1 2 82.207 62.2337 1
 12 -1 -2 119.006 135.934 2
 12 -1 -1 80.3672 113.844 2
 -12 1 1 135.175 83.1221 1
 -12 1 0 272.306 149.568 3
 12 -1 0 565.722 190.232 2
 12 -1 1 532.714 184.236 2
 -12 1 -1 404.671 177.945 3
 12 -1 2 -112.204 139.577 2
 -12 1 -2 28.1277 87.5082 3
 -12 1 -3 113.342 121.832 3
 12 -1 3 220.251 144.845 2
 -12 1 -4 109.656 114.615 3
 12 -1 4 -56.7684 121.853 2
 -12 1 -5 0.79817 92.2619 3
 12 -1 5 889.651 226.126 2
 -12 1 -6 446.64 187.245 3
 -12 1 -7 240.96 155.955 3
 -12 1 -8 71.48 141.839 3
 -12 1 -9 37.5175 101.001 3
 -12 1 -10 131.555 164.536 3
 -12 1 -11 -209.196 168.344 3
 -12 1 -12 107.032 148.236 3
 -12 1 -13 3028.84 554.349 3
 -12 0 9 165.984 200.661 1
 -12 0 8 253.508 199.34 1
 -12 0 7 118.45 164.729 1
 12 0 -7 454.421 276.31 2
 12 0 -6 421.673 230.852 2
 -12 0 6 598.813 204.751 1
 12 0 -5 64.9962 182.53 2
 -12 0 5 -5.17585 102.026 1
 -12 0 4 163.701 117.814 1
 12 0 -4 -171.863 174.741 2
 12 0 -3 142.845 153.517 2
 -12 0 3 102.503 91.6538 1
 -12 0 2 173.509 84.5076 1
 12 0 -2 140.993 155.341 2
 12 0 -1 1024.29 252.72 2
 -12 0 1 610.566 159.146 1
 -12 0 0 664.803 210.117 3
 12 0 0 922.672 234.527 2
 -12 0 0 924.729 197.318 1
 12 0 1 -0.39388 107.598 2
 -12 0 -1 59.6385 88.1829 3
 12 0 2 305.525 162.398 2
 -12 0 -2 87.2534 112.393 3
 12 0 3 152.135 134.976 2
 -12 0 -3 116.509 86.0028 3
 -12 0 -4 20.8919 66.0964 3
 12 0 4 -37.6032 113.262 2
 -12 0 -5 404.123 158.869 3
 12 0 5 202.357 125.526 2
 -12 0 -6 430.628 173.332 3
 12 0 6 896.493 237.839 2
 -12 0 -7 199.601 149.939 3
 -12 0 -8 8.30389 109.77 3
 -12 0 -9 153.078 116.366 3
 -12 0 -10 50.4769 112.284 3
 -12 0 -11 257.724 195.113 3
 -12 0 -12 134.038 161.411 3
 -12 0 -13 -350.635 193.493 3
 -12 0 -14 -52.6572 110.229 3
 -12 -1 9 -76.5195 197.14 1
 -12 -1 8 -29.1976 165.88 1
 -12 -1 7 281.462 171.525 1
 12 1 -7 825.608 308.624 2
 -12 -1 6 318.335 165.151 1
 12 1 -6 159.625 181.092 2
 12 1 -5 -103.382 155.136 2
 -12 -1 5 275.531 139.603 1
 12 1 -4 380.149 204.094 2
 -12 -1 4 438.258 148.877 1
 -12 -1 3 -78.3843 82.3417 1
 12 1 -3 8.79612 133.749 2
 -12 -1 2 334.623 112.954 1
 -12 -1 1 509.653 137.213 1
 12 1 -1 925.186 247.08 2
 12 1 0 402.654 183.281 2
 -12 -1 0 249.673 102.426 1
 -12 -1 -1 20.6665 90.3979 3
 12 1 1 169.695 142.229 2
 12 1 2 133.156 135.993 2
 -12 -1 -2 216.666 128.09 3
 12 1 3 -27.2554 121.852 2
 -12 -1 -3 124.819 98.5776 3
 12 1 4 197.481 157.195 2
 -12 -1 -4 131.806 114.878 3
 -12 -1 -5 605.759 173.992 3
 -12 -1 -5 551.862 205.161 1
 12 1 5 679.477 224.922 2
 -12 -1 -6 102.707 100.646 3
 12 1 6 208.705 132.723 2
 -12 -1 -7 -3.16407 99.838 3
 12 1 7 609.25 207.412 2
 -12 -1 -8 130.092 113.959 3
 -12 -1 -9 -14.0936 108.411 3
 -12 -1 -10 112.209 133.923 3
 -12 -1 -11 135.757 169.677 3
 -12 -1 -12 -341.346 167.654 3
 -12 -1 -13 60.0947 108.154 3
 -12 -1 -14 -9.41681 149.766 3
 -12 -1 -15 -216.392 175.742 3
 -12 -2 10 -33.5746 208.264 1
 -12 -2 9 29.2246 186.413 1
 -12 -2 8 377.038 188.724 1
 -12 -2 7 561.043 200.233 1
 -12 -2 6 2.62158 109.506 1
 12 2 -6 -35.5513 141.246 2
 -12 -2 5 263.632 125.234 1
 12 2 -5 355.605 190.673 2
 12 2 -4 28.1028 160.84 2
 -12 -2 4 137.908 94.3152 1
 -12 -2 3 189.843 95.2952 1
 -12 -2 2 224.48 90.737 1
 12 2 -2 385.604 186.616 2
 12 2 -1 120.523 125.762 2
 -12 -2 1 382.053 115.98 1
 12 2 0 -28.48 116.338 2
 -12 -2 0 -144.244 70.4494 1
 -12 -2 -1 224.555 111.668 3
 -12 -2 -1 321.303 104.458 1
 12 2 1 199.995 105.681 3
 -12 -2 -2 626.674 182.438 3
 12 2 2 87.8394 87.4962 3
 -12 -2 -3 445.217 141.178 3
 12 2 3 200.777 103.527 3
 12 2 4 116.781 122.401 2
 -12 -2 -4 522.23 154.301 3
 12 2 4 320.645 125.762 3
 12 2 5 188.38 141.469 2
 -12 -2 -5 259.486 119.515 3
 12 2 5 266.17 134.515 3
 -12 -2 -5 193.713 130.461 1
 -12 -2 -6 -16.7113 82.0396 3
 12 2 6 3.99796 111.261 2
 -12 -2 -6 -7.13293 124.538 1
 -12 -2 -7 387.684 148.388 3
 12 2 7 201.581 139.924 2
 -12 -2 -8 105.294 118.703 3
 -12 -2 -9 36.217 89.2312 3
 -12 -2 -10 300.945 155.469 3
 -12 -2 -11 -44.5485 93.5033 3
 -12 -2 -13 43.7351 103.938 3
 -12 -2 -14 77.2831 99.7124 3
 -12 -2 -15 31.1328 165.374 3
 -12 -3 10 -37.837 209.468 1
 -12 -3 9 173.067 184.937 1
 -12 -3 8 3599.18 462.348 1
 -12 -3 7 11.7756 116.298 1
 -12 -3 6 626.538 182.994 1
 12 3 -6 895.878 286.062 2
 -12 -3 5 310.928 133.535 1
 12 3 -5 310.764 182.035 2
 -12 -3 4 33.9172 69.8697 1
 12 3 -4 -170.412 174.168 2
 12 3 -3 328.377 174.209 2
 -12 -3 3 526.092 136.437 1
 12 3 -2 6.65225 95.8112 2
 -12 -3 2 928.869 173.838 1
 -12 -3 1 252.428 88.0181 1
 12 3 -1 -20.8013 102.731 2
 12 3 -1 90.2668 93.8522 3
 12 3 0 124.48 122.681 2
 12 3 0 171.439 109.706 3
 -12 -3 0 305.043 95.9223 1
 12 3 1 153.182 122.29 2
 12 3 1 224.175 104.18 3
 -12 -3 -1 331.735 100.808 1
 -12 -3 -2 6.64993 65.2737 3
 12 3 2 92.9499 109.37 2
 12 3 2 -207.305 107.878 3
 12 3 3 271.851 150.385 2
 -12 -3 -3 281.377 109.478 3
 12 3 3 291.901 112.508 3
 12 3 4 396.795 179.379 2
 -12 -3 -4 314.344 120.742 3
 12 3 4 320.329 132.19 3
 -12 -3 -4 316.947 121.404 1
 12 3 5 213.193 151.638 2
 -12 -3 -5 15.3501 62.0456 3
 12 3 5 -14.357 76.9741 3
 -12 -3 -5 -26.1496 88.8932 1
 -12 -3 -6 610.063 157.246 1
 -12 -3 -6 316.03 117.82 3
 12 3 6 567.685 214.973 2
 -12 -3 -7 413.99 145.867 1
[truncated: 35,846 more chars]
