# Supplementary material
Source: publisher figshare collection journal article supplement (https://acs.figshare.com/ndownloader/files/4205155)
Supplement: Supplementary file 27 [file 4205155 › CIFs/Mn/MnY/MnY.cif]

data_MnY
_audit_creation_date              2015-02-16
_audit_creation_method
;
Olex2 1.2
(compiled 2015.01.26 svn.r3151 for OlexSys, GUI svn.r4998)
;
_publ_contact_author_address      
;
The University of Manchester
School of Chemistry
Oxford Road, 
Manchester
M13 9PL
United Kingdom
;
_publ_contact_author_email        eufemio.morenopineda@manchester.ac.uk
_publ_contact_author_name         'Eufemio Moreno Pineda'
_publ_contact_author_phone        '+44 074 1192 4293'
_publ_section_references
;
Dolomanov, O.V., Bourhis, L.J., Gildea, R.J, Howard, J.A.K. & Puschmann, H.
 (2009), J. Appl. Cryst. 42, 339-341.

Palatinus, L. & Chapuis, G. (2007). J. Appl. Cryst., 40, 786-790;
Palatinus, L. & van der Lee, A. (2008). J. Appl. Cryst. 41, 975-984;
Palatinus, L., Prathapa, S. J. & van Smaalen, S. (2012). J. Appl. Cryst. 45,
 575-580.

Sheldrick, G.M. (2008). Acta Cryst. A64, 112-122.
;
_chemical_name_common             ?
_chemical_name_systematic         ?
_chemical_formula_moiety          'C50 H90 Mn2 O22 Y2, 2(C6 H15 N), 3(C2 N)'
_chemical_formula_sum             'C68 H120 Mn2 N5 O22 Y2'
_chemical_formula_weight          1647.38
_chemical_melting_point           ?
loop_
  _atom_type_symbol
  _atom_type_description
  _atom_type_scat_dispersion_real
  _atom_type_scat_dispersion_imag
  _atom_type_scat_source
 'C' 'C' 0.0033 0.0016 'International Tables Vol C Tables 4.2.6.8 and 6.1.1.4'
 'H' 'H' 0.0000 0.0000 'International Tables Vol C Tables 4.2.6.8 and 6.1.1.4'
 'Mn' 'Mn' 0.3368 0.7283 'International Tables Vol C Tables 4.2.6.8 and 6.1.1.4'
 'N' 'N' 0.0061 0.0033 'International Tables Vol C Tables 4.2.6.8 and 6.1.1.4'
 'O' 'O' 0.0106 0.0060 'International Tables Vol C Tables 4.2.6.8 and 6.1.1.4'
 'Y' 'Y' -2.7962 3.5667 'International Tables Vol C Tables 4.2.6.8 and 6.1.1.4'

_shelx_space_group_comment
;
The symmetry employed for this shelxl refinement is uniquely defined
by the following loop, which should always be used as a source of
symmetry information in preference to the above space-group names.
They are only intended as comments.
;
_space_group_crystal_system       'triclinic'
_space_group_IT_number            2
_space_group_name_H-M_alt         'P -1'
_space_group_name_Hall            '-P 1'
loop_
  _space_group_symop_operation_xyz
 'x, y, z'
 '-x, -y, -z'

_cell_length_a                    13.1987(7)
_cell_length_b                    13.5750(8)
_cell_length_c                    14.1952(7)
_cell_angle_alpha                 71.486(5)
_cell_angle_beta                  64.349(5)
_cell_angle_gamma                 81.392(4)
_cell_volume                      2173.8(2)
_cell_formula_units_Z             1
_cell_measurement_reflns_used     6092
_cell_measurement_temperature     156(1)
_cell_measurement_theta_max       27.8970
_cell_measurement_theta_min       3.4270
_shelx_estimated_absorpt_T_max    ?
_shelx_estimated_absorpt_T_min    ?
_exptl_absorpt_coefficient_mu     1.670
_exptl_absorpt_correction_T_max   1.00000
_exptl_absorpt_correction_T_min   0.76701
_exptl_absorpt_correction_type    multi-scan
_exptl_absorpt_process_details
;
CrysAlisPro, Agilent Technologies,
Version 1.171.37.35 (release 13-08-2014 CrysAlis171 .NET)
(compiled Aug 13 2014,18:06:01)
Empirical absorption correction using spherical harmonics,
 implemented in SCALE3 ABSPACK scaling algorithm.
;
_exptl_absorpt_special_details    ?
_exptl_crystal_colour             'clear orange'
_exptl_crystal_colour_lustre      clear
_exptl_crystal_colour_primary     orange
_exptl_crystal_density_diffrn     1.258
_exptl_crystal_density_meas       ?
_exptl_crystal_density_method     ?
_exptl_crystal_description        block
_exptl_crystal_F_000              867
_exptl_crystal_size_max           0.1
_exptl_crystal_size_mid           0.07
_exptl_crystal_size_min           0.06
_exptl_transmission_factor_max    ?
_exptl_transmission_factor_min    ?
_diffrn_reflns_av_R_equivalents   0.0266
_diffrn_reflns_av_unetI/netI      0.0515
_diffrn_reflns_Laue_measured_fraction_full 0.998
_diffrn_reflns_Laue_measured_fraction_max 0.858
_diffrn_reflns_limit_h_max        16
_diffrn_reflns_limit_h_min        -14
_diffrn_reflns_limit_k_max        17
_diffrn_reflns_limit_k_min        -18
_diffrn_reflns_limit_l_max        19
_diffrn_reflns_limit_l_min        -17
_diffrn_reflns_number             17845
_diffrn_reflns_point_group_measured_fraction_full 0.998
_diffrn_reflns_point_group_measured_fraction_max 0.858
_diffrn_reflns_theta_full         25.242
_diffrn_reflns_theta_max          28.859
_diffrn_reflns_theta_min          3.019
_diffrn_ambient_environment       N~2~
_diffrn_ambient_temperature       156(1)
_diffrn_detector                  'CCD plate'
_diffrn_detector_area_resol_mean  8.0714
_diffrn_detector_type             Eos
_diffrn_measured_fraction_theta_full 0.998
_diffrn_measured_fraction_theta_max 0.858
_diffrn_measurement_details
;
#__ type_ start__ end____ width___ exp.time_
  1 omega   -9.00   66.00   1.0000    6.0000
omega____ theta____ kappa____ phi______ frames
    -       20.8673  -99.0000  -60.0000 75

#__ type_ start__ end____ width___ exp.time_
  2 omega  -94.00  -62.00   1.0000    6.0000
omega____ theta____ kappa____ phi______ frames
    -      -21.1798  -77.0000  -30.0000 32

#__ type_ start__ end____ width___ exp.time_
  3 omega  -34.00    3.00   1.0000    6.0000
omega____ theta____ kappa____ phi______ frames
    -      -21.1798  -57.0000   60.0000 37

#__ type_ start__ end____ width___ exp.time_
  4 omega  -90.00   11.00   1.0000    6.0000
omega____ theta____ kappa____ phi______ frames
    -      -21.1798  -77.0000    0.0000 101

#__ type_ start__ end____ width___ exp.time_
  5 omega  -23.00   49.00   1.0000    6.0000
omega____ theta____ kappa____ phi______ frames
    -      -21.1798   57.0000   90.0000 72

#__ type_ start__ end____ width___ exp.time_
  6 omega  -43.00  -17.00   1.0000    6.0000
omega____ theta____ kappa____ phi______ frames
    -      -21.1798   57.0000 -150.0000 26

#__ type_ start__ end____ width___ exp.time_
  7 omega  -47.00   48.00   1.0000    6.0000
omega____ theta____ kappa____ phi______ frames
    -      -21.1798   62.0000 -153.0000 95
;
_diffrn_measurement_device        'four-circle diffractometer'
_diffrn_measurement_device_type   'SuperNova, Single source at offset, Eos'
_diffrn_measurement_method        '\w scans'
_diffrn_orient_matrix_UB_11       -0.0498256000
_diffrn_orient_matrix_UB_12       0.0290980000
_diffrn_orient_matrix_UB_13       0.0018407000
_diffrn_orient_matrix_UB_21       -0.0281354000
_diffrn_orient_matrix_UB_22       -0.0271833000
_diffrn_orient_matrix_UB_23       0.0558613000
_diffrn_orient_matrix_UB_31       0.0167482000
_diffrn_orient_matrix_UB_32       0.0380957000
_diffrn_orient_matrix_UB_33       0.0147425000
_diffrn_radiation_monochromator   mirror
_diffrn_radiation_probe           x-ray
_diffrn_radiation_type            MoK\a
_diffrn_radiation_wavelength      0.71073
_diffrn_source                    'SuperNova (Mo) X-ray Source'
_reflns_Friedel_coverage          0.000
_reflns_Friedel_fraction_full     .
_reflns_Friedel_fraction_max      .
_reflns_number_gt                 7813
_reflns_number_total              9805
_reflns_odcompleteness_completeness 99.83
_reflns_odcompleteness_iscentric  1
_reflns_odcompleteness_theta      26.32
_reflns_special_details
;
 Reflections were merged by SHELXL according to the crystal
 class for the calculation of statistics and refinement.
 
 _reflns_Friedel_fraction is defined as the number of unique
 Friedel pairs measured divided by the number that would be
 possible theoretically, ignoring centric projections and
 systematic absences.
;
_reflns_threshold_expression      'I > 2\s(I)'
_computing_cell_refinement
;
CrysAlisPro, Agilent Technologies,
Version 1.171.37.35 (release 13-08-2014 CrysAlis171 .NET)
(compiled Aug 13 2014,18:06:01)
;
_computing_data_collection
;
CrysAlisPro, Agilent Technologies,
Version 1.171.37.35 (release 13-08-2014 CrysAlis171 .NET)
(compiled Aug 13 2014,18:06:01)
;
_computing_data_reduction
;
CrysAlisPro, Agilent Technologies,
Version 1.171.37.35 (release 13-08-2014 CrysAlis171 .NET)
(compiled Aug 13 2014,18:06:01)
;
_computing_molecular_graphics     'Olex2 (Dolomanov et al., 2009)'
_computing_publication_material   'Olex2 (Dolomanov et al., 2009)'
_computing_structure_refinement   'ShelXL (Sheldrick, 2008)'
_computing_structure_solution
;
Superflip (Palatinus & Chapuis, 2007;Palatinus & van der Lee, 2008;
Palatinus et al., 2012)
;
_refine_diff_density_max          0.937
_refine_diff_density_min          -0.373
_refine_diff_density_rms          0.071
_refine_ls_extinction_coef        .
_refine_ls_extinction_method      none
_refine_ls_goodness_of_fit_ref    1.028
_refine_ls_hydrogen_treatment     constr
_refine_ls_matrix_type            full
_refine_ls_number_parameters      612
_refine_ls_number_reflns          9805
_refine_ls_number_restraints      135
_refine_ls_R_factor_all           0.0621
_refine_ls_R_factor_gt            0.0434
_refine_ls_restrained_S_all       1.029
_refine_ls_shift/su_max           0.001
_refine_ls_shift/su_mean          0.000
_refine_ls_structure_factor_coef  Fsqd
_refine_ls_weighting_details
'w=1/[\s^2^(Fo^2^)+(0.0570P)^2^+1.2660P] where P=(Fo^2^+2Fc^2^)/3'
_refine_ls_weighting_scheme       calc
_refine_ls_wR_factor_gt           0.1057
_refine_ls_wR_factor_ref          0.1162
_refine_special_details           ?
_olex2_refinement_description
;
1. Fixed Uiso
 At 1.2 times of:
  All C(H,H) groups
 At 1.5 times of:
  All C(H,H,H) groups
2. Rigid body (RIGU) restrains
 N1, C26, C27, C28, C29, C30, C31, N1B, C26B, C27B, C28B, C29B, C30B, C31B
 with sigma for 1-2 distances of 0.004 and sigma for 1-3 distances of 0.004
 C0AA, C3, C4, C5, C3B, C4B, C5B
 with sigma for 1-2 distances of 0.004 and sigma for 1-3 distances of 0.004
 N3, C1A, C2
 with sigma for 1-2 distances of 0.004 and sigma for 1-3 distances of 0.004
 N3, C1A, C2
 with sigma for 1-2 distances of 0.004 and sigma for 1-3 distances of 0.004
 N2, C32, C33, C32B, C33B, N3, C1A, C2
 with sigma for 1-2 distances of 0.004 and sigma for 1-3 distances of 0.004
3. Others
 Sof(O1B)=Sof(C1B)=Sof(N1B)=Sof(C26B)=Sof(H26A)=Sof(H26B)=Sof(C27B)=Sof(H27A)=
 Sof(H27B)=Sof(H27C)=Sof(C28B)=Sof(H28A)=Sof(H28B)=Sof(C29B)=Sof(H29A)=
 Sof(H29B)=Sof(H29C)=Sof(C30B)=Sof(H30A)=Sof(H30B)=Sof(C31B)=Sof(H31A)=
 Sof(H31B)=Sof(H31C)=Sof(C32B)=Sof(C33B)=1-FVAR(1)
 Sof(O2)=Sof(C1)=Sof(N1)=Sof(C26)=Sof(H26C)=Sof(H26D)=Sof(C27)=Sof(H27D)=
 Sof(H27E)=Sof(H27F)=Sof(C28)=Sof(H28C)=Sof(H28D)=Sof(C29)=Sof(H29D)=Sof(H29E)=
 Sof(H29F)=Sof(C30)=Sof(H30C)=Sof(H30D)=Sof(C31)=Sof(H31D)=Sof(H31E)=Sof(H31F)=
 Sof(C32)=Sof(C33)=FVAR(1)
 Sof(C3B)=Sof(H3BA)=Sof(H3BB)=Sof(H3BC)=Sof(C4B)=Sof(H4BA)=Sof(H4BB)=Sof(H4BC)=
 Sof(C5B)=Sof(H5BA)=Sof(H5BB)=Sof(H5BC)=1-FVAR(2)
 Sof(C3)=Sof(H3A)=Sof(H3B)=Sof(H3C)=Sof(C4)=Sof(H4A)=Sof(H4B)=Sof(H4C)=Sof(C5)=
 Sof(H5A)=Sof(H5B)=Sof(H5C)=FVAR(2)
 Fixed Sof: N3(0.5) C1A(0.5) C2(0.5)
4.a Secondary CH2 refined with riding coordinates:
 C26(H26C,H26D), C28(H28C,H28D), C30(H30C,H30D), C26B(H26A,H26B), C28B(H28A,
 H28B), C30B(H30A,H30B)
4.b Idealised Me refined as rotating group:
 C8(H8A,H8B,H8C), C9(H9A,H9B,H9C), C10(H10A,H10B,H10C), C13(H13A,H13B,H13C),
 C14(H14A,H14B,H14C), C15(H15A,H15B,H15C), C18(H18A,H18B,H18C), C19(H19A,H19B,
 H19C), C20(H20A,H20B,H20C), C23(H23A,H23B,H23C), C24(H24A,H24B,H24C), C25(H25A,
 H25B,H25C), C3(H3A,H3B,H3C), C4(H4A,H4B,H4C), C5(H5A,H5B,H5C), C3B(H3BA,H3BB,
 H3BC), C4B(H4BA,H4BB,H4BC), C5B(H5BA,H5BB,H5BC), C27(H27D,H27E,H27F), C29(H29D,
 H29E,H29F), C31(H31D,H31E,H31F), C27B(H27A,H27B,H27C), C29B(H29A,H29B,H29C),
 C31B(H31A,H31B,H31C)
;
_atom_sites_solution_hydrogens    geom
_atom_sites_solution_primary      iterative
_atom_sites_solution_secondary    ?
loop_
  _atom_site_label
  _atom_site_type_symbol
  _atom_site_fract_x
  _atom_site_fract_y
  _atom_site_fract_z
  _atom_site_U_iso_or_equiv
  _atom_site_adp_type
  _atom_site_occupancy
  _atom_site_site_symmetry_order
  _atom_site_calc_flag
  _atom_site_refinement_flags_posn
  _atom_site_refinement_flags_adp
  _atom_site_refinement_flags_occupancy
  _atom_site_disorder_assembly
  _atom_site_disorder_group
 Y1 Y 0.63658(2) 0.67163(2) -0.20676(2) 0.02303(8) Uani 1 1 d . . . . .
 Mn1 Mn 0.57633(3) 0.50090(3) 0.04339(3) 0.02193(10) Uani 1 1 d . . . . .
 O1 O 0.68795(18) 0.83251(15) -0.31416(18) 0.0374(5) Uani 1 1 d . . . . .
 O1OH O 0.49438(14) 0.40482(13) 0.03731(14) 0.0215(4) Uani 1 1 d . . . . .
 O3 O 0.6787(2) 0.62424(19) -0.36671(18) 0.0485(6) Uani 1 1 d . . . . .
 O4 O 0.56872(17) 0.51529(15) -0.21781(16) 0.0308(4) Uani 1 1 d . . . . .
 O5 O 0.53100(17) 0.27401(15) 0.22423(18) 0.0355(5) Uani 1 1 d . . . . .
 O6 O 0.65886(16) 0.39694(15) 0.11699(16) 0.0310(4) Uani 1 1 d . . . . .
 O7 O 0.68297(18) 0.73117(15) -0.09513(17) 0.0342(5) Uani 1 1 d . . . . .
 O8 O 0.64883(16) 0.60654(15) 0.06097(16) 0.0294(4) Uani 1 1 d . . . . .
 O9 O 0.83468(17) 0.62802(18) -0.26987(18) 0.0449(6) Uani 1 1 d . . . . .
 O10 O 0.72384(15) 0.51766(14) -0.12401(16) 0.0285(4) Uani 1 1 d . . . . .
 C0AA C 0.6210(3) 1.0014(3) -0.2894(4) 0.0632(11) Uani 1 1 d . U . . .
 C6 C 0.6255(2) 0.5408(2) -0.3193(2) 0.0313(6) Uani 1 1 d . . . . .
 C7 C 0.6383(3) 0.4672(3) -0.3856(3) 0.0416(8) Uani 1 1 d . . . . .
 C8 C 0.7483(4) 0.4069(4) -0.3969(4) 0.0753(13) Uani 1 1 d . . . . .
 H8A H 0.8106 0.4557 -0.4328 0.113 Uiso 1 1 calc GR . . . .
 H8B H 0.7608 0.3595 -0.4406 0.113 Uiso 1 1 calc GR . . . .
 H8C H 0.7441 0.3668 -0.3245 0.113 Uiso 1 1 calc GR . . . .
 C9 C 0.5394(4) 0.3949(3) -0.3292(3) 0.0667(12) Uani 1 1 d . . . . .
 H9A H 0.5386 0.3505 -0.2593 0.100 Uiso 1 1 calc GR . . . .
 H9B H 0.5462 0.3516 -0.3752 0.100 Uiso 1 1 calc GR . . . .
 H9C H 0.4695 0.4359 -0.3164 0.100 Uiso 1 1 calc GR . . . .
 C10 C 0.6481(4) 0.5293(3) -0.4996(3) 0.0642(12) Uani 1 1 d . . . . .
 H10A H 0.5785 0.5692 -0.4942 0.096 Uiso 1 1 calc GR . . . .
 H10B H 0.6607 0.4815 -0.5430 0.096 Uiso 1 1 calc GR . . . .
 H10C H 0.7114 0.5769 -0.5347 0.096 Uiso 1 1 calc GR . . . .
 C11 C 0.6232(2) 0.3142(2) 0.1926(2) 0.0306(6) Uani 1 1 d . . . . .
 C12 C 0.6996(3) 0.2630(3) 0.2516(3) 0.0434(8) Uani 1 1 d . . . . .
 C13 C 0.8219(3) 0.2693(4) 0.1730(4) 0.0839(17) Uani 1 1 d . . . . .
 H13A H 0.8346 0.2308 0.1209 0.126 Uiso 1 1 calc GR . . . .
 H13B H 0.8687 0.2390 0.2135 0.126 Uiso 1 1 calc GR . . . .
 H13C H 0.8419 0.3422 0.1337 0.126 Uiso 1 1 calc GR . . . .
 C14 C 0.6774(5) 0.3241(5) 0.3321(5) 0.103(2) Uani 1 1 d . . . . .
 H14A H 0.6908 0.3980 0.2929 0.155 Uiso 1 1 calc GR . . . .
 H14B H 0.7279 0.2989 0.3692 0.155 Uiso 1 1 calc GR . . . .
 H14C H 0.5992 0.3148 0.3860 0.155 Uiso 1 1 calc GR . . . .
 C15 C 0.6685(4) 0.1504(4) 0.3141(4) 0.0840(17) Uani 1 1 d . . . . .
 H15A H 0.5890 0.1466 0.3648 0.126 Uiso 1 1 calc GR . . . .
 H15B H 0.7148 0.1210 0.3552 0.126 Uiso 1 1 calc GR . . . .
 H15C H 0.6816 0.1108 0.2629 0.126 Uiso 1 1 calc GR . . . .
 C16 C 0.6876(2) 0.6940(2) -0.0051(2) 0.0268(6) Uani 1 1 d . . . . .
 C17 C 0.7428(3) 0.7585(2) 0.0314(3) 0.0341(7) Uani 1 1 d . . . . .
 C18 C 0.8432(3) 0.8161(3) -0.0684(3) 0.0538(10) Uani 1 1 d . . . . .
 H18A H 0.8996 0.7655 -0.0979 0.081 Uiso 1 1 calc GR . . . .
 H18B H 0.8764 0.8604 -0.0469 0.081 Uiso 1 1 calc GR . . . .
 H18C H 0.8176 0.8591 -0.1242 0.081 Uiso 1 1 calc GR . . . .
 C19 C 0.7798(3) 0.6906(3) 0.1193(3) 0.0512(9) Uani 1 1 d . . . . .
 H19A H 0.7141 0.6569 0.1834 0.077 Uiso 1 1 calc GR . . . .
 H19B H 0.8160 0.7336 0.1396 0.077 Uiso 1 1 calc GR . . . .
 H19C H 0.8332 0.6374 0.0916 0.077 Uiso 1 1 calc GR . . . .
 C20 C 0.6550(3) 0.8372(3) 0.0761(3) 0.0484(9) Uani 1 1 d . . . . .
 H20A H 0.6300 0.8799 0.0197 0.073 Uiso 1 1 calc GR . . . .
 H20B H 0.6878 0.8820 0.0976 0.073 Uiso 1 1 calc GR . . . .
 H20C H 0.5907 0.8007 0.1396 0.073 Uiso 1 1 calc GR . . . .
 C21 C 0.8218(2) 0.5467(2) -0.1937(2) 0.0280(6) Uani 1 1 d . . . . .
 C22 C 0.9233(2) 0.4838(2) -0.1816(3) 0.0352(7) Uani 1 1 d . . . . .
 C23 C 0.9409(3) 0.5147(3) -0.0955(4) 0.0544(10) Uani 1 1 d . . . . .
 H23A H 0.9590 0.5887 -0.1219 0.082 Uiso 1 1 calc GR . . . .
 H23B H 1.0029 0.4735 -0.0813 0.082 Uiso 1 1 calc GR . . . .
 H23C H 0.8720 0.5020 -0.0281 0.082 Uiso 1 1 calc GR . . . .
 C24 C 0.8978(3) 0.3684(3) -0.1411(3) 0.0479(9) Uani 1 1 d . . . . .
 H24A H 0.8307 0.3541 -0.0722 0.072 Uiso 1 1 calc GR . . . .
 H24B H 0.9618 0.3284 -0.1297 0.072 Uiso 1 1 calc GR . . . .
 H24C H 0.8846 0.3484 -0.1953 0.072 Uiso 1 1 calc GR . . . .
 C25 C 1.0266(3) 0.5082(3) -0.2892(4) 0.0676(13) Uani 1 1 d . . . . .
 H25A H 1.0128 0.4898 -0.3439 0.101 Uiso 1 1 calc GR . . . .
 H25B H 1.0912 0.4680 -0.2792 0.101 Uiso 1 1 calc GR . . . .
 H25C H 1.0424 0.5825 -0.3136 0.101 Uiso 1 1 calc GR . . . .
 O2 O 0.7696(6) 0.9662(4) -0.4530(5) 0.0513(19) Uani 0.424(4) 1 d . . P A 1
 C1 C 0.6945(10) 0.9289(9) -0.3637(9) 0.032(2) Uani 0.424(4) 1 d . . P A 1
 C3 C 0.6771(6) 1.0725(5) -0.2622(8) 0.092(3) Uani 0.710(8) 1 d . U P A 1
 H3A H 0.7143 1.0303 -0.2157 0.137 Uiso 0.710(8) 1 calc GR . P A 1
 H3B H 0.6201 1.1177 -0.2237 0.137 Uiso 0.710(8) 1 calc GR . P A 1
 H3C H 0.7329 1.1151 -0.3297 0.137 Uiso 0.710(8) 1 calc GR . P A 1
 C4 C 0.5297(5) 0.9405(4) -0.1804(5) 0.0565(18) Uani 0.710(8) 1 d . U P A 1
 H4A H 0.4937 0.8916 -0.1941 0.085 Uiso 0.710(8) 1 calc GR . P A 1
 H4B H 0.4731 0.9893 -0.1476 0.085 Uiso 0.710(8) 1 calc GR . P A 1
 H4C H 0.5645 0.9021 -0.1305 0.085 Uiso 0.710(8) 1 calc GR . P A 1
 C5 C 0.5662(8) 1.0622(6) -0.3616(7) 0.097(3) Uani 0.710(8) 1 d . U P A 1
 H5A H 0.6222 1.1049 -0.4289 0.146 Uiso 0.710(8) 1 calc GR . P A 1
 H5B H 0.5075 1.1072 -0.3246 0.146 Uiso 0.710(8) 1 calc GR . P A 1
 H5C H 0.5324 1.0147 -0.3793 0.146 Uiso 0.710(8) 1 calc GR . P A 1
 O1B O 0.8117(5) 0.9607(5) -0.3930(7) 0.107(3) Uani 0.576(4) 1 d . . P A 2
 C1B C 0.7156(8) 0.9246(7) -0.3291(7) 0.045(2) Uani 0.576(4) 1 d . . P A 2
 C3B C 0.6065(16) 0.9788(13) -0.1746(15) 0.082(5) Uani 0.290(8) 1 d . U P A 2
 H3BA H 0.6024 0.9035 -0.1407 0.124 Uiso 0.290(8) 1 calc GR . P A 2
 H3BB H 0.5370 1.0121 -0.1341 0.124 Uiso 0.290(8) 1 calc GR . P A 2
 H3BC H 0.6706 1.0059 -0.1735 0.124 Uiso 0.290(8) 1 calc GR . P A 2
 C4B C 0.5128(17) 0.9984(15) -0.306(2) 0.096(6) Uani 0.290(8) 1 d . U P A 2
 H4BA H 0.5336 0.9977 -0.3814 0.143 Uiso 0.290(8) 1 calc GR . P A 2
 H4BB H 0.4660 1.0600 -0.2931 0.143 Uiso 0.290(8) 1 calc GR . P A 2
 H4BC H 0.4705 0.9357 -0.2555 0.143 Uiso 0.290(8) 1 calc GR . P A 2
 C5B C 0.6657(15) 1.1148(11) -0.3529(15) 0.073(5) Uani 0.290(8) 1 d . U P A 2
 H5BA H 0.7391 1.1201 -0.3531 0.109 Uiso 0.290(8) 1 calc GR . P A 2
 H5BB H 0.6125 1.1639 -0.3173 0.109 Uiso 0.290(8) 1 calc GR . P A 2
 H5BC H 0.6736 1.1313 -0.4282 0.109 Uiso 0.290(8) 1 calc GR . P A 2
 N1 N 0.9488(7) 0.8527(6) -0.5196(6) 0.0519(19) Uani 0.424(4) 1 d . U P A 1
 C26 C 1.0170(7) 0.9397(6) -0.6139(7) 0.047(2) Uani 0.424(4) 1 d . U P A 1
 H26C H 1.0602 0.9727 -0.5900 0.056 Uiso 0.424(4) 1 calc R . P A 1
 H26D H 1.0715 0.9107 -0.6731 0.056 Uiso 0.424(4) 1 calc R . P A 1
 C27 C 0.9452(8) 1.0208(8) -0.6574(8) 0.061(3) Uani 0.424(4) 1 d . U P A 1
 H27D H 0.9923 1.0785 -0.7141 0.091 Uiso 0.424(4) 1 calc GR . P A 1
 H27E H 0.8879 1.0466 -0.5980 0.091 Uiso 0.424(4) 1 calc GR . P A 1
 H27F H 0.9085 0.9903 -0.6883 0.091 Uiso 0.424(4) 1 calc GR . P A 1
 C28 C 0.8769(14) 0.7967(12) -0.5430(12) 0.072(4) Uani 0.424(4) 1 d . U P A 1
 H28C H 0.8261 0.8477 -0.5691 0.087 Uiso 0.424(4) 1 calc R . P A 1
 H28D H 0.8297 0.7467 -0.4744 0.087 Uiso 0.424(4) 1 calc R . P A 1
 C29 C 0.9436(12) 0.7387(10) -0.6273(10) 0.109(5) Uani 0.424(4) 1 d . U P A 1
 H29D H 1.0059 0.7818 -0.6869 0.163 Uiso 0.424(4) 1 calc GR . P A 1
 H29E H 0.8944 0.7231 -0.6562 0.163 Uiso 0.424(4) 1 calc GR . P A 1
 H29F H 0.9737 0.6736 -0.5932 0.163 Uiso 0.424(4) 1 calc GR . P A 1
 C30 C 1.0230(19) 0.7797(14) -0.4803(16) 0.063(3) Uani 0.424(4) 1 d . U P A 1
 H30C H 1.0924 0.7702 -0.5431 0.076 Uiso 0.424(4) 1 calc R . P A 1
 H30D H 0.9859 0.7115 -0.4400 0.076 Uiso 0.424(4) 1 calc R . P A 1
 C31 C 1.0542(12) 0.8176(8) -0.4045(10) 0.078(3) Uani 0.424(4) 1 d . U P A 1
 H31D H 1.0929 0.8841 -0.4449 0.117 Uiso 0.424(4) 1 calc GR . P A 1
 H31E H 1.1038 0.7662 -0.3786 0.117 Uiso 0.424(4) 1 calc GR . P A 1
 H31F H 0.9856 0.8266 -0.3421 0.117 Uiso 0.424(4) 1 calc GR . P A 1
 N1B N 0.8899(8) 0.8423(5) -0.5691(7) 0.074(3) Uani 0.576(4) 1 d . U P A 2
 C26B C 0.9583(8) 0.9285(6) -0.6684(7) 0.080(3) Uani 0.576(4) 1 d . U P A 2
 H26A H 0.9062 0.9777 -0.6943 0.096 Uiso 0.576(4) 1 calc R . P A 2
 H26B H 0.9979 0.9671 -0.6461 0.096 Uiso 0.576(4) 1 calc R . P A 2
 C27B C 1.0438(8) 0.8889(7) -0.7616(8) 0.106(4) Uani 0.576(4) 1 d . U P A 2
 H27A H 1.0767 0.9479 -0.8260 0.159 Uiso 0.576(4) 1 calc GR . P A 2
 H27B H 1.0068 0.8435 -0.7784 0.159 Uiso 0.576(4) 1 calc GR . P A 2
 H27C H 1.1032 0.8498 -0.7408 0.159 Uiso 0.576(4) 1 calc GR . P A 2
 C28B C 0.8147(8) 0.7885(6) -0.5956(7) 0.086(3) Uani 0.576(4) 1 d . U P A 2
 H28A H 0.7803 0.7281 -0.5319 0.103 Uiso 0.576(4) 1 calc R . P A 2
 H28B H 0.8646 0.7604 -0.6572 0.103 Uiso 0.576(4) 1 calc R . P A 2
 C29B C 0.7176(9) 0.8509(7) -0.6254(10) 0.115(4) Uani 0.576(4) 1 d . U P A 2
 H29A H 0.7230 0.8410 -0.6929 0.172 Uiso 0.576(4) 1 calc GR . P A 2
 H29B H 0.7241 0.9249 -0.6356 0.172 Uiso 0.576(4) 1 calc GR . P A 2
 H29C H 0.6448 0.8258 -0.5662 0.172 Uiso 0.576(4) 1 calc GR . P A 2
 C30B C 0.9606(9) 0.7650(6) -0.5211(8) 0.084(3) Uani 0.576(4) 1 d . U P A 2
 H30A H 1.0209 0.7386 -0.5794 0.101 Uiso 0.576(4) 1 calc R . P A 2
 H30B H 0.9133 0.7054 -0.4662 0.101 Uiso 0.576(4) 1 calc R . P A 2
 C31B C 1.0154(17) 0.8105(13) -0.4656(17) 0.108(6) Uani 0.576(4) 1 d . U P A 2
 H31A H 1.0625 0.8694 -0.5193 0.162 Uiso 0.576(4) 1 calc GR . P A 2
 H31B H 1.0617 0.7566 -0.4375 0.162 Uiso 0.576(4) 1 calc GR . P A 2
 H31C H 0.9562 0.8337 -0.4054 0.162 Uiso 0.576(4) 1 calc GR . P A 2
 N2 N 1.3594(4) 0.7666(4) -0.9350(4) 0.1024(15) Uani 1 1 d . U . . .
 C32 C 1.1924(7) 0.8711(7) -0.8536(8) 0.056(3) Uani 0.424(4) 1 d . U P A 1
 C33 C 1.2651(7) 0.8229(7) -0.8895(8) 0.049(2) Uani 0.424(4) 1 d . U P A 1
 C32B C 1.2345(7) 0.9002(7) -1.0268(8) 0.080(3) Uani 0.576(4) 1 d . U P A 2
 C33B C 1.2878(7) 0.8471(6) -0.9878(8) 0.073(2) Uani 0.576(4) 1 d . U P A 2
 N3 N 1.1386(19) 1.023(2) -1.1200(16) 0.280(15) Uani 0.5 1 d . U P . .
 C1A C 1.0694(15) 0.9915(14) -1.0393(16) 0.116(5) Uani 0.5 1 d . U P . .
 C2 C 0.9824(14) 0.9566(13) -0.9295(15) 0.115(4) Uani 0.5 1 d . U P . .

loop_
  _atom_site_aniso_label
  _atom_site_aniso_U_11
  _atom_site_aniso_U_22
  _atom_site_aniso_U_33
  _atom_site_aniso_U_23
  _atom_site_aniso_U_13
  _atom_site_aniso_U_12
 Y1 0.01817(14) 0.02110(13) 0.02413(14) -0.00472(10) -0.00380(10) -0.00334(9)
 Mn1 0.0174(2) 0.0209(2) 0.0256(2) -0.00561(16) -0.00691(17) -0.00309(15)
 O1 0.0355(12) 0.0217(10) 0.0394(12) -0.0014(9) -0.0055(10) -0.0035(9)
 O1OH 0.0175(9) 0.0195(9) 0.0248(10) -0.0057(7) -0.0058(7) -0.0028(7)
 O3 0.0535(15) 0.0544(15) 0.0287(12) -0.0133(11) 0.0003(11) -0.0262(12)
 O4 0.0316(11) 0.0334(11) 0.0244(10) -0.0098(8) -0.0068(9) -0.0030(8)
 O5 0.0257(11) 0.0303(11) 0.0427(13) 0.0005(9) -0.0138(10) -0.0033(8)
 O6 0.0221(10) 0.0312(10) 0.0352(11) -0.0016(9) -0.0122(9) -0.0032(8)
 O7 0.0397(12) 0.0274(10) 0.0354(12) -0.0065(9) -0.0140(10) -0.0098(9)
 O8 0.0279(11) 0.0296(10) 0.0314(11) -0.0080(8) -0.0107(9) -0.0089(8)
 O9 0.0212(11) 0.0475(13) 0.0378(13) 0.0052(10) 0.0001(9) 0.0031(9)
 O10 0.0170(10) 0.0276(10) 0.0338(11) -0.0071(8) -0.0043(8) -0.0033(8)
 C0AA 0.055(2) 0.0288(17) 0.065(2) -0.0090(17) 0.0075(19) 0.0041(16)
 C6 0.0250(15) 0.0387(17) 0.0294(16) -0.0127(13) -0.0085(12) -0.0005(12)
 C7 0.0402(19) 0.0491(19) 0.0363(18) -0.0225(15) -0.0079(14) -0.0042(15)
 C8 0.071(3) 0.071(3) 0.078(3) -0.041(3) -0.020(3) 0.022(2)
 C9 0.077(3) 0.076(3) 0.049(2) -0.033(2) -0.006(2) -0.035(2)
 C10 0.081(3) 0.077(3) 0.037(2) -0.021(2) -0.018(2) -0.019(2)
 C11 0.0241(15) 0.0289(15) 0.0338(16) -0.0059(12) -0.0099(12) 0.0009(11)
 C12 0.0318(18) 0.0455(19) 0.049(2) 0.0007(16) -0.0226(16) -0.0033(14)
 C13 0.038(2) 0.110(4) 0.074(3) 0.016(3) -0.027(2) 0.004(2)
 C14 0.124(5) 0.130(5) 0.106(4) -0.059(4) -0.091(4) 0.046(4)
 C15 0.063(3) 0.074(3) 0.095(4) 0.031(3) -0.051(3) -0.009(2)
 C16 0.0180(13) 0.0268(14) 0.0336(16) -0.0142(12) -0.0040(11) -0.0033(11)
 C17 0.0280(16) 0.0332(16) 0.0453(18) -0.0200(14) -0.0113(14) -0.0049(12)
 C18 0.039(2) 0.057(2) 0.065(3) -0.029(2) -0.0068(18) -0.0209(17)
 C19 0.053(2) 0.052(2) 0.069(3) -0.0230(19) -0.039(2) -0.0031(17)
 C20 0.045(2) 0.0437(19) 0.066(2) -0.0338(18) -0.0197(18) 0.0015(16)
 C21 0.0200(14) 0.0311(15) 0.0301(15) -0.0124(12) -0.0051(12) -0.0006(11)
 C22 0.0183(14) 0.0379(17) 0.0418(18) -0.0108(14) -0.0070(13) 0.0030(12)
 C23 0.041(2) 0.062(2) 0.078(3) -0.028(2) -0.037(2) 0.0087(17)
 C24 0.0352(19) 0.0377(18) 0.065(2) -0.0141(17) -0.0193(17) 0.0098(14)
 C25 0.0237(19) 0.076(3) 0.065(3) -0.005(2) 0.0020(17) 0.0115(18)
 O2 0.065(5) 0.023(3) 0.036(4) -0.009(2) 0.013(3) -0.021(3)
 C1 0.034(5) 0.026(4) 0.025(6) -0.001(4) -0.008(4) 0.002(3)
 C3 0.059(4) 0.052(4) 0.130(7) -0.038(4) -0.001(4) 0.004(3)
 C4 0.044(3) 0.040(3) 0.056(3) -0.015(2) 0.004(2) 0.010(2)
 C5 0.126(7) 0.059(4) 0.073(5) -0.010(4) -0.022(5) 0.017(4)
 O1B 0.066(4) 0.055(3) 0.124(6) -0.046(4) 0.054(4) -0.029(3)
 C1B 0.043(5) 0.032(3) 0.035(5) -0.002(4) 0.000(3) 0.002(3)
 C3B 0.073(11) 0.057(9) 0.084(7) -0.017(6) -0.005(6) 0.002(8)
 C4B 0.077(9) 0.062(10) 0.143(16) -0.049(10) -0.034(10) 0.018(7)
 C5B 0.083(10) 0.032(6) 0.076(9) -0.019(5) -0.003(7) -0.004(6)
 N1 0.055(4) 0.039(4) 0.038(4) -0.012(3) 0.005(3) -0.011(3)
 C26 0.043(4) 0.037(4) 0.037(4) -0.006(3) 0.003(3) -0.009(3)
 C27 0.059(6) 0.057(5) 0.060(6) -0.009(4) -0.024(5) 0.000(4)
 C28 0.077(7) 0.071(8) 0.054(7) -0.030(6) 0.002(6) -0.024(6)
 C29 0.124(11) 0.092(9) 0.075(8) -0.055(7) 0.029(7) -0.055(8)
 C30 0.065(7) 0.045(6) 0.050(6) -0.003(5) 0.000(5) -0.014(5)
 C31 0.105(9) 0.051(6) 0.063(6) 0.003(5) -0.032(6) -0.008(6)
 N1B 0.071(5) 0.037(4) 0.056(4) -0.012(3) 0.026(3) -0.006(3)
 C26B 0.084(6) 0.041(4) 0.058(4) -0.005(3) 0.020(4) -0.012(3)
 C27B 0.098(7) 0.064(5) 0.080(6) -0.024(4) 0.042(5) -0.027(5)
 C28B 0.093(5) 0.056(4) 0.057(5) -0.009(4) 0.020(4) -0.030(4)
 C29B 0.108(7) 0.045(5) 0.152(10) -0.022(5) -0.024(7) 0.007(5)
 C30B 0.087(6) 0.043(4) 0.068(5) -0.009(3) 0.012(4) -0.002(4)
 C31B 0.100(9) 0.086(12) 0.097(9) -0.017(8) -0.001(8) -0.024(8)
 N2 0.070(3) 0.110(4) 0.122(4) -0.061(3) -0.019(3) 0.011(2)
 C32 0.041(4) 0.049(5) 0.069(6) -0.038(5) 0.000(4) 0.000(3)
 C33 0.042(4) 0.045(4) 0.052(5) -0.029(4) 0.004(3) -0.014(3)
 C32B 0.054(5) 0.060(5) 0.101(6) -0.025(4) -0.008(4) -0.001(4)
 C33B 0.054(5) 0.050(4) 0.098(6) -0.033(4) -0.001(4) -0.014(3)
 N3 0.238(19) 0.47(4) 0.137(11) -0.104(13) -0.012(10) -0.20(2)
 C1A 0.111(11) 0.127(13) 0.129(11) -0.057(10) -0.047(7) -0.018(9)
 C2 0.089(10) 0.121(12) 0.136(11) -0.039(10) -0.043(7) -0.007(8)

_geom_special_details
;
 All esds (except the esd in the dihedral angle between two l.s. planes)
 are estimated using the full covariance matrix.  The cell esds are taken
 into account individually in the estimation of esds in distances, angles
 and torsion angles; correlations between esds in cell parameters are only
 used when they are defined by crystal symmetry.  An approximate (isotropic)
 treatment of cell esds is used for estimating esds involving l.s. planes.
;
loop_
  _geom_bond_atom_site_label_1
  _geom_bond_atom_site_label_2
  _geom_bond_distance
  _geom_bond_site_symmetry_2
  _geom_bond_publ_flag
 Y1 Mn1 3.4117(5) 2_665 ?
 Y1 Mn1 3.3901(5) . ?
 Y1 O1 2.2333(19) . ?
 Y1 O1OH 2.2809(17) 2_665 ?
 Y1 O3 2.368(2) . ?
 Y1 O4 2.4966(19) . ?
 Y1 O5 2.317(2) 2_665 ?
 Y1 O7 2.311(2) . ?
 Y1 O9 2.416(2) . ?
 Y1 O10 2.4425(19) . ?
 Y1 C6 2.795(3) . ?
 Y1 C21 2.800(3) . ?
 Mn1 Y1 3.4116(5) 2_665 ?
 Mn1 Mn1 2.7857(8) 2_665 ?
 Mn1 O1OH 1.8583(17) . ?
 Mn1 O1OH 1.8595(18) 2_665 ?
 Mn1 O4 2.350(2) 2_665 ?
 Mn1 O6 1.9644(19) . ?
 Mn1 O8 1.9696(18) . ?
 Mn1 O10 2.2963(19) . ?
 O1 C1 1.269(11) . ?
 O1 C1B 1.282(10) . ?
 O1OH Y1 2.2809(17) 2_665 ?
 O1OH Mn1 1.8595(18) 2_665 ?
 O3 C6 1.256(4) . ?
 O4 Mn1 2.350(2) 2_665 ?
 O4 C6 1.258(3) . ?
 O5 Y1 2.317(2) 2_665 ?
 O5 C11 1.245(3) . ?
 O6 C11 1.261(3) . ?
 O7 C16 1.242(3) . ?
 O8 C16 1.269(3) . ?
 O9 C21 1.247(3) . ?
 O10 C21 1.267(3) . ?
 C0AA C1 1.584(12) . ?
 C0AA C3 1.525(9) . ?
 C0AA C4 1.550(6) . ?
 C0AA C5 1.477(9) . ?
 C0AA C1B 1.528(10) . ?
 C0AA C3B 1.489(19) . ?
 C0AA C4B 1.56(2) . ?
 C0AA C5B 1.569(14) . ?
 C6 C7 1.523(4) . ?
 C7 C8 1.526(5) . ?
 C7 C9 1.512(5) . ?
 C7 C10 1.527(5) . ?
 C11 C12 1.534(4) . ?
 C12 C13 1.510(5) . ?
 C12 C14 1.523(6) . ?
 C12 C15 1.518(5) . ?
 C16 C17 1.539(4) . ?
 C17 C18 1.534(5) . ?
 C17 C19 1.519(5) . ?
 C17 C20 1.520(4) . ?
 C21 C22 1.521(4) . ?
 C22 C23 1.525(5) . ?
 C22 C24 1.522(4) . ?
 C22 C25 1.520(5) . ?
 O2 C1 1.224(13) . ?
 O1B C1B 1.257(11) . ?
 N1 C26 1.506(10) . ?
 N1 C28 1.495(18) . ?
 N1 C30 1.44(2) . ?
 C26 C27 1.501(12) . ?
 C28 C29 1.519(18) . ?
 C30 C31 1.55(2) . ?
 N1B C26B 1.529(9) . ?
 N1B C28B 1.542(14) . ?
 N1B C30B 1.496(15) . ?
 C26B C27B 1.512(11) . ?
 C28B C29B 1.567(14) . ?
 C30B C31B 1.57(2) . ?
 N2 C33 1.373(10) . ?
 N2 C33B 1.561(11) . ?
 C32 C33 1.099(12) . ?
 C32B C33B 1.120(12) . ?
 N3 C1A 1.11(2) . ?
 N3 C2 1.46(3) 2_773 ?
 C1A C1A 1.71(4) 2_773 ?
 C1A C2 1.455(19) . ?
 C1A C2 1.039(18) 2_773 ?
 C2 N3 1.46(3) 2_773 ?
 C2 C1A 1.039(18) 2_773 ?
 C2 C2 1.86(4) 2_773 ?

loop_
  _geom_angle_atom_site_label_1
  _geom_angle_atom_site_label_2
  _geom_angle_atom_site_label_3
  _geom_angle
  _geom_angle_site_symmetry_1
  _geom_angle_site_symmetry_3
  _geom_angle_publ_flag
 Mn1 Y1 Mn1 48.352(13) . 2_665 ?
 O1 Y1 Mn1 147.63(6) . 2_665 ?
 O1 Y1 Mn1 147.12(6) . . ?
 O1 Y1 O1OH 137.55(7) . 2_665 ?
 O1 Y1 O3 87.25(8) . . ?
 O1 Y1 O4 136.55(7) . . ?
 O1 Y1 O5 82.23(7) . 2_665 ?
 O1 Y1 O7 80.91(8) . . ?
 O1 Y1 O9 86.63(8) . . ?
 O1 Y1 O10 137.15(7) . . ?
 O1 Y1 C6 112.53(9) . . ?
 O1 Y1 C21 111.69(8) . . ?
 O1OH Y1 Mn1 31.13(4) 2_665 . ?
 O1OH Y1 Mn1 30.66(4) 2_665 2_665 ?
 O1OH Y1 O3 125.56(7) 2_665 . ?
 O1OH Y1 O4 72.88(6) 2_665 . ?
 O1OH Y1 O5 77.53(7) 2_665 2_665 ?
 O1OH Y1 O7 77.31(7) 2_665 . ?
 O1OH Y1 O9 123.95(7) 2_665 . ?
 O1OH Y1 O10 72.21(6) 2_665 . ?
 O1OH Y1 C6 99.49(7) 2_665 . ?
 O1OH Y1 C21 98.20(7) 2_665 . ?
 O3 Y1 Mn1 124.51(6) . . ?
 O3 Y1 Mn1 95.05(5) . 2_665 ?
 O3 Y1 O4 53.24(7) . . ?
 O3 Y1 O9 75.90(9) . . ?
 O3 Y1 O10 95.44(8) . . ?
 O3 Y1 C6 26.53(8) . . ?
 O3 Y1 C21 85.84(9) . . ?
 O4 Y1 Mn1 76.07(5) . . ?
 O4 Y1 Mn1 43.52(5) . 2_665 ?
 O4 Y1 C6 26.75(7) . . ?
 O4 Y1 C21 85.47(7) . . ?
 O5 Y1 Mn1 66.23(5) 2_665 2_665 ?
 O5 Y1 Mn1 108.19(5) 2_665 . ?
 O5 Y1 O3 81.98(9) 2_665 . ?
 O5 Y1 O4 75.64(7) 2_665 . ?
 O5 Y1 O9 155.66(8) 2_665 . ?
 O5 Y1 O10 140.55(6) 2_665 . ?
 O5 Y1 C6 78.49(8) 2_665 . ?
 O5 Y1 C21 161.07(8) 2_665 . ?
 O7 Y1 Mn1 107.64(5) . 2_665 ?
 O7 Y1 Mn1 66.70(5) . . ?
 O7 Y1 O3 153.47(8) . . ?
 O7 Y1 O4 142.53(7) . . ?
 O7 Y1 O5 119.37(8) . 2_665 ?
 O7 Y1 O9 79.75(8) . . ?
 O7 Y1 O10 77.98(7) . . ?
 O7 Y1 C6 159.88(8) . . ?
 O7 Y1 C21 76.78(8) . . ?
 O9 Y1 Mn1 92.84(5) . . ?
 O9 Y1 Mn1 125.29(5) . 2_665 ?
 O9 Y1 O4 98.52(8) . . ?
 O9 Y1 O10 53.22(7) . . ?
 O9 Y1 C6 86.00(9) . . ?
 O9 Y1 C21 26.37(7) . . ?
 O10 Y1 Mn1 42.62(5) . . ?
 O10 Y1 Mn1 74.88(4) . 2_665 ?
 O10 Y1 O4 71.71(6) . . ?
 O10 Y1 C6 82.13(8) . . ?
 O10 Y1 C21 26.87(7) . . ?
 C6 Y1 Mn1 69.48(6) . 2_665 ?
 C6 Y1 Mn1 100.20(6) . . ?
 C6 Y1 C21 84.14(8) . . ?
 C21 Y1 Mn1 100.69(6) . 2_665 ?
 C21 Y1 Mn1 67.44(6) . . ?
 Y1 Mn1 Y1 131.647(13) . 2_665 ?
 Mn1 Mn1 Y1 66.227(16) 2_665 . ?
 Mn1 Mn1 Y1 65.420(15) 2_665 2_665 ?
 O1OH Mn1 Y1 38.74(6) . 2_665 ?
 O1OH Mn1 Y1 99.75(6) . . ?
 O1OH Mn1 Y1 99.00(5) 2_665 2_665 ?
 O1OH Mn1 Y1 39.36(5) 2_665 . ?
 O1OH Mn1 Mn1 41.49(5) . 2_665 ?
 O1OH Mn1 Mn1 41.46(5) 2_665 2_665 ?
 O1OH Mn1 O1OH 82.95(8) . 2_665 ?
 O1OH Mn1 O4 84.14(7) . 2_665 ?
 O1OH Mn1 O4 98.31(7) 2_665 2_665 ?
 O1OH Mn1 O6 95.28(8) . . ?
 O1OH Mn1 O6 174.85(9) 2_665 . ?
 O1OH Mn1 O8 95.58(8) 2_665 . ?
 O1OH Mn1 O8 174.19(8) . . ?
 O1OH Mn1 O10 98.04(7) . . ?
 O1OH Mn1 O10 83.50(7) 2_665 . ?
 O4 Mn1 Y1 47.03(5) 2_665 2_665 ?
 O4 Mn1 Y1 135.17(5) 2_665 . ?
 O4 Mn1 Mn1 91.63(5) 2_665 2_665 ?
 O6 Mn1 Y1 82.41(6) . 2_665 ?
 O6 Mn1 Y1 136.86(6) . . ?
 O6 Mn1 Mn1 136.57(6) . 2_665 ?
 O6 Mn1 O4 86.28(8) . 2_665 ?
 O6 Mn1 O8 86.66(8) . . ?
 O6 Mn1 O10 91.99(8) . . ?
 O8 Mn1 Y1 136.57(6) . 2_665 ?
 O8 Mn1 Y1 82.40(6) . . ?
 O8 Mn1 Mn1 136.77(6) . 2_665 ?
 O8 Mn1 O4 90.53(8) . 2_665 ?
 O8 Mn1 O10 87.36(8) . . ?
 O10 Mn1 Y1 46.08(5) . . ?
 O10 Mn1 Y1 134.73(5) . 2_665 ?
 O10 Mn1 Mn1 91.01(5) . 2_665 ?
 O10 Mn1 O4 177.34(7) . 2_665 ?
 C1 O1 Y1 167.3(6) . . ?
 C1B O1 Y1 150.5(4) . . ?
 Mn1 O1OH Y1 110.60(8) . 2_665 ?
 Mn1 O1OH Y1 109.51(8) 2_665 2_665 ?
 Mn1 O1OH Mn1 97.06(8) . 2_665 ?
 C6 O3 Y1 96.09(18) . . ?
 Mn1 O4 Y1 89.44(7) 2_665 . ?
 C6 O4 Y1 89.98(17) . . ?
 C6 O4 Mn1 163.3(2) . 2_665 ?
 C11 O5 Y1 135.94(18) . 2_665 ?
 C11 O6 Mn1 128.73(18) . . ?
 C16 O7 Y1 136.25(18) . . ?
 C16 O8 Mn1 129.02(18) . . ?
 C21 O9 Y1 94.28(17) . . ?
 Mn1 O10 Y1 91.30(7) . . ?
 C21 O10 Y1 92.49(16) . . ?
 C21 O10 Mn1 152.72(19) . . ?
 C3 C0AA C1 120.6(6) . . ?
 C3 C0AA C4 107.0(5) . . ?
 C4 C0AA C1 112.4(5) . . ?
 C5 C0AA C1 96.5(5) . . ?
 C5 C0AA C3 111.1(5) . . ?
 C5 C0AA C4 108.6(5) . . ?
 C1B C0AA C4B 117.1(8) . . ?
 C1B C0AA C5B 108.8(7) . . ?
 C3B C0AA C1B 100.7(8) . . ?
 C3B C0AA C4B 116.3(12) . . ?
 C3B C0AA C5B 108.7(11) . . ?
 C4B C0AA C5B 105.0(11) . . ?
 O3 C6 Y1 57.38(15) . . ?
 O3 C6 O4 120.5(3) . . ?
 O3 C6 C7 118.6(3) . . ?
 O4 C6 Y1 63.28(15) . . ?
 O4 C6 C7 120.6(3) . . ?
 C7 C6 Y1 171.4(2) . . ?
 C6 C7 C8 106.7(3) . . ?
 C6 C7 C10 110.0(3) . . ?
 C8 C7 C10 108.1(3) . . ?
 C9 C7 C6 110.5(3) . . ?
 C9 C7 C8 111.3(4) . . ?
 C9 C7 C10 110.2(3) . . ?
 O5 C11 O6 125.3(3) . . ?
 O5 C11 C12 118.7(3) . . ?
 O6 C11 C12 116.0(2) . . ?
 C13 C12 C11 111.4(3) . . ?
 C13 C12 C14 110.4(4) . . ?
 C13 C12 C15 109.7(4) . . ?
 C14 C12 C11 104.9(3) . . ?
 C15 C12 C11 111.1(3) . . ?
 C15 C12 C14 109.1(4) . . ?
 O7 C16 O8 124.9(2) . . ?
 O7 C16 C17 118.4(2) . . ?
 O8 C16 C17 116.7(3) . . ?
 C18 C17 C16 108.8(3) . . ?
 C19 C17 C16 111.5(2) . . ?
 C19 C17 C18 110.8(3) . . ?
 C20 C17 C16 106.8(2) . . ?
 C20 C17 C18 109.3(3) . . ?
 C20 C17 C19 109.6(3) . . ?
 O9 C21 Y1 59.35(14) . . ?
 O9 C21 O10 119.9(3) . . ?
 O9 C21 C22 120.5(2) . . ?
 O10 C21 Y1 60.64(14) . . ?
 O10 C21 C22 119.6(3) . . ?
 C22 C21 Y1 175.6(2) . . ?
 C21 C22 C23 105.9(3) . . ?
 C24 C22 C21 109.8(2) . . ?
 C24 C22 C23 109.1(3) . . ?
 C25 C22 C21 110.8(3) . . ?
 C25 C22 C23 110.7(3) . . ?
 C25 C22 C24 110.5(3) . . ?
 O1 C1 C0AA 114.6(8) . . ?
 O2 C1 O1 123.2(10) . . ?
 O2 C1 C0AA 120.0(9) . . ?
 O1 C1B C0AA 117.6(7) . . ?
 O1B C1B O1 123.1(8) . . ?
 O1B C1B C0AA 117.6(7) . . ?
 C28 N1 C26 115.2(10) . . ?
 C30 N1 C26 109.2(10) . . ?
 C30 N1 C28 109.8(11) . . ?
 C27 C26 N1 112.4(8) . . ?
 N1 C28 C29 113.6(12) . . ?
 N1 C30 C31 111.4(13) . . ?
 C26B N1B C28B 111.1(8) . . ?
 C30B N1B C26B 113.3(8) . . ?
 C30B N1B C28B 111.4(7) . . ?
 C27B C26B N1B 113.5(6) . . ?
 N1B C28B C29B 120.2(7) . . ?
 N1B C30B C31B 113.6(9) . . ?
 C32 C33 N2 177.1(9) . . ?
 C32B C33B N2 175.9(9) . . ?
 C1A N3 C2 45.1(14) . 2_773 ?
 N3 C1A C1A 144(3) . 2_773 ?
 N3 C1A C2 174.6(18) . . ?
 C2 C1A N3 86(3) 2_773 . ?
 C2 C1A C1A 58.0(16) 2_773 2_773 ?
 C2 C1A C1A 37.3(10) . 2_773 ?
 C2 C1A C2 95(2) 2_773 . ?
 N3 C2 C2 99.9(17) 2_773 2_773 ?
 C1A C2 N3 49.0(16) 2_773 2_773 ?
 C1A C2 N3 134(2) . 2_773 ?
 C1A C2 C1A 85(2) 2_773 . ?
 C1A C2 C2 33.7(9) . 2_773 ?
 C1A C2 C2 51.0(15) 2_773 2_773 ?

_shelx_SHELXL_version_number      '2014/7'
_iucr_refine_instructions_details
;

    arepw185.res created by SHELXL-2014/7

TITL arepw185 in P1
CELL 0.71073 13.198704 13.574959 14.195163 71.4856 64.3493 81.3916
ZERR 1 0.00067 0.000762 0.000701 0.0047 0.0049 0.0044
LATT 1
SFAC C H Mn N O Y
UNIT 68 120 2 5 22 2
RIGU N1 > C31B
RIGU C0AA C3 C4 C5 C3B > C5B
RIGU N3 C1A C2
RIGU N3 C1A C2
RIGU N2 > C2
 
L.S. 10 0 0
PLAN  20
TEMP -117.1(10)
fmap 2 53
ACTA
OMIT 0 3 1
OMIT 2 3 3
OMIT 1 4 2
REM <olex2.extras>
REM <HklSrc "%./arepw185.hkl">
REM </olex2.extras>
 
WGHT    0.057000    1.266000
FVAR       5.91550   0.42371   0.70989
Y1    6    0.636584    0.671631   -0.206761    11.00000    0.01817    0.02110 =
         0.02413   -0.00472   -0.00380   -0.00334
MN1   3    0.576327    0.500902    0.043388    11.00000    0.01741    0.02086 =
         0.02561   -0.00561   -0.00691   -0.00309
O1    5    0.687947    0.832512   -0.314161    11.00000    0.03550    0.02169 =
         0.03944   -0.00136   -0.00546   -0.00353
O1OH  5    0.494377    0.404819    0.037307    11.00000    0.01746    0.01947 =
         0.02476   -0.00565   -0.00583   -0.00280
O3    5    0.678737    0.624242   -0.366713    11.00000    0.05349    0.05439 =
         0.02867   -0.01325    0.00030   -0.02618
O4    5    0.568725    0.515294   -0.217814    11.00000    0.03160    0.03341 =
         0.02441   -0.00977   -0.00684   -0.00300
O5    5    0.531003    0.274014    0.224234    11.00000    0.02571    0.03035 =
         0.04268    0.00048   -0.01381   -0.00327
O6    5    0.658863    0.396938    0.116992    11.00000    0.02212    0.03119 =
         0.03516   -0.00157   -0.01219   -0.00319
O7    5    0.682967    0.731169   -0.095132    11.00000    0.03967    0.02738 =
         0.03541   -0.00649   -0.01398   -0.00975
O8    5    0.648826    0.606540    0.060974    11.00000    0.02789    0.02963 =
         0.03141   -0.00801   -0.01071   -0.00887
O9    5    0.834684    0.628023   -0.269875    11.00000    0.02121    0.04750 =
         0.03776    0.00516    0.00009    0.00306
O10   5    0.723839    0.517663   -0.124012    11.00000    0.01695    0.02757 =
         0.03384   -0.00707   -0.00432   -0.00328
C0AA  1    0.621029    1.001400   -0.289438    11.00000    0.05548    0.02877 =
         0.06474   -0.00900    0.00745    0.00413
C6    1    0.625466    0.540751   -0.319284    11.00000    0.02502    0.03866 =
         0.02943   -0.01265   -0.00849   -0.00050
C7    1    0.638307    0.467172   -0.385552    11.00000    0.04018    0.04911 =
         0.03629   -0.02252   -0.00793   -0.00422
C8    1    0.748299    0.406914   -0.396877    11.00000    0.07130    0.07129 =
         0.07811   -0.04074   -0.01960    0.02226
AFIX 137
H8A   2    0.810614    0.455691   -0.432815    11.00000   -1.50000
H8B   2    0.760823    0.359508   -0.440634    11.00000   -1.50000
H8C   2    0.744101    0.366845   -0.324454    11.00000   -1.50000
AFIX   0
C9    1    0.539432    0.394940   -0.329153    11.00000    0.07669    0.07567 =
         0.04924   -0.03311   -0.00567   -0.03524
AFIX 137
H9A   2    0.538566    0.350476   -0.259275    11.00000   -1.50000
H9B   2    0.546155    0.351584   -0.375219    11.00000   -1.50000
H9C   2    0.469478    0.435934   -0.316405    11.00000   -1.50000
AFIX   0
C10   1    0.648099    0.529251   -0.499571    11.00000    0.08078    0.07739 =
         0.03714   -0.02142   -0.01751   -0.01897
AFIX 137
H10A  2    0.578504    0.569225   -0.494181    11.00000   -1.50000
H10B  2    0.660685    0.481516   -0.543002    11.00000   -1.50000
H10C  2    0.711394    0.576851   -0.534704    11.00000   -1.50000
AFIX   0
C11   1    0.623222    0.314174    0.192560    11.00000    0.02413    0.02886 =
         0.03379   -0.00594   -0.00991    0.00086
C12   1    0.699570    0.263017    0.251617    11.00000    0.03183    0.04553 =
         0.04935    0.00066   -0.02263   -0.00329
C13   1    0.821935    0.269331    0.173030    11.00000    0.03791    0.11014 =
         0.07390    0.01617   -0.02713    0.00359
AFIX 137
H13A  2    0.834607    0.230834    0.120924    11.00000   -1.50000
H13B  2    0.868653    0.239035    0.213514    11.00000   -1.50000
H13C  2    0.841943    0.342222    0.133661    11.00000   -1.50000
AFIX   0
C14   1    0.677355    0.324149    0.332093    11.00000    0.12437    0.13024 =
         0.10638   -0.05926   -0.09116    0.04579
AFIX 137
H14A  2    0.690751    0.398031    0.292863    11.00000   -1.50000
H14B  2    0.727852    0.298913    0.369219    11.00000   -1.50000
H14C  2    0.599164    0.314845    0.385988    11.00000   -1.50000
AFIX   0
C15   1    0.668481    0.150368    0.314139    11.00000    0.06325    0.07432 =
         0.09546    0.03117   -0.05144   -0.00932
AFIX 137
H15A  2    0.588956    0.146591    0.364759    11.00000   -1.50000
H15B  2    0.714840    0.121020    0.355162    11.00000   -1.50000
H15C  2    0.681578    0.110780    0.262852    11.00000   -1.50000
AFIX   0
C16   1    0.687646    0.694023   -0.005054    11.00000    0.01800    0.02678 =
         0.03364   -0.01422   -0.00397   -0.00329
C17   1    0.742848    0.758472    0.031405    11.00000    0.02804    0.03323 =
         0.04530   -0.02001   -0.01129   -0.00488
C18   1    0.843189    0.816084   -0.068395    11.00000    0.03912    0.05706 =
         0.06515   -0.02905   -0.00675   -0.02091
AFIX 137
H18A  2    0.899587    0.765506   -0.097873    11.00000   -1.50000
H18B  2    0.876449    0.860439   -0.046886    11.00000   -1.50000
H18C  2    0.817615    0.859100   -0.124164    11.00000   -1.50000
AFIX   0
C19   1    0.779826    0.690577    0.119308    11.00000    0.05274    0.05226 =
         0.06905   -0.02303   -0.03878   -0.00306
AFIX 137
H19A  2    0.714114    0.656931    0.183428    11.00000   -1.50000
H19B  2    0.815981    0.733594    0.139572    11.00000   -1.50000
H19C  2    0.833241    0.637398    0.091643    11.00000   -1.50000
AFIX   0
C20   1    0.655037    0.837247    0.076053    11.00000    0.04525    0.04366 =
         0.06614   -0.03382   -0.01968    0.00155
AFIX 137
H20A  2    0.630028    0.879856    0.019729    11.00000   -1.50000
H20B  2    0.687824    0.881967    0.097594    11.00000   -1.50000
H20C  2    0.590664    0.800689    0.139612    11.00000   -1.50000
AFIX   0
C21   1    0.821844    0.546713   -0.193736    11.00000    0.02000    0.03115 =
         0.03011   -0.01242   -0.00510   -0.00056
C22   1    0.923256    0.483806   -0.181631    11.00000    0.01832    0.03790 =
         0.04183   -0.01082   -0.00697    0.00296
C23   1    0.940883    0.514748   -0.095550    11.00000    0.04072    0.06179 =
         0.07783   -0.02801   -0.03696    0.00873
AFIX 137
H23A  2    0.958991    0.588685   -0.121916    11.00000   -1.50000
H23B  2    1.002946    0.473461   -0.081271    11.00000   -1.50000
H23C  2    0.872039    0.501985   -0.028138    11.00000   -1.50000
AFIX   0
C24   1    0.897834    0.368389   -0.141093    11.00000    0.03522    0.03771 =
         0.06535   -0.01413   -0.01930    0.00983
AFIX 137
H24A  2    0.830687    0.354081   -0.072179    11.00000   -1.50000
H24B  2    0.961835    0.328369   -0.129656    11.00000   -1.50000
H24C  2    0.884610    0.348395   -0.195341    11.00000   -1.50000
AFIX   0
C25   1    1.026578    0.508180   -0.289165    11.00000    0.02372    0.07576 =
         0.06481   -0.00461    0.00205    0.01154
AFIX 137
H25A  2    1.012775    0.489752   -0.343950    11.00000   -1.50000
H25B  2    1.091161    0.467976   -0.279220    11.00000   -1.50000
H25C  2    1.042399    0.582523   -0.313643    11.00000   -1.50000
AFIX   0
PART 1
O2    5    0.769582    0.966169   -0.452964    21.00000    0.06488    0.02280 =
         0.03595   -0.00890    0.01343   -0.02136
C1    1    0.694506    0.928884   -0.363713    21.00000    0.03413    0.02633 =
         0.02451   -0.00124   -0.00791    0.00179
C3    1    0.677068    1.072474   -0.262206    31.00000    0.05902    0.05245 =
         0.12951   -0.03785   -0.00121    0.00362
AFIX 137
H3A   2    0.714261    1.030284   -0.215735    31.00000   -1.50000
H3B   2    0.620057    1.117679   -0.223687    31.00000   -1.50000
H3C   2    0.732899    1.115136   -0.329694    31.00000   -1.50000
AFIX   0
C4    1    0.529676    0.940508   -0.180366    31.00000    0.04399    0.03969 =
         0.05610   -0.01496    0.00385    0.00955
AFIX 137
H4A   2    0.493675    0.891636   -0.194084    31.00000   -1.50000
H4B   2    0.473085    0.989322   -0.147573    31.00000   -1.50000
H4C   2    0.564524    0.902078   -0.130495    31.00000   -1.50000
AFIX   0
C5    1    0.566154    1.062164   -0.361621    31.00000    0.12614    0.05860 =
         0.07292   -0.00995   -0.02179    0.01744
AFIX 137
H5A   2    0.622178    1.104866   -0.428914    31.00000   -1.50000
H5B   2    0.507457    1.107220   -0.324588    31.00000   -1.50000
H5C   2    0.532419    1.014721   -0.379253    31.00000   -1.50000
AFIX   0
PART 0
PART 2
O1B   5    0.811665    0.960748   -0.393025   -21.00000    0.06583    0.05527 =
         0.12363   -0.04550    0.05367   -0.02927
C1B   1    0.715583    0.924649   -0.329081   -21.00000    0.04297    0.03201 =
         0.03470   -0.00184    0.00000    0.00189
C3B   1    0.606515    0.978813   -0.174630   -31.00000    0.07306    0.05750 =
         0.08352   -0.01736   -0.00512    0.00179
AFIX 137
H3BA  2    0.602373    0.903543   -0.140699   -31.00000   -1.50000
H3BB  2    0.537008    1.012082   -0.134123   -31.00000   -1.50000
H3BC  2    0.670609    1.005946   -0.173496   -31.00000   -1.50000
AFIX   0
C4B   1    0.512753    0.998408   -0.306423   -31.00000    0.07698    0.06218 =
         0.14329   -0.04904   -0.03371    0.01839
AFIX 137
H4BA  2    0.533577    0.997673   -0.381375   -31.00000   -1.50000
H4BB  2    0.465981    1.059982   -0.293098   -31.00000   -1.50000
H4BC  2    0.470546    0.935685   -0.255487   -31.00000   -1.50000
AFIX   0
C5B   1    0.665747    1.114833   -0.352948   -31.00000    0.08272    0.03246 =
         0.07570   -0.01946   -0.00339   -0.00433
AFIX 137
H5BA  2    0.739062    1.120088   -0.353087   -31.00000   -1.50000
H5BB  2    0.612538    1.163933   -0.317261   -31.00000   -1.50000
H5BC  2    0.673570    1.131324   -0.428162   -31.00000   -1.50000
AFIX   0
 
PART 0
PART 1
N1    4    0.948819    0.852695   -0.519622    21.00000    0.05533    0.03933 =
         0.03814   -0.01191    0.00529   -0.01130
C26   1    1.017017    0.939709   -0.613908    21.00000    0.04332    0.03715 =
         0.03744   -0.00579    0.00341   -0.00938
AFIX  23
H26C  2    1.060205    0.972687   -0.590038    21.00000   -1.20000
H26D  2    1.071473    0.910666   -0.673065    21.00000   -1.20000
AFIX   0
C27   1    0.945212    1.020810   -0.657374    21.00000    0.05871    0.05683 =
         0.06009   -0.00923   -0.02363    0.00041
AFIX 137
H27D  2    0.992338    1.078496   -0.714120    21.00000   -1.50000
H27E  2    0.887935    1.046614   -0.598042    21.00000   -1.50000
H27F  2    0.908487    0.990265   -0.688336    21.00000   -1.50000
AFIX   0
C28   1    0.876915    0.796745   -0.543008    21.00000    0.07743    0.07061 =
         0.05371   -0.02953    0.00221   -0.02439
AFIX  23
H28C  2    0.826057    0.847692   -0.569136    21.00000   -1.20000
H28D  2    0.829674    0.746672   -0.474395    21.00000   -1.20000
AFIX   0
C29   1    0.943638    0.738667   -0.627296    21.00000    0.12447    0.09217 =
         0.07479   -0.05488    0.02856   -0.05503
AFIX 137
H29D  2    1.005864    0.781756   -0.686896    21.00000   -1.50000
H29E  2    0.894431    0.723135   -0.656161    21.00000   -1.50000
H29F  2    0.973663    0.673644   -0.593205    21.00000   -1.50000
AFIX   0
C30   1    1.022994    0.779671   -0.480294    21.00000    0.06450    0.04525 =
         0.05032   -0.00278    0.00027   -0.01380
AFIX  23
H30C  2    1.092379    0.770198   -0.543058    21.00000   -1.20000
H30D  2    0.985859    0.711525   -0.440024    21.00000   -1.20000
AFIX   0
C31   1    1.054176    0.817611   -0.404520    21.00000    0.10488    0.05087 =
         0.06342    0.00320   -0.03160   -0.00846
AFIX 137
H31D  2    1.092880    0.884116   -0.444850    21.00000   -1.50000
H31E  2    1.103780    0.766158   -0.378596    21.00000   -1.50000
H31F  2    0.985632    0.826607   -0.342082    21.00000   -1.50000
AFIX   0
 
PART 0
PART 2
N1B   4    0.889906    0.842288   -0.569104   -21.00000    0.07108    0.03709 =
         0.05608   -0.01227    0.02599   -0.00642
C26B  1    0.958324    0.928480   -0.668403   -21.00000    0.08393    0.04069 =
         0.05765   -0.00505    0.02029   -0.01154
AFIX  23
H26A  2    0.906221    0.977736   -0.694287   -21.00000   -1.20000
H26B  2    0.997916    0.967133   -0.646068   -21.00000   -1.20000
AFIX   0
C27B  1    1.043751    0.888944   -0.761575   -21.00000    0.09834    0.06400 =
         0.08034   -0.02401    0.04157   -0.02662
AFIX 137
H27A  2    1.076672    0.947904   -0.825957   -21.00000   -1.50000
H27B  2    1.006762    0.843477   -0.778361   -21.00000   -1.50000
H27C  2    1.103175    0.849832   -0.740784   -21.00000   -1.50000
AFIX   0
C28B  1    0.814666    0.788450   -0.595627   -21.00000    0.09341    0.05593 =
         0.05721   -0.00929    0.01958   -0.03018
AFIX  23
H28A  2    0.780323    0.728086   -0.531946   -21.00000   -1.20000
H28B  2    0.864594    0.760445   -0.657200   -21.00000   -1.20000
AFIX   0
C29B  1    0.717557    0.850862   -0.625371   -21.00000    0.10758    0.04518 =
         0.15151   -0.02237   -0.02388    0.00739
AFIX 137
H29A  2    0.723035    0.840978   -0.692882   -21.00000   -1.50000
H29B  2    0.724050    0.924878   -0.635589   -21.00000   -1.50000
H29C  2    0.644848    0.825764   -0.566244   -21.00000   -1.50000
AFIX   0
C30B  1    0.960583    0.765041   -0.521055   -21.00000    0.08710    0.04303 =
         0.06782   -0.00860    0.01200   -0.00229
AFIX  23
H30A  2    1.020924    0.738629   -0.579358   -21.00000   -1.20000
H30B  2    0.913339    0.705440   -0.466229   -21.00000   -1.20000
AFIX   0
C31B  1    1.015384    0.810450   -0.465617   -21.00000    0.09998    0.08608 =
         0.09679   -0.01745   -0.00146   -0.02393
AFIX 137
H31A  2    1.062531    0.869439   -0.519324   -21.00000   -1.50000
H31B  2    1.061706    0.756578   -0.437464   -21.00000   -1.50000
H31C  2    0.956180    0.833726   -0.405403   -21.00000   -1.50000
AFIX   0
 
PART 0
N2    4    1.359449    0.766571   -0.934958    11.00000    0.07012    0.11000 =
         0.12160   -0.06138   -0.01859    0.01115
PART 1
C32   1    1.192397    0.871095   -0.853635    21.00000    0.04109    0.04938 =
         0.06916   -0.03787    0.00035   -0.00046
C33   1    1.265097    0.822945   -0.889510    21.00000    0.04203    0.04515 =
         0.05170   -0.02877    0.00397   -0.01423
PART 0
PART 2
C32B  1    1.234493    0.900233   -1.026803   -21.00000    0.05354    0.05951 =
         0.10118   -0.02468   -0.00812   -0.00097
C33B  1    1.287776    0.847101   -0.987777   -21.00000    0.05395    0.04960 =
         0.09757   -0.03263   -0.00126   -0.01434
 
PART 0
N3    4    1.138569    1.022623   -1.120016    10.50000    0.23843    0.47457 =
         0.13653   -0.10402   -0.01219   -0.20332
C1A   1    1.069370    0.991477   -1.039301    10.50000    0.11098    0.12694 =
         0.12881   -0.05678   -0.04663   -0.01785
C2    1    0.982377    0.956584   -0.929525    10.50000    0.08949    0.12061 =
         0.13628   -0.03915   -0.04331   -0.00679
HKLF 4
 
REM  arepw185 in P1
REM R1 =  0.0434 for    7813 Fo > 4sig(Fo)  and  0.0621 for all    9805 data
REM    612 parameters refined using    135 restraints
 
END  
     
WGHT      0.0541      1.3720 

REM Highest difference peak  0.937,  deepest hole -0.373,  1-sigma level  0.071
Q1    1   0.6051  0.8450 -0.5242  11.00000  0.05    0.94
Q2    1   0.7552  0.8572 -0.7270  11.00000  0.05    0.88
Q3    1   0.6807  0.8464 -0.6330  11.00000  0.05    0.51
Q4    1   0.7598  0.1789  0.1820  11.00000  0.05    0.50
Q5    1   0.7917  0.3407  0.2150  11.00000  0.05    0.47
Q6    1   0.7509  0.8392 -0.6045  11.00000  0.05    0.40
Q7    1   1.2145  0.8945 -0.8615  11.00000  0.05    0.38
Q8    1   1.3900  0.7360 -1.0073  11.00000  0.05    0.38
Q9    1   1.4438  0.8076 -0.9584  11.00000  0.05    0.38
Q10   1   0.6456  0.2210  0.3611  11.00000  0.05    0.36
Q11   1   0.6965  0.8748 -0.5788  11.00000  0.05    0.36
Q12   1   0.6269  0.6618 -0.1390  11.00000  0.05    0.35
Q13   1   0.5730  0.8412 -0.1823  11.00000  0.05    0.34
Q14   1   0.6576  0.8795 -0.2801  11.00000  0.05    0.32
Q15   1   0.9955  0.4738 -0.3235  11.00000  0.05    0.32
Q16   1   1.1593  0.8407 -0.8138  11.00000  0.05    0.31
Q17   1   0.8828  0.5224 -0.1919  11.00000  0.05    0.31
Q18   1   1.1943  0.8956 -0.9221  11.00000  0.05    0.30
Q19   1   1.3110  0.7478 -0.8389  11.00000  0.05    0.29
Q20   1   1.4060  0.8424 -0.9591  11.00000  0.05    0.29

REM The information below was added by Olex2.
REM
REM R1 = 0.0434 for 7813 Fo > 4sig(Fo) and 0.0621 for all 17864 data
REM n/a parameters refined using n/a restraints
REM Highest difference peak 0.94, deepest hole -0.37
REM Mean Shift 0, Max Shift -0.001.

REM +++ Tabular Listing of Refinement Information +++
REM R1_all = 0.0621
REM R1_gt = 0.0434
REM wR_ref = 0.1162
REM GOOF = 1.028
REM Shift_max = -0.001
REM Shift_mean = 0
REM Reflections_all = 17864
REM Reflections_gt = 7813
REM Parameters = n/a
REM Hole = -0.37
REM Peak = 0.94
REM Flack = n/a

;
_olex2_date_sample_data_collection 2013-06-08
_olex2_submission_special_instructions 'No special instructions were received'
loop_
  _refln_index_h
  _refln_index_k
  _refln_index_l
  _refln_F_squared_meas
  _refln_F_squared_sigma
  _refln_scale_group_code
 -14 -11 -14 1643.74 889.705 3
 -14 -8 -15 3687.08 1064.49 3
 -13 -12 -15 3725.12 1031.89 3
 -13 -11 -15 17803.1 1580.07 3
 -13 -11 -14 1428.32 792.418 3
 -13 -11 -13 -1007.34 807.94 3
 -13 -10 -15 15329.6 1526.1 3
 -13 -10 -14 15686 1406.87 3
 -13 -9 -15 1323.22 841.962 3
 -13 -9 -14 11625.8 1328.13 3
 -13 -8 -15 4991.28 1050.61 3
 -13 -7 -16 8402.12 1409.01 3
 -13 -7 -15 -2946.5 1153.02 3
 -13 -6 -16 19527.1 1785.71 3
 -13 -6 -15 6275.66 1130.14 3
 -13 -5 -16 5337.09 1154.56 3
 -13 -5 -15 13489.1 1540.61 3
 -13 -1 -15 -3805.07 1343.7 3
 -13 0 -15 3149.03 949.8 3
 -13 1 -15 14029.2 1708.49 3
 -13 4 -14 -475.91 969.706 3
 -12 -13 -15 1456.89 891.724 4
 -12 -12 -16 7727.98 1227.24 3
 -12 -12 -15 11935.8 1363.1 3
 -12 -12 -14 1595 883.776 3
 -12 -11 -16 -1056.67 932.111 3
 -12 -11 -15 16804 1521.84 3
 -12 -11 -14 13553.5 1310.28 3
 -12 -11 -13 -1374.89 826.424 3
 -12 -10 -16 5236.31 1075.08 3
 -12 -10 -15 30.1303 870.468 3
 -12 -10 -14 14254.4 1347.76 3
 -12 -10 -13 15715.3 1389.78 3
 -12 -9 -16 1146.87 902.046 3
 -12 -9 -15 1712.56 827.332 3
 -12 -9 -14 4989.82 992.994 3
 -12 -8 -16 4306.64 1043.3 3
 -12 -8 -15 104.143 844.738 3
 -12 -8 -14 748.943 799.207 3
 -12 -7 -16 18188.3 1656.24 3
 -12 -7 -15 2808.94 971.997 3
 -12 -7 -14 299.358 803.014 3
 -12 -6 -16 3226.94 1077.79 3
 -12 -6 -15 9034.46 1276.5 3
 -12 -5 -16 -198.91 932.519 3
 -12 -5 -15 4239.01 991.241 3
 -12 -4 -16 1530.48 1043.48 3
 -12 -4 -15 73.5925 932.798 3
 -12 -3 -16 -498.423 1075.02 3
 -12 -3 -15 2597.06 1068.48 3
 -12 -2 -16 4554.04 1145.69 3
 -12 -2 -15 -561.663 1040.87 3
 -12 -1 -16 22008.7 1925.29 3
 -12 -1 -15 6770.45 1146.11 3
 -12 0 -16 11607.9 1550.5 3
 -12 0 -15 19801.8 1858.13 3
 -12 1 -15 11591.3 1587.97 3
 -12 1 -14 15206 1571.61 3
 -12 2 -15 2848.96 1167.76 3
 -12 2 -14 12828.7 1495.42 3
 -12 3 -15 1409.33 1063.06 3
 -12 3 -14 1894.26 1154.61 3
 -12 4 -15 1658.74 1091.74 3
 -12 4 -14 3445.12 1063.32 3
 -12 5 -14 1502.99 1032.49 3
 -12 5 -13 4106.11 1086.12 3
 -11 -13 -15 11147.2 1462.02 4
 -11 -13 -14 817.942 851.355 4
 -11 -13 -13 4308.25 975.481 4
 -11 -12 -16 1715.39 878.125 3
 -11 -12 -15 13015.7 1319.68 3
 -11 -12 -14 8311.04 1108.25 3
 -11 -12 -13 607.913 710.282 3
 -11 -12 -12 887.006 703.315 4
 -11 -11 -16 260.965 834.851 3
 -11 -11 -15 4071.5 995.025 3
 -11 -11 -14 15713.9 1406.92 3
 -11 -11 -13 5506.28 931.649 3
 -11 -11 -12 813.723 657.986 3
 -11 -10 -16 -1654.13 879.625 3
 -11 -10 -15 1345.02 787.797 3
 -11 -10 -14 5045.21 961.137 3
 -11 -10 -13 19126.6 1453.25 3
 -11 -10 -12 1862.41 674.997 3
 -11 -9 -16 4930.47 1082.5 3
 -11 -9 -15 1562.8 692.075 3
 -11 -9 -14 -35.0992 774.436 3
 -11 -9 -13 20260.8 1512.06 3
 -11 -8 -17 13252.7 1546.44 3
 -11 -8 -16 26180.8 1962.16 3
 -11 -8 -15 9918.78 1245.52 3
 -11 -8 -14 183.382 673.498 3
 -11 -8 -13 7788.6 1078.69 3
 -11 -7 -17 541.793 951.054 3
 -11 -7 -16 14017.5 1499.87 3
 -11 -7 -15 19820.4 1647.44 3
 -11 -7 -14 866.806 743.121 3
 -11 -6 -17 1714.58 969.59 3
 -11 -6 -16 370.856 943.743 3
 -11 -6 -15 12304.1 1362.24 3
 -11 -6 -14 3202.78 851.932 3
 -11 -5 -17 508.255 964.905 3
 -11 -5 -16 -1126.41 859.424 3
 -11 -5 -15 1708.75 876.481 3
 -11 -5 -14 16090.5 1464.75 3
 -11 -4 -17 6632.69 1335.46 3
 -11 -4 -16 11.6861 961.721 3
 -11 -4 -15 -952.708 888.724 3
 -11 -4 -14 1947.38 932.934 3
 -11 -3 -16 10136 1423.29 3
 -11 -3 -15 1954.64 1004.74 3
 -11 -3 -14 2748.48 1015.55 3
 -11 -2 -16 32664.2 2252.3 3
 -11 -2 -15 11780.6 1481.39 3
 -11 -2 -14 3298.37 1039.47 3
 -11 -1 -16 22089 1920.39 3
 -11 -1 -15 30555.6 2098.32 3
 -11 -1 -14 -163.825 807.853 3
 -11 0 -16 803.103 933.745 3
 -11 0 -15 37684.9 2375.04 3
 -11 0 -14 20615.5 1754.79 3
 -11 1 -16 1867.32 1127.31 3
 -11 1 -15 12226.6 1526.32 3
 -11 1 -14 34695.5 2236.33 3
 -11 2 -16 935.388 987.167 3
 -11 2 -15 1800.67 1006.12 3
 -11 2 -14 5881.06 1193.03 3
 -11 3 -15 815.797 866.479 3
 -11 3 -14 802.996 974.468 3
 -11 3 -13 2151.77 915.984 3
 -11 4 -15 -838.702 1027.48 3
 -11 4 -14 -1098.09 949.324 3
 -11 4 -13 784.025 972.945 3
 -11 5 -14 -242.754 878.968 3
 -11 5 -13 2221.55 988.423 3
 -11 6 -12 650.059 834.502 3
 -10 -15 -14 2765.54 1064.73 4
 -10 -14 -14 -283.115 820.349 4
 -10 -14 -13 406.366 802.253 4
 -10 -13 -15 10262 1395.32 4
 -10 -13 -14 8833.52 1324.16 4
 -10 -13 -13 780.718 744.868 4
 -10 -13 -12 3742.02 958.038 4
 -10 -12 -16 1368.44 935.144 3
 -10 -12 -15 3054.34 947.806 3
 -10 -12 -14 17178.3 1424.08 3
 -10 -12 -13 4373.06 898.991 3
 -10 -12 -12 2657.47 731.04 3
 -10 -12 -12 3269.62 860.948 4
 -10 -12 -11 600.234 629.086 4
 -10 -11 -17 3756.69 1079.02 3
 -10 -11 -16 468.478 819.036 3
 -10 -11 -15 -1188.71 810.936 3
 -10 -11 -14 6738.31 1011.71 3
 -10 -11 -13 14725.3 1283.72 3
 -10 -11 -12 1132.88 661.952 3
 -10 -11 -11 10864.3 1062.65 3
 -10 -11 -10 5337.93 844.562 4
 -10 -10 -17 22756.1 1885.91 3
 -10 -10 -16 10619.8 1322.67 3
 -10 -10 -15 2521.96 872.989 3
 -10 -10 -14 358.289 677.299 3
 -10 -10 -13 6300.5 971.711 3
 -10 -10 -12 10886.8 1105.14 3
 -10 -10 -11 604.986 557.487 3
 -10 -9 -17 14145.8 1548.46 3
 -10 -9 -16 21976.4 1746.92 3
 -10 -9 -15 11291.2 1276.33 3
 -10 -9 -14 -68.3899 660.534 3
 -10 -9 -13 -44.1241 665.072 3
 -10 -9 -12 11087.9 1089.19 3
 -10 -8 -17 341.66 752.827 3
 -10 -8 -16 17375.2 1593.02 3
 -10 -8 -15 18246.9 1545.14 3
 -10 -8 -14 1988.53 885.202 3
 -10 -8 -13 5405.88 901.115 3
 -10 -8 -12 97.6972 606.749 3
 -10 -7 -17 4017.3 1057.98 3
 -10 -7 -16 2272.55 982.924 3
 -10 -7 -15 16796.8 1454.47 3
 -10 -7 -14 6127.21 1043.16 3
 -10 -7 -13 3257.41 844.262 3
 -10 -6 -17 2256.1 1049.5 3
 -10 -6 -16 1381.18 807.988 3
 -10 -6 -15 5298.36 1051.77 3
 -10 -6 -14 23371 1693.34 3
 -10 -6 -13 519.101 713.631 3
 -10 -5 -17 -997.376 875.554 3
 -10 -5 -16 -383.896 899.092 3
 -10 -5 -15 1294.32 947.046 3
 -10 -5 -14 8498.42 1164.81 3
 -10 -5 -13 14369.5 1334.96 3
 -10 -4 -17 7513.95 1323.36 3
 -10 -4 -16 4131.18 999.265 3
 -10 -4 -15 30.1106 829.024 3
 -10 -4 -14 976.942 749.342 3
 -10 -4 -13 12980.5 1255.31 3
 -10 -3 -17 6337.24 1255.49 3
 -10 -3 -16 22341.1 1792.54 3
 -10 -3 -15 3816.37 950.097 3
 -10 -3 -14 4080.05 909.289 3
 -10 -3 -13 208.095 818.68 3
 -10 -2 -17 1152.49 937.906 3
 -10 -2 -16 15811.9 1616.62 3
 -10 -2 -15 33197.5 2115.22 3
 -10 -2 -14 700.167 801.993 3
 -10 -2 -13 15113.7 1405.4 3
 -10 -1 -17 1055.3 1118.79 3
 -10 -1 -16 1394.1 1036.81 3
 -10 -1 -15 44984.4 2490.59 3
 -10 -1 -14 15773.9 1527.19 3
 -10 -1 -13 9550.83 1178.38 3
 -10 0 -16 1307.05 932.933 3
 -10 0 -15 11704.3 1370.82 3
 -10 0 -14 48500.2 2553.42 3
 -10 0 -13 2939.38 928.19 3
 -10 0 2 2295.04 539.435 5
 -10 0 3 4817.23 726.488 5
 -10 1 -16 960.212 845.554 3
 -10 1 -15 -1397.07 854.164 3
 -10 1 -14 19076.1 1677.37 3
 -10 1 -13 29920.6 1932.21 3
 -10 1 3 -109.574 483.713 5
 -10 1 4 16070.8 1249.81 5
 -10 1 5 299.183 644.629 5
 -10 2 -16 6437.41 1266.89 3
 -10 2 -15 677.467 876.128 3
 -10 2 -14 141.783 914.325 3
 -10 2 -13 6803.17 1089.61 3
 -10 2 5 4104.23 785.972 5
 -10 2 6 1165.22 701.173 5
 -10 3 -16 11094.5 1525.11 3
 -10 3 -15 1715.96 1030.24 3
 -10 3 -14 2713.56 975.897 3
 -10 3 -13 -118.209 829.357 3
 -10 3 6 5508.18 951.696 5
 -10 3 7 4796.54 1026.05 5
 -10 3 8 27691.2 2024.29 5
 -10 4 -16 3524.62 1074.56 3
 -10 4 -15 8251.81 1308.47 3
 -10 4 -14 2412.92 1019.26 3
 -10 4 -13 2052.2 882.079 3
 -10 4 -12 1677.53 776.732 3
 -10 4 8 9171.3 1349.02 5
 -10 4 9 10693.4 1497.13 5
 -10 5 -14 8923.87 1294.64 3
 -10 5 -13 -782.075 848.722 3
 -10 5 -12 5021.41 971.364 3
 -10 6 -12 -102.753 803.713 3
 -9 -15 -14 1474.82 956.649 4
 -9 -15 -13 639.143 814.635 4
 -9 -15 -12 157.871 824.727 4
 -9 -14 -14 3076.67 1002.19 4
 -9 -14 -13 4787.38 1076.06 4
 -9 -14 -12 5160.09 1086.17 4
 -9 -14 -11 1290.43 807.901 4
 -9 -13 -15 3161.63 1104.78 4
 -9 -13 -14 10099.6 1372.49 4
 -9 -13 -13 -504.122 761.408 4
 -9 -13 -12 15011.3 1459.9 4
 -9 -13 -11 358.238 643.756 4
 -9 -13 -10 2517.7 807.491 4
 -9 -12 -17 -2750.35 1136.49 3
 -9 -12 -16 1430.18 827.375 3
 -9 -12 -15 1205.98 833.273 3
 -9 -12 -14 9575.4 1166.34 3
 -9 -12 -13 7332.47 1078.23 4
 -9 -12 -13 8481.16 1038.82 3
 -9 -12 -12 2990.07 756.929 3
 -9 -12 -12 2135.68 817.479 4
 -9 -12 -11 21394.3 1550.97 4
 -9 -12 -10 3436.21 779.688 4
 -9 -12 -9 -95.7335 583.055 4
 -9 -11 -17 17654.9 1643.02 3
 -9 -11 -16 3170.59 995.414 3
 -9 -11 -15 -809.073 752.702 3
 -9 -11 -14 792.958 672.916 3
 -9 -11 -13 5256.63 924.194 3
 -9 -11 -12 5018.79 834.653 3
 -9 -11 -11 14208.1 1155.29 3
 -9 -11 -10 43709.8 1902.96 3
 -9 -11 -10 41003.6 1963.59 4
 -9 -11 -9 6889.09 877.423 4
 -9 -11 -9 4981.46 702.516 3
 -9 -11 -8 -6.40507 508.909 4
 -9 -10 -17 17917.8 1670.89 3
 -9 -10 -16 15408.7 1469.81 3
 -9 -10 -15 1923.2 817.96 3
 -9 -10 -14 1968.05 782.397 3
 -9 -10 -13 576.365 688.277 3
 -9 -10 -12 18962.3 1346.3 3
 -9 -10 -11 2399.71 686.072 3
 -9 -10 -10 27633.2 1508.83 3
 -9 -10 -8 8638.97 854.738 4
 -9 -10 -7 3554.47 627.094 4
 -9 -9 -17 1564.77 911.738 3
 -9 -9 -16 18677.1 1644.23 3
 -9 -9 -15 10533.7 1252.61 3
 -9 -9 -14 -226.617 638.97 3
 -9 -9 -13 19679.7 1468.71 3
 -9 -9 -12 911.473 612.001 3
 -9 -9 -11 7845.95 907.471 3
 -9 -9 -6 34431.9 1459.02 4
 -9 -8 -17 6469.84 1217.02 3
 -9 -8 -16 3266.71 974.947 3
 -9 -8 -15 18916.1 1514.19 3
 -9 -8 -14 4342.26 942.778 3
 -9 -8 -13 13593.9 1219.86 3
 -9 -8 -12 10721.2 1066.03 3
 -9 -8 -11 1655.4 600.093 3
 -9 -8 -5 12061.7 768.006 4
 -9 -7 -17 4194.94 1169.98 3
 -9 -7 -16 421.979 877.468 3
 -9 -7 -15 5711.18 1029.02 3
 -9 -7 -14 19453 1522.91 3
 -9 -7 -13 -518.63 719.072 3
 -9 -7 -12 23222.9 1481.82 3
 -9 -6 -17 -157.817 788.258 3
 -9 -6 -16 1132.21 947.752 3
 -9 -6 -15 156.903 684.143 3
 -9 -6 -14 7297.09 1089.59 3
 -9 -6 -13 12849.4 1231.68 3
 -9 -6 -12 3418.7 719.32 3
 -9 -5 -17 4401.22 1191.55 3
 -9 -5 -16 -856.979 814.354 3
 -9 -5 -15 1856.97 866.049 3
 -9 -5 -14 -333.411 765.187 3
 -9 -5 -13 2148.05 807.809 3
 -9 -5 -12 14903.7 1237.95 3
 -9 -4 -17 3026.02 1114.61 3
 -9 -4 -16 4299.37 1129.56 3
 -9 -4 -15 -131.619 700.441 3
 -9 -4 -14 2832.23 825.013 3
 -9 -4 -13 112.689 700.109 3
 -9 -4 -12 28956.2 1702.57 3
 -9 -3 -17 -40.054 968.106 3
 -9 -3 -16 8223.14 1290.53 3
 -9 -3 -15 5942.33 1116.79 3
 -9 -3 -14 -493.276 751.645 3
 -9 -3 -13 4947.39 980.676 3
 -9 -3 -1 45433.7 1267.87 5
 -9 -3 0 1609.49 325.067 5
 -9 -3 1 7781.96 596.677 5
 -9 -3 2 1696.88 424.264 5
 -9 -3 3 72625.2 2345.03 5
 -9 -3 4 138456 3842.89 5
 -9 -2 -17 -665.695 1055.33 3
 -9 -2 -16 1811.13 974.487 3
 -9 -2 -15 16528 1478.4 3
 -9 -2 -14 7950.27 1176.78 3
 -9 -2 -13 12746.5 1316.89 3
 -9 -2 -7 151374 3321.74 1
 -9 -2 0 19814.2 893.954 5
 -9 -2 1 1505.17 388.76 5
 -9 -2 2 5149.03 597.18 5
 -9 -2 3 668.948 425.235 5
 -9 -2 4 84084.2 2738.31 5
 -9 -2 5 65177 2458.13 5
 -9 -2 6 -941.349 727.384 5
 -9 -1 -17 501.051 832.349 3
 -9 -1 -16 2598.79 1012.05 3
 -9 -1 -15 9504.99 1299.37 3
 -9 -1 -14 30286.4 1892.85 3
 -9 -1 -13 -49.8524 765.15 3
 -9 -1 1 49731.1 1703.07 5
 -9 -1 2 -228.975 397.259 5
 -9 -1 3 2464.96 584.378 5
 -9 -1 4 15549.5 1093.78 5
 -9 -1 5 43006.8 1955.73 5
 -9 -1 6 29789.8 1701 5
 -9 -1 7 964.065 770.27 5
 -9 0 -17 7663.13 1425.14 3
 -9 0 -16 1746.5 923.749 3
 -9 0 -15 -38.3331 826.328 3
 -9 0 -14 18371.2 1560.78 3
 -9 0 -13 14910.2 1352.04 3
 -9 0 -12 -390.644 743.099 3
 -9 0 2 26448.3 1322.95 5
 -9 0 3 -326.825 496.55 5
 -9 0 4 6871.86 820.08 5
 -9 0 5 5940.09 882.11 5
 -9 0 6 30984.1 1759.15 5
 -9 0 7 5157.47 966.854 5
 -9 0 8 -537.874 819.236 5
 -9 0 9 887.11 869.891 5
 -9 1 -17 17383.6 1799.63 3
 -9 1 -16 -248.485 945.466 3
 -9 1 -15 4209.79 1088.98 3
 -9 1 -14 -787.136 902.794 3
 -9 1 -13 3958.8 964.791 3
 -9 1 -12 10702.3 1220.75 3
 -9 1 3 54224.5 2126.32 5
 -9 1 4 774.555 597.141 5
 -9 1 5 4604.99 841.96 5
 -9 1 6 10649.5 1146.81 5
 -9 1 7 18172.8 1500.24 5
 -9 1 8 4888.56 1009 5
 -9 1 9 338.897 924.758 5
 -9 1 10 1736.83 1078.34 5
 -9 2 -16 6139.85 1191.12 3
 -9 2 -15 875.069 916.935 3
 -9 2 -14 11067.8 1328.66 3
 -9 2 -13 1403.77 780.277 3
 -9 2 -12 6140.48 965.022 3
 -9 2 4 26375.7 1541.27 5
 -9 2 5 -345.452 654.653 5
 -9 2 6 985.563 722.234 5
 -9 2 7 4759.45 998.683 5
 -9 2 8 20451.2 1711.46 5
 -9 2 9 -46.889 955.248 5
 -9 2 10 3141.49 1172.16 5
 -9 3 -16 8035.61 1363 3
 -9 3 -15 6419.09 1102.08 3
 -9 3 -14 1135.11 857.568 3
 -9 3 -13 10010.5 1224.8 3
 -9 3 -12 62.2795 811.679 3
 -9 3 5 10186 1100.51 5
 -9 3 6 4338.24 898.654 5
 -9 3 7 4425.2 1027.73 5
 -9 3 8 4654.86 1093.95 5
 -9 3 9 9354.24 1422.55 5
 -9 3 10 617.191 915.993 5
 -9 4 -16 1376.46 993.31 3
 -9 4 -15 16253.5 1590.85 3
 -9 4 -14 5516.6 1114.67 3
 -9 4 -13 3380.13 950.667 3
 -9 4 -12 10527.9 1221.48 3
 -9 4 7 8831.65 1199.22 5
 -9 4 8 41.2179 898.153 5
 -9 4 9 9618.13 1410.75 5
 -9 4 10 1148.02 1017.37 5
 -9 5 -14 19426.9 1649.47 3
 -9 5 -13 3285.49 878.733 3
 -9 5 -12 12410.2 1261.53 3
 -9 5 -11 12594.6 1220.13 3
 -9 5 9 -1082.39 1096.49 5
 -9 5 10 4892.84 1348.12 5
 -9 6 -12 1668.12 826.647 3
 -9 6 -11 15785.2 1358.29 3
 -9 7 -10 31617.5 1788.94 3
 -8 -16 -13 1769.38 997.872 4
 -8 -16 -12 -182.248 874.908 4
 -8 -15 -14 -644.99 861.375 4
 -8 -15 -13 1574.57 955.779 4
 -8 -15 -12 3855.38 1053.89 4
 -8 -15 -11 1236.79 872.893 4
 -8 -14 -14 3397.26 1043.88 4
 -8 -14 -13 1541.82 921.816 4
 -8 -14 -12 16388.1 1537.94 4
 -8 -14 -11 6500 1106.55 4
 -8 -14 -10 1390.66 803.192 4
 -8 -13 -17 -15.7197 990.717 3
 -8 -13 -16 1975.05 984.266 3
 -8 -13 -15 -1704.62 887.403 4
 -8 -13 -14 7551.66 1258.69 4
 -8 -13 -13 3296.94 909.087 4
 -8 -13 -12 14977.7 1455.6 4
 -8 -13 -11 27470.6 1822.86 4
 -8 -13 -10 1529.5 727.99 4
 -8 -13 -9 891.258 671.084 4
 -8 -13 -8 5624.22 912.322 4
 -8 -12 -17 3218.28 1105.58 3
 -8 -12 -16 -1264.53 1061.95 4
 -8 -12 -16 -326.153 771.866 3
 -8 -12 -15 490.331 876.953 4
 -8 -12 -15 1232.33 878.542 3
 -8 -12 -14 1969.44 787.563 3
 -8 -12 -14 2921.91 993.301 4
 -8 -12 -13 3885.06 999.926 4
 -8 -12 -13 8831.49 1101.6 3
 -8 -12 -12 -2397.29 884.507 4
 -8 -12 -12 -360.048 655.031 3
 -8 -12 -11 28944.6 1813.59 4
 -8 -12 -11 30139.2 1627.73 3
 -8 -12 -10 34634.8 1922.92 4
 -8 -12 -9 3765.7 753.086 4
 -8 -12 -8 1266.08 606.814 4
 -8 -12 -7 13579.9 1147.24 4
 -8 -11 -17 9779.57 1441.19 3
 -8 -11 -16 5426.81 1077.64 3
 -8 -11 -15 3612.32 1001.9 3
 -8 -11 -14 1607.72 823.539 3
 -8 -11 -13 301.913 672.838 3
 -8 -11 -12 10169.2 1083.21 3
 -8 -11 -11 1317.55 623.036 3
 -8 -11 -11 1022.56 660.012 4
 -8 -11 -10 38710.1 1789.64 3
 -8 -11 -10 37875.8 1939.62 4
 -8 -11 -9 21463.8 1246.31 3
 -8 -11 -9 20018 1354.17 4
 -8 -11 -8 812.305 475.404 3
 -8 -11 -8 1676.51 663.117 4
 -8 -11 -7 2047.83 591.758 4
 -8 -11 -6 1599.06 554.235 4
 -8 -10 -17 960.236 841.165 3
 -8 -10 -16 5381.12 1091.77 3
 -8 -10 -15 -579.281 766.15 3
 -8 -10 -14 2701.33 860.954 3
 -8 -10 -13 13883 1232.94 3
 -8 -10 -12 4130.1 775.594 3
 -8 -10 -11 9908.3 966.889 3
 -8 -10 -10 7448.93 853.928 3
 -8 -10 -9 54646.6 2060.49 3
 -8 -10 -8 51993.2 2087.98 4
 -8 -10 -7 9752.22 865.052 4
 -8 -10 -6 5941.24 681.299 4
 -8 -9 -17 1384.74 983.327 3
 -8 -9 -16 1594.42 857.199 3
 -8 -9 -15 6194.23 1109.83 3
 -8 -9 -14 -443.64 725.836 3
 -8 -9 -13 21933.6 1533.14 3
 -8 -9 -12 5298.15 856.698 3
 -8 -9 -11 6964.37 900.404 3
 -8 -9 -10 6125.6 814.72 3
 -8 -9 -6 22492.7 1169.61 4
 -8 -9 -5 12964.4 863.464 4
 -8 -8 -17 4675.73 1099.81 3
 -8 -8 -16 3111.49 931.779 3
 -8 -8 -15 2338 873.773 3
 -8 -8 -14 4973.39 948.9 3
 -8 -8 -13 8543.48 1029.05 3
 -8 -8 -12 32093.5 1746.04 3
 -8 -8 -11 8513.88 958.7 3
 -8 -8 -10 5945.07 758.941 3
 -8 -8 -5 24358.5 1095.46 4
 -8 -8 -4 355.877 286.632 4
 -8 -7 -17 723.973 918.666 3
 -8 -7 -16 6803.5 1235.17 3
 -8 -7 -15 2336.56 802.587 3
 -8 -7 -14 5890.85 1035.07 3
 -8 -7 -13 783.131 714.897 3
 -8 -7 -12 20001.6 1403.01 3
 -8 -7 -11 55691.7 2252.34 3
 -8 -7 -3 10530.1 553.883 4
 -8 -7 -1 41388.9 1308.25 5
 -8 -7 0 25001.4 1044.98 5
 -8 -7 1 64899.6 2014.46 5
 -8 -6 -17 3489 1079.37 3
 -8 -6 -16 -93.8073 870.188 3
 -8 -6 -15 5436.06 954.613 3
 -8 -6 -14 182.465 755.941 3
 -8 -6 -13 10574.2 1128.6 3
 -8 -6 -12 4733.98 871.417 3
 -8 -6 -11 56304.2 2310.2 3
 -8 -6 -3 110266 2283.13 5
 -8 -6 -2 56071.6 1391.75 5
 -8 -6 -1 1439.73 276.192 5
 -8 -6 0 630.998 266.527 5
 -8 -6 1 62406.6 1896.03 5
 -8 -6 2 65417.8 2067.62 5
 -8 -6 3 26031.6 1293.7 5
 -8 -6 4 1379 567.959 5
 -8 -5 -17 7703.15 1250.66 3
 -8 -5 -16 2040.66 824.473 3
 -8 -5 -15 1541.95 899.031 3
 -8 -5 -14 14685.1 1340.08 3
 -8 -5 -13 1420.29 793.799 3
 -8 -5 -12 23406.8 1511.72 3
 -8 -5 -11 2624.89 640.249 3
 -8 -5 -3 11299.6 546.905 4
 -8 -5 -2 114548 2391.01 5
 -8 -5 -1 17655.2 662.306 5
 -8 -5 0 1323.93 282.982 5
 -8 -5 1 3573.41 446.369 5
 -8 -5 2 48058.2 1660.7 5
 -8 -5 3 51546.9 1850.24 5
 -8 -5 4 45169.4 1816.28 5
 -8 -5 5 10496.5 1000.58 5
 -8 -5 6 3862.11 803.585 5
 -8 -4 -17 1402.52 874.484 3
 -8 -4 -16 3257.1 1033.66 3
 -8 -4 -15 4168.44 924.768 3
 -8 -4 -14 4530.48 942.5 3
 -8 -4 -13 34514.8 1909.56 3
 -8 -4 -12 -430.26 705.831 3
 -8 -4 -11 11921.9 1069.6 3
 -8 -4 -5 3607.4 316.113 2
 -8 -4 -4 85287.8 1853.65 2
 -8 -4 -2 48594.1 1266.92 4
 -8 -4 -1 127284 2760.23 5
 -8 -4 0 2100.48 324.819 5
 -8 -4 1 1388.63 342.465 5
 -8 -4 2 9612.62 699.599 5
 -8 -4 3 87304.8 2585.64 5
 -8 -4 4 127340 3533.17 5
 -8 -4 5 15693.7 1139.65 5
 -8 -4 6 18474.1 1337.6 5
 -8 -4 7 951.283 720.047 5
 -8 -4 8 17834.6 1466.43 5
 -8 -3 -17 -348.928 798.808 3
 -8 -3 -16 1843.9 973.357 3
 -8 -3 -15 11023.6 1327.43 3
 -8 -3 -14 2094.92 802.775 3
 -8 -3 -13 38905.4 2055.67 3
 -8 -3 -12 50942 2253.56 3
 -8 -3 -5 14552.7 599.776 2
 -8 -3 -2 7778.8 466.14 4
 -8 -3 -1 99231.8 2238.57 4
 -8 -3 -1 100711 2276.42 5
 -8 -3 0 68049.1 1809.09 5
 -8 -3 1 4911.82 468.022 5
 -8 -3 2 3947.6 504.866 5
 -8 -3 3 410.672 393.818 5
 -8 -3 4 150546 3989.16 5
 -8 -3 5 88188.3 2870.96 5
 -8 -3 6 5665.01 832.316 5
 -8 -3 7 11431.3 1165.89 5
 -8 -3 8 217.211 712.617 5
 -8 -3 9 5897.62 1067.42 5
 -8 -2 -17 261.695 940.133 3
 -8 -2 -16 1262.36 893.819 3
 -8 -2 -15 3299.12 852.639 3
 -8 -2 -14 13850.2 1309.22 3
 -8 -2 -13 4619.63 952.446 3
 -8 -2 -12 52349.7 2326.84 3
 -8 -2 -6 35496.6 1076.54 1
 -8 -2 -1 7475.61 453.459 4
 -8 -2 0 58718.2 1671.56 5
 -8 -2 0 58650.9 1526.02 4
 -8 -2 1 72792.6 2059.23 5
 -8 -2 2 54.4499 329.065 5
 -8 -2 3 10300.3 802.34 5
 -8 -2 4 24777.1 1318.12 5
 -8 -2 5 95965.6 3036.51 5
 -8 -2 6 21430.6 1405.56 5
 -8 -2 7 11633.7 1135.43 5
 -8 -2 8 17578.5 1454.06 5
 -8 -2 9 1044.02 816.297 5
 -8 -2 10 7338.22 1258.21 5
 -8 -1 -17 479.634 1000.38 3
 -8 -1 -16 5496.1 1074.88 3
 -8 -1 -15 3612.98 1026.1 3
 -8 -1 -14 4206.91 979.562 3
 -8 -1 -13 5738.2 916.196 3
 -8 -1 -12 4284.38 868.119 3
 -8 -1 -7 105659 2446.18 1
 -8 -1 -6 211754 4266.74 1
 -8 -1 0 4678.55 458.449 5
 -8 -1 1 67184.1 2017.6 5
 -8 -1 2 25759.6 1170.83 5
 -8 -1 3 22391.3 1173.67 5
 -8 -1 4 3259.85 582.216 5
 -8 -1 5 21218.1 1302.15 5
 -8 -1 6 50180.3 2185.85 5
 -8 -1 7 10366.8 1101.18 5
 -8 -1 8 10632.3 1209.54 5
 -8 -1 9 7637.55 1200.08 5
 -8 -1 10 434.971 857.018 5
 -8 -1 11 10269.3 1462.87 5
 -8 0 -17 12111.5 1531.96 3
 -8 0 -16 601.656 880.863 3
 -8 0 -15 11364.1 1315.55 3
 -8 0 -14 3433.57 965.622 3
 -8 0 -13 777.154 764.494 3
 -8 0 -12 9068.55 1066.49 3
 -8 0 -8 1475.98 277.488 1
 -8 0 -7 20080.8 674.673 1
 -8 0 1 12143.6 790.967 5
 -8 0 2 14923.8 936.893 5
 -8 0 3 20306.9 1167.82 5
 -8 0 4 13651 1031.16 5
 -8 0 5 3194.91 635.764 5
 -8 0 6 20631.7 1392.74 5
 -8 0 7 36502.9 1951.51 5
 -8 0 8 5191.57 952.504 5
 -8 0 9 6530.42 1096.64 5
 -8 0 10 10767 1433.5 5
 -8 0 11 3871.64 1112.59 5
 -8 1 -17 6644.39 1276.81 3
 -8 1 -16 3285.78 1096.78 3
 -8 1 -15 1939.96 934.036 3
 -8 1 -14 23642.2 1711.15 3
 -8 1 -13 8127.5 1098.38 3
 -8 1 -12 2026.44 797.609 3
 -8 1 -11 3577.17 826.174 3
 -8 1 -7 1427.69 175.948 1
 -8 1 2 2324.54 502.638 5
 -8 1 3 61424.2 2222.72 5
 -8 1 4 49750.8 2030.13 5
 -8 1 5 7289.85 934.161 5
 -8 1 6 -107.911 589.073 5
 -8 1 7 12800.4 1235.01 5
 -8 1 8 20579.5 1624.32 5
 -8 1 9 1267.15 799.32 5
 -8 1 10 18061 1720.23 5
 -8 1 11 1856.01 991.479 5
 -8 2 -17 -898.569 1070.24 3
 -8 2 -16 3099.46 1081.28 3
 -8 2 -15 1321.45 852.817 3
 -8 2 -14 3782.61 1008.67 3
 -8 2 -13 28440.9 1791.87 3
 -8 2 -12 7981.66 1064.25 3
 -8 2 -11 14990.5 1261.37 3
 -8 2 -7 319.966 128.332 1
 -8 2 3 5946.48 734.51 5
 -8 2 4 52248.8 2165.42 5
 -8 2 5 14688.3 1207.97 5
 -8 2 6 10020.6 1078.66 5
 -8 2 7 4532.01 928.591 5
 -8 2 8 13662.9 1367.91 5
 -8 2 9 9941.78 1348.13 5
 -8 2 10 8911.21 1276.38 5
 -8 2 11 12738.2 1602.14 5
 -8 3 -16 -170.129 831.8 3
 -8 3 -15 6777.87 1141.7 3
 -8 3 -14 -1704.03 805.892 3
 -8 3 -13 10676.9 1234.62 3
 -8 3 -12 26075.3 1665.19 3
 -8 3 -11 2671.65 718.99 3
 -8 3 4 22423 1434.06 5
 -8 3 5 18302.8 1382.35 5
 -8 3 6 1869.47 771.694 5
 -8 3 7 15904.3 1432.58 5
 -8 3 8 -325.807 764.216 5
 -8 3 9 9891.98 1341.49 5
 -8 3 10 -1095.25 1044.76 5
 -8 3 11 6261.3 1462.83 5
 -8 4 -16 3061.03 1084.51 3
 -8 4 -15 1946.98 925.485 3
 -8 4 -14 3088.71 922.907 3
 -8 4 -13 435.386 763.868 3
 -8 4 -12 24276.2 1630.13 3
 -8 4 -11 14355.4 1267.74 3
 -8 4 6 12273.2 1272.14 5
 -8 4 7 4954.23 1013.4 5
 -8 4 8 12249.2 1401.7 5
 -8 4 9 3732.97 996.998 5
 -8 4 10 3663.49 1176.76 5
 -8 4 11 -117.363 1102.43 5
 -8 5 -14 2343.42 963.761 3
 -8 5 -13 1560.65 782.17 3
 -8 5 -12 14129.1 1295.62 3
 -8 5 -11 30682 1766.72 3
 -8 5 -10 1070.82 621.201 3
 -8 5 7 231.229 751.13 5
 -8 5 8 5061.52 1125.9 5
 -8 5 9 11972.8 1509.82 5
 -8 5 10 3398.53 1237.54 5
 -8 5 11 4635.46 1257.28 5
 -8 6 -12 847.105 700.359 3
 -8 6 -11 25211.4 1583.6 3
 -8 6 -10 32410.3 1751.96 3
 -8 6 9 14252.9 1619.21 5
 -8 6 10 5600.3 1274 5
 -7 -16 -13 3183.41 1061.62 4
 -7 -16 -12 2703.03 943.992 4
 -7 -16 -11 537.026 931.575 4
 -7 -16 -10 615.7 841.992 4
 -7 -15 -13 6651.22 1296.03 4
 -7 -15 -12 15084.4 1638.12 4
 -7 -15 -11 11288.1 1391.36 4
 -7 -15 -10 65.6846 722.912 4
 -7 -15 -9 904.794 722.895 4
 -7 -14 -14 1320.54 995.7 4
 -7 -14 -13 2432.39 1102.63 4
 -7 -14 -12 16359.1 1617.54 4
 -7 -14 -11 23637 1805.09 4
 -7 -14 -10 -400.244 711.934 4
 -7 -14 -9 1732.06 810.354 4
 -7 -14 -8 1915.76 773.041 4
 -7 -13 -15 5733.47 1332.03 4
 -7 -13 -14 -1235.56 845.668 4
 -7 -13 -13 652.806 806.1 4
 -7 -13 -12 1441.29 866.165 4
 -7 -13 -11 32704.8 2002.02 4
 -7 -13 -10 16467.8 1418.41 4
 -7 -13 -9 3888.61 884.865 4
 -7 -13 -8 1702.22 733.257 4
 -7 -13 -7 5724.43 904.028 4
 -7 -12 -16 2050.89 928.065 3
 -7 -12 -16 1533.94 1058.97 4
 -7 -12 -15 6422.28 1283.94 4
 -7 -12 -15 6650.48 1113.36 3
 -7 -12 -14 14947.1 1381.12 3
 -7 -12 -14 10109.3 1305.97 4
 -7 -12 -13 -150.972 687.143 4
 -7 -12 -13 -255.561 730.173 3
 -7 -12 -12 2224.27 783.99 3
 -7 -12 -12 361.581 760.302 4
 -7 -12 -11 7244.04 897.554 3
 -7 -12 -11 7398.3 1038.02 4
 -7 -12 -10 55809.1 2477.62 4
 -7 -12 -9 19700.7 1445.69 4
 -7 -12 -8 235.497 598.279 4
 -7 -12 -7 1173 582.245 4
 -7 -12 -6 -217.127 499.656 4
 -7 -11 -17 -446.976 1013.62 3
 -7 -11 -16 3151.15 918.95 3
 -7 -11 -15 881.249 820.879 3
 -7 -11 -14 13117.8 1313.51 3
 -7 -11 -13 13734.3 1285.75 3
 -7 -11 -12 -90.8851 639.615 3
 -7 -11 -12 2.01912 707.092 4
 -7 -11 -11 3265.22 779.79 4
 -7 -11 -11 2779.09 669.247 3
 -7 -11 -10 17735.1 1165.93 3
 -7 -11 -10 13813.1 1238.16 4
 -7 -11 -9 77068.8 2535.78 3
 -7 -11 -9 72078.4 2763.84 4
 -7 -11 -8 6745.58 709.514 3
 -7 -11 -8 6077.5 824.986 4
 -7 -11 -7 1702 587.6 4
 -7 -11 -7 1469.37 457.873 3
 -7 -11 -6 12304 1006.77 4
 -7 -11 -5 2369.28 587.129 4
 -7 -10 -17 3052.01 970.117 3
 -7 -10 -16 2586.86 965.224 3
 -7 -10 -15 1307.79 841.287 3
 -7 -10 -14 198.193 703.576 3
 -7 -10 -13 22639 1532.72 3
 -7 -10 -12 4999.91 812.486 3
 -7 -10 -11 8858.79 951.285 3
 -7 -10 -10 -504.946 508.229 3
 -7 -10 -9 26672.4 1387.31 3
 -7 -10 -9 25166.8 1459.56 4
 -7 -10 -8 41790.6 1669.18 3
 -7 -10 -8 41028.2 1885.86 4
 -7 -10 -7 20234 1239.19 4
 -7 -10 -6 31741 1493.73 4
 -7 -10 -5 3544.73 570.307 4
 -7 -10 -4 20454.1 1090.04 4
 -7 -9 -17 8146.78 1287.68 3
 -7 -9 -16 1756.97 978.405 3
 -7 -9 -15 1221.97 836.671 3
 -7 -9 -14 712.191 712.048 3
 -7 -9 -13 21736.1 1496.67 3
 -7 -9 -12 50646.5 2192.94 3
 -7 -9 -11 2300.56 674.655 3
 -7 -9 -10 7209.68 822.731 3
 -7 -9 -9 6027.6 732.546 3
 -7 -9 -8 4305.19 582.683 3
 -7 -9 -7 72241.5 2421.17 4
 -7 -9 -6 356.802 416.141 4
 -7 -9 -5 27287.8 1255.49 4
 -7 -9 -4 3873.37 517.016 4
 -7 -9 -3 23091.2 1011.32 4
 -7 -9 3 -71.4966 513.85 5
 -7 -9 4 26993.2 1535.29 5
 -7 -8 -17 -193.576 921.528 3
 -7 -8 -16 11919.4 1423.1 3
 -7 -8 -15 3363.66 966.966 3
 -7 -8 -14 442.559 719.808 3
 -7 -8 -13 6543.58 908.878 3
 -7 -8 -12 34057.2 1792.26 3
 -7 -8 -11 33238.6 1678.55 3
 -7 -8 -10 359.472 536.312 3
 -7 -8 -9 27872.4 1391.54 3
 -7 -8 -5 11137.7 776.004 4
 -7 -8 -4 22924.3 1024.17 4
 -7 -8 -3 327.067 268.487 4
 -7 -8 0 30103.7 1188.83 2
 -7 -8 2 1593.52 496.816 5
 -7 -8 3 19966.2 1185.35 5
 -7 -8 4 5989.74 794.514 5
 -7 -8 5 36877.5 1822.26 5
 -7 -8 6 12589.4 1205.7 5
 -7 -7 -17 2511.69 1013.64 3
 -7 -7 -16 3006.77 945.898 3
 -7 -7 -15 13262.6 1371.17 3
 -7 -7 -14 3196.29 807.814 3
 -7 -7 -13 2747.85 802.905 3
 -7 -7 -12 3281.42 715.188 3
 -7 -7 -11 32449.4 1663.89 3
 -7 -7 -10 17563.6 1170.56 3
 -7 -7 -5 44664.6 1282.81 5
 -7 -7 -4 30825.2 1051.01 5
 -7 -7 -4 32501.3 1192.63 4
 -7 -7 -3 132322 3075.02 4
 -7 -7 -2 18836.1 678.216 4
 -7 -7 0 21675.3 906.515 2
 -7 -7 1 108661 2895.31 5
 -7 -7 1 110515 2746.42 2
 -7 -7 2 17520.9 1006.51 5
 -7 -7 3 -34.045 440.788 5
 -7 -7 4 3505.11 647.743 5
 -7 -7 5 -156.728 580.542 5
 -7 -7 6 27490.5 1616.47 5
 -7 -7 7 3127.04 839.508 5
 -7 -6 -17 5570.74 1138.61 3
 -7 -6 -16 -2147.89 1035.86 3
 -7 -6 -15 8854.98 1204.8 3
 -7 -6 -14 19252 1465.78 3
 -7 -6 -13 388.452 665.822 3
 -7 -6 -12 6582.79 902.085 3
 -7 -6 -11 321.723 541.716 3
 -7 -6 -10 29047.7 1504.1 3
 -7 -6 -6 1779.51 221.359 5
 -7 -6 -5 76342.6 1733.77 5
 -7 -6 -4 1615.09 199.17 5
 -7 -6 -2 244615 4949.38 4
 -7 -6 0 7901.55 472.212 2
 -7 -6 0 8733.1 570.841 5
 -7 -6 1 22758 905.711 2
 -7 -6 1 24038.8 1022.62 5
 -7 -6 2 123753 2976.81 2
 -7 -6 2 124200 3216.73 5
 -7 -6 3 29376.1 1338.04 5
 -7 -6 4 1498.99 494.923 5
 -7 -6 5 7659.28 855.214 5
 -7 -6 6 776.767 629.108 5
 -7 -6 7 17324.1 1352.39 5
 -7 -6 8 896.419 800.678 5
 -7 -6 9 5995.75 1125.88 5
 -7 -5 -17 2335.93 1052.32 3
 -7 -5 -16 3545.4 912.112 3
 -7 -5 -15 -73.9994 813.4 3
 -7 -5 -14 18434.8 1472.8 3
 -7 -5 -13 42441.5 2088.87 3
 -7 -5 -12 3942.03 773.267 3
 -7 -5 -11 257.632 495.749 3
 -7 -5 -10 6601.12 812.676 3
 -7 -5 -7 2869.79 290.522 5
 -7 -5 -6 29706.8 830.054 5
 -7 -5 -5 5571.45 236.38 5
 -7 -5 -3 9903.17 309.453 5
 -7 -5 -3 8852.53 340.717 5
 -7 -5 -2 101211 2176.49 4
 -7 -5 -2 98306.1 2142.5 5
 -7 -5 -1 198280 4041.14 2
 -7 -5 -1 202058 4170.59 5
 -7 -5 0 3068.99 264.327 2
 -7 -5 0 3621.64 371.732 5
 -7 -5 1 2508.17 375.147 5
 -7 -5 2 50186.7 1666.99 5
 -7 -5 3 128502 3378.04 5
 -7 -5 4 18062.8 1087.38 5
 -7 -5 5 169.086 502.378 5
 -7 -5 6 32915.3 1705.7 5
 -7 -5 7 -954.785 731.237 5
 -7 -5 8 7796.39 1093.05 5
 -7 -5 9 859.783 783.356 5
 -7 -5 10 13732.5 1494.67 5
 -7 -4 -17 1162.19 837.93 3
 -7 -4 -16 -1513.49 931.231 3
 -7 -4 -15 8270.15 1163.44 3
 -7 -4 -14 2368.75 838.318 3
 -7 -4 -13 72740.3 2803.32 3
 -7 -4 -12 78010.9 2831.07 3
 -7 -4 -11 27577.6 1531.91 3
 -7 -4 -10 20977.8 1295.3 3
 -7 -4 -2 3203.66 178.08 5
 -7 -4 -2 3645.46 270.12 4
 -7 -4 -1 453635 8822.52 5
 -7 -4 0 133132 2986.6 5
 -7 -4 1 276.151 250.618 5
 -7 -4 2 808.185 307.847 5
 -7 -4 3 23961.9 1151.68 5
 -7 -4 4 99791.1 2910.26 5
 -7 -4 5 6847.8 793.962 5
 -7 -4 6 31049.2 1610.33 5
 -7 -4 7 29909.6 1664.66 5
 -7 -4 8 518.913 672.776 5
 -7 -4 9 5093.03 958.555 5
 -7 -4 10 -2972.96 1066.8 5
 -7 -3 -17 3071.96 971.901 3
 -7 -3 -16 2617.05 996.391 3
 -7 -3 -15 1747.5 793.837 3
 -7 -3 -14 6322.12 1015.96 3
 -7 -3 -13 28025.8 1719.74 3
 -7 -3 -12 125772 3872.38 3
 -7 -3 -11 47699.6 2061.38 3
 -7 -3 -4 56601.7 1362.48 2
 -7 -3 -3 24572.9 598.687 2
 -7 -3 -2 68031.4 1684.95 4
 -7 -3 -1 70298.9 1608.26 4
 -7 -3 -1 69665.2 1627.6 5
 -7 -3 0 336564 6785.33 5
 -7 -3 1 95557.8 2393.12 5
 -7 -3 2 399.054 299.73 5
 -7 -3 3 4646.91 569.499 5
 -7 -3 4 26482.2 1301 5
 -7 -3 5 102541 3088.23 5
 -7 -3 6 2319.29 642.408 5
 -7 -3 7 14560.7 1198.01 5
 -7 -3 8 17263 1414.54 5
 -7 -3 9 -98.8581 700.143 5
 -7 -3 10 5116.51 1112.11 5
 -7 -3 11 5997.58 1276.75 5
 -7 -2 -17 327.489 836.037 3
 -7 -2 -16 10040.6 1329.1 3
 -7 -2 -15 -1161.13 886.899 3
 -7 -2 -14 13916.4 1323.14 3
 -7 -2 -13 58.9387 718.925 3
 -7 -2 -12 43760.2 2061.54 3
 -7 -2 -11 51653.6 2188.34 3
 -7 -2 -6 196741 4255.56 1
 -7 -2 -5 28337.7 912.844 1
 -7 -2 -4 155471 3253.41 2
 -7 -2 -1 3136.92 287.687 5
 -7 -2 -1 4005.28 308.963 4
 -7 -2 0 55763.3 1395.17 4
 -7 -2 0 54551.2 1515.9 5
 -7 -2 1 178585 4003.59 5
 -7 -2 2 20440.9 960.547 5
 -7 -2 3 26637.5 1186.04 5
 -7 -2 4 16447.2 1009.41 5
 -7 -2 5 39178.5 1717.8 5
 -7 -2 6 36760.9 1747.48 5
 -7 -2 7 -253.821 624.253 5
 -7 -2 8 21695.9 1507.14 5
 -7 -2 9 9468.79 1162.44 5
 -7 -2 10 -806.837 863.18 5
 -7 -2 11 1289.89 944.407 5
 -7 -1 -17 7585.6 1349.73 3
 -7 -1 -16 2532.38 910.448 3
 -7 -1 -15 12728.4 1386.28 3
 -7 -1 -14 -777.11 827.109 3
 -7 -1 -13 5617.51 938.995 3
 -7 -1 -12 9670.06 1052.14 3
 -7 -1 -11 30178.4 1653.76 3
 -7 -1 -7 329.047 198.518 1
 -7 -1 -6 129949 2865.14 1
 -7 -1 -5 47741.1 1172.38 1
 -7 -1 0 887.118 235.611 4
 -7 -1 0 1080.54 270.453 5
 -7 -1 1 34598.2 1255.36 5
 -7 -1 1 35334.4 1095.78 4
 -7 -1 2 88377.7 2451.1 5
 -7 -1 3 6056.26 627.227 5
 -7 -1 4 23399.6 1215.79 5
 -7 -1 5 3644.73 641.697 5
 -7 -1 6 22835.5 1395.25 5
 -7 -1 7 36657.2 1873.13 5
 -7 -1 8 2697.88 799.733 5
 -7 -1 9 25022.9 1761.36 5
 -7 -1 10 1995.64 918.174 5
 -7 -1 11 8073.21 1374.66 5
 -7 0 -17 4892.57 1273 3
 -7 0 -16 -983.377 906.9 3
 -7 0 -15 7413.29 1090.82 3
 -7 0 -14 16965.4 1450.09 3
 -7 0 -13 568.53 649.27 3
 -7 0 -12 2681.61 827.936 3
 -7 0 -11 1767.06 706.218 3
 -7 0 -7 31044.8 1042.2 1
 -7 0 -6 16313.8 568.367 1
 -7 0 1 552.897 338.986 5
 -7 0 2 33302.9 1357.15 5
 -7 0 3 113840 3137.21 5
 -7 0 4 10582 864.67 5
 -7 0 5 15441.4 1084.96 5
 -7 0 6 1457.69 626.073 5
 -7 0 7 23937.7 1509.13 5
 -7 0 8 15791 1352.3 5
 -7 0 9 2310.33 870.669 5
 -7 0 10 35018 2187.75 5
 -7 0 11 1465.15 952.789 5
 -7 1 -17 -1659.59 992.237 3
 -7 1 -16 680.479 901.249 3
 -7 1 -15 615.468 782.922 3
 -7 1 -14 9866.79 1148.3 3
 -7 1 -13 24946.6 1637.33 3
 -7 1 -12 3310.27 762.776 3
 -7 1 -11 1266.47 673.542 3
 -7 1 -10 2389.55 639.71 3
 -7 1 -6 20555.1 647.829 1
 -7 1 2 1956.13 474.894 5
 -7 1 3 34896.5 1534.39 5
 -7 1 4 142087 3881.94 5
 -7 1 5 1966.29 586.757 5
 -7 1 6 35697.2 1791.44 5
 -7 1 7 2020.87 757.942 5
 -7 1 8 5362.22 972.597 5
 -7 1 9 7119.23 1069.68 5
 -7 1 10 45613.1 2473.58 5
 -7 1 11 41964.3 2533.93 5
 -7 2 -17 1121.74 1049.09 3
 -7 2 -16 480.234 888.422 3
 -7 2 -15 4243.04 967.267 3
 -7 2 -14 -1484.06 811.639 3
 -7 2 -13 16629.7 1382.68 3
 -7 2 -12 30128.5 1758.83 3
 -7 2 -11 854.472 656.964 3
 -7 2 -10 8292.68 897.785 3
 -7 2 -6 1474.4 178.84 1
 -7 2 3 -571.418 481.563 5
 -7 2 4 5156.69 728.767 5
 -7 2 5 11917.1 1040.12 5
 -7 2 6 149.83 569.837 5
 -7 2 7 68387.3 2722.62 5
 -7 2 8 3349.7 953.216 5
 -7 2 9 22194.3 1694.14 5
 -7 2 10 1885.35 884.93 5
 -7 2 11 34968.8 2330.75 5
 -7 2 12 22182.8 2019.59 5
 -7 3 -16 3474 1030.67 3
 -7 3 -15 2054.12 992.544 3
 -7 3 -14 3427.27 987.439 3
 -7 3 -13 265.455 727.065 3
 -7 3 -12 39167.7 1985.36 3
 -7 3 -11 21657.8 1397.36 3
 -7 3 -10 1191.43 668.594 3
 -7 3 -7 64928.8 1776.64 1
 -7 3 -6 19016.9 700.537 1
 -7 3 -5 4869.54 258.637 1
 -7 3 4 946.776 600.341 5
 -7 3 5 15410.4 1241.5 5
 -7 3 6 3557.57 798.214 5
 -7 3 7 4437.87 930.805 5
 -7 3 8 24353.8 1751.34 5
 -7 3 9 4095.38 979.69 5
 -7 3 10 9743.74 1422.59 5
 -7 3 11 6850.12 1298.02 5
 -7 4 -16 5486.77 1193.34 3
 -7 4 -15 2634.65 892.108 3
 -7 4 -14 387.344 726.977 3
 -7 4 -13 -290.691 667.857 3
 -7 4 -12 13030.2 1203.25 3
 -7 4 -11 58340.2 2386.25 3
 -7 4 -10 12808.4 1114.27 3
 -7 4 -8 15327.8 865.426 1
 -7 4 -7 9157 611.458 1
 -7 4 -6 80499.3 2055.77 1
 -7 4 -5 984.857 205.933 1
 -7 4 -4 71334.1 1656.5 1
 -7 4 5 10290.9 1057.83 5
 -7 4 6 57401.8 2508.47 5
 -7 4 7 1201.65 781.688 5
 -7 4 8 21820.2 1675.92 5
 -7 4 9 17285.5 1590.64 5
 -7 4 10 2099.95 1046.92 5
 -7 4 11 -423.161 976.031 5
 -7 5 -14 2054.19 864.849 3
 -7 5 -13 -612.651 750.266 3
 -7 5 -12 2861.95 784.362 3
 -7 5 -11 42921.2 2020.84 3
 -7 5 -10 71463.9 2636.8 3
 -7 5 -9 4658.83 759.707 3
 -7 5 -8 12936.5 817.2 1
 -7 5 -7 16167.2 872.502 1
 -7 5 -6 28528.1 1118.34 1
 -7 5 -5 23742.3 925.144 1
 -7 5 -4 40084.6 1203.5 1
 -7 5 -3 87455.1 2111.91 1
 -7 5 6 7728.61 1078.16 5
 -7 5 7 6972.08 1061.51 5
 -7 5 8 -1637.26 936.847 5
 -7 5 9 22223.1 1805.45 5
 -7 5 10 20605.1 1861.56 5
 -7 5 11 -432.383 1024.35 5
 -7 6 -12 1329.47 703.351 3
 -7 6 -11 8458.65 955.729 3
 -7 6 -10 56097 2254.16 3
 -7 6 -9 54166.4 2179.74 3
 -7 6 -6 -159.63 332.186 1
 -7 6 -5 14599.4 805.494 1
 -7 6 -4 281.875 251.307 1
 -7 6 -3 24095 959.611 1
 -7 6 8 7771 1210.77 5
 -7 6 9 4139.63 1000.68 5
 -7 6 10 28847.8 2183.08 5
 -7 6 11 14140.2 1689.99 5
 -7 7 -9 37132.8 1747.92 3
 -7 7 -4 15782.6 871.558 1
 -7 7 -3 643.408 308.619 1
 -7 7 -2 29430.3 1176.44 1
 -7 7 10 16776.8 1794.39 5
 -7 7 11 17554.6 1908.5 5
 -7 8 -2 1228.99 419.287 1
 -6 -17 -11 1694.37 1012.88 4
 -6 -17 -10 2444.56 968.095 4
 -6 -16 -12 14040.8 1626.62 4
 -6 -16 -11 6683.7 1236.13 4
 -6 -16 -10 1199.23 870.715 4
 -6 -16 -9 323.898 787.01 4
 -6 -15 -13 3721.6 1019.08 4
 -6 -15 -12 20215.1 1830.69 4
 -6 -15 -11 26681.6 1964.4 4
 -6 -15 -10 214.219 817.116 4
 -6 -15 -9 4765.08 1036.53 4
 -6 -15 -8 2010.94 863.81 4
 -6 -14 -14 -406.77 1002.84 4
 -6 -14 -13 -473.573 881.961 4
 -6 -14 -12 6670.86 1204.71 4
 -6 -14 -11 21682.2 1805.05 4
 -6 -14 -10 8484.06 1240.64 4
 -6 -14 -9 -174.641 752.094 4
 -6 -14 -8 1543.13 755.429 4
 -6 -14 -7 2299.02 788.575 4
 -6 -14 -6 18198.7 1447.01 4
 -6 -13 -15 3805.98 1096.36 4
 -6 -13 -14 7007.01 1264.01 4
 -6 -13 -13 -559.389 718.959 4
 -6 -13 -12 -372.338 879.484 4
 -6 -13 -11 14473.4 1426.88 4
 -6 -13 -10 25056.8 1768.29 4
 -6 -13 -9 2934.63 858.158 4
 -6 -13 -8 210.174 624.156 4
 -6 -13 -7 9371.84 1031.71 4
 -6 -13 -6 115.139 586.588 4
 -6 -13 -5 7373.53 906.762 4
 -6 -12 -15 1970.87 1053.74 4
 -6 -12 -14 18062.9 1520.68 3
 -6 -12 -14 17991.3 1649.84 4
 -6 -12 -13 24130.1 1834.9 4
 -6 -12 -13 21072.2 1536.99 3
 -6 -12 -12 3996.28 977.41 4
 -6 -12 -12 5165.53 873.118 3
 -6 -12 -11 -675.74 600.233 3
 -6 -12 -11 210.383 747.944 4
 -6 -12 -10 16179.5 1390.34 4
 -6 -12 -10 17383.3 1170.18 3
 -6 -12 -9 51272.5 2358.87 4
 -6 -12 -8 797.68 564.399 4
 -6 -12 -7 1137.23 607.113 4
 -6 -12 -6 15888.6 1189.92 4
 -6 -12 -5 16967.7 1200.46 4
 -6 -11 -16 2451.21 1147.07 4
 -6 -11 -15 2694.86 881.893 3
 -6 -11 -15 1717.15 998.418 4
 -6 -11 -14 2769.09 868.645 3
 -6 -11 -14 4309.2 1036.55 4
 -6 -11 -13 26952.4 1704.93 3
 -6 -11 -13 24998.6 1821.53 4
 -6 -11 -12 14241.9 1199.55 3
 -6 -11 -12 13169.4 1362.67 4
 -6 -11 -11 6435.33 830.72 3
 -6 -11 -11 7329.76 975.282 4
 -6 -11 -10 3165.39 633.742 3
 -6 -11 -10 3048.2 761.833 4
 -6 -11 -9 15844.6 1246.1 4
 -6 -11 -9 19473.7 1146.05 3
 -6 -11 -8 17520.9 1295.58 4
 -6 -11 -8 20282.2 1105.99 3
 -6 -11 -7 964.062 432.402 3
 -6 -11 -7 1406.49 579.599 4
 -6 -11 -6 18799 1241.88 4
 -6 -11 -5 24197.9 1382.03 4
 -6 -11 -4 1141.47 482.2 4
 -6 -10 -16 820.483 946.079 3
 -6 -10 -15 7037.94 1065.83 3
 -6 -10 -14 1344.93 823.072 3
 -6 -10 -13 14298.9 1288.04 3
 -6 -10 -12 57702.9 2387.33 3
 -6 -10 -11 792.141 591.344 3
 -6 -10 -10 18281.8 1206.68 3
 -6 -10 -10 17757.4 1345.39 4
 -6 -10 -9 1311.73 506.896 3
 -6 -10 -9 -196.595 513.926 4
 -6 -10 -8 21567.3 1351.85 4
 -6 -10 -8 21878.8 1161.69 3
 -6 -10 -7 32069.8 1357.15 3
 -6 -10 -7 29716.2 1553.5 4
 -6 -10 -6 2281.6 451.16 3
 -6 -10 -6 2787.25 608.508 4
 -6 -10 -5 68990.9 2354.43 4
 -6 -10 -4 67.1952 364.409 4
 -6 -10 -3 19359 1039.81 4
 -6 -10 1 15149.2 1015.43 2
 -6 -10 2 18841.9 1144.73 2
 -6 -10 5 10677.5 1134.29 5
 -6 -10 6 1571.06 761.701 5
 -6 -9 -17 5841.67 1256.73 3
 -6 -9 -16 19821.7 1679.42 3
 -6 -9 -15 -729.01 867.808 3
 -6 -9 -14 1968.86 842.802 3
 -6 -9 -13 3027.58 792.182 3
 -6 -9 -12 47809.7 2152.22 3
 -6 -9 -11 46701.4 1998.11 3
 -6 -9 -10 641.753 523.929 3
 -6 -9 -9 28720.3 1403.56 3
 -6 -9 -8 127.112 403.432 3
 -6 -9 -7 41928.4 1780.58 4
 -6 -9 -7 43981.7 1634.22 3
 -6 -9 -6 8009.17 774.07 4
 -6 -9 -5 64743 2152.92 4
 -6 -9 -4 8923.45 706.976 4
 -6 -9 -3 2631.32 445.596 4
 -6 -9 -2 7924.15 569.288 4
 -6 -9 1 100426 2862.14 2
 -6 -9 2 101.379 443.645 2
 -6 -9 3 31663.2 1462.34 2
 -6 -9 5 7962.08 1008.98 5
 -6 -9 6 2004.53 751.822 5
 -6 -9 7 2288.6 858.455 5
 -6 -9 8 16633.5 1543.21 5
 -6 -8 -17 1512.95 1020.01 3
 -6 -8 -16 19134.9 1695.13 3
 -6 -8 -15 10077.3 1203.21 3
 -6 -8 -14 -585.796 669.971 3
 -6 -8 -13 14604 1253.74 3
 -6 -8 -12 4354.68 772.306 3
 -6 -8 -11 38978.8 1809.64 3
 -6 -8 -10 27148.8 1443.12 3
 -6 -8 -9 233.741 462.245 3
 -6 -8 -8 14038.4 960.783 3
 -6 -8 -5 10361.4 752.144 4
 -6 -8 -4 124993 3186.89 4
 -6 -8 -3 83677.4 2305.59 4
 -6 -8 -2 20343.1 870.383 4
 -6 -8 -1 11839.5 533.914 4
 -6 -8 1 40510.6 1502.81 2
 -6 -8 2 51047.9 1778.72 2
 -6 -8 3 1196.61 475.127 2
 -6 -8 4 15002.6 1089.57 5
 -6 -8 5 2904.69 713.037 5
 -6 -8 6 7020.97 982.456 5
 -6 -8 7 758.665 759.29 5
 -6 -8 8 10991.2 1284.98 5
 -6 -8 9 14234.3 1523.17 5
 -6 -7 -17 1504.92 975.644 3
 -6 -7 -16 1603.12 951.293 3
 -6 -7 -15 12621.8 1359.4 3
 -6 -7 -14 12895 1297.3 3
 -6 -7 -13 2235.74 793.383 3
 -6 -7 -12 8308.96 941.986 3
 -6 -7 -11 5572.35 813.122 3
 -6 -7 -10 59678 2236.29 3
 -6 -7 -9 2137.72 555.495 3
 -6 -7 -8 911.401 438.364 3
 -6 -7 -4 6882.54 570.236 4
 -6 -7 -3 165762 3773.88 4
 -6 -7 -2 99258.4 2379.95 4
 -6 -7 -1 17057.9 580.709 4
 -6 -7 1 60632.8 1836.24 2
 -6 -7 2 22192.8 1041.02 2
 -6 -7 3 4767.51 647.803 5
 -6 -7 3 4596.26 560.757 2
 -6 -7 4 5987.41 668.143 2
 -6 -7 4 5757.93 745.283 5
 -6 -7 5 18130.1 1218.16 5
 -6 -7 6 181.151 575.95 5
 -6 -7 7 14094.7 1251.98 5
 -6 -7 8 1901.8 892.566 5
 -6 -7 9 17034.4 1524.41 5
 -6 -7 10 12442.8 1517.28 5
 -6 -6 -17 789.925 997.105 3
 -6 -6 -16 1474.72 887.202 3
 -6 -6 -15 2108.32 868.968 3
 -6 -6 -14 33912.2 1906.7 3
 -6 -6 -13 41686.9 2060.71 3
 -6 -6 -12 1953.67 730.977 3
 -6 -6 -11 3560.38 660.205 3
 -6 -6 -10 30176.2 1507.9 3
 -6 -6 -9 31621.7 1505.14 3
 -6 -6 -5 3669.58 327.585 5
 -6 -6 -4 26121.9 891.91 5
 -6 -6 -3 7955.38 501.438 4
 -6 -6 -2 79897.5 1933.84 4
 -6 -6 -1 194215 3854.96 4
 -6 -6 1 3390.65 384.778 2
 -6 -6 2 35270.6 1359.7 5
 -6 -6 2 32978.3 1229.24 2
 -6 -6 3 7469.85 628.659 2
 -6 -6 3 6577.03 688.673 5
 -6 -6 4 178.194 423.23 5
 -6 -6 5 1378.56 555.115 5
 -6 -6 6 34118.5 1701.14 5
 -6 -6 7 -382.86 704.557 5
 -6 -6 8 4928.95 920.953 5
 -6 -6 9 3603.11 948.511 5
 -6 -6 10 15365.8 1552.78 5
 -6 -5 -17 -593.625 992.335 3
 -6 -5 -16 2494.95 939.972 3
 -6 -5 -15 1545.28 789.138 3
 -6 -5 -14 10046.8 1141.11 3
 -6 -5 -13 77794.1 2890.59 3
 -6 -5 -12 131044 3903.36 3
 -6 -5 -11 1937.79 653.503 3
 -6 -5 -10 1051.52 576.687 3
 -6 -5 -9 25107.2 1315.17 3
 -6 -5 -6 21603.6 751.965 5
 -6 -5 -5 11894.5 474.985 5
 -6 -5 -4 911.492 152.508 5
 -6 -5 0 154414 3327.13 2
 -6 -5 1 9074.43 517.794 2
 -6 -5 1 9163.14 608.837 5
 -6 -5 2 13627.2 705.525 2
 -6 -5 2 14150 797.916 5
 -6 -5 3 11938.9 825.253 5
 -6 -5 4 9737.06 805.938 5
 -6 -5 5 848.021 550.232 5
 -6 -5 6 29136.7 1533.99 5
 -6 -5 7 21821 1410.16 5
 -6 -5 8 877.278 685.619 5
 -6 -5 9 443.494 716.146 5
 -6 -5 10 7829.68 1154.33 5
 -6 -4 -17 9313.1 1296.42 3
 -6 -4 -16 3292.36 910.696 3
 -6 -4 -15 -568.466 816.64 3
 -6 -4 -14 2008.67 874.09 3
 -6 -4 -13 29672.6 1714.13 3
 -6 -4 -12 173700 4800.45 3
 -6 -4 -11 64343.3 2404.53 3
 -6 -4 -10 4259.32 699.011 3
 -6 -4 -9 5333.13 700.74 3
 -6 -4 -6 2884.95 264.569 5
 -6 -4 -5 82815.3 1793.57 5
 -6 -4 -2 19029.5 614.916 4
 -6 -4 -2 17704.1 506.012 5
 -6 -4 -1 150505 3046.07 4
 -6 -4 -1 158147 3129.68 2
 -6 -4 -1 157837 3225.95 5
 -6 -4 0 387755 7371.73 2
 -6 -4 0 377517 7564.29 5
 -6 -4 1 30220.4 1069.72 5
 -6 -4 2 11021.3 676.157 5
 -6 -4 3 943.844 368.515 5
 -6 -4 4 4365.87 581.654 5
 -6 -4 5 20935.9 1192.78 5
 -6 -4 6 15675.8 1134.17 5
 -6 -4 7 29165.6 1636.33 5
 -6 -4 8 11186.2 1116.78 5
 -6 -4 9 1602.16 817.834 5
 -6 -4 10 1107.99 927.347 5
 -6 -4 11 3434.74 1081.67 5
 -6 -3 -17 739.712 811.1 3
 -6 -3 -16 16814.6 1538.33 3
 -6 -3 -15 9609.88 1255.7 3
 -6 -3 -14 5211.72 916.218 3
 -6 -3 -13 350.307 689.664 3
 -6 -3 -12 64076.9 2497.01 3
 -6 -3 -11 94887.3 3079.35 3
 -6 -3 -10 21591.1 1282.06 3
 -6 -3 -2 19543.4 677.957 4
 -6 -3 -1 1843.91 168.23 4
 -6 -3 -1 1806.6 181.184 5
 -6 -3 0 173309 3665.49 5
 -6 -3 1 219170 4679.46 5
 -6 -3 2 6980.21 528.113 5
 -6 -3 3 61801.1 1926.21 5
 -6 -3 4 6402.15 629.55 5
 -6 -3 5 55844.4 2025.7 5
 -6 -3 6 -308.718 558.304 5
 -6 -3 7 11194.5 1028.58 5
 -6 -3 8 3985.2 779.344 5
 -6 -3 9 7314.7 1078.69 5
 -6 -3 10 955.134 861.217 5
 -6 -3 11 4773.26 1040.37 5
 -6 -2 -17 6102.96 1216.11 3
 -6 -2 -16 9639.97 1244.25 3
 -6 -2 -15 28989.6 1880.84 3
 -6 -2 -14 -502.721 660.868 3
 -6 -2 -13 12781.1 1208.36 3
 -6 -2 -12 3759.82 779.48 3
 -6 -2 -11 15564.6 1155.81 3
 -6 -2 -10 79976 2690.47 3
 -6 -2 -5 8846.54 490.083 1
 -6 -2 -4 98671.9 2254.07 1
 -6 -2 -4 95989.3 2182.88 2
 -6 -2 -3 169842 3398.46 2
 -6 -2 -2 8767.48 462.017 4
 -6 -2 -1 20128.8 660.532 4
 -6 -2 -1 18372.9 606.611 5
 -6 -2 0 9043.09 458.262 5
 -6 -2 0 8272.61 366.021 4
 -6 -2 1 294052 6081.74 5
 -6 -2 2 171673 3931.29 5
 -6 -2 3 12749.8 779.334 5
 -6 -2 4 28390.1 1261.37 5
 -6 -2 5 1123.56 483.11 5
 -6 -2 6 19536.5 1213.45 5
 -6 -2 7 1342.58 602.923 5
 -6 -2 8 7528.99 928.045 5
 -6 -2 9 7672.78 1037.39 5
 -6 -2 10 -391.846 795.296 5
 -6 -2 11 5872.98 1177.38 5
 -6 -2 12 3133.84 1039.36 5
 -6 -1 -17 6474.61 1280.84 3
 -6 -1 -16 -268.659 913.174 3
 -6 -1 -15 16190.1 1411.85 3
 -6 -1 -14 18913.2 1519.38 3
 -6 -1 -13 2525.66 863.409 3
 -6 -1 -12 877.738 668.354 3
 -6 -1 -11 9149.04 931.892 3
 -6 -1 -10 60938.7 2285.47 3
 -6 -1 -6 34568.3 1105.36 1
 -6 -1 -5 12495.5 512.204 1
 -6 -1 -4 33845.1 1029.04 2
 -6 -1 -4 35678 921.942 1
 -6 -1 -1 24115.2 848.648 4
 -6 -1 0 14456.9 607.826 4
 -6 -1 0 15523.6 657.379 5
 -6 -1 1 128460 3095.57 5
 -6 -1 1 138051 2949.9 4
 -6 -1 2 136087 3290.61 5
 -6 -1 3 60834.3 1898.05 5
 -6 -1 4 18782.7 1034.39 5
 -6 -1 5 18926.5 1126.99 5
 -6 -1 6 10310.5 934.468 5
 -6 -1 7 5179.25 790.885 5
 -6 -1 8 725.411 613.382 5
 -6 -1 9 10185.2 1153.13 5
 -6 -1 10 18413.7 1562.86 5
 -6 -1 11 -414.644 879.73 5
 -6 -1 12 5750.18 1248.61 5
 -6 0 -17 -411.432 998.947 3
 -6 0 -16 3369.07 1019.44 3
 -6 0 -15 869.908 865.083 3
 -6 0 -14 13352.9 1274.59 3
 -6 0 -13 20911 1456.5 3
 -6 0 -12 3585.23 760.64 3
 -6 0 -11 1359.14 648.635 3
 -6 0 -10 11170.9 981.452 3
 -6 0 -5 96639.8 2089.16 1
 -6 0 0 98342.2 2422.64 5
 -6 0 1 7040.92 541.265 5
 -6 0 2 41119.5 1452.16 5
 -6 0 3 63184.5 2001.82 5
 -6 0 4 60604.1 2055.53 5
 -6 0 5 15978.9 1040.25 5
 -6 0 6 40563.3 1783.32 5
 -6 0 7 3006.43 719.233 5
 -6 0 8 3211.1 754.68 5
 -6 0 9 3031.26 897.439 5
 -6 0 10 28650.6 1877.6 5
 -6 0 11 21788.5 1767.86 5
 -6 0 12 2458.35 1042.86 5
 -6 1 -17 2210.27 1084.02 3
 -6 1 -16 248.442 810.809 3
 -6 1 -15 1742.02 890.538 3
 -6 1 -14 281.997 730.255 3
 -6 1 -13 3176.05 773.718 3
 -6 1 -12 12931.7 1174.45 3
 -6 1 -11 2158.99 645.555 3
 -6 1 -10 5337.6 755.536 3
 -6 1 -9 2633.52 605.586 3
 -6 1 1 45699.7 1551.65 5
 -6 1 2 42866.3 1576.82 5
 -6 1 3 459.08 381.805 5
 -6 1 4 27992.3 1371.38 5
 -6 1 5 12483.7 991.494 5
 -6 1 6 52734.5 2125.14 5
 -6 1 7 78588.4 2824.88 5
 -6 1 8 310.103 667.066 5
 -6 1 9 6333.23 1032.15 5
 -6 1 10 2413.66 869.851 5
 -6 1 11 46649.8 2589.07 5
 -6 1 12 19238.2 1829.48 5
 -6 2 -17 7103.32 1356.03 3
 -6 2 -16 2564.54 1011.21 3
 -6 2 -15 -767.047 835.994 3
 -6 2 -14 287.807 710.145 3
 -6 2 -13 -509.404 653.786 3
 -6 2 -12 8841.1 1004.51 3
 -6 2 -11 10617.6 1023.12 3
 -6 2 -10 395.397 505.01 3
 -6 2 -9 18328.7 1171.17 3
 -6 2 -5 17960.1 589.481 1
 -6 2 2 35221.6 1471.36 5
 -6 2 3 69697.4 2316.14 5
 -6 2 4 8958.57 817.421 5
 -6 2 5 28203.8 1495.71 5
 -6 2 6 -487.477 615.097 5
 -6 2 7 45996 2115.7 5
 -6 2 8 76525.5 2952.2 5
 -6 2 9 2581.98 927.322 5
 -6 2 10 5191.93 1102.43 5
 -6 2 11 20822.3 1797.75 5
 -6 2 12 19583.5 1848.37 5
 -6 3 -16 8521.75 1366.97 3
 -6 3 -15 4798.88 1002.6 3
 -6 3 -14 898.586 768.333 3
 -6 3 -13 -442.925 704.88 3
 -6 3 -12 3695.26 794.268 3
 -6 3 -11 23280.4 1440.7 3
 -6 3 -10 12087 1038.73 3
 -6 3 -9 14103.6 1059.97 3
 -6 3 -5 878.168 209.627 1
 -6 3 -4 80998 1812 1
 -6 3 3 31223.6 1466.29 5
 -6 3 4 5228.85 717.877 5
 -6 3 5 39440.1 1861.38 5
 -6 3 6 5377.83 878.846 5
 -6 3 7 2956.55 753.025 5
 -6 3 8 70200.9 2870.11 5
 -6 3 9 12558 1301.18 5
 -6 3 10 2372.76 977.843 5
 -6 3 11 4097.56 1144.49 5
 -6 3 12 11945.2 1634.44 5
 -6 4 -16 1618.81 914.676 3
 -6 4 -15 24839.6 1891.12 3
 -6 4 -14 4996.83 986.331 3
 -6 4 -13 1643.69 735.873 3
 -6 4 -12 3192.16 786.868 3
 -6 4 -11 14674.3 1174.27 3
 -6 4 -10 31946.4 1623.85 3
 -6 4 -9 1412.24 515.148 3
 -6 4 -6 2466.97 368.307 1
 -6 4 -5 2794.91 337.219 1
 -6 4 -4 95770.5 2263.57 1
 -6 4 -3 193077 4025.2 1
 -6 4 4 43612.6 1913.02 5
 -6 4 5 25655.8 1522.43 5
 -6 4 6 17726.4 1384.56 5
 -6 4 7 2855.34 796.101 5
 -6 4 8 24034.2 1702.43 5
 -6 4 9 43763.8 2375.76 5
 -6 4 10 9926.13 1331.03 5
 -6 4 11 1914.6 925.381 5
 -6 4 12 1511.82 1097.99 5
 -6 5 -14 14988.6 1400.77 3
 -6 5 -13 743.341 692.239 3
 -6 5 -12 3.93023 664.313 3
 -6 5 -11 6764.6 895.667 3
 -6 5 -10 43427.7 1907.52 3
 -6 5 -9 25046.7 1379.04 3
 -6 5 -8 55.609 462.357 3
 -6 5 -8 209.647 385.577 1
 -6 5 -7 18248.4 995.3 1
 -6 5 -6 21481.4 1002.66 1
 -6 5 -5 9374.17 627.098 1
 -6 5 -4 975.416 282.277 1
 -6 5 -3 93534.8 2314.77 1
 -6 5 -2 143722 3253.54 1
 -6 5 6 49392.1 2282.13 5
 -6 5 7 184.697 680.844 5
 -6 5 8 400.674 690.04 5
 -6 5 9 10387.9 1318.95 5
 -6 5 10 36152.5 2324.78 5
 -6 5 11 5507.74 1209.8 5
 -6 5 12 1798.15 1153.37 5
 -6 6 -12 1191.5 661.025 3
 -6 6 -11 491.426 615.35 3
 -6 6 -10 8055.66 893.602 1
 -6 6 -10 6929.42 846.882 3
 -6 6 -9 51123 1985.79 3
 -6 6 -9 43705.4 1921.67 1
 -6 6 -8 13096.8 1005.08 3
 -6 6 -8 12951 940.397 1
 -6 6 -7 9286.3 760.914 1
 -6 6 -6 26570.4 1215.7 1
 -6 6 -5 1416.03 383.725 1
 -6 6 -4 6986.52 560.862 1
 -6 6 -3 6111.62 528.358 1
 -6 6 -2 46934.8 1495.31 1
 -6 6 7 31952.1 1944.12 5
 -6 6 8 5123.76 1024.4 5
 -6 6 9 7332.92 1267.57 5
 -6 6 10 15414.8 1663.65 5
 -6 6 11 10752.2 1570.78 5
 -6 6 12 4353.2 1248.03 5
 -6 7 -9 3196.68 648.308 1
 -6 7 -9 3788.71 670.148 3
 -6 7 -8 39813.5 1708.55 3
 -6 7 -8 35677.2 1699.49 1
 -6 7 -7 206.177 399.896 1
 -6 7 -6 28633.5 1374.43 1
 -6 7 -5 19041.8 1083.44 1
 -6 7 -4 524.38 338.181 1
 -6 7 -3 10141.5 732.164 1
 -6 7 -2 10442.8 726.184 1
 -6 7 -1 80014.6 2322.94 1
 -6 7 9 25096.3 1930.93 5
 -6 7 10 -340.236 1036.08 5
 -6 7 11 16900.5 1761.82 5
 -6 7 12 13254.5 1809.27 5
 -6 8 -7 8875.17 895.02 1
 -6 8 -6 9914.3 899.39 1
 -6 8 -5 42780.7 1782.63 1
 -6 8 -4 19589.2 1130.66 1
 -6 8 -3 911.96 380.9 1
 -6 8 -2 2081.87 448.505 1
 -6 8 -1 6034.42 633.227 1
 -6 8 11 6.3869 973.074 5
 -6 9 -5 15785.5 1121.58 1
 -6 9 -4 24911.8 1370.68 1
 -6 9 -3 1954.41 528.484 1
 -6 9 -2 1071.09 408.495 1
 -6 9 -1 23046.7 1253 1
 -6 9 0 8289.69 798.681 1
 -6 10 -3 22016.7 1334.81 1
 -6 10 -2 3108.58 601.445 1
 -6 10 -1 867.721 492.159 1
 -6 10 0 1735.42 574.936 1
 -6 11 -1 -251.023 506.382 1
 -6 11 0 1556.81 583.342 1
 -6 12 1 2168.87 661.506 1
 -5 -17 -11 985.12 983.564 4
 -5 -17 -10 2762.24 1129.64 4
 -5 -17 -9 -258.722 953.362 4
 -5 -17 -8 16861.1 1681.59 4
 -5 -16 -12 16319.8 1781.37 4
 -5 -16 -11 20036 1862.33 4
 -5 -16 -10 -1103.83 973.242 4
 -5 -16 -9 8743.03 1280.67 4
 -5 -16 -8 2053.69 953.935 4
 -5 -16 -7 16134.9 1555.68 4
 -5 -15 -13 123.298 1058.18 4
 -5 -15 -12 3342.02 1032.37 4
 -5 -15 -11 19443.8 1747.2 4
 -5 -15 -10 4173.15 1074.4 4
 -5 -15 -9 11784.7 1387.68 4
 -5 -15 -8 10386.6 1289.29 4
 -5 -15 -7 1647.33 839.049 4
 -5 -15 -6 11545.8 1279.15 4
 -5 -14 -14 7205.47 1434.54 4
 -5 -14 -13 672.947 1036.5 4
 -5 -14 -12 -833.684 858.839 4
 -5 -14 -11 10973 1314.45 4
 -5 -14 -10 24183.1 1861.56 4
 -5 -14 -9 324.557 710.949 4
 -5 -14 -8 10294.6 1267.68 4
 -5 -14 -7 15139.8 1396.67 4
 -5 -14 -6 3075.75 782.951 4
 -5 -14 -5 6915.05 966.769 4
 -5 -13 -15 5241.65 1226.09 4
 -5 -13 -14 10819.1 1509.62 4
 -5 -13 -13 5887.85 1180.8 4
 -5 -13 -12 -511.877 832.41 4
 -5 -13 -11 -440.943 759.986 4
 -5 -13 -10 23431.7 1752.89 4
 -5 -13 -9 24439.2 1722.18 4
 -5 -13 -8 507.541 677.125 4
 -5 -13 -7 31213.5 1838.81 4
 -5 -13 -6 39270.7 2026.12 4
 -5 -13 -5 606.004 605.813 4
 -5 -13 -4 3407.61 722.99 4
 -5 -13 2 7782.43 968.362 2
 -5 -12 -15 956.241 1104.25 4
 -5 -12 -14 4159.61 1033.31 4
 -5 -12 -13 23590.5 1873.84 4
 -5 -12 -12 9438.38 1241.57 4
 -5 -12 -11 2899 680.358 3
 -5 -12 -11 4539.87 1006.84 4
 -5 -12 -10 1658.56 821.528 4
 -5 -12 -10 1035.53 513.845 3
 -5 -12 -9 8082.79 1024.09 4
 -5 -12 -8 3023.07 784.274 4
 -5 -12 -7 6704.74 888.107 4
 -5 -12 -6 28695.2 1643.52 4
 -5 -12 -5 31222.6 1677.91 4
 -5 -12 -4 3799.26 707.227 4
 -5 -12 -3 21924.8 1295.58 4
 -5 -12 2 4387.65 747.128 2
 -5 -12 3 5154.12 841.005 2
 -5 -11 -16 3407.54 1172.24 4
 -5 -11 -15 146.672 903.947 4
 -5 -11 -14 -1023.81 866.165 4
 -5 -11 -13 7529.34 1041.45 3
 -5 -11 -13 6311.48 1109.75 4
 -5 -11 -12 47608.4 2161.11 3
 -5 -11 -12 44395.4 2391.43 4
 -5 -11 -11 1750.75 803.077 4
 -5 -11 -11 1115.76 601.486 3
 -5 -11 -10 13349.2 1228.62 4
 -5 -11 -10 13299.8 1016.66 3
 -5 -11 -9 8132.92 989.963 4
 -5 -11 -9 9242.3 847.848 3
 -5 -11 -8 3965.04 583.854 3
 -5 -11 -8 4285.89 767.967 4
 -5 -11 -7 1482.49 406.107 3
 -5 -11 -7 2254.22 672.059 4
 -5 -11 -6 1082.75 590.735 4
 -5 -11 -5 43979.5 1895.66 4
 -5 -11 -4 47.1705 452.697 4
 -5 -11 -3 46033.5 1850.12 4
 -5 -11 -2 5076.57 626.606 4
 -5 -11 2 11788.1 1000.69 2
 -5 -11 3 4490.06 774.117 2
 -5 -11 4 549.84 589.82 2
 -5 -11 7 33115.7 2061.44 5
 -5 -10 -14 253.926 764.609 3
 -5 -10 -13 2317.91 814.498 3
 -5 -10 -12 33817.8 2027.58 4
 -5 -10 -12 35937.9 1858.32 3
 -5 -10 -11 54335.1 2479.38 4
 -5 -10 -11 56253.2 2259.57 3
 -5 -10 -10 1119.19 653.35 4
 -5 -10 -10 1633.88 559.853 3
 -5 -10 -9 30849.8 1698.75 4
 -5 -10 -9 31882.5 1490.57 3
 -5 -10 -8 25759.9 1509.77 4
 -5 -10 -8 27973.1 1298.09 3
 -5 -10 -7 805.952 537.914 4
 -5 -10 -7 775.716 382.235 3
 -5 -10 -6 8943.04 656.524 3
 -5 -10 -6 8675.43 850.97 4
 -5 -10 -5 67935.1 2377.13 4
 -5 -10 -5 68961.9 1947.51 3
 -5 -10 -4 49947.4 1477.82 3
 -5 -10 -4 50750.3 1941.69 4
 -5 -10 -3 556.573 381.069 4
 -5 -10 -2 18125.8 996.271 4
 -5 -10 -1 10100.3 694.374 4
 -5 -10 2 6039.77 728.481 2
 -5 -10 3 12867.5 1024.25 2
 -5 -10 4 1639.7 580.815 2
 -5 -10 6 277.599 773.443 5
 -5 -10 7 11306.1 1262.36 5
 -5 -10 8 33019.4 2094.7 5
 -5 -9 -15 5207.86 1041.48 3
 -5 -9 -14 2281.69 878.529 3
 -5 -9 -13 12325.4 1157.97 3
 -5 -9 -12 6136.51 910.794 3
 -5 -9 -11 43571.1 1939.01 3
 -5 -9 -10 20865.2 1255.74 3
 -5 -9 -9 9676.8 853.271 3
 -5 -9 -8 45528.5 1967.04 4
 -5 -9 -8 48459.7 1789.38 3
 -5 -9 -7 359.571 335.363 3
 -5 -9 -7 -380.994 477.049 4
 -5 -9 -6 25341.9 1332.62 4
 -5 -9 -6 26260 1134.21 3
 -5 -9 -5 9281.55 811.634 4
 -5 -9 -5 10385.5 647.367 3
 -5 -9 -4 75976.1 2378.93 4
 -5 -9 -3 46864.9 1690.35 4
 -5 -9 -2 4532.31 508.974 4
 -5 -9 -1 15150.3 765.672 4
 -5 -9 2 91512.5 2759.83 2
 -5 -9 3 1667.15 508.093 2
 -5 -9 4 17953.5 1191.47 2
 -5 -9 5 -558.498 562.791 2
 -5 -9 6 1616.87 755.216 5
 -5 -9 7 -89.2383 697.135 5
 -5 -9 8 21298.9 1666.89 5
 -5 -9 9 22210 1854.77 5
 -5 -8 -15 16597.4 1536.67 3
 -5 -8 -14 4206.75 863.025 3
 -5 -8 -13 15123.8 1278.96 3
 -5 -8 -12 19971 1394.23 3
 -5 -8 -11 8606.77 942.393 3
 -5 -8 -10 61602 2260.27 3
 -5 -8 -9 513.1 445.204 3
 -5 -8 -8 19336.2 1077.13 3
 -5 -8 -7 71708.2 2196.77 3
 -5 -8 -6 322.981 375.874 4
 -5 -8 -6 261.795 312.31 3
 -5 -8 -5 961.233 385.854 4
 -5 -8 -4 54162.7 1824.65 4
 -5 -8 -3 160660 3870.41 4
 -5 -8 -2 69513.8 1999.29 4
 -5 -8 -1 16759.7 754.123 4
 -5 -8 0 6315.15 415.016 4
 -5 -8 2 48053.1 1747.68 2
 -5 -8 3 59064.1 2050.98 2
 -5 -8 4 20965.3 1196.63 2
 -5 -8 5 43457.2 1832.24 2
 -5 -8 6 2329.93 749.018 5
 -5 -8 6 2723.85 652.078 2
 -5 -8 7 1061.78 704.388 5
 -5 -8 8 5033.91 949.154 5
 -5 -8 9 22387.8 1695.79 5
 -5 -7 -16 510.033 754.082 3
 -5 -7 -15 8838.23 1197.56 3
 -5 -7 -14 36615.2 2044.23 3
 -5 -7 -13 6554.03 955.537 3
 -5 -7 -12 6051.84 897.953 3
 -5 -7 -11 -205.464 553.737 3
 -5 -7 -10 43914.7 1846.91 3
 -5 -7 -9 26582.2 1343.79 3
 -5 -7 -8 1434.75 450.401 3
 -5 -7 -7 52160.5 1776.45 3
 -5 -7 -4 2852.72 408.49 4
 -5 -7 -3 118084 2941.39 4
 -5 -7 -2 131740 3096.61 4
 -5 -7 -1 62284.8 1613.11 4
 -5 -7 0 750.635 164.211 4
 -5 -7 2 12669.6 797.137 2
 -5 -7 3 55358.9 1876.15 2
 -5 -7 4 7279.92 705.126 2
 -5 -7 5 54140.6 2127.8 5
 -5 -7 5 52510 1963.12 2
 -5 -7 6 76920.4 2762.02 5
 -5 -7 7 1427.55 637.384 5
 -5 -7 8 2743.53 829.998 5
 -5 -7 9 2934.88 901.475 5
 -5 -7 10 14258.2 1535.27 5
 -5 -6 -16 837.963 825.204 3
 -5 -6 -15 -25.4995 846.877 3
 -5 -6 -14 31912.3 1918.99 3
 -5 -6 -13 58503 2466.73 3
 -5 -6 -12 35304.9 1797.28 3
 -5 -6 -11 9106.75 924.078 3
 -5 -6 -10 5277.46 715.678 3
 -5 -6 -9 62352.4 2176.88 3
 -5 -6 -8 1194.17 430.95 3
 -5 -6 -7 5739.04 566.979 3
 -5 -6 -3 1840.64 317.03 4
 -5 -6 -2 1211.07 237.93 4
 -5 -6 -1 123239 2679.98 4
 -5 -6 0 94663.6 1987.37 4
 -5 -6 1 16456.3 787.541 2
 -5 -6 2 2805.68 408.862 2
 -5 -6 3 24514.4 1089.6 2
 -5 -6 4 10752 886.369 5
 -5 -6 4 10832.8 765.328 2
 -5 -6 5 454.575 423.801 2
 -5 -6 5 -122.382 496.877 5
 -5 -6 6 117094 3533.17 5
 -5 -6 7 54122.7 2287.3 5
 -5 -6 8 381.347 688.016 5
 -5 -6 9 386.731 691.125 5
 -5 -6 10 6143.62 1137.26 5
 -5 -5 -16 6336.05 1214.79 3
 -5 -5 -15 1686.48 852.993 3
 -5 -5 -14 1032.04 732.661 3
 -5 -5 -13 26954.1 1654.57 3
 -5 -5 -12 143017 4151.67 3
 -5 -5 -11 2478.63 673.914 3
 -5 -5 -10 11769 1008.74 3
 -5 -5 -9 1162.81 485.512 3
 -5 -5 -8 31959.4 1414.14 3
 -5 -5 -5 148223 3232.43 5
 -5 -5 -4 74716.9 1803.54 5
 -5 -5 -2 1600.85 229.67 4
 -5 -5 -1 150600 3103.64 4
 -5 -5 1 42553.5 1292.7 2
 -5 -5 2 4974.55 449.455 2
 -5 -5 3 4711.51 492.213 2
 -5 -5 3 5406.03 571.132 5
 -5 -5 4 2170.3 495.083 5
 -5 -5 4 1464.76 404.706 2
 -5 -5 5 24202.3 1281.19 5
 -5 -5 6 11203.7 961.08 5
 -5 -5 7 82997.8 2876.68 5
 -5 -5 8 20712.8 1436.01 5
 -5 -5 9 806.889 776.697 5
 -5 -5 10 1962.78 893.34 5
 -5 -5 11 12229.3 1420.81 5
 -5 -4 -16 23604.8 1773.17 3
 -5 -4 -15 8471.92 1172.33 3
 -5 -4 -14 4062.64 851.729 3
 -5 -4 -13 764.545 577.064 3
 -5 -4 -12 115475 3591.05 3
 -5 -4 -11 78292.8 2680.76 3
 -5 -4 -10 539.974 511.235 3
 -5 -4 -9 31984.3 1474.32 3
 -5 -4 -8 5663.54 669.273 3
 -5 -4 -5 242523 4887.85 5
 -5 -4 -4 380640 7366.21 5
 -5 -4 -3 290210 5666.72 5
 -5 -4 -1 1144.29 133.336 4
 -5 -4 0 130699 2800.1 2
 -5 -4 1 24558.7 838.709 2
 -5 -4 1 26410.4 949.112 5
 -5 -4 2 60.3549 206.07 2
 -5 -4 2 -383.715 272.309 5
 -5 -4 3 39109.3 1429.09 5
 -5 -4 4 47999.2 1714.3 5
 -5 -4 5 14314.4 970.702 5
 -5 -4 6 3555.42 644.154 5
 -5 -4 7 21041.9 1330.48 5
 -5 -4 8 17019.4 1285.74 5
 -5 -4 9 4833.04 907.112 5
 -5 -4 10 3293.68 999.499 5
 -5 -4 11 -1365.92 938.843 5
 -5 -3 -16 16051.6 1546.23 3
 -5 -3 -15 38132.8 2145.62 3
 -5 -3 -14 3260.59 817.255 3
 -5 -3 -13 24195.3 1576.31 3
 -5 -3 -12 11213.8 1034.08 3
 -5 -3 -11 78110.8 2691.17 3
 -5 -3 -10 33089.3 1554.4 3
 -5 -3 -9 21662.3 1213.2 3
 -5 -3 -8 132517 3522.38 3
 -5 -3 -1 2475.83 166.573 4
 -5 -3 -1 2406.88 186.089 5
 -5 -3 0 2381.24 243.251 5
 -5 -3 0 2165.27 169.061 2
 -5 -3 1 111977 2616.24 5
 -5 -3 2 76513.8 2048.39 5
 -5 -3 3 22859.7 1014.73 5
 -5 -3 4 51117 1763.92 5
 -5 -3 5 12433 885.986 5
 -5 -3 6 13227.2 990.174 5
 -5 -3 7 999.211 560.674 5
 -5 -3 8 13316.8 1140.02 5
 -5 -3 9 8629.87 1088.62 5
 -5 -3 10 484.089 752.384 5
 -5 -3 11 3317.24 944.446 5
 -5 -3 12 -1595.25 958.728 5
 -5 -2 -16 -977.815 904.071 3
 -5 -2 -15 36570.6 2111.9 3
 -5 -2 -14 29791.7 1797.63 3
 -5 -2 -13 1648.6 730.568 3
 -5 -2 -12 997.742 631.584 3
 -5 -2 -11 19000.4 1263.39 3
 -5 -2 -10 56997.3 2152.6 3
 -5 -2 -9 11544.6 917.715 3
 -5 -2 -8 116045 3186.26 3
 -5 -2 -5 125180 2921.34 1
 -5 -2 -4 6242.89 395.46 1
 -5 -2 -4 5992.02 362.308 2
 -5 -2 -3 14457.3 489.775 2
 -5 -2 -3 15363.1 597.883 1
 -5 -2 -2 41081.2 1124.4 4
 -5 -2 -1 17782.7 517.941 5
 -5 -2 -1 18647.5 584.934 4
 -5 -2 0 4646.81 295.177 5
 -5 -2 0 4631.26 231.739 4
 -5 -2 1 22728.5 821.475 5
 -5 -2 2 256822 5453.6 5
 -5 -2 3 182245 4195.95 5
 -5 -2 4 32718.5 1314.67 5
 -5 -2 5 14397.5 927.911 5
 -5 -2 6 7269.16 774.048 5
 -5 -2 7 1647.96 582.814 5
 -5 -2 8 4895.74 863.717 5
 -5 -2 9 3283.74 758.876 5
 -5 -2 10 10515.8 1240.26 5
 -5 -2 11 81.659 794.259 5
 -5 -2 12 2493.7 1064.02 5
 -5 -1 -16 4556.06 1072.46 3
 -5 -1 -15 2395.42 944.973 3
 -5 -1 -14 45871.7 2249.31 3
 -5 -1 -13 38383.8 1956.02 3
 -5 -1 -12 3730.14 762.011 3
 -5 -1 -11 1244.94 584.571 3
 -5 -1 -10 26411.1 1425.95 3
 -5 -1 -9 40346.2 1691.48 3
 -5 -1 -8 639.656 423.078 3
 -5 -1 -5 671.262 203.637 1
 -5 -1 -4 104912 2395.06 2
 -5 -1 -4 104490 2284.72 1
 -5 -1 -3 5792.59 287.273 1
 -5 -1 -3 5324.23 287.27 2
 -5 -1 -2 10877.7 509.622 4
 -5 -1 -1 9702.76 451.372 4
 -5 -1 0 44274.7 1203.99 5
 -5 -1 0 45703.6 1183.98 4
 -5 -1 1 5858.32 421.731 5
 -5 -1 1 5545.99 320.177 4
 -5 -1 2 12273.4 665.002 5
 -5 -1 3 108132 2771.69 5
 -5 -1 4 61168.8 1963.95 5
 -5 -1 5 60520.7 2062.55 5
 -5 -1 6 23441.6 1259.43 5
 -5 -1 7 3882.81 679.325 5
 -5 -1 8 970.531 561.761 5
 -5 -1 9 1061.65 710.99 5
 -5 -1 10 12642.8 1262.38 5
 -5 -1 11 14651.4 1392.79 5
 -5 -1 12 3262.43 1100.57 5
 -5 0 -16 -963.055 982.87 3
 -5 0 -15 7544.87 1130.39 3
 -5 0 -14 1531.66 780.534 3
 -5 0 -13 40235 2015.19 3
 -5 0 -12 20800.8 1424.84 3
 -5 0 -11 11345.1 1029.42 3
 -5 0 -10 5561.5 757.595 3
 -5 0 -9 22311.2 1248.76 3
 -5 0 -8 34129.5 1471.28 3
 -5 0 -4 44094.3 1042.12 1
 -5 0 -1 118838 2736 4
 -5 0 0 2469.98 295.026 5
 -5 0 0 2565.36 285.336 4
 -5 0 1 79663.6 1964.03 4
 -5 0 1 76388.2 2033.63 5
 -5 0 2 1292.22 318.115 5
 -5 0 2 1495.28 249.153 4
 -5 0 3 4184.83 489.819 5
 -5 0 4 16963.5 931.732 5
 -5 0 5 2713.83 543.186 5
 -5 0 6 100468 3022.8 5
 -5 0 7 65351.2 2398.39 5
 -5 0 8 9777.91 1053.65 5
 -5 0 9 2178.12 744.964 5
 -5 0 10 661.69 765.027 5
 -5 0 11 31920.6 2027.43 5
 -5 0 12 9379.23 1364.45 5
 -5 1 -16 2718.81 1051.68 3
 -5 1 -15 -536.621 744.318 3
 -5 1 -14 8888.48 1106.89 3
 -5 1 -13 2558.45 755.313 3
 -5 1 -12 25333.9 1526.54 3
 -5 1 -11 4162.79 762.381 3
 -5 1 -10 25115.4 1391.42 3
 -5 1 -9 13861.4 990.55 3
 -5 1 -8 41415.3 1673.86 3
 -5 1 1 656.978 272.608 5
 -5 1 2 31316.8 1212.26 5
 -5 1 3 248.066 323.051 5
 -5 1 4 9846.45 781.292 5
 -5 1 5 19001.1 1127.58 5
 -5 1 6 32452.7 1541.71 5
 -5 1 7 83930.7 2846.35 5
 -5 1 8 57993.3 2397.41 5
 -5 1 9 1284.04 700.624 5
 -5 1 10 7557.14 1117.77 5
 -5 1 11 6961.9 1058.27 5
 -5 1 12 11803.2 1485.24 5
 -5 1 13 1011.23 1081.93 5
 -5 2 -15 3697.35 973.882 3
 -5 2 -14 3317.3 870.369 3
 -5 2 -13 2228.57 695.997 3
 -5 2 -12 4927.1 786.97 3
 -5 2 -11 40345.3 1862.32 3
 -5 2 -10 869.149 556.029 3
 -5 2 -9 40681.4 1727.65 3
 -5 2 -8 14626.7 972.016 3
 -5 2 -4 585831 11218.7 1
 -5 2 2 4128.39 516.783 5
 -5 2 3 8817.75 741.876 5
 -5 2 4 5949.96 679.403 5
 -5 2 5 6976.69 756.957 5
 -5 2 6 3874.01 689.954 5
 -5 2 7 21531.8 1388.28 5
 -5 2 8 117767 3758.71 5
 -5 2 9 22940.9 1618.51 5
 -5 2 10 4479.75 1012.33 5
 -5 2 11 644.5 884.704 5
 -5 2 12 9463.75 1273.07 5
 -5 2 13 11462.3 1597.74 5
 -5 3 -15 22660.5 1796.21 3
 -5 3 -14 815.245 754.854 3
 -5 3 -13 2074.34 791.178 3
 -5 3 -12 -701.262 657.679 3
 -5 3 -11 22079.4 1380.88 3
 -5 3 -10 62314.9 2305.78 3
 -5 3 -9 905.089 532.647 3
 -5 3 -8 89461 2693.97 3
 -5 3 -4 196480 4107.98 1
 -5 3 -3 614852 11818.1 1
 -5 3 -2 7343.36 351.823 1
 -5 3 3 2529.37 520.368 5
 -5 3 4 56004.1 2085.56 5
 -5 3 5 308.501 458.149 5
 -5 3 6 4026.67 724.117 5
 -5 3 7 36036.3 1847.5 5
 -5 3 8 39886.5 2018.26 5
 -5 3 9 107936 3751.55 5
 -5 3 10 5782.28 1112.87 5
 -5 3 11 2167.6 991.472 5
 -5 3 12 3129.23 1137.18 5
 -5 3 13 3114.3 1065.92 5
 -5 4 -14 19435 1561.35 3
 -5 4 -13 1054.68 720.599 3
 -5 4 -12 119.226 631.544 3
 -5 4 -11 1969.14 660.461 3
 -5 4 -10 17058.2 1170.8 3
 -5 4 -9 43283.7 1802.3 3
 -5 4 -8 718.398 416.035 3
 -5 4 -5 1495.26 302.813 1
 -5 4 -4 29105.9 1017.89 1
 -5 4 -3 294649 6023.63 1
 -5 4 -2 171889 3694.27 1
 -5 4 4 99726.6 3093.06 5
 -5 4 5 114918 3508.99 5
 -5 4 6 2368.17 646.229 5
 -5 4 7 1863.33 735.184 5
 -5 4 8 42646.9 2153.47 5
 -5 4 9 41866.2 2253.15 5
 -5 4 10 43151.7 2358.53 5
 -5 4 11 6127.94 1220.42 5
 -5 4 12 12290.7 1534.52 5
 -5 4 13 583.074 1030.98 5
 -5 5 -14 21581.4 1631.41 3
 -5 5 -13 22447.5 1554.46 3
 -5 5 -12 1170.53 651.829 3
 -5 5 -11 1127.08 609.343 3
 -5 5 -10 326.854 585.478 3
 -5 5 -9 9438.22 862.989 3
 -5 5 -8 10694.9 867.733 3
 -5 5 -7 635.271 379.081 3
 -5 5 -7 681.562 368.517 1
 -5 5 -6 116326 3092.09 1
 -5 5 -5 24989.1 1081.08 1
 -5 5 -4 5175.97 476.006 1
 -5 5 -3 60612.2 1754.36 1
 -5 5 -2 139879 3239 1
 -5 5 -1 69126.3 1888.05 1
 -5 5 5 43192.7 1979.26 5
 -5 5 6 29334.6 1725.79 5
 -5 5 7 -1044.08 766.097 5
 -5 5 8 1834.38 825.335 5
 -5 5 9 2199.74 866.796 5
 -5 5 10 31066.9 2061.62 5
 -5 5 11 32557.7 2264.61 5
 -5 5 12 2152.99 1158.49 5
 -5 5 13 3631.45 1249.6 5
 -5 6 -12 16465.6 1334.78 3
 -5 6 -11 679.899 630.396 3
 -5 6 -10 6254.75 819.787 3
 -5 6 -9 1678.04 588.876 3
 -5 6 -8 6052.11 741.802 1
 -5 6 -8 5791.34 692.792 3
 -5 6 -7 10219.8 864.589 1
 -5 6 -7 11371.6 825.053 3
 -5 6 -6 6752.59 668.417 1
 -5 6 -5 70333.3 2191.78 1
 -5 6 -4 37821.1 1438.25 1
 -5 6 -3 11259.5 725.877 1
 -5 6 -2 7360.29 582.89 1
 -5 6 -1 187236 4290.89 1
 -5 6 0 51646.7 1661.91 1
 -5 6 6 12259.7 1184.09 5
 -5 6 7 36693.9 2041.58 5
 -5 6 8 16888 1471.66 5
 -5 6 9 2626.39 942.37 5
 -5 6 10 1437.89 862.974 5
 -5 6 11 22979.8 1922.4 5
 -5 6 12 4884.25 1343.77 5
 -5 6 13 83.9179 1060.17 5
 -5 7 -11 8676.87 1172.59 1
 -5 7 -10 5718.81 914.671 1
 -5 7 -9 13174.7 1170.41 1
 -5 7 -9 15945.3 1091.89 3
 -5 7 -8 414.682 438.913 3
 -5 7 -8 1306.83 571.118 1
 -5 7 -7 8722.88 857.357 1
 -5 7 -7 8493.38 753.919 3
 -5 7 -6 943.802 472.535 1
 -5 7 -5 40093.4 1638.1 1
 -5 7 -4 152296 3931.35 1
 -5 7 -3 12462.7 848.366 1
 -5 7 -2 2714.98 450.161 1
 -5 7 -1 7326.66 627.832 1
 -5 7 0 113322 3040.98 1
 -5 7 8 61052.2 2814.17 5
 -5 7 9 418.381 805.408 5
 -5 7 10 7350.15 1317.77 5
 -5 7 11 1456.45 953.128 5
 -5 7 12 9264.54 1496.68 5
 -5 8 -10 3623.83 815.818 1
 -5 8 -9 11642.2 1142.16 1
 -5 8 -8 8288.65 957.302 1
 -5 8 -7 -169.892 491.42 1
 -5 8 -6 791.336 428.468 3
 -5 8 -6 189.326 460.851 1
 -5 8 -5 2324.33 566.562 1
 -5 8 -4 116612 3371.65 1
 -5 8 -3 49970.7 1913.18 1
 -5 8 -2 19325.2 1099.74 1
 -5 8 -1 28853.9 1342.31 1
 -5 8 0 1396.04 446.591 1
 -5 8 1 57588.9 2045.3 1
 -5 8 10 6371.23 1258.99 5
 -5 8 11 5042.96 1119.72 5
 -5 8 12 4225.78 1233.74 5
 -5 9 -9 1995.91 767.424 1
 -5 9 -8 12255.2 1159.86 1
 -5 9 -7 420.334 570.992 1
 -5 9 -6 4567.74 753.687 1
 -5 9 -5 -407.113 504.915 1
 -5 9 -4 24020.6 1408.79 1
 -5 9 -3 31337.7 1532.48 1
 -5 9 -2 481.863 395.936 1
 -5 9 -1 32505.4 1528.75 1
 -5 9 0 36294.7 1632 1
 -5 9 1 31540.8 1501.64 1
 -5 10 -7 15849 1322.95 1
 -5 10 -6 754.647 580.082 1
 -5 10 -5 12404.1 1140.1 1
 -5 10 -4 2661.63 674.667 1
 -5 10 -3 28972.8 1574.33 1
 -5 10 -2 14984.5 1135.55 1
 -5 10 -1 1552.27 560.059 1
 -5 10 0 1162.19 517.349 1
 -5 10 1 550.618 494.859 1
 -5 11 -5 3578.88 863.87 1
 -5 11 -4 535.363 577.999 1
 -5 11 -3 4586.34 801.706 1
 -5 11 -2 31109.8 1711.44 1
 -5 11 -1 1921.22 639.113 1
 -5 11 0 2065.38 601.868 1
 -5 11 1 1183.34 556.784 1
 -5 11 2 3882.57 711.441 1
 -5 12 -3 804.958 663.295 1
 -5 12 -2 5337.41 886.765 1
 -5 12 -1 17213.2 1341.2 1
 -5 12 0 1829.96 709.529 1
 -5 12 1 -128.997 593.191 1
 -5 12 2 7244.09 922.933 1
 -5 13 -1 1629.21 744.64 1
 -5 13 0 18250.9 1462.69 1
 -5 13 1 5942.58 912.562 1
 -5 13 2 4575.13 862.587 1
 -5 14 2 -101.6 656.791 1
 -4 -18 -8 5767.68 1277.77 4
 -4 -17 -10 2157.54 1143.54 4
 -4 -17 -9 3376.55 1151.87 4
 -4 -17 -8 645.573 932.045 4
 -4 -17 -7 4271.75 1058.47 4
 -4 -16 -12 4676.11 1238.72 4
 -4 -16 -11 8368 1433.95 4
 -4 -16 -10 1584.58 955.549 4
 -4 -16 -9 15036.4 1667.07 4
 -4 -16 -8 7167.04 1289.45 4
 -4 -16 -7 4201.84 1113.16 4
 -4 -16 -6 581.82 854.006 4
 -4 -15 -13 545.808 956.395 4
 -4 -15 -12 3841.67 1235.56 4
 -4 -15 -11 9678.92 1487.86 4
 -4 -15 -10 14055.8 1595.1 4
 -4 -15 -9 1286.26 887.973 4
 -4 -15 -8 19935.7 1724.2 4
 -4 -15 -7 14770.6 1489.54 4
 -4 -15 -6 730.622 712.13 4
 -4 -15 -5 434.101 725.905 4
 -4 -14 -14 18034.1 1950.08 4
 -4 -14 -13 2445.4 1162.83 4
 -4 -14 -12 40.8902 876.456 4
 -4 -14 -11 915.832 951.455 4
 -4 -14 -10 20165.8 1707.87 4
 -4 -14 -9 10689.7 1344.88 4
 -4 -14 -8 1815.74 825.488 4
 -4 -14 -7 33372.2 2007.19 4
 -4 -14 -6 17789.2 1482.22 4
 -4 -14 -5 1700.84 764.451 4
 -4 -14 -4 1703.35 678.242 4
 -4 -14 3 4921.99 947.11 2
 -4 -13 -14 16528.1 1804.66 4
 -4 -13 -13 9706.21 1413.84 4
 -4 -13 -12 -179.146 765.388 4
 -4 -13 -11 10600.8 1400.81 4
 -4 -13 -10 795.939 855.389 4
 -4 -13 -9 9112.34 1239.1 4
 -4 -13 -8 4295.08 911.309 4
 -4 -13 -7 16847.2 1429.59 4
 -4 -13 -6 50504.5 2370.25 4
 -4 -13 -5 16972 1348.35 4
 -4 -13 -4 5828.28 834.952 4
 -4 -13 -3 -570.226 597.453 4
 -4 -13 3 6179.25 944.437 2
 -4 -13 4 4723.39 921.445 2
 -4 -12 -15 1785.08 1175.93 4
 -4 -12 -14 207.871 860.874 4
 -4 -12 -13 6716.23 1203.99 4
 -4 -12 -12 10544.7 1291.8 4
 -4 -12 -11 11292.8 1365.99 4
 -4 -12 -10 41945.4 2265.56 4
 -4 -12 -9 3026.58 844.915 4
 -4 -12 -8 17914.1 1414.58 4
 -4 -12 -7 958.03 685.329 4
 -4 -12 -6 6080.76 870.789 4
 -4 -12 -5 47662.6 2140.4 4
 -4 -12 -4 687.083 520.546 4
 -4 -12 -3 43971.6 1953.96 4
 -4 -12 -2 2971.39 621.9 4
 -4 -12 3 4968.25 868.435 2
 -4 -12 4 5902.12 925.477 2
 -4 -12 5 2445.54 846.451 2
 -4 -11 -16 10724.6 1577.69 4
 -4 -11 -15 -282.968 985.605 4
 -4 -11 -14 1466.8 1035.42 4
 -4 -11 -13 1851.97 844.454 4
 -4 -11 -12 15340.3 1487.38 4
 -4 -11 -11 13706 1391.68 4
 -4 -11 -10 6964.51 834.413 3
 -4 -11 -10 5364.47 989.151 4
 -4 -11 -9 21276.9 1244.82 3
 -4 -11 -9 21068 1507.34 4
 -4 -11 -8 -413.585 622.662 4
 -4 -11 -8 63.284 416.582 3
 -4 -11 -7 27979.5 1658.96 4
 -4 -11 -7 29102.1 1242.06 3
 -4 -11 -6 767.751 538.007 4
 -4 -11 -5 80648.3 2824.32 4
 -4 -11 -4 46623.4 1973.09 4
 -4 -11 -3 9245.66 874.711 4
 -4 -11 -2 21135.9 1193.03 4
 -4 -11 -1 1498.61 432.771 4
 -4 -11 3 21872.7 1390.22 2
 -4 -11 4 953.011 662.126 2
 -4 -11 5 5031.39 883.877 2
 -4 -11 6 930.01 781.708 2
 -4 -10 -16 16468.1 1743.11 4
 -4 -10 -15 3543.06 1087.87 4
 -4 -10 -14 1059.18 917.592 4
 -4 -10 -13 5991.31 1060.63 4
 -4 -10 -12 1300.06 748.217 4
 -4 -10 -12 1539.37 681.395 3
 -4 -10 -11 14845 1171.59 3
 -4 -10 -11 13695.8 1350.93 4
 -4 -10 -10 14878.1 1113.28 3
 -4 -10 -10 12431.2 1225.99 4
 -4 -10 -9 12609.5 977.479 3
 -4 -10 -9 13474 1220.41 4
 -4 -10 -8 32880.3 1406.72 3
 -4 -10 -8 30717.5 1683.37 4
 -4 -10 -7 7699.11 881.243 4
 -4 -10 -7 7500.33 653.135 3
 -4 -10 -6 11377.7 1009.09 4
 -4 -10 -6 12396.3 735.17 3
 -4 -10 -5 43188.3 1836.48 4
 -4 -10 -5 41697.3 1331.12 3
 -4 -10 -4 176411 4632.76 4
 -4 -10 -4 182228 3870.38 3
 -4 -10 -3 17811.1 1095.02 4
 -4 -10 -2 10614.1 823.06 4
 -4 -10 -1 9207.56 711.842 4
 -4 -10 0 486.549 321.426 4
 -4 -10 3 47661.5 1999.97 2
 -4 -10 4 9584.64 991.627 2
 -4 -10 5 -88.5006 612.743 2
 -4 -10 6 264.949 643.202 2
 -4 -10 7 414.941 719.393 2
 -4 -10 8 22166.7 1724.78 5
 -4 -9 -13 15818.5 1386.57 3
 -4 -9 -12 17489.2 1319.79 3
 -4 -9 -11 556.556 555.046 3
 -4 -9 -10 32166.4 1567.38 3
 -4 -9 -10 31367.1 1780.18 4
 -4 -9 -9 1179.26 583.824 4
 -4 -9 -9 712.537 468.327 3
 -4 -9 -8 39012.2 1545.64 3
 -4 -9 -8 33487.6 1710.4 4
 -4 -9 -7 139321 3521.25 3
 -4 -9 -7 139851 3927.63 4
 -4 -9 -6 2502.66 387.445 3
 -4 -9 -6 2992.58 585.331 4
 -4 -9 -5 1489.44 306.467 3
 -4 -9 -5 1773.57 507.415 4
 -4 -9 -4 97325.6 2364.91 3
 -4 -9 -4 96681.8 2864.62 4
 -4 -9 -3 103415 2387.65 3
 -4 -9 -3 106167 2982.04 4
 -4 -9 -2 31956.7 1331.52 4
 -4 -9 -1 3903.17 462.745 4
 -4 -9 0 23178.6 993.225 4
 -4 -9 1 11366.6 654.02 4
 -4 -9 3 1272.45 498.424 2
 -4 -9 4 36375.5 1689.57 2
 -4 -9 5 20245.9 1293.78 2
 -4 -9 6 -48.2532 601.93 2
 -4 -9 7 709.931 688.973 2
 -4 -9 7 817.689 704.692 5
 -4 -9 8 6180.6 1106.45 5
 -4 -9 9 19806.7 1718.15 5
 -4 -8 -14 18750.8 1510.39 3
 -4 -8 -13 1272.12 780.819 3
 -4 -8 -12 15571.2 1243.39 3
 -4 -8 -11 -186.593 551.577 3
 -4 -8 -10 12538.5 1016.34 3
 -4 -8 -9 37845.1 1613.13 3
 -4 -8 -8 1501.04 448.493 3
 -4 -8 -7 115012 3048.77 3
 -4 -8 -7 114337 3322.48 4
 -4 -8 -6 109489 2851.31 3
 -4 -8 -6 112151 3165.28 4
 -4 -8 -5 1677.03 326.156 3
 -4 -8 -5 1645.18 467.524 4
 -4 -8 -4 6212.51 449.807 3
 -4 -8 -4 5369.48 605.223 4
 -4 -8 -3 73844.2 2225.1 4
 -4 -8 -2 112211 2929.01 4
 -4 -8 -1 18279.2 862.599 4
 -4 -8 0 1481.48 299.49 4
 -4 -8 1 11994 599.861 4
 -4 -8 2 327.872 205.58 4
 -4 -8 3 8790.91 790.028 2
 -4 -8 4 2200.36 584.973 2
 -4 -8 5 68467 2412.75 2
 -4 -8 6 60300.9 2308.75 2
 -4 -8 7 3240.36 831.855 5
 -4 -8 7 3722.45 742.766 2
 -4 -8 8 2996.55 863.165 5
 -4 -8 9 6944.19 1126.21 5
 -4 -8 10 13328.1 1521.06 5
 -4 -7 -14 28348.9 1815.5 3
 -4 -7 -13 35459.1 1907.27 3
 -4 -7 -12 6962.44 939.506 3
 -4 -7 -11 6233.25 794.881 3
 -4 -7 -10 208.213 499.572 3
 -4 -7 -9 16326.6 1035.05 3
 -4 -7 -8 11144.3 825.943 3
 -4 -7 -7 13376.7 835.757 3
 -4 -7 -6 227693 5098.73 3
 -4 -7 -5 159501 3950.38 4
 -4 -7 -5 161351 3709.9 3
 -4 -7 -4 715.44 342.103 4
 -4 -7 -3 1279.14 338.49 4
 -4 -7 -2 118296 2939.07 4
 -4 -7 -1 139348 3230.88 4
 -4 -7 0 22829.3 836.131 4
 -4 -7 1 40160.6 1142.37 4
 -4 -7 2 26596.4 1185.6 2
 -4 -7 3 -35.4536 379.853 2
 -4 -7 4 1014.82 449.037 2
 -4 -7 5 -45.8456 487.857 2
 -4 -7 6 111611 3339.11 2
 -4 -7 6 111758 3478.46 5
 -4 -7 7 59740.5 2486.87 5
 -4 -7 7 62513.5 2350.72 2
 -4 -7 8 -84.0738 661.23 5
 -4 -7 9 573.386 715.019 5
 -4 -7 10 6916.15 1134.47 5
 -4 -6 -14 7702.54 1108.49 3
 -4 -6 -13 24581.8 1603.74 3
 -4 -6 -12 33457.6 1744.76 3
 -4 -6 -11 -256.988 495.215 3
 -4 -6 -10 32306.1 1550.06 3
 -4 -6 -9 1530.98 508.744 3
 -4 -6 -8 50771.9 1811.45 3
 -4 -6 -7 2419.56 457.335 3
 -4 -6 -6 83545.7 2321.3 3
 -4 -6 -4 109094 2758.78 4
 -4 -6 -3 29987.2 1113.45 4
 -4 -6 -2 595.506 241.752 4
 -4 -6 -1 30124.2 1000.38 4
 -4 -6 0 123935 2697.28 4
 -4 -6 1 8066.8 373.467 4
 -4 -6 2 154256 3685.01 2
 -4 -6 3 3839.95 505.616 2
 -4 -6 4 15931.7 926.699 2
 -4 -6 5 28170.9 1320.78 2
 -4 -6 6 3655.19 631.262 2
 -4 -6 6 4450.2 723.764 5
 -4 -6 7 177309 4851.2 5
 -4 -6 8 27719.8 1673.56 5
 -4 -6 9 1048.26 690.785 5
 -4 -6 10 -106.45 768.161 5
 -4 -6 11 9907.94 1374.02 5
 -4 -5 -15 3714.38 1045.49 3
 -4 -5 -14 684.694 723.546 3
 -4 -5 -13 568.859 614.842 3
 -4 -5 -12 29904.9 1629.05 3
 -4 -5 -11 24816.7 1399.93 3
 -4 -5 -10 22971.7 1307.26 3
 -4 -5 -9 13539.4 968.423 3
 -4 -5 -8 670.937 384.806 3
 -4 -5 -7 17757.6 956.513 3
 -4 -5 -6 18774 923.332 3
 -4 -5 -4 534069 10537.5 5
 -4 -5 -2 7817.95 446.314 4
 -4 -5 -1 41917.8 1141.09 4
 -4 -5 0 59021.6 1343.47 4
 -4 -5 2 52600.5 1584.75 2
 -4 -5 3 178591 4113.66 2
 -4 -5 4 13878.9 828.745 2
 -4 -5 5 42113.3 1607.93 2
 -4 -5 5 45156.2 1765.08 5
 -4 -5 6 9172.84 874.748 5
 -4 -5 7 61374.3 2354.27 5
 -4 -5 8 74510.2 2788.41 5
 -4 -5 9 6188.26 1005.52 5
 -4 -5 10 8231.03 1130.73 5
 -4 -5 11 -1381.36 957.655 5
 -4 -4 -15 22081.7 1655.33 3
 -4 -4 -14 1609.24 840.109 3
 -4 -4 -13 22535.9 1513.04 3
 -4 -4 -12 739.826 622.638 3
 -4 -4 -11 30953 1591.58 3
 -4 -4 -10 3278.92 626.879 3
 -4 -4 -9 4201.95 594.644 3
 -4 -4 -8 47965.8 1742.34 3
 -4 -4 -7 3134.69 468.275 3
 -4 -4 -5 108506 2486.17 5
 -4 -4 -4 433093 8476.61 5
 -4 -4 -3 361872 7119.27 5
 -4 -4 -1 6149.66 303.493 4
 -4 -4 1 54451.3 1458.34 2
 -4 -4 2 2109.61 295.103 2
 -4 -4 3 34796.8 1212.28 2
 -4 -4 3 35794.2 1317.54 5
 -4 -4 4 117244 3109.2 5
 -4 -4 4 119478 2977.71 2
 -4 -4 5 4040.2 602.662 5
 -4 -4 6 53021.1 2008.1 5
 -4 -4 7 2769.35 643.155 5
 -4 -4 8 45228.1 2046.98 5
 -4 -4 9 18917 1421.44 5
 -4 -4 10 -669.633 843.571 5
 -4 -4 11 11322 1312.95 5
 -4 -4 12 -1556.52 889.837 5
 -4 -3 -15 48481.2 2483.83 3
 -4 -3 -14 27015.3 1736.11 3
 -4 -3 -13 15423.9 1285.43 3
 -4 -3 -12 10667.7 1034.77 3
 -4 -3 -11 12021.4 999.484 3
 -4 -3 -10 7590.9 835.783 3
 -4 -3 -9 1749.54 515.477 3
 -4 -3 -8 34628.9 1440.23 3
 -4 -3 -7 43595.1 1579.14 3
 -4 -3 -5 6726.56 380.438 5
 -4 -3 -4 189668 3826.76 5
 -4 -3 -3 54701.2 1199.75 5
 -4 -3 -3 54142.3 1537.92 1
 -4 -3 1 127.66 187.753 5
 -4 -3 1 248.585 169.483 2
 -4 -3 2 188143 3987.97 2
 -4 -3 2 187941 4134.45 5
 -4 -3 3 1342.3 362.176 5
 -4 -3 4 64290 1979.32 5
 -4 -3 5 19403.9 1074.22 5
 -4 -3 6 139.728 458.749 5
 -4 -3 7 14143.2 1082.05 5
 -4 -3 8 7861.93 945.063 5
 -4 -3 9 25380.9 1598.94 5
 -4 -3 10 15885.9 1405.6 5
 -4 -3 11 4001.71 1075.67 5
 -4 -3 12 11698.5 1466.2 5
 -4 -2 -15 15755 1427.09 3
 -4 -2 -14 58648.3 2557.28 3
 -4 -2 -13 6196.51 965.73 3
 -4 -2 -12 12452.6 1129.03 3
 -4 -2 -11 423.665 523.67 3
 -4 -2 -10 4890.36 686.52 3
 -4 -2 -9 15050 1008.54 3
 -4 -2 -8 17572.4 1016.93 3
 -4 -2 -7 139822 3523.83 3
 -4 -2 -5 39161.4 1289.73 1
 -4 -2 -4 3374.8 299.856 1
 -4 -2 -3 19616.9 706.268 1
 -4 -2 -2 16535.8 618.547 1
 -4 -2 -1 8944.83 286.407 5
 -4 -2 -1 9688.47 345.082 4
 -4 -2 0 34140.6 896.034 5
 -4 -2 0 34649.9 778.742 2
 -4 -2 1 54787.9 1416.02 5
 -4 -2 2 3590.09 353.845 5
 -4 -2 3 19123.4 866.208 5
 -4 -2 4 8638.66 656.481 5
 -4 -2 5 125697 3309.52 5
 -4 -2 6 17634.8 1068.98 5
 -4 -2 7 1088.36 557.806 5
 -4 -2 8 10876.1 1032.31 5
 -4 -2 9 9811.63 1051.5 5
 -4 -2 10 16878.1 1380 5
 -4 -2 11 11094.6 1305.54 5
 -4 -2 12 1164.93 840.884 5
 -4 -2 13 2317.14 1046.49 5
 -4 -1 -15 -336.637 915.817 3
 -4 -1 -14 16332.7 1449.67 3
 -4 -1 -13 33840 1836.63 3
 -4 -1 -12 395.82 636.774 3
 -4 -1 -11 24365 1390.44 3
 -4 -1 -10 3212.87 600.877 3
 -4 -1 -9 15657.8 1011.1 3
 -4 -1 -8 5516.48 633.019 3
 -4 -1 -7 14565.2 883.424 3
 -4 -1 -4 921.578 178.31 2
 -4 -1 -4 1132.58 174.712 1
 -4 -1 -3 13236.7 464.659 1
 -4 -1 -3 11891.1 466.124 2
 -4 -1 -3 12410.7 573.118 4
 -4 -1 -2 42176.5 1155.73 4
 -4 -1 -2 43506.4 973.17 2
 -4 -1 -1 163376 3364.81 4
 -4 -1 0 31555.3 849.505 4
 -4 -1 0 33659.6 881.651 5
 -4 -1 1 132879 2950.82 5
 -4 -1 1 135820 2773.98 4
 -4 -1 2 113547 2671.96 5
 -4 -1 3 65598.8 1865.92 5
 -4 -1 4 35775.9 1337 5
 -4 -1 5 7478.59 688.354 5
 -4 -1 6 118346 3303.67 5
 -4 -1 7 34145.4 1609.74 5
 -4 -1 8 729.681 588.241 5
 -4 -1 9 -160.078 588.206 5
 -4 -1 10 3288.49 819.747 5
 -4 -1 11 30875.3 1959.47 5
 -4 -1 12 3739.34 1008.3 5
 -4 -1 13 322.866 963.218 5
 -4 0 -15 3071 868.232 3
 -4 0 -14 8676.91 1095.67 3
 -4 0 -13 9547.23 1110.44 3
 -4 0 -12 16466.2 1227.6 3
 -4 0 -11 6232.13 847.146 3
 -4 0 -10 61338.2 2217.85 3
 -4 0 -9 1028.58 492.465 3
 -4 0 -8 36478.5 1502.56 3
 -4 0 -7 62969.7 2007 3
 -4 0 -2 13995.7 604.759 4
 -4 0 -1 75550.5 1824.84 4
 -4 0 0 190194 3978.75 4
 -4 0 0 191429 3976.17 5
 -4 0 1 16057 622.953 4
 -4 0 1 16355.1 678.448 5
 -4 0 2 269306 5649.11 5
 -4 0 3 128923 3135.46 5
 -4 0 4 788.548 354.809 5
 -4 0 5 23864.2 1160.82 5
 -4 0 6 42283.4 1722.73 5
 -4 0 7 93157.1 2938.58 5
 -4 0 8 49870.7 2110.06 5
 -4 0 9 479.618 596.205 5
 -4 0 10 3873.12 860.46 5
 -4 0 11 4757.15 933.92 5
 -4 0 12 10707.4 1302.03 5
 -4 0 13 504.219 992.552 5
 -4 1 -14 11825.8 1280.77 3
 -4 1 -13 3052.18 821.832 3
 -4 1 -12 19682.9 1339.1 3
 -4 1 -11 22172.1 1350.13 3
 -4 1 -10 4960.62 682.726 3
 -4 1 -9 87901.8 2704.08 3
 -4 1 -8 6958.55 674.202 3
 -4 1 -7 84565.7 2449.15 3
 -4 1 0 290540 5980.93 4
 -4 1 1 117828 2744.4 4
 -4 1 1 116598 2799.37 5
 -4 1 2 12910.8 707.88 5
 -4 1 3 377791 7889.09 5
 -4 1 4 34148.5 1349.08 5
 -4 1 5 16059.4 961.92 5
 -4 1 6 20478.1 1194.45 5
 -4 1 7 134399 3791.24 5
 -4 1 8 92686.2 3075.54 5
 -4 1 9 11681.9 1114.53 5
 -4 1 10 18286.3 1431.21 5
 -4 1 11 8940.53 1202.26 5
 -4 1 12 1764.54 972.961 5
 -4 1 13 2743.99 1130.32 5
 -4 2 -14 -37.0828 748.661 3
 -4 2 -13 9980.88 1130.38 3
 -4 2 -12 214.355 583.236 3
 -4 2 -11 45009 1953.65 3
 -4 2 -10 15188.5 1068.44 3
 -4 2 -9 50009.1 1899.85 3
 -4 2 -8 203600 4881.12 3
 -4 2 -7 1603.36 434.977 3
 -4 2 -3 294561 5766.22 1
 -4 2 -2 40612.2 945.089 1
 -4 2 2 32973.7 1278.76 5
 -4 2 3 48494.9 1666.02 5
 -4 2 4 148473 3761.13 5
 -4 2 5 5752.03 663.5 5
 -4 2 6 1668.85 525.657 5
 -4 2 7 2999.97 674.469 5
 -4 2 8 51267 2175.67 5
 -4 2 9 113664 3681.32 5
 -4 2 10 53.4756 772.354 5
 -4 2 11 9780.37 1241.48 5
 -4 2 12 5997.23 1124.85 5
 -4 2 13 3338.22 1089.88 5
 -4 3 -13 3938.94 883.764 3
 -4 3 -12 24840.4 1524.73 3
 -4 3 -11 7906.77 880.362 3
 -4 3 -10 48795.1 1966.26 3
 -4 3 -9 466.706 442.148 3
 -4 3 -8 88597.6 2630.49 3
 -4 3 -7 93220.2 2651.45 3
 -4 3 -4 55037.4 1496.54 1
 -4 3 -3 546168 10625.8 1
 -4 3 -2 480186 9333.14 1
 -4 3 -1 76668.1 1789.4 1
 -4 3 3 16966.4 981.033 5
 -4 3 4 235189 5574.02 5
 -4 3 5 116860 3343.03 5
 -4 3 6 9077.2 910.157 5
 -4 3 7 16080.9 1187.58 5
 -4 3 8 38854.5 1926.78 5
 -4 3 9 53505.3 2400.04 5
 -4 3 10 69090.6 2898.87 5
 -4 3 11 1251.55 936.318 5
 -4 3 12 13083.5 1455.05 5
 -4 3 13 23.8091 948.73 5
 -4 4 -13 7333.38 1037.77 3
 -4 4 -12 11787.9 1150.66 3
 -4 4 -11 6042.11 806.733 3
 -4 4 -10 6221.99 781.423 3
 -4 4 -9 46964.8 1828.7 3
 -4 4 -8 28.2113 456.505 3
 -4 4 -7 62785.8 2031.26 3
 -4 4 -4 2270.17 339.457 1
 -4 4 -3 241358 5108.81 1
 -4 4 -2 482709 9570.92 1
 -4 4 -1 36676.6 1129.86 1
 -4 4 4 3864.79 620.235 5
 -4 4 5 148040 4091.84 5
 -4 4 6 45415.5 1987.1 5
 -4 4 7 485.508 544.449 5
 -4 4 8 1100.26 662.355 5
 -4 4 9 6459.21 947.542 5
 -4 4 10 21202.7 1635.31 5
 -4 4 11 22768.6 1806.12 5
 -4 4 12 2525.56 1126.17 5
 -4 4 13 9814.96 1496.64 5
 -4 5 -12 629.213 683.988 3
 -4 5 -11 12899.2 1078.3 3
 -4 5 -10 10069 903.815 3
 -4 5 -9 -277.908 445.209 3
 -4 5 -8 15275.5 970.056 3
 -4 5 -7 -332.281 364.761 3
 -4 5 -6 117985 3064.53 3
 -4 5 -5 103566 2805.4 1
 -4 5 -4 5357.9 518.409 1
 -4 5 -3 951.191 266.285 1
 -4 5 -2 183514 4144.89 1
 -4 5 -1 251281 5392.7 1
 -4 5 0 959.415 257.774 1
 -4 5 5 15184.3 1153.18 5
 -4 5 6 46924.9 2101.49 5
 -4 5 7 43965.4 2111.85 5
 -4 5 8 2871.22 876.02 5
 -4 5 9 4367.93 1024.42 5
 -4 5 10 5.27384 846.525 5
 -4 5 11 34859.6 2210.87 5
 -4 5 12 5233.4 1226.55 5
 -4 5 13 1482.04 1083.6 5
 -4 6 -11 -159.297 623.478 3
 -4 6 -10 25492.7 1399.24 3
 -4 6 -9 23783.6 1273.53 3
 -4 6 -8 142.45 427.603 3
 -4 6 -7 12922.1 967.595 1
 -4 6 -7 13687.2 864.76 3
 -4 6 -6 9412.07 850.724 1
 -4 6 -6 7569.45 633.491 3
 -4 6 -5 108811 3026.26 1
 -4 6 -4 99135.4 2789.11 1
 -4 6 -3 1175.76 386.18 1
 -4 6 -2 660.936 274.204 1
 -4 6 -1 45660.9 1556.18 1
 -4 6 0 272955 5969.2 1
 -4 6 1 12157.7 773.304 1
 -4 6 6 12708.3 1142.07 5
 -4 6 7 24628.5 1601.35 5
 -4 6 8 49976.2 2392.24 5
 -4 6 9 2492.58 922.616 5
 -4 6 10 5778.2 1081.43 5
 -4 6 11 11387.2 1390.89 5
 -4 6 12 14576.8 1593.18 5
 -4 6 13 2153.64 1089.53 5
 -4 7 -9 41627.5 1730.55 3
 -4 7 -9 38897.8 1999.53 1
 -4 7 -8 46774.1 1743.53 3
 -4 7 -8 40573.6 1962.42 1
 -4 7 -7 2648.96 643.772 1
 -4 7 -7 2232.65 478.708 3
 -4 7 -6 21620 1036.59 3
 -4 7 -6 21495.1 1283.63 1
 -4 7 -5 6642.74 574.875 3
 -4 7 -5 5757.25 683.486 1
 -4 7 -4 112806 3176.43 1
 -4 7 -3 77219.3 2414.47 1
 -4 7 -2 20503.8 1092.02 1
 -4 7 -1 2426.21 439.403 1
 -4 7 0 12504 815.36 1
 -4 7 1 63528 2076.24 1
 -4 7 8 40366.1 2175.34 5
 -4 7 9 22270.3 1698.93 5
 -4 7 10 3775.57 1092.71 5
 -4 7 11 705.532 852.857 5
 -4 7 12 5099.09 1288.72 5
 -4 7 13 7111.3 1527.03 5
 -4 8 -13 1972.53 1102.68 1
 -4 8 -12 644.538 799.286 1
 -4 8 -11 6578.82 1135.81 1
 -4 8 -10 19284.2 1565.42 1
 -4 8 -9 1049.05 613.553 1
 -4 8 -8 47374.5 2193.05 1
 -4 8 -7 11350.6 1056.87 1
 -4 8 -6 4575.61 522.933 3
 -4 8 -6 4493.98 756.892 1
 -4 8 -5 42547.5 1444.38 3
 -4 8 -5 38759.5 1791.97 1
 -4 8 -4 7282.64 825.519 1
 -4 8 -3 164941 4339.38 1
 -4 8 -2 31465.4 1457.15 1
 -4 8 -1 21646.7 1164.58 1
 -4 8 0 12213 890.998 1
 -4 8 1 26446.7 1293.29 1
 -4 8 2 26465.5 1336.3 1
 -4 8 9 40273.3 2385.27 5
 -4 8 10 -2086 1145.44 5
 -4 8 11 7233.44 1239.91 5
 -4 8 12 347.51 1010.26 5
 -4 8 13 7812.24 1586.12 5
 -4 9 -11 562.229 837.6 1
 -4 9 -10 7769.43 1151.35 1
 -4 9 -9 4410.1 962.64 1
 -4 9 -8 10009.6 1110.9 1
 -4 9 -7 24507.9 1562.52 1
 -4 9 -6 -516.113 600.001 1
 -4 9 -5 43905.3 1991.53 1
 -4 9 -4 12916.8 1103.56 1
 -4 9 -3 32463.1 1619.18 1
 -4 9 -2 166290 4447.39 1
 -4 9 -1 11220.2 905.966 1
 -4 9 0 47921.5 1942.46 1
 -4 9 1 2445.23 535.431 1
 -4 9 2 38888.6 1724.9 1
 -4 9 12 6267.67 1330 5
 -4 10 -10 605.114 789.667 1
 -4 10 -9 2299.64 882.057 1
 -4 10 -8 37.5705 686.759 1
 -4 10 -7 11207.1 1212.1 1
 -4 10 -6 45834.1 2233.68 1
 -4 10 -5 127.366 553.393 1
 -4 10 -4 28562.5 1668.4 1
 -4 10 -3 5577.22 811.939 1
 -4 10 -2 66190.4 2531.01 1
 -4 10 -1 51619.9 2137.45 1
 -4 10 0 321.491 526.924 1
 -4 10 1 55581.2 2209.98 1
 -4 10 2 2521.66 624.539 1
 -4 11 -8 1162.58 806.872 1
 -4 11 -7 -402.852 685.095 1
 -4 11 -6 28012.2 1846.1 1
 -4 11 -5 48748 2391.07 1
 -4 11 -4 1237.19 700.199 1
 -4 11 -3 5842.67 889.131 1
 -4 11 -2 7329.33 932.871 1
 -4 11 -1 35138.4 1848.37 1
 -4 11 0 437.967 517.875 1
 -4 11 1 -400.172 569.197 1
 -4 11 2 28137.6 1594.74 1
 -4 11 3 3498.27 704.682 1
 -4 12 -7 84.2303 802.031 1
 -4 12 -6 1388.26 897.041 1
 -4 12 -5 28338 1905.33 1
 -4 12 -4 30224.4 1933.15 1
 -4 12 -3 436.588 670.206 1
 -4 12 -2 1040.5 666 1
 -4 12 -1 3906.4 845.932 1
 -4 12 0 13249.2 1229.89 1
 -4 12 1 246.834 599.331 1
 -4 12 2 17384.6 1336.71 1
 -4 12 3 22880.2 1559.63 1
 -4 13 -5 6191.35 1165.38 1
 -4 13 -4 32386.1 2067.59 1
 -4 13 -3 16913.9 1524.03 1
 -4 13 -2 615.528 693.339 1
 -4 13 -1 736.161 727.527 1
 -4 13 0 193.853 664.013 1
 -4 13 1 15494.5 1368.25 1
 -4 13 2 -371.685 646.626 1
 -4 13 3 25803.7 1699.21 1
 -4 14 -3 18300.7 1656.74 1
 -4 14 -2 9681.46 1252.53 1
 -4 14 -1 1824.18 835.099 1
 -4 14 0 3866.52 894.104 1
 -4 14 1 1619.38 780.66 1
 -4 14 2 3917.55 887.511 1
 -4 14 3 4118.1 956.76 1
 -4 15 0 3772.04 909.99 1
 -4 15 1 5145.48 1082.73 1
 -4 15 2 1451.79 874.524 1
 -4 15 3 813.226 851.951 1
 -4 16 2 1193.98 850.378 1
 -4 16 3 1682.33 919.385 1
 -3 -18 -7 1649.77 971.785 4
 -3 -17 -9 14462.6 1677.15 4
 -3 -17 -8 6205.02 1230.95 4
 -3 -17 -7 348.495 929.532 4
 -3 -17 -6 658.233 905.58 4
 -3 -16 -11 1816.56 1116.22 4
 -3 -16 -10 2569.46 1013.64 4
 -3 -16 -9 9061.42 1408.76 4
 -3 -16 -8 30567.3 2207.56 4
 -3 -16 -7 7297.85 1215.11 4
 -3 -16 -6 516.559 829.083 4
 -3 -16 -5 2347.48 873.351 4
 -3 -16 -4 17080.4 1524.62 4
 -3 -15 -12 6408.08 1334.38 4
 -3 -15 -11 537.155 824.454 4
 -3 -15 -10 7386.48 1296.13 4
 -3 -15 -9 1823.55 897.72 4
 -3 -15 -8 5797.95 1085.59 4
 -3 -15 -7 26257.4 1887.77 4
 -3 -15 -6 10143.2 1238.25 4
 -3 -15 -5 763.922 760.391 4
 -3 -15 -4 4065.93 902.173 4
 -3 -15 -3 24340.2 1707.28 4
 -3 -15 3 1094.64 847.972 2
 -3 -14 -13 3168.8 1258.64 4
 -3 -14 -12 -1217.97 1082.39 4
 -3 -14 -11 8457.79 1374.39 4
 -3 -14 -10 731.951 922.441 4
 -3 -14 -9 3772.71 947.399 4
 -3 -14 -8 812.078 710.352 4
 -3 -14 -7 16654.3 1506.73 4
 -3 -14 -6 26103.3 1804.7 4
 -3 -14 -5 8379.63 1080.97 4
 -3 -14 -4 890.87 668.073 4
 -3 -14 -3 1491.85 685.155 4
 -3 -14 -2 29551.2 1744.21 4
 -3 -14 3 7886.43 1127.97 2
 -3 -14 4 -199.149 760.503 2
 -3 -14 5 10733.8 1358.21 2
 -3 -13 -14 -121.045 956.013 4
 -3 -13 -13 13840.3 1622.48 4
 -3 -13 -12 1829.21 921.164 4
 -3 -13 -11 21354.2 1846.87 4
 -3 -13 -10 36299.3 2265.57 4
 -3 -13 -9 788.456 773.203 4
 -3 -13 -8 2482.53 850.441 4
 -3 -13 -7 -345.507 693.534 4
 -3 -13 -6 4835.05 866.934 4
 -3 -13 -5 24970.5 1664.65 4
 -3 -13 -4 70.4129 595.729 4
 -3 -13 -3 25771.3 1592 4
 -3 -13 -2 382.993 540.822 4
 -3 -13 -1 34977.2 1740.12 4
 -3 -13 3 1852.38 756.712 2
 -3 -13 4 2885.61 796.397 2
 -3 -13 5 345.184 814.524 2
 -3 -13 6 13389.7 1406.61 2
 -3 -12 -15 289.448 934.563 4
 -3 -12 -14 3286.05 1278.6 4
 -3 -12 -13 -35.7979 902.199 4
 -3 -12 -12 9606.61 1378.03 4
 -3 -12 -11 770.777 819.998 4
 -3 -12 -10 46654.4 2468.15 4
 -3 -12 -9 29359.2 1894.05 4
 -3 -12 -8 2380.7 857.387 4
 -3 -12 -7 9573.42 1129.81 4
 -3 -12 -6 2974.08 716.881 4
 -3 -12 -5 10999.3 1086.13 4
 -3 -12 -4 48193.9 2167.82 4
 -3 -12 -3 7377.93 921.298 4
 -3 -12 -2 35487.5 1719.14 4
 -3 -12 -1 1642.54 596.372 4
 -3 -12 0 39015.1 1708.19 4
 -3 -12 3 29541.6 1719.3 2
 -3 -12 4 -406.987 714.077 2
 -3 -12 5 6489.67 1028.63 2
 -3 -12 6 698.511 811.263 2
 -3 -12 7 17180.1 1558.59 2
 -3 -11 -15 2824.27 1154.28 4
 -3 -11 -14 5104.72 1164.05 4
 -3 -11 -13 5906.04 1258.13 4
 -3 -11 -12 2448.21 965.563 4
 -3 -11 -11 8624.08 1228.72 4
 -3 -11 -10 326.298 778.723 4
 -3 -11 -9 54392.7 2487.09 4
 -3 -11 -8 24915.6 1627.62 4
 -3 -11 -7 4268.82 855.868 4
 -3 -11 -6 17099.5 1286.34 4
 -3 -11 -5 11277.7 1050.62 4
 -3 -11 -4 96020.4 3166.1 4
 -3 -11 -3 27493.6 1504.57 4
 -3 -11 -2 8055.64 813.35 4
 -3 -11 -1 5621.99 675.341 4
 -3 -11 0 911.093 506.236 4
 -3 -11 1 29996.7 1347.79 4
 -3 -11 3 55476.1 2279.86 2
 -3 -11 4 10226.2 1045.32 2
 -3 -11 5 1307.41 725.966 2
 -3 -11 6 6841.06 981.541 2
 -3 -11 7 5424.05 1058.98 2
 -3 -11 8 21617.7 1691.75 2
 -3 -10 -16 5938.13 1451.03 4
 -3 -10 -15 18445.8 1868.07 4
 -3 -10 -14 -609.018 949.488 4
 -3 -10 -13 2058.75 886.332 4
 -3 -10 -12 8364.97 1235.7 4
 -3 -10 -11 -546.43 821.361 4
 -3 -10 -10 2189.52 745.827 4
 -3 -10 -9 23202.4 1542.54 4
 -3 -10 -8 77447.7 2868.83 4
 -3 -10 -7 38057.7 1873 4
 -3 -10 -6 7835.44 897.554 4
 -3 -10 -5 3464.93 677.58 4
 -3 -10 -4 92575.9 2962.65 4
 -3 -10 -3 95486.6 2978.09 4
 -3 -10 -2 4650.61 607.223 4
 -3 -10 -1 15043.3 960.644 4
 -3 -10 0 15898.4 941.201 4
 -3 -10 1 8836.22 700.532 4
 -3 -10 2 13752.1 844.289 4
 -3 -10 3 36848.9 1744.29 2
 -3 -10 4 55742.6 2253.27 2
 -3 -10 5 6278.74 890.748 2
 -3 -10 6 594.077 630.996 2
 -3 -10 7 2778.78 862.299 2
 -3 -10 8 5420.59 1008.61 2
 -3 -10 9 16517.2 1538.25 2
 -3 -10 9 16309.3 1549.07 5
 -3 -9 -16 1159.81 1075.23 4
 -3 -9 -15 14347.6 1569.68 4
 -3 -9 -14 8645.99 1254.35 4
 -3 -9 -13 1447.01 813.348 4
 -3 -9 -12 16960.1 1515.13 4
 -3 -9 -11 8205.63 1079.61 4
 -3 -9 -10 2169.09 761.625 4
 -3 -9 -10 1663.99 603.828 3
 -3 -9 -9 1044.69 521.988 3
 -3 -9 -9 1434.48 645.44 4
 -3 -9 -8 42018.3 1653.27 3
 -3 -9 -8 42670.5 1954.66 4
 -3 -9 -7 58487.4 2257.59 4
 -3 -9 -7 58127.4 1898.26 3
 -3 -9 -6 11605.5 724.422 3
 -3 -9 -6 9845.52 909.293 4
 -3 -9 -5 15413.9 1068.47 4
 -3 -9 -5 15895.9 751.664 3
 -3 -9 -4 8634.24 814.615 4
 -3 -9 -4 8154.96 469.16 3
 -3 -9 -3 99464 2536.57 7
 -3 -9 -3 94054.4 2840.24 4
 -3 -9 -3 93985.6 2091.95 3
 -3 -9 -2 82235.8 2530.68 4
 -3 -9 -1 4812.91 569.402 4
 -3 -9 0 25130.7 1117.77 4
 -3 -9 1 25305.1 1101.78 4
 -3 -9 2 2827.07 418.135 4
 -3 -9 3 1849.56 519.319 2
 -3 -9 4 74377.9 2598.13 2
 -3 -9 5 97652.6 3158.5 2
 -3 -9 6 13998.2 1169.33 2
 -3 -9 7 -700.736 710.886 2
 -3 -9 8 2220.5 912.41 5
 -3 -9 8 1295.59 700.509 2
 -3 -9 9 4770.83 978.444 5
 -3 -8 -11 27598.6 1551.95 3
 -3 -8 -10 2137.28 576.842 3
 -3 -8 -9 3283.08 632.842 3
 -3 -8 -8 568.354 406.97 3
 -3 -8 -8 1594.15 575.653 4
 -3 -8 -7 21894.2 1269.32 4
 -3 -8 -7 20398.9 1026.38 3
 -3 -8 -6 123211 3464.31 4
 -3 -8 -6 124166 3086.84 3
 -3 -8 -5 15035.5 729.153 3
 -3 -8 -5 13797.1 951.764 4
 -3 -8 -4 11096.5 561.524 3
 -3 -8 -4 10949.1 811.689 4
 -3 -8 -3 15721.5 798.523 7
 -3 -8 -3 14863.1 575.188 3
 -3 -8 -3 15297.1 932.794 4
 -3 -8 -2 72215.7 1638.07 3
 -3 -8 -2 72387.8 2221.51 4
 -3 -8 -2 77322.6 2102.36 7
 -3 -8 -1 17550.9 895.868 4
 -3 -8 0 620.699 121.201 3
 -3 -8 0 819.935 304.304 4
 -3 -8 1 31178 1147.34 4
 -3 -8 2 21404.8 897.295 4
 -3 -8 3 1166.39 306.488 4
 -3 -8 3 1608.29 478.084 2
 -3 -8 4 479.758 468.004 2
 -3 -8 5 64235.3 2321.99 2
 -3 -8 6 95592.3 3096.56 2
 -3 -8 7 22933 1465.31 2
 -3 -8 8 478.141 678.244 5
 -3 -8 8 1739.45 708.359 2
 -3 -8 9 -1149.2 859.275 5
 -3 -8 10 5035.22 1124.36 5
 -3 -7 -12 17614.6 1300.35 3
 -3 -7 -11 -470.327 575.071 3
 -3 -7 -10 59020.6 2222.73 3
 -3 -7 -9 36719.7 1596.86 3
 -3 -7 -8 -158.314 425.951 3
 -3 -7 -7 6426.21 614.854 3
 -3 -7 -6 51991.5 1917.9 4
 -3 -7 -6 55425 1713.06 3
 -3 -7 -5 185441 4500.74 4
 -3 -7 -5 187443 4156.98 3
 -3 -7 -4 90626.4 2207.98 3
 -3 -7 -4 89839.2 2558.21 4
 -3 -7 -3 87587.2 2429.1 4
 -3 -7 -3 84993.1 2314.17 7
 -3 -7 -3 84515.6 2005.05 3
 -3 -7 -2 19694.6 892.283 7
 -3 -7 -2 18370.4 917.947 4
 -3 -7 -1 39209.9 1336.72 4
 -3 -7 0 16494 754.784 4
 -3 -7 1 17919.4 772.159 4
 -3 -7 2 55770.8 1579.14 4
 -3 -7 3 7845.33 703.836 2
 -3 -7 4 779.785 437.16 2
 -3 -7 5 1135.67 489.716 2
 -3 -7 6 14930.5 1073.69 2
 -3 -7 7 122857 3791.1 5
 -3 -7 7 120571 3632.99 2
 -3 -7 8 5355.12 803.505 2
 -3 -7 8 7817.65 1056.86 5
 -3 -7 9 7049.41 1034.61 5
 -3 -7 10 554.043 744.69 5
 -3 -7 11 7137.03 1206.62 5
 -3 -6 -12 12032 1126.17 3
 -3 -6 -11 29590.8 1585.51 3
 -3 -6 -10 52103.1 2029.45 3
 -3 -6 -9 93633.1 2822.92 3
 -3 -6 -8 21015.7 1099.97 3
 -3 -6 -7 3283.43 480.51 3
 -3 -6 -6 48157.6 1573.36 3
 -3 -6 -5 414072 8438.79 3
 -3 -6 -4 531982 10511.6 3
 -3 -6 -4 531807 10795.1 4
 -3 -6 -3 95085.1 2450.8 7
 -3 -6 -3 90204.7 2417.75 4
 -3 -6 -2 9459.35 587.572 4
 -3 -6 -2 9311.36 610.378 7
 -3 -6 -1 36281.7 1194.62 4
 -3 -6 0 134881 3036.71 4
 -3 -6 1 786.196 216.702 4
 -3 -6 2 112886 2548.71 4
 -3 -6 3 83256.8 2400.27 2
 -3 -6 4 33925.1 1404.99 2
 -3 -6 5 1026.78 457.118 2
 -3 -6 6 22293.8 1256.26 2
 -3 -6 7 45672.1 1925.95 2
 -3 -6 7 46259.5 2044.85 5
 -3 -6 8 82905.3 3010.58 5
 -3 -6 9 170.904 644.632 5
 -3 -6 10 10226.1 1227.17 5
 -3 -6 11 -814.935 774.775 5
 -3 -5 -13 10447.6 1127.74 3
 -3 -5 -12 1582.68 671.183 3
 -3 -5 -11 40897.4 1868.81 3
 -3 -5 -10 2803.25 603.713 3
 -3 -5 -9 83491.5 2613.51 3
 -3 -5 -8 134279 3508.86 3
 -3 -5 -7 2846.47 462.196 3
 -3 -5 -6 63888.3 1895.96 3
 -3 -5 -5 27709.2 1054.39 3
 -3 -5 -3 143258 3393.64 7
 -3 -5 -3 140272 3261.59 4
 -3 -5 -2 18159.2 838.076 7
 -3 -5 -2 18079.8 745.971 4
 -3 -5 -1 275149 5927.9 7
 -3 -5 -1 269278 5567.77 4
 -3 -5 0 4863.89 320.872 4
 -3 -5 1 111382 2406.23 4
 -3 -5 2 44011.2 1417.73 2
 -3 -5 3 36552.1 1322.37 2
 -3 -5 4 168107 4035.93 2
 -3 -5 5 11227.8 816.539 2
 -3 -5 6 37373.9 1688.23 5
 -3 -5 6 40666.2 1651.68 2
 -3 -5 7 876.629 601.065 5
 -3 -5 8 42971.7 2020.36 5
 -3 -5 9 29961.2 1742.26 5
 -3 -5 10 2882.78 860.282 5
 -3 -5 11 12790.9 1379.77 5
 -3 -5 12 1136.74 982.489 5
 -3 -4 -13 3880.71 885.039 3
 -3 -4 -12 11568.8 1078.86 3
 -3 -4 -11 2168.72 612.371 3
 -3 -4 -10 1375.34 506.76 3
 -3 -4 -9 18277.9 1091.25 3
 -3 -4 -8 176473 4325.1 3
 -3 -4 -7 111421 2945.65 3
 -3 -4 -6 157518 3717.97 3
 -3 -4 -5 176134 3964.96 3
 -3 -4 -4 55446.4 1478.64 5
 -3 -4 -3 64672.1 1861.62 7
 -3 -4 -3 64039.1 1620.88 5
 -3 -4 -2 22959.4 780.171 4
 -3 -4 -2 22910.1 945.326 7
 -3 -4 -1 15486.3 569.909 4
 -3 -4 -1 16965.3 827.567 7
 -3 -4 0 8053.45 332.12 4
 -3 -4 1 1026.39 119.422 4
 -3 -4 2 173661 3847.52 2
 -3 -4 3 2536.76 373.775 2
 -3 -4 4 38283.6 1366.31 2
 -3 -4 5 82036.9 2384.86 2
 -3 -4 5 83679.3 2507.56 5
 -3 -4 6 11216.5 894.68 5
 -3 -4 7 22558.5 1311.61 5
 -3 -4 8 1781.45 642.951 5
 -3 -4 9 52686.1 2311.99 5
 -3 -4 10 15308.2 1316.44 5
 -3 -4 11 8891.58 1230.53 5
 -3 -4 12 17194.6 1616.11 5
 -3 -3 -13 3083.36 807.989 3
 -3 -3 -12 17116 1310.63 3
 -3 -3 -11 2274.76 681.655 3
 -3 -3 -10 16526.5 1110.43 3
 -3 -3 -9 4004.18 618.61 3
 -3 -3 -8 19949.5 1064.47 3
 -3 -3 -7 200539 4663.08 3
 -3 -3 -6 16903 863.893 3
 -3 -3 -5 398399 8136.91 3
 -3 -3 -4 22883.6 737.162 5
 -3 -3 -3 99605.6 2563.74 7
 -3 -3 -3 100648 2169.49 5
 -3 -3 -3 99257.8 2438.8 1
 -3 -3 -2 252484 5336.53 1
 -3 -3 -2 261444 5520.77 7
 -3 -3 -1 8407.93 566.382 7
 -3 -3 1 42779.2 1148.15 2
 -3 -3 2 7420.22 434.148 2
 -3 -3 3 21515.3 925.283 5
 -3 -3 3 20878 846.715 2
 -3 -3 4 4808.55 472.143 2
 -3 -3 4 5131.79 526.761 5
 -3 -3 5 72573.1 2223.91 5
 -3 -3 6 1403 451.86 5
 -3 -3 7 5272.74 722.248 5
 -3 -3 8 4934.54 748.986 5
 -3 -3 9 17624.2 1327.85 5
 -3 -3 10 28173.2 1708.95 5
 -3 -3 11 10312.8 1185.06 5
 -3 -3 12 15258 1515.05 5
 -3 -3 13 14441.1 1624.8 5
 -3 -2 -13 15549.5 1336.78 3
 -3 -2 -12 3539.44 770.081 3
 -3 -2 -11 10212.6 947.289 3
 -3 -2 -10 23771.4 1300.23 3
 -3 -2 -9 1649.34 443.379 3
 -3 -2 -8 4943.34 602.729 3
 -3 -2 -7 4552.4 534.778 3
 -3 -2 -6 56648.3 1753.15 3
 -3 -2 -4 3686.35 257.507 5
 -3 -2 -4 4902.05 380.216 1
 -3 -2 -3 194279 4289.97 7
 -3 -2 -3 187243 3748.47 5
 -3 -2 -3 187540 4010.33 1
 -3 -2 -2 74338.6 2006.76 7
 -3 -2 -2 72716.9 1743.97 1
 -3 -2 -1 3380.32 361.956 7
 -3 -2 1 407238 7893.03 2
 -3 -2 1 409864 8015.17 5
 -3 -2 2 277484 5709.06 5
 -3 -2 2 276328 5582.11 2
 -3 -2 3 11681.3 638.283 5
 -3 -2 4 3134.01 425.399 5
 -3 -2 5 20933.6 1038.36 5
 -3 -2 6 126266 3397.3 5
 -3 -2 7 9927.73 855.162 5
 -3 -2 8 9871.54 972.692 5
 -3 -2 9 2947.18 760.249 5
 -3 -2 10 14698.9 1294.62 5
 -3 -2 11 30633 1877.34 5
 -3 -2 12 -302.853 722.799 5
 -3 -2 13 18151.3 1691.22 5
 -3 -1 -13 6926.84 961.642 3
 -3 -1 -12 2736.8 779.47 3
 -3 -1 -11 24634.5 1415.86 3
 -3 -1 -10 80313.4 2625.1 3
 -3 -1 -9 9244.24 807.816 3
 -3 -1 -8 967.642 420.257 3
 -3 -1 -7 20186.8 999.363 3
 -3 -1 -6 4708.77 478.941 3
 -3 -1 -4 4096.33 323.475 2
 -3 -1 -3 146585 3116.8 1
 -3 -1 -3 152637 3499.76 7
 -3 -1 -3 148985 3109.33 2
 -3 -1 -2 9831.43 377.226 1
 -3 -1 -2 10974.3 606.998 7
 -3 -1 -2 10320.6 345.247 2
 -3 -1 -1 22045.6 938.166 7
 -3 -1 -1 22957.3 626.475 4
 -3 -1 0 29196.9 688.366 4
 -3 -1 0 27305 721.308 5
 -3 -1 1 57262.3 1398.72 5
 -3 -1 2 2648.68 268.504 5
 -3 -1 3 184245 4079.53 5
 -3 -1 4 23519.1 1004.88 5
 -3 -1 5 21343.2 1043.67 5
 -3 -1 6 20624.9 1113.37 5
 -3 -1 7 52756.9 1978.26 5
 -3 -1 8 6551.67 784.935 5
 -3 -1 9 5453.12 878.143 5
 -3 -1 10 3688 909.688 5
 -3 -1 11 10985 1257.73 5
 -3 -1 12 13398 1354.26 5
 -3 -1 13 3464.13 1153.03 5
 -3 0 -13 1555.53 717.957 3
 -3 0 -12 9746.69 1029 3
 -3 0 -11 2258.98 664.109 3
 -3 0 -10 57125.3 2139.73 3
 -3 0 -9 112767 3205.99 3
 -3 0 -8 21104 1103.75 3
 -3 0 -7 48502.2 1662.36 3
 -3 0 -6 876.165 338.577 3
 -3 0 -3 445190 8704.01 4
 -3 0 -3 428430 8589.57 2
 -3 0 -3 450075 8966.88 7
 -3 0 -2 97584.6 2230.8 4
 -3 0 -2 99918.3 2480.67 7
 -3 0 -1 118305 2580.4 4
 -3 0 -1 125042 2973.36 7
 -3 0 0 852695 16215.9 4
 -3 0 1 15812.8 563.511 4
 -3 0 1 16429.7 614.81 5
 -3 0 2 581.451 228.598 5
 -3 0 3 121057 2882.8 5
 -3 0 4 95970.5 2524.59 5
 -3 0 5 44920.7 1590.13 5
 -3 0 6 18649.2 1040.13 5
 -3 0 7 94691.8 2893.92 5
 -3 0 8 27746.5 1473.13 5
 -3 0 9 1012.41 693.988 5
 -3 0 10 34758.9 1875.95 5
 -3 0 11 2849.59 781.628 5
 -3 0 12 3909.36 966.84 5
 -3 0 13 -518.903 932.54 5
 -3 0 14 5949.15 1187.56 5
 -3 1 -13 1803.56 743.621 3
 -3 1 -12 6.01125 639.111 3
 -3 1 -11 20675.3 1306.35 3
 -3 1 -10 5006.23 736.551 3
 -3 1 -9 99136.8 2920.57 3
 -3 1 -8 353623 7685.17 3
 -3 1 -7 1909.25 419.686 3
 -3 1 -6 22206.5 991.42 3
 -3 1 -3 53971.4 1635.65 7
 -3 1 -2 91978.4 2199.68 4
 -3 1 -2 93292.2 2367.71 7
 -3 1 -1 178410 4087.75 7
 -3 1 -1 180524 3814.44 4
 -3 1 0 23452.1 785.721 4
 -3 1 1 237962 5006.14 5
 -3 1 1 242189 4967.02 4
 -3 1 2 10163.6 566.302 5
 -3 1 2 9949.97 503.37 4
 -3 1 3 166880 3812.56 5
 -3 1 4 525771 10682.9 5
 -3 1 5 120875 3161.2 5
 -3 1 6 4405.41 619.562 5
 -3 1 7 330.502 486.588 5
 -3 1 8 90458.6 2948.24 5
 -3 1 9 47855.2 2112.3 5
 -3 1 10 20192.1 1441.19 5
 -3 1 11 20683.1 1561.66 5
 -3 1 12 -391.178 870.362 5
 -3 1 13 233.127 915.3 5
 -3 1 14 -1423.74 921.512 5
 -3 2 -12 5333.33 852.321 3
 -3 2 -11 5798.84 820.288 3
 -3 2 -10 12297.9 1004.06 3
 -3 2 -9 10283.4 846.196 3
 -3 2 -8 323760 7138.13 3
 -3 2 -7 233696 5295.67 3
 -3 2 -6 1111.37 371.464 3
 -3 2 -3 20799.1 904.595 7
 -3 2 -2 13624.2 468.586 1
 -3 2 -2 14322.4 706.492 7
 -3 2 -1 55713.6 1269.71 1
 -3 2 -1 54758.7 1664.22 7
 -3 2 2 24277.7 1006.08 5
 -3 2 3 48830.6 1595.89 5
 -3 2 4 371622 7880.65 5
 -3 2 5 352705 7658.22 5
 -3 2 6 1214.67 489.219 5
 -3 2 7 10260.6 886.368 5
 -3 2 8 24666.7 1454.87 5
 -3 2 9 68132.2 2614.58 5
 -3 2 10 30080.2 1775.37 5
 -3 2 11 8825.55 1134.15 5
 -3 2 12 17697.2 1575.99 5
 -3 2 13 1417.42 817.439 5
 -3 2 14 -213.106 894.239 5
 -3 3 -12 14820.1 1245.72 3
 -3 3 -11 14475.8 1124.11 3
 -3 3 -10 7441.52 808.796 3
 -3 3 -9 6336.45 731.822 3
 -3 3 -8 76970.4 2394.01 3
 -3 3 -7 169792 4087.42 3
 -3 3 -6 55382.7 1743.27 3
 -3 3 -3 66131 1913.2 7
 -3 3 -3 69380.7 1746.84 1
 -3 3 -2 71925.7 1740.88 1
 -3 3 -2 70778.7 1969.04 7
 -3 3 -1 25933.7 1029.24 7
 -3 3 -1 24018.1 787.354 1
 -3 3 0 24983.8 827.409 1
 -3 3 3 3113.17 500.604 5
 -3 3 4 64396.4 2090.39 5
 -3 3 5 531896 11139.5 5
 -3 3 6 20964 1212.32 5
 -3 3 7 2459.15 653.655 5
 -3 3 8 3142.18 710.67 5
 -3 3 9 9853.72 1086.09 5
 -3 3 10 28380 1727.65 5
 -3 3 11 9380.15 1182.24 5
 -3 3 12 7181.25 1181.54 5
 -3 3 13 14251.2 1578.96 5
 -3 3 14 -156.072 1082.13 5
 -3 4 -11 26564.6 1504.18 3
 -3 4 -10 10570.4 943.538 3
 -3 4 -9 3067.02 608.491 3
 -3 4 -8 1838.68 466.33 3
 -3 4 -7 75898.4 2258.85 3
 -3 4 -6 159441 3807.55 3
 -3 4 -5 15739.2 785.671 3
 -3 4 -4 13815.2 745.706 1
 -3 4 -3 5007.26 447.668 7
 -3 4 -3 4317.95 414.319 1
 -3 4 -2 149020 3450.04 7
 -3 4 -2 146979 3338.28 1
 -3 4 -1 74461.8 1928.04 1
 -3 4 -1 74728.7 2092.95 7
 -3 4 0 17020.6 731.424 1
 -3 4 3 3999.12 537.841 5
 -3 4 4 10662.8 844.927 5
 -3 4 5 102986 3071.83 5
 -3 4 6 175216 4600.61 5
 -3 4 7 10067 984.394 5
 -3 4 8 7703.2 939.186 5
 -3 4 9 3984.67 862.429 5
 -3 4 10 813.173 769.191 5
 -3 4 11 15864.3 1435.13 5
 -3 4 12 679.044 740.992 5
 -3 4 13 12937.2 1583.01 5
 -3 4 14 10790.6 1559.87 5
 -3 5 -11 12211.7 1120.01 3
 -3 5 -10 43888.7 1901.02 3
 -3 5 -9 9680.27 852.143 3
 -3 5 -8 937.226 442.021 3
 -3 5 -7 11736 786.771 3
 -3 5 -6 60340.3 1858.46 3
 -3 5 -5 93873.2 2679.92 1
 -3 5 -5 94564 2447.78 3
 -3 5 -4 28430.1 1198.38 1
 -3 5 -3 7986.55 552.862 7
 -3 5 -3 7345.37 572.936 1
 -3 5 -2 661.322 266.508 1
 -3 5 -2 758.725 251.803 7
 -3 5 -1 67272.2 1891.25 7
 -3 5 -1 64374.6 1872.96 1
 -3 5 0 160191 3709.86 1
 -3 5 1 29077.5 1117.6 1
 -3 5 5 46745.3 1953.22 5
 -3 5 6 71357.4 2574.82 5
 -3 5 7 114308 3586.4 5
 -3 5 8 29818.9 1721.79 5
 -3 5 9 8484.49 1126.09 5
 -3 5 10 6429.28 1043.87 5
 -3 5 11 3378.05 1016.7 5
 -3 5 12 6620.2 1208.74 5
 -3 5 13 761.373 919.205 5
 -3 5 14 12308.2 1601.35 5
 -3 6 -10 26792.9 1482.67 3
 -3 6 -9 64489.2 2260.19 3
 -3 6 -8 1788.5 483.844 3
 -3 6 -7 586.477 379.729 3
 -3 6 -6 15606.6 1047.15 1
 -3 6 -6 13420.2 799.297 3
 -3 6 -5 55015.8 1660.96 3
 -3 6 -5 54496.4 1960.93 1
 -3 6 -4 72230.1 2271.75 1
 -3 6 -3 18396.1 852.89 7
 -3 6 -3 17666.2 991.456 1
 -3 6 -2 109174 2716.24 7
 -3 6 -2 111993 2958.09 1
 -3 6 -1 14382.5 831.717 1
 -3 6 0 53151.1 1725.59 1
 -3 6 1 82372.3 2336.24 1
 -3 6 2 42924.4 1545.53 1
 -3 6 6 10319.3 1036.63 5
 -3 6 7 35422.3 1872.41 5
 -3 6 8 72425.7 2870.26 5
 -3 6 9 19108.9 1526.57 5
 -3 6 10 20504.5 1618.89 5
 -3 6 11 3485.35 947.987 5
 -3 6 12 7339.54 1295.39 5
 -3 6 13 4781.78 1135.75 5
 -3 6 14 285.912 1077.57 5
 -3 7 -9 15601.9 1040.08 3
 -3 7 -8 52077.8 1852.01 3
 -3 7 -8 48754.4 2257.96 1
 -3 7 -7 967.829 592.498 1
 -3 7 -7 743.748 385.698 3
 -3 7 -6 11311.5 726.19 3
 -3 7 -6 10794.6 938.7 1
 -3 7 -5 875.233 300.939 3
 -3 7 -5 1054.62 459.394 1
 -3 7 -4 36869.5 1562.97 1
 -3 7 -4 34562.8 1195.53 3
 -3 7 -3 67844.1 1921.22 7
 -3 7 -3 73994 2330.71 1
 -3 7 -2 -150.678 367.048 1
 -3 7 -2 355.588 214.522 7
 -3 7 -1 125777 3355.03 1
 -3 7 0 2498.23 473.109 1
 -3 7 1 20916.5 1074.51 1
 -3 7 2 16498.5 964.899 1
 -3 7 7 14294 1245.21 5
 -3 7 8 14197.2 1320.84 5
 -3 7 9 65075.5 2869.25 5
 -3 7 10 255.163 881.887 5
 -3 7 11 15192.9 1588.54 5
 -3 7 12 1140.15 1048.49 5
 -3 7 13 2790.14 1083.73 5
 -3 7 14 541.333 1158.23 5
 -3 8 -12 6292.34 1311.03 1
 -3 8 -11 2699.38 963.161 1
 -3 8 -10 8534.54 1193.97 1
 -3 8 -9 2992.24 898.544 1
 -3 8 -8 24314.4 1620.15 1
 -3 8 -7 22306 1490.63 1
 -3 8 -6 5744.17 810.214 1
 -3 8 -6 6007 557.758 3
 -3 8 -5 28265.8 1527.6 1
 -3 8 -5 27416.9 1053.69 3
 -3 8 -4 -82.6387 250.646 3
 -3 8 -4 -151.623 484.255 1
 -3 8 -3 34406.5 1602.82 1
 -3 8 -2 63021.2 2242.2 1
 -3 8 -1 4581.69 629.571 1
 -3 8 0 41485 1701.71 1
 -3 8 1 1257.3 422.77 1
 -3 8 2 56727 2042.64 1
 -3 8 3 5582.65 677.971 1
 -3 8 9 61397 2814.3 5
 -3 8 10 13075.2 1422.47 5
 -3 8 11 4455.45 1161.54 5
 -3 8 12 9991.84 1490.65 5
 -3 8 13 1678.18 1211.01 5
 -3 9 -12 3526.56 1197.52 1
 -3 9 -11 11762 1441.79 1
 -3 9 -10 206.054 801.332 1
 -3 9 -9 4082.28 959.134 1
 -3 9 -8 2525.12 781.211 1
 -3 9 -7 40664 2079.62 1
 -3 9 -6 20582.7 1435.55 1
 -3 9 -5 941.807 530.359 1
 -3 9 -4 42609.4 1969.47 1
 -3 9 -3 8794.19 942.03 1
 -3 9 -2 50611.2 2096.61 1
 -3 9 -1 51950 2066.25 1
 -3 9 0 6007.36 726.313 1
 -3 9 1 52573.7 2047.45 1
 -3 9 2 4753.74 653.046 1
 -3 9 3 6095.02 740.171 1
 -3 9 11 6967.9 1200.11 5
 -3 9 12 3908.47 1290.01 5
 -3 9 13 13594 1768.31 5
 -3 10 -11 12818.6 1590.08 1
 -3 10 -10 6653.94 1283.6 1
 -3 10 -9 -412.848 718.184 1
 -3 10 -8 251.144 717.471 1
 -3 10 -7 7624.29 1041.21 1
 -3 10 -6 65008.9 2765.06 1
 -3 10 -5 33789.1 1875.49 1
 -3 10 -4 16661.4 1305.76 1
 -3 10 -3 32836.2 1784.54 1
 -3 10 -2 2657.21 675.234 1
 -3 10 -1 44944.1 2037.79 1
 -3 10 0 2376.41 564.018 1
 -3 10 1 35411.8 1744.54 1
 -3 10 2 85864.4 2920.61 1
 -3 10 3 5320.68 787.71 1
 -3 11 -10 10343.4 1492.87 1
 -3 11 -9 6614.8 1155.01 1
 -3 11 -8 222.314 807.742 1
 -3 11 -7 433.273 699.128 1
 -3 11 -6 9393.83 1185.31 1
 -3 11 -5 56170.2 2613.19 1
 -3 11 -4 23291.4 1627.48 1
 -3 11 -3 32863.4 1912.14 1
 -3 11 -2 24542.9 1606.87 1
 -3 11 -1 10786.3 1078.01 1
 -3 11 0 31490.1 1735.94 1
 -3 11 1 -869.875 602.18 1
 -3 11 2 28984.6 1634.65 1
 -3 11 3 67309.2 2602.55 1
 -3 11 4 667.14 606.849 1
 -3 12 -9 11315.3 1576.62 1
 -3 12 -8 6317.02 1165.57 1
 -3 12 -7 1106.18 918.253 1
 -3 12 -6 1222.94 856.627 1
 -3 12 -5 6853.62 1075.08 1
 -3 12 -4 32429.1 2014.6 1
 -3 12 -3 12889.5 1304.45 1
 -3 12 -2 30717.1 1864.14 1
 -3 12 -1 4909.96 879.877 1
 -3 12 0 17370.9 1390.49 1
 -3 12 1 13521.1 1230.8 1
 -3 12 2 13645.5 1207.36 1
 -3 12 3 71241 2800.49 1
 -3 12 4 50411.9 2351.52 1
 -3 13 -8 19812.3 1934 1
 -3 13 -7 7055.26 1267.92 1
 -3 13 -6 941.512 849.357 1
 -3 13 -5 -837.814 925.662 1
 -3 13 -4 15468 1481.98 1
 -3 13 -3 25476.7 1847.28 1
 -3 13 -2 314.976 800.12 1
 -3 13 -1 20505.2 1572.72 1
 -3 13 0 22286.8 1660.3 1
 -3 13 1 8394.9 1128.68 1
 -3 13 2 2580.92 811.953 1
 -3 13 3 40399.3 2157.19 1
 -3 13 4 59339.3 2669.98 1
 -3 14 -6 5454.73 1271.92 1
 -3 14 -5 2535.16 1066.57 1
 -3 14 -4 -714.218 906.772 1
 -3 14 -3 11660.4 1444.12 1
 -3 14 -2 8528.55 1276.12 1
 -3 14 -1 4502.2 1071.77 1
 -3 14 0 22536.2 1781.29 1
 -3 14 1 6730.5 1074.85 1
 -3 14 2 10374.5 1256.77 1
 -3 14 3 1788.85 788.772 1
 -3 14 4 15160.1 1482.75 1
 -3 15 -4 -829.768 1000.94 1
 -3 15 -3 245.156 900.688 1
 -3 15 -2 6262.79 1267.32 1
 -3 15 -1 7892.4 1236.54 1
 -3 15 0 7760.17 1226.79 1
 -3 15 1 14473.3 1503.94 1
 -3 15 2 441.995 749.69 1
 -3 15 3 5878.11 1093.4 1
 -3 15 4 578.88 808.331 1
 -3 16 -2 -756.39 1057.99 1
 -3 16 -1 6757.46 1246.84 1
 -3 16 0 3858.1 1150.07 1
 -3 16 1 5369.69 1163.8 1
 -3 16 2 10645 1430.82 1
 -3 16 3 -743.474 903.106 1
 -3 16 4 1826.2 1002.71 1
 -3 17 1 -104.999 958.261 1
 -3 17 2 3003.68 1117.12 1
 -3 17 3 7791.1 1371.13 1
 -3 17 4 1461.41 941.577 1
 -2 -18 -6 139.226 954.801 4
 -2 -18 -5 5809.54 1342.81 4
 -2 -17 -9 12135.9 1652 4
 -2 -17 -8 31889.5 2343.79 4
 -2 -17 -7 6589.75 1188.95 4
 -2 -17 -6 -690.296 952.806 4
 -2 -17 -5 475.913 931.05 4
 -2 -17 -4 9967.25 1403.14 4
 -2 -16 -10 242.069 986.354 4
 -2 -16 -9 1414.96 1016.5 4
 -2 -16 -8 36130.8 2458.3 4
 -2 -16 -7 30923.3 2221.09 4
 -2 -16 -6 2676.82 998.445 4
 -2 -16 -5 560.868 808.092 4
 -2 -16 -4 -280.884 771.262 4
 -2 -16 -3 8158.7 1169.25 4
 -2 -15 -12 2745.18 1057.22 4
 -2 -15 -11 14867.7 1683.78 4
 -2 -15 -10 -12.5734 891.604 4
 -2 -15 -9 698.067 938.236 4
 -2 -15 -8 -648.039 838.064 4
 -2 -15 -7 17491 1658.95 4
 -2 -15 -6 18811.4 1651.95 4
 -2 -15 -5 -589.946 730.151 4
 -2 -15 -4 3645.1 897.052 4
 -2 -15 -3 930.367 739.359 4
 -2 -15 -2 11676.8 1236.39 4
 -2 -14 -13 6273.85 1420 4
 -2 -14 -12 -81.1596 991.922 4
 -2 -14 -11 11213.6 1531.23 4
 -2 -14 -10 22425.6 1924.8 4
 -2 -14 -9 1062.8 929.462 4
 -2 -14 -8 4607.38 1094.58 4
 -2 -14 -7 390.235 778.997 4
 -2 -14 -6 19402 1620.13 4
 -2 -14 -5 11502.2 1281.47 4
 -2 -14 -4 342.077 692.491 4
 -2 -14 -3 13627.6 1300.69 4
 -2 -14 -2 -167.045 664.416 4
 -2 -14 -1 5462.08 932.269 4
 -2 -14 4 1581.65 923.82 2
 -2 -14 5 -826.845 876.6 2
 -2 -13 -14 4145.34 1255.37 4
 -2 -13 -13 395.606 944.767 4
 -2 -13 -12 8992.76 1457.88 4
 -2 -13 -11 1264.12 934.824 4
 -2 -13 -10 37321.7 2356.66 4
 -2 -13 -9 18748.8 1637.72 4
 -2 -13 -8 4161.96 1030.27 4
 -2 -13 -7 3184.71 892.21 4
 -2 -13 -6 1.40858 680.926 4
 -2 -13 -5 19699 1523.7 4
 -2 -13 -4 17198.5 1430 4
 -2 -13 -3 21188.1 1501.58 4
 -2 -13 -2 34264 1853.82 4
 -2 -13 -1 680.205 557.614 4
 -2 -13 0 6747.62 835.049 4
 -2 -13 4 290.056 728.083 2
 -2 -13 5 2918.69 852.269 2
 -2 -13 6 757.031 941.676 2
 -2 -12 -15 1629.06 1277.29 4
 -2 -12 -14 7595.32 1425.42 4
 -2 -12 -13 11166.4 1569.34 4
 -2 -12 -12 -588.43 1033.54 4
 -2 -12 -11 11730.7 1378.82 4
 -2 -12 -10 2361.12 893.155 4
 -2 -12 -9 45456.7 2374.62 4
 -2 -12 -8 4713.98 987.028 4
 -2 -12 -7 2723.63 804.642 4
 -2 -12 -6 2944.87 840.816 4
 -2 -12 -5 1141.22 593.399 4
 -2 -12 -4 73806.6 2843.94 4
 -2 -12 -3 12107.7 1105.91 4
 -2 -12 -2 42680.3 1979.47 4
 -2 -12 -1 24552.2 1453.45 4
 -2 -12 0 56.7331 473.77 4
 -2 -12 1 18895.7 1217.31 4
 -2 -12 4 9424.12 1124.32 2
 -2 -12 5 4748.09 964.161 2
 -2 -12 6 2070.53 898.783 2
 -2 -12 7 3595.38 941.743 2
 -2 -12 8 5265.06 1150.77 2
 -2 -11 -15 16355.8 1897.22 4
 -2 -11 -14 6386.12 1390.68 4
 -2 -11 -13 20225.2 1843.68 4
 -2 -11 -12 14940.4 1527.79 4
 -2 -11 -11 4074.71 1068.65 4
 -2 -11 -10 5260.31 1003.3 4
 -2 -11 -9 23712.6 1676.44 4
 -2 -11 -8 124282 4058.35 4
 -2 -11 -7 32847.8 1844.7 4
 -2 -11 -6 4558.13 810.401 4
 -2 -11 -5 132.628 588.323 4
 -2 -11 -4 44902 2063.37 4
 -2 -11 -3 60340.4 2389.06 4
 -2 -11 -2 488.711 498.678 4
 -2 -11 -1 34147.4 1647.74 4
 -2 -11 0 24304.8 1307.36 4
 -2 -11 1 206.093 429.39 4
 -2 -11 2 2978.83 547.866 4
 -2 -11 4 50093.4 2224.34 2
 -2 -11 5 2237.09 797.222 2
 -2 -11 6 3508.98 867.214 2
 -2 -11 7 2608.12 852.905 2
 -2 -11 8 3353.45 1022.21 2
 -2 -11 9 2597.69 925.627 2
 -2 -10 -16 -9.79404 1150.81 4
 -2 -10 -15 19291 1958.86 4
 -2 -10 -14 5939.3 1332.41 4
 -2 -10 -13 5776.39 1220.56 4
 -2 -10 -12 30028.8 2049.88 4
 -2 -10 -11 5309.28 1135.87 4
 -2 -10 -10 1708.41 769.673 4
 -2 -10 -9 -647.624 768.656 4
 -2 -10 -8 55329.8 2434 4
 -2 -10 -7 67078.9 2633.85 4
 -2 -10 -6 18204.2 1301.32 4
 -2 -10 -5 56200.9 2252.28 4
 -2 -10 -4 4334.95 759.638 4
 -2 -10 -3 52586.3 2118.64 4
 -2 -10 -2 62835.5 2298.11 4
 -2 -10 -1 -93.4312 421.677 4
 -2 -10 0 54907.2 1990.5 4
 -2 -10 1 43134.2 1679.91 4
 -2 -10 2 2721.12 505.711 4
 -2 -10 3 14674.9 926.7 4
 -2 -10 4 99144.5 3260.71 2
 -2 -10 5 31720.2 1733.07 2
 -2 -10 6 1473.77 680.571 2
 -2 -10 7 1375.94 746.385 2
 -2 -10 8 3877.59 962.628 2
 -2 -10 9 3111.72 1022.96 2
 -2 -10 10 5053.63 1162.58 2
 -2 -9 -16 6039.66 1439.94 4
 -2 -9 -15 2406.21 988.908 4
 -2 -9 -14 16849.3 1686.6 4
 -2 -9 -13 7712.47 1188.84 4
 -2 -9 -12 7323.22 1204.84 4
 -2 -9 -11 45401.2 2353.4 4
 -2 -9 -10 178.381 730.542 4
 -2 -9 -9 -81.9726 620.408 4
 -2 -9 -8 14288.7 1186.64 4
 -2 -9 -7 33476.8 1716.15 4
 -2 -9 -6 48079.7 2024.86 4
 -2 -9 -5 -496.213 518.266 4
 -2 -9 -4 57320.6 2160.28 4
 -2 -9 -4 58237.8 1746.28 7
 -2 -9 -3 173.409 184.235 7
 -2 -9 -3 389.663 472.037 4
 -2 -9 -2 61162.2 2141.64 4
 -2 -9 -1 42431.3 1673.2 4
 -2 -9 0 10229.7 776.555 4
 -2 -9 1 107916 2945.24 4
 -2 -9 2 42787.2 1562.09 4
 -2 -9 3 7848.95 657.213 4
 -2 -9 4 9878.09 947.228 2
 -2 -9 4 9351.24 725.574 4
 -2 -9 5 108213 3434.14 2
 -2 -9 6 17589.7 1291.94 2
 -2 -9 7 -399.654 649.406 2
 -2 -9 8 2961.54 824.225 2
 -2 -9 9 2097.47 794.665 2
 -2 -9 9 564.865 824.359 5
 -2 -9 10 1233.21 875.609 5
 -2 -8 -17 9641.25 1628.52 4
 -2 -8 -16 391.126 1062.56 4
 -2 -8 -15 864.624 931.693 4
 -2 -8 -14 3243.77 1112.48 4
 -2 -8 -13 22570.4 1788.93 4
 -2 -8 -12 3677.73 952.508 4
 -2 -8 -11 10290.3 1146.65 4
 -2 -8 -10 64533.4 2638.68 4
 -2 -8 -9 36160.3 1848.37 4
 -2 -8 -8 27209.1 1539.8 4
 -2 -8 -7 20118.6 1259.15 4
 -2 -8 -6 135923 3343.21 3
 -2 -8 -6 134913 3769.85 4
 -2 -8 -5 104308 2578.35 3
 -2 -8 -5 100603 3027.67 4
 -2 -8 -4 72.0235 196.917 3
 -2 -8 -4 704.004 400.201 4
 -2 -8 -3 86210.8 2617.76 4
 -2 -8 -3 87466.7 2197.07 7
 -2 -8 -2 2778.05 271.007 7
 -2 -8 -2 2846.21 491.156 4
 -2 -8 -1 23614.8 1126.44 4
 -2 -8 0 4369.84 486.78 4
 -2 -8 1 87649.9 2425.29 4
 -2 -8 2 152755 3665.04 4
 -2 -8 3 21794.6 998.125 4
 -2 -8 4 756.262 467.916 2
 -2 -8 5 3746.9 674.364 2
 -2 -8 6 46170.3 1994.16 2
 -2 -8 7 19589.4 1365.87 2
 -2 -8 8 672.886 683.796 2
 -2 -8 9 4461.31 923.62 2
 -2 -8 9 4798.51 1011.8 5
 -2 -8 10 770.759 758.84 5
 -2 -7 -9 92622.1 2876.49 3
 -2 -7 -8 71715.7 2539.56 4
 -2 -7 -8 70917.5 2293.87 3
 -2 -7 -7 14968.1 1091.02 4
 -2 -7 -7 15733.1 911.013 3
 -2 -7 -6 18941.4 1121.69 4
 -2 -7 -6 21568.1 981.249 3
 -2 -7 -5 97611.2 2415.94 3
 -2 -7 -5 88692.6 2721.52 4
 -2 -7 -4 224705 4712.54 3
 -2 -7 -4 223443 5221.58 4
 -2 -7 -3 432.168 366.162 4
 -2 -7 -3 469.631 223.385 7
 -2 -7 -3 1103.87 194.04 3
 -2 -7 -2 78415.8 1685.29 3
 -2 -7 -2 80725.5 2328.08 4
 -2 -7 -2 80182.8 1964.84 7
 -2 -7 -1 12207.5 757.993 4
 -2 -7 0 10013.6 644.114 4
 -2 -7 1 865.43 132.571 3
 -2 -7 1 1278.51 322.105 4
 -2 -7 2 166637 3564.7 3
 -2 -7 2 172075 3851.6 4
 -2 -7 3 115670 2841.4 4
 -2 -7 4 1710.86 497.41 2
 -2 -7 5 943.829 516.157 2
 -2 -7 6 -355.935 527.202 2
 -2 -7 7 54800.4 2206.56 2
 -2 -7 8 20776.4 1392.34 2
 -2 -7 9 11346.5 1229.19 5
 -2 -7 10 8678.02 1235.04 5
 -2 -7 11 -1025.86 973.952 5
 -2 -6 -10 1125.51 556.194 3
 -2 -6 -9 128546 3575.02 3
 -2 -6 -8 99929.9 2867.3 3
 -2 -6 -7 49860.9 1733.06 3
 -2 -6 -6 7331.84 583.67 3
 -2 -6 -5 3609.5 531.903 4
 -2 -6 -5 3820.58 406.035 3
 -2 -6 -4 214513 4651.09 6
 -2 -6 -4 208721 4485.57 3
 -2 -6 -4 213116 4860.16 4
 -2 -6 -3 104671 2547.87 7
 -2 -6 -3 105951 2752.88 4
 -2 -6 -3 104972 2335.18 3
 -2 -6 -2 1162.51 333.842 4
 -2 -6 -2 1225.81 240.655 7
 -2 -6 -2 1071.02 149.776 3
 -2 -6 -1 125785 2812 7
 -2 -6 -1 117732 2975.75 4
 -2 -6 0 6089.85 451.943 4
 -2 -6 1 61473.9 1697.73 4
 -2 -6 1 62126.5 1450.12 3
 -2 -6 2 40246.1 1271.57 4
 -2 -6 2 42941.7 1177.58 3
 -2 -6 3 157463 3574.7 4
 -2 -6 3 163180 3915.62 2
 -2 -6 4 70878.1 2224.69 2
 -2 -6 5 9704.11 832.304 2
 -2 -6 6 6811.78 774.359 2
 -2 -6 7 5380.51 775.551 2
 -2 -6 8 27467.6 1550.77 2
 -2 -6 8 29132.7 1676.8 5
 -2 -6 9 440.696 698.361 5
 -2 -6 10 21459.5 1611.37 5
 -2 -6 11 10466.4 1331.68 5
 -2 -6 12 2689.17 1108.77 5
 -2 -5 -10 14779.2 1074.9 3
 -2 -5 -9 41815.3 1721.46 3
 -2 -5 -8 126483 3386.37 3
 -2 -5 -7 203549 4731.23 3
 -2 -5 -6 35419.7 1293.6 3
 -2 -5 -5 177620 3978.79 3
 -2 -5 -4 29372.6 1070.67 6
 -2 -5 -4 28040.8 962.287 3
 -2 -5 -4 29648.5 1136.62 4
 -2 -5 -3 187912 4168.82 7
 -2 -5 -3 184066 4220.85 4
 -2 -5 -3 193677 3945.22 3
 -2 -5 -2 3327.32 357.752 4
 -2 -5 -2 4092.83 330.984 7
 -2 -5 -1 88194.4 2122.87 7
 -2 -5 -1 84231.3 2157.61 4
 -2 -5 0 112464 2596.13 4
 -2 -5 1 13023.6 569.684 4
 -2 -5 2 123083 2813.1 3
 -2 -5 2 129517 2816.58 4
 -2 -5 3 46831 1573.05 2
 -2 -5 4 56130.4 1839.67 2
 -2 -5 5 73103.5 2261.76 2
 -2 -5 6 19105.4 1109.32 2
 -2 -5 7 15805.4 1123.53 5
 -2 -5 7 16663.6 1093.45 2
 -2 -5 8 3931.75 782.881 5
 -2 -5 9 10151.2 1083.9 5
 -2 -5 10 545.254 773.716 5
 -2 -5 11 14291.4 1436.92 5
 -2 -5 12 13702.1 1500.37 5
 -2 -4 -11 1140.65 623.622 3
 -2 -4 -10 2486.99 586.615 3
 -2 -4 -9 4687.25 653.331 3
 -2 -4 -8 25100 1222.42 3
 -2 -4 -7 269729 5973.46 3
 -2 -4 -6 66831 1939.78 3
 -2 -4 -5 155135 3543.53 3
 -2 -4 -4 86749.3 2123.81 3
 -2 -4 -3 76620.7 1808.36 3
 -2 -4 -3 75722.2 1918.95 5
 -2 -4 -3 75144.1 1969.37 7
 -2 -4 -2 84569.9 2053.81 7
 -2 -4 -2 83594.9 2039.6 4
 -2 -4 -1 182307 3846.81 7
 -2 -4 -1 174369 3769.17 4
 -2 -4 0 339522 6701.97 4
 -2 -4 1 2693.53 225.3 4
 -2 -4 2 12177.4 636.763 2
 -2 -4 2 13015.3 500.073 4
 -2 -4 3 58059.3 1708.47 2
 -2 -4 4 639.319 313.424 2
 -2 -4 5 102704 2781.2 2
 -2 -4 6 24257.1 1256.39 5
 -2 -4 6 23440 1172.05 2
 -2 -4 7 3207.14 632.952 5
 -2 -4 8 11270.8 1040.3 5
 -2 -4 9 4347.15 873.431 5
 -2 -4 10 25127.5 1647.29 5
 -2 -4 11 560.966 669.248 5
 -2 -4 12 17313.5 1615.68 5
 -2 -4 13 4655.68 1069.46 5
 -2 -3 -11 13788.2 1106.71 3
 -2 -3 -10 1311.24 536.2 3
 -2 -3 -9 6734.67 740.619 3
 -2 -3 -8 34631.5 1444.32 3
 -2 -3 -7 47747.6 1658.73 3
 -2 -3 -6 348340 7302.16 3
 -2 -3 -5 214.348 248.226 3
 -2 -3 -4 8074.94 467.895 3
 -2 -3 -4 8335.28 450.374 5
 -2 -3 -3 11742 596.24 7
 -2 -3 -3 12409.6 511.86 5
 -2 -3 -3 12307.3 587 6
 -2 -3 -3 12007.8 625.768 1
 -2 -3 -2 156124 3431.28 7
 -2 -3 -2 158701 3493 1
 -2 -3 -1 187170 4013.47 1
 -2 -3 -1 185654 3981.35 7
 -2 -3 -1 192640 3797.53 4
 -2 -3 0 16509 498.664 4
 -2 -3 1 203079 3987.38 4
 -2 -3 2 60387.6 1583.93 2
 -2 -3 3 9347.93 558.443 2
 -2 -3 4 11059.1 666.816 2
 -2 -3 5 17711.8 913.227 2
 -2 -3 5 18952.3 984.7 5
 -2 -3 6 84309.9 2559.45 5
 -2 -3 7 28059 1408.76 5
 -2 -3 8 17275 1195.15 5
 -2 -3 9 1425.66 673.919 5
 -2 -3 10 9736.72 1081.92 5
 -2 -3 11 26571.6 1758.95 5
 -2 -3 12 2684.3 907.679 5
 -2 -3 13 27650.2 2019.82 5
 -2 -2 -11 9332.44 1001.12 3
 -2 -2 -10 15672.4 1117.87 3
 -2 -2 -9 5134.04 654.361 3
 -2 -2 -8 1490.94 469.58 3
 -2 -2 -7 9970.04 716.056 3
 -2 -2 -6 49764.3 1590.23 3
 -2 -2 -5 172991 3875.08 3
 -2 -2 -4 18497.9 742.536 3
 -2 -2 -4 19752.8 691.801 5
 -2 -2 -3 95632.6 2289.18 1
 -2 -2 -3 97159.7 2363.21 7
 -2 -2 -3 95787.8 2343.04 6
 -2 -2 -3 98537.2 2107.58 5
 -2 -2 -2 251025 4964.84 5
 -2 -2 -2 250119 5250.37 7
 -2 -2 -1 102995 2246.73 1
 -2 -2 -1 95384 2325.49 7
 -2 -2 1 320463 6273.52 2
 -2 -2 2 160901 3419.48 2
 -2 -2 3 304963 6173.49 2
 -2 -2 3 301163 6263.93 5
 -2 -2 4 53023.8 1641.77 5
 -2 -2 5 20078 984.111 5
 -2 -2 6 34551.4 1427.74 5
 -2 -2 7 68205.4 2298.15 5
 -2 -2 8 306.534 510.363 5
 -2 -2 9 30168.2 1615.1 5
 -2 -2 10 9157.74 1082.37 5
 -2 -2 11 8561.2 1091.45 5
 -2 -2 12 15878.8 1490.41 5
 -2 -2 13 6872.22 1154.51 5
 -2 -1 -11 1143.04 649.683 3
 -2 -1 -10 39481.5 1739.21 3
 -2 -1 -9 52838.5 1964.71 3
 -2 -1 -8 27210 1254.02 3
 -2 -1 -7 1265.47 391.923 3
 -2 -1 -6 1509.01 379.183 3
 -2 -1 -5 90394.9 2306.53 3
 -2 -1 -4 65737.8 1717.23 3
 -2 -1 -3 217538 4643.54 5
 -2 -1 -3 228696 4955.34 6
 -2 -1 -2 24879.1 690.462 1
 -2 -1 -2 24065.9 584.317 5
 -2 -1 -1 91896.4 1912.12 1
 -2 -1 0 1800.28 116.002 5
 -2 -1 1 54897.8 1320.51 5
 -2 -1 1 56844 1243.12 2
 -2 -1 2 135449 2957.68 5
 -2 -1 3 324280 6644.04 5
 -2 -1 4 219967 4832.21 5
 -2 -1 5 25541.1 1109.38 5
 -2 -1 6 38184.8 1507.73 5
 -2 -1 7 101126 2957.2 5
 -2 -1 8 14912.4 1056.37 5
 -2 -1 9 2261.64 681.141 5
 -2 -1 10 65197.6 2582.54 5
 -2 -1 11 13567.6 1258.31 5
 -2 -1 12 11056.5 1265.31 5
 -2 -1 13 258.807 925.867 5
 -2 -1 14 22078.3 1882.48 5
 -2 0 -11 7608.75 907.9 3
 -2 0 -10 937.595 504.648 3
 -2 0 -9 101689 3015.33 3
 -2 0 -8 209293 4968.96 3
 -2 0 -7 34008.2 1344.82 3
 -2 0 -6 20800.2 934.305 3
 -2 0 -5 27907.5 1041.54 3
 -2 0 -4 9363.62 514.147 3
 -2 0 -3 122010 2846.7 6
 -2 0 -3 120176 2654.12 2
 -2 0 -3 121467 2824.25 7
 -2 0 -2 140090 2985.94 4
 -2 0 -2 147453 3155.39 7
 -2 0 0 52265.5 1188.8 5
 -2 0 0 54109.7 1188.05 4
 -2 0 1 234165 4741.03 5
 -2 0 1 241318 4680.75 4
 -2 0 2 160180 3415.81 5
 -2 0 3 106349 2532.51 5
 -2 0 4 367947 7592.45 5
 -2 0 5 83226.7 2327.77 5
 -2 0 6 3208.57 500.603 5
 -2 0 7 8023.79 748.812 5
 -2 0 8 35315.6 1630.73 5
 -2 0 9 10903.9 999.332 5
 -2 0 10 28532.4 1636.36 5
 -2 0 11 62479.3 2638.5 5
 -2 0 12 -235.612 775.154 5
 -2 0 13 816.256 903.388 5
 -2 0 14 1967.46 1023.29 5
 -2 1 -11 -714.053 652.611 3
 -2 1 -10 3622.69 665.898 3
 -2 1 -9 11268.7 890.342 3
 -2 1 -8 328656 7227.65 3
 -2 1 -7 143274 3563.16 3
 -2 1 -6 6659.46 554.717 3
 -2 1 -5 3960.59 396.848 3
 -2 1 -4 3719.38 337.324 3
 -2 1 -3 156216 3415.07 2
 -2 1 -3 159021 3554.77 6
 -2 1 -3 154761 3438.87 4
 -2 1 -3 161984 3536.03 7
 -2 1 -2 189029 3860.8 4
 -2 1 -2 177435 3908.53 7
 -2 1 -1 291873 5898.68 7
 -2 1 -1 290330 5795.49 4
 -2 1 0 93706.8 2090.86 4
 -2 1 1 139355 2934.86 5
 -2 1 1 129442 2897.29 4
 -2 1 2 78499.7 1929.28 5
 -2 1 3 155956 3506.51 5
 -2 1 4 213854 4729.2 5
 -2 1 5 277445 6079.3 5
 -2 1 6 8167.34 723.356 5
 -2 1 7 6063.53 699.761 5
 -2 1 8 3408.95 683.364 5
 -2 1 9 32927.2 1673.67 5
 -2 1 10 4174.08 815.895 5
 -2 1 11 26041.7 1673.74 5
 -2 1 12 14136.9 1421.02 5
 -2 1 13 1872.1 872.676 5
 -2 1 14 1325.63 1004.61 5
 -2 2 -10 -160.192 553.419 3
 -2 2 -9 3204.75 603.009 3
 -2 2 -8 74525.1 2322.77 3
 -2 2 -7 282105 6214.21 3
 -2 2 -6 47230.5 1548.4 3
 -2 2 -5 2089.27 319.907 3
 -2 2 -4 22694.9 844.194 3
 -2 2 -3 26873.2 981.183 6
 -2 2 -3 27062.2 969.842 7
 -2 2 -2 141598 3119.69 7
 -2 2 -2 140282 3165.01 4
 -2 2 -1 412421 7976.82 1
 -2 2 -1 409890 8182.56 7
 -2 2 -1 416500 8224.67 4
 -2 2 0 820903 15838.6 4
 -2 2 1 263115 5457.91 4
 -2 2 2 75174.8 1994.2 5
 -2 2 2 77828.8 1958.17 4
 -2 2 3 282086 5988.43 5
 -2 2 4 32290.5 1230.26 5
 -2 2 5 365215 7777.1 5
 -2 2 6 102678 2895.08 5
 -2 2 7 2436.94 524.425 5
 -2 2 8 38945.7 1736.3 5
 -2 2 9 226.563 563.01 5
 -2 2 10 15968.8 1272.99 5
 -2 2 11 304.03 707.355 5
 -2 2 12 22943.7 1678.59 5
 -2 2 13 8827.79 1303.37 5
 -2 2 14 681.855 1016.24 5
 -2 3 -10 9974.38 910.015 3
 -2 3 -9 1182.97 474.298 3
 -2 3 -8 2360.85 468.859 3
 -2 3 -7 121388 3168.08 3
 -2 3 -6 208501 4701.55 3
 -2 3 -5 18486.2 823.475 3
 -2 3 -4 50899.3 1450.19 3
 -2 3 -3 1588.57 252.252 7
 -2 3 -2 114796 2611.35 7
 -2 3 -2 113901 2605.89 1
 -2 3 -1 21362.3 770.431 7
 -2 3 -1 21638.8 752.544 1
 -2 3 0 75696.6 1833.56 1
 -2 3 1 63772.6 1668.67 1
 -2 3 3 812.686 309.729 5
 -2 3 4 47809.8 1661.02 5
 -2 3 5 99289 2802.8 5
 -2 3 6 170266 4296.9 5
 -2 3 7 2568.58 609.831 5
 -2 3 8 12665.3 1056.24 5
 -2 3 9 39706.8 1910.99 5
 -2 3 10 9096.17 1060.78 5
 -2 3 11 8228.53 1174.34 5
 -2 3 12 -2127.41 1001.66 5
 -2 3 13 13934.5 1479.91 5
 -2 3 14 4120.12 1073.56 5
 -2 4 -9 36143 1619.05 3
 -2 4 -8 602.338 409.39 3
 -2 4 -7 13985.6 862.155 3
 -2 4 -6 168516 3941.92 3
 -2 4 -5 183406 4101.36 3
 -2 4 -4 8491.29 518.936 3
 -2 4 -3 69221.3 1951.27 1
 -2 4 -3 70445.4 1858.92 7
 -2 4 -2 49335.9 1340.79 7
 -2 4 -2 47218.4 1453.52 1
 -2 4 -1 18000.1 759.581 1
 -2 4 -1 17586.1 672.569 7
 -2 4 0 18922.4 776.23 1
 -2 4 1 59000.4 1663.08 1
 -2 4 3 271701 6042.57 5
 -2 4 4 13136.5 886.751 5
 -2 4 5 4986.61 677.823 5
 -2 4 6 199096 4957.64 5
 -2 4 7 51675.7 2046.2 5
 -2 4 8 625.046 596.25 5
 -2 4 9 18455.1 1345.02 5
 -2 4 10 9031.67 1100.04 5
 -2 4 11 795.971 753.939 5
 -2 4 12 11511.2 1358.24 5
 -2 4 13 856.484 777.726 5
 -2 4 14 8912.91 1452.97 5
 -2 5 -8 36171.8 1502.1 3
 -2 5 -7 5674.6 593.58 3
 -2 5 -6 14597 810.006 3
 -2 5 -5 98335.2 2480.97 3
 -2 5 -4 35319.9 1374.43 1
 -2 5 -4 31441.8 1076.69 3
 -2 5 -3 44707.9 1559.02 1
 -2 5 -3 45986 1360.8 7
 -2 5 -2 87862.7 2357.38 1
 -2 5 -2 84424.7 2057.82 7
 -2 5 -1 1990.77 345.934 1
 -2 5 -1 2327 267.072 7
 -2 5 0 27950.5 1093.32 1
 -2 5 1 41270.7 1395.82 1
 -2 5 2 4013.89 463.84 1
 -2 5 4 49058 1853.15 5
 -2 5 5 2272.15 545.086 5
 -2 5 6 746.475 550.265 5
 -2 5 7 113099 3476.04 5
 -2 5 8 32305 1714.49 5
 -2 5 9 1429.43 730.515 5
 -2 5 10 11668.9 1226.19 5
 -2 5 11 7020.58 1146.96 5
 -2 5 12 4550.09 1031.63 5
 -2 5 13 2487.63 941.268 5
 -2 5 14 3070.62 1022.31 5
 -2 6 -8 25594.8 1240.12 3
 -2 6 -7 -44.0251 356.433 3
 -2 6 -6 1634.14 373.557 3
 -2 6 -5 1161.06 464.713 1
 -2 6 -5 1118.3 316.918 3
 -2 6 -4 42241.4 1649.19 1
 -2 6 -4 40532.8 1237.52 3
 -2 6 -3 75658.6 1968.75 7
 -2 6 -3 76811.9 2339.36 1
 -2 6 -3 78525.1 1877.77 3
 -2 6 -2 37733.7 1447.58 1
 -2 6 -2 35994.9 1066.45 7
 -2 6 -1 89829.5 2544.36 1
 -2 6 0 22992.2 1057.98 1
 -2 6 1 2294.4 401.57 1
 -2 6 2 2041.05 405.533 1
 -2 6 3 156299 3918.02 1
 -2 6 6 20215.8 1297.27 5
 -2 6 7 629.477 582.8 5
 -2 6 8 15659.7 1244.32 5
 -2 6 9 19515.1 1492.63 5
 -2 6 10 13084.5 1287.83 5
 -2 6 11 48081.7 2458.09 5
 -2 6 12 -4.98263 870.229 5
 -2 6 13 1055.38 934.379 5
 -2 6 14 2919.28 1229.58 5
 -2 7 -7 10659.7 760.594 3
 -2 7 -7 11270.2 1111.27 1
 -2 7 -6 20036.7 1313.43 1
 -2 7 -6 18291.2 902.49 3
 -2 7 -5 3276.34 395.485 3
 -2 7 -5 3195.15 649.746 1
 -2 7 -4 321.437 219.901 7
 -2 7 -4 768.341 267.104 3
 -2 7 -4 742.276 439.242 1
 -2 7 -3 46948.9 1357.13 7
 -2 7 -3 49728.1 1308.68 3
 -2 7 -3 47364.4 1831.46 1
 -2 7 -2 65500.2 2127.88 1
 -2 7 -2 58138.9 1465.3 7
 -2 7 -1 50291.2 1854.95 1
 -2 7 0 167439 4196.43 1
 -2 7 1 3108.52 474.599 1
 -2 7 2 19061.4 1067.15 1
 -2 7 3 528.47 342.575 1
 -2 7 7 22279.9 1459.35 5
 -2 7 8 246.679 723.556 5
 -2 7 9 33564.5 1950.59 5
 -2 7 10 15267.7 1385.73 5
 -2 7 11 16018.3 1531.34 5
 -2 7 12 4050.72 1138.71 5
 -2 7 13 -650.588 947.398 5
 -2 7 14 -1023.54 1127.71 5
 -2 8 -10 2064.27 892.941 1
 -2 8 -9 14125.9 1432.85 1
 -2 8 -8 6527.59 1028.04 1
 -2 8 -7 35671.5 1918.24 1
 -2 8 -6 881.581 551.709 1
 -2 8 -5 1279.2 307.58 3
 -2 8 -5 1893.6 640.908 1
 -2 8 -4 18626.2 1232.24 1
 -2 8 -4 17657.5 713.12 3
 -2 8 -3 11251.2 483.393 3
 -2 8 -3 10533.3 887.186 1
 -2 8 -3 9936.53 477.024 7
 -2 8 -2 50550.5 1982.18 1
 -2 8 -2 49225.7 1225.86 3
 -2 8 -1 4975.3 667.289 1
 -2 8 0 88611.4 2757.27 1
 -2 8 1 58661.9 2089.22 1
 -2 8 2 7827.85 745.16 1
 -2 8 3 26030.9 1332.94 1
 -2 8 4 44219.4 1834.23 1
 -2 8 8 10193.8 1133.77 5
 -2 8 9 15966 1419.69 5
 -2 8 10 27206.4 1874.17 5
 -2 8 11 4622.89 1097.46 5
 -2 8 12 21923.3 1859.43 5
 -2 8 13 13760.4 1609.08 5
 -2 8 14 -293.293 1132.87 5
 -2 9 -12 281.779 949.735 1
 -2 9 -11 15394.9 1718.91 1
 -2 9 -10 10633.5 1418.74 1
 -2 9 -9 835.176 837.634 1
 -2 9 -8 -118.438 749.365 1
 -2 9 -7 19967.9 1527.57 1
 -2 9 -6 36641.7 1961.46 1
 -2 9 -5 6748.79 932.384 1
 -2 9 -4 1395.11 624.278 1
 -2 9 -3 4234.03 740.944 1
 -2 9 -2 13557.4 1079.27 1
 -2 9 -1 4238.11 689.035 1
 -2 9 0 10486.2 904.476 1
 -2 9 1 110554 3324.88 1
 -2 9 2 45665.9 1924.54 1
 -2 9 3 7897.02 855.122 1
 -2 9 4 4705.98 701.617 1
 -2 9 10 -2812.89 1030.09 5
 -2 9 11 -1359.83 1066.16 5
 -2 9 12 3890.47 1084.27 5
 -2 9 13 34532.9 2420.75 5
 -2 9 14 10120.3 1635.49 5
 -2 10 -11 502.499 1012.59 1
 -2 10 -10 16106.8 1764.46 1
 -2 10 -9 5571.76 1190.88 1
 -2 10 -8 20.0681 780.709 1
 -2 10 -7 -48.9161 736.15 1
 -2 10 -6 12152.3 1244.91 1
 -2 10 -5 59954.1 2596.35 1
 -2 10 -4 1345.68 619.113 1
 -2 10 -3 21184.7 1443.73 1
 -2 10 -2 4568.19 791.857 1
 -2 10 -1 406.325 548.239 1
 -2 10 0 2086.55 658.462 1
 -2 10 1 6368.91 803.286 1
 -2 10 2 99865.2 3205.25 1
 -2 10 3 51585.7 2155.45 1
 -2 10 4 3166.1 667.78 1
 -2 10 13 2026.93 981.388 5
 -2 11 -10 7749.8 1465.92 1
 -2 11 -9 17369.6 1755.42 1
 -2 11 -8 3060.57 970.074 1
 -2 11 -7 1214.38 893.659 1
 -2 11 -6 815.922 784.158 1
 -2 11 -5 9418.25 1176.66 1
 -2 11 -4 26344.4 1778.17 1
 -2 11 -3 1326.9 683.873 1
 -2 11 -2 57263.4 2540.99 1
 -2 11 -1 8609.42 1029.08 1
 -2 11 0 724.028 589.382 1
 -2 11 1 1123.97 634.402 1
 -2 11 2 5772.41 817.866 1
 -2 11 3 89723.7 3152.23 1
 -2 11 4 82322.4 2986.92 1
 -2 11 5 10022.7 1055.44 1
 -2 12 -9 14062.6 1782.94 1
 -2 12 -8 20526 1908.59 1
 -2 12 -7 3314.81 1058.9 1
 -2 12 -6 -142.537 765.385 1
 -2 12 -5 413.332 787.55 1
 -2 12 -4 5835.36 1045.79 1
 -2 12 -3 24351.9 1782.47 1
 -2 12 -2 -202.173 766.129 1
 -2 12 -1 46764.2 2328.16 1
 -2 12 0 8191.56 1044.29 1
 -2 12 1 11710.7 1181.69 1
 -2 12 2 1291.75 727.602 1
 -2 12 3 48846.4 2329.36 1
 -2 12 4 106707 3650.94 1
 -2 12 5 39446.6 2073.96 1
 -2 13 -8 24326.9 2174.76 1
 -2 13 -7 16492.1 1752.16 1
 -2 13 -6 927.618 898.779 1
 -2 13 -5 4353.84 1017.34 1
 -2 13 -4 -1338.94 844.946 1
 -2 13 -3 4756.05 1001.62 1
 -2 13 -2 1324.68 821.388 1
 -2 13 -1 13002.4 1338.15 1
 -2 13 0 60761.3 2802.85 1
 -2 13 1 11971.9 1275.18 1
 -2 13 2 24312.5 1721.12 1
 -2 13 3 4627.35 962.482 1
 -2 13 4 78334.5 3130.13 1
 -2 13 5 65830 2825.07 1
 -2 14 -6 13452.1 1695.32 1
 -2 14 -5 785.607 904.27 1
 -2 14 -4 7431.5 1307.83 1
 -2 14 -3 874.581 904.869 1
 -2 14 -2 5222.96 1067.85 1
 -2 14 -1 340.021 860.15 1
 -2 14 0 30763 2063.26 1
 -2 14 1 33138.5 2107.43 1
 -2 14 2 97.0255 760.497 1
 -2 14 3 22736.8 1744.62 1
 -2 14 4 1325.9 773.617 1
 -2 14 5 26795.4 1852.84 1
 -2 15 -5 6007.21 1420.07 1
 -2 15 -4 -1764.05 1049.96 1
 -2 15 -3 1051.71 932.783 1
 -2 15 -2 1904.96 995.037 1
 -2 15 -1 9348.55 1386.62 1
 -2 15 0 -897.573 871.036 1
 -2 15 1 29861.4 2095.6 1
 -2 15 2 8632.78 1237.12 1
 -2 15 3 4115.75 1003.95 1
 -2 15 4 6099.74 1139.26 1
 -2 15 5 3198.65 979.653 1
 -2 16 -3 641.924 1049.73 1
 -2 16 -2 -388.116 1062.58 1
 -2 16 -1 1021.27 970.505 1
 -2 16 0 461.144 935.237 1
 -2 16 1 74.2554 853.708 1
 -2 16 2 13403.2 1566.79 1
 -2 16 3 10227.1 1391.74 1
 -2 16 4 362.931 818.709 1
 -2 16 5 613.367 892.217 1
 -2 17 0 -379.973 1037.55 1
 -2 17 1 -1294.37 1136.04 1
 -2 17 2 1111.4 890.595 1
 -2 17 3 8142.9 1470.05 1
 -2 17 4 3194.95 1103.18 1
 -2 17 5 567.914 921.046 1
 -1 -18 -5 1543.98 1134.02 4
 -1 -18 -4 2022.75 1083.44 4
 -1 -17 -8 31000.5 2373.62 4
 -1 -17 -7 16040.6 1732.01 4
 -1 -17 -6 -1182.63 901.004 4
 -1 -17 -5 5651.84 1234.85 4
 -1 -17 -4 61.9262 945.278 4
 -1 -17 -3 8426.96 1321.33 4
 -1 -16 -10 1114.74 1036.81 4
 -1 -16 -9 1163.16 929.933 4
 -1 -16 -8 7510.94 1495.28 4
 -1 -16 -7 21587 1933.93 4
 -1 -16 -6 5656.34 1120.82 4
 -1 -16 -5 2241.76 987.321 4
 -1 -16 -4 5747.15 1187.03 4
 -1 -16 -3 1388.54 870.1 4
 -1 -16 -2 5923.33 1122.84 4
 -1 -15 -11 13587.8 1741.64 4
 -1 -15 -10 8576.9 1505.05 4
 -1 -15 -9 1784.73 926.902 4
 -1 -15 -8 1408.55 1034.7 4
 -1 -15 -7 723.015 860.403 4
 -1 -15 -6 15813.3 1619.81 4
 -1 -15 -5 181.027 826.044 4
 -1 -15 -4 7315.37 1172.22 4
 -1 -15 -3 16329.2 1518.34 4
 -1 -15 -2 -645.815 750.142 4
 -1 -15 -1 2402.56 837.61 4
 -1 -14 -12 5628.67 1291.91 4
 -1 -14 -11 1207.34 1084.67 4
 -1 -14 -10 22677.5 1946.11 4
 -1 -14 -9 11470.9 1547.39 4
 -1 -14 -8 2367.03 899.029 4
 -1 -14 -7 4142.41 1050.6 4
 -1 -14 -6 2165.57 894.111 4
 -1 -14 -5 2815.19 871.163 4
 -1 -14 -4 247.559 722.21 4
 -1 -14 -3 19408.3 1559.42 4
 -1 -14 -2 30832.5 1884.51 4
 -1 -14 -1 443.354 727.612 4
 -1 -14 0 2403.41 792.661 4
 -1 -14 1 -388.433 625.976 4
 -1 -14 4 619.301 876.736 2
 -1 -14 5 3510.03 1071.22 2
 -1 -13 -13 13833 1815.6 4
 -1 -13 -12 1379.54 1127.98 4
 -1 -13 -11 4472.2 1094.63 4
 -1 -13 -10 2023.88 959.562 4
 -1 -13 -9 30350.4 2094.91 4
 -1 -13 -8 4593.61 1061.61 4
 -1 -13 -7 4516.08 1017.55 4
 -1 -13 -6 855.775 656.01 4
 -1 -13 -5 -205.44 696.827 4
 -1 -13 -4 22591 1649.37 4
 -1 -13 -3 338.356 634.459 4
 -1 -13 -2 55495.4 2491.96 4
 -1 -13 -1 10121.1 1115.33 4
 -1 -13 0 3748.74 778.595 4
 -1 -13 1 5180.86 857.913 4
 -1 -13 2 392.308 529.456 4
 -1 -13 4 13885.8 1376.77 2
 -1 -13 5 476.632 832.72 2
 -1 -13 6 3852.34 964.864 2
 -1 -12 -14 7500.73 1608.47 4
 -1 -12 -13 16561.3 1912.5 4
 -1 -12 -12 6903.22 1341.76 4
 -1 -12 -11 9728.22 1441.23 4
 -1 -12 -10 2855.95 955.89 4
 -1 -12 -9 36683.2 2220.79 4
 -1 -12 -8 73597.2 3100.71 4
 -1 -12 -7 274.895 756.44 4
 -1 -12 -6 2876.42 855.474 4
 -1 -12 -5 975.844 705.861 4
 -1 -12 -4 17594.7 1413.73 4
 -1 -12 -3 21613.1 1499.93 4
 -1 -12 -2 4659.48 800.58 4
 -1 -12 -1 56951.1 2371.69 4
 -1 -12 0 19005.8 1296.6 4
 -1 -12 1 1915.02 625.064 4
 -1 -12 2 2082.43 592.834 4
 -1 -12 4 35576.3 1966.47 2
 -1 -12 5 5078.81 979.238 2
 -1 -12 6 3629.78 925.804 2
 -1 -12 7 4768.19 1037.51 2
 -1 -12 8 3327.83 1048.48 2
 -1 -11 -15 9205.09 1619.73 4
 -1 -11 -14 -174.696 1118.09 4
 -1 -11 -13 17675.8 1762.58 4
 -1 -11 -12 32445.8 2245.44 4
 -1 -11 -11 11622.6 1391.39 4
 -1 -11 -10 374.648 809.789 4
 -1 -11 -9 -999.713 904.015 4
 -1 -11 -8 63130.6 2784.64 4
 -1 -11 -7 77628.4 3031.34 4
 -1 -11 -6 5199.82 860.028 4
 -1 -11 -5 48591.4 2226.7 4
 -1 -11 -4 10994 1085.26 4
 -1 -11 -3 19682.3 1366.4 4
 -1 -11 -2 -301.401 507.686 4
 -1 -11 -1 15879 1172 4
 -1 -11 0 63547.2 2383.74 4
 -1 -11 1 54778 2123.4 4
 -1 -11 2 6113.26 739.235 4
 -1 -11 3 2645.34 578.68 4
 -1 -11 5 31542.8 1810.76 2
 -1 -11 6 502.317 687.183 2
 -1 -11 7 6556.41 1090.5 2
 -1 -11 8 7741.28 1157.57 2
 -1 -11 9 335.726 799.047 2
 -1 -10 -15 2666.9 1303.38 4
 -1 -10 -14 5996 1350.47 4
 -1 -10 -13 -874.54 1043.32 4
 -1 -10 -12 38685.2 2368.19 4
 -1 -10 -11 47417.7 2518.17 4
 -1 -10 -10 -134.314 820.952 4
 -1 -10 -9 6991.08 1083.73 4
 -1 -10 -8 2002.24 747.84 4
 -1 -10 -7 23976.3 1541.01 4
 -1 -10 -6 27629.2 1603.78 4
 -1 -10 -5 23137.2 1437.5 4
 -1 -10 -4 62472 2431.6 4
 -1 -10 -3 4909.66 765.507 4
 -1 -10 -2 10145.6 940.561 4
 -1 -10 -1 1107.42 441.639 4
 -1 -10 0 34240.1 1579.65 4
 -1 -10 1 82439.6 2634.86 4
 -1 -10 2 31632.2 1458.65 4
 -1 -10 3 2085.6 492.814 4
 -1 -10 4 7356.18 736.7 4
 -1 -10 5 60008.4 2456.73 2
 -1 -10 6 18102.2 1398.08 2
 -1 -10 7 -247.184 699.994 2
 -1 -10 8 5814.61 1019.36 2
 -1 -10 9 5494.45 1060.24 2
 -1 -10 10 2502.88 963.031 2
 -1 -9 -16 2300.66 1198.79 4
 -1 -9 -15 3110.21 1235.73 4
 -1 -9 -14 773.215 867.429 4
 -1 -9 -13 13408.9 1569.54 4
 -1 -9 -12 1631.73 992.531 4
 -1 -9 -11 46947.7 2452.04 4
 -1 -9 -10 50831.9 2434.79 4
 -1 -9 -9 1026.31 715.189 4
 -1 -9 -8 -8.08079 674.519 4
 -1 -9 -7 20555.6 1362.27 4
 -1 -9 -6 79105.2 2796.98 4
 -1 -9 -5 37083.2 1754.68 4
 -1 -9 -4 25725.1 1412.81 4
 -1 -9 -4 24135.1 978.059 7
 -1 -9 -3 71434 2482.83 4
 -1 -9 -3 71269.4 1765.91 7
 -1 -9 -2 884.563 484.867 4
 -1 -9 -1 2300.16 473.874 4
 -1 -9 0 2199.79 497.33 4
 -1 -9 1 98115.6 2856.57 4
 -1 -9 2 106402 2991.91 4
 -1 -9 3 5891.1 626.804 4
 -1 -9 4 1464.68 600.88 2
 -1 -9 4 1781.68 460 4
 -1 -9 5 7349.09 930.163 2
 -1 -9 6 41219.4 1978.24 2
 -1 -9 7 4325.63 835.463 2
 -1 -9 8 557.179 706.857 2
 -1 -9 9 8818.15 1136.51 2
 -1 -9 10 3362.72 1078.48 5
 -1 -9 10 4397.61 964.921 2
 -1 -8 -16 3.11738 1020.42 4
 -1 -8 -15 3495.38 1212.69 4
 -1 -8 -14 7492.94 1234.55 4
 -1 -8 -13 2789.32 1018.23 4
 -1 -8 -12 945.257 716.323 4
 -1 -8 -11 12193 1323.62 4
 -1 -8 -10 98490.6 3492.89 4
 -1 -8 -9 72523.9 2800.88 4
 -1 -8 -8 23691.6 1471.58 4
 -1 -8 -7 1502.6 587.395 4
 -1 -8 -6 104483 3223.91 4
 -1 -8 -5 183194 4717.18 4
 -1 -8 -4 38171.2 1213.49 6
 -1 -8 -4 34081.3 1580.01 4
 -1 -8 -3 104347 2427.95 7
 -1 -8 -3 98870.4 2975.37 4
 -1 -8 -2 162823 4185.79 4
 -1 -8 -1 2077.31 457.589 4
 -1 -8 0 5286.73 592.424 4
 -1 -8 1 5192.18 563.348 4
 -1 -8 2 180096 4303.57 4
 -1 -8 3 122920 3195.04 4
 -1 -8 4 1337.45 534.637 2
 -1 -8 4 1376.79 401.072 4
 -1 -8 5 1358.49 549.393 2
 -1 -8 6 -22.4184 567.424 2
 -1 -8 7 22290.8 1457.55 2
 -1 -8 8 1357.75 670.285 2
 -1 -8 9 8678.4 1107.21 2
 -1 -8 10 12795.9 1327.89 2
 -1 -8 10 13488 1440 5
 -1 -8 11 -563.103 859.728 5
 -1 -7 -17 3564.03 1250.06 4
 -1 -7 -16 5490.44 1251.17 4
 -1 -7 -15 2028.37 1053.17 4
 -1 -7 -14 22730.2 1858.57 4
 -1 -7 -13 33904.6 2124.33 4
 -1 -7 -12 2029.71 946.539 4
 -1 -7 -11 3565.85 878.764 4
 -1 -7 -10 43544.9 2109.39 4
 -1 -7 -9 161410 4607.1 4
 -1 -7 -8 61282.2 2367.28 4
 -1 -7 -7 254.186 527.683 4
 -1 -7 -6 6551.25 718.772 4
 -1 -7 -5 2156.12 480.398 4
 -1 -7 -4 87096 2238.96 6
 -1 -7 -4 86727.9 2612.13 4
 -1 -7 -3 3572.2 297.953 6
 -1 -7 -3 4142.08 344.906 7
 -1 -7 -3 3779.76 541.703 4
 -1 -7 -2 148801 3108.4 7
 -1 -7 -2 144633 3750.64 4
 -1 -7 -1 181191 4355.67 4
 -1 -7 0 105674 2815.69 4
 -1 -7 1 74961.9 2165.48 4
 -1 -7 2 45281.8 1528.54 4
 -1 -7 3 217743 4900.35 4
 -1 -7 4 43368.8 1516.19 4
 -1 -7 4 44890.9 1750.89 2
 -1 -7 5 10096.1 875.691 2
 -1 -7 6 11757.6 1010.59 2
 -1 -7 7 2418.35 703.675 2
 -1 -7 8 22638.7 1454.78 2
 -1 -7 9 463.766 635.204 2
 -1 -7 10 21772.7 1651.69 5
 -1 -7 11 2754.33 992.628 5
 -1 -6 -17 1339.55 1213.53 4
 -1 -6 -7 18772 1157.92 4
 -1 -6 -6 20236.5 1141.39 4
 -1 -6 -5 218014 5143.55 4
 -1 -6 -4 1387.89 270.998 6
 -1 -6 -4 1670.11 419.64 4
 -1 -6 -3 68013.7 2028.1 4
 -1 -6 -3 66123.5 1703.25 7
 -1 -6 -2 4376.27 291.628 7
 -1 -6 -2 4738.27 504.826 4
 -1 -6 -1 109520 2833.59 4
 -1 -6 0 48636.7 1550.16 4
 -1 -6 1 214334 4717.11 4
 -1 -6 2 79651 2118.63 4
 -1 -6 2 78091 1794.35 3
 -1 -6 3 189300 4153.66 4
 -1 -6 3 178534 3925.82 3
 -1 -6 4 132255 3476.55 2
 -1 -6 5 20390.2 1166.59 2
 -1 -6 6 4423.14 678.945 2
 -1 -6 7 21954.1 1309.13 2
 -1 -6 8 1726.9 674.194 2
 -1 -6 9 3835.87 797.885 2
 -1 -6 9 3990.64 918.681 5
 -1 -6 10 8991.52 1139.81 5
 -1 -6 11 18081.3 1604.71 5
 -1 -6 12 7486.4 1287.83 5
 -1 -5 -7 223786 5194.71 3
 -1 -5 -6 61205.3 1883.81 3
 -1 -5 -5 244610 5289.97 3
 -1 -5 -5 244152 5521.79 4
 -1 -5 -4 95051.9 2577.85 4
 -1 -5 -4 97589 2341.56 3
 -1 -5 -3 22796.5 803.132 6
 -1 -5 -3 22611.3 754.314 3
 -1 -5 -3 21675.6 964.654 4
 -1 -5 -3 22522.1 835.898 7
 -1 -5 -2 1522.48 190.68 7
 -1 -5 -2 1878.54 326.33 4
 -1 -5 -2 1428.36 161.722 3
 -1 -5 -1 1386.12 145.985 7
 -1 -5 -1 1604.91 308.582 4
 -1 -5 0 164193 3684.67 4
 -1 -5 1 4554.73 383.656 4
 -1 -5 1 4953.88 227.737 3
 -1 -5 2 136168 2891.21 3
 -1 -5 2 135189 3096.23 4
 -1 -5 3 21749.4 996.747 2
 -1 -5 3 22960.8 882.821 4
 -1 -5 3 23079.4 829.968 3
 -1 -5 4 117780 3081.7 2
 -1 -5 5 126139 3366.56 2
 -1 -5 6 1415.12 481.995 2
 -1 -5 7 20785.7 1224.68 2
 -1 -5 8 -865.752 693.697 5
 -1 -5 8 322.027 515.834 2
 -1 -5 9 1560.65 646.356 5
 -1 -5 10 2295.04 807.582 5
 -1 -5 11 3617.41 997.799 5
 -1 -5 12 14839 1528.32 5
 -1 -5 13 3777.81 1010.81 5
 -1 -4 -8 19625.1 1091.47 3
 -1 -4 -7 29580.9 1285.47 3
 -1 -4 -6 383751 8034.11 3
 -1 -4 -5 49759.5 1522.66 3
 -1 -4 -4 175906 3834.22 3
 -1 -4 -3 14277.8 614.85 6
 -1 -4 -3 13538 544.281 3
 -1 -4 -3 12966.9 610.832 7
 -1 -4 -3 13686.1 674.042 4
 -1 -4 -2 13041.3 635.596 4
 -1 -4 -2 13394.4 499.836 6
 -1 -4 -2 13813.3 532.819 7
 -1 -4 -2 13904.9 464.162 3
 -1 -4 -1 51535.3 1213.97 7
 -1 -4 -1 53403.7 1467.78 4
 -1 -4 0 6860.01 404.265 4
 -1 -4 1 425960 8231.88 4
 -1 -4 1 411765 7985.78 3
 -1 -4 2 7492.69 380.014 3
 -1 -4 2 7980.99 437.962 4
 -1 -4 3 121912 2802.55 4
 -1 -4 3 126256 2831.89 3
 -1 -4 3 122696 3003.92 2
 -1 -4 4 1638.46 376.199 2
 -1 -4 5 80104.6 2342.48 2
 -1 -4 6 69713.4 2233.65 2
 -1 -4 7 2100 579.452 2
 -1 -4 8 2056.69 601.954 5
 -1 -4 9 -490.104 693.398 5
 -1 -4 10 977.782 671.771 5
 -1 -4 11 549.257 755.686 5
 -1 -4 12 5978.18 1098.62 5
 -1 -4 13 12790.2 1412.76 5
 -1 -3 -8 55430.1 1970.52 3
 -1 -3 -7 39970.6 1502.31 3
 -1 -3 -6 140682 3438.72 3
 -1 -3 -5 278011 5889.69 3
 -1 -3 -4 1099.83 244 3
 -1 -3 -3 417010 8279.19 7
 -1 -3 -3 425218 8227.27 5
 -1 -3 -3 400665 8100.22 3
 -1 -3 -3 411987 8385.04 1
 -1 -3 -2 924734 18047.6 6
 -1 -3 -2 973921 18176.5 5
 -1 -3 -2 977015 18324.5 1
 -1 -3 -2 903790 18083.9 7
 -1 -3 -2 999999 18201.9 4
 -1 -3 -1 10528.7 523.417 1
 -1 -3 -1 10969.7 394.424 7
 -1 -3 -1 10513.6 473.492 4
 -1 -3 0 53970.8 1336.91 4
 -1 -3 0 56522.2 1495.92 1
 -1 -3 1 233811 4672.18 4
 -1 -3 2 37962.4 1001.05 4
 -1 -3 2 36614.7 1021.36 3
 -1 -3 3 22186.3 889.538 2
 -1 -3 4 74771.7 2053.28 2
 -1 -3 5 14641.2 836.176 2
 -1 -3 6 51217.3 1750.79 2
 -1 -3 6 49138.8 1807.39 5
 -1 -3 7 33530.2 1505.69 5
 -1 -3 8 -66.6887 485.055 5
 -1 -3 9 18659 1268.34 5
 -1 -3 10 15430.8 1254.37 5
 -1 -3 11 2386.8 902.871 5
 -1 -3 12 949.441 767.885 5
 -1 -3 13 10958.7 1413.28 5
 -1 -2 -8 3056.99 543.344 3
 -1 -2 -7 22292.7 1086.33 3
 -1 -2 -6 25021.3 1086.9 3
 -1 -2 -5 208415 4567.29 3
 -1 -2 -4 463547 9197.58 3
 -1 -2 -3 80599.6 1858.02 5
 -1 -2 -3 80232.9 1863.17 3
 -1 -2 -3 78890.2 2002.02 1
 -1 -2 -3 76950.6 1988.1 7
 -1 -2 -2 392274 7435.03 3
 -1 -2 -2 370129 7590.47 1
 -1 -2 -1 11097.3 477.602 1
 -1 -2 -1 13730.6 442.14 4
 -1 -2 0 5192.01 231.165 4
 -1 -2 0 5537.31 323.911 1
 -1 -2 2 386462 7636.3 2
 -1 -2 3 35276.6 1097.51 2
 -1 -2 4 28044.8 1030.47 2
 -1 -2 5 15274.3 794.53 2
 -1 -2 5 14712.7 829.605 5
 -1 -2 6 2530.19 518.716 5
 -1 -2 7 57948 2026.27 5
 -1 -2 8 4857.42 680.621 5
 -1 -2 9 42595.2 1891.39 5
 -1 -2 10 62131.4 2457.33 5
 -1 -2 11 38005.1 1980.92 5
 -1 -2 12 16.863 771.605 5
 -1 -2 13 200.332 763.174 5
 -1 -2 14 15597.1 1585.63 5
 -1 -1 -8 58199.6 2035.32 3
 -1 -1 -7 24730.9 1160.32 3
 -1 -1 -6 94391.8 2517.41 3
 -1 -1 -5 611.989 258.108 3
 -1 -1 -4 248815 5192.52 3
 -1 -1 -3 22346.1 740.484 3
 -1 -1 -3 22705.9 704.803 5
 -1 -1 1 302715 5856.8 2
 -1 -1 2 34924.9 949.757 2
 -1 -1 3 234682 4905.51 5
 -1 -1 4 362341 7444.38 5
 -1 -1 5 52922.7 1677.18 5
 -1 -1 6 55171.6 1823.15 5
 -1 -1 7 149.233 393.853 5
 -1 -1 8 67167.1 2312.58 5
 -1 -1 9 4113.88 673.491 5
 -1 -1 10 74649.2 2725.86 5
 -1 -1 11 136228 4179.27 5
 -1 -1 12 4105.75 932.843 5
 -1 -1 13 1166 889.444 5
 -1 -1 14 4283.46 1118.99 5
 -1 0 -8 162036 4122.21 3
 -1 0 -7 207819 4848.07 3
 -1 0 -6 24269.6 1060.57 3
 -1 0 -5 18122.1 811.814 3
 -1 0 -4 1882.17 267.218 3
 -1 0 -3 3245.68 258.78 2
 -1 0 -3 3249.25 270.14 3
 -1 0 2 23033.6 717.652 5
 -1 0 3 267661 5501.11 5
 -1 0 4 242586 5179.29 5
 -1 0 5 219270 4876.59 5
 -1 0 6 2596.12 453.427 5
 -1 0 7 74337.4 2348.37 5
 -1 0 8 2607.35 563.749 5
 -1 0 9 53824.5 2121.32 5
 -1 0 10 914.601 613.024 5
 -1 0 11 90281.7 3182.96 5
 -1 0 12 44393 2265.25 5
 -1 0 13 1590.11 831.518 5
 -1 0 14 382.719 997.44 5
 -1 1 -8 15704.5 971.027 3
 -1 1 -7 339232 7328.02 3
 -1 1 -6 27123.9 1112.53 3
 -1 1 -5 25908.6 1005.82 3
 -1 1 -4 70980.7 1823.03 3
 -1 1 -3 72539.7 1795.55 2
 -1 1 -3 71640.5 1852.72 7
 -1 1 -3 72044.4 1740.46 3
 -1 1 -3 73654.6 1767.41 4
 -1 1 -2 121733 2630.59 4
 -1 1 -2 126116 2673.48 6
 -1 1 -2 119062 2651.02 7
 -1 1 1 236863 4734.99 5
 -1 1 2 383323 7559.23 5
 -1 1 3 3769.71 331.811 5
 -1 1 4 55169.7 1595.89 5
 -1 1 5 156125 3693.66 5
 -1 1 6 1871.67 454.557 5
 -1 1 7 90953.8 2677.53 5
 -1 1 8 41162.7 1721.75 5
 -1 1 9 10990.2 993.979 5
 -1 1 10 23112 1440.59 5
 -1 1 11 18163.1 1404.26 5
 -1 1 12 54501.8 2491.05 5
 -1 1 13 18642.1 1603.01 5
 -1 1 14 1877.31 976.411 5
 -1 1 15 337.434 1011.97 5
 -1 2 -8 15162.5 958.724 3
 -1 2 -7 47225.2 1663.79 3
 -1 2 -6 82047.2 2276.54 3
 -1 2 -5 8424.79 551.79 3
 -1 2 -4 65010.7 1711.45 3
 -1 2 -3 494.665 168.17 4
 -1 2 -3 755.945 184.966 7
 -1 2 -3 990.122 184.03 3
 -1 2 -2 105743 2368.17 6
 -1 2 -2 104555 2401.49 4
 -1 2 -2 106842 2347.06 7
 -1 2 -1 71518 1717.08 4
 -1 2 -1 71553.8 1641.63 1
 -1 2 -1 71369.1 1573.69 7
 -1 2 1 2934.57 253.189 4
 -1 2 1 3037.46 247.494 1
 -1 2 2 629180 12674.9 5
 -1 2 2 670931 12641.7 4
 -1 2 3 11734.8 612.474 5
 -1 2 4 186514 4184.1 5
 -1 2 5 126686 3163.04 5
 -1 2 6 185197 4413.74 5
 -1 2 7 293.452 424.416 5
 -1 2 8 21965.1 1262.62 5
 -1 2 9 41665.5 1871.62 5
 -1 2 10 -19.9763 664.769 5
 -1 2 11 4568.6 860.161 5
 -1 2 12 14260.6 1326.18 5
 -1 2 13 51200.7 2553.58 5
 -1 2 14 2933.19 987.511 5
 -1 2 15 1383.36 1053.94 5
 -1 3 -7 17579 978.198 3
 -1 3 -6 44831.6 1509.05 3
 -1 3 -5 121671 2927.13 3
 -1 3 -4 25067.8 897.788 3
 -1 3 -3 82737.8 1966.51 3
 -1 3 -3 86498.9 2107.37 7
 -1 3 -3 83528.6 2151.12 6
 -1 3 -2 53305.8 1269.74 3
 -1 3 -2 53726.5 1343.13 7
 -1 3 -2 53365.3 1375.05 6
 -1 3 -1 6003.53 383.9 1
 -1 3 -1 5299.36 370.399 4
 -1 3 -1 5807.12 265.633 7
 -1 3 0 37752.3 1110.52 1
 -1 3 0 38181.4 1164.37 4
 -1 3 1 31964.5 999.078 1
 -1 3 1 31005.4 1039.48 4
 -1 3 3 116981 2894.76 5
 -1 3 4 18990.1 923.005 5
 -1 3 5 2259.02 460.493 5
 -1 3 6 66219.7 2126.69 5
 -1 3 7 26383.4 1310.7 5
 -1 3 8 3120.43 666.563 5
 -1 3 9 38797.2 1812.17 5
 -1 3 10 63170.3 2492.7 5
 -1 3 11 -588.616 746.498 5
 -1 3 12 2680.82 881.782 5
 -1 3 13 9884.56 1230.33 5
 -1 3 14 13351.3 1555.21 5
 -1 3 15 926.643 1104.76 5
 -1 4 -7 1531.58 459.155 3
 -1 4 -6 6613.54 566.861 3
 -1 4 -5 51368 1555.28 3
 -1 4 -4 1886.21 283.928 3
 -1 4 -3 82897.6 2078.41 6
 -1 4 -3 77452.7 2008.91 7
 -1 4 -3 79126.5 1872.87 3
 -1 4 -2 209803 4264.35 7
 -1 4 -2 207793 4178.91 3
 -1 4 -2 208967 4314.33 6
 -1 4 -2 203818 4586.03 1
 -1 4 -1 55627.8 1318.14 7
 -1 4 -1 68454.7 1735.5 1
 -1 4 0 5412.79 427.387 1
 -1 4 1 24542.5 929.428 1
 -1 4 2 57634.3 1671.29 1
 -1 4 3 1764.14 375.164 5
 -1 4 4 114773 3045.25 5
 -1 4 5 32275.1 1383.56 5
 -1 4 6 12817.7 904.361 5
 -1 4 7 35660 1606.97 5
 -1 4 8 43793.6 1903.06 5
 -1 4 9 897.903 616.395 5
 -1 4 10 38990.8 1936.27 5
 -1 4 11 39905.6 2091.12 5
 -1 4 12 5508.25 1073.06 5
 -1 4 13 608.773 892.671 5
 -1 4 14 3616.87 1116.2 5
 -1 4 15 15646 1663.99 5
 -1 5 -6 23478.5 1037.27 3
 -1 5 -5 1811.77 316.29 3
 -1 5 -4 51618.6 1451.84 3
 -1 5 -3 14618.9 694.17 6
 -1 5 -3 14359.1 633.922 7
 -1 5 -3 13359.6 819.193 1
 -1 5 -3 13142.9 543.64 3
 -1 5 -2 184427 3794.23 7
 -1 5 -2 183569 4282.65 1
 -1 5 -2 183869 3721.96 3
 -1 5 -1 69884.4 2019.45 1
 -1 5 0 29551.1 1153.02 1
 -1 5 1 7322.41 562.81 1
 -1 5 2 67.384 248.773 1
 -1 5 3 4465.22 486.539 1
 -1 5 4 189119 4572.52 5
 -1 5 5 30571.1 1406.5 5
 -1 5 6 1882.87 542.395 5
 -1 5 7 926.405 560.57 5
 -1 5 8 55778.4 2238.38 5
 -1 5 9 38109.3 1902.81 5
 -1 5 10 14340.5 1258.2 5
 -1 5 11 75699.1 3007.98 5
 -1 5 12 6445.95 1111 5
 -1 5 13 2856.25 963.685 5
 -1 5 14 2402.83 1000.18 5
 -1 5 15 10074.1 1584.75 5
 -1 6 -4 3343.63 567.898 1
 -1 6 -4 2901.19 323.573 3
 -1 6 -3 63096.4 1635.29 7
 -1 6 -3 61605 1515.73 3
 -1 6 -3 60833.7 2063.24 1
 -1 6 -3 61940.6 1703.59 6
 -1 6 -2 11017.5 784.643 1
 -1 6 -2 10703 409.429 3
 -1 6 -2 10811.9 436.087 7
 -1 6 -1 105794 2888.6 1
 -1 6 0 58082 1881.73 1
 -1 6 1 19336.8 994.522 1
 -1 6 2 90528.7 2557.02 1
 -1 6 3 5193.33 580.265 1
 -1 6 6 3762.63 626.44 5
 -1 6 7 34506.3 1722.77 5
 -1 6 8 3459.71 742.66 5
 -1 6 9 33097.1 1814.53 5
 -1 6 10 12754.3 1257.07 5
 -1 6 11 83696.1 3266.5 5
 -1 6 12 38670.8 2276.87 5
 -1 6 13 -845.427 813.396 5
 -1 6 14 1507.55 994 5
 -1 6 15 -64.9764 936.024 5
 -1 7 -6 5793.08 857.516 1
 -1 7 -5 21353.1 1324.97 1
 -1 7 -4 13487 1015.9 1
 -1 7 -4 14761.3 733.569 7
 -1 7 -3 5084.94 327.695 3
 -1 7 -3 4217.13 617.561 1
 -1 7 -3 4983.96 359.065 7
 -1 7 -2 14765.5 981.842 1
 -1 7 -2 12507.7 423.3 3
 -1 7 -1 28491 1330.19 1
 -1 7 0 165313 4177.02 1
 -1 7 1 27586 1281.52 1
 -1 7 2 610.625 184.493 3
 -1 7 2 -109.25 393.882 1
 -1 7 3 97155.9 2842.55 1
 -1 7 4 7187.44 713.541 1
 -1 7 7 652.075 580.642 5
 -1 7 8 21285.2 1475.95 5
 -1 7 9 3110.17 849.851 5
 -1 7 10 18504.9 1508.15 5
 -1 7 11 11878 1364.05 5
 -1 7 12 40841.6 2363.51 5
 -1 7 13 7783.32 1366.55 5
 -1 7 14 1754.91 954.643 5
 -1 7 15 4659.01 1352.93 5
 -1 8 -8 7870.53 1186.93 1
 -1 8 -7 38070.9 2041.03 1
 -1 8 -6 68227.6 2721.54 1
 -1 8 -5 1413.55 645.686 1
 -1 8 -4 23060.1 1390.84 1
 -1 8 -3 26765.7 1447.62 1
 -1 8 -3 23760.8 752.367 7
 -1 8 -2 2015.76 597.094 1
 -1 8 -1 2065.41 534.716 1
 -1 8 0 20767.7 1193.22 1
 -1 8 1 108140 2269.49 3
 -1 8 1 107945 3184.03 1
 -1 8 2 16492.7 1060.04 1
 -1 8 2 18570.2 660.941 3
 -1 8 3 10500.5 886.355 1
 -1 8 4 1729.09 503.689 1
 -1 8 8 16419.5 1340.59 5
 -1 8 9 18782.9 1531.6 5
 -1 8 10 2454.11 856.428 5
 -1 8 11 3223.23 858.82 5
 -1 8 12 17232.4 1680.65 5
 -1 8 13 35615 2401.93 5
 -1 8 14 13252.6 1655.17 5
 -1 8 15 391.784 1258.32 5
 -1 9 -11 7734.51 1397.86 1
 -1 9 -10 18629.2 1774.1 1
 -1 9 -9 1897.11 935.542 1
 -1 9 -8 7192.59 1169.84 1
 -1 9 -7 974.495 789.834 1
 -1 9 -6 23972.4 1644.96 1
 -1 9 -5 36116.4 1918.1 1
 -1 9 -4 7066.34 891.321 1
 -1 9 -3 39938.4 1908.83 1
 -1 9 -2 12606.4 1081.59 1
 -1 9 -1 340.325 498.895 1
 -1 9 0 14244 1092.77 1
 -1 9 1 43040.8 984.787 3
 -1 9 1 48919.9 1966 1
 -1 9 2 175965 4613.09 1
 -1 9 2 173511 3613.88 3
 -1 9 3 4637.34 703.938 1
 -1 9 4 17264.2 1199.33 1
 -1 9 5 1128.52 547.01 1
 -1 9 10 22439.2 1730.01 5
 -1 9 11 4977.13 1161.69 5
 -1 9 12 4633.21 1075.16 5
 -1 9 13 25255.6 2058.53 5
 -1 9 14 29558.5 2338.51 5
 -1 10 -10 15734.4 1706.99 1
 -1 10 -9 14840.3 1553.29 1
 -1 10 -8 829.71 919.669 1
 -1 10 -7 1821.8 876.325 1
 -1 10 -6 674.132 768.225 1
 -1 10 -5 18534.7 1490.34 1
 -1 10 -4 14757 1278.02 1
 -1 10 -3 14514.4 1263.1 1
 -1 10 -2 43727.8 2121.64 1
 -1 10 -1 10025.3 1045.01 1
 -1 10 0 13160.3 1106.34 1
 -1 10 1 17222.7 1243.15 1
 -1 10 2 64967.8 2494.73 1
 -1 10 3 128712 3871.44 1
 -1 10 4 393.591 496.231 1
 -1 10 5 50606.2 2168.36 1
 -1 10 12 -1707.71 1167.81 5
 -1 10 13 -365.982 1053.79 5
 -1 10 14 3561.99 1277.27 5
 -1 11 -9 10895.5 1495.93 1
 -1 11 -8 13751.1 1554.43 1
 -1 11 -7 585.604 811.368 1
 -1 11 -6 6233.58 1082.97 1
 -1 11 -5 4968.79 992.232 1
 -1 11 -4 15683.8 1422.1 1
 -1 11 -3 5940.7 995.668 1
 -1 11 -2 13382.2 1280.39 1
 -1 11 -1 59488.7 2585.95 1
 -1 11 0 18052.5 1404.32 1
 -1 11 1 16588.1 1290.03 1
 -1 11 2 17662.9 1322.29 1
 -1 11 3 33192.4 1782.45 1
 -1 11 4 94038.1 3280.69 1
 -1 11 5 5468.01 891.185 1
 -1 12 -8 14878 1674.45 1
 -1 12 -7 14159.1 1643.72 1
 -1 12 -6 -956.996 940.803 1
 -1 12 -5 10241.1 1288.22 1
 -1 12 -4 6477.04 1102.04 1
 -1 12 -3 11575.5 1309.65 1
 -1 12 -2 518.599 687.857 1
 -1 12 -1 31626.5 1966.6 1
 -1 12 0 82330.4 3204.5 1
 -1 12 1 25985.8 1729.89 1
 -1 12 2 2764.46 771.642 1
 -1 12 3 6634.08 992.505 1
 -1 12 4 31619.4 1844.83 1
 -1 12 5 26173 1688.18 1
 -1 12 6 1401.93 707.492 1
 -1 13 -7 22974.5 2025.2 1
 -1 13 -6 11935.4 1521.92 1
 -1 13 -5 396.635 843.408 1
 -1 13 -4 14688.8 1548.08 1
 -1 13 -3 1356.91 812.668 1
 -1 13 -2 739.314 784.622 1
 -1 13 -1 901.191 735.429 1
 -1 13 0 27708.7 1913.97 1
 -1 13 1 61858.3 2805.4 1
 -1 13 2 252.827 724.246 1
 -1 13 3 47388 2366.56 1
 -1 13 4 4642.41 919.119 1
 -1 13 5 22413 1656.79 1
 -1 13 6 16430.6 1430.01 1
 -1 14 -6 21387.5 2001.22 1
 -1 14 -5 5142.83 1179.62 1
 -1 14 -4 8086.27 1354.16 1
 -1 14 -3 6463.92 1290.14 1
 -1 14 -2 751.375 884.402 1
 -1 14 -1 4531.99 1013.55 1
 -1 14 0 1600.36 867.383 1
 -1 14 1 46605.2 2544.24 1
 -1 14 2 18592.7 1597.14 1
 -1 14 3 4238.26 1004.08 1
 -1 14 4 7840.91 1172.6 1
 -1 14 5 5274.58 990.801 1
 -1 14 6 20304 1677.91 1
 -1 15 -4 229.675 1118.25 1
 -1 15 -3 6828.3 1314.74 1
 -1 15 -2 6996.59 1268.67 1
 -1 15 -1 2295.94 1027.69 1
 -1 15 0 11846.1 1473.82 1
 -1 15 1 4776.13 1071.79 1
 -1 15 2 36455.8 2302.61 1
 -1 15 3 7152.03 1171.95 1
 -1 15 4 5747.55 1165.26 1
 -1 15 5 1951.09 898.851 1
 -1 15 6 8417.78 1237.44 1
 -1 16 -2 9524.28 1501.73 1
 -1 16 -1 3153.24 1160.78 1
 -1 16 0 436.576 980.576 1
 -1 16 1 1505.97 928.692 1
 -1 16 2 12082.4 1567.42 1
 -1 16 3 20488.5 1832.5 1
 -1 16 4 4441.88 1160.47 1
 -1 16 5 1387.83 904.779 1
 -1 16 6 848.634 883.174 1
 -1 17 1 2824.64 1245.65 1
 -1 17 2 -166.27 968.724 1
 -1 17 3 9379.41 1540.41 1
 -1 17 4 10167.9 1463.13 1
 -1 17 5 703.262 993.858 1
 -1 17 6 2779.38 1080.2 1
 0 -17 -7 16930.4 1815.83 4
 0 -17 -6 1658.57 949.693 4
 0 -17 -5 8923.45 1427.21 4
 0 -17 -4 8187.6 1396.75 4
 0 -17 -3 435.147 847.044 4
 0 -17 -2 4758.92 1114.51 4
 0 -17 -1 778.284 933.242 4
 0 -16 -9 482.388 1134.34 4
 0 -16 -8 6766.07 1309.84 4
 0 -16 -7 1722.97 959.752 4
 0 -16 -6 7882.8 1269.3 4
 0 -16 -5 -1640.59 1009.21 4
 0 -16 -4 13892.2 1551.61 4
 0 -16 -3 12123.7 1448.81 4
 0 -16 -2 3257.3 1053.51 4
 0 -16 -1 2519.78 914.164 4
 0 -16 0 4609.6 1065.35 4
 0 -15 -11 3129.07 1294.82 4
 0 -15 -10 11365.8 1706.08 4
 0 -15 -9 487.314 1047.18 4
 0 -15 -8 704.965 900.929 4
 0 -15 -7 2232.51 967.503 4
 0 -15 -6 5142.62 1075.94 4
 0 -15 -5 7230.24 1261.27 4
 0 -15 -4 6610.51 1167.65 4
 0 -15 -3 23352.5 1812.6 4
 0 -15 -2 28401.4 1920.8 4
 0 -15 -1 -366.046 771.551 4
 0 -15 0 3394.56 887.251 4
 0 -15 1 6160 1064.75 4
 0 -14 -12 999.535 1200.91 4
 0 -14 -11 452.653 1123.32 4
 0 -14 -10 9232.7 1521.13 4
 0 -14 -9 22776.9 2031.13 4
 0 -14 -8 -339.746 932.757 4
 0 -14 -7 6844.73 1227.85 4
 0 -14 -6 1130.5 810.324 4
 0 -14 -5 858.362 904.511 4
 0 -14 -4 2252.36 845.613 4
 0 -14 -3 16090.5 1506.85 4
 0 -14 -2 57628.5 2713.03 4
 0 -14 -1 10168.3 1231.23 4
 0 -14 0 7433.9 1075.17 4
 0 -14 1 4973.6 919.692 4
 0 -14 2 484.187 681.909 4
 0 -14 5 11757.8 1370.5 2
 0 -13 -13 18227 2013.91 4
 0 -13 -12 5912.64 1364.5 4
 0 -13 -11 3344.25 1233.07 4
 0 -13 -10 1484.42 873.171 4
 0 -13 -9 9086.08 1290.02 4
 0 -13 -8 23376.3 1854.94 4
 0 -13 -7 152.568 806.565 4
 0 -13 -6 264.731 789.837 4
 0 -13 -5 3046.48 873.426 4
 0 -13 -4 6484.67 1011.15 4
 0 -13 -3 10991.7 1236.45 4
 0 -13 -2 24322.4 1650.88 4
 0 -13 -1 67603.7 2828.84 4
 0 -13 0 -165.916 651.423 4
 0 -13 1 3955.59 825.335 4
 0 -13 2 1196.27 674.483 4
 0 -13 3 2626.09 678.711 4
 0 -13 5 493.834 826.935 2
 0 -13 6 16486.4 1560.56 2
 0 -12 -14 -2319.28 1411.72 4
 0 -12 -13 23115.3 2081.29 4
 0 -12 -12 10792.7 1478.8 4
 0 -12 -11 112.46 869.819 4
 0 -12 -10 11016.6 1400.35 4
 0 -12 -9 335.322 883.265 4
 0 -12 -8 44091.2 2408.8 4
 0 -12 -7 20467.7 1619.14 4
 0 -12 -6 -26.2846 708.463 4
 0 -12 -5 3113.63 791.455 4
 0 -12 -4 3827.49 845.177 4
 0 -12 -3 4800.36 856.629 4
 0 -12 -2 415.721 617.54 4
 0 -12 -1 47022.3 2219.58 4
 0 -12 0 74239 2818.37 4
 0 -12 1 17813.9 1321.62 4
 0 -12 2 8700.81 947.976 4
 0 -12 3 4389.24 765.815 4
 0 -12 4 20824.3 1353.38 4
 0 -12 5 15032.2 1404.13 2
 0 -12 6 272.555 776.613 2
 0 -12 7 13468.7 1383.2 2
 0 -12 8 6671.26 1173.02 2
 0 -11 -14 1904.8 1184.91 4
 0 -11 -13 5127.75 1192.96 4
 0 -11 -12 21812.4 1951.52 4
 0 -11 -11 18931.2 1751.82 4
 0 -11 -10 121.774 903.968 4
 0 -11 -9 13492.7 1415.96 4
 0 -11 -8 1307.11 804.549 4
 0 -11 -7 44535.3 2286.51 4
 0 -11 -6 6526.12 1041.27 4
 0 -11 -5 53927.6 2404.27 4
 0 -11 -4 39164 1991.97 4
 0 -11 -3 9028.71 987.803 4
 0 -11 -2 5297.87 815.004 4
 0 -11 -1 9395.98 994.675 4
 0 -11 0 61075.4 2430.9 4
 0 -11 1 62961.6 2395.89 4
 0 -11 2 12577.7 1063.57 4
 0 -11 3 15295.4 1118.1 4
 0 -11 4 1182.73 543.167 4
 0 -11 5 17781.2 1411.52 2
 0 -11 5 19421.9 1250.54 4
 0 -11 6 11051.1 1232.7 2
 0 -11 7 920.82 762.007 2
 0 -11 8 15185.2 1500.64 2
 0 -11 9 5023.4 1114.13 2
 0 -10 -15 3285.91 1346.93 4
 0 -10 -14 792.154 1125.92 4
 0 -10 -13 2314.22 1082.02 4
 0 -10 -12 13620.9 1657.84 4
 0 -10 -11 42594.6 2512.14 4
 0 -10 -10 18242.8 1631.49 4
 0 -10 -9 2655.38 940.973 4
 0 -10 -8 3488.07 847.45 4
 0 -10 -7 9826.06 1145.58 4
 0 -10 -6 61665.4 2538.41 4
 0 -10 -5 4036.42 750.494 4
 0 -10 -4 67171.5 2607.64 4
 0 -10 -3 53300 2254.2 4
 0 -10 -2 11762.2 1038.69 4
 0 -10 -1 29657 1552.06 4
 0 -10 0 14966.1 1098.79 4
 0 -10 1 72455.7 2502.94 4
 0 -10 2 55276.5 2112.44 4
 0 -10 3 1385.89 509.11 4
 0 -10 4 18214.5 1150.82 4
 0 -10 5 -1177.92 671.905 2
 0 -10 5 120.74 480.533 4
 0 -10 6 15663.1 1341.56 2
 0 -10 7 8833.42 1129.81 2
 0 -10 8 4996.85 954.121 2
 0 -10 9 14219.6 1438.85 2
 0 -10 10 2110.59 1011.65 2
 0 -9 -16 928.9 1023.13 4
 0 -9 -15 16176.8 1833.47 4
 0 -9 -14 10495.3 1574.3 4
 0 -9 -13 -403.069 943.966 4
 0 -9 -12 1143.89 875.914 4
 0 -9 -11 9199.58 1251.97 4
 0 -9 -10 46211.6 2406.13 4
 0 -9 -9 24662.4 1713.09 4
 0 -9 -8 80.4906 636.57 4
 0 -9 -7 6563.75 974.168 4
 0 -9 -6 66217 2566 4
 0 -9 -5 58668.4 2328.98 4
 0 -9 -4 7546.01 524.561 6
 0 -9 -4 6893.27 849.433 4
 0 -9 -3 63908.4 1647.69 7
 0 -9 -3 63791.4 1535.15 6
 0 -9 -3 62323.9 2376.99 4
 0 -9 -2 45221.5 1899.42 4
 0 -9 -1 29900.3 1485.71 4
 0 -9 0 52901 2013.4 4
 0 -9 1 18318.6 1113.47 4
 0 -9 2 88814.5 2729.92 4
 0 -9 3 65470.7 2228.12 4
 0 -9 4 15013.9 1023.75 4
 0 -9 5 20411.5 1357.87 2
 0 -9 5 21550.4 1206.87 4
 0 -9 6 1847.14 702.721 2
 0 -9 7 19523.6 1449.15 2
 0 -9 8 793.648 716.337 2
 0 -9 9 13276.1 1336.72 2
 0 -9 10 16707.4 1556.38 2
 0 -9 11 186.483 851.308 2
 0 -8 -16 1734.81 1226.25 4
 0 -8 -15 2548.02 1128.15 4
 0 -8 -14 30309 2268.63 4
 0 -8 -13 19878.4 1864.42 4
 0 -8 -12 2320.1 921.95 4
 0 -8 -11 600.889 771.852 4
 0 -8 -10 40228.6 2174.53 4
 0 -8 -9 111205 3716.78 4
 0 -8 -8 7670.36 958.993 4
 0 -8 -7 16982.9 1230.06 4
 0 -8 -6 1904.39 673.86 4
 0 -8 -5 43081 1883.74 4
 0 -8 -4 15136.9 1069.77 4
 0 -8 -3 7269.82 458.973 7
 0 -8 -3 6097.07 716.573 4
 0 -8 -3 7287.52 419.403 6
 0 -8 -2 97380 2090.03 7
 0 -8 -2 99811.9 2977.47 4
 0 -8 -1 87262.7 2695.21 4
 0 -8 0 29041.7 1341.86 4
 0 -8 1 11143.3 799.391 4
 0 -8 2 17684.4 1022.94 4
 0 -8 3 73665.3 2292.83 4
 0 -8 4 24152.7 1213.86 4
 0 -8 5 30792.5 1564.49 2
 0 -8 5 30599.2 1366.21 4
 0 -8 6 31577.9 1641.11 2
 0 -8 7 3133.38 739.377 2
 0 -8 8 21770.9 1512.87 2
 0 -8 9 3781.08 917.938 2
 0 -8 10 26850.4 1822.66 2
 0 -8 11 9019.52 1280.06 5
 0 -7 -16 6853.56 1439.52 4
 0 -7 -15 2440.6 978.892 4
 0 -7 -14 9559.78 1452.44 4
 0 -7 -13 40194.4 2380.79 4
 0 -7 -12 40485.8 2283.67 4
 0 -7 -11 -106.303 754.933 4
 0 -7 -10 1126.85 755.002 4
 0 -7 -9 98929.3 3367.7 4
 0 -7 -8 65300.8 2507.61 4
 0 -7 -7 10437 969.323 4
 0 -7 -6 63361 2298.43 4
 0 -7 -5 14833.7 1035.63 4
 0 -7 -4 22195.7 1207.49 4
 0 -7 -3 35169.4 1497.9 4
 0 -7 -3 32609.5 1127.25 7
 0 -7 -2 7301.45 308.676 6
 0 -7 -2 7632.66 711.267 4
 0 -7 -2 7252.55 354.639 7
 0 -7 -1 216117 5116.08 4
 0 -7 0 68502.1 2141.13 4
 0 -7 1 28904.8 1239.92 4
 0 -7 2 559.063 327.91 4
 0 -7 3 37520.9 1443.28 4
 0 -7 4 41762 1554.45 4
 0 -7 5 4956.72 687.358 2
 0 -7 5 4613.08 564.492 4
 0 -7 6 29925.7 1569.97 2
 0 -7 7 60377.6 2355.16 2
 0 -7 8 10289.1 1050.38 2
 0 -7 9 6871.87 969.628 2
 0 -7 10 14386.4 1345.7 2
 0 -7 10 15281.1 1383.5 5
 0 -7 11 20639.6 1710.58 5
 0 -7 12 4483.46 1084.97 5
 0 -6 -17 3122.84 1247.26 4
 0 -6 -16 171.923 931.816 4
 0 -6 -15 5712.09 1247.48 4
 0 -6 -14 3365.52 1101.9 4
 0 -6 -13 7944.7 1154.77 4
 0 -6 -12 72899.7 3021.54 4
 0 -6 -11 6847.02 979.295 4
 0 -6 -10 61318 2548.63 4
 0 -6 -9 4146.25 813.861 4
 0 -6 -8 126239 3730.17 4
 0 -6 -7 11745.4 984.149 4
 0 -6 -6 15499.6 1047.35 4
 0 -6 -5 59158.7 2057.76 4
 0 -6 -4 34225.7 1420.24 4
 0 -6 -3 74242 2276.52 4
 0 -6 -2 1263.81 189.291 7
 0 -6 -2 1477.08 386.321 4
 0 -6 -1 122396 3186.81 4
 0 -6 0 349116 7408.75 4
 0 -6 1 2873.18 417.714 4
 0 -6 2 116054 2928.1 4
 0 -6 3 890.136 334.71 4
 0 -6 4 30239.7 1195.97 4
 0 -6 4 32195 1383.1 2
 0 -6 5 26317 1304.04 2
 0 -6 6 953.097 510.849 2
 0 -6 7 32769.5 1588.35 2
 0 -6 8 14377 1163.29 2
 0 -6 9 17270.3 1332.51 2
 0 -6 10 1105.45 708.23 5
 0 -6 11 10237.7 1243.82 5
 0 -6 12 20404.1 1733.06 5
 0 -5 -17 3220.69 1133.98 4
 0 -5 -16 7180.65 1386.53 4
 0 -5 -7 108679 3182.23 4
 0 -5 -6 39789.9 1622.48 4
 0 -5 -5 138579 3556.04 4
 0 -5 -4 63866.6 1981.42 4
 0 -5 -3 552.648 326.918 4
 0 -5 -2 7320.13 579.37 4
 0 -5 -1 60566.7 1818.85 4
 0 -5 0 168439 3862.02 4
 0 -5 1 177095 3994.15 4
 0 -5 2 140001 3289.85 4
 0 -5 3 122440 2970.03 4
 0 -5 4 27128.4 1083.5 4
 0 -5 4 28423.1 1247.38 2
 0 -5 5 79829.3 2438.25 2
 0 -5 6 60213.5 2117.28 2
 0 -5 7 14274.9 1033.06 2
 0 -5 8 13138.7 1075.4 2
 0 -5 9 -881.196 735.09 5
 0 -5 9 278.392 624.862 2
 0 -5 10 4827.89 873.503 5
 0 -5 11 1662.49 780.403 5
 0 -5 12 10502.1 1313.24 5
 0 -5 13 14346.4 1510.63 5
 0 -4 -4 381612 7951.77 4
 0 -4 -3 3226.36 397.22 4
 0 -4 -2 41166.4 1326.81 4
 0 -4 -1 2927.78 338.946 4
 0 -4 0 38205.3 1200.65 4
 0 -4 1 256395 5338.08 4
 0 -4 2 92998.2 2262.63 4
 0 -4 3 28723.7 917.699 3
 0 -4 3 27554 991.261 4
 0 -4 4 60162.2 1850.88 2
 0 -4 5 12227.9 791.578 2
 0 -4 6 64401.5 2107.72 2
 0 -4 7 3474.9 618.531 2
 0 -4 8 28725.4 1454.03 2
 0 -4 9 41794.1 1941.94 5
 0 -4 10 2633.68 775.627 5
 0 -4 11 1305.58 812.666 5
 0 -4 12 1701.51 933.92 5
 0 -4 13 10348 1312.9 5
 0 -3 -3 177369 3905 4
 0 -3 -2 562724 11233 1
 0 -3 -2 583959 11190.5 4
 0 -3 -2 563103 11177.9 5
 0 -3 -1 19151.8 726.217 4
 0 -3 -1 18931.3 734.65 1
 0 -3 0 23572.7 825.987 1
 0 -3 0 23687.9 806.986 4
 0 -3 1 26019.4 826.086 4
 0 -3 2 381457 7635.98 4
 0 -3 2 388070 7499.39 3
 0 -3 3 36737.7 1221.61 2
 0 -3 3 38479.4 1130.18 4
 0 -3 3 38329.9 1105.99 3
 0 -3 4 8289.48 578.567 2
 0 -3 5 66548.2 2007.89 2
 0 -3 6 2689.21 454.66 2
 0 -3 7 4867.41 632.757 2
 0 -3 8 8672.98 831.789 5
 0 -3 9 58777.4 2281.51 5
 0 -3 10 42688 1994.94 5
 0 -3 11 25735.3 1639.09 5
 0 -3 12 492.698 652.598 5
 0 -3 13 -973.002 923.301 5
 0 -3 14 11928.6 1400.95 5
 0 -2 -3 13566.2 585.56 5
 0 -2 -2 108391 2495.44 5
 0 -2 -2 115899 2590.74 1
 0 -2 -2 116101 2515.02 4
 0 -2 -1 336303 6603.13 1
 0 -2 -1 332061 6574.78 4
 0 -2 0 42306 1065.34 4
 0 -2 0 42139.2 1078.02 1
 0 -2 1 265110 5148.19 3
 0 -2 1 274113 5301.24 4
 0 -2 2 11031.1 439.848 4
 0 -2 2 9474.13 469.95 2
 0 -2 2 10909.4 421.709 3
 0 -2 3 330316 6736.25 2
 0 -2 3 343520 6667.34 3
 0 -2 4 29068.7 1060.15 2
 0 -2 5 68710.3 1982.04 2
 0 -2 6 28272.6 1214.3 2
 0 -2 6 28923.2 1255.28 5
 0 -2 7 12074.8 869.062 5
 0 -2 8 21060.8 1209.17 5
 0 -2 9 21018.5 1299.67 5
 0 -2 10 44951 2022.29 5
 0 -2 11 67770.6 2675.62 5
 0 -2 12 19805 1523.99 5
 0 -2 13 1799.33 872.934 5
 0 -2 14 1353.37 954.42 5
 0 -1 -4 7448.47 479.097 3
 0 -1 -3 646268 12567.9 5
 0 -1 -3 656124 12611.9 3
 0 -1 -2 35252.8 932.431 3
 0 -1 2 44433.2 1135.54 3
 0 -1 2 47263.4 1166.24 2
 0 -1 3 154020 3285.75 3
 0 -1 3 149628 3286.67 2
 0 -1 4 125713 2919.75 2
 0 -1 5 21044.2 930.321 5
 0 -1 6 76151.1 2222.76 5
 0 -1 7 86902.4 2566.18 5
 0 -1 8 21641.9 1190.95 5
 0 -1 9 15976.9 1123.68 5
 0 -1 10 2035.8 699.869 5
 0 -1 11 86403 3049.76 5
 0 -1 12 59204.2 2555.42 5
 0 -1 13 3007.39 887.925 5
 0 -1 14 1146.52 907.657 5
 0 -1 15 1095.49 1002.54 5
 0 0 -4 1146.58 258.363 3
 0 0 -3 24708 804.083 2
 0 0 -3 26955.9 866.223 3
 0 0 -2 48803.9 1194.61 3
 0 0 2 49853.9 1206.22 5
 0 0 3 26209.4 849.886 5
 0 0 3 26654.4 865.866 3
 0 0 4 752.18 231.55 5
 0 0 5 33913.6 1208.68 5
 0 0 6 3734.48 475.846 5
 0 0 7 197296 4690.75 5
 0 0 8 41885.6 1694.41 5
 0 0 9 2991.06 624.372 5
 0 0 10 11878.4 1023.85 5
 0 0 11 18325.2 1359.98 5
 0 0 12 69448.5 2818.26 5
 0 0 13 19908.4 1622.08 5
 0 0 14 1067.59 833.404 5
 0 0 15 4010.17 1030.21 5
 0 1 -4 130309 3019.49 3
 0 1 -3 150336 3290.92 2
 0 1 -3 151834 3268.65 3
 0 1 -2 49099.9 1190.78 3
 0 1 -2 49068.3 1228.4 2
 0 1 2 34535.7 917.21 5
 0 1 3 641397 12582.1 5
 0 1 3 661786 12617.5 3
 0 1 4 7099.43 460.609 5
 0 1 5 40535.4 1334.99 5
 0 1 6 61819 1904.55 5
 0 1 7 29061.1 1290.13 5
 0 1 8 106950 3058.84 5
 0 1 9 46519.8 1884.64 5
 0 1 10 12945.9 1088.04 5
 0 1 11 169.903 567.22 5
 0 1 12 22254 1571.12 5
 0 1 13 49640 2429.18 5
 0 1 14 4209.43 1083.05 5
 0 1 15 2652.34 950.488 5
 0 2 -4 29438.6 1027.28 3
 0 2 -3 341594 6834.96 4
 0 2 -3 342386 6844.92 3
 0 2 -2 11444.5 432.029 3
 0 2 -2 10348.6 448.54 4
 0 2 -1 260778 5358.98 4
 0 2 -1 276924 5213.91 3
 0 2 2 114649 2503.73 5
 0 2 2 108670 2374.76 3
 0 2 3 14601.8 596.398 3
 0 2 3 13608.8 620.209 5
 0 2 4 152908 3454.07 5
 0 2 5 646.369 312.722 5
 0 2 6 121754 3118.12 5
 0 2 7 2900.43 546.456 5
 0 2 8 46822.8 1817.2 5
 0 2 9 70113.7 2436.19 5
 0 2 10 12070.8 1090.19 5
 0 2 11 6255.39 918.971 5
 0 2 12 687.5 791.776 5
 0 2 13 33338.6 2021.64 5
 0 2 14 25311.1 1870.67 5
 0 2 15 2212.52 958.859 5
 0 3 -3 37337.1 1080.9 3
 0 3 -2 391311 7736.78 4
 0 3 -2 386164 7538.08 3
 0 3 -1 26303.1 905.015 1
 0 3 -1 25889.2 619.368 3
 0 3 -1 25655.5 834.825 4
 0 3 0 26760.7 863.497 4
 0 3 0 26899.7 901.397 1
 0 3 1 19630.5 514.311 3
 0 3 1 19568.7 738.772 1
 0 3 1 20197.1 735.573 4
 0 3 2 581492 11156.6 3
 0 3 2 600287 11392.8 4
 0 3 2 561535 11398.6 1
 0 3 3 172321 3930.96 5
 0 3 3 179698 3767.82 3
 0 3 4 21582.5 931.171 5
 0 3 5 160187 3787.93 5
 0 3 6 7530.22 657.645 5
 0 3 7 48024.9 1768.28 5
 0 3 8 2857.03 571.236 5
 0 3 9 20364.9 1263.86 5
 0 3 10 22637 1412.71 5
 0 3 11 7160.98 1005.61 5
 0 3 12 17373.8 1409.31 5
 0 3 13 -235.209 884.411 5
 0 3 14 21111.5 1754.33 5
 0 3 15 21059.6 1881.59 5
 0 4 -2 94549.2 2479.63 1
 0 4 -1 246052 5301.97 1
 0 4 0 39577.5 1279.13 1
 0 4 0 40704.6 1240.63 4
 0 4 1 2847.32 331.707 1
 0 4 1 2834.64 152.289 3
 0 4 2 43763.7 1372.23 1
 0 4 2 42848.9 1085.55 3
 0 4 3 3021.58 381.332 1
 0 4 3 2976.56 274.161 3
 0 4 4 371956 7834.39 5
 0 4 5 27209.9 1193.69 5
 0 4 6 209713 4953.11 5
 0 4 7 9960.9 790.431 5
 0 4 8 17133.9 1083.46 5
 0 4 9 1995.45 618.932 5
 0 4 10 3250.32 733.406 5
 0 4 11 37936.4 1974.39 5
 0 4 12 4182.76 957.557 5
 0 4 13 3803.61 1014.45 5
 0 4 14 2874.9 1044.51 5
 0 4 15 23476.7 1922.2 5
 0 4 16 11368.5 1564.48 5
 0 5 -2 139623 3499.31 1
 0 5 -1 181311 4117.35 1
 0 5 -1 151174 3448.53 6
 0 5 0 172195 4038.01 1
 0 5 1 53891.6 1175.71 3
 0 5 1 62807.4 1787.27 1
 0 5 2 6484.89 322.534 3
 0 5 2 6062.13 536.433 1
 0 5 3 472.414 285.353 1
 0 5 3 660.455 196.789 3
 0 5 4 64352.4 2024.37 1
 0 5 5 132692 3507.63 5
 0 5 6 40076 1631.6 5
 0 5 7 107173 3168.56 5
 0 5 8 540.812 464.074 5
 0 5 9 35276 1737.87 5
 0 5 10 6549.55 909.469 5
 0 5 11 47182.5 2255.96 5
 0 5 12 18885.8 1531.98 5
 0 5 13 78.4901 757.842 5
 0 5 14 4978.49 1145.95 5
 0 5 15 425.168 1071.81 5
 0 5 16 8351.25 1501.69 5
 0 6 -4 32442.6 1530.25 1
 0 6 -3 1597.09 275.551 7
 0 6 -3 1594.73 310.668 6
 0 6 -3 1984.53 489.721 1
 0 6 -2 122776 2693.06 6
 0 6 -2 121227 3264.81 1
 0 6 -2 119102 2615.61 7
 0 6 -1 1654.5 381.267 1
 0 6 0 354255 7629.82 1
 0 6 1 125223 3254.72 1
 0 6 2 1016.49 157.031 3
 0 6 2 1506.42 415.12 1
 0 6 3 74211.7 2285.28 1
 0 6 3 76303.4 1844.82 3
 0 6 4 35118 1437.66 1
 0 6 6 15577.5 1046.05 5
 0 6 7 9910.99 959.4 5
 0 6 8 123650 3691.43 5
 0 6 9 3653 720.946 5
 0 6 10 58940.9 2496.04 5
 0 6 11 5933.1 1055.16 5
 0 6 12 70382.6 2979.31 5
 0 6 13 8811.46 1278.64 5
 0 6 14 2549.23 1118.74 5
 0 6 15 5708.32 1349.27 5
 0 6 16 1450.23 1175.18 5
 0 7 -5 5087.26 783.168 1
 0 7 -4 45735.7 1944.55 1
 0 7 -3 39376.8 1192.07 7
 0 7 -3 39323.3 1282.53 6
 0 7 -3 39640.5 1697.12 1
 0 7 -2 732.063 124.392 7
 0 7 -2 638.423 373.623 1
 0 7 -2 1346.83 188.065 6
 0 7 -1 33058.8 1462.82 1
 0 7 0 72241.8 2343.5 1
 0 7 1 218671 5223.67 1
 0 7 2 7530.03 343.271 3
 0 7 2 6853.56 661.435 1
 0 7 3 35400.3 1042.57 3
 0 7 3 33578.1 1465.74 1
 0 7 4 21564 1173.96 1
 0 7 5 17176.1 1087.78 1
 0 7 7 9716.14 939.443 5
 0 7 8 68022.5 2617.62 5
 0 7 9 96973.6 3355.29 5
 0 7 10 702.275 732.996 5
 0 7 11 -224.255 673.715 5
 0 7 12 40804.2 2298.75 5
 0 7 13 41079 2406.59 5
 0 7 14 9769.93 1438.53 5
 0 7 15 4070.08 1263.28 5
 0 8 -7 1237.67 792.223 1
 0 8 -6 29490.6 1790.34 1
 0 8 -5 30017.7 1709.58 1
 0 8 -4 24144.6 1483.5 1
 0 8 -3 74417.2 1915.02 6
 0 8 -3 70522.3 1779.71 7
 0 8 -2 18308.3 1204.21 1
 0 8 -1 11708.3 962.129 1
 0 8 0 27721.8 1437.12 1
 0 8 1 87889.1 2788.26 1
 0 8 2 102891 3067.3 1
 0 8 3 7335.23 412.85 3
 0 8 3 7511.15 754.175 1
 0 8 4 15706.4 1080.49 1
 0 8 5 45667 1888.1 1
 0 8 8 5744.16 878.814 5
 0 8 9 111832 3761.45 5
 0 8 10 40384.7 2160.16 5
 0 8 11 506.845 697.879 5
 0 8 12 3417.62 1068.24 5
 0 8 13 24324.9 1954.95 5
 0 8 14 27024.9 2177.22 5
 0 8 15 1223.92 1013.14 5
 0 9 -11 2285.63 1213.35 1
 0 9 -10 18388.6 1841.1 1
 0 9 -9 11667.7 1449.43 1
 0 9 -8 1132.42 782.105 1
 0 9 -7 18191.9 1574.33 1
 0 9 -6 3149.41 868.65 1
 0 9 -5 19252.4 1435.72 1
 0 9 -4 17732.5 1355.6 1
 0 9 -3 71654.5 2711.71 1
 0 9 -2 94289.7 3137.51 1
 0 9 -1 17702 1283.71 1
 0 9 0 54511.6 2199.64 1
 0 9 1 33333 1648.18 1
 0 9 2 48054.8 2008.29 1
 0 9 3 66173.6 1626.39 3
 0 9 3 68278 2429.32 1
 0 9 4 6206.95 776.813 1
 0 9 5 64080.7 2399.68 1
 0 9 6 68574.1 2560.65 1
 0 9 10 47486.5 2393.69 5
 0 9 11 9990.07 1207.71 5
 0 9 12 117.997 800.719 5
 0 9 13 387.997 986.395 5
 0 9 14 11067.9 1630.83 5
 0 9 15 20079.5 2027.83 5
 0 10 -10 3404.36 1131.49 1
 0 10 -9 16502.4 1702.9 1
 0 10 -8 5422.83 1114.28 1
 0 10 -7 9006.47 1312.35 1
 0 10 -6 16394.8 1542.2 1
 0 10 -5 823.582 686.262 1
 0 10 -4 15932.8 1377.24 1
 0 10 -3 931.807 662.763 1
 0 10 -2 50738.8 2298.09 1
 0 10 -1 77425.7 2891.02 1
 0 10 0 16466.1 1266.75 1
 0 10 1 28363.3 1615.38 1
 0 10 2 10421.5 1043.78 1
 0 10 3 53223.4 2224.89 1
 0 10 4 68834.2 2597.3 1
 0 10 5 4306 760.383 1
 0 10 6 57820.1 2396.28 1
 0 10 12 9379.53 1369.94 5
 0 10 13 -937.108 932.157 5
 0 10 14 750.199 951.368 5
 0 10 15 1629.49 1034 5
 0 11 -9 3161.52 1189.98 1
 0 11 -8 17366.5 1789.27 1
 0 11 -7 1997.34 891.007 1
 0 11 -6 12039.4 1461.21 1
 0 11 -5 19127.2 1686.3 1
 0 11 -4 -108.748 720.274 1
 0 11 -3 17465.3 1513.94 1
 0 11 -2 12526.7 1231.12 1
 0 11 -1 67267.5 2809.81 1
 0 11 0 68405.3 2777.7 1
 0 11 1 11044.5 1174.55 1
 0 11 2 5045.88 821.292 1
 0 11 3 7651.53 947.928 1
 0 11 4 38109.8 1986.74 1
 0 11 5 58069 2454.72 1
 0 11 6 8629.78 1029.59 1
 0 12 -8 4648.73 1308.65 1
 0 12 -7 13860.4 1594.19 1
 0 12 -6 -708.825 1016.95 1
 0 12 -5 17785.5 1664.37 1
 0 12 -4 21356.6 1754.45 1
 0 12 -3 5489.97 1100.18 1
 0 12 -2 7025.52 1075.82 1
 0 12 -1 13654.1 1314.2 1
 0 12 0 74092.8 3056.02 1
 0 12 1 47703.1 2347.25 1
 0 12 2 -381.528 767.764 1
 0 12 3 4937.74 895.886 1
 0 12 4 3542.63 744.39 1
 0 12 5 4282.09 847.561 1
 0 12 6 1184.44 668.574 1
 0 13 -7 1154.03 901.323 1
 0 13 -6 15394.6 1694.4 1
 0 13 -5 -354.358 856.489 1
 0 13 -4 16639.5 1716.26 1
 0 13 -3 2720.97 990.303 1
 0 13 -2 2161.97 973.989 1
 0 13 -1 3828.3 935.936 1
 0 13 0 778.879 759.376 1
 0 13 1 75854.3 3202.54 1
 0 13 2 24689.7 1733.55 1
 0 13 3 10708.3 1291.13 1
 0 13 4 4059.1 945.09 1
 0 13 5 3298.39 912.439 1
 0 13 6 1108.32 806.621 1
 0 13 7 594.727 695.437 1
 0 14 -5 7609.46 1331.88 1
 0 14 -4 2242.75 1064.6 1
 0 14 -3 14539.1 1636.54 1
 0 14 -2 -241.217 811.835 1
 0 14 -1 5807.67 1148.97 1
 0 14 0 5503.94 1116.27 1
 0 14 1 11174.6 1384.46 1
 0 14 2 55119.2 2765.74 1
 0 14 3 14847.9 1520.67 1
 0 14 4 1335.29 778.414 1
 0 14 5 1765.38 922.723 1
 0 14 6 2042.89 845.269 1
 0 14 7 4703.91 1047.07 1
 0 15 -4 4045.71 1254.06 1
 0 15 -3 4265.42 1251.81 1
 0 15 -2 27060.8 2200.72 1
 0 15 -1 4672.66 1220.64 1
 0 15 0 4321.6 1121.66 1
 0 15 1 -360.181 888.935 1
 0 15 2 32380.6 2218.07 1
 0 15 3 26929.2 1993.67 1
 0 15 4 4354.69 1001.54 1
 0 15 5 8514.12 1281.4 1
 0 15 6 5551.77 1160.45 1
 0 15 7 2193.73 905.339 1
 0 16 -2 8624.69 1574.04 1
 0 16 -1 21706.4 2065.25 1
 0 16 0 5991.22 1394.14 1
 0 16 1 1750.8 957.3 1
 0 16 2 5586.17 1246.27 1
 0 16 3 14018.3 1598.85 1
 0 16 4 14622.1 1575.38 1
 0 16 5 -579.523 820.082 1
 0 16 6 8244.42 1279.26 1
 0 16 7 2029.21 952.31 1
 0 17 2 2730.64 1149.5 1
 0 17 3 -1272.02 1088.51 1
 0 17 4 7284.9 1315.97 1
 0 17 5 5486.45 1287.32 1
 0 17 6 1243.73 1085.63 1
 1 -17 -5 -113.039 945.956 4
 1 -17 -4 11881.5 1629.34 4
 1 -17 -3 6184.65 1275.52 4
 1 -17 -2 2368.83 1126 4
 1 -17 -1 -679.787 945.3 4
 1 -17 0 2304.26 1074.83 4
 1 -16 -8 10695 1648.6 4
 1 -16 -7 12907.5 1648.09 4
 1 -16 -6 1161.42 895.116 4
 1 -16 -5 4655.99 1202.62 4
 1 -16 -4 3012.47 1100.51 4
 1 -16 -3 20294.3 1856.37 4
 1 -16 -2 5969.46 1211.38 4
 1 -16 -1 1787.07 887.338 4
 1 -16 0 571.513 890.306 4
 1 -16 1 4871.89 1077.14 4
 1 -15 -10 10185.3 1718.22 4
 1 -15 -9 9620.2 1618.51 4
 1 -15 -8 632.441 982.752 4
 1 -15 -7 11742.4 1585.67 4
 1 -15 -6 6499.11 1230.63 4
 1 -15 -5 3145.18 1072.48 4
 1 -15 -4 4868.73 1058.94 4
 1 -15 -3 8083.95 1201.08 4
 1 -15 -2 31903 2152.55 4
 1 -15 -1 5414.1 1100.26 4
 1 -15 0 11370.3 1342.85 4
 1 -15 1 2233.83 853.981 4
 1 -15 2 9615.75 1262.68 4
 1 -14 -11 3173.26 1181.65 4
 1 -14 -10 1109.24 1105.37 4
 1 -14 -9 18629.8 1923.44 4
 1 -14 -8 10823.2 1498.95 4
 1 -14 -7 3309.94 1103.95 4
 1 -14 -6 18889.3 1702.84 4
 1 -14 -5 4293.93 1102.91 4
 1 -14 -4 6193.14 1132.98 4
 1 -14 -3 2517.59 937.076 4
 1 -14 -2 19674.5 1687.76 4
 1 -14 -1 49363.8 2554.39 4
 1 -14 0 -1030.94 778.889 4
 1 -14 1 5615.21 1022.63 4
 1 -14 2 398.429 669.373 4
 1 -14 3 7885.84 1036.18 4
 1 -14 5 2880.35 961.513 2
 1 -13 -12 11947.9 1689.25 4
 1 -13 -11 1718.37 1004.16 4
 1 -13 -10 2284.89 1184.05 4
 1 -13 -9 -1606.35 1085.45 4
 1 -13 -8 10157.5 1410.54 4
 1 -13 -7 1086.8 897.232 4
 1 -13 -6 16520.4 1535.86 4
 1 -13 -5 20008.8 1666.21 4
 1 -13 -4 6378.19 1129.92 4
 1 -13 -3 40436.1 2238.57 4
 1 -13 -2 521.251 639.176 4
 1 -13 -1 55935.2 2635.35 4
 1 -13 0 27263.9 1754.79 4
 1 -13 1 240.128 687.772 4
 1 -13 2 1213.27 629.058 4
 1 -13 3 2264.6 737.059 4
 1 -13 4 15336.4 1293.22 4
 1 -13 5 -700.777 937.176 2
 1 -13 6 12509.8 1395.36 2
 1 -12 -13 3176.41 1185.94 4
 1 -12 -12 16756.6 1810.01 4
 1 -12 -11 14357.3 1674.68 4
 1 -12 -10 -1016.87 1008.36 4
 1 -12 -9 13280.6 1534.11 4
 1 -12 -8 1913.04 980.055 4
 1 -12 -7 769.856 723.428 4
 1 -12 -6 1073.59 767.422 4
 1 -12 -5 23022.8 1714.82 4
 1 -12 -4 33357.6 1999.83 4
 1 -12 -3 6361.81 954.606 4
 1 -12 -2 2840.89 831.202 4
 1 -12 -1 25887.4 1665.18 4
 1 -12 0 81290.4 3083.62 4
 1 -12 1 30846.8 1758.29 4
 1 -12 2 -380.14 626.315 4
 1 -12 3 10982 1067.27 4
 1 -12 4 8012.65 972.572 4
 1 -12 5 8901.99 1127.1 2
 1 -12 5 10123.6 1052.72 4
 1 -12 6 482.746 877.691 2
 1 -12 7 14282.2 1461.41 2
 1 -12 8 14906.8 1584.64 2
 1 -11 -14 1244.89 1213.88 4
 1 -11 -13 4137.39 1253.65 4
 1 -11 -12 5277.07 1240.31 4
 1 -11 -11 20115.3 1868.23 4
 1 -11 -10 17514.6 1726.81 4
 1 -11 -9 2753.2 925.286 4
 1 -11 -8 8875.74 1235.57 4
 1 -11 -7 1829.92 842.041 4
 1 -11 -6 18718 1478.24 4
 1 -11 -5 3648.14 874.218 4
 1 -11 -4 95376.6 3446.81 4
 1 -11 -3 35289.3 1925.94 4
 1 -11 -2 17627.4 1329.82 4
 1 -11 -1 14524.1 1242.95 4
 1 -11 0 16022.6 1263.93 4
 1 -11 1 58599.7 2395.41 4
 1 -11 2 11572.7 1065.84 4
 1 -11 3 7329.13 904.004 4
 1 -11 4 13835.4 1126.42 4
 1 -11 5 4043.51 727.975 4
 1 -11 5 3264.2 819.988 2
 1 -11 6 6941.03 1046.02 2
 1 -11 6 6127.04 856.366 4
 1 -11 7 -5.73814 732.042 2
 1 -11 8 13086.9 1418.24 2
 1 -11 9 13684.9 1511.74 2
 1 -10 -15 19743.8 2078.5 4
 1 -10 -14 278.543 981.481 4
 1 -10 -13 3208.8 1214.13 4
 1 -10 -12 -517.496 938.719 4
 1 -10 -11 17496.3 1681.54 4
 1 -10 -10 21676.7 1745.52 4
 1 -10 -9 6589.64 1097.97 4
 1 -10 -8 43.4079 691.319 4
 1 -10 -7 4533.72 918.13 4
 1 -10 -6 1083.6 733.155 4
 1 -10 -5 49300 2275.18 4
 1 -10 -4 556.827 625.499 4
 1 -10 -3 119744 2966.07 7
 1 -10 -3 120706 3798.37 4
 1 -10 -2 65800.8 2559.29 4
 1 -10 -1 15734.8 1180.15 4
 1 -10 0 11293.4 1007.93 4
 1 -10 1 10397.1 1007.77 4
 1 -10 2 45749.1 1976.25 4
 1 -10 3 13658 1063.9 4
 1 -10 4 16444.7 1157.63 4
 1 -10 5 17345.1 1179.58 4
 1 -10 5 15146.3 1280.99 2
 1 -10 6 688.237 660.776 2
 1 -10 6 1123.29 587.142 4
 1 -10 7 1723.49 820.903 2
 1 -10 8 -452.925 744.696 2
 1 -10 9 16661 1526.55 2
 1 -10 10 15931.7 1578.21 2
 1 -9 -15 9939.82 1646.88 4
 1 -9 -14 33785.9 2405.65 4
 1 -9 -13 23415.5 2047.92 4
 1 -9 -12 5105.97 1144.1 4
 1 -9 -11 4859.9 1091.46 4
 1 -9 -10 24582.7 1818.7 4
 1 -9 -9 31502.8 1955.51 4
 1 -9 -8 1481.82 683.806 4
 1 -9 -7 7415.2 987.6 4
 1 -9 -6 5283.3 850.816 4
 1 -9 -5 426.64 610.093 4
 1 -9 -4 15380.3 1202.22 4
 1 -9 -3 4582.34 693.675 4
 1 -9 -2 172587 4682.27 4
 1 -9 -2 171472 3563.15 7
 1 -9 -2 175097 3676.66 7
 1 -9 -1 48379 2003.03 4
 1 -9 0 16060.3 1140.52 4
 1 -9 1 652.75 483.796 4
 1 -9 2 13792.4 1001.05 4
 1 -9 3 39306.4 1729.53 4
 1 -9 4 7233.46 789.465 4
 1 -9 5 36850.8 1668.01 4
 1 -9 5 37689.5 1853.39 2
 1 -9 6 21869 1474.4 2
 1 -9 6 24702.3 1361.83 4
 1 -9 7 2494.26 782.61 2
 1 -9 8 6952.03 1009.71 2
 1 -9 9 1219.59 801.802 2
 1 -9 10 22298.9 1736.49 2
 1 -9 11 7904.95 1276.9 2
 1 -8 -16 1951.24 1075.16 4
 1 -8 -15 -995.901 1182.09 4
 1 -8 -14 14786 1694.12 4
 1 -8 -13 33031 2283.71 4
 1 -8 -12 17154.6 1694.65 4
 1 -8 -11 6043.75 1126.17 4
 1 -8 -10 2040.42 828.549 4
 1 -8 -9 18420.9 1509.1 4
 1 -8 -8 15774.1 1352.41 4
 1 -8 -7 17691.7 1328.22 4
 1 -8 -6 84287.4 2956.54 4
 1 -8 -5 29279.2 1556.13 4
 1 -8 -4 1553.63 647.339 4
 1 -8 -3 10861.7 945.646 4
 1 -8 -2 15714.6 724.112 7
 1 -8 -2 19769.3 1191.58 4
 1 -8 -1 107669 3198.81 4
 1 -8 0 22264.2 1215.63 4
 1 -8 1 2303.9 514.118 4
 1 -8 2 1895.12 476.566 4
 1 -8 3 26821.8 1334.21 4
 1 -8 4 22067.8 1186.09 4
 1 -8 5 1501.86 586.111 2
 1 -8 5 1082.05 461.289 4
 1 -8 6 67215.4 2526.3 2
 1 -8 7 38159.6 1921.77 2
 1 -8 8 6239.64 976.569 2
 1 -8 9 6259.63 992.527 2
 1 -8 10 8317.05 1183.13 2
 1 -8 11 25236.1 1869.79 2
 1 -7 -16 -575.537 1170.87 4
 1 -7 -15 3881.64 1203.07 4
 1 -7 -14 -1880.88 1103.11 4
 1 -7 -13 11532.2 1456.77 4
 1 -7 -12 41649.8 2371.15 4
 1 -7 -11 8810.02 1184.2 4
 1 -7 -10 18937.3 1501.96 4
 1 -7 -9 3011.96 844.66 4
 1 -7 -8 18203.4 1372.69 4
 1 -7 -7 2673.43 710.409 4
 1 -7 -6 18249.8 1221.91 4
 1 -7 -5 123230 3561.91 4
 1 -7 -4 7825.44 810.229 4
 1 -7 -3 98044.8 2969.97 4
 1 -7 -2 -86.2342 424.482 4
 1 -7 -1 27993.4 1336.08 4
 1 -7 -1 26775.6 753.335 7
 1 -7 0 157265 4023.1 4
 1 -7 1 29495.4 1327.36 4
 1 -7 2 13333.2 877.372 4
 1 -7 3 5752.23 619.93 4
 1 -7 4 13367.3 877.592 4
 1 -7 5 21766.3 1132.22 4
 1 -7 5 20354.2 1232.76 2
 1 -7 6 5238.93 785.876 2
 1 -7 7 93314.3 3083.85 2
 1 -7 8 8802.5 995.697 2
 1 -7 9 33433.9 1857.53 2
 1 -7 10 418.279 742.761 2
 1 -7 11 17630.4 1534.71 2
 1 -7 11 15286.5 1501.55 5
 1 -7 12 12097.6 1377.11 5
 1 -6 -16 7254.55 1422.02 4
 1 -6 -15 1740.37 1073.08 4
 1 -6 -14 2065.87 1006.22 4
 1 -6 -13 -941.784 891.61 4
 1 -6 -12 35245.8 2101.64 4
 1 -6 -11 83794.4 3261.83 4
 1 -6 -10 11365.5 1188.68 4
 1 -6 -9 27978.3 1641.88 4
 1 -6 -8 2148.51 619.276 4
 1 -6 -7 31689.1 1616.14 4
 1 -6 -6 3809.41 649.833 4
 1 -6 -5 39980.3 1676.32 4
 1 -6 -4 115751 3250.58 4
 1 -6 -3 4633.4 587.254 4
 1 -6 -2 89873.5 2639.29 4
 1 -6 -1 19516.7 693.218 7
 1 -6 -1 18660.3 1010.88 4
 1 -6 0 56959.7 1879.86 4
 1 -6 1 100694 2749.47 4
 1 -6 2 10447.4 751.975 4
 1 -6 3 62786.1 1954.68 4
 1 -6 4 2203.7 415.861 4
 1 -6 5 3348.5 612.172 2
 1 -6 5 2814.5 473.971 4
 1 -6 6 12296 987.451 2
 1 -6 7 20550.6 1269.76 2
 1 -6 8 17598.5 1258.41 2
 1 -6 9 1191.32 670.211 2
 1 -6 10 18517.4 1440.47 2
 1 -6 11 -712.404 793.78 5
 1 -6 12 12842.2 1435.28 5
 1 -6 13 12530.9 1475.95 5
 1 -5 -16 12142.4 1600.49 4
 1 -5 -15 11982.2 1504.93 4
 1 -5 -14 -760.382 803.053 4
 1 -5 -13 3000.6 936.78 4
 1 -5 -12 5413.52 1017.28 4
 1 -5 -11 78230.3 3019.73 4
 1 -5 -10 14339.1 1257.46 4
 1 -5 -9 38411.6 1863.73 4
 1 -5 -8 55294.9 2194.08 4
 1 -5 -7 420.842 471.534 4
 1 -5 -6 1895.1 503.36 4
 1 -5 -5 29782.2 1360.73 4
 1 -5 -4 196514 4695.8 4
 1 -5 -3 3891.87 493.103 4
 1 -5 -2 478.644 305.776 4
 1 -5 -1 7561.49 596.8 4
 1 -5 0 28304.1 1139.4 4
 1 -5 1 70418.8 2019.45 4
 1 -5 2 186608 4262.94 4
 1 -5 3 13285.8 752.04 4
 1 -5 4 51511.7 1692.04 4
 1 -5 4 52800.5 1790.52 2
 1 -5 5 2493.63 513.723 2
 1 -5 6 22164.9 1233.44 2
 1 -5 7 2869.41 627.516 2
 1 -5 8 45228.7 1919.14 2
 1 -5 9 12614 1100.24 2
 1 -5 10 -210.691 735.408 5
 1 -5 10 812.853 716.256 2
 1 -5 11 2693.99 850.101 5
 1 -5 12 75.6024 849.973 5
 1 -5 13 19917 1755.4 5
 1 -4 -16 2574.17 1186.76 4
 1 -4 -15 13506.7 1550.91 4
 1 -4 -7 34069.7 1514.23 4
 1 -4 -6 13466.1 914.356 4
 1 -4 -5 32640.9 1361.04 4
 1 -4 -4 117200 3024.4 4
 1 -4 -3 2069.91 339.916 4
 1 -4 -2 58778.5 1756.53 4
 1 -4 -1 22929.2 965.903 4
 1 -4 0 5603.93 455.786 4
 1 -4 1 66769 1450.99 7
 1 -4 1 67148.4 1848.28 4
 1 -4 2 206310 4511.7 4
 1 -4 3 76773.1 2063.08 4
 1 -4 4 1894.54 370.019 4
 1 -4 4 1424.77 368.153 2
 1 -4 5 50103.2 1729.58 2
 1 -4 6 6495.8 680.089 2
 1 -4 7 695.393 472.283 2
 1 -4 8 31495 1545.03 2
 1 -4 9 114120 3453.66 2
 1 -4 10 48347.4 2182.26 5
 1 -4 11 2255.56 839.439 5
 1 -4 12 2716.47 930.515 5
 1 -4 13 204.04 913 5
 1 -4 14 9997.53 1445.75 5
 1 -3 -4 20170.1 916.245 4
 1 -3 -3 113613 2771.91 4
 1 -3 -2 47416.5 1429.62 1
 1 -3 -2 48161.5 1438.78 4
 1 -3 -1 31523.3 1001.13 1
 1 -3 -1 29572.6 1037.38 4
 1 -3 0 37834.4 941.021 7
 1 -3 0 37033.5 1084.59 1
 1 -3 0 36403.1 1133.67 4
 1 -3 1 6052.3 367.569 1
 1 -3 1 5586.01 384.263 4
 1 -3 1 6193.23 280.702 6
 1 -3 1 6021.8 260.496 7
 1 -3 2 52775.1 1467.11 4
 1 -3 3 82822.3 2074.95 4
 1 -3 3 80461.9 2132.95 2
 1 -3 4 25531.5 1029.07 2
 1 -3 5 124276 3139.77 2
 1 -3 6 45086.5 1633.35 2
 1 -3 7 17663.2 1047.18 2
 1 -3 8 2915.22 664.995 2
 1 -3 9 32407 1625.1 5
 1 -3 10 66428.7 2538.14 5
 1 -3 11 34843.1 1885.26 5
 1 -3 12 125.346 658.409 5
 1 -3 13 3620.74 931.664 5
 1 -3 14 1202.24 972.937 5
 1 -2 -3 11530.3 587.744 4
 1 -2 -2 645705 12447.2 5
 1 -2 -2 634695 12438.6 4
 1 -2 -1 2551.48 228.237 1
 1 -2 -1 2734.71 263.183 4
 1 -2 -1 2855.61 264.668 5
 1 -2 0 119619 2535.47 4
 1 -2 0 116783 2433.5 7
 1 -2 1 76542.7 1637.68 7
 1 -2 1 75740.3 1662.96 6
 1 -2 1 75202.2 1783.64 4
 1 -2 2 101021 2301.12 4
 1 -2 3 821.688 214.911 2
 1 -2 3 718.485 184.063 4
 1 -2 4 65889.5 1819.82 2
 1 -2 5 8854.95 625.616 2
 1 -2 6 80118 2297.88 2
 1 -2 7 48024.2 1732.15 2
 1 -2 8 15960.9 1018.61 5
 1 -2 9 1467.39 585.484 5
 1 -2 10 35767.5 1748.18 5
 1 -2 11 59552.1 2429.15 5
 1 -2 12 21233.5 1513.27 5
 1 -2 13 1009.86 901.846 5
 1 -2 14 2492.91 849.558 5
 1 -2 15 3449 1178.17 5
 1 -1 -2 364788 7354.92 5
 1 -1 -2 382359 7351.24 4
 1 -1 2 135396 2828.98 4
 1 -1 2 136167 2845.57 2
 1 -1 2 131878 2871.62 7
 1 -1 3 72034.1 1775.23 2
 1 -1 4 70912.3 1856.33 2
 1 -1 5 26557.4 1036.9 2
 1 -1 6 24534.3 1078.92 5
 1 -1 7 343624 7437.64 5
 1 -1 8 17706.6 1053.82 5
 1 -1 9 4200.76 683.899 5
 1 -1 10 2269.09 657.594 5
 1 -1 11 43707 2023.83 5
 1 -1 12 48800.7 2278.44 5
 1 -1 13 1855.13 833.43 5
 1 -1 14 5322.37 1152.78 5
 1 -1 15 4066.56 1049.29 5
 1 0 -2 21933.7 692.477 5
 1 0 2 79816.3 1820.94 6
 1 0 2 76004 1807.21 7
 1 0 3 3216.38 272.713 3
 1 0 3 3489.25 270.274 5
 1 0 4 375.93 186.105 5
 1 0 5 17350.6 788.695 5
 1 0 6 24816.7 1051.26 5
 1 0 7 208101 4849.17 5
 1 0 8 160598 4088.16 5
 1 0 9 12499.2 955.518 5
 1 0 10 1503.21 513.285 5
 1 0 11 1210.28 561.647 5
 1 0 12 29443.9 1743.92 5
 1 0 13 29700.6 1824.45 5
 1 0 14 -370.217 844.433 5
 1 0 15 4730.18 1184.77 5
 1 1 -3 240075 4968.49 2
 1 1 -2 35345.4 967.191 2
 1 1 3 22814.5 724.765 5
 1 1 3 23846.5 769.463 3
 1 1 4 250753 5185.95 5
 1 1 5 729.878 226.026 5
 1 1 6 92891.5 2473.91 5
 1 1 7 26006.2 1165.83 5
 1 1 8 64087.2 2131.42 5
 1 1 9 54297.4 2020.84 5
 1 1 10 6565.47 822.517 5
 1 1 11 1751.43 701.886 5
 1 1 12 -261.052 637.458 5
 1 1 13 21341.6 1613.35 5
 1 1 14 20525.2 1641.05 5
 1 1 15 -1914.53 1084.95 5
 1 1 16 10292.1 1546.78 5
 1 2 -3 36603.8 1012.36 4
 1 2 -2 406679 7866.69 4
 1 2 0 5519.72 290.433 7
 1 2 0 4590.88 219.325 4
 1 2 2 380347 7489.08 5
 1 2 2 387718 7554.57 7
 1 2 3 80089.2 1867.04 5
 1 2 3 78228.7 1870.15 3
 1 2 4 462160 9162.37 5
 1 2 5 204730 4478.4 5
 1 2 6 23497.5 1007.32 5
 1 2 7 20924.6 1050.34 5
 1 2 8 2048.23 501.921 5
 1 2 9 39514.8 1667.67 5
 1 2 10 50074.1 2039.02 5
 1 2 11 3248.98 734.543 5
 1 2 12 6071.11 941.02 5
 1 2 13 1418.47 864.566 5
 1 2 14 26905.7 1885.47 5
 1 2 15 10653.2 1315.66 5
 1 2 16 -1631.23 1120.65 5
 1 3 -3 24905.4 836.461 4
 1 3 -2 36983 1034.22 4
 1 3 -1 230673 4641.54 4
 1 3 0 55762.5 1518.5 1
 1 3 0 56692.9 1320.05 7
 1 3 0 55538.1 1357.5 4
 1 3 1 10270.1 378.78 7
 1 3 1 11594.4 476.191 4
 1 3 1 11353.3 546.759 1
 1 3 2 987698 18991.9 1
 1 3 3 403585 8120.44 5
 1 3 3 401486 8189.95 1
 1 3 3 409362 7992.97 3
 1 3 4 721.373 256.873 5
 1 3 5 279280 5946.54 5
 1 3 6 139987 3430.65 5
 1 3 7 38650.5 1486.75 5
 1 3 8 53646.6 1915.14 5
 1 3 9 89.2206 455.902 5
 1 3 10 12406.9 1053.13 5
 1 3 11 67404.1 2591.46 5
 1 3 12 751.596 700.633 5
 1 3 13 14609.3 1439.02 5
 1 3 14 8135.78 1242.72 5
 1 3 15 30973.4 2178.46 5
 1 3 16 9352.19 1520.73 5
 1 4 -2 8076.51 461.158 4
 1 4 -1 431853 8674.6 1
 1 4 -1 416222 8364.4 4
 1 4 0 7827.2 331.242 7
 1 4 0 7950.91 530.602 1
 1 4 0 7339.49 426.927 4
 1 4 1 53392.7 1225.04 7
 1 4 1 54736.1 1469.56 4
 1 4 1 56525.3 1617.54 1
 1 4 2 13848.5 707.9 1
 1 4 2 14526.3 651.914 4
 1 4 3 13816.2 730.521 1
 1 4 3 13707.3 552.997 3
 1 4 4 183631 4148.61 1
 1 4 4 173882 4066.24 5
 1 4 5 46162.9 1560.51 5
 1 4 6 378232 8032.27 5
 1 4 7 28449.3 1284.45 5
 1 4 8 19601.4 1136.27 5
 1 4 9 10062.5 912.852 5
 1 4 10 -680.488 608.22 5
 1 4 11 43152 2054.2 5
 1 4 12 24762.1 1655.11 5
 1 4 13 3878.08 958.741 5
 1 4 14 11139.2 1348.88 5
 1 4 15 2234.37 873.734 5
 1 4 16 16099.4 1663.72 5
 1 5 -2 135548 3484.59 1
 1 5 -1 5473.89 360.622 7
 1 5 -1 5456.74 538.381 1
 1 5 0 166196 3337.44 7
 1 5 0 170478 3964.59 1
 1 5 1 1427.16 312.541 1
 1 5 1 1372.36 127.721 7
 1 5 2 1536.85 306.42 1
 1 5 3 23406 755.194 3
 1 5 3 21372.3 1013.93 1
 1 5 4 93527.1 2600.37 1
 1 5 5 242068 5493.39 5
 1 5 6 65316.9 2132.69 5
 1 5 7 232023 5515.83 5
 1 5 8 75418.6 2516.85 5
 1 5 9 2789.16 614.405 5
 1 5 10 8295.85 901.625 5
 1 5 11 11307.1 1130.47 5
 1 5 12 51644.8 2414.09 5
 1 5 13 361.288 797.894 5
 1 5 14 15321.8 1564.8 5
 1 5 15 7120.26 1224.93 5
 1 5 16 2366.91 1253.41 5
 1 6 -3 187269 4713.85 1
 1 6 -2 86248.5 2622.9 1
 1 6 -1 223354 5094.12 1
 1 6 -1 210596 4402.26 7
 1 6 0 51950.4 1806.7 1
 1 6 1 113455 3068.3 1
 1 6 2 4284.14 544.135 1
 1 6 3 66303.1 2091.66 1
 1 6 4 1682.31 414.746 1
 1 6 5 221880 5253.56 1
 1 6 6 20355.8 1137.77 5
 1 6 7 21325.6 1240.64 5
 1 6 8 148075 4108.04 5
 1 6 9 69786.7 2580.24 5
 1 6 10 4601.43 807.072 5
 1 6 11 6149.81 975.446 5
 1 6 12 41059.7 2192.6 5
 1 6 13 15055.3 1408.27 5
 1 6 14 1504.34 990.518 5
 1 6 15 6822.25 1261.24 5
 1 6 16 5425.01 1364.62 5
 1 7 -4 45446.3 2020.07 1
 1 7 -3 212538 5376.66 1
 1 7 -2 46265 1855.33 1
 1 7 -2 46099.5 1413.37 7
 1 7 -1 77242.3 2439.31 1
 1 7 -1 70852.7 1613.69 7
 1 7 0 105719 3057.65 1
 1 7 1 186010 4629.81 1
 1 7 2 154372 3986.65 1
 1 7 3 4032.21 569.694 1
 1 7 4 82937.5 2587.14 1
 1 7 5 2940.25 552.552 1
 1 7 7 56.9768 486.608 5
 1 7 8 62864.8 2409.32 5
 1 7 9 154041 4429.24 5
 1 7 10 43016.2 2106.24 5
 1 7 11 1935.87 776.424 5
 1 7 12 -117.333 865.399 5
 1 7 13 34303.7 2185.48 5
 1 7 14 21573.7 1801.86 5
 1 7 15 178.953 922.313 5
 1 7 16 5766.54 1212.83 5
 1 8 -7 24140.2 1752.9 1
 1 8 -6 97.2654 653.094 1
 1 8 -5 1786.46 730.227 1
 1 8 -4 2117.98 693.949 1
 1 8 -3 120168 3686.69 1
 1 8 -2 170799 3828 6
 1 8 -2 186760 4806.9 1
 1 8 -2 175319 3816.56 7
 1 8 -2 185098 3735.42 7
 1 8 -1 4969.31 667.304 1
 1 8 0 6304.88 747.757 1
 1 8 1 1409.52 479.086 1
 1 8 2 163999 4322.91 1
 1 8 3 102361 3089.79 1
 1 8 4 39290.5 1715.11 1
 1 8 5 183559 4752.85 1
 1 8 6 111969 3395.23 1
 1 8 8 22345.8 1410.08 5
 1 8 9 77740 2902.72 5
 1 8 10 103586 3604.8 5
 1 8 11 11207.9 1233.07 5
 1 8 12 1639 873.335 5
 1 8 13 1397.29 937.258 5
 1 8 14 9392.12 1440.14 5
 1 8 15 4207.09 1124.56 5
 1 8 16 1647 1224.09 5
 1 9 -10 4224.58 1330.96 1
 1 9 -9 11437.6 1454.27 1
 1 9 -8 2026.49 889.384 1
 1 9 -7 5459.06 1129.72 1
 1 9 -6 38643 2191.44 1
 1 9 -5 8137.76 1068.15 1
 1 9 -4 1925.28 742.482 1
 1 9 -3 5486.29 868.083 1
 1 9 -2 109525 3506.82 1
 1 9 -1 97632.2 3240.78 1
 1 9 0 1461.41 563.622 1
 1 9 1 3687.52 681.481 1
 1 9 2 553.496 542.935 1
 1 9 3 75079.4 2625.64 1
 1 9 4 23894.1 1390.17 1
 1 9 5 38513.5 1793.04 1
 1 9 6 81876.1 2845.72 1
 1 9 10 49608.7 2380.79 5
 1 9 11 45247.1 2367.52 5
 1 9 12 1239.71 928.658 5
 1 9 13 16984.5 1650.62 5
 1 9 14 844.008 1041.52 5
 1 9 15 3713.75 1199.1 5
 1 9 16 5563.85 1518.45 5
 1 10 -9 5445.04 1231.91 1
 1 10 -8 6144.49 1197.54 1
 1 10 -7 -187.937 871.574 1
 1 10 -6 20273.4 1707.23 1
 1 10 -5 64138.6 2896.79 1
 1 10 -4 5157.43 920.622 1
 1 10 -3 2909 769.969 1
 1 10 -2 32662.2 1829.25 1
 1 10 -1 86999.8 3143.07 1
 1 10 0 31673.2 1777.08 1
 1 10 1 -6.26393 604.658 1
 1 10 2 9562.35 963.345 1
 1 10 3 4452.94 760.646 1
 1 10 4 57427.4 2342.79 1
 1 10 5 22014.1 1447.93 1
 1 10 6 30622 1704.45 1
 1 10 7 24835.2 1558.16 1
 1 10 12 34892.7 2196.73 5
 1 10 13 182.551 984.573 5
 1 10 14 4627.47 1200.91 5
 1 10 15 815.517 1099.75 5
 1 11 -8 4877.61 1307.43 1
 1 11 -7 7871.25 1321.57 1
 1 11 -6 -356.219 899.228 1
 1 11 -5 30935.1 2049.13 1
 1 11 -4 40055.5 2249.73 1
 1 11 -3 2465.87 837.762 1
 1 11 -2 6560.07 1048.24 1
 1 11 -1 56686.4 2589.76 1
 1 11 0 62830.8 2702.95 1
 1 11 1 13717.3 1241.31 1
 1 11 2 701.666 621.987 1
 1 11 3 19803.2 1432.82 1
 1 11 4 10328.6 1081.81 1
 1 11 5 52991.6 2338.69 1
 1 11 6 5041.67 863.63 1
 1 11 7 77807.1 3002.55 1
 1 11 14 -660.81 1209.33 5
 1 11 15 9380.77 1598.47 5
 1 12 -7 6100.94 1398.02 1
 1 12 -6 5891.82 1190.77 1
 1 12 -5 3140.93 1002.14 1
 1 12 -4 38148 2361.49 1
 1 12 -3 14112.6 1434.54 1
 1 12 -2 1340.31 917.804 1
 1 12 -1 1081.22 727.424 1
 1 12 0 16169.1 1440.76 1
 1 12 1 58591.7 2680.66 1
 1 12 2 3497.05 851.603 1
 1 12 3 22784.2 1589.28 1
 1 12 4 17470.4 1469.91 1
 1 12 5 263.3 624.004 1
 1 12 6 1835.59 686.376 1
 1 12 7 2503.05 856.8 1
 1 13 -6 3796.47 1152.7 1
 1 13 -5 2212.53 968.932 1
 1 13 -4 14250 1626.35 1
 1 13 -3 11635.9 1459.06 1
 1 13 -2 618.429 780.214 1
 1 13 -1 5688.3 1130.03 1
 1 13 0 4906.73 1010.68 1
 1 13 1 9867.75 1212.29 1
 1 13 2 57349.7 2746.82 1
 1 13 3 177.15 673.998 1
 1 13 4 23334.5 1699.36 1
 1 13 5 1192.35 770.282 1
 1 13 6 2386.31 856.396 1
 1 13 7 3287.87 971.603 1
 1 14 -5 658.875 1058.98 1
 1 14 -4 591.846 1032.22 1
 1 14 -3 28458.8 2174.64 1
 1 14 -2 6166.75 1244.55 1
 1 14 -1 -2063.15 1071.11 1
 1 14 0 2516.52 884.499 1
 1 14 1 -235.929 851.528 1
 1 14 2 34024.2 2202.89 1
 1 14 3 19298.5 1656.92 1
 1 14 4 -422.687 835.778 1
 1 14 5 5220.15 1030.26 1
 1 14 6 2362.11 929.264 1
 1 14 7 3068.85 854.029 1
 1 14 8 589.961 796.461 1
 1 15 -3 2155.68 1153.38 1
 1 15 -2 18583.6 1924.07 1
 1 15 -1 16868.9 1780.16 1
 1 15 0 426.463 836.488 1
 1 15 1 732.677 1010.91 1
 1 15 2 -384.973 867.949 1
 1 15 3 16408.7 1601.38 1
 1 15 4 6627.44 1239 1
 1 15 5 -264.515 873.668 1
 1 15 6 17963 1740.74 1
 1 15 7 3664.33 1037.83 1
 1 15 8 790.733 872.494 1
 1 16 -1 9981.32 1457.36 1
 1 16 0 5795.39 1260.4 1
 1 16 1 362.466 1010.28 1
 1 16 2 5177.01 1348.75 1
 1 16 3 1193.23 955.392 1
 1 16 4 4880.52 1124.7 1
 1 16 5 3179.62 1061.34 1
 1 16 6 6036.11 1196.65 1
 1 16 7 23933.7 1967.82 1
 1 16 8 3607.51 981.676 1
 1 17 3 7643.77 1417.35 1
 1 17 4 -702.05 1037.27 1
 1 17 5 3755.76 1226.08 1
 1 17 6 1424.11 1114.01 1
 1 17 7 18931.5 1889.15 1
 2 -17 -1 294.335 869.172 4
 2 -16 -7 22750.5 2100.07 4
 2 -16 -6 4740.8 1281.94 4
 2 -16 -5 44.8545 989.55 4
 2 -16 -4 2387.74 1123.74 4
 2 -16 -3 7772.43 1309.25 4
 2 -16 -2 12595.6 1524.22 4
 2 -16 -1 -832.418 897.844 4
 2 -16 0 1090.06 860.193 4
 2 -16 1 1915.63 1066.12 4
 2 -16 2 2306.1 958.391 4
 2 -15 -9 12049.3 1874.64 4
 2 -15 -8 980.661 1081.45 4
 2 -15 -7 -979.132 980.532 4
 2 -15 -6 27811.4 2167.73 4
 2 -15 -5 1137.64 995.767 4
 2 -15 -4 4444.07 1076.37 4
 2 -15 -3 4087.4 1087.69 4
 2 -15 -2 5649.46 1167.93 4
 2 -15 -1 31242.6 2191.55 4
 2 -15 0 1176.75 854.883 4
 2 -15 1 10731.1 1388.32 4
 2 -15 2 1184.13 926.829 4
 2 -15 3 1739.76 919.3 4
 2 -14 -10 18898.6 1987.09 4
 2 -14 -9 1354.36 1129.13 4
 2 -14 -8 5901.16 1295.74 4
 2 -14 -7 388.024 1015.67 4
 2 -14 -6 23765.6 1921.4 4
 2 -14 -5 25116.8 1930.05 4
 2 -14 -4 419.853 902.979 4
 2 -14 -3 21301.1 1795.66 4
 2 -14 -2 105.892 790.408 4
 2 -14 -1 31409.3 2097.24 4
 2 -14 0 31116.2 2061.35 4
 2 -14 1 484.428 713.528 4
 2 -14 2 6340.24 1030.42 4
 2 -14 3 2.25115 692.703 4
 2 -14 4 6769.26 1112.81 4
 2 -14 5 -370.71 857.377 2
 2 -13 -12 22438.3 2314.48 4
 2 -13 -11 2762.71 1287.95 4
 2 -13 -10 7982.91 1369.91 4
 2 -13 -9 16031.5 1739.88 4
 2 -13 -8 2001.62 916.11 4
 2 -13 -7 8333.89 1328.86 4
 2 -13 -6 7924.39 1257.89 4
 2 -13 -5 68745.6 3126.46 4
 2 -13 -4 76663.1 3273.17 4
 2 -13 -3 3558.96 971.036 4
 2 -13 -2 29588.6 1961.65 4
 2 -13 -1 13737.8 1437.67 4
 2 -13 0 61886.7 2809.18 4
 2 -13 1 13413.1 1324.23 4
 2 -13 2 1646.07 798.496 4
 2 -13 3 6604.01 1034.85 4
 2 -13 4 -68.4909 671.044 4
 2 -13 5 4794.04 1072.76 2
 2 -13 5 6585.31 1025.67 4
 2 -13 6 410.743 926.784 2
 2 -12 -13 1922.37 1125.6 4
 2 -12 -12 7320.68 1487.62 4
 2 -12 -11 16630.3 1835.91 4
 2 -12 -10 6920.43 1315.64 4
 2 -12 -9 2916.11 972.225 4
 2 -12 -8 11959.4 1435.37 4
 2 -12 -7 3960.18 1093.73 4
 2 -12 -6 112.802 818.02 4
 2 -12 -5 35876.5 2180.79 4
 2 -12 -4 107119 3865.14 4
 2 -12 -3 49689.5 2462.39 4
 2 -12 -2 170.868 701.156 4
 2 -12 -1 7025.27 1031.13 4
 2 -12 0 7463.53 1024.33 4
 2 -12 1 46275.9 2296.23 4
 2 -12 2 1650.37 670.6 4
 2 -12 3 24358.4 1630.11 4
 2 -12 4 6588.49 912.321 4
 2 -12 5 584.802 611.298 4
 2 -12 6 115.501 786.905 2
 2 -12 6 -280.113 668.473 4
 2 -12 7 2966.36 1014.03 2
 2 -12 8 22124.3 1866.37 2
 2 -11 -13 27.9068 1120.42 4
 2 -11 -12 -2240.65 1031.37 4
 2 -11 -11 4081.74 1099.82 4
 2 -11 -10 27892.1 2128.51 4
 2 -11 -9 3204.07 947.524 4
 2 -11 -8 8256.78 1168.61 4
 2 -11 -7 7947.04 1187.9 4
 2 -11 -6 1092.04 859.724 4
 2 -11 -5 10943.5 1232.27 4
 2 -11 -4 78201.3 3102.37 4
 2 -11 -3 84673.8 3202.11 4
 2 -11 -2 5347.87 899.226 4
 2 -11 -1 1701.04 683.094 4
 2 -11 0 -113.254 650.019 4
 2 -11 1 6670.1 935.331 4
 2 -11 2 54520.4 2345.21 4
 2 -11 3 141.116 590.06 4
 2 -11 4 30238.4 1690.01 4
 2 -11 5 8516.35 995.927 4
 2 -11 6 199.77 679.917 2
 2 -11 6 1272.71 621.706 4
 2 -11 7 -8.03522 799.795 2
 2 -11 8 3797.86 1039.76 2
 2 -11 9 13979.4 1547.5 2
 2 -10 -14 17545.8 2066.35 4
 2 -10 -13 2291.31 1234.69 4
 2 -10 -12 1612.61 1053.25 4
 2 -10 -11 203.621 815.255 4
 2 -10 -10 11580.9 1460.04 4
 2 -10 -9 23943.1 1813.4 4
 2 -10 -8 6729.08 1016.92 4
 2 -10 -7 19255.3 1568.93 4
 2 -10 -6 40246.6 2126.13 4
 2 -10 -5 226.891 724.34 4
 2 -10 -4 3210.93 829.565 4
 2 -10 -3 50169.7 2269.81 4
 2 -10 -3 49673.8 1778.52 7
 2 -10 -2 95719.3 3290.15 4
 2 -10 -1 4700.24 760.069 4
 2 -10 0 2299.22 621.392 4
 2 -10 1 -273.196 571.179 4
 2 -10 2 3983.92 783 4
 2 -10 3 20087.9 1314.7 4
 2 -10 4 268.928 521.175 4
 2 -10 5 60326.8 2406.9 4
 2 -10 6 11906.5 1205.55 2
 2 -10 6 11609.2 1058.19 4
 2 -10 7 269.228 749.292 2
 2 -10 8 894.592 781.54 2
 2 -10 9 4026.53 1026.57 2
 2 -10 10 12973.9 1443.05 2
 2 -9 -15 -2074.13 1191.73 4
 2 -9 -14 10775.2 1576.36 4
 2 -9 -13 30546.6 2341.71 4
 2 -9 -12 2432.86 1093.7 4
 2 -9 -11 1105.43 932.694 4
 2 -9 -10 -300.545 846.885 4
 2 -9 -9 14093.8 1372.64 4
 2 -9 -8 21868.2 1629.78 4
 2 -9 -7 7346.32 1024.95 4
 2 -9 -6 127777 4058.48 4
 2 -9 -5 64578.2 2619.64 4
 2 -9 -4 3212.29 745.813 4
 2 -9 -3 6062.97 860.418 4
 2 -9 -2 47946.9 1559.99 7
 2 -9 -2 50423.6 2143.31 4
 2 -9 -1 108729 3428.47 4
 2 -9 -1 106998 2323.59 7
 2 -9 0 9286.01 917.374 4
 2 -9 1 5533.19 790.582 4
 2 -9 2 14913.7 1080.58 4
 2 -9 3 3514.11 690.294 4
 2 -9 4 532.97 467.127 4
 2 -9 5 6583.08 824.013 4
 2 -9 6 36678.3 1913.86 2
 2 -9 6 35765.2 1739.88 4
 2 -9 7 20393.2 1494.11 2
 2 -9 8 427.995 742.072 2
 2 -9 9 1735.97 796.766 2
 2 -9 10 10253.5 1250.72 2
 2 -9 11 15504.8 1590.15 2
 2 -8 -15 40.9849 1120.84 4
 2 -8 -14 -2054.49 1095.75 4
 2 -8 -13 13380.7 1619.38 4
 2 -8 -12 19998 1813.01 4
 2 -8 -11 4307.77 1033.19 4
 2 -8 -10 26987.6 1856.73 4
 2 -8 -9 16986.3 1514.08 4
 2 -8 -8 10263.5 1177.85 4
 2 -8 -7 1705.08 749.319 4
 2 -8 -6 19043.4 1364.79 4
 2 -8 -5 103195 3353.45 4
 2 -8 -4 42567.9 1945.79 4
 2 -8 -3 24789.2 1448.37 4
 2 -8 -2 8933 861.584 4
 2 -8 -2 7293.82 605.967 7
 2 -8 -1 60223.4 1593.83 7
 2 -8 -1 59391.4 2236.09 4
 2 -8 0 85735.3 1858.25 6
 2 -8 0 87965.9 2812.84 4
 2 -8 1 5992.89 716.025 4
 2 -8 2 54406.5 2061.58 4
 2 -8 3 11622.1 917.853 4
 2 -8 4 18554.4 1158.06 4
 2 -8 5 1565.48 522.328 4
 2 -8 6 1606.97 605.396 4
 2 -8 6 -459.161 636.84 2
 2 -8 7 37827.7 1925.26 2
 2 -8 8 5583.25 967.898 2
 2 -8 9 10657 1159.34 2
 2 -8 10 -929.228 827.409 2
 2 -8 11 15067 1483.17 2
 2 -8 12 5811.89 1205.85 2
 2 -7 -16 9536.98 1577.04 4
 2 -7 -15 930.48 1070.72 4
 2 -7 -14 6923.21 1451.1 4
 2 -7 -13 1875.64 985.53 4
 2 -7 -12 7583.07 1250.34 4
 2 -7 -11 18117.2 1555.77 4
 2 -7 -10 13997.9 1384.85 4
 2 -7 -9 35555.9 1995.99 4
 2 -7 -8 -218.112 645.135 4
 2 -7 -7 23307.1 1500.58 4
 2 -7 -6 3105.92 708.589 4
 2 -7 -5 31052.4 1567.04 4
 2 -7 -4 172180 4586.92 4
 2 -7 -3 680.691 440.336 4
 2 -7 -2 19066.5 1172.23 4
 2 -7 -1 2739.64 578.166 4
 2 -7 -1 2819.75 341.948 7
 2 -7 0 164336 4272.04 4
 2 -7 0 167051 3454.91 7
 2 -7 1 52431.8 1289.14 6
 2 -7 1 50622.5 1900.99 4
 2 -7 2 65018.6 2216.38 4
 2 -7 3 50515.9 1852.43 4
 2 -7 4 1166.74 461.696 4
 2 -7 5 2324.47 545.549 4
 2 -7 5 1933.09 550.029 2
 2 -7 6 21568.3 1220.54 4
 2 -7 6 21019.5 1333.2 2
 2 -7 7 9762.74 1004.75 2
 2 -7 8 51565.6 2248.98 2
 2 -7 9 164.841 738.629 2
 2 -7 10 21079.4 1574.83 2
 2 -7 11 7.72413 786.534 2
 2 -7 12 11762.5 1451.77 5
 2 -6 -16 15275.9 1882.03 4
 2 -6 -15 8109.08 1424.95 4
 2 -6 -14 -654.964 841.53 4
 2 -6 -13 2064.45 1020.22 4
 2 -6 -12 413.991 870.692 4
 2 -6 -11 47274.9 2368.84 4
 2 -6 -10 14274.7 1319.3 4
 2 -6 -9 21651.5 1501.54 4
 2 -6 -8 16189.1 1273.92 4
 2 -6 -7 430.966 565.365 4
 2 -6 -6 21311.2 1299 4
 2 -6 -5 5477.79 716.237 4
 2 -6 -4 274602 6398.58 4
 2 -6 -3 155357 4046.91 4
 2 -6 -2 1544.32 470.966 4
 2 -6 -1 2201.2 343.3 7
 2 -6 -1 2544.9 515.72 4
 2 -6 0 21589.9 1121.64 4
 2 -6 0 22965.2 767.887 7
 2 -6 1 90061 2620.65 4
 2 -6 1 90297.6 2002.9 7
 2 -6 1 92311.8 2073.42 6
 2 -6 2 36805.4 1462.92 4
 2 -6 3 75049.2 2314.23 4
 2 -6 4 39167.4 1543.85 4
 2 -6 5 882.604 392.992 4
 2 -6 5 481.689 454.87 2
 2 -6 6 1178.79 573.164 2
 2 -6 7 680.82 557.288 2
 2 -6 8 21706.9 1396.14 2
 2 -6 9 37845.3 1911.01 2
 2 -6 10 3985.7 905.992 2
 2 -6 11 15835.8 1398.13 2
 2 -6 12 1520.25 837.615 5
 2 -6 13 8653.12 1323.24 5
 2 -5 -15 18819.2 1824.99 4
 2 -5 -14 3758.35 1098.25 4
 2 -5 -13 2380.07 1009.66 4
 2 -5 -12 3221.69 890.226 4
 2 -5 -11 4965.89 922.47 4
 2 -5 -10 12465.3 1225.14 4
 2 -5 -9 63.5008 564.624 4
 2 -5 -8 33936.1 1722.33 4
 2 -5 -7 116126 3462.55 4
 2 -5 -6 724.914 463.664 4
 2 -5 -5 3444.85 615.138 4
 2 -5 -4 53526.2 1905.27 4
 2 -5 -3 17783.5 1013.66 4
 2 -5 -2 4285.67 541.635 4
 2 -5 -1 40980.3 1511.87 4
 2 -5 -1 38128.9 1348.17 7
 2 -5 0 29102.9 1213.68 4
 2 -5 0 29605.7 944.374 7
 2 -5 1 1980.92 390.001 4
 2 -5 1 2136.29 222.272 7
 2 -5 2 91299.2 2046.2 7
 2 -5 2 86625.7 2113.4 6
 2 -5 3 45520.2 1603.3 4
 2 -5 4 34366 1362.64 4
 2 -5 5 94660.6 2680.91 4
 2 -5 5 96777.6 2783.64 2
 2 -5 6 14407.5 1007.99 2
 2 -5 7 5477.77 745.878 2
 2 -5 8 36223.2 1703.76 2
 2 -5 9 49427.4 2140.27 2
 2 -5 10 18300.3 1373.28 2
 2 -5 11 1441.08 807.482 5
 2 -5 12 9007.58 1172.27 5
 2 -5 13 2433.26 859.497 5
 2 -4 -14 7533.74 1194.65 4
 2 -4 -13 19.2254 755.19 4
 2 -4 -12 9386.82 1195.24 4
 2 -4 -11 1143.57 720.442 4
 2 -4 -10 10405.6 1082.33 4
 2 -4 -9 17119.8 1259.21 4
 2 -4 -8 1043.31 553.001 4
 2 -4 -7 50344.7 1966.75 4
 2 -4 -6 201526 4927.97 4
 2 -4 -5 3455.6 492.896 4
 2 -4 -4 14720.4 871.787 4
 2 -4 -3 286840 6275.67 4
 2 -4 -2 58191.3 1831.34 4
 2 -4 -1 61263.4 1860.05 4
 2 -4 0 19534.3 809.287 1
 2 -4 0 18910.8 874.815 4
 2 -4 0 19813.5 769.615 7
 2 -4 1 15752.3 706.821 1
 2 -4 1 18501.6 642.888 7
 2 -4 1 17769.8 835.764 4
 2 -4 2 49694.7 1580.02 4
 2 -4 2 51493.4 1340 7
 2 -4 2 50840 1382.61 6
 2 -4 3 67023.1 1944.03 4
 2 -4 4 9343.38 671.293 4
 2 -4 4 7916.1 628.826 2
 2 -4 5 178347 4371.45 2
 2 -4 5 185326 4286.73 4
 2 -4 6 166547 4167.75 2
 2 -4 7 14226.9 971.119 2
 2 -4 8 1172.58 526.944 2
 2 -4 9 36811.7 1753.19 2
 2 -4 10 37339.9 1868.01 5
 2 -4 11 14248.8 1291.61 5
 2 -4 12 1306.54 715.877 5
 2 -4 13 3684.17 916.837 5
 2 -4 14 -690.108 821.818 5
 2 -3 -14 701.466 828.66 4
 2 -3 -13 12097.6 1340.21 4
 2 -3 -12 -490.839 676.042 4
 2 -3 -8 14398.3 1055.92 4
 2 -3 -7 2235.11 531.449 4
 2 -3 -6 165528 4136.42 4
 2 -3 -5 104138 2833.6 4
 2 -3 -4 48502.2 1607.96 4
 2 -3 -3 826.057 291.35 4
 2 -3 -2 520175 10458.7 4
 2 -3 -1 63856.2 1690.89 1
 2 -3 -1 63580.2 1801.29 4
 2 -3 0 75258.4 1939.04 7
 2 -3 0 72872 1827.96 1
 2 -3 0 76188.5 1969.79 4
 2 -3 1 20933.9 719.739 1
 2 -3 1 23018 869.518 4
 2 -3 1 21829.5 744.872 7
 2 -3 2 108950 2520.45 7
 2 -3 2 115811 2571.94 6
 2 -3 2 111815 2701.32 4
 2 -3 3 1088.82 227.568 7
 2 -3 3 1025.37 220.051 6
 2 -3 3 1234.29 276.153 4
 2 -3 4 51410.2 1592.4 4
 2 -3 4 52928.3 1642.84 2
 2 -3 5 20156.1 990.29 2
 2 -3 6 202863 4770.51 2
 2 -3 7 126612 3400.52 2
 2 -3 8 1927.15 555.773 2
 2 -3 9 851.943 557.827 2
 2 -3 10 9338.48 999.064 5
 2 -3 11 28399.4 1671.06 5
 2 -3 12 7672.73 1075.74 5
 2 -3 13 8844.97 1198.73 5
 2 -3 14 5161.04 1092.12 5
 2 -2 -5 374962 7884.14 4
 2 -2 -4 33881.4 1216.27 4
 2 -2 -3 280177 5885.07 4
 2 -2 -2 76438.1 1970.33 4
 2 -2 -1 255953 5326.37 5
 2 -2 -1 264069 5349.73 4
 2 -2 0 827163 16457.2 4
 2 -2 0 861513 16297.6 1
 2 -2 0 883413 16609.1 7
 2 -2 1 395055 7655.43 1
 2 -2 1 400757 7904.9 4
 2 -2 1 395173 7855.39 7
 2 -2 2 136429 3028.51 7
 2 -2 2 139872 3091.54 4
 2 -2 2 138399 3055.66 6
 2 -2 3 25629.6 938.422 6
 2 -2 3 26174.1 931.204 4
 2 -2 3 26007.5 924.547 7
 2 -2 3 24484 903.663 2
 2 -2 4 20735.9 884.008 2
 2 -2 5 2419.77 399.342 2
 2 -2 6 46736.7 1620.78 2
 2 -2 7 288031 6424.26 2
 2 -2 9 3698.28 688.607 5
 2 -2 10 -57.5565 625.733 5
 2 -2 11 22692.8 1476.13 5
 2 -2 12 13760 1257.32 5
 2 -2 13 -189.714 677.363 5
 2 -2 14 12194.3 1411.36 5
 2 -2 15 1342.22 890.978 5
 2 -1 -3 154866 3416.09 4
 2 -1 -2 80367.8 1911.21 5
 2 -1 -2 76839.2 1882.4 4
 2 -1 -1 145114 3043.16 5
 2 -1 -1 140261 3044.24 4
 2 -1 0 100051 2419.42 7
 2 -1 0 97287.1 2169.94 4
 2 -1 1 291740 5947.05 7
 2 -1 1 295815 5855.68 4
 2 -1 2 188910 3857.67 4
 2 -1 2 186846 3911.23 7
 2 -1 2 178517 3789.76 2
 2 -1 3 157472 3493.04 7
 2 -1 3 158274 3510.27 6
 2 -1 3 153646 3369.39 2
 2 -1 4 3693.82 364.531 2
 2 -1 5 4061.34 436.436 2
 2 -1 6 5600.11 551.033 2
 2 -1 7 147515 3672.64 5
 2 -1 8 324000 7166.7 5
 2 -1 9 9716.94 836.444 5
 2 -1 10 4249.47 743.856 5
 2 -1 11 886.529 618.393 5
 2 -1 12 24804 1590.74 5
 2 -1 13 3713.05 861.906 5
 2 -1 14 6361.59 1116.66 5
 2 -1 15 4527.05 1146.14 5
 2 0 -2 162908 3423.64 5
 2 0 -2 159585 3317.49 4
 2 0 -1 222567 4678 5
 2 0 -1 247932 4652.38 4
 2 0 0 53629.4 1197.16 4
 2 0 0 56232.4 1578.21 7
 2 0 1 123013 2745.62 7
 2 0 1 120721 2519.32 4
 2 0 2 138259 2929.96 2
 2 0 2 144261 3150.78 7
 2 0 3 115018 2577.75 2
 2 0 3 119796 2764.31 7
 2 0 3 118937 2763.11 6
 2 0 5 29813.4 1033.83 5
 2 0 6 20291.7 930.584 5
 2 0 7 30613.2 1255.37 5
 2 0 8 214791 5052.39 5
 2 0 9 100842 2974.19 5
 2 0 10 244.598 486.281 5
 2 0 11 8538.67 943.843 5
 2 0 12 1724.43 761.932 5
 2 0 13 11823.6 1297.91 5
 2 0 14 868.859 876.084 5
 2 0 15 1542.16 940.68 5
 2 0 16 3873.51 1225.26 5
 2 1 -2 135110 2870.64 2
 2 1 -1 57210.3 1273.02 2
 2 1 0 1495.98 248.277 7
 2 1 1 89986.8 2111.11 7
 2 1 2 28819.4 883.04 7
 2 1 2 23840.1 596.573 5
 2 1 3 235497 5006.36 6
 2 1 3 238201 4727.85 5
 2 1 3 239846 5016.52 7
 2 1 4 66724.2 1632.99 5
 2 1 4 63217.7 1861 7
 2 1 5 91022.5 2246.02 5
 2 1 6 1354.64 334.265 5
 2 1 7 805.185 343.61 5
 2 1 8 30229.9 1316.78 5
 2 1 9 51986.6 1916.23 5
 2 1 10 37821.6 1703.82 5
 2 1 11 691.687 538.471 5
 2 1 12 2438.11 799.831 5
 2 1 13 3212.25 880.645 5
 2 1 14 7947.24 1132.41 5
 2 1 15 -437.116 926.072 5
 2 1 16 5754.6 1265.69 5
 2 2 -2 160340 3201.08 4
 2 2 0 23056.3 880.607 7
 2 2 1 104571 2335.8 7
 2 2 1 96991.8 2249.16 1
 2 2 2 254268 5247.05 7
 2 2 2 245654 5158.46 1
 2 2 2 260465 4989.64 5
 2 2 3 98135.3 2137.44 5
 2 2 3 98100.9 2351.08 6
 2 2 3 95616.3 2359.26 7
 2 2 3 98191.3 2282.86 1
 2 2 4 17967.6 672.831 5
 2 2 4 18000.4 823.211 7
 2 2 5 171645 3780.62 5
 2 2 6 50828.6 1568.04 5
 2 2 7 9559.58 692.397 5
 2 2 8 2199.05 467.539 5
 2 2 9 5700.52 693.706 5
 2 2 10 14254.1 1040.59 5
 2 2 11 10150 1024.56 5
 2 2 12 -11.6899 588.115 5
 2 2 13 1113.13 715.65 5
 2 2 14 3509.94 1020.66 5
 2 2 15 8577.69 1215.18 5
 2 2 16 -1705.78 1119.89 5
 2 3 -4 12270.9 559.938 4
 2 3 -3 10443.4 457.787 4
 2 3 -2 59862.6 1396.46 4
 2 3 -1 195022 3873.52 4
 2 3 0 16680.6 719.128 7
 2 3 0 14908.4 695.896 1
 2 3 0 16681.4 500.133 4
 2 3 1 181258 3899.8 7
 2 3 1 189044 4004.95 1
 2 3 2 148938 3307.49 7
 2 3 2 155059 3389.92 1
 2 3 3 12387.8 586.308 6
 2 3 3 12026.4 598.204 7
 2 3 3 11265.1 517.68 5
 2 3 3 11870.2 609.356 1
 2 3 4 7780.78 459.076 5
 2 3 5 117.957 210.846 5
 2 3 6 343461 7188.93 5
 2 3 7 49428.6 1666.12 5
 2 3 8 33478.3 1419.81 5
 2 3 9 7600.92 736.774 5
 2 3 10 903.387 476.992 5
 2 3 11 11354.2 1028.47 5
 2 3 12 21390.2 1462.08 5
 2 3 13 9291.26 1179.92 5
 2 3 14 6289.4 1119.09 5
 2 3 15 -289.184 950.956 5
 2 3 16 6744.25 1270.96 5
 2 4 -3 57157.6 1505.97 4
 2 4 -2 13564.5 543.971 4
 2 4 -1 2415.85 375.774 1
 2 4 -1 2604.6 233.956 4
 2 4 0 333967 6908.32 1
 2 4 0 342917 6517.62 4
 2 4 0 322318 6714.36 7
 2 4 1 178520 3799.82 7
 2 4 1 181071 3758.37 4
 2 4 1 177201 4044.69 1
 2 4 2 81570.2 1952.36 6
 2 4 2 84458.2 2202.11 1
 2 4 2 84135.9 1993.39 7
 2 4 3 74005.3 1915.92 7
 2 4 3 73187.4 1882.34 6
 2 4 3 75209.6 2055.54 1
 2 4 4 86486.3 2218.86 5
 2 4 4 85983.5 2324.05 1
 2 4 5 155526 3639.1 5
 2 4 6 66811.1 1985.53 5
 2 4 7 272581 6059.62 5
 2 4 8 24210.4 1198.68 5
 2 4 9 4083.46 629.76 5
 2 4 10 4193.14 647.307 5
 2 4 11 947.331 582.396 5
 2 4 12 64027.1 2597 5
 2 4 13 -400.448 670.97 5
 2 4 14 24813.4 1780.71 5
 2 4 15 13900.8 1533.53 5
 2 4 16 1290.23 1049.04 5
 2 5 -2 129434 2954.96 4
 2 5 -2 129984 3439.1 1
 2 5 -1 14567.2 886.044 1
 2 5 -1 14204.2 755.83 7
 2 5 -1 13712.4 609.603 4
 2 5 0 111230 2605.58 7
 2 5 0 113466 2615.22 4
 2 5 0 113157 2950.52 1
 2 5 1 85061.3 2133.18 4
 2 5 1 87216.2 2039.35 7
 2 5 1 89294.3 2428.56 1
 2 5 2 3520.56 291.222 7
 2 5 2 3786.62 274.999 6
 2 5 2 2955.92 397.747 1
 2 5 3 194620 4154.85 6
 2 5 3 188729 4473.08 1
 2 5 3 195731 4197.82 7
 2 5 4 30075.4 1232.12 1
 2 5 5 174328 4251.32 1
 2 5 5 177439 4162.42 5
 2 5 6 33432.1 1360.53 5
 2 5 7 202151 4844.03 5
 2 5 8 132293 3585.67 5
 2 5 9 40928.6 1748.62 5
 2 5 10 14701.7 1129.84 5
 2 5 11 7323.16 950.861 5
 2 5 12 59698.7 2513.03 5
 2 5 13 9643.25 1195.63 5
 2 5 14 2670.82 872.905 5
 2 5 15 23295.8 1877.67 5
 2 5 16 5840.63 1231.03 5
 2 6 -3 168227 4435.33 1
 2 6 -2 43896.3 1776.71 1
 2 6 -1 67066.4 2179.58 1
 2 6 -1 62128.5 1807.73 7
 2 6 0 7257.31 681.993 1
 2 6 0 6469.77 413.356 7
 2 6 1 123454 3242.85 1
 2 6 1 119005 2642.87 7
 2 6 2 1485.22 233.028 7
 2 6 2 877.992 382.912 1
 2 6 2 1174.79 182.191 6
 2 6 3 102606 2863.47 1
 2 6 4 221993 5199.47 1
 2 6 5 3660.03 555.208 1
 2 6 6 7079.6 666.95 5
 2 6 7 50875.7 1917.05 5
 2 6 8 103343 3114.66 5
 2 6 9 128611 3715.43 5
 2 6 10 364.933 541.775 5
 2 6 11 39773.3 1994.62 5
 2 6 12 4374.44 941.397 5
 2 6 13 35748.3 2073.13 5
 2 6 14 4791.57 1066.44 5
 2 6 15 634.115 1006.37 5
 2 6 16 13273.5 1642.97 5
 2 7 -4 2486.52 732.19 1
 2 7 -3 110961 3431.21 1
 2 7 -2 169547 4472.62 1
 2 7 -2 165179 4010.95 7
 2 7 -1 729.495 237.533 7
 2 7 -1 469.794 441.663 1
 2 7 0 9750.76 467.532 7
 2 7 0 11097.3 874.306 1
 2 7 1 12012.7 899.349 1
 2 7 1 11743.5 472.586 7
 2 7 2 76014.6 1839.32 7
 2 7 2 81154.2 2509.33 1
 2 7 3 862.496 442.989 1
 2 7 4 220295 5316.05 1
 2 7 5 102659 3048.18 1
 2 7 6 19741.9 1166.58 1
 2 7 7 14430 1024.93 5
 2 7 8 70429.6 2508.87 5
 2 7 9 92413.5 3084.35 5
 2 7 10 57697.5 2397.38 5
 2 7 11 4660.46 838.893 5
 2 7 12 9627.84 1189.6 5
 2 7 13 321.089 847.041 5
 2 7 14 7607.78 1209.16 5
 2 7 15 1557.01 1074.71 5
 2 7 16 5386.27 1376.6 5
 2 8 -6 39759.9 2173.06 1
 2 8 -5 2740.16 801.709 1
 2 8 -4 702.597 644.83 1
 2 8 -3 23210.9 1454.65 1
 2 8 -3 20225.6 1107.91 7
 2 8 -2 152442 4351.53 1
 2 8 -2 154624 3692.19 7
 2 8 -1 87177.8 2135.82 7
 2 8 -1 89663.2 2913.9 1
 2 8 0 4258.55 664.711 1
 2 8 0 3892.67 259.703 7
 2 8 1 23618.2 1304.23 1
 2 8 1 21167.4 623.812 7
 2 8 2 2486.15 552.631 1
 2 8 3 84241.4 2740.89 1
 2 8 4 910.784 459.035 1
 2 8 5 103219 3156.16 1
 2 8 6 136262 3878.11 1
 2 8 8 25188.3 1472.95 5
 2 8 9 35259.1 1830.85 5
 2 8 10 74231.6 2879.35 5
 2 8 11 9635.95 1145.02 5
 2 8 12 5819.42 1045.71 5
 2 8 13 25362.5 1872.91 5
 2 8 14 1606.34 1016.14 5
 2 8 15 163.656 825.81 5
 2 8 16 -274.821 1068.97 5
 2 9 -9 1625.44 1161.02 1
 2 9 -8 5534.32 1210.29 1
 2 9 -7 1013.31 972.934 1
 2 9 -6 17040.1 1516.2 1
 2 9 -5 112114 3956.03 1
 2 9 -4 10995.6 1217.82 1
 2 9 -3 5778.11 913.487 1
 2 9 -2 42923.2 2040.92 1
 2 9 -1 111489 3430.91 1
 2 9 -1 98681 2217.9 7
 2 9 0 10824.5 1051.63 1
 2 9 1 45104.2 2006.77 1
 2 9 2 64930.9 2437.43 1
 2 9 3 204.064 530.442 1
 2 9 4 59675.3 2293.41 1
 2 9 5 269.443 523.218 1
 2 9 6 51272.3 2148.98 1
 2 9 7 30381.4 1639.24 1
 2 9 10 767.33 649.624 5
 2 9 11 40901.3 2180.95 5
 2 9 12 6020.77 1037.72 5
 2 9 13 8438.15 1290.41 5
 2 9 14 13399.1 1499.79 5
 2 9 15 2350.09 1070.56 5
 2 9 16 4122.64 1350.76 5
 2 10 -9 3342.95 1196.77 1
 2 10 -8 1639.07 898.192 1
 2 10 -7 1823.44 1041.27 1
 2 10 -6 534.277 860.742 1
 2 10 -5 35783.8 2169.43 1
 2 10 -4 103370 3782.65 1
 2 10 -3 14219.7 1316.92 1
 2 10 -2 3981.18 914.471 1
 2 10 -1 43249.8 2135.24 1
 2 10 0 58226.8 2471.02 1
 2 10 1 206.088 548.426 1
 2 10 2 64571.5 2563.71 1
 2 10 3 55860.1 2330.25 1
 2 10 4 2374.86 655.784 1
 2 10 5 54987.2 2301.76 1
 2 10 6 19332.1 1383.99 1
 2 10 7 68240.5 2665.79 1
 2 10 12 26967.3 1874.23 5
 2 10 13 4808.87 1058.97 5
 2 10 14 5392.89 1227.04 5
 2 10 15 14131.6 1793.97 5
 2 10 16 -975.937 1137.47 5
 2 11 -8 4153.3 1263.18 1
 2 11 -7 2182.05 970.238 1
 2 11 -6 2033.09 1019.74 1
 2 11 -5 2238.19 964.223 1
 2 11 -4 48272.5 2589.72 1
 2 11 -3 32458 2008.98 1
 2 11 -2 2730.33 852.099 1
 2 11 -1 -172.384 644.286 1
 2 11 0 28830.3 1805.88 1
 2 11 1 36887 2027.85 1
 2 11 2 121.399 597.193 1
 2 11 3 66875.3 2728.38 1
 2 11 4 46889.4 2218.48 1
 2 11 5 932.3 715.026 1
 2 11 6 4494.75 874.255 1
 2 11 7 35190.4 1927.38 1
 2 11 8 125160 4100.43 1
 2 11 14 6380.12 1241.46 5
 2 11 15 18030.8 1896.99 5
 2 11 16 2773.54 1179.34 5
 2 12 -7 4735.22 1371.43 1
 2 12 -6 1461.81 970.607 1
 2 12 -5 5892.97 1270.79 1
 2 12 -4 9921.13 1335.61 1
 2 12 -3 41150.2 2427.14 1
 2 12 -2 1506.71 790.347 1
 2 12 -1 18228.2 1581.1 1
 2 12 0 1092.19 807.457 1
 2 12 1 25452.2 1791.55 1
 2 12 2 42815.3 2233.05 1
 2 12 3 10957.4 1243.11 1
 2 12 4 75713.6 3023.24 1
 2 12 5 1853.72 766.344 1
 2 12 6 3233.79 843.813 1
 2 12 7 2544.8 742.246 1
 2 12 8 3820.78 871.949 1
 2 13 -5 1567.43 1089.4 1
 2 13 -4 508.42 962.03 1
 2 13 -3 20887.7 1875.68 1
 2 13 -2 17002.8 1644.54 1
 2 13 -1 5463.27 1066.12 1
 2 13 0 6839.39 1164.83 1
 2 13 1 1194.31 907.208 1
 2 13 2 36600.2 2233.26 1
 2 13 3 22850.4 1712.69 1
 2 13 4 16333.2 1498.72 1
 2 13 5 17816.2 1564.69 1
 2 13 6 529.902 758.366 1
 2 13 7 3908.64 966.021 1
 2 13 8 1606.78 827.056 1
 2 14 -4 2031.84 1195.82 1
 2 14 -3 4344.72 1154.19 1
 2 14 -2 30766.3 2301.43 1
 2 14 -1 8994.47 1404.64 1
 2 14 0 -552.067 920.599 1
 2 14 1 4643.17 1055.54 1
 2 14 2 -164.341 806.046 1
 2 14 3 16301.7 1547.58 1
 2 14 4 280.555 921.235 1
 2 14 5 11040.5 1365.95 1
 2 14 6 19640.4 1713.41 1
 2 14 7 -323.87 712.64 1
 2 14 8 2245.75 986.759 1
 2 15 -2 3783.76 1112.84 1
 2 15 -1 18352.2 1844.51 1
 2 15 0 1781.5 1050.1 1
 2 15 1 7198.68 1227.86 1
 2 15 2 11258.3 1533.79 1
 2 15 3 1340.29 1033.05 1
 2 15 4 3908.87 1057.45 1
 2 15 5 -868.374 991.174 1
 2 15 6 18134.9 1747.36 1
 2 15 7 21175.6 1827.8 1
 2 15 8 1482.47 951.379 1
 2 16 0 8891.04 1546.75 1
 2 16 1 2147.83 1129.26 1
 2 16 2 4422.02 1144.46 1
 2 16 3 6895.17 1356.52 1
 2 16 4 1179.92 999.479 1
 2 16 5 1605.43 913.985 1
 2 16 6 4093.03 1035.24 1
 2 16 7 31169.8 2231.33 1
 2 16 8 35877.8 2407.14 1
 2 17 4 9638.65 1585.44 1
 2 17 5 2555.93 1059.91 1
 2 17 6 366.429 1034.24 1
 2 17 7 9073.53 1527.25 1
 3 -16 -5 1814.21 1167.05 4
 3 -16 -4 4612.51 1360.95 4
 3 -16 -3 -1029.58 847.813 4
 3 -16 -2 11341.2 1580.2 4
 3 -16 -1 5656.32 1201 4
 3 -16 0 2090.95 1018.05 4
 3 -16 1 5606.57 1155.59 4
 3 -16 2 65.4752 995.795 4
 3 -16 3 1026.27 896.277 4
 3 -15 -8 1348.44 1172.04 4
 3 -15 -7 1561.56 1052.58 4
 3 -15 -6 7877.49 1446.47 4
 3 -15 -5 20539 1923.45 4
 3 -15 -4 605.321 957.33 4
 3 -15 -3 4708.8 1193.26 4
 3 -15 -2 -237.752 922.81 4
 3 -15 -1 11710.8 1466.45 4
 3 -15 0 6064.81 1154.5 4
 3 -15 1 7636.67 1314.52 4
 3 -15 2 4369.48 982.158 4
 3 -15 3 394.199 848.41 4
 3 -15 4 902.36 897.735 4
 3 -14 -9 17173.7 1854.7 4
 3 -14 -8 1525.67 989.219 4
 3 -14 -7 -170.694 1003.93 4
 3 -14 -6 13791.2 1590.04 4
 3 -14 -5 36641.1 2435.39 4
 3 -14 -4 18153.4 1709.56 4
 3 -14 -3 630.836 867.784 4
 3 -14 -2 10162.5 1313.03 4
 3 -14 -1 5202.71 1025.79 4
 3 -14 0 26826.5 1977.21 4
 3 -14 1 821.687 818.221 4
 3 -14 2 7402.99 1176.87 4
 3 -14 3 10196.3 1278.04 4
 3 -14 4 -511.102 813.613 4
 3 -14 5 4875.08 1107.77 4
 3 -13 -11 10541.5 1761.13 4
 3 -13 -10 -2068.95 1075.6 4
 3 -13 -9 18657.8 1950.98 4
 3 -13 -8 21051.1 1974.12 4
 3 -13 -7 3773.4 1133.73 4
 3 -13 -6 -799.051 906.276 4
 3 -13 -5 26655.9 1974.02 4
 3 -13 -4 62728.2 3017.63 4
 3 -13 -3 39933.2 2352.5 4
 3 -13 -2 2628.64 918.365 4
 3 -13 -1 7200.02 1134.3 4
 3 -13 0 19859.1 1675.46 4
 3 -13 1 17615.6 1547.83 4
 3 -13 2 907.165 826.076 4
 3 -13 3 23669.3 1739.64 4
 3 -13 4 16237.2 1469.42 4
 3 -13 5 -455.516 798.962 4
 3 -13 6 -977.733 1017.21 2
 3 -13 6 779.562 707.334 4
 3 -12 -12 1926.93 1173.72 4
 3 -12 -11 13595.9 1771.29 4
 3 -12 -10 9820.8 1506.82 4
 3 -12 -9 3908.74 1196.04 4
 3 -12 -8 36142.1 2364.81 4
 3 -12 -7 2641.78 945.042 4
 3 -12 -6 1260.14 928.022 4
 3 -12 -5 1100.32 870.294 4
 3 -12 -4 48390 2519.87 4
 3 -12 -3 74419.5 3157.05 4
 3 -12 -2 15555.7 1435.63 4
 3 -12 -1 17471.3 1500.9 4
 3 -12 0 18522.9 1534.43 4
 3 -12 1 7975.28 1142.32 4
 3 -12 2 28735.1 1839.55 4
 3 -12 3 13890.8 1315.59 4
 3 -12 4 36285.1 2012.59 4
 3 -12 5 6019.33 940.511 4
 3 -12 6 262.216 651.79 4
 3 -12 6 -458.495 793.142 2
 3 -12 7 610.063 835.856 2
 3 -12 7 712.988 748.069 4
 3 -12 8 8636.87 1274.86 2
 3 -11 -13 -693.862 1196.68 4
 3 -11 -12 1160.79 1192.03 4
 3 -11 -11 1578.7 1186.48 4
 3 -11 -10 9196.15 1463.63 4
 3 -11 -9 3604.04 1011.24 4
 3 -11 -8 24216.7 1910.22 4
 3 -11 -7 39655.8 2325.03 4
 3 -11 -6 7158.25 1145.9 4
 3 -11 -5 712.507 731.744 4
 3 -11 -4 1358.06 814.337 4
 3 -11 -3 68770.7 2897.24 4
 3 -11 -2 28466.8 1853.62 4
 3 -11 -1 -378.375 636.02 4
 3 -11 0 31383.4 1855.92 4
 3 -11 1 10190.9 1134.41 4
 3 -11 2 26384.1 1697.98 4
 3 -11 3 29130.2 1739.92 4
 3 -11 4 21401.7 1541.2 4
 3 -11 5 53429.3 2388.14 4
 3 -11 6 8379.31 1046.95 4
 3 -11 6 8652.41 1181.98 2
 3 -11 7 1101.95 776.946 2
 3 -11 7 857.995 713.711 4
 3 -11 8 1380.4 907.885 2
 3 -11 9 6564.24 1246.75 2
 3 -10 -14 16908.7 1956.31 4
 3 -10 -13 5047.6 1282.84 4
 3 -10 -12 245.269 1012.37 4
 3 -10 -11 6597.34 1372.43 4
 3 -10 -10 -514.472 903.896 4
 3 -10 -9 3931.77 1088.24 4
 3 -10 -8 -889.427 847.054 4
 3 -10 -7 16995.6 1529.76 4
 3 -10 -6 74930.8 3092.5 4
 3 -10 -5 6385.06 1052.83 4
 3 -10 -4 1453.56 737.568 4
 3 -10 -3 3793.41 765.63 4
 3 -10 -3 4331.57 611.739 7
 3 -10 -2 87938 3191.9 4
 3 -10 -1 36773.1 1937.37 4
 3 -10 0 3143.11 742.675 4
 3 -10 1 49788.9 2214.02 4
 3 -10 2 2805.67 718.875 4
 3 -10 3 30530.6 1707.05 4
 3 -10 4 14164.2 1207.21 4
 3 -10 5 31556.2 1727.06 4
 3 -10 6 69289.2 2722.82 4
 3 -10 6 72813.7 2905.29 2
 3 -10 7 9418.92 1140.39 2
 3 -10 7 9754.76 1050.02 4
 3 -10 8 37.7793 834.5 2
 3 -10 9 -481.011 893.755 2
 3 -10 10 8573.66 1323.82 2
 3 -9 -14 -84.995 1180.58 4
 3 -9 -13 15595.3 1815.16 4
 3 -9 -12 2174.39 1053.81 4
 3 -9 -11 8797.73 1334.52 4
 3 -9 -10 16109 1627.37 4
 3 -9 -9 576.555 909.21 4
 3 -9 -8 10804.9 1275.97 4
 3 -9 -7 1058.68 780.859 4
 3 -9 -6 74474.2 2966.16 4
 3 -9 -5 131874 4175.78 4
 3 -9 -4 37233.2 1965.38 4
 3 -9 -3 5973.06 891.953 4
 3 -9 -3 5351.01 662.502 7
 3 -9 -2 3960.68 522.247 7
 3 -9 -2 5821.39 843.925 4
 3 -9 -1 53191 1634.71 7
 3 -9 -1 50001.9 2202.68 4
 3 -9 0 5218.25 772.92 4
 3 -9 0 5825.62 363.069 7
 3 -9 1 48464.2 2110.36 4
 3 -9 2 48331.9 2082.48 4
 3 -9 3 10071.4 969.263 4
 3 -9 4 44257.2 1984.14 4
 3 -9 5 1435.23 607.733 4
 3 -9 6 20009.1 1311.57 4
 3 -9 6 18312.9 1383.43 2
 3 -9 7 42193.5 2001.73 4
 3 -9 7 42395.4 2143.7 2
 3 -9 8 1445.19 760.981 2
 3 -9 9 3049.61 968.844 2
 3 -9 10 -909.872 945.003 2
 3 -9 11 11543.4 1412.4 2
 3 -8 -15 -562.553 1192.2 4
 3 -8 -14 2257.84 1164.33 4
 3 -8 -13 -265.894 956.153 4
 3 -8 -12 8621.98 1413.05 4
 3 -8 -11 5473.61 1048.59 4
 3 -8 -10 14918.4 1473.08 4
 3 -8 -9 60682.2 2802.36 4
 3 -8 -8 146.136 736.094 4
 3 -8 -7 14085.7 1284.81 4
 3 -8 -6 4937.64 927.198 4
 3 -8 -5 35199.1 1859.41 4
 3 -8 -4 144193 4238.26 4
 3 -8 -3 4493.88 767.616 4
 3 -8 -2 55183.8 2239.34 4
 3 -8 -2 55512.3 1999.49 7
 3 -8 -1 2296.73 358.312 7
 3 -8 -1 1786.26 637.74 4
 3 -8 0 44411.3 1926.82 4
 3 -8 0 44378.4 1335.88 7
 3 -8 1 4003.04 333.299 6
 3 -8 1 3038.61 630.807 4
 3 -8 1 4346.75 309.473 7
 3 -8 2 63209.2 2322.73 4
 3 -8 3 36797.4 1696.65 4
 3 -8 4 -950.783 593.876 4
 3 -8 5 28654.9 1523.33 4
 3 -8 6 5799.67 894.531 2
 3 -8 6 4853.22 756.925 4
 3 -8 7 25828.9 1603.18 2
 3 -8 8 23837.4 1611.27 2
 3 -8 9 3617.45 900.219 2
 3 -8 10 6749.85 1126.01 2
 3 -8 11 3212.18 953.526 2
 3 -8 12 5299.1 1125.24 2
 3 -7 -15 6812.14 1476.21 4
 3 -7 -14 2927.09 1157.9 4
 3 -7 -13 3297.65 1097.72 4
 3 -7 -12 -612.877 850.926 4
 3 -7 -11 12663.1 1408.9 4
 3 -7 -10 455.148 755.49 4
 3 -7 -9 62701.6 2753.67 4
 3 -7 -8 14584.6 1317.39 4
 3 -7 -7 15301.4 1278.82 4
 3 -7 -6 36069.9 1835.14 4
 3 -7 -5 1049.92 589.244 4
 3 -7 -4 195866 5118.51 4
 3 -7 -3 100655 3163.53 4
 3 -7 -2 15465.4 1101.43 4
 3 -7 -2 17514.5 1050.69 7
 3 -7 -1 25054.3 1337.15 4
 3 -7 -1 22004.9 1073.21 7
 3 -7 0 2535.09 339.606 7
 3 -7 0 3486.87 591.108 4
 3 -7 1 125385 3535.89 4
 3 -7 1 125152 2862.6 7
 3 -7 2 384.723 239.447 6
 3 -7 2 223.152 187.577 7
 3 -7 2 564.211 491.412 4
 3 -7 3 72569.1 2435.42 4
 3 -7 4 36607.9 1626.4 4
 3 -7 5 786.154 456.859 4
 3 -7 6 9971.07 943.773 2
 3 -7 6 10301.3 931.136 4
 3 -7 7 2180.31 713.126 2
 3 -7 8 53881.9 2316.3 2
 3 -7 9 16114 1365.42 2
 3 -7 10 7964.5 1129.01 2
 3 -7 11 7098.24 1182.03 2
 3 -7 12 198.968 746.975 2
 3 -6 -14 1141.93 1071.32 4
 3 -6 -13 5266.39 1107.48 4
 3 -6 -12 9082.83 1297.65 4
 3 -6 -11 4345.65 1026.49 4
 3 -6 -10 21950.8 1642.71 4
 3 -6 -9 22084.2 1562.22 4
 3 -6 -8 71650.5 2776.53 4
 3 -6 -7 35652.4 1826.17 4
 3 -6 -6 10101.6 997.367 4
 3 -6 -5 27054.4 1449.75 4
 3 -6 -4 4865.69 697.973 4
 3 -6 -3 187620 4787.28 4
 3 -6 -2 40160 1681.89 4
 3 -6 -1 79699.8 2388.37 7
 3 -6 -1 77659.7 2500.21 4
 3 -6 0 52610.4 1631.27 7
 3 -6 0 53779 1950.54 4
 3 -6 1 16080.7 707.78 7
 3 -6 1 15592.9 979.282 4
 3 -6 2 110127 3090.56 4
 3 -6 2 108885 2575.7 7
 3 -6 2 109406 2657.2 6
 3 -6 3 18226.6 1062.16 4
 3 -6 3 19134.2 869.149 6
 3 -6 3 19234.7 832.424 7
 3 -6 4 73953.8 2365.4 4
 3 -6 5 52057.9 1993.09 2
 3 -6 5 53486.3 1972.08 4
 3 -6 6 13725.1 985.088 4
 3 -6 6 14895.7 1073.75 2
 3 -6 7 958.359 602.037 2
 3 -6 8 2403.38 632.202 2
 3 -6 9 66961.2 2620.2 2
 3 -6 10 27121.4 1738.7 2
 3 -6 11 3157.97 854.666 2
 3 -6 12 6049.22 1141.5 5
 3 -6 13 280.741 750.998 5
 3 -5 -14 10394.2 1412.76 4
 3 -5 -13 1545.54 917.769 4
 3 -5 -12 7287.76 1159.33 4
 3 -5 -11 4056.01 928.406 4
 3 -5 -10 7117.27 1019.26 4
 3 -5 -9 10112.5 1046.7 4
 3 -5 -8 29058.1 1639.45 4
 3 -5 -7 115393 3512.2 4
 3 -5 -6 67897.8 2418.08 4
 3 -5 -5 48564.9 1904.61 4
 3 -5 -4 16137.2 1029.8 4
 3 -5 -3 3150.26 518.013 4
 3 -5 -2 32328.2 1426.62 4
 3 -5 -1 27609.2 1260.06 7
 3 -5 -1 27197.3 1256.88 4
 3 -5 0 160318 3801.05 7
 3 -5 0 161070 4002.17 4
 3 -5 1 64443.3 2067.3 4
 3 -5 1 64815.1 1781.17 7
 3 -5 2 779.712 242.902 7
 3 -5 2 657.301 257.675 6
 3 -5 2 588.173 367.861 4
 3 -5 3 8713.18 710.941 4
 3 -5 3 8084.38 561.809 6
 3 -5 3 7767.58 515.558 7
 3 -5 4 26988 1261.93 4
 3 -5 5 93617.2 2704.94 4
 3 -5 5 91848.4 2724.08 2
 3 -5 6 62609.8 2201.88 2
 3 -5 6 63817.8 2148.41 4
 3 -5 7 12580.8 998.245 2
 3 -5 8 1113.97 582.463 2
 3 -5 9 11514.5 1076.62 2
 3 -5 10 43213.4 2072.8 2
 3 -5 11 12927.7 1232.76 2
 3 -5 12 13990.2 1414.54 5
 3 -5 13 16370.5 1582.75 5
 3 -5 14 -1704.59 1024.17 5
 3 -4 -13 13493.5 1438.1 4
 3 -4 -12 63.8165 737.97 4
 3 -4 -11 15663.6 1338.19 4
 3 -4 -10 624.093 649.553 4
 3 -4 -9 4171.57 771.712 4
 3 -4 -8 6570.25 826.716 4
 3 -4 -7 9001.91 901.198 4
 3 -4 -6 174898 4492.91 4
 3 -4 -5 100244 2948.37 4
 3 -4 -4 12321.9 853.273 4
 3 -4 -3 4182.32 536.22 4
 3 -4 -2 267904 5973.17 4
 3 -4 -1 33139.6 1325.98 4
 3 -4 -1 33928.7 1407.72 7
 3 -4 0 17652.5 775.85 1
 3 -4 0 17804.3 876.39 7
 3 -4 0 17381.5 889.134 4
 3 -4 1 72894 1883.62 1
 3 -4 1 77300.2 2162.53 4
 3 -4 1 73747.2 1987.91 7
 3 -4 2 146033 3559.6 4
 3 -4 2 145007 3331.38 7
 3 -4 3 4756.77 420.847 7
 3 -4 3 4830.54 492.1 4
 3 -4 3 4531.6 447.242 6
 3 -4 4 13460.4 792.15 6
 3 -4 4 13144.6 816.259 4
 3 -4 4 12871.4 724.268 7
 3 -4 5 19726.1 1013.48 2
 3 -4 5 17217.2 949.907 4
 3 -4 6 162302 4114.7 2
 3 -4 7 77757.6 2499.99 2
 3 -4 8 1522.01 522.5 2
 3 -4 9 4773.05 780.105 2
 3 -4 10 11534.6 1091.38 2
 3 -4 11 25151.1 1605.46 5
 3 -4 12 4999.06 1036.21 5
 3 -4 13 31372.5 1987.72 5
 3 -4 14 16238.6 1605.62 5
 3 -3 -13 16218.1 1501.95 4
 3 -3 -12 6734.66 974.383 4
 3 -3 -11 10104.9 1125.68 4
 3 -3 -10 27107.9 1608.14 4
 3 -3 -9 9416.29 972.358 4
 3 -3 -8 1613.19 523.394 4
 3 -3 -7 2732.26 540.161 4
 3 -3 -6 21768.2 1161.05 4
 3 -3 -5 537428 11115.5 4
 3 -3 -4 64215.6 2016.49 4
 3 -3 -3 4125.14 497.198 4
 3 -3 -2 59194.5 1819.61 4
 3 -3 -1 439079 8931.15 1
 3 -3 -1 454155 9128.79 4
 3 -3 0 24694.7 856.073 1
 3 -3 0 26671.2 1048.34 4
 3 -3 0 25033.9 1109.25 7
 3 -3 1 24454.9 977.125 4
 3 -3 1 22555.3 748.783 1
 3 -3 1 23363.2 939.947 7
 3 -3 2 71832.2 1998.65 4
 3 -3 2 70990.3 1910.01 7
 3 -3 3 66867.7 1946.38 4
 3 -3 3 68755.5 1912.05 6
 3 -3 3 67642.4 1867.67 7
 3 -3 4 15336.7 824.371 6
 3 -3 4 15094 808.119 4
 3 -3 4 15978.9 810.524 2
 3 -3 4 14052.4 777.1 7
 3 -3 5 3650.06 476.316 2
 3 -3 6 57072.1 1913.42 2
 3 -3 7 167156 4216.92 2
 3 -3 8 83119.3 2636.13 2
 3 -3 9 6936.71 821.598 2
 3 -3 10 6573.67 878.511 5
 3 -3 11 13872.3 1230.85 5
 3 -3 12 15367.6 1302.8 5
 3 -3 13 1242.17 744.619 5
 3 -3 14 30949.3 1995.01 5
 3 -3 15 6920.12 1284.4 5
 3 -2 -12 16269.1 1369.09 4
 3 -2 -11 6698.99 919.319 4
 3 -2 -10 26053.9 1493.94 4
 3 -2 -9 64634.8 2360.14 4
 3 -2 -8 23946.3 1317.59 4
 3 -2 -7 9678.13 801.722 4
 3 -2 -6 1383.08 408.148 4
 3 -2 -5 353487 7552.81 4
 3 -2 -4 366388 7681.98 4
 3 -2 -3 47560.4 1520.27 4
 3 -2 -2 23803.4 935.433 4
 3 -2 -1 79678.1 2071.76 4
 3 -2 0 52093.2 1522.45 4
 3 -2 0 56188 1358.13 1
 3 -2 0 53388.3 1759.47 7
 3 -2 1 54287.9 1511.02 4
 3 -2 1 51990 1222.18 1
 3 -2 1 53341.6 1597.03 7
 3 -2 2 14144.1 673.04 4
 3 -2 2 14174 678.37 7
 3 -2 3 20456.4 883.011 6
 3 -2 3 21035 878.939 7
 3 -2 3 20700.8 872.802 4
 3 -2 4 38666.7 1309.63 2
 3 -2 4 40753.6 1403.82 7
 3 -2 4 42447 1437.33 6
 3 -2 4 40615.8 1345.65 4
 3 -2 5 1524.49 348.131 2
 3 -2 5 1200.39 351.081 7
 3 -2 6 977.095 375.137 2
 3 -2 7 234258 5432.68 2
 3 -2 8 318559 7164.16 2
 3 -2 9 6995.44 758.33 5
 3 -2 10 10825.1 981.327 5
 3 -2 11 5413.01 811.923 5
 3 -2 12 6991.03 955.703 5
 3 -2 13 1573.08 828.935 5
 3 -2 14 9363.64 1266.76 5
 3 -2 15 21416.8 1765.31 5
 3 -1 -6 3991.57 484.353 4
 3 -1 -5 120430 3018.31 4
 3 -1 -4 519292 10413.3 4
 3 -1 -3 169383 3762.57 4
 3 -1 -2 8482.07 490.736 4
 3 -1 -1 241202 4904.58 5
 3 -1 -1 233097 4907.41 4
 3 -1 0 21173 1005.41 7
 3 -1 0 22601.6 757.728 5
 3 -1 0 22031.2 765.972 4
 3 -1 1 175009 3715.27 4
 3 -1 1 174101 3965.47 7
 3 -1 2 87845.2 2096.97 4
 3 -1 2 86544.8 2244.12 7
 3 -1 3 51880 1458.88 4
 3 -1 3 52180.9 1561.56 6
 3 -1 3 50396 1537.97 7
 3 -1 3 52541.9 1398.89 2
 3 -1 4 16185.1 710.613 2
 3 -1 4 16714.8 821.018 7
 3 -1 4 18828.1 884.451 6
 3 -1 5 140196 3281.51 2
 3 -1 5 141372 3509.94 6
 3 -1 5 133002 3446.56 7
 3 -1 6 19193.1 951.056 2
 3 -1 7 2091.28 446.282 2
 3 -1 8 357247 7765.5 5
 3 -1 9 94632.4 2835.57 5
 3 -1 10 5000.36 741.281 5
 3 -1 11 18991 1295.58 5
 3 -1 12 455.643 633.029 5
 3 -1 13 2344.61 817.737 5
 3 -1 14 299.516 819.987 5
 3 -1 15 8772.14 1281.95 5
 3 -1 16 9825.7 1387.34 5
 3 0 -4 90317.9 2244.4 4
 3 0 -3 116781 2649.78 4
 3 0 -2 969.115 175.666 4
 3 0 -1 16424 591.491 5
 3 0 -1 16630 569.002 4
 3 0 0 843194 16380.4 7
 3 0 0 821495 15682.2 5
 3 0 1 118727 2553.72 4
 3 0 1 120243 2914.33 7
 3 0 2 97462.1 2068.91 2
 3 0 2 96276.5 2186.89 4
 3 0 2 96963 2420.34 7
 3 0 3 432680 8485.29 2
 3 0 3 434550 8799.96 7
 3 0 4 58268.3 1569.57 2
 3 0 4 59170.2 1771.14 7
 3 0 4 59281.7 1783.05 6
 3 0 5 2954.03 444.298 6
 3 0 5 2335.18 414.838 7
 3 0 6 461.005 271.64 5
 3 0 7 44561 1545.78 5
 3 0 8 20843.1 1050.66 5
 3 0 9 115146 3236.54 5
 3 0 10 58994.4 2171.82 5
 3 0 11 3001.63 656.173 5
 3 0 12 10793 1051.03 5
 3 0 13 1056.98 701.213 5
 3 0 14 2625.23 881.353 5
 3 0 15 -2716.26 1014.12 5
 3 0 16 4282.01 1161.82 5
 3 1 -2 2796.81 234.27 2
 3 1 -2 2391.46 195.391 4
 3 1 -1 55920.1 1369.88 5
 3 1 -1 54425.8 1205.01 4
 3 1 -1 56555.8 1248.54 2
 3 1 0 29267.1 688.191 4
 3 1 0 29217.4 730.892 5
 3 1 0 28771.5 1172.7 7
 3 1 1 22920.1 665.991 1
 3 1 1 22107.3 925.876 7
 3 1 2 10494.4 584.699 7
 3 1 2 10331.2 391.284 1
 3 1 3 140285 3330.61 7
 3 1 3 151280 2899.37 5
 3 1 4 4453.82 430.592 6
 3 1 4 4210.09 293.157 5
 3 1 4 4614.71 456.595 7
 3 1 5 5671.06 546.489 7
 3 1 5 6249.75 411.304 5
 3 1 5 5459.35 531.646 6
 3 1 6 4432.3 437.364 5
 3 1 7 19823.9 938.951 5
 3 1 8 746.938 358.354 5
 3 1 9 7605.42 720.11 5
 3 1 10 81238.1 2621.52 5
 3 1 11 21119.6 1315.77 5
 3 1 12 3375.54 765.032 5
 3 1 13 8726.23 1057.85 5
 3 1 14 814.785 803.827 5
 3 1 15 -21.5838 847.743 5
 3 1 16 -932.223 999.399 5
 3 2 0 19537.2 960.947 7
 3 2 1 3218.26 364.642 7
 3 2 1 3225.56 276.946 1
 3 2 2 76628.4 1808.81 1
 3 2 2 73143.1 2006.5 7
 3 2 3 193229 4315.33 7
 3 2 3 192978 3852.16 5
 3 2 3 194758 4087.97 1
 3 2 4 3174.3 370.267 7
 3 2 4 4176.16 429.259 6
 3 2 4 4168.47 282.189 5
 3 2 5 905.503 345.461 7
 3 2 5 427.11 298.96 6
 3 2 5 585.356 202.956 5
 3 2 6 56020.6 1617.77 5
 3 2 7 4887.26 496.684 5
 3 2 8 5352.71 587.48 5
 3 2 9 638.169 426.479 5
 3 2 10 26411.3 1369.17 5
 3 2 11 12429.8 1040.11 5
 3 2 12 3269.92 699.852 5
 3 2 13 16068.6 1351.98 5
 3 2 14 15711.9 1435.83 5
 3 2 15 356.19 821.714 5
 3 2 16 -1024.53 1044.77 5
 3 3 -4 4448.32 314.202 4
 3 3 -3 22240.3 667.834 4
 3 3 -2 8178.93 298.899 4
 3 3 -1 41896.6 1578.1 7
 3 3 0 1833.16 321.435 7
 3 3 0 1803.79 306.16 1
 3 3 1 7958.98 483.482 1
 3 3 1 8074.42 548.643 7
 3 3 2 254635 5306.12 1
 3 3 2 248614 5376.72 7
 3 3 3 100057 2542.22 7
 3 3 3 100248 2443.25 1
 3 3 4 21662.6 945.448 6
 3 3 4 21310.1 748.283 5
 3 3 4 21703.5 886.836 1
 3 3 4 21603.8 940.49 7
 3 3 5 403657 8487.35 6
 3 3 5 403052 8480.06 7
 3 3 5 401479 8088.18 5
 3 3 6 14588.5 722.96 5
 3 3 7 200388 4563.52 5
 3 3 8 21537.5 1072.05 5
 3 3 9 3332.14 544.569 5
 3 3 10 15845.8 1071.1 5
 3 3 11 1331.72 584.29 5
 3 3 12 17547.6 1308.33 5
 3 3 13 3315.46 815.414 5
 3 3 14 36720.1 2077.9 5
 3 3 15 12460.6 1386 5
 3 3 16 471.242 854.688 5
 3 3 17 -808.088 1120.92 5
 3 4 -4 41418.2 1190.77 4
 3 4 -3 2170.97 222.753 4
 3 4 -2 177178 3593.52 4
 3 4 -1 1308.34 423 7
 3 4 -1 1094.61 138.061 4
 3 4 0 7976.15 596.785 1
 3 4 0 7842.96 608.095 7
 3 4 1 14926 775.454 1
 3 4 1 15094.6 746.181 7
 3 4 2 22493.3 952.534 1
 3 4 2 22151.4 903.226 7
 3 4 3 60690.7 1708.49 6
 3 4 3 62702.2 1831.79 1
 3 4 3 60776.4 1744.94 7
 3 4 4 51912.3 1485.16 5
 3 4 4 53536.3 1675.74 1
 3 4 4 54000.2 1648.06 6
 3 4 4 55204.7 1677.14 7
 3 4 5 176827 4186.43 6
 3 4 5 176189 4132.56 1
 3 4 5 174313 3925.22 5
 3 4 5 176243 4195.93 7
 3 4 6 162107 3764.31 5
 3 4 7 110558 2881.97 5
 3 4 8 184283 4433.02 5
 3 4 9 18703.8 1081.78 5
 3 4 10 1237.3 566.287 5
 3 4 11 2446.34 658.586 5
 3 4 12 12735.4 1124.96 5
 3 4 13 3709.96 912.089 5
 3 4 14 7476.77 1051.36 5
 3 4 15 27772.6 1930.77 5
 3 4 16 12203 1539.04 5
 3 4 17 1243.58 1031.43 5
 3 5 -4 168163 3699.04 4
 3 5 -3 35919.8 1080.9 4
 3 5 -2 44696.6 1209.93 4
 3 5 -1 107990 3026.99 1
 3 5 -1 111421 2442.23 4
 3 5 -1 108735 3014.31 7
 3 5 0 5233.36 510.166 7
 3 5 0 4649.74 310.505 4
 3 5 0 5876.19 580.986 1
 3 5 1 268605 5872.91 1
 3 5 1 259247 5618.63 7
 3 5 2 18380.6 929.364 1
 3 5 2 18139.8 798.842 7
 3 5 3 141903 3287.3 6
 3 5 3 142292 3336.19 7
 3 5 3 145027 3541.36 1
 3 5 4 557726 11331.4 6
 3 5 4 571070 11391.3 7
 3 5 4 570430 11551 1
 3 5 5 27039.2 1099.12 5
 3 5 5 29033.8 1258.56 1
 3 5 5 26953.4 1181 7
 3 5 6 65946.3 2002.18 5
 3 5 7 3151.93 503.607 5
 3 5 8 133885 3528.21 5
 3 5 9 85052.3 2649.93 5
 3 5 10 2194.98 643.988 5
 3 5 11 42098 1934.85 5
 3 5 12 4888.63 847.718 5
 3 5 13 10140.9 1175.22 5
 3 5 14 -178.151 798.146 5
 3 5 15 3324.84 947.085 5
 3 5 16 20743.5 1880.71 5
 3 5 17 5420.35 1292.51 5
 3 6 -3 81168.8 2072.64 4
 3 6 -2 115072 3356.72 1
 3 6 -2 112792 2642.8 4
 3 6 -2 113666 3242.81 7
 3 6 -1 493.92 213.27 4
 3 6 -1 419.721 290.958 7
 3 6 -1 -134.123 390.905 1
 3 6 0 137360 3648.25 1
 3 6 0 140499 3104.83 4
 3 6 0 135110 3339.65 7
 3 6 1 34587.1 1456.31 1
 3 6 1 35937.2 1210.08 7
 3 6 2 9481.97 562.195 7
 3 6 2 8556.01 716.639 1
 3 6 3 92582.1 2303.73 6
 3 6 3 94156.2 2381.64 7
 3 6 3 91177.5 2685.14 1
 3 6 4 534443 10697 6
 3 6 4 535523 10771.9 7
 3 6 4 531145 11059.1 1
 3 6 5 421021 9026.99 1
 3 6 6 46340.3 1778.79 1
 3 6 6 44989.8 1653.8 5
 3 6 7 4363.27 573.232 5
 3 6 8 22094 1203.76 5
 3 6 9 94979 2967.56 5
 3 6 10 54693.1 2171.07 5
 3 6 11 30662.2 1683.33 5
 3 6 12 13743.1 1242.66 5
 3 6 13 346.391 731.424 5
 3 6 14 2760.68 953.955 5
 3 6 15 902.675 1000.23 5
 3 6 16 15611.3 1707.85 5
 3 6 17 20647.1 1895.64 5
 3 7 -4 1642.94 688.859 1
 3 7 -3 8357.87 845.579 7
 3 7 -3 8495.39 948.354 1
 3 7 -2 56530.4 2045.2 7
 3 7 -2 63079.1 2322.73 1
 3 7 -1 19027.9 980.952 7
 3 7 -1 17849.5 1168.11 1
 3 7 0 15950.5 789.033 7
 3 7 0 17580.3 1111.26 1
 3 7 1 40003 1280.62 7
 3 7 1 41808.8 1711.56 1
 3 7 2 18031 787.632 7
 3 7 2 18878.3 1120.66 1
 3 7 3 85240.3 2199.06 7
 3 7 3 83696 2124.13 6
 3 7 3 87217.4 2665.24 1
 3 7 4 91201.9 2775.42 1
 3 7 4 89659.7 2415.92 7
 3 7 5 183136 4629.67 1
 3 7 6 53613.9 2029.65 1
 3 7 7 5775.63 667.299 5
 3 7 8 795.829 530.615 5
 3 7 9 35574.1 1693.27 5
 3 7 10 55387.2 2268.78 5
 3 7 11 556.964 674.037 5
 3 7 12 18059.5 1375.56 5
 3 7 13 24750.2 1725.56 5
 3 7 14 3345.18 965.135 5
 3 7 15 1863.62 968.329 5
 3 7 16 2572.5 1161.48 5
 3 7 17 16617.2 1860.14 5
 3 8 -6 90871.6 3571.31 1
 3 8 -5 59375.7 2677.87 1
 3 8 -4 806.321 704.469 1
 3 8 -4 354.06 483.085 7
 3 8 -3 1652.96 528.519 7
 3 8 -3 1877.04 727.304 1
 3 8 -2 19073.5 1091.2 7
 3 8 -2 20397.1 1371.38 1
 3 8 -1 32318.9 1647.66 1
 3 8 -1 30377.1 1220.73 7
 3 8 0 470.576 230.353 7
 3 8 0 394.012 523.816 1
 3 8 1 16182.5 714.098 7
 3 8 1 14650.3 1077.82 1
 3 8 2 73831.3 1821.35 6
 3 8 2 71921.4 2563.99 1
 3 8 2 74208.5 1895.91 7
 3 8 3 13626.2 638.404 6
 3 8 3 15091.5 725.618 7
 3 8 3 14943.8 1063.18 1
 3 8 4 10591.4 916.203 1
 3 8 5 14921.4 1076.49 1
 3 8 6 122571 3590.92 1
 3 8 7 21210.9 1320.81 1
 3 8 9 2863.74 668.601 5
 3 8 10 2127.79 710.509 5
 3 8 11 27812 1732.37 5
 3 8 12 1046.23 764.53 5
 3 8 13 31321.4 1952.11 5
 3 8 14 12383 1379.48 5
 3 8 15 1248.21 924.106 5
 3 8 16 -691.479 1022.34 5
 3 8 17 1209.14 1238.86 5
 3 9 -9 3886.32 1303.03 1
 3 9 -8 1226.8 967.562 1
 3 9 -7 481.927 865.718 1
 3 9 -6 11938.6 1410.79 1
 3 9 -5 94773.9 3657.15 1
 3 9 -4 78630.8 3154.83 1
 3 9 -3 3110.88 812.075 1
 3 9 -2 3238.2 485.592 7
 3 9 -2 1845.45 731.018 1
 3 9 -1 24518.5 1014.19 7
 3 9 -1 26904.9 1612.09 1
 3 9 0 25125.7 918.051 7
 3 9 0 24262 1520.95 1
 3 9 1 5191.26 784.922 1
 3 9 1 5493.21 377.092 7
 3 9 2 84500.4 2861.2 1
 3 9 2 81717.6 1951.74 7
 3 9 3 93248.6 3078.31 1
 3 9 4 8726.9 933.949 1
 3 9 5 15519.6 1177.13 1
 3 9 6 12789.9 1098.12 1
 3 9 7 58672.8 2367.34 1
 3 9 10 1905.48 754.018 5
 3 9 11 10998.4 1170.95 5
 3 9 12 15202 1405.71 5
 3 9 13 -199.31 739.193 5
 3 9 14 9613.83 1395.57 5
 3 9 15 11299.1 1523.67 5
 3 9 16 -664.714 945.003 5
 3 9 17 2187.23 1260.75 5
 3 10 -8 6519.26 1416.46 1
 3 10 -7 4470.47 1297.6 1
 3 10 -6 -1273.63 903.033 1
 3 10 -5 8814.35 1290.1 1
 3 10 -4 57524.7 2738.02 1
 3 10 -3 38766.9 2195.72 1
 3 10 -2 15173.7 1360.84 1
 3 10 -1 8426.91 1065.81 1
 3 10 0 16813.9 1365.14 1
 3 10 1 14849.4 1242.4 1
 3 10 2 5045.38 880.192 1
 3 10 3 92288.6 3187.1 1
 3 10 4 92660.7 3215.35 1
 3 10 5 3394.69 720.417 1
 3 10 6 8208.59 965.449 1
 3 10 7 36946.4 1934.59 1
 3 10 8 81595 3050.49 1
 3 10 12 6620.05 1100.94 5
 3 10 13 3703.03 941.161 5
 3 10 14 -560.452 1041.38 5
 3 10 15 17726 1771.02 5
 3 10 16 3764.8 1209.72 5
 3 11 -7 3264.07 1153.71 1
 3 11 -6 5452.91 1281.37 1
 3 11 -5 -45.8221 836.989 1
 3 11 -4 7435.89 1218.13 1
 3 11 -3 60108.3 2838.43 1
 3 11 -2 4109.45 988.526 1
 3 11 -1 29438.6 1898.59 1
 3 11 0 464.879 714.044 1
 3 11 1 5079.9 897.601 1
 3 11 2 8642.99 1054.86 1
 3 11 3 31364.6 1861.95 1
 3 11 4 104755 3592.76 1
 3 11 5 10692.1 1123.55 1
 3 11 6 19012.9 1421.4 1
 3 11 7 4543.38 898.655 1
 3 11 8 25678.6 1662.22 1
 3 11 14 4779.36 1034.6 5
 3 11 15 -609.129 1127 5
 3 11 16 16954.3 1923.67 5
 3 12 -6 92.1508 986.491 1
 3 12 -5 7493.87 1391.52 1
 3 12 -4 -797.779 1027.08 1
 3 12 -3 32352.7 2178.37 1
 3 12 -2 31981 2125.17 1
 3 12 -1 1550.75 817.039 1
 3 12 0 37313.9 2213.9 1
 3 12 1 1813.48 757.626 1
 3 12 2 35049.4 2079.76 1
 3 12 3 6155.38 1006.73 1
 3 12 4 45464.5 2334.24 1
 3 12 5 10382.4 1186.07 1
 3 12 6 2106.27 868.566 1
 3 12 7 7558.06 1034.33 1
 3 12 8 3029.47 849.772 1
 3 13 -5 159.389 1125.91 1
 3 13 -4 1652.17 1172.91 1
 3 13 -3 3846.3 1205.97 1
 3 13 -2 28980.5 2120.84 1
 3 13 -1 16083.7 1609.64 1
 3 13 0 1355.54 927.694 1
 3 13 1 35533.2 2215.58 1
 3 13 2 284.885 690.512 1
 3 13 3 26478.4 1855.13 1
 3 13 4 -560.383 745.982 1
 3 13 5 23908.2 1810.29 1
 3 13 6 5481.95 1063.51 1
 3 13 7 1108.71 752.365 1
 3 13 8 1751.27 845.058 1
 3 13 9 2002.36 900.149 1
 3 14 -3 6895.68 1436.38 1
 3 14 -2 6109.7 1358.59 1
 3 14 -1 16870.5 1788.43 1
 3 14 0 1594.9 977.916 1
 3 14 1 10355.4 1381.66 1
 3 14 2 24745.1 1968.49 1
 3 14 3 2436.41 984.482 1
 3 14 4 1227.53 909.809 1
 3 14 5 9293.5 1248.06 1
 3 14 6 27081.3 1995.22 1
 3 14 7 18104.6 1617.56 1
 3 14 8 383.709 864.22 1
 3 14 9 5860.29 1174.07 1
 3 15 -2 6264.24 1494.13 1
 3 15 -1 2378.3 980.176 1
 3 15 0 15935.4 1757.11 1
 3 15 1 732.577 1006.93 1
 3 15 2 19211.1 1875.45 1
 3 15 3 24078.1 1999.21 1
 3 15 4 3572.38 1069.99 1
 3 15 5 780.371 839.366 1
 3 15 6 9848.78 1294.52 1
 3 15 7 29138.3 2121.36 1
 3 15 8 4658.29 1171.27 1
 3 15 9 1685.53 913.03 1
 3 16 1 12515.7 1639.51 1
 3 16 2 1708.09 939.799 1
 3 16 3 20562.6 1961.86 1
 3 16 4 15667.6 1740.39 1
 3 16 5 4047.03 1231.65 1
 3 16 6 -1294.35 1111.72 1
 3 16 7 8532.42 1420.08 1
 3 16 8 33832.6 2422.87 1
 3 16 9 4857.34 1324.01 1
 3 17 5 10466.3 1655.89 1
 3 17 6 773.348 978.008 1
 4 -15 -6 6180.28 1357.39 4
 4 -15 -5 16719.2 1817.81 4
 4 -15 -4 16283.9 1836.21 4
 4 -15 -3 1077.93 977.241 4
 4 -15 -2 1173.36 911.886 4
 4 -15 -1 3353.24 1131.01 4
 4 -15 0 5941.95 1274.83 4
 4 -15 1 2073.28 1029.62 4
 4 -15 2 18206.2 1843.22 4
 4 -15 3 8250.41 1383.07 4
 4 -15 4 -375.569 864.72 4
 4 -14 -8 5831.47 1437.5 4
 4 -14 -7 614.125 1069.09 4
 4 -14 -6 979.949 1099.61 4
 4 -14 -5 23494.1 2047.8 4
 4 -14 -4 24671.2 2031.18 4
 4 -14 -3 6636.97 1320.34 4
 4 -14 -2 4789.16 1111.84 4
 4 -14 -1 2873.04 1045.53 4
 4 -14 0 4265.62 1161.84 4
 4 -14 1 -746.207 938.105 4
 4 -14 2 9801.35 1311.56 4
 4 -14 3 21841.3 1862.73 4
 4 -14 4 4263.66 964.75 4
 4 -14 5 560.049 882.085 4
 4 -14 6 590.119 783.216 4
 4 -14 7 7850.29 1322.74 4
 4 -13 -10 725.977 1211.1 4
 4 -13 -9 6229.27 1287.74 4
 4 -13 -8 18976.3 1885.94 4
 4 -13 -7 3504.49 1021.5 4
 4 -13 -6 5533.16 1278.25 4
 4 -13 -5 3248.4 953.274 4
 4 -13 -4 30741.1 2159.27 4
 4 -13 -3 26015.1 1995.5 4
 4 -13 -2 -187.484 732.192 4
 4 -13 -1 12251.6 1442.15 4
 4 -13 0 100.953 761.921 4
 4 -13 1 1407.24 932.269 4
 4 -13 2 1969.82 986.941 4
 4 -13 3 16787.8 1533.52 4
 4 -13 4 29163.3 1969.78 4
 4 -13 5 7059.13 1129.11 4
 4 -13 6 -1989 1090.35 2
 4 -13 6 29.0826 804.728 4
 4 -13 7 838.575 837.857 4
 4 -12 -11 638.02 1039.76 4
 4 -12 -10 2726.68 1098.95 4
 4 -12 -9 -172.822 1082.77 4
 4 -12 -8 30139.5 2267.78 4
 4 -12 -7 43787.5 2637.55 4
 4 -12 -6 3244.33 937.336 4
 4 -12 -5 2881.13 1022.25 4
 4 -12 -4 1634.4 869.995 4
 4 -12 -3 27188.9 1937.96 4
 4 -12 -2 16734.6 1526.87 4
 4 -12 -1 426.631 717.962 4
 4 -12 0 15541.7 1466.22 4
 4 -12 1 2453.35 855.162 4
 4 -12 2 48.4463 806.556 4
 4 -12 3 511.46 648.61 4
 4 -12 4 28903 1879.97 4
 4 -12 5 29702.1 1895.74 4
 4 -12 6 1349.21 766.53 2
 4 -12 6 2288.25 877.239 4
 4 -12 7 -309.197 805.978 2
 4 -12 7 -151.119 740.562 4
 4 -11 -12 4831.75 1438.52 4
 4 -11 -11 10529.6 1679.27 4
 4 -11 -10 -556.472 1048.58 4
 4 -11 -9 4298.79 1109.18 4
 4 -11 -8 3125.39 994.292 4
 4 -11 -7 39317.1 2347.62 4
 4 -11 -6 49974.9 2658.98 4
 4 -11 -5 2114.19 915.354 4
 4 -11 -4 8690.87 1175.7 4
 4 -11 -3 5384.82 1059.28 4
 4 -11 -2 31560.8 1936.83 4
 4 -11 -1 -217.119 691.774 4
 4 -11 0 1257.34 760.941 4
 4 -11 1 35565.6 2046.05 4
 4 -11 2 7858.5 1040.92 4
 4 -11 3 4308.7 865.345 4
 4 -11 4 332.397 663.456 4
 4 -11 5 47592 2342.94 4
 4 -11 6 29126.7 1901.68 2
 4 -11 6 26860.7 1748.35 4
 4 -11 7 -372.852 770.025 2
 4 -11 7 -565.576 714.372 4
 4 -11 8 1265.59 811.893 2
 4 -11 9 -258.583 792.997 2
 4 -10 -13 6836.73 1413.13 4
 4 -10 -12 756.521 1155.78 4
 4 -10 -11 10833.7 1519.11 4
 4 -10 -10 13405 1585 4
 4 -10 -9 -192.325 925.702 4
 4 -10 -8 888.43 909.056 4
 4 -10 -7 10178.2 1284.48 4
 4 -10 -6 59392.2 2768.8 4
 4 -10 -5 40951.9 2247.52 4
 4 -10 -4 1786.39 811.495 4
 4 -10 -4 2058.13 631.137 7
 4 -10 -3 17154.5 1405.62 4
 4 -10 -3 15601.8 1182.16 7
 4 -10 -2 3188.49 787.97 4
 4 -10 -1 55587.1 2522.34 4
 4 -10 0 -464.738 605.101 4
 4 -10 1 51447.6 2383.01 4
 4 -10 2 67094.7 2748.13 4
 4 -10 3 3685.7 810.798 4
 4 -10 4 31453 1791.32 4
 4 -10 5 391.933 574.993 4
 4 -10 6 40161.4 2057.67 4
 4 -10 6 45612.8 2255.54 2
 4 -10 7 9449.79 1100.44 4
 4 -10 7 10045.5 1197.45 2
 4 -10 8 729.108 794.613 2
 4 -10 9 1812.73 946.672 2
 4 -10 10 832.613 895.299 2
 4 -9 -14 219.588 1260.55 4
 4 -9 -13 1980.48 1244.76 4
 4 -9 -12 6052.71 1265.48 4
 4 -9 -11 964.333 1062.64 4
 4 -9 -10 30016 2146.13 4
 4 -9 -9 17404.4 1653.06 4
 4 -9 -8 1751.37 841.395 4
 4 -9 -7 4694.47 936.902 4
 4 -9 -6 12749 1338.58 4
 4 -9 -5 64471.4 2756.93 4
 4 -9 -4 26901.3 1707.47 4
 4 -9 -3 -430.06 609.873 4
 4 -9 -3 614.12 517.805 7
 4 -9 -2 39482.5 2023.62 4
 4 -9 -2 40152.8 1779.69 7
 4 -9 -1 3066.49 515.441 7
 4 -9 -1 3689.87 736.081 4
 4 -9 0 52447.2 1674.37 7
 4 -9 0 50328.2 2242.55 4
 4 -9 1 12357.8 1133.43 4
 4 -9 2 158482 4586.96 4
 4 -9 3 31733.4 1741.15 4
 4 -9 4 13583.4 1201.7 4
 4 -9 5 41680.7 1993.44 4
 4 -9 6 -425.849 665.184 2
 4 -9 6 -367.58 591.247 4
 4 -9 7 24627.3 1680.06 2
 4 -9 7 25091.5 1571.57 4
 4 -9 8 10671.4 1259.98 2
 4 -9 9 4506.88 998.598 2
 4 -9 10 8163 1220.93 2
 4 -9 11 1204.05 897.87 2
 4 -8 -14 3258.83 1277.49 4
 4 -8 -13 5551.4 1347.18 4
 4 -8 -12 -795.441 1035.56 4
 4 -8 -11 6473.66 1241.25 4
 4 -8 -10 1429.84 816 4
 4 -8 -9 45217.5 2463.19 4
 4 -8 -8 4870.24 972.145 4
 4 -8 -7 20576.3 1568.33 4
 4 -8 -6 1601.14 668.977 4
 4 -8 -5 4407.49 807.254 4
 4 -8 -4 81081.8 2954.41 4
 4 -8 -3 60152.3 2422.5 4
 4 -8 -3 54641.1 2334.15 7
 4 -8 -2 26199.3 1430.42 7
 4 -8 -2 24906.4 1495.5 4
 4 -8 -1 27317.9 1585.22 4
 4 -8 -1 26135.8 1306.81 7
 4 -8 0 13543.7 1123.17 4
 4 -8 0 13867.3 835.797 7
 4 -8 1 21649.8 1369.1 4
 4 -8 1 22707.2 964.666 7
 4 -8 2 33606.6 1712.16 4
 4 -8 2 33865.5 1238.55 6
 4 -8 2 33882.3 1173.55 7
 4 -8 3 158173 4467.13 4
 4 -8 3 167355 3782.3 7
 4 -8 3 162089 3875.46 6
 4 -8 4 7310.34 854.629 4
 4 -8 5 41549.8 1908.34 4
 4 -8 6 5128.06 855.952 2
 4 -8 6 4723.43 766.423 4
 4 -8 7 11679.3 1152.78 2
 4 -8 7 13855.6 1189.66 4
 4 -8 8 47979.3 2282.08 2
 4 -8 9 -9.99314 689.873 2
 4 -8 10 17420.4 1522.17 2
 4 -8 11 6674.16 1200.49 2
 4 -8 12 -272.27 929.146 2
 4 -7 -14 1019.03 1131.23 4
 4 -7 -13 6788.05 1276.2 4
 4 -7 -12 5423.66 1255.52 4
 4 -7 -11 -356.924 816.232 4
 4 -7 -10 4516.59 998.499 4
 4 -7 -9 19876.3 1561.46 4
 4 -7 -8 37354 2054.55 4
 4 -7 -7 -8.60032 689.858 4
 4 -7 -6 6879.14 960 4
 4 -7 -5 6386 924.377 4
 4 -7 -4 3665.9 701.733 4
 4 -7 -3 131479 3894.53 4
 4 -7 -2 2423.41 627.162 4
 4 -7 -2 2426.91 533.115 7
 4 -7 -1 63771.8 2241.16 7
 4 -7 -1 66214.5 2400.47 4
 4 -7 0 11883.6 794.671 7
 4 -7 0 12906.2 1026.33 4
 4 -7 1 2600.81 381.158 7
 4 -7 1 3011.54 639.385 4
 4 -7 2 20346.3 1207.5 4
 4 -7 2 19861 888.122 7
 4 -7 2 17563.9 888.681 6
 4 -7 3 73732.1 2597.45 4
 4 -7 3 76729.4 2211.98 6
 4 -7 3 79740.1 2148.44 7
 4 -7 4 109190 3320.16 4
 4 -7 5 5500.86 722.448 4
 4 -7 6 19376.9 1278.92 2
 4 -7 6 20035.4 1268.31 4
 4 -7 7 3873.58 753.917 4
 4 -7 7 2401.4 698.312 2
 4 -7 8 47652.9 2178.25 2
 4 -7 9 37378.7 1971.27 2
 4 -7 10 497.82 707.199 2
 4 -7 11 13554.2 1380.34 2
 4 -7 12 6305.79 1215.43 2
 4 -7 13 -1509.98 1121.22 5
 4 -6 -13 2824.15 1065.5 4
 4 -6 -12 14148.9 1525.33 4
 4 -6 -11 14686 1457.56 4
 4 -6 -10 5901.17 1044.12 4
 4 -6 -9 2556.67 742.349 4
 4 -6 -8 49975.1 2291.89 4
 4 -6 -7 24411.5 1539.82 4
 4 -6 -6 12955.1 1131.38 4
 4 -6 -5 50593.6 2118.67 4
 4 -6 -4 8800.56 882.448 4
 4 -6 -3 61020.7 2268.83 4
 4 -6 -2 34622 1596.59 4
 4 -6 -2 31796.5 1635.37 7
 4 -6 -1 12417 970.545 4
 4 -6 -1 13053.6 954.243 7
 4 -6 0 273760 6261.41 7
 4 -6 0 279780 6463.62 4
 4 -6 1 43158 1775.94 4
 4 -6 1 45270 1553.02 7
 4 -6 2 875.579 272.307 7
 4 -6 2 733.715 407.096 4
 4 -6 3 1859.7 355.103 7
 4 -6 3 1537.53 348.959 6
 4 -6 3 1499.37 507.935 4
 4 -6 4 103641 3095.18 4
 4 -6 4 105056 2853.19 6
 4 -6 4 103192 2744.86 7
 4 -6 5 108809 3203.08 4
 4 -6 6 7851.25 854.651 2
 4 -6 6 9215.32 873.744 4
 4 -6 7 13266.7 1076.62 2
 4 -6 8 459.667 605.772 2
 4 -6 9 21059.3 1458.28 2
 4 -6 10 25253.9 1673.51 2
 4 -6 11 -560.497 787.073 2
 4 -6 12 9148.55 1251.15 2
 4 -6 13 7011.95 1154.89 5
 4 -5 -13 1367.77 843.9 4
 4 -5 -12 5300.46 1077.31 4
 4 -5 -11 30274.6 1952.73 4
 4 -5 -10 42.5 696.781 4
 4 -5 -9 5678.65 980.627 4
 4 -5 -8 2026.55 693.945 4
 4 -5 -7 43152.5 2001.44 4
 4 -5 -6 46859.2 2000.48 4
 4 -5 -5 14217.4 1063.14 4
 4 -5 -4 12284.3 938.313 4
 4 -5 -3 3289.19 570.064 4
 4 -5 -2 77110 2458.85 4
 4 -5 -1 177696 4654.87 7
 4 -5 -1 180745 4487.21 4
 4 -5 0 1263.2 412.472 7
 4 -5 0 1187.78 411.896 4
 4 -5 1 248389 5790.56 4
 4 -5 1 251628 5615.28 7
 4 -5 2 184009 4499.58 4
 4 -5 2 180582 4225.88 7
 4 -5 3 1277 322.19 6
 4 -5 3 2000.92 482.374 4
 4 -5 3 1118.26 320.193 7
 4 -5 4 4313.65 514.068 6
 4 -5 4 3802.95 576.19 4
 4 -5 4 3784.29 462.593 7
 4 -5 5 108323 3050.08 2
 4 -5 5 103656 3045.84 4
 4 -5 5 104478 2923.95 7
 4 -5 6 116894 3303.6 4
 4 -5 6 114467 3335.62 2
 4 -5 7 231.003 488.398 2
 4 -5 8 15343.7 1131.3 2
 4 -5 9 940.569 575.657 2
 4 -5 10 8983.73 1029.2 2
 4 -5 11 11847.7 1214.1 2
 4 -5 13 20548.2 1697.08 5
 4 -5 14 12970.7 1492.66 5
 4 -4 -12 2529.65 877.711 4
 4 -4 -11 23982.9 1672.09 4
 4 -4 -10 24399.4 1594.32 4
 4 -4 -9 4698.04 824.874 4
 4 -4 -8 -29.9319 584.354 4
 4 -4 -7 992.029 552.133 4
 4 -4 -6 42829.8 1824.84 4
 4 -4 -5 147993 3968.58 4
 4 -4 -4 4408.56 659.307 4
 4 -4 -3 2614.05 505.067 4
 4 -4 -2 99632 2822.08 4
 4 -4 -1 229906 5657.23 7
 4 -4 -1 230817 5315.13 4
 4 -4 0 61867.1 1965.58 4
 4 -4 0 59932.1 1710.12 1
 4 -4 0 60678.6 2083.21 7
 4 -4 1 39005.3 1445.36 7
 4 -4 1 37823.1 1421.67 4
 4 -4 1 34220.7 1117.45 1
 4 -4 2 476170 9695.93 1
 4 -4 2 491098 10202.7 4
 4 -4 2 496472 10115.4 7
 4 -4 3 246939 5510.8 4
 4 -4 3 235087 5329.1 7
 4 -4 4 2031.7 379.173 7
 4 -4 4 2722.38 426.369 6
 4 -4 4 2716.1 470.069 4
 4 -4 5 1318.61 387.445 2
 4 -4 5 1165.65 359.616 7
 4 -4 5 1325.49 397.22 6
 4 -4 5 1348.89 416.013 4
 4 -4 6 91442.4 2736.34 4
 4 -4 6 92465.4 2735 2
 4 -4 7 62287.6 2200.59 2
 4 -4 8 509.355 539.915 2
 4 -4 9 44469.1 1944.51 2
 4 -4 10 6345.52 898.957 2
 4 -4 11 7324.97 986.86 2
 4 -4 12 10098.4 1104.44 5
 4 -4 13 5918.21 1106.23 5
 4 -4 14 33473.8 2121.4 5
 4 -3 -11 169.201 694.913 4
 4 -3 -10 66354.9 2647.91 4
 4 -3 -9 58283.6 2336.67 4
 4 -3 -8 41501.2 1864.01 4
 4 -3 -7 15566.2 1065.38 4
 4 -3 -6 8663.01 786.828 4
 4 -3 -5 120155 3270.76 4
 4 -3 -4 227802 5278.53 4
 4 -3 -3 16055.9 920.365 4
 4 -3 -2 140038 3498.42 4
 4 -3 -1 44519.8 1500.32 4
 4 -3 -1 44008.6 1812.56 7
 4 -3 -1 40840.3 1338.87 1
 4 -3 0 135269 2957.95 1
 4 -3 0 130433 3526.78 7
 4 -3 1 71784.9 2094.19 4
 4 -3 1 73353.3 2223.88 7
 4 -3 1 74738.6 1760.36 1
 4 -3 2 463417 9559.29 4
 4 -3 2 465875 9584.83 7
 4 -3 3 553166 11224.5 4
 4 -3 3 545929 11199 7
 4 -3 4 51929.1 1718.46 6
 4 -3 4 51103.8 1724.2 4
 4 -3 4 48531.9 1634.66 2
 4 -3 4 53384.1 1716.45 7
 4 -3 5 4565.36 547.056 2
 4 -3 5 4761.95 538.974 7
 4 -3 5 4887.48 536.86 6
 4 -3 5 4822.67 560.153 4
 4 -3 6 9231.84 746.964 2
 4 -3 6 7605.14 736.144 7
 4 -3 7 95027.2 2792.45 2
 4 -3 8 87002.3 2728.83 2
 4 -3 9 414.757 526.308 2
 4 -3 10 51383.5 2148.69 2
 4 -3 11 6575.23 895.199 5
 4 -3 12 27127.2 1681.85 5
 4 -3 13 4137.55 897.333 5
 4 -3 14 17938.8 1571.77 5
 4 -3 15 28087.8 2020.27 5
 4 -2 -11 12174 1148.97 4
 4 -2 -10 123.788 549.822 4
 4 -2 -9 111410 3398.99 4
 4 -2 -8 49946.7 1992.4 4
 4 -2 -7 3951.37 631.612 4
 4 -2 -6 1747.47 421.901 4
 4 -2 -5 5429.57 589.567 4
 4 -2 -4 143032 3541.63 4
 4 -2 -3 47897.1 1571.6 4
 4 -2 -2 33011.8 1212.6 4
 4 -2 -1 197769 4331.13 4
 4 -2 -1 186153 4886.21 7
 4 -2 0 5398.95 584.932 7
 4 -2 0 4972.62 429.234 4
 4 -2 1 318651 6632.45 4
 4 -2 1 316503 6959.62 7
 4 -2 1 319195 6210.99 1
 4 -2 2 41686.5 1356.07 4
 4 -2 2 42550.1 1484.44 7
 4 -2 3 300951 6380.79 4
 4 -2 3 302091 6502.31 7
 4 -2 4 539916 10986.5 6
 4 -2 4 545819 10862.5 4
 4 -2 4 523856 10938.4 7
 4 -2 4 537466 10752.4 2
 4 -2 5 70096.8 2040.66 2
 4 -2 5 68722.2 2179.61 6
 4 -2 5 69983.1 2167 7
 4 -2 6 1428 394.688 7
 4 -2 6 2548.7 466.274 2
 4 -2 6 1422.09 421.603 6
 4 -2 7 880.773 416.111 2
 4 -2 8 194692 4817.34 2
 4 -2 9 49821.3 1950.61 2
 4 -2 10 13140.2 1038.45 5
 4 -2 11 48883.6 2096.67 5
 4 -2 12 1964.33 772.714 5
 4 -2 13 11062.5 1211.5 5
 4 -2 14 13.1206 831.864 5
 4 -2 15 25122.9 1820.73 5
 4 -1 -10 19476.4 1291.33 4
 4 -1 -9 10848.5 941.446 4
 4 -1 -8 94756.6 2890.8 4
 4 -1 -7 127343 3433.95 4
 4 -1 -6 17030.8 952.92 4
 4 -1 -5 15824.6 865.277 4
 4 -1 -4 35443.4 1274.36 4
 4 -1 -3 376687 7738.15 4
 4 -1 -2 13845.5 671.669 4
 4 -1 -1 117195 2725.95 4
 4 -1 -1 116310 3380.19 7
 4 -1 0 273860 5775.67 4
 4 -1 0 285631 5742.61 5
 4 -1 0 280298 6433.32 7
 4 -1 1 29613.3 1004.2 4
 4 -1 1 30816.2 1283.63 7
 4 -1 2 6718.29 468.407 4
 4 -1 2 6513.56 547.519 7
 4 -1 3 274682 5803.31 4
 4 -1 3 277350 6040.61 7
 4 -1 3 275464 5654.6 2
 4 -1 4 122102 3106.94 6
 4 -1 4 119759 2831.1 2
 4 -1 4 119119 3096.84 7
 4 -1 5 180532 4162.84 2
 4 -1 5 188025 4456.37 6
 4 -1 5 187017 4432.4 7
 4 -1 6 41811.4 1444.44 2
 4 -1 6 37715.5 1579.58 6
 4 -1 6 38124.2 1564.43 7
 4 -1 7 89300.5 2526.58 2
 4 -1 9 97470.4 2870.88 5
 4 -1 10 4136.21 663.809 5
 4 -1 11 22797.7 1372.88 5
 4 -1 12 21091.8 1409.24 5
 4 -1 13 1982.9 742.626 5
 4 -1 14 10191.1 1215.38 5
 4 -1 15 772.522 907.379 5
 4 -1 16 14937.7 1551.6 5
 4 0 -9 69.7826 443.772 4
 4 0 -8 48554.3 1818.43 4
 4 0 -7 93799.2 2669.11 4
 4 0 -6 40622.6 1464.86 4
 4 0 -5 22788.7 972.626 4
 4 0 -4 885.257 266.559 4
 4 0 -3 130315 2970.28 4
 4 0 -2 271011 5543.27 4
 4 0 -1 17587.5 653.168 5
 4 0 -1 15926.3 1044.82 7
 4 0 -1 16829.8 634.605 4
 4 0 0 183122 4688.09 7
 4 0 0 187854 3963.96 4
 4 0 0 196474 3919.51 5
 4 0 1 76743.7 2280.7 7
 4 0 1 75305.5 1823.29 4
 4 0 1 76724.9 1717.45 5
 4 0 2 13610.3 783.679 7
 4 0 2 14544.2 605.194 4
 4 0 2 14454.1 483.281 2
 4 0 3 6129.48 353.578 2
 4 0 3 5747.87 522.578 7
 4 0 4 19761.5 964.35 6
 4 0 4 19089.7 746.036 2
 4 0 4 19392 953.126 7
 4 0 5 29249.8 1044.49 2
 4 0 5 29457 1273.16 6
 4 0 5 28713.7 1233.26 7
 4 0 6 35518.9 1483.4 7
 4 0 6 32975.2 1465.49 6
 4 0 7 65149.7 1941.7 5
 4 0 8 36963.3 1453.08 5
 4 0 9 1692.13 455.869 5
 4 0 10 61055 2189.59 5
 4 0 11 5536.6 788.164 5
 4 0 12 17073.1 1260.89 5
 4 0 13 8661.91 1053.79 5
 4 0 14 9487.89 1171.17 5
 4 0 15 2470.02 965.825 5
 4 0 16 1526.44 1010.14 5
 4 1 -6 118583 2970.29 4
 4 1 -5 7612.82 542.184 4
 4 1 -4 35085.6 1121 4
 4 1 -3 64795.5 1602.81 4
 4 1 -2 115980 2521.05 2
 4 1 -2 115657 2489.46 4
 4 1 -1 141307 2838.47 2
 4 1 -1 141715 3027.74 5
 4 1 -1 139506 2867.47 4
 4 1 -1 138245 3839.99 7
 4 1 0 31452.9 816.728 4
 4 1 0 32166.6 834.564 5
 4 1 0 30834.2 1381.53 7
 4 1 1 155076 3195.69 4
 4 1 1 163779 3891.15 7
 4 1 2 42723 1495.86 7
 4 1 2 40974.2 1042.22 1
 4 1 3 12960.4 754.771 7
 4 1 3 12672.3 467.371 1
 4 1 4 1089.74 319.514 7
 4 1 5 322.533 283.7 7
 4 1 5 1078.93 331.636 6
 4 1 5 594.954 199.23 5
 4 1 6 161065 3571.94 5
 4 1 6 151645 4029.24 6
 4 1 6 158872 4039.94 7
 4 1 7 13912.2 773.229 5
 4 1 7 13240.3 939.12 7
 4 1 8 6051.77 596.65 5
 4 1 9 18649.5 1059.7 5
 4 1 10 2325.65 590.109 5
 4 1 11 24378.8 1400.78 5
 4 1 12 886.612 617.975 5
 4 1 13 32256.3 1809.09 5
 4 1 14 14576.5 1350.36 5
 4 1 15 1692.89 778.952 5
 4 1 16 1858.02 954.735 5
 4 1 17 1899.49 1076.89 5
 4 2 -4 7873.1 440.503 4
 4 2 -3 17362 577.708 4
 4 2 -2 3587.64 187.222 4
 4 2 -1 52234 1988.12 7
 4 2 0 33447.6 1444.22 7
 4 2 1 9422.11 495.462 1
 4 2 1 9058.11 682.068 7
 4 2 2 15672.6 624.061 1
 4 2 2 16326.4 869.767 7
 4 2 3 19886.6 730.6 1
 4 2 3 20417.8 961.256 7
 4 2 4 3271.44 436.938 7
 4 2 4 3520.31 318.525 1
 4 2 4 3549.64 236.334 5
 4 2 5 38210.4 1491.38 7
 4 2 5 41262.8 1510.74 6
 4 2 5 41080.1 1143.36 5
 4 2 6 59156.8 2023.1 6
 4 2 6 58619.2 1614.08 5
 4 2 6 57977.7 1996.1 7
 4 2 7 142939 3348.59 5
 4 2 7 135085 3802.54 7
 4 2 8 17445.7 904.25 5
 4 2 9 14708.4 916.986 5
 4 2 10 5381.83 713.324 5
 4 2 11 330.628 525.112 5
 4 2 12 11956.9 1061.92 5
 4 2 13 6044 948.491 5
 4 2 14 59508.4 2601.25 5
 4 2 15 16842.6 1517.56 5
 4 2 16 597.963 809.066 5
 4 2 17 639.733 945.516 5
 4 3 -5 17934.3 695.272 4
 4 3 -4 64027.8 1528.73 4
 4 3 -3 1311.73 134.658 4
 4 3 -1 406.353 414.712 7
 4 3 0 5048.46 592.102 7
 4 3 1 685.677 284.079 7
 4 3 1 1001.85 252.521 1
 4 3 2 4649.2 471.08 7
 4 3 2 4583.34 407.14 1
 4 3 3 55002.2 1759.56 7
 4 3 3 54850 1581.31 1
 4 3 4 186477 3861.74 5
 4 3 4 188507 4164.04 1
 4 3 4 188847 4413.49 7
 4 3 5 7367.6 649.931 6
 4 3 5 7536.84 431.199 5
 4 3 5 6932 618.37 7
 4 3 6 31738.7 1427.7 6
 4 3 6 33493.6 1103.17 5
 4 3 6 32520.6 1429.75 7
 4 3 7 45105.4 1450.82 5
 4 3 7 44197.8 1819.48 7
 4 3 8 35605.9 1345.14 5
 4 3 9 953.361 410.937 5
 4 3 10 7589.87 770.987 5
 4 3 11 12541.4 1034.65 5
 4 3 12 10881.4 1065.64 5
 4 3 13 16392.7 1276.51 5
 4 3 14 31661.2 1885.83 5
 4 3 15 53120.6 2581.06 5
 4 3 16 4135.93 1122.48 5
 4 3 17 -701.314 865.572 5
 4 4 -4 115681 2528.58 4
 4 4 -3 32399 824.044 4
 4 4 -1 56680.3 2109.1 7
 4 4 0 869.793 398.636 7
 4 4 0 939.506 342.795 1
 4 4 1 5803.72 566.793 7
 4 4 1 5864.86 530.469 1
 4 4 2 102830 2700.5 1
 4 4 2 107811 2821.56 7
 4 4 3 357287 7505.93 1
 4 4 3 362594 7621.53 7
 4 4 4 411380 8585.39 6
 4 4 4 416067 8511.08 1
 4 4 4 410890 8641.88 7
 4 4 5 106293 2914.06 6
 4 4 5 104967 2535.91 5
 4 4 5 107187 2801.37 1
 4 4 5 110998 2947.46 7
 4 4 6 39061.1 1575.07 6
 4 4 6 39553.4 1303.75 5
 4 4 6 41846.5 1622 7
 4 4 7 3734.49 591.079 7
 4 4 7 3308.47 443.681 5
 4 4 8 46558.5 1627.89 5
 4 4 9 4386.81 585.429 5
 4 4 10 2648.16 561.697 5
 4 4 11 32964.7 1616.67 5
 4 4 12 969.181 668.143 5
 4 4 13 22974.1 1524.26 5
 4 4 14 393.749 730.724 5
 4 4 15 24950.5 1825.02 5
 4 4 16 23662.9 1878.2 5
 4 4 17 -761.119 1049.95 5
 4 5 -4 12665.3 537.293 4
 4 5 -3 169720 3489.56 4
 4 5 -2 52614 2122.29 7
 4 5 -2 49245.1 1149.71 4
 4 5 -1 723.507 383.079 1
 4 5 -1 1139.72 477.66 7
 4 5 0 58207.7 1963.09 1
 4 5 0 58047.3 1998.14 7
 4 5 1 42913.5 1557.49 7
 4 5 1 41532.2 1552.22 1
 4 5 2 8101.81 658.508 7
 4 5 2 7835.42 647.058 1
 4 5 3 155649 3791.6 1
 4 5 3 150987 3713.24 7
 4 5 4 531177 10999.2 7
 4 5 4 538093 10950.3 6
 4 5 4 538858 11038.5 1
 4 5 5 688266 13960.4 6
 4 5 5 704496 14021.8 7
 4 5 5 687766 13998.5 1
 4 5 6 18941.5 1051.69 6
 4 5 6 19275.1 1053.1 1
 4 5 6 20576.9 934.557 5
 4 5 6 19934.9 1086.31 7
 4 5 7 20236.1 975.622 5
 4 5 8 1002.53 405.078 5
 4 5 9 14287.4 947.648 5
 4 5 10 23137.2 1291.26 5
 4 5 11 24194.4 1398.3 5
 4 5 12 30998.7 1668.66 5
 4 5 13 157.548 686.292 5
 4 5 14 765.953 794.425 5
 4 5 15 2089.4 883.843 5
 4 5 16 17443.1 1693.87 5
 4 5 17 16015.6 1696.36 5
 4 6 -3 3033.57 661.179 7
 4 6 -3 3282.13 288.02 4
 4 6 -2 150378 4267.44 7
 4 6 -2 152657 3251.11 4
 4 6 -1 8783.66 790.228 7
 4 6 -1 8189.16 398.406 4
 4 6 0 129425 3482.29 1
 4 6 0 118723 3303.48 7
 4 6 1 28948 1225.74 7
 4 6 1 28879.8 1351.71 1
 4 6 2 746.734 305.23 7
 4 6 2 513.787 359.221 1
 4 6 3 30659.5 1370.17 1
 4 6 3 31356.8 1237.78 7
 4 6 4 108121 2826.01 6
 4 6 4 109244 3034.61 1
 4 6 4 107620 2867.61 7
 4 6 5 331128 7191.77 6
 4 6 5 339788 7275.6 7
 4 6 5 327823 7363.95 1
 4 6 6 86362.6 2576.07 6
 4 6 6 83660.1 2590.75 1
 4 6 6 82920.6 2573 7
 4 6 7 2571.77 486.479 5
 4 6 8 49636.7 1818.71 5
 4 6 9 1979.9 524.92 5
 4 6 10 27728.3 1456.06 5
 4 6 11 -302.558 539.02 5
 4 6 12 37556.1 1913.96 5
 4 6 13 25257 1634.34 5
 4 6 14 7996.02 1099.15 5
 4 6 15 1763.85 895.399 5
 4 6 16 3375.13 1113.68 5
 4 6 17 18470.1 1779.66 5
 4 7 -3 482.487 454.795 7
 4 7 -3 -294.276 638.439 1
 4 7 -2 27289 1540.88 1
 4 7 -2 26629.6 916.202 4
 4 7 -2 26329.6 1455.32 7
 4 7 -1 38467.9 1779.27 1
 4 7 -1 39999 1188.86 4
 4 7 -1 40258.6 1675.86 7
 4 7 0 24523.3 1331.21 1
 4 7 0 21732.9 1106.32 7
 4 7 1 130593 3347.08 7
 4 7 1 137361 3748.59 1
 4 7 2 119928 3415.1 1
 4 7 2 116333 3011.95 7
 4 7 3 1052.44 307.967 7
 4 7 3 1847.75 526.657 1
 4 7 4 374.37 277.563 7
 4 7 4 162.502 385.536 1
 4 7 4 438.971 286.074 6
 4 7 5 158333 3956.07 6
 4 7 5 162002 4255.99 1
 4 7 5 167484 4034.6 7
 4 7 6 218080 5440.43 1
 4 7 6 224960 5322.1 7
 4 7 7 12706.7 987.536 1
 4 7 8 11165.3 882.447 5
 4 7 9 18365.1 1188.8 5
 4 7 10 -50.4336 511.313 5
 4 7 11 8732.71 985.026 5
 4 7 12 7204.66 1008.12 5
 4 7 13 36303 1993.79 5
 4 7 14 33098.9 2023.93 5
 4 7 15 4196.8 991.588 5
 4 7 16 205.779 939.502 5
 4 7 17 3767.2 1119.17 5
 4 8 -6 61729.8 2924.76 1
 4 8 -5 66124.9 2927.84 1
 4 8 -5 64053.3 2861.09 7
 4 8 -4 2682.13 690.548 7
 4 8 -4 1553.41 757.737 1
 4 8 -3 7902.64 875.845 7
 4 8 -3 8399.62 1052.42 1
 4 8 -2 24.9085 633.93 1
 4 8 -2 58.9655 393.801 7
 4 8 -1 12235.2 878.126 7
 4 8 -1 11473.4 1068.88 1
 4 8 0 1371.28 374.148 7
 4 8 0 1031.23 571.502 1
 4 8 1 16023.8 875.9 7
 4 8 1 16889.5 1163.1 1
 4 8 2 107691 3325.61 1
 4 8 2 106295 2763.07 7
 4 8 3 70404.2 2014.48 6
 4 8 3 71007.7 2519.32 1
 4 8 3 75486.8 2098.14 7
 4 8 4 5801.51 534.27 7
 4 8 4 6178.65 521.361 6
 4 8 4 6498.31 757.936 1
 4 8 5 1697.48 386.31 7
 4 8 5 1734.21 388.02 6
 4 8 5 1399.45 497.894 1
 4 8 6 107063 3297.63 1
 4 8 7 113110 3452.38 1
 4 8 9 39215.6 1772.4 5
 4 8 10 13763.5 1164.11 5
 4 8 11 791.212 641.515 5
 4 8 12 15943.6 1327.84 5
 4 8 13 1819.14 810.946 5
 4 8 14 18669.1 1615 5
 4 8 15 6769.07 1210.19 5
 4 8 16 2490.81 1084.08 5
 4 8 17 3224.47 1131.99 5
 4 9 -8 3554.41 1104.12 1
 4 9 -7 1718.3 1080.37 1
 4 9 -6 1791.35 893.891 1
 4 9 -5 21398.3 1804.46 1
 4 9 -4 37898.7 2220.85 1
 4 9 -3 2864.1 835.752 1
 4 9 -2 33053.2 1895.02 1
 4 9 -2 33043.5 1565.55 7
 4 9 -1 9808.31 1084.89 1
 4 9 -1 12611.4 864.379 7
 4 9 0 22605.6 1047.49 7
 4 9 0 23387.1 1471.53 1
 4 9 1 3965.82 442.5 7
 4 9 1 2819.34 608.067 1
 4 9 2 31541.4 1733.21 1
 4 9 2 33318.2 1208.79 7
 4 9 3 107032 2631.71 6
 4 9 3 106688 3415.7 1
 4 9 3 103053 2688.82 7
 4 9 4 96707.2 3220.78 1
 4 9 4 100780 2588 6
 4 9 4 99525.2 2674.28 7
 4 9 5 1081.24 538.447 1
 4 9 6 3261.49 665.435 1
 4 9 7 137465 4076.46 1
 4 9 8 35057.9 1815.25 1
 4 9 10 31111.9 1748.84 5
 4 9 11 82.6469 637.726 5
 4 9 12 18070.4 1451.49 5
 4 9 13 12860.4 1307.4 5
 4 9 14 -793.837 870.098 5
 4 9 15 11889.6 1486.79 5
 4 9 16 9905.66 1494.4 5
 4 9 17 3040.05 1179.48 5
 4 10 -7 1481.36 1131.02 1
 4 10 -6 2089.76 1046.92 1
 4 10 -5 633.992 759.979 1
 4 10 -4 8375.35 1192.92 1
 4 10 -3 47131.5 2447.03 1
 4 10 -2 8721.91 1184.46 1
 4 10 -1 68415 2858.73 1
 4 10 0 687.846 718.818 1
 4 10 1 6105.02 906.513 1
 4 10 2 10286.4 547.169 6
 4 10 2 9359.22 1047.07 1
 4 10 2 9297.33 572.834 7
 4 10 3 22966.2 1510.72 1
 4 10 3 21646.5 893.937 7
 4 10 4 190437 5008.43 1
 4 10 4 164487 4044.55 7
 4 10 5 38699 1929.08 1
 4 10 6 14061.6 1192.47 1
 4 10 7 7261.96 905.827 1
 4 10 8 29361.1 1735.04 1
 4 10 12 2167.33 787.394 5
 4 10 13 5534.22 1093.03 5
 4 10 14 2362.26 971.512 5
 4 10 15 6842.92 1239.68 5
 4 10 16 17606.3 1785.78 5
 4 10 17 -2413.64 1239.82 5
 4 11 -6 287.432 876.177 1
 4 11 -5 6218.13 1339.07 1
 4 11 -4 77.7438 882.839 1
 4 11 -3 21438.7 1797.96 1
 4 11 -2 28234 1971.54 1
 4 11 -1 14563.9 1431.72 1
 4 11 0 29465.9 1879.09 1
 4 11 1 2100.2 751.479 1
 4 11 2 22498.8 1617.31 1
 4 11 3 9170 1153.53 1
 4 11 4 48461.3 2319.37 1
 4 11 5 85174.5 3173.82 1
 4 11 6 -550.209 626.163 1
 4 11 7 32149.3 1860.01 1
 4 11 8 136.634 685.556 1
 4 11 9 20990 1577.65 1
 4 11 14 -27.0319 925.03 5
 4 11 15 554.351 976.993 5
 4 11 16 16159.6 1836.9 5
 4 11 17 3601.09 1343.77 5
 4 12 -5 3397.82 1252.87 1
 4 12 -4 5732.91 1272.04 1
 4 12 -3 5955.3 1218.55 1
 4 12 -2 25298.4 1950.42 1
 4 12 -1 3144.34 893.701 1
 4 12 0 12518.8 1439.19 1
 4 12 1 56287.2 2745.78 1
 4 12 2 3625.37 914.847 1
 4 12 3 46834.8 2406.25 1
 4 12 4 -419.805 827.48 1
 4 12 5 40605.2 2231.68 1
 4 12 6 4387.71 923.958 1
 4 12 7 -206.648 591.541 1
 4 12 8 19691.3 1561.32 1
 4 12 9 2598.01 886.054 1
 4 13 -4 1332.17 1073.07 1
 4 13 -3 3669.06 1168.15 1
 4 13 -2 8145.63 1365.83 1
 4 13 -1 17315.5 1797.51 1
 4 13 0 1946.65 1025.97 1
 4 13 1 35571.8 2250.23 1
 4 13 2 57786.7 2876.18 1
 4 13 3 238.663 731.65 1
 4 13 4 6910.65 1156.81 1
 4 13 5 16969.1 1541.58 1
 4 13 6 51635 2583.48 1
 4 13 7 17781.1 1575.47 1
 4 13 8 4336.55 1044.56 1
 4 13 9 10214 1333.11 1
 4 14 -3 4206.42 1311.36 1
 4 14 -2 6810.43 1478.13 1
 4 14 -1 3515.49 1086.07 1
 4 14 0 5131.31 1106.62 1
 4 14 1 238.292 802.964 1
 4 14 2 39021.8 2462.04 1
 4 14 3 56481.3 2916.73 1
 4 14 4 563.197 882.68 1
 4 14 5 1249.15 940.108 1
 4 14 6 18471.4 1650.34 1
 4 14 7 34132.7 2230.21 1
 4 14 8 2036.65 913.33 1
 4 14 9 12814.9 1486.5 1
 4 15 -1 7765.25 1576.95 1
 4 15 0 5255.42 1225.98 1
 4 15 1 5088.69 1174.77 1
 4 15 2 3960.15 1178.14 1
 4 15 3 41991 2606.15 1
 4 15 4 19086.9 1857.06 1
 4 15 5 -646.469 1042.34 1
 4 15 6 1471.68 1028.74 1
 4 15 7 16273 1686.9 1
 4 15 8 21419.5 1860.52 1
 4 15 9 -304.549 929.477 1
 4 15 10 12842.9 1594.77 1
 4 16 1 2722.43 1095.81 1
 4 16 2 2135.17 1019.26 1
 4 16 3 13589.1 1735.01 1
 4 16 4 36130.5 2486.94 1
 4 16 5 18657.2 1901.59 1
 4 16 6 1518.58 1028.96 1
 4 16 7 3647.24 1035.21 1
 4 16 8 5217.24 1091.33 1
 4 16 9 14159.5 1705.74 1
 4 16 10 1849.84 1098.06 1
 5 -15 -4 12715.1 1656.05 4
 5 -15 -3 560.496 906.987 4
 5 -15 -2 11476.2 1557.3 4
 5 -15 -1 3954.14 1291.95 4
 5 -15 0 1294.68 970.451 4
 5 -15 1 -725.626 1027.76 4
 5 -15 2 12409.5 1598.15 4
 5 -14 -7 2362.15 1232.78 4
 5 -14 -6 6227.9 1341.67 4
 5 -14 -5 4249.39 1280.9 4
 5 -14 -4 5983.92 1248.87 4
 5 -14 -3 8996.34 1363.68 4
 5 -14 -2 1351.54 943.525 4
 5 -14 -1 11044.5 1576.98 4
 5 -14 0 2201.07 1064.28 4
 5 -14 1 -537.071 820.039 4
 5 -14 2 2943.35 924.15 4
 5 -14 3 18449.9 1731.71 4
 5 -14 4 24799.1 2000.68 4
 5 -14 5 5373.94 1196.75 4
 5 -13 -9 2821.63 1217.43 4
 5 -13 -8 21137.1 2113.63 4
 5 -13 -7 15172.4 1808.63 4
 5 -13 -6 209.406 1006.39 4
 5 -13 -5 6333.16 1236.38 4
 5 -13 -4 3505.95 984.538 4
 5 -13 -3 8477.29 1284.14 4
 5 -13 -2 6119.35 1232.69 4
 5 -13 -1 4616.21 1048.86 4
 5 -13 0 19359.6 1747.04 4
 5 -13 1 4217.16 1156.37 4
 5 -13 2 1860.27 1023.4 4
 5 -13 3 7438.04 1193.78 4
 5 -13 4 29547.1 2080.32 4
 5 -13 5 19242.8 1725.96 4
 5 -13 6 -2.73561 995.921 2
 5 -13 6 161.855 882.903 4
 5 -13 7 3281.22 1070.56 4
 5 -12 -10 1858.31 1206.54 4
 5 -12 -9 2920.74 1270.58 4
 5 -12 -8 5483.4 1340.33 4
 5 -12 -7 32340.1 2309.74 4
 5 -12 -6 9508.01 1433.21 4
 5 -12 -5 1798.6 890.9 4
 5 -12 -4 5802.91 1113.88 4
 5 -12 -3 1357.64 826.428 4
 5 -12 -2 5993.85 1139.21 4
 5 -12 -1 -69.1677 837.995 4
 5 -12 0 1022.72 874.099 4
 5 -12 1 16027.8 1524.98 4
 5 -12 2 6669.67 1157.09 4
 5 -12 3 -3.99725 717.067 4
 5 -12 4 6231.05 1129.59 4
 5 -12 5 18239.8 1595.21 4
 5 -12 6 8276.69 1231.64 4
 5 -12 6 12725.9 1491.91 2
 5 -12 7 -362.074 946.646 2
 5 -12 7 1695 814.257 4
 5 -11 -11 12128.2 1631.3 4
 5 -11 -10 20554.9 1992.05 4
 5 -11 -9 9281.49 1473.52 4
 5 -11 -8 1173.11 883.343 4
 5 -11 -7 5206.27 1113.56 4
 5 -11 -6 23471.6 1894.14 4
 5 -11 -5 20023.4 1671.76 4
 5 -11 -4 6903.32 1115.9 4
 5 -11 -3 6138.24 1104.83 4
 5 -11 -2 4739.74 1021.53 4
 5 -11 -1 1236.32 863.57 4
 5 -11 0 2415.19 911.531 4
 5 -11 1 1797.04 759.85 4
 5 -11 2 33675.3 2045.52 4
 5 -11 3 4240.39 850.07 4
 5 -11 4 1572.39 823.744 4
 5 -11 5 3541.06 928.395 4
 5 -11 6 17534.7 1552.94 2
 5 -11 6 18763.3 1542.78 4
 5 -11 7 1390.23 804.889 2
 5 -11 7 2837.68 819.251 4
 5 -11 8 2264.6 871.323 2
 5 -11 9 5217.05 1159.25 2
 5 -10 -12 2360.2 1109.13 4
 5 -10 -11 947.543 1058.01 4
 5 -10 -10 19442 1878.11 4
 5 -10 -9 18008.7 1790.65 4
 5 -10 -8 889.471 871.725 4
 5 -10 -7 1617.67 899.02 4
 5 -10 -6 12853.2 1350.22 4
 5 -10 -5 57527.8 2686.99 4
 5 -10 -5 47569.1 2568.39 7
 5 -10 -4 2211.64 791.931 7
 5 -10 -4 2413.51 696.147 4
 5 -10 -3 20344.3 1597.16 4
 5 -10 -3 23191.9 1559.77 7
 5 -10 -2 28819.8 1853.92 4
 5 -10 -1 1565.11 745.57 4
 5 -10 0 1179.98 778.93 4
 5 -10 1 648.22 590.095 4
 5 -10 2 17108.2 1434.35 4
 5 -10 3 29298.3 1798.57 4
 5 -10 4 1220.56 656.103 4
 5 -10 5 11870.1 1235.58 4
 5 -10 6 668.223 722.018 4
 5 -10 6 797.075 681.163 2
 5 -10 7 14388.6 1417.4 2
 5 -10 7 14588.6 1358.27 4
 5 -10 8 -857.014 917.093 2
 5 -10 9 10169.4 1341.02 2
 5 -10 10 8473.41 1292.62 2
 5 -9 -13 4766.04 1448.59 4
 5 -9 -12 3127.5 1226.41 4
 5 -9 -11 1957.96 1114.86 4
 5 -9 -10 5317.01 1218.58 4
 5 -9 -9 47505.6 2649.24 4
 5 -9 -8 6687.66 1216.71 4
 5 -9 -7 15714 1554.35 4
 5 -9 -6 9713.69 1158.52 4
 5 -9 -5 24263.1 1723.46 4
 5 -9 -4 23095.3 1691.62 7
 5 -9 -4 25450.3 1678.4 4
 5 -9 -3 3965.42 730.251 7
 5 -9 -3 4969.56 916.051 4
 5 -9 -2 40553.2 2086.32 4
 5 -9 -2 37061.9 1865.98 7
 5 -9 -1 33749.6 1882.24 4
 5 -9 -1 32115.5 1598.42 7
 5 -9 0 38348.2 2027.36 4
 5 -9 0 40398.3 1636.52 7
 5 -9 1 32580.6 1857.33 4
 5 -9 2 788.938 606.732 4
 5 -9 3 30942.5 1783.59 4
 5 -9 4 21740.7 1476.96 4
 5 -9 5 10.8544 564.005 4
 5 -9 6 3349.65 833.394 2
 5 -9 6 5384.11 932.432 4
 5 -9 7 1175.63 782.936 2
 5 -9 7 376.209 609.714 4
 5 -9 8 13053.9 1366.5 2
 5 -9 9 565.973 784.654 2
 5 -9 10 18718.9 1671.04 2
 5 -9 11 5800.93 1227.24 2
 5 -8 -13 8959.02 1580.43 4
 5 -8 -12 3744.29 1178.49 4
 5 -8 -11 4418.61 1199.67 4
 5 -8 -10 5961.49 1247.22 4
 5 -8 -9 27427.5 1943.76 4
 5 -8 -8 68821.5 3041.94 4
 5 -8 -7 -230.077 729.422 4
 5 -8 -6 26798.5 1745.52 4
 5 -8 -5 472.947 668.011 4
 5 -8 -4 626.168 623.053 4
 5 -8 -3 34293.9 1968.55 7
 5 -8 -3 40858.2 1994.16 4
 5 -8 -2 19717.1 1386.41 4
 5 -8 -2 19139.9 1361.64 7
 5 -8 -1 60270.9 2343.95 7
 5 -8 -1 62176 2530.26 4
 5 -8 0 2170.23 640.12 4
 5 -8 0 1646.71 470.82 7
 5 -8 1 31621.7 1744.35 4
 5 -8 1 33066.5 1408.56 7
 5 -8 2 21808.4 1403.01 4
 5 -8 2 18943.3 981.73 7
 5 -8 3 49074.2 1770.97 6
 5 -8 3 54982.8 2265.31 4
 5 -8 3 50805.6 1698.72 7
 5 -8 4 108207 3562.48 4
 5 -8 4 115865 3154.42 6
 5 -8 4 111636 2987.43 7
 5 -8 5 2890.66 711.809 4
 5 -8 6 -23.1678 642.227 2
 5 -8 6 -391.346 590.816 4
 5 -8 7 -466.492 730.45 2
 5 -8 7 1596.52 701.889 4
 5 -8 8 8504.24 1155.8 2
 5 -8 9 13274.2 1350.48 2
 5 -8 10 5182.87 1045.23 2
 5 -8 11 16539.5 1573.08 2
 5 -8 12 444.232 779.963 2
 5 -7 -13 5396.3 1345.82 4
 5 -7 -12 7111.25 1319.8 4
 5 -7 -11 695.647 933.983 4
 5 -7 -10 7611.36 1203.85 4
 5 -7 -9 475.621 756.376 4
 5 -7 -8 66203.5 2865.9 4
 5 -7 -7 40466.1 2123.94 4
 5 -7 -6 514.899 654.219 4
 5 -7 -5 13023.4 1192.84 4
 5 -7 -4 230.133 550.456 4
 5 -7 -3 9893.39 979.873 4
 5 -7 -3 6977.88 918.678 7
 5 -7 -2 2975.51 693.322 7
 5 -7 -2 3928.51 736.099 4
 5 -7 -1 66323.7 2511.39 4
 5 -7 -1 65765.5 2489.55 7
 5 -7 0 105923 3452.95 4
 5 -7 0 120928 3400.25 7
 5 -7 1 7047.18 674.086 7
 5 -7 1 6161.98 824.614 4
 5 -7 2 2973.27 449.741 7
 5 -7 2 2915.42 681.427 4
 5 -7 3 12668.1 1056.14 4
 5 -7 3 12433.3 822.102 6
 5 -7 3 13154.1 809.861 7
 5 -7 4 150089 4238.04 4
 5 -7 4 153165 3901.51 6
 5 -7 4 150760 3788.01 7
 5 -7 5 38011.3 1817.3 4
 5 -7 5 37365.1 1551.08 7
 5 -7 6 -922.043 660.733 2
 5 -7 6 975.625 656.879 4
 5 -7 7 7500.2 943.767 2
 5 -7 7 8225.66 959.909 4
 5 -7 8 1951.96 766.606 2
 5 -7 9 13447.6 1278.76 2
 5 -7 10 4260.42 946.43 2
 5 -7 11 9665.7 1290.37 2
 5 -7 12 19670.8 1721.68 2
 5 -7 13 6394.14 1309.99 2
 5 -6 -12 7344.51 1247.63 4
 5 -6 -11 25345.3 1901.96 4
 5 -6 -10 258.023 723.956 4
 5 -6 -9 2866.18 801.888 4
 5 -6 -8 11005 1160.16 4
 5 -6 -7 32623.4 1816.11 4
 5 -6 -6 13813.3 1225 4
 5 -6 -5 -300.96 563.063 4
 5 -6 -4 74148 2691.88 4
 5 -6 -3 3749.68 665.117 4
 5 -6 -2 24893.9 1582.19 7
 5 -6 -2 28269.5 1474.64 4
 5 -6 -1 1806.48 501.736 4
 5 -6 -1 1641.8 514.052 7
 5 -6 0 49172.6 1985.14 4
 5 -6 0 49927.1 1987.56 7
 5 -6 1 181743 4582.75 7
 5 -6 1 185468 4755.7 4
 5 -6 2 8938.05 723.771 7
 5 -6 2 8085.3 811.047 4
 5 -6 3 11258.2 759.399 7
 5 -6 3 11426.1 944.654 4
 5 -6 4 41438.3 1780.51 4
 5 -6 4 39850.4 1578.63 6
 5 -6 4 37726.5 1491.94 7
 5 -6 5 67340.4 2280.41 6
 5 -6 5 67326.1 2453.92 4
 5 -6 5 68757 2224.54 7
 5 -6 6 6102.48 766.925 2
 5 -6 6 6677.29 817.997 4
 5 -6 7 10787.7 1004.59 2
 5 -6 7 10973.9 1030.86 4
 5 -6 8 7394.47 919.602 2
 5 -6 9 2185.81 789.278 2
 5 -6 10 5578.48 993.458 2
 5 -6 11 -294.349 687.032 2
 5 -6 12 14135.4 1462.07 2
 5 -5 -11 31035.3 2004.36 4
 5 -5 -10 32708.4 1935.41 4
 5 -5 -9 2076.1 778.58 4
 5 -5 -8 2454.22 718.619 4
 5 -5 -7 740.795 609.862 4
 5 -5 -6 28843.6 1568.59 4
 5 -5 -5 44864.6 1980.24 4
 5 -5 -4 470.421 475.986 4
 5 -5 -3 1543.47 507.657 4
 5 -5 -2 6586.18 876.728 7
 5 -5 -2 6663.46 738.493 4
 5 -5 -1 44976.1 1804.8 4
 5 -5 -1 46368.5 2079.41 7
 5 -5 0 6001.16 664.604 4
 5 -5 0 5593.79 677.504 7
 5 -5 1 70781.3 2357.68 4
 5 -5 1 72132.7 2377.52 7
 5 -5 2 132434 3686.66 4
 5 -5 2 141645 3628.29 7
 5 -5 3 63991.8 2190.46 4
 5 -5 3 62031.1 2037.8 7
 5 -5 4 5244.1 549.804 7
 5 -5 4 5547.47 596.72 6
 5 -5 4 4777.68 625.753 4
 5 -5 5 22630.8 1225.81 2
 5 -5 5 26317.6 1336.8 4
 5 -5 5 25070.3 1220 7
 5 -5 5 25574 1277.27 6
 5 -5 6 123686 3513.14 4
 5 -5 6 122034 3504.87 6
 5 -5 6 122298 3438.61 7
 5 -5 6 120983 3463.06 2
 5 -5 7 1333.17 601.324 2
 5 -5 8 11190.8 1025.39 2
 5 -5 9 10270 1056.79 2
 5 -5 10 -55.858 699.993 2
 5 -5 11 643.058 660.36 2
 5 -5 12 1033.48 829.088 2
 5 -5 13 20490.2 1668.75 5
 5 -5 14 17721.8 1647.71 5
 5 -4 -11 5357.5 1003.33 4
 5 -4 -10 39385.8 2092.25 4
 5 -4 -9 40962.6 2068.43 4
 5 -4 -8 41621.2 1999.95 4
 5 -4 -7 1210.84 539.518 4
 5 -4 -6 3760.14 697.449 4
 5 -4 -5 116036 3371.05 4
 5 -4 -4 99062.7 2970.59 4
 5 -4 -3 26382.3 1312.82 4
 5 -4 -2 59023.1 2010.29 4
 5 -4 -2 52328.3 2332.07 7
 5 -4 -1 12236.4 1008 7
 5 -4 -1 12254 867.947 4
 5 -4 0 9143.44 852.3 7
 5 -4 0 9369.18 573.579 1
 5 -4 0 9289.77 738.144 4
 5 -4 1 1230.8 424.13 7
 5 -4 1 1173.22 412.716 4
 5 -4 1 1357.38 249.41 1
 5 -4 2 174448 4212.97 4
 5 -4 2 178372 4280.87 7
 5 -4 3 286831 6490.32 4
 5 -4 3 287250 6454.01 7
 5 -4 4 27664.8 1275.86 6
 5 -4 4 30036.9 1349.68 4
 5 -4 4 27747.4 1256.58 7
 5 -4 5 1935.69 487.171 2
 5 -4 5 2251.99 491.544 6
 5 -4 5 2356.48 459.424 7
 5 -4 5 1069.58 419.281 4
 5 -4 6 52739.5 1965.83 4
 5 -4 6 53876 1953.8 2
 5 -4 6 54849.4 2046.78 6
 5 -4 6 54768 2018.37 7
 5 -4 7 79043 2565.86 2
 5 -4 8 -37.6824 511.914 2
 5 -4 9 38184.4 1834.14 2
 5 -4 10 15392.2 1247.41 2
 5 -4 11 323.183 689.785 2
 5 -4 13 -465.651 858.728 5
 5 -4 14 20015.7 1701.8 5
 5 -4 15 16047.4 1654.62 5
 5 -3 -10 8452.8 1045.69 4
 5 -3 -9 108726 3541.54 4
 5 -3 -8 42182.5 1919.73 4
 5 -3 -7 34441.9 1636.55 4
 5 -3 -6 4592.7 675.384 4
 5 -3 -5 1107.78 479.244 4
 5 -3 -4 54923 1922.55 4
 5 -3 -3 2600.97 443.13 4
 5 -3 -2 195579 4623.68 4
 5 -3 -1 176064 4877.56 7
 5 -3 -1 179432 4262.8 4
 5 -3 0 8054.65 633.736 4
 5 -3 0 8375.9 815.808 7
 5 -3 0 8119.78 489.589 1
 5 -3 1 57347.2 1817.27 4
 5 -3 1 53540.4 1417.33 1
 5 -3 1 56795.2 2055.64 7
 5 -3 2 6982.97 343.478 1
 5 -3 2 8389.95 655.157 4
 5 -3 2 8733.5 727.082 7
 5 -3 3 629543 12511.3 4
 5 -3 3 614392 12613.8 7
 5 -3 4 202547 4743.38 4
 5 -3 4 198508 4802.71 7
 5 -3 5 468.738 373.068 6
 5 -3 5 71.4385 321.158 7
 5 -3 5 5.60697 366.848 4
 5 -3 5 651.26 382.272 2
 5 -3 6 4812.91 612.032 7
 5 -3 6 4763.2 589.469 2
 5 -3 6 5637.9 653.449 6
 5 -3 7 30137 1398.13 2
 5 -3 7 29722.7 1494.01 7
 5 -3 8 85190.5 2712.73 2
 5 -3 9 356.294 556.024 2
 5 -3 10 58484.2 2327.32 2
 5 -3 12 -1325.79 764.715 5
 5 -3 13 1877.02 801.65 5
 5 -3 14 866.921 724.38 5
 5 -3 15 18101.3 1648.55 5
 5 -2 -9 27238.9 1542.54 4
 5 -2 -8 124832 3635.23 4
 5 -2 -7 23779.7 1278.89 4
 5 -2 -6 2887.84 520.648 4
 5 -2 -5 6465.35 680.635 4
 5 -2 -4 5648.12 563.384 4
 5 -2 -3 8051.77 649.588 4
 5 -2 -2 5390.85 520.463 4
 5 -2 -1 105455 3410.91 7
 5 -2 -1 109418 2771.36 4
 5 -2 0 235900 5171.08 4
 5 -2 0 230404 5825.32 7
 5 -2 1 164851 3817.43 4
 5 -2 1 158997 3345.58 1
 5 -2 1 168960 4290.09 7
 5 -2 2 245588 5706.73 7
 5 -2 2 243760 5370.18 4
 5 -2 3 357131 7510.99 4
 5 -2 3 352847 7737.47 7
 5 -2 4 587867 12233.1 7
 5 -2 4 599850 12017.1 4
 5 -2 4 571733 11819.5 2
 5 -2 5 51386.3 1881.39 6
 5 -2 5 54146.9 1710.91 2
 5 -2 5 51460.5 1773.69 4
 5 -2 5 51533.2 1867.02 7
 5 -2 6 12752.2 912.317 6
 5 -2 6 12122.6 779.913 2
 5 -2 6 12081.1 897.428 7
 5 -2 7 28594.1 1315.17 2
 5 -2 7 28824.3 1495.99 6
 5 -2 7 28900.9 1446.31 7
 5 -2 8 16302.1 1054.9 2
 5 -2 9 38814.4 1720.6 2
 5 -2 11 39787 1861.25 5
 5 -2 12 4086.09 806.232 5
 5 -2 13 1795.49 777.53 5
 5 -2 14 2183.41 860.375 5
 5 -2 15 6030.62 1072.62 5
 5 -2 16 16749.4 1650.08 5
 5 -1 -9 1132.2 556.166 4
 5 -1 -8 62726.1 2230.89 4
 5 -1 -7 84319.2 2614.94 4
 5 -1 -6 32411.3 1372.52 4
 5 -1 -5 18992.9 987.041 4
 5 -1 -4 10673.5 699.41 4
 5 -1 -3 648.717 281.777 4
 5 -1 -2 31213.6 1135.43 4
 5 -1 -1 260.597 231.75 4
 5 -1 -1 425.591 470.581 7
 5 -1 0 267951 5690.8 4
 5 -1 0 275306 6548.8 7
 5 -1 1 31232.6 1114.51 4
 5 -1 1 33154.7 1071.4 5
 5 -1 1 32374.6 1491.43 7
 5 -1 2 193146 4304.35 4
 5 -1 2 197082 4756.63 7
 5 -1 3 1521.95 385.619 7
 5 -1 3 1465 246.393 2
 5 -1 3 1793.7 329.836 4
 5 -1 4 341049 6996.34 2
 5 -1 4 342840 7193.42 4
 5 -1 4 337259 7490.48 7
 5 -1 5 168825 4269.14 7
 5 -1 5 166281 4267.28 6
 5 -1 5 173107 3907.93 2
 5 -1 6 479.902 388.221 7
 5 -1 6 1026.01 424.213 6
 5 -1 6 418.337 324.971 2
 5 -1 7 98028.1 2767.6 2
 5 -1 7 101177 3116.21 6
 5 -1 7 99981.4 3056.13 7
 5 -1 8 41548.5 1637.86 2
 5 -1 10 27202 1374.91 5
 5 -1 11 3121.65 625.665 5
 5 -1 12 26836.4 1568.19 5
 5 -1 13 3351.01 864.951 5
 5 -1 14 9511.13 1222.4 5
 5 -1 15 -911.02 793.433 5
 5 -1 16 3120.02 1051.73 5
 5 0 -8 9707.23 818.804 4
 5 0 -7 60949.9 2024.37 4
 5 0 -6 100487 2737.75 4
 5 0 -5 3381.16 454.326 4
 5 0 -4 17442.2 822.092 4
 5 0 -3 3234 357.049 4
 5 0 -2 1012.11 245.339 4
 5 0 -1 76751.5 2719.28 7
 5 0 -1 74379.4 1874.69 4
 5 0 0 1918.48 254.587 4
 5 0 0 2283.74 579.656 7
 5 0 0 1976.02 233.334 5
 5 0 1 116696 2692.58 4
 5 0 1 117569 2559.02 5
 5 0 1 118705 3365.16 7
 5 0 2 1286.16 413.502 7
 5 0 2 1449.29 171.623 2
 5 0 2 1314.42 119.805 1
 5 0 2 916.149 227.096 4
 5 0 3 203116 4160.31 2
 5 0 3 200574 4388.79 4
 5 0 3 197521 4833.45 7
 5 0 4 47333.4 1331.39 2
 5 0 4 46576.6 1722.36 7
 5 0 5 270482 6185.43 6
 5 0 5 272781 5730.95 2
 5 0 5 268737 6199.54 7
 5 0 6 136435 3691.01 6
 5 0 6 132426 3636.89 7
 5 0 7 1692.62 473.432 7
 5 0 7 1395.86 487.891 6
 5 0 8 31229.2 1624.56 7
 5 0 8 34104.1 1349.01 5
 5 0 9 21856.7 1143.82 5
 5 0 10 4653.78 674.906 5
 5 0 11 14112.4 1073.88 5
 5 0 12 17987.4 1261.31 5
 5 0 13 36441.3 1895.15 5
 5 0 14 2020.14 803.074 5
 5 0 15 6838.91 1035.05 5
 5 0 16 126.384 889.377 5
 5 0 17 5496.05 1303.1 5
 5 1 -7 3636.76 515.851 4
 5 1 -6 23115.2 1015.41 4
 5 1 -5 57725.8 1682.36 4
 5 1 -4 63324.3 1703.35 4
 5 1 -3 108632 2485.52 4
 5 1 -2 12090.3 488.132 2
 5 1 -2 11395.2 499.95 4
 5 1 -1 6579.25 821.915 7
 5 1 -1 6573.87 343.253 4
 5 1 -1 7197.56 296.224 2
 5 1 0 45099 1148.71 4
 5 1 0 43872.5 1135.26 5
 5 1 0 43942.8 1898.45 7
 5 1 1 10341.8 457.951 4
 5 1 1 10433 365.4 5
 5 1 1 10102.9 830.944 7
 5 1 2 10965.6 800.346 7
 5 1 2 10264.6 424.78 1
 5 1 2 8576.35 301.476 5
 5 1 3 5102.8 570.451 7
 5 1 3 5548.17 305.081 1
 5 1 4 99519 2857.04 7
 5 1 5 283.598 330.351 7
 5 1 5 552.634 351.022 6
 5 1 6 197525 4262.7 5
 5 1 6 194708 4875.31 7
 5 1 6 197071 4887.16 6
 5 1 7 145868 4064.52 6
 5 1 7 150640 3512.39 5
 5 1 7 152299 4090.88 7
 5 1 8 221.701 405.529 7
 5 1 8 386.79 357.149 5
 5 1 9 39267.6 1535.9 5
 5 1 10 25123.8 1279.08 5
 5 1 11 2095.34 607.195 5
 5 1 12 1741.17 642.485 5
 5 1 13 36640 1855.64 5
 5 1 14 39857.1 2065.28 5
 5 1 15 4457.83 998.332 5
 5 1 16 3530.6 967.363 5
 5 1 17 579.198 920.462 5
 5 2 -6 7244.33 550.585 4
 5 2 -5 12453.5 631.026 4
 5 2 -4 30257.2 936.64 4
 5 2 -3 176393 3614.21 4
 5 2 -2 241345 4696.36 4
 5 2 -1 22935.7 1399.94 7
 5 2 0 5659.55 733.055 7
 5 2 1 18052.1 761.028 1
 5 2 1 17048.9 1063.51 7
 5 2 2 43415.5 1684.4 7
 5 2 2 42453.7 1241.17 1
 5 2 3 14679.7 906.972 7
 5 2 3 14346.4 611.755 1
 5 2 4 6635.3 630.128 7
 5 2 4 6014.58 267.89 5
 5 2 4 6403.44 407.387 1
 5 2 5 126897 3404.8 6
 5 2 5 128690 2747.94 5
 5 2 5 123662 3410.59 7
 5 2 6 23271.9 1224.7 7
 5 2 6 24210 1229.77 6
 5 2 6 24015.2 856.556 5
 5 2 7 198762 4987.44 6
 5 2 7 194852 4341.17 5
 5 2 7 200091 4975.8 7
 5 2 8 111233 2852.03 5
 5 2 8 107795 3356.68 7
 5 2 9 11420.9 803.508 5
 5 2 10 60011.5 2064.82 5
 5 2 11 17649.9 1140.39 5
 5 2 12 1000.28 602.485 5
 5 2 13 3661.08 781.092 5
 5 2 14 33648.6 1902.83 5
 5 2 15 35365.7 2039.35 5
 5 2 16 -777.407 889.852 5
 5 2 17 1672.57 1002.46 5
 5 3 -5 11952.8 544.194 4
 5 3 -4 48932.9 1166.86 4
 5 3 -4 48164.1 1206.73 4
 5 3 -2 76903.4 2861.55 7
 5 3 -1 117908 3630.57 7
 5 3 0 1344.7 479.224 7
 5 3 1 3104.13 568.941 7
 5 3 1 2872.61 391.753 1
 5 3 2 427.207 308.153 7
 5 3 2 782.409 258.25 1
 5 3 3 68523.3 1860.04 1
 5 3 3 65509.2 2159.1 7
 5 3 4 143226 2969.41 5
 5 3 4 146740 3377.66 1
 5 3 5 6108.74 643.61 7
 5 3 5 5099.43 584.52 6
 5 3 5 5474.94 462.903 1
 5 3 5 5531.24 345.94 5
 5 3 6 69139.9 2352.78 7
 5 3 6 74074.1 2364.72 6
 5 3 6 71401.8 1819.49 5
 5 3 7 4986.35 642.449 7
 5 3 7 4012.3 611.606 6
 5 3 7 4084.13 412.692 5
 5 3 8 132457 3231.5 5
 5 3 8 126986 3773.66 7
 5 3 9 22364.9 1076.83 5
 5 3 10 30839.2 1384.1 5
 5 3 11 76604 2534.04 5
 5 3 12 9738.96 951.092 5
 5 3 13 22754 1462.56 5
 5 3 14 1468.12 699.121 5
 5 3 15 35429.8 2038.02 5
 5 3 16 19348.5 1693.51 5
 5 3 17 1877.16 1056.13 5
 5 4 -4 37262.1 889.763 4
 5 4 -2 -20.6522 507.183 7
 5 4 -1 24450.7 1446.71 7
 5 4 0 124708 3278.69 1
 5 4 0 124964 3635.66 7
 5 4 1 578.304 305.351 1
 5 4 1 1470.58 470.206 7
 5 4 2 4885.05 580.503 7
 5 4 2 3833.98 451.593 1
 5 4 3 288361 6544.78 7
 5 4 3 290648 6254.47 1
 5 4 4 373957 7797.06 1
 5 4 4 367879 8085.87 7
 5 4 5 234076 5542.33 6
 5 4 5 241652 5610.51 7
 5 4 5 239766 4930.45 5
 5 4 5 238481 5322.07 1
 5 4 6 7965.09 736.683 7
 5 4 6 8713.67 767.454 6
 5 4 6 7098.29 484.265 5
 5 4 6 6898.67 599.468 1
 5 4 7 7036.48 767.408 7
 5 4 7 7783.35 793.093 6
 5 4 7 7465.34 529.347 5
 5 4 8 4977.23 734.501 7
 5 4 8 4825.69 507.17 5
 5 4 9 31634.5 1323.62 5
 5 4 10 310.425 426.574 5
 5 4 11 73474.4 2481.23 5
 5 4 12 113065 3436.68 5
 5 4 13 951.097 584.116 5
 5 4 14 3277.39 896.092 5
 5 4 15 12398.2 1356.57 5
 5 4 16 22540.6 1765.78 5
 5 4 17 8814.04 1321.85 5
 5 4 18 1398.21 1073.56 5
 5 5 -3 5090.14 855.203 7
 5 5 -2 4074.84 704.131 7
 5 5 -1 45882 1819.51 1
 5 5 -1 43979.9 1983.19 7
 5 5 0 284697 6396.45 1
 5 5 0 272024 6598 7
 5 5 1 151770 3825.62 1
 5 5 1 147879 3972.68 7
 5 5 2 2466.3 501.053 7
 5 5 2 2288.38 448.335 1
 5 5 3 15111.9 933.524 7
 5 5 3 15655.5 895.069 1
 5 5 4 70177.5 2185.07 1
 5 5 4 72270.6 2272.42 7
 5 5 5 142843 3780.23 6
 5 5 5 148447 3713.76 1
 5 5 5 150484 3843.91 7
 5 5 6 8553.01 778.703 7
 5 5 6 8041.92 702.279 1
 5 5 6 8202.45 569.273 5
 5 5 7 2948.34 589.974 7
 5 5 7 3245.06 545.505 6
 5 5 7 2883.37 411.659 5
 5 5 8 33166.8 1318.14 5
 5 5 8 31442.8 1621.99 7
 5 5 9 1099.95 395.045 5
 5 5 10 13028.5 918.472 5
 5 5 11 4632.41 691.707 5
 5 5 12 139673 4023.9 5
 5 5 13 24770.7 1568.37 5
 5 5 14 -482.108 750.293 5
 5 5 15 401.415 724.468 5
 5 5 16 6837.92 1222 5
 5 5 17 20086.9 1792.77 5
 5 5 18 2227.69 1011.26 5
 5 6 -4 11024.2 1233.96 7
 5 6 -3 26136.9 1700.74 7
 5 6 -2 2841.49 723.498 7
 5 6 -2 3192.53 712.342 1
 5 6 -1 15587.5 1101.31 1
 5 6 -1 15888.3 1156.18 7
 5 6 0 104879 3077.33 1
 5 6 0 99668 3118.34 7
 5 6 1 118534 3345.18 1
 5 6 1 121512 3381.54 7
 5 6 2 449.647 318.459 7
 5 6 2 1264.96 438.808 1
 5 6 3 2696.1 495.153 1
 5 6 3 1396.07 425.668 7
 5 6 4 1359.75 410.794 1
 5 6 4 1735.92 450.8 7
 5 6 5 21377.1 1137.68 7
 5 6 5 20895.3 1093.23 6
 5 6 5 21539.1 1160.63 1
 5 6 6 81181.9 2557.57 6
 5 6 6 80869.9 2561.46 1
 5 6 6 82839.7 2599.19 7
 5 6 7 6644.08 747.116 7
 5 6 7 6364.75 712.077 1
 5 6 7 7211.14 757.58 6
 5 6 7 6368.21 572.957 5
 5 6 8 1400.87 546.882 7
 5 6 8 1211.23 399.112 5
 5 6 9 63861.8 2164.8 5
 5 6 10 5849.8 715.143 5
 5 6 11 9104.46 893.04 5
 5 6 12 33090.5 1677.38 5
 5 6 13 61189.9 2507.73 5
 5 6 14 31174.9 1861.48 5
 5 6 15 1079.37 892.562 5
 5 6 16 1444.01 904.33 5
 5 6 17 3507.99 1142.09 5
 5 6 18 8618.13 1513.79 5
 5 7 -5 49596.1 2674.71 7
 5 7 -4 6748.05 1039.1 7
 5 7 -3 57004 2467.96 1
 5 7 -3 52813.5 2455.99 7
 5 7 -2 13127.4 1126.9 1
 5 7 -2 10381.2 1028.44 7
 5 7 -1 22940.9 1395.17 1
 5 7 -1 22130.2 1359.32 7
 5 7 0 1891.26 490.402 7
 5 7 0 1332.83 534.469 1
 5 7 1 58686.5 2076.01 7
 5 7 1 62689.3 2267.59 1
 5 7 2 127256 3626.82 1
 5 7 2 128057 3425.01 7
 5 7 3 121185 3436.74 1
 5 7 3 115394 3193.28 7
 5 7 4 2391.54 522.337 1
 5 7 4 2761.2 464.711 7
 5 7 5 36127.9 1477 6
 5 7 5 36637.5 1622.69 1
 5 7 5 35361.9 1508.73 7
 5 7 6 37817.6 1582.66 6
 5 7 6 36847.1 1652.3 1
 5 7 6 39061.4 1635 7
 5 7 7 53841.8 2036.18 6
 5 7 7 52492.7 2080.96 1
 5 7 7 53650.9 2078.9 7
 5 7 8 1546.48 454.044 5
 5 7 9 25553.9 1316.82 5
 5 7 10 41555.6 1825.48 5
 5 7 11 696.814 507.164 5
 5 7 12 5759.25 896.092 5
 5 7 13 7095.29 960.623 5
 5 7 14 38670.6 2108.75 5
 5 7 15 8830.55 1267.61 5
 5 7 16 572.793 842.863 5
 5 7 17 257.006 967.281 5
 5 7 18 2866.75 1261.67 5
 5 8 -6 4994.31 1210.53 1
 5 8 -5 46688.2 2489.42 1
 5 8 -5 42155 2424.66 7
 5 8 -4 23247.7 1743.84 1
 5 8 -4 20888.9 1608.78 7
 5 8 -3 57494.6 2599.89 1
 5 8 -3 56729.3 2533.04 7
 5 8 -2 46913.8 2211.18 1
 5 8 -2 44145.5 2072.72 7
 5 8 -1 4166.47 686.305 7
 5 8 -1 3578.9 821.607 1
 5 8 0 6862.07 735.518 7
 5 8 0 7171.52 900.129 1
 5 8 1 18767.3 1272.78 1
 5 8 1 15029.2 969.736 7
 5 8 2 66704.4 2502.45 1
 5 8 2 67344.3 2180.86 7
 5 8 3 153287 4323.81 1
 5 8 3 156876 3926.09 7
 5 8 4 56494.8 1932.62 7
 5 8 4 58152.4 1887.17 6
 5 8 4 53243.5 2165.22 1
 5 8 5 875.126 362.391 7
 5 8 5 1588.79 397.011 6
 5 8 5 491.854 500.421 1
 5 8 6 -220.887 406.992 7
 5 8 6 -63.5107 358.135 6
 5 8 6 88.5106 434.987 1
 5 8 7 65315.7 2409.75 7
 5 8 7 75266.1 2616.54 1
 5 8 8 18985 1285.45 1
 5 8 9 -474.405 521.609 5
 5 8 10 62907.5 2363.85 5
 5 8 11 9195.72 1007.51 5
 5 8 12 16466.3 1314.02 5
 5 8 13 13175.9 1261.71 5
 5 8 14 6721.43 1101.55 5
 5 8 15 14443.7 1466.23 5
 5 8 16 9079.61 1285.34 5
 5 8 17 -269.508 1088.06 5
 5 8 18 -799.552 1187.94 5
 5 9 -7 463.973 922.624 1
 5 9 -6 447.907 836.47 1
 5 9 -5 1679.84 1006.63 1
 5 9 -4 18918.9 1618.02 1
 5 9 -3 1577.91 838.391 1
 5 9 -2 87489.5 3328.44 1
 5 9 -2 88151 3054.74 7
 5 9 -1 49968.8 2327.99 1
 5 9 -1 47772.2 1967.5 7
 5 9 0 4465.3 625.611 7
 5 9 0 4409.57 840.792 1
 5 9 1 13890.7 1210.45 1
 5 9 1 14805.8 923.956 7
 5 9 2 5206.46 577.003 7
 5 9 2 4186.99 695.924 1
 5 9 3 45529.4 1648.35 7
 5 9 3 44394.4 2050.21 1
 5 9 4 74693.3 2210.85 6
 5 9 4 73044.9 2722.38 1
 5 9 4 74402.7 2286.47 7
 5 9 5 10943.1 793.184 6
 5 9 5 9588.86 990.927 1
 5 9 5 10762.9 814.606 7
 5 9 6 26392.5 1295.23 6
 5 9 6 27959.2 1570.13 1
 5 9 6 26637 1317.05 7
 5 9 7 471.763 576.205 1
 5 9 8 47343.2 2153.26 1
 5 9 11 43688.5 2071.68 5
 5 9 12 5518.38 942.694 5
 5 9 13 14201 1345.24 5
 5 9 14 2747.39 949.253 5
 5 9 15 7189.81 1202.59 5
 5 9 16 32309.8 2241.45 5
 5 9 17 903.503 1024.19 5
 5 9 18 5290.08 1461.31 5
 5 10 -7 9477.12 1559.5 1
 5 10 -6 3457.88 1261.72 1
 5 10 -5 3606.18 1043.79 1
 5 10 -4 2041.92 1007.02 1
 5 10 -3 13259.4 1459.36 1
 5 10 -2 7593.68 1141.14 1
 5 10 -1 62048.5 2762.89 1
 5 10 0 20075.5 1524.03 1
 5 10 1 10150.4 1103.84 1
 5 10 1 9750.15 749.793 7
 5 10 2 16821.2 950.032 7
 5 10 2 17939.6 1400.82 1
 5 10 3 409.209 324.652 7
 5 10 3 464.902 560.452 1
 5 10 3 733.286 350.194 6
 5 10 4 52642.8 1715.44 6
 5 10 4 55809.7 2395.88 1
 5 10 4 52470.9 1798.23 7
 5 10 5 72651.2 2218.4 6
 5 10 5 71041.5 2763 1
 5 10 5 73219.5 2319.6 7
 5 10 6 8090.11 761.903 7
 5 10 6 7662.25 971.927 1
 5 10 7 1454.67 593.829 1
 5 10 8 25257.2 1614.66 1
 5 10 9 28330.2 1724.56 1
 5 10 12 34152 1970.37 5
 5 10 13 2555.63 834.702 5
 5 10 14 2102.29 853.266 5
 5 10 15 -1048.89 882.884 5
 5 10 16 16825.3 1695.64 5
 5 10 17 5620.69 1326.18 5
 5 11 -6 14334 1841.65 1
 5 11 -5 4211.18 1121.29 1
 5 11 -4 1272.85 1045.96 1
 5 11 -3 4516.1 1144.75 1
 5 11 -2 11139.9 1320.01 1
 5 11 -1 8100.08 1199.43 1
 5 11 0 45213.3 2411.34 1
 5 11 1 15479.5 1453.31 1
 5 11 2 4699.8 962.457 1
 5 11 3 49419.1 2405.77 1
 5 11 4 242.081 708.246 1
 5 11 5 43748.1 2201.45 1
 5 11 5 42179.1 1599.35 7
 5 11 6 1235.59 701.575 1
 5 11 7 1913.08 737.585 1
 5 11 8 3652.4 841.189 1
 5 11 9 8640.66 1094.83 1
 5 11 15 1818.05 889.098 5
 5 11 16 1819.91 1134.73 5
 5 11 17 11672.9 1694.38 5
 5 12 -5 5524.84 1337.82 1
 5 12 -4 9593.88 1457.49 1
 5 12 -3 6562.94 1315.21 1
 5 12 -2 4525.33 1067.91 1
 5 12 -1 954.755 885.419 1
 5 12 0 8951.16 1333.25 1
 5 12 1 62365.1 2959.59 1
 5 12 2 16614.1 1557.8 1
 5 12 3 22661 1737.55 1
 5 12 4 4769.22 960.033 1
 5 12 5 30314.9 1956.96 1
 5 12 6 27777.9 1847.08 1
 5 12 7 6682.26 1054.58 1
 5 12 8 2694.07 815.607 1
 5 12 9 8163.12 1109.44 1
 5 12 17 1428.65 1159.43 5
 5 13 -3 16035.1 1858.58 1
 5 13 -2 10681.4 1530.38 1
 5 13 -1 2158.98 1022.54 1
 5 13 0 1623.6 1049.39 1
 5 13 1 10289.3 1391.18 1
 5 13 2 65215.7 3086.36 1
 5 13 3 26874.2 1942.53 1
 5 13 4 4893.26 1091.05 1
 5 13 5 -404.834 757.056 1
 5 13 6 41065.1 2357 1
 5 13 7 34967.4 2147.87 1
 5 13 8 744.807 774.057 1
 5 13 9 19885.7 1643.29 1
 5 13 10 22163.2 1771.99 1
 5 14 -2 17970 1982.89 1
 5 14 -1 9045.29 1524.79 1
 5 14 0 2469.85 1095.64 1
 5 14 1 1009.58 1092.09 1
 5 14 2 9500.52 1351.98 1
 5 14 3 43773.9 2647.43 1
 5 14 4 8873.47 1336.2 1
 5 14 5 4928.6 1131.86 1
 5 14 6 3416.55 977.018 1
 5 14 7 19662.6 1758.38 1
 5 14 8 7076.8 1158.82 1
 5 14 9 1617.9 897.446 1
 5 14 10 20309.1 1779.53 1
 5 15 0 6947.75 1437.5 1
 5 15 1 1045.29 1069.52 1
 5 15 2 845.241 1005.87 1
 5 15 3 23377.7 1989.44 1
 5 15 4 34416.3 2421.18 1
 5 15 5 842.805 1063.58 1
 5 15 6 15228.8 1687.38 1
 5 15 7 3531.06 1139.05 1
 5 15 8 10806.7 1497.84 1
 5 15 9 12548.4 1442.81 1
 5 15 10 5360.89 1222.39 1
 5 16 2 633.302 1128.92 1
 5 16 3 5386.83 1473.85 1
 5 16 4 31289.3 2347.43 1
 5 16 5 23295.6 2117.5 1
 5 16 6 745.92 996.439 1
 5 16 7 15766.7 1714.23 1
 5 16 8 1642.63 884.786 1
 5 16 9 11232.5 1478.76 1
 5 16 10 -107.995 912.179 1
 6 -14 -5 5208.31 1408.95 4
 6 -14 -4 -862.228 988.068 4
 6 -14 -3 5134.54 1327.38 4
 6 -14 -2 2639.31 1206.17 4
 6 -14 -1 19005.5 1903.14 4
 6 -14 0 25747.2 2123.22 4
 6 -14 1 -1314.32 1094.87 4
 6 -14 2 1558.18 1172.82 4
 6 -14 3 3450.02 1138.69 4
 6 -14 4 16801.6 1788.09 4
 6 -13 -8 818.953 1072.06 4
 6 -13 -7 29163.4 2321.43 4
 6 -13 -6 9084.23 1398.43 4
 6 -13 -5 4790.97 1330.66 4
 6 -13 -4 10141.9 1409.13 4
 6 -13 -3 -1313.54 987.71 4
 6 -13 -2 4131.28 1119.91 4
 6 -13 -1 -152.56 895.61 4
 6 -13 0 25203.2 2039.35 4
 6 -13 1 23337.4 1980.72 4
 6 -13 2 1338.7 899.72 4
 6 -13 3 -462.436 832.019 4
 6 -13 4 3291.44 1002.99 4
 6 -13 5 14181.5 1572.2 4
 6 -13 6 7127.59 1285.25 4
 6 -12 -9 1681.65 1182.73 4
 6 -12 -8 869.648 1141.21 4
 6 -12 -7 9572.74 1420.13 4
 6 -12 -6 21281.3 1898.9 4
 6 -12 -5 1724.04 1070.86 4
 6 -12 -4 17365.1 1701.82 4
 6 -12 -3 15727.4 1553.43 4
 6 -12 -2 2476.83 1080.29 4
 6 -12 -1 1196.3 889.585 4
 6 -12 0 1238.01 931.249 4
 6 -12 1 18676.4 1675.12 4
 6 -12 2 24081.3 1832.9 4
 6 -12 3 334.379 797.931 4
 6 -12 4 3547.04 1007.84 4
 6 -12 5 4731.29 1154.7 4
 6 -12 6 6995.24 1165.07 2
 6 -12 6 6589.74 1165.86 4
 6 -12 7 200.433 916.444 2
 6 -12 7 751.538 752.132 4
 6 -12 8 2643.6 1054.4 4
 6 -11 -11 2480.57 1354.84 4
 6 -11 -10 10514.1 1657.68 4
 6 -11 -9 8513.49 1514.37 4
 6 -11 -8 1216.14 932.297 4
 6 -11 -7 2150.18 986.721 4
 6 -11 -6 6368.46 1150.77 4
 6 -11 -5 14920.1 1568.07 4
 6 -11 -4 97.408 871.373 4
 6 -11 -3 13160 1467.65 4
 6 -11 -2 7177.19 1171.5 4
 6 -11 -1 -428.906 780.928 4
 6 -11 0 1563.25 794.108 4
 6 -11 1 -31.3025 717.608 4
 6 -11 2 29992.7 1977.21 4
 6 -11 3 17934.5 1599.55 4
 6 -11 4 3769.1 957.65 4
 6 -11 5 6019.94 1065.8 4
 6 -11 6 293.588 788.318 4
 6 -11 6 476.708 853.354 2
 6 -11 7 2467.22 1021.66 2
 6 -11 7 2635.79 921.692 4
 6 -11 8 1359.92 1019.53 2
 6 -11 8 1019.25 880.843 4
 6 -10 -12 863.29 1096.5 4
 6 -10 -11 2001.12 1231.28 4
 6 -10 -10 914.525 1064.91 4
 6 -10 -9 27025.9 2199.28 4
 6 -10 -8 4555.58 1181.92 4
 6 -10 -7 198.579 867.552 4
 6 -10 -6 6821.51 1225.19 4
 6 -10 -6 6384.53 1271.62 7
 6 -10 -5 3918.41 996.469 7
 6 -10 -5 3403.49 998.288 4
 6 -10 -4 6025.23 1057.86 7
 6 -10 -4 8524.66 1209.07 4
 6 -10 -3 2266.93 706.044 7
 6 -10 -3 3021.24 981.851 4
 6 -10 -2 14808 1403.14 4
 6 -10 -1 16314.5 1503.47 4
 6 -10 0 2260.3 839.725 4
 6 -10 1 651.493 683.758 4
 6 -10 2 5514.64 1024.29 4
 6 -10 3 22773.9 1670.43 4
 6 -10 4 9692.44 1189.05 4
 6 -10 5 5016.14 896.65 4
 6 -10 6 9762.54 1212.26 2
 6 -10 6 11333 1300.94 4
 6 -10 7 -12.6244 805.918 2
 6 -10 7 1174.85 761.013 4
 6 -10 8 5335.3 1148.33 2
 6 -10 8 3917.53 991.852 4
 6 -10 9 -104.636 948.405 2
 6 -10 10 24915.1 2009.08 2
 6 -9 -12 1557.2 1108 4
 6 -9 -11 2475.15 1142.6 4
 6 -9 -10 2475.77 1168.99 4
 6 -9 -9 11323.2 1453.22 4
 6 -9 -8 41400.5 2493.62 4
 6 -9 -7 -429.409 753.251 4
 6 -9 -6 25887.8 1855.45 4
 6 -9 -5 5554.86 1096.34 7
 6 -9 -5 4832.66 956.257 4
 6 -9 -4 2522.25 843.282 4
 6 -9 -4 1521.39 780.047 7
 6 -9 -3 6190.77 984.705 7
 6 -9 -3 4218.55 887.097 4
 6 -9 -2 25178.4 1642.01 7
 6 -9 -2 29261.9 1822.95 4
 6 -9 -1 64640.2 2585.2 7
 6 -9 -1 65636.4 2797.96 4
 6 -9 0 10413.6 1135.05 4
 6 -9 0 9379.79 913.599 7
 6 -9 1 23809.1 1598.99 4
 6 -9 2 26.201 706.211 4
 6 -9 3 1474.3 719.922 4
 6 -9 4 28290.5 1741.49 4
 6 -9 5 16841.4 1418.76 4
 6 -9 6 2623.84 812.372 2
 6 -9 6 3458.56 900.167 4
 6 -9 7 5453.16 936.001 2
 6 -9 7 5953.98 954.519 4
 6 -9 8 4488.1 932.9 2
 6 -9 8 5126.87 1001.28 4
 6 -9 9 4571.66 1011.76 2
 6 -9 10 7312.36 1161.37 2
 6 -9 11 18966.7 1786.74 2
 6 -8 -12 16461.3 1837.47 4
 6 -8 -11 1331.46 1013.91 4
 6 -8 -10 14565 1588.2 4
 6 -8 -9 1869.81 946.909 4
 6 -8 -8 41103.2 2364.64 4
 6 -8 -7 33498.9 2054.25 4
 6 -8 -6 7382.06 1119.58 4
 6 -8 -5 24917 1694.05 4
 6 -8 -4 5278.97 920.034 4
 6 -8 -4 6529.65 1056.8 7
 6 -8 -3 934.012 648.472 7
 6 -8 -3 1134 729.314 4
 6 -8 -2 1708.93 692.419 4
 6 -8 -2 725.731 581.859 7
 6 -8 -1 55351.6 2398.49 7
 6 -8 -1 57314.6 2459.99 4
 6 -8 0 67401.2 2679.81 4
 6 -8 0 66271.8 2518.91 7
 6 -8 1 7420.12 773.735 7
 6 -8 1 6348.43 925.214 4
 6 -8 2 2505.78 490.738 7
 6 -8 2 2033.65 642.676 4
 6 -8 3 1331.07 409.886 7
 6 -8 3 674.313 382.713 6
 6 -8 3 932.521 580.614 4
 6 -8 4 19928 1418.57 4
 6 -8 4 20133.5 1181.83 6
 6 -8 4 20559 1112.9 7
 6 -8 5 41990.3 2064.38 4
 6 -8 5 42904.9 1816.24 6
 6 -8 6 10017.6 1035.01 2
 6 -8 6 11272.2 1154.84 4
 6 -8 7 7104.75 1013.45 2
 6 -8 7 9089.06 1060.69 4
 6 -8 8 9917.47 1165.34 2
 6 -8 9 4036.92 910.992 2
 6 -8 10 1542.26 874.095 2
 6 -8 11 21367.4 1791.42 2
 6 -8 12 7371.63 1239.23 2
 6 -7 -11 18672 1742.06 4
 6 -7 -10 537.119 833.694 4
 6 -7 -9 28926.5 1975.14 4
 6 -7 -8 3296.99 892.498 4
 6 -7 -7 69008.4 2907.27 4
 6 -7 -6 15067 1380.82 4
 6 -7 -5 3203.88 786.389 4
 6 -7 -4 14513.5 1505.05 7
 6 -7 -4 14697.7 1248.47 4
 6 -7 -3 1140.58 649.962 4
 6 -7 -3 899.63 639.763 7
 6 -7 -2 3833.92 752.888 7
 6 -7 -2 3196.88 717.245 4
 6 -7 -1 77857 3011.45 7
 6 -7 -1 81848.6 2913.57 4
 6 -7 0 89096.5 3029.91 7
 6 -7 0 82022.4 2968.86 4
 6 -7 1 76520.1 2803.86 4
 6 -7 1 80216.2 2715.78 7
 6 -7 2 10455.4 1015.52 4
 6 -7 2 10674.1 891.251 7
 6 -7 3 9945.1 998.727 4
 6 -7 3 9556.51 801.874 7
 6 -7 4 128.006 363.373 7
 6 -7 4 671.966 419.075 6
 6 -7 4 735.005 571.67 4
 6 -7 5 20464 1389.08 4
 6 -7 5 18255.1 1189.07 6
 6 -7 5 21225.5 1176.55 7
 6 -7 6 30884.3 1687.68 4
 6 -7 6 30602.6 1582.81 6
 6 -7 6 29162.3 1613.19 2
 6 -7 6 28368 1483.13 7
 6 -7 7 -475.776 634.864 2
 6 -7 7 460.092 651.335 4
 6 -7 8 35372.3 1889.36 2
 6 -7 9 4462.02 866.48 2
 6 -7 10 225.515 714.487 2
 6 -7 11 2080.1 937.699 2
 6 -7 12 13482.9 1490.73 2
 6 -7 13 12685.4 1544.56 2
 6 -6 -11 11709 1416.88 4
 6 -6 -10 15289.9 1517.43 4
 6 -6 -9 7686.49 1106.16 4
 6 -6 -8 6440.49 1030.5 4
 6 -6 -7 30074.2 1808.14 4
 6 -6 -6 52900 2340.44 4
 6 -6 -5 8978.79 1032.12 4
 6 -6 -4 32641 1720.73 4
 6 -6 -3 9161.98 1154.86 7
 6 -6 -3 11378.3 1037.24 4
 6 -6 -2 217.82 553.2 7
 6 -6 -2 323.213 487.597 4
 6 -6 -1 3655.13 751.505 7
 6 -6 -1 3738.02 724.505 4
 6 -6 0 27994.7 1498.92 4
 6 -6 0 26049.9 1552.47 7
 6 -6 1 98582 3157.61 4
 6 -6 1 101848 3208.62 7
 6 -6 2 45389.7 1954.65 4
 6 -6 2 46879.2 1880.91 7
 6 -6 3 4622.54 631.876 7
 6 -6 3 4726.25 733.894 4
 6 -6 4 6599.42 685.803 7
 6 -6 4 5684.58 664.244 6
 6 -6 4 5784.16 769.325 4
 6 -6 5 1730.12 452.409 7
 6 -6 5 1281.72 462.024 6
 6 -6 5 1842.92 650.67 4
 6 -6 6 29252 1514.2 6
 6 -6 6 27352 1541.14 4
 6 -6 6 26756.8 1484.14 2
 6 -6 6 29355.4 1468.05 7
 6 -6 7 10087.8 1004.39 2
 6 -6 7 10389.8 1053.31 4
 6 -6 8 12171.5 1131.62 2
 6 -6 9 50415.9 2280.83 2
 6 -6 10 9797.34 1187.75 2
 6 -6 11 69.0187 686.826 2
 6 -6 12 2612.35 1002.78 2
 6 -6 13 15640.3 1575.71 2
 6 -6 14 12762.4 1481.51 5
 6 -5 -10 38694.9 2194.36 4
 6 -5 -9 11607.6 1225.41 4
 6 -5 -8 162.116 647.037 4
 6 -5 -7 530.589 610.296 4
 6 -5 -6 47297.4 2128.02 4
 6 -5 -5 51744.4 2174.41 4
 6 -5 -4 -646.021 553.822 4
 6 -5 -3 46230.4 2405.41 7
 6 -5 -3 44973.9 1918.17 4
 6 -5 -2 23121.9 1604.43 7
 6 -5 -2 23067 1315.47 4
 6 -5 -1 6874.45 915.569 7
 6 -5 -1 7452.46 790.275 4
 6 -5 0 4932.66 764.321 7
 6 -5 0 4533.89 677.486 4
 6 -5 1 18943.1 1164.23 4
 6 -5 1 19561.2 1256.54 7
 6 -5 2 138705 3784.47 4
 6 -5 2 147968 3910.61 7
 6 -5 3 93917.5 2917.6 7
 6 -5 3 95743.6 2942.1 4
 6 -5 4 306.28 391.091 7
 6 -5 4 731.504 499.485 4
 6 -5 5 11001 888.646 6
 6 -5 5 9404.03 900.815 4
 6 -5 5 10089.6 871.663 7
 6 -5 6 22618.4 1289.98 2
 6 -5 6 22854.8 1330.35 6
 6 -5 6 20364.5 1287.55 4
 6 -5 6 21607.1 1266.62 7
 6 -5 7 17066.8 1186.04 7
 6 -5 7 16366.5 1153.54 2
 6 -5 7 16273.3 1158.58 4
 6 -5 7 16965.1 1178 6
 6 -5 8 66.6754 582.847 2
 6 -5 9 27220.7 1584.04 2
 6 -5 10 41702.9 2072.87 2
 6 -5 11 9092.5 1112.95 2
 6 -5 12 801.232 844.045 2
 6 -5 14 13424.1 1481.6 5
 6 -4 -9 38467.2 2011.8 4
 6 -4 -8 21907.3 1469.66 4
 6 -4 -7 1829.81 651.306 4
 6 -4 -6 16208 1197.64 4
 6 -4 -5 26366.7 1422.53 4
 6 -4 -4 44105.7 1856.9 4
 6 -4 -3 11186.9 914.578 4
 6 -4 -2 121792 4211.92 7
 6 -4 -2 132130 3572.52 4
 6 -4 -1 102699 2996.07 4
 6 -4 -1 100344 3523.77 7
 6 -4 0 13676.2 1118.01 7
 6 -4 0 14513.5 949.712 4
 6 -4 1 56102 1551.96 1
 6 -4 1 59522.9 2269.32 7
 6 -4 2 23980.7 810.709 1
 6 -4 2 26955.9 1409.03 7
 6 -4 2 26317.6 1287.82 4
 6 -4 3 202453 4929.94 4
 6 -4 3 199398 5014.05 7
 6 -4 4 92008 2826.85 4
 6 -4 4 95222 2885.34 7
 6 -4 5 3231.07 548.007 2
 6 -4 5 2752.59 515.173 7
 6 -4 5 2977.58 557.698 6
 6 -4 5 1761.69 500.176 4
 6 -4 6 1787.08 476.616 2
 6 -4 6 1856.54 451.589 7
 6 -4 6 1589.56 492.288 6
 6 -4 6 1760.13 562.752 4
 6 -4 7 13578 1083.37 6
 6 -4 7 12765.8 1030.48 7
 6 -4 8 12006.9 1006.61 2
 6 -4 9 2049.69 704.916 2
 6 -4 10 32111.2 1748.66 2
 6 -4 11 14715.6 1275.03 2
 6 -4 13 339.69 774.916 5
 6 -4 14 4110.78 938.605 5
 6 -4 15 18034.1 1613 5
 6 -3 -9 14757.6 1230.1 4
 6 -3 -8 69751.9 2627.7 4
 6 -3 -7 3861.87 703.573 4
 6 -3 -6 4613.55 706.12 4
 6 -3 -5 39577.5 1684.55 4
 6 -3 -4 4380.28 608.149 4
 6 -3 -3 28458.5 1344.3 4
 6 -3 -2 68286.8 2837 7
 6 -3 -2 64404.6 2131.44 4
 6 -3 -1 243218 6437.33 7
 6 -3 -1 242944 5584.89 4
 6 -3 0 117884 3116.98 4
 6 -3 0 115098 3706.02 7
 6 -3 0 112785 2735.66 1
 6 -3 1 24149.9 1171.91 4
 6 -3 1 24391.6 834.479 1
 6 -3 2 -91.3179 420.166 7
 6 -3 2 642.724 374.419 4
 6 -3 2 492.861 119.124 1
 6 -3 3 102654 2881.25 4
 6 -3 3 102819 3117.1 7
 6 -3 4 84325.7 2544.96 4
 6 -3 4 83109.9 2658.17 7
 6 -3 5 1174.63 382.244 2
 6 -3 5 979.161 398.387 7
 6 -3 5 1191.19 483.86 6
 6 -3 5 1146.13 476.719 4
 6 -3 6 13164.7 1027.01 6
 6 -3 6 13810.7 955.519 4
 6 -3 6 11928.7 955.546 7
 6 -3 6 13897 905.722 2
 6 -3 7 20905.1 1185.97 2
 6 -3 7 21113.6 1321.85 6
 6 -3 7 19270.6 1254.03 7
 6 -3 8 8885.4 913.203 7
 6 -3 8 9955.73 901.819 2
 6 -3 8 9392.9 976.592 6
 6 -3 9 13842 1090.45 2
 6 -3 10 10287.6 1035.6 2
 6 -3 12 3044.54 830.731 5
 6 -3 13 11.3644 632.41 5
 6 -3 14 149.51 710.218 5
 6 -3 15 5702.84 1139.63 5
 6 -2 -8 82757.1 2804 4
 6 -2 -7 44571.6 1865.51 4
 6 -2 -6 -266.335 439.85 4
 6 -2 -5 30346.1 1393.56 4
 6 -2 -4 8909.21 733.092 4
 6 -2 -3 70124.9 2172.01 4
 6 -2 -2 35874.4 1369.73 4
 6 -2 -2 32617.3 1919.85 7
 6 -2 -1 39601.3 1435.6 4
 6 -2 -1 36441.6 1965.63 7
 6 -2 0 421328 8871.01 4
 6 -2 0 438592 9843.03 7
 6 -2 1 146199 3534.41 4
 6 -2 1 139499 3022.67 1
 6 -2 1 143861 4135.07 7
 6 -2 2 29257.2 1213.69 4
 6 -2 2 29175.9 1459.4 7
 6 -2 3 13955.3 835.552 4
 6 -2 3 13276.5 985.446 7
 6 -2 4 32793.3 1351.8 4
 6 -2 4 33464.7 1520.2 7
 6 -2 4 31617.7 1196.57 2
 6 -2 5 19799.1 1059.22 4
 6 -2 5 17762.9 1093.49 7
 6 -2 5 17584 901.719 2
 6 -2 6 2808.45 568.069 7
 6 -2 6 2545.38 454.042 2
 6 -2 6 3371.94 595.713 6
 6 -2 7 86465.8 2558.99 2
 6 -2 7 86840.3 2843.11 6
 6 -2 7 82809.5 2790.32 7
 6 -2 8 24590 1268.48 2
 6 -2 8 22518.9 1398.69 6
 6 -2 8 21806.4 1385.64 7
 6 -2 9 17236.8 1154.35 2
 6 -2 12 6059.84 897.892 5
 6 -2 13 -438.985 683.192 5
 6 -2 14 328.943 732.368 5
 6 -2 15 3124.63 1010.98 5
 6 -2 16 4130.16 1134.51 5
 6 -1 -7 75911 2458.36 4
 6 -1 -6 50360.4 1842.48 4
 6 -1 -5 12428.1 840.546 4
 6 -1 -4 26209.4 1163.05 4
 6 -1 -3 680.132 322.159 4
 6 -1 -2 42157.3 1425.65 4
 6 -1 -2 42531.8 2175.29 7
 6 -1 -1 45237.4 2198.24 7
 6 -1 -1 46117.8 1471.4 4
 6 -1 0 57733.4 1712.88 4
 6 -1 0 58736.3 2405.67 7
 6 -1 1 355592 7475.89 4
 6 -1 1 366570 8365.22 7
 6 -1 2 13228.2 1029.51 7
 6 -1 2 11676.5 698.999 4
 6 -1 3 71689.6 2105.25 4
 6 -1 3 75920.5 2498.21 7
 6 -1 3 74244.2 1874.99 2
 6 -1 4 11440.4 727.655 4
 6 -1 4 11272.5 900.725 7
 6 -1 4 10561.6 604.835 2
 6 -1 5 34197 1228.23 2
 6 -1 5 35825.8 1581.07 7
 6 -1 6 26496.3 1407.83 6
 6 -1 6 26763.8 1159.61 2
 6 -1 6 27222.3 1402.71 7
 6 -1 7 495.678 438.495 7
 6 -1 7 213.918 429.93 6
 6 -1 7 1334.3 425.897 2
 6 -1 8 60927.2 2416.74 7
 6 -1 8 66072.9 2136.85 2
 6 -1 8 59334.2 2409.13 6
 6 -1 9 1787.59 593.387 7
 6 -1 10 3421.98 618.73 5
 6 -1 11 1807.44 522.667 5
 6 -1 12 9587.19 1014.51 5
 6 -1 13 4423.85 848.166 5
 6 -1 14 893.651 808.511 5
 6 -1 15 1719.16 876.305 5
 6 -1 16 191.048 789.976 5
 6 0 -6 40096 1503.15 4
 6 0 -5 15605.3 850.508 4
 6 0 -4 58420.2 1765.39 4
 6 0 -3 63617 1801.22 4
 6 0 -2 38426.5 2073.1 7
 6 0 -2 40315.4 1284.22 4
 6 0 -1 6859.42 460.207 4
 6 0 -1 7080.86 921.926 7
 6 0 0 103443 2451.33 4
 6 0 0 99084.2 2354.26 5
 6 0 0 97206 3330.79 7
 6 0 1 52006 1529.41 4
 6 0 1 54571.8 1390.89 5
 6 0 1 53647.9 2177.81 7
 6 0 2 93617.9 2400.6 4
 6 0 2 95621.1 2055.24 1
 6 0 2 98819.7 2228.7 5
 6 0 2 98369.4 3035.18 7
 6 0 2 94812.9 2077.77 2
 6 0 3 68647.6 1923.87 4
 6 0 3 70072.1 2398.05 7
 6 0 3 69355.2 1676.29 2
 6 0 4 78961.9 1968.56 2
 6 0 4 80378.6 2577.67 7
 6 0 5 99226.9 2499.81 2
 6 0 5 105229 3084.51 7
 6 0 6 106080 2724.28 2
 6 0 6 107919 3198.56 6
 6 0 6 105851 3178.9 7
 6 0 7 25848.1 1395.59 7
 6 0 7 25917.8 1419.85 6
 6 0 8 8772.57 921.943 6
 6 0 8 8205.76 891.609 7
 6 0 9 49776.8 1765.17 5
 6 0 9 44540 2121.43 7
 6 0 10 11801.1 919.507 5
 6 0 11 658.675 544.602 5
 6 0 12 3010.31 650.231 5
 6 0 13 23639.1 1534.93 5
 6 0 14 14815.2 1308.78 5
 6 0 15 253.264 805.055 5
 6 0 16 2349.83 901.357 5
 6 0 17 1777.01 934.099 5
 6 1 -5 17047.6 816.644 4
 6 1 -4 18891.2 812.192 4
 6 1 -3 58338.7 1562.08 4
 6 1 -2 141278 3017.19 2
 6 1 -2 138408 4456.4 7
 6 1 -2 143029 3095.28 4
 6 1 -1 129151 2656.66 2
 6 1 -1 131407 2852.61 4
 6 1 -1 127988 4100.41 7
 6 1 0 15733.3 607.188 4
 6 1 0 15767.6 598.25 5
 6 1 0 15035 1179.88 7
 6 1 1 25198 849.129 4
 6 1 1 25728.2 727.83 5
 6 1 1 26246.6 1472.34 7
 6 1 2 85594.7 2018.94 1
 6 1 2 84976.9 2120.12 4
 6 1 2 86915.3 1826.9 5
 6 1 2 92354 2879.46 7
 6 1 3 66243.6 1584.03 1
 6 1 3 69153.8 2360.46 7
 6 1 4 36264.3 1613.8 7
 6 1 5 12018.9 918.263 7
 6 1 6 33044.2 1539.13 6
 6 1 6 30620 1478.66 7
 6 1 7 84231.6 2233.23 5
 6 1 7 87121.6 2836.81 7
 6 1 7 88634 2841.49 6
 6 1 8 5198.37 725.88 7
 6 1 8 5606.98 768.762 6
 6 1 8 4438.85 487.187 5
 6 1 9 80437.3 2365.93 5
 6 1 9 76353.2 2868.98 7
 6 1 10 59867.2 2052.3 5
 6 1 11 8807.86 844.119 5
 6 1 12 18.6735 586.998 5
 6 1 13 234.922 567.728 5
 6 1 14 19755.7 1475.56 5
 6 1 15 17582.4 1425.84 5
 6 1 16 -226.505 759.966 5
 6 1 17 3432.36 971.199 5
 6 2 -4 25695.9 839.235 4
 6 2 -3 11437.4 449.083 4
 6 2 -2 168549 3374.85 4
 6 2 -2 167380 5022.57 7
 6 2 -1 289702 5723.89 4
 6 2 -1 299744 7450.25 7
 6 2 0 7903.29 880.035 7
 6 2 1 19180 1273.73 7
 6 2 2 8267.28 508.132 1
 6 2 2 8084.1 812.571 7
 6 2 3 168238 4370.65 7
 6 2 3 165907 3652.01 1
 6 2 4 93363 1908.33 5
 6 2 4 98057.3 2271.93 1
 6 2 4 96032.3 2936.24 7
 6 2 5 8771.5 811 7
 6 2 5 9284.49 396.611 5
 6 2 6 129180 3643.8 6
 6 2 6 133682 3694.95 7
 6 2 6 129355 2895.58 5
 6 2 7 7520.36 780.062 7
 6 2 7 6695.93 766.971 6
 6 2 7 7477.53 508.724 5
 6 2 8 25891.8 1484.37 7
 6 2 8 26336 1490.49 6
 6 2 8 27379.4 1078.48 5
 6 2 9 11611.2 1085.69 6
 6 2 9 13452.3 817.085 5
 6 2 9 12994.1 1123.32 7
 6 2 10 80391 2468.74 5
 6 2 11 17093.2 1090.35 5
 6 2 12 3874.8 716.534 5
 6 2 13 11011.8 1088.91 5
 6 2 14 -63.294 616.253 5
 6 2 15 27838.4 1780.74 5
 6 2 16 11391.6 1347.74 5
 6 2 17 6468.45 1215.29 5
 6 3 -3 58221.9 2764.59 7
 6 3 -2 5774.14 927.982 7
 6 3 -1 216393 5889.64 7
 6 3 0 175986 4900.03 7
 6 3 1 1340.55 336.585 1
 6 3 1 1485.95 478.373 7
 6 3 2 20057.6 1202.71 7
 6 3 2 19266.8 880.257 1
 6 3 3 59067.8 1732.35 1
 6 3 3 61276.4 2211.95 7
 6 3 4 179889 4081.67 1
 6 3 4 185429 4664.86 7
 6 3 5 122229 2561.58 5
 6 3 5 120741 2959.15 1
 6 3 5 121238 3477.36 7
 6 3 6 34409.6 1556.71 6
 6 3 6 33443.8 1008.08 5
 6 3 6 35499.5 1605.79 7
 6 3 7 25484.2 1410.31 6
 6 3 7 27493.1 977.654 5
 6 3 7 27617.5 1448.19 7
 6 3 8 29002.7 1550.35 7
 6 3 8 30120.5 1587.54 6
 6 3 8 29633 1119.73 5
 6 3 9 23750.3 1473.22 6
 6 3 9 24967.3 1115.17 5
 6 3 9 26002.2 1521.7 7
 6 3 10 18821.2 1033.03 5
 6 3 11 91204.8 2805.19 5
 6 3 12 66987.9 2397.98 5
 6 3 13 -848.242 640.668 5
 6 3 14 4605.99 892.963 5
 6 3 15 8363.72 1105.33 5
 6 3 16 17160.3 1583.17 5
 6 3 17 1146.78 945.594 5
 6 3 18 3071.15 1095.51 5
 6 4 -3 862.698 703.474 7
 6 4 -2 10313.3 1118.32 7
 6 4 -1 29582.4 1722.87 7
 6 4 0 386850 9069.5 7
 6 4 0 393143 8435.44 1
 6 4 1 161609 3950.11 1
 6 4 1 157459 4418.4 7
 6 4 2 18284.8 945.964 1
 6 4 2 18145.2 1185.3 7
 6 4 3 3630.41 603.154 7
 6 4 3 2871.09 414.721 1
 6 4 4 78183.8 2228.57 1
 6 4 4 77508.1 2534.87 7
 6 4 5 86483.7 2403.17 1
 6 4 5 86233.9 2748.49 7
 6 4 6 2802.72 526.645 7
 6 4 6 2651.34 502.27 6
 6 4 6 2654.22 402.991 1
 6 4 6 2596.31 298.549 5
 6 4 7 82947.4 2720.87 6
 6 4 7 78574.1 2080.94 5
 6 4 7 86579.2 2790.9 7
 6 4 8 50443.2 2104.27 6
 6 4 8 48825.5 1563.48 5
 6 4 8 50926.2 2118.57 7
 6 4 9 5670.79 831.449 7
 6 4 9 5619.47 822.185 6
 6 4 9 5514.5 564.181 5
 6 4 10 4285.04 562.05 5
 6 4 11 63228.5 2202.17 5
 6 4 12 174666 4618.82 5
 6 4 13 27862.9 1581.12 5
 6 4 14 998.778 725.609 5
 6 4 15 -1287.39 822.038 5
 6 4 16 5279.93 1025.1 5
 6 4 17 7577.48 1294.94 5
 6 4 18 -1070.06 1116.36 5
 6 5 -4 9737.96 1268.52 7
 6 5 -3 12573.1 1362.5 7
 6 5 -2 14571 1291.1 7
 6 5 -1 9365.99 891.165 1
 6 5 -1 9044.35 1009.81 7
 6 5 0 154378 4068.65 1
 6 5 0 153936 4435.14 7
 6 5 1 503771 10686.2 1
 6 5 1 513934 11110.7 7
 6 5 2 21067.8 1247.56 7
 6 5 2 20662.8 1104.83 1
 6 5 3 5059.32 676.787 7
 6 5 3 5214.54 570.677 1
 6 5 4 546.706 402.47 7
 6 5 4 582.067 356.384 1
 6 5 5 12250.8 843.471 1
 6 5 5 12150.4 942.83 7
 6 5 6 21906.3 1239.32 6
 6 5 6 21761.5 1263.94 7
 6 5 6 21670.3 1127.55 1
 6 5 7 17460.7 1148.16 6
 6 5 7 16791.3 1020.08 1
 6 5 7 18173.6 833.927 5
 6 5 7 19797.4 1214.49 7
 6 5 8 94637.3 3040.47 6
 6 5 8 89042.4 2460.52 5
 6 5 8 91187.6 3052.92 7
 6 5 9 21120.8 1421.29 7
 6 5 9 26261.9 1172.29 5
 6 5 10 715.345 425.446 5
 6 5 11 1700.64 520.287 5
 6 5 12 125134 3647.8 5
 6 5 13 73005.8 2697.36 5
 6 5 14 11309.7 1120.28 5
 6 5 15 3008.54 870.883 5
 6 5 16 1401.82 927.942 5
 6 5 17 5800.43 1214.24 5
 6 5 18 6025 1332.17 5
 6 6 -5 1006.32 905.436 7
 6 6 -4 -143.649 718.305 7
 6 6 -3 6693.1 1038.79 7
 6 6 -2 34538 1795.45 1
 6 6 -2 33466.6 1931.71 7
 6 6 -1 2442.02 646.382 7
 6 6 -1 3857.03 705.718 1
 6 6 0 21223.3 1271.51 1
 6 6 0 21052.6 1356.56 7
 6 6 1 199806 5068.81 1
 6 6 1 205761 5266.57 7
 6 6 2 79888.3 2537.31 1
 6 6 2 74268.7 2568.33 7
 6 6 3 7831.35 775.194 7
 6 6 3 7594.85 741.343 1
 6 6 4 27116.8 1313.59 1
 6 6 4 25981.2 1349.64 7
 6 6 5 3772.35 602.082 7
 6 6 5 3173.91 524.186 1
 6 6 6 9128.38 847.638 7
 6 6 6 8640.57 755.696 1
 6 6 6 11038.8 911.041 6
 6 6 7 20764.5 1230.4 6
 6 6 7 18001.2 1129.65 1
 6 6 7 17973.9 1202.44 7
 6 6 8 3906.11 632.789 6
 6 6 8 5105.62 737.567 7
 6 6 8 4729.97 545.78 5
 6 6 9 32453.6 1373.46 5
 6 6 9 28880.4 1682.31 7
 6 6 10 28151.3 1380.34 5
 6 6 11 4567.86 687.785 5
 6 6 12 426.647 527.189 5
 6 6 13 37441.9 1869.71 5
 6 6 14 29219.4 1733.22 5
 6 6 15 1567.61 832.392 5
 6 6 16 1665.7 810.954 5
 6 6 17 -220.714 929.232 5
 6 6 18 4502.38 1128.97 5
 6 7 -8 1951.01 1117.54 7
 6 7 -7 14174.6 1793.21 7
 6 7 -6 992.988 948.782 7
 6 7 -5 17521.7 1677.43 7
 6 7 -4 4113.57 988.835 7
 6 7 -3 5245.57 949.159 7
 6 7 -3 4811.75 874.15 1
 6 7 -2 22237.7 1508.99 1
 6 7 -2 22502.7 1578.68 7
 6 7 -1 65490.2 2513.44 1
 6 7 -1 57749.8 2499.15 7
 6 7 0 2717.98 607.871 7
 6 7 0 2964.59 679.188 1
 6 7 1 16257.9 1142.35 7
 6 7 1 19991.7 1245.98 1
 6 7 2 91432.7 2907.19 7
 6 7 2 93872.5 2970.03 1
 6 7 3 162073 4324.91 7
 6 7 3 168113 4428.43 1
 6 7 4 7893.03 780.576 7
 6 7 4 7943.72 816.859 1
 6 7 5 2451.73 515.476 7
 6 7 5 2030.05 480.626 6
 6 7 5 2518.45 600.665 1
 6 7 6 2739.06 558.312 7
 6 7 6 3510.82 574.083 6
 6 7 6 2293.78 533.085 1
 6 7 7 8882.09 868.947 7
 6 7 7 8736 836.508 6
 6 7 7 8387.02 853.201 1
 6 7 8 1739.22 595.44 7
 6 7 8 1793.91 585.13 1
 6 7 8 979.007 469.848 6
 6 7 9 1355.1 551.576 7
 6 7 9 1986.48 499.039 5
 6 7 10 59743.7 2159.53 5
 6 7 11 5415.98 778.349 5
 6 7 12 7493.69 890.105 5
 6 7 13 1376.62 626.362 5
 6 7 14 13489 1278.32 5
 6 7 15 9832.11 1173.61 5
 6 7 16 2113.81 926.527 5
 6 7 17 2892.05 1096.51 5
 6 7 18 3041.49 1123.43 5
 6 8 -6 11357.2 1518.16 1
 6 8 -5 742.729 786.752 1
 6 8 -5 1876.74 911.498 7
 6 8 -4 14003.7 1443.41 7
 6 8 -4 17017.9 1590.38 1
 6 8 -3 2353 790.144 7
 6 8 -3 1495.2 836.476 1
 6 8 -2 46739.5 2322.27 7
 6 8 -2 50605.6 2380.01 1
 6 8 -1 36997.9 1968.72 1
 6 8 -1 38969.6 1939.83 7
 6 8 0 17765.4 1334.72 1
 6 8 0 17558.7 1242.49 7
 6 8 1 10560.4 1024.6 1
 6 8 1 10860 910.725 7
 6 8 2 19453.5 1180.54 7
 6 8 2 21290.4 1372.42 1
 6 8 3 81010.5 2815.3 1
 6 8 3 78640.7 2591.05 7
 6 8 4 119037 3403.4 7
 6 8 4 119623 3616.43 1
 6 8 5 10392 821.851 6
 6 8 5 11123.4 975.462 1
 6 8 5 10986.8 873.095 7
 6 8 6 36450.5 1584.1 6
 6 8 6 33011.9 1577.91 7
 6 8 6 31249.9 1634.9 1
 6 8 7 23027.9 1308.3 6
 6 8 7 21132.6 1340.4 1
 6 8 7 21876.8 1337.59 7
 6 8 8 14814.4 1136.13 6
 6 8 8 13251.2 1106.46 1
 6 8 8 13651.8 1146.31 7
 6 8 10 24642.8 1385.97 5
 6 8 11 37972.8 1827.79 5
 6 8 12 4788.51 832.577 5
 6 8 13 14265 1280.16 5
 6 8 14 352.456 713.727 5
 6 8 15 11250.2 1297.73 5
 6 8 16 16249.5 1599.93 5
 6 8 17 651.773 963.028 5
 6 8 18 5058.89 1322.5 5
 6 9 -7 1521.69 1136.22 1
 6 9 -6 2652.87 992.413 1
 6 9 -5 11060.4 1529.23 1
 6 9 -4 -339.315 801.454 1
 6 9 -3 29473 2005.81 1
 6 9 -2 221.864 577.043 7
 6 9 -2 2397.5 935.937 1
 6 9 -1 104947 3687.6 1
 6 9 -1 103222 3437.98 7
 6 9 0 10543.5 952.878 7
 6 9 0 9212.38 1077.96 1
 6 9 1 19227.6 1184.31 7
 6 9 1 16565.1 1334.24 1
 6 9 2 7995.55 813.596 7
 6 9 2 8165.85 1004.39 1
 6 9 3 2406.94 513.817 7
 6 9 3 2581.49 703.554 1
 6 9 4 10541.6 1045.45 1
 6 9 4 9866.94 831.211 7
 6 9 5 67653.7 2250.56 6
 6 9 5 62266.9 2523.08 1
 6 9 5 67897.7 2327.29 7
 6 9 6 9548.92 854.332 7
 6 9 6 8977.96 821.036 6
 6 9 6 9911.06 991.749 1
 6 9 7 45918.3 1921.33 6
 6 9 7 47870.4 2131.56 1
 6 9 7 48213.3 2011.01 7
 6 9 8 42.189 569.049 1
 6 9 8 365.09 502.731 7
 6 9 9 29663.8 1706.44 1
 6 9 11 45825.8 2076 5
 6 9 12 47091.3 2180.08 5
 6 9 13 3490.52 846.262 5
 6 9 14 2607.25 827.233 5
 6 9 15 -1065.49 873.375 5
 6 9 16 19818.5 1772.54 5
 6 9 17 4100.67 1125.24 5
 6 9 18 5680.03 1391.99 5
 6 10 -6 2019.95 1217.54 1
 6 10 -5 10844.9 1482.78 1
 6 10 -4 2792.42 1047.16 1
 6 10 -3 843.159 831.598 1
 6 10 -2 18778 1657.29 1
 6 10 -1 16598.1 1548.8 1
 6 10 0 75486 3096.44 1
 6 10 1 734.504 452.839 7
 6 10 1 23.5521 720.273 1
 6 10 2 7219.14 711.933 7
 6 10 2 10419 1168.94 1
 6 10 3 19116.5 1452.62 1
 6 10 3 18800.4 1106.79 7
 6 10 4 -73.1385 401.555 7
 6 10 4 -49.2137 391.716 6
 6 10 4 687.289 636.281 1
 6 10 5 73630.9 2431.5 7
 6 10 5 72921.5 2358.03 6
 6 10 5 71433.7 2829.18 1
 6 10 6 1688.56 503.029 7
 6 10 6 1897.41 521.432 6
 6 10 6 2070.25 693.042 1
 6 10 7 32508.9 1809.87 1
 6 10 7 33460 1641.39 7
 6 10 8 23732.2 1590.87 1
 6 10 9 2154.33 749.478 1
 6 10 13 11954.3 1237.32 5
 6 10 14 -1407.3 884.871 5
 6 10 15 6371.34 1194.3 5
 6 10 16 1867.03 1073.31 5
 6 10 17 16311 1801.38 5
 6 10 18 -1469.75 1224.94 5
 6 11 -5 1911.32 1041.69 1
 6 11 -4 20458.3 1905.41 1
 6 11 -3 22.7809 942.637 1
 6 11 -2 4079.95 1105.73 1
 6 11 -1 -460.496 897.57 1
 6 11 0 32028 2055.88 1
 6 11 1 52150.7 2599.81 1
 6 11 2 5101.82 923.05 1
 6 11 3 2925.29 900.323 1
 6 11 4 704.694 707.519 1
 6 11 4 816.555 393.309 7
 6 11 5 21269.3 1585.01 1
 6 11 5 22559 1191.98 7
 6 11 6 17782.3 1110.99 6
 6 11 6 17195.9 1408.61 1
 6 11 6 18281.3 1151.01 7
 6 11 7 2363.44 789.192 1
 6 11 8 19601.4 1535.54 1
 6 11 9 15810.7 1391.69 1
 6 11 10 3077.21 882.97 1
 6 11 15 2093.81 978.282 5
 6 11 16 -703.493 976.528 5
 6 11 17 2178.16 1182.26 5
 6 11 18 9161.93 1503.47 5
 6 12 -4 4445.09 1388.88 1
 6 12 -3 15676 1786.59 1
 6 12 -2 -1087.54 1060.48 1
 6 12 -1 230.303 780.072 1
 6 12 0 4012.51 1074.76 1
 6 12 1 21596.9 1751.86 1
 6 12 2 59893 2928.77 1
 6 12 3 3234.43 785.164 1
 6 12 4 6588.49 1047.74 1
 6 12 5 17183 1521.56 1
 6 12 6 17672 1510.66 1
 6 12 7 2018.51 776.721 1
 6 12 8 1028.22 828.212 1
 6 12 9 55578.2 2652.92 1
 6 12 10 20319.1 1702.52 1
 6 13 -3 12783 1670.16 1
 6 13 -2 19065.3 1877.66 1
 6 13 -1 1736.76 1077.41 1
 6 13 0 1147.07 980.428 1
 6 13 1 3465.62 1075.59 1
 6 13 2 24540.1 1953.41 1
 6 13 3 30694.4 2116.16 1
 6 13 4 625.55 914.395 1
 6 13 5 7198.13 1159.89 1
 6 13 6 -248.062 790.182 1
 6 13 7 7169.42 1103.35 1
 6 13 8 726.604 742.529 1
 6 13 9 4159.64 988.341 1
 6 13 10 28689.4 1998.29 1
 6 14 -1 36794 2618.17 1
 6 14 0 6417.9 1493.49 1
 6 14 1 -320.67 969.311 1
 6 14 2 4769.8 1211.21 1
 6 14 3 11414.5 1472.85 1
 6 14 4 11468 1453.55 1
 6 14 5 4846.48 1136.4 1
 6 14 6 18447.1 1747.87 1
 6 14 7 1346.07 867.074 1
 6 14 8 3536.45 1081.81 1
 6 14 9 326.477 875.732 1
 6 14 10 8008.28 1271.77 1
 6 15 1 7012.58 1490.06 1
 6 15 2 -253.696 1023.95 1
 6 15 3 3368.34 1214.67 1
 6 15 4 15252.3 1675.78 1
 6 15 5 6111.03 1229.81 1
 6 15 6 3838.55 1222.49 1
 6 15 7 15285.1 1670.38 1
 6 15 8 3279.22 1077.41 1
 6 15 9 6920.06 1210.21 1
 6 15 10 -0.96177 987.893 1
 6 15 11 30435.1 2244.16 1
 6 16 4 7287.9 1504.74 1
 6 16 5 16691 1834.17 1
 6 16 6 2881.67 1240.16 1
 6 16 7 16706.3 1898.19 1
 6 16 8 27741.2 2233.07 1
 6 16 9 456.453 923.692 1
 6 16 10 1138.44 1009.04 1
 7 -14 -2 2758.95 1068.25 4
 7 -14 -1 257.377 913.611 4
 7 -14 0 49470.6 3022.72 4
 7 -14 1 16570.2 1867.06 4
 7 -13 -6 11912.4 1717.74 4
 7 -13 -5 371.232 1048.98 4
 7 -13 -4 18584.3 1852.67 4
 7 -13 -3 10419 1581.55 4
 7 -13 -2 -47.025 1037.14 4
 7 -13 -1 1034.69 1033.15 4
 7 -13 0 15453.8 1692.21 4
 7 -13 1 33113 2379.99 4
 7 -13 2 5222.46 1208.8 4
 7 -13 3 11458.6 1579.81 4
 7 -13 4 7266.32 1358.62 4
 7 -13 5 3237.09 1080.66 4
 7 -12 -8 2487.97 1190.99 4
 7 -12 -7 7465.28 1359.89 4
 7 -12 -6 5555.35 1390.26 4
 7 -12 -5 14235.5 1612.86 4
 7 -12 -4 -880.598 1106.31 4
 7 -12 -3 37761 2454.56 4
 7 -12 -2 12699.8 1462.88 4
 7 -12 -1 1868.55 967.1 4
 7 -12 0 1972.1 1134.18 4
 7 -12 1 8441.02 1342.26 4
 7 -12 2 22380.6 1897.48 4
 7 -12 3 2255.94 1000.49 4
 7 -12 4 9972.06 1412.93 4
 7 -12 5 10280.4 1445.6 4
 7 -12 6 433.782 961.74 2
 7 -12 6 2467.79 1057.4 4
 7 -12 7 5152.87 1308.47 2
 7 -12 7 5055.47 1219.96 4
 7 -11 -9 4425.38 1191.58 4
 7 -11 -9 2886.8 1363.23 7
 7 -11 -8 1272.35 1148.5 4
 7 -11 -7 9927.94 1418.93 4
 7 -11 -6 12242.4 1540.7 4
 7 -11 -5 11981.8 1467.69 4
 7 -11 -4 13038.9 1525.18 4
 7 -11 -3 6689.01 1219.01 4
 7 -11 -2 41899.5 2471.94 4
 7 -11 -1 3571.32 985.158 4
 7 -11 0 6053.19 1238.33 4
 7 -11 1 6662.68 1134.25 4
 7 -11 2 6079.15 1095.94 4
 7 -11 3 28360 1999.05 4
 7 -11 4 2192.84 906.059 4
 7 -11 5 12960.1 1402.37 4
 7 -11 6 8483.84 1240.36 2
 7 -11 6 6041.96 1089.28 4
 7 -11 7 1635.78 951.385 2
 7 -11 7 478.721 772.273 4
 7 -11 8 1856.05 910.712 2
 7 -11 8 -8.50699 874.895 4
 7 -10 -11 2127.7 1338.83 4
 7 -10 -10 1886.8 1187.67 4
 7 -10 -9 5890.67 1322.08 4
 7 -10 -8 18143 1746.75 4
 7 -10 -8 12965.2 1887.94 7
 7 -10 -7 2362.84 986.256 4
 7 -10 -7 5340.62 1377.54 7
 7 -10 -6 13659.1 1739.93 7
 7 -10 -6 17549.1 1672.08 4
 7 -10 -5 8603.44 1393.16 7
 7 -10 -5 9582.97 1370.8 4
 7 -10 -4 973.857 685.296 7
 7 -10 -4 1438.47 864.884 4
 7 -10 -3 4401.89 1018.33 4
 7 -10 -2 26194 1895.09 4
 7 -10 -1 39143.9 2266.03 4
 7 -10 0 204.928 801.698 4
 7 -10 1 20715.3 1649.37 4
 7 -10 2 796.304 671.601 4
 7 -10 3 16638.3 1517.92 4
 7 -10 4 25863.9 1822.19 4
 7 -10 5 445.323 778.564 4
 7 -10 6 21431.7 1686.37 4
 7 -10 6 18467 1593.77 2
 7 -10 7 8132.24 1212.56 2
 7 -10 7 7484.73 1145.92 4
 7 -10 8 2347.79 957.564 2
 7 -10 8 2306.14 907.366 4
 7 -10 9 753.132 892.252 2
 7 -9 -11 -1321.1 1162.7 4
 7 -9 -10 2255.45 1123.07 4
 7 -9 -9 -1376.37 1043 4
 7 -9 -8 10996.7 1463.49 4
 7 -9 -7 2346.15 934.33 4
 7 -9 -6 9284.29 1507.17 7
 7 -9 -6 10447.1 1319.3 4
 7 -9 -5 33201.3 2341.42 7
 7 -9 -5 31354.1 2012.47 4
 7 -9 -4 4337.55 992.483 7
 7 -9 -4 4322.01 944.241 4
 7 -9 -3 -408.142 851.639 4
 7 -9 -3 991.656 673.727 7
 7 -9 -2 1664.59 716.128 4
 7 -9 -2 1249.2 660.246 7
 7 -9 -1 54271.3 2560.06 4
 7 -9 -1 52956.3 2504.17 7
 7 -9 0 80268.6 3177.62 4
 7 -9 0 77486.6 2953.89 7
 7 -9 1 232.803 722.566 4
 7 -9 2 11987.9 1261.53 4
 7 -9 3 7196.43 1011.18 4
 7 -9 4 27600.4 1810.18 4
 7 -9 5 17227.3 1487.62 4
 7 -9 6 1759.73 796.93 4
 7 -9 6 346.247 754.742 2
 7 -9 7 14740.1 1386.28 2
 7 -9 7 17294.1 1501.37 4
 7 -9 8 6127.3 1076.67 2
 7 -9 8 6845.52 1128.63 4
 7 -9 9 852.956 837.097 2
 7 -9 10 -1854.71 997.823 2
 7 -9 11 12426.3 1489.91 2
 7 -8 -11 11362.9 1605.53 4
 7 -8 -10 4190.3 1154.09 4
 7 -8 -9 10621 1366.97 4
 7 -8 -8 -415.844 881.912 4
 7 -8 -7 22324.2 1750.66 4
 7 -8 -6 -12.7325 751.185 4
 7 -8 -6 -851.366 1055.02 7
 7 -8 -5 13440.5 1372.32 4
 7 -8 -5 11919.3 1546.77 7
 7 -8 -4 41369.3 2560.54 7
 7 -8 -4 42329.5 2224.41 4
 7 -8 -3 11453.6 1350.18 7
 7 -8 -3 13653.2 1342.68 4
 7 -8 -2 11998.6 1209.27 4
 7 -8 -2 10375.9 1241.57 7
 7 -8 -1 2754.09 826.68 4
 7 -8 -1 4132.36 850.639 7
 7 -8 0 62386.5 2624.91 4
 7 -8 0 58340.2 2535.52 7
 7 -8 1 53916.6 2437.09 4
 7 -8 1 56613.2 2352.27 7
 7 -8 2 1035.13 673.248 4
 7 -8 2 1229.02 574.757 7
 7 -8 3 12441.2 1242.51 4
 7 -8 3 14100.2 1068.87 7
 7 -8 4 -13.2814 464.37 6
 7 -8 4 -272.289 637.257 4
 7 -8 5 11572.6 987.854 6
 7 -8 5 11763.3 1181.49 4
 7 -8 6 143.59 664.219 4
 7 -8 6 -59.5813 606.541 2
 7 -8 7 6486.61 996.963 2
 7 -8 7 8196.59 1078.05 4
 7 -8 8 19162.9 1527.48 4
 7 -8 8 21827.3 1617.67 2
 7 -8 9 6526.89 1095.64 2
 7 -8 10 -541.751 731.84 2
 7 -8 11 2430.55 970.977 2
 7 -8 12 19383 1797.18 2
 7 -7 -10 20475.1 1865.22 4
 7 -7 -9 6281.32 1233.3 4
 7 -7 -8 11255.1 1295.8 4
 7 -7 -7 3488.74 933.828 4
 7 -7 -6 14756.8 1362.39 4
 7 -7 -5 2870.75 1017.79 7
 7 -7 -5 4280.55 853.207 4
 7 -7 -4 32311.5 1839.05 4
 7 -7 -4 30332.3 2131.5 7
 7 -7 -3 47573.3 2239.16 4
 7 -7 -3 47204.9 2622.43 7
 7 -7 -2 2527.9 798.346 7
 7 -7 -2 2269.12 668.595 4
 7 -7 -1 4523.65 782.159 4
 7 -7 -1 4062.9 829.413 7
 7 -7 0 25052 1573.29 4
 7 -7 0 25331.4 1607.95 7
 7 -7 1 35175.6 1846.41 4
 7 -7 1 35347.4 1833.89 7
 7 -7 2 28909.9 1652.16 4
 7 -7 2 30740.1 1631.44 7
 7 -7 3 -615.41 524.241 7
 7 -7 3 1553.67 701.279 4
 7 -7 4 18516.5 1379.83 4
 7 -7 4 19298.7 1251.58 7
 7 -7 5 3526.03 592.736 7
 7 -7 5 2589.94 563.051 6
 7 -7 5 2750.73 770.642 4
 7 -7 6 4729.49 701.873 7
 7 -7 6 4189.22 690.565 6
 7 -7 6 3397.43 775.488 4
 7 -7 7 2127.99 734.64 2
 7 -7 7 526.963 504.057 7
 7 -7 7 1779.74 660.494 6
 7 -7 7 2689.19 817.028 4
 7 -7 8 21950.7 1566.87 4
 7 -7 8 24258.8 1608.57 2
 7 -7 9 38946.1 2088.84 2
 7 -7 10 6297.43 1041.99 2
 7 -7 11 1187.58 770.874 2
 7 -7 12 3859.97 1058.94 2
 7 -6 -9 4666.13 1005.16 4
 7 -6 -8 8340.44 1150.81 4
 7 -6 -7 4630.05 890.617 4
 7 -6 -6 7768.42 1017.18 4
 7 -6 -5 26368.1 1588.92 4
 7 -6 -4 2270.1 900.279 7
 7 -6 -4 1927.73 691.543 4
 7 -6 -3 105935 4157.48 7
 7 -6 -3 111637 3548.83 4
 7 -6 -2 32839.9 2041.83 7
 7 -6 -2 35048 1803.55 4
 7 -6 -1 6373.15 830.884 4
 7 -6 -1 7022.84 970.26 7
 7 -6 0 4084.59 778.68 7
 7 -6 0 4286.4 693.211 4
 7 -6 1 28465.4 1570.5 4
 7 -6 1 28732.2 1641.91 7
 7 -6 2 52635.5 2208.42 4
 7 -6 2 54125 2228.53 7
 7 -6 3 26938.9 1484.5 7
 7 -6 3 26203.4 1496.14 4
 7 -6 4 856.9 489.791 7
 7 -6 4 1347.61 621.162 4
 7 -6 5 12894.6 1124.96 4
 7 -6 5 14625.5 1089 6
 7 -6 5 15640.9 1118.94 7
 7 -6 6 -346.668 600.862 2
 7 -6 6 -346.371 545.388 6
 7 -6 6 -386.65 525.88 4
 7 -6 6 -79.9929 445.892 7
 7 -6 7 31281 1692 6
 7 -6 7 32791.1 1765.87 4
 7 -6 7 30291.6 1650.56 2
 7 -6 7 27799.3 1591.94 7
 7 -6 8 1350.05 652.224 2
 7 -6 9 50001.3 2309.52 2
 7 -6 10 53332.2 2467.21 2
 7 -6 11 9533.1 1172.75 2
 7 -6 12 1581.49 903.339 2
 7 -6 13 2295.8 940.469 2
 7 -6 14 7806.14 1196.77 5
 7 -5 -9 23637.9 1722.01 4
 7 -5 -8 -633.183 757.177 4
 7 -5 -7 7742.06 1025.96 4
 7 -5 -6 7492.78 981.152 4
 7 -5 -5 18525.6 1302.13 4
 7 -5 -4 13173.5 1501.46 7
 7 -5 -4 13431.7 1126.63 4
 7 -5 -3 73259 3363.77 7
 7 -5 -3 77800.4 2729.86 4
 7 -5 -2 156546 4231.43 4
 7 -5 -2 139317 4827.9 7
 7 -5 -1 86818.5 3390.94 7
 7 -5 -1 83936.4 2828 4
 7 -5 0 13407.6 1061.06 4
 7 -5 0 14676.8 1263.39 7
 7 -5 1 4279.32 766.563 7
 7 -5 1 3213.73 616.344 4
 7 -5 2 8599.51 925.975 7
 7 -5 2 7430.55 471.884 1
 7 -5 2 7947.91 837.824 4
 7 -5 3 89377.1 2910.26 4
 7 -5 3 90342.4 3017.46 7
 7 -5 4 40791 1843.6 4
 7 -5 4 43843.8 1887.83 7
 7 -5 5 24881.4 1412.89 6
 7 -5 5 27393.5 1480.46 4
 7 -5 5 24303.1 1402.42 7
 7 -5 6 28986.3 1561.17 6
 7 -5 6 31682.6 1631.17 4
 7 -5 6 29848.2 1562.72 7
 7 -5 6 30639 1517.79 2
 7 -5 7 14932.8 1204.18 6
 7 -5 7 16585.1 1234.73 4
 7 -5 7 16943.2 1195.25 2
 7 -5 7 17409.6 1243.89 7
 7 -5 8 16882.3 1246.07 2
 7 -5 8 16818.7 1305.22 6
 7 -5 9 5400.06 866.336 2
 7 -5 10 70627.4 2774.06 2
 7 -5 11 41777.4 2158.13 2
 7 -5 12 3875.17 1025.14 2
 7 -5 14 151.964 901.666 5
 7 -4 -8 22685.3 1543.71 4
 7 -4 -7 1527.78 675.444 4
 7 -4 -6 57167.6 2309.75 4
 7 -4 -5 11051.5 993.288 4
 7 -4 -4 17358.2 1653.98 7
 7 -4 -4 16725.4 1152.08 4
 7 -4 -3 2502.33 867.783 7
 7 -4 -3 1863.24 579.462 4
 7 -4 -2 149879 4955.83 7
 7 -4 -2 152722 4112.07 4
 7 -4 -1 166493 5208.41 7
 7 -4 -1 171453 4429.73 4
 7 -4 0 41833.6 1742.6 4
 7 -4 0 38641.6 2077.37 7
 7 -4 1 23135.3 1272.94 4
 7 -4 1 23840.6 905.3 1
 7 -4 1 24176.9 1546.62 7
 7 -4 2 2665.02 621.532 7
 7 -4 2 2554.5 556.702 4
 7 -4 2 2638.43 248.489 1
 7 -4 3 3624.52 646.56 7
 7 -4 3 4311.83 648.349 4
 7 -4 4 80929.9 2645.46 4
 7 -4 4 80072.7 2744.46 7
 7 -4 5 620.438 381.821 2
 7 -4 5 1156.4 498.996 7
 7 -4 5 908.31 575.965 4
 7 -4 6 83331 2839.53 6
 7 -4 6 84341.6 2765.34 4
 7 -4 6 80812.6 2567.82 2
 7 -4 6 79115 2771.15 7
 7 -4 7 8335.58 902.174 7
 7 -4 7 8384.49 879.647 2
 7 -4 7 9494.17 998.062 6
 7 -4 8 17964.7 1199.72 2
 7 -4 8 16009.2 1275.18 6
 7 -4 8 15306.8 1185.49 7
 7 -4 9 24128.2 1471.98 2
 7 -4 10 10103.7 1045.34 2
 7 -4 11 58191.2 2514.75 2
 7 -4 12 14851.6 1366.85 2
 7 -4 14 2812.69 971.207 5
 7 -4 15 4522.72 1149.04 5
 7 -3 -7 5020.77 775.824 4
 7 -3 -6 3527.14 669.461 4
 7 -3 -5 15771.3 1098.12 4
 7 -3 -4 523.826 456.414 4
 7 -3 -3 27016.1 1937.97 7
 7 -3 -3 25881.3 1315.05 4
 7 -3 -2 1925.7 759.916 7
 7 -3 -2 1655.43 454.546 4
 7 -3 -1 107778 3920.71 7
 7 -3 -1 114714 3187.41 4
 7 -3 0 123908 3339.24 4
 7 -3 0 121056 4055.9 7
 7 -3 1 32295.1 1428.72 4
 7 -3 1 31658.7 1024.57 1
 7 -3 1 33494.3 1798.25 7
 7 -3 2 9774.79 955.635 7
 7 -3 2 8710.83 362.691 1
 7 -3 3 2274.9 569.938 7
 7 -3 3 3451.27 551.015 4
 7 -3 4 54477.7 1947.06 4
 7 -3 4 50415.4 2109.63 7
 7 -3 5 6356.53 779.747 7
 7 -3 5 6416.12 628.921 2
 7 -3 6 19720.1 1280.49 6
 7 -3 6 19869.2 1210.71 4
 7 -3 6 21257.3 1303.97 7
 7 -3 6 20956.4 1110.15 2
 7 -3 7 65195.4 2246.57 2
 7 -3 7 69123.9 2564.8 6
 7 -3 7 67154.9 2533.42 7
 7 -3 8 10101.3 1006.9 7
 7 -3 8 10719 932.291 2
 7 -3 8 11802 1119.99 6
 7 -3 9 37396.1 1732.4 2
 7 -3 9 31483.1 1798.23 7
 7 -3 10 633.283 587.291 2
 7 -3 11 22782.5 1529.48 2
 7 -3 13 1944.41 801.807 5
 7 -3 14 4788.18 1024.5 5
 7 -3 15 2215.71 946.349 5
 7 -3 16 3190.28 1125.95 5
 7 -2 -7 67069.4 2417.52 4
 7 -2 -6 776.686 514.084 4
 7 -2 -5 11524 897.096 4
 7 -2 -4 4266.76 586.518 4
 7 -2 -3 864.292 754.867 7
 7 -2 -3 3.69252 401.744 4
 7 -2 -2 26406.4 1818.85 7
 7 -2 -2 24137 1161.13 4
 7 -2 -1 10803.3 1173.95 7
 7 -2 -1 10697.9 757.553 4
 7 -2 0 44834.6 1591.59 4
 7 -2 0 41371.4 2165.25 7
 7 -2 1 158064 3780.58 4
 7 -2 1 158990 4563.56 7
 7 -2 2 83.5951 71.7444 1
 7 -2 2 -368.561 561.885 7
 7 -2 2 747.394 390.991 4
 7 -2 3 14993.1 908.327 4
 7 -2 3 14679.5 1120.81 7
 7 -2 4 4269.83 645.514 7
 7 -2 4 5724.55 493.867 2
 7 -2 4 5437.85 619.131 4
 7 -2 5 9887.86 909.711 7
 7 -2 5 9825.49 804.37 4
 7 -2 5 11284.8 739.003 2
 7 -2 6 1868.53 576.406 7
 7 -2 6 957.057 410.726 2
 7 -2 6 1142.05 494.005 6
 7 -2 7 23287.1 1200.5 2
 7 -2 7 23382.8 1433.54 6
 7 -2 7 24726.4 1438.93 7
 7 -2 8 81953.8 2592.13 2
 7 -2 8 80826.8 2926.12 6
 7 -2 8 81342.4 2905.76 7
 7 -2 9 231.307 555.446 7
 7 -2 9 550.154 641.974 6
 7 -2 9 674.058 554.101 2
 7 -2 10 9006.48 943.911 2
 7 -2 12 22582.9 1440.24 5
 7 -2 13 17030.2 1359.73 5
 7 -2 14 -1196.68 727.625 5
 7 -2 15 3053.34 961.398 5
 7 -2 16 1997.83 924.199 5
 7 -1 -6 33530 1482.67 4
 7 -1 -5 2347.49 471.553 4
 7 -1 -4 142453 3615.12 4
 7 -1 -3 34926.6 2214.6 7
 7 -1 -3 35438.6 1363.78 4
 7 -1 -2 2435.63 785.626 7
 7 -1 -2 1862.52 376.096 4
 7 -1 -1 19544.8 950.866 4
 7 -1 -1 21518 1591.65 7
 7 -1 0 675.178 593.389 7
 7 -1 0 521.841 292.527 4
 7 -1 1 87067.9 2404.21 4
 7 -1 1 89516.5 3186.99 7
 7 -1 2 6653.02 797.818 7
 7 -1 2 8759.12 647.746 4
 7 -1 3 12799.1 787.737 4
 7 -1 3 12669.7 1016.17 7
 7 -1 3 11661.3 590.806 2
 7 -1 4 11688.4 995.642 7
 7 -1 4 11851.8 799.232 4
 7 -1 4 11655.9 635.376 2
 7 -1 5 7232.2 818.511 7
 7 -1 5 6355.41 543.889 2
 7 -1 6 24062.5 1074.29 2
 7 -1 6 24507.4 1416.06 7
 7 -1 7 21443.9 1080.86 2
 7 -1 7 21693.4 1369.08 6
 7 -1 7 19803.9 1294.23 7
 7 -1 8 22731.5 1183.57 2
 7 -1 8 21701.6 1437.73 6
 7 -1 8 21601.2 1413.01 7
 7 -1 9 22709.3 1528.3 6
 7 -1 9 24916.1 1592.41 7
 7 -1 10 382.184 601.612 7
 7 -1 11 1472.5 507.073 5
 7 -1 12 3428.69 746.507 5
 7 -1 13 20410.6 1429.34 5
 7 -1 14 10127.7 1158.68 5
 7 -1 15 153.889 677.79 5
 7 -1 16 1063.14 884.42 5
 7 -1 17 1220.91 894.046 5
 7 0 -5 13936.4 832.4 4
 7 0 -4 11242 705.141 4
 7 0 -3 112979 4227.38 7
 7 0 -3 109829 2789.95 4
 7 0 -2 36395.2 2128.8 7
 7 0 -2 33959 1204.62 4
 7 0 -1 -88.7709 665.651 7
 7 0 -1 318.383 231.554 4
 7 0 0 32453.4 1155.94 4
 7 0 0 32278.5 1887 7
 7 0 1 6480.65 495.494 4
 7 0 1 6541.26 899.919 7
 7 0 1 7171.05 429.531 5
 7 0 2 78503.1 1828.62 1
 7 0 2 78342.4 2161.32 4
 7 0 2 78783.4 2868.7 7
 7 0 2 82865.4 1953.28 5
 7 0 2 79390.4 1775.36 2
 7 0 3 48741.6 1269.77 2
 7 0 3 48594.8 1579.04 4
 7 0 3 46105.5 2024.48 7
 7 0 4 15164.9 662.395 2
 7 0 4 15468.8 1125.46 7
 7 0 5 41056.6 1314.23 2
 7 0 5 42150.2 1867.43 7
 7 0 6 16357.3 829.566 2
 7 0 6 15926.8 1155.91 7
 7 0 7 32604.8 1670.93 6
 7 0 7 34090.5 1687.87 7
 7 0 8 1455.05 602.573 7
 7 0 8 384.06 527.011 6
 7 0 9 36169.4 1945.52 6
 7 0 9 36963.1 1924.09 7
 7 0 10 41761.8 1637.77 5
 7 0 10 35196.7 2016.1 7
 7 0 11 2724.43 614.751 5
 7 0 12 1517.41 645.145 5
 7 0 13 775.997 599.784 5
 7 0 14 19269.9 1453.93 5
 7 0 15 8547.71 1125.37 5
 7 0 16 -10.3071 860.136 5
 7 0 17 4919.63 1087.14 5
 7 1 -4 22191.2 877.793 4
 7 1 -3 7259 1187.43 7
 7 1 -3 5971.92 432.37 4
 7 1 -2 92091.5 2183.22 4
 7 1 -2 85910.7 3518.91 7
 7 1 -2 89251.2 2045.53 2
 7 1 -1 34006 1056.07 4
 7 1 -1 29367.5 1851.42 7
 7 1 -1 33096.7 827.343 2
 7 1 0 280.423 596.048 7
 7 1 0 827.247 232.243 4
 7 1 1 1999.88 637.949 7
 7 1 1 1900.97 295.53 4
 7 1 1 1913.31 223.14 5
 7 1 2 37531.6 1138.4 1
 7 1 2 37610.8 1231.65 4
 7 1 2 38777.8 966.952 5
 7 1 2 37769.6 1850.86 7
 7 1 3 193303 3863.92 5
 7 1 3 187245 3988.98 1
 7 1 4 45694.7 1163.44 1
 7 1 4 48010 2042.41 7
 7 1 5 49310.2 2035.7 7
 7 1 6 126198 3748.58 7
 7 1 7 144.477 501.616 7
 7 1 7 807.643 499.427 6
 7 1 7 48.1434 258.689 5
 7 1 8 21129.3 1385.04 6
 7 1 8 21259.8 964.909 5
 7 1 8 23828.2 1422.48 7
 7 1 9 5873.23 902.699 6
 7 1 9 7686.29 925.531 7
 7 1 9 6055.34 596.98 5
 7 1 10 55469.9 1905.08 5
 7 1 10 50489.9 2399.08 7
 7 1 11 25662.1 1341.58 5
 7 1 12 7898.66 862.407 5
 7 1 13 3300.02 748.011 5
 7 1 14 -383.145 650.99 5
 7 1 15 18311.8 1489.19 5
 7 1 16 3335.69 1009.35 5
 7 1 17 5085.43 1125.71 5
 7 2 -4 16389.4 1623.56 7
 7 2 -3 24977.9 735.68 4
 7 2 -3 27713.1 1961.79 7
 7 2 -2 17036.9 1482.12 7
 7 2 -2 19868.2 597.371 4
 7 2 -1 175826 3570.54 4
 7 2 -1 178670 5326.02 7
 7 2 0 56580.1 2530.64 7
 7 2 1 4232.4 766.987 7
 7 2 2 23649.9 937.608 1
 7 2 2 25657 1503.92 7
 7 2 3 40252 1821.74 7
 7 2 3 36768.5 1189.17 1
 7 2 4 152174 3419.04 1
 7 2 4 157305 4350.11 7
 7 2 5 26561.1 719.935 5
 7 2 5 26142.6 930.876 1
 7 2 5 27621.1 1479.41 7
 7 2 6 196058 4062.9 5
 7 2 6 193669 5110.5 7
 7 2 7 60868.9 2371.56 6
 7 2 7 60811.9 1650.76 5
 7 2 7 60143.7 2365.15 7
 7 2 8 32068.3 1692.32 6
 7 2 8 32591.8 1169.4 5
 7 2 8 30585.9 1655.14 7
 7 2 9 2430.14 687.106 7
 7 2 9 1911.31 705.434 6
 7 2 9 2127.1 400.129 5
 7 2 10 27984.5 1743.12 6
 7 2 10 30287 1327.67 5
 7 2 10 30272.8 1821.41 7
 7 2 11 48051.3 1832.73 5
 7 2 12 42985.8 1818.52 5
 7 2 13 614.364 557.39 5
 7 2 14 11077 1106.28 5
 7 2 15 1000.85 709.548 5
 7 2 16 10743.6 1293.07 5
 7 2 17 172.009 807.931 5
 7 2 18 4798.12 1106.41 5
 7 3 -4 28430.7 2124.05 7
 7 3 -3 4412.76 1023.17 7
 7 3 -2 767.967 663.255 7
 7 3 -1 92533.2 3504.91 7
 7 3 0 326551 8116.21 7
 7 3 1 71748.1 2136.49 1
 7 3 1 69029.7 2723.31 7
 7 3 2 63768.7 1932.69 1
 7 3 2 69905.8 2604.08 7
 7 3 3 27289.1 1083.49 1
 7 3 3 27599.4 1536.26 7
 7 3 4 53684.2 1632.17 1
 7 3 4 54474.3 2178.53 7
 7 3 5 113178 2799.72 1
 7 3 5 111707 3435.74 7
 7 3 6 2903.26 594.914 7
 7 3 6 2084.72 347.913 1
 7 3 6 2061.17 219.338 5
 7 3 7 156371 4386.7 6
 7 3 7 155604 3428.05 5
 7 3 7 155952 4400.63 7
 7 3 8 32119.5 1692.41 6
 7 3 8 30724.1 1105.44 5
 7 3 8 30185.4 1672.27 7
 7 3 9 467.324 578.628 7
 7 3 9 1230.41 643.214 6
 7 3 9 1073.51 354.32 5
 7 3 10 25731.9 1656.16 6
 7 3 10 24249.2 1163.03 5
 7 3 10 22149.2 1546.83 7
 7 3 11 50623.9 1869.25 5
 7 3 12 126431 3611.34 5
 7 3 13 27899.5 1541.38 5
 7 3 14 5971.55 880.652 5
 7 3 15 4350.89 867.69 5
 7 3 16 4980.93 1064.99 5
 7 3 17 82.9595 863.344 5
 7 3 18 45.5916 1015.52 5
 7 4 -5 6393.02 1250.6 7
 7 4 -4 96513.8 4045.79 7
 7 4 -3 18556.3 1677.66 7
 7 4 -2 1149.7 745.985 7
 7 4 -1 92.4357 590.669 7
 7 4 0 131834 3605.69 1
 7 4 0 134033 4244.53 7
 7 4 1 454824 9620.57 1
 7 4 1 455173 10397.5 7
 7 4 2 4108.8 682.367 7
 7 4 2 3666.98 495.53 1
 7 4 3 138878 3516.06 1
 7 4 3 145134 4109.34 7
 7 4 4 9879.58 695.167 1
 7 4 4 12431.8 1017.12 7
 7 4 5 44680.9 1573.92 1
 7 4 5 48637.5 2016.2 7
 7 4 6 17971.4 638.241 5
 7 4 6 16360.3 909.726 1
 7 4 7 39068.5 1791.8 6
 7 4 7 38485.3 1181.53 5
 7 4 7 39010.2 1815.7 7
 7 4 8 99807.1 3253.39 6
 7 4 8 96665.8 2475.84 5
 7 4 8 101513 3295.04 7
 7 4 9 19144.4 1360.89 6
 7 4 9 18051.2 906.406 5
 7 4 9 17365.9 1323.42 7
 7 4 10 20626.6 1522.5 6
 7 4 10 21014.1 1060.83 5
 7 4 10 20481.7 1470.98 7
 7 4 11 26311.1 1303.18 5
 7 4 12 73541.2 2499.99 5
 7 4 13 72368.8 2610.7 5
 7 4 14 1142.53 622.392 5
 7 4 15 7878.73 1026.38 5
 7 4 16 1765.66 852.433 5
 7 4 17 2247.61 1013.75 5
 7 4 18 1637 975.768 5
 7 5 -6 30226.4 2439.15 7
 7 5 -5 -1088.03 941.993 7
 7 5 -4 17660.6 1733.79 7
 7 5 -3 120387 4461.23 7
 7 5 -2 53622.4 2652.81 7
 7 5 -1 2904.98 756.655 7
 7 5 -1 2943.23 637.696 1
 7 5 0 3218.12 695.693 7
 7 5 0 3377.28 606.538 1
 7 5 1 193845 4887.79 1
 7 5 1 203634 5446.01 7
 7 5 2 99375.5 3280.63 7
 7 5 2 99350.8 2889.48 1
 7 5 3 10572.9 966.844 7
 7 5 3 10181.6 804.156 1
 7 5 4 88942.8 2640.7 1
 7 5 4 93723.8 3030.6 7
 7 5 5 6243.22 751.847 7
 7 5 5 6436.54 626.038 1
 7 5 6 28422.1 1301.43 1
 7 5 6 29492.9 1553.32 7
 7 5 7 2127.82 628.15 7
 7 5 7 2575.23 635.275 6
 7 5 7 2556.58 477.126 1
 7 5 7 3060.73 359.942 5
 7 5 8 62525 2466.57 6
 7 5 8 62975.7 1853.85 5
 7 5 8 64792.9 2550.52 7
 7 5 9 61458.9 2528.65 6
 7 5 9 61166.5 1902.15 5
 7 5 9 59395.9 2497.06 7
 7 5 10 8467.5 1081.46 7
 7 5 10 8934.64 1086.82 6
 7 5 10 8216.83 697.055 5
 7 5 11 755.079 441.263 5
 7 5 12 1834.65 548.912 5
 7 5 13 41727.1 1892.16 5
 7 5 14 19301.4 1399.26 5
 7 5 15 -1406.6 736.63 5
 7 5 16 4120.7 999.885 5
 7 5 17 410.519 830.468 5
 7 5 18 923.469 1070.66 5
 7 6 -9 6796.41 1655.33 7
 7 6 -8 1307.48 1175.67 7
 7 6 -7 13973.8 1909.71 7
 7 6 -6 994.561 1027.77 7
 7 6 -5 8318.72 1367.02 7
 7 6 -4 931.454 812.649 7
 7 6 -3 26189.7 1962.24 7
 7 6 -2 127369 3940.95 1
 7 6 -2 121068 4317.54 7
 7 6 -1 25512.3 1538.82 1
 7 6 -1 26012.6 1725.37 7
 7 6 0 7616.09 977.095 7
 7 6 0 8398.37 887.474 1
 7 6 1 80682.8 2710.09 1
 7 6 1 80152.3 2950.95 7
 7 6 2 240196 6150.77 7
 7 6 2 241465 5824.85 1
 7 6 3 81097.8 2838.98 7
 7 6 3 82253.9 2632.78 1
 7 6 4 1466.66 476.899 7
 7 6 4 1868.45 468.597 1
 7 6 5 75620.5 2455.74 1
 7 6 5 75481.6 2660.64 7
 7 6 6 2880.3 646.178 7
 7 6 6 1712.05 477.934 1
 7 6 7 9629.11 923.715 7
 7 6 7 10401 934.439 6
 7 6 7 8273.53 815.222 1
 7 6 8 1151.71 527.065 7
 7 6 8 -98.1501 581.722 6
 7 6 8 1149.62 481.46 1
 7 6 8 391.241 315.176 5
 7 6 9 6645.32 900.446 7
 7 6 9 7930.37 960.355 6
 7 6 9 6064.7 627.126 5
 7 6 10 28239.1 1319.52 5
 7 6 10 25699.4 1673.11 7
 7 6 11 -544.801 504.987 5
 7 6 12 7185.19 816 5
 7 6 13 1983.71 634.4 5
 7 6 14 20154.7 1411.87 5
 7 6 15 6003.97 950.543 5
 7 6 16 507.014 729.492 5
 7 6 17 5663.21 1087.29 5
 7 6 18 1764.49 1135.39 5
 7 7 -7 3393.63 1255.47 7
 7 7 -6 24626.3 2217.65 7
 7 7 -5 558.876 849.16 7
 7 7 -4 3030.37 972.763 7
 7 7 -4 3335.03 959.031 1
 7 7 -3 325.455 774.874 1
 7 7 -3 1222.54 796.325 7
 7 7 -2 16676.5 1467.82 7
 7 7 -2 17706.7 1413.47 1
 7 7 -1 108581 3587.99 1
 7 7 -1 105062 3766.03 7
 7 7 0 24512.1 1481.28 1
 7 7 0 20991.4 1475.82 7
 7 7 1 3252.92 710.197 7
 7 7 1 2284.37 657.868 1
 7 7 2 17831.5 1260.58 7
 7 7 2 17768.2 1217.82 1
 7 7 3 131274 3786.5 1
 7 7 3 129587 3861.65 7
 7 7 4 28425.9 1497.16 1
 7 7 4 31075.5 1601.98 7
 7 7 5 40817.8 1815.84 1
 7 7 5 43584.6 1917.19 7
 7 7 6 71593.8 2567.62 7
 7 7 6 70687.1 2536.79 6
 7 7 6 68896.5 2462.54 1
 7 7 7 5349.6 777.649 7
 7 7 7 4237.63 721.723 6
 7 7 7 4703.8 708.003 1
 7 7 8 7679.39 919.359 7
 7 7 8 6564.94 853.88 6
 7 7 8 7023.57 822.808 1
 7 7 9 1101.15 567.009 7
 7 7 9 -356.712 648.267 6
 7 7 9 212.939 397.714 5
 7 7 10 18291.8 1116.34 5
 7 7 10 19132.3 1464.78 7
 7 7 11 34037.1 1596.79 5
 7 7 12 3528.59 740.982 5
 7 7 13 3044.95 753.592 5
 7 7 14 3043.53 749.338 5
 7 7 15 13187.3 1289.02 5
 7 7 16 2111.26 910.375 5
 7 7 17 419.741 915.616 5
 7 7 18 9083.45 1384.37 5
 7 7 19 182.074 1070.73 5
 7 8 -7 2022.84 1263.64 1
 7 8 -6 14901.2 1645.44 1
 7 8 -5 30801.4 2364.8 7
 7 8 -5 33520 2244.84 1
 7 8 -4 3642.78 987.835 7
 7 8 -4 3614.07 1020.91 1
 7 8 -3 17462.8 1565.56 1
 7 8 -3 19798.3 1703.31 7
 7 8 -2 -414.361 686.314 7
 7 8 -2 1511.63 716.203 1
 7 8 -1 29672.5 1820.55 1
 7 8 -1 28224.5 1786.32 7
 7 8 0 33022.2 1842.68 1
 7 8 0 34827.4 1879.86 7
 7 8 1 2085.27 626.375 7
 7 8 1 1365.15 615.753 1
 7 8 2 18309.8 1320.86 1
 7 8 2 19044.6 1266.18 7
 7 8 3 253.867 488.813 7
 7 8 3 573.055 489.838 1
 7 8 4 24176.7 1455.4 1
 7 8 4 22459.6 1352.09 7
 7 8 5 12524.7 1072.03 1
 7 8 5 15729 1144.08 7
 7 8 6 41669.9 1816.8 6
 7 8 6 40066.2 1843.04 7
 7 8 7 31561.2 1622.34 6
 7 8 7 31814.1 1672.87 1
 7 8 7 32751.4 1691.19 7
 7 8 8 9329.88 976.785 7
 7 8 8 8591.5 949.244 6
 7 8 8 7300.11 886.359 1
 7 8 9 27248.8 1665.53 6
 7 8 9 26831.9 1585.83 1
 7 8 9 30186 1724.9 7
 7 8 10 597.941 675.184 7
 7 8 10 145.974 515.318 5
 7 8 11 30639.4 1586.33 5
 7 8 12 35525.9 1782.26 5
 7 8 13 6795.45 955.55 5
 7 8 14 1882.58 776.044 5
 7 8 15 2181.51 817.994 5
 7 8 16 14584.1 1470.11 5
 7 8 17 1342.06 989.944 5
 7 8 18 9853.05 1451.48 5
 7 9 -6 -1255.31 1121.74 1
 7 9 -5 13412.7 1717.28 1
 7 9 -4 27198.2 2028.7 1
 7 9 -3 -1976.56 889.57 1
 7 9 -2 49156.7 2512.2 1
 7 9 -2 43448.5 2321.14 7
 7 9 -1 2224.99 750.338 7
 7 9 -1 3487.74 885.839 1
 7 9 0 79174.8 2996.75 7
 7 9 0 83050.5 3203.21 1
 7 9 1 11821.9 1050.95 7
 7 9 1 12022.1 1242.6 1
 7 9 2 1231.94 551.024 7
 7 9 2 1964.2 679.71 1
 7 9 3 21145.1 1472.42 1
 7 9 3 21807.2 1327.16 7
 7 9 4 3610.04 631.149 7
 7 9 4 4833.64 759.646 1
 7 9 5 27564.8 1656.58 1
 7 9 5 28203.5 1494.35 7
 7 9 6 985.409 485.581 7
 7 9 6 -392.087 513.835 6
 7 9 6 982.741 610.734 1
 7 9 7 77992.5 2720.95 6
 7 9 7 79225.4 2874.81 1
 7 9 7 77085.5 2780.66 7
 7 9 8 7163.53 890.354 7
 7 9 8 4965.86 749.714 6
 7 9 8 5323.53 826.917 1
 7 9 9 6872.34 949.572 7
 7 9 9 6174.52 881.663 1
 7 9 12 44709.9 2092.53 5
 7 9 13 21741.4 1537.8 5
 7 9 14 2002.03 780.236 5
 7 9 15 1595.75 802.496 5
 7 9 16 426.686 790.983 5
 7 9 17 6851.86 1260.39 5
 7 9 18 -495.559 1088.62 5
 7 10 -5 44.2775 875.645 1
 7 10 -4 22966.3 1977.62 1
 7 10 -3 8210 1332.73 1
 7 10 -2 3606.82 1060.82 1
 7 10 -1 21764.8 1702.39 1
 7 10 0 29336.6 1923.33 1
 7 10 1 87596.3 3400.99 1
 7 10 1 89784.8 3043.86 7
 7 10 2 13294.4 1255.2 1
 7 10 2 12971.9 1051.53 7
 7 10 3 6902.45 784.324 7
 7 10 3 6711.34 1017.25 1
 7 10 4 22887.7 1591.07 1
 7 10 4 22570 1317.43 7
 7 10 5 3019.45 584.367 7
 7 10 5 4286.42 683.008 6
 7 10 5 3123.69 722.338 1
 7 10 6 32269.3 1562.02 6
 7 10 6 32726.5 1848.09 1
 7 10 6 31442.6 1618.49 7
 7 10 7 23581.6 1352.94 6
 7 10 7 19762.7 1449.55 1
 7 10 7 21347.2 1370.72 7
 7 10 8 45365 2028.46 6
 7 10 8 44599.4 2202.77 1
 7 10 8 46166.5 2107.95 7
 7 10 9 25117.5 1664.4 1
 7 10 9 24323 1574.69 7
 7 10 10 694.63 693.221 1
 7 10 13 21393.1 1562.85 5
 7 10 14 102.626 754.987 5
 7 10 15 2490.46 937.7 5
 7 10 16 1749.3 903.131 5
 7 10 17 1939.31 981.248 5
 7 10 18 1340.36 1029.06 5
 7 11 -4 13728.4 1795.54 1
 7 11 -3 33053.5 2337.16 1
 7 11 -2 4120.62 1117.99 1
 7 11 -1 10378.2 1406.53 1
 7 11 0 3148.26 977.27 1
 7 11 1 24936.7 1837.38 1
 7 11 2 55106.8 2695.74 1
 7 11 3 10857.4 1245.64 1
 7 11 4 9397.77 870.847 7
 7 11 4 9542.88 1204.51 1
 7 11 5 2002.4 514.024 7
 7 11 5 2130.82 823.976 1
 7 11 6 12949.3 989.672 6
 7 11 6 10804.8 1192.09 1
 7 11 6 13853.7 1055.19 7
 7 11 7 2401.73 644.895 7
 7 11 7 2370.81 573.292 6
 7 11 7 2484.15 812.628 1
 7 11 8 5387.22 843.866 7
 7 11 8 6300.76 987.215 1
 7 11 9 77882.7 3137.84 1
 7 11 10 19585.8 1577.6 1
 7 11 16 3306.85 1015.87 5
 7 11 17 -1463.84 1066.41 5
 7 11 18 -3738.11 1324.52 5
 7 12 -3 16859.1 1784.61 1
 7 12 -2 22687.9 2020.92 1
 7 12 -1 -1537.93 1146.47 1
 7 12 0 1244.43 791.174 1
 7 12 1 -572.835 870.818 1
 7 12 2 24887.3 1919.64 1
 7 12 3 20966.7 1759.07 1
 7 12 4 2423.61 834.855 1
 7 12 5 10391.9 1307.59 1
 7 12 6 923.052 760.75 1
 7 12 7 -521.123 761.013 1
 7 12 8 709.019 780.788 1
 7 12 9 23643.1 1753.8 1
 7 12 10 53543.9 2651.66 1
 7 13 -2 26615.8 2289.42 1
 7 13 -1 15002.5 1724.24 1
 7 13 0 1903.6 1111.69 1
 7 13 1 -398.666 955.192 1
 7 13 2 1379.96 1000.43 1
 7 13 3 11766.4 1432.61 1
 7 13 4 3581.42 1018.63 1
 7 13 5 21256.2 1786.21 1
 7 13 6 25342 1901.76 1
 7 13 7 9938.26 1342.27 1
 7 13 8 -181.803 731.561 1
 7 13 9 2316.26 841.156 1
 7 13 10 18967.5 1681.85 1
 7 13 11 40268.5 2430.82 1
 7 14 0 24243.4 2220.95 1
 7 14 1 727.855 1122.55 1
 7 14 2 -1015.65 1075.33 1
 7 14 3 -246.413 978.834 1
 7 14 4 3847.08 1142.51 1
 7 14 5 1416.45 922.64 1
 7 14 6 13518.2 1572.38 1
 7 14 7 18994.5 1790.08 1
 7 14 8 1153.14 789.89 1
 7 14 9 -391.051 901.943 1
 7 14 10 -217.492 763.993 1
 7 14 11 25518.2 2045.46 1
 7 15 2 -1136.73 1236.01 1
 7 15 3 673.925 1073.87 1
 7 15 4 -210.279 1034.68 1
 7 15 5 4140.81 1199.84 1
 7 15 6 229.344 869.48 1
 7 15 7 14827.2 1636 1
 7 15 8 27860.9 2145.88 1
 7 15 9 3910.27 1175.55 1
 7 15 10 -55.5949 944.703 1
 7 15 11 10337.7 1432.27 1
 7 16 5 1521.2 1135.34 1
 7 16 6 2582.43 1017.52 1
 7 16 7 835.973 1062.84 1
 7 16 8 25523.1 2271.08 1
 7 16 9 16662.5 1832.43 1
 7 16 10 515.074 1055.67 1
 8 -13 -4 8774.31 1575.36 4
 8 -13 -3 17382.7 1871.57 4
 8 -13 -2 1050.72 1121.91 4
 8 -13 -1 687.833 1118.1 4
 8 -13 0 1512.42 1076.34 4
 8 -13 1 6833.34 1406.51 4
 8 -13 2 14857.8 1754.93 4
 8 -13 3 1678.66 1020.98 4
 8 -12 -7 5485.79 1373.21 4
 8 -12 -6 6097.75 1406.76 4
 8 -12 -5 4411.71 1309.65 4
 8 -12 -4 530.469 896.149 4
 8 -12 -3 6613.79 1327.61 4
 8 -12 -2 10085.9 1410.62 4
 8 -12 -1 16.7778 842.259 4
 8 -12 0 1514.66 887.086 4
 8 -12 1 -585.36 996.439 4
 8 -12 2 11416.4 1474.22 4
 8 -12 3 8901.14 1381.13 4
 8 -12 4 9324.63 1375.68 4
 8 -12 5 37984.1 2492.18 4
 8 -12 6 796.533 984.513 4
 8 -12 6 1276.83 902.666 2
 8 -11 -8 427.418 1039.37 4
 8 -11 -7 11657.8 1558.45 4
 8 -11 -6 25592.3 2097.05 4
 8 -11 -5 4086.18 1094.5 4
 8 -11 -4 10216.4 1435.42 4
 8 -11 -3 1861.6 994.132 4
 8 -11 -2 19657.8 1804.69 4
 8 -11 -1 34413.1 2305.08 4
 8 -11 0 325.429 772.693 4
 8 -11 1 3805.33 1087.36 4
 8 -11 2 -1756.96 1012.74 4
 8 -11 3 12676.9 1519.43 4
 8 -11 4 1131.58 979.422 4
 8 -11 5 13819.8 1528.85 4
 8 -11 6 22765.3 1852.79 4
 8 -11 6 23424.3 1863.49 2
 8 -11 7 -661.482 997.641 2
 8 -11 7 331.433 893.137 4
 8 -11 8 5377.17 1143.18 2
 8 -11 8 5640.92 1152.88 4
 8 -10 -10 749.133 1036.6 4
 8 -10 -9 -2340.91 1359.61 7
 8 -10 -9 -952.279 1098.2 4
 8 -10 -8 4064.86 1366.43 7
 8 -10 -8 6246.9 1324.93 4
 8 -10 -7 591.052 1078.51 7
 8 -10 -7 265.771 928.137 4
 8 -10 -6 14620 1668.24 4
 8 -10 -6 15529.4 1869.65 7
 8 -10 -5 25383.8 1982.05 4
 8 -10 -5 26031.3 2245.18 7
 8 -10 -4 -955.201 831.799 4
 8 -10 -4 1000.91 831.178 7
 8 -10 -3 6566.62 1176.71 4
 8 -10 -2 -84.1157 959.259 4
 8 -10 -1 52449.4 2690.9 4
 8 -10 0 29356 2020 4
 8 -10 1 849.839 894.81 4
 8 -10 2 7499.99 1191.76 4
 8 -10 3 -85.736 725.767 4
 8 -10 4 7116.09 1130.03 4
 8 -10 5 604.014 781.08 4
 8 -10 6 22207.1 1779.24 4
 8 -10 6 18189.1 1623.83 2
 8 -10 7 17525.3 1619.99 2
 8 -10 7 19021.1 1718.91 4
 8 -10 8 25.5095 817.901 2
 8 -10 8 16.0324 860.115 4
 8 -10 9 11258.5 1458.24 2
 8 -9 -10 1867.24 1142.16 4
 8 -9 -9 1845.6 1089.88 4
 8 -9 -9 -226.052 1345.56 7
 8 -9 -8 7.87271 1018.34 7
 8 -9 -8 -713.491 957.276 4
 8 -9 -7 4794.01 1307.59 7
 8 -9 -7 3591.56 1106.61 4
 8 -9 -6 3981.83 1353.34 7
 8 -9 -6 3751.89 973.767 4
 8 -9 -5 20810.7 1729.29 4
 8 -9 -5 23958.5 2166.25 7
 8 -9 -4 12563.7 1552.52 7
 8 -9 -4 18320.7 1591.47 4
 8 -9 -3 1634.64 760.034 7
 8 -9 -3 2319.58 912.147 4
 8 -9 -2 8140.13 1174.98 7
 8 -9 -2 10600.1 1288.03 4
 8 -9 -1 16568.1 1495.41 4
 8 -9 -1 17118.6 1543.75 7
 8 -9 0 103617 3765.74 4
 8 -9 0 95464 3619.68 7
 8 -9 1 17540 1536.02 4
 8 -9 2 16197 1448.65 4
 8 -9 3 10926.5 1269.96 4
 8 -9 4 -1140.83 789.11 4
 8 -9 5 2691.39 893.682 4
 8 -9 6 75.7838 741.706 4
 8 -9 6 8.24917 768.457 2
 8 -9 7 28649.2 1924.45 4
 8 -9 7 28227.8 1865.5 2
 8 -9 8 28237.5 1947.87 4
 8 -9 8 28816.9 1932.91 2
 8 -9 9 504.502 835.36 2
 8 -9 10 4835.86 1047.17 2
 8 -8 -9 10344.4 1462.86 4
 8 -8 -8 1451.31 937.742 4
 8 -8 -8 4524.59 1577.45 7
 8 -8 -7 1826.71 1225.5 7
 8 -8 -7 1183.62 854.713 4
 8 -8 -6 4609.46 1218.99 7
 8 -8 -6 4457.88 1039.3 4
 8 -8 -5 6121.93 1275.47 7
 8 -8 -5 6315.46 1085.71 4
 8 -8 -4 24959.4 2119.87 7
 8 -8 -4 24953.7 1728.8 4
 8 -8 -3 19734.1 1827.9 7
 8 -8 -3 20209 1600.75 4
 8 -8 -2 -166.206 658.807 7
 8 -8 -2 1335.5 823.95 4
 8 -8 -1 2506.03 793.907 7
 8 -8 -1 2782.72 825.069 4
 8 -8 0 29640.5 1818.29 4
 8 -8 0 24177.4 1727.07 7
 8 -8 1 81220.3 3164.41 4
 8 -8 1 79071.5 3125.68 7
 8 -8 2 3894.06 761.517 7
 8 -8 2 3955.76 900.783 4
 8 -8 3 33870.7 2000.1 4
 8 -8 3 36075.7 1858.39 7
 8 -8 4 20796.5 1539.28 4
 8 -8 5 1440.28 635.563 6
 8 -8 5 1919.72 732.736 4
 8 -8 6 9.05334 612.172 4
 8 -8 6 728.677 634.823 2
 8 -8 7 9279.54 1111.01 2
 8 -8 7 7062.63 1071.7 4
 8 -8 8 40481.4 2224.56 4
 8 -8 8 39166.5 2153.39 2
 8 -8 9 32812.4 2052.42 2
 8 -8 10 -654.518 841.117 2
 8 -8 11 2824.77 988.782 2
 8 -7 -9 4992.72 1111.36 4
 8 -7 -8 8809.95 1216.52 4
 8 -7 -7 4111.94 906.787 4
 8 -7 -7 4192.2 1446.61 7
 8 -7 -6 1567.01 1030.56 7
 8 -7 -6 4435.76 938.024 4
 8 -7 -5 -1298.32 957.047 7
 8 -7 -5 398.515 726.025 4
 8 -7 -4 7417.01 1280.23 7
 8 -7 -4 10650.2 1151.46 4
 8 -7 -3 69420.7 3388.23 7
 8 -7 -3 73295.5 2893.62 4
 8 -7 -2 14679.9 1514.79 7
 8 -7 -2 12273.2 1186.77 4
 8 -7 -1 308.376 638.458 7
 8 -7 -1 1652.23 792.403 4
 8 -7 0 3878.14 845.797 7
 8 -7 0 3121.51 816.975 4
 8 -7 1 10214.5 1112.17 7
 8 -7 1 10070.8 1117.18 4
 8 -7 2 30103.3 1778.51 4
 8 -7 2 31438.5 1796.62 7
 8 -7 3 5172.92 818.135 7
 8 -7 3 4354.57 822.821 4
 8 -7 4 22603.5 1533.39 4
 8 -7 4 27018.2 1564.61 7
 8 -7 5 7726.61 891.93 7
 8 -7 5 6723.42 869.588 6
 8 -7 5 8114.63 1006.18 4
 8 -7 6 1250.08 638.476 2
 8 -7 6 1020.14 505.478 7
 8 -7 6 -565.943 618.779 6
 8 -7 6 934.704 733.188 4
 8 -7 7 949.811 611.999 2
 8 -7 7 595.888 512.484 7
 8 -7 7 1911.67 649.125 6
 8 -7 7 1906.36 733.939 4
 8 -7 8 12696.7 1244.75 2
 8 -7 8 13022.8 1289.64 4
 8 -7 9 38050.4 2105.02 2
 8 -7 10 31202.4 1960.27 2
 8 -7 11 1006.34 885.237 2
 8 -7 12 3241.55 986.858 2
 8 -6 -8 1165.5 813.956 4
 8 -6 -7 11955.2 1277.09 4
 8 -6 -6 16600.8 1877.24 7
 8 -6 -6 19231.2 1453.47 4
 8 -6 -5 4467.42 1219.72 7
 8 -6 -5 4073.55 877.817 4
 8 -6 -4 3353.32 1116.53 7
 8 -6 -4 2863.58 804.773 4
 8 -6 -3 26308.8 2078.91 7
 8 -6 -3 27394 1648.66 4
 8 -6 -2 101454 4104.8 7
 8 -6 -2 108534 3542.13 4
 8 -6 -1 15197.4 1479.29 7
 8 -6 -1 17086.9 1302.25 4
 8 -6 0 2652.06 737.558 7
 8 -6 0 2155.79 686.174 4
 8 -6 1 -625.577 646.665 7
 8 -6 1 216.096 620.917 4
 8 -6 2 46401.6 2107.13 4
 8 -6 2 46607.3 2256.64 7
 8 -6 3 74306.3 2760.91 4
 8 -6 3 75803.3 2911.9 7
 8 -6 4 1917.16 613.345 7
 8 -6 4 1546.78 616.459 4
 8 -6 5 19360.9 1391.24 4
 8 -6 5 16812.6 1274.65 7
 8 -6 6 15892.1 1249.96 6
 8 -6 6 18590.5 1384.08 4
 8 -6 6 16761.9 1235.87 2
 8 -6 6 15782.5 1224.47 7
 8 -6 7 739.684 610.292 2
 8 -6 7 585.983 496.909 7
 8 -6 7 678.021 583.487 6
 8 -6 7 183.38 590.741 4
 8 -6 8 1816.49 680.765 2
 8 -6 8 402.451 542.123 7
 8 -6 8 877.043 624.413 6
 8 -6 9 6660.89 984.76 2
 8 -6 10 26406.4 1731.64 2
 8 -6 11 22135.7 1675.51 2
 8 -6 12 -885.434 855.774 2
 8 -6 13 4709.33 1168.01 2
 8 -5 -7 2069.31 768.547 4
 8 -5 -6 46063.6 2224.42 4
 8 -5 -5 28286 2316.23 7
 8 -5 -5 29281.1 1683.56 4
 8 -5 -4 1513.36 941.855 7
 8 -5 -4 1606.93 637.274 4
 8 -5 -3 587.486 834.336 7
 8 -5 -3 1335.06 620.645 4
 8 -5 -2 129356 4741.54 7
 8 -5 -2 130991 3894.34 4
 8 -5 -1 177225 4742.86 4
 8 -5 -1 164239 5426.37 7
 8 -5 0 38239.2 1821.85 4
 8 -5 0 38089.8 2185.02 7
 8 -5 1 573.231 558.327 7
 8 -5 1 541.73 527.445 4
 8 -5 2 4028.44 805.894 7
 8 -5 2 5193.86 790.981 4
 8 -5 3 11874.4 1131.36 7
 8 -5 3 12258.6 1044.63 4
 8 -5 4 21182.2 1388.41 4
 8 -5 4 21347.9 1405.96 7
 8 -5 5 11218.2 1035.85 7
 8 -5 5 10607.9 1023.6 4
 8 -5 6 113719 3628.85 6
 8 -5 6 109320 3560.23 4
 8 -5 6 112224 3380.73 2
 8 -5 6 111494 3572.36 7
 8 -5 7 19333.3 1384.73 6
 8 -5 7 21004.7 1429.61 4
 8 -5 7 18830.1 1326.85 7
 8 -5 7 20588.9 1317.96 2
 8 -5 8 1286.62 600.828 7
 8 -5 8 153.93 576.423 6
 8 -5 9 3339.28 788.102 7
 8 -5 9 4595.63 841.895 2
 8 -5 9 3331.72 844.373 6
 8 -5 10 1841.1 730.113 2
 8 -5 11 27914.2 1807.47 2
 8 -5 12 11284.1 1297.27 2
 8 -5 14 1653.97 956.87 5
 8 -4 -7 4526.72 846.741 4
 8 -4 -6 12944.5 1144.33 4
 8 -4 -5 126112 5120.49 7
 8 -4 -5 133405 3938.32 4
 8 -4 -4 3282.26 1002.52 7
 8 -4 -4 1248.3 580.606 4
 8 -4 -3 35572.3 2392.95 7
 8 -4 -3 39012.3 1797.73 4
 8 -4 -2 3388.59 681.027 4
 8 -4 -2 5267.68 1069.51 7
 8 -4 -1 190554 5905.97 7
 8 -4 -1 191890 4938.88 4
 8 -4 0 97557.1 3046.73 4
 8 -4 0 99257.5 3742.56 7
 8 -4 1 1474.67 635.837 7
 8 -4 1 1887.52 535.004 4
 8 -4 2 20238 689.717 1
 8 -4 2 21604.1 1274.51 4
 8 -4 2 23099 1575.65 7
 8 -4 3 32266.4 1596.87 4
 8 -4 3 34062.9 1825.43 7
 8 -4 4 2718.21 686.668 7
 8 -4 4 2665.02 617.211 4
 8 -4 5 4659.71 636.682 2
 8 -4 5 4520.44 735.122 7
 8 -4 5 4459.72 736.643 4
 8 -4 6 34316.6 1792.31 6
 8 -4 6 33506.4 1692.15 4
 8 -4 6 33277.7 1783.61 7
 8 -4 6 36865 1590.33 2
 8 -4 7 69031.2 2726.22 6
 8 -4 7 71077.8 2626.09 4
 8 -4 7 69407.7 2685.07 7
 8 -4 7 69753.7 2465.05 2
 8 -4 8 16164.1 1157.11 2
 8 -4 8 14083.1 1258.25 6
 8 -4 8 15352.2 1251.96 7
 8 -4 9 17979.3 1295.1 2
 8 -4 9 17113 1412.34 6
 8 -4 9 17584.2 1398.96 7
 8 -4 10 5130.54 911.752 2
 8 -4 11 14810.2 1325.72 2
 8 -4 12 24831.3 1698.45 2
 8 -4 14 4347.4 935.533 5
 8 -4 15 1294.03 940.998 5
 8 -3 -6 2195.55 691.313 4
 8 -3 -5 18555.1 1894.6 7
 8 -3 -5 18008.8 1197.36 4
 8 -3 -4 17599.2 1830.83 7
 8 -3 -4 21473.4 1280.13 4
 8 -3 -3 6379.74 1115.44 7
 8 -3 -3 6481.39 741.072 4
 8 -3 -2 91166.6 3851.17 7
 8 -3 -2 95236.6 2901.96 4
 8 -3 -1 11401.5 876.333 4
 8 -3 -1 10178 1275.46 7
 8 -3 0 137451 3693.36 4
 8 -3 0 131515 4532.19 7
 8 -3 1 67673.4 2266.32 4
 8 -3 1 65633.3 1751 1
 8 -3 1 67495.9 2886.2 7
 8 -3 2 6024.26 877.332 7
 8 -3 2 5915.12 686.876 4
 8 -3 2 4389.53 258.35 1
 8 -3 3 62475.9 2218.3 4
 8 -3 3 62278.1 2563.37 7
 8 -3 4 -219.934 487.453 7
 8 -3 4 223.773 433.043 4
 8 -3 5 12911.7 1090.57 7
 8 -3 5 13576.6 1037.61 4
 8 -3 5 13961.3 891.237 2
 8 -3 6 274.583 485.269 7
 8 -3 6 -44.094 432.962 2
 8 -3 6 208.117 545.084 4
 8 -3 7 11670.5 1089.04 7
 8 -3 7 12093.7 1105.47 6
 8 -3 7 9758.4 847.135 2
 8 -3 8 77727.4 2581.73 2
 8 -3 8 76483.3 2899.31 6
 8 -3 8 70372.8 2807.19 7
 8 -3 9 1032.05 644.583 7
 8 -3 9 645.096 592.495 6
 8 -3 9 1381.83 605.714 2
 8 -3 10 26803.3 1558.98 2
 8 -3 10 22939.5 1675.41 7
 8 -3 11 4357.33 884.836 2
 8 -3 13 9116.29 1080.85 5
 8 -3 14 -363.558 781.491 5
 8 -3 15 11278.2 1382.12 5
 8 -3 16 -1160.68 1021.4 5
 8 -2 -5 13167.5 1751.94 7
 8 -2 -5 15841.2 1077.29 4
 8 -2 -4 53281.2 3024.67 7
 8 -2 -4 51877.6 1945.01 4
 8 -2 -3 6373.43 1179.33 7
 8 -2 -3 5868.29 674.501 4
 8 -2 -2 6112.03 1069.17 7
 8 -2 -2 5825.82 643.18 4
 8 -2 -1 255.456 672.661 7
 8 -2 -1 1155.28 409.309 4
 8 -2 0 14714.8 1408.14 7
 8 -2 0 13348.8 895.373 4
 8 -2 1 88729.6 2614.45 4
 8 -2 1 88504.4 3389.91 7
 8 -2 2 13492.2 895.443 4
 8 -2 2 13128.9 466.962 1
 8 -2 3 82691.8 2540.25 4
 8 -2 3 76438.5 2985.73 7
 8 -2 4 26012.7 1311.1 4
 8 -2 4 27950.9 1646.07 7
 8 -2 4 28417.5 1140.48 2
 8 -2 5 4496.78 726.715 7
 8 -2 5 5196.61 568.569 2
 8 -2 5 3854.75 587.146 4
 8 -2 6 2545.14 633.541 7
 8 -2 6 1678.04 429.602 2
 8 -2 7 68.5634 496.593 7
 8 -2 7 681.281 555.629 6
 8 -2 7 -118.502 420.819 2
 8 -2 8 41102.7 1708.61 2
 8 -2 8 43059.4 2071.09 6
 8 -2 8 38278.3 1991.38 7
 8 -2 9 29670.2 1519.79 2
 8 -2 9 30872.2 1805.67 6
 8 -2 9 28994.6 1773.09 7
 8 -2 10 88.0765 593.399 7
 8 -2 10 -72.6848 659.928 6
 8 -2 10 587.64 638.768 2
 8 -2 12 7369.64 922.035 5
 8 -2 13 25739 1624.11 5
 8 -2 14 2704.87 806.329 5
 8 -2 15 2398.33 872.369 5
 8 -2 16 3515.79 994.368 5
 8 -1 -5 6597.24 1420.5 7
 8 -1 -4 48092.1 2947.79 7
 8 -1 -4 54052.7 1873.11 4
 8 -1 -3 63320.9 2059.33 4
 8 -1 -3 64991.1 3215.11 7
 8 -1 -2 2980.88 904.743 7
 8 -1 -2 2325.26 428.819 4
 8 -1 -1 5147.79 1062.28 7
 8 -1 -1 6530.11 595.97 4
 8 -1 0 1876.5 401.561 4
 8 -1 0 3317.81 839.325 7
 8 -1 1 6743.48 949.898 7
 8 -1 1 8620.54 665.195 4
 8 -1 2 70396.7 2155.93 4
 8 -1 2 69235.7 2827.62 7
 8 -1 3 1282.33 622.24 7
 8 -1 3 272.444 222.089 2
 8 -1 3 728.589 353.112 4
 8 -1 4 61788.2 2052.24 4
 8 -1 4 63384.4 2531.58 7
 8 -1 4 61891 1756 2
 8 -1 5 34627.4 1269.46 2
 8 -1 5 38946.8 1879.53 7
 8 -1 6 3396.45 742.151 7
 8 -1 6 3736.29 479.779 2
 8 -1 7 1735.84 568.471 7
 8 -1 7 1551.22 591.973 6
 8 -1 7 2500.76 473.027 2
 8 -1 8 19045.4 1101.76 2
 8 -1 8 18981.5 1377.84 6
 8 -1 8 19320.7 1381.38 7
 8 -1 9 23512.4 1596.17 6
 8 -1 9 22861 1544.35 7
 8 -1 10 11237.7 1195.76 6
 8 -1 10 14025.5 1301.5 7
 8 -1 11 2594.39 835.548 7
 8 -1 11 4798.35 711.193 5
 8 -1 12 3430.83 708.839 5
 8 -1 13 6619.27 872.734 5
 8 -1 14 20821.8 1511.34 5
 8 -1 15 2708.31 899.685 5
 8 -1 16 683.831 879.849 5
 8 -1 17 5916.19 1170.65 5
 8 0 -5 2645.8 1096.46 7
 8 0 -4 14280.7 1680.32 7
 8 0 -3 19345.1 1816.97 7
 8 0 -3 21848.5 986.405 4
 8 0 -2 13428.4 1442.09 7
 8 0 -2 13738.3 754.244 4
 8 0 -1 14356.3 757.998 4
 8 0 -1 12051.5 1375.43 7
 8 0 0 2144.97 760.336 7
 8 0 0 2340.74 355.923 4
 8 0 1 1447.24 655.096 7
 8 0 1 1498.56 339.493 4
 8 0 2 22192.9 759.572 1
 8 0 2 20990.7 978.849 4
 8 0 2 20201.1 779.682 5
 8 0 2 22020.6 1536.25 7
 8 0 2 20331 636.988 2
 8 0 3 59101.2 1456.12 2
 8 0 3 61468.9 1875.2 4
 8 0 3 63360.2 1613.5 5
 8 0 3 60994.1 2512.97 7
 8 0 4 1218.31 568.904 7
 8 0 4 577.297 236.221 2
 8 0 5 58627 1668.51 2
 8 0 5 59087.3 2412.93 7
 8 0 6 62834 1860.11 2
 8 0 6 62017.8 2537.87 7
 8 0 7 21242.9 1404.05 6
 8 0 7 21070.1 1410.97 7
 8 0 8 2101.2 664.383 7
 8 0 8 1768.56 661.853 6
 8 0 9 4498.06 807.92 7
 8 0 9 4804.35 836.085 6
 8 0 10 20380.9 1551.06 6
 8 0 10 19835.8 1108.09 5
 8 0 10 19824.4 1501.23 7
 8 0 11 1477.3 735.693 7
 8 0 11 2824.29 598.127 5
 8 0 12 8618.32 903.351 5
 8 0 13 1722.26 670.192 5
 8 0 14 3006.86 833.299 5
 8 0 15 9494.98 1154.42 5
 8 0 16 -359.595 856.896 5
 8 0 17 10503.5 1380.05 5
 8 1 -5 18928.1 1990 7
 8 1 -4 3164.04 1121.19 7
 8 1 -3 22898.8 880.752 4
 8 1 -3 23300.5 1975.49 7
 8 1 -2 25144.6 918.035 4
 8 1 -2 25217.2 1936.24 7
 8 1 -1 68928.8 1821.4 4
 8 1 -1 69517.8 3113.49 7
 8 1 0 6395.44 1020.57 7
 8 1 0 5575.33 438.954 4
 8 1 1 5248.13 889.331 7
 8 1 1 5721.85 462.709 4
 8 1 1 5116.33 342.841 5
 8 1 2 788.666 606.127 7
 8 1 2 1021.75 251.727 1
 8 1 2 1529.04 315.396 4
 8 1 2 1199.53 168.69 5
 8 1 3 15491.3 525.763 5
 8 1 3 15357 636.22 1
 8 1 3 15530.7 1262.3 7
 8 1 4 75729 1734.84 5
 8 1 4 70070.5 1693.63 1
 8 1 4 76455.1 2815.77 7
 8 1 5 2794.22 670.815 7
 8 1 6 232046 6002.01 7
 8 1 7 113078 3608.94 6
 8 1 7 114552 3633.09 7
 8 1 8 2468.23 700.713 7
 8 1 8 2221.76 664.879 6
 8 1 8 2377.96 366.663 5
 8 1 9 1587.17 631.642 7
 8 1 9 1122.32 625.745 6
 8 1 9 2241.19 452.709 5
 8 1 10 7197.35 960.902 7
 8 1 10 8261.26 1062.36 6
 8 1 10 6818.7 682.617 5
 8 1 11 12481.7 1320.45 7
 8 1 11 14656.1 1002.93 5
 8 1 12 4804.54 700.164 5
 8 1 13 4631.95 802.107 5
 8 1 14 5141.39 893.215 5
 8 1 15 2442.26 814.788 5
 8 1 16 3854.92 908.497 5
 8 1 17 710.742 839.297 5
 8 1 18 7331.74 1320.85 5
 8 2 -6 21060.4 2178.06 7
 8 2 -5 92971.1 4347.37 7
 8 2 -4 26413.7 2173.85 7
 8 2 -3 9203.18 1306.41 7
 8 2 -2 -72.8026 746.43 7
 8 2 -1 73835.2 1703.99 4
 8 2 -1 71087.6 3176.37 7
 8 2 0 58737.2 2749.39 7
 8 2 1 6023.26 919.785 7
 8 2 2 4077 777.715 7
 8 2 2 4115.87 426.228 1
 8 2 3 879.859 535.817 7
 8 2 3 1047.3 265.548 1
 8 2 4 16074.9 728.236 1
 8 2 4 18111.2 1310.9 7
 8 2 5 37416.1 870.64 5
 8 2 5 35068.5 1130.03 1
 8 2 6 36409.8 984.18 5
 8 2 6 35385.9 1853.42 7
 8 2 7 370507 8713.12 6
 8 2 7 370027 7463.07 5
 8 2 7 383334 8774.2 7
 8 2 8 82159 3014.59 6
 8 2 8 79674 2973.11 7
 8 2 8 79501.1 2108.04 5
 8 2 9 5757.49 859.285 7
 8 2 9 6358.76 948.444 6
 8 2 9 5469.22 536.727 5
 8 2 10 8068.09 1075.29 7
 8 2 10 8326.08 1025.25 6
 8 2 10 7765.65 707.334 5
 8 2 11 30605.7 1949.34 6
 8 2 11 27939.8 1324.1 5
 8 2 11 27185.5 1821.1 7
 8 2 12 51051.9 2006.26 5
 8 2 13 4264.04 776.598 5
 8 2 14 12720.8 1161.22 5
 8 2 15 3194.9 825.986 5
 8 2 16 -51.0081 824.403 5
 8 2 17 1831.43 957.003 5
 8 2 18 2314.96 1014.06 5
 8 3 -7 13835.5 2022.31 7
 8 3 -6 5433.7 1445.72 7
 8 3 -5 76318.4 3920.83 7
 8 3 -4 149413 5549.2 7
 8 3 -3 199.988 908.781 7
 8 3 -2 2527.69 821.332 7
 8 3 -1 4478.66 966.643 7
 8 3 0 71710.1 3043 7
 8 3 1 106091 2913.11 1
 8 3 1 102975 3691.39 7
 8 3 2 7513.15 972.645 7
 8 3 2 7140.22 600.294 1
 8 3 3 54352.9 2321.05 7
 8 3 3 48068.6 1609.52 1
 8 3 4 2503.73 672.293 7
 8 3 4 1408.1 343.908 1
 8 3 5 13227.7 1123.94 7
 8 3 5 14795.4 763.133 1
 8 3 6 1147.32 530.885 7
 8 3 6 795.071 266.174 1
 8 3 6 1502.72 159.514 5
 8 3 7 182395 3859.1 5
 8 3 7 187865 5108.27 7
 8 3 8 303371 7568.13 6
 8 3 8 315585 6411.21 5
 8 3 8 299841 7592.27 7
 8 3 9 53277.6 2395.28 6
 8 3 9 54658 1669.65 5
 8 3 9 52704.2 2407.47 7
 8 3 10 1204.45 625.295 7
 8 3 10 423.276 580.507 6
 8 3 10 1835.49 434.429 5
 8 3 11 3826.12 931.022 7
 8 3 11 5440.06 970.798 6
 8 3 11 4590.18 647.467 5
 8 3 12 51578.5 1971.35 5
 8 3 13 36172 1720.74 5
 8 3 14 2262.98 703.975 5
 8 3 15 9747.54 1108.89 5
 8 3 16 4990.61 1042.07 5
 8 3 17 -574.922 777.656 5
 8 3 18 50.1354 994.143 5
 8 4 -9 3943.83 1522.04 7
 8 4 -8 16126.3 2184.33 7
 8 4 -7 386.085 1056.9 7
 8 4 -6 15288.1 1910.84 7
 8 4 -5 15754.4 1871.88 7
 8 4 -4 132906 5153.06 7
 8 4 -3 78731.5 3670.79 7
 8 4 -2 7468.07 1144.9 7
 8 4 -1 1224.92 736.292 7
 8 4 0 3299.03 853.595 7
 8 4 0 2587.96 570.295 1
 8 4 1 134912 3595.21 1
 8 4 1 128269 4302.78 7
 8 4 2 45374.6 1703.32 1
 8 4 2 47761.7 2269.18 7
 8 4 3 55843 1893.48 1
 8 4 3 59270.2 2472.59 7
 8 4 4 81975.5 2408.62 1
 8 4 4 88071 3088.78 7
 8 4 5 3993.35 740.338 7
 8 4 5 4353.92 516.233 1
 8 4 6 3312.46 634.718 7
 8 4 6 3203.09 471.695 1
 8 4 7 18960.2 1306.76 6
 8 4 7 19034.6 1010.18 1
 8 4 7 19100.5 704.328 5
 8 4 7 20383 1376.77 7
 8 4 8 148815 4431.44 6
 8 4 8 148119 3373.34 5
 8 4 8 149715 4462.39 7
 8 4 9 105727 3545.06 6
 8 4 9 101163 2609.24 5
 8 4 9 101998 3511.71 7
 8 4 10 1681.71 656.437 7
 8 4 10 1444.21 705.246 6
 8 4 10 1279.53 390.028 5
 8 4 11 13426.9 1352.84 6
 8 4 11 13634.4 902.729 5
 8 4 12 440.65 442.852 5
 8 4 13 34397.5 1651.78 5
 8 4 14 5399.07 863.574 5
 8 4 15 3466.35 854.367 5
 8 4 16 5819.5 1005.35 5
 8 4 17 -992.801 867.573 5
 8 4 18 2044.37 1057.41 5
 8 5 -9 5750.26 1751.6 7
 8 5 -8 14863.2 2136.92 7
 8 5 -7 24213.2 2510.53 7
 8 5 -6 843.266 1029.05 7
 8 5 -5 8275.38 1533.14 7
 8 5 -4 40745.2 2724.47 7
 8 5 -3 48012.8 2777.13 7
 8 5 -2 45088.5 2595.4 7
 8 5 -1 2853.82 676.932 1
 8 5 -1 3545.4 895.236 7
 8 5 0 1273.41 721.73 7
 8 5 0 1465.6 547.372 1
 8 5 1 18341.2 1135.05 1
 8 5 1 17543.6 1449.12 7
 8 5 2 117655 3348.61 1
 8 5 2 122090 3959.58 7
 8 5 3 12562.1 901.781 1
 8 5 3 12411.9 1166.96 7
 8 5 4 41987 1670.22 1
 8 5 4 43894.5 2046.56 7
 8 5 5 90331 2702 1
 8 5 5 95559.4 3217.71 7
 8 5 6 676.426 511.832 7
 8 5 6 1338.11 430.024 1
 8 5 7 7477.05 939.932 7
 8 5 7 5656.53 792.544 6
 8 5 7 6620.65 676.566 1
 8 5 8 22971.9 938.548 5
 8 5 8 21150.6 1463.01 7
 8 5 9 53069.1 2344.77 6
 8 5 9 52469 1668.46 5
 8 5 9 50441.4 2340.35 7
 8 5 10 34218.1 1967.57 6
 8 5 10 34699.1 1376.46 5
 8 5 10 35287 1999.77 7
 8 5 11 1990.83 766.924 7
 8 5 11 3459.78 880.453 6
 8 5 11 2744.5 540.055 5
 8 5 12 21726.7 1261.1 5
 8 5 13 468.904 542.766 5
 8 5 14 14314.4 1189.34 5
 8 5 15 2270.49 763.519 5
 8 5 16 3482.92 889.266 5
 8 5 17 8807.22 1254.98 5
 8 5 18 1443.46 1017.04 5
 8 5 19 1687.3 1109.12 5
 8 6 -9 7072.31 1794.68 7
 8 6 -8 268.405 1183.2 7
 8 6 -7 22187.9 2373.99 7
 8 6 -6 19393.7 2185.42 7
 8 6 -5 4163.24 1126.84 7
 8 6 -4 259.377 857.903 7
 8 6 -3 23862.3 1968.19 7
 8 6 -2 66952.4 2723.18 1
 8 6 -2 64302.4 3129.94 7
 8 6 -1 70142 2719.51 1
 8 6 -1 69780.5 3110.33 7
 8 6 0 324.471 619.936 7
 8 6 0 106.956 577.015 1
 8 6 1 895.887 631.682 7
 8 6 1 2226.49 598.921 1
 8 6 2 57299.2 2488.68 7
 8 6 2 56311.2 2153.76 1
 8 6 3 113034 3365.89 1
 8 6 3 118703 3775.81 7
 8 6 4 11943.1 953.38 1
 8 6 4 15223.5 1214.62 7
 8 6 5 49674.7 1938.62 1
 8 6 5 51757.1 2247.58 7
 8 6 6 50409.9 1966.15 1
 8 6 6 51082.1 2274.43 7
 8 6 7 -348.438 541.396 7
 8 6 7 154.388 525.688 6
 8 6 7 357.056 399.931 1
 8 6 8 1245.29 603.212 7
 8 6 8 1361.22 639.315 6
 8 6 8 472.126 411.453 1
 8 6 9 17947.1 1388.8 6
 8 6 9 20849.1 996.842 5
 8 6 9 20217.9 1458.29 7
 8 6 10 51218.5 2430.05 6
 8 6 10 52607.1 1822.19 5
 8 6 10 51815.6 2434.21 7
 8 6 11 59447.6 2089.57 5
 8 6 11 59259.1 2725.82 7
 8 6 12 5088.13 741.787 5
 8 6 13 9973.55 974.045 5
 8 6 14 571.185 627.574 5
 8 6 15 5687.9 934.372 5
 8 6 16 1115.89 769.28 5
 8 6 17 2514.22 852.713 5
 8 6 18 9567.44 1384.05 5
 8 6 19 -812.321 1010.17 5
 8 7 -7 2104.82 1282.68 7
 8 7 -6 22134.9 2244.91 7
 8 7 -5 15889.9 1880.46 7
 8 7 -4 976.536 865.843 7
 8 7 -4 1018.97 787.731 1
 8 7 -3 3206.89 1035.77 7
 8 7 -3 2268.17 884.184 1
 8 7 -2 24006.1 1681.53 1
 8 7 -2 24172 1872.59 7
 8 7 -1 60621.5 2617.59 1
 8 7 -1 63991.9 2919.84 7
 8 7 0 26528.1 1621.83 1
 8 7 0 28442.8 1834.36 7
 8 7 1 36692.5 1869.94 1
 8 7 1 41478.4 2149.27 7
 8 7 2 43734.6 2139.14 7
 8 7 2 47277.1 2042.04 1
 8 7 3 10191.2 1042.3 7
 8 7 3 10610 973.833 1
 8 7 4 41817.8 1859.47 1
 8 7 4 39814.4 1971.17 7
 8 7 5 4615.18 716.545 1
 8 7 5 5184.24 812.312 7
 8 7 6 77352.2 2676.75 1
 8 7 6 83099.2 2962 7
 8 7 7 48689.7 2109.22 6
 8 7 7 45073.9 1957.73 1
 8 7 7 43129.3 2071.47 7
 8 7 8 1286.98 610.748 7
 8 7 8 1109.57 597.102 6
 8 7 8 1436.9 490.741 1
 8 7 9 8761.48 1011.34 7
 8 7 9 11481.6 1155.8 6
 8 7 9 10823.9 957.636 1
 8 7 10 2336.36 741.034 7
 8 7 10 2511.39 725.362 6
 8 7 10 2992.51 517.622 5
 8 7 11 51745.8 1966.71 5
 8 7 11 48538.6 2495.71 7
 8 7 12 20681.3 1288.97 5
 8 7 13 1102.87 610.301 5
 8 7 14 6914.14 939.744 5
 8 7 15 1474.17 719.404 5
 8 7 16 4900.01 1019.87 5
 8 7 17 1154.83 921.594 5
 8 7 18 10200.4 1450.85 5
 8 7 19 5441.12 1202.88 5
 8 8 -6 3237.21 1050.89 1
 8 8 -5 15494.2 1810.37 7
 8 8 -5 14604.1 1645.3 1
 8 8 -4 19636.9 1893.92 7
 8 8 -4 18053.8 1710.4 1
 8 8 -3 3732.17 1042.43 7
 8 8 -3 5099.56 1088.57 1
 8 8 -2 14315.8 1521.81 7
 8 8 -2 14545.1 1451.95 1
 8 8 -1 23507 1659.7 1
 8 8 -1 26549.7 1891.27 7
 8 8 0 50486.1 2384.25 1
 8 8 0 48106.8 2434.03 7
 8 8 1 2822.08 738.958 7
 8 8 1 1540.28 714.452 1
 8 8 2 32868.7 1836.08 7
 8 8 2 35217.3 1837.9 1
 8 8 3 64554.8 2533.77 1
 8 8 3 58030.6 2464.95 7
 8 8 4 480.525 542.635 7
 8 8 4 828.327 621.757 1
 8 8 5 25947.4 1518.47 1
 8 8 5 24119.9 1491.14 7
 8 8 6 5032.82 820.454 7
 8 8 6 3649.2 689.903 1
 8 8 7 116493 3642.55 6
 8 8 7 114108 3546.49 1
 8 8 7 112583 3682.87 7
 8 8 8 10462 1100.76 7
 8 8 8 13410 1143.43 6
 8 8 8 10077.3 987.223 1
 8 8 9 14401.5 1272.93 7
 8 8 9 16130.3 1315.33 6
 8 8 9 13476.6 1151.21 1
 8 8 10 8206.37 1099.31 7
 8 8 10 6321.8 980.061 6
 8 8 11 8341.72 1142.33 7
 8 8 11 9009.48 845.115 5
 8 8 12 33788.7 1667.63 5
 8 8 13 9966.87 1045.68 5
 8 8 14 4980.3 839.085 5
 8 8 15 1160.24 750.658 5
 8 8 16 4207.35 991.567 5
 8 8 17 8821.55 1321.92 5
 8 8 18 2853.65 1138.16 5
 8 8 19 14466.2 1752.01 5
[truncated: 127,826 more chars]
