# Supplementary material
Source: publisher figshare collection journal article supplement (https://acs.figshare.com/ndownloader/files/4205155)
Supplement: Supplementary file 27 [file 4205155 › CIFs/Ni/NiDy/NiDy.cif]

data_NiDy
_audit_creation_date              2015-02-16
_audit_creation_method
;
Olex2 1.2
(compiled 2015.01.26 svn.r3151 for OlexSys, GUI svn.r4998)
;
_publ_contact_author_address      
;
The University of Manchester
School of Chemistry
Oxford Road, 
Manchester
M13 9PL
United Kingdom
;
_publ_contact_author_email        eufemio.morenopineda@manchester.ac.uk
_publ_contact_author_name         'Eufemio Moreno Pineda'
_publ_contact_author_phone        '+44 074 1192 4293'
_publ_section_references
;
Dolomanov, O.V., Bourhis, L.J., Gildea, R.J, Howard, J.A.K. & Puschmann, H.
 (2009), J. Appl. Cryst. 42, 339-341.

Palatinus, L. & Chapuis, G. (2007). J. Appl. Cryst., 40, 786-790;
Palatinus, L. & van der Lee, A. (2008). J. Appl. Cryst. 41, 975-984;
Palatinus, L., Prathapa, S. J. & van Smaalen, S. (2012). J. Appl. Cryst. 45,
 575-580.

Sheldrick, G.M. (2008). Acta Cryst. A64, 112-122.
;
_chemical_name_common             ?
_chemical_name_systematic         ?
_chemical_formula_moiety          'C50 H90 Dy2 Ni2 O22, 2(C6 H16 N)'
_chemical_formula_sum             'C62 H122 Dy2 N2 Ni2 O22'
_chemical_formula_weight          1690.03
_chemical_melting_point           ?
loop_
  _atom_type_symbol
  _atom_type_description
  _atom_type_scat_dispersion_real
  _atom_type_scat_dispersion_imag
  _atom_type_scat_source
 'C' 'C' 0.0033 0.0016 'International Tables Vol C Tables 4.2.6.8 and 6.1.1.4'
 'H' 'H' 0.0000 0.0000 'International Tables Vol C Tables 4.2.6.8 and 6.1.1.4'
 'Dy' 'Dy' -0.1892 4.4098
 'International Tables Vol C Tables 4.2.6.8 and 6.1.1.4'
 'N' 'N' 0.0061 0.0033 'International Tables Vol C Tables 4.2.6.8 and 6.1.1.4'
 'Ni' 'Ni' 0.3393 1.1124 'International Tables Vol C Tables 4.2.6.8 and 6.1.1.4'
 'O' 'O' 0.0106 0.0060 'International Tables Vol C Tables 4.2.6.8 and 6.1.1.4'

_shelx_space_group_comment
;
The symmetry employed for this shelxl refinement is uniquely defined
by the following loop, which should always be used as a source of
symmetry information in preference to the above space-group names.
They are only intended as comments.
;
_space_group_crystal_system       'monoclinic'
_space_group_IT_number            15
_space_group_name_H-M_alt         'C 1 2/c 1'
_space_group_name_Hall            '-C 2yc'
loop_
  _space_group_symop_operation_xyz
 'x, y, z'
 '-x, y, -z+1/2'
 'x+1/2, y+1/2, z'
 '-x+1/2, y+1/2, -z+1/2'
 '-x, -y, -z'
 'x, -y, z-1/2'
 '-x+1/2, -y+1/2, -z'
 'x+1/2, -y+1/2, z-1/2'

_cell_length_a                    20.6807(4)
_cell_length_b                    21.2712(4)
_cell_length_c                    18.2888(3)
_cell_angle_alpha                 90
_cell_angle_beta                  101.5659(18)
_cell_angle_gamma                 90
_cell_volume                      7881.9(3)
_cell_formula_units_Z             4
_cell_measurement_reflns_used     18772
_cell_measurement_temperature     106(1)
_cell_measurement_theta_max       28.6520
_cell_measurement_theta_min       3.1450
_shelx_estimated_absorpt_T_max    ?
_shelx_estimated_absorpt_T_min    ?
_exptl_absorpt_coefficient_mu     2.410
_exptl_absorpt_correction_T_max   1.00000
_exptl_absorpt_correction_T_min   0.60526
_exptl_absorpt_correction_type    multi-scan
_exptl_absorpt_process_details
;
CrysAlisPro, Agilent Technologies,
Version 1.171.36.28 (release 01-02-2013 CrysAlis171 .NET)
(compiled Feb  1 2013,16:14:44)
Empirical absorption correction using spherical harmonics,
 implemented in SCALE3 ABSPACK scaling algorithm.
;
_exptl_absorpt_special_details    ?
_exptl_crystal_colour             'clear green'
_exptl_crystal_colour_lustre      clear
_exptl_crystal_colour_modifier    ?
_exptl_crystal_colour_primary     green
_exptl_crystal_density_diffrn     1.424
_exptl_crystal_density_meas       ?
_exptl_crystal_density_method     ?
_exptl_crystal_description        irregular
_exptl_crystal_F_000              3488
_exptl_crystal_size_max           0.2
_exptl_crystal_size_mid           0.2
_exptl_crystal_size_min           0.1
_exptl_transmission_factor_max    ?
_exptl_transmission_factor_min    ?
_diffrn_reflns_av_R_equivalents   0.0216
_diffrn_reflns_av_unetI/netI      0.0198
_diffrn_reflns_Laue_measured_fraction_full 0.998
_diffrn_reflns_Laue_measured_fraction_max 0.999
_diffrn_reflns_limit_h_max        25
_diffrn_reflns_limit_h_min        -25
_diffrn_reflns_limit_k_max        26
_diffrn_reflns_limit_k_min        -21
_diffrn_reflns_limit_l_max        22
_diffrn_reflns_limit_l_min        -22
_diffrn_reflns_number             25520
_diffrn_reflns_point_group_measured_fraction_full 0.998
_diffrn_reflns_point_group_measured_fraction_max 0.999
_diffrn_reflns_theta_full         25.242
_diffrn_reflns_theta_max          26.372
_diffrn_reflns_theta_min          2.973
_diffrn_ambient_temperature       106(1)
_diffrn_detector_area_resol_mean  8.3367
_diffrn_measured_fraction_theta_full 0.998
_diffrn_measured_fraction_theta_max 0.999
_diffrn_measurement_details
;
#__ type_ start__ end____ width___ exp.time_
  1 omega  -57.00   70.00   0.5000   15.0000
omega____ theta____ kappa____ phi______ frames
    -      -21.2308   77.0000 -180.0000 254

#__ type_ start__ end____ width___ exp.time_
  2 omega  -55.00   33.00   0.5000   15.0000
omega____ theta____ kappa____ phi______ frames
    -      -21.2308   77.0000   90.0000 176

#__ type_ start__ end____ width___ exp.time_
  3 omega  -13.00  103.00   0.5000   15.0000
omega____ theta____ kappa____ phi______ frames
    -       22.6371   77.0000  -60.0000 232

#__ type_ start__ end____ width___ exp.time_
  4 omega   89.00  118.00   0.5000   15.0000
omega____ theta____ kappa____ phi______ frames
    -       22.6371   77.0000   30.0000 58

#__ type_ start__ end____ width___ exp.time_
  5 omega    2.00   37.00   0.5000   15.0000
omega____ theta____ kappa____ phi______ frames
    -       22.6371   77.0000   30.0000 70
;
_diffrn_measurement_device_type   'Xcalibur, Sapphire2, large Be window'
_diffrn_measurement_method        '\w scans'
_diffrn_orient_matrix_UB_11       0.0302462000
_diffrn_orient_matrix_UB_12       -0.0161597000
_diffrn_orient_matrix_UB_13       0.0016040000
_diffrn_orient_matrix_UB_21       0.0070876000
_diffrn_orient_matrix_UB_22       0.0194845000
_diffrn_orient_matrix_UB_23       -0.0288860000
_diffrn_orient_matrix_UB_31       0.0161043000
_diffrn_orient_matrix_UB_32       0.0217208000
_diffrn_orient_matrix_UB_33       0.0270459000
_diffrn_radiation_monochromator   graphite
_diffrn_radiation_type            MoK\a
_diffrn_radiation_wavelength      0.71073
_diffrn_source                    'Enhance (Mo) X-ray Source'
_reflns_Friedel_coverage          0.000
_reflns_Friedel_fraction_full     .
_reflns_Friedel_fraction_max      .
_reflns_number_gt                 7611
_reflns_number_total              8051
_reflns_odcompleteness_completeness 99.82
_reflns_odcompleteness_iscentric  1
_reflns_odcompleteness_theta      26.32
_reflns_special_details
;
 Reflections were merged by SHELXL according to the crystal
 class for the calculation of statistics and refinement.
 
 _reflns_Friedel_fraction is defined as the number of unique
 Friedel pairs measured divided by the number that would be
 possible theoretically, ignoring centric projections and
 systematic absences.
;
_reflns_threshold_expression      'I > 2\s(I)'
_computing_cell_refinement
;
CrysAlisPro, Agilent Technologies,
Version 1.171.36.28 (release 01-02-2013 CrysAlis171 .NET)
(compiled Feb  1 2013,16:14:44)
;
_computing_data_collection
;
CrysAlisPro, Agilent Technologies,
Version 1.171.36.28 (release 01-02-2013 CrysAlis171 .NET)
(compiled Feb  1 2013,16:14:44)
;
_computing_data_reduction
;
CrysAlisPro, Agilent Technologies,
Version 1.171.36.28 (release 01-02-2013 CrysAlis171 .NET)
(compiled Feb  1 2013,16:14:44)
;
_computing_molecular_graphics     'Olex2 (Dolomanov et al., 2009)'
_computing_publication_material   'Olex2 (Dolomanov et al., 2009)'
_computing_structure_refinement   'ShelXL (Sheldrick, 2008)'
_computing_structure_solution
;
Superflip (Palatinus & Chapuis, 2007;Palatinus & van der Lee, 2008;
Palatinus et al., 2012)
;
_refine_diff_density_max          1.018
_refine_diff_density_min          -0.534
_refine_diff_density_rms          0.079
_refine_ls_extinction_coef        .
_refine_ls_extinction_method      none
_refine_ls_goodness_of_fit_ref    1.048
_refine_ls_hydrogen_treatment     constr
_refine_ls_matrix_type            full
_refine_ls_number_parameters      424
_refine_ls_number_reflns          8051
_refine_ls_number_restraints      0
_refine_ls_R_factor_all           0.0239
_refine_ls_R_factor_gt            0.0215
_refine_ls_restrained_S_all       1.048
_refine_ls_shift/su_max           0.003
_refine_ls_shift/su_mean          0.000
_refine_ls_structure_factor_coef  Fsqd
_refine_ls_weighting_details
'w=1/[\s^2^(Fo^2^)+(0.0263P)^2^+15.4601P] where P=(Fo^2^+2Fc^2^)/3'
_refine_ls_weighting_scheme       calc
_refine_ls_wR_factor_gt           0.0519
_refine_ls_wR_factor_ref          0.0529
_refine_special_details           ?
_olex2_refinement_description
;
1. Fixed Uiso
 At 1.2 times of:
  All C(H,H) groups, All N(H) groups
 At 1.5 times of:
  All C(H,H,H) groups
2.a Ternary CH refined with riding coordinates:
 N1(H1)
2.b Secondary CH2 refined with riding coordinates:
 C26(H26A,H26B), C30(H30A,H30B), C28(H28A,H28B)
2.c Idealised Me refined as rotating group:
 C5(H5A,H5B,H5C), C3(H3A,H3B,H3C), C4(H4A,H4B,H4C), C18(H18A,H18B,H18C),
 C19(H19A,H19B,H19C), C20(H20A,H20B,H20C), C23(H23A,H23B,H23C), C25(H25A,H25B,
 H25C), C24(H24A,H24B,H24C), C8(H8A,H8B,H8C), C9(H9A,H9B,H9C), C10(H10A,H10B,
 H10C), C14(H14A,H14B,H14C), C15(H15A,H15B,H15C), C13(H13A,H13B,H13C), C27(H27A,
 H27B,H27C), C31(H31A,H31B,H31C), C29(H29A,H29B,H29C)
;
_atom_sites_solution_hydrogens    geom
_atom_sites_solution_primary      iterative
_atom_sites_solution_secondary    ?
loop_
  _atom_site_label
  _atom_site_type_symbol
  _atom_site_fract_x
  _atom_site_fract_y
  _atom_site_fract_z
  _atom_site_U_iso_or_equiv
  _atom_site_adp_type
  _atom_site_occupancy
  _atom_site_site_symmetry_order
  _atom_site_calc_flag
  _atom_site_refinement_flags_posn
  _atom_site_refinement_flags_adp
  _atom_site_refinement_flags_occupancy
  _atom_site_disorder_assembly
  _atom_site_disorder_group
 Dy1 Dy 0.25147(2) 0.21107(2) 0.16012(2) 0.01192(4) Uani 1 1 d . . . . .
 Ni1 Ni 0.24532(2) 0.32135(2) 0.02312(2) 0.01242(6) Uani 1 1 d . . . . .
 O2 O 0.29265(7) 0.22470(8) 0.39774(8) 0.0208(3) Uani 1 1 d . . . . .
 O1OH O 0.29607(7) 0.24040(6) 0.05997(7) 0.0129(3) Uani 1 1 d . . . . .
 O1 O 0.28353(7) 0.18931(7) 0.28261(8) 0.0171(3) Uani 1 1 d . . . . .
 O7 O 0.30397(8) 0.30411(7) 0.20069(8) 0.0190(3) Uani 1 1 d . . . . .
 O8 O 0.29209(7) 0.37543(7) 0.10901(8) 0.0174(3) Uani 1 1 d . . . . .
 O9 O 0.15997(8) 0.26852(7) 0.19967(8) 0.0223(3) Uani 1 1 d . . . . .
 O10 O 0.17948(7) 0.29048(6) 0.08947(8) 0.0149(3) Uani 1 1 d . . . . .
 O3 O 0.16360(8) 0.13225(7) 0.15199(8) 0.0218(3) Uani 1 1 d . . . . .
 O4 O 0.18760(7) 0.16262(7) 0.04660(8) 0.0170(3) Uani 1 1 d . . . . .
 O5 O 0.31378(7) 0.12446(7) 0.14412(8) 0.0187(3) Uani 1 1 d . . . . .
 O6 O 0.30983(7) 0.10476(7) 0.02273(8) 0.0180(3) Uani 1 1 d . . . . .
 N1 N 0.16483(9) 0.19230(9) 0.38001(10) 0.0184(4) Uani 1 1 d . . . . .
 H1 H 0.2092 0.2073 0.3780 0.022 Uiso 1 1 calc R . . . .
 C1 C 0.31776(10) 0.20537(9) 0.34513(12) 0.0146(4) Uani 1 1 d . . . . .
 C2 C 0.39265(10) 0.19526(11) 0.35941(12) 0.0189(4) Uani 1 1 d . . . . .
 C5 C 0.40380(13) 0.12817(12) 0.39047(15) 0.0319(6) Uani 1 1 d . . . . .
 H5A H 0.3872 0.1249 0.4357 0.048 Uiso 1 1 calc GR . . . .
 H5B H 0.4502 0.1189 0.4007 0.048 Uiso 1 1 calc GR . . . .
 H5C H 0.3810 0.0988 0.3544 0.048 Uiso 1 1 calc GR . . . .
 C3 C 0.41930(12) 0.20082(13) 0.28779(13) 0.0274(5) Uani 1 1 d . . . . .
 H3A H 0.3990 0.1695 0.2528 0.041 Uiso 1 1 calc GR . . . .
 H3B H 0.4662 0.1947 0.2988 0.041 Uiso 1 1 calc GR . . . .
 H3C H 0.4094 0.2418 0.2666 0.041 Uiso 1 1 calc GR . . . .
 C4 C 0.42831(11) 0.24247(12) 0.41682(13) 0.0272(5) Uani 1 1 d . . . . .
 H4A H 0.4189 0.2844 0.3984 0.041 Uiso 1 1 calc GR . . . .
 H4B H 0.4750 0.2352 0.4251 0.041 Uiso 1 1 calc GR . . . .
 H4C H 0.4134 0.2374 0.4629 0.041 Uiso 1 1 calc GR . . . .
 C16 C 0.30848(9) 0.35915(9) 0.17610(11) 0.0143(4) Uani 1 1 d . . . . .
 C17 C 0.33797(10) 0.40942(10) 0.23375(11) 0.0173(4) Uani 1 1 d . . . . .
 C18 C 0.31822(13) 0.39553(11) 0.30810(12) 0.0258(5) Uani 1 1 d . . . . .
 H18A H 0.2710 0.3974 0.3018 0.039 Uiso 1 1 calc GR . . . .
 H18B H 0.3378 0.4262 0.3444 0.039 Uiso 1 1 calc GR . . . .
 H18C H 0.3334 0.3543 0.3249 0.039 Uiso 1 1 calc GR . . . .
 C19 C 0.31491(12) 0.47510(10) 0.20675(13) 0.0256(5) Uani 1 1 d . . . . .
 H19A H 0.3307 0.4847 0.1621 0.038 Uiso 1 1 calc GR . . . .
 H19B H 0.3320 0.5053 0.2447 0.038 Uiso 1 1 calc GR . . . .
 H19C H 0.2676 0.4766 0.1965 0.038 Uiso 1 1 calc GR . . . .
 C20 C 0.41324(12) 0.40469(13) 0.24347(16) 0.0335(6) Uani 1 1 d . . . . .
 H20A H 0.4273 0.3630 0.2596 0.050 Uiso 1 1 calc GR . . . .
 H20B H 0.4338 0.4346 0.2802 0.050 Uiso 1 1 calc GR . . . .
 H20C H 0.4258 0.4135 0.1967 0.050 Uiso 1 1 calc GR . . . .
 C21 C 0.14824(10) 0.30116(9) 0.14166(11) 0.0142(4) Uani 1 1 d . . . . .
 C22 C 0.09711(10) 0.35379(10) 0.13193(12) 0.0182(4) Uani 1 1 d . . . . .
 C23 C 0.05451(12) 0.34893(12) 0.19098(14) 0.0272(5) Uani 1 1 d . . . . .
 H23A H 0.0327 0.3088 0.1869 0.041 Uiso 1 1 calc GR . . . .
 H23B H 0.0221 0.3818 0.1834 0.041 Uiso 1 1 calc GR . . . .
 H23C H 0.0819 0.3530 0.2397 0.041 Uiso 1 1 calc GR . . . .
 C25 C 0.05352(11) 0.34931(12) 0.05390(13) 0.0272(5) Uani 1 1 d . . . . .
 H25A H 0.0804 0.3537 0.0170 0.041 Uiso 1 1 calc GR . . . .
 H25B H 0.0211 0.3822 0.0476 0.041 Uiso 1 1 calc GR . . . .
 H25C H 0.0318 0.3092 0.0481 0.041 Uiso 1 1 calc GR . . . .
 C24 C 0.13451(12) 0.41649(10) 0.14124(13) 0.0233(5) Uani 1 1 d . . . . .
 H24A H 0.1620 0.4185 0.1902 0.035 Uiso 1 1 calc GR . . . .
 H24B H 0.1035 0.4506 0.1350 0.035 Uiso 1 1 calc GR . . . .
 H24C H 0.1615 0.4196 0.1044 0.035 Uiso 1 1 calc GR . . . .
 C6 C 0.15366(10) 0.12935(9) 0.08238(11) 0.0147(4) Uani 1 1 d . . . . .
 C7 C 0.10012(10) 0.08672(10) 0.03857(12) 0.0182(4) Uani 1 1 d . . . . .
 C8 C 0.05701(12) 0.06062(13) 0.08993(14) 0.0319(6) Uani 1 1 d . . . . .
 H8A H 0.0839 0.0373 0.1297 0.048 Uiso 1 1 calc GR . . . .
 H8B H 0.0240 0.0334 0.0620 0.048 Uiso 1 1 calc GR . . . .
 H8C H 0.0360 0.0947 0.1105 0.048 Uiso 1 1 calc GR . . . .
 C9 C 0.13493(12) 0.03271(10) 0.00698(13) 0.0256(5) Uani 1 1 d . . . . .
 H9A H 0.1631 0.0494 -0.0242 0.038 Uiso 1 1 calc GR . . . .
 H9B H 0.1026 0.0055 -0.0220 0.038 Uiso 1 1 calc GR . . . .
 H9C H 0.1610 0.0093 0.0473 0.038 Uiso 1 1 calc GR . . . .
 C10 C 0.05902(13) 0.12461(13) -0.02536(15) 0.0346(6) Uani 1 1 d . . . . .
 H10A H 0.0391 0.1597 -0.0053 0.052 Uiso 1 1 calc GR . . . .
 H10B H 0.0252 0.0983 -0.0533 0.052 Uiso 1 1 calc GR . . . .
 H10C H 0.0870 0.1396 -0.0576 0.052 Uiso 1 1 calc GR . . . .
 C11 C 0.32667(10) 0.09176(9) 0.09089(11) 0.0156(4) Uani 1 1 d . . . . .
 C12 C 0.36527(10) 0.03073(10) 0.11303(12) 0.0184(4) Uani 1 1 d . . . . .
 C14 C 0.32207(14) -0.01060(12) 0.15128(16) 0.0368(6) Uani 1 1 d . . . . .
 H14A H 0.3130 0.0108 0.1944 0.055 Uiso 1 1 calc GR . . . .
 H14B H 0.3446 -0.0494 0.1664 0.055 Uiso 1 1 calc GR . . . .
 H14C H 0.2813 -0.0193 0.1172 0.055 Uiso 1 1 calc GR . . . .
 C15 C 0.42892(14) 0.04572(14) 0.1682(2) 0.0495(8) Uani 1 1 d . . . . .
 H15A H 0.4552 0.0741 0.1455 0.074 Uiso 1 1 calc GR . . . .
 H15B H 0.4532 0.0076 0.1819 0.074 Uiso 1 1 calc GR . . . .
 H15C H 0.4186 0.0649 0.2119 0.074 Uiso 1 1 calc GR . . . .
 C13 C 0.37996(16) -0.00348(12) 0.04527(15) 0.0376(7) Uani 1 1 d . . . . .
 H13A H 0.3394 -0.0116 0.0106 0.056 Uiso 1 1 calc GR . . . .
 H13B H 0.4016 -0.0426 0.0607 0.056 Uiso 1 1 calc GR . . . .
 H13C H 0.4081 0.0221 0.0217 0.056 Uiso 1 1 calc GR . . . .
 C26 C 0.12040(11) 0.24832(10) 0.36681(13) 0.0231(5) Uani 1 1 d . . . . .
 H26A H 0.0807 0.2396 0.3856 0.028 Uiso 1 1 calc R . . . .
 H26B H 0.1076 0.2557 0.3135 0.028 Uiso 1 1 calc R . . . .
 C27 C 0.15260(13) 0.30667(11) 0.40406(14) 0.0288(5) Uani 1 1 d . . . . .
 H27A H 0.1912 0.3163 0.3845 0.043 Uiso 1 1 calc GR . . . .
 H27B H 0.1650 0.2997 0.4569 0.043 Uiso 1 1 calc GR . . . .
 H27C H 0.1221 0.3412 0.3946 0.043 Uiso 1 1 calc GR . . . .
 C30 C 0.14718(11) 0.14441(10) 0.31936(12) 0.0206(4) Uani 1 1 d . . . . .
 H30A H 0.1816 0.1127 0.3257 0.025 Uiso 1 1 calc R . . . .
 H30B H 0.1460 0.1648 0.2717 0.025 Uiso 1 1 calc R . . . .
 C31 C 0.08167(11) 0.11227(12) 0.31742(14) 0.0275(5) Uani 1 1 d . . . . .
 H31A H 0.0720 0.0849 0.2749 0.041 Uiso 1 1 calc GR . . . .
 H31B H 0.0476 0.1434 0.3140 0.041 Uiso 1 1 calc GR . . . .
 H31C H 0.0839 0.0881 0.3622 0.041 Uiso 1 1 calc GR . . . .
 C28 C 0.16850(12) 0.16611(11) 0.45693(12) 0.0233(5) Uani 1 1 d . . . . .
 H28A H 0.1248 0.1527 0.4621 0.028 Uiso 1 1 calc R . . . .
 H28B H 0.1827 0.1990 0.4933 0.028 Uiso 1 1 calc R . . . .
 C29 C 0.21548(13) 0.11106(11) 0.47351(14) 0.0300(5) Uani 1 1 d . . . . .
 H29A H 0.1980 0.0759 0.4429 0.045 Uiso 1 1 calc GR . . . .
 H29B H 0.2207 0.0997 0.5252 0.045 Uiso 1 1 calc GR . . . .
 H29C H 0.2575 0.1226 0.4630 0.045 Uiso 1 1 calc GR . . . .

loop_
  _atom_site_aniso_label
  _atom_site_aniso_U_11
  _atom_site_aniso_U_22
  _atom_site_aniso_U_33
  _atom_site_aniso_U_23
  _atom_site_aniso_U_13
  _atom_site_aniso_U_12
 Dy1 0.01495(6) 0.01416(6) 0.00684(6) -0.00067(3) 0.00267(4) -0.00163(3)
 Ni1 0.01625(13) 0.01366(12) 0.00750(12) -0.00072(9) 0.00276(9) -0.00096(9)
 O2 0.0182(7) 0.0322(8) 0.0125(7) -0.0057(6) 0.0040(6) -0.0027(6)
 O1OH 0.0151(7) 0.0151(7) 0.0087(7) -0.0008(5) 0.0029(5) -0.0016(5)
 O1 0.0192(7) 0.0222(7) 0.0091(7) -0.0002(6) 0.0008(6) -0.0024(6)
 O7 0.0249(8) 0.0194(7) 0.0121(7) -0.0017(6) 0.0024(6) -0.0050(6)
 O8 0.0227(7) 0.0175(7) 0.0119(7) -0.0016(6) 0.0033(6) -0.0029(6)
 O9 0.0259(8) 0.0269(8) 0.0164(8) 0.0067(6) 0.0101(6) 0.0068(7)
 O10 0.0165(7) 0.0192(7) 0.0102(7) -0.0018(5) 0.0055(6) -0.0008(5)
 O3 0.0274(8) 0.0294(8) 0.0100(7) -0.0039(6) 0.0069(6) -0.0114(7)
 O4 0.0200(7) 0.0196(7) 0.0121(7) -0.0010(6) 0.0049(6) -0.0060(6)
 O5 0.0246(8) 0.0195(7) 0.0116(7) -0.0001(6) 0.0028(6) 0.0024(6)
 O6 0.0246(8) 0.0188(7) 0.0116(7) 0.0009(6) 0.0061(6) 0.0029(6)
 N1 0.0180(9) 0.0220(9) 0.0157(9) -0.0007(7) 0.0047(7) -0.0013(7)
 C1 0.0171(10) 0.0151(9) 0.0118(10) 0.0020(7) 0.0037(8) -0.0015(7)
 C2 0.0162(10) 0.0261(11) 0.0140(10) 0.0004(9) 0.0020(8) 0.0020(9)
 C5 0.0285(13) 0.0322(13) 0.0348(14) 0.0065(11) 0.0059(11) 0.0088(11)
 C3 0.0194(11) 0.0437(14) 0.0204(12) -0.0009(10) 0.0072(9) 0.0002(10)
 C4 0.0181(11) 0.0378(13) 0.0236(12) -0.0050(10) -0.0010(9) -0.0005(10)
 C16 0.0128(9) 0.0179(9) 0.0123(10) -0.0037(8) 0.0025(7) -0.0014(8)
 C17 0.0198(10) 0.0177(10) 0.0137(10) -0.0032(8) 0.0021(8) -0.0029(8)
 C18 0.0407(14) 0.0224(11) 0.0148(11) -0.0041(9) 0.0066(10) -0.0029(10)
 C19 0.0383(13) 0.0173(10) 0.0187(11) -0.0031(9) -0.0001(10) -0.0065(9)
 C20 0.0202(11) 0.0394(14) 0.0393(15) -0.0183(12) 0.0016(10) -0.0079(10)
 C21 0.0129(9) 0.0173(9) 0.0125(10) -0.0019(8) 0.0025(8) -0.0033(8)
 C22 0.0162(10) 0.0252(11) 0.0136(10) 0.0000(8) 0.0041(8) 0.0031(8)
 C23 0.0237(11) 0.0344(13) 0.0268(13) 0.0048(10) 0.0132(10) 0.0081(10)
 C25 0.0196(11) 0.0412(14) 0.0186(12) -0.0004(10) -0.0018(9) 0.0035(10)
 C24 0.0275(12) 0.0211(11) 0.0222(12) -0.0015(9) 0.0069(9) 0.0026(9)
 C6 0.0143(9) 0.0147(9) 0.0156(10) -0.0018(8) 0.0040(8) 0.0012(8)
 C7 0.0160(10) 0.0240(10) 0.0146(10) -0.0024(8) 0.0031(8) -0.0044(8)
 C8 0.0251(12) 0.0437(14) 0.0294(13) -0.0100(11) 0.0113(10) -0.0173(11)
 C9 0.0310(12) 0.0215(11) 0.0260(12) -0.0076(9) 0.0101(10) -0.0070(9)
 C10 0.0258(12) 0.0419(14) 0.0298(14) 0.0011(11) -0.0094(10) -0.0004(11)
 C11 0.0153(9) 0.0166(9) 0.0155(10) 0.0002(8) 0.0042(8) -0.0014(8)
 C12 0.0211(10) 0.0186(10) 0.0155(10) 0.0011(8) 0.0040(8) 0.0030(8)
 C14 0.0477(16) 0.0234(12) 0.0451(16) 0.0105(11) 0.0231(13) 0.0052(11)
 C15 0.0277(14) 0.0415(16) 0.069(2) -0.0137(15) -0.0156(14) 0.0133(12)
 C13 0.0636(19) 0.0262(12) 0.0273(14) 0.0048(10) 0.0190(13) 0.0212(12)
 C26 0.0228(11) 0.0242(11) 0.0230(12) 0.0015(9) 0.0062(9) 0.0038(9)
 C27 0.0371(14) 0.0230(11) 0.0269(13) -0.0015(10) 0.0079(10) 0.0019(10)
 C30 0.0207(11) 0.0250(11) 0.0170(11) -0.0051(9) 0.0059(8) -0.0021(9)
 C31 0.0213(11) 0.0340(13) 0.0264(13) -0.0070(10) 0.0032(9) -0.0061(10)
 C28 0.0269(12) 0.0275(11) 0.0156(11) 0.0006(9) 0.0045(9) -0.0030(9)
 C29 0.0350(13) 0.0260(12) 0.0259(13) 0.0054(10) -0.0016(10) -0.0037(10)

_geom_special_details
;
 All esds (except the esd in the dihedral angle between two l.s. planes)
 are estimated using the full covariance matrix.  The cell esds are taken
 into account individually in the estimation of esds in distances, angles
 and torsion angles; correlations between esds in cell parameters are only
 used when they are defined by crystal symmetry.  An approximate (isotropic)
 treatment of cell esds is used for estimating esds involving l.s. planes.
;
loop_
  _geom_bond_atom_site_label_1
  _geom_bond_atom_site_label_2
  _geom_bond_distance
  _geom_bond_site_symmetry_2
  _geom_bond_publ_flag
 Dy1 Ni1 3.4160(3) . ?
 Dy1 Ni1 3.4350(3) 7 ?
 Dy1 O1OH 2.2961(13) . ?
 Dy1 O1 2.2531(14) . ?
 Dy1 O7 2.3072(15) . ?
 Dy1 O9 2.4793(15) . ?
 Dy1 O10 2.4430(14) . ?
 Dy1 O3 2.4551(15) . ?
 Dy1 O4 2.4530(14) . ?
 Dy1 O5 2.3002(14) . ?
 Dy1 C21 2.838(2) . ?
 Dy1 C6 2.825(2) . ?
 Ni1 Dy1 3.4350(3) 7 ?
 Ni1 O1OH 2.0583(14) . ?
 Ni1 O1OH 2.0605(13) 7 ?
 Ni1 O8 2.0291(14) . ?
 Ni1 O10 2.1023(14) . ?
 Ni1 O4 2.0919(14) 7 ?
 Ni1 O6 2.0226(15) 7 ?
 O2 C1 1.251(3) . ?
 O1OH Ni1 2.0605(13) 7 ?
 O1 C1 1.265(3) . ?
 O7 C16 1.264(3) . ?
 O8 C16 1.254(2) . ?
 O9 C21 1.250(3) . ?
 O10 C21 1.276(2) . ?
 O3 C6 1.250(2) . ?
 O4 Ni1 2.0918(14) 7 ?
 O4 C6 1.267(2) . ?
 O5 C11 1.267(2) . ?
 O6 Ni1 2.0226(15) 7 ?
 O6 C11 1.256(2) . ?
 N1 C26 1.494(3) . ?
 N1 C30 1.496(3) . ?
 N1 C28 1.501(3) . ?
 C1 C2 1.533(3) . ?
 C2 C5 1.536(3) . ?
 C2 C3 1.524(3) . ?
 C2 C4 1.531(3) . ?
 C16 C17 1.539(3) . ?
 C17 C18 1.525(3) . ?
 C17 C19 1.526(3) . ?
 C17 C20 1.534(3) . ?
 C21 C22 1.526(3) . ?
 C22 C23 1.528(3) . ?
 C22 C25 1.531(3) . ?
 C22 C24 1.534(3) . ?
 C6 C7 1.528(3) . ?
 C7 C8 1.523(3) . ?
 C7 C9 1.529(3) . ?
 C7 C10 1.530(3) . ?
 C11 C12 1.535(3) . ?
 C12 C14 1.520(3) . ?
 C12 C15 1.523(3) . ?
 C12 C13 1.519(3) . ?
 C26 C27 1.506(3) . ?
 C30 C31 1.512(3) . ?
 C28 C29 1.513(3) . ?

loop_
  _geom_angle_atom_site_label_1
  _geom_angle_atom_site_label_2
  _geom_angle_atom_site_label_3
  _geom_angle
  _geom_angle_site_symmetry_1
  _geom_angle_site_symmetry_3
  _geom_angle_publ_flag
 Ni1 Dy1 Ni1 55.071(7) . 7 ?
 O1OH Dy1 Ni1 35.60(3) . 7 ?
 O1OH Dy1 Ni1 35.92(3) . . ?
 O1OH Dy1 O7 77.59(5) . . ?
 O1OH Dy1 O9 123.43(5) . . ?
 O1OH Dy1 O10 71.93(5) . . ?
 O1OH Dy1 O3 123.24(5) . . ?
 O1OH Dy1 O4 70.93(5) . . ?
 O1OH Dy1 O5 77.95(5) . . ?
 O1OH Dy1 C21 97.73(5) . . ?
 O1OH Dy1 C6 97.32(5) . . ?
 O1 Dy1 Ni1 150.39(4) . 7 ?
 O1 Dy1 Ni1 146.16(4) . . ?
 O1 Dy1 O1OH 139.80(5) . . ?
 O1 Dy1 O7 80.26(5) . . ?
 O1 Dy1 O9 84.31(5) . . ?
 O1 Dy1 O10 133.99(5) . . ?
 O1 Dy1 O3 89.23(5) . . ?
 O1 Dy1 O4 139.15(5) . . ?
 O1 Dy1 O5 84.34(5) . . ?
 O1 Dy1 C21 108.74(6) . . ?
 O1 Dy1 C6 114.35(6) . . ?
 O7 Dy1 Ni1 65.97(4) . . ?
 O7 Dy1 Ni1 112.71(4) . 7 ?
 O7 Dy1 O9 79.68(5) . . ?
 O7 Dy1 O10 76.97(5) . . ?
 O7 Dy1 O3 154.18(5) . . ?
 O7 Dy1 O4 140.48(5) . . ?
 O7 Dy1 C21 75.72(5) . . ?
 O7 Dy1 C6 158.89(6) . . ?
 O9 Dy1 Ni1 123.28(4) . 7 ?
 O9 Dy1 Ni1 87.54(3) . . ?
 O9 Dy1 C21 26.09(5) . . ?
 O9 Dy1 C6 86.49(6) . . ?
 O10 Dy1 Ni1 37.64(3) . . ?
 O10 Dy1 Ni1 75.62(3) . 7 ?
 O10 Dy1 O9 52.67(5) . . ?
 O10 Dy1 O3 94.30(5) . . ?
 O10 Dy1 O4 71.04(5) . . ?
 O10 Dy1 C21 26.63(5) . . ?
 O10 Dy1 C6 81.97(5) . . ?
 O3 Dy1 Ni1 120.42(4) . . ?
 O3 Dy1 Ni1 87.86(3) . 7 ?
 O3 Dy1 O9 75.83(5) . . ?
 O3 Dy1 C21 85.63(6) . . ?
 O3 Dy1 C6 26.20(5) . . ?
 O4 Dy1 Ni1 74.52(3) . . ?
 O4 Dy1 Ni1 37.10(3) . 7 ?
 O4 Dy1 O9 98.10(5) . . ?
 O4 Dy1 O3 52.80(5) . . ?
 O4 Dy1 C21 85.32(5) . . ?
 O4 Dy1 C6 26.61(5) . . ?
 O5 Dy1 Ni1 66.06(4) . 7 ?
 O5 Dy1 Ni1 113.33(4) . . ?
 O5 Dy1 O7 119.23(5) . . ?
 O5 Dy1 O9 155.75(5) . . ?
 O5 Dy1 O10 141.63(5) . . ?
 O5 Dy1 O3 82.66(5) . . ?
 O5 Dy1 O4 77.07(5) . . ?
 O5 Dy1 C21 162.33(5) . . ?
 O5 Dy1 C6 78.82(5) . . ?
 C21 Dy1 Ni1 100.41(4) . 7 ?
 C21 Dy1 Ni1 62.13(4) . . ?
 C6 Dy1 Ni1 62.45(4) . 7 ?
 C6 Dy1 Ni1 97.80(4) . . ?
 C6 Dy1 C21 84.83(6) . . ?
 Dy1 Ni1 Dy1 124.930(7) . 7 ?
 O1OH Ni1 Dy1 92.98(4) 7 . ?
 O1OH Ni1 Dy1 40.87(4) . . ?
 O1OH Ni1 Dy1 92.48(4) . 7 ?
 O1OH Ni1 Dy1 40.44(4) 7 7 ?
 O1OH Ni1 O1OH 79.47(6) . 7 ?
 O1OH Ni1 O10 90.30(5) 7 . ?
 O1OH Ni1 O10 84.06(5) . . ?
 O1OH Ni1 O4 88.79(6) . 7 ?
 O1OH Ni1 O4 83.25(5) 7 7 ?
 O8 Ni1 Dy1 83.08(4) . . ?
 O8 Ni1 Dy1 140.32(4) . 7 ?
 O8 Ni1 O1OH 174.50(6) . 7 ?
 O8 Ni1 O1OH 95.06(6) . . ?
 O8 Ni1 O10 89.63(6) . . ?
 O8 Ni1 O4 96.20(6) . 7 ?
 O10 Ni1 Dy1 129.93(4) . 7 ?
 O10 Ni1 Dy1 45.20(4) . . ?
 O4 Ni1 Dy1 45.02(4) 7 7 ?
 O4 Ni1 Dy1 128.85(4) 7 . ?
 O4 Ni1 O10 171.15(5) 7 . ?
 O6 Ni1 Dy1 140.60(4) 7 . ?
 O6 Ni1 Dy1 82.59(4) 7 7 ?
 O6 Ni1 O1OH 94.21(6) 7 7 ?
 O6 Ni1 O1OH 173.68(6) 7 . ?
 O6 Ni1 O8 91.26(6) 7 . ?
 O6 Ni1 O10 96.05(6) 7 . ?
 O6 Ni1 O4 90.48(6) 7 7 ?
 Ni1 O1OH Dy1 103.21(6) . . ?
 Ni1 O1OH Dy1 103.95(6) 7 . ?
 Ni1 O1OH Ni1 100.52(6) . 7 ?
 C1 O1 Dy1 147.45(13) . . ?
 C16 O7 Dy1 138.02(13) . . ?
 C16 O8 Ni1 126.45(13) . . ?
 C21 O9 Dy1 93.19(12) . . ?
 Ni1 O10 Dy1 97.16(6) . . ?
 C21 O10 Dy1 94.23(12) . . ?
 C21 O10 Ni1 149.32(13) . . ?
 C6 O3 Dy1 93.67(12) . . ?
 Ni1 O4 Dy1 97.88(5) 7 . ?
 C6 O4 Dy1 93.30(12) . . ?
 C6 O4 Ni1 155.42(13) . 7 ?
 C11 O5 Dy1 138.30(13) . . ?
 C11 O6 Ni1 127.13(13) . 7 ?
 C26 N1 C30 111.86(17) . . ?
 C26 N1 C28 111.18(17) . . ?
 C30 N1 C28 113.64(17) . . ?
 O2 C1 O1 122.72(19) . . ?
 O2 C1 C2 118.42(19) . . ?
 O1 C1 C2 118.62(18) . . ?
 C1 C2 C5 105.37(18) . . ?
 C3 C2 C1 111.70(18) . . ?
 C3 C2 C5 109.7(2) . . ?
 C3 C2 C4 109.33(19) . . ?
 C4 C2 C1 110.85(18) . . ?
 C4 C2 C5 109.86(19) . . ?
 O7 C16 C17 116.55(17) . . ?
 O8 C16 O7 125.38(18) . . ?
 O8 C16 C17 118.06(17) . . ?
 C18 C17 C16 109.63(17) . . ?
 C18 C17 C19 110.11(18) . . ?
 C18 C17 C20 109.32(19) . . ?
 C19 C17 C16 111.05(17) . . ?
 C19 C17 C20 109.97(19) . . ?
 C20 C17 C16 106.70(17) . . ?
 O9 C21 Dy1 60.71(11) . . ?
 O9 C21 O10 119.66(19) . . ?
 O9 C21 C22 121.23(18) . . ?
 O10 C21 Dy1 59.14(10) . . ?
 O10 C21 C22 119.11(18) . . ?
 C22 C21 Dy1 175.24(14) . . ?
 C21 C22 C23 110.62(18) . . ?
 C21 C22 C25 109.14(18) . . ?
 C21 C22 C24 107.63(17) . . ?
 C23 C22 C25 109.85(18) . . ?
 C23 C22 C24 109.25(18) . . ?
 C25 C22 C24 110.32(19) . . ?
 O3 C6 Dy1 60.14(10) . . ?
 O3 C6 O4 120.23(18) . . ?
 O3 C6 C7 121.15(18) . . ?
 O4 C6 Dy1 60.09(10) . . ?
 O4 C6 C7 118.61(18) . . ?
 C7 C6 Dy1 178.26(15) . . ?
 C6 C7 C9 107.30(17) . . ?
 C6 C7 C10 108.74(18) . . ?
 C8 C7 C6 110.19(17) . . ?
 C8 C7 C9 109.70(19) . . ?
 C8 C7 C10 111.0(2) . . ?
 C9 C7 C10 109.78(19) . . ?
 O5 C11 C12 116.09(18) . . ?
 O6 C11 O5 125.61(19) . . ?
 O6 C11 C12 118.29(18) . . ?
 C14 C12 C11 106.74(18) . . ?
 C14 C12 C15 109.0(2) . . ?
 C15 C12 C11 109.41(19) . . ?
 C13 C12 C11 111.61(18) . . ?
 C13 C12 C14 109.3(2) . . ?
 C13 C12 C15 110.7(2) . . ?
 N1 C26 C27 112.48(19) . . ?
 N1 C30 C31 114.17(18) . . ?
 N1 C28 C29 112.64(19) . . ?

_shelx_SHELXL_version_number      '2014/7'
_iucr_refine_instructions_details
;

    oejlm1154.res created by SHELXL-2014/7

TITL CF solution in C2/c
CELL 0.71073 20.680655 21.271154 18.28878 90 101.5659 90
ZERR 4 0.000393 0.00037 0.00034 0 0.0018 0
LATT 7
SYMM -X,+Y,0.5-Z
SFAC C H Dy N Ni O
UNIT 248 488 8 8 8 88
 
L.S. 10
PLAN  25
BOND
fmap 2
acta
SHEL 100 0.8
OMIT -15 19 12
REM <olex2.extras>
REM <HklSrc "%./oejlm1154.hkl">
REM </olex2.extras>
 
WGHT    0.026300   15.460100
FVAR       1.01005
DY1   3    0.251474    0.211067    0.160119    11.00000    0.01495    0.01416 =
         0.00684   -0.00067    0.00267   -0.00163
NI1   5    0.245318    0.321349    0.023121    11.00000    0.01625    0.01366 =
         0.00750   -0.00072    0.00276   -0.00096
O2    6    0.292650    0.224702    0.397738    11.00000    0.01820    0.03219 =
         0.01246   -0.00567    0.00403   -0.00274
O1OH  6    0.296067    0.240404    0.059969    11.00000    0.01514    0.01513 =
         0.00866   -0.00077    0.00286   -0.00164
O1    6    0.283530    0.189312    0.282610    11.00000    0.01916    0.02219 =
         0.00908   -0.00017    0.00078   -0.00242
O7    6    0.303975    0.304109    0.200691    11.00000    0.02490    0.01937 =
         0.01212   -0.00173    0.00238   -0.00496
O8    6    0.292091    0.375427    0.109014    11.00000    0.02270    0.01747 =
         0.01189   -0.00163    0.00326   -0.00286
O9    6    0.159968    0.268519    0.199670    11.00000    0.02594    0.02689 =
         0.01645    0.00671    0.01009    0.00680
O10   6    0.179482    0.290481    0.089470    11.00000    0.01655    0.01922 =
         0.01025   -0.00181    0.00553   -0.00081
O3    6    0.163597    0.132248    0.151990    11.00000    0.02737    0.02943 =
         0.01001   -0.00393    0.00693   -0.01143
O4    6    0.187600    0.162624    0.046598    11.00000    0.01996    0.01959 =
         0.01208   -0.00103    0.00491   -0.00602
O5    6    0.313784    0.124464    0.144115    11.00000    0.02460    0.01948 =
         0.01159   -0.00013    0.00285    0.00236
O6    6    0.309826    0.104759    0.022728    11.00000    0.02456    0.01884 =
         0.01155    0.00092    0.00607    0.00293
N1    4    0.164826    0.192302    0.380011    11.00000    0.01800    0.02201 =
         0.01574   -0.00067    0.00472   -0.00127
AFIX  13
H1    2    0.209234    0.207307    0.377979    11.00000   -1.20000
AFIX   0
 
C1    1    0.317757    0.205369    0.345129    11.00000    0.01712    0.01513 =
         0.01185    0.00201    0.00369   -0.00155
C2    1    0.392646    0.195258    0.359406    11.00000    0.01621    0.02605 =
         0.01396    0.00040    0.00203    0.00196
C5    1    0.403803    0.128174    0.390465    11.00000    0.02848    0.03225 =
         0.03476    0.00646    0.00595    0.00884
AFIX 137
H5A   2    0.387178    0.124877    0.435700    11.00000   -1.50000
H5B   2    0.450171    0.118888    0.400696    11.00000   -1.50000
H5C   2    0.381034    0.098831    0.354410    11.00000   -1.50000
AFIX   0
C3    1    0.419303    0.200817    0.287787    11.00000    0.01943    0.04371 =
         0.02040   -0.00088    0.00724    0.00024
AFIX 137
H3A   2    0.399030    0.169466    0.252839    11.00000   -1.50000
H3B   2    0.466240    0.194651    0.298828    11.00000   -1.50000
H3C   2    0.409430    0.241837    0.266586    11.00000   -1.50000
AFIX   0
C4    1    0.428311    0.242473    0.416824    11.00000    0.01809    0.03778 =
         0.02363   -0.00501   -0.00099   -0.00046
AFIX 137
H4A   2    0.418874    0.284434    0.398428    11.00000   -1.50000
H4B   2    0.475023    0.235167    0.425124    11.00000   -1.50000
H4C   2    0.413396    0.237418    0.462917    11.00000   -1.50000
AFIX   0
C16   1    0.308477    0.359146    0.176096    11.00000    0.01281    0.01790 =
         0.01232   -0.00374    0.00252   -0.00139
C17   1    0.337969    0.409423    0.233745    11.00000    0.01981    0.01775 =
         0.01371   -0.00324    0.00209   -0.00286
C18   1    0.318223    0.395527    0.308097    11.00000    0.04073    0.02242 =
         0.01478   -0.00415    0.00663   -0.00287
AFIX 137
H18A  2    0.271050    0.397353    0.301845    11.00000   -1.50000
H18B  2    0.337838    0.426157    0.344388    11.00000   -1.50000
H18C  2    0.333353    0.354323    0.324862    11.00000   -1.50000
AFIX   0
C19   1    0.314906    0.475102    0.206748    11.00000    0.03828    0.01726 =
         0.01869   -0.00312   -0.00013   -0.00646
AFIX 137
H19A  2    0.330652    0.484735    0.162094    11.00000   -1.50000
H19B  2    0.332007    0.505328    0.244691    11.00000   -1.50000
H19C  2    0.267551    0.476561    0.196475    11.00000   -1.50000
AFIX   0
C20   1    0.413244    0.404694    0.243466    11.00000    0.02018    0.03936 =
         0.03929   -0.01829    0.00161   -0.00794
AFIX 137
H20A  2    0.427277    0.363045    0.259572    11.00000   -1.50000
H20B  2    0.433754    0.434619    0.280174    11.00000   -1.50000
H20C  2    0.425798    0.413461    0.196735    11.00000   -1.50000
AFIX   0
C21   1    0.148240    0.301157    0.141661    11.00000    0.01294    0.01728 =
         0.01246   -0.00193    0.00254   -0.00327
C22   1    0.097114    0.353791    0.131930    11.00000    0.01615    0.02519 =
         0.01364   -0.00002    0.00409    0.00310
C23   1    0.054513    0.348925    0.190984    11.00000    0.02371    0.03438 =
         0.02675    0.00480    0.01315    0.00806
AFIX 137
H23A  2    0.032737    0.308849    0.186915    11.00000   -1.50000
H23B  2    0.022098    0.381843    0.183399    11.00000   -1.50000
H23C  2    0.081939    0.353027    0.239739    11.00000   -1.50000
AFIX   0
C25   1    0.053522    0.349306    0.053899    11.00000    0.01956    0.04116 =
         0.01864   -0.00041   -0.00179    0.00350
AFIX 137
H25A  2    0.080364    0.353720    0.017033    11.00000   -1.50000
H25B  2    0.021070    0.382177    0.047605    11.00000   -1.50000
H25C  2    0.031792    0.309208    0.048114    11.00000   -1.50000
AFIX   0
C24   1    0.134507    0.416485    0.141240    11.00000    0.02746    0.02106 =
         0.02221   -0.00151    0.00688    0.00265
AFIX 137
H24A  2    0.161976    0.418505    0.190174    11.00000   -1.50000
H24B  2    0.103466    0.450577    0.135020    11.00000   -1.50000
H24C  2    0.161482    0.419614    0.104355    11.00000   -1.50000
AFIX   0
C6    1    0.153658    0.129347    0.082379    11.00000    0.01434    0.01467 =
         0.01560   -0.00175    0.00397    0.00121
C7    1    0.100118    0.086718    0.038573    11.00000    0.01604    0.02399 =
         0.01456   -0.00237    0.00307   -0.00437
C8    1    0.057015    0.060619    0.089926    11.00000    0.02507    0.04370 =
         0.02937   -0.01003    0.01128   -0.01732
AFIX 137
H8A   2    0.083904    0.037281    0.129656    11.00000   -1.50000
H8B   2    0.023999    0.033430    0.062006    11.00000   -1.50000
H8C   2    0.035978    0.094698    0.110478    11.00000   -1.50000
AFIX   0
C9    1    0.134927    0.032714    0.006979    11.00000    0.03101    0.02149 =
         0.02598   -0.00762    0.01007   -0.00702
AFIX 137
H9A   2    0.163059    0.049412   -0.024150    11.00000   -1.50000
H9B   2    0.102591    0.005492   -0.022024    11.00000   -1.50000
H9C   2    0.160982    0.009335    0.047278    11.00000   -1.50000
AFIX   0
C10   1    0.059022    0.124607   -0.025359    11.00000    0.02584    0.04187 =
         0.02979    0.00105   -0.00945   -0.00037
AFIX 137
H10A  2    0.039086    0.159694   -0.005340    11.00000   -1.50000
H10B  2    0.025162    0.098270   -0.053282    11.00000   -1.50000
H10C  2    0.087031    0.139632   -0.057573    11.00000   -1.50000
AFIX   0
C11   1    0.326671    0.091763    0.090892    11.00000    0.01525    0.01658 =
         0.01553    0.00016    0.00419   -0.00139
C12   1    0.365266    0.030733    0.113034    11.00000    0.02112    0.01861 =
         0.01546    0.00111    0.00399    0.00301
C14   1    0.322066   -0.010595    0.151279    11.00000    0.04770    0.02340 =
         0.04507    0.01049    0.02308    0.00521
AFIX 137
H14A  2    0.313000    0.010771    0.194356    11.00000   -1.50000
H14B  2    0.344589   -0.049355    0.166409    11.00000   -1.50000
H14C  2    0.281327   -0.019300    0.117223    11.00000   -1.50000
AFIX   0
C15   1    0.428920    0.045716    0.168183    11.00000    0.02769    0.04149 =
         0.06886   -0.01374   -0.01562    0.01326
AFIX 137
H15A  2    0.455163    0.074071    0.145454    11.00000   -1.50000
H15B  2    0.453159    0.007592    0.181935    11.00000   -1.50000
H15C  2    0.418563    0.064929    0.211926    11.00000   -1.50000
AFIX   0
C13   1    0.379956   -0.003481    0.045274    11.00000    0.06358    0.02617 =
         0.02732    0.00476    0.01899    0.02122
AFIX 137
H13A  2    0.339403   -0.011566    0.010612    11.00000   -1.50000
H13B  2    0.401627   -0.042586    0.060693    11.00000   -1.50000
H13C  2    0.408118    0.022092    0.021704    11.00000   -1.50000
AFIX   0
 
C26   1    0.120396    0.248317    0.366813    11.00000    0.02284    0.02423 =
         0.02295    0.00154    0.00615    0.00379
AFIX  23
H26A  2    0.080653    0.239579    0.385576    11.00000   -1.20000
H26B  2    0.107588    0.255740    0.313539    11.00000   -1.20000
AFIX   0
C27   1    0.152603    0.306672    0.404064    11.00000    0.03705    0.02305 =
         0.02691   -0.00153    0.00788    0.00187
AFIX 137
H27A  2    0.191189    0.316339    0.384499    11.00000   -1.50000
H27B  2    0.165024    0.299727    0.456887    11.00000   -1.50000
H27C  2    0.122131    0.341161    0.394558    11.00000   -1.50000
AFIX   0
C30   1    0.147178    0.144406    0.319356    11.00000    0.02066    0.02503 =
         0.01705   -0.00513    0.00593   -0.00214
AFIX  23
H30A  2    0.181571    0.112708    0.325680    11.00000   -1.20000
H30B  2    0.146035    0.164776    0.271661    11.00000   -1.20000
AFIX   0
C31   1    0.081666    0.112272    0.317424    11.00000    0.02131    0.03399 =
         0.02638   -0.00701    0.00318   -0.00614
AFIX 137
H31A  2    0.071968    0.084943    0.274858    11.00000   -1.50000
H31B  2    0.047558    0.143378    0.314013    11.00000   -1.50000
H31C  2    0.083866    0.088088    0.362174    11.00000   -1.50000
AFIX   0
C28   1    0.168500    0.166108    0.456927    11.00000    0.02687    0.02753 =
         0.01560    0.00063    0.00453   -0.00295
AFIX  23
H28A  2    0.124796    0.152710    0.462053    11.00000   -1.20000
H28B  2    0.182729    0.199012    0.493319    11.00000   -1.20000
AFIX   0
C29   1    0.215481    0.111061    0.473507    11.00000    0.03499    0.02601 =
         0.02589    0.00540   -0.00158   -0.00373
AFIX 137
H29A  2    0.197955    0.075932    0.442905    11.00000   -1.50000
H29B  2    0.220749    0.099721    0.525173    11.00000   -1.50000
H29C  2    0.257550    0.122599    0.462965    11.00000   -1.50000
AFIX   0
HKLF 4
 
REM  CF solution in C2/c
REM R1 =  0.0215 for    7611 Fo > 4sig(Fo)  and  0.0239 for all    8051 data
REM    424 parameters refined using      0 restraints
 
END  
     
WGHT      0.0263     15.4639 

REM Highest difference peak  1.018,  deepest hole -0.534,  1-sigma level  0.079
Q1    1   0.2471  0.2102  0.5198  11.00000  0.05    1.02
Q2    1   0.2517  0.3678  0.1594  11.00000  0.05    0.88
Q3    1   0.3389  0.2458  0.0607  11.00000  0.05    0.84
Q4    1   0.2844  0.1847  0.1615  11.00000  0.05    0.71
Q5    1   0.2824  0.2351  0.1619  11.00000  0.05    0.67
Q6    1   0.2191  0.2359  0.1586  11.00000  0.05    0.61
Q7    1   0.2157  0.1856  0.1616  11.00000  0.05    0.60
Q8    1   0.2572  0.3214  0.2994  11.00000  0.05    0.58
Q9    1   0.2450  0.0999  0.0219  11.00000  0.05    0.57
Q10   1   0.2424  0.2576  0.0211  11.00000  0.05    0.54
Q11   1   0.1267  0.1067  0.0585  11.00000  0.05    0.53
Q12   1   0.2536  0.2581  0.1831  11.00000  0.05    0.45
Q13   1   0.2525  0.1707  0.1921  11.00000  0.05    0.43
Q14   1   0.1244  0.3283  0.1382  11.00000  0.05    0.41
Q15   1   0.0879  0.1031  0.0041  11.00000  0.05    0.41
Q16   1   0.0811  0.0766  0.0618  11.00000  0.05    0.41
Q17   1   0.3239  0.3889  0.2041  11.00000  0.05    0.39
Q18   1   0.3255  0.4393  0.2205  11.00000  0.05    0.38
Q19   1   0.2460  0.2515  0.1251  11.00000  0.05    0.37
Q20   1   0.2963  0.2210  0.0587  11.00000  0.05    0.37
Q21   1   0.1621  0.2154  0.3418  11.00000  0.05    0.36
Q22   1   0.3723  0.4057  0.2372  11.00000  0.05    0.36
Q23   1   0.1148  0.0611  0.0225  11.00000  0.05    0.35
Q24   1   0.2479  0.1716  0.1263  11.00000  0.05    0.34
Q25   1   0.2654  0.2081  0.2114  11.00000  0.05    0.33

REM The information below was added by Olex2.
REM
REM R1 = 0.0215 for 7611 Fo > 4sig(Fo) and 0.0239 for all 27419 data
REM n/a parameters refined using n/a restraints
REM Highest difference peak 1.02, deepest hole -0.53
REM Mean Shift 0, Max Shift -0.003.

REM +++ Tabular Listing of Refinement Information +++
REM R1_all = 0.0239
REM R1_gt = 0.0215
REM wR_ref = 0.0529
REM GOOF = 1.048
REM Shift_max = -0.003
REM Shift_mean = 0
REM Reflections_all = 27419
REM Reflections_gt = 7611
REM Parameters = n/a
REM Hole = -0.53
REM Peak = 1.02
REM Flack = n/a

;
_olex2_date_sample_data_collection 2012-08-16
_olex2_submission_special_instructions 'No special instructions were received'
loop_
  _refln_index_h
  _refln_index_k
  _refln_index_l
  _refln_F_squared_meas
  _refln_F_squared_sigma
  _refln_scale_group_code
 0 0 3 1073.37 68.1406 3
 0 0 -3 1168.94 73.8852 3
 0 0 -3 981.165 59.0158 4
 0 0 -4 197180 1526.92 4
 0 0 -4 199960 1617.45 3
 0 0 4 193615 1603.61 3
 0 0 5 204.571 22.4787 1
 0 0 -5 121.168 44.0529 3
 0 0 -5 192.668 24.1136 1
 0 0 -6 413722 2735.05 1
 0 0 6 421174 2719.73 1
 0 0 -7 335.388 35.6812 1
 0 0 7 353.738 36.0072 1
 0 0 -7 626.288 99.5889 3
 0 0 -8 5955.54 270.776 3
 0 0 -8 5787.48 140.683 1
 0 0 8 5880.94 134.901 1
 0 0 -9 56.9743 57.6941 3
 0 0 9 43.9699 22.0875 1
 0 0 -9 85.0048 26.5429 1
 0 0 10 60605.1 598.093 1
 0 0 -10 61868.3 641.642 1
 0 0 -11 514.726 124.786 3
 0 0 11 299.642 41.5841 1
 0 0 -11 321.828 50.6782 1
 0 0 12 27309.9 364.787 1
 0 0 -12 26980.5 717.231 3
 0 0 -13 485.36 113.021 3
 0 0 13 189.081 35.8904 1
 0 0 -14 3266.75 277.323 3
 0 0 -15 872.699 193.069 3
 0 0 -16 167983 2335.78 3
 0 0 -17 2875.97 312.611 3
 0 0 -18 2798.24 294.193 3
 0 0 -19 142.471 90.2304 3
 0 0 -20 4048.16 380.918 3
 0 0 -21 628.174 179.047 3
 0 0 -22 61861.8 1625.46 3
 0 2 -2 11990.8 216.413 3
 0 2 2 12504.8 168.306 1
 0 -2 3 53061 575.906 3
 0 2 3 55668.2 465.575 2
 0 2 -3 53051.6 591.995 3
 0 2 -3 52006.3 504.364 4
 0 2 3 52815 472.115 1
 0 -2 -3 39302.2 433.475 1
 0 -2 3 52438.9 515.193 4
 0 -2 -3 36303.9 421.216 2
 0 2 4 127772 994.391 1
 0 -2 -4 127526 1015.27 2
 0 -2 -4 123308 986.468 1
 0 2 -4 121484 1175 3
 0 -2 4 123139 1081.53 4
 0 -2 -5 102592 855.387 1
 0 2 -5 100281 1072.14 3
 0 2 5 101134 859.349 1
 0 -2 -5 101438 1059.22 3
 0 -2 -6 102769 838.247 1
 0 -2 -6 104026 1097.09 3
 0 2 -6 104084 1116.99 3
 0 2 6 101911 839.778 1
 0 2 7 13578.1 245.697 1
 0 -2 -7 13734.4 377.326 3
 0 2 -7 14435.1 390.946 3
 0 -2 -7 14179.7 248.453 1
 0 2 -8 12587.5 400.916 3
 0 -2 -8 12513.7 400.831 3
 0 -2 -9 3114.51 209.616 3
 0 2 9 2874.95 118.167 1
 0 2 -9 3129.61 216.251 3
 0 -2 9 2550.61 74.6261 1
 0 2 10 41767.5 520.718 1
 0 2 -10 42499.3 830.885 3
 0 -2 -10 42239 829.029 3
 0 -2 -11 92314.6 1334.01 3
 0 2 11 91880.6 876.009 1
 0 2 -11 95164.8 1360.04 3
 0 -2 -12 36729.8 843.098 3
 0 2 -12 37318.3 844.665 3
 0 2 12 36915.9 494.296 1
 0 -2 -13 373.192 119.127 3
 0 2 -13 171.422 105.897 3
 0 2 13 339.087 52.8799 1
 0 2 14 757.229 70.79 1
 0 -2 -14 1001.64 171.936 3
 0 -2 -15 7361.67 423.56 3
 0 2 -15 7315.76 441.524 3
 0 -2 -16 82867.2 1508.53 3
 0 2 -16 63178.8 1389.33 3
 0 -2 -17 57937.2 1312.64 3
 0 2 -17 58477 1370.88 3
 0 2 -18 11680.7 618.52 3
 0 -2 -18 12281.5 619.804 3
 0 -2 -19 148.409 118.768 3
 0 2 -19 208.93 131.848 3
 0 -2 -20 1213.6 224.649 3
 0 2 -20 1375.92 236.578 3
 0 2 -21 3449.37 387.964 3
 0 -2 -21 3336.56 365.988 3
 0 2 -22 50950.7 1477.32 3
 0 -2 -22 52628.2 1481.37 3
 0 4 0 4972.11 126.479 2
 0 4 0 4463.3 142.762 3
 0 -4 0 4076.26 135.437 3
 0 -4 0 5004.78 129.953 1
 0 4 0 4559.49 123.345 1
 0 4 -1 179466 1400.21 3
 0 4 1 177086 1299.96 1
 0 -4 1 168737 1368.06 3
 0 -4 -1 180887 1304.13 1
 0 4 -1 148553 1227.26 1
 0 4 1 172538 1251.45 2
 0 -4 1 174739 1268.44 1
 0 -4 -1 144306 1208.05 2
 0 4 -2 28641.2 443.762 3
 0 4 -2 29145.3 335.004 1
 0 -4 2 29922 338.729 1
 0 4 2 29291 344.801 2
 0 -4 -2 28602.9 334.747 2
 0 4 2 30043.6 383.639 1
 0 -4 2 30287.9 451.662 3
 0 -4 -2 29465.7 380.755 1
 0 -4 2 29068.7 322.749 4
 0 4 -3 43700.4 432.364 1
 0 -4 -3 43759.8 463.604 2
 0 -4 3 43783.9 432.035 1
 0 4 -3 44011.4 476.579 4
 0 4 3 44942.1 510.848 1
 0 4 -3 43587.9 615.392 3
 0 -4 3 43053.9 477.451 4
 0 4 3 44851.4 474.727 2
 0 -4 3 44391.7 590.009 3
 0 4 -4 59208.5 785.688 3
 0 4 -4 57758.6 536.237 1
 0 -4 4 56888.9 514.972 1
 0 4 4 58010.3 587.088 2
 0 4 4 55964.4 621.952 1
 0 -4 4 56953.5 626.62 4
 0 -4 -4 59241.4 586.89 2
 0 4 5 231209 1742.16 2
 0 -4 -5 234128 1755.62 2
 0 4 -5 227943 2025.86 3
 0 -4 5 225472 1600.31 1
 0 4 5 223035 1772.25 1
 0 -4 5 224094 1827.66 4
 0 -4 6 6311.07 213.14 4
 0 4 6 6606.71 192.003 1
 0 4 -6 6479.85 259.883 3
 0 -4 6 6320.16 122.434 1
 0 4 7 5812.96 185.532 1
 0 -4 7 5212.39 108.459 1
 0 4 -7 5856.7 265.288 3
 0 -4 8 6737.83 152.019 1
 0 4 -8 8703.82 346.529 3
 0 4 8 7637.25 221.755 1
 0 -4 -8 8247.8 318.187 3
 0 -4 8 7177.74 126.469 1
 0 -4 9 6580.97 116.98 1
 0 -4 -9 7748.42 327.244 3
 0 4 -9 7551.46 340.615 3
 0 4 9 7483.5 221.58 1
 0 4 -10 7115.35 353.416 3
 0 4 10 7505.71 228.704 1
 0 -4 -10 7474.03 336.534 3
 0 4 -11 228236 2455.63 3
 0 4 11 228176 1882.5 1
 0 4 12 27247.1 479.016 1
 0 4 -12 26494.3 746.793 3
 0 -4 -12 25998.5 729.532 3
 0 -4 -13 6810.15 383.946 3
 0 4 13 6707.18 229.916 1
 0 4 -13 6678.72 382.744 3
 0 -4 -14 14520.4 575.717 3
 0 4 14 13263.7 332.051 1
 0 4 -14 14346.5 589.174 3
 0 -4 -15 2091.43 234.398 3
 0 4 -15 2151.61 250.141 3
 0 4 -16 15361.2 667.277 3
 0 -4 -16 14303.3 613.947 3
 0 4 -17 112020 1955.14 3
 0 -4 -17 111371 1899.75 3
 0 4 -18 29558.8 995.702 3
 0 -4 -18 28204.5 947.015 3
 0 -4 -19 2447.77 320.975 3
 0 4 -19 3197.97 355.098 3
 0 -4 -20 8569.1 556.702 3
 0 4 -20 8235.45 554.238 3
 0 4 -21 19925.2 913.009 3
 0 -4 -21 20421.1 893.121 3
 0 4 -22 16162.2 844.922 3
 0 -4 -22 17179.9 841.943 3
 0 6 0 19471.8 369.868 3
 0 6 0 19545.8 320.881 1
 0 6 0 19171.1 312.577 2
 0 -6 -1 165789 1195.72 5
 0 6 1 167433 1385.1 1
 0 6 1 164213 1341.07 2
 0 6 -1 162864 1478.33 3
 0 6 -1 163790 1347.38 1
 0 6 2 27404.1 385.144 2
 0 6 -2 30064.2 521.614 3
 0 6 2 27603.1 424.959 1
 0 6 -2 27351.8 379.024 1
 0 -6 2 28896.5 335.522 4
 0 6 3 297.159 44.8172 2
 0 6 -3 247.48 65.9474 3
 0 6 3 235.096 42.8543 1
 0 6 -3 349.789 42.8115 1
 0 -6 4 32815.6 410.451 1
 0 6 -4 31299.6 592.881 3
 0 -6 4 30359.8 429.845 4
 0 6 -4 32364.8 408.795 1
 0 6 4 32303.4 437.945 2
 0 6 4 32052 484.803 1
 0 6 5 195772 1662.46 1
 0 6 -5 194627 1502.17 1
 0 -6 5 190364 1617.26 4
 0 6 5 189854 1569.46 2
 0 6 -5 191437 1901.71 3
 0 -6 5 195732 1488.85 1
 0 6 6 31641.6 464.514 2
 0 6 6 31400 506.305 1
 0 -6 6 31137.5 507.455 4
 0 6 -6 30823.1 635.102 3
 0 -6 6 31790.7 389.05 1
 0 6 7 11355.9 269.318 2
 0 6 7 11774.1 301.175 1
 0 -6 7 11075.4 309.244 4
 0 -6 7 11210.2 206.286 1
 0 6 -7 12312.9 420.999 3
 0 6 -8 767.456 122.314 3
 0 6 8 744.547 82.5951 1
 0 -6 8 749.593 50.0809 1
 0 6 -9 11727 450.615 3
 0 6 9 11692.8 318.398 1
 0 -6 9 11209.1 194.49 1
 0 -6 10 41.0599 15.3002 1
 0 6 -10 106.664 55.6496 3
 0 6 10 64.5795 44.3588 1
 0 -6 -10 148.096 54.1448 3
 0 6 11 138755 1317.06 1
 0 -6 -11 140519 1709.33 3
 0 6 -11 141652 1798.14 3
 0 -6 -12 15683.7 545.534 3
 0 6 12 15113.2 384.737 1
 0 6 -12 15582.1 586.132 3
 0 6 -13 8473.36 445.46 3
 0 -6 -13 9674.29 461.144 3
 0 6 13 8969.38 297.127 1
 0 6 -14 1683.36 218.358 3
 0 6 14 1893.43 138.108 1
 0 -6 -14 2177.3 232.022 3
 0 -6 -15 2520.51 265.039 3
 0 6 -15 2485.22 272.069 3
 0 6 15 1913.63 140.166 1
 0 6 -16 601.084 179.11 3
 0 -6 -16 651.588 165.284 3
 0 -6 -17 101704 1821.55 3
 0 6 -17 103518 1895.38 3
 0 -6 -18 1285.7 253.751 3
 0 6 -18 1128.3 251.106 3
 0 -6 -19 17077.5 786.638 3
 0 6 -19 18152.6 813.871 3
 0 -6 -20 3080.11 354.777 3
 0 6 -20 3334.27 370.289 3
 0 -6 -21 31524.9 1102.35 3
 0 6 -21 32454.5 1172.11 3
 0 6 -22 1121.43 287.496 3
 0 8 0 10577.7 265.323 2
 0 8 0 11169.5 318.677 3
 0 8 0 11253.6 277.208 1
 0 8 -1 97491.2 812.88 5
 0 8 -1 106006 1025.34 1
 0 -8 -1 96388.1 802.988 5
 0 8 -1 103916 1143.15 3
 0 8 -1 105342 1045.17 2
 0 8 1 102898 1006.03 2
 0 8 1 104752 1054.25 1
 0 -8 2 1386.21 66.2863 4
 0 8 -2 1412.52 126.882 3
 0 8 2 1287.48 93.1941 2
 0 8 -2 1359.18 93.246 1
 0 8 2 1273.2 100.441 1
 0 8 3 33613.4 495.38 2
 0 8 -3 34075.8 491.294 1
 0 -8 3 35290.7 425.378 4
 0 8 3 33714.8 542.181 1
 0 8 -3 33257.7 640.294 3
 0 8 4 6099.05 198.182 2
 0 8 -4 6788.67 290.986 3
 0 -8 4 7457.24 196.722 4
 0 8 -4 6519.38 196.378 1
 0 8 4 6195.15 224.68 1
 0 8 5 113080 1099.96 2
 0 8 -5 109814 1039.17 1
 0 8 -5 109653 1395.54 3
 0 8 5 111531 1181.61 1
 0 -8 5 113634 1087.12 4
 0 8 6 25848.7 447.218 2
 0 8 6 26397.9 501.916 1
 0 8 -6 27057.8 419.813 1
 0 8 -6 27081.3 651.013 3
 0 -8 6 26375.8 464.804 4
 0 8 7 108766 1205.13 1
 0 8 7 111150 1121.96 2
 0 8 -7 113697 1507.99 3
 0 -8 7 109901 1181.38 4
 0 8 8 3511.6 184.75 1
 0 8 8 3646.1 168.666 2
 0 8 -8 3231.16 249.536 3
 0 8 9 39112.4 662.352 1
 0 8 -9 39566.7 888.741 3
 0 8 10 2037.2 146.742 1
 0 8 -10 2458.07 231.513 3
 0 8 11 51291.1 805.351 1
 0 8 -11 53996.7 1136.54 3
 0 8 -12 2211.51 238.67 3
 0 8 12 2992.33 187.61 1
 0 -8 -12 2723.07 238.055 3
 0 -8 -13 34580.9 892.388 3
 0 8 -13 35024.8 963.805 3
 0 8 13 34035.9 660.268 1
 0 -8 -14 322.93 104.55 3
 0 8 14 392.042 85.5483 1
 0 8 -14 206.315 101.153 3
 0 8 -15 47210.8 1196.86 3
 0 8 15 43803.7 770.608 1
 0 8 -16 38583.8 1119.32 3
 0 -8 -16 36758.8 1043.46 3
 0 -8 -17 47813.5 1234.26 3
 0 8 -17 47612.2 1290.89 3
 0 8 -18 191.854 109.05 3
 0 -8 -18 463.423 157.319 3
 0 8 -19 8488.16 580.365 3
 0 -8 -19 9090.19 565.756 3
 0 -8 -20 1080.18 227.692 3
 0 8 -20 980.262 222.779 3
 0 8 -21 22144.8 988.371 3
 0 -8 -21 23374.8 958.473 3
 0 10 0 249991 2112.23 2
 0 10 0 248732 2112.78 1
 0 10 1 71964.4 854.567 2
 0 10 -1 72379.9 886.552 2
 0 10 1 71059.7 880.765 1
 0 10 -1 59186.6 605.921 5
 0 10 -1 83824.6 1059.16 3
 0 10 -1 71193 861.368 1
 0 10 -2 30645.7 518.224 1
 0 10 2 30543.9 515.949 2
 0 10 -2 30824.9 627.618 3
 0 10 -2 30787.6 558.318 2
 0 -10 -2 29821 381.553 5
 0 -10 2 30397.5 361.021 4
 0 10 2 31109.4 553.943 1
 0 10 -3 27114.6 615.729 3
 0 10 -3 27590 483.413 1
 0 -10 3 27109.1 369.645 4
 0 10 3 27093.9 479.875 2
 0 10 3 26931.6 528.27 1
 0 10 4 10999.5 332.751 1
 0 10 -4 11879 423.168 3
 0 10 -4 11876.4 300.113 1
 0 10 4 11259.3 301.876 2
 0 -10 4 10617.1 242.573 4
 0 10 5 53624.2 802.245 1
 0 -10 5 54016 671.01 4
 0 10 -5 52813.4 695.825 1
 0 10 5 54778.1 737.586 2
 0 10 -5 53801 956.752 3
 0 10 -6 85329.7 942.059 1
 0 10 6 88106 1006.43 2
 0 10 -6 85140.6 1291 3
 0 -10 6 85821.4 956.995 4
 0 10 6 84903.6 1076.68 1
 0 10 7 50976.3 805.029 1
 0 10 -7 52200.3 694.694 1
 0 10 -7 50553 1005.42 3
 0 10 7 51672.4 729.656 2
 0 10 -8 2317.99 236.352 3
 0 10 8 2003.86 133.796 2
 0 10 8 2010.04 154.823 1
 0 10 -9 60908.8 1185.64 3
 0 10 9 57565.9 805.401 2
 0 10 9 58871 901.659 1
 0 10 10 22814.8 542.917 1
 0 10 -10 23975.1 746.405 3
 0 10 -11 23932.6 778.881 3
 0 10 11 22575.7 548.945 1
 0 10 12 29964.1 651.033 1
 0 10 -12 30424.8 919.306 3
 0 -10 -13 48369.8 1088.93 3
 0 10 13 46093.9 840.44 1
 0 10 -13 48158 1215.65 3
 0 -10 -14 185.322 92.4859 3
 0 10 14 294.143 83.1969 1
 0 10 -14 210.953 127.158 3
 0 10 -15 44556 1205.64 3
 0 -10 -15 42931.7 1094.93 3
 0 10 15 41058.8 805.305 1
 0 10 -16 81355.6 1712.4 3
 0 -10 -16 85315 1652.18 3
 0 -10 -17 4542.16 388.044 3
 0 10 -17 4514.55 409.64 3
 0 10 -18 3969.89 399.448 3
 0 -10 -18 4471.4 396.384 3
 0 10 -19 6343.96 511.678 3
 0 -10 -19 7238.1 515.696 3
 0 -10 -20 2093.51 294.022 3
 0 10 -20 1770.72 277.573 3
 0 10 -21 17397.4 896.17 3
 0 12 0 144982 1494.94 2
 0 12 0 143209 1491.66 1
 0 12 1 7008.92 263.245 2
 0 12 -1 7150.13 318.319 3
 0 12 -1 7393.48 263.549 1
 0 -12 1 6404.57 132.874 4
 0 12 -1 5976.44 141.272 5
 0 12 -1 6802.12 267.388 2
 0 12 1 6641.52 270.84 1
 0 12 2 81843.5 1042.15 1
 0 12 -2 83565.6 1179.53 3
 0 12 2 81352.4 993.891 2
 0 -12 -2 71771.2 704.025 5
 0 12 -2 73578.1 736.659 5
 0 -12 2 79319.6 697.772 4
 0 12 -2 83140.4 1059.79 2
 0 12 -2 82178.5 1003.32 1
 0 -12 -3 6845.28 184.302 5
 0 12 -3 7114.29 330.794 3
 0 12 -3 6755.81 256.438 1
 0 12 3 6885.07 256.39 2
 0 12 -3 6895.26 284.294 2
 0 12 3 7169.54 287.214 1
 0 -12 3 7013.21 174.23 4
 0 12 -4 199361 2185.18 3
 0 12 -4 196293 1810.61 1
 0 12 4 194363 1936.15 1
 0 -12 4 195529 1601.36 4
 0 12 5 619.478 98.1845 1
 0 12 -5 562.581 115.315 3
 0 12 5 646.647 87.39 2
 0 -12 5 483.972 60.125 4
 0 12 -5 466.456 74.5179 1
 0 12 6 114608 1383.78 1
 0 12 6 115875 1274.51 2
 0 12 -6 113256 1224.74 1
 0 -12 6 116681 1175.04 4
 0 12 -6 112947 1620.18 3
 0 12 -7 7463.71 261.439 1
 0 12 7 6943 300.875 1
 0 12 -7 7064.62 381.604 3
 0 12 7 7247.3 272.533 2
 0 12 -8 409.726 117.616 3
 0 12 8 502.818 80.5906 2
 0 12 8 367.267 83.6779 1
 0 12 9 2850.15 173.451 2
 0 12 9 2801.5 198.425 1
 0 12 -9 2492.66 248.347 3
 0 12 10 15790 482.512 1
 0 12 10 16585.9 427.202 2
 0 12 -10 16844.4 653.623 3
 0 12 11 1906.51 172.878 1
 0 12 -11 1873.85 235.291 3
 0 12 12 91171 1305.56 1
 0 12 -12 97882.5 1749.08 3
 0 12 -13 12061 611.774 3
 0 12 13 9904.99 395.252 1
 0 12 -14 3458.81 342.817 3
 0 12 14 3034.42 221.898 1
 0 -12 -14 3413.96 305.831 3
 0 -12 -15 6437.53 430.206 3
 0 12 -15 6892.31 492.904 3
 0 12 15 6055.34 321.315 1
 0 -12 -16 52089.2 1285.09 3
 0 12 -16 53808 1419.16 3
 0 -12 -17 629.779 159.746 3
 0 12 -17 690.665 196.187 3
 0 -12 -18 40632 1226.42 3
 0 12 -18 38317.9 1274.41 3
 0 -12 -19 716.075 177.45 3
 0 12 -19 571.433 181.745 3
 0 -12 -20 10096.6 640.723 3
 0 12 -20 9887.44 678.572 3
 0 14 0 30970.6 618.873 1
 0 14 0 28488.7 612.154 2
 0 14 1 34041.6 653.728 2
 0 14 -1 34012.3 655.725 1
 0 14 -1 33116 659.878 2
 0 14 1 33735.7 661.159 1
 0 14 -2 86310.4 1179.69 2
 0 14 2 85799.3 1174.88 1
 0 14 -2 86524.3 1133.42 1
 0 14 -2 88205.2 1341.4 3
 0 14 2 85874.1 1122.99 2
 0 14 -3 14261.2 405.611 1
 0 14 -3 14282 443.012 2
 0 -14 3 14428 256.794 4
 0 14 3 13712.4 396.803 2
 0 14 -3 14234.8 497.297 3
 0 14 3 14055.4 433.813 1
 0 -14 -3 13213.7 260.774 5
 0 -14 -4 153791 1360.69 5
 0 14 -4 156665 1755.2 2
 0 14 -4 157757 1625.49 1
 0 -14 4 160853 1333.86 4
 0 14 -4 157592 1940.93 3
 0 14 4 154805 1724.53 1
 0 14 5 41578.7 793.197 1
 0 14 -5 44226.5 966.665 3
 0 14 5 42646.8 732.797 2
 0 -14 -5 42473.8 594.953 5
 0 14 -5 41985.1 820.202 2
 0 14 -5 43045.3 724.109 1
 0 14 -6 45719.5 1019.21 3
 0 14 6 45631.9 765.934 2
 0 14 6 43147.5 824.381 1
 0 14 -6 44261.9 733.215 1
 0 14 -7 2842.7 179.332 1
 0 14 7 2819.27 184.319 2
 0 14 -7 2924.28 262.847 3
 0 14 7 2773.66 208.038 1
 0 14 -8 16535.4 434.876 1
 0 14 8 15284.8 430.865 2
 0 14 -8 15937.5 627.885 3
 0 14 8 15069.1 485.412 1
 0 14 9 2617.83 210.032 1
 0 14 -9 2855.16 278.886 3
 0 14 9 2646.56 181.244 2
 0 14 -10 67928.8 1392.69 3
 0 14 10 64656.8 1097.69 1
 0 14 10 68801.7 998.483 2
 0 14 -11 12315.2 597.47 3
 0 14 11 12514.1 395.957 2
 0 14 11 11806.6 451.074 1
 0 14 12 74710.2 1226.57 1
 0 14 -12 79214.3 1607.94 3
 0 14 13 219.266 80.4451 1
 0 14 -13 214.603 110.414 3
 0 14 -14 3178.63 341.753 3
 0 14 14 2934.73 238.833 1
 0 14 15 6395.85 350.378 1
 0 -14 -15 7730.94 486.911 3
 0 14 -15 7355.31 520.421 3
 0 -14 -16 31616.5 1024.64 3
 0 14 -16 32188.9 1131.36 3
 0 -14 -17 769.104 175.35 3
 0 14 -17 874.61 193.22 3
 0 14 -18 46909 1442.15 3
 0 -14 -18 47551.6 1345.23 3
 0 14 -19 295.664 130.306 3
 0 -14 -19 60.3148 176.678 3
 0 14 -20 20441 994.357 3
 0 16 0 10248.4 382.975 1
 0 16 0 10235.2 382.633 2
 0 16 1 18783.8 518.487 2
 0 16 -1 17247.3 503.246 1
 0 16 1 18152.6 520.705 1
 0 16 -1 18944.1 533.082 2
 0 16 -2 21293.6 656.266 3
 0 16 2 20395.9 534.524 2
 0 16 -2 20077.9 554.784 2
 0 16 -2 20293.5 534.357 1
 0 16 3 452.78 90.1498 2
 0 16 -3 471.365 112.517 3
 0 16 -3 605.62 103.427 2
 0 16 3 551.026 104.928 1
 0 16 -3 601.158 102.026 1
 0 16 -4 8878.91 381.709 2
 0 16 -4 9156.91 433.246 3
 0 16 -4 9374.5 348.898 1
 0 16 4 8696.3 369.6 1
 0 16 4 8880.87 346.845 2
 0 16 5 30534.3 655.746 2
 0 16 -5 30969.6 647.486 1
 0 16 -5 29431.1 813.865 3
 0 16 -5 30507.1 729.155 2
 0 16 5 30404.4 712.957 1
 0 16 -6 20316.6 603.147 2
 0 16 -6 21209.9 709.468 3
 0 16 6 21459.5 546.712 2
 0 16 -6 21627.9 534.402 1
 0 16 6 20517.5 592.763 1
 0 16 7 30451.3 656.629 2
 0 16 7 29036.1 720.418 1
 0 16 -7 30255.3 886.316 3
 0 16 -7 30270.8 643.885 1
 0 16 -8 6354.15 426.91 3
 0 16 8 5899.1 287.645 2
 0 16 -8 6586.87 295.832 1
 0 16 8 6048.94 327.814 1
 0 16 9 12603 483.743 1
 0 16 9 12179.3 411.836 2
 0 16 -9 11923.4 592.171 3
 0 16 -10 19102.5 763.225 3
 0 16 10 20837.4 629.645 1
 0 16 -11 10413.4 566.359 3
 0 16 11 9940.85 440.919 1
 0 16 -12 29288.5 990.298 3
 0 16 12 27729 756.977 1
 0 16 -13 18362.8 792.541 3
 0 16 13 15960.1 575.479 1
 0 16 14 120.837 68.6765 1
 0 16 -14 113.792 113.861 3
 0 16 -15 18354.7 845.156 3
 0 16 15 16356.4 597.198 1
 0 16 -16 8153.87 574.224 3
 0 16 16 7301.19 407.036 1
 0 -16 -16 7743.8 516.89 3
 0 16 -17 11291.9 696.419 3
 0 -16 -17 13090.5 692.637 3
 0 16 -18 20209.6 964.798 3
 0 -16 -18 21333.6 904.937 3
 0 16 -19 3187 399.981 3
 0 18 0 264.375 83.2786 2
 0 18 0 509.343 106.709 1
 0 18 1 35347.6 778.829 2
 0 18 -1 35826 779.538 1
 0 18 1 35773.1 789.145 1
 0 18 -1 34775 788.994 2
 0 18 -2 3524.43 249.733 2
 0 18 -2 3661.91 248.844 1
 0 18 2 3521.79 237.39 2
 0 18 2 3460.52 246.926 1
 0 18 3 2631.14 220.223 1
 0 18 3 2565.85 202.89 2
 0 18 -3 3004.45 218.78 1
 0 18 -3 2537.31 216.33 2
 0 18 -3 2504.14 250.732 3
 0 18 -4 1035.77 166.46 3
 0 18 4 886.282 124.875 2
 0 18 4 1351.29 168.184 1
 0 18 -4 1302.99 159.914 2
 0 18 -4 1348 151.574 1
 0 18 5 36615.4 829.163 1
 0 18 -5 35347 943.369 3
 0 18 -5 36596.7 762.408 1
 0 18 -5 36368.3 853.947 2
 0 18 5 35661.6 763.029 2
 0 18 6 6922.7 329.078 2
 0 18 -6 7492.61 335.887 1
 0 18 6 6547.29 352.056 1
 0 18 -6 6958.6 373.771 2
 0 18 -6 7362.29 432.746 3
 0 18 -7 87875.7 1603.99 3
 0 18 7 88205.8 1267.52 2
 0 18 -7 88381.4 1253.24 1
 0 18 -7 83652.4 1394.89 2
 0 18 -8 1746.98 218.25 2
 0 18 8 1603.22 191.636 1
 0 18 8 1777.11 171.015 2
 0 18 -8 1459.91 219.457 3
 0 18 -8 1979.61 181.176 1
 0 18 9 30222.4 795.794 1
 0 18 -9 32588.5 855.504 2
 0 18 10 3293.44 269.669 1
 0 18 -10 4028.84 370.677 3
 0 18 11 8690.06 428.365 1
 0 18 -11 7301.46 508.168 3
 0 18 12 3915.04 295.918 1
 0 18 -12 4139.71 397.341 3
 0 18 -13 41203.2 1262.19 3
 0 18 13 38851 966.735 1
 0 18 -14 5232.97 462.256 3
 0 18 14 4107.14 317.075 1
 0 18 15 23829.7 771.794 1
 0 18 -15 24138.3 998.048 3
 0 18 16 4876.66 354.385 1
 0 18 -16 5638.95 502.662 3
 0 -18 -17 31095.8 1099.5 3
 0 18 -17 29909.3 1169.73 3
 0 18 -18 959.572 231.366 3
 0 20 0 922.043 137.1 2
 0 20 0 776.204 138.775 1
 0 20 -1 40359.9 881.276 1
 0 20 1 39941.4 886.567 2
 0 20 1 40998 911.786 1
 0 20 -1 41297.8 927.813 2
 0 20 -2 14871.7 519.574 1
 0 20 2 13810.6 521.056 1
 0 20 -2 14601.1 543.762 2
 0 20 2 14431.3 518.52 2
 0 20 3 -26.1684 71.0335 1
 0 20 -3 -3.53483 62.7673 1
 0 20 3 99.5949 60.9376 2
 0 20 -3 -37.0774 94.1445 2
 0 20 -4 5550.71 315.158 1
 0 20 4 5600.96 320.539 2
 0 20 4 5475.67 338.032 1
 0 20 -4 4872.17 319.913 2
 0 20 -4 5461.69 386.113 3
 0 20 -5 33837.8 866.952 2
 0 20 5 32197 770.792 2
 0 20 5 33286 848.465 1
 0 20 -5 32233 757.768 1
 0 20 -5 34457.9 993.211 3
 0 20 -6 357.828 96.9779 1
 0 20 -6 293.734 126.779 3
 0 20 -6 241.437 105.823 2
 0 20 6 301.247 84.8429 2
 0 20 6 292.636 87.7838 1
 0 20 -7 51100.9 984.031 1
 0 20 -7 49790.1 1099.45 2
 0 20 -7 51862.4 1246.49 3
 0 20 7 50014.1 1079.85 1
 0 20 -8 4522.94 378.207 3
 0 20 8 4451.62 321.497 1
 0 20 -8 4607.07 329.027 2
 0 20 -8 5240.54 305.892 1
 0 20 -9 18726.2 779.382 3
 0 20 9 19342.3 672.585 1
 0 20 -9 18487.3 675.761 2
 0 20 -10 4618.99 400.22 3
 0 20 10 4692.68 334.947 1
 0 20 -10 4293.12 330.594 2
 0 20 -11 25397 817.301 2
 0 20 11 25974.6 810.09 1
 0 20 -11 26977.4 1007.28 3
 0 20 12 1784.2 221.43 1
 0 20 -12 1696.99 216.836 2
 0 20 -12 1583.48 252.524 3
 0 20 -13 16662.7 679.071 2
 0 20 -13 18199.9 863.596 3
 0 20 13 16515.3 660.259 1
 0 20 14 792.418 164.525 1
 0 20 -14 857.651 236.58 3
 0 20 -14 532.599 117.471 2
 0 20 -15 12914.5 760.46 3
 0 20 15 12009.1 576.417 1
 0 20 16 716.246 151.594 1
 0 20 -16 1102.71 260.143 3
 0 20 -17 22622.6 1053.32 3
 0 22 0 4647.36 317.755 2
 0 22 0 5613.35 351.187 1
 0 22 -1 29384.2 788.423 1
 0 22 -1 27393.7 793.607 2
 0 22 1 29062.9 800.281 1
 0 22 1 28386.2 789.399 2
 0 22 -2 9241.49 463.281 2
 0 22 -2 9968.78 451.852 1
 0 22 2 9558.59 447.618 2
 0 22 2 9534.06 456.379 1
 0 22 -3 143.745 82.3584 1
 0 22 -3 61.1939 77.573 2
 0 22 3 -136.407 113.952 1
 0 22 3 16.7359 74.5257 2
 0 22 -4 19809.8 695.441 2
 0 22 4 19866.3 641.44 2
 0 22 -4 20210.4 637.622 1
 0 22 4 20362.1 686.221 1
 0 22 -5 43691.6 1172.97 3
 0 22 -5 43513.9 1050.98 2
 0 22 5 41328.4 937.305 2
 0 22 -5 40465.1 922.301 1
 0 22 5 41252.2 1005.69 1
 0 22 6 10701.2 513.243 1
 0 22 -6 11206.9 472.205 1
 0 22 -6 10476 576.663 3
 0 22 -6 10361.4 509.423 2
 0 22 -7 11594.6 611.031 3
 0 22 -7 11726.7 548.144 2
 0 22 -7 12346.5 496.543 1
 0 22 7 12376.4 551.829 1
 0 22 -8 3154 332.207 3
 0 22 8 3561.76 306.498 1
 0 22 -8 3138.92 294.969 2
 0 22 -8 3732 276.645 1
 0 22 9 961.861 169.622 1
 0 22 -9 655.104 168.971 3
 0 22 -9 1089.18 181.609 2
 0 22 -10 10599.8 542.217 2
 0 22 10 10268 528.358 1
 0 22 -11 35083.1 1163.12 3
 0 22 11 36046.9 1008.05 1
 0 22 -11 36635.5 1034.68 2
 0 22 12 6708 439.882 1
 0 22 -12 6284.02 435.263 2
 0 22 -12 6982.84 532.817 3
 0 22 13 798.71 159.872 1
 0 22 -13 1056.49 250.227 3
 0 24 0 33122.3 901.999 1
 0 24 0 31786.7 896.663 2
 0 24 1 1941.69 219.785 1
 0 24 -1 1966.08 231.993 1
 0 24 1 2229.75 237.755 2
 0 24 -1 2422.18 253.534 2
 0 24 2 1753.83 208.748 2
 0 24 -2 1868.17 224.204 2
 0 24 2 2052.34 236.763 1
 0 24 -2 2077.47 222.815 1
 0 24 3 177.656 97.3282 2
 0 24 -3 347.787 108.687 1
 0 24 3 303.749 112.637 1
 0 24 -3 413.127 134.051 2
 0 24 4 25661.8 817.7 1
 0 24 -4 25633 771.659 1
 0 24 -4 24415.7 818.144 2
 0 24 -5 17749.5 702.816 2
 0 24 5 17628.4 681.263 1
 0 24 -5 18685.6 655.176 1
 0 24 6 20709.6 744.888 1
 0 24 -6 19656.9 745.317 2
 0 24 -6 21285.3 696.979 1
 0 24 -7 118.31 113.6 3
 0 24 -7 10.0431 86.0754 2
 0 24 7 163.87 101.686 1
 0 24 -7 143.346 66.7049 1
 0 24 -8 229.131 125.09 3
 0 24 8 241.495 107.31 1
 0 24 -8 234.639 117.763 2
 0 24 -9 5417.93 407.423 2
 0 24 9 5386.62 402.187 1
 0 24 10 36258.5 1042.85 1
 0 24 -10 35285.8 1051.01 2
 0 26 0 39166.5 1041.08 1
 0 26 0 39591.4 1058.41 2
 0 26 -1 933.148 175.983 1
 0 26 -1 828.899 162.387 2
 0 26 1 637.607 131.345 2
 0 26 1 804.556 162.125 1
 0 26 2 1273.79 199.847 1
 0 26 -2 1307.77 195.553 1
 0 26 -2 1120.32 189.519 2
 0 26 3 1263.51 210.036 1
 0 26 -3 1113 194.939 2
 0 26 -3 1511.77 205.172 1
 0 26 -4 7423.35 437.942 1
 0 26 -4 7446.34 474.591 2
 0 26 4 7763.05 471.155 1
 0 26 -5 491.819 124.13 1
 0 26 5 354.788 105.246 1
 0 26 -5 643.328 143.822 2
 0 26 -6 27992.8 859.968 1
 0 26 -6 26071.6 911.504 2
 0 28 -1 5601.46 418.856 2
 0 28 -2 102.324 100.85 2
 0 28 -5 5874.93 410.633 1
 1 -1 -22 758.166 209.475 3
 1 1 -22 805.896 220.263 3
 1 1 -21 21934.2 920.086 3
 1 -1 -21 22181.4 913.073 3
 1 -1 -20 1545.42 253.541 3
 1 1 -20 1474.99 271.369 3
 1 1 -19 34052.5 1068.36 3
 1 -1 -19 37020.3 1107.12 3
 1 -1 -18 10352.9 562.708 3
 1 1 -18 9205.42 531.872 3
 1 -1 -17 28724.3 899.559 3
 1 1 -17 28108.3 889.737 3
 1 -1 -16 1638.05 227.683 3
 1 1 -16 2026.48 248.107 3
 1 1 -15 44180.6 1067.04 3
 1 -1 -15 43480.5 1034.62 3
 1 1 -14 2533.68 263.061 3
 -1 1 14 1775.93 111.57 1
 1 -1 -14 2559.56 246.483 3
 -1 -1 13 87413.8 849.554 1
 1 1 -13 87761.7 1435.37 3
 1 -1 -13 87890.1 1428.81 3
 1 1 -12 6247.87 335.28 3
 1 -1 -12 6342.54 334.809 3
 -1 1 12 6204.68 187.875 1
 -1 -1 12 6298.59 164.464 1
 1 1 -11 208.888 84.5504 3
 -1 1 11 179.805 36.893 1
 -1 -1 11 215.042 34.0233 1
 1 -1 -11 178.936 91.3056 3
 -1 -1 10 21057.3 309.988 1
 -1 1 10 21112.4 346.759 1
 1 1 -10 21481.9 567.801 3
 1 -1 -10 21006.5 564.986 3
 1 -1 -9 201950 2036.8 3
 -1 1 9 200082 1580.17 1
 -1 -1 9 199764 1519.49 1
 1 1 -9 197558 2011.27 3
 -1 1 8 16414.8 282.441 1
 -1 -1 8 16434.3 255.856 1
 1 -1 -8 17170.8 455.247 3
 1 1 -8 16990.9 445.947 3
 1 -1 -7 71492.7 719.517 1
 -1 1 7 73851.2 704.889 1
 -1 -1 7 72328.9 887.165 4
 1 1 -7 73452.4 959.626 3
 -1 -1 7 74301.7 666.245 1
 1 1 -6 25214.3 476.087 3
 -1 -1 6 25035.8 305.044 1
 1 -1 -6 23857.5 326.753 1
 -1 1 6 24895.9 430.897 4
 -1 1 6 25448.7 334.167 1
 -1 -1 6 25055.6 440.759 4
 1 -1 -6 25130.6 477.347 3
 -1 -1 5 149202 1308.95 4
 -1 1 5 146683 1291.5 4
 1 1 -5 149029 1363.38 3
 1 -1 -5 147550 1155.4 1
 -1 -1 5 153075 1126.61 1
 -1 1 5 144581 1149.71 1
 1 -1 -5 149122 1370.67 3
 -1 1 4 45472 529.596 4
 1 -1 -4 44980.8 515.731 4
 -1 -1 4 47078.1 449.045 1
 1 1 -4 46112 526.244 4
 1 -1 -4 44332.7 447.482 1
 -1 -1 4 44437.7 526.505 4
 -1 1 4 46085.8 456.46 1
 1 1 -4 45790.9 562.639 3
 -1 -1 3 114853 938.926 3
 -1 1 3 168331 918.982 1
 1 1 -3 166470 992.479 4
 1 -1 -3 102874 874.801 4
 -1 1 3 165933 987.239 4
 -1 -1 3 156826 987.386 4
 1 1 -3 165055 1035.73 3
 1 1 3 26411.5 242.089 1
 1 1 3 26675.2 366.495 3
 -1 -1 -3 26125.4 369.503 3
 1 -1 3 25990.3 376.806 3
 -1 1 -4 34032.3 508.158 3
 -1 -1 -4 34316.4 336.989 1
 -1 -1 -4 33874 498.616 3
 1 1 4 34801.1 335.452 1
 -1 1 -5 61498.1 791.616 3
 1 1 5 61946.8 537.08 1
 -1 -1 -5 60420.3 775.639 3
 -1 -1 -5 62866.2 538.841 1
 1 1 6 8907.35 159.697 1
 -1 -1 -6 9131.94 160.151 1
 -1 -1 -6 8913.26 287.249 3
 -1 1 -6 9361.47 301.234 3
 1 1 7 178711 1330.83 1
 -1 -1 -7 177123 1332.16 1
 -1 -1 -7 177000 1751.19 3
 -1 -1 -8 28624.3 627.932 3
 -1 -1 -8 29413.7 357.883 1
 1 1 8 29624.9 354.022 1
 -1 1 -8 31940 665.649 3
 -1 -1 -9 170465 1116.23 1
 -1 -1 -9 175237 1727.78 3
 1 1 9 176520 1115.74 1
 1 1 10 33839.8 382.307 1
 -1 1 -10 34829.6 761.053 3
 -1 -1 -10 33766.9 392.475 1
 -1 -1 -10 33992.1 735.33 3
 -1 -1 -11 726.566 132.344 3
 1 1 11 689.738 54.3539 1
 -1 1 -11 953.961 148.806 3
 -1 -1 -12 20596.8 612.962 3
 -1 1 -12 21941.9 643.086 3
 1 1 13 60808.8 614.651 1
 -1 -1 -13 57953.2 1132.76 3
 -1 1 -13 57023.4 1137.19 3
 -1 -1 -14 8770.07 450.902 3
 -1 1 -14 9002.36 469.097 3
 -1 1 -15 87902 1556.16 3
 -1 -1 -15 86872.1 1550.38 3
 -1 1 -16 2684.81 294.75 3
 -1 -1 -16 2822.79 307.41 3
 -1 -1 -17 13930.7 639.921 3
 -1 1 -17 10715.6 569.958 3
 -1 -1 -18 5942.66 446.63 3
 -1 1 -18 6401.5 460.06 3
 -1 1 -19 16494.4 753.067 3
 -1 -1 -19 14766.9 739.715 3
 -1 -1 -20 2918.89 353.121 3
 -1 1 -20 3450.09 372.684 3
 -1 1 -21 43034.4 1323 3
 -1 -1 -21 40909 1313.87 3
 -1 1 -22 950.884 229.7 3
 -1 -1 -22 1080.11 251.61 3
 1 -3 -22 544.883 186.057 3
 1 3 -22 577.763 211.871 3
 1 3 -21 18064.7 844.789 3
 1 -3 -21 20571.9 894.195 3
 1 3 -20 10582.3 624.858 3
 1 -3 -20 10749.9 612.287 3
 1 3 -19 22205.3 872.477 3
 1 -3 -19 22111.9 848.801 3
 1 3 -18 22288.3 839.637 3
 1 -3 -18 22422.2 822.348 3
 1 -3 -17 1453.56 218.942 3
 1 3 -17 1690.53 244.813 3
 1 -3 -16 11764.9 565.246 3
 1 3 -16 11640.7 562.204 3
 1 3 -15 11375.3 546.836 3
 1 -3 -15 10541.7 504.371 3
 -1 3 14 3249.54 160.873 1
 1 3 -14 3389.45 293.089 3
 1 -3 -14 3138.58 267.328 3
 -1 3 13 15018 346.055 1
 1 -3 -13 14757.7 550.561 3
 1 3 -13 15594.5 576.2 3
 -1 -3 13 13825.6 225.65 1
 1 -3 -12 90154 1386.35 3
 -1 -3 12 85171.2 758.558 1
 1 3 -12 91369.1 1400.46 3
 -1 3 12 86139.5 939.769 1
 1 -3 -11 90.4922 63.5114 3
 -1 -3 11 206.998 30.2638 1
 1 -3 -10 169866 1870.51 3
 1 3 -10 170932 1894.14 3
 -1 3 10 169447 1468.31 1
 1 3 -9 210794 2112.22 3
 1 -3 -9 208745 2104.52 3
 -1 3 9 211469 1715.41 1
 -1 -3 8 18917.2 286.079 1
 1 -3 -8 19398.3 490.192 3
 1 3 -8 19816.5 497.56 3
 -1 -3 8 19991.7 449.154 4
 -1 3 8 19714.5 355.795 1
 1 3 -7 33279.9 621.542 3
 -1 -3 7 32058.3 550.819 4
 -1 3 7 31784.9 455.785 1
 -1 -3 7 31973.8 415.103 1
 -1 -3 6 26573.6 463.395 4
 1 3 -6 28184.1 532.683 3
 1 -3 -6 28798.8 381.03 2
 -1 3 6 27283.4 399.795 1
 -1 -3 5 96768.8 973.785 4
 1 3 -5 99694.6 1067.4 3
 -1 3 5 100828 916.996 1
 1 -3 -5 102205 851.053 2
 -1 -3 4 44336.1 570.039 3
 1 3 -4 43573.8 582.672 3
 -1 3 4 43741.5 502.634 1
 1 -3 -4 44168.2 502.237 4
 1 -3 -4 43252.3 492.499 1
 1 -3 -4 44907.2 432.994 2
 -1 -3 4 43151.3 523.252 4
 -1 3 3 15018.8 251.994 1
 -1 3 3 15312.9 193.413 2
 1 3 -3 14671.3 284.208 3
 -1 -3 3 15284.3 277.92 3
 1 -3 -3 15835 252.968 1
 1 -3 -3 12931.9 178.923 2
 -1 -3 3 15135.9 250.96 4
 1 -3 -3 14843.8 227.668 4
 -1 -3 3 14996.7 214.909 1
 1 -3 -2 1839.52 61.8276 4
 -1 -3 2 4883.57 111.544 1
 1 -3 -2 4633.81 121.955 1
 1 3 -2 4680.35 137.192 3
 -1 -3 2 3338.58 111.159 3
 -1 3 2 4663.6 86.9632 2
 1 3 -2 2648.57 87.4208 1
 -1 3 2 5009.77 128.692 1
 1 -3 -2 1608.87 52.2179 2
 1 -3 -1 1049.34 56.1779 1
 1 3 -1 405.513 34.6741 1
 -1 3 1 891.727 51.3251 1
 1 3 -1 1223.78 62.3081 3
 -1 -3 1 1358.01 60.4675 1
 -1 -3 1 132.665 27.1238 3
 1 3 -1 1110.5 57.961 2
 -1 3 1 1311.95 46.816 2
 -1 3 0 1735.73 66.1154 1
 -1 3 0 4469.92 132.362 3
 1 -3 0 1787.81 86.229 3
 1 3 0 4217.1 106.609 2
 -1 -3 0 122.756 19.2952 5
 1 -3 0 5221.17 114.164 1
 -1 -3 0 246.445 29.0963 3
 1 3 0 4974.87 102.472 5
 -1 -3 -1 488.511 38.2649 1
 1 -3 1 576.161 37.3505 1
 -1 3 -1 795.007 65.2651 3
 1 -3 1 766.354 63.2418 3
 -1 -3 -1 286.249 30.2523 2
 -1 3 -1 173.226 20.8245 1
 1 3 1 634.222 44.9098 2
 1 3 1 709.022 48.1772 1
 -1 -3 -2 10960 199.844 2
 -1 3 -2 11984.6 179.858 4
 -1 3 -2 11998.4 273.554 3
 1 3 2 12295.2 202.256 1
 1 -3 2 12155.1 263.802 3
 1 -3 2 12795.4 168.243 1
 -1 -3 -2 11699.7 198.5 1
 1 3 2 12441.4 210.592 2
 1 3 3 100273 846.572 1
 -1 3 -3 94780.3 1013.9 3
 1 3 3 98267.9 869.165 2
 -1 3 -3 96511.4 845.917 4
 -1 -3 -3 101454 850.516 1
 -1 -3 -3 101091 877.857 2
 1 -3 3 96648.9 992.367 3
 -1 3 -3 99066.8 734.393 1
 1 -3 3 101225 740.884 1
 1 3 4 81883.2 745.602 1
 -1 3 -4 82446.6 948.39 3
 -1 -3 -4 83764.2 788.783 2
 -1 -3 -4 78186.1 732.827 1
 1 3 4 83736.1 787.605 2
 -1 -3 -5 68109.4 671.015 1
 -1 3 -5 67786.2 894.313 3
 1 3 5 69150.5 668.605 1
 -1 -3 -5 66203 825.659 3
 -1 -3 -6 75998.1 959.091 3
 -1 3 -6 78504.7 1019.48 3
 1 3 6 78488 752.203 1
 1 3 7 2657.3 113.604 1
 -1 3 -7 2155.05 161.943 3
 -1 -3 -7 2053.73 157.956 3
 1 3 8 49515.2 573.224 1
 -1 3 -8 50250 879.333 3
 -1 -3 -9 127400 1541.33 3
 -1 3 -9 128439 1589.61 3
 1 3 9 126677 1134.29 1
 -1 3 -10 105552 1476.43 3
 -1 -3 -10 105134 1421.12 3
 1 3 10 102546 991.914 1
 -1 3 -11 13842.7 510.703 3
 1 3 11 13098.3 286.138 1
 -1 -3 -11 13811.2 489.698 3
 1 3 12 91176 933.351 1
 -1 -3 -12 92139.9 1432.51 3
 -1 3 -12 95709.8 1499.93 3
 1 3 13 30952.3 475.544 1
 -1 3 -13 31996.8 856.579 3
 -1 -3 -13 31300.4 820.496 3
 -1 3 -14 39145.5 1001.1 3
 -1 -3 -14 40646.2 976.862 3
 -1 3 -15 20445.8 746.502 3
 -1 -3 -15 19738.3 704.364 3
 -1 3 -16 16699.6 694.549 3
 -1 -3 -16 16633.4 666.323 3
 -1 -3 -17 360.436 152.536 3
 -1 3 -17 463.179 161.827 3
 -1 3 -18 36560.6 1120.63 3
 -1 -3 -18 66056.9 1863.98 3
 -1 3 -19 28705 1013.12 3
 -1 -3 -19 27347.7 999.069 3
 -1 -3 -20 20778.1 866.702 3
 -1 3 -20 18599 836.217 3
 -1 3 -21 12600.1 722.518 3
 -1 -3 -21 12448.9 686.451 3
 -1 3 -22 348.227 145.666 3
 -1 -3 -22 259.598 126.308 3
 1 5 -22 893.007 188.27 3
 1 -5 -22 989.116 228.008 3
 1 5 -21 510.031 210.079 3
 1 -5 -21 464.634 184.317 3
 1 5 -20 43172.3 1284.35 3
 1 -5 -20 41673.2 1232.96 3
 1 -5 -19 20059.8 836.983 3
 1 5 -19 20742.9 855.711 3
 1 5 -18 13497.5 659.666 3
 1 -5 -18 13378 642.854 3
 1 5 -17 1671.12 248.7 3
 1 -5 -17 1588.58 242.27 3
 1 5 -16 60075.3 1326.25 3
 1 -5 -16 59762.4 1304.96 3
 -1 5 15 2980.47 174.8 1
 1 -5 -15 2711.75 272.91 3
 1 5 -15 2721.43 281.178 3
 1 5 -14 45509.4 1065.72 3
 1 -5 -14 45573.4 1054.02 3
 -1 5 14 44159.5 703.34 1
 -1 5 13 7322.75 265.128 1
 1 5 -13 7683.58 412.264 3
 1 -5 -13 7830.26 414.824 3
 1 -5 -12 79451.9 1274.19 3
 -1 5 12 77149.8 938.481 1
 1 5 -12 77730.3 1316.17 3
 -1 -5 11 47.3288 18.476 1
 -1 5 11 177.515 63.789 1
 1 -5 -11 23.9116 61.532 3
 1 5 -11 21.5083 62.1019 3
 -1 -5 11 88.4085 26.7248 1
 1 -5 -10 109144 1443.45 3
 1 5 -10 108143 1478.41 3
 -1 -5 10 104431 870.755 1
 -1 -5 10 99988.6 944.708 1
 -1 5 10 102739 1110.1 1
 -1 -5 9 20212.6 484.636 4
 -1 5 9 18424.9 380.224 1
 -1 -5 9 19774.4 282.049 1
 1 5 -9 20555.8 565.464 3
 -1 -5 8 145896 1147.87 1
 -1 -5 8 147749 1492.98 4
 -1 5 7 399.369 64.0141 1
 -1 -5 7 219.09 56.9375 4
 1 5 -7 221.088 63.4224 3
 -1 -5 7 258.35 35.0897 1
 -1 -5 6 53818 548.856 1
 -1 -5 6 52868.8 696.269 4
 1 5 -6 53471.9 823.822 3
 -1 5 6 52384.4 662.201 1
 1 -5 -6 55711.1 589.018 2
 -1 5 5 15862.2 258.689 2
 -1 -5 5 15551.9 252.929 1
 1 5 -5 15132.4 388.241 3
 -1 5 5 14958.7 311.098 1
 1 -5 -5 15796.1 255.797 2
 -1 -5 5 15017.2 311.824 4
 1 5 -4 80175.5 965.958 3
 1 -5 -4 81604.8 772.32 4
 -1 -5 4 83440.8 758.06 1
 -1 5 4 85715.6 749.983 2
 1 -5 -4 82993.4 725.773 2
 -1 -5 4 82544.2 820.869 4
 -1 5 4 80944.2 846.147 1
 -1 5 3 36685.9 403.481 2
 -1 -5 3 36975.1 434.046 1
 -1 5 3 34817.7 480.153 1
 -1 -5 3 35588 433.788 4
 -1 -5 3 35835 525.86 3
 1 5 -3 35878.8 435.002 1
 1 -5 -3 36024.4 395.786 4
 1 5 -3 35306.8 544.033 3
 1 -5 -3 36579.1 391.613 2
 1 5 -2 63362.8 721.345 3
 1 -5 -2 61385.4 582.786 2
 -1 -5 2 59918.1 620.589 1
 1 -5 -2 62172.5 528.516 4
 -1 -5 2 64363.4 725.011 3
 1 5 -2 63425.3 634.849 1
 -1 5 2 61989.4 587.274 2
 -1 5 1 2930.61 115.125 1
 1 5 -1 2975.39 118.667 2
 -1 -5 1 2972.05 111.197 1
 1 5 -1 2909.04 109.47 1
 -1 5 1 2989.94 100.214 2
 1 5 -1 2874.56 119.826 3
 -1 -5 1 2927.23 125.471 3
 1 5 0 111017 968.934 1
 1 -5 0 111659 1095.68 3
 -1 5 0 113402 971.078 1
 -1 5 0 109799 1070.63 3
 1 -5 0 116179 975.291 1
 1 5 0 109047 969.08 2
 1 5 0 107904 883.111 5
 -1 -5 0 108069 984.193 3
 -1 -5 0 107204 868.707 5
 -1 5 -1 25756.3 452.816 3
 1 5 1 26152.1 375.161 1
 -1 -5 -1 26043.1 360.942 2
 1 5 1 25893.1 366.832 2
 -1 5 -1 26977.4 357.818 1
 1 -5 1 27308.5 359.936 1
 -1 -5 -1 26660.5 323.643 5
 1 5 2 7989.46 197.665 1
 -1 -5 -2 8380.48 191.444 2
 1 5 2 8338.08 197.611 2
 -1 5 -2 8059.66 173.17 1
 -1 5 -2 8560.7 268.301 3
 -1 5 -2 8245.09 150.194 4
 1 -5 2 8487.78 179.32 1
 -1 5 -3 59038.5 811.447 3
 1 5 3 59118.6 640.067 2
 1 5 3 59111 651.127 1
 1 -5 3 58600.8 555.74 1
 -1 5 -3 58451.1 580.85 4
 -1 5 -3 57945.9 559.048 1
 -1 5 -4 59121.8 851.942 3
 1 5 4 61260.6 675.234 2
 1 5 4 60725.4 677.699 1
 -1 5 -4 59575.8 560.729 1
 1 -5 4 61149.1 565.459 1
 -1 5 -5 1780.79 141.956 3
 1 5 5 1984.42 107.832 2
 1 -5 5 1926.56 71.8797 1
 -1 5 -5 1900.91 72.1501 1
 1 5 5 1928.66 105.823 1
 1 5 6 75024.2 812.747 1
 1 -5 6 75755.5 635.695 1
 -1 5 -6 75593.2 1077.15 3
 1 5 6 77136.5 837.715 2
 -1 5 -7 19702.8 527.378 3
 1 5 7 19267.5 356.937 1
 -1 5 -8 77463.9 1158.7 3
 -1 -5 -8 74797.8 1058.89 3
 1 5 8 74829.5 833.84 1
 -1 -5 -9 6072.89 294.001 3
 1 5 9 5912.35 206.108 1
 -1 5 -9 6081.59 320.73 3
 -1 5 -10 131679 1732.36 3
 -1 -5 -10 132504 1649.91 3
 1 5 10 132152 1281.3 1
 -1 5 -11 6120.18 357.601 3
 1 5 11 6509.19 229.159 1
 -1 -5 -11 5331.28 317.657 3
 -1 5 -12 54607 1129.32 3
 -1 -5 -12 53164 1064.14 3
 1 5 12 51747 716.12 1
 -1 -5 -13 10719.6 480.707 3
 -1 5 -13 10733.6 505.298 3
 1 5 13 10364.2 297.835 1
 -1 5 -14 32926.4 922.908 3
 -1 -5 -14 31651.3 872.125 3
 1 5 14 30536.2 542.523 1
 -1 -5 -15 246.125 120.858 3
 -1 5 -15 143.287 134.141 3
 -1 -5 -16 90430.5 1636.97 3
 -1 5 -16 91724.5 1727.89 3
 -1 -5 -17 3730.81 363.252 3
 -1 5 -17 3204.71 344.542 3
 -1 -5 -18 20927.3 815.022 3
 -1 5 -18 20416.6 838.56 3
 -1 -5 -19 14780.5 731.004 3
 -1 5 -19 15850.6 765.21 3
 -1 5 -20 47074.2 1365.8 3
 -1 -5 -20 45272.9 1292.44 3
 -1 5 -21 346.64 213.733 3
 -1 -5 -21 294.431 208.819 3
 -1 5 -22 237.582 137.792 3
 1 7 -22 2125.21 317.98 3
 1 7 -21 8168.48 593.369 3
 1 -7 -21 7460.49 555.138 3
 1 -7 -20 54624.4 1424.99 3
 1 7 -20 52725.5 1455.22 3
 1 -7 -19 2083.13 313.443 3
 1 7 -19 2094.56 293.905 3
 1 -7 -18 8469.48 524.326 3
 1 7 -18 8550.99 541.16 3
 1 -7 -17 4250.43 355.467 3
 1 7 -17 4209.17 370.151 3
 1 -7 -16 14779 647.099 3
 1 7 -16 14733.5 659.881 3
 1 7 -15 2913.94 287.807 3
 1 -7 -15 3113.76 288.349 3
 -1 7 15 3081.46 194.426 1
 1 7 -14 58923.2 1266.27 3
 -1 7 14 55775.5 867.764 1
 1 -7 -14 57991.8 1201.54 3
 1 7 -13 10035.3 488.598 3
 -1 7 13 10157.7 343.564 1
 1 -7 -13 10611.8 480.266 3
 -1 7 12 10061.8 333.84 1
 -1 -7 12 9307.05 231.148 1
 1 -7 -12 10016.5 445.787 3
 -1 7 11 6888.86 269.824 1
 1 7 -11 7264.26 385.616 3
 1 7 -10 78864.7 1282.38 3
 -1 7 10 75667.5 982.524 1
 -1 7 9 2438.71 157.023 1
 -1 -7 9 2667.38 172.59 4
 1 7 -9 2287.46 201.752 3
 -1 7 8 178589 1682.71 1
 1 7 -8 180282 1995.52 3
 -1 -7 8 176668 1721.89 4
 -1 7 7 30204.3 536.949 1
 1 7 -7 30608.2 669.974 3
 -1 -7 7 30748 538.621 4
 -1 7 7 30738.8 452.737 2
 1 7 -6 10377.4 369 3
 -1 7 6 9873.75 286.954 1
 -1 7 6 10254.8 240.31 2
 -1 -7 6 9951.51 275.028 4
 1 7 -5 4935.32 171.199 1
 -1 7 5 4994.77 162.091 2
 -1 7 5 4596.48 188.774 1
 1 7 -5 4831.2 241.35 3
 -1 -7 5 5131.82 183.354 4
 -1 7 4 47730.4 556.312 2
 1 -7 -4 47622.9 527.997 4
 1 7 -4 48271.4 585.492 1
 1 7 -4 48136.3 750.474 3
 -1 7 4 49346.1 662.289 1
 -1 -7 4 46972 575.145 4
 -1 -7 3 788.268 59.1134 4
 1 7 -3 695.092 85.9353 3
 -1 7 3 927.99 87.9618 1
 -1 7 3 880.733 66.5008 2
 1 7 -3 935.309 76.0446 1
 1 -7 -3 1241.45 61.8087 4
 -1 7 2 63577.4 742.419 1
 1 7 -2 62989.1 696.069 1
 1 -7 -2 60316.6 515.783 4
 -1 7 2 61864 658.939 2
 1 7 -2 64080.3 808.978 3
 1 7 -2 61724.3 741.693 2
 -1 7 1 19141.9 325.471 2
 -1 7 1 19609.3 363.265 1
 1 7 -1 19403.6 285.332 5
 1 7 -1 19022.3 358.92 2
 1 7 -1 19736.9 351.815 1
 1 7 -1 19002 380.334 3
 1 7 0 6466.42 149.338 5
 -1 7 0 7799.31 206.567 2
 -1 7 0 6383.14 195.944 1
 1 7 0 6518.54 200.326 2
 -1 7 0 6879.78 248.529 3
 1 7 0 6146.39 192.153 1
 -1 7 -1 19811.3 344.587 1
 -1 7 -1 19470.4 429.319 3
 -1 -7 -1 18166.2 282.957 5
 1 7 1 19503.9 353.535 2
 1 7 1 19389.2 361.1 1
 1 7 2 37467.7 538.144 1
 -1 7 -2 37742.7 492.403 1
 1 7 2 37232.1 520.503 2
 -1 7 -2 38023.1 659.174 3
 1 7 3 65030.4 734.868 2
 -1 7 -3 63224.9 909.068 3
 -1 7 -3 63576.6 679.861 1
 1 7 3 64001.9 760.137 1
 -1 7 -4 83808.7 810.321 1
 1 7 4 84793.4 898.998 2
 -1 7 -4 83114.4 1118.08 3
 1 7 4 86245.2 936.918 1
 1 7 5 120188 1196.17 1
 1 7 5 119018 1163.46 2
 -1 7 -5 119272 1459.87 3
 -1 7 -5 118765 1033.22 1
 1 7 6 291.718 56.2536 1
 -1 7 -6 322.864 43.6553 1
 1 7 6 215.091 52.9063 2
 -1 7 -7 5332.11 301.81 3
 1 7 7 5299.33 209.427 1
 1 7 7 5221.56 203.459 2
 1 -7 7 4553.82 132.257 1
 1 7 8 116447 1230.2 1
 -1 7 -8 115347 1551.74 3
 1 -7 8 118400 978.738 1
 1 -7 9 348.751 34.6734 1
 -1 7 -9 218.016 75.0648 3
 1 7 9 234.16 59.2177 1
 1 -7 10 51477.7 489.878 1
 1 7 10 54127.2 772.7 1
 -1 -7 -10 53969.4 985.205 3
 -1 7 -10 55018.5 1094.94 3
 -1 -7 -11 4215.37 285.306 3
 1 7 11 4261.25 204.273 1
 -1 7 -11 4475.77 325.299 3
 1 7 12 431.794 70.8322 1
 -1 -7 -12 573.779 132.249 3
 -1 7 -12 417.749 109.52 3
 -1 -7 -13 405.266 105.703 3
 -1 7 -13 378.053 116.972 3
 1 7 13 142.723 46.9827 1
 1 7 14 80689.8 1049.32 1
 -1 -7 -14 84600.9 1507.7 3
 -1 7 -14 82497.6 1584.33 3
 -1 7 -15 4140.77 352.169 3
 -1 -7 -15 4095.94 327.949 3
 -1 -7 -16 42127.6 1104.1 3
 -1 7 -16 42999.7 1180.4 3
 -1 7 -17 3136.84 338.916 3
 -1 -7 -17 3008.19 306.303 3
 -1 -7 -18 13436.6 655.282 3
 -1 7 -18 13396.3 696.953 3
 -1 -7 -19 2874.24 336.38 3
 -1 7 -19 2864.59 359.069 3
 -1 7 -20 50909.4 1467.26 3
 -1 -7 -20 51633.8 1391.42 3
 -1 7 -21 5853.15 530.277 3
 -1 -7 -21 5827.18 501.798 3
 1 9 -22 1187.48 236.736 3
 1 -9 -21 6532.6 520.389 3
 1 9 -21 5553.79 500.637 3
 1 -9 -20 21753 908.285 3
 1 9 -20 22292.7 965.137 3
 1 -9 -19 250.372 109.877 3
 1 9 -19 331.627 140.178 3
 1 9 -18 6389.25 492.213 3
 1 -9 -18 6373.68 462.52 3
 1 -9 -17 3712.04 361.33 3
 1 9 -17 3757.57 362.004 3
 -1 9 16 1854.57 170.797 1
 1 -9 -16 1542.29 215.553 3
 1 9 -16 1624.8 249.655 3
 1 -9 -15 34559.4 964.112 3
 1 9 -15 35007.1 1031.6 3
 1 -9 -14 73991.9 1394.92 3
 1 9 -14 72951.8 1474.16 3
 1 -9 -13 7188.93 407.24 3
 -1 9 13 6374.61 289.043 1
 1 9 -13 6839.34 424.178 3
 -1 9 12 6058.92 277.904 1
 1 9 -12 5878.98 375.461 3
 -1 9 11 578.445 94.5272 1
 1 9 -11 759.544 147.871 3
 1 9 -10 4565.54 319.318 3
 -1 9 10 4758.67 239.955 1
 -1 -9 9 29372.7 597.973 4
 1 9 -9 30370.2 781.11 3
 -1 9 9 29430 600.781 1
 -1 9 8 256149 2312.73 1
 -1 9 8 258921 2115.84 2
 1 9 -8 261015 2678.5 3
 -1 -9 8 256814 2274.45 4
 -1 9 7 58693.7 729.538 2
 -1 9 7 58887.9 853.666 1
 1 9 -7 58969 1034.63 3
 -1 -9 7 58334.6 798.556 4
 1 9 -6 9945.75 275.707 1
 1 9 -6 9807.62 388.995 3
 -1 9 6 10112.5 320.826 1
 -1 9 6 9718.07 260.622 2
 -1 -9 6 9842.92 277.433 4
 1 9 -5 11626.9 396.377 3
 1 9 -5 12430.1 301.196 1
 -1 9 5 12386.2 289.317 2
 -1 -9 5 12433 291.324 4
 -1 9 5 12427 346.876 1
 1 -9 -4 29435.4 388.386 4
 1 9 -4 29755.6 622.991 3
 -1 9 4 29217.1 460.34 2
 -1 -9 4 28619.5 432.73 4
 -1 9 4 29650.8 542.419 1
 1 9 -4 29716.3 482.082 1
 1 9 -3 35395.8 599.274 2
 -1 9 3 35590.3 516.936 2
 1 9 -3 36389.3 666.768 3
 -1 9 3 36970.5 603.829 1
 1 9 -3 35941 546.837 1
 1 -9 -3 35670.5 394.046 4
 -1 -9 3 36015.2 457.334 4
 1 9 -2 41058.4 584.042 1
 1 9 -2 40450.8 667.524 3
 1 9 -2 41022.9 628.201 2
 -1 9 2 42254.7 628.653 1
 -1 9 2 39969.5 552.36 2
 1 -9 -2 38260.7 363.43 4
 1 9 -1 37609.3 569.286 1
 -1 9 1 38188.8 583.083 1
 -1 9 1 35732.6 531.49 2
 1 9 -1 36994.7 630.739 3
 1 9 -1 36266.1 578.609 2
 1 9 -1 36083.8 444.026 5
 1 9 0 1735.81 117.131 1
 1 9 0 2174.12 132.468 2
 -1 9 0 2033.7 151.858 3
 -1 9 0 2034.83 124.163 1
 -1 9 0 1940.18 120.282 2
 -1 9 -1 2061.44 124.801 1
 1 -9 1 1761.54 53.1501 4
 -1 -9 -1 2017.28 91.2453 5
 1 9 1 1933 123.116 2
 1 9 1 1919.46 125.267 1
 -1 -9 -2 130704 1131.72 5
 1 9 2 132396 1280.53 2
 -1 9 -2 134839 1256.59 1
 -1 9 -2 131411 1495.03 3
 1 9 2 132720 1324.62 1
 -1 9 -3 5323.76 266.262 3
 1 9 3 5173.18 200.757 2
 -1 9 -3 5542.13 192.514 1
 1 9 3 5359.31 216.587 1
 1 9 4 49895.3 691.813 2
 -1 9 -4 51314.4 900.125 3
 -1 9 -4 48840.3 628.882 1
 1 9 4 47479.4 708.42 1
 -1 9 -5 21887 594.316 3
 1 9 5 20812.9 426.216 2
 -1 9 -5 21145.6 375.233 1
 1 9 5 21409.8 456.386 1
 1 9 6 637.317 86.2085 1
 1 9 6 727.455 83.5576 2
 -1 9 -6 1114.06 148.167 3
 -1 9 -6 991.103 77.1029 1
 -1 9 -7 19657.7 609.651 3
 1 9 7 18612.5 419.449 2
 -1 9 -7 19060.6 348.24 1
 1 9 7 18739.5 443.743 1
 -1 9 -8 222963 2498.53 3
 1 9 8 222912 1993.21 2
 1 9 8 216218 2031.5 1
 -1 9 -9 29770.6 808.546 3
 1 9 9 29546.6 559.783 2
 1 9 9 29471.6 585.684 1
 1 9 10 2928.86 182.318 1
 -1 9 -10 2944.46 273.903 3
 -1 9 -11 3466.42 304.672 3
 -1 -9 -11 3732.34 270.922 3
 1 9 11 3933.6 212.051 1
 -1 9 -12 8565.75 476.766 3
 -1 -9 -12 8195.41 422.007 3
 1 9 12 8414.78 318.79 1
 -1 9 -13 26322.9 853.092 3
 -1 -9 -13 25919.9 787.896 3
 1 9 13 25527.6 579.524 1
 -1 -9 -14 92877.6 1600.59 3
 -1 9 -14 93783.7 1722.66 3
 1 9 15 46670.5 814.049 1
 -1 9 -15 42859.5 1181.6 3
 -1 -9 -15 43768.9 1138.62 3
 -1 -9 -16 624.6 140.719 3
 -1 9 -16 548.203 146.32 3
 -1 9 -17 13612.5 700.92 3
 -1 -9 -17 12988.4 644.668 3
 -1 -9 -18 4760.41 404.473 3
 -1 9 -18 4884.24 435.208 3
 -1 -9 -19 1258.07 229.192 3
 -1 9 -19 1217.08 247.863 3
 -1 -9 -20 38374.2 1214.44 3
 -1 9 -20 36759 1278.87 3
 -1 9 -21 7644.99 594.409 3
 1 11 -21 7316.19 599.386 3
 1 11 -20 10671.7 699.465 3
 1 -11 -20 12327.3 701.413 3
 1 11 -19 30741 1148.92 3
 1 -11 -19 31521.1 1083.75 3
 1 11 -18 550.674 182.662 3
 1 -11 -18 327.893 117.178 3
 1 11 -17 3792.41 385.23 3
 1 -11 -17 4390.45 375.532 3
 1 11 -16 514.396 152.678 3
 -1 11 16 339.232 82.6632 1
 1 -11 -16 538.29 147.499 3
 1 11 -15 38950.5 1153.23 3
 1 -11 -15 37555.7 1035.95 3
 -1 11 15 36058.7 784.896 1
 1 -11 -14 55625.9 1234.69 3
 1 11 -14 57788.5 1371.82 3
 -1 11 14 53884.3 968.366 1
 1 11 -13 40978.9 1102.89 3
 -1 11 13 37880 785.433 1
 1 11 -12 3145.86 292.343 3
 -1 11 12 2960.16 212.598 1
 1 11 -11 12599.5 574.928 3
 -1 11 11 11748.6 408.247 1
 -1 11 10 4951.07 210.883 2
 -1 11 10 5289.55 267.85 1
 1 11 -10 5534.57 358.473 3
 -1 -11 9 33206.7 647.129 4
 -1 11 9 32989.7 680.541 1
 1 11 -9 34051.2 868.026 3
 -1 11 9 34595.7 582.498 2
 -1 -11 8 87195.6 1081.29 4
 -1 11 8 88141.8 1019.23 2
 -1 11 8 86595.9 1168.79 1
 1 11 -8 88719.3 1416.83 3
 1 11 -7 68551 1183.13 3
 -1 11 7 72030.7 886.096 2
 -1 -11 7 71385.5 909.888 4
 -1 11 7 71103.7 1020.24 1
 -1 11 6 8466.8 265.906 2
 -1 11 6 8569.3 320.714 1
 1 11 -6 8723.83 379.551 3
 1 11 -6 8649.03 277.78 1
 -1 -11 6 9076.3 268.359 4
 1 11 -5 2788.06 161.239 1
 -1 11 5 2795.76 177.645 1
 1 11 -5 2653.56 215.532 3
 -1 11 5 3046.37 157.682 2
 -1 -11 5 3071.91 151.346 4
 1 -11 -4 17014.4 278.801 4
 -1 11 4 16194.2 424.367 1
 1 11 -4 16653.1 499.36 3
 1 11 -4 16950.5 443.222 2
 1 11 -4 16624.3 386.186 1
 -1 11 4 16556.5 372.394 2
 -1 -11 4 17705 336.341 4
 1 -11 -3 129238 1031.25 4
 -1 -11 3 133753 1144.56 4
 1 11 -3 135145 1351.29 1
 1 -11 -3 127522 1064.23 5
 -1 11 3 135159 1430.29 1
 1 11 -3 136147 1542.56 3
 -1 11 3 135128 1310.53 2
 1 11 -3 132360 1440.11 2
 -1 11 2 38087.3 639.682 1
 1 11 -2 37860.9 646.654 2
 1 11 -2 37988 697.287 3
 -1 11 2 38119.5 588.46 2
 1 11 -2 38749.1 489.469 5
 1 11 -2 37840.2 608.352 1
 1 11 -1 63325.7 932.18 3
 -1 11 1 59682.8 838.481 1
 1 11 -1 60942.2 825.917 1
 1 11 -1 57517.7 627.407 5
 1 11 -1 57820.2 825.308 2
 -1 11 1 60241.3 797.477 2
 1 11 0 1055.14 108.711 2
 -1 11 0 979.477 99.5515 1
 -1 11 0 1036.94 103.192 2
 1 11 0 994.502 102.422 1
 -1 11 -1 2295.31 146.683 1
 1 11 1 2851.09 167.117 1
 -1 11 -1 2276.78 150.376 2
 1 11 1 2444.87 156.348 2
 -1 11 -1 2317.79 183.414 3
 -1 11 -2 14531.8 455.528 3
 -1 11 -2 13234.5 344.685 1
 1 11 2 12562.3 360.516 1
 -1 -11 -2 13257 269.292 5
 1 11 2 13473.6 358.232 2
 1 11 3 144238 1444.7 2
 -1 -11 -3 143258 1261.85 5
 1 11 3 146900 1503.5 1
 -1 11 -3 148126 1727.4 3
 1 11 4 8914.53 309.059 1
 -1 11 -4 10470.4 441.344 3
 1 11 4 9153.8 295.683 2
 -1 11 -4 9358.22 277.17 1
 -1 11 -5 3639.3 270.944 3
 1 11 5 3806.47 194.431 2
 -1 11 -5 4112.28 178.787 1
 1 11 5 3867.87 208.449 1
 -1 11 -6 119.155 42.7275 1
 1 11 6 143.341 46.7738 2
 1 11 6 83.2902 48.8046 1
 -1 11 -7 38910.4 586.492 1
 1 11 7 39501.1 671.539 2
 1 11 7 38274.5 703.433 1
 -1 11 -7 39493.9 912.822 3
 -1 11 -8 72816.7 1317.45 3
 1 11 8 70598.8 1017.49 1
 1 11 8 71995.7 971.766 2
 -1 11 -8 73255 867.985 1
 -1 11 -9 60666.8 1236.16 3
 1 11 9 59569.4 939.379 1
 1 11 10 4749.38 234.614 2
 -1 11 -10 4186.23 331.798 3
 1 11 10 3959.09 231.33 1
 -1 11 -11 54.7384 81.3708 3
 1 11 11 67.9743 51.0901 1
 1 11 12 13710.6 446.077 1
 -1 11 -12 14608 652.217 3
 -1 11 -13 78388.8 1595.71 3
 -1 -11 -13 73832.9 1382.1 3
 -1 -11 -14 31398.6 908.011 3
 -1 11 -14 31277.1 1017.79 3
 -1 -11 -15 25730.2 842.905 3
 1 11 15 23482 615.085 1
 -1 11 -15 26310.9 959.68 3
 -1 -11 -16 7013.69 480.27 3
 -1 11 -16 8329 561.291 3
 -1 -11 -17 2989.28 319.745 3
 -1 11 -17 3052.54 359.352 3
 -1 -11 -18 147.994 103.339 3
 -1 11 -18 -101.213 132.567 3
 -1 -11 -19 45049.5 1309.78 3
 -1 11 -19 45925.2 1454.59 3
 -1 -11 -20 14025.6 742.25 3
 -1 11 -20 14041.8 819.188 3
 1 13 -21 2087.94 333.685 3
 1 13 -20 154.3 127.081 3
 1 13 -19 67932.6 1754.42 3
 1 -13 -19 60675.2 1610.26 3
 1 13 -18 -175.802 160.33 3
 1 -13 -18 -37.3066 115.593 3
 1 13 -17 1729.74 290.937 3
 1 -13 -17 1577.48 244.31 3
 1 -13 -16 165.896 114.551 3
 1 13 -16 117.205 118.546 3
 -1 13 16 86.211 60.8624 1
 1 13 -15 24333.7 921.672 3
 -1 13 15 22652.3 648.961 1
 1 -13 -15 24078.1 861.776 3
 -1 13 14 109.291 71.9128 1
 1 13 -14 62.5821 103.071 3
 -1 13 13 61042.1 1089.43 1
 1 13 -13 67067.9 1474.4 3
 -1 13 12 183.098 79.4524 1
 1 13 -12 19.0003 123.142 3
 -1 13 11 3235.51 184.687 2
 1 13 -11 3892.49 344.933 3
 -1 13 11 3321.75 234.114 1
 -1 13 10 2730.63 210.837 1
 1 13 -10 2833.12 271.209 3
 -1 13 10 2809.71 173.499 2
 1 13 -9 69030.9 1316.96 3
 -1 13 9 67738.1 1085.21 1
 -1 13 9 68310.8 928.373 2
 1 13 -8 4390.83 312.603 3
 -1 -13 8 4318.35 210.747 4
 -1 13 8 4163.15 206.9 2
 -1 13 8 4013.33 243.719 1
 -1 -13 7 68713.1 890.097 4
 -1 13 7 66292.1 1040.64 1
 1 13 -7 67257.2 1235.01 3
 -1 13 7 68639.9 918.369 2
 1 13 -7 67298.2 941.418 1
 1 13 -6 7384.62 279.262 1
 -1 -13 6 7306.43 243.652 4
 -1 13 6 7582.32 273.59 2
 1 13 -6 7259.77 379.828 3
 -1 13 6 7264.35 313.898 1
 -1 13 5 3203.15 208.323 1
 1 13 -5 3585.06 221.261 2
 -1 13 5 3239.68 178.527 2
 1 13 -5 3415.91 189.8 1
 -1 -13 5 3402.91 151.81 4
 1 13 -5 3307.4 246.093 3
 1 -13 -4 2195.53 92.2199 4
 1 -13 -4 2174.59 102.275 5
 1 13 -4 2048.35 167.48 2
 -1 13 4 2012.6 168.383 1
 -1 -13 4 2201.81 115.164 4
 1 13 -4 1939.95 181.335 3
 1 13 -4 2084.71 150.806 1
 -1 13 4 2156.07 149.921 2
 -1 13 3 278244 2435.14 1
 1 13 -3 284530 2591.41 3
 -1 13 3 281454 2306.63 2
 1 13 -3 280612 2455.93 2
 -1 -13 3 276627 1994.25 4
 1 13 -3 279913 2346.54 1
 1 13 -2 218.837 69.0197 2
 1 13 -2 158.932 54.1646 1
 1 13 -2 248.874 81.9862 3
 -1 13 2 284.49 59.7068 2
 -1 13 2 16.5714 54.6627 1
 1 13 -1 3192.97 190.627 1
 1 13 -1 3100.57 191.731 2
 -1 13 1 3416.5 189.581 2
 -1 13 1 3350.49 202.221 1
 1 13 0 808.623 106.998 1
 1 13 0 592.436 91.7953 2
 -1 13 0 570.729 93.14 1
 -1 13 0 683.805 94.5318 2
 -1 13 -1 8352.25 373.173 3
 1 13 1 8139.41 303.458 2
 -1 13 -1 8041.37 297.933 1
 1 13 1 8480.13 314.849 1
 -1 13 -1 8210.38 303.309 2
 -1 13 -2 1147.77 120.885 2
 -1 13 -2 1095.86 142.176 3
 -1 -13 -2 1156.38 78.0277 5
 1 13 2 975.022 120.744 1
 -1 13 -2 1035.82 107.196 1
 1 13 2 1095.32 116.249 2
 -1 13 -2 831.059 52.0191 5
 -1 13 -3 286118 2431.89 1
 1 13 3 286944 2494.93 2
 -1 -13 -3 280072 2193.44 5
 -1 13 -3 293032 2832.8 3
 -1 13 -4 5774.88 238.975 1
 -1 13 -4 5192.88 313.036 3
 1 13 4 5436.74 263.973 1
 1 13 4 5395.54 247.025 2
 -1 -13 -4 5728.07 200.635 5
 -1 13 -5 366.164 71.6232 1
 1 13 5 250.806 71.0203 1
 -1 13 -5 214.526 86.7078 3
 1 13 6 8161.34 309.583 2
 1 13 6 8286.9 336.022 1
 -1 13 -6 7981.16 419.947 3
 -1 13 -6 8403.98 285.337 1
 1 13 7 24104.6 547.055 2
 1 13 7 24058.7 590.978 1
 -1 13 -7 24288.7 489.998 1
 -1 13 -7 23894 738.482 3
 -1 13 -8 302.013 107.609 3
 1 13 8 172.616 78.7728 1
 -1 13 -8 138.512 48.7297 1
 1 13 8 74.763 47.059 2
 1 13 9 139269 1549.59 2
 -1 13 -9 136291 2018.68 3
 1 13 9 135119 1642.4 1
 -1 13 -10 14494.8 628.87 3
 1 13 10 14464.6 477.022 1
 1 13 10 14702.3 436.547 2
 -1 13 -11 125.563 97.8386 3
 1 13 11 40.0063 57.0551 1
 1 13 11 190.223 62.6225 2
 1 13 12 -37.208 65.4658 1
 -1 13 -12 49.6828 103.697 3
 -1 13 -13 86803.1 1767.13 3
 1 13 13 95594.9 1361.85 1
 1 13 14 -22.7525 56.9758 1
 -1 -13 -14 -77.5712 105.254 3
 -1 13 -14 16.2572 137.981 3
 -1 13 -15 14668.4 748.333 3
 1 13 15 14438 512.095 1
 -1 -13 -15 15777.2 681.575 3
 -1 13 -16 4063.46 403.251 3
 -1 -13 -16 4336.91 370.998 3
 -1 13 -17 43.9432 108.324 3
 -1 -13 -17 138.065 110.197 3
 -1 13 -18 574.698 190.339 3
 -1 -13 -18 443.737 142.712 3
 -1 -13 -19 53648.7 1457.13 3
 -1 13 -19 54051.7 1604.58 3
 -1 13 -20 1158.42 259.997 3
 1 15 -20 1730.12 316.52 3
 1 15 -19 43707.6 1427.87 3
 1 -15 -18 6037.76 482.544 3
 1 15 -18 5356.31 498.11 3
 1 15 -17 -107.37 148.148 3
 1 -15 -17 80.9041 94.1883 3
 1 15 -16 121.097 114.133 3
 1 -15 -16 45.2463 94.771 3
 -1 15 16 37.4591 72.1954 1
 -1 15 15 11357.7 487.204 1
 1 15 -15 12402.1 678.18 3
 1 15 -14 26701.9 962.139 3
 -1 15 14 23684.4 695.771 1
 -1 15 13 49276.7 1014.35 1
 1 15 -13 54019 1345.45 3
 -1 15 12 786.774 133.187 1
 1 15 -12 1064.76 201.634 3
 -1 15 11 46.7408 62.6743 1
 1 15 -11 -95.2771 134.331 3
 1 15 -10 139.864 99.4202 3
 -1 15 10 404.983 102.651 1
 -1 15 9 51157.5 978.518 1
 1 15 -9 52828.8 1194.8 3
 -1 15 9 50374.6 822.91 2
 -1 15 8 22991.5 533.008 2
 -1 15 8 22562.8 624.937 1
 1 15 -8 23439 764.599 3
 1 15 -7 2277.77 200.991 2
 -1 -15 7 2621.43 155.282 4
 1 15 -7 2169.96 170.648 1
 -1 15 7 2018.56 156.404 2
 1 15 -7 2132.84 228.671 3
 -1 15 7 2093.55 192.224 1
 1 15 -6 780.184 108.898 1
 1 15 -6 686.55 112.389 2
 -1 15 6 655.135 107.072 1
 -1 15 6 728.797 95.4873 2
 -1 -15 6 773.633 84.4889 4
 1 15 -6 876.346 162.189 3
 -1 -15 5 178.699 40.5669 4
 1 -15 -5 279.355 47.1182 5
 -1 15 5 145.73 72.2888 1
 1 15 -5 404.21 91.837 2
 -1 15 5 139.009 51.4858 2
 1 15 -5 254.436 68.6777 1
 -1 15 4 15033.1 477.162 1
 -1 -15 4 15873.6 312.51 4
 1 15 -4 14900.4 476.448 2
 1 15 -4 15041 432.14 1
 1 15 -4 15178.9 526.699 3
 -1 15 4 14498 414.931 2
 -1 15 3 173778 1897.26 1
 -1 -15 3 173490 1434.03 4
 1 15 -3 181965 2084.2 3
 -1 15 3 178692 1811.64 2
 1 15 -3 179449 1941.91 2
 1 15 -3 176868 1828.31 1
 -1 -15 2 11542.9 229.604 4
 -1 15 2 11254.3 395.208 1
 -1 15 2 11913.5 382.986 2
 1 15 -2 12298.7 421.458 2
 1 15 -2 11904.9 454.43 3
 1 15 -2 11238 384.808 1
 1 15 -1 939.436 120.943 2
 -1 15 1 836.999 113.891 1
 1 15 -1 905.929 119.523 1
 -1 15 1 894.025 115.259 2
 1 15 0 632.606 104.782 1
 -1 15 0 617.76 95.847 1
 -1 15 0 527.757 92.4228 2
 1 15 0 552.757 97.6184 2
 -1 15 -1 7327.66 306.073 1
 1 15 1 7836.94 322.22 2
 -1 15 -1 7792.86 321.473 2
 1 15 1 7654.63 325.641 1
 -1 15 -2 6476.09 301.398 2
 -1 15 -2 6496.19 362.839 3
 1 15 2 6271.53 286.737 2
 -1 15 -2 6296.52 280.771 1
 1 15 2 6136.65 294.292 1
 -1 -15 -3 117132 1123.34 5
 -1 15 -3 123727 1721.4 3
 1 15 3 124476 1466.83 2
 -1 15 -3 122721 1516.82 2
 1 15 3 121692 1501.11 1
 -1 15 -3 124531 1430.05 1
 -1 -15 -4 7191.98 228.364 5
 1 15 4 7102.67 306.08 2
 1 15 4 6822.35 318.721 1
 -1 15 -4 6806.34 285.398 1
 -1 15 -4 6689.96 382 3
 -1 15 -4 6794.27 318.23 2
 -1 15 -5 1079.17 166.801 3
 1 15 5 1027.12 132.978 1
 1 15 5 1073.5 127.317 2
 -1 15 -5 1153.76 120.831 1
 -1 -15 -5 1239.51 102.145 5
 1 15 6 -30.5764 58.3426 1
 -1 15 -6 161.504 98.4382 3
 -1 15 -6 178.985 60.8794 1
 1 15 6 22.3678 50.069 2
 -1 -15 -6 124.034 46.7233 5
 1 15 7 14619.6 485.418 1
 -1 15 -7 16740.4 439.212 1
 -1 15 -7 15479 630.722 3
 1 15 7 16269.5 476.152 2
 1 15 8 38556.9 756.783 2
 -1 15 -8 37408.6 1022.56 3
 1 15 8 36094.2 794.079 1
 -1 15 -9 36900.8 686.433 1
 1 15 9 35239.5 728.452 2
 -1 15 -9 35132.3 1006.97 3
 -1 15 -10 9977.95 546.101 3
 1 15 10 9712.42 419.433 1
 1 15 10 11116.7 395.858 2
 1 15 11 74.0401 64.9348 1
 -1 15 -11 -50.4931 116.621 3
 -1 15 -12 5460.1 429.995 3
 1 15 12 5148.11 310.993 1
 -1 15 -13 30701.9 1037.77 3
 1 15 13 27659.2 740.571 1
 -1 15 -14 36749.4 1169.6 3
 -1 -15 -14 35938.7 1039.41 3
 -1 -15 -15 14086.5 661.679 3
 1 15 15 12549.8 508.596 1
 -1 15 -15 13038.5 722.419 3
 -1 -15 -16 390.246 143.457 3
 1 15 16 238.362 80.9066 1
 -1 15 -16 249.65 134.293 3
 -1 15 -17 312.097 141.359 3
 -1 -15 -17 511.736 159.389 3
 -1 15 -18 5216.56 501.957 3
 -1 -15 -18 3766.62 398.24 3
 -1 15 -19 30107.4 1212.16 3
 1 17 -19 10545.9 711.296 3
 1 17 -18 3986.58 436.82 3
 1 17 -17 289.541 156.548 3
 1 -17 -17 196.506 113.629 3
 1 17 -16 543.976 173.071 3
 -1 17 16 738.222 141.271 1
 -1 17 15 6443.61 387.563 1
 1 17 -15 7571.96 544.203 3
 1 17 -14 62459.3 1531.82 3
 -1 17 14 58356.4 1198.11 1
 1 17 -13 18673.1 803.893 3
 -1 17 13 17017.5 619.017 1
 -1 17 12 3132.55 260.427 1
 1 17 -12 3537.2 350.095 3
 -1 17 11 866.306 144.25 1
 1 17 -11 606.32 166.261 3
 1 17 -10 558.163 127.171 2
 -1 17 10 352.551 98.8081 1
 1 17 -10 348.798 130.772 3
 -1 17 9 4707.72 303.007 1
 1 17 -9 4813.21 316.163 2
 1 17 -9 4623.91 372.33 3
 -1 17 8 64984 1161.32 1
 1 17 -8 67305.7 1388.61 3
 1 17 -8 64307.1 1186.1 2
 -1 17 8 67830.5 1041 2
 1 17 -7 4273.51 332.192 3
 -1 17 7 4558.7 252.95 2
 -1 17 7 4627.57 289.721 1
 1 17 -7 5032.62 272.914 1
 1 17 -7 4403.42 294.426 2
 1 17 -6 311.491 105.18 3
 -1 17 6 123.165 67.6415 1
 1 17 -6 202.614 71.1323 1
 -1 17 6 179.928 70.2369 2
 1 17 -6 105.004 70.1128 2
 1 17 -5 20.8512 62.4099 2
 1 17 -5 95.4229 79.8559 3
 1 17 -5 65.3627 57.341 1
 -1 17 5 159.462 69.1152 2
 -1 17 5 31.7908 63.9053 1
 1 17 -4 429.435 109.523 3
 -1 17 4 507.423 86.7998 2
 -1 17 4 357.389 90.3954 1
 1 17 -4 748.691 114.774 1
 1 17 -4 480.597 105.694 2
 1 17 -3 14444.1 460.553 1
 -1 17 3 14384.6 450.429 2
 1 17 -3 12572.5 463.456 2
 -1 17 3 13890.6 476.658 1
 1 17 -3 13980.5 535.359 3
 1 17 -2 33849.6 725.21 1
 -1 17 2 33481.9 708.459 2
 1 17 -2 33378.2 764.807 2
 -1 17 2 33505.2 751.203 1
 -1 17 1 3889.56 245.639 1
 1 17 -1 3906.19 255.294 2
 1 17 -1 3909.45 244.854 1
 -1 17 1 3937.98 244.706 2
 1 17 0 126.059 61.3366 1
 -1 17 0 153.258 61.0606 1
 -1 17 0 140.39 61.0181 2
 -1 17 -1 2805.98 205.412 1
 1 17 1 2643.68 202.447 2
 -1 17 -1 2731.01 208.987 2
 1 17 1 2742.27 211.167 1
 -1 17 -2 38824.1 777.23 1
 -1 17 -2 39765.6 965.604 3
 1 17 2 38699.5 790.159 2
 -1 17 -2 37683.1 805.614 2
 1 17 2 38780.1 815.484 1
 -1 17 -3 19315.7 569.259 2
 -1 17 -3 19389.9 681.859 3
 1 17 3 19385.3 548.436 2
 1 17 3 18875.9 563.101 1
 -1 17 -3 19149.8 536.255 1
 -1 17 -4 17688.2 557.155 2
 -1 17 -4 16712.6 624.731 3
 1 17 4 17650.5 519.932 2
 -1 17 -4 17413 495.8 1
 1 17 4 17521.7 548.793 1
 -1 17 -5 2121.52 202.548 2
 -1 17 -5 2563.55 187.346 1
 -1 17 -5 2273.84 240.237 3
 1 17 5 2396.46 195.372 2
 1 17 5 2506.42 213.218 1
 -1 17 -6 264.636 96.3687 2
 1 17 6 63.7862 61.3807 2
 -1 17 -6 64.4625 148.414 3
 1 17 6 29.1653 62.3718 1
 -1 17 -6 114.107 55.671 1
 -1 17 -7 14168.7 436.166 1
 1 17 7 12559.1 440.628 2
 1 17 7 13131 491.814 1
 -1 17 -7 13558.5 614.144 3
 -1 17 -8 80612.9 1137.01 1
 1 17 8 79840.7 1211.09 2
 1 17 8 78139.8 1292.04 1
 -1 17 -8 80667.9 1600.98 3
 -1 17 -9 14187.8 446.186 1
 -1 17 -9 14166.6 668.518 3
 1 17 9 12810.6 499.6 1
 1 17 9 12995.8 453.82 2
 -1 17 -10 168.276 142.733 3
 1 17 10 123.359 80.8915 1
 1 17 11 48.7853 59.3195 1
 -1 17 -11 490.144 184.345 3
 1 17 12 2525.81 237.654 1
 -1 17 -12 2975.35 337.362 3
 -1 17 -13 10020.2 613.607 3
 1 17 13 9158.5 451.351 1
 -1 17 -14 70467.4 1689.17 3
 1 17 14 63428.8 1253.27 1
 1 17 15 9023.53 459.473 1
 -1 17 -15 8836.7 607.337 3
 -1 -17 -15 9907.02 576.635 3
 1 17 16 2007.67 221.179 1
 -1 17 -16 2046.77 296.806 3
 -1 -17 -16 2192.38 287.966 3
 -1 17 -17 9.19992 119.919 3
 -1 -17 -17 113.534 98.0082 3
 -1 17 -18 8252.74 630.283 3
 1 19 -17 908.586 242.182 3
 -1 19 17 618.021 146.693 1
 1 19 -16 915.609 228.051 3
 -1 19 16 887.354 170.201 1
 1 19 -16 816.528 163.104 2
 -1 19 15 732.745 157.724 1
 1 19 -15 688.907 118.296 2
 1 19 -15 832.005 208.808 3
 1 19 -14 43872.6 1338.12 3
 1 19 -14 43453.2 1103.5 2
 1 19 -13 407.832 136.11 2
 1 19 -13 379.454 166.629 3
 -1 19 13 67.6343 76.0755 1
 1 19 -12 399.715 111.108 2
 1 19 -12 320.776 137.144 3
 -1 19 12 411.076 109.916 1
 1 19 -11 46.6042 74.6007 2
 -1 19 11 87.6048 81.7832 1
 1 19 -11 206.944 133.611 3
 -1 19 10 313.896 107.118 1
 1 19 -10 442.47 119.303 2
 1 19 -10 415.625 137.201 3
 1 19 -9 1338.48 209.116 3
 1 19 -9 1256.92 180.128 2
 -1 19 9 1644.31 200.668 1
 1 19 -8 77084.6 1382.69 2
 -1 19 8 74552.6 1334.05 1
 1 19 -7 1375.31 183.419 2
 -1 19 7 1415.19 182.793 1
 1 19 -7 1495.44 214.991 3
 1 19 -7 1495.54 165.89 1
 1 19 -6 101.966 85.1438 3
 1 19 -6 157.962 81.8889 2
 1 19 -6 94.5763 62.1965 1
 -1 19 6 146.196 70.0967 2
 -1 19 6 217.989 88.3511 1
 1 19 -5 97.5243 67.2006 1
 -1 19 5 -52.3692 85.2708 1
 1 19 -5 19.7433 77.3914 3
 -1 19 5 41.2198 61.1848 2
 1 19 -5 -20.8266 84.0346 2
 1 19 -4 43461.3 954.685 2
 -1 19 4 38975.7 885.993 1
 -1 19 4 41707.6 847.492 2
 1 19 -4 41725.2 1017.3 3
 1 19 -4 40515.5 842.771 1
 1 19 -3 2560.25 226.726 2
 -1 19 3 2581.65 206.079 2
 -1 19 3 2572.51 219.347 1
 1 19 -3 2429.82 206.38 1
 -1 19 2 59701.9 1052.72 2
 1 19 -2 60100.8 1120.64 2
 1 19 -2 58888.3 1053.68 1
 1 19 -1 658.919 121.535 1
 1 19 -1 679.878 127.698 2
 -1 19 1 862.229 130.439 2
 -1 19 1 752.465 128.257 1
 -1 19 0 289.783 81.2846 1
 1 19 0 240.144 92.7025 2
 1 19 0 401.415 96.6311 1
 -1 19 0 213.841 76.9064 2
 -1 19 -1 2956.53 235.016 2
 1 19 1 2648.08 226.247 1
 1 19 1 2793.22 227.669 2
 -1 19 -1 2805.08 226.93 1
 1 19 2 67981.8 1158.06 2
 -1 19 -2 69549.6 1144.59 1
 -1 19 -2 67302.9 1173.57 2
 1 19 2 69043.2 1186.31 1
 -1 19 -3 289.804 77.6627 1
 1 19 3 88.4888 62.238 2
 -1 19 -3 126.085 69.4403 2
 1 19 3 164.552 70.1398 1
 -1 19 -3 35.2571 100.726 3
 -1 19 -4 34695.5 768.26 1
 -1 19 -4 36647.1 1007.7 3
 -1 19 -4 34441.8 837.115 2
 1 19 4 34164.5 791.052 2
 1 19 4 34626.1 837.507 1
 -1 19 -5 3300.7 262.166 2
 -1 19 -5 3458.69 315.511 3
 1 19 5 3362.86 243.053 2
 1 19 5 3236.08 259.732 1
 -1 19 -5 3516.31 239.145 1
 -1 19 -6 2954.61 254.681 2
 1 19 6 3345.41 263.038 1
 -1 19 -6 3462.16 233.421 1
 1 19 6 3085.49 237.241 2
 -1 19 -6 3233.23 307.284 3
 -1 19 -7 2383.38 279.61 3
 -1 19 -7 2332.6 232.806 2
 1 19 7 2121.43 196.812 2
 1 19 7 2785 253.044 1
 -1 19 -7 2810.26 216.187 1
 -1 19 -8 74297.5 1565.29 3
 1 19 8 69999.9 1184.58 2
 -1 19 -8 69170.8 1308.32 2
 -1 19 -8 75068.1 1160.14 1
 1 19 8 71519 1302.41 1
 -1 19 -9 360.148 159.357 3
 -1 19 -9 69.4759 100.171 2
 1 19 9 227.664 101.909 1
 1 19 10 1570.63 196.339 1
 -1 19 -10 1432.92 249.401 3
 -1 19 -11 267.029 145.189 3
 1 19 11 531.84 121.84 1
 -1 19 -12 123.343 126.511 3
 1 19 12 -65.4265 97.8837 1
 -1 19 -13 206.94 148.836 3
 1 19 13 -106.104 108.387 1
 1 19 14 47075.4 1118.5 1
 -1 19 -14 51680.7 1508.26 3
 1 19 15 -17.0804 91.783 1
 -1 -19 -15 54.6888 97.3296 3
 -1 19 -15 117.369 150.884 3
 -1 -19 -16 3835.11 382.22 3
 -1 19 -16 3065.08 393.467 3
 1 19 16 3168.52 294.973 1
 -1 19 -17 3423.98 426.909 3
 -1 21 15 -284.096 135.048 1
 1 21 -14 25414.5 868.01 2
 -1 21 14 24836.6 842.064 1
 -1 21 13 3102.9 292.763 1
 1 21 -13 3423.9 312.544 2
 1 21 -13 3247.03 365.62 3
 1 21 -12 14729.2 747.412 3
 -1 21 12 14960.2 629.625 1
 1 21 -12 15576 660.354 2
 1 21 -11 298.37 126.258 3
 1 21 -11 119.047 87.9041 2
 -1 21 11 193.388 96.1593 1
 1 21 -10 6408.34 465.662 3
 1 21 -10 7168.73 436.14 2
 -1 21 10 6632.18 402.295 1
 1 21 -9 8091.4 453.143 2
 -1 21 9 9274.65 476.372 1
 1 21 -9 7728.26 495.18 3
 1 21 -8 32921.7 1003.07 3
 1 21 -8 30957 894.744 2
 1 21 -7 168.972 80.4579 1
 1 21 -7 200.133 102.182 2
 -1 21 7 177.726 91.6069 1
 1 21 -7 241.788 108.209 3
 1 21 -6 2581.05 274.641 3
 1 21 -6 2754.4 257.71 2
 1 21 -6 2649.77 233.668 1
 -1 21 6 2186.26 219.861 1
 1 21 -5 859.958 150.818 2
 -1 21 5 885.726 152.074 1
 1 21 -5 1180.61 198.566 3
 -1 21 5 1123.33 154.178 2
 1 21 -5 1212.85 164.298 1
 1 21 -4 50298.5 1010.36 1
 -1 21 4 48367.2 983.435 2
 -1 21 4 48968.7 1057.18 1
 1 21 -4 50624.2 1102.68 2
 -1 21 3 18215.1 590.057 2
 1 21 -3 18476.8 600.296 1
 -1 21 3 19733.2 643.307 1
 1 21 -3 19357.2 659.296 2
 -1 21 2 49499.9 1008.12 2
 -1 21 2 48827.1 1036.53 1
 1 21 -2 48795 1064.08 2
 1 21 -2 49186.2 1005.78 1
 1 21 -1 6428.73 370.227 2
 -1 21 1 6617.11 361.529 2
 -1 21 1 6834.8 374.274 1
 1 21 -1 6988.11 373.03 1
 -1 21 0 1282.16 167.923 1
 1 21 0 1130.76 163.211 2
 1 21 0 842.33 144.617 1
 -1 21 0 1129.7 161.142 2
 1 21 1 2849.23 248.71 1
 1 21 1 3067.26 256.311 2
 -1 21 -1 2698.68 243.678 2
 -1 21 -1 2937.62 241.392 1
 -1 21 -2 27479.1 772.821 2
 -1 21 -2 27907.2 735.499 1
 1 21 2 27268.6 764.418 1
 1 21 2 27889.4 763.294 2
 -1 21 -3 8895.51 410.26 1
 -1 21 -3 7778.21 411.694 2
 1 21 3 8138.07 404.522 2
 1 21 3 8163.12 414.908 1
 -1 21 -4 52425.5 1025.45 1
 1 21 4 51763.1 1090.23 1
 -1 21 -4 51305.9 1101.89 2
 1 21 4 52648.7 1061.09 2
 -1 21 -4 53594.8 1290.51 3
 -1 21 -5 1883.74 216.973 2
 1 21 5 2241.58 216.665 2
 -1 21 -5 2200.4 207.408 1
 -1 21 -5 2197.65 276.116 3
 1 21 5 2065.42 223.748 1
 1 21 6 3056.81 265.825 1
 -1 21 -6 3226.51 275.213 2
 -1 21 -6 2994.28 313.762 3
 -1 21 -6 3468.95 253.812 1
 1 21 6 2679.64 236.895 2
 -1 21 -7 1115.15 149.265 1
 1 21 7 986.294 170.866 1
 -1 21 -7 1001.79 177.291 3
 -1 21 -7 1046.39 166.141 2
 -1 21 -8 50485.5 1155.86 2
 -1 21 -8 50897.7 1310.89 3
 1 21 8 52186.7 1156.18 1
 1 21 9 9200 481.052 1
 -1 21 -9 8866.01 558.36 3
 -1 21 -9 8713.43 473.772 2
 1 21 10 6544.28 411.433 1
 -1 21 -10 6435.65 411.832 2
 -1 21 -10 7069.73 515.51 3
 -1 21 -11 532.488 175.085 3
 -1 21 -11 778.34 164.645 2
 1 21 11 798.323 158.345 1
 -1 21 -12 7849.37 472.278 2
 -1 21 -12 7371.71 557.538 3
 1 21 12 7976.43 461.848 1
 -1 21 -13 4831.74 380.162 2
 -1 21 -13 4331.06 441.876 3
 1 21 13 4800.9 365.629 1
 -1 21 -14 17615.2 895.901 3
 1 21 14 15917.6 669.372 1
 -1 21 -15 3759.22 436.25 3
 1 21 15 2781.69 289.172 1
 -1 23 12 13456.8 635.64 1
 -1 23 11 478.863 138.272 1
 1 23 -11 797.882 168.552 2
 -1 23 10 16961.3 690.561 1
 1 23 -10 16989.3 703.133 2
 -1 23 9 18183.6 711.726 1
 1 23 -9 18994.9 738.87 2
 1 23 -8 7611.7 460.295 2
 -1 23 8 7742.68 458.051 1
 1 23 -8 6483.07 464.93 3
 -1 23 7 7298.23 440.474 1
 1 23 -7 6583.48 385.463 1
 1 23 -7 7796.57 461.139 2
 1 23 -7 6342.83 455.741 3
 -1 23 6 5521.56 378.061 1
 1 23 -6 5354.98 380.542 2
 1 23 -6 5316.69 341.715 1
 1 23 -5 566.427 134.604 2
 -1 23 5 490.435 120.631 1
 1 23 -5 604.804 124.485 1
 -1 23 4 26470 810.362 1
 1 23 -4 26148.1 760.979 1
 1 23 -4 25967.8 825.407 2
 -1 23 3 42152.3 972.528 2
 1 23 -3 42784.2 1060.85 2
 -1 23 3 43597.1 1034.74 1
 1 23 -3 41430.3 972.308 1
 1 23 -2 19442 654.753 1
 1 23 -2 18492.8 676.782 2
 -1 23 2 19776.5 684.635 1
 -1 23 2 17710.9 621.649 2
 -1 23 1 6098.2 377.23 1
 1 23 -1 6329.35 376.724 1
 -1 23 1 5554.85 353.523 2
 1 23 -1 6034.43 385.403 2
 -1 23 0 403.4 120.521 1
 1 23 0 393.419 111.349 1
 -1 23 0 385.303 113.864 2
 1 23 0 473.201 123.252 2
 -1 23 -1 3544.03 293.768 2
 1 23 1 3752.36 304.169 1
 -1 23 -1 3650.99 286.96 1
 1 23 1 3416.26 287.704 2
 -1 23 -2 12987 561.825 2
 1 23 2 13105.1 555.89 1
 1 23 2 13059.6 546.268 2
 -1 23 -2 12861.1 530.828 1
 1 23 3 50516.7 1099.18 2
 -1 23 -3 49758.8 1059.4 1
 1 23 3 49182.8 1112.92 1
 -1 23 -3 48052.2 1117.44 2
 1 23 4 32945.5 902.956 1
 -1 23 -4 32515 838.782 1
 -1 23 -4 33170 926.228 2
 1 23 4 30734.8 841.807 2
 1 23 5 227.269 105.11 1
 -1 23 -5 139.785 87.2218 1
 -1 23 -5 -10.8724 111.254 2
 -1 23 -6 2078.42 235.079 2
 -1 23 -6 2238.85 221.831 1
 -1 23 -6 2458.33 301.762 3
 1 23 6 2288.63 253.908 1
 -1 23 -7 6387.77 486.939 3
 -1 23 -7 7209.05 446.01 2
 -1 23 -7 7611.04 394.012 1
 1 23 7 6710.17 420.312 1
 -1 23 -8 5967.58 466.612 3
 -1 23 -8 5905.77 409.017 2
 1 23 8 5851.21 396.806 1
 -1 23 -9 15411.5 757.19 3
 -1 23 -9 14598.1 649.809 2
 1 23 9 14634.5 633.552 1
 -1 23 -10 8193.21 565.58 3
 1 23 10 8227.7 487.093 1
 -1 23 -10 8072.9 487.279 2
 -1 23 -11 -186.4 123.373 2
 1 23 11 -7.69269 95.9625 1
 -1 23 -11 -49.7173 139.844 3
 -1 23 -12 11353.8 697.186 3
 -1 23 -13 16268.2 852.647 3
 1 25 -8 944.38 179.389 2
 1 25 -7 11839.9 604.254 2
 -1 25 7 12564.5 607.32 1
 1 25 -6 5052.54 388.929 2
 1 25 -6 5834.69 384.19 1
 -1 25 6 5469.37 393.8 1
 1 25 -5 976.864 164.212 1
 -1 25 5 751.741 160.422 1
 1 25 -5 811.645 172.088 2
 1 25 -4 8505.72 500.128 2
 -1 25 4 9201.94 498.392 1
 1 25 -4 8473.75 460.417 1
 1 25 -3 37163.2 1042.66 2
 -1 25 3 37040.8 999.57 1
 1 25 -3 37077.6 973.907 1
 1 25 -2 19.0035 77.1593 1
 1 25 -2 -25.9583 114.71 2
 -1 25 2 -7.48528 108.384 1
 -1 25 1 23036.2 766.583 1
 -1 25 1 21730.1 743.04 2
 1 25 -1 21977.9 775.702 2
 1 25 -1 22842 756.36 1
 -1 25 0 609.7 152.785 2
 -1 25 0 936.177 167.029 1
 1 25 0 759.737 158.828 2
 1 25 0 874.012 172.27 1
 1 25 1 14189.1 611.97 2
 -1 25 -1 14513.9 621.427 2
 -1 25 -1 15387.5 618.497 1
 1 25 1 14631.4 620.317 1
 1 25 2 1527.99 200.651 2
 -1 25 -2 1810.96 215.889 1
 -1 25 -2 1561.24 214.675 2
 1 25 2 1527.59 210.125 1
 -1 25 -3 28609.8 900.296 2
 1 25 3 28322 858.288 2
 1 25 3 29820.2 904.06 1
 -1 25 -3 29179.8 842.954 1
 -1 25 -4 2498.57 253.472 1
 1 25 4 2270.39 254.795 1
 -1 25 -4 2215.77 258.208 2
 -1 25 -5 1242.56 203.538 2
 1 25 5 1044.91 184.176 1
 -1 25 -5 1398.61 188.658 1
 1 25 6 5590.09 403.911 1
 -1 25 -6 6241.47 390.909 1
 -1 25 -6 5762.59 411.967 2
 1 25 7 13508.7 628.197 1
 -1 25 -7 13442.9 721.743 3
 -1 25 -7 12315 610.143 2
 -1 25 -8 168.697 92.841 2
 -1 25 -8 -70.3562 154.608 3
 1 27 -6 300.778 133.15 1
 1 27 -5 6090.29 416.173 1
 1 27 -4 -125.488 107.941 2
 1 27 -4 110.716 98.2426 1
 1 27 -3 8444.04 487.54 1
 1 27 -3 8356.78 512.923 2
 1 27 -2 6031.1 411.946 1
 1 27 -2 4684.49 378.194 2
 1 27 -1 24345.8 832.766 1
 1 27 -1 22885.3 832.357 2
 -1 27 1 23612.9 817.941 1
 1 27 0 133.479 106.031 2
 -1 27 0 126.3 100.271 1
 1 27 0 125.556 92.8451 1
 -1 27 -1 19305.1 728.392 1
 1 27 1 17674.2 712.413 1
 -1 27 -1 18548.9 735.774 2
 -1 27 -2 3530.05 329.497 2
 -1 27 -2 3924.9 332.32 1
 -1 27 -3 9530.08 540.409 2
 -1 27 -3 9961.38 521.228 1
 -1 27 -4 707.861 149.909 1
 -1 27 -4 548.802 153.483 2
 -1 27 -5 4276.43 341.983 1
 2 0 -23 1948.45 345.182 3
 2 0 -22 110127 2195.24 3
 2 0 -21 1030.21 224.44 3
 2 0 -20 3227.93 328.058 3
 2 0 -19 490.062 157.769 3
 2 0 -18 39878.6 1129.5 3
 2 0 -17 4266.79 371.424 3
 2 0 -16 271219 3077.99 3
 2 0 -15 968.507 194.161 3
 2 0 -14 1826.5 201.991 3
 -2 0 14 1748.54 104.601 1
 -2 0 13 21.8201 29.1772 1
 2 0 -13 813.942 160.415 3
 -2 0 12 98785 972.889 1
 2 0 -12 97825.4 1432.03 3
 2 0 -11 212.841 76.6957 3
 -2 0 11 282.474 45.6607 1
 2 0 -10 44953.6 848.911 3
 -2 0 10 42935.9 552.151 1
 -2 0 9 77.2606 49.5614 4
 -2 0 9 80.0486 33.368 1
 -2 0 8 2105.37 145.99 4
 2 0 -8 2167.95 158.694 3
 -2 0 8 2598.37 115.574 1
 -2 0 7 96.3712 29.4084 1
 2 0 -7 56.988 37.2193 3
 -2 0 7 65.3896 39.2206 4
 2 0 -7 62.831 25.3916 1
 2 0 -6 467196 3492.4 3
 -2 0 6 460378 3235.06 1
 -2 0 6 456317 3414.35 4
 2 0 -6 473562 3275.18 1
 -2 0 5 69.0529 22.8035 1
 2 0 -5 124.821 32.3886 1
 -2 0 5 50.1799 27.7953 4
 -2 0 4 74869.7 752.483 4
 2 0 -4 75811.2 715.761 1
 2 0 -4 75069.6 772.329 3
 -2 0 4 79230.6 709.469 1
 -2 0 3 702.771 51.0023 1
 2 0 -3 284.933 35.0332 1
 -2 0 -2 341.848 43.1343 3
 2 0 2 824.487 59.5384 3
 -2 0 -3 750.153 68.3525 3
 2 0 3 602.538 63.6631 3
 -2 0 -4 40978.1 344.891 1
 -2 0 -4 41602.5 582.377 3
 2 0 5 204.229 19.0416 1
 -2 0 -5 210.801 54.5985 3
 -2 0 -5 154.587 16.9362 1
 -2 0 -6 256503 1715.04 1
 -2 0 -6 268353 2238.32 3
 -2 0 -7 151.438 71.048 3
 2 0 7 67.6776 14.5704 1
 -2 0 -7 77.6608 14.8498 1
 -2 0 -8 3852.54 225.113 3
 -2 0 -8 3437.38 87.5452 1
 2 0 8 3422.81 84.087 1
 -2 0 -9 48.2501 16.4315 1
 2 0 9 107.377 19.7309 1
 -2 0 -9 118.543 75.4326 3
 2 0 10 60441.2 530.377 1
 -2 0 -10 60174.5 541.463 1
 -2 0 -11 209.936 26.9956 1
 -2 0 -11 304.384 131.756 3
 2 0 11 91.8863 18.5227 1
 2 0 12 16651.8 224.05 1
 -2 0 -12 25933.6 713.036 3
 -2 0 -13 237.086 104.707 3
 -2 0 -14 624.598 137.154 3
 -2 0 -15 253.985 142.243 3
 -2 0 -16 81183.8 1567.39 3
 -2 0 -17 1329.76 249.134 3
 -2 0 -18 2744.43 341.212 3
 -2 0 -19 -9.17908 121.914 3
 -2 0 -20 -18.8748 108.068 3
 -2 0 -21 626.53 226.275 3
 -2 0 -22 84952.9 1961.91 3
 2 2 -23 6901.95 558.243 3
 2 -2 -22 63561.1 1608.33 3
 2 2 -22 59913 1585.91 3
 2 -2 -21 4907.34 440.821 3
 2 2 -21 4537.78 426.72 3
 2 2 -20 2118.56 288.507 3
 2 -2 -20 2081.64 280.141 3
 2 -2 -19 3931 365.822 3
 2 2 -19 3388.45 354.089 3
 2 -2 -18 37924.2 1074.57 3
 2 2 -18 38334.4 1093.87 3
 2 2 -17 36113.6 1019.81 3
 2 -2 -17 35470.6 996.731 3
 2 2 -16 100999 1701.07 3
 2 -2 -16 101710 1712.08 3
 2 -2 -15 233.918 106.839 3
 2 2 -15 344.839 134.246 3
 -2 2 14 4716.65 192.244 1
 2 -2 -14 5202.36 339.079 3
 2 2 -14 5049.99 332.504 3
 2 -2 -13 68.0778 81.572 3
 -2 2 13 64.6683 50.4196 1
 -2 -2 13 144.792 34.435 1
 -2 -2 12 65108.1 699.971 1
 2 2 -12 66296.6 1152.18 3
 -2 2 12 66212.1 795.945 1
 2 -2 -12 64511.2 1144.1 3
 2 2 -11 110146 1492.59 3
 -2 -2 11 113226 1033.17 1
 2 -2 -11 114676 1532.52 3
 -2 2 11 112178 1119.94 1
 -2 -2 10 69452 721.748 1
 -2 -2 10 70091.8 1012.23 4
 2 2 -10 69215.3 1072.74 3
 -2 2 10 69566.5 793.911 1
 2 -2 -10 72100.5 1103.22 3
 2 -2 -9 27981.1 616.439 3
 -2 -2 9 27594.7 396.222 1
 -2 -2 9 27704.8 568.193 4
 -2 2 9 27160.4 436.104 1
 2 2 -9 27385.7 608.028 3
 -2 -2 8 1247.88 114.409 4
 -2 -2 8 1407.04 84.3963 1
 -2 2 8 1132.37 106.642 4
 2 -2 -8 1277.85 129.967 3
 -2 2 8 1286.93 88.5903 1
 2 2 -8 1247.84 122.408 3
 -2 -2 7 1850.63 124.835 4
 -2 2 7 1822.13 97.6245 1
 2 2 -7 1662.18 129.552 3
 -2 -2 7 1819.96 94.4581 1
 -2 2 7 1767.67 121.902 4
 2 2 -6 96562.4 1045.76 3
 -2 -2 6 96203.4 1003.37 4
 -2 2 6 96447.6 996.228 4
 -2 -2 6 96641.3 908.345 1
 -2 2 5 56130.5 669.007 4
 -2 -2 5 59147.3 693.051 4
 2 2 -5 59679.2 713.472 3
 2 -2 -5 61810.1 630.184 1
 -2 2 5 59593.6 632.421 1
 -2 -2 4 22331.1 353.561 4
 -2 -2 4 22405.9 351.017 3
 2 2 -4 22440 356.541 3
 2 -2 -4 23768.5 340.58 4
 -2 2 4 21873.1 337.332 4
 -2 2 4 22266.7 329.073 1
 2 -2 -4 22772.3 323.482 1
 2 -2 -3 28312.3 360.147 1
 -2 2 3 28827.8 353.939 4
 -2 2 3 29377.8 368.135 1
 2 2 -3 29380.4 366.791 3
 -2 -2 3 27058.5 346.174 3
 -2 2 2 62926.9 471.526 1
 2 -2 -2 44674.7 408.396 1
 2 2 -2 61331.8 399.154 3
 2 2 -2 29917.3 329.141 2
 -2 -2 2 12291 229.907 3
 2 -2 1 29814.7 381.329 3
 -2 -2 -1 17987.6 220.237 1
 2 2 1 35100.9 308.777 1
 -2 2 -1 3482.02 105.947 1
 -2 -2 -1 4867.37 124.435 3
 2 2 1 30587.2 317.099 2
 2 -2 1 38211.9 279.525 1
 -2 -2 -1 30555.6 311.665 2
 -2 2 -1 26335.4 356.381 3
 2 2 2 27899.2 349.899 2
 -2 2 -2 15169.9 205.814 1
 2 -2 2 28149.3 254.564 1
 2 2 2 27440.1 301.254 1
 -2 2 -2 27673.3 419.722 3
 2 -2 2 28634.6 415.825 3
 -2 -2 -2 21112.2 272.609 1
 -2 -2 -2 20308.6 302.578 3
 -2 -2 -2 32197.5 369.156 2
 -2 -2 -3 1345.37 81.4308 2
 2 2 3 1672.22 88.0933 2
 -2 2 -3 1327.85 95.8252 3
 -2 -2 -3 1527.99 65.382 1
 -2 -2 -3 1538.25 90.9483 3
 2 2 3 1521.85 66.2031 1
 -2 -2 -4 99583.7 1021.1 3
 -2 -2 -4 102266 830.822 1
 2 2 4 99668.7 826.993 1
 -2 2 -4 100124 1082.95 3
 -2 2 -5 9698.86 306.658 3
 2 2 5 10132.5 186.452 1
 -2 -2 -5 9681.15 284.493 3
 -2 -2 -5 10168.8 187.737 1
 -2 -2 -6 216384 1586.97 1
 -2 -2 -6 210990 1932.25 3
 2 2 6 209736 1578.81 1
 -2 2 -6 212693 1993.48 3
 -2 -2 -7 55574.9 562.408 1
 -2 2 -7 54617 871.731 3
 -2 -2 -7 54415.9 835.314 3
 2 2 7 53971.5 555.321 1
 -2 2 -8 13774.8 440.735 3
 -2 -2 -8 13752.2 242.13 1
 2 2 8 13105.5 237.777 1
 -2 -2 -8 13113.4 408.971 3
 2 2 9 2747.72 107.31 1
 -2 2 -9 2934.31 220.114 3
 -2 -2 -9 2887.41 212.478 3
 2 2 10 48696.9 550.147 1
 -2 2 -10 52248.6 982.87 3
 -2 -2 -10 49975.7 932.918 3
 -2 -2 -11 81517.3 1269.37 3
 2 2 11 77965.1 769.941 1
 -2 2 -11 81450.4 1312.32 3
 2 2 12 49603.2 568.34 1
 -2 2 -12 52230.4 1073.97 3
 -2 -2 -12 52382.7 1035.46 3
 -2 2 -13 7679.19 422.043 3
 2 2 13 7217.76 188.989 1
 -2 -2 -13 8284.59 419.285 3
 -2 -2 -14 396.976 119.808 3
 -2 2 -14 213.129 112.867 3
 -2 2 -15 8887.7 496.281 3
 -2 -2 -15 9517.25 494.603 3
 -2 2 -16 71015 1482.78 3
 -2 -2 -16 72258.6 1457.99 3
 -2 -2 -17 30256.9 960.031 3
 -2 2 -17 30042.7 974.835 3
 -2 -2 -18 73391.6 1640.13 3
 -2 2 -18 8805.96 556.562 3
 -2 2 -19 2905.03 327.611 3
 -2 -2 -19 2378.59 315.537 3
 -2 2 -20 808.894 200.855 3
 -2 -2 -20 1082.9 224.364 3
 -2 -2 -21 5547.89 483.355 3
 -2 2 -21 6833.08 546.014 3
 -2 2 -22 48975.5 1479.67 3
 2 4 -22 15212.2 793.823 3
 2 -4 -22 14525.3 756.093 3
 2 -4 -21 16090.2 772.961 3
 2 4 -21 15231.8 770.289 3
 2 4 -20 9419.63 586.029 3
 2 -4 -20 11233.2 624.926 3
 2 4 -19 4541.06 392.701 3
 2 -4 -19 4774.23 399.993 3
 2 4 -18 16075.9 721.41 3
 2 -4 -18 16313.9 725.202 3
 2 -4 -17 136215 2107.69 3
 2 4 -17 136431 2143.26 3
 2 4 -16 11618.3 563.841 3
 2 -4 -16 10884.7 539.923 3
 -2 4 15 537.684 80.6568 1
 2 4 -15 632.888 139.628 3
 2 -4 -15 690.41 146.96 3
 2 -4 -14 2008.93 228.205 3
 2 4 -14 1924.4 211.247 3
 -2 4 14 1864.28 131.606 1
 -2 -4 13 324.381 44.461 1
 -2 4 13 278.775 61.0053 1
 2 4 -13 438.506 106.446 3
 2 -4 -13 310.46 101.316 3
 2 -4 -12 3679.36 262.967 3
 2 4 -12 4017.62 285.887 3
 -2 -4 12 3365.49 131.468 1
 -2 4 12 3990.45 193.64 1
 -2 4 11 200999 1808.98 1
 -2 -4 11 207585 1664.42 1
 2 -4 -11 200534 2210.72 3
 -2 -4 11 200337 2089.29 4
 -2 4 10 20373 416.848 1
 2 -4 -10 21150.8 569.415 3
 -2 -4 10 20483.6 354.996 1
 -2 -4 10 20905.4 519.084 4
 2 4 -10 22075.7 593.352 3
 -2 -4 9 226.588 73.381 4
 2 4 -9 69.3768 53.9596 3
 -2 -4 9 183.21 42.9692 1
 -2 4 9 188.06 51.611 1
 2 4 -8 1144.49 126.403 3
 -2 -4 8 1313.45 120.888 4
 -2 4 8 1076.38 91.0486 1
 -2 4 7 15212 325.694 1
 2 -4 -7 15313.8 263.986 2
 2 4 -7 15039.4 404.89 3
 -2 -4 7 15045.8 366.848 4
 -2 -4 6 8085.18 245.448 4
 -2 4 6 8068.62 226.383 1
 2 -4 -6 8422.37 168.141 2
 2 4 -6 8097.65 273.982 3
 2 -4 -5 246675 1715.47 2
 -2 -4 5 240245 1955.56 4
 -2 4 5 238223 1897.81 4
 -2 4 5 247743 1930.8 1
 2 4 -5 240881 2037.31 3
 -2 4 4 14676.5 192.455 2
 -2 4 4 15881.2 301.344 1
 -2 4 4 15611.9 271.671 4
 -2 -4 4 16407.8 280.225 1
 2 -4 -4 15737.6 190.598 2
 -2 -4 4 15424.5 297.928 3
 2 4 -4 15704.5 330.284 3
 2 -4 -4 16344.6 270.855 4
 -2 4 3 13692.9 176.735 2
 2 -4 -3 14795.8 226.509 4
 -2 -4 3 14451.4 264.726 3
 2 -4 -3 14571.7 172.762 2
 -2 4 3 14642.5 279.084 1
 2 4 -3 14621.1 286.583 3
 -2 4 3 16112.2 237.586 4
 -2 -4 3 14870.3 256.636 1
 -2 -4 2 11292.3 216.746 3
 -2 4 2 11630 160.762 2
 -2 -4 2 11687.3 221.605 1
 -2 4 2 11525.3 234.397 1
 2 4 -2 11426.9 234.383 2
 2 4 -2 11763.3 223.42 3
 -2 4 2 11368.8 163.818 4
 2 4 -1 189794 1466.39 1
 -2 -4 1 194201 1468.52 1
 2 4 -1 184721 1474.58 2
 2 4 -1 187127 1397.61 3
 2 -4 -1 194350 1479.56 1
 2 4 -1 188845 1448.48 5
 2 -4 -1 195042 1581.43 3
 -2 -4 1 185003 1467.15 2
 -2 -4 1 191315 1425.18 3
 -2 4 1 189137 1473.24 1
 2 -4 0 61955.1 601.899 1
 -2 4 0 61064 597.034 1
 2 4 0 59083.4 600.925 1
 2 4 0 59327.4 614.891 2
 -2 4 0 60189.8 698.826 3
 -2 -4 0 60532.7 618.495 2
 -2 -4 0 61532.8 613.569 1
 2 -4 0 64387.9 729.82 3
 -2 -4 0 59482.2 589.39 5
 -2 -4 0 55162.9 554.459 3
 2 4 0 62522.5 605.759 5
 -2 4 -1 207686 1784.99 3
 2 4 1 212218 1634.89 2
 -2 -4 -1 211177 1610.77 1
 2 4 1 213136 1616.78 1
 -2 -4 -1 213885 1632.61 2
 2 -4 1 204241 1794.39 3
 -2 4 -1 211930 1566.68 1
 2 -4 1 214034 1576.37 1
 -2 -4 -1 214525 1604.26 5
 2 4 2 95194.7 888.481 2
 -2 -4 -2 94387.3 883.899 2
 -2 4 -2 90966.4 1022.85 3
 2 -4 2 97970.8 795.587 1
 2 4 2 91811.8 853.086 1
 -2 4 -2 95802.8 784.661 1
 2 4 3 24862.4 387.002 2
 -2 4 -3 24651.6 287.578 1
 2 -4 3 25744.4 299.398 1
 2 4 3 24067.2 357.129 1
 2 -4 4 46044.8 423.664 1
 2 4 4 45516.9 576.009 2
 -2 4 -4 44586.5 713.294 3
 -2 4 -4 44986 410.338 1
 2 4 4 44820.8 529.437 1
 -2 -4 -5 210796 1958.09 3
 2 -4 5 213362 1583.82 1
 2 4 5 219841 1865.29 2
 -2 4 -5 215409 2106.78 3
 -2 4 -6 40464.6 733.373 3
 -2 -4 -6 40044.8 658.248 3
 -2 4 -7 16172.6 473.784 3
 -2 -4 -7 15777 430.056 3
 2 4 7 15500.9 301.153 1
 -2 4 -8 27408.4 652.319 3
 2 4 8 24635.9 401.501 1
 -2 -4 -8 25607.4 604.743 3
 2 4 9 86.2429 33.1851 1
 -2 4 -9 155.59 81.2102 3
 -2 -4 -10 21111.9 596.734 3
 -2 4 -10 21902.2 645.272 3
 -2 -4 -11 204626 2285.99 3
 2 4 11 201497 1713.04 1
 -2 -4 -12 54507.7 1068.61 3
 2 4 12 53566.7 689.076 1
 -2 4 -12 56168.6 1137.22 3
 -2 -4 -13 424.989 124.415 3
 -2 4 -13 322.583 111.725 3
 2 4 13 451.895 71.6935 1
 -2 -4 -14 13757.6 565.245 3
 -2 4 -14 14474.4 610.11 3
 -2 -4 -15 1010.51 179.21 3
 -2 4 -15 739.52 168.537 3
 -2 4 -16 7358.34 485.815 3
 -2 -4 -16 7048.27 441.702 3
 -2 -4 -17 83933.3 1626.49 3
 -2 4 -17 85344.2 1717.38 3
 -2 -4 -18 26255.9 922.597 3
 -2 4 -18 26632.9 972.513 3
 -2 4 -19 118.503 133.649 3
 -2 -4 -19 308.307 150.977 3
 -2 4 -20 4086.78 406.971 3
 -2 -4 -20 4034.5 388.242 3
 -2 -4 -21 19264.6 857.553 3
 -2 4 -21 18203.1 877.008 3
 2 6 -22 1806.09 294.976 3
 2 -6 -22 1746.69 315.681 3
 2 6 -21 42480.4 1313.45 3
 2 -6 -21 44544.9 1316.5 3
 2 -6 -20 8210.74 543.269 3
 2 6 -20 7027.56 520.798 3
 2 6 -19 10483.6 610.927 3
 2 -6 -19 10852.7 618.108 3
 2 6 -18 15994.9 722.318 3
 2 -6 -18 15961 710.259 3
 2 6 -17 147045 2272.37 3
 2 -6 -17 141527 2196.13 3
 2 -6 -16 5318.64 392.052 3
 2 6 -16 5530.24 407.715 3
 -2 6 15 8016.39 308.161 1
 2 6 -15 8161.69 461.551 3
 2 -6 -15 9265.64 493.839 3
 2 -6 -14 5232.06 350.397 3
 -2 6 14 4970.27 240.181 1
 2 6 -14 5009.85 347.958 3
 2 -6 -13 13982.4 547.668 3
 2 6 -13 14458.4 564.382 3
 -2 6 13 12568.8 373.294 1
 -2 -6 12 474.895 59.8828 1
 2 -6 -12 439.33 106.6 3
 -2 6 12 672.177 101.023 1
 2 6 -12 397.44 107.852 3
 -2 -6 11 164191 1782.84 4
 2 6 -11 163579 1983.65 3
 -2 -6 11 158370 1452.71 1
 -2 6 10 493.954 71.3719 1
 2 6 -10 364.778 93.8128 3
 -2 -6 10 405.843 86.8577 4
 2 6 -9 1256.8 147.974 3
 -2 -6 9 1155.35 121.231 4
 -2 6 9 1128.59 105.191 1
 -2 -6 8 1626.6 130.755 4
 2 6 -8 1806.21 175.266 3
 -2 6 8 1340.69 110.875 1
 2 6 -7 7471.3 302.881 3
 -2 6 7 7055.37 240.758 1
 2 -6 -7 7144.17 174.625 2
 -2 -6 7 7911.96 262.069 4
 2 -6 -6 4862.47 131.261 2
 -2 6 6 4699.86 134.225 2
 -2 6 6 4722.02 191.112 1
 -2 -6 6 4402.87 188.395 4
 2 6 -6 4430.81 221.821 3
 2 -6 -5 95939.8 797.91 2
 -2 6 5 98546.4 1017.5 1
 2 6 -5 96186.9 1131.54 3
 -2 -6 5 95341.3 979.638 4
 -2 6 4 13408.4 222.601 2
 2 -6 -4 13646.1 210.742 2
 2 6 -4 12416.1 328.991 3
 -2 6 4 13322.9 306.577 1
 -2 6 3 503.876 42.4785 2
 2 6 -3 519.615 58.6377 1
 2 -6 -3 602.599 41.8541 4
 2 6 -3 538.826 69.6246 3
 -2 6 3 615.223 66.0953 1
 2 6 -3 572.428 66.4126 2
 -2 -6 3 700.649 69.3449 3
 -2 6 2 29339.5 363.505 2
 2 6 -2 29634.9 452.691 2
 2 6 -2 29854.9 435.166 1
 -2 6 2 29844.9 454.243 1
 2 6 -2 30057.6 459.425 3
 -2 -6 2 30622.5 460.878 3
 2 6 -1 85351.1 843.021 3
 2 6 -1 85871.5 858.971 1
 -2 6 1 86618.6 870.993 1
 2 6 -1 86278.3 878.937 2
 2 6 -1 86333.2 814.503 5
 -2 -6 1 86945.1 871.714 3
 2 6 0 26277.3 367.425 5
 -2 6 0 26062.6 481.902 3
 2 6 0 27157.4 409.27 1
 -2 6 0 26145.4 395.138 1
 2 6 0 25744.9 409.739 2
 -2 -6 0 26237.6 395.589 3
 -2 -6 0 25636.6 357.907 5
 2 6 1 75938.1 749.798 1
 2 6 1 72427.1 743.902 2
 -2 -6 -1 75487.1 694 5
 -2 6 -1 73993.1 899.935 3
 -2 6 -1 74521.9 697.715 1
 2 6 2 2642.2 126.065 1
 -2 6 -2 2826.32 87.1628 4
 2 6 2 2692.93 126.574 2
 -2 6 -2 2844.95 113.299 1
 -2 6 -2 2545.75 168.368 3
 -2 6 -3 240.531 35.4167 4
 -2 6 -3 129.631 30.8016 1
 2 6 3 195.106 40.5128 1
 -2 6 -3 147.627 57.4647 3
 2 -6 3 151.634 29.2017 1
 2 6 4 27607.5 464.852 2
 -2 6 -4 26694.4 595.619 3
 -2 6 -4 28183.2 367.275 1
 2 6 5 456891 3443.72 1
 -2 6 -5 450326 3218.26 1
 2 6 5 490699 3533.19 2
 2 -6 5 516772 3277.52 1
 -2 6 -5 477656 3891.19 3
 -2 6 -6 2304.11 83.8919 1
 2 6 6 2452.34 137.799 1
 2 -6 6 2342.38 85.9833 1
 2 6 6 2118.48 136.893 2
 -2 6 -6 2301.91 198.768 3
 2 -6 7 12589.3 198.963 1
 -2 6 -7 12840.7 442.584 3
 2 6 7 12661.2 309.639 1
 2 6 7 12938.1 335.31 2
 -2 -6 -8 8456.44 334.442 3
 2 6 8 8136.81 249.452 1
 2 6 9 1612.54 117.104 1
 -2 -6 -9 1872.72 175.994 3
 -2 6 -9 1598.17 181.098 3
 -2 6 -10 4023.09 288.388 3
 -2 -6 -10 4693.7 277.258 3
 2 6 10 3768.82 176.343 1
 2 6 11 178948 1553.81 1
 -2 6 -11 151860 2042.06 3
 2 6 12 15002 372.115 1
 -2 -6 -12 15192.4 554.743 3
 -2 6 -12 14690.9 589.417 3
 -2 -6 -13 12320.3 519.673 3
 2 6 13 11712.8 332.865 1
 -2 6 -13 12159.4 556.3 3
 -2 6 -14 160.043 98.5213 3
 -2 -6 -14 140.539 92.1054 3
 2 6 14 159.839 55.3119 1
 -2 -6 -15 278.015 99.5452 3
 -2 6 -15 244.073 116.484 3
 -2 6 -16 2223.15 289.192 3
 -2 -6 -16 2059.38 249.719 3
 -2 -6 -17 84195.5 1650.53 3
 -2 6 -17 86322.3 1772.18 3
 -2 -6 -18 1379.51 248.285 3
 -2 6 -18 1252.19 270.392 3
 -2 -6 -19 11615.8 635.817 3
 -2 6 -19 12167.9 684.714 3
 -2 -6 -20 4990.84 440.217 3
 -2 6 -20 4513.73 448.661 3
 -2 6 -21 19617.2 929.964 3
 -2 -6 -21 19987.4 899.212 3
 2 8 -22 16333.8 859.894 3
 2 8 -21 27015.2 1067.81 3
 2 -8 -21 28431.3 1055.61 3
 2 8 -20 1685.14 271.221 3
 2 -8 -20 1091.04 211.391 3
 2 8 -19 8392.61 562.385 3
 2 -8 -19 8506.19 546 3
 2 -8 -18 108.782 90.7387 3
 2 8 -18 79.7013 107.211 3
 2 -8 -17 33475.5 1046.25 3
 2 8 -17 31214.5 1012.66 3
 2 -8 -16 29319 915.056 3
 2 8 -16 30689.3 964.653 3
 -2 8 16 27786.2 635.938 1
 2 8 -15 31798.9 956.217 3
 2 -8 -15 31272.6 914.615 3
 -2 8 15 31375.6 675.672 1
 2 -8 -14 1198.37 172.923 3
 -2 8 14 1284.69 138.42 1
 2 8 -14 1607.41 216.403 3
 -2 8 13 43617.6 782.51 1
 2 8 -13 44284.2 1046.59 3
 2 -8 -13 45117.6 1022.24 3
 2 8 -12 9828.11 465.542 3
 -2 8 12 10775.5 368.704 1
 -2 -8 12 10531.7 406.049 4
 2 8 -11 96387.1 1502.19 3
 -2 -8 11 95227.9 1286.73 4
 -2 8 11 95038.9 1203.02 1
 -2 -8 10 11828.5 392.125 4
 2 8 -10 11741.6 468.504 3
 -2 8 10 10803.3 346.811 1
 -2 -8 9 50788.2 814.584 4
 2 8 -9 51568.3 971.296 3
 -2 8 9 50075.3 778.571 1
 2 8 -8 12960.5 457.467 3
 -2 8 8 12472.1 266.008 2
 -2 8 8 11848.5 344.997 1
 -2 -8 8 12777 366.223 4
 -2 8 7 54975.1 785.607 1
 -2 -8 7 56916.6 786.701 4
 -2 8 7 59023.5 653.91 2
 2 8 -7 58456.9 978.325 3
 -2 8 6 25763.4 396.266 2
 2 8 -6 25882.5 595.954 3
 -2 -8 6 26553.3 484.177 4
 -2 8 5 139388 1216.61 2
 -2 -8 5 134086 1308 4
 2 8 -5 134578 1525.08 3
 2 8 -4 13006.8 367.936 3
 -2 8 4 13416.2 264.552 2
 2 8 -4 13573.3 348.675 2
 2 -8 -4 13730.4 238.786 4
 2 8 -4 13591.6 313.504 1
 -2 8 4 12815.2 322.829 1
 -2 8 3 6429.36 180.785 2
 -2 8 3 6423.4 222.649 1
 2 8 -3 6672.6 215.752 1
 2 8 -3 6626.03 250.881 3
 2 8 -3 7263.3 244.707 2
 2 -8 -3 8098.3 154.027 4
 2 8 -2 1023.11 93.4946 3
 2 8 -2 721.325 81.2094 2
 2 8 -2 813.135 78.9596 1
 -2 8 2 825.86 81.2529 1
 -2 8 2 738.289 64.7573 2
 -2 8 1 54713.4 642.32 2
 -2 8 1 55062.9 703.486 1
 2 8 -1 54721.1 696.874 1
 2 8 -1 54616 714.175 3
 2 8 -1 55055.6 721.731 2
 2 8 -1 54632.3 621.416 5
 2 8 0 66237.9 694.556 5
 -2 8 0 68258.3 790.716 1
 2 8 0 65005.9 797.248 2
 -2 8 0 67010.9 924.342 3
 2 8 0 67458.4 798.215 1
 2 8 1 153109 1420.92 2
 -2 8 -1 153777 1606.83 3
 2 8 1 157912 1433.48 1
 -2 -8 -1 150045 1295.82 5
 -2 8 -1 155512 1377.23 1
 2 8 2 16908.8 367.086 1
 -2 8 -2 16453.8 328.264 1
 2 8 2 15453.2 349.195 2
 -2 8 -2 18244.8 482.962 3
 -2 -8 -2 16327.7 311.356 5
 2 8 3 13122.6 322.003 2
 2 8 3 13519.9 331.616 1
 -2 8 -3 13768.8 286.936 1
 -2 8 -3 13185.9 234.377 4
 -2 8 -4 5960.58 296.435 3
 2 8 4 6178.86 224.281 2
 -2 8 -4 5957.28 182.052 1
 -2 8 -5 101706 935.015 1
 2 8 5 103993 1118.7 2
 -2 8 -5 99944.6 1370.76 3
 2 8 6 44691.1 682.194 2
 2 8 6 43214.2 664.949 1
 -2 8 -6 44945 531.947 1
 -2 8 -6 44766.7 907.265 3
 2 8 7 77397.4 963.794 1
 -2 8 -7 79036.9 764.159 1
 -2 8 -7 79895.6 1292.23 3
 2 8 7 80145.8 983.018 2
 2 -8 8 20446.9 314.048 1
 -2 8 -8 20287.4 636.708 3
 2 8 8 19644.3 442.823 1
 2 8 8 20319.8 459.356 2
 2 -8 9 34981.7 416.069 1
 -2 8 -9 36987.6 905.1 3
 2 8 9 34441.7 609.287 1
 -2 -8 -10 228.476 73.6124 3
 2 8 10 120.65 43.5788 1
 -2 8 -10 281.022 95.4052 3
 -2 8 -11 38084.1 964.453 3
 -2 -8 -11 37008.4 866.047 3
 2 8 12 438.844 78.4092 1
 -2 8 -12 632.508 157.083 3
 -2 -8 -12 546.86 121.567 3
 -2 8 -13 63748 1363.28 3
 2 8 13 61044.5 899.61 1
 -2 -8 -14 491.337 119.92 3
 -2 8 -14 530.112 159.928 3
 2 8 14 611.82 102.065 1
 -2 8 -15 60120.9 1430.49 3
 -2 -8 -15 60776.9 1311.66 3
 -2 8 -16 18099.6 784.624 3
 -2 -8 -16 17336.9 704.402 3
 -2 -8 -17 66350.3 1469.26 3
 -2 8 -17 67818.3 1599.42 3
 -2 8 -18 268.081 182.608 3
 -2 -8 -18 59.1717 113.833 3
 -2 8 -19 10568.2 663.833 3
 -2 -8 -19 10536.4 610.6 3
 -2 -8 -20 4246.09 414.999 3
 -2 8 -20 3863.39 429.155 3
 -2 -8 -21 31501.7 1121.2 3
 -2 8 -21 31063.4 1198.27 3
 2 10 -22 24664.2 1059.45 3
 2 -10 -21 10856.1 667.944 3
 2 10 -21 9864.23 661.585 3
 2 -10 -20 1024.84 219.591 3
 2 10 -20 909.619 217.825 3
 2 10 -19 5002.79 447.745 3
 2 -10 -19 5318.13 444.684 3
 2 -10 -18 5956.92 469.858 3
 2 10 -18 6524.25 493.931 3
 2 10 -17 9108.66 563.22 3
 2 -10 -17 10033.5 553.738 3
 2 10 -16 66906 1495.41 3
 2 -10 -16 67664.1 1441.83 3
 2 -10 -15 42106 1078.19 3
 -2 10 15 38776.1 806.369 1
 2 10 -15 41399.2 1122.81 3
 -2 10 14 1121.25 136.221 1
 2 10 -14 1472.15 208.331 3
 2 10 -13 55286.2 1229.9 3
 -2 10 13 52918.1 935.828 1
 -2 10 12 59570 980.008 1
 2 10 -12 61205 1284.3 3
 -2 -10 11 10366.7 385.886 4
 -2 10 11 9547.9 360.004 1
 2 10 -11 9544.61 475.714 3
 -2 10 10 10702.8 374.943 1
 -2 -10 10 11385.7 389.055 4
 2 10 -10 11652.9 510.028 3
 -2 10 9 86282.8 936.931 2
 -2 -10 9 85627.5 1128.7 4
 -2 10 9 87321.1 1167.11 1
 2 10 -8 1901.91 187.394 3
 -2 10 8 2071.28 118.917 2
 -2 -10 8 2127.84 150.992 4
 -2 10 8 2348.18 175.891 1
 2 10 -7 119763 1562.76 3
 -2 10 7 116017 1136.09 2
 -2 -10 7 115823 1255.36 4
 -2 10 7 120123 1379.99 1
 -2 10 6 114963 1115.05 2
 -2 10 6 115889 1332.67 1
 2 10 -6 114700 1459.23 3
 -2 -10 6 112783 1188.66 4
 -2 10 5 42092.2 709.409 1
 2 10 -5 42742.7 650.58 1
 -2 -10 5 41024.3 593.151 4
 2 10 -5 41142.3 711.683 2
 2 10 -5 43867.9 798.42 3
 -2 10 5 40540.5 565.214 2
 2 10 -4 13078.5 412.393 3
 2 10 -4 11738.2 355.986 2
 -2 10 4 11188.5 274.755 2
 2 -10 -4 12729.8 224.721 4
 2 10 -4 11903.9 321.227 1
 -2 10 4 12206.8 357.587 1
 -2 10 3 24263.6 422.009 2
 2 10 -3 25270.5 536.761 3
 2 10 -3 25431.7 517.151 2
 2 10 -3 24947.3 470.005 1
 2 -10 -3 23781.9 279.586 4
 -2 10 3 25012.5 506.544 1
 2 10 -2 11868.2 348.45 3
 2 10 -2 11167.3 330.566 2
 -2 10 2 10302.3 271.513 2
 -2 10 2 10688.9 317.636 1
 2 10 -2 10645.4 305.66 1
 -2 10 1 66690.6 863.012 1
 -2 10 1 66590.6 803.379 2
 2 10 -1 65805.3 848.057 1
 2 10 -1 65253.6 874 2
 2 10 0 274839 2307.91 1
 -2 10 0 275166 2254.91 2
 2 10 0 269550 2317.34 2
 -2 10 0 275729 2291.77 1
 -2 10 0 273819 2549.98 3
 -2 -10 -1 22397 374.934 5
 -2 10 -1 23788.7 454.76 1
 -2 10 -1 23260.9 568.013 3
 2 10 1 23280.8 477.813 1
 2 10 1 22928.7 470.262 2
 2 10 2 14577.7 370.816 2
 -2 -10 -2 14817.6 313.044 5
 -2 10 -2 14900.5 345.435 1
 -2 10 -2 14941.9 466.053 3
 2 10 2 14416.1 374.613 1
 -2 -10 -3 13873.5 311.176 5
 -2 10 -3 14981 485.431 3
 2 10 3 13388.1 356.171 2
 2 10 3 13921.2 372.655 1
 -2 10 -3 13922.6 327.44 1
 2 10 4 60603.9 836.493 2
 -2 10 -4 58046.8 732.856 1
 -2 10 -4 60314.9 1052.04 3
 2 10 4 59558 840.617 1
 -2 10 -5 9070.44 409.27 3
 2 10 5 7262.81 270.486 2
 -2 10 -5 7665.5 229.232 1
 2 10 5 8768.42 294.349 1
 -2 10 -6 62250.1 727.83 1
 2 10 6 61467.3 868.825 2
 -2 10 -6 61315.3 1119.3 3
 -2 10 -7 47033.2 1002.25 3
 -2 10 -7 45244.1 594.313 1
 2 10 7 46026.9 746.166 2
 -2 10 -8 639.397 64.7044 1
 2 10 8 611.333 92.0231 1
 2 10 8 465.261 78.7219 2
 -2 10 -8 532.737 115.585 3
 2 10 9 56098.7 852.054 2
 -2 10 -9 56686.6 1179.66 3
 -2 10 -10 21804 750.286 3
 2 10 10 26758.7 574.72 1
 -2 -10 -11 17890.7 604.547 3
 -2 10 -11 17687.4 685.256 3
 2 10 11 16918.7 466.194 1
 2 10 12 23135.3 560.9 1
 -2 10 -12 25902.1 862.964 3
 -2 -10 -12 24614.2 738.299 3
 -2 10 -13 30564.2 978.521 3
 -2 -10 -13 30241.4 845.185 3
 -2 -10 -14 78.9092 91.9494 3
 2 10 14 -6.01535 61.3512 1
 -2 10 -14 8.66504 128.29 3
 2 10 15 44777.2 840.647 1
 -2 -10 -15 46206.5 1169.34 3
 -2 -10 -16 45983.5 1193.17 3
 -2 10 -16 41468.4 1272.11 3
 -2 10 -17 3883.96 406.635 3
 -2 -10 -17 4178.52 377.607 3
 -2 10 -18 5125.13 468.403 3
 -2 -10 -18 5242.77 422.959 3
 -2 10 -19 1132.79 244.781 3
 -2 -10 -19 1237.98 230.931 3
 -2 10 -20 497.499 178.691 3
 -2 -10 -20 659.666 171.821 3
 2 12 -21 2081.08 343.629 3
 2 12 -20 15337.5 834.237 3
 2 -12 -20 17075.1 827.224 3
 2 -12 -19 563.212 186.425 3
 2 12 -19 555.416 172.738 3
 2 12 -18 41892.8 1303.13 3
 2 -12 -18 39835.7 1185.28 3
 2 -12 -17 58.801 93.9768 3
 2 12 -17 -71.4841 139.028 3
 -2 12 16 48494.6 979.169 1
 2 12 -16 52462.8 1372.32 3
 2 -12 -16 51056.3 1268.12 3
 2 12 -15 25.847 99.4503 3
 -2 12 15 122.571 59.3306 1
 2 12 -14 32.5506 101.761 3
 -2 12 14 158.044 71.0199 1
 2 12 -13 2119.79 259.021 3
 -2 12 13 1827.88 179.167 1
 2 12 -12 121435 1915.8 3
 -2 12 12 112918 1520.71 1
 -2 -12 11 3187.4 217.22 4
 -2 12 11 3077.6 223.601 1
 2 12 -11 3951.09 327.78 3
 2 12 -10 39344.5 967.312 3
 -2 -12 10 39879.4 755.917 4
 -2 12 10 38663.7 612.233 2
 -2 12 10 38941.8 796.349 1
 2 12 -9 6778.78 400.281 3
 -2 -12 9 6352.45 277.224 4
 -2 12 9 5971.57 223.02 2
 -2 12 9 6182.2 300.406 1
 2 12 -8 116.444 72.9224 3
 -2 12 8 173.293 44.4169 2
 -2 12 8 99.0079 52.7569 1
 -2 -12 8 197.589 54.6428 4
 -2 -12 7 38991.5 645.613 4
 2 12 -7 38768.7 857.25 3
 -2 12 7 39557.4 614.395 2
 -2 12 7 39566.9 760.407 1
 2 12 -6 92072.1 1133.88 1
 -2 12 6 92673.3 1035.33 2
 -2 12 6 93489.4 1230.48 1
 2 12 -6 91399.5 1236.98 2
 2 12 -6 89185.6 1344.57 3
 -2 -12 6 92911.7 1039.03 4
 -2 -12 5 11098.8 291.448 4
 2 12 -5 11498.8 343.599 1
 2 12 -5 11275.4 421.97 3
 2 12 -5 10951.5 377.263 2
 -2 12 5 11256 377.204 1
 -2 12 5 10420.2 295.551 2
 2 12 -4 156785 1572.78 1
 2 -12 -4 153217 1209.42 4
 -2 -12 4 154780 1390.55 4
 -2 12 4 159604 1680.76 1
 -2 12 4 158361 1488.85 2
 2 12 -4 160735 1767.71 3
 2 12 -4 156892 1686.26 2
 -2 12 3 16514.3 376.558 2
 2 12 -3 17279.9 455.067 2
 2 12 -3 17370.5 472.211 3
 -2 12 3 17519.6 453.782 1
 2 12 -3 17126.5 415.875 1
 -2 12 2 91386.8 1142.65 1
 -2 12 2 87627.1 1039.02 2
 2 12 -2 94022.6 1165.97 2
 2 12 -2 89561.1 1101.44 1
 2 12 -2 89699 1188.8 3
 -2 12 1 14832.5 398.558 1
 2 12 -1 14385.6 408.727 2
 2 12 -1 14675.6 393.893 1
 -2 12 1 14758.7 373.002 2
 2 12 0 112252 1275.53 1
 -2 12 0 112036 1245.72 2
 -2 12 0 110189 1254.24 1
 2 12 0 110913 1290.84 2
 -2 12 0 113500 1498.3 3
 -2 12 -1 11815.7 344.376 1
 2 12 1 11614 361.541 1
 2 12 1 11540.6 356.879 2
 -2 12 -1 11726.2 349.535 2
 -2 12 -1 11842.6 432.649 3
 -2 12 -2 50783.2 757.128 1
 -2 -12 -2 50043.3 645.08 5
 2 12 2 51171.1 799.405 2
 2 12 2 52106.3 817.913 1
 -2 12 -2 52179.2 955.804 3
 2 12 3 205.897 68.0243 1
 -2 -12 -3 280.558 50.3643 5
 -2 12 -3 205.063 86.0019 3
 2 12 3 231.703 67.4172 2
 -2 12 -3 196.505 49.63 1
 2 12 4 108053 1270.02 2
 -2 12 -4 105778 1161.62 1
 -2 12 -4 111291 1586.6 3
 2 12 4 111472 1318.83 1
 -2 -12 -4 108433 1134.11 5
 2 12 5 4278.69 222.636 2
 2 12 5 4630.49 241.616 1
 -2 12 -5 4212.82 301.905 3
 -2 12 -5 4656.43 199.82 1
 2 12 6 57887.3 909.527 1
 -2 12 -6 57750.5 772.888 1
 -2 12 -6 58959.6 1161.52 3
 2 12 6 58360 896.739 2
 -2 12 -7 7412.3 245.241 1
 -2 12 -7 6471.37 384.044 3
 2 12 7 6881 287.814 2
 2 12 7 6833.31 296.603 1
 -2 12 -8 7918.11 436.073 3
 2 12 8 7769.26 311.866 2
 2 12 8 8190.67 330.398 1
 -2 12 -8 8378.74 260.255 1
 -2 12 -9 5023.5 355.626 3
 -2 12 -9 6153.7 225.59 1
 2 12 9 5095.76 255.784 2
 2 12 9 5281.51 272.811 1
 -2 12 -10 46636.9 1153.42 3
 2 12 10 44835 804.367 2
 2 12 11 787.692 115.775 1
 -2 12 -11 856.458 174.173 3
 -2 -12 -12 43821.1 1031.85 3
 -2 12 -12 44995.9 1206.53 3
 2 12 13 3363.34 233.226 1
 -2 -12 -13 3648.34 301.717 3
 -2 12 -13 3735.86 353.501 3
 -2 -12 -14 7698.3 454.247 3
 2 12 14 7140.2 341.262 1
 -2 12 -14 7445.45 512.824 3
 2 12 15 8266.61 371.366 1
 -2 12 -15 9388.69 591.671 3
 -2 -12 -15 9588.49 525.69 3
 -2 -12 -16 37480.5 1115.57 3
 -2 12 -16 36115.4 1198.47 3
 -2 12 -17 19.8868 121.435 3
 -2 -12 -17 88.1282 85.7619 3
 -2 12 -18 27142.4 1095.78 3
 -2 -12 -18 27953.6 1002.89 3
 -2 12 -19 218.913 128.286 3
 -2 -12 -19 408.621 107.642 3
 -2 12 -20 8190.91 634.634 3
 2 14 -20 17297.5 891.37 3
 2 -14 -19 2334.91 307.544 3
 2 14 -19 2247.08 337.724 3
 2 14 -18 53139 1501.88 3
 2 -14 -18 55360.6 1455.23 3
 2 -14 -17 5933.77 448.23 3
 -2 14 17 5400.87 334.634 1
 2 14 -17 5925.41 487.309 3
 2 -14 -16 34037.5 1060.94 3
 2 14 -16 31965.4 1087.28 3
 2 14 -15 12337.6 657.353 3
 -2 14 15 11523 480.368 1
 2 14 -14 1745.43 248.698 3
 -2 14 14 1558.55 181.824 1
 2 14 -13 127.671 112.665 3
 -2 14 13 -28.0355 81.146 1
 -2 14 12 98009.2 1455.75 1
 2 14 -12 102364 1793.46 3
 2 14 -11 2287.3 259.531 3
 -2 14 11 2472.36 210.454 1
 -2 -14 10 76883.7 1102.82 4
 -2 14 10 74039.5 1201.3 1
 2 14 -10 77271.3 1432.46 3
 -2 -14 9 10157.1 353.276 4
 -2 14 9 9800.68 314.868 2
 -2 14 9 9280.67 391.597 1
 2 14 -9 8938.29 451.573 3
 -2 14 8 5209.12 230.601 2
 -2 14 8 4915.28 278.813 1
 2 14 -8 5247.09 298.13 2
 2 14 -8 5214.36 350.852 3
 -2 -14 8 5368.17 241.294 4
 -2 14 7 938.437 128.324 1
 -2 -14 7 1045.93 106.513 4
 2 14 -7 879.315 147.178 3
 2 14 -7 852.751 124.371 2
 -2 14 7 1109.45 111.064 2
 -2 -14 6 72016.8 895.575 4
 2 14 -6 72818.5 1140.15 2
 -2 14 6 71901.6 1111.14 1
 -2 14 6 73777.9 957.517 2
 2 14 -6 74875.6 1260.99 3
 2 14 -6 74448.7 1041.17 1
 -2 -14 5 18949.7 388.811 4
 2 14 -5 18079.2 521.511 2
 -2 14 5 17603.5 507.601 1
 2 14 -5 18545.5 480.817 1
 -2 14 5 16062.9 414.017 2
 2 14 -5 18012.4 557.721 3
 2 14 -4 167831 1684.55 1
 -2 14 4 167799 1781.99 1
 -2 -14 4 168710 1415.39 4
 2 14 -4 171731 1875.83 3
 -2 14 4 168828 1601.6 2
 2 14 -4 170820 1808.71 2
 -2 14 3 12728 414.665 1
 2 14 -3 12486.5 417.429 2
 2 14 -3 12648.6 389.721 1
 2 14 -3 12897.3 446.63 3
 -2 14 3 11892.6 355.035 2
 2 14 -2 159363 1752.12 2
 2 14 -2 157961 1673.65 1
 -2 14 2 154673 1606.88 2
 -2 14 2 154918 1703.07 1
 -2 14 1 14035.6 419.281 1
 2 14 -1 13975.5 416.28 1
 -2 14 1 13841.3 396.289 2
 2 14 -1 13655 430.918 2
 2 14 0 21616.9 533.742 1
 -2 14 0 21597 507.869 2
 -2 14 0 21930.3 526.37 1
 2 14 0 21994.1 544.847 2
 -2 14 -1 204.646 80.12 3
 2 14 1 320.632 72.6243 2
 -2 14 -1 470.624 81.0452 1
 -2 14 -1 307.583 72.8269 2
 2 14 1 312.754 73.9028 1
 2 14 2 33923.4 687.196 1
 2 14 2 33240.5 673.736 2
 -2 14 -2 33641.9 815.323 3
 -2 14 -2 35155.8 695.504 2
 -2 -14 -2 32105.6 495.552 5
 -2 14 -2 31937.5 631.844 1
 2 14 3 252.386 74.0864 1
 -2 14 -3 165.623 80.4324 3
 2 14 3 172.695 57.3968 2
 -2 14 -3 212.439 59.5687 1
 -2 -14 -3 285.168 51.692 5
 -2 14 -4 110788 1275.03 1
 -2 -14 -4 110141 1175.22 5
 -2 14 -4 109684 1636.97 3
 2 14 4 112155 1415.62 1
 2 14 4 111637 1362.79 2
 2 14 5 13223.5 438.143 1
 -2 14 -5 13640.3 383.032 1
 2 14 5 13244.8 419.499 2
 -2 14 -5 12858 544.839 3
 -2 -14 -5 13148.9 350.355 5
 2 14 6 25465 593.397 2
 -2 14 -6 26264 807.044 3
 2 14 6 25017 620.281 1
 -2 14 -6 25478.2 525.794 1
 -2 14 -7 14470.7 386.298 1
 -2 14 -7 13533.8 595.374 3
 2 14 7 14110.2 443.466 2
 2 14 7 14047.7 462.092 1
 2 14 8 11667.4 405.851 2
 -2 14 -8 10771.1 539.503 3
 -2 14 -8 11881.6 346.669 1
 2 14 8 10879.9 412.413 1
 2 14 9 2578.35 196.17 2
 -2 14 -9 2330.34 254.892 3
 2 14 9 2519.45 204.034 1
 -2 14 -9 2970.78 174.273 1
 -2 14 -10 39330.2 1079.86 3
 2 14 10 37526 812.354 1
 2 14 10 38807.6 779.817 2
 -2 14 -11 17213 733.179 3
 2 14 11 16159.1 494.233 2
 2 14 11 15682.8 521.087 1
 2 14 12 80461 1283.32 1
 -2 14 -12 84744.6 1733.03 3
 -2 14 -13 797.052 175.077 3
 -2 -14 -13 618.501 139.572 3
 2 14 13 589.507 115.657 1
 -2 14 -14 1269.81 232.406 3
 -2 -14 -14 1712.83 231.793 3
 2 14 14 1318.29 163.41 1
 -2 14 -15 4420.75 419.274 3
 2 14 15 3540.4 260.522 1
 -2 -14 -15 4764.87 382.192 3
 -2 14 -16 17904.6 866.779 3
 -2 -14 -16 19653.6 802.041 3
 -2 -14 -17 44.7456 117.391 3
 -2 14 -17 -63.8892 151.775 3
 -2 -14 -18 36890.6 1187.87 3
 -2 14 -18 37872.4 1332.05 3
 -2 14 -19 -128.409 163.058 3
 -2 -14 -19 -28.4845 127.277 3
 2 16 -20 6271.96 552.496 3
 2 16 -19 4297.61 455.618 3
 2 16 -18 15912.1 835.141 3
 2 -16 -18 16421.3 804.116 3
 -2 16 17 13097.3 560.672 1
 2 16 -17 14018.6 754.797 3
 2 16 -16 17327 815.253 3
 -2 16 16 15346.6 594.012 1
 2 16 -15 12997.3 683.493 3
 -2 16 15 12573.9 528.434 1
 2 16 -14 3897.59 370.582 3
 -2 16 14 3595.7 284.005 1
 -2 16 13 14989.3 565.61 1
 2 16 -13 15870.8 711.803 3
 2 16 -12 30777.4 973.792 3
 -2 16 12 27870.2 767.99 1
 2 16 -11 16677.8 689.385 3
 -2 16 11 16281.2 572.011 1
 2 16 -11 17090.2 598.428 2
 -2 16 10 20508.8 635.076 1
 2 16 -10 20685.1 646.587 2
 2 16 -10 21079.8 767.364 3
 2 16 -9 8826.68 414.984 2
 -2 -16 9 9547.32 342.679 4
 2 16 -9 8831.38 477.878 3
 -2 16 9 8732.08 405.045 1
 2 16 -8 13533.4 509.096 2
 -2 16 8 13434.2 493.936 1
 -2 -16 8 14920.5 408.413 4
 2 16 -8 13583.7 576.796 3
 -2 16 8 13028.6 398.267 2
 -2 16 7 24590 662.274 1
 -2 -16 7 26331.9 522.81 4
 2 16 -7 25711.2 766.207 3
 2 16 -7 25088.3 685.048 2
 -2 16 7 23880.9 547.362 2
 -2 16 6 17381.7 548.092 1
 2 16 -6 18317.3 514.534 1
 -2 -16 6 18392.9 406.988 4
 2 16 -6 18434.4 613.57 3
 2 16 -6 17733.9 560.859 2
 -2 16 6 16688.3 450.28 2
 -2 16 5 7461.66 300.291 2
 -2 16 5 8048.08 361.24 1
 2 16 -5 8008.63 369.63 2
 2 16 -5 8226.83 399.514 3
 2 16 -5 8293.46 339.327 1
 -2 -16 5 8519.16 256.251 4
 2 16 -4 34889.2 780.742 2
 -2 -16 4 37035.8 539.614 4
 2 16 -4 35987.8 728.55 1
 -2 16 4 35600 683.388 2
 -2 16 4 35310.6 765.921 1
 2 16 -4 36598.3 836.167 3
 -2 16 3 93.5591 62.7216 2
 -2 -16 3 74.7399 38.3019 4
 2 16 -3 -1.39728 70.4209 2
 2 16 -3 114.2 76.1393 3
 -2 16 3 83.179 65.351 1
 2 16 -3 22.1956 62.2516 1
 2 16 -2 24214.9 596.446 1
 -2 16 2 25462 588.786 2
 -2 16 2 25145.5 621.188 1
 2 16 -2 24918.6 637.382 2
 -2 16 1 43788.1 799.057 2
 2 16 -1 44194.4 864.98 2
 -2 16 1 43614.7 829.408 1
 2 16 -1 45287.4 836.742 1
 2 16 0 14468.3 464.374 1
 2 16 0 13849.2 460.042 2
 -2 16 0 14095.6 443.977 1
 -2 16 0 14105.5 441.578 2
 2 16 1 17717.5 513.964 1
 -2 16 -1 16926 495.78 2
 -2 16 -1 17036.6 488.563 1
 2 16 1 17459 513.914 2
 2 16 2 6542.22 313.615 2
 2 16 2 6773.78 320.442 1
 -2 16 -2 7137.65 403.776 3
 -2 16 -2 6765.55 299.917 1
 -2 16 -2 6656.13 318.461 2
 2 16 3 1592.44 160.438 2
 2 16 3 1755.97 170.886 1
 -2 16 -3 1814.34 170.743 2
 -2 -16 -3 2036.68 122.648 5
 -2 16 -3 1680.32 203.066 3
 -2 16 -3 2114.43 170.139 1
 -2 -16 -4 22752.3 450.855 5
 -2 16 -4 22820 616.498 2
 -2 16 -4 20986.8 706.195 3
 2 16 4 21915.9 577.783 2
 2 16 4 22206.9 606.448 1
 -2 16 -4 23554.4 558.964 1
 -2 16 -5 70493.2 1362.85 3
 2 16 5 70322.5 1108.74 2
 -2 16 -5 71866.1 1031.37 1
 2 16 5 71541.4 1159.78 1
 -2 -16 -5 70780.6 928.846 5
 2 16 6 18016.7 528.591 2
 -2 16 -6 19277.8 491.849 1
 -2 -16 -6 19125.7 453.516 5
 2 16 6 18133.4 562.711 1
 -2 16 -6 18013.5 689.867 3
 -2 -16 -7 41300.5 721.892 5
 2 16 7 42906.4 847.057 2
 2 16 7 41347.2 876.227 1
 -2 16 -7 41672.4 1099.24 3
 -2 16 -7 41660.4 741.965 1
 -2 16 -8 294.071 102.832 3
 2 16 8 404.627 109.82 1
 -2 16 -8 472.319 86.1359 1
 2 16 8 398.779 93.4612 2
 -2 16 -9 19873.7 493.208 1
 -2 16 -9 18958 773.364 3
 2 16 9 17603.3 537.327 2
 2 16 9 18321.7 588.285 1
 -2 16 -10 12874 645.119 3
 2 16 10 12353.9 484.346 1
 2 16 10 11514.2 431.818 2
 2 16 11 11738.5 481.906 1
 -2 16 -11 12732.6 654.971 3
 2 16 12 34536.7 851.267 1
 -2 16 -12 36945.4 1153.04 3
 2 16 13 22136.2 681.177 1
 -2 16 -13 23520.8 931.881 3
 2 16 14 1331.25 176.98 1
 -2 -16 -14 2051.48 256.822 3
 -2 16 -14 2055.14 298.746 3
 -2 16 -15 18159.7 864.002 3
 -2 -16 -15 19052.2 791.27 3
 -2 -16 -16 16624.7 746.389 3
 -2 16 -16 15106.3 809.798 3
 -2 16 -17 5216.64 499.289 3
 -2 -16 -17 5393.31 456.843 3
 -2 16 -18 11340.1 740.25 3
 -2 -16 -18 12467.2 703.099 3
 2 -18 -17 16076.4 796.8 3
 2 18 -17 15402.5 804.677 3
 2 18 -17 13851 626.441 2
 2 18 -16 1679.51 218.189 2
 -2 18 16 1701.83 220.702 1
 2 18 -16 1094.39 231.159 3
 2 18 -15 28615.6 876.418 2
 2 18 -15 30265.9 1079.5 3
 -2 18 15 27664.6 841.352 1
 -2 18 14 -172.897 120.975 1
 2 18 -14 -112.216 149.652 3
 2 18 -14 136.321 90.5186 2
 2 18 -13 36673.1 972.054 2
 -2 18 13 34224.8 905.785 1
 2 18 -12 58.0093 91.3582 2
 -2 18 12 120.234 73.0515 1
 2 18 -12 52.1564 119.596 3
 2 18 -11 29161.3 963.297 3
 -2 18 11 27085.8 782.146 1
 2 18 -11 26335.8 792.336 2
 2 18 -10 2462.52 244.607 2
 -2 18 10 2403.16 232.117 1
 2 18 -10 2186.54 264.44 3
 2 18 -9 25782.2 852.835 3
 2 18 -9 25241.7 748.422 2
 -2 18 9 25333.5 735.605 1
 2 18 -8 9710.08 451.488 2
 2 18 -8 9841.44 505.163 3
 -2 18 8 9584.29 441.701 1
 2 18 -7 60564.4 1237.26 3
 -2 18 7 57105.5 1106.09 1
 2 18 -7 59989.2 1063.35 1
 2 18 -7 58447.9 1139.42 2
 -2 18 7 60053.1 973.277 2
 -2 18 6 7191.68 374.4 1
 2 18 -6 7445.93 386.169 2
 2 18 -6 7757.76 356.343 1
 -2 18 6 7298.22 318.788 2
 2 18 -6 7201.61 403.954 3
 2 18 -5 16327.8 598.12 3
 -2 18 5 15497.7 538.908 1
 2 18 -5 15405.5 499.898 1
 2 18 -5 15323.9 545.949 2
 -2 18 5 14025.9 451.059 2
 2 18 -4 102.082 76.4437 3
 -2 18 4 44.3755 57.8174 1
 2 18 -4 26.1428 72.2464 2
 -2 18 4 63.9634 55.5054 2
 2 18 -4 107.278 56.121 1
 -2 18 3 11971.7 455.307 1
 2 18 -3 12300.2 477.947 2
 2 18 -3 12334.4 441.068 1
 -2 18 3 11889.8 419.396 2
 -2 18 2 1489.02 151.779 2
 2 18 -2 1365.06 169.421 2
 2 18 -2 1721.15 172.806 1
 -2 18 2 1486.55 165.313 1
 -2 18 1 30093.8 720.206 1
 -2 18 1 30404.9 702.888 2
 2 18 -1 31022.9 726.33 1
 2 18 -1 31798.9 764.991 2
 2 18 0 7270.13 350.108 1
 2 18 0 7268.55 357.087 2
 -2 18 0 7390.99 343.39 2
 -2 18 0 7484.78 350.318 1
 -2 18 -1 81156.1 1243.27 2
 2 18 1 82193.3 1261.04 1
 2 18 1 81832.1 1270.3 2
 2 18 2 1805.92 180.962 2
 2 18 2 2059.53 198.663 1
 -2 18 -2 2138.62 185.056 1
 -2 18 -2 2332.98 255.231 3
 -2 18 -2 2086.87 193.401 2
 2 18 3 3047.21 232.645 2
 -2 18 -3 3536.34 234.01 1
 2 18 3 3308.7 244.122 1
 -2 18 -3 2878.86 229.726 2
 2 18 4 670.201 114.994 1
 -2 18 -4 897.878 204.709 3
 2 18 4 598.974 110.769 2
 -2 18 -4 575.302 102.536 1
 -2 18 -4 604.021 118.088 2
 -2 18 -5 53268.7 1047.68 2
 2 18 5 52503.7 990.217 2
 -2 18 -5 51394.2 1203.05 3
 2 18 5 52276.6 1029.13 1
 -2 18 -5 53272.9 927.323 1
 2 18 6 7193.6 373.124 1
 -2 18 -6 6933.79 371.512 2
 -2 18 -6 6975.38 456.601 3
 2 18 6 6723.62 342.433 2
 -2 18 -6 6885.63 315.766 1
 2 18 7 50206.2 1036.92 1
 -2 18 -7 52154.1 903.499 1
 2 18 7 50807.8 979.798 2
 -2 18 -7 50714.8 1248.69 3
 -2 18 -8 6692.1 304.929 1
 2 18 8 6029.73 331.687 2
 -2 18 -8 6054.74 452.88 3
 2 18 8 6038.84 357.504 1
 2 18 9 27621.9 770.833 1
 -2 18 -9 28514.3 995.775 3
 2 18 9 26274.2 693.304 2
 -2 18 -10 8362.63 547.756 3
 2 18 10 7565.9 401.788 1
 -2 18 -11 6050.58 479.365 3
 2 18 11 5974.09 365.236 1
 2 18 12 6630.78 387.799 1
 -2 18 -12 7181.47 539.394 3
 2 18 13 29919.8 842.758 1
 -2 18 -13 32110.8 1151.03 3
 -2 18 -14 2352.43 336.713 3
 2 18 14 1764.22 213.352 1
 -2 -18 -14 2259.27 284.585 3
 -2 18 -15 15313.5 822.849 3
 -2 -18 -15 15598.3 731.221 3
 -2 18 -16 11505.7 731.515 3
 -2 -18 -16 12538.6 680.647 3
 -2 18 -17 27071.3 1145.1 3
 -2 20 16 -87.3893 91.2377 1
 -2 20 15 16842.7 683.515 1
 2 20 -15 20282.9 763.765 2
 -2 20 14 1366.95 202.304 1
 2 20 -14 1400.68 211.916 2
 2 20 -13 13086.3 703.52 3
 2 20 -13 12576.3 587.709 2
 -2 20 13 12416.4 574.185 1
 -2 20 12 5780.02 383.488 1
 2 20 -12 6178.24 473.031 3
 2 20 -12 6700.56 424.888 2
 2 20 -11 32558.4 931.21 2
 2 20 -11 34590.3 1082.34 3
 -2 20 11 33374.1 919.004 1
 2 20 -10 2601.09 259.851 2
 -2 20 10 2624.55 255.62 1
 2 20 -10 2867.23 303.845 3
 2 20 -9 15500.8 615.2 2
 -2 20 9 15876.5 608.64 1
 2 20 -9 17039.7 703.606 3
 2 20 -8 2594.9 271.616 3
 -2 20 8 2187.78 231.698 1
 2 20 -8 2479.75 240.918 2
 2 20 -7 62942.2 1324.41 3
 -2 20 7 60243.4 1194.58 1
 2 20 -7 59362.4 1216.26 2
 2 20 -6 771.434 156.132 3
 2 20 -6 1045.52 149.702 1
 -2 20 6 993.523 161.864 1
 2 20 -6 647.581 123.926 2
 2 20 -5 50529.9 1143.67 3
 -2 20 5 46185.8 1007.94 1
 2 20 -5 48236.2 1067.98 2
 2 20 -5 48466 978.639 1
 -2 20 5 49158.7 931.321 2
 2 20 -4 1330.49 181.894 2
 2 20 -4 1548.57 182.226 1
 -2 20 4 1189.8 150.307 2
 -2 20 4 1514.35 186.544 1
 -2 20 3 593.943 107.031 2
 2 20 -3 573.234 125.545 2
 2 20 -3 672.068 119.003 1
 -2 20 3 419.255 103.509 1
 2 20 -2 5438.08 343.871 2
 -2 20 2 5500.54 310.477 2
 2 20 -2 5715.2 330.324 1
 -2 20 2 5412.15 321.651 1
 -2 20 1 35221.8 815.452 2
 2 20 -1 34705.3 822.566 1
 2 20 -1 34705.9 855.096 2
 -2 20 1 34895.9 817.223 1
 2 20 0 2900.19 245.323 2
 -2 20 0 2767.27 230.932 1
 -2 20 0 2759.05 229.31 2
 2 20 0 2645.99 227.207 1
 -2 20 -1 42850.9 930.284 2
 2 20 1 45096.9 965.194 2
 -2 20 -1 43750.6 918.922 1
 2 20 1 43357.6 939.319 1
 -2 20 -2 8715.79 411.866 2
 2 20 2 8395.6 405.992 2
 2 20 2 8338.4 405.625 1
 -2 20 -2 8556.02 392.006 1
 -2 20 -3 3199.85 257.105 2
 2 20 3 3047.69 242.968 2
 -2 20 -3 2807.1 292.117 3
 2 20 3 2994.04 252.375 1
 -2 20 -3 3438.64 248.242 1
 -2 20 -4 6164.65 433.472 3
 -2 20 -4 6044.19 323.867 1
 2 20 4 6006.56 352.591 1
 -2 20 -4 5800.68 349.479 2
 2 20 4 5677.62 330.421 2
 2 20 5 21928.4 683.067 1
 2 20 5 21969.3 660.696 2
 -2 20 -5 22579.5 704.154 2
 -2 20 -5 22912.3 833.321 3
 -2 20 -5 22672.2 625.864 1
 -2 20 -6 214.919 83.6042 2
 2 20 6 69.2415 69.4337 2
 -2 20 -6 87.2384 60.7298 1
 2 20 6 326.383 117.974 1
 -2 20 -6 239.141 94.4663 3
 -2 20 -7 40310.5 981.612 2
 2 20 7 40292.4 962.984 1
 2 20 7 39583.6 902.628 2
 -2 20 -7 42540.4 857.696 1
 -2 20 -7 41946.8 1167.74 3
 2 20 8 2148.34 228.106 1
 -2 20 -8 2289.64 233.527 2
 -2 20 -8 2081.53 268.762 3
 -2 20 -9 21606.4 873.71 3
 2 20 9 21456.1 710.885 1
 -2 20 -10 468.143 164.358 3
 2 20 10 530.457 132.208 1
 2 20 11 18323.2 672.487 1
 -2 20 -11 19998.7 895.59 3
 2 20 12 625.777 140.547 1
 -2 20 -12 179.664 123.071 3
 -2 20 -13 23048 1005.78 3
 2 20 13 23384.7 784.021 1
 2 20 14 41.0955 90.6628 1
 -2 20 -14 68.9822 173.27 3
 2 20 15 6458.98 419.638 1
 -2 20 -15 7416.22 603.761 3
 -2 -20 -15 7615.34 532.172 3
 -2 20 -16 255.884 178.598 3
 -2 22 13 198.72 117.675 1
 -2 22 12 14256.3 627.007 1
 2 22 -12 12373.8 600.599 2
 -2 22 11 29980.8 911.691 1
 2 22 -11 34707.7 1001.47 2
 2 22 -10 9792.42 524.067 2
 -2 22 10 8969 484.347 1
 2 22 -9 1075.85 204.404 2
 -2 22 9 738.992 148.471 1
 2 22 -8 1956.12 250.556 3
 -2 22 8 1899.75 226.878 1
 2 22 -8 1942.42 240.743 2
 -2 22 7 9135.78 479.248 1
 2 22 -7 10646.8 526.668 2
 2 22 -7 10310.6 553.108 3
 -2 22 6 8440.21 444.767 1
 2 22 -6 8726.71 476.989 2
 2 22 -6 9209.7 511.406 3
 2 22 -6 9395.19 449.4 1
 2 22 -5 37015.8 974.719 2
 -2 22 5 34566.3 912.455 1
 2 22 -5 37049.3 898.409 1
 -2 22 4 19206.4 667.074 1
 2 22 -4 18470.7 624.795 1
 -2 22 3 297.191 105.861 1
 -2 22 3 305.498 98.2562 2
 2 22 -3 304.913 98.7504 1
 2 22 -3 356.23 107.933 2
 -2 22 2 8834.55 440.193 1
 -2 22 2 8871.75 425.477 2
 2 22 -2 8588.8 450.665 2
 2 22 -2 8695.76 433.143 1
 -2 22 1 28910.6 782.763 2
 2 22 -1 30228.5 807.571 1
 -2 22 1 31105.6 824.424 1
 2 22 -1 29490.8 833.594 2
 2 22 0 4968.24 331.202 1
 -2 22 0 4887.02 322.051 1
 -2 22 0 4712.33 318.579 2
 2 22 0 4755.64 331.464 2
 -2 22 -1 14025.7 553.67 2
 -2 22 -1 14803.5 554.72 1
 2 22 1 13932.5 555.897 1
 2 22 1 13674.8 554.744 2
 2 22 2 10547.4 484.465 2
 2 22 2 11434.5 506.928 1
 -2 22 -2 11301.4 478.376 1
 -2 22 -2 10337.9 481.115 2
 -2 22 -3 280.036 114.202 2
 2 22 3 296.891 98.435 1
 2 22 3 390.869 117.709 2
 -2 22 -3 480.189 112.684 1
 2 22 4 14334.2 577.947 1
 -2 22 -4 14043.8 576.551 2
 2 22 4 13523.4 544.231 2
 -2 22 -4 14048.6 528.078 1
 -2 22 -5 50305.2 1021.4 1
 2 22 5 50893.8 1123.64 1
 -2 22 -5 51651.4 1339.23 3
 -2 22 -5 49412.8 1123.74 2
 2 22 5 49392 1073.32 2
 2 22 6 8463.87 429.251 2
 -2 22 -6 8164.33 533.703 3
 -2 22 -6 8674.27 462.846 2
 2 22 6 8818.45 463.415 1
 -2 22 -6 9329.72 421.467 1
 -2 22 -7 9368.26 492.522 2
 2 22 7 10058.6 502.904 1
 -2 22 -7 10228.7 603.721 3
 -2 22 -7 10499.7 448.515 1
 -2 22 -8 2958.94 339.592 3
 2 22 8 3254.21 293.698 1
 -2 22 -8 3093.58 290.262 2
 -2 22 -9 321.738 107.948 2
 2 22 9 326.579 106.232 1
 -2 22 -9 260.262 157.243 3
 2 22 10 21544.5 764.118 1
 -2 22 -10 19796.7 885.917 3
 -2 22 -10 21201.7 771.407 2
 -2 22 -11 37669.7 1062.91 2
 2 22 11 37512.1 1029.92 1
 -2 22 -11 38902 1270.04 3
 -2 22 -12 5497.07 506.457 3
 2 22 12 5301.67 389.812 1
 -2 22 -12 5200.98 393.227 2
 -2 22 -13 4296.32 462.617 3
 2 22 13 4343.33 357.532 1
 -2 22 -14 2837.72 387.129 3
 2 24 -10 19778.6 785.716 2
 -2 24 10 20216.6 774.918 1
 -2 24 9 4709.59 375.499 1
 2 24 -9 4773.35 386.076 2
 2 24 -8 690.156 148.544 2
 -2 24 8 690.195 161.858 1
 -2 24 7 73.4238 80.6018 1
 2 24 -7 283.624 124.223 2
 2 24 -6 21353.9 731.794 1
 -2 24 6 22466.4 782.125 1
 2 24 -6 21791.7 792.828 2
 -2 24 5 21062.9 743.9 1
 2 24 -5 20643.6 706.752 1
 2 24 -5 20400.4 762.063 2
 2 24 -4 29489 909.085 2
 -2 24 4 31144.3 900.412 1
 2 24 -4 30975.9 868.741 1
 2 24 -3 2369.58 261.508 2
 -2 24 3 2955.41 282.349 1
 2 24 -3 2647.9 263.139 1
 2 24 -2 6891.8 407.543 1
 -2 24 2 6040.62 369.564 2
 2 24 -2 6326.94 414.917 2
 -2 24 2 6649.95 404.027 1
 -2 24 1 5369.44 363.405 1
 2 24 -1 5504.37 370.971 1
 -2 24 1 4598.07 332.742 2
 2 24 -1 4968.2 362.583 2
 2 24 0 25015.9 777.541 1
 -2 24 0 24427.8 773.896 2
 -2 24 0 24991.9 774.09 1
 2 24 0 25224.3 808.834 2
 2 24 1 1523.42 203.467 2
 -2 24 -1 1358.52 186.309 2
 2 24 1 1774.66 217.638 1
 -2 24 -1 1789.13 211.753 1
 2 24 2 4859.61 348.51 1
 -2 24 -2 4669.14 327.432 1
 2 24 2 4201.5 333.642 2
 -2 24 -2 4485.57 338.862 2
 2 24 3 71.0499 93.3833 1
 2 24 3 -58.746 99.6108 2
 -2 24 -3 82.3414 86.6461 1
 -2 24 -3 -48.9902 112.281 2
 2 24 4 19805.6 720.408 1
 -2 24 -4 18697.7 704.828 2
 2 24 4 17682.5 660.477 2
 -2 24 -4 19905.2 664.995 1
 -2 24 -5 12719 526.44 1
 -2 24 -5 11846.6 564.789 2
 2 24 5 12507.3 576.97 1
 -2 24 -6 19208.3 855.626 3
 -2 24 -6 19465.2 738.726 2
 -2 24 -6 20412.5 668.107 1
 2 24 6 19814.3 734.604 1
 -2 24 -7 1187.67 193.326 2
 -2 24 -7 1093.14 233.535 3
 2 24 7 1053.42 176.196 1
 2 24 8 1003.41 190.668 1
 -2 24 -8 670.99 153.289 2
 -2 24 -8 781.716 189.072 3
 -2 24 -9 1368.32 216.447 2
 -2 24 -9 1508.81 273.551 3
 2 24 9 1385.12 210.296 1
 -2 24 -10 32723 1176.3 3
 -2 24 -11 7648.04 577.77 3
 -2 24 -12 31766.7 1197.44 3
 2 26 -6 40519.4 1151.9 2
 2 26 -5 712.465 152.213 1
 -2 26 5 613.429 139.854 1
 2 26 -5 1051.81 206.654 2
 -2 26 4 13206.1 614.334 1
 2 26 -4 11669.9 598.245 2
 2 26 -4 12898.7 590.143 1
 2 26 -3 432.747 131.809 1
 2 26 -3 449.641 154.506 2
 -2 26 3 526.114 140.816 1
 -2 26 2 1906.46 241.181 1
 2 26 -2 1921.02 233.46 1
 2 26 -2 1628.32 227.687 2
 -2 26 1 1548.03 211.454 1
 2 26 -1 1819.5 229.475 1
 2 26 -1 1486.68 218.177 2
 2 26 0 46844.3 1160.55 1
 2 26 0 47847.3 1205.53 2
 -2 26 0 47130.4 1135.28 1
 -2 26 0 44217.6 1110.44 2
 -2 26 -1 90.0319 87.6493 1
 -2 26 -1 294.685 112.804 2
 2 26 1 225.576 116.484 1
 2 26 1 162.708 96.3345 2
 2 26 2 974.913 179.423 2
 2 26 2 984.751 177.52 1
 -2 26 -2 1162.29 195.396 2
 -2 26 -2 714.378 157.195 1
 2 26 3 418.704 133.312 1
 -2 26 -3 356.412 126.144 2
 -2 26 -3 210.003 111.361 1
 2 26 4 3143.95 314.972 1
 -2 26 -4 3532.18 327.214 2
 -2 26 -4 3420.65 299.07 1
 -2 26 -5 70.8517 108.271 2
 -2 26 -5 274.116 118.704 1
 -2 26 -6 35441.8 1053.5 2
 -2 26 -8 1460.07 269.034 3
 2 28 -1 2943.02 315.972 2
 2 28 0 25231.8 902.385 2
 -2 28 -4 162.293 114.139 1
 3 1 -23 16444.2 838.491 3
 3 -1 -23 16497.6 826.016 3
 3 -1 -22 726.898 201.381 3
 3 1 -22 775.962 226.301 3
 3 -1 -21 27705.9 1015.02 3
 3 1 -21 25638.7 981.801 3
 3 -1 -20 1365.33 242.489 3
 3 1 -20 1268.05 245.947 3
 3 -1 -19 44704.4 1197.09 3
 3 1 -19 44425.4 1196.45 3
 3 1 -18 501.857 151.918 3
 3 -1 -18 225.005 128.036 3
 3 1 -17 19599.1 734.119 3
 3 -1 -17 18511.7 710.272 3
 3 1 -16 1360.63 232.974 3
 3 -1 -16 891.181 187.939 3
 -3 1 15 84992.7 981.748 1
 3 -1 -15 84002.2 1465.55 3
 3 1 -15 83723.5 1456.84 3
 -3 1 14 814.715 85.0625 1
 3 1 -14 1145.48 176.843 3
 -3 -1 14 830.686 76.8367 1
 3 -1 -14 1255.74 178.997 3
 3 -1 -13 61168 1138.69 3
 -3 1 13 61397.5 776.869 1
 3 1 -13 61172.1 1122.41 3
 -3 -1 13 57598.5 730.942 1
 -3 -1 12 20210.8 385.886 1
 -3 -1 12 20194.4 559.4 4
 3 -1 -12 21045.9 617.73 3
 -3 1 12 21401.1 414.774 1
 3 1 -12 21231.9 610.607 3
 -3 1 11 762.124 77.989 1
 -3 1 11 749.462 107.325 4
 -3 -1 11 900.782 118.648 4
 3 1 -11 869.311 124.146 3
 -3 -1 11 875.092 80.0503 1
 3 -1 -11 894.022 125.507 3
 -3 -1 10 8427.18 234.735 1
 -3 -1 10 8039.6 317.755 4
 -3 1 10 7411.92 229.048 1
 3 -1 -10 8160.12 352.252 3
 -3 1 10 7965.65 311.544 4
 3 1 -10 7929.54 334.583 3
 3 -1 -9 161223 1703.98 3
 -3 1 9 157903 1632.56 4
 -3 -1 9 158693 1393.78 1
 -3 -1 9 165386 1663.38 4
 -3 1 9 157719 1421.02 1
 3 1 -9 157489 1693.82 3
 -3 -1 8 994.857 83.6214 1
 -3 1 8 1105.18 86.9436 1
 -3 1 8 998.17 105.939 4
 3 1 -8 854.326 110.634 3
 3 -1 -8 833.713 101.163 3
 -3 -1 8 987.365 105.146 4
 -3 -1 7 130202 1177.88 1
 3 -1 -7 130914 1361.53 3
 -3 -1 7 126054 1297.26 4
 3 1 -7 127649 1347.98 3
 -3 1 7 129898 1301.19 4
 -3 1 7 134293 1198.48 1
 3 1 -6 4720.2 193.195 3
 -3 -1 6 5090.33 169.39 1
 -3 1 6 4906.6 163.834 1
 -3 1 6 4823.49 185.727 4
 -3 1 5 35925.3 475.257 1
 -3 -1 5 35300 492.109 1
 3 1 -5 34501.6 500.554 3
 -3 1 5 34185.6 498.119 4
 -3 -1 5 37690 526.832 4
 3 -1 -4 2374.32 105.997 1
 -3 -1 4 2384.18 124.059 1
 3 1 -4 2710.31 111.798 3
 -3 1 4 2340.37 106.623 1
 -3 1 3 363128 2526.19 1
 3 -1 -3 369370 2504.1 1
 -3 -1 2 425.735 34.7844 2
 -3 1 2 537.277 52.5505 1
 3 1 -2 107.762 19.1606 2
 3 -1 -2 390.672 44.0083 1
 -3 1 1 283177 696.536 2
 -3 1 1 234632 903.561 1
 3 1 -1 30856.2 285.971 2
 -3 -1 1 270235 839.682 2
 3 1 -1 181692 808.842 5
 3 -1 -1 271109 906.743 3
 -3 1 1 95803.5 551.286 3
 3 -1 -1 242484 925.022 1
 -3 -1 0 3920.68 110.975 2
 3 1 0 1197.79 63.163 2
 -3 1 0 1936.86 79.8865 1
 3 1 0 2908.64 107.179 5
 3 -1 0 3891.57 120.969 3
 3 -1 0 293.261 38.041 5
 -3 1 0 4095.51 113.967 5
 3 -1 0 4324.37 124.799 1
 -3 1 0 1290.08 71.942 3
 -3 -1 -1 241025 1288.28 2
 -3 -1 -1 100958 1046.73 3
 3 -1 1 222225 1338.04 3
 3 1 1 203826 1240.51 2
 3 1 1 234248 1213.38 3
 -3 1 -1 145780 1115.31 1
 -3 1 -1 177993 1275.37 3
 -3 1 -2 39341.9 526.139 3
 3 -1 2 39982.1 530.162 3
 3 1 2 41196.3 488.588 2
 3 1 2 40424.2 478.33 3
 -3 -1 -2 41607.1 485.053 2
 -3 1 -2 38074.9 412.249 1
 -3 -1 -2 37812.5 463.036 3
 -3 -1 -3 57924.5 526.705 1
 -3 1 -3 55145.3 695.931 3
 -3 -1 -3 57035.3 659.802 3
 -3 1 -3 57288.3 535.856 1
 3 1 3 57412.8 670.423 3
 -3 1 -4 142596 1383.88 3
 -3 -1 -4 140240 1329.73 3
 -3 -1 -5 39700.2 616.61 3
 -3 1 -5 40330 651.458 3
 -3 -1 -5 40164.7 405.955 1
 -3 -1 -6 19643.8 255.966 1
 -3 1 -6 19049.6 463.048 3
 3 1 6 18113.3 261.468 1
 -3 -1 -6 18420 436.875 3
 -3 -1 -7 114386 909.674 1
 3 1 7 111189 920.138 1
 -3 -1 -7 112649 1324.49 3
 -3 -1 -8 35858.4 386.63 1
 3 1 8 34359.1 390.952 1
 -3 -1 -8 36068.9 704.001 3
 -3 1 -9 75185.8 1179.57 3
 -3 -1 -9 78263.6 683.272 1
 3 1 9 74908.9 690.189 1
 -3 -1 -9 79253.4 1160.92 3
 3 1 10 11978.8 214.98 1
 -3 1 -10 12571 472.798 3
 -3 -1 -10 12695.5 217.651 1
 -3 -1 -10 13698.6 477.671 3
 -3 -1 -11 4176.73 120.923 1
 -3 -1 -11 4413.88 286.98 3
 -3 1 -12 10695.1 489.449 3
 -3 -1 -12 12767.1 512.582 3
 -3 -1 -13 57422.2 1161.77 3
 -3 1 -13 56570.3 1191.28 3
 -3 1 -14 2165.24 267.652 3
 -3 -1 -14 2237.18 264.644 3
 -3 1 -15 65010.2 1360.13 3
 -3 -1 -15 62728.9 1312.19 3
 -3 -1 -16 6189.39 433.406 3
 -3 1 -16 6741.52 461.57 3
 -3 -1 -17 6284.5 441.237 3
 -3 1 -17 5775.09 436.178 3
 -3 -1 -18 2499.77 326.277 3
 -3 1 -18 2561.72 349.678 3
 -3 1 -19 13180.4 697.516 3
 -3 -1 -19 12124.8 683.704 3
 -3 1 -20 1194.05 265.568 3
 -3 -1 -20 957.407 234.114 3
 -3 -1 -21 69759.5 1718.18 3
 -3 1 -21 66189.3 1677.68 3
 3 3 -23 5382.16 488.627 3
 3 3 -22 8.65898 155.7 3
 3 -3 -22 366.765 154.772 3
 3 -3 -21 8616.12 563.358 3
 3 3 -21 7286.33 529.056 3
 3 -3 -20 12601.9 654.58 3
 3 3 -20 13268.6 688.142 3
 3 -3 -19 23368.7 862.963 3
 3 3 -19 22812.4 870.428 3
 3 -3 -18 11211.2 582.629 3
 3 3 -18 12365.7 629.857 3
 3 3 -17 13709.1 619.356 3
 3 -3 -17 13007.7 599.018 3
 3 3 -16 5941.72 392.686 3
 3 -3 -16 5530.99 376.614 3
 -3 3 15 24919.4 513.523 1
 3 3 -15 26069 781.942 3
 3 -3 -15 27132.5 804.076 3
 -3 -3 14 2034.77 114.772 1
 3 3 -14 1872.74 214.023 3
 -3 3 14 1906.84 137.106 1
 3 -3 -14 1829.93 214.494 3
 -3 -3 13 34412.5 515.808 1
 -3 3 13 35231 598.109 1
 3 3 -13 36041.7 852.618 3
 -3 -3 13 34865.6 779.384 4
 3 -3 -12 104225 1489.5 3
 -3 3 12 104075 1150.88 1
 -3 -3 12 103059 1393.85 4
 3 3 -12 107469 1510.43 3
 -3 -3 12 105401 1048.08 1
 3 -3 -11 19729 568.93 3
 -3 -3 11 19910.9 392.568 1
 3 3 -11 20641.3 586.538 3
 -3 -3 11 18894.5 519.72 4
 -3 3 11 19336.5 415.105 1
 -3 -3 10 109303 1087.47 1
 -3 -3 10 109316 1341.23 4
 -3 3 10 110842 1155.15 1
 3 -3 -10 112516 1433 3
 3 3 -10 115537 1444.56 3
 -3 3 9 66809.7 926.075 4
 -3 3 9 66076.2 810.15 1
 -3 -3 9 66456.8 937.862 4
 3 3 -9 67670.2 995.914 3
 -3 -3 9 65917.6 778.013 1
 -3 3 8 8948.52 290.585 4
 -3 -3 8 8794.35 295.224 4
 -3 3 8 9115.45 255.3 1
 3 3 -8 9012.88 320.4 3
 -3 -3 8 8429.05 250.213 1
 -3 -3 7 105296 1179.59 4
 3 3 -7 103775 1202.65 3
 -3 3 7 102338 1143.12 4
 -3 -3 6 12379.1 310.549 4
 -3 3 6 12800 292.034 1
 3 -3 -6 12591.2 189.18 2
 -3 3 6 12865.8 299.959 4
 3 3 -6 12754 321.395 3
 -3 3 5 21709.8 374.757 1
 -3 3 5 21897.8 369.958 4
 3 3 -5 22635 396.141 3
 -3 -3 5 21705.7 371.923 3
 3 3 -4 139551 1180.33 2
 3 3 -4 138214 1185.42 3
 -3 3 4 140709 1226.17 1
 -3 3 4 142587 1185.75 4
 -3 -3 4 137201 1159.18 3
 3 3 -3 78824.1 745.9 2
 -3 3 3 79483 788.486 1
 3 3 -3 77576.8 706.072 3
 -3 -3 3 76736 677.547 3
 -3 3 2 221405 1698.16 1
 -3 -3 2 218611 1660.53 2
 3 3 -1 107946 903.403 2
 3 -3 -1 114478 916.654 1
 -3 3 1 108560 912.012 1
 -3 3 1 108844 999.024 3
 -3 -3 1 107759 911.987 2
 3 3 -1 108619 934.788 5
 3 -3 -1 110321 983.246 3
 -3 -3 0 16041.3 283.263 5
 -3 3 0 15791.7 318.347 3
 3 -3 0 16104.7 254.347 1
 3 3 0 16085.4 284.886 5
 -3 -3 0 16098.3 275.867 1
 3 -3 0 15371.2 319.984 3
 -3 3 0 15428.9 251.719 1
 3 3 0 15214.1 266.854 2
 -3 3 0 15890.6 225.419 5
 -3 -3 0 15034.5 269.829 2
 3 -3 1 396382 2661.98 1
 -3 -3 -1 383304 2750.07 5
 3 -3 1 386927 2902.39 3
 -3 3 -1 370573 2871.74 3
 3 3 1 373797 2739.93 2
 -3 -3 -1 386551 2747.7 2
 -3 -3 -1 392564 2711.55 1
 -3 3 -1 371620 2645.41 1
 3 3 2 197246 1576.75 2
 -3 3 -2 189614 1712.52 3
 3 -3 2 201356 1436.45 1
 -3 -3 -2 196538 1504.73 1
 -3 -3 -2 190219 1508.32 3
 -3 3 -2 192502 1420.8 1
 3 3 2 190935 1509.68 1
 3 3 3 65180.1 664.781 1
 3 -3 3 71020.9 600.797 1
 -3 -3 -3 67099.7 662.87 1
 3 3 3 65814.3 735.44 2
 -3 3 -3 65321.3 866.954 3
 -3 3 -3 68895.8 569.339 1
 -3 -3 -3 64316.5 721.818 3
 3 3 4 95373 968.313 2
 -3 3 -4 93373.3 1111.98 3
 -3 -3 -4 98237.6 1020.3 3
 3 -3 4 95327.3 742.743 1
 -3 3 -4 92230.1 709.279 1
 3 3 4 92378.6 848.112 1
 3 3 5 24900.6 356.002 1
 -3 -3 -5 24588.2 476.672 3
 -3 3 -5 24141.8 532.572 3
 -3 -3 -6 23979.9 504.724 3
 -3 3 -6 23625.9 551.033 3
 3 3 6 23577.9 351.685 1
 3 3 7 13016.7 257.226 1
 -3 3 -7 14364.2 443.634 3
 -3 -3 -7 13013.2 391.048 3
 3 3 8 112678 1026.25 1
 -3 3 -8 117797 1490.43 3
 -3 -3 -8 115322 1401.21 3
 -3 3 -9 119470 1575.26 3
 3 3 9 116887 1063.52 1
 -3 -3 -9 119782 1488.89 3
 3 3 10 48889.3 591.44 1
 -3 -3 -10 50146.9 938.257 3
 -3 3 -10 50720.3 999.803 3
 3 3 11 3738.55 144.815 1
 -3 3 -11 3786.54 283.712 3
 -3 -3 -11 4071.49 275.334 3
 -3 3 -12 36350.6 900.91 3
 3 3 12 33267.1 475.109 1
 -3 -3 -12 36034.7 853.229 3
 -3 3 -13 65650.5 1285.9 3
 -3 -3 -13 63137.4 1204.03 3
 -3 -3 -14 19633.4 689.119 3
 -3 3 -14 19136.7 703.141 3
 -3 3 -15 26421.2 868.778 3
 -3 -3 -15 27105.4 835.338 3
 -3 -3 -16 38264.3 1053.14 3
 -3 3 -16 38157.1 1092.75 3
 -3 3 -17 1949.16 313.887 3
 -3 -3 -17 2378.38 296.76 3
 -3 -3 -18 29803.7 979.801 3
 -3 3 -18 29607 1040.2 3
 -3 -3 -19 10539 610.943 3
 -3 3 -19 10499.8 629.022 3
 -3 3 -20 10689.9 663.971 3
 -3 -3 -20 11124.7 644.907 3
 -3 3 -21 17030.3 843.7 3
 -3 -3 -21 13623.3 760.621 3
 3 5 -23 -16.7683 119.261 3
 3 5 -22 2198.9 299.119 3
 3 -5 -22 2104.58 298.698 3
 3 5 -21 -70.7538 123.191 3
 3 -5 -21 297.885 167.4 3
 3 5 -20 30303 1045.45 3
 3 -5 -20 29947.5 1035.98 3
 3 -5 -19 11449.4 618.391 3
 3 5 -19 12095.2 636.345 3
 3 5 -18 49433.1 1258.94 3
 3 -5 -18 50588.9 1280.65 3
 3 -5 -17 804.155 176.874 3
 3 5 -17 786.436 178.198 3
 3 -5 -16 10362.2 528.046 3
 3 5 -16 10938.4 538.438 3
 -3 5 16 9601.3 335.416 1
 3 -5 -15 311.125 104.916 3
 -3 5 15 231.841 74.1876 1
 3 5 -15 320.174 109.932 3
 3 -5 -14 43719.1 1002.86 3
 3 5 -14 43591 1010.66 3
 -3 5 14 41224.2 722.145 1
 -3 -5 13 24186.6 438.462 1
 3 -5 -13 24272.8 713.157 3
 3 5 -13 24758.9 724.939 3
 -3 5 13 24481.2 523.67 1
 -3 -5 13 23736.5 644.017 4
 3 -5 -12 136492 1774.38 3
 -3 -5 12 133266 1648.3 4
 3 5 -12 137867 1795.08 3
 -3 5 12 133740 1429.16 1
 -3 -5 12 133535 1287.59 1
 -3 -5 11 6005.03 292.819 4
 -3 5 11 6690.33 261.183 1
 3 5 -11 6111.01 327.905 3
 -3 -5 11 5788.2 215.89 1
 -3 -5 10 104829 1163.95 1
 3 5 -10 104691 1405.13 3
 -3 -5 10 101587 1286.89 4
 -3 5 10 105192 1173.21 1
 -3 5 9 24638.5 486.139 1
 -3 -5 9 24251.6 536.841 4
 3 5 -9 24056.8 586.568 3
 3 5 -8 107687 1308.97 3
 -3 5 8 108692 1155.84 1
 3 -5 -8 106155 925.094 2
 3 5 -7 487.052 89.6512 3
 -3 5 7 429.702 67.2382 4
 -3 -5 7 431.561 72.0958 4
 3 -5 -7 536.222 42.975 2
 -3 5 7 461.029 69.1462 1
 -3 -5 6 39052.2 594.355 4
 3 5 -6 39269.6 631.667 3
 3 -5 -6 37114 369.232 2
 -3 5 6 38943.6 551.844 4
 -3 5 6 40283 588.594 1
 3 -5 -5 17288.3 191.486 2
 -3 5 5 17064 353.333 1
 3 5 -5 17657.8 374.764 3
 -3 5 5 17988.5 319.789 4
 3 5 -4 43987.2 584.196 3
 -3 5 4 46967.3 513.624 4
 -3 -5 4 46929.4 569.395 3
 3 5 -4 47470.5 595.722 2
 -3 5 4 45732.1 598.923 1
 -3 5 3 2390.64 88.4746 4
 -3 5 3 2126.68 65.6626 2
 -3 -5 3 2374.12 102.345 3
 3 5 -3 2334.93 118.273 2
 -3 5 3 2155.94 118.867 1
 3 5 -3 2011.47 102.943 3
 3 5 -2 117282 991.113 3
 3 5 -2 115336 1075.72 2
 -3 5 2 116763 1080.22 1
 -3 -5 2 114761 979.313 3
 3 5 -1 3132.81 129.715 5
 -3 5 1 3242.54 161.352 3
 -3 -5 1 3392.31 110.124 3
 3 -5 -1 3244.4 80.0956 5
 3 5 -1 2958.55 134.821 1
 3 5 -1 3221.15 133.795 2
 -3 5 1 3174.09 128.599 1
 3 5 0 38626.5 514.114 2
 -3 -5 0 39045.7 500.822 5
 3 5 0 39105.4 513.105 1
 3 5 0 39830.6 507.035 5
 -3 5 0 38828 485.778 1
 -3 5 0 38894.4 595.804 3
 -3 5 0 36539.3 361.665 5
 3 5 1 1041.18 79.2858 2
 -3 5 -1 1726.74 174.622 3
 -3 -5 -1 1139.37 80.2374 5
 -3 5 -1 1133.03 71.2204 1
 3 5 1 1143.66 79.9584 1
 3 5 2 34449.5 478.828 1
 3 -5 2 36524.8 441.43 1
 -3 5 -2 35017.4 428.446 1
 3 5 2 34218.8 503.135 2
 3 5 3 92774.4 973.288 2
 3 5 3 90558.6 911.784 1
 -3 5 -3 91268.6 805.603 1
 -3 5 -3 91463 1146.14 3
 -3 5 -4 193021 1943.93 3
 -3 5 -4 190004 1440.49 1
 3 5 4 192854 1610.5 1
 3 5 4 193222 1700.78 2
 3 5 5 14895 349.349 2
 -3 5 -5 15840.1 467.106 3
 -3 -5 -5 14495.2 365.017 3
 3 5 5 14041.4 298.791 1
 3 -5 5 14758.7 225.549 1
 -3 5 -5 14587.1 211.347 1
 -3 -5 -6 76975.8 985.896 3
 -3 5 -6 73889.2 1100.29 3
 3 5 6 75168.9 815.964 1
 3 -5 6 74499.1 624.384 1
 3 5 6 78276.6 924.595 2
 -3 -5 -7 269.674 68.9918 3
 3 -5 7 112.517 16.5538 1
 -3 5 -7 345.031 100.327 3
 3 5 7 214.112 46.9792 1
 -3 5 -8 73829 1177.61 3
 3 5 8 70410.1 797.456 1
 -3 5 -9 39757.6 876.054 3
 3 5 9 38987.5 570.668 1
 -3 -5 -9 40642.6 808.718 3
 3 5 10 104066 1084.59 1
 -3 -5 -10 109110 1482.43 3
 -3 5 -10 107775 1607.93 3
 -3 -5 -11 544.386 120.043 3
 -3 5 -11 492.317 116.205 3
 3 5 11 361.484 62.7342 1
 3 5 12 41261.6 615.074 1
 -3 -5 -12 42978.4 947.213 3
 -3 5 -12 42234.3 1014.45 3
 3 5 13 15029.9 355.537 1
 -3 5 -13 16430 641.651 3
 -3 -5 -13 15868.2 590.416 3
 -3 5 -14 32203.5 943.541 3
 -3 -5 -14 32309.7 886.074 3
 -3 5 -15 574.738 159.834 3
 -3 -5 -15 521.734 147.235 3
 -3 5 -16 38083.2 1098.78 3
 -3 -5 -16 36967.2 1024 3
 -3 -5 -17 2800.95 304.063 3
 -3 5 -17 2694.94 328.759 3
 -3 5 -18 32804.9 1086.73 3
 -3 -5 -18 32168.8 1025.76 3
 -3 5 -19 8796.67 591.453 3
 -3 -5 -19 8528.23 572.316 3
 -3 -5 -20 39431.9 1226.51 3
 -3 5 -20 38845.3 1279.99 3
 -3 5 -21 475.617 242.302 3
 -3 -5 -21 477.631 195.435 3
 3 -7 -22 3659.19 404.71 3
 3 7 -22 2781.67 347.415 3
 3 -7 -21 6600.75 517.938 3
 3 7 -21 5994.58 498.204 3
 3 -7 -20 40022.7 1213.14 3
 3 7 -20 38091.6 1192.63 3
 3 7 -19 2785.69 320.537 3
 3 -7 -19 2562.49 328.053 3
 3 7 -18 21765.6 832.851 3
 3 -7 -18 20774.3 826.297 3
 3 -7 -17 11873.9 632.229 3
 3 7 -17 12790.1 616.16 3
 3 -7 -16 1731.21 226.92 3
 3 7 -16 1761.36 235.644 3
 -3 7 16 1503.2 145.577 1
 -3 7 15 4322.64 245.059 1
 3 -7 -15 4774.9 351.784 3
 3 7 -15 4403.68 343.945 3
 3 -7 -14 103584 1644.71 3
 -3 7 14 98998 1266.39 1
 3 7 -14 100900 1656.68 3
 -3 -7 13 5203.62 211.742 1
 -3 7 13 5559.33 273.587 1
 3 7 -13 5940.59 362.8 3
 3 -7 -13 6153.37 373.936 3
 -3 -7 13 5840.68 316.99 4
 -3 -7 12 68062.2 1105.83 4
 -3 7 12 66284.8 973.549 1
 3 7 -12 69544.5 1237.16 3
 -3 -7 12 68427.2 926.231 1
 -3 -7 11 689.901 106.872 4
 -3 7 11 826.614 99.8143 1
 3 7 -11 676.4 118.105 3
 -3 7 10 55176.1 835.268 1
 -3 -7 10 55333.3 897.66 4
 3 7 -10 56586.5 1020.18 3
 -3 -7 9 13955.9 401.859 4
 -3 7 9 14103.9 384.267 1
 3 7 -9 14154.8 468.955 3
 -3 -7 8 231692 2106.6 4
 -3 7 8 231092 2085.01 1
 3 7 -8 234297 2296.03 3
 3 -7 -8 233255 1732.41 2
 3 7 -7 11197.6 375.018 3
 -3 7 7 11864.5 337.091 1
 -3 7 7 11418.1 208.438 2
 -3 -7 7 11557.1 333.236 4
 3 -7 -7 11313.9 200.478 2
 3 -7 -6 7905.98 153.839 2
 3 7 -6 6556.48 274.122 3
 -3 7 6 6803.9 249.735 1
 -3 7 6 7133.16 159.901 2
 -3 -7 6 6703.89 236.903 4
 3 -7 -5 19903.8 262.013 2
 -3 7 5 19691.3 420.21 1
 -3 7 5 20019 281.865 2
 3 7 -5 18268.1 432.736 3
 3 7 -5 19299.6 417.941 2
 3 7 -4 49900.1 694.539 2
 -3 7 4 50377.9 696.542 1
 -3 7 4 49860.5 509.625 2
 3 7 -4 48221.7 689.763 3
 -3 7 3 36.2589 19.7674 2
 3 7 -3 138.53 42.4657 3
 -3 -7 3 100.873 35.3592 3
 -3 7 3 57.6183 34.6751 1
 3 7 -3 102.652 41.5861 2
 3 7 -2 76887.9 858.366 1
 3 7 -2 78307.6 878.105 2
 3 7 -2 76239.1 799.925 3
 -3 7 2 78809.6 733.447 2
 -3 7 2 77787.4 871.105 1
 -3 7 1 6584.83 261.883 3
 3 7 -1 6616.09 219.604 2
 -3 7 1 6493.32 210.049 1
 3 7 -1 6475.18 213.34 1
 -3 7 0 109115 1056.44 1
 3 7 0 108168 1069.23 1
 -3 -7 0 108022 1024.23 5
 -3 7 0 108483 1239.24 3
 -3 -7 0 106465 1017.41 3
 3 7 0 107831 1095.11 2
 3 7 1 18092.8 367.094 1
 -3 7 -1 17914.4 336.52 1
 3 7 1 17718.2 368.937 2
 -3 7 -1 17389.6 448.719 3
 -3 -7 -1 19420.4 357.245 5
 -3 -7 -2 97321.6 970.465 5
 3 7 2 95335 1013.57 2
 -3 7 -2 93927.5 783.456 4
 -3 7 -2 95127.8 1226.13 3
 -3 7 -2 90764.6 899.322 1
 3 7 2 96183.6 999.442 1
 -3 7 -3 126766 1069.15 4
 3 7 3 130151 1280.71 2
 -3 7 -3 130188 1141.29 1
 3 7 3 129203 1247.62 1
 -3 7 -3 130080 1510.33 3
 -3 7 -4 227681 1753.23 1
 3 7 4 229706 1972.09 2
 3 7 4 225192 1910.68 1
 3 7 5 85603.9 955.266 1
 3 7 5 84418 996.519 2
 -3 7 -5 82953.2 1231.78 3
 -3 7 -5 82247.8 785.46 1
 -3 7 -6 19573.2 576.906 3
 3 7 6 19516.1 411.362 1
 3 7 6 19751.4 439.212 2
 3 -7 6 20307.9 313.159 1
 -3 7 -6 19379.3 293.157 1
 -3 -7 -7 6064.41 273.726 3
 3 -7 7 6219.35 155.298 1
 -3 7 -7 6310.87 147.782 1
 3 7 7 6211.85 251.034 2
 -3 7 -7 6085.64 336.13 3
 3 7 7 6135.51 228.788 1
 -3 -7 -8 69346.2 1053.88 3
 -3 7 -8 74460 1273.85 3
 3 7 8 71236.5 884.209 1
 -3 7 -8 69522.2 630.534 1
 3 7 8 69176.6 933.832 2
 3 -7 8 64832.9 622.117 1
 -3 -7 -9 2717.06 208.437 3
 3 7 9 2620.29 156.658 1
 -3 7 -9 3010.79 251.854 3
 -3 -7 -10 29351.1 725.284 3
 -3 7 -10 29059.8 803.926 3
 3 7 10 27518.6 531.452 1
 3 7 11 439.046 73.8223 1
 -3 7 -11 343.706 105.48 3
 -3 -7 -11 375.126 99.2919 3
 3 7 12 15549 397.208 1
 -3 7 -12 16068.8 649.375 3
 -3 -7 -12 16341.8 587.344 3
 3 7 13 417.978 73.6053 1
 -3 7 -13 517.221 143.348 3
 -3 -7 -13 409.171 120.086 3
 -3 -7 -14 75023.6 1412.32 3
 -3 7 -14 76515.1 1550.72 3
 -3 7 -15 15736.7 709.77 3
 -3 -7 -15 16301.2 657.795 3
 -3 -7 -16 16947.5 694.04 3
 -3 7 -16 17237.9 763.242 3
 -3 -7 -17 13923.9 655.509 3
 -3 7 -17 13068.1 689.872 3
 -3 -7 -18 21241.4 832.749 3
 -3 7 -18 20989.9 901.894 3
 -3 -7 -19 1697.3 271.876 3
 -3 7 -19 1694.23 294.782 3
 -3 7 -20 65456.7 1711.25 3
 -3 -7 -20 64965.5 1582.79 3
 -3 7 -21 6065.3 557.723 3
 -3 -7 -21 6905.8 545.11 3
 3 9 -22 2608.52 351.042 3
 3 9 -21 16764.8 849.326 3
 3 -9 -21 18512.5 855.965 3
 3 9 -20 18467.7 854.906 3
 3 -9 -20 20489.7 877.969 3
 3 -9 -19 3298.17 351.545 3
 3 9 -19 4115.71 401.853 3
 3 9 -18 5479.05 438.951 3
 3 -9 -18 6229.61 477.94 3
 3 -9 -17 58400.7 1514.79 3
 3 9 -17 4495.92 389.94 3
 3 -9 -16 671.252 148.327 3
 3 9 -16 924.216 182.384 3
 -3 9 16 819.796 122.323 1
 3 -9 -15 5258.43 374.453 3
 -3 9 15 5577.62 295.173 1
 3 9 -15 5185.66 383.057 3
 -3 9 14 113444 1469.4 1
 3 9 -14 119235 1877.54 3
 -3 -9 13 18717.2 576.322 4
 -3 9 13 18481.1 517.858 1
 3 9 -13 18497.7 668.98 3
 -3 9 12 241.62 73.8288 1
 3 9 -12 252.764 85.5728 3
 -3 -9 11 51.0417 54.7689 4
 3 9 -11 -11.4808 63.4046 3
 -3 9 11 61.3902 53.3152 1
 3 9 -10 509.62 111.059 3
 -3 -9 10 853.975 115.853 4
 -3 9 10 817.46 111.406 1
 3 9 -9 23369.3 652.283 3
 -3 -9 9 23552.5 537.394 4
 -3 9 9 21057 524.417 1
 3 9 -8 190751 2092.96 3
 -3 9 8 181947 1861.69 1
 -3 -9 8 186845 1829.62 4
 -3 9 8 195878 1541.76 2
 -3 9 7 110937 1000.19 2
 -3 9 7 107924 1271.78 1
 3 9 -7 108766 1409.4 3
 -3 -9 7 108136 1214.83 4
 -3 9 6 170.562 58.0767 1
 3 9 -6 226.539 74.1124 3
 -3 9 6 113.446 31.8402 2
 -3 -9 6 201.08 83.3063 4
 3 9 -5 39609.2 714.488 3
 3 9 -5 37463.6 653.404 2
 -3 9 5 37148.3 482.515 2
 -3 9 5 37390.7 643.739 1
 3 9 -4 50782.9 762.738 2
 -3 9 4 50955.3 591.507 2
 -3 9 4 50190.5 749.921 1
 -3 9 3 67342.6 882.656 1
 3 9 -3 69831.7 864.584 1
 3 9 -3 71149.4 884.374 3
 -3 9 3 66836 729.814 2
 3 9 -3 68319.5 895.194 2
 -3 9 2 70271.2 764.756 2
 3 9 -2 71041.2 863.569 1
 3 9 -2 69743 897.354 2
 3 9 -2 70306.4 848.274 3
 3 9 -1 58105.9 795.906 2
 3 9 -1 58481.1 767.812 1
 -3 9 1 55879.7 743.18 1
 3 9 0 37462.9 593.654 1
 -3 9 0 36294.4 571.941 1
 3 9 0 36820 604.991 2
 -3 9 0 37867.7 721.706 3
 -3 9 -1 26922.9 471.554 1
 -3 9 -1 26753.5 609.297 3
 -3 -9 -1 25990.6 436.834 5
 3 9 1 27079.8 503.31 1
 3 9 1 26300.1 502.509 2
 -3 9 -2 201578 1718.68 1
 -3 9 -2 198332 1450.98 4
 3 9 2 199570 1809.44 1
 -3 9 -2 203189 2099.75 3
 3 9 2 200243 1821.9 2
 -3 -9 -2 201567 1721.13 5
 3 9 3 613.556 85.3767 2
 -3 -9 -3 498.149 65.9814 5
 -3 9 -3 408.637 41.1645 4
 3 9 3 509.206 76.479 1
 -3 9 -3 421.684 58.3705 1
 -3 9 -4 63768.7 744.355 1
 3 9 4 64698.1 874.132 2
 -3 9 -4 65240.4 1082.74 3
 3 9 4 66274.3 871.189 1
 3 9 5 26695.8 537.39 2
 -3 9 -5 25252.2 673.969 3
 3 9 5 26402.8 522.306 1
 -3 9 -5 25657.8 416.278 1
 -3 9 -6 3701.03 294.806 3
 -3 9 -6 3673.48 140.271 1
 3 9 6 3732.7 199.552 2
 3 9 6 3623.93 192.491 1
 3 9 7 28681.6 563.275 1
 -3 9 -7 28670.7 769.922 3
 -3 9 -7 28878.2 418.39 1
 3 9 7 28029.4 573.077 2
 3 9 8 105711 1275.24 2
 3 9 8 104317 1224.71 1
 -3 9 -8 106286 1632.22 3
 -3 9 -8 104505 955.567 1
 -3 -9 -9 19867.3 580.751 3
 -3 9 -9 21558.2 717.272 3
 3 9 9 19762.3 499.346 2
 3 9 9 19929.5 477.949 1
 -3 -9 -10 14974.7 528.796 3
 -3 9 -10 15634 628.285 3
 3 9 10 15628.6 426.932 1
 -3 -9 -11 4602.52 305.585 3
 3 9 11 4530.52 233.368 1
 -3 9 -11 5599.97 398.602 3
 -3 9 -12 3789.06 336.364 3
 3 9 12 3284.91 200.756 1
 -3 -9 -12 3324.42 282.61 3
 3 9 13 9104.01 336.443 1
 -3 -9 -13 10028.3 494.736 3
 -3 9 -14 100057 1873.1 3
 -3 -9 -14 97555.3 1659.93 3
 -3 9 -15 37510.8 1147.51 3
 -3 -9 -15 36680.4 1016.99 3
 -3 -9 -16 218.823 95.2949 3
 -3 9 -16 406.535 146.672 3
 -3 9 -17 6485.01 505.191 3
 -3 -9 -17 7107.55 472.559 3
 -3 9 -18 4412.81 431.337 3
 -3 -9 -18 4881.53 407.956 3
 -3 9 -19 8847.17 631.537 3
 -3 -9 -19 10280.6 606.574 3
 -3 -9 -20 49016.4 1390.43 3
 -3 9 -20 49853.5 1509.29 3
 3 11 -22 61.4914 143.25 3
 3 11 -21 4222.13 440.145 3
 3 11 -20 5507.06 479.889 3
 3 -11 -20 6678.21 519.203 3
 3 11 -19 36551.8 1197.19 3
 3 -11 -19 40477.5 1247.04 3
 3 11 -18 2069.87 281.257 3
 3 -11 -18 2000.22 269.083 3
 -3 11 17 2218.76 201.891 1
 3 11 -17 2701.22 321.946 3
 3 -11 -17 2500.23 293.521 3
 3 -11 -16 36.2518 113.716 3
 3 11 -16 229.754 115.145 3
 -3 11 16 94.7379 57.9154 1
 -3 11 15 33012.6 781.128 1
 3 11 -15 38176.3 1098.85 3
 -3 11 14 29852.4 723.631 1
 3 11 -14 31167.2 959.651 3
 -3 -11 13 27585.7 709.608 4
 3 11 -13 27102.5 864.064 3
 -3 11 13 25767.8 656.227 1
 -3 -11 12 8138.96 363.369 4
 -3 11 12 7666.71 347.417 1
 3 11 -12 8126.18 452.959 3
 -3 11 11 8244.3 354.106 1
 3 11 -11 8364.06 442.776 3
 -3 -11 11 9142.07 371.968 4
 -3 -11 10 1364.04 142.177 4
 -3 11 10 1216.14 136.271 1
 3 11 -10 1577.78 240.234 3
 -3 11 9 53008 661.116 2
 -3 -11 9 51993.9 843.828 4
 3 11 -9 53176.9 1054.8 3
 -3 11 9 51437.5 896.438 1
 -3 11 8 80412.8 869.941 2
 -3 11 8 80442 1134.91 1
 -3 -11 8 77956.6 1033.17 4
 3 11 -8 81205.9 1276.77 3
 3 11 -7 71282.9 1137.94 3
 -3 11 7 71206.5 1033.5 1
 -3 -11 7 70460.2 934.788 4
 -3 11 7 73837 825.655 2
 3 11 -7 70092.8 1044.95 2
 -3 11 6 46835.3 797.718 1
 3 11 -6 46349.4 853.826 3
 -3 -11 6 46844.7 693.687 4
 3 11 -6 45666.1 800.119 2
 -3 11 6 46518.2 617.569 2
 3 11 -5 2439.6 175.66 2
 3 11 -5 2770.83 199.535 3
 -3 11 5 2378.69 127.097 2
 -3 11 5 2465 172.164 1
 3 11 -4 2067.11 159.49 2
 3 11 -4 2114.17 163.781 3
 -3 11 4 2225.45 164.564 1
 -3 11 4 1952.36 116.508 2
 3 11 -4 1845.67 135.682 1
 3 11 -3 248087 2158.31 1
 -3 11 3 244447 2002.56 2
 3 11 -3 245124 2191.24 3
 -3 11 3 248963 2224.42 1
 -3 11 2 47708.6 662.483 2
 -3 11 2 48733.7 766.326 1
 3 11 -2 47210.1 743.316 3
 3 11 -2 47762.9 737.085 1
 3 11 -2 47538.1 771.963 2
 3 11 -1 58715.6 839.361 1
 3 11 -1 60311.3 876.331 2
 -3 11 1 60506.8 850.634 1
 -3 11 1 58514.6 773.401 2
 3 11 0 1417.46 122.486 1
 -3 11 0 1312.66 113.697 1
 -3 11 0 1373.09 154.377 3
 3 11 0 1442.47 127.959 2
 3 11 1 2162.73 152.865 2
 -3 -11 -1 2351.82 129.105 5
 3 11 1 2068.75 153.041 1
 -3 11 -1 2445.94 151.301 1
 -3 11 -1 2112.81 185.251 3
 -3 -11 -2 17265.7 371.804 5
 -3 11 -2 16819.4 391.764 1
 3 11 2 16855.8 429.235 1
 -3 11 -2 16329.7 518.928 3
 3 11 2 15054.1 409.703 2
 3 11 3 150160 1559.69 1
 -3 11 -3 148476 1442.85 1
 -3 11 -3 151252 1866.57 3
 -3 -11 -3 148445 1433.65 5
 3 11 3 148295 1550.93 2
 -3 -11 -4 742.744 85.8459 5
 -3 11 -4 780.139 81.2085 1
 3 11 4 808.607 102.17 1
 -3 11 -4 561.594 113.238 3
 3 11 4 730.039 92.1863 2
 -3 11 -5 11004.6 293.601 1
 3 11 5 10507.2 347.041 2
 3 11 5 11244.6 366.862 1
 3 11 6 6079.15 271.097 2
 -3 11 -6 5745.79 347.985 3
 -3 11 -6 5791.71 206.667 1
 3 11 6 6216.55 274.172 1
 -3 11 -7 13497.5 312.971 1
 -3 11 -7 12913.2 537.374 3
 3 11 7 12495.9 396.364 2
 3 11 7 13777.6 413.262 1
 -3 11 -8 64603.5 1283.51 3
 3 11 8 63839.6 970.702 2
 -3 11 -8 63508.1 753.043 1
 3 11 8 63924.1 970.051 1
 3 11 9 77430.6 1105.38 1
 -3 11 -9 80176.5 1492.67 3
 3 11 9 77735.7 1118.62 2
 -3 11 -9 80262.5 861.855 1
 3 11 10 3605.13 225.606 2
 -3 11 -10 3604.29 325.565 3
 3 11 10 3332.02 215.379 1
 -3 11 -11 374.654 119.846 3
 3 11 11 219.231 69.0666 1
 -3 -11 -11 411.951 118.168 3
 3 11 12 1419.25 148.756 1
 -3 -11 -12 1510.4 196.165 3
 -3 11 -12 1538.66 221.059 3
 -3 -11 -13 53364.5 1165.83 3
 -3 11 -13 54991.4 1375.98 3
 3 11 14 16204.7 495.92 1
 -3 -11 -14 14271.2 638.982 3
 -3 -11 -15 21408.8 785.885 3
 -3 11 -15 20808.5 876.913 3
 -3 11 -16 4609.77 433.881 3
 -3 -11 -16 4149.4 356.834 3
 -3 11 -17 83.2895 107.048 3
 -3 -11 -17 280.655 125.228 3
 -3 -11 -18 845.064 178.407 3
 -3 11 -18 716.495 194.907 3
 -3 -11 -19 53084.6 1420.57 3
 -3 11 -19 53988.3 1595.34 3
 -3 -11 -20 13732.9 738.927 3
 -3 11 -20 14137.3 830.146 3
 3 13 -21 3372.91 407.976 3
 3 13 -20 -100.685 144.088 3
 3 13 -19 78608.3 1847.77 3
 3 -13 -19 82117.1 1799.39 3
 3 -13 -18 787.295 168.489 3
 3 13 -18 755.081 188.908 3
 3 -13 -17 83.264 89.3184 3
 3 13 -17 99.3435 99.1085 3
 -3 13 17 -5.19361 67.3656 1
 3 13 -16 -190.925 147.097 3
 -3 13 16 26.6182 66.5919 1
 3 13 -15 42245.9 1191.93 3
 -3 13 15 40240.5 904.402 1
 3 13 -14 -57.0524 112.856 3
 -3 13 14 20.0087 62.6541 1
 -3 -13 13 49610.7 972.49 4
 -3 13 13 47473.7 969.149 1
 3 13 -13 49884.5 1215.6 3
 -3 13 12 1824.19 182.833 1
 -3 -13 12 1997.89 187.156 4
 3 13 -12 1705.92 226.771 3
 3 13 -11 606.415 144.514 3
 -3 13 11 549.057 110.581 1
 -3 -13 11 883.951 124.724 4
 -3 13 10 900.04 136.485 1
 3 13 -10 579.713 129.541 3
 -3 -13 10 843.61 115.494 4
 3 13 -9 39484.2 830.069 2
 -3 -13 9 41592.1 744.859 4
 -3 13 9 39643.2 820.484 1
 -3 13 9 40566.4 618.182 2
 3 13 -9 41278.1 946.306 3
 3 13 -8 247.839 84.5918 3
 -3 13 8 270.143 56.0218 2
 -3 13 8 301.349 83.0039 1
 3 13 -8 380.157 93.6775 2
 -3 -13 8 321.109 76.9886 4
 3 13 -7 47191 882.262 2
 -3 13 7 45883.1 858.19 1
 -3 13 7 47112.6 681.913 2
 -3 -13 7 47929.8 743.672 4
 3 13 -7 46022.5 951.134 3
 3 13 -6 7254.65 350.454 3
 -3 13 6 7095.41 315.13 1
 3 13 -6 7032.5 318.234 2
 -3 13 6 6378.96 231.123 2
 -3 -13 6 7355.3 260.151 4
 -3 13 5 105.388 42.5337 2
 -3 13 5 20.3631 53.0704 1
 3 13 -5 89.1171 47.4556 1
 -3 -13 5 113.403 39.983 4
 3 13 -5 77.4743 53.4986 2
 3 13 -4 2416.59 182.93 3
 3 13 -4 1886.5 161.082 2
 -3 13 4 2049.82 165.663 1
 -3 13 4 2032.18 133.682 2
 3 13 -4 2139.29 159.094 1
 3 13 -3 200714 2038.85 2
 -3 13 3 199792 2007.99 1
 -3 13 3 198138 1821.84 2
 3 13 -3 193741 1944.56 1
 3 13 -3 205392 2034.59 3
 -3 13 2 4996.87 248.168 1
 3 13 -2 4782.46 250.908 2
 3 13 -2 4562.43 233.029 1
 -3 13 2 4782.71 215.769 2
 3 13 -1 627.771 92.0269 1
 -3 13 1 449.921 79.64 1
 3 13 -1 462.34 88.4381 2
 -3 13 1 327.228 65.276 2
 -3 13 0 220.86 62.9633 2
 3 13 0 199.874 67.4511 1
 -3 13 0 353.11 94.7642 3
 3 13 0 262.932 77.7118 2
 -3 13 0 204.512 58.442 1
 3 13 1 3068.07 197.537 2
 -3 13 -1 2974.71 179.308 1
 -3 13 -1 3057.27 241.285 3
 3 13 1 2935.83 193.249 1
 3 13 2 505.93 87.1171 2
 3 13 2 348.355 74.6385 1
 -3 13 -2 428.782 101.621 3
 -3 -13 -2 743.88 78.1742 5
 -3 13 -2 579.331 84.179 1
 3 13 3 232984 2221.86 1
 -3 13 -3 229801 2538.45 3
 3 13 3 231234 2211.72 2
 -3 13 -3 227596 2079.29 1
 -3 -13 -3 227797 2004.41 5
 -3 13 -4 449.243 71.1761 1
 -3 -13 -4 642.087 80.1522 5
 3 13 4 471.779 86.7248 2
 -3 13 -4 443.7 106.589 3
 3 13 4 574.759 98.1102 1
 -3 13 -5 5970.73 375.081 3
 3 13 5 6684.01 296.662 2
 3 13 5 6439.05 294.107 1
 -3 -13 -5 6435.36 252.688 5
 -3 13 -5 6035.95 237.444 1
 3 13 6 3392.21 219.291 1
 -3 13 -6 3526.3 181.825 1
 3 13 6 3673.54 226.711 2
 -3 13 -6 3531.79 304.843 3
 3 13 7 15049.3 469.428 1
 -3 13 -7 14709.7 603.249 3
 -3 13 -7 15133.5 373.188 1
 3 13 7 15730 470.3 2
 -3 13 -8 29.6669 111.442 3
 -3 13 -8 205.816 53.6194 1
 3 13 8 330.705 80.6915 2
 3 13 8 187.287 71.02 1
 3 13 9 109955 1451.43 1
 -3 13 -9 110519 1845.34 3
 -3 13 -9 112741 1183.6 1
 3 13 9 109806 1423.13 2
 3 13 10 18653.5 544.427 1
 -3 13 -10 18567.7 736.027 3
 3 13 10 18239 527.681 2
 3 13 11 335.397 86.5069 1
 3 13 11 502.507 104.703 2
 -3 13 -11 489.476 139.298 3
 -3 -13 -12 244.323 107.658 3
 -3 13 -12 286.554 116.043 3
 3 13 12 251.248 81.2426 1
 -3 -13 -13 59633 1277.93 3
 -3 13 -13 61726.9 1491.81 3
 -3 -13 -14 454.073 138.549 3
 3 13 14 394.032 97.2236 1
 -3 13 -14 579.614 160.153 3
 3 13 15 18032.3 572.248 1
 -3 13 -15 20030.3 888.88 3
 -3 -13 -15 20099.6 784.771 3
 -3 -13 -16 4343.81 380.027 3
 -3 13 -16 4262.78 421.774 3
 -3 13 -17 2991.16 363.792 3
 -3 -13 -17 2801.77 325.309 3
 -3 13 -18 448.9 125.404 3
 -3 -13 -18 647.027 167.478 3
 -3 13 -19 76616.4 1964.98 3
 -3 -13 -19 72694 1719.1 3
 3 15 -20 5228.9 497.255 3
 3 15 -19 65965.4 1724.17 3
 3 15 -18 1434.02 256.843 3
 3 -15 -18 1865.46 274.682 3
 -3 15 17 -8.76428 77.7799 1
 3 15 -17 -55.147 129.844 3
 3 -15 -17 -165.838 150.471 3
 3 15 -16 68.0011 97.1938 3
 -3 15 16 157.326 85.7361 1
 3 15 -15 19564.1 824.766 3
 -3 15 15 18211.2 631.223 1
 3 15 -14 15448.1 705.661 3
 -3 15 14 14350.7 549.975 1
 -3 15 13 69001.7 1247.77 1
 3 15 -13 76845.6 1566.44 3
 3 15 -12 264.202 114.371 2
 3 15 -12 223.012 104.916 3
 -3 15 12 96.2817 70.9267 1
 -3 -15 12 204.44 80.2777 4
 -3 15 11 1964.42 197.509 1
 3 15 -11 2397.25 222.892 2
 -3 -15 11 1876 174.598 4
 3 15 -11 1584.24 208.974 3
 -3 15 10 4676.35 294.32 1
 3 15 -10 5098.91 358.085 3
 -3 -15 10 5240.11 270.301 4
 3 15 -10 4468 293.651 2
 3 15 -9 63201.6 1130.79 2
 -3 15 9 63030.1 1116.62 1
 3 15 -9 62894.9 1258.24 3
 -3 -15 9 60913.6 951.494 4
 -3 -15 8 36575.5 673.32 4
 3 15 -8 35347.2 815.4 2
 -3 15 8 37325.5 824.85 1
 -3 15 8 37473 644.779 2
 3 15 -8 36949.3 914.524 3
 3 15 -7 7242.7 354.322 2
 -3 15 7 7281.68 274.836 2
 -3 15 7 7592.23 358.317 1
 -3 -15 7 7752.85 283.18 4
 3 15 -7 8005.1 402.49 3
 -3 15 6 4113.81 261.054 1
 3 15 -6 3789.24 252.044 2
 -3 -15 6 4354.59 201.825 4
 -3 15 6 3740.72 194.455 2
 3 15 -6 4028.26 270.994 3
 3 15 -5 2200.24 194.357 2
 3 15 -5 2324.54 182.936 1
 3 15 -5 2133.23 192.189 3
 -3 -15 5 2526.08 148.732 4
 -3 15 5 2274.4 192.556 1
 -3 15 5 2197.68 153.418 2
 -3 15 4 19029.2 456.141 2
 -3 15 4 18718.9 534.832 1
 3 15 -4 19451.1 520.313 1
 3 15 -4 18679.7 548.617 3
 3 15 -4 18372.7 542.464 2
 3 15 -3 112218 1393.48 1
 3 15 -3 109317 1462.11 2
 -3 15 3 110739 1433.13 1
 -3 15 3 113000 1304.48 2
 3 15 -3 114488 1487.55 3
 3 15 -2 16615.7 506.413 2
 -3 15 2 16235 437.568 2
 3 15 -2 16105.7 477.019 1
 -3 15 2 16208.7 479.807 1
 -3 15 1 1117.38 120.742 2
 3 15 -1 1252.5 142.79 2
 3 15 -1 1271.24 135.319 1
 -3 15 1 1383.27 142.109 1
 -3 15 0 53.1573 49.1254 1
 3 15 0 43.0461 58.6291 1
 -3 15 0 9.26572 48.8617 2
 3 15 0 51.4381 57.3815 2
 -3 15 -1 429.831 85.1065 2
 3 15 1 327.982 81.0788 2
 -3 15 -1 295.76 73.8441 1
 3 15 1 471.808 93.957 1
 -3 15 -2 22398 565.506 2
 3 15 2 21631.7 566.911 2
 -3 15 -2 22263.4 693.387 3
 3 15 2 21696.6 570.91 1
 -3 15 -2 22241.1 535.34 1
 3 15 3 97223.7 1318.44 2
 3 15 3 97594.6 1328.1 1
 -3 15 -3 97497.9 1562.74 3
 -3 -15 -3 96751.4 1099.96 5
 -3 15 -3 95890 1218.54 1
 -3 15 -4 7135.24 288.258 1
 -3 -15 -4 7329.62 269.387 5
 3 15 4 6511.45 308.535 2
 -3 15 -4 6907.15 402.335 3
 3 15 4 6954.56 324.208 1
 3 15 5 2501.69 194.975 2
 -3 -15 -5 2978.71 177.595 5
 3 15 5 2766.45 207.467 1
 -3 15 -5 2855.91 182.346 1
 -3 15 -5 2533.79 253.346 3
 -3 15 -6 951.95 174.484 3
 -3 -15 -6 1308.05 126.524 5
 -3 15 -6 1347.69 126.454 1
 3 15 6 1129.29 134.26 2
 3 15 6 954.299 131.973 1
 -3 15 -7 16517 680.481 3
 -3 15 -7 16874.1 432.867 1
 3 15 7 16343 519.106 1
 -3 -15 -7 16572.4 453.552 5
 3 15 7 16270.9 507.094 2
 -3 15 -8 41113.7 1116.48 3
 3 15 8 41351.8 858.578 1
 3 15 8 40547.7 826.138 2
 -3 15 -8 41518.3 699.749 1
 -3 15 -9 54126.6 1314.42 3
 3 15 9 51390.5 982.571 1
 3 15 9 51291.2 958.719 2
 -3 15 -9 54694.5 810.495 1
 3 15 10 4719.84 294.768 1
 -3 15 -10 4584.56 386.073 3
 3 15 10 4795.32 283.392 2
 -3 15 -11 1391.47 234.005 3
 3 15 11 1075.28 148.48 1
 3 15 11 1293.71 154.753 2
 -3 -15 -12 195.159 87.2395 3
 3 15 12 103.563 73.5672 1
 -3 15 -12 172.081 118.305 3
 3 15 12 192.729 74.2361 2
 -3 -15 -13 32867.4 958.592 3
 3 15 13 29436.2 768.166 1
 -3 15 -13 32041.5 1093.71 3
 -3 15 -14 27697.9 1049.94 3
 -3 -15 -14 29197.9 932.136 3
 -3 -15 -15 18357.1 750.674 3
 3 15 15 17000.7 589.971 1
 -3 -15 -16 1545.14 236.755 3
 -3 15 -16 1320.97 238.58 3
 -3 -15 -17 16.081 116.708 3
 -3 15 -17 99.1993 157.514 3
 -3 15 -18 3303.38 424.916 3
 -3 -15 -18 3326.6 368.515 3
 3 17 -18 5252.29 391.402 2
 3 17 -17 109.987 103.505 2
 3 17 -17 268.817 112.476 3
 -3 17 17 43.3928 79.8986 1
 -3 17 16 370.382 106.498 1
 3 17 -16 445.857 120.043 2
 3 17 -16 469.533 155.4 3
 -3 17 15 3192.49 283.284 1
 3 17 -15 3405.92 290.695 2
 3 17 -15 3186.25 340.131 3
 -3 17 14 61651.5 1245.05 1
 3 17 -14 58411.1 1239.09 2
 3 17 -13 31827.9 1011.6 3
 3 17 -13 28875.8 827.745 2
 -3 17 13 29494.2 829.97 1
 3 17 -12 3327.82 276.883 2
 3 17 -12 3365.96 328.393 3
 -3 17 12 2746.39 249.291 1
 -3 17 11 132.673 77.6741 1
 3 17 -11 250.224 97.161 2
 3 17 -10 159.587 77.9341 2
 3 17 -10 82.4739 96.2695 3
 -3 17 10 90.1201 68.7195 1
 3 17 -9 13059.1 521.516 2
 -3 17 9 12465.1 499.997 1
 3 17 -9 13044.9 574.466 3
 -3 17 8 59421.4 1123.95 1
 3 17 -8 62167.6 1248.61 3
 3 17 -8 57959.8 1126.08 2
 3 17 -7 2663.52 233.664 2
 -3 17 7 2188.84 162.535 2
 3 17 -7 2406.84 232.612 3
 -3 17 7 2335.46 213.279 1
 3 17 -6 1997.2 185.999 1
 3 17 -6 1840.44 195.426 2
 -3 17 6 1610.14 144.275 2
 -3 17 6 1857.41 191.201 1
 3 17 -6 1700.08 194.854 3
 -3 17 5 28.7702 60.19 1
 3 17 -5 9.55264 69.1767 3
 -3 17 5 159.608 61.7367 2
 3 17 -5 39.4561 60.0088 1
 3 17 -5 87.4822 60.5867 2
 3 17 -4 2101.54 200.985 2
 -3 17 4 2174.18 168.021 2
 3 17 -4 2451.66 217.882 3
 -3 17 4 1974.91 186.719 1
 3 17 -4 2208.15 194.988 1
 -3 17 3 5626.26 274.131 2
 3 17 -3 5740.24 320.551 2
 3 17 -3 5886.47 305.333 1
 -3 17 3 5568.14 309.507 1
 3 17 -2 48269.7 955.728 2
 3 17 -2 48619.8 909.264 1
 -3 17 2 49685.3 863.331 2
 -3 17 2 49467.7 927.093 1
 3 17 -1 1052.62 144.42 2
 -3 17 1 1234.99 145.439 1
 3 17 -1 977.734 127.24 1
 -3 17 1 996.924 125.317 2
 3 17 0 1145.81 150.441 2
 -3 17 0 1112.6 131.939 2
 -3 17 0 1327.28 148.315 1
 3 17 0 1137.44 143.69 1
 -3 17 -1 119.465 58.8909 2
 -3 17 -1 59.8413 62.8341 1
 3 17 1 74.458 70.2959 2
 3 17 1 58.3402 61.8368 1
 -3 17 -2 81336.3 1493.25 3
 -3 17 -2 79810.9 1219.64 2
 3 17 2 79614.4 1242.87 2
 3 17 2 79943.8 1235.14 1
 -3 17 -2 77706.3 1153.34 1
 -3 17 -3 26294.3 817.54 3
 3 17 3 25136 654.285 2
 -3 17 -3 25577.6 661.689 2
 3 17 3 25624.8 664.364 1
 -3 17 -3 23722.5 585.508 1
 -3 17 -4 48165.5 1139.79 3
 3 17 4 48929.4 939.11 2
 3 17 4 50173.7 968.561 1
 -3 17 -4 49329.2 866.313 1
 3 17 5 7488.83 357.94 2
 -3 17 -5 7309.28 453.504 3
 -3 17 -5 7950.31 328.463 1
 3 17 5 8039.15 382.563 1
 3 17 6 830.31 138.289 1
 3 17 6 948.07 136.463 2
 -3 17 -6 1034.41 124.916 1
 3 17 7 14076.6 516.182 1
 3 17 7 14030.1 499.978 2
 -3 17 -7 14001.6 662.019 3
 -3 17 -7 14358.5 433.193 1
 -3 17 -8 103929 1297.77 1
 3 17 8 103181 1467.66 2
 -3 17 -8 102953 1900.96 3
 3 17 8 100752 1512.69 1
 3 17 9 23466.2 663.641 2
 3 17 9 23393 687.758 1
 3 17 10 714.858 127.539 1
 -3 17 -10 632.367 165.954 3
 3 17 10 693.264 120.714 2
 3 17 11 -93.6864 86.0377 1
 -3 17 -11 -83.0376 139.092 3
 3 17 12 -139.472 99.9628 1
 -3 17 -12 94.5839 129.091 3
 -3 17 -13 6691.77 520.958 3
 3 17 13 5967.92 362.256 1
 -3 17 -14 60409.1 1605.29 3
 3 17 14 55909.7 1160.66 1
 -3 -17 -14 59561.6 1390.35 3
 -3 17 -15 11400.8 703.149 3
 3 17 15 9816.75 477.804 1
 -3 -17 -15 11638.4 627.393 3
 -3 17 -16 3242.91 390.243 3
 -3 -17 -16 3192.47 337.109 3
 -3 -17 -17 1358.12 249.004 3
 -3 17 -17 1937.05 312.514 3
 -3 19 17 43.7217 85.6329 1
 -3 19 16 -29.0416 98.7655 1
 3 19 -16 33.7824 101.862 2
 3 19 -15 1121.76 184.363 2
 -3 19 15 1129.01 182.24 1
 3 19 -14 51446.8 1203.36 2
 -3 19 14 51201.2 1177.31 1
 3 19 -13 113.631 100.943 2
 3 19 -13 123.667 112.725 3
 -3 19 13 -51.8766 106.963 1
 3 19 -12 6024.41 391.302 2
 3 19 -12 5825.26 441.817 3
 -3 19 12 5313.51 362.015 1
 -3 19 11 410.823 123.874 1
 3 19 -11 213.036 111.909 3
 3 19 -11 374.505 110.436 2
 -3 19 10 4106.16 310.871 1
 3 19 -10 4150.7 320.669 2
 3 19 -10 4054.03 346.301 3
 -3 19 9 81.8028 68.4243 1
 3 19 -9 3.44695 89.1209 2
 3 19 -8 69212.6 1357.49 3
 3 19 -8 68276 1293.45 2
 -3 19 8 67045.3 1262.37 1
 -3 19 7 -47.7492 95.2112 1
 3 19 -7 143.003 113.956 2
 3 19 -7 -10.9073 85.901 3
 -3 19 6 255.191 96.9973 1
 3 19 -6 243.306 70.6627 1
 3 19 -6 42.7837 68.2248 3
 3 19 -6 125.03 71.0793 2
 3 19 -5 100.156 64.4156 1
 3 19 -5 31.1056 84.9371 2
 -3 19 5 99.2401 52.7682 2
 -3 19 5 107.744 65.0881 1
 3 19 -5 133.039 86.2681 3
 3 19 -4 23340.9 650.242 1
 -3 19 4 22792.6 592.977 2
 3 19 -4 23283.2 700.56 2
 -3 19 4 22620.1 668.894 1
 -3 19 3 3464.3 231.647 2
 3 19 -3 3766.41 280.598 2
 -3 19 3 4174.01 282.264 1
 3 19 -3 3968.24 269.894 1
 3 19 -2 58637.4 1129.26 2
 -3 19 2 60190.6 1033.77 2
 3 19 -2 59389.1 1076.58 1
 -3 19 2 57289.1 1065.18 1
 3 19 -1 2276.03 219.274 2
 -3 19 1 2131.16 193.677 2
 3 19 -1 2363.63 209.875 1
 -3 19 1 2045.07 191.324 1
 3 19 0 61.8288 68.2167 1
 3 19 0 288.057 100.695 2
 -3 19 0 280.826 83.1872 2
 -3 19 0 82.4161 67.9225 1
 -3 19 -1 7316.42 352.136 1
 3 19 1 7816.68 384.109 1
 -3 19 -1 7522.89 365.361 2
 3 19 1 7247.1 375.944 2
 -3 19 -2 60768.3 1039.18 1
 3 19 2 60870.1 1115.25 1
 -3 19 -2 59854.9 1094.93 2
 3 19 2 61238.7 1130.31 2
 3 19 3 -25.4734 88.4431 1
 -3 19 -3 -47.0765 90.8996 2
 -3 19 -3 8.64376 93.1926 3
 -3 19 -3 87.3133 61.1804 1
 3 19 3 15.7795 90.1688 2
 3 19 4 41923.6 932.534 1
 -3 19 -4 43450.8 946.249 2
 -3 19 -4 43391.6 1134.44 3
 -3 19 -4 43124.4 862.91 1
 3 19 4 41318.2 912.079 2
 -3 19 -5 12703.4 510.853 2
 -3 19 -5 12077.6 603.754 3
 -3 19 -5 12349.6 441.479 1
 3 19 5 12264 485.111 2
 3 19 5 12153.9 497.358 1
 3 19 6 688.098 131.265 2
 -3 19 -6 887.96 125.413 1
 3 19 6 1082.35 163.256 1
 3 19 7 11246.8 473.654 2
 -3 19 -7 11494.7 610.239 3
 3 19 7 11080.6 486.252 1
 -3 19 -7 12533.7 437.274 1
 3 19 8 85230.2 1434.76 1
 -3 19 -8 87050.3 1775.32 3
 3 19 8 82189.1 1364.83 2
 3 19 9 108.899 69.7097 2
 -3 19 -9 50.27 127.079 3
 3 19 9 32.9943 79.9836 1
 -3 19 -10 2277.62 311.781 3
 3 19 10 2046.91 228.965 1
 3 19 11 937.599 159.043 1
 -3 19 -11 1327.75 261.942 3
 -3 19 -12 1042.1 234.575 3
 3 19 12 827.669 160.699 1
 -3 19 -13 78.8253 135.763 3
 3 19 13 0.31441 87.2792 1
 -3 19 -14 58071.5 1648.16 3
 -3 -19 -14 59211.7 1429.06 3
 3 19 14 54247.5 1209.53 1
 3 19 15 471.876 116.377 1
 -3 -19 -15 740.364 178.171 3
 -3 19 -15 322.783 155.682 3
 -3 -19 -16 7769.22 536.113 3
 -3 19 -16 6596 575.982 3
 -3 21 15 -58.4178 94.035 1
 3 21 -14 32665.7 990.701 2
 -3 21 14 32764.2 978.871 1
 -3 21 13 7441.54 451.937 1
 3 21 -13 8270.5 487.281 2
 3 21 -12 11869 578 2
 -3 21 12 11991.9 566.937 1
 -3 21 11 -143.476 107.403 1
 3 21 -11 -51.0103 109.886 2
 3 21 -10 12783.2 587.092 2
 -3 21 10 12243 557.528 1
 3 21 -9 10453.2 519.23 2
 -3 21 9 10374.2 502.917 1
 3 21 -8 40235 1027.79 2
 -3 21 8 34064.2 916.638 1
 3 21 -7 6128.23 394.199 2
 3 21 -7 5883.94 403.556 3
 -3 21 7 6056.58 375.097 1
 3 21 -6 2217.18 237.98 2
 -3 21 6 2542 252.493 1
 3 21 -6 2288.18 245.114 3
 3 21 -5 39.003 88.9011 2
 -3 21 5 -81.8454 83.3536 1
 3 21 -5 -30.7002 87.1737 1
 -3 21 4 21124.4 678.759 1
 3 21 -4 21993.6 672.596 1
 -3 21 4 20537.3 603.711 2
 3 21 -4 21263.9 710.565 2
 -3 21 3 35596.5 884.909 1
 -3 21 3 36116.8 823.729 2
 3 21 -3 36319.6 873.253 1
 3 21 -3 36348.3 929.259 2
 3 21 -2 44125.2 971.675 1
 -3 21 2 44213 979.905 1
 3 21 -2 44518.8 1023.04 2
 -3 21 2 43146.2 918.692 2
 3 21 -1 3.06392 75.328 2
 -3 21 1 -18.7284 75.1162 1
 3 21 -1 9.42927 86.2064 1
 -3 21 1 -108.165 88.6876 2
 3 21 0 168.39 86.199 2
 -3 21 0 64.7809 69.9176 2
 3 21 0 -27.6669 76.9972 1
 -3 21 0 77.9993 64.3121 1
 -3 21 -1 164.264 70.9679 2
 3 21 1 37.5437 73.82 1
 -3 21 -1 53.4044 76.84 1
 3 21 1 109.011 70.8862 2
 -3 21 -2 14694.5 532.619 1
 3 21 2 14242 551.92 1
 -3 21 -2 14123.4 540.713 2
 3 21 2 13657.4 551.166 2
 3 21 3 18397.5 641.502 1
 -3 21 -3 17144.4 607.826 2
 -3 21 -3 19174.7 603.45 1
 3 21 3 18569.5 633.333 2
 3 21 4 41028.9 955.115 2
 -3 21 -4 42714.8 1196 3
 3 21 4 39590.5 960.439 1
 -3 21 -4 40429.3 966.953 2
 -3 21 -4 41773.3 896.597 1
 3 21 5 316.556 110.431 1
 -3 21 -5 446.952 104.441 1
 -3 21 -5 319.726 137.738 3
 -3 21 -5 173.034 86.2447 2
 3 21 5 252.368 93.433 2
 3 21 6 115.791 68.0254 2
 -3 21 -6 -64.9823 121.042 3
 3 21 6 44.6246 83.309 1
 -3 21 -6 54.7227 55.6487 1
 -3 21 -6 44.0964 83.7547 2
 -3 21 -7 1963.96 231.003 2
 -3 21 -7 2154.3 193.87 1
 3 21 7 1662.72 196.898 2
 3 21 7 2186.48 237.537 1
 -3 21 -7 1829.84 261.66 3
 -3 21 -8 47147.2 1117.63 2
 -3 21 -8 47556.8 1328.5 3
 3 21 8 48209 1106.73 1
 -3 21 -9 6586.85 504.015 3
 3 21 9 5992.9 387.92 1
 -3 21 -10 12072.3 693.102 3
 3 21 10 11018 534.331 1
 -3 21 -11 598.847 205.079 3
 3 21 11 58.9641 87.5058 1
 -3 21 -12 2010.27 323.225 3
 3 21 12 1888.09 233.394 1
 -3 21 -13 5335.94 507.812 3
 3 21 13 5071.78 376.026 1
 -3 -21 -14 27072.1 986.73 3
 -3 21 -14 25075.9 1107.23 3
 3 21 15 1887.82 237.292 1
 -3 23 12 4605.03 371.334 1
 3 23 -11 180.154 95.0613 2
 -3 23 11 -44.4386 119.959 1
 -3 23 10 15421.8 659.433 1
 3 23 -10 17101.7 716.683 2
 3 23 -9 16225.6 686.791 2
 -3 23 9 15800.6 662.16 1
 -3 23 8 3694.54 320.196 1
 3 23 -8 3809.67 332.631 2
 -3 23 7 4985.79 363.531 1
 3 23 -7 4802.15 367.817 2
 -3 23 6 9661.61 496.328 1
 3 23 -6 9100.94 499.83 2
 -3 23 5 2739.67 267.552 1
 3 23 -5 3074.47 294.082 2
 3 23 -5 2590.94 256.857 1
 -3 23 4 17999.2 657.335 1
 3 23 -4 19867.3 680.895 1
 3 23 -4 19523.2 722.83 2
 -3 23 3 65157.5 1261.49 1
 3 23 -3 60936.1 1228.94 1
 3 23 -3 61782.9 1304.26 2
 -3 23 2 5915.57 369.99 1
 3 23 -2 6183.46 400.492 2
 -3 23 2 5898.29 352.705 2
 3 23 -2 6341.06 386.286 1
 3 23 -1 3566.1 305.851 2
 -3 23 1 3560 278.953 2
 3 23 -1 4138.17 315.588 1
 -3 23 1 3693.79 294.109 1
 3 23 0 81.8257 101.993 1
 -3 23 0 115.273 84.4331 2
 -3 23 0 74.2316 80.8407 1
 3 23 0 121.628 81.1144 2
 -3 23 -1 1918.78 208.248 2
 3 23 1 1856.01 214.213 1
 -3 23 -1 2129.72 226.064 1
 3 23 1 2157.72 236.567 2
 -3 23 -2 2215.14 235.104 2
 3 23 2 2491.55 246.656 1
 -3 23 -2 2935.49 255.24 1
 3 23 2 2446.19 251.487 2
 -3 23 -3 48080.3 1030 1
 3 23 3 47649 1098.25 1
 -3 23 -3 44074.3 1055.11 2
 3 23 3 45147.1 1068.27 2
 3 23 4 17786.3 668.88 1
 -3 23 -4 18203.7 673.519 2
 3 23 4 16024.9 623.108 2
 -3 23 -4 18272.1 617.919 1
 3 23 5 2635.8 269.65 1
 -3 23 -5 2615.98 320.135 3
 3 23 5 2019.58 232.1 2
 -3 23 -5 2101.87 237.276 2
 -3 23 -5 2361.2 226.019 1
 -3 23 -6 3179.66 294.104 2
 -3 23 -6 2788.72 341.89 3
 -3 23 -6 3419.95 268.292 1
 3 23 6 3329.92 296.532 1
 -3 23 -7 4643.27 429.088 3
 3 23 7 4514.42 351.739 1
 -3 23 -7 4816.47 360.463 2
 3 23 8 679.266 159.114 1
 -3 23 -8 1061.24 186.4 2
 -3 23 -8 911.73 198.687 3
 -3 23 -9 18398.5 728.162 2
 3 23 9 17762.7 706.32 1
 -3 23 -9 17783.9 849.891 3
 -3 23 -10 3811.04 408.249 3
 -3 23 -10 3996.79 346.84 2
 3 23 10 3809.71 334.855 1
 3 23 11 -184.918 145.668 1
 -3 23 -11 -72.6881 170.61 3
 -3 23 -12 11233 726.742 3
 3 25 -8 966.646 185.283 2
 -3 25 7 11607.4 582.534 1
 3 25 -7 12113.8 615.689 2
 -3 25 6 473.917 139.071 1
 3 25 -6 692.213 159.88 2
 -3 25 5 766.192 158.752 1
 3 25 -5 703.691 169.071 2
 3 25 -4 7551.69 447.643 1
 3 25 -4 8017.19 486.329 2
 -3 25 4 7341.03 451.73 1
 3 25 -3 35305.2 1022.75 2
 3 25 -3 35588.4 979.338 1
 -3 25 3 36162.1 996.292 1
 3 25 -2 1876.25 226.777 1
 3 25 -2 1795.51 230.274 2
 -3 25 2 1633.56 211.458 1
 -3 25 1 15600.2 632.531 1
 3 25 -1 14587.5 639.118 2
 3 25 -1 14571.2 624.223 1
 -3 25 0 265.993 113.015 2
 3 25 0 257.781 122.298 2
 3 25 0 163.316 104.409 1
 -3 25 0 528.112 141.751 1
 -3 25 -1 19527.7 693.905 1
 3 25 1 20443 741.877 1
 -3 25 -1 18208.7 688.392 2
 -3 25 -2 828.256 147.132 1
 3 25 2 679.306 156.541 1
 -3 25 -2 792.092 152.427 2
 3 25 2 739.55 146.221 2
 3 25 3 22236.8 773.667 2
 3 25 3 23512.2 805.755 1
 -3 25 -3 24330.2 764.173 1
 -3 25 -3 23305.8 802.995 2
 -3 25 -4 723.628 136.961 1
 3 25 4 681.886 152.796 2
 3 25 4 766.202 157.944 1
 -3 25 -4 788.62 155.589 2
 -3 25 -5 3795.48 302.325 1
 3 25 5 3537.2 319.874 1
 -3 25 -5 3282.11 309.685 2
 3 25 6 5073.19 388.23 1
 -3 25 -6 5218.77 470.258 3
 -3 25 -6 5024.09 381.075 2
 -3 25 -7 22647.3 826.004 2
 -3 25 -7 22375.1 979.831 3
 -3 25 -8 -36.7849 100.225 2
 -3 25 -8 -179.393 191.805 3
 -3 25 -9 17723.9 882.203 3
 -3 25 -10 1216.79 258.738 3
 3 27 -4 157.228 93.3801 1
 3 27 -3 9394.76 548.557 2
 3 27 -3 10320.1 553.642 1
 3 27 -2 3540.45 337.177 2
 3 27 -2 4124.53 349.229 1
 -3 27 1 24948.9 844.8 1
 3 27 -1 24801.6 858.987 1
 3 27 -1 24107.9 876.758 2
 -3 27 0 -17.8875 91.6073 1
 3 27 0 -97.6422 112.027 2
 -3 27 -1 14344.1 626.784 1
 3 27 1 12882.4 628.459 2
 3 27 2 3557.68 335.347 2
 -3 27 -2 3322.52 319.823 2
 -3 27 -2 3415.27 313.405 1
 -3 27 -3 13568.5 600.601 1
 -3 27 -3 11769.8 601.631 2
 -3 27 -4 988.874 185.779 2
 -3 27 -4 1133.72 175.015 1
 4 0 -23 1563.65 316.831 3
 4 0 -22 127398 2308.97 3
 4 0 -21 502.547 180.602 3
 4 0 -20 163.918 107.131 3
 4 0 -19 327.15 146.871 3
 4 0 -18 35997.3 1029.06 3
 4 0 -17 919.887 238.431 3
 4 0 -16 146231 2076.98 3
 -4 0 15 82.0936 39.0875 1
 4 0 -15 219.643 112.174 3
 -4 0 14 10926.7 311.466 1
 4 0 -14 10359.9 465.553 3
 4 0 -13 -5.59681 62.1663 3
 -4 0 13 55.7629 33.2206 1
 -4 0 13 -53.0974 65.1378 4
 -4 0 12 96276.2 1336.46 4
 -4 0 12 95721.4 1067.8 1
 4 0 -12 97912.2 1411.42 3
 -4 0 11 232.445 50.8012 1
 -4 0 11 86.3188 56.874 4
 4 0 -11 145.182 59.8626 3
 -4 0 10 22530.2 540.703 4
 -4 0 10 23012.1 442.362 1
 4 0 -10 22709.8 577.987 3
 -4 0 9 68.2542 33.7994 1
 -4 0 9 8.94995 55.3321 4
 4 0 -9 54.6415 51.1606 3
 -4 0 8 30135.5 493.39 1
 4 0 -8 29824.1 579.505 3
 -4 0 8 29770.8 563.691 4
 -4 0 7 133.197 78.9025 4
 4 0 -7 87.1947 42.7983 3
 -4 0 7 92.3195 39.9062 1
 -4 0 6 241155 1940.19 1
 -4 0 6 233970 1983.01 4
 -4 0 5 589.796 68.5996 1
 4 0 -5 703.029 49.911 2
 4 0 -4 28575.5 316.732 2
 -4 0 4 29077.4 453.568 1
 4 0 -3 943.518 52.0371 2
 -4 0 3 802.586 46.6441 2
 -4 0 3 841.41 77.4954 1
 -4 0 2 98099.1 778.045 2
 -4 0 2 101494 986.398 1
 -4 0 1 93.8328 24.1731 2
 4 0 -1 100.978 30.9486 5
 4 0 -1 154.323 27.0007 3
 -4 0 1 83.7319 19.5326 3
 4 0 -1 164.25 28.5808 2
 -4 0 1 117.333 32.164 5
 4 0 0 15041 277.444 5
 -4 0 0 15040.4 248.338 2
 -4 0 0 13018.6 229.697 3
 4 0 0 14639.6 251.306 3
 4 0 0 14271.5 245.822 2
 -4 0 0 15180.5 279.508 5
 4 0 1 35.8375 23.9399 2
 4 0 1 133.641 29.9323 3
 -4 0 -1 97.7159 32.7903 3
 -4 0 -1 71.1032 29.7218 2
 4 0 2 56816.1 661.888 3
 -4 0 -2 56031 656.054 3
 -4 0 -3 479.457 68.6355 3
 -4 0 -4 2815 151.06 3
 -4 0 -5 130.581 21.6851 1
 -4 0 -5 34.2104 33.2757 3
 -4 0 -6 187425 1286.84 1
 -4 0 -6 131864 1644.67 3
 -4 0 -7 76.6324 19.2526 1
 -4 0 -7 242.984 84.7689 3
 -4 0 -8 6787.48 313.153 3
 -4 0 -8 6598.68 128.251 1
 -4 0 -9 46.1346 14.54 1
 -4 0 -9 44.0753 65.859 3
 -4 0 -10 55672.7 492.117 1
 -4 0 -10 67908.4 1127.37 3
 -4 0 -11 263.314 120.499 3
 -4 0 -11 92.0074 15.6209 1
 -4 0 -12 75857.3 1344.01 3
 -4 0 -13 242.4 143.577 3
 -4 0 -14 283.407 113.188 3
 -4 0 -15 168.058 156.342 3
 -4 0 -16 103088 1841.61 3
 -4 0 -17 748.716 251.498 3
 -4 0 -18 18630.7 834.889 3
 -4 0 -19 132.702 123.091 3
 -4 0 -20 1480.37 245.039 3
 -4 0 -21 292.534 198.672 3
 4 -2 -23 3641.09 414.37 3
 4 2 -23 3730.86 417.098 3
 4 -2 -22 67025.3 1644.93 3
 4 2 -22 67290.4 1665.11 3
 4 -2 -21 7838.65 538.901 3
 4 2 -21 6241.65 494.058 3
 4 -2 -20 1438.51 228.217 3
 4 2 -20 1761.08 250.989 3
 4 2 -19 4088.36 380.467 3
 4 -2 -19 4030.87 380.966 3
 4 2 -18 56122 1295.58 3
 4 -2 -18 55975.9 1301.88 3
 4 -2 -17 7020.77 447.488 3
 4 2 -17 6863.81 449.552 3
 4 -2 -16 97461.9 1662.9 3
 4 2 -16 104841 1722.48 3
 -4 2 15 3303.59 182.782 1
 4 2 -15 3591.21 293.478 3
 4 -2 -15 3658.27 302.254 3
 -4 -2 14 14252.7 349 1
 4 -2 -14 13891.9 545.659 3
 4 2 -14 14344.2 539.463 3
 -4 2 14 14214.4 377.568 1
 -4 -2 14 14596.5 516.095 4
 4 -2 -13 1378.5 179.362 3
 -4 -2 13 1317.85 108.003 1
 -4 -2 13 1004.91 136.49 4
 -4 2 13 1283.04 112.707 1
 4 2 -13 1373.78 172.475 3
 -4 2 12 56174.4 970.026 4
 -4 -2 12 55479.2 978.669 4
 -4 2 12 56090.8 781.537 1
 4 -2 -12 55680.1 1029.57 3
 4 2 -12 56687.6 1020.44 3
 -4 -2 12 55481.9 741.741 1
 -4 -2 11 90526.9 1000.21 1
 4 2 -11 90205.9 1285.89 3
 -4 2 11 92299.4 1232.45 4
 -4 -2 11 95332.4 1259.22 4
 4 -2 -11 90038.4 1303.75 3
 4 -2 -10 101639 1339.53 3
 -4 -2 10 102202 1098.27 1
 -4 -2 10 101915 1279.38 4
 -4 2 10 103133 1115.96 1
 -4 2 10 104137 1284.76 4
 4 2 -10 101254 1319.84 3
 4 2 -9 3084.14 194.614 3
 -4 2 9 3380.89 167.195 1
 -4 -2 9 3124.28 204.01 4
 -4 2 9 3502.79 212.411 4
 -4 -2 9 2856.38 150.387 1
 4 2 -8 71.2806 49.711 3
 -4 -2 8 144.765 50.1632 1
 -4 2 8 140.2 57.1796 4
 -4 -2 8 136.632 67.8355 4
 -4 2 7 19404.3 387.383 1
 -4 2 7 19129.5 417.342 4
 -4 -2 7 19526.4 428.292 4
 4 2 -7 19281.6 421.611 3
 -4 -2 7 19375.6 409.526 1
 4 2 -6 255426 2159.7 3
 -4 2 6 256659 2161.71 4
 4 2 -5 56389.3 598.622 2
 -4 2 5 54699.9 675.498 1
 4 2 -5 54842.1 652.955 3
 -4 2 5 56656.5 678.659 4
 4 2 -4 1368.52 75.3165 2
 -4 2 4 1498.97 94.9061 1
 4 2 -4 1442.24 80.1578 3
 -4 -2 3 126437 1045.45 2
 -4 2 3 127472 1141.13 1
 4 2 -3 126015 976.234 3
 4 2 -3 125572 1049.13 2
 -4 2 2 234.755 23.6954 2
 -4 2 2 178.113 39.9348 1
 4 -2 -2 121.485 30.2907 3
 -4 -2 2 266.507 36.7532 2
 4 2 -2 254.655 36.9833 2
 -4 -2 1 432.425 51.3168 5
 4 -2 -1 491.832 55.458 3
 -4 -2 1 410.119 45.7618 2
 -4 2 1 485.114 54.0165 3
 4 2 -1 420.825 50.7826 2
 4 -2 -1 411.775 48.8344 1
 4 -2 -1 477.1 45.4207 5
 4 2 -1 468.555 54.2262 5
 -4 2 1 534.021 56.5127 1
 -4 -2 0 402519 2929.32 5
 -4 2 0 394743 2854.3 5
 -4 2 0 402109 2876.41 1
 -4 -2 0 411518 2884.45 2
 4 -2 0 394478 2953.67 3
 4 2 0 388943 2867.07 2
 4 -2 0 403396 2845.87 5
 4 2 0 406291 2938.06 5
 -4 2 0 387484 2957.02 3
 4 -2 0 421035 2878.65 1
 -4 -2 -1 53219.3 529.005 3
 -4 2 -1 55640.5 575.487 1
 4 2 1 54488.1 621.141 2
 4 -2 1 58439.3 601.882 1
 4 -2 1 54977.6 694.636 3
 -4 2 -1 53112.7 675.252 3
 -4 -2 -1 56056 643.045 5
 4 2 1 55147.3 543.356 3
 4 -2 2 2734.87 110.976 1
 -4 -2 -2 2694.96 111.109 3
 -4 2 -2 2901.3 101.407 1
 4 2 2 2888.9 117.453 3
 4 2 2 2751.38 127.061 2
 -4 2 -2 2642.11 143.964 3
 -4 2 -3 2788.87 92.7041 1
 4 2 3 3034.93 139.869 2
 -4 -2 -3 2915.38 108.575 1
 -4 -2 -3 2593.68 123.046 3
 -4 2 -3 2761.17 154.411 3
 -4 -2 -4 2237.12 129.043 3
 -4 2 -4 2295.06 78.1387 1
 -4 -2 -4 2123.92 91.569 1
 -4 2 -4 2167.93 146.303 3
 -4 -2 -5 80020.8 950.418 3
 -4 -2 -5 83485.1 739.652 1
 -4 2 -5 81449.1 1044.47 3
 -4 2 -6 132191 1493.54 3
 -4 -2 -6 129774 1392.41 3
 -4 -2 -7 2942.24 191.378 3
 -4 2 -7 2880.9 204.283 3
 -4 2 -8 6232.74 312.532 3
 -4 -2 -8 6212.3 286.165 3
 -4 -2 -9 1165.28 143.363 3
 -4 2 -9 916.271 129.469 3
 -4 -2 -10 36002.3 790.157 3
 -4 2 -10 35721.2 828.867 3
 -4 -2 -11 73784.2 1239.39 3
 -4 2 -11 73745.3 1295.05 3
 -4 2 -12 77881.9 1383.88 3
 -4 -2 -12 81673.7 1378.8 3
 -4 2 -13 1719.04 218.891 3
 -4 -2 -13 2041.59 231.706 3
 -4 -2 -14 554.216 135.313 3
 -4 2 -14 341.856 107.116 3
 -4 -2 -15 1202.17 200.829 3
 -4 2 -15 1001.59 206.399 3
 -4 2 -16 60751.3 1380.27 3
 -4 -2 -16 59667.2 1332.38 3
 -4 -2 -17 48568.2 1244.09 3
 -4 2 -17 48519.6 1271.31 3
 -4 -2 -18 12890 671.629 3
 -4 2 -18 13385.3 720.03 3
 -4 2 -19 2381.86 323.602 3
 -4 -2 -19 2391.52 304.022 3
 -4 -2 -20 111.818 112.254 3
 -4 2 -20 -16.5827 116.03 3
 -4 2 -21 2358.97 339.675 3
 -4 -2 -21 2458.46 344.572 3
 4 4 -23 20439.2 929.488 3
 4 -4 -22 11973.1 691.764 3
 4 4 -22 11040.7 666.63 3
 4 -4 -21 31662.4 1079.63 3
 4 4 -21 30270.2 1072.77 3
 4 4 -20 4815.12 416.747 3
 4 -4 -20 4894.64 411.851 3
 4 4 -19 2365.25 282.666 3
 4 -4 -19 2258.21 276.847 3
 4 -4 -18 13038.3 636.081 3
 4 4 -18 13478.3 641.804 3
 4 -4 -17 108789 1855.95 3
 4 4 -17 112064 1897.91 3
 -4 4 16 10433.9 352.464 1
 4 4 -16 9602.33 513.373 3
 4 -4 -16 11388.1 542.349 3
 4 -4 -15 2568.44 269.213 3
 4 4 -15 2803.14 265.203 3
 -4 4 15 2686.17 174.979 1
 -4 -4 14 84.5035 88.6008 4
 -4 4 14 158.93 54.2574 1
 4 -4 -14 279.962 99.7337 3
 -4 -4 14 168.089 46.6719 1
 4 4 -14 188.555 82.3739 3
 -4 -4 13 94.7169 62.4351 4
 4 -4 -13 0.73828 76.6143 3
 -4 -4 13 118.263 39.5581 1
 4 4 -13 180.244 72.0885 3
 -4 4 13 164.6 59.4446 1
 4 -4 -12 15092.3 531.776 3
 -4 -4 12 15622.9 497.498 4
 -4 4 12 15527.2 403.409 1
 -4 -4 12 14740.4 355.968 1
 4 4 -12 15741.5 520.581 3
 -4 -4 11 139113 1619.32 4
 4 4 -11 139632 1684.97 3
 -4 4 11 139598 1595.51 4
 -4 4 11 139598 1443.79 1
 -4 -4 11 135782 1373.56 1
 -4 4 10 87942.6 1042.49 1
 -4 4 10 86822.6 1134 4
 -4 -4 10 86186.9 1157.84 4
 -4 -4 10 84867.4 1025.08 1
 4 4 -10 88599.4 1216.06 3
 -4 4 9 10267.9 332.703 4
 -4 -4 9 9237.84 311.763 1
 -4 4 9 10229.3 305.184 1
 4 -4 -9 9862.41 203.446 2
 4 4 -9 9617.24 343.616 3
 4 4 -8 4046.64 209.584 3
 -4 4 8 4373.23 192.087 1
 -4 -4 8 4504.3 220.147 4
 4 -4 -8 4072.78 111.39 2
 -4 4 8 4415.81 208.926 4
 4 4 -7 830.664 92.7084 3
 -4 4 7 976.955 94.2305 4
 -4 -4 7 655.291 84.6128 4
 4 -4 -7 654.582 40.5632 2
 -4 4 7 1127.9 99.0294 1
 -4 4 6 62592.9 784.905 1
 -4 4 6 60582.7 744.356 4
 4 4 -6 63519.6 789.18 3
 -4 -4 5 203608 1668.76 3
 -4 4 5 212217 1715.22 4
 4 4 -5 212853 1728.89 2
 -4 4 5 211462 1790.98 1
 4 4 -5 210647 1736.64 3
 4 4 -4 80927.3 826.87 2
 -4 4 4 79140.6 868.244 1
 4 4 -4 77901.4 773.441 3
 -4 -4 4 77270.5 730.609 3
 4 4 -3 1788.52 102.812 2
 -4 4 3 2003.11 114.747 1
 4 4 -3 1707.71 76.288 3
 -4 -4 3 1896.26 69.6481 3
 4 4 -2 111690 1022.91 2
 -4 4 2 109296 1046.35 1
 4 -4 -1 142033 1110.44 5
 -4 4 1 138982 1221.47 1
 4 4 -1 138622 1221.88 2
 -4 4 1 137351 1323.22 3
 -4 4 0 42175.5 520.997 1
 -4 4 0 41690.2 623.773 3
 4 4 0 41796.1 544.296 2
 -4 -4 0 45624.3 582.965 5
 -4 4 0 43057.2 469.125 5
 -4 4 -1 39015.8 476.297 1
 4 -4 1 41641.1 491.526 1
 4 4 1 40115 544.175 2
 -4 -4 -1 40631 549.096 5
 -4 4 -1 41272.9 652.003 3
 -4 -4 -1 38726.8 429.662 3
 -4 4 -2 20055 453.109 3
 -4 -4 -2 19965.2 323.724 3
 -4 4 -2 19999.3 303.208 1
 4 4 2 20421.8 383.562 2
 4 -4 2 21301.1 315.147 1
 -4 -4 -3 300.936 49.4709 3
 4 -4 3 260.784 36.5675 1
 4 4 3 134.954 38.3518 1
 -4 4 -3 185.43 31.7867 1
 -4 4 -3 274.177 68.3919 3
 4 -4 4 49107.9 500.425 1
 -4 4 -4 45951.8 464.97 1
 4 4 4 46254.1 582.337 1
 -4 -4 -4 48100.4 667.996 3
 4 4 4 47712.8 666.794 2
 -4 4 -4 46624.9 790.871 3
 -4 -4 -5 172709 1638.16 3
 4 4 5 171926 1459.21 1
 4 4 5 176371 1621.29 2
 -4 4 -5 173331 1828.76 3
 -4 4 -5 170339 1256.5 1
 4 -4 5 174610 1313.34 1
 -4 -4 -6 4618.79 219.904 3
 4 4 6 3891.97 151.897 1
 -4 4 -6 4289.55 250.405 3
 4 4 7 17955.8 343.109 1
 -4 4 -7 19292.7 548.902 3
 -4 -4 -7 18883.2 483.815 3
 4 4 8 8002.38 225.036 1
 -4 4 -8 9027.07 396.549 3
 -4 -4 -8 8829.39 347.42 3
 4 4 9 3388.96 146.501 1
 -4 4 -9 3595.06 262.815 3
 -4 -4 -9 3657.39 235.625 3
 4 4 10 16470.2 337.9 1
 -4 4 -10 17158.7 585.939 3
 -4 -4 -10 17127.1 535.954 3
 -4 4 -11 143790 1937.79 3
 4 4 11 138861 1301.51 1
 -4 -4 -11 142431 1818.96 3
 4 4 12 77515.2 875.889 1
 -4 4 -12 81367.2 1440.21 3
 -4 -4 -12 81065.4 1346.96 3
 -4 -4 -13 4725.23 329.497 3
 4 4 13 4346.68 180.336 1
 -4 4 -13 4639.81 341.027 3
 -4 4 -14 1221.6 201.415 3
 -4 -4 -14 1159.26 177.99 3
 -4 4 -15 5415.82 407.977 3
 -4 -4 -15 5533.49 382.451 3
 -4 4 -16 22586.4 860.668 3
 -4 -4 -16 24583.8 843.259 3
 -4 4 -17 68658.6 1594.43 3
 -4 -4 -17 74719.6 1560.23 3
 -4 4 -18 11191.5 665.701 3
 -4 -4 -18 12421.1 640.28 3
 -4 -4 -19 -13.8706 96.7737 3
 -4 4 -19 62.5324 129.986 3
 -4 -4 -20 1009.32 224.55 3
 -4 4 -20 848.208 209.034 3
 -4 4 -21 9238.48 638.525 3
 -4 -4 -21 7365.5 562.432 3
 4 6 -23 37942.2 1283.9 3
 4 6 -22 468.884 198.325 3
 4 -6 -22 477.083 193.745 3
 4 6 -21 25930.9 1002.47 3
 4 -6 -21 27345.3 1016.59 3
 4 6 -20 8038.82 539.423 3
 4 -6 -20 7699.39 524.69 3
 4 -6 -19 1125.41 203.571 3
 4 6 -19 945.857 204.197 3
 4 -6 -18 13166.5 652.779 3
 4 6 -18 12365.7 616.88 3
 4 6 -17 138622 2151.77 3
 4 -6 -17 149006 2276.46 3
 4 -6 -16 1645.63 213.898 3
 4 6 -16 1426.35 211.189 3
 -4 6 16 986.774 122.431 1
 4 -6 -15 17238.8 657.588 3
 -4 6 15 16601.9 474.561 1
 -4 -6 15 17390 594.721 4
 4 6 -15 17641.8 657.176 3
 4 -6 -14 13369.2 544.633 3
 -4 6 14 13224.4 409.693 1
 -4 -6 14 12937.8 493.074 4
 4 6 -14 12742.9 534.914 3
 4 -6 -13 10956.3 487.814 3
 -4 -6 13 10712.5 318.782 1
 -4 6 13 11806.8 379.818 1
 4 6 -13 10517.1 466.594 3
 -4 -6 13 11557.2 450.572 4
 -4 -6 12 64.9278 45.2817 1
 -4 -6 12 -23.7674 87.082 4
 -4 6 12 40.1222 47.492 1
 4 6 -12 44.6443 69.3374 3
 -4 6 11 204164 1974.88 1
 4 6 -11 207527 2248.4 3
 -4 -6 11 204265 2110.05 4
 4 6 -10 1333.96 147.346 3
 4 -6 -10 1474.98 79.4303 2
 -4 6 10 1469.9 127.11 1
 -4 -6 10 1439.72 142.612 4
 4 -6 -9 408.616 40.4525 2
 -4 6 9 299.569 66.2566 4
 -4 6 9 326.346 65.732 1
 4 6 -9 482.301 91.2426 3
 4 -6 -8 218.497 25.8374 2
 -4 6 8 314.778 62.7351 1
 -4 6 8 69.0205 46.5616 4
 4 6 -8 251.709 74.6581 3
 -4 -6 7 76158.5 943.449 4
 -4 6 7 77153.9 888.14 4
 -4 6 7 75335 931.673 1
 4 6 -7 76221.6 980.291 3
 4 6 -6 366.551 65.0041 2
 -4 6 6 226.988 52.8562 4
 4 6 -6 260.187 59.3778 3
 -4 6 6 482.337 78.8692 1
 4 6 -5 87715.6 895.4 2
 -4 6 5 88146.1 773.1 4
 4 6 -5 85213.6 879.456 3
 -4 6 5 87466.2 913.264 1
 -4 6 4 7022.41 127.445 2
 -4 6 4 7392.33 240.818 1
 -4 6 4 7304.34 182.202 4
 4 6 -4 7255.19 232.751 2
 4 6 -4 7218.05 216.361 3
 -4 -6 4 7201.34 191.889 3
 -4 6 3 19733.2 282.48 4
 -4 6 3 20327.9 396.952 1
 -4 -6 3 19179.8 303.127 3
 4 6 -3 19614.3 386.393 2
 4 6 -3 19549.2 325.707 3
 -4 -6 2 14074.3 246.67 3
 4 6 -2 13684.9 233.6 3
 4 6 -2 14201.2 319.914 2
 -4 6 2 14098.7 317.344 1
 4 6 -1 206387 1768.92 2
 4 -6 -1 210815 1509.64 5
 -4 -6 1 206944 1585.19 3
 -4 6 1 209884 1747.06 1
 -4 6 0 9609.85 173.882 5
 -4 6 0 9649.32 243.101 1
 -4 6 0 9812.58 318.322 3
 4 6 0 9852.98 266.236 2
 4 6 0 9899.79 265.302 1
 -4 -6 0 9739.78 257.709 5
 4 6 1 216911 1802.57 1
 -4 6 -1 210179 2019.47 3
 4 6 1 210146 1808.92 2
 -4 6 -1 214685 1721.86 1
 -4 -6 -1 218678 1815.19 5
 4 6 2 1883.72 115.129 1
 -4 -6 -2 2042.6 123.003 5
 4 6 2 1990.28 129.964 2
 -4 6 -2 1969.61 159.648 3
 -4 6 -2 1969.05 100.126 1
 -4 6 -3 2373.19 105.224 1
 4 6 3 2168.66 126.823 1
 4 6 3 2575.37 148.416 2
 -4 6 -3 2185.52 171.708 3
 -4 6 -4 213434 1625.79 1
 4 6 4 209800 1787.75 1
 -4 6 -4 209041 2155.77 3
 4 6 4 214343 1895.26 2
 -4 -6 -5 333730 2771.94 3
 4 6 5 338835 2658.15 1
 4 6 5 339862 2786.2 2
 -4 6 -5 339082 3118.7 3
 -4 6 -5 329398 2421.66 1
 4 -6 6 13976.6 237.068 1
 4 6 6 13473.5 322.877 1
 -4 6 -6 13849.4 221.639 1
 -4 6 -6 13879.9 491.392 3
 4 6 6 13875 377.056 2
 -4 -6 -6 13375.3 384.108 3
 -4 -6 -7 25771.5 573.784 3
 4 6 7 25579.7 461.083 1
 -4 6 -7 26601.2 714.444 3
 4 6 7 26953.4 550.07 2
 -4 6 -7 25062.6 290.288 1
 -4 -6 -8 7586.65 330.249 3
 4 6 8 7276.65 238.426 1
 4 6 9 1490.01 112.885 1
 -4 -6 -9 1554.35 165.034 3
 -4 6 -9 1656.73 190.376 3
 4 6 10 5157.98 209.135 1
 -4 6 -10 5640.32 356.259 3
 -4 -6 -10 5403.95 305.381 3
 4 6 11 133198 1356.84 1
 -4 6 -11 137834 1970.07 3
 -4 -6 -11 135519 1786.39 3
 -4 6 -12 7478.55 443.191 3
 -4 -6 -12 7975.94 407.454 3
 4 6 12 7283.21 256.245 1
 -4 -6 -13 17021.9 618.965 3
 4 6 13 16225.8 393.758 1
 -4 6 -13 17583.2 695.129 3
 -4 6 -14 2661.39 300.791 3
 -4 -6 -14 2899.86 276.208 3
 -4 -6 -15 18685.7 702.06 3
 -4 6 -15 18700.2 770.498 3
 -4 6 -16 640.694 166.473 3
 -4 -6 -16 746.88 150.685 3
 -4 -6 -17 64850.3 1440.11 3
 -4 6 -17 67427.6 1582.88 3
 -4 6 -18 9377.14 606.792 3
 -4 -6 -18 10012.6 574.192 3
 -4 6 -19 156.8 143.446 3
 -4 -6 -19 669.062 170.286 3
 -4 -6 -20 5647.11 470.835 3
 -4 6 -20 5330.05 492.187 3
 4 8 -23 27520.4 1122.68 3
 4 8 -22 20665 938.582 3
 4 8 -21 29098.5 1087.72 3
 4 -8 -21 30508.8 1097.85 3
 4 8 -20 5101.24 444.688 3
 4 -8 -20 5576.91 461.323 3
 4 -8 -19 6066.08 467.593 3
 4 8 -19 6118.05 465.256 3
 4 -8 -18 221.575 108.781 3
 4 8 -18 404.144 136.198 3
 4 -8 -17 27983 920.405 3
 4 8 -17 26731.1 907.3 3
 -4 8 17 25370.1 650.992 1
 4 -8 -16 19907.4 738.591 3
 -4 8 16 17435.4 522.621 1
 4 8 -16 18733.8 726.022 3
 4 -8 -15 22678.9 764.466 3
 4 8 -15 22107.4 757.08 3
 -4 -8 15 21396.4 667.904 4
 -4 8 14 3301.74 227.655 1
 -4 -8 14 3733.08 271.101 4
 4 8 -14 3166.6 279.353 3
 -4 8 13 47575.4 860.07 1
 -4 -8 13 50605.5 850.201 1
 -4 -8 13 51616.6 987.11 4
 4 8 -13 50043.5 1079.64 3
 -4 -8 12 18942.5 557.161 4
 4 8 -12 18950.1 625.11 3
 -4 8 12 18966.4 507.741 1
 4 8 -11 55056.5 1048.85 3
 -4 8 11 54459.2 888.788 1
 -4 -8 11 54193.5 935.697 4
 -4 -8 10 9286.75 351.186 4
 4 -8 -10 9273.5 193.978 2
 4 8 -10 9093.46 393.233 3
 -4 8 10 9945.1 348.376 1
 4 -8 -9 51016.4 516.724 2
 -4 -8 9 51268.2 835.881 4
 -4 8 9 53491 842.368 1
 4 8 -9 53389.6 950.673 3
 4 -8 -8 9174.19 167.924 2
 4 8 -8 9545.42 361.147 3
 -4 -8 8 9636.92 329.752 4
 -4 8 8 9286.26 324.758 1
 -4 8 7 98050.3 828.207 2
 4 8 -7 98456.6 1264.78 3
 4 -8 -7 100100 804.897 2
 4 8 -7 101174 1184.55 2
 -4 -8 7 96992 1140.36 4
 -4 8 7 100098 1193.43 1
 4 8 -6 73522.4 958.295 2
 -4 8 6 72509.3 667.734 2
 4 8 -6 71849.5 988.415 3
 -4 8 6 73355.5 967.222 1
 4 8 -5 142845 1464.07 2
 4 8 -5 141425 1446.1 3
 -4 8 5 143692 1233.97 4
 -4 8 5 144696 1146.83 2
 -4 8 5 147154 1484.3 1
 -4 8 4 392.88 43.7998 2
 4 8 -4 267.295 63.0568 2
 -4 8 4 322.255 74.2227 1
 -4 8 4 199.314 34.4705 4
 4 8 -4 286.602 62.5606 3
 -4 8 3 13979.9 254.71 2
 -4 8 3 14432.8 215.339 4
 4 8 -3 13678.5 355.289 2
 4 8 -3 13121.1 302.195 3
 -4 -8 3 12685.8 297.655 3
 -4 8 3 13457.2 351.492 1
 -4 -8 2 3068.97 139.59 3
 4 8 -2 2957.41 132.298 3
 -4 8 2 2722.59 72.6555 4
 -4 8 2 2958.57 160.332 1
 4 -8 -2 2626.75 77.296 5
 4 8 -2 3105.3 169.086 2
 -4 8 1 43073 636.099 1
 -4 8 1 43287.7 772.445 3
 4 8 -1 44886.6 656.001 1
 -4 -8 1 44582.6 583.108 3
 4 8 -1 43795.6 660.062 2
 -4 -8 0 107805 1100.07 5
 -4 8 0 110251 1335.65 3
 -4 -8 0 107437 1048.83 3
 4 8 0 109209 1171.82 2
 4 8 0 112076 1171.98 1
 -4 8 0 110247 1124.12 1
 -4 8 -1 448921 3324.51 1
 -4 -8 -1 445987 3361.5 5
 4 8 1 448746 3431.6 2
 4 8 1 456775 3415.09 1
 -4 8 -1 447838 3705.26 3
 -4 8 -2 7222.05 219.336 1
 -4 8 -2 7220.53 323.987 3
 -4 -8 -2 7336.26 244.012 5
 4 8 2 6966.81 242.672 1
 4 8 2 6822.99 249.173 2
 4 8 3 2283.78 143.539 1
 4 8 3 2355.7 154.262 2
 -4 -8 -3 2423.03 145.018 5
 -4 8 -3 2119.59 113.795 1
 -4 8 -3 2102.53 199.08 3
 -4 8 -4 10612.8 252.084 1
 4 8 4 10148 301.317 1
 -4 8 -4 9917.24 402.22 3
 4 8 4 10204.7 325.514 2
 -4 8 -5 43261.4 544.104 1
 4 8 5 43260.3 669.804 1
 -4 8 -5 44587.2 913.637 3
 4 8 5 42918.5 712.49 2
 -4 8 -6 41161.3 508.784 1
 4 8 6 41687 717.081 2
 4 8 6 41460.6 661.293 1
 -4 8 -7 47236.1 1004.08 3
 -4 8 -7 46151.4 519.992 1
 4 8 7 46138.4 710.501 1
 4 8 7 46844.8 780.448 2
 -4 -8 -7 46376.7 818.864 3
 4 -8 8 874.111 62.5966 1
 -4 -8 -8 762.951 112.787 3
 4 8 8 790.786 104.98 2
 -4 8 -8 906.589 58.8992 1
 4 8 8 818.311 93.3098 1
 -4 8 -8 841.878 148.824 3
 -4 -8 -9 11204.5 424.332 3
 -4 8 -9 11218.4 506.464 3
 4 8 9 10663.9 328.616 1
 -4 -8 -10 2629.67 224.418 3
 4 8 10 2364.73 157.47 1
 -4 8 -10 2524.76 254.405 3
 -4 -8 -11 51310.8 1047.36 3
 -4 8 -11 54110.5 1247.92 3
 4 8 11 51009.1 796.88 1
 4 8 12 1896.32 146.945 1
 -4 8 -12 1801.77 240.287 3
 -4 -8 -12 1868.42 205.206 3
 -4 -8 -13 37262.6 939.687 3
 -4 8 -13 35699.6 1031.59 3
 -4 -8 -14 34.1577 80.017 3
 -4 8 -14 64.0027 107.384 3
 -4 -8 -15 38212.8 1030.34 3
 -4 8 -15 37280.7 1120.03 3
 -4 8 -16 21437 869.715 3
 -4 -8 -16 21365.8 789.754 3
 -4 8 -17 51992.5 1418.24 3
 -4 -8 -17 52085 1298.42 3
 -4 -8 -18 158.673 112.143 3
 -4 8 -18 80.1802 106.382 3
 -4 8 -19 3549.2 400.522 3
 -4 -8 -19 3366.12 354.205 3
 -4 -8 -20 674.871 175.072 3
 -4 8 -20 540.532 181.916 3
 4 10 -22 36553.9 1283.55 3
 4 10 -21 9598.23 640.827 3
 4 -10 -21 10534.1 653.119 3
 4 -10 -20 941.148 192.556 3
 4 10 -20 636.99 166.956 3
 4 -10 -19 1949.82 280.673 3
 4 10 -19 1937.31 285.232 3
 4 -10 -18 8229.13 544.186 3
 4 10 -18 7974.38 527.621 3
 -4 10 17 9202.86 406.47 1
 4 -10 -17 9691.06 572.282 3
 4 10 -17 10615 588.87 3
 4 -10 -16 31246.9 977.586 3
 4 10 -16 30731.1 969.487 3
 -4 10 16 28224.5 711.665 1
 -4 -10 15 16135.1 579.965 4
 -4 10 15 15154.9 511.716 1
 4 10 -15 16085.4 671.691 3
 -4 10 14 451.713 89.6115 1
 -4 -10 14 378.113 94.9149 4
 4 10 -14 367.266 122.183 3
 4 10 -13 26075.2 792.051 3
 -4 10 13 25445.7 636.531 1
 -4 -10 13 27601.7 713.753 4
 4 10 -12 45310.8 1025.47 3
 -4 -10 12 44003 869.865 4
 4 10 -11 1280.68 175.408 3
 -4 10 11 1193.75 137.391 1
 -4 -10 11 1126.98 137.864 4
 -4 10 10 3459.82 222.378 1
 -4 -10 10 3507.38 218.212 4
 -4 10 9 45217.9 813.78 1
 4 10 -9 48510.8 953.411 3
 -4 -10 9 46262.8 796.363 4
 4 10 -8 105.362 66.9434 2
 4 10 -8 152.586 72.6631 3
 -4 -10 8 60.8796 52.4372 4
 -4 10 8 150.103 33.142 2
 -4 10 8 44.0743 46.8268 1
 -4 10 7 142098 1583.05 1
 4 10 -7 142949 1665.17 3
 4 10 -7 140662 1587.58 2
 -4 -10 7 141301 1488.08 4
 -4 10 6 106519 1291.67 1
 4 10 -6 107352 1297.88 2
 -4 10 6 107717 983.114 2
 4 10 -6 105988 1307.65 3
 4 10 -5 15780.4 430.215 2
 -4 10 5 15356.7 298.066 2
 -4 10 5 16556.4 438.544 1
 4 10 -4 22968.1 517.764 2
 -4 10 4 25504.3 537.201 1
 4 10 -4 25398.8 513.648 3
 -4 10 4 24221.3 391.133 2
 4 10 -3 769.227 92.3784 1
 -4 10 3 897.921 76.665 2
 -4 10 3 843.126 97.1157 1
 4 10 -3 869.061 91.2611 3
 4 10 -3 903.479 110.196 2
 -4 10 2 16604.3 341.275 2
 -4 10 2 16766.4 412.785 1
 4 10 -2 17202.6 434.201 2
 4 10 -2 17311.8 422.419 1
 -4 10 1 33448.4 595.047 1
 4 10 -1 34250.9 619.971 2
 -4 10 1 37093.7 776.526 3
 4 10 -1 35226.2 613.142 1
 -4 10 0 99377 1373.55 3
 4 10 0 100546 1184.15 1
 4 10 0 98700.5 1193.58 2
 -4 10 -1 21379.6 436.835 1
 4 10 1 21642.9 473.108 1
 4 10 1 21542.7 486.844 2
 -4 10 -1 21097.9 575.609 3
 -4 -10 -1 22509.1 442.174 5
 -4 10 -2 8215.87 159.62 4
 4 10 2 8729.5 304.348 2
 -4 -10 -2 9388.37 288.552 5
 4 10 2 8587.65 298.354 1
 -4 10 -2 9147.17 275.746 1
 -4 10 -2 8430.08 369.883 3
 -4 10 -3 13879.4 498.171 3
 -4 10 -3 12096.8 229.056 4
 -4 10 -3 12734.9 318.787 1
 -4 -10 -3 13026.3 343.887 5
 4 10 3 12366.3 369.852 2
 4 10 3 12726.9 364.262 1
 -4 10 -4 13148.4 317.201 1
 -4 10 -4 12816.3 495.659 3
 -4 -10 -4 13114.8 354.79 5
 4 10 4 12439.2 375.953 2
 4 10 4 12498.3 365.745 1
 4 10 5 633.211 95.8473 2
 -4 10 -5 677.572 71.0876 1
 4 10 5 654.009 89.9812 1
 -4 10 -5 519.82 112.208 3
 4 10 6 103279 1275.66 2
 -4 10 -6 102395 1570.13 3
 4 10 6 104403 1235.54 1
 -4 10 -6 101699 1026.41 1
 4 10 7 68702.9 1011.85 2
 -4 10 -7 69127.5 1290.37 3
 -4 10 -7 66614.7 753.499 1
 4 10 7 69280.3 970.556 1
 -4 10 -8 6307.77 187.508 1
 -4 10 -8 6320.26 389.995 3
 4 10 8 5833.09 279.914 2
 4 10 8 6037.49 266.43 1
 -4 10 -9 27816.4 404.768 1
 -4 10 -9 26451.1 821.597 3
 4 10 9 26797.8 624.122 2
 4 10 9 26734.7 584.184 1
 -4 -10 -9 27442 690.914 3
 -4 -10 -10 44646 942.717 3
 4 10 10 43472.4 772.5 1
 -4 10 -10 46331.8 1136.93 3
 4 10 10 43611.9 814.506 2
 -4 -10 -11 12660.6 503.415 3
 -4 10 -11 13021.8 615.886 3
 4 10 11 12456.2 400.79 1
 4 10 12 22538.8 555.684 1
 -4 -10 -12 21001.7 717.429 3
 -4 -10 -13 26876.8 819.703 3
 -4 10 -13 27038.6 941.859 3
 4 10 13 24663.2 592.224 1
 -4 -10 -14 231.257 96.1275 3
 4 10 14 163.123 60.0111 1
 -4 10 -14 181.805 111.52 3
 -4 10 -15 33059.1 1106.96 3
 -4 -10 -15 30681.5 939.512 3
 -4 10 -16 36426.5 1205.13 3
 -4 -10 -16 32964.4 1017.11 3
 -4 10 -17 8751.83 605.67 3
 -4 -10 -17 8698.2 529.684 3
 -4 -10 -18 19110.5 813.029 3
 -4 10 -18 19914.7 947.563 3
 -4 10 -19 607.319 196.476 3
 -4 -10 -19 549.979 155.757 3
 -4 10 -20 32.526 186.858 3
 -4 -10 -20 291.951 109.347 3
 4 12 -22 15663.1 864.948 3
 4 12 -21 1742.52 295.464 3
 4 -12 -20 20928.1 918.055 3
 4 12 -20 18429.9 890.366 3
 4 -12 -19 -148.544 162.036 3
 4 12 -19 -148.981 153.599 3
 4 -12 -18 39021.6 1178.64 3
 4 12 -18 38287.7 1216.1 3
 -4 12 17 236.824 90.8524 1
 4 12 -17 -14.7951 128.317 3
 4 -12 -17 205.186 123.191 3
 -4 12 16 39948.5 913.489 1
 4 12 -16 45048.6 1236.6 3
 -4 12 15 1587.71 179.242 1
 4 12 -15 1699.87 242.317 3
 4 12 -14 2181.85 259.976 3
 -4 12 14 2463.54 215.427 1
 -4 -12 14 2705.23 235.755 4
 -4 -12 13 1604.66 173.792 4
 -4 12 13 1432.78 166.083 1
 4 12 -13 1424.99 197.748 3
 4 12 -12 60596.5 1260.6 3
 -4 -12 12 59415.2 1044.72 4
 -4 12 12 58119.5 1053.99 1
 4 12 -11 1759.25 209.7 3
 -4 -12 11 1888.71 170.542 4
 -4 12 11 1863.54 178.856 1
 4 12 -10 37803.7 801.912 2
 -4 12 10 38394.9 799.775 1
 4 12 -10 39276.4 922.294 3
 -4 -12 10 38951.6 758.018 4
 4 12 -9 10335.4 396.517 2
 -4 12 9 10523.9 399.575 1
 -4 -12 9 10551.8 368.433 4
 4 12 -9 10642.7 448.783 3
 -4 12 9 10613 256.455 2
 4 12 -8 6660.38 315.465 2
 -4 12 8 7112.39 319.358 1
 -4 12 8 6642.97 205.741 2
 -4 -12 8 7302.01 296.404 4
 4 12 -8 7413.07 363.459 3
 4 12 -7 45886.5 847.108 2
 -4 12 7 46134 611.953 2
 -4 12 7 45096.7 821.35 1
 -4 -12 7 46584 744.461 4
 4 12 -7 46621.8 888.37 3
 -4 12 6 51860.2 871.935 1
 -4 12 6 51741.3 667.618 2
 4 12 -6 54322.2 932.093 3
 4 12 -6 53689.8 904.529 2
 4 12 -5 2240.71 173.847 2
 -4 12 5 2189.99 169.512 1
 -4 12 5 2077.5 121.06 2
 4 12 -5 2190.95 169.969 3
 -4 12 4 88434 1173.95 1
 4 12 -4 92578.4 1217.3 2
 4 12 -4 92274.4 1147.66 3
 4 12 -4 88194.3 1160.57 1
 -4 12 4 93078.2 992.539 2
 -4 12 3 19319.6 398.014 2
 -4 12 3 18395.1 473.356 1
 4 12 -3 17666.8 447.032 3
 4 12 -3 18203.5 469.403 1
 4 12 -3 17844.4 483.47 2
 -4 12 2 59591.7 894.341 1
 4 12 -2 60426.9 900.064 1
 4 12 -2 59782 931.405 2
 -4 12 2 59275.5 785.091 2
 -4 12 1 24094.4 483.302 2
 4 12 -1 24384.1 557.288 2
 -4 12 1 25218.9 542.61 1
 4 12 -1 24499.3 542.854 1
 4 12 0 76335.5 1033.13 1
 -4 12 0 76161.2 1245.78 3
 -4 12 0 75308.8 1001.12 1
 4 12 0 75967.2 1054.94 2
 -4 -12 -1 506.331 71.2149 5
 4 12 1 358.202 71.907 1
 4 12 1 326.008 77.1442 2
 -4 12 -1 288.256 81.7442 3
 -4 12 -1 375.04 74.334 1
 4 12 2 46263.3 766.621 1
 -4 12 -2 46981.5 714.708 1
 -4 -12 -2 46111.7 679.009 5
 4 12 2 46298 780.387 2
 -4 12 -2 47381.4 949.552 3
 -4 12 -3 3301.01 175.812 1
 -4 12 -3 3597 274.031 3
 -4 -12 -3 3417.41 185.141 5
 4 12 3 3454.71 205.628 1
 4 12 3 3371.37 207.165 2
 -4 12 -4 30189.2 806.711 3
 4 12 4 30821.1 647.058 2
 4 12 4 30421.7 632.084 1
 -4 12 -4 29983.1 542.726 1
 -4 -12 -4 29903.1 575.01 5
 -4 -12 -5 131.554 44.065 5
 4 12 5 212.632 60.5718 2
 -4 12 -5 122.56 83.7748 3
 -4 12 -5 129.175 45.5827 1
 4 12 5 -33.9525 64.9586 1
 -4 12 -6 71870.5 1347.91 3
 4 12 6 70207.7 1061.41 2
 4 12 6 69199.6 1029.49 1
 -4 12 -6 68982.7 863.721 1
 -4 12 -7 99.1432 93.5308 3
 4 12 7 188.181 71.307 2
 -4 12 -7 266.543 52.2051 1
 4 12 7 193.436 68.7165 1
 -4 12 -8 7369.38 235.059 1
 -4 12 -8 6640.02 413.808 3
 4 12 8 6614.43 301.989 1
 4 12 8 6753.46 315.784 2
 4 12 9 9916.78 388.874 2
 -4 12 -9 10500.2 535.457 3
 -4 12 -9 10778.3 276.145 1
 4 12 9 9815.98 375.045 1
 -4 -12 -10 117325 1675.53 3
 4 12 10 116362 1511.9 2
 -4 12 -10 120308 1982.61 3
 -4 12 -11 4680.21 388.228 3
 -4 -12 -11 4679.09 318.132 3
 4 12 11 4295.03 254.511 1
 -4 -12 -12 30341.2 844.941 3
 4 12 12 28662.8 680.813 1
 -4 12 -13 11150.8 625.168 3
 -4 -12 -13 11643.5 547.442 3
 4 12 13 9950.78 399.182 1
 -4 -12 -14 3871.93 328.832 3
 -4 12 -14 3102.82 344.522 3
 4 12 14 2945.56 222.979 1
 -4 -12 -15 8416.61 498.714 3
 -4 12 -15 7751.54 562.286 3
 -4 12 -16 31352.3 1139.54 3
 -4 -12 -16 30489.6 992.073 3
 -4 -12 -17 56.0589 108.608 3
 -4 12 -17 -71.2317 145.544 3
 -4 -12 -18 31655.8 1065.82 3
 -4 12 -18 32193.6 1224.09 3
 -4 12 -19 4332 470.847 3
 -4 -12 -19 4162.19 393.756 3
 4 14 -20 13702.5 778.225 3
 4 14 -19 722.062 198.95 3
 4 -14 -19 645.868 161.102 3
 4 14 -18 69473 1674.99 3
 4 -14 -18 69568.5 1641.41 3
 -4 14 17 5458.07 347.704 1
 4 14 -17 5778.7 464.22 3
 -4 14 16 20505.4 669.645 1
 4 14 -16 23883.7 906.859 3
 4 14 -15 1679.38 248.552 3
 -4 14 15 1369.55 173.095 1
 -4 -14 14 -18.2502 89.9237 4
 4 14 -14 37.5137 107.407 3
 4 14 -14 238.442 83.0125 2
 -4 14 14 -5.74047 72.4222 1
 4 14 -13 1811.28 201.403 2
 -4 14 13 1836.64 197.685 1
 4 14 -13 1839.76 233.636 3
 -4 -14 13 1736.75 183.811 4
 4 14 -12 68775.4 1223.97 2
 -4 14 12 70931.1 1232.67 1
 4 14 -12 74620.4 1442.2 3
 -4 -14 12 73538.5 1184.74 4
 4 14 -11 468.839 113.193 2
 -4 -14 11 401.921 91.0295 4
 4 14 -11 406.564 113.588 3
 -4 14 11 380.163 102.228 1
 4 14 -10 44961.8 932.745 2
 -4 -14 10 46300.5 843.66 4
 4 14 -10 47382.4 1051.08 3
 -4 14 10 45729.2 933.766 1
 4 14 -9 26.7216 80.8868 2
 -4 -14 9 228.015 76.4221 4
 -4 14 9 67.2891 77.9746 1
 -4 -14 8 1124.18 127.771 4
 4 14 -8 1152.37 145.041 2
 -4 14 8 1063.2 95.4857 2
 -4 14 8 976.639 135.67 1
 4 14 -8 1019.5 164.703 3
 -4 14 7 152.82 44.3888 2
 -4 14 7 88.0526 56.378 1
 4 14 -7 251.328 99.2833 3
 4 14 -7 195.299 69.4048 2
 -4 -14 7 225.915 73.9172 4
 -4 -14 6 55668.5 806.342 4
 4 14 -6 54219.4 976.487 2
 -4 14 6 55267.5 975.768 1
 4 14 -6 55818.1 983.135 3
 -4 14 6 54048.7 752.928 2
 -4 14 5 336.438 61.6645 2
 4 14 -5 215.035 72.3143 3
 -4 14 5 441.564 97.3864 1
 4 14 -5 354.989 84.0546 2
 4 14 -4 169457 1832.55 1
 4 14 -4 169084 1903.23 2
 -4 14 4 170889 1872 1
 -4 14 4 165881 1623.62 2
 -4 14 3 149.072 66.1402 1
 4 14 -3 88.4964 62.7153 1
 -4 14 3 164.842 51.329 2
 4 14 -3 44.3409 69.4364 2
 -4 14 2 71006.2 949.322 2
 4 14 -2 70650.9 1094.6 2
 4 14 -2 71827 1056.42 1
 -4 14 2 72571.7 1065.06 1
 -4 14 1 226.025 57.9943 1
 4 14 -1 162.423 57.357 2
 -4 14 1 193.205 54.8422 2
 4 14 -1 279.723 71.9401 1
 -4 14 0 25013.8 549.602 2
 -4 14 0 25008.9 725.17 3
 -4 14 0 24578.4 571.396 1
 4 14 0 25626 611.364 2
 4 14 0 24332.5 583.068 1
 -4 14 -1 245.008 77.6869 3
 4 14 1 345.993 81.2011 1
 4 14 1 262.935 72.5087 2
 -4 14 -1 349.438 71.6277 1
 4 14 2 53391.5 906.115 1
 -4 14 -2 52746.2 837.281 1
 -4 14 -2 54228.3 1107.36 3
 4 14 2 52873.9 911.576 2
 -4 -14 -2 53300.7 770.602 5
 4 14 3 277.375 80.1456 1
 -4 14 -3 233.425 64.0213 1
 4 14 3 266.218 79.0717 2
 -4 -14 -3 390.83 69.9329 5
 -4 14 -3 193.341 95.019 3
 4 14 4 38368.4 773.728 1
 4 14 4 38455.5 776.586 2
 -4 -14 -4 38606.4 686.38 5
 -4 14 -4 39112.8 681.601 1
 -4 14 -4 39051.5 963.22 3
 4 14 5 4688.43 265.433 2
 -4 -14 -5 5485.61 249.614 5
 -4 14 -5 5139.63 230.654 1
 -4 14 -5 4704.35 346.81 3
 4 14 5 5107.65 279.27 1
 -4 14 -6 27154.9 531.805 1
 -4 14 -6 25289.7 822.457 3
 -4 -14 -6 26476.8 580.118 5
 4 14 6 26173.9 641.397 1
 4 14 6 25907.9 643.265 2
 -4 14 -7 20898.4 463.137 1
 4 14 7 20045.7 565.05 1
 4 14 7 20650.2 572.891 2
 -4 14 -7 20443.2 760.689 3
 4 14 8 6884.89 331.812 1
 -4 14 -8 7941.27 272.266 1
 -4 14 -8 7332.84 466.576 3
 4 14 8 7414.14 347.809 2
 4 14 9 1159.34 144.841 2
 4 14 9 1246.23 150.758 1
 -4 14 -9 1359.83 228.889 3
 -4 14 -10 25760.9 906.338 3
 4 14 10 25069.4 658.757 1
 4 14 10 26251.6 682.495 2
 -4 -14 -11 12159.7 532.516 3
 4 14 11 11147.8 442.954 2
 4 14 11 11075.7 438.586 1
 -4 14 -11 12697.8 646.314 3
 -4 -14 -12 51703.3 1159.7 3
 4 14 12 50144.5 986.824 1
 -4 14 -13 2200.86 292.737 3
 -4 -14 -13 1921.23 224.397 3
 4 14 13 1712.08 182.641 1
 -4 -14 -14 4674.18 372.312 3
 4 14 14 3605.52 261.507 1
 -4 14 -14 4191.74 416.098 3
 -4 -14 -15 1058.56 203.422 3
 -4 14 -15 1081.71 222.804 3
 -4 -14 -16 8876.58 542.72 3
 -4 14 -16 7992.23 598.603 3
 -4 14 -17 3607.51 414.697 3
 -4 -14 -17 3838.21 372.468 3
 -4 14 -18 31728.7 1244.37 3
 -4 -14 -18 30084 1061.94 3
 4 16 -19 1122.29 192.48 2
 4 -16 -18 19861.8 887.298 3
 4 16 -18 18373.9 707.614 2
 -4 16 17 16732.1 643.713 1
 4 16 -17 18645.5 841.356 3
 4 16 -17 17925.9 683.976 2
 4 16 -16 10324.5 501.962 2
 4 16 -16 9788.87 590.128 3
 -4 16 16 9478.03 475.986 1
 4 16 -15 27668.3 822.507 2
 -4 16 15 26528.4 795.588 1
 4 16 -15 28735.3 987.05 3
 4 16 -14 3607.17 288.095 2
 4 16 -14 4170.45 370.433 3
 -4 16 14 3669.38 291.286 1
 -4 -16 13 15605.7 539.666 4
 -4 16 13 14190.5 561.269 1
 4 16 -13 14973.5 664.129 3
 4 16 -13 14645 572.164 2
 4 16 -12 22809.3 708.86 2
 -4 -16 12 24828.7 659.136 4
 4 16 -12 23741.4 815.281 3
 -4 16 12 22643.9 701.292 1
 4 16 -11 15525.9 574.394 2
 -4 16 11 15650.4 575.626 1
 -4 -16 11 17032.8 519.528 4
 4 16 -11 15709.7 642.489 3
 4 16 -10 24804.8 716.167 2
 4 16 -10 25711.2 802.356 3
 -4 16 10 24790.6 717.06 1
 -4 -16 9 20630.4 527.965 4
 4 16 -9 21248.3 709.484 3
 -4 16 9 19961 632.106 1
 4 16 -9 20290.1 633.308 2
 4 16 -8 695.8 135.761 3
 4 16 -8 749.907 133.204 2
 -4 -16 8 940.408 127.756 4
 -4 16 8 886.283 145.875 1
 -4 -16 7 25575.9 545.735 4
 4 16 -7 25157.2 699.49 3
 4 16 -7 24705.2 684.749 2
 -4 16 7 24524.8 517.614 2
 -4 16 7 24866.5 683.973 1
 4 16 -6 48140.5 968.165 2
 -4 16 6 46431.4 946.138 1
 -4 16 6 48980.1 769.423 2
 -4 -16 6 48061.7 746.412 4
 4 16 -6 46877.3 937.361 3
 4 16 -5 4985.5 298.733 2
 4 16 -5 5435.09 299.6 3
 -4 16 5 4869.14 232.047 2
 -4 16 5 5020.11 293.081 1
 4 16 -4 73654.5 1203.14 2
 -4 16 4 73288 1177.13 1
 -4 16 4 72200.5 997.304 2
 4 16 -4 74440.2 1157.32 1
 4 16 -4 76077.7 1180.17 3
 -4 16 3 4417.12 229.531 2
 4 16 -3 4609.99 268.91 1
 4 16 -3 4671.83 283.636 2
 -4 16 3 4392.19 264.849 1
 -4 16 2 37154.3 781.887 1
 -4 16 2 38921.9 719.207 2
 4 16 -2 38148.9 823.459 2
 4 16 -2 37783.1 791.497 1
 4 16 -1 52022.1 966.019 2
 -4 16 1 52238.1 870.235 2
 -4 16 1 51226.4 918.321 1
 4 16 -1 52106 934.074 1
 4 16 0 13927.6 463.568 1
 -4 16 0 13822.2 448.073 1
 4 16 0 14523.4 487.031 2
 -4 16 0 14056.8 441.772 2
 -4 16 -1 12700.5 426.239 2
 -4 16 -1 11770.5 527.222 3
 -4 16 -1 12348.3 416.889 1
 4 16 1 12527.1 446.747 1
 4 16 1 13041.8 462.439 2
 4 16 2 5628.6 303.06 1
 4 16 2 5683.15 304.017 2
 -4 16 -2 5709.96 372.717 3
 -4 16 -2 5843.5 282.992 1
 4 16 3 2921.52 224.829 1
 -4 -16 -3 3141 180.435 5
 4 16 3 3031.1 224.885 2
 -4 16 -3 2722.65 269.275 3
 -4 16 -3 3172.18 205.342 1
 -4 16 -4 44890.3 1091.99 3
 -4 16 -4 44849.4 794.253 1
 4 16 4 44264.6 888.501 2
 4 16 4 44572.6 884.814 1
 -4 -16 -4 44202.8 740.387 5
 -4 16 -5 43913.4 1106.55 3
 -4 -16 -5 45452.5 784.724 5
 4 16 5 44975.4 896.597 2
 4 16 5 45204.6 902.958 1
 -4 16 -5 42700.7 758.434 1
 4 16 6 7493.53 359.132 2
 -4 -16 -6 7529.01 310.727 5
 -4 16 -6 8034.41 313.626 1
 4 16 6 7583.43 361.84 1
 -4 16 -6 7208.46 459.98 3
 -4 16 -7 33805 652.813 1
 -4 -16 -7 33153.3 693.88 5
 -4 16 -7 34636.5 1035.86 3
 4 16 7 33379 783.001 2
 4 16 7 34041.6 795.888 1
 -4 16 -8 10552.4 587.075 3
 -4 -16 -8 10539 393.817 5
 4 16 8 10196.5 429.698 2
 -4 16 -8 11154.8 357.054 1
 4 16 8 10656 445.078 1
 4 16 9 27018.9 721.164 1
 -4 16 -9 26907.1 957.28 3
 4 16 9 26654.4 712.628 2
 4 16 10 32408.2 785.423 2
 4 16 10 32435.7 803.466 1
 4 16 11 10626.5 447.961 2
 -4 16 -11 10734.5 620.23 3
 4 16 11 10178.6 450.03 1
 -4 -16 -12 28755.2 876.337 3
 -4 16 -12 30418.1 1073.39 3
 4 16 13 15588.9 571.02 1
 -4 -16 -13 17838.6 712.032 3
 -4 16 -13 17749 838.843 3
 -4 -16 -14 287.146 122.683 3
 4 16 14 356.925 102.537 1
 -4 16 -14 320.69 152.947 3
 -4 16 -15 11602 712.641 3
 -4 -16 -15 12566.8 640.865 3
 -4 -16 -16 15048.8 733.288 3
 -4 16 -16 14770.5 821.247 3
 -4 16 -17 5387.81 511.266 3
 -4 -16 -17 5864.5 470.067 3
 4 18 -17 11141.2 559.165 2
 -4 18 17 9809.14 515.014 1
 -4 18 16 1857.96 225.389 1
 4 18 -16 1941.66 242.554 2
 -4 18 15 41020.5 1048.44 1
 4 18 -15 42423.3 1073.67 2
 -4 18 14 3445.63 298.88 1
 4 18 -14 4020.25 323.459 2
 4 18 -13 28526.4 850.74 2
 -4 18 13 28698.6 846.522 1
 4 18 -12 670.218 157.614 3
 4 18 -12 251.332 81.7956 2
 -4 18 12 610.984 131.2 1
 4 18 -11 33135 891.91 2
 -4 18 11 32074.7 869.579 1
 -4 18 10 1215.39 176.861 1
 4 18 -10 1255.89 178.726 2
 4 18 -10 1261.28 195.687 3
 4 18 -9 20683.8 678.707 2
 4 18 -9 19983.6 695.11 3
 -4 18 9 19650.7 653.627 1
 4 18 -8 13150.9 535.713 2
 4 18 -8 13986.5 560.054 3
 -4 18 8 12901.5 522.25 1
 4 18 -7 42065.4 964.325 2
 4 18 -7 41373.4 949.884 3
 -4 18 7 39957.5 920.976 1
 -4 18 6 3811.16 274.712 1
 4 18 -6 3937.45 288.328 2
 4 18 -6 3439.47 263.205 3
 -4 18 5 22958.9 556.082 2
 4 18 -5 22311.1 650.029 1
 4 18 -5 23814.2 684.093 3
 4 18 -5 23248.8 694.408 2
 -4 18 5 23334.8 674.953 1
 -4 18 4 7129.58 361.016 1
 4 18 -4 6984.94 376.021 2
 4 18 -4 7211.4 356.876 1
 -4 18 4 6958.65 304.692 2
 -4 18 3 10451.4 383.137 2
 4 18 -3 11103.3 448.068 1
 4 18 -3 11460.7 473.542 2
 -4 18 3 11610.9 455.258 1
 -4 18 2 3973.81 261.691 1
 4 18 -2 4128.16 282.027 2
 -4 18 2 3748.92 237.366 2
 4 18 -2 3840.64 258.416 1
 -4 18 1 58298.9 989.692 2
 -4 18 1 57614.8 1034.52 1
 4 18 -1 57430.2 1043.85 1
 4 18 -1 58604.2 1098.75 2
 -4 18 0 36309.7 778.621 2
 4 18 0 35738.4 830.624 2
 4 18 0 35588.7 817.088 1
 -4 18 0 35760.7 787.027 1
 -4 18 -1 49237 934.132 2
 4 18 1 48721.3 981.794 2
 -4 18 -1 49364.6 922.878 1
 4 18 1 48400.7 953.879 1
 -4 18 -2 4838.09 289.784 2
 4 18 2 4768.4 295.84 1
 -4 18 -2 4469.73 359.058 3
 4 18 2 4578.65 293.642 2
 -4 18 -2 4897.59 277.086 1
 4 18 3 4312.29 285.57 1
 -4 18 -3 3547.9 313.886 3
 4 18 3 3734.47 266.011 2
 -4 18 -3 3733.3 245.042 1
 -4 18 -3 4105.96 272.281 2
 -4 18 -4 14107.4 638.431 3
 4 18 4 12792.6 491.453 2
 -4 18 -4 12894.8 435.154 1
 4 18 4 13473.6 503.297 1
 -4 18 -5 41366.3 1112.09 3
 -4 18 -5 41632.7 811.428 1
 4 18 5 42099.5 918.411 2
 4 18 5 42070.5 920.456 1
 4 18 6 16160.2 566.51 1
 -4 18 -6 16156.4 708.655 3
 -4 18 -6 17195.4 501.742 1
 4 18 6 15968 550.343 2
 -4 18 -7 33465 1057.61 3
 4 18 7 33353 836.877 1
 -4 18 -7 34535.2 712.512 1
 4 18 7 32917.9 816.75 2
 4 18 8 -5.19834 98.0163 1
 -4 18 -8 53.8115 136.285 3
 4 18 8 78.4171 81.3253 2
 4 18 9 43893.8 969.202 2
 -4 18 -9 46115.4 1309.31 3
 4 18 9 44351.4 994.907 1
 4 18 10 5393.73 346.983 1
 -4 18 -10 6225.2 493.609 3
 4 18 10 5178.12 327.035 2
 -4 18 -11 12470.4 716.019 3
 4 18 11 11546.6 508.906 1
 4 18 12 7737.02 422.231 1
 -4 -18 -12 8740.52 501 3
 -4 18 -12 8098.11 586.785 3
 4 18 13 29975.4 850.431 1
 -4 18 -13 31515.6 1189.94 3
 -4 18 -14 1768.78 316.385 3
 -4 -18 -14 1099.91 197.757 3
 4 18 14 1228.18 188.877 1
 4 18 15 15830.1 621.305 1
 -4 18 -15 17958.4 919.097 3
 -4 -18 -15 18367.7 783.998 3
 -4 -18 -16 8051.62 556.963 3
 -4 18 -16 7718.88 618.796 3
 -4 20 16 265.713 99.853 1
 -4 20 15 21825 785.266 1
 4 20 -15 22885.7 815.012 2
 4 20 -14 1595.48 224.481 2
 -4 20 14 1613.95 219.314 1
 4 20 -13 16551.3 674.541 2
 -4 20 13 16026.9 659.448 1
 4 20 -12 6955.32 431.877 2
 -4 20 12 6629.71 414.837 1
 4 20 -11 35114.7 965.78 2
 -4 20 11 33253 932.894 1
 4 20 -10 138.876 80.0599 2
 -4 20 10 123.19 89.6056 1
 4 20 -9 7966.13 449.076 2
 -4 20 9 8413.06 451.354 1
 4 20 -8 2997.88 274.98 2
 -4 20 8 3348.16 283.392 1
 4 20 -7 38249.5 972.507 2
 -4 20 7 36901.6 926.295 1
 4 20 -6 1145.83 162.391 3
 4 20 -6 1179.66 171.237 2
 -4 20 6 1305.72 187.565 1
 -4 20 5 51836.4 1083.3 1
 4 20 -5 53725.6 1147.02 2
 4 20 -4 1311.26 178.997 2
 4 20 -4 1580.01 184.968 1
 -4 20 4 1315.8 147.508 2
 -4 20 4 1825.04 198.599 1
 4 20 -3 8301.89 426.588 2
 -4 20 3 8445.36 372.479 2
 4 20 -3 8382.41 413.433 1
 -4 20 3 8660.52 420.054 1
 -4 20 2 2908.17 222.602 2
 4 20 -2 2910.94 256.675 2
 4 20 -2 2860.98 245.739 1
 -4 20 2 2732.58 233.826 1
 -4 20 1 41179.6 873.834 2
 4 20 -1 41048.9 930.829 1
 4 20 -1 42114.5 971.928 2
 -4 20 1 40904.2 902.704 1
 -4 20 0 3837.4 264.613 2
 -4 20 0 4303.17 283.002 1
 4 20 0 3910.35 290.298 2
 4 20 0 4187.85 290.138 1
 4 20 1 36931.1 901.497 2
 4 20 1 36930 876.483 1
 -4 20 -1 36494.8 846.275 2
 -4 20 -1 36576.8 835.702 1
 -4 20 -2 11348.7 471.658 2
 4 20 2 11233 487.87 2
 4 20 2 11245.8 476.697 1
 -4 20 -2 11055.1 443.909 1
 -4 20 -3 4337.77 277.708 1
 -4 20 -3 4473.48 308.599 2
 4 20 3 4058.88 294.351 1
 4 20 3 4047.58 291.87 2
 -4 20 -3 4338 375.332 3
 -4 20 -4 5890.22 354.4 2
 4 20 4 5698.73 355.926 1
 4 20 4 6403.89 370.116 2
 -4 20 -4 6380.47 462.172 3
 -4 20 -4 6164.11 329.116 1
 -4 20 -5 28607.4 801.626 2
 4 20 5 30384.7 823.482 1
 -4 20 -5 30526.2 731.44 1
 -4 20 -5 29365 985.342 3
 4 20 5 29614.9 805.296 2
 4 20 6 2430.18 239.582 1
 -4 20 -6 2920.02 221.72 1
 4 20 6 2417.11 227.961 2
 -4 20 -6 2383.99 283.641 3
 4 20 7 34168.5 895.148 1
 -4 20 -7 33579.6 1089.56 3
 -4 20 -7 36175 783.12 1
 4 20 7 35048.3 888.89 2
 4 20 8 2847.02 261.969 1
 4 20 8 2775.35 253.366 2
 4 20 9 18505.2 666.832 1
 -4 20 -9 19239.4 868.065 3
 4 20 10 337.552 110.595 1
 -4 20 -10 281.143 130.845 3
 -4 20 -11 18866.2 896.365 3
 4 20 11 18463.6 681.559 1
 -4 20 -12 -48.2458 145.871 3
 4 20 12 177.337 100.856 1
 -4 -20 -13 27706.3 946.191 3
 -4 20 -13 26344 1108.51 3
 -4 -20 -14 -8.64819 128.878 3
 -4 20 -14 -51.9748 188.517 3
 4 20 14 60.1305 101.738 1
 -4 -20 -15 10884.6 623.349 3
 -4 20 -15 9997.89 718.352 3
 -4 22 13 448.554 136.707 1
 4 22 -12 15663.5 678.433 2
 -4 22 12 15166.1 659.803 1
 4 22 -11 32016.8 967.937 2
 -4 22 11 29572.5 913.403 1
 4 22 -10 8204.02 485.177 2
 -4 22 10 7586.85 454.162 1
 -4 22 9 1127.55 177.944 1
 4 22 -9 1129.05 182.175 2
 4 22 -8 5310.67 383.661 2
 -4 22 8 4980.99 362.114 1
 -4 22 7 5800.48 379.939 1
 4 22 -7 5736.78 394.822 2
 4 22 -6 10952.1 540.198 2
 -4 22 6 10829.9 511.024 1
 4 22 -5 49552.2 1160.82 2
 -4 22 5 48871.8 1098.18 1
 4 22 -4 16651.1 624.625 1
 -4 22 4 16710.6 625.46 1
 4 22 -4 17264.6 666.13 2
 4 22 -3 70.376 95.4193 1
 -4 22 3 47.6547 84.2268 1
 4 22 -3 24.4235 88.8902 2
 -4 22 2 11459.4 504.635 1
 4 22 -2 11479.5 529.695 2
 4 22 -2 11999.8 520.382 1
 -4 22 2 11334.9 471.666 2
 4 22 -1 14920.9 603.052 2
 4 22 -1 14867.2 591.683 1
 -4 22 1 15176.6 554.992 2
 -4 22 1 15641.3 580.885 1
 -4 22 0 6515.59 369.929 1
 4 22 0 7025.34 402.137 1
 -4 22 0 6811.85 377.302 2
 4 22 0 6572.38 397.522 2
 4 22 1 12213.4 532.153 1
 -4 22 -1 11660.4 482.015 1
 4 22 1 10928.2 512.171 2
 -4 22 -1 10836.5 484.415 2
 -4 22 -2 14348.8 561.29 2
 -4 22 -2 15132.5 554.234 1
 4 22 2 14635.1 588.117 2
 4 22 2 14535.9 589.636 1
 -4 22 -3 1364.83 183.52 2
 4 22 3 1487.78 190.904 2
 4 22 3 1594.78 203.359 1
 -4 22 -3 1775.56 194.805 1
 -4 22 -4 10511.2 501.276 2
 -4 22 -4 11882.7 659.019 3
 4 22 4 10199.2 496.559 2
 4 22 4 10309.3 494.167 1
 -4 22 -4 11583.4 477.732 1
 -4 22 -5 31721.4 893.198 2
 4 22 5 31836.9 887.656 1
 4 22 5 31505.6 876.376 2
 -4 22 -5 32709.3 805.927 1
 -4 22 -5 32644.1 1108.5 3
 -4 22 -6 2207.12 239.203 2
 4 22 6 2204.42 240.033 1
 -4 22 -6 2706.25 229.495 1
 4 22 6 2036.86 222.871 2
 -4 22 -6 2485.91 307.437 3
 4 22 7 10205 503.266 2
 -4 22 -7 10731.3 529.281 2
 -4 22 -7 11599.1 666.477 3
 4 22 7 11501.1 539.506 1
 -4 22 -8 3322.56 302.003 2
 4 22 8 2725.52 273.913 1
 -4 22 -8 2846.3 338.437 3
 -4 22 -9 120.996 111.682 3
 -4 22 -9 209.77 89.1717 2
 4 22 9 332.479 115.702 1
 4 22 10 16961.5 681.109 1
 -4 22 -10 18458.5 892.127 3
 -4 22 -11 41633.2 1363.31 3
 4 22 11 39338.5 1059.84 1
 -4 22 -12 11928 748.529 3
 4 22 12 10689.2 549.751 1
 -4 -22 -13 1940.74 272.618 3
 -4 22 -13 1440.73 286.991 3
 -4 24 9 1038.5 197.696 1
 4 24 -9 1036.18 196.874 2
 4 24 -8 3368.67 322.593 2
 -4 24 8 3357.98 319.783 1
 4 24 -7 -42.2143 110.502 2
 -4 24 7 -90.2209 118.618 1
 4 24 -6 24602.7 855.524 2
 -4 24 6 24420.1 817.03 1
 -4 24 5 18854 710.539 1
 4 24 -5 19628.6 751.027 2
 -4 24 4 21603.1 749.282 1
 4 24 -4 22147.5 793.717 2
 4 24 -4 19721.8 726.625 1
 -4 24 3 2166.51 248.977 1
 4 24 -3 1816.96 234.287 1
 4 24 -3 1531.47 210.505 2
 4 24 -2 14949.3 641.308 2
 4 24 -2 15129.4 630.593 1
 4 24 -1 4288.17 350.078 2
 -4 24 1 4609.77 336.465 1
 4 24 -1 4455.2 341.031 1
 4 24 0 16764.5 672.775 2
 4 24 0 17763.9 674.399 1
 -4 24 0 16859.6 635.952 1
 -4 24 0 15479.9 606.699 2
 4 24 1 3003.29 288.854 2
 -4 24 -1 3407.99 285.024 1
 4 24 1 3636.96 308.641 1
 -4 24 -2 7196.92 425.649 2
 -4 24 -2 7460.95 418.272 1
 4 24 2 7924.34 466.169 1
 4 24 2 7805.45 452.783 2
 4 24 3 73.6078 88.6093 2
 -4 24 -3 133.614 94.1752 2
 -4 24 -3 78.4711 84.9735 1
 4 24 3 127.937 109.266 1
 -4 24 -4 11304 542.848 2
 4 24 4 12197.4 570.898 2
 -4 24 -4 13367.6 540.089 1
 4 24 4 13207.4 596.795 1
 -4 24 -5 8630.88 485.221 2
 -4 24 -5 9055.58 442.022 1
 4 24 5 8394.48 468.633 2
 4 24 5 9344.96 508.774 1
 -4 24 -5 8595.85 590.151 3
 -4 24 -6 29384.5 911.634 2
 4 24 6 28289.6 897.811 1
 -4 24 -6 29363 1101.33 3
 4 24 7 1032.87 180.051 1
 -4 24 -7 1162.61 195.73 2
 -4 24 -7 1277.08 257.812 3
 4 24 8 211.903 105.034 1
 -4 24 -8 358.766 153.545 3
 -4 24 -8 308.117 112.013 2
 -4 24 -9 -177.942 134.579 2
 -4 24 -9 -1.66382 117.292 3
 -4 24 -10 12728.2 760.885 3
 -4 24 -11 7700.12 600.851 3
 4 26 -5 335.002 117.282 2
 -4 26 5 554.005 150.822 1
 -4 26 4 10850.9 560.257 1
 4 26 -4 10287 572.636 2
 4 26 -3 395.695 137.213 1
 4 26 -3 399.108 128.9 2
 -4 26 3 400.57 138.14 1
 4 26 -2 1121.69 200.315 1
 4 26 -2 1303.17 211.21 2
 4 26 -1 293.867 112.083 2
 4 26 -1 187.838 117.286 1
 -4 26 1 92.6818 89.05 1
 -4 26 0 45809.1 1124.15 1
 4 26 0 46088.3 1164.32 1
 -4 26 -1 733.337 162.916 1
 4 26 1 479.274 132.436 1
 4 26 1 435.262 155.309 2
 -4 26 -2 943.68 176.398 2
 -4 26 -2 962.904 169.305 1
 4 26 2 738.229 170.017 2
 4 26 2 728.886 173.335 1
 4 26 3 12.7334 91.5042 1
 -4 26 -3 296.987 119.38 1
 4 26 3 -2.23398 83.0493 2
 -4 26 -3 74.4905 86.1925 2
 -4 26 -4 4771.53 375.657 2
 -4 26 -4 5557.29 373.856 1
 -4 26 -5 20.8473 110.478 2
 -4 26 -6 34442 1036.78 2
 -4 26 -7 1643.36 287.916 3
 5 -1 -23 16286.8 821.746 3
 5 1 -23 16853.1 836.515 3
 5 1 -22 671.335 196.465 3
 5 -1 -22 628.623 211.66 3
 5 -1 -21 37256.1 1153.06 3
 5 1 -21 36552.5 1134.6 3
 5 1 -20 2405.42 308.194 3
 5 -1 -20 2294.19 301.591 3
 5 1 -19 34495 1051.86 3
 5 -1 -19 34560.7 1041.25 3
 5 1 -18 192.067 94.54 3
 5 -1 -18 277.974 126.271 3
 5 1 -17 2299.75 249.24 3
 5 -1 -17 2443.28 260.787 3
 5 -1 -16 529.553 171.367 3
 5 1 -16 632.359 167.34 3
 -5 -1 15 109875 1610.57 4
 -5 -1 15 108133 1227.56 1
 -5 1 15 108415 1264.56 1
 5 1 -15 107778 1661.42 3
 5 -1 -15 107586 1682.99 3
 5 1 -14 324.584 104.237 3
 -5 -1 14 374.506 112.128 4
 -5 1 14 48.5997 36.94 1
 -5 1 14 219.037 82.3049 4
 -5 -1 14 136.391 51.7495 1
 5 -1 -14 -27.5742 65.9353 3
 -5 -1 13 19296.2 575.635 4
 -5 1 13 19758.8 577.577 4
 -5 1 13 19396.6 454.162 1
 5 -1 -13 20080.7 622.39 3
 -5 -1 13 19491.3 447.258 1
 5 1 -13 18787.4 590.811 3
 5 -1 -12 48192.6 957.908 3
 -5 1 12 45190.2 715.494 1
 -5 1 12 46082.2 870.908 4
 5 1 -12 45239.8 903.941 3
 -5 -1 12 45075.4 698.935 1
 5 -1 -11 786.555 114.093 3
 -5 -1 11 687.927 85.1684 1
 -5 1 11 759.513 111.613 4
 -5 1 11 731.138 88.0386 1
 -5 -1 11 722.621 111.832 4
 5 1 -11 924.77 124.652 3
 -5 -1 10 13216.9 368.519 1
 -5 1 10 13171.3 354.007 1
 -5 1 10 12585.2 402.924 4
 5 1 -10 12966.3 420.015 3
 -5 -1 10 12423.1 399.576 4
 5 -1 -10 12676.8 417.183 3
 5 1 -9 179356 1832.26 3
 5 -1 -9 176789 1830.28 3
 -5 1 9 179625 1790.31 4
 -5 -1 9 179534 1674.42 1
 -5 -1 9 178202 1798.88 4
 -5 1 9 178142 1665.64 1
 -5 -1 8 3490.1 176.529 1
 -5 1 8 3660.68 177.504 1
 -5 1 8 3371.86 194.481 4
 -5 -1 8 3542.21 201.153 4
 5 1 -8 3682.26 192.898 3
 5 1 -7 245194 2108.62 3
 -5 1 7 246462 2089.64 1
 -5 1 7 245244 2123.17 4
 5 1 -7 251437 1891.1 2
 -5 -1 7 250549 2117.98 1
 5 1 -6 25583.2 446.767 3
 5 1 -6 25476.9 361.231 2
 -5 1 6 26185.7 482.883 1
 5 -1 -6 25704.7 299.685 2
 -5 -1 6 24598.8 485.995 1
 -5 1 5 12986.6 316.851 1
 5 1 -5 12601.4 234.206 2
 5 -1 -5 12839 185.956 2
 -5 -1 5 13151 347.685 1
 -5 1 4 100503 1031.14 1
 -5 -1 4 99264.1 852.425 2
 -5 1 4 97583.9 763.699 2
 5 -1 -4 95772.9 769.656 2
 -5 -1 4 96396.4 1148.78 1
 5 1 -4 97548 849.742 2
 5 1 -3 50514.1 544.172 2
 -5 1 3 53339.9 489.274 2
 5 -1 -3 53135.8 495.12 2
 -5 -1 3 53494.4 550.216 2
 -5 1 3 54122.6 680.931 1
 -5 1 2 4120.23 113.242 2
 5 -1 -2 4189.36 115.602 2
 -5 -1 2 3972.54 127.913 2
 -5 1 2 4057.45 165.742 1
 5 1 -2 4157.68 104.375 3
 5 -1 -2 4268.64 140.981 3
 5 1 -2 4206.63 134.743 2
 5 -1 -2 4107.28 148.998 5
 -5 -1 1 352407 2687.26 5
 -5 1 1 347672 2595.71 3
 5 -1 -1 370265 2672.13 5
 -5 -1 1 350240 2457.35 3
 5 1 -1 351906 2483.02 3
 5 1 -1 363828 2599.09 2
 -5 1 1 364259 2714.61 1
 5 -1 -1 364979 2647.75 3
 5 -1 -1 363968 2552.96 2
 -5 -1 1 376411 2602.36 2
 -5 1 1 370794 2550.84 2
 -5 1 1 353466 2651.95 5
 5 -1 0 11062.5 251.607 5
 -5 1 0 10406.3 246.789 5
 -5 1 0 11504.3 262.337 3
 5 1 0 10734.7 241.862 2
 -5 -1 0 10256.4 200.727 3
 5 -1 0 10929.8 256.489 3
 -5 1 0 11006.4 223.536 2
 5 1 0 10241.1 201.384 3
 -5 -1 0 10571.4 260.793 5
 -5 1 0 10924.5 263.855 1
 -5 1 -1 58608.9 674.205 5
 5 -1 1 59219.8 709.272 3
 -5 1 -1 57798.6 683.12 1
 -5 1 -1 56814.6 701.287 3
 5 1 1 58966.1 679.103 2
 -5 -1 -1 56864.6 622.865 3
 -5 -1 -1 59450.9 701.798 5
 5 1 1 57811.9 627.646 3
 -5 1 -2 2232.55 155.471 3
 -5 1 -2 1521.74 97.0683 1
 5 1 2 2134.83 119.234 2
 -5 -1 -2 1573.74 95.129 3
 5 1 2 1625.24 99.1196 3
 -5 1 -3 37182.5 532.057 1
 -5 -1 -3 40193.7 574.554 3
 -5 1 -3 38939.1 618.634 3
 -5 -1 -4 17253 386.675 3
 -5 -1 -4 16156.8 287.54 1
 -5 1 -4 16904.3 411.735 3
 -5 -1 -5 121612 944.656 1
 -5 1 -5 119088 1296.08 3
 -5 -1 -6 11235.4 215.493 1
 -5 1 -6 11179.6 186.113 1
 -5 1 -6 11058.4 377.191 3
 -5 -1 -6 11456.5 359.036 3
 -5 1 -7 153306 1657.19 3
 -5 -1 -7 150274 1127.78 1
 -5 -1 -7 150097 1602.72 3
 -5 1 -8 1071.61 133.633 3
 -5 1 -8 959.316 44.7225 1
 -5 1 -8 716.702 50.1104 1
 -5 -1 -8 1295.69 68.664 1
 -5 -1 -8 1506.81 155.761 3
 -5 1 -9 97125.2 1427.65 3
 -5 -1 -9 96783.7 1386.28 3
 -5 -1 -10 19600 287.638 1
 -5 -1 -10 20535.6 605.79 3
 -5 1 -10 19600.2 608.248 3
 -5 1 -11 155.224 86.7479 3
 -5 -1 -11 429.812 118.716 3
 -5 -1 -12 2576.29 245.23 3
 -5 1 -12 2750.71 254.678 3
 -5 -1 -13 33986.6 917.736 3
 -5 1 -13 34510.9 927.36 3
 -5 -1 -14 1570.53 232.535 3
 -5 1 -14 1669.72 235.041 3
 -5 1 -15 74993.7 1512.69 3
 -5 -1 -15 75921.6 1503.93 3
 -5 1 -16 9545.54 544.816 3
 -5 -1 -16 9649.82 545.103 3
 -5 -1 -17 1089.62 208.992 3
 -5 1 -17 995.649 205.351 3
 -5 1 -18 4454.21 424.872 3
 -5 -1 -18 5005.81 422.843 3
 -5 -1 -19 17816.5 815.82 3
 -5 1 -19 17496.7 811.216 3
 -5 1 -20 386.378 208.547 3
 -5 -1 -20 394.693 208.821 3
 -5 1 -21 53009.8 1532.08 3
 -5 -1 -21 51298.6 1481.25 3
 5 3 -23 9441.99 626.661 3
 5 -3 -23 9909.15 635.398 3
 5 -3 -22 -77.7484 123.187 3
 5 3 -22 6.91034 103.261 3
 5 3 -21 4998.08 430.706 3
 5 -3 -21 5459.97 451.97 3
 5 -3 -20 22332.6 870.275 3
 5 3 -20 21075.4 860.367 3
 5 -3 -19 34735.6 1061.02 3
 5 3 -19 35802.7 1068.2 3
 5 3 -18 17809.7 713.992 3
 5 -3 -18 17208.9 716.312 3
 5 3 -17 5393.46 379.938 3
 5 -3 -17 5284.68 388.25 3
 5 -3 -16 10136.2 508.189 3
 -5 -3 16 9962.38 468.595 4
 -5 3 16 10377 358.316 1
 5 3 -16 10236.6 503.965 3
 -5 -3 15 58800.1 834.843 1
 -5 -3 15 61058.7 1154.23 4
 5 -3 -15 62694 1274.75 3
 5 3 -15 61445 1225.45 3
 -5 3 15 59125.1 907.906 1
 5 -3 -14 4251.66 305.843 3
 -5 -3 14 4509.83 290.572 4
 5 3 -14 4511.82 311.092 3
 -5 3 14 4016.58 214.214 1
 -5 -3 14 4221.08 202.878 1
 5 -3 -13 47846 995.685 3
 -5 3 13 47552.8 920.898 4
 -5 -3 13 46832.5 723.193 1
 -5 -3 13 46074.5 921.751 4
 -5 3 13 47890.6 774.389 1
 5 3 -13 46247 951.905 3
 5 -3 -12 85536.2 1312.25 3
 -5 -3 12 85147.3 1054.78 1
 -5 -3 12 84176.8 1239.91 4
 -5 3 12 86740.7 1245.77 4
 -5 3 12 85773.6 1075.37 1
 5 3 -12 84688 1278.21 3
 -5 3 11 13983.3 388.128 1
 -5 3 11 14631.2 450.756 4
 5 3 -11 14257.1 459.853 3
 -5 -3 11 13889.9 373.911 1
 -5 -3 11 15126.4 462.492 4
 -5 -3 10 71409.7 1039.18 4
 -5 3 10 70772.9 935.547 1
 -5 -3 10 70540.3 930.47 1
 -5 3 10 69313.6 1008.82 4
 5 3 -10 71359.4 1048.73 3
 -5 -3 9 56976 884.268 4
 -5 3 9 60168.8 872.035 4
 -5 3 9 59757.4 826.686 1
 5 3 -9 58207.6 883.411 3
 -5 -3 9 57645.7 839.304 1
 -5 -3 8 36978.2 658.711 4
 -5 3 8 37899.9 622.853 1
 -5 -3 8 37580.1 673.699 1
 5 3 -8 36600.4 639.995 3
 -5 3 7 121855 1242.13 4
 5 3 -7 121539 1130.11 2
 -5 3 7 122947 1254.07 1
 5 3 -7 122272 1225.88 3
 5 3 -6 66963.1 749.206 2
 -5 3 6 67171.2 852.38 1
 -5 3 6 66422.7 809.09 4
 5 3 -6 68725.7 789.788 3
 5 3 -5 8999.57 226.343 2
 -5 3 5 9751.96 279.643 1
 5 3 -5 9537.78 226.914 3
 -5 3 4 196109 1697.69 1
 5 3 -4 196171 1589.38 2
 5 3 -4 195364 1489.11 3
 5 3 -3 100641 951.775 2
 -5 3 3 104740 1046.62 1
 -5 3 3 100876 771.832 2
 5 3 -3 100796 784.928 3
 5 3 -2 22457.1 364.798 2
 -5 3 2 23324.5 405.065 1
 -5 3 2 22291.8 271.861 2
 5 -3 -2 23413.5 358.962 5
 5 3 -1 44328.6 562.422 2
 -5 3 1 45508.9 541.267 5
 5 -3 -1 46236.8 546.988 5
 -5 -3 1 43731.6 601.289 5
 -5 3 1 44240 621.641 3
 -5 3 1 46425.1 586.306 1
 5 3 0 2682.36 76.1112 3
 -5 3 0 3051.07 129.642 1
 -5 -3 0 3348.96 154.668 5
 5 -3 0 3321.05 127.298 5
 5 3 0 2995.94 134.553 2
 -5 3 0 4928.02 182.207 5
 -5 3 0 5467.01 220.516 3
 -5 -3 0 2971.18 80.7154 3
 5 3 1 82311.9 742.881 3
 -5 3 -1 83485.7 815.97 1
 -5 3 -1 84282.1 827.843 5
 -5 -3 -1 81825.7 734.38 3
 5 3 1 80322.2 884.326 2
 -5 3 -1 80236.8 958.538 3
 -5 -3 -1 82669 909.104 5
 5 3 2 26511.5 398.825 3
 -5 3 -2 26918 383.806 1
 -5 -3 -2 27889.4 472.216 5
 5 -3 2 29808.1 423.348 1
 5 3 2 27635.4 470.403 2
 -5 3 -2 28798.6 545.619 3
 -5 -3 -2 26601.5 389.375 3
 -5 3 -3 57634.4 599.429 1
 5 3 3 58756.2 756.483 2
 -5 3 -3 56819.5 854.942 3
 -5 -3 -3 54970.2 678.406 3
 5 3 4 73735 898.948 2
 -5 3 -4 73552.8 676.895 1
 -5 -3 -4 72255.1 856.095 3
 -5 3 -5 5171.84 263.83 3
 -5 -3 -5 4431.19 203.487 3
 -5 3 -5 4566.9 120.623 1
 -5 3 -6 89878.9 1230.71 3
 -5 -3 -6 89628.6 1096.81 3
 -5 3 -7 132041 1570.53 3
 -5 -3 -7 130565 1417.43 3
 -5 3 -8 15737.8 514.743 3
 -5 -3 -8 15380.7 464.801 3
 -5 3 -9 50506 1000.74 3
 -5 -3 -9 50250.5 915.185 3
 -5 3 -10 58354.3 1121.91 3
 -5 -3 -10 59372.9 1052.63 3
 -5 3 -11 598.497 120.967 3
 -5 -3 -11 666.576 128.254 3
 -5 3 -12 26674.4 802.173 3
 -5 -3 -12 28326.2 785.878 3
 -5 3 -13 63113.4 1313.36 3
 -5 -3 -13 65338.1 1269.24 3
 -5 3 -14 7996.57 477.904 3
 -5 -3 -14 8365.52 456.118 3
 -5 -3 -15 26550.8 841.129 3
 -5 3 -15 26590.3 894.531 3
 -5 -3 -16 42769.7 1121.51 3
 -5 3 -16 41501.3 1158.71 3
 -5 3 -17 59390.7 1361.27 3
 -5 -3 -17 91.5563 118.87 3
 -5 -3 -18 13513.8 685.036 3
 -5 3 -18 14622.9 747.954 3
 -5 -3 -19 12646.4 688.631 3
 -5 3 -19 11934.4 684.713 3
 -5 3 -20 10207.8 663.108 3
 -5 -3 -20 10287.6 634.6 3
 -5 -3 -21 25617.9 1044.31 3
 5 5 -23 550.477 177.986 3
 5 -5 -22 -13.8813 103.464 3
 5 5 -22 -18.8521 121.51 3
 5 -5 -21 0.92398 102.256 3
 5 5 -21 99.4747 114.043 3
 5 5 -20 34274.9 1092.47 3
 5 -5 -20 33135 1083.92 3
 5 5 -19 12995.1 649.855 3
 5 -5 -19 14209.4 693.079 3
 5 -5 -18 68601.9 1490.44 3
 5 5 -18 67024.9 1453.13 3
 5 -5 -17 757.106 155.377 3
 5 5 -17 1026.56 178.457 3
 5 -5 -16 4389.34 343.621 3
 5 5 -16 4373.78 333.9 3
 -5 5 16 3923.58 231.4 1
 -5 -5 16 4002.07 303.979 4
 -5 -5 15 4385.52 297.746 4
 5 5 -15 3532.06 291.451 3
 -5 5 15 4040.48 233.792 1
 5 -5 -15 4402.91 326.012 3
 -5 -5 14 45717.5 953.309 4
 -5 -5 14 44356 722.747 1
 5 5 -14 46236.3 1028.03 3
 5 -5 -14 44519.4 1015.8 3
 -5 5 14 45947 805.1 1
 -5 -5 13 27480.1 556.71 1
 -5 -5 13 29538.6 731.301 4
 5 -5 -13 29952.2 788.212 3
 5 5 -13 31157.6 807.222 3
 -5 5 13 29434.4 621.367 1
 -5 -5 12 92704.6 1319.51 4
 -5 5 12 93293.8 1294.91 4
 5 5 -12 97088.3 1423.56 3
 -5 5 12 91047.3 1172.14 1
 -5 -5 12 90790 1134.39 1
 -5 5 11 1257.29 131.918 4
 -5 -5 11 1276.31 139.19 4
 -5 -5 11 1391.42 131.931 1
 -5 5 11 1415.11 131.261 1
 5 5 -11 1341.16 156.092 3
 5 -5 -11 1206.77 75.7805 2
 -5 5 10 149705 1555.7 4
 -5 5 10 146461 1482.13 1
 -5 -5 10 145569 1592.42 4
 -5 -5 9 25743.5 564.124 4
 -5 5 9 24584.9 513.333 1
 -5 5 9 25541.2 524.612 4
 5 5 -9 24338.5 557.095 3
 5 5 -8 78503.6 1026.46 3
 -5 5 8 80629.9 984.683 4
 -5 -5 8 78550.8 1030 4
 -5 5 8 77415.1 984.842 1
 -5 5 7 29773.1 516.936 4
 5 5 -7 29869.1 544.01 3
 5 5 -7 30924.1 519.375 2
 -5 5 6 38849.9 576.634 4
 5 5 -6 39268.3 586.595 3
 5 5 -6 39055.9 588.844 2
 -5 5 6 39110.2 637.95 1
 5 5 -5 857.487 87.0976 2
 -5 5 5 1059.28 101.646 1
 -5 5 5 1068.69 94.385 4
 5 5 -5 1075.32 84.8799 3
 -5 -5 5 1081.31 72.1341 3
 5 5 -4 68824.3 802.341 2
 5 5 -4 64667.8 677.5 3
 -5 5 4 69059.7 845.135 1
 -5 -5 4 66561.9 630.327 3
 5 5 -3 27349.8 450.677 2
 -5 5 3 26992.9 471.727 1
 5 5 -3 25282.7 313.893 3
 -5 -5 3 25395.6 284.037 3
 -5 5 2 193386 1677.24 1
 5 -5 -2 193899 1505.78 5
 5 5 -2 192894 1651.26 2
 -5 -5 1 25192.5 446.955 5
 5 -5 -1 26801 362.608 5
 -5 5 1 25267.9 505.549 3
 -5 5 1 24466.9 424.529 1
 -5 5 0 235.364 58.2423 3
 5 5 0 165.487 41.6479 2
 -5 -5 0 172.831 46.1592 5
 -5 5 0 222.402 48.2829 1
 -5 5 -1 8974.6 208.412 5
 -5 5 -1 8568.3 306.986 3
 5 5 1 8494.12 256.057 2
 -5 5 -1 8391.79 221.185 1
 -5 -5 -1 8818.84 184.64 3
 -5 -5 -1 8726.62 260.833 5
 -5 -5 -2 195845 1559.33 3
 -5 -5 -2 199542 1736.7 5
 -5 5 -2 188642 1565.57 1
 -5 5 -2 192970 1903.74 3
 5 5 2 194645 1737.63 2
 -5 5 -3 156097 1309.07 1
 5 5 3 161874 1539.37 2
 -5 5 -3 159753 1724.66 3
 -5 5 -4 257226 1970.5 1
 -5 5 -4 259803 2520.83 3
 5 5 4 267508 2289.03 2
 -5 -5 -4 266828 2221.35 3
 5 5 4 261131 2179.91 1
 5 5 5 45832.7 641.212 1
 -5 5 -5 46805.7 882.201 3
 5 5 5 46577.5 731.312 2
 -5 5 -5 45189.3 490.962 1
 -5 -5 -5 45684.9 708.165 3
 5 -5 5 48614.9 539.815 1
 -5 5 -6 57219.3 1022.37 3
 5 5 6 55423 722.454 1
 5 5 6 56507.5 840.544 2
 5 -5 6 57743.5 609.966 1
 -5 5 -6 55542.6 532.593 1
 -5 -5 -6 56220.6 845.659 3
 -5 -5 -7 4949.59 248.094 3
 5 5 7 4846.1 192.383 1
 -5 5 -7 4759.16 106.693 1
 -5 5 -7 4882.58 296.118 3
 5 5 8 94654.7 1028.29 1
 -5 -5 -8 96052.6 1285.01 3
 -5 5 -8 96471.7 1447.73 3
 5 5 9 52600.9 711.677 1
 -5 -5 -9 52140.5 948.205 3
 -5 5 -9 53849.7 1090.5 3
 5 5 10 63809.1 816.441 1
 -5 5 -10 67882.2 1265.33 3
 -5 -5 -10 66497.5 1127.07 3
 5 5 11 311.196 62.8863 1
 -5 5 -11 343.846 113.241 3
 -5 -5 -11 339.879 90.9235 3
 -5 -5 -12 17782.8 605.495 3
 -5 5 -12 16577.7 652.012 3
 -5 -5 -13 37484.1 931.258 3
 -5 5 -13 39000 1045.22 3
 -5 -5 -14 36396.1 953.952 3
 -5 5 -14 36391 1038.28 3
 -5 5 -15 1925.06 259.364 3
 -5 -5 -15 1851.71 239.474 3
 -5 5 -16 17413.6 772.698 3
 -5 -5 -16 18955.5 758.039 3
 -5 5 -17 474.87 176.782 3
 -5 -5 -17 739.255 193.071 3
 -5 5 -18 18706 875.129 3
 -5 -5 -18 20422.5 823.584 3
 -5 -5 -19 15654.7 742.912 3
 -5 5 -19 15433 807.83 3
 -5 5 -20 24041.6 1029.16 3
 -5 -5 -20 24786.7 982.23 3
 5 7 -23 13847 773.885 3
 5 -7 -22 57.1539 116.068 3
 5 7 -22 -133.168 144.006 3
 5 7 -21 3461.66 365.78 3
 5 -7 -21 3722.93 386.815 3
 5 -7 -20 31780.9 1076.44 3
 5 7 -20 31519 1062.48 3
 5 7 -19 4027.33 375.979 3
 5 -7 -19 3766.12 369.6 3
 5 -7 -18 60858.4 1427.1 3
 5 7 -18 57646 1370.1 3
 5 -7 -17 12494.8 595.28 3
 5 7 -17 12261.2 605.567 3
 5 -7 -16 321.406 122.954 3
 -5 -7 16 311.846 87.8958 4
 5 7 -16 322.269 107.257 3
 -5 7 16 383.534 90.9862 1
 5 -7 -15 7735.54 447.118 3
 5 7 -15 7669.51 433.334 3
 -5 -7 15 7533.66 395.927 4
 -5 7 15 7006.58 322.835 1
 -5 -7 14 144824 1564.43 1
 -5 7 14 146347 1696.43 1
 -5 -7 14 145101 1872.78 4
 5 7 -13 154.006 82.7906 3
 -5 -7 13 202.162 86.0281 4
 -5 7 13 -48.671 54.684 1
 -5 -7 13 244.944 82.2388 1
 -5 -7 12 44325.9 871.655 4
 5 7 -12 46823.7 967.553 3
 -5 7 12 46048.3 819.936 1
 -5 7 11 113.319 49.9455 1
 -5 -7 11 -56.2161 87.9126 4
 5 7 -11 143.34 74.2057 3
 -5 -7 10 37326.4 729.14 4
 -5 7 10 37283.7 679.219 4
 5 7 -10 39205.2 781.199 3
 -5 7 10 39549.8 711.124 1
 -5 -7 9 20165 503.575 4
 5 7 -9 20065.2 526.075 3
 -5 7 9 19456.9 483.954 1
 -5 7 9 20440.9 469.232 4
 5 7 -8 203975 1926.11 2
 5 7 -8 203804 2017.38 3
 -5 7 8 212041 1889.06 4
 -5 -7 8 204525 1980.06 4
 -5 7 8 208073 1980.43 1
 -5 7 7 2142.55 135.505 4
 -5 7 7 2501.11 165.634 1
 5 7 -7 2201.73 149.356 2
 5 7 -7 2159.06 157.689 3
 5 7 -6 1090.05 106.931 2
 -5 7 6 819.639 77.9165 4
 -5 7 6 1162.91 114.921 1
 5 7 -6 1307.86 115.565 3
 5 7 -5 9293.87 292.18 2
 5 7 -5 9410.88 268.317 3
 -5 7 5 9501.74 233.482 4
 -5 7 5 9896.14 308.702 1
 -5 7 5 7929.25 138.877 2
 -5 -7 5 9880.98 237.554 3
 -5 -7 4 58227.8 638.463 3
 5 7 -4 59963.1 807.802 2
 -5 7 4 60980.5 641.83 4
 5 7 -4 60031.5 691.903 3
 -5 7 4 58774.8 815.053 1
 -5 7 4 59148.3 541.527 2
 5 7 -3 39675.1 624.176 2
 -5 7 3 40219.1 631.861 1
 5 7 -3 40107.4 482.355 3
 -5 -7 3 39345.6 466.488 3
 5 -7 -2 255711 1859.44 5
 -5 -7 2 253092 1890.71 3
 5 7 -2 253888 2147.83 2
 -5 7 2 256757 2144.27 1
 -5 7 1 55332.5 873.097 3
 5 7 -1 53809.4 747.871 2
 -5 -7 1 57283.2 592.328 3
 -5 7 1 54696.9 724.557 1
 5 7 0 63754.2 817.737 2
 -5 -7 0 59044.2 639.036 3
 -5 7 0 61333.6 922.732 3
 -5 -7 0 62776.9 801.178 5
 -5 7 0 61729.7 759.504 1
 -5 7 0 62267.7 610.123 5
 -5 7 -1 145936 1641.85 3
 -5 7 -1 145685 1191.36 5
 -5 7 -1 141812 1322.07 1
 5 7 1 141753 1417.92 2
 5 7 1 146410 1432.43 1
 -5 -7 -1 143927 1413.61 5
 -5 -7 -2 463602 3484.97 5
 -5 7 -2 451005 3809.47 3
 5 7 2 447984 3506.57 2
 -5 7 -2 451019 3324.46 1
 5 7 2 468355 3478.7 1
 5 7 3 58114.6 791.246 1
 -5 7 -3 57990.9 986.487 3
 5 7 3 60146 841.322 2
 -5 -7 -3 59459.8 807.096 5
 -5 7 -3 58646.6 684.737 1
 -5 7 -4 130680 1637.31 3
 -5 -7 -4 127449 1305.73 3
 5 7 4 130096 1394.38 2
 5 7 4 129217 1316.08 1
 -5 7 -4 129280 1149.81 1
 -5 -7 -5 8008.41 281.582 3
 5 7 5 7827.37 264.21 1
 -5 7 -5 7736.3 382.263 3
 -5 7 -5 7679.5 196.887 1
 5 7 5 7774.77 295.189 2
 -5 -7 -6 40256 701.306 3
 -5 7 -6 40148 888.398 3
 5 7 6 39348 632.38 1
 5 7 6 39064.8 704.594 2
 -5 7 -6 39297 477.165 1
 -5 -7 -7 17641 488.397 3
 5 -7 7 16568.6 285.211 1
 5 7 7 16217.3 390.463 1
 -5 7 -7 16736.4 580.714 3
 -5 7 -7 16197.8 258.308 1
 5 7 7 16873.8 458.743 2
 -5 -7 -8 138519 1604.6 3
 5 7 8 135577 1347.25 1
 -5 7 -8 143294 1882.08 3
 -5 7 -8 113575 957.115 1
 5 7 8 135853 1498.68 2
 5 -7 8 122788 1038.58 1
 -5 -7 -9 555.248 100.236 3
 5 7 9 590.243 83.6085 1
 -5 7 -9 351.455 104.886 3
 5 7 10 25916.6 519.617 1
 -5 -7 -10 25885.3 693.726 3
 -5 7 -11 1431.79 209.891 3
 5 7 11 1355.64 123.799 1
 -5 -7 -11 1485.94 171.274 3
 -5 7 -12 25754.7 837.806 3
 5 7 12 24657.3 520.708 1
 -5 -7 -12 26156.2 753.564 3
 -5 -7 -13 810.571 146.458 3
 5 7 13 619.027 85.4239 1
 -5 7 -13 868.039 186.291 3
 -5 7 -14 42570.7 1168.24 3
 -5 -7 -14 40652.6 1029.63 3
 -5 7 -15 22420.2 872.404 3
 -5 -7 -15 22706.1 782.549 3
 -5 7 -16 7630.54 528.29 3
 -5 -7 -16 8485.81 495.982 3
 -5 7 -17 6229.37 497.247 3
 -5 -7 -17 6395.12 448.732 3
 -5 7 -18 16213.2 807.939 3
 -5 -7 -18 16502.3 750.738 3
 -5 -7 -19 3800.01 386.858 3
 -5 7 -19 3884.46 426.955 3
 -5 7 -20 40258.8 1359.42 3
 -5 -7 -20 39827.9 1252.29 3
 5 9 -23 15394.4 829.284 3
 5 9 -22 405.061 169.569 3
 5 -9 -21 19804.8 889.226 3
 5 9 -21 17021.6 823.07 3
 5 9 -20 29231.7 1047.77 3
 5 -9 -20 30999 1092.57 3
 5 -9 -19 7809.38 535.318 3
 5 9 -19 6910.88 494.92 3
 5 -9 -18 8683.12 531.36 3
 5 9 -18 8057.64 511.126 3
 5 -9 -17 14478.1 681.364 3
 -5 9 17 12797.3 473.641 1
 5 9 -17 14857 672.186 3
 5 -9 -16 -11.4023 117.355 3
 -5 9 16 220.966 79.9932 1
 -5 -9 16 -22.7405 101.265 4
 5 9 -16 177.835 101.991 3
 -5 -9 15 17040.8 596.49 4
 5 9 -15 17018.2 663.788 3
 -5 9 14 70290.9 1139.73 1
 -5 -9 14 71914.8 1242.29 4
 5 9 -14 74437 1389.79 3
 -5 9 13 23967.5 616.082 1
 -5 -9 13 24721.6 673.731 4
 5 9 -13 24369.3 743.112 3
 -5 -9 12 6265.58 318.189 4
 5 9 -12 6290.31 360.103 3
 -5 9 12 6082.37 301.081 1
 -5 -9 11 3038.01 219.69 4
 5 9 -11 3249.12 253.393 3
 -5 9 11 3030.65 209.199 1
 5 9 -10 456.328 80.1397 2
 -5 9 10 57.8322 46.578 1
 -5 -9 10 138.485 60.0323 4
 5 9 -10 364.576 92.4905 3
 5 9 -9 29621.7 626.544 2
 5 9 -9 30492.6 717.512 3
 -5 9 9 29675 646.097 1
 -5 -9 9 28678.9 622.05 4
 5 9 -8 128216 1465.21 2
 5 9 -8 128411 1541.82 3
 -5 -9 8 125190 1423.49 4
 -5 9 8 130056 1493.41 1
 5 9 -7 81930.7 1074.56 2
 5 9 -7 81067.9 1092.03 3
 -5 9 7 84031.5 1099.92 1
 -5 9 6 65.2338 31.5121 4
 5 9 -6 73.5786 48.8034 2
 -5 9 6 148.08 26.4875 2
 5 9 -5 10167.8 334.613 2
 -5 9 5 10329.5 233.903 4
 -5 9 5 9986.92 200.814 2
 5 9 -5 10308.4 306.706 3
 -5 9 5 10317.1 338.346 1
 -5 9 4 27870.2 379.181 2
 5 9 -4 29977.5 578.242 2
 5 9 -4 30398.2 498.845 3
 -5 9 4 30089.7 577.211 1
 -5 9 3 39880.1 505.127 2
 -5 -9 3 38324.2 550.526 3
 5 9 -3 39282.2 542.559 3
 -5 9 3 38295.1 410.149 4
 -5 9 3 39605.5 667.942 1
 5 9 -3 39284.7 673.575 2
 5 9 -2 47582.9 734.155 2
 -5 9 2 44974.1 420.287 4
 -5 -9 2 48800.7 615.777 3
 -5 9 2 47788.9 722.585 1
 -5 9 1 49334.9 731.822 1
 5 9 -1 49236.2 757.873 2
 -5 9 1 50945 903.896 3
 -5 -9 1 51262.6 647.989 3
 5 9 0 22610 493.378 1
 5 9 0 22256.2 489.983 2
 -5 -9 0 22394.3 457.806 5
 -5 9 0 22574.3 582.349 3
 -5 9 0 23010.9 460.602 1
 5 9 1 70976.6 936.925 1
 -5 9 -1 70159.8 1105.05 3
 -5 9 -1 68668.8 660.65 5
 5 9 1 70102.3 940.615 2
 -5 -9 -1 72937.4 910.994 5
 -5 9 -1 69893.1 861.328 1
 5 9 2 75786.8 982.451 1
 -5 9 -2 76092.9 892.318 1
 -5 9 -2 77613.7 1222.48 3
 -5 -9 -2 79432.3 983.815 5
 5 9 2 75571 1004.84 2
 -5 9 -3 5352.93 197.814 1
 -5 -9 -3 5579.86 232.842 5
 5 9 3 4887.27 234.472 2
 5 9 3 5176.1 234.375 1
 -5 9 -4 72355.7 1216.81 3
 5 9 4 72054.7 954.868 1
 -5 -9 -4 72045.8 951.437 5
 5 9 4 73625 1016.39 2
 -5 9 -4 69870.5 807.91 1
 5 9 5 1068.27 117.531 2
 -5 9 -5 1084.6 84.6131 1
 5 9 5 944.645 103.174 1
 -5 9 -5 977.568 145.288 3
 -5 9 -6 645.911 62.9894 1
 5 9 6 510.925 80.6081 1
 -5 9 -6 584.844 120.338 3
 5 9 6 771.942 107.268 2
 -5 9 -7 27470.3 412.41 1
 -5 -9 -7 27511.1 624.421 3
 5 9 7 26916 552.806 1
 -5 9 -7 28576.2 807.225 3
 5 9 7 27442.6 615.815 2
 -5 -9 -8 86842.1 1253.67 3
 5 9 8 85414.9 1094.13 1
 -5 9 -8 86973.7 826.77 1
 -5 9 -8 88731.8 1531.05 3
 5 9 8 87966.1 1212.17 2
 -5 9 -9 12071 551.521 3
 -5 -9 -9 12718.9 465.26 3
 5 9 9 12792.3 381.55 1
 5 9 9 12573.1 428.066 2
 -5 9 -9 12570.1 231.865 1
 -5 -9 -10 13150.4 503.374 3
 5 9 10 13468.7 398.634 1
 -5 -9 -11 3135.96 256.069 3
 5 9 11 2942.47 190.892 1
 -5 9 -11 2787.37 287.549 3
 5 9 12 626.424 94.813 1
 -5 9 -12 612.854 155.145 3
 -5 -9 -12 799.419 140.284 3
 5 9 13 9561.47 350.57 1
 -5 9 -13 11309.9 609.02 3
 -5 -9 -13 10587 503.862 3
 -5 9 -14 58966.4 1463.74 3
 -5 -9 -14 53740.3 1224.95 3
 -5 9 -15 34109.6 1147.19 3
 -5 -9 -15 31464.2 940.938 3
 -5 9 -16 1037.36 217.196 3
 -5 -9 -16 884.376 170.454 3
 -5 9 -17 322.044 144.484 3
 -5 -9 -17 302.036 129.328 3
 -5 9 -18 9332.91 643.758 3
 -5 -9 -18 7709.59 508.231 3
 -5 -9 -19 14795.8 735.091 3
 -5 9 -19 17153 897.555 3
 -5 -9 -20 43970.9 1337.09 3
 5 11 -22 1578.21 287.327 3
 5 11 -21 6075.58 501.589 3
 5 -11 -20 2668.43 336.311 3
 5 11 -20 1767.75 279.913 3
 5 -11 -19 40683 1222.89 3
 5 11 -19 36988.1 1168.14 3
 5 -11 -18 2055.59 275.05 3
 5 11 -18 2006.08 270.577 3
 -5 11 17 1573.9 180.21 1
 5 11 -17 1630.26 239.686 3
 5 -11 -17 1582.91 257.705 3
 -5 -11 16 156.272 90.0065 4
 -5 11 16 217.851 86.9779 1
 5 11 -16 247.749 110.12 3
 -5 -11 15 34321.2 863.281 4
 -5 11 15 31880 782.351 1
 5 11 -15 34928.3 996.476 3
 -5 -11 14 25220.5 707.587 4
 5 11 -14 24926.3 823.572 3
 -5 11 14 22842.7 641.205 1
 -5 -11 13 55566.3 1053.46 4
 -5 11 13 58276.9 1036.08 1
 5 11 -13 56184.2 1221.49 3
 5 11 -12 11784.7 439.195 2
 -5 11 12 10268.2 419.17 1
 5 11 -12 11199.1 506.315 3
 -5 -11 12 11562 440.585 4
 -5 11 11 2136.65 192.672 1
 5 11 -11 1951.54 177.542 2
 -5 -11 11 2101.31 187.301 4
 5 11 -11 2027.39 215.08 3
 5 11 -10 65.7373 60.5945 2
 -5 -11 10 82.8684 70.5853 4
 5 11 -10 87.3731 71.2595 3
 -5 11 10 -19.0409 53.6484 1
 5 11 -9 92265.1 1281.35 2
 5 11 -9 98587.5 1401.57 3
 -5 -11 9 94572.1 1236.97 4
 -5 11 9 89492.1 824.969 2
 -5 11 9 96079.2 1307.16 1
 -5 11 8 63515.6 1010.98 1
 5 11 -8 62952.4 999.081 2
 -5 -11 8 63009.3 934.617 4
 5 11 -8 65515 1056.38 3
 -5 11 7 95043.9 1271.82 1
 5 11 -7 94244.3 1261.98 2
 5 11 -7 97382.9 1278.12 3
 -5 11 7 96862.9 901.468 2
 -5 11 6 27676.4 617.602 1
 5 11 -6 27195.7 611.247 2
 -5 11 6 26926.6 403.822 2
 5 11 -6 25766.1 578.858 3
 -5 11 5 4569.33 241.902 1
 5 11 -5 4336.95 237.856 2
 5 11 -5 4582.02 221.865 3
 -5 11 5 4028.5 150.902 2
 -5 11 4 2882.13 190.331 1
 -5 11 4 2447.37 123.353 2
 5 11 -4 2705.16 155.589 3
 5 11 -4 2705.94 186.347 2
 -5 11 3 156593 1526.23 1
 5 11 -3 157232 1559.23 2
 -5 11 3 154005 1261.13 2
 5 11 -3 153820 1356.04 3
 -5 11 2 19195.1 468.308 1
 5 11 -2 19268.4 491.279 1
 5 11 -2 18910 481.163 2
 -5 11 1 12176 360.87 1
 -5 11 1 11865.1 454.968 3
 5 11 -1 11422.1 370.593 2
 5 11 -1 12500.9 378.472 1
 -5 11 0 1462.87 124.343 1
 5 11 0 1522.8 134.763 1
 5 11 0 1414.89 131.098 2
 -5 11 0 1491.24 166.892 3
 -5 11 -1 686.829 38.9074 4
 -5 11 -1 1254.48 110.845 1
 -5 11 -1 863.31 46.4712 5
 -5 11 -1 1278.51 156.773 3
 5 11 1 1411.03 133.936 2
 -5 -11 -1 1351.51 121.492 5
 5 11 1 1404.15 129.857 1
 -5 -11 -2 21357.3 475.64 5
 -5 11 -2 20651.9 626.089 3
 -5 11 -2 19855.7 295.009 5
 5 11 2 22403.7 515.084 1
 -5 11 -2 19524.3 272.165 4
 -5 11 -2 20702.3 446.002 1
 5 11 2 20890 508.027 2
 5 11 3 63551.7 935.66 1
 -5 -11 -3 64174.8 901.966 5
 -5 11 -3 63304.9 844.617 1
 -5 11 -3 65752.3 1193.95 3
 5 11 3 63018.6 961.854 2
 -5 -11 -4 9966.62 331.103 5
 5 11 4 9527.73 337.627 1
 -5 11 -4 10016.5 293.662 1
 5 11 4 9197.14 346.129 2
 -5 -11 -5 1851.35 146.428 5
 5 11 5 1728.11 159.481 2
 -5 11 -5 1575.05 113.845 1
 -5 11 -5 1509.68 192.062 3
 5 11 5 1437.34 137.62 1
 5 11 6 12738.2 400.381 1
 -5 11 -6 12715.2 538.179 3
 5 11 6 12590.3 421.449 2
 -5 11 -6 12647.5 314.319 1
 5 11 7 16063.4 455.452 1
 -5 11 -7 16700.8 645.5 3
 5 11 7 16287.9 491.374 2
 -5 11 -7 16265.1 349.339 1
 -5 -11 -8 28460.1 693.984 3
 5 11 8 27038.4 609.934 1
 -5 11 -8 28845.1 459.435 1
 5 11 8 27993.1 660.285 2
 -5 11 -8 27726.1 853.385 3
 -5 -11 -9 59871.5 1079.99 3
 5 11 9 57819.3 941.482 1
 -5 11 -9 60207.4 692.53 1
 5 11 9 59619.9 1017.16 2
 -5 11 -9 58707.6 1304.15 3
 5 11 10 415.32 94.4705 2
 -5 -11 -10 471.344 98.3072 3
 5 11 10 332.876 81.7442 1
 -5 11 -10 485.347 140.008 3
 -5 -11 -11 112.858 82.1768 3
 5 11 11 12.8144 49.3836 1
 -5 11 -11 7.64849 114.666 3
 -5 -11 -12 3387.88 292.313 3
 -5 11 -12 2950.47 317.546 3
 5 11 12 2726.29 202.029 1
 -5 11 -13 37105.5 1142.02 3
 -5 -11 -13 36373.8 965.298 3
 -5 11 -14 49213.8 1356.1 3
 -5 -11 -14 47416.8 1150.46 3
 -5 11 -15 39349.8 1251.3 3
 -5 -11 -15 36675.7 1041.21 3
 -5 -11 -16 1334.57 213.434 3
 -5 11 -16 1370.58 250.469 3
 -5 -11 -17 240.086 106.301 3
 -5 11 -17 130.355 125.887 3
 -5 11 -18 2540.86 349.363 3
 -5 -11 -18 2456.36 298.646 3
 -5 11 -19 46685 1506.74 3
 -5 -11 -19 42284 1267.73 3
 5 13 -21 3561.72 302.958 2
 5 -13 -20 781.15 198.127 3
 5 13 -20 444.11 101.403 2
 5 13 -20 367.033 155.341 3
 5 -13 -19 73371.6 1699.8 3
 5 13 -19 70186.2 1690.81 3
 5 -13 -18 51.2414 113.12 3
 5 13 -18 187.651 96.1334 2
 -5 13 18 209.43 85.4016 1
 5 13 -18 -9.28558 126.563 3
 -5 13 17 265.147 96.9032 1
 5 13 -17 450.845 145.336 3
 -5 13 16 686.044 128.934 1
 5 13 -16 877.986 146.53 2
 -5 -13 16 1031.14 168.367 4
 5 13 -16 629.955 155.196 3
 5 13 -15 35326.7 875.387 2
 5 13 -15 39924.7 1114.42 3
 -5 13 15 35289.3 871.066 1
 -5 -13 15 39203.6 932.872 4
 5 13 -14 3483.78 263.755 2
 -5 -13 14 3754.04 277.267 4
 5 13 -14 3256.89 304.114 3
 -5 13 14 3620.99 272.825 1
 -5 13 13 74101.5 1267.6 1
 -5 -13 13 73299 1228.16 4
 5 13 -13 76045.1 1461.8 3
 5 13 -12 11272 523.918 3
 -5 13 12 11351.7 461.57 1
 -5 -13 12 12076.6 454.549 4
 5 13 -12 11545.5 460.6 2
 5 13 -11 369.056 91.1258 2
 -5 13 11 318.566 91.1014 1
 -5 -13 11 272.701 84.2437 4
 5 13 -11 447.084 121.335 3
 -5 13 10 51.2197 64.6569 1
 5 13 -10 45.8368 84.5559 3
 5 13 -10 44.7321 73.1747 2
 -5 -13 9 49175.5 855.299 4
 -5 13 9 48604.9 923.367 1
 5 13 -9 52486.9 1013.13 3
 5 13 -9 48946.5 940.906 2
 -5 -13 8 79.0927 72.809 4
 -5 13 8 158.856 66.5386 1
 -5 13 8 228.092 47.1523 2
 5 13 -8 126.351 74.8833 3
 5 13 -8 219.576 77.8109 2
 -5 13 7 22290.4 576.461 1
 5 13 -7 23680.5 615.673 2
 -5 13 7 22886.2 409.91 2
 5 13 -7 24687.5 625.762 3
 5 13 -6 16096.9 477.603 3
 -5 13 6 14603.3 457.145 1
 5 13 -6 16737.8 506.535 2
 -5 13 6 15117.2 334.325 2
 -5 13 5 218.143 51.6188 2
 5 13 -5 236.62 82.4659 2
 -5 13 5 212.386 68.7357 1
 5 13 -5 152.908 47.1883 3
 5 13 -4 4672.5 260.447 2
 -5 13 4 4721.81 251.639 1
 5 13 -4 5589.12 260.589 3
 -5 13 4 4395.96 186.614 2
 5 13 -3 164161 1823.37 2
 -5 13 3 164090 1552.85 2
 -5 13 3 160739 1744.9 1
 5 13 -2 2261.91 176.598 1
 -5 13 2 2331.16 147.04 2
 -5 13 2 2031.43 162.707 1
 5 13 -2 2151.01 175.006 2
 -5 13 1 6185.01 272.122 1
 5 13 -1 6520.68 292.805 1
 5 13 -1 6571.35 304.267 2
 5 13 0 825.178 115.975 2
 5 13 0 1049.81 126.722 1
 -5 13 0 955.498 157.784 3
 -5 13 0 1044.38 117.225 1
 -5 -13 -1 4078.76 202.651 5
 5 13 1 3836.07 229.437 1
 -5 13 -1 4129.19 218.415 1
 5 13 1 4550.41 253.755 2
 -5 13 -1 3801.56 275.883 3
 5 13 2 66.3491 63.2997 1
 -5 13 -2 135.195 20.3666 5
 -5 13 -2 179.701 82.3918 3
 -5 -13 -2 139.346 49.3117 5
 -5 13 -2 49.4259 48.8523 1
 5 13 2 39.4853 58.3321 2
 -5 -13 -3 158673 1645.77 5
 5 13 3 159065 1744.71 1
 5 13 3 161706 1795.07 2
 -5 13 -3 158158 2093.55 3
 -5 13 -3 157007 1618.51 1
 5 13 4 1519.81 151.32 1
 -5 -13 -4 1785.4 145.711 5
 5 13 4 1690.42 160.11 2
 -5 13 -4 1854.76 137.245 1
 -5 13 -4 1904.33 231.198 3
 5 13 5 6207.59 293.883 1
 -5 -13 -5 6553.51 282.843 5
 -5 13 -5 6027.68 384.224 3
 5 13 5 6043.01 300.922 2
 -5 13 -5 6199.75 247.161 1
 5 13 6 1568.23 156.982 1
 -5 -13 -6 1594.5 145.128 5
 5 13 6 1464.74 158.456 2
 -5 13 -6 1445.76 210.798 3
 -5 13 -6 1768.79 128.419 1
 -5 13 -7 18843.2 415.894 1
 5 13 7 19365.5 539.626 1
 5 13 7 18870.9 553.107 2
 5 13 8 101.321 65.8357 2
 5 13 8 -16.2579 54.5581 1
 -5 13 -8 -63.9021 141.479 3
 -5 13 -8 154.004 44.61 1
 -5 -13 -9 95488.6 1460.81 3
 5 13 9 93807.2 1325.67 1
 5 13 9 94283.8 1378.41 2
 -5 13 -9 97338 1767.68 3
 -5 -13 -10 17533.8 604.87 3
 -5 13 -10 17010.4 723.077 3
 5 13 10 16768.4 544.594 2
 5 13 10 16054.9 510.078 1
 -5 -13 -11 4593.44 327.569 3
 5 13 11 3946.1 258.637 1
 -5 13 -11 4421.58 387.379 3
 5 13 11 4762.32 293.283 2
 -5 -13 -12 2482.41 247.798 3
 5 13 12 2109.39 191.536 1
 -5 13 -12 2544.87 311.018 3
 -5 -13 -13 31091.3 954.166 3
 5 13 13 36193.4 811.202 1
 -5 -13 -14 1119.02 192.926 3
 -5 13 -14 1206.3 241.101 3
 5 13 14 884.232 135.172 1
 -5 13 -15 23461.9 988.169 3
 -5 -13 -15 23693.1 848.128 3
 -5 -13 -16 2696.34 299.668 3
 -5 13 -16 2685.03 344.843 3
 -5 13 -17 2012.95 309.674 3
 -5 -13 -17 2314.28 286.774 3
 -5 -13 -18 568.245 138.662 3
 -5 13 -18 798.363 183.02 3
 5 15 -20 7248.41 438.357 2
 5 15 -19 45269.7 1103.93 2
 5 15 -18 287.506 108.737 2
 -5 15 18 301.036 94.4245 1
 5 15 -17 399.928 112.73 2
 -5 15 17 221.778 99.6747 1
 5 15 -16 -54.0261 99.1559 2
 5 15 -16 -69.5571 98.2569 3
 -5 15 16 67.5762 83.6428 1
 5 15 -15 9348.89 547.494 3
 5 15 -15 8957.73 453.013 2
 -5 -15 15 8585.94 431.814 4
 -5 15 15 8309.83 441.673 1
 5 15 -14 16766.5 609.127 2
 -5 15 14 16778.4 615.293 1
 -5 -15 14 17888.5 604.391 4
 5 15 -14 17419.2 718.379 3
 -5 15 13 59911.3 1185.46 1
 5 15 -13 60835.9 1191.7 2
 5 15 -13 65986.1 1379.9 3
 -5 -15 13 64508.2 1152.13 4
 5 15 -12 -25.9206 111.475 3
 5 15 -12 -11.254 94.2862 2
 -5 -15 12 -21.9907 87.5355 4
 -5 15 12 -66.8927 87.4424 1
 5 15 -11 490.413 112.263 3
 5 15 -11 402.231 95.0397 2
 -5 15 11 367.703 101.448 1
 -5 -15 11 400.963 94.3669 4
 5 15 -10 1.659 83.1111 2
 -5 -15 10 10.7565 79.6846 4
 -5 15 10 -34.1656 76.5506 1
 5 15 -10 199.608 93.0326 3
 -5 15 9 67406.1 1189.57 1
 5 15 -9 64903.8 1167.61 2
 -5 -15 9 66713.8 1033.18 4
 5 15 -9 69266.6 1249.18 3
 5 15 -8 42719.3 907.344 2
 -5 15 8 43238 919.158 1
 5 15 -8 45435.3 949.638 3
 -5 -15 8 43928.6 786.447 4
 5 15 -7 18851.4 583.519 2
 -5 15 7 20327.2 606.333 1
 -5 -15 7 20857.2 499.898 4
 5 15 -7 19727.4 576.426 3
 -5 15 7 19296.2 415.56 2
 5 15 -6 2968.59 233.798 2
 -5 15 6 3147.09 169.347 2
 5 15 -6 2985.41 212.753 3
 -5 15 6 3372 244.856 1
 -5 15 5 1900.75 182.949 1
 5 15 -5 1680.09 174.073 2
 -5 15 5 1766.94 129.866 2
 5 15 -5 1913.88 168.448 3
 5 15 -4 4441.46 244.086 3
 5 15 -4 4028.11 262.97 2
 -5 15 4 3901.65 198.954 2
 -5 15 4 4429.9 267.821 1
 -5 15 3 103603 1209.95 2
 -5 15 3 102740 1387.82 1
 5 15 -3 101895 1428.85 2
 5 15 -3 103486 1404.69 1
 -5 15 2 31512.2 611.882 2
 -5 15 2 32478.9 705.836 1
 5 15 -2 31757.2 712.623 1
 5 15 -2 31710.5 728.997 2
 -5 15 1 479.985 88.9231 2
 5 15 -1 706.932 115.756 2
 5 15 -1 457.509 96.0814 1
 -5 15 1 806.396 114.809 1
 -5 15 0 4085.32 228.526 2
 -5 15 0 3873.4 303.959 3
 -5 15 0 3995.69 236.888 1
 5 15 0 3852.15 251.084 2
 5 15 0 3909.7 248.281 1
 -5 15 -1 747.99 140.998 3
 5 15 1 557.135 105.935 1
 5 15 1 468.823 96.6351 2
 -5 15 -1 606.3 99.0273 1
 5 15 2 17432.2 530.177 2
 -5 15 -2 17382 643.704 3
 5 15 2 18188.1 535.448 1
 -5 15 -2 17876.6 483.736 1
 -5 -15 -2 17805.9 446.728 5
 5 15 3 118365 1524.07 1
 -5 15 -3 118839 1402.15 1
 5 15 3 117272 1531.3 2
 -5 -15 -3 119483 1379.92 5
 -5 15 -3 116956 1807.66 3
 5 15 4 4019.65 258.129 2
 -5 15 -4 4429.18 230.968 1
 -5 -15 -4 4131.65 230.177 5
 5 15 4 3782.43 249.941 1
 -5 15 -4 4388.06 336.542 3
 5 15 5 4376.76 269.857 1
 5 15 5 4043.39 262.921 2
 -5 -15 -5 4674.63 248.222 5
 -5 15 -5 4015.11 341.748 3
 -5 15 -5 4537.71 229.581 1
 -5 15 -6 1177.75 119.175 1
 5 15 6 1042.67 144.093 2
 5 15 6 948.804 133.75 1
 -5 -15 -6 1140.91 124.748 5
 -5 15 -6 986.921 177.733 3
 -5 15 -7 8217.3 299.609 1
 5 15 7 7933.16 374.085 2
 -5 -15 -7 8113.06 341.727 5
 -5 15 -7 8543.65 512.284 3
 5 15 7 7598.27 357.173 1
 5 15 8 17631 575.881 2
 5 15 8 19065.5 581.079 1
 -5 -15 -8 19898.4 557.608 5
 -5 15 -8 19305.9 785.906 3
 -5 15 -8 20244.2 463.835 1
 5 15 9 90526.4 1371.43 1
 5 15 9 92025.3 1396.82 2
 5 15 10 6153.1 339.483 1
 -5 15 -10 6115.89 468.149 3
 5 15 10 6483.47 354.566 2
 -5 -15 -10 6688.61 387.316 3
 -5 -15 -11 132.629 78.608 3
 5 15 11 58.423 66.1687 1
 -5 15 -11 -92.1896 114.22 3
 5 15 11 88.317 64.4741 2
 -5 -15 -12 393.801 106.582 3
 -5 15 -12 679.63 178.464 3
 5 15 12 438.27 104.733 1
 5 15 12 582.59 126.949 2
 -5 -15 -13 25477.7 833.608 3
 -5 15 -13 24958.4 989.152 3
 -5 -15 -14 19739 795.757 3
 5 15 14 21483 663.084 1
 -5 -15 -15 11533.2 609.118 3
 -5 15 -15 11311.7 699.141 3
 -5 15 -16 2853 366.591 3
 -5 -15 -16 2761.85 312.149 3
 -5 -15 -17 445.623 146.467 3
 -5 15 -17 492.676 206.431 3
 -5 -15 -18 102.937 112.503 3
 5 17 -18 6605.55 431.397 2
 -5 17 18 5960.18 402.673 1
 5 17 -17 172.521 91.7553 2
 -5 17 17 191.265 86.1501 1
 5 17 -16 289.306 113.529 2
 -5 17 16 529.506 129.277 1
 -5 17 15 843.411 161.359 1
 5 17 -15 1274.91 177.422 2
 5 17 -14 99066.5 1653.1 2
 -5 17 14 96755.2 1640.87 1
 -5 17 13 34296.9 920.55 1
 5 17 -13 34459.4 913.858 2
 5 17 -12 6467.09 386.631 2
 5 17 -12 6572.31 426.701 3
 -5 17 12 6651.65 392.524 1
 -5 -17 12 6992.15 352.297 4
 -5 17 11 49.307 72.9695 1
 5 17 -11 -18.4673 102.49 2
 5 17 -11 54.2219 79.2273 3
 -5 -17 11 106.994 65.9399 4
 5 17 -10 714.369 134.379 2
 5 17 -10 977.307 175.771 3
 -5 -17 10 758.136 107.522 4
 -5 17 10 621.863 134.149 1
 5 17 -9 23420.4 708.298 2
 -5 -17 9 23759.3 582.111 4
 5 17 -9 24178.7 732.997 3
 -5 17 9 22660 700.351 1
 -5 -17 8 108821 1364.72 4
 -5 17 8 108267 1628.37 1
 5 17 -7 3042.36 254.577 2
 -5 -17 7 3292.29 202.328 4
 5 17 -7 2950.29 231.766 3
 -5 17 7 2894.29 244.055 1
 5 17 -6 1465.06 186.623 2
 5 17 -6 1311.63 153.581 3
 -5 17 6 1306.35 162.426 1
 -5 -17 6 1391.99 125.201 4
 5 17 -5 297.967 97.2045 2
 5 17 -5 199.721 64.6946 3
 -5 17 5 256.544 90.0951 1
 -5 17 5 197.224 56.7817 2
 5 17 -4 17058.4 574.949 2
 -5 17 4 17580.1 463.094 2
 -5 17 4 17182.2 559.886 1
 5 17 -3 30172.9 765.792 2
 -5 17 3 30490.9 638.018 2
 -5 17 3 30234.2 740.108 1
 5 17 -3 30588.4 748.355 1
 5 17 -2 52081.6 1010.78 2
 -5 17 2 52288.2 972.999 1
 5 17 -2 51508.7 983.069 1
 -5 17 1 218.799 75.1309 2
 5 17 -1 205.473 90.105 2
 5 17 -1 127.48 74.9573 1
 -5 17 1 184.691 66.3299 1
 5 17 0 872.953 130.951 1
 -5 17 0 1064.84 131.301 2
 5 17 0 816.431 134.871 2
 -5 17 0 1027.16 132.767 1
 5 17 1 4033.41 267.402 1
 -5 17 -1 3977.09 327.478 3
 -5 17 -1 4175.9 251.528 1
 -5 17 -1 4007.56 248.995 2
 5 17 1 3524.48 260.618 2
 5 17 2 90338.3 1368.69 2
 -5 17 -2 89247.6 1255.23 1
 5 17 2 89477 1356.13 1
 -5 -17 -3 48547.9 798.577 5
 5 17 3 47520.9 961.358 2
 -5 17 -3 47462 866.355 1
 5 17 3 48123.9 955.954 1
 -5 17 -3 47852.7 1165.7 3
 5 17 4 19289.7 604.668 2
 5 17 4 19598.4 600.071 1
 -5 17 -4 19692.5 745.214 3
 -5 17 -4 19318.8 522.163 1
 -5 -17 -4 21084.5 523.541 5
 -5 -17 -5 5209.99 264.941 5
 -5 17 -5 5023.77 387.053 3
 5 17 5 4758.76 300.426 2
 -5 17 -5 5146.46 263.288 1
 5 17 5 5039.66 307.949 1
 -5 -17 -6 646.445 107.445 5
 5 17 6 688.838 136.686 2
 -5 17 -6 575.768 156.941 3
 -5 17 -6 664.57 104.954 1
 5 17 6 758.639 139.042 1
 5 17 7 8855.4 413.482 1
 -5 17 -7 9809.52 356.16 1
 -5 -17 -7 8960.74 370.79 5
 -5 17 -7 9169.22 552.943 3
 5 17 7 8580.72 411.022 2
 5 17 8 99279 1510.05 1
 -5 -17 -8 100006 1393.37 5
 5 17 8 99026.1 1509.15 2
 -5 17 -8 101992 1954.43 3
 -5 -17 -9 22649.9 623.64 5
 5 17 9 21602.2 667.136 1
 -5 17 -9 21988.6 902.282 3
 5 17 9 22244.6 681.733 2
 -5 -17 -10 2128.28 199.454 5
 -5 17 -10 2144.45 297.759 3
 5 17 10 2083.44 212.965 2
 5 17 10 1884.94 203.933 1
 -5 -17 -11 126.602 86.5269 3
 -5 17 -11 6.94119 129.715 3
 5 17 11 276.174 98.9481 2
 5 17 11 -83.4421 101.612 1
 5 17 12 73.7203 64.9784 1
 -5 -17 -12 104.989 89.9961 3
 -5 17 -12 296.533 172.83 3
 -5 -17 -13 7765.46 475.003 3
 -5 17 -13 7075.11 548.539 3
 -5 -17 -14 53504.7 1310.32 3
 -5 17 -14 54988.1 1572.75 3
 -5 -17 -15 6696.71 490.39 3
 -5 17 -15 5586.76 514.805 3
 -5 -17 -16 2655.79 318.702 3
 -5 17 -16 2414.82 351.292 3
 -5 -17 -17 1831.76 281.835 3
 -5 19 17 2572.73 278.687 1
 -5 19 16 -97.5609 102.343 1
 5 19 -16 -28.6637 124.618 2
 5 19 -15 2596.96 270.108 2
 -5 19 15 2526.26 271.542 1
 5 19 -14 100591 1736.03 2
 -5 19 14 100503 1735.6 1
 5 19 -13 2216.79 243.338 2
 -5 19 13 1848.46 228.001 1
 5 19 -12 10801.8 524.809 2
 -5 19 12 10524.5 516.016 1
 5 19 -11 619.545 143.896 2
 -5 19 11 534.918 118.888 1
 5 19 -10 11619.7 532.775 2
 -5 19 10 12633.3 549.351 1
 -5 19 9 -112.529 107.81 1
 5 19 -9 44.4337 98.4394 2
 5 19 -8 57047 1201.33 2
 -5 19 8 57332 1166.03 1
 -5 19 7 333.172 98.7995 1
 5 19 -7 252.329 85.0432 2
 -5 19 6 2703.49 244.546 1
 5 19 -6 2648.18 249.277 2
 5 19 -5 195.598 99.296 2
 -5 19 5 325.032 104.305 1
 -5 19 4 2632.29 193.054 2
 5 19 -4 3422.93 275.288 2
 -5 19 4 2984.34 249.507 1
 -5 19 3 2484.39 196.728 2
 5 19 -3 2699.76 239.878 2
 -5 19 3 2665.97 232.545 1
 5 19 -3 2716.67 239.747 1
 -5 19 2 89148.5 1291.01 2
 5 19 -2 91467.4 1476.48 2
 -5 19 2 89597.2 1399.49 1
 5 19 -2 94098 1446.48 1
 5 19 -1 1812.57 195.657 1
 -5 19 1 1795.36 174.178 2
 -5 19 1 1807.41 187.607 1
 5 19 -1 1753.08 199.856 2
 -5 19 0 114.668 61.9691 1
 5 19 0 43.5505 74.5706 2
 -5 19 0 134.172 64.9997 2
 5 19 0 127.49 68.9857 1
 -5 19 -1 8461.96 387.972 2
 5 19 1 9375.28 440.336 2
 -5 19 -1 8513.72 387.479 1
 5 19 1 8397.15 410.735 1
 -5 19 -2 53803.9 1033.03 2
 5 19 2 56058.2 1107.58 2
 5 19 2 54105.8 1083.39 1
 -5 19 -2 55577.2 1328.17 3
 -5 19 -2 52665 982.848 1
 -5 19 -3 2944.38 224.362 1
 -5 19 -3 2991.09 241.509 2
 5 19 3 3012.54 248.778 1
 -5 19 -3 2600.25 300.723 3
 5 19 3 3034.39 253.419 2
 5 19 4 30908.5 814.543 2
 -5 19 -4 28623.7 696.067 1
 5 19 4 30326.7 797.985 1
 -5 19 -4 30895.4 991.988 3
 -5 19 -5 3632.77 239.475 1
 -5 19 -5 3325.77 337.506 3
 5 19 5 3314.78 274.675 1
 5 19 5 3627.09 282.406 2
 5 19 6 1417.76 179.608 2
 -5 19 -6 1370.09 232.563 3
 -5 19 -6 1678.14 162.269 1
 5 19 6 1463.12 183.882 1
 -5 19 -7 9347.35 571.669 3
 5 19 7 9977.34 463.584 2
 -5 19 -7 11094.3 407.203 1
 5 19 7 10803.7 481.145 1
 5 19 8 78821.8 1392.21 1
 5 19 8 80721.6 1398.63 2
 -5 19 -9 1189.95 226.23 3
 5 19 9 1304.13 183.098 2
 5 19 9 1331.4 184.597 1
 -5 19 -10 2357.3 330.582 3
 5 19 10 1773.88 211.449 1
 5 19 10 1700.57 197.472 2
 5 19 11 117.25 77.4848 1
 -5 19 -11 85.0055 135.659 3
 -5 -19 -12 58.5762 87.4272 3
 -5 19 -12 25.6267 176.767 3
 5 19 12 -4.67752 80.8407 1
 -5 -19 -13 280.394 122.167 3
 -5 19 -13 451.746 184.127 3
 5 19 13 341.637 124.682 1
 -5 -19 -14 81816.8 1677.72 3
 -5 19 -14 84649.3 2056.25 3
 -5 -19 -15 1255.13 226.258 3
 -5 19 -15 777.765 237.198 3
 -5 21 15 -27.1861 117.272 1
 -5 21 14 27382.4 906.019 1
 5 21 -14 28577.9 927.313 2
 5 21 -13 11698.6 577.653 2
 -5 21 13 10918.4 559.077 1
 5 21 -12 13715.7 626.523 2
 -5 21 12 14221.3 629.929 1
 -5 21 11 565.223 147.782 1
 5 21 -11 483.52 138.366 2
 5 21 -10 13428.2 609.46 2
 -5 21 10 13547.2 601.634 1
 5 21 -9 9340.13 500.764 2
 -5 21 9 8983.74 479.725 1
 -5 21 8 25168.6 796.858 1
 5 21 -8 25300.4 820.372 2
 -5 21 7 4248.35 320.903 1
 5 21 -7 4258.27 338.204 2
 5 21 -6 6972.71 420.314 2
 -5 21 6 6475.89 389.767 1
 5 21 -5 1974.84 234.059 2
 -5 21 5 2307.14 234.061 1
 -5 21 4 6560.74 383.816 1
 5 21 -4 6498.02 394.456 2
 5 21 -3 50744.4 1130.29 2
 5 21 -3 51190.7 1098.66 1
 -5 21 3 49812 1068.35 1
 -5 21 2 42705.9 903.88 2
 5 21 -2 42938.3 1027.8 2
 -5 21 2 43394.7 982.625 1
 5 21 -2 45811.3 1025.23 1
 -5 21 1 714.364 128.307 1
 -5 21 1 599.362 116.003 2
 5 21 -1 638.416 138.816 2
 5 21 -1 414.935 118.242 1
 5 21 0 24.5637 85.4712 1
 -5 21 0 131.598 70.3125 2
 -5 21 0 57.9195 68.7113 1
 5 21 0 -39.6255 83.725 2
 5 21 1 -33.6243 80.3684 1
 -5 21 -1 84.163 71.5846 2
 5 21 1 100.459 88.1733 2
 -5 21 -1 12.9674 71.7773 1
 -5 21 -2 20520.3 653.225 2
 5 21 2 19597.6 675.611 2
 5 21 2 20394.9 686.944 1
 -5 21 -2 19956 626.391 1
 -5 21 -3 32485.3 785.494 1
 -5 21 -3 32765.8 854.601 2
 5 21 3 32603.8 875.89 2
 -5 21 -3 33228.4 1081.48 3
 5 21 3 33961.4 888.655 1
 -5 21 -4 27294.7 720.039 1
 -5 21 -4 27068.6 783.207 2
 5 21 4 27995.4 813.784 1
 5 21 4 25789.7 782.291 2
 -5 21 -4 28456.9 1017.57 3
 -5 21 -5 431.264 113.597 2
 -5 21 -5 512.882 103.65 1
 -5 21 -5 535.014 161.59 3
 5 21 5 555.431 137.697 2
 5 21 5 319.927 104.781 1
 -5 21 -6 244.741 76.3509 1
 5 21 6 207.372 99.205 1
 -5 21 -6 75.9711 109.258 3
 5 21 6 237.931 98.7779 2
 5 21 7 129.202 84.0134 1
 -5 21 -7 169.019 105.502 3
 5 21 7 222.766 101.354 2
 -5 21 -8 23679.2 961.489 3
 5 21 8 24230.1 781.32 1
 5 21 8 23273.4 750.453 2
 5 21 9 7747.96 448.595 1
 -5 21 -9 7984.9 572.454 3
 -5 21 -10 15497.7 809.076 3
 5 21 10 15165.5 635.921 1
 5 21 11 40.8141 96.5453 1
 -5 21 -11 -103.378 160.896 3
 -5 -21 -12 4071.35 360.278 3
 -5 21 -12 3848.55 447.665 3
 5 21 12 3683.95 326.352 1
 -5 -21 -13 7310.43 497.047 3
 -5 21 -13 7558.36 636.026 3
 5 21 13 6364.37 425.623 1
 -5 -21 -14 36530.4 1132.57 3
 5 21 14 29807.4 943.828 1
 -5 23 11 505.219 144.655 1
 5 23 -11 553.57 140.612 2
 5 23 -10 16720.8 713.766 2
 -5 23 10 16779 698.197 1
 5 23 -9 14848.1 664.841 2
 -5 23 9 14603.2 642.787 1
 5 23 -8 3621.91 333.587 2
 -5 23 8 3351.44 308.165 1
 5 23 -7 6271.78 427.392 2
 -5 23 7 5656.38 395.399 1
 5 23 -6 3257.19 310.392 2
 -5 23 6 3423.71 301.334 1
 -5 23 5 141.899 97.1933 1
 5 23 -5 156.586 101.05 2
 -5 23 4 15603.1 619.177 1
 5 23 -4 16676.1 672.654 2
 -5 23 3 44313 1049.83 1
 5 23 -3 43211.2 1094.75 2
 5 23 -2 8804.91 485.737 2
 5 23 -2 8586.28 462.341 1
 -5 23 2 8390.23 442.237 1
 5 23 -1 711.383 194.804 1
 -5 23 1 306.695 101.468 2
 -5 23 1 501.866 124.593 1
 5 23 -1 314.194 112.331 2
 -5 23 0 671.993 130.653 1
 -5 23 0 443.2 123.81 2
 5 23 0 535.254 143.974 1
 5 23 0 579.744 142.046 2
 -5 23 -1 230.488 84.0225 1
 -5 23 -1 100.609 68.6664 2
 5 23 1 131.047 83.6642 1
 5 23 1 307.461 114.859 2
 5 23 2 4945.35 354.776 1
 -5 23 -2 4909.08 328.826 1
 -5 23 -2 4333.39 322.051 2
 5 23 2 4787.75 356.321 2
 5 23 3 28446.3 865.007 2
 -5 23 -3 27923.5 827.338 2
 -5 23 -3 29870.8 811.24 1
 5 23 3 29281.6 879.109 1
 -5 23 -4 13074 571.618 2
 5 23 4 13120.4 587.395 2
 -5 23 -4 13763 540.907 1
 -5 23 -4 12728.6 708.375 3
 5 23 4 13780.2 604.336 1
 -5 23 -5 4341.62 428.024 3
 5 23 5 4503.81 346.405 2
 -5 23 -5 5320.23 330.865 1
 -5 23 -5 4382.94 340.763 2
 5 23 5 5101 375.021 1
 5 23 6 774.239 161.147 1
 -5 23 -6 633.117 148.792 2
 -5 23 -6 580.03 172.141 3
 5 23 6 715.62 135.282 2
 -5 23 -7 5391.13 382.081 2
 -5 23 -7 5373.07 478.696 3
 5 23 7 5678.35 400.319 1
 -5 23 -8 3919.78 415.895 3
 -5 23 -8 3713.42 329.59 2
 5 23 8 3698.65 327.455 1
 -5 23 -9 29587.5 941.151 2
 5 23 9 30353.3 941.449 1
 -5 23 -9 30277.3 1154.19 3
 5 23 10 5926.24 419.553 1
 -5 23 -10 6804.13 557.493 3
 -5 23 -11 406.897 150.414 3
 5 25 -7 20013.9 800.817 2
 -5 25 7 20488.4 781.679 1
 5 25 -6 332.731 128.156 2
 -5 25 6 428.079 132.344 1
 -5 25 5 6266.55 419.542 1
 5 25 -5 5849.74 429.257 2
 -5 25 4 3018.82 294.004 1
 5 25 -4 3184.87 314.75 2
 -5 25 3 17954.4 692.063 1
 5 25 -3 17888 735.039 2
 -5 25 2 135.306 84.6109 1
 5 25 -2 74.2228 94.2819 2
 5 25 -2 138.562 86.0112 1
 5 25 -1 8130.45 479.045 1
 -5 25 1 8513.03 466.392 1
 5 25 -1 8468.31 499.741 2
 5 25 0 699.833 175.626 1
 5 25 0 426.569 139.424 2
 -5 25 0 396.398 122.468 1
 5 25 1 12796.4 607.796 2
 5 25 1 12911.6 598.913 1
 -5 25 -1 12928.3 567.999 1
 -5 25 -2 664.367 135.047 2
 5 25 2 642.625 144.036 2
 5 25 2 448.789 135.29 1
 -5 25 -2 701.994 146.989 1
 5 25 3 28014.6 905.301 1
 -5 25 -3 24974.5 822.622 2
 5 25 3 27641.8 899.59 2
 -5 25 -3 27963.6 825.449 1
 -5 25 -4 920.826 179.77 2
 -5 25 -4 930.533 157.469 1
 5 25 4 774.61 155.231 2
 5 25 4 803.555 170.899 1
 -5 25 -5 13311.5 617.664 2
 5 25 5 14669.2 650.824 2
 5 25 5 14152.6 653.162 1
 -5 25 -6 2182.26 265.454 2
 -5 25 -6 2500.94 350.192 3
 -5 25 -7 23307 844.641 2
 -5 25 -7 25908.3 1096.33 3
 -5 25 -8 -157.4 172.809 3
 -5 27 1 15103.5 661.471 1
 5 27 -1 15564.8 717.193 2
 -5 27 0 29.7021 96.427 1
 5 27 0 33.4169 115.827 2
 5 27 1 9476.43 554.461 2
 -5 27 -1 10802.9 546.994 1
 5 27 2 2968.67 309.56 2
 -5 27 -2 4288.96 345.58 1
 5 27 3 11162.6 599.86 2
 -5 27 -3 13852.7 605.366 1
 -5 27 -4 1593.87 231.227 2
 6 0 -23 134.263 163.936 3
 6 0 -22 81178.7 1807.59 3
 6 0 -21 188.557 145.045 3
 6 0 -20 2565.69 298.388 3
 6 0 -19 4.84454 105.442 3
 6 0 -18 22584.3 796.212 3
 6 0 -17 203.243 115.939 3
 -6 0 16 52518.6 1096.54 4
 6 0 -16 50998.6 1128.54 3
 6 0 -15 60.9711 74.1126 3
 -6 0 15 110.255 42.296 1
 -6 0 14 4476.58 227.534 1
 -6 0 14 4427.05 286.517 4
 6 0 -14 3669.6 274.018 3
 6 0 -13 130.832 65.7267 3
 -6 0 13 -19.7889 76.1993 4
 -6 0 13 67.383 43.8759 1
 6 0 -12 42657.7 884.411 3
 -6 0 12 42852.9 726.211 1
 -6 0 12 42408.2 839.366 4
 -6 0 11 69.7338 58.5603 4
 -6 0 11 142.883 54.6916 1
 6 0 -11 158.145 73.4544 3
 6 0 -10 66810.1 1011.77 3
 -6 0 10 65558.8 911.496 1
 -6 0 10 66573.4 1006.58 4
 -6 0 9 8.77981 43.3273 1
 -6 0 9 -1.00708 107.825 4
 -6 0 8 54488.8 804.207 1
 6 0 -8 54989.4 603.135 2
 -6 0 8 56775.9 836.595 4
 6 0 -7 47.4933 28.4756 2
 -6 0 7 118.494 53.0509 1
 -6 0 6 142050 1431.03 1
 6 0 -6 140009 1136.58 2
 -6 0 5 264.526 58.8986 1
 6 0 -5 289.901 37.9247 2
 6 0 -4 9091.43 189.825 2
 -6 0 4 9192.6 185.603 2
 -6 0 4 9175.1 291.535 1
 6 0 -3 344.665 44.5208 2
 -6 0 3 247.97 34.6733 2
 -6 0 3 327.479 80.5668 1
 -6 0 2 2518.67 104.428 2
 -6 0 2 2381.3 158.611 1
 6 0 -2 2418.76 102.545 3
 6 0 -2 2428.47 104.538 2
 -6 0 1 73.1926 42.4223 3
 6 0 -1 222.036 43.6018 2
 6 0 -1 293.561 48.2881 3
 -6 0 1 241.194 48.7389 5
 -6 0 0 119455 1171.44 5
 -6 0 0 114538 1065.79 3
 6 0 0 122132 1130.36 3
 6 0 0 114104 1090.47 2
 6 0 1 202.617 44.1185 3
 -6 0 -1 87.843 31.3707 5
 6 0 1 86.4104 38.3883 2
 -6 0 -2 9956.05 274.892 3
 -6 0 -3 443.427 70.2855 3
 -6 0 -4 11828 339.812 3
 -6 0 -5 228.651 65.5282 3
 -6 0 -6 235942 1778.6 1
 -6 0 -6 234665 2233.24 3
 -6 0 -7 153.463 29.4251 1
 -6 0 -7 105.698 56.7077 3
 -6 0 -8 13957.4 472.497 3
 -6 0 -8 14793.5 239 1
 -6 0 -9 426.657 37.774 1
 -6 0 -9 -32.7664 62.349 3
 -6 0 -10 78996.7 1292.92 3
 -6 0 -10 75341.4 663.998 1
 -6 0 -11 53.8467 70.0771 3
 -6 0 -12 72562 1337.26 3
 -6 0 -13 151.855 124.35 3
 -6 0 -14 3364.1 308.293 3
 -6 0 -15 219.538 165.681 3
 -6 0 -16 109090 1933.2 3
 -6 0 -17 217.825 191.494 3
 -6 0 -18 13272.6 679.182 3
 -6 0 -19 7.13193 113.703 3
 -6 0 -20 5433.32 480.609 3
 6 2 -23 1613.36 289.592 3
 6 -2 -23 1682.2 305.134 3
 6 2 -22 54899.1 1471.72 3
 6 -2 -22 54498.9 1451.5 3
 6 -2 -21 3958.71 377.973 3
 6 2 -21 3365.85 351.768 3
 6 2 -20 -14.5276 107.702 3
 6 -2 -20 -60.7435 124.197 3
 6 2 -19 2625.01 280.847 3
 6 -2 -19 2759.35 298.355 3
 6 2 -18 20416.4 766.199 3
 6 -2 -18 19567.6 750.877 3
 -6 -2 17 21235.2 713.877 4
 6 2 -17 22702.1 768.73 3
 6 -2 -17 22152.9 774.914 3
 -6 -2 16 97161.6 1560.55 4
 -6 2 16 97382 1251.23 1
 6 2 -16 96112 1605.36 3
 6 -2 -16 97636.7 1643.73 3
 -6 -2 15 113.854 47.2228 1
 -6 -2 15 80.8167 83.3307 4
 -6 2 15 -174.67 108.12 4
 6 -2 -15 -58.9213 114.646 3
 -6 2 15 45.9999 45.4193 1
 6 2 -15 54.2358 64.0412 3
 6 -2 -14 1253.89 173.739 3
 -6 2 14 1518.91 181.147 4
 -6 2 14 1154.79 125.376 1
 6 2 -14 1368.62 175.704 3
 -6 -2 14 1273.57 122.085 1
 6 -2 -13 1356.04 167.22 3
 -6 -2 13 1503.91 133.412 1
 -6 -2 13 1540.83 165.373 4
 -6 2 13 1485.32 134.479 1
 6 2 -13 1472.66 168.552 3
 -6 2 13 1243.69 153.331 4
 6 -2 -12 44144.4 893.042 3
 -6 2 12 40809.5 825.24 4
 -6 -2 12 44497.7 861.451 4
 -6 2 12 44820.7 759.079 1
 6 2 -12 44508 877.334 3
 -6 -2 12 43556.5 761.341 1
 6 -2 -11 50027.4 918.559 3
 -6 -2 11 48432.1 776.161 1
 -6 2 11 50517.8 880.543 4
 -6 -2 11 48223.6 883.453 4
 -6 2 11 50337 799.627 1
 6 2 -11 49106.9 886.838 3
 -6 -2 10 99757.6 1195.77 1
 6 2 -10 99819.9 1276.98 3
 -6 2 10 99674.8 1260.18 4
 -6 2 10 99075.1 1193.25 1
 -6 -2 10 97466.3 1275.94 4
 6 2 -9 12841 299.36 2
 -6 2 9 12905.6 371.01 1
 -6 2 9 11840.2 373.859 4
 -6 -2 9 12907.6 396.1 4
 -6 -2 9 11560.4 358.237 1
 6 2 -9 12346.7 377.141 3
 6 2 -8 4324.14 207.025 3
 6 2 -8 4558.02 170.693 2
 6 -2 -8 4614.68 115.583 2
 -6 2 8 4536.7 212.815 1
 -6 2 8 4529.57 222.218 4
 -6 -2 8 4882.46 235.752 1
 6 2 -7 1700.62 124.718 3
 6 2 -7 1786.44 107.224 2
 6 -2 -7 2029.13 70.5492 2
 -6 2 7 1714.09 130.52 1
 -6 -2 7 1937.7 158.971 1
 6 2 -6 198590 1681.51 3
 -6 2 6 193728 1799.86 1
 6 2 -6 199474 1611.43 2
 6 -2 -6 200171 1404.82 2
 6 2 -5 145919 1207.12 3
 -6 2 5 140484 1004.27 2
 -6 2 5 124892 1379.8 1
 6 2 -5 144302 1207.75 2
 6 -2 -5 129730 1021.87 2
 6 2 -4 8245.62 208.499 2
 6 -2 -4 8875.23 155.813 2
 -6 2 4 8505.73 147.735 2
 -6 2 3 94789.7 1030.98 1
 6 2 -3 90285.8 896.931 2
 -6 2 3 95619.9 791.827 2
 6 -2 -3 93617.9 793.746 2
 -6 2 2 30307.4 363.979 2
 6 2 -2 29404.1 427.196 2
 -6 2 2 30348.3 492.089 1
 -6 2 1 14896.5 331.802 1
 -6 2 1 14468.8 309.449 5
 -6 2 1 13791.8 312.424 3
 6 2 -1 13673.3 207.703 3
 -6 -2 1 14254.5 331.474 5
 -6 -2 1 13819 197.54 3
 6 2 -1 14542.7 304.306 2
 -6 2 1 14854.5 263.296 2
 -6 2 0 194302 1522.16 1
 -6 -2 0 188071 1571.95 5
 -6 2 0 189619 1569.93 3
 -6 2 0 190008 1500.32 5
 6 2 0 185329 1491 2
 -6 -2 0 188491 1309.78 3
 -6 2 -1 60738.6 789.301 3
 -6 2 -1 59956.2 711.642 1
 -6 -2 -1 61025.4 779.285 5
 6 2 1 60474.6 746.589 2
 -6 2 -1 60405.4 728.378 5
 -6 -2 -1 58389.9 635.87 3
 6 2 1 59282.4 638.338 3
 -6 2 -2 854.675 74.0225 1
 -6 -2 -2 573.527 70.6372 5
 -6 2 -2 882.482 94.5614 3
 -6 -2 -2 696.154 65.3433 3
 6 2 2 560.706 69.7039 2
 6 2 2 696.675 66.8487 3
 -6 2 -3 952.446 104.014 3
 6 2 3 1069.63 100.262 2
 -6 -2 -3 943.167 84.4415 3
 -6 2 -3 970.627 75.5775 1
 -6 2 -4 9749.86 335.446 3
 -6 -2 -4 10312 299.625 3
 -6 2 -4 9839.6 227.442 1
 -6 2 -5 51010.9 569.861 1
 -6 2 -5 50642.9 857.907 3
 -6 -2 -5 53013.4 786.767 3
 -6 2 -6 159278 1264.17 1
 -6 -2 -6 157569 1644.87 3
 -6 2 -6 156744 1766.56 3
 -6 2 -7 2558.08 92.0719 1
 -6 2 -7 2595.66 207.497 3
 -6 2 -7 2729.48 92.2261 1
 -6 -2 -7 2931.72 199.684 3
 -6 2 -8 128.726 67.4281 3
 -6 2 -8 92.0464 18.9982 1
 -6 2 -8 94.1171 17.8286 1
 -6 -2 -8 227.836 79.135 3
 -6 2 -9 45492 941.35 3
 -6 -2 -9 45292 884.605 3
 -6 -2 -10 30710.4 749.422 3
 -6 2 -10 30922.6 801.828 3
 -6 2 -11 37919 933.291 3
 -6 -2 -11 39528.7 898.239 3
 -6 2 -12 76657.8 1411.04 3
 -6 -2 -12 77457.2 1358.51 3
 -6 2 -13 545.076 140.945 3
 -6 -2 -13 622.777 156.215 3
 -6 2 -14 5002.21 375.318 3
 -6 -2 -14 3925.18 340.148 3
 -6 2 -15 90.0462 115.127 3
 -6 -2 -15 293.224 139.027 3
 -6 -2 -16 54238.4 1314.11 3
 -6 2 -16 56189 1364.61 3
 -6 -2 -17 36480 1106.28 3
 -6 2 -17 36866.5 1128.9 3
 -6 2 -18 10915.9 646.537 3
 -6 -2 -18 10668.2 612.185 3
 -6 2 -19 269.86 156.923 3
 -6 -2 -19 263.001 142.084 3
 -6 2 -20 556.921 198.233 3
 -6 -2 -20 267.898 100.922 3
 6 -4 -23 12741 726.692 3
 6 4 -23 12670.8 723.138 3
 6 4 -22 2363.16 319.021 3
 6 -4 -22 2407.75 327.057 3
 6 4 -21 22767.3 908.638 3
 6 -4 -21 24440.5 940.465 3
 6 -4 -20 3185.68 330.613 3
 6 4 -20 3402.25 342.802 3
 6 -4 -19 428.246 118.041 3
 6 4 -19 433.822 134.485 3
 6 4 -18 17381.3 709.554 3
 6 -4 -18 16790.4 711.924 3
 6 -4 -17 64007.2 1381.98 3
 -6 -4 17 64169.9 1288.1 4
 -6 4 17 63204.1 1017.54 1
 6 4 -17 64871.8 1345.49 3
 6 -4 -16 29585.8 874.081 3
 -6 -4 16 28278 801.293 4
 -6 4 16 26928.3 630.249 1
 6 4 -16 26921.8 806.201 3
 6 -4 -15 17137.1 629.728 3
 -6 -4 15 15971.2 432.457 1
 -6 -4 15 17205.1 599.487 4
 6 4 -15 16111.4 594.941 3
 -6 4 15 17213 485.964 1
 6 -4 -14 560.873 129.316 3
 6 4 -14 739.871 127.308 3
 -6 4 14 637.918 96.8609 1
 -6 4 14 487.523 108.006 4
 -6 -4 14 562.132 123.197 4
 -6 -4 14 596.67 88.7117 1
 6 -4 -13 287.976 79.9815 3
 -6 -4 13 202.331 59.5968 1
 6 4 -13 198.908 77.5012 3
 -6 4 13 211.325 72.9849 4
 -6 -4 13 162.537 79.8864 4
 -6 4 13 336.276 77.4653 1
 -6 4 12 22458.8 529.601 1
 -6 4 12 22970.8 595.944 4
 -6 -4 12 22666.1 609.037 4
 -6 -4 12 22023 520.228 1
 6 4 -12 24364.1 649.829 3
 -6 -4 11 174366 1862.76 4
 -6 4 11 168012 1713.27 1
 6 4 -11 178284 1869.87 3
 -6 -4 11 167456 1707.53 1
 -6 4 10 109973 1281.4 4
 -6 4 10 111566 1245.55 1
 -6 -4 10 108607 1323.52 4
 -6 -4 10 108682 1287.67 1
 6 4 -10 111233 1306.58 3
 6 4 -9 8443.95 266.23 2
 -6 -4 9 8161.01 314.804 4
 -6 4 9 8540.87 304.191 1
 6 -4 -9 6942.54 115.153 2
 -6 -4 9 8302.55 357.106 1
 6 4 -9 8117.14 299.551 3
 -6 4 9 7856.77 295.09 4
 6 4 -8 5899.53 221.255 2
 -6 4 8 6194.92 256.13 1
 -6 4 8 5996.45 249.045 4
 6 4 -8 5896.89 238.341 3
 -6 4 7 3390.17 221.346 4
 6 4 -7 3063.15 155.597 2
 -6 4 7 3560.36 193.851 1
 6 4 -7 3151.13 161.814 3
 6 4 -6 160918 1424.39 3
 6 4 -6 160831 1454.85 2
 -6 4 6 160904 1589.02 1
 6 4 -5 65868.5 689.969 3
 6 4 -5 64829.4 768.827 2
 -6 4 5 64461.6 859.392 1
 6 4 -4 133565 1232.08 2
 -6 4 4 138699 1356.29 1
 6 4 -4 138476 1068.5 3
 6 4 -3 6495.32 207.14 2
 -6 4 3 6799.1 238.307 1
 -6 4 3 6731.54 136.414 2
 -6 4 2 80393.8 914.867 1
 6 4 -2 77924.6 865.861 2
 -6 -4 1 80247.1 942.943 5
 -6 4 1 80808.5 837.452 5
 6 -4 -1 85001.1 851.457 5
 -6 4 1 78907.9 973.747 3
 -6 4 1 79750 896.287 1
 6 4 -1 78980.5 888.335 2
 -6 4 0 46540.3 581.585 5
 -6 4 0 44507 707.715 3
 -6 4 0 43642.8 592.602 1
 6 4 0 42422.6 612.954 2
 -6 -4 0 41910.6 415.493 3
 -6 -4 0 43388.5 646.539 5
 -6 -4 -1 65121.2 838.347 5
 -6 4 -1 62956.6 734.033 1
 6 4 1 63901.3 811.339 2
 -6 4 -1 63124.4 903.831 3
 -6 4 -1 64908.6 737.707 5
 -6 -4 -1 65255.6 636.38 3
 -6 4 -2 2318.71 116.967 1
 -6 -4 -2 2285.88 141.092 5
 -6 4 -2 2335.5 162.226 3
 6 4 2 2408.16 144.66 2
 -6 -4 -2 2499.79 112.835 3
 -6 4 -3 3504.32 138.842 1
 6 4 3 3261.85 176.364 2
 -6 -4 -3 3520.63 151.423 3
 -6 4 -4 16465.6 477.408 3
 -6 4 -4 16472.1 292.449 1
 6 4 4 15972.5 407.159 2
 -6 -4 -4 16187.1 367.038 3
 6 4 5 282814 2438.93 2
 -6 4 -5 273810 2036.58 1
 -6 4 -5 283909 2679.13 3
 -6 -4 -5 275544 2355.33 3
 -6 4 -6 3422 107.43 1
 -6 4 -6 3388.41 235.721 3
 -6 -4 -6 3526.65 200.691 3
 -6 4 -7 2859.31 89.3608 1
 -6 4 -7 3251.01 241.128 3
 -6 -4 -7 2942.43 196.173 3
 -6 4 -8 5122.52 310.534 3
 -6 -4 -8 5071.07 268.766 3
 -6 -4 -9 16092.4 507.003 3
 -6 4 -9 15936.5 569.798 3
 -6 4 -10 11210 498.91 3
 -6 -4 -10 11851.4 454.725 3
 -6 4 -11 109963 1725.47 3
 -6 -4 -11 108674 1581.76 3
 -6 4 -12 64886 1331.83 3
 -6 -4 -12 68252.2 1274.27 3
 -6 4 -13 3218.91 310.377 3
 -6 -4 -13 3250.46 282.358 3
 -6 4 -14 6736.43 455.093 3
 -6 -4 -14 7198.36 427.088 3
 -6 -4 -15 9721.74 518.477 3
 -6 4 -15 9764.8 558.852 3
 -6 4 -16 21072.3 870.234 3
 -6 -4 -16 21508.4 798.01 3
 -6 4 -17 54072.6 1447.24 3
 -6 -4 -17 55528.7 1355.47 3
 -6 -4 -18 5871.34 463.771 3
 -6 4 -18 7128.41 543.35 3
 -6 -4 -19 85.5386 108.59 3
 -6 4 -19 196.884 132.525 3
 -6 4 -20 323.969 175.271 3
 -6 -4 -20 382.169 153.879 3
 6 6 -23 36637.4 1247.12 3
 6 6 -22 2923.79 351.697 3
 6 -6 -22 2520.77 331.856 3
 6 6 -21 27302.7 1004.56 3
 6 -6 -21 28984.6 1044.18 3
 6 6 -20 10060.7 589.416 3
 6 -6 -20 9491.71 582.939 3
 6 -6 -19 515.139 151.164 3
 6 6 -19 432.824 130.11 3
 6 -6 -18 8026.2 515.179 3
 6 6 -18 8196.75 494.313 3
 6 -6 -17 115670 1915.3 3
 -6 -6 17 110120 1746.48 4
 6 6 -17 111894 1861.58 3
 -6 6 17 111361 1483.09 1
 6 -6 -16 150.945 87.0279 3
 -6 6 16 42.7235 53.6479 1
 -6 -6 16 70.5043 81.3677 4
 6 6 -16 274.888 105.924 3
 6 -6 -15 79177 1450.55 3
 6 6 -15 77782.6 1407.38 3
 -6 -6 15 78521.5 1350.97 4
 -6 6 15 79713.6 1180.6 1
 -6 -6 14 72.252 54.1201 1
 -6 -6 14 -32.3373 98.4486 4
 6 6 -14 80.9929 67.6088 3
 -6 6 14 61.9393 51.2508 1
 -6 6 13 3249.75 216.447 1
 -6 -6 13 3381.41 247.415 4
 6 6 -13 3507.89 263.049 3
 -6 -6 13 3412.65 211.073 1
 -6 6 12 1594.71 150.317 1
 -6 -6 12 1804.83 185.659 4
 -6 6 12 1596.18 158.123 4
 6 6 -12 1726.45 178.069 3
 -6 -6 12 1661.84 158.68 1
 -6 6 11 205168 1926.06 4
 -6 6 11 203710 1881.11 1
 6 6 -11 201242 2009.83 3
 6 6 -10 4369.86 217.013 2
 -6 6 10 4218.61 227.558 4
 -6 6 10 4205.27 229.099 1
 -6 -6 10 4454.34 249.923 4
 6 6 -10 4517.76 250.731 3
 6 6 -9 14855.5 390.941 2
 -6 -6 9 14030.8 427.234 4
 -6 6 9 15091.4 405.341 4
 -6 6 9 14633.2 422.744 1
 6 6 -9 14741.9 425.431 3
 6 6 -8 977.248 98.7174 2
 -6 6 8 1164.22 120.082 1
 6 6 -8 1077.07 116.64 3
 -6 6 8 1064.63 107.003 4
 6 6 -7 21503.3 457.49 2
 -6 6 7 22200.7 453.403 4
 6 6 -7 21154 448.675 3
 -6 6 7 23866.7 518.082 1
 6 6 -6 24015.8 476.784 2
 -6 6 6 22547.2 504.265 1
 6 6 -6 22978.4 431.069 3
 -6 6 6 24105.9 446.393 4
 -6 -6 5 156277 1277.52 3
 6 6 -5 161934 1522.66 2
 -6 6 5 161818 1593.94 1
 6 6 -5 153263 1358.39 3
 -6 6 4 2461.51 157.286 1
 6 6 -4 2322.43 99.3266 3
 6 6 -4 2606.69 147.161 2
 -6 -6 4 2468.29 86.2955 3
 6 6 -3 492.111 72.3164 2
 6 6 -3 555.678 37.7256 3
 -6 6 3 539.1 79.0058 1
 -6 -6 3 486.29 32.6139 3
 -6 6 2 5829.68 226.158 1
 6 6 -2 5474.78 216.071 2
 -6 -6 1 341159 2751.51 5
 6 6 -1 341310 2727.21 2
 -6 6 1 344691 2915.25 3
 -6 6 1 342913 2702.43 1
 -6 -6 0 309.24 32.4346 3
 -6 -6 0 473.368 84.1593 5
 -6 6 0 405.714 57.9487 5
 -6 6 0 276.694 55.1588 1
 6 6 0 332.424 68.8249 2
 -6 -6 -1 265796 1971.25 3
 6 6 1 268200 2272.88 2
 -6 6 -1 266138 2488.39 3
 -6 6 -1 272261 2074.56 5
 -6 -6 -1 271285 2307.44 5
 -6 -6 -2 24362.4 393.07 3
 -6 -6 -2 24267 497.959 5
 -6 6 -2 27043.8 437.146 1
 6 6 2 24795.4 509.549 2
 -6 6 -2 25639.1 612.324 3
 -6 -6 -3 22335.7 417.64 3
 -6 -6 -3 22600 483.505 5
 -6 6 -3 22274.5 379.872 1
 -6 6 -3 22256.7 573.698 3
 6 6 3 21530.4 481.919 2
 -6 -6 -4 81976.6 966.932 3
 -6 6 -4 82252.9 1230.45 3
 -6 6 -4 81287.4 825.922 1
 6 6 4 83601.3 1073.54 2
 -6 6 -5 187384 1512.54 1
 -6 6 -5 192386 2140.39 3
 6 6 5 190641 1872.57 2
 -6 -6 -5 189901 1798.7 3
 -6 6 -6 39828.6 874.843 3
 6 6 6 39630.4 721.311 2
 -6 6 -6 38230.3 462.224 1
 -6 -6 -6 38834.3 696.329 3
 -6 6 -7 78603.1 716.216 1
 -6 -6 -7 80246.8 1114.91 3
 6 6 7 79444.8 1101.4 2
 -6 6 -7 80633.4 1340.4 3
 -6 6 -8 21425.1 687.544 3
 -6 6 -8 19771.2 257.748 1
 -6 -6 -8 20884.1 554.141 3
 -6 -6 -9 342.11 87.2453 3
 -6 6 -9 164.763 76.7709 3
 -6 6 -10 14287.8 577.716 3
 -6 -6 -10 14480.1 507.667 3
 -6 6 -11 111668 1794.01 3
 -6 -6 -11 110978 1602.78 3
 -6 6 -12 2960.39 296.858 3
 -6 -6 -12 2432.69 229.199 3
 -6 6 -13 8055.09 490.824 3
 -6 -6 -13 7512.61 416.346 3
 -6 6 -14 233.08 99.9513 3
 -6 -6 -14 382.002 121.71 3
 -6 6 -15 31873.8 1047.45 3
 -6 -6 -15 32205 955.654 3
 -6 -6 -16 2025.53 262.182 3
 -6 6 -16 1699.16 270.91 3
 -6 -6 -17 36546.7 1091.45 3
 -6 6 -17 35871.9 1183.95 3
 -6 6 -18 7176.99 544.864 3
 -6 -6 -18 7723.26 509.592 3
 -6 -6 -19 675.971 181.556 3
 -6 6 -19 475.779 186.052 3
 -6 6 -20 2741.92 369.376 3
 -6 -6 -20 2395.55 316.493 3
 6 8 -23 26264.2 1073.7 3
 6 -8 -22 22458.5 969.672 3
 6 8 -22 18919.8 883.687 3
 6 -8 -21 24085.5 975.708 3
 6 8 -21 22446.9 922.597 3
 6 -8 -20 6107.37 486.536 3
 6 8 -20 5682.46 452.08 3
 6 -8 -19 1698.43 254.561 3
 6 8 -19 1690.77 239.526 3
 6 -8 -18 208.527 115.77 3
 6 8 -18 18.733 82.3537 3
 6 -8 -17 48659.7 1224.32 3
 -6 8 17 43916.7 912.678 1
 -6 -8 17 46279.5 1089.26 4
 6 8 -17 46816.3 1171.25 3
 -6 8 16 29798.8 725.752 1
 -6 -8 16 29874.2 836.401 4
 6 -8 -16 30184.7 932.064 3
 6 8 -16 30601.6 898.234 3
 -6 -8 15 37530.1 907.825 4
 6 8 -15 36708.2 953.283 3
 -6 8 15 36232.3 794.638 1
 6 8 -14 1758.58 198.358 3
 -6 -8 14 1835.38 186.784 4
 -6 -8 14 1865 168.978 1
 -6 8 14 1992.86 184.913 1
 -6 8 13 19407.7 554.208 1
 -6 -8 13 20365.8 611.557 4
 6 8 -13 20584.6 647.988 3
 6 8 -12 5326.01 267.785 2
 -6 -8 12 5057.55 293.602 4
 6 8 -12 4922 304.534 3
 -6 8 12 5222.19 278.311 1
 6 8 -11 35565.6 699.448 2
 -6 -8 11 35836 762.237 4
 6 8 -11 35708.6 796.863 3
 -6 8 11 35314.4 732.833 1
 6 8 -10 25615.6 576.959 2
 -6 8 10 26026.1 566.696 4
 -6 -8 10 25795.2 617.896 4
 6 8 -10 26612.6 647.14 3
 -6 8 10 27092.8 620.994 1
 6 8 -9 35851.7 681.185 2
 -6 8 9 36688.3 651.116 4
 -6 -8 9 36099.8 713.67 4
 6 8 -9 35908.3 725.292 3
 -6 8 9 36000.3 712.67 1
 6 8 -8 120.305 64.4995 2
 -6 8 8 27.1939 48.1837 4
 -6 8 8 181.264 67.4196 1
 6 8 -8 227.386 60.9548 3
 6 8 -7 120257 1354.79 2
 -6 8 7 120360 1231.86 4
 6 8 -7 117840 1333.47 3
 -6 8 7 120125 1397.48 1
 -6 8 6 64725 680.34 4
 6 8 -6 62816.5 817.6 2
 -6 8 6 63306.2 853.914 1
 6 8 -6 62550.5 755.191 3
 -6 8 5 60588.9 559.029 2
 6 8 -5 61834.2 881.158 2
 -6 -8 5 64646.7 696.987 3
 6 8 -5 63915.3 759.128 3
 -6 8 5 63858.1 718.97 4
 -6 8 5 62654.9 902.472 1
 6 8 -4 1952.91 144.765 2
 -6 8 4 2055.69 102.277 4
 -6 8 4 1921.46 148.979 1
 -6 -8 4 2062.37 95.9146 3
 6 8 -3 10326.2 319.326 2
 6 8 -3 9552.74 204.085 3
 -6 8 3 10506.5 326.06 1
 6 -8 -3 10302.8 221.082 5
 -6 -8 3 9844.19 203.759 3
 6 -8 -2 10877.3 221.089 5
 6 8 -2 10551.8 323.034 2
 -6 -8 2 10238.3 213.972 3
 -6 8 2 10849.1 323.232 1
 -6 -8 1 148866 1240.21 3
 6 8 -1 153018 1537.9 2
 -6 8 1 154229 1737.04 3
 -6 8 1 149343 1480.16 1
 6 8 0 84155.1 1038.14 2
 -6 -8 0 85644.8 1030.33 5
 -6 8 0 81901.1 786.435 5
 -6 8 0 83471 971.963 1
 -6 8 0 83032 1176.22 3
 -6 8 -1 246701 1881.32 5
 6 8 1 239798 2177.33 2
 -6 8 -1 236250 2402.68 3
 -6 8 -1 236450 2037.25 1
 -6 -8 -1 242879 2158.71 5
 -6 -8 -2 1889.82 141.704 5
 6 8 2 1726.75 145.99 2
 -6 8 -2 2261.9 197.114 3
 -6 8 -2 2012.96 125.576 1
 -6 -8 -3 15015.3 400.666 5
 6 8 3 15438.3 424.374 2
 -6 8 -3 15269.5 528.748 3
 6 8 3 13693.7 396.886 1
 -6 8 -3 14519.7 327.085 1
 -6 -8 -4 12982.5 344.599 3
 6 8 4 12773.3 369.089 1
 6 8 4 12638.3 392.024 2
 -6 8 -4 12628.9 476.123 3
 -6 -8 -4 13064.4 380.671 5
 -6 8 -4 12648.9 294.907 1
 -6 8 -5 46365.7 597.226 1
 -6 -8 -5 47963 751.275 3
 -6 8 -5 47419.4 981.107 3
 6 8 5 47536.5 815.842 2
 6 8 5 48375.2 756.513 1
 6 8 6 108051 1240.05 1
 -6 -8 -6 110256 1302.83 3
 -6 8 -6 108223 1605.11 3
 6 8 6 106674 1331.69 2
 -6 8 -7 92088.9 1512.17 3
 6 8 7 90080.1 1119.9 1
 -6 8 -7 89404.5 863.607 1
 6 8 7 91620.4 1244.69 2
 -6 -8 -8 1662.5 163.341 3
 -6 8 -8 1901.5 87.2742 1
 -6 8 -8 1799.36 216.821 3
 6 8 8 1780.35 162.521 2
 6 8 8 1675.57 138.331 1
 -6 8 -9 10308.5 189.569 1
 6 8 9 10674 346.203 1
 -6 8 -9 11003.5 527.631 3
 -6 -8 -9 11515.3 437.253 3
 6 8 10 4497.59 228.32 1
 -6 8 -10 4781.68 357.658 3
 -6 -8 -10 4327.87 285.81 3
 6 8 11 45318 773.386 1
 -6 8 -11 47706.6 1183.26 3
 -6 -8 -11 45840.4 987.704 3
 6 8 12 16946.9 462.067 1
 -6 -8 -12 17615.3 619.643 3
 6 8 13 8933.16 339.505 1
 -6 8 -13 10056.5 579.031 3
 -6 -8 -13 10283.1 493.406 3
 -6 8 -14 4749.48 406.068 3
 -6 -8 -14 4640.43 346.278 3
 -6 8 -15 8573.87 589.063 3
 -6 -8 -15 12111 574.692 3
 -6 8 -16 22778.4 971.62 3
 -6 -8 -16 23727 838.755 3
 -6 8 -17 30847 1136.32 3
 -6 -8 -17 29056.7 968.825 3
 -6 8 -18 151.309 115.142 3
 -6 -8 -18 -24.472 132.423 3
 -6 8 -19 312.65 156.125 3
 -6 -8 -19 119.388 115.057 3
 -6 -8 -20 -68.9567 145.591 3
 6 10 -22 23265.5 997.701 3
 6 -10 -21 8027.29 594.987 3
 6 10 -21 6292.99 508.763 3
 6 -10 -20 86.3274 105.399 3
 6 10 -20 36.426 95.6288 3
 6 -10 -19 3427.85 356.409 3
 6 10 -19 2785.45 321.163 3
 6 -10 -18 20378.3 822.246 3
 6 10 -18 20082.8 809.984 3
 -6 10 18 19126.8 619.19 1
 6 -10 -17 10449.6 571.48 3
 -6 10 17 9433.45 420.453 1
 6 10 -17 9116.46 530.979 3
 -6 -10 17 9958.11 491.949 4
 -6 -10 16 21061.9 700.432 4
 6 10 -16 20483.5 763.377 3
 -6 10 15 4966.37 300.015 1
 6 10 -15 5371.44 305.146 2
 -6 -10 15 5280.8 337.233 4
 6 10 -15 4951.76 359.207 3
 -6 10 14 762.927 119.827 1
 6 10 -14 759.059 119.711 2
 -6 -10 14 850.538 143.806 4
 6 10 -14 722.597 148.589 3
 -6 10 13 14126.7 490.756 1
 6 10 -13 13630.7 472.898 2
 6 10 -13 13133.8 544.811 3
 -6 -10 13 13409.6 497.641 4
 6 10 -12 31166 798.739 3
 6 10 -12 30692.7 701.265 2
 -6 -10 12 30660 733.286 4
 -6 10 12 30653.2 724.491 1
 -6 10 11 266.903 80.6528 1
 6 10 -11 380.726 89.7555 2
 6 10 -11 395.096 104.874 3
 6 10 -10 41668.4 806.671 2
 6 10 -10 43643.6 892.43 3
 -6 -10 10 42051.6 818.899 4
 -6 10 10 42268 832.568 1
 6 10 -9 31378.6 675.388 2
 -6 -10 9 30941.4 662.746 4
 6 10 -9 32405.8 728.868 3
 -6 10 9 31449.7 695.676 1
 -6 10 8 749.571 113.226 1
 6 10 -8 755.631 108.883 3
 6 10 -8 659.598 93.015 2
 6 10 -7 82126.7 1110.34 2
 -6 10 7 82703.6 907.707 4
 6 10 -7 84238.2 1079.16 3
 -6 10 7 83417.6 1146.44 1
 6 10 -6 90194.5 1192.23 2
 -6 10 6 91477.6 936.797 4
 -6 10 6 87877.8 801.343 2
 6 10 -6 92806 1100.69 3
 -6 10 6 91874.4 1213.41 1
 6 10 -5 16648.4 457.712 2
 -6 10 5 16650.2 287.333 2
 6 10 -5 17169.4 389.812 3
 -6 10 5 17955.3 316.982 4
 -6 10 5 17168.7 470.889 1
 -6 10 4 2488.47 113.744 2
 6 10 -4 2729.94 186.132 2
 -6 10 4 2545.8 177.9 1
 6 10 -4 2695.79 135.747 3
 -6 10 3 3544.18 110.871 4
 -6 -10 3 3680.96 155.874 3
 -6 10 3 3421.47 198.075 1
 6 10 -3 3430.32 201.333 2
 6 -10 -3 3428.65 114.106 5
 6 10 -2 1243.08 124.655 2
 -6 -10 2 1869.82 108.682 3
 -6 10 2 1524.87 131.945 1
 -6 10 1 54484.2 1000.36 3
 6 10 -1 53135.9 843.36 2
 -6 -10 1 53764.5 678.778 3
 -6 10 1 53944.3 809.958 1
 -6 -10 0 38528.4 658.078 5
 -6 10 0 37735.2 820.16 3
 6 10 0 36237.8 681.444 2
 -6 10 0 37166.9 640.456 1
 -6 10 -1 46553.2 530.184 5
 -6 -10 -1 48155.8 763.129 5
 6 10 1 48493.5 801.625 1
 6 10 1 46525.3 785.639 2
 -6 10 -1 48533.9 953.22 3
 -6 10 -1 47012.5 717.846 1
 -6 10 -2 30112 424.475 5
 -6 10 -2 29762.6 540.441 1
 -6 10 -2 29724.7 764.256 3
 -6 -10 -2 30067.2 597.741 5
 6 10 2 29460.3 621.035 2
 6 10 2 30358.1 613.902 1
 -6 10 -3 6587.01 236.474 1
 6 10 3 6474.58 276.014 1
 6 10 3 6657.12 288.964 2
 -6 10 -3 6873.07 365.315 3
 -6 -10 -3 6784.7 280.877 5
 -6 10 -4 936.111 85.973 1
 6 10 4 1039.31 117.061 1
 -6 10 -4 789.449 152.633 3
 6 10 4 826.683 113.312 2
 -6 -10 -4 851.417 106.106 5
 6 10 5 2384.04 171.02 1
 -6 -10 -5 2545.16 176.957 5
 6 10 5 2383.05 182.531 2
 -6 10 -5 2646.94 239.652 3
 -6 10 -5 2592.14 140.63 1
 -6 -10 -6 97404.8 1247.03 3
 -6 10 -6 97555 1576.07 3
 -6 10 -6 96980.9 1017.34 1
 6 10 6 97188.1 1315.23 2
 6 10 6 96117.8 1224.83 1
 -6 -10 -7 61786 998.233 3
 -6 10 -7 59601.9 713.78 1
 -6 10 -7 61148.9 1256.54 3
 6 10 7 59431.5 995.225 2
 6 10 7 60866.1 933.898 1
 -6 -10 -8 19798 558.452 3
 6 10 8 18852.5 548.376 2
 -6 10 -8 19208.2 345.247 1
 -6 10 -8 18455.7 691.354 3
 6 10 8 18559.8 493.557 1
 -6 -10 -9 2362.11 210.009 3
 -6 10 -9 2666.75 284.11 3
 6 10 9 2456.71 207.155 2
 6 10 9 2451.62 181.727 1
 -6 -10 -10 55276.5 1080.62 3
 -6 10 -10 55612.3 1303.6 3
 6 10 10 53247.4 899.254 1
 6 10 11 4166.11 239.171 1
 -6 10 -11 4661.36 380.988 3
 -6 -10 -11 4552.06 311.829 3
 -6 10 -12 18848.5 779.737 3
 -6 -10 -12 18164.9 646.935 3
 -6 10 -13 53520.5 1381.97 3
 -6 -10 -13 52230.3 1157.06 3
 -6 -10 -14 -25.2369 106.309 3
 -6 10 -14 60.0175 141.223 3
 -6 10 -15 23354 950.736 3
 -6 -10 -15 21967.8 794.001 3
 -6 10 -16 32940.8 1167.57 3
 -6 -10 -16 34407.9 1032.92 3
 -6 10 -17 12048 726.473 3
 -6 -10 -17 11900.3 628.489 3
 -6 10 -18 22620.7 1013.86 3
 -6 -10 -18 21966.5 878.397 3
 -6 10 -19 3118.97 388.459 3
 -6 -10 -19 2753.22 334.294 3
 6 12 -22 17349.6 668.939 2
 6 12 -21 2828.89 273.047 2
 6 -12 -20 8905 596.198 3
 6 12 -20 7935.61 430.189 2
 6 -12 -19 -154.913 137.022 3
 6 12 -19 -59.4189 110.475 2
 6 12 -19 -26.6456 127.024 3
 6 12 -18 53190.3 1120.41 2
 6 -12 -18 59991.8 1484.73 3
 6 12 -18 61310.7 1506.2 3
 -6 12 18 50125.7 1090.34 1
 6 12 -17 576.911 126.431 2
 -6 -12 17 498.714 124.956 4
 -6 12 17 517.86 118.196 1
 6 12 -17 367.525 145.162 3
 6 12 -16 23614.1 698.478 2
 -6 -12 16 24846.1 765.88 4
 6 12 -16 24997 886.616 3
 -6 12 16 23228 702.512 1
 6 12 -15 855.832 132.847 2
 6 12 -15 802.159 168.838 3
 -6 -12 15 756.206 132.621 4
 -6 12 15 821.993 137.891 1
 6 12 -14 9.68501 88.9617 2
 -6 -12 14 -78.6017 111.272 4
 -6 12 14 109.551 67.0447 1
 6 12 -14 33.2648 79.5949 3
 6 12 -13 16724.6 552.893 2
 -6 -12 13 16782.6 560.573 4
 6 12 -13 17284.8 649.542 3
 -6 12 12 50199 996.065 1
 6 12 -12 50119.4 976.598 2
 -6 -12 12 51209.8 975.034 4
 6 12 -12 53819.3 1125.96 3
 -6 -12 11 8433.13 374.488 4
 -6 12 11 9184.91 402.009 1
 6 12 -11 8683.66 383.496 2
 6 12 -11 8987.35 431.962 3
 -6 12 10 36785.4 809.361 1
 6 12 -10 36649.5 789.341 2
 6 12 -10 36482.3 840.347 3
 -6 -12 10 36101.8 758.657 4
 -6 12 9 12433.3 450.938 1
 6 12 -9 12545 446.332 2
 -6 -12 9 12339 413.603 4
 6 12 -9 13435.7 470.913 3
 -6 12 8 2373.16 198.761 1
 -6 12 8 1865.45 91.1691 2
 6 12 -8 2299.45 192.211 2
 6 12 -8 2387.37 190.832 3
 6 12 -7 23130.1 595.597 2
 -6 12 7 22479.2 357.853 2
 -6 12 7 22509.7 591.077 1
 6 12 -7 22839.8 560.111 3
 -6 12 6 70415.1 760.913 2
 6 12 -6 71102.3 1097.41 2
 6 12 -6 71560.8 997.613 3
 -6 12 6 70721.1 1090.69 1
 -6 12 5 598.211 105.691 1
 6 12 -5 329.308 69.7788 2
 -6 12 5 341.403 51.1588 2
 6 12 -5 430.794 68.7734 3
 -6 12 4 50484.5 859.841 1
 6 12 -4 50301.9 875.388 2
 -6 12 4 49188.1 637.77 2
 6 12 -4 49391.3 715.474 3
 -6 12 3 16986.4 368.668 2
 6 12 -3 16677.3 481.839 2
 -6 12 3 17693.2 482.095 1
 -6 12 2 18636.1 488.48 1
 6 12 -2 19387.8 519.128 2
 -6 12 1 6817.74 287.293 1
 6 12 -1 7124.49 314.237 2
 -6 12 1 7203.71 376.441 3
 -6 12 0 43224.8 742.695 1
 6 12 0 41735 791.385 2
 6 12 0 43328.5 802.355 1
 -6 12 0 45504.1 966.047 3
 -6 12 -1 1929.57 145.196 1
 6 12 1 2480.58 184.848 2
 -6 -12 -1 2356.26 164.262 5
 -6 12 -1 1822.19 196.417 3
 -6 12 -1 1720.65 61.6267 4
 6 12 1 2312.5 177.191 1
 -6 12 -2 79606 717.504 4
 -6 12 -2 78826.9 1012.67 1
 6 12 2 83864.6 1151.53 1
 -6 -12 -2 81048.4 1070.74 5
 -6 12 -2 81995.8 1369.44 3
 -6 12 -2 77066.2 759.512 5
 6 12 2 82508.1 1161.22 2
 -6 -12 -3 126.027 52.0192 5
 6 12 3 -25.4703 73.9866 1
 -6 12 -3 86.66 40.6211 1
 6 12 3 151.28 84.537 2
 -6 12 -3 223.284 84.8306 3
 -6 12 -4 34379.5 602.642 1
 -6 -12 -4 34416.6 681.272 5
 -6 12 -4 35403.1 921.026 3
 6 12 4 33993.1 724.669 2
 6 12 4 35018.3 710.348 1
 6 12 5 741.139 118.52 1
 -6 12 -5 688.614 85.7594 1
 -6 12 -5 550.862 128.148 3
 -6 -12 -5 499.158 88.3273 5
 6 12 5 455.554 95.6958 2
 6 12 6 47559.9 896.363 2
 -6 -12 -6 47934.3 848.804 5
 -6 12 -6 47626.3 695.608 1
 6 12 6 48783.5 863.39 1
 -6 -12 -7 107.238 63.813 3
 -6 12 -7 137.824 41.0056 1
 6 12 7 83.0021 55.7568 1
 -6 12 -7 44.783 108.798 3
 6 12 7 159.083 64.0955 2
 -6 12 -8 23484.9 438.337 1
 -6 -12 -8 24029.2 642.223 3
 -6 12 -8 23328.6 813.228 3
 6 12 8 23284.5 593.558 1
 6 12 8 23188.5 629.304 2
 -6 -12 -9 8888.39 407.611 3
 -6 12 -9 8548.67 504.809 3
 6 12 9 8428.33 358.009 1
 6 12 9 8600.22 391.888 2
 -6 -12 -10 69932.3 1243.02 3
 -6 12 -10 69845.2 1513.33 3
 6 12 10 65698.8 1075.38 1
 6 12 10 66122.2 1155.99 2
 -6 -12 -11 -7.49379 74.8872 3
 6 12 11 148.79 71.911 1
 -6 12 -11 194.392 118.59 3
 -6 12 -12 33034.5 1084.22 3
 -6 -12 -12 31746.5 882.766 3
 -6 12 -13 22514.8 909.662 3
 -6 -12 -13 21104.1 742.164 3
 -6 -12 -14 274.967 107.917 3
 -6 12 -14 16.5107 170.426 3
 -6 12 -15 14460.1 777.072 3
 -6 -12 -15 15102.9 664.392 3
 -6 12 -16 27541 1099.43 3
 -6 -12 -16 25654.8 904.992 3
 -6 12 -17 16.0211 142.35 3
 -6 -12 -17 30.8723 95.6343 3
 -6 12 -18 44188.9 1471.05 3
 -6 -12 -18 43226.8 1259.28 3
 6 14 -21 119.58 85.6858 2
 6 14 -20 14686.6 614.937 2
 6 -14 -19 278.643 126.176 3
 6 14 -19 82.4342 101.527 2
 6 14 -18 49304.4 1119.8 2
 -6 14 18 49036.5 1127.59 1
 6 14 -17 3372.01 282.138 2
 -6 -14 17 3348.58 307.798 4
 -6 14 17 2886.44 264.57 1
 6 14 -16 13477.9 552.641 2
 -6 14 16 13183.3 551.945 1
 6 14 -16 14535.1 676.49 3
 -6 -14 16 15297 601.504 4
 6 14 -15 131.073 81.2264 2
 -6 -14 15 47.554 87.9289 4
 6 14 -15 187.247 136.355 3
 -6 14 15 115.168 67.8419 1
 6 14 -14 2583.96 229.625 2
 -6 14 14 2464.22 233.51 1
 -6 -14 14 2892.43 246.266 4
 6 14 -14 2738.19 285.498 3
 6 14 -13 634.295 117.417 2
 -6 14 13 529.902 114.703 1
 -6 -14 13 736.525 132.099 4
 6 14 -13 463.083 134.071 3
 6 14 -12 19572.9 626.462 2
 -6 14 12 19898.5 636.066 1
 -6 -14 12 20562.1 606.24 4
 6 14 -12 21203.1 706.257 3
 6 14 -11 2588.7 225.057 2
 -6 14 11 2866.39 237.058 1
 -6 -14 11 2889.56 223.305 4
 6 14 -11 2653.4 248.306 3
 6 14 -10 32190.2 784.474 2
 -6 14 10 30125.5 752.658 1
 6 14 -10 32267 807.429 3
 -6 -14 10 31445.8 711.697 4
 -6 -14 9 54.1694 72.7232 4
 6 14 -9 -80.4025 90.0369 2
 -6 14 9 83.4956 59.8494 1
 6 14 -9 -52.7778 89.6645 3
 -6 14 8 5060.15 295.481 1
 6 14 -8 4190.07 275.094 2
 -6 -14 8 4257.69 237.774 4
 6 14 -8 4134.39 265.388 3
 6 14 -7 57.8897 61.1525 2
 -6 14 7 97.1689 67.3459 1
 -6 14 7 94.4413 33.2646 2
 -6 14 6 15157.9 501.949 1
 6 14 -6 17110.2 469.316 3
 6 14 -6 17540.8 542.434 2
 -6 14 6 16678.7 362.577 2
 -6 14 5 752.054 120.471 1
 6 14 -5 578.63 108.215 2
 6 14 -5 576.182 85.6462 3
 -6 14 5 718.401 78.4759 2
 -6 14 4 91219.2 1064.73 2
 6 14 -4 90473.9 1329.74 2
 -6 14 3 4350.69 201.678 2
 -6 14 3 4055.76 241.193 1
 6 14 -3 4272.6 260.632 2
 -6 14 2 31813.4 593.194 2
 -6 14 2 32259.7 683.638 1
 6 14 -2 32002.6 722.871 2
 6 14 -1 4256.49 259.633 2
 6 14 -1 4620.75 269.854 1
 -6 14 1 4517.51 247.173 1
 -6 14 0 26679.8 791.832 3
 6 14 0 25411.8 640.314 2
 -6 14 0 25100.6 586.147 1
 6 14 0 25922.9 633.462 1
 6 14 1 5264.63 289.082 1
 6 14 1 4951.86 280.05 2
 -6 14 -1 5489.23 268.637 1
 -6 14 -1 4625.8 326.405 3
 6 14 2 41024.1 812.766 1
 -6 -14 -2 41179.4 736.96 5
 -6 14 -2 40208 975.345 3
 6 14 2 40741.1 822.457 2
 -6 14 -2 40921.3 742.624 1
 6 14 3 41.2733 74.4732 1
 -6 -14 -3 3.5946 48.6515 5
 6 14 3 57.4005 85.9662 2
 -6 14 -3 49.6833 93.2799 3
 -6 14 -3 34.3889 52.7748 1
 6 14 4 26228.8 667.233 2
 -6 14 -4 26968.5 570.09 1
 -6 -14 -4 28084.6 628.304 5
 -6 14 -4 26743.4 832.169 3
 6 14 4 27282.6 666.67 1
 -6 -14 -5 5918.35 286.861 5
 6 14 5 5492.92 310.898 2
 -6 14 -5 5417.29 392.93 3
 -6 14 -5 5670.29 247.373 1
 6 14 5 5388.76 295.008 1
 -6 14 -6 48675.5 765.493 1
 6 14 6 48161.8 916.938 1
 -6 -14 -6 48383.8 878.524 5
 -6 14 -6 51040.2 1237.25 3
 6 14 6 48025.3 953.389 2
 -6 -14 -7 8831.88 366.679 5
 6 14 7 8444.9 373.085 1
 -6 14 -7 8965.89 538.903 3
 6 14 7 8120.4 379.858 2
 -6 14 -7 9059.85 301.19 1
 -6 14 -8 6985.57 256.326 1
 -6 -14 -8 6730.63 328.235 5
 6 14 8 6517.61 350.184 2
 6 14 8 6334.55 329.226 1
 -6 -14 -9 419.578 99.6679 3
 -6 14 -9 393.676 148.31 3
 6 14 9 333.482 109.158 2
 6 14 9 409.969 100.929 1
 -6 -14 -10 45377.6 1008.83 3
 6 14 10 42406.3 892.589 1
 -6 14 -10 43611.4 1233.82 3
 6 14 10 42383.3 934.366 2
 -6 -14 -11 2470.38 240.321 3
 -6 14 -11 2136.67 279.94 3
 6 14 11 2234.81 206.152 1
 6 14 11 2215.45 212.141 2
 -6 -14 -12 26294.6 838.997 3
 6 14 12 25646.8 703.602 1
 -6 -14 -13 4727.3 364.467 3
 -6 14 -13 4735.7 442.837 3
 6 14 13 4441.86 296.218 1
 -6 -14 -14 1375.77 210.304 3
 6 14 14 980.046 151.395 1
 -6 14 -14 1422.96 272.87 3
 -6 -14 -15 56.8002 104.389 3
 -6 14 -15 -8.67812 118.435 3
 -6 14 -16 14970.9 832.421 3
 -6 -14 -16 14576.3 692.5 3
 -6 -14 -17 7778.89 521.445 3
 -6 14 -17 8486.61 654.238 3
 -6 -14 -18 35271.2 1157.23 3
 6 16 -19 -59.3684 124.545 2
 -6 16 18 16164.9 658.514 1
 6 16 -18 17719.9 689.263 2
 6 16 -17 19557.5 710.632 2
 -6 16 17 19023.7 709.791 1
 6 16 -16 3592.91 300.609 2
 -6 -16 16 3947.21 310.719 4
 -6 16 16 3351.05 299.103 1
 -6 16 15 30567.5 885.021 1
 6 16 -15 31093.4 871.748 2
 -6 -16 15 33408.7 874.688 4
 6 16 -14 6281.8 382.067 2
 -6 -16 14 7003.31 382.639 4
 -6 16 14 5875.15 376.075 1
 6 16 -13 13877.7 560.393 2
 -6 16 13 14227.8 575.772 1
 -6 -16 13 15214.2 549.081 4
 6 16 -12 21821.3 698.812 2
 -6 16 12 21366.7 695.253 1
 -6 -16 12 23842.5 658.448 4
 6 16 -11 10006.9 462.351 2
 -6 -16 11 9760.67 405.93 4
 -6 16 11 9818.71 464.678 1
 6 16 -10 29776.4 799.956 2
 -6 16 10 30379.5 815.561 1
 -6 -16 10 31456.8 718.229 4
 6 16 -10 32050.5 841.44 3
 6 16 -9 28054.8 761.038 2
 -6 16 9 25785.3 739.233 1
 -6 -16 9 26180.9 631.506 4
 6 16 -9 25946.6 724.147 3
 6 16 -8 211.152 83.965 2
 -6 -16 8 16.4107 83.3362 4
 -6 16 8 206.949 80.3572 1
 6 16 -8 313.126 94.3984 3
 6 16 -7 43129 852.159 3
 6 16 -7 44611.4 962.644 2
 -6 16 7 44993.9 957.887 1
 -6 16 6 43563.1 925.956 1
 6 16 -6 44301.4 836.101 3
 6 16 -6 43084.1 934.701 2
 -6 16 5 235.701 55.2581 2
 6 16 -5 393.048 91.906 2
 -6 16 5 286.023 92.5254 1
 -6 16 4 57489.2 1055.66 1
 -6 16 4 58539.6 857.002 2
 6 16 -4 57912.4 1082.21 2
 -6 16 3 4461.07 225.575 2
 -6 16 3 5224.93 300.461 1
 6 16 -3 5468.93 320.121 2
 -6 16 2 47462 797.498 2
 6 16 -2 46676.2 944.835 2
 -6 16 2 46474.8 897.042 1
 -6 16 1 39193.2 739.905 2
 6 16 -1 37591.1 837.399 1
 -6 16 1 38567.4 799.571 1
 6 16 -1 38490.3 851.537 2
 6 16 0 12283.5 469.38 2
 -6 16 0 12046.8 430.315 1
 6 16 0 12236.4 455.607 1
 6 16 1 16747.4 547.374 2
 6 16 1 16416.7 535.273 1
 -6 16 -1 16900.5 507.824 1
 -6 16 -1 16018.2 657.355 3
 6 16 2 11695 453.907 1
 -6 -16 -2 12838.2 402.063 5
 -6 16 -2 12831.4 584.323 3
 -6 16 -2 11930 412.503 1
 6 16 2 11655.4 455.936 2
 -6 -16 -3 6555.38 293.223 5
 -6 16 -3 6481.12 296.545 1
 -6 16 -3 6091.39 409.95 3
 6 16 3 6145.83 325.502 1
 6 16 3 5985.32 332.141 2
 -6 16 -4 38749.7 1060.63 3
 6 16 4 38509.2 860.394 2
 -6 16 -4 39567.6 751.398 1
 -6 -16 -4 39457 763.369 5
 6 16 4 40261.4 868.293 1
 -6 -16 -5 19670 542.314 5
 6 16 5 19305.9 605.024 2
 -6 16 -5 19334.6 758.938 3
 6 16 5 19908.4 603.776 1
 -6 16 -5 20152.4 514.464 1
 -6 -16 -6 19130.6 546.551 5
 6 16 6 18996 601.433 1
 -6 16 -6 19054.7 777.891 3
 6 16 6 18939.7 606.814 2
 -6 16 -6 19594.6 497.431 1
 -6 16 -7 21834.2 510.818 1
 6 16 7 20728 640.503 2
 6 16 7 22039.7 653.126 1
 -6 -16 -7 22489.3 608.74 5
 -6 16 -7 21846.1 855.639 3
 6 16 8 2522.6 241.109 2
 -6 -16 -8 2746.81 218.618 5
 6 16 8 2762.39 239.534 1
 -6 16 -8 2413.02 307.042 3
 6 16 9 22082.3 668.498 1
 -6 -16 -9 23394.9 651.488 5
 -6 16 -9 23846.9 930.698 3
 6 16 9 23147.7 694.958 2
 -6 -16 -10 42165.2 1001.1 3
 -6 16 -10 40966.2 1257.5 3
 -6 -16 -10 40239.2 889.093 5
 6 16 10 38276.4 900.891 1
 6 16 10 39790.6 937.082 2
 -6 -16 -11 7235.74 424.851 3
 -6 16 -11 6342.3 495.19 3
 6 16 11 5830.07 351.045 1
 6 16 11 6075.87 363.577 2
 6 16 12 25656.2 755.754 2
 -6 -16 -12 27530.5 851.25 3
 6 16 12 25918.3 749.744 1
 -6 16 -13 14968.6 798.185 3
 -6 -16 -13 14333.3 655.134 3
 6 16 13 13444.4 542.866 1
 -6 -16 -14 91.1855 138.839 3
 6 16 14 -118.719 101.743 1
 -6 16 -14 168.421 134.06 3
 -6 16 -15 12137 753.323 3
 -6 -16 -15 11533.8 612.042 3
 -6 16 -16 12584.7 779.69 3
 -6 -16 -16 11711.3 638.257 3
 -6 -16 -17 15107.5 743.293 3
 -6 18 18 2263.49 265.748 1
 6 18 -17 54247.5 1409.96 2
 -6 18 17 17192 708.672 1
 6 18 -16 4237.58 336.124 2
 -6 18 16 4255.75 348.974 1
 6 18 -15 41649.6 1068.26 2
 -6 18 15 40537.1 1061.64 1
 6 18 -14 600.458 180.358 2
 -6 18 14 408.583 137.642 1
 6 18 -13 26895.7 827.517 2
 -6 18 13 27680.8 849.311 1
 6 18 -12 11167.4 524.034 2
 -6 18 12 11125.6 531.244 1
 -6 18 11 34860.1 930.458 1
 6 18 -11 32188.8 890.267 2
 6 18 -10 338.485 86.8009 2
 -6 18 10 218.826 95.2931 1
 6 18 -9 16586.7 619.549 2
 -6 18 9 16519 612.258 1
 6 18 -8 -83.4096 111.646 2
 -6 18 8 -98.6444 118.436 1
 6 18 -7 61561.6 1207.05 2
 -6 18 7 60014 1182.52 1
 -6 18 6 5407.24 339.101 1
 6 18 -6 5562.56 347.155 2
 -6 18 5 32071.2 819.174 1
 6 18 -5 31809.5 833.266 2
 6 18 -4 8581.36 418.958 2
 -6 18 4 8007.17 393.804 1
 -6 18 4 7783.9 317.783 2
 -6 18 3 8705.38 344.499 2
 6 18 -3 8376.12 416.69 2
 -6 18 3 9178.85 419.597 1
 -6 18 2 5769.36 281.937 2
 6 18 -2 5871.05 353.941 1
 6 18 -2 6788.43 371.393 2
 -6 18 2 6181.07 337.646 1
 -6 18 1 37341.8 772.582 2
 6 18 -1 38404.1 891.248 1
 -6 18 1 39690.9 856.904 1
 6 18 -1 40065.3 920.266 2
 -6 18 0 15275.6 494.114 2
 6 18 0 16050.7 554.713 1
 6 18 0 15280.4 556.907 2
 -6 18 0 14641.6 500.524 1
 -6 18 -1 48739.1 936.079 1
 -6 18 -1 50247.6 951.45 2
 6 18 1 52047.6 1032.3 1
 6 18 1 51732.5 1050.16 2
 -6 18 -1 50500.9 1246.03 3
 6 18 2 -44.1602 86.5734 1
 6 18 2 -153.274 101.585 2
 -6 18 -2 98.8613 117.645 3
 -6 18 -2 -21.1127 73.9435 1
 6 18 3 1323.75 170.279 1
 -6 18 -3 1769.13 165.733 1
 -6 18 -3 1463.97 223.009 3
 6 18 3 1457.58 179.491 2
 6 18 4 4303.13 304.492 2
 -6 18 -4 5082.23 406.155 3
 6 18 4 4221.75 294.423 1
 -6 18 -4 4875.65 273.39 1
 6 18 5 26088.8 736.813 1
 -6 18 -5 25131.6 902.238 3
 6 18 5 26610.3 748.211 2
 -6 18 -5 26629.6 639.043 1
 -6 18 -6 9962.99 373.802 1
 -6 18 -6 9515.23 565.959 3
 6 18 6 9827.6 461.956 2
 6 18 6 10247.1 466.312 1
 6 18 7 39961.8 951.392 2
 6 18 7 43530.9 978.735 1
 -6 18 -7 43265.2 1242.39 3
 6 18 8 277.673 120.66 1
 -6 18 -8 524.198 172.461 3
 6 18 8 474.389 138.162 2
 6 18 9 31595.2 854.538 2
 6 18 9 31405.3 846.917 1
 -6 18 -9 32612.6 1134.63 3
 -6 -18 -10 2236.99 244.467 3
 -6 18 -10 1888.05 287.861 3
 6 18 10 1696.38 202.615 1
 6 18 10 1251.28 170.609 2
 -6 -18 -11 14055.9 605.718 3
 -6 18 -11 12494.2 732.13 3
 6 18 11 12445.3 539.569 2
 6 18 11 12601.8 546.665 1
 6 18 12 5835.24 376.681 1
 -6 18 -12 6208.22 536.4 3
 -6 -18 -13 26169.4 886.447 3
 -6 18 -13 25043 1083.3 3
 -6 -18 -14 133.445 115.205 3
 6 18 14 229.595 112.616 1
 -6 18 -14 293.781 219.226 3
 -6 -18 -15 22955.7 896.663 3
 -6 18 -15 23087 1073.82 3
 -6 -18 -16 2136.09 289.695 3
 -6 20 16 -27.6057 103.65 1
 6 20 -15 21544 792.557 2
 -6 20 15 20642.5 784.009 1
 6 20 -14 6055.8 416.493 2
 -6 20 14 5424.97 394.002 1
 6 20 -13 23106.2 804.45 2
 -6 20 13 22324.1 795.763 1
 6 20 -12 1105.29 166.923 2
 -6 20 12 1173.51 188.08 1
 6 20 -11 36568.7 1003.01 2
 -6 20 11 35032.6 974.894 1
 6 20 -10 2074.54 242.762 2
 -6 20 10 2100.49 232.375 1
 6 20 -9 5608.33 381.373 2
 -6 20 9 5540.84 376.144 1
 6 20 -8 324.751 125.133 2
 -6 20 8 436.864 110.213 1
 -6 20 7 18989.7 668.212 1
 6 20 -7 19994 706.246 2
 6 20 -6 115.693 86.3733 2
 -6 20 6 65.6266 77.9916 1
 6 20 -5 61842.8 1259.09 2
 -6 20 5 60704.3 1198.84 1
 6 20 -4 6163.06 379.914 2
 -6 20 4 6392.6 371.462 1
 -6 20 3 12958.8 519.182 1
 6 20 -3 12922.4 547.931 2
 6 20 -2 15691.5 602.351 2
 -6 20 2 13706 479.136 2
 6 20 -2 13484.7 557.757 1
 -6 20 2 14691.1 547.584 1
 -6 20 1 39132.3 842.049 2
 6 20 -1 40846.8 984.054 2
 6 20 -1 41428.5 972.389 1
 -6 20 1 39238.4 901.883 1
 -6 20 0 236.321 86.4558 1
 -6 20 0 109.236 59.7416 2
 6 20 0 118.505 70.7002 1
 6 20 0 147.312 72.6715 2
 -6 20 -1 36828.3 856.537 2
 6 20 1 37109.4 928.095 2
 6 20 1 36686.4 912.598 1
 -6 20 -1 36890.8 851.991 1
 -6 20 -2 6827.64 368.323 2
 6 20 2 7003.74 390.84 1
 6 20 2 6742.75 393.019 2
 -6 20 -2 7313.1 367.548 1
 -6 20 -2 6965.34 491.044 3
 -6 20 -3 98.2659 70.4579 2
 -6 20 -3 -53.4187 134.866 3
 6 20 3 208.652 95.7713 2
 -6 20 -3 124.512 73.1575 1
 6 20 3 20.071 75.9202 1
 6 20 4 6318.84 383.695 2
 -6 20 -4 6869.25 492.273 3
 6 20 4 6662.48 393.181 1
 -6 20 -4 7275.92 356.532 1
 -6 20 -5 35760 1131.91 3
 6 20 5 33148.9 884.753 2
 6 20 5 34513.8 904.419 1
 6 20 6 54.9134 73.1804 1
 6 20 6 32.1624 78.1037 2
 -6 20 -6 37.0303 55.3124 1
 -6 20 -7 23820.3 943.121 3
 6 20 7 23500.6 758.527 1
 6 20 7 21989.2 730.885 2
 -6 20 -8 3284.15 375.167 3
 6 20 8 2616.46 257.022 2
 6 20 8 2754.03 270.362 1
 6 20 9 7662.36 440.321 1
 6 20 9 7578.17 431.505 2
 -6 20 -9 7906.23 572.653 3
 -6 20 -10 3176.92 379.865 3
 6 20 10 3146.01 292.528 1
 -6 20 -11 27549.1 1127.84 3
 6 20 11 25939.1 837.445 1
 -6 -20 -12 321.997 121.186 3
 6 20 12 304.391 117.99 1
 -6 20 -12 248.377 194.099 3
 -6 -20 -13 14717.4 680.106 3
 6 20 13 12385.4 588.373 1
 -6 20 -13 13303.9 817.908 3
 -6 -20 -14 1096.24 212.193 3
 6 20 14 849.868 174.05 1
 -6 -20 -15 15562.1 758.766 3
 -6 22 13 211.452 92.2173 1
 6 22 -12 22591.9 831.602 2
 -6 22 12 21116.1 795.803 1
 6 22 -11 30786.2 962.087 2
 -6 22 11 29471.3 928.948 1
 -6 22 10 2251.05 248.461 1
 6 22 -10 2553.54 281.795 2
 -6 22 9 969.448 170.536 1
 6 22 -9 947.239 181.98 2
 6 22 -8 1866.15 237.814 2
 -6 22 8 2364.48 251.516 1
 -6 22 7 2720.94 271.825 1
 6 22 -7 2667.58 275.259 2
 6 22 -6 10931.9 546.603 2
 -6 22 6 10923.5 524.535 1
 6 22 -5 38319.5 1027.45 2
 -6 22 5 37027.5 967.716 1
 6 22 -4 21422.2 756.104 2
 -6 22 4 21814.6 723.765 1
 -6 22 3 818.48 148.601 1
 6 22 -3 721.466 162.927 2
 6 22 -2 22351.7 765.505 2
 -6 22 2 21579.1 702.83 1
 6 22 -1 13944.3 599.877 2
 -6 22 1 13916.4 555.339 1
 6 22 -1 14500.8 609.044 1
 -6 22 1 14431.2 533.148 2
 6 22 0 3327.75 293.238 2
 6 22 0 3762.93 304.966 1
 -6 22 0 3103.11 255.378 2
 -6 22 0 3662.22 281.935 1
 -6 22 -1 7627.43 400.646 2
 6 22 1 7964.87 447.609 2
 6 22 1 8755.83 466.749 1
 -6 22 -1 8254.96 418.208 1
 -6 22 -2 17397.8 621.936 2
 6 22 2 19007.6 694.389 1
 6 22 2 17136.3 657.075 2
 -6 22 -2 18053.2 615.706 1
 -6 22 -3 430.307 161.408 3
 -6 22 -3 342.43 107.936 2
 -6 22 -3 685.368 125.511 1
 6 22 3 379.168 114.424 2
 6 22 3 445.204 122.015 1
 -6 22 -4 17206.6 641.614 2
 6 22 4 18074.7 683.276 1
 -6 22 -4 19005.1 615.295 1
 6 22 4 17686.2 675.107 2
 -6 22 -4 18762.7 853.927 3
 6 22 5 16221.7 649.285 1
 -6 22 -5 15408.6 617.912 2
 6 22 5 14955.8 618.763 2
 -6 22 -5 16803.3 573.262 1
 -6 22 -5 15415.6 779.183 3
 6 22 6 2370.64 262.626 1
 -6 22 -6 1936.06 222.052 2
 -6 22 -6 2303.47 317.974 3
 6 22 6 2117.69 239.287 2
 6 22 7 4246.78 343.975 1
 -6 22 -7 3688.95 400.844 3
 6 22 7 4065.13 331.119 2
 6 22 8 3178.29 293.681 2
 -6 22 -8 3112.54 373.557 3
 6 22 8 3554.36 321.258 1
 6 22 9 1423 214.768 1
 -6 22 -9 1928.95 304.687 3
 6 22 10 9822.27 527.944 1
 -6 22 -10 10300 688.26 3
 -6 22 -11 18293.3 930.154 3
 6 22 11 16443.8 702.381 1
 -6 24 9 199.064 92.3379 1
 6 24 -9 256.054 113.893 2
 6 24 -8 4219.6 371.697 2
 -6 24 8 3933 342.855 1
 -6 24 7 59.9451 80.9932 1
 6 24 -7 124.881 92.8169 2
 6 24 -6 23194.1 843.431 2
 -6 24 6 24493.8 830.098 1
 6 24 -5 13135.7 627.218 2
 -6 24 5 12714.8 585.73 1
 6 24 -4 12505 609.056 2
 -6 24 4 12473.8 568.168 1
 -6 24 3 21.5516 88.8044 1
 6 24 -3 203.297 124.233 2
 6 24 -2 4890.49 378.443 2
 -6 24 2 4790.66 348.953 1
 6 24 -1 1053.85 192.857 2
 -6 24 1 928.428 168.079 1
 -6 24 0 22455.1 739.611 1
 6 24 0 23414.8 820.296 2
 6 24 0 23536.9 816.567 1
 -6 24 -1 1694.03 199.84 1
 6 24 1 1816.04 234.957 1
 6 24 1 1476.32 223.539 2
 -6 24 -1 1431.04 190.243 2
 -6 24 -2 15762.1 603.142 1
 -6 24 -2 14711 602.783 2
 6 24 2 16261.8 673.882 2
 6 24 2 16661.6 684.89 1
 -6 24 -3 176.869 90.5254 2
 6 24 3 455.514 140.576 1
 6 24 3 360.75 136.398 2
 -6 24 -3 414.935 107.074 1
 -6 24 -4 7787.86 456.266 2
 -6 24 -4 8691.21 442.457 1
 6 24 4 7865.83 473.087 2
 6 24 4 7847.68 479.472 1
 -6 24 -5 8999.25 497.284 2
 -6 24 -5 9163.7 633.537 3
 6 24 5 8535.56 496.062 2
 6 24 5 9176.47 524.724 1
 -6 24 -6 31954.1 960.675 2
 6 24 6 33672.1 995.92 2
 -6 24 -6 32168.5 1206.74 3
 6 24 6 34177.4 1011.21 1
 -6 24 -7 -97.9399 116.931 2
 6 24 7 -97.2874 111.03 1
 -6 24 -7 -176.949 155.448 3
 -6 24 -8 1051.04 185.834 2
 -6 24 -8 894.957 214.646 3
 -6 24 -9 137.633 158.399 3
 -6 26 4 5737.81 416.596 1
 6 26 -4 6088.39 447.917 2
 -6 26 3 2013.2 245.687 1
 6 26 -3 1938.78 256.009 2
 -6 26 2 1400.77 212.698 1
 6 26 -2 1299.36 205.171 2
 6 26 -1 997.304 196.239 2
 -6 26 1 1046.47 173.945 1
 -6 26 0 34961.6 974.054 1
 6 26 0 35230.5 1062.21 2
 6 26 1 275.155 126.259 2
 -6 26 -1 359.358 118.786 1
 6 26 2 1377.45 226.695 2
 -6 26 -2 1732.4 225.15 1
 -6 26 -3 51.7045 96.0417 1
 6 26 3 322.267 111.174 2
 -6 26 -4 4883.97 379.818 2
 6 26 4 5032.6 401.715 2
 -6 26 -5 -88.0494 137.15 2
 7 1 -23 22682.6 942.259 3
 7 -1 -23 23703.1 983.69 3
 7 1 -22 559.94 195.566 3
 7 -1 -22 271.908 139.388 3
 7 1 -21 43014 1247.8 3
 7 -1 -21 42136.2 1222.64 3
 7 1 -20 7692.83 505.143 3
 7 -1 -20 7697.27 505.238 3
 7 1 -19 22750 824.107 3
 7 -1 -19 22812.5 834.396 3
 -7 -1 18 4090.09 348.536 4
 7 1 -18 4660.49 359.145 3
 7 -1 -18 4092.35 347.648 3
 -7 -1 17 12282.7 540.606 4
 -7 1 17 10833.4 506.576 4
 7 1 -17 10512.1 520.223 3
 7 -1 -17 10694.4 533.224 3
 -7 -1 16 12233 523.788 4
 -7 1 16 12591.1 524.121 4
 -7 1 16 11280.5 401.397 1
 7 1 -16 12406 539.804 3
 -7 -1 16 12238.5 403.406 1
 7 -1 -16 11779.8 542.21 3
 -7 1 15 82164.8 1364.7 4
 7 -1 -15 80512.2 1416.09 3
 -7 -1 15 79871.8 1126.85 1
 -7 1 15 81863.2 1153.12 1
 -7 -1 15 82984.1 1378.74 4
 7 1 -15 77644.7 1374.32 3
 7 -1 -14 4105.89 297.553 3
 -7 1 14 4109.41 234.465 1
 -7 1 14 4324.04 288.359 4
 -7 -1 14 4044.74 275.867 4
 -7 -1 14 3608.68 215.288 1
 7 1 -14 4167.23 289.784 3
 -7 -1 13 39075.6 840.719 4
 -7 1 13 38743.7 831.947 4
 -7 1 13 38634.4 737.185 1
 7 -1 -13 39118.8 867.685 3
 -7 -1 13 39054 733.087 1
 7 1 -13 39628.5 871.014 3
 7 -1 -12 9604.69 400.983 3
 -7 -1 12 9063.93 335.642 1
 -7 1 12 9272.01 380.81 4
 -7 -1 12 9423.3 390.699 4
 -7 1 12 9751.84 353.6 1
 7 1 -12 9023.01 385.555 3
 7 1 -11 1048.85 125.651 3
 7 -1 -11 1094.92 132.423 3
 7 -1 -11 1371.06 88.4098 2
 7 1 -11 1278.85 97.7721 2
 -7 -1 11 949.837 120.033 1
 -7 1 11 1497.29 136.582 1
 -7 1 11 1138.43 139.179 4
 -7 -1 11 1088.05 144.568 4
 7 1 -10 6616.8 291.599 3
 -7 -1 10 6371.95 276.031 1
 7 1 -10 6871.04 212.381 2
 7 -1 -10 6750.41 180.247 2
 -7 -1 10 6524.41 297.487 4
 -7 1 10 6536.22 297.477 4
 -7 1 10 6126.14 266.854 1
 -7 -1 9 136419 1521.67 1
 7 1 -9 136863 1494.61 3
 7 1 -9 135518 1237.48 2
 7 -1 -9 142814 1153.97 2
 -7 1 9 135592 1506.28 1
 -7 -1 9 138914 1556.39 4
 -7 1 9 137894 1539.06 4
 7 1 -8 527.048 76.7643 3
 7 1 -8 579.369 61.427 2
 -7 -1 8 545.488 91.2073 1
 7 -1 -8 645.23 52.8279 2
 -7 1 8 509.001 96.1758 1
 -7 1 7 163033 1652.82 1
 7 -1 -7 160370 1254.06 2
 -7 -1 7 159270 1674.82 1
 7 1 -7 162706 1361.03 2
 -7 1 6 310.091 74.6311 1
 7 -1 -6 442.21 43.2637 2
 7 1 -6 260.462 45.2406 2
 -7 -1 6 178.177 62.5077 1
 -7 1 5 21040.8 472.963 1
 -7 1 5 21281.2 292.236 2
 7 1 -5 20233 337.198 2
 7 -1 -5 20294 296.39 2
 -7 -1 5 20940.1 513.461 1
 -7 1 4 27463.5 538.292 1
 -7 1 4 26897 354.876 2
 -7 -1 4 25871.6 609.841 1
 7 1 -4 26623.2 398.9 2
 7 -1 -4 27718.5 369.142 2
 7 1 -3 9997.36 208.2 3
 -7 1 3 10300.7 216.699 2
 7 1 -3 10237.5 239.602 2
 7 -1 -3 11082.1 229.299 2
 -7 1 3 10207.7 313.914 1
 -7 1 2 408.236 72.0704 1
 -7 1 2 333.738 49.8705 3
 7 1 -2 436.402 46.4269 3
 7 1 -2 348.828 51.7521 2
 -7 1 1 297354 2387.49 5
 -7 -1 1 295631 2420.38 5
 7 -1 -1 294485 2258.61 2
 -7 1 1 288434 2285.52 3
 7 1 -1 294177 2297.34 2
 7 1 -1 294492 2204.17 3
 -7 1 1 296294 2462.17 1
 -7 1 0 533.519 77.5502 1
 -7 -1 0 986.647 96.1452 5
 -7 1 0 701.27 77.9812 3
 -7 -1 0 578.387 60.364 3
 7 1 0 707.677 78.8575 2
 7 1 0 790.235 68.5223 3
 -7 1 0 705.718 79.8962 5
 -7 1 -1 28585.8 508.099 5
 -7 1 -1 27966.1 501.086 3
 -7 -1 -1 28885.6 523.99 5
 -7 -1 -1 28874.1 460.409 3
 7 1 1 28159.3 495.55 2
 7 1 1 27201.1 448.929 3
 -7 1 -1 28243.9 521.397 1
 -7 -1 -2 784.224 88.7718 5
 -7 1 -2 695.728 81.3904 5
 -7 1 -2 711.063 84.9821 3
 -7 -1 -2 708.225 74.7756 3
 7 1 2 905.629 92.7313 2
 -7 1 -2 732.19 84.4327 1
 -7 1 -3 77726.5 1012.67 3
 -7 -1 -3 74473.7 915.551 3
 -7 1 -3 74221.8 907.261 1
 -7 1 -4 2893.71 184.385 3
 -7 -1 -4 2780.69 165.523 3
 -7 1 -4 2768.08 153.632 1
 -7 1 -5 58521.9 927.55 3
 -7 -1 -5 60631.5 892.708 3
 -7 1 -5 61282.8 772.443 1
 -7 1 -6 8514.07 357.589 3
 -7 -1 -6 8190.58 321.799 3
 -7 1 -6 7740.6 234.341 1
 -7 1 -7 194636 2085.07 3
 -7 -1 -7 198179 2043.53 3
 -7 1 -8 435.602 50.0418 1
 -7 1 -8 390.329 40.1691 1
 -7 1 -8 337.727 84.3361 3
 -7 -1 -8 288.668 84.8314 3
 -7 1 -9 41208.5 892.963 3
 -7 1 -9 38524.2 415.548 1
 -7 -1 -9 41047.1 868.266 3
 -7 1 -9 37785.6 463.6 1
 -7 1 -10 13289.5 523.05 3
 -7 -1 -10 13799.5 512.146 3
 -7 -1 -11 177.222 81.2775 3
 -7 1 -11 279.021 110.216 3
 -7 1 -12 334.908 105.833 3
 -7 -1 -12 337.413 115.609 3
 -7 1 -13 54548 1217.2 3
 -7 -1 -13 53172.9 1178.16 3
 -7 -1 -14 1406.62 214.242 3
 -7 1 -14 1057.37 184.592 3
 -7 1 -15 99717.2 1816.61 3
 -7 -1 -15 98991.7 1781.7 3
 -7 1 -16 10327.2 592.465 3
 -7 -1 -16 10605.8 575.4 3
 -7 1 -17 787.185 176.628 3
 -7 -1 -17 585.255 143.353 3
 -7 1 -18 1166.46 225.855 3
 -7 -1 -18 1317.41 221.584 3
 -7 1 -19 25170.6 994.713 3
 -7 -1 -19 24529.3 978.541 3
 -7 1 -20 2001.9 328.591 3
 -7 -1 -20 2084.05 322.61 3
 7 3 -23 9379.27 617.95 3
 7 -3 -23 9339.3 613.359 3
 7 3 -22 85.4908 105.117 3
 7 -3 -22 22.4055 94.9606 3
 7 3 -21 18675.1 811.073 3
 7 -3 -21 18145.9 804.588 3
 7 3 -20 27473.7 941.625 3
 7 -3 -20 29914.3 1003.56 3
 7 3 -19 25299.5 866.599 3
 7 -3 -19 26561.1 913.47 3
 -7 -3 18 27541.5 863.102 4
 7 3 -18 27740.2 884.54 3
 7 -3 -18 28095.9 909.7 3
 7 -3 -17 7031.61 447.679 3
 -7 -3 17 6903.87 416.373 4
 -7 3 17 6410.16 307.467 1
 7 3 -17 7379.37 438.423 3
 7 -3 -16 13026.2 591.482 3
 -7 3 16 13963.7 551.031 4
 -7 -3 16 14682.4 573.272 4
 -7 3 16 13195.8 439.967 1
 7 3 -16 13751.1 569.351 3
 7 -3 -15 71926.1 1333.3 3
 -7 -3 15 68824.3 1029.34 1
 -7 3 15 70545.9 1255.83 4
 -7 -3 15 72808.3 1292.22 4
 -7 3 15 71899.5 1087.08 1
 7 3 -15 70512.5 1285.12 3
 7 -3 -14 9017.86 438.631 3
 -7 3 14 9336.82 366.693 1
 -7 3 14 9848.97 434.289 4
 -7 -3 14 9762.59 430.527 4
 7 3 -14 9488 426.855 3
 7 -3 -13 38139.4 870.575 3
 -7 -3 13 36815 722.3 1
 -7 3 13 40465.4 850.91 4
 -7 3 13 37947.9 742.201 1
 -7 -3 13 37480.9 828.106 4
 7 3 -13 37358.4 830.329 3
 -7 -3 12 19026.3 500.722 1
 7 3 -12 19539.2 440.041 2
 -7 3 12 19587.2 515.959 1
 -7 3 12 19471.4 556.854 4
 -7 -3 12 19789.7 578.826 4
 7 3 -12 20428 572.883 3
 7 3 -11 2775.43 155.415 2
 7 -3 -11 2926.19 101.836 2
 -7 3 11 2625.38 194.679 4
 -7 -3 11 2532.9 203.105 4
 -7 3 11 2671.53 186.072 1
 7 3 -11 2811.52 200.192 3
 -7 -3 11 3000.83 197.107 1
 -7 -3 10 111653 1408.25 4
 7 -3 -10 116574 913.437 2
 -7 3 10 114709 1393.65 4
 7 3 -10 110928 1183.47 2
 -7 3 10 115295 1370.74 1
 -7 -3 10 109253 1371.69 1
 7 3 -10 112302 1362.56 3
 -7 3 9 109883 1305.18 1
 7 3 -9 109677 1117.98 2
 -7 3 9 110332 1301.85 4
 -7 -3 9 107989 1360.47 1
 7 3 -9 109870 1260.19 3
 7 3 -8 4642.76 182.036 2
 -7 3 8 4659.42 230.321 1
 -7 3 8 4964.03 235.048 4
 7 -3 -8 4047.44 89.8944 2
 -7 -3 8 4431.4 255.715 1
 7 3 -8 4331.53 200.949 3
 7 3 -7 68725.9 811.605 2
 -7 3 7 70893.5 967.768 1
 7 3 -7 70714.7 847.98 3
 7 3 -6 15331.8 312.924 3
 -7 3 6 16159.4 414.16 1
 7 3 -6 16000.6 328.315 2
 7 3 -5 19338.3 317.863 3
 -7 3 5 18328.5 434.966 1
 -7 3 5 17595.6 219.2 2
 7 3 -5 17885.4 353.242 2
 7 3 -4 121438 990.254 3
 -7 3 4 125133 1325.87 1
 7 3 -4 119817 1168.98 2
 7 3 -3 43065.6 599.063 2
 -7 3 3 45122.7 492.622 2
 -7 3 2 58174.1 802.49 1
 7 3 -2 55394.8 712.229 2
 -7 3 2 57883.5 604.394 2
 -7 3 2 56260.6 768.914 3
 -7 -3 1 159052 1488.72 5
 -7 3 1 168991 1491.44 1
 -7 3 1 158491 1390.61 5
 -7 3 1 155187 1456.05 3
 7 3 -1 158701 1399.87 2
 -7 -3 1 148123 1077.13 3
 -7 3 0 19444.7 406.737 1
 -7 3 0 19178.7 390.904 5
 -7 -3 0 19331 432.168 5
 -7 3 0 19630.2 445.137 3
 -7 -3 0 18905.9 283.83 3
 7 3 0 19196.7 404.596 2
 7 3 0 19808.7 282.217 3
 -7 3 -1 25986.9 462.166 1
 -7 3 -1 26156.3 467.958 5
 7 3 1 25719.3 492.021 2
 -7 3 -1 26194.6 533.113 3
 -7 -3 -1 25466.1 380.692 3
 -7 -3 -1 26488 517.802 5
 7 3 1 26021.9 385.257 3
 -7 3 -2 35375.3 530.894 1
 -7 -3 -2 34213.3 598.672 5
 -7 3 -2 34873 556.985 5
 -7 3 -2 33648.3 641.207 3
 7 3 2 32970.6 578.927 2
 -7 -3 -2 33577.1 488.907 3
 -7 3 -3 99042.1 999.983 1
 -7 -3 -3 101463 1154.72 5
 7 3 3 97933.7 1148.65 2
 -7 3 -3 94507.1 1227.58 3
 -7 -3 -3 95528.4 1031.96 3
 -7 3 -4 127735 1187.34 1
 -7 3 -4 125015 1527.35 3
 7 3 4 125513 1397.93 2
 -7 3 -5 433.353 57.0813 1
 -7 3 -5 319.239 95.3712 3
 -7 -3 -5 347.321 74.9189 3
 -7 3 -6 26950.9 384.992 1
 -7 3 -6 27017.8 661.781 3
 -7 -3 -6 28844.9 594.255 3
 -7 3 -7 75208.7 1215.58 3
 -7 -3 -7 76825.7 1090.24 3
 -7 3 -7 74002.1 707.036 1
 -7 3 -8 4638.98 122.371 1
 -7 3 -8 4984.71 307.592 3
 -7 3 -8 4491.98 122.633 1
 -7 -3 -8 4826.57 267.135 3
 -7 3 -9 19077.2 618.753 3
 -7 -3 -9 19575.9 562.883 3
 -7 -3 -10 98795.3 1457.07 3
 -7 3 -10 98440.2 1569.01 3
 -7 3 -11 645.759 133.015 3
 -7 -3 -11 997.249 154.633 3
 -7 3 -12 27511.5 844.998 3
 -7 -3 -12 27775.7 792.759 3
 -7 3 -13 60178.4 1328.44 3
 -7 -3 -13 58481.7 1241.97 3
 -7 3 -14 14305.5 653.03 3
 -7 -3 -14 12205.5 590.278 3
 -7 3 -15 50896.1 1294.11 3
 -7 -3 -15 52499.6 1245.9 3
 -7 3 -16 31774.9 1054.57 3
 -7 -3 -16 33599.1 1019.98 3
 -7 3 -17 525.477 176.622 3
 -7 -3 -17 725.859 171.405 3
 -7 3 -18 11644.5 701.247 3
 -7 -3 -18 12174.1 658.334 3
 -7 3 -19 24155.6 1003.93 3
 -7 -3 -19 24655.1 974.325 3
 -7 3 -20 9963.29 671.987 3
 -7 -3 -20 10176.6 645.15 3
 7 5 -23 -84.2382 138.691 3
 7 -5 -22 407.058 156.598 3
 7 5 -22 346.718 161.932 3
 7 -5 -21 943.959 220.614 3
 7 5 -21 936.05 191.291 3
 7 5 -20 48443.2 1283.69 3
 7 -5 -20 47915.8 1317.66 3
 7 -5 -19 22034.3 848.622 3
 7 5 -19 21159.4 808.205 3
 7 -5 -18 68316.8 1525.37 3
 -7 -5 18 66648.8 1361.49 4
 7 5 -18 66910 1424.94 3
 7 -5 -17 4622.48 361.585 3
 -7 -5 17 4303.84 329.094 4
 -7 5 17 4588.8 273.154 1
 7 5 -17 4933.23 366.398 3
 7 -5 -16 3367.7 307.324 3
 -7 -5 16 3722.33 294.459 4
 -7 5 16 3796.87 244.204 1
 7 5 -16 3929.9 313.728 3
 7 -5 -15 5844.91 373.195 3
 -7 -5 15 4662 250.856 1
 -7 5 15 5098.2 317.439 4
 -7 5 15 5390.74 288.071 1
 -7 -5 15 5864.2 357.454 4
 7 5 -15 5354.08 339.599 3
 -7 -5 14 60444.5 972.481 1
 -7 -5 14 61316.7 1137.65 4
 -7 5 14 63419.2 1025.28 1
 -7 5 14 63249.9 1128.67 4
 7 5 -14 62154.4 1156.48 3
 -7 -5 13 8220.43 388.107 4
 7 5 -13 7963.75 307.323 2
 -7 5 13 8234.02 376.187 4
 -7 5 13 7839.13 338.807 1
 7 5 -13 8020.01 378.82 3
 -7 -5 13 7911.74 329.248 1
 7 5 -12 34097.3 638.632 2
 7 -5 -12 31236.5 341.359 2
 -7 5 12 35684 754.838 4
 -7 -5 12 35339 784.37 4
 -7 5 12 34714.8 706.442 1
 7 5 -12 35079.8 761.867 3
 -7 -5 12 33950.7 716.164 1
 7 5 -11 136.974 44.0378 2
 -7 -5 11 7.55042 89.0407 4
 -7 5 11 -1.53595 69.41 4
 -7 5 11 216.371 71.1251 1
 7 5 -11 143.19 68.9884 3
 -7 -5 11 66.0241 58.0546 1
 7 5 -10 105798 1213.75 2
 -7 -5 10 106041 1374.06 4
 -7 5 10 105631 1331.84 1
 7 5 -10 107123 1318.12 3
 -7 5 10 109995 1333.67 4
 -7 5 9 37001.7 679.538 4
 7 5 -9 36756 616.924 2
 -7 5 9 35910.5 696.203 1
 7 5 -9 35972.1 650.603 3
 7 5 -8 29290.7 532.088 2
 -7 5 8 30115.5 577.806 4
 -7 5 8 29706.1 615.966 1
 7 5 -8 29888.5 546.006 3
 7 5 -7 49471 723.354 2
 -7 5 7 51093.9 741.914 4
 -7 5 7 50083.9 808.562 1
 7 5 -7 51955.2 701.86 3
 -7 5 6 44164.2 747.585 1
 7 5 -6 44318.4 582.786 3
 7 5 -6 44484.9 661.632 2
 -7 5 5 2453.15 163.113 1
 7 5 -5 2442.1 142.582 2
 7 5 -5 2465.31 105.978 3
 7 5 -4 200389 1708.03 2
 -7 5 4 204625 1828.47 1
 -7 5 4 204382 1365.18 2
 7 5 -3 51982 717.586 2
 -7 5 3 53666.6 782.308 1
 -7 5 2 261832 2360.55 3
 7 5 -2 259181 2196.86 2
 -7 -5 1 4058.38 205.54 5
 7 5 -1 4060.46 189.257 2
 -7 5 1 4212.79 194.6 1
 -7 5 1 4318.54 227.292 3
 -7 5 0 29214.9 471.429 5
 -7 -5 0 29565.3 561.075 5
 7 5 0 28811.9 527.922 2
 -7 5 0 29343.2 601.709 3
 -7 5 0 30192.8 519.599 1
 -7 -5 0 27773.1 326.201 3
 -7 5 -1 492.045 63.8851 5
 -7 -5 -1 554.075 91.5981 5
 7 5 1 600.099 88.3115 2
 -7 5 -1 620.188 93.86 3
 -7 5 -1 380.406 64.2132 1
 -7 -5 -1 523.212 51.4153 3
 -7 -5 -2 258422 2270.2 5
 -7 5 -2 263477 2118.56 5
 7 5 2 254243 2252.77 2
 -7 5 -2 254949 2424.66 3
 -7 5 -2 258793 2092.54 1
 -7 -5 -2 251729 1986.79 3
 -7 5 -3 47517.4 864.803 3
 -7 5 -3 47961.1 628.006 1
 -7 -5 -3 48594.5 764.916 5
 7 5 3 49369.5 777.518 2
 -7 -5 -3 47942.8 639.278 3
 -7 5 -4 106598 1033.08 1
 7 5 4 112779 1299.52 2
 -7 5 -4 110535 1466.08 3
 -7 -5 -4 107448 1147.76 3
 7 5 5 3749.79 214.385 2
 -7 5 -5 3809.46 141.633 1
 -7 5 -5 3520.92 248.065 3
 -7 -5 -5 3964.05 196.444 3
 -7 5 -6 29900.7 754.611 3
 -7 5 -6 27235.1 389.527 1
 7 5 6 29597.8 632.202 2
 -7 -5 -6 29579.6 594.11 3
 -7 5 -7 485.639 108.186 3
 -7 5 -7 404.542 41.9687 1
 -7 -5 -7 405.276 80.3504 3
 -7 5 -8 42466.5 981.872 3
 -7 5 -8 40344.6 426.244 1
 -7 -5 -8 41697.7 803.82 3
 -7 5 -9 28971.2 812.949 3
 -7 -5 -9 28247.8 686.101 3
 -7 5 -10 68599.9 1325.49 3
 -7 -5 -10 72078.6 1201.53 3
 -7 5 -11 153.052 92.487 3
 -7 -5 -11 48.9866 79.5509 3
 -7 5 -12 24687.8 828.779 3
 -7 -5 -12 24362.5 738.565 3
 -7 5 -13 17541.7 724.181 3
 -7 -5 -13 17857.7 652.07 3
 -7 5 -14 26547.1 919.956 3
 -7 -5 -14 26605.8 826.558 3
 -7 5 -15 4544.2 412.705 3
 -7 -5 -15 4919.7 368.312 3
 -7 5 -16 14123.9 736.608 3
 -7 -5 -16 14747.7 664.917 3
 -7 -5 -17 -2.86666 122.994 3
 -7 5 -17 -49.7191 140.719 3
 -7 -5 -18 22429.1 922.968 3
 -7 5 -18 26778.6 1039.01 3
 -7 -5 -19 18772.9 842.696 3
 -7 5 -19 19483.2 927.95 3
 -7 -5 -20 19704.9 895.345 3
 7 7 -23 7916.92 573.899 3
 7 -7 -22 421.33 152.881 3
 7 7 -22 376.895 138.967 3
 7 7 -21 17968.3 812.549 3
 7 -7 -21 19959.4 880.779 3
 7 -7 -20 56447 1473.29 3
 7 7 -20 53324.5 1386.58 3
 7 -7 -19 2325.6 288.219 3
 -7 -7 19 2139.25 252.045 4
 7 7 -19 2331.52 289.697 3
 7 -7 -18 85052 1674.56 3
 -7 -7 18 83166.6 1544.54 4
 7 7 -18 84655 1634.94 3
 7 -7 -17 9766.36 530.28 3
 -7 -7 17 9911.64 497.232 4
 7 7 -17 9575.02 508.341 3
 -7 7 17 9483.84 411.687 1
 -7 7 16 1101.72 143.366 1
 7 -7 -16 1503.98 218.232 3
 7 7 -16 1367.13 187.081 3
 -7 -7 16 1288.6 194.374 4
 7 7 -15 9147.04 365.123 2
 -7 -7 15 9321.43 442.695 4
 -7 7 15 8746.86 382.035 1
 7 7 -15 8472.83 437.585 3
 7 7 -14 116447 1474.24 2
 -7 -7 14 119506 1685.66 4
 -7 7 14 123158 1579.72 1
 7 7 -14 123093 1750.55 3
 -7 -7 14 122498 1539.5 1
 7 7 -13 108.435 56.7122 2
 -7 7 13 156.777 76.6142 4
 -7 -7 13 104.228 79.4414 4
 7 7 -13 17.6696 61.3326 3
 -7 7 13 136.437 64.9864 1
 -7 -7 13 185.551 88.0369 1
 7 7 -12 31122.5 650.721 2
 7 7 -12 32622.2 758.816 3
 -7 7 12 31625.4 704.499 1
 -7 -7 12 31072.7 738.454 4
 -7 7 12 31766.7 712.652 4
 -7 -7 11 348.582 79.688 4
 7 7 -11 240.516 60.4677 2
 -7 7 11 378.905 81.4776 4
 -7 7 11 365.002 87.0725 1
 7 7 -11 317.561 82.2515 3
 7 7 -10 31475.8 624.498 2
 -7 7 10 31198.7 639.869 4
 -7 -7 10 31455.9 694.614 4
 -7 7 10 31683.1 682.577 1
 7 7 -10 32303.5 683.401 3
 7 7 -9 109.079 47.8017 2
 -7 7 9 129.444 66.5536 4
 -7 7 9 70.3131 52.6997 1
 7 7 -9 127.764 54.3915 3
 7 7 -8 118139 1340.8 2
 -7 7 8 121027 1310.61 4
 7 7 -8 120146 1333.7 3
 -7 7 8 120691 1433.34 1
 7 7 -7 65496.9 909.945 2
 -7 7 7 65100.3 962.856 1
 7 7 -7 65843.1 854.45 3
 -7 7 7 66639.5 860.528 4
 -7 -7 6 13437.5 262.128 3
 7 7 -6 13177.9 370.352 2
 -7 7 6 12953.7 322.337 4
 7 7 -6 12855.4 312.243 3
 -7 -7 5 1495.66 75.3047 3
 -7 7 5 1149.85 48.687 2
 7 7 -5 1386.3 116.714 2
 -7 7 5 1273.68 124.974 1
 7 7 -5 1370.47 91.9257 3
 -7 -7 4 111391 889.552 3
 7 7 -4 125448 1297.08 2
 7 7 -4 113261 933.342 3
 -7 7 4 123117 1349.17 1
 -7 7 3 12281.2 365.075 1
 7 7 -3 12080.8 346.001 2
 -7 7 2 184424 1758.79 1
 -7 7 2 187405 1947.77 3
 7 7 -1 90213.3 1042.02 2
 -7 -7 1 87618 1047.49 5
 -7 7 1 88626.4 1019.39 1
 -7 7 1 89632.7 1182.48 3
 -7 -7 0 1361.62 66.2826 3
 -7 7 0 1203.63 89.3207 5
 -7 -7 0 1499.43 142.954 5
 -7 7 0 1630.92 156.355 3
 7 7 0 1194.17 121.308 2
 -7 7 0 1029.69 102.479 1
 -7 -7 -1 93112.3 1141.73 5
 7 7 1 89378 1116.81 2
 -7 7 -1 91022.1 1290.82 3
 -7 7 -1 92798 959.537 5
 -7 -7 -2 233338 1876.24 3
 -7 -7 -2 234138 2152.31 5
 7 7 2 235616 2168.28 2
 -7 7 -2 230269 2393.79 3
 -7 7 -2 235288 1924.32 5
 7 7 3 50725 814.659 2
 -7 -7 -3 47856.3 784.201 5
 -7 7 -3 47855.6 927.337 3
 -7 7 -3 46547.6 643.551 1
 -7 -7 -3 47486.4 655.516 3
 -7 -7 -4 71242 999.601 5
 -7 7 -4 69803.6 1168.17 3
 7 7 4 70362.7 1019.41 2
 -7 7 -4 68772.8 793.271 1
 -7 -7 -4 71370.6 895.936 3
 -7 7 -5 9764.56 429.06 3
 7 7 5 9662.43 353.405 2
 -7 7 -5 10185.9 252.191 1
 -7 -7 -5 10376 328.987 3
 -7 7 -6 24260.1 709.599 3
 7 7 6 24463 591.918 2
 -7 7 -6 23976.8 385.917 1
 -7 -7 -6 24844.2 552.417 3
 -7 7 -7 21876.8 691.701 3
 7 7 7 20982 557.659 2
 -7 -7 -7 21028.4 536.159 3
 -7 7 -7 21619.4 340.005 1
 -7 7 -8 117344 1003.23 1
 -7 7 -8 124803 1837.67 3
 7 7 8 122335 1512.59 2
 -7 -7 -8 119630 1506.2 3
 -7 7 -9 1416.33 192.658 3
 -7 7 -9 1455.29 63.8204 1
 -7 -7 -9 1474 161.906 3
 -7 7 -10 23931.7 799.39 3
 -7 -7 -10 22738.4 648.769 3
 -7 7 -11 -36.0575 118.396 3
 -7 -7 -11 58.8174 71.2223 3
 -7 7 -12 26040.8 903.594 3
 -7 -7 -12 23926.6 725.909 3
 -7 7 -13 1814.08 259.15 3
 -7 -7 -13 2597.16 256.978 3
 -7 7 -14 56881.2 1451.27 3
 -7 -7 -14 55792.7 1234.77 3
 -7 7 -15 21817.9 1587.56 3
 -7 -7 -15 12092.3 590.68 3
 -7 7 -16 9171.41 615.826 3
 -7 -7 -16 9828.13 548.409 3
 -7 7 -17 737.01 205.373 3
 -7 -7 -17 512.981 137.301 3
 -7 7 -18 10966.9 691.179 3
 -7 -7 -18 10526.6 602.259 3
 -7 -7 -19 2749.42 323.44 3
 -7 7 -19 2932.5 377.059 3
 7 9 -22 1279.38 244.392 3
 7 -9 -21 13799.6 774.187 3
 7 9 -21 11789.6 673.36 3
 7 9 -20 25217.3 725.869 2
 7 9 -20 24946.2 948.578 3
 7 -9 -19 9599.45 578.543 3
 -7 -9 19 9050.1 508.937 4
 7 9 -19 8314.18 524.544 3
 7 9 -19 9056.58 420.948 2
 7 -9 -18 24817.6 896.029 3
 -7 9 18 22431.3 680.625 1
 7 9 -18 22762.2 665.424 2
 -7 -9 18 25375.1 822.481 4
 7 9 -18 24305.2 872.011 3
 -7 9 17 4725.99 303.646 1
 7 -9 -17 4709.89 382.772 3
 7 9 -17 4871.96 299.402 2
 -7 -9 17 5074.22 359.287 4
 7 9 -17 4930.06 383.985 3
 7 9 -16 619.511 105.219 2
 -7 9 16 357.906 92.7943 1
 -7 -9 16 323.914 107.749 4
 7 9 -16 311.776 108.358 3
 7 9 -15 23163.1 621.769 2
 7 9 -15 22386.3 744.98 3
 -7 -9 15 23884.4 718.749 4
 -7 9 15 23362.2 659.603 1
 7 9 -14 64497.9 1086.97 2
 -7 -9 14 66931.4 1215.88 4
 7 9 -14 67574.1 1283.05 3
 -7 9 14 67201.7 1156.38 1
 -7 9 13 682.67 111.867 1
 7 9 -13 776.447 111.952 2
 -7 -9 13 622.727 127.646 4
 7 9 -13 549.087 116.685 3
 7 9 -12 7023.11 319.222 2
 7 9 -12 6510.19 352.319 3
 -7 -9 12 7291.93 358.814 4
 -7 9 12 6996.43 341.048 1
 -7 9 11 2.17626 59.82 1
 7 9 -11 86.8628 56.7529 2
 -7 9 11 1.81876 66.2958 4
 -7 -9 11 -118.313 95.2002 4
 7 9 -11 12.9789 57.9714 3
 7 9 -10 1990.71 164.158 2
 -7 9 10 1406.37 134.031 4
 -7 -9 10 1957.37 174.564 4
 7 9 -10 1842.34 169.33 3
 -7 9 10 1899.11 175.81 1
 7 9 -9 46449.9 817.39 2
 -7 9 9 47484.9 759.559 4
 7 9 -9 48845.4 871.509 3
 -7 9 9 46238.5 861.501 1
 -7 9 8 90715.5 1068.33 4
 7 9 -8 91266.3 1198.21 2
 -7 9 8 90483.4 1247.1 1
 7 9 -8 91493.4 1173.5 3
 7 9 -7 29709.5 623.857 2
 -7 9 7 28994.9 510.129 4
 7 9 -7 28901.8 558.94 3
 -7 9 7 29826.1 648.319 1
 7 9 -6 9749.49 341.262 2
 -7 9 6 7759.03 145.634 2
 -7 9 6 9474.1 261.643 4
 -7 9 6 9607.19 352.488 1
 7 9 -6 9018.69 266.966 3
 -7 9 5 9152.47 183.012 2
 7 9 -5 9227.53 327.598 2
 7 9 -5 9760.99 254.007 3
 -7 9 5 9335.77 243.394 4
 -7 9 5 9472.65 343.241 1
 -7 -9 5 9280.38 213.391 3
 7 9 -4 1527.82 84.8107 3
 7 9 -4 1285.57 125.491 2
 -7 -9 4 1185.77 71.6191 3
 -7 9 4 1287.57 131.941 1
 7 9 -3 65639.9 932.826 2
 7 -9 -3 64715.6 695.389 5
 -7 9 3 65725.6 934.862 1
 7 -9 -2 75911.6 743.807 5
 7 9 -2 73003.9 1006.82 2
 -7 9 2 72658.8 981.968 1
 -7 -9 1 89771.7 847.398 3
 7 9 -1 92382.3 1153.72 2
 -7 9 1 92875.5 1107.96 1
 -7 9 0 3957.65 148.203 5
 7 9 0 3964.42 216.147 2
 -7 -9 0 4003.89 153.867 3
 -7 9 0 4010.09 198.552 1
 -7 -9 0 4221.78 220.998 5
 7 9 1 57831.6 897.991 2
 -7 -9 -1 57578.5 873.231 5
 -7 9 -1 56512.7 799.178 1
 -7 9 -1 58181 1042.92 3
 -7 9 -1 57617.8 676.993 5
 -7 -9 -2 91891.1 1185.19 5
 -7 9 -2 92725 951.337 5
 7 9 2 87438.1 1172.34 2
 -7 9 -2 92735.3 1409.31 3
 -7 9 -2 91192.5 1051.48 1
 -7 -9 -3 7252.84 241.68 3
 -7 -9 -3 7128.25 294.21 5
 -7 9 -3 7539.8 403.303 3
 7 9 3 7118.22 305.586 2
 -7 9 -3 6797.88 237.667 1
 -7 -9 -4 42309.5 675.269 3
 -7 -9 -4 40173.3 743.516 5
 -7 9 -4 40085 925.386 3
 -7 9 -4 41141 618.495 1
 -7 -9 -5 34488.3 637.998 3
 -7 -9 -5 32912.6 675.854 5
 -7 9 -5 34396.2 864.49 3
 7 9 5 32527.2 701.467 2
 -7 9 -5 33467.2 528.247 1
 -7 -9 -6 3034.09 202.996 3
 -7 9 -6 3798.34 161.952 1
 -7 9 -6 3965.34 301.671 3
 -7 -9 -7 53565.4 917.601 3
 -7 9 -7 52662.5 652.297 1
 7 9 7 52979.9 879.291 1
 -7 9 -7 54372.7 1168.08 3
 7 9 7 52650.4 949.141 2
 -7 9 -8 82071.7 822.329 1
 -7 9 -8 84408.2 1527.95 3
 7 9 8 81459.7 1236.92 2
 7 9 8 79731.9 1127.41 1
 -7 -9 -8 82776.3 1230.55 3
 7 9 9 41565.5 779.253 1
 -7 9 -9 43202.7 1100.83 3
 7 9 9 41468.8 853.851 2
 -7 -9 -9 42571.3 884.564 3
 -7 -9 -10 5504.82 321.996 3
 -7 9 -10 5533.87 403.681 3
 -7 9 -11 2112.97 273.133 3
 -7 -9 -11 2106.22 213.091 3
 -7 -9 -12 73.096 79.3732 3
 -7 9 -12 208.514 122.854 3
 -7 9 -13 21301.6 877.911 3
 -7 -9 -13 21353.6 722.441 3
 -7 9 -14 87850.2 1878.97 3
 -7 -9 -14 86727.4 1580.44 3
 -7 9 -15 21348.4 952.677 3
 -7 -9 -15 22658.5 797.902 3
 -7 9 -16 3528.3 394.728 3
 -7 -9 -16 3658.76 333.489 3
 -7 9 -17 465.289 184.587 3
 -7 -9 -17 485.906 148.52 3
 -7 9 -18 8271.01 617.152 3
 -7 -9 -18 8233.42 548.944 3
 -7 9 -19 11708.3 751.422 3
 -7 -9 -19 12420.2 685.616 3
 7 11 -21 4217.68 316.167 2
 7 -11 -20 3119.4 357.682 3
 7 11 -20 3064.55 262.844 2
 7 11 -19 39222.6 942.042 2
 7 11 -19 41640.2 1204.72 3
 -7 11 18 137.235 82.7855 1
 7 11 -18 317.763 97.154 2
 -7 -11 18 76.867 123.898 4
 7 11 -18 80.4293 103.847 3
 7 11 -17 153.974 73.4027 2
 -7 -11 17 74.7529 83.0655 4
 -7 11 17 169.656 60.9885 1
 7 11 -17 144.403 101.839 3
 7 11 -16 494.422 91.3525 2
 -7 11 16 479.279 118.267 1
 -7 -11 16 415.644 115.666 4
 7 11 -16 712.218 157.565 3
 -7 11 15 14808.8 546.255 1
 7 11 -15 15155.7 533.031 2
 -7 -11 15 15391.8 581.613 4
 7 11 -15 14853.5 619.082 3
 -7 11 14 40221.3 905.215 1
 7 11 -14 38514.3 857.861 2
 -7 -11 14 39197.6 916.015 4
 7 11 -13 45503 923.061 2
 7 11 -13 46790.4 1061.25 3
 -7 11 13 47088.2 965.463 1
 -7 -11 13 45828.8 963.469 4
 -7 -11 12 2062.28 201.189 4
 7 11 -12 2127.96 187.631 2
 7 11 -12 1802.96 202.576 3
 -7 11 12 1953.71 189.247 1
 -7 -11 11 3198.59 235.492 4
 7 11 -11 3260.48 226.949 2
 7 11 -11 3023.45 243.142 3
 -7 11 11 3160.08 238.136 1
 7 11 -10 1970.71 176.469 2
 -7 -11 10 1643.99 165.71 4
 7 11 -10 1827.53 175.089 3
 -7 11 10 1797.13 179.986 1
 7 11 -9 82259.1 1207.28 2
 7 11 -9 86591.4 1228.89 3
 -7 11 9 82108.3 1258.43 1
 7 11 -8 58866.1 986.435 2
 -7 11 8 59192.4 799.214 4
 7 11 -8 58649.7 921.95 3
 -7 11 8 57671.3 1005.92 1
 7 11 -7 39489.3 787.338 2
 -7 11 7 37336.6 424.168 2
 -7 11 7 40498 806.059 1
 -7 11 7 39506.2 590.309 4
 7 11 -6 5982.14 291.223 2
 -7 11 6 5590.99 156.045 2
 -7 11 6 5600.96 189.85 4
 7 11 -6 5882 234.321 3
 -7 11 6 5684.37 287.191 1
 -7 11 5 3749.59 137.283 2
 -7 11 5 3552.71 226.858 1
 -7 11 5 3302.44 132.28 4
 7 11 -5 3699.51 165.049 3
 7 11 -5 4113.28 235.35 2
 -7 11 4 371.341 87.174 1
 -7 11 4 278.727 46.632 2
 7 11 -4 367.109 79.2273 2
 7 -11 -4 391.894 45.8798 5
 7 11 -3 93713.7 1226.1 2
 7 -11 -3 87924.4 805.753 5
 -7 11 3 90386.8 784.524 4
 -7 11 3 92284.4 1196.98 1
 -7 -11 2 26716.1 441.254 3
 7 11 -2 25721.9 598.015 2
 -7 11 2 25715.9 576.625 1
 -7 11 1 39311.2 890.16 3
 7 11 -1 37580.4 739.151 2
 -7 11 1 39635.8 713.542 1
 -7 -11 0 6306.58 275.327 5
 -7 11 0 6384.21 350.273 3
 7 11 0 6325.45 292.123 2
 -7 11 0 6402.95 268.782 1
 -7 11 -1 1277.79 81.9318 5
 -7 -11 -1 1227.18 128.257 5
 7 11 1 1671.36 153.37 2
 -7 11 -1 1237.33 166.101 3
 -7 11 -1 1272.13 119.975 1
 -7 11 -2 36928.6 510.501 5
 7 11 2 36887 743.797 2
 -7 11 -2 36963.1 888.636 3
 -7 11 -2 35920.3 639.303 1
 -7 -11 -2 37226.3 712.852 5
 -7 11 -3 102004 1173.46 1
 -7 11 -3 106076 1637.09 3
 -7 11 -3 105468 1043.96 5
 7 11 3 102902 1356.45 2
 7 11 3 105281 1355.23 1
 -7 11 -4 21858.7 462.265 1
 7 11 4 21125.7 556.673 1
 -7 -11 -4 22816.1 560.642 5
 7 11 4 22377.6 587.963 2
 -7 11 -4 23509.8 744.358 3
 -7 -11 -5 3339.33 200.355 3
 7 11 5 2882.47 204.19 1
 -7 11 -5 3192.82 169.408 1
 -7 11 -5 3067.89 284 3
 -7 -11 -5 3131.62 209.735 5
 7 11 5 2782.43 210.831 2
 -7 -11 -6 6113.36 286.414 3
 -7 11 -6 5875.34 220.11 1
 -7 11 -6 5432.74 371.789 3
 7 11 6 5776.9 308.244 2
 -7 -11 -6 5825.54 289.225 5
 7 11 6 5776.13 288.325 1
 -7 -11 -7 34956.3 729.707 3
 -7 11 -7 32390.5 532.817 1
 -7 11 -7 33416 945.136 3
 7 11 7 32688.3 704.588 1
 7 11 7 31945.8 746.125 2
 -7 -11 -8 26127.5 671.453 3
 7 11 8 24092.2 658.747 2
 7 11 8 23440.9 597.869 1
 -7 11 -8 24961.4 832.931 3
 -7 11 -8 24885.8 434.682 1
 -7 -11 -9 88893.4 1373.13 3
 -7 11 -9 89136.9 1681.38 3
 7 11 9 83400 1322.95 2
 7 11 9 85540.7 1235.79 1
 -7 11 -10 1885.56 251.436 3
 7 11 10 1667.31 185.288 2
 7 11 10 1910.79 182.235 1
 -7 -11 -10 1757.36 190.072 3
 -7 -11 -11 50.3386 68.9643 3
 7 11 11 -4.40706 53.899 1
 -7 11 -11 83.6684 101.31 3
 -7 11 -12 17311.4 775.722 3
 -7 -11 -12 17873.8 645.321 3
 -7 11 -13 38253.1 1190.96 3
 -7 -11 -13 35063.6 956.716 3
 -7 11 -14 48571.2 1388.62 3
 -7 -11 -14 43224.7 1103.88 3
 -7 11 -15 39425.4 1269.91 3
 -7 -11 -15 38426.8 1071.17 3
 -7 11 -16 1948.42 311.22 3
 -7 -11 -16 1836.32 244.841 3
 -7 11 -17 3602.7 416.004 3
 -7 -11 -17 3604.96 352.796 3
 -7 11 -18 1729.13 309.753 3
 -7 -11 -18 1620.2 245.566 3
 7 13 -21 5425.25 371.892 2
 7 13 -20 2093.48 225.406 2
 7 -13 -19 80227.9 1813.35 3
 7 13 -19 69039.2 1347.71 2
 7 13 -18 311.204 87.2162 2
 -7 -13 18 305.94 114.011 4
 -7 13 18 245.373 91.2906 1
 7 13 -17 2.76682 79.3348 2
 -7 13 17 179.987 79.9981 1
 -7 -13 17 -49.8591 99.23 4
 -7 13 16 -72.4229 80.5144 1
 7 13 -16 25.1117 73.4798 2
 -7 -13 16 -94.1611 98.0778 4
 7 13 -15 14967.8 558.469 2
 -7 13 15 13627.6 537.94 1
 -7 -13 15 15678.6 594.528 4
 7 13 -15 16025.1 667.472 3
 7 13 -14 5636.93 333.437 2
 -7 -13 14 6336.4 364.357 4
 7 13 -14 5822.89 387.546 3
 -7 13 13 86911.2 1437.22 1
 7 13 -13 87572 1397.76 2
 -7 -13 13 88859 1404.66 4
 -7 13 12 2772.96 242.506 1
 7 13 -12 2765.66 230.782 2
 -7 -13 12 3028.72 242.395 4
 7 13 -12 3116.3 263.544 3
 7 13 -11 119.859 69.1296 2
 -7 -13 11 215.211 95.9957 4
 7 13 -11 312.433 94.1852 3
 -7 13 11 138.755 66.3101 1
 7 13 -10 432.173 94.424 2
 -7 13 10 696.735 126.256 1
 -7 -13 10 479.025 95.8048 4
 7 13 -10 696.365 135.149 3
 -7 13 9 70793 1194.42 1
 7 13 -9 69951.1 1175.88 2
 -7 -13 9 69356.7 1086.89 4
 7 13 -9 73381.2 1143.53 3
 -7 13 8 4275.22 273.892 1
 7 13 -8 4180.34 271.306 2
 7 13 -8 4226.51 247.143 3
 7 13 -7 30698.9 634.129 3
 7 13 -7 29598.9 712.235 2
 -7 13 7 29319.5 713.211 1
 7 13 -6 14532.6 391.457 3
 7 13 -6 14809.4 491.657 2
 -7 13 6 13900.5 299.977 2
 -7 13 6 14605.2 484.514 1
 -7 13 5 432.64 98.0605 1
 -7 13 5 485.008 60.4439 2
 7 13 -5 574.539 115.965 2
 7 13 -5 490.877 75.2552 3
 -7 13 4 5751.93 209.234 2
 7 13 -4 5724.32 298.972 2
 -7 13 4 5885.27 297.713 1
 -7 13 3 115403 1460.75 1
 -7 13 3 116479 1225.6 2
 7 13 -3 116145 1503.14 2
 -7 13 2 125.907 65.5503 1
 7 13 -2 325.263 85.0282 2
 -7 13 1 9508.3 356.075 1
 7 13 -1 9611.64 384.9 2
 -7 13 1 10448.7 485.129 3
 7 13 0 1218.27 146.383 2
 -7 13 0 1088.13 123.971 1
 -7 13 0 1075.01 172.262 3
 -7 13 -1 660.63 125.267 3
 -7 -13 -1 986.739 117.21 5
 -7 13 -1 788.802 104.273 1
 7 13 1 871.679 121.549 2
 -7 13 -2 1140.53 116.363 1
 -7 -13 -2 981.606 124.076 5
 7 13 2 840.824 127.731 2
 -7 13 -2 798.003 64.6118 5
 -7 13 -2 677.819 137.012 3
 7 13 2 872.711 118.685 1
 -7 13 -3 148361 1582.43 1
 7 13 3 155428 1789.3 1
 7 13 3 147459 1782.63 2
 -7 13 -3 150345 1318.88 5
 -7 13 -3 148857 2077.18 3
 -7 -13 -3 148153 1693.75 5
 7 13 4 574.107 114.574 1
 7 13 4 529.219 109.695 2
 -7 13 -4 575.636 76.9718 1
 -7 13 -4 605.338 169.079 3
 -7 -13 -4 528.68 97.5499 5
 -7 13 -5 9028.98 307.581 1
 7 13 5 8419.58 369.475 1
 -7 -13 -5 8673.19 358.879 5
 -7 13 -5 8993.3 486.408 3
 7 13 5 8536.42 384.478 2
 -7 -13 -6 1107.22 135.551 3
 7 13 6 1146.07 157.046 2
 7 13 6 1121.9 147.784 1
 -7 13 -6 1199.61 110.869 1
 -7 -13 -6 1147.08 138.756 5
 -7 13 -6 1525.19 231.004 3
 -7 -13 -7 16666.5 516.452 3
 7 13 7 15346.2 534.359 2
 7 13 7 16012.5 513.916 1
 -7 13 -7 16566.6 702.348 3
 -7 13 -7 16189.7 394.987 1
 -7 -13 -7 16191.2 509.984 5
 -7 -13 -8 1752.77 179.635 3
 -7 13 -8 1339.1 209.509 3
 7 13 8 1236.88 153.119 1
 7 13 8 1188.33 152.966 2
 -7 -13 -8 1277.05 151.089 5
 -7 -13 -9 84442.1 1345.68 3
 7 13 9 79861 1258.74 1
 -7 13 -9 84283.3 1695.36 3
 7 13 9 81847.9 1348.8 2
 -7 -13 -10 2608.38 244.753 3
 7 13 10 2737.03 236.997 2
 7 13 10 3060.88 233.05 1
 -7 13 -10 2825.75 314.304 3
 -7 13 -11 32.1025 108.354 3
 7 13 11 23.3012 74.9298 2
 7 13 11 127.717 56.7106 1
 -7 13 -12 2119.23 293.451 3
 7 13 12 2044.34 196.591 1
 -7 -13 -12 2204.42 236.982 3
 -7 13 -13 29878.6 1082.9 3
 -7 -13 -13 30202.9 900.74 3
 -7 -13 -14 507.505 124.455 3
 -7 13 -14 372.924 135.023 3
 -7 13 -15 22406.4 988.479 3
 -7 -13 -15 21138.3 800.904 3
 -7 13 -16 2187.46 334.118 3
 -7 -13 -16 2074.77 267.513 3
 -7 13 -17 3335.64 411.196 3
 -7 -13 -17 3461.48 352.403 3
 -7 -13 -18 -162.874 162.726 3
 7 15 -20 9547.71 507.43 2
 7 15 -19 41775.1 1066.79 2
 7 15 -18 1235.09 175.414 2
 -7 15 18 1157.74 192.898 1
 -7 -15 18 1588.23 221.113 4
 7 15 -17 77.6365 75.1252 2
 -7 -15 17 16.2014 82.5128 4
 -7 15 17 -30.6406 71.8402 1
 7 15 -16 740.677 143.911 2
 -7 15 16 738.726 146.725 1
 -7 -15 16 833.728 153.862 4
 7 15 -15 6978.87 402.064 2
 -7 -15 15 7550.17 416.576 4
 -7 15 15 6950.15 414 1
 7 15 -14 15747.5 590.405 2
 -7 15 14 14658.1 591.835 1
 -7 -15 14 16647.4 594.207 4
 7 15 -13 72580.1 1315.22 2
 -7 15 13 71616 1331.14 1
 -7 -15 13 74141.3 1274.2 4
 7 15 -12 608.024 116.185 2
 -7 15 12 754.891 139.689 1
 -7 -15 12 446.915 104.051 4
 -7 15 11 1701.21 194.888 1
 7 15 -11 1524.33 183.832 2
 -7 -15 11 1603.46 179.267 4
 -7 15 10 1624.09 184.439 1
 7 15 -10 1944.11 205.806 2
 -7 -15 10 1853.96 179.949 4
 -7 -15 9 52698 944.511 4
 7 15 -9 53342.5 1070.34 2
 7 15 -9 55026 1016.71 3
 7 15 -8 36643.1 856.579 2
 7 15 -8 39448 792.963 3
 7 15 -7 63816.4 1146.6 2
 7 15 -7 64141.3 982.437 3
 -7 15 6 601.616 114.387 1
 7 15 -6 792.789 132.343 2
 -7 15 5 429.245 104.814 1
 7 15 -5 599.654 116.15 2
 -7 15 5 483.074 70.6014 2
 -7 15 4 1213.09 149.58 1
 -7 15 4 817.428 95.8434 2
 7 15 -4 994.97 142.304 2
 -7 15 3 142518 1472.96 2
 7 15 -3 140344 1775.36 2
 -7 15 2 48414 785.002 2
 -7 15 2 48058.9 887.538 1
 7 15 -2 48739.6 954.728 2
 -7 15 1 1461.22 153.941 1
 7 15 -1 1448.31 165.861 2
 7 15 0 303.397 96.0376 2
 -7 15 0 301.072 76.2586 1
 -7 15 0 317.264 106.378 3
 -7 15 -1 8309.84 463.075 3
 7 15 1 8597.27 386.995 2
 7 15 1 8261.16 392.568 1
 -7 15 -1 8822.49 354.317 1
 -7 15 -2 3874.58 232.008 1
 7 15 2 4052.71 270.191 1
 7 15 2 3754.22 261.594 2
 -7 -15 -2 3782.5 226.166 5
 -7 15 -2 3511.42 301.77 3
 -7 -15 -3 104440 1363.3 5
 7 15 3 101584 1474.65 2
 -7 15 -3 102958 1314.19 1
 -7 15 -3 102430 1742 3
 7 15 3 100555 1455.36 1
 -7 15 -4 5541.37 265.325 1
 7 15 4 5290.97 314.347 2
 -7 -15 -4 5557.85 288 5
 -7 15 -4 5170.03 381.502 3
 7 15 4 4879.94 296.159 1
 -7 -15 -5 676.208 108.511 5
 -7 15 -5 954.17 115.277 1
 -7 15 -5 1125.43 222.289 3
 7 15 5 848.579 142.83 2
 7 15 5 858.687 132.788 1
 -7 -15 -6 3023.37 219.789 5
 7 15 6 2291.06 210.519 1
 -7 15 -6 2518.71 298.392 3
 7 15 6 2259.01 216.271 2
 -7 15 -6 2582.75 174.741 1
 7 15 7 20686.7 620.77 1
 7 15 7 19484.5 623.565 2
 -7 -15 -7 19224.6 576.251 5
 -7 15 -7 20054.9 814.413 3
 -7 15 -7 20588.5 482.192 1
 -7 -15 -8 26275.6 710.373 3
 7 15 8 25154.5 698.143 1
 -7 -15 -8 24842.4 667.936 5
 -7 15 -8 25002.7 934.069 3
 7 15 8 24358 713.208 2
 -7 -15 -9 63219.4 1184.82 3
 7 15 9 60692.5 1130.8 1
 7 15 9 61479.1 1179.34 2
 -7 15 -9 62928.1 1533.72 3
 -7 -15 -9 59679.6 1105.36 5
 -7 -15 -10 4457.56 313.622 3
 7 15 10 3926.42 283.388 1
 -7 15 -10 4303.52 405.692 3
 7 15 10 3732.81 288.189 2
 -7 -15 -11 1169.37 177.284 3
 -7 15 -11 949.424 218.623 3
 7 15 11 900.917 148.615 1
 7 15 11 1095.23 163.182 2
 -7 -15 -12 28.4821 107.569 3
 -7 15 -12 -87.5199 157.268 3
 7 15 12 68.6185 66.1815 1
 -7 15 -13 22524.5 961.006 3
 -7 -15 -13 23038.4 803.646 3
 -7 15 -14 18907.3 899.135 3
 -7 -15 -14 18174.9 737.275 3
 -7 15 -15 12175 746.887 3
 -7 -15 -15 11901.3 613.883 3
 -7 -15 -16 1737.68 243.473 3
 -7 15 -16 1737.57 304.133 3
 -7 -15 -17 318.077 157.896 3
 7 17 -18 9822.77 521.079 2
 -7 17 18 8093.37 482.873 1
 7 17 -17 311.844 99.653 2
 -7 -17 17 214.6 93.6364 4
 -7 17 17 367.373 132.464 1
 7 17 -16 845.806 162.033 2
 -7 -17 16 692.526 145.669 4
 -7 17 16 905.938 168.321 1
 7 17 -15 3551.52 303.308 2
 -7 -17 15 3655.31 293.947 4
 -7 17 15 2774.49 274.518 1
 -7 17 14 79375.9 1496.48 1
 7 17 -14 78464.6 1465.07 2
 -7 -17 14 81654.4 1397.41 4
 7 17 -13 22083.9 733.451 2
 -7 -17 13 23388.3 689.132 4
 -7 17 13 21739.2 743.206 1
 -7 17 12 864.941 151.94 1
 -7 -17 12 1102.5 156.663 4
 7 17 -12 1022.04 166.772 2
 -7 17 11 113.208 85.678 1
 -7 -17 11 93.8179 74.9963 4
 7 17 -11 132.745 90.4691 2
 7 17 -10 5510.71 355.959 2
 -7 -17 10 6473.77 329.525 4
 -7 17 10 5532.93 360.315 1
 7 17 -9 12293.7 523.88 2
 -7 -17 9 13962.7 467.647 4
 -7 17 9 12279.4 530.32 1
 7 17 -8 105512 1621.84 2
 -7 17 8 102791 1597.08 1
 -7 -17 8 105420 1382.32 4
 7 17 -7 9916.2 462.007 2
 -7 17 7 9902.38 454.417 1
 7 17 -6 56.6752 87.2121 2
 -7 17 6 16.933 65.0689 1
 7 17 -5 1138.26 161.353 2
 -7 17 5 1065.48 156.856 1
 7 17 -4 22710.1 681.112 2
 -7 17 4 21254.6 504.587 2
 -7 17 4 22908.9 663.171 1
 -7 17 3 64329.1 964.063 2
 -7 17 3 64269.7 1141.9 1
 7 17 -3 65959.3 1193.97 2
 -7 17 2 99550.2 1286.09 2
 -7 17 2 98664.5 1438.75 1
 7 17 -2 100944 1528.07 2
 -7 17 1 194.696 66.4301 2
 -7 17 1 324.412 92.5504 1
 7 17 -1 287.512 94.4161 2
 7 17 0 62.9172 87.6292 1
 -7 17 0 170.14 74.6476 1
 7 17 1 14978.5 553.182 1
 7 17 1 16203.8 564.354 2
 -7 17 -1 16739.5 522.975 1
 -7 17 -1 16604.6 698.749 3
 7 17 2 61566.4 1140.45 1
 -7 17 -2 60588.7 1027.26 1
 -7 17 -2 62694.9 1381.16 3
 7 17 2 60404.9 1138.67 2
 -7 17 -3 30689.6 959.923 3
 7 17 3 29937.1 784.753 2
 -7 17 -3 29556.3 680.614 1
 7 17 3 30530.4 787.969 1
 -7 -17 -3 29526.3 668.914 5
 -7 17 -4 14463.2 663.894 3
 -7 -17 -4 14784.3 481.024 5
 -7 17 -4 14091.6 453.215 1
 7 17 4 13908.7 531.551 2
 7 17 4 14265.3 531.48 1
 -7 17 -5 1022.02 126.45 1
 -7 17 -5 789.165 180.496 3
 -7 -17 -5 1059.5 140.48 5
 7 17 5 880.434 158.417 2
 7 17 5 1033.71 156.82 1
 -7 -17 -6 4063.65 263.825 5
 -7 17 -6 4296.34 389.141 3
 7 17 6 3942.65 295.065 2
 -7 17 -6 4287.35 239.118 1
 7 17 6 3518.2 269.904 1
 7 17 7 7057.47 386.695 1
 -7 -17 -7 7124.62 357.744 5
 -7 17 -7 6669.69 489.85 3
 7 17 7 6615.26 382.325 2
 7 17 8 66533.7 1246.56 1
 -7 -17 -8 66885 1177.13 5
 -7 17 -8 67962.4 1619.29 3
 7 17 8 66981.6 1280.37 2
 -7 -17 -9 16653.6 603.921 3
 -7 -17 -9 15703.2 552.217 5
 -7 17 -9 15360.6 784.192 3
 7 17 9 14552.8 573.62 2
 7 17 9 14715.8 566.683 1
 -7 -17 -10 1670.37 204.417 3
 -7 -17 -10 1458.29 173.703 5
 7 17 10 1565.52 202.526 1
 7 17 10 1278.29 183.672 2
 -7 17 -10 1416.77 265.907 3
 -7 -17 -11 385.694 131.409 3
 -7 -17 -11 173.026 84.2714 5
 -7 17 -11 94.3457 133.644 3
 7 17 11 276.96 101.606 1
 7 17 11 417.691 129.077 2
 7 17 12 52.8986 71.1695 2
 -7 -17 -12 47.1768 81.6478 3
 -7 -17 -12 -4.55376 66.9375 5
 -7 17 -12 -131.575 171.764 3
 7 17 12 124.823 92.6288 1
 -7 17 -13 5074.72 493.85 3
 7 17 13 4795.02 344.01 1
 -7 17 -14 50527.4 1544.77 3
 -7 -17 -14 50040.9 1277.39 3
 -7 -17 -15 1523.03 227.816 3
 -7 17 -15 1018.31 242.355 3
 -7 -17 -16 468.685 154.444 3
 -7 19 17 3302.32 316.707 1
 7 19 -16 785.984 155.364 2
 -7 19 16 547.002 147.7 1
 7 19 -15 2227.82 256.655 2
 -7 19 15 2354.34 267.759 1
 7 19 -14 88658.9 1627.42 2
 -7 19 14 81747.2 1598.93 1
 7 19 -13 280.921 113.375 2
 -7 19 13 196.999 108.711 1
 7 19 -12 6910.5 429.281 2
 -7 19 12 6792.07 429.263 1
 7 19 -11 16.0711 91.4581 2
 -7 19 11 67.3087 82.9145 1
 7 19 -10 10683 520.369 2
 -7 19 10 10349.6 508.582 1
 -7 19 9 161.783 97.6349 1
 7 19 -9 116.09 91.4374 2
 -7 19 8 77792.7 1421.3 1
 7 19 -8 79016 1456.29 2
 7 19 -7 566.512 130.225 2
 -7 19 7 524.26 124.551 1
 -7 19 6 6304.12 378.008 1
 7 19 -6 6203.76 381.37 2
 7 19 -5 4087.29 308.433 2
 -7 19 5 4404.18 313.91 1
 7 19 -4 8888.18 449.816 2
 -7 19 4 8155.61 417.251 1
 -7 19 3 889.931 123.079 2
 7 19 -3 1059.07 164.954 2
 -7 19 3 875.814 144.938 1
 -7 19 2 87837.7 1406.98 1
 -7 19 2 85527.1 1251.5 2
 7 19 -2 90456.4 1503.03 2
 -7 19 1 265.345 85.1991 2
 7 19 -1 143.289 87.73 2
 -7 19 1 212.784 74.3288 1
 -7 19 0 238.915 75.6015 2
 7 19 0 251.712 94.6686 1
 7 19 0 160.042 80.3079 2
 -7 19 0 296.227 94.4496 1
 -7 19 -1 7103.41 354.018 2
 7 19 1 7248.32 404.411 1
 7 19 1 7230.56 400.832 2
 -7 19 -1 7722.79 370.869 1
 7 19 2 45319.9 1018 1
 -7 19 -2 44784.6 1234.87 3
 -7 19 -2 44471.6 907.67 1
 7 19 2 43542.5 1000.16 2
 -7 19 -3 -27.7939 69.7976 1
 7 19 3 34.0358 73.5474 1
 -7 19 -3 -36.4046 128.771 3
 7 19 3 53.0598 78.7461 2
 7 19 4 20655.3 685.986 2
 -7 19 -4 21500.3 853.346 3
 7 19 4 22023.6 708.631 1
 -7 19 -4 21878.4 609.088 1
 -7 19 -5 800.268 177.852 3
 7 19 5 855.029 157.909 2
 7 19 5 1099.53 179.539 1
 -7 19 -5 1143.17 143.962 1
 7 19 6 265.65 99.5982 1
 -7 19 -6 646.726 104.493 1
 -7 19 -6 605.589 155.701 3
 7 19 6 401.091 106.48 2
 7 19 7 2783.1 264.557 1
 -7 19 -7 2500.26 324.631 3
 7 19 7 2822.18 268.096 2
 7 19 8 71200.8 1363.78 1
 -7 19 -8 72888.5 1723.48 3
 7 19 8 70735.4 1354.35 2
 -7 -19 -9 202.04 100.602 3
 -7 19 -9 -63.5681 143.911 3
 7 19 9 -38.7019 95.0456 1
 7 19 9 -94.4135 107.627 2
 -7 -19 -10 8046.74 448.772 3
 7 19 10 6435.23 401.183 1
 -7 19 -10 6748.42 547.388 3
 7 19 10 6837.19 414.506 2
 7 19 11 52.95 79.6428 2
 -7 -19 -11 87.7501 89.9271 3
 -7 19 -11 -51.4628 160.685 3
 7 19 11 39.2727 82.1488 1
 -7 -19 -12 10196 541.996 3
 7 19 12 8142.64 466.168 1
 -7 19 -12 9233.34 665.102 3
 -7 -19 -13 285.476 114.249 3
 7 19 13 118.428 94.4228 1
 -7 19 -13 262.972 164.83 3
 -7 -19 -14 56286.3 1397.3 3
 -7 21 14 32201.8 1001.25 1
 7 21 -13 11425.9 582.14 2
 -7 21 13 10825 569.477 1
 7 21 -12 11585.5 579.502 2
 -7 21 12 11105.5 567.912 1
 7 21 -11 220.814 97.7493 2
 -7 21 11 295.568 114.714 1
 7 21 -10 9972.74 532.468 2
 -7 21 10 9240.75 504.519 1
 -7 21 9 5149.36 374.35 1
 7 21 -9 5042.67 377.266 2
 7 21 -8 27438 867.291 2
 -7 21 8 25826.3 827.579 1
 7 21 -7 3068.88 288.763 2
 -7 21 7 2770.88 269.379 1
 -7 21 6 7099 415.839 1
 7 21 -6 7051.07 430.116 2
 7 21 -5 626.092 152.652 2
 -7 21 5 585.12 132.174 1
 -7 21 4 15819.9 605.992 1
 7 21 -4 16124 643.071 2
 -7 21 3 45941 1041.27 1
 7 21 -3 46177.6 1101.11 2
 7 21 -2 38213.2 994.988 2
 -7 21 2 37642 922.365 1
 -7 21 1 2063.14 200.996 2
 7 21 -1 1843.45 223.476 2
 -7 21 1 2190.31 216.622 1
 -7 21 0 993.996 159.595 1
 -7 21 0 903.364 137.453 2
 7 21 0 1006.8 173.781 2
 -7 21 -1 1407.21 172.162 1
 -7 21 -1 1277.99 169.343 2
 7 21 1 1134.54 185.707 2
 7 21 1 1123.88 191.595 1
 -7 21 -2 32005.3 830.508 2
 7 21 2 32800.8 913.755 2
 -7 21 -2 33231.5 823.364 1
 7 21 2 33664.5 917.702 1
 7 21 3 32167.1 908.089 1
 -7 21 -3 30960.5 833.003 2
 7 21 3 30973.9 892.397 2
 -7 21 -3 31653.8 1091.31 3
 -7 21 -3 31073.5 780.756 1
 7 21 4 16903.9 650.914 2
 7 21 4 17797.4 675.993 1
 -7 21 -4 17882.1 583.081 1
 7 21 5 1535.36 214.292 1
 -7 21 -5 1479.45 164.912 1
 -7 21 -5 1163.15 229.082 3
 7 21 5 1449.86 200.06 2
 7 21 6 1764.71 223.534 1
 7 21 6 1402.07 196.684 2
 -7 21 -6 1496.83 259.821 3
 -7 21 -7 303.976 137.223 3
 7 21 7 212.716 96.0762 2
 7 21 7 457.956 130.371 1
 7 21 8 25588.5 833.332 1
 7 21 8 23056.7 784.68 2
 -7 21 -8 25580.5 1032.88 3
 7 21 9 14047.8 616.846 1
 -7 21 -9 12002 722.644 3
 7 21 9 12720.6 588.583 2
 -7 21 -10 10719.6 704.134 3
 7 21 10 10101.8 535.17 1
 -7 21 -11 253.674 204.054 3
 7 21 11 134.724 86.572 1
 -7 21 -12 2811.97 405.317 3
 7 21 12 2616.03 286.542 1
 7 21 13 9165.67 525.614 1
 7 23 -10 12078.2 612.64 2
 -7 23 10 11423.4 584.639 1
 -7 23 9 15990.7 683.515 1
 7 23 -9 16085.2 705.095 2
 7 23 -8 6865.39 456.149 2
 -7 23 8 6460.94 431.915 1
 -7 23 7 6606.64 428.964 1
 7 23 -7 6918.06 453.776 2
 7 23 -6 4458.88 366.185 2
 -7 23 6 3599.52 313.851 1
 -7 23 5 869.281 159.893 1
 7 23 -5 888.891 168.044 2
 7 23 -4 7298.32 453.004 2
 -7 23 4 7499.02 442.646 1
 7 23 -3 24091.9 831.661 2
 -7 23 3 24422.9 780.407 1
 7 23 -2 8498.33 490.573 2
 -7 23 2 8375.39 452.315 1
 7 23 -1 620.056 153.221 2
 -7 23 1 676.26 139.243 1
 -7 23 0 414.943 108.221 1
 7 23 0 597.859 150.045 2
 -7 23 -1 548.69 126.725 2
 7 23 1 504.518 133.025 2
 -7 23 -1 799.04 138.962 1
 -7 23 -2 5535.78 360.474 2
 7 23 2 6159.39 420.707 2
 7 23 2 6039.61 426.327 1
 -7 23 -2 6756.82 388.461 1
 7 23 3 36960.4 1034.8 1
 -7 23 -3 36420.6 903.537 1
 -7 23 -3 35694.3 949.099 2
 7 23 3 35785.9 1010.57 2
 -7 23 -4 6759.16 412.629 2
 7 23 4 7991.7 475.351 1
 -7 23 -4 8077.23 408.257 1
 7 23 4 6910.79 438.194 2
 -7 23 -4 7108.22 548.033 3
 -7 23 -5 2088.94 243.161 2
 -7 23 -5 2083.15 306.116 3
 7 23 5 2072.4 250.589 2
 7 23 5 2287.78 265.443 1
 -7 23 -6 822.242 147.23 2
 -7 23 -6 871.918 219.124 3
 7 23 6 727.435 169.997 2
 7 23 6 729.487 161.328 1
 -7 23 -7 5758.96 511.427 3
 7 23 7 4728.31 372.882 2
 7 23 7 5643.93 414.818 1
 -7 23 -8 8096.13 609.338 3
 7 23 8 7005.19 463.709 1
 -7 23 -9 30814.7 1186.62 3
 7 23 9 28680.1 945.139 1
 7 25 -6 5544.7 435.671 2
 -7 25 6 5726.84 417.215 1
 7 25 -5 7879.18 498.822 2
 -7 25 5 8572.46 497.577 1
 -7 25 4 3267.14 304.613 1
 7 25 -4 3189.31 321.503 2
 7 25 -3 14052.8 666.688 2
 -7 25 3 13947.4 614.953 1
 7 25 -2 -117.119 104.701 2
 -7 25 2 -74.7838 105.688 1
 7 25 -1 9043.49 529.74 2
 -7 25 1 9823.98 508.326 1
 7 25 0 672.174 177.237 2
 -7 25 0 640.915 147.223 1
 -7 25 -1 4885.65 351.217 1
 7 25 1 4525.52 373.623 2
 7 25 2 330.62 104.667 2
 -7 25 -2 543.054 133.393 1
 -7 25 -3 32110.8 941.777 2
 7 25 3 32407 1014.68 2
 -7 25 -3 34322.9 922.283 1
 7 25 3 32964.1 1030.02 1
 -7 25 -4 3125.2 301.966 2
 7 25 4 3139.7 318.385 2
 -7 25 -5 17321.2 717.201 2
 7 25 5 17861.4 743.448 2
 -7 25 -6 1017.69 185.932 2
 7 25 6 1165.74 206.487 2
 -7 25 -6 1194.79 270.832 3
 -7 27 -1 19977.9 750.583 1
 -7 27 -2 1800.54 230.201 1
 8 0 -23 44.0527 110.098 3
 8 0 -22 47590 1343.47 3
 8 0 -21 -107.096 134.704 3
 8 0 -20 869.55 178.563 3
 8 0 -19 -32.5283 97.6735 3
 -8 0 18 15980.2 646.051 4
 8 0 -18 15688.6 655.383 3
 8 0 -17 -27.8717 103.211 3
 -8 0 17 -37.8058 100.996 4
 -8 0 16 51422.8 925.084 1
 -8 0 16 53188.6 1123.33 4
 8 0 -16 51278.1 1135.38 3
 8 0 -15 12.4838 79.9536 3
 8 0 -15 71.2873 41.0518 2
 -8 0 15 144.533 63.0782 1
 8 0 -14 948.699 151.336 3
 8 0 -14 871.545 88.034 2
 -8 0 14 903.086 123.92 1
 -8 0 14 734.181 144.289 4
 8 0 -13 17.04 61.1659 3
 8 0 -13 50.567 32.0612 2
 -8 0 13 16.4316 88.7637 4
 -8 0 13 84.3778 45.7234 1
 8 0 -12 44513.8 877.342 3
 8 0 -12 44747.3 604.995 2
 -8 0 12 45048 822.525 1
 -8 0 12 45689.1 894.857 4
 8 0 -11 202.362 65.2711 3
 8 0 -11 105.202 35.4599 2
 -8 0 11 262.772 73.497 4
 -8 0 11 99.4678 53.9175 1
 8 0 -10 276597 2556.19 3
 -8 0 10 279736 2605.55 1
 8 0 -10 272417 2141.31 2
 -8 0 10 275588 2598.15 4
 8 0 -9 198.338 42.5112 2
 -8 0 9 39.1215 57.4183 1
 -8 0 8 54602.8 887.365 1
 8 0 -8 55033.6 618.266 2
 -8 0 7 41.3507 63.7457 1
 8 0 -7 110.081 32.3417 2
 8 0 -6 306389 2262.99 2
 -8 0 6 303856 2687.37 1
 -8 0 5 159.718 64.0779 1
 8 0 -5 226.282 47.0647 2
 8 0 -4 46403.5 575.894 2
 -8 0 4 45168.2 780.763 1
 8 0 -3 266.655 50.1719 3
 8 0 -3 243.59 45.5916 2
 -8 0 3 303.053 76.5177 1
 8 0 -2 3657.17 152.212 3
 -8 0 2 3753.89 150.225 3
 -8 0 2 3535.72 211.715 1
 8 0 -2 3737.87 157.411 2
 -8 0 1 49.9079 29.9587 3
 8 0 -1 115.709 37.1518 3
 8 0 -1 82.4984 40.8283 2
 -8 0 1 50.193 53.6784 1
 -8 0 0 4052.17 197.836 5
 8 0 0 3080.65 157.622 2
 -8 0 -1 102.796 42.1244 3
 -8 0 -1 140.479 45.4131 5
 -8 0 -2 448.98 72.5814 5
 -8 0 -2 827.489 94.165 3
 -8 0 -3 162.167 61.1362 3
 -8 0 -4 2330.56 171.966 3
 -8 0 -5 99.9928 65.9713 3
 -8 0 -6 188686 1994.7 3
 -8 0 -7 88.1733 60.1115 3
 -8 0 -8 2448.72 207.172 3
 -8 0 -9 307.14 92.366 3
 -8 0 -10 20442.3 651.809 3
 -8 0 -11 262.675 100.382 3
 -8 0 -12 69999.6 1361.35 3
 -8 0 -13 -2.91943 88.9365 3
 -8 0 -14 206.154 113.222 3
 -8 0 -15 60.6619 111.665 3
 -8 0 -16 67972.4 1535.75 3
 -8 0 -17 58.0325 102.315 3
 -8 0 -18 16523 781.742 3
 -8 0 -19 -74.687 126.264 3
 -8 0 -20 2617.11 355.75 3
 8 2 -23 3137.57 354.855 3
 8 -2 -23 3457.13 383.95 3
 8 2 -22 41232 1230.64 3
 8 -2 -22 41597.7 1254.17 3
 8 2 -21 10477.1 598.117 3
 8 -2 -21 11353.1 629.385 3
 8 -2 -20 268.554 99.0199 3
 8 2 -20 320.486 114.489 3
 -8 -2 19 4618.49 393.696 4
 8 2 -19 5026.66 388.719 3
 8 -2 -19 5315.31 405.975 3
 -8 2 18 3536.41 302.419 4
 -8 -2 18 3855.39 344.899 4
 8 2 -18 4035.84 335.181 3
 8 -2 -18 3830.29 329.765 3
 8 -2 -17 11359.9 556.273 3
 -8 2 17 10878.9 410.982 1
 -8 2 17 11707 528.547 4
 -8 -2 17 11383.6 535.056 4
 8 2 -17 11706.6 539.781 3
 8 -2 -16 75673 1434.7 3
 -8 2 16 75155.2 1357.37 4
 8 2 -16 72539.5 992.643 2
 -8 2 16 72665.2 1151.61 1
 -8 -2 16 76915.5 1376.08 4
 -8 -2 16 73924.7 1122.37 1
 8 2 -16 72167 1347.24 3
 8 -2 -15 1544.8 192.463 3
 -8 2 15 1377.29 181.481 4
 8 2 -15 1689.25 133.203 2
 -8 -2 15 1440.4 147.501 1
 -8 2 15 1307.15 141.958 1
 -8 -2 15 1495.53 186.167 4
 8 2 -15 1263.81 173.371 3
 8 2 -14 719.935 129.616 3
 8 -2 -14 722.094 128.911 3
 8 -2 -14 885.366 74.6054 2
 8 2 -14 709.048 84.2389 2
 -8 -2 14 817.157 118.559 1
 -8 2 14 792.5 150.211 4
 -8 2 14 841.507 117.081 1
 8 -2 -13 6587.31 348.164 3
 8 2 -13 6931.96 253.231 2
 8 -2 -13 7043.92 195.615 2
 -8 2 13 6850.51 315.697 1
 -8 2 13 6511.34 336.171 4
 -8 -2 13 6477.75 312.162 1
 -8 -2 13 6729.79 356.241 4
 8 2 -13 6845.04 344.69 3
 -8 -2 12 42832.5 807.99 1
 8 2 -12 44463 665.275 2
 8 -2 -12 45804.7 537.768 2
 -8 2 12 46299.4 843.032 1
 -8 2 12 45925.4 897.847 4
 -8 -2 12 45056 906.792 4
 8 2 -12 44896.6 876.603 3
 -8 -2 11 50153.6 885.053 1
 8 2 -11 51659 707.248 2
 8 -2 -11 53677.1 571.293 2
 -8 2 11 52570.5 896.371 1
 -8 -2 11 52453.6 940.822 4
 -8 2 11 52877.1 934.339 4
 8 2 -11 52087.9 904.204 3
 8 2 -10 138403 1557.27 3
 -8 -2 10 136588 1611.25 4
 8 2 -10 137310 1309.6 2
 -8 2 10 135065 1570.94 1
 -8 2 10 140508 1606.57 4
 8 -2 -10 135390 1109.94 2
 -8 -2 10 134607 1584.16 1
 8 2 -9 11341.5 354.169 3
 -8 2 9 11527.1 386.589 1
 8 2 -9 11740.8 292.248 2
 -8 2 9 11719.5 381.872 4
 8 -2 -9 11537.5 205.55 2
 -8 -2 9 10574.9 383.882 1
 8 2 -8 6843.48 251.243 3
 -8 2 8 6903.79 291.923 1
 8 -2 -8 7069.71 153.529 2
 8 2 -8 7292.88 222.936 2
 -8 -2 8 6609.18 306.527 1
 8 2 -7 5556.93 205.258 3
 -8 2 7 5133.1 261.698 1
 8 2 -7 5704.14 193.917 2
 8 -2 -7 5729.13 138.7 2
 -8 -2 7 5632.23 298.582 1
 -8 2 6 254540 1830.34 2
 8 -2 -6 251959 1855.84 2
 8 2 -6 258938 2038.27 2
 -8 2 5 71337.1 987.498 1
 -8 2 5 73125.4 672.505 2
 8 2 -5 70372.4 796.712 2
 8 -2 -5 72044.3 692.243 2
 -8 2 4 59516.8 867.581 1
 8 2 -4 58438.2 713.152 2
 8 -2 -4 60231 633.765 2
 -8 2 4 61300.5 625.777 2
 -8 2 3 66743.9 920.791 1
 8 2 -3 67517.7 649.681 3
 8 2 -3 65673.6 780.267 2
 8 -2 -3 66556.2 709.819 2
 -8 2 2 35915.8 628.847 1
 -8 2 2 36657.4 589.951 3
 8 2 -2 33720.3 538.911 2
 8 2 -2 33574.8 421.063 3
 -8 2 1 35338.4 611.401 1
 -8 2 1 33710.1 574.601 5
 -8 2 1 32433.4 558.094 3
 -8 -2 1 34768.8 423.569 3
 8 2 -1 34124.1 550.961 2
 -8 -2 1 35061.1 620.374 5
 8 2 -1 33465.4 435.228 3
 -8 2 0 111076 1213.4 3
 -8 -2 0 107254 997.769 3
 8 2 0 110145 1174.65 2
 8 2 0 106899 1008.72 3
 -8 2 0 108199 1183.25 5
 -8 -2 0 109354 1238.63 5
 -8 2 0 108833 1195.55 1
 -8 2 -1 17523.7 407.418 5
 -8 -2 -1 19018.7 452.55 5
 -8 2 -1 17774.3 427.171 3
 -8 -2 -1 17039.1 342.547 3
 8 2 1 18248.1 414.198 2
 -8 2 -1 17890.1 405.558 1
 -8 -2 -2 28038 557.937 5
 -8 2 -2 27929.6 527.923 5
 -8 2 -2 27196.9 568.317 3
 -8 -2 -2 27030.7 476.837 3
 8 2 2 28494.9 549.382 2
 -8 2 -2 27841.1 506.902 1
 -8 -2 -3 1441.77 130.729 5
 -8 2 -3 1098.54 125.837 3
 -8 -2 -3 1370.73 119.001 3
 8 2 3 1476.68 130.455 2
 -8 2 -3 1223.71 103.692 1
 -8 2 -4 8300.29 337.4 3
 -8 -2 -4 8278.49 288.97 3
 -8 2 -4 8302.56 254.493 1
 -8 -2 -5 26565.6 562.18 3
 -8 2 -5 26771.4 451.003 1
 -8 2 -6 180939 2008.14 3
 -8 -2 -6 178933 1876.38 3
 -8 2 -6 183286 1556.83 1
 -8 2 -7 11113.1 256.31 1
 -8 2 -7 10534.3 430.419 3
 -8 -2 -7 10916.7 397.452 3
 -8 2 -8 462.185 52.1885 1
 -8 2 -8 330.587 93.1284 3
 -8 -2 -8 340.947 88.6224 3
 -8 2 -9 27576.8 380.812 1
 -8 2 -9 29388.4 779.68 3
 -8 -2 -9 28867.4 724.702 3
 -8 2 -10 27258.4 780.084 3
 -8 -2 -10 28240.8 750.086 3
 -8 2 -11 31170.8 869.404 3
 -8 -2 -11 30978.8 821.749 3
 -8 -2 -12 73038.9 1364.76 3
 -8 2 -12 72925.4 1418.82 3
 -8 2 -13 7193.8 458.676 3
 -8 -2 -13 8201.01 456.024 3
 -8 2 -14 583.163 144.292 3
 -8 -2 -14 441.958 129.662 3
 -8 2 -15 2662.74 312.074 3
 -8 -2 -15 2873.41 300.296 3
 -8 2 -16 55890.3 1405.68 3
 -8 -2 -16 55509.4 1354.22 3
 -8 2 -17 22634.9 911.518 3
 -8 -2 -17 22040.2 866.171 3
 -8 2 -18 7568.33 545.472 3
 -8 -2 -18 7095.93 506.409 3
 -8 2 -19 183.165 126.538 3
 -8 -2 -19 102.647 107.23 3
 -8 -2 -20 246.376 153.059 3
 8 4 -23 7778.02 558.915 3
 8 -4 -23 8566.21 594.051 3
 8 4 -22 6118.25 478.877 3
 8 -4 -22 6488.49 503.373 3
 8 4 -21 15971.4 744.796 3
 8 -4 -21 16691.6 776.306 3
 8 -4 -20 1512.65 241.283 3
 8 4 -20 1809.33 256.73 3
 8 -4 -19 -83.9659 138.963 3
 -8 -4 19 -60.8587 147.792 4
 8 4 -19 119.577 75.4746 3
 8 -4 -18 14123.1 652.884 3
 -8 -4 18 14038 619.421 4
 8 4 -18 14186.9 617.217 3
 8 -4 -17 45976.6 1135.57 3
 8 4 -17 44895.7 811.168 2
 -8 4 17 45329.1 1058.16 4
 -8 -4 17 43790 1079.18 4
 -8 4 17 44965.7 901.051 1
 8 4 -17 45398.4 1085.47 3
 8 -4 -16 10497.9 511.06 3
 8 4 -16 10672.6 369.382 2
 -8 -4 16 9750.13 471.5 4
 -8 4 16 9935.82 405.333 1
 8 4 -16 10250.2 487.344 3
 -8 4 16 10501.1 479.656 4
 8 -4 -15 16900.5 628.285 3
 -8 4 15 17288.2 599.319 4
 8 4 -15 16916.8 456.171 2
 -8 -4 15 17512.4 523.712 1
 -8 -4 15 17735.6 613.538 4
 -8 4 15 17072.7 522.485 1
 8 4 -15 17980.7 624.834 3
 -8 -4 14 5996.23 294.442 1
 8 -4 -14 6054.4 358.825 3
 8 4 -14 5944.88 261.58 2
 -8 -4 14 6745.82 382.188 4
 -8 4 14 6249.49 340.732 4
 -8 4 14 5478.36 295.633 1
 8 4 -14 5798.86 333.402 3
 -8 -4 13 1758.2 166.307 1
 8 4 -13 1966.97 148.851 2
 -8 4 13 1653 165.615 4
 -8 4 13 1801.91 169.203 1
 8 4 -13 2302.63 202.88 3
 8 -4 -12 8667.42 159.594 2
 8 4 -12 9181.5 306.837 2
 -8 4 12 9655.52 397.052 4
 -8 4 12 9582.74 375.82 1
 -8 -4 12 8985.85 401.819 4
 8 4 -12 8827.41 366.877 3
 -8 -4 12 7951.69 344.483 1
 8 4 -11 198183 1488.65 2
 -8 4 11 200009 1780.83 4
 -8 4 11 199195 1773.64 1
 -8 -4 11 197541 1836.58 4
 -8 -4 11 194182 1814.52 1
 8 4 -11 198409 1723.3 3
 8 4 -10 32302.2 572.31 2
 -8 4 10 34168 710.248 1
 -8 4 10 34946.9 704.695 4
 -8 -4 10 33376.7 747.108 1
 8 4 -10 33322.8 651.399 3
 8 4 -9 722.776 85.7364 2
 -8 4 9 640.46 133.863 4
 -8 4 9 669.437 100.684 1
 -8 -4 9 704.671 120.121 1
 8 4 -9 677.83 89.8421 3
 -8 4 8 763.786 107.389 1
 8 4 -8 696.818 84.3847 3
 8 4 -8 737.534 83.6454 2
 8 4 -7 515.091 72.7815 2
 -8 4 7 469.247 92.949 1
 8 4 -7 702.865 74.5022 3
 8 4 -6 154287 1360.13 2
 -8 4 6 151630 1537.3 1
 8 4 -6 156034 1220.96 3
 -8 4 5 143566 1539.23 1
 -8 4 5 143859 1086.42 2
 8 4 -5 138973 1374.98 2
 8 4 -5 142312 1158.62 3
 -8 4 4 17234.3 260.789 2
 8 4 -4 18049.9 386.707 2
 -8 4 3 15420.6 409.754 1
 8 4 -3 14609.3 353.051 2
 -8 4 3 15173.9 267.804 2
 -8 4 2 12112.1 353.253 1
 8 4 -2 11930.4 322.406 2
 -8 4 2 12189.5 362.328 3
 -8 4 1 107767 1259.15 3
 -8 4 1 112621 1213.71 1
 -8 4 1 108618 1154.85 5
 8 4 -1 108974 1190.39 2
 -8 -4 1 111693 1270.8 5
 8 4 0 126789 1029.7 3
 -8 4 0 129658 1316.39 1
 -8 4 0 124767 1428.19 3
 -8 -4 0 128969 1401.22 5
 -8 -4 0 123918 1042.41 3
 8 4 0 130429 1352.07 2
 -8 4 0 126964 1283.24 5
 8 4 1 70268.7 730.051 3
 -8 4 -1 70488.7 880.565 5
 -8 4 -1 69862.5 865.59 1
 -8 4 -1 70919 1019.97 3
 8 4 1 69794.6 929.502 2
 -8 -4 -1 67350 719.423 3
 -8 4 -2 2281.85 135.73 1
 -8 4 -2 2716.68 154.564 5
 -8 -4 -2 2906.08 184.2 5
 -8 4 -2 2622.73 195.019 3
 8 4 2 2648.88 175.691 2
 -8 -4 -2 2506.1 125.756 3
 8 4 3 6522.81 273.752 2
 -8 4 -3 6964.64 226.402 1
 -8 -4 -3 6707.42 278.418 5
 -8 4 -3 6996.88 318.031 3
 -8 -4 -3 6950.02 232.952 3
 -8 4 -4 14891.3 327.776 1
 8 4 4 14588.2 427.561 2
 -8 -4 -4 15644.3 391.587 3
 -8 4 -5 222077 1822.94 1
 -8 4 -5 223522 2364.07 3
 8 4 5 222247 2178.25 2
 -8 -4 -5 229776 2086.86 3
 -8 4 -6 39088.4 517.487 1
 -8 4 -6 37615.4 849.44 3
 -8 -4 -6 38882.6 714.96 3
 -8 4 -7 29838.3 417.361 1
 -8 4 -7 30201.1 788.964 3
 -8 -4 -7 30588.9 659.783 3
 -8 4 -8 1922.01 86.3162 1
 -8 4 -8 1477.17 182.712 3
 -8 -4 -8 1797.53 167.152 3
 -8 4 -9 14666.2 225.565 1
 -8 4 -9 15554.1 582.038 3
 -8 4 -10 33331.6 902.292 3
 -8 -4 -10 33623.2 805.088 3
 -8 4 -11 109894 1793.73 3
 -8 -4 -11 111812 1642.28 3
 -8 4 -12 17045.2 688.683 3
 -8 -4 -12 17853.2 639.2 3
 -8 4 -13 5065.91 392.093 3
 -8 -4 -13 3520.88 299.569 3
 -8 4 -14 54.1615 95.3994 3
 -8 -4 -14 49.4742 96.3864 3
 -8 -4 -15 908.328 187.559 3
 -8 4 -15 1130.38 222.839 3
 -8 4 -16 9062.77 573.469 3
 -8 -4 -16 8170.55 508.442 3
 -8 4 -17 43139.2 1310.61 3
 -8 -4 -17 43858.6 1233.73 3
 -8 4 -18 6388.2 516.38 3
 -8 -4 -18 6573.39 489.529 3
 -8 4 -19 -53.5549 145.092 3
 -8 -4 -19 -21.8165 108.006 3
 8 6 -23 22245.5 950.341 3
 8 -6 -22 1538.03 269.845 3
 8 6 -22 1375.37 245.478 3
 8 6 -21 31042.8 1047.38 3
 8 -6 -21 32438.5 1113.58 3
 8 -6 -20 11717.9 653.54 3
 -8 -6 20 12218.6 611.731 4
 8 6 -20 12229 636.434 3
 8 -6 -19 394.559 150.012 3
 -8 -6 19 66.0593 101.641 4
 8 6 -19 192.582 105.054 3
 8 -6 -18 15134.9 670.476 3
 8 6 -18 13336.4 464.727 2
 -8 -6 18 14005.6 613.384 4
 8 6 -18 13799.4 620.586 3
 -8 6 18 13114.4 493.86 1
 8 -6 -17 97875.4 1741.67 3
 8 6 -17 90543.9 1291.3 2
 -8 -6 17 94577.2 1629.95 4
 -8 6 17 93917.1 1415.86 1
 8 6 -17 95856.4 1663.98 3
 8 -6 -16 5626.63 395.548 3
 8 6 -16 5942.47 295.926 2
 -8 -6 16 5606.68 363.997 4
 -8 6 16 5804.05 317.425 1
 8 6 -16 5730.38 373.628 3
 -8 -6 15 58177.7 1006.6 1
 8 6 -15 57737.9 953.576 2
 -8 6 15 60292.6 1147.79 4
 -8 -6 15 59237 1168.46 4
 -8 6 15 58383.1 1049.44 1
 8 6 -15 61392.3 1199.85 3
 8 6 -14 1101.3 127.691 2
 -8 -6 14 1220.65 162.1 4
 -8 6 14 1145.39 143.875 1
 8 6 -14 978.217 142.741 3
 -8 6 14 1128.25 161.087 4
 -8 -6 14 1273.62 150.617 1
 8 6 -13 7153.88 303.933 2
 -8 -6 13 7021.69 368.174 4
 -8 6 13 6240.41 330.966 4
 -8 6 13 6427.36 323.642 1
 8 6 -13 6486.36 342.052 3
 -8 -6 13 7117.05 349.987 1
 8 6 -12 114.009 49.3422 2
 -8 6 12 46.5449 65.2313 4
 -8 6 12 133.315 61.7741 1
 8 6 -12 47.652 44.3328 3
 -8 -6 12 84.69 71.9072 1
 8 6 -11 170149 1725.85 2
 -8 -6 11 166907 1924.62 4
 8 6 -11 171424 1866.6 3
 8 6 -10 2956.62 180.259 2
 -8 6 10 2741.67 203.742 1
 -8 6 10 2693.88 189.818 4
 8 6 -10 2317.68 170.876 3
 8 6 -9 29468.6 574.138 2
 -8 6 9 28296.6 595.327 4
 8 6 -9 28638.6 573.331 3
 -8 6 9 28638.1 650.009 1
 8 6 -8 2560.05 161.716 2
 -8 6 8 2542.31 164.51 4
 -8 6 8 2683.19 192.44 1
 8 6 -8 2547.68 152.456 3
 8 6 -7 25167.2 514.913 2
 -8 6 7 25101.4 583.589 1
 8 6 -7 25127.2 449.464 3
 8 6 -6 4843.2 215.894 2
 -8 6 6 4764.04 244.157 1
 8 6 -6 4525.61 161.682 3
 -8 6 5 175705 1742.75 1
 8 6 -5 170195 1608.19 2
 -8 6 5 160158 1180.72 2
 8 6 -5 152198 1261.13 3
 -8 6 4 40867.2 728.148 1
 8 6 -4 40347.2 663.566 2
 -8 6 4 42266.3 454.086 2
 -8 6 3 5687.51 250.9 1
 8 6 -3 4621.98 212.351 2
 -8 6 2 12724.8 369.184 1
 -8 6 2 12576.8 408.986 3
 8 6 -2 12018.5 348.525 2
 8 6 -1 116362 1299.3 2
 -8 -6 1 118172 1354.51 5
 -8 6 1 118435 1298.68 1
 -8 6 1 116083 1414.32 3
 -8 6 0 11216.8 327.64 1
 -8 6 0 11009.6 388.924 3
 8 6 0 11413.3 347.511 2
 -8 6 0 11346.9 299.624 5
 -8 -6 0 10752.5 188.029 3
 -8 -6 0 11804.4 372.713 5
 -8 -6 -1 81262.4 1078.14 5
 -8 6 -1 82303.1 948.275 5
 -8 6 -1 79686.7 966.871 1
 8 6 1 80400.8 1057.15 2
 -8 6 -1 79622.8 1177.03 3
 -8 -6 -1 77251.3 756.416 3
 -8 6 -2 78625.3 936.983 1
 -8 -6 -2 80482.8 1085.76 5
 -8 6 -2 80075.6 945.483 5
 -8 6 -2 80324.7 1212.91 3
 8 6 2 78366.8 1059.94 2
 -8 -6 -2 81648.1 845.453 3
 -8 6 -3 6850.98 230.571 1
 -8 -6 -3 6910.41 288.849 5
 -8 6 -3 7016.56 346.948 3
 8 6 3 7107.23 299.371 2
 -8 -6 -3 7613.51 235.941 3
 -8 -6 -4 8258.07 321.624 5
 -8 6 -4 7748.8 234.209 1
 -8 6 -4 8192.08 379.855 3
 8 6 4 7684.3 312.694 2
 -8 -6 -4 8422.27 271.692 3
 -8 6 -5 165251 2011.57 3
 8 6 5 169579 1817.97 2
 -8 -6 -5 164805 1631.83 3
 -8 6 -6 138.452 85.8877 3
 -8 6 -6 112.493 31.9295 1
 8 6 6 226.119 70.7194 2
 -8 -6 -6 129.506 61.858 3
 -8 6 -7 42043.9 967.071 3
 -8 6 -7 39007.9 501.676 1
 8 6 7 39876.6 792.216 2
 -8 -6 -7 40404.6 761.06 3
 -8 6 -8 7087.53 409.369 3
 -8 6 -8 7421.25 178.843 1
 -8 -6 -8 7488.9 334.492 3
 -8 6 -9 709.814 141.194 3
 -8 -6 -9 939.673 136.831 3
 -8 6 -10 17908.6 695.844 3
 -8 -6 -10 18197.6 585.892 3
 -8 6 -11 72420.6 1495.34 3
 -8 -6 -11 70822.5 1283.07 3
 -8 6 -12 1079.38 193.459 3
 -8 -6 -12 1229.76 178.676 3
 -8 6 -13 3010.48 321.711 3
 -8 -6 -13 2874.24 266.551 3
 -8 6 -14 3570.76 373.286 3
 -8 -6 -14 4329.77 339.273 3
 -8 6 -15 9891.65 614.298 3
 -8 -6 -15 10759.5 553.108 3
 -8 6 -16 60.5618 118.693 3
 -8 -6 -16 175.059 105.071 3
 -8 6 -17 28383.5 1052.26 3
 -8 -6 -17 23838.5 910.911 3
 -8 6 -18 3698.91 402.139 3
 -8 -6 -18 3038.82 344.303 3
 -8 6 -19 2192.36 331.27 3
 -8 -6 -19 1836.89 268.813 3
 8 -8 -22 20955.5 938.911 3
 8 8 -22 18043.8 830.934 3
 8 -8 -21 22000.9 943.626 3
 8 8 -21 19008.5 823.996 3
 8 -8 -20 3521.06 373.049 3
 -8 -8 20 3068.73 314.638 4
 8 8 -20 2728.01 308.026 3
 8 -8 -19 342.729 133.408 3
 8 8 -19 386.583 91.5872 2
 -8 -8 19 255.9 94.4528 4
 8 8 -19 359.925 128.14 3
 -8 -8 18 31.3886 116.588 4
 8 -8 -18 41.3922 116.688 3
 8 8 -18 237.799 79.8556 2
 -8 8 18 251.834 87.2859 1
 8 8 -18 40.7636 93.1789 3
 8 -8 -17 87137.6 1678.17 3
 8 8 -17 80610.2 1271.63 2
 -8 -8 17 84205.3 1520.89 4
 8 8 -17 84367.6 1569.24 3
 -8 8 17 84551 1373.49 1
 8 8 -16 21897.2 610.45 2
 -8 -8 16 22348 728.568 4
 8 8 -16 23776 773.919 3
 -8 8 16 22653.1 663.178 1
 8 8 -15 34208.8 756.23 2
 -8 -8 15 33912.8 873.154 4
 8 8 -15 36209 922.753 3
 -8 8 15 35832.8 831.317 1
 -8 -8 15 36752.5 815.213 1
 8 8 -14 762.543 109.544 2
 -8 8 14 602.921 114.175 4
 -8 -8 14 779.116 155.134 4
 -8 8 14 746.117 122.267 1
 8 8 -14 436.858 105.676 3
 -8 -8 14 811.74 132.245 1
 8 8 -13 21699.6 565.959 2
 -8 8 13 22401.5 619.393 4
 -8 -8 13 21271.7 644.201 4
 -8 8 13 21814 620.292 1
 8 8 -13 21195.8 637.114 3
 8 8 -12 7027.17 307.532 2
 -8 -8 12 6809.93 348.45 4
 -8 8 12 7041.48 342.896 1
 -8 8 12 6599.88 319.929 4
 8 8 -12 5991.7 319.465 3
 -8 -8 11 63804.1 1088.38 4
 8 8 -11 65512.7 1005.7 2
 -8 8 11 68877.7 1046.54 4
 -8 8 11 65721.5 1090.73 1
 8 8 -11 67520.1 1079.83 3
 8 8 -10 34596.9 690.947 2
 -8 8 10 35555.7 686.224 4
 -8 8 10 35901.1 763.991 1
 8 8 -10 34862.4 709.971 3
 8 8 -9 50960.1 849.316 2
 -8 8 9 52690.4 932.117 1
 8 8 -9 51695.8 834.958 3
 -8 8 9 51539 814.469 4
 8 8 -8 3962.53 220.427 2
 -8 8 8 3833.26 200.036 4
 -8 8 8 3522.12 225.598 1
 8 8 -8 3458.96 184.413 3
 -8 8 7 79335.1 1140.85 1
 -8 8 7 80629.6 979.854 4
 8 8 -7 78170.3 936.821 3
 8 8 -7 80713.8 1081.64 2
 -8 -8 6 33055 423.821 3
 8 8 -6 34942.6 663.046 2
 -8 8 6 35002.9 704.988 1
 8 8 -6 33984.2 497.968 3
 8 8 -5 60855.4 890.496 2
 8 8 -5 58032.7 607.64 3
 8 8 -4 2964.85 180.555 2
 -8 8 4 2286.92 176.846 1
 8 8 -3 299.425 78.0241 2
 -8 8 3 266.941 70.0406 1
 8 8 -2 321.139 72.2067 2
 -8 8 2 258.78 74.841 3
 -8 8 2 223.663 73.0685 1
 -8 8 1 104848 1124.16 1
 -8 8 1 84809.9 1212.89 3
 -8 -8 1 60236.4 597.502 3
 8 8 -1 84516.6 1061.84 2
 -8 -8 1 73250.6 597.585 3
 -8 -8 0 106962 1307.7 5
 -8 8 0 106461 1082.16 5
 8 8 0 106105 1294.19 2
 -8 8 0 106313 1205.59 1
 -8 8 0 105609 1434.57 3
 -8 -8 0 106492 903.165 3
 -8 8 -1 32603.1 524.66 5
 -8 -8 -1 32625 656.287 5
 -8 8 -1 34566.2 784.731 3
 -8 8 -1 32208.9 577.401 1
 8 8 1 31462.4 641.675 2
 -8 -8 -1 32594.6 442.484 3
 -8 8 -2 27088.7 484.203 5
 8 8 2 27329.6 610.419 2
 -8 8 -2 27177.5 517.739 1
 -8 8 -2 27227.8 710.868 3
 -8 -8 -2 27712.1 447.499 3
 -8 -8 -3 2398.21 177.596 5
 -8 8 -3 2147.63 133.138 5
 -8 8 -3 2699.07 244.866 3
 8 8 3 2456.07 186.376 2
 -8 8 -3 2343.65 142.364 1
 -8 -8 -3 2578.16 143.167 3
 -8 -8 -4 1533.49 146.932 5
 -8 8 -4 1743.8 117.984 1
 -8 8 -4 1577.02 185.077 3
 8 8 4 1468.96 151.061 2
 -8 -8 -4 1813 130.286 3
 -8 8 -5 42622.8 963.89 3
 8 8 5 42349.9 816.769 2
 -8 8 -5 41408.9 604.397 1
 -8 -8 -5 43603.2 805.752 5
 -8 -8 -5 43350.7 717.813 3
 -8 8 -6 98198.7 1014.62 1
 -8 8 -6 100908 1590.87 3
 8 8 6 100152 1369.72 2
 -8 -8 -6 101194 1252.67 3
 -8 -8 -7 52479.8 893.391 3
 -8 8 -7 52891.4 1153.47 3
 8 8 7 52094.1 954.771 2
 -8 8 -7 50555.6 630.07 1
 -8 -8 -8 695.194 109.892 3
 -8 8 -8 859.984 66.482 1
 -8 8 -8 763.968 163.998 3
 8 8 8 727.151 116.69 2
 -8 8 -9 5660.51 393.227 3
 -8 -8 -9 5634.99 310.699 3
 -8 8 -10 2454.76 279.987 3
 -8 -8 -10 2504.97 224.043 3
 -8 8 -11 56226.3 1342.96 3
 -8 -8 -11 52733.6 1074.96 3
 -8 8 -12 11699.2 615.453 3
 -8 -8 -12 12398.9 525.821 3
 -8 8 -13 18108.2 794.559 3
 -8 -8 -13 18626.5 675.304 3
 -8 8 -14 63738.2 1465.91 3
 -8 -8 -14 659.072 146.795 3
 -8 8 -15 9918.02 655.229 3
 -8 -8 -15 10532.6 557.549 3
 -8 8 -16 13187.2 730.441 3
 -8 -8 -16 12199.1 615.989 3
 -8 8 -17 18297.8 898.859 3
 -8 -8 -17 17222.7 752.692 3
 -8 8 -18 -86.8966 162.261 3
 -8 -8 -18 258.771 106.641 3
 -8 -8 -19 1327.37 238.864 3
 8 -10 -21 8133.57 579.568 3
 8 -10 -20 868.167 196.447 3
 8 10 -20 850.916 145.693 2
 -8 -10 20 784.762 155.295 4
 8 -10 -19 3652.77 368.131 3
 8 10 -19 3363.26 270.454 2
 -8 -10 19 3123.76 304.833 4
 8 10 -18 23245.4 843.728 3
 -8 10 18 22791.5 713.629 1
 8 -10 -18 23218.9 901.3 3
 -8 -10 18 24314.3 819.681 4
 8 10 -18 23136.7 681.578 2
 -8 10 17 8323.38 421.159 1
 8 10 -17 9126.98 423.03 2
 -8 -10 17 9944.15 505.39 4
 8 10 -17 9703.18 522.394 3
 8 10 -16 28809.3 744.422 2
 -8 -10 16 29198.9 841.921 4
 8 10 -16 29421.6 889.171 3
 -8 10 16 28512.7 778.176 1
 8 10 -15 16474 539.886 2
 -8 -10 15 16011.6 596.71 4
 8 10 -15 16442.5 634.662 3
 -8 10 15 16385.8 575.036 1
 -8 10 14 45.0055 61.4943 1
 8 10 -14 35.244 71.7885 2
 -8 -10 14 -84.3796 110.975 4
 8 10 -14 141.981 88.3934 3
 8 10 -13 15754 506.707 2
 -8 -10 13 15216.4 545.475 4
 8 10 -13 15548.5 564.611 3
 -8 10 13 14663.7 526.679 1
 8 10 -12 38826.4 810.848 2
 -8 -10 12 39766.1 877.584 4
 8 10 -12 38716.8 853.405 3
 -8 10 12 40108.8 877.814 1
 -8 10 11 713.711 104.527 4
 -8 -10 11 594.645 117.615 4
 8 10 -11 837.023 131.148 3
 8 10 -11 800.001 120.178 2
 -8 10 11 648.057 116.815 1
 -8 10 10 88859.8 1171.74 4
 8 10 -10 91266.5 1283.94 3
 -8 10 10 88373.7 1331.63 1
 8 10 -9 62682.3 1020 2
 -8 10 9 64354.1 912.132 4
 8 10 -9 63054.4 975.643 3
 -8 10 9 62537.9 1070.74 1
 8 10 -8 1119.55 136.19 2
 -8 10 8 1312.46 119.688 4
 8 10 -8 1267.34 123.811 3
 -8 10 8 1331.21 150.314 1
 8 10 -7 42903.5 802.461 2
 -8 10 7 42313.2 644.249 4
 8 10 -7 43349.7 664.803 3
 -8 10 7 42983.4 835.533 1
 8 10 -6 41527.4 776.221 2
 8 10 -6 42044.9 588.959 3
 -8 10 6 41598.3 800.24 1
 -8 10 6 41474.4 600.437 4
 -8 -10 6 39335.8 508.984 3
 -8 10 5 16414.3 279.814 2
 8 10 -5 16303.1 465.52 2
 -8 10 5 16791.8 339.017 4
 8 10 -5 15720.2 294.081 3
 -8 10 5 16426.4 478.79 1
 -8 -10 5 15249.6 267.584 3
 -8 10 4 30428.4 650.668 1
 8 10 -4 30529.2 644.75 2
 8 10 -3 18033.2 491.951 2
 -8 10 3 17217.2 471.179 1
 -8 -10 2 1264.47 72.8819 3
 -8 10 2 1191.88 124.842 1
 8 10 -2 1093.87 129.278 2
 8 10 -1 47188 825.049 2
 -8 10 1 50028.6 997.443 3
 -8 10 1 46595.8 775.639 1
 -8 -10 0 65584.3 978.16 5
 8 10 0 63488.8 979.584 2
 -8 10 0 65447.5 1151.48 3
 -8 10 0 64787.4 922.25 1
 8 10 1 56893.2 942.454 2
 -8 10 -1 56500.3 1082.5 3
 -8 10 -1 56635 702.72 5
 -8 10 -1 56144.2 841.206 1
 -8 -10 -1 59116.9 940.974 5
 -8 10 -2 564.719 86.9057 1
 -8 -10 -2 750.22 76.7893 3
 -8 10 -2 517.781 65.7989 5
 -8 10 -2 516.578 114.208 3
 8 10 2 578.608 110.518 2
 -8 -10 -3 11417.2 313.853 3
 -8 10 -3 10808.5 296.158 5
 -8 -10 -3 10703.3 389.534 5
 8 10 3 10703.9 402.087 2
 -8 10 -3 10665.3 484.534 3
 -8 10 -3 10586 322.03 1
 -8 -10 -4 12706.8 361.13 3
 -8 10 -4 12139.2 531.8 3
 8 10 4 13134.5 445.223 2
 -8 -10 -4 12271.3 420.152 5
 -8 10 -4 12699.1 341.901 1
 -8 -10 -5 1890.27 156.71 3
 -8 -10 -5 2152.53 178.395 5
 -8 10 -5 2047.3 228.654 3
 8 10 5 1983.45 179.043 2
 -8 10 -5 2114.74 135.064 1
 -8 -10 -6 63745.4 979.271 3
 -8 10 -6 61062.7 792.527 1
 -8 -10 -6 62671.4 1035.06 5
 -8 10 -6 62399.2 1279.63 3
 8 10 6 61984 1066.66 2
 -8 10 -7 51552.6 688.494 1
 -8 10 -7 52565.2 1190.71 3
 8 10 7 52689.9 991.246 2
 -8 -10 -7 54405.4 935.983 3
 -8 10 -8 21127 390.465 1
 8 10 8 20436.5 611.996 2
 -8 -10 -8 21673.6 597.472 3
 -8 10 -9 4459.06 380.036 3
 8 10 9 4629.27 299.918 2
 -8 -10 -9 4380.39 278.35 3
 -8 10 -10 49497.3 1258.24 3
 -8 -10 -10 47945.1 996.747 3
 -8 10 -11 6286.11 451.382 3
 -8 -10 -11 7001.89 382.558 3
 -8 10 -12 20012.2 855.964 3
 -8 -10 -12 19621 678.055 3
 -8 10 -13 47032.4 1347.59 3
 -8 -10 -13 47036.7 1107.44 3
 -8 10 -14 117.683 154.261 3
 -8 -10 -14 218.143 87.2001 3
 -8 10 -15 25409.7 1024.49 3
 -8 -10 -15 24767.1 850.555 3
 -8 10 -16 24381.8 1028.45 3
 -8 -10 -16 23400 860.308 3
 -8 10 -17 12252.5 746.392 3
 -8 -10 -17 12638.1 664.097 3
 -8 10 -18 16588.1 900.589 3
 -8 -10 -18 16687.4 778.2 3
 8 12 -21 249.712 89.8663 2
 8 -12 -20 6559.51 520.318 3
 8 12 -20 6655.92 392.031 2
 8 -12 -19 1237.94 229.499 3
 8 12 -19 1370.79 181.265 2
 -8 -12 19 1404.05 210.055 4
 8 12 -18 40638.1 965.057 2
 -8 -12 18 43867.8 1115.35 4
 8 12 -17 127.438 65.7147 2
 -8 12 17 101.93 77.154 1
 -8 -12 17 25.8358 94.6456 4
 -8 12 16 18022.5 640.53 1
 8 12 -16 19206.7 626.173 2
 -8 -12 16 19785.4 697.73 4
 8 12 -15 540.896 112.196 2
 -8 -12 15 671.303 137.073 4
 -8 12 15 557.7 125.334 1
 -8 12 14 10079.9 463.211 1
 8 12 -14 10441 444.998 2
 -8 -12 14 10086.1 465.071 4
 8 12 -14 10390.8 494.693 3
 8 12 -13 7705.3 376.54 2
 -8 -12 13 7772.57 399.042 4
 8 12 -13 8168.05 424.25 3
 -8 12 13 7378.8 388.9 1
 8 12 -12 63189.4 1124.9 2
 8 12 -12 68268.7 1211.08 3
 -8 -12 12 63806.3 1143.93 4
 -8 12 12 67076.1 1209.75 1
 8 12 -11 9811.4 413.975 2
 -8 -12 11 10454 426.049 4
 8 12 -11 10201.3 427.378 3
 -8 12 11 10075.3 440.749 1
 8 12 -10 64823 1106.6 2
 8 12 -10 66425.1 1081.15 3
 -8 12 10 64398 1148.08 1
 8 12 -9 12284.3 452.238 2
 8 12 -9 11423 393.798 3
 -8 12 9 11775.4 463.903 1
 -8 12 8 2553.77 150.172 4
 8 12 -8 2401.73 170.013 3
 -8 12 8 2685.71 222.128 1
 8 12 -8 2780.73 214.786 2
 -8 12 7 23638 442.164 4
 8 12 -7 24211.1 628.129 2
 8 12 -7 23523.5 502.772 3
 -8 12 7 23265.3 634.051 1
 8 12 -6 42563.7 630.267 3
 8 12 -6 42955 847.642 2
 -8 12 6 46275 602.594 4
 -8 12 6 42661.8 524.226 2
 -8 12 6 43699.5 863.984 1
 -8 12 5 3039.81 133.328 2
 8 12 -5 3054.48 214.617 2
 -8 12 5 2966.76 128.564 4
 -8 12 5 3062.77 220.51 1
 -8 12 4 36654.9 543.742 2
 -8 12 4 35528.9 453.281 4
 8 12 -4 35887.8 755.915 2
 -8 12 4 35617.8 746.56 1
 -8 12 3 7446.06 173.145 4
 8 12 -3 7850.46 346.811 2
 -8 12 3 7759.47 335.787 1
 8 12 -2 8503.75 357.916 2
 -8 12 2 8079.7 332.318 1
 8 12 -1 4565.37 262.701 2
 -8 12 1 4510.99 315.117 3
 -8 12 1 4637.51 246.174 1
 -8 12 0 27499.6 775.921 3
 8 12 0 27474.8 653.505 2
 -8 12 0 27209.9 603.466 1
 -8 12 -1 665.151 67.3642 5
 8 12 1 727.7 121.55 2
 -8 12 -1 880.45 143.945 3
 -8 -12 -1 796.147 106.51 5
 -8 12 -1 1225.72 124.014 1
 -8 -12 -2 42809.4 810.465 5
 -8 12 -2 42769.7 582.996 5
 8 12 2 43160 854.799 2
 -8 12 -2 42822.1 1007.22 3
 -8 12 -2 42653.3 742.635 1
 -8 12 -3 342.188 76.5209 1
 -8 12 -3 301.595 50.4096 5
 8 12 3 499.393 136.623 2
 -8 12 -3 102.777 84.5937 3
 -8 -12 -3 190.206 62.0217 5
 -8 -12 -4 37070.7 666.099 3
 -8 12 -4 35302.2 637.925 1
 -8 -12 -4 36609.8 771.758 5
 -8 12 -4 36720.2 978.638 3
 8 12 4 35584.6 791.84 2
 -8 12 -4 35793 577.741 5
 -8 -12 -5 2243.83 167.559 3
 -8 12 -5 2117.76 147.238 1
 -8 -12 -5 2203.55 189.578 5
 8 12 5 2156.38 198.316 2
 -8 12 -5 2692.15 284.774 3
 -8 -12 -6 26654.4 611.929 3
 -8 -12 -6 24701.9 638.437 5
 -8 12 -6 25410.1 512.38 1
 -8 12 -6 25366.9 849.077 3
 8 12 6 24496.1 671.468 2
 -8 -12 -7 24547.9 632.331 3
 -8 12 -7 23639.3 475.872 1
 -8 12 -7 24087.9 835.665 3
 8 12 7 23305.3 662.514 2
 -8 -12 -7 22796.2 624.255 5
 -8 -12 -8 24939.8 667.939 3
 -8 -12 -8 23763.7 656.08 5
 -8 12 -8 24277 857.665 3
 8 12 8 23470.9 683.597 2
 -8 12 -9 15763.3 709.75 3
 8 12 9 15041 551.109 2
 -8 -12 -9 16081.9 551.389 3
 -8 12 -10 41875.6 1187.58 3
 8 12 10 39978.8 938.192 2
 -8 -12 -10 41737.2 949.678 3
 -8 12 -11 2107.42 284.068 3
 -8 -12 -11 2426.72 233.435 3
 -8 12 -12 48729.1 1350.73 3
 -8 -12 -12 45602.1 1068.29 3
 -8 12 -13 20143.3 887.882 3
 -8 -12 -13 18857.4 702.518 3
 -8 12 -14 2013.73 312.153 3
 -8 -12 -14 2412.91 264.811 3
 -8 12 -15 11555 712.674 3
 -8 -12 -15 12119.8 601.712 3
 -8 12 -16 17149.2 882.628 3
 -8 -12 -16 16164.3 715.843 3
 -8 12 -17 65.1363 144.851 3
 -8 -12 -17 31.3442 104.071 3
 -8 -12 -18 50075.7 1373.85 3
 8 14 -21 1.9862 99.9342 2
 8 14 -20 13543.7 590.052 2
 8 14 -19 -20.7339 124.292 2
 -8 -14 19 62.0677 108.105 4
 -8 14 19 29.8179 118.544 1
 8 14 -18 22329.3 736.267 2
 -8 14 18 21413 756.877 1
 8 14 -17 740.716 138.257 2
 -8 14 17 750.198 151.919 1
 -8 -14 17 584.026 152.656 4
 8 14 -16 15595.8 597.245 2
 -8 14 16 15117.3 607.27 1
 -8 -14 16 16460.2 640.475 4
 -8 14 15 1833.09 216.128 1
 8 14 -15 2106.93 220.64 2
 -8 -14 15 2277.57 236.335 4
 8 14 -14 6464.76 364.26 2
 -8 -14 14 6958.62 389.618 4
 -8 -14 13 1901.31 205.978 4
 -8 14 13 1851.33 208.533 1
 8 14 -13 2018.6 213.907 2
 -8 14 12 29407 809.809 1
 8 14 -12 30362.9 791.872 2
 -8 -14 12 29610.4 763.087 4
 -8 14 11 11453.5 490.412 1
 8 14 -11 11812.7 481.054 2
 -8 -14 11 11239.2 449.468 4
 -8 14 10 48151.9 1018.83 1
 -8 -14 10 48748.6 937.734 4
 8 14 -10 47944.4 995.042 2
 -8 14 9 3948.24 279.566 1
 8 14 -9 3447.57 255.375 2
 -8 14 8 11167.7 462.554 1
 8 14 -8 10692.7 444.884 2
 8 14 -7 4267.2 278.139 2
 -8 14 7 4257.79 278.569 1
 8 14 -6 42244.7 892.208 2
 8 14 -6 40387.3 671.351 3
 -8 14 6 41961.7 882.219 1
 -8 14 5 120.32 66.7733 1
 8 14 -5 79.6902 70.8342 2
 -8 14 5 72.5044 33.6348 2
 -8 14 4 39058.4 620.297 2
 8 14 -4 41177.4 866.722 2
 -8 14 4 41178.3 844.658 1
 -8 14 3 2969.28 223.981 1
 -8 14 3 2665.41 162.43 2
 8 14 -3 3241.86 243.578 2
 -8 14 2 32428.4 722.528 1
 8 14 -2 32848.9 767.272 2
 -8 14 1 514.026 96.0672 1
 8 14 -1 557.344 107.61 2
 -8 14 0 23837.2 594.201 1
 -8 14 0 25691.4 807.886 3
 8 14 0 24317.1 653.099 2
 -8 -14 -1 3081.37 212.832 5
 -8 14 -1 3052.12 207.104 1
 8 14 1 3338.32 242.338 2
 -8 14 -1 3230.98 294.973 3
 -8 14 -2 48679.8 833.556 1
 -8 -14 -2 52897.8 922.567 5
 8 14 2 51212.8 987.454 2
 -8 14 -2 51439.7 1157.69 3
 -8 14 -3 5714.88 268.401 1
 8 14 3 5506.98 330.944 2
 -8 14 -3 5205.75 371.344 3
 -8 -14 -3 5741.74 296.697 5
 -8 -14 -4 44649.4 872.92 5
 -8 14 -4 44003.1 1120.63 3
 8 14 4 44873.1 945.765 2
 -8 14 -4 45221.9 789.224 1
 -8 -14 -5 182.148 58.1775 3
 -8 -14 -5 236.462 79.5446 5
 8 14 5 25.1379 75.1063 1
 -8 14 -5 219.832 137.724 3
 -8 14 -5 260.54 70.485 1
 8 14 5 129.674 76.3618 2
 -8 -14 -6 37625.7 772.548 3
 -8 -14 -6 35462.1 797.53 5
 -8 14 -6 36665.4 666.737 1
 -8 14 -6 36674.3 1074.62 3
 8 14 6 33900.5 829.651 2
 8 14 6 34478.1 815.653 1
 -8 -14 -7 1224.43 149.069 3
 -8 -14 -7 1236.33 153.095 5
 -8 14 -7 1447.46 237.924 3
 -8 14 -7 1307.17 120.702 1
 8 14 7 963.209 151.532 2
 8 14 7 1026.29 155.87 1
 -8 -14 -8 13853.2 499.812 3
 -8 -14 -8 13801.7 503.778 5
 -8 14 -8 13057.7 667.212 3
 8 14 8 12416.1 499.535 1
 8 14 8 12615.1 510.426 2
 -8 -14 -9 1772.1 196.959 3
 -8 -14 -9 1990.49 198.685 5
 8 14 9 2039.27 221.77 2
 -8 14 -9 1776.75 271.684 3
 8 14 9 1643.9 191.419 1
 -8 -14 -10 51222.4 1084.81 3
 -8 14 -10 50387.6 1361.1 3
 8 14 10 47126.4 1051.42 2
 -8 -14 -11 132.035 92.6723 3
 -8 14 -11 13.0315 157.701 3
 8 14 11 37.7424 74.9827 2
 -8 14 -12 40170.3 1263.14 3
 -8 -14 -12 39382.5 1015.49 3
 -8 14 -13 1773.25 283.419 3
 -8 -14 -13 1862.51 229.866 3
 -8 -14 -14 179.389 96.7194 3
 -8 14 -14 140.091 125.493 3
 -8 -14 -15 524.794 135.186 3
 -8 14 -15 644.185 214.199 3
 -8 14 -16 21315.4 1003.5 3
 -8 -14 -16 19597.3 807.057 3
 -8 -14 -17 8380.49 541.693 3
 8 16 -19 565.501 146.972 2
 -8 16 19 35.7581 107.122 1
 8 16 -18 24282.3 807.527 2
 -8 -16 18 24564.8 833.73 4
 -8 16 18 23397.5 824.013 1
 8 16 -17 9864.61 503.292 2
 -8 -16 17 10749.5 538.821 4
 -8 16 17 9497.72 516.749 1
 8 16 -16 6678.2 408.535 2
 -8 16 16 6794.28 429.093 1
 -8 -16 16 7367.48 430.364 4
 8 16 -15 14783 599.043 2
 -8 -16 15 16184.1 619.256 4
 -8 16 15 14391 617.126 1
 8 16 -14 4354.13 326.374 2
 -8 16 14 4279.44 331.412 1
 -8 -16 14 4219.9 304.585 4
 8 16 -13 17467.1 642.792 2
 -8 16 13 16935.5 646.215 1
 -8 -16 13 17687.9 607.028 4
 -8 16 12 29256.7 830.158 1
 8 16 -12 31305.5 853.466 2
 -8 -16 12 31203.6 794.842 4
 -8 16 11 9096.65 449.565 1
 8 16 -11 10036 473.212 2
 -8 -16 11 10117.5 433.211 4
 -8 16 10 13975 559.97 1
 8 16 -10 13824.6 546.35 2
 -8 -16 10 14383.6 505.465 4
 -8 16 9 10949.5 484.317 1
 8 16 -9 10968.3 485.132 2
 8 16 -8 106.731 89.6119 2
 -8 16 8 -112.901 98.2002 1
 -8 16 7 50235.6 1044.43 1
 8 16 -7 53532.3 1076.84 2
 -8 16 6 30294 781.424 1
 8 16 -6 32955.3 826.846 2
 -8 16 5 2372.35 219.712 1
 8 16 -5 2921.86 240.767 2
 -8 16 4 55777.2 1037.6 1
 -8 16 4 55696.1 824.207 2
 8 16 -4 57046 1098.63 2
 -8 16 3 13354.1 392.506 2
 -8 16 3 13504.2 475.899 1
 8 16 -3 14897.8 541.241 2
 -8 16 2 26350.9 582.657 2
 -8 16 2 25815.4 663.565 1
 8 16 -2 26652.2 727.327 2
 -8 16 1 58709 1027.86 1
 8 16 -1 60479.9 1122.05 2
 -8 16 0 16322.7 510.567 1
 8 16 0 16171.8 558.441 2
 -8 16 0 17382.9 697.88 3
 -8 16 -1 32822.4 735.548 1
 8 16 1 30976.3 784.766 2
 -8 16 -1 31537.2 970.193 3
 -8 16 -2 15723.1 673.767 3
 8 16 2 16754.2 579.616 2
 -8 16 -2 16461.3 503.736 1
 -8 -16 -2 16966.6 510.827 5
 -8 -16 -3 3539.77 239.733 5
 -8 16 -3 3518.5 226.061 1
 -8 16 -3 3161.56 315.378 3
 8 16 3 3399.36 267.993 2
 8 16 4 24702 716.95 1
 -8 16 -4 25228.6 609.874 1
 -8 16 -4 25546 876.804 3
 -8 -16 -4 25069.4 650.632 5
 8 16 4 25176.5 722.169 2
 -8 -16 -5 12707.4 467.363 5
 -8 16 -5 12451.8 623.602 3
 -8 16 -5 12704.9 415.789 1
 8 16 5 12728.2 517.762 2
 8 16 5 11952.1 498.923 1
 8 16 6 19264.8 642.737 1
 -8 16 -6 21507.2 848.99 3
 8 16 6 21613.8 681.767 2
 -8 -16 -6 18104.2 587.107 5
 -8 16 -6 21797.2 538.382 1
 -8 -16 -7 46577 938.383 3
 -8 -16 -7 44118.9 932.16 5
 -8 16 -7 45234.2 1274.11 3
 8 16 7 43243.7 992.916 2
 -8 -16 -8 1009.56 155.452 3
 -8 -16 -8 856.606 141.169 5
 -8 16 -8 558.891 182.272 3
 8 16 8 779.68 153.8 2
 8 16 8 645.08 136.893 1
 -8 -16 -9 6944.18 378.587 3
 8 16 9 5710.43 360.117 1
 -8 16 -9 7361.93 529.161 3
 -8 -16 -9 6908.97 374.34 5
 8 16 9 6557.64 388.753 2
 -8 -16 -10 20608.5 706.907 3
 -8 16 -10 19649.9 890.818 3
 8 16 10 17796.5 636.28 1
 8 16 10 17943.9 653.678 2
 -8 -16 -10 19141.9 637.665 5
 -8 -16 -11 6714.95 415.145 3
 -8 16 -11 5060.67 472.224 3
 -8 -16 -11 5987.55 363.547 5
 8 16 11 5351.66 362.96 2
 8 16 11 4609.31 326.349 1
 -8 -16 -12 21511.9 713.759 5
 -8 16 -12 22097.1 971.815 3
 -8 -16 -12 23390 793.844 3
[truncated: 393,207 more chars]
