# Supplementary material
Source: publisher figshare collection journal article supplement (https://acs.figshare.com/ndownloader/files/4205155)
Supplement: Supplementary file 27 [file 4205155 › CIFs/Ni/NiEr/NiEr.cif]

data_NiEr
_audit_creation_date              2015-02-16
_audit_creation_method
;
Olex2 1.2
(compiled 2015.01.26 svn.r3151 for OlexSys, GUI svn.r4998)
;
_publ_contact_author_address      
;
The University of Manchester
School of Chemistry
Oxford Road, 
Manchester
M13 9PL
United Kingdom
;
_publ_contact_author_email        eufemio.morenopineda@manchester.ac.uk
_publ_contact_author_name         'Eufemio Moreno Pineda'
_publ_contact_author_phone        '+44 074 1192 4293'
_publ_section_references
;
Dolomanov, O.V., Bourhis, L.J., Gildea, R.J, Howard, J.A.K. & Puschmann, H.
 (2009), J. Appl. Cryst. 42, 339-341.

Sheldrick, G.M. (2008). Acta Cryst. A64, 112-122.
;
_chemical_name_common             ?
_chemical_name_systematic         ?
_chemical_formula_moiety          'C50 H90 Er2 Ni2 O22, 2(C6 H16 N)'
_chemical_formula_sum             'C62 H122 Er2 N2 Ni2 O22'
_chemical_formula_weight          1699.55
_chemical_melting_point           ?
loop_
  _atom_type_symbol
  _atom_type_description
  _atom_type_scat_dispersion_real
  _atom_type_scat_dispersion_imag
  _atom_type_scat_source
 'C' 'C' 0.0033 0.0016 'International Tables Vol C Tables 4.2.6.8 and 6.1.1.4'
 'H' 'H' 0.0000 0.0000 'International Tables Vol C Tables 4.2.6.8 and 6.1.1.4'
 'Er' 'Er' -0.2586 4.9576
 'International Tables Vol C Tables 4.2.6.8 and 6.1.1.4'
 'N' 'N' 0.0061 0.0033 'International Tables Vol C Tables 4.2.6.8 and 6.1.1.4'
 'Ni' 'Ni' 0.3393 1.1124 'International Tables Vol C Tables 4.2.6.8 and 6.1.1.4'
 'O' 'O' 0.0106 0.0060 'International Tables Vol C Tables 4.2.6.8 and 6.1.1.4'

_shelx_space_group_comment
;
The symmetry employed for this shelxl refinement is uniquely defined
by the following loop, which should always be used as a source of
symmetry information in preference to the above space-group names.
They are only intended as comments.
;
_space_group_crystal_system       'monoclinic'
_space_group_IT_number            15
_space_group_name_H-M_alt         'C 1 2/c 1'
_space_group_name_Hall            '-C 2yc'
loop_
  _space_group_symop_operation_xyz
 'x, y, z'
 '-x, y, -z+1/2'
 'x+1/2, y+1/2, z'
 '-x+1/2, y+1/2, -z+1/2'
 '-x, -y, -z'
 'x, -y, z-1/2'
 '-x+1/2, -y+1/2, -z'
 'x+1/2, -y+1/2, z-1/2'

_cell_length_a                    20.7791(3)
_cell_length_b                    21.3052(2)
_cell_length_c                    18.3054(2)
_cell_angle_alpha                 90
_cell_angle_beta                  101.5961(12)
_cell_angle_gamma                 90
_cell_volume                      7938.44(16)
_cell_formula_units_Z             4
_cell_measurement_reflns_used     12756
_cell_measurement_temperature     150.0(1)
_cell_measurement_theta_max       29.3390
_cell_measurement_theta_min       3.1460
_shelx_estimated_absorpt_T_max    ?
_shelx_estimated_absorpt_T_min    ?
_exptl_absorpt_coefficient_mu     2.624
_exptl_absorpt_correction_T_max   1.00000
_exptl_absorpt_correction_T_min   0.92961
_exptl_absorpt_correction_type    multi-scan
_exptl_absorpt_process_details
;
CrysAlisPro, Agilent Technologies,
Version 1.171.36.28 (release 01-02-2013 CrysAlis171 .NET)
(compiled Feb  1 2013,16:14:44)
Empirical absorption correction using spherical harmonics,
 implemented in SCALE3 ABSPACK scaling algorithm.
;
_exptl_absorpt_special_details    ?
_exptl_crystal_colour             'clear green'
_exptl_crystal_colour_lustre      clear
_exptl_crystal_colour_primary     green
_exptl_crystal_density_diffrn     1.422
_exptl_crystal_density_meas       ?
_exptl_crystal_density_method     ?
_exptl_crystal_description        rhombohedral
_exptl_crystal_F_000              3504
_exptl_crystal_size_max           0.1
_exptl_crystal_size_mid           0.1
_exptl_crystal_size_min           0.05
_exptl_transmission_factor_max    ?
_exptl_transmission_factor_min    ?
_diffrn_reflns_av_R_equivalents   0.0366
_diffrn_reflns_av_unetI/netI      0.0438
_diffrn_reflns_Laue_measured_fraction_full 0.998
_diffrn_reflns_Laue_measured_fraction_max 0.998
_diffrn_reflns_limit_h_max        20
_diffrn_reflns_limit_h_min        -25
_diffrn_reflns_limit_k_max        26
_diffrn_reflns_limit_k_min        -26
_diffrn_reflns_limit_l_max        22
_diffrn_reflns_limit_l_min        -22
_diffrn_reflns_number             21955
_diffrn_reflns_point_group_measured_fraction_full 0.998
_diffrn_reflns_point_group_measured_fraction_max 0.998
_diffrn_reflns_theta_full         25.242
_diffrn_reflns_theta_max          26.372
_diffrn_reflns_theta_min          3.038
_diffrn_ambient_temperature       150.0(1)
_diffrn_detector_area_resol_mean  10.3705
_diffrn_measured_fraction_theta_full 0.998
_diffrn_measured_fraction_theta_max 0.998
_diffrn_measurement_details
;
#__ type_ start__ end____ width___ exp.time_
  1 omega   73.00   99.00   1.0000    3.0000
omega____ theta____ kappa____ phi______ frames
    -       11.6555 -178.0000 -150.0000 26

#__ type_ start__ end____ width___ exp.time_
  2 omega  -27.00   38.00   1.0000    3.0000
omega____ theta____ kappa____ phi______ frames
    -       11.6555  -37.0000  -30.0000 65

#__ type_ start__ end____ width___ exp.time_
  3 omega  -29.00   93.00   1.0000    3.0000
omega____ theta____ kappa____ phi______ frames
    -       11.6555   19.0000 -180.0000 122
;
_diffrn_measurement_device_type   'SuperNova, Single source at offset, Atlas'
_diffrn_measurement_method        '\w scans'
_diffrn_orient_matrix_UB_11       -0.0135209000
_diffrn_orient_matrix_UB_12       0.0183130000
_diffrn_orient_matrix_UB_13       -0.0317392000
_diffrn_orient_matrix_UB_21       0.0287828000
_diffrn_orient_matrix_UB_22       -0.0049483000
_diffrn_orient_matrix_UB_23       -0.0145258000
_diffrn_orient_matrix_UB_31       -0.0142482000
_diffrn_orient_matrix_UB_32       -0.0273541000
_diffrn_orient_matrix_UB_33       -0.0186074000
_diffrn_radiation_monochromator   mirror
_diffrn_radiation_type            MoK\a
_diffrn_radiation_wavelength      0.71073
_diffrn_source                    'SuperNova (Mo) X-ray Source'
_reflns_Friedel_coverage          0.000
_reflns_Friedel_fraction_full     .
_reflns_Friedel_fraction_max      .
_reflns_number_gt                 6947
_reflns_number_total              8117
_reflns_odcompleteness_completeness 99.78
_reflns_odcompleteness_iscentric  1
_reflns_odcompleteness_theta      26.32
_reflns_special_details
;
 Reflections were merged by SHELXL according to the crystal
 class for the calculation of statistics and refinement.
 
 _reflns_Friedel_fraction is defined as the number of unique
 Friedel pairs measured divided by the number that would be
 possible theoretically, ignoring centric projections and
 systematic absences.
;
_reflns_threshold_expression      'I > 2\s(I)'
_computing_cell_refinement
;
CrysAlisPro, Agilent Technologies,
Version 1.171.36.32 (release 02-08-2013 CrysAlis171 .NET)
(compiled Aug  2 2013,16:46:58)
;
_computing_data_collection
;
CrysAlisPro, Agilent Technologies,
Version 1.171.36.32 (release 02-08-2013 CrysAlis171 .NET)
(compiled Aug  2 2013,16:46:58)
;
_computing_data_reduction
;
CrysAlisPro, Agilent Technologies,
Version 1.171.36.32 (release 02-08-2013 CrysAlis171 .NET)
(compiled Aug  2 2013,16:46:58)
;
_computing_molecular_graphics     'Olex2 (Dolomanov et al., 2009)'
_computing_publication_material   'Olex2 (Dolomanov et al., 2009)'
_computing_structure_refinement   'ShelXL (Sheldrick, 2008)'
_computing_structure_solution     'ShelXS (Sheldrick, 2008)'
_refine_diff_density_max          0.792
_refine_diff_density_min          -0.594
_refine_diff_density_rms          0.085
_refine_ls_extinction_coef        .
_refine_ls_extinction_method      none
_refine_ls_goodness_of_fit_ref    1.030
_refine_ls_hydrogen_treatment     constr
_refine_ls_matrix_type            full
_refine_ls_number_parameters      424
_refine_ls_number_reflns          8117
_refine_ls_number_restraints      0
_refine_ls_R_factor_all           0.0331
_refine_ls_R_factor_gt            0.0249
_refine_ls_restrained_S_all       1.030
_refine_ls_shift/su_max           0.002
_refine_ls_shift/su_mean          0.000
_refine_ls_structure_factor_coef  Fsqd
_refine_ls_weighting_details
'w=1/[\s^2^(Fo^2^)+(0.0187P)^2^] where P=(Fo^2^+2Fc^2^)/3'
_refine_ls_weighting_scheme       calc
_refine_ls_wR_factor_gt           0.0504
_refine_ls_wR_factor_ref          0.0537
_refine_special_details           ?
_olex2_refinement_description
;
1. Fixed Uiso
 At 1.2 times of:
  All C(H,H) groups, All N(H) groups
 At 1.5 times of:
  All C(H,H,H) groups
2.a Ternary CH refined with riding coordinates:
 N1(H1)
2.b Secondary CH2 refined with riding coordinates:
 C25(H25A,H25B), C27(H27A,H27B), C29(H29A,H29B)
2.c Idealised Me refined as rotating group:
 C3(H3A,H3B,H3C), C4(H4A,H4B,H4C), C5(H5A,H5B,H5C), C8(H8A,H8B,H8C), C9(H9A,
 H9B,H9C), C10(H10A,H10B,H10C), C13(H13A,H13B,H13C), C14(H14A,H14B,H14C),
 C15(H15A,H15B,H15C), C18(H18A,H18B,H18C), C19(H19A,H19B,H19C), C20(H20A,H20B,
 H20C), C22(H22A,H22B,H22C), C23(H23A,H23B,H23C), C24(H24A,H24B,H24C), C26(H26A,
 H26B,H26C), C28(H28A,H28B,H28C), C30(H30A,H30B,H30C)
;
_atom_sites_solution_hydrogens    geom
_atom_sites_solution_primary      direct
_atom_sites_solution_secondary    ?
loop_
  _atom_site_label
  _atom_site_type_symbol
  _atom_site_fract_x
  _atom_site_fract_y
  _atom_site_fract_z
  _atom_site_U_iso_or_equiv
  _atom_site_adp_type
  _atom_site_occupancy
  _atom_site_site_symmetry_order
  _atom_site_calc_flag
  _atom_site_refinement_flags_posn
  _atom_site_refinement_flags_adp
  _atom_site_refinement_flags_occupancy
  _atom_site_disorder_assembly
  _atom_site_disorder_group
 Er1 Er 0.25060(2) 0.28854(2) 0.65911(2) 0.01507(4) Uani 1 1 d . . . . .
 Ni1 Ni 0.25438(2) 0.32104(2) 0.47709(2) 0.01573(8) Uani 1 1 d . . . . .
 O1 O 0.28292(9) 0.31017(8) 0.78007(9) 0.0210(4) Uani 1 1 d . . . . .
 O1OH O 0.20413(8) 0.24025(7) 0.43955(8) 0.0141(4) Uani 1 1 d . . . . .
 O2 O 0.29186(9) 0.27690(8) 0.89607(10) 0.0257(4) Uani 1 1 d . . . . .
 O4 O 0.16039(10) 0.23184(8) 0.69903(10) 0.0261(4) Uani 1 1 d . . . . .
 O5 O 0.30291(9) 0.19674(8) 0.69989(9) 0.0225(4) Uani 1 1 d . . . . .
 O6 O 0.32025(9) 0.29052(7) 0.41077(9) 0.0191(4) Uani 1 1 d . . . . .
 O7 O 0.31186(9) 0.37470(8) 0.64421(9) 0.0219(4) Uani 1 1 d . . . . .
 O8 O 0.30899(9) 0.39499(8) 0.52312(9) 0.0225(4) Uani 1 1 d . . . . .
 O9 O 0.16447(9) 0.36635(8) 0.65249(9) 0.0267(5) Uani 1 1 d . . . . .
 O10 O 0.18742(9) 0.33658(8) 0.54675(9) 0.0201(4) Uani 1 1 d . . . . .
 O11 O 0.20779(9) 0.37482(7) 0.39130(9) 0.0209(4) Uani 1 1 d . . . . .
 C1 C 0.31703(14) 0.29553(11) 0.84329(14) 0.0189(6) Uani 1 1 d . . . . .
 C2 C 0.39124(14) 0.30610(13) 0.85733(15) 0.0243(6) Uani 1 1 d . . . . .
 C3 C 0.40176(17) 0.37329(14) 0.88713(19) 0.0458(9) Uani 1 1 d . . . . .
 H3A H 0.3788 0.4021 0.8506 0.069 Uiso 1 1 calc GR . . . .
 H3B H 0.4478 0.3829 0.8971 0.069 Uiso 1 1 calc GR . . . .
 H3C H 0.3853 0.3770 0.9323 0.069 Uiso 1 1 calc GR . . . .
 C4 C 0.41823(15) 0.29952(15) 0.78637(16) 0.0361(8) Uani 1 1 d . . . . .
 H4A H 0.4089 0.2582 0.7661 0.054 Uiso 1 1 calc GR . . . .
 H4B H 0.4649 0.3061 0.7976 0.054 Uiso 1 1 calc GR . . . .
 H4C H 0.3979 0.3301 0.7506 0.054 Uiso 1 1 calc GR . . . .
 C5 C 0.42711(15) 0.25976(15) 0.91575(16) 0.0365(8) Uani 1 1 d . . . . .
 H5A H 0.4120 0.2652 0.9616 0.055 Uiso 1 1 calc GR . . . .
 H5B H 0.4735 0.2675 0.9242 0.055 Uiso 1 1 calc GR . . . .
 H5C H 0.4183 0.2176 0.8980 0.055 Uiso 1 1 calc GR . . . .
 C6 C 0.14839(13) 0.19906(11) 0.64110(14) 0.0174(6) Uani 1 1 d . . . . .
 C7 C 0.09721(13) 0.14729(12) 0.63157(14) 0.0223(6) Uani 1 1 d . . . . .
 C8 C 0.05453(15) 0.15252(14) 0.69032(16) 0.0346(7) Uani 1 1 d . . . . .
 H8A H 0.0814 0.1469 0.7391 0.052 Uiso 1 1 calc GR . . . .
 H8B H 0.0211 0.1208 0.6815 0.052 Uiso 1 1 calc GR . . . .
 H8C H 0.0343 0.1932 0.6873 0.052 Uiso 1 1 calc GR . . . .
 C9 C 0.05405(15) 0.15226(15) 0.55312(16) 0.0370(8) Uani 1 1 d . . . . .
 H9A H 0.0325 0.1923 0.5475 0.055 Uiso 1 1 calc GR . . . .
 H9B H 0.0217 0.1195 0.5463 0.055 Uiso 1 1 calc GR . . . .
 H9C H 0.0810 0.1481 0.5165 0.055 Uiso 1 1 calc GR . . . .
 C10 C 0.13358(15) 0.08446(12) 0.64001(16) 0.0307(7) Uani 1 1 d . . . . .
 H10A H 0.1602 0.0813 0.6030 0.046 Uiso 1 1 calc GR . . . .
 H10B H 0.1023 0.0508 0.6335 0.046 Uiso 1 1 calc GR . . . .
 H10C H 0.1611 0.0819 0.6888 0.046 Uiso 1 1 calc GR . . . .
 C11 C 0.30805(12) 0.14178(11) 0.67575(14) 0.0184(6) Uani 1 1 d . . . . .
 C12 C 0.33794(14) 0.09185(12) 0.73304(14) 0.0221(6) Uani 1 1 d . . . . .
 C13 C 0.41275(15) 0.09656(16) 0.74244(19) 0.0455(9) Uani 1 1 d . . . . .
 H13A H 0.4251 0.0874 0.6958 0.068 Uiso 1 1 calc GR . . . .
 H13B H 0.4333 0.0670 0.7795 0.068 Uiso 1 1 calc GR . . . .
 H13C H 0.4267 0.1383 0.7580 0.068 Uiso 1 1 calc GR . . . .
 C14 C 0.31496(16) 0.02646(12) 0.70670(16) 0.0334(8) Uani 1 1 d . . . . .
 H14A H 0.2679 0.0246 0.6984 0.050 Uiso 1 1 calc GR . . . .
 H14B H 0.3334 -0.0037 0.7440 0.050 Uiso 1 1 calc GR . . . .
 H14C H 0.3290 0.0172 0.6610 0.050 Uiso 1 1 calc GR . . . .
 C15 C 0.31853(17) 0.10584(13) 0.80772(14) 0.0349(8) Uani 1 1 d . . . . .
 H15A H 0.3343 0.1467 0.8248 0.052 Uiso 1 1 calc GR . . . .
 H15B H 0.3375 0.0748 0.8437 0.052 Uiso 1 1 calc GR . . . .
 H15C H 0.2716 0.1048 0.8015 0.052 Uiso 1 1 calc GR . . . .
 C16 C 0.32532(13) 0.40750(11) 0.59143(14) 0.0187(6) Uani 1 1 d . . . . .
 C17 C 0.36406(14) 0.46824(12) 0.61379(14) 0.0233(6) Uani 1 1 d . . . . .
 C18 C 0.3227(2) 0.50855(15) 0.6546(2) 0.0585(11) Uani 1 1 d . . . . .
 H18A H 0.2808 0.5163 0.6228 0.088 Uiso 1 1 calc GR . . . .
 H18B H 0.3446 0.5477 0.6682 0.088 Uiso 1 1 calc GR . . . .
 H18C H 0.3164 0.4871 0.6988 0.088 Uiso 1 1 calc GR . . . .
 C19 C 0.42865(18) 0.45211(17) 0.6652(2) 0.0752(14) Uani 1 1 d . . . . .
 H19A H 0.4202 0.4309 0.7085 0.113 Uiso 1 1 calc GR . . . .
 H19B H 0.4528 0.4900 0.6801 0.113 Uiso 1 1 calc GR . . . .
 H19C H 0.4539 0.4253 0.6395 0.113 Uiso 1 1 calc GR . . . .
 C20 C 0.3766(2) 0.50401(14) 0.54615(17) 0.0521(10) Uani 1 1 d . . . . .
 H20A H 0.4050 0.4799 0.5217 0.078 Uiso 1 1 calc GR . . . .
 H20B H 0.3969 0.5435 0.5618 0.078 Uiso 1 1 calc GR . . . .
 H20C H 0.3356 0.5112 0.5122 0.078 Uiso 1 1 calc GR . . . .
 C21 C 0.09987(13) 0.41203(12) 0.54002(14) 0.0222(6) Uani 1 1 d . . . . .
 C22 C 0.05790(16) 0.43837(16) 0.59189(17) 0.0423(8) Uani 1 1 d . . . . .
 H22A H 0.0855 0.4597 0.6328 0.064 Uiso 1 1 calc GR . . . .
 H22B H 0.0352 0.4047 0.6107 0.064 Uiso 1 1 calc GR . . . .
 H22C H 0.0265 0.4674 0.5650 0.064 Uiso 1 1 calc GR . . . .
 C23 C 0.13434(15) 0.46640(13) 0.50781(17) 0.0355(8) Uani 1 1 d . . . . .
 H23A H 0.1019 0.4937 0.4794 0.053 Uiso 1 1 calc GR . . . .
 H23B H 0.1619 0.4498 0.4761 0.053 Uiso 1 1 calc GR . . . .
 H23C H 0.1607 0.4896 0.5479 0.053 Uiso 1 1 calc GR . . . .
 C24 C 0.05866(16) 0.37452(15) 0.47681(18) 0.0488(9) Uani 1 1 d . . . . .
 H24A H 0.0379 0.3402 0.4971 0.073 Uiso 1 1 calc GR . . . .
 H24B H 0.0864 0.3584 0.4451 0.073 Uiso 1 1 calc GR . . . .
 H24C H 0.0256 0.4012 0.4484 0.073 Uiso 1 1 calc GR . . . .
 C33 C 0.15332(13) 0.36988(11) 0.58257(14) 0.0171(6) Uani 1 1 d . . . . .
 N1 N 0.33522(11) 0.19211(10) 1.11976(12) 0.0223(5) Uani 1 1 d . . . . .
 H1 H 0.2909 0.2067 1.1217 0.027 Uiso 1 1 calc R . . . .
 C25 C 0.33184(15) 0.16652(13) 1.04249(15) 0.0302(7) Uani 1 1 d . . . . .
 H25A H 0.3754 0.1534 1.0374 0.036 Uiso 1 1 calc R . . . .
 H25B H 0.3176 0.1996 1.0065 0.036 Uiso 1 1 calc R . . . .
 C26 C 0.28546(17) 0.11157(13) 1.02509(17) 0.0411(8) Uani 1 1 d . . . . .
 H26A H 0.2804 0.1008 0.9733 0.062 Uiso 1 1 calc GR . . . .
 H26B H 0.2435 0.1227 1.0356 0.062 Uiso 1 1 calc GR . . . .
 H26C H 0.3030 0.0763 1.0552 0.062 Uiso 1 1 calc GR . . . .
 C27 C 0.35285(14) 0.14390(12) 1.18005(15) 0.0248(6) Uani 1 1 d . . . . .
 H27A H 0.3189 0.1120 1.1732 0.030 Uiso 1 1 calc R . . . .
 H27B H 0.3537 0.1638 1.2279 0.030 Uiso 1 1 calc R . . . .
 C28 C 0.41838(14) 0.11252(14) 1.18181(17) 0.0361(8) Uani 1 1 d . . . . .
 H28A H 0.4164 0.0886 1.1370 0.054 Uiso 1 1 calc GR . . . .
 H28B H 0.4284 0.0851 1.2242 0.054 Uiso 1 1 calc GR . . . .
 H28C H 0.4520 0.1439 1.1853 0.054 Uiso 1 1 calc GR . . . .
 C29 C 0.37884(15) 0.24825(12) 1.13379(16) 0.0302(7) Uani 1 1 d . . . . .
 H29A H 0.4186 0.2401 1.1152 0.036 Uiso 1 1 calc R . . . .
 H29B H 0.3913 0.2552 1.1871 0.036 Uiso 1 1 calc R . . . .
 C30 C 0.34651(16) 0.30659(13) 1.09716(17) 0.0370(8) Uani 1 1 d . . . . .
 H30A H 0.3340 0.2999 1.0443 0.055 Uiso 1 1 calc GR . . . .
 H30B H 0.3767 0.3411 1.1068 0.055 Uiso 1 1 calc GR . . . .
 H30C H 0.3082 0.3159 1.1170 0.055 Uiso 1 1 calc GR . . . .

loop_
  _atom_site_aniso_label
  _atom_site_aniso_U_11
  _atom_site_aniso_U_22
  _atom_site_aniso_U_33
  _atom_site_aniso_U_23
  _atom_site_aniso_U_13
  _atom_site_aniso_U_12
 Er1 0.01814(7) 0.01810(7) 0.00952(6) 0.00096(4) 0.00410(5) 0.00226(5)
 Ni1 0.02021(19) 0.01726(16) 0.01032(16) 0.00094(13) 0.00447(14) 0.00153(15)
 O1 0.0230(11) 0.0279(10) 0.0115(9) -0.0003(7) 0.0022(8) 0.0025(9)
 O1OH 0.0177(10) 0.0154(8) 0.0095(8) 0.0005(7) 0.0035(7) 0.0009(8)
 O2 0.0206(11) 0.0400(11) 0.0170(10) 0.0081(8) 0.0054(8) 0.0037(9)
 O4 0.0293(12) 0.0325(10) 0.0207(10) -0.0089(8) 0.0147(9) -0.0087(9)
 O5 0.0305(12) 0.0212(9) 0.0142(9) 0.0007(7) 0.0008(8) 0.0072(9)
 O6 0.0192(10) 0.0252(10) 0.0140(9) 0.0027(7) 0.0058(8) -0.0013(8)
 O7 0.0288(11) 0.0227(9) 0.0147(9) 0.0001(8) 0.0056(8) -0.0047(9)
 O8 0.0326(12) 0.0217(9) 0.0143(10) -0.0021(7) 0.0073(8) -0.0045(9)
 O9 0.0294(11) 0.0388(11) 0.0132(10) 0.0035(8) 0.0070(8) 0.0155(10)
 O10 0.0248(11) 0.0233(9) 0.0130(9) 0.0010(7) 0.0055(8) 0.0091(8)
 O11 0.0296(11) 0.0206(9) 0.0125(9) 0.0018(7) 0.0041(8) 0.0051(8)
 C1 0.0246(16) 0.0174(13) 0.0148(14) -0.0032(10) 0.0041(12) 0.0010(12)
 C2 0.0197(15) 0.0348(15) 0.0185(15) 0.0007(12) 0.0038(12) -0.0036(13)
 C3 0.040(2) 0.0456(19) 0.054(2) -0.0122(17) 0.0142(17) -0.0158(17)
 C4 0.0198(17) 0.060(2) 0.0297(18) 0.0030(15) 0.0085(14) -0.0009(15)
 C5 0.0208(17) 0.057(2) 0.0287(17) 0.0077(15) -0.0022(14) -0.0015(16)
 C6 0.0157(14) 0.0219(13) 0.0153(14) 0.0044(11) 0.0047(11) 0.0054(12)
 C7 0.0176(15) 0.0329(15) 0.0163(14) -0.0007(12) 0.0034(11) -0.0040(13)
 C8 0.0283(18) 0.0464(18) 0.0331(18) -0.0079(14) 0.0156(14) -0.0117(15)
 C9 0.0246(17) 0.055(2) 0.0278(17) 0.0002(15) -0.0028(14) -0.0067(16)
 C10 0.0385(19) 0.0276(15) 0.0276(16) 0.0034(12) 0.0103(14) -0.0030(14)
 C11 0.0130(14) 0.0223(14) 0.0204(14) 0.0066(11) 0.0046(11) 0.0033(12)
 C12 0.0246(16) 0.0231(14) 0.0174(14) 0.0045(11) 0.0016(12) 0.0050(13)
 C13 0.0283(19) 0.054(2) 0.051(2) 0.0251(17) 0.0012(16) 0.0130(17)
 C14 0.050(2) 0.0226(14) 0.0256(16) 0.0045(12) 0.0016(15) 0.0096(15)
 C15 0.059(2) 0.0278(15) 0.0179(15) 0.0094(12) 0.0079(15) 0.0065(16)
 C16 0.0174(14) 0.0195(13) 0.0209(15) -0.0002(11) 0.0078(12) 0.0046(12)
 C17 0.0278(16) 0.0214(14) 0.0211(15) -0.0011(11) 0.0058(12) -0.0041(13)
 C18 0.084(3) 0.0354(18) 0.069(3) -0.0227(18) 0.044(2) -0.014(2)
 C19 0.042(2) 0.055(2) 0.111(4) 0.029(2) -0.029(2) -0.023(2)
 C20 0.089(3) 0.0369(18) 0.036(2) -0.0058(15) 0.028(2) -0.033(2)
 C21 0.0185(15) 0.0271(14) 0.0209(14) 0.0026(11) 0.0035(12) 0.0078(12)
 C22 0.0333(19) 0.060(2) 0.0377(19) 0.0146(16) 0.0163(16) 0.0249(17)
 C23 0.041(2) 0.0304(16) 0.0380(18) 0.0125(14) 0.0142(15) 0.0125(15)
 C24 0.035(2) 0.054(2) 0.048(2) -0.0021(17) -0.0137(17) 0.0026(18)
 C33 0.0161(14) 0.0170(13) 0.0194(14) 0.0023(11) 0.0066(11) -0.0018(12)
 N1 0.0212(13) 0.0279(12) 0.0186(12) 0.0021(10) 0.0055(10) 0.0022(11)
 C25 0.0367(19) 0.0351(16) 0.0189(15) -0.0022(12) 0.0059(13) 0.0015(15)
 C26 0.048(2) 0.0333(17) 0.0378(19) -0.0074(14) -0.0016(16) 0.0051(16)
 C27 0.0268(16) 0.0283(15) 0.0201(15) 0.0046(12) 0.0068(12) 0.0039(13)
 C28 0.0257(17) 0.0461(18) 0.0363(18) 0.0111(15) 0.0056(14) 0.0092(15)
 C29 0.0311(18) 0.0316(16) 0.0294(17) -0.0023(13) 0.0093(14) -0.0060(14)
 C30 0.045(2) 0.0280(15) 0.0396(19) 0.0012(14) 0.0128(16) -0.0036(16)

_geom_special_details
;
 All esds (except the esd in the dihedral angle between two l.s. planes)
 are estimated using the full covariance matrix.  The cell esds are taken
 into account individually in the estimation of esds in distances, angles
 and torsion angles; correlations between esds in cell parameters are only
 used when they are defined by crystal symmetry.  An approximate (isotropic)
 treatment of cell esds is used for estimating esds involving l.s. planes.
;
loop_
  _geom_bond_atom_site_label_1
  _geom_bond_atom_site_label_2
  _geom_bond_distance
  _geom_bond_site_symmetry_2
  _geom_bond_publ_flag
 Er1 Ni1 3.4019(3) 7_556 ?
 Er1 Ni1 3.4194(3) . ?
 Er1 O1 2.2291(16) . ?
 Er1 O1OH 2.2815(16) 7_556 ?
 Er1 O4 2.4611(18) . ?
 Er1 O5 2.2886(17) . ?
 Er1 O6 2.4256(17) 7_556 ?
 Er1 O7 2.2812(17) . ?
 Er1 O9 2.4245(17) . ?
 Er1 O10 2.4321(16) . ?
 Er1 C6 2.823(3) . ?
 Er1 C33 2.813(2) . ?
 Ni1 Er1 3.4020(3) 7_556 ?
 Ni1 O1OH 2.0610(15) 7_556 ?
 Ni1 O1OH 2.0584(16) . ?
 Ni1 O6 2.1067(18) . ?
 Ni1 O8 2.0237(17) . ?
 Ni1 O10 2.0940(18) . ?
 Ni1 O11 2.0261(16) . ?
 O1 C1 1.268(3) . ?
 O1OH Er1 2.2815(16) 7_556 ?
 O1OH Ni1 2.0610(15) 7_556 ?
 O2 C1 1.252(3) . ?
 O4 C6 1.252(3) . ?
 O5 C11 1.264(3) . ?
 O6 Er1 2.4257(17) 7_556 ?
 O6 C6 1.274(3) 7_556 ?
 O7 C16 1.268(3) . ?
 O8 C16 1.257(3) . ?
 O9 C33 1.256(3) . ?
 O10 C33 1.274(3) . ?
 O11 C11 1.256(3) 7_556 ?
 C1 C2 1.528(4) . ?
 C2 C3 1.532(4) . ?
 C2 C4 1.521(4) . ?
 C2 C5 1.534(4) . ?
 C6 O6 1.274(3) 7_556 ?
 C6 C7 1.518(4) . ?
 C7 C8 1.529(4) . ?
 C7 C9 1.536(4) . ?
 C7 C10 1.530(4) . ?
 C11 O11 1.256(3) 7_556 ?
 C11 C12 1.535(3) . ?
 C12 C13 1.533(4) . ?
 C12 C14 1.519(4) . ?
 C12 C15 1.530(4) . ?
 C16 C17 1.536(4) . ?
 C17 C18 1.515(4) . ?
 C17 C19 1.516(4) . ?
 C17 C20 1.520(4) . ?
 C21 C22 1.520(4) . ?
 C21 C23 1.540(4) . ?
 C21 C24 1.521(4) . ?
 C21 C33 1.516(3) . ?
 N1 C25 1.504(3) . ?
 N1 C27 1.498(3) . ?
 N1 C29 1.492(3) . ?
 C25 C26 1.509(4) . ?
 C27 C28 1.511(4) . ?
 C29 C30 1.505(4) . ?

loop_
  _geom_angle_atom_site_label_1
  _geom_angle_atom_site_label_2
  _geom_angle_atom_site_label_3
  _geom_angle
  _geom_angle_site_symmetry_1
  _geom_angle_site_symmetry_3
  _geom_angle_publ_flag
 Ni1 Er1 Ni1 55.119(9) 7_556 . ?
 O1 Er1 Ni1 145.95(4) . 7_556 ?
 O1 Er1 Ni1 149.85(5) . . ?
 O1 Er1 O1OH 138.77(6) . 7_556 ?
 O1 Er1 O4 84.37(6) . . ?
 O1 Er1 O5 79.87(6) . . ?
 O1 Er1 O6 134.20(6) . 7_556 ?
 O1 Er1 O7 83.59(6) . . ?
 O1 Er1 O9 88.87(6) . . ?
 O1 Er1 O10 139.17(6) . . ?
 O1 Er1 C6 108.97(7) . . ?
 O1 Er1 C33 114.22(7) . . ?
 O1OH Er1 Ni1 35.83(4) 7_556 . ?
 O1OH Er1 Ni1 36.10(4) 7_556 7_556 ?
 O1OH Er1 O4 124.26(6) 7_556 . ?
 O1OH Er1 O5 77.53(6) 7_556 . ?
 O1OH Er1 O6 72.48(6) 7_556 7_556 ?
 O1OH Er1 O9 124.19(6) 7_556 . ?
 O1OH Er1 O10 71.46(6) 7_556 . ?
 O1OH Er1 C6 98.41(7) 7_556 . ?
 O1OH Er1 C33 98.09(6) 7_556 . ?
 O4 Er1 Ni1 88.17(4) . 7_556 ?
 O4 Er1 Ni1 123.83(4) . . ?
 O4 Er1 C6 26.29(6) . . ?
 O4 Er1 C33 86.35(7) . . ?
 O5 Er1 Ni1 66.12(4) . 7_556 ?
 O5 Er1 Ni1 112.86(4) . . ?
 O5 Er1 O4 79.86(7) . . ?
 O5 Er1 O6 77.10(6) . 7_556 ?
 O5 Er1 O9 153.90(7) . . ?
 O5 Er1 O10 140.87(6) . . ?
 O5 Er1 C6 75.99(7) . . ?
 O5 Er1 C33 159.32(7) . . ?
 O6 Er1 Ni1 75.95(4) 7_556 . ?
 O6 Er1 Ni1 37.93(4) 7_556 7_556 ?
 O6 Er1 O4 52.99(6) 7_556 . ?
 O6 Er1 O10 71.28(5) 7_556 . ?
 O6 Er1 C6 26.75(6) 7_556 . ?
 O6 Er1 C33 82.30(6) 7_556 . ?
 O7 Er1 Ni1 66.29(4) . . ?
 O7 Er1 Ni1 113.59(4) . 7_556 ?
 O7 Er1 O1OH 78.05(6) . 7_556 ?
 O7 Er1 O4 155.10(6) . . ?
 O7 Er1 O5 119.13(7) . . ?
 O7 Er1 O6 142.17(6) . 7_556 ?
 O7 Er1 O9 82.40(7) . . ?
 O7 Er1 O10 77.27(6) . . ?
 O7 Er1 C6 162.57(7) . . ?
 O7 Er1 C33 78.88(7) . . ?
 O9 Er1 Ni1 121.28(4) . 7_556 ?
 O9 Er1 Ni1 88.52(4) . . ?
 O9 Er1 O4 75.63(6) . . ?
 O9 Er1 O6 94.87(6) . 7_556 ?
 O9 Er1 O10 53.31(6) . . ?
 O9 Er1 C6 85.73(7) . . ?
 O9 Er1 C33 26.45(6) . . ?
 O10 Er1 Ni1 37.35(4) . . ?
 O10 Er1 Ni1 74.77(4) . 7_556 ?
 O10 Er1 O4 98.27(6) . . ?
 O10 Er1 C6 85.41(6) . . ?
 O10 Er1 C33 26.87(6) . . ?
 C6 Er1 Ni1 100.78(5) . . ?
 C6 Er1 Ni1 62.60(5) . 7_556 ?
 C33 Er1 Ni1 98.33(5) . 7_556 ?
 C33 Er1 Ni1 62.93(5) . . ?
 C33 Er1 C6 84.81(7) . . ?
 Er1 Ni1 Er1 124.879(9) 7_556 . ?
 O1OH Ni1 Er1 93.12(4) 7_556 7_556 ?
 O1OH Ni1 Er1 40.78(5) . 7_556 ?
 O1OH Ni1 Er1 40.39(5) 7_556 . ?
 O1OH Ni1 Er1 92.67(4) . . ?
 O1OH Ni1 O1OH 79.98(7) . 7_556 ?
 O1OH Ni1 O6 90.44(7) 7_556 . ?
 O1OH Ni1 O6 83.93(6) . . ?
 O1OH Ni1 O10 88.91(7) . . ?
 O1OH Ni1 O10 83.08(6) 7_556 . ?
 O6 Ni1 Er1 45.04(5) . 7_556 ?
 O6 Ni1 Er1 130.08(5) . . ?
 O8 Ni1 Er1 140.47(5) . 7_556 ?
 O8 Ni1 Er1 82.69(5) . . ?
 O8 Ni1 O1OH 173.93(7) . . ?
 O8 Ni1 O1OH 93.95(6) . 7_556 ?
 O8 Ni1 O6 96.05(7) . . ?
 O8 Ni1 O10 90.52(7) . . ?
 O8 Ni1 O11 91.32(7) . . ?
 O10 Ni1 Er1 128.95(5) . 7_556 ?
 O10 Ni1 Er1 44.80(4) . . ?
 O10 Ni1 O6 171.09(6) . . ?
 O11 Ni1 Er1 83.14(5) . 7_556 ?
 O11 Ni1 Er1 140.25(5) . . ?
 O11 Ni1 O1OH 94.75(7) . . ?
 O11 Ni1 O1OH 174.70(7) . 7_556 ?
 O11 Ni1 O6 89.56(7) . . ?
 O11 Ni1 O10 96.33(7) . . ?
 C1 O1 Er1 148.97(16) . . ?
 Ni1 O1OH Er1 103.12(7) . 7_556 ?
 Ni1 O1OH Er1 103.78(7) 7_556 7_556 ?
 Ni1 O1OH Ni1 100.02(7) . 7_556 ?
 C6 O4 Er1 93.22(15) . . ?
 C11 O5 Er1 138.23(16) . . ?
 Ni1 O6 Er1 97.03(7) . 7_556 ?
 C6 O6 Er1 94.30(15) 7_556 7_556 ?
 C6 O6 Ni1 149.80(16) 7_556 . ?
 C16 O7 Er1 138.43(16) . . ?
 C16 O8 Ni1 126.59(16) . . ?
 C33 O9 Er1 94.30(15) . . ?
 Ni1 O10 Er1 97.85(7) . . ?
 C33 O10 Er1 93.48(14) . . ?
 C33 O10 Ni1 155.24(16) . . ?
 C11 O11 Ni1 126.08(15) 7_556 . ?
 O1 C1 C2 118.5(2) . . ?
 O2 C1 O1 122.6(3) . . ?
 O2 C1 C2 118.7(2) . . ?
 C1 C2 C3 105.3(2) . . ?
 C1 C2 C5 110.8(2) . . ?
 C3 C2 C5 109.8(2) . . ?
 C4 C2 C1 112.1(2) . . ?
 C4 C2 C3 109.8(2) . . ?
 C4 C2 C5 109.0(2) . . ?
 O4 C6 Er1 60.50(13) . . ?
 O4 C6 O6 119.3(2) . 7_556 ?
 O4 C6 C7 121.2(2) . . ?
 O6 C6 Er1 58.95(13) 7_556 . ?
 O6 C6 C7 119.5(2) 7_556 . ?
 C7 C6 Er1 175.84(18) . . ?
 C6 C7 C8 111.0(2) . . ?
 C6 C7 C9 108.7(2) . . ?
 C6 C7 C10 107.7(2) . . ?
 C8 C7 C9 109.9(2) . . ?
 C8 C7 C10 109.7(2) . . ?
 C10 C7 C9 109.8(2) . . ?
 O5 C11 C12 117.0(2) . . ?
 O11 C11 O5 125.3(2) 7_556 . ?
 O11 C11 C12 117.6(2) 7_556 . ?
 C13 C12 C11 107.1(2) . . ?
 C14 C12 C11 111.1(2) . . ?
 C14 C12 C13 110.0(2) . . ?
 C14 C12 C15 109.9(2) . . ?
 C15 C12 C11 109.4(2) . . ?
 C15 C12 C13 109.3(2) . . ?
 O7 C16 C17 116.4(2) . . ?
 O8 C16 O7 125.8(2) . . ?
 O8 C16 C17 117.8(2) . . ?
 C18 C17 C16 106.9(2) . . ?
 C18 C17 C19 110.0(3) . . ?
 C18 C17 C20 108.9(3) . . ?
 C19 C17 C16 109.0(2) . . ?
 C19 C17 C20 110.2(3) . . ?
 C20 C17 C16 111.8(2) . . ?
 C22 C21 C23 109.3(2) . . ?
 C22 C21 C24 111.3(3) . . ?
 C24 C21 C23 109.8(2) . . ?
 C33 C21 C22 110.5(2) . . ?
 C33 C21 C23 107.0(2) . . ?
 C33 C21 C24 108.8(2) . . ?
 O9 C33 Er1 59.26(13) . . ?
 O9 C33 O10 118.9(2) . . ?
 O9 C33 C21 121.7(2) . . ?
 O10 C33 Er1 59.66(12) . . ?
 O10 C33 C21 119.4(2) . . ?
 C21 C33 Er1 178.27(18) . . ?
 C27 N1 C25 113.7(2) . . ?
 C29 N1 C25 111.4(2) . . ?
 C29 N1 C27 111.9(2) . . ?
 N1 C25 C26 112.8(2) . . ?
 N1 C27 C28 113.9(2) . . ?
 N1 C29 C30 112.6(2) . . ?

_shelx_SHELXL_version_number      '2014/7'
_iucr_refine_instructions_details
;

    arepw342.res created by SHELXL-2014/7

TITL arepw342 in C2/c #15
REM reset to C2/c #15
CELL 0.71073 20.77908 21.305238 18.305381 90 101.5961 90
ZERR 4 0.000261 0.000243 0.000201 0 0.0012 0
LATT 7
SYMM -X,+Y,0.5-Z
SFAC C H Er N Ni O
UNIT 248 488 8 8 8 88
 
L.S. 10
PLAN  20
BOND
fmap 2
acta
SHEL 100 0.8
REM <olex2.extras>
REM <HklSrc "%./arepw342.hkl">
REM </olex2.extras>
 
WGHT    0.018700
FVAR       1.19877
ER1   3    0.250595    0.288540    0.659107    11.00000    0.01814    0.01810 =
         0.00952    0.00096    0.00410    0.00226
NI1   5    0.254381    0.321041    0.477091    11.00000    0.02021    0.01726 =
         0.01032    0.00094    0.00447    0.00153
O1    6    0.282923    0.310172    0.780072    11.00000    0.02305    0.02791 =
         0.01148   -0.00028    0.00217    0.00249
O1OH  6    0.204134    0.240246    0.439547    11.00000    0.01770    0.01544 =
         0.00946    0.00046    0.00346    0.00089
O2    6    0.291856    0.276900    0.896068    11.00000    0.02059    0.04003 =
         0.01704    0.00809    0.00538    0.00366
O4    6    0.160392    0.231844    0.699029    11.00000    0.02926    0.03253 =
         0.02071   -0.00891    0.01474   -0.00866
O5    6    0.302911    0.196744    0.699891    11.00000    0.03053    0.02121 =
         0.01419    0.00065    0.00076    0.00716
O6    6    0.320254    0.290520    0.410771    11.00000    0.01922    0.02517 =
         0.01399    0.00269    0.00576   -0.00126
O7    6    0.311857    0.374698    0.644213    11.00000    0.02883    0.02265 =
         0.01472    0.00008    0.00562   -0.00470
O8    6    0.308990    0.394989    0.523122    11.00000    0.03256    0.02172 =
         0.01427   -0.00207    0.00726   -0.00453
O9    6    0.164473    0.366353    0.652491    11.00000    0.02940    0.03875 =
         0.01316    0.00345    0.00702    0.01548
O10   6    0.187418    0.336575    0.546752    11.00000    0.02479    0.02325 =
         0.01303    0.00103    0.00547    0.00909
O11   6    0.207792    0.374817    0.391296    11.00000    0.02957    0.02059 =
         0.01254    0.00175    0.00409    0.00510
C1    1    0.317030    0.295532    0.843287    11.00000    0.02462    0.01738 =
         0.01482   -0.00316    0.00410    0.00103
C2    1    0.391240    0.306102    0.857327    11.00000    0.01970    0.03483 =
         0.01847    0.00073    0.00375   -0.00359
C3    1    0.401765    0.373287    0.887131    11.00000    0.03977    0.04561 =
         0.05408   -0.01220    0.01416   -0.01577
AFIX 137
H3A   2    0.378783    0.402054    0.850642    11.00000   -1.50000
H3B   2    0.447832    0.382931    0.897117    11.00000   -1.50000
H3C   2    0.385275    0.376981    0.932314    11.00000   -1.50000
AFIX   0
C4    1    0.418230    0.299519    0.786368    11.00000    0.01978    0.06038 =
         0.02967    0.00296    0.00846   -0.00087
AFIX 137
H4A   2    0.408903    0.258176    0.766147    11.00000   -1.50000
H4B   2    0.464885    0.306091    0.797606    11.00000   -1.50000
H4C   2    0.397933    0.330136    0.750575    11.00000   -1.50000
AFIX   0
C5    1    0.427114    0.259755    0.915746    11.00000    0.02080    0.05700 =
         0.02871    0.00771   -0.00225   -0.00146
AFIX 137
H5A   2    0.411992    0.265160    0.961570    11.00000   -1.50000
H5B   2    0.473534    0.267502    0.924197    11.00000   -1.50000
H5C   2    0.418262    0.217602    0.898026    11.00000   -1.50000
AFIX   0
C6    1    0.148394    0.199063    0.641097    11.00000    0.01573    0.02189 =
         0.01528    0.00441    0.00472    0.00540
C7    1    0.097206    0.147292    0.631568    11.00000    0.01764    0.03288 =
         0.01632   -0.00065    0.00336   -0.00396
C8    1    0.054529    0.152516    0.690321    11.00000    0.02833    0.04637 =
         0.03310   -0.00785    0.01563   -0.01173
AFIX 137
H8A   2    0.081388    0.146852    0.739052    11.00000   -1.50000
H8B   2    0.021082    0.120764    0.681525    11.00000   -1.50000
H8C   2    0.034329    0.193211    0.687268    11.00000   -1.50000
AFIX   0
C9    1    0.054047    0.152257    0.553125    11.00000    0.02457    0.05525 =
         0.02779    0.00018   -0.00279   -0.00674
AFIX 137
H9A   2    0.032486    0.192328    0.547522    11.00000   -1.50000
H9B   2    0.021686    0.119482    0.546317    11.00000   -1.50000
H9C   2    0.080995    0.148065    0.516512    11.00000   -1.50000
AFIX   0
C10   1    0.133584    0.084461    0.640013    11.00000    0.03851    0.02760 =
         0.02761    0.00340    0.01032   -0.00301
AFIX 137
H10A  2    0.160240    0.081310    0.602987    11.00000   -1.50000
H10B  2    0.102287    0.050757    0.633547    11.00000   -1.50000
H10C  2    0.161054    0.081886    0.688805    11.00000   -1.50000
AFIX   0
C11   1    0.308051    0.141776    0.675750    11.00000    0.01301    0.02232 =
         0.02037    0.00659    0.00463    0.00331
C12   1    0.337938    0.091848    0.733042    11.00000    0.02460    0.02311 =
         0.01739    0.00447    0.00164    0.00497
C13   1    0.412753    0.096562    0.742445    11.00000    0.02827    0.05427 =
         0.05116    0.02512    0.00125    0.01297
AFIX 137
H13A  2    0.425110    0.087358    0.695799    11.00000   -1.50000
H13B  2    0.433295    0.067005    0.779461    11.00000   -1.50000
H13C  2    0.426718    0.138276    0.757964    11.00000   -1.50000
AFIX   0
C14   1    0.314958    0.026462    0.706697    11.00000    0.04965    0.02258 =
         0.02561    0.00449    0.00158    0.00960
AFIX 137
H14A  2    0.267888    0.024592    0.698429    11.00000   -1.50000
H14B  2    0.333429   -0.003725    0.743987    11.00000   -1.50000
H14C  2    0.329037    0.017209    0.661030    11.00000   -1.50000
AFIX   0
C15   1    0.318529    0.105835    0.807718    11.00000    0.05911    0.02779 =
         0.01787    0.00942    0.00788    0.00647
AFIX 137
H15A  2    0.334336    0.146676    0.824812    11.00000   -1.50000
H15B  2    0.337522    0.074835    0.843713    11.00000   -1.50000
H15C  2    0.271551    0.104770    0.801475    11.00000   -1.50000
AFIX   0
C16   1    0.325318    0.407500    0.591428    11.00000    0.01741    0.01947 =
         0.02090   -0.00016    0.00783    0.00459
C17   1    0.364063    0.468243    0.613793    11.00000    0.02780    0.02140 =
         0.02110   -0.00106    0.00578   -0.00411
C18   1    0.322664    0.508553    0.654639    11.00000    0.08362    0.03536 =
         0.06874   -0.02275    0.04438   -0.01438
AFIX 137
H18A  2    0.280764    0.516321    0.622766    11.00000   -1.50000
H18B  2    0.344627    0.547743    0.668222    11.00000   -1.50000
H18C  2    0.316368    0.487140    0.698811    11.00000   -1.50000
AFIX   0
C19   1    0.428651    0.452108    0.665188    11.00000    0.04161    0.05478 =
         0.11061    0.02902   -0.02883   -0.02317
AFIX 137
H19A  2    0.420176    0.430874    0.708540    11.00000   -1.50000
H19B  2    0.452823    0.489950    0.680089    11.00000   -1.50000
H19C  2    0.453868    0.425280    0.639493    11.00000   -1.50000
AFIX   0
C20   1    0.376551    0.504008    0.546145    11.00000    0.08915    0.03692 =
         0.03644   -0.00582    0.02761   -0.03260
AFIX 137
H20A  2    0.405040    0.479868    0.521705    11.00000   -1.50000
H20B  2    0.396907    0.543534    0.561821    11.00000   -1.50000
H20C  2    0.335593    0.511211    0.512187    11.00000   -1.50000
AFIX   0
C21   1    0.099874    0.412032    0.540022    11.00000    0.01850    0.02714 =
         0.02089    0.00258    0.00346    0.00778
C22   1    0.057904    0.438369    0.591886    11.00000    0.03325    0.05983 =
         0.03775    0.01462    0.01625    0.02491
AFIX 137
H22A  2    0.085498    0.459657    0.632750    11.00000   -1.50000
H22B  2    0.035191    0.404688    0.610699    11.00000   -1.50000
H22C  2    0.026510    0.467399    0.564971    11.00000   -1.50000
AFIX   0
C23   1    0.134343    0.466396    0.507815    11.00000    0.04087    0.03041 =
         0.03798    0.01247    0.01423    0.01250
AFIX 137
H23A  2    0.101927    0.493668    0.479357    11.00000   -1.50000
H23B  2    0.161856    0.449790    0.476134    11.00000   -1.50000
H23C  2    0.160732    0.489619    0.547877    11.00000   -1.50000
AFIX   0
C24   1    0.058662    0.374521    0.476809    11.00000    0.03480    0.05448 =
         0.04780   -0.00214   -0.01370    0.00264
AFIX 137
H24A  2    0.037934    0.340229    0.497102    11.00000   -1.50000
H24B  2    0.086393    0.358449    0.445064    11.00000   -1.50000
H24C  2    0.025642    0.401207    0.448357    11.00000   -1.50000
AFIX   0
C33   1    0.153322    0.369879    0.582569    11.00000    0.01612    0.01701 =
         0.01937    0.00228    0.00655   -0.00177
 
N1    4    0.335221    0.192107    1.119764    11.00000    0.02119    0.02789 =
         0.01856    0.00210    0.00548    0.00215
AFIX  13
H1    2    0.290871    0.206690    1.121726    11.00000   -1.20000
AFIX   0
C25   1    0.331841    0.166516    1.042495    11.00000    0.03674    0.03510 =
         0.01894   -0.00224    0.00591    0.00151
AFIX  23
H25A  2    0.375443    0.153449    1.037414    11.00000   -1.20000
H25B  2    0.317638    0.199608    1.006465    11.00000   -1.20000
AFIX   0
C26   1    0.285465    0.111566    1.025086    11.00000    0.04807    0.03326 =
         0.03780   -0.00737   -0.00165    0.00506
AFIX 137
H26A  2    0.280379    0.100764    0.973326    11.00000   -1.50000
H26B  2    0.243495    0.122691    1.035627    11.00000   -1.50000
H26C  2    0.303018    0.076285    1.055230    11.00000   -1.50000
AFIX   0
C27   1    0.352850    0.143895    1.180052    11.00000    0.02680    0.02827 =
         0.02008    0.00464    0.00683    0.00392
AFIX  23
H27A  2    0.318874    0.111981    1.173235    11.00000   -1.20000
H27B  2    0.353679    0.163829    1.227874    11.00000   -1.20000
AFIX   0
C28   1    0.418376    0.112517    1.181809    11.00000    0.02574    0.04614 =
         0.03630    0.01107    0.00562    0.00921
AFIX 137
H28A  2    0.416398    0.088563    1.136994    11.00000   -1.50000
H28B  2    0.428362    0.085136    1.224230    11.00000   -1.50000
H28C  2    0.451988    0.143923    1.185320    11.00000   -1.50000
AFIX   0
C29   1    0.378844    0.248251    1.133792    11.00000    0.03109    0.03162 =
         0.02935   -0.00234    0.00926   -0.00598
AFIX  23
H29A  2    0.418585    0.240103    1.115199    11.00000   -1.20000
H29B  2    0.391337    0.255241    1.187128    11.00000   -1.20000
AFIX   0
C30   1    0.346506    0.306588    1.097163    11.00000    0.04510    0.02802 =
         0.03960    0.00122    0.01277   -0.00361
AFIX 137
H30A  2    0.333983    0.299943    1.044340    11.00000   -1.50000
H30B  2    0.376736    0.341093    1.106825    11.00000   -1.50000
H30C  2    0.308171    0.315943    1.116959    11.00000   -1.50000
AFIX   0
HKLF 4
 
REM  arepw342 in C2/c #15
REM R1 =  0.0249 for    6947 Fo > 4sig(Fo)  and  0.0331 for all    8117 data
REM    424 parameters refined using      0 restraints
 
END  
     
WGHT      0.0187      0.0000 

REM Highest difference peak  0.792,  deepest hole -0.594,  1-sigma level  0.085
Q1    1   0.1596  0.2446  0.4391  11.00000  0.05    0.79
Q2    1   0.2150  0.2500  0.6639  11.00000  0.05    0.55
Q3    1   0.2915  0.2698  0.6409  11.00000  0.05    0.46
Q4    1   0.2134  0.3321  0.6625  11.00000  0.05    0.46
Q5    1   0.2161  0.2958  0.6985  11.00000  0.05    0.45
Q6    1   0.2922  0.3273  0.6555  11.00000  0.05    0.44
Q7    1   0.2117  0.2231  0.3848  11.00000  0.05    0.42
Q8    1   0.1976  0.2212  0.4160  11.00000  0.05    0.39
Q9    1   0.2852  0.3788  0.4991  11.00000  0.05    0.39
Q10   1   0.2018  0.2837  0.6687  11.00000  0.05    0.39
Q11   1   0.2152  0.2593  0.4373  11.00000  0.05    0.38
Q12   1   0.3612  0.4901  0.6788  11.00000  0.05    0.37
Q13   1   0.2126  0.2244  0.4594  11.00000  0.05    0.37
Q14   1   0.2631  0.2907  0.7569  11.00000  0.05    0.34
Q15   1   0.2266  0.3632  0.4167  11.00000  0.05    0.34
Q16   1   0.0846  0.3895  0.5177  11.00000  0.05    0.34
Q17   1   0.2014  0.3286  0.5228  11.00000  0.05    0.33
Q18   1   0.3887  0.3476  0.7416  11.00000  0.05    0.31
Q19   1   0.3215  0.5135  0.6206  11.00000  0.05    0.31
Q20   1   0.3729  0.4795  0.5837  11.00000  0.05    0.31

REM The information below was added by Olex2.
REM
REM R1 = 0.0249 for 6947 Fo > 4sig(Fo) and 0.0331 for all 24095 data
REM n/a parameters refined using n/a restraints
REM Highest difference peak 0.79, deepest hole -0.59
REM Mean Shift 0, Max Shift -0.002.

REM +++ Tabular Listing of Refinement Information +++
REM R1_all = 0.0331
REM R1_gt = 0.0249
REM wR_ref = 0.0537
REM GOOF = 1.030
REM Shift_max = -0.002
REM Shift_mean = 0
REM Reflections_all = 24095
REM Reflections_gt = 6947
REM Parameters = n/a
REM Hole = -0.59
REM Peak = 0.79
REM Flack = n/a

;
_olex2_date_sample_data_collection 2013-10-29
_olex2_submission_special_instructions 'No special instructions were received'
loop_
  _refln_index_h
  _refln_index_k
  _refln_index_l
  _refln_F_squared_meas
  _refln_F_squared_sigma
  _refln_scale_group_code
 0 0 -3 161.257 108.826 2
 0 0 3 42.5207 83.7046 2
 0 0 3 215.209 75.4442 1
 0 0 -4 281837 3768.33 2
 0 0 4 288766 3783.57 2
 0 0 4 283156 2981.82 1
 0 0 5 109.386 87.5923 1
 0 0 -5 215.085 153.186 2
 0 0 5 303.288 159.023 2
 0 0 6 532404 6335.88 2
 0 0 6 569232 5159.3 1
 0 0 -6 569345 6628.17 2
 0 0 7 124.088 130.619 1
 0 0 7 72.0384 136.632 2
 0 0 -7 -25.0693 206.841 2
 0 0 8 2569.21 408.741 1
 0 0 -8 1826.25 439.631 2
 0 0 8 2274.26 497.321 2
 0 0 -9 120.928 220.27 2
 0 0 9 -28.1928 173.236 1
 0 0 9 97.4961 189.147 2
 0 0 -10 115496 3868.46 2
 0 0 10 113474 2989.48 1
 0 0 10 108541 3764.39 2
 0 0 11 -23.5828 181.168 1
 0 0 -11 368.01 331.451 2
 0 0 11 635.265 394.975 2
 0 0 -12 43164.3 2664.16 2
 0 0 12 42735.7 2015.42 1
 0 0 12 37962.1 2484.87 2
 0 0 -13 63.5705 259.101 2
 0 0 13 171.887 258.076 3
 0 0 -14 1298.86 606.711 2
 0 0 -15 35.1713 353.867 2
 0 0 -16 233067 7280.74 2
 0 0 -17 578.566 429.768 2
 0 0 -18 4087.07 1032.45 2
 0 0 -19 -1374.79 738.718 2
 0 0 -20 11441.8 1921.83 2
 0 0 -21 817.767 686.391 2
 0 0 -22 87611.7 5552.43 2
 0 2 3 76460.5 1714.27 2
 0 -2 3 79040.8 1847.53 3
 0 -2 -3 81185.2 1778.13 1
 0 2 -3 78535.1 1767.5 2
 0 2 3 78801 1748.91 1
 0 -2 -3 75920.1 1716.33 2
 0 -2 -4 178819 2905.25 1
 0 -2 -4 179916 3019.21 2
 0 2 4 173628 2863.52 1
 0 2 4 178804 3001.48 2
 0 2 -4 182442 3102.18 2
 0 -2 4 179009 3127.43 3
 0 2 -5 143054 3039 2
 0 2 5 139346 2962.09 2
 0 -2 -5 143435 3023.57 2
 0 2 5 141854 2779.04 1
 0 -2 5 137761 3006.14 3
 0 -2 5 140059 3024.19 2
 0 -2 -5 152571 2878.39 1
 0 2 6 148808 3372.43 2
 0 2 -6 156664 3510.23 2
 0 -2 -6 169914 3227.72 1
 0 -2 -6 159498 3511.96 2
 0 2 6 160725 3146.75 1
 0 -2 6 152851 3440.08 2
 0 -2 6 160722 3520.93 3
 0 -2 7 17804.5 863.385 1
 0 2 7 19176.4 1309.08 2
 0 -2 7 19687.9 1332.06 2
 0 -2 7 16977.9 1236.73 3
 0 2 -7 19064.9 1314.12 2
 0 2 7 17457.7 1106.11 1
 0 -2 -7 17672.1 1265.97 2
 0 2 8 11456.6 1076.71 2
 0 -2 -8 11322 1088.68 2
 0 -2 8 10281.5 1045.18 2
 0 -2 8 10688.8 730.497 1
 0 2 8 9405.52 871.583 1
 0 2 -8 10886.1 1054.63 2
 0 -2 8 10081.9 1026.44 3
 0 2 9 7872.72 850.553 1
 0 2 9 8604.87 1000.93 2
 0 2 -9 9567.33 1082.25 2
 0 -2 9 7223.76 932.347 2
 0 -2 -9 9099.79 1045 2
 0 -2 9 7997.96 677.314 1
 0 -2 9 8720.09 1001.92 3
 0 -2 10 74246.7 3139.07 2
 0 2 10 79219.2 2740.38 1
 0 -2 -10 80764.4 3261.69 2
 0 -2 10 70625.7 3017.39 3
 0 -2 10 77786.5 2244.01 1
 0 2 10 74748 3116.11 2
 0 2 -10 81793.9 3297.02 2
 0 2 -11 137569 4484.1 2
 0 -2 -11 139589 4527.85 2
 0 2 11 135649 4446.85 2
 0 -2 11 138076 3148.29 1
 0 -2 11 138281 4393.37 3
 0 -2 -12 52969 2938 2
 0 -2 12 55555.6 2084.66 1
 0 2 -12 53155.2 2950.53 2
 0 2 12 52458.1 2909.01 2
 0 -2 12 56210.6 2957.79 3
 0 -2 13 -70.5888 367.318 3
 0 -2 -13 1119.28 604.371 2
 0 -2 13 868.1 276.5 1
 0 2 -13 123.486 279.03 2
 0 -2 -14 2314.29 319.687 2
 0 2 -14 4810.05 1023.54 2
 0 -2 -15 12650.6 1664.26 2
 0 2 -15 10467 1496.06 2
 0 2 -16 113978 5109.36 2
 0 -2 -16 123607 5321.55 2
 0 -2 -17 75900.3 4339.51 2
 0 2 -17 75073.3 4326.76 2
 0 -2 -18 10780.9 1733.53 2
 0 2 -18 10944.5 1751.1 2
 0 -2 -19 -251.181 441.319 2
 0 2 -19 174.543 432.169 2
 0 -2 -20 4743.23 1185.16 2
 0 2 -20 6395.72 1442.21 2
 0 2 -21 6369.87 1498.41 2
 0 -2 -21 6376.25 1529.89 2
 0 2 -22 67726.2 4883.25 2
 0 -2 -22 65231.8 4773.34 2
 0 4 0 6526.73 426.292 3
 0 -4 1 238246 2904.28 3
 0 4 -1 237203 2882.82 3
 0 4 1 242211 2427.01 3
 0 4 2 41847 1165.4 2
 0 4 2 41609.6 1050.15 3
 0 -4 -2 44367.7 1474.75 1
 0 -4 -2 40560.5 1042.77 3
 0 4 -2 42408.1 1357.14 3
 0 -4 2 44414.7 1397.59 3
 0 -4 -3 55889.2 1776.09 1
 0 -4 3 56094.7 1745.5 3
 0 4 3 52986.5 1305.97 3
 0 4 -3 55752.8 1743.39 3
 0 4 3 53966.3 1519.01 2
 0 -4 -3 53262.5 1511.99 2
 0 4 4 82286.5 2106.66 2
 0 4 -4 83256.1 2172.92 2
 0 4 -4 83660.8 2331.56 3
 0 -4 -4 83706.5 2130.6 2
 0 -4 -4 88505.3 2388.91 1
 0 -4 4 81797 2306.66 3
 0 4 4 77187.3 1801.03 3
 0 4 -5 287036 4450.85 2
 0 4 5 294636 4392.84 2
 0 -4 5 268558 4560.97 3
 0 -4 -5 299145 4469.37 2
 0 -4 -5 298338 4644.97 1
 0 4 -6 9822.23 889.29 2
 0 -4 -6 12429.4 989.564 1
 0 -4 -6 11159.1 941.583 2
 0 4 6 10519.1 904.733 2
 0 -4 6 10428.6 951.417 3
 0 -4 -7 8449.82 864.196 1
 0 -4 -7 7499.14 839.767 2
 0 -4 7 8022.49 892.336 3
 0 4 7 7024.3 814.208 2
 0 4 -7 7136.64 829.804 2
 0 4 8 10043.6 1021.95 2
 0 -4 -8 12133.3 1077.26 1
 0 -4 -8 10356.8 1048.55 2
 0 -4 8 10868.6 1115.43 3
 0 4 -8 11147.2 1113.27 2
 0 -4 -9 15789.3 1372.87 2
 0 4 9 14747.5 1330.25 2
 0 -4 -9 15551.5 1291.12 1
 0 -4 9 15687.9 1391.49 3
 0 -4 9 16609.8 858.011 1
 0 4 -9 14694.2 1351.2 2
 0 4 10 14181.9 1374.17 2
 0 -4 10 16248.5 1511.66 3
 0 4 -10 18192 1569.64 2
 0 -4 -10 17194 1520.92 2
 0 -4 10 17096.4 932.287 1
 0 4 -11 328228 7027.64 2
 0 -4 11 332583 4338.55 1
 0 -4 11 321287 6950.84 3
 0 4 11 317382 6802.55 2
 0 -4 -11 333107 6993.6 2
 0 -4 -12 35539.3 2408.16 2
 0 -4 12 32386.9 2323.28 3
 0 -4 12 35286.5 1493.26 1
 0 4 -12 35875.9 2429.82 2
 0 4 12 33213.6 2309.77 2
 0 4 -13 12339.6 1445.06 2
 0 -4 13 11779.7 910.869 1
 0 -4 -13 11245.1 1436.8 2
 0 -4 -14 24033.7 2159.83 2
 0 -4 14 20724.2 1264.03 1
 0 4 -14 20043.9 2034.03 2
 0 4 -15 6747.14 1224 2
 0 -4 -15 7630.04 1291.54 2
 0 4 -16 20680.1 2197.79 2
 0 -4 -16 23532.5 2356.53 2
 0 -4 -17 150640 6113.01 2
 0 4 -17 142316 5986.18 2
 0 4 -18 30291.8 2879.76 2
 0 -4 -18 33001.6 3017.61 2
 0 -4 -19 1624.04 719.504 2
 0 4 -19 520.944 430.594 2
 0 4 -20 14729 2180.07 2
 0 -4 -20 13975.7 2113.3 2
 0 4 -21 30663.4 3202.41 2
 0 -4 -21 32158.1 3260.65 2
 0 4 -22 22160.4 2843.68 2
 0 -4 -22 25475.2 2988.95 2
 0 6 0 27421.9 1077.43 3
 0 -6 0 27901.9 1093.04 3
 0 -6 -1 238379 3023.02 3
 0 6 1 236888 3014.27 3
 0 -6 1 243889 3460.56 3
 0 6 -1 238628 3441.43 3
 0 -6 -2 37897.6 1187.62 3
 0 6 2 36920.5 1220.06 2
 0 6 2 40468.2 1229.98 3
 0 6 -2 39722 1504.72 3
 0 -6 2 40317.6 1513.15 3
 0 6 -3 147.841 140.999 3
 0 6 3 180.85 117.289 3
 0 -6 3 105.629 110.488 3
 0 -6 -3 184.577 106.862 1
 0 -6 -3 340.775 121.3 3
 0 6 3 100.89 87.0716 2
 0 -6 -4 51041.4 2032.18 1
 0 -6 4 47835.3 1919.67 3
 0 -6 -4 48765 1699.15 2
 0 6 4 48375.5 1478.21 3
 0 6 4 48754 1692.74 2
 0 6 -4 47157.6 1916.61 3
 0 -6 -5 263302 4339.1 2
 0 -6 5 266088 4865.72 3
 0 6 -5 271638 4893.46 3
 0 6 5 250999 3653.73 3
 0 -6 -5 290192 5063.53 1
 0 6 5 264311 4299.1 2
 0 -6 -6 38103.6 1765.49 2
 0 6 6 33863.4 1672.13 2
 0 6 -6 38113.5 1810.72 2
 0 -6 6 38803.1 1966.35 3
 0 -6 -6 39526.2 1964.33 1
 0 6 6 33021 1458.88 3
 0 6 7 10124.9 873.304 3
 0 6 -7 11635.7 1057.82 2
 0 -6 7 10475.4 1090.2 3
 0 -6 -7 12665.9 1164.16 1
 0 6 7 11120.9 1032.92 2
 0 -6 -7 11736.6 1063.82 2
 0 6 -8 1147.99 372.668 2
 0 6 8 1121.88 466.592 2
 0 -6 8 676.95 334.101 3
 0 -6 -8 613.773 250.418 1
 0 -6 -8 843.998 327.424 2
 0 6 -9 26687.8 1817.42 2
 0 -6 -9 25615.4 1787.89 1
 0 -6 -9 27612.4 1820.78 2
 0 -6 9 25042.9 1834.78 3
 0 6 9 21905.8 1634.57 2
 0 -6 10 80.6416 145.078 3
 0 -6 -10 405.28 328.691 1
 0 -6 -10 93.5755 233.279 2
 0 6 10 317.161 270.901 2
 0 6 -10 -339.733 264.325 2
 0 6 11 202835 5491.19 2
 0 -6 11 203571 5748.05 3
 0 6 -11 200522 5531.63 2
 0 -6 -11 210477 5615.19 2
 0 -6 11 205794 3097.15 1
 0 6 -12 19165.5 1806.64 2
 0 -6 -12 18322.8 1757.01 2
 0 6 12 18284.7 1729.91 2
 0 -6 12 17172.1 931.273 1
 0 6 -13 8522.64 1270.54 2
 0 -6 13 8538.81 692.428 1
 0 -6 -13 9240.96 1316.89 2
 0 6 -14 4979.11 1010.83 2
 0 -6 -14 3655.86 892.927 2
 0 -6 14 4781.35 549.934 1
 0 -6 -15 10667.8 1502.39 2
 0 6 -15 9022.06 1419.09 2
 0 6 -16 567.724 459.117 2
 0 -6 -16 727.477 336.938 2
 0 6 -17 140006 5967.4 2
 0 -6 -17 145172 6001.66 2
 0 -6 -18 1420.92 671.849 2
 0 6 -18 533.412 401.412 2
 0 6 -19 13242.5 1966.84 2
 0 -6 -19 12620.1 1977.04 2
 0 -6 -20 5563.97 1374.23 2
 0 6 -20 7770.07 1613.1 2
 0 6 -21 46894.1 3971.46 2
 0 -6 -21 51544.2 4135.51 2
 0 6 -22 1464.24 783.431 2
 0 -6 -22 -578.953 925.159 2
 0 8 0 19330.6 1044.67 3
 0 -8 0 19627.6 1060.14 3
 0 -8 1 163211 3208.79 3
 0 8 -1 152086 3102.45 3
 0 -8 -1 164223 2914.92 3
 0 8 1 157909 2864.88 3
 0 8 2 811.791 198.072 3
 0 -8 2 1197.63 313.679 3
 0 -8 -2 958.207 239.655 3
 0 8 -2 779.236 269.874 3
 0 -8 -3 50015 1578.14 3
 0 -8 -3 51050.8 2170.69 1
 0 8 3 48806 1672.5 2
 0 8 -3 49701.4 2000.65 3
 0 8 3 51811.7 1607.19 3
 0 -8 3 51505.6 2031.51 3
 0 8 4 7362.38 700.373 2
 0 -8 -4 7824.55 648.78 3
 0 8 4 7032.68 609.208 3
 0 8 -4 7435.61 828.006 3
 0 -8 -4 7438.72 869.097 1
 0 -8 4 8145.07 858.948 3
 0 8 5 155960 3458.82 2
 0 8 -5 162605 4043.95 3
 0 -8 -5 172413 4328.64 1
 0 8 5 157694 3034.78 3
 0 -8 5 167047 4077.88 3
 0 -8 -6 31195.4 1663.2 2
 0 8 6 33127.2 1690.68 2
 0 -8 -6 35948.3 2043.13 1
 0 8 -6 31623 1876.1 3
 0 8 6 31577.8 1442.72 3
 0 -8 6 32548.2 1904.83 3
 0 -8 -7 153088 4363.05 1
 0 -8 7 142619 4190.9 3
 0 8 7 135113 3170.09 3
 0 -8 -7 145662 3818.01 2
 0 8 -7 144550 3861.3 2
 0 8 7 140790 3727.82 2
 0 -8 8 8361.6 1066.35 3
 0 -8 -8 7683.31 1017.8 1
 0 8 8 5935.91 805.543 2
 0 -8 -8 7404.47 926.144 2
 0 8 8 7367.57 795.048 3
 0 8 -8 7427.25 922.403 2
 0 -8 -9 67703.9 3080.15 1
 0 -8 -9 64124.2 2829.64 2
 0 8 -9 61316.3 2821.27 2
 0 8 9 63778 2824.05 2
 0 -8 9 59747.6 2972.9 3
 0 8 9 57358.6 2333.8 3
 0 -8 10 3274.99 728.225 3
 0 -8 -10 4024.99 747.176 2
 0 8 10 3334.47 692.208 2
 0 8 -10 3824.99 744.629 2
 0 8 10 4519.21 718.302 3
 0 -8 -10 4762.21 882.289 1
 0 -8 -11 84759.4 3697.98 1
 0 -8 11 79921.4 3737.17 3
 0 8 11 84173 3560.25 2
 0 -8 -11 90402.1 3721.96 2
 0 8 -11 83084.1 3616.1 2
 0 8 11 73114.8 2927.58 3
 0 -8 -12 2539.41 686.999 2
 0 8 12 2270.85 643.134 2
 0 -8 12 2949.17 349.908 1
 0 -8 -12 2896.75 739.005 1
 0 8 12 2611.62 610.176 3
 0 8 -12 2869.47 702.133 2
 0 -8 -13 38480.8 2678.07 2
 0 -8 13 39674.6 1305.59 1
 0 8 13 36237.8 2274.42 3
 0 8 -13 38638.9 2711.72 2
 0 8 -14 700.866 480.921 2
 0 8 14 -120.468 316.629 3
 0 -8 -14 213.795 470.047 2
 0 -8 14 332.442 139.08 1
 0 -8 -15 69091.7 3877.04 2
 0 8 15 65623.3 3346.23 3
 0 8 -15 69924.7 3965.94 2
 0 8 16 46120.1 2920.4 3
 0 -8 -16 51037.7 3474.49 2
 0 8 -16 45871.9 3335.35 2
 0 8 17 59392 3441.13 3
 0 8 -17 65412.6 4119.53 2
 0 -8 -17 60647.6 3914.74 2
 0 8 18 1017.4 505.798 3
 0 -8 -18 988.581 694.71 2
 0 8 -18 2593.53 1192.74 2
 0 8 -19 8984.4 1665.08 2
 0 8 19 7368.37 1331.46 3
 0 -8 -19 7848.33 1530.89 2
 0 -8 -20 182.439 616.547 2
 0 8 20 780.215 564.187 3
 0 8 -20 952.103 607.109 2
 0 8 -21 39578.1 3682.35 2
 0 -8 -21 36765.9 3543.17 2
 0 8 21 33432.7 2973.75 3
 0 -8 -22 14169.5 2260.59 2
 0 8 22 11626.8 1864.59 3
 0 8 23 33046.2 3128.5 3
 0 -10 0 357289 5059.53 3
 0 10 0 338316 4905.43 3
 0 -10 1 109560 2902.26 3
 0 10 -1 105201 2850.84 3
 0 -10 -1 105421 2659.76 3
 0 10 1 105697 2638.28 3
 0 10 2 39938.2 1591.78 3
 0 10 -2 39534.1 1843.05 3
 0 -10 2 38502.5 1820.15 3
 0 -10 -2 39888.1 1582.34 3
 0 -10 -2 38337.3 1999.34 1
 0 -10 -3 42362.2 2188.24 1
 0 -10 -3 42601.3 1613.06 3
 0 10 -3 41896.6 1991.25 3
 0 10 3 40394.5 1623.48 2
 0 -10 3 46650.4 2098.22 3
 0 10 3 40657.6 1585.59 3
 0 -10 4 18163.9 1373.8 3
 0 10 4 16666.8 1013.46 3
 0 10 4 16546.7 1107.32 2
 0 -10 -4 18017.8 1465.42 1
 0 -10 -4 16346.1 1022.27 3
 0 10 -4 17453.5 1349.75 3
 0 10 5 78822.6 2569.8 2
 0 -10 5 90718.9 3221.27 3
 0 -10 -5 88629.9 3365.83 1
 0 10 5 86615.5 2401.44 3
 0 -10 -5 85154.9 2382.58 3
 0 10 -5 86623 3141.27 3
 0 10 6 106159 3143.18 2
 0 10 -6 111765 3723.41 3
 0 -10 6 114943 3794.51 3
 0 -10 -6 117038 3977.99 1
 0 10 6 106479 2781.64 3
 0 -10 7 77038 3242.5 3
 0 -10 -7 79307 3383.28 1
 0 10 -7 73241.2 2836.03 2
 0 10 7 69615 2341.51 3
 0 10 7 71724.3 2741.43 2
 0 10 -7 68361.3 3056.98 3
 0 10 -8 3241.31 631.918 2
 0 -10 8 2638.52 637.919 3
 0 10 8 3386.05 630.426 2
 0 -10 -8 2828.84 651.4 1
 0 10 8 3802.37 595.162 3
 0 10 9 83164.8 3295.66 2
 0 -10 -9 97349.8 3954.98 1
 0 10 -9 86612.4 3436.1 2
 0 -10 9 95622.1 3905.66 3
 0 10 9 85909.1 2860.99 3
 0 -10 -9 91118.7 3452.73 2
 0 -10 -10 39680.2 2609.19 1
 0 10 -10 38193.3 2387.23 2
 0 -10 -10 37058 2308.24 2
 0 -10 10 38825.8 2588.52 3
 0 10 10 38838.6 2370.78 2
 0 10 10 34104.8 1916.95 3
 0 10 11 30655.1 1901.03 3
 0 10 -11 34422.6 2373.04 2
 0 10 11 32933.8 2263.73 2
 0 -10 -11 34991.7 2366.35 2
 0 -10 -11 39624.5 2690.6 1
 0 -10 -12 40796.1 2658.52 2
 0 -10 -12 45164.7 2943.3 1
 0 10 12 36696.5 2502.14 2
 0 10 -12 42987.3 2781.38 2
 0 10 12 35842.9 2159.24 3
 0 -10 13 53053 1284 1
 0 10 13 50331.2 2671.64 3
 0 -10 -13 55351.2 3255.49 2
 0 10 -13 49244.3 3109.78 2
 0 -10 -13 60439.4 3492.31 1
 0 -10 -14 1217.4 582.909 2
 0 -10 14 851.744 152.782 1
 0 10 -14 1505.52 666.745 2
 0 10 14 968.396 415.484 3
 0 -10 -15 66606.8 3856.01 2
 0 10 15 58285.9 3130.73 3
 0 10 -15 67662.6 3941.5 2
 0 -10 -16 106618 5054.31 2
 0 10 16 101089 4249.86 3
 0 10 -16 111219 5228.83 2
 0 10 17 6018.65 1055.4 3
 0 10 -17 4694.02 1112.61 2
 0 -10 -17 6731.47 1321.02 2
 0 10 -18 5826 1397.24 2
 0 10 18 4277.2 970.673 3
 0 -10 -18 4972.67 1243.93 2
 0 10 19 4903.84 1043.74 3
 0 10 -19 5675.51 1347.59 2
 0 -10 -19 7024.71 1462.91 2
 0 10 -20 4918.46 1311.34 2
 0 -10 -20 4326.98 1158.37 2
 0 10 20 3698.24 1001.51 3
 0 10 -21 26397.9 3053.28 2
 0 -10 -21 26057.4 3023.85 2
 0 10 21 18592.6 2165.2 3
 0 10 22 34556.6 3059.02 3
 0 -12 0 224844 4384.54 3
 0 12 0 206494 4226.06 3
 0 12 -1 12826.8 1089.69 3
 0 12 1 12359.2 1004.76 3
 0 -12 -1 13436.1 1257.17 1
 0 -12 1 13284.2 1116.95 3
 0 -12 -1 13026.6 1020.27 3
 0 -12 2 115260 3414.5 3
 0 12 2 111991 2934.22 3
 0 -12 -2 108698 3691.12 1
 0 12 -2 109849 3314.21 3
 0 -12 -2 109336 2902.42 3
 0 -12 -3 8669.09 1088.65 1
 0 -12 3 9916.5 1047.92 3
 0 -12 -3 9452.29 855.178 3
 0 12 3 8553.97 806.055 2
 0 12 3 8526.5 815.469 3
 0 12 -3 9467.34 1021.47 3
 0 -12 -4 264933 6117.01 1
 0 12 4 262522 4406.77 3
 0 12 4 244076 4504.48 2
 0 -12 4 269952 5642.35 3
 0 12 -4 258790 5547.38 3
 0 -12 -4 248730 4298.42 3
 0 12 5 126.121 163.066 2
 0 -12 -5 -53.2261 200.79 3
 0 -12 -5 348.493 300.004 1
 0 12 -5 -56.3113 310.711 3
 0 -12 5 306.419 185.431 3
 0 12 5 164.07 141.146 3
 0 12 6 151514 3892.74 2
 0 12 -6 147791 4536.31 3
 0 -12 -6 156125 4948.75 1
 0 -12 6 157620 4697.7 3
 0 12 6 152279 3492.97 3
 0 -12 -7 12263.4 1427.96 1
 0 12 -7 12355.6 1381.23 3
 0 12 7 11882.9 1167.05 2
 0 -12 7 12296.3 1375.81 3
 0 12 7 11093 977.369 3
 0 12 8 -14.4175 178.587 2
 0 -12 -8 87.3405 340.465 1
 0 12 -8 256.662 256.83 2
 0 -12 8 334.499 231.441 3
 0 12 8 240.832 202.285 3
 0 12 -9 5326.21 903.915 2
 0 12 9 6341.25 909.282 2
 0 -12 -9 8087.6 1222.94 1
 0 12 9 5329.14 736.419 3
 0 12 10 26775.3 1991.68 2
 0 -12 -10 32954.8 2524.87 1
 0 12 -10 28291.8 2091.72 2
 0 12 10 26215.9 1696.96 3
 0 12 -11 2408.35 660.167 2
 0 12 11 5221.81 942.544 2
 0 12 11 2734.13 581.777 3
 0 -12 -11 3916.55 898.423 1
 0 12 12 104853 3682.1 3
 0 -12 -12 127361 5225.11 1
 0 12 -12 111142 4554.48 2
 0 12 13 12728.6 1359.96 3
 0 -12 -13 13343.7 1632.18 2
 0 12 -13 9989.52 1428.73 2
 0 -12 -13 13817.6 1776.83 1
 0 12 14 7875.15 1100.9 3
 0 -12 -14 9245.88 1480.35 2
 0 12 -14 7512.87 1301.13 2
 0 12 15 11744.7 1423.85 3
 0 12 -15 9543.35 1544.75 2
 0 -12 -15 13151.8 1739.16 2
 0 -12 -16 79572.9 4418.81 2
 0 12 -16 72124 4273.45 2
 0 12 16 68464.4 3487.4 3
 0 12 17 1252.21 538.948 3
 0 12 -17 186.138 374.153 2
 0 -12 -17 71.2451 368.276 2
 0 12 -18 34505.3 3175.49 2
 0 -12 -18 42853.2 3498.07 2
 0 12 18 33883.8 2644.58 3
 0 12 19 1183.5 681.199 3
 0 12 -19 645.124 443.03 2
 0 -12 -19 413.708 606.362 2
 0 -12 -20 20010 2541.67 2
 0 12 -20 20167.8 2612.43 2
 0 12 20 16258.7 1984.01 3
 0 -12 -21 7186.39 1639.89 2
 0 12 -21 6888.62 1559.39 2
 0 -14 0 47438.5 2209.13 3
 0 -14 0 48849.9 2540.9 1
 0 14 0 45011.1 2141.13 3
 0 -14 -1 41347.3 1982.7 3
 0 -14 1 41893.7 2137.19 3
 0 14 1 38183.3 1918.75 3
 0 14 -1 38188.9 2038.2 3
 0 -14 -1 40961.7 2390.86 1
 0 14 2 114590 3233.02 3
 0 -14 2 124603 3791.58 3
 0 14 -2 115441 3651.89 3
 0 -14 -2 120330 4184.9 1
 0 -14 -2 121455 3314.26 3
 0 -14 -3 19776.8 1756.13 1
 0 -14 -3 19393.6 1309.18 3
 0 -14 3 18876.4 1545.8 3
 0 14 -3 18982.8 1552.42 3
 0 14 3 17084.7 1239.64 3
 0 14 3 15486.8 1154.48 2
 0 14 4 226484 4453.58 3
 0 -14 -4 234729 6188.07 1
 0 -14 4 236942 5623.31 3
 0 -14 -4 225927 4413.35 3
 0 14 4 219483 4453.52 2
 0 14 -4 218470 5422.59 3
 0 14 -5 50155.4 2684.55 3
 0 -14 -5 54633.7 3037.32 1
 0 -14 -5 49542.6 2073.81 3
 0 14 5 53918.3 2302.55 2
 0 -14 5 55924.9 2834.14 3
 0 14 5 53508.4 2155.84 3
 0 -14 -6 71739 3593.14 1
 0 -14 6 69583.4 3277.73 3
 0 14 6 66780.2 2433.03 3
 0 14 6 63855.1 2630.25 2
 0 -14 -6 66553.2 2439.18 3
 0 14 -6 65906.4 3195.46 3
 0 14 -7 2732.76 688.98 3
 0 14 7 2605.55 588.967 2
 0 14 7 4128.01 635.222 3
 0 -14 7 3490.79 810.545 3
 0 -14 -7 2475.92 727.175 1
 0 14 8 18009.5 1332.04 3
 0 14 8 15780.8 1450.78 2
 0 -14 -8 20641.5 2032.59 1
 0 14 -8 19827.4 1654 2
 0 -14 -9 4247.36 974.266 1
 0 14 9 3483.96 736.979 2
 0 14 -9 5271 915.474 2
 0 14 9 4536.49 679.762 3
 0 14 10 91252.5 3780.27 2
 0 14 -10 94749.8 3974.56 2
 0 -14 -10 101719 4709.71 1
 0 14 10 94035.4 3234.9 3
 0 14 11 13434.9 1278.42 3
 0 -14 -11 16132 1921.58 1
 0 14 11 13323.3 1527.99 2
 0 14 -11 15960.7 1684.87 2
 0 -14 -12 107081 5081.03 1
 0 14 12 98161.1 3566.33 3
 0 14 -12 96342.1 4307.31 2
 0 14 13 500.232 329.384 3
 0 14 -13 1156.03 628.691 2
 0 -14 13 263.261 100.463 1
 0 -14 -13 839.826 519.944 1
 0 14 14 6039.31 902.095 3
 0 14 -14 8143.36 1345.89 2
 0 -14 -14 8137.49 1470.02 1
 0 14 -15 10835.7 1621.26 2
 0 14 15 8525.8 1203.46 3
 0 14 16 43374.6 2748.12 3
 0 14 -16 39848.3 3239.64 2
 0 14 17 861.982 455.001 3
 0 14 -17 1390.95 760.783 2
 0 14 18 43418.4 2949.63 3
 0 14 -18 46092.1 3718.83 2
 0 14 -19 752.019 558.517 2
 0 14 -20 28378.1 3076.65 2
 0 -16 0 19834 1531.33 3
 0 -16 0 19515.6 1757.71 1
 0 16 0 19860.3 1523.14 3
 0 16 -1 26793.8 1832.57 3
 0 16 1 27273.4 1757.85 3
 0 -16 -1 28560.2 1776.79 3
 0 -16 1 27241.9 2015.03 1
 0 -16 -1 28795.9 2159.99 1
 0 -16 1 28512.4 1869.92 3
 0 -16 -2 34551.6 2425.86 1
 0 16 2 28805 1748.65 3
 0 -16 2 31219.6 2031.82 3
 0 -16 2 30698.4 2093.98 1
 0 -16 -2 29556.9 1778.06 3
 0 16 -2 28996 1976.29 3
 0 -16 -3 899.8 330.031 3
 0 -16 3 1157.65 402.402 3
 0 16 -3 622.417 342.488 3
 0 -16 -3 1348.44 536.517 1
 0 16 3 1051.24 340.879 3
 0 16 3 875.348 317.276 2
 0 16 4 19547.8 1407.35 3
 0 -16 -4 22930.8 2077.39 1
 0 -16 4 19744.8 1732.78 3
 0 16 -4 17352.4 1624.69 3
 0 -16 -4 18944.1 1397.68 3
 0 16 4 17066.2 1317 2
 0 16 5 42537.2 2053.6 3
 0 16 -5 38886.2 2502.97 3
 0 -16 5 44072.9 2675.65 3
 0 16 5 38138.6 2033.59 2
 0 -16 -5 38269.6 1966.81 3
 0 -16 -5 45682.4 2997.29 1
 0 -16 -6 30547 2497.26 1
 0 16 -6 27583.3 2195.33 3
 0 -16 -6 25361 1589.1 3
 0 16 6 27811.5 1803.61 2
 0 -16 6 32493 2354.17 3
 0 16 6 29106.2 1706.62 3
 0 16 -7 36563.6 2610.69 3
 0 16 7 32782.8 2057.44 2
 0 16 7 35477.7 1905.82 3
 0 -16 -7 37985.6 2869 1
 0 16 8 6961.19 993.235 2
 0 16 8 8339.26 932.748 3
 0 -16 -8 6338.87 1230.37 1
 0 16 -8 7368.6 1052.67 2
 0 16 -9 17047.2 1667.94 2
 0 16 9 18843.5 1711.55 2
 0 -16 -9 19253.1 2134.05 1
 0 16 9 17333.7 1394.98 3
 0 16 10 27206.3 1971.09 2
 0 -16 -10 34219.8 2896.78 1
 0 16 -10 33293.5 2382.63 2
 0 16 10 29627.2 1869.45 3
 0 -16 11 16960.9 1086.89 1
 0 16 11 15413.4 1392.32 3
 0 16 -11 15867.9 1731.8 2
 0 -16 -11 19637.2 2244.39 1
 0 16 12 33940.7 2126.3 3
 0 -16 12 35143.6 1392.92 1
 0 -16 -12 37720.1 3199.04 1
 0 16 -12 34239.7 2644.63 2
 0 16 13 20900.6 1719.43 3
 0 -16 -13 23739.6 2585.25 1
 0 16 -13 19612.8 2060.48 2
 0 16 -14 -1063.68 586.011 2
 0 -16 -14 260.544 468.724 1
 0 16 14 192.9 254.418 3
 0 16 15 25498.1 2031.46 3
 0 16 -15 27051.6 2612.73 2
 0 16 16 14423.3 1591.27 3
 0 16 -16 13418.5 1906.52 2
 0 16 -17 12091.2 1893.71 2
 0 16 -18 15907 2223.56 2
 0 16 -19 1864.39 950.263 2
 0 18 0 412.71 282.809 3
 0 -18 0 261.327 236.142 3
 0 -18 0 287.851 316.318 1
 0 -18 -1 49928 3097.59 1
 0 -18 1 46303.4 2803.95 1
 0 18 -1 45178.6 2522.98 3
 0 -18 1 47822.1 2594.12 3
 0 18 1 46444.4 2437.42 3
 0 -18 -1 51580.5 2552.6 3
 0 -18 -2 2164.14 488.448 3
 0 -18 -2 3806.74 904.988 1
 0 -18 2 3137.67 736.445 1
 0 -18 2 3680.98 792.423 3
 0 18 2 3137.51 638.964 3
 0 18 2 3505.26 588.163 2
 0 18 -2 4241.62 823.896 3
 0 18 3 4753.22 745.05 3
 0 -18 -3 5055.53 790.853 3
 0 -18 3 4747.5 869.503 1
 0 18 -3 6105.4 995.694 3
 0 18 3 5161.85 736.223 2
 0 -18 -3 5932.05 1092.23 1
 0 -18 3 5582.22 946.201 3
 0 18 4 48246.3 2739.19 3
 0 -18 4 665.228 420.43 3
 0 -18 -4 1300.15 574.014 1
 0 18 4 704.589 290.225 2
 0 18 -4 1260.97 552.401 3
 0 -18 4 1226.04 508.071 1
 0 -18 -4 770.457 335.316 3
 0 18 -5 48868.2 2962.52 3
 0 -18 -5 45048.3 2239.56 3
 0 -18 -5 46198.3 3194.52 1
 0 18 5 44060.5 2276.12 2
 0 18 5 45519.9 2268.25 3
 0 -18 5 48516.9 2615.63 1
 0 18 -6 9655.75 1396.67 3
 0 -18 -6 13491.8 1801.12 1
 0 -18 -6 9856.01 1048.35 3
 0 18 6 10261.8 1129.39 2
 0 -18 6 11687.8 1255.96 1
 0 18 6 11740.3 1136.55 3
 0 18 7 96923 3596.28 2
 0 -18 7 94986.9 3455.44 1
 0 -18 -7 99718.8 4890.04 1
 0 18 -7 97983.6 4439.42 3
 0 18 7 97545.5 3314.17 3
 0 -18 -8 1328.05 677.29 1
 0 18 -8 1609.47 543.399 2
 0 18 8 1894.81 550.227 2
 0 -18 8 1317.49 430.179 1
 0 18 8 1748.06 475.845 3
 0 -18 9 47271 2243 1
 0 18 9 42816.4 2590.13 2
 0 18 9 44100.9 2267.5 3
 0 -18 -9 50842.9 3645.2 1
 0 18 -9 41140.2 2644.45 2
 0 18 10 6435.74 907.004 3
 0 -18 -10 8390.52 1534.35 1
 0 -18 10 9424.01 960.262 1
 0 18 -10 8529.42 1257.75 2
 0 18 11 10686.8 1162.07 3
 0 -18 -11 12854.1 1914.61 1
 0 -18 11 11081.2 960.93 1
 0 18 -11 9432.45 1347.83 2
 0 18 -12 6265.28 1182.99 2
 0 18 12 6879.07 968.888 3
 0 -18 -12 7351.14 1471.03 1
 0 18 -13 44870.9 3188.52 2
 0 18 13 43805.8 2497.16 3
 0 -18 -13 52278.3 3984.46 1
 0 18 -14 2541.13 810.027 2
 0 -18 -14 3626.86 1138.93 1
 0 18 -15 34923.5 3004.93 2
 0 18 -16 7993.15 1448.36 2
 0 18 -17 33049.7 3137.45 2
 0 18 -18 2016.18 833.364 2
 0 18 -19 5032.71 1346.08 2
 0 -20 0 773.181 474.732 1
 0 -20 0 621.649 289.756 3
 0 20 0 233.995 293.856 3
 0 -20 1 52079.3 3175.56 1
 0 20 1 54645.1 2800.74 3
 0 -20 -1 51135.4 3276.16 1
 0 -20 1 53956.6 2905.28 3
 0 -20 -1 53223 2750.48 3
 0 20 -1 54385.2 2932.79 3
 0 -20 2 17606.3 1720 3
 0 -20 -2 17119.5 1951.92 1
 0 -20 -2 17153.3 1525.7 3
 0 20 2 16322.6 1340.73 2
 0 -20 2 16995.5 1791.33 1
 0 20 2 15244.8 1452.63 3
 0 20 -2 16552.6 1676.31 3
 0 20 3 246.369 180.783 2
 0 -20 3 -128.754 260.24 1
 0 20 -3 366.038 271.589 3
 0 -20 -3 187.371 239.405 3
 0 -20 -3 111.279 417.947 1
 0 20 3 -226.708 256.665 3
 0 -20 4 6694.62 1107.26 1
 0 20 4 6101.6 867.639 2
 0 -20 -4 6481.67 888.344 3
 0 20 4 7687.71 1123.8 3
 0 20 -4 6163.55 1083.81 3
 0 -20 -4 5500.98 1175.14 1
 0 -20 5 49699.1 2845.59 1
 0 20 -5 49095.7 3109.77 3
 0 -20 -5 47448.4 2402.65 3
 0 -20 -5 50808.2 3532.57 1
 0 20 5 47544 2424.59 2
 0 20 5 48400.2 2453.16 3
 0 20 6 -53.3845 210.63 3
 0 -20 -6 -1068.35 401.908 3
 0 20 -6 587.965 380.732 3
 0 -20 6 163.237 218.075 1
 0 20 6 181.895 226.658 2
 0 -20 -6 184.235 341.333 1
 0 20 7 56995.4 2635.57 3
 0 -20 7 60614.8 2983.34 1
 0 -20 -7 64513 4152.11 1
 0 20 -7 53164.8 2871.88 2
 0 20 8 5158.83 817.911 3
 0 20 -8 5658.32 965.323 2
 0 -20 8 4346.65 795.95 1
 0 -20 -8 6038.99 1353.84 1
 0 20 9 27567.5 1828.48 3
 0 -20 9 29165.5 1911.62 1
 0 20 -9 26310.4 2160.31 2
 0 -20 -9 29520.9 2938.19 1
 0 20 -10 4048.19 897.025 2
 0 -20 -10 4973.35 1296.41 1
 0 20 10 5488.79 846.995 3
 0 -20 -11 37436.5 3444.16 1
 0 20 -11 30469.4 2474.89 2
 0 20 -12 3428.78 950.972 2
 0 -20 -12 1893.19 865.964 1
 0 -20 -13 20049.2 2614.4 1
 0 20 -13 17183.1 2040.08 2
 0 20 -14 136.162 385.743 2
 0 20 -15 21197.7 2360.19 2
 0 20 -16 343.523 369.196 2
 0 20 -17 24633 2743.34 2
 0 20 -18 961.959 870.605 2
 0 -22 0 4888.42 1066.71 1
 0 22 0 5176.84 946.174 3
 0 22 -1 38619.6 2593.83 3
 0 -22 1 38563.9 2913.9 1
 0 -22 -1 37903 3024.39 1
 0 22 1 38933.9 2477.35 3
 0 22 -2 12542.5 1525.25 3
 0 -22 -2 12054.3 1754.77 1
 0 -22 2 14120.3 1736.81 1
 0 22 2 12014.7 1365.88 3
 0 -22 3 342.478 463.614 1
 0 -22 -3 128.163 414.792 1
 0 22 -3 110.47 339.337 3
 0 22 3 -189.537 394.7 3
 0 -22 4 21977.6 2066.23 1
 0 22 -4 24504 2259.56 3
 0 22 4 23808.8 1823.12 3
 0 -22 -4 24401.2 2578.2 1
 0 22 -5 51408 3323.23 3
 0 22 5 54142.4 2691.24 3
 0 -22 5 52952.9 3123.91 1
 0 -22 -5 56608.7 3946.15 1
 0 -22 6 11390.3 1417.92 1
 0 22 6 11740.3 1240.71 3
 0 -22 -6 13097.8 1960.92 1
 0 22 -6 9077.38 1429.02 3
 0 22 -7 14028.1 1498.72 2
 0 -22 -7 15964.1 2176.38 1
 0 -22 7 12504.6 1447.57 1
 0 22 7 13267.3 1294.3 3
 0 22 -8 3304.26 772.536 2
 0 -22 -8 4818.33 1165.97 1
 0 -22 8 4127.91 827.778 1
 0 -22 -9 3623.71 1105.21 1
 0 22 -9 3046.7 737.931 2
 0 22 -10 13931 1655.31 2
 0 -22 -10 14756.8 2280.34 1
 0 22 -11 41057.5 2916.37 2
 0 -22 -11 49387.6 4119.17 1
 0 -22 -12 7692.93 1686.08 1
 0 22 -12 6189.68 1223.75 2
 0 22 -13 162.691 559.339 2
 0 22 -14 1843.07 680.344 2
 0 -24 0 40635.4 3237.93 1
 0 24 0 34292.6 2504.23 3
 0 -24 -1 5514.06 1258.1 1
 0 24 1 5166.15 941.975 3
 0 24 -1 5845.24 1045.89 3
 0 -24 1 4725.98 1094.55 1
 0 24 -2 1735.2 547.551 3
 0 -24 -2 2276.82 821.442 1
 0 -24 2 2731.98 885.45 1
 0 24 2 2263.38 640.639 3
 0 -24 -3 -32.9989 517.305 1
 0 24 3 1116.72 541.382 3
 0 24 -3 253.049 428.173 3
 0 -24 3 803.9 679.339 1
 0 -24 -4 29999.7 2968.35 1
 0 24 -4 30402.2 2615.01 3
 0 -24 4 31501.1 2622.49 1
 0 -24 5 26437.8 2353.8 1
 0 -24 -5 23382.2 2661.64 1
 0 -24 -6 27258.2 2955.64 1
 0 -24 6 25951.2 2278.77 1
 0 -24 -7 -1474.27 785.681 1
 0 -24 -8 -370.729 513.711 1
 0 -24 -9 4408.19 1213.78 1
 0 -24 -10 38374.8 3746.89 1
 0 -26 0 44618.4 3578.08 1
 0 -26 1 634.682 601.893 1
 0 -26 -1 239.588 406.82 1
 0 26 -2 235.724 403.944 3
 0 -26 -2 1026.82 660.942 1
 0 -26 2 1807.89 689.723 1
 0 -26 3 1055.46 685.695 1
 0 -26 -3 1086.2 716.097 1
 0 26 -3 1341.22 594.645 3
 0 -26 4 11369.2 1710.47 1
 0 -26 -4 9803.44 1785.73 1
 0 -26 -5 734.685 477.23 1
 0 -26 5 2227.19 759.967 1
 0 -26 -6 35097.6 3519.52 1
 0 -26 -7 3186.07 1203.02 1
 0 -28 0 25557.6 2821.71 1
 0 -28 1 6779.99 1474.49 1
 0 -28 -1 8422.99 1708.01 1
 0 -28 2 -1479.14 725.735 1
 0 -28 -2 312.788 514.481 1
 0 -28 -3 3289.46 1153.14 1
 0 -28 3 2471.4 800.155 1
 1 1 -22 1232.99 1154.16 2
 1 -1 -22 261.751 607.241 2
 1 -1 -21 20584.5 2617.62 2
 1 1 -21 22113.7 2704.05 2
 1 1 -20 3901.13 1454.8 2
 1 -1 -20 1709.58 802.892 2
 1 -1 -19 52101.8 3865.31 2
 1 1 -19 50319.9 3793.27 2
 1 1 -18 13258.8 1904.05 2
 1 -1 -18 11908.5 1784.27 2
 1 1 -17 52942.4 3599.8 2
 1 -1 -17 55804.9 3697.1 2
 1 1 -16 598.401 552.484 2
 1 -1 -16 1855.88 652.828 2
 1 1 -15 46582.9 3137.84 2
 1 -1 -15 50347 3271.08 2
 1 1 -14 1600.05 592.128 2
 1 -1 -14 1305.91 509.529 2
 1 1 -13 130865 4783.21 2
 -1 1 13 121785 4576.88 2
 1 -1 -13 133964 4821.02 2
 -1 -1 13 131710 4744.39 2
 -1 1 12 9438.09 1235.94 2
 -1 -1 12 8531.77 1178.17 2
 1 -1 -12 9816.99 1257.41 2
 1 1 -12 10410.5 1304.36 2
 -1 1 11 63.1084 185.534 2
 -1 -1 11 83.3944 263.514 2
 1 -1 -11 16.6053 255.92 2
 1 1 -11 128.948 296.282 2
 1 1 -10 25522.1 1813.23 2
 -1 1 10 28002.5 1898.21 2
 -1 -1 10 25127.2 1804.39 2
 1 -1 -10 25315.9 1820.05 2
 -1 -1 9 257270 5428.61 2
 1 1 -9 271714 5557.05 2
 -1 1 9 261799 5443.12 2
 1 -1 -9 269721 5626.21 2
 -1 1 8 23131.1 1529.38 2
 1 -1 -8 21513.5 1498.47 2
 1 -1 -8 23458 1250.15 1
 -1 -1 8 22300.3 1047.49 1
 1 1 -8 23744.7 1544.7 2
 -1 -1 8 24202.3 1559.15 2
 -1 1 7 111959 3146.1 2
 1 -1 -7 110488 3141.66 2
 -1 -1 7 112051 3110.85 2
 -1 -1 7 116307 2193.45 1
 1 -1 -7 117829 2608.77 1
 1 1 -7 114846 3173.92 2
 -1 -1 6 30809.5 1518.46 2
 -1 -1 6 31447.7 1020.33 1
 1 -1 -6 29753.6 1516.93 2
 1 -1 -6 32055.8 1265.2 1
 -1 1 6 31093.5 1532.55 2
 1 1 -6 31279.5 1533.46 2
 -1 -1 5 185697 3370.93 2
 1 -1 -5 193600 3474.35 2
 1 1 -5 187594 3388.04 2
 -1 1 5 180705 3332.93 2
 -1 -1 5 189446 2216.71 1
 1 -1 -5 195264 2868.68 1
 1 -1 -4 62684.5 1773.71 2
 1 1 -4 60936.1 1723.96 2
 1 -1 -4 61481.6 1488.61 1
 -1 -1 4 63216.5 1746.81 2
 -1 1 4 61262.6 1756.31 2
 1 1 -3 246508 2966.41 2
 -1 1 3 233126 2998.66 2
 -1 -1 -3 39561.3 1243.31 2
 1 1 3 39127.6 1190.86 1
 1 -1 3 38115.3 1249.62 3
 1 1 3 38283.6 1229.64 2
 -1 1 -3 40055.1 1259.75 3
 -1 1 -3 41770.6 1325.61 2
 1 1 4 44710.5 1527.17 2
 1 -1 4 45393.5 1538.07 3
 1 1 4 45624.5 1420.74 1
 -1 1 -4 45409.8 1570.46 2
 -1 -1 -4 42808.6 1499.46 2
 -1 -1 -5 76899.3 2227.32 2
 -1 1 -5 71844.6 2208.24 2
 1 1 5 76977.5 2002.05 1
 1 1 5 75570.4 2210.24 2
 1 -1 5 72567.1 2133.77 3
 1 -1 6 12557.5 971.053 3
 -1 1 -6 13083.8 1020.23 2
 1 1 6 13440.1 905.461 1
 1 1 6 12327.7 979.646 2
 -1 -1 -6 13214 1030.51 2
 1 1 7 247559 4766.41 2
 -1 -1 -7 270521 4953.95 2
 1 1 7 258347 4220.26 1
 -1 1 -7 260154 4932.97 2
 1 -1 7 254646 4683 3
 -1 1 -8 40330.3 2081.01 2
 1 -1 8 42790 1649.32 1
 1 1 8 42837 2107.35 2
 1 1 8 43111.5 1830.77 1
 -1 -1 -8 42417.5 2114.99 2
 1 -1 8 41713 2025.06 3
 -1 1 -9 230475 5291.67 2
 1 -1 9 241220 4142 1
 -1 -1 -9 245678 5411.08 2
 1 1 9 228736 4404.76 1
 1 1 9 240730 5316.42 2
 1 -1 9 232622 5079.94 3
 1 -1 10 45948.9 1907.59 1
 1 1 10 44240 2423.11 2
 1 1 10 44124.6 2021.84 1
 -1 1 -10 46495.8 2495.38 2
 1 -1 10 43493 2336.08 3
 -1 -1 -10 48830.3 2552.29 2
 1 1 11 223.402 204.849 2
 1 -1 11 -122.969 254.995 3
 1 1 11 6.56887 136.049 1
 1 1 11 264.55 203.366 3
 -1 1 -11 705.064 300.178 2
 1 -1 11 92.1507 152.908 1
 -1 -1 -11 45.5424 241.287 2
 1 -1 12 29691.5 1686.78 1
 -1 1 -12 32723.7 2311.09 2
 1 1 12 31430.2 2264.13 2
 1 -1 12 30530.8 2150.74 3
 -1 -1 -12 30390.5 2244.19 2
 1 1 12 28830.8 1776.43 1
 1 1 12 30002.6 2071.28 3
 -1 -1 -13 94240.7 4094.22 2
 -1 1 -13 96164.3 4172.25 2
 1 1 13 92787.5 3311.31 1
 1 -1 13 94060 3097.3 1
 1 -1 13 90526 3850.67 3
 1 1 13 87768.1 3731.25 3
 1 -1 14 10189.1 1067.99 1
 1 1 14 10401.8 1156.11 1
 1 1 14 9823.89 1315.42 3
 -1 -1 -14 9725.21 1411.34 2
 -1 1 -14 11115.3 1506.29 2
 1 -1 15 96221.7 3403.46 1
 -1 1 -15 106973 4783.45 2
 -1 -1 -15 106522 4774.94 2
 -1 -1 -16 1195.38 584.741 2
 -1 1 -16 1283.09 588.319 2
 -1 1 -17 31083.5 2806.8 2
 -1 -1 -17 32624.9 2854.6 2
 -1 -1 -18 12754.6 1880.5 2
 -1 1 -18 11053.5 1720.62 2
 -1 1 -19 26440.1 2796.92 2
 -1 -1 -19 25272.4 2741.93 2
 -1 1 -20 2496.45 909.383 2
 -1 -1 -20 3428.81 1081.51 2
 -1 -1 -21 42597.2 3787.99 2
 -1 1 -21 38841.1 3643.76 2
 -1 -1 -22 -1934.43 958.101 2
 -1 1 -22 -591.948 897.35 2
 1 3 -22 -235.865 737.264 2
 1 -3 -22 633.547 772.305 2
 1 -3 -21 16237.7 2322.01 2
 1 3 -21 18467.6 2475.66 2
 1 3 -20 13086.6 2044.86 2
 1 -3 -20 13893.5 2086.42 2
 1 3 -19 33708.5 3090.21 2
 1 -3 -19 31926.9 3038.51 2
 1 -3 -18 41739.2 3347.52 2
 1 3 -18 41926.1 3320.88 2
 1 3 -17 4952.19 1186.81 2
 1 -3 -17 6179.33 1291.58 2
 1 -3 -16 7375.73 1324.87 2
 1 3 -16 10336.2 1543.61 2
 1 -3 -15 13166.8 1673.57 2
 1 3 -15 12157.1 1622.77 2
 1 -3 -14 4814.67 958.768 2
 1 3 -14 5608.58 1060.03 2
 1 3 -13 33013.3 2413.33 2
 -1 -3 13 29289.2 2252.06 3
 1 -3 -13 34362.2 2472.73 2
 -1 3 12 131054 4571.64 2
 -1 -3 12 126153 4472.71 3
 1 3 -12 130320 4582.58 2
 -1 -3 12 126871 4492.34 2
 1 -3 -12 133960 4622.74 2
 -1 3 11 -739.329 376.02 2
 -1 -3 11 112.881 310.188 3
 -1 -3 11 115.798 164.487 2
 1 -3 -11 -95.1197 308.269 2
 1 3 -11 83.5357 233.439 2
 -1 3 10 203996 5145.57 2
 1 -3 -10 212947 4633.39 1
 -1 -3 10 199212 5117.09 3
 1 -3 -10 209155 5252.73 2
 1 3 -10 208721 5207.19 2
 -1 -3 10 206626 3157.66 1
 -1 -3 10 208980 5196.08 2
 1 -3 -9 299405 5876.95 2
 -1 -3 9 290527 5806.9 2
 1 -3 -9 292482 5199.57 1
 -1 -3 9 283633 5756.8 3
 -1 3 9 269999 5619.18 2
 -1 -3 9 289293 3441.19 1
 1 3 -9 282985 5728.64 2
 -1 -3 8 32452.4 1044.74 1
 1 -3 -8 30472.3 1780.93 2
 -1 -3 8 32123.7 1816.59 2
 1 3 -8 30440.7 1754.65 2
 1 -3 -8 34082.7 1683.9 1
 -1 3 8 28389.4 1724.3 2
 1 3 -7 53052.3 2178.97 2
 -1 3 7 52357.6 2169.01 2
 -1 -3 7 54765.6 2197.03 2
 1 -3 -7 53349.2 2218.32 2
 -1 -3 7 54262.4 1192.02 1
 1 -3 -7 53358.1 2020.15 1
 1 3 -6 43363.5 1809.99 2
 -1 -3 6 44355.8 925.632 1
 1 -3 -6 45260.4 1875.71 2
 -1 -3 6 38400.9 1708.87 2
 1 -3 -6 47499.8 1791.66 1
 -1 3 6 41404.9 1792.31 2
 1 -3 -5 134948 2844.7 1
 1 3 -5 134197 2896.05 2
 -1 -3 5 134230 2904.73 2
 1 -3 -5 131383 2950.34 2
 -1 3 5 128733 2910.04 2
 1 -3 -4 57712.3 1769.49 2
 1 3 -4 60019.1 1726.83 2
 -1 3 4 57145.1 1747.22 2
 -1 -3 4 59634.6 1727.31 2
 1 -3 -4 62238.6 1814.97 1
 -1 -3 4 58952.2 1844.2 3
 1 -3 -3 24030.4 1024.49 2
 1 3 -3 26022.6 980.602 2
 -1 -3 3 25587.9 1088.15 3
 -1 3 3 25280.7 969.227 3
 -1 3 3 25572.4 1054.93 2
 -1 -3 2 5512.95 438.075 3
 -1 3 2 5383.58 404.696 3
 -1 3 2 4328.13 390.985 2
 1 3 -2 5338.17 366.114 2
 1 3 -1 1091.23 159.709 3
 -1 -3 1 1155.55 155.463 1
 -1 3 1 1504.76 208.065 3
 -1 -3 0 6671.41 428.998 1
 -1 3 0 6790.52 441.045 3
 -1 3 -1 3186.77 332.307 3
 -1 -3 -1 2720.53 312.336 1
 1 3 2 14167 620.669 2
 1 3 2 13090.7 458.011 3
 1 -3 2 14861 794.381 3
 -1 3 -2 14206.6 779.173 3
 1 3 2 13681.9 774.273 1
 -1 -3 -2 15514.8 814.497 1
 -1 -3 -2 15087.2 640.928 2
 -1 -3 -3 138614 2338.81 2
 -1 -3 -3 144856 2708.19 1
 1 3 3 140160 2341.67 2
 -1 3 -3 143588 2729.98 3
 1 3 3 139678 2675.3 1
 1 -3 3 142224 2716.98 3
 1 -3 4 109030 2613.33 3
 -1 3 -4 114671 2663.74 3
 1 3 4 110451 2551.79 1
 1 3 4 111673 2417.54 2
 -1 -3 -4 110922 2411 2
 -1 -3 -4 119674 2648.4 1
 1 3 5 81425.2 2292.5 2
 1 3 5 87202.8 2410.74 1
 1 -3 5 80193.4 2428.92 3
 -1 3 -5 87267.3 2518.83 3
 -1 -3 -5 85013.4 2340.54 2
 -1 -3 -5 93631.9 2487.56 1
 -1 3 -5 80414.4 2404.34 2
 1 3 6 116446 2962.8 1
 1 3 6 111468 2944.94 2
 -1 -3 -6 113573 2975.03 2
 -1 3 -6 114310 3089.41 2
 1 -3 6 112968 3086.63 3
 1 3 7 7808.26 817.943 1
 -1 3 -7 7866.74 887.458 2
 1 -3 7 8761.99 924.838 3
 1 3 7 8316.03 868.75 2
 -1 -3 -7 8007.25 869.256 2
 1 3 8 75178.3 2799.33 2
 -1 3 -8 74782.6 2903.85 2
 -1 -3 -8 78325 2886.02 2
 1 3 8 76734.6 2658.61 1
 1 -3 8 73192.3 2813.5 3
 -1 -3 -9 173395 4542.48 2
 -1 3 -9 175109 4650.32 2
 1 -3 9 173482 4578.49 3
 1 3 9 180139 4246.7 1
 1 3 9 177354 4566.48 2
 1 -3 10 137640 3042.28 1
 1 3 10 132279 4191.46 2
 -1 3 -10 134614 4323.4 2
 1 3 10 136024 3843.59 1
 1 -3 10 136780 4288.27 3
 -1 -3 -10 140541 4324.25 2
 1 -3 11 14935.8 1472.74 3
 -1 3 -11 16133.5 1590.7 2
 -1 -3 -11 13757.8 1453.36 2
 1 3 11 13549.8 1415.22 2
 1 -3 11 13382.7 997.205 1
 1 3 11 12746.5 1236.8 1
 1 3 12 141388 4235.74 1
 -1 3 -12 140664 4864.92 2
 1 -3 12 135998 3360.15 1
 1 -3 12 138477 4723.8 3
 1 3 12 137637 4709.88 2
 -1 -3 -12 145472 4888.77 2
 -1 3 -13 50728.6 3056.84 2
 -1 -3 -13 53692.3 3114.06 2
 1 -3 13 52824.8 2171.35 1
 -1 -3 -14 49142.4 3099.3 2
 1 -3 14 46075.3 2118.32 1
 -1 3 -14 51635.3 3213.92 2
 1 3 14 45109.3 2732.19 3
 1 -3 15 22106.5 1504.24 1
 -1 3 -15 23606.7 2276.56 2
 -1 -3 -15 20307 2082.27 2
 -1 3 -16 16095 1965.66 2
 1 -3 16 16508.8 1345.88 1
 -1 -3 -16 17904.5 2078.75 2
 -1 3 -17 1797.38 601.508 2
 -1 -3 -17 2553.23 907.341 2
 -1 3 -18 54905.6 3880.71 2
 -1 -3 -18 63517.6 4142.59 2
 -1 -3 -19 38099.2 3321.68 2
 -1 3 -19 36844.8 3303.01 2
 -1 -3 -20 20553.8 2551.8 2
 -1 3 -20 19400.6 2485.9 2
 -1 3 -21 10292 1812.28 2
 -1 -3 -21 11180.6 1978.1 2
 -1 3 -22 -69.889 761.444 2
 1 -5 -22 -1862.23 879.936 2
 1 5 -22 891.315 725.157 2
 1 5 -21 892.948 657.356 2
 1 -5 -21 -4.25723 726.946 2
 1 -5 -20 52165.2 4020.97 2
 1 5 -20 49280.1 3924.3 2
 1 5 -19 27055.6 2800.12 2
 1 -5 -19 25681.3 2700.33 2
 1 -5 -18 31713.1 2941.19 2
 1 5 -18 32519.8 2957.53 2
 1 5 -17 760.485 468.349 2
 1 -5 -17 736.897 465.052 2
 1 -5 -16 56512 3624.14 2
 1 5 -16 57773.2 3636.07 2
 1 5 -15 4263.86 963.922 2
 1 -5 -15 3300.25 869.708 2
 1 5 -14 56101.4 3290.34 2
 1 -5 -14 61501.4 3449.99 2
 1 5 -13 12218.4 1462.64 2
 1 -5 -13 15104.1 1724.83 2
 1 5 -12 128027 4582.67 2
 -1 5 12 126648 4527.15 2
 -1 -5 12 127804 4627.79 3
 1 -5 -12 133877 4696.64 2
 1 -5 -12 138364 4333.37 1
 -1 5 11 -168.418 358.334 2
 1 -5 -11 -1203.91 477.083 2
 -1 -5 11 300.837 258.945 3
 1 5 -11 249.129 284.076 2
 1 -5 -11 21.1917 221.543 1
 -1 -5 11 19.6309 93.7295 1
 1 -5 -10 146398 4424.05 2
 -1 -5 10 137379 4405.36 3
 -1 -5 10 140747 2147.61 1
 1 -5 -10 147139 4193.15 1
 1 5 -10 140675 4307.82 2
 -1 5 10 141826 4340.33 2
 1 -5 -9 32664.2 1896.54 1
 -1 5 9 28329.8 1853.34 2
 -1 -5 9 30805.4 921.428 1
 -1 -5 9 30210.8 1971.65 3
 1 -5 -9 32914 1996.52 2
 1 5 -9 28983 1856.06 2
 -1 -5 8 204935 4868.35 3
 -1 5 8 211923 4736.79 2
 1 -5 -8 219734 4850.56 2
 1 5 -8 215901 4728.79 2
 1 -5 -8 222444 4751.55 1
 -1 -5 8 218154 2202.59 1
 -1 -5 7 30.3857 132.741 3
 1 -5 -7 82.6334 131.849 1
 -1 5 7 405.395 223.23 2
 1 5 -7 386.539 218.394 2
 1 -5 -7 373.76 199.816 2
 1 5 -6 83766.9 2549.63 2
 -1 5 6 73649.7 2224.39 3
 1 -5 -6 85672.6 2666.27 2
 -1 -5 6 81789.4 2707.2 3
 -1 5 6 77697.7 2522.91 2
 1 -5 -6 88245.4 2742.4 1
 1 -5 -5 20517 1272.9 1
 1 5 -5 19657.7 1143.87 2
 -1 -5 5 19555 1244.16 3
 1 -5 -5 22035.1 1259.71 2
 -1 5 5 18644.5 1144.44 2
 -1 5 5 19772.9 1070.84 3
 -1 5 4 114081 2422.91 3
 1 -5 -4 124179 2716.69 2
 -1 5 4 116603 2654.15 2
 -1 -5 4 122875 2888.79 3
 1 5 -4 128864 2612.08 2
 -1 5 3 50508.6 1598.23 2
 -1 5 3 52105.3 1514.49 3
 -1 -5 3 54963.8 1770.79 3
 1 -5 -3 49823.7 1484.17 3
 1 5 -3 52726.3 1726.68 3
 1 5 -2 99568.7 2124.89 3
 1 -5 -2 90414.1 1945.29 3
 -1 -5 2 95570.7 2109.81 3
 -1 5 2 98662.4 1986.01 3
 1 5 -1 5087.24 436.147 3
 -1 5 1 6008.21 499.215 3
 -1 -5 1 4985.41 428.991 3
 1 -5 -1 4255.17 416.077 3
 -1 -5 1 5275.82 449.135 1
 -1 -5 0 155451 2075.64 3
 1 5 0 142416 1994.65 3
 -1 -5 0 152149 2612.57 1
 1 -5 0 147879 2527.49 3
 -1 5 0 150109 2521.26 3
 -1 5 -1 29608.6 1200.1 3
 1 5 1 30095.2 815.366 3
 1 5 1 28550.9 792.673 2
 -1 -5 -1 28260.3 1211.83 1
 1 -5 1 31158.2 1232.83 3
 -1 -5 -1 29257.6 815.003 3
 1 5 2 16294.1 600.315 3
 -1 5 -2 16868.2 971.271 3
 1 -5 2 17135.8 984.774 3
 1 5 2 16842.9 724.557 2
 -1 -5 -2 17357.3 1016.82 1
 -1 -5 -2 15794.3 602.683 3
 1 -5 3 96228 2489.09 3
 1 5 3 94935.3 2007.29 2
 1 5 3 90938.5 2486.92 1
 -1 -5 -3 93472.5 1989.62 2
 -1 -5 -3 99895.2 2587.71 1
 -1 5 -3 93020.4 2451.46 3
 1 5 3 90536 1587.02 3
 1 5 4 78358.9 1710.65 3
 1 5 4 87975.6 2175.94 2
 -1 5 -4 84961.3 2521.78 3
 -1 -5 -4 87362.3 2183.92 2
 -1 -5 -4 91257.5 2622.75 1
 1 5 4 85788.3 2556.7 1
 1 -5 4 87927.9 2555.26 3
 1 5 5 2223.28 445.051 1
 -1 -5 -5 2544.6 465.65 1
 -1 5 -5 2729.36 491.232 3
 1 5 5 2503.79 413.45 2
 1 -5 5 2060.62 441.809 3
 -1 -5 -5 2264.9 400.12 2
 1 5 6 115263 3018.51 2
 1 -5 6 119142 3372.09 3
 -1 -5 -6 121041 3339.92 1
 -1 -5 -6 119618 3094.56 2
 -1 5 -6 119899 3401.98 3
 1 5 6 113961 3236.01 1
 -1 5 -6 115869 3212.94 2
 1 -5 7 20417.3 1483.69 3
 1 5 7 21044 1389.1 2
 -1 -5 -7 22041.6 1476.14 1
 -1 -5 -7 20388.2 1378.33 2
 1 5 7 19391.3 1400.39 1
 -1 5 -7 21057.8 1465.95 2
 1 5 8 109587 3440.01 1
 -1 -5 -8 116010 3493.46 2
 1 -5 8 114879 3726.93 3
 1 5 8 113797 3466.65 2
 -1 5 -8 106388 3492.2 2
 1 5 9 10563 1124.89 1
 -1 -5 -9 9589.32 1082.53 2
 -1 5 -9 9850.08 1129.76 2
 1 5 9 10967.3 1151.27 2
 1 -5 9 11301 1228.2 3
 1 -5 10 160881 4823.51 3
 -1 -5 -10 164666 4706.08 2
 1 5 10 159011 4636.38 2
 -1 5 -10 158578 4736.74 2
 1 -5 11 5686.54 939.302 3
 -1 5 -11 4858.53 890.051 2
 1 5 11 6013.29 1017.87 2
 -1 -5 -11 6489.44 994.789 2
 1 -5 12 87310.2 3872.52 3
 -1 -5 -12 86964.3 3786.05 2
 1 5 12 87213.2 3771.61 2
 -1 5 -12 84918.6 3802.88 2
 1 -5 12 86501.9 2437.99 1
 -1 5 -13 16301.7 1757.26 2
 1 -5 13 18914.6 1201.37 1
 -1 -5 -13 18586.6 1826.85 2
 1 -5 14 44041.8 1886.24 1
 -1 -5 -14 46127.9 3011.76 2
 -1 5 -14 44470.1 3020.85 2
 1 -5 15 -32.8703 202.838 1
 -1 -5 -15 178.95 382.157 2
 -1 5 -15 76.6904 332.281 2
 -1 5 -16 86533.9 4560.19 2
 1 -5 16 87403.5 2832.38 1
 -1 -5 -16 94551.9 4670.93 2
 -1 5 -17 3499.91 941.367 2
 -1 -5 -17 2422.17 818.102 2
 -1 -5 -18 35216.9 3086.71 2
 -1 5 -18 31648.4 2971.84 2
 -1 -5 -19 25636.3 2753.9 2
 -1 5 -19 22838.3 2621.58 2
 -1 -5 -20 55139.3 4156.37 2
 -1 5 -20 57326.5 4282.55 2
 -1 5 -21 -498.066 581.942 2
 -1 -5 -21 64.7154 636.684 2
 -1 -5 -22 613.683 654.512 2
 -1 7 24 25887.9 2892.9 3
 -1 7 23 6316.19 1393.18 3
 1 7 -22 1081.21 711.414 2
 -1 7 22 376.85 419.862 3
 1 -7 -22 1622.17 1065.38 2
 -1 7 21 6492.39 1316.9 3
 1 -7 -21 7616.44 1625.05 2
 1 7 -21 6206.82 1502.58 2
 1 7 -20 62290.9 4425.89 2
 1 -7 -20 61894 4410.55 2
 1 -7 -19 3588.13 1030.37 2
 1 7 -19 2692.24 981.773 2
 1 -7 -18 19760.7 2325 2
 1 7 -18 18816.9 2247.83 2
 1 7 -17 7398.61 1344.61 2
 1 -7 -17 6740.77 1281.23 2
 1 7 -16 11106.2 1602.46 2
 1 -7 -16 14552.1 1862.06 2
 1 7 -15 2515.17 776.833 2
 1 -7 -15 1736.98 645.349 2
 1 -7 -14 83476.5 4087.05 2
 1 7 -14 82003.7 4047.44 2
 1 -7 -13 14407.9 1561.08 1
 1 -7 -13 14676.3 1648.37 2
 1 7 -13 15351.4 1682.19 2
 1 -7 -12 30907.2 2296.03 2
 -1 7 12 27317 1927.65 3
 1 -7 -12 30456.2 2182.69 1
 -1 7 12 26350.3 2087.46 2
 1 7 -12 28722.9 2188.07 2
 1 -7 -11 7294.99 1065.14 2
 1 -7 -11 6653.71 1013.43 1
 1 7 -11 7713.95 1098.14 2
 -1 -7 11 6958.86 1078.49 3
 -1 7 11 6851.5 917.544 3
 -1 7 11 6203.55 953.665 2
 -1 -7 11 7372.14 426.195 1
 -1 7 10 81695.3 3028.38 3
 1 -7 -10 91381.1 3555.7 2
 -1 -7 10 91681 3740.19 3
 -1 7 10 83209.9 3393.62 2
 -1 -7 10 88655.9 1408.74 1
 1 7 -10 91931.3 3562.24 2
 1 -7 -10 96080.7 3645.23 1
 -1 7 9 1815.15 474.301 2
 1 -7 -9 2906.7 650.783 1
 -1 -7 9 2467.58 630.149 3
 1 -7 -9 2141.51 553.223 2
 -1 7 9 1619.42 402.722 3
 1 7 -9 2585.01 568.994 2
 1 7 -8 251327 5211.75 2
 -1 -7 8 250487 5635.11 3
 -1 7 8 240340 5171.54 2
 1 -7 -8 257518 5368.6 2
 -1 7 8 236703 4594.6 3
 1 -7 -8 264668 5670.69 1
 1 7 -7 45417.8 2093.58 2
 -1 -7 7 41985.5 2199.35 3
 1 -7 -7 44947.3 2261.97 1
 1 -7 -7 44365.7 2110.83 2
 -1 7 7 41724.7 1816.5 3
 -1 7 7 42626 2050.16 2
 -1 7 6 19800.2 1194.02 3
 -1 -7 6 21361 1473.06 3
 1 7 -6 20593.2 1297.43 2
 -1 7 6 19503.3 1311.9 2
 1 -7 -6 21544.9 1521.4 1
 1 -7 -6 19079.5 1298.81 2
 -1 7 5 7311.65 687.543 3
 1 -7 -5 7938.93 885.001 1
 -1 7 5 7468.91 764.903 2
 1 7 -5 8206.74 761.572 2
 -1 -7 5 9138.07 927.132 3
 1 7 -4 66657.8 2301.24 3
 1 -7 -4 66105 1958.28 3
 -1 7 4 62798.8 2063.43 2
 -1 7 4 65147.5 1948.29 3
 -1 -7 4 68660.2 2347.54 3
 -1 7 3 701.918 223.223 2
 -1 -7 3 647.581 218.841 3
 1 7 -3 733.361 244.988 3
 -1 7 3 622.815 176.776 3
 1 -7 -3 566.203 199.206 3
 1 -7 -2 91592.9 2188.82 3
 -1 -7 2 93814.2 2342.9 3
 1 7 -2 93169.3 2334.4 3
 -1 7 2 90508.6 2168.43 3
 -1 7 1 27715.7 1215.39 3
 1 7 -1 26657.1 1144.48 3
 -1 -7 1 27268 1162.92 3
 1 -7 -1 26082.5 1190.88 3
 1 7 0 11823.7 706.595 3
 -1 7 0 10511.1 783.986 3
 1 -7 0 12101.7 838.899 3
 -1 -7 0 10935.2 677.885 3
 -1 -7 0 11023.8 833.726 1
 -1 7 -1 27304.7 1310.57 3
 -1 -7 -1 26118.5 1353.12 1
 1 -7 1 28019 1333.89 3
 1 7 1 26733.1 991.274 3
 -1 -7 -1 29585.2 1039.09 3
 1 -7 2 62645.5 2099.9 3
 1 7 2 57176.7 1488.79 2
 -1 -7 -2 60817.2 1430.09 3
 1 7 2 60148.9 1439.24 3
 -1 7 -2 63497 2098.65 3
 -1 -7 -2 65665.3 2253.89 1
 -1 -7 -3 85802.6 2692.76 1
 1 7 3 81280.8 1975.76 2
 -1 7 -3 81269 2547.51 3
 1 7 3 82197.3 1708.85 3
 -1 -7 -3 77820.3 1671.12 3
 1 -7 3 83004 2556.9 3
 1 -7 4 122657 3285.5 3
 -1 -7 -4 117534 2625.01 2
 1 7 4 112076 2151.09 3
 -1 -7 -4 123114 3381.67 1
 -1 7 -4 118927 3228.04 3
 1 7 4 119682 2636.98 2
 1 7 5 156056 3301.36 2
 1 -7 5 158316 3931.79 3
 -1 7 -5 151176 3878.58 3
 -1 -7 -5 161558 3365.52 2
 -1 -7 -5 162921 4055.19 1
 1 7 5 151581 2686.92 3
 -1 7 -6 1688.79 461.907 3
 1 7 6 2322.24 372.86 3
 1 -7 6 2337.65 524.383 3
 -1 -7 -6 2104.08 505.022 1
 1 7 6 1967.51 409.69 2
 -1 -7 -6 1624.96 402.098 2
 -1 -7 -7 9463.62 951.109 2
 -1 -7 -7 10641.2 1121.55 1
 1 7 7 9220.04 933.647 2
 -1 7 -7 8423.84 952.724 2
 1 -7 7 9260.62 1065.18 3
 1 7 7 8655.5 772.897 3
 -1 7 -7 8571.44 1031.7 3
 -1 -7 -8 189498 4887.58 1
 1 7 8 172063 4304.45 2
 -1 -7 -8 180771 4449.98 2
 -1 7 -8 176619 4604.97 2
 1 -7 8 181728 4900.77 3
 1 7 8 160154 3566.46 3
 1 7 9 548.415 321.382 2
 -1 -7 -9 468.688 318.658 1
 -1 -7 -9 755.773 344.503 2
 -1 7 -9 525.066 294.07 2
 1 -7 9 -33.6104 296.442 3
 1 -7 10 60740.5 3095.69 3
 1 7 10 62656.9 2907.04 2
 -1 -7 -10 67951.1 3037.71 2
 -1 7 -10 60513.5 2984.09 2
 -1 -7 -11 6072.47 998.28 2
 1 -7 11 5838.83 1025.5 3
 -1 7 -11 6187.61 1005.03 2
 1 7 11 7407.68 1072.15 2
 -1 -7 -12 3326 776.978 2
 -1 7 -12 4433.1 901.906 2
 1 7 12 3943.17 824.18 2
 1 -7 13 349.293 188.291 1
 -1 7 -13 817.296 486.719 2
 -1 -7 -13 1118.31 467.084 2
 1 -7 14 110257 2739.63 1
 -1 7 -14 109005 4780.78 2
 -1 -7 -14 111255 4716.12 2
 1 -7 15 3693.84 517.138 1
 -1 7 -15 5133.68 1093 2
 -1 -7 -15 4484.33 925.447 2
 1 -7 16 37102.2 1654.38 1
 -1 7 -16 36190.6 2977.77 2
 -1 -7 -16 37317.4 2974.75 2
 -1 -7 -17 4518.89 920.513 2
 -1 7 -17 4779.57 1162.65 2
 -1 7 -18 28454.9 2858.65 2
 -1 -7 -18 27874.5 2766.78 2
 -1 7 -19 2174.86 816.242 2
 -1 -7 -19 4944.06 1538.3 2
 -1 -7 -20 54317.8 4139.74 2
 -1 7 -20 57187.3 4303.98 2
 -1 7 -21 5936.13 1476.06 2
 -1 -7 -21 6910.59 1559.93 2
 -1 -7 -22 -422.183 864.879 2
 -1 9 23 3626.19 1069.71 3
 -1 9 22 -1500.51 715.556 3
 -1 9 21 4665.46 1136.16 3
 1 9 -21 7556.77 1624.85 2
 1 -9 -21 7799.8 1765.17 2
 -1 9 20 26852.1 2602.21 3
 1 -9 -20 27809.6 2969.86 2
 1 9 -20 31403 3192.98 2
 -1 9 19 1229.63 626.983 3
 1 -9 -19 2476.63 966.62 2
 1 9 -19 619.418 495.482 2
 1 9 -18 16824.9 2155.1 2
 -1 9 18 13943.8 1745.18 3
 1 -9 -18 16997.1 2211.21 2
 -1 9 17 9615.3 1392.4 3
 1 -9 -17 11326.3 1782.18 2
 1 9 -17 9577.93 1591.14 2
 -1 9 16 3620.18 832.216 3
 1 -9 -16 3695.14 1044.91 2
 1 9 -16 4301.47 1074.02 2
 -1 9 15 30946.6 2322.02 3
 1 9 -15 34135 2754.3 2
 1 -9 -15 35620.8 2802.54 2
 -1 9 14 96951.9 3936.05 3
 1 9 -14 105645 4649.34 2
 1 -9 -14 111854 4718.01 1
 1 -9 -14 105846 4658.45 2
 -1 9 13 12316.2 1345.58 3
 1 9 -13 12312.1 1524.66 2
 1 -9 -13 14630.6 1675.13 2
 1 -9 -13 12933.9 1578.61 1
 1 -9 -12 14363 1600.55 1
 1 -9 -12 13857.3 1544 2
 -1 9 12 13325.5 1522.78 2
 1 9 -12 13406.3 1518.64 2
 -1 9 12 12885.8 1340.3 3
 -1 9 11 -75.3446 328.343 2
 -1 9 11 69.6547 249.567 3
 1 -9 -11 232.571 282.77 2
 1 -9 -11 323.027 251.792 1
 1 9 -11 -19.9601 278.655 2
 1 -9 -10 7374.91 1063.12 2
 -1 9 10 5771.96 930.784 2
 1 9 -10 6267.72 970.776 2
 -1 9 10 6576.04 857.318 3
 1 -9 -10 6968.52 1063.6 1
 -1 -9 10 7060.98 1063.34 3
 -1 9 9 39906.6 2270.83 2
 -1 -9 9 41691.5 2510.54 3
 1 9 -9 39826.6 2271.46 2
 1 -9 -9 44097.3 2404.17 2
 -1 9 9 40284 2020.15 3
 1 -9 -9 40088.8 2446.51 1
 -1 -9 8 360173 7074.85 3
 1 9 -8 361595 6376.47 2
 1 -9 -8 372858 7273.21 1
 -1 9 8 348177 6405.73 2
 -1 9 8 337151 5565.73 3
 -1 9 7 80310.1 2902.13 2
 -1 9 7 80277.3 2607.37 3
 -1 -9 7 88765.5 3336.94 3
 1 -9 -7 91592.3 3478.73 1
 1 9 -7 82374.5 2876.41 2
 1 9 -6 11175.9 996.195 2
 -1 -9 6 10358.7 1091.4 3
 -1 9 6 9276.26 942.354 2
 1 -9 -6 10513.6 1138.31 1
 -1 9 6 10536.6 906.601 3
 -1 9 5 19008.6 1269.61 2
 1 9 -5 19528.3 1412.73 3
 -1 -9 5 20209.8 1448.88 3
 1 -9 -5 18064.2 1461.36 1
 -1 9 5 18325.4 1134.35 3
 1 -9 -5 18790.9 1160.8 3
 1 9 -4 41707.3 1972.53 3
 -1 9 4 41179.3 1773.05 2
 -1 9 4 41836.7 1676.57 3
 -1 -9 4 46704.1 2073.19 3
 1 -9 -4 43693.9 1711.68 3
 1 9 -3 44163.9 1899.78 3
 -1 -9 3 45954.5 1936.93 3
 1 -9 -3 43101.8 1674.2 3
 -1 9 3 47487.9 1759.13 3
 -1 -9 2 65871.9 2184.67 3
 1 9 -2 64746.1 2166.56 3
 1 -9 -2 66637.2 2082.11 3
 -1 9 2 65668.3 2074.51 3
 1 -9 -1 49859.8 1842.87 3
 -1 -9 1 51309.5 1815.08 3
 1 9 -1 47428.6 1733.59 3
 -1 9 1 49891 1835.73 3
 -1 -9 1 46788.8 1876.73 1
 1 9 0 1765.99 324.509 3
 -1 9 0 2130.94 403.807 3
 -1 -9 0 2452.46 378.558 3
 -1 -9 0 3051.12 515.562 1
 1 -9 0 2228.48 415.098 3
 -1 -9 -1 3340.1 409.639 3
 1 9 1 940.416 152.715 3
 -1 -9 -1 3958.91 606.188 1
 -1 9 -1 3131.62 505.888 3
 1 -9 1 3799.93 545.164 3
 1 9 2 198823 3048.62 3
 1 -9 2 204130 4167.49 3
 1 9 2 183275 2941.63 2
 -1 9 -2 197814 4097.7 3
 -1 -9 -2 199631 3076.16 3
 -1 -9 -2 199970 4400.46 1
 -1 9 -3 7754.56 855.142 3
 -1 -9 -3 7702.95 899.153 1
 1 9 3 6719.64 567.326 3
 1 -9 3 8927.03 920.784 3
 -1 -9 -3 8068.94 615.641 3
 1 9 3 7236.28 633.646 2
 1 9 4 67557.4 1813.94 3
 1 -9 4 70135.9 2677.17 3
 -1 9 -4 66082.6 2605.47 3
 1 9 4 69538 2105.81 2
 -1 -9 -4 75137.5 2897.06 1
 -1 -9 -4 68257.7 1832.05 3
 -1 9 -5 29172.9 1806.86 3
 -1 -9 -5 30750.3 1921.63 1
 1 -9 5 28310 1779.84 3
 1 9 5 30651.3 1281.7 3
 1 9 5 28507.7 1478 2
 1 -9 6 727.497 345.378 3
 -1 -9 -6 285.253 279.758 1
 1 9 6 581.063 211.029 3
 1 9 6 315.11 215.267 2
 -1 -9 -6 126.277 212.541 2
 -1 9 -6 193.55 225.342 3
 -1 -9 -7 28057 1682.07 2
 -1 -9 -7 30179.3 2044.59 1
 1 9 7 27103 1635.07 2
 -1 9 -7 28522.1 1963.53 3
 1 9 7 26228.6 1343.12 3
 1 -9 7 28133.4 1961.51 3
 -1 -9 -8 321715 6850.7 1
 -1 -9 -8 297207 5799.6 2
 -1 9 -8 291719 6095.12 2
 1 9 8 293584 5739.47 2
 1 9 8 277070 4685.97 3
 1 -9 8 308311 6692.42 3
 -1 9 -9 37625.7 2280.65 2
 -1 -9 -9 38384 2193.08 2
 1 9 9 35191.4 1788.78 3
 1 -9 9 38946.3 2485.47 3
 1 9 9 40412.2 2241 2
 -1 -9 -9 40005.1 2501.68 1
 1 9 10 3764.59 730.21 2
 1 9 10 3254.51 564.607 3
 -1 -9 -10 3926.89 817.296 1
 -1 9 -10 3871.96 812.043 2
 1 -9 10 3198.17 756.903 3
 -1 -9 -10 4847.38 854.206 2
 -1 -9 -11 2994.93 703.057 2
 -1 9 -11 4642.8 876.582 2
 1 9 11 3422.42 623.032 3
 1 9 11 3315.33 742.558 2
 1 9 12 14929.9 1587.55 2
 1 9 12 13646.7 1305.26 3
 -1 -9 -12 17847.2 1758.21 2
 -1 9 -12 17921.4 1817.28 2
 -1 9 -13 29842.1 2458.5 2
 1 9 13 27738.8 1929.27 3
 -1 -9 -13 32083.1 2437.27 2
 1 -9 14 126490 2658.3 1
 1 9 14 118127 4204.35 3
 -1 -9 -14 126786 5087.38 2
 -1 9 -14 120270 5074.5 2
 -1 9 -15 45645.5 3253.73 2
 1 -9 15 47845.8 1638.79 1
 -1 -9 -15 49594.1 3304.54 2
 1 9 15 43249.1 2667.16 3
 1 9 16 215.752 337.301 3
 -1 -9 -16 -345.421 452.808 2
 -1 9 -16 511.729 509.235 2
 1 9 17 16107.1 1764.19 3
 -1 -9 -17 18482.1 2196.98 2
 -1 9 -17 18604.6 2233.37 2
 -1 -9 -18 11470.2 1780.93 2
 -1 9 -18 11462.7 1820.56 2
 1 9 18 10480.2 1479.34 3
 1 9 19 2152.93 697.676 3
 -1 -9 -19 1110.98 584.993 2
 -1 9 -19 3024.57 1038.2 2
 -1 9 -20 43516.7 3783.39 2
 -1 -9 -20 42070.3 3652.76 2
 1 9 20 40156.7 3108.02 3
 -1 9 -21 5946.62 1388.74 2
 -1 -9 -21 8032.08 1673.83 2
 1 9 21 5067.49 1160.08 3
 1 9 22 -1564.94 727.708 3
 -1 11 22 414.736 528.554 3
 1 11 -21 6589.05 1554.22 2
 1 -11 -21 7094.12 1587.62 2
 -1 11 21 4627.28 1066.65 3
 1 11 -20 15146.6 2226.79 2
 -1 11 20 13668.1 1869.6 3
 1 -11 -20 14147.2 2124.44 2
 -1 11 19 35422.1 2877.56 3
 1 11 -19 42707.7 3607.78 2
 1 -11 -19 38003 3350.83 2
 1 -11 -18 792.102 408.338 2
 1 11 -18 1366.8 759.915 2
 -1 11 18 1914.75 705.417 3
 1 11 -17 10513.3 1685.18 2
 1 -11 -17 14006.4 1927.24 2
 -1 11 17 10348.6 1449.68 3
 1 -11 -16 1766.83 672.914 2
 1 11 -16 2441.92 842.424 2
 -1 11 16 883.405 463.962 3
 1 -11 -15 45050.2 3196.11 2
 1 11 -15 42348.8 3097.12 2
 -1 11 15 39085.6 2606.91 3
 1 -11 -14 83963.8 4189.39 2
 1 -11 -14 88755.9 4454.84 1
 1 11 -14 82742 4142.69 2
 -1 11 14 72923.3 3418.72 3
 1 -11 -13 56561.6 3319.75 2
 1 11 -13 62177.7 3452.15 2
 -1 11 13 53722 2806.48 3
 1 -11 -13 66495.2 3741.5 1
 1 -11 -12 5845.13 1053.79 2
 1 -11 -12 7368.33 1254.27 1
 -1 11 12 5665.35 899.203 3
 1 11 -12 5475.41 997.555 2
 -1 -11 11 7532.44 385.858 1
 -1 11 11 9725.5 1271.37 2
 1 -11 -11 9496.78 1345.41 1
 1 11 -11 10068.5 1279.15 2
 -1 11 11 7679.59 995.228 3
 1 -11 -10 6664.27 1107.29 1
 -1 11 10 7679.68 941.055 3
 -1 11 10 8445.7 1142.48 2
 1 11 -10 7470.83 1049.61 2
 -1 11 9 47410.5 2537.8 2
 -1 -11 9 50105.1 2858.5 3
 -1 11 9 44967.9 2175.77 3
 1 -11 -9 50119.9 2932.64 1
 1 11 -9 45114.5 2466.45 2
 1 11 -8 125951 3879.87 2
 -1 11 8 122605 3900.73 2
 -1 11 8 120817 3456.8 3
 -1 -11 8 128697 4430.21 3
 1 -11 -8 137223 4694.3 1
 -1 -11 7 106137 3838.25 3
 1 -11 -7 107065 4058.71 1
 -1 11 7 94950.5 2936.67 3
 -1 11 7 97440.9 3309.32 2
 1 11 -7 96121.3 3199.6 2
 -1 11 6 9862.92 1014.11 2
 -1 11 6 8964.54 879.813 3
 -1 -11 6 9869.3 1114.47 3
 1 -11 -6 9634.4 1183.6 1
 1 -11 -6 10531.7 944.827 3
 1 11 -6 9223.2 941.063 2
 1 -11 -5 3877.15 567.4 3
 -1 11 5 3610.51 576.392 2
 1 11 -5 4263.93 723.767 3
 -1 -11 5 4038.58 706.32 3
 -1 11 5 3999.46 579.702 3
 1 -11 -5 4719.81 814.202 1
 1 -11 -4 23314.8 1748.49 1
 -1 -11 4 24698.6 1619.02 3
 1 11 -4 23512.8 1569.07 3
 1 -11 -4 22691.9 1352.72 3
 -1 11 4 20257.2 1326.21 2
 -1 11 4 24276.9 1389.07 3
 -1 11 3 185639 3818.93 3
 -1 -11 3 198617 4357.16 3
 1 11 -3 190365 4245.43 3
 1 -11 -3 184192 3798.93 3
 -1 -11 2 60449.1 2290.2 3
 1 -11 -2 59136.9 2158.49 3
 1 11 -2 57915.5 2243.9 3
 -1 11 2 59033.7 2174.7 3
 -1 -11 2 59704.2 2277.93 1
 -1 11 1 83401.3 2635.5 3
 -1 -11 1 84011.4 2820.91 1
 1 11 -1 82320.3 2537.32 3
 1 -11 -1 89730 2729.78 3
 -1 -11 1 85328 2609.42 3
 -1 11 0 565.402 219.132 3
 1 11 0 1197.39 305.238 3
 -1 -11 0 407.232 231.603 1
 1 -11 0 602.113 266.513 3
 -1 -11 0 859.828 290.47 3
 -1 -11 -1 4757.96 571.65 3
 -1 11 -1 3897.13 606.157 3
 1 -11 1 3433.6 573.064 3
 -1 -11 -1 3637.88 645.071 1
 1 11 1 2346.17 369.621 3
 -1 11 -2 28896 1711.47 3
 1 11 2 26566.2 1218.2 2
 1 11 2 28152.1 1305.49 3
 -1 -11 -2 29081 1323.96 3
 1 -11 2 30420.4 1752.95 3
 -1 -11 -2 29555.1 1844.84 1
 1 -11 3 204766 4705.8 3
 -1 -11 -3 185653 3345.44 3
 -1 -11 -3 200367 4962.18 1
 1 11 3 192725 3341.29 3
 -1 11 -3 190625 4540.69 3
 1 11 3 179695 3387.58 2
 -1 -11 -4 14878.1 1405.85 1
 1 -11 4 15845.6 1368.52 3
 1 11 4 13951.3 912.607 3
 -1 11 -4 14233.1 1299.99 3
 -1 -11 -4 13537.6 886.08 3
 1 11 4 16043.3 1066.18 2
 -1 11 -5 5909.1 887.179 3
 -1 -11 -5 5157.86 868.827 1
 1 11 5 5142.46 657.578 2
 1 11 5 4961.12 550.059 3
 1 -11 5 5830.78 877.379 3
 -1 -11 -6 1256.82 511.096 1
 -1 11 -6 540.502 287.004 3
 1 11 6 893.85 325.164 2
 1 -11 6 2185.29 635.549 3
 1 11 6 807.74 247.231 3
 1 -11 7 63583 3079.03 3
 1 11 7 62691.5 2548.88 2
 -1 -11 -7 69133.1 3297.7 1
 -1 11 -7 63123.2 3075.71 3
 1 11 7 61863.3 2111.36 3
 1 11 8 107892 2933.52 3
 -1 11 -8 108182 4193.9 3
 -1 11 -8 106006 3763.47 2
 -1 -11 -8 122809 4529.73 1
 1 -11 8 107990 4204.91 3
 1 11 8 106618 3519.37 2
 1 11 9 76099 2611.42 3
 -1 11 -9 76245.9 3337.69 2
 -1 -11 -9 80460.9 3245.7 2
 1 11 9 80224 3231.56 2
 1 -11 9 84292.7 3822.67 3
 -1 -11 -9 82594.7 3799.44 1
 1 11 10 4396.97 652.882 3
 -1 -11 -10 4900.33 848.903 2
 -1 11 -10 4654.57 885.035 2
 1 11 10 5040.04 850.662 2
 -1 -11 -10 6869.69 1138.57 1
 -1 -11 -11 975.648 563.517 1
 -1 -11 -11 776.41 409.916 2
 -1 11 -11 -795.907 423.091 2
 1 11 11 -88.4922 357.864 2
 1 11 11 468.316 286.208 3
 -1 -11 -12 26477.6 2156.36 2
 1 11 12 21806.4 1619.47 3
 1 11 12 25635.3 2105.81 2
 -1 11 -12 24428.2 2157.85 2
 -1 11 -13 96612.4 4464.58 2
 1 11 13 93813.2 3528.26 3
 -1 -11 -13 103148 4431.6 2
 -1 11 -14 47184.2 3239.44 2
 1 11 14 44350.9 2547.58 3
 -1 -11 -14 50677.9 3261.88 2
 1 -11 14 50017.2 1525.88 1
 1 11 15 27086.3 2079.41 3
 -1 -11 -15 31046.6 2646.49 2
 -1 11 -15 27179 2563.42 2
 -1 11 -16 10476.1 1617.07 2
 -1 -11 -16 13368.8 1822.42 2
 1 11 16 11128.3 1413.59 3
 1 11 17 8893.26 1306.78 3
 -1 -11 -17 10488 1663.06 2
 -1 11 -17 8229.47 1547.27 2
 -1 -11 -18 793.298 504.712 2
 1 11 18 -169.937 476.682 3
 -1 11 -18 202.029 434.88 2
 1 11 19 48736.6 3234.68 3
 -1 11 -19 52794.4 4101.34 2
 -1 -11 -19 50403.5 3886.87 2
 1 11 20 14736.4 1845.86 3
 -1 11 -20 16141.8 2354.48 2
 -1 -11 -20 14776 2170.73 2
 -1 -11 -21 11690 2081.68 2
 1 13 -21 2877.18 1056.34 2
 -1 13 20 1382.45 601.054 3
 1 13 -20 886.158 644.848 2
 1 13 -19 78090.5 4898.84 2
 -1 13 19 76554.5 4141.79 3
 -1 13 18 -123.329 393.485 3
 1 13 -18 -104.199 486.944 2
 1 13 -17 5950.66 1303.11 2
 -1 13 17 5714.9 1073.75 3
 -1 13 16 341.436 252.795 3
 1 13 -16 538.509 413.475 2
 1 13 -15 27075.2 2502.56 2
 1 -13 -15 30193 2798.78 1
 -1 13 15 27741.3 2184.69 3
 1 13 -14 238.12 487.471 2
 1 -13 -14 1486.92 660.016 1
 -1 13 14 320.315 275.581 3
 -1 13 13 84554.8 3541.82 3
 1 13 -13 91494.8 4246.09 2
 1 -13 -13 99319.6 4829.13 1
 1 -13 -12 609.832 500.743 1
 1 13 -12 -108.175 346.055 2
 -1 13 12 89.0888 277.478 3
 -1 -13 11 1616.27 238.724 1
 1 -13 -11 1326.77 584.276 1
 1 13 -11 1524.77 529.138 2
 -1 13 11 1879.85 491.201 3
 -1 13 11 1006.94 401.981 2
 -1 13 10 1905.76 535.157 2
 -1 13 10 2472.25 593.351 3
 1 -13 -10 2334.62 738.097 1
 1 13 -10 2078.9 571.8 2
 -1 -13 10 2623.23 359.866 1
 1 13 -9 91904.5 3564.46 2
 -1 13 9 90375.5 3182.93 3
 -1 13 9 89131.8 3564.81 2
 1 -13 -9 97415 4350.13 1
 -1 -13 9 94726.7 2309.82 1
 -1 13 8 7503.77 995.314 2
 1 -13 -8 8419.86 1270.2 1
 1 13 -8 7526.19 978.828 2
 -1 13 8 6846.82 852.113 3
 -1 -13 8 7347.34 1111.5 3
 -1 13 7 105960 3230.38 3
 -1 -13 7 108199 4107.15 3
 1 13 -7 105752 3467.44 2
 -1 13 7 97199.8 3431.26 2
 1 -13 -7 113820 4495.56 1
 1 -13 -6 8023.69 881.292 3
 1 -13 -6 8973.31 1225.7 1
 -1 -13 6 8285.46 1089.72 3
 -1 13 6 9120.33 1013.6 2
 1 13 -6 9104.76 1157.1 3
 -1 13 6 8718.63 910.029 3
 -1 -13 5 3990.41 734.018 3
 1 -13 -5 4950.16 900.494 1
 -1 13 5 4580.23 667.4 3
 1 13 -5 3772.46 704.034 3
 1 -13 -5 4069.42 617.614 3
 -1 13 5 3865.43 631.838 2
 -1 13 4 1885.84 435.036 3
 1 -13 -4 1742.98 501.852 1
 -1 -13 4 1778.15 423.448 1
 -1 13 4 1128.89 320.04 2
 -1 -13 4 4664.78 790.367 3
 1 13 -4 1294.76 390.429 3
 1 -13 -4 1363.44 375.26 3
 1 13 -3 376168 6419.9 3
 -1 -13 3 378407 6129.73 1
 1 -13 -3 377653 5876.44 3
 -1 13 3 373294 5834.33 3
 -1 -13 3 396196 6605.14 3
 1 -13 -2 1049.87 333.905 3
 -1 -13 2 1376.31 401.754 1
 1 13 -2 1238.04 363.89 3
 -1 13 2 1307.41 337.362 3
 -1 -13 2 1127.26 373.236 3
 1 13 -1 7166.58 828.107 3
 -1 -13 1 7445.16 916.222 1
 -1 13 1 8026.3 886.497 3
 -1 -13 1 7951.62 856.232 3
 1 -13 -1 6445.14 795.557 3
 -1 -13 0 788.022 298.155 1
 -1 13 0 1103.89 358.115 3
 -1 -13 0 981.832 312.204 3
 1 13 0 1256.54 359.573 3
 1 -13 0 1382.23 414.992 3
 1 -13 1 14805.6 1275.2 3
 -1 -13 -1 14617.3 1077.39 3
 -1 13 -1 13563 1221.01 3
 1 13 1 13611.5 1044.3 3
 -1 -13 -1 13664.4 1340.33 1
 -1 13 -2 3486.45 643.796 3
 -1 -13 -2 2774.52 458.955 3
 1 13 2 2166.36 380.184 2
 1 13 2 2319.11 420.265 3
 1 -13 2 2848.69 589.685 3
 -1 -13 -2 3348.9 693.443 1
 -1 13 -3 402705 7029.23 3
 -1 -13 -3 387439 5246.74 3
 1 13 3 361964 5098.45 2
 1 -13 3 410171 7166.87 3
 1 13 3 395361 5332.53 3
 -1 -13 -3 421240 7775.49 1
 -1 -13 -4 5716.72 639.51 3
 1 13 4 7220.69 705.251 3
 -1 -13 -4 7913.73 1126.66 1
 1 13 4 6257.27 712.508 2
 -1 13 -4 6846.57 970.194 3
 1 -13 4 7219.52 998.202 3
 -1 -13 -5 459.794 405.894 1
 1 13 5 158.543 141.338 3
 -1 13 -5 -16.529 206.094 3
 1 -13 5 -565.485 336.154 3
 1 13 5 241.871 141.931 2
 -1 -13 -5 53.9247 186.497 3
 1 13 6 10816.4 896.459 3
 -1 13 -6 9604.85 1219.64 3
 1 13 6 9412.7 977.173 2
 -1 -13 -6 11020 1380.98 1
 1 -13 6 10502 1274.86 3
 1 13 7 42959.5 2179.9 2
 1 13 7 43446.2 1849.31 3
 -1 13 -7 39736.5 2576.31 3
 -1 -13 -7 44633.7 2837.27 1
 1 -13 7 46369.9 2764.13 3
 -1 13 -8 1351.73 559.612 3
 1 13 8 551.418 236.314 3
 -1 -13 -8 816.081 480.319 1
 1 13 8 837.987 381.194 2
 -1 13 -9 174830 5215.18 2
 1 13 9 168720 4765.26 2
 -1 -13 -9 190271 6133.95 1
 1 13 9 164478 3905.68 3
 1 13 10 16690.5 1299.26 3
 -1 13 -10 15996.3 1655.15 2
 -1 -13 -10 17637.5 1938.78 1
 1 13 10 15474.2 1556.01 2
 1 13 11 613.958 330.935 3
 1 13 11 314.748 380.615 2
 -1 13 -11 23.5612 367.266 2
 -1 -13 -11 11.2438 296.482 1
 1 13 12 124.487 210.922 3
 -1 -13 -12 85.6577 496.814 1
 -1 13 -12 -1108.34 540.327 2
 -1 13 -13 114152 4927.22 2
 -1 -13 -13 121832 4842.55 2
 1 13 13 109804 3794.97 3
 1 13 14 415.102 247.727 3
 -1 13 -14 -53.3143 312.508 2
 -1 -13 -14 -13.5985 310.285 2
 -1 13 -15 15346.2 1935.08 2
 -1 -13 -15 17649.3 2010.59 2
 1 13 15 17084.1 1645.92 3
 -1 13 -16 4545.72 1132.31 2
 -1 -13 -16 4385.38 1028.08 2
 1 13 16 4419.59 866.547 3
 -1 13 -17 985.099 682.092 2
 -1 -13 -17 1044.97 592.197 2
 1 13 17 2268.69 726.148 3
 -1 13 -18 1574.78 811.188 2
 -1 -13 -18 872.708 693.089 2
 1 13 18 1095.71 533.633 3
 -1 -13 -19 70795.9 4631.68 2
 -1 13 -19 67591.4 4669.8 2
 -1 13 -20 1672.8 841.151 2
 -1 -13 -20 663.774 561.422 2
 -1 -13 -21 7033.54 1823.6 2
 1 15 -20 2376.04 1041.68 2
 1 15 -19 55458 4188.34 2
 -1 15 18 7604.14 1320.1 3
 1 15 -18 6473.95 1464.27 2
 -1 15 17 1017.53 517.327 3
 1 15 -17 349.038 351.883 2
 -1 15 16 49.9327 243.734 3
 1 15 -16 -295.345 399.131 2
 1 15 -15 15742 1948.14 2
 1 -15 -15 15952.7 2153.9 1
 -1 15 15 14358.8 1580.51 3
 1 15 -14 25137.5 2350.38 2
 -1 15 14 30625.4 2226.67 3
 1 -15 -14 29186.9 2846.49 1
 1 15 -13 76609.8 3969.43 2
 -1 15 13 75400.8 3387.5 3
 1 -15 -13 85936.8 4746.54 1
 1 15 -12 1677.38 638.149 2
 -1 15 12 1888.85 530.672 3
 1 -15 -12 2715.5 902.998 1
 -1 -15 12 1878.65 229.878 1
 1 15 -11 292.578 248.912 2
 -1 -15 11 329.797 117.285 1
 1 -15 -11 226.814 399.337 1
 -1 15 11 363.082 307.447 3
 -1 15 10 77.1018 335.952 2
 -1 -15 10 503.156 189.187 1
 1 -15 -10 -325.22 517.167 1
 -1 15 10 29.0296 222.668 3
 1 15 -10 -1323.82 492.704 2
 -1 -15 9 79428 2406.85 1
 -1 15 9 77460.8 3048.51 3
 1 15 -9 78935.1 3398.16 2
 -1 15 9 75231.9 3368.59 2
 1 -15 -9 79326.3 4167.33 1
 -1 -15 8 31143.8 1604.79 1
 1 -15 -8 31193.3 2556.97 1
 -1 15 8 28696.7 2023.78 2
 1 15 -8 28946.4 1958.71 2
 -1 15 8 32530.2 1915.82 3
 1 15 -7 7072.99 940.601 2
 1 -15 -7 8761.78 1343.84 1
 -1 15 7 8551.23 978.216 3
 -1 -15 7 8344.93 883.147 1
 -1 15 7 7363.83 978.622 2
 -1 -15 7 8151.24 1174.28 3
 -1 15 6 1555.7 453.834 2
 1 -15 -6 1684.59 565.003 1
 1 15 -6 1761.12 544.561 3
 -1 -15 6 1418.19 357.474 1
 -1 -15 6 1972.62 590.414 3
 -1 15 6 1636.27 446.322 3
 1 -15 -6 2486.92 526.904 3
 1 -15 -5 287.427 281.564 1
 1 15 -5 652.98 341.488 3
 1 -15 -5 360.79 183.154 3
 -1 15 5 134.488 167.361 3
 -1 -15 5 322.966 300.015 3
 -1 15 5 -29.1289 195.774 2
 -1 -15 5 -89.9859 196.977 1
 -1 -15 4 22852 1776.55 3
 1 -15 -4 25995.4 2129.77 1
 -1 15 4 22884.5 1541.92 3
 -1 -15 4 22161.9 1588.91 1
 1 15 -4 23766 1795.73 3
 1 -15 -4 19739.5 1423.56 3
 -1 15 4 20001.5 1458.9 2
 1 -15 -3 251196 5150.55 3
 -1 15 3 219395 4691.44 2
 1 -15 -3 262177 6620.58 1
 -1 -15 3 264901 5772.34 3
 1 15 -3 250970 5608.27 3
 -1 -15 3 260460 5626.25 1
 -1 15 3 255806 5193.53 3
 -1 -15 2 15986.6 1369.57 3
 -1 15 2 16218.5 1337.02 3
 1 -15 -2 15755.2 1307.27 3
 1 15 -2 13344.9 1235.51 3
 1 -15 -2 15386.7 1568.37 1
 -1 -15 2 15024.2 1400.86 1
 -1 -15 1 2505.57 589.18 1
 1 -15 -1 3248.58 639.052 3
 -1 -15 1 1535.62 443.276 3
 1 15 -1 1738.09 461.381 3
 -1 15 1 2012.42 467.525 3
 -1 -15 0 512.254 358.901 1
 1 15 0 423.508 240.513 3
 -1 15 0 13.7069 215.835 3
 1 -15 0 407.242 178.253 3
 -1 -15 0 556.382 223.086 3
 -1 -15 -1 13707.8 1125.23 3
 -1 15 -1 13390.5 1289.71 3
 -1 -15 -1 15173.3 1523.71 1
 1 15 1 13560.4 1133.54 3
 1 -15 1 14948.7 1364.62 3
 1 15 2 8383.45 869.978 3
 -1 -15 -2 8004.53 1147.34 1
 -1 -15 -2 10087.4 947.906 3
 1 -15 2 8520.69 1054.73 3
 -1 15 -2 7740.81 1028.47 3
 1 15 2 6942.39 717.091 2
 1 15 3 167989 3677.01 2
 -1 -15 -3 188099 3951.42 3
 -1 15 -3 186528 5116.77 3
 1 -15 3 201606 5314.87 3
 1 15 3 188702 3977.02 3
 -1 -15 -3 205672 5844.83 1
 -1 -15 -4 9901.84 912.288 3
 -1 -15 -4 9347.69 1299.27 1
 1 -15 4 9030.54 1166.4 3
 1 15 4 9180.99 899.373 2
 -1 15 -4 10191.6 1242.18 3
 1 15 4 9576.92 879.742 3
 -1 15 -5 1296.68 508.008 3
 -1 -15 -5 1209.65 527.581 1
 -1 -15 -5 961.758 263.918 3
 1 15 5 1100.79 358.124 3
 1 -15 5 178.013 256.223 3
 1 15 5 802.447 281.27 2
 1 15 6 125.428 155.614 3
 1 15 6 167.598 214.016 2
 1 -15 6 280.64 268.726 3
 -1 15 -6 399.036 282.459 3
 -1 -15 -6 -133.386 428.938 1
 -1 -15 -7 28387.7 2408.23 1
 1 15 7 27151.2 1521.59 3
 -1 15 -7 26027.1 2183.46 3
 1 15 7 27784.2 1806.72 2
 -1 15 -8 48487.1 3069.91 3
 1 15 8 45849 2439.6 2
 1 15 8 47397.4 2046.14 3
 -1 -15 -8 48501.6 3205.49 1
 -1 -15 -9 57498.3 3591.15 1
 1 15 9 50005.2 2666.98 2
 -1 15 -9 49881 2852.98 2
 1 15 9 49063.3 2156.46 3
 1 15 10 13015.1 1163.04 3
 1 15 10 12328.1 1387.97 2
 -1 15 -10 12668.6 1499.82 2
 -1 -15 -10 14747.9 1887.67 1
 -1 -15 -11 888.721 638.389 1
 1 15 11 267.924 256.237 3
 -1 15 -11 14.8413 300.043 2
 1 15 12 8874.54 1045.6 3
 -1 15 -12 7481.99 1249.18 2
 -1 -15 -12 8531.96 1476.75 1
 -1 15 -13 46157.8 3199.12 2
 1 15 13 43000.7 2376.55 3
 1 15 14 38358 2304.86 3
 -1 15 -14 38378.7 3034.58 2
 -1 15 -15 14890 1946.46 2
 1 15 15 16574.2 1572.65 3
 1 15 16 186.602 245.942 3
 -1 15 -16 441.647 379.356 2
 -1 15 -17 101.98 449.799 2
 -1 15 -18 6555.46 1423.02 2
 -1 15 -19 34353 3389.77 2
 1 17 -20 30123.7 3217.98 2
 1 17 -19 16741.8 2302.82 2
 1 17 -18 8569.31 1609.71 2
 1 17 -17 -175.623 676.623 2
 1 17 -16 683.239 449.87 2
 1 -17 -15 11511.6 1932.91 1
 1 17 -15 10352.3 1638.46 2
 -1 17 15 10406.8 1345.19 3
 1 17 -14 77846.8 4203.47 2
 -1 17 14 70815.4 3384.5 3
 1 -17 -14 83509 5032.15 1
 1 17 -13 28809.4 2478.48 2
 -1 17 13 30719.1 2156.06 3
 1 -17 -13 35827.7 3217.03 1
 1 17 -12 1688.6 531.232 2
 1 -17 -12 1565.87 772.547 1
 -1 17 12 1559.53 526.358 3
 -1 -17 11 2097.75 370.708 1
 1 17 -11 2341.69 683.349 2
 -1 17 11 1519.03 495.103 3
 1 -17 -11 3022.83 922.656 1
 -1 17 10 176.371 214.593 3
 1 17 -10 216.391 266.165 2
 -1 -17 10 388.757 216.732 1
 1 -17 -10 647.626 394.948 1
 1 -17 -9 10781.2 1651.12 1
 -1 -17 9 10362.2 965.787 1
 -1 17 9 9954.39 1138.32 3
 1 17 -9 10462.6 1269.24 2
 -1 17 9 8992.87 1219.94 2
 -1 17 8 80929.8 3468.09 2
 -1 -17 8 87396.4 2962.66 1
 1 -17 -8 91730.5 4651.69 1
 -1 17 8 83939.9 3218.47 3
 1 17 -8 80020.8 3361.3 2
 1 17 -7 6618.82 931.69 2
 1 -17 -7 7453.34 1338.8 1
 1 -17 -7 8645.19 1024.17 3
 -1 17 7 7069.59 938.624 3
 -1 -17 7 8165.95 955.832 1
 -1 17 7 6993.01 998.717 2
 1 -17 -6 -560.751 300.644 3
 1 -17 -6 71.8972 368.194 1
 -1 17 6 251.512 268.242 3
 1 17 -6 -47.2678 332.191 3
 -1 17 6 517.286 326.891 2
 -1 -17 6 -175.598 183.603 1
 -1 17 5 -90.694 286.121 3
 1 -17 -5 308.573 273.118 3
 1 -17 -5 225.458 305.737 1
 -1 17 5 398.264 246.9 2
 -1 -17 5 -281.759 240.111 3
 -1 -17 5 157.997 299.063 1
 -1 -17 4 1264.64 428.613 1
 -1 17 4 900.409 380.067 2
 1 -17 -4 2486.04 737.569 1
 -1 17 4 1339.04 384.704 3
 1 17 -4 515.882 330.508 3
 1 -17 -4 510.713 306.22 3
 -1 -17 4 2064.61 596.12 3
 -1 17 3 23382.4 1689.56 3
 -1 17 3 24210.7 1633.75 2
 1 -17 -3 24288 1731.85 3
 -1 -17 3 26693.8 1948.02 3
 1 -17 -3 26432.4 2266.96 1
 -1 -17 3 25492.4 1901.19 1
 1 17 -3 24384.9 1864.45 3
 -1 -17 2 48921.4 2713.03 1
 1 17 -2 45188.5 2458.14 3
 -1 -17 2 47404.4 2507.93 3
 1 -17 -2 46783.8 2903.11 1
 1 -17 -2 47172.7 2406.84 3
 -1 17 2 44005.9 2342.8 3
 -1 -17 1 7218.87 961.065 3
 -1 17 1 7031.77 950.783 3
 1 -17 -1 6688.92 1088.05 1
 1 -17 -1 7704.63 1008.17 3
 1 17 -1 6460.3 893.248 3
 -1 -17 1 7580.8 1095.49 1
 -1 -17 0 -116.616 290.363 1
 -1 -17 0 268.356 167.055 3
 -1 17 0 10.4229 219.978 3
 1 17 0 -20.876 167.122 3
 1 -17 0 163.888 246.086 1
 1 -17 0 344.373 311.78 3
 -1 -17 -1 6511.79 1089.81 1
 -1 -17 -1 5369.52 774.105 3
 1 -17 1 4680.16 832.192 3
 -1 17 -1 5313.57 881.789 3
 1 17 1 4618.2 722.128 3
 -1 -17 -2 51925.5 2314.04 3
 1 17 2 47201.7 1970.21 2
 -1 -17 -2 52555.8 3097.68 1
 -1 17 -2 49316.3 2705.17 3
 1 -17 2 55550.1 2877.42 3
 1 17 2 48670.1 2252.69 3
 1 -17 3 33706 2306.91 3
 -1 -17 -3 34228.7 2549.94 1
 1 17 3 31302.4 1765.73 3
 1 17 3 32037.8 1678.09 2
 -1 17 -3 31745.6 2243.56 3
 -1 -17 -3 31670 1774.26 3
 1 17 4 17971.6 1310.06 3
 -1 -17 -4 20313.4 1387.9 3
 1 -17 4 23787.1 1992.84 3
 -1 17 -4 19325.4 1812.41 3
 1 17 4 20275 1401.73 2
 -1 -17 -4 20180.6 1983.36 1
 -1 -17 -5 3384.51 881.372 1
 -1 -17 -5 3029.45 529.297 3
 1 17 5 4074.07 769.672 2
 1 17 5 2775.17 526.754 3
 -1 17 -5 3088.04 779.643 3
 -1 17 -6 354.175 372.467 3
 1 17 6 303.888 235.071 3
 -1 -17 -6 420.709 357.02 1
 1 17 6 218.42 256.38 2
 -1 17 -7 20932.3 2066.64 3
 1 17 7 22934 1678.69 2
 -1 -17 -7 22287.6 2247.59 1
 1 17 7 22837.3 1473.05 3
 1 17 8 101430 3155.41 3
 1 17 8 100987 3691.62 2
 -1 17 -8 108232 4773.88 3
 -1 -17 -8 113853 5209.21 1
 -1 17 -9 18175.5 1802.24 2
 -1 -17 -9 19572.5 2225.48 1
 1 17 9 17167.8 1582.34 2
 1 17 9 18128.8 1344.97 3
 -1 17 -10 365.105 290.791 2
 -1 -17 -10 142.89 413.107 1
 1 17 10 714.548 347.152 2
 1 17 10 144.252 225.318 3
 1 17 11 -24.5949 242.542 3
 -1 -17 -11 59.0151 524.565 1
 -1 17 -11 -15.5852 317.708 2
 1 17 12 1621.75 436.446 3
 -1 17 -12 1243.36 548.912 2
 -1 -17 -12 2429.41 882.891 1
 1 17 13 17061.9 1480.41 3
 -1 17 -13 18042.5 2057.69 2
 -1 17 -14 73703.5 4276.61 2
 -1 17 -15 10289.9 1644.67 2
 -1 17 -16 270.431 493.625 2
 -1 17 -17 1995.47 847.989 2
 -1 17 -18 8799.22 1701.44 2
 -1 17 -19 14922.4 2330.49 2
 1 19 -19 55.4099 587.943 2
 1 19 -18 14128.3 2089.14 2
 1 19 -17 1501.27 738.573 2
 1 19 -16 14.0473 534.065 2
 1 19 -15 1836.65 712.708 2
 1 -19 -15 465.565 545.241 1
 1 -19 -14 64073.3 4636.51 1
 1 19 -14 53158.5 3520.57 2
 1 -19 -13 -90.1198 394.11 1
 1 19 -13 93.8441 317.872 2
 -1 19 12 1719 572.668 3
 1 19 -12 1467.83 493.299 2
 1 -19 -12 732.228 567.458 1
 1 19 -11 494.036 364.588 2
 1 -19 -11 -533.448 755.398 1
 -1 19 11 77.538 257.031 3
 -1 -19 10 709.813 305.58 1
 1 -19 -10 363.619 460.232 1
 -1 19 10 477.65 268.443 3
 1 19 -10 192.194 266.945 2
 1 -19 -9 657.104 543.245 1
 -1 19 9 878.24 366.432 3
 1 19 -9 734.398 325.475 2
 -1 -19 9 286.689 201.144 1
 -1 -19 8 108914 3603.17 1
 1 -19 -8 113665 5473.83 1
 -1 19 8 107279 3739.35 3
 1 19 -8 101119 3882.27 2
 -1 19 8 101142 3988.86 2
 1 19 -7 3054.1 666.876 2
 -1 -19 7 2891.29 627.201 1
 -1 19 7 2729.8 613.049 3
 -1 19 7 2283.57 638.916 2
 1 -19 -7 3920.13 709.356 3
 1 -19 -7 3635.09 1096.03 1
 1 -19 -6 -237.384 283.704 3
 -1 -19 6 238.925 275.711 1
 1 -19 -6 -310.768 580.837 1
 1 19 -6 -105.754 259.157 2
 -1 19 6 -988.359 389.603 3
 -1 19 6 -150.586 301.146 2
 1 19 -5 -221.117 369.042 3
 -1 19 5 356.92 187.578 3
 1 -19 -5 1.69481 204.105 3
 -1 19 5 -123.447 328.121 2
 -1 -19 5 120.104 221.149 1
 1 -19 -5 68.7583 469.784 1
 -1 -19 4 49557.7 2880.46 3
 -1 -19 4 49594.5 2789.36 1
 -1 19 4 48039.8 2484.42 3
 -1 19 4 47037.4 2424.89 2
 1 -19 -4 52919 2648.96 3
 1 -19 -4 50666.5 3393.29 1
 1 19 -4 50178 2925.36 3
 1 -19 -3 1530.62 561.869 1
 -1 -19 3 2038.06 598.861 1
 -1 19 3 2024.96 539.388 3
 1 -19 -3 2548.43 542.879 3
 -1 19 3 1533.99 439.1 2
 1 19 -3 2195.01 609.689 3
 -1 -19 3 1486 538.433 3
 -1 -19 2 82946.7 3511.63 3
 1 -19 -2 74998.2 3218.05 3
 1 -19 -2 77031.5 4019.66 1
 1 19 -2 79441.1 3431.21 3
 -1 19 2 75283.9 3264.33 3
 -1 -19 2 80143.7 3716.45 1
 -1 -19 1 1635.37 502.482 3
 1 -19 -1 1614.98 601.476 1
 1 -19 -1 2141.19 628.642 3
 -1 19 1 1904.42 543.262 3
 -1 -19 1 608.714 362.941 1
 1 19 -1 1209.51 397.899 3
 -1 -19 0 191.009 259.499 3
 1 -19 0 404.532 338.369 1
 1 19 0 413.432 276.019 3
 -1 19 0 1654.27 737.55 3
 -1 -19 0 903.383 470.346 1
 1 -19 0 -891.561 408.838 3
 -1 -19 -1 3697.11 701.197 3
 1 19 1 3490.86 670.843 3
 1 19 1 3656.95 540.947 2
 -1 19 -1 3543.91 779.225 3
 1 -19 1 2237.53 726.516 1
 -1 -19 -1 3331.94 828.582 1
 1 -19 1 4097 845.448 3
 -1 -19 -2 94599.8 3334.13 3
 -1 -19 -2 101030 4571.31 1
 -1 19 -2 92796.3 3924.08 3
 1 -19 2 97690.6 4160.34 1
 1 19 2 90602.2 2854.03 2
 1 -19 2 93482.4 3958.44 3
 1 19 2 90381.2 3244.69 3
 1 19 3 457.565 250.147 2
 1 19 3 192.769 191.18 3
 -1 19 -3 708.133 399.403 3
 1 -19 3 804.177 458.62 1
 -1 -19 -3 366.986 358.534 1
 -1 -19 -3 831.806 328.166 3
 1 19 4 45785.5 2226.26 3
 -1 -19 -4 44734.1 2167.14 3
 1 19 4 43477.7 2114.19 2
 -1 19 -4 45306.7 2886.5 3
 -1 -19 -4 49527.4 3348.59 1
 1 19 5 4533.62 719.725 3
 1 19 5 4875.91 736.547 2
 -1 -19 -5 4245.67 1043.76 1
 -1 19 -5 3979.94 904.452 3
 -1 -19 -5 3668.44 596.344 3
 -1 -19 -6 2268.6 807.161 1
 1 19 6 1576.68 437.003 2
 -1 -19 -6 1335.74 370.093 3
 -1 19 -6 2260.78 765.372 3
 1 19 6 1604.47 429.737 3
 -1 -19 -7 7088.99 1349.06 1
 -1 19 -7 5018.02 1078.49 3
 1 19 7 5482.95 761.13 3
 1 19 7 4986.49 803.129 2
 -1 19 -8 92385.4 3971.15 2
 1 19 8 93942.7 3643.01 2
 -1 -19 -8 102337 5211 1
 1 19 8 95552.6 3104.87 3
 -1 19 -8 96040.1 4729.91 3
 1 19 9 639.219 213.987 3
 -1 19 -9 853.38 433.692 2
 -1 -19 -9 1290.6 764.186 1
 1 -19 10 1029.54 414.006 1
 1 19 10 1061.79 382.868 3
 -1 19 -10 788.905 452.666 2
 -1 -19 -10 817.943 619.899 1
 -1 19 -11 490.263 430.186 2
 -1 -19 -11 1393.58 703.961 1
 -1 -19 -12 1147.98 710.766 1
 -1 19 -12 157.319 280.834 2
 -1 19 -13 731.683 441.084 2
 -1 19 -14 58546.6 3868.35 2
 -1 19 -15 -1900.28 761.467 2
 -1 19 -16 3308.21 941.05 2
 -1 19 -17 3218.1 1056.91 2
 -1 19 -18 10811.4 1908.72 2
 1 21 -16 1550.29 763.758 2
 1 21 -15 -134.657 432.667 2
 1 21 -14 30418.2 2689.33 2
 1 -21 -14 35711.2 3623.36 1
 1 -21 -13 5557.08 1452.55 1
 1 21 -13 1937.95 378.114 2
 1 21 -12 19585.8 2017.84 2
 1 -21 -12 24729.8 2907.69 1
 1 21 -11 309.137 256.224 2
 1 -21 -11 -104.524 590.832 1
 1 -21 -10 6971.41 1518.12 1
 1 21 -10 7848.56 1209.06 2
 -1 21 9 12117.5 1398.5 3
 1 21 -9 9466.96 1260.52 2
 1 -21 -9 10061 1766.77 1
 -1 -21 9 9906.03 1115.14 1
 1 -21 -8 50922.7 3864.75 1
 -1 -21 8 48820.7 2610.39 1
 -1 21 8 45619.4 2539.2 3
 1 21 -8 49440.5 2774.74 2
 -1 21 7 430.705 268.122 3
 1 -21 -7 356.748 494.588 1
 1 21 -7 150.38 285.776 2
 -1 -21 7 25.3446 250.615 1
 -1 -21 6 3075.82 707.729 1
 1 -21 -6 3765.69 1047.72 1
 -1 21 6 3877.67 752.419 3
 1 21 -6 3571.5 705.894 2
 1 -21 -5 1897.51 567.362 3
 -1 21 5 594.104 298.69 3
 -1 -21 5 384.378 359.604 1
 1 21 -5 1429.63 623.765 3
 1 -21 -5 1406.85 690.167 1
 -1 21 4 61998.4 3049.3 3
 1 -21 -4 66197.1 3104.22 3
 1 -21 -4 65458.9 4070.26 1
 -1 -21 4 71532.7 3579.84 1
 1 21 -4 57451.3 3274.85 3
 1 -21 -3 25202.7 1913.84 3
 1 21 -3 21162.9 1940.05 3
 -1 -21 3 22641.4 2066.73 1
 1 -21 -3 22843.1 2348 1
 -1 21 3 19415.8 1599.94 2
 -1 21 3 21523.1 1803.81 3
 -1 -21 2 64817.2 3570.69 1
 -1 21 2 54262.9 2632.29 2
 1 -21 -2 64983.1 3901.15 1
 1 -21 -2 64371.5 3158.18 3
 -1 21 2 59682.1 3048 3
 -1 -21 2 61682.2 3195.01 3
 1 21 -2 58125.8 3108.95 3
 1 -21 -1 8185.16 1159.32 3
 -1 -21 1 8423.05 1313.83 1
 -1 -21 1 8529.08 1166.3 3
 1 -21 -1 8581.64 1403.79 1
 -1 21 1 6742.98 1049.3 3
 1 21 -1 8109.89 1119.54 3
 1 -21 0 1358.82 531.978 1
 -1 21 0 521.802 390.827 3
 1 21 0 1632.99 543.559 3
 1 -21 0 623.464 269.852 3
 -1 -21 0 1058.03 539.297 1
 -1 -21 0 778.905 415.94 3
 -1 -21 -1 5358.45 868.001 3
 1 21 1 3424.03 707.881 3
 1 -21 1 2856.98 872.6 1
 -1 21 -1 4228.48 903.892 3
 -1 -21 -1 4653.04 1051.34 1
 -1 21 -2 41594.7 2760.66 3
 1 21 2 40312.6 2296.76 3
 1 -21 2 44160.5 2994.03 1
 -1 -21 -2 41991.6 2324.22 3
 -1 -21 -2 40035.1 3068.27 1
 -1 -21 -3 10929.1 1152.45 3
 1 -21 3 11723.6 1537.24 1
 -1 -21 -3 10091.7 1594.79 1
 1 21 3 9102.41 1071.77 3
 -1 21 -3 10227.3 1408.28 3
 1 -21 4 63752.8 3432.23 1
 -1 -21 -4 67711.8 4123.8 1
 1 21 4 63269.3 2767.25 3
 -1 21 -4 65603.6 3648.04 3
 -1 21 -5 2629.28 749.018 3
 -1 -21 -5 3163.83 962.41 1
 1 21 5 2592.03 567.86 3
 1 -21 5 3776.92 834.463 1
 1 21 6 3451.74 635.672 3
 1 -21 6 4755.27 911.503 1
 -1 -21 -6 2856.25 852.683 1
 -1 21 -6 3387.96 882.363 3
 -1 -21 -7 1250.65 649.385 1
 1 -21 7 1669.71 570.059 1
 -1 21 -7 1479.41 663.38 3
 1 21 7 891.785 316.861 3
 -1 -21 -8 73634.1 4650.47 1
 -1 21 -8 67568.3 3489.29 2
 1 -21 8 69336 3259.09 1
 1 -21 9 9552.36 1185.6 1
 -1 21 -9 9825.01 1395.28 2
 -1 -21 -9 10901.3 1841.57 1
 -1 21 -10 6287.66 1092.8 2
 -1 -21 -10 8933.98 1728.98 1
 -1 -21 -11 -21.1654 727.364 1
 -1 21 -11 298.807 397.101 2
 -1 21 -12 13628.6 1767.76 2
 -1 21 -13 4501.68 1124.14 2
 -1 21 -14 23835.6 2514.84 2
 -1 21 -15 1292.98 503.881 2
 -1 21 -16 1521.68 637.778 2
 -1 21 -17 2386.99 909.574 2
 1 -23 -11 331.555 457.116 1
 1 -23 -10 22566.6 2822.52 1
 1 -23 -9 21592 2636.58 1
 1 -23 -8 13042.4 2070.66 1
 1 -23 -7 8354.34 1630.22 1
 -1 -23 7 7395.09 1137.29 1
 -1 -23 6 7461.25 1159.87 1
 -1 23 6 5968.69 957.768 3
 1 -23 -6 6407.87 1465.9 1
 -1 23 5 78.9591 258.164 3
 -1 -23 5 1349.09 687.169 1
 1 -23 -5 1187.37 616.98 1
 -1 -23 4 38072.6 2779.92 1
 1 -23 -4 34769.7 3123.89 1
 -1 23 4 31291 2236.09 3
 1 -23 -3 52152.4 3774.77 1
 -1 23 3 47476.8 2827.64 3
 -1 -23 3 49640.2 3261.5 1
 1 23 -3 48713.9 3063.55 3
 1 23 -2 25140.1 2126.08 3
 -1 23 2 28361.3 2210.8 3
 1 -23 -2 32130 2934.99 1
 -1 -23 2 30286.2 2596.56 1
 1 23 -1 6674.63 1075.71 3
 -1 23 1 6061.4 1069.33 3
 1 -23 -1 5417.41 1194.91 1
 -1 -23 1 6134.43 1220.41 1
 -1 23 0 670.249 457.52 3
 -1 -23 0 -62.0274 358.573 1
 1 -23 0 286.186 403.782 1
 1 23 0 186.962 241.245 3
 1 23 1 4114.45 816.474 3
 -1 -23 -1 4691.37 1113.19 1
 -1 23 -1 5141.44 1008.45 3
 1 -23 1 5368.26 1159.05 1
 -1 23 -2 18066.5 1943.31 3
 -1 -23 -2 19726.9 2279.12 1
 1 23 2 16851.9 1585.32 3
 1 -23 2 17777 2015.2 1
 -1 23 -3 53090.9 3367.57 3
 1 23 3 53780.6 2702.88 3
 1 -23 3 55223.6 3475.18 1
 -1 -23 -3 55620.6 3876.19 1
 -1 -23 -4 41846.3 3419.29 1
 1 -23 4 39827.7 2920.07 1
 -1 23 -4 37668.8 2916.79 3
 1 23 4 38683 2238.93 3
 -1 23 -5 505.424 629.602 3
 1 -23 5 98.9676 321.354 1
 -1 -23 -5 -1905.29 832.966 1
 -1 -23 -6 4824.31 1224.07 1
 -1 23 -6 3918.68 1038.08 3
 1 -23 6 5662.32 1051.94 1
 1 -23 7 8416.96 1247.21 1
 -1 23 -7 7386.35 1131.67 2
 -1 -23 -7 8195.15 1656.34 1
 -1 -23 -8 11272.8 1981.92 1
 -1 23 -8 10499.6 1403.07 2
 -1 -23 -9 20696.9 2694.07 1
 -1 23 -9 16104.6 1802.99 2
 -1 -23 -10 11842.9 2100.71 1
 -1 23 -10 9748.71 1415.16 2
 -1 -23 -11 502.572 766.447 1
 -1 23 -11 -17.7286 385.23 2
 1 -25 -8 224.049 383.1 1
 1 -25 -7 16787.3 2481.47 1
 1 -25 -6 9510.44 1756.08 1
 1 -25 -5 965.065 632.664 1
 -1 -25 5 115.208 372.033 1
 -1 -25 4 12989.9 1714.67 1
 1 -25 -4 11027.4 1866.91 1
 1 -25 -3 47795.4 3826.18 1
 -1 -25 3 45592 3311.15 1
 -1 -25 2 83.4518 516.534 1
 1 -25 -2 -112.63 532.979 1
 1 25 -2 -162.15 411.226 3
 1 25 -1 21981.5 2021.96 3
 -1 25 1 24188.6 2174.84 3
 1 -25 -1 21787.1 2478.72 1
 -1 -25 1 21439.3 2376.63 1
 -1 -25 0 -232.228 657.57 1
 1 25 0 229.375 328.234 3
 -1 25 0 991.079 553.019 3
 1 -25 0 1454.38 612.653 1
 1 -25 1 18093.4 2229.29 1
 -1 -25 -1 19824.9 2353.72 1
 -1 25 -1 17021.8 1914.03 3
 -1 -25 -2 3480.74 1066.11 1
 1 -25 2 3255.3 944.598 1
 -1 25 -2 3966.48 960.82 3
 1 -25 3 39999.5 3131.94 1
 -1 25 -3 35027.3 2853.31 3
 -1 -25 -3 37786.2 3383.88 1
 1 -25 4 4866.23 1105.31 1
 -1 -25 -4 3618.67 1133.98 1
 -1 25 -4 4385.27 1020.43 3
 -1 25 -5 738.511 501.171 3
 -1 -25 -5 1006.09 565.533 1
 1 -25 5 694.575 446.915 1
 -1 -25 -6 6219.92 1469.49 1
 1 -25 6 7247.22 1285.1 1
 -1 -25 -7 17716.5 2523.59 1
 -1 -25 -8 105.677 517.063 1
 1 -27 -5 6907.52 1588.04 1
 -1 -27 4 1246.4 699.258 1
 1 -27 -4 -1302.42 761.948 1
 -1 -27 3 15202.6 2014.58 1
 1 -27 -3 15225.6 2263.88 1
 1 -27 -2 4852.92 1309.36 1
 -1 -27 2 2508.57 848.607 1
 -1 -27 1 28159.1 2858.28 1
 1 -27 -1 26832.8 2906.91 1
 1 -27 0 -1071.88 668.348 1
 -1 -27 0 542.415 510.088 1
 1 -27 1 22717.8 2579.27 1
 -1 -27 -1 25870.2 2805.78 1
 -1 -27 -2 -2785.64 987.262 1
 1 -27 2 3469.68 1021.32 1
 -1 27 -3 12229.3 1783.64 3
 1 -27 3 14615.2 2015.12 1
 -1 -27 -3 12933.6 2102.75 1
 -1 -27 -4 -419.526 651.078 1
 1 -27 4 -358.019 561.17 1
 -1 27 -4 491.869 675.841 3
 -1 -27 -5 4305.65 1265.78 1
 -1 -29 2 8808.14 1630.55 1
 -1 -29 1 3641.76 1197.3 1
 1 -29 -1 2878.2 1075.93 1
 -1 -29 0 105.965 506.561 1
 1 -29 0 -455.161 568.369 1
 1 -29 1 12152.1 2009.3 1
 -1 -29 -1 9028.84 1751.02 1
 1 -29 2 12297.7 1953.65 1
 2 0 -22 141002 6983.76 2
 2 0 -21 -188.064 607.399 2
 2 0 -20 10623.1 1796.65 2
 2 0 -19 -2203.27 875.467 2
 2 0 -18 44468.4 3422.81 2
 2 0 -17 825.446 574.086 2
 2 0 -16 355231 8898.68 2
 2 0 -15 193.363 274.628 2
 2 0 -14 697.494 432.635 2
 -2 0 13 -138.724 314.231 2
 2 0 -13 44.4117 289.683 2
 2 0 -12 135012 4630.96 2
 -2 0 12 133157 4570.3 2
 -2 0 11 211.114 290.15 2
 2 0 -11 344.909 233.197 2
 -2 0 10 79288.5 3173.75 2
 2 0 -10 80906.6 3230.13 2
 2 0 -9 5.82652 218.709 2
 -2 0 9 98.0403 200.939 2
 2 0 -8 3687.7 448.995 1
 2 0 -8 3535.15 608.609 2
 -2 0 8 3282.86 579.931 2
 2 0 -7 -30.1616 110.688 1
 -2 0 7 43.4864 117.715 2
 2 0 -7 187.805 202.556 2
 2 0 -6 597733 6717.72 2
 2 0 -6 642924 5028.08 1
 -2 0 6 594785 6635.38 2
 2 0 -5 156.926 85.4311 1
 2 0 -5 279.092 145.553 2
 -2 0 5 144.208 132.885 2
 2 0 -4 113009 2363.77 2
 -2 0 4 108454 2311.97 2
 2 0 -3 61.6307 68.1382 2
 2 0 2 1418.11 208.518 3
 2 0 3 249.937 124.443 3
 -2 0 -3 -6.288 97.7264 3
 2 0 4 68686.6 1829.22 3
 -2 0 -4 68455.2 2000.32 2
 -2 0 -5 -6.22697 116.31 2
 2 0 5 197.527 148.554 3
 -2 0 -6 375392 5564.08 2
 2 0 6 371727 5138.34 3
 -2 0 -7 128.241 211.071 2
 2 0 7 284.326 199.676 3
 2 0 8 1533.43 332.88 1
 2 0 8 1777.66 430.787 3
 -2 0 -8 1583.19 417.937 2
 -2 0 -9 -870.41 365.08 2
 2 0 9 87.1339 153.146 1
 2 0 9 -619.202 292.914 3
 -2 0 -10 124476 4135.34 2
 2 0 10 123720 3409.94 1
 2 0 10 119460 3803.41 3
 2 0 11 367.996 306.105 3
 -2 0 -11 333.608 307.291 2
 2 0 11 85.8902 215.51 1
 -2 0 -12 36465.7 2474.1 2
 2 0 12 35056.2 2278.91 3
 2 0 12 33726.1 1944.51 1
 2 0 13 -724.493 335.026 1
 -2 0 -13 110.776 284.759 2
 2 0 13 67.3933 235.339 3
 2 0 14 78.2141 241.527 1
 -2 0 -14 771.744 495.931 2
 2 0 15 60.5765 293.933 1
 -2 0 -15 -83.9182 359.867 2
 -2 0 -16 133182 5605.79 2
 2 0 16 123177 4232.06 1
 -2 0 -17 -55.7121 541.059 2
 -2 0 -18 3059.98 925.755 2
 -2 0 -19 57.019 452.354 2
 -2 0 -20 1020.22 544.913 2
 -2 0 -21 -4.37245 511.271 2
 -2 0 -22 105027 6144.89 2
 2 -2 -22 73025.9 5042.67 2
 2 2 -22 78891.3 5224.47 2
 2 -2 -21 4841.73 1292.04 2
 2 2 -21 5290.93 1306.52 2
 2 -2 -20 5237.92 1292.81 2
 2 2 -20 5562.96 1277.42 2
 2 2 -19 1287.24 726.111 2
 2 -2 -19 4569.01 1211.14 2
 2 -2 -18 42836.9 3356.13 2
 2 2 -18 42930.9 3366.29 2
 2 2 -17 47530.6 3404.72 2
 2 -2 -17 41089.6 3182.46 2
 2 -2 -16 137829 5589.31 2
 2 2 -16 142643 5639.16 2
 2 -2 -15 -1743.39 656.906 2
 2 2 -15 7.94406 324.02 2
 2 2 -14 3276.15 814.383 2
 2 -2 -14 3241.48 810.2 2
 2 2 -13 166.337 248.889 2
 -2 -2 13 165.374 273.051 2
 -2 2 13 -117.363 282.2 2
 2 -2 -13 -190.38 357.725 2
 -2 -2 12 87802.8 3694.69 2
 -2 2 12 81681.6 3599.52 2
 2 2 -12 85840.9 3674.36 2
 2 -2 -12 93197.5 3820.32 2
 -2 -2 11 149895 4613.02 2
 -2 2 11 150549 4648.78 2
 2 -2 -11 160284 4787.03 2
 2 -2 -11 171224 4028.23 1
 2 2 -11 154451 4689.3 2
 -2 2 10 110314 3783.76 2
 2 -2 -10 111788 3807.15 2
 -2 -2 10 109689 3747.53 2
 2 -2 -10 115393 3164.09 1
 2 2 -10 105319 3680.28 2
 2 -2 -9 41113.4 2183.58 2
 -2 2 9 40027.1 2152.16 2
 -2 -2 9 40285.8 2138.48 2
 2 2 -9 42556.9 2212.33 2
 2 -2 -9 41910.1 1832.45 1
 -2 2 8 293.772 217.461 2
 2 -2 -8 680.954 294.051 2
 2 2 -8 339.189 204.739 2
 -2 -2 8 392.819 247.617 2
 2 -2 -8 315.511 173.397 1
 -2 2 7 2175.56 445.968 2
 2 -2 -7 2048.76 442.786 2
 -2 -2 7 2173.66 445.032 2
 2 2 -7 1735.07 423.853 2
 2 -2 -7 2045.48 372.478 1
 2 -2 -6 138740 2863.99 1
 -2 -2 6 127591 3054.05 2
 2 -2 -6 138609 3295.88 2
 -2 2 6 134655 3236.08 2
 2 2 -6 141747 3216.23 2
 2 -2 -5 85356.6 2364.97 2
 -2 2 5 82751.5 2318.99 2
 2 2 -5 87536.8 2284.01 2
 -2 -2 5 82795.5 2240.29 2
 -2 -2 4 39209.8 1359.81 2
 2 -2 -4 39247.2 1453.83 2
 2 2 -4 41360.2 1393.9 2
 -2 2 4 37268.6 1423.41 2
 -2 2 3 34583.3 1243.4 2
 2 -2 -3 35824.2 1258.33 2
 -2 2 3 35011.7 1204.22 3
 -2 -2 3 37173.1 1129.75 2
 2 2 -3 38402 1151.14 2
 2 2 -2 89784.4 1412.56 2
 -2 2 2 85393 1723.13 3
 2 -2 1 54468.9 1375.64 3
 2 2 2 38036 776.399 3
 2 -2 2 38845.2 1265.54 3
 -2 2 -2 38367.3 1260.15 3
 -2 -2 -2 38081.9 1051.45 2
 -2 2 -3 982.561 235.005 3
 2 2 3 967.787 155.538 3
 2 2 3 1014.14 213.282 2
 2 -2 3 1135.32 257.376 3
 -2 -2 -3 1057.7 216.94 2
 2 -2 4 155037 3088.45 3
 -2 2 -4 164129 3136.51 3
 -2 -2 -4 164782 2981.18 2
 2 2 4 164362 3072.1 1
 2 2 4 162760 2970.11 2
 2 2 4 158333 2479.68 3
 -2 -2 -5 18819.4 1134.71 2
 2 2 5 19078.2 1118.76 1
 -2 2 -5 20356.1 1206.52 3
 -2 2 -5 19456.2 1208.9 2
 2 -2 5 19302.7 1178.05 3
 2 2 5 18756.7 1113.77 2
 2 2 6 290487 4672.88 1
 -2 -2 -6 297676 4886.97 2
 2 -2 6 293156 4902.64 3
 -2 2 -6 300213 5104.56 2
 2 2 6 300521 4874.32 2
 2 2 7 68093.9 2370.32 1
 2 2 7 68703.1 2528.44 2
 -2 2 -7 70737.6 2647.87 2
 -2 -2 -7 67683.8 2520.36 2
 2 2 7 67667.5 2240.83 3
 2 -2 7 67772 2519.33 3
 -2 -2 -8 11032.1 1095.15 2
 -2 2 -8 9980.68 1067.2 2
 2 2 8 10380.3 980.737 1
 2 2 8 12039.7 1138.84 2
 2 2 8 11330.2 991.183 3
 2 -2 8 11635.7 1108.21 3
 -2 -2 -9 6828.66 921.337 2
 2 2 9 7085.75 855.858 3
 2 -2 9 8714.92 1028.58 3
 -2 2 -9 6860.49 954.342 2
 2 2 9 7239.32 848.753 1
 2 2 9 7827.09 967.638 2
 2 -2 10 85622 3357.07 3
 -2 -2 -10 90711.6 3500.72 2
 2 2 10 85926.9 3055.25 1
 2 2 10 90538.1 3186.42 3
 -2 2 -10 89110.3 3545.05 2
 2 2 10 84614.7 3400.23 2
 2 2 11 113605 3636.95 1
 -2 2 -11 112404 4172.3 2
 2 2 11 108369 4009.45 2
 -2 -2 -11 112797 4155.47 2
 2 -2 11 114611 3207.74 1
 2 2 11 109426 3695.58 3
 2 -2 11 111264 4005.5 3
 2 -2 12 65020.3 3205.22 3
 2 2 12 68015.7 2913.9 1
 -2 -2 -12 68541.3 3370.48 2
 -2 2 -12 66131.9 3371.85 2
 2 -2 12 64424.2 2516.49 1
 2 2 12 68385.7 3068.88 3
 -2 -2 -13 11464 1449.22 2
 2 -2 13 14991.4 1593.07 3
 2 -2 13 13043.7 1179.16 1
 2 2 13 12274.8 1303.47 1
 2 2 13 11052.6 1293.01 3
 -2 2 -13 12482.4 1545.72 2
 -2 -2 -14 3317.92 835.989 2
 2 -2 14 2711.66 582.248 1
 -2 2 -14 2596.22 698.353 2
 2 2 14 3008.06 731.214 3
 2 2 14 1950.38 501.445 1
 -2 -2 -15 17460 1957.82 2
 2 2 15 14897 1502.52 1
 -2 2 -15 17136.3 1964.03 2
 2 -2 15 14112.9 1320.59 1
 2 -2 16 97199.4 3513.45 1
 -2 2 -16 104261 5003.39 2
 -2 -2 -16 108874 5059.81 2
 2 -2 17 38670.1 2295.18 1
 -2 2 -17 44259.6 3394.35 2
 -2 -2 -17 40142.6 3234.94 2
 -2 2 -18 11706.6 1817.89 2
 -2 -2 -18 10924 1792.68 2
 -2 2 -19 6266.15 1356.09 2
 -2 -2 -19 5157.08 1277.28 2
 -2 2 -20 5723.53 1370.98 2
 -2 -2 -20 3360.12 1075.61 2
 -2 2 -21 10126.1 1916.62 2
 -2 -2 -21 10167.1 1883.12 2
 -2 -2 -22 70130.2 5001.59 2
 2 -4 -22 21297.3 2749.13 2
 2 4 -22 20093.4 2661.6 2
 2 4 -21 27719.1 3005.19 2
 2 -4 -21 25463.7 2914.64 2
 2 4 -20 14924.2 2180.08 2
 2 -4 -20 14737.2 2107.13 2
 2 -4 -19 4045.57 1150.52 2
 2 4 -19 2386.93 927.366 2
 2 -4 -18 20723.1 2378.05 2
 2 4 -18 21105.1 2375.85 2
 2 4 -17 171190 6441.35 2
 2 -4 -17 182624 6669.66 2
 2 4 -16 14906.7 1859.71 2
 2 -4 -16 18307.1 2072.67 2
 2 -4 -15 2185.98 784.093 2
 2 4 -15 2183.8 661.851 2
 2 4 -14 1341.14 483.389 2
 2 -4 -14 1504.32 583.825 2
 2 4 -13 330.23 271.323 2
 2 -4 -13 839.568 391.618 2
 -2 -4 13 643.109 367.06 2
 2 -4 -12 4060.61 735.06 1
 -2 4 12 4439.92 838.19 2
 -2 -4 12 4798.09 883.994 3
 -2 -4 12 4977.47 898.493 2
 2 4 -12 5063.1 900.733 2
 2 -4 -12 4926.27 937.384 2
 -2 4 11 268372 6290.76 2
 -2 -4 11 272024 6231.39 2
 2 4 -11 284168 6389.42 2
 2 -4 -11 269511 6324.37 2
 -2 -4 11 276405 6423.41 3
 2 -4 -11 301264 5864.46 1
 -2 -4 10 37756.9 2188.89 2
 2 -4 -10 35025.6 2170.35 2
 -2 4 10 35051.1 2156.51 2
 2 -4 -10 44886.2 2187.22 1
 2 4 -10 39743.4 2264.04 2
 -2 4 9 1352.31 409.594 2
 2 -4 -9 2012.96 458.377 1
 2 -4 -9 1514.05 415.027 2
 2 4 -9 1708.53 457.834 2
 -2 -4 9 1567.08 444.163 2
 -2 4 8 999.698 334.211 2
 2 4 -8 1284.32 395.86 2
 2 -4 -8 1651.89 453.851 2
 -2 -4 8 1443.6 378.962 2
 2 -4 -8 1309.5 399.964 1
 2 -4 -7 21672.3 1436.52 2
 -2 -4 7 19518.4 1296.81 2
 2 -4 -7 20992.6 1332.39 1
 2 4 -7 21415.6 1364.9 2
 -2 4 7 19081.2 1349.07 2
 -2 -4 6 18197.1 1154.04 2
 -2 4 6 16933 1108.02 3
 2 4 -6 16975.1 1125.89 2
 2 -4 -6 17033.3 1195.11 2
 -2 4 6 16884 1178.59 2
 -2 4 5 322641 4769.72 2
 -2 -4 5 343446 4527.23 2
 2 4 -5 343086 4548.44 2
 2 -4 -5 329151 4858.03 2
 -2 4 5 307785 4409.29 3
 2 4 -4 24489.9 1078.48 2
 -2 4 4 24208.7 1222.81 2
 -2 -4 4 25706.1 1105.5 2
 -2 4 4 23553.6 1138.41 3
 2 -4 -4 24004.1 1144.77 3
 -2 4 3 18698.5 948.506 3
 -2 -4 3 19625.9 823.908 2
 -2 4 3 16865.2 949.203 2
 2 -4 -3 17844.5 927.756 3
 2 4 -3 18318 792.669 2
 2 4 -2 16840.9 614.43 2
 -2 -4 2 16981.8 802.938 3
 -2 4 2 16338 850.773 3
 2 4 -2 16936.6 639.019 1
 -2 -4 2 17577.7 651.649 1
 2 -4 -2 15487.3 840.691 3
 -2 -4 1 274233 2946.12 1
 2 4 -1 266171 2925.82 1
 -2 -4 1 269905 2663.34 3
 2 -4 -1 261588 3331.04 3
 -2 4 1 264948 3341.49 3
 2 -4 0 95568.7 2058.63 3
 -2 -4 0 98554.7 1970.26 1
 -2 4 0 94766.4 2044.14 3
 2 4 0 93279.5 1932.2 1
 2 4 1 290688 3729.99 1
 2 -4 1 297140 3814.61 3
 -2 -4 -1 295890 3778.09 1
 -2 4 -1 288535 3727.33 3
 2 4 2 130542 2689.85 1
 -2 4 -2 130657 2676.44 3
 -2 -4 -2 128472 1900.07 2
 2 4 2 123987 1874.82 2
 2 -4 2 127385 2672.54 3
 -2 -4 -2 128056 2666.29 1
 -2 4 -3 38951.5 1576.03 3
 -2 -4 -3 40242.6 1280.03 2
 2 -4 3 37869.5 1556.01 3
 2 4 3 41109.6 1621.56 1
 2 4 3 40034.6 1272.96 2
 -2 4 -4 66009.6 2195.48 3
 2 4 4 71101 2248.27 1
 2 4 4 68462.8 1901.8 2
 -2 -4 -4 64379.8 1864.94 2
 2 -4 4 69559.6 2254.54 3
 -2 -4 -5 309027 4531.57 2
 2 4 5 295185 4858.43 1
 2 4 5 290065 4389.74 2
 -2 4 -5 292896 4963.28 3
 2 -4 5 306640 5011.45 3
 2 -4 6 64663.7 2464.44 3
 -2 -4 -6 64765.8 2270.22 2
 2 4 6 62789.5 2218.17 2
 2 4 6 63090.4 2360.4 1
 -2 4 -6 63203.2 2433.15 3
 -2 -4 -7 16905.8 1257.28 2
 2 4 7 16154.8 1252.03 1
 2 -4 7 16937.1 1339.48 3
 2 4 7 15804.9 1221 2
 -2 4 -7 17276.5 1349.61 2
 -2 -4 -8 33457.9 1897.02 2
 2 -4 8 32882.7 1961.5 3
 2 4 8 32326.4 1845.31 1
 -2 4 -8 32343.8 1940.32 2
 2 4 8 31805.1 1843.24 2
 -2 -4 -9 1649.62 462.115 2
 -2 4 -9 1668.28 489.946 2
 2 -4 9 1761.68 488.476 3
 2 4 9 1502.35 459.067 2
 2 4 9 2420.17 519.371 1
 2 4 10 37379.3 2143.49 1
 2 -4 10 37961.1 2336.04 3
 -2 4 -10 35917.5 2271.03 2
 -2 -4 -10 39665.1 2309.21 2
 2 4 10 35855 2208.6 2
 -2 4 -11 281173 6677.72 2
 2 -4 11 278328 6553.69 3
 2 4 11 288507 6162.07 1
 -2 -4 -11 298503 6701.11 2
 2 4 11 277589 6441.38 2
 2 4 12 70058.8 3414.82 2
 2 4 12 65407.8 2958.41 3
 2 -4 12 71189.9 3459.81 3
 -2 -4 -12 71472.9 3448.92 2
 2 4 12 71236.4 3167.55 1
 -2 4 -12 64617.8 3361.75 2
 2 -4 12 71137.2 2481.54 1
 2 -4 13 2138.36 489.242 1
 -2 4 -13 1680.46 555.027 2
 -2 -4 -13 2736.67 743.136 2
 2 4 13 1395.81 518.787 3
 2 4 13 2680.57 655.639 1
 2 4 14 23321.3 1937.95 1
 -2 4 -14 27147.2 2373.9 2
 2 -4 14 28601 1688.01 1
 2 4 14 23285.1 1945.06 3
 -2 -4 -14 28053.4 2384.38 2
 -2 -4 -15 3321.22 886.442 2
 -2 4 -15 3724.86 912.414 2
 2 -4 15 4456.18 674.469 1
 2 -4 16 13372.4 1227.78 1
 -2 -4 -16 12801.4 1756.04 2
 -2 4 -16 13861.9 1863.49 2
 2 -4 17 108153 3575.33 1
 -2 -4 -17 116650 5437.52 2
 -2 4 -17 118357 5566 2
 -2 -4 -18 28504.5 2788.12 2
 -2 4 -18 29836.1 2945.77 2
 -2 4 -19 38.8456 518.491 2
 -2 -4 -19 -102.098 503.644 2
 -2 -4 -20 8246.91 1626.34 2
 -2 4 -20 9482.72 1848.22 2
 -2 -4 -21 30967.5 3252.1 2
 -2 4 -21 29863.3 3213.91 2
 -2 -4 -22 17454.4 2558.13 2
 -2 6 24 2977.74 1066.52 3
 -2 6 23 24026.7 2721.4 3
 2 6 -22 983.6 644.239 2
 2 -6 -22 1577.16 713 2
 2 6 -21 60620.1 4461.27 2
 2 -6 -21 63791.4 4597.37 2
 2 -6 -20 10695.3 1849.35 2
 2 6 -20 9933.26 1767.31 2
 2 -6 -19 11363.4 1814.98 2
 2 6 -19 10775.7 1786.67 2
 2 6 -18 17201.2 2161.84 2
 2 -6 -18 17663.7 2204.45 2
 2 -6 -17 179826 6729.73 2
 2 6 -17 178235 6633.32 2
 2 6 -16 6792.85 1250.57 2
 2 -6 -16 5972.26 1217.03 2
 2 6 -15 15669.5 1822.29 2
 2 -6 -15 16677.3 1898.83 2
 2 6 -14 10850.2 1440.71 2
 2 -6 -14 9936.76 1415.64 2
 2 -6 -14 11659.7 1381.44 1
 2 6 -13 14091.4 1575.8 2
 2 -6 -13 13776.2 1610.69 2
 2 -6 -13 14408.4 1490.35 1
 2 -6 -12 1016.08 434.792 2
 -2 -6 12 690.286 400.84 3
 -2 6 12 1087.81 510.055 2
 2 -6 -12 520.46 323.413 1
 2 6 -12 962.294 350.664 2
 2 6 -11 227068 5719.97 2
 2 -6 -11 233597 5629.86 1
 -2 -6 11 228711 6035.45 3
 2 -6 -11 231988 5944.9 2
 -2 6 11 218421 5720.3 2
 -2 6 10 524.831 220.184 2
 -2 6 10 300.37 179.893 3
 2 -6 -10 -12.914 229.035 1
 2 -6 -10 91.6752 215.478 2
 -2 -6 10 52.5628 220.951 3
 2 6 -10 360.572 298.587 2
 2 6 -9 4500.7 719.141 2
 -2 6 9 4348.84 746.315 2
 -2 6 9 4035.64 656.35 3
 2 -6 -9 5266.39 801.847 1
 -2 -6 9 3556.47 697.044 3
 2 -6 -9 4834.73 787.776 2
 2 -6 -8 2249.73 507.491 1
 -2 6 8 1852.67 444.123 3
 2 6 -8 2281.99 484.312 2
 -2 -6 8 2202.97 556.77 3
 -2 6 8 1946.85 488.362 2
 2 -6 -8 1882.43 445.548 2
 -2 -6 7 10022 1035.93 3
 2 6 -7 9619.61 932.273 2
 -2 6 7 9486.97 971.377 2
 -2 6 7 9547.69 898.182 3
 2 -6 -7 11638.1 1102.91 1
 2 -6 -7 11539.2 1080.42 2
 -2 6 6 4742.98 612.879 3
 -2 6 6 4732.45 653.391 2
 -2 -6 6 4507.74 664.994 3
 2 6 -6 5389.09 648.327 2
 2 -6 -5 136498 3044.29 3
 -2 -6 5 140514 1595.09 1
 -2 -6 5 150499 3503.39 3
 -2 6 5 131589 3012.57 3
 -2 6 5 129431 3177.95 2
 2 6 -5 136762 2949.09 2
 2 6 -4 18238.6 960.288 2
 -2 -6 4 19302.4 1171.56 3
 -2 -6 4 19183.3 704.74 1
 -2 6 4 16534.6 1078.91 2
 -2 6 4 17309.5 1033.96 3
 2 -6 -4 18251.4 1065.06 3
 2 -6 -3 1611.23 310.888 3
 -2 -6 3 331.324 179.866 3
 -2 6 3 364.739 156.976 3
 2 6 -3 325.652 111.772 2
 -2 -6 3 336.451 109.183 1
 2 -6 -2 39141.4 1470.18 3
 -2 -6 2 40828.3 1420.2 3
 -2 -6 2 38603.1 1254.73 1
 -2 6 2 39126.9 1478.47 3
 -2 6 1 135248 2729.04 3
 2 -6 -1 134290 2741.13 3
 -2 -6 1 135728 2562.6 1
 2 6 -1 133519 2233.91 3
 -2 -6 1 132648 2249.29 3
 2 6 0 33789.6 1377.64 1
 2 -6 0 34009.3 1407.03 3
 -2 -6 0 35729.4 1001.19 3
 -2 6 0 34311.7 1412.15 3
 -2 -6 0 36984.5 1441.47 1
 2 6 0 33061.5 967.767 3
 -2 -6 -1 112248 1529.86 3
 2 6 1 117544 2735.06 1
 -2 -6 -1 119826 2756.28 1
 2 -6 1 113024 2677.43 3
 2 6 1 114558 1534.55 3
 -2 6 -1 108038 2600.03 3
 2 6 1 108668 1480.63 2
 -2 -6 -2 5344.69 400.517 2
 -2 6 -2 5465.38 618.571 3
 -2 -6 -2 5492.35 633.982 1
 2 6 2 5199.77 311.08 3
 2 6 2 5487.12 410.645 2
 2 6 2 5817.08 646.68 1
 2 -6 2 4871.88 582.569 3
 -2 -6 -2 4476.77 290.567 3
 2 6 3 300.904 112.308 2
 2 6 3 467.522 197.99 1
 2 6 3 274.778 87.6323 3
 2 -6 3 321.889 209.865 3
 -2 -6 -3 229.255 122.121 2
 -2 -6 -3 175.672 181.065 1
 -2 6 -3 138.671 133.761 3
 2 6 4 34140 1032.68 3
 2 6 4 39693.6 1471.57 2
 -2 -6 -4 40036.8 1871.32 1
 2 -6 4 42406.4 1919.32 3
 -2 6 -4 36701.3 1788.87 3
 2 6 4 39168.8 1862.96 1
 -2 -6 -4 40054.5 1476.91 2
 -2 -6 -5 683406 6792.74 2
 2 6 5 600278 4904.37 3
 2 -6 5 672343 8092.27 3
 -2 -6 -5 701982 8220.22 1
 -2 6 -5 670147 7999.64 3
 2 6 5 669496 6680.39 2
 2 6 5 646609 7880.34 1
 -2 -6 -6 3348.13 606.801 1
 -2 6 -6 3101.95 607.49 3
 2 -6 6 2757.11 552.784 3
 -2 -6 -6 2836.24 480.669 2
 2 6 6 2694.37 478.458 2
 2 6 6 3044.13 570.856 1
 2 6 7 18287.8 1301.66 2
 -2 -6 -7 18466.2 1326.93 2
 -2 6 -7 17949 1454.28 3
 2 6 7 18566.3 1458.31 1
 2 -6 7 18073.7 1463.98 3
 -2 -6 -8 11924.5 1137.28 2
 -2 6 -8 12668.9 1267.24 2
 2 6 8 12216.7 1143.6 2
 2 -6 8 13801.5 1336.46 3
 2 6 8 11207.9 1174.93 1
 2 -6 9 7901.94 1067.64 3
 2 6 9 8609.06 1068.98 1
 -2 6 -9 7986.8 1052.67 2
 2 6 9 8281.21 1017.52 2
 -2 -6 -9 9380.24 1078.92 2
 -2 6 -10 7132.17 1039.88 2
 2 -6 10 8771.07 1146.22 3
 2 6 10 7369.55 1009.45 2
 2 6 10 8422.59 1103.64 1
 -2 -6 -10 7352.07 998.252 2
 2 6 11 215429 5656.54 1
 -2 6 -11 213525 5936.23 2
 2 6 11 207222 5543.87 2
 -2 -6 -11 216990 5721.97 2
 2 -6 11 206999 5880.35 3
 2 6 12 21023.2 1872.17 2
 -2 -6 -12 22062.5 1935.36 2
 -2 6 -12 22487.7 2003.41 2
 -2 6 -13 11652.5 1532.23 2
 -2 -6 -13 12046.8 1498.41 2
 2 6 14 986.802 423.44 3
 -2 -6 -14 264.049 309.785 2
 2 -6 14 575.695 283.861 1
 -2 6 -14 446.534 364.917 2
 -2 -6 -15 4409.82 1014.6 2
 -2 6 -15 3986.44 930.368 2
 2 6 15 2880.6 719.413 3
 2 -6 15 3882.48 612.222 1
 -2 6 -16 1418.49 648.98 2
 2 -6 16 1527.25 418.013 1
 -2 -6 -16 2667.69 804.05 2
 -2 -6 -17 116623 5434.23 2
 -2 6 -17 109628 5412.42 2
 -2 -6 -18 1562.2 747.853 2
 -2 6 -18 1435.99 621.793 2
 -2 -6 -19 8877.42 1632.29 2
 -2 6 -19 7916.28 1598.02 2
 -2 -6 -20 8205.94 1622.44 2
 -2 6 -20 9251.77 1810.51 2
 -2 6 -21 34826.4 3492.11 2
 -2 -6 -21 35269.9 3471.71 2
 -2 8 24 1941.17 814.758 3
 -2 8 23 34982 3296.85 3
 -2 8 22 21016.9 2523.59 3
 2 -8 -22 20239.7 2681.97 2
 2 8 -22 20926.2 2739.55 2
 2 -8 -21 45083.9 3902.93 2
 -2 8 21 36756.6 3165.23 3
 2 8 -21 45229.7 3883.2 2
 -2 8 20 1846.97 730.373 3
 2 -8 -20 2385.48 914.939 2
 2 8 -20 2019.78 832.927 2
 -2 8 19 5480.03 1177.5 3
 2 -8 -19 7295.46 1473.92 2
 2 8 -19 8531.79 1587.83 2
 -2 8 18 315.769 405.549 3
 2 8 -18 -748.007 541.635 2
 2 -8 -18 -211.003 465.633 2
 -2 8 17 37803.5 2816.3 3
 2 8 -17 44026.4 3323.24 2
 2 -8 -17 42410.4 3295.86 2
 2 8 -16 36819.8 2920.26 2
 -2 8 16 32177.7 2492.17 3
 2 -8 -16 35547.5 2925.26 2
 -2 8 15 46211 2886.7 3
 2 8 -15 53367 3377.21 2
 2 -8 -15 58283.1 3354.34 1
 2 -8 -15 54551.8 3449.45 2
 2 8 -14 2033.86 610.125 2
 2 -8 -14 2969.45 766.436 1
 2 -8 -14 2340.25 771.521 2
 -2 8 14 1133.74 471.16 3
 2 8 -13 49908.5 2982.21 2
 -2 8 13 47572.1 2702.09 3
 2 -8 -13 52693.5 3152.83 2
 2 -8 -13 56816.6 3142.92 1
 2 8 -12 15415.7 1585.5 2
 -2 8 12 13532.9 1369.25 3
 2 -8 -12 16715.1 1705.07 2
 -2 8 12 13882.6 1549.01 2
 2 -8 -12 17249 1700.99 1
 -2 8 11 122904 3966.22 3
 2 -8 -11 141863 4696.3 1
 -2 -8 11 128905 4651.97 3
 -2 8 11 124765 4416 2
 2 -8 -11 141121 4720.87 2
 2 8 -11 133901 4476.78 2
 -2 8 10 12436.9 1337.4 2
 2 -8 -10 15478.2 1508.64 1
 -2 8 10 13323.8 1242.22 3
 2 8 -10 13395.4 1342.26 2
 -2 -8 10 14105.9 1475.39 3
 2 -8 -10 14836.8 1465.88 2
 -2 8 9 77401.1 2893.41 3
 2 -8 -9 89330.4 3497.69 1
 2 8 -9 84749.8 3183.56 2
 -2 8 9 79773.1 3203.97 2
 2 -8 -9 85170.3 3320.76 2
 -2 -8 9 85846.4 3488.6 3
 2 8 -8 11310.1 1106.87 2
 -2 8 8 11560.1 1067.44 3
 -2 -8 8 13027.4 1299.21 3
 2 -8 -8 12526.2 1279.24 1
 -2 8 8 11060.7 1140.62 2
 2 8 -7 76544.3 2668.69 2
 -2 -8 7 81723.1 3100.59 3
 -2 8 7 74667.1 2576.01 3
 -2 -8 7 74609.1 1244.94 1
 2 -8 -7 83754.6 3185.31 1
 -2 8 7 72571.6 2769.3 2
 2 8 -6 36920.8 1721.74 2
 -2 8 6 32928.5 1658.02 3
 -2 -8 6 34282.2 1006.09 1
 -2 8 6 31786.3 1755.7 2
 -2 -8 6 36842.3 1969.15 3
 -2 -8 5 213165 2779.9 1
 -2 8 5 195247 3843.65 3
 -2 -8 5 202969 4380.29 3
 2 8 -5 207424 3719.89 2
 -2 8 5 194364 4084.19 2
 2 -8 -5 170921 3588.46 3
 -2 8 4 17411.4 1165.16 2
 2 -8 -4 16796.7 1100.76 3
 -2 -8 4 17402.9 875.752 1
 -2 8 4 16646.8 1088.22 3
 2 8 -4 17074.7 979.811 2
 -2 -8 4 16204.6 1155.31 3
 -2 8 3 9473.54 808.011 3
 2 -8 -3 9633.21 814.534 3
 -2 -8 3 10661.7 867.582 3
 -2 -8 3 9171.41 691.97 1
 2 8 -3 9215.75 810.91 3
 -2 -8 2 1148.36 288.477 1
 2 -8 -2 992.797 266.362 3
 -2 -8 2 933.272 249.786 3
 2 8 -2 1147.27 266.086 3
 -2 8 2 1111.94 288.461 3
 -2 -8 1 89451.9 2137.5 3
 2 -8 -1 85506.5 2444.1 3
 2 8 -1 83762.8 2051.9 3
 -2 8 1 83610.9 2420.74 3
 -2 -8 1 90506.8 2434.39 1
 -2 -8 0 90271.4 1963.89 3
 -2 8 0 89992.6 2551.62 3
 -2 -8 0 92126.2 2592.05 1
 2 8 0 90332.6 1942.83 3
 2 -8 0 89253.2 2551.36 3
 -2 8 -1 216308 4104.59 3
 2 8 1 214648 2460.22 2
 -2 -8 -1 230218 4326.93 1
 2 -8 1 227259 4203.68 3
 -2 -8 -1 230948 2811.51 3
 2 8 1 212256 2710.11 3
 2 -8 2 23440.3 1410.2 3
 -2 8 -2 24436.7 1432.49 3
 2 8 2 23343.8 913.04 2
 -2 -8 -2 24873.6 1483.17 1
 -2 -8 -2 25169.3 872.829 3
 2 8 2 24381.5 863.512 3
 2 8 3 23457.8 1040.14 2
 -2 -8 -3 21284 811.13 3
 -2 -8 -3 21832.6 1449.51 1
 2 8 3 22273.7 825.076 3
 -2 8 -3 18852.5 1326.43 3
 2 -8 3 22599.2 1444.64 3
 2 -8 4 9571.53 984.18 3
 2 8 4 9329.16 741.77 2
 -2 -8 -4 10379.1 1057.14 1
 -2 -8 -4 9175.56 734.111 2
 2 8 4 8551.18 546.959 3
 -2 8 -4 8238.77 917.69 3
 2 -8 5 168220 4315.47 3
 -2 -8 -5 157795 3349.24 2
 2 8 5 150365 2515.9 3
 -2 -8 -5 166233 4331.97 1
 -2 8 -5 157160 4143.76 3
 2 8 5 159490 3359.79 2
 2 8 6 59976.6 2234.84 2
 -2 8 -6 60834 2729.29 3
 -2 -8 -6 61951 2742.59 1
 -2 -8 -6 61667.6 2268.2 2
 2 8 6 56717.9 1702.54 3
 2 -8 6 61532.1 2721.52 3
 -2 -8 -7 110004 3805.46 1
 -2 8 -7 103838 3683.57 3
 2 8 7 103396 3132.47 2
 2 8 7 91693.9 2390.71 3
 2 -8 7 103876 3695.09 3
 -2 -8 -7 110797 3265.39 2
 2 -8 8 29347.2 2067.55 3
 -2 -8 -8 31724.6 1870.61 2
 -2 8 -8 30886.4 2106.08 3
 2 8 8 32521.9 1881.71 2
 -2 -8 -8 33921.3 2177.77 1
 -2 8 -8 33207.4 2075.69 2
 2 8 8 26981.1 1423.44 3
 -2 8 -9 58425 2880.36 2
 2 8 9 56883.5 2641.19 2
 2 8 9 53721.9 2117.23 3
 2 -8 9 53576.6 2896.42 3
 -2 -8 -9 63230.3 2809.17 2
 -2 -8 -10 -1443.5 476.395 2
 2 -8 10 439.878 354.587 3
 2 8 10 375.922 259.847 2
 2 8 10 353.377 195.856 3
 -2 8 -10 339.661 244.08 2
 2 8 11 57937.1 2968.78 2
 -2 -8 -11 57426.8 2986.45 2
 -2 8 -11 54971.1 3063.15 2
 -2 -8 -12 660.18 368.937 2
 2 8 12 274.806 282.573 2
 -2 8 -12 71.638 387.343 2
 -2 8 -13 68526.3 3720.66 2
 -2 -8 -13 72245.6 3662.38 2
 -2 -8 -14 207.157 418.108 2
 -2 8 -14 148.617 319.486 2
 2 -8 14 212.249 199.038 1
 2 8 15 83667.8 3642.06 3
 -2 -8 -15 92162.6 4493.31 2
 -2 8 -15 86849.4 4515.73 2
 2 -8 15 91910.2 2700.24 1
 -2 8 -16 25367 2546.59 2
 -2 -8 -16 27773.2 2563.63 2
 -2 -8 -17 90250.2 4818.76 2
 -2 8 -17 85295.5 4818.46 2
 -2 -8 -18 -376.547 742.249 2
 -2 8 -18 63.9723 483.355 2
 -2 -8 -19 7776.12 1494.2 2
 -2 8 -19 9147.15 1675.47 2
 -2 -8 -20 2220.74 843.98 2
 -2 8 -20 2142.78 1019.5 2
 -2 8 -21 46321.2 4031.82 2
 -2 -8 -21 46625.1 4017.17 2
 2 8 22 8445.62 1508.3 3
 -2 10 23 9989.59 1700.53 3
 -2 10 22 28307 2808.75 3
 2 10 -21 17408.7 2439.21 2
 2 -10 -21 19388.6 2611.09 2
 -2 10 21 15687.1 2063.81 3
 -2 10 20 3175.45 947.715 3
 2 10 -20 3102.35 1091.03 2
 2 -10 -20 2366.91 984.069 2
 2 -10 -19 4956.82 1245.53 2
 2 10 -19 3968.35 1076.79 2
 -2 10 19 4154.86 956.965 3
 -2 10 18 7183.75 1259.57 3
 2 10 -18 4703.82 1153.92 2
 2 -10 -18 7632.86 1509.77 2
 2 -10 -17 14203.4 1951.04 2
 -2 10 17 10151.6 1462.87 3
 2 10 -17 11818.5 1776.82 2
 2 10 -16 84378.1 4458 2
 -2 10 16 84418.4 4021.81 3
 2 -10 -16 91482.6 4699.92 2
 2 -10 -15 69906.2 3875.78 1
 2 10 -15 65112.8 3757.48 2
 -2 10 15 58614.7 3236.69 3
 2 -10 -15 61262.8 3729.56 2
 2 -10 -14 2914.24 841.63 1
 -2 10 14 1442.56 439.205 3
 2 10 -14 2206.73 668.601 2
 2 -10 -14 2168.06 745.925 2
 2 -10 -13 63943.9 3561.45 1
 -2 10 13 56901.3 2950.6 3
 2 10 -13 61653.8 3371.34 2
 2 -10 -13 69448.7 3666.84 2
 -2 10 12 71400.3 3181.92 3
 2 -10 -12 79356.3 3851.66 1
 2 -10 -12 76030.2 3690.31 2
 2 10 -12 78585 3628.28 2
 -2 10 11 17336.6 1509.07 3
 2 -10 -11 16997.1 1756.56 1
 -2 10 11 17723.3 1708.68 2
 2 10 -11 18617.3 1693.14 2
 -2 10 10 17466.6 1607.72 2
 -2 10 10 18769.4 1512.46 3
 2 -10 -10 17704.8 1726.66 1
 2 10 -10 16503.7 1525.28 2
 -2 -10 10 19875 1830.36 3
 -2 -10 9 126011 4418.59 3
 -2 10 9 119448 3645.94 3
 2 -10 -9 132428 4604.57 1
 2 10 -9 129085 3997.4 2
 -2 10 9 124649 4106.83 2
 -2 10 8 1110.64 363.68 2
 -2 10 8 1546.05 389.792 3
 2 -10 -8 982.525 434.406 1
 -2 -10 8 1168.7 197.894 1
 -2 -10 8 1051.48 421.255 3
 2 10 -8 1591.49 438.889 2
 2 -10 -7 162988 4803.13 1
 -2 -10 7 157620 2472.63 1
 -2 -10 7 160108 4562.11 3
 -2 10 7 151391 3820.22 3
 2 10 -7 151749 3825.15 2
 -2 10 7 142855 4044.62 2
 2 10 -6 152231 3596.75 2
 2 -10 -6 165575 4753.22 1
 -2 10 6 154233 3726.15 3
 -2 -10 6 157266 2732.67 1
 2 -10 -6 140739 3553.23 3
 -2 10 6 147514 3919.18 2
 -2 -10 6 160640 4336.39 3
 -2 10 5 70393.1 2441.97 3
 -2 10 5 63942.2 2457.92 2
 2 -10 -5 69291.9 2432.16 3
 -2 -10 5 71941.1 2020.58 1
 2 10 -5 72327.9 2283.04 2
 -2 -10 5 72572 2760.48 3
 2 10 -4 19797.6 1374.8 3
 2 -10 -4 18302.2 1233.56 3
 -2 -10 4 19629.3 1368.76 3
 -2 -10 4 18206.8 1084.23 1
 -2 10 4 17589.6 1247.22 2
 -2 10 4 20878.8 1315.13 3
 2 10 -3 34928.4 1706.98 3
 -2 10 3 35010.6 1688.85 3
 2 -10 -3 36868 1729.37 3
 -2 -10 3 37285.9 1613.78 1
 -2 -10 3 36992.5 1757.02 3
 -2 -10 2 17418.3 1175.09 1
 -2 -10 2 17154.7 1124.35 3
 2 -10 -2 16874.4 1189.91 3
 2 10 -2 15978 1079.27 3
 -2 10 2 16225 1157.54 3
 -2 10 1 96641.7 2842.04 3
 2 10 -1 95665.6 2470.61 3
 -2 -10 1 102104 2556.71 3
 -2 -10 1 101738 2930.38 1
 2 -10 -1 100917 2912.51 3
 2 -10 0 380264 5759.41 3
 -2 10 0 362163 5651.53 3
 -2 -10 0 377926 5898.35 1
 2 10 0 366486 4513.45 3
 -2 -10 0 388258 4651.34 3
 -2 -10 -1 42666.3 2061.99 1
 2 -10 1 43165.7 2014.62 3
 -2 10 -1 39380.6 1920.05 3
 -2 -10 -1 41374 1423.23 3
 2 10 1 36581.7 1159.63 2
 2 10 1 37121.1 1353.62 3
 -2 -10 -2 18321.1 1404.46 1
 -2 10 -2 17018 1300.96 3
 -2 -10 -2 16080 835.87 3
 2 10 2 16224 829.042 2
 2 -10 2 16790.5 1291.17 3
 2 10 2 16571.7 845.49 3
 2 10 3 21170.8 939.413 3
 -2 -10 -3 22454.3 1611.17 1
 2 10 3 20247.6 1043.21 2
 -2 -10 -3 20879.1 930.678 3
 2 -10 3 20329.1 1482.97 3
 -2 10 -3 21890 1544.08 3
 2 10 4 78682.4 1846.28 3
 -2 -10 -4 79217.4 1831.47 3
 -2 -10 -4 84829.6 3241.54 1
 2 10 4 78730.9 2236.48 2
 2 -10 4 81950.2 3089.29 3
 -2 10 -4 82885 3097.52 3
 2 10 5 18054 913.777 3
 2 -10 5 17716.9 1499.59 3
 -2 10 -5 17490.3 1491.46 3
 -2 -10 -5 20937 1667.41 1
 2 10 5 18429.8 1171.28 2
 -2 -10 -6 88187.6 2752.86 2
 -2 10 -6 83242.9 3353.21 3
 -2 -10 -6 89090.2 3536.14 1
 2 10 6 80619.7 2089.08 3
 2 10 6 85666.3 2702.48 2
 2 -10 6 90828.1 3505.13 3
 -2 10 -7 62850.9 3026.48 3
 2 -10 7 66959.5 3128.53 3
 -2 -10 -7 69020.2 3231.84 1
 2 10 7 63882.1 1972.92 3
 2 10 7 66519 2564.79 2
 -2 -10 -7 65658.9 2569.75 2
 -2 -10 -8 3184.71 736.895 1
 -2 10 -8 1885.63 601.481 3
 -2 -10 -8 2565.64 605.944 2
 2 10 8 2293.02 427.594 3
 2 10 8 2298.47 537.062 2
 2 -10 8 2417.58 678.116 3
 2 -10 9 85693.5 3821.81 3
 -2 -10 -9 88744.4 3354.58 2
 2 10 9 85544.3 3282.01 2
 -2 10 -9 83233 3763.23 3
 -2 10 -9 84797.9 3561.92 2
 -2 -10 -9 86248.1 3816.48 1
 2 10 9 78559.2 2550.08 3
 2 10 10 31900.6 2117.94 2
 -2 10 -10 32768.5 2335.64 2
 -2 -10 -10 37032.1 2275.66 2
 2 10 10 28279 1631.73 3
 2 10 11 24974 1600.97 3
 -2 -10 -11 28189.3 2107.55 2
 2 10 11 28016.1 2086.62 2
 -2 10 -11 28526.9 2264.93 2
 2 10 12 26110.5 2110.39 2
 -2 10 -12 28722.4 2355.55 2
 -2 -10 -12 29717.8 2258.82 2
 2 10 12 26490.8 1768.53 3
 2 10 13 31323.7 2014.38 3
 -2 10 -13 34193.5 2676.03 2
 -2 -10 -13 36323.2 2641.57 2
 -2 -10 -14 -877.602 505.357 2
 -2 10 -14 -211.701 431.69 2
 2 10 14 23.8896 284.607 3
 -2 -10 -15 74248.3 4074.6 2
 2 10 15 66098.6 3217.31 3
 -2 10 -15 67941.8 4076.77 2
 -2 -10 -16 67097.6 4018.51 2
 -2 10 -16 64346.4 4104.87 2
 2 10 16 60271.7 3182.17 3
 2 10 17 5035.79 988.686 3
 -2 -10 -17 6981.45 1375.73 2
 -2 10 -17 4365.76 1185.39 2
 -2 -10 -18 5574.93 1297.53 2
 -2 10 -18 3866.43 1133.39 2
 2 10 18 4400 956.743 3
 -2 -10 -19 1087.42 711 2
 2 10 19 167.357 348.919 3
 -2 10 -19 548.879 553.119 2
 2 10 20 1052.04 442.967 3
 -2 -10 -20 1640.82 682.233 2
 -2 10 -20 3093.48 1095.43 2
 -2 -10 -21 33784.5 3426.01 2
 2 12 -21 3829.07 1201.93 2
 -2 12 21 2647.07 855.005 3
 -2 12 20 25365.7 2525.86 3
 2 12 -20 28346.9 3008.73 2
 2 12 -19 648.198 476.999 2
 -2 12 19 -140.065 524.884 3
 -2 12 18 36021.8 2805.93 3
 2 12 -18 41126.9 3393.96 2
 -2 12 17 303.974 325.995 3
 2 12 -17 43.4487 330.05 2
 2 12 -16 75623.5 4274.69 2
 -2 12 16 64405.8 3528.06 3
 2 -12 -16 74703.6 4371.95 1
 2 -12 -15 1323.63 666.126 1
 -2 12 15 1143.91 494.484 3
 2 12 -15 361.265 304.155 2
 2 -12 -14 291.056 442.408 1
 -2 12 14 529.295 303.254 3
 2 12 -14 727.164 427.2 2
 2 12 -13 3161.97 747.208 2
 -2 12 13 2188.68 613.328 3
 2 -12 -13 3790.29 995.085 1
 -2 12 12 130227 4333.05 3
 2 -12 -12 145493 5544.73 1
 2 12 -12 132838 4806.61 2
 2 12 -11 2557.81 670.79 2
 2 -12 -11 5259.43 1040.33 1
 -2 12 11 2725.76 670.58 2
 -2 12 11 3378.64 691.781 3
 2 12 -10 52642.4 2746.18 2
 -2 -12 10 51205.9 1060.63 1
 -2 12 10 54502.8 2633.59 3
 -2 12 10 53278.9 2893.93 2
 2 -12 -10 56953.8 3290.83 1
 -2 12 9 12745 1365.37 2
 -2 -12 9 14362.2 1553.93 3
 -2 -12 9 12169.1 680.69 1
 2 -12 -9 13993.3 1611.78 1
 -2 12 9 11019.2 1135.49 3
 2 12 -9 12521.8 1277.41 2
 -2 12 8 143.608 209.858 2
 2 -12 -8 -81.9193 355.025 1
 -2 12 8 233.039 227.159 3
 -2 -12 8 -110.512 403.389 3
 2 12 -8 268.654 147.092 2
 -2 -12 8 38.7001 104.817 1
 -2 -12 7 57706.5 2882.21 3
 2 -12 -7 58342.1 3089.57 1
 -2 12 7 58874.6 2472.75 3
 -2 12 7 56771.9 2629.43 2
 -2 -12 7 60108.4 1864.6 1
 2 12 -7 59348.4 2469 2
 2 -12 -6 132487 4547.68 1
 -2 12 6 127170 3555.61 3
 2 -12 -6 126420 3557.64 3
 -2 -12 6 131465 4135.07 3
 -2 -12 6 127457 2915.13 1
 2 12 -6 126760 3384.42 2
 -2 12 6 117198 3638.19 2
 2 -12 -5 10561.9 857.054 3
 -2 12 5 15530 1288.16 2
 -2 -12 5 17826.9 1163.78 1
 -2 -12 5 17248.9 1436.29 3
 2 12 -5 16794.9 1167.48 2
 -2 12 5 17588.7 1313.16 3
 -2 -12 4 229845 4979.44 3
 -2 -12 4 215993 4246.07 1
 -2 12 4 198858 4399.91 2
 2 -12 -4 213359 4492.45 3
 -2 12 4 226117 4633.81 3
 2 12 -4 212894 4808.63 3
 2 -12 -3 21945.7 1434.53 3
 -2 12 3 24622.1 1524.9 3
 -2 -12 3 22965.8 1490.34 3
 2 12 -3 23871.9 1533.79 3
 -2 -12 3 23504.2 1459.05 1
 2 12 -2 117738 3194.77 3
 -2 12 2 115935 3367.38 3
 -2 -12 2 129044 3352.46 3
 -2 -12 2 121715 3428.38 1
 2 -12 -2 125376 3452.81 3
 2 12 -1 24247.9 1376.2 3
 -2 12 1 22905.8 1519.88 3
 -2 -12 1 24092.6 1591.83 1
 -2 -12 1 24975.5 1405.14 3
 2 -12 -1 24990.9 1570.2 3
 -2 -12 0 171618 4379.6 1
 -2 -12 0 182635 3576.94 3
 -2 12 0 175422 4252.34 3
 2 -12 0 176046 4270.86 3
 2 12 0 170950 3444.13 3
 2 12 1 15506.4 840.014 2
 2 12 1 16644.9 1033.07 3
 -2 -12 -1 20684.4 1574.69 1
 2 -12 1 20547.4 1492.69 3
 -2 -12 -1 18490.2 1081.6 3
 -2 12 -1 15636.2 1314 3
 2 -12 2 79251.6 3019.49 3
 -2 -12 -2 73132 2031.8 3
 -2 -12 -2 75853.5 3114.23 1
 -2 12 -2 71588.6 2885.78 3
 2 12 2 73959.7 2057.67 3
 2 12 2 69315.6 1874.73 2
 -2 12 -3 1194.35 422.981 3
 -2 -12 -3 298.466 252.718 1
 2 12 3 476.527 166.502 2
 2 -12 3 693.299 364.45 3
 -2 -12 -3 491.487 184.298 3
 2 12 3 554.796 174.547 3
 2 12 4 154197 3273.34 2
 -2 -12 -4 165746 4892 1
 2 -12 4 170108 4728.23 3
 -2 12 -4 158672 4581.31 3
 -2 -12 -4 159889 2890.86 3
 2 12 4 157357 2878.43 3
 -2 12 -5 3407.19 695.553 3
 2 -12 5 3820.26 748.445 3
 2 12 5 3658.06 448.482 3
 -2 -12 -5 3182.1 729.564 1
 2 12 5 3485.77 539.087 2
 2 12 6 84713.9 2779.26 2
 -2 -12 -6 91356.1 3840.4 1
 2 -12 6 84627.8 3599.01 3
 -2 12 -6 83732.7 3561.74 3
 2 12 6 86042.1 2246.68 3
 2 12 7 12113.8 878.253 3
 -2 12 -7 12026.7 1391.92 3
 2 12 7 11727.1 1107.79 2
 2 -12 7 12581.4 1445.55 3
 -2 -12 -7 13180 1517.06 1
 2 12 8 8740.44 1007.24 2
 -2 -12 -8 7821.02 1201.59 1
 -2 12 -8 7337.86 1130.77 3
 2 12 8 7317.51 723.853 3
 2 -12 8 7259.82 1134.64 3
 2 12 9 9167.19 1091.54 2
 2 12 9 9251.18 880.76 3
 -2 -12 -9 10609.2 1421.04 1
 -2 -12 -9 11571.1 1241.69 2
 -2 12 -9 9909.13 1258.36 2
 -2 12 -9 9497.36 1333.85 3
 -2 -12 -10 70150 3201.18 2
 2 12 10 65406.1 2452 3
 -2 12 -10 68984.3 3457.51 2
 -2 -12 -10 75917.8 3914.9 1
 2 12 10 67012.8 3107.04 2
 2 12 11 2158.74 625.262 2
 -2 -12 -11 2524.58 684.324 2
 -2 12 -11 3686.47 934.686 2
 2 12 11 1575.22 388.656 3
 -2 -12 -12 55274.7 3136.5 2
 2 12 12 46548.9 2315.86 3
 -2 12 -12 53729.2 3293.96 2
 -2 -12 -13 5216.12 1019.71 2
 -2 12 -13 4361.06 998.805 2
 2 12 13 3963.55 738.042 3
 -2 12 -14 15025.8 1871.84 2
 -2 -12 -14 17787.5 1948.38 2
 2 12 14 14183.4 1420.51 3
 2 12 15 13170.7 1409.97 3
 -2 -12 -15 14279.4 1799.61 2
 -2 12 -15 15084.5 1971.29 2
 2 12 16 47158.4 2767.46 3
 -2 -12 -16 57010 3742.89 2
 -2 12 -16 53442.2 3798.29 2
 -2 12 -17 341.417 382.55 2
 2 12 17 -66.7362 339.265 3
 -2 -12 -17 740.473 578.467 2
 -2 12 -18 30406.8 3046.8 2
 -2 -12 -18 25609.8 2686.88 2
 2 12 18 26141.4 2230.48 3
 -2 -12 -19 671.044 456.232 2
 -2 12 -19 -554.822 832.972 2
 -2 -12 -20 17533.7 2417.03 2
 -2 12 -20 14079.9 2224.71 2
 -2 -12 -21 10105.5 1897.2 2
 2 14 -21 -224.679 499.774 2
 2 14 -20 26869.5 2967.01 2
 -2 14 19 2363.53 734.601 3
 2 14 -19 3024.23 972.559 2
 -2 14 18 50745.1 3331.96 3
 2 14 -18 58785 4113.76 2
 -2 14 17 7038.45 1230.03 3
 2 14 -17 7565.65 1426.23 2
 -2 14 16 43282.7 2907.47 3
 2 -14 -16 49233.2 3738.1 1
 2 14 -16 48316.8 3444.31 2
 -2 14 15 13992.4 1616.58 3
 2 14 -15 12313.9 1674.74 2
 2 -14 -15 16878.9 2168.03 1
 2 -14 -14 3798.87 1055.03 1
 2 14 -14 3566.4 840.312 2
 -2 14 14 3823.24 817.105 3
 2 -14 -13 533.665 666.079 1
 -2 14 13 -195.082 239.795 3
 2 14 -13 298.474 375.988 2
 2 -14 -12 127539 5498.86 1
 -2 14 12 115089 4158.48 3
 2 14 -12 116827 4572.28 2
 2 -14 -11 3319.19 917.774 1
 2 14 -11 3047.31 689.115 2
 -2 14 11 2836.86 662.469 3
 -2 14 10 107914 3780.08 3
 2 -14 -10 117924 5037.57 1
 2 14 -10 110040 4067.11 2
 -2 14 10 106068 4168.04 2
 -2 -14 10 108194 2125.18 1
 -2 14 9 10443.8 1169.58 3
 2 14 -9 12275.7 1300.39 2
 -2 -14 9 13028.6 863.055 1
 -2 14 9 10859.2 1286.43 2
 2 -14 -9 11406.5 1560.98 1
 2 14 -8 4176.77 713.911 2
 2 -14 -8 5478.12 1059.49 1
 -2 14 8 3856.63 748.667 2
 -2 -14 8 5050.15 591.14 1
 -2 -14 8 3812.61 821.28 3
 -2 14 8 4418.52 726.532 3
 2 14 -7 1314.49 401.257 2
 -2 14 7 998.432 329.153 3
 2 -14 -7 449.428 266.735 1
 -2 -14 7 1433.47 533.643 3
 2 -14 -7 894.1 366.081 3
 -2 -14 7 836.045 294.605 1
 -2 14 7 1069.12 438.378 2
 2 -14 -6 108527 4405.12 1
 -2 -14 6 110307 3988.54 3
 -2 -14 6 109770 3062.14 1
 -2 14 6 105854 3428.34 3
 2 -14 -6 104832 3409.86 3
 -2 14 6 95350.5 3437.97 2
 2 14 -6 102376 3129.59 2
 2 14 -5 20489.3 1323.14 2
 -2 -14 5 24907.6 1817.39 3
 2 -14 -5 19526.7 1471.99 3
 -2 -14 5 20976.7 1408.53 1
 2 -14 -5 21280.3 1904.12 1
 -2 14 5 18269.5 1464.78 2
 -2 14 5 21259.1 1522.25 3
 -2 14 4 240148 5093.32 3
 2 14 -4 238643 5369.22 3
 2 -14 -4 243051 5112.58 3
 -2 -14 4 253819 5064.23 1
 -2 14 4 216071 4861 2
 -2 -14 4 254717 5582.95 3
 -2 14 3 15367.2 1311.37 3
 2 -14 -3 15274.4 1296.24 3
 -2 -14 3 16829 1368.48 1
 -2 -14 3 17107.6 1387.2 3
 2 14 -3 15738 1337.04 3
 2 -14 -2 211046 4854.86 3
 -2 -14 2 213460 4981.29 1
 -2 -14 2 215169 4666.89 3
 -2 14 2 208860 4806.22 3
 2 14 -2 209758 4617.04 3
 2 14 -1 19014.6 1330.17 3
 -2 -14 1 16501.6 1238.03 3
 2 -14 -1 17337.1 1406.75 3
 -2 14 1 16980.1 1392.57 3
 -2 -14 1 18815 1525.53 1
 2 -14 0 40547.2 2199.24 3
 -2 -14 0 40705.9 2334.33 1
 2 14 0 35651.8 1739.95 3
 -2 -14 0 40177.2 1839.24 3
 -2 14 0 38410.2 2135.86 3
 -2 14 -1 376.502 221.838 3
 -2 -14 -1 879.379 256.67 3
 2 14 1 350.23 139.306 2
 2 -14 1 299.282 270.004 3
 2 14 1 166.99 163.396 3
 -2 -14 -1 242.505 203.666 1
 -2 14 -2 46417.6 2482.27 3
 2 14 2 50302.6 1890.5 3
 -2 -14 -2 52460.2 1919.31 3
 -2 -14 -2 52290.5 2803.7 1
 2 14 2 47362.5 1685.43 2
 2 -14 2 52361.7 2624.82 3
 2 14 3 485.43 221.003 2
 2 -14 3 515.648 349.829 3
 -2 -14 -3 -50.1963 359.838 1
 2 14 3 285.803 184.696 3
 -2 -14 -3 328.683 181.625 3
 -2 14 -3 156.448 265.184 3
 -2 -14 -4 166606 5267.94 1
 -2 -14 -4 158957 3168.94 3
 -2 14 -4 162982 4926.11 3
 2 14 4 162336 3205.23 3
 2 -14 4 174785 5071.33 3
 2 14 4 158050 3449.95 2
 -2 -14 -5 17424.8 1755.99 1
 2 14 5 17220.3 1218.73 2
 2 -14 5 18594.5 1721.14 3
 2 14 5 16645 1027.16 3
 -2 14 -5 15731.6 1590.71 3
 -2 14 -6 37710.1 2518.87 3
 -2 -14 -6 43585 2828.71 1
 2 -14 6 39056.1 2564.89 3
 2 14 6 38347.2 1922.63 2
 2 14 6 38645.2 1592.19 3
 -2 -14 -7 13928.5 1644.57 1
 -2 14 -7 14116.6 1606.91 3
 2 14 7 11391 1118.82 2
 2 14 7 12948.7 953.719 3
 2 14 8 12142.3 1221.67 2
 2 14 8 12739 977.123 3
 -2 -14 -8 12771.6 1628.68 1
 -2 14 -8 13672.7 1624.01 3
 2 14 9 2629.14 466.217 3
 -2 14 -9 2007.89 687.853 3
 -2 -14 -9 2875.09 886.461 1
 2 14 9 3220.51 767.185 2
 2 14 10 60678 2332.31 3
 -2 -14 -10 66735.4 3889.83 1
 -2 14 -10 61866.4 3350.28 2
 2 14 10 59141.3 2961.4 2
 -2 14 -11 20665.3 2012.8 2
 2 14 11 21580.9 1487.89 3
 2 14 11 20157.3 1796.69 2
 -2 14 -12 97018.7 4520.56 2
 2 14 12 91310.1 3166.21 3
 -2 14 -13 122.59 345.164 2
 2 14 13 917.727 366.611 3
 2 14 14 4017.72 753.206 3
 -2 14 -14 3831.63 947.565 2
 2 14 15 5389.6 893.617 3
 -2 14 -15 7255.79 1404.29 2
 -2 -14 -15 7102.3 1314.39 2
 2 14 16 28226.5 2090.97 3
 -2 -14 -16 31049 2770.83 2
 -2 14 -16 27906.9 2797.72 2
 -2 -14 -17 250.694 522.01 2
 -2 14 -17 -390.791 659.745 2
 -2 14 -18 37450.6 3434.87 2
 -2 -14 -18 38369.5 3317.07 2
 -2 14 -19 95.7882 538.281 2
 -2 -14 -19 -86.9301 700.094 2
 -2 -14 -20 21538.6 2640.69 2
 2 16 -20 11936.1 2012.57 2
 2 16 -19 2235.49 832.921 2
 2 16 -18 19416.8 2382.07 2
 2 16 -17 15083 2037.25 2
 -2 16 17 18368.1 1954.25 3
 2 16 -16 24095.2 2479.85 2
 2 -16 -16 25890.4 2853.62 1
 -2 16 16 23365.7 2157.85 3
 -2 16 15 21420.8 1981.97 3
 2 16 -15 22078.5 2286.85 2
 2 -16 -15 24685.4 2731.94 1
 2 16 -14 7505.96 1270.98 2
 2 -16 -14 8749.08 1570.8 1
 -2 16 14 6901.5 1118.53 3
 2 -16 -13 17745.7 2233.3 1
 2 16 -13 18341.1 1917.58 2
 -2 16 13 18715 1745.97 3
 -2 16 12 36713 2389.45 3
 2 16 -12 35731.1 2564.99 2
 2 -16 -12 38217.3 3172.74 1
 2 -16 -11 19553.9 2237.25 1
 2 16 -11 19087 1798.69 2
 -2 16 11 18887.9 1684.76 3
 2 -16 -10 37547.7 3001.48 1
 -2 16 10 33299.4 2151.39 3
 -2 -16 10 33790 1424.48 1
 2 16 -10 34211 2290.84 2
 -2 -16 9 12891.9 987.974 1
 2 -16 -9 15565.4 1933.94 1
 -2 16 9 14535.4 1403.05 3
 2 16 -9 13537.8 1375.79 2
 -2 16 9 11125 1397.59 2
 -2 16 8 14822.6 1497.94 2
 -2 -16 8 14631.9 1128.99 1
 -2 16 8 17252.9 1500.85 3
 2 -16 -8 15937.1 1906.21 1
 2 16 -8 17260.6 1493.24 2
 2 -16 -7 29605.4 2531.28 1
 2 -16 -7 27117.8 1870.42 3
 -2 16 7 27876.5 1875.03 3
 -2 -16 7 29360.8 1680.79 1
 2 16 -7 28063.6 1801.37 2
 -2 16 7 23925.5 1835.43 2
 -2 16 6 29831.1 1925.68 3
 -2 -16 6 33273 2315.79 3
 2 -16 -6 31955.2 2557.81 1
 -2 -16 6 31107.7 1825.83 1
 2 -16 -6 31924.3 1976.37 3
 -2 16 6 28209.7 1941.24 2
 2 16 -6 31301.7 1791.83 2
 -2 16 5 12738.7 1241.04 3
 2 -16 -5 13149.7 1265.09 3
 -2 16 5 12640.8 1273.5 2
 -2 -16 5 15660.5 1330.32 1
 2 -16 -5 15707.9 1752.35 1
 2 16 -5 13341.1 1113.79 2
 -2 -16 5 15415.4 1514.58 3
 -2 -16 4 61080.7 2723 1
 2 -16 -4 56627.7 2625.01 3
 -2 -16 4 60034 2893.13 3
 -2 16 4 48883.9 2424.23 2
 -2 16 4 60935.5 2741.7 3
 2 16 -4 55241.4 2767.85 3
 2 -16 -4 62123.5 3417.69 1
 2 -16 -3 1.60511 266.965 3
 -2 -16 3 70.5441 259.897 3
 2 16 -3 218.564 192.903 3
 -2 -16 3 91.764 211.99 1
 -2 16 3 467.637 278.724 3
 -2 -16 2 44781.4 2493.92 1
 2 16 -2 39938.7 2160.72 3
 2 -16 -2 41309.5 2290.82 3
 -2 16 2 39524.1 2232.65 3
 -2 -16 2 45528.4 2303.45 3
 -2 16 1 60373.8 2809.93 3
 2 -16 -1 60330.4 2814.87 3
 2 16 -1 57351.2 2499.53 3
 -2 -16 1 60038.6 2957.19 1
 -2 -16 1 63844.9 2622.9 3
 -2 16 0 24052.8 1820.87 3
 -2 -16 0 23729 1907.63 1
 -2 -16 0 25702.4 1603.78 3
 2 16 0 24462 1556.17 3
 2 -16 0 24494 1812.55 3
 2 16 1 22101.2 1428.49 3
 2 16 1 22236.2 1179.93 2
 -2 -16 -1 24362.1 1491.14 3
 -2 16 -1 23284.1 1835.93 3
 -2 -16 -1 23003.4 1957.33 1
 2 -16 1 23155.1 1811.07 3
 -2 -16 -2 10813 950.688 3
 2 16 2 11835.5 1001.41 3
 -2 -16 -2 12750.3 1511.91 1
 2 -16 2 12349.2 1376.02 3
 2 16 2 9822.17 806.2 2
 -2 16 -2 11381.5 1307.5 3
 2 -16 3 2239.71 648.07 3
 -2 -16 -3 2638.25 466.839 3
 2 16 3 2671.6 486.8 3
 -2 -16 -3 2546.84 700.381 1
 2 16 3 2749.57 464.829 2
 -2 16 -3 2391.68 631.467 3
 2 16 4 36793.2 1724.09 2
 -2 -16 -4 39312.5 2736.65 1
 -2 16 -4 35464.3 2432.08 3
 -2 -16 -4 37644.6 1682.55 3
 2 16 4 35604.2 1621.74 3
 2 -16 4 38127.4 2505.8 3
 -2 -16 -5 92709.7 4305.93 1
 -2 16 -5 89021.1 3955.55 3
 2 16 5 88203.5 2534.02 3
 -2 -16 -5 91218.4 2575.99 3
 2 16 5 90148.8 2867.35 2
 -2 -16 -6 30820.1 2535.32 1
 2 16 6 27883.3 1717.31 2
 2 16 6 26328.5 1378.54 3
 -2 16 -6 27207.5 2258.35 3
 2 16 7 48705.2 2344.72 2
 -2 -16 -7 49838.8 3288.66 1
 2 16 7 49105.8 1911.41 3
 -2 16 -7 45861.2 3023.09 3
 2 16 8 6.10756 155.293 3
 -2 -16 -8 -101.996 420.906 1
 -2 16 -8 758.289 504.119 3
 2 16 8 340.877 300.436 2
 2 16 9 28600.1 2003.22 2
 -2 -16 -9 30141.4 2697.86 1
 -2 16 -9 26452.9 2454.95 3
 2 16 9 26657.4 1469.95 3
 -2 -16 -10 25406.4 2525.16 1
 -2 16 -10 22446.9 2078.48 2
 2 16 10 23515 1900.29 2
 2 16 10 24253.7 1466.63 3
 2 16 11 17019.6 1284.07 3
 2 16 11 20013.4 1845.96 2
 -2 16 -11 16821.8 1862.47 2
 -2 16 -12 41508.3 3025.75 2
 2 16 12 41019 2086.21 3
 2 16 13 22943.1 1624.11 3
 -2 16 -13 23209.7 2358.48 2
 -2 16 -14 472.792 439.45 2
 2 16 14 595.168 286.49 3
 -2 16 -15 26221.5 2653.32 2
 -2 16 -16 24160 2621.5 2
 -2 16 -17 5504.04 1318.96 2
 -2 16 -18 13115.3 2098.64 2
 -2 16 -19 -58.2332 638.199 2
 2 18 -20 -729.637 642.547 2
 2 18 -18 -1182.93 714.827 2
 2 18 -17 16733.4 2175.39 2
 2 -18 -16 3237.09 1137.15 1
 2 18 -16 3899.25 1055.87 2
 2 18 -15 42192 3197.75 2
 2 -18 -15 38223.3 3558.14 1
 -2 18 15 37264.9 2619.65 3
 -2 18 14 -277.118 383.417 3
 2 -18 -14 -214.085 613.753 1
 2 18 -14 650.187 513.57 2
 -2 18 13 41068.5 2615.15 3
 2 18 -13 41754.5 2927.73 2
 2 -18 -13 40823.9 3530.77 1
 -2 18 12 -115.615 378.204 3
 2 -18 -12 -328.065 552.971 1
 2 18 -12 -303.635 315.537 2
 2 -18 -11 35207.7 3167.35 1
 2 18 -11 29299.7 2277.13 2
 -2 18 11 32224.2 2218.57 3
 -2 18 10 2742.36 642.792 3
 2 18 -10 4840.48 914.183 2
 -2 -18 10 5066.04 632.671 1
 2 -18 -10 7495.64 1445.05 1
 2 18 -9 31272.4 2153.8 2
 -2 18 9 35932.6 2276.3 3
 -2 -18 9 36641.8 1840.88 1
 2 -18 -9 36485.4 3091.35 1
 -2 18 8 11764.7 1293.59 3
 2 18 -8 10523.9 1206.6 2
 2 -18 -8 11322.4 1688.05 1
 -2 18 8 10587 1323.45 2
 -2 -18 8 10820.5 1080.74 1
 -2 18 7 69988.4 3091.05 3
 -2 -18 7 69148.2 2847.31 1
 2 -18 -7 64623 2957.31 3
 2 18 -7 69597.6 2905.74 2
 2 -18 -7 66410.4 3981.1 1
 -2 18 7 58799.5 3007.79 2
 -2 -18 6 14579.7 1358.72 1
 2 -18 -6 13363.6 1790.11 1
 2 18 -6 12975.4 1190.2 2
 -2 18 6 13195.4 1355.04 3
 -2 18 6 13407 1406 2
 2 -18 -6 12174 1253.32 3
 -2 18 5 20205.2 1669.98 3
 2 -18 -5 20249.3 1654.81 3
 -2 -18 5 20121.1 1807.01 3
 -2 18 5 18483 1599.29 2
 -2 -18 5 24262.6 1805.25 1
 2 -18 -5 23162.3 2262.29 1
 2 18 -5 20936.2 1436.58 2
 2 18 -4 608.697 343.836 3
 -2 -18 4 1012.11 416.633 1
 2 -18 -4 35.5864 204.785 3
 -2 18 4 -125.489 268.338 3
 -2 18 4 317.673 236.337 2
 -2 -18 4 266.812 179.238 3
 2 -18 -4 193.4 321.934 1
 -2 -18 3 18809 1634.25 3
 2 18 -3 18452 1622.46 3
 -2 18 3 17324.5 1569.69 3
 -2 -18 3 19510.4 1732.02 1
 2 -18 -3 20736.7 2064.42 1
 2 -18 -3 17655.5 1604 3
 2 18 -2 1268.94 444.742 3
 -2 -18 2 1196.48 478.392 3
 -2 18 2 1181.53 446.676 3
 2 -18 -2 618.987 450.568 1
 2 -18 -2 1312.2 452.489 3
 -2 -18 2 1144.12 520.051 1
 2 -18 -1 46329.7 2612.38 3
 2 18 -1 43041.6 2308.05 3
 -2 -18 1 50155.5 2910.21 1
 -2 18 1 47324.4 2653.92 3
 -2 -18 1 47374.8 2384.89 3
 -2 18 0 11478 1347.15 3
 -2 -18 0 11708.1 1442.23 1
 2 18 0 9967.63 1080.4 3
 -2 -18 0 11902 1172.42 3
 2 -18 0 10554.3 1271.91 3
 -2 -18 -1 104347 3298.15 3
 -2 -18 -1 106567 4451.8 1
 2 18 1 94838.1 2557.8 2
 -2 18 -1 100938 4032.14 3
 2 18 1 91668.7 3137.38 3
 2 -18 1 103885 4064.69 3
 2 18 2 2362.01 501.33 3
 -2 -18 -2 2756.25 546.838 3
 -2 -18 -2 2905.27 736.355 1
 2 -18 2 2631.36 686.329 3
 -2 18 -2 2088.57 651.586 3
 2 18 2 2137.17 414.874 2
 2 18 3 6863.57 800.488 3
 2 18 3 6579.98 729.345 2
 -2 -18 -3 7164.97 813.543 3
 -2 -18 -3 8033.37 1305.46 1
 -2 18 -3 7376.53 1152.08 3
 -2 18 -4 2706.85 753.439 3
 2 18 4 1823.07 375.49 2
 -2 -18 -4 1477.47 367.248 3
 2 18 4 1648.79 400.288 3
 -2 -18 -4 2867.18 821.818 1
 -2 -18 -5 72890.4 2446.77 3
 2 18 5 75732.5 2710.4 2
 2 18 5 74294.8 2484.99 3
 -2 -18 -5 79795.1 4231.83 1
 -2 18 -5 72772.4 3778.14 3
 -2 -18 -6 12850.5 1735.28 1
 -2 18 -6 12361.6 1597.62 3
 2 18 6 11812.5 1135.26 2
 2 18 6 11164.8 950.458 3
 2 18 7 60977.5 2205.08 3
 -2 -18 -7 69847.1 4130.88 1
 -2 18 -7 62303.4 3672.44 3
 2 18 7 57639.6 2610.98 2
 -2 -18 -8 5247.45 1177.83 1
 2 18 8 6749.95 745.235 3
 2 18 8 6141.58 931.109 2
 -2 18 -8 7532.47 1338.49 3
 -2 18 -9 42279.5 2831.7 2
 2 18 9 44117.4 2519.57 2
 2 18 9 40872 1846.72 3
 -2 -18 -9 48408.6 3567 1
 -2 18 -9 40433 3135.44 3
 -2 -18 -10 13150.5 1939.56 1
 -2 18 -10 11414.8 1541.33 2
 2 18 10 12032.6 1054.09 3
 -2 18 -11 9741.97 1466.76 2
 2 18 11 9866.17 966.362 3
 -2 18 -12 10165.5 1523.83 2
 -2 18 -13 30775.5 2751.37 2
 -2 18 -14 1793.26 866.177 2
 -2 18 -15 26593.1 2713.74 2
 -2 18 -16 11614.2 1861.87 2
 -2 18 -17 26851.6 2902.2 2
 -2 18 -18 795.041 643.038 2
 2 20 -17 25166.6 2663.62 2
 2 20 -16 684.575 444.945 2
 2 -20 -15 35130.4 3535.86 1
 2 20 -15 30739.3 2769.16 2
 2 20 -14 1610.8 699.499 2
 2 -20 -14 2409.26 917.478 1
 2 -20 -13 13040.6 2118.95 1
 2 20 -13 10694 1516.23 2
 2 20 -12 8659.46 1322.15 2
 -2 20 12 7637.02 1155.7 3
 2 -20 -12 7907.61 1650.41 1
 -2 20 11 39764.8 2517.19 3
 2 -20 -11 45435.9 3776.39 1
 2 20 -11 38393.4 2643.82 2
 -2 20 10 2188.37 545.142 3
 2 20 -10 2157.69 633.593 2
 2 -20 -10 2506.8 869.219 1
 -2 -20 9 27955.5 1776.34 1
 -2 20 9 25310.6 1980.15 3
 2 20 -9 26119.9 2009.59 2
 2 -20 -9 26618.1 2779.04 1
 2 20 -8 3830.48 741.569 2
 2 -20 -8 4639.48 1199.89 1
 -2 20 8 4707.16 878.312 3
 -2 -20 8 4708.25 807.256 1
 2 -20 -7 76900.7 4546.43 1
 2 -20 -7 66363.7 3120.93 3
 -2 -20 7 72156.7 3147.91 1
 2 20 -7 72906.6 3039.25 2
 -2 20 7 61877.4 3026.07 3
 2 -20 -6 688.35 281.281 3
 2 20 -6 -351.682 266.703 2
 2 -20 -6 484.584 539.374 1
 -2 20 6 257.903 304.318 2
 -2 -20 6 607.669 313.92 1
 -2 20 6 134.65 336.308 3
 2 -20 -5 75410.5 4317.34 1
 -2 20 5 66768.8 3175.18 3
 -2 -20 5 67313.3 3263.21 1
 2 20 -5 62668.6 2551.2 2
 -2 20 5 57097.7 2899.41 2
 2 -20 -5 62209 3046.58 3
 -2 20 4 1463.56 512.874 3
 -2 -20 4 1490.49 499.389 3
 2 -20 -4 883.556 495.544 1
 2 -20 -4 1415.86 525.119 3
 -2 20 4 1763.14 558.518 2
 -2 -20 4 1811.92 570.01 1
 -2 -20 3 1580.67 494.311 3
 2 20 -3 415.464 392.735 3
 -2 -20 3 1443.64 501.504 1
 2 -20 -3 1421.43 570.118 3
 -2 20 3 1949.54 557.055 3
 2 -20 -3 1291.03 594.589 1
 -2 20 3 1174.12 426.668 2
 -2 -20 2 6886.16 1033.52 3
 -2 -20 2 7892.14 1204.76 1
 -2 20 2 6761.25 1052.79 3
 2 -20 -2 6358.13 1028.84 3
 2 -20 -2 6134.91 1110.05 1
 2 20 -2 6541.74 1005.69 3
 -2 -20 1 54966.5 3273.56 1
 2 -20 -1 51291 2891.37 3
 2 -20 -1 49010.8 3252.67 1
 2 20 -1 45868.4 2504.87 3
 -2 20 1 49162.4 2850.09 3
 -2 -20 1 54050.5 2710.74 3
 -2 -20 0 3409.42 680.307 3
 2 20 0 3529.51 698.572 3
 -2 -20 0 3255.02 855.429 1
 2 -20 0 4076.28 952.844 1
 -2 20 0 3011.52 753.305 3
 2 20 0 3985.7 540.599 2
 2 20 1 57655.3 2625.01 3
 2 20 1 53467.8 1993.41 2
 -2 20 -1 59297.7 3241.63 3
 -2 -20 -1 64399.1 3668.85 1
 -2 -20 -1 63848.1 2733.5 3
 -2 -20 -2 10434.2 1087.69 3
 2 20 2 10921.7 1096.83 3
 2 20 2 10469.9 903.041 2
 -2 -20 -2 10502.1 1550.47 1
 -2 20 -2 13186.7 1569.12 3
 2 20 3 5285.27 653.454 2
 -2 -20 -3 5702.27 1192.54 1
 -2 -20 -3 5502.7 759.381 3
 -2 20 -3 4172.73 917.764 3
 2 20 3 4466.83 699.738 3
 -2 -20 -4 6945.53 832.971 3
 -2 20 -4 6058.83 1170.71 3
 2 20 4 6404.86 777.964 3
 2 20 4 7436.53 826.95 2
 -2 -20 -4 5594.06 1209.77 1
 2 20 5 31321.8 1710.6 3
 -2 -20 -5 36662.3 3036.66 1
 -2 20 -5 33859.3 2690.41 3
 -2 20 -6 546.696 375.062 3
 2 20 6 870.516 280.92 3
 -2 -20 -6 2442.12 793.161 1
 -2 -20 -7 48766.4 3643.01 1
 -2 20 -7 46495.3 3334.92 3
 2 20 7 49120 2046.04 3
 -2 -20 -8 2284.65 879.05 1
 2 20 8 3124.8 513.915 3
 -2 20 -8 3383.16 1052.21 3
 -2 20 -9 31634.9 2515.09 2
 -2 -20 -9 31588.1 3050.29 1
 -2 -20 -10 -58.7116 678.195 1
 -2 20 -10 -447.134 518.15 2
 -2 20 -11 25142.7 2403.02 2
 -2 20 -12 -1174.7 602.711 2
 -2 20 -13 25373.1 2533.94 2
 -2 20 -14 -748.817 556.217 2
 -2 20 -15 13623.4 1974.6 2
 -2 20 -16 111.494 495.642 2
 -2 20 -17 32679.9 3226.88 2
 2 -22 -13 28.2311 557.373 1
 2 -22 -12 10164.3 1965.19 1
 2 -22 -11 45222.8 3925 1
 2 -22 -10 12567.8 2076.78 1
 2 22 -9 2719.82 663.061 2
 -2 22 9 2398.09 643.964 3
 2 -22 -9 3113.45 1095.12 1
 -2 -22 8 2805.77 670.561 1
 -2 22 8 2389.98 636.562 3
 2 22 -8 3313.29 672.263 2
 2 -22 -8 2958.88 1089.69 1
 -2 22 7 13353.5 1469.47 3
 -2 -22 7 15340.2 1561.87 1
 2 22 -7 14910.8 1418.61 2
 2 -22 -7 15955.6 2231.78 1
 -2 22 6 11044 1346.28 3
 2 -22 -6 10933.8 1841.82 1
 -2 -22 6 9896.07 1277.38 1
 2 22 -6 10621.1 1141.81 2
 2 -22 -5 54988.1 3919.42 1
 2 22 -5 49121.3 2284.05 2
 -2 -22 5 47937.2 2926.02 1
 -2 22 5 48437.6 2814.95 3
 2 22 -4 19671.3 1389.58 2
 -2 -22 4 20476.9 1972.35 1
 2 -22 -4 20984.1 2390.29 1
 -2 22 4 18682.3 1779.82 3
 -2 22 3 352.332 303.963 3
 2 -22 -3 415.199 446.813 1
 -2 -22 3 1831.23 836.44 1
 -2 22 2 10866.3 1385.55 3
 2 -22 -2 13872 1885.5 1
 -2 -22 2 13454.4 1700.69 1
 2 22 -2 11721.3 1396.87 3
 -2 22 1 40608.7 2718.41 3
 2 -22 -1 37660.2 3004.85 1
 2 22 -1 38667.2 2445.52 3
 -2 -22 1 41957.1 3019.21 1
 -2 -22 0 4435.49 1031.62 1
 2 22 0 5481.93 899.709 3
 2 -22 0 5197.06 1063.76 1
 -2 22 0 4996.98 983.905 3
 -2 22 -1 20220.8 2030.81 3
 2 22 1 18596.2 1582.51 3
 2 -22 1 19670.6 2101.98 1
 -2 -22 -1 24535.2 2418 1
 2 -22 2 14285.3 1756.85 1
 -2 22 -2 14425.7 1724.26 3
 -2 -22 -2 12870.6 1756.98 1
 2 22 2 13228 1293.36 3
 -2 -22 -3 -141.678 432.924 1
 -2 22 -3 221.401 299.721 3
 2 22 3 -58.5108 275.235 3
 2 -22 3 -8.14207 479.984 1
 2 -22 4 20210.7 2061.98 1
 -2 -22 -4 19543 2309.9 1
 2 22 4 16328.9 1337.36 3
 -2 22 -4 15641.8 1899.71 3
 -2 -22 -5 69466.4 4376.8 1
 2 -22 5 66596.2 3598.03 1
 -2 22 -5 64316.4 3888.57 3
 -2 22 -6 8413.35 1447.06 3
 2 -22 6 7430.32 1172.74 1
 -2 -22 -6 10360.5 1801.94 1
 2 -22 7 12568.6 1482.17 1
 -2 -22 -7 14295.5 2139.68 1
 -2 22 -7 13365.4 1869.01 3
 2 -22 8 2751.12 712.14 1
 -2 -22 -8 5725.04 1344.47 1
 -2 22 -8 3221 955.827 3
 -2 22 -9 2030.96 722.654 2
 -2 -22 -9 2727.26 918.182 1
 -2 22 -10 21269.6 2170.31 2
 -2 22 -11 46963.3 3319.17 2
 -2 22 -12 5512.06 1253.24 2
 -2 22 -13 4133.17 1080.58 2
 -2 22 -14 2324.34 841.581 2
 -2 22 -15 4726.88 1204.28 2
 2 -24 -10 24302.6 2948.05 1
 2 -24 -9 5794.52 1533.27 1
 2 -24 -8 222.283 540.999 1
 2 -24 -7 -531.346 503.038 1
 2 -24 -6 27777 3006.03 1
 -2 -24 6 23619.4 2135.5 1
 -2 24 5 27340.9 2194.18 3
 2 -24 -5 30145.1 3057 1
 -2 -24 5 31372.1 2515.13 1
 -2 -24 4 40553.6 2947.09 1
 -2 24 4 35630.4 2547.62 3
 2 -24 -4 39613.5 3476.01 1
 -2 -24 3 1848.39 836.81 1
 2 -24 -3 2189.57 781.367 1
 -2 24 3 1548.92 655.933 3
 -2 24 2 9467.89 1374.62 3
 -2 -24 2 9881.47 1585.24 1
 2 -24 -2 9003.18 1605.14 1
 2 24 -1 8603.12 1211.76 3
 -2 24 1 8307.85 1285.95 3
 2 -24 -1 9891.2 1686.75 1
 -2 -24 1 11341.1 1671.32 1
 2 -24 0 31666.8 2892.87 1
 -2 24 0 29211.7 2452.13 3
 -2 -24 0 29557.4 2763.91 1
 2 24 0 28751.4 2115.75 3
 -2 -24 -1 2019.22 813.872 1
 2 -24 1 4974.92 1180.43 1
 -2 24 -1 3606.39 893.965 3
 -2 -24 -2 7413.08 1459.07 1
 -2 24 -2 4578.32 1019.87 3
 2 -24 2 5427.33 1165.61 1
 -2 -24 -3 627.786 708.228 1
 2 -24 3 234.538 504.959 1
 -2 24 -3 -163.641 405.637 3
 -2 24 -4 22352.3 2325.34 3
 -2 -24 -4 27601.8 2904.14 1
 2 -24 4 23814.2 2332.89 1
 -2 24 -5 14633.7 1941.53 3
 2 -24 5 17579.3 1960.17 1
 -2 -24 -5 18579 2416.02 1
 2 -24 6 22737.8 2173.84 1
 -2 24 -6 16673.4 2121.62 3
 -2 -24 -6 26944 2950.59 1
 -2 24 -7 1062.35 727.05 3
 2 -24 7 654.599 381.339 1
 -2 -24 -7 679.938 558.028 1
 -2 -24 -8 973.864 671.362 1
 2 -26 -7 3131.26 1179.49 1
 2 -26 -6 43436.7 3891.88 1
 2 -26 -5 1097.3 665.519 1
 2 -26 -4 17683.3 2452.45 1
 -2 -26 4 16363.4 1994.62 1
 2 -26 -3 1080.87 651.976 1
 -2 -26 3 829.399 575.007 1
 -2 -26 2 2745.5 773.628 1
 2 -26 -2 3036.44 1093.88 1
 -2 -26 1 1936.37 861.098 1
 -2 26 1 -224.883 464.452 3
 2 -26 -1 2016.53 881.941 1
 -2 26 0 51102.7 3392.28 3
 2 -26 0 50650.4 3835.76 1
 -2 -26 0 58126.6 4049.04 1
 -2 26 -1 -191.209 561.469 3
 2 -26 1 -155.928 679.02 1
 -2 -26 -1 643.501 522.513 1
 2 -26 2 2551.26 914.329 1
 -2 26 -2 793.214 551.429 3
 -2 -26 -2 785.156 373.622 1
 -2 -26 -3 -219.709 417.63 1
 2 -26 3 1292.29 1048.36 1
 -2 26 -3 65.8827 481.834 3
 2 -26 4 4322.83 1065.2 1
 -2 26 -4 5107.13 1326.01 3
 -2 -26 -4 5942.8 1411.18 1
 -2 26 -5 717.671 617.789 3
 -2 -26 -5 894.745 493.405 1
 2 -26 5 -333.818 525.779 1
 -2 -26 -6 43068.5 3908.51 1
 -2 26 -6 38968.4 3348.57 3
 2 -28 -3 1074.31 798.088 1
 -2 -28 2 -223.742 444.557 1
 2 -28 -2 -558.619 988.893 1
 -2 -28 1 4711.29 1248.26 1
 2 -28 -1 4100.4 1205.9 1
 -2 -28 0 36140.4 3368.86 1
 2 -28 0 35907.6 3400.2 1
 -2 -28 -1 2428.89 999.508 1
 2 -28 1 6977.32 1536.38 1
 -2 -28 -2 194.898 758.235 1
 2 -28 2 -473.134 472.84 1
 2 -28 3 974.201 819.756 1
 -2 -28 -3 1627.47 791.868 1
 3 -1 -22 877.278 704.304 2
 3 1 -22 -146.564 642.654 2
 3 1 -21 29053.6 3043.07 2
 3 -1 -21 28287.8 3009.25 2
 3 1 -20 1523.08 777.805 2
 3 -1 -20 938.657 544.722 2
 3 1 -19 65426.9 4275.55 2
 3 -1 -19 63107.9 4218.07 2
 3 1 -18 116.805 411.832 2
 3 -1 -18 596.632 422.945 2
 3 1 -17 42015.5 3180.53 2
 3 -1 -17 40331.8 3110.89 2
 3 -1 -16 462.071 339.836 2
 3 1 -16 1047.23 564.784 2
 3 -1 -15 103943 4645.03 2
 3 1 -15 106405 4677.22 2
 3 -1 -14 53.4361 249.568 2
 3 1 -14 800.067 453.563 2
 3 -1 -13 102546 4220.85 2
 -3 1 13 99723.9 4147.75 2
 -3 -1 13 102595 4178.06 2
 3 1 -13 104729 4253.71 2
 -3 1 12 29620.4 2155.18 2
 -3 -1 12 29850.5 2154.01 2
 3 1 -12 32123.5 2240.97 2
 3 -1 -12 30684.4 2194.55 2
 3 -1 -11 79.8549 119.959 1
 3 -1 -11 399.642 311.387 2
 3 1 -11 179.033 249.042 2
 -3 1 11 202.86 241.055 2
 -3 -1 11 483.881 287.755 2
 -3 1 10 11113.3 1199.25 2
 3 1 -10 12076 1233.89 2
 3 -1 -10 10828.7 915.786 1
 3 -1 -10 10827.3 1198.46 2
 -3 -1 10 11143.9 1199.74 2
 3 -1 -9 225206 3985.45 1
 3 1 -9 242542 3413.57 1
 -3 1 9 220084 5011.65 2
 3 -1 -9 224725 5080.36 2
 3 1 -9 228330 5078.26 2
 -3 -1 9 212053 4896.69 2
 3 -1 -8 286.909 189.035 2
 3 1 -8 668.044 180.092 1
 3 1 -8 430.201 246.946 2
 -3 -1 8 281.56 181.286 2
 3 -1 -8 401.977 186.02 1
 -3 1 8 1039.66 345.364 2
 -3 1 7 194219 4148.19 2
 3 1 -7 210332 2719.03 1
 3 1 -7 194417 4098.15 2
 3 -1 -7 197101 4210.63 2
 -3 -1 7 189765 4036.91 2
 -3 1 6 7753.43 786.986 2
 -3 -1 6 6703.19 707.323 2
 3 1 -6 6383.12 693.172 2
 3 -1 -6 6497.7 720.52 2
 -3 1 5 46957.9 1748.86 2
 3 -1 -5 49881.4 1819.52 2
 -3 -1 5 47313.6 1703.5 2
 3 1 -5 50012.5 1738.59 2
 -3 -1 4 4157.19 456.629 2
 3 -1 -4 3719.41 465.82 2
 3 1 -4 4169.54 462.89 2
 -3 1 4 4281.88 485.014 2
 -3 1 3 450820 4503 2
 -3 -1 3 452118 4199.63 2
 3 1 -3 465469 4267 2
 -3 1 3 471650 4628.91 3
 3 -1 -2 311.762 125.947 3
 -3 1 2 325.062 124.657 3
 3 -1 -1 351371 3436.23 3
 3 1 -1 339346 2944.74 3
 3 -1 0 3910.87 359.697 3
 3 1 0 4141.12 291.536 3
 -3 1 -1 325171 3383.28 3
 3 1 1 327985 2595.86 3
 3 -1 1 322483 3366.65 3
 3 1 2 57837.8 1246.1 3
 -3 -1 -2 55272.3 1225.38 3
 -3 1 -2 57481.7 1538.71 3
 3 -1 2 55937.1 1509.42 3
 -3 -1 -3 87950 1769.25 3
 3 1 3 88851.2 1785.24 3
 -3 1 -3 89640.1 2084.05 3
 3 -1 3 85595.5 2059.96 3
 3 -1 4 182654 3266.92 3
 -3 1 -4 194021 3350.07 3
 -3 -1 -4 181099 3320.96 2
 -3 -1 -4 185475 2956.57 3
 3 1 4 193562 2995.07 3
 -3 -1 -5 50608.8 1930.23 2
 -3 1 -5 49860.8 1839.02 3
 3 -1 5 50365.3 1861.38 3
 3 1 5 48810.9 1664.53 3
 3 -1 6 26156.3 1434.31 3
 3 1 6 27413.8 1369.37 3
 -3 1 -6 26286.3 1537.62 2
 -3 -1 -6 29154.9 1576.28 2
 -3 1 -7 178264 4307.24 2
 -3 -1 -7 182649 4244.31 2
 3 1 7 175855 3759.88 3
 3 -1 7 189667 4132.97 3
 3 1 8 55099.8 2244.61 3
 3 -1 8 51863 2305.13 3
 -3 -1 -8 52888.2 2441.83 2
 -3 1 -8 54215.4 2507.06 2
 3 -1 9 119896 3710.27 3
 3 1 9 116334 3497.74 3
 3 1 9 122837 3503.27 1
 -3 1 -9 119356 3943.33 2
 -3 -1 -9 117024 3849.77 2
 -3 1 -10 17120.5 1569.56 2
 3 -1 10 17870 1516.21 3
 -3 -1 -10 15843.5 1515.46 2
 3 1 10 16726 1406.16 3
 3 1 10 16653.2 1355.59 1
 3 -1 11 2437.49 507.447 1
 -3 1 -11 1672.9 519.918 2
 3 -1 11 1954.65 550.181 3
 3 1 11 2645.65 600.016 3
 -3 -1 -11 2789.14 674.956 2
 3 1 11 2343.56 524.752 1
 -3 -1 -12 21317.2 1905.01 2
 3 -1 12 19585.1 1732.34 3
 3 1 12 18902 1640.64 3
 -3 1 -12 20084.4 1880.14 2
 3 -1 12 19237.1 1484.28 1
 3 1 12 19665.6 1586.53 1
 3 1 13 86976.1 3430.03 1
 -3 -1 -13 88986.9 4106.31 2
 3 1 13 88011.5 3715.99 3
 3 -1 13 87516.2 3818.39 3
 3 -1 13 88478.3 3293.36 1
 -3 1 -13 92520 4207.98 2
 3 1 14 2306.41 645.477 1
 -3 -1 -14 2588.52 776.05 2
 3 -1 14 2535.74 583.472 1
 3 1 14 1946.26 645.94 3
 -3 1 -14 1905 646.013 2
 3 1 15 70134.2 3276.87 1
 -3 -1 -15 76027.4 4095.98 2
 3 -1 15 71632.7 3167.68 1
 -3 1 -15 77057.5 4196.44 2
 3 1 16 4337.89 883.952 1
 3 -1 16 4361.27 817.957 1
 -3 -1 -16 3606.6 950.017 2
 -3 1 -16 5211.01 1201.39 2
 -3 1 -17 18608.4 2202.51 2
 -3 -1 -17 16847.3 2103.65 2
 3 -1 17 18669.8 1697 1
 -3 1 -18 4675.04 1191.14 2
 -3 -1 -18 5599.13 1222.94 2
 -3 -1 -19 24305.4 2717.63 2
 -3 1 -19 26458.7 2859.23 2
 -3 -1 -20 -1273.05 706.015 2
 -3 1 -20 650.022 661.376 2
 -3 -1 -21 66313 4734.76 2
 -3 1 -21 63505.8 4672.09 2
 3 3 -22 1324.71 758.975 2
 3 -3 -22 2119.52 964.685 2
 3 3 -21 7214.55 1543.54 2
 3 -3 -21 6291.16 1486.63 2
 3 3 -20 19509.3 2454.19 2
 3 -3 -20 16620.7 2264.53 2
 3 -3 -19 41493 3443.37 2
 3 3 -19 39483.1 3338.01 2
 3 -3 -18 20816.5 2376.61 2
 3 3 -18 21016.7 2341.6 2
 3 3 -17 23676.2 2396.75 2
 3 -3 -17 23685.4 2412.22 2
 3 -3 -16 9146.12 1444.56 2
 3 3 -16 4744.31 1067.92 2
 3 3 -15 35001.6 2691.25 2
 3 -3 -15 35197.6 2696.36 2
 3 -3 -14 2508.5 712.031 2
 3 3 -14 3049.4 801.657 2
 -3 -3 13 55882.7 3066.51 2
 3 3 -13 60555.7 3232.74 2
 3 -3 -13 60117.3 3269.83 2
 3 -3 -13 62767.6 2743.84 1
 -3 3 12 151654 4925.87 2
 3 -3 -12 158602 5031.4 2
 3 3 -12 158111 4940.22 2
 3 -3 -12 162650 4241.87 1
 -3 -3 12 146758 4758.28 2
 -3 -3 11 29699.2 2040.97 2
 3 -3 -11 33037.4 2203.85 2
 3 3 -11 28099.8 1991.16 2
 -3 3 11 27177.2 1996.89 2
 3 -3 -11 33824.1 1868.56 1
 3 3 -10 133769 4102.66 2
 3 -3 -10 140606 4329.62 2
 3 -3 -10 144630 3705.12 1
 -3 3 10 139497 4300.55 2
 -3 -3 10 137371 4158 2
 3 3 -9 94998.3 3251.73 2
 -3 3 9 86024.2 3199.68 2
 -3 -3 9 92388.2 3204.88 2
 3 -3 -9 95550.2 3378.2 2
 3 -3 -9 97123.3 2918.49 1
 3 -3 -8 14860.4 1255.41 2
 3 -3 -8 14899.1 1094.83 1
 3 3 -8 14668.3 1209.46 2
 -3 3 8 14078.8 1229.71 2
 -3 -3 8 15636.7 1234.15 2
 -3 3 7 143841 3690.61 2
 -3 -3 7 146663 3510.41 2
 3 -3 -7 140950 3674.69 2
 3 3 -7 145596 3533.13 2
 -3 3 6 21172.9 1271.92 3
 3 3 -6 21170.3 1237.23 2
 -3 -3 6 20938.3 1218.46 2
 3 -3 -6 21010.9 1328.49 2
 -3 3 6 18586.2 1233.49 2
 3 3 -5 32609.3 1385.98 2
 -3 -3 5 30668.3 1334.91 2
 -3 3 5 30640.7 1429.44 3
 3 -3 -5 34142.5 1574.28 2
 -3 3 5 29257.1 1447.34 2
 3 3 -4 181852 2895.1 2
 -3 3 4 175958 3199.08 3
 -3 -3 4 192626 2969.52 2
 3 -3 -4 173804 3217.44 3
 -3 3 4 167412 3227.98 2
 3 3 -3 116776 1998.11 2
 -3 -3 3 115174 1989.7 2
 3 -3 -3 109859 2396.47 3
 -3 3 3 116599 2451.73 3
 -3 -3 2 303140 2571.82 2
 3 -3 -2 284904 3662.09 3
 -3 3 2 297128 3743.04 3
 3 3 -2 293806 2538.11 2
 -3 3 1 149502 2568.49 3
 3 -3 -1 142711 2523.69 3
 -3 3 0 26377.8 1096.9 3
 3 -3 0 25439.3 1087.62 3
 3 -3 1 521520 5077.65 3
 -3 3 -1 509738 5001.79 3
 -3 3 -2 264434 3819.33 3
 -3 -3 -2 264326 2936.44 2
 3 -3 2 264933 3822.23 3
 3 -3 3 95596 2445.3 3
 -3 -3 -3 95364 2067.73 2
 3 3 3 96600.8 1510.46 3
 -3 3 -3 93869.5 2434.03 3
 3 3 4 132019 2154.03 3
 -3 3 -4 136285 3106.98 3
 3 -3 4 133285 3099.68 3
 -3 -3 -4 137337 2786.31 2
 -3 3 -5 27071.8 1490.77 3
 3 3 5 28379.9 1148.62 3
 -3 -3 -5 30346.7 1452.14 2
 3 3 5 27131.1 1477.64 1
 3 -3 5 28071 1517.73 3
 3 -3 6 43977.5 2025.58 3
 -3 -3 -6 43016.4 1905.86 2
 3 3 6 42412.9 1606.82 3
 3 3 6 43076.5 1954.48 1
 -3 3 -6 44689.4 2045.47 3
 -3 3 -7 25149.6 1605.7 3
 -3 3 -7 27093.7 1699.03 2
 -3 -3 -7 27799.2 1639.23 2
 3 3 7 24938.2 1326.99 3
 3 3 7 28286.9 1653.53 1
 3 -3 7 25435.2 1609.57 3
 3 -3 8 175962 4484.65 3
 3 3 8 173984 4267.18 1
 3 3 8 172874 3777.71 3
 -3 3 -8 173643 4565.88 2
 -3 -3 -8 175412 4405.79 2
 3 3 9 151602 3783.76 3
 3 -3 9 155798 4425.68 3
 -3 -3 -9 158277 4409.71 2
 3 3 9 150063 4124.34 1
 -3 3 -9 153264 4534.95 2
 3 3 10 65835.8 2831.57 1
 3 -3 10 66087.1 3038.68 3
 -3 -3 -10 70712.2 3134.28 2
 -3 3 -10 65667.8 3118.52 2
 3 3 10 65267.5 2659.21 3
 3 3 11 2486.32 546.129 1
 3 -3 11 3095.67 697.399 3
 -3 -3 -11 2873.72 683.031 2
 3 3 11 2807.75 601.146 3
 -3 3 -11 2967.07 721.871 2
 3 -3 12 62966.3 3241.24 3
 3 3 12 63192 2972.93 1
 3 3 12 66182.8 2976.1 3
 -3 3 -12 64101.4 3368.37 2
 -3 -3 -12 64091.1 3300.01 2
 3 3 13 94261.8 3737.61 3
 3 3 13 96610.5 3795.58 1
 -3 -3 -13 95990.3 4211.02 2
 -3 3 -13 98201.3 4330.96 2
 3 -3 13 97021.1 3260.21 1
 -3 3 -14 29274.8 2496.84 2
 -3 -3 -14 29928.7 2463.58 2
 3 -3 14 26937.6 1793.96 1
 3 3 14 26967.9 2091.62 3
 3 3 14 27509.6 2096.71 1
 -3 -3 -15 31202.5 2637.11 2
 -3 3 -15 29155.1 2575.91 2
 3 -3 15 31547.4 1975.8 1
 3 3 15 31046.6 2288.41 1
 -3 3 -16 36903.6 3039.8 2
 3 -3 16 32632 2071.97 1
 -3 -3 -16 36714.4 2974.26 2
 -3 -3 -17 6738.16 1359.58 2
 3 -3 17 5637.42 887.003 1
 -3 3 -17 8159.94 1453.07 2
 -3 -3 -18 49032.7 3710 2
 -3 3 -18 46559.5 3655.32 2
 -3 -3 -19 16378.9 2237.76 2
 -3 3 -19 17882.8 2377.97 2
 -3 3 -20 13197 2078.76 2
 -3 -3 -20 12913.4 2015.39 2
 -3 -3 -21 17565.7 2468.71 2
 -3 3 -21 11712.3 2076.7 2
 -3 5 24 16714.5 2462.65 3
 3 5 -22 129.472 585.679 2
 3 -5 -22 968.266 608.086 2
 3 5 -21 250.199 483.345 2
 3 -5 -21 249.747 782.294 2
 3 5 -20 39880.4 3473.86 2
 3 -5 -20 47284.7 3834.18 2
 3 5 -19 17087.1 2216.56 2
 3 -5 -19 20067 2432.36 2
 3 5 -18 89927 4839.69 2
 3 -5 -18 90194.8 4918.8 2
 3 5 -17 2351.52 792.001 2
 3 -5 -17 1388.54 616.869 2
 3 -5 -16 9045.37 1461.15 2
 3 5 -16 12098.9 1655.89 2
 3 5 -15 263.891 360.859 2
 3 -5 -15 133.683 372.391 2
 3 5 -14 58000.8 3320.59 2
 3 -5 -14 66639.3 3137.82 1
 3 -5 -14 63485.9 3525.94 2
 3 -5 -13 41318.7 2722.17 2
 3 -5 -13 39710.3 2368.41 1
 -3 -5 13 36994.8 2505.79 2
 3 5 -13 33430.9 2402.17 2
 3 -5 -12 203047 5811 2
 3 5 -12 198450 5589.92 2
 -3 -5 12 192698 5467.29 2
 -3 5 12 189815 5580 2
 -3 -5 12 195846 5729.68 3
 3 -5 -12 216618 5323.15 1
 3 -5 -11 8563.34 1154.76 2
 -3 -5 11 8226.02 1094.56 2
 3 5 -11 8145.86 1086.83 2
 3 -5 -11 9370.03 1091.53 1
 -3 5 11 6493.65 987.199 2
 -3 5 10 136444 4333.41 2
 3 -5 -10 141017 4407.66 2
 3 5 -10 135403 4146.41 2
 -3 5 10 126932 3911.11 3
 3 -5 -10 146263 4097.49 1
 -3 -5 10 135245 4132.03 2
 -3 -5 9 36141.1 2011.71 2
 -3 5 9 35303.8 2099.76 2
 3 5 -9 38278.9 2066.61 2
 3 -5 -9 36491.3 2131.81 2
 -3 5 9 33377.8 1921.28 3
 3 -5 -9 39425.2 2061.49 1
 -3 5 8 148969 4073.64 2
 -3 -5 8 159310 3949.14 2
 -3 5 8 147918 3808.6 3
 3 -5 -8 154477 4151.79 2
 3 -5 -8 159315 4009.41 1
 3 5 -8 161662 4014.95 2
 3 -5 -7 369.826 172.372 2
 -3 -5 7 623.343 242.938 2
 -3 5 7 918.572 404.492 2
 3 5 -7 346.334 213.123 2
 -3 5 7 426.15 265.017 3
 -3 5 6 52677.6 2070.24 3
 -3 -5 6 58390.3 2030.37 2
 3 5 -6 57837.4 2030.4 2
 -3 5 6 55759.8 2220.72 2
 -3 -5 5 23260.7 1159.92 2
 3 5 -5 24321.9 1190.22 2
 -3 5 5 22160.4 1324.83 2
 -3 5 5 22244.9 1277.85 3
 3 -5 -5 21713.6 1250.51 3
 -3 5 4 67111.8 2098.32 3
 -3 -5 4 73097.5 1807.41 2
 3 5 -4 71230.7 1785.17 2
 -3 5 4 65298.1 2151.61 2
 3 -5 -4 64648.2 2065.92 3
 -3 -5 3 5000.38 399.305 2
 3 5 -3 4780.87 398.315 2
 3 -5 -3 4764.57 537.401 3
 3 5 -3 5549.29 398.258 1
 -3 5 3 4775.15 543.881 3
 3 5 -2 178540 2563.02 1
 3 -5 -2 163528 3108.14 3
 -3 5 2 179359 3227.42 3
 -3 -5 2 174179 2670.16 3
 3 5 -2 174289 1838.52 2
 -3 -5 1 3291.79 315.694 3
 -3 5 1 3992.51 486.101 3
 3 -5 -1 3523.65 463.608 3
 3 5 -1 3245.53 388.287 1
 3 -5 0 48855 1714.94 3
 -3 -5 0 50603.9 937.326 3
 -3 5 0 50432.6 1744.42 3
 3 5 0 52315.3 1658 1
 3 5 1 631.818 210.513 1
 -3 -5 -1 772.364 113.969 2
 -3 5 -1 878.692 251.145 3
 3 -5 1 631.953 198.04 3
 3 5 2 56444.1 1276.26 2
 -3 -5 -2 58046.2 1289.82 2
 -3 5 -2 54234.6 1939.68 3
 3 5 2 55603.9 1948.58 1
 3 -5 2 58243.6 2001.28 3
 -3 -5 -3 120264 2262.89 2
 3 5 3 120223 3040.25 1
 3 -5 3 117507 3002.99 3
 -3 5 -3 123850 3086.47 3
 3 5 3 120510 2259.84 2
 3 5 4 246658 3666.51 2
 3 -5 4 248302 4595.23 3
 -3 5 -4 239913 4530.96 3
 -3 -5 -4 242770 3685.5 2
 3 5 4 236152 4469.12 1
 -3 -5 -5 21033.2 1204.2 2
 3 5 5 20332 1177.45 2
 -3 5 -5 19663.1 1369.24 3
 3 -5 5 20378.4 1393.77 3
 3 5 5 19408.8 1350.93 1
 3 5 6 121708 3512.26 1
 -3 -5 -6 115989 3072.39 2
 3 5 6 112881 3032.75 2
 -3 5 -6 116540 3523.25 3
 3 -5 6 122660 3577.01 3
 -3 -5 -7 74.0674 213.254 2
 -3 5 -7 114.046 183.392 3
 3 -5 7 141.359 162.922 3
 3 5 7 275.444 227.531 2
 3 5 7 287.507 223.82 1
 -3 5 -8 112433 3760.46 3
 -3 5 -8 109937 3749.33 2
 3 -5 8 111942 3765.96 3
 -3 -5 -8 109171 3456.52 2
 3 5 8 112829 3657.46 1
 3 5 8 111588 3461.57 2
 -3 5 -9 51722.9 2699.25 2
 -3 -5 -9 56145.4 2633.47 2
 3 -5 9 54208.8 2758.36 3
 3 5 9 53585.9 2632.35 1
 3 5 9 53822.5 2563.59 2
 3 5 9 52891.7 2161.34 3
 -3 -5 -10 139119 4383.93 2
 3 5 10 133558 4286.55 2
 -3 5 -10 132829 4538.05 2
 3 5 10 128095 3612.4 3
 3 -5 10 137028 4581.39 3
 3 5 10 129885 4236.34 1
 3 -5 11 775.379 338.304 3
 3 5 11 808.756 335.171 3
 3 5 11 456.76 236.087 1
 3 5 11 757.57 403.456 2
 -3 5 -11 985.803 426.779 2
 -3 -5 -11 917.247 376.29 2
 -3 -5 -12 76002.5 3568.54 2
 -3 5 -12 69354.1 3564.72 2
 3 5 12 74027.9 3414.2 1
 3 5 12 72215.8 3476.91 2
 3 5 12 69597.6 2969.16 3
 -3 -5 -13 29124.3 2301.22 2
 -3 5 -13 29371.8 2420.44 2
 3 5 13 27211.1 1951.23 3
 3 5 13 28115.3 2181.85 1
 -3 -5 -14 45500.8 3029.97 2
 3 -5 14 45788.8 2197.6 1
 -3 5 -14 44948.4 3131.14 2
 3 5 14 42518.2 2578.54 3
 -3 5 -15 182.453 368.244 2
 -3 -5 -15 893.385 539.804 2
 3 5 15 -95.2799 238.234 3
 3 -5 15 647.168 279.57 1
 -3 -5 -16 37090.7 2984.72 2
 -3 5 -16 33787.7 2920.55 2
 3 -5 16 33186.9 1989.59 1
 -3 5 -17 1666.78 716.457 2
 -3 -5 -17 1433.52 675.075 2
 -3 -5 -18 59350 4095.89 2
 -3 5 -18 51676.1 3873.25 2
 -3 -5 -19 10776.1 1850.4 2
 -3 5 -19 12800.1 2046.16 2
 -3 5 -20 41610.3 3715.83 2
 -3 -5 -20 48550.6 3953.48 2
 -3 5 -21 -347.735 756.682 2
 -3 -5 -21 101.288 476.577 2
 -3 7 24 33271 3315.14 3
 -3 7 23 13576.3 2105.72 3
 3 -7 -22 467.491 534.953 2
 3 7 -22 1668.73 927.08 2
 -3 7 22 897.119 421.658 3
 3 7 -21 10003.9 1802.43 2
 -3 7 21 8137.21 1551.65 3
 3 -7 -21 7988.87 1649.87 2
 -3 7 20 43286.6 3385.4 3
 3 -7 -20 45181.1 3773.58 2
 3 7 -20 50618 3919.52 2
 -3 7 19 3747.3 1007.16 3
 3 7 -19 4340.97 1157.82 2
 3 -7 -19 3806.89 1056.76 2
 -3 7 18 38191.5 2983.73 3
 3 7 -18 39776.8 3246.36 2
 3 -7 -18 40800.1 3333.63 2
 3 7 -17 16070.5 1998.39 2
 -3 7 17 17607.5 1961.82 3
 3 -7 -17 15963.5 2037.34 2
 -3 7 16 660.997 510.724 3
 3 7 -16 1002.44 610.689 2
 3 -7 -16 500.547 388.902 2
 3 -7 -16 1527.71 553.823 1
 3 -7 -15 5271.49 1129.67 2
 3 -7 -15 4841.31 966.139 1
 3 7 -15 4134.4 948.883 2
 -3 7 15 4514.88 964.603 3
 3 7 -14 150687 5373.42 2
 3 -7 -14 149180 5498.78 2
 -3 7 14 139141 4901.75 3
 3 -7 -14 154230 5132.92 1
 -3 7 13 6866.52 1047.33 3
 3 7 -13 6493.46 1077.41 2
 3 -7 -13 6182.73 1014.15 1
 3 -7 -13 6473.61 1111.3 2
 3 -7 -12 115265 4184.94 1
 3 -7 -12 107370 4268.25 2
 3 7 -12 105478 4061.83 2
 -3 7 12 101448 4147.09 2
 -3 7 12 99222.4 3801.17 3
 3 -7 -11 705.218 346.868 1
 -3 -7 11 863.656 413.571 3
 3 -7 -11 1396.86 538.28 2
 3 7 -11 273.134 227.387 2
 -3 7 11 1327.63 406.219 3
 -3 7 11 529.367 377.881 2
 -3 7 10 69028.1 2917.89 3
 -3 7 10 67055.8 3101.73 2
 3 -7 -10 79935.7 3385.5 2
 3 7 -10 75960.4 3117.48 2
 -3 -7 10 76921 3392.53 3
 3 -7 -10 78648.9 3289.13 1
 -3 7 9 15548.4 1422.61 2
 3 -7 -9 17734.1 1533.05 2
 -3 -7 9 16128 1497.8 3
 3 7 -9 17894.5 1435.45 2
 3 -7 -9 17710.5 1503.73 1
 -3 7 9 15469.1 1322.25 3
 -3 -7 8 307769 6162.5 3
 3 7 -8 309526 5547.12 2
 -3 7 8 294437 5527.35 3
 3 -7 -8 327403 6263.77 1
 -3 7 8 301074 5979 2
 -3 7 7 15431.5 1282.74 2
 -3 -7 7 15973.6 1325.71 3
 3 7 -7 13216.7 1080.82 2
 -3 7 7 15514.5 1207.72 3
 -3 7 6 10791.7 971.582 3
 -3 7 6 11688 1067.74 2
 -3 -7 6 11293.2 1059.92 3
 3 7 -6 12946.7 975.518 2
 3 -7 -5 23130.4 1358.22 3
 3 7 -5 23173.6 1178.63 2
 -3 7 5 20774.1 1353.36 2
 -3 7 5 24040.6 1386.34 3
 -3 -7 5 24147.3 1435.94 3
 3 7 -4 69682.9 1798.16 2
 3 -7 -4 57648.4 2081.04 3
 -3 -7 4 70222.3 2284.09 3
 -3 7 4 67567.2 2238.37 3
 3 7 -3 108.316 79.1102 2
 -3 7 3 312.074 189.192 3
 -3 -7 3 193.969 116.173 1
 3 -7 -3 138.989 170.355 3
 -3 -7 3 58.7505 112.035 3
 3 -7 -2 123589 2940.06 3
 -3 7 2 124471 2966.36 3
 -3 -7 2 122618 2496.58 3
 3 7 -2 120364 1615.17 2
 -3 -7 2 121486 2542.93 1
 3 -7 -1 10696.6 874.25 3
 3 7 -1 9338.6 752.516 1
 -3 7 1 9280.73 823.94 3
 -3 -7 1 8662.28 711.3 1
 -3 -7 1 9136.12 607.761 3
 -3 -7 0 145641 3148.19 1
 -3 -7 0 140686 2014.81 3
 -3 7 0 141703 3225.69 3
 3 7 0 133181 3029.47 1
 3 -7 0 141404 3245.6 3
 3 7 1 18266.4 1187.8 1
 -3 -7 -1 22372.9 656.891 3
 -3 7 -1 21570 1311.02 3
 -3 -7 -1 21847.7 1313.49 1
 3 7 1 21261 614.763 2
 3 7 1 21741.7 647.329 3
 3 -7 1 23647.1 1358.8 3
 3 7 2 144347 3501.28 1
 -3 -7 -2 143998 2065.94 2
 3 7 2 149049 2084.06 2
 -3 7 -2 147425 3518.52 3
 -3 -7 -2 151904 3625.14 1
 3 -7 2 154185 3602.4 3
 3 -7 3 188514 4134.12 3
 3 7 3 187367 2790.71 2
 -3 -7 -3 188168 2792.05 2
 -3 7 -3 178505 4036.18 3
 3 7 3 181261 4079.41 1
 -3 -7 -3 191195 4190.65 1
 -3 7 -4 298306 5445.28 3
 3 7 4 274344 2585.4 3
 3 7 4 302515 4081.83 2
 3 -7 4 298541 5489.98 3
 3 7 4 299813 5474.31 1
 -3 -7 -4 299324 4081.31 2
 -3 -7 -5 126266 2954.18 2
 3 7 5 112418 1962.65 3
 -3 7 -5 126062 3696.58 3
 3 -7 5 127627 3718.9 3
 3 7 5 121948 3636.75 1
 3 7 5 125794 2910.62 2
 3 7 6 35739.6 2062.66 1
 -3 -7 -6 36891.6 1733.84 2
 3 7 6 36586.8 1728.68 2
 3 -7 6 38989.4 2140.47 3
 3 7 6 33725.1 1238.16 3
 -3 7 -6 38764.9 2145.84 3
 -3 -7 -7 8242.54 888.046 2
 3 -7 7 8897.34 1071.82 3
 3 7 7 7303.26 827.036 2
 -3 7 -7 7767.72 1018.83 3
 3 7 7 8190.8 1021.25 1
 3 7 8 112558 3897.75 1
 3 7 8 111984 3503.91 2
 -3 -7 -8 114685 3547.33 2
 3 -7 8 115655 4033.29 3
 -3 7 -8 111794 3975.79 3
 3 7 9 4292.83 798.788 1
 -3 -7 -9 4499.16 748.944 2
 3 7 9 4099.32 726.69 2
 -3 7 -9 3641.46 740.317 2
 3 -7 9 3296.82 727.294 3
 -3 7 -9 4996.75 899.077 3
 3 7 10 37311.9 2275.94 2
 -3 7 -10 35304.4 2364.63 2
 -3 -7 -10 37249.3 2256.46 2
 3 7 10 35295.6 2341.47 1
 3 -7 10 37962.9 2529.03 3
 -3 -7 -11 208.544 251.418 2
 3 7 11 -36.3734 400.446 1
 3 7 11 859.579 493.469 2
 -3 7 -11 158.906 273.555 2
 3 7 12 30303.4 2264.14 2
 3 7 12 30533.1 1908.71 3
 -3 -7 -12 33321.2 2388.4 2
 -3 7 -12 32415.6 2487.25 2
 -3 7 -13 505.951 426.387 2
 3 7 13 888.231 390.979 3
 -3 -7 -13 259.528 346.388 2
 3 7 14 97537.2 3791.26 3
 -3 -7 -14 103506 4573.76 2
 -3 7 -14 99408.8 4713.34 2
 -3 -7 -15 18495.3 2026.98 2
 -3 7 -15 17999.3 2070.75 2
 3 -7 15 16282.1 1298.12 1
 3 7 15 15195.9 1440.73 3
 -3 -7 -16 15472.4 1962.01 2
 -3 7 -16 15297.1 2012.96 2
 3 -7 16 15210.8 1281.03 1
 -3 7 -17 16972.5 2197.46 2
 -3 -7 -17 15384.3 2024.21 2
 -3 7 -18 35401.8 3247.82 2
 -3 -7 -18 41958.1 3380.15 2
 -3 -7 -19 1651.67 772.765 2
 -3 7 -19 1767.21 794.079 2
 -3 7 -20 69524.4 4827.82 2
 -3 -7 -20 71769.9 4766.1 2
 -3 -7 -21 7382.33 1603.77 2
 -3 7 -21 5373.57 1372.23 2
 -3 9 24 32156.1 3250.03 3
 -3 9 23 16520.1 2323.81 3
 -3 9 22 264.372 377.291 3
 3 9 -22 195.384 553.814 2
 -3 9 21 16255.6 2131.52 3
 3 9 -21 18855.1 2507.44 2
 3 -9 -21 21423.5 2679.53 2
 3 9 -20 25870.3 2830.29 2
 -3 9 20 23406.3 2495.41 3
 3 -9 -20 29282.7 3084.55 2
 3 9 -19 4653.81 1204.14 2
 -3 9 19 4181.13 1023.98 3
 3 -9 -19 3597.62 1067.64 2
 -3 9 18 13475.3 1772.91 3
 3 -9 -18 16487.9 2184.54 2
 3 9 -18 14520.3 1984.24 2
 -3 9 17 9460.47 1435.95 3
 3 9 -17 11670.9 1708.25 2
 3 -9 -17 14052.2 1945.27 2
 3 -9 -16 3362.3 896.053 1
 3 9 -16 2322.81 751.004 2
 3 -9 -16 1661.69 678.446 2
 -3 9 16 1507.24 542.912 3
 3 -9 -15 6512.6 1175.27 1
 3 9 -15 6269.4 1175.11 2
 -3 9 15 6404.02 1095.36 3
 3 -9 -15 8199.03 1384.99 2
 -3 9 14 153087 5132.61 3
 3 -9 -14 164283 5840 2
 3 -9 -14 167546 5725.81 1
 3 9 -14 163781 5632.08 2
 3 -9 -13 33576.1 2482 1
 3 -9 -13 29891.3 2418.39 2
 -3 9 13 28068.7 2125.55 3
 3 9 -13 30598.4 2313.11 2
 3 9 -12 2439.7 667.371 2
 -3 9 12 2229.16 572.285 3
 3 -9 -12 2623.29 740.179 1
 3 -9 -12 2443.47 714.145 2
 3 9 -11 71.1157 195.952 2
 -3 -9 11 588.024 369.732 3
 3 -9 -11 95.302 262.808 1
 -3 9 11 -133.376 280.646 3
 -3 9 11 -593.144 376.388 2
 3 -9 -10 657.962 357.21 1
 -3 9 10 521.57 344.937 2
 -3 -9 10 458.625 324.514 3
 -3 9 10 740.947 358.178 3
 3 9 -10 688.95 331.893 2
 -3 9 9 32738.4 2126.54 2
 -3 -9 9 34415.8 2239.27 3
 3 9 -9 33900.9 1993.81 2
 3 -9 -9 32597 2203.24 1
 -3 9 9 30347.4 1875.65 3
 -3 9 8 256868 5671.47 2
 3 9 -8 279034 5348.1 2
 -3 9 8 264026 5348.71 3
 -3 -9 8 274407 6063.41 3
 3 -9 -8 282338 6280.51 1
 -3 9 7 141066 4034.96 2
 3 9 -7 151101 3686.07 2
 -3 9 7 143174 3782.08 3
 -3 -9 7 150323 4266.36 3
 -3 9 6 781.436 320.079 3
 -3 -9 6 976.393 198.737 1
 -3 -9 6 1389.28 416.797 3
 3 -9 -6 293.876 157.446 3
 3 9 -6 382.197 180.509 2
 -3 9 6 367.065 173.471 2
 -3 9 5 55436.3 2224.87 3
 3 -9 -5 50448.3 2116.54 3
 -3 9 5 47153.1 2134.12 2
 -3 -9 5 54510.9 1570.89 1
 -3 -9 5 56206.6 2317.67 3
 3 9 -5 52388.5 1815.01 2
 -3 -9 4 79125.2 2054.19 1
 3 -9 -4 72004.7 2495.02 3
 -3 -9 4 76551.7 2545.21 3
 -3 9 4 73681.9 2516.98 3
 3 9 -4 73886.9 1933.09 2
 3 -9 -3 84552.5 2677.26 3
 -3 -9 3 87157.6 2515.79 3
 -3 9 3 88536.9 2726.17 3
 -3 -9 3 89493.4 2336.35 1
 3 9 -3 85408.6 1823.32 2
 -3 -9 2 113191 2793.71 1
 3 9 -2 108372 1722.01 2
 3 -9 -2 104378 2953.44 3
 -3 -9 2 109361 2604.72 3
 -3 9 2 107333 3008.99 3
 3 -9 -1 78186.9 2582.49 3
 3 9 -1 80100.9 2021.7 3
 -3 -9 1 82640.2 2059.71 3
 -3 9 1 81179.2 2638.39 3
 -3 -9 1 82265.8 2528.59 1
 -3 -9 0 55536.3 2171.76 1
 3 9 0 52661.2 1465.56 3
 3 9 0 46706.5 920.182 2
 -3 9 0 50940.7 2138.67 3
 -3 -9 0 52758.5 1503.29 3
 3 -9 0 53173.5 2164.06 3
 -3 9 -1 37539.9 1878.16 3
 3 9 1 40771.7 1157.43 3
 -3 -9 -1 42331.2 1177.87 3
 3 -9 1 42656.7 1991.13 3
 -3 -9 -1 43526.4 2008.87 1
 3 9 1 40457.5 973.264 2
 3 -9 2 312804 5587.22 3
 3 9 2 290642 2784.95 3
 -3 -9 -2 292428 2789.07 3
 3 9 2 294694 3155.72 2
 -3 9 -2 295618 5397.75 3
 -3 -9 -2 315061 5641.94 1
 3 9 3 887.063 329.198 1
 3 9 3 1226.04 179.943 3
 3 9 3 985.842 217.645 2
 3 -9 3 1591.99 402.841 3
 -3 -9 -3 1562.74 426.404 1
 -3 9 -3 1486.78 432.799 3
 3 9 4 92796.6 3310.03 1
 -3 -9 -4 97980.6 3402.33 1
 -3 9 -4 90232.7 3216.03 3
 3 -9 4 97843 3358.8 3
 -3 -9 -4 91509.6 2303.11 2
 3 9 4 93681.1 2320.19 2
 3 9 4 95045.4 1628.57 3
 3 9 5 33149.1 1067.09 3
 3 9 5 32688.4 2031.94 1
 3 -9 5 35432.4 2096.3 3
 -3 9 -5 31775.6 2016.94 3
 -3 -9 -5 33320.5 1524.52 2
 3 9 5 33004.7 1522.4 2
 -3 -9 -5 34100.4 2088.14 1
 3 9 6 4443.64 770.246 1
 -3 9 -6 2145.09 566.238 3
 3 9 6 1934.89 412.189 2
 3 -9 6 2584.95 609.987 3
 3 9 6 1327.4 234.946 3
 -3 -9 -6 2377.97 452.634 2
 3 9 7 38701.3 1440.83 3
 -3 9 -7 38931.2 2372.54 3
 3 9 7 41689.8 1995.09 2
 3 9 7 42958.6 2486.05 1
 -3 -9 -7 41530.5 2014.21 2
 3 -9 7 48441.5 2641.06 3
 3 9 8 139443 2993.54 3
 3 -9 8 151359 4856.07 3
 3 9 8 142669 4680.02 1
 -3 9 -8 146146 4777.83 3
 3 9 8 152746 4088.8 2
 -3 -9 -8 154956 4151.11 2
 -3 9 -9 26355.1 2099.08 3
 -3 -9 -9 26443 1815.56 2
 3 9 9 23990.5 1974.79 1
 3 -9 9 24826.8 2043.9 3
 3 9 9 23161 1353.24 3
 3 9 9 24159.3 1745.84 2
 -3 9 -10 18094.9 1737.98 2
 3 9 10 15751.6 1490.35 2
 -3 -9 -10 18084.3 1597.97 2
 3 9 10 14324.6 1151.56 3
 3 9 11 5637.34 769.662 3
 3 9 11 5730.75 956.164 2
 -3 -9 -11 4651.66 891.853 2
 -3 9 -11 5914.34 1045.32 2
 3 9 12 9952.9 1071.64 3
 -3 -9 -12 11444.5 1407.68 2
 3 9 12 10598.2 1370.66 2
 -3 9 -12 10348.2 1408.43 2
 -3 -9 -13 15266.3 1711.46 2
 -3 9 -13 12233.2 1608.94 2
 3 9 13 11794.6 1241.27 3
 3 9 14 121838 4141.59 3
 -3 9 -14 121054 5258.59 2
 -3 -9 -14 129598 5139.6 2
 -3 9 -15 41776.1 3207.59 2
 -3 -9 -15 46542 3212.94 2
 3 9 15 43546.1 2587.13 3
 -3 9 -16 -1266.33 657.399 2
 -3 -9 -16 -327.328 459.897 2
 -3 9 -17 10260.9 1739.97 2
 -3 -9 -17 11769 1745.34 2
 -3 9 -18 9117.61 1678.07 2
 -3 -9 -18 9704.14 1650.84 2
 3 9 19 11183.1 1537.2 3
 -3 -9 -19 14771.9 2135.97 2
 -3 9 -19 10653.3 1902.44 2
 3 9 20 43910.1 3193.04 3
 -3 9 -20 49942.9 4130.19 2
 -3 -9 -20 55023.4 4200.02 2
 3 9 21 11508.8 1671.27 3
 -3 -9 -21 12272.9 2115.71 2
 -3 11 23 9337.97 1717.78 3
 -3 11 22 151.405 359.435 3
 3 11 -21 1868.97 836.106 2
 -3 11 21 1636.73 628.639 3
 -3 11 20 6296.65 1305.84 3
 3 11 -20 6429.04 1422 2
 3 11 -19 46333.5 3663.58 2
 -3 11 19 42220 3205.98 3
 3 11 -18 3397.67 975.127 2
 -3 11 18 4314.31 1018.25 3
 3 -11 -17 6953.37 1338.32 1
 3 11 -17 8344.11 1484.38 2
 -3 11 17 8594.87 1371.1 3
 -3 11 16 -131.482 405.288 3
 3 -11 -16 -153.424 383.664 1
 3 11 -16 83.8617 444.572 2
 3 11 -15 44285.1 3081.18 2
 -3 11 15 40294.1 2741.04 3
 3 -11 -15 45372.2 3222.97 1
 -3 11 14 45657.6 2827.86 3
 3 11 -14 51383.1 3178.58 2
 3 -11 -14 48854.2 3254.61 1
 -3 11 13 39103.8 2530.4 3
 3 11 -13 41712.4 2739.91 2
 3 -11 -13 44978.1 3081.71 1
 3 -11 -12 6933.61 1188.83 1
 -3 11 12 7015.68 1039.29 3
 3 11 -12 8545.46 1193.13 2
 -3 11 11 7487.49 1144.98 2
 -3 11 11 6507.33 956.823 3
 3 -11 -11 6795.05 1150.74 1
 3 11 -11 7134.75 1053.4 2
 -3 11 10 874.435 367.172 3
 -3 -11 10 1472.25 493.884 3
 -3 11 10 1268.87 541.323 2
 3 11 -10 1429.58 452.465 2
 3 -11 -10 1441.8 576.522 1
 -3 -11 9 77716.8 3504.44 3
 -3 11 9 68919.5 3154.59 2
 3 11 -9 72629.1 2950.34 2
 3 -11 -9 74666.6 3579.63 1
 -3 11 9 66877.7 2875.04 3
 3 -11 -8 120149 4420.29 1
 -3 -11 8 120264 4183.34 3
 3 11 -8 117781 3533.34 2
 -3 11 8 112746 3601.82 3
 -3 11 8 107243 3794.51 2
 -3 11 7 102960 3343.76 3
 -3 -11 7 110090 2201.88 1
 3 -11 -7 104264 3369.06 3
 -3 -11 7 108108 3781.78 3
 3 11 -7 109241 3187.23 2
 -3 11 7 97443.6 3481.77 2
 3 -11 -6 54683.2 2386.31 3
 -3 11 6 57216.4 2438.42 3
 3 11 -6 54074 2088.2 2
 -3 -11 6 56566.2 2606.18 3
 -3 -11 6 59389.9 1786.11 1
 -3 11 6 51016.3 2425.68 2
 -3 -11 5 3245.93 591.38 3
 -3 -11 5 3595.33 481.788 1
 -3 11 5 2297.95 486.929 2
 3 -11 -5 2680.46 517.449 3
 3 11 -5 2663.1 435.661 2
 -3 11 5 3708.47 614.678 3
 3 11 -4 5243.07 547.803 2
 3 -11 -4 3336.14 581.584 3
 -3 -11 4 5170.9 712.135 3
 -3 -11 4 5326.09 623.808 1
 -3 11 4 4826.91 697.808 3
 3 -11 -3 322291 5613.85 3
 -3 11 3 334856 5707.34 3
 -3 -11 3 345693 5431.34 3
 3 11 -3 335881 3866.33 2
 -3 -11 3 353038 5324.24 1
 3 -11 -2 68617 2588.91 3
 -3 -11 2 72148 2324.57 3
 3 11 -2 66161.1 2223.73 3
 -3 -11 2 72296.6 2511.19 1
 -3 11 2 66330.3 2555.66 3
 3 11 -1 91249.8 2418.44 3
 -3 -11 1 93205.1 2461.34 3
 -3 -11 1 96869.7 3032.37 1
 -3 11 1 96305.9 3096.16 3
 3 -11 -1 89879.7 3023.89 3
 3 11 0 2730.27 272.052 2
 3 11 0 2353.04 302.608 3
 -3 -11 0 3497.6 605.277 1
 3 -11 0 2952.42 573.447 3
 -3 11 0 2391.94 513.877 3
 -3 -11 0 2901.72 407.207 3
 -3 -11 -1 5390.4 510.12 3
 -3 11 -1 6016.08 816.02 3
 3 11 1 5369.91 406.417 2
 3 -11 1 4993.76 749.014 3
 -3 -11 -1 5857.33 811.294 1
 3 11 1 4743.21 472.092 3
 3 -11 2 32956.3 1952.96 3
 -3 -11 -2 32015.5 1122.02 3
 -3 11 -2 29445.2 1850.69 3
 -3 -11 -2 31133.7 1930.58 1
 3 11 2 31838.1 1123.79 3
 3 11 2 31591.3 1108.77 2
 -3 -11 -3 193712 2653.38 3
 3 11 3 210197 3182.6 2
 3 11 3 202006 2676.31 3
 3 -11 3 215970 5127 3
 -3 -11 -3 215846 5234.29 1
 -3 11 -3 203866 5008.61 3
 -3 -11 -4 789.967 365.959 1
 3 -11 4 789.73 321.827 3
 3 11 4 532.382 146.249 3
 -3 11 -4 761.931 401.36 3
 3 11 4 552.202 175.378 2
 3 11 5 12091.6 945.302 2
 -3 -11 -5 15198.6 1503.35 1
 -3 11 -5 12750.2 1352.61 3
 3 -11 5 11066.9 1251.08 3
 3 11 5 11590.1 672.466 3
 3 11 6 5959.58 518.61 3
 -3 -11 -6 5739.04 953.076 1
 3 -11 6 5645.32 920.473 3
 3 11 6 6029.7 717.332 2
 -3 11 -6 7287.52 1050.4 3
 -3 11 -7 26967.4 2065.42 3
 -3 -11 -7 30415.8 2219.6 1
 3 11 7 26528.8 1625.43 2
 -3 -11 -7 26782 1637.2 2
 3 11 7 25634.4 1160.73 3
 3 -11 7 26771.8 2061.88 3
 -3 -11 -8 99531 3351.27 2
 3 11 8 90000.1 2359.27 3
 -3 11 -8 92740.8 3981.11 3
 3 11 8 96226.1 3288.86 2
 3 -11 8 110688 4346.37 3
 -3 11 -9 104378 4357.73 3
 3 11 9 96584.8 2634.89 3
 -3 -11 -9 105210 3647.48 2
 3 11 9 102047 3591.46 2
 3 11 10 3447.67 712.721 2
 -3 11 -10 3338.55 812.597 2
 3 11 10 3494.64 545.715 3
 -3 11 -10 2730.08 747.4 3
 -3 -11 -10 5066.8 869.846 2
 3 11 11 1835.73 447.983 3
 3 11 11 2762.04 735.759 2
 -3 11 -11 1609.16 558.304 2
 -3 -11 -11 1793.12 553.373 2
 3 11 12 5005.98 745.651 3
 -3 11 -12 4790.55 1024.56 2
 3 11 12 4983.9 956.399 2
 -3 -11 -12 6001.25 1077.13 2
 -3 11 -13 69300.5 3956.91 2
 3 11 13 64238.8 2797.35 3
 -3 -11 -13 80742.3 3889.35 2
 3 11 14 27748.8 1914.84 3
 -3 11 -14 26856.2 2554.4 2
 3 11 14 29590.9 2011.99 3
 -3 -11 -14 32953.4 2619.55 2
 3 11 15 21662.1 1782.11 3
 -3 11 -15 23381.1 2459.47 2
 -3 -11 -15 22810.5 2235.55 2
 3 11 15 22233.5 1817.54 3
 -3 -11 -16 8331.2 1544.91 2
 3 11 16 6669.62 1063.13 3
 -3 11 -16 6257 1304.26 2
 -3 -11 -17 2249.87 744.013 2
 3 11 17 1274.61 480.943 3
 -3 11 -17 1053.14 429.322 2
 3 11 18 1591.54 504.559 3
 -3 -11 -18 2610.64 868.709 2
 -3 11 -18 1788.4 774.183 2
 3 11 19 58011.6 3421.65 3
 -3 11 -19 63907.1 4599.48 2
 -3 -11 -19 64311.2 4440.43 2
 -3 11 -20 13670.4 2198.39 2
 -3 -11 -20 19011.5 2537.57 2
 -3 -11 -21 14088.2 2267.3 2
 -3 13 21 1710.12 711.415 3
 3 13 -21 1944.98 763.77 2
 -3 13 20 -366.583 457.149 3
 3 13 -20 -748.192 618.695 2
 3 13 -19 91158.8 5179.52 2
 -3 13 19 83664.8 4479.16 3
 3 13 -18 1137.21 618.527 2
 -3 13 18 1203.92 627.599 3
 -3 13 17 332.559 316.586 3
 3 13 -17 1446.08 677.668 2
 3 -13 -17 1065.03 640.955 1
 -3 13 16 -195.024 388.884 3
 3 -13 -16 -6.81633 417.954 1
 3 13 -16 -238.618 333.766 2
 3 13 -15 54555.3 3456.44 2
 -3 13 15 48231 3013.34 3
 3 -13 -15 54571.7 3740.79 1
 -3 13 14 733.68 416.511 3
 3 -13 -14 -152.653 377.75 1
 3 13 -14 275.894 493.788 2
 -3 13 13 71023.9 3430.01 3
 3 13 -13 74625.1 3720.6 2
 3 -13 -13 82194.6 4387.14 1
 3 -13 -12 3902.16 956.078 1
 -3 13 12 2354.49 637.203 3
 3 13 -12 3524.77 788.745 2
 3 13 -11 352.843 257.763 2
 3 -13 -11 -209.201 439.46 1
 -3 13 11 411.934 276.984 3
 -3 13 10 1673.68 510.429 3
 -3 13 10 1436.36 565.656 2
 3 13 -10 1334.09 496.913 2
 3 -13 -10 1476.71 577.612 1
 3 13 -9 66687 2890.14 2
 3 -13 -9 66708.6 3600.66 1
 -3 13 9 63178 2874.46 3
 -3 -13 9 70951.6 3487.8 3
 -3 13 9 54871.8 2930.65 2
 -3 13 8 1089.41 398.825 2
 -3 13 8 1199.92 409.615 3
 3 13 -8 1437.01 433.874 2
 -3 -13 8 3382.24 720.041 3
 3 -13 -8 2032.37 657.722 1
 -3 -13 8 1508.01 289.469 1
 -3 -13 7 72080.3 2154.15 1
 3 13 -7 71693.8 2628.07 2
 -3 -13 7 74576.7 3301.93 3
 -3 13 7 69802.5 2891.25 3
 3 -13 -7 73348.7 3597.12 1
 -3 13 7 65872.6 2975.22 2
 3 -13 -7 67287.9 2833.53 3
 3 13 -6 9542.17 902.096 2
 -3 13 6 8679.9 1051.22 2
 -3 13 6 9903.69 1063.55 3
 3 -13 -6 8780.49 994.153 3
 -3 -13 6 11511.3 1253.95 3
 -3 -13 6 9784.98 855.265 1
 -3 13 5 140.619 195.408 3
 3 -13 -5 201.04 179.233 3
 3 13 -5 216.668 174.142 2
 -3 -13 5 -10.9663 256.04 3
 -3 -13 5 96.4449 194.908 1
 -3 13 5 -72.1071 262.142 2
 3 13 -4 2262.52 392.19 2
 -3 -13 4 2660.89 517.819 1
 3 -13 -4 1994.82 503.915 3
 -3 -13 4 2651.6 551.144 3
 -3 13 4 1469.22 426.818 3
 -3 -13 3 288844 5351.02 1
 3 -13 -3 276197 5538.89 3
 -3 -13 3 290066 5360.95 3
 -3 13 3 276551 5563.65 3
 -3 -13 2 8663.08 881.039 3
 3 -13 -2 8372.28 978.575 3
 -3 13 2 7726.8 948.931 3
 3 13 -2 7526.2 815.818 3
 -3 -13 2 8615.94 964.234 1
 3 -13 -1 1366.79 421.627 3
 3 13 -1 858.253 272.756 3
 -3 13 1 1541.99 449.566 3
 -3 -13 1 923.335 285.963 3
 -3 -13 1 1318.24 426.551 1
 3 13 0 224.777 96.2452 2
 3 -13 0 201.778 186.283 3
 3 13 0 251.922 169.092 3
 -3 13 0 220.823 260.979 3
 -3 -13 0 137.814 162.77 3
 -3 -13 0 371.64 264.333 1
 3 13 1 6556.04 499.073 2
 3 13 1 6188.05 611.098 3
 -3 13 -1 6400.69 904.993 3
 -3 -13 -1 7207.1 666.889 3
 3 -13 1 7602.09 983.629 3
 -3 -13 -1 7574.42 1008.33 1
 3 13 2 1181.2 222.885 2
 -3 -13 -2 1950.28 334.883 3
 -3 -13 -2 1646.76 506.555 1
 3 -13 2 1262.55 453.624 3
 3 13 2 1322.59 276.691 3
 -3 13 -2 1545.16 452.938 3
 3 13 3 318558 4126.67 2
 -3 -13 -3 323744 6950.41 1
 -3 13 -3 304318 6534.58 3
 -3 -13 -3 310914 3855.41 3
 3 13 3 305186 3819.18 3
 3 -13 3 312166 6621.4 3
 -3 -13 -4 620.594 164.193 3
 3 13 4 1132.99 236.889 3
 3 13 4 1692.73 345.292 2
 3 -13 4 950.16 392.15 3
 -3 -13 -4 1686.09 521.751 1
 -3 13 -4 1207.61 473.111 3
 -3 -13 -5 6771.46 1084.25 1
 3 13 5 6164.47 531.746 3
 -3 13 -5 6946.75 1066.47 3
 3 -13 5 6102.55 983.729 3
 3 13 5 6824.52 741.764 2
 3 13 6 5399.22 701.97 2
 -3 -13 -6 5438.56 982.368 1
 3 -13 6 6151.61 1033.98 3
 -3 13 -6 5384.48 955.489 3
 3 13 6 5122.06 511.629 3
 3 13 7 27055.1 1660.14 2
 3 13 7 23840.6 1131.63 3
 -3 13 -7 26576.9 2174.84 3
 -3 -13 -7 30230.9 2359.01 1
 3 13 8 169.586 173.898 3
 3 13 8 501.164 276.137 2
 -3 13 -8 -33.9948 383.817 3
 3 13 9 146586 4366.39 2
 3 13 9 143439 3189.39 3
 -3 13 -9 143866 5385.14 3
 3 13 10 23275.3 1831.04 2
 -3 -13 -10 27458.2 1992.51 2
 -3 13 -10 24648.9 2329.63 3
 3 13 10 23683.2 1391.3 3
 -3 13 -10 24859.8 2161.3 2
 3 13 11 -593.267 373.25 2
 3 13 11 300.948 186.838 3
 -3 13 -11 534.056 336.003 2
 -3 -13 -11 240.855 380.575 2
 -3 -13 -12 533.816 352.567 2
 3 13 12 454.948 270.097 3
 -3 13 -12 -185.568 334.393 2
 3 13 13 78409.7 3018.45 3
 -3 -13 -13 91595.7 4195.54 2
 -3 13 -13 88417.3 4512.78 2
 -3 -13 -14 1273.82 619.77 2
 -3 13 -14 295.928 339.488 2
 3 13 14 944.296 387.456 3
 3 13 15 17670.1 1561.22 3
 -3 13 -15 19653.3 2268.99 2
 -3 -13 -15 19785.7 2156.85 2
 -3 -13 -16 5273.22 1132.86 2
 3 13 16 5838.4 955.919 3
 -3 13 -16 5699.02 1249.06 2
 -3 13 -17 1099.45 611.991 2
 -3 -13 -17 810.82 576.122 2
 -3 13 -18 608.901 476.273 2
 -3 -13 -18 864.641 566.862 2
 -3 -13 -19 84685.6 5073.3 2
 -3 13 -19 84249.2 5370.92 2
 -3 -13 -20 -492.123 649.692 2
 3 15 -21 6319.9 1549.09 2
 3 15 -20 7442.38 1601.71 2
 3 15 -19 70079.4 4524.79 2
 -3 15 19 75358.3 4235.86 3
 -3 15 18 2634.17 771.196 3
 3 15 -18 2769.08 1011.5 2
 -3 15 17 172.944 425.089 3
 3 15 -17 131.511 465.108 2
 3 -15 -17 1748.84 812.174 1
 3 15 -16 704.076 440.643 2
 3 -15 -16 633.148 452.458 1
 -3 15 16 1007.47 408.992 3
 -3 15 15 25242.2 2210.98 3
 3 15 -15 23443.6 2299.42 2
 3 -15 -15 27123.5 2753.12 1
 -3 15 14 16871 1741.89 3
 3 15 -14 17039.7 1890.48 2
 3 -15 -14 17773.8 2229.26 1
 3 -15 -13 98447.6 5043.36 1
 -3 15 13 101195 4151.61 3
 3 15 -13 105210 4459.05 2
 3 -15 -12 1004.27 609.039 1
 3 15 -12 1211.64 582.951 2
 -3 15 12 -1222.27 490.47 3
 3 15 -11 1890.69 565.87 2
 3 -15 -11 1166.23 520.059 1
 -3 15 11 1099.58 348.93 3
 -3 15 10 6437.2 987.608 3
 3 15 -10 6095.01 943.28 2
 3 -15 -10 7586.35 1362.54 1
 -3 15 9 88986 3521.2 3
 3 15 -9 85603 3333.39 2
 -3 15 9 78161.6 3565.54 2
 3 -15 -9 92753 4511.36 1
 -3 -15 8 48762.4 1866.31 1
 3 -15 -8 42637.7 2389.66 3
 3 15 -8 44302.5 2273.86 2
 -3 15 8 45673.3 2658.19 2
 -3 15 8 47040.1 2529.47 3
 3 -15 -8 51854.3 3310.94 1
 -3 15 7 12555.7 1357.45 2
 3 -15 -7 17175.9 1869.57 1
 -3 -15 7 20605.7 1802.43 3
 -3 -15 7 15392.9 1130.73 1
 3 -15 -7 13569.8 1335.02 3
 3 15 -7 13143.5 1159.38 2
 -3 15 7 12582.6 1286.53 3
 -3 15 6 4521 808.87 2
 3 -15 -6 4966.94 809.208 3
 -3 -15 6 6274.51 764.277 1
 -3 -15 6 5899.04 939.395 3
 3 15 -6 5656.5 718.498 2
 -3 15 6 6092.15 883.022 3
 3 -15 -6 6170 1111.89 1
 3 15 -5 2456.78 444.784 2
 -3 -15 5 2196.96 489.208 1
 -3 15 5 1689.76 471.727 3
 -3 15 5 2786.78 605.714 2
 -3 -15 5 2663.26 603.875 3
 3 -15 -5 1500.31 228.937 3
 3 15 -4 25260.8 1301.68 2
 -3 15 4 26483.3 1825.01 3
 -3 -15 4 29501.6 1805.43 1
 3 -15 -4 23267.4 1726.05 3
 -3 -15 4 25658.8 1788.68 3
 -3 -15 3 175719 4575.96 1
 3 -15 -3 160947 4529.9 3
 -3 -15 3 175402 4427.29 3
 -3 15 3 162447 4548.51 3
 3 -15 -2 20383.4 1630.51 3
 3 15 -2 20298.5 1447.2 3
 -3 -15 2 21324.8 1468.04 3
 -3 -15 2 19366.9 1585.44 1
 -3 15 2 18171.4 1541.07 3
 3 15 -1 1173.23 315.351 3
 -3 15 1 1520.44 469.798 3
 -3 -15 1 1403.46 442.466 1
 3 -15 -1 796.39 321.102 3
 -3 -15 1 1461.58 400.286 3
 3 -15 0 446.506 371.956 3
 -3 -15 0 203.484 312.2 1
 -3 -15 0 43.6481 155.847 3
 -3 15 0 -47.5498 266.45 3
 3 15 0 89.0982 115.125 3
 3 15 0 87.8267 72.9108 2
 3 15 1 198.832 119.498 2
 -3 -15 -1 269.929 162.811 3
 -3 15 -1 -40.3358 250.376 3
 -3 -15 -1 139.008 211.254 1
 3 -15 1 -112.552 206.846 3
 3 15 1 286.157 169.124 3
 3 15 2 23500.5 1249.88 3
 3 15 2 23349.2 1092.62 2
 -3 -15 -2 23472 1243.36 3
 -3 15 -2 24516 1926.62 3
 -3 -15 -2 23911.7 1978.16 1
 3 -15 2 25815.8 1961.13 3
 3 15 3 133585 2829.14 3
 3 15 3 134795 2840.72 2
 -3 15 -3 138029 4619.64 3
 -3 -15 -3 139285 2872.53 3
 3 -15 3 146429 4780.68 3
 -3 -15 -3 147979 5002.29 1
 3 -15 4 8016.35 1154.11 3
 3 15 4 8616.42 778.725 2
 -3 -15 -4 7226.46 634.446 3
 -3 15 -4 8812.91 1209.43 3
 3 15 4 7645.51 662.581 3
 -3 -15 -4 9815.31 1327.35 1
 3 15 5 2692.86 377.647 3
 -3 -15 -5 2502.35 759.19 1
 3 15 5 3099.54 516.416 2
 -3 15 -5 1708.37 540.719 3
 3 15 6 2715.95 406.135 3
 -3 15 -6 2289.61 652.756 3
 -3 -15 -6 1652.31 559.697 1
 3 15 6 2000.45 443.136 2
 -3 15 -7 27858.8 2328.54 3
 3 15 7 31133.7 1828.63 2
 -3 -15 -7 28417.3 2438.04 1
 3 15 7 27198.5 1254.01 3
 -3 -15 -8 55182.8 3473.4 1
 -3 15 -8 48045.8 3147.68 3
 3 15 8 52692.5 1810.12 3
 3 15 8 54721.6 2545.06 2
 -3 15 -9 70637.5 3943.03 3
 3 15 9 68673.9 3020.7 2
 3 15 9 70962.3 2195.67 3
 3 15 10 6042.97 687.199 3
 -3 15 -10 6099.36 1123.03 2
 3 15 10 7019.53 1016.06 2
 -3 15 -10 4500.43 1051.9 3
 3 15 11 -91.1125 429.415 2
 3 15 11 323.99 154.575 3
 -3 15 -11 502.801 436.555 2
 -3 15 -12 395.297 298.54 2
 3 15 12 846.024 320.511 3
 -3 15 -13 50040.6 3475.44 2
 3 15 13 46653 2234.52 3
 3 15 14 27991.9 1818.57 3
 -3 15 -14 31455.8 2859.9 2
 -3 15 -15 20367.2 2387.36 2
 -3 15 -16 1649.27 664.751 2
 -3 15 -17 -80.3835 673.858 2
 -3 15 -18 3428.87 1094.6 2
 -3 15 -19 50143.8 4256.43 2
 3 17 -20 23141.3 2756.6 2
 3 17 -19 15803.8 2221.02 2
 3 17 -18 5860.48 1292.41 2
 3 -17 -17 -47.5278 505.468 1
 -3 17 17 -1448.59 604.744 3
 3 17 -17 296.117 353.002 2
 3 -17 -16 49.8284 479.311 1
 -3 17 16 628.47 501.556 3
 3 17 -16 1312.12 521.35 2
 -3 17 15 6315.08 1136.1 3
 3 -17 -15 4404.1 1170.8 1
 3 17 -15 6780.93 1266.01 2
 3 17 -14 76237.3 4025.73 2
 3 -17 -14 83405.2 5018.34 1
 -3 17 14 77905.1 3791.27 3
 3 -17 -13 47757.6 3715.42 1
 -3 17 13 43054.8 2764.11 3
 3 17 -13 50056.1 3128.71 2
 3 17 -12 4944.65 942.823 2
 3 -17 -12 6001.96 1327.91 1
 -3 17 12 5377.48 987.646 3
 -3 17 11 -106.285 329.059 3
 3 17 -11 401.967 352.003 2
 3 -17 -11 -105.259 537.99 1
 3 -17 -10 228.365 512.477 1
 3 17 -10 -105.767 316.104 2
 -3 17 10 -182.233 255.716 3
 3 17 -9 22316.3 1733.97 2
 -3 17 9 20559 1763.35 3
 3 -17 -9 20944.2 2278.48 1
 3 -17 -8 75656.4 3318.94 3
 -3 -17 8 83234 2744.31 1
 3 -17 -8 79853.9 4319.92 1
 3 17 -8 77665.8 3072.57 2
 -3 17 8 79631.3 3409.87 3
 -3 17 8 73662.1 3485.44 2
 3 -17 -7 5407.12 1166.27 1
 -3 17 7 4935.38 862.922 3
 3 17 -7 6064.81 808.029 2
 3 -17 -7 8055.05 1096.99 3
 -3 -17 7 5176.73 718.855 1
 -3 17 7 2630.37 291.168 2
 3 17 -6 1175.09 348.802 2
 -3 -17 6 785.521 332.776 1
 3 -17 -6 1927.79 708.542 1
 -3 17 6 1898.3 544.396 3
 3 -17 -6 1750.38 571.418 3
 -3 -17 6 1213.5 495.761 3
 -3 17 6 1066.3 488.338 2
 3 -17 -5 2.68597 357.474 1
 -3 17 5 669.736 335.726 2
 3 17 -5 56.2562 144.724 2
 -3 17 5 513.363 344.709 3
 -3 -17 5 -538.227 290.418 1
 3 -17 -5 436.757 362.756 3
 -3 -17 5 333.818 218.531 3
 -3 -17 4 4005.18 735.191 1
 3 -17 -4 4019.62 776.141 3
 3 17 -4 3420.34 509.158 2
 -3 17 4 4078.09 765.331 3
 -3 -17 4 3799.02 758.354 3
 -3 -17 3 13383.8 1383.2 1
 3 -17 -3 12635.9 1357.65 3
 -3 17 3 14596.3 1445.5 3
 -3 -17 3 15383.5 1403.3 3
 3 -17 -2 62839.5 3015.42 3
 -3 17 2 56263.7 2862.35 3
 -3 -17 2 61026.6 2664.96 3
 3 17 -2 57034.1 2586.21 3
 -3 -17 2 63325.7 3071.56 1
 -3 -17 1 2176.68 618.591 1
 3 17 -1 2381.01 531.795 3
 -3 17 1 2457.59 666.52 3
 3 -17 -1 1132.84 461.676 3
 -3 -17 1 1943.7 505.923 3
 -3 -17 0 1071.94 343.784 3
 3 17 0 2205.04 477.677 3
 -3 -17 0 1321.66 474.198 1
 3 -17 0 1112.94 465.095 3
 3 17 0 1454.95 266.494 2
 -3 17 0 1263.91 416.719 3
 3 -17 1 307.846 239.988 3
 -3 -17 -1 -22.4706 393.24 1
 -3 -17 -1 459.418 259.642 3
 3 17 1 343.717 170.519 2
 3 17 1 87.9021 203.803 3
 -3 17 -1 187.865 261.872 3
 -3 -17 -2 104097 2851.27 3
 -3 -17 -2 104736 4401.81 1
 3 -17 2 105786 4193.94 3
 3 17 2 98173.4 2765.16 3
 3 17 2 99082.8 2359.46 2
 -3 17 -2 94962.1 3988.25 3
 3 17 3 39761 1679.59 3
 3 17 3 38379.8 1562.91 2
 -3 17 -3 40227.7 2643.7 3
 -3 -17 -3 43764.6 1761.92 3
 -3 -17 -3 41911.7 2854.58 1
 3 17 4 56735 1936.55 3
 3 17 4 56645.4 2049.01 2
 -3 -17 -4 57260.9 1934.72 3
 -3 -17 -4 65254 3644.43 1
 -3 17 -4 55334.5 3219.68 3
 3 17 5 7555.18 801.159 2
 -3 -17 -5 7889.78 1334.95 1
 -3 17 -5 8210.63 1266.81 3
 3 17 5 7293.3 680.667 3
 -3 17 -6 2861.36 807.491 3
 3 17 6 3395.66 459.175 3
 3 17 6 2436.83 482.13 2
 -3 -17 -6 3288.69 946.224 1
 3 17 7 19839.7 1096.64 3
 -3 -17 -7 21647.8 2256.63 1
 3 17 7 20891.9 1507.81 2
 -3 17 -7 18902.9 2024.83 3
 -3 -17 -8 138074 5786.86 1
 -3 17 -8 123495 5306.21 3
 3 17 8 127647 2809.95 3
 3 17 8 125108 3912.41 2
 -3 17 -9 33604.1 2826.03 3
 3 17 9 33652.2 2145.84 2
 3 17 9 31250.3 1451.17 3
 3 17 10 73.3146 190.466 3
 -3 17 -10 252.634 263.163 2
 3 17 10 -88.3245 404.144 2
 -3 17 -10 91.1857 578.168 3
 -3 17 -11 592.858 403.226 2
 3 17 11 419.07 249.423 3
 -3 17 -12 -976.632 546.509 2
 -3 17 -13 13577.3 1873.91 2
 -3 17 -14 66536.3 4232.62 2
 -3 17 -15 10844.5 1803.86 2
 -3 17 -16 1355.11 664.275 2
 -3 17 -17 1210.64 510.472 2
 -3 17 -18 10617.3 1897.91 2
 3 19 -19 28.1182 476.04 2
 3 19 -18 11880.4 1827.05 2
 3 19 -17 343.771 397.712 2
 3 19 -16 84.9025 586.368 2
 3 -19 -16 665.821 847.182 1
 3 -19 -15 1062.52 695.385 1
 3 19 -15 1148.91 646.824 2
 3 19 -14 74083.2 3994.83 2
 3 -19 -14 80280.2 5142.29 1
 -3 19 14 65511.4 3513.17 3
 3 19 -13 -245.869 423.181 2
 -3 19 13 -47.2176 366.523 3
 3 -19 -13 -907.198 620.03 1
 -3 19 12 10810.5 1383.79 3
 3 -19 -12 10056.6 1781.82 1
 3 19 -12 9554.81 1314.03 2
 3 -19 -11 1428.98 689.293 1
 3 19 -11 435.398 290.564 2
 -3 19 11 850.815 431.643 3
 3 19 -10 3355.5 695.834 2
 -3 19 10 4808.68 907.09 3
 3 -19 -10 4622.26 1184.31 1
 3 19 -9 -98.8393 349.54 2
 3 -19 -9 -202.877 600.402 1
 -3 19 9 -812.898 418.523 3
 -3 19 8 93873.7 3858.88 3
 3 19 -8 93026.8 3405.68 2
 -3 -19 8 97059.2 3293.18 1
 3 -19 -8 89004.7 3715.5 3
 3 -19 -8 103157 5210.42 1
 -3 19 7 -205.152 254.736 2
 3 -19 -7 -3.24996 431.002 1
 3 19 -7 91.2892 224.189 2
 -3 19 7 144.622 256.669 3
 3 -19 -7 46.5788 308.796 3
 -3 -19 7 41.3128 217.427 1
 -3 -19 6 243.421 310.652 1
 3 -19 -6 295.974 236.044 3
 3 -19 -6 203.763 455.687 1
 -3 19 6 -285.125 362.982 2
 -3 19 6 -105.859 294.827 3
 3 19 -6 41.227 144.644 2
 -3 19 5 554.955 407.87 2
 -3 -19 5 101.973 215.284 1
 3 -19 -5 196.644 433.562 1
 3 -19 -5 774.271 301.274 3
 -3 -19 5 268.025 259.963 3
 3 19 -5 -34.1513 143.777 2
 -3 19 5 -254.051 294.927 3
 3 19 -4 27477.7 1445 2
 -3 -19 4 31103.4 2203.77 3
 3 -19 -4 28285 2560.43 1
 3 -19 -4 26070.7 2009.93 3
 -3 19 4 26058.8 2045.03 3
 -3 -19 4 29905.5 2143.92 1
 -3 19 4 25541.5 1935.83 2
 3 -19 -3 3193.18 689.62 3
 3 19 -3 3798.81 514.236 2
 -3 -19 3 2930.01 733.816 1
 -3 19 3 4286.56 850.096 3
 -3 -19 3 3566.78 712.106 3
 -3 -19 2 78722.1 3217.36 3
 3 -19 -2 83258 3664.09 3
 -3 -19 2 76555.2 3661.18 1
 -3 19 2 74171.6 3469.78 3
 -3 -19 1 3417.92 680.342 3
 3 -19 -1 5099.4 935.435 3
 3 19 -1 3227.27 434.076 2
 -3 19 1 3464.68 786.547 3
 3 19 -1 3708.3 689.921 3
 -3 -19 1 3944.69 858.388 1
 -3 -19 0 -120.24 201.696 3
 -3 19 0 -35.5616 289.31 3
 3 19 0 -34.166 190.469 3
 -3 -19 0 214.59 409.032 1
 3 19 0 -0.70229 135.614 2
 -3 19 -1 10007.2 1344.78 3
 -3 -19 -1 12726.6 1143.72 3
 -3 -19 -1 12697.7 1573.43 1
 3 19 1 12049 815.596 2
 3 19 1 10930.4 1054.58 3
 3 19 2 82656.4 2764.09 3
 3 19 2 84603.1 2237.03 2
 -3 -19 -2 89235.4 4297.64 1
 -3 -19 -2 84573.7 2776.48 3
 -3 19 -2 89008 4082.71 3
 -3 -19 -3 634.828 504.99 1
 -3 19 -3 531.037 389.32 3
 3 19 3 230.842 139.945 2
 -3 -19 -3 469.641 207.142 3
 3 19 4 50461.2 1945.66 2
 -3 19 -4 51799.4 3237.44 3
 -3 -19 -4 50628.9 1953.76 3
 -3 -19 -4 50849.4 3404.9 1
 3 19 4 51051.8 1967.08 3
 -3 -19 -5 16785.4 1994.7 1
 3 19 5 14465 1125.21 2
 3 19 5 13959.3 987.126 3
 -3 19 -5 14007.5 1748.58 3
 -3 -19 -6 621.284 542.802 1
 3 19 6 225.058 175.882 2
 -3 19 -6 703.838 515.285 3
 3 19 6 190.777 159.596 3
 -3 -19 -7 19628.6 2248.49 1
 -3 19 -7 16350 2010.48 3
 3 19 7 15712.1 998.401 3
 -3 19 -8 111200 5247.17 3
 3 19 8 103890 2528.61 3
 -3 -19 -8 118768 5654.91 1
 -3 19 -9 463.195 472.815 3
 -3 19 -10 971.096 553.042 2
 -3 19 -11 1169.81 520.97 2
 -3 19 -12 -105.667 580.472 2
 -3 19 -13 -996.321 594.955 2
 -3 19 -14 56080.8 3957.3 2
 -3 19 -15 3696.41 1097.29 2
 -3 19 -16 3094.99 1024.79 2
 -3 19 -17 1441.56 618.967 2
 3 -21 -14 41914 3887.08 1
 3 -21 -13 9215.19 1785.68 1
 3 -21 -12 18625.8 2533.54 1
 3 21 -12 13423.5 1408.46 2
 3 21 -11 515.66 447.331 2
 3 -21 -11 575.633 432.324 1
 -3 21 11 -156.455 413.444 3
 3 21 -10 15291.5 1559.43 2
 3 -21 -10 15203.7 2271.91 1
 -3 21 10 15498.2 1641.1 3
 3 -21 -9 15053.3 2135.89 1
 -3 21 9 11427 1414.3 3
 3 21 -9 12523.9 1380.22 2
 3 -21 -8 49508.9 3814.11 1
 -3 21 8 46928 2813.93 3
 3 21 -8 48383.2 2462.94 2
 -3 -21 7 6504.38 956.19 1
 -3 21 7 5486.31 973.514 3
 3 21 -7 7283.97 906.487 2
 3 -21 -7 6902.18 1420.07 1
 3 21 -6 3652.49 611.581 2
 -3 21 6 3298.31 771.136 3
 3 -21 -6 2428.05 833.346 1
 -3 -21 6 4170.24 833.268 1
 3 21 -5 392.361 276.8 2
 -3 -21 5 92.0775 244.82 1
 3 -21 -5 -433.652 454.858 1
 -3 21 5 105.522 258.268 3
 -3 -21 4 29750.4 2310.23 1
 3 -21 -4 33993.8 2940.6 1
 3 21 -4 28736.1 1490.34 2
 -3 21 4 28248.9 2210.61 3
 -3 -21 3 41104.9 2762.94 1
 3 21 -3 36591.8 1584.3 2
 -3 21 3 39846.2 2650.19 3
 -3 -21 3 41517.4 2558.5 3
 3 -21 -3 39704.4 3162.31 1
 3 -21 -2 61333.4 3835.66 1
 -3 21 2 57118.8 3214.11 3
 -3 -21 2 65746.8 3585.19 1
 -3 -21 2 61443.3 2991.7 3
 -3 21 1 167.181 374.088 3
 3 -21 -1 -86.2682 494.207 1
 -3 -21 1 -159.536 351.187 3
 -3 -21 1 73.8991 353.694 1
 3 21 0 158.53 207.632 3
 -3 -21 0 -53.196 314.47 3
 -3 21 0 -170.157 320.704 3
 -3 -21 0 88.349 243.529 1
 3 21 1 872.03 356.925 3
 -3 -21 -1 475.836 436.795 1
 -3 -21 -1 530.261 322.22 3
 -3 21 -1 408.817 445.36 3
 -3 -21 -2 27923.2 2583.56 1
 3 21 2 24672.7 1592.36 3
 -3 21 -2 24522.9 2250 3
 3 21 3 19736.3 1348.19 3
 -3 -21 -3 19944.9 2212.54 1
 -3 21 -3 18097.1 1987.27 3
 3 21 4 46275.1 1969.43 3
 -3 21 -4 46553.3 3233.12 3
 -3 -21 -4 50024.9 3573.85 1
 3 21 5 753.03 287.404 3
 -3 -21 -5 1314.02 739.196 1
 -3 21 -5 745.559 365.408 3
 -3 21 -6 -995.419 564.336 3
 -3 -21 -6 5539.96 1273.25 1
 -3 -21 -7 3855.75 1182.08 1
 -3 21 -7 2993.86 919.149 3
 -3 21 -8 68969.4 4295.61 3
 -3 21 -9 7167.44 1499.35 3
 -3 21 -10 9618.37 1514.95 2
 -3 21 -11 37.983 315.135 2
 -3 21 -12 4755.31 1058 2
 -3 21 -13 5226.52 1224.48 2
 -3 21 -14 34386.9 3144.45 2
 -3 21 -15 2595.28 972.579 2
 -3 21 -16 -1437.33 778.1 2
 3 -23 -11 464.434 701.162 1
 3 -23 -10 19682 2634.45 1
 3 -23 -9 20991 2686.06 1
 3 -23 -8 7004.79 1557.29 1
 -3 23 8 7223.61 1146.63 3
 3 -23 -7 7169.59 1546.57 1
 -3 23 7 6588.85 1095.88 3
 -3 23 6 13468.3 1578.56 3
 3 -23 -6 11045.3 1835.34 1
 -3 -23 6 12775.5 1516.42 1
 3 -23 -5 4967.66 1257.85 1
 -3 -23 5 3166.53 778.849 1
 -3 23 5 3389.3 781.974 3
 3 -23 -4 27142.1 2794.93 1
 -3 -23 4 28629 2409.75 1
 -3 23 4 26794.7 2249.77 3
 3 -23 -3 63821 4207.31 1
 -3 -23 3 70267.5 3839.52 1
 -3 23 3 62181 3467.34 3
 -3 23 2 11974.9 1549.78 3
 -3 -23 2 11426.8 1607.11 1
 3 -23 -2 11050.1 1720.09 1
 3 -23 -1 4659.62 1123.79 1
 -3 -23 1 3951.52 1007.45 1
 -3 23 1 3573.39 873.442 3
 3 -23 0 -1464.34 679.07 1
 -3 23 0 684.267 454.369 3
 -3 -23 0 161.333 341.791 1
 3 -23 1 1426.34 626.142 1
 -3 23 -1 1180.98 522.541 3
 -3 -23 -1 1092.69 591.781 1
 -3 23 -2 4719.62 1020.47 3
 -3 -23 -2 5602.75 1258.62 1
 3 -23 2 5272.98 1169.62 1
 3 -23 3 53839 3483.79 1
 -3 23 -3 53749.5 3569.16 3
 -3 -23 -3 51715.4 3768.96 1
 3 -23 4 25152.9 2352.56 1
 -3 23 -4 28821.2 2662.62 3
 -3 -23 -4 26399.9 2759.58 1
 -3 23 -5 825.035 401.199 3
 -3 -23 -5 1879.05 843.454 1
 -3 23 -6 3467.91 970.399 3
 -3 -23 -6 5047.2 1282.56 1
 -3 23 -7 6476.87 1365.08 3
 3 -23 8 2085.78 641.487 1
 -3 23 -8 3677 1164.72 3
 -3 23 -9 17062.3 1982.8 2
 -3 23 -10 4663.45 1112.93 2
 -3 23 -11 -932.61 562.403 2
 -3 23 -12 15546.9 2043.97 2
 -3 23 -13 21730.3 2496.27 2
 -3 23 -14 8716.59 1646.32 2
 3 -25 -8 -298.482 688.486 1
 3 -25 -7 16624.6 2410.15 1
 3 -25 -6 1894.59 925.871 1
 3 -25 -5 456.247 421.599 1
 -3 25 5 1193.69 513.378 3
 -3 -25 4 10637.1 1573.67 1
 -3 25 4 10318.5 1467.6 3
 3 -25 -4 11163.3 1930.52 1
 -3 25 3 38261.8 2839.28 3
 -3 -25 3 41149.6 3120.17 1
 3 -25 -3 42669.2 3636.57 1
 -3 -25 2 261.182 605.528 1
 3 -25 -2 1369.21 658.692 1
 -3 25 2 1367.57 588.001 3
 3 -25 -1 15995.9 2153.05 1
 -3 -25 1 14619.9 1928.23 1
 -3 25 1 13033.6 1695.36 3
 -3 25 0 720.817 395.017 3
 -3 -25 0 103.877 457.099 1
 3 -25 0 129.702 455.772 1
 -3 25 -1 20570.5 2246.14 3
 -3 -25 -1 22336.2 2503.05 1
 3 -25 1 19118 2303.99 1
 -3 -25 -2 1118.83 630.684 1
 3 -25 2 2545.87 867.587 1
 -3 25 -2 659.618 500.238 3
 3 -25 3 34153.3 2946.62 1
 -3 25 -3 27287.2 2647.78 3
 -3 -25 -3 31568 3131.35 1
 -3 25 -4 1739.89 686.528 3
 3 -25 4 1497.01 685.268 1
 -3 -25 -4 2019.49 787.329 1
 3 -25 5 3281.58 939.833 1
 -3 25 -5 2454.92 834.085 3
 -3 25 -6 6668.93 1438.38 3
 3 -25 6 8051.76 1348.13 1
 -3 25 -7 30676.3 3047.14 3
 3 -27 -4 -143.534 560.277 1
 3 -27 -3 12852.2 2094.1 1
 3 -27 -2 2682.88 881.073 1
 3 -27 -1 30691.9 3135.37 1
 -3 27 0 173.449 447.158 3
 3 -27 0 -15.9612 375.429 1
 3 -27 1 18610.6 2345.49 1
 -3 27 -1 15849.7 2035.23 3
 3 -27 2 2793.67 728.924 1
 -3 27 -2 2306.04 711.225 3
 -3 27 -3 14083.9 1926.69 3
 3 -27 3 15809.2 2110.38 1
 -3 27 -4 1338.27 810.099 3
 3 -27 4 640.009 386.326 1
 -3 27 -5 10108.6 1793.47 3
 -3 27 -6 2233.68 835.372 3
 3 -29 0 1251.05 913.914 1
 3 -29 1 14059.5 2143.13 1
 3 -29 2 11009.6 1835.65 1
 4 0 -22 159544 7371.25 2
 4 0 -21 599.236 663.712 2
 4 0 -20 3.85328 572.995 2
 4 0 -19 -415.953 586.838 2
 4 0 -18 42913.2 3332.67 2
 4 0 -17 811.447 523.651 2
 4 0 -16 214767 6911.63 2
 4 0 -15 -2.62775 351.561 2
 4 0 -14 8761.4 1308.36 2
 4 0 -13 26.5013 294.669 2
 -4 0 13 -447.263 331.225 2
 4 0 -12 150367 3441.09 1
 -4 0 12 140861 4694.95 2
 4 0 -12 142452 4710.22 2
 4 0 -11 -263.957 170.003 1
 4 0 -11 89.3187 235.487 2
 -4 0 11 51.3436 174.484 2
 4 0 -10 42954.5 1678.46 1
 -4 0 10 38030.6 2216.16 2
 4 0 -10 41491.8 2321.13 2
 4 0 -9 19.0727 195.281 2
 4 0 -9 -18.0403 115.725 1
 -4 0 9 1.47392 167.762 2
 -4 0 8 26516.6 1649.24 2
 4 0 -8 26719.3 1653.08 2
 -4 0 7 2.28729 128.477 2
 4 0 -7 43.3071 170.943 2
 -4 0 6 312426 4919.97 2
 4 0 -6 335646 5104.53 2
 -4 0 5 196.317 151.791 2
 4 0 -5 200.883 121.512 2
 -4 0 4 32025.9 1340.18 2
 -4 0 3 373.054 147.701 2
 -4 0 3 48.8503 87.0309 3
 -4 0 2 123663 2283.72 3
 4 0 -2 119694 2260.94 3
 -4 0 1 -10.435 74.572 3
 4 0 -1 235.587 120.216 3
 -4 0 0 25882.8 953.397 3
 4 0 0 25532.3 943.33 3
 -4 0 -1 126.248 80.4392 3
 4 0 1 182.243 100.823 3
 -4 0 -2 69311.8 1688.91 3
 4 0 2 72277.3 1717.13 3
 -4 0 -3 8.58045 86.5612 3
 4 0 3 365.939 155.821 3
 4 0 4 9021.28 715.032 3
 -4 0 -4 9141.22 718.135 3
 -4 0 -5 153.248 100.104 3
 4 0 5 215.092 155.253 3
 -4 0 -6 279899 5090.47 2
 -4 0 -6 284469 4673.99 3
 4 0 6 280262 4635.65 3
 -4 0 -7 8.09786 194.5 2
 4 0 7 119.196 183.376 3
 4 0 8 3226.88 588.564 3
 -4 0 -8 2295.61 541.819 2
 -4 0 -9 -44.094 245.705 2
 4 0 9 115.664 202.275 3
 -4 0 -10 111419 4060.18 2
 4 0 10 116033 3794.52 3
 4 0 11 296.025 294.191 3
 4 0 11 -140.549 253.792 1
 -4 0 -11 144.992 375.949 2
 -4 0 -12 88804.6 3976.54 2
 4 0 12 92975.2 3463.87 1
 4 0 12 95041.2 3770.57 3
 4 0 13 -34.095 234.001 1
 4 0 13 -27.9436 276.402 3
 -4 0 -13 166.095 294.835 2
 -4 0 -14 1019.23 423.197 2
 4 0 14 1464.9 448.053 1
 -4 0 -15 -2142.9 753.244 2
 4 0 15 -1069.76 455.454 1
 -4 0 -16 146154 5981.96 2
 4 0 16 136743 4745.69 1
 -4 0 -17 -115.914 435.438 2
 -4 0 -18 21316.2 2488.87 2
 -4 0 -19 -1761.29 813.23 2
 -4 0 -20 270.303 441.2 2
 -4 0 -21 -1726.09 900.196 2
 4 2 -22 86032.9 5420.42 2
 4 -2 -22 90526.6 5581.97 2
 4 2 -21 9699.52 1760.07 2
 4 -2 -21 13535.4 2161.06 2
 4 2 -20 4550.8 1203.88 2
 4 -2 -20 6048.54 1462.27 2
 4 2 -19 1535.96 844.137 2
 4 -2 -19 3702.37 1026.63 2
 4 2 -18 64851.7 4068.86 2
 4 -2 -18 67079.5 4190.98 2
 4 2 -17 12630.8 1771.71 2
 4 -2 -17 9339.04 1520.48 2
 4 2 -16 128097 5320.27 2
 4 -2 -16 129866 5429.82 2
 4 2 -15 4698.91 990.532 2
 4 -2 -15 5444.46 1066.82 2
 4 2 -14 13124.3 1575.2 2
 4 -2 -14 13222.3 1235.82 1
 4 -2 -14 11598 1488.05 2
 4 -2 -13 3563.56 761.615 2
 -4 2 13 2003.85 613.78 2
 4 -2 -13 3542.87 622.172 1
 4 2 -13 2859.33 710.235 2
 -4 -2 13 2079.18 549.173 2
 4 -2 -12 79194.4 2810.35 1
 4 2 -12 73763.5 3382.86 2
 -4 2 12 72231.4 3378.89 2
 -4 -2 12 75532.4 3402.69 2
 4 -2 -12 74523.7 3468.67 2
 4 2 -11 124467 4164.08 2
 4 -2 -11 130228 3459.18 1
 -4 -2 11 122698 4127.27 2
 4 -2 -11 124957 4266.25 2
 -4 2 11 119599 4179.5 2
 4 2 -10 156811 2616.95 1
 -4 2 10 148790 4440.64 2
 -4 -2 10 152297 4368.58 2
 4 2 -10 147574 4326.99 2
 4 -2 -10 147647 4431.68 2
 4 -2 -10 160087 3690.65 1
 4 2 -9 2697.03 558.149 2
 4 -2 -9 3153.23 513.331 1
 -4 -2 9 2522.23 555.737 2
 4 2 -9 3393.15 354.079 1
 -4 2 9 3186.16 626.151 2
 4 -2 -9 2993.2 612.128 2
 -4 2 8 425.395 293.261 2
 4 2 -8 100.802 164.321 2
 -4 -2 8 -41.7445 136.621 2
 4 -2 -8 191.439 223.804 2
 4 2 -8 211.046 92.6864 1
 -4 -2 7 26454.8 1500.36 2
 4 -2 -7 26711.8 1602.11 2
 4 2 -7 26913.6 1529.24 2
 -4 2 7 27619.3 1616.06 2
 4 -2 -6 324293 5217.42 2
 -4 -2 6 337158 4957.92 2
 -4 2 6 332828 5173.56 3
 4 2 -6 350300 5043.61 2
 -4 2 6 320628 5162.46 2
 -4 -2 5 81038.9 2216.44 2
 4 2 -5 79172.7 2201.93 2
 -4 2 5 75783.5 2340.96 2
 -4 2 5 78315.9 2359.83 3
 -4 -2 4 2959.67 388.872 2
 4 2 -4 3344.25 422.67 2
 -4 2 4 3044.52 444.213 2
 -4 2 4 3046.51 442.294 3
 4 -2 -3 153866 2938.89 3
 -4 -2 3 158811 2498.65 2
 -4 2 3 157707 2982.48 3
 -4 2 2 1071.46 246.884 3
 4 -2 -2 960.713 237.881 3
 4 -2 -1 1622.14 292.321 3
 -4 2 1 935.113 220.309 3
 -4 -2 1 848.035 171.498 3
 4 -2 0 524935 5012.02 3
 4 2 0 502253 3432.31 3
 -4 -2 0 555170 3583.46 3
 -4 2 0 550501 5090.75 3
 4 2 1 70279.5 1256.78 3
 -4 2 -1 72943.2 1911.47 3
 -4 -2 -1 73983.1 1293.04 3
 4 -2 1 73415.5 1930.62 3
 4 2 2 4083.29 327.685 3
 -4 -2 -2 4186.42 336.182 3
 -4 2 -2 3475.23 447.371 3
 4 -2 2 5870.55 570.933 3
 4 -2 3 5155.07 570.767 3
 4 2 3 6745.31 479.556 3
 -4 2 -3 5912.19 608.196 3
 -4 -2 -3 6062.35 453.748 3
 -4 -2 -4 8423.58 609.279 3
 -4 2 -4 8203.63 766.365 3
 4 -2 4 8374.14 772.815 3
 -4 -2 -4 7970.25 710.007 2
 4 2 4 8431.31 607.659 3
 -4 2 -5 113068 2982.63 3
 -4 -2 -5 110850 2898.03 2
 4 2 5 110408 2453.32 3
 4 -2 5 113979 3015.7 3
 4 2 6 193214 3553.84 3
 -4 2 -6 188603 4131.54 3
 -4 -2 -6 187913 4105.79 2
 4 -2 6 184257 4122.84 3
 4 -2 7 2762.18 551.24 3
 -4 2 -7 2680.88 567.031 2
 4 2 7 3243.18 498.486 3
 -4 2 -7 2927.69 566.175 3
 -4 -2 -7 2610.43 527.657 2
 -4 2 -8 3747.91 700.066 2
 -4 -2 -8 4947.54 746.573 2
 4 -2 8 5709.43 809.566 3
 4 -2 9 2582.12 569.009 3
 4 2 9 2934.87 560.624 3
 -4 -2 -9 3078.8 638.398 2
 4 2 9 4011.32 676.58 1
 -4 2 -9 3310.07 688.863 2
 -4 -2 -10 63170.8 3018.68 2
 4 2 10 63687 2695.54 3
 4 -2 10 61097.3 2892.6 3
 4 2 10 61977.7 2782.64 1
 -4 2 -10 67336.9 3196.01 2
 4 2 11 96993.4 3514.71 3
 4 -2 11 94998.4 3778.53 3
 -4 -2 -11 101239 4017.59 2
 4 2 11 98223.1 3622.75 1
 -4 2 -11 103750 4135.37 2
 4 2 12 94147.8 3656.15 1
 -4 -2 -12 99579.1 4175.83 2
 4 -2 12 99461.9 4004.81 3
 -4 2 -12 104166 4324.5 2
 4 2 12 99821.7 3727.99 3
 -4 2 -13 3963.91 918.998 2
 4 2 13 2917.56 703.692 3
 -4 -2 -13 3309.14 783.687 2
 4 -2 13 4170.73 746.568 1
 4 2 13 3574.23 762.927 1
 -4 -2 -14 3961.71 933.036 2
 4 -2 14 4034.38 808.863 1
 4 2 14 3076.63 701.375 3
 4 2 14 3458.61 723.51 1
 -4 2 -14 3959.05 953.97 2
 -4 2 -15 2890.43 909.309 2
 4 -2 15 2978.68 669.484 1
 -4 -2 -15 3154.39 871.461 2
 4 2 15 3424.72 767.324 1
 -4 2 -16 92604.9 4825.35 2
 4 -2 16 86797 3604.8 1
 -4 -2 -16 94220.6 4781.14 2
 -4 2 -17 57033.9 3930.35 2
 -4 -2 -17 59013.4 3931.96 2
 4 -2 17 57505 3014.67 1
 -4 2 -18 12663.4 1984 2
 -4 -2 -18 14454.2 2007.06 2
 -4 -2 -19 4684.21 1264.13 2
 -4 2 -19 4807.1 1223.94 2
 -4 -2 -20 1550.24 818.537 2
 -4 2 -20 1290.33 767.399 2
 -4 2 -21 5353.6 1406.58 2
 -4 -2 -21 3883.65 1247.89 2
 4 -4 -22 14208.8 2275.66 2
 4 4 -22 18093 2486.48 2
 4 -4 -21 43956.9 3800.61 2
 4 4 -21 42062.3 3689.96 2
 4 4 -20 10491.3 1756.28 2
 4 -4 -20 10317.2 1816.8 2
 4 -4 -19 1329.13 689.312 2
 4 4 -19 732.627 521.66 2
 4 4 -18 14789.1 1957.18 2
 4 -4 -18 16799.1 2101.74 2
 4 4 -17 131745 5632.83 2
 4 -4 -17 128583 5646.31 2
 4 -4 -16 21383.3 2229.68 2
 4 4 -16 20009.1 2102.98 2
 4 -4 -15 6604.16 986.161 1
 4 -4 -15 4378.58 1054.68 2
 4 4 -15 5008.45 1011.21 2
 4 -4 -14 520.663 353.389 1
 4 4 -14 308.096 262.665 2
 4 -4 -14 242.721 369.387 2
 4 4 -13 708.283 407.076 2
 4 -4 -13 1247.53 407.371 1
 -4 -4 13 669.749 401.825 2
 4 -4 -13 508.604 416.131 2
 4 -4 -12 20538.7 1569.64 1
 4 4 -12 21207.8 1821.34 2
 -4 -4 12 21939.8 1833.48 2
 4 -4 -12 23171.7 1967.25 2
 -4 4 12 20589.2 1825.53 2
 4 4 -11 196817 5244.63 2
 4 -4 -11 201422 5528.44 2
 4 -4 -11 207164 4815.02 1
 -4 4 11 186562 5271.16 2
 -4 -4 11 203501 5292.87 2
 -4 4 10 132178 4253.12 2
 4 -4 -10 139674 4350.4 2
 4 -4 -10 139614 3833.13 1
 -4 -4 10 133239 4067.88 2
 4 4 -10 140242 4164.75 2
 -4 4 9 8067.18 963.367 3
 4 4 -9 8417.92 956.612 2
 4 -4 -9 7613.77 985.589 2
 -4 -4 9 6858.39 886.607 2
 -4 4 9 8161.38 1027.72 2
 -4 4 8 5481.83 797.357 2
 -4 4 8 5359.77 751.451 3
 4 4 -8 5093.54 716.213 2
 4 -4 -8 5539.11 802.188 2
 -4 -4 8 5772.54 747.899 2
 4 -4 -7 1052.69 350.128 2
 -4 4 7 784.789 299.771 3
 4 4 -7 1031.95 272.655 2
 -4 -4 7 630.657 234.008 2
 -4 4 7 850.141 303.887 2
 -4 4 6 84692.4 2687.39 3
 -4 -4 6 89610.5 2514.09 2
 4 4 -6 92640.6 2559.46 2
 -4 4 6 87846.6 2807.66 2
 4 -4 -5 266850 4532 3
 -4 -4 5 308208 4193.14 2
 -4 4 5 280608 4619.46 3
 -4 4 5 273802 4688.13 2
 4 4 -5 303252 4176.57 2
 4 -4 -4 107222 2736.45 3
 -4 4 4 110989 2800.24 3
 -4 -4 4 116173 2288.24 2
 4 4 -4 117492 2299.02 2
 4 -4 -3 2219.28 386.301 3
 -4 4 3 2208.85 379.511 3
 4 4 -3 1644.71 243.01 2
 -4 -4 3 1897.57 251.311 2
 -4 4 2 157541 3105.15 3
 4 -4 -2 147257 3010.67 3
 -4 -4 2 156630 1847.8 2
 4 -4 -1 192805 3429.58 3
 -4 4 1 208555 3523.09 3
 -4 -4 0 64444.4 1041.36 3
 -4 4 0 70150.4 2062.7 3
 4 -4 0 65113.9 1997.68 3
 -4 4 -1 55725.8 1897.23 3
 4 -4 1 55411.8 1900.14 3
 -4 -4 -2 27833.9 984.511 2
 -4 4 -2 27050.4 1369.07 3
 4 -4 2 27489.2 1387.56 3
 -4 -4 -3 729.493 190.003 2
 4 4 3 622.951 114.743 3
 4 -4 3 778.102 277.159 3
 -4 4 -3 567.252 232.524 3
 -4 -4 -4 77654 2138.69 2
 4 -4 4 73745.3 2500.26 3
 -4 4 -4 74334.1 2509.41 3
 4 4 4 74058 1532.33 3
 -4 -4 -5 271282 4428.01 2
 -4 4 -5 259668 4919.13 3
 4 -4 5 267329 4977.02 3
 4 4 5 264713 4967.43 1
 4 4 5 263322 3342.97 3
 4 -4 6 6911.42 856.517 3
 -4 4 -6 7461.6 883.612 3
 4 4 6 8078.68 670.088 3
 -4 -4 -6 8773.37 869.744 2
 4 4 6 7435.27 884.261 1
 -4 -4 -7 20211.1 1418.51 2
 4 4 7 18877.4 1119.32 3
 4 -4 7 19850.3 1505.15 3
 4 4 7 21035.9 1543.51 1
 -4 4 -7 19702 1506.07 3
 4 -4 8 6979.85 955.15 3
 -4 -4 -8 6597.06 873.788 2
 -4 4 -8 6873.57 962.387 2
 -4 4 -8 7811.14 992.282 3
 4 4 8 6407.84 890.231 1
 4 4 8 6523.84 724.808 3
 4 4 9 805.847 309.061 3
 -4 -4 -9 922.635 364.524 2
 4 -4 9 884.463 371.544 3
 4 4 9 747.582 339.458 1
 -4 4 -9 1151.54 443.25 2
 -4 4 -10 28713 2143.04 2
 4 4 10 32457.4 2112.32 1
 -4 -4 -10 30127 2088.05 2
 4 4 10 30136.9 1767.21 3
 4 -4 10 28217.9 2057.96 3
 4 4 11 199534 4835.47 3
 -4 4 -11 198334 5845.55 2
 -4 -4 -11 206285 5689.17 2
 4 -4 11 206104 5765.46 3
 4 4 11 192884 5311.5 1
 4 4 12 92112.8 3794.9 1
 -4 -4 -12 98206.5 4125.65 2
 4 4 12 88862.9 3407.91 3
 -4 4 -12 94983.4 4217.44 2
 -4 4 -13 5104.46 1061.31 2
 4 4 13 3239.3 692.69 3
 -4 -4 -13 2843.65 729.673 2
 4 4 13 3990.92 847.682 1
 -4 -4 -14 2621.23 746.254 2
 4 -4 14 4277.81 752.184 1
 -4 4 -14 3495.16 895.442 2
 4 4 14 3391.59 762.572 3
 -4 4 -15 13815.1 1806 2
 4 -4 15 14511.1 1382.58 1
 -4 -4 -15 12377.9 1697.14 2
 -4 -4 -16 34671.6 2921.61 2
 4 -4 16 34888.4 2193.41 1
 -4 4 -16 37369.2 3086.22 2
 -4 -4 -17 100173 5122.52 2
 -4 4 -17 103031 5311.39 2
 -4 4 -18 13100.5 2000.49 2
 -4 -4 -18 15450.5 2116.59 2
 -4 -4 -19 19.4405 515.244 2
 -4 4 -19 1362.25 823.9 2
 -4 4 -20 3942.96 1202.81 2
 -4 -4 -20 2865.43 1026.07 2
 -4 -4 -21 15154.6 2323.21 2
 -4 4 -21 15706 2357.88 2
 -4 6 24 4827.96 1374.16 3
 -4 6 23 38329.7 3532.15 3
 4 6 -22 851.406 820.29 2
 -4 6 22 738.845 551.285 3
 4 -6 -22 -118.408 665.502 2
 4 6 -21 40824.9 3603.38 2
 4 -6 -21 43655.6 3813.57 2
 -4 6 21 39866.9 3394.21 3
 4 6 -20 9620.02 1746.45 2
 -4 6 20 9427.35 1620.11 3
 4 -6 -20 10872.3 1882.9 2
 4 -6 -19 595.744 532.321 2
 4 6 -19 -1576.17 745.608 2
 -4 6 19 365.844 349.598 3
 4 6 -18 15581.5 2001.09 2
 -4 6 18 13797.5 1821.1 3
 4 -6 -18 13412.7 1911.96 2
 4 6 -17 162197 6225.74 2
 4 -6 -17 171065 6575.32 2
 -4 6 17 162328 5967.79 3
 -4 6 16 940.6 464.987 3
 4 6 -16 1858.17 702.653 2
 4 -6 -16 1589.1 572.657 1
 4 -6 -16 1463.3 651.982 2
 4 -6 -15 32878.3 2342.16 1
 -4 6 15 30147.4 2391.58 3
 4 -6 -15 34721.1 2750.69 2
 4 6 -15 31391.2 2532.57 2
 -4 6 14 17167.8 1736.4 3
 4 6 -14 17508.1 1817.14 2
 4 -6 -14 19828 2007.1 2
 4 -6 -14 20023.6 1785.13 1
 -4 6 13 9417.87 1261.34 3
 4 -6 -13 10712 1284.42 1
 4 -6 -13 10392.6 1414.65 2
 4 6 -13 9721.96 1298.4 2
 -4 -6 13 10827 1355.26 2
 4 -6 -12 478.018 347.781 2
 4 6 -12 -132.971 299.525 2
 -4 -6 12 -729.193 417.667 3
 -4 6 12 -8.796 260.108 2
 -4 6 12 329.024 258.023 3
 -4 -6 12 111.902 303.32 2
 4 -6 -12 56.0682 234.173 1
 4 6 -11 291048 6372.82 2
 -4 -6 11 294347 6367.37 2
 -4 6 11 279687 6602.8 2
 4 -6 -11 294091 6772.28 2
 4 -6 -11 303569 6371.1 1
 -4 6 11 270731 6144.24 3
 -4 6 10 2329.77 618.627 2
 4 6 -10 3736.58 690.67 2
 -4 -6 10 3367.37 655.742 2
 4 -6 -10 3693.91 707.581 1
 -4 6 10 3419.26 675.086 3
 4 -6 -10 4536.46 820.365 2
 -4 6 9 1438.62 478.805 2
 -4 6 9 1788.59 476.842 3
 4 6 -9 1764.17 445.157 2
 -4 -6 9 2143.24 508.987 2
 4 -6 -9 2093.7 569.377 2
 4 6 -8 576.972 244.807 2
 -4 -6 8 579.258 245.168 2
 -4 6 8 671.69 272.963 3
 -4 6 8 950.811 366.33 2
 -4 -6 7 104397 2923.5 2
 4 6 -7 103235 2918.87 2
 -4 6 7 96345.8 3075.22 3
 -4 6 7 94963.2 3189.68 2
 -4 6 6 734.065 307.731 2
 -4 -6 6 402.853 188.925 2
 4 6 -6 331.518 154.847 2
 -4 6 6 323.253 249.16 3
 4 -6 -6 439.541 203.446 3
 -4 6 5 129232 3300.26 3
 4 6 -5 130632 2725.59 2
 4 -6 -5 125388 3247.68 3
 -4 6 5 116039 3229.7 2
 -4 -6 5 130509 2708.93 2
 -4 6 4 9643.55 872.566 3
 4 -6 -4 7633.77 778.623 3
 -4 -6 4 8912.19 625.386 2
 4 6 -4 8835.65 536.901 1
 4 6 -4 9009.67 620.193 2
 4 6 -3 27489.5 907.353 2
 -4 -6 3 28536.8 914.118 2
 4 6 -3 28379.2 1089.36 1
 4 -6 -3 24121.1 1367.33 3
 -4 6 3 26494.7 1414.68 3
 -4 6 2 22739.4 1304.72 3
 -4 -6 2 21744.8 991.268 3
 4 -6 -2 21753.6 1268.66 3
 4 6 -2 21913.3 606.372 2
 4 6 -2 22702.9 1065.36 1
 4 -6 -1 291460 4646.76 3
 4 6 -1 304088 4177.01 1
 -4 -6 1 287004 3084.9 3
 -4 6 1 303341 4702.04 3
 4 6 0 13714 957.478 1
 -4 -6 0 12679.5 502.056 3
 -4 6 0 10368.3 889.281 3
 4 -6 0 10508.5 906.066 3
 -4 -6 -1 270081 2152.35 2
 -4 6 -1 277286 4719.39 3
 4 6 1 283651 4601.79 1
 4 -6 1 288550 4779.34 3
 -4 6 -2 1843.84 413.546 3
 4 6 2 1955.27 407.775 1
 -4 -6 -2 1967.85 248.305 2
 4 -6 2 1916.97 411.336 3
 -4 6 -3 6246.89 769.333 3
 -4 -6 -3 6801.19 539.529 2
 4 -6 3 5411.59 706.475 3
 4 6 3 6110.33 750.263 1
 -4 -6 -4 286522 4023.42 2
 4 -6 4 294738 5428.59 3
 4 6 4 283083 2423.48 3
 -4 6 -4 290201 5322.13 3
 4 6 4 282976 5286.86 1
 4 6 5 499526 4048.84 3
 -4 -6 -5 504394 5930.95 2
 4 6 5 504041 7331.81 1
 4 -6 5 498651 7372.7 3
 -4 6 -5 498320 7319.58 3
 4 6 6 14555.5 1305.17 1
 -4 -6 -6 14452.9 1099.61 2
 4 6 6 15188.1 1130.21 2
 4 6 6 15071.4 828.039 3
 4 -6 6 15787.7 1363.4 3
 -4 6 -6 14876.4 1344.51 3
 4 6 7 31241 1983.69 1
 -4 -6 -7 29224.4 1683.48 2
 4 -6 7 32400.1 2033.77 3
 4 6 7 30837.9 1733.52 2
 -4 6 -7 29399.5 1937.41 3
 4 6 7 30652.4 1326.24 3
 4 6 8 9587.33 820.915 3
 -4 6 -8 7517.7 1018.1 3
 4 -6 8 7917.5 1051.17 3
 -4 -6 -8 9976.2 1068.11 2
 4 6 8 7425.69 901.228 2
 4 6 8 8162.96 1050.44 1
 4 6 9 387.947 276.322 1
 -4 -6 -9 308.602 250.537 2
 -4 6 -9 535.329 306.574 2
 4 -6 9 262.694 297.039 3
 -4 6 -9 235.893 231.579 3
 4 6 9 235.829 134.662 3
 -4 6 -10 8937.02 1233.88 2
 4 -6 10 9446.26 1252.96 3
 4 6 10 10816.3 1023.11 3
 4 6 10 10933.3 1305.11 1
 -4 -6 -10 9641.88 1167.52 2
 -4 6 -11 192772 5877.2 2
 -4 -6 -11 196403 5519.21 2
 4 6 11 186195 4506.65 3
 4 6 11 186918 5500.33 1
 4 6 12 10725.5 1359.43 1
 4 6 12 11074.9 1168.21 3
 -4 -6 -12 12629.4 1495.43 2
 -4 6 -12 12286 1533.24 2
 -4 -6 -13 16006.1 1742.11 2
 -4 6 -13 14152.2 1741.9 2
 4 6 13 15681.2 1451.75 3
 4 6 14 2569.1 644.481 3
 -4 -6 -14 3301.31 859.254 2
 -4 6 -14 4173.89 1017.53 2
 4 6 15 28470 2120.52 3
 4 -6 15 32089.8 1981.18 1
 -4 6 -15 32893 2816.6 2
 -4 -6 -15 34104.7 2758.31 2
 4 -6 16 570.697 260.462 1
 -4 -6 -16 601.738 390.052 2
 -4 6 -16 188.01 378.051 2
 -4 -6 -17 87682.6 4798.97 2
 -4 6 -17 83540.7 4844.49 2
 -4 -6 -18 13110.6 1968.44 2
 -4 6 -18 11603.7 1912.86 2
 -4 -6 -19 469.85 419.216 2
 -4 6 -19 -318.42 594.965 2
 -4 6 -20 6495.44 1519.57 2
 -4 -6 -20 8780.82 1753.16 2
 -4 -6 -21 31510.7 3314.77 2
 -4 8 24 1180.07 534.75 3
 -4 8 23 30712 3131.16 3
 4 8 -22 23842 2856.82 2
 4 -8 -22 21788.8 2820.95 2
 -4 8 22 21052.2 2542.64 3
 4 8 -21 42864.7 3704.92 2
 -4 8 21 35439.3 3169.53 3
 4 -8 -21 46652.3 3942.76 2
 4 8 -20 6778.51 1458.36 2
 4 -8 -20 5873.49 1361.8 2
 -4 8 20 4539.22 1114.8 3
 4 8 -19 4688.56 1203.61 2
 4 -8 -19 6267.32 1471.02 2
 -4 8 19 4067.08 1045.53 3
 -4 8 18 740.675 407.413 3
 4 8 -18 450.333 397.641 2
 4 -8 -18 471.951 436.738 2
 -4 8 17 33538 2699.78 3
 4 -8 -17 37326.4 2809.7 1
 4 -8 -17 35207.1 3000.89 2
 4 8 -17 36313.8 2966.97 2
 4 8 -16 25799.2 2407.92 2
 4 -8 -16 22377.7 2333.49 2
 4 -8 -16 25103 2239.73 1
 -4 8 16 24822.8 2276.79 3
 4 8 -15 37630.5 2802.98 2
 4 -8 -15 38966.6 2946.8 2
 -4 8 15 39006.9 2724.2 3
 4 -8 -15 42375.5 2853.11 1
 4 8 -14 5890.77 1075.11 2
 -4 8 14 5329.42 996.675 3
 4 -8 -14 5485.5 1130.27 2
 4 -8 -14 5492.56 1020.43 1
 4 8 -13 57369.5 3153.03 2
 4 -8 -13 57419.3 3143.86 1
 -4 8 13 50114.5 2868.41 3
 4 -8 -13 55036.9 3256.19 2
 4 8 -12 26443.6 2047.02 2
 4 -8 -12 26804.6 2102.69 1
 -4 8 12 25683.3 1973.46 3
 -4 -8 11 83568.1 3732.71 3
 -4 8 11 79295.3 3562.92 2
 4 8 -11 82979 3429.05 2
 4 -8 -11 85004.1 3637.65 1
 -4 8 11 75963.4 3296.64 3
 4 -8 -10 14236.6 1439.22 1
 4 8 -10 15474.4 1398.59 2
 -4 8 10 14349.6 1374.17 3
 -4 8 10 13715.4 1442.54 2
 -4 -8 10 15105 1527.12 3
 -4 8 9 79116.9 3315.85 2
 -4 -8 9 85056.3 3455.62 3
 4 8 -9 86043.7 3089.25 2
 -4 8 9 79907.4 3101.7 3
 4 8 -8 12354.6 1096.97 2
 -4 8 8 12433.7 1183.77 3
 -4 -8 8 12342 1262.78 3
 -4 8 8 10123.8 1154.08 2
 4 8 -7 139256 3432.3 2
 -4 -8 7 149778 4126.65 3
 -4 8 7 137322 3794.29 3
 -4 8 7 131323 3919.4 2
 4 8 -6 101311 2656.48 2
 4 -8 -6 91876 3004.18 3
 -4 8 6 94510.2 3041.49 3
 -4 -8 6 98811.3 3164.48 3
 -4 8 6 86417.2 3061.67 2
 -4 8 5 204956 4384.92 3
 4 -8 -5 197457 4285.83 3
 4 8 -5 210850 3430.08 2
 -4 -8 5 211067 4342.13 3
 -4 8 5 175288 4180 2
 4 -8 -4 362.704 194.404 3
 -4 -8 4 284.428 196.204 3
 -4 8 4 330.528 193.892 3
 4 8 -4 537.879 172.068 2
 4 -8 -3 18481.5 1280.98 3
 4 8 -3 18875.1 741.544 2
 -4 8 3 18017.8 1262.54 3
 -4 -8 3 18499.3 1096.17 3
 4 -8 -2 5361.98 681.737 3
 -4 -8 2 5511.18 545.109 3
 4 8 -2 4939.32 580.136 1
 -4 8 2 4663.13 638.257 3
 4 8 -1 70320 2276.93 1
 -4 -8 1 74988.1 1751.15 3
 4 -8 -1 68147.9 2449.7 3
 -4 8 1 75441.3 2558.9 3
 4 8 0 148876 3480.59 1
 -4 -8 0 156860 2143.12 3
 -4 8 0 158044 3775.24 3
 4 -8 0 149935 3688.6 3
 -4 -8 -1 622761 3314.06 3
 4 8 1 626613 7485.05 1
 4 -8 1 627593 7708.78 3
 -4 8 -1 616326 7585.27 3
 -4 8 -2 9818.99 999.618 3
 4 8 2 10063 535.545 2
 -4 -8 -2 10563.8 551.067 2
 4 8 2 9916.18 1001.93 1
 4 -8 2 10350.7 1024.45 3
 4 8 3 7890.48 583.21 2
 4 8 3 8173.24 930.931 1
 -4 8 -3 7852.35 924.145 3
 4 -8 3 7247.39 889.551 3
 -4 -8 -3 8463.14 602.453 2
 -4 8 -4 15846.3 1357.5 3
 4 8 4 17171.6 970.241 2
 4 8 4 15361.1 1340.97 1
 4 -8 4 16289 1375.19 3
 -4 -8 -4 17380.6 979.294 2
 -4 -8 -5 91782.7 2510.71 2
 4 8 5 90600.9 2484.1 2
 4 -8 5 91213.1 3353.28 3
 4 8 5 78349.7 1450.31 3
 -4 8 -5 89324.5 3304.2 3
 4 8 5 86486.2 3268.09 1
 -4 -8 -6 58037.2 2189.85 2
 4 8 6 54397 2107.58 2
 4 8 6 48745.7 1378.11 3
 4 -8 6 58412.6 2770.39 3
 4 8 6 55054.7 2689.97 1
 -4 8 -6 51921.4 2621.35 3
 -4 -8 -7 58314.8 2376.9 2
 4 8 7 49967.3 1578.37 3
 4 8 7 56899.3 2322.93 2
 4 -8 7 56815.3 2854.92 3
 -4 8 -7 56740.2 2847.16 3
 4 8 7 55003.3 2769.14 1
 -4 -8 -8 2617.6 540.175 2
 -4 8 -8 1969.36 582.094 3
 4 8 8 1867.97 533.374 1
 4 8 8 2334.29 529.134 2
 4 -8 8 1622.73 536.545 3
 4 8 8 1993.43 360.402 3
 -4 -8 -9 25894.5 1802.22 2
 4 8 9 24676.7 1991.46 1
 -4 8 -9 24375.1 2011.97 3
 4 8 9 26141.9 1807.3 2
 4 8 9 24763.2 1368.68 3
 4 -8 9 26973.7 2105.3 3
 -4 -8 -10 4426.07 783.89 2
 4 8 10 3270.98 671.797 2
 -4 8 -10 2647.16 707.052 2
 4 8 10 4373.86 879.739 1
 4 8 10 3656.61 576.839 3
 -4 8 -10 3661.77 827.845 3
 4 8 11 77805.3 2790.41 3
 -4 -8 -11 82725.4 3594.65 2
 4 8 11 76659.5 3456.4 2
 -4 8 -11 76214.1 3782.25 2
 -4 -8 -12 1775.86 520.637 2
 -4 8 -12 1727.53 605.873 2
 4 8 12 1855.43 458.996 3
 -4 -8 -13 38393.5 2706.79 2
 4 8 13 34805.9 2093.64 3
 -4 8 -13 36545.8 2818.48 2
 -4 -8 -14 685.889 441.564 2
 -4 8 -14 131.752 442.136 2
 4 8 14 56.9115 280.651 3
 -4 -8 -15 68026.6 3916.68 2
 -4 8 -15 59957.6 3882.62 2
 4 8 15 59074.7 3004.33 3
 -4 8 -16 30463.8 2858.62 2
 -4 -8 -16 29266.5 2656.38 2
 -4 -8 -17 69648.6 4253.81 2
 -4 8 -17 66470.4 4389.96 2
 -4 -8 -18 -361.89 474.988 2
 -4 8 -18 526.79 570.001 2
 -4 -8 -19 1268.12 735.305 2
 -4 8 -19 1282.3 676.84 2
 -4 -8 -20 404.65 604.918 2
 -4 8 -20 180.605 412.576 2
 -4 -8 -21 50128.6 4156.13 2
 -4 10 23 18307.1 2402.2 3
 -4 10 22 39999.6 3473.6 3
 4 10 -22 43706.5 3903.41 2
 -4 10 21 18227.3 2287.68 3
 4 10 -21 20407.2 2576.25 2
 -4 10 20 6481.69 1386.42 3
 4 10 -20 3717.33 1130.3 2
 4 10 -19 1783.63 758.753 2
 -4 10 19 1761.92 625.728 3
 -4 10 18 8909.32 1445.66 3
 4 10 -18 9634.01 1649.17 2
 4 -10 -18 11369.9 1679.13 1
 4 10 -17 16378.5 2024.03 2
 4 -10 -17 16633.7 1960.18 1
 -4 10 17 12629.3 1681.22 3
 4 10 -16 40226.2 3012.44 2
 4 -10 -16 40339.8 3028.26 1
 -4 10 16 37968.3 2788.86 3
 4 10 -15 26025 2336.18 2
 -4 10 15 24863 2203.17 3
 4 -10 -15 28437.4 2491.11 1
 4 10 -14 1108.65 460.997 2
 -4 10 14 778.94 292.447 3
 4 -10 -14 996.511 531.294 1
 4 10 -13 29061.4 2243.28 2
 -4 10 13 27376.6 2151.39 3
 4 -10 -13 32715.3 2542.16 1
 4 -10 -12 60437.6 3361.12 1
 4 10 -12 56328.5 2996.27 2
 -4 10 12 54951.5 2936.79 3
 -4 10 11 3960.07 812.619 2
 -4 10 11 4443.62 813.962 3
 4 10 -11 4688.29 837.933 2
 4 -10 -11 6285.51 1100.34 1
 4 -10 -10 10067.8 1291.67 1
 -4 -10 10 7343.76 1103.84 3
 -4 10 10 7427.63 1076.18 2
 -4 10 10 12560.8 1340.94 3
 4 10 -10 7695.61 996.394 2
 4 10 -9 77337 2965.02 2
 -4 10 9 68702 3158.68 2
 -4 -10 9 71594.9 3275.94 3
 -4 10 9 70374.9 3042.96 3
 -4 10 8 1276.48 478.576 2
 -4 10 8 556.171 306.791 3
 4 10 -8 318.012 278.656 2
 -4 -10 8 346.295 257.362 3
 4 10 -7 193189 4052.05 2
 -4 10 7 162647 4540.39 2
 4 -10 -7 177587 4495.79 3
 -4 -10 7 191718 4890.4 3
 -4 10 7 185761 4589.46 3
 4 10 -6 161987 3394.41 2
 -4 10 6 152961 4068 3
 -4 -10 6 156526 4185.19 3
 -4 10 6 131558 3939.6 2
 4 -10 -6 147216 4004.23 3
 4 -10 -5 28006.5 1713.56 3
 -4 -10 5 31396.7 1767.1 3
 -4 10 5 29608.9 1761.42 3
 4 10 -5 31644.8 1352.78 2
 -4 10 4 33228.4 1840.01 3
 4 10 -4 33420.4 1227.7 2
 4 -10 -4 34337.4 1867.61 3
 -4 -10 4 33022.2 1697.21 3
 -4 10 3 1697.07 454.131 3
 4 -10 -3 1850.97 451.156 3
 4 10 -3 1719.96 239.689 2
 -4 -10 3 2503.71 503.275 3
 -4 -10 2 24353.1 1413.61 1
 4 10 -2 22011.4 659.082 2
 -4 10 2 22320.2 1503.08 3
 -4 -10 2 25671.5 1291.13 3
 4 -10 -2 24655.4 1573.91 3
 -4 -10 1 56059.8 1696.44 3
 -4 -10 1 58212.3 2287.31 1
 4 -10 -1 52584.7 2318.65 3
 -4 10 1 56676 2406.96 3
 -4 10 0 150433 3968.62 3
 -4 -10 0 155473 3894.02 1
 -4 -10 0 158839 2542.98 3
 4 -10 0 153652 4016.65 3
 -4 -10 -1 46390 1189.79 3
 -4 -10 -1 45293.7 2211.98 1
 4 10 1 46287.2 2216.04 1
 -4 10 -1 40793.1 2120.18 3
 4 -10 1 42215.7 2155.08 3
 4 10 2 9721.35 459.799 3
 4 10 2 10995 1132.25 1
 -4 -10 -2 10161.4 469.055 3
 -4 10 -2 10182.5 1101.79 3
 4 -10 2 10013.6 1077.44 3
 4 10 2 10353.4 557.929 2
 -4 10 -3 24553.4 1743.21 3
 4 -10 3 20919.6 1592.64 3
 4 10 3 22898.3 982.315 2
 4 10 3 20832.3 1614.58 1
 -4 10 -4 24704.3 1802.14 3
 4 10 4 25761.4 1200.68 2
 -4 -10 -4 24318.2 1160.24 2
 4 -10 4 25464.4 1815.87 3
 4 10 4 24940.3 1813.52 1
 -4 -10 -5 3532.17 504.391 2
 4 -10 5 2858.22 619.29 3
 4 10 5 3237.69 467.542 2
 4 10 5 3622.68 721.311 1
 4 10 5 3701.33 301.011 3
 -4 10 -5 3734.97 736.551 3
 4 10 6 125379 2060.4 3
 -4 -10 -6 138154 3403.89 2
 4 -10 6 143323 4609.43 3
 -4 10 -6 132956 4416.29 3
 4 10 6 136118 4491.46 1
 4 10 6 134743 3328.85 2
 -4 10 -7 91656.2 3818.04 3
 4 10 7 88668.8 1982.95 3
 4 10 7 90499.7 3791.79 1
 4 -10 7 96101.5 3901.46 3
 -4 -10 -7 98353.9 3075.99 2
 4 10 7 94521.1 3015.82 2
 -4 -10 -8 4125.28 663.737 2
 -4 10 -8 3960.09 848.55 3
 4 10 8 4542.23 512.072 3
 4 10 8 5000.24 743.928 2
 4 -10 8 5785.62 1029.53 3
 4 10 8 4729.52 899.689 1
 4 10 9 39268.5 1627.23 3
 -4 10 -9 42194.8 2766.89 3
 4 10 9 44975 2378.91 2
 -4 -10 -9 43072.8 2324.78 2
 4 10 10 55645.6 2107.76 3
 4 10 10 60798.7 2912.91 2
 -4 10 -10 60331.4 3297.35 2
 4 10 10 61574 2210.27 3
 -4 10 -10 65720.1 3577.41 3
 -4 -10 -10 65256.2 3047.53 2
 4 10 11 18780.4 1323.05 3
 -4 10 -11 20892.8 2036.08 2
 4 10 11 20488.3 1789.82 2
 -4 -10 -11 24539.7 1959.24 2
 4 10 11 22632.7 1455.77 3
 -4 10 -12 32918.3 2626.41 2
 4 10 12 29428 1761.69 3
 4 10 12 28355.3 2204.4 2
 -4 -10 -12 32073.1 2364.31 2
 4 10 12 26926.7 1693.97 3
 -4 10 -13 31321.8 2664.03 2
 4 10 13 32565.8 1969.95 3
 4 10 13 27751.5 1801.53 3
 -4 -10 -13 37564.7 2670.79 2
 -4 10 -14 -1966.83 755.18 2
 4 10 14 862.403 434.192 3
 4 10 14 616.705 345.938 3
 -4 -10 -14 -66.3499 439.56 2
 4 10 15 43163.6 2499.66 3
 4 10 15 45582.1 2584 3
 -4 10 -15 52234.3 3682.98 2
 -4 -10 -15 52941.8 3446.03 2
 4 10 16 45071.1 2698.09 3
 -4 10 -16 49837.9 3709.84 2
 -4 -10 -16 49567.9 3459.51 2
 -4 -10 -17 11798.1 1762.06 2
 4 10 17 12670.6 1496.81 3
 -4 10 -17 11379.8 1821.3 2
 -4 -10 -18 16594.4 2175.61 2
 -4 10 -18 16685.6 2305.09 2
 4 10 18 15395.6 1689.96 3
 4 10 19 261.154 292.911 3
 -4 10 -19 -121.619 405.448 2
 -4 -10 -19 -1230.5 761.667 2
 -4 10 -20 259.061 455.009 2
 -4 -10 -20 71.1775 637.373 2
 -4 -10 -21 20640 2641.41 2
 -4 12 22 21176.3 2492.01 3
 4 12 -21 3344.91 1111.15 2
 -4 12 21 3106.92 952.365 3
 4 12 -20 33765.7 3213.32 2
 -4 12 20 28914.5 2749.96 3
 4 12 -19 3.71376 607.009 2
 -4 12 19 697.102 492.849 3
 4 12 -18 42069.2 3337.69 2
 -4 12 18 40135.9 3077.93 3
 4 -12 -18 46530.3 3562.14 1
 4 -12 -17 592.189 514.691 1
 4 12 -17 835.543 537.347 2
 -4 12 17 -103.155 347.608 3
 4 12 -16 55730 3560.22 2
 -4 12 16 56251.5 3440.6 3
 4 -12 -16 57826.8 3805.14 1
 4 -12 -15 4133.24 1052.96 1
 -4 12 15 4243.32 925.803 3
 4 12 -15 3548.58 888.483 2
 -4 12 14 968.559 465.395 3
 4 -12 -14 1223.6 691.048 1
 4 12 -14 1219.53 555.904 2
 4 -12 -13 2950.85 882.051 1
 4 12 -13 2511.05 688.057 2
 -4 12 13 2439.81 681.853 3
 -4 12 12 70372.9 3376.48 3
 4 12 -12 73128.6 3430.25 2
 4 -12 -12 73805.1 3941.11 1
 -4 12 11 1530.48 480.08 3
 4 12 -11 1608.37 513.845 2
 4 -12 -11 1738.78 673.58 1
 -4 12 10 55760 3041.15 2
 -4 12 10 55693.5 2835.46 3
 4 -12 -10 64718.7 3508.9 1
 4 12 -10 60482.4 2820.01 2
 -4 12 9 18364.8 1586.31 3
 -4 -12 9 16325.3 1624 3
 4 -12 -9 18966.5 1874.11 1
 4 12 -9 18084 1445.2 2
 -4 12 9 14849.9 1518.32 2
 4 12 -8 8495.85 943.283 2
 -4 -12 8 7775.04 1069.38 3
 -4 12 8 5863.83 888.409 3
 -4 12 8 7640.5 1072.88 2
 -4 12 7 71209.5 2959.89 3
 -4 -12 7 75163.2 3197.33 3
 4 -12 -7 66680.9 2874.24 3
 4 12 -7 67966.1 2462.53 2
 -4 12 7 62651 2914.77 2
 -4 12 6 83676.8 3159.03 3
 4 -12 -6 76926.6 3014.17 3
 -4 -12 6 85968.8 3261.48 3
 4 12 -6 81202.5 2449.27 2
 -4 12 6 73258.9 3063.91 2
 4 12 -5 4709.53 543.548 2
 -4 -12 5 4761.8 741.022 3
 4 -12 -5 4371.43 713.166 3
 -4 12 5 4482.72 720.112 3
 4 12 -4 133019 2539.98 2
 4 -12 -4 124420 3802.7 3
 -4 -12 4 141078 3449.74 1
 -4 -12 4 139920 3721.18 3
 -4 12 4 133217 3897.96 3
 4 -12 -3 24902.8 1678.03 3
 4 12 -3 22815.5 910.221 2
 -4 -12 3 23762.3 1437.85 3
 -4 -12 3 23869 1477.29 1
 -4 12 3 23816.2 1663.85 3
 -4 -12 2 88160.4 2574.51 3
 4 12 -2 87973.3 1472.65 2
 -4 -12 2 91923.5 3021.97 1
 4 -12 -2 86633.9 3156.61 3
 -4 12 2 89685.9 3229.3 3
 -4 -12 1 39265 2062.24 1
 4 -12 -1 38372.5 2127.04 3
 -4 -12 1 39739.8 1597.98 3
 -4 12 1 37023.1 2091.04 3
 4 -12 0 123712 3866.65 3
 -4 12 0 116622 3778.2 3
 -4 -12 0 127680 3842.08 1
 -4 -12 0 123181 2577.24 3
 4 -12 1 1311.89 458.211 3
 4 12 1 1026.53 228.605 3
 -4 -12 -1 847.772 195.855 3
 -4 12 -1 878.058 315.95 3
 -4 -12 -1 1177.77 416.188 1
 4 12 1 793.37 137.072 2
 -4 -12 -2 59612.4 1430.64 3
 4 12 2 59039.1 1397.75 2
 4 12 2 56117.3 1393.69 3
 -4 12 -2 58923.6 2792.55 3
 -4 -12 -2 66600.6 2964.93 1
 4 -12 2 58775.7 2792.49 3
 -4 -12 -3 6024.49 413.284 3
 4 12 3 7048.68 562.717 2
 -4 -12 -3 6248.25 962.843 1
 4 12 3 6709.71 432.836 3
 -4 12 -3 7559.06 1026.42 3
 4 -12 3 6515.45 949.921 3
 -4 12 -4 55629.8 2861.81 3
 -4 -12 -4 57244.8 2946.94 1
 4 12 4 54265.9 1758.5 2
 4 12 4 51889.6 1126.27 3
 4 -12 4 55585.9 2858.41 3
 -4 12 -5 575.196 235.187 3
 4 12 5 463.25 116.683 3
 4 12 5 503.887 217.81 2
 4 -12 5 428.277 199.748 3
 4 12 6 97899.2 2873.36 2
 -4 12 -6 95921.3 3985.06 3
 4 -12 6 101637 4075.39 3
 4 12 6 94591.2 1757.54 3
 -4 -12 -7 663.194 309.848 2
 4 12 7 628.167 164.215 3
 -4 12 -7 1130.12 476.476 3
 4 12 7 524.655 253.625 2
 4 12 8 6229.61 842.253 2
 4 12 8 6715.09 590.976 3
 -4 12 -8 7035.24 1158.16 3
 -4 -12 -8 6113.36 824.024 2
 4 12 9 15917.9 993.421 3
 -4 12 -9 14960.8 1787.68 3
 -4 -12 -9 16883.5 1464.63 2
 4 12 9 13924.5 1335.88 2
 4 12 10 160317 4753.26 2
 4 12 10 147912 3267.98 3
 -4 12 -10 166033 5911.81 3
 -4 -12 -10 163778 4828.78 2
 4 12 11 4469.09 620.01 3
 4 12 11 5431.29 945.071 2
 -4 12 -11 3400.07 820.12 2
 4 12 11 4321.26 615.32 3
 -4 -12 -11 4169.21 824.05 2
 -4 12 -12 35908.4 2801.33 2
 4 12 12 34700.6 1832 3
 4 12 12 38397.5 1923.81 3
 -4 -12 -12 36684.7 2557.85 2
 -4 12 -13 13260.4 1767.97 2
 4 12 13 13256 1227.84 3
 4 12 13 11587.5 1138.51 3
 -4 -12 -13 14778.1 1663.93 2
 -4 12 -14 9194.34 1553.75 2
 4 12 14 8656.81 1043.18 3
 -4 -12 -14 10247.9 1480.52 2
 -4 -12 -15 13202.7 1753.86 2
 4 12 15 11138 1238.73 3
 -4 12 -15 12765.3 1870.24 2
 4 12 16 42650 2526.34 3
 -4 12 -16 46417.3 3638.79 2
 -4 -12 -16 48528.8 3448.59 2
 4 12 17 -739.905 392.774 3
 -4 12 -17 -929.742 600.931 2
 -4 -12 -17 85.0011 457.244 2
 -4 12 -18 30004.6 3124.9 2
 -4 -12 -18 33650.9 3100.67 2
 -4 -12 -19 2789.58 964.81 2
 -4 12 -19 3449.63 1191.75 2
 -4 -12 -20 9357.93 1817.48 2
 -4 14 21 -159.971 613.894 3
 4 14 -21 -51.8626 529.542 2
 -4 14 20 22782.1 2459.07 3
 4 14 -20 20754.2 2546.06 2
 4 14 -19 -7.54161 648.362 2
 -4 14 19 344.745 453.439 3
 4 14 -18 70567.5 4362.46 2
 -4 14 18 65970.8 3936.5 3
 4 -14 -18 74423.4 4730.76 1
 4 -14 -17 5084.06 1258.76 1
 4 14 -17 7495.69 1391.61 2
 -4 14 17 8490.23 1363.1 3
 4 14 -16 36558.1 2921.5 2
 -4 14 16 34734.9 2719.73 3
 4 -14 -16 37225.2 3238.86 1
 -4 14 15 4297.16 919.576 3
 4 14 -15 1952.74 655.51 2
 4 -14 -15 1310.85 615.318 1
 -4 14 14 -12.1614 298.111 3
 4 -14 -14 1134.68 581.07 1
 4 14 -14 1025.33 589.547 2
 4 -14 -13 1266.17 639.72 1
 -4 14 13 2577.37 711.2 3
 4 14 -13 2803.74 858.984 2
 4 14 -12 84167 3716.58 2
 -4 14 12 82869.9 3737.33 3
 4 -14 -12 87577.6 4536.47 1
 -4 14 11 10.3011 399.527 3
 4 -14 -11 1444.93 616.621 1
 4 14 -11 154.377 196.603 2
 -4 14 10 74120.1 3366.72 3
 4 14 -10 74600.9 3164.51 2
 4 -14 -10 76919 4079.91 1
 -4 14 9 239.67 315.566 3
 4 14 -9 190.105 168.951 2
 4 -14 -9 360.363 361.972 1
 -4 14 9 353.152 351.47 2
 -4 14 8 1063.12 478.157 3
 4 -14 -8 827.42 406.681 3
 -4 -14 8 903.97 390.286 3
 -4 14 8 461.688 297.843 2
 4 14 -8 904.518 337.335 2
 -4 14 7 99.1739 217.879 3
 4 -14 -7 458.675 310.112 3
 4 14 -7 179.999 225.173 2
 -4 14 7 95.7627 201.086 2
 -4 -14 7 61.8312 199.197 3
 -4 14 6 69122.7 3088.94 2
 4 -14 -6 77695.4 3193.85 3
 4 14 -6 82480.6 2549.4 2
 -4 -14 6 79268.6 3290.35 3
 -4 14 6 82332.3 3296.86 3
 4 -14 -5 278.592 246.257 3
 -4 -14 5 452.807 290.373 3
 -4 -14 5 589.931 234.733 1
 4 14 -5 556.887 219.448 2
 -4 14 5 370.426 225.135 3
 -4 14 4 235596 5525.15 3
 -4 -14 4 239563 5167 3
 4 -14 -4 232212 5439.15 3
 4 14 -4 236923 3503.42 2
 -4 -14 4 241772 4946.23 1
 4 -14 -3 -45.1323 357.856 3
 -4 14 3 322.447 292.819 3
 -4 -14 3 117.293 198.22 3
 4 14 -3 343.961 145.1 2
 -4 -14 3 268.045 245.905 1
 4 -14 -2 102414 3645.16 3
 -4 -14 2 113415 3668.62 1
 -4 -14 2 112841 3166.22 3
 -4 14 2 102496 3670.3 3
 4 14 -2 101862 1768.64 2
 -4 14 1 -146.195 287.735 3
 4 -14 -1 307.943 183.635 3
 -4 -14 1 663.08 356.823 1
 4 14 -1 267.809 98.7644 2
 -4 -14 1 228.557 157.646 3
 4 -14 0 48213.8 2585.54 3
 4 14 0 40941.6 953.686 2
 -4 -14 0 49614.3 1811.32 3
 -4 -14 0 48321 2581.15 1
 -4 14 0 45352 2520.25 3
 -4 -14 -1 369.681 178.514 3
 4 14 1 335.958 96.9211 2
 4 14 1 88.361 118.573 3
 -4 14 -1 148.851 213.258 3
 4 -14 1 486.341 323.833 3
 -4 -14 -1 317.592 273.022 1
 -4 -14 -2 74208.5 3372.29 1
 -4 14 -2 66497.5 3161.44 3
 4 14 2 69239.8 1801.4 3
 4 -14 2 69117.1 3210.29 3
 -4 -14 -2 68130.5 1789.1 3
 4 14 2 67221.3 1567.71 2
 -4 -14 -3 150.208 105.569 3
 4 14 3 342.134 154.006 2
 -4 -14 -3 1123.75 464.745 1
 4 14 3 269.751 126.231 3
 -4 14 -3 385.716 377.74 3
 4 -14 3 -226.562 421.264 3
 -4 -14 -4 72900.4 3544.76 1
 4 14 4 66717.2 1988.42 2
 -4 14 -4 64738.1 3260.57 3
 4 14 4 64016 1469.68 3
 4 -14 4 69471.2 3363.4 3
 -4 -14 -5 5732.7 1043 1
 -4 14 -5 4562.49 902.114 3
 4 14 5 4248.86 372.868 3
 4 14 5 5133.91 606.775 2
 4 -14 5 4843.04 911.782 3
 4 14 6 41724.4 1892.39 2
 -4 14 -6 38922 2670.6 3
 4 14 6 38481.8 1153.42 3
 -4 14 -7 22584 2084.81 3
 4 14 7 22608 1514.07 2
 4 14 7 23762.4 956.592 3
 4 14 8 6133.47 818.012 2
 -4 14 -8 5726.61 1093.72 3
 4 14 8 5992.49 532.77 3
 -4 14 -9 2357.57 739.078 3
 4 14 9 1007.49 386.237 2
 4 14 9 1751.08 320.456 3
 4 14 10 45132.3 2535.71 2
 4 14 10 44851.6 1717.19 3
 -4 14 -10 44895.7 3229.6 3
 -4 14 -11 13997.2 1756.18 2
 4 14 11 15479.2 1089.41 3
 4 14 11 15289.3 1585.4 2
 -4 -14 -11 16548.7 1650.52 2
 -4 14 -11 15561.9 1948.56 3
 -4 14 -12 58451.2 3661.47 2
 4 14 12 53737.9 2156.45 3
 -4 -14 -12 66090.9 3414.79 2
 4 14 13 1143.52 359.624 3
 -4 14 -13 1242.66 551.358 2
 -4 -14 -13 1650.63 614.643 2
 -4 14 -14 8177.45 1470.79 2
 4 14 14 8402.84 970.757 3
 -4 -14 -14 8966.21 1375.66 2
 -4 14 -15 4046.23 1127.7 2
 -4 -14 -15 2584.86 840.998 2
 -4 14 -16 18137.7 2364.81 2
 -4 -14 -16 17236.7 2097.53 2
 -4 14 -17 2834.01 937.732 2
 -4 -14 -17 2735.01 918.768 2
 -4 14 -18 21703.5 2710.85 2
 -4 -14 -18 29707.8 2897.31 2
 -4 14 -19 -105.902 498.244 2
 -4 -14 -19 -494.153 726.173 2
 -4 -14 -20 21720.8 2693.43 2
 4 16 -21 6117.91 1392.94 2
 4 16 -20 8143.3 1649.75 2
 4 16 -19 1458.72 762.261 2
 -4 16 19 -143.575 393.156 3
 4 -16 -19 182.058 547.838 1
 4 -16 -18 25435.8 2953.84 1
 4 16 -18 22337.7 2478.08 2
 -4 16 18 19356.7 2152.94 3
 4 16 -17 21502.5 2340.1 2
 4 -16 -17 22402 2675.81 1
 -4 16 17 18120.2 2020.11 3
 -4 16 16 16263.6 1897.51 3
 4 16 -16 17381.6 2047.09 2
 4 -16 -16 15594.9 2198.18 1
 -4 16 15 34220.4 2642.38 3
 4 -16 -15 34953.2 3232.6 1
 4 16 -15 35774.6 2765.33 2
 -4 16 14 6014.75 1100.9 3
 4 16 -14 8588.47 1324.7 2
 4 -16 -14 6401.45 1395.44 1
 -4 16 13 15543.3 1715.99 3
 4 16 -13 15226 1708.23 2
 4 -16 -13 14347 2017.12 1
 -4 16 12 32128.1 2385.39 3
 4 -16 -12 32027 2920.09 1
 4 16 -12 33644.4 2399.08 2
 -4 16 11 17398.5 1725.59 3
 4 16 -11 15135 1529.34 2
 4 -16 -11 19257.7 2213.81 1
 -4 16 10 38879.8 2515.37 3
 4 -16 -10 43415.5 3260.21 1
 4 16 -10 39712.2 2334.5 2
 4 16 -9 27217.6 1844.95 2
 -4 16 9 27661.9 2093.25 3
 4 -16 -9 31822.1 2734.79 1
 4 -16 -8 952.473 373.048 3
 4 16 -8 1675.08 454.884 2
 -4 16 8 1291.74 505.45 2
 4 -16 -8 2005.4 720.759 1
 -4 16 8 1183.29 496.679 3
 -4 -16 7 27802.8 2133.6 3
 4 16 -7 27916.6 1638.87 2
 -4 16 7 24823.4 2000.28 2
 -4 16 7 27114.4 2028.13 3
 4 -16 -7 28150.7 2041.23 3
 4 -16 -6 65772.3 3084.89 3
 4 16 -6 70266.5 2401.83 2
 -4 16 6 67724.2 3152.08 3
 -4 -16 6 75985.6 3366.36 3
 -4 16 6 64610.8 3109.25 2
 4 16 -5 8380.84 759.707 2
 4 -16 -5 8062.92 1090.95 3
 -4 -16 5 8249.85 973.226 1
 -4 -16 5 9424.45 1137.8 3
 -4 16 5 6730.31 976.944 2
 -4 16 5 8789.74 1118.97 3
 -4 16 4 101848 3827.08 3
 4 -16 -4 100580 3799.2 3
 -4 -16 4 105328 3665 3
 -4 -16 4 107925 3625.51 1
 4 16 -4 101153 2380.02 2
 4 -16 -3 6661.78 993.562 3
 -4 16 3 7650.51 1081.09 3
 -4 -16 3 6280.31 926.054 1
 -4 -16 3 7495.4 931.962 3
 4 16 -3 7626.47 608.223 2
 4 16 -2 53362.2 1361.87 2
 -4 -16 2 54850.9 2766.42 1
 -4 -16 2 55484.2 2371.98 3
 4 -16 -2 55105.4 2832.82 3
 -4 16 2 51398.4 2754.05 3
 4 -16 -1 69437.8 3237.44 3
 -4 16 1 69439.2 3244.8 3
 -4 -16 1 71835.5 3273.57 1
 -4 -16 1 75610.8 2624.02 3
 4 16 -1 65307.3 1356.82 2
 4 -16 0 23479.8 1921.15 3
 4 16 0 22459.4 773.742 2
 -4 -16 0 24484 1968.63 1
 -4 16 0 22973.7 1893.65 3
 -4 -16 0 24859.9 1410.4 3
 -4 -16 -1 17280.8 1699.9 1
 4 16 1 15559.7 693.593 2
 -4 -16 -1 15551.8 1031.21 3
 4 -16 1 16313 1635.97 3
 -4 16 -1 15495.8 1586.24 3
 4 16 1 15006.7 1024.24 3
 -4 -16 -2 9794.23 765.809 3
 4 16 2 9829.05 771.366 3
 4 16 2 10530.8 650.006 2
 -4 16 -2 11021 1383.46 3
 -4 -16 -2 11654.5 1438.35 1
 4 -16 2 11427.3 1387.79 3
 -4 -16 -3 6359.11 577.52 3
 4 16 3 5753.38 545.915 2
 4 16 3 6152.3 561.61 3
 -4 -16 -3 6596.84 1117.86 1
 -4 16 -3 6427.47 1078.76 3
 -4 16 -4 64198.9 3461.37 3
 -4 -16 -4 71597.3 3714.08 1
 4 16 4 67194.4 2034.63 2
 4 16 4 64083.7 1673.31 3
 4 16 5 58035.1 1491.85 3
 -4 -16 -5 61053.1 3543.88 1
 4 16 5 58502.6 2097.27 2
 -4 16 -5 58342.1 3368.61 3
 4 16 6 14515.1 1134.62 2
 -4 16 -6 13707 1687.54 3
 4 16 6 12385.4 672.27 3
 4 16 7 36154.6 1172.66 3
 4 16 7 38479.9 1966.97 2
 -4 16 -7 37438.1 2823.85 3
 4 16 8 8742.58 612.151 3
 -4 16 -8 8268.2 1398.8 3
 4 16 8 10405 1112.15 2
 -4 16 -9 35521.1 2907.98 3
 4 16 9 35652.8 2158.25 2
 4 16 9 34366.9 1296.03 3
 4 16 10 45443.5 1601.28 3
 4 16 10 46331.8 2598.65 2
 -4 16 -10 45693 3380.07 3
 -4 16 -11 13585.9 1766.35 2
 -4 16 -11 15832 2069.49 3
 4 16 11 14411.6 978.815 3
 -4 16 -12 34108.3 2863.88 2
 -4 16 -13 15837.4 2043.01 2
 -4 16 -14 849.164 417.677 2
 -4 16 -15 15227.4 2116.23 2
 -4 16 -16 20831 2506.52 2
 -4 16 -17 7449 1597.41 2
 -4 16 -18 8030.7 1727.26 2
 4 18 -19 1563.79 846.971 2
 4 -18 -17 14176.4 2244.65 1
 4 18 -17 13450.3 1892.78 2
 -4 18 16 3788.03 910.033 3
 4 -18 -16 3326.49 1103.04 1
 4 18 -16 2575.77 728.579 2
 -4 18 15 60068.6 3534.25 3
 4 18 -15 63415.8 3750.62 2
 4 -18 -15 67478.1 4696.86 1
 -4 18 14 4715.29 1016.04 3
 4 18 -14 5995.27 1206.18 2
 4 -18 -14 6843.17 1549.1 1
 4 -18 -13 34356.4 3251.17 1
 4 18 -13 30175.4 2375.95 2
 -4 18 13 32175.8 2480.62 3
 -4 18 12 361.918 268.14 3
 4 -18 -12 1129.34 570.236 1
 4 18 -12 872.499 409.095 2
 4 18 -11 36154 2360.14 2
 4 -18 -11 43070.9 3519.67 1
 -4 18 11 39316.1 2634.54 3
 -4 18 10 3588.32 787.804 3
 4 -18 -10 4154.61 1117.06 1
 4 18 -10 2678.89 619.715 2
 4 -18 -9 35119.6 3047.05 1
 -4 18 9 33753.7 2377.43 3
 4 18 -9 30905.6 1973.06 2
 4 -18 -8 15260.3 1972.57 1
 4 18 -8 15438.6 1330.18 2
 -4 18 8 14622.1 1557.19 3
 4 -18 -8 12364 1432.62 3
 4 -18 -7 51769.6 2870.86 3
 4 -18 -7 55261.5 3674.92 1
 -4 18 7 47117.3 2823.75 2
 4 18 -7 52647.5 2264.19 2
 -4 18 7 54518.2 2957.04 3
 4 18 -6 6608.71 719.739 2
 4 -18 -6 9855.01 1518.52 1
 4 -18 -6 9683.59 1254.38 3
 -4 -18 6 8703.73 1193.83 3
 -4 18 6 8708.96 1178.2 3
 -4 18 6 6872.92 1065.63 2
 4 18 -5 31914.8 1500.35 2
 4 -18 -5 30893.4 2208.15 3
 -4 -18 5 33525.2 2109.11 1
 -4 -18 5 33235.9 2249.39 3
 -4 18 5 24545.8 1965.77 2
 -4 18 5 33856.1 2324.75 3
 -4 -18 4 10780.8 1236.24 1
 4 -18 -4 11722.6 1374.43 3
 4 18 -4 11014.7 795.391 2
 -4 18 4 10973.1 1302.93 3
 -4 -18 4 11181.5 1256.29 3
 -4 -18 3 13255.4 1436.37 1
 4 -18 -3 11062.2 1345.15 3
 -4 -18 3 13522.2 1314.94 3
 -4 18 3 10502 1316.29 3
 4 18 -3 11754.8 744.22 2
 4 -18 -2 7345.9 1120.85 3
 -4 -18 2 7448.75 1100.18 1
 -4 18 2 5244.33 971.57 3
 -4 -18 2 6301.19 869.444 3
 4 18 -2 5904.16 471.063 2
 4 -18 -1 79955.2 3662.85 3
 4 18 -1 74490.2 1509.99 2
 -4 -18 1 82205.2 3734.99 1
 4 18 -1 70529.6 1485.92 2
 -4 18 1 83697.5 3773.01 3
 -4 -18 1 91852.8 3074.59 3
 -4 -18 0 50529.9 2158.84 3
 4 18 0 43423.7 1112.33 2
 -4 18 0 48441.6 2907.16 3
 -4 -18 0 50008.5 3026 1
 -4 -18 -1 67199.1 2339.6 3
 4 18 1 62308.4 1408.41 2
 -4 18 -1 63040.2 3354.77 3
 -4 -18 -1 68338.9 3595.89 1
 4 18 2 4550.09 579.063 3
 -4 -18 -2 4458.74 577.483 3
 4 18 2 4555.6 431.134 2
 -4 18 -2 5090.31 1001.42 3
 -4 -18 -2 4177.14 947.988 1
 4 18 3 8140.25 716.67 3
 -4 -18 -3 8261.43 721.502 3
 -4 18 -3 9273.22 1347.62 3
 4 18 3 8721.3 673.786 2
 -4 -18 -3 9279.91 1413.43 1
 -4 18 -4 20809.6 2063.9 3
 4 18 4 22954.5 1196.44 2
 4 18 4 20643.3 1042.62 3
 -4 -18 -4 24542.7 2318.87 1
 -4 -18 -5 67378.4 3897.51 1
 4 18 5 59790.8 1634.71 3
 -4 18 -5 62775.8 3627.12 3
 4 18 5 61198.4 2124.87 2
 4 18 6 22112.3 1387.06 2
 4 18 6 20385.9 890.534 3
 -4 18 -6 23704.4 2308.81 3
 -4 18 -7 40443.9 3077.34 3
 4 18 7 36200.8 1143.37 3
 4 18 7 38266 1979.89 2
 4 18 8 250.69 262.79 2
 -4 18 -8 1174.7 596.544 3
 4 18 8 137.418 113.613 3
 -4 18 -9 58604.8 3892.36 3
 -4 18 -10 9276.72 1609.53 3
 -4 18 -11 15382.7 1945.31 2
 -4 18 -12 9109.42 1549.49 2
 -4 18 -13 27337.9 2679.96 2
 -4 18 -14 887.038 562.102 2
 -4 18 -15 26389.6 2862.61 2
 -4 18 -16 8781.84 1699.53 2
 -4 18 -17 15502 2198.93 2
 4 20 -15 31174.2 2650.07 2
 4 -20 -15 37073.7 3493 1
 4 -20 -14 828.809 533.014 1
 4 20 -14 2293.98 704.877 2
 -4 20 14 1264.57 502.152 3
 4 -20 -13 19098.3 2566.2 1
 4 20 -13 18745.6 1952.12 2
 -4 20 13 17480.6 1881.93 3
 4 -20 -12 5722.72 1454.07 1
 4 20 -12 7878.74 1168.98 2
 -4 20 12 5855.92 1099.94 3
 4 20 -11 43212.4 2612.06 2
 -4 20 11 45069.3 2915.11 3
 4 -20 -11 49596.1 3922.62 1
 -4 20 10 -713.447 429.504 3
 4 20 -10 -931.628 408.931 2
 4 -20 -10 -30.7131 394.087 1
 4 -20 -9 12751.3 1941.81 1
 4 20 -9 13202.1 1314.07 2
 -4 20 9 13095.9 1536.05 3
 4 20 -8 4158.12 717.632 2
 4 -20 -8 3100.87 928.944 1
 -4 20 8 4008.1 878.555 3
 4 20 -7 46460.9 2138.04 2
 4 -20 -7 44525.9 3467.17 1
 -4 20 7 43757.3 2776.67 3
 4 -20 -6 465.2 467.05 1
 4 20 -6 412.352 217.037 2
 -4 20 6 522.583 331.743 3
 4 20 -5 68338.3 2193.74 2
 -4 -20 5 71713.3 3332.31 1
 4 -20 -5 68456.2 4158.73 1
 -4 20 5 58762.7 3142.97 2
 -4 20 5 68036.7 3447.65 3
 -4 -20 5 74136.5 3501.15 3
 -4 -20 4 2329.5 628.805 3
 4 20 -4 1463.1 311.124 2
 -4 20 4 687.626 364.523 2
 -4 -20 4 1343.04 474.568 1
 -4 20 4 1270.76 489.241 3
 -4 20 3 11291.6 1428.88 3
 4 20 -3 10975.1 705.192 2
 -4 -20 3 13337.3 1549.25 1
 -4 -20 3 13816.4 1407.95 3
 -4 20 2 3536.8 825.571 3
 4 20 -2 3326.54 345.297 2
 -4 -20 2 3930.26 757.732 3
 -4 -20 2 3784.84 837.478 1
 -4 -20 1 66449 3581.74 1
 -4 20 1 59735.9 3342.97 3
 -4 -20 1 65583.6 2749.16 3
 4 20 -1 55689 1207.45 2
 -4 -20 0 7030.04 863.883 3
 4 20 0 6126.26 378.064 2
 4 20 0 7018.77 402.89 2
 -4 20 0 7295.36 1202.96 3
 -4 -20 0 7943.39 1281.47 1
 -4 -20 -1 54592 3445.17 1
 -4 -20 -1 51525.1 2179.94 3
 4 20 1 45012.8 1122.64 2
 -4 20 -1 48196.5 3096.6 3
 -4 -20 -2 11875.3 987.986 3
 -4 -20 -2 10576.5 1576.1 1
 -4 20 -2 9639.67 1423.2 3
 4 20 2 11215.8 648.031 2
 -4 -20 -3 6875.21 1295.82 1
 4 20 3 7069.95 712.916 3
 -4 20 -3 6922.49 1217.92 3
 -4 20 -4 6515.03 1180.3 3
 4 20 4 5759.77 587.798 3
 -4 -20 -4 6189.46 1282.85 1
 -4 20 -5 44366.7 3217.21 3
 4 20 5 39275.5 1406.5 3
 -4 20 -6 4855.4 1083.73 3
 -4 20 -7 41626.8 3229.97 3
 -4 20 -8 4334.49 1153.78 3
 -4 20 -9 28401.3 2820.81 3
 -4 20 -10 1185.97 687.762 3
 -4 20 -10 138.345 304.238 2
 -4 20 -11 23856.1 2475.4 2
 -4 20 -12 -3.4342 356.067 2
 -4 20 -13 21110.2 2450.51 2
 -4 20 -14 1140.52 828.316 2
 -4 20 -15 16790.8 2291.15 2
 -4 20 -16 -115.822 379.655 2
 4 -22 -13 860.631 974.275 1
 4 -22 -12 17284.6 2479.37 1
 4 -22 -11 45875 3966.65 1
 -4 22 11 39535.8 2793.12 3
 4 -22 -10 8219.83 1702.59 1
 -4 22 10 8290.91 1277.54 3
 4 -22 -9 2539.35 907.165 1
 -4 22 9 2282.4 697.412 3
 -4 22 8 5785.26 1042.3 3
 4 -22 -8 4127.37 1131.65 1
 -4 22 7 6947.49 1160.09 3
 4 -22 -7 8888.98 1723.75 1
 4 -22 -6 12391.8 1910.04 1
 -4 22 6 10948.3 1444.17 3
 4 -22 -5 68229.6 4368.92 1
 -4 22 5 65049.9 3535.57 3
 4 -22 -4 19027.7 2288.91 1
 -4 22 4 21873.4 2055.66 3
 -4 22 3 -124.511 419.478 3
 4 -22 -3 -30.6047 417.366 1
 -4 -22 3 557.186 479.595 1
 -4 22 2 16110.1 1806.95 3
 -4 -22 2 16288.2 1851.26 1
 -4 22 1 25791.1 2304.08 3
 -4 -22 1 25904.1 2402.04 1
 -4 22 0 8071.51 1321.74 3
 -4 -22 0 8275.52 1420.61 1
 -4 -22 -1 17535.6 2062.28 1
 -4 22 -1 17788.7 1994.38 3
 -4 -22 -2 16573.6 2043.97 1
 -4 22 -2 15122.3 1847.07 3
 -4 22 -3 898.534 491.548 3
 -4 22 -4 15698.8 1971.84 3
 -4 22 -5 41905.4 3285.78 3
 -4 22 -6 1693.76 668.789 3
 -4 22 -7 13892.2 2003.59 3
 -4 22 -8 2840.67 903.795 3
 -4 22 -9 673.422 446.029 3
 -4 22 -10 19068 2207.59 2
 -4 22 -11 47200.8 3491.06 2
 -4 22 -12 8810.67 1560.11 2
 -4 22 -13 3178.71 1218.56 2
 -4 22 -14 -179.769 424.976 2
 -4 22 -15 4354.46 1264.04 2
 4 -24 -10 16970.3 2497.04 1
 4 -24 -9 480.934 713.49 1
 4 -24 -8 2445.07 923.212 1
 -4 24 7 -176.177 319.065 3
 4 -24 -7 -68.226 784.579 1
 -4 24 6 25476.5 2270.54 3
 4 -24 -6 31900.6 3223.33 1
 -4 24 5 25885.1 2292.95 3
 4 -24 -5 24215.2 2741.73 1
 -4 24 4 24077.6 2267.12 3
 4 -24 -4 26461.7 2835.97 1
 -4 24 3 1010.08 564.96 3
 4 -24 -3 1355.37 642.327 1
 -4 24 2 18723.1 2037.41 3
 4 -24 -2 18941.5 2351.88 1
 -4 24 1 5501.38 1093.83 3
 4 -24 -1 9049.46 1630.81 1
 -4 24 0 21358.8 2240.84 3
 4 -24 0 22303.6 2447.06 1
 4 -24 1 4710.04 1146.43 1
 -4 24 -1 6135.24 1245.95 3
 -4 24 -2 6490.29 1238.68 3
 -4 24 -3 262.172 413.21 3
 -4 24 -4 16614.4 2121.12 3
 -4 24 -5 12865.1 1888.65 3
 -4 24 -6 30613.8 3013.31 3
 -4 24 -7 -256.545 645.993 3
 -4 24 -8 -89.1985 609.884 3
 -4 24 -9 -342.796 523.707 3
 -4 24 -9 -1675.35 689.975 2
 -4 24 -10 20987.7 2361.23 2
 -4 24 -11 9304.43 1543.47 2
 4 -26 -6 56784.3 4474.71 1
 4 -26 -5 1704.18 902.116 1
 -4 26 4 12323.5 1693.42 3
 4 -26 -4 13509.4 2163.13 1
 4 -26 -3 1174.13 736.783 1
 -4 26 3 -231.379 505.396 3
 4 -26 -2 2050.98 886.777 1
 -4 26 2 3431.82 1037.29 3
 4 -26 -1 -459.967 670.209 1
 -4 26 1 -379.939 433.264 3
 -4 26 0 50934.5 3585.09 3
 4 -26 0 59369.8 4211.24 1
 4 -26 1 -59.9811 610.12 1
 -4 26 -1 387.151 715.299 3
 -4 26 -2 835.509 641.194 3
 4 -26 2 987.255 645.142 1
 -4 26 -3 -1481.95 700.064 3
 4 -26 3 -1199.19 653.932 1
 -4 26 -4 8631.55 1642.37 3
 4 -26 4 8604.55 1512.3 1
 4 -26 5 -192.658 372.162 1
 -4 26 -5 -295.156 501.403 3
 -4 26 -6 40504.2 3545.25 3
 -4 26 -7 1667.5 892.705 3
 -4 26 -8 782.788 615.502 3
 4 -28 -2 1024.58 825.148 1
 4 -28 -1 -380.312 565.493 1
 4 -28 0 41764.2 3715.15 1
 4 -28 1 5818.43 1375.37 1
 -4 28 -2 307.978 595.371 3
 4 -28 2 405.4 537.886 1
 4 -28 3 572.471 724.051 1
 -4 28 -3 272.239 334.843 3
 -4 28 -4 2318.04 826.817 3
 -4 28 -5 6754.88 1495.65 3
 -4 28 -6 22552.2 2768.56 3
 5 1 -23 29035.9 3281.31 2
 5 -1 -22 225.762 558.949 2
 5 1 -22 -87.9889 739.769 2
 5 -1 -21 40874.5 3625.93 2
 5 1 -21 41757.2 3643.89 2
 5 -1 -20 2347.6 1057.69 2
 5 1 -20 2230.45 867.212 2
 5 1 -19 54783.6 3910.66 2
 5 -1 -19 58020.7 4032.3 2
 5 1 -18 1016.93 597.472 2
 5 -1 -18 1939.14 735.676 2
 5 1 -17 8600.59 1505.88 2
 5 -1 -17 8420.95 1448.99 2
 5 1 -16 -340.452 357.427 2
 5 -1 -16 109.091 485.535 2
 5 -1 -15 141104 5404.08 2
 5 1 -15 140578 5343.82 2
 5 1 -14 21.6198 287.028 2
 5 -1 -14 240.831 190.833 1
 5 -1 -14 422.089 324.665 2
 5 -1 -13 38909.3 2614.33 2
 5 -1 -13 38822.2 1929.76 1
 -5 1 13 38904.8 2593.86 2
 5 1 -13 37286.7 2538.13 2
 -5 -1 13 36499.6 2497.48 2
 5 -1 -12 64323.8 3209.27 2
 5 1 -12 66398.3 2092.29 1
 5 -1 -12 64997.4 2405.24 1
 -5 1 12 61813.2 3116.3 2
 -5 -1 12 63296.2 3130.33 2
 5 1 -12 65474.8 3193.17 2
 5 1 -11 621.072 347.796 2
 5 -1 -11 228.736 151.488 1
 5 1 -11 577.135 213.258 1
 -5 -1 11 396.426 235.539 2
 -5 1 11 758.947 344.019 2
 5 -1 -11 214.194 220.53 2
 -5 1 10 15704 1419.61 2
 5 1 -10 17019.3 965.731 1
 5 -1 -10 16145.9 1125.26 1
 -5 -1 10 14199.3 1355.15 2
 5 1 -10 15317.6 1411.22 2
 5 -1 -10 15143.4 1425.82 2
 -5 1 9 240546 5320.89 2
 -5 -1 9 231796 5160.58 2
 5 1 -9 241429 5268.28 2
 5 -1 -9 242660 5375.36 2
 5 -1 -8 3127.84 595.08 2
 -5 1 8 2366.09 523.582 2
 -5 -1 8 2956.76 570.725 2
 5 1 -8 3466.99 621.458 2
 -5 1 7 336797 5641.82 2
 5 1 -7 354342 5670.56 2
 -5 -1 7 345540 5536.73 2
 5 -1 -7 345265 5719.9 2
 -5 -1 6 36526.6 1681.23 2
 -5 1 6 37244.7 1790.21 3
 5 -1 -6 36660.9 1756.87 2
 5 1 -6 37332.2 1707.78 2
 -5 1 6 37142.2 1773.15 2
 5 1 -5 19674.7 1149.16 2
 -5 1 5 20274.4 1245.49 3
 -5 1 5 17668.1 1138.58 2
 -5 -1 5 19693.2 1142.58 2
 -5 1 4 116808 2770 2
 -5 1 4 130272 2960.45 3
 -5 -1 4 123247 2653.09 2
 -5 1 3 77064.6 2190.92 3
 5 -1 -3 77700.5 2158.92 3
 -5 -1 3 75048.7 2032.6 3
 -5 1 2 4935.89 527.152 3
 5 -1 -2 4821.91 522.891 3
 -5 -1 2 5372.42 508.803 3
 5 1 -2 4674.43 475.164 3
 5 -1 -1 446247 4812.99 3
 -5 -1 1 461247 4377.67 3
 5 1 -1 444944 4272.79 3
 -5 1 1 470952 4946.51 3
 5 -1 0 12987.9 809.727 3
 5 1 0 12613 692.796 3
 -5 -1 0 13946.6 724.043 3
 -5 1 0 12978.9 805.532 3
 5 1 1 98571.7 1925.87 3
 -5 1 -1 102305 2313.36 3
 -5 -1 -1 105798 2006.65 3
 5 -1 1 99895.6 2269.61 3
 5 1 2 4018.76 415.457 3
 -5 -1 -2 4396.21 423.727 3
 5 -1 2 3805.91 466.638 3
 -5 1 -2 3918.64 468.967 3
 5 -1 3 67144.1 2043.56 3
 5 1 3 66446.8 1770.79 3
 -5 1 -3 66070.2 2021.6 3
 -5 -1 -3 65635.7 1763.96 3
 -5 -1 -4 23289.5 1131.15 3
 5 1 4 21211.6 1088.81 3
 -5 1 -4 21615.8 1214.15 3
 5 -1 4 21234.6 1212.05 3
 -5 -1 -5 154777 3159.24 3
 5 1 5 156530 3175.05 3
 -5 1 -5 153179 3470.37 3
 5 -1 5 147880 3433.23 3
 -5 -1 -6 22989.3 1501.2 2
 -5 -1 -6 21107.1 1260.58 3
 5 -1 6 21324.9 1384.08 3
 5 1 6 21421 1284.77 3
 -5 1 -6 20841.2 1358.28 3
 -5 1 -7 251620 4969.73 3
 -5 -1 -7 240697 5151.96 2
 5 1 7 235303 4522.98 3
 -5 1 -7 242049 5299.65 2
 5 -1 7 250180 4959.99 3
 -5 -1 -8 1684.78 461.694 2
 -5 1 -8 1734.03 510.121 2
 5 1 8 669.497 231.456 3
 5 -1 8 1650.65 408.758 3
 -5 1 -9 136559 4399.87 2
 5 -1 9 130706 4006.27 3
 5 1 9 136834 3863.89 3
 -5 -1 -9 134041 4287.84 2
 -5 -1 -10 24523.9 1915.87 2
 5 1 10 22208.5 1640.99 3
 5 -1 10 23511.5 1785.33 3
 -5 1 -10 22584.4 1891.95 2
 -5 1 -11 674.294 383.173 2
 5 -1 11 323.04 268.736 3
 5 1 11 573.616 271.432 3
 -5 -1 -11 169.458 231.676 2
 5 1 11 810.361 341.74 1
 5 1 12 4553.86 824.772 1
 5 1 12 3822.7 768.201 3
 5 -1 12 4596.65 856.874 3
 -5 -1 -12 5525.9 1026.96 2
 -5 1 -12 5100.95 985.392 2
 5 -1 13 56837.8 2842.06 1
 -5 1 -13 63189.1 3554.88 2
 5 1 13 56290.3 2959.31 1
 -5 -1 -13 58720.4 3411.06 2
 5 -1 13 58690 3183.84 3
 5 1 13 62894 3199.82 3
 5 -1 14 2031.28 589.34 1
 -5 1 -14 2213.84 715.111 2
 -5 -1 -14 1546.62 608.174 2
 5 1 14 1561.04 515.348 1
 5 -1 15 80787.9 3598.17 1
 -5 1 -15 78805.3 4329.88 2
 -5 -1 -15 80881.9 4344.38 2
 5 -1 16 10729.5 1358.29 1
 -5 1 -16 10855.5 1701.76 2
 -5 -1 -16 11313.3 1705.82 2
 -5 -1 -17 6531.5 1553.1 2
 -5 1 -17 5099.35 1238.85 2
 -5 -1 -18 8358.37 1592.81 2
 -5 1 -18 6909.21 1423.73 2
 -5 -1 -19 28176.7 2958.46 2
 -5 1 -19 31210.3 3125.67 2
 -5 -1 -20 287.055 376.913 2
 -5 1 -20 156.007 677.172 2
 -5 -1 -21 53276.3 4328.15 2
 -5 1 -21 47451.8 4123.94 2
 5 3 -22 -522.136 617.674 2
 5 -3 -22 205.616 553.459 2
 5 -3 -21 8008.39 1937.98 2
 5 3 -21 6715.99 1524.49 2
 5 -3 -20 27912.4 2956.62 2
 5 3 -20 30206.3 3006.09 2
 5 -3 -19 55561.3 3996.86 2
 5 3 -19 57916.4 3997.13 2
 5 -3 -18 32169.4 2914.01 2
 5 3 -18 30020.5 2782.96 2
 5 3 -17 8593.52 1448.33 2
 5 -3 -17 9445.97 1566.68 2
 5 -3 -16 12121.2 1304.25 1
 5 -3 -16 11509.1 1644.05 2
 5 3 -16 11244.3 1593.46 2
 5 3 -15 78746.7 3973.31 2
 5 -3 -15 80015.7 3245.08 1
 5 -3 -15 73947.4 3963.76 2
 5 3 -14 5688.26 1039.63 2
 5 -3 -14 7377.34 1242.9 2
 5 -3 -14 7382.99 968.127 1
 5 -3 -13 76908.7 3695.11 2
 5 3 -13 72224.3 3490.9 2
 5 -3 -13 77551.1 2998.86 1
 -5 -3 13 66497.1 3345.95 2
 5 3 -12 126089 4402.12 2
 -5 3 12 112801 4292.89 2
 5 -3 -12 120941 4449.48 2
 -5 -3 12 122697 4339.2 2
 5 -3 -12 130107 3763.36 1
 5 3 -11 24392.9 1850.11 2
 5 -3 -11 25275.1 1607.87 1
 -5 3 11 18723.6 1665.92 2
 5 -3 -11 23127.6 1877.08 2
 -5 -3 11 22879.7 1796.44 2
 -5 3 10 91397.9 3535.7 2
 5 3 -10 97228.6 3482 2
 -5 -3 10 96641.7 3455.39 2
 5 3 -10 100854 1777.23 1
 5 -3 -10 94424.4 3606.15 2
 -5 3 9 81326.2 3194.18 2
 5 3 -9 86156.7 1576.88 1
 5 -3 -9 83106.4 3208.41 2
 -5 -3 9 84970.3 3061.54 2
 -5 3 9 77423.7 3043.96 3
 5 3 -9 89879.1 3176.56 2
 -5 3 8 51286.1 2398.52 2
 -5 -3 8 55818.1 2342.91 2
 5 -3 -8 49134.4 2345.42 2
 -5 3 8 51076.1 2354.83 3
 5 3 -8 54440.9 2299.78 2
 -5 3 7 168886 4067.73 3
 5 3 -7 181646 3925.88 2
 -5 -3 7 174080 3839.75 2
 -5 3 7 157224 4008.92 2
 -5 3 6 76119.6 2641.17 2
 -5 3 6 83620.1 2741.05 3
 -5 -3 6 87082.6 2510.55 2
 5 3 -6 86712.7 2515.45 2
 -5 -3 5 12815 889.05 2
 -5 3 5 13338.1 1054.97 3
 5 -3 -5 12416.4 1007.86 3
 -5 3 5 11705.8 984.534 2
 5 3 -5 11605 852.073 2
 -5 -3 4 250128 3531.93 2
 -5 3 4 249389 4278.89 3
 5 -3 -4 234865 4170.81 3
 5 3 -4 235987 3477.3 2
 -5 3 3 152266 3231.18 3
 5 -3 -3 146095 3152.68 3
 -5 -3 3 149378 2465.43 2
 -5 3 2 39541.5 1587.25 3
 5 -3 -2 33873.3 1498.36 3
 -5 -3 2 38219 1272.93 3
 -5 3 1 60451 1952.92 3
 5 -3 -1 57981.7 1913.82 3
 -5 -3 1 57409.6 1399.06 3
 -5 3 0 6859.96 665.289 3
 -5 -3 0 6894.15 429.37 3
 5 3 0 6212.3 408.256 3
 5 -3 0 6489.11 649.999 3
 5 3 1 114494 1655.63 3
 -5 -3 -1 127619 1755.21 3
 -5 3 -1 129130 2896.93 3
 5 -3 1 123840 2846.76 3
 -5 -3 -2 45010.1 1080.55 3
 5 3 2 44006.3 1079.67 3
 5 -3 2 42794.8 1728.63 3
 -5 3 -2 44172.5 1757.6 3
 -5 3 -3 79990.3 2475.35 3
 5 3 3 82687.9 1646.35 3
 -5 -3 -3 81447.9 1625.78 3
 5 -3 3 78753.6 2453.94 3
 -5 -3 -4 105239 2078.19 3
 -5 -3 -4 98734.9 2575.78 2
 5 -3 4 101510 2915.35 3
 -5 3 -4 102145 2915.88 3
 5 3 4 101736 2058.71 3
 -5 -3 -5 5943.95 689.132 2
 -5 3 -5 5719.9 732.947 3
 5 3 5 6319.94 570.241 3
 5 -3 5 5573.49 727.461 3
 5 3 6 139498 2941.23 3
 5 -3 6 140837 3785.42 3
 -5 3 -6 140138 3760.53 3
 -5 -3 -6 143786 3633.65 2
 -5 3 -7 195208 4652.98 3
 5 -3 7 196690 4673.03 3
 5 3 7 189881 3721.19 3
 -5 -3 -7 191059 4483.86 2
 -5 3 -8 26474.2 1810.92 3
 -5 -3 -8 30314.3 1905.65 2
 5 -3 8 31813.2 1981.16 3
 5 3 8 29919.6 1594.11 3
 5 3 9 74963.4 3141.1 1
 5 -3 9 73765.4 3156.39 3
 5 3 9 73825.7 2688.06 3
 -5 -3 -9 75364.8 3167.4 2
 -5 3 -9 75087.7 3322.79 2
 -5 3 -9 75160.4 3180.74 3
 -5 3 -10 76148.1 3492.46 2
 5 3 10 73938.3 2847.59 3
 5 3 10 75737.7 3241.85 1
 -5 -3 -10 79563.6 3426.88 2
 5 -3 10 73568.1 3290.6 3
 -5 3 -11 -94.3784 454.442 2
 5 3 11 -262.242 433.32 1
 -5 -3 -11 137.017 240.809 2
 5 3 11 -78.2777 259.501 3
 5 -3 11 -322.781 350.845 3
 5 -3 12 41344.7 2674.97 3
 5 3 12 39489.3 2317.44 3
 -5 -3 -12 46277.5 2883.49 2
 -5 3 -12 40667 2811.59 2
 5 3 12 42975.3 2602.15 1
 5 3 13 92187.1 3731.88 3
 -5 3 -13 101677 4570.35 2
 -5 -3 -13 100064 4396.26 2
 5 3 13 95329.8 4016.07 1
 -5 -3 -14 9770 1474.84 2
 5 -3 14 11524.9 1286.36 1
 5 3 14 12562 1473.99 3
 -5 3 -14 11471.5 1620.81 2
 -5 -3 -15 30360.4 2649.12 2
 -5 3 -15 29251.3 2658.67 2
 5 -3 15 29943.3 2110.99 1
 -5 -3 -16 44998.1 3336.01 2
 -5 3 -16 43092.1 3368.65 2
 5 -3 16 40674.4 2527.58 1
 -5 3 -17 873.349 651.635 2
 -5 -3 -17 1231.55 553.259 2
 -5 -3 -18 30394.6 2939.26 2
 -5 3 -18 26843.2 2872.39 2
 -5 -3 -19 20536.9 2505.02 2
 -5 3 -19 15757.6 2243.31 2
 -5 -3 -20 12257.3 2028.82 2
 -5 3 -20 11971.9 2099.53 2
 -5 -3 -21 29777.4 3275.51 2
 -5 3 -21 25241.1 3061.71 2
 -5 5 23 642.839 575.932 3
 5 5 -22 447.847 559.078 2
 5 -5 -22 2078.81 933.724 2
 -5 5 22 320.587 466.718 3
 5 5 -21 123.003 447.25 2
 -5 5 21 -358.166 557.495 3
 5 -5 -21 -441.164 863.343 2
 5 -5 -20 43283.4 3673.52 2
 -5 5 20 44391 3517.06 3
 5 5 -20 43452.3 3598.84 2
 5 -5 -19 24320.6 2657.43 2
 -5 5 19 20986.2 2334.23 3
 5 5 -19 24045 2605.91 2
 5 -5 -18 107065 5384.19 2
 5 5 -18 104981 5203.02 2
 -5 5 18 98728.8 4894.27 3
 5 5 -17 1531.56 680.198 2
 5 -5 -17 1965.43 623.426 1
 -5 5 17 1689.16 740.358 3
 5 -5 -17 1960.38 782.017 2
 -5 5 16 2868.83 752.981 3
 5 -5 -16 4302.23 874.327 1
 5 5 -16 2542.28 806.058 2
 5 -5 -16 4111.42 1055.96 2
 5 5 -15 6313.23 1135.37 2
 5 -5 -15 6235.37 1015.8 1
 -5 5 15 4291.62 948.461 3
 5 -5 -15 6130.04 1184.08 2
 5 -5 -14 71555.3 3237.9 1
 -5 5 14 61640.1 3354.48 3
 5 -5 -14 68526.4 3691.09 2
 5 5 -14 69546.4 3568.32 2
 -5 -5 13 41819.3 2628.48 2
 5 5 -13 43705.9 2731.27 2
 -5 5 13 38159.7 2535.55 3
 5 -5 -13 42780.9 2833.65 2
 5 -5 -13 42391.1 2420.97 1
 5 -5 -12 140512 4893.91 2
 5 5 -12 135236 4554.18 2
 5 -5 -12 147019 4364.65 1
 -5 5 12 132121 4704.71 2
 -5 -5 12 141235 4616.51 2
 -5 5 12 127059 4442.46 3
 5 -5 -11 4811.49 774.645 1
 -5 -5 11 2722.55 605.044 2
 5 5 -11 2748.94 646.8 2
 -5 5 11 4517.16 858.321 2
 5 -5 -11 3471.62 757.827 2
 -5 5 11 2826.48 668.75 3
 5 5 -10 190836 4871.66 2
 -5 5 10 182124 5083.76 2
 -5 -5 10 189317 4817.71 2
 -5 5 10 187655 4953.53 3
 5 -5 -10 190010 5230.89 2
 -5 5 9 34647.6 2117.55 2
 -5 -5 9 36518.9 2011.07 2
 -5 5 9 35362.7 2071.43 3
 5 5 -9 39638.2 2085.38 2
 -5 5 8 101470 3375.3 3
 5 5 -8 113317 3290.86 2
 -5 -5 8 112188 3265.35 2
 -5 5 8 102762 3500.89 2
 5 5 -7 41673.7 1858.14 2
 -5 5 7 41249.5 2059.27 3
 -5 -5 7 41850.7 1851.83 2
 -5 5 7 37164.4 2019.34 2
 -5 -5 6 63239.7 2082.63 2
 -5 5 6 56376.4 2326.86 3
 5 -5 -6 56554.9 2317.7 3
 -5 5 6 58944.3 2423.14 2
 5 5 -6 65825 2129.73 2
 5 5 -5 356.827 253.417 2
 -5 5 5 788.95 308.516 3
 -5 -5 5 761.881 214.201 2
 5 -5 -5 851.54 275.47 3
 -5 5 4 106130 2943.21 3
 5 5 -4 106116 2168.13 2
 -5 -5 4 108572 2187.1 2
 5 -5 -4 97591.1 2836.46 3
 -5 5 3 44351.2 1871.68 3
 -5 -5 3 43383.7 1207.44 2
 5 -5 -3 41527.8 1828.02 3
 -5 -5 2 257902 2381.57 2
 -5 5 2 256643 4398.56 3
 5 -5 -2 220214 4102.97 3
 5 -5 -1 25887.1 1415.86 3
 -5 5 1 31550 1539.57 3
 5 -5 0 248.354 155.496 3
 -5 -5 0 621.547 124.485 3
 -5 5 0 484.43 227.852 3
 -5 5 -1 9580.55 890.788 3
 5 -5 1 9661.48 881.115 3
 -5 -5 -2 266310 3159 2
 5 -5 2 265889 4740.4 3
 -5 5 -2 259356 4706.08 3
 -5 -5 -3 214549 3220.18 2
 -5 5 -3 211474 4375.08 3
 5 -5 3 215684 4423.81 3
 5 5 4 350078 3088.91 3
 -5 5 -4 354534 5894.6 3
 5 -5 4 362806 5962.23 3
 -5 -5 -4 345906 4646.77 2
 5 5 5 66788.3 2674.14 1
 5 5 5 63060.6 1567.37 3
 -5 5 -5 66095.2 2665.31 3
 5 -5 5 61631.5 2574.75 3
 -5 -5 -5 68710.2 2259.68 2
 -5 -5 -6 103908 3012.39 2
 -5 5 -6 100551 3424.1 3
 5 5 6 98926.4 3418.21 1
 5 -5 6 99141.8 3385.75 3
 5 5 6 101572 2241.9 3
 -5 5 -7 8025.26 1004.24 3
 5 5 7 8776.3 746.344 3
 -5 -5 -7 8504.69 920.777 2
 5 -5 7 8804.91 1068.13 3
 5 5 7 6813.39 937.482 1
 -5 5 -8 145103 4468.43 3
 -5 -5 -8 153559 4211 2
 5 5 8 147589 3332.36 3
 5 -5 8 152567 4569.85 3
 5 5 8 147994 4457.46 1
 5 -5 9 76615.1 3361.54 3
 -5 5 -9 74111.5 3300.06 3
 -5 -5 -9 73488.6 3071.35 2
 5 5 9 74989.9 2555.55 3
 5 5 9 70190.6 3188 1
 5 5 10 83856.4 3573.39 1
 -5 5 -10 80667.9 3685.46 2
 -5 -5 -10 81815.3 3435.79 2
 5 5 10 80540.8 2816.04 3
 5 -5 10 78030.2 3537.89 3
 5 5 11 1323.16 515.731 1
 -5 5 -11 718.938 432.67 2
 5 -5 11 947.85 446.217 3
 5 5 11 1156.64 319.185 3
 -5 -5 -11 1580.89 561.025 2
 -5 -5 -12 38910.8 2637.5 2
 5 5 12 38042.8 2551.59 1
 5 5 12 36397.7 2131.95 3
 -5 5 -12 38144 2750.09 2
 -5 -5 -13 62623.9 3482.98 2
 -5 5 -13 59648.2 3551.71 2
 5 5 13 55617.7 2789.09 3
 -5 5 -14 49461.6 3375.41 2
 -5 -5 -14 47984 3205.91 2
 5 5 14 49262.4 2738.61 3
 -5 -5 -15 3402.23 917.836 2
 -5 5 -15 2425 801.522 2
 -5 -5 -16 14972.1 1906.72 2
 -5 5 -16 13522.3 1898.06 2
 5 -5 16 15164.8 1507.22 1
 -5 -5 -17 -163.675 481.867 2
 -5 5 -17 58.5618 527.837 2
 -5 -5 -18 39642.5 3371.68 2
 -5 5 -18 41086.9 3551.68 2
 -5 -5 -19 20558 2537.32 2
 -5 5 -19 17467 2399.6 2
 -5 -5 -20 27034.7 2973.28 2
 -5 5 -20 23298.5 2862.98 2
 -5 -5 -21 601.797 532.253 2
 -5 7 23 15338.2 2261.15 3
 -5 7 22 -217.062 475.743 3
 5 7 -22 180.687 700.41 2
 5 -7 -21 5530.94 1412.92 2
 -5 7 21 6595.19 1417.17 3
 5 7 -21 4515.49 1210.24 2
 5 7 -20 41000.5 3496.71 2
 5 -7 -20 41488.2 3615.52 2
 -5 7 20 37135.6 3195.34 3
 -5 7 19 4299.65 1027.81 3
 5 7 -19 4024.53 1049.32 2
 5 -7 -19 4383.01 1173.87 2
 5 -7 -18 95896.6 4460.52 1
 5 -7 -18 89006.9 4962.09 2
 -5 7 18 84188.4 4501.2 3
 5 7 -18 93400.8 4882.43 2
 5 7 -17 15247 1966.78 2
 -5 7 17 13840.6 1796.29 3
 5 -7 -17 15466.6 2020.04 2
 5 -7 -17 16208.7 1785.76 1
 5 7 -16 502.978 404.038 2
 -5 7 16 141.125 375.785 3
 5 -7 -16 386.431 353.174 2
 5 -7 -16 168.102 379.956 1
 5 -7 -15 10253.5 1368.49 1
 5 7 -15 9675.14 1386.16 2
 -5 7 15 7645.23 1236.08 3
 5 -7 -15 9720.71 1481.41 2
 5 7 -14 203761 6138.95 2
 5 -7 -14 199345 5804.64 1
 5 -7 -14 186302 6197.52 2
 -5 7 14 181611 5760.26 3
 -5 7 13 249.358 259.766 3
 5 7 -13 186.504 217.953 2
 -5 -7 13 -415.259 306.881 2
 5 -7 -13 424.387 294.219 2
 5 -7 -13 376.823 349.896 1
 5 7 -12 74076.6 3378.8 2
 -5 -7 12 71529.1 3298.54 2
 5 -7 -12 74761.1 3364.28 1
 -5 7 12 66669.5 3234.72 3
 5 -7 -11 120.373 228.139 1
 5 7 -11 10.6159 250.997 2
 -5 7 11 145.046 254.552 3
 -5 7 11 -114.021 315.103 2
 -5 -7 11 121.043 302.123 2
 -5 -7 10 55964.4 2618.51 2
 -5 7 10 52724.1 2822.33 2
 5 7 -10 55639.3 2608.51 2
 -5 7 10 52289.9 2661.98 3
 -5 7 9 21176.7 1735.16 2
 5 7 -9 23086.5 1586.11 2
 -5 -7 9 22532.9 1570.04 2
 -5 7 9 20771.3 1620.31 3
 5 7 -8 285083 5204.93 2
 -5 -7 8 292423 5261.33 2
 -5 7 8 280646 5725.54 3
 -5 7 8 266255 5845.01 2
 5 7 -7 1878.17 407.721 2
 -5 -7 7 2470.92 460.252 2
 -5 7 7 2660.81 525.088 3
 -5 7 7 1951.67 485.027 2
 -5 -7 6 3834.51 516.767 2
 5 7 -6 2478.67 411.416 2
 -5 7 6 3143.22 591.529 3
 5 -7 -6 1970.37 469.629 3
 -5 7 6 1414.17 405.612 2
 5 7 -5 11454 792.086 2
 -5 -7 5 12890.4 841.728 2
 -5 7 5 12180.3 1101.93 3
 5 -7 -5 11646.4 1063.84 3
 5 7 -5 11889.1 662.641 1
 -5 7 4 93354.4 2955.24 3
 -5 -7 4 92436.4 1948.09 2
 5 7 -4 96192.9 2104.53 1
 5 -7 -4 87199.3 2856.41 3
 5 7 -4 92358.6 1929.21 2
 5 7 -3 51614.2 1686.44 1
 -5 7 3 49917.3 2117.73 3
 5 -7 -3 47386.8 2072.39 3
 -5 -7 3 50150 1168.29 2
 5 7 -3 47980.4 1141.93 2
 5 -7 -2 357309 5647.55 3
 -5 7 2 370494 5730.49 3
 -5 -7 2 372815 4198.03 3
 5 7 -2 369155 4851.15 1
 5 -7 -1 69436.9 2486.56 3
 -5 -7 1 74143.4 1604.8 3
 5 7 -1 73930.8 2308.39 1
 -5 7 1 73779.2 2571.13 3
 5 -7 0 74121.1 2612.67 3
 -5 -7 0 75481.5 1284.31 3
 5 7 0 76185.8 2469.25 1
 -5 7 0 75997 2628.48 3
 -5 -7 -1 178099 1760.9 2
 5 -7 1 177005 4123.86 3
 -5 7 -1 185976 4210.04 3
 5 7 1 172967 3916.81 1
 -5 7 -2 633457 7963.29 3
 -5 -7 -2 646383 4439.28 2
 5 7 2 643451 7870.53 1
 5 -7 2 631545 7972.91 3
 5 -7 3 89594.9 3080.34 3
 -5 -7 -3 86697.5 1974.01 2
 -5 7 -3 88886 3067.27 3
 5 7 3 85893 2991.53 1
 -5 -7 -4 194746 3343.88 2
 -5 7 -4 184040 4579.63 3
 5 -7 4 191350 4678.99 3
 5 7 4 184244 4629.77 1
 -5 -7 -5 13831.3 993.628 2
 -5 7 -5 11310.5 1181.64 3
 5 7 5 12586.8 573.717 3
 5 -7 5 13371.2 1286.55 3
 5 7 5 12414.8 1239.39 1
 5 7 6 64660 2922.95 1
 -5 -7 -6 67947.3 2402.22 2
 5 7 6 69080.2 1623.52 3
 5 -7 6 70905.1 3045.44 3
 -5 7 -6 68494.3 2989.33 3
 5 7 7 24393.1 1124.33 3
 -5 7 -7 24719.4 1881.44 3
 -5 -7 -7 24804.2 1574.87 2
 5 -7 7 24265.4 1849.63 3
 5 7 7 25123.7 1879.81 1
 5 7 8 206513 3607.58 3
 -5 -7 -8 215513 4949.19 2
 5 7 8 210472 5595.69 1
 5 -7 8 207031 5621.52 3
 -5 7 -8 201805 5535.93 3
 5 -7 9 1047.19 462.831 3
 5 7 9 690.245 388.942 1
 -5 7 -9 945.301 377.393 3
 -5 -7 -9 1439.72 456.992 2
 5 7 9 1414.08 353.445 3
 5 7 10 30880.7 1657.72 3
 -5 -7 -10 36736 2302.26 2
 -5 7 -10 29547.3 2286.52 3
 5 7 10 33683.7 2380.99 1
 -5 7 -10 30620.6 2326.54 2
 -5 -7 -11 1993.76 577.576 2
 -5 7 -11 1486.17 512.697 2
 5 7 11 2388.02 544.029 3
 -5 7 -12 43837.5 2987.84 2
 -5 -7 -12 46278.3 2859.74 2
 5 7 12 45763.1 2297.88 3
 5 7 13 -721.526 356.687 3
 -5 7 -13 31.1534 386.028 2
 -5 -7 -13 483.333 312.535 2
 -5 -7 -14 59035.4 3547.26 2
 5 7 14 59398.9 2918.69 3
 -5 7 -14 61377.8 3833.11 2
 5 7 15 23559.9 1924.05 3
 -5 7 -15 24706.1 2497.9 2
 -5 -7 -15 25817.4 2419.08 2
 -5 -7 -16 5934.57 1236.24 2
 -5 7 -16 4230.94 1113.68 2
 -5 -7 -17 7136.87 1359.86 2
 -5 7 -17 7615.11 1490.38 2
 -5 -7 -18 32444.9 3043.07 2
 -5 7 -18 26680.1 2897.18 2
 -5 7 -19 5440.02 1413.78 2
 -5 -7 -19 5173.26 1271.08 2
 -5 -7 -20 45381.8 3890.79 2
 -5 7 -20 42396.7 3876.19 2
 -5 -7 -21 4984.56 1422.53 2
 -5 9 23 19628.8 2486.6 3
 5 9 -22 501.128 668.91 2
 -5 9 22 -1266.02 681.733 3
 5 9 -21 21362.9 2665.15 2
 -5 9 21 22897.7 2585.33 3
 5 9 -20 36039.6 3259.89 2
 -5 9 20 37420.5 3195.44 3
 5 9 -19 11466.7 1808.03 2
 -5 9 19 8719.03 1505.97 3
 5 9 -18 14280.2 1928.14 2
 5 -9 -18 17466 2012.74 1
 -5 9 18 14178.6 1867.65 3
 5 9 -17 21579.1 2275.88 2
 -5 9 17 23925.8 2339.22 3
 5 -9 -17 26266.4 2407.3 1
 5 9 -16 39.8773 282.35 2
 5 -9 -16 -293.263 443.226 1
 -5 9 16 -396.519 520.279 3
 5 9 -15 23088.5 2193.51 2
 5 -9 -15 21155.7 2094.81 1
 -5 9 15 23008.9 2154.03 3
 5 9 -14 118255 4688.5 2
 -5 9 14 99440.8 4314.2 3
 5 -9 -14 115064 4700.48 1
 5 9 -13 34838.9 2432.98 2
 -5 9 13 31134.2 2331.18 3
 5 -9 -13 33856.9 2492.45 1
 5 9 -12 12427.5 1377.41 2
 5 -9 -12 13015.9 1515.33 1
 -5 9 12 11192.5 1351.27 3
 -5 9 11 2572.39 688.93 2
 5 9 -11 3183.49 682.044 2
 -5 -9 11 4900.9 925.076 3
 -5 9 11 2979.41 710.542 3
 5 -9 -11 3736.14 805.491 1
 -5 -9 10 -110.939 254.026 3
 -5 9 10 -90.6451 314.672 2
 5 9 -10 152.513 202.998 2
 -5 9 10 383.923 309.254 3
 5 9 -9 42006.5 2131.57 2
 -5 9 9 39407.7 2285.1 3
 -5 -9 9 39128.4 2384.06 3
 -5 9 9 34953.3 2309.35 2
 5 9 -8 196630 4300.66 2
 -5 9 8 177095 4715.62 3
 -5 -9 8 194705 5072.32 3
 -5 9 8 175655 4920.48 2
 5 9 -7 109813 2990.02 2
 -5 9 7 111368 3646.3 3
 5 -9 -7 104530 3498.82 3
 -5 9 7 103377 3640.01 2
 -5 -9 7 112411 3655.01 3
 5 -9 -6 146.042 151.729 3
 -5 9 6 -122.336 184.836 3
 5 9 -6 21.4884 139.751 2
 -5 -9 6 185.899 238.855 3
 -5 9 6 -95.5567 221.806 2
 -5 9 5 16249.1 1327.03 3
 5 9 -5 17736.8 961.342 2
 -5 -9 5 15112.8 1194.88 3
 5 -9 -5 15520.6 1297.26 3
 -5 9 4 51846.4 2324.46 3
 5 9 -4 47652.1 1345.56 2
 5 -9 -4 43650.5 2139.38 3
 -5 -9 4 47374.3 1958.34 3
 5 -9 -3 56976 2415.9 3
 -5 -9 3 61890.7 2066.91 3
 -5 9 3 59818.6 2471.39 3
 5 9 -3 64281.1 2105.32 1
 5 9 -3 57195.2 1169.97 2
 5 -9 -2 80721.3 2866.84 3
 5 9 -2 78782.4 2487.37 1
 -5 -9 2 84108.2 2179.63 3
 -5 9 2 80702.1 2903.12 3
 5 -9 -1 70357.8 2702.88 3
 -5 -9 1 67496.4 1707.11 3
 -5 9 1 67929.3 2659.65 3
 5 9 -1 64577.5 2374.78 1
 5 -9 0 30427.6 1804.18 3
 -5 -9 0 30676.2 953.69 3
 -5 9 0 31425.6 1826.04 3
 5 9 0 28866.4 1652.37 1
 5 -9 1 108785 3471.54 3
 5 9 1 103540 3309.35 1
 -5 9 -1 107207 3436.92 3
 5 -9 2 133906 3926.31 3
 5 9 2 128163 3801.41 1
 -5 9 -2 125183 3811.39 3
 5 9 3 8248.82 997.861 1
 -5 9 -3 7712.74 963.416 3
 5 -9 3 9880 1105.97 3
 -5 -9 -3 9313.01 616.429 2
 5 -9 4 107114 3723.97 3
 5 9 4 99487.8 3581.74 1
 -5 9 -4 99726 3585.73 3
 -5 -9 -4 104032 2390.42 2
 -5 -9 -5 1656.01 356.875 2
 5 9 5 1713.63 516.841 1
 5 -9 5 1653.39 473.891 3
 -5 9 -5 1278.05 446.413 3
 -5 -9 -6 301.886 216.659 2
 5 9 6 166.913 83.5802 3
 5 9 6 107.773 81.1953 3
 -5 9 -6 439.644 371.486 3
 5 9 6 -57.0132 214.483 1
 5 -9 6 28.4787 192.365 3
 -5 -9 -7 46269 2133.69 2
 5 9 7 47356.9 1382.4 3
 5 9 7 42791.3 1326.89 3
 -5 9 -7 43003.7 2603.57 3
 5 -9 7 48791 2766.31 3
 5 9 7 49052 2753.47 1
 -5 -9 -8 135828 3902.36 2
 5 9 8 133091 2681.63 3
 5 9 8 123061 2552.9 3
 -5 9 -8 133008 4723.53 3
 5 -9 8 133323 4705.73 3
 5 9 8 125704 4557.61 1
 -5 -9 -9 18123.2 1534.57 2
 5 9 9 18593.2 1110.27 3
 -5 9 -9 18780.3 1837.36 3
 5 9 9 16938.2 1051.43 3
 -5 -9 -10 17394.3 1579.8 2
 -5 9 -10 14619.9 1703.3 3
 5 9 10 16147.7 1132.48 3
 -5 9 -11 2458.71 755.07 2
 -5 -9 -11 2958.89 678.54 2
 5 9 11 1841.39 424.756 3
 -5 9 -11 2467.46 724.096 3
 -5 -9 -12 7042.37 1115.12 2
 -5 9 -12 6188.19 1173.75 2
 5 9 12 6465.77 832.681 3
 5 9 13 13217.4 1263.03 3
 -5 -9 -13 16364.3 1798.91 2
 -5 9 -13 15026 1869.03 2
 -5 -9 -14 75329.6 3974.48 2
 5 9 14 73617.5 3146.81 3
 -5 9 -14 76505.2 4338.5 2
 -5 -9 -15 33790.7 2764.06 2
 5 9 15 29520.5 2108.37 3
 -5 9 -15 34458.9 3018.44 2
 -5 -9 -16 -15.7592 415.238 2
 -5 9 -16 -608.287 634.282 2
 -5 9 -17 2302.15 875.008 2
 -5 -9 -17 2307.92 765.851 2
 -5 9 -18 15093.7 2208.58 2
 -5 -9 -18 16645.1 2189.09 2
 -5 9 -19 17969.4 2467.51 2
 -5 -9 -19 19623.5 2428.88 2
 -5 9 -20 45823.8 4072.64 2
 -5 -9 -20 47020.6 3896.12 2
 -5 -9 -21 16111.2 2342.73 2
 -5 11 23 10837.8 1839.95 3
 5 11 -22 1453.14 890.213 2
 -5 11 22 11.9308 444.145 3
 5 11 -21 4837.68 1259.37 2
 -5 11 21 5799.17 1284.07 3
 -5 11 20 3807.73 1059.89 3
 5 11 -20 4888.13 1280.02 2
 5 11 -19 48563.7 3722.38 2
 -5 11 19 45075.5 3426.33 3
 5 -11 -19 51260.6 3724.26 1
 5 -11 -18 5341.6 1219.79 1
 5 11 -18 4197.4 1098.69 2
 5 11 -17 5462.71 1180.97 2
 5 -11 -17 6071.54 1226.53 1
 -5 11 17 4544.14 1073.98 3
 5 11 -16 720.315 580.402 2
 -5 11 16 595.967 404.061 3
 5 -11 -16 85.201 312.351 1
 5 -11 -15 41547.1 3104.52 1
 5 11 -15 41131.7 2908.97 2
 -5 11 15 39047.5 2825.2 3
 5 11 -14 39838.7 2731.67 2
 -5 11 14 36996.9 2651.92 3
 5 -11 -14 36753.6 2833.25 1
 -5 11 13 76040.5 3697.42 3
 5 11 -13 77414.8 3645.93 2
 5 -11 -13 78530 4032.13 1
 5 11 -12 11445.5 1331.8 2
 -5 11 12 11545.5 1390.92 3
 5 -11 -12 13107.2 1629.13 1
 -5 11 11 2144.83 621.989 3
 5 11 -11 2451.92 604.989 2
 5 -11 -11 2193.94 674.084 1
 -5 11 10 -135.628 311.396 2
 -5 11 10 78.4557 268.751 3
 5 11 -10 91.7144 233.73 2
 -5 -11 10 309.676 214.52 3
 -5 11 9 128064 4251.9 3
 -5 -11 9 128685 4454.66 3
 5 11 -9 131197 3789.41 2
 -5 11 9 122381 4343.05 2
 -5 11 8 91949.1 3520.61 3
 5 11 -8 91554.9 2964.7 2
 -5 11 8 82755.6 3490.03 2
 -5 -11 8 97413.1 3702.9 3
 5 -11 -8 88747.7 3443.37 3
 -5 -11 7 135992 4173.02 3
 -5 11 7 135669 4176.61 3
 5 11 -7 135756 3335.61 2
 5 -11 -7 133053 4116.26 3
 -5 11 7 118644 4044.88 2
 -5 11 6 34580.5 2055.09 3
 5 11 -6 34981.3 1529.79 2
 5 -11 -6 31772.6 1982.54 3
 -5 -11 6 33162.6 1957.41 3
 -5 11 6 29063.8 1931.24 2
 -5 11 5 6709.3 906.906 3
 5 11 -5 8273.18 668.713 2
 -5 -11 5 7375.76 879.784 3
 5 -11 -5 6528.5 880.692 3
 5 11 -4 5879.33 472.596 2
 -5 11 4 5888.4 831.37 3
 5 -11 -4 5597.38 823.35 3
 -5 -11 4 5389.47 701.124 3
 5 11 -3 208733 2175.81 2
 -5 11 3 218971 5058.42 3
 5 -11 -3 204520 4891.19 3
 -5 -11 3 219032 4112.24 3
 -5 -11 2 32606.4 1455.4 3
 5 -11 -2 30957.2 1896.85 3
 -5 11 2 31434.3 1923.23 3
 5 -11 -1 19983.6 1546.74 3
 -5 -11 1 20787 1045.19 3
 -5 11 1 17968.3 1464.27 3
 5 -11 0 2554 572.498 3
 5 11 0 2092.21 505.784 1
 -5 11 0 2746.56 601.126 3
 -5 -11 0 2503.96 321.646 3
 5 -11 1 3174.25 649.652 3
 5 11 1 3060.01 618.223 1
 -5 -11 -1 3804.71 325.708 3
 -5 11 -1 3735.82 679.726 3
 -5 11 -2 35012.4 2158 3
 5 -11 2 38094.4 2245.17 3
 5 11 2 35595.5 2145.29 1
 5 -11 3 96072 3646.7 3
 -5 11 -3 93722.8 3599.83 3
 5 11 3 89757.3 3514.45 1
 -5 11 -4 15150.1 1495.31 3
 5 11 4 15691.5 1518.47 1
 5 -11 4 14940.3 1494.25 3
 5 11 5 1824.99 358.462 2
 5 11 5 1630.85 510.05 1
 5 -11 5 1911.8 555.674 3
 -5 -11 -5 1856.95 365.272 2
 -5 11 -5 1726.53 507.612 3
 5 11 6 16090.2 1153.32 2
 -5 11 -6 15260.3 1576.39 3
 5 -11 6 15481.5 1592.43 3
 5 11 6 13656.4 1507.9 1
 -5 -11 -6 16138.8 1156.82 2
 -5 11 -7 30814.6 2330.5 3
 5 11 7 27707.1 916.432 3
 5 -11 7 26900.4 2163.69 3
 5 11 7 28611 940.367 3
 5 11 7 29338.4 1681.8 2
 5 11 7 30439.5 2309.4 1
 -5 -11 -7 31153.3 1739.87 2
 5 11 8 50639.1 2373.53 2
 5 11 8 43416.4 1373.09 3
 -5 11 -8 43555.1 2832.77 3
 5 11 8 47159.5 1439.52 3
 -5 -11 -8 47579.1 2313.95 2
 5 11 9 72678.2 2014.76 3
 -5 11 -9 77207.6 3897.06 3
 5 11 9 76273.3 2068.75 3
 -5 -11 -9 78154.5 3137.68 2
 -5 -11 -10 407.845 300.135 2
 5 11 10 251.203 164.48 3
 -5 11 -10 406.095 449.762 3
 5 11 10 252.007 172.436 3
 -5 11 -11 237.458 382.397 3
 -5 -11 -11 1005.92 448.666 2
 -5 11 -11 1699.06 563.844 2
 5 11 11 1277.85 338.856 3
 5 11 11 1498.6 367.982 3
 5 11 12 1420.38 381.347 3
 -5 -11 -12 1869.91 600.457 2
 5 11 12 1623.95 418.948 3
 -5 11 -12 1106.44 510.025 2
 -5 11 -13 47758 3402.47 2
 5 11 13 44982.2 2204.18 3
 5 11 13 48784.6 2290.27 3
 -5 -11 -13 54151.6 3219.92 2
 -5 11 -14 55955.9 3782.53 2
 5 11 14 48969.6 2439.82 3
 -5 -11 -14 61107.4 3571.29 2
 5 11 15 35367.6 2187.43 3
 -5 11 -15 36661.6 3230.93 2
 -5 -11 -15 38479.2 2948.09 2
 -5 11 -16 3137.21 985.8 2
 -5 -11 -16 2510.27 867.62 2
 5 11 16 1566.82 491.698 3
 5 11 17 187.259 313.765 3
 -5 11 -17 811.248 613.113 2
 -5 -11 -17 -174.109 404.25 2
 -5 -11 -18 16427.6 2479.18 2
 -5 11 -18 4630.96 1213.73 2
 -5 11 -19 55494.6 4385.87 2
 -5 -11 -19 55163.5 4105.72 2
 -5 -11 -20 22014.9 2752.15 2
 -5 13 22 2581.04 912.706 3
 5 13 -21 3197.52 1005.73 2
 -5 13 21 3651.04 1081.53 3
 5 13 -20 -1956.46 876.251 2
 -5 13 20 799.605 466.457 3
 -5 13 19 80011.4 4546.61 3
 5 -13 -19 96167.9 5345.14 1
 5 13 -19 88025.6 4983.09 2
 5 -13 -18 486.127 414.035 1
 5 13 -18 218.499 445.866 2
 -5 13 18 834.075 679.375 3
 5 13 -17 563.034 456.561 2
 5 -13 -17 190.785 400.764 1
 -5 13 17 -17.9573 491.305 3
 5 -13 -16 -60.9764 539.325 1
 5 13 -16 1241.6 730.49 2
 -5 13 16 697.431 448.431 3
 -5 13 15 44739.2 3028.69 3
 5 -13 -15 52748.9 3684.97 1
 5 13 -15 47345 3149.53 2
 -5 13 14 4644.26 988.829 3
 5 13 -14 6041.66 1110.03 2
 5 -13 -14 5550.7 1208.49 1
 5 -13 -13 104949 4942.72 1
 5 13 -13 102741 4221.86 2
 -5 13 13 93649.3 4137.65 3
 -5 13 12 16184.2 1683.39 3
 5 13 -12 18294.6 1724.98 2
 5 -13 -12 19255.6 2103.25 1
 5 -13 -11 -150.604 407.044 1
 -5 13 11 358.01 394.404 3
 5 13 -11 273.302 279.052 2
 -5 13 10 243.197 225.75 3
 5 13 -10 -435.36 290.871 2
 5 -13 -10 -47.2573 408.103 1
 -5 13 9 72953.4 3311.69 3
 5 13 -9 77608.6 2948.98 2
 -5 -13 9 79242.5 3633.35 3
 -5 13 9 69041.8 3404.87 2
 -5 13 8 987.908 429.733 3
 5 -13 -8 600.021 258.168 3
 -5 -13 8 1124.05 450.071 3
 5 13 -8 523.498 205.943 2
 -5 13 8 199.55 302.191 2
 -5 13 7 45733.9 2517.13 3
 5 13 -7 41358.5 1860.23 2
 5 -13 -7 38991.1 2328.61 3
 -5 13 7 36288.9 2327.42 2
 -5 -13 7 46760.1 2547.44 3
 5 13 -6 18647.8 1128.85 2
 5 -13 -6 18509.3 1592.33 3
 -5 -13 6 17470 1503.19 3
 -5 13 6 16498.6 1533.7 2
 -5 13 6 19776.3 1651.94 3
 5 13 -5 331.982 180.495 2
 -5 13 5 213.863 229.21 3
 5 -13 -5 -199.627 270.702 3
 -5 -13 5 11.7549 186.363 3
 5 13 -4 5418.5 463.2 2
 5 -13 -4 5481.09 872.633 3
 -5 -13 4 5472.12 748.146 3
 -5 13 4 5238.06 866.06 3
 5 13 -3 231392 2303.03 2
 5 -13 -3 228114 5501.23 3
 -5 13 3 234641 5564.1 3
 -5 -13 3 251373 4728.29 3
 5 -13 -2 4419.31 775.326 3
 -5 13 2 4062.89 748.323 3
 -5 -13 2 4892.16 599.914 3
 5 -13 -1 9586.57 1136.35 3
 -5 13 1 7099.99 991.188 3
 -5 -13 1 10217.3 808.297 3
 5 -13 0 1171.5 447.994 3
 -5 -13 0 1039.28 232.788 3
 -5 13 0 1030.77 376.964 3
 -5 -13 -1 7022.11 530.676 3
 -5 13 -1 6691.96 993.049 3
 5 -13 1 6433.01 963.568 3
 -5 13 -2 145.721 250.983 3
 -5 -13 -2 97.419 61.5927 3
 5 -13 2 316.492 313.676 3
 5 13 3 226126 2955.69 2
 -5 13 -3 219895 5837.95 3
 5 -13 3 236701 6057.52 3
 -5 13 -4 1743.57 601.265 3
 5 13 4 2359.26 369.663 2
 5 -13 4 2457.38 677.786 3
 5 13 5 7332.25 707.66 2
 -5 13 -5 6387.01 1072.65 3
 5 -13 5 7038.57 1114.33 3
 5 13 6 2764.74 411.976 2
 -5 13 -6 2312.3 712.327 3
 5 13 7 38482.5 1935.38 2
 -5 13 -7 36818.3 2664.43 3
 -5 13 -8 49.6146 331.522 3
 -5 -13 -8 -34.626 264.511 2
 5 13 8 112.966 91.3451 3
 5 13 8 328.998 126.02 3
 5 13 8 26.1009 246.814 2
 5 13 9 111827 2247.02 3
 5 13 9 117043 3848.93 2
 -5 13 -9 116762 5010.21 3
 -5 -13 -9 117541 3865.22 2
 5 13 9 116882 2282.43 3
 5 13 10 19395.9 1054.42 3
 5 13 10 19162.1 1663.89 2
 -5 13 -10 21622.1 2208.28 3
 5 13 10 19945.7 1071.45 3
 -5 -13 -10 21350.3 1740.41 2
 5 13 11 1158.8 276.892 3
 -5 13 -11 1241.16 600.255 3
 -5 13 -11 305.461 397.679 2
 5 13 11 1149.07 280.708 3
 -5 -13 -11 857.259 347.046 2
 5 13 12 2331.23 427.651 3
 5 13 12 1823.64 395.223 3
 -5 13 -12 2133.05 729.354 2
 -5 -13 -12 2775.17 745.487 2
 5 13 13 52033.7 2213.99 3
 -5 -13 -13 61797.2 3445.72 2
 -5 13 -13 50828.9 3581.12 2
 -5 13 -14 1999.42 754.415 2
 5 13 14 1193.52 329.736 3
 -5 -13 -14 1953.03 625.469 2
 -5 -13 -15 28934.3 2576.55 2
 -5 13 -15 25727.6 2708.78 2
 -5 -13 -16 3724.69 973.888 2
 -5 13 -16 3613.1 1076.94 2
 -5 13 -17 558.481 599.068 2
 -5 -13 -17 1316.16 689.599 2
 -5 -13 -18 630.764 714.396 2
 -5 13 -18 1230.96 522.14 2
 -5 -13 -19 71072.5 4672.09 2
 -5 -13 -20 2928.14 983.705 2
 5 15 -21 2278.71 831.068 2
 5 15 -20 8030.44 1561.6 2
 -5 15 20 7962.81 1481.14 3
 -5 15 19 61226.4 4014.93 3
 5 -15 -19 73711.8 4913.61 1
 5 15 -19 65038.2 4317.3 2
 5 -15 -18 532.274 533.524 1
 5 15 -18 584.621 493.342 2
 -5 15 18 690.502 475.988 3
 5 15 -17 -291.893 423.816 2
 5 -15 -17 -359.313 583.088 1
 -5 15 17 -1787.18 693.27 3
 -5 15 16 -2.88641 504.559 3
 5 -15 -16 18.7623 432.109 1
 5 15 -16 130.446 400.653 2
 5 15 -15 15089.8 1797.42 2
 -5 15 15 13929.5 1725.6 3
 5 -15 -15 15167.3 2092.89 1
 -5 15 14 16376.8 1833.32 3
 5 15 -14 17889.2 1874.86 2
 5 -15 -14 21002.9 2407.23 1
 -5 15 13 82871.5 3997.18 3
 5 15 -13 83188.8 3846.28 2
 5 -15 -13 89785.4 4828.46 1
 -5 15 12 -117.71 303.964 3
 5 15 -12 -143.02 440.432 2
 5 -15 -12 127.766 478.933 1
 -5 15 11 845.653 491.97 3
 5 15 -11 554.498 388.184 2
 5 -15 -11 758.116 549.289 1
 -5 15 10 -84.0956 246.184 3
 5 -15 -10 436.678 498.756 1
 5 15 -10 308.358 328.799 2
 -5 15 9 89622.4 3784.38 3
 5 15 -9 104988 3896.6 2
 -5 15 8 50582.4 2813.93 3
 5 15 -8 53971 2296.69 2
 -5 -15 8 55501.2 3023.49 3
 5 -15 -8 49488.5 2771.72 3
 -5 15 8 45181.5 2790.04 2
 -5 15 7 30118.4 2128.84 3
 5 15 -7 28807.3 1567.41 2
 5 -15 -7 28393.9 2058.95 3
 -5 15 7 26022.8 2068.21 2
 -5 -15 7 29840.2 2140.5 3
 -5 -15 6 5002.61 861.237 3
 5 15 -6 4116.35 541.935 2
 5 -15 -6 3917.87 775.804 3
 -5 15 6 4897.48 883.054 2
 -5 15 6 4084.82 795.987 3
 5 15 -5 1696.01 315.209 2
 5 -15 -5 2761.01 616.345 3
 -5 -15 5 1677.36 413.282 3
 -5 15 5 789.503 391.761 3
 5 15 -4 5529.79 475.452 2
 5 -15 -4 5347.56 919.317 3
 -5 -15 4 5975.49 831.106 3
 -5 15 4 4981.11 873.276 3
 5 15 -3 134327 1777.91 2
 5 -15 -3 140788 4528.52 3
 -5 15 3 149171 4672.82 3
 -5 -15 3 150788 3882.91 3
 5 -15 -2 39363.9 2422.86 3
 -5 -15 2 44958.1 1990.65 3
 -5 15 2 41696.7 2505.89 3
 5 -15 -1 942.259 448.965 3
 -5 -15 1 831.767 246.588 3
 -5 15 1 1059.17 437.616 3
 5 -15 0 3696.47 770.483 3
 -5 -15 0 4931.95 556.665 3
 -5 15 0 5199.49 900.376 3
 5 -15 1 2059.77 578.999 3
 -5 -15 -1 1707.33 304.02 3
 -5 15 -1 1710.94 548.835 3
 -5 -15 -2 22788.4 945.736 3
 -5 15 -2 21378.2 1904.95 3
 5 -15 2 24890.5 2055.78 3
 5 15 3 162840 2457.06 2
 -5 15 -3 159695 5273.8 3
 -5 15 -4 5572.95 1045.34 3
 5 15 4 5248.51 528.066 2
 5 15 5 6044.89 635.414 2
 -5 15 -5 4368.24 922.534 3
 -5 15 -6 2870.24 779.213 3
 5 15 6 2977.92 490.506 2
 5 15 7 17739.6 1315.54 2
 -5 15 -7 15909.2 1845.1 3
 -5 15 -8 26785.8 2470.45 3
 5 15 8 24547.3 1672.24 2
 5 15 9 114616 3797.18 2
 5 15 9 105923 1778.07 3
 -5 15 -9 116839 5219.9 3
 5 15 9 104582 1758.67 3
 -5 15 -10 6163.59 1263.45 3
 5 15 10 6053.96 509.993 3
 5 15 10 7384.67 1026.76 2
 5 15 10 5946.93 505.572 3
 5 15 11 322.553 173.817 3
 -5 15 -11 612.047 568.933 3
 5 15 12 218.902 148.585 3
 -5 -15 -12 -113.135 383.231 2
 -5 15 -12 269.644 455.649 2
 -5 -15 -13 42313.3 2855 2
 -5 15 -13 39752.4 3205.25 2
 -5 15 -14 24912.7 2648.34 2
 -5 -15 -14 27599.7 2428.24 2
 -5 -15 -15 13549.3 1778.58 2
 -5 15 -15 12067.9 1930.09 2
 -5 15 -16 2534.35 953.818 2
 -5 -15 -16 1587.62 687.213 2
 -5 -15 -17 574.376 612.118 2
 -5 15 -17 -334.524 690.256 2
 -5 -15 -18 351.406 682.862 2
 -5 15 -18 477.418 573.838 2
 -5 -15 -19 49261.8 3868.66 2
 5 17 -20 12860.5 1955.96 2
 5 17 -19 15495.7 2093.26 2
 5 -17 -18 10551.1 1960.23 1
 -5 17 18 9736.64 1572.12 3
 5 17 -18 8427.07 1563.62 2
 -5 17 17 970.597 587.231 3
 5 -17 -17 2842.48 987.698 1
 5 17 -17 1020.23 619.181 2
 -5 17 16 1454.3 657.275 3
 5 -17 -16 1109.49 742.075 1
 5 17 -16 1400.45 547.603 2
 5 17 -15 2652.97 806.771 2
 5 -17 -15 2550.18 1021.54 1
 -5 17 15 2329.21 771.999 3
 -5 17 14 115754 4938.49 3
 5 17 -14 111500 4666.15 2
 5 -17 -14 125602 6154.38 1
 -5 17 13 47618.5 3100.35 3
 5 17 -13 47986.8 2951.72 2
 5 -17 -13 53167.3 3946.76 1
 -5 17 12 9652.93 1390.29 3
 5 17 -12 8246.67 1186.12 2
 5 -17 -12 11486.2 1792.84 1
 -5 17 11 123.773 378.526 3
 5 17 -11 -43.6089 253.239 2
 5 -17 -11 -130.059 427.297 1
 5 -17 -10 1249.8 564.438 1
 5 17 -10 814.092 357.871 2
 -5 17 10 692.17 340.788 3
 5 -17 -9 36290.2 3041.69 1
 5 17 -9 34758.1 1991.74 2
 -5 17 9 35513.5 2493.27 3
 5 -17 -8 129723 4674.86 3
 5 17 -8 135049 3657.64 2
 -5 17 8 139208 4842.95 3
 5 17 -7 6330.7 745.041 2
 5 -17 -7 7780.83 1129.22 3
 -5 -17 7 8090.97 1172.72 3
 -5 17 7 8206.23 1181.49 3
 5 17 -6 1908.03 391.137 2
 5 -17 -6 1216.54 414.472 3
 -5 -17 6 1685.43 500.783 3
 -5 17 6 1064.3 449.582 2
 -5 17 6 1396.69 463.926 3
 5 -17 -5 598.266 311.649 3
 5 17 -5 415.836 192.751 2
 -5 -17 5 1867.51 567.72 3
 -5 17 5 1059.19 424.146 3
 5 -17 -4 22402.1 1922.43 3
 5 17 -4 22867.9 948.77 2
 -5 -17 4 23724.1 1721.25 3
 -5 17 4 23694.9 1969.9 3
 5 -17 -3 47820.2 2815.65 3
 -5 -17 3 51383.8 2398.1 3
 5 17 -3 43899.4 939.031 2
 -5 17 3 46425.2 2767.9 3
 5 -17 -2 65535.1 3298.52 3
 -5 17 2 66794.8 3342.82 3
 -5 -17 2 69765 2639.82 3
 5 -17 -1 83.8666 324.363 3
 -5 17 1 54.7322 338.804 3
 -5 -17 1 296.05 234.948 3
 -5 -17 0 1761.64 383.113 3
 -5 17 0 1448.84 549.997 3
 -5 -17 -1 6883.92 661.132 3
 -5 17 -1 5947.55 1036.95 3
 -5 17 -2 117346 4694.75 3
 -5 -17 -2 117453 2428.3 3
 -5 17 -3 61586.2 3448.36 3
 5 17 3 64385.8 1468.12 2
 -5 -17 -3 58633.8 1465.63 3
 5 17 4 26299.6 1142.25 2
 -5 17 -4 25588.2 2291.4 3
 5 17 5 5361.35 594.916 2
 -5 17 -5 4302 1011.8 3
 -5 17 -6 1375.45 621.651 3
 5 17 6 1172.61 334.012 2
 5 17 7 14140.3 1163.52 2
 -5 17 -7 15282.9 1883.65 3
 -5 17 -8 123595 5459.03 3
 5 17 8 116966 3584.1 2
 -5 17 -9 32048 2865.92 3
 5 17 9 28571.3 1899.97 2
 -5 17 -10 954.944 362.72 3
 -5 17 -11 2286.77 907.749 3
 -5 17 -11 797.042 420.746 2
 -5 17 -12 223.605 529.956 2
 -5 17 -13 10644.4 1755.24 2
 -5 17 -14 50758.5 3839.78 2
 -5 17 -15 5521.67 1348.66 2
 -5 17 -16 4094.2 1202.02 2
 -5 17 -17 3759.05 1252.69 2
 -5 19 16 -160.367 473.801 3
 5 19 -16 6.06969 350.331 2
 5 -19 -16 955.789 803.858 1
 -5 19 15 3979.6 1003.6 3
 5 -19 -15 2971.6 1152.48 1
 5 19 -15 4920.82 1066.63 2
 -5 19 14 122743 5147.36 3
 5 19 -14 121112 4885.86 2
 5 -19 -14 129472 6540.97 1
 5 -19 -13 4556.03 1341.59 1
 5 19 -13 3556.64 813.965 2
 -5 19 13 3571.3 900.549 3
 5 19 -12 14627.8 1556.94 2
 5 -19 -12 17789 2367.9 1
 -5 19 12 14483.1 1703.49 3
 -5 19 11 1179.6 598.8 3
 5 -19 -11 1698.75 884.69 1
 5 19 -11 1761.09 506.018 2
 5 19 -10 14715.3 1408.81 2
 5 -19 -10 13252 1974.91 1
 -5 19 10 13357.8 1603.26 3
 5 -19 -9 88.5945 349.445 1
 5 19 -9 143.935 224.274 2
 -5 19 9 -31.1673 290.882 3
 5 -19 -8 80850.7 4654.17 1
 5 19 -8 74986 2724.04 2
 -5 19 8 80524.9 3838.87 3
 -5 19 7 -158.16 277.619 3
 5 -19 -7 -13.2497 677.666 1
 5 19 -7 246.435 163.412 2
 5 19 -6 2885.57 458.352 2
 -5 -19 6 3612.49 725.46 3
 -5 19 6 4403.04 933.147 3
 5 19 -5 496.339 197.281 2
 -5 -19 5 196.978 315.906 3
 -5 19 5 1086.98 470.527 3
 5 19 -4 6305.15 462.135 2
 -5 19 4 6868.99 1158.79 3
 -5 -19 4 6169.08 927.614 3
 -5 19 3 1265.55 493.536 3
 -5 -19 3 994.745 351.987 3
 -5 19 2 114421 4635.98 3
 -5 -19 2 114460 3614.63 3
 -5 19 1 2324.89 673.815 3
 -5 -19 1 2723.91 538.232 3
 -5 -19 0 417.157 222.375 3
 -5 19 0 29.9395 276.421 3
 -5 -19 -1 14893 1041.33 3
 -5 19 -1 14973.8 1751.38 3
 -5 -19 -2 74933.6 2130.76 3
 -5 19 -2 76894.3 3978.42 3
 -5 -19 -3 1333 254.494 3
 -5 19 -3 1049.94 442.455 3
 -5 19 -4 33317.4 2713 3
 -5 19 -5 3565.68 965.045 3
 -5 19 -6 4040.95 1046.45 3
 -5 19 -7 15330.8 1953.71 3
 -5 19 -8 108652 5346.93 3
 -5 19 -9 211.085 413.059 3
 -5 19 -10 1572.29 667.333 3
 -5 19 -11 795.5 648.867 3
 -5 19 -11 209.345 410.249 2
 -5 19 -12 512.317 453.393 2
 -5 19 -13 1071.3 701.299 2
 -5 19 -14 84748.1 5072.79 2
 -5 19 -15 645.42 487.368 2
 -5 19 -16 209.718 634.243 2
 5 -21 -14 44724.1 4028.04 1
 -5 21 13 12152.6 1614.41 3
 5 -21 -13 12566.7 2161.08 1
 -5 21 12 18722.4 1978.92 3
 5 -21 -12 23333.9 2847.15 1
 5 -21 -11 1324.24 701.563 1
 -5 21 11 229.144 395.951 3
 -5 21 10 16705.2 1848.8 3
 5 -21 -10 17853.1 2420.18 1
 5 -21 -9 9237.34 1703.47 1
 -5 21 9 9141.69 1363.75 3
 -5 21 8 34485.9 2612.86 3
 5 -21 -8 35996.9 3271.6 1
 5 -21 -7 6084.31 1264.72 1
 -5 21 7 4117.21 878.77 3
 5 -21 -6 10987.5 1788.58 1
 -5 21 6 9297.87 1355.45 3
 -5 21 5 2544.34 697.276 3
 -5 21 4 9851.42 1420.32 3
 -5 -21 3 60172.4 2892.43 3
 -5 21 3 55744.5 3329.17 3
 -5 21 2 60263.6 3491.72 3
 -5 21 1 257.729 332.115 3
 -5 21 0 -278.196 426.745 3
 -5 21 -1 -147.46 380.884 3
 -5 21 -2 31158.9 2672.22 3
 -5 21 -3 32175.9 2739.29 3
 -5 21 -4 30181.1 2722.88 3
 -5 21 -5 507.284 455.899 3
 -5 21 -6 -276.146 418.948 3
 -5 21 -7 942.43 570.686 3
 -5 21 -8 42523.5 3504.89 3
 -5 21 -9 7808.13 1576.61 3
 -5 21 -10 14448.5 2147.09 3
 -5 21 -11 -384.717 438.879 2
 -5 21 -12 5954.02 1312.81 2
 -5 21 -13 5356.07 1288.69 2
 -5 21 -14 37552.9 3430.29 2
 -5 21 -15 -1067.39 655.504 2
 5 -23 -11 2395.65 1077.42 1
 -5 23 10 19746.2 2047.13 3
 5 -23 -10 19572.2 2636.2 1
 5 -23 -9 18681.6 2534.86 1
 -5 23 9 19547.5 2012.39 3
 5 -23 -8 7454.09 1589.53 1
 -5 23 8 6940.58 1225.83 3
 5 -23 -7 5831.88 1429.6 1
 -5 23 7 7693.57 1285.16 3
 5 -23 -6 4477.12 1207.2 1
 -5 23 6 4835.6 1036.75 3
 5 -23 -5 416.712 456.405 1
 -5 23 5 -918.559 498.201 3
 5 -23 -4 20841.4 2498.52 1
 -5 23 4 19708 2075.72 3
 5 -23 -3 52690 3896.63 1
 -5 23 3 48320.7 3252 3
 -5 23 2 12845.2 1705.48 3
 -5 23 1 718.697 349.485 3
 -5 23 0 341.569 307.701 3
 -5 23 -1 818.201 463.748 3
 -5 23 -2 5839.39 1196.95 3
 -5 23 -3 37760.3 3124.05 3
 -5 23 -4 16553.6 2092.35 3
 -5 23 -5 4954.35 1156.61 3
 -5 23 -6 1645.19 727.117 3
 -5 23 -7 5273.26 1244.2 3
 -5 23 -8 6027.15 1435.79 3
 -5 23 -9 29230.5 3078.92 3
 -5 23 -10 5855.27 1288.69 2
 -5 23 -10 6289.61 1533.26 3
 -5 23 -11 1217.38 693.109 2
 -5 23 -12 14285 2052.37 2
 -5 23 -13 20849.4 2542.93 2
 -5 23 -14 7534.16 1503.32 2
 5 -25 -8 1517.02 854.519 1
 -5 25 7 21383.5 2198.12 3
 5 -25 -7 24460.1 2918.21 1
 5 -25 -6 2078.01 985.393 1
 -5 25 6 970.154 709.996 3
 -5 25 5 5716.41 1150.14 3
 5 -25 -5 6851.73 1601.78 1
 -5 25 4 4919.27 1072.73 3
 5 -25 -4 6050.17 1436.14 1
 -5 25 3 20119.2 2204.07 3
 5 -25 -3 22213.4 2636.03 1
 5 -25 -2 -2787.46 988.413 1
 -5 25 2 -43.8899 421.519 3
 5 -25 -1 8657.73 1640.27 1
 -5 25 1 9143.03 1529.09 3
 -5 25 0 2323.8 918.746 3
 5 -25 0 366.016 613.355 1
 -5 25 -1 12131.3 1807.3 3
 -5 25 -2 1969.95 810.732 3
 -5 25 -3 32409.6 3019.35 3
 -5 25 -4 2316.97 880.955 3
 -5 25 -5 13022.9 1984.45 3
 -5 25 -6 9490.14 1968.7 3
 -5 25 -7 32817.3 3246.46 3
 -5 25 -8 -561.649 903.938 3
 -5 25 -9 30391.6 3261.44 3
 5 -27 -4 -183.286 628.444 1
 5 -27 -3 22007.3 2787.5 1
 5 -27 -2 3168.37 1112.27 1
 -5 27 2 2282.43 847.962 3
 -5 27 1 17227.4 2136.06 3
 5 -27 -1 17713.8 2439.34 1
 -5 27 0 342.563 598.835 3
 5 -27 0 1666.11 1195.13 1
 5 -27 1 12254 1964.03 1
 -5 27 -1 12689.3 1929.82 3
 5 -27 2 3604.89 1146.83 1
 -5 27 -2 5330.98 1456.03 3
 -5 27 -3 16018.7 2225.41 3
 5 -27 3 16898.3 2221.78 1
 -5 27 -4 1866.18 628.619 3
 5 -27 4 1773.86 712.327 1
 -5 27 -5 12983.4 2073.04 3
 -5 27 -6 682.33 607.372 3
 6 0 -22 101442 5871.71 2
 6 0 -21 -1153.5 700.529 2
 6 0 -20 622.848 423.926 2
 6 0 -19 562.336 417.138 2
 6 0 -18 28861.7 2747.68 2
 6 0 -17 -500.655 460.205 2
 6 0 -16 69925.1 3963.65 2
 6 0 -15 -136.738 193.946 1
 6 0 -15 -399.027 381.352 2
 6 0 -14 1051.66 337.878 1
 6 0 -14 620.588 319.672 2
 -6 0 13 344.478 296.153 2
 6 0 -13 36.8369 151.942 1
 6 0 -13 -142.989 344.765 2
 6 0 -12 63157.5 3192.72 2
 -6 0 12 57652.2 3016.75 2
 6 0 -12 67194.4 2309.17 1
 6 0 -11 -173.966 157.616 1
 -6 0 11 224.807 269.362 2
 6 0 -11 1.86194 176.543 2
 -6 0 10 105354 3732.44 2
 6 0 -10 109732 3812.22 2
 -6 0 9 38.2828 164.967 2
 6 0 -9 184.394 244.683 2
 -6 0 8 78026 2889.73 2
 6 0 -8 80652.5 2951.72 2
 6 0 -7 29.323 213.747 2
 -6 0 7 -34.3399 150.802 2
 -6 0 6 196832 4229.32 3
 -6 0 6 195093 4062.34 2
 -6 0 5 138.375 148.346 2
 -6 0 5 921.929 303.26 3
 -6 0 4 13088.4 971.553 3
 -6 0 3 75.8893 120.824 3
 6 0 -3 -24.8072 74.9552 3
 6 0 -2 1926.4 336.698 3
 -6 0 2 1565.06 308.115 3
 -6 0 1 380.2 173.713 3
 6 0 -1 54.2268 83.2098 3
 -6 0 0 179038 3070.32 3
 6 0 0 167904 2967.34 3
 6 0 1 254.097 131.836 3
 -6 0 -1 138.012 100.304 3
 -6 0 -2 14416.9 902.321 3
 6 0 2 13579.8 883.187 3
 -6 0 -3 144.53 127.289 3
 6 0 3 -57.7896 126.702 3
 -6 0 -4 8069.74 748.07 3
 6 0 4 6555.14 676.81 3
 -6 0 -5 61.259 181.627 3
 6 0 5 224.959 171.339 3
 -6 0 -6 324375 5281.59 3
 6 0 6 326742 5315.6 3
 -6 0 -7 344.99 244.055 3
 6 0 7 -98.4161 199.249 3
 -6 0 -8 7816.24 1010.78 2
 6 0 8 8398.97 960.607 3
 -6 0 -9 137.235 183.045 2
 6 0 9 267.858 234.496 3
 6 0 10 128681 4115.51 3
 -6 0 -10 131218 4557.12 2
 -6 0 -11 60.1243 232.609 2
 6 0 11 181.023 285.174 3
 6 0 12 90794.1 3762.95 3
 -6 0 -12 90563.5 4145.4 2
 -6 0 -13 -158.118 422.566 2
 6 0 13 6.67707 267.612 3
 6 0 13 551.872 413.348 1
 6 0 14 340.949 393.353 1
 -6 0 -14 -234.037 564.812 2
 -6 0 -15 -144.915 371.678 2
 -6 0 -16 165730 6531.6 2
 -6 0 -17 285.966 567.181 2
 -6 0 -18 12513.9 1966.4 2
 -6 0 -19 -1106.17 696.368 2
 -6 0 -20 501.453 428.593 2
 6 2 -23 2147.38 1018.31 2
 6 2 -22 71840.7 4947.14 2
 6 -2 -22 63088.2 4670.76 2
 6 -2 -21 7235.91 1557.52 2
 6 2 -21 3166.91 987.378 2
 6 -2 -20 1361.28 885.546 2
 6 2 -20 595.266 517.378 2
 6 -2 -19 1766.57 773.401 2
 6 2 -19 1505.93 766.205 2
 6 2 -18 24030.7 2487.48 2
 6 -2 -18 25546.5 2608.76 2
 6 -2 -17 27464.9 2613.4 2
 6 2 -17 23702.3 2403.58 2
 6 -2 -16 148769 4341.23 1
 6 -2 -16 136828 5589.01 2
 6 2 -16 136393 5483.84 2
 6 2 -15 482.065 417.814 2
 6 -2 -15 622.989 344.589 1
 6 -2 -15 142.819 381.109 2
 6 2 -14 924.243 463.596 2
 6 -2 -14 826.086 571.118 2
 6 -2 -14 1593.32 443.545 1
 6 2 -13 4377.55 911.338 2
 -6 -2 13 3090.08 709.532 2
 6 -2 -13 4210.18 691.917 1
 6 2 -13 4408.71 516.295 1
 6 -2 -13 4221.1 896.831 2
 6 -2 -12 63648.2 3250.9 2
 -6 2 12 63630.4 3224.35 2
 -6 -2 12 61362.6 3094.21 2
 6 -2 -12 69195.9 2639.46 1
 6 2 -12 61636.9 3123.54 2
 6 2 -12 67999.2 1919.79 1
 -6 2 11 70877.7 3254.66 2
 -6 -2 11 72650.7 3204.23 2
 6 2 -11 75841.8 1958.84 1
 6 -2 -11 75903.1 3396.64 2
 6 2 -11 75283.1 3264.17 2
 -6 2 10 151169 4527.79 2
 -6 -2 10 144457 4284.22 2
 6 -2 -10 159163 4685.93 2
 6 2 -10 156020 4464.14 2
 -6 2 9 12532 1236.81 3
 -6 2 9 11791.4 1201.31 2
 -6 -2 9 10704.7 1111.08 2
 6 -2 -9 11517.3 1219.79 2
 6 2 -9 12717.5 1208.18 2
 -6 2 8 6469.19 854.14 2
 -6 -2 8 7077.72 841.527 2
 6 2 -8 6919.93 838.609 2
 -6 2 8 5898.31 829.374 3
 -6 2 7 2660.82 553.799 2
 -6 -2 7 2163.42 457.71 2
 -6 2 7 2366.88 512.268 3
 6 2 -7 2540.97 495.096 2
 -6 2 6 274313 5057.58 3
 -6 -2 6 278715 4656.01 2
 6 2 -6 274184 4644.32 2
 -6 2 6 249919 4842.76 2
 -6 -2 5 193203 3604.57 2
 -6 2 5 189746 4017.84 3
 -6 2 5 169634 3795.16 2
 -6 2 4 12314.6 986.609 3
 -6 -2 4 12409.5 862.189 2
 6 -2 -4 11051.6 934.438 3
 -6 -2 3 116813 2633.09 3
 -6 2 3 112862 2913.52 3
 6 -2 -3 112227 2836.51 3
 -6 -2 2 43561.5 1496.45 3
 -6 2 2 46509 1773.46 3
 6 -2 -2 40649.5 1671.7 3
 -6 2 1 23560.3 1246.92 3
 6 -2 -1 21252.3 1182.96 3
 -6 -2 1 21378.2 980.474 3
 6 2 -1 19347 933.25 3
 -6 -2 0 278482 3331.37 3
 6 -2 0 266038 4181.09 3
 6 2 0 246627 3177.27 3
 -6 2 0 272241 4231.4 3
 6 2 1 77327.1 1760.62 3
 6 -2 1 79749.5 2321 3
 -6 2 -1 88336.9 2443.39 3
 -6 -2 -1 87533.7 1857.21 3
 6 2 2 521.309 157.813 3
 6 -2 2 940.209 264.675 3
 -6 -2 -2 697.195 180.808 3
 -6 2 -2 982.062 265.396 3
 -6 -2 -3 732.645 203.195 3
 -6 2 -3 473.716 208.416 3
 6 -2 3 451.597 198.428 3
 6 2 3 616.449 179.394 3
 -6 -2 -4 17694.1 978.425 3
 -6 2 -4 19375 1270.89 3
 6 2 4 17494.1 977.594 3
 6 -2 4 17391.5 1209.03 3
 -6 -2 -5 77049.7 2194.88 3
 -6 2 -5 76135.1 2642.73 3
 6 2 5 75885.1 2179.68 3
 6 -2 5 80060.5 2701.34 3
 6 2 6 218516 3966.94 3
 -6 -2 -6 211580 4602.96 2
 -6 2 -6 213447 4639.43 3
 -6 -2 -6 217971 3995.15 3
 6 -2 6 215153 4648.64 3
 -6 2 -7 2108.06 500.669 3
 6 -2 7 2375.2 518.004 3
 -6 -2 -7 2634.51 579.752 2
 6 2 7 2795.32 494.479 3
 -6 2 -8 930.715 305.961 3
 -6 -2 -8 402.975 247.572 2
 6 -2 8 286.235 214.057 3
 6 2 8 641.658 267.546 3
 -6 2 -9 47782.4 2683.73 2
 -6 2 -9 49248.4 2558.03 3
 6 2 9 48335.2 2283.29 3
 6 -2 9 49350.7 2559.39 3
 -6 -2 -9 49439.5 2631.46 2
 -6 2 -10 49261.3 2873.57 2
 6 -2 10 53573.4 2772.84 3
 -6 -2 -10 53429 2858.58 2
 6 2 10 51814.3 2482.86 3
 -6 2 -11 56591.1 3195.49 2
 6 2 11 59881.5 2807.09 3
 -6 -2 -11 60425.2 3196.35 2
 6 -2 11 61833.4 3104.26 3
 6 2 11 56485.7 2927.91 1
 6 2 12 95979.9 3717.66 3
 -6 -2 -12 99803.9 4284.49 2
 6 -2 12 95801.2 4025.12 3
 6 2 12 97127.5 3946.71 1
 -6 2 -12 88163.9 4156.78 2
 -6 2 -13 -200.098 277.08 2
 -6 -2 -13 90.3378 387.694 2
 6 2 13 -20.0892 326.614 1
 6 2 13 354.444 336.597 3
 -6 2 -14 12804.5 1735.3 2
 -6 -2 -14 13900.8 1756.69 2
 6 2 14 11903.2 1437.05 3
 -6 -2 -15 178.879 551.084 2
 6 -2 15 -130.421 398.583 1
 -6 2 -15 179.521 492.804 2
 -6 -2 -16 89074.8 4751.34 2
 -6 2 -16 87462.7 4799.91 2
 -6 -2 -17 46493.7 3588.5 2
 -6 2 -17 48830.7 3715.08 2
 -6 2 -18 10582.4 1818.47 2
 -6 -2 -18 9602.29 1701.19 2
 -6 2 -19 1019.1 543.812 2
 -6 -2 -19 528.148 456.403 2
 -6 -2 -20 700.2 681.501 2
 -6 2 -20 -89.2656 420.933 2
 -6 -2 -21 6909.81 1623.48 2
 -6 4 23 13073 2179.03 3
 6 4 -23 19360.4 2653.47 2
 -6 4 22 4536.58 1303.5 3
 6 -4 -22 6532.43 1587.56 2
 6 4 -22 5689.92 1451.07 2
 6 4 -21 34721 3322.08 2
 -6 4 21 30150 3054.38 3
 6 -4 -21 33138.6 3300.99 2
 6 -4 -20 8863.89 1679.76 2
 -6 4 20 6763.78 1389.75 3
 6 4 -20 8109.47 1561.17 2
 6 4 -19 1089.3 662.592 2
 -6 4 19 157.243 533.005 3
 6 -4 -19 -1176.83 727.923 2
 6 -4 -18 18935 2284.87 2
 6 4 -18 20247.7 2254.06 2
 6 -4 -17 88474.2 3761.66 1
 6 -4 -17 81418 4512.79 2
 6 4 -17 87025.1 4523.81 2
 -6 4 16 46857.4 3186.35 3
 6 -4 -16 42020.6 3127.86 2
 6 4 -16 48477.7 3259.37 2
 6 -4 -16 49328.7 2726.02 1
 6 -4 -15 25823.1 2366.85 2
 6 4 -15 27379.4 2349.52 2
 6 -4 -15 26438.8 1956.33 1
 -6 4 15 28984.9 2406.64 3
 6 -4 -14 1.7432 236.306 1
 6 4 -14 16.5891 275.083 2
 6 -4 -14 442.577 391.753 2
 -6 4 14 -93.7888 342.945 3
 6 4 -13 160.185 268.777 2
 -6 -4 13 -65.4342 376.141 2
 -6 4 13 -113.737 275.032 3
 6 -4 -13 107.23 196.347 1
 6 -4 -13 290.82 263.106 2
 6 -4 -12 34040.6 2045.14 1
 -6 4 12 31475.5 2290.47 2
 -6 4 12 34904.6 2380.76 3
 6 -4 -12 36075.8 2474.69 2
 -6 -4 12 33071.1 2257.11 2
 6 4 -12 36635.1 2365.37 2
 -6 4 11 236523 6036.63 2
 6 4 -11 253536 5890.97 2
 -6 4 11 238066 5974.22 3
 -6 -4 11 241544 5782.78 2
 6 -4 -11 241334 6121.4 2
 6 4 -10 161906 1897.91 1
 -6 4 10 143776 4561.43 2
 -6 -4 10 162102 4485.77 2
 6 4 -10 159055 4457.79 2
 -6 4 10 150435 4559.52 3
 -6 4 9 6976.07 961.282 2
 -6 -4 9 8442.58 975.996 2
 -6 4 9 7407.44 959.762 3
 6 4 -9 8477.79 972.61 2
 -6 -4 8 6894.51 785.19 2
 -6 4 8 7011 919.517 3
 6 4 -8 7474.58 861.093 2
 -6 4 8 6623.21 902.095 2
 -6 -4 7 4502.86 628.123 2
 -6 4 7 3157.66 604.98 3
 -6 4 7 3783.51 652.316 2
 6 4 -7 3541.71 553.318 2
 -6 -4 6 224593 4037.81 2
 -6 4 6 214833 4618.84 3
 -6 4 6 201969 4520.28 2
 6 4 -6 218600 3989.61 2
 -6 -4 5 101782 2491.43 2
 -6 4 5 101632 3057.56 3
 6 4 -5 103591 2516.3 2
 6 -4 -5 94850.9 2956.39 3
 -6 -4 4 176396 2978.52 2
 -6 4 4 183201 3961.41 3
 6 -4 -4 165751 3781.02 3
 -6 4 3 9148.3 865.317 3
 6 -4 -3 8750.79 855.325 3
 -6 -4 3 9228.24 624.021 2
 -6 4 2 117664 3047.75 3
 6 -4 -2 111620 2975.01 3
 -6 -4 2 116613 2342.77 3
 6 -4 -1 118967 3059.8 3
 -6 -4 1 120197 2162.46 3
 -6 4 1 130719 3187.14 3
 6 -4 0 67998.2 2319.48 3
 -6 -4 0 64972.4 1414.53 3
 -6 4 0 70103 2341.69 3
 6 -4 1 84426.7 2615.74 3
 6 4 1 79071.3 1436.23 3
 -6 4 -1 84517.1 2617.65 3
 -6 -4 -1 89072.9 1520.44 3
 -6 -4 -2 4608.13 349.368 3
 6 4 2 4503.88 345.029 3
 -6 4 -2 4443.24 632.567 3
 6 -4 2 4475.53 630.802 3
 6 -4 3 2740 515.74 3
 -6 -4 -3 3017.5 307.652 3
 -6 4 -3 3508.54 572.375 3
 6 4 3 2752.51 294.431 3
 6 4 4 33482.1 1153.24 3
 -6 -4 -4 33495.4 1537.67 2
 -6 -4 -4 35094.1 1161.1 3
 -6 4 -4 30988.8 1755.19 3
 6 -4 4 32227.9 1788.47 3
 -6 4 -5 390500 6434.35 3
 -6 -4 -5 401545 5721.58 2
 6 4 5 382498 4323.54 3
 6 -4 5 394140 6466.12 3
 6 -4 6 5095.45 779.984 3
 6 4 6 4813.13 534.164 3
 -6 4 -6 5284.39 796.26 3
 -6 -4 -6 5433.39 723.46 2
 -6 -4 -7 2526.04 542.27 2
 6 -4 7 2871.49 597.444 3
 -6 4 -7 2672.64 606.71 3
 6 4 7 1847.42 343.931 3
 -6 4 -8 3783.42 726.717 3
 6 4 8 3832.25 747.524 1
 6 -4 8 4563.95 795.029 3
 6 4 8 4077.42 580.264 3
 -6 -4 -8 4192.51 720.335 2
 -6 4 -9 12126.6 1345.38 3
 6 4 9 13246.7 1109.28 3
 6 4 9 13305.7 1406.34 1
 -6 -4 -9 13868.2 1371.89 2
 6 -4 9 15100.5 1498.9 3
 -6 4 -10 19124.7 1839.23 2
 -6 4 -10 21560.9 1868.47 3
 6 4 10 19167.8 1433.94 3
 -6 -4 -10 20528.1 1752.75 2
 6 -4 10 20815.3 1814.17 3
 6 4 10 23220.2 1907.25 1
 -6 4 -11 157966 5415.8 2
 6 4 11 154180 4273.36 3
 -6 -4 -11 157261 5086.74 2
 6 -4 11 158317 5181.05 3
 6 4 11 152446 5003.11 1
 -6 4 -12 84360.3 4137.19 2
 -6 -4 -12 82623.9 3877.35 2
 6 4 12 76086.8 3189.16 3
 -6 -4 -13 2164.58 717.451 2
 -6 4 -13 3292.36 873.747 2
 6 4 13 1425.41 488.234 3
 -6 4 -14 9005.63 1452.18 2
 -6 -4 -14 12995.3 1700.13 2
 6 4 14 14122.5 1517.88 3
 -6 -4 -15 23621.9 2340.9 2
 -6 4 -15 19806.2 2236.17 2
 -6 -4 -16 33562.4 2807.85 2
 -6 4 -16 36122 3131 2
 -6 -4 -17 79717.7 4656.96 2
 -6 4 -17 69001 4489.04 2
 -6 -4 -18 10135 1866.91 2
 -6 4 -18 10680.5 1848.42 2
 -6 -4 -19 861.813 745.991 2
 -6 4 -19 1366.43 733.536 2
 -6 -4 -20 3420.41 1129.04 2
 -6 4 -20 1253.98 702.972 2
 -6 -4 -21 21230.6 2750.76 2
 -6 6 23 33074.7 3321.29 3
 6 6 -22 3647.34 1143.26 2
 -6 6 22 2842.69 971.911 3
 6 -6 -22 3702.94 1191.59 2
 -6 6 21 43085.1 3592.94 3
 6 -6 -21 51133.9 4131.92 2
 6 6 -21 46672.8 3828.03 2
 6 -6 -20 12503 2000.12 2
 -6 6 20 11768.1 1856.63 3
 6 6 -20 14128 2069.95 2
 6 6 -19 3136.1 969.423 2
 -6 6 19 2841.7 877.214 3
 6 -6 -19 2429.61 855.874 2
 6 -6 -18 9223.38 1606.32 2
 -6 6 18 14439 1928.24 3
 6 -6 -18 16761.1 1816.52 1
 6 6 -18 16614.4 2067.6 2
 -6 6 17 136132 5620.24 3
 6 -6 -17 154454 6256 2
 6 -6 -17 149719 5236.25 1
 6 6 -17 151688 5974.46 2
 6 6 -16 613.347 336.995 2
 6 -6 -16 363.753 447.89 1
 6 -6 -16 318.115 347.204 2
 -6 6 16 626.627 400.129 3
 6 6 -15 112009 4741.43 2
 6 -6 -15 114760 5062.26 2
 -6 6 15 105109 4611.39 3
 6 -6 -15 123560 4539.46 1
 -6 6 14 -48.4233 403.053 3
 6 -6 -14 338.407 329.171 2
 6 6 -14 -18.8733 429.483 2
 6 -6 -14 375.897 309.391 1
 6 6 -13 3319.23 781.463 2
 -6 -6 13 4185.82 866.501 2
 -6 6 13 4200.61 875.727 3
 6 -6 -13 4052.31 808.596 1
 6 6 -12 3080.31 692.055 2
 -6 -6 12 2028.87 579.637 2
 6 -6 -12 2759.51 629.575 1
 -6 6 12 2495.71 649.052 3
 6 6 -11 289949 6261.42 2
 -6 6 11 265959 6580.85 2
 -6 6 11 276000 6474.86 3
 -6 -6 11 298343 6358.84 2
 6 6 -10 11648.9 1197.29 2
 -6 6 10 8674.51 1109.1 3
 -6 6 10 8531.29 1150.06 2
 -6 -6 10 9673.34 1110.03 2
 -6 6 9 24610 1797.05 3
 -6 -6 9 25535.9 1672.88 2
 -6 6 9 21501.6 1732.56 2
 6 6 -9 25196.1 1657.93 2
 6 6 -8 218.49 161.836 2
 -6 6 8 1030.72 423.418 3
 -6 -6 8 584.933 224.41 2
 -6 6 8 629.858 334.247 2
 -6 -6 7 31848.6 1611 2
 -6 6 7 31112.1 1878.34 3
 6 6 -7 31530.1 851.697 1
 -6 6 7 30388.2 1910.28 2
 6 6 -7 30662.9 1584.04 2
 6 -6 -6 31270.1 1841.61 3
 -6 6 6 34305.5 1913.65 3
 -6 -6 6 35979.1 1560.6 2
 -6 6 6 31657.3 1888.96 2
 6 6 -6 35180.1 1554.28 2
 -6 6 5 225202 4829.72 3
 -6 -6 5 238381 3621.39 2
 6 6 -5 232346 3575.81 2
 6 -6 -5 217633 4693.27 3
 -6 6 4 4886.4 690.399 3
 6 -6 -4 4466.81 664.094 3
 -6 -6 4 5678.62 501.276 2
 -6 6 3 1336.73 370.69 3
 6 -6 -3 910.782 313.227 3
 -6 -6 3 963.243 184.605 2
 -6 6 2 8469.65 926.314 3
 -6 -6 2 7369.96 409.8 2
 6 -6 -2 7442.15 831.53 3
 6 -6 -1 464574 6524.67 3
 -6 6 1 495922 6785.75 3
 -6 6 0 358.338 235.055 3
 6 -6 0 506.611 267.012 3
 -6 -6 0 760.257 151.963 3
 -6 -6 -1 368933 3227.07 2
 -6 6 -1 361007 5879.45 3
 6 -6 1 357423 5882.67 3
 -6 6 -2 30808.4 1759.96 3
 6 -6 2 33813 1862.51 3
 -6 -6 -2 33784.9 1148.27 2
 -6 6 -3 43298.8 2138.75 3
 -6 -6 -3 42814.8 1486.77 2
 6 -6 3 41065.2 2090.66 3
 6 6 4 129866 3823.64 1
 -6 6 -4 126997 3772.08 3
 -6 -6 -4 129363 2889.18 2
 6 -6 4 133724 3878.98 3
 6 6 4 124948 1647.4 3
 6 6 5 276144 3021.45 3
 -6 6 -5 279384 5825.18 3
 6 6 5 277972 5814.86 1
 -6 -6 -5 288061 4707.9 2
 6 -6 5 287474 5896.75 3
 6 -6 6 48802.2 2536.74 3
 -6 -6 -6 50170.2 2127.21 2
 -6 6 -6 48578 2523.11 3
 6 6 6 49132 1476.8 3
 6 6 6 50760.6 2563.94 1
 -6 6 -7 89152.4 3538.01 3
 -6 -6 -7 95875.6 3160.61 2
 6 6 7 89916.5 2257.24 3
 6 -6 7 91410.4 3586.96 3
 6 6 7 88072.6 3512.08 1
 6 6 8 27272.1 2019.3 1
 -6 6 -8 28804.9 2076.32 3
 -6 -6 -8 25253.7 1736.31 2
 6 -6 8 28580.2 2066.25 3
 6 6 8 25253 1328.13 3
 -6 -6 -9 1274.58 452.876 2
 6 6 9 1473.43 525.879 1
 -6 6 -9 2368.63 636.77 3
 6 6 9 1795.16 411.066 3
 6 -6 9 1704.63 546.799 3
 6 6 10 21648.1 1921.97 1
 -6 6 -10 22506.5 1980.34 3
 6 -6 10 16648.9 1669.67 3
 -6 -6 -10 22576.1 1825.94 2
 6 6 10 21563 1425.3 3
 6 6 11 157306 4106.38 3
 -6 6 -11 159747 5587.3 2
 -6 -6 -11 169670 5248.4 2
 -6 6 -12 3713.05 869.517 2
 6 6 12 4168.33 726.985 3
 -6 -6 -12 3936.02 866.237 2
 6 6 13 6737.5 967.247 3
 -6 6 -13 6931.19 1264.59 2
 -6 -6 -13 6605.74 1146.49 2
 -6 6 -14 753.74 529.142 2
 -6 -6 -14 3554.47 959.615 2
 6 6 14 -462.681 405.87 3
 -6 -6 -15 58700.6 3678.54 2
 6 6 15 54951.7 2981.78 3
 -6 6 -15 53480.7 3762.13 2
 -6 -6 -16 758.084 356.911 2
 -6 6 -16 3177.53 1060.99 2
 -6 -6 -17 52563.9 3765.44 2
 -6 6 -17 46844.8 3738.31 2
 -6 -6 -18 8831.1 1640.12 2
 -6 6 -18 9633.28 1834.54 2
 -6 -6 -19 3563.65 1005.42 2
 -6 6 -19 3682.48 1158.71 2
 -6 -6 -20 3976.53 1207.61 2
 -6 6 -20 2597.98 1052.27 2
 -6 -6 -21 27904.2 3178.1 2
 -6 8 23 31711.3 3267.72 3
 -6 8 22 27701.9 2947.16 3
 6 8 -22 23689.6 2852.37 2
 -6 8 21 33538.8 3159.36 3
 6 8 -21 32027.8 3056.24 2
 6 8 -20 6087.73 1389.73 2
 -6 8 20 5406.92 1288.67 3
 6 8 -19 1606.8 770.794 2
 6 -8 -19 438.89 407.343 1
 -6 8 19 435.907 580.004 3
 6 -8 -18 649.781 472.352 1
 6 8 -18 914.691 651.69 2
 -6 8 18 -105.487 461.909 3
 6 8 -17 62969.5 3857.8 2
 -6 8 17 63557.8 3843.53 3
 6 -8 -17 62431.4 3637.22 1
 6 8 -16 35748.3 2803.82 2
 6 -8 -16 39604.7 2816.75 1
 -6 8 16 34656.6 2727.53 3
 6 8 -15 64141.1 3562.32 2
 -6 8 15 57271.6 3427.81 3
 6 -8 -15 65896.5 3540.98 1
 6 8 -14 1598.34 511.314 2
 6 -8 -14 2639.45 717.756 1
 -6 8 14 2652.49 741.039 3
 6 8 -13 23701.2 1987.06 2
 6 -8 -13 25794.6 2120.52 1
 -6 -8 13 24338.5 2009.4 2
 -6 8 13 21361.7 1958.27 3
 6 8 -12 8421.49 1132.56 2
 -6 -8 12 7740.93 1080.24 2
 -6 8 12 7451.75 1126.55 3
 6 -8 -12 7902.86 1150.84 1
 6 8 -11 63542 2941.77 2
 -6 8 11 55844.8 3085.55 2
 -6 -8 11 62057.9 2911.93 2
 -6 8 11 57617.4 3014.36 3
 -6 8 10 33363.9 2312.8 2
 -6 -8 10 33324.6 2000.68 2
 -6 8 10 32278 2177.16 3
 6 8 -10 34655.7 2043.66 2
 6 8 -9 62092.5 2565.61 2
 -6 -8 9 61133 2545.39 2
 -6 8 9 55369.1 2771.78 3
 -6 8 9 53699 2822.64 2
 6 8 -8 306.285 225.089 2
 -6 8 8 389.835 335.576 3
 -6 -8 8 153.148 177.709 2
 -6 8 8 292.055 422.109 2
 -6 -8 7 170888 3656.43 2
 -6 8 7 160874 4412.12 3
 6 -8 -7 154756 4351.27 3
 -6 8 7 143976 4322.55 2
 6 8 -7 164791 3621.99 2
 -6 -8 6 90517.3 2420.94 2
 -6 8 6 86499.8 3165.22 3
 6 8 -6 85123.1 1861.87 1
 6 -8 -6 79982.8 3047.95 3
 6 8 -6 81039 2311.34 2
 6 8 -5 110420 2361.09 1
 -6 8 5 99816.6 3353.78 3
 -6 -8 5 107126 2340.36 2
 6 -8 -5 97290.6 3278.08 3
 6 8 -5 103265 2289.25 2
 -6 8 4 3732.06 649.028 3
 6 8 -4 3124.28 440.744 1
 -6 -8 4 3642.29 371.032 2
 6 -8 -4 3156.97 614.362 3
 6 8 -4 2867.67 336.109 2
 -6 8 3 14234.7 1235.66 3
 6 -8 -3 13226 1186.16 3
 6 8 -3 14078.1 1003.29 1
 -6 -8 2 15762.3 901.091 3
 6 8 -2 16969.7 1140.33 1
 6 -8 -2 14453 1234.28 3
 -6 8 2 15744.5 1300.06 3
 6 -8 -1 231805 4958.3 3
 -6 -8 1 233342 3001.62 3
 6 8 -1 238819 4514.29 1
 -6 8 1 238136 5025.61 3
 6 -8 0 125797 3665.48 3
 6 8 0 122441 3381.59 1
 -6 -8 0 124426 1718.41 3
 -6 8 0 124374 3649.89 3
 -6 8 -1 332242 6115.01 3
 6 8 1 346704 5937.41 1
 6 -8 1 349956 6218.49 3
 6 -8 2 4556.3 740.379 3
 -6 -8 -2 4723.08 395.194 2
 -6 8 -2 4675.01 769.338 3
 6 8 2 5423.99 780.261 1
 -6 -8 -3 34426.3 1248.88 2
 -6 8 -3 33944.6 2036.37 3
 6 -8 3 30611.3 1939.97 3
 6 8 3 31681 1942.48 1
 6 8 4 20564.2 1630.27 1
 -6 -8 -4 19138.8 1066.01 2
 -6 8 -4 19239.4 1590.48 3
 6 -8 4 21719.6 1675.68 3
 6 8 5 79851.3 3314.9 1
 -6 -8 -5 86096.3 2508.8 2
 6 -8 5 83941.7 3405.95 3
 -6 8 -5 83259.3 3382.6 3
 6 8 6 135895 4451.42 1
 6 8 6 121628 1896.47 3
 -6 -8 -6 139806 3468.09 2
 -6 8 -6 136290 4450.2 3
 6 8 6 134384 1978.45 3
 6 -8 6 141142 4560.17 3
 6 8 7 103806 4022.34 1
 -6 -8 -7 107768 3317.22 2
 -6 8 -7 106899 4075.11 3
 6 8 7 108971 2153.34 3
 6 -8 7 104912 4059.96 3
 6 8 8 1387.29 478.844 1
 -6 8 -8 2506.34 679.69 3
 -6 -8 -8 1597.64 452.413 2
 6 8 8 2173.66 357.896 3
 6 -8 8 1430.25 550.578 3
 6 8 9 25639.7 1343.93 3
 -6 -8 -9 27707.2 1912.63 2
 6 8 9 26365.2 2146.72 1
 -6 8 -9 25716.9 2154.92 3
 -6 8 -10 5586.08 1056.41 3
 -6 -8 -10 6478.41 972.056 2
 6 8 10 5732.79 687.748 3
 -6 8 -11 71117.7 3797.27 3
 -6 -8 -11 74982.9 3460.02 2
 -6 8 -11 65168.4 3623.43 2
 6 8 11 72358.2 2642 3
 6 8 12 21513.3 1533.73 3
 -6 -8 -12 20334.6 1904.04 2
 -6 8 -12 19143.6 2038.02 2
 -6 8 -13 10746.9 1619.36 2
 -6 -8 -13 8302.66 1286.69 2
 6 8 13 9648.17 1093.95 3
 -6 8 -14 6565.49 1335.58 2
 -6 -8 -14 6766.77 1202.1 2
 6 8 14 6183.34 918.328 3
 -6 -8 -15 30352.7 2646.44 2
 6 8 15 26539.8 1983.95 3
 -6 8 -15 30655.9 2853.39 2
 -6 -8 -16 37998.2 3064.15 2
 -6 8 -16 30003.3 2901.18 2
 -6 8 -17 38086.3 3426.8 2
 -6 -8 -17 39120.8 3216.94 2
 -6 -8 -18 122.658 518.927 2
 -6 8 -18 -129.903 685.105 2
 -6 -8 -19 -1991.69 870.041 2
 -6 8 -19 968.803 548.166 2
 -6 -8 -20 132.558 894.304 2
 -6 10 23 28018.4 3066.72 3
 -6 10 22 29347.5 3049.43 3
 6 10 -22 31844.7 3308.26 2
 -6 10 21 15094.5 2134.2 3
 6 10 -21 15601.4 2225.94 2
 6 10 -20 1316.07 638.122 2
 -6 10 20 374.269 488.451 3
 6 -10 -20 1027.48 692.065 1
 6 10 -19 3411.72 1088.2 2
 -6 10 19 2656.56 901.997 3
 6 -10 -19 4246.56 1123.73 1
 6 10 -18 20427.2 2302.3 2
 6 -10 -18 22072.1 2316.29 1
 -6 10 18 18392.7 2163.6 3
 6 -10 -17 12463.4 1712.49 1
 6 10 -17 12072.9 1684.77 2
 -6 10 17 11025.5 1626.29 3
 6 10 -16 30389.3 2599.68 2
 6 -10 -16 33771.9 2780.01 1
 -6 10 16 31601.5 2641.58 3
 6 10 -15 14653.2 1722.64 2
 -6 10 15 13975.9 1721.55 3
 6 -10 -15 13456.6 1700.3 1
 6 10 -14 -111.54 352.682 2
 6 -10 -14 318.827 517.221 1
 -6 10 14 226.359 353.867 3
 6 10 -13 17543.2 1718.98 2
 -6 10 13 17337.7 1794.34 3
 6 -10 -13 17750 1875.68 1
 6 10 -12 44047.2 2579.47 2
 6 -10 -12 48348.8 3010.88 1
 -6 10 12 42460.3 2714.68 3
 6 10 -11 802.885 419.791 2
 -6 10 11 412.359 371.856 3
 6 10 -10 59117.7 2659.35 2
 -6 10 10 54964.8 2900.95 3
 -6 -10 10 61830.2 3178.83 3
 -6 10 10 56345.9 3091.91 2
 6 10 -9 49829.5 2297.06 2
 -6 -10 9 48774.5 2697.78 3
 -6 10 9 49759.1 2685.95 3
 -6 10 9 46108.1 2686 2
 6 10 -8 1036.08 366.417 2
 -6 10 8 491.822 302.531 3
 6 -10 -8 128.607 237.291 3
 -6 -10 8 70.2112 195.342 3
 -6 10 8 88.7832 282.694 2
 6 10 -7 119842 3053.4 2
 -6 10 7 122642 4016.32 3
 6 -10 -7 112691 3845.65 3
 -6 10 7 105367 3829.39 2
 -6 -10 7 120602 3847.83 3
 6 10 -6 128312 2828.67 2
 -6 10 6 129471 4070.8 3
 6 -10 -6 109519 3741.75 3
 -6 -10 6 128721 3759.75 3
 -6 10 5 27090.1 1825.1 3
 6 -10 -5 25923.6 1789.5 3
 -6 -10 5 28136.3 1643.98 3
 6 10 -5 27351.2 1139.88 2
 6 10 -4 6223.76 684.237 1
 6 10 -4 4952.5 402.709 2
 6 -10 -4 4532.61 742.628 3
 -6 -10 4 5421.53 675.783 3
 -6 10 4 5564.26 835.88 3
 -6 10 3 4744 763.085 3
 6 -10 -3 4716.68 749.759 3
 6 10 -3 5799.83 700.72 1
 -6 -10 3 5157.45 611.016 3
 6 -10 -2 4247.48 722.76 3
 6 10 -2 3516.39 574.089 1
 -6 -10 2 3881.01 475.993 3
 -6 10 2 4260.34 718.047 3
 6 -10 -1 82175.6 3160.22 3
 -6 -10 1 88545.1 1972.88 3
 -6 10 1 87031 3230.89 3
 6 10 -1 80643 2852.5 1
 6 10 0 59475.2 2546.35 1
 6 -10 0 63223.9 2794.37 3
 -6 -10 0 62801.5 1358.84 3
 -6 10 0 62158.6 2788.52 3
 6 10 1 71660.4 2919.01 1
 -6 10 -1 71511 3014.38 3
 6 -10 1 75639.3 3101.98 3
 6 10 2 35874.4 2120.2 1
 -6 10 -2 34525.3 2143.58 3
 6 -10 2 36768 2221.83 3
 -6 -10 -3 16465.1 809.223 2
 -6 10 -3 15202.7 1463.93 3
 6 10 3 16005.7 1471.2 1
 6 -10 3 16140.8 1503.36 3
 -6 10 -4 1856.26 536.942 3
 -6 -10 -4 2837.86 403.852 2
 6 10 4 2670.39 649.206 1
 6 -10 4 2999.22 693.011 3
 -6 10 -5 7435.03 1054.97 3
 6 10 5 7704.09 1093.75 1
 6 -10 5 8360.95 1155.98 3
 -6 -10 -5 8715.74 785.104 2
 -6 -10 -6 133782 3365.85 2
 6 10 6 125684 4497.36 1
 -6 10 -6 124839 4512.05 3
 6 -10 6 130900 4593.2 3
 -6 -10 -7 79406.5 2824.39 2
 6 10 7 70286.8 1364.1 3
 -6 10 -7 75430.3 3626.27 3
 6 10 7 75564.4 1408.84 3
 6 -10 7 88215.4 3881.94 3
 6 10 7 76511.6 3612.59 1
 -6 -10 -8 20636.4 1527.51 2
 6 10 8 18393.8 877.337 3
 -6 10 -8 21895.7 1995.97 3
 6 10 8 21319 936.053 3
 -6 10 -9 7887.25 1267.33 3
 -6 -10 -9 8437.37 1059.28 2
 6 10 9 7755.25 658.014 3
 6 10 9 8930.99 712.82 3
 -6 -10 -10 79329.9 3384.3 2
 -6 10 -10 83377.8 4145.99 3
 6 10 10 80452 2338.8 3
 6 10 10 72296.8 2216.9 3
 -6 -10 -11 9698.83 1244.17 2
 -6 10 -11 10020.1 1507.34 3
 6 10 11 7905.34 820.121 3
 6 10 11 8364.49 841.975 3
 6 10 12 19853.9 1389.8 3
 -6 10 -12 20638.4 2177.06 2
 6 10 12 21566.1 1434.41 3
 -6 -10 -12 22507.8 2002.94 2
 -6 -10 -13 53403.2 3211.06 2
 -6 10 -13 49948.8 3468.6 2
 6 10 13 52739 2393.96 3
 6 10 13 45709.9 2244.81 3
 -6 -10 -14 1416.61 560.94 2
 -6 10 -14 43.47 532.746 2
 -6 -10 -15 36218.3 2887.29 2
 -6 10 -15 33982 3067.03 2
 -6 10 -16 45229 3656.09 2
 -6 -10 -16 49974.6 3523.12 2
 6 10 17 11780.2 1401.36 3
 -6 10 -17 15270.9 2238.67 2
 -6 -10 -17 14803.6 1972.26 2
 -6 10 -18 21717.8 2681.9 2
 -6 -10 -18 22652.3 2520.51 2
 -6 -10 -19 1036.36 749.193 2
 -6 10 -19 426.988 583.993 2
 -6 -10 -20 4888.37 1387.19 2
 -6 12 23 3398.07 976.136 3
 -6 12 22 20043.8 2523.58 3
 6 12 -22 24219 2873.59 2
 6 12 -21 3974.91 1251.99 2
 -6 12 21 2681.58 847.884 3
 6 12 -20 14511.1 2072.64 2
 6 -12 -20 11574.4 1660.66 1
 -6 12 20 13955.5 1978.93 3
 6 12 -19 255.446 577.712 2
 -6 12 19 -131.267 411.61 3
 6 -12 -19 145.631 583.677 1
 -6 12 18 55586.1 3756.99 3
 6 12 -18 59049.6 3910.63 2
 6 -12 -18 57738.6 3963.98 1
 6 12 -17 602.39 385.065 2
 6 -12 -17 972.997 550.414 1
 -6 12 17 1265.64 599.336 3
 6 12 -16 36802.6 2841.76 2
 6 -12 -16 36553.1 3022.05 1
 -6 12 16 33368.8 2762.8 3
 6 12 -15 1475.94 576.425 2
 -6 12 15 2112.07 703.522 3
 6 -12 -15 3165.6 936.636 1
 6 12 -14 7.1796 316.416 2
 6 -12 -14 313.525 378.683 1
 -6 12 14 1017.88 540.232 3
 6 12 -13 19751.3 1841.21 2
 -6 12 13 17942.3 1864.16 3
 6 -12 -13 20075.3 2128.29 1
 6 -12 -12 67728.8 3798.01 1
 6 12 -12 66374.1 3189.05 2
 -6 12 12 66791.2 3481.17 3
 6 12 -11 10062.4 1186.65 2
 -6 12 11 10162.5 1326.54 3
 6 12 -10 57128 2625.63 2
 -6 12 10 60983.8 3145.39 3
 6 12 -9 18246.7 1401.03 2
 -6 12 9 19994.5 1765.62 3
 -6 -12 9 18867.8 1772.63 3
 -6 12 9 15655.7 1612.17 2
 -6 12 8 2739.76 628.273 3
 6 12 -8 3554.34 582.023 2
 6 -12 -8 2388.57 553.73 3
 -6 -12 8 2564.49 616.814 3
 -6 12 8 1949.46 599.891 2
 -6 12 7 34976.2 2235.7 3
 6 12 -7 36689.8 1660.34 2
 6 -12 -7 36603.6 2300.32 3
 -6 12 7 31521.9 2182.73 2
 -6 -12 7 36158.4 2187.89 3
 -6 12 6 104475 3807.4 3
 6 12 -6 105538 2518.57 2
 6 -12 -6 99135 3705.02 3
 -6 -12 6 107071 3561.28 3
 -6 12 5 360.938 207.156 3
 6 12 -5 185.145 110.492 2
 6 -12 -5 -51.1126 293.444 3
 -6 -12 5 46.3961 207.599 3
 6 -12 -4 69624.9 3072.12 3
 -6 -12 4 73427.1 2617.43 3
 6 12 -4 68570.1 1397.58 2
 -6 12 4 72870.6 3120.45 3
 6 -12 -3 22899.1 1753.4 3
 -6 -12 3 25125.6 1423.93 3
 -6 12 3 25307.6 1841.21 3
 6 -12 -2 32480.6 2094.2 3
 -6 -12 2 32593.9 1480.94 3
 -6 12 2 33058.3 2120.31 3
 6 -12 -1 13147.5 1343.83 3
 6 12 -1 12829.8 1228.13 1
 -6 -12 1 15338.7 895.97 3
 -6 12 1 12972.8 1352.56 3
 6 12 0 70624 2995.82 1
 6 -12 0 70415 3123.65 3
 -6 12 0 67881.8 3082.85 3
 -6 -12 0 71988.9 1660 3
 6 -12 1 2198.69 585.716 3
 -6 -12 -1 1576.39 188.521 3
 6 12 1 1325.2 463.44 1
 -6 12 -1 1681.5 511.723 3
 6 12 2 98540.1 3731.38 1
 -6 12 -2 98390.6 3848.41 3
 6 -12 2 98200.3 3830.91 3
 6 12 3 887.687 393.476 1
 -6 12 -3 684.906 384.671 3
 6 -12 3 675.421 332.223 3
 6 -12 4 54692.8 2986.31 3
 -6 12 -4 50651.6 2910.59 3
 6 12 4 52254.1 2901.5 1
 -6 -12 -5 292.405 183.646 2
 6 12 5 115.452 263.565 1
 -6 12 -5 586.182 337.736 3
 6 -12 5 210.941 285.619 3
 -6 -12 -6 67606.6 2336.1 2
 -6 12 -6 68745.3 3519.64 3
 -6 12 -7 487.665 328.311 3
 -6 -12 -7 319.405 286.794 2
 -6 12 -8 18572.6 1950.62 3
 6 12 8 19729 637.949 3
 -6 -12 -8 23997 1638.38 2
 6 12 8 18107.4 636.738 3
 6 12 9 12251 690.619 3
 6 12 9 12522.5 694.245 3
 -6 -12 -9 14513.9 1352.99 2
 -6 12 -9 12333 1627.11 3
 6 12 10 95498.7 2259.45 3
 6 12 10 99799.6 2288.36 3
 -6 12 -10 105101 4862.32 3
 -6 -12 -10 114078 4024.4 2
 6 12 11 413.447 200.019 3
 -6 12 -11 829.717 554.082 3
 6 12 11 478.232 259.439 3
 -6 -12 -11 217.163 255.976 2
 -6 12 -12 38130.4 3121.35 3
 -6 12 -12 33461.2 2833.81 2
 6 12 12 33866 1642.39 3
 6 12 12 39895.9 1786.64 3
 -6 -12 -12 38812.9 2629.75 2
 -6 12 -13 21966.3 2392.99 2
 6 12 13 23937.4 1502.58 3
 -6 -12 -13 27847.5 2336.45 2
 -6 12 -14 864.785 456.852 2
 6 12 14 -142.178 307.824 3
 -6 -12 -14 460.998 436.732 2
 6 12 15 16494.8 1405.17 3
 -6 -12 -15 22181.2 2270.9 2
 -6 12 -15 17449.8 2292.44 2
 -6 -12 -16 40979.7 3203.84 2
 -6 12 -16 35177 3301.14 2
 -6 12 -17 -197.305 433.702 2
 -6 -12 -17 282.747 440.81 2
 -6 12 -18 43310.4 3841.13 2
 -6 -12 -18 41710.6 3451.82 2
 -6 -12 -19 5497.96 1368.01 2
 -6 -12 -20 11063.8 1984.69 2
 -6 14 22 29137.3 3046.82 3
 6 14 -21 -91.8793 637.019 2
 -6 14 21 256.159 610.312 3
 6 14 -20 22652.4 2603.9 2
 -6 14 20 25434.7 2696.53 3
 6 -14 -20 31025.2 3171.5 1
 6 -14 -19 -245.335 576.521 1
 6 14 -19 -1437.54 741.943 2
 -6 14 19 835.321 481.918 3
 6 14 -18 55682.5 3804.29 2
 -6 14 18 54607.7 3756.96 3
 6 -14 -18 55499.7 4073.5 1
 6 14 -17 2427 822.082 2
 -6 14 17 2192.32 728.104 3
 6 -14 -17 2685.47 936.762 1
 6 14 -16 24169.4 2326.49 2
 -6 14 16 20437.6 2174.48 3
 6 -14 -16 25907.2 2701.45 1
 6 14 -15 -882.868 472.272 2
 -6 14 15 53.657 339.699 3
 6 -14 -15 -515.131 743.886 1
 6 14 -14 5943.52 1036.09 2
 -6 14 14 4099.17 922.84 3
 6 -14 -14 4572.92 1148.63 1
 -6 14 13 287.996 359.421 3
 6 14 -13 290.119 299.061 2
 6 -14 -13 415.291 405.726 1
 6 14 -12 27118.1 2047.87 2
 -6 14 12 26096.5 2230.03 3
 6 -14 -12 34617.8 2869.64 1
 6 -14 -11 2103.31 713.174 1
 -6 14 11 2647.45 721.562 3
 6 14 -11 2944.07 693.955 2
 -6 14 10 53852.5 3045.53 3
 6 14 -10 54271.8 2577.48 2
 -6 14 9 -160.267 216.52 3
 6 14 -9 452.668 298.717 2
 -6 -14 9 158.15 277.213 3
 6 -14 -9 -943.403 431.389 3
 -6 14 8 4474.82 870.427 3
 6 14 -8 4676.3 660.876 2
 -6 -14 8 4718.31 848.988 3
 6 -14 -8 5491.11 961.224 3
 -6 14 8 4491.23 891.731 2
 -6 14 7 -26.1151 237.028 3
 6 -14 -7 157.824 484.907 3
 6 14 -7 443.288 122.87 2
 -6 -14 7 1331.88 453.247 3
 -6 14 7 971.704 473.07 2
 6 14 -6 29463.9 1324.72 2
 6 -14 -6 26672.7 2008.85 3
 -6 -14 6 30926.4 2005.56 3
 -6 14 6 28663.9 2108.85 3
 6 14 -5 606.923 168.641 2
 6 -14 -5 27.3184 192.827 3
 -6 -14 5 484.623 279.409 3
 -6 14 5 -81.3996 242.234 3
 6 -14 -4 125177 4331.95 3
 -6 -14 4 136257 3747.95 3
 6 14 -4 117239 1674.65 2
 -6 14 4 129261 4386.21 3
 6 -14 -3 5872.01 959.068 3
 -6 -14 3 4934.6 678.887 3
 -6 14 3 4925.36 875.873 3
 6 -14 -2 50174 2758.16 3
 -6 -14 2 56686.9 2070.1 3
 -6 14 2 53586.3 2840.86 3
 6 -14 -1 5340.12 910.024 3
 -6 -14 1 6468.26 640.474 3
 -6 14 1 5315.74 900.543 3
 6 -14 0 40744.1 2527.13 3
 -6 14 0 42090 2578.1 3
 -6 -14 0 43643.9 1444.84 3
 6 -14 1 4157.76 832.33 3
 -6 -14 -1 5809.9 437.626 3
 -6 14 -1 6497.75 1053.74 3
 -6 14 -2 53129.7 2997.64 3
 6 -14 2 56206.3 3063.58 3
 -6 14 -3 -2.23855 323.361 3
 6 -14 3 173.726 342.634 3
 -6 14 -4 48055.3 2946.63 3
 -6 14 -5 7660.29 1235.62 3
 -6 14 -6 64964.3 3605.62 3
 -6 14 -7 10844.1 1509.79 3
 -6 -14 -8 5893.89 805.052 2
 -6 14 -8 4923.13 1054.19 3
 -6 -14 -9 256.753 278.779 2
 -6 14 -9 209.459 321.339 3
 6 14 10 62078.5 1365.6 3
 -6 -14 -10 70657.4 3174.01 2
 -6 14 -10 65969.1 4021.13 3
 6 14 10 59164.7 1343.23 3
 6 14 11 2396.49 347.81 3
 -6 14 -11 1858.56 748.507 3
 -6 -14 -11 3543.15 776.151 2
 6 14 12 30214.4 1362.16 3
 -6 -14 -12 32000.5 2359.01 2
 -6 14 -12 31544.1 2873.52 2
 -6 14 -12 33232.3 3043.71 3
 -6 14 -13 2789.62 813.698 2
 -6 -14 -13 4362.31 952.869 2
 -6 -14 -14 4306.1 947.24 2
 -6 14 -14 4335.89 1081.25 2
 -6 14 -15 146.984 376.176 2
 -6 -14 -15 -262.335 522.871 2
 -6 -14 -16 24556.3 2466.02 2
 -6 14 -16 18695.6 2469.48 2
 -6 14 -17 7164.56 1580.98 2
 -6 -14 -17 7290.93 1405.74 2
 -6 14 -18 31052 3303.72 2
 -6 -14 -18 34001.5 3130.87 2
 -6 -14 -19 -198.994 842.911 2
 -6 -14 -20 19739.1 2431.51 2
 6 16 -21 8697.11 1673.15 2
 6 16 -20 8480.32 1617.96 2
 -6 16 20 9298.94 1638.19 3
 6 -16 -19 48.6488 598.038 1
 6 16 -19 128.098 543.443 2
 -6 16 19 -449.669 487.767 3
 6 16 -18 24272.8 2534.83 2
 -6 16 18 21637.5 2385.35 3
 6 -16 -18 27169.5 3041.14 1
 6 -16 -17 21993.2 2651.74 1
 6 16 -17 20847.5 2291.37 2
 -6 16 17 21595.1 2382.99 3
 6 16 -16 6793.35 1205.57 2
 -6 16 16 7351.53 1335.19 3
 6 -16 -16 10129.1 1820.93 1
 6 16 -15 38299.5 2802.66 2
 -6 16 15 37480.9 2916.58 3
 6 -16 -15 41624.8 3507.31 1
 6 16 -14 8671.49 1304.72 2
 -6 16 14 9758.35 1493.94 3
 6 -16 -14 7965.83 1523.31 1
 -6 16 13 15997.2 1843.84 3
 6 -16 -13 17077.8 2200.52 1
 6 16 -13 16967.9 1709.53 2
 -6 16 12 32006.9 2542.99 3
 6 16 -12 33902.2 2298.32 2
 6 -16 -12 33965.5 3008.7 1
 -6 16 11 9574.68 1357.1 3
 6 -16 -11 13678.3 1860.11 1
 6 16 -11 11624.1 1277.11 2
 -6 16 10 44891.8 2884.48 3
 6 16 -10 43811.2 2324.45 2
 6 -16 -10 46973.3 3404.17 1
 6 16 -9 35796.3 1953.2 2
 -6 16 9 32868.9 2444.01 3
 -6 16 8 -93.8921 289.68 3
 6 16 -8 364.436 270.236 2
 -6 -16 8 1293.67 529.882 3
 6 16 -7 56833.2 2039.78 2
 6 -16 -7 49454.5 2895.85 3
 -6 -16 7 59507.8 3029.03 3
 -6 16 7 52285.1 2994.79 3
 6 16 -6 63821 1903.15 2
 -6 -16 6 64591 3017 3
 6 -16 -6 63777.3 3256.54 3
 -6 16 6 64045.4 3286.35 3
 -6 16 6 50835.2 2953.16 2
 6 -16 -5 465.482 333.678 3
 6 16 -5 651.881 167.562 2
 -6 -16 5 949.171 366.68 3
 -6 16 5 718.399 435.947 3
 6 -16 -4 81536.1 3688.79 3
 -6 16 4 78363.1 3610.57 3
 -6 -16 4 87029.2 3159.05 3
 6 -16 -3 7297.05 1114.18 3
 -6 16 3 6880.21 1088.04 3
 -6 -16 3 7659.48 885.62 3
 6 -16 -2 63766 3274.95 3
 -6 16 2 61292 3233.08 3
 -6 -16 2 68500.1 2458.95 3
 6 -16 -1 52024.8 2983.9 3
 -6 16 1 52140.7 2987.03 3
 -6 -16 1 59816.5 2075.68 3
 -6 16 0 22136.1 1990.15 3
 -6 -16 0 23263.6 1163.89 3
 -6 16 -1 17278.4 1774.36 3
 -6 -16 -1 17948.5 884.138 3
 -6 -16 -2 12193.7 539.782 3
 -6 16 -2 13559.6 1592.8 3
 -6 16 -3 10881.3 1470.52 3
 -6 16 -4 56721.3 3403.01 3
 -6 16 -5 22814.8 2188 3
 -6 16 -6 27476.8 2472.95 3
 -6 16 -7 26380.6 2470.27 3
 -6 16 -8 1266.72 621.082 3
 -6 16 -9 32266.1 2880.87 3
 -6 16 -10 57342.8 3912.94 3
 -6 16 -11 10741.4 1764.34 3
 -6 16 -12 28114.2 2739.99 2
 -6 16 -12 33563.2 3152.1 3
 -6 16 -13 12769.1 1872.7 2
 -6 16 -14 -224.886 347.873 2
 -6 -16 -14 297.177 323.735 2
 -6 16 -15 11678 1936.53 2
 -6 -16 -15 16322.7 1942.65 2
 -6 16 -16 12201.2 1997.53 2
 -6 -16 -16 18724.8 2157.76 2
 -6 16 -17 15549.3 2335.71 2
 -6 -16 -17 14923.3 2028.08 2
 6 18 -18 2968.34 926.107 2
 -6 18 18 6200.41 1291.84 3
 6 18 -17 22428.8 2328.37 2
 -6 18 17 23763.7 2442.55 3
 6 -18 -17 22554.7 2823.2 1
 -6 18 16 6542.13 1262.72 3
 6 18 -16 5473.37 1024.15 2
 6 -18 -16 7125.86 1655.23 1
 -6 18 15 54701.2 3571.09 3
 6 18 -15 54909.2 3374.29 2
 6 -18 -15 62311.6 4513.62 1
 -6 18 14 2077.83 718.778 3
 6 18 -14 1512.83 619.583 2
 6 -18 -14 1862.66 880.055 1
 -6 18 13 28013.5 2460.93 3
 6 18 -13 30075.2 2271.65 2
 6 -18 -13 31018.9 3105.98 1
 -6 18 12 13673.9 1706.19 3
 6 18 -12 14180 1474.69 2
 6 -18 -12 15235.5 2149.36 1
 6 18 -11 44284.5 2468.5 2
 -6 18 11 40547.8 2874.28 3
 6 -18 -11 44174.4 3558.99 1
 -6 18 10 682.971 436.19 3
 6 18 -10 1858.68 492.452 2
 6 -18 -10 885.681 605.191 1
 6 18 -9 25109.1 1618.97 2
 6 -18 -9 28003.7 2732.84 1
 -6 18 9 24931.4 2172.21 3
 6 18 -8 -199.42 179.689 2
 -6 18 8 275.69 388.974 3
 6 18 -7 71571.2 2238.44 2
 -6 -18 7 78417.4 3624.66 3
 -6 18 7 75573.8 3733.45 3
 6 18 -6 9562.56 704.7 2
 -6 -18 6 9281.25 1192.05 3
 -6 18 6 10683 1415.2 3
 -6 18 5 41057.5 2744.81 3
 -6 -18 5 42612.1 2450.76 3
 6 18 -5 36273 1074.68 2
 -6 18 4 14287.9 1630.08 3
 -6 -18 4 15321.1 1407.52 3
 -6 18 3 9068.9 1311.79 3
 -6 -18 3 8864.02 1016.4 3
 -6 18 2 11581.3 1482.01 3
 -6 -18 2 11924.4 1084.44 3
 -6 18 1 56124.4 3259.74 3
 -6 -18 1 65720 2342.4 3
 -6 18 0 23553.8 2138.42 3
 -6 -18 0 28019.5 1386.05 3
 -6 -18 -1 62109.8 1806.36 3
 -6 18 -1 64163.2 3619.66 3
 -6 -18 -2 0.43173 94.5246 3
 -6 18 -2 -146.159 409.778 3
 -6 18 -3 4371.14 1008.89 3
 -6 18 -4 8607.5 1398.44 3
 -6 18 -5 35754.5 2874.68 3
 -6 18 -6 17825.4 2081.19 3
 -6 18 -7 50775 3577.88 3
 -6 18 -8 1869.87 904.095 3
 -6 18 -9 49272.8 3692 3
 -6 18 -10 4842.53 1178.08 3
 -6 18 -11 15611 2182.85 3
 -6 18 -12 9943.43 1750.5 3
 -6 18 -12 9494.46 1675.16 2
 -6 18 -13 18781.6 2352.45 2
 -6 18 -14 -27.9165 779.044 2
 -6 18 -15 28731.4 3042.82 2
 -6 18 -16 2941.89 1041.04 2
 6 -20 -15 37245.3 3692.27 1
 -6 20 15 30760.1 2728.51 3
 -6 20 14 4036.44 952.542 3
 6 -20 -14 4786.92 1412.68 1
 6 -20 -13 27843 3084.99 1
 -6 20 13 27842.5 2511.23 3
 -6 20 12 22.678 536.365 3
 6 -20 -12 1608.75 881.812 1
 6 -20 -11 49349.2 3954.32 1
 -6 20 11 43443.8 3071.57 3
 6 -20 -10 3045.64 1039.37 1
 -6 20 10 1722.02 646.36 3
 6 -20 -9 8826.71 1677.22 1
 -6 20 9 7372.31 1191.42 3
 6 -20 -8 789.997 625.968 1
 -6 20 8 161.904 342.999 3
 -6 20 7 27937.1 2382.83 3
 -6 20 6 25.74 415.21 3
 -6 20 5 77193.4 3921.39 3
 -6 -20 5 87289.7 3642.05 3
 -6 20 4 6964.29 1162.06 3
 -6 -20 4 6313.73 951.879 3
 -6 20 3 18680.9 1965.7 3
 -6 -20 3 16160.8 1407.48 3
 -6 -20 2 15452.5 1315.7 3
 -6 20 2 15259.8 1798.26 3
 -6 -20 1 58765.2 2329.45 3
 -6 20 1 54209.7 3355.01 3
 -6 20 0 -47.0471 444.65 3
 -6 20 -1 44224.4 3126.32 3
 -6 20 -2 7664.04 1365.92 3
 -6 20 -3 962.934 452.618 3
 -6 20 -4 5701.38 1169.17 3
 -6 20 -5 48299.7 3499.48 3
 -6 20 -6 433.99 351.644 3
 -6 20 -7 25380.6 2653.16 3
 -6 20 -8 5140.08 1265.08 3
 -6 20 -9 16379.2 2235.23 3
 -6 20 -10 2408.69 968.085 3
 -6 20 -11 34539.6 3363.77 3
 -6 20 -12 -52.6715 473.559 2
 -6 20 -13 8516.96 1708.6 2
 -6 20 -14 2042.5 815.538 2
 -6 20 -15 21529.1 2748.38 2
 -6 22 13 128.031 377.077 3
 6 -22 -12 23866.3 2949.32 1
 -6 22 12 25240.9 2419.01 3
 -6 22 11 39351.1 2973.96 3
 6 -22 -11 43069.8 3850.21 1
 6 -22 -10 3599.62 1138.82 1
 -6 22 10 2723.12 844.145 3
 6 -22 -9 2888.27 1143.77 1
 -6 22 9 1962.29 677.355 3
 6 -22 -8 827.248 443.024 1
 -6 22 8 2138.78 734.354 3
 -6 22 7 4128.56 961.88 3
 6 -22 -7 5090.2 1213.35 1
 6 -22 -6 12831.1 2008.38 1
 -6 22 6 8940.96 1437.25 3
 -6 22 5 53661.4 3420.2 3
 -6 22 4 23973.7 2311.88 3
 -6 22 3 320.803 330.253 3
 -6 22 2 27411.1 2492.81 3
 -6 22 1 21658.1 2254.9 3
 -6 22 0 3839.39 978.993 3
 -6 22 -1 12751.5 1756.63 3
 -6 22 -2 20533.9 2268.55 3
 -6 22 -3 -680.295 570.54 3
 -6 22 -4 20134.7 2327.06 3
 -6 22 -5 23561.3 2577.96 3
 -6 22 -6 2195.77 839.115 3
 -6 22 -7 5328.3 1273.12 3
 -6 22 -8 2758.08 1005.81 3
 -6 22 -9 2699.61 1016.29 3
 -6 22 -10 14168.4 2163.17 3
 -6 22 -11 25550.7 2721.61 2
 -6 22 -11 23800.9 2941.6 3
 -6 22 -12 11369.2 1873.83 2
 -6 22 -13 3287.05 1078.06 2
 -6 22 -14 165.138 355.008 2
 -6 24 9 404.777 441.937 3
 6 -24 -9 502.523 477.676 1
 6 -24 -8 4026.39 1211.86 1
 -6 24 8 3428.03 936.763 3
 -6 24 7 812.569 504.011 3
 6 -24 -7 -134.953 582.67 1
 -6 24 6 22175.9 2283.93 3
 6 -24 -6 28121.5 3050.61 1
 6 -24 -5 17597.7 2419.5 1
 -6 24 5 17056.3 1972.17 3
 6 -24 -4 17822.1 2366.71 1
 -6 24 4 13367.6 1807.81 3
 -6 24 3 -1007.89 558.366 3
 -6 24 2 7730.76 1395.52 3
 -6 24 1 2568.47 882.266 3
 -6 24 0 24076.6 2502.85 3
 -6 24 -1 3413.14 979.429 3
 -6 24 -2 17227.6 2176.2 3
 -6 24 -3 -43.4377 503.951 3
 -6 24 -4 13269.1 1981.71 3
 -6 24 -5 13399.6 2041.17 3
 -6 24 -6 33815.6 3273.81 3
 -6 24 -7 -383.473 689.776 3
 -6 24 -8 -775.392 666.229 3
 -6 24 -9 1171.55 662.565 3
 -6 24 -11 16990 2243.94 2
 -6 24 -12 11678.7 1936.76 2
 -6 26 6 36617.7 3022.17 3
 -6 26 5 1077.7 479.542 3
 6 -26 -5 2059.23 931.704 1
 6 -26 -4 7499.45 1685.4 1
 -6 26 4 8388.99 1518.05 3
 6 -26 -3 1636.69 907.617 1
 -6 26 3 2039.54 657.945 3
 -6 26 2 2857.46 1019.84 3
 6 -26 -2 3087.15 882.449 1
 6 -26 -1 180.788 471.683 1
 -6 26 1 -1485.04 727.678 3
 -6 26 0 37946.7 3236.48 3
 -6 26 -1 218.459 549.02 3
 -6 26 -2 1142.99 533.708 3
 -6 26 -3 290.635 624.537 3
 -6 26 -4 6747.98 1540.61 3
 -6 26 -5 440.296 510.761 3
 -6 26 -6 30256 3173.56 3
 -6 26 -7 287.995 577.579 3
 -6 28 1 3607.76 1107.59 3
 -6 28 0 45693.3 3678.07 3
 6 -28 0 48538.9 4022.95 1
 6 -28 1 2973.57 1018.05 1
 -6 28 -1 2379.7 896.219 3
 6 -28 2 351.887 472.313 1
 -6 28 -2 -538.231 657.513 3
 -6 28 -3 512.321 667.076 3
 6 -28 3 -934.519 705.122 1
 -6 28 -4 4312.28 1115.73 3
 7 1 -23 37043.6 3671.37 2
 7 -1 -22 -536.46 1043.84 2
 7 1 -22 -281.004 536.246 2
 7 -1 -21 58756.2 4354.93 2
 7 1 -21 51030.5 4030.77 2
 7 1 -20 10528.4 1801.42 2
 7 -1 -20 7964.14 1539.68 2
 7 -1 -19 35468 3182.77 2
 7 1 -19 36611.1 3204.51 2
 7 1 -18 5035.87 1215.54 2
 7 -1 -18 5427.64 1244.39 2
 7 -1 -17 20276 2205.67 2
 7 1 -17 22549 2323.26 2
 7 1 -16 11052.1 1588.04 2
 7 -1 -16 11460.6 1153.75 1
 7 -1 -16 12510.8 1696.64 2
 7 -1 -15 110630 3444.79 1
 7 1 -15 111841 4781.97 2
 7 1 -15 110994 3015.86 1
 7 -1 -15 109170 4771.48 2
 7 -1 -14 5357.86 737.263 1
 7 -1 -14 4763.18 975.583 2
 7 1 -14 4812.58 623.057 1
 7 1 -14 5154.35 1001.72 2
 7 -1 -13 61832.5 3342.34 2
 7 -1 -13 64287.1 2509.05 1
 -7 -1 13 57849 3171.34 2
 7 1 -13 64997.8 2208.35 1
 7 1 -13 60358.6 3257.27 2
 -7 -1 12 14817.9 1529.46 2
 -7 1 12 12700.3 1447.05 2
 7 1 -12 15766.5 1597.46 2
 7 -1 -12 14949.5 1585.64 2
 7 1 -12 15082.9 1037.85 1
 7 -1 -11 1313.85 550.594 2
 -7 1 11 731.15 317.11 2
 -7 -1 11 754.285 368.671 2
 7 1 -11 870.837 408.017 2
 -7 1 10 9489.12 1159.2 2
 -7 -1 10 8780.32 1084.16 2
 7 1 -10 9084.24 1107.12 2
 7 -1 -10 10077.6 1199.22 2
 -7 1 9 170907 4641.16 2
 -7 -1 9 174417 4543.81 2
 -7 1 9 167670 4654.78 3
 7 1 -9 174571 4585.82 2
 -7 1 8 311.827 221.366 2
 -7 -1 8 996.627 370.876 2
 7 1 -8 378.999 242.742 2
 -7 1 8 518.796 273.427 3
 -7 1 7 225257 4912.63 3
 -7 1 7 212990 4723.9 2
 -7 -1 7 217678 4597.91 2
 -7 1 6 307.587 261.951 3
 -7 -1 6 402.742 264.473 3
 -7 1 6 187.978 142.132 2
 -7 -1 6 285.883 201.882 2
 -7 1 5 29730.3 1650.95 3
 -7 -1 5 30622.2 1626.85 3
 -7 -1 5 30178.4 1527 2
 -7 1 5 29202.8 1599.14 2
 -7 1 4 37653 1766.63 3
 7 -1 -4 35085.6 1716.37 3
 -7 -1 4 38379.4 1725.38 3
 -7 1 3 17290.5 1158.5 3
 -7 -1 3 18404.4 1135.91 3
 7 -1 -3 16335.8 1124 3
 7 1 -3 16541.9 1075.86 3
 -7 1 2 1353.13 329.798 3
 -7 -1 2 313.61 154.734 3
 7 -1 -2 1077.57 282.372 3
 7 1 -2 995.194 270.975 3
 -7 1 1 385908 5159.72 3
 -7 -1 1 371183 4720.93 3
 7 -1 -1 367506 5047.35 3
 7 1 -1 357394 4580.9 3
 -7 1 0 1041.29 275.821 3
 -7 -1 0 794.516 226.35 3
 7 -1 0 692.799 250.835 3
 7 1 0 859.988 246.387 3
 7 -1 1 27976.5 1392.79 3
 7 1 1 27133.3 1223.59 3
 -7 1 -1 30042.2 1444.64 3
 -7 -1 -1 30035.2 1293.34 3
 7 -1 2 1270.94 336.164 3
 7 1 2 709.376 204.176 3
 -7 -1 -2 913.844 254.465 3
 -7 1 -2 885.181 288.588 3
 -7 -1 -3 112062 2647.62 3
 -7 1 -3 109103 2895.69 3
 7 -1 3 113782 2957.13 3
 7 1 3 111201 2645.32 3
 -7 -1 -4 5529.12 640.697 3
 -7 1 -4 4466.1 621.058 3
 7 -1 4 4634.58 637.766 3
 7 1 4 5269.79 607.114 3
 -7 -1 -5 69781.9 2307.86 3
 -7 1 -5 69194 2495 3
 7 1 5 71963.6 2351 3
 7 -1 5 71471.1 2551.44 3
 -7 -1 -6 8314.45 844.632 3
 -7 1 -6 7788.97 892.854 3
 7 1 6 7547.31 802.323 3
 7 -1 6 7253.18 866.398 3
 -7 -1 -7 298113 6062.04 2
 -7 -1 -7 296061 5341.05 3
 -7 1 -7 303282 5764.57 3
 7 1 7 290286 5266.74 3
 7 -1 7 303869 5756.32 3
 -7 -1 -8 149.115 183.45 2
 -7 1 -8 169.057 206.449 3
 7 1 8 373.298 253.889 3
 7 -1 8 264.108 172.249 3
 -7 -1 -9 58052 2952.11 2
 -7 1 -9 60176.1 3055.23 2
 7 1 9 61611.8 2687.72 3
 7 -1 9 60019.5 2808.14 3
 -7 1 -9 61715.8 2852.66 3
 -7 1 -10 17748.4 1738.49 2
 7 1 10 19921.9 1603.81 3
 7 -1 10 18669.7 1648.33 3
 -7 -1 -10 18615.6 1751.66 2
 -7 -1 -11 451.785 308.85 2
 -7 1 -11 23.5583 401.095 2
 7 -1 11 601.256 300.156 3
 7 1 11 298.556 256.034 3
 -7 1 -12 985.874 376.622 2
 7 1 12 1473.45 512.831 3
 7 -1 12 1804.4 618.016 3
 -7 -1 -12 769.568 460.372 2
 -7 -1 -13 83980.7 4197.52 2
 -7 1 -13 82532.1 4229.96 2
 7 1 13 78909.2 3625.79 3
 -7 -1 -14 2528.63 709.002 2
 -7 1 -14 2414.74 858.843 2
 -7 -1 -15 108330 5152.84 2
 -7 1 -15 108658 5191.61 2
 -7 -1 -16 11741.8 1743.7 2
 -7 1 -16 9681.73 1652.8 2
 -7 -1 -17 4177.33 1161.69 2
 -7 1 -17 5437.5 1248.97 2
 -7 -1 -18 2810.44 1084.64 2
 -7 1 -18 4011.94 1127.64 2
 -7 -1 -19 32200.5 3235.03 2
 -7 1 -19 33943.4 3351.82 2
 -7 -1 -20 1465.4 742.139 2
 -7 1 -20 1042.5 480.015 2
 -7 3 23 14069.8 2251.83 3
 7 3 -23 17251 2502.5 2
 7 -3 -22 -17.9683 629.248 2
 -7 3 22 -427.095 528.192 3
 7 3 -22 -1910.93 898.535 2
 7 -3 -21 21974.5 2642.03 2
 7 3 -21 22913.8 2703.21 2
 -7 3 21 23596.4 2706.19 3
 -7 3 20 36644.8 3271.29 3
 7 -3 -20 37822.6 3420.35 2
 7 3 -20 37548.4 3353.38 2
 7 -3 -19 39923.3 3384.31 2
 7 3 -19 44105.9 3496.15 2
 7 3 -18 44628.6 3384.51 2
 7 -3 -18 45103 2649.71 1
 7 -3 -18 43126.2 3399.49 2
 7 -3 -17 12771.3 1778.02 2
 7 -3 -17 13224.2 1404.94 1
 7 3 -17 14798.3 1896.45 2
 7 -3 -16 20047.8 1684.4 1
 7 -3 -16 19167.3 2122.74 2
 7 3 -16 18260 1993.27 2
 7 -3 -15 101413 3672.27 1
 -7 3 15 90256.4 4335.02 3
 7 -3 -15 97371.1 4581.41 2
 7 3 -15 100016 4523.94 2
 7 3 -14 15232.7 1714.49 2
 -7 3 14 15568.3 1746.06 3
 7 -3 -14 16091.9 1790.35 2
 7 -3 -14 15290.8 1390.5 1
 7 -3 -13 57812.3 3284.39 2
 7 3 -13 55515.8 3099.12 2
 -7 3 13 53032.5 3063.12 3
 -7 -3 13 54637.4 3049.87 2
 7 3 -13 63792.3 1726.49 1
 7 -3 -13 62487.3 2727.79 1
 7 -3 -12 35304.4 2457.22 2
 -7 3 12 31950.5 2316.57 2
 7 3 -12 33062.2 1227.03 1
 -7 -3 12 29609.6 2150.6 2
 -7 3 12 35305.5 2407.73 3
 7 3 -12 33863.5 2303.45 2
 7 3 -11 2834.68 353.194 1
 -7 -3 11 2265.58 567.391 2
 -7 3 11 1486.27 491.447 2
 -7 3 11 2977.54 705.363 3
 7 3 -11 1847.89 513.85 2
 -7 3 10 137256 4466.77 2
 -7 -3 10 135319 4167.04 2
 -7 3 10 141116 4470.09 3
 7 3 -10 139702 4202.42 2
 -7 3 9 140653 4287.28 3
 -7 -3 9 148595 4101.72 2
 7 3 -9 143755 4038.88 2
 -7 3 9 137307 4252.41 2
 -7 -3 8 8439.03 934.301 2
 -7 3 8 7865.28 990.69 3
 7 3 -8 7875.03 901.216 2
 -7 3 8 7228.26 945.844 2
 -7 -3 7 100667 3014.22 2
 -7 3 7 105225 3430.92 3
 7 3 -7 105517 3085.32 2
 -7 3 7 101804 3365.59 2
 -7 -3 6 20717.4 1283.9 2
 -7 3 6 19315.5 1428.08 3
 -7 3 6 18723.1 1402.2 2
 -7 3 5 24127.9 1526.81 3
 7 -3 -5 22712.8 1490.64 3
 -7 -3 5 25213.5 1319.03 2
 -7 -3 4 165023 3480.83 3
 -7 3 4 167777 3946.11 3
 -7 -3 4 163548 3140.94 2
 7 -3 -4 152121 3728.33 3
 -7 3 3 74147.9 2526.31 3
 7 -3 -3 70746.2 2464.72 3
 -7 -3 3 71669.3 2139.56 3
 -7 3 2 78400.5 2525.1 3
 7 -3 -2 71215.7 2438.16 3
 -7 -3 2 76612.8 2066.3 3
 -7 3 1 215860 4186.63 3
 7 -3 -1 202130 4031.56 3
 -7 -3 1 212836 3210.8 3
 7 3 -1 191539 3050.85 3
 -7 -3 0 27021.1 1085.01 3
 7 -3 0 26198 1451.62 3
 7 3 0 23963.2 1021.38 3
 -7 3 0 28236.5 1525.12 3
 7 -3 1 39148.5 1805.54 3
 7 3 1 36623.8 1240.96 3
 -7 3 -1 41714.3 1860.11 3
 -7 -3 -1 41127.9 1308.81 3
 7 3 2 50227.3 1461.59 3
 -7 3 -2 51705.6 2118.87 3
 -7 -3 -2 52212.2 1508.4 3
 7 -3 2 55652.1 2205.66 3
 -7 -3 -3 147992 2611.78 3
 -7 3 -3 135691 3528.71 3
 7 -3 3 141890 3614.57 3
 7 3 3 139462 2541.74 3
 -7 -3 -4 152689 2867.67 3
 -7 3 -4 156550 3917.9 3
 7 -3 4 157118 3931 3
 7 3 4 160478 2915.04 3
 -7 3 -5 919.037 344.107 3
 -7 -3 -5 357.436 224.019 3
 7 3 5 1703.28 343.417 3
 7 -3 5 313.083 262.064 3
 -7 -3 -6 52178 2325.44 2
 -7 3 -6 48914.6 2360.09 3
 7 3 6 50619.8 1888.49 3
 7 -3 6 47612.6 2341.47 3
 -7 -3 -6 48718 1851.17 3
 -7 -3 -7 131908 3920.76 2
 7 3 7 133275 3277.95 3
 7 -3 7 134736 4088.69 3
 -7 3 -7 129798 4003.63 3
 -7 3 -8 9701.44 1151.55 3
 7 3 8 8786.3 902.048 3
 7 -3 8 9794.02 1157.18 3
 -7 -3 -8 10022.2 1140.41 2
 7 -3 9 29399.1 2074.75 3
 -7 3 -9 27122.9 1997.71 3
 -7 -3 -9 28770.2 2033.43 2
 7 3 9 28572.8 1718.15 3
 -7 -3 -10 119324 4366.12 2
 7 3 10 123154 3762.12 3
 7 -3 10 123845 4413.22 3
 -7 3 -10 120788 4622.33 2
 -7 3 -10 124250 4421.04 3
 7 -3 11 -1112.7 493.654 3
 -7 3 -11 413.026 406.333 2
 7 3 11 -21.9001 267.563 1
 7 3 11 116.082 246.042 3
 -7 -3 -11 364.241 289.919 2
 -7 -3 -12 39073.5 2716.47 2
 -7 3 -12 43284 2983.56 2
 7 3 12 38020.7 2314.97 3
 -7 -3 -13 92153.2 4333.75 2
 7 3 13 86678.6 3651.84 3
 -7 3 -13 84720.5 4355.35 2
 -7 -3 -14 19389.6 2072.28 2
 7 3 14 17285.6 1701.78 3
 -7 3 -14 18428.5 2106.6 2
 -7 -3 -15 55737.1 3663.2 2
 -7 3 -15 61032.5 3981.28 2
 -7 3 -16 34525.4 3115.22 2
 -7 -3 -16 35553.3 3052.71 2
 -7 -3 -17 2131.08 732.509 2
 -7 3 -17 2028.39 793.925 2
 -7 -3 -18 19390.4 2446.23 2
 -7 3 -18 19958.1 2543.57 2
 -7 -3 -19 31521 3182.16 2
 -7 3 -19 30880.6 3239.48 2
 -7 -3 -20 13890.5 2173.09 2
 -7 3 -20 10396.7 1916.25 2
 7 5 -23 171.912 736.86 2
 -7 5 23 -1722.85 825.346 3
 -7 5 22 629.281 584.682 3
 7 5 -22 -374.012 693.222 2
 7 -5 -22 1484.11 753.553 2
 -7 5 21 892.153 530.573 3
 7 -5 -21 2634.84 1081.21 2
 7 5 -21 -105.63 681.798 2
 7 -5 -20 63577.4 4466.12 2
 7 5 -20 60194.1 4216.26 2
 -7 5 20 58343.1 4106.96 3
 7 -5 -19 29608 2973.75 2
 -7 5 19 28243.8 2754.1 3
 7 -5 -19 31996.4 2436.99 1
 7 5 -19 29886.5 2875.26 2
 -7 5 18 97352.1 4950.63 3
 7 -5 -18 109703 5471.17 2
 7 -5 -18 107220 4379.42 1
 7 5 -18 99484 5031.72 2
 7 5 -17 4680.03 1081.74 2
 7 -5 -17 5999.28 1066.23 1
 -7 5 17 5309.54 1168.16 3
 7 -5 -17 4807.34 1126.22 2
 7 5 -16 3191.7 892.476 2
 -7 5 16 3488.11 972.951 3
 7 -5 -16 4490.73 1054.61 2
 7 -5 -16 3990.83 831.907 1
 7 5 -15 8696.14 1338.56 2
 -7 5 15 7257.99 1237.52 3
 7 -5 -15 8026.42 1336.82 2
 7 -5 -15 8814.7 1173 1
 7 -5 -14 94116.7 3725.93 1
 -7 5 14 81022.5 3961.38 3
 7 5 -14 86276.4 3979.2 2
 -7 -5 13 14223.4 1539.93 2
 7 -5 -13 13930.2 1413.98 1
 -7 5 13 12083.7 1486.47 3
 7 5 -13 12608.8 1464.12 2
 -7 -5 12 61552.7 3046 2
 -7 5 12 55729.2 3047.61 3
 7 5 -12 59580.7 3016.03 2
 -7 5 11 843.913 464.096 2
 -7 5 11 255.458 319.276 3
 -7 -5 11 645.403 359.575 2
 7 5 -11 148.865 248.718 2
 -7 5 10 139443 4611.2 2
 -7 5 10 142605 4585.86 3
 -7 -5 10 144494 4233.33 2
 7 5 -10 144156 4248.08 2
 -7 -5 9 53930.3 2436.9 2
 7 5 -9 57642.7 2523.89 2
 -7 5 9 51554.3 2660.74 3
 -7 5 9 50523.5 2685.64 2
 -7 5 8 40292 2264.89 3
 -7 5 8 39521.7 2267.46 2
 -7 -5 8 42487 2033.46 2
 7 5 -8 45179.7 2102.53 2
 -7 5 7 66662.7 2830.9 3
 -7 -5 7 71644.4 2448.07 2
 7 5 -7 72627.6 2484.15 2
 -7 5 7 62723.3 2769.17 2
 7 -5 -6 57395.7 2527.92 3
 -7 -5 6 60117 2104.37 2
 -7 5 6 60647.9 2585.04 3
 7 5 -6 61322.5 2110.85 2
 -7 -5 5 4641.22 543.719 2
 -7 5 5 4236.36 696.509 3
 7 -5 -5 3558.8 625.45 3
 -7 5 4 292662 5389.07 3
 7 -5 -4 261880 5110.34 3
 -7 -5 4 282087 3793.57 2
 -7 5 3 76112.9 2724.57 3
 7 -5 -3 70849.9 2622.97 3
 -7 -5 3 75531.5 1788.09 2
 7 -5 -2 350640 5775.1 3
 -7 -5 2 344011 4229.89 3
 -7 5 2 370285 5894.34 3
 7 -5 -1 4628.61 673.776 3
 -7 -5 1 5245.31 478.487 3
 -7 5 1 4701.82 669.092 3
 7 -5 0 29600.9 1684.58 3
 -7 -5 0 31986.5 1038.28 3
 -7 5 0 33516 1795.77 3
 7 -5 1 1460.78 377.12 3
 7 5 1 1445.32 203.442 3
 -7 5 -1 1952.35 446.24 3
 -7 -5 -1 2602.07 277.786 3
 7 5 2 340791 2998.22 3
 -7 -5 -2 374173 3165.56 3
 -7 5 -2 372079 6178.59 3
 7 -5 2 374440 6183.9 3
 7 5 3 70909 1446.8 3
 -7 -5 -3 71503.2 1461.56 3
 -7 5 -3 72404.7 2770.82 3
 7 -5 3 75189.4 2850.89 3
 -7 -5 -4 154430 3387.97 2
 -7 -5 -4 151207 2366.33 3
 -7 5 -4 154678 4185.34 3
 7 -5 4 153864 4182.32 3
 7 5 4 151840 2341.14 3
 -7 -5 -5 6058.4 724.741 2
 -7 5 -5 6220.83 881.44 3
 7 5 5 6602.61 542.032 3
 7 -5 5 6140.61 874.939 3
 -7 5 -6 65276.7 2917 3
 7 5 6 66379.7 1914.17 3
 7 -5 6 64801.8 2901.38 3
 -7 -5 -6 67832.9 2576.71 2
 -7 -5 -7 2030.49 493.471 2
 -7 5 -7 2519.22 613.72 3
 7 5 7 2523.69 401.477 3
 7 -5 7 2442.26 608.36 3
 7 -5 8 72772.4 3306.33 3
 -7 5 -8 71380.7 3275.63 3
 7 5 8 75523.1 2419.1 3
 7 5 8 70410.5 3270.42 1
 -7 -5 -8 71423.4 2995.62 2
 -7 -5 -9 42686.2 2428.81 2
 7 -5 9 39948.3 2526.25 3
 -7 5 -9 39822.4 2530.93 3
 7 5 9 42819 2630.72 1
 7 5 9 41965.6 1935.78 3
 -7 -5 -10 86584.3 3648.37 2
 -7 5 -10 82417.2 3780.28 3
 7 -5 10 86301.5 3842.24 3
 7 5 10 79878 3710.76 1
 7 5 10 81722.6 2902.15 3
 -7 5 -11 154.589 314.767 3
 -7 5 -11 415.079 390.645 2
 7 5 11 -25.2777 280.175 3
 -7 -5 -11 102.108 268.293 2
 -7 5 -12 44992.6 3088.38 2
 7 5 12 42473.5 2329.23 3
 -7 -5 -12 43414.7 2840.1 2
 -7 5 -13 29338.8 2602.67 2
 -7 -5 -13 28133.3 2400.94 2
 7 5 13 26987.2 1966.31 3
 -7 -5 -14 39370 2964.37 2
 7 5 14 34547.9 2314.17 3
 -7 5 -14 36066.5 2994.08 2
 -7 5 -15 4548.28 1158.6 2
 -7 -5 -15 5958.7 1206.65 2
 7 5 15 4589.66 911.615 3
 -7 -5 -16 11084.1 1708.83 2
 -7 5 -16 13320.8 1958.42 2
 -7 -5 -17 1004.47 645.378 2
 -7 5 -17 492.785 529.304 2
 -7 -5 -18 37910.5 3372.05 2
 -7 5 -18 41083.2 3730.14 2
 -7 -5 -19 22782.9 2705.4 2
 -7 5 -19 23770.4 2874.98 2
 -7 -5 -20 20923.5 2675.77 2
 -7 5 -20 18615.2 2636.66 2
 -7 7 23 8729.99 1678.63 3
 -7 7 22 559.895 646.686 3
 7 7 -22 1212.94 618.961 2
 -7 7 21 22474.6 2600.69 3
 7 7 -21 23499.6 2762.59 2
 -7 7 20 63307 4271.6 3
 7 -7 -20 69454.4 3940.9 1
 7 7 -20 68442.6 4482.86 2
 7 7 -19 3910.63 1071.68 2
 -7 7 19 2648.89 822.433 3
 7 -7 -19 4134.9 979.931 1
 -7 7 18 113416 5357.48 3
 7 -7 -18 121338 4993.02 1
 7 7 -18 119795 5503.47 2
 7 -7 -17 13610.8 1650.85 1
 -7 7 17 12484.4 1731.8 3
 7 7 -17 14219.7 1844.15 2
 7 7 -16 1170.75 524.469 2
 7 -7 -16 1147.82 565.441 1
 -7 7 16 2505.81 725.904 3
 -7 7 15 10297.7 1485.9 3
 7 -7 -15 10732 1406.17 1
 7 7 -15 10325.2 1441.51 2
 -7 7 14 157049 5581.93 3
 7 -7 -14 169381 5382.81 1
 7 7 -14 162971 5474.29 2
 7 7 -13 -124.055 275.227 2
 -7 7 13 475.425 440.154 3
 -7 -7 13 541.037 406.956 2
 7 -7 -13 73.5332 263.718 1
 -7 -7 12 56952.3 2916.49 2
 -7 7 12 52805.2 3020.78 3
 7 7 -12 53019.8 2815.78 2
 7 7 -11 560.203 585.487 2
 -7 7 11 324.608 333.222 2
 -7 -7 11 -50.9165 250.62 2
 -7 7 11 -6.21844 320.363 3
 -7 7 10 47109.1 2681.09 3
 7 7 -10 45951.2 2362.47 2
 -7 -7 10 50997.2 2482.46 2
 -7 7 10 42657.1 2622.67 2
 -7 -7 9 70.5458 126.958 2
 -7 7 9 397.496 381.477 3
 -7 7 9 -747.61 375.645 2
 7 7 -9 380.027 235.773 2
 7 7 -8 179483 2130.35 1
 -7 7 8 173381 4797.33 3
 -7 -7 8 179715 4118.38 2
 -7 7 8 164213 4798.64 2
 7 7 -8 171525 4015.04 2
 -7 7 7 78472.2 3162.94 3
 7 -7 -7 75843.5 3092.31 3
 7 7 -7 83042.8 1748.88 1
 -7 -7 7 80269.1 2543.85 2
 -7 7 7 72671.2 3071.41 2
 7 7 -7 76840.1 2501.27 2
 7 -7 -6 16898.5 1428.44 3
 -7 7 6 18105.5 1476.45 3
 -7 -7 6 17019.3 1071.95 2
 7 7 -6 16562.4 1053.83 2
 7 -7 -5 2137.63 503.867 3
 -7 7 5 2486.21 552.295 3
 -7 -7 5 2252.53 352.805 2
 -7 7 4 191364 4592.67 3
 7 -7 -4 178606 4458.8 3
 -7 -7 4 196387 2871.08 2
 -7 7 3 14239.4 1248.43 3
 7 -7 -3 13250.4 1199.87 3
 -7 -7 3 14460.7 679.114 2
 -7 -7 2 262376 2424.9 2
 7 -7 -2 258114 5262.36 3
 -7 7 2 258017 5327.49 3
 7 -7 -1 120068 3590.67 3
 -7 -7 1 114966 2116.15 3
 -7 -7 1 111047 1431.96 2
 -7 7 1 117225 3554.3 3
 7 -7 0 1916.01 488.423 3
 -7 -7 0 2686.47 276.001 3
 -7 7 0 2132.41 512.795 3
 -7 -7 -1 123418 1955.44 2
 -7 7 -1 121169 3734.63 3
 7 -7 1 120216 3687.42 3
 -7 -7 -2 355713 3857.46 2
 -7 7 -2 356519 6516.59 3
 7 -7 2 364645 6513.53 3
 7 7 3 65943.9 2836.89 1
 -7 7 -3 67854.4 2875.12 3
 -7 -7 -3 68949.6 1910.21 2
 7 -7 3 67880.7 2903.58 3
 7 -7 4 99507.6 3585.91 3
 -7 -7 -4 100431 2570.83 2
 7 7 4 99174.7 3573.95 1
 -7 7 -4 97667.6 3558.37 3
 -7 -7 -5 9888.93 898.046 2
 -7 7 -5 9170.15 1140.09 3
 7 7 5 10137.2 1210.63 1
 7 -7 5 11381 1254.25 3
 7 7 5 9703.22 500.431 3
 -7 7 -6 45915.5 2579.31 3
 -7 -7 -6 48693.6 2124.36 2
 7 7 6 46539.5 2627.34 1
 7 7 6 45608.8 1317.46 3
 7 -7 6 49733.1 2691.53 3
 -7 -7 -7 31436.9 1834.75 2
 -7 7 -7 28112.9 2099.95 3
 7 7 7 29951.3 1216.55 3
 7 -7 7 29178.5 2136.82 3
 7 7 7 29942.2 2165.21 1
 -7 7 -8 180084 5456.94 3
 -7 -7 -8 175970 4626.26 2
 7 7 8 181010 3327 3
 7 -7 8 182161 5457.49 3
 7 7 8 175312 5358.55 1
 -7 7 -9 2098.16 592.494 3
 -7 -7 -9 3072.87 696.244 2
 7 7 9 2297.05 434.306 3
 -7 -7 -10 25617.4 1980.4 2
 -7 7 -10 28323.6 2317.36 3
 7 7 10 26749.9 1535.3 3
 -7 7 -11 282.352 344.823 2
 -7 -7 -11 111.006 254.063 2
 7 7 11 65.5706 240.919 3
 -7 7 -11 -191.419 326.478 3
 -7 7 -12 41933.5 3055.69 2
 -7 -7 -12 45734.6 2900.94 2
 7 7 12 44088.4 2240.68 3
 -7 7 -13 3530.69 942.851 2
 -7 -7 -13 3713.17 866.815 2
 7 7 13 2900.24 629.832 3
 -7 -7 -14 70467.2 3906.54 2
 7 7 14 68520.2 3103.15 3
 -7 7 -14 68336.4 4184.13 2
 -7 -7 -15 13238.9 1798.08 2
 -7 7 -15 12886.2 1905.15 2
 -7 7 -16 5614.8 1329.14 2
 -7 -7 -16 7076.03 1339.24 2
 -7 -7 -17 116.227 448.103 2
 -7 7 -17 255.485 464.56 2
 -7 -7 -18 22623.3 2589.97 2
 -7 7 -18 22026.3 2691.55 2
 -7 -7 -19 3149.34 1028.29 2
 -7 7 -19 2609.98 871.099 2
 -7 -7 -20 29110.7 3138.4 2
 -7 9 23 20928.8 2654.62 3
 -7 9 22 363.303 572.446 3
 7 9 -22 487.865 676.33 2
 -7 9 21 14466.9 2125.49 3
 7 9 -21 15983.8 2248.86 2
 -7 9 20 33866.9 3142.31 3
 7 9 -20 33406.3 3148.58 2
 7 -9 -20 36906.3 3040.15 1
 7 9 -19 12018.7 1803.27 2
 -7 9 19 13048.6 1903.98 3
 7 -9 -19 14643.1 1870.33 1
 -7 9 18 34888.3 3007.43 3
 7 9 -18 39638.1 3182.83 2
 7 -9 -18 35502.2 2891.81 1
 7 9 -17 8424.14 1407.67 2
 7 -9 -17 10964.6 1599.39 1
 -7 9 17 6867.9 1299.5 3
 7 9 -16 -337.4 470.387 2
 -7 9 16 336.155 455.571 3
 7 -9 -16 -60.0679 300.189 1
 7 -9 -15 31788 2571.75 1
 -7 9 15 27907.7 2424.18 3
 7 9 -15 31405.8 2486.57 2
 -7 9 14 99875.9 4478.75 3
 7 -9 -14 108699 4610.48 1
 7 9 -14 95666.5 4185.92 2
 7 -9 -13 2474.79 695.455 1
 7 9 -13 3905.67 832.434 2
 -7 9 13 1679.84 638.982 3
 -7 9 12 12092.5 1469.21 3
 -7 -9 12 14511.7 1451.01 2
 7 9 -12 13431.9 1419.47 2
 7 9 -11 -67.4195 249.818 2
 -7 9 11 -62.5273 392.565 3
 -7 -9 11 225.778 333.33 3
 -7 -9 11 295.686 219.814 2
 -7 9 10 2902.06 692.032 2
 7 9 -10 3616.79 688.382 2
 -7 9 10 4046.62 803.237 3
 -7 -9 10 2772.69 571.418 2
 -7 -9 9 59448.7 2482.95 2
 -7 9 9 59778.4 2982.81 3
 -7 9 9 50624.2 2859 2
 7 9 -9 57833.1 2463.89 2
 -7 -9 8 139342 3546.03 2
 -7 9 8 132231 4333.96 3
 7 -9 -8 128992 4293.64 3
 -7 9 8 116023 4188.82 2
 7 9 -8 134598 3481.47 2
 -7 9 7 44014.1 2445.61 3
 -7 -9 7 44886.3 1853.57 2
 7 -9 -7 42855.6 2409.64 3
 -7 9 7 36034.3 2283.57 2
 7 9 -7 41527.7 1792.32 2
 -7 9 6 10219.2 1159.76 3
 -7 -9 6 12164.4 867.158 2
 7 -9 -6 11016.8 1197.75 3
 7 9 -6 11190.1 832.977 2
 7 9 -6 10957.9 778.664 1
 -7 9 5 12667.2 1263.78 3
 -7 -9 5 14740.8 841.627 2
 7 9 -5 13705.2 955.702 1
 7 -9 -5 13167.2 1292.34 3
 7 9 -5 14050.5 826.493 2
 -7 9 4 4931.27 796.278 3
 7 9 -4 6242.35 689.578 1
 7 -9 -4 4233.41 743.335 3
 7 -9 -3 86701.3 3261.48 3
 -7 -9 3 87852.7 2439.66 3
 7 9 -3 91862.9 2775.1 1
 -7 9 3 91098.1 3353.58 3
 -7 -9 2 111323 2464.95 3
 7 -9 -2 107329 3606.77 3
 7 9 -2 112587 3203.11 1
 -7 9 2 108498 3639.17 3
 7 9 -1 129598 3591.24 1
 7 -9 -1 125377 3909.59 3
 -7 -9 1 130885 2281.9 3
 -7 9 1 123576 3896.17 3
 7 -9 0 7103.66 944.388 3
 -7 9 0 7907.72 1012.89 3
 -7 -9 0 7342.46 426.431 3
 7 9 0 7770.41 923.972 1
 -7 -9 0 7850.37 440.923 3
 7 9 1 85632.2 3182.84 1
 -7 9 -1 87376.1 3360.77 3
 7 -9 1 90108.7 3410.17 3
 -7 -9 -2 131596 2100.08 2
 -7 9 -2 134176 4249.79 3
 7 9 2 142490 4217.29 1
 7 -9 2 143900 4395.36 3
 -7 -9 -3 11193.1 735.879 2
 7 9 3 11807.5 1272.26 1
 -7 9 -3 10156 1158.06 3
 7 -9 3 11595.7 1277.33 3
 -7 -9 -4 59108.5 1878.71 2
 7 -9 4 54730.4 2863.35 3
 -7 9 -4 54447.5 2810.06 3
 7 9 4 56179.5 2849.85 1
 7 9 5 39215.9 2437.65 1
 -7 -9 -5 39668.4 1714.43 2
 -7 9 -5 36877.6 2386.36 3
 7 -9 5 39688.1 2478.6 3
 7 9 6 11986 1416.68 1
 -7 -9 -6 12016 1033.37 2
 -7 9 -6 10477 1317.78 3
 7 -9 6 12401 1455.87 3
 7 -9 7 86822.8 3854.2 3
 7 9 7 83645.4 3783.75 1
 -7 -9 -7 89986.3 3035.56 2
 7 9 7 70965.5 1476.48 3
 -7 9 -7 79265.9 3703.93 3
 7 9 7 82139.6 1584.5 3
 -7 -9 -8 125996 3862.24 2
 7 9 8 125785 2372.75 3
 -7 9 -8 124717 4765.57 3
 -7 -9 -9 54939.6 2695.48 2
 -7 9 -9 55594.7 3263.53 3
 7 9 9 59916.4 1903.82 3
 -7 -9 -10 4455.1 826.155 2
 -7 9 -10 5072.38 1043.46 3
 7 9 10 4300.4 559.461 3
 -7 9 -11 3413.45 866.02 3
 -7 -9 -11 5697.29 982.052 2
 7 9 11 4383.84 617.756 3
 -7 -9 -12 1126.19 499.188 2
 7 9 12 1176.17 353.358 3
 -7 9 -12 869.03 406.104 2
 -7 9 -12 471.792 395.507 3
 -7 -9 -13 30778.8 2472.14 2
 -7 9 -13 30090.5 2739.54 2
 7 9 13 29352.6 1823.06 3
 -7 9 -14 106000 5290.7 2
 -7 -9 -14 113032 4925.76 2
 -7 -9 -15 25370.3 2444.77 2
 -7 9 -15 20069.1 2390.77 2
 -7 9 -16 1570.59 752.529 2
 -7 -9 -16 2250.43 816.988 2
 -7 -9 -17 1716.52 782.458 2
 -7 9 -17 2463.4 976.028 2
 -7 -9 -18 13480.7 1996.28 2
 -7 9 -18 13849.1 2167.6 2
 -7 -9 -19 12342.9 1979.03 2
 -7 9 -19 11043.9 1977.84 2
 -7 -9 -20 31175.6 3233.14 2
 -7 11 23 9957.38 1927.55 3
 7 11 -22 887.371 899.024 2
 -7 11 22 1008.6 420.237 3
 7 11 -21 5976.38 1475.73 2
 -7 11 21 4101.81 1139.64 3
 7 -11 -21 5442.45 1272.58 1
 7 11 -20 5666.7 1317.08 2
 -7 11 20 5271.03 1291.85 3
 7 -11 -20 5428.72 1296.15 1
 -7 11 19 54367.1 3858.47 3
 7 -11 -19 54890.5 3847.47 1
 7 11 -19 52768.4 3797.32 2
 7 11 -18 1106.7 721.37 2
 7 -11 -18 1452.12 668.473 1
 -7 11 18 1114.6 591.565 3
 7 11 -17 1038.38 500.257 2
 -7 11 17 -79.0137 401.914 3
 7 -11 -17 475.413 327.058 1
 7 11 -16 497.953 380.796 2
 -7 11 16 751.95 378.701 3
 7 -11 -16 358.276 435.804 1
 7 -11 -15 21465.2 2209.54 1
 7 11 -15 21915.3 2103.94 2
 -7 11 15 20692.3 2143.01 3
 7 11 -14 55037.1 3156.82 2
 7 -11 -14 64891.2 3767.93 1
 -7 11 14 54610.6 3347.59 3
 7 -11 -13 70153.6 3853.61 1
 7 11 -13 66828.2 3315.67 2
 -7 11 13 63167.7 3542.22 3
 7 11 -12 2677.82 633.627 2
 -7 11 12 3109.32 780.219 3
 7 11 -11 3737.36 718.163 2
 -7 11 11 3670.3 829.161 3
 -7 11 10 3292.75 762.26 3
 7 11 -10 2511.8 553.237 2
 -7 -11 10 2312.48 664.481 3
 -7 11 9 114057 4279.34 3
 -7 11 9 103988 4219.05 2
 -7 -11 9 113111 4168.66 3
 7 11 -9 118834 3491.71 2
 7 -11 -8 80711.9 3502.17 3
 -7 11 8 88151.8 3657.16 3
 -7 -11 8 94562.8 3649.49 3
 -7 11 8 78542.7 3547.8 2
 7 11 -8 89519.9 2809.09 2
 -7 11 7 54416.3 2819.12 3
 -7 -11 7 53603.8 2618.94 3
 7 -11 -7 56488 2887.27 3
 -7 11 7 47201.5 2699.86 2
 7 11 -7 56663.3 2039.24 2
 -7 11 6 7967.97 1080.34 3
 7 -11 -6 7291.26 1011.72 3
 -7 -11 6 7412.52 920.544 3
 7 11 -6 7214.63 651.6 2
 -7 11 5 7230.44 1018.73 3
 7 11 -5 7337.03 555.384 2
 7 -11 -5 6575.54 962.505 3
 -7 -11 5 6741.47 830.592 3
 -7 11 4 468.094 316.063 3
 7 11 -4 99.6138 140.298 1
 7 -11 -4 366.014 251.805 3
 -7 -11 4 325.219 215.127 3
 7 11 -3 130260 3530.54 1
 7 -11 -3 129861 4198.39 3
 -7 -11 3 131927 3110.77 3
 -7 11 3 131647 4248.26 3
 7 -11 -2 42676.1 2432.85 3
 -7 -11 2 44192.8 1623.54 3
 -7 11 2 41328.9 2368.39 3
 7 11 -2 39336.7 2040.88 1
 7 -11 -1 52556.6 2687.96 3
 7 11 -1 56843 2547.33 1
 -7 11 1 54206.8 2750.8 3
 -7 -11 1 57778.9 1612.74 3
 7 -11 0 6124.62 942.273 3
 -7 11 0 6808.19 989.912 3
 -7 -11 0 6628.18 431.926 3
 7 11 0 6836.2 918.243 1
 7 11 1 4944.86 830.417 1
 -7 11 -1 3726.79 748.511 3
 7 -11 1 5915.25 937.244 3
 7 11 2 59988.7 2895.26 1
 -7 11 -2 59728.9 3003.55 3
 7 -11 2 63962.1 3093.13 3
 -7 11 -3 141676 4701.46 3
 7 11 3 139865 4560.89 1
 -7 -11 -3 145714 2316.05 2
 7 -11 3 151016 4857.21 3
 7 11 4 30867.6 2220.11 1
 7 -11 4 35240.3 2387.96 3
 -7 11 -4 27242.5 2108.13 3
 -7 -11 -4 33881.8 1341.26 2
 7 11 5 3813.31 821.796 1
 -7 11 -5 2054.75 612.601 3
 -7 -11 -5 2992.41 456.088 2
 7 -11 5 3095.35 737.044 3
 -7 11 -6 4914.88 948.204 3
 -7 -11 -6 6911.16 779.453 2
 -7 11 -7 55248.7 3244.07 3
 -7 -11 -7 55774.5 2359.09 2
 -7 -11 -8 37504.1 2081.94 2
 -7 11 -8 31776.2 2538.96 3
 -7 -11 -9 118140 3911.51 2
 7 11 9 98574.7 1948.02 3
 -7 11 -9 111250 4847.4 3
 7 11 9 109460 2059.01 3
 -7 -11 -10 2238.16 593.853 2
 -7 11 -10 1079.68 571.814 3
 7 11 10 1503.52 314.513 3
 7 11 10 1549.1 292.063 3
 -7 -11 -11 1492.31 570.16 2
 -7 11 -11 1075.9 557.362 3
 7 11 11 906.126 272.153 3
 7 11 11 647.612 223.816 3
 -7 -11 -12 13675.9 1573.68 2
 -7 11 -12 11379.8 1688.92 2
 7 11 12 13812.7 1062.79 3
 7 11 12 13014 1031.6 3
 -7 11 -12 14477.7 1930.11 3
 -7 -11 -13 50556.9 3159.57 2
 7 11 13 41005.3 1997.68 3
 -7 11 -13 49058.2 3575.34 2
 -7 11 -14 57451.4 3978.28 2
 -7 -11 -14 61702.6 3616.08 2
 7 11 14 54125.5 2436.6 3
 7 11 15 35032.5 2063.63 3
 -7 -11 -15 42946.4 3144.2 2
 -7 11 -15 41949 3516.25 2
 -7 -11 -16 3294.51 960.469 2
 -7 11 -16 4520.81 1257.23 2
 -7 11 -17 345.216 511.987 2
 -7 -11 -17 2602.9 873.836 2
 -7 -11 -18 4685.53 1266.52 2
 -7 11 -18 4013.32 1238.95 2
 -7 -11 -19 48934.4 3895.54 2
 -7 -11 -20 21849.1 2684.3 2
 7 13 -22 1066.55 563.053 2
 -7 13 22 -1798.43 836.77 3
 7 13 -21 6570.54 1466.88 2
 -7 13 21 3089.57 1014.3 3
 7 -13 -21 5401.94 1345.5 1
 7 -13 -20 1301.22 611.701 1
 7 13 -20 1699.44 461.941 2
 -7 13 20 2182.07 702.597 3
 -7 13 19 85354.4 4861.54 3
 7 -13 -19 95687.3 5321.13 1
 7 13 -19 86050.2 4840.05 2
 7 13 -18 -99.048 583.244 2
 -7 13 18 1014.99 550.691 3
 7 -13 -18 590.15 572.837 1
 7 13 -17 454.755 410.256 2
 -7 13 17 164.654 308.6 3
 7 -13 -17 638.552 645.263 1
 7 13 -16 185.531 285.91 2
 -7 13 16 -143.859 382.322 3
 7 -13 -16 -324.019 451.981 1
 7 13 -15 20027.6 1994.65 2
 -7 13 15 18346.3 2040.33 3
 7 -13 -15 21475.3 2331.38 1
 7 13 -14 7759.88 1204.74 2
 -7 13 14 6990.38 1228.52 3
 7 -13 -14 6927.68 1339.99 1
 7 13 -13 124065 4513.8 2
 7 -13 -13 133704 5638.45 1
 -7 13 13 121248 4977.39 3
 7 13 -12 4806.86 857.989 2
 -7 13 12 4075.76 904.093 3
 7 13 -11 447.517 303.298 2
 -7 13 11 -45.276 397.5 3
 7 13 -10 1334.43 452.055 2
 -7 13 10 759.968 497.202 3
 -7 13 9 99871.4 4118.26 3
 -7 -13 9 107216 4183.04 3
 7 -13 -9 99385.7 4097.14 3
 7 13 -9 103780 3230.38 2
 -7 13 8 7895.65 1130.82 3
 -7 -13 8 7202.11 1042.13 3
 7 -13 -8 6642.79 1081.03 3
 -7 13 8 6320.42 1060.51 2
 7 13 -8 6972.52 777.133 2
 -7 13 7 44314.9 2666.61 3
 7 -13 -7 38458 2478.64 3
 -7 -13 7 44648.7 2455.11 3
 -7 13 7 34604.9 2401.49 2
 7 13 -7 42395.9 1703.82 2
 -7 -13 6 20051.2 1555.08 3
 7 -13 -6 16762.1 1618.61 3
 7 13 -6 17562.5 969.221 2
 -7 13 6 17273.9 1650 3
 -7 13 5 662.526 311.911 3
 7 -13 -5 402.24 284.95 3
 -7 -13 5 550.714 290.49 3
 7 13 -5 478.217 121.913 2
 7 -13 -4 7347.2 1069.68 3
 -7 -13 4 7392.2 856.344 3
 -7 13 4 7589.84 1084.88 3
 7 -13 -3 165719 4992.45 3
 -7 -13 3 170834 3713.96 3
 -7 13 3 165110 5018.57 3
 -7 13 2 -49.2072 302.694 3
 7 -13 -2 136.727 239.087 3
 -7 -13 2 29.4605 161.799 3
 7 -13 -1 15604.3 1558.43 3
 -7 13 1 14399.5 1498 3
 7 13 -1 16412.4 1461.41 1
 -7 -13 1 15409.7 898.08 3
 7 -13 0 1252.28 469.202 3
 7 13 0 1488.72 507.278 1
 -7 13 0 2065.91 653.84 3
 -7 -13 0 1500.31 232.206 3
 7 -13 1 515.717 375.887 3
 7 13 1 416.458 282.438 1
 -7 13 -1 344.844 349.852 3
 7 -13 2 2110.97 628.467 3
 -7 13 -2 1968.03 603.573 3
 7 13 2 2086.9 601.385 1
 7 13 3 207745 5874.56 1
 -7 13 -3 206195 5995.54 3
 7 -13 3 221379 6171.95 3
 -7 13 -4 911.787 399.545 3
 -7 13 -5 6645.84 1139.94 3
 -7 13 -6 2163.01 669.289 3
 -7 -13 -6 2521.96 467.616 2
 -7 13 -7 29989.2 2517.84 3
 -7 -13 -7 28755.2 1661.72 2
 -7 13 -8 3026.61 849.293 3
 -7 -13 -8 2864.94 604.759 2
 -7 13 -9 107393 4961.15 3
 -7 -13 -9 110257 3725.98 2
 7 13 10 3046.27 275.997 3
 -7 13 -10 3476.06 952.095 3
 -7 -13 -10 4410.65 782.37 2
 7 13 11 913.714 207.276 3
 -7 13 -11 39.6409 534.002 3
 -7 -13 -11 1098.85 437.441 2
 7 13 12 1918.05 340.363 3
 -7 13 -12 3012.09 983.903 3
 -7 13 -12 1711.16 842.849 2
 -7 -13 -12 1957.21 542.67 2
 -7 13 -13 44855 3492.88 2
 -7 -13 -13 48110.2 3042.95 2
 -7 13 -14 -33.3456 450.041 2
 -7 -13 -14 240.432 394.211 2
 -7 13 -15 21044.6 2548.43 2
 -7 -13 -15 24739.4 2403.62 2
 -7 13 -16 2476.04 895.318 2
 -7 -13 -16 3280.51 949.107 2
 -7 13 -17 8.83661 879.691 2
 -7 -13 -17 635.993 576.134 2
 -7 -13 -18 -426.336 843.817 2
 -7 -13 -19 48826.9 3842.96 2
 -7 -13 -20 -261.853 619.221 2
 -7 15 21 430.69 709.029 3
 7 -15 -20 13482.9 2175.52 1
 -7 15 20 15173.8 2146.42 3
 7 15 -20 13850 2294.31 2
 -7 15 19 55106.2 3917.24 3
 7 -15 -19 62739.1 4526.45 1
 7 15 -19 60806.2 4074.03 2
 7 15 -18 2522 863.258 2
 -7 15 18 2585.74 883.246 3
 7 -15 -18 2643.28 1007.22 1
 7 15 -17 1220.79 500.358 2
 -7 15 17 674.945 414.212 3
 7 -15 -17 745.522 488.289 1
 7 15 -16 1104.23 508.208 2
 -7 15 16 286.748 406.605 3
 7 -15 -16 -290.991 593.296 1
 7 15 -15 10741.9 1468.03 2
 -7 15 15 9088.83 1506.06 3
 7 -15 -15 11544.2 1859.32 1
 7 15 -14 19025.7 1867.4 2
 -7 15 14 16603.2 1963.5 3
 7 -15 -14 19485.1 2339 1
 7 15 -13 100510 4079 2
 -7 15 13 97378 4558.79 3
 7 -15 -13 109627 5357.46 1
 7 15 -12 562.505 372.436 2
 -7 15 12 55.1417 297.661 3
 7 -15 -12 -117.151 737.997 1
 7 15 -11 2408.31 563.445 2
 -7 15 11 2452.27 697.927 3
 -7 15 10 2369.02 713.206 3
 7 15 -10 2039.97 536.935 2
 7 15 -9 76551.2 2760.96 2
 -7 15 9 76830 3758.82 3
 -7 -15 8 47896.6 2756.56 3
 7 15 -8 45607.3 1943.44 2
 -7 15 8 42782.3 2775.23 3
 -7 -15 7 89864.9 3622.29 3
 7 15 -7 85414.9 2360.17 2
 -7 15 7 83591.8 3813.21 3
 -7 -15 6 524.413 361.222 3
 7 -15 -6 1000.41 401.271 3
 7 15 -6 475.445 163.967 2
 -7 15 6 748.135 388.139 3
 7 -15 -5 399.32 325.6 3
 -7 -15 5 697.595 303.614 3
 -7 15 5 507.198 355.263 3
 7 -15 -4 353.868 254.78 3
 -7 15 4 951.489 487.988 3
 -7 -15 4 1472.23 437.547 3
 7 -15 -3 186887 5619.33 3
 -7 -15 3 196767 4222.57 3
 -7 15 3 187340 5630.99 3
 7 -15 -2 63869.6 3292.3 3
 -7 -15 2 65696.4 2246.71 3
 -7 15 2 59820.7 3218.2 3
 7 -15 -1 1862.58 581.396 3
 -7 15 1 1605.49 508.176 3
 -7 -15 1 2140.95 360.707 3
 -7 -15 0 810.653 192.152 3
 -7 15 0 926.122 452.626 3
 -7 15 -1 15417.7 1672.53 3
 -7 15 -2 7819.32 1206.4 3
 -7 15 -3 138677 5152.77 3
 -7 15 -4 5142.18 1039.81 3
 -7 15 -5 -53.8208 419.526 3
 -7 15 -6 1084.98 583.122 3
 -7 15 -7 31719.2 2683.03 3
 -7 15 -8 30501.3 2728.67 3
 -7 15 -9 77071.1 4386.78 3
 -7 15 -10 3701.02 1025.56 3
 -7 -15 -10 4933.41 845.878 2
 -7 15 -11 3888.33 1110.7 3
 -7 -15 -11 4518.43 881.048 2
 -7 15 -12 -120.439 452.056 3
 -7 15 -12 -3.4628 359.137 2
 -7 -15 -12 -157.481 334.25 2
 -7 15 -13 35452.9 3161.79 2
 -7 -15 -13 32710.5 2507.39 2
 -7 15 -14 21356.5 2554.74 2
 -7 -15 -14 23530.9 2223.47 2
 -7 15 -15 11535.7 1928.33 2
 -7 -15 -15 13636.7 1762.98 2
 -7 15 -16 958.648 600.224 2
 -7 -15 -16 1427.06 777.193 2
 -7 15 -17 1623.6 695.929 2
 -7 -15 -17 1471.89 680.462 2
 -7 -15 -18 1096.79 801.353 2
 -7 17 20 21795.2 2565.9 3
 -7 17 19 18406.1 2295.53 3
 7 17 -19 20153.6 2327.42 2
 -7 17 18 13131.2 1931.26 3
 7 -17 -18 13256 2166.3 1
 7 17 -18 13528.3 1864.71 2
 7 17 -17 1872.56 650.654 2
 -7 17 17 88.3093 486.681 3
 7 -17 -17 -17.2875 554.032 1
 7 -17 -16 583.765 639.101 1
 7 17 -16 2405.02 1043.87 2
 -7 17 16 998.034 712.883 3
 7 17 -15 3611.43 896.476 2
 -7 17 15 3255.03 923.152 3
 7 -17 -15 3712.93 1136.85 1
 7 -17 -14 104885 5644.53 1
 7 17 -14 93611.4 4106.67 2
 -7 17 14 96557.9 4738.65 3
 7 17 -13 34344.4 2385.39 2
 -7 17 13 35551.1 2802.91 3
 7 -17 -13 32935.2 3115.23 1
 -7 17 12 2285.05 708.299 3
 7 17 -12 2741.28 608.777 2
 7 -17 -12 1967.22 750.471 1
 -7 17 11 -139.228 431.178 3
 7 17 -11 189.011 312.875 2
 7 -17 -11 -41.9176 539.415 1
 7 17 -10 6693.05 900.611 2
 -7 17 10 7571.07 1258.65 3
 -7 17 9 21124.8 2038.65 3
 7 17 -9 18011 1320.48 2
 -7 17 8 132107 5082.35 3
 7 17 -8 128224 3151.91 2
 -7 -17 7 19491 1754.78 3
 7 17 -7 17857.4 1038.8 2
 -7 17 7 18178.1 1875.77 3
 -7 -17 6 -136.454 393.875 3
 7 17 -6 55.3872 89.5749 2
 -7 17 6 -1339.52 551.094 3
 -7 -17 5 1443.37 424.581 3
 -7 17 5 1802.17 659.468 3
 -7 -17 4 31443.9 1920.87 3
 -7 17 4 32943.8 2464.69 3
 -7 -17 3 97279.6 3105.65 3
 -7 17 3 90992.8 4102.28 3
 -7 17 2 127214 4896.28 3
 -7 -17 2 134764 3380.77 3
 -7 17 1 106.036 339.023 3
 -7 -17 1 538.731 219.16 3
 -7 -17 0 -6.67735 124.818 3
 -7 17 0 -1445.22 581.29 3
 -7 -17 -1 21913.4 796.932 3
 -7 17 -1 25618.6 2268.64 3
 -7 17 -2 79872.4 4050.58 3
 -7 17 -3 42869.3 3044.61 3
 -7 17 -4 17523.6 1976.61 3
 -7 17 -5 103.62 491.823 3
 -7 17 -6 2198.94 686.779 3
 -7 17 -7 15469.6 1993.11 3
 -7 17 -8 86481 4748.3 3
 -7 17 -9 21180.5 2433.19 3
 -7 17 -10 1048 649.656 3
 -7 17 -11 -1632.98 778.266 3
 -7 17 -12 -263.92 553.081 3
 -7 17 -12 -229.691 583.336 2
 -7 17 -13 10163.8 1749.33 2
 -7 17 -14 51686.8 4008.26 2
 -7 17 -15 2602.92 1041.24 2
 -7 17 -16 560.046 388.028 2
 -7 19 17 4162.95 1088.81 3
 -7 19 16 422.746 527.172 3
 7 -19 -16 1356.92 871.524 1
 -7 19 15 5521 1276.32 3
 7 -19 -15 4735.89 1416.34 1
 -7 19 14 109911 5137.48 3
 7 -19 -14 109763 6045.17 1
 -7 19 13 -205.111 476.622 3
 7 -19 -13 -335.279 910.908 1
 7 -19 -12 11372.4 1906.76 1
 7 19 -12 9644.87 1170.52 2
 -7 19 12 15919.4 1904.76 3
 -7 19 11 153.542 407.883 3
 7 19 -11 586.704 290.804 2
 7 -19 -11 518.99 683.444 1
 7 -19 -10 15279.8 2136.21 1
 -7 19 10 14124.1 1747.39 3
 7 19 -10 12548.1 1157.92 2
 7 19 -9 325.29 196.373 2
 -7 19 9 288.045 367.159 3
 -7 19 8 98712.1 4522.32 3
 7 19 -8 98545 2626.71 2
 7 19 -7 545.771 186.37 2
 -7 19 7 232.426 317.202 3
 -7 -19 6 7770.19 1083.33 3
 -7 19 6 7460.53 1225.88 3
 -7 -19 5 6852.13 999.978 3
 -7 19 5 6698.02 1214.32 3
 -7 19 4 13429.5 1659.43 3
 -7 -19 4 12832.2 1265.11 3
 -7 19 3 37.008 516.847 3
 -7 -19 3 452.383 261.948 3
 -7 19 2 113443 4846.64 3
 -7 -19 2 121241 3357.81 3
 -7 -19 1 444.791 239.29 3
 -7 19 1 54.4302 407.132 3
 -7 -19 0 473.662 202.12 3
 -7 19 0 619.771 463.08 3
 -7 -19 -1 8644.77 531.819 3
 -7 19 -1 11675.8 1615.83 3
 -7 19 -2 65656.5 3845.93 3
 -7 19 -3 -90.7356 508.64 3
 -7 19 -4 28150.9 2619.07 3
 -7 19 -5 1230.28 620.456 3
 -7 19 -6 1164 587.711 3
 -7 19 -7 5019.96 1250.85 3
 -7 19 -8 89339.8 5059.35 3
 -7 19 -9 42.0694 431.672 3
 -7 19 -10 3977.06 1163.19 3
 -7 19 -11 -104.52 671.617 3
 -7 19 -12 12973.9 2131.76 3
 -7 19 -12 12968.6 2001.34 2
 -7 19 -13 831.275 675.436 2
 -7 19 -14 59965.1 4434.02 2
 -7 19 -15 192.098 492.932 2
 -7 21 15 38410.5 3171.09 3
 -7 21 14 44770.7 3368.68 3
 7 -21 -13 12303.7 2144.07 1
 -7 21 13 11689.8 1706.45 3
 7 -21 -12 15145.6 2342.48 1
 -7 21 12 15362.3 1904.13 3
 7 -21 -11 1065.46 702.058 1
 -7 21 11 301.62 467.398 3
 7 -21 -10 11699.5 1942.21 1
 -7 21 10 13074.5 1753.29 3
 7 -21 -9 6568.89 1444.04 1
 -7 21 9 10350.9 1555.46 3
 -7 21 8 39906.5 2985.63 3
 -7 21 7 4169.03 1008.08 3
 -7 21 6 9195.33 1465.58 3
 -7 21 5 1344.08 570.053 3
 -7 21 4 22573 2262.17 3
 -7 21 3 51307.6 3392.36 3
 -7 21 2 52074.1 3463.26 3
 -7 21 1 3506.78 851.271 3
 -7 21 0 1041.3 505.933 3
 -7 21 -1 1524.07 601.192 3
 -7 21 -2 48707.6 3500.93 3
 -7 21 -3 30803.7 2811.27 3
 -7 21 -4 20901.9 2381.93 3
 -7 21 -5 2561.23 921.727 3
 -7 21 -6 3312 990.449 3
 -7 21 -7 -175.891 483.614 3
 -7 21 -8 34040.4 3244.28 3
 -7 21 -9 12470.7 2019.42 3
 -7 21 -10 9710.31 1769.76 3
 -7 21 -11 -680.93 727.301 3
 -7 21 -12 7066.3 1539.47 2
 -7 21 -13 12597.8 2075.92 2
 -7 21 -14 32723 3337.56 2
 -7 23 12 15772.6 1998.81 3
 -7 23 11 -676.198 498.147 3
 7 -23 -10 16755.1 2488.38 1
 -7 23 10 15192.5 1947.13 3
 7 -23 -9 18103.5 2495.03 1
 -7 23 9 17273.5 2026.19 3
 7 -23 -8 7671.51 1642.64 1
 -7 23 8 12274.9 1746.54 3
 7 -23 -7 8437.05 1663.79 1
 -7 23 7 8628.18 1458.52 3
 -7 23 6 5158.82 1136.85 3
 -7 23 5 731.304 563.268 3
 -7 23 4 11117.3 1673.1 3
 -7 23 3 31492.8 2764.36 3
 -7 23 2 12112.2 1758.87 3
 -7 23 1 -503.309 579.217 3
 -7 23 0 694.586 583.804 3
 -7 23 -1 444.832 356.976 3
 -7 23 -2 11470.8 1760.85 3
 -7 23 -3 39069.2 3337.43 3
 -7 23 -4 9355.02 1678.59 3
 -7 23 -5 1344.28 680.935 3
 -7 23 -6 3556.6 1102.09 3
 -7 23 -7 8875.61 1683.22 3
 -7 23 -8 8829.29 1734.9 3
 -7 23 -9 28812.7 3168.25 3
 -7 23 -11 811.844 753.244 2
 -7 23 -12 7302.66 1539.6 2
 -7 25 8 541.926 357.437 3
 -7 25 7 19387.2 2266.57 3
 7 -25 -7 19711.8 2705.35 1
 7 -25 -6 5225.52 1403.74 1
 -7 25 6 6248.31 1300.09 3
 7 -25 -5 7931.91 1661.01 1
 -7 25 5 7355.56 1396.84 3
 -7 25 4 3304.2 877.652 3
 -7 25 3 18465.1 2213.37 3
 -7 25 2 -1150.26 620.127 3
 -7 25 1 11492.9 1781.66 3
 -7 25 0 -76.288 414.957 3
 -7 25 -1 9689.83 1682.52 3
 -7 25 -2 802.858 639.697 3
 -7 25 -3 36369.9 3321.73 3
 -7 25 -4 9025.56 1744.22 3
 -7 25 -5 18557.7 2470.11 3
 -7 25 -6 2647.09 1019.48 3
 -7 25 -7 14522.1 2255.27 3
 -7 27 4 730.965 401.2 3
 -7 27 3 17932.2 2293.91 3
 7 -27 -2 918.293 495.918 1
 -7 27 2 -300.962 771.34 3
 7 -27 -1 9610.04 1827.72 1
 -7 27 1 13028.6 2077.08 3
 -7 27 0 1602.53 838.449 3
 -7 27 -1 22110.1 2619.03 3
 -7 27 -2 334.867 507.066 3
 -7 27 -3 10197.8 1827.33 3
 -7 27 -4 1660.5 878.958 3
 8 0 -22 71811.5 4949.8 2
 8 0 -21 -1511.11 815.167 2
 8 0 -20 77.3973 456.49 2
 8 0 -19 -133.631 378.29 2
 8 0 -18 13565 1914.87 2
 8 0 -17 111.532 234.904 1
 8 0 -17 303.627 365.686 2
 8 0 -16 75324.9 4154.05 2
 8 0 -16 72084.3 2716.77 1
 8 0 -15 -371.647 502.41 2
 8 0 -15 25.2946 185.019 1
 8 0 -14 129.494 289.811 2
 8 0 -14 270.809 194.527 1
 8 0 -13 -57.4363 238.271 2
 -8 0 12 68644.3 3351.69 2
 8 0 -12 67027.5 3335.34 2
 -8 0 11 -41.0285 274.025 2
 8 0 -11 516.332 262.589 2
 -8 0 10 378655 7236.79 2
 -8 0 9 253.056 225.834 2
 -8 0 9 -48.1654 207.66 3
 -8 0 8 74740.9 3030.03 3
 -8 0 8 70626.5 2845.29 2
 -8 0 7 410.834 281.99 3
 -8 0 7 1.35638 143.333 2
 -8 0 6 434587 6695.76 3
 -8 0 6 403450 6278.66 2
 -8 0 5 187.994 193.287 3
 -8 0 4 69570.9 2462.58 3
 8 0 -4 60529.4 2291.06 3
 -8 0 3 301.16 203.837 3
 8 0 -3 -51.729 174.05 3
 8 0 -2 1410.27 340.34 3
 -8 0 2 1697.09 374.506 3
 -8 0 1 101.508 153.004 3
 8 0 -1 292.411 189.934 3
 8 0 0 8500.89 770.048 3
 -8 0 0 7132.35 715.674 3
 8 0 1 -20.9571 134.651 3
 -8 0 -1 63.6087 102.316 3
 8 0 2 331.633 168.318 3
 -8 0 -2 726.213 256.391 3
 -8 0 -3 124.196 168.882 3
 8 0 3 174.4 151.565 3
 -8 0 -4 8180.33 825.295 3
 8 0 4 7491.24 789.094 3
 8 0 5 73.3687 159.405 3
 -8 0 -5 199.589 204.192 3
 -8 0 -6 268772 5158.48 3
 8 0 6 269110 5148.37 3
 -8 0 -7 -91.5621 265.396 3
 8 0 7 -94.755 233.878 3
 -8 0 -8 7846.47 964.172 3
 8 0 8 6542.56 867.367 3
 -8 0 -9 112.832 270.194 3
 -8 0 -9 -175.966 359.418 2
 8 0 9 432.129 282.79 3
 -8 0 -10 40287.6 2661.74 2
 8 0 10 41504.9 2414.06 3
 -8 0 -11 -922.656 465.767 2
 8 0 11 444.063 439.544 3
 -8 0 -12 84695.6 4158.01 2
 8 0 12 86537 3780.79 3
 -8 0 -13 -50.8408 345.398 2
 -8 0 -14 4165.24 1037.38 2
 -8 0 -15 -298.116 555.7 2
 -8 0 -16 111622 5534.19 2
 -8 0 -17 -113.18 422.306 2
 -8 0 -18 14139.1 2147.52 2
 -8 0 -19 -202.868 537.95 2
 -8 0 -20 -188.835 546.983 2
 -8 2 23 3322.68 1132.38 3
 8 2 -23 2920.84 1069.33 2
 -8 2 22 55874.8 4327.76 3
 8 -2 -22 62347.3 4666.56 2
 8 2 -22 58160.4 4434.77 2
 -8 2 21 17167 2341.34 3
 8 -2 -21 12686.3 2025.87 2
 8 2 -21 13127.4 1979.88 2
 -8 2 20 503.255 430.758 3
 8 -2 -20 66.8142 598.826 2
 8 2 -20 458.962 466.728 2
 8 -2 -19 3875.31 1033.54 2
 8 2 -19 5226.46 1249.18 2
 8 2 -18 4942.4 1164.41 2
 8 -2 -18 5821.25 1231.72 2
 8 -2 -18 4569.35 801.549 1
 8 -2 -17 14464 1898.73 2
 8 2 -17 15446.9 1930.78 2
 8 -2 -17 18412.6 1590.35 1
 8 -2 -16 111870 3826.02 1
 8 -2 -16 113492 5121.09 2
 8 2 -16 108826 4925.01 2
 -8 2 15 1934.35 640.487 3
 8 -2 -15 1284.57 515.805 2
 8 -2 -15 1798.65 505.212 1
 8 2 -15 2160.67 687.677 2
 8 2 -15 1797.99 367.691 1
 8 -2 -14 162.824 199.17 1
 -8 2 14 7.63678 313.645 3
 8 2 -14 605.779 225.239 1
 8 -2 -14 1545.22 854.665 2
 8 2 -14 -4.86457 470.226 2
 8 2 -13 10933 849.668 1
 -8 -2 13 9009.73 1255.1 2
 -8 2 13 10025.2 1361.47 3
 8 2 -13 9437.77 1273.41 2
 8 -2 -13 10121.3 1387.49 2
 -8 2 12 65960.7 3330.76 2
 -8 -2 12 66969 3251.64 2
 -8 2 12 68046.9 3390.29 3
 8 2 -12 66921.8 3270.38 2
 -8 2 11 75295.7 3426.89 2
 -8 -2 11 76336.8 3320.01 2
 -8 2 11 80106.1 3560.47 3
 8 2 -11 84156.4 3503.6 2
 -8 2 10 194854 5324.49 2
 -8 -2 10 197583 5102.55 2
 -8 2 10 200123 5420.56 3
 8 2 -10 203256 5203.96 2
 -8 -2 9 14926.8 1338.73 2
 8 2 -9 16159.3 1397.54 2
 -8 2 9 14089.8 1382.27 2
 -8 2 9 14445.3 1400.09 3
 -8 -2 8 12671.6 1164.76 2
 -8 2 8 10839.8 1171.46 3
 -8 2 8 11372.8 1178.29 2
 -8 2 7 7116.62 909.935 2
 -8 2 7 7120.32 908.474 3
 -8 -2 7 6273.64 789.903 2
 -8 2 6 360543 6304.59 3
 -8 -2 6 354132 5956.36 3
 -8 2 6 341645 5975.28 2
 -8 -2 6 345467 5519.54 2
 -8 2 5 102734 3231.72 3
 -8 -2 5 97541.5 2963.75 3
 8 -2 -5 89725.5 3021.15 3
 -8 -2 5 88927.7 2664.35 2
 -8 2 4 82653.9 2794.38 3
 8 -2 -4 72875.7 2633.36 3
 -8 -2 4 78056.5 2526.97 3
 -8 2 3 93866 2900.3 3
 -8 -2 3 92903.1 2598.95 3
 8 -2 -3 86905.6 2782.31 3
 -8 2 2 51732.9 2107.12 3
 -8 -2 2 49051.8 1806.58 3
 8 -2 -2 46602.1 2004.96 3
 8 2 -2 44075.1 1716.31 3
 -8 2 1 51745.4 2087.76 3
 -8 -2 1 49144.3 1770.55 3
 8 -2 -1 46674 1973.78 3
 8 2 -1 44801.2 1658.17 3
 -8 -2 0 163245 3071.62 3
 8 -2 0 155310 3590.18 3
 8 2 0 142369 2920.28 3
 -8 2 0 162929 3702.6 3
 8 -2 1 24454.4 1438.57 3
 8 2 1 24112.2 1174.88 3
 -8 2 -1 25560.3 1483.53 3
 -8 -2 -1 27002 1249.18 3
 8 2 2 32742.3 1389.69 3
 -8 2 -2 36286.2 1776.33 3
 -8 -2 -2 34509.9 1422.04 3
 8 -2 2 34573.9 1744.35 3
 8 2 3 864.404 242.873 3
 -8 -2 -3 1185.48 285.999 3
 -8 2 -3 617.666 285.835 3
 8 -2 3 1392.13 391.429 3
 -8 -2 -4 21753.2 1239.74 3
 8 2 4 20046.4 1179.55 3
 -8 2 -4 20006.4 1409.79 3
 8 -2 4 20703 1426.4 3
 -8 -2 -5 42422.8 1781.31 3
 -8 2 -5 41285 2085.01 3
 8 2 5 40862.5 1754.14 3
 8 -2 5 42630.1 2130.46 3
 8 2 6 240054 4481.36 3
 8 -2 6 249164 5318.38 3
 -8 -2 -6 255484 4588.18 3
 -8 2 -6 239598 5228.3 3
 -8 -2 -7 14678.1 1358.64 2
 -8 2 -7 15132 1368.32 3
 8 2 7 14796.5 1174.65 3
 8 -2 7 14367.5 1346.88 3
 -8 -2 -7 13752.2 1135.7 3
 -8 -2 -8 123.422 261.077 2
 -8 2 -8 6.839 209.946 3
 8 2 8 261.707 194.688 3
 8 -2 8 12.0354 242.638 3
 -8 -2 -9 30371.5 2158.62 2
 -8 2 -9 33449.2 2196.26 3
 8 2 9 30271 1860.48 3
 8 -2 9 32372.2 2150.95 3
 -8 2 -10 50894.1 3032.15 2
 -8 2 -10 49480.5 2784.76 3
 8 2 10 49671.7 2494.91 3
 8 -2 10 46191.6 2687.16 3
 -8 -2 -10 50733.4 2903.04 2
 -8 2 -11 46631.7 3003.81 2
 8 2 11 46788.3 2532.42 3
 8 -2 11 46089.7 2760 3
 -8 -2 -11 48205.9 2969.78 2
 -8 2 -12 87435.7 4323.24 2
 8 2 12 84735.9 3620.11 3
 -8 -2 -12 91418.1 4258.77 2
 -8 2 -13 6970.08 1282.9 2
 8 2 13 6288.7 1056.37 3
 -8 -2 -13 7748.44 1319.62 2
 -8 2 -14 3725.2 1022.97 2
 -8 -2 -14 5007.87 1060.86 2
 -8 -2 -15 2110.97 848.875 2
 -8 2 -15 2457.95 910.04 2
 -8 -2 -16 84010.6 4755.95 2
 -8 2 -16 82285.5 4826.74 2
 -8 -2 -17 32127.7 3038.58 2
 -8 2 -17 25900.7 2785.88 2
 -8 -2 -18 8195.77 1659.64 2
 -8 2 -18 5300.82 1226.68 2
 -8 -2 -19 1160.39 828.113 2
 -8 2 -19 3367.66 1158.53 2
 -8 -2 -20 -127.11 481.662 2
 -8 2 -20 42.1733 609.018 2
 -8 4 23 7014.74 1617.5 3
 8 4 -23 11323.6 2033.99 2
 -8 4 22 8814.66 1699.44 3
 8 -4 -22 10981.3 1973.8 2
 8 4 -22 8416.83 1796.33 2
 -8 4 21 22238.6 2650.6 3
 8 -4 -21 29074.8 3092.49 2
 8 4 -21 28791.9 3035.98 2
 -8 4 20 5232.31 1227.48 3
 8 -4 -20 4719.53 1326.88 2
 8 4 -20 4059.32 1165.67 2
 -8 4 19 341.843 448.882 3
 8 -4 -19 247.54 383.904 2
 8 4 -19 367.412 423.082 2
 8 -4 -19 919.901 467.774 1
 8 4 -18 19304.2 2216.09 2
 -8 4 18 14654.7 1947.43 3
 8 -4 -18 18562.5 2272.25 2
 8 -4 -18 18885.2 1782.72 1
 8 -4 -17 70627.1 3358.16 1
 -8 4 17 59589.1 3809.54 3
 8 -4 -17 62310.2 4003.09 2
 8 4 -17 65313.6 3930.37 2
 8 -4 -16 20593.6 2219.37 2
 8 -4 -16 19648.4 1741.47 1
 -8 4 16 17127.8 1987.41 3
 8 4 -16 21420.6 2172.48 2
 8 -4 -15 24531.1 1912.6 1
 -8 4 15 22426.7 2187.07 3
 8 4 -15 24463.2 2226.49 2
 -8 4 14 5248.26 1003.51 3
 8 4 -14 5776.15 1036.02 2
 8 -4 -14 5823.97 906.51 1
 -8 4 13 1608.24 596.982 3
 8 4 -13 2695.04 310.658 1
 -8 -4 13 1713.13 534.735 2
 8 4 -13 2894.35 740.941 2
 8 4 -12 14698.7 744.052 1
 -8 4 12 12655.4 1493.49 3
 -8 -4 12 14183.1 1475.32 2
 8 4 -12 13743.9 1470.42 2
 -8 4 11 257140 6472.81 2
 -8 -4 11 267548 6135.62 2
 -8 4 11 261326 6523.6 3
 8 4 -11 277619 6241.23 2
 -8 -4 10 57181.9 2685.96 2
 -8 4 10 53855.6 2863.13 3
 8 4 -10 56942.7 2693.38 2
 -8 4 10 53387.5 2853.2 2
 -8 -4 9 710.927 312.044 2
 8 4 -9 675.145 332.358 2
 -8 4 9 575.983 326.113 3
 -8 4 9 228.052 276.678 2
 -8 -4 8 641.855 267.918 2
 8 4 -8 755.936 298.632 2
 -8 4 8 340.454 307.979 3
 -8 4 8 884.74 365.245 2
 -8 -4 7 344.41 202.453 2
 -8 4 7 633.008 331.734 2
 -8 4 7 1171.57 400.871 3
 -8 -4 6 214964 4152.6 2
 -8 4 6 215535 4966.91 3
 8 -4 -6 200440 4812.34 3
 -8 4 5 198121 4674.26 3
 8 -4 -5 191908 4563.15 3
 -8 -4 5 202681 3775.4 2
 -8 4 4 26075.5 1653.02 3
 8 -4 -4 25855.3 1645.07 3
 -8 -4 4 26285.2 1439.8 3
 -8 -4 4 24562.8 1242.72 2
 -8 4 3 21012.7 1463.75 3
 8 -4 -3 20171.5 1435.83 3
 -8 -4 3 19729.2 1165.42 3
 -8 4 2 24147.4 1552.92 3
 8 -4 -2 21011.8 1433.56 3
 -8 -4 2 24390.4 1210.97 3
 8 -4 -1 173752 4089.95 3
 -8 -4 1 170170 3006.13 3
 -8 4 1 179766 4186.84 3
 -8 -4 0 192374 3011.16 3
 8 -4 0 182631 4224.18 3
 8 4 0 162537 2780.74 3
 -8 4 0 192515 4319.46 3
 8 -4 1 100625 3164.73 3
 8 4 1 89989.6 1968.44 3
 -8 4 -1 96055 3108.24 3
 -8 -4 -1 104502 2140.03 3
 8 -4 2 2683.1 539.768 3
 8 4 2 2041.65 313.69 3
 -8 -4 -2 2389.31 332.419 3
 -8 4 -2 2971.33 567.002 3
 8 4 3 14073.5 819.065 3
 -8 -4 -3 15932.5 857.048 3
 -8 4 -3 15817.4 1316.51 3
 8 -4 3 15591.4 1301.11 3
 -8 -4 -4 26667.6 1170.54 3
 -8 4 -4 26985.3 1745.42 3
 8 -4 4 27611.8 1772.58 3
 8 4 4 27306 1192.09 3
 -8 -4 -5 332591 4405.01 3
 -8 4 -5 329023 6323.03 3
 8 -4 5 329410 6309.36 3
 8 4 5 324049 4361.81 3
 -8 -4 -6 56545.1 2465.72 2
 -8 -4 -6 59210.7 1994.4 3
 -8 4 -6 56758.1 2706.2 3
 8 -4 6 57811.6 2738.11 3
 8 4 6 59949.4 2010.26 3
 -8 -4 -7 36584.8 2091.8 2
 -8 4 -7 37919.4 2287.34 3
 8 4 7 35045.3 1640.31 3
 8 -4 7 36587.6 2240.86 3
 -8 -4 -8 652.458 348.672 2
 -8 4 -8 984.226 405.413 3
 8 4 8 1530.81 382.093 3
 8 -4 8 648.799 288.867 3
 8 4 9 13432 1157.07 3
 8 -4 9 15262 1558.52 3
 -8 4 -9 13059.7 1440.11 3
 -8 -4 -9 12450.7 1365.73 2
 -8 4 -10 53455.9 3027.97 3
 8 4 10 53993.7 2474.79 3
 8 -4 10 52981.6 2961.33 3
 -8 -4 -10 54019.7 2946.38 2
 -8 4 -11 147388 5492.41 2
 -8 4 -11 152661 5295.52 3
 8 4 11 153038 4334.62 3
 -8 -4 -11 153110 5211.41 2
 -8 4 -12 25287.7 2358.64 2
 -8 -4 -12 22674.4 2103.42 2
 8 4 12 23941.4 1810.98 3
 -8 4 -13 2295.12 710.126 2
 8 4 13 5065.72 873.467 3
 -8 -4 -13 2471.36 724.733 2
 -8 4 -14 738.631 519.232 2
 -8 -4 -14 642.181 379.094 2
 8 4 14 1166.79 481.512 3
 -8 4 -15 6080.02 1253.52 2
 -8 -4 -15 5167.94 1165.51 2
 -8 4 -16 19213.3 2360.69 2
 -8 -4 -16 19876.8 2283.04 2
 -8 4 -17 52193.9 4014.36 2
 -8 -4 -17 55862.1 3986.76 2
 -8 -4 -18 5754.37 1376.64 2
 -8 4 -18 5065.31 1403.67 2
 -8 -4 -19 1187.92 532.026 2
 -8 4 -19 1284.6 809.32 2
 -8 -4 -20 6491.6 1532.36 2
 -8 6 23 26355.5 3060.3 3
 -8 6 22 2889.38 1011.03 3
 8 6 -22 1109.34 644.97 2
 -8 6 21 43125.6 3673.07 3
 8 6 -21 51909 4057.64 2
 8 -6 -20 16505.9 1885.9 1
 -8 6 20 14325.1 2039.31 3
 8 6 -20 15756.1 2190.38 2
 8 -6 -19 1115.46 540.063 1
 -8 6 19 370.796 566.939 3
 8 6 -19 1187.52 717.53 2
 8 -6 -18 18045.2 1877.55 1
 -8 6 18 19094.7 2246.69 3
 8 6 -18 21120.2 2314.19 2
 8 -6 -17 129853 4903.29 1
 -8 6 17 119551 5432.98 3
 8 6 -17 124868 5412.01 2
 -8 6 16 7014.36 1306.09 3
 8 -6 -16 6418.88 1085.3 1
 8 6 -16 8569.86 1384.75 2
 8 -6 -15 91162.8 3931.04 1
 -8 6 15 79508.9 4115.56 3
 8 6 -15 89880.7 4231.17 2
 8 -6 -14 1271.12 412.898 1
 -8 6 14 -54.5257 472.4 3
 8 6 -14 1552.4 506.775 2
 -8 6 13 8737.63 1282.84 3
 -8 -6 13 9060.07 1231.58 2
 8 6 -13 9164.15 1254.27 2
 -8 -6 12 -23.6313 275.699 2
 -8 6 12 426.386 371.163 3
 8 6 -12 33.2475 265.361 2
 -8 6 11 219315 6164.19 2
 -8 6 11 231908 6175.4 3
 -8 -6 11 234063 5655.07 2
 8 6 -11 240639 5762.95 2
 -8 6 10 4204.66 825.635 2
 -8 6 10 4401.79 849.277 3
 -8 -6 10 5754.94 835.803 2
 8 6 -10 5743.15 908.09 2
 -8 -6 9 47767.7 2289.15 2
 8 6 -9 45142.1 2225.28 2
 -8 6 9 44196.2 2556.13 3
 -8 6 9 39404.6 2446.23 2
 8 6 -8 4843.56 686.797 2
 -8 6 8 3622.9 717.932 3
 -8 -6 8 4241.12 634.008 2
 -8 6 8 3783.49 751.153 2
 -8 6 7 41412.8 2337 3
 -8 -6 7 43643.6 1926.56 2
 8 -6 -7 40160.8 2282.69 3
 -8 6 7 35404.4 2189.65 2
 -8 6 6 8806.05 1054.49 3
 -8 -6 6 8370.28 795.933 2
 8 -6 -6 6581.29 896.834 3
 -8 -6 5 245056 3881.39 2
 -8 6 5 250566 5456.81 3
 8 -6 -5 228895 5200.93 3
 -8 -6 4 53794.3 1684.14 2
 -8 6 4 53496.1 2492.96 3
 8 -6 -4 50432.3 2403.88 3
 -8 6 3 9017.27 1019.14 3
 8 -6 -3 9103.93 1022.63 3
 -8 -6 3 8312.99 749.727 3
 -8 -6 3 8592.89 609.822 2
 8 -6 -2 17096.7 1382.68 3
 -8 -6 2 18678.5 1019.64 3
 -8 6 2 16569.8 1366.46 3
 8 -6 -1 190323 4589.92 3
 -8 -6 1 196300 2976.94 3
 -8 6 1 196750 4655.02 3
 8 -6 0 12165.7 1166.19 3
 -8 -6 0 12116.1 670.442 3
 -8 6 0 13739.9 1246.27 3
 8 -6 1 110868 3542.04 3
 -8 6 -1 105866 3485.3 3
 -8 -6 -1 109890 1810.45 3
 8 6 2 90087.6 1529.97 3
 -8 -6 -2 106454 1658.9 3
 -8 6 -2 100631 3459.86 3
 8 -6 2 101516 3457.93 3
 8 6 3 15043.8 642.101 3
 -8 -6 -3 17727.7 1089.84 2
 -8 -6 -3 16102.8 660.052 3
 -8 6 -3 17153.9 1459.07 3
 8 -6 3 14162.2 1333.53 3
 8 6 4 13534.3 674.286 3
 -8 -6 -4 13807.3 1033.77 2
 -8 6 -4 14534.4 1365.94 3
 8 -6 4 15071.4 1400.16 3
 -8 6 -5 237611 5711.67 3
 8 -6 5 256550 5924.59 3
 8 6 5 237858 3107.89 3
 -8 -6 -5 249576 4680.1 2
 -8 -6 -6 -128.501 225.231 2
 -8 6 -6 -37.2933 338.897 3
 8 -6 6 -215.747 352.792 3
 8 6 6 7.83362 119.566 3
 -8 6 -7 53954.7 2878.3 3
 -8 -6 -7 53234.4 2467.85 2
 8 6 7 49278 1729.9 3
 8 -6 7 54337.2 2899.57 3
 -8 6 -8 8836.13 1232.02 3
 8 6 8 9676.35 1298.28 1
 -8 -6 -8 11136.7 1209.2 2
 8 6 8 10215.7 860.926 3
 8 -6 8 9593.62 1264.18 3
 -8 6 -9 3731.73 821.456 3
 8 6 9 2892.33 493.797 3
 -8 -6 -9 3844.36 742.733 2
 8 -6 9 3376.87 815.941 3
 -8 6 -10 27658.5 2284.05 3
 -8 -6 -10 24476.9 1966.74 2
 8 6 10 26066.7 1569.24 3
 -8 6 -11 106473 4626.73 3
 -8 -6 -11 107501 4295.82 2
 -8 6 -11 102179 4666.87 2
 8 6 11 100666 3307.24 3
 -8 6 -12 1616.16 668.088 2
 -8 -6 -12 741.347 461.018 2
 8 6 12 1411.15 499.471 3
 -8 6 -13 936.578 499.886 2
 -8 -6 -13 855.127 492.423 2
 8 6 13 1909.16 536.492 3
 -8 6 -14 3551.97 978.983 2
 8 6 14 3441.73 724.219 3
 -8 -6 -14 4198.15 1039.41 2
 -8 -6 -15 25271.5 2487.21 2
 -8 6 -15 22944.3 2511.85 2
 -8 6 -16 323.607 576.108 2
 -8 -6 -16 -218.076 538.028 2
 -8 -6 -17 39373.6 3324.19 2
 -8 6 -17 41508.7 3613.79 2
 -8 -6 -18 3548.5 1122.86 2
 -8 6 -18 2543.13 883.658 2
 -8 -6 -19 -245.183 806.007 2
 -8 6 -19 110.457 594.868 2
 -8 -6 -20 5918.79 1568.42 2
 -8 8 23 28014.8 3144.95 3
 -8 8 22 27069.9 2998.79 3
 8 8 -22 27211.3 3020.25 2
 -8 8 21 35199.1 3321.67 3
 8 -8 -21 39223.9 3116.74 1
 8 8 -21 38213.3 3449.62 2
 8 -8 -20 271.147 423.983 1
 -8 8 20 3040.87 962.556 3
 8 8 -20 2460.94 848.318 2
 8 -8 -19 -82.0747 350.828 1
 -8 8 19 -190.187 503.012 3
 8 8 -19 -336.477 477.004 2
 8 -8 -18 904.119 572.657 1
 -8 8 18 -138.62 439.713 3
 8 8 -18 666.581 436.706 2
 -8 8 17 99284 4952.52 3
 8 -8 -17 109618 4783.42 1
 8 8 -17 106025 4964.22 2
 -8 8 16 29802.6 2638.05 3
 8 8 -16 31930.7 2623.88 2
 8 -8 -16 31428 2531.28 1
 -8 8 15 54499.1 3447.16 3
 8 -8 -15 57515.9 3347.45 1
 8 8 -15 59407.6 3432.28 2
 -8 8 14 753.726 410.478 3
 8 -8 -14 1147.06 514.102 1
 8 8 -14 1475.18 542.322 2
 -8 -8 13 24740.6 2004.48 2
 -8 8 13 23821.6 2148.61 3
 8 8 -13 24748.6 2040.22 2
 -8 -8 12 9089.96 1166.14 2
 -8 8 12 10383.1 1397.72 3
 8 8 -12 9876.19 1239.85 2
 -8 8 11 96593.7 4099.23 3
 8 8 -11 100780 3686.59 2
 -8 -8 11 105355 3749.86 2
 -8 8 10 41637 2605.3 3
 8 8 -10 46127.6 2343.82 2
 -8 8 10 37884.8 2559.34 2
 -8 -8 10 42860.2 2278.93 2
 8 8 -9 68836.1 1299.42 1
 -8 8 9 70726 3320.59 3
 8 8 -9 72513.7 2773.17 2
 -8 8 9 64593.7 3226.44 2
 -8 -8 9 74681.8 2800.88 2
 -8 8 8 6111.84 970.674 3
 8 -8 -8 5799.12 926.38 3
 8 8 -8 7430.62 835.954 2
 -8 -8 8 7297.19 830.401 2
 -8 8 8 4950.63 878.081 2
 8 8 -8 7866.11 554.94 1
 8 -8 -7 99124.6 3735.27 3
 -8 8 7 105068 3834.77 3
 8 8 -7 111747 2370.8 1
 -8 8 7 95792.7 3738.15 2
 8 8 -7 106773 2902.52 2
 -8 -8 7 108013 2924.51 2
 -8 8 6 55341.4 2722.12 3
 8 -8 -6 53540.8 2675.4 3
 -8 -8 6 57360.6 1948.54 2
 8 8 -6 56047.7 1838.4 1
 -8 8 5 94961.5 3510.05 3
 8 -8 -5 91613.5 3453.12 3
 -8 -8 5 103365 2342.33 2
 -8 8 4 2422.88 577.334 3
 8 -8 -4 2638.82 594.452 3
 -8 -8 4 3266.03 368.01 2
 -8 8 3 375.503 271.847 3
 8 -8 -3 187.103 195.409 3
 -8 -8 3 104.052 75.2745 2
 -8 8 2 922.16 406.033 3
 8 -8 -2 487.481 238.499 3
 -8 -8 2 636.489 118.487 2
 -8 -8 2 451.023 157.9 3
 8 -8 -1 130681 4044.97 3
 -8 -8 1 131963 2334.98 3
 -8 -8 1 123766 1514.92 2
 -8 8 1 136900 4136.58 3
 8 -8 0 139477 4220.28 3
 -8 -8 0 140762 2013.07 3
 -8 -8 0 142957 1811.82 2
 -8 8 0 144721 4261.34 3
 8 -8 1 46479.8 2463.12 3
 -8 8 -1 49012.6 2519.1 3
 -8 -8 -1 49495.9 1259.24 2
 8 8 2 38993 2232.67 1
 -8 8 -2 41387 2372.54 3
 -8 -8 -2 41288.7 1345.52 2
 8 -8 2 39871.3 2318.33 3
 8 8 3 8595.37 1098.48 1
 -8 -8 -3 7296.07 644.112 2
 -8 8 -3 6559.51 964.651 3
 8 -8 3 7028.18 998.004 3
 8 8 4 2916.55 675.22 1
 -8 8 -4 1859.69 541.934 3
 -8 -8 -4 2418.36 407.251 2
 8 -8 4 2763.27 653.616 3
 8 8 5 68235.5 3231.74 1
 -8 8 -5 72802 3331.66 3
 -8 -8 -5 78186.8 2507.27 2
 8 -8 5 70025.4 3283.99 3
 -8 -8 -6 129762 3523.85 2
 -8 8 -6 122110 4453.03 3
 8 8 6 127055 4544.46 1
 8 -8 6 129637 4574.03 3
 8 8 6 120024 1805.86 3
 -8 8 -7 65660.1 3363.54 3
 8 8 7 66575.8 3395.94 1
 8 -8 7 69008.3 3416.49 3
 8 8 7 65969.9 1638.08 3
 -8 -8 -7 68476.6 2724.02 2
 -8 8 -8 1611 559.537 3
 -8 -8 -8 1721.86 463.804 2
 8 8 8 1309.96 280.994 3
 -8 8 -9 12769.2 1570.79 3
 -8 -8 -9 16494.6 1508.6 2
 8 8 9 13907.5 962.538 3
 -8 -8 -10 4165.09 823.748 2
 -8 8 -10 3882.18 928.341 3
 8 8 10 4681.23 628.394 3
 -8 -8 -11 77633.7 3635.34 2
 -8 8 -11 78095.5 4092.25 3
 8 8 11 74730.2 2651.05 3
 -8 -8 -12 15507.4 1696.2 2
 -8 8 -12 12510 1745.56 2
 -8 8 -12 14565.7 1836.12 3
 8 8 12 14273 1229.97 3
 -8 8 -13 14408.6 1913.74 2
 -8 -8 -13 18142.5 1912.64 2
 8 8 13 15258.4 1357.24 3
 -8 8 -14 -149.065 664.62 2
 -8 -8 -14 82.2657 546.008 2
 -8 -8 -15 24537.8 2441.41 2
 -8 8 -15 27142.6 2802.82 2
 -8 -8 -16 18326 2182.83 2
 -8 8 -16 16434.2 2277.62 2
 -8 -8 -17 24695.7 2659.9 2
 -8 8 -17 25075.6 2863.13 2
 -8 -8 -18 -1626.45 757.293 2
 -8 8 -18 342.785 732.776 2
 -8 -8 -19 -1187.15 740.926 2
 -8 -8 -20 542.274 606.646 2
 -8 10 22 21656.4 2689.99 3
 8 10 -22 22884.5 2744.01 2
 -8 10 21 13684.1 2122.66 3
 8 -10 -21 15292.1 2038.59 1
 8 10 -21 19750.4 2609.48 2
 8 -10 -20 3305.25 973.75 1
 -8 10 20 4252.71 1124 3
 8 10 -20 2341.12 867.764 2
 -8 10 19 3341.94 906.528 3
 8 -10 -19 2035.06 848.691 1
 8 10 -19 3333.26 990.639 2
 8 -10 -18 26828.9 2563.4 1
 -8 10 18 25375.8 2604.27 3
 8 10 -18 28420.6 2680.74 2
 -8 10 17 14623.3 1927.85 3
 8 -10 -17 14835.8 1884.88 1
 8 10 -17 13856.3 1824.48 2
 -8 10 16 33566 2827.8 3
 8 10 -16 36103.7 2788.28 2
 8 -10 -16 38063.8 2951 1
 -8 10 15 25733.8 2411.34 3
 8 -10 -15 30376.3 2588.23 1
 8 10 -15 29021.1 2386.43 2
 8 10 -14 -888.848 477.961 2
 -8 10 14 251.316 304.041 3
 8 -10 -14 -78.1299 388.741 1
 -8 10 13 18179.1 1922 3
 8 10 -13 21328.1 1865.06 2
 -8 10 12 45307.4 2939 3
 8 10 -12 48386.4 2678.04 2
 -8 10 11 575.972 294.706 3
 -8 -10 11 430.26 249.413 2
 8 10 -11 386.719 269.534 2
 -8 10 10 115024 4446.08 3
 -8 -10 10 122822 3779.89 2
 -8 -10 10 121040 4440.67 3
 8 10 -10 121685 3760.73 2
 -8 10 9 87747.9 3802.75 3
 -8 -10 9 87171.2 2993.02 2
 -8 10 9 70590.1 3499.38 2
 8 -10 -9 81816.1 3657.56 3
 8 10 -9 86504.8 2968.16 2
 -8 10 8 842.153 337.477 3
 -8 -10 8 1446.83 386.567 2
 8 -10 -8 953.752 395.243 3
 -8 10 8 933.653 479.193 2
 8 10 -8 1458.19 383.109 2
 -8 10 7 67351 3185.17 3
 -8 -10 7 67319.4 2205.59 2
 8 10 -7 63527.1 1908.63 1
 8 -10 -7 58269.3 2954.34 3
 8 10 -7 61249.4 2133.95 2
 -8 10 6 63570.6 3064.53 3
 8 -10 -6 60024.8 2965.4 3
 8 10 -6 60248.6 2044.2 1
 -8 10 5 29808.6 2070.43 3
 8 10 -5 28509.6 1502.41 1
 8 -10 -5 28667.6 2015.2 3
 -8 -10 5 28684.3 1667.43 3
 8 10 -4 42769.3 1947.79 1
 8 -10 -4 39874.5 2375.12 3
 -8 -10 4 44952.3 1933.85 3
 -8 10 4 43087.7 2464.92 3
 8 10 -3 19108.6 1370.91 1
 8 -10 -3 17115.2 1549.97 3
 -8 -10 3 19736.2 1176.87 3
 -8 10 3 16573.2 1525.47 3
 8 -10 -2 3741.64 715.199 3
 8 10 -2 4136.3 680.655 1
 -8 -10 2 5181.37 543.706 3
 -8 10 2 3877.19 752.552 3
 8 -10 -1 74865.1 3236.53 3
 -8 -10 1 80134.2 1822.76 3
 -8 -10 1 74141.9 1745.43 3
 -8 10 1 79579 3340.33 3
 8 10 -1 80194.1 3048.22 1
 -8 -10 0 88504.4 1483.56 3
 -8 -10 0 95137.7 1518.93 3
 8 -10 0 90927.5 3612.1 3
 -8 10 0 96072.9 3692.24 3
 8 10 0 90481.2 3335.6 1
 8 -10 1 84511.5 3512.56 3
 -8 10 -1 80918.6 3443.73 3
 8 10 1 83505.5 3332.4 1
 8 -10 2 409.577 285.388 3
 -8 -10 -2 724.107 164.46 2
 8 10 2 426.815 208.428 1
 -8 10 -2 401.152 259.577 3
 -8 -10 -3 20101.5 949.557 2
 -8 10 -3 21069.3 1824.74 3
 8 -10 3 22437.6 1873.42 3
 8 10 3 19564.6 1727.11 1
 8 10 4 19774.5 1788.98 1
 -8 -10 -4 22249.3 1148.18 2
 -8 10 -4 19553.8 1800.8 3
 8 -10 4 20691 1837.35 3
 -8 -10 -5 7030.84 716.245 2
 8 10 5 5822.13 1002.08 1
 8 -10 5 5723.02 998.138 3
 -8 10 -5 5724.37 1026.96 3
 -8 -10 -6 90868.9 2849.45 2
 -8 10 -6 89703.2 4006.57 3
 -8 -10 -7 62393.6 2534.09 2
 -8 10 -7 63618.6 3482.25 3
 -8 -10 -8 19153.3 1506.51 2
 8 10 8 13869.5 636.432 3
 -8 10 -8 16505.7 1814.09 3
 8 10 8 15846.6 665.614 3
 -8 -10 -9 11931.5 1266.91 2
 8 10 9 9140.52 639.861 3
 -8 10 -9 11679.7 1588.42 3
 8 10 9 11188.7 707.739 3
 -8 -10 -10 75250.3 3363.54 2
 -8 10 -10 71255.7 3969.84 3
 8 10 10 60526.7 1891.43 3
 8 10 10 69245.4 2011.9 3
 -8 -10 -11 12249.6 1433.75 2
 -8 10 -11 10701.6 1625.09 3
 8 10 11 11588.1 919.534 3
 -8 10 -12 23704.3 2438.05 3
 -8 -10 -12 21960.4 2021.89 2
 8 10 12 19586.5 1301.55 3
 -8 10 -12 20005.2 2232.63 2
 -8 -10 -13 52868.6 3260.49 2
 -8 10 -13 50234.3 3679.19 2
 -8 -10 -14 620.074 489.98 2
 -8 10 -14 -256.332 465.771 2
 -8 10 -15 39005.5 3430.14 2
 -8 -10 -15 36714.7 2941.76 2
 -8 -10 -16 35965.6 3114.14 2
 -8 10 -16 34188.4 3298.59 2
 -8 -10 -17 15905.6 2101.36 2
 -8 10 -17 12659.3 2090.97 2
 -8 -10 -18 15440.3 2143.7 2
 -8 10 -18 11930 2074.87 2
 -8 -10 -19 2488.66 944.471 2
 -8 -10 -20 4916.56 1384.82 2
 -8 12 22 23529.2 2778.57 3
 8 12 -22 26046.7 2934.48 2
 8 -12 -22 23672.4 2723.26 1
 -8 12 21 -40.9342 455.693 3
 8 12 -21 1632.46 793.338 2
 8 -12 -21 668.348 586.273 1
 8 -12 -20 10861.4 1827.64 1
 -8 12 20 8331.84 1561.28 3
 8 12 -20 8706.96 1575.67 2
 8 12 -19 1217.95 587.603 2
 8 -12 -19 14019.4 2338.33 1
 -8 12 19 972.507 735.444 3
 8 -12 -18 49840 3705.08 1
 -8 12 18 43564.3 3426.13 3
 8 12 -18 46453.5 3441.98 2
 8 12 -17 102.189 443.238 2
 -8 12 17 -122.501 474.818 3
 8 -12 -17 647.393 505.489 1
 -8 12 16 29429 2678.86 3
 8 12 -16 31031.5 2574.77 2
 8 -12 -16 32072.3 2870.86 1
 8 12 -15 1866.12 672.204 2
 -8 12 15 2805.75 852.204 3
 8 -12 -15 3187.98 865.932 1
 8 -12 -14 15053.7 1902.15 1
 -8 12 14 14370.8 1791.01 3
 8 12 -14 13467.5 1565.09 2
 -8 12 13 9342.41 1435.68 3
 8 12 -13 11520.1 1374.57 2
 -8 12 12 82513.3 4050.5 3
 8 12 -12 84084.3 3507.15 2
 -8 12 11 11576.7 1485.68 3
 8 12 -11 11111.3 1214.06 2
 -8 12 10 94151.9 4136.42 3
 8 12 -10 94843.2 3283.98 2
 -8 12 9 18955.9 1837.93 3
 -8 -12 9 21904.5 1949.52 3
 8 12 -9 17314.2 1321.53 2
 -8 12 8 3978.03 830.617 3
 -8 -12 8 3747.44 747.567 3
 8 -12 -8 3293.28 765.377 3
 8 12 -8 3623.43 548.156 2
 -8 12 7 37232.8 2467.61 3
 8 -12 -7 31480.3 2281.69 3
 -8 -12 7 38822.3 2247.13 3
 8 12 -7 34750 1536.75 2
 -8 12 6 69139.1 3341.22 3
 8 -12 -6 65317.7 3215.59 3
 -8 -12 6 66261.1 2804.54 3
 -8 12 5 4031.99 836.808 3
 -8 -12 5 2501.36 505.396 3
 8 -12 -5 3214.69 738.006 3
 8 12 -5 2732.34 523.534 1
 8 -12 -4 53122.8 2858.25 3
 -8 -12 4 50598 2124.14 3
 8 12 -4 52094 2305.76 1
 -8 12 4 52758.7 2862.69 3
 8 12 -3 10236.4 1075.19 1
 8 -12 -3 10468.7 1275.82 3
 -8 -12 3 11837.7 960.019 3
 -8 12 3 10299 1265.47 3
 8 -12 -2 13839.7 1467.81 3
 -8 -12 2 15138.5 957.581 3
 -8 12 2 13491.3 1436.33 3
 8 12 -2 14236.4 1316.66 1
 8 -12 -1 8862.38 1178.16 3
 8 12 -1 7989.02 1033.84 1
 -8 12 1 9140.95 1201.96 3
 -8 -12 1 8747.74 620.146 3
 8 -12 0 45992 2696.26 3
 -8 -12 0 40550.9 985.54 3
 8 12 0 43572.2 2455.6 1
 -8 12 0 44353.7 2678.86 3
 -8 -12 0 43559.3 1032.64 3
 8 -12 1 2092.23 601.93 3
 8 12 1 3464.15 756.862 1
 -8 12 -1 2968.83 713.118 3
 8 12 2 51510.6 2841.72 1
 -8 12 -2 53422.9 3000.55 3
 8 -12 2 50791 2916.93 3
 8 -12 3 2673.72 941.027 3
 8 12 3 -25.9079 305.691 1
 -8 12 -3 -401.446 326.188 3
 -8 12 -4 58330.2 3283.64 3
 -8 -12 -4 61219.6 1756.07 2
 -8 12 -5 3893.18 889.664 3
 -8 -12 -5 4552.08 567.22 2
 -8 12 -6 36924.7 2723.67 3
 -8 -12 -6 41925.2 1872.06 2
 -8 12 -7 32777.9 2597.53 3
 -8 -12 -7 32568.9 1787.15 2
 -8 12 -8 21410.3 2150.55 3
 -8 -12 -8 21536.6 1574.54 2
 -8 12 -9 21799 2261.61 3
 -8 -12 -9 24754.7 1790.02 2
 8 12 10 53419.3 1200.08 3
 -8 12 -10 65625.4 3997.19 3
 -8 -12 -10 73736.6 3284.5 2
 -8 -12 -11 3331.9 783.475 2
[truncated: 301,584 more chars]
