# Supplementary material
Source: publisher figshare collection journal article supplement (https://acs.figshare.com/ndownloader/files/4205155)
Supplement: Supplementary file 27 [file 4205155 › CIFs/Ni/NiGd/NIGd.cif]

data_NiGd
_audit_creation_date              2015-02-16
_audit_creation_method
;
Olex2 1.2
(compiled 2015.01.26 svn.r3151 for OlexSys, GUI svn.r4998)
;
_publ_contact_author_address      
;
The University of Manchester
School of Chemistry
Oxford Road, 
Manchester
M13 9PL
United Kingdom
;
_publ_contact_author_email        eufemio.morenopineda@manchester.ac.uk
_publ_contact_author_name         'Eufemio Moreno Pineda'
_publ_contact_author_phone        '+44 074 1192 4293'
_publ_section_references
;
Dolomanov, O.V., Bourhis, L.J., Gildea, R.J, Howard, J.A.K. & Puschmann, H.
 (2009), J. Appl. Cryst. 42, 339-341.

Palatinus, L. & Chapuis, G. (2007). J. Appl. Cryst., 40, 786-790;
Palatinus, L. & van der Lee, A. (2008). J. Appl. Cryst. 41, 975-984;
Palatinus, L., Prathapa, S. J. & van Smaalen, S. (2012). J. Appl. Cryst. 45,
 575-580.

Sheldrick, G.M. (2008). Acta Cryst. A64, 112-122.
;
_chemical_name_common             ?
_chemical_name_systematic         ?
_chemical_formula_moiety          'C50 H90 Gd2 Ni2 O22, 2(C6 H16 N), 2(C2 H3 N)'
_chemical_formula_sum             'C66 H128 Gd2 N4 Ni2 O22'
_chemical_formula_weight          1761.64
_chemical_melting_point           ?
loop_
  _atom_type_symbol
  _atom_type_description
  _atom_type_scat_dispersion_real
  _atom_type_scat_dispersion_imag
  _atom_type_scat_source
 'C' 'C' 0.0033 0.0016 'International Tables Vol C Tables 4.2.6.8 and 6.1.1.4'
 'H' 'H' 0.0000 0.0000 'International Tables Vol C Tables 4.2.6.8 and 6.1.1.4'
 'Gd' 'Gd' -0.1653 3.9035
 'International Tables Vol C Tables 4.2.6.8 and 6.1.1.4'
 'N' 'N' 0.0061 0.0033 'International Tables Vol C Tables 4.2.6.8 and 6.1.1.4'
 'Ni' 'Ni' 0.3393 1.1124 'International Tables Vol C Tables 4.2.6.8 and 6.1.1.4'
 'O' 'O' 0.0106 0.0060 'International Tables Vol C Tables 4.2.6.8 and 6.1.1.4'

_shelx_space_group_comment
;
The symmetry employed for this shelxl refinement is uniquely defined
by the following loop, which should always be used as a source of
symmetry information in preference to the above space-group names.
They are only intended as comments.
;
_space_group_crystal_system       'monoclinic'
_space_group_IT_number            14
_space_group_name_H-M_alt         'P 1 21/c 1'
_space_group_name_Hall            '-P 2ybc'
loop_
  _space_group_symop_operation_xyz
 'x, y, z'
 '-x, y+1/2, -z+1/2'
 '-x, -y, -z'
 'x, -y-1/2, z-1/2'

_cell_length_a                    15.9042(5)
_cell_length_b                    12.9690(3)
_cell_length_c                    21.7691(6)
_cell_angle_alpha                 90
_cell_angle_beta                  111.352(3)
_cell_angle_gamma                 90
_cell_volume                      4181.9(2)
_cell_formula_units_Z             2
_cell_measurement_reflns_used     12107
_cell_measurement_temperature     100.3(1)
_cell_measurement_theta_max       28.5930
_cell_measurement_theta_min       3.1820
_shelx_estimated_absorpt_T_max    ?
_shelx_estimated_absorpt_T_min    ?
_exptl_absorpt_coefficient_mu     2.074
_exptl_absorpt_correction_T_max   1.00000
_exptl_absorpt_correction_T_min   0.57974
_exptl_absorpt_correction_type    multi-scan
_exptl_absorpt_process_details
;
CrysAlisPro, Agilent Technologies,
Version 1.171.36.32 (release 02-08-2013 CrysAlis171 .NET)
(compiled Aug  2 2013,16:46:58)
Empirical absorption correction using spherical harmonics,
 implemented in SCALE3 ABSPACK scaling algorithm.
;
_exptl_absorpt_special_details    ?
_exptl_crystal_colour             'clear green'
_exptl_crystal_colour_lustre      clear
_exptl_crystal_colour_primary     green
_exptl_crystal_density_diffrn     1.399
_exptl_crystal_density_meas       ?
_exptl_crystal_density_method     ?
_exptl_crystal_description        ''
_exptl_crystal_F_000              1824
_exptl_crystal_size_max           0.1
_exptl_crystal_size_mid           0.08
_exptl_crystal_size_min           0.05
_exptl_transmission_factor_max    ?
_exptl_transmission_factor_min    ?
_diffrn_reflns_av_R_equivalents   0.0282
_diffrn_reflns_av_unetI/netI      0.0284
_diffrn_reflns_Laue_measured_fraction_full 0.998
_diffrn_reflns_Laue_measured_fraction_max 0.999
_diffrn_reflns_limit_h_max        19
_diffrn_reflns_limit_h_min        -19
_diffrn_reflns_limit_k_max        16
_diffrn_reflns_limit_k_min        -16
_diffrn_reflns_limit_l_max        27
_diffrn_reflns_limit_l_min        -27
_diffrn_reflns_number             26978
_diffrn_reflns_point_group_measured_fraction_full 0.998
_diffrn_reflns_point_group_measured_fraction_max 0.999
_diffrn_reflns_theta_full         25.242
_diffrn_reflns_theta_max          26.372
_diffrn_reflns_theta_min          3.005
_diffrn_ambient_temperature       100.3(1)
_diffrn_detector_area_resol_mean  8.3367
_diffrn_measured_fraction_theta_full 0.998
_diffrn_measured_fraction_theta_max 0.999
_diffrn_measurement_details
;
#__ type_ start__ end____ width___ exp.time_
  1 omega   25.75   58.00   0.7500    3.5000
omega____ theta____ kappa____ phi______ frames
    -       22.6371  -57.0000  -90.0000 43

#__ type_ start__ end____ width___ exp.time_
  2 omega  -24.00   66.00   0.7500    3.5000
omega____ theta____ kappa____ phi______ frames
    -       22.6371  -99.0000   60.0000 120

#__ type_ start__ end____ width___ exp.time_
  3 omega  -10.00  113.00   0.7500    3.5000
omega____ theta____ kappa____ phi______ frames
    -       22.6371   57.0000 -180.0000 164

#__ type_ start__ end____ width___ exp.time_
  4 omega  -14.00  108.25   0.7500    3.5000
omega____ theta____ kappa____ phi______ frames
    -       22.6371   77.0000  -90.0000 163

#__ type_ start__ end____ width___ exp.time_
  5 omega  -65.00  -39.50   0.7500    3.5000
omega____ theta____ kappa____ phi______ frames
    -       22.6371  -57.0000  -90.0000 34
;
_diffrn_measurement_device_type   'Xcalibur, Sapphire2, large Be window'
_diffrn_measurement_method        '\w scans'
_diffrn_orient_matrix_UB_11       -0.0453303000
_diffrn_orient_matrix_UB_12       0.0068409000
_diffrn_orient_matrix_UB_13       -0.0217468000
_diffrn_orient_matrix_UB_21       -0.0154387000
_diffrn_orient_matrix_UB_22       -0.0189695000
_diffrn_orient_matrix_UB_23       0.0245863000
_diffrn_orient_matrix_UB_31       0.0003046000
_diffrn_orient_matrix_UB_32       0.0508483000
_diffrn_orient_matrix_UB_33       0.0120812000
_diffrn_radiation_monochromator   graphite
_diffrn_radiation_type            MoK\a
_diffrn_radiation_wavelength      0.71073
_diffrn_source                    'Enhance (Mo) X-ray Source'
_reflns_Friedel_coverage          0.000
_reflns_Friedel_fraction_full     .
_reflns_Friedel_fraction_max      .
_reflns_number_gt                 7655
_reflns_number_total              8550
_reflns_odcompleteness_completeness 99.80
_reflns_odcompleteness_iscentric  1
_reflns_odcompleteness_theta      26.32
_reflns_special_details
;
 Reflections were merged by SHELXL according to the crystal
 class for the calculation of statistics and refinement.
 
 _reflns_Friedel_fraction is defined as the number of unique
 Friedel pairs measured divided by the number that would be
 possible theoretically, ignoring centric projections and
 systematic absences.
;
_reflns_threshold_expression      'I > 2\s(I)'
_computing_cell_refinement
;
CrysAlisPro, Agilent Technologies,
Version 1.171.36.32 (release 02-08-2013 CrysAlis171 .NET)
(compiled Aug  2 2013,16:46:58)
;
_computing_data_collection
;
CrysAlisPro, Agilent Technologies,
Version 1.171.36.32 (release 02-08-2013 CrysAlis171 .NET)
(compiled Aug  2 2013,16:46:58)
;
_computing_data_reduction
;
CrysAlisPro, Agilent Technologies,
Version 1.171.36.32 (release 02-08-2013 CrysAlis171 .NET)
(compiled Aug  2 2013,16:46:58)
;
_computing_molecular_graphics     'Olex2 (Dolomanov et al., 2009)'
_computing_publication_material   'Olex2 (Dolomanov et al., 2009)'
_computing_structure_refinement   'ShelXL (Sheldrick, 2008)'
_computing_structure_solution
;
Superflip (Palatinus & Chapuis, 2007;Palatinus & van der Lee, 2008;
Palatinus et al., 2012)
;
_refine_diff_density_max          1.526
_refine_diff_density_min          -0.765
_refine_diff_density_rms          0.105
_refine_ls_extinction_coef        .
_refine_ls_extinction_method      none
_refine_ls_goodness_of_fit_ref    1.031
_refine_ls_hydrogen_treatment     constr
_refine_ls_matrix_type            full
_refine_ls_number_parameters      453
_refine_ls_number_reflns          8550
_refine_ls_number_restraints      54
_refine_ls_R_factor_all           0.0377
_refine_ls_R_factor_gt            0.0321
_refine_ls_restrained_S_all       1.030
_refine_ls_shift/su_max           0.002
_refine_ls_shift/su_mean          0.000
_refine_ls_structure_factor_coef  Fsqd
_refine_ls_weighting_details
'w=1/[\s^2^(Fo^2^)+(0.0337P)^2^+11.8749P] where P=(Fo^2^+2Fc^2^)/3'
_refine_ls_weighting_scheme       calc
_refine_ls_wR_factor_gt           0.0757
_refine_ls_wR_factor_ref          0.0795
_refine_special_details           ?
_olex2_refinement_description
;
1. Fixed Uiso
 At 1.2 times of:
  All C(H,H) groups, All N(H) groups
 At 1.5 times of:
  All C(H,H,H) groups
2. Uiso/Uaniso restraints and constraints
Uanis(N2) \\sim Ueq, Uanis(C33) \\sim Ueq, Uanis(C32) \\sim Ueq: with sigma of
0.1 and sigma for terminal atoms of 0.2
Uanis(C1P) = Uanis(C4) = Uanis(C3) = Uanis(C1O) = Uanis(C1R) = Uanis(C5)
Uanis(C13) = Uanis(C1A) = Uanis(C15) = Uanis(C1S) = Uanis(C14) = Uanis(C1Q)
3. Rigid body (RIGU) restrains
 N1, H1, C26, H26A, H26B, C27, H27A, H27B, H27C, C28, H28A, H28B, C29, H29A,
 H29B, H29C, C30, H30A, H30B, C31
 with sigma for 1-2 distances of 0.004 and sigma for 1-3 distances of 0.004
4. Others
 Sof(C1A)=Sof(H1AA)=Sof(H1AB)=Sof(H1AC)=Sof(C1O)=Sof(H1OA)=Sof(H1OB)=Sof(H1OC)=
 Sof(C1P)=Sof(H1PA)=Sof(H1PB)=Sof(H1PC)=Sof(C1Q)=Sof(H1QA)=Sof(H1QB)=Sof(H1QC)=
 Sof(C1R)=Sof(H1RA)=Sof(H1RB)=Sof(H1RC)=Sof(C1S)=Sof(H1SA)=Sof(H1SB)=Sof(H1SC)=
 1-FVAR(1)
 Sof(C3)=Sof(H3A)=Sof(H3B)=Sof(H3C)=Sof(C4)=Sof(H4A)=Sof(H4B)=Sof(H4C)=Sof(C5)=
 Sof(H5A)=Sof(H5B)=Sof(H5C)=Sof(C13)=Sof(H13A)=Sof(H13B)=Sof(H13C)=Sof(C14)=
 Sof(H14A)=Sof(H14B)=Sof(H14C)=Sof(C15)=Sof(H15A)=Sof(H15B)=Sof(H15C)=FVAR(1)
5.a Ternary CH refined with riding coordinates:
 N1(H1)
5.b Secondary CH2 refined with riding coordinates:
 C26(H26A,H26B), C28(H28A,H28B), C30(H30A,H30B)
5.c Idealised Me refined as rotating group:
 C8(H8A,H8B,H8C), C9(H9A,H9B,H9C), C10(H10A,H10B,H10C), C18(H18A,H18B,H18C),
 C19(H19A,H19B,H19C), C20(H20A,H20B,H20C), C23(H23A,H23B,H23C), C24(H24A,H24B,
 H24C), C25(H25A,H25B,H25C), C3(H3A,H3B,H3C), C4(H4A,H4B,H4C), C5(H5A,H5B,H5C),
 C13(H13A,H13B,H13C), C14(H14A,H14B,H14C), C15(H15A,H15B,H15C), C1A(H1AA,H1AB,
 H1AC), C1O(H1OA,H1OB,H1OC), C1P(H1PA,H1PB,H1PC), C1Q(H1QA,H1QB,H1QC), C1R(H1RA,
 H1RB,H1RC), C1S(H1SA,H1SB,H1SC), C27(H27A,H27B,H27C), C29(H29A,H29B,H29C),
 C31(H31A,H31B,H31C), C32(H32A,H32B,H32C)
;
_atom_sites_solution_hydrogens    geom
_atom_sites_solution_primary      iterative
_atom_sites_solution_secondary    ?
loop_
  _atom_site_label
  _atom_site_type_symbol
  _atom_site_fract_x
  _atom_site_fract_y
  _atom_site_fract_z
  _atom_site_U_iso_or_equiv
  _atom_site_adp_type
  _atom_site_occupancy
  _atom_site_site_symmetry_order
  _atom_site_calc_flag
  _atom_site_refinement_flags_posn
  _atom_site_refinement_flags_adp
  _atom_site_refinement_flags_occupancy
  _atom_site_disorder_assembly
  _atom_site_disorder_group
 Gd1 Gd 0.29641(2) 0.45041(2) 0.45953(2) 0.01293(6) Uani 1 1 d . . . . .
 Ni1 Ni 0.51798(3) 0.38794(3) 0.48018(2) 0.01220(9) Uani 1 1 d . . . . .
 O1 O 0.26002(15) 0.50129(19) 0.55778(11) 0.0215(5) Uani 1 1 d . . . . .
 O2 O 0.13200(15) 0.4149(2) 0.41265(11) 0.0237(5) Uani 1 1 d . . . . .
 O3 O 0.42622(14) 0.50716(16) 0.44416(10) 0.0130(4) Uani 1 1 d . . . . .
 O4 O 0.61071(15) 0.27723(17) 0.52199(11) 0.0185(5) Uani 1 1 d . . . . .
 O5 O 0.19309(16) 0.4800(2) 0.34517(12) 0.0252(5) Uani 1 1 d . . . . .
 O6 O 0.60519(14) 0.45783(16) 0.43998(10) 0.0143(4) Uani 1 1 d . . . . .
 O7 O 0.31205(15) 0.31308(18) 0.39299(11) 0.0212(5) Uani 1 1 d . . . . .
 O8 O 0.45645(15) 0.29488(17) 0.40243(11) 0.0174(5) Uani 1 1 d . . . . .
 O9 O 0.29665(15) 0.28876(18) 0.52302(12) 0.0209(5) Uani 1 1 d . . . . .
 O10 O 0.42834(14) 0.34371(16) 0.52650(11) 0.0155(4) Uani 1 1 d . . . . .
 O11 O 0.26336(16) 0.62838(17) 0.44467(12) 0.0219(5) Uani 1 1 d . . . . .
 C1 C 0.1253(2) 0.4488(3) 0.35610(17) 0.0230(7) Uani 1 1 d . . . . .
 C2 C 0.0331(3) 0.4541(3) 0.29923(19) 0.0330(9) Uani 1 1 d . . . . .
 C6 C 0.3347(2) 0.5439(2) 0.58570(16) 0.0158(6) Uani 1 1 d . . . . .
 C7 C 0.3576(2) 0.5966(3) 0.65253(16) 0.0209(7) Uani 1 1 d . . . . .
 C8 C 0.2858(3) 0.5724(3) 0.68197(18) 0.0283(8) Uani 1 1 d . . . . .
 H8A H 0.2287 0.5996 0.6537 0.042 Uiso 1 1 calc GR . . . .
 H8B H 0.3027 0.6035 0.7248 0.042 Uiso 1 1 calc GR . . . .
 H8C H 0.2811 0.4991 0.6859 0.042 Uiso 1 1 calc GR . . . .
 C9 C 0.3622(3) 0.7133(3) 0.6420(2) 0.0309(8) Uani 1 1 d . . . . .
 H9A H 0.4051 0.7271 0.6213 0.046 Uiso 1 1 calc GR . . . .
 H9B H 0.3806 0.7479 0.6838 0.046 Uiso 1 1 calc GR . . . .
 H9C H 0.3037 0.7379 0.6142 0.046 Uiso 1 1 calc GR . . . .
 C10 C 0.4505(2) 0.5575(3) 0.69776(17) 0.0282(8) Uani 1 1 d . . . . .
 H10A H 0.4490 0.4838 0.7013 0.042 Uiso 1 1 calc GR . . . .
 H10B H 0.4658 0.5877 0.7407 0.042 Uiso 1 1 calc GR . . . .
 H10C H 0.4950 0.5766 0.6796 0.042 Uiso 1 1 calc GR . . . .
 C11 C 0.3051(2) 0.7117(3) 0.45225(15) 0.0182(7) Uani 1 1 d . . . . .
 C12 C 0.2484(2) 0.8097(3) 0.42685(19) 0.0263(8) Uani 1 1 d . . . . .
 C16 C 0.3738(2) 0.2730(2) 0.37801(15) 0.0155(6) Uani 1 1 d . . . . .
 C17 C 0.3462(2) 0.1907(2) 0.32290(15) 0.0173(6) Uani 1 1 d . . . . .
 C18 C 0.3504(3) 0.2419(3) 0.26098(17) 0.0295(8) Uani 1 1 d . . . . .
 H18A H 0.3103 0.3000 0.2495 0.044 Uiso 1 1 calc GR . . . .
 H18B H 0.3326 0.1932 0.2253 0.044 Uiso 1 1 calc GR . . . .
 H18C H 0.4110 0.2647 0.2692 0.044 Uiso 1 1 calc GR . . . .
 C19 C 0.2508(2) 0.1514(3) 0.30990(19) 0.0287(8) Uani 1 1 d . . . . .
 H19A H 0.2485 0.1202 0.3492 0.043 Uiso 1 1 calc GR . . . .
 H19B H 0.2347 0.1013 0.2751 0.043 Uiso 1 1 calc GR . . . .
 H19C H 0.2091 0.2080 0.2972 0.043 Uiso 1 1 calc GR . . . .
 C20 C 0.4126(3) 0.1008(3) 0.34273(18) 0.0272(8) Uani 1 1 d . . . . .
 H20A H 0.4725 0.1257 0.3507 0.041 Uiso 1 1 calc GR . . . .
 H20B H 0.3964 0.0508 0.3079 0.041 Uiso 1 1 calc GR . . . .
 H20C H 0.4108 0.0694 0.3822 0.041 Uiso 1 1 calc GR . . . .
 C21 C 0.3804(2) 0.2761(2) 0.54079(15) 0.0158(6) Uani 1 1 d . . . . .
 C22 C 0.4267(2) 0.1801(2) 0.57851(16) 0.0181(7) Uani 1 1 d . . . . .
 C23 C 0.3646(2) 0.1215(3) 0.60611(18) 0.0244(7) Uani 1 1 d . . . . .
 H23A H 0.3483 0.1656 0.6354 0.037 Uiso 1 1 calc GR . . . .
 H23B H 0.3956 0.0619 0.6298 0.037 Uiso 1 1 calc GR . . . .
 H23C H 0.3111 0.1002 0.5704 0.037 Uiso 1 1 calc GR . . . .
 C24 C 0.4479(2) 0.1125(3) 0.52826(17) 0.0230(7) Uani 1 1 d . . . . .
 H24A H 0.3932 0.0983 0.4917 0.034 Uiso 1 1 calc GR . . . .
 H24B H 0.4745 0.0489 0.5488 0.034 Uiso 1 1 calc GR . . . .
 H24C H 0.4894 0.1480 0.5128 0.034 Uiso 1 1 calc GR . . . .
 C25 C 0.5138(2) 0.2118(3) 0.63414(17) 0.0255(8) Uani 1 1 d . . . . .
 H25A H 0.5522 0.2478 0.6160 0.038 Uiso 1 1 calc GR . . . .
 H25B H 0.5443 0.1514 0.6571 0.038 Uiso 1 1 calc GR . . . .
 H25C H 0.4996 0.2562 0.6643 0.038 Uiso 1 1 calc GR . . . .
 C3 C -0.0425(4) 0.4204(6) 0.3189(3) 0.0530(10) Uani 0.794(4) 1 d . . P A 1
 H3A H -0.0372 0.3479 0.3282 0.080 Uiso 0.794(4) 1 calc GR . P A 1
 H3B H -0.0987 0.4341 0.2836 0.080 Uiso 0.794(4) 1 calc GR . P A 1
 H3C H -0.0404 0.4575 0.3575 0.080 Uiso 0.794(4) 1 calc GR . P A 1
 C4 C 0.0405(4) 0.3914(7) 0.2420(3) 0.0530(10) Uani 0.794(4) 1 d . . P A 1
 H4A H 0.0893 0.4176 0.2306 0.080 Uiso 0.794(4) 1 calc GR . P A 1
 H4B H -0.0149 0.3967 0.2047 0.080 Uiso 0.794(4) 1 calc GR . P A 1
 H4C H 0.0518 0.3204 0.2550 0.080 Uiso 0.794(4) 1 calc GR . P A 1
 C5 C 0.0178(4) 0.5687(6) 0.2769(3) 0.0530(10) Uani 0.794(4) 1 d . . P A 1
 H5A H 0.0195 0.6110 0.3135 0.080 Uiso 0.794(4) 1 calc GR . P A 1
 H5B H -0.0400 0.5756 0.2420 0.080 Uiso 0.794(4) 1 calc GR . P A 1
 H5C H 0.0644 0.5901 0.2614 0.080 Uiso 0.794(4) 1 calc GR . P A 1
 C13 C 0.2281(4) 0.8121(4) 0.3524(3) 0.0436(8) Uani 0.794(4) 1 d . . P A 1
 H13A H 0.2837 0.8168 0.3447 0.065 Uiso 0.794(4) 1 calc GR . P A 1
 H13B H 0.1910 0.8708 0.3333 0.065 Uiso 0.794(4) 1 calc GR . P A 1
 H13C H 0.1969 0.7501 0.3325 0.065 Uiso 0.794(4) 1 calc GR . P A 1
 C14 C 0.3025(4) 0.9062(4) 0.4569(3) 0.0436(8) Uani 0.794(4) 1 d . . P A 1
 H14A H 0.3223 0.9026 0.5041 0.065 Uiso 0.794(4) 1 calc GR . P A 1
 H14B H 0.2652 0.9660 0.4415 0.065 Uiso 0.794(4) 1 calc GR . P A 1
 H14C H 0.3540 0.9107 0.4440 0.065 Uiso 0.794(4) 1 calc GR . P A 1
 C15 C 0.1624(4) 0.8041(4) 0.4392(3) 0.0436(8) Uani 0.794(4) 1 d . . P A 1
 H15A H 0.1297 0.7434 0.4186 0.065 Uiso 0.794(4) 1 calc GR . P A 1
 H15B H 0.1267 0.8641 0.4211 0.065 Uiso 0.794(4) 1 calc GR . P A 1
 H15C H 0.1755 0.8012 0.4858 0.065 Uiso 0.794(4) 1 calc GR . P A 1
 C1A C 0.1453(14) 0.7844(18) 0.3962(14) 0.0436(8) Uani 0.206(4) 1 d . . P A 2
 H1AA H 0.1317 0.7529 0.3538 0.065 Uiso 0.206(4) 1 calc GR . P A 2
 H1AB H 0.1112 0.8470 0.3913 0.065 Uiso 0.206(4) 1 calc GR . P A 2
 H1AC H 0.1297 0.7379 0.4247 0.065 Uiso 0.206(4) 1 calc GR . P A 2
 C1O C -0.0262(15) 0.355(2) 0.3063(12) 0.0530(10) Uani 0.206(4) 1 d . . P A 2
 H1OA H -0.0019 0.2929 0.2950 0.080 Uiso 0.206(4) 1 calc GR . P A 2
 H1OB H -0.0878 0.3629 0.2771 0.080 Uiso 0.206(4) 1 calc GR . P A 2
 H1OC H -0.0237 0.3498 0.3509 0.080 Uiso 0.206(4) 1 calc GR . P A 2
 C1P C 0.0374(16) 0.460(2) 0.2350(12) 0.0530(10) Uani 0.206(4) 1 d . . P A 2
 H1PA H 0.0615 0.5253 0.2294 0.080 Uiso 0.206(4) 1 calc GR . P A 2
 H1PB H -0.0222 0.4517 0.2024 0.080 Uiso 0.206(4) 1 calc GR . P A 2
 H1PC H 0.0756 0.4056 0.2300 0.080 Uiso 0.206(4) 1 calc GR . P A 2
 C1Q C 0.2780(14) 0.8713(17) 0.3837(12) 0.0436(8) Uani 0.206(4) 1 d . . P A 2
 H1QA H 0.3330 0.9062 0.4090 0.065 Uiso 0.206(4) 1 calc GR . P A 2
 H1QB H 0.2324 0.9212 0.3616 0.065 Uiso 0.206(4) 1 calc GR . P A 2
 H1QC H 0.2885 0.8277 0.3516 0.065 Uiso 0.206(4) 1 calc GR . P A 2
 C1R C -0.0184(15) 0.536(2) 0.3193(11) 0.0530(10) Uani 0.206(4) 1 d . . P A 2
 H1RA H -0.0146 0.5236 0.3637 0.080 Uiso 0.206(4) 1 calc GR . P A 2
 H1RB H -0.0805 0.5345 0.2902 0.080 Uiso 0.206(4) 1 calc GR . P A 2
 H1RC H 0.0069 0.6024 0.3168 0.080 Uiso 0.206(4) 1 calc GR . P A 2
 C1S C 0.2616(14) 0.8781(17) 0.4921(12) 0.0436(8) Uani 0.206(4) 1 d . . P A 2
 H1SA H 0.2285 0.8472 0.5165 0.065 Uiso 0.206(4) 1 calc GR . P A 2
 H1SB H 0.2396 0.9467 0.4792 0.065 Uiso 0.206(4) 1 calc GR . P A 2
 H1SC H 0.3245 0.8808 0.5193 0.065 Uiso 0.206(4) 1 calc GR . P A 2
 N1 N 0.0782(2) 0.2735(3) 0.49390(19) 0.0418(9) Uani 1 1 d . U . . .
 H1 H 0.0921 0.3216 0.4642 0.050 Uiso 1 1 calc R U . . .
 C26 C 0.1110(3) 0.1718(4) 0.4836(3) 0.0516(12) Uani 1 1 d . U . . .
 H26A H 0.0855 0.1202 0.5040 0.062 Uiso 1 1 calc R U . . .
 H26B H 0.1761 0.1701 0.5058 0.062 Uiso 1 1 calc R U . . .
 C27 C 0.0882(4) 0.1427(4) 0.4113(3) 0.0573(13) Uani 1 1 d . U . . .
 H27A H 0.0239 0.1385 0.3895 0.086 Uiso 1 1 calc GR U . . .
 H27B H 0.1148 0.0771 0.4088 0.086 Uiso 1 1 calc GR U . . .
 H27C H 0.1117 0.1941 0.3902 0.086 Uiso 1 1 calc GR U . . .
 C28 C 0.1246(3) 0.3119(4) 0.5616(2) 0.0411(10) Uani 1 1 d . U . . .
 H28A H 0.1058 0.3826 0.5636 0.049 Uiso 1 1 calc R U . . .
 H28B H 0.1890 0.3129 0.5706 0.049 Uiso 1 1 calc R U . . .
 C29 C 0.1088(3) 0.2521(5) 0.6151(2) 0.0561(14) Uani 1 1 d . U . . .
 H29A H 0.0460 0.2553 0.6090 0.084 Uiso 1 1 calc GR U . . .
 H29B H 0.1443 0.2810 0.6571 0.084 Uiso 1 1 calc GR U . . .
 H29C H 0.1260 0.1815 0.6133 0.084 Uiso 1 1 calc GR U . . .
 C30 C -0.0229(3) 0.2735(4) 0.4747(2) 0.0465(11) Uani 1 1 d . U . . .
 H30A H -0.0390 0.2220 0.5009 0.056 Uiso 1 1 calc R U . . .
 H30B H -0.0504 0.2532 0.4288 0.056 Uiso 1 1 calc R U . . .
 C31 C -0.0620(4) 0.3768(4) 0.4839(3) 0.0589(14) Uani 1 1 d . U . . .
 H31A H -0.0409 0.4298 0.4623 0.088 Uiso 1 1 calc GR . . . .
 H31B H -0.0431 0.3922 0.5301 0.088 Uiso 1 1 calc GR . . . .
 H31C H -0.1267 0.3737 0.4651 0.088 Uiso 1 1 calc GR . . . .
 N2 N 0.1586(6) 0.5688(9) 0.1291(5) 0.162(5) Uani 1 1 d . U . . .
 C32 C 0.2862(5) 0.5634(6) 0.2430(4) 0.090(2) Uani 1 1 d . U . . .
 H32A H 0.3363 0.5249 0.2402 0.135 Uiso 1 1 calc GR . . . .
 H32B H 0.2647 0.5310 0.2742 0.135 Uiso 1 1 calc GR . . . .
 H32C H 0.3052 0.6325 0.2571 0.135 Uiso 1 1 calc GR . . . .
 C33 C 0.2147(6) 0.5660(7) 0.1791(6) 0.118(4) Uani 1 1 d . U . . .

loop_
  _atom_site_aniso_label
  _atom_site_aniso_U_11
  _atom_site_aniso_U_22
  _atom_site_aniso_U_33
  _atom_site_aniso_U_23
  _atom_site_aniso_U_13
  _atom_site_aniso_U_12
 Gd1 0.00993(8) 0.01392(9) 0.01410(9) -0.00094(6) 0.00336(6) -0.00037(5)
 Ni1 0.01030(18) 0.01319(19) 0.01198(18) -0.00020(15) 0.00271(15) 0.00009(14)
 O1 0.0176(12) 0.0255(13) 0.0236(12) -0.0062(10) 0.0103(10) -0.0053(10)
 O2 0.0127(11) 0.0387(14) 0.0173(12) -0.0042(10) 0.0028(9) -0.0020(10)
 O3 0.0125(10) 0.0125(10) 0.0127(10) -0.0006(8) 0.0030(8) -0.0009(8)
 O4 0.0168(11) 0.0162(11) 0.0213(12) 0.0029(9) 0.0053(9) 0.0012(9)
 O5 0.0186(12) 0.0334(14) 0.0188(12) 0.0001(10) 0.0009(10) 0.0006(10)
 O6 0.0120(10) 0.0179(11) 0.0139(10) -0.0004(8) 0.0059(9) -0.0003(8)
 O7 0.0155(11) 0.0241(12) 0.0216(12) -0.0090(10) 0.0038(10) 0.0007(9)
 O8 0.0152(11) 0.0186(11) 0.0185(11) -0.0053(9) 0.0062(9) -0.0025(9)
 O9 0.0167(12) 0.0207(12) 0.0270(13) 0.0061(10) 0.0099(10) 0.0018(9)
 O10 0.0159(11) 0.0129(10) 0.0181(11) 0.0019(9) 0.0067(9) 0.0002(9)
 O11 0.0212(12) 0.0150(12) 0.0272(13) 0.0033(10) 0.0060(10) 0.0061(9)
 C1 0.0157(17) 0.0273(18) 0.0224(17) -0.0067(14) 0.0024(14) 0.0050(13)
 C2 0.0173(18) 0.054(3) 0.0200(18) -0.0051(17) -0.0019(15) 0.0054(17)
 C6 0.0189(16) 0.0122(15) 0.0167(15) 0.0030(12) 0.0068(13) 0.0010(12)
 C7 0.0212(17) 0.0274(18) 0.0179(16) -0.0030(14) 0.0118(14) -0.0005(14)
 C8 0.029(2) 0.039(2) 0.0218(18) -0.0020(16) 0.0155(16) -0.0041(16)
 C9 0.034(2) 0.028(2) 0.038(2) -0.0121(17) 0.0209(18) -0.0036(16)
 C10 0.0236(19) 0.043(2) 0.0163(17) -0.0027(15) 0.0057(15) -0.0026(16)
 C11 0.0179(16) 0.0207(17) 0.0156(15) 0.0021(13) 0.0056(13) 0.0030(13)
 C12 0.0182(17) 0.0222(18) 0.034(2) 0.0090(15) 0.0044(15) 0.0051(14)
 C16 0.0174(16) 0.0150(15) 0.0137(14) 0.0012(12) 0.0052(12) 0.0001(12)
 C17 0.0174(16) 0.0187(16) 0.0155(15) -0.0030(12) 0.0055(13) -0.0009(13)
 C18 0.042(2) 0.029(2) 0.0152(17) -0.0054(14) 0.0081(16) -0.0097(17)
 C19 0.0244(19) 0.030(2) 0.033(2) -0.0155(16) 0.0121(16) -0.0089(15)
 C20 0.030(2) 0.0240(18) 0.0239(18) -0.0089(15) 0.0049(15) 0.0034(15)
 C21 0.0191(16) 0.0152(15) 0.0141(15) -0.0015(12) 0.0072(13) 0.0013(12)
 C22 0.0210(16) 0.0169(16) 0.0179(16) 0.0046(13) 0.0089(13) 0.0024(13)
 C23 0.0269(19) 0.0227(18) 0.0271(18) 0.0074(14) 0.0138(15) -0.0007(14)
 C24 0.0305(19) 0.0163(16) 0.0271(18) 0.0034(14) 0.0164(16) 0.0049(14)
 C25 0.0236(18) 0.0302(19) 0.0210(17) 0.0085(15) 0.0059(14) 0.0010(15)
 C3 0.0241(16) 0.088(3) 0.0341(17) -0.0010(19) -0.0044(13) 0.0069(18)
 C4 0.0241(16) 0.088(3) 0.0341(17) -0.0010(19) -0.0044(13) 0.0069(18)
 C5 0.0241(16) 0.088(3) 0.0341(17) -0.0010(19) -0.0044(13) 0.0069(18)
 C13 0.0293(16) 0.0361(17) 0.063(2) 0.0165(16) 0.0137(16) 0.0136(13)
 C14 0.0293(16) 0.0361(17) 0.063(2) 0.0165(16) 0.0137(16) 0.0136(13)
 C15 0.0293(16) 0.0361(17) 0.063(2) 0.0165(16) 0.0137(16) 0.0136(13)
 C1A 0.0293(16) 0.0361(17) 0.063(2) 0.0165(16) 0.0137(16) 0.0136(13)
 C1O 0.0241(16) 0.088(3) 0.0341(17) -0.0010(19) -0.0044(13) 0.0069(18)
 C1P 0.0241(16) 0.088(3) 0.0341(17) -0.0010(19) -0.0044(13) 0.0069(18)
 C1Q 0.0293(16) 0.0361(17) 0.063(2) 0.0165(16) 0.0137(16) 0.0136(13)
 C1R 0.0241(16) 0.088(3) 0.0341(17) -0.0010(19) -0.0044(13) 0.0069(18)
 C1S 0.0293(16) 0.0361(17) 0.063(2) 0.0165(16) 0.0137(16) 0.0136(13)
 N1 0.039(2) 0.045(2) 0.048(2) 0.0008(17) 0.0231(17) -0.0066(16)
 C26 0.028(2) 0.050(3) 0.080(3) 0.002(2) 0.022(2) -0.0030(19)
 C27 0.057(3) 0.055(3) 0.064(3) -0.016(3) 0.027(3) -0.006(3)
 C28 0.040(2) 0.046(2) 0.048(2) -0.0009(19) 0.029(2) -0.0018(19)
 C29 0.038(3) 0.082(4) 0.045(3) 0.012(3) 0.011(2) 0.002(3)
 C30 0.033(2) 0.062(3) 0.044(3) 0.002(2) 0.0143(19) 0.004(2)
 C31 0.060(3) 0.069(3) 0.048(3) 0.012(3) 0.020(3) 0.024(3)
 N2 0.085(6) 0.228(11) 0.185(9) 0.132(8) 0.062(6) 0.050(6)
 C32 0.091(5) 0.090(5) 0.116(6) 0.032(5) 0.071(5) 0.006(4)
 C33 0.080(6) 0.132(7) 0.176(10) 0.104(7) 0.087(7) 0.047(5)

_geom_special_details
;
 All esds (except the esd in the dihedral angle between two l.s. planes)
 are estimated using the full covariance matrix.  The cell esds are taken
 into account individually in the estimation of esds in distances, angles
 and torsion angles; correlations between esds in cell parameters are only
 used when they are defined by crystal symmetry.  An approximate (isotropic)
 treatment of cell esds is used for estimating esds involving l.s. planes.
;
loop_
  _geom_bond_atom_site_label_1
  _geom_bond_atom_site_label_2
  _geom_bond_distance
  _geom_bond_site_symmetry_2
  _geom_bond_publ_flag
 Gd1 O1 2.499(2) . ?
 Gd1 O2 2.479(2) . ?
 Gd1 O3 2.328(2) . ?
 Gd1 O5 2.463(2) . ?
 Gd1 O6 2.481(2) 3_666 ?
 Gd1 O7 2.365(2) . ?
 Gd1 O9 2.510(2) . ?
 Gd1 O10 2.493(2) . ?
 Gd1 O11 2.363(2) . ?
 Gd1 C1 2.830(3) . ?
 Gd1 C6 2.858(3) . ?
 Gd1 C21 2.881(3) . ?
 Ni1 Gd1 3.4656(4) 3_666 ?
 Ni1 O3 2.074(2) . ?
 Ni1 O3 2.070(2) 3_666 ?
 Ni1 O4 2.022(2) . ?
 Ni1 O6 2.096(2) . ?
 Ni1 O8 2.018(2) . ?
 Ni1 O10 2.104(2) . ?
 O1 C6 1.249(4) . ?
 O2 C1 1.274(4) . ?
 O3 Ni1 2.070(2) 3_666 ?
 O4 C11 1.257(4) 3_666 ?
 O5 C1 1.252(4) . ?
 O6 Gd1 2.481(2) 3_666 ?
 O6 C6 1.272(4) 3_666 ?
 O7 C16 1.255(4) . ?
 O8 C16 1.258(4) . ?
 O9 C21 1.255(4) . ?
 O10 C21 1.273(4) . ?
 O11 C11 1.247(4) . ?
 C1 C2 1.539(5) . ?
 C2 C3 1.480(8) . ?
 C2 C4 1.528(8) . ?
 C2 C5 1.554(8) . ?
 C2 C1O 1.64(3) . ?
 C2 C1P 1.43(3) . ?
 C2 C1R 1.50(3) . ?
 C6 O6 1.271(4) 3_666 ?
 C6 C7 1.526(4) . ?
 C7 C8 1.531(5) . ?
 C7 C9 1.538(5) . ?
 C7 C10 1.533(5) . ?
 C11 O4 1.257(4) 3_666 ?
 C11 C12 1.540(5) . ?
 C12 C13 1.534(7) . ?
 C12 C14 1.525(7) . ?
 C12 C15 1.487(7) . ?
 C12 C1A 1.56(2) . ?
 C12 C1Q 1.44(2) . ?
 C12 C1S 1.62(2) . ?
 C16 C17 1.545(4) . ?
 C17 C18 1.526(5) . ?
 C17 C19 1.526(5) . ?
 C17 C20 1.526(5) . ?
 C21 C22 1.525(4) . ?
 C22 C23 1.532(4) . ?
 C22 C24 1.532(5) . ?
 C22 C25 1.527(5) . ?
 N1 C26 1.466(6) . ?
 N1 C28 1.475(6) . ?
 N1 C30 1.507(6) . ?
 C26 C27 1.528(7) . ?
 C28 C29 1.494(6) . ?
 C30 C31 1.521(7) . ?
 N2 C33 1.129(14) . ?
 C32 C33 1.441(13) . ?

loop_
  _geom_angle_atom_site_label_1
  _geom_angle_atom_site_label_2
  _geom_angle_atom_site_label_3
  _geom_angle
  _geom_angle_site_symmetry_1
  _geom_angle_site_symmetry_3
  _geom_angle_publ_flag
 O1 Gd1 O9 72.76(8) . . ?
 O1 Gd1 C1 103.16(9) . . ?
 O1 Gd1 C6 25.86(8) . . ?
 O1 Gd1 C21 83.20(8) . . ?
 O2 Gd1 O1 82.13(8) . . ?
 O2 Gd1 O6 133.15(7) . 3_666 ?
 O2 Gd1 O9 82.04(8) . . ?
 O2 Gd1 O10 132.42(8) . . ?
 O2 Gd1 C1 26.74(9) . . ?
 O2 Gd1 C6 107.34(9) . . ?
 O2 Gd1 C21 106.90(9) . . ?
 O3 Gd1 O1 122.23(7) . . ?
 O3 Gd1 O2 149.00(7) . . ?
 O3 Gd1 O5 96.07(8) . . ?
 O3 Gd1 O6 70.58(7) . 3_666 ?
 O3 Gd1 O7 81.58(8) . . ?
 O3 Gd1 O9 121.30(7) . . ?
 O3 Gd1 O10 70.00(7) . . ?
 O3 Gd1 O11 80.58(8) . . ?
 O3 Gd1 C1 122.28(9) . . ?
 O3 Gd1 C6 96.56(8) . . ?
 O3 Gd1 C21 95.69(8) . . ?
 O5 Gd1 O1 123.14(8) . . ?
 O5 Gd1 O2 52.94(8) . . ?
 O5 Gd1 O6 142.26(8) . 3_666 ?
 O5 Gd1 O9 123.61(8) . . ?
 O5 Gd1 O10 141.95(8) . . ?
 O5 Gd1 C1 26.21(10) . . ?
 O5 Gd1 C6 137.35(9) . . ?
 O5 Gd1 C21 137.09(9) . . ?
 O6 Gd1 O1 52.20(7) 3_666 . ?
 O6 Gd1 O9 92.35(7) 3_666 . ?
 O6 Gd1 O10 67.93(7) 3_666 . ?
 O6 Gd1 C1 145.08(8) 3_666 . ?
 O6 Gd1 C6 26.36(8) 3_666 . ?
 O6 Gd1 C21 80.35(8) 3_666 . ?
 O7 Gd1 O1 146.26(8) . . ?
 O7 Gd1 O2 86.47(8) . . ?
 O7 Gd1 O5 71.26(8) . . ?
 O7 Gd1 O6 136.70(7) . 3_666 ?
 O7 Gd1 O9 74.27(8) . . ?
 O7 Gd1 O10 71.72(7) . . ?
 O7 Gd1 C1 78.00(9) . . ?
 O7 Gd1 C6 151.04(8) . . ?
 O7 Gd1 C21 69.92(8) . . ?
 O9 Gd1 C1 103.88(9) . . ?
 O9 Gd1 C6 82.42(8) . . ?
 O9 Gd1 C21 25.75(8) . . ?
 O10 Gd1 O1 93.09(7) . . ?
 O10 Gd1 O9 51.85(7) . . ?
 O10 Gd1 C1 145.24(9) . . ?
 O10 Gd1 C6 80.44(8) . . ?
 O10 Gd1 C21 26.14(8) . . ?
 O11 Gd1 O1 75.52(8) . . ?
 O11 Gd1 O2 88.64(8) . . ?
 O11 Gd1 O5 71.10(8) . . ?
 O11 Gd1 O6 71.92(8) . 3_666 ?
 O11 Gd1 O7 136.01(8) . . ?
 O11 Gd1 O9 147.85(8) . . ?
 O11 Gd1 O10 136.06(8) . . ?
 O11 Gd1 C1 78.29(9) . . ?
 O11 Gd1 C6 71.10(8) . . ?
 O11 Gd1 C21 151.71(8) . . ?
 C1 Gd1 C6 125.06(9) . . ?
 C1 Gd1 C21 125.37(10) . . ?
 C6 Gd1 C21 81.59(8) . . ?
 Gd1 Ni1 Gd1 126.201(11) 3_666 . ?
 O3 Ni1 Gd1 94.03(6) 3_666 . ?
 O3 Ni1 Gd1 94.43(6) . 3_666 ?
 O3 Ni1 Gd1 40.71(6) 3_666 3_666 ?
 O3 Ni1 Gd1 40.35(6) . . ?
 O3 Ni1 O3 81.35(9) 3_666 . ?
 O3 Ni1 O6 90.08(8) . . ?
 O3 Ni1 O6 83.73(8) 3_666 . ?
 O3 Ni1 O10 88.10(8) 3_666 . ?
 O3 Ni1 O10 83.00(8) . . ?
 O4 Ni1 Gd1 139.60(7) . . ?
 O4 Ni1 Gd1 82.99(6) . 3_666 ?
 O4 Ni1 O3 94.44(9) . 3_666 ?
 O4 Ni1 O3 175.64(9) . . ?
 O4 Ni1 O6 90.57(9) . . ?
 O4 Ni1 O10 95.80(9) . . ?
 O6 Ni1 Gd1 45.15(6) . 3_666 ?
 O6 Ni1 Gd1 129.63(6) . . ?
 O6 Ni1 O10 170.01(8) . . ?
 O8 Ni1 Gd1 139.95(6) . 3_666 ?
 O8 Ni1 Gd1 82.64(6) . . ?
 O8 Ni1 O3 175.29(9) . 3_666 ?
 O8 Ni1 O3 93.97(9) . . ?
 O8 Ni1 O4 90.25(9) . . ?
 O8 Ni1 O6 95.80(9) . . ?
 O8 Ni1 O10 91.87(9) . . ?
 O10 Ni1 Gd1 128.01(6) . 3_666 ?
 O10 Ni1 Gd1 45.14(6) . . ?
 C6 O1 Gd1 93.32(19) . . ?
 C1 O2 Gd1 92.2(2) . . ?
 Ni1 O3 Gd1 104.41(9) . . ?
 Ni1 O3 Gd1 103.84(9) 3_666 . ?
 Ni1 O3 Ni1 98.65(9) 3_666 . ?
 C11 O4 Ni1 127.1(2) 3_666 . ?
 C1 O5 Gd1 93.5(2) . . ?
 Ni1 O6 Gd1 98.06(8) . 3_666 ?
 C6 O6 Gd1 93.57(18) 3_666 3_666 ?
 C6 O6 Ni1 153.3(2) 3_666 . ?
 C16 O7 Gd1 137.6(2) . . ?
 C16 O8 Ni1 127.1(2) . . ?
 C21 O9 Gd1 93.87(19) . . ?
 Ni1 O10 Gd1 98.12(8) . . ?
 C21 O10 Gd1 94.22(18) . . ?
 C21 O10 Ni1 151.2(2) . . ?
 C11 O11 Gd1 138.3(2) . . ?
 O2 C1 Gd1 61.09(17) . . ?
 O2 C1 C2 120.8(3) . . ?
 O5 C1 Gd1 60.29(17) . . ?
 O5 C1 O2 121.4(3) . . ?
 O5 C1 C2 117.8(3) . . ?
 C2 C1 Gd1 176.9(3) . . ?
 C1 C2 C5 106.9(3) . . ?
 C1 C2 C1O 107.6(8) . . ?
 C3 C2 C1 113.0(4) . . ?
 C3 C2 C4 112.9(5) . . ?
 C3 C2 C5 108.8(5) . . ?
 C4 C2 C1 107.3(3) . . ?
 C4 C2 C5 107.7(5) . . ?
 C1P C2 C1 114.8(10) . . ?
 C1P C2 C1O 111.5(15) . . ?
 C1P C2 C1R 118.4(15) . . ?
 C1R C2 C1 105.1(9) . . ?
 C1R C2 C1O 97.8(15) . . ?
 O1 C6 Gd1 60.82(16) . . ?
 O1 C6 O6 120.8(3) . 3_666 ?
 O1 C6 C7 121.1(3) . . ?
 O6 C6 Gd1 60.06(16) 3_666 . ?
 O6 C6 C7 118.1(3) 3_666 . ?
 C7 C6 Gd1 177.9(2) . . ?
 C6 C7 C8 110.6(3) . . ?
 C6 C7 C9 107.8(3) . . ?
 C6 C7 C10 107.7(3) . . ?
 C8 C7 C9 110.3(3) . . ?
 C8 C7 C10 110.8(3) . . ?
 C10 C7 C9 109.5(3) . . ?
 O4 C11 C12 117.1(3) 3_666 . ?
 O11 C11 O4 125.9(3) . 3_666 ?
 O11 C11 C12 117.0(3) . . ?
 C11 C12 C1A 111.5(8) . . ?
 C11 C12 C1S 105.3(7) . . ?
 C13 C12 C11 105.5(3) . . ?
 C14 C12 C11 111.0(3) . . ?
 C14 C12 C13 107.8(4) . . ?
 C15 C12 C11 110.6(3) . . ?
 C15 C12 C13 109.8(4) . . ?
 C15 C12 C14 112.0(4) . . ?
 C1A C12 C1S 105.7(13) . . ?
 C1Q C12 C11 113.9(8) . . ?
 C1Q C12 C1A 112.3(13) . . ?
 C1Q C12 C1S 107.4(13) . . ?
 O7 C16 O8 126.3(3) . . ?
 O7 C16 C17 117.4(3) . . ?
 O8 C16 C17 116.3(3) . . ?
 C18 C17 C16 107.1(3) . . ?
 C18 C17 C20 109.5(3) . . ?
 C19 C17 C16 110.9(3) . . ?
 C19 C17 C18 110.0(3) . . ?
 C19 C17 C20 109.7(3) . . ?
 C20 C17 C16 109.6(3) . . ?
 O9 C21 Gd1 60.37(16) . . ?
 O9 C21 O10 119.9(3) . . ?
 O9 C21 C22 121.6(3) . . ?
 O10 C21 Gd1 59.64(16) . . ?
 O10 C21 C22 118.6(3) . . ?
 C22 C21 Gd1 174.8(2) . . ?
 C21 C22 C23 111.2(3) . . ?
 C21 C22 C24 105.8(3) . . ?
 C21 C22 C25 109.2(3) . . ?
 C23 C22 C24 109.7(3) . . ?
 C25 C22 C23 110.5(3) . . ?
 C25 C22 C24 110.4(3) . . ?
 C26 N1 C28 112.4(4) . . ?
 C26 N1 C30 111.1(4) . . ?
 C28 N1 C30 111.9(3) . . ?
 N1 C26 C27 114.6(4) . . ?
 N1 C28 C29 116.0(4) . . ?
 N1 C30 C31 114.1(4) . . ?
 N2 C33 C32 179.5(13) . . ?

_shelx_SHELXL_version_number      '2014/7'
_iucr_refine_instructions_details
;

    oejlm1218.res created by SHELXL-2014/7

TITL oejlm1218 in P21/c #14
REM reset to P21/c #14
CELL 0.71073 15.904191 12.968965 21.769137 90 111.3524 90
ZERR 2 0.000497 0.000295 0.000552 0 0.0031 0
LATT 1
SYMM -X,0.5+Y,0.5-Z
SFAC C H Gd N Ni O
UNIT 132 256 4 8 4 44
RIGU N1 H1 C26 C28 C30 H26a H26b C27 H28a H28b C29 H30a H30b C31 H27a H27b =
 H27C H29A H29B H29C H31A H31B H31C
ISOR N2 C33 C32
EADP C1P C4 C3 C1O C1R C5
EADP C13 C1A C15 C1S C14 C1Q
 
L.S. 10
PLAN  20
FREE C15 C1A
FREE C15 C1S
BOND
fmap 2
acta
SHEL 100 0.8
REM <olex2.extras>
REM <HklSrc "%./oejlm1218.hkl">
REM </olex2.extras>
 
WGHT    0.033700   11.874900
FVAR       2.49318   0.79355
GD1   3    0.296412    0.450414    0.459527    11.00000    0.00993    0.01392 =
         0.01410   -0.00094    0.00336   -0.00037
NI1   5    0.517978    0.387941    0.480176    11.00000    0.01030    0.01319 =
         0.01198   -0.00020    0.00271    0.00009
O1    6    0.260023    0.501287    0.557783    11.00000    0.01761    0.02553 =
         0.02358   -0.00621    0.01030   -0.00533
O2    6    0.132004    0.414932    0.412647    11.00000    0.01273    0.03870 =
         0.01731   -0.00424    0.00282   -0.00203
O3    6    0.426217    0.507161    0.444165    11.00000    0.01250    0.01254 =
         0.01269   -0.00056    0.00304   -0.00086
O4    6    0.610715    0.277233    0.521991    11.00000    0.01677    0.01625 =
         0.02130    0.00286    0.00534    0.00120
O5    6    0.193090    0.480042    0.345174    11.00000    0.01858    0.03336 =
         0.01876    0.00012    0.00093    0.00064
O6    6    0.605195    0.457833    0.439985    11.00000    0.01201    0.01793 =
         0.01388   -0.00041    0.00587   -0.00027
O7    6    0.312055    0.313079    0.392993    11.00000    0.01545    0.02411 =
         0.02163   -0.00905    0.00378    0.00074
O8    6    0.456447    0.294882    0.402434    11.00000    0.01520    0.01860 =
         0.01852   -0.00531    0.00615   -0.00249
O9    6    0.296652    0.288763    0.523023    11.00000    0.01674    0.02071 =
         0.02697    0.00606    0.00994    0.00177
O10   6    0.428340    0.343713    0.526503    11.00000    0.01585    0.01295 =
         0.01813    0.00186    0.00674    0.00023
O11   6    0.263362    0.628385    0.444674    11.00000    0.02116    0.01497 =
         0.02723    0.00330    0.00599    0.00606
C1    1    0.125348    0.448753    0.356100    11.00000    0.01565    0.02726 =
         0.02243   -0.00666    0.00242    0.00496
C2    1    0.033081    0.454147    0.299230    11.00000    0.01733    0.05429 =
         0.02000   -0.00512   -0.00186    0.00544
C6    1    0.334690    0.543904    0.585704    11.00000    0.01886    0.01221 =
         0.01667    0.00297    0.00676    0.00103
C7    1    0.357576    0.596553    0.652527    11.00000    0.02120    0.02745 =
         0.01788   -0.00304    0.01178   -0.00054
C8    1    0.285829    0.572450    0.681975    11.00000    0.02949    0.03880 =
         0.02185   -0.00203    0.01547   -0.00415
AFIX 137
H8A   2    0.228663    0.599599    0.653725    11.00000   -1.50000
H8B   2    0.302733    0.603506    0.724814    11.00000   -1.50000
H8C   2    0.281097    0.499130    0.685852    11.00000   -1.50000
AFIX   0
C9    1    0.362169    0.713331    0.641961    11.00000    0.03387    0.02773 =
         0.03771   -0.01212    0.02093   -0.00364
AFIX 137
H9A   2    0.405056    0.727070    0.621335    11.00000   -1.50000
H9B   2    0.380581    0.747935    0.683775    11.00000   -1.50000
H9C   2    0.303740    0.737898    0.614177    11.00000   -1.50000
AFIX   0
C10   1    0.450511    0.557530    0.697757    11.00000    0.02361    0.04336 =
         0.01625   -0.00273    0.00565   -0.00262
AFIX 137
H10A  2    0.448971    0.483823    0.701281    11.00000   -1.50000
H10B  2    0.465756    0.587745    0.740711    11.00000   -1.50000
H10C  2    0.494999    0.576587    0.679600    11.00000   -1.50000
AFIX   0
C11   1    0.305102    0.711702    0.452251    11.00000    0.01791    0.02066 =
         0.01556    0.00205    0.00564    0.00302
C12   1    0.248370    0.809656    0.426851    11.00000    0.01815    0.02216 =
         0.03420    0.00897    0.00443    0.00505
C16   1    0.373818    0.272969    0.378006    11.00000    0.01737    0.01496 =
         0.01370    0.00119    0.00521    0.00012
C17   1    0.346159    0.190695    0.322899    11.00000    0.01739    0.01871 =
         0.01547   -0.00299    0.00549   -0.00091
C18   1    0.350388    0.241891    0.260979    11.00000    0.04224    0.02921 =
         0.01517   -0.00540    0.00812   -0.00971
AFIX 137
H18A  2    0.310275    0.300016    0.249472    11.00000   -1.50000
H18B  2    0.332598    0.193198    0.225317    11.00000   -1.50000
H18C  2    0.410951    0.264670    0.269192    11.00000   -1.50000
AFIX   0
C19   1    0.250795    0.151400    0.309903    11.00000    0.02444    0.02969 =
         0.03333   -0.01553    0.01206   -0.00890
AFIX 137
H19A  2    0.248523    0.120162    0.349248    11.00000   -1.50000
H19B  2    0.234731    0.101283    0.275071    11.00000   -1.50000
H19C  2    0.209125    0.208030    0.297211    11.00000   -1.50000
AFIX   0
C20   1    0.412610    0.100832    0.342732    11.00000    0.02972    0.02399 =
         0.02386   -0.00886    0.00495    0.00345
AFIX 137
H20A  2    0.472493    0.125744    0.350651    11.00000   -1.50000
H20B  2    0.396363    0.050782    0.307858    11.00000   -1.50000
H20C  2    0.410772    0.069445    0.382162    11.00000   -1.50000
AFIX   0
C21   1    0.380383    0.276117    0.540791    11.00000    0.01912    0.01516 =
         0.01411   -0.00152    0.00719    0.00125
C22   1    0.426739    0.180144    0.578510    11.00000    0.02102    0.01687 =
         0.01790    0.00464    0.00893    0.00235
C23   1    0.364624    0.121492    0.606111    11.00000    0.02691    0.02268 =
         0.02707    0.00737    0.01383   -0.00073
AFIX 137
H23A  2    0.348259    0.165629    0.635363    11.00000   -1.50000
H23B  2    0.395561    0.061863    0.629821    11.00000   -1.50000
H23C  2    0.311136    0.100236    0.570441    11.00000   -1.50000
AFIX   0
C24   1    0.447927    0.112515    0.528261    11.00000    0.03046    0.01633 =
         0.02709    0.00335    0.01643    0.00490
AFIX 137
H24A  2    0.393167    0.098267    0.491688    11.00000   -1.50000
H24B  2    0.474490    0.048895    0.548801    11.00000   -1.50000
H24C  2    0.489400    0.148012    0.512813    11.00000   -1.50000
AFIX   0
C25   1    0.513761    0.211819    0.634139    11.00000    0.02358    0.03017 =
         0.02102    0.00852    0.00590    0.00103
AFIX 137
H25A  2    0.552155    0.247787    0.616014    11.00000   -1.50000
H25B  2    0.544266    0.151418    0.657055    11.00000   -1.50000
H25C  2    0.499589    0.256171    0.664334    11.00000   -1.50000
AFIX   0
PART 1
C3    1   -0.042454    0.420447    0.318852    21.00000    0.02411    0.08836 =
         0.03411   -0.00101   -0.00435    0.00687
AFIX 137
H3A   2   -0.037215    0.347874    0.328167    21.00000   -1.50000
H3B   2   -0.098741    0.434071    0.283581    21.00000   -1.50000
H3C   2   -0.040404    0.457536    0.357536    21.00000   -1.50000
AFIX   0
C4    1    0.040523    0.391393    0.242044    21.00000    0.02411    0.08836 =
         0.03411   -0.00101   -0.00435    0.00687
AFIX 137
H4A   2    0.089307    0.417625    0.230553    21.00000   -1.50000
H4B   2   -0.014892    0.396676    0.204652    21.00000   -1.50000
H4C   2    0.051833    0.320439    0.254987    21.00000   -1.50000
AFIX   0
C5    1    0.017796    0.568656    0.276887    21.00000    0.02411    0.08836 =
         0.03411   -0.00101   -0.00435    0.00687
AFIX 137
H5A   2    0.019511    0.611028    0.313484    21.00000   -1.50000
H5B   2   -0.039966    0.575619    0.241957    21.00000   -1.50000
H5C   2    0.064400    0.590059    0.261418    21.00000   -1.50000
AFIX   0
C13   1    0.228110    0.812054    0.352371    21.00000    0.02927    0.03613 =
         0.06280    0.01652    0.01367    0.01360
AFIX 137
H13A  2    0.283712    0.816764    0.344678    21.00000   -1.50000
H13B  2    0.191049    0.870766    0.333275    21.00000   -1.50000
H13C  2    0.196892    0.750133    0.332549    21.00000   -1.50000
AFIX   0
C14   1    0.302486    0.906209    0.456911    21.00000    0.02927    0.03613 =
         0.06280    0.01652    0.01367    0.01360
AFIX 137
H14A  2    0.322314    0.902602    0.504115    21.00000   -1.50000
H14B  2    0.265182    0.966040    0.441522    21.00000   -1.50000
H14C  2    0.354020    0.910749    0.444015    21.00000   -1.50000
AFIX   0
C15   1    0.162450    0.804095    0.439190    21.00000    0.02927    0.03613 =
         0.06280    0.01652    0.01367    0.01360
AFIX 137
H15A  2    0.129705    0.743407    0.418600    21.00000   -1.50000
H15B  2    0.126654    0.864107    0.421108    21.00000   -1.50000
H15C  2    0.175530    0.801182    0.485826    21.00000   -1.50000
AFIX   0
PART 0
PART 2
C1A   1    0.145307    0.784426    0.396190   -21.00000    0.02927    0.03613 =
         0.06280    0.01652    0.01367    0.01360
AFIX 137
H1AA  2    0.131747    0.752899    0.353765   -21.00000   -1.50000
H1AB  2    0.111171    0.846953    0.391307   -21.00000   -1.50000
H1AC  2    0.129697    0.737927    0.424665   -21.00000   -1.50000
AFIX   0
C1O   1   -0.026219    0.354647    0.306297   -21.00000    0.02411    0.08836 =
         0.03411   -0.00101   -0.00435    0.00687
AFIX 137
H1OA  2   -0.001858    0.292883    0.295000   -21.00000   -1.50000
H1OB  2   -0.087810    0.362918    0.277102   -21.00000   -1.50000
H1OC  2   -0.023738    0.349834    0.350931   -21.00000   -1.50000
AFIX   0
C1P   1    0.037362    0.459607    0.235001   -21.00000    0.02411    0.08836 =
         0.03411   -0.00101   -0.00435    0.00687
AFIX 137
H1PA  2    0.061512    0.525251    0.229371   -21.00000   -1.50000
H1PB  2   -0.022173    0.451677    0.202391   -21.00000   -1.50000
H1PC  2    0.075631    0.405567    0.230007   -21.00000   -1.50000
AFIX   0
C1Q   1    0.278026    0.871302    0.383664   -21.00000    0.02927    0.03613 =
         0.06280    0.01652    0.01367    0.01360
AFIX 137
H1QA  2    0.332964    0.906216    0.408988   -21.00000   -1.50000
H1QB  2    0.232411    0.921187    0.361622   -21.00000   -1.50000
H1QC  2    0.288499    0.827654    0.351553   -21.00000   -1.50000
AFIX   0
C1R   1   -0.018425    0.536052    0.319300   -21.00000    0.02411    0.08836 =
         0.03411   -0.00101   -0.00435    0.00687
AFIX 137
H1RA  2   -0.014611    0.523618    0.363710   -21.00000   -1.50000
H1RB  2   -0.080535    0.534547    0.290215   -21.00000   -1.50000
H1RC  2    0.006914    0.602401    0.316819   -21.00000   -1.50000
AFIX   0
C1S   1    0.261598    0.878082    0.492137   -21.00000    0.02927    0.03613 =
         0.06280    0.01652    0.01367    0.01360
AFIX 137
H1SA  2    0.228508    0.847214    0.516495   -21.00000   -1.50000
H1SB  2    0.239587    0.946691    0.479231   -21.00000   -1.50000
H1SC  2    0.324525    0.880816    0.519304   -21.00000   -1.50000
AFIX   0
 
PART 0
N1    4    0.078178    0.273525    0.493903    11.00000    0.03862    0.04537 =
         0.04754    0.00080    0.02309   -0.00657
AFIX  13
H1    2    0.092137    0.321637    0.464227    11.00000   -1.20000
AFIX   0
C26   1    0.111001    0.171829    0.483555    11.00000    0.02778    0.04950 =
         0.07989    0.00192    0.02244   -0.00302
AFIX  23
H26A  2    0.085532    0.120213    0.503974    11.00000   -1.20000
H26B  2    0.176057    0.170067    0.505847    11.00000   -1.20000
AFIX   0
C27   1    0.088228    0.142653    0.411272    11.00000    0.05730    0.05457 =
         0.06423   -0.01643    0.02722   -0.00603
AFIX 137
H27A  2    0.023889    0.138457    0.389475    11.00000   -1.50000
H27B  2    0.114770    0.077053    0.408781    11.00000   -1.50000
H27C  2    0.111718    0.194121    0.390151    11.00000   -1.50000
AFIX   0
C28   1    0.124619    0.311939    0.561627    11.00000    0.03979    0.04609 =
         0.04819   -0.00086    0.02893   -0.00180
AFIX  23
H28A  2    0.105814    0.382609    0.563636    11.00000   -1.20000
H28B  2    0.189001    0.312888    0.570628    11.00000   -1.20000
AFIX   0
C29   1    0.108807    0.252075    0.615051    11.00000    0.03775    0.08211 =
         0.04511    0.01238    0.01109    0.00187
AFIX 137
H29A  2    0.045998    0.255277    0.609048    11.00000   -1.50000
H29B  2    0.144251    0.280974    0.657139    11.00000   -1.50000
H29C  2    0.126011    0.181503    0.613298    11.00000   -1.50000
AFIX   0
C30   1   -0.022927    0.273453    0.474725    11.00000    0.03331    0.06208 =
         0.04431    0.00151    0.01425    0.00447
AFIX  23
H30A  2   -0.039030    0.222024    0.500883    11.00000   -1.20000
H30B  2   -0.050430    0.253248    0.428804    11.00000   -1.20000
AFIX   0
C31   1   -0.062018    0.376821    0.483906    11.00000    0.06034    0.06878 =
         0.04798    0.01199    0.02034    0.02388
AFIX 137
H31A  2   -0.040881    0.429787    0.462285    11.00000   -1.50000
H31B  2   -0.043113    0.392171    0.530113    11.00000   -1.50000
H31C  2   -0.126731    0.373738    0.465113    11.00000   -1.50000
AFIX   0
 
N2    4    0.158620    0.568833    0.129127    11.00000    0.08473    0.22801 =
         0.18453    0.13153    0.06202    0.05002
C32   1    0.286183    0.563387    0.242999    11.00000    0.09088    0.09031 =
         0.11648    0.03208    0.07057    0.00646
AFIX 137
H32A  2    0.336251    0.524896    0.240247    11.00000   -1.50000
H32B  2    0.264723    0.531039    0.274171    11.00000   -1.50000
H32C  2    0.305225    0.632487    0.257129    11.00000   -1.50000
AFIX   0
C33   1    0.214663    0.565996    0.179136    11.00000    0.08012    0.13232 =
         0.17583    0.10375    0.08698    0.04749
HKLF 4
 
REM  oejlm1218 in P21/c #14
REM R1 =  0.0321 for    7655 Fo > 4sig(Fo)  and  0.0377 for all    8550 data
REM    453 parameters refined using     54 restraints
 
END  
     
WGHT      0.0339     11.8685 

REM Highest difference peak  1.526,  deepest hole -0.765,  1-sigma level  0.105
Q1    1   0.1242  0.2183  0.5195  11.00000  0.05    1.53
Q2    1   0.0651  0.2156  0.4441  11.00000  0.05    1.39
Q3    1   0.1097  0.4498  0.6214  11.00000  0.05    1.20
Q4    1   0.1508  0.3272  0.6188  11.00000  0.05    1.15
Q5    1   0.1194  0.1229  0.5548  11.00000  0.05    1.12
Q6    1   0.3369  0.4534  0.4447  11.00000  0.05    1.03
Q7    1   0.2548  0.4519  0.4757  11.00000  0.05    0.98
Q8    1   0.3197  0.4945  0.4896  11.00000  0.05    0.90
Q9    1   0.0362  0.0890  0.5572  11.00000  0.05    0.88
Q10   1   0.2727  0.4063  0.4316  11.00000  0.05    0.85
Q11   1   0.0758  0.3919  0.4418  11.00000  0.05    0.83
Q12   1   0.2699  0.4932  0.4337  11.00000  0.05    0.80
Q13   1   0.3112  0.3985  0.4838  11.00000  0.05    0.79
Q14   1   0.4810  0.2913  0.5234  11.00000  0.05    0.77
Q15   1   0.5194  0.5156  0.4784  11.00000  0.05    0.77
Q16   1   0.4322  0.5338  0.4085  11.00000  0.05    0.77
Q17   1   0.2988  0.6512  0.4628  11.00000  0.05    0.77
Q18   1   0.1099  0.6089  0.3985  11.00000  0.05    0.70
Q19   1   0.3008  0.9055  0.4252  11.00000  0.05    0.67
Q20   1   0.1587  0.6437  0.1650  11.00000  0.05    0.67

REM The information below was added by Olex2.
REM
REM R1 = 0.0321 for 7655 Fo > 4sig(Fo) and 0.0377 for all 29168 data
REM n/a parameters refined using n/a restraints
REM Highest difference peak 1.53, deepest hole -0.77
REM Mean Shift 0, Max Shift -0.002.

REM +++ Tabular Listing of Refinement Information +++
REM R1_all = 0.0377
REM R1_gt = 0.0321
REM wR_ref = 0.0795
REM GOOF = 1.031
REM Shift_max = -0.002
REM Shift_mean = 0
REM Reflections_all = 29168
REM Reflections_gt = 7655
REM Parameters = n/a
REM Hole = -0.77
REM Peak = 1.53
REM Flack = n/a

;
_olex2_date_sample_data_collection 2012-10-23
_olex2_submission_special_instructions 'No special instructions were received'
loop_
  _refln_index_h
  _refln_index_k
  _refln_index_l
  _refln_F_squared_meas
  _refln_F_squared_sigma
  _refln_scale_group_code
 0 0 3 22.2718 48.3751 3
 0 0 -3 125.907 89.689 3
 0 0 -4 247683 2266.57 2
 0 0 -4 254214 2946.07 4
 0 0 4 244389 2914.42 4
 0 0 4 249025 2469.78 3
 0 0 5 579.632 115.455 5
 0 0 5 293.875 225.958 4
 0 0 -5 712.892 127.713 2
 0 0 -5 839.627 185.783 3
 0 0 6 40743.9 846.544 5
 0 0 -6 41049.9 1027.01 3
 0 0 -6 41565.5 881.296 2
 0 0 6 39133 1256.06 4
 0 0 -7 474.543 195.002 3
 0 0 7 361.233 203.203 4
 0 0 7 582.206 133.513 5
 0 0 8 45353.3 1544.81 4
 0 0 -8 45313.6 1246.16 3
 0 0 9 742.708 378.216 4
 0 0 -9 595.245 276.09 3
 0 0 -10 218445 3275.71 3
 0 0 10 217121 3996.81 4
 0 0 -11 2138.54 462.991 3
 0 0 11 2248.11 638.855 4
 0 0 -12 153653 2931.39 3
 0 0 12 150836 3575.52 4
 0 0 13 3166.1 757.169 4
 0 0 -13 2746.96 543.777 3
 0 0 14 193083 4360.2 4
 0 0 -14 188238 3583.43 3
 0 0 -15 3987.27 651.701 3
 0 0 15 3449.81 742.632 4
 0 0 16 66194.8 2696.66 4
 0 0 -16 60311.5 2115.47 3
 0 0 -17 901.103 385.559 3
 0 0 17 1569.22 611.835 4
 0 0 -18 20419.9 1316.93 3
 0 0 18 21121.6 1644.63 4
 0 0 19 201.798 405.976 4
 0 0 -19 595.681 291.526 3
 0 0 -20 2328.95 504.958 3
 0 0 -21 -54.7659 437.909 3
 0 0 -22 3386.63 690.688 3
 0 0 -23 297.04 290.303 3
 0 0 -24 1646.99 496.148 3
 0 0 -25 -202.323 438.705 3
 0 0 -26 7669.24 1102.22 3
 0 -1 -3 277437 2504.68 3
 0 1 3 312332 2578.77 3
 0 1 -3 325129 3059.7 4
 0 -1 -3 339550 2670.65 2
 0 1 -3 344047 2374.43 3
 0 -1 -4 88100 1376.22 3
 0 1 4 87471.5 1331.82 2
 0 -1 -4 92668 1348.21 2
 0 -1 4 88979 1220.54 3
 0 1 -4 88191.7 1225.99 3
 0 1 -4 91337.8 1675.27 4
 0 -1 4 85659.4 1622.4 4
 0 1 4 92484.2 1386.94 3
 0 -1 -4 85630.7 1585.22 4
 0 -1 5 160601 1906.54 3
 0 1 -5 153998 1572.97 2
 0 1 -5 157945 1924.31 3
 0 1 5 159420 2019.02 2
 0 -1 5 149535 2417.61 4
 0 -1 -5 154631 2087.58 3
 0 -1 -6 717.821 196.201 3
 0 1 6 614.759 160.161 2
 0 1 -6 635.482 100.28 2
 0 1 -6 607.472 179.716 3
 0 -1 6 615.17 232.524 4
 0 1 6 689.238 236.923 4
 0 1 -7 38685.5 806.37 2
 0 1 -7 38249.1 1025.73 3
 0 1 7 40734.9 831.694 5
 0 -1 7 40175.1 1360.03 4
 0 -1 -7 38693 1109.73 3
 0 1 7 37055.7 1338.03 4
 0 1 -8 1716 279.708 3
 0 1 8 1642.54 373.973 4
 0 1 8 2003.9 211.127 5
 0 -1 8 1209.18 280.44 4
 0 -1 -8 1433.82 264.385 3
 0 -1 9 193511 3562.47 4
 0 1 -9 191593 2825.67 3
 0 -1 -9 190669 3000.39 3
 0 1 9 193275 3540.81 4
 0 1 9 197228 2377.79 5
 0 -1 -10 7754.34 677.112 3
 0 1 10 6855.18 760.121 4
 0 1 -10 8563.42 660.729 3
 0 -1 11 171063 3684 4
 0 1 11 178262 3749.05 4
 0 -1 -11 173055 3091.81 3
 0 1 -11 168058 2959.22 3
 0 1 -12 47530.5 1570.89 3
 0 -1 12 48564.1 1984.43 4
 0 1 12 51143.5 2068.1 4
 0 -1 -12 47641.1 1636.84 3
 0 1 -13 141645 2893.88 3
 0 -1 -13 140435 3003.35 3
 0 -1 13 143781 3589.9 4
 0 1 13 148460 3689.58 4
 0 -1 14 12109.9 1110.45 4
 0 -1 -14 11176 912.177 3
 0 1 -14 12993 950.534 3
 0 1 14 13614.1 1253 4
 0 -1 -15 54930.9 1983.68 3
 0 1 -15 56067.2 1931.38 3
 0 -1 15 57030.3 2418.02 4
 0 -1 16 1198.44 520.224 4
 0 1 -16 1508.69 432.206 3
 0 -1 -16 890.254 365.472 3
 0 -1 -17 30066.9 1575.47 3
 0 1 -17 31611.9 1577.34 3
 0 -1 17 34428.8 2011.99 4
 0 -1 18 3196.01 708.616 4
 0 -1 -18 2123.04 517.399 3
 0 1 -18 1828.03 460.065 3
 0 1 -19 314.303 293.746 3
 0 -1 -19 923.841 365.752 3
 0 -1 19 1230.59 583.536 4
 0 -1 20 3282.92 716.068 4
 0 -1 -20 2027.04 486.214 3
 0 1 -20 3264.57 557.255 3
 0 -1 -21 14762.4 1259.73 3
 0 -1 21 15645.3 1527.61 4
 0 1 -21 11867.1 1138.16 3
 0 -1 22 889.19 409.317 4
 0 -1 -22 598.224 371.87 3
 0 1 -22 847.879 425.392 3
 0 1 -23 10171.7 1129.75 3
 0 -1 -23 11083.6 1158.95 3
 0 1 -24 -144.209 343.835 3
 0 -1 -24 869.837 442.871 3
 0 -1 -25 8844.75 1118.1 3
 0 1 -25 9164 1130.26 3
 0 1 -26 903.46 496.101 3
 0 2 0 63982.2 841.583 2
 0 2 0 61978.8 959.949 4
 0 2 -1 115523 1018.54 2
 0 -2 -1 75589.6 1055.84 2
 0 2 2 2707.1 237.424 2
 0 2 -2 3074.75 256.589 4
 0 -2 2 2172.93 225.18 4
 0 -2 -2 1894.03 161.636 3
 0 -2 -2 2665.58 229.936 2
 0 -2 3 346703 3522.64 4
 0 -2 3 307769 2598.77 3
 0 2 3 364190 3225.07 3
 0 2 -3 365956 3594.46 4
 0 -2 -3 341913 3166.63 3
 0 2 3 334639 3306.16 2
 0 2 -3 352577 2682.69 3
 0 2 3 344726 2679.77 1
 0 -2 -3 376155 3385.62 2
 0 -2 -4 67429.7 1244.95 3
 0 2 4 68840.4 1286.44 2
 0 -2 4 68134.4 965.593 3
 0 2 -4 66406.3 968.796 3
 0 -2 4 66443.1 1445.23 4
 0 2 5 122787 1893.12 2
 0 -2 -5 120306 1866.14 3
 0 -2 5 122555 1543.5 3
 0 -2 5 119394 2157.35 4
 0 2 -5 121149 1570.71 3
 0 -2 6 579.108 237.761 4
 0 2 -6 662.897 149.779 3
 0 -2 -6 791.76 218.857 3
 0 -2 -6 382 73.8833 5
 0 2 6 862.293 190.46 2
 0 -2 -7 82734.5 1716.14 3
 0 -2 7 82392.6 2009.06 4
 0 -2 -7 80296.8 1003.09 5
 0 2 -7 82317.9 1488.54 3
 0 2 -7 81070.1 1075.38 2
 0 2 7 84300.6 1689.69 2
 0 2 -8 246650 3027.2 3
 0 -2 -8 245301 3382.8 3
 0 2 8 252087 3297.32 2
 0 -2 8 244744 3895.18 4
 0 2 -9 88685.3 1813.96 3
 0 2 -9 89242.2 1322.04 2
 0 -2 9 91821.8 2412.1 4
 0 2 -10 190047 2911.17 3
 0 -2 10 184346 3637.09 4
 0 -2 -10 180886 3105.68 3
 0 2 -11 63321.3 1695.09 3
 0 -2 11 60382.5 2125.57 4
 0 -2 -11 62007.9 1851.18 3
 0 2 -12 93223 2168.43 3
 0 -2 -12 96813.6 2384.95 3
 0 -2 12 92580.8 2788.57 4
 0 2 -13 23227.5 1139.12 3
 0 -2 -13 22101 1205.84 3
 0 -2 13 21069.1 1377.21 4
 0 -2 14 30535.7 1712.17 4
 0 -2 -14 30419.9 1431.4 3
 0 2 -14 29073.2 1317.47 3
 0 -2 -15 2715.24 512.109 3
 0 2 -15 2908.41 477.157 3
 0 -2 15 2458.1 563.908 4
 0 -2 16 19101.2 1474.51 4
 0 -2 -16 18799.5 1234.93 3
 0 2 -16 19465.1 1169.95 3
 0 2 -17 1244.72 404.467 3
 0 -2 17 1398.8 566.005 4
 0 -2 -17 1453.77 443.038 3
 0 -2 18 33.2774 365.714 4
 0 -2 -18 -54.3964 403.99 3
 0 2 -18 -238.835 266.98 3
 0 -2 -19 18275.8 1347.83 3
 0 2 -19 17449.5 1236.24 3
 0 -2 19 19270.7 1634.49 4
 0 -2 20 21864.9 1797.1 4
 0 2 -20 20018.3 1409.28 3
 0 -2 -20 18991.5 1437.34 3
 0 2 -21 2984.19 568.485 3
 0 -2 21 2872.78 779.211 4
 0 -2 -21 3052.9 618.793 3
 0 2 -22 18744.6 1416.88 3
 0 -2 22 22172.7 1890.3 4
 0 -2 -22 20028 1550.36 3
 0 -2 -23 1013.5 461.592 3
 0 -2 23 1142.59 630.705 4
 0 2 -23 1269.04 443.974 3
 0 -2 24 24685.6 2114.91 4
 0 -2 -24 23821.7 1771.58 3
 0 2 -24 20382.8 1585.74 3
 0 -2 -25 500.552 366.127 3
 0 2 -25 657.2 333.378 3
 0 -2 25 823.1 583.898 4
 0 2 -26 18902.5 1615.82 3
 0 -3 0 357.305 73.4586 3
 0 3 0 336.485 144.783 4
 0 -3 0 486.518 144.512 2
 0 3 0 330.792 134.651 2
 0 -3 0 431.187 159.374 4
 0 -3 1 137059 1899.64 4
 0 -3 -1 136841 1919.99 4
 0 -3 -1 146816 1888.82 2
 0 3 -1 138983 1980.77 4
 0 3 -1 137747 1601.24 2
 0 -3 -1 131394 1459.77 3
 0 -3 1 146017 1640.94 2
 0 3 1 140147 1816.87 2
 0 3 -2 455914 3589.4 2
 0 -3 2 456475 4317.31 4
 0 3 2 441954 4166.17 2
 0 -3 -2 451926 3821.47 3
 0 -3 3 27823.8 884.777 4
 0 -3 3 28400.1 531.811 2
 0 3 3 26414.8 615.966 1
 0 3 -3 28074.3 517.231 2
 0 -3 -3 27916.8 740.232 3
 0 3 3 27903.1 836.899 2
 0 -3 -4 125007 1840.99 3
 0 -3 4 121774 2138.45 4
 0 3 4 126012 1461.05 1
 0 -3 4 123987 1307.03 3
 0 3 -4 124712 1347.93 3
 0 3 4 127402 1991.12 2
 0 3 -4 123254 1200.93 2
 0 3 -5 391.428 97.7097 3
 0 -3 5 561.887 108.044 3
 0 -3 -5 490.997 160.861 3
 0 3 5 735.948 178.686 2
 0 -3 5 339.444 217.033 4
 0 -3 -6 348641 3897.91 3
 0 -3 6 353437 3224.62 3
 0 -3 6 345409 4421.6 4
 0 3 -6 351351 3281.47 3
 0 3 6 343480 4025.63 2
 0 -3 -7 79924.9 1770.05 3
 0 -3 7 82841.9 2064.35 4
 0 3 7 86609.9 1837.44 2
 0 -3 -7 76380.5 1011.67 1
 0 3 -7 81371.5 1424.53 3
 0 3 -8 357457 3016.2 2
 0 -3 -8 421934 4716.7 3
 0 -3 -8 386765 3187.81 1
 0 -3 8 405684 5300.97 4
 0 3 -8 420986 4085.16 3
 0 -3 -8 382467 3048.15 5
 0 3 8 419071 4737.96 2
 0 3 9 199017 3126.03 2
 0 3 -9 191014 2661.27 3
 0 -3 -9 197587 3164.41 3
 0 -3 9 193881 3589.97 4
 0 3 -9 176532 1819.88 2
 0 -3 -9 179101 1756.71 5
 0 3 -10 46533.6 1311.71 3
 0 -3 -10 45952.1 1546.56 3
 0 -3 10 43787.1 1741.84 4
 0 3 -10 42744.8 814.484 2
 0 -3 -11 44776.8 1572.77 3
 0 -3 11 41773.9 1767.54 4
 0 3 -11 46736.3 1388.96 3
 0 3 -11 41612.9 871.529 2
 0 3 -12 30659 1182.22 3
 0 -3 -12 29691.8 1353.6 3
 0 -3 12 28758.8 1527.7 4
 0 -3 13 8845.05 895.234 4
 0 3 -13 8841.01 682.531 3
 0 -3 -13 9781.95 813.745 3
 0 -3 14 549.178 304.602 4
 0 -3 -14 511.839 236.504 3
 0 3 -14 587.586 253.709 3
 0 3 -15 524.35 303.654 3
 0 -3 -15 1757.55 351.854 3
 0 -3 15 793.039 470.712 4
 0 -3 -16 155.62 292.106 3
 0 -3 16 459.512 354.562 4
 0 3 -16 247.45 240.366 3
 0 3 -17 -307.68 242.172 3
 0 -3 -17 108.592 283.828 3
 0 3 -18 33021.8 1606.89 3
 0 -3 18 35320.8 2109.66 4
 0 -3 -18 35477.1 1829.77 3
 0 -3 -19 5650.09 793.306 3
 0 -3 19 5894.06 964.951 4
 0 3 -19 5585.88 728.572 3
 0 3 -20 21632.5 1416.31 3
 0 -3 20 23110.4 1800.6 4
 0 -3 -20 26264.3 1694.28 3
 0 -3 -21 26081.9 1755.03 3
 0 3 -21 23474 1517.85 3
 0 -3 21 27841.2 2036.31 4
 0 -3 22 10339.6 1313.49 4
 0 3 -22 7633.43 922.872 3
 0 -3 -22 9121.17 1083.24 3
 0 -3 -23 24943.3 1829.35 3
 0 -3 23 28453.6 2194.62 4
 0 3 -23 21335.5 1541.9 3
 0 -3 24 2091.72 712.064 4
 0 -3 -24 1388.7 627.035 3
 0 3 -24 321.028 303.016 3
 0 -3 -25 25375.9 1925.48 3
 0 3 -25 23174.5 1703.11 3
 0 3 -26 3103.89 672.451 3
 0 -4 0 3786.49 349.141 4
 0 -4 0 4498.24 207.768 3
 0 4 0 3581.03 295.51 2
 0 -4 -1 37611.1 1084.12 4
 0 4 -1 37504.1 873.251 2
 0 -4 1 41286.9 918.83 2
 0 4 1 37503.5 983.585 2
 0 -4 -1 42353.3 775.086 3
 0 -4 1 37955.2 1052.41 4
 0 -4 2 231.776 165.533 4
 0 -4 2 223.556 101.184 2
 0 4 -2 117.276 78.9926 2
 0 -4 -2 346.985 113.694 3
 0 4 2 298.226 154.922 2
 0 -4 3 153616 2428.13 4
 0 -4 -3 155845 2046.68 3
 0 4 -3 155955 1741.37 2
 0 4 3 157846 2357.04 2
 0 -4 4 18807.1 845.308 4
 0 4 -4 16396.8 395.819 3
 0 4 4 16856.8 575.348 1
 0 4 -4 17781.8 454.277 2
 0 -4 4 17313.6 363.156 3
 0 -4 -4 18441.3 695.673 3
 0 4 4 16414.2 765.358 2
 0 -4 4 18471.9 484.332 2
 0 4 -5 470044 3758.41 3
 0 4 5 481651 4055.68 1
 0 -4 -5 472123 4690.41 3
 0 -4 5 477183 5295.3 4
 0 4 5 483575 5013.23 2
 0 -4 5 470126 3652.62 3
 0 -4 -6 34601.5 1113.41 3
 0 -4 6 33263.1 1275.7 4
 0 4 6 31797.8 1164.22 2
 0 4 -6 32982.3 754.046 3
 0 -4 6 35048.8 729.148 3
 0 4 -7 822896 6488.1 3
 0 4 7 799400 7724.95 2
 0 -4 -7 823786 7490.26 3
 0 -4 7 812926 8307.26 4
 0 -4 8 23803.4 1206.85 4
 0 4 8 24657.3 1071.86 2
 0 -4 -8 23394.3 1053.64 3
 0 4 -8 22440.5 759.675 3
 0 4 9 136002 2635.96 2
 0 -4 9 127425 2907.3 4
 0 4 -9 130368 2013.06 3
 0 -4 -9 132229 2536.51 3
 0 4 -10 58381.3 1426.69 3
 0 4 10 61079.8 1829.42 2
 0 -4 -10 58859.6 1792.09 3
 0 -4 -10 56494.6 788.897 5
 0 -4 10 61005.6 2078.62 4
 0 -4 11 42233.3 1809.44 4
 0 4 -11 35199.2 662.562 2
 0 -4 -11 42122 1562.75 3
 0 4 -11 42891.3 1287.34 3
 0 -4 -11 34955.1 661.128 1
 0 4 -12 42758.8 1363.55 3
 0 -4 12 44190.5 1922.45 4
 0 -4 -12 40325.9 1608.48 3
 0 4 -13 944.32 280.343 3
 0 -4 -13 1096.31 399.623 3
 0 -4 13 1526.87 481.763 4
 0 4 -14 2691.89 440.774 3
 0 -4 14 2488.42 518.354 4
 0 -4 -14 2275.78 498.926 3
 0 4 -15 25305.9 1236.82 3
 0 -4 -15 25392.5 1421.59 3
 0 -4 15 24828.9 1619.33 4
 0 -4 -16 2631.46 513.47 3
 0 -4 16 2339.49 653.174 4
 0 4 -16 1580.63 347.48 3
 0 4 -17 41915.4 1711.69 3
 0 -4 -17 41834.3 1958.19 3
 0 -4 17 47507.5 2408.55 4
 0 4 -18 8294.96 840.809 3
 0 -4 18 9721.06 1171.18 4
 0 -4 -18 9351.01 1040.87 3
 0 4 -19 67159.9 2357.75 3
 0 -4 -19 75921.9 2811.15 3
 0 -4 19 74821.4 3181.27 4
 0 -4 20 16377.8 1607.92 4
 0 4 -20 16160.8 1219.04 3
 0 -4 -20 16485.7 1418.22 3
 0 -4 -21 35091.4 2040.95 3
 0 -4 21 35806.1 2311.96 4
 0 4 -21 32891 1773.97 3
 0 -4 -22 20402.6 1601.35 3
 0 4 -22 17058.5 1297.46 3
 0 -4 22 18772.4 1761.96 4
 0 -4 23 4439.21 944.666 4
 0 -4 -23 5111.2 835.711 3
 0 4 -23 3908.01 663.243 3
 0 -4 24 19306.3 1871.48 4
 0 -4 -24 20458.5 1697.41 3
 0 -5 0 204.899 74.6816 3
 0 5 0 -41.7374 127.502 2
 0 5 1 24540.9 873.579 2
 0 -5 -1 25473.4 971.127 4
 0 -5 1 25208.9 955.451 4
 0 -5 1 23553.6 434.84 3
 0 -5 -1 26196.8 647.672 3
 0 5 -1 24428.2 776.5 2
 0 -5 -2 226855 3304.99 4
 0 -5 2 233038 3232.36 4
 0 5 -2 233970 2627.68 2
 0 5 2 233795 3080.47 2
 0 -5 -2 240442 2573.6 3
 0 5 3 217.469 210.01 2
 0 -5 3 720.464 158.09 2
 0 -5 3 185.607 191.325 4
 0 5 -3 348.239 144.512 2
 0 -5 -3 44.8691 129.99 3
 0 5 4 166180 2250.99 1
 0 -5 4 170802 2855.06 4
 0 5 -4 167133 1919.43 2
 0 5 4 173590 2743.33 2
 0 -5 -4 169797 2387.72 3
 0 -5 4 172376 1988.91 2
 0 5 5 28953.6 841.25 1
 0 5 5 29504.3 1129.6 2
 0 -5 -5 28820.5 981.68 3
 0 5 -5 28171 634.208 2
 0 -5 5 27618 1180.16 4
 0 5 -5 25060.6 552.455 3
 0 -5 5 28492.6 670.532 2
 0 5 6 199908 2381.53 1
 0 -5 6 207150 3463.25 4
 0 -5 -6 199864 2930.12 3
 0 5 -6 197654 2085.27 3
 0 5 6 215030 3301.08 2
 0 5 -6 186513 1857.67 2
 0 5 -7 3226.31 170.848 2
 0 -5 -7 4890.77 474.485 3
 0 -5 7 4042.69 544.564 4
 0 5 7 3670.47 484.261 2
 0 5 -7 4311.21 297.332 3
 0 -5 8 101680 2607.44 4
 0 5 8 105528 2432.46 2
 0 -5 -8 106491 2279.15 3
 0 5 -8 102672 1647.23 3
 0 5 -9 3147.13 300.682 3
 0 5 9 2791.11 430.663 2
 0 -5 -9 3387.91 466.326 3
 0 -5 9 3283.1 540.551 4
 0 5 -10 11953.3 616.952 3
 0 5 10 11059.9 848.531 2
 0 -5 -10 12821.2 846.244 3
 0 -5 11 20271.4 1289.23 4
 0 -5 -11 17785.3 413.218 5
 0 5 -11 19506.1 853.955 3
 0 -5 -11 20384.6 1126.78 3
 0 5 -12 7968.64 581.33 3
 0 -5 12 9378.37 952.698 4
 0 -5 -12 9740.03 811.118 3
 0 -5 -13 7065.35 732.638 3
 0 5 -13 7716.21 597.468 3
 0 -5 13 6253.9 827.505 4
 0 -5 14 40993 2054.66 4
 0 -5 -14 40607.2 1783.47 3
 0 5 -14 37157.5 1385.54 3
 0 -5 15 2134.37 612.954 4
 0 5 -15 1812.72 357.191 3
 0 -5 -15 1313.29 413.622 3
 0 -5 -16 62322.9 2390.24 3
 0 5 -16 61459.4 1990.53 3
 0 -5 16 63322.2 2694.3 4
 0 5 -17 2599.76 499.37 3
 0 -5 17 2743.47 582.911 4
 0 -5 -17 2540.9 644.527 3
 0 -5 18 91909.4 3510.5 4
 0 -5 -18 90486.2 3066.98 3
 0 5 -18 85611.1 2534.52 3
 0 -5 -19 24670.9 1678.2 3
 0 -5 19 25351.7 1884.59 4
 0 5 -19 22129 1331.27 3
 0 5 -20 69177 2458.87 3
 0 -5 20 78613.6 3426.87 4
 0 -5 -20 77174.6 2998.62 3
 0 -5 21 7432.81 1130.7 4
 0 -5 -21 6655.08 973.483 3
 0 -5 -22 17584.3 1519.59 3
 0 -5 22 18195.8 1715.22 4
 0 -5 -23 -269.425 385.531 3
 0 -5 23 347.652 469.579 4
 0 -5 24 3339.6 880.831 4
 0 -5 -24 3258.77 678.19 3
 0 -6 0 113941 2286.84 4
 0 -6 0 108496 1350.15 3
 0 6 0 109004 1973.76 2
 0 6 1 68979.5 1591.24 2
 0 6 -1 66524.2 1455.2 2
 0 -6 -1 71736.1 1807.45 4
 0 -6 1 67153.4 1750.12 4
 0 -6 -1 68833.3 1147.35 3
 0 -6 2 3173.75 398.052 4
 0 -6 -2 3311.4 442.245 4
 0 6 -2 3379.42 340.775 2
 0 6 2 2897.21 378.127 2
 0 -6 -2 4438.94 341.947 3
 0 6 3 183822 2944.98 2
 0 6 -3 181631 2343.32 2
 0 -6 -3 186619 3154.58 4
 0 -6 3 185701 3103.75 4
 0 -6 -3 185438 2441.32 3
 0 -6 4 34615.8 1336.75 4
 0 -6 -4 34115.2 1031.4 3
 0 6 -4 32830.5 844.056 2
 0 6 4 36748.5 1276.16 2
 0 6 4 33449.2 1038.18 1
 0 -6 5 33116.7 1329.28 4
 0 6 -5 31643.2 771.674 2
 0 -6 5 34496.3 838.884 2
 0 6 5 31310.9 980.686 1
 0 6 5 30054 1221.96 2
 0 -6 -5 33396.3 1089.17 3
 0 -6 6 16908.5 543.857 2
 0 6 6 14498.9 907.075 2
 0 -6 -6 17110.5 828.119 3
 0 6 -6 15647.5 488.931 2
 0 -6 6 16969.2 1013.28 4
 0 6 6 15802.7 669.171 1
 0 -6 -7 35422.5 1256.8 3
 0 6 -7 32336.3 752.017 3
 0 6 7 32678.3 1380.05 2
 0 6 7 32893.5 932.055 1
 0 -6 7 34813.3 1502.17 4
 0 6 -7 30159 622.914 2
 0 6 -8 16835.3 600.185 3
 0 -6 8 15278.4 1047.13 4
 0 -6 -8 16322.3 884.913 3
 0 6 8 16620.7 1020.41 2
 0 -6 -9 701.439 231.692 3
 0 6 -9 928.642 182.194 3
 0 6 9 1306.1 309.951 2
 0 6 -10 789.499 174.534 3
 0 -6 -10 1074.66 260.387 3
 0 -6 10 346.099 266.923 4
 0 6 10 855.457 341.086 2
 0 6 11 9878.4 842.186 2
 0 6 -11 9461.94 581.918 3
 0 -6 -11 9032.78 767.761 3
 0 -6 11 10906.5 1011.91 4
 0 -6 12 5811.88 770.752 4
 0 6 -12 5820.05 489.098 3
 0 -6 -12 5377.48 610.942 3
 0 6 -13 69128.9 1794.13 3
 0 -6 13 68858.8 2625.53 4
 0 -6 -13 71044.2 2301.67 3
 0 -6 14 17805.8 1366.78 4
 0 -6 -14 16581 1182.16 3
 0 6 -14 16502.6 923.031 3
 0 -6 -15 64273.9 2353.93 3
 0 6 -15 61187.6 1860.21 3
 0 -6 15 63920.1 2689.85 4
 0 6 -16 10787.1 817.626 3
 0 -6 -16 11041.6 1037.66 3
 0 -6 16 11215.3 1200.28 4
 0 -6 -17 97447 3155.64 3
 0 -6 17 96883.2 3483.81 4
 0 -6 -18 8471.64 1048.58 3
 0 -6 18 6557.31 952.082 4
 0 -6 -19 129040 3855.61 3
 0 -6 19 121765 4213.49 4
 0 -6 20 1220.99 560.913 4
 0 -6 -20 908.946 587.513 3
 0 -6 -21 37060 2178.33 3
 0 -6 21 37737.6 2441.72 4
 0 -6 -22 1535.74 589.677 3
 0 -6 22 2164.69 774.585 4
 0 -6 23 7477.34 1169.51 4
 0 -6 -23 5818.67 935.566 3
 0 7 0 19.4097 145.65 2
 0 -7 0 444.565 233.732 4
 0 -7 0 164.572 97.6326 3
 0 -7 -1 108441 1556.25 3
 0 -7 1 106141 2394.43 4
 0 7 -1 107950 2008.78 2
 0 7 1 107114 2169.26 2
 0 -7 -1 107418 2412.69 4
 0 -7 1 102559 1224.71 3
 0 -7 -2 48038.1 1608.68 4
 0 -7 -2 47702.8 1088.64 3
 0 -7 2 47802.4 1584.3 4
 0 7 2 45235.5 1454.14 2
 0 7 -2 46926.6 1249.82 2
 0 7 3 10563 712.771 2
 0 -7 3 11268.2 791.918 4
 0 -7 -3 11454.4 565.121 3
 0 -7 -3 11710.3 806.25 4
 0 7 -3 9691.35 548.846 2
 0 -7 -4 49052.6 1277.72 3
 0 7 4 46982.6 1364.08 1
 0 7 -4 46307.9 1119.97 2
 0 7 4 45838.5 1560.64 2
 0 -7 4 48233.6 1664.51 4
 0 -7 -4 46799.1 1700.76 4
 0 7 5 3681.3 382.749 1
 0 7 5 3041.1 402.097 2
 0 -7 5 3668.04 492.086 4
 0 -7 -5 3691.56 398.634 3
 0 7 -5 3352.2 289.644 2
 0 7 -6 53519.7 1062.87 2
 0 -7 6 55871.3 1888.5 4
 0 7 6 54271.8 1835.47 2
 0 7 6 54724.5 1421.12 1
 0 -7 -6 57678 1558.14 3
 0 7 -7 430.758 96.9902 2
 0 7 7 322.097 222.927 2
 0 7 -7 215.874 57.9454 3
 0 -7 7 614.098 283.292 4
 0 -7 -7 245.289 178.974 3
 0 7 -8 13909 417.217 2
 0 -7 -8 17206.7 941.956 3
 0 7 -8 13686.9 497.952 3
 0 -7 8 18656.2 1193.42 4
 0 7 8 16266.4 716.729 1
 0 7 8 17818.3 1095.86 2
 0 -7 9 306.866 282.346 4
 0 7 -9 527.944 142.038 3
 0 -7 -9 610.22 233.033 3
 0 7 9 455.321 314.486 2
 0 7 -9 183.005 50.8852 2
 0 -7 -10 2253.81 381.499 3
 0 7 -10 1790.37 237.63 3
 0 7 10 1502.18 387.743 2
 0 7 11 6548.83 715.875 2
 0 -7 -11 6507.75 666.376 3
 0 7 -11 6463.48 466.311 3
 0 -7 11 6298.54 792.104 4
 0 -7 -12 458.123 245.121 3
 0 -7 12 1194.6 474.349 4
 0 7 -12 659.144 210.28 3
 0 -7 -13 53289.8 2036 3
 0 -7 13 52305.2 2339.33 4
 0 -7 14 71304.7 2805.75 4
 0 -7 -14 71650.6 2487.98 3
 0 -7 -15 32720.4 1713.05 3
 0 -7 15 33442.1 1978.26 4
 0 -7 16 114669 3767.05 4
 0 -7 -16 114022 3330 3
 0 -7 -17 14002.4 1236.88 3
 0 -7 17 12517.9 1298.2 4
 0 -7 -18 108557 3461.12 3
 0 -7 18 107754 3841.54 4
 0 -7 19 -275.573 459.785 4
 0 -7 -19 762.33 497.894 3
 0 -7 -20 45815.2 2399.57 3
 0 -7 20 49591.1 2743.45 4
 0 -7 -21 12138.3 1292.24 3
 0 -7 21 13181.7 1501.09 4
 0 -7 22 10859.9 1448.28 4
 0 -7 -22 11725 1309.54 3
 0 -7 23 19311 1859.89 4
 0 -8 0 65209.1 1087.36 3
 0 -8 0 66809.5 1982.58 4
 0 8 0 64412.2 1704.16 2
 0 -8 1 299.019 70.5697 3
 0 -8 -1 171.132 132.438 3
 0 8 -1 585.95 239.572 2
 0 -8 1 316.365 77.7743 3
 0 -8 1 -114.561 213.149 4
 0 -8 -1 141.992 219.896 4
 0 8 1 82.0194 156.59 2
 0 8 -2 4806.01 445.393 2
 0 8 2 4591.21 502.759 2
 0 -8 2 5520.27 581.53 4
 0 -8 -2 4564.14 550.552 4
 0 -8 -2 5430.75 383.282 3
 0 8 -3 4738.3 422.699 2
 0 -8 -3 5482.13 415.436 3
 0 -8 -3 5503.19 605.414 4
 0 8 3 4773.46 520.571 2
 0 -8 3 5599.38 611.712 4
 0 8 4 1038.03 263.207 2
 0 -8 -4 1400.16 253.823 3
 0 8 -4 1767.46 258.304 2
 0 8 4 971.597 267.76 1
 0 -8 4 1333.55 389.633 4
 0 -8 -4 1493.12 363.374 4
 0 8 -5 38332.3 1046.94 2
 0 -8 5 40256.9 1657.92 4
 0 8 5 40763.2 1341.03 1
 0 -8 -5 39978.6 1688.99 4
 0 -8 -5 42481.3 1302.33 3
 0 8 5 39447.9 1574.44 2
 0 8 6 8900.27 787.191 2
 0 8 6 9285.74 639.055 1
 0 8 -6 8409.47 455.148 2
 0 -8 -6 9822.88 672.495 3
 0 -8 6 9660.79 853.549 4
 0 8 7 46659 1379.39 1
 0 -8 7 48167 1917.04 4
 0 -8 -7 47170 1531.17 3
 0 8 7 49430.8 1843.79 2
 0 8 8 50510.9 1387.52 1
 0 8 8 50771.7 1934.95 2
 0 -8 -8 54284.1 1718.37 3
 0 8 -8 47185.2 927.64 2
 0 -8 8 53702 2083.74 4
 0 -8 -9 9643.32 778.464 3
 0 -8 9 9510 907.432 4
 0 8 9 9621.76 878.848 2
 0 8 10 28072.2 1507.14 2
 0 -8 10 27304.1 1589.73 4
 0 -8 -10 28516.8 1361.33 3
 0 -8 11 4287.85 660.405 4
 0 -8 -11 3598.86 513.504 3
 0 -8 12 49593.5 2281.61 4
 0 -8 -12 51124.4 1983 3
 0 -8 13 24469.4 1639.24 4
 0 -8 -13 25768.9 1435.9 3
 0 -8 14 33253.6 1953.08 4
 0 -8 -14 32844.7 1684.07 3
 0 -8 -15 29890.5 1665.04 3
 0 -8 15 25935.9 1805.59 4
 0 -8 16 10003.2 1139.06 4
 0 -8 -16 9694.55 1012.15 3
 0 -8 -17 50895.3 2365.08 3
 0 -8 17 50849.4 2637.92 4
 0 -8 18 1455.94 553.312 4
 0 -8 -18 1034.86 474.918 3
 0 -8 19 32221.6 2161.6 4
 0 -8 -19 33537.2 2001.4 3
 0 -8 20 8849.3 1197.05 4
 0 -8 -20 8063.27 1033.56 3
 0 -8 -21 10292 1219.32 3
 0 -8 21 10530 1356.12 4
 0 -8 22 44672.2 2810.25 4
 0 -8 -22 46475.8 2570.92 3
 0 9 0 84.2775 174.963 2
 0 -9 0 248.794 97.0295 3
 0 -9 1 3790.43 217.537 3
 0 -9 -1 4547.84 600.128 4
 0 9 -1 3326 448.91 2
 0 -9 1 4956.71 615.133 4
 0 -9 -1 4761.4 328.588 3
 0 9 1 3630.62 471.733 2
 0 -9 -2 1871.62 249.879 3
 0 9 2 1297.46 277.299 2
 0 -9 2 1759.65 342.323 4
 0 9 -2 1578.58 306.778 2
 0 -9 -2 1462.93 409.332 4
 0 -9 3 571.644 237.064 4
 0 -9 -3 551.427 312.512 4
 0 9 -3 599.558 175.485 2
 0 -9 -3 723.958 194.736 3
 0 9 3 432.479 226.102 2
 0 -9 -4 19826.2 854.589 3
 0 -9 4 18815.5 1165.72 4
 0 9 4 17531.9 1053.52 2
 0 9 4 17366 979.362 1
 0 9 -4 16013.3 767.798 2
 0 -9 -4 20222.5 1240.08 4
 0 -9 -5 1195.28 353.76 4
 0 -9 5 1227.43 387.507 4
 0 -9 -5 997.478 256.999 3
 0 9 5 1122.99 320.305 2
 0 9 -5 745.625 186.77 2
 0 9 5 1029.12 309.56 1
 0 9 6 33067.2 1549.18 2
 0 9 6 35526.1 1341.26 1
 0 -9 -6 36772 1768.52 4
 0 9 -6 32029.4 984.018 2
 0 -9 -6 36451.4 1315.09 3
 0 -9 6 35277.1 1685.83 4
 0 -9 7 30769.7 1613.06 4
 0 9 7 30321.6 1536.27 2
 0 9 7 30376.9 1202.7 1
 0 -9 -7 33785.5 1329.69 3
 0 9 -7 27963.3 855.143 2
 0 -9 -8 14960 924.045 3
 0 9 8 14261.3 1068.24 2
 0 -9 8 14339.1 1123.83 4
 0 9 8 14087.8 805.871 1
 0 -9 9 49546.2 2169.88 4
 0 9 9 48165.5 2009.01 2
 0 -9 -9 49550.1 1771.29 3
 0 -9 10 3804.42 669.953 4
 0 9 10 4666.82 732.312 2
 0 -9 -10 4005.77 568.09 3
 0 -9 11 73354.7 2782.15 4
 0 -9 -11 74246.9 2328.82 3
 0 -9 -12 6315.57 738.898 3
 0 -9 12 5821.13 815.617 4
 0 -9 -13 71127.8 2490.26 3
 0 -9 13 70739.4 2844.66 4
 0 -9 14 621.925 430.265 4
 0 -9 -14 1845.02 490.031 3
 0 -9 15 31988.1 2004.26 4
 0 -9 -15 33062.9 1794.08 3
 0 -9 -16 1160.43 369.652 3
 0 -9 16 431.453 412.598 4
 0 -9 17 5294.17 945.368 4
 0 -9 -17 4680.32 729.482 3
 0 -9 18 1224.57 532.039 4
 0 -9 -18 2055.23 523.956 3
 0 -9 19 3986.39 884.058 4
 0 -9 -19 4956.7 804.556 3
 0 -9 -20 4149.77 785.033 3
 0 -9 20 5552.01 967.688 4
 0 -9 -21 33287.1 2124.21 3
 0 -9 21 32401.7 2350.01 4
 0 10 0 16309.9 973.379 2
 0 -10 0 19397.1 1209.6 4
 0 -10 -1 644.576 162.906 3
 0 10 1 406.904 194.091 2
 0 -10 -1 571.482 387.45 4
 0 -10 1 853.902 336.616 4
 0 10 -1 544.484 265.354 2
 0 -10 -2 12937.1 610.458 3
 0 -10 -2 13205.8 1023.07 4
 0 -10 2 12338 963.039 4
 0 10 -2 9120.9 684.938 2
 0 10 2 9605.22 812.883 2
 0 10 -3 329.09 188.827 2
 0 -10 -3 -117.052 325.454 4
 0 10 3 -105.403 238.082 2
 0 -10 -3 96.1033 148.566 3
 0 -10 3 319.497 280.769 4
 0 -10 4 16504.5 1139.22 4
 0 10 -4 14931.3 804.146 2
 0 -10 -4 17239.1 1200.68 4
 0 10 4 15185.5 962.917 1
 0 10 4 15113.8 1046.58 2
 0 -10 -4 16616.5 807.54 3
 0 10 -5 21.9476 134.588 2
 0 -10 5 439.626 273.008 4
 0 10 5 -78.9514 260.208 2
 0 10 5 -32.9378 216.477 1
 0 -10 -5 141.234 156.042 3
 0 -10 -5 763.09 349.672 4
 0 -10 -6 1487.24 310.632 3
 0 10 6 1035.34 326.651 2
 0 -10 6 1414.75 437.611 4
 0 10 6 782.028 281.538 1
 0 -10 -6 2194.08 505.427 4
 0 10 7 591.715 293.552 2
 0 10 7 700.619 245.059 1
 0 -10 -7 301.843 306.826 4
 0 -10 7 823.32 393.328 4
 0 -10 -7 1021.6 303.323 3
 0 -10 -8 25406.2 1236.46 3
 0 -10 -8 26112.3 1614.57 4
 0 10 8 23414.7 1452.91 2
 0 -10 8 23664.6 1507.72 4
 0 -10 -9 15931.2 1038.71 3
 0 -10 9 15617.9 1256.03 4
 0 10 9 14211.3 1155.59 2
 0 -10 10 40729.4 2068.21 4
 0 -10 -10 42382.4 1735.16 3
 0 -10 11 11433.4 1164.35 4
 0 -10 -11 12405.3 1001.67 3
 0 -10 -12 94309.9 2815.63 3
 0 -10 12 92638.3 3298.44 4
 0 -10 13 5455.2 878.406 4
 0 -10 -13 6516.42 785.371 3
 0 -10 -14 58162.6 2350.24 3
 0 -10 14 54528.9 2635.68 4
 0 -10 15 4988.59 863.959 4
 0 -10 -15 6677.19 849.264 3
 0 -10 -16 7456.76 933.57 3
 0 -10 16 7282.59 1072.17 4
 0 -10 17 2497.54 619.947 4
 0 -10 -17 3101.22 631.285 3
 0 -10 18 872.475 498.423 4
 0 -10 -18 999.355 383.618 3
 0 -10 19 1884.5 652.775 4
 0 -10 -19 2745.35 630.829 3
 0 -10 -20 9071.42 1147.99 3
 0 -10 20 8903.14 1278.56 4
 0 -11 0 265.809 340.057 4
 0 11 0 235.192 294.465 2
 0 11 1 144280 3186.21 2
 0 11 -1 143612 3013.29 2
 0 -11 1 148176 3620.34 4
 0 -11 -1 149824 3634.16 4
 0 11 2 1584.31 405.262 2
 0 -11 -2 2212.44 515.285 4
 0 11 -2 1320.05 343.805 2
 0 -11 2 1679.2 442.674 4
 0 -11 3 76608.8 2584.72 4
 0 11 3 69094.3 2239.82 1
 0 11 -3 69475.9 1923.81 2
 0 11 3 66300.6 2235.14 2
 0 -11 -3 75484.1 2592.85 4
 0 11 4 3382.46 523.865 1
 0 11 4 2985.01 538.14 2
 0 11 -4 3064.83 401.664 2
 0 -11 -4 3420.72 571.673 4
 0 -11 4 3974.67 648.771 4
 0 -11 -5 20476.8 1394.13 4
 0 11 5 17391.8 1176.52 2
 0 -11 -5 20129.6 970.24 3
 0 -11 5 19191.4 1316.65 4
 0 11 5 19060 1142.93 1
 0 -11 -6 8947.15 923.561 4
 0 -11 6 8092.33 884.733 4
 0 11 6 8235.16 848.324 2
 0 -11 -6 9161.51 698.633 3
 0 11 6 7629.67 728.549 1
 0 -11 -7 1662.94 538.881 4
 0 -11 -7 2534.15 396.624 3
 0 -11 7 2350.74 571.435 4
 0 11 7 1030.86 366.15 2
 0 -11 -8 -62.2922 300.143 3
 0 -11 -8 292.984 326.403 4
 0 -11 8 554.579 350.38 4
 0 11 8 -284.143 378.13 2
 0 -11 -9 44018.5 2228.14 4
 0 -11 -9 42776.6 1716.27 3
 0 -11 9 42583.6 2139.86 4
 0 -11 10 1443.9 415.995 4
 0 -11 -10 2148.01 423.559 3
 0 -11 11 70409.8 2896.74 4
 0 -11 -11 72952.7 2438.28 3
 0 -11 -12 6394.56 784.35 3
 0 -11 12 5147.91 828.676 4
 0 -11 -13 60654.7 2376.49 3
 0 -11 13 59586.5 2765.53 4
 0 -11 14 23081.5 1778.16 4
 0 -11 -14 26313.6 1611.75 3
 0 -11 15 21433.9 1756.5 4
 0 -11 -15 22113.8 1536.16 3
 0 -11 -16 16000.6 1363.4 3
 0 -11 16 16327.3 1547.27 4
 0 -11 17 12939.1 1423.98 4
 0 -11 -17 12404.5 1247.08 3
 0 -11 -18 6397.61 891.897 3
 0 -11 18 6445.52 1029.39 4
 0 -11 -19 51.8706 333.47 3
 0 -11 19 488.502 522.93 4
 0 -12 0 154692 3815.49 4
 0 12 0 143839 3254.93 2
 0 12 -1 1426.65 426.479 2
 0 -12 -1 675.77 407.845 4
 0 12 1 1259.38 443.752 2
 0 -12 1 876.742 353.106 4
 0 12 2 101353 2816.85 2
 0 12 -2 97821.2 2506.99 2
 0 -12 -2 112625 3268.9 4
 0 -12 2 111233 3241.43 4
 0 12 3 125.101 346.856 1
 0 12 3 383.577 265.042 2
 0 12 -3 1290.34 373.655 2
 0 -12 3 627.745 290.024 4
 0 -12 -3 606.767 409.745 4
 0 -12 4 25178.7 1572.64 4
 0 -12 -4 24157.7 1595.42 4
 0 12 4 24386.6 1381.16 1
 0 12 4 23071.4 1392.9 2
 0 -12 -5 526.449 329.408 4
 0 -12 5 833.152 395.441 4
 0 12 5 243.39 259.614 1
 0 12 5 -200.065 470.837 2
 0 -12 6 2118.12 554.055 4
 0 12 6 1097.49 393.274 2
 0 -12 -6 2308.51 621.51 4
 0 -12 -7 5894.94 835.416 4
 0 -12 7 6788.3 881.808 4
 0 -12 8 3908.15 746.299 4
 0 -12 -8 3867.74 741.637 4
 0 -12 9 152.884 354.195 4
 0 -12 -9 26.799 425.283 4
 0 -12 -10 26524 1427.06 3
 0 -12 10 22671.5 1686.11 4
 0 -12 -10 23237.3 1760.69 4
 0 -12 -11 705.651 336.081 3
 0 -12 -11 780.056 413.143 4
 0 -12 11 376.965 457.491 4
 0 -12 -12 49173.5 2089.82 3
 0 -12 12 47159 2499.04 4
 0 -12 -13 18893.4 1345.92 3
 0 -12 13 18430.2 1591.33 4
 0 -12 14 31925.2 2162.71 4
 0 -12 -14 33826.8 1849.34 3
 0 -12 15 31063.1 2148.02 4
 0 -12 -15 30284.8 1821.48 3
 0 -12 16 17973.9 1695.78 4
 0 -12 -16 18606.9 1489.05 3
 0 -12 -17 19994.2 1558.35 3
 0 -12 17 19305.9 1796.64 4
 0 -12 -18 2218.61 562.144 3
 0 -12 18 2766.86 789.857 4
 0 -13 0 1588.69 452.65 4
 0 -13 -1 29626.5 1773.34 4
 0 -13 1 33006.4 1818.35 4
 0 -13 -2 10075.5 1030.83 4
 0 13 2 8069.49 943.378 1
 0 -13 2 9105.42 994.194 4
 0 -13 -3 29592.9 1772.9 4
 0 13 3 26192.8 1560.04 1
 0 -13 3 27622.9 1715.54 4
 0 -13 -4 27064.1 1726.54 4
 0 13 4 24902.1 1482.86 1
 0 -13 4 26296.1 1687.62 4
 0 -13 -5 7349.2 980.296 4
 0 -13 5 7961.59 959.722 4
 0 -13 -6 30583.9 1872.16 4
 0 -13 6 29552.2 1823.65 4
 0 -13 7 105.141 339.886 4
 0 -13 -7 91.8338 334.331 4
 0 -13 8 8499.04 1060.82 4
 0 -13 -8 10076.9 1151.16 4
 0 -13 -9 2124.28 633.436 4
 0 -13 9 1196.72 453.787 4
 0 -13 10 2233.23 560.604 4
 0 -13 -10 1325.98 386.921 4
 0 -13 11 11982.5 1329.61 4
 0 -13 -11 12131.2 1364.27 4
 0 -13 12 380.347 507.95 4
 0 -13 -12 331.111 441.127 4
 0 -13 -13 12804 1469.95 4
 0 -13 13 13253.8 1401.06 4
 0 -13 14 10752.8 1272.38 4
 0 -13 -14 13262.3 1589 4
 0 -13 15 11282.7 1331.05 4
 0 -13 16 14555.8 1576.83 4
 0 -14 0 19022 1461.13 4
 0 -14 -1 7852.01 971.159 4
 0 -14 1 7119.75 934.819 4
 0 14 1 5351.89 831.652 1
 0 14 2 12188.8 1130.33 1
 0 -14 2 15410.4 1328.53 4
 0 -14 -2 14882.8 1315.59 4
 0 14 3 40514.7 2007.43 1
 0 -14 -3 41445.2 2210.34 4
 0 -14 3 42316.2 2210.1 4
 0 -14 -4 9010.94 1076.76 4
 0 -14 4 8183.26 1037.11 4
 0 -14 5 78596.6 3050.48 4
 0 -14 -5 78767.6 3118.55 4
 0 -14 -6 1151.76 524.343 4
 0 -14 6 366.014 371.405 4
 0 -14 -7 56614.8 2701.57 4
 0 -14 7 57627.3 2682.26 4
 0 -14 -8 -58.2371 420.84 4
 0 -14 8 -769.363 567.288 4
 0 -14 -9 39838.1 2361.09 4
 0 -14 9 34387.7 2165.72 4
 0 -14 10 1120.03 530.076 4
 0 -14 -10 1179.87 622.99 4
 0 -14 -11 21676.9 1870.22 4
 0 -14 11 19069.5 1650.65 4
 0 -14 -12 718.631 469.453 4
 0 -14 12 252.464 451.175 4
 0 -14 -13 572.316 538.31 4
 0 -14 13 -770.857 543.576 4
 0 -14 14 1812.43 571.483 4
 0 -14 -14 3402.8 833.074 4
 0 15 0 -22.2626 370.729 1
 0 -15 0 704.5 371.816 4
 0 -15 -1 1502.31 433.827 4
 0 15 1 1429.04 451.073 1
 0 -15 1 1427.58 532.609 4
 0 -15 2 14713.8 1361.66 4
 0 15 2 11330.6 1180.17 1
 0 -15 -2 15556.4 1411.99 4
 0 -15 3 1391.93 395.943 4
 0 -15 -3 1149.98 384.579 4
 0 -15 -4 55707.5 2682.18 4
 0 -15 4 54993.4 2636.4 4
 0 -15 5 702.771 547.891 4
 0 -15 -5 294.894 365.096 4
 0 -15 -6 105521 3802.29 4
 0 -15 6 101862 3694.52 4
 0 -15 -7 2101.9 651.048 4
 0 -15 7 2316.05 662.017 4
 0 -15 -8 92973.8 3700.73 4
 0 -15 8 85331.7 3482.84 4
 0 -15 -9 1019.79 473.277 4
 0 -15 9 -64.1111 415.053 4
 0 -15 10 52579.4 2791.44 4
 0 -15 -10 58142.1 3015.74 4
 0 -15 11 140.414 392.059 4
 0 -15 -11 904.201 628.093 4
 0 -15 -12 9610.16 1333.9 4
 0 -15 12 11915.5 1404.02 4
 0 16 0 3074.34 652.195 1
 0 -16 0 3555.12 679.298 4
 0 -16 1 3905.29 768.064 4
 0 16 -1 3170.17 710.432 1
 0 -16 -1 4057.75 767.489 4
 0 -16 2 965.779 393.563 4
 0 16 -2 1404.89 585.712 1
 0 -16 -2 1127.42 456.684 4
 0 -16 -3 37871.1 2284.47 4
 0 -16 3 39173.4 2297.33 4
 0 -16 -4 831.715 436.651 4
 0 -16 4 1037.54 554.185 4
 0 -16 5 72924.9 3193.83 4
 0 -16 -5 75438.2 3237.73 4
 0 -16 -6 2084.62 698.211 4
 0 -16 6 1174.86 594.463 4
 0 -16 7 70670.8 3220.64 4
 0 -16 -7 73154.5 3315.07 4
 0 -16 8 2960.74 778.179 4
 0 -16 -8 3599.57 816.904 4
 0 -16 -9 38874.2 2515.46 4
 0 -16 9 37978.8 2421.06 4
 0 -17 0 230.061 427.453 4
 0 17 -1 21469.5 1809.44 1
 0 -17 -1 24557.4 1878.18 4
 0 -17 1 22337.5 1788.94 4
 0 -17 2 15766.5 1540.91 4
 0 17 -2 13616.9 1519.88 1
 0 -17 -2 13805.7 1411.36 4
 0 -17 -3 15706.8 1551.52 4
 0 17 -3 18407.2 1708.73 1
 0 -17 3 14189 1453.83 4
 0 -17 4 27786.7 2083.01 4
 1 0 -26 1494.82 512.047 3
 1 0 -25 392.663 325.935 3
 1 0 -24 5037.91 812.844 3
 1 0 -23 741.521 471.796 3
 1 0 -22 28211 1744.58 3
 1 0 -21 2636.87 642.936 3
 -1 0 21 2382.96 776.472 4
 1 0 -20 101919 3124.09 3
 -1 0 20 102720 3861.68 4
 1 0 -19 3283.23 769.648 3
 -1 0 19 6951.6 1193.76 4
 -1 0 18 209046 5236.97 4
 1 0 -18 201319 4239.65 3
 1 0 -17 4698.06 760.119 3
 -1 0 17 6157.47 1041.78 4
 1 0 -16 202030 3909.02 3
 -1 0 16 210084 4899.98 4
 1 0 -15 2089.95 454.878 3
 -1 0 15 2669.07 715.584 4
 1 0 -14 122756 2783.25 3
 -1 0 14 127667 3462.84 4
 -1 0 13 516.997 449.705 4
 1 0 -13 764.695 280.849 3
 -1 0 12 51248.5 1997.66 4
 1 0 -12 50382.5 1598.69 3
 -1 0 11 -205.505 326.519 4
 1 0 -11 518.469 256.872 3
 1 0 -10 2165.56 359.004 3
 -1 0 10 727.269 329.943 4
 -1 0 9 68.4473 137.565 2
 1 0 -9 90.1045 188.342 3
 -1 0 9 467.531 348.937 4
 -1 0 8 140161 2790.81 4
 -1 0 8 143073 1962.6 2
 1 0 -8 138923 2227.65 3
 1 0 -7 40.0435 87.6361 2
 -1 0 7 -147.07 186.268 4
 -1 0 7 260.954 94.9841 5
 -1 0 7 -25.9675 127.186 2
 1 0 -7 -6.63061 148.701 3
 1 0 -6 394367 3506.65 2
 -1 0 6 394226 4484.36 4
 -1 0 6 398467 3671.34 5
 1 0 -6 378108 3514.56 5
 -1 0 6 388631 3443.81 2
 1 0 -6 380845 3808.45 3
 1 0 -5 1406.1 163.03 2
 1 0 -5 1234.06 165.377 5
 -1 0 5 1518.9 281.176 4
 1 0 -5 1224.52 193.335 3
 -1 0 5 1321.79 170.124 2
 -1 0 5 1310.07 179.338 5
 -1 0 4 473111 3476.02 5
 1 0 -4 451998 3919.47 4
 1 0 -4 477949 3277.11 2
 -1 0 4 457663 3980.34 4
 1 0 3 155.835 142.164 4
 -1 0 -3 173.03 125.863 4
 1 0 3 229.498 98.399 3
 -1 0 -3 298.183 130.206 3
 1 0 4 109813 1550.55 3
 1 0 4 108393 1845.03 4
 -1 0 -4 106711 1563.43 3
 -1 0 -5 458.036 151.991 3
 1 0 5 437.362 186.946 4
 1 0 6 89841.1 1971.89 4
 -1 0 -6 89551.7 1657.67 3
 1 0 7 587.601 320.816 4
 -1 0 -7 525.441 207.624 3
 -1 0 -8 144594 2435.47 3
 1 0 8 143375 2879.82 4
 -1 0 -9 693.049 334.278 3
 1 0 9 1307.48 527.128 4
 -1 0 -10 113076 2374.04 3
 1 0 10 109881 2778.75 4
 -1 0 -11 1323.24 393.236 3
 1 0 11 908.578 496.659 4
 -1 0 -12 27003.1 1233.68 3
 1 0 12 28628.4 1540.45 4
 1 0 13 182.217 288.284 4
 -1 0 -13 543.018 284.995 3
 1 0 14 2665.01 557.203 4
 -1 0 -14 2524.33 433.45 3
 -1 0 -15 -717.145 367.009 3
 1 0 15 540.583 404.611 4
 -1 0 -16 24337.5 1380.09 3
 1 0 16 23805.9 1670.73 4
 -1 0 -17 432.768 352.6 3
 1 0 17 705.237 480.632 4
 -1 0 -18 54994.9 2237.19 3
 -1 0 -19 1512.51 594.404 3
 -1 0 -20 33124.3 1881.1 3
 -1 0 -21 1050.58 509.943 3
 -1 0 -22 6830.01 923.283 3
 -1 0 -23 -245.254 397.085 3
 -1 0 -24 616.236 390.578 3
 -1 0 -25 -118.281 490.2 3
 1 1 -27 3974.21 774.647 3
 1 -1 -26 3049.16 655.23 3
 1 1 -26 2512.13 531.216 3
 1 -1 -25 687.277 347.496 3
 1 1 -25 132.683 323.616 3
 1 1 -24 4520.26 802.92 3
 -1 -1 24 6341.2 1195.22 4
 1 -1 -24 4902.06 780.21 3
 -1 -1 23 17291.3 1777.29 4
 1 1 -23 17070.1 1368.47 3
 1 -1 -23 15314.7 1333.96 3
 1 1 -22 727.889 356.284 3
 1 -1 -22 17.4399 347.902 3
 -1 -1 21 40274.7 2688.07 4
 1 1 -21 34121.2 1816.6 3
 1 -1 -21 35252 1941.79 3
 1 1 -20 3646.99 695.8 3
 1 -1 -20 2846.41 636.406 3
 -1 -1 20 3452.78 824.521 4
 1 -1 -19 106151 3115.87 3
 -1 -1 19 111512 3848.65 4
 1 1 -19 111421 3126.88 3
 1 -1 -18 3945.46 727.336 3
 1 1 -18 4145.02 720.267 3
 -1 -1 18 2774.21 855.403 4
 -1 1 17 141888 4161.38 4
 -1 -1 17 136683 4036.88 4
 1 1 -17 131343 3168.4 3
 1 -1 -17 132048 3284.71 3
 1 1 -16 3253.53 569.935 3
 -1 1 16 3494.11 799.434 4
 -1 -1 16 1563.15 626.24 4
 1 -1 -16 604.797 426.438 3
 1 1 -15 88067.7 2363.47 3
 -1 -1 15 91661.8 3053.72 4
 -1 1 15 94128 3100.03 4
 1 -1 -15 91824.9 2546.55 3
 -1 1 14 52942.7 2234.42 4
 -1 -1 14 51438.1 2239.85 4
 1 1 -14 54132.3 1760.4 3
 1 -1 -14 51558 1821.86 3
 1 -1 -13 43828.6 1600.08 3
 -1 1 13 43800.5 1957.69 4
 1 1 -13 43171.9 1501.67 3
 -1 -1 13 44141.4 1944.91 4
 -1 -1 12 11967.7 1008.31 4
 -1 1 12 11047.4 942.871 4
 1 1 -12 11203.6 740.935 3
 1 -1 -12 11489.9 780.047 3
 -1 -1 11 -69.8741 345.724 4
 1 1 -11 -83.9144 185.737 3
 -1 1 11 326.638 310.154 4
 1 -1 -11 38.556 223.329 3
 -1 1 11 78.5684 215.514 2
 -1 1 10 3197.59 359.274 2
 -1 1 10 2460.33 582.543 4
 1 -1 -10 2073.7 381.573 3
 1 1 -10 2475.16 369.609 3
 -1 -1 10 2852.07 542.326 4
 1 1 -9 117202 2081.14 3
 -1 1 9 119033 2660.55 4
 -1 -1 9 114149 2667.3 4
 -1 1 9 121454 2041.32 2
 1 -1 -9 119077 2253.53 3
 1 1 -8 22609.1 809.691 3
 -1 1 8 22328.2 789.627 2
 1 1 -8 22427.8 625.215 2
 -1 1 8 21468.4 1061.82 4
 1 -1 -8 22340.4 649.913 5
 -1 -1 8 23251.4 1097.98 4
 1 -1 -8 22801.2 899.71 3
 1 1 -7 37582.3 748.031 2
 -1 1 7 36188.7 971.359 2
 1 -1 -7 38410.2 1075.55 3
 -1 1 7 35812.7 1276.75 4
 -1 -1 7 38257 751.585 2
 -1 -1 7 38592.8 1328.77 4
 1 -1 -7 38233.3 825.42 5
 1 1 -7 35707.6 965.024 3
 -1 -1 6 429.087 180.118 4
 1 1 -6 476.787 92.7667 2
 1 -1 -6 647.817 124.787 5
 -1 1 6 245.392 115.662 2
 -1 -1 6 472.215 82.0084 2
 1 1 -6 403.705 117.794 3
 1 -1 -6 356.131 132.782 3
 -1 1 6 384.091 178.916 4
 -1 -1 5 269229 3316.97 4
 -1 -1 5 280593 2876.57 5
 1 1 -5 276077 2687.39 3
 1 -1 -5 283604 2867.02 2
 -1 1 5 260380 3259.69 4
 -1 -1 5 280250 2225.07 2
 1 1 -5 254508 2200.93 2
 -1 1 5 273761 2793.96 2
 -1 -1 4 33020.4 935.629 4
 -1 1 4 34937.3 904.801 4
 -1 -1 4 34978.6 796.624 5
 1 1 -4 34123.9 957.393 4
 1 -1 -4 31810 853.885 4
 -1 1 4 31423.6 750.326 2
 1 -1 -4 34886.9 795.082 2
 -1 -1 3 438728 3684.32 4
 -1 -1 3 524232 3582.75 5
 1 1 -3 431240 3683.2 4
 1 1 2 48271.9 819.665 3
 -1 1 -2 52971.2 784.592 3
 -1 1 -2 54349.2 976.444 4
 -1 -1 -3 20136.7 607.585 3
 -1 1 -3 20149.1 703.115 4
 1 -1 3 18397.7 668.945 4
 -1 1 -3 19963.3 551.831 3
 1 1 3 19710.3 588.845 3
 1 -1 3 19648.6 525.785 3
 -1 -1 -4 248.357 137.585 3
 1 -1 4 363.11 173.95 4
 1 -1 4 615.921 123.33 3
 -1 1 -4 427.311 146.258 3
 1 -1 5 101408 1961.17 4
 -1 1 -5 99560.2 1588 3
 -1 -1 -5 102488 1716.39 3
 1 -1 6 15604.5 829.56 4
 -1 1 -6 15473.9 630.515 3
 -1 -1 -6 15492.9 697.113 3
 1 1 6 14787.6 390.285 5
 -1 -1 -7 86259 1779.56 3
 1 1 7 88067.8 1177.14 5
 -1 1 -7 84300.5 1667.62 3
 1 1 8 482.434 126.587 5
 -1 1 -8 760.228 277.629 3
 -1 -1 -8 581.425 314.354 3
 1 -1 8 335.49 331.207 4
 -1 1 -9 192986 2968.31 3
 1 -1 9 194448 3619.07 4
 1 1 9 199560 2278.47 5
 -1 -1 -9 198389 3177.17 3
 -1 1 -10 6665.05 609.846 3
 -1 -1 -10 7132.79 670.358 3
 1 -1 10 6781.72 779.458 4
 -1 1 -11 61227.8 1742.77 3
 1 -1 11 59859.2 2111.98 4
 -1 -1 -11 62181.7 1838.1 3
 1 -1 12 7874.91 843.583 4
 -1 1 -12 7619.32 673.08 3
 -1 -1 -12 8471.66 753.497 3
 1 -1 13 4945.99 702.041 4
 -1 -1 -13 5442.14 611.816 3
 -1 1 -13 6117.52 623.078 3
 -1 -1 -14 28796.2 1410.14 3
 -1 1 -14 28093.5 1346.8 3
 1 -1 14 26737.2 1617.35 4
 1 -1 15 12893.8 1196.38 4
 -1 -1 -15 11480.8 956.158 3
 -1 1 -15 12647 979.215 3
 -1 1 -16 14056.3 1051.2 3
 -1 -1 -16 13652.1 1072.78 3
 1 -1 16 13887.6 1293.64 4
 -1 -1 -17 83001.1 2699.41 3
 -1 1 -17 79582.2 2573.4 3
 1 -1 17 85926.8 3199.21 4
 -1 -1 -18 2033.95 612.431 3
 -1 1 -18 2162.34 596.784 3
 1 -1 18 2010.45 748.818 4
 -1 1 -19 63709.4 2495.7 3
 1 -1 19 66037.3 2969.88 4
 -1 -1 -19 60672.1 2460.58 3
 -1 -1 -20 4548.37 793.702 3
 -1 1 -20 3694.4 703.305 3
 1 -1 20 4271.19 875.649 4
 -1 -1 -21 26365.3 1756.92 3
 1 -1 21 29318.5 2120.99 4
 -1 1 -21 26665 1682.73 3
 -1 1 -22 9059.54 1059.41 3
 -1 -1 -22 6623.2 955.245 3
 -1 1 -23 5018.85 823.022 3
 -1 -1 -23 4550.99 756.225 3
 -1 1 -24 4285.78 784.665 3
 -1 -1 -24 5025.2 875.073 3
 -1 1 -25 866.278 420.877 3
 -1 -1 -25 1170.05 537.362 3
 -1 1 -26 4929.74 909.234 3
 1 2 -27 9687.4 1213.53 3
 1 -2 -26 4030.25 861.951 3
 1 2 -26 4099.89 831.7 3
 1 2 -25 17513.2 1459.85 3
 1 -2 -25 18432.5 1604.56 3
 -1 -2 25 20930.2 1955.76 4
 1 2 -24 1339.73 475.238 3
 -1 -2 24 1176.65 669.534 4
 1 -2 -24 944.167 466.185 3
 1 -2 -23 11951.2 1214.28 3
 -1 -2 23 15409.2 1633.44 4
 1 2 -23 13008.5 1222.57 3
 -1 -2 22 21220.8 1835.88 4
 1 -2 -22 21358.9 1594.28 3
 1 2 -22 18372 1351.89 3
 -1 -2 21 2617.1 711.923 4
 1 -2 -21 3185.66 670.883 3
 1 2 -21 2578.67 602.003 3
 1 2 -20 26217.2 1533.16 3
 -1 -2 20 28200.3 1962.59 4
 1 -2 -20 25321.3 1589.16 3
 -1 -2 19 579.38 519.994 4
 1 2 -19 897.261 363.964 3
 1 -2 -19 1422.27 500.467 3
 1 2 -18 61957.1 2180.49 3
 1 -2 -18 63466.7 2353.43 3
 -1 -2 18 66456.3 2856.79 4
 1 2 -17 18657 1159.51 3
 -1 -2 17 21560.8 1595.76 4
 1 -2 -17 18566.3 1241 3
 1 2 -16 16066.6 1043.84 3
 1 -2 -16 15832.2 1164.83 3
 -1 -2 16 17500.1 1422.99 4
 1 -2 -15 59731.4 2065.84 3
 -1 -2 15 58774.8 2427.43 4
 1 2 -15 59519.8 1900.85 3
 1 -2 -14 12016.4 934.666 3
 1 2 -14 12367.1 843.041 3
 -1 -2 14 12565.8 1119.02 4
 -1 -2 13 91504 2874.71 4
 1 2 -13 93950 2188.64 3
 1 -2 -13 91795.9 2404.76 3
 -1 2 12 5986.39 530.086 2
 1 -2 -12 6691.33 677.726 3
 1 2 -12 8199.27 687.056 3
 -1 -2 12 6514.64 750.97 4
 -1 2 11 212860 3257.66 2
 1 -2 -11 212504 3473.68 3
 -1 -2 11 207302 4042.52 4
 1 2 -11 214024 3155.64 3
 -1 2 10 27479.4 1065.91 2
 1 -2 -10 26973.8 741.25 5
 1 2 -10 28874.9 1015.86 3
 1 -2 -10 27955.6 1149.39 3
 1 2 -10 27175.5 688.643 2
 -1 -2 10 26585.6 1348.77 4
 -1 -2 9 58603.7 1905.45 4
 -1 2 9 59894.1 1493.7 2
 1 2 -9 59291.3 962.86 2
 1 -2 -9 60285.7 1102.39 5
 1 2 -9 60945 1399.55 3
 1 -2 -9 60660.2 1604.64 3
 1 2 -8 68921.8 954.38 2
 -1 -2 8 70468.4 1941.4 4
 1 -2 -8 70073.4 1151.03 5
 1 2 -8 71296.2 1428.11 3
 -1 2 8 69616.9 1568.81 2
 1 -2 -8 73163.5 1664.74 3
 1 2 -7 8300.99 258.851 2
 1 -2 -7 9700.23 564.044 3
 -1 -2 7 8844.67 659.83 4
 1 2 -7 9458.66 465.23 3
 -1 2 7 10203.8 577.284 2
 -1 -2 6 98346.2 2049.91 4
 1 -2 -6 99097.9 1748.95 3
 1 2 -6 98211.2 1446.12 3
 -1 2 6 99530.8 1726.62 2
 -1 2 5 65492.7 1301.13 2
 1 2 -5 65474.1 1021.79 3
 -1 -2 5 63251.4 1519.4 4
 -1 -2 4 320249 3617.99 4
 1 2 -4 333252 2724.77 3
 -1 2 4 324245 3365.39 2
 1 -2 -4 333333 3004.47 1
 -1 2 3 6639.1 369.377 2
 1 2 -3 5595.75 368.447 4
 -1 -2 3 5286.87 371.012 4
 1 -2 -3 5331.17 289.053 1
 1 -2 -3 5904.08 359.604 2
 -1 2 3 5469.82 301.403 1
 -1 2 2 167940 1789.97 2
 1 2 -2 161284 1875.39 4
 -1 2 2 169222 1691.59 1
 1 -2 -2 163365 1795.38 2
 -1 2 1 26861.9 629.988 2
 -1 2 1 25764 619.178 1
 -1 -2 1 21653.9 612.595 4
 1 2 -1 24015.2 649.824 4
 1 -2 -1 20113.9 543.254 2
 -1 -2 0 675.542 152.455 4
 -1 2 0 742.582 126.164 2
 -1 -2 0 151.883 48.548 3
 1 -2 0 433.781 72.4155 3
 1 -2 0 307.479 76.6819 4
 -1 -2 0 336.545 85.641 2
 -1 2 0 807.226 123.937 4
 1 -2 0 320.076 92.5193 2
 1 2 0 1017.84 101.062 3
 -1 2 -1 148704 1342.84 3
 -1 -2 -1 130832 1561.09 2
 1 2 1 151344 1442.37 3
 -1 2 -1 148159 1480.99 2
 -1 2 -1 153148 1603.67 4
 -1 2 -2 120578 1642.33 4
 -1 2 -2 113415 1342.14 2
 1 -2 2 107164 1237.63 3
 -1 -2 -2 101390 1404.73 3
 1 -2 2 104031 1543.44 4
 -1 -2 -2 115955 1621.09 2
 1 2 2 113644 1459.02 3
 -1 2 -2 112859 1312.57 3
 -1 2 -3 394928 3336.83 3
 1 -2 3 387407 3898.85 4
 1 -2 3 391246 3258.9 3
 -1 -2 -4 10457.2 508.857 3
 1 -2 4 11614.5 612.453 4
 -1 2 -4 10604.1 433.006 3
 1 -2 4 11552 419.251 3
 -1 2 -5 13166.8 529.627 3
 1 -2 5 13040.7 700.293 4
 -1 -2 -5 12846.9 606.564 3
 -1 2 -6 100570 1664.24 3
 -1 -2 -6 99779.3 1870.87 3
 1 -2 6 103614 2151.11 4
 -1 2 -7 5186.55 392.913 3
 -1 -2 -7 5035.42 488.607 3
 -1 -2 -8 388711 4577.07 3
 -1 2 -8 380098 4229.33 3
 1 -2 8 381201 5083.83 4
 -1 -2 -9 2586.99 571.391 3
 1 -2 9 2663.8 476.794 4
 -1 2 -9 2152.46 364.374 3
 -1 -2 -10 124329 2613.74 3
 1 -2 10 128164 3035.09 4
 -1 2 -10 127591 2418.91 3
 -1 2 -11 2718.97 438.941 3
 1 -2 11 1684.72 470.558 4
 -1 -2 -11 2476.43 498.287 3
 1 -2 12 9281.78 894.572 4
 -1 2 -12 7730.49 643.046 3
 -1 -2 -12 7215.07 698.215 3
 -1 2 -13 10900.7 791.056 3
 -1 -2 -13 11718.6 904.955 3
 1 -2 13 11078.7 1001.71 4
 -1 2 -14 2031.31 430.986 3
 -1 -2 -14 1136.55 343.694 3
 1 -2 14 1650.45 523.142 4
 -1 -2 -15 6354.25 744.741 3
 -1 2 -15 5161.77 597.014 3
 1 -2 15 5108.34 778.361 4
 -1 -2 -16 26336.2 1490.23 3
 1 -2 16 27216.2 1755.66 4
 -1 2 -16 26051.5 1377.37 3
 -1 2 -17 5353.71 755.238 3
 -1 -2 -17 4087.93 715.731 3
 1 -2 17 4620.42 832.366 4
 -1 2 -18 112253 3136.06 3
 1 -2 18 113867 3794.39 4
 -1 -2 -18 114659 3366.16 3
 -1 -2 -19 4865.35 824.417 3
 -1 2 -19 4535.44 760.58 3
 1 -2 19 4453.55 931.408 4
 1 -2 20 59611.9 2912.77 4
 -1 -2 -20 59363.2 2538.83 3
 -1 2 -20 52720.7 2291.23 3
 1 -2 21 8573.44 1176.5 4
 -1 2 -21 6634.94 885.206 3
 -1 -2 -21 7709.87 1051.53 3
 -1 2 -22 18962 1455.32 3
 1 -2 22 19611.3 1784.1 4
 -1 -2 -22 19377 1547.02 3
 -1 -2 -23 17074.1 1509.37 3
 -1 2 -23 16542.4 1406.25 3
 1 -2 23 19298.5 1804.63 4
 -1 -2 -24 4907.97 860.926 3
 -1 2 -24 3898.43 737.908 3
 -1 2 -25 15667.7 1469.12 3
 -1 -2 -25 15028.2 1474.71 3
 -1 2 -26 12.2552 407.389 3
 1 3 -26 15575.4 1405.69 3
 1 3 -25 3189.24 683.893 3
 1 -3 -25 3623.22 802.31 3
 -1 -3 24 31899.7 2320.42 4
 1 3 -24 25640.4 1686.73 3
 1 -3 -24 29558.8 1977.4 3
 1 -3 -23 828.986 467.718 3
 1 3 -23 1952.93 596.894 3
 -1 -3 23 1699.18 700.617 4
 1 3 -22 20169.1 1426.79 3
 1 -3 -22 21975.6 1614.16 3
 -1 -3 22 23071.2 1922.35 4
 1 3 -21 3305.4 591.465 3
 1 -3 -21 3664.77 692.858 3
 -1 -3 21 3427.43 897.657 4
 1 3 -20 6717.91 790.885 3
 -1 -3 20 7608.02 1138.12 4
 1 -3 -20 5686.22 801.941 3
 1 -3 -19 14501.4 1209.08 3
 1 3 -19 12818.3 1020.79 3
 -1 -3 18 6217.89 989.378 4
 1 -3 -18 7625.8 857.307 3
 1 3 -18 6360.96 707.982 3
 1 3 -17 2821.08 541.568 3
 1 -3 -17 2467.91 595.013 3
 -1 -3 17 2057.65 656.709 4
 -1 -3 16 77253.4 2955.37 4
 1 3 -16 79715.2 2265.65 3
 1 -3 -16 79090 2506.73 3
 1 -3 -15 1777.47 541.29 3
 1 3 -15 2413.47 489.995 3
 -1 -3 15 1138.21 389.296 4
 1 3 -14 81111.6 2088.8 3
 1 -3 -14 89099.9 2473.8 3
 -1 -3 14 87607.3 2879.4 4
 1 -3 -13 1093.81 439.254 3
 -1 3 13 1389.01 326.944 2
 1 3 -13 1423.42 367.472 3
 -1 -3 13 436.439 283.151 4
 1 3 -12 137790 2533.63 3
 1 3 -12 131754 1666.93 2
 -1 -3 12 142194 3445.82 4
 1 -3 -12 141565 2931.14 3
 -1 3 12 144185 2839.12 2
 -1 3 11 1503.54 306.732 2
 1 -3 -11 1660.78 173.838 5
 1 -3 -11 2141.85 420.454 3
 -1 -3 11 1604.82 360.834 4
 1 3 -11 1592.81 151.712 2
 1 3 -10 261243 3265.34 3
 1 -3 -10 260030 3830.59 3
 -1 -3 10 260972 4398.46 4
 1 -3 -10 261283 2615.43 5
 -1 3 10 266565 3756.67 2
 -1 -3 9 10234.8 816.949 4
 1 3 -9 9992.94 575.056 3
 -1 3 9 9439.09 664.864 2
 1 -3 -9 9934.75 677.174 3
 -1 3 8 307915 3912.78 2
 1 3 -8 309890 3298.66 3
 1 -3 -8 312239 3951.44 3
 -1 -3 8 306667 4465.96 4
 -1 3 7 61212.8 1510.48 2
 1 -3 -7 62684.1 1521.67 3
 1 3 -7 62759.4 1161.16 3
 1 -3 -7 65706.6 1171.6 1
 -1 -3 7 64291.6 1810.42 4
 -1 -3 6 178422 2945.85 4
 1 -3 -6 188163 2140.62 1
 -1 3 6 182091 2654.79 2
 1 3 -6 178520 1985.68 3
 1 -3 -6 179080 2557.52 3
 -1 3 5 4254.64 372.633 2
 1 -3 -5 4004.63 337.277 3
 1 3 -5 3576.57 207.402 3
 1 -3 -5 4343.21 283.23 1
 -1 -3 5 3917.12 425.414 4
 1 3 -4 6219.51 217.639 3
 1 -3 -4 7128.5 360.542 1
 -1 -3 4 6358.89 473.526 4
 -1 3 4 6148.47 344.299 1
 -1 3 4 5920.16 422.457 2
 -1 -3 3 12390.2 618.641 4
 -1 -3 3 14060.3 362.56 2
 -1 3 3 13298.9 594.691 2
 -1 3 3 13422.9 515.214 1
 -1 3 2 179953 2167.73 1
 -1 3 2 184217 2282.12 2
 1 -3 -1 54021.1 1086.7 2
 -1 -3 1 50764.2 1159.58 4
 1 -3 -1 50967.4 1018.94 4
 1 3 -1 47518.9 885.765 2
 -1 -3 1 53473.8 920.733 2
 -1 3 1 49559.7 1030.69 2
 1 -3 0 18993.7 587.843 2
 1 3 0 17982.9 413.938 3
 1 3 0 17917.7 560.785 2
 -1 -3 0 18691.1 583.429 2
 -1 -3 0 15655.2 393.151 3
 -1 3 0 18757.7 605.488 4
 1 -3 0 17862.4 428.23 3
 -1 -3 0 17104.9 678.674 4
 -1 3 0 17614.8 569.079 2
 1 -3 0 17336.8 568.893 4
 -1 3 -1 83155.8 1020.6 3
 -1 3 -1 88119.5 1424.05 4
 -1 3 -1 86361 1280.31 2
 1 3 1 85224.6 1400.44 2
 -1 -3 -1 85127.7 1166.34 3
 1 -3 1 86052.6 1393.53 4
 1 -3 1 87479.4 1050.16 3
 1 3 1 86865.1 1180.81 3
 1 -3 1 88740.6 1292.97 2
 -1 3 -2 139435 1503.63 3
 1 3 2 142897 1997.88 2
 1 -3 2 138883 1971.24 4
 -1 3 -2 142608 2022.2 4
 -1 3 -2 138865 1658.65 2
 1 3 2 139564 1771.7 3
 1 -3 2 141347 1676.13 2
 1 -3 2 143472 1475.97 3
 -1 -3 -2 138500 1748.19 3
 -1 3 -3 31736.7 675.56 3
 1 -3 3 33492.1 984.206 4
 -1 3 -3 31234.6 688.593 2
 1 -3 3 33269.4 643.414 3
 -1 -3 -3 32338 836.526 3
 1 -3 4 46063.9 1268.04 4
 -1 3 -4 46143.1 901.541 3
 1 -3 4 47041.2 841.87 3
 -1 3 -4 44913 853.227 2
 -1 -3 -4 46134.2 1094.25 3
 -1 -3 -5 45896.2 1191.03 3
 1 -3 5 46837.9 1372.25 4
 -1 3 -5 47695.5 996.081 3
 1 -3 5 47865 937.332 3
 -1 3 -6 182376 2325.96 3
 1 -3 6 182223 3024.67 4
 -1 -3 -6 183313 2707.62 3
 -1 3 -7 375687 3893.7 3
 -1 -3 -7 367596 4372.56 3
 1 -3 7 363911 4824.81 4
 -1 -3 -8 35933.7 1284.69 3
 -1 3 -8 32338.3 1026.75 3
 1 -3 8 32965.1 1384.98 4
 -1 3 -9 262454 3417.49 3
 -1 -3 -9 259660 3824.99 3
 1 -3 9 262758 4314.86 4
 -1 3 -10 1730.49 271.022 3
 1 -3 10 2282.47 452.498 4
 -1 -3 -10 2651.76 503.058 3
 1 -3 11 20272 1260.94 4
 -1 3 -11 18562.2 929.641 3
 -1 -3 -11 20066.7 1087.97 3
 -1 3 -12 39123.5 1395.37 3
 1 -3 12 41063.8 1866.34 4
 -1 -3 -12 40689.8 1635.43 3
 -1 3 -13 999.619 321.46 3
 -1 -3 -13 1929.7 444.541 3
 1 -3 13 1409.04 461.646 4
 -1 3 -14 9692.4 785.896 3
 1 -3 14 8403.6 895.353 4
 -1 -3 -14 9424.93 874.681 3
 1 -3 15 6273.26 868.841 4
 -1 -3 -15 6568.73 762.667 3
 -1 3 -15 5775.08 656.88 3
 -1 3 -16 20445.1 1211.78 3
 1 -3 16 22275.7 1585.61 4
 -1 -3 -16 22094.1 1391.69 3
 1 -3 17 44721.1 2289.29 4
 -1 -3 -17 43238.2 2007.68 3
 -1 -3 -18 2225.84 613.157 3
 -1 3 -18 1977.37 520.325 3
 1 -3 18 1315.79 469.69 4
 -1 3 -19 41870 1939.98 3
 1 -3 19 40586.2 2334.64 4
 -1 -3 -19 42262.6 2104.83 3
 -1 -3 -20 9455.86 1092.38 3
 1 -3 20 9947.46 1281.55 4
 -1 3 -20 9543.31 1000.25 3
 -1 -3 -21 32520.9 1968.82 3
 1 -3 21 32246.5 2228.72 4
 -1 3 -21 31109.8 1782.24 3
 -1 3 -22 18570.6 1465.33 3
 -1 -3 -22 19869.1 1614.01 3
 1 -3 22 19495.9 1817.97 4
 -1 -3 -23 23037.2 1769 3
 -1 3 -23 20954.2 1579.38 3
 1 -3 23 25497.2 2110.78 4
 1 -3 24 27250.9 2214.67 4
 -1 3 -24 22222.2 1647.24 3
 -1 -3 -24 26029.7 1926.37 3
 -1 3 -25 8375.42 1100.5 3
 -1 -4 25 43658.5 2885.43 4
 1 -4 -25 42901.4 2478.26 3
 -1 -4 24 5143.87 1092.75 4
 1 -4 -24 5462.09 957.155 3
 1 -4 -23 65481.8 2896.63 3
 -1 -4 23 66250.6 3298.75 4
 1 -4 -22 13587 1329.37 3
 -1 -4 22 13372.3 1467.47 4
 1 4 -22 11202.9 1061.5 3
 1 -4 -21 41755.1 2194.18 3
 -1 -4 21 41829.6 2533.35 4
 1 4 -21 37834.3 1851.51 3
 -1 -4 20 667.035 441.829 4
 1 -4 -20 1003.88 451.381 3
 1 4 -20 1273.32 365.522 3
 1 -4 -19 502.196 430.287 3
 -1 -4 19 1051.74 368.696 4
 1 4 -19 1121.68 342.429 3
 1 -4 -18 295.182 334.631 3
 -1 -4 18 950.79 477.203 4
 1 4 -18 636.751 216.658 3
 1 4 -17 6219.78 633.891 3
 1 -4 -17 6983.58 822.481 3
 -1 -4 17 8177.91 1055.53 4
 1 -4 -16 319.962 355.869 3
 -1 -4 16 366.519 427.884 4
 1 4 -16 424.149 245.709 3
 -1 -4 15 43661.3 2151.14 4
 1 -4 -15 40901 1769.38 3
 1 4 -15 40718.6 1494.04 3
 -1 -4 14 979.193 373.221 4
 1 4 -14 729.928 284.863 3
 1 -4 -14 1080.75 430.552 3
 -1 4 13 149373 3129.1 2
 -1 -4 13 146853 3739.41 4
 1 -4 -13 145264 1858.47 5
 1 4 -13 151084 2733.27 3
 1 -4 -13 149849 3236.68 3
 1 -4 -12 600.688 116.906 5
 -1 -4 12 687.11 287.929 4
 -1 4 12 241.89 233.594 2
 1 4 -12 835.939 301.22 3
 1 -4 -12 258.332 112.201 1
 1 -4 -12 182.093 362.699 3
 -1 4 11 245655 3945.63 2
 1 -4 -11 251295 3978.08 3
 1 -4 -11 257967 2842.59 1
 1 -4 -11 235416 2535.39 5
 1 4 -11 249102 3290.97 3
 -1 -4 11 238318 4539.63 4
 1 -4 -10 2008.31 426.608 3
 -1 4 10 1700.8 347.284 2
 -1 -4 10 1388.44 387.161 4
 1 4 -10 2183.38 305.48 3
 1 -4 -10 2094.14 223.552 1
 1 4 -9 263467 3074.78 3
 1 -4 -9 276042 2887.94 1
 -1 4 9 267317 3862.27 2
 1 -4 -9 263341 3813.27 3
 -1 -4 9 259727 4360.05 4
 1 4 -8 319.306 133.94 3
 -1 4 8 423.958 329.63 2
 1 -4 -8 99.0916 135.083 1
 1 -4 -8 294.668 215.133 3
 -1 -4 8 257.073 315.264 4
 -1 4 7 189354 2970.78 2
 -1 -4 7 185699 3276.62 4
 1 4 -7 178811 2068.41 3
 1 -4 -7 186129 2216.4 1
 1 -4 -7 183211 2838.02 3
 1 -4 -6 57034.1 1405.19 3
 1 4 -6 56087.5 903.18 3
 -1 -4 6 56592.8 1671.54 4
 -1 4 6 56499.6 1501.04 2
 1 4 -5 13881.5 352.326 3
 1 -4 -5 15009.6 667.708 3
 -1 4 5 13700.4 713.176 2
 -1 4 5 14164 581.897 1
 -1 -4 5 15366.3 825.384 4
 -1 4 4 18084.2 774.293 2
 -1 -4 4 18700 451.61 2
 -1 -4 4 17122.4 819.96 4
 -1 4 4 17477.7 652.488 1
 -1 -4 3 64620.4 1008.74 2
 -1 4 3 60955.9 1251.57 1
 -1 4 3 61863.7 1400.7 2
 -1 -4 3 61974.7 1502.37 4
 1 4 -3 58291.5 943.824 2
 1 -4 -2 13235.1 615.333 4
 -1 -4 2 12247.2 646.834 4
 1 4 -2 12688.5 466.361 2
 -1 -4 2 14551 506.1 2
 -1 4 2 12300.8 557.226 1
 -1 4 2 13058.6 603.688 2
 1 4 -1 132470 1783.55 2
 -1 4 1 129990 1963.86 2
 -1 -4 1 134080 2192.49 4
 1 -4 -1 133377 1986.03 4
 -1 -4 1 126376 1241.21 3
 -1 -4 0 828.237 221.804 4
 1 4 0 670.086 161.046 2
 -1 4 0 695.024 150.018 2
 1 -4 0 707.08 186.195 4
 -1 -4 0 633.789 99.9188 3
 1 4 0 825.855 108.21 3
 1 4 1 90970.4 1286.59 3
 -1 -4 -1 88094.8 1256.08 3
 -1 -4 -1 86937.6 1779.89 4
 1 -4 1 87559.7 1592.37 4
 -1 4 -1 86501.5 1435.84 2
 1 4 1 89111.1 1583.97 2
 1 -4 1 87973.3 1097.9 3
 1 -4 2 43974.1 947.361 2
 1 -4 2 42300.9 704.564 3
 -1 4 -2 42130.9 919.511 2
 1 4 2 43302.3 1131.83 2
 1 -4 2 42686.1 1119.71 4
 -1 -4 -2 40783.1 907.359 3
 -1 4 -2 40755.9 689.825 3
 -1 4 -3 87159.2 1328.02 2
 -1 -4 -3 87586.5 1504.27 3
 -1 4 -3 85453.8 1169.87 3
 1 -4 3 87935.6 1349.46 2
 1 -4 3 88847.8 1108.97 3
 1 -4 3 84590.2 1722.49 4
 1 -4 4 19179.4 860.79 4
 -1 -4 -4 19788.8 754.343 3
 -1 4 -4 19341.3 570.906 2
 1 4 4 18663.3 837.049 2
 1 -4 4 19877.7 507.603 3
 -1 4 -4 18739.4 556.671 3
 -1 -4 -5 279597 3387.11 3
 -1 4 -5 284995 2871.17 3
 1 -4 5 280735 3816.88 4
 -1 4 -5 279921 2702.83 2
 1 -4 5 280924 2669.64 3
 -1 -4 -6 152185 2487.38 3
 -1 4 -6 148338 2024.98 3
 1 -4 6 154517 2843.11 4
 -1 4 -6 147391 1790.47 2
 -1 4 -7 113474 1569.66 2
 1 -4 7 118035 2577.74 4
 -1 -4 -7 120593 2313.88 3
 -1 4 -7 118855 1882.81 3
 -1 -4 -8 118903 2394.75 3
 1 -4 8 115512 2705.15 4
 -1 4 -8 119442 1999.43 3
 -1 4 -8 112330 1639.49 2
 -1 -4 -9 4028.49 510.061 3
 1 -4 9 3411.76 556.734 4
 -1 4 -9 3223.5 340.104 3
 -1 -4 -10 67065.1 1952.18 3
 -1 4 -10 65621.8 1624.47 3
 1 -4 10 61918.7 2116.55 4
 -1 4 -11 43220.7 1380.64 3
 1 -4 11 44779.8 1869.71 4
 -1 -4 -11 45697.7 1667.35 3
 1 -4 12 7759.34 809.405 4
 -1 -4 -12 10187.4 856.066 3
 -1 4 -12 8813.85 686.55 3
 1 -4 13 70431.4 2566.11 4
 -1 -4 -13 73180.2 2305.22 3
 -1 4 -13 69345.3 1953.94 3
 -1 4 -14 949.023 310.095 3
 -1 -4 -14 2435.43 557.094 3
 1 -4 14 2755.93 613.665 4
 -1 4 -15 66225.2 2082.86 3
 -1 -4 -15 70289.4 2450.35 3
 1 -4 15 71880.7 2769.14 4
 -1 -4 -16 24319.3 1503.02 3
 1 -4 16 24361.8 1683.33 4
 -1 4 -16 21884.6 1254.05 3
 1 -4 17 27236 1821.73 4
 -1 4 -17 23249.6 1318.21 3
 -1 -4 -17 26132.8 1581.22 3
 -1 4 -18 17625.5 1203.79 3
 -1 -4 -18 17517.2 1352.66 3
 1 -4 18 19815.9 1635.1 4
 1 -4 19 322.383 378.94 4
 -1 4 -19 -213.078 309.902 3
 -1 -4 -19 501.837 470.377 3
 1 -4 20 24459.9 1865.29 4
 -1 4 -20 21703.9 1434.8 3
 -1 -4 -20 22998.6 1618.78 3
 -1 -4 -21 12974.3 1284.03 3
 1 -4 21 14750.4 1522.62 4
 -1 4 -21 11347.4 1084.05 3
 -1 4 -22 24804.6 1643.57 3
 -1 -4 -22 27790.6 1919.53 3
 1 -4 22 28345.8 2172.83 4
 1 -4 23 34598.3 2442.22 4
 -1 4 -23 30042.8 1847.85 3
 -1 -4 -23 32932.9 2139.03 3
 1 -4 24 18492.1 1834.54 4
 -1 -4 -24 17607.9 1630.96 3
 1 -5 -24 61517.9 2931.51 3
 -1 -5 24 67031 3427.84 4
 1 -5 -23 3680.6 832.059 3
 -1 -5 23 3209.85 868.194 4
 -1 -5 22 48680 2806.47 4
 1 -5 -22 48130.6 2466.59 3
 1 -5 -21 9986.83 1151.67 3
 -1 -5 21 11277 1372.15 4
 1 5 -20 35428.2 1696.24 3
 1 -5 -20 42428.9 2161.21 3
 -1 -5 20 42845.3 2516.9 4
 1 5 -19 8434.08 814.75 3
 1 -5 -19 9999.91 1068.75 3
 -1 -5 19 9680.45 1212.12 4
 -1 -5 18 3121.74 714.231 4
 1 -5 -18 2743.23 562.29 3
 1 5 -18 1875.53 402.378 3
 -1 -5 17 410.116 384.827 4
 1 -5 -17 -39.5543 306.639 3
 1 5 -17 154.421 223.136 3
 -1 -5 16 4406.48 740.311 4
 1 -5 -16 5603.61 722.515 3
 1 5 -16 4555.22 525.003 3
 1 5 -15 480.649 246.2 3
 -1 -5 15 571.594 370.108 4
 1 -5 -15 90.038 304.708 3
 1 5 -14 28919.7 1169.67 3
 -1 5 14 27873.9 1437.59 2
 1 -5 -14 29703 1488.63 3
 -1 -5 14 31389.1 1776.54 4
 -1 -5 13 138.301 325.437 4
 1 -5 -13 27.1978 88.898 5
 1 -5 -13 -33.1013 291.715 3
 1 5 -13 252.073 183.934 3
 -1 5 13 -345.355 248.682 2
 1 5 -12 119436 2202.36 3
 1 -5 -12 113090 1580.78 5
 -1 -5 12 124631 3317.58 4
 1 -5 -12 123833 2848.83 3
 -1 5 12 121428 2854.33 2
 -1 -5 11 298.332 293.685 4
 -1 5 11 623.443 262.101 2
 1 -5 -11 664.717 132.208 1
 1 -5 -11 450.918 256.641 3
 1 5 -11 783.339 214.339 3
 1 -5 -10 184426 3295.51 3
 1 5 -10 179252 2475.05 3
 -1 -5 10 183225 3804.08 4
 -1 5 10 187282 3414.84 2
 1 -5 -9 513.409 190.805 3
 -1 -5 9 -221.1 324.165 4
 -1 5 9 48.8759 212.111 2
 1 5 -9 423.176 131.588 3
 1 5 -8 7314.28 381.259 3
 -1 5 8 6295.07 610.847 2
 -1 -5 8 6928.87 702.681 4
 1 -5 -8 6979.08 567.619 3
 1 5 -7 28331.5 649.604 3
 -1 5 7 29635.1 1187.62 2
 -1 -5 7 27814.5 1282.23 4
 1 -5 -7 30497.8 1121.12 3
 -1 -5 6 5096.74 228.337 2
 1 5 -6 5484.44 232.415 3
 -1 -5 6 6811.23 644.85 4
 1 -5 -6 6610.84 514.578 3
 -1 5 6 6104.81 558.423 2
 -1 5 6 5073.93 399.854 1
 -1 5 5 123650 2384.11 2
 1 -5 -5 124666 2101.17 3
 -1 -5 5 125422 2527.04 4
 -1 -5 5 124844 1465.38 2
 -1 5 5 123943 2011.72 1
 -1 5 4 13086.3 743.124 2
 -1 5 4 14544.8 665.013 1
 1 -5 -4 15810.6 662.11 3
 -1 -5 4 14589.4 844.009 4
 1 5 -4 13755.7 467.487 2
 -1 -5 4 16180.5 513.542 2
 1 5 -3 16920.7 568.181 2
 -1 -5 3 16038.5 845.008 4
 -1 5 3 16788.8 805.453 2
 -1 5 3 16159.1 717.589 1
 1 5 -2 93189.7 1509.56 2
 1 -5 -2 92773.1 1856.56 4
 -1 5 2 91177.2 1803.43 2
 -1 -5 2 89421.5 1970.96 4
 1 -5 -1 962.989 213.535 4
 -1 5 1 809.712 211.432 2
 -1 -5 1 806.318 98.1666 3
 -1 -5 1 1340.64 265.148 4
 1 5 -1 914.281 185.556 2
 1 5 0 130364 2047.02 2
 -1 -5 0 129975 1499.32 3
 -1 5 0 128202 2034.48 2
 1 -5 0 128750 2147.52 4
 -1 -5 0 132478 2393.59 4
 -1 -5 -1 8415.97 379.212 3
 1 5 1 7558.82 505.701 2
 1 -5 1 7941.49 307.92 3
 1 -5 1 8081.74 526.548 4
 -1 5 -1 7501.07 453.143 2
 -1 -5 -1 7962.07 601.92 4
 -1 -5 -2 277773 2964.45 3
 1 5 2 290411 3582.47 2
 1 -5 2 287422 3592.16 4
 1 -5 2 277658 2451.79 3
 -1 -5 -2 290654 3873.24 4
 -1 5 -2 284037 3091.28 2
 -1 5 -3 276.404 116.764 2
 -1 -5 -3 282.657 167.077 3
 1 -5 3 58.499 198.42 4
 1 5 3 42.6058 194.902 2
 1 -5 3 281.824 79.15 3
 -1 5 -3 332.841 91.0979 3
 1 -5 4 145277 1557.73 3
 -1 5 -4 144714 1702.47 3
 1 5 4 154301 2624.61 2
 1 -5 4 151457 1981.4 2
 -1 -5 -4 151538 2276 3
 1 -5 4 150809 2678.67 4
 -1 5 -4 151424 1936.88 2
 1 -5 5 3409.51 430.227 4
 1 -5 5 3307.91 220.235 3
 1 5 5 2931.92 264.183 1
 -1 -5 -5 2749.76 389.12 3
 -1 5 -5 3540.12 279.069 2
 -1 5 -5 3047.8 250.056 3
 1 5 5 3059.74 439.481 2
 1 5 6 19977.5 584.142 1
 1 -5 6 22299 1097.43 4
 -1 5 -6 23093.3 716.061 3
 -1 -5 -6 22110 947.094 3
 1 -5 6 22523.7 618.974 3
 -1 5 -6 21629 621.023 2
 -1 5 -7 12667.8 462.799 2
 -1 -5 -7 13680.7 780.927 3
 -1 5 -7 12694 578.91 3
 1 -5 7 13519.8 918.869 4
 1 -5 8 16041 1022.81 4
 -1 5 -8 16709.6 698.252 3
 -1 5 -8 15515.3 515.14 2
 -1 -5 -8 16856.9 923.185 3
 1 -5 9 9911.17 823.741 4
 -1 5 -9 8257.32 382.235 2
 -1 -5 -9 10298.6 752.696 3
 -1 5 -9 9195.34 559.029 3
 -1 5 -10 126345 2271.23 3
 -1 -5 -10 126997 2803.75 3
 1 -5 10 127685 3148.98 4
 -1 -5 -11 6441.59 692.42 3
 -1 5 -11 5650.82 341.009 2
 -1 5 -11 6209.63 504.032 3
 1 -5 11 6694.09 751.231 4
 1 -5 12 148065 3676.04 4
 -1 5 -12 152665 2805.11 3
 -1 -5 -12 152968 3351.74 3
 -1 5 -13 9636.51 730.305 3
 1 -5 13 9340.8 946.926 4
 -1 -5 -13 10869.2 963.694 3
 -1 -5 -14 92290.5 2787.74 3
 1 -5 14 92396.5 3062.45 4
 -1 5 -14 94240.5 2368.92 3
 1 -5 15 537.878 401.401 4
 -1 -5 -15 1218.44 511.601 3
 -1 5 -15 1159.2 399.823 3
 1 -5 16 95808.8 3336.99 4
 -1 -5 -16 94985 2987.92 3
 -1 5 -16 89358.1 2514.18 3
 1 -5 17 5385.4 862.857 4
 -1 5 -17 5543.15 669.104 3
 -1 -5 -17 7367.92 905.405 3
 1 -5 18 8852.13 1092.8 4
 -1 5 -18 9841.32 898.297 3
 -1 -5 -18 10267.4 1068.25 3
 -1 5 -19 10858.7 982.555 3
 -1 -5 -19 10735.3 1113.25 3
 1 -5 19 12565.7 1320.61 4
 -1 -5 -20 -192.386 414.999 3
 1 -5 20 385.327 449.379 4
 -1 5 -20 309.641 254.128 3
 -1 -5 -21 2480.41 609.009 3
 1 -5 21 2656.38 721.976 4
 -1 -5 -22 10306.9 1195.02 3
 1 -5 22 10058.4 1290.2 4
 1 -5 23 3605.37 792.058 4
 -1 -5 -23 4472.3 898.553 3
 1 -6 -24 662.226 406.919 3
 -1 -6 24 1137.69 567.421 4
 1 -6 -23 27303.2 1953.34 3
 -1 -6 23 28994 2273.02 4
 1 -6 -22 11063.3 1236.82 3
 -1 -6 22 12441.5 1449.87 4
 -1 -6 21 44798.3 2667.21 4
 1 -6 -21 40905.3 2254.69 3
 1 -6 -20 7105.6 965.439 3
 -1 -6 20 6571.02 1026.84 4
 1 -6 -19 34888.2 1941.7 3
 -1 -6 19 35657.5 2235.45 4
 1 -6 -18 12733.3 1151.68 3
 -1 -6 18 12646.1 1304.04 4
 1 -6 -17 593.48 352.263 3
 -1 -6 17 872.809 487.641 4
 -1 -6 16 11424.3 1199.25 4
 1 -6 -16 11695.9 1027.42 3
 1 6 -16 10073.5 759.198 3
 1 6 -15 4137.86 458.678 3
 -1 -6 15 4896.74 778.304 4
 1 -6 -15 4736.19 672.061 3
 1 -6 -14 3516.96 552.726 3
 -1 -6 14 4097.03 762.201 4
 -1 6 14 2273.42 466.114 2
 1 6 -14 3006.36 371.373 3
 -1 6 13 15460.3 1081.28 2
 1 6 -13 12710.2 711.812 3
 -1 -6 13 14762.9 1235.52 4
 1 -6 -13 12915.3 972.055 3
 1 6 -12 3600.8 364.852 3
 1 -6 -12 4082.66 549.96 3
 -1 6 12 3411.22 525.534 2
 -1 -6 12 4397.58 647.103 4
 -1 -6 11 39250.6 1817.63 4
 -1 6 11 36675.5 1604.2 2
 1 -6 -11 37575.8 1543.35 3
 1 6 -11 34639.9 1029.31 3
 1 6 -10 1904.41 237.262 3
 -1 -6 10 1917.2 420.336 4
 1 -6 -10 1863.13 363.031 3
 -1 6 10 1753.48 374.084 2
 -1 -6 9 12866.4 987.601 4
 1 6 -9 12525.4 515.73 3
 -1 6 9 12410.9 874.992 2
 1 -6 -9 11622.3 782.444 3
 -1 6 8 15339.9 963.155 2
 1 6 -8 15540 501.982 3
 -1 -6 8 14175 986.566 4
 1 -6 -8 15957.1 872.02 3
 1 6 -7 8476.66 308.728 3
 1 -6 -7 10833.8 680.752 3
 -1 6 7 10435.9 746.292 2
 -1 6 7 8463.61 545.657 1
 -1 -6 7 10187.4 822.393 4
 1 -6 -6 89631.4 1913.74 3
 -1 6 6 87766.6 1773.97 1
 -1 -6 6 90869.3 2326.43 4
 -1 -6 6 88723 1253.59 2
 -1 6 6 90683.8 2176.53 2
 -1 -6 5 12289 476.26 2
 -1 6 5 9572.83 703.03 2
 1 -6 -5 10567.3 616.604 3
 -1 6 5 10057.4 603.302 1
 -1 -6 5 10058.1 765.568 4
 -1 6 4 106732 2224.39 2
 -1 -6 4 104756 2364.08 4
 -1 6 4 103478 1996.91 1
 1 -6 -4 105029 1856.18 3
 -1 6 3 32954.6 1119.62 1
 1 -6 -3 33292.6 1221.7 4
 1 -6 -3 33777 947.033 3
 -1 -6 3 33738 1302.56 4
 -1 6 3 30956.1 1163.91 2
 1 6 -3 32619.2 896.099 2
 1 -6 -2 657.619 182.08 3
 1 6 -2 1045.92 244.739 2
 -1 -6 2 467.439 278.099 4
 1 -6 -2 562.759 250.895 4
 -1 6 1 272355 3523.25 2
 -1 -6 1 280809 3941.08 4
 1 -6 -1 282401 3716.23 4
 1 6 -1 273947 3270.83 2
 -1 6 0 5883.2 472.862 2
 -1 -6 0 5954.72 572.978 4
 -1 -6 0 6839.23 325.492 3
 1 6 0 6854.13 536.973 2
 1 -6 0 6153.5 525.881 4
 -1 -6 -1 427467 3866.8 3
 1 -6 1 435311 4894.74 4
 -1 6 -1 437931 4504.96 2
 1 -6 1 427053 3542.71 3
 1 6 1 429817 4733.88 2
 -1 -6 -1 438419 5271.51 4
 -1 6 -2 9765.55 544.622 2
 1 -6 2 9523.26 335.995 3
 1 -6 2 10137.4 679.103 4
 1 6 2 9820.46 695.021 2
 -1 -6 -2 9980.48 494.003 3
 -1 -6 -2 9897.45 743.9 4
 -1 -6 -3 125343 1981.6 3
 1 6 3 121911 2431.2 2
 1 -6 3 128183 2484.55 4
 -1 6 -3 125301 1936.29 2
 1 -6 3 118917 1283.63 3
 -1 -6 -4 22673.3 860.913 3
 1 -6 4 20321.6 446.748 3
 -1 6 -4 18838.8 479.419 3
 1 6 4 21042.1 1036.46 2
 -1 6 -4 20585.6 712.543 2
 1 -6 4 23327.9 1061.1 4
 -1 6 -5 4941.46 335.778 2
 1 -6 5 5962.45 589.41 4
 -1 -6 -5 5927.64 469.054 3
 -1 6 -5 4289.2 264.823 3
 1 -6 5 5584.73 256.787 3
 1 6 5 4788.07 524.279 2
 1 6 5 5201.59 389.701 1
 -1 6 -6 863.01 139.194 2
 1 -6 6 1139.95 132.359 3
 -1 -6 -6 1075.98 260.899 3
 1 6 6 880.46 176.53 1
 -1 6 -6 824.346 154.22 3
 1 6 6 597.307 266.067 2
 1 -6 6 1034.64 326.313 4
 -1 6 -7 20522.8 708.7 3
 -1 6 -7 19497.4 597.148 2
 1 -6 7 21290.5 614.473 3
 -1 -6 -7 21046 975.888 3
 1 6 7 18408.8 616.887 1
 1 -6 7 20749.8 1160.22 4
 -1 -6 -8 297.453 213.701 3
 -1 6 -8 185.773 80.1396 2
 -1 6 -8 131.587 122.145 3
 1 -6 8 65.7213 260.114 4
 -1 6 -9 104705 1906.25 3
 1 -6 9 103554 2795.38 4
 -1 -6 -9 106508 2471.49 3
 -1 6 -10 16945.8 792.396 3
 1 -6 10 16609.6 1172.04 4
 -1 -6 -10 17352.1 1058.68 3
 1 -6 11 217758 4467.2 4
 -1 -6 -11 218550 3997.85 3
 -1 6 -11 224050 3280.62 3
 -1 -6 -12 141.67 374.607 3
 1 -6 12 -298.077 422.955 4
 -1 6 -12 -156.043 203.99 3
 1 -6 13 212572 4713.34 4
 -1 -6 -13 221002 4282.39 3
 -1 6 -13 226309 3614.92 3
 1 -6 14 -111.166 416.909 4
 -1 -6 -14 252.725 364.565 3
 -1 6 -14 -173.311 248.113 3
 -1 6 -15 174598 3404.57 3
 1 -6 15 183664 4584.25 4
 -1 -6 -15 181632 4112.84 3
 -1 6 -16 248.298 247.972 3
 1 -6 16 -558.252 489.35 4
 -1 -6 -16 252.988 446.795 3
 -1 -6 -17 54427 2352.71 3
 1 -6 17 58361.6 2700.93 4
 -1 -6 -18 325.084 375.436 3
 1 -6 18 -81.1935 424.056 4
 1 -6 19 3654.76 820.311 4
 -1 -6 -19 3984.42 716.361 3
 1 -6 20 4983.61 916.557 4
 -1 -6 -20 4128.12 804.622 3
 1 -6 21 -302.728 517.723 4
 -1 -6 -21 216.632 430.976 3
 1 -6 22 2.02616 439.279 4
 -1 -6 -22 -349.129 466.343 3
 -1 -6 -23 6652.5 1027.54 3
 1 -6 23 8858.12 1220.35 4
 -1 -7 23 -194.688 569.088 4
 1 -7 -23 756.047 433.585 3
 1 -7 -22 30492.6 2059.96 3
 -1 -7 22 29869.8 2254.12 4
 -1 -7 21 4448.33 889.087 4
 1 -7 -21 5188.55 875.211 3
 -1 -7 20 29523.7 2137.82 4
 1 -7 -20 29721.3 1909.6 3
 -1 -7 19 8458.13 1176.8 4
 1 -7 -19 9189.22 1025.41 3
 1 -7 -18 9783.89 1057.41 3
 -1 -7 18 10107.3 1189.83 4
 1 -7 -17 17201.2 1339.86 3
 -1 -7 17 19442 1598.81 4
 1 -7 -16 -559.802 465.426 3
 -1 -7 16 -173.152 454.557 4
 1 -7 -15 26018.7 1522.78 3
 -1 -7 15 26019.4 1751.79 4
 -1 7 14 5840.03 737.637 2
 -1 -7 14 7027.89 893.008 4
 1 -7 -14 6145.7 706.134 3
 1 -7 -13 6478.72 746.2 3
 -1 7 13 6661.46 779.948 2
 -1 -7 13 7169.09 882.754 4
 -1 -7 12 46062.8 2122.86 4
 -1 7 12 47993.3 1941.29 2
 1 -7 -12 43838.3 1742.37 3
 -1 -7 11 6621.1 812.196 4
 -1 7 11 6598.63 704.61 2
 1 7 -11 6116.33 411.476 3
 1 -7 -11 7346.08 699.362 3
 1 7 -10 10084.2 468.844 3
 1 -7 -10 10295.7 798.265 3
 -1 7 10 9263.79 811.097 2
 -1 -7 10 9900.77 955.356 4
 1 7 -9 9537.39 402.493 3
 1 -7 -9 12942.4 857.516 3
 -1 -7 9 12123.5 1008.85 4
 -1 7 9 12050.8 906.511 2
 -1 7 8 1678.98 369.935 2
 1 -7 -8 2059.24 358.451 3
 1 -7 -7 19048.1 939.367 3
 -1 7 7 17726.1 830.071 1
 -1 -7 7 17104.9 1101.47 4
 -1 -7 7 18268.4 546.523 2
 -1 7 7 16698.8 1019.15 2
 -1 7 6 10604.5 797.355 2
 -1 7 6 9958.65 652.791 1
 -1 -7 6 10661.8 841.684 4
 1 -7 -6 11413.3 684.861 3
 -1 -7 6 12010.9 490.468 2
 -1 7 5 42094.1 1329.76 1
 1 -7 -5 44686.5 1284.25 3
 -1 7 5 42021.4 1522.51 2
 -1 -7 5 43389.1 1648.79 4
 1 7 -4 5331.86 378.675 2
 1 -7 -4 5621.41 436.701 3
 -1 7 4 5489.34 557.027 2
 1 -7 -4 5823.31 575.384 4
 -1 7 4 5395.17 490.621 1
 -1 -7 4 6006.26 616.481 4
 -1 7 3 18312.8 954.409 2
 1 -7 -3 20577.9 768.286 3
 1 7 -3 18079.5 732.705 2
 1 -7 -3 19576.1 1022.18 4
 -1 7 3 18716.2 912.588 1
 -1 -7 3 19488 1060.12 4
 -1 -7 2 98274.9 2351.86 4
 1 7 -2 93409.5 1837.43 2
 1 -7 -2 100581 1643.83 3
 -1 7 2 97028.8 2133.71 2
 1 -7 -2 95600.3 2238.23 4
 -1 7 1 5710.32 529.836 2
 -1 -7 1 4775.62 568.126 4
 1 -7 -1 5388.7 565.586 4
 -1 -7 1 5305.2 255.449 3
 1 -7 -1 5673.6 343.99 3
 1 7 -1 5508.71 468.375 2
 1 -7 0 169164 1927.07 3
 -1 -7 0 174490 3237.15 4
 1 -7 0 168913 1964.46 3
 1 7 0 166739 2718.56 2
 -1 7 0 164326 2692.6 2
 -1 -7 0 165890 1922.39 3
 1 -7 0 168776 2943.9 4
 1 -7 1 -1.59963 72.6451 3
 -1 7 -1 269.384 161.933 2
 -1 -7 -1 294.698 150.193 3
 1 7 1 416.563 238.395 2
 -1 -7 -1 -335.658 235.784 4
 1 -7 1 201.725 205.746 4
 -1 -7 -2 100416 1675.44 3
 1 -7 2 98753 2263.06 4
 -1 -7 -2 104144 2505.77 4
 -1 7 -2 96341.5 1861.47 2
 1 7 2 101354 2192.98 2
 -1 -7 -3 25698.2 884.101 3
 -1 7 -3 24099.3 868.357 2
 1 -7 3 25790 1163.08 4
 1 7 3 25391.5 1127.75 2
 -1 -7 -3 24667.4 1257.79 4
 -1 7 -4 79863.3 1538.97 2
 -1 -7 -4 84792.5 1732.08 3
 1 -7 4 84594.3 2146.54 4
 1 7 4 82350.9 2090.1 2
 1 7 5 69145.9 1521.38 1
 1 7 5 72582.1 2020.05 2
 -1 7 -5 70421.8 1384.72 2
 1 -7 5 74592.1 2094.65 4
 -1 -7 -5 71170.3 1684.36 3
 -1 7 -6 26780.3 798.43 2
 1 -7 6 27858 1337.86 4
 1 7 6 28866.9 1319.13 2
 1 7 6 27886.8 915.354 1
 1 -7 6 26955.6 568.178 3
 -1 -7 -6 28658.4 1125.64 3
 -1 7 -7 21513.7 670.558 3
 -1 7 -7 22164.1 683.834 2
 1 -7 7 22828.2 1248.12 4
 1 7 7 22283.4 789.328 1
 1 -7 7 24491.2 606.401 3
 -1 -7 -7 24778.9 1117.86 3
 1 -7 8 37463.1 1684.79 4
 1 7 8 35094.5 932.003 1
 -1 7 -8 36260.7 830.676 2
 -1 -7 -8 37775.7 1431.23 3
 -1 7 -8 37727.2 991.756 3
 -1 7 -9 26150.3 897.088 3
 -1 -7 -9 28009.6 1277.42 3
 1 -7 9 28280.9 1510.98 4
 -1 -7 -10 112405 2763.26 3
 1 -7 10 107607 3059.61 4
 -1 7 -10 109880 2043.12 3
 -1 -7 -11 28441.2 1412.65 3
 -1 7 -11 26918.5 1033.46 3
 1 -7 11 25507 1532.37 4
 -1 7 -12 121775 2405.85 3
 1 -7 12 117743 3435.92 4
 -1 -7 -13 8327.23 871.484 3
 1 -7 13 7422.18 927.361 4
 1 -7 14 155302 4160.2 4
 -1 -7 -14 158394 3772.44 3
 1 -7 15 1285.54 527.612 4
 -1 -7 -15 1227.39 502.088 3
 -1 -7 -16 103660 3211.99 3
 1 -7 16 101181 3569.89 4
 -1 -7 -17 10198.2 1071.62 3
 1 -7 17 9393.46 1167.11 4
 1 -7 18 23341.5 1815.5 4
 -1 -7 -18 25012.2 1676.07 3
 1 -7 19 30771.7 2107.65 4
 -1 -7 -19 29598.9 1883.96 3
 -1 -7 -20 602.095 401.662 3
 1 -7 20 1064.11 494.823 4
 1 -7 21 21213.5 1905.23 4
 -1 -7 -21 18709.3 1598.9 3
 1 -7 22 2228.79 616.062 4
 -1 -7 -22 2976.86 669.08 3
 1 -8 -22 30.2558 536 3
 -1 -8 22 64.1462 457.617 4
 1 -8 -21 14634.1 1387.86 3
 -1 -8 21 14598.1 1579.08 4
 1 -8 -20 5685.46 833.669 3
 -1 -8 20 5901.7 1047.27 4
 -1 -8 19 7651.71 1174.91 4
 1 -8 -19 6174.91 890.859 3
 -1 -8 18 37381 2329.74 4
 1 -8 -18 38566.7 2062.59 3
 -1 -8 17 294.353 383.151 4
 1 -8 -17 162.264 323.901 3
 1 -8 -16 26991.4 1639.97 3
 -1 -8 16 26687.7 1845.1 4
 -1 -8 15 3935.87 717.198 4
 1 -8 -15 5235.26 712.383 3
 1 -8 -14 17613 1241.22 3
 -1 8 14 17017.5 1279.38 2
 -1 -8 14 18591.1 1483.29 4
 -1 -8 13 11497.1 1148.29 4
 1 -8 -13 11006.2 932.059 3
 -1 8 13 9777.99 937.84 2
 -1 -8 12 907.78 397.338 4
 -1 8 12 1167.42 433.711 2
 1 -8 -12 1476.89 363.82 3
 1 -8 -11 23642.3 1281.76 3
 -1 8 11 25252.3 1426.13 2
 -1 -8 11 25412.7 1583.28 4
 -1 8 10 23323.8 1340.61 2
 -1 -8 10 20300.9 1385.37 4
 1 -8 -10 21152.1 1155.3 3
 1 -8 -9 9387.41 763.717 3
 -1 8 9 8839.35 820.302 2
 -1 -8 9 9204.18 914.161 4
 -1 8 8 17463.2 878.768 1
 1 -8 -8 19223.6 998.511 3
 -1 8 8 16685.3 1082.28 2
 -1 -8 8 19067.1 1250.99 4
 -1 -8 7 942.026 345.764 4
 -1 8 7 378.039 180.669 1
 1 -8 -7 967.462 239.421 3
 -1 8 7 614.876 223.363 2
 -1 8 6 22368.7 1024.9 1
 -1 8 6 21401.8 1168.76 2
 1 -8 -6 24267.9 1030.5 3
 -1 -8 6 21862 1263.24 4
 -1 8 5 316.06 180.094 1
 -1 -8 5 287.353 252.65 4
 1 -8 -5 602.488 209.816 3
 -1 8 5 130.488 217.493 2
 1 -8 -5 117.401 241.315 4
 -1 8 4 35220.1 1344.11 1
 1 -8 -4 37503.3 1146.03 3
 -1 -8 4 38100.1 1577.91 4
 1 -8 -4 37291.2 1509.26 4
 1 8 -4 33385.9 1033.96 2
 -1 8 4 33616 1406.82 2
 -1 8 3 3127.14 432.553 2
 1 -8 -3 3430.44 333.968 3
 -1 -8 3 2944.76 465.497 4
 -1 8 3 3278.32 421.211 1
 1 8 -3 2345.51 326.524 2
 1 -8 -3 3542.16 516.984 4
 1 -8 -2 14665.9 931.483 4
 1 -8 -2 15653.2 647.957 3
 1 8 -2 13871.3 736.629 2
 -1 8 2 14095 854.998 2
 -1 -8 2 15319.2 986.596 4
 -1 8 1 40819.6 1406.45 2
 -1 -8 1 41812.1 769.886 3
 1 8 -1 40179.6 1343.98 2
 -1 -8 1 41026.3 1615.94 4
 1 -8 -1 44301.7 1000.11 3
 1 -8 -1 41598.4 1541.08 4
 1 -8 0 2845.22 228.426 3
 1 -8 0 2765.4 444.301 4
 1 -8 0 2470.12 223.1 3
 -1 -8 0 2418.44 434.985 4
 1 8 0 2460.5 410.722 2
 -1 8 0 2631.38 388.972 2
 -1 -8 0 2646.83 235.548 3
 -1 8 -1 24582.3 1006.94 2
 1 -8 1 24225.7 580.326 3
 1 8 1 22789.1 1063.35 2
 -1 -8 -1 22711.6 1228.12 4
 1 -8 1 23128.1 1135.58 4
 -1 -8 -1 24795.3 755.338 3
 1 -8 1 23453.8 611.313 3
 1 -8 2 39952.6 726.339 3
 -1 8 -2 46273.6 1348.6 2
 1 -8 2 49539.9 1694 4
 -1 -8 -2 49343.7 1832.31 4
 1 -8 2 41201.6 670.37 3
 1 8 2 50370.9 1603.5 2
 -1 -8 -2 50512.7 1190.39 3
 -1 -8 -3 14337.6 1029.64 4
 -1 8 -3 13826.2 717.52 2
 1 -8 3 13622.1 908.675 4
 1 8 3 15175.7 938.289 2
 -1 -8 -3 15332.6 714.66 3
 1 8 4 155355 3142.94 2
 -1 -8 -4 162498 2592.64 3
 -1 -8 -4 160232 3452.55 4
 1 -8 4 154965 3175.14 4
 -1 -8 -5 51257.1 1955.58 4
 -1 -8 -5 50055.4 1467.14 3
 1 -8 5 46381.7 1772.7 4
 1 8 5 47229.5 1735.04 2
 1 8 5 46571.6 1374.12 1
 -1 8 -5 46489.4 1211.87 2
 1 8 6 114758 2155.59 1
 1 -8 6 113863 2893.13 4
 -1 -8 -6 119676 2418.36 3
 1 -8 7 7302.59 763.727 4
 -1 8 -7 6077.11 388.716 2
 1 8 7 6330.09 477.842 1
 -1 -8 -7 7386.71 639.421 3
 1 8 8 98086.3 1818.06 1
 1 -8 8 103039 2906.6 4
 -1 -8 -8 104409 2479.23 3
 -1 -8 -9 46285.6 1697.64 3
 1 -8 9 44122 1947.86 4
 1 -8 10 43156.3 1985.21 4
 -1 -8 -10 42510.2 1708.23 3
 1 -8 11 95963.7 3044.63 4
 -1 -8 -11 97528.1 2683.56 3
 -1 -8 -12 10906 965.229 3
 1 -8 12 9682.67 1014.63 4
 -1 -8 -13 34116 1707.79 3
 1 -8 13 33340.1 1898 4
 -1 -8 -14 61.2946 309.172 3
 1 -8 14 302.804 418.165 4
 -1 -8 -15 61047.6 2411.19 3
 1 -8 15 56974.5 2606.19 4
 1 -8 16 23416.7 1731.9 4
 -1 -8 -16 22894.3 1532.47 3
 -1 -8 -17 22673.7 1564.27 3
 1 -8 17 22208.5 1774.3 4
 -1 -8 -18 47490.3 2341.54 3
 1 -8 18 45306.6 2554.61 4
 -1 -8 -19 324.319 432.769 3
 1 -8 19 749.219 510.382 4
 -1 -8 -20 43486 2391.71 3
 1 -8 20 44038.9 2629.53 4
 1 -8 21 494.735 546.701 4
 -1 -8 -21 154.367 395.724 3
 1 -8 22 35100.2 2487.41 4
 1 -9 -21 6716.08 1019.54 3
 -1 -9 21 3856.3 863.872 4
 -1 -9 20 7684.51 1142.89 4
 1 -9 -20 7441.13 1010.59 3
 1 -9 -19 24666.6 1751.68 3
 -1 -9 19 24883.1 1974.54 4
 1 -9 -18 1578 526.506 3
 -1 -9 18 913.097 533.066 4
 1 -9 -17 41227 2110.23 3
 -1 -9 17 43194.8 2475.47 4
 -1 -9 16 874.883 407.543 4
 1 -9 -16 588.555 340.698 3
 -1 -9 15 23467.6 1705.26 4
 1 -9 -15 25140.2 1533.48 3
 1 -9 -14 1364.77 376.315 3
 -1 -9 14 878.218 442.239 4
 -1 -9 13 12366.3 1213.15 4
 -1 9 13 10751.8 1040.55 2
 1 -9 -13 12080.9 1017.11 3
 -1 9 12 5667.68 780.314 2
 1 -9 -12 6353.91 694.764 3
 -1 -9 12 7298.91 941.283 4
 -1 -9 11 434.727 325.118 4
 1 -9 -11 439.4 255.654 3
 -1 9 11 -29.4198 351.97 2
 -1 -9 10 20218.4 1435.83 4
 -1 9 10 17714.1 1282.97 2
 1 -9 -10 21063 1196.06 3
 -1 9 9 37366.2 1743.02 2
 -1 9 9 34738 1311.35 1
 1 -9 -9 37761.9 1525.59 3
 -1 9 8 1700.2 432.358 2
 -1 9 8 1536.61 327.559 1
 -1 -9 8 1822.97 478.469 4
 1 -9 -8 1164.5 335.98 3
 -1 9 7 52649.3 1679.95 1
 -1 -9 7 52464.6 2078.38 4
 1 -9 -7 52652.4 1652.6 3
 1 -9 -7 52743.8 2040.32 4
 -1 9 6 1397.71 342.814 1
 -1 9 6 1720.3 389.533 2
 1 -9 -6 1432.16 399.919 4
 1 -9 -6 1425.26 316.507 3
 -1 -9 6 1252.22 343.957 4
 -1 9 5 47929.4 1634.86 1
 1 -9 -5 53491.2 1496.15 3
 1 -9 -5 51528.2 1952.05 4
 -1 9 5 47253 1802.38 2
 -1 -9 5 54481.5 2027.68 4
 -1 9 4 -498.52 276.4 1
 1 -9 -4 2.48052 221.938 4
 -1 9 4 -54.828 233.453 2
 1 -9 -4 134.641 169.66 3
 -1 -9 4 -357.813 378.667 4
 -1 9 3 27428.8 1278.68 2
 1 -9 -3 28338 962.902 3
 1 -9 -3 28574.8 1383.92 4
 -1 -9 3 26652.8 1386.05 4
 -1 9 3 26058.1 1228.51 1
 1 9 -3 25458.4 1018.71 2
 1 -9 -2 3992.17 350.219 3
 -1 -9 2 3849.69 569.632 4
 1 -9 -2 3334.65 486.568 4
 1 9 -2 3456.5 435.598 2
 -1 9 2 3160.19 467.846 2
 -1 9 1 1053.51 324.574 2
 -1 -9 1 1202.14 316.492 4
 -1 -9 1 1409.43 147.53 3
 1 -9 -1 1571.33 206.576 3
 1 9 -1 1347.98 288.302 2
 1 -9 -1 1304.84 365.355 4
 1 -9 0 14170.1 507.752 3
 -1 -9 0 14466.7 531.71 3
 1 9 0 12599.3 799.982 2
 1 -9 0 13752.3 938.779 4
 -1 -9 0 14516.1 1022.22 4
 1 9 1 16608.4 969.381 2
 -1 -9 -1 20559.6 1226.14 4
 1 -9 1 18283.6 1096.26 4
 1 -9 1 18022.1 498.771 3
 -1 -9 -1 20279.4 704.82 3
 -1 9 -1 17649.5 923.187 2
 1 9 2 412.667 290.269 2
 -1 9 -2 388.709 166.207 2
 1 -9 2 375.248 240.883 4
 1 -9 2 179.815 54.6438 3
 -1 -9 -2 239.824 256.071 4
 -1 -9 -2 206.134 141.872 3
 -1 -9 -3 58223.2 1429.48 3
 1 -9 3 57662.8 1969.13 4
 -1 9 -3 53170.7 1505.73 2
 1 9 3 57364.3 1884.55 2
 -1 -9 -3 58475.3 2111.65 4
 1 -9 4 10856.2 856.425 4
 -1 -9 -4 10999.8 951.684 4
 -1 -9 -4 12161.1 697.134 3
 1 9 4 10519.7 860.846 2
 -1 9 -4 8821.95 595.842 2
 -1 -9 -5 108652 2243.59 3
 -1 -9 -5 101437 2989.31 4
 1 -9 5 104669 2780.03 4
 -1 9 -5 97994.5 1937.55 2
 1 9 5 107188 2290.08 1
 -1 -9 -6 9198.24 687.341 3
 -1 9 -6 7695.01 507.625 2
 1 -9 6 8321.7 830.251 4
 1 9 6 7519.43 585.709 1
 -1 -9 -6 8382.32 864.343 4
 1 -9 7 128223 3263.35 4
 -1 -9 -7 124688 2675.54 3
 1 9 7 122282 2368.25 1
 -1 -9 -8 1388.15 366.89 3
 1 -9 8 767.24 354.985 4
 1 -9 9 130193 3500.9 4
 -1 -9 -9 132031 2988.96 3
 1 -9 10 13104.1 1160.03 4
 -1 -9 -10 13149 980.908 3
 -1 -9 -11 21766.3 1308.58 3
 1 -9 11 20410.2 1446 4
 1 -9 12 11890.4 1154.66 4
 -1 -9 -12 11397.4 979.57 3
 -1 -9 -13 555.381 316.626 3
 1 -9 13 470.174 385.578 4
 1 -9 14 8691.35 1050.72 4
 -1 -9 -14 9270.1 961.87 3
 -1 -9 -15 6008.08 779.636 3
 1 -9 15 5434.98 886.083 4
 1 -9 16 3299.35 725.829 4
 -1 -9 -16 2526.16 573.865 3
 1 -9 17 45365.6 2527.22 4
 -1 -9 -17 48404.1 2363.59 3
 -1 -9 -18 -36.7887 367.823 3
 1 -9 18 183.515 431.003 4
 1 -9 19 66150.6 3180.88 4
 -1 -9 -19 65000.3 2910.22 3
 1 -9 20 432.372 501.784 4
 -1 -9 -20 346.151 504.067 3
 1 -9 21 52049.9 2993.11 4
 1 -10 -21 -1185.81 511.418 3
 1 -10 -20 25436.2 1843.97 3
 -1 -10 20 22927.3 1984.12 4
 1 -10 -19 1630.67 521.032 3
 -1 -10 19 914.544 533.782 4
 -1 -10 18 29343.7 2132.91 4
 1 -10 -18 33821.8 1994.26 3
 -1 -10 17 2725.93 666.655 4
 1 -10 -17 2455.57 605.648 3
 1 -10 -16 18201.1 1382.28 3
 -1 -10 16 18010.5 1619.86 4
 1 -10 -15 1442.12 415.02 3
 -1 -10 15 2057.48 644.518 4
 -1 -10 14 20954.3 1621.76 4
 1 -10 -14 21886.6 1413.19 3
 -1 -10 13 2738.67 657.869 4
 -1 10 13 1384.98 475.583 2
 1 -10 -13 1757.01 402.999 3
 -1 10 12 2793.31 542.644 2
 1 -10 -12 2905.38 476.393 3
 -1 -10 12 3555.62 700.279 4
 -1 -10 11 1862.18 543.143 4
 1 -10 -11 1458.39 343.153 3
 -1 10 11 824.146 343.67 2
 1 -10 -10 9474.13 808.101 3
 -1 -10 10 11469.1 1136.11 4
 -1 10 10 10677.6 997.425 2
 -1 -10 9 1782.03 459.437 4
 1 -10 -9 1951.76 378.305 3
 -1 10 9 1672.81 435.983 2
 -1 10 8 36886 1758.31 2
 1 -10 -8 37166 1868.53 4
 1 -10 -8 38588.9 1495.45 3
 -1 10 8 34065.6 1422.85 1
 -1 -10 8 39077.8 1919.79 4
 -1 10 7 1622.52 347.427 1
 -1 -10 7 1301.74 416.182 4
 1 -10 -7 2391.7 398.221 3
 1 -10 -7 1988.17 441.439 4
 -1 10 7 1787.13 416.152 2
 -1 10 6 53113 1843.44 1
 1 -10 -6 55515.1 1645.03 3
 -1 -10 6 53517.7 2174.47 4
 -1 10 6 48870.4 1982.08 2
 1 -10 -6 53476.7 2111.03 4
 1 -10 -5 3166.23 556.187 4
 -1 10 5 2911.58 495.802 2
 1 -10 -5 3716.7 437.469 3
 -1 10 5 2947.56 458.503 1
 -1 -10 5 3951.44 597.571 4
 1 -10 -4 69840.8 1670.22 3
 -1 10 4 62851.9 2096.1 2
 1 -10 -4 68604.3 2294.65 4
 -1 -10 4 67820.7 2366.03 4
 -1 10 4 67663.4 2116.65 1
 -1 10 3 11072.2 877.118 1
 -1 10 3 11133.5 868.599 2
 1 -10 -3 11641.1 954.196 4
 1 -10 -3 11973.8 637.872 3
 -1 -10 3 10463.6 939.581 4
 -1 -10 2 9005.69 848.423 4
 -1 10 2 8848.1 755.944 2
 1 -10 -2 10572.5 551.805 3
 1 -10 -2 9748.24 869.426 4
 -1 -10 1 4413.98 627.79 4
 1 -10 -1 5431.3 355.672 3
 1 -10 -1 5715.45 644.206 4
 -1 10 1 5323.31 584.501 2
 -1 -10 0 4225.12 585.847 4
 -1 10 0 4617.84 521.41 2
 1 10 1 2865.76 450.922 2
 -1 -10 -1 2724.12 516.321 4
 1 -10 1 3538.94 542.563 4
 -1 10 -1 2805.77 423.128 2
 -1 -10 -1 3542.1 318.976 3
 -1 10 -2 12693.6 806.957 2
 1 -10 2 14626.4 1057.61 4
 -1 -10 -2 14639.7 1119.14 4
 -1 -10 -3 -235.726 373.698 4
 1 -10 3 -148.275 265.12 4
 -1 -10 -3 111.001 149.664 3
 -1 10 -3 -104.104 174.676 2
 1 -10 4 38449.7 1718.01 4
 -1 -10 -4 40722.2 1299.4 3
 -1 -10 -4 38924 1861.56 4
 -1 -10 -5 2324.55 373.782 3
 1 10 5 1648.15 365.013 1
 -1 10 -5 1648.49 298.679 2
 1 -10 5 1513.8 446.331 4
 -1 -10 -5 2110.46 573.703 4
 -1 -10 -6 172674 3106.92 3
 1 10 6 168734 3112.38 1
 -1 -10 -6 166307 4101.65 4
 1 -10 6 163649 3822.24 4
 1 -10 7 3178.93 582.647 4
 -1 -10 -7 3021.73 637.062 4
 -1 -10 -7 3313.44 484.642 3
 -1 -10 -8 173027 3402.04 3
 1 -10 8 168007 4059.05 4
 -1 -10 -9 2554.79 503.426 3
 1 -10 9 1790.63 408.356 4
 -1 -10 -10 93607.3 2663.85 3
 1 -10 10 95274.3 3167.66 4
 1 -10 11 9259.33 1073.22 4
 -1 -10 -11 8861.81 865.643 3
 1 -10 12 8756.86 1036.97 4
 -1 -10 -12 9717.54 929.624 3
 -1 -10 -13 2062.69 452.611 3
 1 -10 13 2379.58 585.695 4
 1 -10 14 2137.15 617.396 4
 -1 -10 -14 2716.71 525.685 3
 -1 -10 -15 918.065 320.721 3
 1 -10 15 1339.47 544.927 4
 1 -10 16 26065.7 1918.67 4
 -1 -10 -16 26679.2 1724.94 3
 1 -10 17 1967.84 624.502 4
 -1 -10 -17 958.277 512.221 3
 -1 -10 -18 45377.4 2364.17 3
 1 -10 18 43418.6 2560.56 4
 -1 -10 -19 364.152 448.551 3
 1 -10 19 39.4393 484.178 4
 -1 -10 -20 52610.5 2696.02 3
 1 -10 20 52693.9 2971.82 4
 1 -11 -20 6204.68 995.661 3
 1 -11 -19 30465.9 1990.95 3
 -1 -11 19 28953 2219.05 4
 1 -11 -18 2270.79 626.641 3
 -1 -11 18 1307.88 511.22 4
 1 -11 -17 55651.5 2542.39 3
 -1 -11 17 51249.3 2834.74 4
 -1 -11 16 6915.03 1081.9 4
 1 -11 -16 6612.18 902.915 3
 1 -11 -15 47915.9 2226.14 3
 -1 -11 15 45218 2531.75 4
 -1 -11 14 10444.8 1231.03 4
 1 -11 -14 8495.79 928.828 3
 -1 -11 13 20946.1 1681.87 4
 1 -11 -13 19458 1337.91 3
 1 -11 -12 7.09466 342.062 3
 -1 -11 12 316.587 378.145 4
 -1 -11 11 -34.6447 375.773 4
 1 -11 -11 -329.341 477.633 3
 -1 11 11 -1344.25 590.189 2
 1 -11 -10 859.636 372.821 4
 -1 11 10 297.463 386.365 2
 1 -11 -10 777.856 284.581 3
 -1 -11 10 1687.49 500.131 4
 -1 11 9 21049.4 1487.38 2
 1 -11 -9 24127 1609.33 4
 -1 -11 9 25691.9 1660.6 4
 1 -11 -9 24072.5 1256.4 3
 -1 11 8 510.659 366.65 2
 1 -11 -8 495.378 255.282 3
 -1 -11 8 355.26 405.556 4
 1 -11 -8 593.497 308.022 4
 -1 11 7 69299.2 2206.57 1
 -1 11 7 69840 2477.9 2
 -1 -11 7 70485.9 2645.19 4
 1 -11 -7 73733 2685.38 4
 1 -11 -7 74255.8 2054.7 3
 -1 11 6 461.251 308.363 1
 1 -11 -6 314.789 301.01 4
 -1 -11 6 158.294 377.878 4
 -1 11 6 251.197 358.355 2
 1 -11 -6 170.11 207.26 3
 -1 11 5 58543.2 2065.16 1
 1 -11 -5 66046 1739.23 3
 -1 -11 5 60815.8 2405.71 4
 -1 11 5 57983.5 2183.09 2
 1 -11 -5 63361.3 2399.11 4
 -1 11 4 13213.2 1044.84 2
 1 -11 -4 14402.6 1109.8 4
 -1 11 4 13010.7 998.227 1
 -1 -11 4 14221.7 1157.48 4
 -1 11 3 74476.5 2402.65 1
 -1 -11 3 75644.3 2603.67 4
 1 -11 -3 76376.6 2506.43 4
 1 -11 -2 26961.8 1462.02 4
 -1 -11 2 25828 1505.61 4
 -1 11 2 25565.2 1414.15 1
 -1 11 2 23762.6 1275.8 2
 1 -11 -1 43912.2 1855.13 4
 -1 -11 1 43561.3 1946.5 4
 -1 11 1 39412.2 1624.13 2
 -1 11 0 12508.8 879.841 2
 1 -11 0 12961.5 1032.89 4
 -1 -11 0 13037.9 1090.01 4
 -1 11 -1 421.287 220.542 2
 -1 -11 -1 552.933 348.458 4
 1 -11 1 559.915 320.546 4
 -1 -11 -2 8392.9 880.759 4
 1 -11 2 8422.42 842.206 4
 -1 11 -2 6455.4 638.931 2
 1 -11 3 21589.6 1328.39 4
 -1 -11 -3 22464.3 1487.15 4
 -1 11 -3 18366 999.265 2
 -1 11 -4 840.909 259.485 2
 1 11 4 613.173 307.415 1
 -1 -11 -4 358.441 346.34 4
 1 -11 4 57.7597 306.708 4
 1 -11 5 83283.4 2719.87 4
 -1 -11 -5 84206.5 2906.47 4
 -1 -11 -5 83595.8 2051.49 3
 1 11 5 76842.8 2218.57 1
 -1 -11 -6 2383.38 528.2 4
 -1 -11 -6 3016.98 433.616 3
 1 -11 6 2183.92 528.274 4
 -1 -11 -7 160744 3193.6 3
 1 -11 7 150558 3884.99 4
 -1 -11 -7 159593 4246.27 4
 -1 -11 -8 13910.4 962.863 3
 1 -11 8 11332.9 1082.54 4
 -1 -11 -8 12249 1239.72 4
 -1 -11 -9 104847 2756.38 3
 -1 -11 -9 102245 3539.42 4
 1 -11 9 101101 3296.73 4
 1 -11 10 18495.3 1455.96 4
 -1 -11 -10 17993.9 1184.92 3
 -1 -11 -11 12420.9 1014.84 3
 1 -11 11 11434 1164.67 4
 -1 -11 -12 35681.5 1772.74 3
 1 -11 12 36909 2121.41 4
 1 -11 13 345.003 354.39 4
 -1 -11 -13 -614.261 475.398 3
 1 -11 14 26490.3 1872.75 4
 -1 -11 -14 24109.5 1570.23 3
 1 -11 15 8275.39 1117.72 4
 -1 -11 -15 7799.73 940 3
 1 -11 16 12443.2 1379.15 4
 -1 -11 -16 14344.9 1289.76 3
 1 -11 17 22365.9 1854.7 4
 -1 -11 -17 22739.7 1659.53 3
 1 -11 18 7145.78 1104.54 4
 -1 -11 -18 7246.84 1023.23 3
 -1 -11 -19 19505.8 1646.32 3
 1 -11 19 18933.7 1804.35 4
 1 -12 -19 4148.6 781.192 3
 1 -12 -18 42523.1 2313 3
 -1 -12 18 39762.4 2620.96 4
 1 -12 -17 2118.17 596.292 3
 -1 -12 17 910.745 486.7 4
 -1 -12 16 51258.4 2843.53 4
 1 -12 -16 55390.2 2508.66 3
 1 -12 -15 -57.2909 395.844 3
 -1 -12 15 692.606 502.625 4
 -1 -12 14 38233 2339.72 4
 1 -12 -14 40180.4 2011.77 3
 1 -12 -13 267.712 316.771 3
 -1 -12 13 289.999 415.843 4
 1 -12 -12 5551.45 711.974 3
 -1 -12 12 6349.18 960.951 4
 1 -12 -12 6332.41 1017.82 4
 -1 12 11 -431.523 555.533 2
 -1 -12 11 967.93 406.018 4
 1 -12 -11 385.824 286.527 3
 1 -12 -11 91.2606 427.871 4
 -1 12 10 4424.27 694.408 2
 1 -12 -10 6043.61 885.436 4
 -1 -12 10 5993.53 885.797 4
 1 -12 -10 5412.52 640.01 3
 1 -12 -9 -243.169 383.104 4
 -1 12 9 -170.143 452.494 2
 -1 -12 9 101.923 363.377 4
 -1 -12 8 44349.3 2253.97 4
 -1 12 8 41539.9 2059.01 2
 1 -12 -7 4787.33 782.318 4
 -1 -12 7 4880.74 736.522 4
 -1 12 7 5021.69 770.519 2
 -1 -12 6 62675.9 2567.17 4
 -1 12 6 57130.9 2320.88 2
 -1 12 6 62292 2219.16 1
 1 -12 -6 62608.2 2531.7 4
 1 -12 -5 20350.3 1398.58 4
 -1 12 5 16757.1 1247.8 2
 -1 12 5 16790.2 1169.04 1
 -1 -12 5 19215 1399.25 4
 -1 -12 4 59287.2 2439.94 4
 1 -12 -4 61744.7 2398.49 4
 -1 12 4 52766.3 2100.35 1
 -1 12 4 54778.4 2179.2 2
 1 -12 -3 25258 1522.84 4
 -1 12 3 24345.3 1451.48 1
 -1 12 3 25338.7 1432.07 2
 -1 -12 3 25347.5 1621.98 4
 -1 12 2 61601.5 2185.51 2
 -1 -12 2 69293.3 2588.28 4
 1 -12 -2 65191.5 2393.7 4
 -1 12 2 67361.3 2417.58 1
 -1 12 1 12916.4 972.75 2
 -1 -12 1 14787.2 1219.04 4
 -1 12 1 14540.8 1159.26 1
 1 -12 -1 14526 1141.87 4
 -1 -12 0 30359.7 1721.22 4
 1 -12 0 28466.1 1596.27 4
 -1 -12 -1 23390.9 1536.1 4
 1 -12 1 20634.2 1360.27 4
 -1 12 -1 19055.5 1130.76 2
 1 -12 2 269.013 303.354 4
 -1 -12 -2 922.964 420.586 4
 -1 12 -2 696.799 242.112 2
 -1 -12 -3 8551.27 963.322 4
 -1 12 -3 7264.85 653.175 2
 1 -12 3 9332.67 920.775 4
 1 -12 4 18243.2 1320.85 4
 -1 -12 -4 18566.9 1434.85 4
 1 12 4 15722 1116.38 1
 1 -12 5 512.963 307.538 4
 -1 -12 -5 -270.362 445.601 4
 -1 -12 -6 42297.7 2175.31 4
 1 -12 6 40888.4 2010.2 4
 -1 -12 -7 1236.96 541.969 4
 1 -12 7 1367.9 499.428 4
 -1 -12 -8 33977.4 2074.12 4
 1 -12 8 34136.9 1941.25 4
 -1 -12 -9 25665.6 1818.21 4
 1 -12 9 25534 1701.35 4
 1 -12 10 6300.56 927.119 4
 -1 -12 -10 8107.09 820.739 3
 -1 -12 -10 6836.03 998.348 4
 -1 -12 -11 57438.5 2870.19 4
 1 -12 11 61658 2768.57 4
 -1 -12 -11 59562.1 2267.02 3
 1 -12 12 2822.95 746.313 4
 -1 -12 -12 2658.12 544.94 3
 -1 -12 -13 63305.7 2494.07 3
 1 -12 13 61277.2 2873.57 4
 -1 -12 -14 1464.96 502.38 3
 1 -12 14 1292.56 550.676 4
 1 -12 15 50420.7 2715.64 4
 -1 -12 -15 49111.3 2347.36 3
 1 -12 16 9369.1 1258.05 4
 -1 -12 -16 10037.9 1121.25 3
 1 -12 17 18234.5 1781.55 4
 -1 -12 -17 19528.7 1585.3 3
 -1 -12 -18 15612.5 1467.87 3
 1 -13 -18 406.636 357.071 3
 1 -13 -17 33291.3 2008.47 3
 -1 -13 16 3308.55 836.135 4
 -1 -13 15 23162.8 1934.4 4
 1 -13 -14 13790 1488.77 4
 -1 -13 14 11871.3 1346.93 4
 -1 -13 13 1243.05 560.591 4
 1 -13 -13 2062.94 672.09 4
 1 -13 -12 30948.2 2129.81 4
 -1 -13 12 31617 2124.65 4
 1 -13 -11 4773.08 869.972 4
 -1 -13 11 3108.61 684.216 4
 -1 -13 10 11664.8 1268.33 4
 1 -13 -10 12208 1285.18 4
 1 -13 -9 21220 1620.96 4
 -1 -13 9 17669.4 1515.55 4
 -1 13 9 18373.5 1438.91 2
 -1 -13 8 4532.21 814.344 4
 -1 13 8 2643.96 497.933 2
 1 -13 -8 3724.6 733.624 4
 -1 -13 7 28217.6 1834.91 4
 1 -13 -7 28756.4 1815.76 4
 -1 13 7 24167.9 1597.16 2
 -1 -13 6 90.8091 328.524 4
 -1 13 6 119.499 302.977 2
 1 -13 -6 369.652 312.637 4
 -1 -13 5 35071.5 2006.88 4
 -1 13 5 35181.2 1775.44 1
 -1 13 5 36320.3 1857.27 2
 -1 13 4 2702.52 589.298 1
 -1 -13 4 2509.55 578.102 4
 1 -13 -4 3029.75 586.384 4
 -1 13 4 2869.02 589.864 2
 1 -13 -3 43128.2 2045.37 4
 -1 -13 3 43838.8 2178.5 4
 -1 13 3 39113.7 1848.04 2
 -1 13 3 41096 1963.01 1
 -1 13 2 25587.9 1575.46 1
 -1 13 2 23436 1458.37 2
 -1 -13 2 26604.8 1676.33 4
 1 -13 -2 25555.9 1593.81 4
 -1 13 1 21406.9 1470.45 1
 -1 -13 1 22183.4 1556.5 4
 1 -13 -1 20972.4 1464.35 4
 -1 13 1 19188.3 1252.86 2
 1 -13 0 27159.9 1609.31 4
 -1 13 0 22557 1321.98 2
 -1 13 0 24973 1609.73 1
 -1 -13 0 23872.7 1630.98 4
 1 -13 1 2146.68 559.059 4
 -1 -13 -1 2503.44 618.06 4
 -1 13 -1 1957.62 420.288 2
 -1 -13 -2 41707.1 2164.68 4
 1 -13 2 43593.2 2071.73 4
 1 13 3 40.2532 288.048 1
 -1 -13 -3 -99.0119 428.35 4
 1 -13 3 -94.4776 379.531 4
 1 -13 4 32777.2 1837 4
 -1 -13 -4 31089.3 1887.3 4
 1 -13 5 6071.48 823.923 4
 -1 -13 -5 5568.3 860.244 4
 1 -13 6 6214.74 872.716 4
 -1 -13 -6 6481.21 945.78 4
 1 -13 7 12696.9 1236.57 4
 -1 -13 -7 14135.9 1366.22 4
 -1 -13 -8 6563.41 984.769 4
 1 -13 8 6518.39 915.742 4
 1 -13 9 6962.85 951.598 4
 -1 -13 -9 8500.76 1120.58 4
 1 -13 10 26186.7 1855.12 4
 -1 -13 -10 26143.7 1975.79 4
 -1 -13 -11 5819.88 1002.74 4
 1 -13 11 6311.84 1068.8 4
 1 -13 12 39255.3 2317.87 4
 -1 -13 -12 42492.3 2599.93 4
 -1 -13 -13 195.052 434.309 4
 1 -13 13 -145.046 485.448 4
 1 -13 14 37675.4 2363.35 4
 -1 -13 -14 38077.3 2609.49 4
 1 -13 15 5699.19 1022.58 4
 1 -13 16 19626.5 1792.14 4
 1 -14 -15 25353.3 2137.4 4
 -1 -14 14 1915.27 709.68 4
 1 -14 -14 1875.12 714.87 4
 1 -14 -13 52079.3 2908.45 4
 -1 -14 13 46139.5 2720.74 4
 1 -14 -12 1300.62 658.428 4
 -1 -14 12 506.296 440.525 4
 1 -14 -11 70620.5 3196.52 4
 -1 -14 11 59887.5 2987.49 4
 1 -14 -10 4516.44 853.126 4
 -1 -14 10 4385.84 823.368 4
 -1 -14 9 42816.9 2426.8 4
 1 -14 -9 42048.3 2370.76 4
 1 -14 -8 11994.9 1259.87 4
 -1 -14 8 9815.51 1175.57 4
 1 -14 -7 20519.6 1579.05 4
 -1 -14 7 18324.8 1562.09 4
 -1 -14 6 13597.1 1360.81 4
 -1 14 6 11417.5 1133.83 2
 1 -14 -6 14238.9 1332.68 4
 -1 -14 5 3927.98 736.59 4
 -1 14 5 3672.59 628.552 2
 1 -14 -5 3922.27 723.45 4
 1 -14 -4 13445.4 1261.92 4
 -1 14 4 12152 1108.93 1
 -1 -14 4 14006.6 1297.05 4
 -1 14 4 10837.2 1090.26 2
 1 -14 -3 2336.17 620.133 4
 -1 14 3 1173.5 399.744 1
 -1 14 3 1718.59 486.011 2
 -1 -14 3 2134.59 548.134 4
 1 -14 -2 15885.2 1324.39 4
 -1 -14 2 15801.2 1345.14 4
 -1 14 2 13541.6 1122.45 2
 -1 14 2 13783 1269.58 1
 -1 14 1 19435.3 1317.54 2
 -1 14 1 21854.2 1555.53 1
 1 -14 -1 22919.3 1570.2 4
 -1 -14 1 24186 1680.89 4
 -1 14 0 7955.88 1019.24 1
 -1 14 0 8319.18 858.851 2
 -1 -14 0 8699.81 1027.5 4
 1 -14 0 9604.17 1060.81 4
 -1 -14 -1 55734.7 2588.7 4
 1 -14 1 55162.1 2467.73 4
 -1 14 -1 56311.6 2571.71 1
 -1 -14 -2 3884.66 763.358 4
 1 14 2 2743.28 607.375 1
 1 -14 2 3032.06 629.522 4
 1 -14 3 62534.2 2602.61 4
 -1 -14 -3 61110 2731.77 4
 -1 -14 -4 1714.03 578.121 4
 1 -14 4 1907.28 557.809 4
 1 -14 5 39035.1 2122.48 4
 -1 -14 -5 39268.7 2306.86 4
 1 -14 6 548.836 400.166 4
 -1 -14 -6 689.457 513.093 4
 1 -14 7 2581.84 645.895 4
 -1 -14 -7 2706.39 730.527 4
 -1 -14 -8 4233.34 861.417 4
 1 -14 8 4803.98 838.705 4
 -1 -14 -9 1925.45 731.926 4
 1 -14 9 1872.9 594.645 4
 1 -14 10 311.699 358.441 4
 -1 -14 -10 65.7537 483.391 4
 -1 -14 -11 14255.8 1540.59 4
 1 -14 11 12684.8 1358.95 4
 -1 -14 -12 1425.9 514.321 4
 1 -14 12 2123.7 619.031 4
 -1 -14 -13 13658.1 1610.46 4
 1 -14 13 13464.1 1426.91 4
 1 -14 14 -278.782 541.901 4
 1 -15 -13 461.913 512.614 4
 -1 -15 12 75546.3 3504.4 4
 1 -15 -12 82436.5 3660.39 4
 1 -15 -11 972.578 559.358 4
 -1 -15 11 666.09 441.112 4
 1 -15 -10 81967.7 3500.4 4
 -1 -15 10 75928.5 3410.38 4
 1 -15 -9 70.0485 429.008 4
 -1 -15 9 119.744 489.79 4
 -1 -15 8 45499.6 2559.62 4
 1 -15 -8 51899.2 2680.8 4
 -1 -15 7 2443.97 588.731 4
 1 -15 -7 1940.78 564.772 4
 -1 -15 6 21638.3 1725.58 4
 1 -15 -6 23194.2 1714.73 4
 -1 -15 5 -188.67 491.575 4
 1 -15 -5 540.195 457.54 4
 1 -15 -4 426.582 409.445 4
 -1 -15 4 370.448 403.716 4
 -1 15 3 401.026 339.832 1
 -1 -15 3 962.453 417.753 4
 1 -15 -3 1069.19 413.954 4
 1 -15 -2 9726.59 1102.33 4
 -1 -15 2 9730.74 1147.13 4
 -1 15 2 8886.06 1058.19 1
 -1 15 1 950.712 463.698 1
 -1 -15 1 549.772 398.822 4
 1 -15 -1 360.193 412.583 4
 1 -15 0 45223.3 2288.96 4
 -1 -15 0 42254.1 2305.11 4
 -1 15 0 42822.9 2297.7 1
 1 -15 1 1676.18 514.128 4
 -1 15 -1 2553.88 691.089 1
 1 15 1 1931.08 594.837 1
 -1 -15 -1 1383.72 575.908 4
 1 -15 2 55266.7 2572.72 4
 -1 15 -2 52332.6 2617.83 1
 -1 -15 -2 56362.4 2691.36 4
 1 -15 3 1852.85 563.434 4
 -1 -15 -3 1236.5 432.763 4
 1 -15 4 46735.6 2400.33 4
 -1 -15 -4 44547.3 2476.05 4
 1 -15 5 2196.26 649.912 4
 -1 -15 -5 1723.19 692.983 4
 -1 -15 -6 25997.4 1960.13 4
 1 -15 6 27516.5 1883.89 4
 -1 -15 -7 1200.89 453.225 4
 1 -15 7 871.491 471.909 4
 -1 -15 -8 2384.95 668.024 4
 1 -15 8 3068.69 644.351 4
 -1 -15 -9 1937.05 727.016 4
 1 -15 9 360.928 396.586 4
 1 -15 10 3927.19 777.77 4
 -1 -15 -10 5497.16 1026.54 4
 -1 -15 -11 -491.544 546.976 4
 1 -15 11 109.876 430.764 4
 1 -15 12 16840.9 1685.54 4
 1 -16 -10 3043.4 781.07 4
 1 -16 -9 54191.8 2870.06 4
 -1 -16 9 50177.5 2805.65 4
 1 -16 -8 1363.34 609.096 4
 -1 -16 8 2012.69 690.291 4
 -1 -16 7 25220.9 1943.91 4
 1 -16 -7 27657.7 1974.14 4
 1 -16 -6 1732.39 572.025 4
 -1 -16 6 1376.75 395.179 4
 1 -16 -5 5168.98 944.612 4
 -1 -16 5 3554.09 753.019 4
 -1 -16 4 5594.3 927.485 4
 1 -16 -4 5435.37 932.812 4
 1 -16 -3 306.662 325.603 4
 -1 -16 3 1045.79 483.975 4
 1 -16 -2 1125.76 404.537 4
 -1 -16 2 1924.47 610.876 4
 -1 16 1 18067 1558.93 1
 1 -16 -1 18767.2 1528.29 4
 -1 -16 1 17925.5 1604.38 4
 -1 -16 0 1045.1 567.578 4
 -1 16 0 -419.679 484.133 1
 1 -16 0 214.866 406.601 4
 -1 -16 -1 33704.7 2169.59 4
 1 -16 1 37127.6 2169.32 4
 -1 16 -1 33586.5 2188.17 1
 -1 -16 -2 303.869 413.217 4
 1 -16 2 510.02 450.457 4
 -1 16 -2 463.68 455.754 1
 1 -16 3 44609.1 2407.68 4
 -1 -16 -3 46138.8 2544.94 4
 -1 16 -3 44247.2 2526.38 1
 -1 -16 -4 -323.494 465.858 4
 1 -16 4 164.445 388.127 4
 -1 16 -4 693.757 490.764 1
 -1 -16 -5 33371 2218.29 4
 1 -16 5 34840.5 2177.34 4
 -1 -16 -6 3313 869.259 4
 1 -16 6 3849.58 817.657 4
 1 -16 7 8259.8 1117.89 4
 -1 -16 -7 7542.45 1147.66 4
 1 -16 8 4300.99 772.066 4
 1 -16 9 2156.44 670.895 4
 1 17 -2 11344.7 1300.09 1
 -1 17 0 22243.9 1801.04 1
 -1 17 -1 2046.57 700.709 1
 -1 17 -2 34493.1 2314.42 1
 2 0 -27 927.522 438.308 3
 2 0 -26 38460.1 2217.16 3
 2 0 -25 3784.9 802.856 3
 2 0 -24 64015 2739.36 3
 -2 0 23 2197.09 790.003 4
 2 0 -23 4165.29 889.395 3
 -2 0 22 141469 4715.69 4
 2 0 -22 122973 3629.53 3
 -2 0 21 2459.6 939.948 4
 2 0 -21 1130.82 534.21 3
 2 0 -20 87801.3 2832.34 3
 -2 0 20 94707.1 3657.36 4
 2 0 -19 1619.83 462.947 3
 -2 0 19 2066.81 701.02 4
 2 0 -18 47521.7 1938.87 3
 -2 0 18 54718 2598.84 4
 -2 0 17 42.9724 367.191 4
 2 0 -17 147.254 298.989 3
 2 0 -16 76803.5 2309.78 3
 -2 0 16 79507.6 2898.34 4
 2 0 -15 -181.411 247.8 3
 -2 0 15 257.425 304.87 4
 2 0 -14 1913.14 347.288 3
 -2 0 14 1656.32 424.47 4
 -2 0 13 148.181 452.865 4
 2 0 -13 84.1046 231.835 3
 -2 0 13 -168.932 201.565 2
 -2 0 12 132136 2203.41 2
 2 0 -12 129162 2577.78 3
 -2 0 12 129202 3228.22 4
 -2 0 11 30.6282 162.195 2
 2 0 -11 -12.632 204.547 3
 -2 0 11 670.497 597.432 4
 2 0 -10 613226 6167.16 3
 -2 0 10 631948 7267.97 4
 -2 0 10 624926 5571.53 2
 2 0 -9 -21.868 196.856 3
 -2 0 9 -18.9532 148.704 2
 -2 0 9 -288.589 286.014 4
 2 0 -9 99.0603 138.377 5
 2 0 -8 454519 4408.61 5
 -2 0 8 463961 4230.67 2
 -2 0 8 461745 5462.62 4
 2 0 -7 45.9747 116.91 5
 2 0 -7 463.292 104.82 2
 -2 0 7 80.0696 104.575 2
 -2 0 7 -23.0985 227.414 4
 -2 0 6 166071 2616.9 4
 -2 0 6 166093 1953.37 2
 2 0 -6 164900 2155.82 5
 2 0 -5 698.686 155.127 5
 -2 0 5 608.61 152.32 2
 -2 0 5 1055.55 242.737 4
 2 0 -5 817.605 184.857 4
 2 0 -5 765.743 135.424 2
 2 0 -4 87118.6 1198.76 2
 -2 0 4 87490.1 1442.02 4
 2 0 -4 89641.8 1406.8 4
 2 0 -3 883.442 136.385 2
 -2 0 3 737.798 142.146 4
 2 0 -3 422.575 88.3446 4
 -2 0 -1 282.62 107.779 3
 2 0 1 473.155 103.693 3
 2 0 1 459.748 112.456 1
 2 0 2 41729.4 897.032 3
 2 0 2 41073.1 742.002 1
 -2 0 -2 40106 885.684 3
 -2 0 -2 40536.3 912.424 4
 -2 0 -3 1308.67 215.426 3
 -2 0 -3 1601.89 192.277 1
 -2 0 -3 1915.72 269.685 4
 2 0 4 1063.24 230.553 4
 -2 0 -4 1506.33 238.947 3
 -2 0 -4 1431.64 165.355 1
 -2 0 -5 116.709 127.037 3
 2 0 5 187.666 175.698 4
 2 0 6 178.528 193.543 4
 -2 0 -6 391.375 176.563 3
 -2 0 -7 -134.123 197.571 3
 2 0 7 168.025 232.016 4
 2 0 8 50990.5 1726.94 4
 -2 0 -8 51595.4 1463.79 3
 -2 0 -9 448.26 299.182 3
 2 0 9 106.628 263.615 4
 -2 0 -10 113649 2458.71 3
 2 0 10 117816 2918.87 4
 -2 0 -11 604.331 380.793 3
 2 0 11 874.469 587.665 4
 -2 0 -12 87966.2 2326.25 3
 2 0 12 85921.4 2734.47 4
 -2 0 -13 848.831 531.259 3
 2 0 13 2789.36 733.466 4
 -2 0 -14 199923 3894.06 3
 2 0 14 195046 4478.26 4
 -2 0 -15 3247.09 776.346 3
 -2 0 -16 154917 3676.45 3
 -2 0 -17 2244.39 631.612 3
 -2 0 -18 352.089 296.726 3
 -2 0 -19 49.9167 303.122 3
 -2 0 -20 6270.4 900.701 3
 -2 0 -21 -62.507 433.324 3
 -2 0 -22 19995.5 1614.47 3
 -2 0 -23 1600.78 640.362 3
 -2 0 -24 47255.4 2539.75 3
 -2 0 -25 1473.16 686.938 3
 2 1 -27 20522.5 1695.9 3
 2 1 -26 4257.31 770.802 3
 2 -1 -26 4491.48 782.501 3
 2 1 -25 40773.5 2206.82 3
 2 -1 -25 43157.5 2333.25 3
 -2 -1 24 3204.37 916.137 4
 2 -1 -24 2837.66 687.897 3
 2 1 -24 2915.66 665.444 3
 2 -1 -23 88362.9 3164.37 3
 2 1 -23 82175.1 2961.97 3
 -2 -1 23 90026.5 3839.88 4
 -2 -1 22 7793.25 1178.91 4
 2 -1 -22 7691.27 976.875 3
 2 1 -22 6985.63 888.724 3
 2 1 -21 92702.8 2963.99 3
 2 -1 -21 93218.9 3042.97 3
 -2 -1 20 29921.6 2036.83 4
 2 1 -20 27610.1 1565.09 3
 2 -1 -20 27262.7 1614.32 3
 -2 1 19 57134 2736.2 4
 -2 -1 19 54321.1 2654.62 4
 2 1 -19 46834.7 1951.84 3
 2 -1 -19 50070.3 2080.16 3
 2 -1 -18 10312.3 959.349 3
 2 1 -18 11030.1 946.615 3
 -2 -1 18 10416.7 1178.15 4
 -2 1 18 11217.6 1263.51 4
 -2 -1 17 21412.3 1588.72 4
 -2 1 17 21279 1639.44 4
 2 -1 -17 21244.4 1295.95 3
 2 1 -17 19860.2 1212.1 3
 -2 -1 16 56232.6 2440.95 4
 -2 1 16 54036.4 2407.76 4
 2 1 -16 52304.2 1842.54 3
 2 -1 -16 50210.1 1873.39 3
 2 1 -15 261.78 234.755 3
 2 -1 -15 151.095 283.448 3
 2 -1 -14 108974 2616.46 3
 -2 -1 14 111568 3260.9 4
 -2 1 14 113485 3270.35 4
 -2 1 14 112867 2314.43 2
 2 1 -14 109060 2500.52 3
 -2 -1 13 37416.7 1810.87 4
 2 1 -13 36312.3 1355.52 3
 -2 1 13 37706.6 1267.15 2
 -2 1 13 35307.8 1769.61 4
 2 -1 -13 34849 1395.6 3
 -2 1 12 32830.8 1644.65 4
 2 -1 -12 31013.6 1269.17 3
 2 1 -12 29433.9 1189.28 3
 -2 -1 12 30570.9 1535 4
 -2 1 12 30477.9 1090.85 2
 -2 1 11 323781 5046.66 4
 2 -1 -11 315067 4274.23 3
 -2 1 11 319224 3844.45 2
 -2 -1 11 327859 5086.23 4
 2 1 -11 318742 4082.1 3
 2 -1 -11 307250 3561.18 5
 -2 -1 11 323622 3382.17 2
 2 -1 -10 2754.75 393.725 3
 2 1 -10 2737.06 340.205 3
 -2 1 10 2786.77 329.878 2
 2 -1 -10 3388.36 320.344 5
 -2 -1 10 3164 560.378 4
 -2 -1 10 3316.22 270.229 2
 -2 1 9 320176 4548.45 4
 2 -1 -9 308048 3377.45 5
 2 1 -9 317254 3143.35 2
 2 1 -9 309151 3669.78 3
 -2 -1 9 324728 4607.39 4
 -2 -1 9 314054 3059.82 2
 -2 1 9 313043 3597.9 2
 2 -1 -9 319909 3904.12 3
 -2 1 8 9818.36 719.708 4
 2 1 -8 10341.3 422.673 2
 -2 -1 8 10588.6 409.82 2
 2 1 -8 9293.76 513.774 3
 -2 -1 8 9556.58 706.349 4
 -2 1 8 9335.84 512.262 2
 2 -1 -8 9681.78 480.901 5
 -2 -1 7 74483.7 1852.9 4
 -2 -1 7 78216.1 1120.33 2
 -2 1 7 76914.9 1454.77 2
 2 1 -7 74242 1493 5
 2 1 -7 77293.9 1149.44 2
 -2 1 7 72226.7 1794.54 4
 -2 1 6 21616.8 712.993 2
 2 1 -6 22132.9 756.375 5
 -2 -1 6 22109.1 913.133 4
 2 1 -6 23197.5 556.351 2
 -2 1 6 23002.4 890.613 4
 -2 -1 6 23349.5 526.343 2
 -2 -1 5 476379 3672.52 2
 -2 -1 5 468027 4787.34 4
 2 1 -5 466866 3722.28 2
 -2 1 5 471545 4229.12 2
 2 1 -5 472269 4346.49 5
 2 -1 -5 479656 4537.82 4
 -2 1 5 481699 4586.53 4
 -2 -1 4 46649.9 1027.28 5
 -2 1 4 46076.1 958.228 2
 -2 1 4 45021.2 990.592 4
 2 1 -4 47871.8 1077.38 4
 -2 -1 4 46472 1070.94 4
 2 1 -4 46530.2 995.872 5
 2 -1 -4 44451.5 945.037 4
 2 1 -3 1635.24 198.506 4
 -2 -1 3 2466.52 224.97 5
 2 -1 -3 2446.02 225.115 2
 -2 1 3 1939.52 214.183 2
 2 1 -3 2485.61 244.168 5
 -2 -1 3 2567.64 237.491 4
 2 -1 -3 1423.14 155.61 4
 -2 1 3 2443.03 213.204 4
 2 1 -2 4130.5 265.274 5
 -2 -1 2 3914.26 240.023 4
 2 -1 -2 3631.26 259.432 2
 2 1 -2 4386.44 237.556 3
 2 1 -1 78972.6 1205.3 4
 -2 1 1 145727 1520.69 3
 -2 1 0 3816.83 265.599 1
 2 -1 0 4833.87 276.361 3
 -2 1 0 6364.51 306.947 3
 2 1 0 7945.29 338.914 3
 2 -1 0 7754.75 361.08 1
 2 -1 1 8911.49 383.761 3
 -2 1 -1 6278.7 343.799 1
 2 -1 1 9427.72 408.698 1
 2 1 1 9365.59 395.886 3
 -2 1 -1 9999.48 374.201 4
 -2 -1 -1 7061.79 347.577 3
 2 -1 1 5221.11 257.812 4
 -2 1 -1 9773.63 407.904 3
 -2 1 -2 1270.21 201.378 1
 -2 1 -2 1284.53 194.113 3
 2 -1 2 1387.29 218.104 4
 -2 1 -2 1939.78 237.103 4
 2 1 2 1317.23 182.08 3
 -2 -1 -2 1037.29 191.495 3
 -2 -1 -3 183912 2291.33 3
 -2 1 -3 185379 2244.57 3
 2 -1 3 192408 2413.06 4
 -2 1 -3 197269 2550.45 4
 2 -1 3 194717 2237.39 3
 -2 -1 -4 31215.3 912.991 3
 -2 -1 -4 32446.6 581.302 1
 2 -1 4 32873.1 1021.3 4
 -2 1 -4 32596.4 885.59 3
 -2 -1 -5 43131 1154.37 3
 -2 -1 -5 45093.1 725.532 1
 -2 1 -5 43179.9 1101.61 3
 -2 -1 -6 858.611 220.845 3
 -2 1 -6 760.347 204.466 3
 2 -1 6 829.339 290.794 4
 -2 -1 -6 448.983 81.5804 1
 -2 1 -7 188.522 164.148 3
 2 -1 7 525.662 277.849 4
 -2 -1 -7 550.976 221.793 3
 2 -1 8 614.011 303.777 4
 -2 -1 -8 502.778 268.337 3
 -2 1 -8 406.209 227.476 3
 -2 1 -9 57804.6 1613.26 3
 -2 -1 -9 58787.6 1700.5 3
 2 -1 9 57716.7 1955.7 4
 2 -1 10 1406.32 478.695 4
 -2 -1 -10 1854.22 403.776 3
 -2 1 -10 1154.03 295.459 3
 -2 -1 -11 69260.9 2020.53 3
 -2 1 -11 70827 1956.36 3
 2 -1 11 71002.5 2339.9 4
 -2 1 -12 113.004 269.117 3
 -2 -1 -12 774.514 419.982 3
 2 -1 12 375.839 391.368 4
 -2 1 -13 78721.2 2279.52 3
 2 -1 13 85316.6 2772.17 4
 -2 -1 -13 82541.4 2406.92 3
 -2 1 -14 1897.58 574.619 3
 2 -1 14 2425.46 625.985 4
 -2 -1 -14 1709.3 540.354 3
 -2 1 -15 170456 3671.08 3
 2 -1 15 179257 4393.74 4
 -2 -1 -15 171501 3820.59 3
 -2 1 -16 12515.4 1082.32 3
 2 -1 16 13079.8 1343.97 4
 -2 -1 -16 11088.2 1116.06 3
 2 -1 17 40231.5 2251.7 4
 -2 -1 -17 44525.7 2051.32 3
 -2 1 -17 40665.3 1916.29 3
 2 -1 18 14334.4 1384.03 4
 -2 1 -18 13393.6 1158.05 3
 -2 -1 -18 12960.6 1177.46 3
 -2 -1 -19 715.28 421.907 3
 -2 1 -19 343.938 323.447 3
 -2 -1 -20 14795.7 1300.41 3
 -2 1 -20 14908.3 1253.08 3
 -2 1 -21 3958.67 725.634 3
 -2 -1 -21 3562.56 719.204 3
 -2 1 -22 12850.2 1279.23 3
 -2 -1 -22 13571.4 1352.55 3
 -2 1 -23 32124.2 2028.4 3
 -2 -1 -23 29392.7 1995.88 3
 -2 1 -24 8600.84 1117.16 3
 -2 -1 -24 9311.21 1229.61 3
 -2 1 -25 53904.9 2785.28 3
 2 2 -27 12614.2 1306.63 3
 2 2 -26 11153.9 1195.7 3
 -2 -2 26 10913.4 1504.98 4
 2 -2 -26 10587.4 1225.9 3
 2 2 -25 3292.4 653.762 3
 2 -2 -25 4353.75 835.576 3
 -2 -2 25 4144.71 1064.86 4
 2 -2 -24 26844 1809.32 3
 2 2 -24 27218 1725.02 3
 -2 -2 24 28849.5 2268.44 4
 -2 -2 23 1178.11 800.679 4
 2 2 -23 887.322 463.699 3
 2 -2 -23 484.442 398.842 3
 -2 -2 22 71641.7 3311.83 4
 2 2 -22 64071.2 2490.51 3
 2 -2 -22 65225.8 2672.33 3
 2 -2 -21 13378.8 1199.65 3
 2 2 -21 12925.1 1104.85 3
 -2 -2 21 15035.6 1479.35 4
 2 -2 -20 37486.3 1904.38 3
 -2 -2 20 40032.4 2330.77 4
 2 2 -20 36089.4 1761.19 3
 2 2 -19 38570.3 1744.11 3
 -2 -2 19 43864.6 2388.96 4
 2 -2 -19 40138.8 1906.01 3
 2 -2 -18 17590.7 1241.4 3
 -2 -2 18 17994.2 1622.08 4
 2 2 -18 16474.4 1119.33 3
 2 -2 -17 103791 2912.34 3
 2 2 -17 103274 2673.5 3
 -2 -2 17 109511 3568.17 4
 2 2 -16 3465.16 550.323 3
 2 -2 -16 2387.39 611.729 3
 -2 -2 16 3372.86 810.39 4
 2 2 -15 105594 2514.59 3
 2 -2 -15 109318 2762.79 3
 -2 2 15 109051 2501.29 2
 -2 -2 15 111072 3352.4 4
 2 -2 -14 13504.7 970.206 3
 2 2 -14 14204 872.289 3
 -2 -2 14 13852.7 1138.24 4
 -2 2 14 14877.2 884.129 2
 2 -2 -13 164183 3205.95 3
 2 -2 -13 159812 2373.5 5
 -2 -2 13 166251 3811.52 4
 2 2 -13 164298 2907.77 3
 -2 2 13 164454 2957.94 2
 2 -2 -12 41595.2 1101.05 5
 -2 2 12 43390.2 1387.57 2
 2 -2 -12 41248.3 1485.69 3
 2 2 -12 43690.1 1381.26 3
 -2 -2 12 40035.7 1807.02 4
 -2 -2 11 82166.8 2435.3 4
 2 -2 -11 80009.7 1534.07 5
 2 -2 -11 81869.5 2031.73 3
 -2 2 11 82347.8 1884.48 2
 2 2 -11 79866.5 1304.97 2
 2 2 -11 83652.9 1826.2 3
 -2 -2 10 174022 3463.57 4
 2 2 -10 167072 2556.44 3
 -2 2 10 175818 2756.38 2
 2 -2 -10 163248 2266.43 5
 2 2 -10 169319 1939.49 2
 2 -2 -10 171826 2920.01 3
 2 2 -9 4056.08 241.008 2
 2 2 -9 4347.78 375.813 3
 -2 -2 9 4324.09 565.874 4
 -2 -2 9 4540.04 241.416 2
 -2 2 9 3941.12 431.734 2
 2 -2 -9 4419.1 453.937 3
 -2 2 8 138409 2257.7 2
 2 2 -8 136557 2017.84 3
 2 2 -8 132587 1480.32 2
 -2 -2 8 138793 1424.86 2
 -2 -2 8 143852 2801.08 4
 -2 -2 7 3548.78 169.877 2
 -2 2 7 3262.75 336.774 2
 2 2 -7 2976.82 171.307 2
 -2 -2 6 93139.3 1976.26 4
 -2 2 6 88899.7 1659.42 2
 2 -2 -5 10261.2 541.605 4
 -2 -2 5 11261.8 633.37 4
 -2 2 5 10982.4 539.308 2
 -2 2 4 35435.3 945.884 2
 2 -2 -4 36124.2 883.219 4
 2 -2 -4 37965.8 939.232 1
 -2 -2 4 35675.3 1019.26 4
 -2 -2 3 374175 3760.31 4
 2 -2 -3 392829 3716.7 2
 -2 2 3 373145 3658.6 2
 2 2 -3 367842 3061.79 3
 2 2 -3 383535 3780.4 4
 2 -2 -3 385553 3655.2 1
 -2 -2 3 394522 3694.02 5
 -2 2 2 268696 2778.09 2
 2 2 -2 263447 2309.67 3
 2 2 -2 269588 2870.02 4
 -2 -2 2 271051 2814.99 4
 2 2 -2 273266 2701.32 5
 -2 2 2 263561 2778.64 1
 2 -2 -2 273585 2801.62 2
 -2 -2 2 268741 2689.36 5
 2 -2 -2 278625 2838.3 1
 -2 -2 1 23170.7 619.332 5
 2 -2 -1 28219 735.328 2
 2 2 -1 27177.2 769.152 4
 2 -2 -1 26270 619.744 3
 2 -2 -1 28809.7 782.714 1
 2 2 -1 28346 680.246 5
 -2 2 1 28211.8 768.281 1
 -2 -2 1 28824.9 779.876 4
 2 2 -1 27788.4 598.419 3
 -2 2 1 25858.8 732.439 2
 -2 -2 0 117716 1530.65 3
 -2 2 0 146073 1843.27 2
 2 -2 0 142109 1781.73 2
 -2 -2 0 146417 1934.62 4
 -2 2 0 141610 1429.77 4
 -2 2 0 147859 1912.82 1
 -2 2 0 143063 1669.8 3
 2 2 0 146613 1604.82 5
 2 -2 0 143721 1663.71 3
 2 2 0 147512 1635.73 3
 2 -2 1 2061.97 188.33 4
 -2 2 -1 2330.68 252.393 2
 -2 -2 -1 1906.95 209.951 3
 -2 2 -1 1949.88 184.911 4
 2 2 1 1892.56 207.784 3
 -2 2 -1 2274.11 219.296 3
 2 2 1 2011.35 165.707 5
 2 -2 1 2136.83 214.678 3
 -2 2 -1 1862.69 242.609 1
 -2 -2 -2 100621 1541.77 3
 -2 2 -2 105777 1624.26 4
 2 -2 2 103228 1562.65 4
 2 2 2 106137 1123.74 5
 -2 2 -2 104149 1521.27 3
 2 -2 2 109944 1519 3
 2 -2 3 15411.9 650.383 4
 -2 2 -3 16434.8 693.333 4
 -2 2 -3 15872.5 579.136 3
 -2 -2 -3 15083.7 609.51 3
 2 -2 3 16653.5 569.029 3
 2 -2 4 86416.5 1737.98 4
 -2 2 -4 89636.8 1524.94 3
 -2 -2 -4 87931.2 1621.55 3
 -2 -2 -5 13680.3 667.793 3
 2 -2 5 13668.4 726.448 4
 -2 2 -5 12606 582.88 3
 -2 -2 -6 90676.8 1851 3
 -2 2 -6 90482.6 1716.11 3
 2 -2 6 88568 2031.11 4
 -2 -2 -7 675.981 254.017 3
 2 -2 7 1010.62 312.142 4
 -2 2 -7 972.903 221.372 3
 -2 2 -8 33459.8 1148.5 3
 -2 -2 -8 34247.2 1256.74 3
 2 -2 8 33270.7 1399.6 4
 -2 -2 -9 544.36 99.371 1
 -2 2 -9 251.774 168.936 3
 2 2 9 385.306 74.4191 5
 2 -2 9 237.472 245.42 4
 -2 -2 -10 20389.7 509.04 1
 -2 -2 -10 22382.1 1118.34 3
 -2 2 -10 22367.9 1029.1 3
 2 -2 10 23695.8 1286.06 4
 -2 2 -11 469.8 253.732 3
 2 -2 11 384.986 323.469 4
 -2 -2 -11 221.859 278.75 3
 2 -2 12 48625.2 2017.05 4
 -2 -2 -12 48930.3 1782.11 3
 -2 2 -12 45480.2 1615.68 3
 -2 2 -13 785.298 296.934 3
 -2 -2 -13 410.492 394.113 3
 2 -2 13 1462.64 556.245 4
 -2 -2 -14 90774.4 2684.37 3
 2 -2 14 91578 2987.62 4
 -2 2 -14 87162.9 2450.42 3
 2 -2 15 3869.19 789.831 4
 -2 2 -15 3699.13 640.916 3
 -2 -2 -15 4327.9 722.215 3
 -2 -2 -16 70260.5 2496.83 3
 -2 2 -16 65507.4 2298.99 3
 2 -2 16 68930.2 2841.54 4
 2 -2 17 78924 3097.18 4
 -2 2 -17 70148.9 2492.89 3
 -2 -2 -17 75629.7 2672.72 3
 -2 -2 -18 27750.6 1673.62 3
 -2 2 -18 28602.7 1631.05 3
 2 -2 18 28124 1909.23 4
 -2 2 -19 36461.9 1885.69 3
 -2 -2 -19 37798.1 2010.9 3
 2 -2 19 37170.7 2276.73 4
 -2 2 -20 2832.52 617.297 3
 -2 -2 -20 2484.36 630.176 3
 2 -2 20 3396.02 870.215 4
 -2 2 -21 36347.1 1993.14 3
 -2 -2 -21 35139.7 2069.94 3
 2 -2 21 39143.5 2433.5 4
 -2 2 -22 3965.14 786.772 3
 -2 -2 -22 5128.95 930.668 3
 -2 2 -23 27310.2 1846.19 3
 -2 -2 -23 27931.6 1967.49 3
 -2 2 -24 22533.1 1747.94 3
 -2 -2 -24 25865.3 1966.91 3
 -2 2 -25 8101.04 1091.11 3
 2 3 -26 11137 1162.86 3
 2 -3 -26 13421.2 1389.98 3
 2 3 -25 474.493 314.583 3
 2 -3 -25 852.69 380.667 3
 2 3 -24 2379.92 579.686 3
 -2 -3 24 3238.09 861.241 4
 2 -3 -24 2673.64 613.358 3
 2 -3 -23 5622.48 805.732 3
 2 3 -23 4396.89 710.427 3
 -2 -3 23 6538.38 1121.96 4
 2 -3 -22 6020.26 884.395 3
 -2 -3 22 6402.71 1025.62 4
 2 3 -22 6019.56 792.777 3
 2 3 -21 18887 1295.43 3
 2 -3 -21 19399.2 1463.58 3
 -2 -3 20 43426.9 2445.22 4
 2 -3 -20 41056 2030.84 3
 2 3 -20 43477.7 1895.74 3
 -2 -3 19 2516.24 598.739 4
 2 -3 -19 2579.34 591.893 3
 2 3 -19 3085.72 562 3
 2 3 -18 59761.6 2052.8 3
 -2 -3 18 66388.6 2870.35 4
 2 -3 -18 62033.1 2356.72 3
 2 -3 -17 577.511 511.947 3
 -2 -3 17 -241.299 395.366 4
 2 3 -17 1162.09 432.443 3
 2 3 -16 131985 2879.5 3
 -2 3 16 136623 3067.65 2
 -2 -3 16 140055 3940.98 4
 2 -3 -16 134269 3263.14 3
 2 3 -15 9933.91 756.978 3
 2 -3 -15 8455 793.556 3
 -2 -3 15 8801.76 956.349 4
 -2 3 15 8859.66 747.173 2
 2 3 -14 73384.2 1930.32 3
 -2 3 14 75985.8 2131.11 2
 -2 -3 14 74514.9 2668.4 4
 2 -3 -14 74056.8 1511.11 5
 2 -3 -14 76097.5 2294.81 3
 2 3 -13 23469.9 1028.98 3
 2 -3 -13 21888.4 774.729 5
 2 3 -13 18987.6 580.335 2
 2 -3 -13 22550.3 1169.52 3
 -2 -3 13 21715.1 1383.23 4
 -2 3 13 20856.5 1067.93 2
 -2 -3 12 130046 3262.29 4
 -2 3 12 131786 2633.18 2
 2 3 -12 128486 2362.24 3
 2 -3 -12 126343 1953.1 5
 2 -3 -12 128966 2781.58 3
 -2 -3 11 28759.9 1451.88 4
 2 3 -11 27960 1011.39 3
 2 -3 -11 27579.9 842.151 5
 2 -3 -11 29121.6 1245.52 3
 -2 3 11 27347.5 1139.72 2
 2 3 -11 23951.7 546.818 2
 -2 -3 10 3038.35 476.56 4
 2 3 -10 4158.24 387.315 3
 -2 3 10 4212.35 469.742 2
 2 -3 -10 3870.44 456.004 3
 2 3 -9 158816 2277.96 3
 -2 -3 9 160278 3219.82 4
 -2 3 9 163080 2738.29 2
 2 -3 -9 161803 2765.62 3
 2 3 -8 39104.7 966.375 3
 -2 3 8 39492.5 1251.56 2
 -2 -3 8 40058.5 1521.99 4
 -2 -3 7 50955.2 1599.08 4
 -2 3 7 51943.6 1402.36 2
 2 3 -7 54217.8 1049.54 3
 -2 -3 6 307893 4123.75 4
 -2 3 6 313209 3767.24 2
 -2 -3 5 8938.19 616.424 4
 -2 3 5 8815.65 549.232 2
 2 -3 -5 9161.71 496.943 1
 -2 3 4 117658 1960.43 2
 -2 -3 4 115127 2102.16 4
 2 3 -4 121083 1322.39 3
 -2 3 4 122456 1879.33 1
 -2 3 3 192669 2454.88 1
 2 3 -3 186633 1773.37 3
 -2 -3 3 187467 2613.66 4
 -2 3 3 189199 2501.82 2
 -2 3 2 186092 2399.67 1
 -2 -3 2 182320 2513.18 4
 -2 3 2 184693 2400.52 2
 2 3 -2 179894 1740.38 3
 2 -3 -2 178874 2011.08 4
 -2 -3 2 182490 1745.8 3
 -2 3 1 296425 3218.25 2
 -2 -3 1 303815 2693.78 3
 -2 3 1 294918 3303.37 1
 -2 -3 1 297237 3430.43 4
 2 3 -1 311276 2659.76 3
 2 -3 -1 305955 2894.35 3
 2 -3 -1 300969 2824.61 4
 -2 -3 0 530.697 127.591 5
 -2 -3 0 408.198 112.417 3
 2 3 0 258.122 82.5341 3
 -2 3 0 413.679 179.107 1
 -2 -3 0 651.093 178.992 4
 -2 3 0 393.002 114.752 3
 2 -3 0 331.241 141.037 2
 -2 3 0 386.913 129.502 2
 -2 3 0 334.567 99.3015 4
 2 -3 0 542.994 137.427 4
 2 -3 0 459.055 108.341 3
 2 -3 1 97716.9 1397.6 3
 -2 -3 -1 101905 1340.35 5
 2 -3 1 97185.4 1524.39 2
 -2 3 -1 97268.1 1486.39 4
 -2 3 -1 96039.1 1392.57 3
 -2 3 -1 94886.8 1533.48 2
 2 -3 1 94877.1 1457.79 4
 2 3 1 96276.3 1405.14 3
 -2 -3 -1 94571.8 1413.49 3
 -2 3 -2 5918.51 378.753 2
 -2 -3 -2 5852.39 268.42 5
 2 -3 2 5443.58 375.424 4
 2 -3 2 5340.14 316.757 3
 -2 3 -2 6264.85 353.435 3
 -2 -3 -2 4962.16 331.683 3
 -2 3 -2 5524.24 367.106 4
 -2 3 -3 17836.2 622.872 3
 -2 3 -3 17180.1 631.714 2
 -2 -3 -3 17589 409.275 5
 2 -3 3 18784.8 604.84 3
 -2 -3 -3 16093.7 649.828 3
 2 -3 3 16696.6 712.762 4
 -2 3 -4 13028.5 563.579 3
 -2 -3 -4 13637.5 648.108 3
 2 -3 4 13479.1 688.06 4
 -2 3 -5 119649 1911.44 3
 2 -3 5 122587 2300.92 4
 -2 -3 -5 119374 2115.87 3
 2 -3 6 5647.88 534.675 4
 -2 3 -6 5468.48 435.462 3
 -2 -3 -6 5135.87 463.13 3
 -2 -3 -7 104355 2184.58 3
 -2 3 -7 106569 1965.65 3
 2 -3 7 106327 2414.92 4
 -2 -3 -8 29353.4 1174.07 3
 2 -3 8 27145 1275.36 4
 -2 3 -8 28861.5 1051.86 3
 -2 3 -9 5117.82 453.62 3
 -2 -3 -9 6049.31 605.724 3
 2 -3 9 6452.38 676.853 4
 -2 -3 -10 24647 1189.67 3
 -2 3 -10 23974.3 1053.35 3
 2 -3 10 24291.6 1323.84 4
 -2 3 -11 3012.17 399 3
 -2 -3 -11 3495.31 495.273 3
 2 -3 11 4245.08 632.547 4
 -2 -3 -12 18230.5 1102.72 3
 2 -3 12 16695.4 1201.01 4
 -2 3 -12 16213.3 972.2 3
 -2 3 -13 19659 1095.28 3
 2 -3 13 18990.7 1348.26 4
 -2 -3 -13 17578.7 1160.1 3
 -2 -3 -14 332.476 370.611 3
 -2 3 -14 632.631 313.542 3
 2 -3 14 1061.44 401.36 4
 2 -3 15 55614.5 2420.32 4
 -2 -3 -15 57893.5 2229.33 3
 -2 3 -15 56991.1 2041.11 3
 2 -3 16 42761.8 2210.7 4
 -2 3 -16 36314.9 1706.73 3
 -2 -3 -16 42265.1 1971.19 3
 -2 3 -17 34263.8 1707.25 3
 -2 -3 -17 36256.3 1896.85 3
 2 -3 17 36531.9 2093.98 4
 -2 -3 -18 85275 2981.96 3
 2 -3 18 87593.3 3340.85 4
 -2 3 -18 81401.9 2733.77 3
 -2 -3 -19 15460.6 1366.69 3
 2 -3 19 15889.4 1537.78 4
 -2 3 -19 14932.7 1255.72 3
 -2 -3 -20 63184.2 2754.1 3
 2 -3 20 65993 3064.18 4
 -2 3 -20 61417 2500.6 3
 -2 -3 -21 5668.5 1019.57 3
 2 -3 21 5982.73 1072.97 4
 -2 3 -21 4337.92 745.509 3
 2 -3 22 41255.7 2594.63 4
 -2 -3 -22 42014.6 2360.25 3
 -2 3 -22 35880 2042.27 3
 -2 3 -23 786.111 444.663 3
 -2 -3 -23 1014.59 562.877 3
 2 -3 23 1283.5 685.449 4
 -2 -3 -24 13649 1439.12 3
 -2 3 -24 13611.3 1336.06 3
 -2 3 -25 3675.62 769.326 3
 -2 -4 25 24089 2140.57 4
 2 -4 -25 20576.1 1684.37 3
 -2 -4 24 179.974 479.719 4
 2 -4 -24 509.833 450.807 3
 -2 -4 23 7151.71 1141.79 4
 2 -4 -23 7257.53 931.259 3
 2 4 -23 4511.37 686.975 3
 2 -4 -22 1291.24 493.783 3
 -2 -4 22 1357.82 592.593 4
 2 4 -22 992.312 369.618 3
 -2 -4 21 22500 1844.76 4
 2 -4 -21 20591.8 1515.87 3
 2 4 -21 20809.1 1330.6 3
 2 4 -20 1518.86 449.33 3
 -2 -4 20 552.008 453.413 4
 2 -4 -20 1346.29 541.525 3
 -2 -4 19 68959.8 3039.84 4
 2 -4 -19 63289.2 2488.68 3
 -2 -4 18 8379.1 1123.9 4
 2 -4 -18 8501.87 937.896 3
 2 4 -18 9074.89 812.663 3
 -2 -4 17 68013 2829.58 4
 2 4 -17 70202.3 2107.51 3
 2 -4 -17 72598.5 2522.61 3
 -2 -4 16 10091.2 1098.68 4
 2 -4 -16 10461.4 961.605 3
 2 4 -16 11667.5 830.686 3
 -2 4 16 10710.1 894.123 2
 -2 -4 15 87450.8 3015.76 4
 -2 4 15 84976 2441.35 2
 2 4 -15 81961.7 2093.69 3
 2 -4 -15 85424 2533.38 3
 2 -4 -15 81131.3 1545.95 5
 2 4 -14 26254.3 1105.36 3
 -2 4 14 26469.6 1331.12 2
 -2 -4 14 22797.5 1498.12 4
 2 -4 -14 23969.3 1288.06 3
 2 -4 -14 26095.3 834.329 5
 2 -4 -13 52449.8 1199.61 5
 2 4 -13 51672.4 1484.21 3
 2 -4 -13 52641.7 1865.7 3
 -2 4 13 51021.1 1771.51 2
 -2 -4 13 53074 2187.8 4
 2 4 -12 27164 1007.17 3
 -2 -4 12 27464.1 1523.55 4
 2 -4 -12 28270.6 1291.12 3
 -2 4 12 27870.3 1275.63 2
 -2 4 11 31693.7 1320.1 2
 -2 -4 11 33433.4 1612.51 4
 2 -4 -11 33506.8 1364.09 3
 2 4 -11 32041.6 1042.84 3
 2 -4 -10 64825.4 1841.84 3
 2 4 -10 62234.5 1376.91 3
 -2 4 10 65326.1 1818.42 2
 -2 -4 10 65129.2 2168.38 4
 -2 -4 9 -81.5466 354.191 4
 2 4 -9 408.477 136.308 3
 -2 4 9 294.514 219.747 2
 2 -4 -9 332.167 235.063 3
 -2 -4 8 5999.06 659.899 4
 2 4 -8 5313.02 342.151 3
 2 -4 -8 5822.87 499.022 3
 -2 4 8 6171.68 567.472 2
 -2 -4 7 73157.7 2000.55 4
 2 4 -7 72095.9 1151.21 3
 -2 4 7 70657.1 1771.13 2
 2 4 -6 8561.66 325.971 3
 -2 4 6 8218.79 589.89 2
 -2 -4 6 8498.7 666.544 4
 -2 4 5 252432 3114.19 1
 2 4 -5 247395 2215.18 3
 -2 4 5 261677 3446.25 2
 -2 -4 5 256943 3631.87 4
 -2 -4 5 256247 2192.34 2
 -2 4 4 7071.54 477.911 1
 -2 -4 4 7168.24 551.188 4
 -2 4 4 6297.89 470.771 2
 -2 -4 4 7871.45 319.103 2
 2 4 -4 6181.45 238.399 3
 -2 4 3 405147 4124.58 1
 -2 4 3 411474 4201.31 2
 -2 -4 3 404517 4416.7 4
 -2 -4 2 39136.3 672.315 3
 -2 -4 2 39283.5 1216.4 4
 2 -4 -2 39114.4 969.437 4
 -2 4 2 38870.2 1094.18 2
 -2 4 2 38528.6 1111.21 1
 -2 -4 2 41491.3 923.781 2
 2 4 -2 38930.6 627.559 3
 -2 -4 1 16164.2 468.407 3
 2 4 -1 16956.5 448.929 3
 -2 4 1 15049.7 655.787 2
 -2 -4 1 15506.5 759.701 4
 -2 4 1 14597.2 697.657 1
 2 -4 -1 15257.2 601.578 4
 2 -4 -1 16388.4 545.08 3
 2 -4 0 129831 1859.28 4
 2 4 0 133381 1616.02 3
 -2 4 0 129937 2008.39 2
 2 -4 0 131602 1679.38 3
 -2 -4 0 137072 2348.64 4
 -2 -4 0 133011 1652.81 3
 -2 -4 -1 1462.89 177.639 3
 2 -4 1 1508.47 165.846 3
 -2 4 -1 1653.57 213.44 2
 2 -4 1 1756.12 220.936 4
 -2 -4 -1 1258.5 248.224 4
 -2 4 -1 2049.73 193.32 3
 -2 -4 -2 200555 2470.6 3
 2 -4 2 208367 2273.02 3
 -2 4 -2 205051 2550.18 2
 2 -4 2 206885 2694.19 4
 -2 4 -2 203189 2302.98 3
 -2 -4 -3 1418.04 154.027 5
 -2 -4 -3 1317.76 219.682 3
 -2 4 -3 1751.86 219.362 2
 2 -4 3 1518.02 259.586 4
 2 -4 3 1510.63 188.056 3
 -2 4 -3 1274.23 184.357 3
 -2 4 -4 275425 3070.74 2
 2 -4 4 283943 2882.86 3
 -2 4 -4 279452 3068.26 3
 -2 -4 -4 266930 3304.74 3
 2 -4 4 272407 3611.78 4
 -2 -4 -4 271544 2412.86 5
 -2 4 -5 25479.4 830.891 3
 2 -4 5 27457.5 1104.52 4
 -2 -4 -5 25541.2 976.925 3
 -2 -4 -5 23425.2 441.727 5
 -2 4 -5 25704 816.926 2
 -2 4 -6 63492.3 1408.73 3
 2 -4 6 60835.8 1750.26 4
 -2 4 -6 63676.8 1344.56 2
 -2 -4 -6 62363.7 1622.26 3
 -2 -4 -7 178625 2982.49 3
 2 -4 7 177883 3299.95 4
 -2 4 -7 181759 2649.4 3
 -2 -4 -8 8364.39 679.853 3
 2 -4 8 8158.62 713.395 4
 -2 4 -8 7698.08 533.681 3
 -2 -4 -9 166059 3151.45 3
 -2 4 -9 168526 2782.43 3
 2 -4 9 169267 3468.39 4
 -2 -4 -10 3244.37 527.714 3
 2 -4 10 2880.21 486.634 4
 -2 4 -10 2955.93 380.867 3
 2 -4 11 72976 2409.82 4
 -2 -4 -11 73462.5 2187.3 3
 -2 4 -11 74152.2 1964.65 3
 -2 -4 -12 4412.03 599.328 3
 -2 4 -12 3981.09 485.822 3
 2 -4 12 4624.73 662.865 4
 -2 4 -13 7730.26 711.173 3
 2 -4 13 8296.13 904.779 4
 -2 -4 -13 8242.57 811.255 3
 2 -4 14 8589.7 943.536 4
 -2 -4 -14 8038.41 847.605 3
 -2 4 -14 7900.58 743.527 3
 2 -4 15 5339.47 866.381 4
 -2 -4 -15 5217.61 736.897 3
 -2 4 -15 4685.4 607.078 3
 -2 -4 -16 32885.6 1771.07 3
 2 -4 16 33671.7 1969.34 4
 -2 4 -16 30273.1 1513.83 3
 2 -4 17 76821.8 3066.74 4
 -2 -4 -17 78293.5 2802.9 3
 -2 4 -17 74781.3 2488.2 3
 2 -4 18 8035.97 1061.09 4
 -2 -4 -18 9470.77 1067.24 3
 -2 4 -18 8292.29 894.371 3
 -2 -4 -19 53957.9 2463.74 3
 -2 4 -19 54938.3 2275.37 3
 2 -4 19 58075.5 2814.14 4
 -2 4 -20 8263.7 976.221 3
 2 -4 20 10735.6 1286.2 4
 -2 -4 -20 8852.55 1101.94 3
 -2 4 -21 68173.6 2704.24 3
 2 -4 21 74821.5 3361.69 4
 -2 -4 -21 72115 3025.04 3
 2 -4 22 7062.73 1193.05 4
 -2 4 -22 6018.68 916.413 3
 -2 -4 -22 5374.87 970.908 3
 -2 4 -23 31351.1 1936.61 3
 2 -4 23 37436.8 2525.35 4
 -2 -4 -23 35685.9 2274.42 3
 -2 -5 25 5112.6 1093.94 4
 2 -5 -25 4597.76 870.53 3
 -2 -5 24 21851.2 1977.22 4
 2 -5 -24 21069 1730.34 3
 -2 -5 23 3418.83 785.345 4
 2 -5 -23 3686.68 661.697 3
 2 -5 -22 -210.405 414.605 3
 -2 -5 22 79.1874 400.724 4
 -2 -5 21 14548.8 1543.26 4
 2 -5 -21 13114.8 1254.2 3
 2 -5 -20 18317.6 1411.34 3
 2 5 -20 18219.3 1180.19 3
 -2 -5 20 20390.5 1772.46 4
 2 -5 -19 4819.98 760.568 3
 2 5 -19 4227.98 556.229 3
 -2 -5 19 5617.16 923.455 4
 2 -5 -18 39945.8 1938.11 3
 2 5 -18 36742.8 1549.52 3
 -2 -5 18 42786.9 2338.48 4
 -2 -5 17 2380.29 610.881 4
 2 5 -17 2564.04 439.704 3
 -2 5 17 1826.53 427.104 2
 2 -5 -17 1998 566.909 3
 2 -5 -16 91214.1 2765.72 3
 -2 5 16 93263.1 2735.86 2
 -2 -5 16 88359.7 3193.94 4
 2 5 -16 87987 2234.77 3
 2 -5 -15 1043.68 364.598 3
 -2 5 15 1850.57 435.297 2
 -2 -5 15 836.75 392.41 4
 2 5 -15 1112.16 284.676 3
 -2 5 14 65203.5 2156.9 2
 -2 -5 14 65301.1 2586.7 4
 2 -5 -14 65047.2 1344.73 5
 2 5 -14 65701.3 1737.32 3
 2 -5 -14 64362.9 2190.23 3
 -2 -5 13 1384.02 395.265 4
 2 -5 -13 1340.21 362.788 3
 -2 5 13 1436.09 324.419 2
 2 5 -13 1419.74 265.967 3
 2 -5 -12 59636.2 1932.44 3
 -2 -5 12 59491.7 2277.29 4
 -2 5 12 59616.4 1956.07 2
 2 5 -12 59167.4 1456.56 3
 -2 5 11 167.555 204.982 2
 2 5 -11 -12.8239 114.394 3
 -2 -5 11 -197.304 373.761 4
 2 -5 -11 -56.0707 257.898 3
 2 5 -10 1010.43 205.203 3
 2 -5 -10 1107.78 269.426 3
 -2 -5 10 999.131 392.775 4
 -2 5 10 1193.1 353.158 2
 2 5 -9 10210 458.426 3
 2 -5 -9 10712.1 741.529 3
 -2 -5 9 10095.4 863.89 4
 -2 5 9 11083.8 790.53 2
 -2 -5 8 96957.3 2533.94 4
 2 5 -8 98539.9 1400.24 3
 -2 5 8 98533.3 2278.08 2
 2 -5 -8 99674.5 2145.28 3
 -2 5 7 26345 1170.28 2
 2 5 -7 28377.5 612.953 3
 -2 -5 7 29374.8 1327.42 4
 -2 -5 6 101200 1165.72 2
 -2 5 6 101122 1932.25 1
 -2 -5 6 100760 2410.38 4
 2 5 -6 95704.1 1072.45 3
 -2 5 5 3503.79 448.869 2
 -2 5 5 3711.26 418.031 1
 -2 -5 5 4271.45 250.26 2
 -2 -5 5 3392.34 456.012 4
 -2 5 4 350155 4308.45 2
 -2 -5 4 353780 4564.49 4
 -2 5 4 353195 4117.74 1
 -2 5 3 576.149 204.623 2
 -2 -5 3 431.127 205.902 4
 -2 5 3 819.285 262.463 1
 2 -5 -3 1214.81 272.181 4
 2 5 -2 184758 1697.48 3
 -2 5 2 194638 2853.19 1
 2 -5 -2 192941 2623.85 4
 -2 5 2 184576 2783.15 2
 -2 -5 2 196272 3081.99 4
 -2 -5 2 181879 1784.88 3
 -2 -5 1 8996.2 650.757 4
 2 5 -1 9588.11 343.651 3
 2 -5 -1 8560.68 525.376 4
 -2 5 1 8762.72 562.408 2
 -2 -5 1 9911.96 379.742 3
 2 -5 -1 9488.29 434.096 3
 -2 5 1 8233.75 585.172 1
 2 -5 0 2913.29 247.654 3
 -2 -5 0 3190.33 404.95 4
 -2 -5 0 2584.98 236.612 3
 -2 5 0 2271.35 294.649 2
 2 5 0 2675.32 211.971 3
 2 -5 0 2421.51 307.983 4
 -2 -5 -1 90350.8 1469.82 3
 2 -5 1 92639 1386.62 3
 -2 5 -1 89982 1698.76 2
 -2 -5 -1 93860.2 2113.29 4
 2 -5 1 92944.4 1770.82 4
 -2 -5 -2 12956.3 583.355 3
 2 -5 2 12606.5 675.414 4
 -2 5 -2 13347.1 495.747 3
 2 -5 2 14004.1 503.124 3
 -2 5 -2 12508.2 611.27 2
 -2 5 -3 116466 1902.93 2
 2 -5 3 117433 2226.5 4
 -2 -5 -3 116145 1964.55 3
 -2 5 -3 116843 1685.83 3
 2 -5 4 40094.2 887.352 3
 -2 5 -4 37786.5 957.336 3
 -2 5 -4 36463.2 998.958 2
 -2 -5 -4 38607 1144.83 3
 2 -5 4 38393 1302.57 4
 -2 5 -5 59530.3 1289.07 3
 -2 -5 -5 61032.2 1552.09 3
 2 -5 5 61521.9 1750.82 4
 -2 5 -5 59404.1 1283.05 2
 -2 -5 -5 62153.7 978.586 5
 -2 5 -6 126776 2036.02 3
 -2 5 -6 125625 1928.91 2
 -2 -5 -6 128953 2415 3
 2 -5 6 128243 2671.5 4
 2 -5 7 14992 953.932 4
 -2 5 -7 13816.6 608.708 2
 -2 -5 -7 14902 848.78 3
 -2 5 -7 14223.6 678.961 3
 -2 -5 -8 166469 3086.11 3
 -2 5 -8 166616 2360.78 2
 2 -5 8 167948 3403.76 4
 -2 5 -8 171507 2655.64 3
 -2 5 -9 4892.01 376.018 2
 -2 5 -9 4990.58 456.964 3
 -2 -5 -9 5633.86 600.523 3
 2 -5 9 3903.75 551.297 4
 -2 5 -10 161788 2435.21 2
 -2 -5 -10 164461 3300.93 3
 -2 5 -10 170024 2887.97 3
 2 -5 10 166896 3646.74 4
 -2 5 -11 -148.101 196.354 2
 2 -5 11 13.0194 338.052 4
 -2 5 -11 -90.9273 218.603 3
 2 -5 12 37390.1 1822.26 4
 -2 5 -12 35530.7 1373.39 3
 -2 -5 -12 34993.4 1609.56 3
 -2 5 -13 929.595 306.46 3
 2 -5 13 449.08 336.269 4
 -2 -5 -13 227.762 322.375 3
 -2 5 -14 19800.2 1119.52 3
 -2 -5 -14 20119.8 1301.62 3
 2 -5 14 18354.6 1390.06 4
 2 -5 15 354.005 393.815 4
 -2 -5 -15 72.1524 298.991 3
 -2 5 -15 -172.536 328.045 3
 -2 5 -16 11244.8 930.215 3
 2 -5 16 11202.4 1185.56 4
 -2 -5 -16 11293.8 1065.86 3
 -2 -5 -17 1337.26 429.226 3
 2 -5 17 1694.21 521.936 4
 -2 5 -17 1647.83 423.156 3
 2 -5 18 30523.9 2009.05 4
 -2 -5 -18 31554.5 1853.99 3
 -2 5 -18 29715.4 1593.57 3
 -2 5 -19 1730.76 503.663 3
 2 -5 19 1409.16 611.834 4
 -2 -5 -19 2190.05 714.493 3
 2 -5 20 38878.7 2370.32 4
 -2 -5 -20 39919 2217.63 3
 -2 5 -20 36294.4 1888.6 3
 -2 -5 -21 1664.65 625.485 3
 2 -5 21 1525.31 678.676 4
 -2 -5 -22 46705.8 2552.54 3
 2 -5 22 40699.4 2577.45 4
 2 -5 23 2085.08 719.732 4
 -2 -5 -23 2135.92 662.035 3
 -2 -6 24 28617.5 2288.22 4
 2 -6 -24 24822.4 1885.02 3
 -2 -6 23 2808.22 880.461 4
 2 -6 -23 1202.79 524.989 3
 -2 -6 22 17766.7 1755.9 4
 2 -6 -22 16514.9 1455.13 3
 2 -6 -21 4058.18 746.405 3
 -2 -6 21 4877.18 912.826 4
 -2 -6 20 4994.8 957.622 4
 2 -6 -20 4539.88 683.447 3
 -2 -6 19 8905.11 1179.37 4
 2 -6 -19 11009.5 1108.9 3
 2 -6 -18 305.984 316.842 3
 -2 -6 18 -212.543 376.329 4
 -2 6 17 45641.9 2024.93 2
 -2 -6 17 46768.7 2409.36 4
 2 -6 -17 47186.7 2078.02 3
 -2 6 16 351.912 358.327 2
 -2 -6 16 27.1881 393.837 4
 2 6 -16 51.5118 209.775 3
 2 -6 -16 639.419 339.52 3
 -2 -6 15 85067.8 3062.85 4
 2 -6 -15 86185.1 2650.19 3
 -2 6 15 84050.9 2628.33 2
 2 6 -15 82241.1 1992.51 3
 -2 -6 14 8882.21 975.882 4
 2 6 -14 8897.85 622.17 3
 2 -6 -14 9359.43 854.2 3
 -2 6 14 8894.11 876.102 2
 2 -6 -13 35382.9 1584.1 3
 2 6 -13 37278.7 1169.85 3
 -2 -6 13 37669.3 1914.63 4
 -2 6 13 38674.7 1680.02 2
 -2 -6 12 6307.15 790.368 4
 -2 6 12 6614.79 720.987 2
 2 -6 -12 6749.59 678.759 3
 2 6 -12 6923.25 468.572 3
 -2 6 11 867.2 335.121 2
 -2 -6 11 87.9765 280.84 4
 2 -6 -11 720.98 217.117 3
 2 6 -11 451.005 143.439 3
 -2 -6 10 48670.3 1965.31 4
 2 -6 -10 48930.5 1652.87 3
 2 6 -10 45293.1 1018.19 3
 -2 6 10 50243.9 1757.54 2
 2 -6 -9 114802 2510.52 3
 -2 6 9 108396 2663.73 2
 2 6 -9 112657 1538.66 3
 2 6 -8 24717.5 576.252 3
 2 -6 -8 29490 1179.33 3
 -2 6 8 28363.9 1294.26 2
 -2 -6 8 27451.7 1386.12 4
 2 -6 -7 218836 3158.6 3
 -2 6 7 225278 3541.18 2
 -2 6 7 220594 3057.65 1
 -2 -6 7 219754 3799.5 4
 -2 6 6 22429.4 1073.92 2
 -2 6 6 21268.1 940.627 1
 -2 -6 6 24478.4 623.221 2
 -2 -6 6 22137.6 1151.43 4
 -2 6 5 251249 3519.88 1
 -2 -6 5 256457 4031.01 4
 -2 6 5 250936 3784.44 2
 -2 6 4 859.856 279.264 2
 2 -6 -4 1448.34 306.678 4
 -2 -6 4 458.161 258.33 4
 -2 6 4 681.172 237.895 1
 -2 6 3 280792 3814.07 1
 -2 6 3 285793 3874.06 2
 -2 -6 3 279470 4137.72 4
 2 -6 -3 280849 3726.99 4
 -2 -6 2 1331.98 363.016 4
 2 -6 -2 857.956 203.682 4
 -2 6 2 699.651 228.121 2
 -2 6 2 560.71 292.727 1
 -2 -6 2 963.425 124.793 3
 -2 -6 1 43105.1 1540.4 4
 -2 6 1 43673.2 1312.51 2
 2 6 -1 43636.6 813.259 3
 2 -6 -1 44363.4 1284.42 4
 -2 -6 1 44699.7 859.377 3
 -2 -6 0 6774.46 367.36 3
 2 6 0 6969.74 362.304 3
 2 -6 0 6716.39 507.617 4
 -2 6 0 5927.54 490.288 2
 -2 -6 0 6126.72 630.198 4
 2 -6 0 6838.61 372.439 3
 2 -6 1 1514.26 281.45 4
 2 -6 1 1433.78 193.665 3
 -2 6 -1 1028.66 242.734 2
 -2 -6 -1 1076.37 197.088 3
 -2 -6 -1 1091.05 351.327 4
 2 -6 2 2952.04 241.897 3
 -2 -6 -2 2693.72 283.905 3
 -2 6 -2 2611.9 317.653 2
 2 -6 2 3003.09 397.033 4
 -2 -6 -2 1963.31 404.005 4
 -2 6 -3 13702.6 654.242 2
 2 -6 3 16181.1 536.417 3
 2 -6 3 14743.4 823.3 4
 -2 6 -3 14254.6 519.116 3
 -2 -6 -3 14403.6 679.28 3
 2 -6 4 3604.91 258.219 3
 -2 -6 -4 2829.81 347.216 3
 -2 6 -4 2809.49 314.702 2
 2 -6 4 3513.86 448.844 4
 -2 6 -4 2846.1 260.594 3
 2 -6 5 161924 1972.25 3
 -2 6 -5 158618 2178.42 3
 2 -6 5 159517 3039.89 4
 -2 6 -5 157318 2288.48 2
 -2 -6 -5 158447 2647.18 3
 2 6 6 100.553 103.806 1
 -2 -6 -6 241.428 82.4214 5
 -2 6 -6 250.886 138.137 3
 2 -6 6 110.485 238.899 4
 -2 6 -6 235.202 111.754 2
 -2 -6 -6 244.599 213.321 3
 -2 6 -7 181370 2398.52 2
 -2 -6 -7 173060 1764.37 5
 2 -6 7 184098 3531.74 4
 -2 6 -7 184322 2632.74 3
 -2 -6 -7 184676 3151.26 3
 -2 6 -8 646.401 206.837 3
 -2 -6 -8 793.707 265.106 3
 2 -6 8 346.996 248.707 4
 -2 6 -8 506.584 125.397 2
 -2 6 -9 139078 2453.85 3
 2 -6 9 134306 3243.01 4
 -2 6 -9 135633 2031.37 2
 2 -6 10 291.967 295.55 4
 -2 -6 -10 -180.768 222.258 3
 -2 6 -10 34.4657 179.752 3
 -2 6 -10 378.822 110.687 2
 2 -6 11 93105.5 2867.74 4
 -2 -6 -11 89122.8 2552.63 3
 -2 6 -11 94661.4 2176.45 3
 -2 6 -12 5585.57 564.809 3
 -2 -6 -12 6465.07 755.242 3
 2 -6 12 4799.95 676.172 4
 -2 -6 -13 75595.3 2528.18 3
 2 -6 13 77925.6 2793.72 4
 -2 6 -13 72706.9 2067.63 3
 2 -6 14 5584.42 826.913 4
 -2 6 -14 4764.12 551.645 3
 -2 -6 -14 5637.08 728.261 3
 2 -6 15 16080.2 1366.37 4
 -2 6 -15 16133.1 1048.31 3
 -2 -6 -15 17234.1 1279.84 3
 2 -6 16 4821.55 845.03 4
 -2 -6 -16 4737.64 719.379 3
 -2 6 -16 3647.97 512.837 3
 2 -6 17 3397.47 662.931 4
 -2 -6 -17 3953.16 661.77 3
 -2 -6 -18 -244.723 449.263 3
 2 -6 18 205.155 387.941 4
 2 -6 19 19286.6 1648.65 4
 -2 -6 -19 20334.1 1575.91 3
 -2 -6 -20 -410.805 341.381 3
 2 -6 20 -67.8889 347.98 4
 -2 -6 -21 18352.2 1586.56 3
 2 -6 21 17017.9 1622.91 4
 2 -6 22 2289.8 705.772 4
 -2 -6 -22 1190.67 552.628 3
 2 -7 -23 21228.4 1730.32 3
 -2 -7 23 22268.7 2020.21 4
 -2 -7 22 -463.314 505.339 4
 2 -7 -22 -150.74 448.289 3
 -2 -7 21 10546.5 1327.59 4
 2 -7 -21 9412.17 1098.91 3
 -2 -7 20 8903.67 1196.7 4
 2 -7 -20 9505.11 1045.5 3
 2 -7 -19 43.2834 402.047 3
 -2 -7 19 -498.522 598.623 4
 2 -7 -18 16941.7 1325.15 3
 -2 -7 18 19207.6 1634.58 4
 -2 -7 17 199.016 401.557 4
 2 -7 -17 -336.345 398.79 3
 -2 7 17 -240.421 401.701 2
 -2 -7 16 31646.6 1979.72 4
 2 -7 -16 32983.7 1725.26 3
 -2 7 16 32353.4 1749.49 2
 2 -7 -15 3145.48 525.406 3
 -2 -7 15 3458.58 645.132 4
 -2 7 15 2108.22 446.219 2
 -2 -7 14 13482.3 1250.35 4
 2 -7 -14 13872 1085.08 3
 -2 7 14 13237.6 1055.5 2
 -2 -7 13 41454.8 2078.14 4
 -2 7 13 41685.2 1846.84 2
 2 -7 -13 44543.2 1829.86 3
 -2 7 12 310.949 254.883 2
 2 -7 -12 658.576 253.145 3
 2 -7 -11 57016.9 1925.58 3
 -2 -7 11 55512.3 2260.16 4
 2 7 -11 53563.1 1134.1 3
 -2 7 11 55989.5 2002.68 2
 -2 7 10 39275.9 1669.07 2
 2 7 -10 39121.9 853.601 3
 2 -7 -10 41972.8 1581.83 3
 -2 -7 10 42924.8 1926.1 4
 2 -7 -9 40988 1484.03 3
 -2 -7 9 39682.7 1794.43 4
 -2 7 9 41843.5 1648.73 2
 -2 -7 8 138510 3252.63 4
 2 -7 -8 133297 2639.16 3
 -2 7 8 133643 2948.32 2
 -2 7 7 2007.01 424.992 2
 -2 -7 7 2799.38 214.316 2
 2 -7 -7 2740.73 389.739 3
 -2 7 7 2225.68 343.052 1
 -2 -7 7 1869.4 398.295 4
 -2 7 6 171825 2965.9 1
 2 -7 -6 175268 2856.37 3
 -2 -7 6 176704 3518.27 4
 -2 7 6 174828 3262.14 2
 -2 -7 5 512.254 290.39 4
 2 -7 -5 672.344 211.997 4
 2 -7 -5 1086.07 256.973 3
 -2 7 5 583.355 240.162 2
 -2 7 5 499.123 203.344 1
 -2 7 4 227183 3508.05 1
 -2 7 4 219275 3569.12 2
 2 -7 -4 222001 3493.94 4
 -2 -7 4 224204 3875.48 4
 2 -7 -3 21868.8 1006.62 4
 -2 7 3 19427.4 1006.07 2
 -2 7 3 20337 1000.76 1
 -2 -7 3 20474.8 1105.64 4
 -2 7 2 201535 3282.15 1
 2 -7 -2 195775 3109.59 4
 -2 7 2 197802 3179.93 2
 -2 -7 2 196297 3508.93 4
 -2 -7 1 58610.4 1029.97 3
 -2 -7 1 55615.1 1837.67 4
 -2 7 1 54706.9 1580.51 2
 2 -7 -1 56691.1 1583.46 4
 -2 -7 0 35400.2 863.616 3
 2 -7 0 33474.6 1220.69 4
 -2 -7 0 34008.1 1445.85 4
 -2 7 0 33650.9 1177.41 2
 2 -7 1 22429.2 1024.38 4
 -2 -7 -1 22488.6 749.742 3
 -2 7 -1 21084.5 914.37 2
 -2 -7 -1 23451.2 1204.11 4
 2 -7 1 23422.5 676.499 3
 -2 -7 -2 382.411 160.975 3
 -2 7 -2 -14.7663 146.819 2
 2 -7 2 276.771 214.777 4
 -2 -7 -2 -204.182 331.193 4
 2 -7 2 264.184 119.513 3
 -2 -7 -3 59733.7 2019.06 4
 -2 7 -3 58994.6 1454.46 2
 -2 -7 -3 62612.6 1474.05 3
 2 -7 3 62362.8 1773.47 4
 2 -7 3 63809 1088.24 3
 2 -7 4 59584.5 1036.53 3
 -2 -7 -4 61009.5 1541.85 3
 2 -7 4 63643 1886.77 4
 -2 7 -4 56998.8 1405.68 2
 -2 -7 -5 55316.1 1551.96 3
 -2 7 -5 51050.7 1080.94 3
 2 -7 5 55768 1004.8 3
 2 -7 5 55429.4 1809.6 4
 -2 7 -5 51751.6 1298.81 2
 2 -7 6 115079 2744.85 4
 2 7 6 108765 1786.08 1
 2 -7 6 114437 1588.71 3
 -2 7 -6 108272 1888.29 2
 -2 -7 -6 112903 2375.58 3
 -2 7 -6 110729 1789.62 3
 2 -7 7 24858.2 1301.65 4
 -2 7 -7 23133.7 804.862 2
 -2 -7 -7 25194.8 1174.76 3
 -2 7 -7 22658.9 819.578 3
 2 7 7 23952.8 739.519 1
 -2 7 -8 167936 2549.41 3
 -2 7 -8 170965 2292.8 2
 -2 -7 -8 173409 3221.9 3
 2 -7 8 176425 3680.62 4
 -2 7 -9 1399.96 286.101 3
 -2 -7 -9 1390.88 365.798 3
 -2 7 -9 1006.87 152.075 2
 2 -7 9 950.163 356.331 4
 2 -7 10 89381.4 2754.77 4
 -2 -7 -10 89084.7 2463 3
 -2 7 -10 84644.5 1957.23 3
 -2 7 -11 5154.25 486.941 3
 -2 -7 -11 6929.42 763.107 3
 2 -7 11 7457.42 817.275 4
 2 -7 12 78598.7 2763.18 4
 -2 -7 -12 81465.7 2527.24 3
 -2 7 -12 78247.6 2038.57 3
 2 -7 13 29531.1 1765.13 4
 -2 -7 -13 30853.5 1635.28 3
 2 -7 14 38617.1 2059.48 4
 -2 -7 -14 37833.8 1837.17 3
 -2 -7 -15 30568.4 1723.24 3
 2 -7 15 31987.6 1917.99 4
 2 -7 16 423.101 382.403 4
 -2 -7 -16 -123.48 464.335 3
 2 -7 17 19367.4 1623.27 4
 -2 -7 -17 20701.8 1519.47 3
 2 -7 18 4686.27 915.711 4
 -2 -7 -18 4356.64 725.517 3
 2 -7 19 7260.81 1016.27 4
 -2 -7 -19 6186.21 922.227 3
 -2 -7 -20 6087.58 911.698 3
 2 -7 20 5240.37 957.14 4
 2 -7 21 386.196 389.978 4
 -2 -7 -21 -432.767 639.995 3
 2 -7 22 17769.7 1720.76 4
 2 -8 -23 -36.3995 541.829 3
 -2 -8 23 580.018 534.923 4
 2 -8 -22 13215.9 1339.99 3
 -2 -8 22 13817.9 1576.65 4
 2 -8 -21 1993.08 599.568 3
 -2 -8 21 2157.79 804.59 4
 2 -8 -20 1609.66 475.46 3
 -2 -8 20 1954.02 666.317 4
 2 -8 -19 11384.5 1130.57 3
 -2 -8 19 10336.9 1284.72 4
 -2 -8 18 2079.74 690.956 4
 2 -8 -18 984.087 336.748 3
 2 -8 -17 21559.8 1472.32 3
 -2 -8 17 22058.8 1732.39 4
 -2 8 17 22137.8 1524.83 2
 -2 -8 16 989.992 359.475 4
 2 -8 -16 1067.18 360.502 3
 -2 8 16 677.925 355.199 2
 -2 8 15 10974.9 1038.23 2
 2 -8 -15 11394.9 1013.6 3
 -2 -8 15 8727.16 1051.52 4
 2 -8 -14 41199.8 1854.23 3
 -2 -8 14 41395.2 2187.56 4
 -2 8 14 40983.9 1948.84 2
 -2 -8 13 202.43 422.114 4
 2 -8 -13 459.754 266.213 3
 -2 8 13 110.352 386.027 2
 -2 -8 12 77895.7 2878.75 4
 -2 8 12 72758.3 2506.94 2
 2 -8 -12 78914.8 2400.5 3
 -2 8 11 10067.5 939.109 2
 2 -8 -11 10539.2 847.506 3
 -2 -8 11 10198 1018.58 4
 2 -8 -10 60606.6 1936.86 3
 -2 8 10 60245.8 2167.53 2
 -2 -8 10 61470.1 2393.27 4
 2 -8 -9 65785.6 1947.74 3
 -2 -8 9 63849.4 2368.23 4
 -2 8 9 61206.6 2117.57 2
 -2 8 8 21620.9 1218.59 2
 -2 -8 8 23648.9 1400.28 4
 -2 8 8 20987.9 1031.14 1
 2 -8 -8 22285.7 1073.09 3
 -2 8 7 101191 2346.97 1
 -2 -8 7 98931.1 2807.37 4
 -2 8 7 100162 2592.84 2
 2 -8 -7 102737 2263.46 3
 -2 8 6 -18.5753 277.367 1
 -2 8 6 -331.727 310.358 2
 2 -8 -6 340.592 222.112 3
 2 -8 -6 41.8041 272.324 4
 -2 -8 6 29.4633 319.97 4
 2 -8 -5 162616 3178.89 4
 -2 -8 5 164980 3494.24 4
 2 -8 -5 160608 2678.58 3
 -2 8 5 159749 3190.42 2
 -2 8 5 162111 3077.7 1
 2 -8 -4 16095.3 969.757 4
 -2 -8 4 17220.9 1093.68 4
 2 -8 -4 18525.4 806.679 3
 -2 8 4 15654.5 921.432 1
 -2 8 4 16665.1 977.47 2
 -2 8 3 145322 2895.2 2
 2 -8 -3 147817 2894.13 4
 -2 8 3 146932 2939.29 1
 -2 -8 3 142317 3196.4 4
 -2 8 2 101899 2412.07 1
 -2 8 2 100442 2312.41 2
 -2 -8 2 100915 2620.52 4
 2 -8 -2 103540 2367.25 4
 -2 8 1 62601.4 1777.69 2
 -2 -8 1 64254.3 1115.63 3
 2 -8 -1 63907.6 1806.21 4
 -2 -8 1 64025.2 2076.13 4
 -2 8 0 169811 2962.88 2
 2 -8 0 166077 3044.31 4
 -2 -8 0 173133 3556.96 4
 -2 -8 0 173157 2195.75 3
 2 -8 1 9633.39 730.9 4
 -2 -8 -1 8879.06 794.179 4
 -2 8 -1 8874.07 629.038 2
 -2 -8 -1 9899.9 525.761 3
 2 -8 1 10354.5 459.967 3
 2 -8 2 205146 3482.51 4
 2 -8 2 194903 2232.58 3
 -2 -8 -2 198539 2728.39 3
 -2 -8 -2 206265 3950.57 4
 -2 8 -2 197752 3085.43 2
 2 -8 3 10167.6 398.434 3
 -2 8 -3 9011.45 614.768 2
 2 -8 3 9717.44 735.408 4
 -2 -8 -3 10421 613.303 3
 -2 -8 -3 10022.2 888.602 4
 -2 8 -4 131011 2322.46 2
 -2 -8 -4 132130 3285.1 4
 -2 -8 -4 136605 2450.36 3
 2 -8 4 136251 2936.75 4
 -2 8 -5 22544.5 887.121 2
 -2 -8 -5 25195.1 1071.92 3
 2 -8 5 25519.1 1282.21 4
 2 8 6 57727.4 1409.03 1
 -2 8 -6 56284.9 1115.19 3
 -2 8 -6 58573.2 1403.53 2
 -2 8 -7 30911.8 883.21 3
 2 8 7 33236.1 1000 1
 -2 -8 -7 34301.4 1375.05 3
 -2 8 -7 32257 987.91 2
 2 -8 7 33014.9 1570.2 4
 2 -8 8 20272.5 1286.22 4
 -2 8 -8 18142.4 706.205 2
 -2 -8 -8 20204.1 1105.43 3
 -2 -8 -9 99494.4 2611.54 3
 2 -8 9 101023 2936.71 4
 2 -8 10 1023.78 319.606 4
 -2 -8 -10 1475.21 362.397 3
 -2 -8 -11 50607.4 1986.53 3
 2 -8 11 49178 2193.23 4
 2 -8 12 5645.33 779.876 4
 -2 -8 -12 6099.06 729.872 3
 2 -8 13 19659 1468.06 4
 -2 -8 -13 19294.3 1335.34 3
 -2 -8 -14 59230.1 2356.73 3
 2 -8 14 56609.3 2560.97 4
 2 -8 15 8662.57 1078.35 4
 -2 -8 -15 7656.24 933.175 3
 -2 -8 -16 74883.4 2874.46 3
 2 -8 16 74259.6 3078.32 4
 -2 -8 -17 -575.708 443.402 3
 2 -8 17 191.731 357.26 4
 2 -8 18 38480 2340.44 4
 -2 -8 -18 40164.8 2212.44 3
 -2 -8 -19 4306.5 809.292 3
 2 -8 19 4853.8 960.964 4
 2 -8 20 11201 1393.34 4
 -2 -8 -20 9700.2 1161.21 3
 -2 -8 -21 9712.65 1226.72 3
 2 -8 21 9260.3 1243.81 4
 2 -9 -22 78.2556 472.956 3
 -2 -9 22 50.5272 458.695 4
 -2 -9 21 12151 1465.44 4
 2 -9 -21 10878.4 1244.38 3
 -2 -9 20 2917.02 732.768 4
 2 -9 -20 1678.45 492.778 3
 2 -9 -19 9002.64 1047.77 3
 -2 -9 19 7522.39 1097.87 4
 -2 -9 18 13527.1 1424.03 4
 2 -9 -18 13526.7 1229.59 3
 -2 -9 17 -83.0559 448.392 4
 2 -9 -17 74.3048 370.316 3
 -2 -9 16 9739.28 1175.36 4
 2 -9 -16 8323.54 909.866 3
 -2 9 16 8985.81 1007.8 2
 -2 -9 15 33411.9 2070.06 4
 2 -9 -15 35547.4 1801.04 3
 -2 9 15 35136.9 1902.73 2
 -2 9 14 4032.95 713.503 2
 -2 -9 14 4796.66 798.597 4
 2 -9 -14 3705.84 627.913 3
 -2 9 13 45404.5 2069.64 2
 -2 -9 13 47529.1 2384.18 4
 2 -9 -13 47727.5 1947.58 3
 2 -9 -12 6604.41 733.574 3
 -2 9 12 6021.64 777.685 2
 -2 -9 12 5794.44 811.701 4
 -2 9 11 30170.9 1615.17 2
 -2 -9 11 30340.5 1781.56 4
 2 -9 -11 29208.7 1447 3
 2 -9 -10 1143.66 334.05 3
 -2 -9 10 713.605 414.29 4
 -2 9 10 747.323 294.485 2
 2 -9 -9 57545.7 1877.13 3
 -2 -9 9 56634.9 2319.3 4
 -2 9 9 53338.2 2068.7 2
 2 -9 -8 14425.9 903.955 3
 -2 -9 8 13941.2 1136.44 4
 -2 9 8 12828.8 1058.39 2
 -2 9 8 12550.1 876.545 1
 -2 -9 7 19172.8 1280.74 4
 2 -9 -7 20278.7 1225.51 4
 -2 9 7 19435.3 1079.23 1
 -2 9 7 16928.6 1135.99 2
 2 -9 -7 20960.2 1038.13 3
 2 -9 -6 14307.1 817.864 3
 -2 -9 6 12397.4 1028.12 4
 2 -9 -6 15000.1 1014.93 4
 -2 9 6 11695.8 864.784 1
 -2 9 6 12325.7 931.352 2
 2 -9 -5 685.899 252.671 3
 -2 9 5 635.929 283.588 1
 -2 9 5 90.7798 222.293 2
 -2 -9 5 289.903 271.672 4
 2 -9 -5 -213.779 299.732 4
 -2 9 4 34573.2 1476.88 1
 -2 -9 4 38625.4 1739.17 4
 -2 9 4 32295.8 1482.28 2
 2 -9 -4 40378.7 1231.21 3
 2 -9 -4 35837.8 1516.51 4
 2 -9 -3 86255.9 2325.75 4
 2 -9 -3 87759.3 1761.02 3
 -2 9 3 84397.1 2329.72 1
 -2 -9 3 85146 2554.55 4
 -2 9 3 80053.3 2235.25 2
 -2 -9 2 15529 1087.47 4
 2 -9 -2 14233.6 927.499 4
 2 -9 -2 16307 698.524 3
 -2 9 2 13995.1 961.511 1
 -2 9 2 13736.7 893.338 2
 -2 9 1 110715 2562.4 2
 2 -9 -1 116570 2671.8 4
 2 -9 -1 120186 1860.07 3
 -2 -9 1 117380 3011.14 4
 -2 9 1 121617 2865.37 1
 -2 -9 1 118248 1612.85 3
 -2 -9 0 1060 203.933 3
 2 -9 0 417.299 249.334 4
 -2 9 0 613.613 241.315 2
 -2 -9 0 737.323 344.954 4
 -2 9 -1 160406 2972.64 2
 -2 -9 -1 169741 2397.72 3
 -2 -9 -1 163976 3666.78 4
 2 -9 1 163861 3242.44 4
 -2 -9 -2 1047.06 250.384 3
 2 -9 2 691.03 259.325 4
 -2 9 -2 558.755 272.048 2
 -2 -9 -2 1217.83 421.387 4
 -2 9 -3 200074 3194.04 2
 -2 -9 -3 204792 2994.85 3
 -2 -9 -3 206262 4241.2 4
 2 -9 3 198580 3715.17 4
 2 -9 4 246.877 232.556 4
 -2 -9 -4 683.271 241.376 3
 -2 -9 -4 -172.907 436.189 4
 -2 9 -4 445.96 234.125 2
 -2 9 -5 73785.5 1745.03 2
 -2 -9 -5 77371.1 2624.95 4
 2 -9 5 79029.5 2384.87 4
 -2 -9 -5 78176.1 1942.4 3
 2 -9 6 8380.57 806.534 4
 -2 -9 -6 10809.5 1028.82 4
 2 9 6 8476.16 596.994 1
 -2 -9 -6 8817.15 687.911 3
 -2 9 -6 8149.34 552.538 2
 -2 -9 -7 44179.8 1611.38 3
 2 -9 7 44481.1 1900.32 4
 -2 -9 -8 10912.6 848.714 3
 2 -9 8 11130.9 1007.87 4
 2 -9 9 13910.7 1136.54 4
 -2 -9 -9 12970.5 957.325 3
 2 -9 10 8947.24 948.806 4
 -2 -9 -10 10619.4 896.739 3
 2 -9 11 10611.9 1039.5 4
 -2 -9 -11 9950.09 924.194 3
 -2 -9 -12 4022.19 633.05 3
 2 -9 12 4281.35 718.462 4
 -2 -9 -13 38487.4 1862.26 3
 2 -9 13 39256.5 2108.21 4
 2 -9 14 1545.38 385.226 4
 -2 -9 -14 2072.72 537.884 3
 -2 -9 -15 63622.5 2562.73 3
 2 -9 15 61747.7 2789.86 4
 2 -9 16 416.937 405.937 4
 -2 -9 -16 1115.48 512.314 3
 -2 -9 -17 48573.5 2411.57 3
 2 -9 17 48828 2595.51 4
 -2 -9 -18 3238.4 737.466 3
 2 -9 18 3133.61 764.414 4
 -2 -9 -19 21645.8 1707.56 3
 2 -9 19 20123 1747.31 4
 -2 -9 -20 4802.6 888.143 3
 2 -9 20 4637.02 942.945 4
 2 -10 -21 360.934 384.975 3
 -2 -10 21 1127.16 547.789 4
 2 -10 -20 14892.4 1401.24 3
 -2 -10 20 14210.2 1577.27 4
 -2 -10 19 4639.95 975.136 4
 2 -10 -19 5123.41 785.499 3
 -2 -10 18 1662.01 624.985 4
 2 -10 -18 1151.82 385.229 3
 2 -10 -17 2919.18 609.227 3
 -2 -10 17 3161.2 751.936 4
 2 -10 -16 3286.52 577.033 3
 -2 -10 16 2195.7 654.958 4
 -2 10 16 2795.12 586.722 2
 2 -10 -15 1374.97 327.941 3
 -2 10 15 2139.24 521.416 2
 -2 -10 15 1917.59 618.558 4
 -2 -10 14 42680.6 2373.39 4
 2 -10 -14 44341.9 1986.78 3
 -2 10 14 42360 2151.86 2
 -2 -10 13 6789.84 978.908 4
 2 -10 -13 7874.22 834.549 3
 -2 10 13 6024.87 884.556 2
 2 -10 -12 56505.3 2105.82 3
 -2 10 12 53368.8 2357.64 2
 -2 -10 12 52060.6 2486.81 4
 -2 -10 11 9412.89 1086.36 4
 2 -10 -11 9707.12 859.075 3
 -2 10 11 8559.31 947.679 2
 -2 10 10 91030.3 2909.39 2
 2 -10 -10 95201.6 2582.75 3
 -2 -10 10 92870 3166.22 4
 -2 10 9 18876.7 1095.12 1
 -2 -10 9 20521.3 1474.3 4
 2 -10 -9 21281.2 1160.34 3
 -2 10 9 19008 1346.56 2
 -2 -10 8 36942.1 1892.14 4
 -2 10 8 34932.6 1705.12 2
 -2 10 8 37363.6 1540.34 1
 2 -10 -8 40193.6 1532.24 3
 2 -10 -8 38590.9 1835.17 4
 -2 10 7 16345 1166.02 2
 2 -10 -7 19896.2 1041.71 3
 -2 -10 7 17010.9 1258.75 4
 -2 10 7 17113.1 1073.29 1
 2 -10 -7 18470.6 1214.91 4
 2 -10 -6 5938.03 552.87 3
 -2 10 6 4936.48 668.552 2
 -2 10 6 6082.08 674.318 1
 2 -10 -6 5893.05 725.876 4
 -2 -10 6 5653.42 763.428 4
 -2 10 5 20872 1202.64 1
 -2 -10 5 22829.7 1427.3 4
 2 -10 -5 23091.7 1312.47 4
 2 -10 -5 23475.3 1019.25 3
 -2 10 4 6152.5 671.381 2
 2 -10 -4 7030.81 525.127 3
 -2 10 4 6630.99 724.892 1
 -2 -10 4 7371.98 839.958 4
 2 -10 -4 6919.58 710.903 4
 2 -10 -3 14203.6 998.133 4
 -2 10 3 11785.5 928.764 2
 -2 10 3 12715.4 965.637 1
 -2 -10 3 13886.2 1101.75 4
 2 -10 -3 14776.5 721.969 3
 -2 10 2 63108.9 2014.39 2
 -2 -10 2 67495.9 2374.91 4
 2 -10 -2 65390.9 2099.88 4
 -2 10 2 64591 2169.99 1
 2 -10 -2 68926.9 1486.55 3
 -2 10 1 5343.13 653.072 1
 -2 10 1 5130.14 581.46 2
 -2 -10 1 5664.75 729.675 4
 2 -10 -1 5891.45 394.687 3
 2 -10 -1 5313.79 635.453 4
 2 -10 0 106772 2696.95 4
 -2 -10 0 104267 3008.56 4
 -2 10 0 105148 2504.96 2
 -2 10 -1 333.702 223.725 2
 -2 -10 -1 574.764 382.7 4
 -2 -10 -1 835.764 194.775 3
 2 -10 1 273.789 261.043 4
 -2 -10 -2 121270 2154.9 3
 -2 -10 -2 121454 3293.46 4
 2 -10 2 116694 2880.31 4
 -2 -10 -3 656.054 364.421 4
 -2 10 -3 776.879 264.999 2
 -2 -10 -3 903.062 246.428 3
 2 -10 3 905.211 357.752 4
 -2 -10 -4 105110 3161.88 4
 -2 10 -4 97530.3 2182.14 2
 2 -10 4 102590 2837.25 4
 -2 -10 -4 105662 2237.63 3
 -2 -10 -5 3199.24 417.389 3
 2 -10 5 3295.97 543.716 4
 -2 -10 -5 2544.9 594.495 4
 -2 10 -5 2731.98 374.011 2
 -2 -10 -6 43851.9 1555.76 3
 -2 -10 -6 43606.5 2105.45 4
 2 -10 6 43129.8 1887.42 4
 2 -10 7 457.34 283.736 4
 -2 -10 -7 1296.64 314.625 3
 -2 -10 -7 663.024 359.243 4
 -2 -10 -8 14348.1 980.723 3
 2 -10 8 14330.1 1179.95 4
 2 -10 9 6949.55 833.534 4
 -2 -10 -9 6435.22 693.489 3
 2 -10 10 485.666 341.547 4
 -2 -10 -10 180.285 291.137 3
 -2 -10 -11 13602.7 1073.96 3
 2 -10 11 11960.8 1131.43 4
 2 -10 12 31891.2 1903.73 4
 -2 -10 -12 30579.6 1692.91 3
 -2 -10 -13 4239.85 686.655 3
 2 -10 13 3460.4 697.57 4
 2 -10 14 54490.9 2627.59 4
 -2 -10 -14 56292.2 2397.5 3
 2 -10 15 5025.25 835.918 4
 -2 -10 -15 6656 928.218 3
 2 -10 16 47830 2588.2 4
 -2 -10 -16 49728.7 2414.01 3
 -2 -10 -17 3682.66 745.984 3
 2 -10 17 4996.24 909.521 4
 2 -10 18 27433.2 2037 4
 -2 -10 -18 27415 1886.76 3
 2 -10 19 1372.36 595.216 4
 -2 -10 -19 1057.92 493.319 3
 2 -10 20 6033.48 1092.18 4
 2 -11 -20 -91.9603 370.78 3
 -2 -11 19 12661.8 1476.44 4
 2 -11 -19 13520.7 1341.96 3
 2 -11 -18 -1632.12 517.042 3
 -2 -11 18 -440.738 636.146 4
 -2 -11 17 2109.62 652.659 4
 2 -11 -17 1473.6 431.94 3
 -2 -11 16 -294.956 386.154 4
 2 -11 -16 464.905 360.343 3
 -2 -11 15 4937.94 886.434 4
 -2 11 15 4493 731.84 2
 2 -11 -15 5181.03 712.845 3
 -2 -11 14 5975.31 938.056 4
 -2 11 14 4431.35 709.558 2
 2 -11 -14 5805.61 754.542 3
 2 -11 -13 53997.7 2191.11 3
 -2 -11 13 51156.8 2621.77 4
 -2 11 13 51527.8 2391.28 2
 -2 11 12 4701.19 811.96 2
 2 -11 -12 6460.23 765.416 3
 -2 -11 12 4622.71 765.369 4
 -2 -11 11 90477.9 3355.19 4
 -2 11 11 94829.9 3138.91 2
 2 -11 -11 97856 2755.15 3
 2 -11 -10 834.889 338.226 3
 2 -11 -10 781.275 392.972 4
 -2 -11 10 77.3187 392.435 4
 -2 11 10 774.139 424.245 2
 2 -11 -9 98084 3143.81 4
 2 -11 -9 98088.2 2572.3 3
 -2 -11 9 100917 3359.83 4
 -2 11 9 96073.1 3035.29 2
 -2 -11 8 16501.5 1342.74 4
 2 -11 -8 17346.6 1028.76 3
 -2 11 8 14564.2 1038.83 1
 2 -11 -8 17024.7 1270.87 4
 -2 11 8 14196.9 1186.01 2
 -2 11 7 40724 1757.68 1
 2 -11 -7 43735.9 1563.25 3
 2 -11 -7 45095.2 2003.57 4
 -2 -11 7 43997.9 2117.37 4
 -2 11 7 41987.5 1898.67 2
 -2 11 6 44015.3 1952.19 2
 -2 -11 6 48865.7 2194.92 4
 2 -11 -6 50695.5 1612.46 3
 2 -11 -6 50782.9 2093.9 4
 -2 11 6 45593.5 1859.51 1
 -2 -11 5 1567.71 531.055 4
 -2 11 5 1296.14 379.753 2
 2 -11 -5 1661.07 300.598 3
 2 -11 -5 1731.78 445.698 4
 -2 11 5 1538.68 395.829 1
 -2 11 4 57064.7 2115.47 1
 -2 -11 4 54777.2 2305.03 4
 -2 11 4 53314.9 2008.47 2
 2 -11 -4 58331.5 2161.43 4
 2 -11 -3 18749 1233.11 4
 -2 -11 3 19192.7 1335.18 4
 -2 11 3 15287.3 1130.61 1
 -2 11 3 15982.3 1073.99 2
 -2 11 2 21483.9 1336.15 1
 -2 11 2 21525 1227.06 2
 2 -11 -2 24683 1361.94 4
 -2 -11 2 25159.6 1536.08 4
 -2 11 1 49774.3 2043.89 1
 -2 -11 1 49489 2136.41 4
 2 -11 -1 47293.6 1902.56 4
 -2 11 1 45700.9 1756.68 2
 -2 11 0 3717 541.07 2
 -2 11 0 3541.07 601.922 1
 2 -11 0 4243.92 625.498 4
 -2 -11 0 4123.15 636.166 4
 -2 -11 -1 84689 2833.45 4
 2 -11 1 84039.4 2558.78 4
 -2 11 -1 77769.4 2218.32 2
 2 -11 2 60.3152 331.37 4
 -2 11 -2 1033.75 359.552 2
 -2 -11 -2 464.959 366.176 4
 -2 11 -3 80568.9 2132.13 2
 2 -11 3 87336.6 2635.33 4
 -2 -11 -3 85499.6 2977.31 4
 -2 11 -4 5724.54 563.865 2
 -2 -11 -4 6447.04 838.272 4
 2 -11 4 5942.86 719.168 4
 -2 -11 -5 22938.1 1106.36 3
 2 -11 5 25321.3 1482.35 4
 -2 -11 -5 22092.1 1569.07 4
 -2 -11 -6 26970.6 1743.08 4
 2 -11 6 26315.9 1543.07 4
 -2 -11 -6 27719.2 1267.24 3
 -2 -11 -7 8071.69 1043.64 4
 -2 -11 -7 8855.66 757.115 3
 2 -11 7 8113.67 918.595 4
 -2 -11 -8 23695.6 1708.34 4
 2 -11 8 23771 1558.2 4
 -2 -11 -8 24054 1271.77 3
 -2 -11 -9 2045.39 420.74 3
 2 -11 9 2215.72 484.537 4
 -2 -11 -9 2804.44 655.608 4
 2 -11 10 50758.7 2370.25 4
 -2 -11 -10 50655.4 2004.7 3
 2 -11 11 24357.5 1693.72 4
 -2 -11 -11 25929.8 1502.84 3
 -2 -11 -12 28772.7 1643.19 3
 2 -11 12 28115.3 1854.62 4
 2 -11 13 28300 1880.57 4
 -2 -11 -13 26846.1 1624.17 3
 -2 -11 -14 8037.71 961.367 3
 2 -11 14 6912.89 994.68 4
 -2 -11 -15 36804.1 2051.43 3
 2 -11 15 35746.4 2239.27 4
 -2 -11 -16 1810.77 465.859 3
 2 -11 16 430.517 416.864 4
 -2 -11 -17 35227.7 2135.75 3
 2 -11 17 33096.6 2232.74 4
 2 -11 18 462.699 428.73 4
 -2 -11 -18 1337.67 501.005 3
 2 -12 -19 1211.05 410 3
 -2 -12 18 15546.9 1639.96 4
 2 -12 -18 14653.1 1363.61 3
 -2 -12 17 5908.72 1038.57 4
 2 -12 -17 4813 765.955 3
 -2 -12 16 781.906 465.302 4
 2 -12 -16 -727.073 467.203 3
 2 -12 -15 4519.53 695.011 3
 -2 -12 15 4921.72 888.55 4
 2 -12 -14 12878.7 1102.65 3
 -2 12 14 11699.5 1225.56 2
 -2 -12 14 13057.5 1423.79 4
 -2 -12 13 -533.379 531.588 4
 2 -12 -13 -232.844 336.228 3
 -2 12 13 8.92509 406.08 2
 2 -12 -12 47723 2466.97 4
 2 -12 -12 48614.7 2041.9 3
 -2 -12 12 47815 2517.4 4
 -2 12 12 40650.4 2209.73 2
 2 -12 -11 3322.76 579.44 3
 -2 -12 11 2191.31 641.916 4
 2 -12 -11 2885.97 639.484 4
 -2 12 11 2303.28 554.99 2
 -2 -12 10 62629.6 2785.95 4
 2 -12 -10 62413.9 2659.47 4
 2 -12 -10 61319.2 2130.82 3
 -2 12 10 56436.1 2545.67 2
 2 -12 -9 4396.01 773.724 4
 2 -12 -9 4173.6 590.841 3
 -2 -12 9 2886.06 688.363 4
 -2 12 9 2495.88 647.385 2
 -2 -12 8 56875.8 2533.85 4
 2 -12 -8 57417.2 2417.87 4
 -2 12 8 51699 2253.85 2
 -2 -12 7 21799.8 1554.44 4
 2 -12 -7 23761.5 1510.96 4
 -2 12 7 19616 1395.1 2
 -2 12 7 19832.5 1302.82 1
 -2 12 6 23348.9 1483.89 2
 2 -12 -6 26729.2 1574.96 4
 -2 12 6 22818.5 1385.62 1
 -2 -12 6 25286.3 1689.68 4
 -2 -12 5 48126.5 2233.07 4
 2 -12 -5 48674.5 2111.89 4
 -2 12 5 43263.9 1948.91 2
 -2 12 5 42377.3 1906.39 1
 -2 12 4 -45.1997 319.812 2
 2 -12 -4 39.1444 351.442 4
 -2 -12 4 819.582 458.588 4
 -2 12 4 659.197 348.98 1
 -2 12 3 25849.8 1519.56 1
 -2 -12 3 29676 1760.46 4
 -2 12 3 26448.2 1473.05 2
 2 -12 -3 29808 1571.45 4
 -2 12 2 11269.2 948.782 2
 -2 -12 2 14449.7 1213.17 4
 2 -12 -2 13220.2 1070.41 4
 -2 12 2 11792.7 1062.97 1
 -2 12 1 19943.1 1212.54 2
 2 -12 -1 25181 1449.71 4
 -2 -12 1 22865 1553.56 4
 -2 12 1 22302 1454.22 1
 2 -12 0 18911.2 1261.91 4
 -2 -12 0 17894.3 1375.49 4
 -2 12 0 14923.4 1035.64 2
 -2 12 0 18269.3 1364.39 1
 -2 -12 -1 21427.5 1498.04 4
 -2 12 -1 19973 1171.09 2
 2 -12 1 21888.7 1384.21 4
 2 -12 2 33849.1 1701.9 4
 -2 -12 -2 34664.8 1925.27 4
 -2 12 -2 29701.7 1364.5 2
 -2 -12 -3 575.323 369.193 4
 2 -12 3 306.718 291.609 4
 -2 -12 -4 24364.8 1680.68 4
 2 -12 4 25488.8 1534.35 4
 2 -12 5 24627.9 1553.89 4
 -2 -12 -5 25740.7 1753.97 4
 2 -12 6 7167.85 864.703 4
 -2 -12 -6 5326.9 860.408 4
 -2 -12 -7 28723.2 1928.07 4
 2 -12 7 30510.7 1810.02 4
 -2 -12 -8 449.066 380.825 4
 2 -12 8 1001.27 404.442 4
 -2 -12 -9 72080.6 3163.23 4
 2 -12 9 72027.6 2866.09 4
 -2 -12 -10 16471.1 1560.84 4
 -2 -12 -10 18501.9 1256.79 3
 2 -12 10 17023.1 1465 4
 -2 -12 -11 49523.3 2140.13 3
 2 -12 11 45442.5 2400.46 4
 -2 -12 -11 49480.5 2718.25 4
 -2 -12 -12 16251.5 1291.34 3
 2 -12 12 16340.8 1427.8 4
 -2 -12 -13 19423.8 1417.97 3
 2 -12 13 17541.4 1571.86 4
 2 -12 14 24562.2 1844.16 4
 -2 -12 -14 23838 1637.11 3
 -2 -12 -15 5376.06 829.439 3
 2 -12 15 5387.61 899.745 4
 -2 -12 -16 22405.1 1670.06 3
 2 -12 16 21219.4 1856.81 4
 -2 -12 -17 -549.245 510.678 3
 2 -12 17 -179.471 439.342 4
 2 -13 -18 6822.25 972.609 3
 2 -13 -17 4973.74 784.556 3
 -2 -13 16 21539.6 1889.8 4
 -2 -13 15 105.362 405.484 4
 2 -13 -15 926.786 516.688 4
 2 -13 -14 23203.3 1858.25 4
 -2 -13 14 22889.3 1900.84 4
 -2 -13 13 13670.8 1468.69 4
 -2 13 13 13377.2 1336.03 2
 2 -13 -13 14572.5 1491.03 4
 -2 13 12 5965.65 938.381 2
 -2 -13 12 6581.41 1058.08 4
 2 -13 -12 7087.33 1039.67 4
 2 -13 -11 30612.2 2004.36 4
 -2 13 11 27110.2 1811.94 2
 -2 -13 11 29375.1 2013.41 4
 -2 -13 10 1878.27 580.186 4
 -2 13 10 1307.21 471.888 2
 2 -13 -10 2042.71 547.284 4
 2 -13 -9 27258.9 1771.37 4
 -2 -13 9 22563.5 1728.78 4
 -2 13 9 24275.9 1663.93 2
 2 -13 -8 16399.1 1355.83 4
 -2 -13 8 16420.1 1448.56 4
 -2 13 8 14604.9 1298.11 2
 -2 -13 7 16497.3 1430.56 4
 2 -13 -7 18251.1 1390.75 4
 2 -13 -6 25545.6 1642.54 4
 -2 -13 6 24423.9 1697.13 4
 -2 13 6 23064 1552.81 2
 -2 13 6 24735.6 1508.69 1
 -2 13 5 11184.9 1067.83 2
 -2 13 5 12399 1122.78 1
 2 -13 -5 13899.6 1174.46 4
 -2 -13 5 14304.5 1294.21 4
 -2 -13 4 31395.4 1895.57 4
 -2 13 4 28361.3 1698.96 1
 2 -13 -4 33056.4 1746.84 4
 -2 13 4 28006.1 1602.19 2
 -2 13 3 535.412 344.113 1
 -2 -13 3 1510.01 520.575 4
 2 -13 -3 785.138 366.225 4
 -2 13 3 481.829 274.298 2
 -2 -13 2 30465.6 1836.84 4
 -2 13 2 29571 1586.19 2
 -2 13 2 29240.7 1736.24 1
 2 -13 -2 31899.6 1717.08 4
 -2 13 1 1151.88 459.998 1
 2 -13 -1 1423.01 485.193 4
 -2 -13 1 1089.19 362.327 4
 -2 13 1 1422.8 413.096 2
 -2 13 0 12453 1167.12 1
 -2 13 0 11062.4 927.164 2
 2 -13 0 14945.1 1166 4
 -2 -13 0 13059.2 1230.33 4
 -2 -13 -1 4935.96 742.828 4
 -2 13 -1 4576.17 779.864 1
 -2 13 -1 4614.24 603.497 2
 2 -13 1 5285.97 719.639 4
 2 -13 2 5410.99 766.308 4
 -2 -13 -2 4991.51 798.176 4
 -2 13 -2 3987.43 687.021 1
 -2 -13 -3 9819.51 1119.12 4
 2 -13 3 11047.1 1059.99 4
 2 -13 4 3114.09 583.815 4
 -2 -13 -4 3420.92 746.952 4
 2 -13 5 6600.62 871.514 4
 -2 -13 -5 7764.34 1019.05 4
 2 -13 6 18979.3 1445.4 4
 -2 -13 -6 20463.7 1651.51 4
 2 -13 7 991.973 442.852 4
 -2 -13 -7 136.844 441.352 4
 -2 -13 -8 45854.3 2560.27 4
 2 -13 8 44127.7 2253.54 4
 2 -13 9 3926.1 732.803 4
 -2 -13 -9 2924.63 709.348 4
 2 -13 10 33398.1 2066.34 4
 -2 -13 -10 34338.5 2305.65 4
 2 -13 11 12032.9 1272.84 4
 -2 -13 -11 11805.4 1433.08 4
 -2 -13 -12 16517.3 1728.79 4
 2 -13 12 15319.2 1459.54 4
 2 -13 13 16933 1594.03 4
 -2 -13 -13 17199.3 1782.38 4
 2 -13 14 4362.42 843.512 4
 -2 -13 -14 5493.13 1121.04 4
 2 -13 15 17629.3 1683.03 4
 2 -13 16 916.079 591.87 4
 2 -14 -16 1659.77 531.171 4
 2 -14 -15 47079.7 2801.89 4
 -2 -14 14 324.15 408.64 4
 2 -14 -14 636.669 622.007 4
 -2 -14 13 12279.9 1429.65 4
 2 -14 -13 14917.5 1518.14 4
 2 -14 -12 4292.65 807.715 4
 -2 -14 12 3459.41 844.7 4
 -2 14 11 3515.88 742.609 2
 -2 -14 11 3733.55 788.197 4
 2 -14 -11 5823.62 911.967 4
 -2 -14 10 6908.75 1052.83 4
 2 -14 -10 6150.9 937.738 4
 -2 14 10 5200.38 869.853 2
 2 -14 -9 455.413 306.029 4
 -2 -14 9 927.96 506.581 4
 -2 14 9 681.873 357.854 2
 2 -14 -8 5036.77 766.89 4
 -2 -14 8 4913.32 855.276 4
 -2 14 8 3388.17 674.237 2
 2 -14 -7 8950.19 1046.81 4
 -2 -14 7 9389.85 1126.34 4
 -2 14 7 8122.17 998.714 2
 -2 14 6 6765.84 906.691 2
 2 -14 -6 7475.4 910.231 4
 -2 -14 6 6802.67 927.655 4
 2 -14 -5 30504 1818.27 4
 -2 14 5 28001 1711.19 2
 -2 14 5 26626.9 1703.45 1
 -2 -14 5 31182.2 1998.1 4
 -2 14 4 3090.42 652.738 1
 -2 -14 4 1764.29 460.482 4
 -2 14 4 2488.73 543.862 2
 2 -14 -4 2819.57 576.922 4
 -2 -14 3 32303.2 1993.13 4
 2 -14 -3 30830.5 1813.65 4
 -2 14 3 28607.6 1750.91 1
 2 -14 -2 1694.12 542.061 4
 -2 -14 2 2054.18 586.412 4
 -2 14 2 1894.13 615.788 1
 -2 14 2 1328.72 407.673 2
 -2 -14 1 11183.5 1223.39 4
 2 -14 -1 12326.1 1121.04 4
 -2 14 1 9575.37 1065.61 1
 -2 14 1 8506.46 855.359 2
 -2 -14 0 -51.1698 317.586 4
 -2 14 0 187.585 365.914 1
 2 -14 0 509.022 354.214 4
 -2 14 -1 3293.18 621.415 1
 -2 -14 -1 4682.19 796.268 4
 2 -14 1 3539.03 681.534 4
 -2 14 -2 -155.846 535.84 1
 2 -14 2 -159.042 369.649 4
 -2 -14 -2 411.67 394.597 4
 2 -14 3 308.664 270.328 4
 -2 -14 -3 -36.4241 412.512 4
 -2 14 -3 -406.084 585.614 1
 -2 -14 -4 5462.73 912.804 4
 2 -14 4 5190.68 803.641 4
 2 -14 5 12628.6 1242.72 4
 -2 -14 -5 12052.2 1315.67 4
 -2 -14 -6 3379.72 759.639 4
 2 -14 6 3423.76 725.602 4
 -2 -14 -7 14866.8 1485.95 4
 2 -14 7 13814.3 1298.79 4
 2 -14 8 80.0887 393.32 4
 -2 -14 -8 587.47 478.98 4
 -2 -14 -9 19164 1746.74 4
 2 -14 9 19278.5 1574.6 4
 2 -14 10 2417.36 675.909 4
 -2 -14 -10 2273.96 867.398 4
 2 -14 11 12662.9 1369.27 4
 -2 -14 -11 14886.1 1664.14 4
 2 -14 12 3718.07 763.428 4
 -2 -14 -12 4770.15 1025.3 4
 2 -14 13 368.061 419.951 4
 2 -14 14 3448.26 862.234 4
 2 -15 -13 559.695 491.846 4
 -2 -15 12 10536.2 1332.76 4
 2 -15 -12 13177.7 1451.83 4
 2 -15 -11 1.79173 411.647 4
 -2 -15 11 -477.944 424.451 4
 2 -15 -10 1128.29 528.272 4
 -2 -15 10 1980.53 693.682 4
 -2 -15 9 -361.54 493.524 4
 2 -15 -9 353.298 393.469 4
 -2 15 9 -251.204 440.535 2
 -2 -15 8 1030.28 368.64 4
 2 -15 -8 1268.42 394.611 4
 -2 15 8 1280.24 419.158 2
 -2 15 7 -45.246 357.979 2
 2 -15 -7 177.875 363.733 4
 -2 -15 7 601.684 386.915 4
 -2 -15 6 14322.1 1411.43 4
 2 -15 -6 15681.4 1357.84 4
 -2 15 6 13378.2 1271.44 2
 -2 -15 5 493.142 353.353 4
 -2 15 5 451.737 357.749 2
 2 -15 -5 8.59534 349.095 4
 -2 -15 4 34980.3 2169.49 4
 2 -15 -4 36977 2037.85 4
 -2 15 4 31349.5 1883.26 2
 -2 15 3 233.635 416.78 1
 -2 15 3 227.201 374.806 2
 2 -15 -3 550.217 290.793 4
 -2 -15 3 691.553 434.551 4
 -2 15 2 23918.2 1735.02 1
 2 -15 -2 23655.3 1613.61 4
 -2 15 2 19453.1 1394.79 2
 -2 -15 2 23741.9 1809.07 4
 2 -15 -1 527.505 335.6 4
 -2 -15 1 709.423 482.666 4
 -2 15 1 -227.755 472.214 1
 2 -15 0 19419.9 1482.64 4
 -2 15 0 18142.4 1516.57 1
 -2 -15 0 18536.6 1611.42 4
 2 -15 1 4365.89 698.637 4
 -2 -15 -1 4874.05 863.92 4
 -2 15 -1 2854.85 655.097 1
 -2 -15 -2 1040.56 553.99 4
 -2 15 -2 953.828 455.599 1
 2 -15 2 578.306 304.43 4
 -2 -15 -3 7863 1050.07 4
 -2 15 -3 6042.4 939.475 1
 2 -15 3 8097.02 1000.51 4
 -2 15 -4 9877.59 1176.86 1
 2 -15 4 10205.8 1125.84 4
 -2 -15 -4 10818.3 1288.19 4
 -2 15 -5 5603.07 940.528 1
 2 -15 5 6445.36 951.639 4
 -2 -15 -5 5149.75 909.404 4
 2 -15 6 16439.4 1482.18 4
 -2 -15 -6 16241.7 1576.07 4
 2 -15 7 633.636 329.755 4
 -2 -15 -7 699.599 609.506 4
 -2 -15 -8 21122 1923.35 4
 2 -15 8 21936.9 1716.91 4
 2 -15 9 -461.984 350.399 4
 -2 -15 -9 315.117 412.717 4
 -2 -15 -10 21891.6 2012.66 4
 2 -15 10 19482.4 1699.18 4
 -2 -16 8 4018.32 897.19 4
 -2 -16 7 2508.47 610.51 4
 -2 -16 6 3559.78 792.73 4
 -2 -16 5 16170.8 1559.26 4
 -2 -16 4 1064.22 431.019 4
 -2 16 4 677.809 407.656 2
 -2 -16 3 25158.6 1929.57 4
 -2 -16 2 -1169.5 565.851 4
 -2 16 2 311.886 480.714 1
 -2 -16 1 11249.4 1331.36 4
 -2 16 1 9290.89 1137.08 1
 -2 -16 0 2279.64 692.83 4
 -2 16 0 2142.65 564.635 1
 -2 -16 -1 1966.45 517.467 4
 -2 16 -1 1841.13 574.024 1
 -2 16 -2 2307.12 646.39 1
 -2 -16 -2 4977.82 949.864 4
 -2 -16 -3 2347.38 663.539 4
 -2 16 -3 371.795 546.611 1
 -2 16 -4 513.626 476.965 1
 -2 -16 -4 -55.0558 513.44 4
 -2 -16 -5 5877.35 963.341 4
 -2 16 -5 5902.83 1014.12 1
 -2 -16 -6 709.596 500.076 4
 -2 17 0 1493.31 526.652 1
 -2 17 -1 3039.61 776.132 1
 3 0 -27 1671.73 641.295 3
 3 0 -26 49526.9 2520.72 3
 3 0 -25 8.7625 333.755 3
 -3 0 24 23705.4 2068.37 4
 3 0 -24 20054.4 1495.1 3
 -3 0 23 650.755 559.283 4
 3 0 -23 795.182 346.761 3
 -3 0 22 21064 1835.12 4
 3 0 -22 16947.9 1289.23 3
 3 0 -21 15.7959 321.965 3
 -3 0 21 133.876 396.08 4
 3 0 -20 -386.685 394.215 3
 -3 0 20 868.083 469.984 4
 -3 0 19 -763.482 454.716 4
 3 0 -19 -106.667 307.043 3
 3 0 -18 11935.1 954.724 3
 -3 0 18 12717.1 1296.05 4
 -3 0 17 476.528 544.533 4
 3 0 -17 273.89 322.245 3
 -3 0 16 42966.9 2134.2 4
 -3 0 16 46828.7 1440.23 2
 3 0 -16 45975.3 1734.94 3
 -3 0 15 10.5713 168.062 2
 3 0 -15 6.6342 277.273 3
 -3 0 15 -14.0657 413.826 4
 -3 0 14 281080 3628.62 2
 3 0 -14 273176 4210.03 3
 -3 0 14 271577 5180.97 4
 3 0 -13 -24.9879 194.207 3
 -3 0 13 -13.1899 136.566 2
 -3 0 13 174.785 344.887 4
 3 0 -12 129614 2336.98 5
 3 0 -12 131809 2582.49 3
 -3 0 12 131139 2190.84 2
 -3 0 11 210.701 301.12 4
 -3 0 11 26.8041 168.941 2
 3 0 -11 232.694 171 5
 3 0 -10 12791.5 685.9 5
 -3 0 10 14130 638.786 2
 -3 0 9 478.043 164.615 2
 -3 0 9 828.267 335.722 4
 3 0 -9 508.437 204.109 5
 -3 0 8 42127.6 1012.92 2
 3 0 -8 41379.2 1144.87 5
 -3 0 8 41151.1 1392.6 4
 -3 0 7 -14.8284 126.215 2
 3 0 -7 240.09 148.13 5
 3 0 -6 115864 1716.14 2
 -3 0 6 111689 1664.02 2
 -3 0 6 114734 2029.01 4
 3 0 -5 36.4384 104.6 2
 -3 0 5 86.2008 140.564 4
 -3 0 5 192.745 126.837 2
 -3 0 4 685499 5618.14 4
 -3 0 4 675069 5606.46 2
 3 0 -4 693123 5491.55 4
 3 0 -4 692793 5629.83 2
 -3 0 3 606.882 190.929 2
 -3 0 3 793.318 145.884 4
 3 0 -3 414.109 133.651 3
 -3 0 2 164055 1581.23 4
 -3 0 2 160203 1975.43 3
 3 0 -2 162238 1969.16 3
 3 0 -1 541.643 149.236 3
 -3 0 1 221.572 85.9745 4
 -3 0 1 760.697 205.537 3
 -3 0 0 341385 3427.68 3
 3 0 0 345968 3444.73 3
 3 0 1 909.423 168.833 1
 -3 0 -1 478.774 163.863 3
 -3 0 -2 58495.7 1124.04 1
 3 0 2 61619.1 1132.11 1
 -3 0 -2 58280.4 1260.32 3
 3 0 3 147.786 107.797 1
 -3 0 -3 137.192 127.694 3
 -3 0 -3 471.497 141.128 1
 -3 0 -4 9968.26 461.908 1
 -3 0 -4 8661.34 518.009 3
 -3 0 -5 -199.058 195.562 3
 -3 0 -5 9.61989 118.252 1
 -3 0 -6 419053 4699.55 3
 -3 0 -6 407121 3913.29 1
 -3 0 -7 833.705 319.771 3
 -3 0 -7 -61.0051 157.739 1
 -3 0 -8 422817 5059.33 3
 -3 0 -8 412472 4116.85 1
 -3 0 -9 84.39 239.973 3
 -3 0 -10 301784 4438.57 3
 -3 0 -11 437.507 387.133 3
 -3 0 -12 145235 3217.01 3
 -3 0 -13 861.204 519.188 3
 -3 0 -14 46278.5 1893.15 3
 -3 0 -15 60.4172 278.544 3
 -3 0 -16 4407.34 657.784 3
 -3 0 -17 308.516 365.661 3
 -3 0 -18 41005.7 2029.79 3
 -3 0 -19 738.406 491.549 3
 -3 0 -20 66165.8 2818.9 3
 -3 0 -21 1241.22 590.003 3
 -3 0 -22 90244.7 3457.11 3
 -3 0 -23 1797.14 755.238 3
 -3 0 -24 88590.7 3633.98 3
 3 -1 -27 57078.3 2784.2 3
 3 1 -27 52171 2579.95 3
 -3 -1 26 1882.98 864.205 4
 3 1 -26 1477.69 571.046 3
 3 -1 -26 1885.24 670.197 3
 3 1 -25 39150.6 2130.57 3
 3 -1 -25 40000.1 2203.82 3
 3 -1 -24 754.273 447.438 3
 3 1 -24 1087.85 477.205 3
 -3 -1 24 1442.31 649.08 4
 3 1 -23 22219.4 1524.76 3
 3 -1 -23 21736.5 1544.44 3
 -3 -1 23 25306.3 2030.36 4
 -3 -1 22 3889.36 883.996 4
 3 1 -22 3349.69 610.505 3
 3 -1 -22 3255.28 606.456 3
 3 1 -21 3458.83 570.32 3
 -3 -1 21 3803.71 814.727 4
 3 -1 -21 3567.07 660.983 3
 -3 1 21 4208.58 856.73 4
 3 -1 -20 4331.83 640.841 3
 -3 -1 20 5379.89 921.419 4
 3 1 -20 5703.67 734.166 3
 -3 1 20 5657.58 959.565 4
 -3 1 19 6191.6 950.109 4
 -3 -1 19 6328.58 905.077 4
 3 1 -19 4908.48 625.455 3
 3 -1 -19 6742.87 778.901 3
 -3 1 18 474.969 497.657 4
 -3 -1 18 153.681 357.214 4
 3 -1 -18 68.7121 254.962 3
 3 1 -18 200.389 245.304 3
 3 1 -17 36171.2 1563.36 3
 -3 1 17 38922.7 2162.17 4
 -3 -1 17 38048.8 2083.56 4
 -3 1 17 40910.3 1476.6 2
 3 -1 -17 36363.6 1675.6 3
 -3 1 16 10206.3 723.516 2
 -3 1 16 8247.07 1021.64 4
 3 1 -16 8522.88 753.292 3
 3 -1 -16 7751.29 739.912 3
 -3 -1 16 9131.33 1044.23 4
 3 1 -15 50774 1745.9 3
 -3 -1 15 55484 2327.8 4
 3 -1 -15 50626.6 1795.24 3
 -3 1 15 53244.3 2276.3 4
 -3 1 15 53686 1600.75 2
 3 1 -14 10749.2 766.896 3
 -3 1 14 11913.2 1119.82 4
 3 -1 -14 12628.2 709.284 5
 -3 1 14 13069.3 747.303 2
 -3 -1 14 13046.3 1139.96 4
 -3 -1 14 12532.9 622.073 2
 3 -1 -14 12113.4 842.795 3
 3 1 -13 92766.2 2170.51 3
 -3 -1 13 93160.7 2859.36 4
 3 -1 -13 93195 2300.34 3
 -3 1 13 97930.3 2847.12 4
 3 -1 -13 91152 1907.39 5
 -3 -1 13 100310 1767.13 2
 -3 1 13 98095.8 2060.49 2
 -3 -1 12 191.926 139.254 2
 -3 -1 12 311.872 354.657 4
 3 1 -12 283.791 177.701 3
 3 -1 -12 60.1451 191.723 3
 -3 1 12 80.0269 192.002 2
 -3 1 12 162.014 329.98 4
 3 -1 -12 346.087 138.069 5
 3 -1 -11 46952.1 1282.06 5
 -3 1 11 50448 1849.83 4
 -3 -1 11 48912.2 1104.86 2
 3 1 -11 46531.2 1371.06 3
 -3 -1 11 48866.9 1837.52 4
 -3 1 11 47898.3 1329.63 2
 -3 1 10 3435.26 365.926 2
 3 -1 -10 3489.48 353.716 5
 -3 -1 10 3717.49 294.341 2
 -3 1 10 3401.25 513.111 4
 -3 -1 10 3401.25 537.357 4
 3 1 -10 3302.77 387.959 5
 -3 1 9 862.439 338.463 4
 3 -1 -9 612.934 225.778 5
 -3 -1 9 162.038 275.394 4
 -3 1 9 601.223 217.337 2
 -3 -1 9 525.424 130.086 2
 3 1 -9 609.334 172.273 5
 -3 1 8 529.583 252.369 4
 3 1 -8 869.915 145.21 2
 -3 -1 8 567.621 225.432 4
 -3 1 8 801.24 194.78 2
 -3 -1 8 913.051 152.705 2
 3 1 -8 474.113 157.083 5
 -3 -1 7 50317.5 967.937 2
 3 1 -7 50974.2 1290.91 5
 -3 1 7 51067.1 1203 2
 -3 1 7 51652.1 1426.11 4
 -3 -1 7 51730.3 1491.95 4
 3 1 -7 50417.9 1005.42 2
 -3 -1 6 125299 1609.24 2
 3 1 -6 125836 1672.39 2
 -3 1 6 128540 2129.77 4
 -3 -1 6 121080 2239.28 4
 -3 1 6 126159 1920.11 2
 3 1 -6 123140 2011.75 5
 -3 -1 5 119082 1581.1 2
 -3 1 5 121503 1862.47 4
 -3 1 5 120189 1825.74 2
 -3 -1 5 118477 1980.35 4
 3 -1 -5 121620 1779.21 4
 3 1 -5 119427 1924.62 5
 -3 1 4 65844.2 1143 4
 3 1 -4 67990.9 1268.86 4
 -3 -1 4 61986.4 1250.56 4
 3 1 -4 65543.2 1315.21 5
 -3 1 4 63751 1270.71 2
 3 1 -4 65430 1161.14 3
 3 -1 -4 65820.4 1085.55 4
 -3 1 3 94112.6 1142.01 4
 -3 1 3 88599.8 1533.29 2
 3 -1 -3 92915.4 1530.54 2
 3 1 -3 94645.6 1400.62 4
 3 -1 -3 89517.1 1076.98 4
 3 -1 -3 92103.5 1469.13 3
 -3 -1 3 92033.9 1425.19 4
 -3 -1 3 92311.6 1377.22 3
 3 1 -3 89730.1 1369.97 3
 3 1 -2 92870.1 1364.57 4
 -3 -1 2 92008.3 1353.89 4
 -3 -1 2 91314.7 1391.34 3
 -3 1 2 91137.8 1457.54 3
 -3 1 2 95743 1567.11 2
 3 -1 -2 91117.3 1436.85 3
 3 1 -2 91497.5 1408.78 3
 -3 1 1 225779 2572.7 3
 -3 -1 1 225369 2517.96 3
 3 -1 -1 227730 2658.55 1
 3 1 -1 232992 2560.58 3
 -3 -1 1 234002 2435.31 4
 3 -1 -1 226094 2534.33 3
 3 -1 0 110769 1666.28 3
 3 -1 0 112368 1714.83 1
 -3 1 0 108596 1670.65 3
 3 1 0 110986 1653.2 3
 -3 -1 0 110024 1659.13 3
 -3 1 0 111526 1702.13 1
 -3 1 -1 61041.8 1265.45 3
 -3 -1 -1 59419.5 1221.13 3
 3 -1 1 62746.6 1254.51 3
 3 -1 1 60534.2 998.691 4
 -3 1 -1 61115.2 1233.85 1
 3 -1 1 63079 1249.98 1
 -3 1 -1 64939.8 1096.52 4
 -3 -1 -2 30896.8 895.824 3
 3 -1 2 30150.7 806.828 4
 -3 1 -2 30345.5 852.485 1
 -3 1 -2 32201.7 888.705 4
 -3 1 -2 29121.2 875.991 3
 -3 1 -3 2846.18 278.208 1
 -3 -1 -3 3363.86 323.852 3
 3 1 3 3469.25 233.848 1
 3 -1 3 3064.8 297.926 4
 -3 1 -3 3302.15 312.279 3
 -3 1 -4 8970.11 527.957 3
 -3 -1 -4 9862.19 569.926 3
 3 -1 4 8807.24 549.963 4
 -3 1 -4 8951.94 485.248 1
 -3 1 -5 39131.8 1033.13 1
 -3 -1 -5 39828.6 823.181 1
 3 -1 5 40311.2 1280.79 4
 -3 -1 -5 39438.3 1186.32 3
 -3 1 -5 39167.3 1164.67 3
 -3 -1 -6 12878 478.701 1
 -3 1 -6 12746.7 710.485 3
 -3 -1 -6 11302.3 687.016 3
 3 -1 6 12427.6 777.742 4
 -3 -1 -7 329801 3138.74 1
 -3 -1 -7 327490 4260.94 3
 3 -1 7 333944 4561.61 4
 -3 1 -7 329179 4171.47 3
 -3 1 -8 235.785 253.274 3
 -3 -1 -8 235.805 250.727 3
 -3 -1 -8 -12.5639 132.392 1
 -3 -1 -9 311823 4408.79 3
 -3 -1 -9 304811 3118.34 1
 3 -1 9 307205 4808.75 4
 -3 1 -9 311533 4313.26 3
 -3 -1 -10 6196.01 373.271 1
 -3 1 -10 5551.15 596.174 3
 -3 -1 -10 5785.82 665.816 3
 -3 -1 -11 178135 3474.34 3
 3 -1 11 177733 3856.33 4
 -3 -1 -11 175990 2306.57 1
 -3 1 -11 175934 3348.82 3
 3 -1 12 52075.2 2157.64 4
 -3 1 -12 47706.2 1799.5 3
 -3 -1 -12 51027.4 1178.15 1
 -3 -1 -12 52314.6 1904.68 3
 3 -1 13 96384.4 3008.16 4
 -3 1 -13 95889.2 2649.42 3
 -3 -1 -13 94120.4 2668.36 3
 -3 -1 -13 99300.4 1751.13 1
 -3 1 -14 41619.1 1804.75 3
 -3 -1 -14 43276.9 1890.2 3
 3 -1 14 48026.2 2200.44 4
 3 -1 15 4102.3 741.589 4
 -3 -1 -15 3454.89 612.862 3
 -3 1 -15 4042.38 661.892 3
 -3 1 -16 26737.2 1526.54 3
 -3 -1 -16 29838.8 1666.17 3
 3 -1 16 30034.1 1855.6 4
 -3 -1 -17 17028.2 1336.98 3
 -3 1 -17 15650.2 1254.97 3
 -3 1 -18 10255.1 1037.82 3
 -3 -1 -18 8345.64 981.622 3
 -3 1 -19 34987.9 1928.91 3
 -3 -1 -19 41170.3 2134.12 3
 -3 1 -20 9935.75 1127.65 3
 -3 -1 -20 9227.12 1112.27 3
 -3 1 -21 53373.6 2541 3
 -3 -1 -21 52595 2554.11 3
 -3 1 -22 3709.02 849.286 3
 -3 -1 -22 4417.36 866.434 3
 -3 -1 -23 71698 3167.06 3
 -3 1 -23 68662.2 3056.62 3
 -3 1 -24 2669.81 817.628 3
 -3 -1 -24 2976.76 837.833 3
 3 2 -28 16455.9 1477.34 3
 3 2 -27 1280.25 446.975 3
 3 2 -26 21443.2 1592.04 3
 3 -2 -26 26124.7 1893.91 3
 -3 -2 26 26788.7 2277.16 4
 -3 -2 25 6580.36 1128.68 4
 3 2 -25 5369.07 814.864 3
 3 -2 -25 6636.97 941.977 3
 3 2 -24 15063.6 1279.74 3
 -3 -2 24 15975.1 1683.27 4
 3 -2 -24 15296.8 1372.13 3
 -3 -2 23 7443.24 1148.79 4
 3 -2 -23 6714.69 925.355 3
 3 2 -23 5892.61 800.975 3
 3 2 -22 5022.6 749.571 3
 3 -2 -22 4720.71 756.796 3
 -3 -2 22 6105.9 932.64 4
 -3 -2 21 10484.5 1290.66 4
 3 2 -21 9278.26 898.905 3
 3 -2 -21 8191.86 942.812 3
 3 -2 -20 1190.76 422.504 3
 3 2 -20 1406.17 399.518 3
 -3 -2 20 2060.97 646.455 4
 3 -2 -19 27650.2 1546.33 3
 3 2 -19 27280.8 1446.05 3
 3 -2 -18 14096.7 1104.53 3
 3 2 -18 13193.2 969.234 3
 -3 2 18 15764 1002.73 2
 -3 -2 18 16819.7 1480 4
 -3 -2 17 24514.5 1724.33 4
 3 -2 -17 22257.5 1325.65 3
 -3 2 17 25296.9 1248.07 2
 3 2 -17 23928.7 1257.89 3
 3 2 -16 31508.4 1386.25 3
 -3 2 16 35656.7 1413.16 2
 3 -2 -16 32028 1513.4 3
 -3 -2 16 34051.6 1912.64 4
 -3 2 16 32665.4 1878.42 4
 3 -2 -15 16204.4 785.549 5
 3 2 -15 14734.2 921.59 3
 3 -2 -15 15547.4 1044.46 3
 -3 -2 15 17442.8 1331.51 4
 -3 2 15 14213.2 866.463 2
 -3 2 15 14649.4 1222.52 4
 3 -2 -14 14766.6 979.303 3
 3 2 -14 15245.1 885.569 3
 -3 2 14 14577.7 1196.42 4
 -3 -2 14 14732.4 1178.91 4
 -3 2 14 15593.6 882.454 2
 3 -2 -14 15130.1 741.841 5
 3 -2 -13 14662 718.223 5
 -3 -2 13 13534.7 1102.85 4
 3 -2 -13 14583.7 928.374 3
 -3 -2 13 14786.4 577.174 2
 -3 2 13 13761.3 1086.54 4
 3 2 -13 12885.7 763.2 3
 -3 2 13 13829.9 814.855 2
 3 2 -12 8473.55 602.835 3
 3 -2 -12 8148.09 668.936 3
 3 -2 -12 8680.51 544.233 5
 -3 2 12 9556.49 666.85 2
 -3 -2 12 8258.98 830.18 4
 -3 2 12 8088.86 783.962 4
 -3 -2 12 8622.61 411.035 2
 -3 -2 11 1791.19 423.757 4
 -3 -2 11 1991.77 200.553 2
 -3 2 11 2269.8 468.787 4
 3 2 -11 1278.56 183.106 2
 -3 2 11 1683.38 321.983 2
 3 2 -11 1113.99 226.1 3
 3 -2 -11 1445.2 235.759 5
 -3 -2 10 9075.48 380.656 2
 3 2 -10 8101.05 395.333 2
 -3 2 10 7911.66 714.673 4
 -3 2 10 7834.74 566.657 2
 -3 -2 10 8242.75 766.314 4
 -3 2 9 703.578 232.295 2
 -3 -2 9 817.156 332.594 4
 3 2 -9 526.845 126.089 2
 -3 2 9 1281.24 332.056 4
 -3 -2 9 660.351 122.96 2
 -3 2 8 1290.82 243.62 2
 -3 -2 8 1420.48 379.011 4
 -3 2 8 1477.25 325.015 4
 -3 -2 8 1160.61 138.495 2
 -3 -2 7 4315.77 466.041 4
 -3 2 7 4500.31 416.849 2
 -3 2 7 4292.29 437.83 4
 -3 -2 7 5395.1 260.757 2
 3 2 -7 4106.78 384.441 5
 -3 -2 6 2477.69 348.901 4
 -3 -2 6 2596.1 196.266 2
 -3 2 6 2504.64 314.346 2
 3 2 -6 2673.93 321.097 5
 3 2 -5 25016.8 883.324 5
 3 -2 -5 27860.3 789.856 4
 -3 2 5 27458.8 894.804 2
 -3 -2 5 25370.5 918.764 4
 3 2 -4 98178.3 1415.03 3
 -3 2 4 94680.2 1713.37 2
 3 -2 -4 96945.9 1363.75 4
 -3 -2 4 95563.4 1755.09 4
 3 2 -4 98931.6 1726.96 5
 3 -2 -3 3757.25 213.098 4
 3 2 -3 3918.31 273.154 3
 -3 -2 3 3804.93 271.107 3
 -3 2 3 3725.97 346.909 2
 3 2 -3 4108.79 326.8 5
 -3 -2 3 3602.17 325.015 4
 3 2 -2 50619.4 1018.46 3
 -3 2 2 48452.9 1177.08 1
 -3 2 2 50323.8 1166.2 2
 3 2 -2 52370.1 1117.84 5
 3 -2 -2 49546.1 1044.81 3
 -3 -2 2 50928.1 1137.46 4
 -3 -2 2 50024.8 988.424 3
 3 -2 -1 151512 1984.23 3
 -3 -2 1 147230 1930.66 3
 -3 2 1 148359 2180.72 1
 -3 -2 1 148556 2134.48 4
 3 2 -1 155283 1956.88 3
 -3 2 1 149658 2165.87 2
 -3 2 1 145870 1974.12 3
 3 2 -1 157963 2014.3 5
 3 -2 0 44467.4 1018.05 3
 3 2 0 43529.6 914.943 5
 -3 2 0 40176.9 678.862 4
 -3 -2 0 43260.1 991.761 3
 -3 2 0 40787.5 1082.33 2
 3 -2 0 43300.9 697.805 4
 3 2 0 43250.6 975.872 3
 -3 2 0 42566.5 1105.04 1
 -3 2 0 42225.9 1013.58 3
 -3 2 -1 329980 3483.3 3
 -3 2 -1 331452 3646.37 1
 -3 2 -1 344334 3169.86 4
 -3 -2 -1 334987 3450.92 3
 3 -2 1 330744 3053.83 4
 3 -2 1 337631 3460.31 3
 -3 2 -2 51370.1 1198.1 3
 -3 -2 -2 50457.9 1183.85 3
 -3 2 -2 51307.8 1233.11 1
 3 -2 2 51360.5 1082.27 4
 -3 2 -2 55295 1193.09 4
 -3 -2 -3 106649 1875 3
 -3 2 -3 108790 1850.08 3
 -3 2 -3 110444 1885.8 1
 3 -2 3 108751 1828.03 4
 3 2 4 1291.45 126.013 1
 -3 2 -4 820.491 210.826 3
 -3 -2 -4 1375.9 239.169 3
 3 -2 4 1133.72 210.736 4
 -3 2 -5 25123.6 920.438 3
 3 -2 5 27289.9 1061.51 4
 -3 -2 -5 25079.5 967.377 3
 -3 2 -6 114272 2130.76 3
 -3 -2 -6 113358 2250.56 3
 3 -2 6 119278 2414.05 4
 3 -2 7 9011.73 713.779 4
 -3 -2 -7 8943.2 672.616 3
 -3 2 -7 8009.8 588.964 3
 -3 2 -8 207800 3247.41 3
 3 -2 8 207669 3665.23 4
 -3 -2 -8 202399 3380.35 3
 -3 -2 -9 2761.94 199.071 1
 -3 2 -9 3047.62 431.117 3
 -3 -2 -9 2883.15 492.223 3
 3 2 9 2669.47 174.294 5
 3 -2 9 3076.82 540.112 4
 3 -2 10 151480 3346.37 4
 3 2 10 140068 1595.77 5
 -3 -2 -10 150806 3105.62 3
 -3 -2 -10 132848 1608.25 1
 -3 2 -10 155220 2953.31 3
 -3 -2 -11 31789.6 1448.29 3
 -3 -2 -11 29717.5 701.189 1
 -3 2 -11 30433 1327.51 3
 3 -2 11 33700.1 1658.73 4
 -3 -2 -12 99795.4 2682.56 3
 -3 -2 -12 91475.5 1365.76 1
 3 -2 12 96326.8 2918.95 4
 -3 2 -12 100559 2571.08 3
 -3 2 -13 51498.6 1880.08 3
 -3 -2 -13 53115.1 2035.53 3
 3 -2 13 54231.6 2230.47 4
 -3 -2 -14 21124.2 1347.14 3
 3 -2 14 22509.7 1543.77 4
 -3 2 -14 20188.5 1244.66 3
 -3 2 -15 127906 3258.26 3
 3 -2 15 133966 3794.51 4
 -3 -2 -15 134607 3519.38 3
 -3 2 -16 1094.34 477.901 3
 -3 -2 -16 1578.38 608.386 3
 3 -2 16 2182.37 778.322 4
 3 -2 17 82247.2 3172.63 4
 -3 2 -17 81833.6 2767.48 3
 -3 -2 -17 79757 2837.19 3
 -3 -2 -18 10385.9 1119.52 3
 -3 2 -18 11402.2 1116.83 3
 3 -2 18 10355.7 1255.8 4
 3 -2 19 33489.7 2179.14 4
 -3 2 -19 33054.6 1894.82 3
 -3 -2 -19 34385.5 1986.17 3
 -3 2 -20 32216.8 1895.8 3
 -3 -2 -20 30838.4 1964.96 3
 -3 2 -21 9821.58 1137.21 3
 -3 -2 -21 9797.17 1183.46 3
 -3 -2 -22 42658.9 2425.69 3
 -3 2 -22 37868.8 2174.96 3
 -3 2 -23 5022.68 915.916 3
 -3 -2 -23 2967.06 684.12 3
 -3 2 -24 21409.9 1722.41 3
 3 3 -26 2938.05 571.923 3
 3 -3 -26 4517.14 813.118 3
 -3 -3 26 3215.42 757.349 4
 -3 -3 25 669.575 547.693 4
 3 3 -25 694.486 260.351 3
 3 -3 -25 1128.61 490.085 3
 3 3 -24 16931.5 1335.82 3
 3 -3 -24 17458.1 1495.76 3
 -3 -3 24 17002.7 1730.67 4
 3 3 -23 725.6 443.574 3
 -3 -3 23 300 557.285 4
 3 -3 -23 -209.848 368.633 3
 -3 -3 22 52085.7 2835.72 4
 3 -3 -22 49505.4 2337.92 3
 3 3 -22 46265.7 2047.8 3
 -3 -3 21 8636.69 1237.2 4
 3 3 -21 7519.94 840.867 3
 3 -3 -21 7461.41 942.938 3
 3 3 -20 63314.6 2258.01 3
 3 -3 -20 67029.8 2566.69 3
 3 -3 -19 29643.6 1662.78 3
 -3 -3 19 28184.8 2002.25 4
 3 3 -19 27305.8 1438.61 3
 3 -3 -18 105112 3040.38 3
 3 3 -18 99996.5 2646.16 3
 -3 -3 18 111245 3709.9 4
 -3 3 18 103753 2715.42 2
 -3 -3 17 14932.8 1347.93 4
 3 3 -17 15141.3 981.724 3
 -3 3 17 16198.6 1043.47 2
 3 -3 -17 15345.9 1118.06 3
 3 -3 -16 37831.2 1704.64 3
 3 3 -16 35557.8 1454.07 3
 -3 -3 16 38867.8 2066.04 4
 -3 3 16 36842.5 1540.16 2
 3 -3 -16 37909 1187.39 5
 3 -3 -15 36340.9 1153.39 5
 -3 -3 15 33769.5 1866.72 4
 3 3 -15 33561.1 1335.85 3
 3 -3 -15 33684.1 1526.52 3
 -3 3 15 36336.9 1456.12 2
 3 -3 -14 2876.95 476.384 3
 -3 3 14 2888.58 435.856 2
 -3 -3 14 2691.37 556.292 4
 3 -3 -14 2728.67 311.877 5
 3 3 -14 1880.17 337.927 3
 3 -3 -13 28126.7 971.15 5
 3 3 -13 27996.2 1113.68 3
 3 -3 -13 27901.5 1289.16 3
 3 3 -13 24038.4 669.618 2
 -3 -3 13 27233.4 1567.36 4
 -3 3 13 26265.5 1173.92 2
 -3 3 12 35591.1 1332.63 2
 3 -3 -12 33932.6 1385.91 3
 -3 -3 12 35110.6 1683.26 4
 3 3 -12 33975.3 1161.09 3
 -3 3 11 564.131 291.002 2
 -3 -3 11 763.007 336.713 4
 3 3 -11 895.526 248.437 3
 3 -3 -11 707.812 273.557 3
 -3 3 10 14409.2 814.76 2
 3 3 -10 15156.3 691.991 3
 -3 -3 10 15265.8 1033.7 4
 -3 -3 10 14309.7 365.141 2
 -3 -3 9 6741.27 237.934 2
 -3 -3 9 8004.64 747.51 4
 -3 3 9 7822.73 601.96 2
 -3 3 8 110173 2172 2
 -3 -3 8 113360 2523.47 4
 -3 -3 7 10199 322.713 2
 -3 3 7 10831.6 667.414 2
 -3 -3 7 10889 749.577 4
 -3 3 6 129619 2249.21 2
 -3 -3 6 130249 2451.26 4
 -3 3 5 12467.3 652.682 2
 -3 -3 5 13668.3 745.919 4
 3 3 -5 12408.4 453.685 3
 -3 3 4 8035.03 536.261 2
 3 3 -4 8198.6 368.642 3
 -3 -3 4 8470.47 562.222 4
 3 3 -3 64110.1 1106.84 3
 -3 3 3 63321.9 1443.58 2
 -3 -3 3 65355.2 1482.05 4
 -3 -3 3 63289.9 1057.12 3
 -3 3 3 63087.3 1431.34 1
 -3 3 2 187737 2687.83 1
 -3 3 2 186811 2598.28 2
 -3 -3 2 193407 2691.7 4
 3 -3 -2 185569 1874.23 4
 3 3 -2 189176 2144.86 3
 -3 -3 2 190598 2145.84 3
 -3 -3 1 73123.6 1286.77 3
 3 3 -1 74342.9 1257.79 3
 -3 -3 1 73951.9 1587.32 4
 3 3 -1 73360.3 1361.89 5
 3 -3 -1 72668.1 1015.75 4
 -3 3 1 76670.3 1072.72 4
 -3 3 1 71005.9 1515.98 2
 -3 3 1 73648.1 1561.61 1
 -3 3 0 53383.8 1283.76 2
 -3 -3 0 58487.5 1125.95 5
 -3 3 0 54504.9 1353.07 1
 -3 -3 0 55666.8 1387.98 4
 3 -3 0 57591.5 1168.63 3
 3 -3 0 56080.5 961.408 4
 -3 3 0 56686.1 960.475 4
 -3 -3 0 55159.3 1140.86 3
 3 3 0 57922.2 1126.73 5
 -3 3 0 54331.9 1166.34 3
 3 -3 1 16205.5 563.372 4
 -3 3 -1 16462.9 565.233 4
 -3 3 -1 15174.7 678.338 2
 -3 3 -1 15911.9 731.297 1
 3 3 1 15575 532.571 5
 -3 3 -1 17634.5 663.755 3
 -3 -3 -1 16186.9 634.647 3
 -3 -3 -2 33726.2 983.806 3
 -3 3 -2 33188.7 1032.95 2
 -3 3 -2 36247.4 1125.97 1
 3 -3 2 35712.4 943.206 4
 -3 3 -2 34613.2 981.742 3
 3 3 2 35649.4 746.672 5
 -3 3 -2 35114.6 961.426 4
 -3 3 -3 68061.6 1452.01 3
 3 -3 3 67968.2 1470.56 4
 -3 -3 -3 68861.3 1493.32 3
 -3 -3 -4 150340 2416.58 3
 -3 3 -4 152125 2334.85 3
 3 -3 4 151521 2468.72 4
 3 -3 5 4070.51 422.049 4
 -3 3 -5 4275.41 414.026 3
 -3 -3 -5 5296.37 486.224 3
 3 -3 6 109292 2316.26 4
 -3 3 -6 106912 2059.19 3
 -3 -3 -6 108352 2245.6 3
 -3 -3 -7 25941.4 1107.03 3
 3 -3 7 26576.6 1220.65 4
 -3 3 -7 25974.4 1035.71 3
 -3 3 -8 7518.65 574.711 3
 3 -3 8 8735.06 751.093 4
 -3 -3 -8 7833.67 656.94 3
 -3 -3 -9 13615.5 895.653 3
 3 -3 9 13876.9 970.028 4
 -3 3 -9 14190.9 832.383 3
 -3 3 -10 24454.7 1125.92 3
 -3 -3 -10 25859.4 1246.86 3
 3 -3 10 25173.2 1356.16 4
 -3 3 -11 9574.87 751.267 3
 3 -3 11 9327.33 897.821 4
 -3 -3 -11 10216.3 848.41 3
 -3 3 -12 55443.3 1851.77 3
 -3 -3 -12 52620.5 1947.29 3
 3 -3 12 56289.2 2215.13 4
 -3 3 -13 31959.7 1479.95 3
 -3 -3 -13 32040.6 1648.18 3
 3 -3 13 32398.4 1740.01 4
 -3 3 -14 107852 2839.75 3
 -3 -3 -14 107208 3022.61 3
 3 -3 14 110916 3340.11 4
 3 -3 15 6924.69 931.187 4
 -3 3 -15 6175.51 763.209 3
 -3 -3 -15 7013.2 896.334 3
 -3 3 -16 75388.5 2541.96 3
 -3 -3 -16 76875.2 2726.57 3
 3 -3 16 77304 2990.65 4
 -3 3 -17 1340.15 456.077 3
 -3 -3 -17 3006.26 743.186 3
 3 -3 17 1572.02 643.23 4
 -3 -3 -18 68591.3 2745.64 3
 -3 3 -18 62783.2 2464.59 3
 3 -3 18 64172.4 2878.27 4
 -3 3 -19 5809.48 847.866 3
 -3 -3 -19 8448.78 1100.14 3
 3 -3 19 7294.62 1097.96 4
 -3 -3 -20 18416.1 1553.41 3
 3 -3 20 17800.5 1639.67 4
 -3 3 -20 14587.3 1265.56 3
 -3 3 -21 13504.5 1275.96 3
 3 -3 21 13409.1 1482.85 4
 -3 -3 -21 14862 1412.97 3
 3 -3 22 1773.52 709.667 4
 -3 3 -22 1718.03 522.823 3
 -3 -3 -22 2176.31 633.209 3
 -3 3 -23 19324.8 1605.82 3
 -3 -3 -23 21363.7 1765.21 3
 -3 3 -24 5528.52 890.515 3
 -3 3 -25 3138.62 716.283 3
 3 -4 -25 8111.51 1005.7 3
 -3 -4 25 8141.04 1263.16 4
 -3 -4 24 808.027 448.689 4
 3 -4 -24 500.979 444.377 3
 3 4 -23 25674.9 1538.93 3
 3 -4 -23 27351.7 1828.67 3
 -3 -4 23 29637 2245.82 4
 3 4 -22 13293.7 1110.18 3
 3 -4 -22 13894.5 1313.08 3
 -3 -4 22 14305.5 1520.84 4
 3 -4 -21 99564.6 3290.11 3
 3 4 -21 93096.9 2787.47 3
 3 4 -20 35899.5 1651.79 3
 3 -4 -20 36353.9 1925.69 3
 -3 -4 20 38166.7 2357.1 4
 -3 -4 19 88201.6 3419.83 4
 -3 4 19 88287.3 2674.69 2
 3 -4 -19 88291.8 2899.59 3
 3 4 -19 80418.8 2398.36 3
 -3 -4 18 78431.6 3110.12 4
 3 4 -18 73475 2225.32 3
 3 -4 -18 78653.6 2677.04 3
 -3 4 18 81352 2503.33 2
 -3 4 17 47772.1 1865.9 2
 -3 -4 17 46125.8 2345.69 4
 3 -4 -17 46194.5 1972.58 3
 3 4 -17 42131.7 1594 3
 3 4 -16 30636.1 1307.6 3
 -3 -4 16 33313.9 1950.53 4
 3 -4 -16 32517.9 1588.04 3
 3 -4 -16 35769.6 1112.24 5
 -3 4 16 33752.7 1519.69 2
 -3 -4 15 2961.4 619.251 4
 3 -4 -15 2550.38 487.2 3
 3 -4 -15 2968.16 334.03 5
 3 4 -15 2650.61 405.754 3
 -3 4 15 2619.71 459.621 2
 3 -4 -14 27433.5 973.936 5
 3 4 -14 26756.1 1099.05 3
 -3 -4 14 26716.5 1614.56 4
 3 -4 -14 25411.7 1326.73 3
 -3 4 14 27064.5 1315.15 2
 3 4 -13 43625.6 1356.37 3
 -3 -4 13 43516.6 1972.02 4
 3 -4 -13 44547.1 1687.79 3
 -3 4 13 46637.6 1657.92 2
 -3 -4 12 34088.5 1684.94 4
 3 4 -12 32981.4 1102.8 3
 3 -4 -12 34681.6 1431.27 3
 -3 4 12 33928 1405.86 2
 3 -4 -11 120945 2646.44 3
 -3 4 11 126994 2655.13 2
 3 4 -11 122411 2092.54 3
 -3 -4 11 123946 3131.9 4
 -3 -4 10 15793.3 1074.2 4
 -3 4 10 16111.8 914.618 2
 3 4 -10 14307.5 643.32 3
 -3 4 9 145878 2786.62 2
 -3 -4 9 144263 3122.74 4
 3 4 -9 138380 2002.74 3
 -3 -4 8 1032.12 381.852 4
 -3 4 8 631.611 267.045 2
 -3 4 7 292446 3956.93 2
 -3 -4 7 300632 4332.36 4
 3 4 -6 2114.88 194.543 3
 -3 -4 6 2024.93 373.544 4
 -3 4 6 1550.82 284.791 2
 -3 -4 5 26509.2 1091.67 4
 -3 4 5 26609.4 1025.26 2
 3 4 -5 26508.4 652.965 3
 -3 4 4 74171.8 1663.65 1
 -3 4 4 75361.9 1708.34 2
 -3 -4 4 76504.5 1814.73 4
 3 4 -4 73820.5 1150.99 3
 -3 -4 3 4772.14 459.541 4
 -3 4 3 4903.16 448.13 2
 3 -4 -3 5665.89 351.285 4
 3 4 -3 5294.84 288.456 3
 -3 -4 3 5490.46 295.524 3
 -3 4 3 4891.07 443.181 1
 -3 -4 2 120798 1608.37 3
 -3 4 2 120007 2178.66 1
 -3 -4 2 118043 2243.67 4
 3 -4 -2 118495 1648.09 4
 3 4 -2 123853 1589.8 3
 -3 4 2 117420 2116.47 2
 -3 -4 1 62622.5 1180.68 3
 -3 4 1 60505.9 1467.65 2
 -3 4 1 61868.2 1530.15 1
 -3 4 1 63945.9 1186.78 4
 3 -4 -1 61208.4 1115.54 4
 -3 -4 1 64026.8 1611.45 4
 3 4 -1 61465.3 1114.16 3
 -3 -4 0 132043 1895.13 3
 3 -4 0 131969 1802.15 4
 -3 4 0 134649 1872.41 4
 -3 4 0 131719 2191.13 2
 -3 -4 0 135030 2446.84 4
 -3 4 0 132021 2337.5 1
 -3 4 0 127823 1905.3 3
 3 -4 1 259321 2938.54 4
 -3 4 -1 259805 3478.2 1
 -3 -4 -1 257499 2980.2 3
 -3 4 -1 250571 2939.53 3
 -3 4 -1 248108 3220.76 2
 -3 4 -2 225011 3010.52 2
 -3 -4 -2 226444 2878.32 3
 -3 4 -2 220842 2787.42 3
 3 -4 2 228763 2880.01 4
 -3 4 -3 311393 3555.87 3
 3 -4 3 316266 3754.1 4
 -3 -4 -3 314787 3683.4 3
 -3 4 -3 318682 3742.34 2
 -3 4 -4 237067 3058.8 3
 -3 -4 -4 236846 3225.45 3
 -3 4 -4 229052 3100.58 2
 3 -4 4 229624 3288.94 4
 -3 4 -5 273935 3444.01 3
 -3 4 -5 269224 3484.9 2
 -3 -4 -5 271091 3643.89 3
 3 -4 5 270514 3811.38 4
 -3 4 -6 54074.1 1431.67 3
 -3 -4 -6 55079.9 1579.03 3
 3 -4 6 53665.8 1656.04 4
 -3 4 -7 89494.1 1943.72 3
 -3 -4 -7 92350.8 2167.48 3
 3 -4 7 92260.4 2305.17 4
 3 -4 8 6737.49 651.464 4
 -3 4 -8 5868.39 516.829 3
 -3 -4 -8 5175.43 539.09 3
 -3 -4 -9 1382.27 339.183 3
 -3 4 -9 1487.65 307.987 3
 3 -4 9 1717.97 413.202 4
 -3 4 -10 1968.55 336.082 3
 3 -4 10 1907.11 388.442 4
 -3 -4 -10 2294.77 420.086 3
 -3 -4 -11 54457.2 1971.25 3
 -3 4 -11 50120.5 1693.92 3
 3 -4 11 54437.8 2115.93 4
 3 -4 12 609.429 406.733 4
 -3 4 -12 324.449 237.576 3
 -3 -4 -12 760.463 384.908 3
 3 -4 13 106857 3199.01 4
 -3 -4 -13 104877 2931.52 3
 -3 4 -13 105772 2699.73 3
 -3 -4 -14 5857.47 845.444 3
 -3 4 -14 4640.13 616.053 3
 3 -4 14 5426.26 849.507 4
 3 -4 15 139089 3953.19 4
 -3 4 -15 134916 3292.74 3
 -3 -4 -15 140659 3642.82 3
 -3 4 -16 617.174 358.932 3
 -3 -4 -16 249.798 542.544 3
 3 -4 16 692.952 642.746 4
 3 -4 17 57988.7 2672.27 4
 -3 -4 -17 54822.9 2423.07 3
 -3 4 -17 53439 2168.59 3
 3 -4 18 631.486 483.251 4
 -3 4 -18 396.214 310.711 3
 -3 -4 -19 22975.4 1656.13 3
 3 -4 19 24588.9 1830.55 4
 -3 4 -19 20445.3 1435.45 3
 3 -4 20 572.878 434.358 4
 -3 4 -20 -722.211 427.049 3
 -3 -4 -20 376.252 326.291 3
 -3 -4 -21 5805.37 920.031 3
 3 -4 21 4612.44 881.743 4
 -3 4 -21 4737.36 785.465 3
 -3 4 -22 2888.24 612.481 3
 -3 -4 -22 3321.33 746.9 3
 3 -4 22 3719.95 869.076 4
 3 -4 23 2919.2 740.873 4
 -3 -5 25 4753.16 1091.61 4
 3 -5 -25 3457.5 766.892 3
 3 -5 -24 17512.8 1517.81 3
 -3 -5 24 19168.9 1869.64 4
 3 -5 -23 7025.93 1006.92 3
 -3 -5 23 6559.34 1120.38 4
 3 -5 -22 32551.5 1977.72 3
 -3 -5 22 36436.9 2465.16 4
 3 -5 -21 19779.8 1511.22 3
 -3 -5 21 19768.9 1830.93 4
 3 -5 -20 51760.1 2354.63 3
 -3 -5 20 54360.6 2872.06 4
 3 5 -19 18108 1102.15 3
 -3 -5 19 18509 1609.84 4
 -3 5 19 20112.4 1328.51 2
 3 -5 -19 20597.2 1420.99 3
 -3 -5 18 14758.7 1406.15 4
 3 -5 -18 14561.6 1172.14 3
 3 5 -18 13223.1 905.519 3
 -3 5 18 15444.3 1173.99 2
 -3 -5 17 18895.4 1529.12 4
 -3 5 17 20007.7 1288.31 2
 3 5 -17 17995.1 1014.32 3
 3 -5 -17 20021.7 1326.22 3
 -3 -5 16 401.011 371.522 4
 -3 5 16 73.5422 308.743 2
 3 5 -16 -39.1333 203.577 3
 3 -5 -16 573.698 325.157 3
 3 -5 -15 9835.4 579.799 5
 -3 -5 15 8601.92 1005 4
 3 -5 -15 8660.23 840.081 3
 -3 5 15 8510.53 808.766 2
 3 5 -15 8256.09 627.386 3
 -3 -5 14 7370.61 883.214 4
 3 -5 -14 6538.89 710.302 3
 3 5 -14 7053.47 559.205 3
 -3 5 14 6200.41 675.442 2
 3 -5 -13 8416.37 758.032 3
 -3 -5 13 7798.28 884.089 4
 3 5 -13 6917.57 513.725 3
 -3 5 13 8165.57 748.906 2
 -3 5 12 98475 2546.47 2
 -3 -5 12 102297 2992.83 4
 3 -5 -12 101793 2539.44 3
 3 5 -12 96175.6 1870.04 3
 -3 -5 11 9.85541 380.056 4
 3 5 -11 208.556 122.431 3
 -3 5 11 124 241.048 2
 3 -5 -11 213.517 211.202 3
 -3 5 10 274541 4193.12 2
 -3 -5 10 262755 4675.75 4
 3 -5 -10 261081 3972.78 3
 3 5 -10 261960 3001.11 3
 -3 -5 9 22868 1261.5 4
 -3 5 9 23857.2 1155.27 2
 3 5 -9 23491.1 703.311 3
 -3 5 8 247987 3859.56 2
 -3 -5 8 255247 4248 4
 3 5 -8 246531 2543.91 3
 -3 5 7 102.183 242.484 2
 -3 -5 7 172.327 68.1151 2
 3 5 -7 174.692 89.3593 3
 -3 5 6 194492 3171.28 2
 -3 -5 6 195513 3418.2 4
 -3 -5 6 194508 2013.49 2
 3 5 -5 4170.18 249.488 3
 -3 5 5 3928.98 465.546 2
 -3 5 5 3837.84 439.546 1
 -3 -5 5 4049 531.387 4
 -3 -5 5 3888.97 277.23 2
 -3 5 4 23964.4 1019.16 2
 -3 -5 4 25292 1123.24 4
 3 5 -4 23506.7 557.684 3
 -3 5 4 24383.9 1012.29 1
 3 5 -3 30314.3 653.803 3
 -3 5 3 28991.5 1109.86 2
 -3 5 3 29978.9 1136.38 1
 -3 -5 3 29472.5 663.64 3
 -3 -5 3 30942.5 1217.89 4
 3 -5 -3 31027.7 934.241 4
 -3 -5 2 77978.5 1252.12 3
 3 -5 -2 75172 1462.19 4
 -3 5 2 76704.3 1767.3 2
 -3 -5 2 76570.4 1933.98 4
 -3 5 2 77376.2 1830.99 1
 3 5 -2 76716.3 1175.92 3
 -3 5 1 92709.4 2029.64 1
 3 5 -1 89352.5 1373.55 3
 3 -5 -1 89182.1 1586.92 4
 -3 5 1 89551.4 1906.35 2
 -3 -5 1 86264.9 2107.54 4
 -3 -5 1 92439.7 1466.24 3
 -3 -5 0 168412 2989.69 4
 -3 -5 0 164305 2191.9 3
 -3 5 0 158995 2594.71 2
 3 -5 0 163041 2299.8 4
 -3 5 0 168057 2836.91 1
 -3 5 -1 176603 2354.28 3
 3 -5 1 181297 2541.19 4
 -3 -5 -1 188468 3223.12 4
 -3 -5 -1 178458 2425.12 3
 -3 5 -1 179718 2735.53 2
 -3 5 -1 185208 3064.16 1
 -3 5 -2 414452 4526.68 2
 3 -5 2 424710 4527.02 4
 -3 -5 -2 416956 4342.37 3
 -3 5 -2 410344 4145.39 3
 3 -5 3 189780 2894.14 4
 -3 5 -3 188766 2798.66 2
 -3 -5 -3 190191 2775.15 3
 -3 5 -3 188575 2592.8 3
 3 -5 4 282945 3862.25 4
 -3 -5 -4 285825 2762.42 5
 -3 -5 -4 276837 3601.57 3
 -3 5 -4 270381 3482.04 2
 -3 5 -4 269202 3339.66 3
 -3 5 -5 25905.5 952.667 3
 -3 5 -5 25112.9 947.673 2
 3 -5 5 26186.5 1138.27 4
 -3 -5 -5 26455.7 1082.46 3
 -3 5 -6 100299 1984.17 3
 -3 5 -6 97840.3 1928.83 2
 3 -5 6 98658.1 2314.98 4
 -3 -5 -6 100493 2178.86 3
 -3 5 -7 30603.1 1114.29 3
 -3 5 -7 29552.6 1053.88 2
 3 -5 7 31083.2 1353.95 4
 -3 -5 -7 31882.4 1290.91 3
 3 -5 8 6850.22 674.912 4
 -3 5 -8 6651.83 517.471 2
 -3 -5 -8 6927.83 631.07 3
 -3 5 -8 6607.91 555.476 3
 -3 5 -9 18755.5 944.474 3
 -3 -5 -9 18277.1 1057.99 3
 -3 5 -9 19072 885.218 2
 3 -5 9 19114.2 1162 4
 3 -5 10 3531.93 545.996 4
 -3 5 -10 3534.88 453.736 3
 -3 -5 -10 3802.78 536.708 3
 3 -5 11 228.051 351.092 4
 -3 -5 -11 27.7361 302.253 3
 -3 5 -11 -531.309 285.753 3
 -3 5 -12 25419.4 1245.29 3
 3 -5 12 25636.2 1520.48 4
 -3 -5 -12 25913.5 1416.01 3
 -3 5 -13 978.953 345.2 3
 -3 -5 -13 973.67 367.034 3
 3 -5 13 1727.61 490.744 4
 -3 5 -14 52343.3 1934.27 3
 -3 -5 -14 57911.5 2281.1 3
 3 -5 14 55445.3 2398.24 4
 -3 5 -15 2083.6 462.728 3
 3 -5 15 2052.37 629.589 4
 -3 -5 -15 1961.8 528.376 3
 3 -5 16 73736.5 2938.53 4
 -3 5 -16 66935 2343.95 3
 -3 -5 -16 70947.6 2720.97 3
 -3 5 -17 246.948 295.591 3
 3 -5 17 122.993 379.913 4
 -3 -5 -17 678.908 515.952 3
 -3 -5 -18 27868.4 1806.78 3
 -3 5 -18 24699.7 1533.09 3
 3 -5 18 24014.3 1795.93 4
 -3 -5 -19 470.772 451.254 3
 -3 5 -19 399.734 357.063 3
 3 -5 19 953.777 492.038 4
 3 -5 20 13230.4 1414.78 4
 -3 -5 -20 12710.4 1316.34 3
 3 -5 21 -178.709 464.838 4
 -3 -5 -21 -666.864 654.352 3
 -3 -5 -22 435.051 364.91 3
 3 -5 22 1015.35 575.974 4
 -3 -6 24 7828.21 1242.99 4
 3 -6 -24 8291.71 1104.44 3
 -3 -6 23 30092.7 2321.37 4
 3 -6 -23 31383.5 1999.46 3
 3 -6 -22 3345.8 660.653 3
 -3 -6 22 3690.85 881.677 4
 -3 -6 21 35724.8 2359.37 4
 3 -6 -21 38560.5 2113.77 3
 3 -6 -20 2449.13 570.864 3
 -3 -6 20 1215.02 525.032 4
 3 -6 -19 15444.2 1268.62 3
 -3 6 19 14825.8 1180.7 2
 -3 -6 19 15073.5 1466.17 4
 -3 -6 18 1753.69 610.44 4
 3 -6 -18 1620.43 388.614 3
 -3 6 18 1374.08 413.689 2
 3 -6 -17 3290.53 601.29 3
 -3 6 17 2834.3 557.493 2
 -3 -6 17 2568.49 654.936 4
 -3 6 16 15167 1114.62 2
 -3 -6 16 14794.6 1370.27 4
 3 6 -16 13147.4 789.21 3
 3 -6 -16 13824.8 1095.12 3
 -3 6 15 1556.1 380.04 2
 -3 -6 15 2356.89 561.796 4
 3 6 -15 1844.84 293.716 3
 3 -6 -15 2079.46 500.578 3
 3 -6 -14 18400.4 1184.68 3
 3 6 -14 16078.7 784.509 3
 -3 -6 14 17444.2 1386.96 4
 -3 6 14 17925.1 1202.42 2
 3 -6 -13 49187.3 1872.72 3
 -3 -6 13 50345.8 2209.3 4
 3 6 -13 48542.2 1297.49 3
 -3 6 13 48190.9 1868.72 2
 3 -6 -12 9325.34 796.163 3
 3 6 -12 8246.3 500.471 3
 -3 6 12 8417.78 777.243 2
 -3 -6 12 9128.3 916.406 4
 -3 6 11 243313 4203.14 2
 -3 -6 11 243052 4728.83 4
 3 -6 -11 239449 4024.12 3
 3 6 -11 234148 2804.4 3
 3 6 -10 11677.5 496.727 3
 -3 -6 10 12100.1 1006.39 4
 -3 6 10 11792.3 876.174 2
 3 -6 -10 12520.2 850.497 3
 3 6 -9 306386 2944.8 3
 -3 6 9 313292 4666.93 2
 -3 -6 9 320039 5189.42 4
 -3 6 8 1494.29 340.003 2
 3 6 -8 1097.29 143.676 3
 3 6 -8 1189.62 129.94 3
 -3 -6 8 1433.08 115.219 2
 -3 -6 8 1166.67 347.153 4
 -3 -6 7 288707 2575.83 2
 -3 -6 7 292544 4570.2 4
 -3 -6 6 17483.8 1051.74 4
 -3 -6 6 19355.8 595.366 2
 -3 6 6 18494.7 997.91 2
 -3 6 6 16839 901.409 1
 -3 6 5 115320 2327.62 1
 -3 -6 5 111622 2566.93 4
 -3 6 5 106987 2335.46 2
 -3 6 4 63935.4 1764.46 2
 -3 6 4 65708.3 1762.73 1
 3 -6 -4 62447.8 1529.72 4
 -3 -6 4 63890.6 1888.3 4
 3 -6 -3 11696.1 647.508 4
 -3 6 3 10962.3 726.621 2
 -3 6 3 11078.9 747.778 1
 -3 -6 3 11260.9 803.186 4
 -3 -6 3 11163.1 389.97 3
 3 6 -3 10727.5 358.455 3
 3 6 -2 852.639 130.751 3
 -3 6 2 865.82 298.818 1
 -3 6 2 770.136 270.163 2
 -3 -6 2 823.379 247.857 4
 3 -6 -2 1139.45 217.082 4
 -3 -6 2 1314.17 188.45 3
 -3 -6 1 60237.4 1175.88 3
 -3 6 1 55395.3 1553.65 2
 -3 -6 1 60683.5 1847.04 4
 3 -6 -1 56979.8 1394.38 4
 -3 6 1 58276.4 1724.4 1
 -3 -6 0 25497.8 805.729 3
 3 -6 0 26188.9 946.161 4
 -3 6 0 25738.3 1157.64 1
 -3 6 0 24310.7 1008.29 2
 -3 -6 0 23446.5 1181.29 4
 3 -6 1 87186.4 1823.92 4
 -3 -6 -1 89426.7 1656.85 3
 -3 6 -1 88843 1929.83 2
 -3 -6 -1 87179 2326.98 4
 -3 6 -2 2125.66 317.035 2
 -3 -6 -2 2174.94 302.482 3
 3 -6 2 2571.78 347.986 4
 -3 -6 -2 1888.32 396.595 4
 3 -6 3 211649 3253.17 4
 -3 6 -3 207453 3041.87 2
 -3 -6 -3 209284 2989.26 3
 -3 6 -3 205581 2683.35 3
 3 -6 4 3926.04 447.106 4
 -3 -6 -4 3768.82 395.306 3
 -3 6 -4 3685.09 386.734 2
 -3 6 -4 3370.91 335.441 3
 -3 -6 -5 196148 2227.22 5
 -3 -6 -5 190660 3087.49 3
 -3 6 -5 186342 2817.5 2
 3 -6 5 189082 3365.74 4
 -3 6 -5 186154 2719.57 3
 -3 -6 -6 20451.2 1005.34 3
 3 -6 6 20046.5 1075.75 4
 -3 6 -6 19252.5 850.124 3
 -3 6 -6 18624.9 817.365 2
 3 -6 7 36434.2 1516.32 4
 -3 -6 -7 34917.9 1358.96 3
 -3 6 -7 35119.8 1198.46 3
 -3 6 -7 35182 1134.49 2
 -3 6 -8 22108.6 899.01 2
 -3 6 -8 21526.8 983.671 3
 -3 -6 -8 22830.1 1154.64 3
 3 -6 8 23610 1267.69 4
 -3 -6 -9 324.741 261.261 3
 3 -6 9 698.72 338.583 4
 -3 6 -9 344.312 181.971 3
 -3 6 -9 384.921 169.034 2
 3 -6 10 47560.1 1940.46 4
 -3 6 -10 46028.4 1345.61 2
 -3 6 -10 46640 1550.56 3
 -3 -6 -10 47049.1 1829.75 3
 -3 6 -11 778.029 253.607 3
 -3 -6 -11 937.553 302.027 3
 3 -6 11 880.789 345.832 4
 -3 6 -12 4617.69 537.902 3
 3 -6 12 4654.6 704.069 4
 -3 -6 -12 4676.31 636.389 3
 -3 -6 -13 16387.5 1188.72 3
 3 -6 13 18414.7 1357.26 4
 -3 6 -13 15310.3 1011.45 3
 -3 -6 -14 558.289 341.195 3
 3 -6 14 639.034 321.906 4
 -3 6 -14 433.832 216.506 3
 -3 -6 -15 25361.2 1581.76 3
 -3 6 -15 23339.1 1343.25 3
 3 -6 15 27378.5 1791.02 4
 3 -6 16 3908.09 781.558 4
 -3 -6 -16 3814.19 723.159 3
 -3 6 -16 2726.8 509.395 3
 3 -6 17 14780.5 1380.71 4
 -3 -6 -17 13388.7 1220.98 3
 -3 -6 -18 4315.66 814.744 3
 3 -6 18 4715.95 829.484 4
 3 -6 19 6768.04 1009.34 4
 -3 -6 -19 7031.97 1001.24 3
 3 -6 20 3933.99 835.862 4
 -3 -6 -20 3209 749.439 3
 -3 -6 -21 994.282 491.944 3
 3 -6 21 1164.83 558.035 4
 3 -6 22 1577.92 537.211 4
 -3 -7 24 13405.5 1618.7 4
 3 -7 -24 13603.5 1393.11 3
 3 -7 -23 1864.93 443.718 3
 -3 -7 23 1774.95 748.028 4
 3 -7 -22 29436.4 1938.38 3
 -3 -7 22 34030.8 2400.05 4
 -3 -7 21 402.049 442.409 4
 3 -7 -21 720.487 465.081 3
 3 -7 -20 41213 2147.28 3
 -3 -7 20 42560.2 2513.13 4
 3 -7 -19 14768.5 1271.87 3
 -3 -7 19 13947 1453.4 4
 -3 7 19 15304.3 1264.36 2
 3 -7 -18 21409.8 1466.02 3
 -3 7 18 21569.7 1494.87 2
 -3 -7 18 20634.9 1697.31 4
 -3 -7 17 40050.5 2280.29 4
 3 -7 -17 40653.7 1957.95 3
 -3 7 17 37866.2 1883.28 2
 -3 -7 16 192.72 452.355 4
 3 -7 -16 395.424 314.842 3
 -3 7 16 332.918 331.446 2
 -3 -7 15 103776 3498.12 4
 3 -7 -15 104253 2969.41 3
 -3 7 15 102339 2993.77 2
 -3 -7 14 29201.5 1810.88 4
 3 -7 -14 28234.3 1484.91 3
 -3 7 14 28353.1 1550.08 2
 -3 -7 13 113592 3519.78 4
 3 -7 -13 116051 2994.24 3
 -3 7 13 114322 3034.45 2
 3 -7 -12 150501 3279.09 3
 -3 -7 12 152127 3900.36 4
 -3 7 12 143791 3434.23 2
 -3 -7 11 65893.8 2468.93 4
 3 -7 -11 69614.2 2131.68 3
 3 7 -11 65677.9 1221.84 3
 -3 7 11 68498.8 2236.86 2
 -3 7 10 160724 3451.95 2
 3 -7 -10 165486 3203.08 3
 -3 -7 10 157600 3788.49 4
 -3 7 9 1444.99 363.085 2
 -3 -7 9 857.419 306.624 4
 3 -7 -9 1169.73 326.142 3
 3 7 -9 678.801 102.184 3
 -3 7 8 154123 3210.09 2
 -3 -7 8 150680 1695.77 2
 -3 -7 8 153553 3490.75 4
 -3 7 7 51271.9 1827 2
 -3 -7 7 54300 1980.73 4
 -3 -7 7 56804.9 1066.43 2
 -3 7 7 49925.3 1638.33 1
 -3 7 6 230777 3671.57 1
 -3 7 6 230892 3909.31 2
 -3 -7 6 228979 4162.45 4
 -3 -7 5 64985.1 2101.47 4
 -3 7 5 64186.4 1843.9 1
 -3 7 5 65307.5 1930.15 2
 3 -7 -5 62224.4 1726.9 4
 -3 7 4 139168 2811.15 2
 -3 -7 4 133895 3014.87 4
 -3 7 4 141703 2872.19 1
 3 -7 -4 140839 2570.49 4
 3 -7 -3 43593.2 1342.18 4
 3 7 -3 39155.8 683.401 3
 -3 7 3 42736 1529.36 1
 -3 7 3 39806 1430.6 2
 -3 -7 3 38085.1 720.091 3
 -3 -7 3 42457.2 1626.49 4
 -3 -7 2 7339.81 370.339 3
 3 -7 -2 6467.07 518.328 4
 -3 -7 2 6087.7 613.44 4
 3 7 -2 6457.21 316.576 3
 -3 7 2 6227.08 570.772 2
 -3 7 2 6455.51 622.576 1
 -3 -7 1 164379 2140.43 3
 3 -7 -1 164484 2696.63 4
 -3 7 1 157585 2862.19 2
 -3 -7 1 160308 3339.32 4
 -3 7 1 163306 3140.76 1
 -3 7 0 46239.7 1618.34 1
 3 -7 0 45691.3 1369.06 4
 -3 7 0 43991.6 1420.09 2
 -3 -7 0 44958.4 1701.08 4
 -3 -7 0 45459.7 1115.99 3
 -3 7 -1 86439.9 1985.87 2
 -3 -7 -1 87018 1686.8 3
 -3 -7 -1 87143.4 2429.89 4
 3 -7 1 86516.4 1960.42 4
 3 -7 2 131433 2545.02 4
 -3 7 -2 127083 2415.52 2
 -3 -7 -2 132009 2242.07 3
 -3 -7 -2 135982 3100.49 4
 -3 7 -3 9770.39 648.564 2
 3 -7 3 11381.4 770.237 4
 -3 -7 -3 10239.7 631.425 3
 -3 -7 -3 10264.3 902.701 4
 -3 7 -4 193477 2971.94 2
 -3 -7 -4 194150 3047.13 3
 3 -7 4 198100 3430.51 4
 -3 7 -4 191324 2581.81 3
 3 -7 5 566.555 236.977 4
 -3 -7 -5 141.268 185.238 3
 -3 7 -5 373.204 163.391 3
 -3 7 -5 353.63 168.845 2
 -3 -7 -6 109731 2416.85 3
 3 -7 6 111923 2712.09 4
 -3 7 -6 108329 2094.28 2
 -3 7 -6 105613 2010.7 3
 -3 7 -7 6858.31 530.279 3
 -3 -7 -7 7786.27 677.79 3
 3 -7 7 7835.14 732.25 4
 3 7 7 6622.77 346.671 1
 -3 7 -7 7093.82 519.391 2
 -3 7 -8 13058.5 752.489 3
 -3 -7 -8 14113.6 930.531 3
 -3 7 -8 12742 676.895 2
 -3 7 -9 19293.9 966.139 3
 3 -7 9 20684.8 1282.26 4
 -3 7 -9 17642.8 786.597 2
 -3 -7 -9 19778.1 1161.52 3
 -3 7 -10 -345.05 205.546 3
 -3 -7 -10 -471.531 353.789 3
 3 -7 10 -77.5017 373.605 4
 -3 7 -11 21341.2 1097.44 3
 3 -7 11 21580.9 1387.71 4
 -3 -7 -11 19991.9 1248.21 3
 -3 7 -12 1181.01 296.692 3
 -3 -7 -12 1292.31 300.309 3
 3 -7 13 1494.87 408.308 4
 -3 -7 -13 1585.58 406.639 3
 3 -7 14 26629.1 1708.46 4
 -3 -7 -14 25521.1 1555.98 3
 3 -7 15 2821.32 599.102 4
 -3 -7 -15 2884.93 502.046 3
 -3 -7 -16 11368.4 1134.29 3
 3 -7 16 11049.2 1199.14 4
 -3 -7 -17 2539.86 629.909 3
 3 -7 17 2250.61 577.982 4
 -3 -7 -18 727.328 364.281 3
 3 -7 18 1262.19 496.583 4
 -3 -7 -19 9047.11 1122.86 3
 3 -7 19 7762.9 1100.46 4
 -3 -7 -20 482.954 404.233 3
 3 -7 20 515.448 423.614 4
 -3 -7 -21 3767.81 714.377 3
 3 -7 21 4502.84 825.55 4
 3 -8 -23 27868.3 1951.35 3
 -3 -8 23 28968.2 2283.26 4
 -3 -8 22 356.898 597.995 4
 3 -8 -22 -339.974 537.956 3
 -3 -8 21 33078.4 2326.21 4
 3 -8 -21 32791.8 2020.28 3
 3 -8 -20 14001.8 1298.29 3
 -3 -8 20 15486.8 1617.73 4
 3 -8 -19 23063.4 1621.41 3
 -3 -8 19 24840.2 1927.3 4
 -3 8 19 22748.1 1607.23 2
 -3 -8 18 38393.2 2346.08 4
 -3 8 18 38574.2 2019.93 2
 3 -8 -18 39243.4 2002.2 3
 -3 -8 17 7918.83 1102.03 4
 3 -8 -17 6995.7 863.639 3
 -3 8 17 8551.46 985.042 2
 3 -8 -16 78889 2700.65 3
 -3 -8 16 78901.6 3189.44 4
 -3 8 16 76921.4 2817.92 2
 3 -8 -15 963.874 421.291 3
 -3 -8 15 286.266 389.945 4
 -3 8 15 898.219 451.061 2
 -3 8 14 117632 3301.89 2
 3 -8 -14 122917 3203.42 3
 3 -8 -13 30422 1528.44 3
 -3 8 13 28769.7 1626.48 2
 -3 -8 13 29695.5 1818.66 4
 -3 -8 12 81770.1 2937.47 4
 3 -8 -12 85239 2501.71 3
 -3 8 12 86379.4 2694.89 2
 -3 -8 11 82656.6 2853.54 4
 3 -8 -11 85474.7 2420.15 3
 -3 8 11 80740.2 2544.59 2
 3 -8 -10 18182.1 1064.5 3
 -3 -8 10 18369.6 1332.52 4
 -3 8 10 16487.6 1194.18 2
 -3 -8 9 74623.4 2585.55 4
 3 -8 -9 79638 2169.35 3
 -3 8 9 71841 2323.52 2
 -3 -8 8 401.964 285.308 4
 -3 8 8 1273.43 316.124 1
 3 -8 -8 1035.68 270.275 3
 -3 8 8 444.312 273.47 2
 -3 8 7 128350 3035.06 2
 -3 8 7 129596 2802.98 1
 -3 -8 7 133177 3327.9 4
 3 -8 -7 135985 2656.01 3
 -3 8 6 116119 2811.03 2
 -3 8 6 116418 2656.58 1
 -3 -8 6 117781 3034.44 4
 3 -8 -6 118721 2662.51 4
 -3 8 5 219480 3878.55 2
 -3 8 5 215407 3781.23 1
 3 -8 -5 223528 3656.47 4
 -3 -8 5 220926 4188.28 4
 -3 8 4 217560 3791.05 1
 -3 -8 4 215867 4068.39 4
 -3 8 4 208339 3753.59 2
 3 -8 -4 213106 3501.36 4
 3 -8 -3 27537.5 1173.34 4
 -3 8 3 24693.4 1199.58 2
 -3 8 3 25706.7 1268.88 1
 -3 -8 3 25442.9 1344.97 4
 -3 -8 2 159180 1941.26 3
 -3 -8 2 165038 3488 4
 3 -8 -2 161254 2893.1 4
 -3 8 2 163687 3295.7 1
 -3 8 2 163755 3093.49 2
 -3 -8 1 2601.37 455.901 4
 -3 -8 1 3114.85 285.94 3
 3 -8 -1 2790.66 408.832 4
 -3 8 1 1713.44 329.524 2
 -3 8 1 2789.84 448.619 1
 -3 8 0 120251 2530.57 2
 -3 8 0 127941 2915.67 1
 -3 -8 0 121693 3027.69 4
 3 -8 0 120956 2484.42 4
 -3 -8 0 127792 2003.37 3
 -3 -8 -1 32054.2 1564.36 4
 3 -8 1 32730.1 1264.87 4
 -3 8 -1 33255.9 1256.54 2
 -3 -8 -1 34525.5 1057.26 3
 -3 8 -2 29375 1177.74 2
 3 -8 2 31756.1 1296.12 4
 -3 -8 -2 29403.7 1517.33 4
 -3 -8 -2 30823.9 1058.85 3
 -3 -8 -3 85439.9 1902.9 3
 -3 -8 -3 85108.3 2638.94 4
 3 -8 3 86764.3 2236.06 4
 -3 8 -3 84158.7 1985.52 2
 3 -8 4 199.513 210.231 4
 -3 -8 -4 524.73 333.081 4
 -3 8 -4 -11.9339 201.606 2
 -3 -8 -4 271.149 182.635 3
 3 -8 5 50873.6 1830.6 4
 -3 -8 -5 53261.8 1616.36 3
 -3 8 -5 49029.7 1192.73 3
 -3 8 -5 49395.1 1432.98 2
 -3 -8 -6 2396.81 401.019 3
 -3 8 -6 2168.79 315.451 2
 3 -8 6 2804.09 492.652 4
 -3 8 -6 2811.58 311.306 3
 3 -8 7 12419.8 969.803 4
 -3 -8 -7 12344.2 857.307 3
 -3 8 -7 10314.5 632.644 2
 -3 8 -7 10998 625.448 3
 -3 8 -8 23219.8 918.068 2
 -3 -8 -8 25492.5 1279.7 3
 3 -8 8 27719.9 1479.09 4
 3 -8 9 3478.87 628.221 4
 -3 -8 -9 3710.83 541.359 3
 3 -8 10 14873.9 1191.52 4
 -3 -8 -10 15123.9 1094.39 3
 -3 -8 -11 2357.64 471.277 3
 3 -8 11 2548.44 486.573 4
 -3 -8 -12 5908.94 752.495 3
 3 -8 12 5893.93 801.772 4
 3 -8 13 633.38 351.731 4
 -3 -8 -13 514.664 319.577 3
 3 -8 14 5853.35 872.783 4
 -3 -8 -14 4640.43 681.812 3
 -3 -8 -15 3348.02 676.073 3
 3 -8 15 2985.13 709.386 4
 -3 -8 -16 715.695 376.423 3
 3 -8 16 738.093 439.023 4
 -3 -8 -17 496.43 412.767 3
 3 -8 17 914.5 488.73 4
 -3 -8 -18 5152.82 826.056 3
 3 -8 18 5376.57 926.629 4
 -3 -8 -19 419.763 422.32 3
 3 -8 19 -145.664 423.236 4
 -3 -8 -20 5934.83 946.19 3
 3 -8 20 5795.83 943.959 4
 3 -8 21 124.413 479.379 4
 -3 -9 22 7016.48 1149.26 4
 3 -9 -22 6386.47 911.961 3
 -3 -9 21 1365.93 553.089 4
 3 -9 -21 1588.57 603.316 3
 -3 -9 20 11046.9 1361.35 4
 3 -9 -20 11048.1 1188.56 3
 -3 -9 19 12978.9 1462.94 4
 -3 9 19 13724.4 1301.79 2
 3 -9 -19 13701.4 1260.39 3
 -3 9 18 2826.55 637.727 2
 -3 -9 18 3103.66 652.006 4
 3 -9 -18 3398.69 665.694 3
 -3 -9 17 64160.3 2988.6 4
 -3 9 17 59458.5 2595.95 2
 3 -9 -17 59695.9 2470.42 3
 3 -9 -16 568.423 400.593 3
 -3 -9 16 1306.82 498.496 4
 -3 9 16 919.319 538.53 2
 -3 -9 15 124059 4026.24 4
 3 -9 -15 124850 3403.92 3
 -3 9 15 121299 3605.2 2
 3 -9 -14 -6.21277 334.68 3
 -3 9 14 384.856 418.999 2
 -3 -9 14 48.5878 399.194 4
 3 -9 -13 40947.7 1822.2 3
 -3 -9 13 41817 2222.31 4
 -3 9 13 39953.9 1934.78 2
 -3 -9 12 1215.86 418.45 4
 -3 9 12 581.409 324.273 2
 3 -9 -12 1127.89 344.943 3
 -3 9 11 397.531 336.011 2
 -3 -9 11 847.034 480.172 4
 3 -9 -11 607.831 251.246 3
 -3 -9 10 19456.7 1430.68 4
 3 -9 -10 20079.7 1155.07 3
 -3 9 10 19882.1 1299.49 2
 -3 -9 9 3395.99 608.333 4
 -3 9 9 3409.94 540.081 2
 3 -9 -9 4496.4 541.072 3
 -3 9 8 14884.6 1089.07 2
 -3 -9 8 15513.9 1208.29 4
 -3 9 8 13762.1 957.233 1
 3 -9 -8 15149.6 914.755 3
 -3 9 7 23400.6 1244.05 1
 -3 9 7 21442.5 1255.04 2
 -3 -9 7 24489.8 1456.39 4
 3 -9 -7 24436.8 1126.06 3
 3 -9 -7 24114.5 1277.65 4
 -3 9 6 24224.3 1317.95 2
 -3 9 6 25063.5 1287.57 1
 -3 -9 6 23278.1 1423.74 4
 3 -9 -6 27012.5 1348.41 4
 3 -9 -6 27213.8 1133.37 3
 -3 9 5 191305 3733.11 2
 3 -9 -5 189422 3538.78 4
 -3 -9 5 189199 4055.72 4
 -3 9 5 196073 3737.01 1
 -3 9 4 15736.2 1040.35 2
 3 -9 -4 17519.1 1019.52 4
 -3 -9 4 15414.1 1125.61 4
 -3 9 4 17947.8 1120.78 1
 -3 9 3 241417 4123.81 2
 -3 -9 3 236823 4540.53 4
 3 -9 -3 244648 3918.12 4
 -3 9 3 240163 4218.16 1
 -3 9 2 3556.13 575.716 1
 -3 -9 2 4443.12 623.291 4
 3 -9 -2 4707.59 516.066 4
 -3 -9 2 4326.13 272.511 3
 -3 9 2 4617.86 559.46 2
 -3 9 1 170822 3558.59 1
 -3 -9 1 174615 2262.73 3
 3 -9 -1 168085 3162.75 4
 -3 -9 1 168581 3783.71 4
 -3 9 1 165461 3218.74 2
 -3 9 0 16804.5 1151.12 1
 -3 -9 0 16681.1 1176.39 4
 3 -9 0 17715.5 1007.46 4
 -3 9 0 16064.3 964.48 2
 -3 -9 0 18283.8 737.776 3
 -3 9 -1 83664.1 2497 1
 -3 9 -1 76871.9 2054.23 2
 3 -9 1 79938.5 2171.55 4
 -3 -9 -1 76376.4 2531.85 4
 -3 -9 -1 83655.3 1722.38 3
 -3 -9 -2 7458.44 544.388 3
 -3 9 -2 6102.06 568.054 2
 3 -9 2 7074 677.639 4
 -3 -9 -2 6231.4 761.229 4
 -3 -9 -3 6881.54 549.397 3
 3 -9 3 6975.12 682.242 4
 -3 -9 -3 5890.59 765.876 4
 -3 9 -3 6058.35 561.431 2
 -3 -9 -4 19971 1382 4
 -3 -9 -4 20212.6 987.966 3
 -3 9 -4 19058.5 939.285 2
 3 -9 4 20068.4 1146.55 4
 -3 -9 -5 22997.2 1523.7 4
 3 -9 5 25336.3 1330.36 4
 -3 9 -5 21776.5 989.945 2
 -3 -9 -5 23254.5 1102.68 3
 3 -9 6 15008.1 1067.89 4
 -3 -9 -6 15690 963.891 3
 -3 -9 -6 13851.3 1221.04 4
 -3 9 -6 13520.5 763.784 2
 3 -9 7 57077.5 2142.05 4
 -3 -9 -7 57089.1 1880.11 3
 -3 -9 -8 6694.8 702.769 3
 3 -9 8 6355.9 780.753 4
 -3 -9 -9 44801.8 1815.33 3
 3 -9 9 45268.9 2011.51 4
 -3 -9 -10 -388.1 335.632 3
 3 -9 10 29.159 314.931 4
 -3 -9 -11 37744.6 1787.84 3
 3 -9 11 38649.3 1975.64 4
 -3 -9 -12 6.56436 348.423 3
 3 -9 12 -148.582 354.678 4
 3 -9 13 24337.5 1650.08 4
 -3 -9 -13 23660 1532.95 3
 3 -9 14 1287.26 440.931 4
 -3 -9 -14 1760.59 491.807 3
 3 -9 15 2878.48 691.646 4
 -3 -9 -15 1962.9 531.78 3
 3 -9 16 4863.86 847.53 4
 -3 -9 -16 3499.86 670.217 3
 -3 -9 -17 3204.36 675.072 3
 3 -9 17 3390.01 747.811 4
 3 -9 18 4917.82 943.7 4
 -3 -9 -18 5148.94 835.872 3
 -3 -9 -19 5219.34 885.496 3
 3 -9 19 9006.27 1221.44 4
 3 -9 20 3443.11 901.472 4
 3 -10 -21 47.0236 488.414 3
 -3 -10 21 869.078 651.252 4
 3 -10 -20 9575.48 1080 3
 -3 -10 20 9627.85 1307.31 4
 3 -10 -19 -129.352 330.81 3
 -3 -10 19 -365.823 551.842 4
 3 -10 -18 54615.6 2493.14 3
 -3 -10 18 49723.4 2800.32 4
 -3 10 18 55656.3 2619.76 2
 3 -10 -17 229.388 378.147 3
 -3 10 17 47.3253 363.262 2
 -3 -10 17 -213.887 511.267 4
 -3 -10 16 84646.3 3509.53 4
 3 -10 -16 88573.2 3032.93 3
 -3 10 16 90214.3 3237.38 2
 -3 -10 15 38.8805 431.681 4
 3 -10 -15 793.517 401.543 3
 -3 10 15 1114.13 554.686 2
 3 -10 -14 100691 3013.49 3
 -3 -10 14 103177 3682.24 4
 -3 10 14 103314 3341.98 2
 -3 10 13 5185.38 759.857 2
 -3 -10 13 5959.6 920.504 4
 3 -10 -13 6520.43 773.005 3
 3 -10 -12 33637.9 1636.22 3
 -3 -10 12 33962.9 2006.98 4
 -3 10 12 33311.1 1793.39 2
 -3 -10 11 7690.8 949.284 4
 3 -10 -11 9211.43 827.402 3
 -3 10 11 7566.93 874.602 2
 -3 10 10 4654.04 702.981 2
 3 -10 -10 5420.33 625.866 3
 -3 -10 10 6433.27 891.437 4
 3 -10 -9 16650.2 1216.64 4
 -3 10 9 15305.7 1174.51 2
 -3 10 9 14816.8 1024 1
 3 -10 -9 17139.3 1041.07 3
 -3 -10 9 16160.7 1288.46 4
 -3 -10 8 9650.36 1015.88 4
 -3 10 8 7606.05 802.353 2
 3 -10 -8 10321.8 785.064 3
 3 -10 -8 8851.09 854.752 4
 -3 10 8 9245.26 818.426 1
 -3 10 7 27875.3 1412.2 1
 -3 10 7 27411.6 1478.71 2
 -3 -10 7 28975.3 1693 4
 3 -10 -7 29331.6 1262.95 3
 3 -10 -7 29707.9 1511.93 4
 3 -10 -6 61803.7 1765.9 3
 3 -10 -6 62483.1 2114.05 4
 -3 10 6 57122.1 2144.26 2
 -3 -10 6 62550 2404.33 4
 -3 10 6 60801.9 2126.76 1
 3 -10 -5 15517.4 853.886 3
 -3 10 5 13025.9 996.716 1
 -3 -10 5 13883.7 1152.46 4
 3 -10 -5 15353.8 1021.54 4
 -3 10 5 12293.4 1028.81 2
 -3 -10 4 187078 4154.69 4
 -3 10 4 183153 3850.13 1
 3 -10 -4 188623 3665.75 4
 3 -10 -4 189028 2991.68 3
 -3 10 4 181300 3708.91 2
 -3 -10 3 11590 1033.55 4
 -3 10 3 11818.5 969.53 2
 3 -10 -3 12546.1 690.904 3
 -3 10 3 11777.4 989.132 1
 3 -10 -3 11888 904.585 4
 -3 -10 2 209349 4396.27 4
 -3 10 2 200619 3813.36 2
 3 -10 -2 205771 3732.02 4
 -3 10 2 204981 4104.19 1
 -3 10 1 3430.67 610.83 1
 3 -10 -1 4052.6 547.136 4
 -3 10 1 3435.95 529.17 2
 -3 -10 1 3508.48 683.533 4
 -3 10 0 121602 3173.24 1
 -3 10 0 115909 2722.31 2
 -3 -10 0 120430 3342.86 4
 3 -10 0 119639 2806.19 4
 -3 10 -1 1058.65 308.622 2
 -3 -10 -1 1059.48 228.696 3
 -3 -10 -1 405.08 360.977 4
 3 -10 1 790.147 267.598 4
 -3 -10 -2 26566.1 1573.16 4
 3 -10 2 28535 1380.67 4
 -3 -10 -2 29057.8 1077.66 3
 -3 10 -2 25272 1213.47 2
 -3 -10 -3 252.775 333.368 4
 -3 -10 -3 195.809 179.537 3
 3 -10 3 481.669 224.093 4
 -3 10 -3 329.934 206.059 2
 -3 -10 -4 -70.5564 356.892 4
 -3 10 -4 -95.4019 242.18 2
 -3 -10 -4 -242.417 215.908 3
 3 -10 4 542.596 285.845 4
 -3 -10 -5 283.23 235.96 3
 3 -10 5 322.505 235.585 4
 -3 -10 -5 -238.722 443.788 4
 -3 10 -5 179.426 197.535 2
 3 -10 6 61269 2236.37 4
 -3 -10 -6 59943.4 2612.82 4
 -3 -10 -6 58912.4 1891.64 3
 -3 -10 -7 5092.06 815.242 4
 -3 -10 -7 5514.83 608.061 3
 3 -10 7 4230.25 654.802 4
 3 -10 8 59552.2 2376.19 4
 -3 -10 -8 57352.7 2006.56 3
 3 -10 9 9538.26 1005.82 4
 -3 -10 -9 9895.39 904.882 3
 3 -10 10 45812.7 2171.97 4
 -3 -10 -10 45788.1 1932.72 3
 -3 -10 -11 3906.86 643.51 3
 3 -10 11 5398.38 780.884 4
 3 -10 12 34223.4 1971.98 4
 -3 -10 -12 34075.3 1794.9 3
 3 -10 13 5679.33 901.774 4
 -3 -10 -13 5994.05 784.191 3
 3 -10 14 1504.13 547.787 4
 -3 -10 -14 695.08 376.79 3
 -3 -10 -15 6528.25 866.25 3
 3 -10 15 8158.11 1056.76 4
 3 -10 16 1236.66 598.919 4
 -3 -10 -16 824.878 416.138 3
 3 -10 17 3975.71 807.076 4
 -3 -10 -17 3437.65 685.555 3
 -3 -10 -18 4392.26 774.108 3
 3 -10 18 5023.16 907.508 4
 3 -10 19 3468.49 805.016 4
 3 -11 -20 3075.41 655.087 3
 -3 -11 20 2927.47 899.354 4
 -3 -11 19 23409.1 2033.38 4
 3 -11 -19 24393.4 1766.67 3
 -3 -11 18 1388.51 580.799 4
 3 -11 -18 672.266 449.205 3
 -3 11 18 85.9453 429.688 2
 -3 -11 17 45295.1 2656.21 4
 -3 11 17 43395.6 2404.44 2
 3 -11 -17 45275.8 2247.6 3
 -3 -11 16 727.432 503.756 4
 -3 11 16 452.961 477.559 2
 3 -11 -16 183.514 384.443 3
 -3 -11 15 71195 3240.56 4
 -3 11 15 67939.4 2926.32 2
 3 -11 -15 75617.1 2754.17 3
 3 -11 -14 18519.3 1316.27 3
 -3 -11 14 19217.8 1655.66 4
 -3 11 14 17969.4 1481.78 2
 3 -11 -13 97339.9 2956.89 3
 -3 -11 13 94478.2 3532.21 4
 -3 11 13 92964.3 3226.94 2
 -3 11 12 32567.6 1909.42 2
 -3 -11 12 34439.5 2089.08 4
 3 -11 -12 33797.4 1669.03 3
 -3 -11 11 45940.1 2360.08 4
 3 -11 -11 47687.6 1933.96 3
 3 -11 -11 51328 2307.78 4
 -3 11 11 42365.2 2117.67 2
 3 -11 -10 32586.4 1781.7 4
 -3 -11 10 34708.8 2016.01 4
 3 -11 -10 33352.6 1548.25 3
 -3 11 10 31437.9 1755.42 2
 -3 11 9 6152.46 810.67 2
 -3 11 9 5897.85 688.992 1
 -3 -11 9 5952.14 879.216 4
 3 -11 -9 6994.25 686.784 3
 3 -11 -9 6275.24 777.898 4
 -3 -11 8 57525.5 2507.09 4
 3 -11 -8 57740.3 1883.51 3
 3 -11 -8 58440.5 2264.41 4
 -3 11 8 52153.3 2010.49 1
 -3 11 8 50113.6 2158.6 2
 -3 11 7 20139.7 1284.86 1
 3 -11 -7 22451.2 1363.49 4
 -3 -11 7 22367.1 1530.56 4
 3 -11 -7 22387.5 1132.83 3
 -3 11 7 20042 1319.37 2
 -3 -11 6 42555.5 2101.04 4
 3 -11 -6 47336.9 1573.09 3
 3 -11 -6 46707.9 1899.88 4
 -3 11 6 46100.2 1935.01 1
 -3 11 5 141886 3466.93 2
 3 -11 -5 152578 3475.15 4
 -3 -11 5 158268 4023.67 4
 -3 11 5 143436 3502.66 1
 3 -11 -5 152847 2793.5 3
 -3 11 4 21093.9 1327.16 2
 -3 -11 4 21405.7 1486.05 4
 -3 11 4 18514.8 1275.99 1
 3 -11 -4 21765.5 1275.81 4
 3 -11 -3 185414 3715.82 4
 -3 11 3 181695 4025.44 1
 -3 -11 3 186046 4340.57 4
 -3 11 2 4158.1 628.285 2
 -3 -11 2 3843.28 698.68 4
 3 -11 -2 5024.77 632.617 4
 -3 11 2 6027.58 823.108 1
 -3 11 1 143675 3219.5 2
 -3 -11 1 148927 3858.89 4
 -3 11 1 145737 3628.66 1
 3 -11 -1 148472 3324.97 4
 3 -11 0 7.01053 235.406 4
 -3 11 0 316.507 418.999 1
 -3 -11 0 -279.078 389.795 4
 -3 11 0 405.568 301.646 2
 -3 11 -1 58485 2337.35 1
 3 -11 1 58478 2063.2 4
 -3 -11 -1 63461.7 2528.21 4
 3 -11 2 2128.86 448.762 4
 -3 -11 -2 2165.67 565.996 4
 -3 11 -2 2354.81 422.979 2
 -3 11 -2 2808.25 597.591 1
 -3 11 -3 131.464 210.916 2
 3 -11 3 -106.198 348.776 4
 -3 -11 -3 -129.929 437.369 4
 -3 -11 -4 9742.66 1081.84 4
 -3 11 -4 8469.84 679.375 2
 3 -11 4 10962.2 942.386 4
 -3 -11 -5 44047.9 1584.15 3
 3 -11 5 43363.1 1912.27 4
 -3 -11 -5 39006.1 2134.8 4
 3 -11 6 8870.22 908.476 4
 -3 -11 -6 9567.41 805.916 3
 -3 -11 -6 8356.92 1057.3 4
 3 -11 7 59087.7 2378.43 4
 -3 -11 -7 61986.9 2049.56 3
 -3 -11 -7 62289.7 2790.06 4
 3 -11 8 3448.71 628.206 4
 -3 -11 -8 3760.04 583.157 3
 -3 -11 -8 2304.69 598.614 4
 -3 -11 -9 54431.8 2738.97 4
 3 -11 9 57537.9 2446.53 4
 -3 -11 -9 58662.8 2150.37 3
 3 -11 10 9972.41 1063.72 4
 -3 -11 -10 9983.26 945.255 3
 -3 -11 -11 25833.4 1545.72 3
 3 -11 11 25535 1717.36 4
 3 -11 12 4764.81 807.1 4
 -3 -11 -12 4164.88 629.55 3
 -3 -11 -13 9869.72 1004.86 3
 3 -11 13 10574.5 1181.29 4
 3 -11 14 914.951 453.676 4
 -3 -11 -14 885.99 377.794 3
 3 -11 15 217.072 390.905 4
 -3 -11 -15 -238.528 353.105 3
 -3 -11 -16 -812.151 568.374 3
 3 -11 16 642.402 466.795 4
 3 -11 17 4273.48 875.215 4
 -3 -11 -17 3727.44 791.254 3
 -3 -11 -18 -405.078 458.841 3
 3 -11 18 369.09 466.481 4
 3 -12 -19 1878.65 578.3 3
 -3 -12 18 8273.64 1207.21 4
 3 -12 -18 11273.3 1159.53 3
 3 -12 -17 1.40908 378.282 3
 -3 -12 17 -171.816 569.09 4
 -3 12 17 -846.982 629.629 2
 -3 -12 16 35352.2 2404.74 4
 3 -12 -16 36925.4 1987.71 3
 -3 12 16 34258 2148.1 2
 -3 -12 15 3526.47 827.77 4
 3 -12 -15 3962.21 720.829 3
 -3 12 15 2619.43 631.138 2
 -3 -12 14 48597.8 2701.37 4
 3 -12 -14 49388.6 2183.71 3
 -3 12 14 44409.5 2366.58 2
 -3 -12 13 22110.7 1788.77 4
 3 -12 -13 25671 1526.87 3
 3 -12 -13 28106.8 1859.8 4
 -3 12 13 23979.8 1709.82 2
 -3 -12 12 35851 2243.01 4
 3 -12 -12 40341.4 1853.28 3
 3 -12 -12 40920.9 2181.51 4
 -3 12 12 33815.1 2040.56 2
 3 -12 -11 37703.8 2016.14 4
 -3 -12 11 34687.2 2152.84 4
 3 -12 -11 35431 1687.69 3
 -3 12 11 33535.8 1923.32 2
 -3 12 10 5227.17 839.757 2
 -3 -12 10 5576.88 852.069 4
 3 -12 -10 6490.57 890.258 4
 3 -12 -10 5922.14 698.334 3
 -3 12 9 29742.3 1738.92 2
 3 -12 -9 35530.9 1869.22 4
 3 -12 -9 34998.9 1543.58 3
 -3 -12 9 29795.7 1896.51 4
 -3 12 8 397.494 297.277 2
 -3 12 8 396.345 252.016 1
 -3 -12 8 921.016 479.877 4
 3 -12 -8 1103.3 381.933 4
 -3 12 7 58238.3 2277.24 1
 -3 -12 7 59951 2640.02 4
 3 -12 -7 66419.1 2437.91 4
 -3 12 7 59355.8 2393.69 2
 -3 12 6 25827.9 1521.3 1
 3 -12 -6 26331.9 1520.46 4
 -3 -12 6 30157.5 1861.11 4
 -3 12 6 25647.8 1539.35 2
 -3 -12 5 14674.9 1303.46 4
 -3 12 5 11825.5 1077.15 1
 3 -12 -5 14072.2 1095.78 4
 -3 12 5 12024.7 1066.53 2
 3 -12 -4 67751.5 2339.73 4
 -3 12 4 64536.3 2391.98 2
 -3 12 4 64729.8 2477.08 1
 -3 -12 4 69389.6 2734.69 4
 -3 12 3 3176.61 620.37 2
 3 -12 -3 3879 621.629 4
 -3 -12 3 3683.08 664.257 4
 -3 12 3 2865.82 646.822 1
 -3 12 2 60251.1 2219.64 2
 -3 12 2 67938 2552.94 1
 3 -12 -2 69197.3 2353.31 4
 -3 -12 2 65671.2 2660.02 4
 -3 12 1 1583.17 544.196 1
 3 -12 -1 2219.18 537.801 4
 -3 -12 1 1964.54 574.421 4
 -3 12 1 1714.26 479.287 2
 3 -12 0 26818.6 1481.89 4
 -3 -12 0 24596.8 1609.7 4
 -3 12 0 23784.1 1539.69 1
 -3 12 -1 1190.72 356.563 2
 -3 12 -1 985.044 436.984 1
 3 -12 1 2135.77 505.37 4
 -3 -12 -1 1093.89 464.681 4
 -3 -12 -2 1583.49 523.377 4
 -3 12 -2 1061.82 480.976 1
 -3 12 -2 1279.68 327.078 2
 3 -12 2 1803.98 481.252 4
 -3 12 -3 28014 1758.4 1
 -3 -12 -3 30229 1891.89 4
 3 -12 3 29821.3 1584.12 4
 3 -12 4 18417.9 1290.66 4
 -3 -12 -4 17183.5 1451.19 4
 3 -12 5 16588.3 1254.59 4
 -3 -12 -5 16176 1427.77 4
 3 -12 6 65650.6 2527.12 4
 -3 -12 -6 62771 2867.59 4
 3 -12 7 18584.7 1387.62 4
 -3 -12 -7 21190 1747.56 4
 -3 -12 -8 76227.4 3247.11 4
 3 -12 8 76659.8 2889.05 4
 -3 -12 -9 7948.9 1172.92 4
 3 -12 9 9722.23 1072.03 4
 -3 -12 -10 33155 2234.91 4
 3 -12 10 34569.3 2012.24 4
 -3 -12 -10 37142.8 1804.43 3
 -3 -12 -11 500.933 518.222 4
 -3 -12 -11 202.926 309.21 3
 3 -12 11 1429.49 515.825 4
 3 -12 12 17868.8 1521.36 4
 -3 -12 -12 16523.9 1299.77 3
 3 -12 13 992.371 449.842 4
 -3 -12 -13 569.432 441.986 3
 -3 -12 -14 2739.41 529.612 3
 3 -12 14 2567.26 660.139 4
 3 -12 15 2852.71 596.527 4
 -3 -12 -15 2783.29 599.73 3
 3 -12 16 1800.54 609.066 4
 -3 -12 -16 933.558 360.702 3
 3 -12 17 595.559 447.221 4
 -3 -12 -17 1241.47 385.085 3
 3 -13 -18 1051.74 339.39 3
 3 -13 -17 3822.13 639.47 3
 -3 -13 16 707.933 557.697 4
 3 -13 -16 -15.224 303.834 3
 -3 13 16 -838.554 610.673 2
 -3 -13 15 16714.2 1687.33 4
 3 -13 -15 18384.1 1681.14 4
 -3 13 15 13755.4 1423.95 2
 -3 -13 14 3910.11 876.201 4
 -3 13 14 2402.5 566.783 2
 3 -13 -14 3515.1 742.768 4
 -3 -13 13 12516.2 1422.95 4
 3 -13 -13 15015.8 1409.19 4
 -3 13 13 12036.6 1287.33 2
 3 -13 -12 14901.1 1398.32 4
 -3 -13 12 12073.7 1325.97 4
 -3 13 12 12734.5 1296.52 2
 -3 -13 11 9752.07 1202.73 4
 3 -13 -11 10294.6 1161.91 4
 -3 13 11 7146.44 990.5 2
 -3 -13 10 29563.1 2007.33 4
 -3 13 10 30191.1 1871.16 2
 3 -13 -10 33007.1 1929.23 4
 3 -13 -9 1513.94 388.805 4
 -3 -13 9 844.281 464.757 4
 -3 13 9 931.572 351.09 2
 3 -13 -8 42838.5 2076.97 4
 -3 -13 8 39069.7 2236.66 4
 -3 13 7 44.591 300.049 2
 -3 -13 7 907.193 382.574 4
 -3 13 7 293.493 337.08 1
 3 -13 -7 1338.41 447.904 4
 -3 13 6 14068.1 1238.05 1
 3 -13 -6 17647.1 1297.54 4
 -3 -13 6 15962.6 1431.94 4
 -3 13 6 14551.8 1223.42 2
 -3 -13 5 3630.23 682.547 4
 -3 13 5 3383.18 615.994 2
 -3 13 5 3176.85 613.147 1
 3 -13 -5 3736.56 618.146 4
 -3 13 4 1154.92 423.973 1
 -3 13 4 1524.73 401.949 2
 3 -13 -4 2072.07 479.291 4
 -3 -13 4 2657.74 686.677 4
 3 -13 -3 17147.5 1237.78 4
 -3 13 3 12722.9 1067.92 2
 -3 13 3 12866.4 1184.62 1
 -3 -13 3 14223.8 1304.1 4
 -3 13 2 970.139 394.074 2
 -3 13 2 1563.49 543.157 1
 3 -13 -2 2195.72 523.139 4
 -3 -13 2 2126.48 600.421 4
 -3 -13 1 5787.6 837.383 4
 -3 13 1 4722.91 648.583 2
 -3 13 1 4940.39 752.188 1
 3 -13 0 18042.4 1267.62 4
 -3 -13 0 18625.5 1478.18 4
 -3 13 0 17494.3 1407.3 1
 -3 13 0 13736.7 1075.89 2
 -3 13 -1 192.148 242.773 2
 -3 13 -1 -524.405 573.104 1
 -3 -13 -1 306.826 383.953 4
 3 -13 1 16.5379 341.106 4
 -3 13 -2 33424.3 1968.73 1
 3 -13 2 37431.3 1862.28 4
 -3 -13 -2 37795.2 2168.9 4
 -3 13 -3 4580.87 773.033 1
 -3 -13 -3 4932.09 819.285 4
 3 -13 3 4893.02 702.518 4
 3 -13 4 47725.6 2169.5 4
 -3 -13 -4 49031.3 2518.66 4
 -3 13 -4 45298.3 2346.32 1
 -3 -13 -5 37444 2248.42 4
 3 -13 5 36688.8 1953.15 4
 -3 13 -5 33341 2079.87 1
 3 -13 6 32160.6 1849.25 4
 -3 -13 -6 32017.7 2120.45 4
 3 -13 7 68009.5 2737.62 4
 -3 -13 -7 68650.9 3135.84 4
 3 -13 8 11269.3 1177.76 4
 -3 -13 -8 9709.53 1277.77 4
 3 -13 9 38705.1 2168.63 4
 -3 -13 -9 35872.9 2364.61 4
 3 -13 10 -347.963 332.443 4
 -3 -13 -10 -122.619 447.302 4
 3 -13 11 19695.6 1640.69 4
 -3 -13 -11 20606.8 1916.61 4
 3 -13 12 6933.37 976.363 4
 -3 -13 -12 7100.26 1159.58 4
 3 -13 13 1613.33 480.409 4
 -3 -13 -13 1352.39 690.709 4
 3 -13 14 14445.3 1486.7 4
 3 -13 15 -79.4376 456.841 4
 -3 -14 14 1326.61 530.706 4
 -3 14 14 1130.5 528.423 2
 3 -14 -14 2148.54 681.715 4
 3 -14 -13 13161.4 1390.38 4
 -3 -14 13 11671 1431.2 4
 -3 14 13 9672.54 1179.42 2
 3 -14 -12 622.436 463.043 4
 -3 -14 12 -796.819 554.204 4
 -3 14 12 -133.736 365.288 2
 -3 -14 11 12799.3 1474 4
 3 -14 -11 13642.6 1320.14 4
 -3 14 11 10777.6 1200.7 2
 3 -14 -10 -578.044 416.069 4
 -3 -14 10 142.916 396.533 4
 -3 14 10 262.203 337.827 2
 3 -14 -9 17770.4 1406.6 4
 -3 -14 9 15962.2 1505.57 4
 -3 14 9 14529.9 1355.85 2
 3 -14 -8 353.344 349.228 4
 -3 14 8 -292.895 359.971 2
 -3 -14 8 388.715 444.82 4
 -3 14 7 15342.6 1370.01 2
 3 -14 -7 19541.5 1446.88 4
 -3 -14 7 16622.5 1526.96 4
 -3 14 6 -143.603 312.137 2
 -3 -14 6 -230.795 375.162 4
 -3 14 6 -465.918 345.438 1
 -3 14 5 5848.47 818.936 1
 -3 -14 5 7485.09 1023.1 4
 -3 14 5 5288.3 785.696 2
 -3 14 4 2054.11 474.183 2
 -3 14 4 2758.6 582.11 1
 3 -14 -4 4157.71 706.529 4
 -3 -14 4 3880.99 735.682 4
 -3 14 3 -184.299 376.878 2
 -3 14 3 129.964 318.129 1
 -3 -14 3 270 314.514 4
 3 -14 -3 955.808 442.235 4
 -3 14 2 408.073 272.41 2
 -3 14 2 309.198 337.023 1
 -3 -14 2 1256.52 416.716 4
 3 -14 -1 19888.9 1394.6 4
 -3 -14 1 17897.8 1534.45 4
 -3 14 1 19115.2 1530.2 1
 -3 14 1 15006.6 1161.83 2
 3 -14 0 45.6216 359.45 4
 -3 -14 0 488.714 415.455 4
 -3 14 0 71.107 397.209 1
 -3 -14 -1 39531.7 2295.88 4
 3 -14 1 42402.3 2026.26 4
 -3 14 -1 41653.9 2277.01 1
 -3 -14 -2 17599.3 1566.4 4
 -3 14 -2 16865.1 1506.78 1
 3 -14 2 16915.5 1320.21 4
 3 -14 3 52334.5 2340.08 4
 -3 -14 -3 52257 2671.86 4
 -3 14 -3 49841.4 2538.35 1
 -3 14 -4 38780.9 2269.69 1
 3 -14 4 43003.5 2134.78 4
 -3 -14 -4 39587.3 2376.07 4
 -3 14 -5 39201.7 2339.37 1
 -3 -14 -5 42554.2 2504.78 4
 3 -14 5 42676.8 2161.62 4
 -3 -14 -6 30710.1 2152.12 4
 3 -14 6 31097.7 1880.04 4
 -3 14 -6 29108.6 2034.81 1
 -3 -14 -7 5835.66 1014.81 4
 3 -14 7 5420.42 814.612 4
 -3 14 -7 5736.6 974.684 1
 3 -14 8 12437.5 1238.06 4
 -3 -14 -8 10981.4 1318.02 4
 -3 -14 -9 16.5397 491.863 4
 3 -14 9 377.514 375.379 4
 -3 -14 -10 5833 1060.76 4
 -3 -14 -11 4464.05 935.076 4
 -3 -15 11 -450.227 516.925 4
 -3 15 11 -689.834 520.576 2
 -3 -15 10 9733.52 1293.01 4
 -3 15 10 8621.91 1076.64 2
 -3 -15 9 -393.558 385.442 4
 -3 15 9 669.761 411.842 2
 -3 -15 8 17369.9 1623.1 4
 -3 15 8 14429.1 1367.06 2
 -3 -15 7 190.58 418.463 4
 -3 15 7 -519.279 409.127 2
 -3 -15 6 22155.5 1811.11 4
 -3 15 6 20197.4 1546.34 2
 -3 15 5 -479.491 409.045 2
 -3 -15 5 155.104 386.673 4
 -3 15 4 2076.72 635.713 1
 -3 -15 4 2132.13 587.038 4
 -3 15 4 1398.36 427.96 2
 -3 -15 3 -319.51 472.664 4
 -3 15 3 -590.221 448.058 2
 -3 15 2 3099.14 674.254 1
 -3 -15 2 3799.14 789.633 4
 -3 -15 1 66.8326 432.725 4
 -3 15 1 -786.108 550.542 1
 -3 15 0 16212.2 1494.55 1
 -3 -15 0 17642.4 1595.86 4
 -3 15 -1 1962.59 676.325 1
 -3 -15 -1 443.141 452.123 4
 -3 -15 -2 59134.5 2921.93 4
 -3 15 -2 56956 2838.35 1
 -3 -15 -3 4050.55 859.156 4
 -3 15 -3 5087.68 934.808 1
 -3 -15 -4 69414.3 3284.27 4
 -3 15 -4 68810.4 3154.49 1
 -3 15 -5 1733.6 728.122 1
 -3 -15 -5 1984.2 678.709 4
 -3 15 -6 34127.2 2278.68 1
 -3 -15 -6 36039.9 2436.3 4
 -3 -15 -7 1249.97 617.349 4
 -3 15 -7 1678.58 577.545 1
 -3 -15 -8 2893.27 717.266 4
 -3 16 9 9318.66 1129.27 2
 -3 16 8 -130.905 416.862 2
 -3 16 7 10768.2 1181.34 2
 -3 -16 7 13167.1 1493.69 4
 -3 -16 6 1079.51 526.106 4
 -3 16 6 -674.139 532.198 2
 -3 16 5 1451.68 432.901 2
 -3 -16 5 2709.11 725.342 4
 -3 -16 4 1506.29 594.367 4
 -3 16 4 -581.938 485.433 2
 -3 16 3 8.47054 330.349 1
 -3 -16 3 -435.684 523.541 4
 -3 -16 2 -452.812 512.973 4
 -3 16 2 -360.583 554.902 1
 -3 -16 1 13223.3 1426.72 4
 -3 16 1 11625.2 1365.69 1
 -3 -16 0 -956.318 549.75 4
 -3 16 0 -192.187 496.845 1
 -3 -16 -1 49836.6 2811.56 4
 -3 16 -1 47377.3 2661.48 1
 -3 16 -2 4113.57 907.858 1
 -3 -16 -2 1664.67 583.511 4
 -3 -16 -3 57449.6 3039.34 4
 -3 16 -3 62489.4 3129.75 1
 -3 -16 -4 2053.9 685.632 4
 -3 16 -4 3590.25 900.485 1
 -3 17 1 136.204 631.407 1
 4 0 -27 -43.0974 394.507 3
 4 0 -26 4455.71 732.436 3
 -4 0 26 4703.23 1015.82 4
 4 0 -25 564.37 371.986 3
 -4 0 25 -56.1102 536.002 4
 -4 0 24 3698.92 882.446 4
 4 0 -24 3456.4 655.3 3
 -4 0 23 -263.234 460.117 4
 4 0 -23 260.85 389.818 3
 4 0 -22 29661.1 1681.9 3
 -4 0 22 35572.4 2315.69 4
 -4 0 21 -186.901 442.519 4
 4 0 -21 53.9835 333.803 3
 -4 0 20 36945.7 2270.73 4
 4 0 -20 36321.9 1752 3
 -4 0 19 40.3403 481.941 4
 4 0 -19 96.0325 325.007 3
 -4 0 18 20323.2 993.769 2
 -4 0 18 19915.3 1592.03 4
 4 0 -18 19036.7 1217.01 3
 4 0 -17 -136.398 326.273 3
 -4 0 17 -258.168 416.145 4
 -4 0 17 15.2924 227.797 2
 -4 0 16 18155.6 1397.41 4
 4 0 -16 18767.8 1097.74 3
 -4 0 16 19239 910.846 2
 -4 0 15 204.302 152.573 2
 -4 0 15 75.6205 301.106 4
 4 0 -15 -188.586 217.542 3
 -4 0 14 575.626 417.361 4
 4 0 -14 531.575 193.221 5
 -4 0 14 345.449 167.845 2
 4 0 -14 539.256 222.295 3
 -4 0 13 -110.02 163.302 2
 -4 0 13 -175.549 312.797 4
 4 0 -13 42.6092 232.274 5
 -4 0 12 170848 3644.45 4
 -4 0 12 169404 2566.09 2
 4 0 -12 163871 2800.93 5
 -4 0 11 -154.458 184.632 2
 -4 0 11 111.906 291.942 4
 4 0 -11 97.2922 184.24 5
 -4 0 10 218661 3824.74 4
 4 0 -10 218477 3188.95 5
 -4 0 10 221278 2873.92 2
 -4 0 9 -36.4619 244.885 4
 -4 0 9 193.45 154.995 2
 4 0 -9 427.062 211.51 5
 4 0 -8 360425 4166.6 5
 -4 0 8 365944 3849.01 2
 -4 0 8 372208 4589.17 4
 -4 0 7 110.79 169.232 4
 -4 0 7 1960.9 258.4 2
 -4 0 6 214201 2873.12 4
 -4 0 6 209880 2653.94 2
 -4 0 5 323.132 140.927 4
 -4 0 5 89.3737 141.069 2
 4 0 -5 274.085 105.592 4
 -4 0 4 1579.64 193.778 4
 4 0 -4 1574.74 183.107 4
 4 0 -3 495.475 106.663 4
 -4 0 3 573.674 126.506 4
 -4 0 3 699.914 192.403 3
 -4 0 2 6021.41 419.179 3
 4 0 -2 5691.74 267.583 4
 -4 0 2 5340.71 267.702 4
 -4 0 1 351.084 180.449 3
 -4 0 0 71858 1492.12 3
 -4 0 -1 55.5269 183.56 3
 -4 0 -2 89970.5 1784.25 3
 -4 0 -3 129.936 173.714 3
 -4 0 -3 214.068 144.844 1
 -4 0 -4 996765 8646.55 3
 -4 0 -4 999999 7998.66 1
 -4 0 -5 54.6374 242.467 3
 -4 0 -5 293.352 185.926 1
 -4 0 -6 670993 5960.4 1
 -4 0 -6 673834 6809.41 3
 -4 0 -7 -332.96 225.947 1
 -4 0 -7 79.4959 286.326 3
 -4 0 -8 53324.5 1302.82 1
 -4 0 -8 53352.4 1697.96 3
 -4 0 -9 87.104 164.044 1
 -4 0 -9 -490.872 283.607 3
 -4 0 -10 61140 1988.31 3
 -4 0 -10 61511.7 1472.63 1
 -4 0 -11 -267.561 183.722 1
 -4 0 -11 -335.099 302.425 3
 -4 0 -12 491.614 265.535 3
 -4 0 -12 1062.82 242.891 1
 -4 0 -13 287.222 372.544 3
 -4 0 -13 117.935 170.019 1
 -4 0 -14 84267.3 1911.61 1
 -4 0 -14 81877.8 2634.68 3
 -4 0 -15 747.409 489.046 3
 -4 0 -16 65380.9 2531.39 3
 -4 0 -17 1884.11 634.742 3
 -4 0 -18 82360.5 3012.9 3
 -4 0 -19 2180.3 713.443 3
 -4 0 -20 44919.9 2359.15 3
 -4 0 -21 196.865 469.137 3
 -4 0 -22 17769.8 1582.91 3
 -4 0 -23 -304.332 499.107 3
 4 1 -28 1360.79 494.359 3
 -4 -1 27 5644.79 1097.23 4
 4 1 -27 4467.43 782.909 3
 4 -1 -27 4273.17 741.155 3
 4 -1 -26 -170.592 327.129 3
 -4 -1 26 23.4817 530.985 4
 4 1 -26 -507.538 401.746 3
 4 1 -25 -222.552 382.798 3
 4 -1 -25 -269.572 382.784 3
 -4 -1 25 319.91 535.001 4
 4 1 -24 -102.709 309.12 3
 4 -1 -24 -43.7556 443.351 3
 -4 -1 24 -56.6225 490.23 4
 4 -1 -23 13983 1217.21 3
 -4 1 23 14428.3 1585.34 4
 -4 -1 23 15330.5 1617.51 4
 4 1 -23 12386.6 1114.31 3
 4 1 -22 -265.432 290.158 3
 -4 1 22 255.152 499.417 4
 4 -1 -22 -273.06 345.187 3
 -4 -1 22 360.911 488.626 4
 4 1 -21 12469.7 1046.37 3
 -4 1 21 13037.6 1396.02 4
 4 -1 -21 13413.9 1135.71 3
 -4 -1 21 13809.1 1460.92 4
 -4 -1 20 860.029 485.047 4
 4 1 -20 1567.9 521.219 3
 4 -1 -20 967.786 355.619 3
 -4 1 20 1115.98 586.715 4
 4 -1 -19 53428.1 2121.83 3
 -4 -1 19 53375.8 2624.42 4
 4 1 -19 49498.6 1970.87 3
 -4 1 19 55173.2 2662.54 4
 -4 1 19 54381.1 1787.56 2
 -4 1 18 -21.8296 390.134 4
 -4 -1 18 752.595 489.966 4
 4 1 -18 -14.7606 225.577 3
 4 -1 -18 -53.6583 263.488 3
 -4 1 18 -389.747 242.137 2
 -4 -1 17 32776.9 1953.04 4
 -4 1 17 30367.3 1842.65 4
 4 1 -17 30849.6 1448.05 3
 4 -1 -17 30933.3 1528.36 3
 -4 -1 17 33413 1148.21 2
 -4 1 17 35512.4 1362.84 2
 -4 1 16 370.632 242.324 2
 4 -1 -16 543.327 185.044 5
 -4 -1 16 -231.439 364.299 4
 4 1 -16 -162.587 304.363 3
 4 -1 -16 -19.7095 247.4 3
 -4 -1 16 325.347 201.228 2
 -4 -1 15 1950.06 271.894 2
 -4 1 15 1645.33 283.638 2
 4 -1 -15 1404.65 321.157 3
 -4 1 15 1475.45 463.704 4
 -4 -1 15 1056.71 396.382 4
 4 1 -15 2866.36 396.128 3
 4 -1 -15 2543.45 349.559 5
 -4 1 14 3764.25 423.418 2
 -4 -1 14 4040.6 664.319 4
 -4 1 14 3673.63 619.832 4
 4 1 -14 3336.46 428.14 3
 4 -1 -14 3660.4 481.459 3
 4 -1 -14 4234.48 449.328 5
 -4 -1 14 4245.42 373.188 2
 -4 -1 13 38531.1 1070.16 2
 -4 1 13 37712.4 1261.36 2
 -4 -1 13 35109.2 1684.53 4
 4 -1 -13 38193.8 1282.26 5
 -4 1 13 36427.7 1740.42 4
 -4 -1 12 31658.8 942.244 2
 -4 1 12 28503.6 1479.51 4
 -4 1 12 31015.7 1112.4 2
 -4 -1 12 28953.8 1490.88 4
 4 -1 -12 30771.2 1119.31 5
 4 1 -12 29701.1 1172.99 5
 -4 -1 11 127510 2963.17 4
 -4 -1 11 119680 1878.17 2
 -4 1 11 121801 2870.86 4
 4 -1 -11 116794 2227.61 5
 4 1 -11 119042 2356.8 5
 -4 1 11 120405 2211.78 2
 -4 -1 10 15869.5 1006.33 4
 -4 -1 10 15988.8 629.706 2
 -4 1 10 15425.9 970.915 4
 -4 1 10 16078 760.659 2
 4 1 -10 15581.6 817.134 5
 4 1 -9 202312 3055.46 5
 -4 -1 9 204468 3481.59 4
 -4 1 9 197950 2811.68 2
 -4 -1 9 196910 2473.63 2
 -4 1 9 202434 3389.38 4
 4 1 -8 41897.9 1269.67 5
 -4 -1 8 41519.9 1424.19 4
 -4 1 8 40893.4 1363.17 4
 -4 1 8 42568.2 1188.88 2
 -4 -1 8 42231.6 1009.18 2
 -4 -1 7 125719 2371.24 4
 -4 1 7 124925 2231.38 4
 -4 1 7 124481 2074.93 2
 4 1 -7 123198 2199.56 5
 -4 -1 7 119824 1799.99 2
 4 -1 -6 134493 1987.76 4
 -4 -1 6 132040 2249.02 4
 -4 1 6 133833 2119.85 4
 -4 1 6 130171 2120.78 2
 -4 -1 6 131836 1911.48 2
 4 1 -6 132236 2256.52 5
 -4 1 5 95686 1561.17 4
 4 -1 -5 98644.9 1483.82 4
 -4 -1 5 95854.6 1629.43 2
 -4 -1 5 97674.1 1759.43 4
 -4 1 5 94957.6 1761.7 2
 -4 1 4 98120.4 1804.43 2
 -4 -1 4 97630.9 1617 4
 -4 1 4 97711.8 1360.84 4
 4 1 -4 99666.7 1580.31 4
 4 -1 -4 98338.3 1264.22 4
 -4 1 3 25512.1 891.152 2
 -4 -1 3 25691.5 744.542 4
 4 1 -3 27181.4 752.818 4
 -4 1 3 24633.8 817.376 3
 -4 -1 3 24592.7 790.773 3
 -4 1 2 4844.15 437.92 2
 -4 -1 2 5100.67 347.36 4
 4 1 -2 5869.71 339.49 4
 -4 1 2 5848.5 416.364 3
 -4 -1 2 4793.95 386.665 3
 -4 -1 1 70116.7 1429.14 3
 -4 -1 1 68245.5 1264.25 4
 -4 1 1 68863.9 1441.6 3
 -4 1 0 63139 1427.76 3
 -4 -1 0 66026.9 1418.38 3
 -4 1 0 62785.2 990.892 4
 -4 1 -1 186604 2660.9 3
 -4 -1 -1 185018 2609.43 3
 -4 1 -1 187877 2236.54 4
 -4 1 -1 188966 2597.94 1
 -4 1 -2 26543.4 907.684 1
 -4 1 -2 26301.7 850.57 4
 -4 1 -2 27073.9 953.715 3
 -4 -1 -2 25888.2 936.743 3
 4 1 2 24635.9 739.068 1
 -4 1 -3 150901 2439.38 3
 4 1 3 152561 1981.66 1
 -4 -1 -3 151165 2451.39 3
 -4 1 -3 152677 2311.27 1
 -4 1 -4 1379.42 262.759 3
 -4 1 -4 1389.69 251.376 1
 -4 -1 -4 1352.99 270.571 3
 4 1 4 1549.22 201.27 1
 4 -1 5 614001 6237.42 4
 -4 1 -5 606422 5763.05 1
 -4 1 -5 611572 6181.89 3
 -4 -1 -5 609762 6229.92 3
 4 -1 6 31812.3 1265.43 4
 -4 -1 -6 33376.9 1244.95 3
 -4 1 -6 32582.5 1053.53 1
 -4 1 -6 31791.1 1196.69 3
 -4 1 -7 136516 2645.35 3
 4 -1 7 139644 2833 4
 -4 1 -7 134784 2286.68 1
 -4 -1 -7 136533 2700.14 3
 -4 -1 -7 135829 1964.89 1
 -4 -1 -8 1411.16 341.245 3
 -4 -1 -8 1695.22 216.948 1
 -4 1 -8 1647.79 277.432 1
 4 -1 8 1757.35 410.022 4
 -4 1 -8 1892.22 302.343 3
 -4 -1 -9 93334.6 2386.96 3
 -4 -1 -9 94690.2 1644.66 1
 -4 1 -9 92555.9 2345.78 3
 4 -1 9 95620.9 2562.46 4
 -4 1 -9 95049.8 1964.78 1
 -4 1 -10 27781.9 1292.31 3
 -4 -1 -10 29695.6 1377.88 3
 -4 1 -10 29008.8 1078.42 1
 -4 -1 -10 28940.8 898.94 1
 4 -1 10 29327.1 1485.79 4
 4 -1 11 15036.6 1131.81 4
 -4 -1 -11 15431.6 660.443 1
 -4 1 -11 12320.2 905.203 3
 -4 1 -11 15584.3 820.456 1
 -4 -1 -11 14862.5 1027.52 3
 -4 1 -12 97612.8 2135.39 1
 -4 -1 -12 92183.4 2632.95 3
 -4 -1 -12 94979.5 1760.36 1
 -4 1 -12 95989.9 2669.05 3
 -4 -1 -13 57062.7 2143.44 3
 -4 1 -13 57582.4 1657.62 1
 -4 1 -13 54696.5 2046.06 3
 -4 1 -14 18929.7 1284.51 3
 -4 1 -14 20748.1 1031.31 1
 -4 -1 -14 18236.9 1294.95 3
 -4 -1 -15 85349.9 2792.32 3
 -4 1 -15 88064.6 2158.87 1
 -4 -1 -16 894.611 621.679 3
 -4 1 -16 576.408 420.453 3
 -4 -1 -17 51062.5 2301.32 3
 -4 1 -17 54393.8 2346.23 3
 -4 1 -18 601.09 478.291 3
 -4 -1 -18 825.674 661.073 3
 -4 1 -19 49960.9 2389.98 3
 -4 -1 -19 49230.8 2412.55 3
 -4 -1 -20 914.014 551.981 3
 -4 1 -20 737.516 506.352 3
 -4 1 -21 16595.9 1466.76 3
 -4 -1 -21 17150.6 1513.15 3
 -4 1 -22 208.485 355.506 3
 -4 -1 -22 99.5559 477.94 3
 -4 -1 -23 4976.17 872.08 3
 -4 1 -23 4676.89 859.174 3
 4 2 -28 780.83 450.319 3
 4 2 -27 3248.39 740.79 3
 4 -2 -27 3675.12 743.999 3
 4 -2 -26 1401.57 484.405 3
 4 2 -26 557.407 331.865 3
 -4 -2 25 14469.4 1681.76 4
 4 -2 -25 15345.3 1415.17 3
 4 2 -25 12062.9 1152.22 3
 -4 -2 24 13113.7 1499.82 4
 4 -2 -24 10643.3 1111.64 3
 4 2 -24 10834.5 1067.65 3
 4 -2 -23 700.003 450.661 3
 4 2 -23 1191.26 390.11 3
 -4 -2 23 1348.33 585.544 4
 4 -2 -22 27494.2 1685.55 3
 -4 -2 22 28589.3 2106.96 4
 4 2 -22 26509.5 1547.46 3
 -4 -2 21 -336.166 490.722 4
 4 2 -21 488.29 286.14 3
 4 -2 -21 -106.101 305.678 3
 4 2 -20 29613.7 1539.44 3
 4 -2 -20 30605.8 1701.48 3
 -4 -2 20 32459.6 2119.49 4
 -4 2 20 31765.5 1472.19 2
 -4 -2 19 1795.47 720.756 4
 4 -2 -19 682.624 296.078 3
 4 2 -19 1318.83 469.541 3
 -4 2 19 906.84 323.467 2
 -4 -2 18 58622.1 2658.57 4
 -4 2 18 55557.8 2631.53 4
 4 -2 -18 54196.3 2093.67 3
 -4 2 18 56018.2 1883.49 2
 4 2 -18 51628.2 1891.54 3
 -4 2 17 1545.81 337.83 2
 4 2 -17 1865.52 367.531 3
 -4 -2 17 2057.33 606.27 4
 4 -2 -17 1328.1 344.334 3
 -4 2 17 1559.44 494.934 4
 4 -2 -17 1791.17 328.275 5
 4 -2 -16 11781.4 722.058 5
 4 -2 -16 10383.1 873.558 3
 -4 -2 16 11792.6 597.691 2
 -4 2 16 11388.5 1156.36 4
 4 2 -16 11215.9 810.165 3
 -4 -2 16 9710.47 1042.14 4
 -4 2 16 11454.2 802.1 2
 -4 2 15 2377.4 374.243 2
 -4 2 15 2121.61 545.452 4
 -4 -2 15 3438.52 655.142 4
 -4 -2 15 2919.13 296.195 2
 4 -2 -15 3078.63 385.068 5
 4 2 -15 1902.93 350.002 3
 4 -2 -15 2964.2 484.015 3
 -4 2 14 3769.86 641.564 4
 4 -2 -14 3990.01 513.186 3
 -4 2 14 3927.33 481.327 2
 -4 -2 14 3409.65 588.431 4
 4 2 -14 3615.5 435.549 3
 4 -2 -14 3809.2 407.165 5
 -4 -2 14 4338.7 340.532 2
 -4 2 13 1444.38 286.978 2
 4 -2 -13 1936.05 295.256 5
 -4 2 13 2046.52 523.564 4
 -4 -2 13 2385.34 519.557 4
 4 2 -13 1428.73 260.062 3
 -4 -2 13 2356.55 256.7 2
 -4 -2 12 107980 2903.81 4
 -4 -2 12 107011 1632.19 2
 -4 2 12 106474 2257.27 2
 4 -2 -12 103500 2079.4 5
 -4 2 12 105042 2793.8 4
 -4 -2 11 484.246 268.831 4
 -4 2 11 529.913 217.681 2
 -4 2 11 1104.03 384.875 4
 -4 -2 11 499.802 123.074 2
 -4 2 10 200576 3076.91 2
 -4 -2 10 200501 2290.75 2
 -4 -2 10 202154 3726.1 4
 -4 2 10 198747 3540.08 4
 4 2 -10 199152 3213.68 5
 -4 2 9 44854 1340.19 2
 -4 -2 9 45689.7 1613.98 4
 -4 2 9 44557.5 1509.96 4
 -4 -2 9 44563.4 945.122 2
 4 2 -9 43366.2 1379.64 5
 -4 -2 8 122097 1683.92 2
 -4 -2 8 121581 2552.6 4
 -4 2 8 121015 2248.83 2
 4 2 -8 125868 2337.4 5
 -4 2 8 121102 2355.78 4
 -4 2 7 125795 2186.01 4
 -4 -2 7 126024 2458.97 4
 -4 -2 7 125498 1753.95 2
 -4 2 7 127639 2247.17 2
 4 2 -7 127237 2315.19 5
 -4 2 6 91328.4 1656.16 4
 4 -2 -6 95170.2 1607.26 4
 4 2 -6 94158.4 1916.89 5
 -4 -2 6 90234.8 1954.17 4
 -4 2 6 91737.7 1852.15 2
 4 2 -5 133186 2252.99 5
 -4 -2 5 133096 2227.92 4
 4 -2 -5 132935 1743.05 4
 -4 2 5 133987 2250.42 2
 -4 2 4 514.507 206.058 2
 4 2 -4 557.742 174.321 5
 4 -2 -4 678.31 126.779 4
 -4 -2 4 366.107 139.639 3
 -4 -2 4 805.361 201.429 4
 -4 2 3 266763 3346.27 2
 -4 -2 3 261034 2950.12 3
 -4 -2 3 258221 3129.47 4
 4 2 -3 269973 3237.34 5
 -4 -2 2 -182.215 160.67 3
 4 2 -2 307.909 152.176 5
 -4 2 2 118.314 177.422 2
 -4 -2 2 -73.7876 150.597 4
 -4 2 2 263.276 141.069 3
 -4 -2 1 89738.3 1642.06 3
 -4 2 1 88388.4 1799.82 2
 -4 -2 1 86231.8 1674.14 4
 -4 2 1 88076.8 1664.94 3
 -4 2 1 87628.3 1772.04 1
 -4 -2 0 179698 2504.45 3
 -4 2 0 182392 2666.19 1
 4 -2 0 180066 1760.6 4
 -4 2 0 179421 1860.37 4
 -4 2 0 180881 2567.62 3
 -4 2 -1 64497.1 1481.82 3
 4 -2 1 63711.9 1094.76 4
 -4 2 -1 66311.7 1526.18 1
 -4 -2 -1 63413.2 1439.42 3
 -4 2 -1 66807.3 1213.02 4
 -4 2 -2 68191.9 1569.72 3
 -4 -2 -2 69292.8 1554.97 3
 -4 2 -2 70002.3 1438.93 4
 -4 2 -2 70670.3 1587.8 1
 4 -2 2 70762.7 1324.75 4
 -4 2 -3 75047.1 1677.54 3
 4 -2 3 75589.7 1535.37 4
 -4 2 -3 77826.3 1697.76 1
 -4 -2 -3 74528.2 1670.87 3
 4 2 4 297061 2879.75 1
 -4 2 -4 306120 3826.04 3
 -4 -2 -4 304441 3902.83 3
 -4 2 -4 306031 3771.87 1
 4 -2 4 306645 3723 4
 -4 -2 -5 2940.03 400.182 3
 -4 2 -5 3129.31 378.966 1
 4 -2 5 2966.95 398.426 4
 -4 2 -5 2604.38 372.008 3
 4 2 5 2846.33 216.334 1
 -4 -2 -6 178144 3058.49 3
 4 -2 6 179324 3079.9 4
 -4 2 -6 180955 3007.96 3
 -4 2 -6 181108 2843.77 1
 -4 2 -7 91707.4 1984.36 1
 4 -2 7 93750.4 2291.29 4
 -4 2 -7 90185.9 2111.37 3
 -4 -2 -7 91654.6 2217 3
 4 -2 8 56254.5 1852.88 4
 -4 -2 -8 52881.7 1730.2 3
 -4 2 -8 56210.8 1566.79 1
 -4 2 -8 54121.6 1675.9 3
 -4 2 -9 117033 2597.24 3
 -4 -2 -9 110955 2664.39 3
 4 -2 9 118972 2858.17 4
 -4 -2 -10 24430.5 1281.48 3
 4 -2 10 25840.1 1402.17 4
 -4 2 -10 24387.1 1221.82 3
 -4 2 -11 153613 3233.64 3
 -4 -2 -11 156066 3416.3 3
 4 -2 11 151941 3579.61 4
 -4 -2 -12 3009.06 623.413 3
 -4 2 -12 2571.13 448.765 3
 4 -2 12 3924.01 778.435 4
 -4 2 -13 138732 3306.88 3
 -4 -2 -13 138874 3414.84 3
 4 -2 13 139091 3644.93 4
 -4 2 -14 68899.9 2372.83 3
 4 -2 14 75061.6 2771.18 4
 -4 -2 -14 74044.2 2568.97 3
 -4 2 -15 28968 1576.13 3
 -4 -2 -15 30956.1 1749.98 3
 4 -2 15 30865.3 1848.51 4
 -4 2 -16 17172.1 1284.3 3
 4 -2 16 19062.9 1513.81 4
 -4 -2 -16 17142.9 1340.77 3
 -4 -2 -17 18593.4 1455.77 3
 -4 2 -17 20278.7 1422.31 3
 -4 -2 -18 34847.7 1976.64 3
 -4 2 -18 34822.6 1919.61 3
 -4 -2 -19 856.482 585.968 3
 -4 2 -19 361.575 402.244 3
 -4 -2 -20 27915 1904.95 3
 -4 2 -20 25480.2 1756.89 3
 -4 -2 -21 1604.36 684.089 3
 -4 2 -21 935.761 456.525 3
 -4 2 -22 6149.61 927.243 3
 -4 -2 -22 5898.92 1030.94 3
 -4 2 -23 4441.86 825.383 3
 -4 2 -24 247.697 538.779 3
 -4 -3 26 16876.5 1772.27 4
 4 3 -26 13839.3 1247.1 3
 4 -3 -26 13797.7 1384.89 3
 -4 -3 25 10304.9 1465.41 4
 4 3 -25 9004.28 992.514 3
 4 -3 -25 11126.9 1200.65 3
 4 -3 -24 19297 1533.62 3
 -4 -3 24 22020.5 1976.09 4
 4 3 -24 16557.7 1295.66 3
 4 3 -23 19906 1356.41 3
 -4 -3 23 21085.6 1859.17 4
 4 -3 -23 20253.9 1542.48 3
 4 -3 -22 8773.25 1018.91 3
 4 3 -22 8076.13 862.585 3
 -4 -3 22 9180.6 1292.58 4
 -4 -3 21 58910.3 2948.87 4
 4 -3 -21 57076.9 2388.96 3
 4 3 -21 54409.6 2125.24 3
 -4 -3 20 1847.18 640.627 4
 4 3 -20 768.644 318.843 3
 4 -3 -20 841.544 369.944 3
 -4 3 20 1082.39 350.182 2
 -4 -3 19 42629.8 2380.61 4
 4 3 -19 36886.4 1615.52 3
 4 -3 -19 39827.5 1891.8 3
 -4 3 19 41877.5 1731.64 2
 4 -3 -18 306.014 311.433 3
 -4 -3 18 284.482 373.859 4
 4 3 -18 635.058 306.153 3
 4 -3 -18 643.322 191.102 5
 -4 3 18 7.5708 271.357 2
 -4 3 17 13062.8 926.408 2
 4 3 -17 11043.7 834.617 3
 4 -3 -17 13092.9 761.831 5
 -4 -3 17 12654.1 1220.36 4
 4 -3 -17 12119.4 1007.28 3
 -4 -3 16 23853.9 1611.4 4
 4 -3 -16 22789.1 1347.78 3
 -4 3 16 23214.1 1216.44 2
 4 3 -16 21615.7 1106.95 3
 4 -3 -16 23853.2 1018.31 5
 4 -3 -15 10949.5 882.103 3
 4 3 -15 11294.1 783.075 3
 -4 -3 15 10980.4 1082.61 4
 4 -3 -15 12336 725.458 5
 -4 3 15 12118 862.486 2
 -4 3 14 52567.2 1747.82 2
 4 -3 -14 53093.6 1854.73 3
 -4 -3 14 53155.8 2201.56 4
 4 -3 -14 53462.8 1493.74 5
 4 3 -14 49875.7 1563.75 3
 -4 -3 14 54847.9 1032.26 2
 -4 3 13 8777.26 697.722 2
 -4 -3 13 8720.73 873.028 4
 4 3 -13 8454.77 619.583 3
 -4 -3 13 9405.2 387.856 2
 -4 -3 12 29617 678.991 2
 -4 3 12 30259.1 1261.36 2
 -4 -3 12 27970.6 1495.71 4
 -4 -3 11 91326.1 2600.39 4
 -4 3 11 94844.3 2190.53 2
 -4 -3 11 91527.1 1253.87 2
 -4 3 10 889.824 255.434 2
 -4 -3 10 365.69 278.687 4
 -4 -3 10 515.409 110.278 2
 -4 -3 9 29853.3 677.446 2
 -4 3 9 27951.8 1145.11 2
 -4 -3 9 29363.2 1371.36 4
 -4 3 8 430.07 227.495 2
 -4 -3 8 682.487 297.195 4
 -4 -3 8 289.63 121.586 2
 -4 3 7 54553.3 1526.57 2
 -4 -3 7 54241.2 1645.01 4
 4 3 -7 54679.5 1556.88 5
 4 3 -6 10992.3 681.681 5
 4 -3 -6 11674.5 553.841 4
 -4 3 6 12299.6 708.629 2
 -4 -3 6 11692.6 739.014 4
 4 -3 -5 54208.4 1072.66 4
 -4 -3 5 54633.4 1485.21 4
 4 3 -5 54732.2 1441.65 5
 -4 3 5 54680 1476.43 2
 -4 -3 4 9912.41 620.473 4
 -4 3 4 10167.1 627.461 2
 4 3 -4 10467.3 609.737 5
 -4 -3 4 9671.62 460.045 3
 4 -3 -3 20978 466.565 4
 4 3 -3 21597.3 849.141 5
 -4 -3 3 22873.7 903.123 4
 -4 3 3 20915.2 899.207 2
 -4 3 3 22171.5 922.587 1
 -4 -3 3 20735.8 700.279 3
 -4 3 2 124781 2243 1
 -4 -3 2 123150 1888.08 3
 4 3 -2 126128 2048.73 5
 -4 -3 2 125411 2210.19 4
 -4 3 2 119976 2213.09 2
 -4 -3 1 1364.52 232.563 3
 -4 3 1 1049.64 222.432 2
 4 -3 -1 1172.17 118.164 4
 4 3 -1 1388.28 215.399 5
 -4 -3 1 1072.38 251.952 4
 -4 3 1 1203.11 115.874 4
 -4 3 1 1139.95 247.093 1
 -4 3 1 928.443 203.827 3
 -4 -3 0 52905.6 1255.69 3
 -4 3 0 52147.5 1425.65 1
 -4 3 0 53319.6 908.952 4
 4 -3 0 51408.3 907.7 4
 -4 3 0 52552.8 1421.48 2
 -4 -3 0 52339 1416.46 4
 4 3 0 52470.6 1180.86 5
 -4 3 0 49611.2 1272.57 3
 4 -3 1 2585.86 235.162 4
 -4 3 -1 2862.89 332.101 3
 -4 3 -1 2551.86 350.887 2
 4 3 1 2709.46 266.931 5
 -4 3 -1 1943.41 311.478 1
 -4 -3 -1 2451 309.289 3
 -4 3 -1 2594.96 241.711 4
 -4 3 -2 92473.1 1863.6 3
 -4 3 -2 97050.7 1995.23 1
 -4 -3 -2 93101.2 1849.81 3
 4 -3 2 94712.1 1621.57 4
 -4 3 -2 92898.4 2027 2
 -4 3 -2 97677.4 1729.68 4
 4 3 2 97853 1514.48 5
 4 -3 3 485.162 178.748 4
 4 3 3 637.507 133.656 5
 -4 3 -3 523.889 224.646 3
 -4 3 -3 665.004 256.156 1
 -4 -3 -3 1114.4 283.076 3
 -4 3 -4 48643 1398.83 3
 -4 -3 -4 49528.2 1441.92 3
 4 3 4 50567.9 917.127 5
 -4 3 -4 50672.8 1467.37 1
 4 -3 4 50899.4 1392.89 4
 -4 3 -5 67023.5 1744.06 1
 -4 3 -5 66817 1678.3 3
 -4 -3 -5 65632.9 1762.21 3
 4 -3 5 66730.1 1729 4
 4 3 5 60668.1 932.431 1
 4 3 5 65616.8 974.254 5
 -4 3 -6 53651.1 1554.81 3
 -4 -3 -6 52937.9 1611.16 3
 4 -3 6 55007.6 1657.66 4
 -4 3 -6 55164.3 1601.54 1
 4 3 6 48694.3 746.766 5
 -4 3 -7 19889.4 991.898 3
 -4 -3 -7 19172.4 1024.72 3
 4 -3 7 20375.5 1081.37 4
 4 -3 8 156610 3203.09 4
 -4 3 -8 159074 2975.13 3
 -4 -3 -8 157126 3105.55 3
 -4 3 -9 597.691 210.966 3
 4 -3 9 1129.14 346.984 4
 -4 -3 -9 1013.52 331.599 3
 4 -3 10 154710 3473.25 4
 -4 3 -10 154812 3125.61 3
 -4 -3 -10 152206 3312.61 3
 -4 -3 -11 1467.82 480.515 3
 -4 3 -11 1547.98 359.257 3
 4 -3 11 1622.72 495.922 4
 4 -3 12 207694 4388.76 4
 -4 -3 -12 213696 4212.3 3
 -4 3 -12 207043 3950.68 3
 -4 -3 -13 12643.5 1113.57 3
 -4 3 -13 11912.6 983.767 3
 4 -3 13 12045.8 1173.43 4
 4 -3 14 43571.9 2083.52 4
 -4 3 -14 38721.7 1750.6 3
 -4 -3 -14 44001.2 1963.67 3
 4 -3 15 8060.24 1009.53 4
 -4 3 -15 5553.26 759.784 3
 -4 -3 -15 6298.93 822.093 3
 4 -3 16 14538.5 1296.54 4
 -4 -3 -16 12480.5 1159.93 3
 -4 3 -16 13511.9 1126.78 3
 -4 3 -17 15455.7 1220.5 3
 -4 -3 -17 14993.4 1318.58 3
 4 -3 17 16753 1463.07 4
 4 -3 18 6788.85 985.525 4
 -4 3 -18 5243.63 775.619 3
 -4 -3 -18 6798.69 932.298 3
 -4 -3 -19 17087.2 1463.99 3
 4 -3 19 19837.3 1673.45 4
 -4 3 -19 16313.1 1346.05 3
 -4 3 -20 13405.1 1271.31 3
 -4 -3 -20 13711 1399.75 3
 -4 3 -21 5562.4 831.444 3
 -4 -3 -21 7017.5 1045.19 3
 -4 3 -22 12657.5 1317.48 3
 -4 -3 -22 15597.9 1546.08 3
 -4 3 -23 -173.964 391.026 3
 -4 3 -24 15214.1 1529.35 3
 -4 -4 26 1611.5 789.97 4
 4 -4 -26 935.361 468.634 3
 -4 -4 25 23192.9 2071.47 4
 4 -4 -25 23489.9 1774.12 3
 4 4 -24 9148.69 945.237 3
 4 -4 -24 10890.9 1191.23 3
 -4 -4 24 11978.5 1500.2 4
 4 4 -23 10974.9 1008.8 3
 4 -4 -23 10617.1 1182.57 3
 -4 -4 23 12600.9 1512.84 4
 4 4 -22 15406.8 1132.5 3
 4 -4 -22 15776.9 1368.89 3
 4 4 -21 7516.22 796.376 3
 4 -4 -21 9324.19 996.367 3
 -4 -4 21 9395.65 1297.07 4
 -4 4 21 8271 842.275 2
 -4 -4 20 40173.8 2382.35 4
 4 4 -20 36924.6 1655.73 3
 4 -4 -20 40803.7 2019.25 3
 -4 4 20 42056.9 1878.58 2
 -4 -4 19 606.953 427.066 4
 4 4 -19 556.708 249.129 3
 4 -4 -19 960.025 398.185 3
 -4 4 19 914.007 305.046 2
 4 -4 -18 26711 1555.22 3
 4 4 -18 23638.3 1231.84 3
 -4 -4 18 26735.2 1845.21 4
 -4 4 18 29263.1 1474.77 2
 -4 -4 17 39172.2 2148.11 4
 4 4 -17 34195.4 1418.55 3
 4 -4 -17 39721.4 1297.87 5
 4 -4 -17 37008 1745.71 3
 -4 4 17 38178.9 1657.42 2
 4 4 -16 7057.67 638.545 3
 -4 -4 16 7400.74 942.149 4
 4 -4 -16 8547.24 607.103 5
 4 -4 -16 7584.01 787.22 3
 -4 4 16 7466.97 745.85 2
 4 -4 -15 111836 2912.11 3
 4 4 -15 110242 2385.91 3
 -4 -4 15 113713 3422.93 4
 -4 4 15 113313 2763.65 2
 4 -4 -15 110974 2209.96 5
 -4 4 14 18687.6 1101.23 2
 -4 -4 14 18248 1341.2 4
 4 4 -14 18196.2 909.891 3
 4 -4 -14 17874.4 1102.79 3
 -4 4 13 157915 3179.72 2
 -4 -4 13 161457 3840.21 4
 4 4 -13 160079 2686.09 3
 4 -4 -13 161064 3276.22 3
 -4 4 12 8300.58 700.926 2
 -4 -4 12 7843.87 867.395 4
 4 4 -12 7359.02 523.691 3
 -4 -4 11 53375.1 2060.1 4
 -4 4 11 55898.1 1762.9 2
 -4 4 10 -26.0623 236.389 2
 -4 -4 10 -117.483 308.565 4
 -4 -4 10 110.539 52.5841 2
 -4 -4 9 28236.1 592.429 2
 -4 4 9 30142.4 1234.34 2
 -4 -4 9 30468.4 1408.8 4
 -4 4 8 13384.9 840.613 2
 -4 -4 8 13113.2 916.043 4
 -4 -4 8 13531.8 463.675 2
 -4 4 7 11327.9 763.904 2
 -4 -4 7 9825.15 763.465 4
 -4 4 6 30590.7 1185.8 2
 -4 -4 6 28555.1 1218.3 4
 -4 -4 5 77798.4 1937.42 4
 -4 4 5 77644.4 1866.34 2
 4 4 -5 73658.9 1346.99 3
 4 4 -4 13626.5 558.315 3
 -4 4 4 12772.4 750.823 2
 -4 4 4 14269.9 802.003 1
 -4 -4 4 13507.1 796.783 4
 -4 -4 4 13588.9 525.805 3
 -4 -4 3 150425 2041.34 3
 -4 4 3 155260 2644.35 2
 -4 -4 3 154361 2682.96 4
 -4 4 3 154400 2682.27 1
 4 -4 -3 148700 1779.9 4
 -4 -4 2 236.768 151.996 3
 -4 -4 2 291.828 231.499 4
 4 -4 -2 670.159 136.743 4
 -4 4 2 420.767 231.746 1
 -4 4 2 969.664 224.781 2
 -4 -4 1 194238 3102.22 4
 -4 4 1 192582 3050.67 1
 4 -4 -1 192197 2103.77 4
 -4 4 1 196528 2166.65 4
 -4 4 1 183942 2929.56 2
 -4 -4 1 192403 2570.44 3
 -4 -4 0 51701.6 1548.21 4
 -4 4 0 50120.6 1458.64 2
 4 -4 0 53607.8 1061.78 4
 -4 4 0 52793.7 1534.35 1
 -4 -4 0 54338.1 1295.76 3
 -4 4 0 53793 1062.19 4
 -4 4 0 50422.3 1287.28 3
 -4 4 -1 280800 3822.98 2
 -4 -4 -1 290658 3521.84 3
 -4 4 -1 290503 3143.62 4
 -4 4 -1 293286 3952.09 1
 4 -4 1 290962 3162.22 4
 -4 4 -1 283630 3513.69 3
 -4 4 -2 36106.2 1288.78 1
 4 -4 2 36012.6 1031 4
 -4 4 -2 36130.1 1261.25 2
 -4 -4 -2 35546.8 1132.4 3
 -4 4 -2 34453.7 1121.66 3
 -4 4 -3 128433 2304.46 3
 -4 4 -3 133521 2478.4 2
 4 -4 3 130012 2217.18 4
 -4 -4 -3 131345 2346.15 3
 -4 4 -3 131570 2577.51 1
 -4 4 -4 70391.8 1716.24 3
 -4 4 -4 73956.7 1899.54 1
 -4 -4 -4 71874.5 1766.6 3
 -4 4 -4 69627.5 1800.07 2
 4 -4 4 73532.3 1732.63 4
 -4 4 -5 2687.88 396.064 3
 -4 4 -5 2876.57 425.276 1
 4 -4 5 3474.79 430.041 4
 -4 -4 -5 2696.39 388.918 3
 -4 -4 -6 8713.41 666.186 3
 4 -4 6 8497.76 653.102 4
 -4 4 -6 7251.75 586.579 3
 -4 -4 -7 94203.8 2303.63 3
 -4 4 -7 95603.3 2179.04 3
 4 -4 7 95849.5 2387.62 4
 4 -4 8 13992.3 949.121 4
 -4 -4 -8 15259.7 971.321 3
 -4 4 -8 13807.9 840.227 3
 -4 4 -9 170321 3192.11 3
 -4 -4 -9 171080 3415.62 3
 4 -4 9 170527 3539.83 4
 4 -4 10 6029.89 711.615 4
 -4 -4 -10 6314.78 736.973 3
 -4 4 -10 5246.26 567.889 3
 -4 4 -11 245354 4186.4 3
 -4 -4 -11 243905 4472.17 3
 4 -4 11 249947 4697.8 4
 -4 -4 -12 4068.29 710.989 3
 -4 4 -12 3704.4 542.188 3
 4 -4 12 3453.74 680.507 4
 4 -4 13 118118 3386.65 4
 -4 4 -13 113096 2937.46 3
 -4 -4 -13 115782 3184.85 3
 4 -4 14 9720.62 1048.09 4
 -4 -4 -14 8880.7 984.614 3
 -4 4 -14 7833.09 803.913 3
 4 -4 15 7489.58 958.527 4
 -4 4 -15 6502.46 766.469 3
 -4 -4 -15 6693.97 859.098 3
 -4 4 -16 27579.5 1608.45 3
 4 -4 16 29668.2 1855.04 4
 -4 -4 -16 27281.5 1666.79 3
 4 -4 17 2005.6 579.576 4
 -4 4 -17 2033.37 490.419 3
 -4 4 -18 1681.86 427.186 3
 -4 -4 -18 1593.63 496.881 3
 4 -4 18 2932.52 659.114 4
 4 -4 19 14273.5 1440.74 4
 -4 -4 -19 11915.6 1244.41 3
 -4 4 -19 10127.2 1113.83 3
 -4 -4 -20 -83.9852 346.729 3
 -4 4 -20 230.427 345.286 3
 4 -4 20 -239.755 464.229 4
 -4 -4 -21 25338.7 1889.78 3
 4 -4 21 27261.5 2105.81 4
 -4 4 -21 24612.4 1751.91 3
 -4 -4 -22 1395.57 707.784 3
 -4 4 -22 1308.37 497.998 3
 4 -5 -25 5145.5 878.109 3
 -4 -5 25 4689.81 1107.24 4
 4 -5 -24 29874.3 1957.09 3
 -4 -5 24 33321.5 2461.87 4
 4 -5 -23 5214.46 840.763 3
 -4 -5 23 5943.04 1081.25 4
 4 -5 -22 1341.47 489.633 3
 -4 -5 22 566.642 499.648 4
 -4 5 21 13425.3 1118.72 2
 -4 -5 21 14260.4 1482.45 4
 4 5 -20 -16.2999 262.778 3
 -4 -5 20 -399.706 566.516 4
 4 -5 -20 -140.66 435.687 3
 -4 5 20 -368.563 390.079 2
 -4 -5 19 11013.7 1268.09 4
 4 5 -19 8493.55 755.806 3
 4 -5 -19 9302.4 987.051 3
 -4 5 19 10743.7 973.381 2
 4 5 -18 36739.1 1474.06 3
 -4 -5 18 39552.7 2245.01 4
 -4 5 18 43547.7 1879.09 2
 4 -5 -18 37254.4 1854.25 3
 -4 -5 17 4070.11 783.82 4
 4 -5 -17 4718.19 671.28 3
 4 5 -17 5020.01 563.447 3
 -4 5 17 5255.59 679.221 2
 4 -5 -16 78216.1 1828.65 5
 -4 -5 16 79246.6 3008.87 4
 4 5 -16 75540 1967.82 3
 4 -5 -16 78156.7 2543.03 3
 -4 5 16 77372.6 2424.85 2
 4 5 -15 5382.82 509.127 3
 -4 5 15 4939.5 642.071 2
 -4 -5 15 5389.58 845.372 4
 4 -5 -15 5442.14 689.052 3
 -4 5 14 132311 3114.73 2
 -4 -5 14 128605 3654.16 4
 4 5 -14 129859 2441.13 3
 4 -5 -14 129901 3137.38 3
 -4 5 13 12616.8 920.394 2
 -4 -5 13 10094.1 1019.09 4
 4 5 -13 9255.31 602.344 3
 4 -5 -13 10670.1 867.935 3
 -4 -5 12 136075 3557.19 4
 -4 5 12 139126 3045 2
 4 5 -12 134025 2244.15 3
 -4 5 11 400.328 229.272 2
 -4 -5 11 673.112 273.264 4
 4 5 -11 725.77 151.702 3
 -4 -5 10 69657 2307.15 4
 -4 5 10 69128.9 2055.77 2
 -4 -5 9 37.9703 307.929 4
 -4 -5 9 245.664 65.9901 2
 -4 5 9 -237.089 277.399 2
 -4 5 8 807.02 275.883 2
 -4 -5 8 579.07 353.477 4
 -4 5 7 8914.76 720.986 2
 -4 -5 7 8532.02 755.579 4
 4 5 -7 8690.84 436.596 3
 4 5 -6 82215.8 1401.43 3
 -4 -5 6 86234 2226.55 4
 -4 5 6 85642.1 2119.99 2
 -4 5 5 2754.41 424.452 2
 -4 -5 5 3499.99 513.393 4
 4 5 -5 2578.53 248.913 3
 -4 5 5 2287.62 413.144 1
 4 5 -4 220603 2542.15 3
 -4 5 4 236005 3553.34 1
 -4 -5 4 228663 3681.17 4
 -4 5 4 234900 3554.88 2
 -4 -5 4 227291 2482.66 3
 4 -5 -4 230132 2735.51 4
 4 -5 -3 9194.84 459.353 4
 -4 -5 3 8578.95 690.722 4
 -4 5 3 7840.8 636.75 2
 -4 5 3 8341.76 670.919 1
 -4 -5 3 8599.81 448.648 3
 -4 -5 2 188874 2445.03 3
 -4 5 2 192187 3199.94 1
 4 -5 -2 185375 2293.5 4
 -4 -5 1 25256.1 1164.86 4
 -4 5 1 24917.2 1122.91 1
 4 -5 -1 24609.2 760.286 4
 -4 -5 1 25007 852.186 3
 -4 5 1 22668.4 1018.55 2
 -4 5 0 235042 3639.71 1
 4 -5 0 232092 2795.71 4
 -4 5 0 234804 3454.18 2
 -4 -5 0 245494 3849.39 4
 -4 -5 0 239289 3030.93 3
 -4 -5 -1 77729.8 1669.6 3
 -4 -5 -1 76604 2126.67 4
 4 -5 1 78902.8 1565.72 4
 -4 5 -1 74366 1617.85 3
 -4 5 -1 80317.4 2022.99 1
 -4 5 -1 76512.5 1845.6 2
 -4 5 -2 191548 3255.95 1
 4 -5 2 187518 2728.89 4
 -4 -5 -2 181946 2803.35 3
 -4 5 -2 181570 2734.68 3
 -4 5 -2 184827 2986.27 2
 -4 5 -3 21375.2 967.947 2
 -4 5 -3 23221.6 1117.92 1
 4 -5 3 23712.7 960.605 4
 -4 -5 -3 24802.7 1010.8 3
 -4 5 -3 22140 915.09 3
 -4 5 -4 27260.6 1050.95 3
 -4 5 -4 23518.2 1042.34 2
 -4 5 -4 26378.8 1194.6 1
 4 -5 4 26090.4 1061.34 4
 -4 -5 -4 25875.6 1062.28 3
 -4 5 -5 24563.9 1067.43 2
 -4 -5 -5 26365.3 1134.05 3
 -4 5 -5 23738.3 1008.1 3
 4 -5 5 26711.1 1136.31 4
 -4 -5 -6 24436.2 1135.21 3
 -4 5 -6 24525.1 1064.15 3
 4 -5 6 25485 1179.93 4
 -4 5 -6 23708.8 1057.31 2
 -4 5 -7 28806.9 1195.42 3
 -4 5 -7 28248 1178.81 2
 4 -5 7 32510.3 1395.25 4
 -4 -5 -7 31396 1347.49 3
 -4 5 -8 110259 2439.88 3
 -4 5 -8 103546 2372.66 2
 -4 -5 -8 109458 2669.07 3
 4 -5 8 113836 2778.07 4
 -4 5 -9 7679.73 665.215 3
 4 -5 9 8955.24 803.25 4
 -4 -5 -9 8208.36 803.944 3
 4 -5 10 97581.4 2779.01 4
 -4 -5 -10 92948 2599.69 3
 -4 5 -10 91369.8 2360.59 3
 4 -5 11 1333.93 385.139 4
 -4 5 -11 1156.79 288.042 3
 -4 -5 -11 2061.35 501.404 3
 -4 5 -12 138587 3179.57 3
 -4 -5 -12 143327 3497.85 3
 4 -5 12 139887 3628.01 4
 4 -5 13 2251.29 548.272 4
 -4 5 -13 1677.93 411.972 3
 -4 -5 -13 2518.53 549.397 3
 4 -5 14 23398.2 1583.66 4
 -4 -5 -14 23193.6 1487.99 3
 -4 5 -14 22667 1344.21 3
 -4 -5 -15 7556.68 911.552 3
 4 -5 15 7973.49 973.925 4
 -4 5 -15 6666.95 774.172 3
 4 -5 16 384.371 450.402 4
 -4 5 -16 -168.358 346.943 3
 -4 -5 -16 19.7436 411.159 3
 -4 5 -17 8.27867 315.706 3
 -4 -5 -17 -113.627 458.17 3
 4 -5 17 43.0832 360.459 4
 4 -5 18 10331 1219.27 4
 -4 5 -18 7927.4 914.18 3
 -4 -5 -18 8356.8 1051.08 3
 -4 5 -19 -155.231 271.543 3
 -4 -5 -19 257.152 373.394 3
 -4 -5 -20 25364 1891.15 3
 4 -5 20 26139.7 1978.05 4
 -4 -5 -21 1023.97 506.559 3
 4 -5 21 2096.57 684.625 4
 4 -5 22 38588.2 2543.74 4
 4 -6 -25 38152.1 2296.72 3
 -4 -6 25 40641.5 2773.12 4
 4 -6 -24 364.595 334.492 3
 -4 -6 24 1171.53 625.061 4
 -4 -6 23 12739.9 1539.75 4
 4 -6 -23 12195 1271.27 3
 -4 -6 22 -351.457 514.353 4
 4 -6 -22 -343.114 557.346 3
 -4 -6 21 1102.12 466.497 4
 4 -6 -21 603.748 357.74 3
 -4 6 21 56.7237 449.37 2
 4 -6 -20 191.26 307.327 3
 -4 6 20 -1.21665 367.91 2
 -4 -6 19 15685.7 1512.01 4
 4 -6 -19 14301.8 1232.35 3
 -4 6 19 13780.5 1167.29 2
 -4 6 18 3410.05 610.915 2
 -4 -6 18 2592.18 645.238 4
 4 -6 -18 3142.93 564.428 3
 -4 -6 17 73892.4 3018.71 4
 4 -6 -17 71173.9 2547.65 3
 -4 6 17 73466.8 2536.12 2
 -4 6 16 685.591 390.233 2
 -4 -6 16 -159.052 446.24 4
 4 6 -16 86.1988 165.162 3
 4 -6 -16 -8.14984 346.32 3
 -4 -6 15 131914 3912.93 4
 4 6 -15 132086 2466.46 3
 4 -6 -15 135831 3338.18 3
 -4 6 15 132344 3312.71 2
 4 6 -14 -204.467 182.261 3
 -4 -6 14 -477.324 435.175 4
 -4 6 14 -272.908 350.792 2
 4 -6 -14 385.73 312.859 3
 -4 6 13 190882 3846.55 2
 4 6 -13 181275 2697.94 3
 4 -6 -13 187449 3752.23 3
 -4 -6 12 -36.918 399.572 4
 4 -6 -12 717.217 294.127 3
 4 6 -12 407.908 156.422 3
 -4 6 12 598.046 310.878 2
 -4 -6 11 106435 3104.76 4
 -4 6 11 106152 2764.63 2
 4 6 -11 106188 1756.88 3
 -4 6 10 3465.12 514.433 2
 -4 -6 10 3751.63 604.24 4
 4 6 -10 3232.3 261.477 3
 -4 -6 9 43297.8 710.155 2
 -4 6 9 44687.1 1695.14 2
 -4 -6 9 45747.2 1877.55 4
 -4 -6 8 30766.4 1481.24 4
 -4 -6 8 30888.8 699.62 2
 -4 6 8 31379 1373.07 2
 4 6 -7 1827.21 199.975 3
 -4 6 7 1567.37 346.633 2
 -4 -6 7 1889.39 199.536 2
 -4 -6 7 1620.65 409.495 4
 4 6 -6 7837.41 374.613 3
 -4 -6 6 8634.52 772.68 4
 -4 6 6 8207.79 702.003 2
 -4 6 6 9043.81 693.429 1
 -4 6 5 61741.7 1807.32 1
 4 -6 -5 60717.8 1470.69 4
 -4 6 5 60185.7 1815.79 2
 4 6 -5 59697.3 1067.05 3
 -4 -6 5 62706.6 1973.9 4
 -4 6 4 6786.02 623.374 2
 -4 6 4 7793.64 667.441 1
 -4 -6 4 7027.2 680.033 4
 4 6 -4 6514.9 348.173 3
 4 -6 -4 6582.19 453.754 4
 -4 -6 4 7147.79 356.829 3
 -4 6 3 195318 3396.15 1
 -4 6 3 186125 3243.62 2
 -4 -6 3 190791 3480.7 4
 4 -6 -3 189365 2619.15 4
 -4 -6 3 187929 2301.95 3
 -4 -6 2 2759.52 478.476 4
 -4 6 2 3374.68 499.464 1
 4 -6 -2 3208.04 326.505 4
 -4 6 2 3260.97 459.68 2
 -4 -6 2 3542.55 330.439 3
 -4 -6 1 177293 2469.65 3
 4 -6 -1 174229 2474.81 4
 -4 6 1 174149 3055.56 2
 -4 6 1 178750 3223.11 1
 -4 -6 1 174031 3370.13 4
 4 -6 0 215.362 151.466 4
 -4 6 0 165.288 289.722 1
 -4 6 0 -156.864 265.536 2
 -4 -6 0 -63.7288 246.668 4
 -4 -6 0 47.0423 145.571 3
 -4 -6 -1 65282.9 2066.02 4
 4 -6 1 66472.6 1557.57 4
 -4 -6 -1 63609.5 1517.99 3
 -4 6 -1 63862.6 1745.62 2
 -4 6 -1 66526.9 1961.05 1
 -4 6 -2 11103.8 804.745 1
 -4 6 -2 10430.3 702.95 2
 4 -6 2 11428.7 667.581 4
 -4 -6 -2 11252.6 655.131 3
 -4 -6 -2 10244.4 826.057 4
 -4 6 -2 10083.2 592.495 3
 -4 6 -3 38703.1 1518.38 1
 4 -6 3 37627.2 1276.88 4
 -4 -6 -3 37739.7 1280.06 3
 -4 6 -3 36110.8 1297.22 2
 -4 6 -3 35535.7 1157.29 3
 4 -6 4 84116 2040.8 4
 -4 6 -4 78411.9 1800.95 3
 -4 6 -4 81368.2 1965.02 2
 -4 -6 -4 82101.8 1963.38 3
 -4 6 -5 711.848 222.464 3
 4 -6 5 511.327 205.141 4
 -4 -6 -5 752.902 244.204 3
 -4 6 -5 953.058 247.718 2
 -4 -6 -6 67426.9 1938.37 3
 4 -6 6 70309.1 2034.15 4
 -4 6 -6 66216.8 1761.75 3
 -4 6 -6 65681.1 1777.85 2
 -4 6 -7 49722 1564.01 3
 -4 6 -7 50269.3 1561.92 2
 4 -6 7 52901.9 1856.26 4
 -4 -6 -7 51907 1758.32 3
 -4 6 -8 16986.8 951.533 3
 -4 6 -8 15397.6 875.525 2
 4 -6 8 16400.2 1067.51 4
 -4 -6 -8 16888.3 1060.55 3
 4 -6 9 21287.2 1267.32 4
 -4 -6 -9 20015 1185.79 3
 -4 6 -9 20287.3 1081.52 3
 -4 6 -9 17609.3 948.504 2
 -4 6 -10 5731.43 579.346 3
 -4 6 -10 6325.81 583.974 2
 -4 -6 -10 7499.78 766.501 3
 4 -6 10 6644.8 756.143 4
 -4 6 -11 57185 1915.63 3
 4 -6 11 57343.8 2234 4
 -4 -6 -11 56182.6 2120.37 3
 -4 -6 -12 5323 730.874 3
 -4 6 -12 5390.85 617.687 3
 4 -6 12 6069.65 771.269 4
 -4 6 -13 32721.4 1549.82 3
 4 -6 13 35332.1 1904.99 4
 -4 -6 -13 35532.1 1802.46 3
 -4 6 -14 12810.6 992.005 3
 4 -6 14 14976.4 1270.07 4
 -4 -6 -14 13935.3 1170.1 3
 -4 -6 -15 942.471 437.785 3
 -4 6 -15 1327.42 343.422 3
 4 -6 15 1292.23 408.757 4
 -4 -6 -16 6281.54 846.327 3
 4 -6 16 6830.27 933.368 4
 -4 6 -16 6157.27 739.586 3
 -4 -6 -17 10449.2 1173.54 3
 4 -6 17 11707.6 1258.77 4
 4 -6 18 8914.87 1182.86 4
 -4 -6 -18 9114.96 1126.6 3
 -4 -6 -19 34766.5 2158.65 3
 4 -6 19 35143.7 2284.42 4
 -4 -6 -20 8367.43 1154.42 3
 4 -6 20 8038.83 1165.68 4
 -4 -6 -21 43707.6 2594.48 3
 4 -6 21 46263.6 2695.9 4
 -4 -7 24 10978.1 1482.58 4
 4 -7 -24 10558.6 1226.63 3
 4 -7 -23 6964.58 986.682 3
 -4 -7 23 6590.07 1141.58 4
 -4 -7 22 7525.87 1165.41 4
 4 -7 -22 6626.67 972.902 3
 4 -7 -21 7649.36 983.346 3
 -4 -7 21 8648.45 1240.19 4
 -4 7 21 7339.81 921.492 2
 -4 -7 20 121.3 484.16 4
 -4 7 20 -237.172 378.563 2
 4 -7 -20 -222.005 465.388 3
 -4 7 19 21233.1 1501.93 2
 4 -7 -19 21890.6 1534.07 3
 -4 -7 19 18151.8 1663.91 4
 -4 7 18 17066.4 1298.01 2
 -4 -7 18 18100.6 1607.33 4
 4 -7 -18 17414.3 1314.3 3
 4 -7 -17 26962.3 1599.09 3
 -4 -7 17 26868 1877.28 4
 -4 7 17 23645.5 1490.56 2
 -4 -7 16 75681.2 3036.05 4
 4 -7 -16 72989 2568.13 3
 -4 7 16 68934.9 2541.39 2
 -4 7 15 2249.16 507.044 2
 -4 -7 15 2658.56 627.493 4
 4 -7 -15 2182.1 498.3 3
 -4 7 14 158860 3725.05 2
 4 -7 -14 157065 3611.72 3
 -4 -7 14 162149 4285.91 4
 -4 7 13 1091.57 360.772 2
 4 -7 -13 1745.87 482.497 3
 -4 -7 13 807.771 371.116 4
 -4 7 12 223968 4323.96 2
 -4 -7 12 224023 4831.5 4
 4 -7 -12 222137 4050.61 3
 -4 -7 11 368.601 336.687 4
 4 7 -11 34.2904 114.313 3
 4 -7 -11 -173.21 279.143 3
 -4 7 11 543.939 291.013 2
 -4 7 10 107171 2815.53 2
 -4 -7 10 103272 3045.88 4
 4 7 -10 103850 1462.93 3
 -4 7 9 18742.1 1151.4 2
 -4 -7 9 17951.8 1247.35 4
 4 7 -9 16874.6 489.471 3
 -4 -7 8 62639.6 1115.41 2
 -4 -7 8 57376.1 2116.49 4
 -4 7 8 58525 1989.72 2
 -4 -7 7 48686.8 1885.81 4
 -4 7 7 47664.9 1665.91 1
 -4 7 7 46524.9 1734.23 2
 -4 7 6 2844.65 452.195 2
 -4 7 6 2490.1 413.279 1
 4 -7 -6 2882.12 386.331 4
 4 7 -6 2718.05 178.737 3
 -4 -7 6 3062.61 515.343 4
 -4 7 5 10788.8 792.951 1
 4 7 -5 10272.4 364.665 3
 -4 7 5 11185.1 813.574 2
 -4 -7 5 11803.4 943.191 4
 4 -7 -5 11959.5 709.884 4
 4 7 -4 11077.2 413.748 3
 -4 7 4 10777.9 818.375 1
 4 -7 -4 12105.8 681.307 4
 -4 -7 4 11675.8 914.398 4
 -4 7 4 10626 810.828 2
 -4 -7 4 11578.2 425.971 3
 -4 -7 3 17178.9 1075.55 4
 -4 7 3 15681.6 963.819 2
 4 -7 -3 16967.3 789.847 4
 -4 7 3 16296.3 986.552 1
 -4 -7 3 16777.5 594.409 3
 4 7 -3 15563.1 534.875 3
 -4 -7 2 59056.1 1270.07 3
 -4 7 2 54848.4 1733.49 2
 -4 7 2 59749.9 1893.54 1
 4 -7 -2 59270.5 1474.2 4
 -4 -7 2 58790.1 2010.91 4
 -4 -7 1 25193.8 868.288 3
 4 -7 -1 25012.4 956.466 4
 -4 7 1 22687.5 1100.24 2
 -4 7 1 24707.4 1233.3 1
 -4 -7 1 22869.6 1264.77 4
 -4 -7 0 102028 1911.67 3
 -4 -7 0 103271 2710.6 4
 4 -7 0 101363 2033.51 4
 -4 7 0 99497.2 2300.82 2
 -4 7 0 101079 2519.5 1
 -4 -7 -1 339.16 156.607 3
 4 -7 1 559.85 193.124 4
 -4 7 -1 69.0177 172.352 2
 -4 7 -1 249.871 256.664 1
 -4 -7 -1 239.286 272.282 4
 -4 7 -2 41654.3 1652.81 1
 -4 -7 -2 43874.6 1797.51 4
 4 -7 2 45226.7 1423.8 4
 -4 -7 -2 41942.5 1314.75 3
 -4 7 -2 43190.1 1459.99 2
 -4 -7 -3 22627.8 997.543 3
 -4 7 -3 21131.7 1009.27 2
 4 -7 3 23758.7 1073.13 4
 -4 7 -3 21690.4 1224.39 1
 -4 -7 -3 22486.6 1322.6 4
 -4 7 -3 20726.7 861.006 3
 -4 7 -4 8078.28 564.012 3
 4 -7 4 8417.62 679.534 4
 -4 7 -4 7262.51 595.216 2
 -4 -7 -4 8287.84 656.123 3
 -4 -7 -5 92671.7 2234.7 3
 4 -7 5 90142.9 2323.98 4
 -4 7 -5 88032.2 2076.34 2
 -4 7 -5 86242.3 1931.3 3
 -4 7 -6 1392.28 275.049 3
 4 -7 6 2034.19 411.83 4
 -4 -7 -6 1711.12 358.888 3
 -4 7 -6 1625.05 310.657 2
 -4 -7 -7 14902.3 974.099 3
 4 -7 7 15483 1041.41 4
 -4 7 -7 14684 831.01 2
 -4 7 -7 15011.3 850.756 3
 -4 7 -8 27195.2 1184.67 3
 4 -7 8 30682.7 1509.71 4
 -4 -7 -8 30208.9 1403.44 3
 -4 7 -8 30078.8 1183.18 2
 -4 -7 -9 5380.28 645.568 3
 4 -7 9 6792.85 738.806 4
 -4 7 -9 6087.97 538.729 2
 -4 7 -9 6057.34 596.581 3
 -4 7 -10 29518.6 1336.96 3
 4 -7 10 29821.4 1603.17 4
 -4 -7 -10 30742.8 1552.95 3
 -4 7 -11 3.9914 232.217 3
 -4 -7 -11 70.266 361.514 3
 4 -7 11 -17.8462 313.286 4
 -4 7 -12 25655.7 1329.91 3
 -4 -7 -12 28785.8 1618.64 3
 4 -7 12 28130.9 1664.46 4
 -4 -7 -13 44361.5 2087.05 3
 4 -7 13 46392.9 2203.54 4
 4 -7 14 4356.71 719.058 4
 -4 -7 -14 4160.63 703.929 3
 -4 -7 -15 35753.4 1962.75 3
 4 -7 15 37777.2 2117.76 4
 -4 -7 -16 3796.91 734.193 3
 4 -7 16 3606.25 735.459 4
 4 -7 17 22685.2 1733.88 4
 -4 -7 -17 21060 1607.83 3
 -4 -7 -18 33360.3 2114.84 3
 4 -7 18 32601.7 2133.31 4
 -4 -7 -19 14795.6 1451.24 3
 4 -7 19 14044.4 1468.47 4
 -4 -7 -20 47657 2626.66 3
 4 -7 20 47428 2709.62 4
 4 -7 21 -498.715 381.85 4
 4 -8 -23 8935.39 1164.33 3
 -4 -8 23 9192.14 1333.41 4
 -4 -8 22 34573.3 2455.17 4
 4 -8 -22 32275.2 2041.35 3
 -4 -8 21 8253.63 1243.07 4
 4 -8 -21 9139.57 1089.22 3
 -4 8 21 9614.31 1092.98 2
 -4 -8 20 38981.1 2471.29 4
 4 -8 -20 40725.1 2179.9 3
 -4 8 20 37787.8 2101.82 2
 -4 -8 19 -253.669 537.772 4
 4 -8 -19 116.416 370.221 3
 -4 8 19 290.601 326.006 2
 -4 -8 18 54340.4 2817.94 4
 -4 8 18 54415.5 2411.45 2
 4 -8 -18 53319.1 2392.18 3
 -4 -8 17 9141.4 1185.07 4
 4 -8 -17 7736.19 898.968 3
 -4 8 17 7963.36 914.511 2
 -4 -8 16 28080.8 1905.71 4
 4 -8 -16 26820.4 1579.88 3
 -4 8 16 27315 1629.19 2
 -4 -8 15 21542 1674.57 4
 -4 8 15 21387.3 1455.03 2
 4 -8 -15 23232.7 1428.74 3
 -4 8 14 2747.73 561.287 2
 -4 -8 14 2728.1 706.899 4
 4 -8 -14 2828.52 520.585 3
 -4 -8 13 75814.8 2896.67 4
 4 -8 -13 75686.8 2425.96 3
 -4 8 13 71013.4 2551.55 2
 -4 8 12 5690.2 718.949 2
 4 -8 -12 5051.26 643.235 3
 -4 -8 12 4491.6 748.422 4
 -4 8 11 49467 2038.53 2
 -4 -8 11 51807.5 2283.65 4
 4 -8 -11 52523.8 1872.96 3
 -4 8 10 16616.9 1145.66 2
 -4 -8 10 17173.8 1286.11 4
 4 -8 -10 15627.4 997.53 3
 -4 8 9 32690.7 1587.39 2
 -4 -8 9 35107 1766.84 4
 -4 8 8 53417 1969.31 2
 -4 -8 8 49672.1 2064.5 4
 -4 -8 7 49511.7 2023.1 4
 -4 8 7 49837.7 1907.91 2
 4 -8 -7 51498.6 1668.6 4
 -4 8 7 50357.7 1798.5 1
 -4 8 6 101170 2616.64 1
 -4 8 6 105671 2695.69 2
 -4 -8 6 102879 2897.45 4
 4 -8 -6 103792 2341.69 4
 -4 -8 5 3037.58 547.539 4
 -4 8 5 2263.8 383.305 2
 -4 8 5 2325.48 416.674 1
 4 -8 -5 3397.78 437.883 4
 -4 8 4 58938.5 1986.58 1
 -4 -8 4 60185.4 2130.56 4
 4 -8 -4 61138.8 1676.55 4
 -4 -8 4 53755.1 901.781 3
 -4 8 4 60087.6 1944.13 2
 -4 8 3 4608.88 585.726 1
 -4 8 3 3895.79 517.307 2
 4 -8 -3 5003.93 484.946 4
 -4 -8 3 3640.27 547.05 4
 -4 -8 3 5248.3 328.165 3
 -4 -8 2 81682.3 1504.81 3
 -4 -8 2 77351.8 2448.76 4
 -4 8 2 76164.4 2141.78 2
 -4 8 2 76643.4 2300.74 1
 4 -8 -2 79697.4 1885.53 4
 -4 -8 1 14714 673.857 3
 -4 8 1 13216.5 867.953 2
 4 -8 -1 15268.9 814.534 4
 -4 8 1 13403.9 973.425 1
 -4 -8 1 13317.6 1017.95 4
 -4 -8 0 114.333 133.956 3
 -4 8 0 238.618 200.82 2
 4 -8 0 342.569 160.354 4
 -4 8 0 23.4447 269.578 1
 -4 -8 0 247.293 258.078 4
 -4 8 -1 14151.1 1008.99 1
 -4 -8 -1 15225.5 775.588 3
 -4 8 -1 13625.1 848.783 2
 4 -8 1 14773.7 856.498 4
 -4 -8 -1 15215.4 1132.82 4
 -4 8 -2 11832.9 955.443 1
 -4 -8 -2 12404.4 1036.7 4
 -4 8 -2 10654.6 768.289 2
 4 -8 2 12725.7 813.863 4
 -4 -8 -2 12956 738.307 3
 -4 8 -3 592.603 224.989 2
 -4 -8 -3 268.972 196.918 3
 4 -8 3 519.386 264.129 4
 -4 8 -3 65.1775 315.547 1
 -4 -8 -3 128.394 270.221 4
 -4 -8 -4 25939.1 1155.21 3
 -4 8 -4 23300 915.479 3
 4 -8 4 26318 1251.73 4
 -4 8 -4 24934.3 1127.3 2
 -4 -8 -4 24377 1460.31 4
 -4 -8 -5 1178.45 308.408 3
 4 -8 5 933.797 278.847 4
 -4 8 -5 915.218 250.049 2
 -4 8 -5 973.359 229.445 3
 4 -8 6 27369.7 1387.39 4
 -4 8 -6 22890.7 1043.82 2
 -4 -8 -6 25994 1252.73 3
 -4 8 -6 23027.3 986.346 3
 -4 -8 -7 16339.4 1035.89 3
 -4 8 -7 13859.1 808.855 2
 -4 8 -7 14777.6 825.301 3
 4 -8 7 15530.6 1104.3 4
 -4 -8 -8 21750 1226.18 3
 4 -8 8 23727.4 1367.18 4
 -4 8 -8 21116.6 990.57 2
 -4 8 -8 20485.8 1016.42 3
 -4 -8 -9 19241.7 1219.26 3
 4 -8 9 17926.7 1256.34 4
 4 -8 10 111.943 332.094 4
 -4 -8 -10 424.509 274.275 3
 4 -8 11 25261.6 1558.2 4
 -4 -8 -11 25295.6 1499.46 3
 -4 -8 -12 16006.4 1232.09 3
 4 -8 12 14798.4 1260.18 4
 4 -8 13 7557.97 934.01 4
 -4 -8 -13 6692.83 833.23 3
 -4 -8 -14 54916.6 2409.73 3
 4 -8 14 56813.9 2567.8 4
 4 -8 15 146.215 359.531 4
 -4 -8 -15 21.7183 335.541 3
 4 -8 16 49990.5 2543.87 4
 -4 -8 -16 47491.1 2364.92 3
 -4 -8 -17 10930.7 1205.42 3
 4 -8 17 11445.4 1290.35 4
 4 -8 18 30078 2083.44 4
 -4 -8 -18 30603.8 2028.9 3
 -4 -8 -19 14946.5 1493.19 3
 4 -8 19 16027.3 1572.96 4
 4 -8 20 3809.58 868.982 4
 4 -9 -22 1199.83 556.293 3
 -4 -9 22 1085.17 536.22 4
 -4 -9 21 51812.8 2979.64 4
 4 -9 -21 51699.2 2595.59 3
 -4 9 21 49059.3 2513.2 2
 -4 -9 20 -613.68 480.233 4
 4 -9 -20 162.442 442.552 3
 -4 9 20 596.628 543.786 2
 -4 -9 19 64697.8 3192.8 4
 4 -9 -19 67118.4 2764.45 3
 -4 9 19 67810.2 2848.65 2
 4 -9 -18 1997.25 544.965 3
 -4 -9 18 1674.24 568.014 4
 -4 9 18 1655.74 479.963 2
 -4 -9 17 44540.3 2521.68 4
 -4 9 17 41345.2 2195.58 2
 4 -9 -17 45739.4 2184.54 3
 -4 9 16 687.813 413 2
 -4 -9 16 -214.275 409.25 4
 4 -9 -16 107.463 327.409 3
 -4 -9 15 15474.4 1463.16 4
 4 -9 -15 15224.3 1202.23 3
 -4 9 15 14587.3 1216.4 2
 -4 9 14 1902.32 487.066 2
 -4 -9 14 2168.71 621.089 4
 4 -9 -14 2476 512.389 3
 -4 9 13 2104.35 508.566 2
 -4 -9 13 1265.6 474.655 4
 4 -9 -13 1248.02 379.391 3
 -4 9 12 1777.18 474.723 2
 -4 -9 12 1046.16 381.881 4
 4 -9 -12 1718.02 364.455 3
 -4 9 11 58437.4 2278.62 2
 4 -9 -11 59499.9 2066.04 3
 -4 -9 11 58155.5 2513.39 4
 -4 -9 10 1380.6 447.027 4
 4 -9 -10 1536.19 350.756 3
 -4 9 10 1474.51 465.008 2
 -4 9 9 81910.6 2624.51 2
 -4 -9 9 86700 2928.23 4
 4 -9 -9 91638.8 2406.59 3
 -4 9 8 273.801 308.192 1
 4 -9 -8 -145.094 287.328 4
 -4 9 8 642.037 315.341 2
 -4 -9 8 -87.2097 433.348 4
 -4 9 7 104884 2887.48 2
 4 -9 -7 111449 2672.65 4
 -4 -9 7 111195 3237.74 4
 -4 9 7 111067 2834.54 1
 -4 9 6 770.788 292.386 2
 4 -9 -6 1324.47 345.258 4
 -4 -9 6 1216.26 424.14 4
 -4 9 6 2010.8 507.711 1
 -4 -9 5 117594 3209.95 4
 -4 9 5 120585 2980.19 2
 4 -9 -5 119218 2607.7 4
 -4 9 5 121127 3002.6 1
 -4 9 4 1939.03 379.247 1
 -4 -9 4 1090.77 358.06 4
 -4 9 4 1988.84 395.455 2
 4 -9 -4 2137.76 362.902 4
 -4 9 3 65489.3 2126.44 2
 -4 9 3 69443.1 2310.93 1
 -4 -9 3 70005.6 2440.04 4
 4 -9 -3 74572.5 1958.9 4
 -4 -9 2 19659.5 700.502 3
 -4 -9 2 17326.2 1229.16 4
 -4 9 2 17349.6 1077.98 2
 -4 9 2 19747.2 1211.83 1
 4 -9 -2 19704 988.057 4
 -4 -9 1 13311.8 632.349 3
 -4 9 1 10808.3 840.772 2
 4 -9 -1 12745.2 814.468 4
 -4 -9 1 10430.9 953.347 4
 -4 9 1 12479.9 995.515 1
 4 -9 0 12133.8 798.533 4
 -4 -9 0 13582.7 686.853 3
 -4 9 0 10498 870.229 2
 -4 -9 0 10680.4 1002.17 4
 -4 9 0 10727.1 934.501 1
 -4 -9 -1 7821.56 888.533 4
 -4 -9 -1 9063.24 607.857 3
 -4 9 -1 7456.02 668.574 2
 4 -9 1 8809.11 713.418 4
 -4 9 -1 6827.31 757.886 1
 -4 9 -2 436.825 232.635 2
 -4 -9 -2 397.585 215.613 3
 4 -9 2 493.122 231.449 4
 -4 9 -2 183.455 295.365 1
 -4 -9 -2 592.051 397.448 4
 -4 9 -3 34888.1 1710.26 1
 4 -9 3 34617 1464.07 4
 -4 -9 -3 34661.5 1294.61 3
 -4 -9 -3 35678.3 1867.65 4
 -4 -9 -4 2593.04 406.036 3
 -4 9 -4 2229.07 371.364 2
 4 -9 4 2616.51 422.179 4
 -4 -9 -4 2438.12 541.097 4
 -4 9 -4 2291.54 567.199 1
 -4 9 -5 78942.3 2045.95 2
 -4 -9 -5 82742.1 2899.82 4
 4 -9 5 84890.1 2448.81 4
 -4 -9 -5 84029.3 2232.59 3
 4 -9 6 3382.78 564.393 4
 -4 -9 -6 2626.32 477.934 3
 -4 9 -6 2273.79 384.961 2
 4 -9 7 64117.2 2255.91 4
 -4 -9 -7 62786.2 2067.08 3
 -4 -9 -8 14004.9 1028.23 3
 4 -9 8 15210.5 1170.54 4
 4 -9 9 16773.8 1235.05 4
 -4 -9 -9 17162.5 1181.44 3
 4 -9 10 11135.2 1047.26 4
 -4 -9 -10 11013.9 988.913 3
 4 -9 11 1354.34 456.164 4
 -4 -9 -11 587.567 304.95 3
 4 -9 12 10226.8 1088.29 4
 -4 -9 -12 9550.38 961.116 3
 4 -9 13 39971.4 2137.13 4
 -4 -9 -13 36788.9 1948.06 3
 -4 -9 -14 5213.05 751.549 3
 4 -9 14 5387.05 818.306 4
 4 -9 15 43429.7 2361.83 4
 -4 -9 -15 43159.4 2232.93 3
 -4 -9 -16 410.826 349.967 3
 4 -9 16 258.681 479.038 4
 -4 -9 -17 44757.3 2430.91 3
 4 -9 17 48205.6 2603.4 4
 4 -9 18 1884.23 677.39 4
 -4 -9 -18 2056.21 644.46 3
 -4 -9 -19 30857.8 2142.08 3
 4 -9 19 31438.5 2219.21 4
 4 -9 20 5911.89 1022.65 4
 -4 -10 21 1304.46 524.294 4
 4 -10 -21 2445.1 712.369 3
 4 -10 -20 70495.2 2985.94 3
 -4 -10 20 73909.2 3535.84 4
 -4 10 20 66760.1 3059.44 2
 4 -10 -19 2690.15 601.115 3
 -4 -10 19 2017.48 772.697 4
 -4 10 19 2281.14 693.848 2
 -4 -10 18 66340.7 3259.11 4
 4 -10 -18 67336.2 2739.58 3
 -4 10 18 68788.4 2923.33 2
 -4 -10 17 919.603 526.953 4
 4 -10 -17 2167.47 518.11 3
 -4 10 17 2634.59 665.723 2
 -4 -10 16 20417.6 1737.2 4
 4 -10 -16 22604.3 1500.82 3
 -4 10 16 21393.9 1578.51 2
 -4 -10 15 8482.46 1138.52 4
 4 -10 -15 8749.65 918.952 3
 -4 10 15 8273.87 984.108 2
 -4 10 14 897.532 472.296 2
 -4 -10 14 1532.71 520.236 4
 4 -10 -14 566.787 276.183 3
 -4 10 13 3763.79 646.221 2
 -4 -10 13 5117.08 826.81 4
 4 -10 -13 5349.6 701.566 3
 -4 10 12 3711.65 663.136 2
 -4 -10 12 5063.53 814.302 4
 4 -10 -12 4281.22 623.911 3
 -4 -10 11 7279.34 979.446 4
 4 -10 -11 8097.88 765.274 3
 -4 10 11 7764.6 858.63 2
 -4 10 10 51417.5 2180.28 2
 4 -10 -10 55010.5 1959.94 3
 -4 -10 10 55041.4 2470.41 4
 4 -10 -10 56422.1 2135.63 4
 4 -10 -9 9142.05 794.129 3
 -4 10 9 8397.76 875.659 2
 -4 -10 9 9005.83 996.887 4
 4 -10 -9 8808.3 833.51 4
 -4 10 8 152771 3695.34 2
 -4 -10 8 157574 4081.74 4
 4 -10 -8 164270 3544.66 4
 4 -10 -8 158518 3199.2 3
 -4 10 8 152682 3518.7 1
 -4 10 7 9573.75 885.969 1
 -4 10 7 11482.5 990.34 2
 4 -10 -7 11340.3 880.379 4
 -4 -10 7 10671.2 1087.09 4
 4 -10 -7 12716.2 855.557 3
 -4 10 6 88519.5 2679.41 2
 -4 10 6 90159.1 2705.41 1
 -4 -10 6 92620.4 3009.39 4
 4 -10 -6 94103.1 2502.22 4
 -4 10 5 32134 1582.54 2
 -4 -10 5 34419.8 1811.37 4
 4 -10 -5 36702.5 1533.37 4
 -4 10 5 34487.4 1673.01 1
 -4 10 4 56032.2 2084.85 2
 -4 10 4 63158.6 2266.62 1
 -4 -10 4 62259.1 2416.68 4
 4 -10 -4 64429.4 1963.61 4
 -4 10 3 4695.51 614.929 1
 -4 10 3 5652.33 681.328 2
 -4 -10 3 5909.38 769.813 4
 4 -10 -3 7065.83 672.29 4
 -4 10 2 44337.9 1767.12 2
 -4 10 2 43608.8 1895.24 1
 -4 -10 2 44118.8 2045.09 4
 4 -10 -2 48210.3 1665.24 4
 -4 -10 1 246.143 397.449 4
 -4 10 1 1308.39 359.558 2
 4 -10 -1 1742.53 362.079 4
 -4 10 1 685.811 353.271 1
 -4 -10 0 -201.563 357.473 4
 -4 10 0 113.543 228.719 2
 -4 10 0 439.055 334.212 1
 4 -10 0 602.936 249.947 4
 -4 -10 -1 1808.77 523.678 4
 -4 10 -1 1791.33 471.402 1
 -4 -10 -1 2415.81 328.633 3
 -4 10 -1 1957.04 368.012 2
 4 -10 1 2303.67 407.71 4
 -4 10 -2 27833.4 1589.76 1
 -4 -10 -2 31267.5 1788.31 4
 -4 -10 -2 32268.3 1222.03 3
 4 -10 2 31507.2 1436.56 4
 -4 10 -2 26335.3 1275.79 2
 4 -10 3 7030.15 697.609 4
 -4 10 -3 7037.83 860.645 1
 -4 -10 -3 6960.47 926.425 4
 -4 10 -3 6574.96 642.859 2
 -4 -10 -3 8213.98 672.752 3
 -4 -10 -4 61552.8 1842.74 3
 -4 -10 -4 58298.7 2506.63 4
 4 -10 4 61804 2145.03 4
 -4 10 -4 57319.7 2350.68 1
 -4 10 -4 55146.4 1775 2
 -4 -10 -5 192.664 204.25 3
 -4 10 -5 370.483 207.564 2
 4 -10 5 954.467 303.973 4
 -4 -10 -5 926.633 530.223 4
 4 -10 6 84379.8 2660.44 4
 -4 -10 -6 82694.5 3112.4 4
 -4 -10 -6 84609.1 2376.56 3
 4 -10 7 101.531 346.405 4
 -4 -10 -7 304.759 223.62 3
 -4 -10 -7 -38.2385 428.75 4
 4 -10 8 14147.8 1153.15 4
 -4 -10 -8 12792 1012.78 3
 -4 -10 -9 4890.72 631.727 3
 4 -10 9 5538.87 745.641 4
 -4 -10 -10 970.209 282.867 3
 4 -10 10 574.601 332.933 4
 -4 -10 -11 4206.11 657.541 3
 4 -10 11 4620.66 720.08 4
 4 -10 12 16355 1386.58 4
 -4 -10 -12 16368.7 1264.69 3
 -4 -10 -13 10590.1 1061.47 3
 4 -10 13 10018.1 1102.29 4
 4 -10 14 41409.9 2270.79 4
 -4 -10 -14 39487.6 2100.56 3
 -4 -10 -15 8416.7 1046.81 3
 4 -10 15 7670.02 1032.7 4
 4 -10 16 49080 2593.27 4
 -4 -10 -16 47549.5 2460.01 3
 4 -10 17 63.6595 459.739 4
 -4 -10 -17 335.805 432.043 3
 4 -10 18 39287 2471.41 4
 -4 -10 -18 41215 2426.18 3
 4 -10 19 434.351 372.405 4
 -4 -11 20 95.6722 466.555 4
 -4 11 20 504.949 378.492 2
 4 -11 -20 -74.4486 438.493 3
 -4 -11 19 49051.6 2898.47 4
 4 -11 -19 49360.9 2451.28 3
 -4 11 19 44720.3 2508.11 2
 -4 -11 18 1661.15 563.095 4
 4 -11 -18 823.922 380.259 3
 -4 11 18 1576.31 550.784 2
 -4 11 17 17509.9 1543.27 2
 -4 -11 17 18934.8 1740.05 4
 4 -11 -17 18381.1 1450.6 3
 -4 -11 16 13158.6 1462.44 4
 4 -11 -16 14633.9 1260.89 3
 -4 11 16 13124.6 1297.5 2
 -4 -11 15 9244.99 1225.23 4
 4 -11 -15 10232.9 1017.82 3
 -4 11 15 8199.84 1032.77 2
 4 -11 -14 26309.4 1582.71 3
 -4 -11 14 27081.5 1954.92 4
 -4 11 14 25584.2 1701.29 2
 -4 11 13 -456.467 404.877 2
 -4 -11 13 -183.276 411.479 4
 4 -11 -13 -192.443 368.914 3
 4 -11 -12 24002.3 1417.46 3
 -4 -11 12 25277.4 1803.2 4
 -4 11 12 23319.9 1585.93 2
 4 -11 -11 14922.5 1061.38 3
 -4 -11 11 12995.7 1279.38 4
 -4 11 11 10902.4 1067.04 2
 4 -11 -11 15183.2 1213.93 4
 4 -11 -10 31878.6 1688.23 4
 -4 -11 10 28453.1 1838.13 4
 4 -11 -10 30001.4 1458.73 3
 -4 11 9 52107.2 2113.62 1
 -4 -11 9 56568.7 2555.44 4
 4 -11 -9 56029.3 1945.95 3
 4 -11 -9 57563 2233.37 4
 -4 11 9 49048.2 2178.88 2
 -4 11 8 4691.48 725.671 2
 -4 11 8 3734.97 629.985 1
 4 -11 -8 5255.14 634.545 3
 -4 -11 8 4105.44 758.175 4
 4 -11 -8 4122.57 585.712 4
 -4 11 7 151123 3834.71 2
 -4 11 7 155392 3712.56 1
 -4 -11 7 162643 4243.16 4
 4 -11 -7 164755 3596.88 4
 4 -11 -7 166267 3228.71 3
 -4 -11 6 2798.52 624.851 4
 -4 11 6 3319.64 640.996 2
 4 -11 -6 4001.18 557.369 4
 -4 11 6 2100.65 481.734 1
 4 -11 -6 3546.85 465.122 3
 -4 11 5 80343 2622.76 2
 4 -11 -5 87331.5 2114.93 3
 -4 -11 5 85978.9 3005.09 4
 -4 11 5 84414.2 2739.92 1
 4 -11 -5 86869.6 2476.07 4
 -4 11 4 7103.56 796.56 2
 -4 11 4 8686.45 914.795 1
 -4 -11 4 10025.3 1022 4
 4 -11 -4 9776.42 822.347 4
 -4 11 3 12959 1013.06 2
 -4 11 3 13978 1173.59 1
 -4 -11 3 16070.6 1315.23 4
 4 -11 -3 15457.6 1020.09 4
 -4 11 2 -84.6859 351.067 2
 4 -11 -2 181.557 224.063 4
 -4 -11 2 305.534 342.15 4
 -4 11 2 -400.393 501.193 1
 -4 11 1 -238.87 406.003 1
 -4 11 1 62.8665 289.827 2
 4 -11 -1 836.79 278.634 4
 -4 -11 1 957.837 455.15 4
 -4 11 0 506.273 339.431 1
 -4 11 0 1191.25 328.758 2
 4 -11 0 862.987 220.114 4
 -4 -11 0 741.762 421.521 4
 -4 11 -1 16917.5 1081.21 2
 4 -11 1 20036.1 1181.37 4
 -4 -11 -1 18692.3 1473.19 4
 -4 11 -1 17735.7 1352.27 1
 -4 11 -2 222.964 186.753 2
 4 -11 2 101.366 238.4 4
 -4 -11 -2 -166.09 393.386 4
 -4 11 -3 70744.7 2692.31 1
 4 -11 3 69575 2321.81 4
 -4 11 -3 62148.9 1994.78 2
 -4 -11 -3 66392.7 2763.96 4
 -4 11 -4 720.687 341.345 2
 -4 11 -4 387.58 489.224 1
 4 -11 4 431.57 269.187 4
 -4 -11 -4 380.286 423.957 4
 -4 -11 -5 77739.2 3072.73 4
 -4 -11 -5 78875.1 2237.09 3
 4 -11 5 76951.3 2562.32 4
 -4 11 -5 78129.5 2926.03 1
 -4 -11 -6 147.841 243.81 3
 4 -11 6 205.189 260.477 4
 -4 -11 -6 -485.486 543.315 4
 4 -11 7 46417.6 2097.42 4
 -4 -11 -7 46426.3 2452.74 4
 -4 -11 -7 47280.3 1873.09 3
 -4 -11 -8 518.585 271.024 3
 4 -11 8 742.996 397.043 4
 -4 -11 -8 444.982 382.836 4
 4 -11 9 9141.8 1022.36 4
 -4 -11 -9 7852.99 1107.87 4
 -4 -11 -9 8965.63 889.832 3
 -4 -11 -10 56.6704 261.407 3
 4 -11 10 640.344 443.976 4
 4 -11 11 1000.33 422.442 4
 -4 -11 -11 1077.61 364.745 3
 -4 -11 -12 108.634 340.117 3
 4 -11 12 643.142 352.066 4
 4 -11 13 24471.7 1761.05 4
 -4 -11 -13 22048.5 1566.48 3
 4 -11 14 4375.83 786.437 4
 -4 -11 -14 4855.22 816.488 3
 4 -11 15 55051.5 2732.04 4
 -4 -11 -15 55322.2 2614.53 3
 4 -11 16 -32.0222 420.336 4
 -4 -11 -16 -143.599 318.239 3
 -4 -11 -17 46228.2 2548.46 3
 4 -11 17 46257.3 2615.6 4
 4 -11 18 4688.37 912.096 4
 4 -12 -19 3612.26 691.021 3
 -4 -12 18 11799.9 1464.49 4
 4 -12 -18 13180.3 1270.67 3
 -4 12 18 10343.8 1250.43 2
 -4 -12 17 15209.8 1613.1 4
 4 -12 -17 14796.9 1306.42 3
 -4 12 17 13402.3 1385.01 2
 4 -12 -16 4690.85 709.088 3
 -4 -12 16 5970.77 1012.01 4
 -4 12 16 4846.31 871.04 2
 4 -12 -15 13162.8 1187.86 3
 -4 -12 15 14187.2 1485.05 4
 -4 12 15 13687.4 1321.91 2
 -4 12 14 1062.17 367.552 2
 -4 -12 14 1469.72 556.921 4
 4 -12 -14 1956.61 431.577 3
 -4 -12 13 18833 1689.8 4
 4 -12 -13 22343.8 1417.55 3
 4 -12 -13 24308.9 1672.47 4
 -4 12 13 17497.7 1483.17 2
 -4 12 12 1722.05 500.226 2
 -4 -12 12 2510.47 631.33 4
 4 -12 -12 2078.27 388.477 3
 4 -12 -12 2961.32 606.284 4
 -4 12 11 17860.4 1430.86 2
 -4 -12 11 20896.2 1655.4 4
 4 -12 -11 21738.9 1316.63 3
 4 -12 -11 21061.1 1487.4 4
 -4 -12 10 16938.8 1512.18 4
 4 -12 -10 17944 1174.59 3
 4 -12 -10 19156.8 1374.48 4
 -4 12 10 15538.8 1323.83 2
 -4 -12 9 12284.3 1286.99 4
 4 -12 -9 12031.9 1052.01 4
 -4 12 9 10332.1 980.81 1
 -4 12 9 9589.89 1030.25 2
 -4 -12 8 43602.7 2281.52 4
 4 -12 -8 45506.9 1983.28 4
 -4 12 8 37634.5 1853.97 1
 -4 12 8 37850.2 1970.69 2
 -4 12 7 492.157 365.939 2
 -4 12 7 -13.7804 326.042 1
 -4 -12 7 -219.165 432.509 4
 4 -12 -7 189.927 261.783 4
 -4 12 6 41678 2021.95 2
 -4 -12 6 45704.8 2290.73 4
 4 -12 -6 47637 1958.6 4
 -4 12 6 47218.7 2115.88 1
 -4 12 5 5283.76 729.588 2
 -4 -12 5 6410.1 896.235 4
 4 -12 -5 6641.79 756.805 4
 -4 12 5 4933.37 699.215 1
 -4 12 4 4757.13 725.22 1
 4 -12 -4 5550.57 673.483 4
 -4 -12 4 5792.56 926.1 4
 -4 12 4 3799.98 600.801 2
 -4 -12 3 1299.69 455.411 4
 -4 12 3 1095.39 368.25 1
 4 -12 -3 2014.01 423.383 4
 -4 12 3 1262.83 416.322 2
 -4 12 2 77.5838 414.848 1
 4 -12 -2 1050.14 328.295 4
 -4 -12 2 330.902 337.879 4
 -4 12 2 -99.9881 318.065 2
 -4 12 1 1099.95 414.324 1
 4 -12 -1 1011.17 324.109 4
 -4 12 1 678.869 265.243 2
 -4 -12 1 1402.5 507.378 4
 -4 12 0 17492.6 1183.08 2
 4 -12 0 22483.7 1303.16 4
 -4 -12 0 19805.2 1556.16 4
 -4 12 0 19762.3 1452.09 1
 -4 12 -1 5917.01 693.195 2
 -4 12 -1 7353.84 940.812 1
 -4 -12 -1 7540.41 1025.25 4
 4 -12 1 7230 792.881 4
 -4 12 -2 52981.9 1942.34 2
 4 -12 2 59894.4 2200.05 4
 -4 -12 -2 56704 2615.57 4
 -4 12 -2 57719.8 2496.82 1
 -4 12 -3 2077.49 625.668 1
 4 -12 3 2017.62 431.192 4
 -4 -12 -3 981.326 531.424 4
 -4 12 -4 79670.1 3016.33 1
 4 -12 4 82233.8 2709.09 4
 -4 -12 -4 79226.2 3185.77 4
 4 -12 5 -349.018 391.069 4
 -4 12 -5 618.251 484.824 1
 -4 -12 -5 88.3523 428.617 4
 4 -12 6 80662.1 2786.68 4
 -4 -12 -6 80393.6 3328.62 4
 -4 12 -6 83440.5 3195.33 1
 4 -12 7 1766.98 506.481 4
 -4 12 -7 1697.35 628.54 1
 -4 -12 -7 1241.13 636.95 4
 4 -12 8 50384.1 2317.16 4
 -4 -12 -8 47772.6 2671.67 4
 -4 12 -8 49767.5 2532.66 1
 4 -12 9 8024.55 938.015 4
 -4 -12 -9 6838.35 1055.03 4
 4 -12 10 2279.56 557.523 4
 -4 -12 -10 2754.73 551.387 3
 -4 -12 -10 2455.28 717.201 4
 -4 -12 -11 7149.34 1130.61 4
 -4 -12 -11 8033.52 920.55 3
 4 -12 11 8297.29 1040.9 4
 4 -12 12 3703.52 735.168 4
 -4 -12 -12 4895.3 761.657 3
 4 -12 13 1512.89 583.6 4
 -4 -12 -13 2891.2 615.324 3
 -4 -12 -14 38415.2 2158.02 3
 4 -12 14 39126.1 2340.03 4
 -4 -12 -15 -516.808 469.921 3
 -4 -12 -16 46708.5 2493.41 3
 4 -13 -18 15704.6 1394.12 3
 4 -13 -17 1167.7 469.51 3
 -4 13 16 34159.5 2224.6 2
 -4 -13 16 37368.4 2529.36 4
 4 -13 -16 38167.3 2065.6 3
 -4 -13 15 -206.837 485.655 4
 -4 13 15 -86.2317 549.696 2
 -4 13 14 12357.1 1357.82 2
 -4 -13 14 13726 1522.7 4
 -4 13 13 4206.67 771.943 2
 -4 -13 13 4774.47 916.984 4
 4 -13 -13 5776.82 856.221 4
 -4 13 12 12935.3 1318.19 2
 -4 -13 12 14369.1 1506.6 4
 4 -13 -12 16635.6 1396.05 4
 -4 13 11 3794.27 679.01 2
 4 -13 -11 5825.22 814.155 4
 -4 -13 11 5132.18 880.68 4
 -4 -13 10 16759.5 1578.9 4
 4 -13 -10 18880.8 1421.59 4
 -4 13 10 14873.2 1354.24 2
 4 -13 -9 10911.2 1032.35 4
 -4 -13 9 10533.2 1226.58 4
 -4 13 9 9834.55 1058.99 2
 -4 13 8 573.257 361.288 2
 -4 13 8 1533.38 480.37 1
 -4 -13 8 1128.87 570.744 4
 4 -13 -8 2304.86 534.293 4
 -4 13 7 7583.87 891.331 1
 -4 -13 7 9445.03 1143.74 4
 4 -13 -7 9898.39 963.776 4
 -4 13 7 7326.01 928.776 2
 -4 13 6 16867.3 1344.02 1
 -4 13 6 14372.5 1226.7 2
 -4 -13 6 18781.8 1547.62 4
 4 -13 -6 18938.7 1266.64 4
 -4 13 5 4253.51 686.041 2
 -4 -13 5 5690.19 903.328 4
 4 -13 -5 3688.19 581.837 4
 -4 13 5 4241.89 714.32 1
 -4 13 4 15500.3 1305.25 1
 -4 -13 4 17403.1 1516.8 4
 4 -13 -4 18759.3 1238.37 4
 -4 13 4 14881.9 1202.41 2
 -4 -13 3 492.556 367.94 4
 -4 13 3 283.988 289.271 2
 -4 13 3 -147.269 379.113 1
 4 -13 -3 -28.393 239.097 4
 -4 13 2 29100.5 1622.87 2
 -4 13 2 31147.5 1878.7 1
 4 -13 -2 34500.2 1695 4
 -4 -13 2 33740.4 2039.1 4
 -4 13 1 8887.87 924.989 2
 -4 -13 1 10424.5 1190.4 4
 4 -13 -1 11205.7 968.998 4
 -4 13 1 10117.6 1086.03 1
 -4 13 0 36681.1 1753.6 2
 -4 -13 0 40535.2 2268.76 4
 4 -13 0 43607.5 1914.34 4
 -4 13 0 37970.4 2084.47 1
 -4 -13 -1 49639.8 2520.78 4
 4 -13 1 49767.6 2072.62 4
 -4 13 -1 48071.7 2379.81 1
 4 -13 2 18109 1285.47 4
 -4 -13 -2 16620.1 1534.59 4
 -4 13 -2 18080.2 1548.23 1
 4 -13 3 57872.7 2334.63 4
 -4 -13 -3 55882.4 2725.66 4
 -4 13 -3 54700.2 2580.09 1
 -4 13 -4 2359.1 714.14 1
 4 -13 4 2487.02 524.835 4
 -4 -13 -4 1218.37 524.53 4
 -4 13 -5 66459.1 2954.98 1
 4 -13 5 70417.4 2658.75 4
 -4 -13 -5 69400.3 3116.99 4
 4 -13 6 985.324 415.352 4
 -4 -13 -6 492.629 502.819 4
 -4 13 -6 1508.86 503.908 1
 -4 13 -7 49758.9 2609.7 1
 4 -13 7 49298.9 2348.88 4
 -4 -13 -7 47317.2 2730.13 4
 -4 13 -8 17411.2 1637.01 1
 -4 -13 -8 16367.9 1648.64 4
 -4 13 -9 18575.9 1691.47 1
 -4 -13 -9 18179.6 1773.68 4
 -4 -13 -10 23549.3 2031.96 4
 -4 13 -10 24797.1 1988.89 1
 -4 -13 -11 436.762 492.93 4
 -4 13 -11 391.578 524.251 1
 -4 -13 -12 26376.5 2222.76 4
 -4 13 -12 28981.6 2187.68 1
 -4 -14 14 647.257 452.85 4
 -4 14 14 -104.326 518.704 2
 -4 14 13 25387.2 1903.15 2
 -4 -14 13 27395.4 2149.96 4
 -4 -14 12 8670.36 1230.73 4
 -4 14 12 7211.17 1005.9 2
 -4 -14 11 13949.2 1513.54 4
 -4 14 11 11984.8 1277.66 2
 -4 14 10 3970.03 751.337 2
 -4 -14 10 4141.51 813.693 4
 -4 14 9 3553.41 674.5 2
 -4 -14 9 2988.54 695.638 4
 -4 14 8 630.018 351.332 2
 -4 -14 8 1446.73 582.484 4
 -4 14 7 2958.58 650.937 2
 -4 -14 7 4122.61 823.67 4
 -4 14 6 2220.39 545.276 2
 -4 14 6 2339.53 571.488 1
 -4 -14 6 2041.1 634.04 4
 -4 -14 5 20747.4 1668.21 4
 -4 14 5 18804.2 1473.84 1
 -4 14 5 20409.3 1475.12 2
 -4 14 4 -356.311 308.983 2
 -4 -14 4 934.134 438.917 4
 -4 14 4 472.045 408.414 1
 -4 14 3 43879.4 2276.84 1
 -4 -14 3 39885.5 2305.25 4
 -4 14 3 36256.7 1903.87 2
 -4 14 2 1316.91 493.625 2
 -4 14 2 669.965 528.534 1
 -4 -14 2 -109.795 388.504 4
 -4 14 1 53066.6 2605.88 1
 -4 -14 1 52186.5 2666.64 4
 -4 14 1 48556.9 2106.12 2
 -4 -14 0 3375.26 715.254 4
 -4 14 0 3242.26 795.783 1
 -4 -14 -1 29858 2015.47 4
 -4 14 -1 32355.9 2038.49 1
 -4 -14 -2 31824.3 2131.4 4
 -4 14 -2 30887.5 2022.97 1
 -4 -14 -3 7998.57 1118.59 4
 -4 14 -3 8660.04 1103.7 1
 -4 -14 -4 34373.5 2308.61 4
 -4 14 -4 36841.9 2282.91 1
 -4 14 -5 736.895 429.285 1
 -4 -14 -5 583.331 506.441 4
 -4 -14 -6 30016.1 2185.31 4
 -4 14 -6 27993.2 2046.56 1
 -4 14 -7 8340.41 1164.97 1
 -4 -14 -7 9057 1295.69 4
 -4 14 -8 18257.1 1701.04 1
 -4 -14 -8 16252.5 1688.48 4
 -4 14 -9 20380 1816.94 1
 -4 -14 -9 19054 1826.02 4
 -4 -14 -10 6525.79 1187.11 4
 -4 -15 11 -635.286 558.138 4
 -4 15 11 -152.945 462.496 2
 -4 -15 10 640.256 403.415 4
 -4 15 10 1839.68 531.289 2
 -4 -15 9 174.237 432.965 4
 -4 15 9 -336.795 496.111 2
 -4 15 8 -93.4178 508.684 2
 -4 -15 8 155.536 410.399 4
 -4 15 7 -951.773 604.342 2
 -4 -15 7 -586.863 561.595 4
 -4 15 6 11469.9 1192.03 2
 -4 -15 6 14848.8 1501.54 4
 -4 15 5 96.9965 319.413 2
 -4 -15 5 -130.33 399.185 4
 -4 15 5 542.184 368.579 1
 -4 15 4 40421.6 2288.88 1
 -4 -15 4 44354.3 2561.77 4
 -4 15 4 37397.6 2028.9 2
 -4 15 3 399.622 400.506 1
 -4 15 3 605.256 411.054 2
 -4 -15 3 1.80041 401.757 4
 -4 -15 2 53160.6 2795.38 4
 -4 15 2 50075.7 2602.11 1
 -4 15 1 1700.24 662.279 1
 -4 -15 1 198.179 474.54 4
 -4 15 0 63564.4 2968.04 1
 -4 -15 0 66785.9 3117.79 4
 -4 -15 -1 529.451 428.396 4
 -4 15 -1 187.208 467.939 1
 -4 15 -2 14598.6 1462.3 1
 -4 -15 -2 15051.5 1524.9 4
 -4 15 -3 -108.866 538.006 1
 -4 -15 -3 253.707 457.511 4
 -4 15 -4 87.4823 439.02 1
 -4 -15 -4 1216.35 547.15 4
 -4 15 -5 1693.2 476.065 1
 -4 -15 -5 1799.01 708.778 4
 -4 -15 -6 1966.22 687.991 4
 -4 15 -6 925.551 440.504 1
 -4 -15 -7 2622.77 805.474 4
 -4 16 9 -766.334 582.605 2
 -4 16 8 969.08 363.413 2
 -4 16 7 14964.8 1418.02 2
 -4 -16 6 -97.4439 413.75 4
 -4 16 6 -736.366 478.358 2
 -4 16 5 37860.7 2199.23 2
 -4 -16 5 43872.9 2670.85 4
 -4 -16 4 -229.152 618.325 4
 -4 16 4 -188.699 370.44 1
 -4 -16 3 39120.5 2484.45 4
 -4 16 3 39962.7 2402.11 1
 -4 16 2 2045.81 694.057 1
 -4 -16 2 654.649 426.517 4
 -4 -16 1 64765 3161.71 4
 -4 16 1 65399.4 3099.83 1
 -4 -16 0 5635.81 938.038 4
 -4 16 0 5971.58 1047.07 1
 -4 16 -1 49355.1 2778.35 1
 -4 -16 -1 47572.1 2756.65 4
 -4 16 -2 13409.7 1492.9 1
 -4 -16 -2 13301.7 1514.97 4
 -4 17 2 22573.3 1898.48 1
 5 0 -28 19246 1592.34 3
 5 0 -27 -459.83 307.006 3
 -5 0 27 678.616 527.871 4
 5 0 -26 13671.2 1275.62 3
 -5 0 26 14744.7 1661.43 4
 -5 0 25 144.512 439.682 4
 5 0 -25 107.404 402.975 3
 -5 0 24 32892.3 2362.18 4
 5 0 -24 32450.4 1862.12 3
 5 0 -23 657.847 407.728 3
 -5 0 23 157.809 611.717 4
 -5 0 22 40181.1 2473.38 4
 5 0 -22 37429.7 1899.27 3
 5 0 -21 -111.967 320.783 3
 -5 0 21 -106.752 410.009 4
 5 0 -20 -553.09 430.769 3
 -5 0 20 172.236 434.238 4
 -5 0 20 33.3394 259.607 2
 -5 0 19 -190.094 243.194 2
 5 0 -19 -490.455 321.686 3
 -5 0 18 98855.6 2229.03 2
 -5 0 18 99123.6 3434.31 4
 5 0 -18 92708.8 2681.02 3
 -5 0 17 -309.167 284.737 2
 5 0 -17 -360.367 374.622 3
 -5 0 17 119.033 370.076 4
 -5 0 16 108070 2250.05 2
 -5 0 16 109351 3404.18 4
 5 0 -16 107003 2660.01 3
 5 0 -16 105525 2462.48 5
 -5 0 15 -180.543 221.769 2
 5 0 -15 -298.671 249.545 5
 -5 0 15 -176.389 347.561 4
 -5 0 14 405087 4658.65 2
 -5 0 14 406317 6431.93 4
 5 0 -13 -688.625 251.336 5
 -5 0 13 -90.2873 225.317 2
 -5 0 13 108.151 277.02 4
 -5 0 12 386224 5700.31 4
 -5 0 12 371616 4298.89 2
 5 0 -12 373833 4776.69 5
 5 0 -11 -132.917 217.565 5
 -5 0 11 72.8235 161.526 2
 -5 0 11 134.943 263.923 4
 -5 0 10 91313.2 2369.18 4
 -5 0 10 86865.8 1783.65 2
 5 0 -10 92323.9 2064.67 5
 -5 0 9 -119.983 256.986 4
 -5 0 9 328.96 221.728 2
 -5 0 8 17746.8 793 2
 -5 0 8 18056.4 914.903 4
 -5 0 7 608.631 210.229 4
 -5 0 7 436.667 212.215 2
 -5 0 6 75546.8 1565.97 4
 -5 0 6 72611 1621.59 2
 -5 0 5 584.472 162.426 4
 5 0 -5 582.761 152.315 4
 -5 0 5 495.63 182.987 2
 -5 0 4 253839 2691.85 4
 5 0 -4 259493 2583.4 4
 -5 0 4 251046 3222.98 3
 -5 0 3 -12.3381 163.76 3
 5 0 -3 122.947 104.575 4
 -5 0 3 36.3454 75.5571 4
 -5 0 2 912302 6766.05 4
 -5 0 2 891015 7814.51 3
 -5 0 1 326.609 196.061 3
 -5 0 0 619124 6047.83 3
 -5 0 -1 38.2011 224.809 3
 -5 0 -2 418043 4785.49 3
 -5 0 -3 -122.015 253.414 3
 -5 0 -4 149564 2717.91 3
 -5 0 -5 885.479 326.73 3
 -5 0 -5 91.2098 217.053 1
 -5 0 -6 25900.9 1164.96 3
 -5 0 -6 26597.9 969.725 1
 -5 0 -7 179.52 229.273 3
 -5 0 -7 409.455 175.989 1
 -5 0 -8 3786.04 500.495 3
 -5 0 -8 4208.86 422.259 1
 -5 0 -9 -23.3622 234.087 3
 -5 0 -9 143.729 172.616 1
 -5 0 -10 6153.33 519.372 1
 -5 0 -10 5767.26 656.367 3
 -5 0 -11 117.96 183.458 1
 -5 0 -11 -146.439 267.154 3
 -5 0 -12 24152.9 1394.65 3
 -5 0 -12 26756.5 1069.68 1
 -5 0 -13 468.81 226.072 1
 -5 0 -13 -445.615 362.283 3
 -5 0 -14 43673.4 1988.61 3
 -5 0 -15 -207.011 303.016 3
 -5 0 -16 10557.7 1055.43 3
 -5 0 -17 -211.548 361.72 3
 -5 0 -18 2595.34 528.721 3
 -5 0 -19 -216.607 455.967 3
 -5 0 -20 1790.97 503.642 3
 -5 0 -21 -401.555 384.399 3
 -5 0 -22 25082.6 1920.42 3
 5 1 -28 410.711 302.661 3
 5 1 -27 21637.3 1647.79 3
 -5 -1 27 24081.5 2206.5 4
 5 -1 -27 21904.8 1672 3
 5 1 -26 1219.7 448.045 3
 5 -1 -26 818.954 400.037 3
 -5 -1 26 775.688 598.101 4
 -5 -1 25 32497.9 2479.3 4
 5 1 -25 28104.3 1756.52 3
 5 -1 -25 28547.8 1837.75 3
 -5 1 24 718.386 502.435 4
 5 1 -24 1381.61 445.522 3
 -5 -1 24 240.052 475.456 4
 5 -1 -24 897.165 382.965 3
 5 -1 -23 20301.6 1449.7 3
 5 1 -23 18837.8 1356.28 3
 -5 1 23 21453.7 1895.72 4
 -5 -1 23 20978.3 1857.31 4
 -5 -1 22 2946.24 838.422 4
 5 -1 -22 2775.36 582.659 3
 -5 1 22 2507.14 666.041 4
 5 1 -22 2236.64 477.715 3
 -5 1 21 2942.62 750.192 4
 -5 -1 21 2452.89 685.342 4
 5 1 -21 2485.85 481.548 3
 5 -1 -21 3076.72 549.095 3
 -5 1 21 2103.02 379.688 2
 5 -1 -20 13559.5 1107.01 3
 5 1 -20 14734.8 1097.46 3
 -5 1 20 14459.8 1416.89 4
 -5 1 20 15572.2 983.051 2
 -5 -1 20 15812.5 1487.23 4
 -5 -1 19 12639.8 1340.26 4
 5 -1 -19 11760.7 986.051 3
 -5 -1 19 12587.9 747.147 2
 -5 1 19 12870.2 866.14 2
 5 1 -19 10175.6 897.309 3
 -5 1 19 12528.8 1307.99 4
 -5 1 18 747.946 262.629 2
 -5 -1 18 259.81 371.552 4
 5 -1 -18 758.651 266.248 5
 5 -1 -18 371.804 269.426 3
 5 1 -18 50.7054 327.915 3
 -5 1 18 1142.01 550.196 4
 -5 -1 18 626.829 207.556 2
 -5 1 17 76580.8 2898.99 4
 5 -1 -17 81864.7 2120.9 5
 -5 1 17 82633.3 2103.65 2
 5 1 -17 77439 2300.09 3
 5 -1 -17 78619.8 2404 3
 -5 -1 17 80381.7 3053.42 4
 -5 -1 17 80913 1821.02 2
 -5 1 16 5644.95 552.927 2
 -5 -1 16 5352.25 462.699 2
 5 -1 -16 4857.59 524.74 5
 -5 -1 16 4653.05 709.73 4
 -5 1 16 5460.87 869.309 4
 5 1 -16 4590.86 552.491 3
 5 -1 -16 4399.39 566.899 3
 -5 -1 15 174871 2676.15 2
 -5 1 15 180335 3089.26 2
 5 1 -15 174161 3278.2 5
 -5 -1 15 183696 4235.71 4
 5 -1 -15 175764 3140.85 5
 -5 1 15 178602 4187.28 4
 -5 -1 14 18449.4 1286.01 4
 -5 -1 14 19515.6 814.71 2
 -5 1 14 19552.4 950.332 2
 5 -1 -14 18698.4 953.607 5
 -5 1 14 18097 1272.58 4
 5 1 -14 16877.7 956.499 5
 -5 -1 13 254763 3247.64 2
 5 1 -13 255383 3928.59 5
 -5 1 13 269329 4775.85 4
 -5 -1 13 261679 4782.36 4
 -5 1 13 262575 3699.42 2
 5 -1 -13 252190 3801.26 5
 -5 1 12 49238 1452.48 2
 -5 1 12 50763.4 1905.07 4
 -5 -1 12 47204.5 1901.91 4
 5 -1 -12 48354.4 1506.49 5
 -5 -1 12 50005.1 1260.98 2
 5 1 -12 48730.7 1571.62 5
 5 1 -11 167435 2988.62 5
 -5 1 11 163775 2740.45 2
 -5 -1 11 165633 3422.08 4
 -5 -1 11 168727 2447.38 2
 -5 1 11 172519 3423.05 4
 5 1 -10 24908.4 1084.94 5
 -5 1 10 23790.8 988.936 2
 -5 -1 10 23098.5 1196.08 4
 -5 -1 10 23787.2 855.181 2
 -5 1 10 23746.8 1200.84 4
 -5 1 9 40214 1272.39 2
 -5 1 9 43819.7 1486.63 4
 -5 -1 9 42215.4 1511.27 4
 5 1 -9 41809.6 1385.79 5
 -5 -1 9 40891.1 1120.49 2
 -5 1 8 24546.5 961.453 2
 -5 1 8 23867.7 1016.24 4
 -5 -1 8 23198.3 1062.17 4
 5 1 -8 24562.4 1040.14 5
 -5 -1 8 22559.9 837.14 2
 -5 1 7 194.317 208.826 2
 5 1 -7 308.292 182.861 5
 -5 1 7 444.208 156.382 4
 -5 -1 7 390.617 206.538 4
 -5 -1 7 576.459 187.704 2
 -5 1 6 74078.2 1488.53 4
 -5 -1 6 72663.6 1561.46 2
 -5 -1 6 75178.7 1654.68 4
 -5 1 6 71906.1 1685.62 2
 -5 -1 5 177676 2487.78 4
 -5 1 5 178114 2785.28 2
 5 -1 -5 181347 2009.69 4
 -5 1 5 174898 2181.53 4
 -5 1 4 89007.8 1884.46 2
 -5 1 4 89788.7 1256.12 4
 -5 -1 4 86842.2 1572.24 4
 5 -1 -4 88086.6 1109.68 4
 -5 -1 4 89199 1729.34 3
 -5 1 3 124592 2362.79 2
 -5 -1 3 129471 1879.77 4
 -5 1 3 123676 1325.9 4
 5 1 -3 136935 1926.13 4
 5 -1 -3 125010 1256.24 4
 -5 1 3 130908 2207.26 3
 -5 -1 3 130780 2158.37 3
 -5 1 2 6183.55 229.235 4
 -5 -1 2 6100.7 395.946 4
 -5 1 2 6707.67 511.783 3
 -5 -1 2 6193.96 489.283 3
 -5 -1 1 293644 3642.7 3
 -5 1 1 293834 3706.1 3
 -5 -1 1 295648 3238.57 4
 -5 -1 0 19867.8 863.212 3
 -5 1 0 19513.1 589.317 4
 -5 1 0 19846.7 870.771 3
 -5 1 -1 435493 4834.52 3
 -5 -1 -1 434750 4805.32 3
 -5 1 -1 422749 4117.44 4
 -5 -1 -2 5137.34 474.946 3
 -5 1 -2 6021.39 520.367 3
 -5 1 -2 6207.3 508.318 1
 -5 1 -3 193902 2876.65 1
 -5 1 -3 187758 3055.27 3
 -5 -1 -3 191202 3049.13 3
 -5 1 -4 48779.4 1387.17 1
 -5 1 -4 49016.5 1498.07 3
 -5 -1 -4 48452.5 1533.49 3
 -5 1 -5 2257.93 416.346 3
 -5 1 -5 2168.14 341.158 1
 -5 -1 -5 2441.93 404.942 3
 -5 1 -6 40131.1 1271.66 1
 -5 -1 -6 37386 1425.51 3
 -5 1 -6 37461.2 1416.62 3
 -5 -1 -7 582.27 228.93 3
 -5 1 -7 1253.93 305.632 3
 -5 1 -7 1128.16 265.632 1
 -5 -1 -8 12712.2 898.03 3
 -5 1 -8 11917.9 712.985 1
 -5 1 -8 11261.5 804.053 3
 -5 1 -9 20380.1 1137.63 3
 -5 -1 -9 20550.8 825.066 1
 -5 1 -9 21322.1 954.519 1
 -5 -1 -9 18261.7 1098.66 3
 -5 1 -10 16184.8 1060.13 3
 -5 -1 -10 16957.2 752.025 1
 -5 -1 -10 17562.6 1132.75 3
 -5 1 -10 17938 898.011 1
 -5 1 -11 23279.8 1324.83 3
 -5 1 -11 24560.3 1067.53 1
 -5 -1 -11 23683.2 898.071 1
 -5 -1 -12 29000.8 1555.92 3
 -5 1 -12 28248.4 1190.96 1
 -5 1 -12 24577.1 1396.97 3
 -5 -1 -12 28029.4 985.893 1
 -5 1 -13 49335.6 2029.59 3
 -5 1 -13 53180.6 1658.14 1
 -5 -1 -13 49856.5 2096.79 3
 -5 1 -14 12534.3 1078.42 3
 -5 1 -14 14337.4 877.034 1
 -5 -1 -14 12394.5 1113.52 3
 -5 -1 -15 37374.6 1914.02 3
 -5 1 -15 33309.2 1809.11 3
 -5 1 -16 1574.76 507.366 3
 -5 -1 -16 1849.2 537.343 3
 -5 1 -17 2419.84 621.458 3
 -5 -1 -17 2611.78 559.123 3
 -5 1 -18 3344.06 663.149 3
 -5 -1 -18 2590.76 591.672 3
 -5 1 -19 501.973 365.844 3
 -5 -1 -19 -819.826 560.65 3
 -5 1 -20 216.998 368.13 3
 -5 -1 -20 248.893 351.758 3
 -5 -1 -21 13948.9 1414.81 3
 -5 1 -21 15390.6 1471.6 3
 -5 -1 -22 -445.877 518.575 3
 -5 1 -22 -521.751 525.383 3
 -5 1 -23 24913.2 1941.84 3
 5 2 -28 10597.3 1185.88 3
 -5 -2 27 19.5938 487.252 4
 5 2 -27 -286.823 314.861 3
 5 2 -26 30576.8 1828.7 3
 5 -2 -26 34395.3 2089.31 3
 -5 -2 25 2305.87 753.306 4
 5 2 -25 1048.31 476.778 3
 5 -2 -25 1520.98 607.64 3
 5 2 -24 23403.7 1532.8 3
 5 -2 -24 25153 1699.52 3
 -5 -2 23 9886.4 1339.34 4
 5 -2 -23 9420.69 1018.89 3
 5 2 -23 8392.05 898.096 3
 -5 -2 22 14224.9 1517.93 4
 5 2 -22 10018 982.129 3
 5 -2 -22 12509.8 1154.41 3
 -5 2 22 13005.2 983.228 2
 -5 -2 21 27147.8 2001.33 4
 5 2 -21 22864.4 1383.39 3
 5 -2 -21 23799 1520.35 3
 -5 2 21 26435.4 1374.35 2
 -5 -2 20 -648.024 462.315 4
 -5 2 20 506.061 374.508 4
 5 2 -20 146.718 237.961 3
 5 -2 -20 -144.206 365.7 3
 -5 2 20 -243.585 294.552 2
 -5 2 19 30480 2002.37 4
 5 -2 -19 31008.5 1311.45 5
 5 -2 -19 31739.1 1653.05 3
 5 2 -19 31473.1 1535.88 3
 -5 -2 19 33173.6 2098.8 4
 -5 2 19 32665.3 1451.28 2
 -5 2 18 18571.9 1521.51 4
 -5 -2 18 20236.9 1567.82 4
 5 -2 -18 18343 987.768 5
 5 2 -18 16529.7 1049.78 3
 5 -2 -18 17759.7 1195.71 3
 -5 2 18 18865.9 1095.46 2
 -5 2 17 6863.94 916.565 4
 -5 -2 17 9857.7 1085.34 4
 5 -2 -17 7029.95 760.598 3
 5 -2 -17 8334.92 667.433 5
 -5 -2 17 9048.59 546.122 2
 5 2 -17 7190.14 691.45 3
 -5 2 17 8139.27 700.074 2
 5 -2 -16 77375.3 2000.39 5
 -5 2 16 72797.5 2721.24 4
 -5 -2 16 74802.9 2783.27 4
 -5 2 16 75779.3 2093.47 2
 5 -2 -16 70266.2 2262.33 3
 5 2 -16 71647.6 2082.94 3
 -5 -2 16 75849.2 1556.89 2
 -5 -2 15 993.322 180.134 2
 -5 2 15 1239.08 449.365 4
 -5 -2 15 963.123 332.296 4
 -5 2 15 709.614 202.435 2
 5 2 -15 1158.1 292.591 3
 5 -2 -15 768.326 210.407 5
 5 -2 -14 96508.6 2198.8 5
 -5 -2 14 101722 1757.62 2
 -5 2 14 101455 2332.57 2
 -5 -2 14 101390 3024.3 4
 -5 2 14 98706.3 2918.97 4
 -5 -2 13 26811.3 1494.37 4
 -5 2 13 28009.7 1170.64 2
 5 2 -13 24943.4 1185.75 5
 -5 -2 13 27958.7 857.603 2
 -5 2 13 25362.9 1401.98 4
 5 -2 -13 26028.5 1090.83 5
 5 2 -12 87100.5 2190.52 5
 -5 2 12 87917.2 2074.25 2
 -5 2 12 88042.9 2504.08 4
 -5 -2 12 88884.4 1571.85 2
 -5 -2 12 90617.1 2634.21 4
 -5 2 11 117320 2789.28 4
 -5 2 11 120677 2438.58 2
 -5 -2 11 123926 2952.75 4
 -5 -2 11 122045 1875.54 2
 5 2 -11 116478 2518.75 5
 -5 -2 10 40542.1 1029.44 2
 -5 -2 10 39045.1 1599.8 4
 -5 2 10 41394.7 1506.43 4
 -5 2 10 39634.1 1343.93 2
 5 2 -10 39252.7 1423.6 5
 -5 -2 9 135842 2017.95 2
 -5 -2 9 137433 2883.42 4
 -5 2 9 134517 2517.41 2
 -5 2 9 136072 2637.47 4
 5 2 -9 140554 2695.27 5
 5 2 -8 22023.2 1017.98 5
 -5 2 8 20131.3 910.457 4
 -5 2 8 19719.2 918.536 2
 -5 -2 8 20838.8 1037.48 4
 -5 -2 8 20390.4 764.088 2
 -5 -2 7 135516 2124.11 2
 -5 2 7 140432 2249.41 4
 -5 2 7 140922 2537.59 2
 5 2 -7 142315 2619.02 5
 -5 -2 7 140652 2587.65 4
 5 -2 -6 6460 374.378 4
 -5 2 6 6405.8 396.143 4
 -5 -2 6 6243.28 504.297 4
 5 2 -6 7018.13 551.785 5
 -5 2 6 6479.7 532.319 2
 5 -2 -5 188155 1966.14 4
 -5 -2 5 183376 2718.67 4
 5 2 -5 184042 2904.96 5
 -5 2 5 175321 2001.31 4
 -5 2 5 178901 2883.89 2
 5 2 -4 177296 2771.4 5
 -5 2 4 172504 2856.05 2
 -5 -2 4 176660 2573.23 4
 -5 -2 4 176165 2499.56 3
 -5 2 3 123964 2350.92 2
 -5 -2 3 117970 2038.87 4
 -5 2 3 119802 2171.68 3
 -5 -2 3 122009 2065.36 3
 -5 2 2 88393.7 1975.27 2
 -5 -2 2 87962.1 1721.25 4
 -5 2 2 85004.9 1797.26 3
 -5 -2 2 85601.7 1748.01 3
 -5 -2 1 118380 2133.87 3
 -5 2 1 120160 2370.36 2
 -5 -2 1 118881 2074.01 4
 -5 2 1 121365 2207.52 3
 -5 -2 0 76706.4 1736.7 3
 -5 2 0 79078.4 1216.17 4
 -5 2 0 75779.5 1788.23 1
 -5 2 0 75841.1 1751.64 3
 -5 2 -1 1557.21 277.732 3
 -5 -2 -1 1610.46 288.996 3
 -5 2 -1 2106.2 233.428 4
 -5 2 -1 1746.88 338.663 1
 -5 2 -2 169214 2805.14 3
 -5 -2 -2 169032 2763.47 3
 -5 2 -2 173128 2822.81 1
 5 -2 2 165462 2250 4
 -5 2 -3 29647.3 1154.89 3
 5 -2 3 29799.4 969.333 4
 -5 -2 -3 29114.9 1150.4 3
 -5 2 -3 30562.4 1151.61 1
 -5 2 -4 53490.8 1578.28 3
 5 2 4 50208.8 1103.86 1
 -5 2 -4 53005.8 1506.8 1
 5 -2 4 52707.8 1422.5 4
 -5 -2 -4 53083.2 1580.85 3
 -5 -2 -5 33549.7 1309.96 3
 -5 2 -5 33111.8 1276.14 3
 -5 2 -5 34860.1 1231.22 1
 5 2 5 32757.3 845.793 1
 5 -2 5 34441.1 1222.75 4
 -5 -2 -6 1579.67 360.019 3
 -5 2 -6 2262.93 354.16 1
 -5 2 -6 971.528 281.224 3
 5 -2 6 2013.79 338.519 4
 -5 -2 -7 144734 3007.18 3
 5 -2 7 148060 2970.94 4
 -5 2 -7 150120 2736.37 1
 -5 2 -7 144545 2926.34 3
 -5 -2 -8 20360 1133.4 3
 -5 2 -8 21282.5 1006.95 1
 5 -2 8 22073.6 1183.7 4
 -5 2 -8 19768.4 1103.68 3
 5 -2 9 91237.7 2535.28 4
 -5 -2 -9 89412.8 2497.21 3
 -5 2 -9 89176 2411.11 3
 -5 2 -9 92289.7 2182.26 1
 -5 -2 -10 74780.1 2356.85 3
 5 -2 10 79862.6 2458.56 4
 -5 2 -10 71872.5 2250.24 3
 -5 2 -10 77440.6 2023.08 1
 -5 2 -11 47659.3 1852.16 3
 5 -2 11 50112.4 2023.32 4
 -5 -2 -11 48070.7 1934.67 3
 -5 2 -11 50696.6 1675.32 1
 -5 2 -12 81558.8 2173.28 1
 5 -2 12 78919.4 2641.91 4
 -5 -2 -12 75829.8 2554.66 3
 -5 2 -12 77458.4 2441.12 3
 -5 2 -13 16279.4 997.126 1
 -5 2 -13 12795.5 1064.46 3
 -5 -2 -13 13460.8 1144.93 3
 5 -2 13 15722.9 1271.3 4
 -5 -2 -14 61418.2 2406.56 3
 -5 2 -14 59591.7 1933.97 1
 -5 -2 -15 -166.402 315.161 3
 -5 2 -15 3.86038 278.417 1
 -5 2 -15 16.0729 379.599 3
 -5 -2 -16 11814.6 1156.78 3
 -5 2 -16 14433.3 1244.05 3
 -5 2 -17 8884.23 1000.8 3
 -5 -2 -17 7186.71 956.293 3
 -5 2 -18 9928.34 1068.64 3
 -5 -2 -18 10937.6 1185.87 3
 -5 -2 -19 2124.26 588.901 3
 -5 2 -19 1318.26 520.001 3
 -5 2 -20 -240.076 314.494 3
 -5 -2 -20 125.947 406.959 3
 -5 2 -21 2921.68 682.73 3
 -5 -2 -21 3895.27 739.93 3
 -5 2 -22 28984 2048.93 3
 -5 -2 -22 30385.7 2153.8 3
 -5 2 -23 241.847 352.741 3
 5 3 -26 595.436 388.175 3
 5 -3 -26 1944.32 591.901 3
 -5 -3 26 1694.72 610.86 4
 5 3 -25 17928.1 1364.9 3
 5 -3 -25 21883.6 1677.33 3
 -5 -3 25 23220.8 2092.86 4
 5 -3 -24 5878.71 855.704 3
 -5 -3 24 7436.39 1201.82 4
 5 3 -24 5162.05 714.729 3
 5 3 -23 28294 1602.64 3
 5 -3 -23 30123.7 1866.7 3
 -5 -3 22 20849.3 1847.17 4
 5 3 -22 18221.3 1251.25 3
 5 -3 -22 20388.4 1481.86 3
 -5 3 22 20831 1304.97 2
 5 -3 -21 11141 1101.08 3
 -5 -3 21 12957.5 1456.44 4
 5 3 -21 10904.5 948.387 3
 -5 3 21 12593 992.261 2
 -5 3 20 51261.4 1973.27 2
 -5 -3 20 51988.6 2685.17 4
 5 -3 -20 50425.2 2183.94 3
 5 3 -20 46371.5 1863.53 3
 -5 3 19 1096.62 337.939 2
 -5 -3 19 1279.81 531.275 4
 5 3 -19 667.771 260.693 3
 5 -3 -19 841.549 397.408 3
 5 -3 -19 1129.76 278.72 5
 -5 -3 18 24486.5 1740.23 4
 5 -3 -18 23466.9 1103.32 5
 5 3 -18 21429.3 1183.79 3
 5 -3 -18 24080.5 1429.12 3
 -5 3 18 22968.7 1244.2 2
 5 -3 -17 3345.36 419.983 5
 -5 3 17 2733.02 455.323 2
 5 3 -17 3179.72 447.114 3
 -5 -3 17 3675.35 710.5 4
 5 -3 -17 4596.78 634.526 3
 -5 3 16 12083.2 896.648 2
 -5 -3 16 13527 1241.27 4
 5 3 -16 11837.5 824.416 3
 5 -3 -16 12965.9 996.94 3
 -5 -3 16 13396 558.531 2
 5 -3 -16 12811.1 807.113 5
 -5 3 15 9125.22 741.621 2
 -5 -3 15 9991.92 462.888 2
 5 -3 -15 9983.09 699.018 5
 -5 -3 15 8774.62 981.789 4
 5 3 -15 8358.42 645.752 3
 -5 3 14 1785.47 350.183 2
 -5 -3 14 1683.7 188.951 2
 -5 3 13 30367.7 1311.56 2
 -5 -3 13 30074.8 1601.03 4
 -5 -3 13 33733.8 830.434 2
 -5 -3 12 71576.1 1249.49 2
 -5 -3 12 67292.2 2329.45 4
 -5 3 12 68799.5 1936.25 2
 -5 3 11 2629.45 413.112 2
 -5 -3 11 3272.28 536.21 4
 -5 -3 11 3149.81 258.941 2
 5 3 -10 342403 4672.95 5
 -5 -3 10 338574 5086.95 4
 -5 -3 10 332485 3340.37 2
 -5 3 10 336022 4539.67 2
 -5 -3 9 2316.26 245.095 2
 5 3 -9 1483.24 289.842 5
 -5 -3 9 1995.87 420.613 4
 -5 3 9 1824.27 369.132 2
 -5 3 8 129000 2537.86 2
 -5 -3 8 123222 1894.73 2
 5 3 -8 128045 2560.88 5
 -5 -3 8 125510 2706.26 4
 5 3 -7 2855.08 411.724 5
 -5 -3 7 2962.07 417.725 4
 -5 3 7 3254.35 428.271 2
 5 -3 -6 235432 2630.26 4
 -5 -3 6 236815 3502.98 4
 -5 3 6 228895 3494.03 2
 5 3 -6 237601 3496.65 5
 -5 3 5 9362.8 665.752 2
 5 3 -5 10165.9 679.306 5
 -5 -3 5 9450.32 669.202 4
 -5 -3 5 9947.97 537.023 3
 5 -3 -5 10689.1 410.181 4
 5 -3 -4 182028 1743.84 4
 -5 -3 4 192337 2589.12 3
 -5 -3 4 187715 2923.31 4
 -5 3 4 186581 3075.36 2
 5 3 -3 24567 975.769 5
 -5 -3 3 24130.4 876.758 3
 -5 -3 3 24292.1 978.647 4
 -5 3 3 23687.6 1040.57 2
 -5 -3 2 155688 2425.16 3
 -5 3 2 161359 2811.36 2
 -5 -3 2 158574 2620 4
 -5 3 2 152190 2528.13 3
 -5 3 2 156963 2793.67 1
 5 3 -2 162829 2555.54 5
 -5 -3 1 8600.09 563.006 3
 -5 3 1 7652.16 618.074 2
 5 3 -1 9014.82 559.42 5
 -5 -3 1 7507.59 571.178 4
 -5 3 1 7782.32 559.16 3
 -5 3 1 7706.09 610.99 1
 -5 -3 0 6339.07 509.426 3
 -5 3 0 6401.38 576.263 1
 5 -3 0 6992.45 313.603 4
 -5 3 0 6238.59 556.657 2
 -5 3 0 6729 315.17 4
 -5 -3 0 6432.33 531.766 4
 5 3 0 6622.75 463.613 5
 -5 3 0 5627.14 500.482 3
 5 -3 1 10618.6 467.248 4
 -5 3 -1 10043.2 478.586 4
 -5 3 -1 9239.52 701.506 2
 -5 3 -1 8789.35 619.744 3
 -5 -3 -1 10110.4 632.439 3
 -5 3 -1 10737 720.205 1
 5 3 1 10259.5 549.587 5
 -5 3 -2 18303.5 901.417 3
 5 -3 2 18671.4 702.619 4
 -5 -3 -2 18388.6 885.465 3
 -5 3 -2 19062.8 940.499 1
 5 3 2 19198.9 718.867 5
 5 -3 3 12031.4 643.167 4
 -5 3 -3 10640.2 728.85 3
 -5 3 -3 13115.5 795.404 1
 -5 -3 -3 13105.1 774.302 3
 -5 3 -4 101556 2254.99 3
 5 -3 4 99770.9 2016.09 4
 -5 3 -4 102152 2249.11 1
 -5 -3 -4 100649 2253.52 3
 -5 3 -5 349.171 239.231 1
 5 -3 5 912.818 267.794 4
 -5 -3 -5 275.836 276.02 3
 -5 3 -5 571.767 236.025 3
 5 3 5 935.545 161.004 1
 -5 3 -6 113523 2483.46 3
 -5 -3 -6 113148 2548.65 3
 5 3 6 110729 1443.63 1
 -5 3 -6 114135 2463.04 1
 5 -3 6 111672 2433.93 4
 -5 -3 -7 5800.9 624.349 3
 -5 3 -7 5491.96 556.509 3
 5 -3 7 6268.07 619.791 4
 -5 3 -7 6102.66 596.224 1
 -5 -3 -8 105502 2634.22 3
 -5 3 -8 103811 2502.64 3
 -5 3 -8 107910 2458.3 1
 5 -3 8 105698 2611.18 4
 -5 3 -9 36275.6 1513.42 3
 -5 -3 -9 37670.3 1618.15 3
 5 -3 9 37308.5 1606.7 4
 -5 3 -9 39693.3 1499.59 1
 -5 3 -10 36348.5 1555.15 3
 -5 -3 -10 34112 1570.97 3
 5 -3 10 36072.2 1644.64 4
 -5 3 -10 36988.6 1484.39 1
 5 -3 11 93286.6 2803.64 4
 -5 -3 -11 94912.9 2814.24 3
 -5 3 -11 88731.8 2571.49 3
 -5 3 -11 97546.5 2476.9 1
 -5 -3 -12 8870.83 924.429 3
 5 -3 12 8942.4 921.875 4
 -5 3 -12 8578.15 832.802 3
 -5 3 -12 9520.71 807.711 1
 -5 3 -13 67172.9 2358.55 3
 -5 -3 -13 71565.3 2564.18 3
 5 -3 13 73265.2 2640.13 4
 -5 3 -13 73177.2 2220.36 1
 5 -3 14 2687.76 658.693 4
 -5 3 -14 1413.01 403.821 3
 -5 -3 -14 2386 600.996 3
 -5 3 -14 2508.89 525.561 1
 -5 -3 -15 28278.7 1710.33 3
 5 -3 15 29739.5 1795.68 4
 -5 3 -15 27508.3 1597.83 3
 -5 3 -15 28855.6 1447.01 1
 5 -3 16 9167.84 1127.06 4
 -5 3 -16 9111.54 1008.94 3
 -5 -3 -16 9962.77 1067.83 3
 -5 3 -16 9969.73 900.438 1
 -5 -3 -17 9926.75 1098.52 3
 -5 3 -17 8410.54 983.226 3
 5 -3 17 8460.83 1021.06 4
 -5 3 -18 8167.07 1003.59 3
 -5 -3 -18 11663.3 1225.13 3
 -5 3 -19 376.115 353.285 3
 -5 -3 -19 123.139 420.81 3
 -5 -3 -20 26250.6 1934.58 3
 -5 3 -20 23447.1 1731.9 3
 -5 3 -21 9455.49 1177.59 3
 -5 -3 -21 10485.4 1269.57 3
 -5 3 -22 8385.99 1129.11 3
 -5 3 -23 31533.3 2152.64 3
 -5 -4 26 16341.6 1799.13 4
 5 -4 -26 17323.3 1527.36 3
 5 -4 -25 1851.34 533.113 3
 -5 -4 25 2272.65 780.865 4
 5 -4 -24 27508.9 1834.73 3
 -5 -4 24 29683.4 2288.96 4
 -5 -4 23 13776.8 1510.96 4
 5 4 -23 11005.7 1000.93 3
 5 -4 -23 11940.8 1176.81 3
 -5 4 23 12638.2 1108.86 2
 5 -4 -22 10180.5 1111.67 3
 5 4 -22 8210.87 832.432 3
 -5 -4 22 11271 1410.13 4
 -5 4 22 10721 985.849 2
 -5 -4 21 59615.6 2981.83 4
 5 4 -21 52316.6 2005.53 3
 5 -4 -21 57589.8 2439.74 3
 -5 4 21 57533.9 2229.57 2
 5 -4 -20 7185.23 913.749 3
 -5 -4 20 7490.21 1045.35 4
 5 4 -20 7133.11 755.713 3
 -5 4 20 8665.33 849.617 2
 -5 -4 19 101755 3684.05 4
 5 -4 -19 96813.2 3053.13 3
 5 4 -19 88846.7 2463.58 3
 -5 4 19 96223.2 2781.58 2
 -5 -4 18 5340.47 854.692 4
 5 4 -18 4083.13 525.763 3
 5 -4 -18 5472.18 719.029 3
 5 -4 -18 5875.53 548.642 5
 -5 4 18 6164.17 721.437 2
 -5 -4 17 70831.1 2867.26 4
 5 -4 -17 67542.7 1856.26 5
 5 4 -17 64426.4 1949.43 3
 5 -4 -17 67706.7 2363.29 3
 -5 4 17 66525.8 2220.52 2
 -5 -4 16 5025.85 774.619 4
 -5 4 16 5330.13 622.004 2
 5 -4 -16 6353.58 578.299 5
 5 4 -16 5321.87 537.764 3
 5 -4 -16 4940.92 617.808 3
 -5 4 15 22954.4 1245.23 2
 -5 -4 15 22567.7 1552.22 4
 5 4 -15 20224.6 1001.32 3
 -5 -4 14 611.506 105.018 2
 -5 -4 14 341.182 366.078 4
 -5 4 14 486.414 243.882 2
 5 4 -14 439.641 149.746 3
 -5 -4 13 2722.64 195.717 2
 -5 4 13 2274.03 407.705 2
 -5 -4 13 1723.29 419.935 4
 -5 4 12 1293.22 315.305 2
 -5 -4 12 2074.8 462.623 4
 -5 -4 12 1803.47 167.995 2
 -5 4 11 35420.2 1431.37 2
 -5 -4 11 36311.7 1656.6 4
 -5 -4 11 35812.4 772.236 2
 -5 -4 10 976.351 161.876 2
 -5 4 10 580.804 209.969 2
 -5 -4 10 791.128 359.229 4
 -5 -4 9 144758 3182.89 4
 -5 4 9 148418 2914.04 2
 -5 -4 9 146855 1955.24 2
 -5 -4 8 649.918 324.213 4
 -5 4 8 -322.482 282.082 2
 -5 4 7 485583 5732.89 2
 -5 -4 7 478752 5936.59 4
 5 4 -6 2586.22 457.48 5
 5 -4 -6 1736.16 216.918 4
 -5 -4 6 1592.43 399.635 4
 -5 4 6 2048.24 415.649 2
 5 -4 -5 289302 2915.78 4
 -5 -4 5 297043 4148.4 4
 -5 4 5 285248 4141.53 2
 -5 -4 5 288324 3247.11 3
 5 4 -5 302865 4047.22 5
 5 4 -4 772.297 306.79 5
 -5 -4 4 1066.57 331.865 4
 5 -4 -4 1661.02 180.203 4
 -5 4 4 1016.5 320.622 2
 -5 -4 4 960.73 205.105 3
 5 -4 -3 93708 1173.66 4
 -5 -4 3 96162.6 2201.31 4
 5 4 -3 100199 2052.7 5
 -5 4 3 100320 2237.18 2
 -5 4 3 99998.2 2264.5 1
 -5 -4 3 96209 1803.07 3
 -5 -4 2 16080 745.895 3
 -5 4 2 17409 955.762 1
 5 4 -2 16042.6 773.747 5
 5 -4 -2 15667.6 434.563 4
 -5 -4 2 14769 867.566 4
 -5 4 2 15813.1 884.421 2
 -5 -4 1 89526.4 1851.72 3
 5 -4 -1 88314.5 1250.33 4
 -5 4 1 89000.8 2117.07 2
 -5 4 1 89810.7 1248.66 4
 -5 -4 1 93148 2159.25 4
 -5 4 1 89584 2152.9 1
 -5 4 1 86164 1886.77 3
 5 4 -1 89286.2 1822.47 5
 5 4 0 13508.4 668.831 5
 -5 4 0 13343.3 835.561 2
 5 -4 0 13539.6 513.239 4
 -5 4 0 13250.8 855.22 1
 -5 4 0 12919.2 485.525 4
 -5 -4 0 12544.1 836.549 4
 -5 4 0 12501.5 722.6 3
 -5 -4 0 12362.9 689.543 3
 5 -4 1 4231.14 332.043 4
 -5 -4 -1 4141.6 437.018 3
 -5 4 -1 4139.03 532.966 2
 -5 4 -1 4009.09 321.795 4
 -5 4 -1 4478.55 532.227 1
 5 4 1 4320.83 380.069 5
 -5 4 -1 3269.32 420.805 3
 -5 4 -2 4330.04 512.643 1
 -5 -4 -2 4242.98 461.608 3
 5 -4 2 5192.1 409.48 4
 5 4 2 4276.28 352.024 5
 -5 4 -2 4319.32 529.42 2
 -5 4 -2 4463 482.958 3
 -5 -4 -3 162427 2860.53 3
 5 -4 3 160284 2526.47 4
 -5 4 -3 161592 3058.25 2
 5 4 3 165473 2179.8 5
 -5 4 -3 162542 3049.99 1
 -5 4 -3 159866 2832.25 3
 -5 4 -4 33256.2 1256.94 3
 -5 -4 -4 35510.6 1314.08 3
 -5 4 -4 32496.3 1349.37 2
 -5 4 -4 35076.8 1362.43 1
 5 4 4 35310.6 852.215 5
 5 -4 4 34110.7 1176.05 4
 -5 4 -5 136214 2724.66 3
 5 4 5 135825 1690.87 5
 5 -4 5 138820 2635.73 4
 -5 4 -5 142482 2870.03 1
 -5 -4 -5 137486 2760.39 3
 -5 4 -6 28563.4 1238.39 3
 -5 -4 -6 30869.4 1328.8 3
 5 -4 6 31854.1 1289.56 4
 -5 4 -6 30603.1 1310.9 1
 -5 4 -7 133336 2814.39 3
 5 -4 7 140086 2919.45 4
 -5 -4 -7 135001 2975.24 3
 -5 4 -7 135121 2894.37 1
 -5 4 -8 18925.3 1090.61 1
 -5 4 -8 16768.7 1001.94 3
 -5 -4 -8 19355 1132.41 3
 5 -4 8 18644.5 1091.2 4
 -5 4 -9 51727.7 1814.46 1
 -5 4 -9 46137.4 1703.78 3
 5 -4 9 47640.1 1822.88 4
 -5 -4 -9 48407 1844.23 3
 -5 4 -10 34936.9 1524.05 1
 -5 -4 -10 32800.3 1572.17 3
 -5 4 -10 31593.5 1461.78 3
 5 -4 10 33102.4 1586.4 4
 -5 4 -11 4131.04 567.629 3
 -5 4 -11 4723.35 619.515 1
 5 -4 11 4882.4 692.151 4
 -5 -4 -11 3736.27 543.056 3
 -5 -4 -12 51917.7 2140.04 3
 -5 4 -12 55679.5 1997.59 1
 -5 4 -12 51391.5 1988.17 3
 5 -4 12 52927.7 2162.73 4
 5 -4 13 5436.95 769.459 4
 -5 -4 -13 4758.97 723.77 3
 -5 4 -13 3100.79 522.341 3
 -5 4 -13 5083.9 618.464 1
 -5 4 -14 26364.3 1451.52 1
 -5 4 -14 23837.4 1441.33 3
 5 -4 14 26425.7 1681.58 4
 -5 -4 -14 24168.8 1563.15 3
 -5 4 -15 10825.3 967.234 1
 -5 4 -15 8599.94 923.062 3
 5 -4 15 12231.6 1208.31 4
 -5 -4 -15 8277.8 949.226 3
 -5 4 -16 10771.2 979.085 1
 5 -4 16 9629.04 1080.42 4
 -5 4 -16 8731.46 931.242 3
 -5 -4 -16 9261 1121.25 3
 -5 4 -17 32573.5 1848.48 3
 5 -4 17 33112.1 2056 4
 -5 -4 -17 34065.6 2046.83 3
 -5 4 -17 37085.4 1787.28 1
 -5 -4 -18 941.415 591.656 3
 5 -4 18 370.993 427.075 4
 -5 4 -18 -39.8555 318.439 3
 -5 4 -19 25084 1743.38 3
 5 -4 19 27555.8 1973.96 4
 -5 -4 -19 27625.8 1950.56 3
 -5 -4 -20 7735.35 1121.97 3
 -5 4 -20 6150.66 914.279 3
 -5 -4 -21 34899 2300.65 3
 -5 4 -21 29426.7 1965.03 3
 -5 4 -22 14504.2 1454.81 3
 -5 -5 25 12098 1514.88 4
 5 -5 -25 10983.8 1221.73 3
 -5 -5 24 -170.034 560.954 4
 5 -5 -24 782.625 359.474 3
 -5 -5 23 16335.4 1695.44 4
 5 -5 -23 16283.4 1388.48 3
 -5 5 23 17331.7 1315.48 2
 -5 -5 22 27877.5 2144.02 4
 5 -5 -22 29540 1838.91 3
 -5 5 22 31323.4 1732.62 2
 -5 -5 21 4958.57 898.274 4
 -5 5 21 5019.57 729.467 2
 -5 -5 20 108920 3980.88 4
 5 -5 -20 108419 3349.31 3
 -5 5 20 106961 3097.43 2
 -5 -5 19 10748.9 1230.99 4
 5 5 -19 9612.95 806.874 3
 5 -5 -19 10847.8 1086.93 3
 -5 5 19 11066.2 1004.89 2
 -5 -5 18 147087 4345.97 4
 -5 5 18 136254 3429.97 2
 5 -5 -18 141022 3664.91 3
 5 -5 -17 9313.32 677.719 5
 5 5 -17 8598.1 694.235 3
 5 -5 -17 10247.8 953.696 3
 -5 -5 17 9058.5 1107.3 4
 -5 5 17 8957.45 869.3 2
 -5 5 16 77260 2433.7 2
 -5 -5 16 76032.7 2934.38 4
 5 5 -16 71096.7 1926.04 3
 5 -5 -16 78591.8 2530.85 3
 -5 5 15 8000.51 805.279 2
 -5 -5 15 7389.31 954.641 4
 5 5 -15 6999.32 576.927 3
 5 -5 -15 8155.11 798.47 3
 -5 5 14 29815.6 1453.77 2
 -5 -5 14 31166.8 1782.01 4
 5 5 -14 29164.7 1105.87 3
 -5 5 13 16605.2 1081.09 2
 -5 -5 13 15776.7 1237.83 4
 5 5 -13 13478.3 704.329 3
 -5 5 12 165.269 267.546 2
 -5 -5 12 79.5201 282.664 4
 -5 -5 11 5360.1 707.684 4
 -5 -5 11 5757.49 260.933 2
 -5 5 11 5845.19 642.517 2
 -5 5 10 18278.9 1044.68 2
 -5 -5 10 20845.1 1263.07 4
 -5 -5 10 19219.5 565.551 2
 -5 5 9 4637.65 535.532 2
 -5 -5 9 3437.51 510.957 4
 -5 5 8 90421.2 2304.78 2
 -5 -5 8 89169.7 2452.68 4
 -5 -5 7 24548.8 1226.77 4
 -5 5 7 24618.7 1183.88 2
 -5 5 6 174321 3235.12 2
 -5 -5 6 182112 3396.98 4
 -5 5 5 19469 1042.63 2
 -5 -5 5 18788.3 1043.54 4
 -5 5 5 21271.9 1093.77 1
 5 -5 -5 20697.7 694.11 4
 -5 -5 5 21347.3 733.166 3
 -5 5 4 96625.2 2281.02 2
 -5 -5 4 94694 2320.63 4
 5 -5 -4 89955.8 1439.46 4
 -5 -5 4 90027.9 1639.26 3
 -5 5 4 93755.7 2281.87 1
 -5 -5 3 1279.94 253.166 3
 -5 5 3 1516.77 320.35 2
 -5 5 3 1121.97 373.864 1
 5 -5 -3 1839.39 197.925 4
 -5 -5 3 1653.76 377.705 4
 -5 -5 2 3531.72 357.315 3
 5 -5 -2 3610.32 270.389 4
 -5 -5 2 3665.96 512.427 4
 -5 5 2 2721.06 460.675 1
 -5 5 2 3562.76 459.647 2
 -5 5 1 11524.9 812.188 2
 -5 -5 1 11135.1 652.965 3
 -5 5 1 10328.7 474.9 4
 -5 5 1 11402.1 802.078 1
 5 -5 -1 12232.6 507.864 4
 -5 -5 1 11486.3 832.937 4
 5 -5 0 2285.79 243.51 4
 -5 5 0 1678.81 366.543 1
 -5 5 0 1681.28 345.621 2
 -5 -5 0 1717.54 405.078 4
 -5 5 0 2026.19 321.25 3
 -5 -5 0 2408.97 344.414 3
 -5 -5 -1 53245.5 1490.58 3
 -5 5 -1 50720 1691.16 1
 5 -5 1 51362.8 1233.37 4
 -5 -5 -1 51642 1763.46 4
 -5 5 -1 47970.7 1442.68 3
 -5 5 -1 51664 1652.78 2
 -5 5 -2 66683.8 1886.05 2
 5 -5 2 66617 1520.82 4
 -5 5 -2 68549.7 1983.6 1
 -5 -5 -2 68567.9 1745.62 3
 -5 5 -2 65148.3 1717.45 3
 -5 5 -3 15564.1 970.797 1
 -5 -5 -3 15039 863.681 3
 -5 5 -3 14126.5 876.258 2
 5 -5 3 15846 788.328 4
 -5 5 -3 15018.6 846.018 3
 -5 5 -4 91425.1 2294.49 2
 5 -5 4 94209.1 2084.17 4
 -5 5 -4 94011.3 2433.17 1
 -5 -5 -4 94878.3 2218.47 3
 -5 5 -4 93067.8 2155.63 3
 -5 5 -5 24306.7 1113.48 3
 5 -5 5 25261.9 1113.42 4
 -5 5 -5 23817.4 1167.69 2
 -5 -5 -5 24991.7 1157.13 3
 -5 5 -5 26332.6 1283.62 1
 -5 5 -6 140993 2843.06 3
 -5 -5 -6 141285 2966.47 3
 5 -5 6 136004 2801.03 4
 -5 5 -6 137601 2935.32 2
 -5 5 -6 145642 3103.95 1
 -5 5 -7 26629.5 1333.27 1
 -5 5 -7 25157.7 1214.42 3
 -5 5 -7 25410 1246.44 2
 5 -5 7 26753 1269.06 4
 -5 -5 -7 25359.6 1265.2 3
 -5 5 -8 66824.9 2037.76 3
 -5 5 -8 71564.1 2223.16 1
 5 -5 8 71079.2 2193.11 4
 -5 -5 -8 69346.1 2201.26 3
 -5 5 -9 426.669 241.574 3
 -5 5 -9 255.968 313.43 1
 -5 -5 -9 -310.537 340.585 3
 5 -5 9 278.704 273.723 4
 -5 5 -10 15138.2 1013.59 3
 -5 5 -10 16430.8 1103.41 1
 5 -5 10 17388.6 1156.3 4
 -5 -5 -10 15697.5 1154.84 3
 -5 5 -11 2951.57 461.199 1
 5 -5 11 4081.52 639.815 4
 -5 -5 -11 3192.93 591.17 3
 -5 5 -11 3893.7 561.743 3
 -5 -5 -12 2878.91 593.828 3
 5 -5 12 3009.85 553.994 4
 -5 5 -12 2317.83 476.395 3
 -5 5 -12 2763.66 545.664 1
 5 -5 13 14472.4 1207.15 4
 -5 -5 -13 12777.5 1132.66 3
 -5 5 -13 14660.2 1111.75 1
 -5 5 -13 12917 1037.46 3
 -5 5 -14 20454.5 1342.83 1
 -5 -5 -14 22116.4 1541.3 3
 -5 5 -14 16775.6 1212.45 3
 5 -5 14 19772.2 1446.25 4
 5 -5 15 863.138 308.257 4
 -5 5 -15 2.19663 345.885 1
 -5 5 -15 707.46 318.218 3
 -5 -5 -15 964.893 484.383 3
 -5 5 -16 74549.7 2637.63 1
 -5 -5 -16 72487.5 2902.15 3
 -5 5 -16 68544.8 2617.03 3
 5 -5 16 69082.2 2878.55 4
 -5 5 -17 -365.539 346.536 3
 5 -5 17 -253.876 350.439 4
 -5 -5 -17 269.855 436.376 3
 -5 5 -17 179.468 455.695 1
 -5 5 -18 50997.2 2389.52 3
 -5 -5 -18 57823.9 2726.36 3
 5 -5 18 59207.7 2864.33 4
 -5 -5 -19 2546.47 783.758 3
 5 -5 19 2424.33 733.25 4
 -5 5 -19 1943.7 575.369 3
 5 -5 20 60947.6 3042.27 4
 -5 -5 -20 63296.7 3084.85 3
 5 -5 21 5669.64 1016.95 4
 -5 -6 25 3703.83 953.046 4
 5 -6 -25 2219.43 593.746 3
 5 -6 -24 1644.83 518.49 3
 -5 -6 24 1262.11 625.397 4
 5 -6 -23 5823.28 878.437 3
 -5 6 23 4671.3 692.786 2
 -5 -6 22 -272.549 485.69 4
 5 -6 -22 -219.669 426.372 3
 -5 6 22 -186.069 394.714 2
 -5 -6 21 69318 3303.29 4
 5 -6 -21 66310.6 2769.86 3
 -5 6 21 66137.8 2584.63 2
 -5 6 20 -609.594 339.411 2
 5 -6 -20 269.176 411.926 3
 -5 -6 20 612.452 463.947 4
 -5 -6 19 72199.8 3171.19 4
 -5 6 19 71984.2 2592.95 2
 5 -6 -19 72549.6 2738.03 3
 -5 6 18 14909.4 1188.45 2
 -5 -6 18 15229.1 1466.53 4
 5 -6 -18 14838.6 1212.88 3
 5 -6 -17 77827.6 2675.73 3
 -5 -6 17 79542.9 3161.84 4
 -5 6 17 79020.1 2652.52 2
 -5 6 16 9006.55 890.159 2
 -5 -6 16 9502.79 1077.48 4
 5 6 -16 7726.13 606.554 3
 5 -6 -16 9568.09 915.7 3
 -5 6 15 55891.6 2119.3 2
 -5 -6 15 54551.3 2446.76 4
 5 6 -15 49448.6 1470.31 3
 5 -6 -15 51507 2033.48 3
 -5 6 14 8955.03 844.878 2
 -5 -6 14 8981.59 1020.48 4
 5 6 -14 7347.08 533.638 3
 -5 6 13 13469.7 1015.14 2
 -5 -6 13 15083.4 1259.37 4
 5 6 -13 12765.6 670.811 3
 -5 6 12 10158.3 866.099 2
 5 6 -12 10725.8 579.75 3
 -5 -6 12 10500.8 1007.13 4
 -5 6 11 725.995 303.177 2
 -5 -6 11 891.605 336.665 4
 -5 -6 11 442.65 75.5413 2
 -5 6 10 11897.5 900.561 2
 -5 -6 10 11041.9 980.318 4
 -5 -6 10 11240.5 438.88 2
 -5 -6 10 12013.4 415.252 2
 -5 6 9 17498.5 1075.05 2
 -5 -6 9 16471.4 1146.35 4
 -5 -6 9 19376.6 602.554 2
 -5 6 8 -26.5045 220.758 2
 -5 -6 8 372.743 311.069 4
 -5 6 7 30464.7 1375.6 2
 -5 -6 7 30177.5 1449.3 4
 -5 6 6 -128.53 274.843 2
 -5 -6 6 150.111 255.672 4
 -5 6 5 14519.3 957.056 2
 -5 -6 5 15161.8 1002.69 4
 5 -6 -5 16521.5 702.319 4
 -5 -6 5 16294.1 613.762 3
 -5 6 5 14053.3 920.872 1
 -5 6 4 13903 912.783 1
 -5 6 4 14602.5 925.709 2
 -5 -6 4 14908.2 983.55 4
 5 -6 -4 14595.5 630.914 4
 -5 -6 4 14556.4 615.226 3
 -5 6 3 9972.57 802.563 1
 -5 6 3 8703.57 714.723 2
 5 -6 -3 9941.24 503.373 4
 -5 -6 3 9066.09 780.693 4
 -5 -6 3 9911.31 552.053 3
 -5 -6 2 26709.5 947.948 3
 -5 6 2 26229.2 1278.48 1
 5 -6 -2 27292.4 839.887 4
 -5 6 2 25711.3 1212.78 2
 -5 -6 2 26073 1311.5 4
 -5 -6 1 19169.5 844.385 3
 -5 6 1 18552 1069.82 1
 5 -6 -1 18351.6 710.424 4
 -5 6 1 17872 1007.21 2
 -5 -6 1 17524.1 1083.86 4
 -5 -6 0 49649.6 1393.8 3
 5 -6 0 49194.8 1238.37 4
 -5 6 0 46351.2 1621.46 2
 -5 -6 0 45729.7 1780.84 4
 -5 6 0 46406.5 1715.73 1
 -5 6 -1 83161.8 2323.99 1
 5 -6 1 88416 1792.36 4
 -5 -6 -1 83749 2461.74 4
 -5 6 -1 88481.8 2234.08 2
 -5 6 -1 82654.2 1913.21 3
 -5 -6 -1 90661.8 1975.73 3
 5 -6 2 49832.9 1410.79 4
 -5 -6 -2 48614.5 1499.7 3
 -5 6 -2 48813.8 1750.69 1
 -5 -6 -2 47768.1 1839.08 4
 -5 6 -2 49404.8 1637.13 2
 -5 6 -2 46160.4 1425.45 3
 -5 6 -3 113309 2756.28 1
 -5 -6 -3 112477 2385.46 3
 -5 6 -3 108436 2296.67 3
 -5 6 -3 109718 2528.19 2
 5 -6 3 111458 2256.08 4
 -5 6 -4 14183.8 984.977 1
 -5 -6 -4 14587.9 886.532 3
 5 -6 4 14740.1 848.288 4
 -5 6 -4 13516.6 811.677 3
 -5 6 -4 13766 893.007 2
 -5 6 -5 125942 2739.94 2
 -5 -6 -5 123549 2716.27 3
 5 -6 5 127885 2685.13 4
 -5 6 -5 120926 2562.89 3
 -5 6 -5 130293 3040.87 1
 -5 6 -6 5690.83 576.239 3
 -5 6 -6 5107.52 573.36 2
 -5 -6 -6 5591.62 593.778 3
 -5 6 -6 5332.81 659.034 1
 5 -6 6 5441.52 588.05 4
 -5 6 -7 40305.4 1515 3
 -5 6 -7 41974.7 1759.77 1
 5 -6 7 40368.8 1604.76 4
 -5 6 -7 39742.9 1533.84 2
 -5 -6 -7 41533.5 1653.28 3
 5 -6 8 5784.5 661.608 4
 -5 6 -8 4549.42 541.874 3
 -5 -6 -8 6105.75 681.132 3
 -5 6 -8 5861 599.533 2
 -5 6 -8 5446.58 704.995 1
 -5 6 -9 12202.9 893.988 3
 5 -6 9 12649.1 995.118 4
 -5 -6 -9 11890.8 961.569 3
 -5 6 -9 12079.5 880.882 2
 -5 6 -9 12200.2 1002.25 1
 -5 6 -10 6158.19 722.731 1
 -5 6 -10 4486.05 589.771 3
 -5 -6 -10 5222.47 692.744 3
 -5 6 -10 3839.77 526.873 2
 5 -6 10 5789.8 729.744 4
 -5 -6 -11 4429.8 649.723 3
 5 -6 11 4729.47 674.923 4
 -5 6 -11 4708.12 628.445 3
 -5 6 -12 654.392 286.879 3
 5 -6 12 823.261 286.602 4
 -5 -6 -12 529.875 296.686 3
 -5 6 -13 9749.52 899.931 3
 -5 -6 -13 10520.6 1072.13 3
 5 -6 13 10382.4 1024.53 4
 -5 6 -14 1612.15 427.684 3
 5 -6 14 2779.07 640.497 4
 -5 -6 -14 2383.15 565.839 3
 -5 6 -14 2339.41 506.719 1
 -5 6 -15 74495.4 2628.63 3
 -5 6 -15 84598.8 2924.06 1
 5 -6 15 78581.9 3018.13 4
 -5 -6 -15 80683.3 3016.38 3
 -5 -6 -16 751.896 432.444 3
 -5 6 -16 325.582 295.504 3
 5 -6 16 783.927 466.848 4
 -5 6 -16 749.816 441.102 1
 -5 6 -17 116713 3554.41 1
 5 -6 17 112463 3820.47 4
 -5 -6 -17 107740 3778.01 3
 -5 -6 -18 277.921 445.757 3
 5 -6 18 -509.426 341.494 4
 -5 6 -18 260.925 473.651 1
 5 -6 19 108274 3951.9 4
 -5 -6 -19 111856 4015.66 3
 5 -6 20 1132.17 625.25 4
 -5 -6 -20 1067.32 580.737 3
 5 -6 21 46271.3 2710.89 4
 -5 -7 24 2573.71 746.658 4
 5 -7 -24 2550.57 656.38 3
 -5 -7 23 18174.6 1813.28 4
 5 -7 -23 18966.6 1574.72 3
 -5 7 23 18763.4 1483.62 2
 -5 -7 22 19893.8 1856.22 4
 5 -7 -22 17278.3 1468.32 3
 -5 7 22 19806.8 1515.01 2
 5 -7 -21 12054.2 1218.68 3
 -5 -7 21 12689.1 1448.05 4
 -5 7 21 12822.9 1230.63 2
 5 -7 -20 42976.2 2195.61 3
 -5 -7 20 44498.7 2607.81 4
 -5 7 20 44499.3 2168.31 2
 -5 7 19 -633.92 431.847 2
 5 -7 -19 -115.605 378.198 3
 -5 -7 18 54135.5 2748.52 4
 5 -7 -18 53324.8 2323.19 3
 -5 7 18 52157.1 2278.86 2
 -5 7 17 8412.68 902.175 2
 -5 -7 17 10658.8 1228.55 4
 5 -7 -17 8862.51 915.459 3
 -5 -7 16 64594.5 2836.07 4
 5 -7 -16 62496.2 2391.76 3
 -5 7 16 60277.8 2364.44 2
 -5 7 15 19046.4 1304.83 2
 -5 -7 15 19868 1573.82 4
 5 -7 -15 20674.8 1313.86 3
 -5 7 14 15451.3 1154.83 2
 5 -7 -14 13876.2 1034.76 3
 -5 -7 14 13929.5 1291.6 4
 -5 7 13 9904.12 914.232 2
 -5 -7 13 11339.4 1122.58 4
 -5 7 12 1471.85 416.53 2
 -5 -7 12 862.451 521.932 4
 -5 7 11 8397.56 827.96 2
 -5 -7 11 9327.7 975.156 4
 5 7 -11 8674.27 450.477 3
 -5 7 10 382.891 262.721 2
 -5 -7 10 -57.0763 349.81 4
 -5 -7 9 20564.1 1327.39 4
 -5 7 9 20323.1 1232.61 2
 -5 7 8 15955.5 1060.17 2
 -5 -7 8 17651.6 1216.12 4
 -5 7 7 576.843 297.029 2
 -5 -7 7 806.545 356.162 4
 -5 7 6 47328.4 1796.52 2
 -5 -7 6 49112.5 1938.99 4
 5 -7 -6 52369.8 1432.02 4
 -5 7 6 49509.6 1782.41 1
 -5 7 5 5797.86 624.617 1
 -5 7 5 5903.47 649.549 2
 5 -7 -5 6161.07 473.191 4
 -5 -7 5 5662.68 665.109 4
 -5 -7 5 6934.03 381.865 3
 -5 7 4 13561.1 947.563 1
 -5 7 4 12385.2 875.311 2
 -5 -7 4 12738 970.381 4
 5 -7 -4 14083.3 695.775 4
 -5 -7 4 14733.9 604.675 3
 -5 7 3 19561.6 1140.6 1
 -5 7 3 19964.9 1104.07 2
 5 -7 -3 21802.9 834.112 4
 -5 -7 3 21007.4 1244.8 4
 -5 -7 3 22023.5 807.263 3
 -5 -7 2 436.536 162.038 3
 5 -7 -2 915.55 219.141 4
 -5 7 2 445.552 197.898 2
 -5 7 2 345.678 253.062 1
 -5 -7 2 601.656 297.27 4
 -5 -7 1 105429 2063.85 3
 -5 7 1 103949 2680.19 1
 -5 7 1 100119 2495.7 2
 5 -7 -1 105137 1971.76 4
 -5 -7 1 99617.5 2739.26 4
 -5 -7 0 23188.8 958.107 3
 -5 7 0 20650.9 1191.51 1
 -5 7 0 18624.5 1048.34 2
 5 -7 0 21695.6 887.251 4
 -5 -7 0 21178.3 1275.81 4
 5 -7 1 43295 1329.89 4
 -5 7 -1 41590.3 1688.85 1
 -5 -7 -1 42947.1 1362.88 3
 -5 7 -1 38070 1489.38 2
 -5 -7 -1 38704.3 1742.8 4
 -5 -7 -2 110319 2334.42 3
 5 -7 2 107342 2242.19 4
 -5 7 -2 106894 2505.36 2
 -5 7 -2 106171 2767.89 1
 -5 7 -2 105078 2205.17 3
 -5 -7 -2 103745 2914.73 4
 -5 7 -3 9042.79 639.07 3
 -5 -7 -3 9426.96 692.977 3
 5 -7 3 10591 726.635 4
 -5 7 -3 10152.2 776.318 2
 -5 -7 -3 9276.8 918.955 4
 -5 7 -3 9462.8 866.12 1
 -5 7 -4 110404 2876.83 1
 -5 -7 -4 104718 2428.48 3
 5 -7 4 104496 2410.66 4
 -5 7 -4 106233 2508.07 2
 -5 7 -5 537.161 259.64 2
 -5 7 -5 -414.716 391.651 1
 -5 -7 -5 129.871 193.527 3
 5 -7 5 117.809 203.926 4
 -5 7 -5 160.031 200.584 3
 -5 7 -6 16734.1 1166.73 1
 -5 -7 -6 17023.9 1046.11 3
 5 -7 6 18775.3 1100.04 4
 -5 7 -6 17009.9 988.48 2
 -5 7 -6 16745.8 961.995 3
 -5 7 -7 7115.13 806.765 1
 -5 -7 -7 8266.27 761.203 3
 5 -7 7 6902.09 697.137 4
 -5 7 -7 7007.19 642.796 2
 -5 7 -7 6919.67 640.37 3
 -5 7 -8 21101.3 1139.98 3
 -5 7 -8 21528.5 1377.87 1
 -5 -7 -8 21181 1260.55 3
 5 -7 8 21204.7 1249.99 4
 -5 7 -8 21574 1124.24 2
 5 -7 9 32223.5 1601.95 4
 -5 7 -9 28498.2 1308.99 2
 -5 7 -9 27979.7 1344.09 3
 -5 -7 -9 30992.8 1560.65 3
 -5 7 -9 31815 1677.92 1
 -5 7 -10 14387.4 1013.69 3
 5 -7 10 16460.9 1201.51 4
 -5 -7 -10 15253.9 1133.25 3
 -5 7 -11 20942.8 1233.96 3
 -5 -7 -11 22997.6 1448.84 3
 5 -7 11 22985.6 1452.43 4
 -5 7 -12 5750.3 687.91 3
 -5 -7 -12 7016.2 830.31 3
 5 -7 12 7760.91 913.294 4
 5 -7 13 32416.6 1848.35 4
 -5 -7 -13 29515.4 1716.63 3
 5 -7 14 47429.9 2309.54 4
 -5 -7 -14 47787.2 2269.31 3
 -5 -7 -15 22465.1 1643.51 3
 5 -7 15 21113.4 1586.55 4
 -5 7 -15 21319.6 1558.28 1
 -5 7 -16 80442.5 3027.1 1
 -5 -7 -16 74748.3 3049.37 3
 5 -7 16 74148.6 3051.59 4
 -5 -7 -17 557.676 403.447 3
 -5 7 -17 806.307 493.68 1
 5 -7 17 988.015 532.533 4
 -5 7 -18 88846 3293.39 1
 -5 -7 -18 82982.2 3379.94 3
 5 -7 18 79901.7 3339.73 4
 5 -7 19 2578.32 756.185 4
 -5 -7 -19 2142.69 694.867 3
 5 -7 20 51966.9 2819.7 4
 5 -8 -23 6460.35 983.251 3
 -5 8 23 6367.26 951.996 2
 -5 -8 23 7567.83 1302.02 4
 -5 -8 22 31601.5 2368.71 4
 5 -8 -22 31989.9 2031.83 3
 -5 8 22 30698.8 1953.65 2
 -5 -8 21 7499.92 1168.15 4
 5 -8 -21 6460.44 907.866 3
 -5 8 21 7353.75 988.337 2
 -5 -8 20 15414.4 1605.87 4
 5 -8 -20 15295.5 1345.02 3
 -5 8 20 14518.2 1310.32 2
 5 -8 -19 11382.1 1172.05 3
 -5 -8 19 13731.6 1485.15 4
 -5 8 19 11765 1139.34 2
 -5 8 18 384.618 384.098 2
 5 -8 -18 219.481 394.215 3
 5 -8 -17 22144.5 1464.03 3
 -5 -8 17 25917.1 1900.36 4
 -5 8 17 25164.7 1594.31 2
 -5 8 16 3977.22 667.276 2
 5 -8 -16 4092.18 637.353 3
 -5 -8 16 4467.93 797.193 4
 5 -8 -15 18752.3 1276.92 3
 -5 -8 15 18159.3 1536.02 4
 -5 8 15 17577 1311.84 2
 -5 8 14 33457 1767.11 2
 -5 -8 14 33443 1997.02 4
 5 -8 -14 32877.7 1650.71 3
 -5 8 13 1617.77 446.917 2
 -5 -8 13 1953.48 508.442 4
 5 -8 -13 1469.26 342.826 3
 -5 8 12 57059.3 2210.54 2
 -5 -8 12 57703 2484.33 4
 -5 -8 11 2978.11 632.31 4
 -5 8 11 2399.09 475.375 2
 -5 8 10 16874.7 1174.99 2
 -5 -8 10 15484.7 1242.19 4
 -5 8 9 13064 1045.81 2
 -5 -8 9 13117 1122.49 4
 -5 -8 8 5088.35 740.56 4
 -5 8 8 4742.15 634.368 2
 -5 -8 7 20319.4 1310.28 4
 5 -8 -7 20438.9 994.549 4
 -5 8 7 19772.3 1196.65 1
 -5 8 7 20190.6 1242.69 2
 -5 8 6 434.589 214.808 2
 -5 8 6 174.225 280.705 1
 -5 -8 6 272.749 269.235 4
 5 -8 -6 814.754 265.786 4
 -5 8 5 10788.4 911.835 1
 -5 -8 5 11492.2 984.148 4
 -5 8 5 10032.6 864.475 2
 5 -8 -5 12313 733.308 4
 5 -8 -4 16392.8 810.354 4
 -5 -8 4 15178.8 1140.81 4
 -5 8 4 16185.6 1094.69 1
 -5 -8 4 16851.4 619.554 3
 -5 8 4 15222.5 1023.81 2
 -5 -8 3 507.549 138.454 3
 -5 8 3 -89.6101 294.035 1
 -5 8 3 363.274 261.414 2
 5 -8 -3 566.201 194.189 4
 -5 -8 3 1110.58 408.35 4
 -5 -8 2 26270.4 940.271 3
 -5 8 2 24165.3 1257.21 2
 -5 8 2 23451.7 1326.96 1
 5 -8 -2 26987.2 1035.02 4
 -5 -8 2 24292.8 1417.73 4
 -5 -8 1 8314.07 570.215 3
 -5 8 1 6571.95 661.112 2
 5 -8 -1 7864.32 559.311 4
 -5 -8 1 7426.3 812.126 4
 -5 8 1 6567.25 732.304 1
 -5 -8 0 64275.3 1652.37 3
 -5 8 0 61974.8 1969.08 2
 5 -8 0 64961.2 1705.21 4
 -5 8 0 64228.2 2193.07 1
 -5 -8 0 64876 2310.91 4
 5 -8 1 7976.36 631.15 4
 -5 8 -1 6755.95 670.854 2
 -5 -8 -1 8593.2 630.098 3
 -5 8 -1 7197.68 780.54 1
 -5 -8 -1 5833.99 721.219 4
 -5 -8 -2 22891.9 1452.24 4
 5 -8 2 25273 1117.02 4
 -5 8 -2 22339 1150.88 2
 -5 8 -2 22856.2 1343.25 1
 -5 -8 -2 26013.2 1127.93 3
 5 -8 3 49100.1 1653.51 4
 -5 8 -3 44978.5 1644.29 2
 -5 -8 -3 47966.4 2079.61 4
 -5 -8 -3 47311.7 1585.7 3
 -5 8 -3 46254.5 1924.08 1
 -5 8 -4 1730.99 470.914 1
 -5 -8 -4 1267.68 263.301 3
 5 -8 4 1343.69 326.603 4
 -5 8 -4 1234.47 301.04 2
 -5 -8 -4 1854.14 508.953 4
 -5 8 -4 1534.84 301.527 3
 -5 8 -5 44097.9 1940.34 1
 5 -8 5 44053.3 1672.94 4
 -5 -8 -5 43415.3 1617.75 3
 -5 8 -5 41471.4 1564.03 2
 -5 8 -5 38905.7 1383.94 3
 -5 8 -6 8614.24 879.286 1
 -5 -8 -6 9539.55 806.802 3
 5 -8 6 9399.89 827.931 4
 -5 8 -6 8602.36 733.045 2
 -5 8 -6 7886.92 643.999 3
 -5 8 -7 16018.7 1225.33 1
 -5 -8 -7 13788.8 1002.15 3
 5 -8 7 16397.1 1094.78 4
 -5 8 -7 14240.1 901.318 2
 -5 8 -7 14568.9 904.737 3
 5 -8 8 32999.3 1602.46 4
 -5 8 -8 36562.2 1871.96 1
 -5 -8 -8 35127.6 1644.56 3
 -5 8 -8 34222.6 1403.85 2
 -5 8 -8 32731.3 1395.79 3
 -5 -8 -9 11981.9 987.708 3
 5 -8 9 11258.5 972.277 4
 -5 8 -9 11038.3 1064.11 1
 5 -8 10 110508 3194.15 4
 -5 -8 -10 110815 3136.5 3
 -5 -8 -11 115.06 304.089 3
 5 -8 11 -46.3823 299.043 4
 -5 -8 -12 71043.1 2643.76 3
 5 -8 12 68764.6 2682.27 4
 -5 -8 -13 14581.8 1289.52 3
 5 -8 13 15056.6 1304.31 4
 5 -8 14 83489.7 3114.49 4
 -5 -8 -14 80520.4 3039.18 3
 -5 8 -14 86877 3159.73 1
 5 -8 15 42419.2 2288.77 4
 -5 -8 -15 41935.9 2251.76 3
 -5 8 -15 45364.6 2347.19 1
 5 -8 16 25453.4 1817.35 4
 -5 -8 -16 27466.9 1874.45 3
 -5 8 -16 28405.4 1881.86 1
 -5 8 -17 36032.8 2178.02 1
 -5 -8 -17 36693.6 2247.16 3
 5 -8 17 35868.6 2237.11 4
 -5 8 -18 -267.719 465.784 1
 5 -8 18 -278.605 377.265 4
 -5 -8 -18 -495.376 530.982 3
 -5 8 -19 41735.8 2366.81 1
 5 -8 19 38463.6 2400.3 4
 5 -8 20 11291.7 1309.42 4
 -5 9 23 52844.2 2679.32 2
 -5 -9 22 4893.16 1019.94 4
 5 -9 -22 5344.26 918.054 3
 -5 9 22 5138.7 860.459 2
 5 -9 -21 29153.3 1933.11 3
 -5 -9 21 28762.5 2253.14 4
 -5 9 21 31475.4 2010.2 2
 -5 -9 20 1877.7 633.17 4
 5 -9 -20 1587.4 525.651 3
 -5 9 20 1675.24 498.182 2
 5 -9 -19 9390.46 1073.71 3
 -5 9 19 12261.9 1244.79 2
 -5 -9 19 10434.5 1341.76 4
 -5 9 18 743.737 364.162 2
 5 -9 -18 1760.04 571.861 3
 -5 -9 18 1634.08 633.054 4
 -5 9 17 2358.09 603.398 2
 -5 -9 17 1748.42 597.302 4
 5 -9 -17 1689.72 450.589 3
 -5 9 16 2194.84 613.855 2
 -5 -9 16 3491.27 762.506 4
 5 -9 -16 2957.38 599.182 3
 5 -9 -15 15085.6 1186.31 3
 -5 -9 15 14864.3 1429.41 4
 -5 9 15 14046.8 1197.78 2
 -5 9 14 -96.0982 311.573 2
 -5 -9 14 429.876 412.226 4
 5 -9 -14 -75.4736 364.521 3
 -5 9 13 45335.2 2085.48 2
 -5 -9 13 45509.8 2335.49 4
 5 -9 -13 48140.2 1966.7 3
 -5 -9 12 412.561 418.017 4
 5 -9 -12 91.8399 286.844 3
 -5 9 12 -301.547 372.439 2
 -5 9 11 58548 2363.07 2
 -5 -9 11 59915.8 2557.25 4
 -5 9 10 1947.15 472.296 2
 -5 -9 10 1545.59 506.321 4
 -5 9 9 41933.4 1914.01 2
 -5 -9 9 43487.6 2095.98 4
 5 -9 -9 46710 1731.18 4
 -5 9 8 37586.1 1814.12 2
 -5 -9 8 40453.5 1991.5 4
 -5 9 7 1669.51 395.972 1
 -5 9 7 2555.56 552.205 2
 5 -9 -7 2400.8 381.699 4
 -5 -9 7 2033.05 569.512 4
 -5 9 6 14247.1 1053.11 1
 -5 -9 6 16001.8 1262.1 4
 5 -9 -6 17291.1 939.37 4
 -5 9 6 13953.2 1050.95 2
 5 -9 -5 1631.07 327.053 4
 -5 9 5 627.327 247.143 2
 -5 -9 5 800.213 380.016 4
 -5 9 5 644.426 276.813 1
 -5 9 4 9961.81 875.074 2
 -5 9 4 11021.8 946.872 1
 -5 -9 4 11152.2 1025.42 4
 5 -9 -4 11188 736.546 4
 -5 9 3 15118.9 1096.18 1
 -5 9 3 15207.6 1042.56 2
 5 -9 -3 17690.8 908.601 4
 -5 -9 3 15946.3 1214.21 4
 -5 -9 3 17294.9 680.981 3
 -5 -9 2 1547.29 261.28 3
 5 -9 -2 960.828 257.309 4
 -5 9 2 1075.2 341.486 2
 -5 9 2 457.957 275.923 1
 -5 -9 2 1224.4 405.766 4
 -5 -9 1 43922 1310.31 3
 -5 9 1 37597.3 1616.74 2
 5 -9 -1 41845.5 1425.19 4
 -5 -9 1 41575.3 1951.28 4
 -5 9 1 36734.1 1732.58 1
 -5 -9 0 -59.5959 191.508 3
 5 -9 0 109.466 183.002 4
 -5 -9 0 35.8561 345.459 4
 -5 9 0 -91.7424 224.954 2
 -5 9 0 13.9718 320.812 1
 -5 9 -1 47697.1 1760.04 2
 5 -9 1 52170.8 1677.34 4
 -5 9 -1 49283.3 2045.09 1
 -5 -9 -1 50007.4 2203.26 4
 -5 -9 -1 51467.5 1551.72 3
 5 -9 2 197.354 197.947 4
 -5 -9 -2 -51.2491 182.748 3
 -5 -9 -2 54.3335 377.773 4
 -5 9 -2 -56.2943 345.431 1
 -5 9 -2 -162.922 239.886 2
 -5 -9 -3 524.857 231.994 3
 5 -9 3 680.19 272.503 4
 -5 9 -3 13.7008 221.057 2
 -5 -9 -3 461.251 387.798 4
 -5 9 -3 617.753 333.194 1
 -5 -9 -4 12877.7 882.394 3
 5 -9 4 14467.4 980.295 4
 -5 9 -4 11874.7 860.106 2
 -5 -9 -4 11847.3 1157.12 4
 -5 9 -4 12541.7 1091.32 1
 -5 9 -5 11534.9 1057.12 1
 -5 -9 -5 12548.6 900.11 3
 5 -9 5 13551.2 973.477 4
 -5 9 -5 10420.6 802.194 2
 -5 -9 -5 12217.5 1182.64 4
 -5 9 -6 25131.9 1571.42 1
 -5 -9 -6 22919 1241.06 3
 5 -9 6 24640.3 1356.7 4
 -5 9 -6 19932 1083.97 2
 -5 -9 -6 22796.4 1633.04 4
 -5 9 -7 21696.5 1463.32 1
 -5 -9 -7 21129.4 1252.56 3
 5 -9 7 23184.2 1362.55 4
 -5 -9 -8 7201.9 756.496 3
 5 -9 8 7220.64 786.846 4
 -5 9 -8 5228.52 728.874 1
 -5 9 -9 78382.5 2922.27 1
 -5 -9 -9 78926.7 2601.71 3
 5 -9 9 80762.7 2701.38 4
 -5 9 -10 17134.8 1403.74 1
 -5 -9 -10 15464.5 1194.74 3
 5 -9 10 16380.1 1287.02 4
 -5 9 -11 125697 3795.88 1
 -5 -9 -11 122145 3461.9 3
 5 -9 11 114527 3433.57 4
 -5 -9 -12 -49.904 350.636 3
 5 -9 12 254.41 367.625 4
 -5 -9 -13 97985.2 3280.43 3
 5 -9 13 96801 3317.11 4
 -5 9 -13 103693 3544.59 1
 5 -9 14 2470.34 558.998 4
 -5 9 -14 2103.44 651.156 1
 -5 -9 -14 2581.47 646.596 3
 -5 -9 -15 34978.9 2081.15 3
 5 -9 15 33162.7 2060.63 4
 -5 9 -15 36361.8 2182.06 1
 -5 9 -16 2081.37 630.624 1
 5 -9 16 1949.77 487.503 4
 -5 -9 -16 1125.62 453.348 3
 -5 9 -17 4936.8 844.203 1
 -5 -9 -17 5405.75 949.501 3
 5 -9 17 5380.53 900.858 4
 -5 9 -18 9002.6 1205.1 1
 5 -9 18 9053.85 1204.49 4
 -5 -9 -18 8823.19 1196.73 3
 5 -9 19 281.241 370.533 4
 -5 9 -19 -375.148 413.122 1
 5 -10 -22 24550.9 1835.22 3
 -5 -10 21 985.965 518.32 4
 5 -10 -21 1328.9 502.737 3
 -5 10 21 1709.35 573.055 2
 -5 -10 20 15421.1 1636.78 4
 5 -10 -20 15048.6 1383.12 3
 -5 10 20 13771.7 1340.69 2
 -5 -10 19 -294.328 513.448 4
 5 -10 -19 -389.483 475.755 3
 -5 10 19 -164.177 392.226 2
 -5 10 18 166.479 452.465 2
 -5 -10 18 923.515 591.162 4
 5 -10 -18 481.731 349.001 3
 -5 10 17 2961.2 640.014 2
 -5 -10 17 2574.16 741.078 4
 5 -10 -17 3705.03 607.178 3
 5 -10 -16 21066.3 1486.91 3
 -5 -10 16 21389.8 1816.1 4
 -5 10 16 18860.7 1486.72 2
 -5 -10 15 2914.16 753.519 4
 5 -10 -15 2627.01 555.995 3
 -5 -10 14 41014 2319.85 4
 5 -10 -14 40770.4 1947.93 3
 -5 10 14 40562 2090.9 2
 5 -10 -13 1802.73 432.327 3
 -5 10 13 1175.46 454.994 2
 -5 -10 13 1746.57 600.777 4
 -5 10 12 22005.3 1555.75 2
 -5 -10 12 24530.1 1726.91 4
 5 -10 -12 24453.3 1398.26 3
 -5 10 11 436.665 388.74 2
 -5 -10 11 952.415 525.68 4
 5 -10 -11 428.802 321.421 3
 -5 10 10 61228.9 2440.79 2
 -5 -10 10 62642.5 2688.48 4
 5 -10 -10 69923.1 2285.27 4
 5 -10 -10 66533.9 2165.66 3
 -5 -10 9 1044.95 407.599 4
 -5 10 9 747.627 304.884 2
 -5 10 8 12908.8 1094.56 2
 5 -10 -8 13766.4 957.646 4
 -5 -10 8 13604.6 1249.88 4
 -5 10 8 12831.4 1035.19 1
 -5 10 7 13681.9 1083.01 2
 -5 -10 7 15031.9 1244.1 4
 5 -10 -7 15837.4 997.568 4
 -5 10 7 13541.6 1063.57 1
 -5 10 6 5827.4 725.65 1
 -5 -10 6 5394.97 757.782 4
 5 -10 -6 6910.28 660.796 4
 -5 10 6 5764.35 723.35 2
 -5 -10 5 23531.5 1561.83 4
 5 -10 -5 25199.1 1183.13 4
 -5 10 5 21492.4 1364.65 1
 -5 10 5 20523.4 1304.57 2
 -5 10 4 16024.5 1212.14 1
 -5 10 4 15810.7 1132.02 2
 -5 -10 4 16220.2 1271.02 4
 5 -10 -4 17222.7 975.362 4
 -5 10 3 6233.72 702.589 2
 -5 10 3 8212.39 884.134 1
 5 -10 -3 8260.91 686.8 4
 -5 -10 3 7214.13 888.092 4
 -5 10 2 28938.9 1486.69 2
 -5 10 2 30889.9 1699.95 1
 5 -10 -2 34809.9 1373.02 4
 -5 -10 2 32304.7 1789.82 4
 -5 10 1 744.805 356.06 2
 5 -10 -1 729.43 216.242 4
 -5 10 1 100.247 319.919 1
 -5 -10 1 951.96 356.003 4
 -5 10 0 39751.3 1678.78 2
 5 -10 0 47382 1652.85 4
 -5 10 0 42697 2005.62 1
 -5 -10 0 45178.2 2159.5 4
 -5 -10 -1 7742.81 629.654 3
 -5 -10 -1 6080.95 813.24 4
 -5 10 -1 6298.96 843.962 1
 5 -10 1 6797.18 658.791 4
 -5 10 -1 5449.9 639.02 2
 5 -10 2 18499.1 1081.28 4
 -5 -10 -2 18480.2 992.239 3
 -5 -10 -2 18547.4 1423.64 4
 -5 10 -2 16973.1 1089.67 2
 -5 10 -2 17977.4 1339.57 1
 -5 -10 -3 3964.32 496.328 3
 5 -10 3 4310.8 564.859 4
 -5 10 -3 3818.98 532.191 2
 -5 -10 -3 2995.63 645.82 4
 -5 10 -3 3869.22 695.179 1
 -5 -10 -4 342.109 365.751 4
 -5 10 -4 -129.417 394.912 1
 -5 -10 -4 143.114 210.904 3
 5 -10 4 642.805 241.481 4
 -5 10 -4 80.8074 230.591 2
 -5 -10 -5 -402.476 339.592 3
 -5 10 -5 -100.941 549.027 1
 5 -10 5 288.342 239.334 4
 -5 10 -5 42.0441 222.522 2
 -5 -10 -5 -15.8261 386.95 4
 -5 10 -6 12967.9 1208.89 1
 -5 -10 -6 13502.7 1330.9 4
 5 -10 6 13994.4 1078.07 4
 -5 -10 -6 13534.8 1001.06 3
 -5 10 -7 -459.367 630.602 1
 5 -10 7 32.2692 326.552 4
 -5 -10 -7 -11.1565 263.005 3
 -5 -10 -7 534.23 485.112 4
 -5 10 -8 33778 1940.74 1
 5 -10 8 35320.2 1794.64 4
 -5 -10 -8 32437.6 1627.15 3
 -5 10 -9 10290.9 1141.64 1
 -5 -10 -9 10228.5 979.75 3
 5 -10 9 10168.3 1010.33 4
 -5 -10 -10 74053.3 2653.35 3
 5 -10 10 76832.1 2790.68 4
 -5 10 -10 80135.4 3096.11 1
 5 -10 11 8631.73 1006.53 4
 -5 -10 -11 8342.44 948.475 3
 -5 10 -11 8427.32 1108.07 1
 -5 -10 -12 88145.1 3075.5 3
 5 -10 12 87663.7 3186.45 4
 -5 10 -12 92293.1 3450.16 1
 -5 -10 -13 6594.98 933.714 3
 5 -10 13 4284.63 717.877 4
 -5 10 -13 4810.31 914.158 1
 -5 -10 -14 31951.7 1948.01 3
 5 -10 14 30415.8 1957.56 4
 -5 10 -14 31684.7 2076.11 1
 5 -10 15 4966.6 862.484 4
 -5 -10 -15 5240.29 844.072 3
 -5 10 -15 6397.93 1021.76 1
 -5 10 -16 14436.8 1461.61 1
 -5 -10 -16 13577.7 1380.32 3
 5 -10 16 15200.4 1462.11 4
 -5 10 -17 4246.95 882.662 1
 5 -10 17 2489.41 654.3 4
 -5 -10 -17 2594.53 674.63 3
 5 -10 18 770.04 376.837 4
 5 -11 -21 12326.6 1297.33 3
 -5 -11 20 2560.39 735.283 4
 5 -11 -20 3133.3 666.832 3
 -5 11 20 1842.21 543.807 2
 -5 -11 19 -163.754 576.835 4
 5 -11 -19 -529.574 505.123 3
 -5 11 19 -220.107 414.224 2
 5 -11 -18 10341.3 1131.79 3
 -5 -11 18 10629.2 1369.25 4
 -5 11 18 8303 1097.51 2
 -5 11 17 8937.65 1066.27 2
 5 -11 -17 8989.46 1013.28 3
 -5 -11 17 8866.88 1223.74 4
 -5 11 16 6729.33 930.642 2
 -5 -11 16 6624.47 1064.38 4
 5 -11 -16 8868.8 984.526 3
 5 -11 -15 35136.7 1871.04 3
 -5 -11 15 32695.7 2209.38 4
 -5 11 15 29041.6 1869.09 2
 -5 11 14 4452.25 786.219 2
 -5 -11 14 5120.63 915.112 4
 5 -11 -14 5310.75 755.742 3
 5 -11 -13 58264.9 2284.91 3
 -5 -11 13 56284.8 2796.57 4
 -5 11 13 55031.3 2491.05 2
 -5 11 12 5485.57 824.24 2
 5 -11 -12 5067.92 734.386 4
 -5 -11 12 4624.92 808.726 4
 5 -11 -12 5139.72 695.709 3
 -5 -11 11 67709.9 2946.55 4
 5 -11 -11 67225.5 2333.96 3
 5 -11 -11 72892.7 2518.43 4
 -5 11 10 1328.92 539.771 2
 -5 -11 10 946.479 429.146 4
 5 -11 -10 1137.34 408.091 4
 5 -11 -10 980.301 286.265 3
 -5 -11 9 34200.8 1997.36 4
 5 -11 -9 37717.4 1687.3 4
 5 -11 -9 35055.9 1554.08 3
 5 -11 -8 3660.33 499.66 3
 -5 -11 8 3934.73 744.746 4
 5 -11 -8 4137.48 595.402 4
 -5 11 8 2806.9 548.976 2
 -5 11 8 2103.22 483.581 1
 -5 11 7 1696.09 492.172 1
 -5 -11 7 984.216 450.259 4
 5 -11 -7 1176.42 351.791 4
 -5 11 7 97.4561 375.753 2
 -5 -11 6 -429.653 455.569 4
 -5 11 6 -147.388 439.769 2
 -5 11 6 -737.493 440.661 1
 5 -11 -6 -52.2587 258.748 4
 -5 11 5 29965.1 1662.37 2
 -5 11 5 32526.1 1768.88 1
 -5 -11 5 34197.2 1907.83 4
 5 -11 -5 35991.9 1491.23 4
 -5 -11 4 2088.42 576.313 4
 -5 11 4 1752.29 432.095 2
 5 -11 -4 1838.92 365.156 4
 -5 11 4 1327.15 457.483 1
 -5 11 3 59693.5 2257.79 2
 -5 11 3 61713.4 2447.1 1
 5 -11 -3 66582.6 2037.77 4
 -5 -11 3 63085 2637.98 4
 -5 11 2 1132.37 368.274 2
 -5 11 2 1209.37 504.703 1
 -5 -11 2 1020 461.012 4
 5 -11 -2 1431.77 314.341 4
 -5 -11 1 48577.3 2294.58 4
 5 -11 -1 54177.6 1847.17 4
 -5 11 1 49578 2207.95 1
 5 -11 0 2757.93 444.856 4
 -5 -11 0 2979.42 653.137 4
 -5 11 0 2487.18 460.297 2
 -5 11 0 2814.67 616.91 1
 5 -11 1 49103.4 1833.2 4
 -5 11 -1 46302.8 2175.74 1
 -5 -11 -1 46300.5 2315.8 4
 -5 11 -1 44291 1819.37 2
 -5 11 -2 18620.7 1162.63 2
 -5 -11 -2 19586.2 1528.4 4
 -5 11 -2 21920.5 1510.74 1
 -5 11 -3 24587.6 1310.78 2
 5 -11 3 31722.2 1548.42 4
 -5 -11 -3 29644.5 1888.18 4
 -5 11 -3 26419.7 1720.49 1
 5 -11 4 7401.56 790.517 4
 -5 -11 -4 6742.77 969.185 4
 -5 11 -4 6325.38 835.062 1
 -5 11 -5 -334.261 480.055 1
 -5 -11 -5 733.508 276.421 3
 5 -11 5 1324.75 390.45 4
 -5 -11 -5 245.557 364.711 4
 -5 -11 -6 9081.69 817.709 3
 5 -11 6 9852.24 967.506 4
 -5 11 -6 7660.72 958.657 1
 -5 -11 -6 8662.72 1118.59 4
 -5 11 -7 1194.59 432.907 1
 -5 -11 -7 1987.43 415.432 3
 5 -11 7 2486.01 497.227 4
 -5 -11 -7 2745.96 673.952 4
 -5 -11 -8 2063.45 466.241 3
 -5 11 -8 1581.89 475.21 1
 5 -11 8 2123.49 468.83 4
 -5 -11 -8 2083.16 640.671 4
 -5 11 -9 32159.6 2067.43 1
 5 -11 9 31131.2 1767.87 4
 -5 -11 -9 30667.1 1683.04 3
 -5 -11 -9 31873.1 2188.12 4
 -5 -11 -10 -359.728 428.549 3
 -5 11 -10 -382.471 461.934 1
 5 -11 10 -396.881 480.243 4
 -5 -11 -11 42606 2092.9 3
 -5 11 -11 44403.3 2445.29 1
 5 -11 11 41825.6 2152.4 4
 -5 11 -12 8880.88 1163.47 1
 -5 -11 -12 9849.17 1050.16 3
 5 -11 12 9341.99 1070.65 4
 -5 11 -13 40739 2413.15 1
 -5 -11 -13 38759.3 2139.53 3
 5 -11 13 39059.4 2218.53 4
 -5 -11 -14 7171.25 987.451 3
 -5 11 -14 9182.09 1237.83 1
 -5 11 -15 26134.3 2006.5 1
 -5 -11 -15 22579.4 1737.15 3
 -5 -11 -16 6021.23 947.657 3
 5 -12 -20 -73.9778 407.644 3
 5 -12 -19 16428.2 1458.72 3
 -5 -12 18 10426 1395.74 4
 5 -12 -18 9500.51 1110.69 3
 -5 12 18 9858.2 1195.29 2
 -5 -12 17 11254.8 1464.58 4
 5 -12 -17 9886.2 1056.8 3
 -5 12 17 10635.5 1288.94 2
 -5 -12 16 32683.2 2346.7 4
 5 -12 -16 34666.9 1938.16 3
 -5 12 16 29364.5 2009.46 2
 -5 12 15 3157.57 709.84 2
 -5 -12 15 4266.42 900.698 4
 5 -12 -15 4589.11 731.745 3
 -5 -12 14 30634.1 2196.06 4
 -5 12 14 29673.3 1956.75 2
 5 -12 -14 34701.1 1854.27 3
 -5 12 13 4451.75 753.179 2
 -5 -12 13 6891.34 1084.96 4
 5 -12 -13 6171.73 789.766 3
 -5 12 12 48038.5 2358.91 2
 -5 -12 12 55058 2784.57 4
 5 -12 -12 53208.3 2153.58 3
 -5 12 11 23.7614 362.837 2
 -5 -12 11 -413.775 442.383 4
 5 -12 -11 491.284 280.924 3
 5 -12 -11 -321.487 369.041 4
 -5 -12 10 44674.2 2423.31 4
 5 -12 -10 47621.7 1911.57 3
 5 -12 -10 49339.2 2083.63 4
 -5 12 10 41351.1 2163.45 2
 -5 12 9 1974.44 580.388 2
 -5 -12 9 2440.71 596.125 4
 5 -12 -9 2160.45 476.169 4
 -5 12 8 10572.7 1077.16 2
 -5 -12 8 11936.8 1259.26 4
 5 -12 -8 13658.3 1075.66 4
 -5 12 8 10200.3 1056.06 1
 -5 12 7 10597 1044.7 2
 5 -12 -7 13018.4 1006.54 4
 -5 -12 7 11604.8 1199.48 4
 -5 12 7 10547.2 1054.26 1
 -5 12 6 2975.34 566.362 2
 -5 -12 6 3081.41 676.982 4
 -5 12 6 3318.54 658.326 1
 5 -12 -6 3693.5 567.108 4
 -5 12 5 3488.77 633.917 2
 5 -12 -5 4756.72 597.947 4
 -5 -12 5 3405.41 628.755 4
 -5 12 5 4107.28 687.234 1
 -5 12 4 56891.3 2444.09 1
 -5 -12 4 54032.5 2524.44 4
 5 -12 -4 59203.5 2043.21 4
 -5 12 3 1962.32 541.214 1
 -5 12 3 2220.89 564.382 2
 -5 -12 3 1504.92 458.377 4
 5 -12 -3 2245.47 437.647 4
 -5 12 2 106899 3094.7 2
 -5 12 2 115902 3528.47 1
 5 -12 -2 120104 2947.12 4
 -5 -12 2 111905 3695.73 4
 -5 12 1 1820.72 499.057 2
 5 -12 -1 1465.8 353.44 4
 -5 12 1 1559.49 544.865 1
 -5 -12 1 1148.6 394.918 4
 5 -12 0 94981.2 2651.88 4
 -5 12 0 87680.4 3140.91 1
 -5 -12 0 92527.2 3331.52 4
 -5 12 -1 11486.8 990.247 2
 5 -12 1 13092.5 1000.6 4
 -5 12 -1 10832 1173.34 1
 -5 -12 -1 11702.7 1260.03 4
 5 -12 2 40348.4 1801.66 4
 -5 -12 -2 40082 2247.88 4
 -5 12 -2 37699.9 2078.84 1
 -5 -12 -3 34574.8 2137.87 4
 -5 12 -3 34152 2026.74 1
 -5 -12 -4 8541.14 1127.3 4
 -5 12 -4 10509.2 1168.92 1
 -5 -12 -5 21367 1731.02 4
 -5 12 -5 22098.9 1677.67 1
 -5 12 -6 1532.72 486.095 1
 -5 -12 -6 1385.65 623.119 4
 -5 -12 -7 21667.2 1821.57 4
 -5 12 -7 24195.3 1800.98 1
 -5 12 -8 929.204 566.194 1
 -5 -12 -8 1226.04 610.658 4
 -5 12 -9 7973.15 1046.45 1
 -5 -12 -9 6692.78 1127.49 4
 -5 12 -10 18954.9 1657.95 1
 -5 -12 -10 14762.4 1622.38 4
 -5 -12 -11 1919.29 531.822 3
 -5 -12 -11 547.214 524.061 4
 -5 12 -11 483.617 421.485 1
 -5 12 -12 28496.9 2077.91 1
 -5 -12 -12 30267.7 1844.56 3
 -5 -12 -12 24359.8 2119.43 4
 -5 -12 -13 3679.39 739.405 3
 -5 12 -13 2884.35 795.669 1
 -5 -12 -14 19077.1 1577.99 3
 -5 -12 -15 13024.6 1341.84 3
 5 -13 -18 32682 2011.49 3
 5 -13 -17 15439.9 1371.34 3
 -5 -13 16 16879.3 1770.32 4
 5 -13 -16 17354.5 1422.53 3
 -5 13 16 15669.6 1542.49 2
 -5 -13 15 43569.1 2696.79 4
 -5 13 15 40828.5 2354.97 2
 -5 13 14 788.968 476.21 2
 -5 -13 14 535.438 465.008 4
 -5 -13 13 34942.1 2358.55 4
 -5 13 13 29374.2 1977.92 2
 -5 13 12 -239.754 363.494 2
 -5 -13 12 -331.962 539.299 4
 -5 -13 11 26675.9 1982.24 4
 -5 13 11 22380.5 1700.57 2
 -5 13 10 2990.69 622.645 2
 -5 -13 10 4123.03 785.29 4
 -5 -13 9 9129.8 1130.83 4
 -5 13 9 8833.22 1047.92 2
 -5 -13 8 22138.5 1752.83 4
 -5 13 8 22427.5 1554.27 1
 -5 13 8 23786.9 1651.05 2
 -5 13 7 2563.29 641.401 2
 -5 13 7 1892.87 521.04 1
 -5 -13 7 1663.27 521.939 4
 -5 13 6 28150.7 1731.91 2
 -5 13 6 29168.9 1788.43 1
 -5 13 5 11023.6 1083.37 2
 -5 13 5 10867.2 1136.15 1
 -5 -13 5 11889.1 1266.15 4
 -5 13 4 10004.1 1003.33 2
 -5 13 4 10004.2 1082.51 1
 -5 -13 4 11050.7 1213.53 4
 -5 13 3 47832.7 2140.79 2
 -5 -13 3 55995.8 2682.87 4
 -5 13 3 53349.7 2462.47 1
 -5 13 2 2296.77 631.473 1
 -5 13 2 2136.09 523.278 2
 -5 13 1 96596.6 2969.58 2
 -5 13 1 103814 3549.3 1
 -5 -13 1 99127.9 3625.01 4
 -5 -13 0 1654.66 456.83 4
 -5 13 0 2065.15 634.659 1
 -5 13 0 1485.58 445.872 2
 -5 -13 -1 66745.9 3039.14 4
 -5 13 -1 65641.9 2859.02 1
 -5 13 -2 16437.6 1486.52 1
 -5 -13 -2 16779.3 1514.57 4
 -5 -13 -3 30042.5 2107.22 4
 -5 13 -3 29750.1 1947.41 1
 -5 -13 -4 18504.1 1650.22 4
 -5 13 -4 16639.8 1500.57 1
 -5 13 -5 5492.51 975.638 1
 -5 -13 -5 5396.51 978.619 4
 -5 -13 -6 19868.8 1802.94 4
 -5 13 -6 19762.8 1681.9 1
 -5 -13 -7 77.1051 377.979 4
 -5 13 -7 493.91 432.814 1
 -5 -13 -8 25644.6 2087.15 4
 -5 13 -8 24687.3 1909.87 1
 -5 13 -9 939.784 523.49 1
 -5 -13 -9 418.8 436.076 4
 -5 13 -10 5175.09 1024.82 1
 -5 -13 -10 4457.85 932.068 4
 -5 -13 -11 12749.3 1599.27 4
 -5 13 -11 12483.9 1439.81 1
 -5 -14 14 16693.2 1732.29 4
 -5 14 14 17092.3 1587.23 2
 -5 14 13 944.052 416.942 2
 -5 -14 13 2131.95 778.382 4
 -5 -14 12 16291.3 1646.58 4
 -5 14 12 15884.4 1471.71 2
 -5 14 11 7433.11 1025.25 2
 -5 -14 11 8475.11 1189.74 4
 -5 14 10 5323.79 837.285 2
 -5 -14 10 5516.96 922.536 4
 -5 -14 9 37673.3 2380.3 4
 -5 14 9 33418.2 2030.56 2
 -5 14 8 247.458 404.806 2
 -5 -14 8 -178.484 502.197 4
 -5 14 7 49681.5 2415 2
 -5 14 7 45522.3 2312.96 1
 -5 14 6 641.179 408.276 2
 -5 14 6 572.226 454.355 1
 -5 -14 6 351.363 450.293 4
 -5 14 5 42709.6 2327.18 1
 -5 -14 5 46030.5 2544.47 4
 -5 14 5 40051.2 2099.58 2
 -5 14 4 7865.71 978.406 2
 -5 14 4 8809.92 1081.93 1
 -5 -14 4 8212.45 1134.75 4
 -5 -14 3 32080.3 2102.8 4
 -5 14 3 32107.6 2029.18 1
 -5 14 2 11290.2 1104.79 2
 -5 14 2 14367.3 1363.44 1
 -5 -14 2 14455.2 1418.25 4
 -5 14 1 1358.96 424.277 2
 -5 14 1 1585.48 588.091 1
 -5 -14 1 1254.3 507.867 4
 -5 14 0 14744.4 1401.51 1
 -5 -14 0 15587.4 1514.08 4
 -5 -14 -1 4726.96 891.276 4
 -5 14 -1 4217.61 857.495 1
 -5 14 -2 17552.9 1601.62 1
 -5 -14 -2 19820.1 1744.74 4
 -5 14 -3 9322.51 1154.56 1
 -5 -14 -3 10083.8 1272.15 4
 -5 -14 -4 12427.6 1425.24 4
 -5 14 -4 10265.2 1270.35 1
 -5 14 -5 14049.6 1449.49 1
 -5 -14 -5 11005.3 1388.49 4
 -5 14 -6 4844.23 911.074 1
 -5 -14 -6 2539.16 703.41 4
 -5 -14 -7 19689.5 1885.48 4
 -5 14 -7 21254.3 1859.86 1
 -5 14 -8 1315.43 565.112 1
 -5 -14 -8 2037.57 666.755 4
 -5 -14 -9 23134.9 2115.32 4
 -5 15 11 -77.6581 469.583 2
 -5 -15 10 49811.2 2892.28 4
 -5 15 10 45178.6 2523.74 2
 -5 15 9 857.053 511.459 2
 -5 -15 9 -233.685 461.945 4
 -5 -15 8 83115.8 3612.63 4
 -5 15 8 72504.6 3067.18 2
 -5 15 7 1654.22 678.25 2
 -5 -15 7 -206.096 519.583 4
 -5 15 6 67646.9 2949.39 1
 -5 -15 6 68833 3232.56 4
 -5 15 6 59631.3 2690.58 2
 -5 15 5 487.533 449.001 2
 -5 -15 5 125.002 405.537 4
 -5 15 5 369.256 479.476 1
 -5 -15 4 46516.3 2675.19 4
 -5 15 4 41847.4 2367.73 1
 -5 15 4 38506 2131.73 2
 -5 15 3 -206.287 326.963 2
 -5 -15 3 -308.183 428.157 4
 -5 15 3 10.1802 420.621 1
 -5 15 2 20113.9 1698.54 1
 -5 -15 2 23034.1 1867.77 4
 -5 -15 1 519.363 481.468 4
 -5 15 1 -90.5113 483.874 1
 -5 15 0 1957.45 578.226 1
 -5 -15 0 2063.59 603.942 4
 -5 15 -1 349.466 421.212 1
 -5 -15 -1 -687.21 612.201 4
 -5 15 -2 16262.1 1594.53 1
 -5 -15 -2 17438.2 1685.55 4
 -5 -15 -3 48.7682 490.133 4
 -5 15 -3 827.599 495.587 1
 -5 -15 -4 28285.8 2220.35 4
 -5 15 -4 31545.8 2245.7 1
 -5 15 -5 732.298 409.183 1
 -5 -15 -5 410.571 516.398 4
 -5 16 8 1049.33 615.13 2
 -5 16 7 78898.2 3294.74 2
 -5 16 6 1706.34 633.969 2
 -5 16 5 45495.6 2415.99 2
 -5 16 4 5252.26 941.076 1
 -5 16 3 23805.1 1889.05 1
 -5 16 2 1935.98 668.742 1
 -5 16 1 4790.9 906.342 1
 -5 16 0 8429.13 1181.59 1
 -5 16 -1 -540.339 703.119 1
 6 0 -28 22933.2 1730.45 3
 -6 0 27 -24.5703 517.09 4
 6 0 -27 -324.154 414.327 3
 -6 0 26 3242.6 832.305 4
 6 0 -26 1970.41 527.828 3
 -6 0 25 -360.486 538.481 4
 6 0 -25 -199.544 308.295 3
 -6 0 24 2009 734.489 4
 6 0 -24 1509.96 380.929 3
 -6 0 23 -354.279 502.343 4
 6 0 -23 -166.354 321.064 3
 -6 0 22 17521.1 1617.95 4
 6 0 -22 15525 1199.41 3
 6 0 -21 -117.273 253.464 3
 -6 0 21 431.517 464.513 4
 -6 0 20 169794 4852.4 4
 6 0 -20 162324 3776.52 3
 -6 0 20 168774 3136.57 2
 -6 0 19 -204.02 290.999 2
 -6 0 19 -94.1499 619.379 4
 6 0 -19 -220.798 315.1 3
 -6 0 18 348608 4624.22 2
 6 0 -18 343296 5080.27 5
 6 0 -18 338370 5362.59 3
 -6 0 17 -431.944 396.974 4
 6 0 -17 32.9359 256.668 5
 -6 0 17 -250.49 262.42 2
 -6 0 16 361726 4605.33 2
 -6 0 16 371857 6469.51 4
 6 0 -16 357164 5076.81 5
 -6 0 15 -225.339 237.419 2
 -6 0 15 -250.649 410.751 4
 6 0 -15 15.6536 306.794 5
 -6 0 14 168047 3850.37 4
 6 0 -14 156455 3113.26 5
 -6 0 14 164062 2795.24 2
 -6 0 13 79.0557 267.98 4
 -6 0 13 134.646 159.003 2
 6 0 -13 -290.186 282.561 5
 -6 0 12 36092.6 1224.09 2
 -6 0 12 35781.7 1628.99 4
 6 0 -12 33199.5 1337.61 5
 6 0 -11 441.095 250.256 5
 -6 0 11 331.957 285.606 4
 -6 0 11 -147.836 207.635 2
 -6 0 10 2273.85 425.222 4
 -6 0 10 1758.97 331.725 2
 -6 0 9 423.995 278.011 2
 -6 0 9 232.961 298.327 4
 -6 0 8 235592 3415.59 4
 -6 0 8 232366 3341.98 2
 -6 0 7 195.714 188.366 4
 -6 0 7 -37.8644 195.335 2
 -6 0 6 137743 2554.04 2
 -6 0 6 145880 2235.94 4
 -6 0 5 452.434 149.556 4
 6 0 -5 616.872 140.256 4
 -6 0 5 -82.6202 271.187 2
 -6 0 5 46.794 196.061 3
 -6 0 4 351175 3434.91 4
 6 0 -4 358181 3341.86 4
 -6 0 3 218.017 92.8819 4
 -6 0 3 -23.9879 200.943 3
 -6 0 2 100792 1531.48 4
 -6 0 2 101474 2129.51 3
 -6 0 1 391.965 242.14 3
 -6 0 0 7322.15 610.423 3
 -6 0 -1 -59.5907 243.946 3
 -6 0 -2 156347 2911.43 3
 -6 0 -3 760.584 286.213 3
 -6 0 -4 247226 3903.37 3
 -6 0 -5 222.274 271.88 3
 -6 0 -6 12600.7 888.118 3
 -6 0 -7 178.088 230.473 3
 -6 0 -7 402.204 206.61 1
 -6 0 -8 3373.94 406.092 1
 -6 0 -8 3037.56 501.094 3
 -6 0 -9 129.483 231.443 3
 -6 0 -9 176.195 219.889 1
 -6 0 -10 1531.09 401.453 3
 -6 0 -10 1455.91 293.115 1
 -6 0 -11 160.225 254.366 3
 -6 0 -11 44.2868 231.195 1
 -6 0 -12 4618.04 485.052 1
 -6 0 -12 4623.1 694.851 3
 -6 0 -13 331.807 324.59 3
 -6 0 -14 8504.01 962.182 3
 -6 0 -15 -484.226 375.817 3
 -6 0 -16 47740.4 2299.94 3
 -6 0 -17 543.643 500.962 3
 -6 0 -18 81131.1 3220.58 3
 -6 0 -19 874.734 640.479 3
 -6 0 -20 53082.4 2745.85 3
 -6 0 -21 608.183 490.464 3
 6 1 -28 5236.77 892.919 3
 6 -1 -27 14092.3 1379.21 3
 6 1 -27 13351.1 1264.42 3
 -6 -1 27 16869 1813.88 4
 6 1 -26 4643.02 738.788 3
 6 -1 -26 5590.42 869.584 3
 -6 -1 26 6690.78 1218.07 4
 -6 1 25 6227.42 1194.81 4
 -6 -1 25 5516.55 981.519 4
 6 1 -25 5037.68 734.551 3
 6 -1 -25 4343.79 729.59 3
 -6 -1 24 3648.04 808.176 4
 6 1 -24 3129.57 594.982 3
 6 -1 -24 3371.89 619.94 3
 -6 1 24 4164.55 945.183 4
 -6 -1 23 6489.05 1078.21 4
 -6 1 23 7934.34 1216.39 4
 6 1 -23 4780.92 686.901 3
 6 -1 -23 5957.74 817.151 3
 -6 1 22 3112.62 863.012 4
 -6 -1 22 3184.56 851.118 4
 6 1 -22 2253.57 496.719 3
 6 -1 -22 2886.99 588.779 3
 -6 1 21 78799 3344.39 4
 -6 -1 21 78981.9 3347.93 4
 6 1 -21 72113.4 2485.22 3
 6 -1 -21 73045.1 2628.67 3
 -6 1 21 78745.6 2252.94 2
 6 -1 -20 385.173 360.936 3
 -6 1 20 1037.93 693.63 4
 -6 -1 20 371.41 393.344 4
 -6 1 20 734.109 280.449 2
 6 1 -20 5.85928 278.762 3
 -6 1 19 183330 4894.79 4
 6 -1 -19 173697 3429.45 5
 -6 -1 19 192619 4971.67 4
 6 1 -19 168414 3723.11 3
 6 -1 -19 179581 3943.38 3
 -6 -1 19 182412 3004.57 2
 -6 1 19 181447 3393.56 2
 -6 1 18 8707.69 689.896 2
 -6 -1 18 7418.29 1024.72 4
 -6 1 18 8172.61 1116.54 4
 6 1 -18 7656.93 768.126 3
 6 -1 -18 8069.44 835.054 3
 6 -1 -18 8789.09 738.56 5
 -6 -1 18 9054.91 623.948 2
 -6 -1 17 304185 3945.22 2
 -6 1 17 307156 4430.68 2
 6 1 -17 301772 4752.23 5
 6 -1 -17 301941 4579.11 5
 -6 1 17 317303 6044.08 4
 -6 -1 17 306636 6088.63 4
 -6 -1 16 45527.5 1360.44 2
 -6 1 16 43338 1514.12 2
 6 1 -16 40291 1601.76 5
 6 -1 -16 42810.7 1584.95 5
 -6 -1 16 46475.9 2195.34 4
 -6 1 16 44185.5 2098.58 4
 6 1 -15 164007 3283.19 5
 -6 -1 15 164406 4094.07 4
 6 -1 -15 163665 3173.54 5
 -6 1 15 177797 4095.99 4
 -6 1 15 171144 3065.63 2
 -6 -1 15 171047 2735.52 2
 6 -1 -14 37579.4 1430.22 5
 -6 -1 14 39190.6 1208.59 2
 -6 1 14 39007.6 1372.52 2
 -6 1 14 40482.2 1849.41 4
 6 1 -14 37086.8 1486.63 5
 -6 -1 14 40128.2 1855.75 4
 -6 1 13 17912.6 919.32 2
 -6 1 13 16773.7 1137.28 4
 -6 -1 13 16257 1184.57 4
 -6 -1 13 17563.5 803.089 2
 6 1 -13 17325.2 1003.27 5
 6 -1 -13 17657.6 984.773 5
 6 1 -12 24458 1186.91 5
 -6 1 12 27121.4 1383.72 4
 -6 -1 12 25017.3 1360.19 4
 -6 1 12 25833 1097.64 2
 -6 -1 12 26334 984.498 2
 -6 1 11 1305.9 336.613 4
 -6 -1 11 2051.99 432.095 4
 -6 1 11 2220.94 322.98 2
 -6 -1 11 1911.64 276.392 2
 6 1 -11 2298.98 397.38 5
 6 1 -10 22570.7 1081.82 5
 -6 1 10 21131.1 1080.89 4
 -6 -1 10 21301 1129.38 4
 -6 1 10 22552 1000.33 2
 -6 -1 10 21853.4 904.943 2
 6 1 -9 158006 2928.54 5
 -6 1 9 156327 2829.01 4
 -6 -1 9 157992 2991.66 4
 -6 1 9 156521 2750.47 2
 -6 -1 9 152441 2496.85 2
 -6 -1 8 32847.8 1157.47 2
 -6 1 8 32630.8 1162.65 4
 -6 -1 8 32217.2 1228.78 4
 -6 1 8 35303 1254.83 2
 -6 -1 7 202036 3081.29 4
 -6 1 7 200903 2824.26 4
 -6 -1 7 201926 3015.16 2
 -6 1 7 201323 3192.16 2
 -6 1 6 2085.32 255.21 4
 -6 1 6 2126.35 384.973 2
 6 -1 -6 2513.14 230.599 4
 -6 -1 6 2056.38 317.399 4
 -6 1 5 322700 4254.01 2
 -6 1 5 321981 3189.92 4
 -6 -1 5 324702 3674.63 4
 6 -1 -5 321895 2920.35 4
 -6 -1 5 321662 3973.29 3
 -6 1 4 30449.3 684.66 4
 -6 -1 4 30905.6 935.55 4
 6 -1 -4 32624.7 625.937 4
 -6 1 4 32161.5 1160.6 3
 -6 -1 4 32170.4 1125.4 3
 -6 1 4 33296.3 1246.16 2
 -6 1 3 180729 1809.05 4
 -6 -1 3 179918 2476.1 4
 -6 1 3 188210 2974.11 3
 -6 -1 3 191490 2950.99 3
 -6 1 2 24714.4 561.605 4
 -6 -1 2 24645.8 845.327 4
 -6 1 2 25474.4 1056.83 3
 -6 -1 2 24714.5 1020 3
 -6 -1 1 34222.5 1215.8 3
 -6 -1 1 33343 1002.49 4
 -6 1 1 34125 1247.71 3
 -6 -1 0 72675.4 1806.53 3
 -6 1 0 67882.3 1794.32 3
 -6 1 -1 2051.86 377.208 3
 -6 -1 -1 1730.16 364.832 3
 -6 1 -2 128719 2636.97 3
 -6 -1 -2 135136 2631.63 3
 -6 1 -3 184372 3226.73 3
 -6 -1 -3 181217 3162.01 3
 -6 1 -3 183527 3037.64 1
 -6 1 -4 17521.5 978.35 3
 -6 -1 -4 16305.7 957.749 3
 -6 1 -4 17939.2 907.774 1
 -6 -1 -5 69722.3 2005.3 3
 -6 1 -5 67958.1 1961.01 3
 -6 1 -5 70119.3 1797.94 1
 -6 1 -6 9693.75 663.506 1
 -6 -1 -6 9898.31 788.076 3
 -6 1 -6 9865.97 782.558 3
 -6 1 -7 32215.8 1239.22 1
 -6 1 -7 32137.7 1442.38 3
 -6 -1 -7 30825.7 1430.78 3
 -6 1 -8 2910.93 402.889 1
 -6 1 -8 2337.68 439.548 3
 -6 -1 -8 2210.77 422.114 3
 -6 -1 -9 18411.4 1159.74 3
 -6 1 -9 16966.8 1110.85 3
 -6 1 -9 16960.3 935.479 1
 -6 1 -10 2540.09 469.27 3
 -6 -1 -10 2993.71 513.375 3
 -6 1 -10 2276.99 369.122 1
 -6 -1 -11 1990.08 449.426 3
 -6 1 -11 1041.44 342.891 3
 -6 1 -11 2095.53 377.933 1
 -6 1 -12 226.831 318.45 3
 -6 -1 -12 416.93 355.95 3
 -6 1 -12 660.584 287.701 1
 -6 1 -13 12336.8 1094.92 3
 -6 -1 -13 12633.7 1116.61 3
 -6 1 -13 14743.2 931.164 1
 -6 1 -14 94.8821 346.783 3
 -6 -1 -14 964.296 372 3
 -6 -1 -15 12563.8 1179.99 3
 -6 1 -15 12546.8 1202.32 3
 -6 1 -16 5363.3 836.854 3
 -6 -1 -16 5842.49 890.298 3
 -6 -1 -17 23659.9 1726.76 3
 -6 1 -17 24667.8 1734.32 3
 -6 1 -18 107.686 381.602 3
 -6 -1 -18 -569.802 480.188 3
 -6 -1 -19 39238.7 2285.08 3
 -6 1 -19 36928.3 2190.53 3
 -6 -1 -20 479.445 477.611 3
 -6 1 -20 1437.77 747.065 3
 -6 -1 -21 28507.3 2079.33 3
 -6 1 -21 29088 2066.38 3
 -6 1 -22 304.919 375.075 3
 6 2 -28 12045.8 1235.87 3
 6 2 -27 13442.6 1286.03 3
 6 -2 -27 14606 1400.63 3
 6 2 -26 14335.2 1242.46 3
 6 -2 -26 14390.4 1401.59 3
 -6 -2 26 17446.9 1863.88 4
 -6 -2 25 20427.4 1932.37 4
 6 2 -25 18938 1405.23 3
 6 -2 -25 20590.7 1556.58 3
 -6 -2 24 371.797 482.298 4
 6 2 -24 19.1777 363.512 3
 6 -2 -24 -159.798 420.283 3
 6 -2 -23 18232.7 1413.91 3
 -6 -2 23 18947.5 1797.24 4
 6 2 -23 15455 1207.74 3
 -6 2 23 17070.3 1132.81 2
 6 2 -22 18013.2 1257.85 3
 6 -2 -22 20596.6 1446.59 3
 -6 2 22 20936.3 1245.29 2
 6 2 -21 9669.65 924.813 3
 -6 2 21 11651.5 1370.23 4
 -6 -2 21 10001.2 1270.62 4
 6 -2 -21 10181.1 1001.71 3
 -6 2 21 11352.9 904.928 2
 -6 -2 20 47415.8 2543.86 4
 -6 2 20 46201.9 2494.98 4
 6 2 -20 40294.6 1776.82 3
 6 -2 -20 43412.5 1993.8 3
 6 -2 -20 44085.4 1656.56 5
 -6 2 20 43944.7 1738.33 2
 -6 -2 19 8214.73 1050.26 4
 -6 2 19 6088.45 904.537 4
 6 2 -19 6521.59 699.795 3
 6 -2 -19 5582.34 701.839 3
 -6 2 19 7228.31 695.689 2
 6 -2 -19 7538.04 689.014 5
 -6 2 18 59429.3 1945.97 2
 -6 -2 18 61135.3 2690.68 4
 -6 2 18 57165.3 2613.71 4
 6 2 -18 56365 1965.09 3
 6 -2 -18 58995.6 2170.62 3
 6 -2 -18 60107.6 1893.7 5
 -6 -2 17 5450.94 435.143 2
 6 -2 -17 5023.49 535.76 5
 -6 2 17 5807.9 885.641 4
 -6 -2 17 4975.48 779.807 4
 6 2 -17 4598.02 583.366 3
 -6 2 17 5397.24 574.175 2
 -6 -2 16 119532 2096.86 2
 -6 2 16 119815 2728.59 2
 -6 -2 16 117796 3514.45 4
 -6 2 16 117441 3439.7 4
 6 -2 -16 114870 2629.57 5
 6 2 -15 85579.9 2409.94 5
 -6 2 15 85873.2 2826.24 4
 -6 -2 15 87372.6 2901.03 4
 6 -2 -15 84895.1 2199.06 5
 -6 -2 15 87057 1730.73 2
 -6 2 15 88255.1 2252.96 2
 -6 2 14 13105.4 848.381 2
 -6 2 14 13573.8 1134.22 4
 -6 -2 14 13647.7 664.73 2
 -6 -2 14 13024 1104.48 4
 6 2 -14 12529.3 896.975 5
 6 2 -13 100957 2527.56 5
 -6 2 13 98602.8 2795.85 4
 -6 2 13 104425 2374.88 2
 -6 -2 13 100940 2913.92 4
 -6 -2 13 101926 1858.43 2
 -6 2 12 562.787 325.391 4
 -6 -2 12 397.266 270.867 4
 -6 2 12 819.605 245.671 2
 6 2 -12 132.033 235.822 5
 -6 -2 12 331.013 159.484 2
 -6 -2 11 181213 3654.37 4
 -6 2 11 182925 3465.3 4
 -6 2 11 187759 3203.77 2
 -6 -2 11 179214 2608.99 2
 6 2 -11 179805 3352.76 5
 -6 2 10 93082.1 2250.12 4
 -6 -2 10 95840.8 2475.99 4
 -6 2 10 94898.8 2206.57 2
 6 2 -10 95097.7 2320.78 5
 -6 -2 10 92149.2 1800.25 2
 -6 -2 9 112001 2064.82 2
 -6 2 9 113716 2317.09 4
 -6 -2 9 112919 2582.02 4
 -6 2 9 115308 2444.76 2
 6 2 -9 118208 2547.25 5
 6 2 -8 233584 3724.23 5
 -6 2 8 228635 3175.35 4
 -6 -2 8 239912 3681.52 4
 -6 -2 8 229904 3165.74 2
 -6 2 8 233404 3584.28 2
 -6 -2 7 91018 2074.07 4
 6 -2 -7 97864.2 1594.89 4
 -6 2 7 91878.4 1705.1 4
 -6 2 7 94229.6 2166.48 2
 6 2 -7 94948.4 2211.54 5
 6 2 -6 232086 3552.35 5
 -6 2 6 224580 2560.79 4
 6 -2 -6 234665 2410.51 4
 -6 -2 6 226012 3284.29 4
 -6 2 6 226079 3549.95 2
 -6 2 5 112849 2384.8 2
 6 -2 -5 103248 1182.42 4
 -6 2 5 97876.4 1297.95 4
 -6 -2 5 110630 2099.04 4
 -6 -2 5 107273 2044.32 3
 -6 2 4 218746 3569.78 2
 -6 -2 4 220926 3066.68 4
 -6 -2 4 226516 3175.91 3
 -6 2 3 25615.1 1147.79 2
 -6 -2 3 25425.9 957.956 4
 -6 2 3 26650.1 1067.04 3
 -6 -2 3 26024.6 1021.61 3
 -6 2 2 72083.9 1959.45 2
 -6 -2 2 72455.3 1662.64 4
 -6 2 2 70294.3 1801.36 3
 -6 -2 2 70302.2 1741.65 3
 -6 -2 1 36085.1 1242.62 3
 -6 -2 1 34399.7 1137.59 4
 -6 2 1 36220 1272.54 3
 -6 2 0 1154.6 300.821 3
 -6 -2 0 1229.3 313.829 3
 -6 2 0 1469.2 194.743 4
 -6 2 -1 185514 3153.5 3
 -6 -2 -1 184052 3094.5 3
 -6 2 -1 183953 2505.67 4
 -6 2 -1 188303 3164.26 1
 -6 2 -2 4248.28 488.749 3
 -6 2 -2 4700.81 508.309 1
 -6 -2 -2 4727.95 526.029 3
 -6 2 -3 56609.3 1657.16 1
 -6 2 -3 56561.9 1750.13 3
 -6 -2 -3 55275.8 1708.05 3
 -6 2 -4 99533.3 2384.21 3
 -6 2 -4 97410.8 2219.21 1
 -6 -2 -4 93946.3 2303.93 3
 -6 2 -5 1229.48 263.758 3
 -6 -2 -5 1170.74 328.941 3
 -6 2 -5 961.102 306.978 1
 -6 -2 -6 69950.3 2092.8 3
 -6 2 -6 69543.2 2042.79 3
 -6 2 -6 70125.4 1905.27 1
 -6 -2 -7 5662.06 611.716 3
 -6 2 -7 5871.88 574.181 1
 -6 2 -7 4944.57 598.237 3
 -6 2 -8 66840 2133.21 3
 -6 -2 -8 67765.7 2188.8 3
 -6 2 -8 70779.9 1960.01 1
 -6 2 -9 -262.289 306.169 3
 -6 2 -9 130.463 276.958 1
 -6 -2 -9 -58.1694 297.237 3
 -6 -2 -10 12642.5 1045.04 3
 -6 2 -10 12343.6 849.274 1
 -6 2 -10 12050.6 970.31 3
 -6 2 -11 1552.63 372.17 3
 -6 -2 -11 1759.78 369.944 3
 -6 -2 -12 612.722 352.616 3
 -6 2 -12 60.5526 308.204 1
 -6 2 -12 18.757 342.826 3
 -6 2 -13 916.431 325.67 3
 -6 2 -13 1545.58 333.38 1
 -6 -2 -13 813.978 341.323 3
 -6 2 -14 3320.9 582.159 3
 -6 -2 -14 2388.94 568.99 3
 -6 2 -14 3399.51 487.63 1
 -6 2 -15 7156.61 879.041 3
 -6 -2 -15 7070.97 923.21 3
 -6 -2 -16 6001.3 880.653 3
 -6 2 -16 5700.44 832.423 3
 -6 2 -17 -452.679 480.008 3
 -6 -2 -17 -157.409 423.889 3
 -6 2 -18 4391.27 815.2 3
 -6 -2 -18 4109.06 827.257 3
 -6 2 -19 881.641 418.373 3
 -6 -2 -19 685.337 399.727 3
 -6 2 -20 17583.9 1557.59 3
 -6 -2 -20 18470.2 1655.39 3
 -6 -2 -21 23791.8 1937.02 3
 -6 2 -21 20272.9 1736.02 3
 -6 2 -22 13340.7 1434.44 3
 6 -3 -27 5161.1 868.855 3
 -6 -3 27 6012.37 1249.27 4
 -6 -3 26 40401.9 2767.17 4
 6 -3 -26 36170.3 2190.41 3
 -6 -3 25 4905.51 1004.1 4
 6 3 -25 4819.6 816.713 3
 6 -3 -25 5189.58 880.891 3
 -6 -3 24 62558.5 3286.49 4
 6 -3 -24 56674.5 2600.13 3
 -6 3 24 61917.1 2337.38 2
 -6 -3 23 892.756 446.306 4
 6 3 -23 457.935 312.757 3
 6 -3 -23 635.693 351.62 3
 -6 3 23 681.32 286.911 2
 -6 -3 22 74178.2 3400.2 4
 6 3 -22 61615.8 2286.15 3
 6 -3 -22 65758.3 2639.97 3
 -6 3 22 70404 2396.26 2
 -6 3 21 6107.3 677.466 2
 -6 -3 21 5049.75 935.5 4
 6 3 -21 4524.78 628.435 3
 6 -3 -21 4884 724.941 3
 6 -3 -20 12260.3 859.851 5
 -6 -3 20 11596.4 1294.3 4
 6 3 -20 9314.9 849.225 3
 6 -3 -20 11681.4 1096.51 3
 -6 3 20 12755.7 990.736 2
 -6 -3 19 7984.29 1049.55 4
 6 -3 -19 7043.55 832.085 3
 6 3 -19 5827.99 635.583 3
 6 -3 -19 8312.13 713.662 5
 -6 3 19 7971.38 780.405 2
 6 -3 -18 526.21 262.221 5
 -6 -3 18 239.087 384.43 4
 6 3 -18 234.878 209.845 3
 6 -3 -18 269.128 328.59 3
 -6 3 18 -197.544 280.683 2
 -6 3 17 10708.4 847.572 2
 6 -3 -17 10484.2 771.802 5
 -6 -3 17 10048.5 1123.22 4
 6 3 -17 9384.63 758.486 3
 -6 -3 16 37580.1 2011.48 4
 -6 -3 16 43662.3 1075.5 2
 -6 3 16 40617.5 1638.98 2
 6 -3 -16 40042.2 1495.88 5
 -6 -3 15 25008.8 1574.53 4
 -6 3 15 24432.1 1256.94 2
 -6 -3 15 25088.7 804.861 2
 -6 -3 14 64921.8 2462.37 4
 -6 -3 14 68382.9 1363.06 2
 -6 3 14 67910.8 2037.83 2
 -6 3 13 1123.55 252.012 2
 -6 -3 13 1678.75 385.424 4
 -6 -3 13 1315.24 197.662 2
 -6 3 12 175782 3276.58 2
 -6 -3 12 172858 3816.83 4
 -6 -3 12 176051 2390.92 2
 6 3 -12 175648 3407.81 5
 -6 3 11 14326.9 893.826 2
 6 3 -11 13610.3 922.34 5
 -6 -3 11 13719.2 623.918 2
 -6 -3 11 13212.2 1009.88 4
 -6 -3 10 305797 3531.98 2
 6 3 -10 306154 4532.45 5
 -6 -3 10 305146 4814.65 4
 -6 -3 9 113208 1994.72 2
 -6 -3 9 119308 2727.77 4
 6 3 -9 117753 2614.46 5
 -6 3 9 114216 2534.29 2
 6 3 -8 237458 3835.86 5
 -6 -3 8 244740 3894.05 4
 -6 3 8 236761 3811.75 2
 6 -3 -7 160498 2133.92 4
 -6 -3 7 163947 2984.04 4
 -6 3 7 159653 3001.5 2
 6 3 -7 165248 3055.29 5
 6 3 -6 35042.9 1341.66 5
 6 -3 -6 34276.9 770.187 4
 -6 -3 6 33040 1264.97 4
 -6 3 6 33386 1365.29 2
 -6 -3 5 217884 3284.68 4
 -6 -3 5 221237 3003.69 3
 6 3 -5 228453 3481.59 5
 -6 3 5 224326 3568.36 2
 -6 3 4 24922.2 1156.32 2
 6 3 -4 26607.9 1108.42 5
 -6 -3 4 24984.5 1068.41 4
 -6 -3 4 23922.3 953.3 3
 -6 3 3 44953.5 1620.26 2
 -6 -3 3 48215.8 1467.7 4
 -6 3 3 47618.6 1468.3 3
 6 3 -3 48029.8 1486.42 5
 -6 -3 3 45870.3 1365.52 3
 -6 -3 2 44556.1 1351.04 3
 -6 3 2 43719.1 1537.33 2
 -6 -3 2 43491.5 1388.14 4
 6 3 -2 42208.7 1333.44 5
 -6 3 2 41649.9 1362.56 3
 -6 -3 1 13419.2 779.381 3
 6 3 -1 14594.9 773.797 5
 -6 3 1 11724.2 859.07 2
 -6 -3 1 12586.4 804.4 4
 -6 3 1 13441.4 879.314 1
 -6 3 1 12305.2 776.843 3
 -6 -3 0 45021.9 1447.51 3
 -6 3 0 43350.4 884.496 4
 -6 3 0 42267.7 1602.73 2
 -6 -3 0 44525.1 1449.62 4
 -6 3 0 45116.6 1478.24 3
 -6 3 0 44544.3 1545.32 1
 -6 3 -1 8937.55 733.437 1
 -6 -3 -1 9773.29 709.308 3
 6 -3 1 9686.55 447.222 4
 -6 3 -1 9092.56 489.553 4
 -6 3 -1 8215.71 650.525 3
 -6 3 -2 83868 2097.96 3
 -6 3 -2 85174 2150.16 1
 -6 -3 -2 83160.1 2060.28 3
 6 -3 2 82396.1 1547.93 4
 -6 3 -3 52865.4 1682.8 3
 -6 3 -3 55609.6 1737.11 1
 -6 -3 -3 56062.2 1704.8 3
 6 -3 3 55741.1 1378.76 4
 -6 3 -4 34959 1414.25 3
 -6 3 -4 36610.9 1417.9 1
 6 -3 4 36720 1198.82 4
 -6 -3 -4 35220.2 1396.31 3
 -6 3 -5 87351 2291.53 3
 -6 -3 -5 86572 2271.85 3
 -6 3 -5 91278.8 2275.65 1
 6 -3 5 89997.5 2051.72 4
 -6 3 -6 1917.37 376.322 3
 -6 -3 -6 1925.55 383.865 3
 -6 3 -6 1807.63 358.384 1
 6 -3 6 2247.81 368.143 4
 -6 3 -7 40749.4 1602.31 3
 -6 -3 -7 43447.9 1699.55 3
 6 -3 7 46167.6 1622.67 4
 -6 3 -7 44778.4 1612.39 1
 6 -3 8 4082.87 547.811 4
 -6 -3 -8 3405.26 569.597 3
 -6 3 -8 3805.07 512.54 1
 -6 3 -8 3099.95 491.485 3
 6 -3 9 75258.7 2322.24 4
 -6 -3 -9 70856.8 2327.85 3
 -6 3 -9 77790.6 2215.55 1
 -6 3 -9 73477.7 2312.12 3
 -6 3 -10 41392.6 1773.14 3
 -6 -3 -10 44394.7 1890.61 3
 -6 3 -10 42057.7 1642.84 1
 6 -3 10 42903.5 1816.46 4
 6 -3 11 25928.6 1474.2 4
 -6 3 -11 21660.1 1317.36 3
 -6 3 -11 26906.2 1346.11 1
 -6 -3 -11 24801.2 1471.02 3
 -6 -3 -12 38733 1893.55 3
 -6 3 -12 36841.3 1778.08 3
 -6 3 -12 41040.7 1679.18 1
 6 -3 12 40351.2 1931.58 4
 6 -3 13 1224.12 432.771 4
 -6 3 -13 1061.64 311.553 3
 -6 -3 -13 1330.04 484.451 3
 -6 3 -13 1756.28 411.516 1
 -6 3 -14 15525.3 1255.12 3
 -6 -3 -14 16394.2 1344.29 3
 -6 3 -14 17527 1151.27 1
 -6 3 -15 1.24903 296.083 3
 -6 -3 -15 -16.2389 393.135 3
 -6 3 -15 239.432 262.839 1
 -6 3 -16 2381.15 548.26 3
 -6 -3 -16 2387.21 559.84 3
 -6 3 -17 1876.19 461.212 3
 -6 -3 -17 2381.12 579.257 3
 -6 3 -18 -554.08 480.444 3
 -6 -3 -18 -981.153 580.801 3
 -6 3 -19 4976.77 804.207 3
 -6 -3 -19 5680.99 884.33 3
 -6 3 -20 4001.24 744.05 3
 -6 -3 -20 6594.47 1066.16 3
 -6 3 -21 13914.6 1422.82 3
 -6 3 -22 38539.7 2435.69 3
 -6 -4 26 4265.19 1088.56 4
 6 -4 -26 6201.82 985.293 3
 -6 -4 25 60529 3329.4 4
 6 -4 -25 55178.8 2647.63 3
 -6 4 24 13323.9 1161.71 2
 6 4 -24 10816.9 1034.09 3
 6 -4 -24 12003.8 1297.58 3
 -6 -4 24 12157.9 1559.32 4
 -6 -4 23 89850.7 3875.9 4
 6 4 -23 83552 2698.8 3
 6 -4 -23 88026 3192.97 3
 -6 4 23 91955.1 2922.49 2
 -6 4 22 -93.1745 388.779 2
 -6 -4 22 377.569 453.266 4
 6 -4 -22 -110.247 429.791 3
 6 4 -22 249.004 320.99 3
 -6 -4 21 57937.3 2892.47 4
 6 -4 -21 53275.9 2386.9 3
 -6 4 21 56054.7 2171.08 2
 -6 4 20 1891.22 460.542 2
 -6 -4 20 2079.44 618.119 4
 6 4 -20 1791.77 379.622 3
 6 -4 -20 1015.28 376.79 3
 6 -4 -19 12419.9 845.353 5
 -6 -4 19 10550.8 1231.45 4
 6 4 -19 9446.17 792.855 3
 6 -4 -19 10455.6 995.186 3
 -6 4 19 11140.9 940.871 2
 -6 4 18 10890.1 915.07 2
 -6 -4 18 9711.33 1150.83 4
 6 4 -18 8689.34 727.191 3
 6 -4 -18 10133.8 942.003 3
 6 -4 -18 10799.5 809.957 5
 6 -4 -17 1489.15 330.004 5
 6 4 -17 657.489 227.564 3
 6 -4 -17 575.702 309.519 3
 -6 4 17 1557.46 369.635 2
 -6 -4 17 1650.95 557.584 4
 -6 4 16 2734.78 457.06 2
 -6 -4 16 3313.89 641.647 4
 6 4 -16 3222.2 420.329 3
 -6 4 15 74142.4 2270.74 2
 -6 -4 15 65951.6 2609.32 4
 -6 -4 14 1121.27 154.556 2
 -6 4 14 1059.3 289.43 2
 -6 -4 14 1184.36 478.07 4
 -6 4 13 99782.1 2570.38 2
 -6 -4 13 95214.5 2997.45 4
 -6 -4 13 101941 1547.7 2
 -6 4 12 4744.82 559.573 2
 -6 -4 12 4211.16 635.903 4
[truncated: 445,666 more chars]
