# Supplementary material
Source: publisher figshare collection journal article supplement (https://acs.figshare.com/ndownloader/files/4205155)
Supplement: Supplementary file 27 [file 4205155 › CIFs/Ni/NiY/NiY.cif]

data_NiY
_audit_creation_date              2015-02-16
_audit_creation_method
;
Olex2 1.2
(compiled 2015.01.26 svn.r3151 for OlexSys, GUI svn.r4998)
;
_publ_contact_author_address      
;
The University of Manchester
School of Chemistry
Oxford Road, 
Manchester
M13 9PL
United Kingdom
;
_publ_contact_author_email        eufemio.morenopineda@manchester.ac.uk
_publ_contact_author_name         'Eufemio Moreno Pineda'
_publ_contact_author_phone        '+44 074 1192 4293'
_publ_section_references
;
Dolomanov, O.V., Bourhis, L.J., Gildea, R.J, Howard, J.A.K. & Puschmann, H.
 (2009), J. Appl. Cryst. 42, 339-341.

Palatinus, L. & Chapuis, G. (2007). J. Appl. Cryst., 40, 786-790;
Palatinus, L. & van der Lee, A. (2008). J. Appl. Cryst. 41, 975-984;
Palatinus, L., Prathapa, S. J. & van Smaalen, S. (2012). J. Appl. Cryst. 45,
 575-580.

Sheldrick, G.M. (2008). Acta Cryst. A64, 112-122.
;
_chemical_name_common             ?
_chemical_name_systematic         ?
_chemical_formula_moiety          'C50 H90 Ni2 O22 Y2, 2(C6 H16 N)'
_chemical_formula_sum             'C62 H122 N2 Ni2 O22 Y2'
_chemical_formula_weight          1542.85
_chemical_melting_point           ?
loop_
  _atom_type_symbol
  _atom_type_description
  _atom_type_scat_dispersion_real
  _atom_type_scat_dispersion_imag
  _atom_type_scat_source
 'C' 'C' 0.0033 0.0016 'International Tables Vol C Tables 4.2.6.8 and 6.1.1.4'
 'H' 'H' 0.0000 0.0000 'International Tables Vol C Tables 4.2.6.8 and 6.1.1.4'
 'N' 'N' 0.0061 0.0033 'International Tables Vol C Tables 4.2.6.8 and 6.1.1.4'
 'Ni' 'Ni' 0.3393 1.1124 'International Tables Vol C Tables 4.2.6.8 and 6.1.1.4'
 'O' 'O' 0.0106 0.0060 'International Tables Vol C Tables 4.2.6.8 and 6.1.1.4'
 'Y' 'Y' -2.7962 3.5667 'International Tables Vol C Tables 4.2.6.8 and 6.1.1.4'

_shelx_space_group_comment
;
The symmetry employed for this shelxl refinement is uniquely defined
by the following loop, which should always be used as a source of
symmetry information in preference to the above space-group names.
They are only intended as comments.
;
_space_group_crystal_system       'monoclinic'
_space_group_IT_number            15
_space_group_name_H-M_alt         'C 1 2/c 1'
_space_group_name_Hall            '-C 2yc'
loop_
  _space_group_symop_operation_xyz
 'x, y, z'
 '-x, y, -z+1/2'
 'x+1/2, y+1/2, z'
 '-x+1/2, y+1/2, -z+1/2'
 '-x, -y, -z'
 'x, -y, z-1/2'
 '-x+1/2, -y+1/2, -z'
 'x+1/2, -y+1/2, z-1/2'

_cell_length_a                    20.8134(9)
_cell_length_b                    21.3724(8)
_cell_length_c                    18.3457(6)
_cell_angle_alpha                 90
_cell_angle_beta                  101.401(3)
_cell_angle_gamma                 90
_cell_volume                      7999.7(5)
_cell_formula_units_Z             4
_cell_measurement_reflns_used     8062
_cell_measurement_temperature     180.1(2)
_cell_measurement_theta_max       27.7950
_cell_measurement_theta_min       3.2920
_shelx_estimated_absorpt_T_max    ?
_shelx_estimated_absorpt_T_min    ?
_exptl_absorpt_coefficient_mu     1.964
_exptl_absorpt_correction_T_max   1.00000
_exptl_absorpt_correction_T_min   0.57868
_exptl_absorpt_correction_type    multi-scan
_exptl_absorpt_process_details
;
CrysAlisPro, Agilent Technologies,
Version 1.171.36.28 (release 01-02-2013 CrysAlis171 .NET)
(compiled Feb  1 2013,16:14:44)
Empirical absorption correction using spherical harmonics,
 implemented in SCALE3 ABSPACK scaling algorithm.
;
_exptl_absorpt_special_details    ?
_exptl_crystal_colour             'clear green'
_exptl_crystal_colour_lustre      clear
_exptl_crystal_colour_primary     green
_exptl_crystal_density_diffrn     1.281
_exptl_crystal_density_meas       ?
_exptl_crystal_density_method     ?
_exptl_crystal_description        trapezoid
_exptl_crystal_F_000              3272
_exptl_crystal_size_max           0.1
_exptl_crystal_size_mid           0.08
_exptl_crystal_size_min           0.05
_exptl_transmission_factor_max    ?
_exptl_transmission_factor_min    ?
_diffrn_reflns_av_R_equivalents   0.0412
_diffrn_reflns_av_unetI/netI      0.0461
_diffrn_reflns_Laue_measured_fraction_full 0.998
_diffrn_reflns_Laue_measured_fraction_max 0.999
_diffrn_reflns_limit_h_max        26
_diffrn_reflns_limit_h_min        -24
_diffrn_reflns_limit_k_max        26
_diffrn_reflns_limit_k_min        -15
_diffrn_reflns_limit_l_max        20
_diffrn_reflns_limit_l_min        -22
_diffrn_reflns_number             28107
_diffrn_reflns_point_group_measured_fraction_full 0.998
_diffrn_reflns_point_group_measured_fraction_max 0.999
_diffrn_reflns_theta_full         25.242
_diffrn_reflns_theta_max          26.371
_diffrn_reflns_theta_min          2.961
_diffrn_ambient_temperature       180.1(2)
_diffrn_detector_area_resol_mean  8.0714
_diffrn_measured_fraction_theta_full 0.998
_diffrn_measured_fraction_theta_max 0.999
_diffrn_measurement_details
;
#__ type_ start__ end____ width___ exp.time_
  1 omega   28.00   66.00   1.0000    5.0000
omega____ theta____ kappa____ phi______ frames
    -       20.8673  -99.0000   30.0000 38

#__ type_ start__ end____ width___ exp.time_
  2 omega  -45.00   47.00   1.0000    5.0000
omega____ theta____ kappa____ phi______ frames
    -      -21.1798   57.0000    0.0000 92

#__ type_ start__ end____ width___ exp.time_
  3 omega  -31.00   17.00   1.0000    5.0000
omega____ theta____ kappa____ phi______ frames
    -      -21.1798  -90.0000  152.0000 48

#__ type_ start__ end____ width___ exp.time_
  4 omega  -52.00   47.00   1.0000    5.0000
omega____ theta____ kappa____ phi______ frames
    -      -21.1798   37.0000  150.0000 99

#__ type_ start__ end____ width___ exp.time_
  5 omega  -72.00  -35.00   1.0000    5.0000
omega____ theta____ kappa____ phi______ frames
    -      -21.1798 -178.0000  -30.0000 37

#__ type_ start__ end____ width___ exp.time_
  6 omega  -91.00    3.00   1.0000    5.0000
omega____ theta____ kappa____ phi______ frames
    -      -21.1798  -57.0000 -150.0000 94
;
_diffrn_measurement_device_type   'SuperNova, Single source at offset, Eos'
_diffrn_measurement_method        '\w scans'
_diffrn_orient_matrix_UB_11       0.0056761000
_diffrn_orient_matrix_UB_12       0.0256633000
_diffrn_orient_matrix_UB_13       0.0249826000
_diffrn_orient_matrix_UB_21       0.0171745000
_diffrn_orient_matrix_UB_22       0.0157465000
_diffrn_orient_matrix_UB_23       -0.0243149000
_diffrn_orient_matrix_UB_31       -0.0296771000
_diffrn_orient_matrix_UB_32       0.0140044000
_diffrn_orient_matrix_UB_33       -0.0184226000
_diffrn_radiation_monochromator   mirror
_diffrn_radiation_type            MoK\a
_diffrn_radiation_wavelength      0.71073
_diffrn_source                    'SuperNova (Mo) X-ray Source'
_reflns_Friedel_coverage          0.000
_reflns_Friedel_fraction_full     .
_reflns_Friedel_fraction_max      .
_reflns_number_gt                 6410
_reflns_number_total              8179
_reflns_odcompleteness_completeness 99.82
_reflns_odcompleteness_iscentric  1
_reflns_odcompleteness_theta      26.32
_reflns_special_details
;
 Reflections were merged by SHELXL according to the crystal
 class for the calculation of statistics and refinement.
 
 _reflns_Friedel_fraction is defined as the number of unique
 Friedel pairs measured divided by the number that would be
 possible theoretically, ignoring centric projections and
 systematic absences.
;
_reflns_threshold_expression      'I > 2\s(I)'
_computing_cell_refinement
;
CrysAlisPro, Agilent Technologies,
Version 1.171.36.28 (release 01-02-2013 CrysAlis171 .NET)
(compiled Feb  1 2013,16:14:44)
;
_computing_data_collection
;
CrysAlisPro, Agilent Technologies,
Version 1.171.36.28 (release 01-02-2013 CrysAlis171 .NET)
(compiled Feb  1 2013,16:14:44)
;
_computing_data_reduction
;
CrysAlisPro, Agilent Technologies,
Version 1.171.36.28 (release 01-02-2013 CrysAlis171 .NET)
(compiled Feb  1 2013,16:14:44)
;
_computing_molecular_graphics     'Olex2 (Dolomanov et al., 2009)'
_computing_publication_material   'Olex2 (Dolomanov et al., 2009)'
_computing_structure_refinement   'ShelXL (Sheldrick, 2008)'
_computing_structure_solution
;
Superflip (Palatinus & Chapuis, 2007;Palatinus & van der Lee, 2008;
Palatinus et al., 2012)
;
_refine_diff_density_max          0.708
_refine_diff_density_min          -0.269
_refine_diff_density_rms          0.063
_refine_ls_extinction_coef        .
_refine_ls_extinction_method      none
_refine_ls_goodness_of_fit_ref    1.032
_refine_ls_hydrogen_treatment     constr
_refine_ls_matrix_type            full
_refine_ls_number_parameters      424
_refine_ls_number_reflns          8179
_refine_ls_number_restraints      0
_refine_ls_R_factor_all           0.0538
_refine_ls_R_factor_gt            0.0337
_refine_ls_restrained_S_all       1.032
_refine_ls_shift/su_max           0.002
_refine_ls_shift/su_mean          0.000
_refine_ls_structure_factor_coef  Fsqd
_refine_ls_weighting_details
'w=1/[\s^2^(Fo^2^)+(0.0290P)^2^+6.4036P] where P=(Fo^2^+2Fc^2^)/3'
_refine_ls_weighting_scheme       calc
_refine_ls_wR_factor_gt           0.0684
_refine_ls_wR_factor_ref          0.0758
_refine_special_details           ?
_olex2_refinement_description
;
1. Fixed Uiso
 At 1.2 times of:
  All C(H,H) groups, All N(H) groups
 At 1.5 times of:
  All C(H,H,H) groups
2.a Ternary CH refined with riding coordinates:
 N1(H1)
2.b Secondary CH2 refined with riding coordinates:
 C26(H26A,H26B), C28(H28A,H28B), C30(H30A,H30B)
2.c Idealised Me refined as rotating group:
 C3(H3A,H3B,H3C), C4(H4A,H4B,H4C), C5(H5A,H5B,H5C), C8(H8A,H8B,H8C), C9(H9A,
 H9B,H9C), C10(H10A,H10B,H10C), C13(H13A,H13B,H13C), C14(H14A,H14B,H14C),
 C15(H15A,H15B,H15C), C18(H18A,H18B,H18C), C19(H19A,H19B,H19C), C20(H20A,H20B,
 H20C), C23(H23A,H23B,H23C), C24(H24A,H24B,H24C), C25(H25A,H25B,H25C), C27(H27A,
 H27B,H27C), C29(H29A,H29B,H29C), C31(H31A,H31B,H31C)
;
_atom_sites_solution_hydrogens    geom
_atom_sites_solution_primary      iterative
_atom_sites_solution_secondary    ?
loop_
  _atom_site_label
  _atom_site_type_symbol
  _atom_site_fract_x
  _atom_site_fract_y
  _atom_site_fract_z
  _atom_site_U_iso_or_equiv
  _atom_site_adp_type
  _atom_site_occupancy
  _atom_site_site_symmetry_order
  _atom_site_calc_flag
  _atom_site_refinement_flags_posn
  _atom_site_refinement_flags_adp
  _atom_site_refinement_flags_occupancy
  _atom_site_disorder_assembly
  _atom_site_disorder_group
 Y1 Y 0.74918(2) 0.71169(2) 0.34087(2) 0.01905(7) Uani 1 1 d . . . . .
 Ni1 Ni 0.75427(2) 0.82104(2) 0.47727(2) 0.01952(8) Uani 1 1 d . . . . .
 O1 O 0.71708(8) 0.69013(8) 0.21986(8) 0.0260(4) Uani 1 1 d . . . . .
 O1OH O 0.70412(7) 0.74029(7) 0.44009(8) 0.0195(3) Uani 1 1 d . . . . .
 O3 O 0.83559(9) 0.63383(9) 0.34750(9) 0.0336(4) Uani 1 1 d . . . . .
 O4 O 0.70798(8) 0.72190(9) 0.10371(9) 0.0325(4) Uani 1 1 d . . . . .
 O5 O 0.68800(8) 0.62547(8) 0.35630(8) 0.0273(4) Uani 1 1 d . . . . .
 O6 O 0.69147(8) 0.60518(8) 0.47681(8) 0.0269(4) Uani 1 1 d . . . . .
 O7 O 0.69666(9) 0.80351(8) 0.30072(9) 0.0282(4) Uani 1 1 d . . . . .
 O8 O 0.70774(8) 0.87470(8) 0.39179(8) 0.0266(4) Uani 1 1 d . . . . .
 O9 O 0.83957(9) 0.76853(9) 0.30141(9) 0.0338(4) Uani 1 1 d . . . . .
 O10 O 0.81991(8) 0.79068(8) 0.41083(8) 0.0229(4) Uani 1 1 d . . . . .
 O11 O 0.81268(8) 0.66353(8) 0.45284(8) 0.0245(4) Uani 1 1 d . . . . .
 C1 C 0.68295(12) 0.70391(11) 0.15666(13) 0.0228(5) Uani 1 1 d . . . . .
 C2 C 0.60890(13) 0.69311(13) 0.14272(14) 0.0310(6) Uani 1 1 d . . . . .
 C3 C 0.58208(14) 0.69980(16) 0.21353(15) 0.0444(8) Uani 1 1 d . . . . .
 H3A H 0.6028 0.6697 0.2495 0.067 Uiso 1 1 calc GR . . . .
 H3B H 0.5356 0.6927 0.2027 0.067 Uiso 1 1 calc GR . . . .
 H3C H 0.5909 0.7412 0.2332 0.067 Uiso 1 1 calc GR . . . .
 C4 C 0.59854(16) 0.62640(15) 0.11330(19) 0.0582(9) Uani 1 1 d . . . . .
 H4A H 0.6153 0.6226 0.0683 0.087 Uiso 1 1 calc GR . . . .
 H4B H 0.5526 0.6168 0.1032 0.087 Uiso 1 1 calc GR . . . .
 H4C H 0.6213 0.5978 0.1498 0.087 Uiso 1 1 calc GR . . . .
 C5 C 0.57346(13) 0.73923(16) 0.08456(15) 0.0464(8) Uani 1 1 d . . . . .
 H5A H 0.5830 0.7813 0.1018 0.070 Uiso 1 1 calc GR . . . .
 H5B H 0.5271 0.7321 0.0768 0.070 Uiso 1 1 calc GR . . . .
 H5C H 0.5881 0.7333 0.0386 0.070 Uiso 1 1 calc GR . . . .
 C6 C 0.84652(12) 0.63049(11) 0.41670(13) 0.0223(5) Uani 1 1 d . . . . .
 C7 C 0.89986(12) 0.58862(12) 0.45939(13) 0.0287(6) Uani 1 1 d . . . . .
 C8 C 0.94166(15) 0.56230(17) 0.40705(17) 0.0555(9) Uani 1 1 d . . . . .
 H8A H 0.9144 0.5391 0.3680 0.083 Uiso 1 1 calc GR . . . .
 H8B H 0.9746 0.5352 0.4343 0.083 Uiso 1 1 calc GR . . . .
 H8C H 0.9623 0.5961 0.3859 0.083 Uiso 1 1 calc GR . . . .
 C9 C 0.94087(16) 0.62617(17) 0.52218(18) 0.0607(10) Uani 1 1 d . . . . .
 H9A H 0.9610 0.6607 0.5018 0.091 Uiso 1 1 calc GR . . . .
 H9B H 0.9743 0.5998 0.5501 0.091 Uiso 1 1 calc GR . . . .
 H9C H 0.9133 0.6417 0.5543 0.091 Uiso 1 1 calc GR . . . .
 C10 C 0.86644(15) 0.53430(13) 0.49151(16) 0.0448(8) Uani 1 1 d . . . . .
 H10A H 0.8381 0.5505 0.5224 0.067 Uiso 1 1 calc GR . . . .
 H10B H 0.8991 0.5080 0.5206 0.067 Uiso 1 1 calc GR . . . .
 H10C H 0.8411 0.5104 0.4516 0.067 Uiso 1 1 calc GR . . . .
 C11 C 0.67460(12) 0.59233(11) 0.40886(13) 0.0230(5) Uani 1 1 d . . . . .
 C12 C 0.63641(13) 0.53204(12) 0.38699(13) 0.0280(6) Uani 1 1 d . . . . .
 C13 C 0.57167(17) 0.54791(19) 0.3378(3) 0.0951(16) Uani 1 1 d . . . . .
 H13A H 0.5468 0.5740 0.3646 0.143 Uiso 1 1 calc GR . . . .
 H13B H 0.5478 0.5101 0.3228 0.143 Uiso 1 1 calc GR . . . .
 H13C H 0.5792 0.5698 0.2945 0.143 Uiso 1 1 calc GR . . . .
 C14 C 0.6250(2) 0.49575(15) 0.45403(17) 0.0664(11) Uani 1 1 d . . . . .
 H14A H 0.6664 0.4864 0.4857 0.100 Uiso 1 1 calc GR . . . .
 H14B H 0.6025 0.4575 0.4380 0.100 Uiso 1 1 calc GR . . . .
 H14C H 0.5989 0.5204 0.4810 0.100 Uiso 1 1 calc GR . . . .
 C15 C 0.67677(19) 0.49196(16) 0.3446(2) 0.0717(12) Uani 1 1 d . . . . .
 H15A H 0.6843 0.5144 0.3018 0.108 Uiso 1 1 calc GR . . . .
 H15B H 0.6535 0.4539 0.3290 0.108 Uiso 1 1 calc GR . . . .
 H15C H 0.7180 0.4822 0.3763 0.108 Uiso 1 1 calc GR . . . .
 C16 C 0.69165(11) 0.85825(12) 0.32500(13) 0.0228(5) Uani 1 1 d . . . . .
 C17 C 0.66195(13) 0.90832(12) 0.26783(13) 0.0284(6) Uani 1 1 d . . . . .
 C18 C 0.68143(16) 0.89410(13) 0.19356(14) 0.0430(8) Uani 1 1 d . . . . .
 H18A H 0.6628 0.9250 0.1576 0.064 Uiso 1 1 calc GR . . . .
 H18B H 0.6655 0.8534 0.1766 0.064 Uiso 1 1 calc GR . . . .
 H18C H 0.7283 0.8949 0.1998 0.064 Uiso 1 1 calc GR . . . .
 C19 C 0.68555(16) 0.97329(12) 0.29392(15) 0.0456(8) Uani 1 1 d . . . . .
 H19A H 0.6714 0.9829 0.3394 0.068 Uiso 1 1 calc GR . . . .
 H19B H 0.6676 1.0034 0.2566 0.068 Uiso 1 1 calc GR . . . .
 H19C H 0.7325 0.9746 0.3022 0.068 Uiso 1 1 calc GR . . . .
 C20 C 0.58767(14) 0.90404(16) 0.25950(18) 0.0564(9) Uani 1 1 d . . . . .
 H20A H 0.5758 0.9127 0.3065 0.085 Uiso 1 1 calc GR . . . .
 H20B H 0.5733 0.8627 0.2435 0.085 Uiso 1 1 calc GR . . . .
 H20C H 0.5671 0.9340 0.2233 0.085 Uiso 1 1 calc GR . . . .
 C21 C 0.85184(12) 0.80102(11) 0.35928(13) 0.0220(5) Uani 1 1 d . . . . .
 C22 C 0.90318(12) 0.85213(12) 0.36899(13) 0.0266(6) Uani 1 1 d . . . . .
 C23 C 0.94552(14) 0.84689(15) 0.31035(16) 0.0450(8) Uani 1 1 d . . . . .
 H23A H 0.9660 0.8065 0.3136 0.067 Uiso 1 1 calc GR . . . .
 H23B H 0.9786 0.8788 0.3186 0.067 Uiso 1 1 calc GR . . . .
 H23C H 0.9186 0.8521 0.2618 0.067 Uiso 1 1 calc GR . . . .
 C24 C 0.86717(14) 0.91506(13) 0.36040(15) 0.0388(7) Uani 1 1 d . . . . .
 H24A H 0.8986 0.9485 0.3666 0.058 Uiso 1 1 calc GR . . . .
 H24B H 0.8406 0.9185 0.3974 0.058 Uiso 1 1 calc GR . . . .
 H24C H 0.8398 0.9176 0.3118 0.058 Uiso 1 1 calc GR . . . .
 C25 C 0.94557(14) 0.84731(16) 0.44683(15) 0.0466(8) Uani 1 1 d . . . . .
 H25A H 0.9675 0.8076 0.4524 0.070 Uiso 1 1 calc GR . . . .
 H25B H 0.9184 0.8511 0.4832 0.070 Uiso 1 1 calc GR . . . .
 H25C H 0.9775 0.8803 0.4539 0.070 Uiso 1 1 calc GR . . . .
 N1 N 0.83509(10) 0.69209(9) 0.11973(10) 0.0247(5) Uani 1 1 d . . . . .
 H1 H 0.7906 0.7061 0.1213 0.030 Uiso 1 1 calc R . . . .
 C26 C 0.87797(13) 0.74843(13) 0.13468(14) 0.0348(6) Uani 1 1 d . . . . .
 H26A H 0.9181 0.7408 0.1168 0.042 Uiso 1 1 calc R . . . .
 H26B H 0.8896 0.7551 0.1880 0.042 Uiso 1 1 calc R . . . .
 C27 C 0.84574(16) 0.80675(13) 0.09820(17) 0.0457(8) Uani 1 1 d . . . . .
 H27A H 0.8338 0.8003 0.0455 0.068 Uiso 1 1 calc GR . . . .
 H27B H 0.8757 0.8412 0.1083 0.068 Uiso 1 1 calc GR . . . .
 H27C H 0.8072 0.8158 0.1176 0.068 Uiso 1 1 calc GR . . . .
 C28 C 0.83284(14) 0.66733(13) 0.04260(14) 0.0349(7) Uani 1 1 d . . . . .
 H28A H 0.8766 0.6548 0.0379 0.042 Uiso 1 1 calc R . . . .
 H28B H 0.8187 0.7005 0.0070 0.042 Uiso 1 1 calc R . . . .
 C29 C 0.78718(16) 0.61232(14) 0.02424(16) 0.0493(8) Uani 1 1 d . . . . .
 H29A H 0.7845 0.6007 -0.0268 0.074 Uiso 1 1 calc GR . . . .
 H29B H 0.7444 0.6236 0.0320 0.074 Uiso 1 1 calc GR . . . .
 H29C H 0.8036 0.5777 0.0558 0.074 Uiso 1 1 calc GR . . . .
 C30 C 0.85242(13) 0.64369(13) 0.17919(14) 0.0307(6) Uani 1 1 d . . . . .
 H30A H 0.8188 0.6116 0.1716 0.037 Uiso 1 1 calc R . . . .
 H30B H 0.8524 0.6631 0.2270 0.037 Uiso 1 1 calc R . . . .
 C31 C 0.91805(13) 0.61300(15) 0.18169(16) 0.0442(8) Uani 1 1 d . . . . .
 H31A H 0.9168 0.5891 0.1371 0.066 Uiso 1 1 calc GR . . . .
 H31B H 0.9278 0.5858 0.2241 0.066 Uiso 1 1 calc GR . . . .
 H31C H 0.9514 0.6446 0.1855 0.066 Uiso 1 1 calc GR . . . .

loop_
  _atom_site_aniso_label
  _atom_site_aniso_U_11
  _atom_site_aniso_U_22
  _atom_site_aniso_U_33
  _atom_site_aniso_U_23
  _atom_site_aniso_U_13
  _atom_site_aniso_U_12
 Y1 0.02293(13) 0.02266(12) 0.01243(11) 0.00106(9) 0.00558(9) 0.00241(10)
 Ni1 0.02503(18) 0.02133(16) 0.01311(15) 0.00128(12) 0.00600(12) 0.00156(13)
 O1 0.0269(10) 0.0349(10) 0.0163(9) -0.0016(7) 0.0042(7) 0.0025(8)
 O1OH 0.0256(9) 0.0212(9) 0.0126(8) 0.0016(6) 0.0065(7) 0.0020(7)
 O3 0.0398(11) 0.0475(12) 0.0160(9) 0.0059(8) 0.0115(8) 0.0188(9)
 O4 0.0249(10) 0.0524(12) 0.0211(9) 0.0095(8) 0.0069(7) 0.0024(9)
 O5 0.0370(11) 0.0286(10) 0.0170(9) 0.0015(7) 0.0068(7) -0.0049(8)
 O6 0.0391(11) 0.0271(10) 0.0164(9) -0.0015(7) 0.0099(7) -0.0047(8)
 O7 0.0372(11) 0.0271(10) 0.0192(9) 0.0010(7) 0.0025(8) 0.0078(8)
 O8 0.0371(11) 0.0270(10) 0.0168(9) 0.0034(7) 0.0079(7) 0.0055(8)
 O9 0.0394(11) 0.0413(11) 0.0256(10) -0.0092(8) 0.0180(8) -0.0118(9)
 O10 0.0246(9) 0.0290(9) 0.0171(8) 0.0017(7) 0.0088(7) -0.0008(8)
 O11 0.0288(10) 0.0281(9) 0.0183(9) 0.0004(7) 0.0087(7) 0.0070(8)
 C1 0.0262(14) 0.0247(13) 0.0176(12) -0.0038(10) 0.0049(10) 0.0010(11)
 C2 0.0233(14) 0.0450(17) 0.0247(14) -0.0001(11) 0.0046(11) -0.0067(12)
 C3 0.0262(16) 0.075(2) 0.0345(16) 0.0022(15) 0.0107(13) -0.0033(15)
 C4 0.051(2) 0.057(2) 0.069(2) -0.0155(18) 0.0164(17) -0.0234(18)
 C5 0.0237(16) 0.073(2) 0.0389(17) 0.0100(16) -0.0030(13) -0.0021(15)
 C6 0.0215(13) 0.0220(13) 0.0254(14) 0.0015(10) 0.0095(10) -0.0020(11)
 C7 0.0251(14) 0.0377(15) 0.0239(13) 0.0032(11) 0.0066(11) 0.0075(12)
 C8 0.045(2) 0.077(2) 0.049(2) 0.0191(17) 0.0224(16) 0.0353(18)
 C9 0.043(2) 0.067(2) 0.060(2) -0.0039(18) -0.0180(17) 0.0052(18)
 C10 0.055(2) 0.0381(17) 0.0454(18) 0.0158(14) 0.0191(15) 0.0157(16)
 C11 0.0227(13) 0.0229(13) 0.0243(14) -0.0001(10) 0.0069(10) 0.0022(11)
 C12 0.0348(15) 0.0253(14) 0.0247(14) -0.0020(11) 0.0075(11) -0.0063(12)
 C13 0.049(2) 0.070(3) 0.145(4) 0.035(3) -0.036(3) -0.029(2)
 C14 0.118(3) 0.0409(19) 0.046(2) -0.0037(15) 0.030(2) -0.040(2)
 C15 0.099(3) 0.043(2) 0.089(3) -0.0306(19) 0.057(2) -0.019(2)
 C16 0.0199(13) 0.0295(14) 0.0199(13) 0.0055(10) 0.0059(10) 0.0036(11)
 C17 0.0346(15) 0.0290(14) 0.0203(13) 0.0053(10) 0.0024(11) 0.0051(12)
 C18 0.073(2) 0.0343(16) 0.0215(15) 0.0071(12) 0.0085(14) 0.0047(16)
 C19 0.071(2) 0.0281(15) 0.0345(16) 0.0059(12) 0.0028(15) 0.0130(16)
 C20 0.0348(18) 0.066(2) 0.065(2) 0.0291(18) 0.0025(16) 0.0143(17)
 C21 0.0218(13) 0.0266(13) 0.0187(13) 0.0045(10) 0.0067(10) 0.0056(10)
 C22 0.0235(14) 0.0360(15) 0.0217(13) -0.0021(11) 0.0076(10) -0.0072(12)
 C23 0.0346(17) 0.060(2) 0.0456(18) -0.0096(15) 0.0216(14) -0.0159(15)
 C24 0.0490(19) 0.0334(16) 0.0369(16) 0.0015(12) 0.0154(13) -0.0085(14)
 C25 0.0341(17) 0.066(2) 0.0357(17) 0.0006(15) -0.0024(13) -0.0103(16)
 N1 0.0237(11) 0.0301(12) 0.0219(11) 0.0020(9) 0.0087(9) 0.0025(9)
 C26 0.0344(16) 0.0390(17) 0.0317(15) -0.0032(12) 0.0082(12) -0.0046(13)
 C27 0.059(2) 0.0328(16) 0.0469(19) -0.0012(13) 0.0151(16) -0.0042(15)
 C28 0.0405(17) 0.0413(17) 0.0230(14) -0.0043(12) 0.0062(12) 0.0067(14)
 C29 0.059(2) 0.0399(18) 0.0430(19) -0.0115(14) -0.0032(15) 0.0047(16)
 C30 0.0312(15) 0.0371(16) 0.0253(14) 0.0090(11) 0.0095(11) 0.0057(13)
 C31 0.0333(17) 0.056(2) 0.0445(18) 0.0136(15) 0.0093(14) 0.0121(15)

_geom_special_details
;
 All esds (except the esd in the dihedral angle between two l.s. planes)
 are estimated using the full covariance matrix.  The cell esds are taken
 into account individually in the estimation of esds in distances, angles
 and torsion angles; correlations between esds in cell parameters are only
 used when they are defined by crystal symmetry.  An approximate (isotropic)
 treatment of cell esds is used for estimating esds involving l.s. planes.
;
loop_
  _geom_bond_atom_site_label_1
  _geom_bond_atom_site_label_2
  _geom_bond_distance
  _geom_bond_site_symmetry_2
  _geom_bond_publ_flag
 Y1 Ni1 3.4234(4) 7_666 ?
 Y1 Ni1 3.4103(4) . ?
 Y1 O1 2.2362(15) . ?
 Y1 O1OH 2.2894(14) . ?
 Y1 O3 2.4357(17) . ?
 Y1 O5 2.2890(17) . ?
 Y1 O7 2.2957(16) . ?
 Y1 O9 2.4653(17) . ?
 Y1 O10 2.4327(16) . ?
 Y1 O11 2.4398(16) . ?
 Y1 C6 2.817(2) . ?
 Y1 C21 2.835(2) . ?
 Ni1 Y1 3.4235(4) 7_666 ?
 Ni1 O1OH 2.0609(15) 7_666 ?
 Ni1 O1OH 2.0621(16) . ?
 Ni1 O6 2.0237(17) 7_666 ?
 Ni1 O8 2.0279(16) . ?
 Ni1 O10 2.1051(15) . ?
 Ni1 O11 2.0979(16) 7_666 ?
 O1 C1 1.269(3) . ?
 O1OH Ni1 2.0609(15) 7_666 ?
 O3 C6 1.247(3) . ?
 O4 C1 1.250(3) . ?
 O5 C11 1.271(3) . ?
 O6 Ni1 2.0237(16) 7_666 ?
 O6 C11 1.257(3) . ?
 O7 C16 1.263(3) . ?
 O8 C16 1.255(3) . ?
 O9 C21 1.252(3) . ?
 O10 C21 1.278(3) . ?
 O11 Ni1 2.0979(15) 7_666 ?
 O11 C6 1.272(3) . ?
 C1 C2 1.529(3) . ?
 C2 C3 1.519(3) . ?
 C2 C4 1.525(4) . ?
 C2 C5 1.531(4) . ?
 C6 C7 1.518(3) . ?
 C7 C8 1.525(4) . ?
 C7 C9 1.520(4) . ?
 C7 C10 1.530(4) . ?
 C11 C12 1.526(3) . ?
 C12 C13 1.505(4) . ?
 C12 C14 1.512(4) . ?
 C12 C15 1.517(4) . ?
 C16 C17 1.540(3) . ?
 C17 C18 1.527(3) . ?
 C17 C19 1.518(4) . ?
 C17 C20 1.526(4) . ?
 C21 C22 1.514(3) . ?
 C22 C23 1.524(3) . ?
 C22 C24 1.533(4) . ?
 C22 C25 1.526(3) . ?
 N1 C26 1.492(3) . ?
 N1 C28 1.503(3) . ?
 N1 C30 1.495(3) . ?
 C26 C27 1.508(4) . ?
 C28 C29 1.507(4) . ?
 C30 C31 1.508(3) . ?

loop_
  _geom_angle_atom_site_label_1
  _geom_angle_atom_site_label_2
  _geom_angle_atom_site_label_3
  _geom_angle
  _geom_angle_site_symmetry_1
  _geom_angle_site_symmetry_3
  _geom_angle_publ_flag
 Ni1 Y1 Ni1 55.147(10) . 7_666 ?
 O1 Y1 Ni1 149.96(4) . 7_666 ?
 O1 Y1 Ni1 146.05(4) . . ?
 O1 Y1 O1OH 139.06(6) . . ?
 O1 Y1 O3 88.94(6) . . ?
 O1 Y1 O5 83.84(6) . . ?
 O1 Y1 O7 80.08(6) . . ?
 O1 Y1 O9 84.58(6) . . ?
 O1 Y1 O10 134.24(6) . . ?
 O1 Y1 O11 139.00(6) . . ?
 O1 Y1 C6 114.07(6) . . ?
 O1 Y1 C21 109.10(6) . . ?
 O1OH Y1 Ni1 36.08(4) . . ?
 O1OH Y1 Ni1 35.80(4) . 7_666 ?
 O1OH Y1 O3 123.87(5) . . ?
 O1OH Y1 O7 77.46(6) . . ?
 O1OH Y1 O9 123.94(6) . . ?
 O1OH Y1 O10 72.28(5) . . ?
 O1OH Y1 O11 71.47(5) . . ?
 O1OH Y1 C6 98.02(6) . . ?
 O1OH Y1 C21 98.22(6) . . ?
 O3 Y1 Ni1 121.07(4) . . ?
 O3 Y1 Ni1 88.24(4) . 7_666 ?
 O3 Y1 O9 75.67(6) . . ?
 O3 Y1 O11 52.98(5) . . ?
 O3 Y1 C6 26.19(6) . . ?
 O3 Y1 C21 85.55(7) . . ?
 O5 Y1 Ni1 113.47(4) . . ?
 O5 Y1 Ni1 66.15(4) . 7_666 ?
 O5 Y1 O1OH 77.95(6) . . ?
 O5 Y1 O3 82.37(6) . . ?
 O5 Y1 O7 119.12(6) . . ?
 O5 Y1 O9 155.29(6) . . ?
 O5 Y1 O10 141.89(5) . . ?
 O5 Y1 O11 77.19(6) . . ?
 O5 Y1 C6 78.83(6) . . ?
 O5 Y1 C21 162.15(6) . . ?
 O7 Y1 Ni1 112.76(4) . 7_666 ?
 O7 Y1 Ni1 66.01(4) . . ?
 O7 Y1 O3 154.18(6) . . ?
 O7 Y1 O9 80.05(6) . . ?
 O7 Y1 O10 77.06(6) . . ?
 O7 Y1 O11 140.81(6) . . ?
 O7 Y1 C6 159.28(7) . . ?
 O7 Y1 C21 76.26(6) . . ?
 O9 Y1 Ni1 87.88(4) . . ?
 O9 Y1 Ni1 123.44(4) . 7_666 ?
 O9 Y1 C6 86.13(7) . . ?
 O9 Y1 C21 26.15(6) . . ?
 O10 Y1 Ni1 75.80(4) . 7_666 ?
 O10 Y1 Ni1 37.77(4) . . ?
 O10 Y1 O3 94.81(6) . . ?
 O10 Y1 O9 52.82(5) . . ?
 O10 Y1 O11 71.21(5) . . ?
 O10 Y1 C6 82.29(6) . . ?
 O10 Y1 C21 26.70(6) . . ?
 O11 Y1 Ni1 37.40(4) . 7_666 ?
 O11 Y1 Ni1 74.83(4) . . ?
 O11 Y1 O9 97.89(6) . . ?
 O11 Y1 C6 26.79(6) . . ?
 O11 Y1 C21 85.05(6) . . ?
 C6 Y1 Ni1 98.33(5) . . ?
 C6 Y1 Ni1 62.90(5) . 7_666 ?
 C6 Y1 C21 84.52(7) . . ?
 C21 Y1 Ni1 100.48(5) . 7_666 ?
 C21 Y1 Ni1 62.47(5) . . ?
 Y1 Ni1 Y1 124.851(9) . 7_666 ?
 O1OH Ni1 Y1 40.84(4) . . ?
 O1OH Ni1 Y1 92.95(4) 7_666 . ?
 O1OH Ni1 Y1 40.52(4) 7_666 7_666 ?
 O1OH Ni1 Y1 92.56(4) . 7_666 ?
 O1OH Ni1 O1OH 79.79(6) 7_666 . ?
 O1OH Ni1 O10 90.20(6) 7_666 . ?
 O1OH Ni1 O10 83.95(6) . . ?
 O1OH Ni1 O11 83.33(6) 7_666 7_666 ?
 O1OH Ni1 O11 88.84(6) . 7_666 ?
 O6 Ni1 Y1 140.64(5) 7_666 . ?
 O6 Ni1 Y1 82.59(4) 7_666 7_666 ?
 O6 Ni1 O1OH 94.05(6) 7_666 7_666 ?
 O6 Ni1 O1OH 173.84(6) 7_666 . ?
 O6 Ni1 O8 91.33(7) 7_666 . ?
 O6 Ni1 O10 96.23(6) 7_666 . ?
 O6 Ni1 O11 90.38(7) 7_666 7_666 ?
 O8 Ni1 Y1 140.39(5) . 7_666 ?
 O8 Ni1 Y1 83.06(5) . . ?
 O8 Ni1 O1OH 94.83(6) . . ?
 O8 Ni1 O1OH 174.61(7) . 7_666 ?
 O8 Ni1 O10 89.54(6) . . ?
 O8 Ni1 O11 96.33(6) . 7_666 ?
 O10 Ni1 Y1 129.97(4) . 7_666 ?
 O10 Ni1 Y1 45.05(4) . . ?
 O11 Ni1 Y1 128.91(5) 7_666 . ?
 O11 Ni1 Y1 44.94(4) 7_666 7_666 ?
 O11 Ni1 O10 171.07(6) 7_666 . ?
 C1 O1 Y1 149.62(16) . . ?
 Ni1 O1OH Y1 103.68(6) 7_666 . ?
 Ni1 O1OH Y1 103.08(6) . . ?
 Ni1 O1OH Ni1 100.21(6) 7_666 . ?
 C6 O3 Y1 94.25(14) . . ?
 C11 O5 Y1 138.88(15) . . ?
 C11 O6 Ni1 127.34(15) . 7_666 ?
 C16 O7 Y1 138.22(15) . . ?
 C16 O8 Ni1 126.23(15) . . ?
 C21 O9 Y1 93.66(14) . . ?
 Ni1 O10 Y1 97.18(6) . . ?
 C21 O10 Y1 94.51(14) . . ?
 C21 O10 Ni1 150.13(15) . . ?
 Ni1 O11 Y1 97.67(6) 7_666 . ?
 C6 O11 Y1 93.38(13) . . ?
 C6 O11 Ni1 155.33(16) . 7_666 ?
 O1 C1 C2 118.8(2) . . ?
 O4 C1 O1 122.5(2) . . ?
 O4 C1 C2 118.5(2) . . ?
 C1 C2 C5 110.5(2) . . ?
 C3 C2 C1 111.8(2) . . ?
 C3 C2 C4 109.9(2) . . ?
 C3 C2 C5 109.1(2) . . ?
 C4 C2 C1 105.5(2) . . ?
 C4 C2 C5 109.9(2) . . ?
 O3 C6 Y1 59.56(12) . . ?
 O3 C6 O11 119.4(2) . . ?
 O3 C6 C7 121.8(2) . . ?
 O11 C6 Y1 59.83(12) . . ?
 O11 C6 C7 118.8(2) . . ?
 C7 C6 Y1 177.98(18) . . ?
 C6 C7 C8 110.0(2) . . ?
 C6 C7 C9 108.9(2) . . ?
 C6 C7 C10 107.7(2) . . ?
 C8 C7 C10 108.8(2) . . ?
 C9 C7 C8 111.5(3) . . ?
 C9 C7 C10 109.8(2) . . ?
 O5 C11 C12 116.9(2) . . ?
 O6 C11 O5 124.8(2) . . ?
 O6 C11 C12 118.3(2) . . ?
 C13 C12 C11 109.0(2) . . ?
 C13 C12 C14 109.7(3) . . ?
 C13 C12 C15 109.9(3) . . ?
 C14 C12 C11 112.1(2) . . ?
 C14 C12 C15 108.6(3) . . ?
 C15 C12 C11 107.4(2) . . ?
 O7 C16 C17 117.0(2) . . ?
 O8 C16 O7 125.4(2) . . ?
 O8 C16 C17 117.6(2) . . ?
 C18 C17 C16 109.1(2) . . ?
 C19 C17 C16 111.1(2) . . ?
 C19 C17 C18 109.7(2) . . ?
 C19 C17 C20 110.2(2) . . ?
 C20 C17 C16 106.8(2) . . ?
 C20 C17 C18 109.9(2) . . ?
 O9 C21 Y1 60.19(13) . . ?
 O9 C21 O10 118.9(2) . . ?
 O9 C21 C22 121.4(2) . . ?
 O10 C21 Y1 58.79(12) . . ?
 O10 C21 C22 119.7(2) . . ?
 C22 C21 Y1 176.11(17) . . ?
 C21 C22 C23 110.9(2) . . ?
 C21 C22 C24 107.6(2) . . ?
 C21 C22 C25 109.0(2) . . ?
 C23 C22 C24 109.3(2) . . ?
 C23 C22 C25 110.3(2) . . ?
 C25 C22 C24 109.6(2) . . ?
 C26 N1 C28 111.33(19) . . ?
 C26 N1 C30 112.0(2) . . ?
 C30 N1 C28 113.7(2) . . ?
 N1 C26 C27 112.8(2) . . ?
 N1 C28 C29 112.7(2) . . ?
 N1 C30 C31 114.2(2) . . ?

_shelx_SHELXL_version_number      '2014/7'
_iucr_refine_instructions_details
;

    arepw157.res created by SHELXL-2014/7

TITL CF solution in C2/c
CELL 0.71073 20.813366 21.37245 18.345728 90 101.4009 90
ZERR 4 0.000861 0.000768 0.000622 0 0.0034 0
LATT 7
SYMM -X,+Y,0.5-Z
SFAC C H N Ni O Y
UNIT 248 488 8 8 88 8
 
L.S. 12
PLAN  25
BOND
fmap 2
acta
SHEL 8 0.8
REM <olex2.extras>
REM <HklSrc "%./arepw157.hkl">
REM </olex2.extras>
 
WGHT    0.029000    6.403600
FVAR       1.96402
Y1    6    0.749178    0.711690    0.340871    11.00000    0.02293    0.02266 =
         0.01243    0.00106    0.00558    0.00241
NI1   4    0.754272    0.821041    0.477274    11.00000    0.02503    0.02133 =
         0.01311    0.00128    0.00600    0.00156
O1    5    0.717084    0.690132    0.219860    11.00000    0.02687    0.03488 =
         0.01630   -0.00155    0.00420    0.00250
O1OH  5    0.704115    0.740290    0.440086    11.00000    0.02563    0.02122 =
         0.01262    0.00161    0.00649    0.00195
O3    5    0.835594    0.633827    0.347501    11.00000    0.03982    0.04752 =
         0.01604    0.00586    0.01147    0.01882
O4    5    0.707977    0.721899    0.103709    11.00000    0.02488    0.05243 =
         0.02114    0.00947    0.00688    0.00244
O5    5    0.688000    0.625471    0.356304    11.00000    0.03699    0.02861 =
         0.01700    0.00154    0.00681   -0.00489
O6    5    0.691466    0.605183    0.476812    11.00000    0.03912    0.02713 =
         0.01636   -0.00147    0.00992   -0.00467
O7    5    0.696659    0.803510    0.300723    11.00000    0.03722    0.02705 =
         0.01918    0.00101    0.00251    0.00784
O8    5    0.707735    0.874698    0.391785    11.00000    0.03713    0.02696 =
         0.01675    0.00336    0.00795    0.00553
O9    5    0.839567    0.768525    0.301406    11.00000    0.03936    0.04128 =
         0.02559   -0.00921    0.01800   -0.01176
O10   5    0.819911    0.790685    0.410830    11.00000    0.02463    0.02898 =
         0.01713    0.00172    0.00879   -0.00078
O11   5    0.812683    0.663529    0.452841    11.00000    0.02884    0.02811 =
         0.01831    0.00037    0.00873    0.00703
C1    1    0.682952    0.703912    0.156660    11.00000    0.02620    0.02474 =
         0.01756   -0.00384    0.00490    0.00098
C2    1    0.608896    0.693115    0.142719    11.00000    0.02328    0.04501 =
         0.02467   -0.00013    0.00464   -0.00670
C3    1    0.582077    0.699799    0.213525    11.00000    0.02622    0.07456 =
         0.03449    0.00216    0.01074   -0.00329
AFIX 137
H3A   2    0.602787    0.669710    0.249460    11.00000   -1.50000
H3B   2    0.535620    0.692686    0.202682    11.00000   -1.50000
H3C   2    0.590871    0.741228    0.233197    11.00000   -1.50000
AFIX   0
C4    1    0.598536    0.626397    0.113302    11.00000    0.05099    0.05685 =
         0.06853   -0.01548    0.01638   -0.02342
AFIX 137
H4A   2    0.615268    0.622592    0.068347    11.00000   -1.50000
H4B   2    0.552565    0.616825    0.103215    11.00000   -1.50000
H4C   2    0.621253    0.597768    0.149823    11.00000   -1.50000
AFIX   0
C5    1    0.573458    0.739233    0.084559    11.00000    0.02371    0.07285 =
         0.03886    0.01001   -0.00304   -0.00208
AFIX 137
H5A   2    0.582957    0.781267    0.101812    11.00000   -1.50000
H5B   2    0.527063    0.732094    0.076771    11.00000   -1.50000
H5C   2    0.588128    0.733262    0.038618    11.00000   -1.50000
AFIX   0
C6    1    0.846515    0.630490    0.416701    11.00000    0.02150    0.02202 =
         0.02536    0.00155    0.00946   -0.00204
C7    1    0.899863    0.588623    0.459391    11.00000    0.02514    0.03775 =
         0.02389    0.00317    0.00664    0.00747
C8    1    0.941661    0.562295    0.407047    11.00000    0.04550    0.07705 =
         0.04925    0.01912    0.02237    0.03535
AFIX 137
H8A   2    0.914351    0.539076    0.367996    11.00000   -1.50000
H8B   2    0.974649    0.535170    0.434287    11.00000   -1.50000
H8C   2    0.962292    0.596067    0.385909    11.00000   -1.50000
AFIX   0
C9    1    0.940867    0.626167    0.522181    11.00000    0.04301    0.06736 =
         0.06013   -0.00392   -0.01796    0.00520
AFIX 137
H9A   2    0.960986    0.660692    0.501796    11.00000   -1.50000
H9B   2    0.974250    0.599815    0.550098    11.00000   -1.50000
H9C   2    0.913262    0.641706    0.554305    11.00000   -1.50000
AFIX   0
C10   1    0.866439    0.534298    0.491505    11.00000    0.05463    0.03813 =
         0.04537    0.01580    0.01905    0.01573
AFIX 137
H10A  2    0.838085    0.550482    0.522408    11.00000   -1.50000
H10B  2    0.899122    0.507951    0.520630    11.00000   -1.50000
H10C  2    0.841140    0.510375    0.451627    11.00000   -1.50000
AFIX   0
C11   1    0.674599    0.592335    0.408856    11.00000    0.02272    0.02292 =
         0.02430   -0.00009    0.00692    0.00225
C12   1    0.636414    0.532035    0.386986    11.00000    0.03480    0.02529 =
         0.02467   -0.00203    0.00747   -0.00635
C13   1    0.571667    0.547907    0.337756    11.00000    0.04869    0.06967 =
         0.14451    0.03467   -0.03557   -0.02897
AFIX 137
H13A  2    0.546778    0.573994    0.364555    11.00000   -1.50000
H13B  2    0.547769    0.510095    0.322834    11.00000   -1.50000
H13C  2    0.579158    0.569756    0.294481    11.00000   -1.50000
AFIX   0
C14   1    0.625012    0.495750    0.454031    11.00000    0.11818    0.04088 =
         0.04562   -0.00366    0.02968   -0.04046
AFIX 137
H14A  2    0.666385    0.486369    0.485708    11.00000   -1.50000
H14B  2    0.602465    0.457473    0.437977    11.00000   -1.50000
H14C  2    0.598947    0.520370    0.480977    11.00000   -1.50000
AFIX   0
C15   1    0.676766    0.491959    0.344625    11.00000    0.09878    0.04317 =
         0.08906   -0.03062    0.05725   -0.01911
AFIX 137
H15A  2    0.684275    0.514427    0.301775    11.00000   -1.50000
H15B  2    0.653524    0.453935    0.329025    11.00000   -1.50000
H15C  2    0.718035    0.482151    0.376267    11.00000   -1.50000
AFIX   0
C16   1    0.691655    0.858247    0.325001    11.00000    0.01993    0.02945 =
         0.01986    0.00553    0.00588    0.00361
C17   1    0.661949    0.908321    0.267831    11.00000    0.03455    0.02903 =
         0.02026    0.00534    0.00244    0.00512
C18   1    0.681428    0.894096    0.193559    11.00000    0.07280    0.03434 =
         0.02152    0.00707    0.00850    0.00467
AFIX 137
H18A  2    0.662753    0.925014    0.157598    11.00000   -1.50000
H18B  2    0.665462    0.853432    0.176609    11.00000   -1.50000
H18C  2    0.728314    0.894899    0.199778    11.00000   -1.50000
AFIX   0
C19   1    0.685555    0.973286    0.293920    11.00000    0.07107    0.02806 =
         0.03452    0.00593    0.00280    0.01296
AFIX 137
H19A  2    0.671408    0.982871    0.339389    11.00000   -1.50000
H19B  2    0.667637    1.003440    0.256628    11.00000   -1.50000
H19C  2    0.732544    0.974623    0.302239    11.00000   -1.50000
AFIX   0
C20   1    0.587668    0.904036    0.259504    11.00000    0.03482    0.06632 =
         0.06507    0.02907    0.00249    0.01430
AFIX 137
H20A  2    0.575824    0.912737    0.306467    11.00000   -1.50000
H20B  2    0.573333    0.862686    0.243503    11.00000   -1.50000
H20C  2    0.567114    0.933991    0.223303    11.00000   -1.50000
AFIX   0
C21   1    0.851845    0.801017    0.359285    11.00000    0.02180    0.02662 =
         0.01874    0.00453    0.00665    0.00561
C22   1    0.903177    0.852132    0.368995    11.00000    0.02355    0.03597 =
         0.02169   -0.00209    0.00763   -0.00717
C23   1    0.945517    0.846892    0.310353    11.00000    0.03462    0.06029 =
         0.04559   -0.00956    0.02160   -0.01595
AFIX 137
H23A  2    0.965982    0.806461    0.313630    11.00000   -1.50000
H23B  2    0.978641    0.878785    0.318650    11.00000   -1.50000
H23C  2    0.918606    0.852129    0.261828    11.00000   -1.50000
AFIX   0
C24   1    0.867167    0.915061    0.360403    11.00000    0.04898    0.03343 =
         0.03691    0.00147    0.01535   -0.00850
AFIX 137
H24A  2    0.898578    0.948496    0.366568    11.00000   -1.50000
H24B  2    0.840598    0.918526    0.397443    11.00000   -1.50000
H24C  2    0.839770    0.917578    0.311818    11.00000   -1.50000
AFIX   0
C25   1    0.945570    0.847313    0.446829    11.00000    0.03412    0.06619 =
         0.03571    0.00063   -0.00240   -0.01028
AFIX 137
H25A  2    0.967482    0.807566    0.452364    11.00000   -1.50000
H25B  2    0.918368    0.851057    0.483202    11.00000   -1.50000
H25C  2    0.977523    0.880285    0.453871    11.00000   -1.50000
AFIX   0
 
N1    3    0.835091    0.692091    0.119726    11.00000    0.02375    0.03013 =
         0.02192    0.00202    0.00874    0.00249
AFIX  13
H1    2    0.790565    0.706109    0.121350    11.00000   -1.20000
AFIX   0
C26   1    0.877967    0.748434    0.134679    11.00000    0.03436    0.03899 =
         0.03174   -0.00323    0.00817   -0.00455
AFIX  23
H26A  2    0.918098    0.740805    0.116759    11.00000   -1.20000
H26B  2    0.889625    0.755135    0.187954    11.00000   -1.20000
AFIX   0
C27   1    0.845735    0.806747    0.098201    11.00000    0.05924    0.03278 =
         0.04686   -0.00116    0.01505   -0.00424
AFIX 137
H27A  2    0.833754    0.800329    0.045466    11.00000   -1.50000
H27B  2    0.875750    0.841219    0.108283    11.00000   -1.50000
H27C  2    0.807181    0.815817    0.117629    11.00000   -1.50000
AFIX   0
C28   1    0.832837    0.667330    0.042605    11.00000    0.04049    0.04127 =
         0.02304   -0.00428    0.00618    0.00665
AFIX  23
H28A  2    0.876619    0.654791    0.037883    11.00000   -1.20000
H28B  2    0.818748    0.700514    0.006955    11.00000   -1.20000
AFIX   0
C29   1    0.787185    0.612323    0.024238    11.00000    0.05940    0.03989 =
         0.04301   -0.01153   -0.00324    0.00474
AFIX 137
H29A  2    0.784492    0.600656   -0.026809    11.00000   -1.50000
H29B  2    0.744402    0.623592    0.032026    11.00000   -1.50000
H29C  2    0.803584    0.577688    0.055801    11.00000   -1.50000
AFIX   0
C30   1    0.852420    0.643686    0.179185    11.00000    0.03123    0.03711 =
         0.02527    0.00900    0.00953    0.00574
AFIX  23
H30A  2    0.818783    0.611612    0.171566    11.00000   -1.20000
H30B  2    0.852389    0.663078    0.226982    11.00000   -1.20000
AFIX   0
C31   1    0.918050    0.613003    0.181694    11.00000    0.03329    0.05559 =
         0.04450    0.01363    0.00927    0.01206
AFIX 137
H31A  2    0.916793    0.589117    0.137118    11.00000   -1.50000
H31B  2    0.927789    0.585779    0.224066    11.00000   -1.50000
H31C  2    0.951355    0.644575    0.185494    11.00000   -1.50000
AFIX   0
HKLF 4
 
REM  CF solution in C2/c
REM R1 =  0.0337 for    6410 Fo > 4sig(Fo)  and  0.0538 for all    8179 data
REM    424 parameters refined using      0 restraints
 
END  
     
WGHT      0.0292      6.3231 

REM Highest difference peak  0.708,  deepest hole -0.269,  1-sigma level  0.063
Q1    1   0.6600  0.7478  0.4402  11.00000  0.05    0.71
Q2    1   0.7099  0.7203  0.4573  11.00000  0.05    0.33
Q3    1   0.7058  0.7664  0.4555  11.00000  0.05    0.29
Q4    1   0.7076  0.7290  0.4169  11.00000  0.05    0.29
Q5    1   0.7534  0.6986  0.2808  11.00000  0.05    0.28
Q6    1   0.6410  0.5160  0.3084  11.00000  0.05    0.27
Q7    1   0.9167  0.8479  0.4096  11.00000  0.05    0.27
Q8    1   0.9585  0.6032  0.4173  11.00000  0.05    0.27
Q9    1   0.5592  0.5844  0.3339  11.00000  0.05    0.26
Q10   1   0.6859  1.0073  0.2573  11.00000  0.05    0.26
Q11   1   0.6072  0.6619  0.1359  11.00000  0.05    0.26
Q12   1   0.7438  0.7819  0.4229  11.00000  0.05    0.25
Q13   1   0.6119  0.5516  0.2731  11.00000  0.05    0.25
Q14   1   0.6778  0.8869  0.2967  11.00000  0.05    0.25
Q15   1   0.6994  0.6894  0.1162  11.00000  0.05    0.25
Q16   1   0.8852  0.8221  0.3684  11.00000  0.05    0.24
Q17   1   0.6272  0.9034  0.2628  11.00000  0.05    0.24
Q18   1   0.6380  0.6987  0.1459  11.00000  0.05    0.24
Q19   1   0.6859  0.4882  0.4544  11.00000  0.05    0.24
Q20   1   0.7624  0.8438  0.5284  11.00000  0.05    0.24
Q21   1   0.9474  0.6603  0.4573  11.00000  0.05    0.24
Q22   1   0.6473  0.5290  0.2643  11.00000  0.05    0.23
Q23   1   0.6947  0.6097  0.3815  11.00000  0.05    0.23
Q24   1   0.6748  0.9320  0.2798  11.00000  0.05    0.23
Q25   1   0.9481  0.5753  0.3564  11.00000  0.05    0.22

REM The information below was added by Olex2.
REM
REM R1 = 0.0337 for 6410 Fo > 4sig(Fo) and 0.0538 for all 30414 data
REM n/a parameters refined using n/a restraints
REM Highest difference peak 0.71, deepest hole -0.27
REM Mean Shift 0, Max Shift 0.002.

REM +++ Tabular Listing of Refinement Information +++
REM R1_all = 0.0538
REM R1_gt = 0.0337
REM wR_ref = 0.0758
REM GOOF = 1.032
REM Shift_max = 0.002
REM Shift_mean = 0
REM Reflections_all = 30414
REM Reflections_gt = 6410
REM Parameters = n/a
REM Hole = -0.27
REM Peak = 0.71
REM Flack = n/a

;
_olex2_date_sample_data_collection 2013-05-23
_olex2_submission_special_instructions 'No special instructions were received'
loop_
  _refln_index_h
  _refln_index_k
  _refln_index_l
  _refln_F_squared_meas
  _refln_F_squared_sigma
  _refln_scale_group_code
 0 0 3 112.549 93.1314 2
 0 0 3 23.6132 284.049 3
 0 0 -3 -61.9586 170.827 4
 0 0 4 333969 4066.79 4
 0 0 4 325796 2731.58 2
 0 0 -4 322476 3897.76 4
 0 0 -4 320802 5078.83 3
 0 0 -4 337223 2883.47 2
 0 0 4 331009 3097.61 5
 0 0 -4 328778 3334.23 6
 0 0 -5 -66.2191 298.898 4
 0 0 -5 -8.23146 201.426 6
 0 0 5 216.886 179.052 5
 0 0 5 98.3186 164.353 2
 0 0 6 615743 4558.73 2
 0 0 -6 626424 5765.64 6
 0 0 -6 622610 6727 4
 0 0 6 643295 5303.28 5
 0 0 -7 252.666 375.932 4
 0 0 7 -13.5918 235.136 5
 0 0 -7 724.732 379.55 6
 0 0 7 312.486 267.35 2
 0 0 -8 93.3698 326.95 6
 0 0 8 327.891 275.735 2
 0 0 -8 313.124 551.94 4
 0 0 9 116.786 307.961 2
 0 0 -9 -301.236 629.174 4
 0 0 -10 40869.1 2258.95 4
 0 0 10 41036.2 1567.29 2
 0 0 -11 -493.429 765.597 4
 0 0 11 413.265 399.443 2
 0 0 -12 4329.99 1033.21 4
 0 0 12 2170.88 490.483 2
 0 0 -13 825.591 986.129 4
 0 0 13 418.203 396.479 2
 0 0 14 8003.63 902.699 2
 0 0 -14 9334.24 1605.01 4
 0 0 -15 2267.66 1091.85 4
 0 0 -16 203560 6564.72 4
 0 0 -17 1440.48 1257.59 4
 0 0 -18 5992.45 1783.1 4
 0 0 -19 966.771 1198.13 4
 0 0 -20 70.634 1134.22 4
 0 0 -21 2834.95 1795.57 4
 0 0 -22 48615.5 4233.4 4
 0 2 2 2404.43 356.125 6
 0 2 -3 189064 2446.21 1
 0 2 3 186099 2601.51 2
 0 2 -3 179738 2547.02 4
 0 -2 3 179821 2463.95 1
 0 2 3 192967 2881.18 6
 0 -2 -3 184447 3300.73 3
 0 2 -3 179696 3299.64 3
 0 -2 3 193408 2644.26 4
 0 -2 -3 186249 3023.69 6
 0 2 -3 190644 2557.23 5
 0 -2 3 185786 2572.82 5
 0 -2 4 168021 2678.28 5
 0 -2 -4 167211 3128.09 6
 0 2 4 164574 2636.86 2
 0 -2 -4 167847 3684.14 3
 0 -2 4 164945 2615.67 1
 0 2 -4 165294 3675.87 3
 0 2 -4 162308 2691.42 4
 0 -2 4 175147 2847.62 4
 0 2 -4 163120 2607.53 5
 0 2 5 154670 2739.17 2
 0 2 -5 151476 2871.74 4
 0 2 -5 156924 2762.92 5
 0 -2 5 160456 2830.3 5
 0 -2 5 155360 2835.65 1
 0 -2 -5 158107 3304.08 6
 0 2 -6 72285 2019.88 5
 0 2 -6 74874.8 1478.38 6
 0 2 -6 74986.2 1168.3 2
 0 -2 6 74731.1 1140.01 2
 0 2 6 71561.7 1967.88 2
 0 2 -6 73526.8 2218.9 4
 0 -2 -6 76650.7 2468.95 6
 0 2 7 6319.85 679.962 2
 0 2 -7 6004.08 693.225 5
 0 2 -7 6746.11 552.022 6
 0 -2 7 6820.36 403.276 2
 0 2 7 6466.87 543.127 5
 0 2 -7 6925.32 835.662 4
 0 2 -8 12901.9 1187.57 4
 0 -2 8 12470.8 592.722 2
 0 -2 -8 14507 1364.6 4
 0 2 8 12428.4 937.821 2
 0 2 -8 13238.3 824.952 6
 0 2 8 12211.2 801.654 5
 0 2 -9 6243.64 633.842 6
 0 -2 -9 5360.48 974.975 4
 0 -2 9 5793.74 458.281 2
 0 2 9 5985.84 719.557 2
 0 2 -9 7465.52 974.399 4
 0 -2 -10 24564.5 1919.82 4
 0 2 -10 26927.6 1368.12 6
 0 2 -10 28878.3 1881.37 4
 0 -2 10 25508.7 987.524 2
 0 2 10 25887.5 1402.91 2
 0 -2 -11 175962 5143.5 4
 0 2 -11 170656 3689.66 6
 0 2 11 176255 3755.84 2
 0 2 -11 170623 4710.65 4
 0 -2 11 178613 2695.55 2
 0 -2 -12 12739.3 1586.37 4
 0 2 -12 14594.5 1629.36 4
 0 -2 12 14382.4 839.079 2
 0 2 12 14495 1171.46 2
 0 -2 -13 10489.1 1657.56 4
 0 -2 13 9844.54 738.835 2
 0 2 -13 9930.66 1429.58 4
 0 2 13 10509.3 1040.59 2
 0 -2 -14 2057.64 1066.65 4
 0 2 -14 5037.21 1237.03 4
 0 2 14 3094.91 668.793 2
 0 2 -15 7129.26 1532.02 4
 0 -2 -15 7648.07 1591.71 4
 0 2 15 4910.96 833.216 2
 0 2 -16 83158.5 4159.29 4
 0 -2 -16 86151.3 4442.91 4
 0 2 -17 84890.9 4453.73 4
 0 -2 -17 93309.5 4825.59 4
 0 2 -18 102.036 1019.34 4
 0 -2 -18 2791.21 1449.49 4
 0 -2 -19 1131.15 1494.07 4
 0 2 -19 4459.2 1431.55 4
 0 -2 -20 2456.64 1668.7 4
 0 2 -20 2137.62 1333.22 4
 0 -2 -21 1175.98 1566.72 4
 0 2 -21 5129.28 1905.57 4
 0 -2 -22 38000.2 3776.41 4
 0 2 -22 43727.3 3908.92 4
 0 -4 0 162849 2609.53 4
 0 -4 0 166032 2838.95 6
 0 4 0 161555 2708.46 6
 0 4 -1 200656 2924.69 4
 0 4 -1 210705 2829.61 6
 0 -4 1 207514 2858.11 6
 0 4 1 208126 3315.83 6
 0 -4 1 212915 2979.62 4
 0 -4 -1 210130 3480.72 6
 0 4 -1 210256 2800.51 5
 0 -4 2 54846.8 1246.63 6
 0 4 -2 53707.9 1581.1 4
 0 -4 -2 54054.2 1907.23 6
 0 -4 -2 55961.7 1477.89 3
 0 4 2 55859.5 1841.84 6
 0 -4 2 54133 1541.99 4
 0 4 -2 52831.3 1491.23 3
 0 4 -2 52642.8 1269.05 6
 0 4 -2 55884.2 1598.16 5
 0 4 -3 186354 3074.16 5
 0 -4 -3 178840 3321.08 3
 0 -4 -3 189370 3794.36 6
 0 4 -3 188308 2843.78 1
 0 -4 3 197852 3120.25 4
 0 -4 3 190131 1846.53 6
 0 4 -3 189456 3427.85 3
 0 -4 3 191191 3108.44 5
 0 4 -3 185887 2068.01 6
 0 4 3 186698 3531.1 6
 0 4 -3 190647 3084.64 4
 0 4 -4 84807.4 2661.99 3
 0 4 -4 82927.1 2207.2 4
 0 4 -4 83193.4 2187.82 5
 0 4 4 88417.7 2525.32 6
 0 -4 4 87165.2 2151.66 1
 0 4 4 85372.8 2352.81 2
 0 4 -4 86891.9 2094.1 1
 0 -4 -4 84999.9 2632.54 3
 0 4 -5 258821 3797.7 1
 0 4 -5 266896 4081.43 5
 0 4 5 263031 4191.56 2
 0 4 -5 262406 4130.93 4
 0 4 -6 6455.56 731.285 4
 0 4 6 5336.67 695.435 2
 0 4 -6 6777.12 734.688 1
 0 4 -6 6583.64 746.603 5
 0 4 -7 8536.71 892.734 5
 0 4 -7 8726.15 957.075 4
 0 4 7 8505.1 914.995 2
 0 4 8 19575.2 1298.49 2
 0 4 -8 21779 1470.29 4
 0 4 -8 18902.6 682.546 6
 0 4 -8 20967.8 1394.25 5
 0 4 -9 2769.36 338.859 6
 0 4 -9 2540.31 722.036 4
 0 4 9 3219.36 634.402 2
 0 4 -9 2518.11 670.918 5
 0 4 10 796.286 336.667 5
 0 4 10 1449.39 627.845 2
 0 4 -10 3.57156 636.35 4
 0 4 -10 1505.78 298.845 6
 0 4 -11 351512 3941.32 6
 0 4 11 362526 5968.22 2
 0 4 -11 362473 6872.35 4
 0 4 -12 17416.3 970.669 6
 0 -4 -12 17189.4 1907.05 4
 0 4 -12 17242 1658.68 4
 0 4 12 16134.2 1383.58 2
 0 -4 -13 75572.3 3929.86 4
 0 4 13 76721 2939.12 2
 0 4 -13 80197.4 3596.91 4
 0 -4 -14 34848.9 2863.5 4
 0 4 14 32290.6 1972.18 2
 0 4 -14 31688.1 2465.48 4
 0 4 -15 1413.61 980.819 4
 0 4 15 302.437 603.691 2
 0 -4 -15 892.519 1071.83 4
 0 4 -16 8541.63 1675.21 4
 0 4 16 6544.42 1137.49 2
 0 -4 -16 5588.8 1556.73 4
 0 4 -17 152194 5847.09 4
 0 -4 -17 154527 6320.9 4
 0 -4 -18 27770.9 2950.68 4
 0 4 -18 31042.2 2905.93 4
 0 4 -19 1553.74 1370.52 4
 0 -4 -19 1575.37 1475.11 4
 0 4 -20 17796.7 2559.28 4
 0 -4 -20 14671 2463.62 4
 0 -4 -21 13210.1 2442.79 4
 0 4 -21 14837.4 2390.46 4
 0 4 -22 12847.6 2296.21 4
 0 -4 -22 13385.4 2416.35 4
 0 6 0 111416 2796.25 6
 0 -6 0 113419 2936.53 6
 0 6 -1 165462 3011.01 5
 0 6 -1 160704 3163.29 4
 0 6 -1 160180 3135.99 6
 0 6 1 166009 3503.35 6
 0 -6 1 163362 3264.25 6
 0 6 -2 91672.2 2006.37 3
 0 6 -2 91298.3 2322.71 5
 0 6 -2 86877.4 2380.63 4
 0 -6 2 92383.3 2213.7 6
 0 6 2 92375.6 2728.52 6
 0 -6 -2 93058.5 1934.57 3
 0 6 -2 92387.1 2220.21 6
 0 6 -3 3802.07 629.121 4
 0 6 -3 3280.66 452.785 6
 0 -6 3 3810.72 442.439 6
 0 -6 -3 3391.7 541.286 3
 0 6 -3 3226.75 483.513 3
 0 6 -3 4890.82 659.663 5
 0 6 3 2870.69 578.801 6
 0 -6 -4 99994 2912.33 3
 0 6 -4 95879.9 2461.63 1
 0 6 -4 105338 3001.5 3
 0 6 -4 100911 2739.38 4
 0 6 4 100245 3090.35 6
 0 -6 4 98014.5 1728 6
 0 6 4 101262 2913.89 2
 0 6 -4 104097 2755.2 5
 0 6 -4 99101.8 1909.78 6
 0 6 -5 184349 3836.83 4
 0 -6 5 176011 1898.16 6
 0 6 -5 185673 3836.9 5
 0 6 -5 179097 2232.9 6
 0 6 -5 184861 3510.62 1
 0 6 5 174998 3974.49 2
 0 6 -6 124478 3021.02 1
 0 6 -6 126540 3323.1 5
 0 6 6 127779 3437.66 2
 0 6 -6 124837 3305.46 4
 0 6 7 11226.8 1176.08 2
 0 6 -7 12378.6 496.667 2
 0 6 -7 12434.8 1078.48 1
 0 6 -7 13893.5 1250.27 5
 0 6 -7 12718 1175.55 4
 0 6 -8 2792.18 595.764 1
 0 6 -8 2407.36 723.702 4
 0 6 8 2702.07 732.32 2
 0 6 -8 3456.18 784.085 5
 0 6 -9 7768.02 1042.18 5
 0 6 9 7576.15 1032.42 2
 0 6 -9 9254.38 1182.53 4
 0 6 10 288.205 636.22 2
 0 6 -10 201.45 620.164 5
 0 6 -10 399.141 672.048 4
 0 6 -11 132054 4107.65 5
 0 6 11 128172 3964.1 2
 0 6 -11 136995 4336.88 4
 0 6 12 25844.7 1903.43 2
 0 6 -12 29472.9 2229.88 4
 0 6 -13 -548.906 828.955 4
 0 6 13 110.403 694.492 2
 0 -6 -14 4939.98 1215.62 4
 0 6 -14 8550.91 1471.49 4
 0 6 14 8708.45 1257.53 2
 0 6 15 1860.5 721.764 2
 0 -6 -15 1997.38 1235.92 4
 0 6 -15 4885.62 1255.48 4
 0 -6 -16 216.135 978.107 4
 0 6 -16 2707.58 1184.58 4
 0 6 16 2788.25 941.961 2
 0 -6 -17 109200 5531.05 4
 0 6 -17 119056 5286.76 4
 0 6 17 108789 4329.27 2
 0 -6 -18 4385.05 1654.04 4
 0 6 -18 4518.36 1573.23 4
 0 -6 -19 24725.6 2942.48 4
 0 6 -19 18297.3 2448.59 4
 0 6 -20 13352.6 2281.07 4
 0 -6 -20 12268.9 2345.31 4
 0 6 -21 30085.5 3250.06 4
 0 -6 -21 26905.4 3218.12 4
 0 6 -22 1639.5 1710.82 4
 0 -6 -22 4675.16 1880.02 4
 0 8 0 9524.75 983.188 6
 0 8 -1 88983.3 2716.67 4
 0 8 -1 93331.2 2767.33 6
 0 8 -1 88141.1 2538.09 5
 0 8 1 89238.9 2936.5 6
 0 8 -2 391.116 461.594 5
 0 8 -2 76.6448 415.484 4
 0 -8 2 983.823 367.974 6
 0 8 2 772.266 461.912 6
 0 8 -2 690.088 276.448 3
 0 8 -2 1403.38 439.233 6
 0 -8 -2 1387.41 266.913 3
 0 8 -3 87943.1 2441.06 3
 0 -8 -3 93002.5 2381.16 3
 0 8 -3 91938 2769.77 5
 0 8 -3 91477.4 2475.47 6
 0 8 3 90123.5 3136.25 6
 0 8 -3 93349.1 2898.92 4
 0 -8 3 92504.2 2465.83 6
 0 -8 4 55072.2 1710.85 6
 0 8 4 54541 2535.03 6
 0 8 -4 56502.7 2244.6 3
 0 8 -4 58668.9 2416.57 4
 0 8 4 53411.3 2384.76 2
 0 -8 -4 53555.1 2172.93 3
 0 8 -4 49818.6 1728.68 6
 0 8 -4 52706.4 2230.08 5
 0 -8 5 81054.1 1803.33 6
 0 -8 -5 79208.9 2967.1 3
 0 8 -5 79171 2536.9 1
 0 8 5 82923.9 2969.63 2
 0 8 -5 79917.7 1946.37 6
 0 8 -5 83012 2877.09 4
 0 8 -5 77676.4 2773.32 5
 0 8 -6 21608.3 1564.43 4
 0 -8 6 21755.4 804.952 6
 0 8 -6 21646.7 906.313 6
 0 8 -6 22154.3 1566.57 5
 0 8 -6 21846 1417.07 1
 0 8 6 21337.8 1671.05 2
 0 8 -7 139264 3925.78 4
 0 8 -7 131090 3498.27 1
 0 8 7 134168 4000.71 2
 0 8 -7 142248 3975.43 5
 0 8 -8 21259.1 1519.53 1
 0 8 8 22793 1780.33 2
 0 8 -8 23251.1 1756.97 4
 0 8 -8 25691.2 1849.65 5
 0 8 9 65978.5 2951.81 2
 0 8 -9 61227.1 1052.36 2
 0 8 -9 68495.8 2973.04 5
 0 8 -9 68168.6 3016.72 4
 0 8 -9 63234.3 2622.14 1
 0 8 -10 121.209 628.309 4
 0 8 -10 1033.38 766.186 5
 0 8 10 -312.403 722.814 2
 0 8 -10 -357.131 692.862 1
 0 8 -11 24584.9 1990.68 5
 0 8 -11 25586.2 2086.97 4
 0 8 11 24360.8 1978.31 2
 0 8 -12 1677.64 990.159 4
 0 8 -12 196.01 770.987 5
 0 8 12 214.64 685.296 2
 0 8 13 48401.3 2804.67 2
 0 8 -13 42686.3 2858.14 4
 0 8 14 1130.84 865.624 2
 0 8 -14 20.8961 907.809 4
 0 8 15 50669 2953.68 2
 0 8 -15 57433.8 3539.13 4
 0 8 -16 62915.7 3837.62 4
 0 -8 -16 50857.6 3813.84 4
 0 8 16 57275.7 3239.31 2
 0 -8 -17 23015.6 2948.36 4
 0 8 17 29140 2403.29 2
 0 8 -17 32567.3 2910.36 4
 0 -8 -18 -317.698 1314.99 4
 0 8 -18 155.457 1128.02 4
 0 -8 -19 10406 2235.37 4
 0 8 -19 10764.7 2067.8 4
 0 -8 -20 6485.25 2012.86 4
 0 8 -20 11060.3 2392.61 4
 0 8 -21 21811.6 2940.26 4
 0 -8 -21 19970.8 3055.48 4
 0 10 0 415283 5841.56 5
 0 10 0 421481 6835.8 6
 0 10 -1 92013.2 2876.97 5
 0 10 1 88284.1 3208.52 6
 0 10 -1 90709.5 3052.65 6
 0 10 2 32754.1 2036.27 6
 0 10 -2 34735.2 1956.36 4
 0 10 -2 36591.8 1863.8 6
 0 10 -2 34193.9 1182.89 3
 0 10 -2 34088.3 1847.78 5
 0 10 -3 81727.6 3032.44 4
 0 10 -3 76049.9 2570.34 6
 0 10 -3 76445.3 2839.69 5
 0 10 -3 78473.2 2254.24 3
 0 -10 -3 84137 2184.39 3
 0 10 3 85605.8 3367.19 6
 0 10 3 76845.8 3030.72 2
 0 10 -4 1997.04 501.803 6
 0 10 4 845.412 671.443 6
 0 10 4 1620.99 803.298 2
 0 10 -4 1258.09 698.586 4
 0 10 -4 2261.14 718.503 5
 0 10 -4 752.83 409.542 3
 0 -10 -4 1018.08 461.391 3
 0 10 -5 51900.5 2588.06 4
 0 10 5 52643.7 2665.91 2
 0 10 -5 53062.7 1911.21 6
 0 -10 5 53584.2 1831.23 6
 0 10 -5 54029.4 2557.18 5
 0 -10 -5 50446.2 2409.69 3
 0 10 -5 52936.5 2322.98 1
 0 -10 6 62222.9 1760.81 6
 0 10 6 62359.3 2869.66 2
 0 10 -6 64008.7 2550.43 1
 0 10 -6 65592.4 2847.24 5
 0 10 -6 69060.4 3052.72 4
 0 10 -7 76590.6 2861.57 1
 0 10 -7 75467 3169.55 5
 0 10 7 80581.1 3363.03 2
 0 -10 7 80111.9 1722.66 6
 0 10 -7 86234.6 3431.37 4
 0 10 -8 12352.9 1472.68 5
 0 10 -8 14337.2 939.485 2
 0 10 -8 14874.8 1365.92 1
 0 10 -8 14095.3 1521.24 4
 0 10 8 13540.4 1491.31 2
 0 10 9 151008 4764.19 2
 0 10 -9 146715 4642.65 5
 0 10 -9 145055 4094.52 1
 0 10 -9 149074 4650.77 4
 0 10 -9 143123 2406.69 2
 0 10 -10 7654.48 467.896 2
 0 10 -10 6623.64 1234.26 5
 0 10 -10 8555.16 1120.19 1
 0 10 -10 6810.31 443.453 2
 0 10 10 7766.22 1325.1 2
 0 10 -10 9145.01 1441.67 4
 0 10 -11 6216.06 1319.04 5
 0 10 -11 5210.34 1182.46 4
 0 10 11 7096.39 1342.75 2
 0 10 -11 6531.51 1146.08 1
 0 10 -12 20683.7 1998 5
 0 10 -12 13740.7 1808.47 4
 0 10 12 17270.5 1885.15 2
 0 10 13 82049.6 3802.57 2
 0 10 -13 83653.8 3926.73 5
 0 10 -13 82387.8 4002.47 4
 0 10 -14 -551.12 1149.4 4
 0 10 14 -538.834 847.746 2
 0 10 -15 84366.7 4391.97 4
 0 10 15 85447 4038.02 2
 0 10 16 94318.4 4324.51 2
 0 10 -16 106345 5059.03 4
 0 10 -17 707.447 1172.16 4
 0 10 17 232.402 976.405 2
 0 -10 -17 101.368 1452.8 4
 0 10 18 2413.88 1167.18 2
 0 -10 -18 -1233.81 1633.38 4
 0 10 -18 522.767 1296.49 4
 0 -10 -19 11931 2496.71 4
 0 10 -19 12519.1 2231.02 4
 0 -10 -20 1264.03 1594.4 4
 0 10 -20 2425.78 1749.04 4
 0 -10 -21 18491.3 2969.01 4
 0 10 -21 14970.3 2459.47 4
 0 12 0 136701 3710.76 5
 0 12 0 144199 4290.35 6
 0 12 -1 10155 1160.53 5
 0 12 -1 11730.5 1270.16 6
 0 12 1 9927.55 1331.68 6
 0 12 1 10497.2 1074.35 5
 0 12 2 139164 4488.78 6
 0 12 -2 145584 4080.4 6
 0 12 -2 138037 3953.35 5
 0 12 -2 142694 4250.88 4
 0 12 2 142447 4348.09 2
 0 12 -3 19833.2 1107.41 3
 0 12 -3 17939.2 1466.37 6
 0 12 -3 22682.5 1830.99 4
 0 12 -3 17919.7 1563.41 5
 0 12 3 16630.8 1597.06 2
 0 12 -4 333207 5319.02 3
 0 12 -4 326068 6459.2 5
 0 12 4 345946 6984.67 2
 0 12 -4 332702 6765.16 4
 0 -12 -4 354026 5151.64 3
 0 12 -4 341538 5742.42 6
 0 12 -5 6393.7 1161.66 5
 0 12 -5 5925.72 1116.42 4
 0 -12 -5 5810.82 867.337 3
 0 12 5 3364.83 909.433 2
 0 12 -6 82749.8 3196.96 1
 0 12 -6 92167.7 3733.27 4
 0 12 -6 85678.9 3500.13 5
 0 12 6 79429.7 3564.5 2
 0 12 -7 16697.8 1560.4 1
 0 -12 7 15438.8 977.731 6
 0 12 -7 16975.3 1265.06 2
 0 12 -7 17867.9 1782.38 4
 0 12 7 16460.8 1753.69 2
 0 12 -7 19900 1854.31 5
 0 12 -8 2549.64 717.096 1
 0 12 8 2026.14 886.156 2
 0 12 -8 2839.53 987.516 4
 0 12 -8 1996.97 771.838 5
 0 12 -8 3400.92 653.88 2
 0 12 -9 8542.61 1446.44 4
 0 12 9 8479.03 1425.02 2
 0 12 -9 9024.17 1440.61 5
 0 12 -9 8590.22 791.982 2
 0 12 -9 10137.2 1290.65 1
 0 12 -10 1792.78 830.352 1
 0 12 -10 1240.53 813.728 4
 0 12 10 2300.54 1015.58 2
 0 12 -10 1317.59 941.058 5
 0 12 -10 2165.43 429.178 2
 0 12 -11 -121.54 983.86 5
 0 12 -11 -488.468 748.319 1
 0 12 11 262.624 976.693 2
 0 12 -11 1367.34 981.851 4
 0 12 -12 97146.6 4328.09 5
 0 12 -12 97061.5 3862.96 1
 0 12 -12 89634.6 4213.49 4
 0 12 12 89763.2 4205.2 2
 0 12 13 20587.7 2217.66 2
 0 12 -13 20300.3 2279.53 5
 0 12 -13 21291.5 2294.53 4
 0 12 -14 8971.5 1595.93 4
 0 12 -14 11215.9 1839.88 5
 0 12 14 10436.5 1681.61 2
 0 12 -15 12753.2 1987.86 4
 0 12 15 15477.5 1991.27 2
 0 12 -16 40400.6 3286.58 4
 0 12 16 35579.3 2894.86 2
 0 12 -17 2606.72 1555.1 4
 0 12 17 64.6488 984.698 2
 0 12 -18 23548.5 2767.17 4
 0 12 18 20586.8 2366.38 2
 0 12 19 1493.24 1221.21 2
 0 -12 -19 302.834 1643.61 4
 0 12 -19 1939.34 1441.66 4
 0 -12 -20 12817.8 2681.04 4
 0 12 -20 18531.7 2772.86 4
 0 14 0 841.795 746.12 5
 0 14 0 3024.52 939.702 2
 0 14 -1 56685.9 2933.84 2
 0 14 1 55524.8 2896.89 2
 0 14 -1 51925.7 2612.67 5
 0 14 1 51784.4 2484.23 5
 0 14 2 163806 4217.19 5
 0 14 2 157768 4982.36 2
 0 14 -2 163527 4705.47 5
 0 14 -2 170946 4774.65 2
 0 14 -3 43019.7 2658 4
 0 14 3 41792.6 2680.01 2
 0 14 3 43513.5 2145.62 5
 0 14 -3 46855.3 2514.18 2
 0 14 -3 43852.1 2563.76 5
 0 14 -4 300251 6899.03 4
 0 14 -4 295979 6016.3 2
 0 14 4 294670 7048.22 2
 0 14 -4 300006 6634.98 5
 0 14 5 74256.7 3644.63 2
 0 14 -5 75369.6 3605.85 4
 0 14 -5 75847.2 2814.45 3
 0 14 -5 76448.7 3427.9 5
 0 14 -5 80160.1 3094.4 2
 0 14 -6 15109.4 1686.77 5
 0 14 -6 12180.1 1695.89 4
 0 14 -6 13396.2 1307.77 2
 0 14 6 15135.6 1839.23 2
 0 14 -6 8721.5 1251.93 1
 0 14 -7 299.515 709.594 1
 0 14 -7 907.017 951.446 5
 0 14 7 977.379 989.109 2
 0 14 -7 25.2772 997.921 4
 0 14 -7 178.958 499.187 2
 0 14 -8 31692.1 2607.34 4
 0 14 -8 27206.6 2074.36 1
 0 14 8 29095.7 2426.54 2
 0 14 -8 27349.5 1622.45 2
 0 14 -8 32859.9 2525.92 5
 0 14 -9 8420.54 1533.4 4
 0 14 -9 7237.94 862.762 2
 0 14 -9 4548.61 1235.8 5
 0 14 -9 5590.76 1030.78 1
 0 14 9 3991.1 1456.2 2
 0 14 10 62758.4 3592.69 2
 0 14 -10 61756.7 3491.58 5
 0 14 -10 66511.9 3786.45 4
 0 14 -10 63020.1 3136.65 1
 0 14 -11 11061.7 1805.9 4
 0 14 -11 14762.7 1932.18 5
 0 14 -11 11988.7 1520.35 1
 0 14 11 9769.8 1744.47 2
 0 14 -12 80712.3 4155.97 5
 0 14 12 75236.5 4139.85 2
 0 14 -12 82963.5 4360.09 4
 0 14 -12 72621.4 3464.57 1
 0 14 -13 1982.49 1241.86 4
 0 14 -13 2140.43 1045.71 1
 0 14 -13 2633.44 1363.83 5
 0 14 13 2870.49 1181.13 2
 0 14 -14 9534.66 1901.98 4
 0 14 14 10561.9 1943.65 2
 0 14 -14 11038.9 1918.13 5
 0 14 -15 12239.5 2036.74 5
 0 14 -15 14682.5 2138.13 4
 0 14 15 12844.4 2075.3 2
 0 14 -16 13398.3 2208.95 4
 0 14 16 13374 2098.23 2
 0 14 17 -1750.44 1286.06 2
 0 14 -17 829.553 1419.92 4
 0 14 18 36347.7 3300.74 2
 0 14 -18 46647.6 3996.41 4
 0 14 19 2551.35 1404.89 2
 0 14 -19 3115.76 1885.35 4
 0 16 0 225.128 715.066 5
 0 16 0 547.312 846.147 2
 0 16 1 7156.17 1214.26 5
 0 16 -1 11178.4 1575.68 2
 0 16 -1 7739.16 1279.58 5
 0 16 1 9379.25 1438.78 2
 0 16 -2 38255.2 2469.5 5
 0 16 2 32126.6 2486.86 2
 0 16 2 34200.5 2131.42 5
 0 16 -2 29895.2 2258.61 2
 0 16 -3 4698.9 1100.88 2
 0 16 3 3273.78 1126.35 2
 0 16 3 4604.02 1071.96 5
 0 16 4 8372.56 1121.54 5
 0 16 4 8117.8 1527.52 2
 0 16 -4 9693.15 1645.36 4
 0 16 -4 7991.3 1366.51 5
 0 16 -4 8741.01 1255.69 2
 0 16 5 15913.6 1417.23 5
 0 16 -5 18282.9 2091.95 4
 0 16 -5 18269.6 1761.49 2
 0 16 5 23262.8 2323.5 2
 0 16 -5 19137.3 1962.97 5
 0 16 6 4595.96 855.407 5
 0 16 -6 3504.89 1136.8 4
 0 16 -6 3707.36 1243.1 5
 0 16 6 2412.15 1097.59 2
 0 16 -6 5176.12 1206.59 1
 0 16 -6 2356.39 798.848 2
 0 16 -7 27681.4 1936.17 2
 0 16 -7 28790.2 2641.69 4
 0 16 -7 29676.9 2360.72 1
 0 16 7 26097.1 2496.35 2
 0 16 -7 31092.1 2561.12 5
 0 16 -8 12635 1643.24 1
 0 16 -8 11143.5 1250.28 2
 0 16 -8 14439 1946.54 4
 0 16 -8 9550 1610.39 5
 0 16 8 14107.7 2005.48 2
 0 16 -9 17416.4 1851.66 1
 0 16 -9 14466.5 2048.64 4
 0 16 -9 18590.3 2165.45 5
 0 16 9 16957.7 2132.19 2
 0 16 -10 16479.1 1843.45 1
 0 16 10 16899.6 2160.74 2
 0 16 -10 15623.4 2118.81 5
 0 16 -10 17675.2 2303.74 4
 0 16 -11 1499.42 1245.85 4
 0 16 -11 1852.75 1057.6 1
 0 16 -11 -1705.46 1445.12 5
 0 16 11 1728.55 1199.18 2
 0 16 12 18262 2392.81 2
 0 16 -12 21940.5 2462.03 5
 0 16 -12 20775.3 2532.15 4
 0 16 -12 22778.6 2197.52 1
 0 16 -13 25455.7 2326.65 1
 0 16 13 22222.6 2481.99 2
 0 16 -13 27993.1 2857.37 4
 0 16 -13 24849.2 2691.71 5
 0 16 -14 -1313.22 1424.53 4
 0 16 -14 34.5505 1026.71 1
 0 16 14 451.73 1261.08 2
 0 16 -14 -3009.13 1590.72 5
 0 16 -15 30357.5 3104.48 4
 0 16 -15 26120.8 2837.48 5
 0 16 15 27729.5 2958.08 2
 0 16 16 3894.01 1586.57 2
 0 16 -16 2186.92 1388.53 4
 0 16 -17 1264.23 1530.32 4
 0 16 17 1137.33 1126.46 2
 0 16 -18 14414.1 2387.34 4
 0 16 18 11994 2258.58 2
 0 16 19 4754.57 1815.83 2
 0 16 20 7793.26 1977.72 2
 0 18 0 5283.68 1199.52 5
 0 18 0 5181.97 1310.66 2
 0 18 -1 16006.3 1919.42 2
 0 18 -1 16638.1 1857.32 5
 0 18 1 15779.3 2023.67 2
 0 18 1 15822.3 1784.9 5
 0 18 2 16357.6 1702.34 5
 0 18 -2 16812.1 1963.46 5
 0 18 2 16322.3 2065.72 2
 0 18 -2 14606.9 1767.87 2
 0 18 -3 6127.14 1341.47 2
 0 18 3 6341.54 1095.36 5
 0 18 -3 7065.33 1355.32 5
 0 18 3 6513.01 1500.17 2
 0 18 -4 11520.2 1741.8 5
 0 18 4 10964.2 1929.21 2
 0 18 -4 10615 1548.03 2
 0 18 4 9651.27 1294.59 5
 0 18 5 9293.84 1646.27 2
 0 18 -5 8994.46 1758.89 4
 0 18 -5 9928.34 1455.53 2
 0 18 5 9623.87 1245.32 5
 0 18 -5 11991.4 1708.08 5
 0 18 -6 4882.02 1427.8 4
 0 18 6 9466.13 1165.8 5
 0 18 -6 8014.91 1480.81 1
 0 18 -6 5865.14 1219.79 2
 0 18 6 6189.06 1496.19 2
 0 18 -6 8363.66 1602.45 5
 0 18 7 107933 4995.74 2
 0 18 -7 106700 5044.75 4
 0 18 -7 99974.9 3782.25 2
 0 18 -7 105626 4561.01 1
 0 18 -8 1623.24 1178 5
 0 18 8 1636.49 1084.55 2
 0 18 -8 3758.55 1498.42 4
 0 18 -8 2692.46 1175.65 1
 0 18 -9 61145.9 3992.12 4
 0 18 -9 60453.9 3853 5
 0 18 -9 56409.5 3374.58 1
 0 18 9 53617.6 3725.99 2
 0 18 10 6211 1718.76 2
 0 18 -10 3132.16 1503.96 4
 0 18 -10 6582.45 1634.86 5
 0 18 -10 5688.87 1351.64 1
 0 18 -11 3661.73 1565.51 5
 0 18 -11 2622.95 1399.23 4
 0 18 -11 25.4025 1144.11 1
 0 18 11 2532.18 1507.36 2
 0 18 -12 4753.46 1564.89 4
 0 18 -12 6641.87 1842.71 5
 0 18 12 2978.75 1267.1 2
 0 18 -12 3929.5 1220.99 1
 0 18 -13 59748.2 4241.03 4
 0 18 -13 57632 3455.65 1
 0 18 -13 54160.7 4035.33 5
 0 18 13 61129.9 4191.28 2
 0 18 14 6312.52 1719.65 2
 0 18 -14 7333.6 1757.52 5
 0 18 -14 10881 1819.4 1
 0 18 -14 7582.71 1930.5 4
 0 18 -15 26267.5 2548.23 1
 0 18 -15 32169.6 3339.26 4
 0 18 15 22116.6 2803.13 2
 0 18 -15 29487.3 3164.02 5
 0 18 16 2771.34 1694.47 2
 0 18 -16 5487.26 1898.08 4
 0 18 -17 11543.8 2584.41 4
 0 18 17 11349.5 2156.54 2
 0 18 18 665.952 1566.3 2
 0 20 0 734.641 964.863 5
 0 20 0 -1153.18 1112.96 2
 0 20 1 26970 2367.59 5
 0 20 1 21471 2388.72 2
 0 20 -1 23842.2 2397.84 2
 0 20 -1 27390.7 2405.89 5
 0 20 -2 27772.3 2517.39 2
 0 20 2 32479.9 2837.48 2
 0 20 -2 33259.2 2712.64 5
 0 20 2 33038.5 2467.25 5
 0 20 -3 -774.079 1037.25 2
 0 20 3 -291.72 797.625 5
 0 20 -3 -2469.66 1146.05 5
 0 20 4 9484.27 1424.1 5
 0 20 4 10279.8 1884.35 2
 0 20 -4 8532.85 1550.43 5
 0 20 -4 11147.6 1629.14 2
 0 20 -5 15284 1810.56 2
 0 20 5 13272.9 1537.39 5
 0 20 -5 13303.2 1950.36 5
 0 20 5 16043.6 2229.93 2
 0 20 -6 607.437 822.834 2
 0 20 -6 -2887.18 1486.3 4
 0 20 -6 241.502 1118.22 5
 0 20 -6 -1290.33 1286.73 1
 0 20 6 1406.49 1455.3 2
 0 20 7 53653.5 3824.08 2
 0 20 -7 53257.6 3678.37 5
 0 20 -7 53040.3 3859.84 4
 0 20 -7 53245.7 3496.57 1
 0 20 -8 10569.1 2052.5 5
 0 20 -8 10901.5 1927.7 1
 0 20 8 5875.13 1655.14 2
 0 20 -8 13674.3 2313.08 4
 0 20 9 30210.4 3098.08 2
 0 20 -9 30941.6 3095.26 5
 0 20 -9 29627.9 2734.24 1
 0 20 -9 32373.4 3195.5 4
 0 20 -10 5089.12 1741.7 4
 0 20 10 9836.73 2093.41 2
 0 20 -10 5606.31 1541.03 1
 0 20 -10 5153.23 1712.08 5
 0 20 -11 3016.27 1293.97 4
 0 20 -11 6659.78 1882.9 5
 0 20 11 5601.5 1869.36 2
 0 20 -11 6398.75 1578.96 1
 0 20 -12 -778.023 1144.2 1
 0 20 12 -30.0531 1217.5 2
 0 20 -12 593.1 1430.37 4
 0 20 -12 -13.7648 1139.67 5
 0 20 -13 16036.4 2065.45 1
 0 20 -13 16926.3 2540.91 4
 0 20 -13 14848.8 2422.02 5
 0 20 13 12685.1 2354.53 2
 0 20 14 1653.09 1445.33 2
 0 20 -14 3181.94 1850.72 4
 0 20 -14 217.776 1590.57 5
 0 20 -14 3213.45 1476.48 1
 0 20 -15 12203 2338.36 5
 0 20 15 13662.8 2543.08 2
 0 20 -15 12690.4 2639.62 4
 0 22 0 -592.742 1022.63 2
 0 22 0 -708.708 1052.35 5
 0 22 -1 24891.8 2479.96 5
 0 22 -1 21485.7 2457.97 2
 0 22 1 22518.1 2236.59 5
 0 22 1 22892.8 2552.93 2
 0 22 2 16704.3 2031.64 5
 0 22 2 13655.1 2213.23 2
 0 22 -2 15799.9 2045.67 5
 0 22 -2 14781.7 2248.05 2
 0 22 -3 1047.46 1106.7 2
 0 22 3 1271.63 1294.61 2
 0 22 3 376.933 935.326 5
 0 22 -3 -97.3042 1317.75 5
 0 22 4 22237.5 2672.52 2
 0 22 -4 20824 2433.36 2
 0 22 -4 22908.3 2444.91 5
 0 22 4 19496.6 2037.16 5
 0 22 5 32826 3237.14 2
 0 22 -5 36142.1 3120.42 5
 0 22 -5 37685.5 2903.36 2
 0 22 6 1188.51 1426.79 2
 0 22 -6 2768.2 1348.52 5
 0 22 -6 2162.96 1139.87 1
 0 22 -7 6658.23 1832.72 5
 0 22 -7 8080.99 1787.19 1
 0 22 7 7656.41 2009.47 2
 0 22 -8 6879.44 1644.01 1
 0 22 -8 6694.39 1890.72 4
 0 22 -8 5741.74 1648.46 5
 0 22 8 2958.93 1396.68 2
 0 22 -9 -101.79 1395.03 5
 0 22 9 1073.9 1306.04 2
 0 22 -9 3731.75 1821.15 4
 0 22 -9 -267.295 1201.6 1
 0 22 -10 4904.3 1438.9 1
 0 22 10 5179.47 1673.4 2
 0 22 -10 4324.37 1468.76 5
 0 22 -10 8330.68 2180.4 4
 0 22 -11 30026.7 3397.97 4
 0 22 11 29702.3 3261.42 2
 0 22 -11 25589.4 2970.6 5
 0 22 -11 29949.3 2876.29 1
 0 22 12 825.229 1585.81 2
 0 22 -12 -1149.16 1580.48 5
 0 22 -12 -2579.3 2030.43 4
 0 22 -12 1969.05 1401.14 1
 0 22 -13 33.7058 1519.89 4
 0 24 0 18993.1 2333.14 5
 0 24 0 12090.5 2111.08 2
 0 24 -1 1586.24 1226.19 2
 0 24 -1 -235.643 1231.29 5
 0 24 1 2480.25 1623.99 2
 0 24 1 1714.21 1066.04 5
 0 24 -2 -121.157 1344.26 2
 0 24 2 -2381.03 1682.49 2
 0 24 -2 -831.332 1387.09 5
 0 24 2 -376.509 1132.98 5
 0 24 3 3114.8 1270.28 5
 0 24 -3 772.834 1340.56 2
 0 24 -3 2713.08 1371.98 5
 0 24 3 2192.16 1435.51 2
 0 24 -4 21439.7 2419.99 2
 0 24 4 19275.4 2596.44 2
 0 24 -5 26232.1 2792.78 5
 0 24 5 27685.5 3097.44 2
 0 24 -6 6864.35 1803.65 5
 0 24 -6 6444.98 1821.41 1
 0 24 6 4364.43 1792.78 2
 0 24 -7 2224.33 1379.92 1
 0 24 7 3202.39 1645.83 2
 0 24 -7 3292.48 1587.3 5
 0 24 8 -1779.66 1770.72 2
 0 24 -8 -2498.73 1815.16 5
 0 24 -8 1244.03 1501.4 1
 0 24 9 19593.4 2884.89 2
 0 24 -9 13220 2160.23 1
 0 24 -9 21794.1 2963.45 5
 0 24 -10 21727.7 2902.93 5
 0 24 -10 25010 2910.16 1
 0 24 -10 26352.5 3361.69 4
 0 26 0 25686.9 3036.52 2
 0 26 0 23718.6 2576.31 5
 0 26 -1 1213.83 1311.97 2
 0 26 1 2399.49 1358.43 5
 0 26 -1 2571.14 1676.54 5
 0 26 1 1368.55 1498.69 2
 0 26 2 2182.81 1761.47 2
 0 26 -2 392.261 1288.02 2
 0 26 -2 298.945 1190.24 5
 0 26 -3 1626.64 1271.91 2
 0 26 -3 800.203 1310.3 5
 0 26 3 2380.84 1581.75 2
 0 26 -4 4465.74 1738.54 5
 0 26 4 2466.38 1805.53 2
 0 26 5 5373.71 2144.81 2
 0 26 -5 4388.01 1699.26 5
 0 26 -6 11634 2329.25 5
 0 26 -6 11627.9 2279.24 1
 0 26 6 12893.8 2497.68 2
 0 26 -7 11878.8 2357.77 1
 0 26 -8 -1449.65 1448.04 1
 0 28 0 9943.5 2344.76 2
 0 28 1 2191.01 1671.38 2
 0 28 -1 740.149 1518.02 2
 0 28 -1 4122.17 1646.68 5
 0 28 -2 1294.04 1338.88 2
 0 28 -2 3547.77 1828.66 5
 0 28 -3 6603.07 1967.72 5
 0 28 -5 -1687.54 1986.44 1
 0 28 -6 31632.7 3426.38 1
 1 1 -22 6761.1 2175.11 4
 1 -1 -22 713.17 1341.66 4
 1 1 -21 10921.8 2218.52 4
 1 -1 -21 11309.1 2227.87 4
 1 -1 -20 729.389 1392.97 4
 1 1 -20 -1296.9 1252.39 4
 1 1 -19 9444.92 1877.45 4
 1 -1 -19 10797.5 1963.92 4
 1 1 -18 14860.5 2114.28 4
 1 -1 -18 17717.4 2407.24 4
 1 -1 -17 71209.9 4137.58 4
 1 1 -17 70036.5 4046.98 4
 1 -1 -16 2388.95 1278.84 4
 1 1 -16 3075.03 1151.45 4
 1 -1 -15 16370.1 2017.13 4
 -1 1 15 17264.3 1416.51 2
 1 1 -15 17702.6 2007.41 4
 -1 1 14 686.935 471.661 2
 1 1 -14 697.715 935.666 4
 -1 -1 14 311.04 463.903 2
 1 -1 -14 974.611 1077.51 4
 -1 -1 13 74633 2254.44 2
 -1 1 13 68538.3 2503.75 2
 1 1 -13 74175.3 3488.29 4
 1 -1 -13 74190.7 3544.11 4
 1 -1 -12 11701.6 1483.57 4
 1 1 -12 11973.6 1483.32 4
 -1 -1 12 13373.5 954.993 2
 -1 1 12 12340.7 1080.34 2
 -1 -1 11 -212.58 306.493 2
 1 1 -11 402.305 734.929 4
 1 -1 -11 -408.557 720.172 4
 -1 1 11 228.36 424.521 2
 -1 -1 10 42368.1 1486.79 2
 1 -1 -10 44135.8 2418.51 4
 -1 1 10 41935.2 1729.78 2
 1 1 -10 43017.3 2264.42 4
 -1 -1 9 227754 3271.62 2
 1 1 -9 221616 4847.49 4
 1 1 -9 229547 3906.72 6
 -1 1 9 231972 3825.77 2
 1 -1 -9 225857 5145.08 4
 1 1 -9 227775 3376.67 2
 -1 1 9 227124 3510.28 5
 1 -1 -8 13817.3 970.318 2
 1 -1 -8 16376.2 1372.96 4
 1 1 -8 17252.5 1323.07 4
 -1 -1 8 15704.5 839.319 2
 -1 1 8 15689 881.428 5
 1 1 -8 15463.7 828.873 2
 -1 1 8 16134.7 1018.15 2
 1 1 -7 45947.3 1572.43 5
 1 -1 -7 49622.4 2147.97 4
 -1 -1 7 49577.9 1329.2 2
 1 1 -7 50015.2 2010.96 4
 -1 -1 7 47342.7 1610.98 5
 -1 1 7 45599.8 1358.55 5
 1 -1 -7 48034.2 1636.22 2
 -1 1 7 39791.6 1544.52 2
 1 -1 -7 45196.9 1791.85 6
 1 1 -7 50151.2 1336.71 2
 1 1 -6 58624.4 1341.86 2
 1 -1 -6 59156.8 2186.38 4
 -1 -1 6 60287.7 1668.27 5
 1 -1 -6 57824.1 1681.92 2
 -1 1 6 58351.3 1378.93 5
 -1 -1 6 58804.4 1366.4 2
 1 1 -6 58168.3 1971.33 4
 1 1 -6 57804.8 1617.61 5
 -1 1 6 60030.8 1635.55 2
 -1 1 5 327687 3561.27 2
 -1 -1 5 326049 3601.86 5
 1 1 -5 318717 3516.52 5
 1 1 -5 306923 4165.93 4
 -1 1 5 324882 2826.53 5
 -1 -1 5 328200 2911.25 2
 1 -1 -5 324771 3669.14 2
 1 -1 -5 322262 4621.19 4
 -1 1 4 253358 2089.21 5
 -1 -1 4 257573 2328.9 2
 -1 -1 4 257594 3415.13 4
 -1 -1 4 249569 2837.32 5
 1 1 -4 249268 2822.41 5
 -1 1 4 251465 2896.6 2
 1 -1 -4 254381 2943.04 2
 1 1 -4 247083 3293.93 4
 1 1 -4 251698 2279.43 2
 -1 1 3 120331 1828.28 2
 1 1 -3 120511 1984.44 4
 -1 -1 3 124750 1461.4 2
 1 1 -3 121290 1756.76 5
 1 -1 3 27636.3 975.672 5
 -1 -1 -3 27517.6 1081.21 6
 -1 1 -3 25759 913.491 4
 1 1 3 26367.2 1348.69 3
 -1 1 -3 26799.1 1416.71 3
 -1 -1 -3 22698.8 1309.59 3
 1 -1 3 26379.2 1361.51 3
 1 1 3 25156.7 1024.79 6
 1 -1 3 27821 1016.95 1
 1 -1 3 26404.1 955.538 4
 1 -1 4 59948.1 2279.02 3
 -1 1 -4 66032.9 1259.42 6
 -1 1 -4 61601.2 1659.34 4
 -1 1 -4 73003.9 2643.57 3
 -1 -1 -4 66527.5 1848.56 6
 1 -1 4 66794 1752.6 4
 1 1 4 63919.5 1744.91 6
 1 -1 4 67018 1667.27 5
 1 1 4 63751.7 2319 3
 1 -1 4 65285.6 1216.22 6
 1 -1 4 62879.9 1734.62 1
 -1 -1 -4 65661.3 2500.62 3
 1 -1 5 95429 1317.06 2
 -1 1 -5 94928.9 1806.88 6
 -1 1 -5 95838.1 2310.61 4
 -1 -1 -5 97525.8 2440.34 6
 1 -1 5 99141.7 2193.7 5
 1 1 5 93745.9 3096.78 3
 -1 -1 -5 97849.1 2563.03 4
 1 -1 5 94564 3111.5 3
 1 1 5 94600.5 2221.7 6
 -1 1 -6 24256.5 1318.45 4
 -1 1 -6 27650.3 1084.49 6
 1 -1 6 25308.4 774.548 2
 -1 -1 -6 25340.2 1325 6
 -1 -1 -6 23454.7 1406.06 4
 1 -1 6 24803.6 1753.24 3
 1 1 6 26185.1 1781.78 3
 1 1 6 27417.4 1117.68 2
 -1 -1 -7 258231 4811.05 4
 -1 -1 -7 258211 4539.31 6
 1 -1 7 257087 2678.54 2
 1 1 7 249462 3544.82 2
 -1 1 -7 255110 3689.55 6
 -1 1 -7 253588 4515.93 4
 1 -1 7 255649 5972.89 3
 1 1 7 265550 5990.51 3
 -1 1 -8 52444.2 2221.56 4
 -1 1 -8 54936.6 1857.37 6
 1 1 8 54108.7 1714.64 2
 1 1 8 58696.5 3021.66 3
 -1 -1 -8 52454.3 2351.54 4
 1 -1 8 52526 2928.19 3
 -1 1 -9 187244 3644.76 6
 1 1 9 182259 3250.86 2
 1 -1 9 171879 2604.21 2
 -1 1 -9 186116 4390.9 4
 -1 -1 -9 181606 4555.22 4
 1 -1 10 79741.2 1876.97 2
 -1 1 -10 82160.6 2581.13 6
 -1 1 -10 81201 3114.38 4
 -1 -1 -10 79461.8 3225.63 4
 1 1 10 79036.1 2280.07 2
 1 1 11 220.765 416.138 2
 -1 1 -11 106.145 709.47 4
 -1 -1 -11 -548.593 748.729 4
 1 -1 11 660.523 300.344 2
 1 1 12 56434.4 2058.71 2
 -1 -1 -12 54840.5 2944.76 4
 1 -1 12 52775.3 1691.15 2
 -1 1 -12 52553.1 2795.21 4
 -1 1 -13 35806.6 2492.91 4
 1 -1 13 36036.2 1440.98 2
 1 1 13 34437 1747.14 2
 -1 -1 -13 37332.4 2575.92 4
 -1 -1 -14 4842.29 1250.2 4
 1 1 14 4344.5 730.201 2
 -1 1 -14 5622.76 1252.69 4
 -1 -1 -15 78730.2 3996.77 4
 -1 1 -15 77533.1 3900.87 4
 -1 -1 -16 3549.93 1515.05 4
 -1 1 -16 1733.47 1268.36 4
 -1 -1 -17 36674.7 3064.15 4
 -1 1 -17 41367.2 3190.52 4
 -1 -1 -18 15903.9 2214.4 4
 -1 1 -18 17555.8 2228.87 4
 -1 1 -19 2404.62 1367.96 4
 -1 -1 -19 17.8382 1309.66 4
 -1 -1 -20 1876.44 1414.16 4
 -1 1 -20 1507.55 1316.5 4
 -1 1 -21 36344 3482.4 4
 -1 -1 -21 36319.4 3598.78 4
 -1 -1 -22 -19.9805 1474.41 4
 -1 1 -22 -59.0812 1731.16 4
 1 3 -22 779.778 1443.02 4
 1 -3 -22 -3474.32 1973.21 4
 1 -3 -21 10534.9 2113.64 4
 1 3 -21 12772.7 2318.37 4
 1 3 -20 -844.779 1506.65 4
 1 -3 -20 5914.94 2058.93 4
 1 -3 -19 13189.7 2287.27 4
 1 3 -19 13951.2 2308.28 4
 1 3 -18 30855.9 2883.37 4
 1 -3 -18 35466.5 3230.02 4
 1 -3 -17 8432.07 1953.72 4
 1 3 -17 4304.97 1050.84 4
 1 -3 -16 9912.6 1656.42 4
 1 3 -16 7589.82 1556.18 4
 -1 3 16 10891.6 1325.62 2
 -1 3 15 980.163 637.002 2
 1 3 -15 -683.184 1130.93 4
 1 -3 -15 1052.82 1093.31 4
 1 -3 -14 13750.2 1853.46 4
 -1 3 14 11243.2 1224.52 2
 1 3 -14 12856.6 1703.58 4
 1 -3 -13 5150.23 1249.31 4
 -1 -3 13 5690.29 543.022 2
 -1 3 13 5168.45 828.522 2
 1 3 -13 4491.93 1077.16 4
 1 3 -12 207578 5429.61 4
 -1 -3 12 215418 2960.12 2
 1 -3 -12 208767 6000.41 4
 1 3 -12 208142 3965.89 6
 1 -3 -11 695.085 657.682 4
 -1 -3 11 -98.0944 206.288 2
 -1 3 11 70.6597 545.089 2
 1 3 -11 1397.49 848.584 4
 1 3 -11 -41.5142 380.485 6
 1 3 -10 332688 6133.63 4
 1 -3 -10 324771 6925.73 4
 -1 3 10 319456 3935.93 5
 1 3 -10 325266 4222.31 6
 -1 -3 10 338230 3423.71 2
 -1 3 10 321056 5306.01 2
 1 3 -10 328362 3461.25 2
 1 3 -10 327098 5372.74 5
 -1 -3 9 342559 3261.46 2
 1 3 -9 338746 3254.13 2
 -1 3 9 321468 5118.48 2
 1 3 -9 324181 5141.84 5
 1 3 -9 321657 5778.31 4
 -1 3 9 336800 3712.13 5
 1 3 -8 1238.08 536.252 5
 1 3 -8 759.489 509.285 4
 -1 3 8 193.183 193.194 5
 -1 -3 8 697.693 194.239 2
 -1 3 8 283.008 389.814 2
 1 3 -8 600.335 183.561 2
 1 3 -7 17228.7 1125.53 5
 -1 3 7 19078.4 742.929 5
 1 3 -7 17817.7 675.19 2
 1 3 -7 17569 1230.55 4
 -1 3 7 17674.2 1118.37 2
 1 3 -6 63391.5 1985.61 5
 1 3 -6 68014.7 1213.59 2
 -1 3 6 61922.5 2011.15 2
 1 3 -6 58679.7 2028.84 4
 -1 -3 5 242235 3450.13 1
 1 3 -5 251995 2252.14 2
 1 3 -5 242261 3629.23 5
 1 -3 -5 249280 3959.25 2
 -1 3 5 242522 3758.55 2
 1 3 -5 241013 3774.59 4
 -1 -3 4 25101.2 1014.53 1
 1 3 -4 24317.1 1094.25 5
 1 3 -4 25019.3 991.021 1
 -1 3 4 27261.4 1173.38 2
 1 3 -4 25568.5 663.689 6
 1 3 -4 25895.4 1165.19 4
 1 3 -4 25490.5 714.803 2
 1 -3 -4 25110.7 1288.14 6
 1 -3 -4 25803.4 1203.73 2
 -1 -3 4 26630.6 1164.57 4
 1 3 -3 11002.2 474.142 6
 -1 -3 3 11404.9 631.146 1
 1 -3 -3 11240.3 769.677 2
 -1 3 3 11324.3 759.261 2
 1 3 -3 11741.4 748.34 4
 -1 -3 3 12105.7 728.771 4
 -1 -3 3 11322.3 459.897 6
 1 3 -3 10950.6 595.055 1
 1 3 -3 11022.8 697.107 5
 1 3 -2 160006 1928.28 6
 1 3 -2 160329 2413.11 4
 -1 3 2 157354 2504.03 2
 -1 -3 2 157391 1853.83 6
 1 3 -1 58393.9 1376.92 4
 -1 3 1 58296.8 1430.72 2
 1 3 0 15798 806.778 6
 -1 3 0 16650.2 648.188 5
 -1 3 -1 14747.1 681.317 5
 1 3 1 14873.8 844.94 6
 -1 3 -1 16082.7 704.754 4
 1 3 1 15540.3 701.596 3
 1 -3 1 15061.6 731.484 3
 1 3 2 241349 3698.13 6
 -1 3 -2 238520 2990.29 1
 1 -3 2 239912 3536.35 3
 1 -3 2 247497 3067.19 5
 1 -3 2 242848 2911.55 4
 -1 3 -2 240163 2937.66 4
 -1 3 -2 245569 3608.9 3
 1 3 2 241878 3403.93 3
 -1 -3 -2 243433 3734.62 6
 -1 3 -2 240533 3042.92 5
 -1 -3 -2 248793 3582.61 3
 -1 3 -2 245488 2003.83 2
 -1 -3 -3 63812.5 2071.4 6
 1 3 3 63684.6 2008.99 6
 -1 3 -3 59214.5 1629.11 5
 1 -3 3 62348.5 1690.27 5
 -1 -3 -3 62022.4 2147.9 3
 1 -3 3 62881.8 1622.86 4
 1 -3 3 60226.4 2038.14 3
 -1 3 -3 60178.1 1626.91 1
 1 3 3 60835.7 1989.85 3
 -1 3 -3 59541.7 1607.48 4
 1 -3 3 60452.1 1702.45 1
 -1 3 -3 66124 2219.43 3
 -1 -3 -4 100203 3096.91 3
 -1 3 -4 99671.7 2250.94 1
 1 -3 4 100433 2298.22 5
 -1 3 -4 102304 3071.04 3
 1 3 4 96917.9 2604.65 6
 -1 3 -4 96269.2 2218.04 4
 1 -3 4 95185.3 2292.53 1
 -1 3 -4 97114.8 2269.03 5
 1 -3 4 105724 2292.31 4
 1 -3 4 95886.9 2864.27 3
 -1 -3 -4 103512 2813.81 6
 1 3 4 92329 2770.84 3
 -1 3 -5 137520 2836.84 4
 1 3 5 138680 3683.54 3
 1 3 5 131829 3161 6
 1 -3 5 134683 3744.58 3
 -1 3 -5 142620 2836.21 1
 -1 3 -5 136198 2842.5 5
 1 3 6 199493 3628.22 2
 1 3 6 204474 4902.21 3
 -1 3 -6 202070 3703.55 4
 1 -3 6 214287 5122.14 3
 1 3 6 211771 4147.07 6
 1 3 7 11647.3 947.201 2
 -1 3 -7 9592.75 948.94 4
 1 -3 7 10192.5 1332.97 3
 1 3 7 10487.2 1316.68 3
 -1 3 -7 10181.4 468.458 6
 -1 3 -8 30708 952.529 6
 -1 3 -8 31580.3 1729.36 4
 1 3 8 31139.7 1586.81 2
 -1 3 -9 164599 4110.4 4
 -1 -3 -9 164525 4736.4 4
 1 3 9 165446 3626.62 2
 -1 3 -9 168920 2498.69 6
 -1 3 -10 199794 4793.66 4
 -1 -3 -10 202771 5442.04 4
 -1 3 -10 202497 3004.28 6
 1 3 10 199756 4123.78 2
 1 3 11 35435.8 1818.19 2
 -1 -3 -11 36960.8 2477.65 4
 -1 3 -11 36360 1394.66 6
 -1 3 -11 35275.9 2188.81 4
 -1 -3 -12 221663 6192.76 4
 -1 3 -12 223575 3568.33 6
 1 -3 12 222629 2054.03 2
 1 3 12 223298 4571.5 2
 -1 3 -12 219336 5568.62 4
 1 3 13 18167.2 1417.24 2
 -1 3 -13 15891.9 1696.51 4
 -1 -3 -13 21455.2 2220.29 4
 1 3 14 14687.1 1314.9 2
 -1 -3 -14 14960.3 2031.5 4
 -1 3 -15 1607.62 1088.04 4
 -1 -3 -15 1867.59 1165.88 4
 1 3 15 3427.84 812.539 2
 -1 3 -16 21685.4 2241.38 4
 -1 -3 -16 19781.2 2245.22 4
 -1 -3 -17 558.272 1269.61 4
 -1 3 -17 262.441 1159.17 4
 -1 -3 -18 67057.8 4309.68 4
 -1 3 -18 65531.2 3989.36 4
 -1 -3 -19 13936.2 2358.35 4
 -1 3 -19 16294.3 2333.66 4
 -1 -3 -20 9833.9 2352.75 4
 -1 3 -20 5497.4 1576.34 4
 -1 -3 -21 7778.5 2050.42 4
 -1 3 -21 6845.12 1849.54 4
 -1 -3 -22 1219.41 1718.56 4
 -1 3 -22 1004.87 1526.95 4
 1 5 -22 787.499 1329.3 4
 1 -5 -22 -384.629 1754.38 4
 1 -5 -21 -2166.94 1628.96 4
 1 5 -21 1028.49 1486.21 4
 1 5 -20 24538.9 2970.41 4
 1 -5 -20 21664.3 2771.96 4
 1 -5 -19 28887.3 3202.28 4
 1 5 -19 27296.7 2847.47 4
 1 5 -18 15989.6 2319.72 4
 1 -5 -18 14324 2372.08 4
 1 5 -17 3573.36 1328.94 4
 -1 5 17 5648.39 1044.34 2
 1 5 -16 87388.4 4307.42 4
 1 -5 -16 91588.1 4853.02 4
 -1 5 16 86413.1 3568.75 2
 1 -5 -15 -1.4329 1059.35 4
 -1 5 15 621.112 723.764 2
 1 5 -15 1181.16 1075.64 4
 1 5 -14 9386.47 1596.84 4
 1 -5 -14 8185.38 1496.95 4
 -1 5 14 7544.67 1242.84 2
 1 -5 -13 3801.96 1090.42 4
 -1 5 13 5243.24 965.637 2
 1 5 -13 5428.87 1191.58 4
 -1 5 12 152315 4290.61 2
 -1 5 12 150380 2747.48 5
 1 5 -12 152659 2668.33 6
 1 -5 -12 155330 5496.42 4
 1 5 -12 165515 4898.52 4
 1 5 -12 160088 4409.16 5
 1 5 -11 183.307 132.304 2
 -1 5 11 237.178 250.394 5
 1 5 -11 469.801 608.966 5
 1 5 -11 145.393 172.408 6
 1 5 -11 69.048 211.565 6
 1 5 -11 673.788 774.781 4
 -1 5 11 151.891 537.632 2
 1 5 -10 177849 2098.49 6
 -1 5 10 166473 2513.43 5
 1 5 -10 152926 1854 2
 1 5 -10 174079 4291.77 5
 1 5 -10 155577 2258.23 6
 -1 5 10 162665 4184.01 2
 1 5 -10 159925 4446.79 4
 -1 5 9 24391.5 914.52 5
 1 5 -9 22808.1 723.063 6
 1 5 -9 20809.3 696.633 2
 -1 5 9 23919.6 1596.57 2
 1 5 -9 21575.4 1604.24 4
 1 5 -9 22697 1563.74 5
 1 5 -8 133694 3492.48 5
 1 5 -8 132506 1747.97 2
 1 5 -8 134265 3688.99 4
 1 5 -8 129756 1681.05 6
 -1 5 8 132490 3531.06 2
 1 5 -7 15120.3 612.539 2
 1 5 -7 14133.8 1055.5 1
 1 5 -7 16266 1295.47 4
 -1 5 7 15926.8 1259.24 2
 1 5 -7 13329.8 550.593 6
 1 5 -7 13105.4 1107.6 5
 1 5 -6 123718 3095.04 5
 -1 5 6 117182 3115.67 2
 1 5 -6 118231 3142.06 4
 1 5 -6 121269 1810.92 2
 1 5 -6 122741 1695.32 6
 1 5 -6 119105 2723.71 1
 1 5 -5 36298.8 998.473 6
 1 5 -5 34042.9 1400.74 1
 1 -5 -5 34022.6 1813.23 3
 -1 5 5 34855.1 1669.96 2
 1 5 -5 36792.4 1614.31 5
 1 5 -5 36471.6 1649.86 4
 1 5 -4 66377.1 1502.19 6
 1 5 -4 67293.9 2294.36 3
 1 5 -4 66903.2 1797.96 1
 -1 5 4 63096.5 2167.34 2
 1 -5 -4 65768 2208.19 3
 -1 -5 4 66916.2 1331.15 6
 1 5 -4 67408.4 2105.3 4
 1 5 -4 63450.3 2045.96 5
 1 5 -3 46251.9 1652.14 5
 -1 5 3 45312.2 1754.39 2
 1 5 -3 46612.7 1683.66 4
 -1 -5 3 45122.1 1239.48 6
 1 5 -3 45248 1379.65 6
 -1 -5 2 9464.76 746.756 4
 -1 5 2 10797.4 880.536 2
 1 5 -2 12033.2 854.055 4
 1 5 -2 11147.4 767.055 6
 -1 -5 2 12100.8 729.002 6
 1 -5 -2 12183.2 981.806 6
 -1 -5 1 1288.29 368.872 4
 -1 -5 1 1486.6 397.054 6
 1 5 -1 948.736 383.479 6
 -1 5 1 1493.63 266.498 5
 1 5 -1 1764.06 423.607 4
 -1 5 1 1349.76 381.712 2
 1 -5 -1 1080.02 409.815 6
 -1 -5 0 395030 4955.9 6
 1 5 0 389565 5018.6 6
 1 -5 0 377643 4422.89 4
 1 -5 0 398980 4714.76 6
 -1 5 0 380748 4328.64 2
 -1 -5 0 390305 4514.29 4
 -1 5 0 390635 3961.22 5
 -1 5 -1 130351 2486.53 5
 1 -5 1 132776 2476.71 5
 1 5 1 126163 3002.95 6
 1 5 1 132163 1953.66 3
 1 -5 1 128578 2566.45 4
 -1 5 -1 125932 2560.65 4
 -1 5 -1 130579 2369.37 2
 1 -5 1 130291 2527.95 6
 -1 -5 -1 136795 3157.68 6
 1 -5 1 129682 2061.86 3
 -1 5 -2 41803.7 1511.76 3
 -1 -5 -2 44145.3 1515.57 3
 -1 5 -2 40592.9 1223.42 2
 1 5 2 41692.9 1820.78 6
 -1 5 -2 41174.5 1517.6 4
 1 -5 2 41336.1 1294.98 6
 1 -5 2 43194.4 1522.49 5
 1 -5 2 41606.5 1488.08 4
 -1 5 -2 41577.3 1495.8 5
 1 -5 2 41391.1 1454.5 3
 1 5 2 42938.3 1381.58 3
 -1 5 -3 121302 1926.79 2
 -1 5 -3 121129 2721.72 5
 1 5 3 121507 3222.73 6
 -1 5 -3 121732 2691.78 4
 1 -5 3 124779 2931.9 3
 -1 5 -3 125310 3052.24 3
 1 -5 3 122387 1942.14 6
 -1 -5 -3 129236 3075.52 3
 -1 5 -3 121305 2621.29 1
 1 5 3 119869 2721.52 3
 -1 -5 -4 28767.3 1716.85 3
 1 5 4 28591.7 1535.02 3
 1 -5 4 29706.7 1613.65 3
 -1 5 -4 30107 849.209 2
 1 5 4 29393.6 1660.57 6
 -1 5 -4 29898.7 1720.74 3
 -1 5 -4 28224.7 1356.26 1
 -1 5 -4 32057.1 1449.16 4
 -1 5 -4 29213.1 1411.28 5
 1 -5 5 2218.32 593.678 3
 -1 5 -5 920.006 426.192 4
 -1 5 -5 746.679 360.285 5
 -1 5 -5 1272.04 461.692 1
 1 5 5 1558.51 567.062 3
 1 5 5 2165.64 680.992 6
 1 -5 6 194601 4912 3
 1 5 6 190260 4661.99 3
 -1 5 -6 191629 3942.5 5
 -1 5 -6 186854 3890.75 4
 -1 5 -6 195946 3780.25 1
 1 5 6 192620 4407.55 6
 1 5 7 104677 3449.82 6
 -1 5 -7 106419 3080.3 5
 -1 5 -7 112205 3048.89 1
 1 5 7 105479 3083.9 2
 -1 5 -7 106501 3087.15 4
 -1 5 -8 25824.9 1708.63 4
 1 5 8 25357.8 1637.63 2
 -1 5 -8 26356 1639.95 5
 -1 5 -9 3427.6 765.457 4
 1 5 9 3055.8 758.608 2
 -1 5 -10 197572 4892.33 4
 1 5 10 201053 4615.03 2
 -1 5 -11 12131.6 1422.28 4
 1 5 11 13246.2 1285.47 2
 -1 5 -12 90283.3 3623.58 4
 -1 -5 -12 84675.5 4045.16 4
 1 5 12 91043.4 3254.27 2
 -1 -5 -13 9039.16 1506.87 4
 1 5 13 11403.7 1328.2 2
 -1 5 -13 9014.63 1385.31 4
 -1 5 -14 4114.39 1147.45 4
 -1 -5 -14 5560.76 1468.55 4
 1 5 14 3599.13 910.703 2
 -1 5 -15 5539.18 1382 4
 -1 -5 -15 8194.02 1815.65 4
 1 5 15 7146.11 1165.63 2
 -1 -5 -16 158617 6293.9 4
 -1 5 -16 160319 5747.71 4
 -1 5 -17 12867.1 1968.83 4
 -1 -5 -17 10257.8 1945.61 4
 -1 -5 -18 17189.5 2438.41 4
 -1 5 -18 12095.1 1993.29 4
 -1 -5 -19 19854.2 2579.95 4
 -1 5 -19 23630.6 2689.23 4
 -1 -5 -20 24784.2 3063.84 4
 -1 5 -20 30934.6 3146.51 4
 -1 5 -21 -1507.27 1393.86 4
 -1 -5 -21 898.22 1537.44 4
 -1 -5 -22 1693.47 2115.87 4
 -1 5 -22 4938.82 2130.89 4
 1 -7 -22 1877.21 1416.39 4
 1 7 -22 -1377.37 1653.89 4
 1 -7 -21 19726.3 3032.48 4
 1 7 -21 15440.1 2470.79 4
 1 7 -20 37066.4 3384.76 4
 1 -7 -20 36132.3 3673.66 4
 1 -7 -19 11304.7 2218.09 4
 1 7 -19 13118.3 2114.03 4
 1 -7 -18 -602.144 1380.94 4
 1 7 -18 526.694 1079.2 4
 1 -7 -17 16293.5 2418.26 4
 -1 7 17 11463.1 1700.71 2
 1 7 -17 12013.4 1916.09 4
 1 7 -16 10042.9 1702.72 4
 -1 7 16 11390.4 1516.41 2
 1 -7 -16 9192.62 1860.6 4
 -1 7 15 675.774 850.948 2
 1 7 -15 515.349 958.066 4
 1 -7 -15 -1427.83 1482.82 4
 -1 7 14 26132.8 2097.96 2
 1 7 -14 29935.4 2481.28 4
 -1 7 13 38320.1 2415.09 2
 1 7 -13 40442.2 2510.11 5
 1 7 -13 44757.6 2823.2 4
 1 7 -12 10256.3 1356.5 5
 -1 7 12 9909.15 1373.18 2
 1 7 -12 10142 1475.62 4
 1 7 -11 14809 1598.65 4
 -1 7 11 16207.4 812.016 5
 -1 7 11 15332.9 1513.57 2
 1 7 -10 77180.7 1246.42 2
 -1 7 10 80655.6 3195.89 2
 1 7 -10 83663.5 3358.05 4
 1 7 -10 85923 3295.5 5
 1 7 -9 -180.722 654.047 5
 1 7 -9 257.016 557.721 1
 1 7 -9 915.706 205.75 2
 1 7 -9 265.328 726.58 4
 -1 7 9 849.845 614.43 2
 -1 7 8 171192 4392.92 2
 1 7 -8 180553 4514.7 4
 1 7 -8 187114 3988.37 1
 1 7 -8 178601 4411.36 5
 1 7 -8 173245 2229.39 6
 1 7 -8 179769 2337.93 2
 1 7 -7 89646.3 3058.45 4
 1 7 -7 91184.3 3068.13 5
 1 7 -7 83764.2 2624.69 1
 -1 7 7 89009.7 3057.92 2
 1 7 -7 85711.3 1747.88 6
 1 7 -6 10982.1 973.996 1
 1 7 -6 14428.7 1242.07 5
 1 7 -6 14091.4 817.892 6
 -1 7 6 12432.6 1237.12 2
 -1 -7 6 12853.2 618.011 6
 1 7 -6 13241.2 1198.67 4
 1 7 -5 18666.3 1157.92 1
 -1 -7 5 19322.9 852.463 6
 1 7 -5 18586.4 1358.9 4
 1 7 -5 19059.4 1351.22 5
 1 -7 -5 17434.5 1310.43 3
 -1 7 5 18567.7 1416.35 2
 1 7 -5 18853.7 995.643 6
 1 7 -4 11779.2 882.428 6
 -1 7 4 10736.3 1075.39 2
 1 7 -4 12603.3 1041.99 3
 1 7 -4 10620.6 968.301 4
 -1 -7 4 11630.9 757.711 6
 1 7 -4 9905.36 831.899 1
 1 7 -4 12940.1 1096.17 5
 1 -7 -4 11546 967.995 3
 1 7 -3 406.71 373.223 4
 -1 -7 3 495.64 294.305 6
 1 7 -3 680.198 331.272 6
 -1 7 3 372.353 414.54 2
 1 -7 -3 918.248 312.447 3
 1 7 -3 577.993 429.649 5
 1 7 -3 960.792 313.528 3
 1 7 -2 7982.47 856.361 6
 1 -7 -2 8988.57 556.972 3
 1 7 -2 9609.44 933.872 4
 -1 7 2 8060.86 854.688 2
 -1 -7 2 8662.96 778.384 6
 1 7 -1 50621.7 1951.18 4
 1 7 -1 50193.1 2007.81 6
 -1 7 1 51633.3 1627.48 5
 -1 -7 1 52452.2 2005.77 6
 -1 7 1 51816.3 1964.02 2
 -1 7 0 28578.6 1296.26 5
 -1 7 0 28007.3 1424.72 2
 1 7 0 29288 1652.62 6
 -1 7 -1 48740.7 1783.53 2
 1 7 1 46632.6 2103.49 6
 1 -7 1 52010.7 2004.88 6
 -1 7 -1 50648.2 1812.02 5
 -1 7 -1 54969.7 2000.12 4
 1 -7 1 50267.4 1205 3
 -1 7 -2 2389.37 459.499 2
 1 -7 2 2191.15 413.955 3
 -1 7 -2 3104.2 597.294 4
 1 7 2 2452.29 331.942 3
 1 7 2 2946.82 697.107 6
 1 -7 2 3114.68 547.914 6
 -1 7 -2 3302.19 637.797 5
 -1 7 -2 3144.47 490.281 3
 1 7 3 259816 5245.22 6
 -1 7 -3 270522 4497.56 5
 -1 7 -3 267337 4452.18 3
 1 7 3 266243 3868.37 3
 1 -7 3 251055 3740.6 6
 -1 7 -3 263592 3650.54 2
 -1 -7 -3 274404 4466.24 3
 -1 7 -3 260574 4530.5 4
 1 -7 3 255898 4147.6 3
 -1 7 -4 59093.7 2427.24 3
 1 7 4 62492.1 2648.46 6
 1 -7 4 58825.4 1563.26 6
 -1 7 -4 60022.7 2125.07 1
 -1 7 -4 60388.8 2229.72 5
 1 -7 4 57965.8 2231.73 3
 -1 7 -4 59250.9 1637.28 2
 -1 -7 -4 63696.1 2495.05 3
 1 7 4 59138.8 2112.46 3
 -1 7 -4 62612 2326.73 4
 1 7 5 400142 6070.07 3
 1 7 5 381285 6690.95 6
 -1 7 -5 399776 3778.17 2
 -1 7 -5 388733 5906.1 5
 1 -7 5 386620 3195.97 6
 -1 7 -5 393037 5893.72 4
 -1 7 -5 381521 5531.64 1
 -1 7 -6 659.559 434.919 1
 -1 7 -6 1459.09 630.041 4
 1 7 6 1340.56 776.302 6
 -1 7 -6 1307.29 588.602 5
 -1 7 -6 891.214 256.063 2
 -1 7 -7 14874.4 551.425 2
 -1 7 -7 16004.8 1321.64 5
 1 7 7 16278.5 1417.59 2
 -1 7 -7 15778.7 1327.39 4
 -1 7 -7 14852.3 1264.02 1
 1 7 7 16551.4 1550.19 6
 1 7 8 93983.6 3324.27 2
 -1 7 -8 96122.5 3060.88 1
 -1 7 -8 93546.5 3220.56 4
 -1 7 -8 92973.4 3276.83 5
 -1 7 -9 6653.92 1056.44 4
 1 7 9 4843.02 935.464 2
 -1 7 -9 4813.03 882.893 1
 -1 7 -9 5231.08 1014.34 5
 1 7 10 40266 2338.48 2
 -1 7 -10 48125.6 2556.82 4
 -1 7 -10 47720.1 2527.78 5
 1 7 11 18124.7 1628.08 2
 -1 7 -11 15374.9 1586.65 4
 -1 7 -12 6846.71 1189.22 4
 1 7 12 5472.61 1065.7 2
 -1 7 -13 4831.04 1164.14 4
 1 7 13 5204.39 1069.24 2
 1 7 14 51684.9 2838.5 2
 -1 7 -14 54945.7 3270.98 4
 -1 -7 -15 2937.72 1263.77 4
 -1 7 -15 3467.85 1300.05 4
 1 7 15 4029.07 1022.49 2
 -1 -7 -16 52248.8 3851.12 4
 1 7 16 49889 2849.28 2
 -1 7 -16 48408 3340.85 4
 -1 -7 -17 9146.4 2023.86 4
 1 7 17 12044.6 1574.32 2
 -1 7 -17 10295.5 1853.29 4
 -1 7 -18 5673.36 1563.46 4
 -1 -7 -18 10840.9 2160.67 4
 -1 -7 -19 17040.5 2834.14 4
 -1 7 -19 10821 1946.44 4
 -1 7 -20 42360.6 3767.06 4
 -1 -7 -20 36989.7 3846.3 4
 -1 -7 -21 10626.6 2521.71 4
 -1 7 -21 7616.82 1992.57 4
 -1 -7 -22 -1268.57 1752.4 4
 -1 7 -22 -1930.22 1952.12 4
 1 -9 -21 2987 1741.57 4
 1 9 -21 3163.45 1548.76 4
 1 -9 -20 12350 2612.9 4
 1 9 -20 9921.85 2109.38 4
 1 -9 -19 7032.47 1743.26 4
 1 9 -19 7145.33 1855.83 4
 -1 9 18 1886.46 917.676 2
 1 9 -18 2907.56 1582.81 4
 1 -9 -18 379.747 1449.55 4
 -1 9 17 10337.9 1791.05 2
 1 9 -17 14181 2083.6 4
 1 -9 -17 12139.4 2191.57 4
 1 9 -16 21625 2468.36 4
 -1 9 16 24488.8 2323.95 2
 -1 9 15 21893.1 2097.1 2
 1 9 -15 20922.2 2322.25 4
 1 9 -14 78327.8 3806.84 5
 -1 9 14 78655.7 3611.78 2
 1 9 -14 76482.1 3871.72 4
 1 9 -13 209.39 1035.4 4
 1 9 -13 337.975 946.525 5
 -1 9 13 188.438 800.199 2
 1 9 -12 1168.74 847.56 4
 1 9 -12 802.483 755.842 5
 -1 9 12 849.503 871.462 2
 1 9 -11 1119.87 846.327 5
 1 9 -11 -233.894 740.139 4
 -1 9 11 369.497 748.186 2
 1 9 -10 843.412 221.383 2
 -1 9 10 662.429 680.873 2
 1 9 -10 964.137 686.279 1
 1 9 -10 -140.432 697.218 5
 1 9 -10 967.71 759.479 4
 1 9 -9 20346.5 1526.24 1
 1 9 -9 18586.4 745.394 6
 1 9 -9 19273.2 1766.65 4
 1 9 -9 21819 1801.87 5
 1 9 -9 20448.2 917.328 2
 -1 9 9 19409.7 1763.24 2
 1 9 -8 423937 6445.74 1
 1 9 -8 435494 7330.9 5
 1 9 -8 431327 7435.76 4
 1 9 -8 433953 4287.19 6
 -1 9 8 446003 7606.76 2
 1 9 -7 99314.8 3467.78 5
 1 9 -7 96036.1 3429.99 4
 1 9 -7 89954.7 2238.92 6
 -1 -9 7 92858 1823.37 6
 1 9 -7 94401 2953.4 1
 -1 9 7 91759.8 3429.8 2
 1 9 -6 60492.4 2007.89 6
 1 9 -6 60638.8 2672.38 5
 -1 9 6 62502.2 2782.46 2
 -1 -9 6 61184.1 1690.7 6
 1 9 -6 60015.1 2307.65 1
 1 9 -6 60130.5 2691.74 4
 -1 -9 5 27154.5 1264.27 6
 1 9 -5 30185.6 1494.68 6
 1 9 -5 29002.9 1887.34 4
 -1 9 5 29737.1 1912.68 2
 1 -9 -5 29676 1718 3
 1 9 -5 29113.7 1826.83 5
 1 9 -5 29250 1587.44 1
 1 9 -4 10382.3 1169.07 4
 1 9 -4 8627.37 903.448 3
 1 9 -4 9910.65 981.291 6
 1 9 -4 8445.76 1010.28 5
 1 -9 -4 7786.18 793.821 3
 -1 9 4 9882.7 1095.56 2
 -1 -9 4 10007.2 835.334 6
 1 9 -3 9369.59 981.931 6
 1 9 -3 10508.8 1123.84 4
 1 9 -3 8762.65 771.663 3
 -1 9 3 9865.02 1184.65 2
 1 9 -3 10855.9 1081.96 5
 1 -9 -3 9499.62 759.398 3
 -1 9 2 16278.4 1028.75 5
 1 9 -2 14360.9 774.334 3
 1 9 -2 14464.7 1241.8 6
 1 9 -2 15152 1213.68 5
 1 -9 -2 18079.3 768.062 3
 1 9 -2 14182.1 1249.51 4
 -1 9 2 13555.8 1271.49 2
 1 9 -1 50254.3 2267.9 6
 1 9 -1 46928.7 2155.77 4
 -1 9 1 45259.1 2090.19 2
 -1 9 1 49461.7 1842.91 5
 -1 9 0 5838.11 770.541 5
 1 9 0 6254.32 898.549 6
 -1 9 0 5206.22 774.019 2
 1 9 1 2380.62 722.146 6
 -1 9 -1 2672.48 645.897 4
 -1 9 -1 3199.49 611.302 5
 -1 9 -1 3032.79 655.305 2
 -1 9 -2 169343 3600.92 2
 -1 9 -2 168559 4014.78 4
 -1 9 -2 167953 3812.2 5
 1 9 2 167498 4472.4 6
 -1 9 -3 132727 3537.84 5
 -1 9 -3 138695 3128.15 2
 -1 9 -3 132474 3629.59 4
 1 -9 3 129824 3236.65 6
 -1 9 -3 137812 3182.23 3
 1 9 3 136847 4141.74 6
 -1 9 -4 29092.5 1697.41 3
 1 -9 4 32557.5 1475.5 6
 -1 9 -4 31251.6 1841.2 5
 -1 9 -4 31020.1 1865.52 4
 1 9 4 29219.3 2030.4 6
 -1 -9 -4 32694.2 1805.72 3
 -1 9 -4 30888.5 1448.75 2
 -1 9 -5 50773.2 2423.51 4
 1 -9 5 49062.9 1572.9 6
 1 9 5 51058.3 2709.13 6
 -1 9 -5 48375.6 2171.22 1
 -1 9 -5 49607.7 1700.08 2
 -1 9 -5 45912.1 2273.03 5
 -1 9 -6 14777.2 1397.9 4
 -1 9 -6 13039.3 1363.49 5
 1 -9 6 13011.1 703.606 6
 -1 9 -6 12883.1 857.898 2
 -1 9 -6 12231 1177.83 1
 1 9 6 12912.1 1517.88 6
 1 -9 7 10509 463.3 6
 1 9 7 10541.7 1332.22 2
 -1 9 -7 11679.4 1284.04 4
 -1 9 -7 12085.6 1342.03 5
 -1 9 -7 11250.1 702.861 2
 1 9 7 14606.1 1608.96 6
 -1 9 -7 10478.9 1144.69 1
 1 9 8 324606 6659.22 2
 -1 9 -8 328671 5994.73 1
 -1 9 -8 353714 6704.48 5
 -1 9 -8 328919 3137.75 2
 -1 9 -8 348430 6648.76 4
 -1 9 -9 16360.8 1572.92 4
 -1 9 -9 14948.6 1546.33 5
 1 9 9 14814.8 1570.79 2
 -1 9 -9 14622.6 1357.34 1
 -1 9 -10 2575.53 862.204 4
 1 9 10 3474.53 1028.12 2
 -1 9 -10 2201.87 877.098 5
 -1 9 -10 2793.9 889.975 1
 -1 9 -11 6699.11 1302.26 5
 1 9 11 8833.95 1374.51 2
 -1 9 -11 10231.2 1423.43 4
 -1 9 -11 8154.99 1204.59 1
 -1 9 -12 4696.47 1289.77 4
 1 9 12 3439.46 1146.74 2
 -1 9 -13 15564.9 1824.95 4
 1 9 13 14997.9 1717.75 2
 -1 9 -14 98792.7 4463.25 4
 1 9 14 101030 4188.04 2
 -1 9 -15 43170.7 3138.44 4
 1 9 15 46167.5 2921.87 2
 -1 9 -16 1037.7 1200.3 4
 1 9 16 1981.15 1050.19 2
 1 9 17 27432.1 2388.02 2
 -1 9 -17 27359.3 2733.33 4
 -1 -9 -17 26758.4 3030.46 4
 -1 -9 -18 -125.791 1452.38 4
 -1 9 -18 1430.79 1372.13 4
 -1 -9 -19 4758.56 1901.26 4
 -1 9 -19 2005.64 1489.99 4
 -1 9 -20 31474.1 3396.02 4
 -1 -9 -20 29991.3 3496.35 4
 -1 9 -21 7131.73 1918.35 4
 -1 -9 -21 3832.25 1837.94 4
 1 11 -21 1088.61 1336.84 4
 1 11 -20 9384.81 2202.51 4
 1 -11 -20 8770.82 2142.27 4
 1 11 -19 10531.5 2192.55 4
 -1 11 19 12967.1 1945.48 2
 1 11 -18 1976.55 1288.8 4
 -1 11 18 -295.515 1179.67 2
 1 11 -17 11867.5 2136.04 4
 -1 11 17 10385 1794.67 2
 -1 11 16 9622.21 1698.55 2
 1 11 -16 5719.74 1458.59 4
 1 11 -15 21205.1 2465.88 4
 1 11 -15 26455.4 2535.88 5
 -1 11 15 19866.6 2080.3 2
 1 11 -14 95158.4 4373.81 5
 1 11 -14 87783 4363.29 4
 -1 11 14 90968 4235.26 2
 1 11 -13 22798.1 2191.97 4
 -1 11 13 22651.6 2263.14 2
 1 11 -13 27393.6 2459.02 5
 1 11 -12 926.882 879.456 1
 1 11 -12 909.063 943.372 5
 -1 11 12 -564.876 1075.61 2
 1 11 -12 1943.65 920.541 4
 -1 11 11 17688 1945.68 2
 1 11 -11 19047.1 1997.05 4
 1 11 -11 18267.9 1913.93 5
 1 11 -11 19767.4 1724.08 1
 1 11 -10 49071.9 2856.54 5
 1 11 -10 52836.3 3010 4
 -1 11 10 48364.9 2919.34 2
 1 11 -10 47212.4 2466.9 1
 -1 11 9 13341.4 1690.62 2
 1 11 -9 8872.69 1160.58 1
 1 11 -9 9351.31 1376.69 4
 1 11 -9 12995.2 1615.22 5
 1 11 -8 180068 5199.09 4
 1 11 -8 172228 5050.18 5
 -1 11 8 169521 5141.91 2
 1 11 -8 170621 3151.13 6
 1 11 -8 162444 4282.91 1
 -1 11 7 75435.4 3415.69 2
 1 11 -7 77805.7 2370.12 6
 -1 -11 7 71760.7 2002.48 6
 1 11 -7 75552.4 3356.13 4
 1 11 -7 69109.7 3126.52 5
 1 11 -7 67333 2733.25 1
 1 11 -6 40071.9 2419.04 4
 1 11 -6 42129.6 2117.38 1
 1 11 -6 40845.9 2417.63 5
 1 11 -6 39184.8 1853.37 6
 -1 11 6 38425 2416.4 2
 1 11 -5 -448.645 743.173 4
 1 -11 -5 448.618 502.195 3
 1 11 -5 267.088 480.385 6
 1 11 -5 418.23 662.696 5
 -1 11 5 -620.59 654.708 2
 1 11 -4 13677.1 1111.25 3
 -1 11 4 14511.6 1489.99 2
 1 11 -4 14349.4 1251.82 6
 1 11 -4 13229.8 1342.75 5
 1 11 -4 15021.5 1459.46 4
 1 -11 -4 15247.7 1117.72 3
 1 11 -3 128063 3802.25 5
 1 11 -3 124537 2726.28 3
 -1 11 3 124001 3984.08 2
 -1 11 3 125811 3018.96 5
 1 11 -3 131219 3761.31 6
 1 11 -3 134229 4043.61 4
 1 -11 -3 126066 2483.15 3
 1 11 -2 59646.7 2513.96 5
 1 11 -2 57698.6 2613.09 6
 1 11 -2 63044.6 2721.62 4
 -1 11 2 57718.1 2670.22 2
 -1 11 2 60113.9 2217.21 5
 1 11 -2 54618.3 1390.55 3
 1 11 -1 76950.3 3080.9 6
 -1 11 1 72901.2 2513.3 5
 -1 11 1 74572.1 2932.24 2
 -1 11 0 167.346 552.629 2
 1 11 0 1775.73 723.203 6
 -1 11 0 1259.56 613.787 5
 -1 11 -1 9295.35 1057.13 5
 -1 11 -1 9219.94 1074.94 2
 1 11 1 10997.2 1296.84 6
 -1 11 -2 17537.9 1435.84 5
 -1 11 -2 19728.7 1433.07 2
 -1 11 -2 18144 1534.1 4
 1 11 2 16899 1687.84 6
 -1 11 -3 140689 3596.35 2
 -1 11 -3 139789 4077.21 4
 1 11 3 138056 4545.45 6
 -1 11 -3 144912 3997.75 5
 -1 11 -4 5049.51 950.027 5
 -1 11 -4 5990.1 1009.39 4
 -1 11 -4 4236.69 723.421 2
 1 11 4 3664.41 980.309 6
 -1 11 -4 4437.3 750.02 3
 -1 11 -5 737.45 528.713 2
 -1 -11 -5 858.904 502.277 3
 -1 11 -5 697.131 583.188 1
 1 11 5 1821.33 912.372 6
 -1 11 -5 409.687 628.739 5
 -1 11 -5 498.313 692.928 4
 -1 11 -6 -147.858 768.744 4
 -1 11 -6 -88.2703 438.802 2
 1 11 6 -220.26 753.019 6
 -1 11 -6 -574.632 641.296 1
 1 -11 6 458.301 363.66 6
 -1 11 -6 -158.25 615.943 5
 1 11 6 -634.325 835.571 2
 1 -11 7 28895.4 1110.31 6
 -1 11 -7 31412.2 2236.53 4
 -1 11 -7 30597.3 2132.89 5
 -1 11 -7 26931.7 1354.09 2
 1 11 7 32320.9 2268.9 2
 -1 11 -7 28316 1906.85 1
 1 -11 8 125451 1744.95 6
 -1 11 -8 134604 4558.59 4
 -1 11 -8 137831 2649.42 2
 -1 11 -8 132615 4090.56 1
 -1 11 -8 138200 4571.4 5
 1 11 8 133632 4621.51 2
 -1 11 -9 41022.4 2623.55 4
 -1 11 -9 38332.2 2549.89 5
 -1 11 -9 37092.4 1214.52 2
 -1 11 -9 37063.5 2247.92 1
 1 11 9 34330.4 2449.65 2
 -1 11 -10 37315.7 2321.77 1
 1 11 10 33034.1 2467.93 2
 -1 11 -10 40041.2 2703.38 5
 -1 11 -10 38139.4 2611.81 4
 -1 11 -11 -5.29729 961.829 5
 1 11 11 444.495 862.734 2
 -1 11 -11 971.795 842.507 1
 -1 11 -11 -164.732 942.663 4
 -1 11 -12 27745 2395.29 5
 -1 11 -12 30727.1 2488.67 4
 -1 11 -12 31702.5 2312.4 1
 1 11 12 29494.2 2415.92 2
 -1 11 -13 71621.2 3779.61 4
 1 11 13 66775.8 3656.08 2
 -1 11 -14 53156.7 3433.36 4
 1 11 14 53366.1 3251.8 2
 -1 11 -15 8397.21 1653.93 4
 1 11 15 7832.5 1525.63 2
 1 11 16 34074.3 2793.82 2
 -1 11 -16 33347 3058.37 4
 -1 11 -17 8059.75 1752.52 4
 1 11 17 7284.03 1546.19 2
 -1 -11 -18 660.753 1615.94 4
 -1 11 -18 1709.94 1575.37 4
 1 11 18 190.665 988.989 2
 -1 11 -19 28304.8 3149.13 4
 -1 -11 -19 18791.9 2908.38 4
 -1 11 -20 9801.9 2015.15 4
 -1 -11 -20 9480.28 2440.33 4
 1 13 -20 1861.01 1543.4 4
 1 -13 -19 48324.9 4559.06 4
 -1 13 19 49956.4 3750.27 2
 1 13 -19 54823.1 4245.86 4
 1 13 -18 -968.849 1501.52 4
 -1 13 18 945.87 1173.33 2
 -1 13 17 92.5936 1017 2
 1 13 -17 -68.9156 1575.52 4
 1 13 -16 -440.23 1218.09 4
 -1 13 16 25.2528 1004.89 2
 1 13 -16 196.954 1288.83 5
 -1 13 15 5212.63 1389.59 2
 1 13 -15 6397.48 1560.84 4
 1 13 -15 7034.87 1616.04 5
 1 13 -14 2643.62 1099.65 4
 -1 13 14 1293.77 1125.23 2
 1 13 -14 3142.2 1206.51 5
 1 13 -13 57296.3 3625.66 4
 1 13 -13 55362.3 3529.65 5
 1 13 -13 53271.9 2999.61 1
 -1 13 13 56682.6 3471.07 2
 1 13 -12 -567.872 1125.21 4
 -1 13 12 -251.398 967.097 2
 1 13 -12 -238.394 945.645 5
 1 13 -12 -168.122 713.996 1
 1 13 -11 351.44 855.375 4
 -1 13 11 4052.78 1351.11 2
 1 13 -11 2353.65 1119.22 5
 1 13 -11 2249.93 891.361 1
 1 13 -10 4754.78 733.06 2
 1 13 -10 5238.4 1300.26 5
 1 13 -10 4106.88 1243.81 4
 -1 13 10 6254.43 1443.73 2
 1 13 -10 4867.72 1055.6 1
 -1 13 9 42455.2 2891.93 2
 1 13 -9 41360.4 2824.83 5
 1 13 -9 43073.9 3030.11 4
 1 13 -9 42705 2376.42 1
 1 13 -8 19981.4 2099.13 4
 -1 13 8 15852.8 1861.73 2
 1 13 -8 18507.9 1869.55 5
 1 13 -8 21109.3 1750.63 1
 1 13 -7 69346.3 2982.71 1
 -1 13 7 78484.3 3698.92 2
 1 13 -7 69703.9 3624.43 4
 1 13 -7 68049.3 3311.3 5
 1 13 -7 67662.2 2485.53 6
 1 13 -6 22279.4 1739.81 1
 1 13 -6 19636 1868.59 5
 1 13 -6 20387.1 1508.55 6
 -1 13 6 20690.1 1961.18 2
 1 13 -6 20892.9 1944.95 4
 1 13 -5 40925.2 2598.96 4
 -1 13 5 38031.9 1776.77 5
 1 -13 -5 35478 1876.81 3
 1 13 -5 36022.5 2015.77 6
 -1 13 5 39251.9 2635.07 2
 1 13 -5 36835.3 2389.22 5
 1 13 -4 4429.92 893.759 6
 -1 13 4 2854.78 652.921 5
 1 13 -4 3364.26 1058.4 4
 1 13 -4 3109.47 875.193 5
 1 -13 -4 3944.56 557.131 3
 -1 13 4 2249.78 1005.16 2
 1 13 -4 3041.86 606.46 3
 1 13 -3 402571 7161.32 5
 -1 13 3 410464 7602.01 2
 1 13 -3 390666 7060.95 6
 1 13 -3 380868 4378.76 3
 1 13 -3 404966 7585.06 4
 -1 13 3 383434 5921.37 5
 1 13 -2 4691.94 963.186 5
 1 13 -2 5324.96 1023.05 6
 -1 13 2 3971.82 769.637 5
 -1 13 2 4682.96 1042.79 2
 -1 13 1 4441.59 1034.22 2
 -1 13 1 3735.88 847.337 5
 1 13 -1 3870.89 1004.01 6
 1 13 -1 3713.95 859.481 5
 1 13 0 1551 801.239 6
 -1 13 0 2560.5 742.338 2
 -1 13 0 2325.5 774.586 5
 -1 13 -1 1565.24 815.939 5
 -1 13 -1 80.0133 662.597 2
 1 13 1 334.617 697.456 6
 1 13 2 9426.3 1399.66 6
 -1 13 -2 8109.09 1100.43 5
 -1 13 -2 10185.9 1267.89 2
 1 13 3 448600 8669.7 6
 -1 13 -3 435648 7519.67 5
 -1 13 -3 445193 7964.91 4
 -1 13 -3 438348 7018.14 2
 -1 13 -4 12645.8 1408.51 5
 -1 13 -4 14638.6 1608.88 4
 -1 13 -4 13528.1 1294.97 2
 1 13 4 14294.4 1717.21 6
 -1 13 -5 11543 1538.13 4
 1 13 5 10099.2 1603.1 6
 -1 13 -5 9050.42 1351.25 5
 -1 13 -5 9096.48 1063.41 2
 1 13 5 9003.28 1459.95 2
 -1 13 -6 24037.1 1561.17 2
 -1 13 -6 27856.8 2227.72 4
 -1 13 -6 27469.9 1992.05 1
 1 13 6 24997.6 2158.94 2
 -1 13 -6 25138.8 2058.75 5
 -1 13 -7 8913.65 1374.64 5
 -1 13 -7 10541.8 1386.28 1
 -1 13 -7 11614.1 1628.65 4
 -1 13 -7 10807.6 1010.41 2
 1 13 7 8123.99 1450.89 2
 -1 13 -8 1573.88 902.134 4
 -1 13 -8 1922.32 946.815 1
 1 13 8 2198.5 1173.48 2
 -1 13 -8 1550.9 529.315 2
 -1 13 -8 1213.47 1038.75 5
 -1 13 -9 139413 4546.79 1
 -1 13 -9 145923 2950.37 2
 -1 13 -9 158473 5447.26 4
 1 13 9 146345 5230.79 2
 -1 13 -9 156233 5217.81 5
 1 13 10 35362.1 2686.16 2
 -1 13 -10 31894.9 2600.36 5
 -1 13 -10 37840.6 2790.44 4
 -1 13 -10 33807.2 2281.38 1
 -1 13 -11 1103.69 942.966 1
 -1 13 -11 913.952 893.57 5
 -1 13 -11 2011.92 1151.62 4
 1 13 11 -443.181 1029.63 2
 -1 13 -12 665.563 1059.16 4
 -1 13 -12 98.4007 888.266 1
 -1 13 -12 151.174 994.696 5
 1 13 12 144.014 1054.89 2
 -1 13 -13 86005 4353.69 4
 1 13 13 89884.3 4409.14 2
 -1 13 -13 84769.5 3910.53 1
 -1 13 -13 89539.6 4477.91 5
 -1 13 -14 106.454 1194.78 4
 1 13 14 1311.17 1093.7 2
 1 13 15 1628.71 1128.3 2
 -1 13 -15 153.518 1256.86 4
 -1 13 -16 8238.24 1798.34 4
 1 13 16 10379.9 1900.78 2
 -1 13 -17 1874.85 1278.4 4
 1 13 17 1206.23 1291.32 2
 -1 13 -18 2391.27 1298.34 4
 1 13 18 777.28 1232.13 2
 -1 13 -19 49437.8 4035.51 4
 1 13 19 44724 3520.59 2
 -1 13 -20 5509.87 2243.16 4
 -1 15 20 -1048.89 1455.23 2
 -1 15 19 34565 3524.27 2
 1 15 -19 45466.9 4093.5 4
 -1 15 18 4907.65 1610.02 2
 1 15 -18 5053.23 1880.74 4
 1 15 -17 508.028 1454.61 4
 -1 15 17 -862.951 1192.33 2
 -1 15 16 3559.23 1460.96 2
 1 15 -16 3239.49 1770.91 5
 1 15 -16 2602.41 1597.66 4
 -1 15 15 4426.5 1569.49 2
 1 15 -15 3775.42 1636.87 4
 1 15 -15 1747.62 1214.67 5
 -1 15 14 21104.9 2420.48 2
 1 15 -14 19593.6 2508.06 4
 1 15 -14 21155.5 2107.16 1
 1 15 -14 22734.9 2504.61 5
 1 15 -13 54367 3772.73 4
 1 15 -13 57607.9 3260.57 1
 -1 15 13 55557.7 3756.51 2
 1 15 -13 63360.1 3960.93 5
 1 15 -12 -2156.13 1107.87 1
 1 15 -12 -1316.4 1167.96 4
 -1 15 12 -168.925 964.41 2
 1 15 -12 275.486 1228.61 5
 1 15 -11 222.998 1177.16 4
 1 15 -11 2458.61 1464.64 5
 -1 15 11 -1208.08 1196.73 2
 1 15 -11 2361.99 1022.21 1
 1 15 -10 2962.78 1342.81 4
 1 15 -10 4105.7 1045.39 1
 -1 15 10 4040.74 1350.9 2
 1 15 -10 7004.53 1551.34 5
 -1 15 9 53373 3335.5 2
 1 15 -9 45389.6 2634.28 1
 1 15 -9 47383.6 2286.97 2
 1 15 -9 49290 3185.01 5
 1 15 -9 53721.9 3406.39 4
 1 15 -8 19350.6 2112.42 5
 -1 15 8 18761.8 1289.29 5
 -1 15 8 22554.2 2326.96 2
 1 15 -8 20514.1 2226.59 4
 1 15 -8 21224.8 1915.26 1
 1 15 -8 21594.5 1653.6 2
 -1 15 7 1951.1 626.949 5
 -1 15 7 1201.31 1024.03 2
 1 15 -7 2903.5 1127.54 5
 1 15 -7 2299.32 835.083 1
 1 15 -7 1578.45 981.637 4
 1 15 -6 2879.15 1202.53 5
 -1 15 6 1837.29 640.678 5
 -1 15 6 2045.02 974.499 2
 1 15 -6 44.2964 824.839 4
 1 15 -6 969.988 687.083 1
 1 15 -5 5104.9 1353.47 5
 -1 15 5 3020.24 699.338 5
 1 15 -5 2594.08 778.713 6
 1 15 -5 4724.16 1410.31 4
 -1 15 5 4228.95 1217.65 2
 -1 15 4 18736.1 1474.86 5
 1 15 -4 18734.9 1692.67 6
 1 15 -4 18647.4 2001.44 4
 -1 15 4 16930.4 1950.48 2
 1 15 -4 15436.1 1737.29 5
 1 15 -3 284649 6551.13 5
 -1 15 3 277962 6798.52 2
 -1 15 3 272333 5476 5
 1 15 -3 285928 6920.38 4
 1 15 -3 282070 6439.3 6
 1 15 -2 -313.312 867.165 5
 -1 15 2 2402.93 784.839 5
 -1 15 2 1474.54 909.66 2
 1 15 -2 2861.74 948.905 6
 1 15 -1 4677.4 1144.96 6
 -1 15 1 7237.95 1178.03 5
 -1 15 1 6887.2 1267.77 2
 1 15 -1 6441 1156.86 5
 -1 15 0 1908.86 849.834 2
 1 15 0 616.343 715.032 5
 1 15 0 132.552 814.989 6
 -1 15 0 1254.72 818.554 5
 -1 15 -1 1888.14 930.441 5
 1 15 1 546.195 740.19 5
 1 15 1 247.309 779.485 6
 -1 15 -1 2067.06 911.339 2
 1 15 2 1794.82 1139.15 6
 -1 15 -2 1025.63 832.571 2
 -1 15 -2 815.906 779.392 5
 1 15 3 180078 5695.21 2
 -1 15 -3 181785 5192.54 5
 1 15 3 188715 5980.99 6
 -1 15 -3 173036 4830.72 2
 1 15 4 1593.74 1106.58 2
 -1 15 -4 1071.13 832.269 5
 -1 15 -4 2221.19 790.932 2
 -1 15 -4 1283.62 907.66 4
 1 15 5 1877.77 1189.47 2
 -1 15 -5 2885.71 1164.57 4
 -1 15 -5 565.721 632.934 2
 -1 15 -5 692.241 786.335 5
 1 15 6 -482.55 1135.93 2
 -1 15 -6 316.416 516.101 2
 -1 15 -6 -455.334 913.853 5
 -1 15 -6 162.217 950.967 4
 -1 15 -6 -1083.87 905.801 1
 -1 15 -7 5377.58 897.005 2
 1 15 7 4298.36 1166.2 2
 -1 15 -7 6066.4 1350.43 1
 -1 15 -7 7765.66 1527.36 5
 -1 15 -7 4070.99 1211.73 4
 -1 15 -8 39951.8 2905.84 4
 1 15 8 39394.2 3008.99 2
 -1 15 -8 40750.6 2706.65 1
 -1 15 -8 40793.1 1966.05 2
 -1 15 -8 42562 2893.35 5
 -1 15 -9 23801.1 2407.48 4
 -1 15 -9 23787.7 2091.67 1
 1 15 9 19482.9 2147.63 2
 -1 15 -9 22208.7 2237.39 5
 -1 15 -10 8237.51 1541.62 5
 -1 15 -10 9500.57 1481.7 1
 1 15 10 8201.76 1656.13 2
 -1 15 -10 9656.41 1642.28 4
 1 15 11 -488.085 1034.69 2
 -1 15 -11 1843.05 1355.32 4
 -1 15 -11 1041.44 960.827 1
 -1 15 -11 -465.942 1327.7 5
 1 15 12 7554.33 1657.46 2
 -1 15 -12 4727.49 1575.86 4
 -1 15 -12 7576.12 1517.14 1
 -1 15 -12 8036.03 1701.43 5
 -1 15 -13 20955.5 2501.78 5
 -1 15 -13 27236 2800.69 4
 -1 15 -13 23397.6 2240.45 1
 1 15 13 21468.5 2576.43 2
 -1 15 -14 36530.5 3231.17 4
 -1 15 -14 38049.5 2862.87 1
 1 15 14 31862.5 3056.02 2
 -1 15 -15 743.811 1220.56 4
 1 15 15 3748.43 1399.32 2
 -1 15 -16 -1959.2 1386.92 4
 1 15 16 -945.524 1202.19 2
 -1 15 -17 -1195.07 1694.73 4
 1 15 17 2702.92 1434.76 2
 1 15 18 1208.7 1304.72 2
 -1 15 -18 3054.19 1684.01 4
 -1 15 -19 24828.8 3342.77 4
 1 15 19 17969.1 2482.8 2
 -1 17 19 7071.45 1994.24 2
 -1 17 18 2740.29 1743.15 2
 1 17 -17 2379.39 1624.34 4
 -1 17 17 1164.91 1505.46 2
 -1 17 16 327.638 1289.12 2
 1 17 -16 1121.15 1450.61 5
 1 17 -16 3505.36 1974.39 4
 1 17 -15 5923.14 1871.14 5
 1 17 -15 5066.57 1634.5 4
 -1 17 15 5631.74 1708.81 2
 1 17 -14 74154 4697.67 4
 -1 17 14 67485.5 4352.49 2
 1 17 -14 63352.4 3584.32 1
 1 17 -14 66052.8 4270.77 5
 1 17 -13 22197.1 2159.98 1
 1 17 -13 21420.2 2716.63 4
 1 17 -13 18009.4 2362.32 5
 -1 17 13 19367.6 2523.65 2
 -1 17 12 26665.1 2897.12 2
 1 17 -12 24176.3 2674.2 5
 1 17 -12 22233.3 2138.47 1
 1 17 -12 24100 2693.54 4
 -1 17 11 1644.41 1197.13 2
 1 17 -11 4052.43 1535.54 4
 1 17 -11 3607.17 1244.94 1
 1 17 -11 3324.72 1397.06 5
 1 17 -10 7317.52 1603.54 5
 -1 17 10 6535.17 1547.93 2
 1 17 -10 7687.47 1370 1
 1 17 -10 10481.6 2040.07 4
 1 17 -9 1686.44 1066.06 5
 1 17 -9 1735.75 963.815 1
 -1 17 9 -48.2433 1155.57 2
 1 17 -9 2323.43 1258.73 4
 1 17 -8 60706.6 3616.92 5
 1 17 -8 59296.4 3806.92 4
 1 17 -8 61444.1 2938.01 2
 -1 17 8 60811.2 3783.89 2
 1 17 -8 57278.3 3231.71 1
 1 17 -7 252.343 1068.13 5
 -1 17 7 1581.48 725.412 5
 -1 17 7 3147.34 1309.63 2
 1 17 -7 -274.345 859.354 1
 1 17 -7 1526.01 803.361 2
 1 17 -7 1171.24 1100.56 4
 1 17 -6 4346.03 1280.06 4
 1 17 -6 4410.24 1228.54 5
 -1 17 6 2391.72 738.021 5
 1 17 -6 2823.87 1054.92 2
 -1 17 6 3109.76 1284.82 2
 -1 17 5 1324.39 624.828 5
 -1 17 5 1988.51 1211.66 2
 1 17 -5 958.581 823.969 2
 1 17 -5 177.943 814.769 5
 1 17 -5 159.381 1103.82 4
 -1 17 4 18294 1628.3 5
 -1 17 4 16573.1 1988.74 2
 1 17 -4 14255.5 1650.12 2
 1 17 -4 18921 2111.36 4
 1 17 -4 14601.4 1743.51 5
 1 17 -3 10597 1547.54 2
 -1 17 3 11680.7 1385.82 5
 -1 17 3 8710.8 1548.85 2
 1 17 -3 11520.1 1711.08 5
 1 17 -2 12629.8 1578.48 5
 1 17 -2 12115.2 1611.26 2
 -1 17 2 16168.6 1956.64 2
 -1 17 2 12710.1 1466.35 5
 -1 17 1 2626.16 902.589 5
 1 17 -1 2347.81 827.572 5
 1 17 -1 1412.12 1088.47 2
 -1 17 1 4633.71 1274.81 2
 -1 17 0 378.149 736.605 5
 1 17 0 745.234 803.89 5
 -1 17 0 809.946 998.255 2
 1 17 0 371.279 926.984 2
 -1 17 -1 2518.68 1038.22 2
 1 17 1 817.369 861.003 5
 1 17 1 3162.69 1236.78 2
 -1 17 -1 2203.65 919.041 5
 1 17 2 20974.3 2301.94 2
 1 17 2 17643.5 1695.69 5
 -1 17 -2 21577.3 2010.7 2
 -1 17 -2 21531.5 2046.49 5
 -1 17 -3 16712.2 1861.04 5
 1 17 3 18469.8 1664.9 5
 1 17 3 17556.9 2103.87 2
 -1 17 -3 19753.4 1874.02 2
 -1 17 -4 4270.44 1219.21 5
 1 17 4 592.452 1157.34 2
 -1 17 -4 2993.43 946.735 2
 -1 17 -5 865.807 893.483 5
 1 17 5 1905.22 1110.23 2
 -1 17 -5 1922.98 926.573 2
 -1 17 -5 4000.82 1348.71 4
 -1 17 -6 218.865 649.151 2
 -1 17 -6 -704.169 989.331 4
 -1 17 -6 771.691 898.444 1
 -1 17 -6 513.53 1004.39 5
 1 17 6 745.12 1152.59 2
 -1 17 -7 15751.1 1884.17 5
 -1 17 -7 16541.2 2230.32 4
 -1 17 -7 16926.1 1945.59 1
 1 17 7 18689.4 2330.36 2
 -1 17 -7 15686.3 1530.73 2
 -1 17 -8 90699.1 4456.1 5
 1 17 8 91975.6 4646.53 2
 -1 17 -8 95638.4 4757.36 4
 -1 17 -8 85165.4 4025.53 1
 -1 17 -9 7531.9 1438.24 1
 -1 17 -9 7332.68 1701.02 4
 1 17 9 7202.54 1611.76 2
 -1 17 -9 8318.86 1689.97 5
 -1 17 -10 14790.8 2132.63 4
 -1 17 -10 14811.7 2101.1 5
 -1 17 -10 14212.6 1820.62 1
 1 17 10 13511.6 2149.56 2
 1 17 11 1133.83 1127.11 2
 -1 17 -11 -1900.64 1423.67 4
 -1 17 -11 1906.48 1254.9 5
 -1 17 -11 -338.897 1084.08 1
 1 17 12 27069.1 2884.87 2
 -1 17 -12 26806.6 2868.77 4
 -1 17 -12 24167 2314.13 1
 -1 17 -12 22425.7 2547.17 5
 1 17 13 9453.11 1956.6 2
 -1 17 -13 8437.75 2021.47 5
 -1 17 -13 9043.25 1574.85 1
 -1 17 -13 8491.37 1836.52 4
 -1 17 -14 63308 3749.16 1
 -1 17 -14 63433.4 4390.87 4
 1 17 14 62413.2 4221.03 2
 -1 17 -14 63572.6 4297.89 5
 -1 17 -15 8201.1 1727.63 1
 -1 17 -15 8435.09 2143.25 4
 1 17 15 10879.7 2079.82 2
 -1 17 -16 898.493 1295.77 4
 1 17 16 -463.242 1324.07 2
 1 17 17 -3063.86 1673.8 2
 -1 17 -17 2345.93 1739.4 4
 1 17 18 3848.08 1594.57 2
 1 17 19 7485.12 2033.23 2
 -1 19 17 1221.14 1456.67 2
 -1 19 16 1369.63 1473.86 2
 1 19 -16 3628.03 1528.44 4
 1 19 -16 1114.49 1685.6 5
 1 19 -15 1542.13 1370.67 4
 -1 19 15 3283.54 1567.87 2
 1 19 -14 34481.8 3479.22 4
 -1 19 14 37064 3463.47 2
 1 19 -14 28064.2 3041.19 5
 1 19 -14 37848.5 2912.12 1
 -1 19 13 -2015.07 1536.73 2
 1 19 -13 256.419 1518.02 4
 1 19 -13 -307.675 1161.36 5
 1 19 -13 -507.968 946.668 1
 -1 19 12 571.83 1214.71 2
 1 19 -12 1713.73 1254.62 5
 1 19 -12 -269.035 1292.05 1
 1 19 -12 1742.96 1380.48 4
 1 19 -11 -84.8124 1394.13 5
 1 19 -11 -841.159 1565.2 4
 1 19 -11 -394.236 935.148 1
 -1 19 11 951.874 1351.48 2
 1 19 -10 5432.27 1385.53 1
 1 19 -10 7351.3 1714.75 5
 1 19 -10 8956.84 1909.21 4
 -1 19 10 4903.72 1647.82 2
 1 19 -9 3845.69 1197.64 1
 -1 19 9 3478.73 1550.39 2
 1 19 -9 3444.58 1315.32 5
 1 19 -9 2597.99 1482.56 4
 1 19 -8 89728.8 4857.43 4
 1 19 -8 88984.7 4600.78 5
 -1 19 8 73743.1 4519.46 2
 1 19 -8 83098.4 4140.59 1
 1 19 -7 5676.45 1423.3 1
 1 19 -7 3710.84 1437 4
 1 19 -7 2875.65 1199.43 5
 1 19 -7 5307.86 1299.44 2
 -1 19 7 1791.96 1280.09 2
 -1 19 6 4924.17 972.424 5
 1 19 -6 5480.66 1391.66 5
 1 19 -6 5565.69 1252.53 2
 -1 19 6 6664.36 1692.94 2
 1 19 -6 6507.62 1621.71 4
 -1 19 5 97.8775 753.854 5
 -1 19 5 -583.955 994.328 2
 1 19 -5 709.915 870.927 2
 1 19 -5 1097.51 1109.68 5
 1 19 -4 27073.5 2397.64 2
 1 19 -4 27777.7 2548.96 5
 -1 19 4 25926 2031.01 5
 -1 19 3 6773.06 1213.42 5
 1 19 -3 9511.71 1675.91 2
 -1 19 3 9424.42 1866.93 2
 1 19 -3 9597.32 1749.53 5
 -1 19 2 44936.4 3227.57 2
 -1 19 2 41732.4 2657.5 5
 1 19 -2 39427.1 2901.43 2
 1 19 -2 43538.2 2974.63 5
 -1 19 1 1972.76 849.549 5
 1 19 -1 2405.74 1048.41 2
 1 19 -1 1868.76 993.251 5
 -1 19 1 2901.28 1228.74 2
 -1 19 0 -514.972 957.998 2
 1 19 0 -1034.44 988.213 5
 -1 19 0 -532.201 781.357 5
 -1 19 -1 7430.99 1496.69 2
 1 19 1 6783.14 1489.55 2
 -1 19 -1 5029.09 1253.45 5
 1 19 1 4870.21 1095.97 5
 1 19 2 63250.6 3802.78 2
 -1 19 -2 55892.1 3294.1 5
 -1 19 -2 57009 3341.53 2
 1 19 2 58886.3 3149.76 5
 1 19 3 -246.79 1093.46 2
 1 19 3 -573.767 836.837 5
 -1 19 -3 621.66 1087.95 5
 -1 19 -3 -1180.11 876.903 2
 -1 19 -4 23363.8 2116.54 2
 1 19 4 25449.5 2642.2 2
 -1 19 -4 21385.3 2282.63 5
 1 19 4 25511.9 2041.04 5
 -1 19 -5 10734.1 1711.28 5
 -1 19 -5 11082.6 1526.79 2
 1 19 5 9983.83 1294.03 5
 1 19 5 10646.8 1860.95 2
 1 19 6 15451.6 1550.3 5
 -1 19 -6 18882.5 2141.05 1
 1 19 6 16580.6 2284.05 2
 -1 19 -6 18122.1 2307.92 4
 -1 19 -6 19573.3 2316.44 5
 -1 19 -6 16936.1 1740.87 2
 -1 19 -7 9856.49 1793.3 5
 -1 19 -7 11722.7 2094.02 4
 -1 19 -7 10702.1 1787.67 1
 1 19 7 8957.65 1875.04 2
 -1 19 -8 68559.5 4257.17 4
 -1 19 -8 78491.4 4192.46 1
 -1 19 -8 65583.8 4022.8 5
 1 19 8 64570.1 4182.66 2
 -1 19 -9 -1203.09 1464.58 5
 -1 19 -9 -515.371 1290.22 4
 1 19 9 53.264 1312.72 2
 -1 19 -9 1355.55 1195.3 1
 -1 19 -10 4225.16 1634.98 4
 -1 19 -10 4173.46 1328.18 1
 -1 19 -10 6330.6 1590.61 5
 1 19 10 5053.36 1743.8 2
 -1 19 -11 -598.808 1406.36 5
 -1 19 -11 143.728 1191.59 1
 -1 19 -11 2780.85 1474.69 4
 1 19 11 307.898 1145.48 2
 -1 19 -12 5499.09 1860.39 4
 -1 19 -12 6638.61 1557.1 1
 1 19 12 7316.74 2016.1 2
 -1 19 -12 5308.9 1688.38 5
 -1 19 -13 119.797 1024.6 1
 1 19 13 1350.88 1342.42 2
 -1 19 -13 -7.29374 1215.6 4
 -1 19 -13 -1208.91 1578.32 5
 -1 19 -14 38940.1 3668.44 4
 -1 19 -14 33419.7 3420.23 5
 -1 19 -14 41236.4 3193.63 1
 1 19 14 36480 3516.06 2
 -1 19 -15 -379.965 1641.24 4
 -1 19 -15 -988.373 1324.72 1
 1 19 15 2316.1 1571.62 2
 -1 19 -16 24.8442 1649.77 4
 1 19 16 2031.37 1696.44 2
 -1 21 14 15656.1 2602.71 2
 1 21 -14 11851.2 2490.17 4
 1 21 -14 17568.5 2882.3 5
 1 21 -13 1026.72 1611.29 5
 1 21 -13 342.209 1422.91 4
 -1 21 13 3441.58 1778.36 2
 1 21 -12 16305.2 2386.25 5
 -1 21 12 11894.5 2457.5 2
 1 21 -12 15823.7 2201.76 1
 1 21 -12 21111.8 3020.93 4
 1 21 -11 -1640.03 1279.72 1
 1 21 -11 -368.976 1432.52 5
 -1 21 11 -1740.63 1663.79 2
 1 21 -11 775.298 1542.37 4
 1 21 -10 4016.93 1895.85 4
 1 21 -10 -307.343 1385.87 5
 -1 21 10 5017.96 1890.8 2
 1 21 -10 1712.23 1229.74 1
 -1 21 9 7798.74 2088.14 2
 1 21 -9 6384.96 2074.88 4
 1 21 -9 11947.4 1976.07 1
 1 21 -9 7134.02 1711.04 5
 1 21 -8 24397.4 2904.1 4
 -1 21 8 27023.5 2958.71 2
 1 21 -8 25286.5 2513.39 1
 1 21 -8 26200.3 2846.64 5
 1 21 -7 2275.17 1156.35 5
 1 21 -7 407.903 1423.81 4
 -1 21 7 -1082.42 1373.95 2
 1 21 -7 -48.7256 1232.36 1
 -1 21 6 1048.25 1194.7 2
 1 21 -6 1037.03 1431.48 5
 1 21 -6 1342.07 1002.74 2
 1 21 -5 2992.15 1358.3 5
 -1 21 5 5337.81 1660.31 2
 1 21 -5 7143.65 1404.13 2
 1 21 -4 58206.1 3596.92 2
 -1 21 4 54011 3759.96 2
 -1 21 4 54859.7 3023.79 5
 1 21 -4 50648.4 3483.63 5
 -1 21 3 22034.9 2546.19 2
 1 21 -3 21141.3 2318.08 5
 1 21 -3 20685 2333.32 2
 -1 21 3 19521.1 1931.84 5
 1 21 -2 34237.9 2965.11 2
 1 21 -2 38289 2986.9 5
 -1 21 2 41450.3 3221.65 2
 -1 21 2 38284.1 2679 5
 1 21 -1 36117.3 2874.59 5
 -1 21 1 35563.2 2684.69 5
 1 21 -1 33651.1 2972.13 2
 -1 21 1 35072.5 3014.23 2
 -1 21 0 2479.47 1129.35 5
 1 21 0 3664.99 1477 2
 1 21 0 2076.31 1065.49 5
 -1 21 0 1469.18 1056.81 2
 -1 21 -1 21894.5 2250.19 5
 1 21 1 20037 2076.51 5
 1 21 1 18483.7 2297.48 2
 -1 21 -1 21794.1 2466.55 2
 -1 21 -2 16914.5 2065.16 5
 -1 21 -2 18319.8 2150.35 2
 1 21 2 15278.9 1862.32 5
 1 21 2 15166.8 2257.99 2
 -1 21 -3 5166.84 1432.32 2
 1 21 3 3286.04 1458.39 2
 1 21 3 6040.35 1239.11 5
 -1 21 -3 3889.65 1361.63 5
 -1 21 -4 52294.5 3246.8 2
 1 21 4 58916.6 3939.36 2
 1 21 4 51477.6 3037.79 5
 -1 21 -4 49213.6 3450.19 5
 1 21 5 11414.6 2072.98 2
 1 21 5 15536.8 1786.99 5
 -1 21 -5 14352.5 1973.73 5
 -1 21 -5 12903.6 1876 2
 1 21 6 2246.14 1370.5 2
 -1 21 -6 1778.13 1302.87 5
 -1 21 -6 483.29 1262.33 1
 1 21 7 9582.77 1889.78 2
 -1 21 -7 13559 2026.45 5
 -1 21 -7 10987.5 2208.75 4
 -1 21 -7 10934.4 1854.23 1
 -1 21 -8 48642 3521.9 1
 -1 21 -8 43869.9 3717.67 4
 1 21 8 42877.3 3598.93 2
 -1 21 -8 46763.3 3593.2 5
 -1 21 -9 5845.45 1664.4 4
 -1 21 -9 8868.6 1934.29 5
 1 21 9 5316.78 1600.42 2
 -1 21 -9 5540.59 1461.82 1
 -1 21 -10 559.65 1355.24 5
 -1 21 -10 4705.34 1612.37 1
 -1 21 -10 5419.9 1716.56 4
 1 21 10 1643.36 1521.42 2
 -1 21 -11 1895.27 1227.03 1
 -1 21 -11 1502.64 1482.22 4
 1 21 11 -2042.25 1813.23 2
 -1 21 -11 1910.49 1482.77 5
 1 21 12 10080.6 2146.92 2
 -1 21 -12 7724.29 2090.47 5
 -1 21 -12 9769.61 1831.99 1
 -1 21 -12 7546.46 2049.23 4
 -1 21 -13 1114.62 1503.29 5
 -1 21 -13 263.73 1257.85 1
 -1 21 -13 2996.36 1899.81 4
 1 21 13 1546.41 1391.23 2
 -1 21 -14 8450.82 2272.99 4
 1 21 14 10323.2 2492.91 2
 -1 21 -14 4676.64 1459.16 1
 -1 21 -15 -882.972 1347.68 1
 -1 23 11 1211.87 1800.33 2
 1 23 -11 -56.9973 1769.74 5
 1 23 -11 417.528 1508.19 4
 -1 23 10 21209.5 3039.3 2
 1 23 -10 22316.1 3071.19 4
 1 23 -10 22076.1 2815.93 5
 1 23 -10 22171.7 2491.35 1
 1 23 -9 9377.01 1924 1
 1 23 -9 9656.37 2112.27 5
 1 23 -9 10731.7 2452.83 4
 -1 23 9 6558.52 1754.14 2
 -1 23 8 5359.47 1837.08 2
 1 23 -8 5159.63 1696.24 5
 1 23 -8 3755.92 1565.22 1
 1 23 -7 -1543.94 1358.6 5
 1 23 -7 -825.319 1100.83 1
 -1 23 7 -1476.39 1498.23 2
 1 23 -6 12635 2266.14 5
 -1 23 6 7371.73 1876.47 2
 1 23 -6 14823.2 2212.02 1
 1 23 -5 4448.78 1366.68 5
 1 23 -5 8554.07 1698.86 2
 -1 23 5 9199.09 2094.94 2
 1 23 -4 30430 2821.64 2
 -1 23 4 36999.1 3474.43 2
 1 23 -4 32378.3 3013.52 5
 -1 23 3 35726.5 3366.87 2
 -1 23 3 36358.7 2699.12 5
 1 23 -3 36791.8 3083.73 5
 1 23 -3 35745 3078.37 2
 1 23 -2 15665.6 2152.91 5
 1 23 -2 21017.3 2492.89 2
 -1 23 2 22449.3 2247.35 5
 -1 23 2 14202.1 2231.18 2
 -1 23 1 685.865 1110.83 2
 1 23 -1 1909.31 1246.25 5
 -1 23 1 917.709 1204.95 5
 1 23 -1 -1917.19 1523.89 2
 -1 23 0 -690.568 936.646 5
 1 23 0 1762.72 1340.18 5
 1 23 0 1592.1 1424.69 2
 -1 23 0 3559.97 1515.73 2
 1 23 1 -697.928 1193.04 5
 1 23 1 1938.56 1534.16 2
 -1 23 -1 -1876.59 1235.41 5
 -1 23 -1 1028.91 1258.86 2
 -1 23 -2 6810.29 1502.08 5
 1 23 2 7847.14 1790.16 2
 1 23 2 8479.87 1571.13 5
 -1 23 -2 10306.7 1910.94 2
 1 23 3 45544.2 3793.52 2
 1 23 3 43856.8 3056.24 5
 -1 23 -3 43893.2 3389.78 5
 -1 23 -3 39876 3201.23 2
 1 23 4 40546 3573.11 2
 -1 23 -4 44884.1 3324.56 2
 -1 23 -4 44668.1 3454.03 5
 -1 23 -5 -1228.15 1416.13 5
 1 23 5 2465.82 1766.29 2
 -1 23 -6 7453.94 1719.39 1
 1 23 6 4851.91 1691.06 2
 -1 23 -6 4543.04 1534.72 5
 -1 23 -7 844.071 1295.68 5
 -1 23 -7 1861.28 1438.18 1
 1 23 7 -918.903 1358.18 2
 1 23 8 739.216 1728.39 2
 -1 23 -8 2480.61 1601.2 1
 -1 23 -8 1170.26 1235 5
 -1 23 -9 8068.35 1860.68 1
 -1 23 -9 7951.83 2133.5 4
 -1 23 -9 7591.86 1977.01 5
 1 23 9 4146.45 1797.14 2
 -1 23 -10 10850.7 2347.78 5
 -1 23 -10 6922.44 1704.93 4
 -1 23 -10 11328.6 1906.84 1
 1 23 10 15116 2665.98 2
 -1 23 -11 985.409 1482.55 1
 1 23 11 954.913 1534.81 2
 -1 23 -11 -923.005 1365.68 5
 -1 23 -11 -247.256 1687.35 4
 -1 23 -12 15868.1 2385.06 1
 -1 23 -13 4842.1 1567.28 1
 1 25 -8 8006.96 2172.96 5
 1 25 -8 4822.99 1604.35 1
 -1 25 8 5857.46 1940.27 2
 1 25 -7 2242.8 1596.38 5
 1 25 -7 5227.75 1511.52 1
 -1 25 7 3799.5 1694.36 2
 1 25 -6 7435.72 1865.29 5
 -1 25 6 12517.4 2421.69 2
 1 25 -6 9385.96 2058.69 1
 1 25 -5 264.182 1269.59 5
 -1 25 5 48.8029 1248.94 2
 -1 25 4 20539.1 2852.79 2
 1 25 -4 18292.9 2404.35 2
 1 25 -4 16096.9 2383.52 5
 -1 25 3 21760 2875.92 2
 1 25 -3 22594.3 2657.87 2
 1 25 -3 17573.7 2375.84 5
 1 25 -2 -453.719 1141.28 5
 -1 25 2 230.368 1359.09 2
 1 25 -2 1254.35 1367.56 2
 1 25 -1 17308.7 2505.48 2
 -1 25 1 16559.8 2497.45 2
 -1 25 1 12463.5 1806.66 5
 1 25 -1 20136.9 2496.04 5
 1 25 0 572.196 1355.47 2
 -1 25 0 2503.17 1414.27 5
 -1 25 0 1881.38 1420.29 2
 1 25 0 750.261 1240.62 5
 -1 25 -1 15265 2268.94 2
 1 25 1 10327.7 1789.85 5
 -1 25 -1 11737.5 2049.06 5
 1 25 1 15497.6 2494.74 2
 -1 25 -2 1600.99 1148.42 2
 -1 25 -2 3062.05 1637 5
 1 25 2 -407.932 1363.55 2
 1 25 2 4135.62 1292.69 5
 1 25 3 15092.9 2455.18 2
 -1 25 -3 14231.6 2173.77 2
 -1 25 -3 16072.3 2385.76 5
 -1 25 -4 4685.84 1652.18 5
 1 25 4 5115.97 1744.21 2
 -1 25 -5 1295.69 1610.86 5
 1 25 5 1539.43 1627.7 2
 -1 25 -6 11258.6 2228.19 5
 -1 25 -6 14614.7 2464.11 1
 1 25 6 15666.2 2625.87 2
 1 25 7 10578 2615.63 2
 -1 25 -7 6336.04 1846.17 1
 -1 25 -7 11304.5 2231.84 5
 -1 25 -8 -1491.34 1548.66 1
 -1 25 -8 3389.08 1945.24 5
 -1 25 -9 3341.61 1648.93 1
 -1 25 -10 4396.35 1865.55 1
 -1 25 -11 -954.682 1617.36 1
 1 27 -5 8933.49 2253.89 5
 1 27 -4 2854.96 1597.93 5
 -1 27 4 1283.84 1928.11 2
 1 27 -3 -750.043 1473.53 2
 1 27 -3 -581.314 1555.14 5
 -1 27 3 938.763 1698.84 2
 1 27 -2 4318.28 1668.25 5
 1 27 -2 4135.05 1792.8 2
 -1 27 2 1852.37 1608.14 2
 -1 27 1 28126 3295.6 2
 1 27 -1 26375.6 2835.19 5
 1 27 -1 28195.1 3200.83 2
 -1 27 0 1155.68 1652.91 2
 -1 27 0 -599.45 1462.54 5
 1 27 0 -142.621 1481.53 2
 1 27 0 1677.52 1240.66 5
 -1 27 -1 22664.5 2939.45 2
 -1 27 -1 17319.8 2408.5 5
 -1 27 -2 3001.44 1505.42 5
 1 27 2 3420.04 1800.11 2
 -1 27 -2 2419.24 1587.65 2
 -1 27 -3 -2357.92 1719.81 5
 1 27 3 139.855 1431.23 2
 -1 27 -4 374.054 1414.21 5
 -1 27 -5 1294.99 1372.87 5
 -1 27 -5 1473.11 1537.53 1
 -1 27 -6 5663.02 2023.41 1
 -1 27 -7 13810.8 2465.84 1
 -1 27 -8 4945.37 1870.15 1
 -1 29 -1 4014.34 1811.24 2
 2 0 -22 121243 6314.3 4
 2 0 -21 -524.677 1556.79 4
 2 0 -20 2699.16 1683.17 4
 2 0 -19 -863.165 1431.73 4
 2 0 -18 25202.3 2609.22 4
 2 0 -17 -307.213 1073.01 4
 2 0 -16 399776 9156.64 4
 -2 0 15 179.912 476.23 2
 2 0 -15 232.226 1087.85 4
 2 0 -14 5528.99 1238.82 4
 -2 0 14 7256.38 895.653 2
 -2 0 13 537.743 515.321 2
 2 0 -13 -101.919 742.083 4
 -2 0 12 82483.9 2566.65 2
 2 0 -12 82764.8 3569.64 4
 -2 0 11 60.1833 359.857 2
 2 0 -11 482.331 634.539 4
 2 0 -10 14903.6 1476.89 4
 -2 0 10 12840.9 962.121 2
 -2 0 9 37.5439 312.205 2
 2 0 -9 -102.517 562.083 4
 2 0 -8 24988.8 1173.92 2
 2 0 -8 20696.7 1025.9 5
 -2 0 8 21582 1052.89 5
 -2 0 8 22136 1145.18 2
 2 0 -8 22306 1502.45 4
 2 0 -7 216.608 253.341 2
 -2 0 7 385.236 306.64 2
 2 0 -7 790.265 544.968 4
 2 0 -7 -40.9424 219.057 5
 2 0 -6 689905 4912.34 5
 2 0 -6 705077 7120.75 4
 -2 0 6 699057 5587.9 2
 2 0 -6 711103 5444.66 2
 2 0 -5 6.61327 161.818 5
 -2 0 5 619.266 226.421 2
 2 0 -5 75.2435 172.69 2
 2 0 -5 -74.2163 276.456 4
 2 0 -4 51670.3 1580.54 4
 -2 0 4 51077.3 1578.23 4
 2 0 -4 51864.3 1102.56 5
 2 0 -4 51706.7 1300.11 2
 -2 0 4 49729.5 1307.39 2
 -2 0 3 217.579 174.894 2
 2 0 -3 149.274 202.341 4
 -2 0 3 107.879 140.331 4
 2 0 2 68021.4 2120.59 3
 2 0 2 66935 1297.87 6
 2 0 3 117.627 217.598 6
 -2 0 -3 5.56444 156.547 4
 2 0 3 6.08711 304.257 3
 -2 0 -3 -379.667 413.655 3
 -2 0 -3 -4.24802 156.986 6
 -2 0 -4 10346.1 1081.55 3
 2 0 4 13101.1 1192.11 3
 2 0 4 10005.8 706.338 6
 -2 0 -4 10987.5 667.309 6
 -2 0 -4 11122.8 743.444 4
 -2 0 -5 -377.622 306.828 6
 2 0 5 -186.361 271.973 6
 2 0 5 -176.721 578.463 3
 -2 0 -5 -368.387 344.889 4
 2 0 6 291130 4069.81 6
 2 0 6 299433 6264.05 3
 -2 0 -6 299415 4089.36 6
 -2 0 -6 307634 4648.08 4
 -2 0 -7 13.6514 420.4 4
 2 0 7 -429.688 646.602 3
 -2 0 -7 37.4069 316.037 6
 2 0 7 -121.447 242.13 2
 2 0 7 179.124 294.652 6
 -2 0 -8 84.2163 351.401 6
 -2 0 -8 -93.5469 517.885 4
 2 0 8 122.526 250.404 2
 2 0 8 347.28 638.423 3
 -2 0 -9 469.145 538.016 4
 2 0 9 -395.005 295.011 2
 2 0 9 1030.35 882.8 3
 2 0 10 52967.5 1730.51 2
 2 0 10 54965.7 3457.58 3
 -2 0 -10 56973.5 2672.03 4
 2 0 11 -361.673 343.824 2
 -2 0 -11 -133.255 708.572 4
 -2 0 -12 1816.99 909.84 4
 2 0 12 1870.98 467.441 2
 -2 0 -13 185.298 849.317 4
 2 0 13 767.063 404.939 2
 -2 0 -14 4600.46 1352.27 4
 2 0 14 368.728 441.919 2
 -2 0 -15 -936.636 1049.78 4
 -2 0 -16 80417.7 4170.3 4
 -2 0 -17 1700.32 1162.86 4
 -2 0 -18 10198.3 1993.34 4
 -2 0 -19 2929.49 1549.72 4
 -2 0 -20 4062.31 1678.21 4
 -2 0 -21 429.644 1377.91 4
 -2 0 -22 87712.9 5461.84 4
 2 -2 -22 52741.1 4404.19 4
 2 2 -22 61730.3 4642.86 4
 2 2 -21 3433.81 1766.17 4
 2 -2 -21 3045.43 1623.37 4
 2 -2 -20 1768.07 1632.84 4
 2 2 -20 2180.4 1443.18 4
 2 2 -19 4917.8 1577.34 4
 2 -2 -19 5764.23 1834.79 4
 2 -2 -18 24559.3 2813.85 4
 2 2 -18 21743.6 2307.63 4
 2 2 -17 44541.5 3239.27 4
 2 -2 -17 44107.8 3405.12 4
 -2 2 16 114918 3775.86 2
 2 -2 -16 111672 5114.63 4
 2 2 -16 105435 4685.25 4
 -2 2 15 6864.04 993.773 2
 2 -2 -15 9253.69 1599.33 4
 2 2 -15 6369.15 1358.31 4
 -2 -2 14 18886.8 1215.06 2
 2 -2 -14 17171.2 1919.42 4
 2 2 -14 16944.7 1941.97 4
 -2 2 14 18556.2 1481.91 2
 -2 -2 13 2522.31 520.489 2
 2 2 -13 3129.12 1027.44 4
 2 -2 -13 2346.84 882.75 4
 -2 2 13 2654.15 748.89 2
 2 2 -12 37212.6 2344.08 4
 -2 2 12 43096.6 2049.49 2
 2 -2 -12 41550.3 2742.71 4
 -2 -2 12 42985.2 1631.88 2
 2 2 -11 207092 3377.16 2
 -2 2 11 199984 4236.29 2
 -2 -2 11 199585 3379.38 2
 2 2 -11 200194 5111.21 4
 2 -2 -11 203190 5535.19 4
 2 2 -11 201536 4131.04 5
 -2 -2 10 51337.7 1669.14 2
 2 -2 -10 55013.4 2764.5 4
 -2 2 10 53486.4 2082.34 2
 2 2 -10 53693.7 1636.22 2
 2 2 -10 52058.8 2012.09 5
 -2 2 10 51060.8 1596.65 5
 2 2 -10 54662.3 2520.91 4
 2 2 -9 54572.8 2003.57 5
 -2 -2 9 58230.6 1654.34 2
 2 2 -9 55381.2 2392.5 4
 -2 2 9 53749.1 1506.17 5
 2 2 -9 55699.8 1584.82 2
 2 -2 -9 49780.7 2501.37 4
 -2 2 9 55693.3 2064.92 2
 -2 2 8 2672.15 571.317 2
 2 2 -8 2255.36 476.305 5
 2 2 -8 2404.24 374.035 2
 -2 2 8 2019.47 333.963 5
 2 -2 -8 1420.7 578.331 4
 2 2 -8 2689.13 675.284 4
 -2 -2 8 2387.45 412.088 2
 2 2 -7 4733.17 579.217 5
 2 -2 -7 3632.15 689.672 4
 -2 2 7 4363.64 365.799 5
 -2 2 7 4981.43 594.125 2
 -2 -2 7 4435.83 436.507 2
 2 2 -7 4115.08 434.16 2
 2 2 -6 51134.4 1321.36 2
 2 -2 -6 51231.8 1753.56 2
 2 2 -6 53966.5 1908.94 4
 -2 2 6 54664.8 1764.54 2
 -2 -2 6 51303.2 1614.98 1
 -2 -2 6 52146.9 1352.91 2
 2 2 -6 53897.9 1679.3 5
 -2 2 6 50713.4 1008.96 5
 2 2 -5 69707.9 1476.43 2
 2 -2 -5 70933.3 1914.7 2
 -2 -2 5 69789.6 1473.13 2
 2 2 -5 69752.9 1800.91 5
 -2 -2 5 69771.9 1659.51 1
 2 2 -5 67565.3 1960.2 4
 -2 2 5 62243.8 1856.94 2
 -2 -2 4 2904.11 337.828 2
 2 2 -4 5030.75 395.88 2
 2 2 -4 3257.76 448.779 4
 2 -2 -4 3182.8 442.322 2
 -2 -2 4 3244.65 432.645 4
 -2 -2 4 3381.89 343.071 1
 -2 2 4 2774.99 439.177 2
 2 2 -3 71394.6 1626.95 4
 -2 -2 3 70429.1 1184.44 1
 2 2 -3 74174.9 1416.72 2
 -2 -2 3 72894.1 1635.49 4
 2 -2 -3 72314.8 1700.65 2
 -2 2 3 68974 1676.02 2
 -2 2 2 95464.6 1810.09 2
 2 2 -2 95435.6 1536.02 6
 2 2 -2 96763.8 1683.99 4
 2 2 1 33288.6 1142.19 6
 2 2 2 247073 3963.4 3
 -2 2 -2 245809 2599.19 4
 2 2 2 240451 3394.3 6
 -2 -2 -2 262097 4151.95 3
 2 -2 2 242630 3100.53 1
 2 -2 2 252264 2608.88 4
 -2 2 -2 257071 4172.89 3
 -2 -2 -2 250375 3349.27 6
 2 -2 2 254722 4088.15 3
 -2 2 -3 5076.05 728.843 3
 -2 -2 -3 5467.3 604.787 6
 2 -2 3 5283.51 537.087 1
 -2 2 -3 5017.85 451.172 4
 2 2 3 6288.61 796.014 3
 2 2 3 5368.85 641.564 6
 2 -2 3 5391.27 457.187 4
 -2 -2 -3 5469.77 763.24 3
 2 -2 3 5702.15 816.498 3
 2 -2 3 5528.62 549.411 5
 -2 2 -3 4662.58 489.25 1
 -2 -2 -4 154649 4070.99 3
 -2 2 -4 153570 4023.23 3
 2 -2 4 149523 3878.37 3
 -2 2 -4 144205 1490.81 6
 2 2 4 144051 3784.49 3
 2 -2 4 159155 2894.15 5
 2 2 4 142811 3088.64 6
 2 -2 4 148889 2614.49 4
 -2 2 -4 141635 2513.75 4
 -2 -2 -4 148830 3053.63 6
 -2 2 -4 147893 2809.22 1
 2 -2 5 2145.26 272.067 6
 2 -2 5 2395.77 695.086 3
 2 2 5 1557.73 618.66 3
 -2 -2 -5 2851.56 529.819 6
 -2 2 -5 2138.99 232.313 6
 -2 2 -5 3506.05 511.443 4
 2 2 5 1715.19 458.952 6
 2 2 6 248055 5696.07 3
 2 -2 6 258333 5879.12 3
 2 2 6 258709 4529.22 6
 -2 2 -6 256242 4076.53 4
 -2 2 -6 260310 2608.17 6
 2 -2 6 259924 2765.55 6
 2 2 7 80278.3 3450.17 3
 -2 -2 -7 78609.7 2808.82 4
 -2 2 -7 80556.1 1645.97 6
 -2 2 -7 79411 2484.31 4
 2 -2 7 79517.5 3481.28 3
 2 2 7 83076.4 2625.94 6
 2 -2 7 75466.8 1177.43 2
 -2 -2 -8 12908.7 1272.41 4
 2 2 8 12367.4 981.385 2
 -2 2 -8 12929.3 750.792 6
 2 2 8 14112.2 1140.21 6
 2 2 8 12956 1635.88 3
 -2 2 -8 14499.3 1179.03 4
 2 -2 8 15372.6 1776.11 3
 2 -2 8 14044.5 549.042 2
 -2 2 -9 4742.89 524.494 6
 2 -2 9 4165.93 1134.72 3
 -2 2 -9 3479.99 793.477 4
 2 2 9 5518.59 1276.31 3
 2 -2 9 4208.23 376.21 2
 2 2 9 4334.47 676.763 2
 -2 -2 -9 3724.35 834.351 4
 2 -2 10 40961.2 2994.03 3
 -2 2 -10 37731.7 1479.69 6
 -2 2 -10 39497.7 2149.65 4
 2 2 10 40582.1 2922.61 3
 2 2 10 37660.4 1725.84 2
 -2 -2 -10 37872.3 2290.34 4
 2 -2 10 34325.7 1086.99 2
 2 2 11 129272 3209.13 2
 2 -2 11 130136 2045.08 2
 -2 -2 -11 130213 4398.91 4
 -2 2 -11 131119 4093.94 4
 -2 2 -11 132379 2893.99 6
 2 -2 12 25043.8 967.246 2
 2 2 12 24308.1 1478.74 2
 -2 -2 -12 23992.8 2002.43 4
 -2 2 -12 24113.8 1349.92 6
 -2 2 -12 25243 1990.54 4
 2 2 13 59585.8 2338.8 2
 -2 2 -13 58245.5 3093.15 4
 -2 -2 -13 62513.7 3353.42 4
 2 2 14 2772 639.724 2
 -2 -2 -14 2610.23 1131.48 4
 -2 2 -14 2540.35 1103.62 4
 -2 -2 -15 10948.7 1735.15 4
 -2 2 -15 13477.5 1829.85 4
 -2 -2 -16 69061.5 3952.18 4
 -2 2 -16 67728.2 3778.58 4
 -2 2 -17 38824.7 3077.17 4
 -2 -2 -17 45520 3377.14 4
 -2 -2 -18 375.525 1056.9 4
 -2 2 -18 2943.21 1354.97 4
 -2 -2 -19 13171.6 2088.66 4
 -2 2 -19 16628.5 2292.56 4
 -2 -2 -20 -1.76544 1217.85 4
 -2 2 -20 1392.97 1202.14 4
 -2 -2 -21 4932.62 1907.96 4
 -2 2 -21 3444.39 1574.48 4
 -2 -2 -22 34612.2 3631 4
 -2 2 -22 47120.5 4028.87 4
 2 4 -22 6194.38 2102.74 4
 2 -4 -22 6032.88 2136.81 4
 2 4 -21 7409.92 2183.21 4
 2 -4 -21 10605.9 2320.21 4
 2 4 -20 15995.2 2249.84 4
 2 -4 -20 16374.7 2539.74 4
 2 4 -19 4126.4 1495.99 4
 2 -4 -19 6103.26 1889.42 4
 2 4 -18 14301.6 2099.79 4
 2 -4 -18 14623.7 2420.79 4
 2 -4 -17 180237 6800.3 4
 2 4 -17 187922 6460.95 4
 -2 4 17 189429 5272.39 2
 2 4 -16 743.771 1013.64 4
 -2 4 16 1731.12 700.781 2
 2 -4 -16 1963.81 1030.67 4
 -2 4 15 8807.71 1210.74 2
 2 -4 -15 9715.19 1741.93 4
 2 4 -15 9577.07 1627.58 4
 -2 4 14 9109.06 1193.54 2
 2 4 -14 11891.3 1655.75 4
 2 -4 -14 10803.2 1677.37 4
 2 -4 -13 26270.2 2380.22 4
 2 4 -13 25723.1 1418.72 6
 2 4 -13 27327.3 1861.14 5
 2 4 -13 29762.6 2317.43 4
 -2 4 13 26286 1828.23 2
 -2 4 12 3160.79 441.024 5
 -2 4 12 2947.79 764.965 2
 2 4 -12 3907.69 837.041 5
 2 4 -12 1660.67 859.008 4
 2 -4 -12 1441.61 953.897 4
 2 4 -12 2486.93 511.383 6
 2 4 -12 3655.51 470.246 2
 -2 4 11 286373 5447.52 2
 -2 4 11 276909 3311.53 5
 2 4 -11 277623 3389.99 2
 2 4 -11 279516 5359.41 5
 2 4 -11 273826 5996.65 4
 2 -4 -11 270075 6798.44 4
 -2 4 10 18574.8 808.249 5
 -2 4 10 17459 1380.27 2
 2 4 -10 18822.1 862.865 2
 2 4 -10 17517.4 1366.67 5
 2 4 -10 19095.4 1590.91 4
 -2 4 9 5478.25 410.017 5
 2 4 -9 6919.09 997.666 4
 -2 4 9 5539.62 793.568 2
 2 4 -9 4776.6 740.159 5
 2 4 -9 5619.77 515.355 2
 2 4 -8 1578.54 297.489 2
 2 4 -8 2287.63 612.5 5
 -2 4 8 1269.62 196.479 5
 -2 4 8 1188.81 466.773 2
 2 4 -8 2734.13 725.955 4
 2 4 -7 548.13 466.531 4
 -2 4 7 405.025 376.139 2
 2 4 -7 349.267 186.209 6
 2 4 -7 502.592 203.914 2
 2 4 -7 -147.597 461.195 5
 2 4 -6 1299.24 242.755 6
 2 4 -6 1274.69 410.766 5
 2 4 -6 1457.16 508.316 4
 -2 4 6 2061.27 511.738 2
 -2 -4 6 1289.28 337.775 1
 2 4 -6 1640.12 283.227 2
 2 4 -5 349001 3453.59 2
 2 4 -5 342581 3811.19 1
 2 4 -5 343858 4755.41 4
 -2 -4 5 333314 3969.03 1
 2 4 -5 334691 3197.75 6
 -2 4 5 346341 4817.37 2
 2 4 -5 346509 4617.16 5
 -2 -4 4 7660.68 558.961 1
 2 4 -4 9320.67 608.1 1
 2 4 -4 8763.73 550.944 6
 -2 4 4 8192.2 777.721 2
 -2 -4 4 7445.35 487.677 6
 2 4 -4 8638.01 751.954 4
 -2 -4 3 72795.3 1555.67 6
 -2 -4 3 73403.8 1928.07 4
 2 4 -3 69947.5 1467.78 1
 2 4 -3 73787 1978.83 4
 2 -4 -3 74875.8 2081.85 2
 -2 4 3 74797.7 2069.22 2
 2 4 -3 71972.5 1615.46 6
 2 -4 -2 9893.38 771.872 2
 2 4 -2 9230.54 687.248 4
 -2 -4 2 11332.1 669.622 6
 2 4 -2 10966.8 699.747 6
 -2 4 2 11139.5 779.293 2
 -2 4 2 10515.8 476.844 5
 -2 -4 2 10091 690.427 4
 2 -4 -2 9914.02 462.38 5
 -2 -4 1 261026 3354.87 6
 -2 4 1 260692 3381.06 2
 -2 4 1 253153 2644.07 5
 2 4 -1 251648 3278.72 4
 -2 -4 1 263504 3368.06 4
 2 4 -1 256938 3445.67 6
 2 -4 -1 253247 3424.32 2
 2 -4 -1 256887 2678.05 5
 -2 -4 0 52371.8 1647.57 6
 2 -4 0 54811.9 1485.65 4
 2 -4 0 53893.9 1466.71 2
 2 4 0 51610.3 1689.06 6
 -2 -4 0 54892.4 1523.35 4
 2 -4 0 53230.2 1360.41 5
 -2 4 0 52047.6 1435.82 2
 -2 4 0 54192.6 1364.47 5
 2 -4 1 300212 3947.4 3
 2 4 1 284577 4259.28 6
 -2 -4 -1 298344 4230.35 6
 -2 4 -1 283872 3406.82 4
 2 -4 1 294438 3189.45 2
 2 -4 1 295144 3479.16 4
 -2 4 -1 284259 3446.06 5
 -2 4 -1 289992 3038.07 2
 2 -4 1 295149 3497.59 5
 -2 4 -2 217115 3261.14 5
 2 -4 2 209716 3791.59 3
 -2 4 -2 226783 3892.21 3
 -2 4 -2 215754 3295.05 1
 -2 4 -2 211080 3105.56 4
 2 -4 2 224943 3308.84 5
 -2 4 -2 215064 2368.03 2
 2 -4 2 214488 2492.88 2
 -2 -4 -2 218754 3903.97 6
 2 4 2 216688 3965.49 6
 2 -4 2 214496 3024.92 4
 2 4 2 218232 3719.52 3
 -2 4 -3 70824.8 1989.47 5
 2 -4 3 72210 2469.26 3
 -2 4 -3 70627.1 1887 4
 2 4 3 71121.1 2405.33 6
 2 4 3 72687.3 2395.12 3
 2 -4 3 71948.5 1907.04 4
 -2 4 -3 71818.5 1219.39 2
 -2 -4 -3 70125.9 2514.39 3
 -2 4 -3 72949.7 2019.84 1
 2 -4 3 73593.7 1287.46 2
 -2 4 -3 72361.4 2517.14 3
 2 -4 4 66903.9 2644.8 3
 -2 4 -4 65075 1916.2 4
 2 4 4 64708 2422.09 6
 -2 -4 -4 71683.4 2783.9 3
 -2 4 -4 65141 2013.13 1
 2 4 4 65140.1 2497.07 3
 -2 4 -4 61669.8 1998.05 5
 2 -4 5 273365 5639.06 3
 -2 4 -5 271734 4198.14 4
 -2 4 -5 279106 4335.98 1
 2 4 5 268199 5435.31 3
 2 4 5 268237 5017.33 6
 -2 4 -6 30272.2 1547.67 1
 2 4 6 25240.7 1660.29 6
 2 -4 6 26751.7 1986.28 3
 2 4 6 29787.7 2005.85 3
 -2 4 -6 28783.4 1482.19 4
 2 4 7 2110.84 696.374 6
 -2 4 -7 70.071 462.62 4
 -2 4 -7 1673.81 597.21 1
 2 -4 7 1527.19 841.853 3
 2 4 7 1313.1 731.703 3
 2 -4 8 69701.8 3475.54 3
 2 4 8 69563.7 3392.56 3
 -2 4 -8 66286.9 2522.44 4
 2 4 8 67638.8 2756.41 6
 2 4 9 3434.6 699.095 2
 -2 4 -9 3354.88 818.225 4
 2 -4 9 2388.27 959.059 3
 2 4 9 2755.81 999.146 3
 2 4 9 4301.16 857.286 6
 2 -4 10 18136.5 2100.84 3
 -2 4 -10 17510.7 563.504 6
 -2 4 -10 20005.5 1679.81 4
 2 4 10 21531.9 2151.82 3
 2 4 10 19079 1418.67 2
 -2 4 -11 299184 2638.38 6
 -2 4 -11 309352 6352.4 4
 -2 -4 -11 314222 7241.98 4
 2 4 11 294930 5527.54 2
 -2 -4 -12 64468.2 3458.59 4
 -2 4 -12 68484.2 3151.65 4
 2 4 12 66571.7 2647.98 2
 -2 4 -12 63525.8 1346.97 6
 -2 4 -13 37186.6 2465.04 4
 2 4 13 38009.4 2122.94 2
 -2 -4 -13 35130.1 2689.65 4
 -2 4 -14 50690.6 2993.24 4
 2 4 14 44276.8 2309.12 2
 -2 -4 -14 51133.6 3351.56 4
 -2 4 -15 4077.65 1263.79 4
 2 4 15 2759.11 812.256 2
 -2 -4 -15 3337.58 1185.63 4
 -2 4 -16 785.816 1057.79 4
 -2 -4 -16 607.825 1064.65 4
 -2 -4 -17 99543.6 5077.62 4
 -2 4 -17 100124 4776.29 4
 -2 -4 -18 27086 2964.92 4
 -2 4 -18 32924.7 2974.86 4
 -2 4 -19 130.356 1334.51 4
 -2 -4 -19 1737.88 1401.27 4
 -2 -4 -20 9941.05 2251.83 4
 -2 4 -20 7741.12 1894.72 4
 -2 -4 -21 12661.7 2409.17 4
 -2 4 -21 13018.2 2325.82 4
 -2 4 -22 6184.81 2016.46 4
 -2 -4 -22 7361.12 2077.02 4
 2 6 -22 11586 2448.96 4
 2 -6 -22 4783.38 2124.28 4
 2 -6 -21 32408.6 3779.75 4
 2 6 -21 38216.8 3762.91 4
 2 6 -20 17236.8 2541.56 4
 2 -6 -20 18015.7 2747.31 4
 2 -6 -19 13620 2309.85 4
 2 6 -19 14092.2 2282.3 4
 2 -6 -18 33011.7 3313.2 4
 2 6 -18 27909.1 2808.36 4
 -2 6 17 164263 5279.22 2
 2 -6 -17 163633 6751.15 4
 2 6 -17 164855 6165.02 4
 2 6 -16 25317.5 2510.52 4
 2 -6 -16 27146.2 2907.29 4
 -2 6 16 25106.9 2153.06 2
 2 6 -15 822.755 1146.74 4
 -2 6 15 1383.49 897.824 2
 2 6 -14 24466.9 2014.95 5
 -2 6 14 25448.6 1935.44 2
 2 6 -14 22472.7 2127.7 4
 2 -6 -14 22191.7 2423.5 4
 2 6 -13 1677.66 729.538 5
 2 6 -13 2241.88 358.641 6
 2 6 -13 1004.83 779.357 4
 -2 6 13 867.407 676.873 2
 -2 6 12 6796.66 1106.91 2
 2 6 -12 8397.2 1449 4
 2 6 -12 6130.49 482.515 2
 2 6 -12 5984.98 1040.4 5
 2 6 -12 6906.77 516.883 6
 -2 6 11 166075 4459.28 2
 2 6 -11 162386 4401.68 5
 2 6 -11 160987 2369.03 6
 2 6 -11 160212 2315.11 2
 2 6 -11 167146 4822.65 4
 -2 6 10 2625.76 274.084 5
 2 6 -10 2942.61 786.42 5
 2 6 -10 3189.63 392.971 2
 2 6 -10 3123.37 360.358 6
 -2 6 10 1805.9 672.627 2
 2 6 -10 1497.73 796.069 4
 2 6 -9 3945.04 415.47 6
 2 6 -9 3418.73 407.436 2
 2 6 -9 4684.08 852.198 5
 -2 6 9 2799 254.966 5
 2 6 -9 3829.36 919.371 4
 -2 6 9 3992.95 796.969 2
 -2 6 8 5589.42 806.613 2
 2 6 -8 4753.84 453.904 6
 2 6 -8 6268.63 927.701 5
 2 6 -8 5938.4 996.154 4
 2 6 -8 5790.82 745.32 1
 2 6 -8 5389.31 468.145 2
 2 6 -7 9105.64 976.982 4
 2 6 -7 11389.1 667.469 6
 2 6 -7 10658.9 661.558 2
 2 6 -7 13049.4 1197.88 5
 2 6 -7 11843.1 945.133 1
 -2 6 7 10646.9 1127.73 2
 2 6 -6 23960.7 1246.69 1
 2 6 -6 22317 1449.04 4
 2 6 -6 23825.4 990.244 6
 2 6 -6 22310.7 1422.73 5
 -2 6 6 21580.7 1478.74 2
 2 6 -5 39382.3 1826.41 4
 -2 6 5 35929.4 822.791 5
 2 6 -5 37974.5 1749.15 5
 -2 -6 5 35787 1164.87 6
 2 6 -5 37713.6 1469.4 1
 -2 6 5 38598.7 1832.54 2
 2 6 -5 38303 1311.6 6
 -2 6 4 32613.1 892.252 5
 2 6 -4 31917.1 1270.36 1
 2 6 -4 34223.6 1606.67 4
 -2 6 4 33530.7 1674.19 2
 2 6 -4 33900.3 1337.56 6
 -2 -6 4 34554.3 1213.2 6
 -2 6 3 7650.97 832.685 2
 -2 -6 3 7219.24 639.617 6
 2 6 -3 7606.54 700.409 6
 2 6 -3 8501.92 851.178 4
 -2 6 3 7443.73 501.877 5
 -2 6 2 90991.6 1819.42 5
 -2 -6 2 89008.2 2243.97 6
 2 6 -2 93503 2458.45 6
 2 6 -2 88267.2 2428.13 4
 -2 6 2 87673.6 2484.97 2
 -2 -6 1 50798.1 1831.42 6
 2 6 -1 51351.3 1806.63 4
 -2 6 1 50819.6 1466.14 5
 2 6 -1 50225.6 1916.45 6
 -2 6 1 50183.8 1801.16 2
 2 -6 -1 49569.1 1464.36 5
 2 -6 0 124370 2504.97 5
 -2 6 0 118735 2591.75 2
 2 -6 0 121964 2785.52 6
 -2 6 0 122083 2446.05 5
 2 6 0 120089 3123.54 6
 2 -6 1 31091.1 1336.32 6
 -2 6 -1 29031.7 1354.78 4
 2 -6 1 29751.6 1237.93 3
 2 6 1 31375.2 1696.99 6
 2 6 1 31393.3 1207.6 3
 -2 6 -1 30275.6 1305.07 5
 -2 6 -1 27448.6 1212.42 2
 2 -6 2 11062.5 902.089 3
 2 6 2 10538.1 1064.08 6
 2 6 2 10483.9 855.15 3
 -2 6 -2 11390.8 885.158 5
 2 -6 2 12132.5 790.907 6
 -2 6 -2 10885.6 860.322 4
 -2 6 -2 13269 796.076 2
 -2 6 -3 1537.2 430.184 5
 2 6 3 1821.21 453.586 3
 -2 6 -3 2942.92 571.499 1
 2 6 3 1442.28 594.115 6
 -2 6 -3 1627.59 485.719 3
 -2 -6 -3 1311.83 450.622 3
 2 -6 3 1805.75 561.068 3
 -2 6 -3 1857.13 470.303 4
 -2 6 -3 1622.06 309.386 2
 2 -6 3 1567.53 333.244 6
 2 6 4 76879.1 2940.89 6
 2 -6 4 75882.9 2773.74 3
 -2 6 -4 81901.9 2423.87 4
 -2 6 -4 76535.3 2388.91 1
 2 6 4 73931.7 2613.21 3
 -2 6 -4 74640.1 2430.34 5
 -2 6 -4 79433.6 1549.18 2
 -2 -6 -4 79685.4 3001.38 3
 2 -6 4 77190.9 1568.81 6
 -2 6 -5 816914 4326.53 2
 -2 6 -5 809755 8300.03 5
 2 6 5 791500 9606.25 6
 -2 6 -5 786875 7941.31 1
 2 6 5 787651 9175.17 3
 -2 6 -5 801678 7986.33 4
 2 -6 5 797896 9653.11 3
 -2 6 -6 15180.2 1175.23 1
 -2 6 -6 16285.2 1230.48 4
 2 6 6 15891 1445.09 3
 2 6 6 16715.6 1506.85 6
 -2 6 -6 16086.8 1289.25 5
 2 -6 6 15548.9 1536.04 3
 2 6 7 2878.08 853.088 6
 -2 6 -7 3251.45 673.26 1
 2 6 7 2585.29 795.538 3
 -2 6 -7 3836.62 769.29 5
 2 -6 7 3373.84 942.429 3
 -2 6 -7 3166.85 724.229 4
 2 6 8 31592 2126.39 6
 2 6 8 31688 2311 3
 2 -6 8 27841.7 2247.09 3
 -2 6 -8 31892.3 1835.12 1
 -2 6 -8 30479.6 1848.62 4
 2 6 9 588.826 733.953 6
 2 -6 9 16.3326 792.597 3
 2 6 9 1604.39 901.473 3
 2 6 9 658.476 687.16 2
 -2 6 -9 674.755 671.753 1
 -2 6 -9 322.05 584.674 4
 2 6 10 12212.2 1316.23 2
 -2 6 -10 16703.8 1553.26 4
 -2 6 -11 156826 4674.81 4
 2 6 11 159947 4449.76 2
 2 6 12 40331.3 2332.9 2
 -2 6 -12 42613.7 2590.53 4
 -2 6 -13 2300.11 1090.53 4
 2 6 13 1971 893.882 2
 -2 -6 -13 -281.155 1313.56 4
 -2 6 -14 -421.962 866.525 4
 -2 -6 -14 -1256.3 1144.3 4
 2 6 14 1070.14 771.158 2
 -2 -6 -15 7308.49 1588.74 4
 2 6 15 9167.37 1272.38 2
 -2 6 -15 8601.17 1644.26 4
 -2 6 -16 5221.53 1363.82 4
 -2 -6 -16 7271.45 1734.03 4
 2 6 16 5777.74 1192.49 2
 -2 -6 -17 79288.4 4742.12 4
 -2 6 -17 85627 4504.45 4
 -2 6 -18 1732.01 1240.33 4
 -2 -6 -18 3438.25 1352.32 4
 -2 6 -19 13346.3 2144.39 4
 -2 -6 -19 6790.07 1862.92 4
 -2 6 -20 19358.8 2778.73 4
 -2 -6 -20 12685.7 2336.93 4
 -2 6 -21 14961 2463.48 4
 -2 -6 -21 14824.6 2599.04 4
 -2 6 -22 2332.85 1821.47 4
 -2 -6 -22 1335.92 1425.72 4
 2 8 -21 22386.3 2932.3 4
 2 -8 -21 22628.7 3067.36 4
 2 -8 -20 12597.9 2419.76 4
 2 8 -20 9702.61 2006.2 4
 2 8 -19 7470.44 1807.07 4
 2 -8 -19 11518.3 2280.93 4
 2 -8 -18 3160.45 1674.26 4
 2 8 -18 5419.85 1837.53 4
 -2 8 18 1305.64 925.742 2
 2 8 -17 10036.4 1968.14 4
 2 -8 -17 7302.38 1861.91 4
 -2 8 17 7984.5 1556.76 2
 2 8 -16 41529 3192.4 4
 -2 8 16 32364 2687.84 2
 2 -8 -16 35437.3 3249.39 4
 2 8 -15 33904.8 2762.81 4
 2 8 -15 37744.7 2641.61 5
 -2 8 15 31266.7 2491.79 2
 2 8 -14 7142 1427.62 4
 2 8 -14 9005.92 1368.56 5
 -2 8 14 8067.37 1350.43 2
 2 8 -13 56125.2 3035.39 5
 2 8 -13 54543.2 3201.12 4
 -2 8 13 55855.6 3001.52 2
 -2 8 12 8675.24 1318.27 2
 2 8 -12 10442 1422.95 5
 2 8 -12 9186.83 1406.64 4
 2 8 -11 62659.9 1493.25 2
 2 8 -11 71516.8 3182.21 5
 2 8 -11 65807.2 3204.29 4
 2 8 -11 63273.9 1411.8 6
 -2 8 11 70679.5 3148.11 2
 2 8 -10 5348.4 1090.39 5
 -2 8 10 5198.13 1008.94 2
 2 8 -10 4788.02 486.442 2
 -2 8 10 4161.24 285.201 5
 2 8 -10 5327.06 495.915 6
 2 8 -10 4713.09 1064.29 4
 -2 8 9 106924 3738.22 2
 2 8 -9 105063 3176.35 1
 2 8 -9 103902 3626.55 5
 2 8 -9 102186 2108.25 6
 2 8 -9 107334 3774.17 4
 2 8 -8 21454.1 1405.07 1
 2 8 -8 22087.3 1062.71 6
 2 8 -8 24561.3 1777.9 5
 2 8 -8 21359.6 1710.92 4
 -2 8 8 22828.6 1732.29 2
 2 8 -7 41822 2269.57 4
 -2 8 7 43390 2340.4 2
 2 8 -7 43302.4 2228.72 5
 2 8 -7 45510 1922.22 1
 2 8 -6 27127.8 1719.25 5
 -2 8 6 26370.1 883.875 5
 2 8 -6 28719.9 1361.74 6
 -2 8 6 26853.2 1802.61 2
 2 8 -6 27754.9 1464.03 1
 2 8 -6 28298.2 1752.81 4
 -2 -8 6 25792.1 1100.3 6
 2 8 -5 126763 2958.35 6
 2 8 -5 129615 2984.43 1
 -2 -8 5 128707 2636.71 6
 2 8 -5 130809 3565.47 5
 -2 8 5 134292 3787.53 2
 -2 8 5 131610 2120.58 5
 2 8 -5 137193 3725.31 4
 2 8 -4 93936.6 2913.06 5
 2 8 -4 97211.8 2745.71 6
 -2 8 4 98770.6 3146.09 2
 -2 -8 4 97483.3 2480.49 6
 2 8 -4 102235 3220.77 4
 -2 8 4 99410.3 1991.16 5
 -2 8 3 8779.5 681.52 5
 2 8 -3 9843.97 1018.94 4
 2 8 -3 8415.36 927.985 6
 -2 8 3 8642.28 971.757 2
 -2 8 2 -84.6144 474.211 2
 2 8 -2 15.276 468.712 4
 2 8 -2 52.2032 404.231 6
 -2 8 2 44.8201 273.168 5
 2 8 -1 19517.9 1413.27 6
 -2 8 1 19491.6 1336.94 2
 2 8 -1 19422.6 1300.59 4
 -2 8 1 20453.8 1109.13 5
 -2 8 0 101512 2597.53 5
 2 -8 0 101817 1961.02 3
 -2 8 0 101981 2812.65 2
 2 8 0 104281 3323.48 6
 -2 8 -1 160472 3377.56 2
 2 -8 1 170796 2907.59 3
 -2 8 -1 175898 3805.75 4
 -2 8 -1 171738 3537.55 5
 2 8 1 170328 4353.82 6
 2 8 1 169247 2671.79 3
 -2 8 -2 102240 2836.94 5
 -2 8 -2 100947 2553.01 2
 2 -8 2 102304 2533.93 3
 2 -8 2 100786 2806.57 6
 2 8 2 100896 2383.91 3
 2 8 2 100646 3480.34 6
 -2 8 -2 99316.1 2887.53 4
 2 8 3 32494.4 2049.86 6
 -2 8 -3 32254.1 1701.91 4
 -2 8 -3 34210 1430.19 2
 2 -8 3 33545.2 1656.75 3
 -2 8 -3 32608.2 1707.6 5
 2 8 3 29480.4 1476.53 3
 2 -8 3 30244.9 1451.9 6
 2 8 4 58640.5 2257.09 3
 -2 8 -4 56009.7 2335.21 4
 2 -8 4 55728.7 1797.04 6
 2 8 4 59576.2 2836.24 6
 -2 8 -4 58402.4 2349.48 1
 2 -8 4 58676 2428.22 3
 -2 -8 -4 59033.4 2553.95 3
 -2 8 -4 56341.4 2321.75 5
 -2 8 -4 57356.4 1719.27 2
 -2 8 -5 81435.1 2770.53 1
 -2 8 -5 89730.9 2986.87 4
 -2 8 -5 83312.6 1904.55 2
 2 -8 5 79043 3046.69 3
 -2 8 -5 81956.2 2900.25 5
 2 8 5 78365.1 3326.1 6
 2 8 5 79801.2 2890.5 3
 2 -8 5 80292.9 1829.83 6
 2 -8 6 63256.4 1197.78 6
 2 8 6 63707.5 2756.57 3
 -2 8 -6 63682.9 2671.33 5
 -2 8 -6 62448 2587.65 4
 2 -8 6 61148.7 2898.95 3
 2 8 6 64486.2 3094.58 6
 -2 8 -6 67562.1 2593 1
 -2 8 -6 62374.3 1455.34 2
 -2 8 -7 80744.8 2925.69 1
 2 8 7 82332.5 3400.36 3
 -2 8 -7 90838.1 3177.14 4
 -2 8 -7 78457.8 1428.32 2
 2 8 7 80721.1 3549.94 6
 -2 8 -7 82514.7 3127.14 5
 2 -8 7 88016.8 3686.1 3
 -2 8 -8 91469.8 3287.86 4
 2 8 8 87379.9 3696.12 6
 -2 8 -8 87354.2 3329.15 5
 -2 8 -8 88750.4 3151.46 1
 -2 8 -9 58594.7 2762.6 4
 -2 8 -9 60150.7 2863.91 5
 2 8 9 57362 3062.76 6
 -2 8 -9 63989.7 2735.4 1
 2 8 9 59415 2909.71 2
 -2 8 -10 4622.22 1012.34 4
 2 8 10 5282.76 1117.75 2
 -2 8 -10 5457.52 1029.51 1
 -2 8 -11 7438.84 1273.13 4
 2 8 11 6219.52 1173.08 2
 -2 8 -12 4572.75 1171.94 4
 2 8 12 4692.05 1068.12 2
 -2 8 -13 86345.9 3940.68 4
 2 8 13 78664.8 3545.54 2
 2 8 14 -553.731 783.058 2
 -2 8 -14 878.666 978.302 4
 -2 -8 -15 94612.5 4961.19 4
 2 8 15 90678.9 3895.22 2
 -2 8 -15 94476.5 4444.17 4
 2 8 16 25165.8 2170.45 2
 -2 -8 -16 22750.6 2629.6 4
 -2 8 -16 24708 2500.03 4
 -2 -8 -17 58280.9 4214.7 4
 2 8 17 49960 3034.3 2
 -2 8 -17 60282.7 3908.72 4
 -2 -8 -18 3408.03 1663.17 4
 -2 8 -18 3866.4 1413.87 4
 -2 -8 -19 11110.6 2339.49 4
 -2 8 -19 13857.7 2388.42 4
 -2 -8 -20 11788.5 2437.54 4
 -2 8 -20 11224.3 2365.06 4
 -2 -8 -21 24170 3313.81 4
 -2 8 -21 25073.9 2943.73 4
 2 -10 -21 7461.96 2432.36 4
 2 10 -21 11109.2 2339.15 4
 2 -10 -20 2363.49 1757 4
 2 10 -20 1444.83 1335.77 4
 2 -10 -19 7201.12 2038.38 4
 2 10 -19 7990.32 1921.19 4
 -2 10 19 4241.86 1284.25 2
 -2 10 18 2156.97 1003.68 2
 2 10 -18 3335.88 1473.02 4
 2 -10 -17 -2040.24 1832.77 4
 -2 10 17 1605.31 1120.52 2
 2 10 -17 2320.06 1583.02 4
 -2 10 16 78436.8 3958.58 2
 2 10 -16 79868.5 4077.92 5
 2 10 -16 80170.6 4409.6 4
 2 10 -15 73770 3829.1 5
 2 10 -15 72275.9 4080.09 4
 -2 10 15 72879.3 3724.54 2
 -2 10 14 1869.89 1001.92 2
 2 10 -14 2410.42 1042.48 5
 2 10 -14 278.583 971.362 4
 -2 10 13 92473.3 4080.07 2
 2 10 -13 93870.8 4269.32 4
 2 10 -13 91366.3 4012.98 5
 -2 10 12 55483.1 3167.73 2
 2 10 -12 56381.9 3231.72 4
 2 10 -12 62030.6 3249.78 5
 2 10 -11 -429.961 637.927 1
 2 10 -11 968.357 819.593 5
 2 10 -11 372.959 199.752 6
 2 10 -11 -49.7646 852.331 4
 -2 10 11 677.297 870.861 2
 2 10 -10 756.88 796.015 4
 2 10 -10 776.127 341.324 2
 2 10 -10 716.9 309.665 6
 2 10 -10 231.531 849.634 5
 -2 10 10 -155.473 813.92 2
 2 10 -10 344.212 563.468 1
 2 10 -9 230024 5810.66 4
 2 10 -9 217187 4743.24 1
 2 10 -9 213543 3614.77 6
 2 10 -9 221056 5608.97 5
 -2 10 9 222089 5646.11 2
 2 10 -8 -299.412 800.882 4
 2 10 -8 88.7382 548.28 1
 2 10 -8 481.744 657.684 5
 -2 10 8 249.961 231.967 5
 -2 10 8 -9.496 676.418 2
 2 10 -8 -479.873 453.455 6
 2 10 -7 218716 5342.92 5
 -2 10 7 209863 2861.58 5
 -2 10 7 217215 5462.28 2
 2 10 -7 217385 5423.76 4
 2 10 -7 209320 4084.53 6
 -2 -10 7 205053 3336.65 6
 2 10 -7 204458 4379.38 1
 -2 10 6 125952 4037.38 2
 2 10 -6 125263 3289.1 6
 2 10 -6 128864 3969.36 5
 -2 10 6 122379 2375.69 5
 2 10 -6 119627 3281.09 1
 2 -10 -5 36557.7 1856.28 3
 2 10 -5 38782.2 1931.74 6
 2 10 -5 36780.7 2119.73 5
 2 10 -5 39333 2269.01 4
 -2 10 5 41285.4 2326.64 2
 -2 10 5 38578.1 1418.7 5
 2 10 -4 210.35 503.239 6
 2 -10 -4 1141.38 369.888 3
 2 10 -4 1926.27 546.179 3
 -2 10 4 2214.67 467.158 5
 2 10 -4 2720.45 764.363 4
 2 10 -4 3228.22 783.825 5
 -2 10 4 1196.31 758.861 2
 2 10 -3 71693.7 2868.1 4
 -2 10 3 69535.3 2110.93 5
 2 10 -3 72934.7 2843.21 6
 -2 10 3 73928.5 2914.93 2
 2 -10 -3 66407 1826.29 3
 2 10 -2 10061.8 1153.21 4
 2 10 -2 10432.9 1253.88 6
 -2 10 2 8002.05 801.747 5
 -2 10 1 77541.4 2833.95 2
 -2 10 1 76440.8 2444.01 5
 2 10 -1 76707 3102.73 6
 -2 10 0 457936 6103.79 5
 2 10 0 456904 7646.36 6
 -2 10 0 458071 6598.52 2
 -2 10 -1 12669.5 1128.15 5
 2 -10 1 10366.5 653.661 3
 -2 10 -1 12774.5 1157.56 2
 2 10 1 10587.3 1283.68 6
 2 10 1 10126.8 594.901 3
 -2 10 -2 5685.54 787.38 2
 2 -10 2 4830.62 570.299 3
 2 10 2 4687.89 1019.16 6
 -2 10 -2 6205.48 880.797 5
 2 10 2 5541.64 527.802 3
 -2 10 -2 5768.18 964.04 4
 -2 10 -3 33553.3 1964.37 4
 2 10 3 33804.7 1441.08 3
 2 -10 3 34854.2 1633.97 3
 2 10 3 35685.2 2428.6 6
 -2 10 -3 31747.6 1874.9 5
 -2 10 -3 31504.6 1593.64 2
 -2 10 -4 66292.7 2738.73 5
 2 10 4 65215.2 3224.48 6
 2 -10 4 65878.4 2327.71 6
 2 10 4 64389.8 2286.09 3
 2 -10 4 67161.9 2517.2 3
 -2 10 -4 66974.8 2168.08 2
 -2 10 -4 68289.3 2825.49 4
 2 10 5 829.852 471.397 3
 -2 10 -5 1185.96 445.294 2
 2 10 5 925.477 840.838 6
 2 -10 5 1598.05 439.29 6
 -2 10 -5 1098.58 597.901 1
 -2 10 -5 1732.79 771.3 4
 -2 10 -5 1225.1 786.302 5
 -2 10 -6 37277 2243.3 5
 -2 10 -6 38417.9 1487.68 2
 2 -10 6 39506.8 1370.83 6
 -2 10 -6 42888.5 2404.48 4
 2 10 6 37685.6 2558.48 6
 -2 10 -6 39301.4 2213.1 1
 -2 10 -7 67852.1 2845.22 1
 -2 10 -7 68701.8 1760.76 2
 2 -10 7 64066.5 1339.28 6
 -2 10 -7 65770 3035.99 5
 2 10 7 65080.1 3413.15 6
 -2 10 -7 72798.4 3141.89 4
 -2 10 -8 11446.1 680.17 2
 -2 10 -8 13514 1520.01 5
 -2 10 -8 13382.1 1491.97 4
 2 10 8 11622.5 1612.26 6
 2 10 8 10470.6 1412.69 2
 -2 10 -8 13204 1392.37 1
 2 10 9 137456 5050.22 6
 -2 10 -9 133721 4138.93 1
 -2 10 -9 130169 4457.2 5
 2 10 9 134145 4601.19 2
 -2 10 -9 133674 4459.44 4
 -2 10 -10 7977.67 1328.03 4
 -2 10 -10 6719.75 1270.24 5
 2 10 10 6864.36 1306.86 2
 -2 10 -10 8956.64 1241.12 1
 -2 10 -11 6025.75 1264.63 4
 2 10 11 3279.32 1015.05 2
 -2 10 -11 3682.31 989.906 1
 2 10 12 7353.74 1405.32 2
 -2 10 -12 4345.29 1082.42 4
 -2 10 -13 48042.5 3110.13 4
 2 10 13 49456.8 3021.04 2
 -2 10 -14 -436.576 1145.43 4
 2 10 14 197.993 1005.11 2
 -2 10 -15 90667.3 4511.73 4
 2 10 15 91376.8 4200.54 2
 -2 10 -16 38991.5 3198.3 4
 2 10 16 40563.4 2904.93 2
 2 10 17 173.215 931.626 2
 -2 10 -17 3536.62 1280.63 4
 -2 -10 -17 2001.91 1583.64 4
 -2 -10 -18 1957.83 1593.05 4
 -2 10 -18 -749.718 1398.66 4
 -2 10 -19 -454.183 1400.04 4
 -2 -10 -19 3805.06 1928.79 4
 -2 -10 -20 -2039.08 1846.07 4
 -2 10 -20 -718.896 1626.31 4
 -2 -10 -21 21767 3269.84 4
 -2 10 -21 28441.3 3292.71 4
 2 -12 -20 22195.1 3158.88 4
 2 12 -20 30400.1 3445.67 4
 2 12 -19 -1414.55 1346.17 4
 2 -12 -19 -1061.16 1753.64 4
 -2 12 19 1739.28 1163.95 2
 -2 12 18 30224.3 2842.07 2
 2 12 -18 27769 2980.07 4
 2 12 -17 927.223 1329.26 4
 2 12 -17 1268.48 1209.06 5
 -2 12 17 1602.29 1242.73 2
 2 12 -16 41507 3149.82 5
 2 12 -16 34126.5 3071.72 4
 -2 12 16 39442.9 3059.77 2
 -2 12 15 378.672 940.983 2
 2 12 -15 163.253 916.252 5
 2 12 -15 -340.242 1075.82 4
 -2 12 14 -386.792 982.012 2
 2 12 -14 484.325 1010.64 4
 2 12 -14 967.894 1011.62 5
 2 12 -13 3261.93 1115.19 5
 -2 12 13 4488.81 1339.72 2
 2 12 -13 3525.91 1347.36 4
 2 12 -12 115050 4678.83 5
 2 12 -12 120480 4856.73 4
 2 12 -12 118055 4100.11 1
 -2 12 12 116722 4723.37 2
 -2 12 11 22068.6 2147.96 2
 2 12 -11 22413.2 2138.94 4
 2 12 -11 20298.9 1729.71 1
 2 12 -11 23677.8 2225.28 5
 2 12 -10 14742 1836.07 4
 2 12 -10 15227.5 1716.24 5
 2 12 -10 13782.9 1402.97 1
 2 12 -10 14244.4 949.325 6
 -2 12 10 14387.8 1779.07 2
 2 12 -9 21601.2 1661.96 1
 2 12 -9 21235.5 1292.3 6
 -2 12 9 24069.2 2263.85 2
 2 12 -9 22645.2 2043.19 5
 -2 12 9 21795.6 969.695 5
 2 12 -9 22862.4 2155.54 4
 2 12 -8 1950.77 600.114 6
 -2 12 8 2081.45 412.196 5
 2 12 -8 2011.93 685.952 1
 2 12 -8 2311.89 889.632 4
 2 12 -8 1213.15 725.438 5
 -2 12 8 2894.34 1060.74 2
 -2 12 7 105899 2461.43 5
 2 12 -7 109411 3317.35 6
 2 12 -7 106457 3456.26 1
 2 12 -7 112383 4086.43 5
 -2 12 7 110453 4294.5 2
 2 12 -7 113548 4365.54 4
 2 12 -6 54603.2 2835.24 5
 -2 12 6 54286.2 2966.47 2
 -2 12 6 52268.2 1828.2 5
 2 12 -6 57810 2539.87 6
 2 12 -6 56976.6 2988.78 4
 2 12 -6 52807.3 2428.6 1
 -2 12 5 14780.2 1631.38 2
 2 -12 -5 16675.4 1280.47 3
 -2 12 5 17195.5 1136.68 5
 2 12 -5 14714.2 1647.13 4
 2 12 -5 14354.1 1389.24 6
 2 12 -5 15450.2 1589.58 5
 2 12 -4 258199 5663.47 6
 -2 12 4 269691 6062.53 2
 2 12 -4 256347 6009.37 4
 -2 12 4 266178 4436.34 5
 2 12 -4 269417 4559.7 3
 2 -12 -4 255537 4185.76 3
 2 12 -4 265641 5793.64 5
 2 12 -3 51475.6 2548.44 5
 2 12 -3 55638.4 2745.55 4
 2 12 -3 54246.7 2729.62 6
 2 -12 -3 51522.6 1541.14 3
 -2 12 3 50730.9 2062.51 5
 -2 12 3 51662.8 2720.83 2
 2 12 -3 50206 1707.4 3
 2 12 -2 156362 4634.98 6
 -2 12 2 172353 3884.96 5
 2 12 -2 165460 4591.9 4
 -2 12 2 149723 4453.14 2
 2 12 -2 146618 2283.91 3
 2 12 -1 29586.5 2146.1 6
 -2 12 1 30158.3 2018.97 2
 -2 12 1 31559.4 1773.97 5
 2 12 0 95774.9 3846.94 6
 -2 12 0 97651.5 3136.97 5
 -2 12 0 96878.6 3387.24 2
 2 12 1 18151.8 1801.44 6
 -2 12 -1 19157.1 1555.67 2
 -2 12 -1 21905.7 1603.78 5
 -2 12 -2 81801.2 3098.94 5
 -2 12 -2 88578 3422.29 4
 -2 12 -2 83391.6 2918.02 2
 2 12 2 80357.4 3648.74 6
 -2 12 -3 773.49 664.263 4
 -2 12 -3 633.511 603.228 2
 2 12 3 -636.683 943.499 6
 -2 12 -3 543.993 639.142 5
 2 12 4 167688 5435.3 6
 -2 12 -4 176136 3966.58 2
 -2 12 -4 176326 4757.06 5
 -2 12 -4 173340 4869.34 4
 2 12 5 31188.1 2461.62 6
 -2 12 -5 28808.3 2056.92 5
 -2 12 -5 30594.2 2066.44 1
 -2 12 -5 29000.7 1582.13 2
 -2 12 -5 25478.8 2009.98 4
 2 -12 6 26265.9 1388.45 6
 -2 12 -6 25512.6 2022.01 5
 -2 12 -6 23479 1845.1 1
 -2 12 -6 26482.5 1441.15 2
 2 12 6 26613.2 2377.45 6
 -2 12 -6 26141.8 2056.65 4
 2 -12 7 17657.9 966.273 6
 -2 12 -7 14981.2 1547.6 1
 2 12 7 16663.6 2006.54 6
 -2 12 -7 17245.7 1788.81 4
 -2 12 -7 14702.9 1624.47 5
 -2 12 -7 17572.5 1140.34 2
 -2 12 -8 6714.58 1285.92 4
 -2 12 -8 7048.76 657.928 2
 -2 12 -8 8843.81 1352.91 1
 -2 12 -8 7569.46 1309.05 5
 2 12 8 10247.6 1569.16 6
 2 12 8 8934.61 1557.65 2
 2 12 9 15259.5 1879.9 2
 -2 12 -9 15355.3 1592.57 1
 -2 12 -9 16006.5 1861.51 5
 -2 12 -9 13733.5 1687.91 4
 -2 12 -9 13035.9 810.588 2
 -2 12 -10 30709.2 2199.97 1
 2 12 10 31975.5 2548.58 2
 -2 12 -10 29576.1 2434.87 5
 -2 12 -10 30937.2 2470.65 4
 -2 12 -11 -304.634 990.406 4
 -2 12 -11 -52.8737 836.373 1
 -2 12 -11 610.296 869.668 5
 2 12 11 662.728 1033.07 2
 2 12 12 20367.5 2182.43 2
 -2 12 -12 18876.3 1843.96 1
 -2 12 -12 21915.2 2248.14 4
 -2 12 -13 5986.45 1286.35 1
 2 12 13 6930.32 1522.41 2
 -2 12 -13 7452.68 1625.98 4
 2 12 14 23540 2324.18 2
 -2 12 -14 24477.2 2491.15 4
 2 12 15 17968.8 2143.83 2
 -2 12 -15 18896.6 2276.83 4
 -2 12 -16 21674.5 2489.86 4
 2 12 16 22311 2408.71 2
 2 12 17 -2144.18 1293.87 2
 -2 12 -17 -1068.42 1425 4
 -2 -12 -18 12589.7 2398.57 4
 -2 12 -18 13574.3 2135.57 4
 2 12 18 14483.3 1973.74 2
 -2 -12 -19 -4287.78 1968.38 4
 -2 12 -19 2458.97 1621.49 4
 -2 12 -20 8681.08 2190.38 4
 -2 -12 -20 11135.4 2662.41 4
 -2 14 20 32200.9 3267.2 2
 2 14 -19 4222.39 1667.96 4
 -2 14 19 5362.99 1847.8 2
 2 14 -18 53600 4183.98 4
 -2 14 18 54735.3 3865.03 2
 2 14 -17 4245.75 1553.43 4
 2 14 -17 3798.32 1532.65 5
 -2 14 17 4682.16 1649.81 2
 2 14 -16 19439.3 2558.55 4
 2 14 -16 20597.2 2516.55 5
 -2 14 16 15508.2 2223.5 2
 -2 14 15 16466.5 2333.26 2
 2 14 -15 21061.7 2566.24 4
 2 14 -15 19680.1 2402.68 5
 2 14 -14 4335.07 1352.84 5
 2 14 -14 5449.1 1602.19 4
 -2 14 14 4969.92 1308.13 2
 2 14 -13 112.742 1132.39 5
 2 14 -13 -156.112 780.486 1
 2 14 -13 1808.73 1350.09 4
 -2 14 13 1026.44 997.106 2
 -2 14 12 100190 4624.92 2
 2 14 -12 100191 4539.65 5
 2 14 -12 96640 3822.3 1
 2 14 -12 106808 4927.48 4
 -2 14 11 -801.517 1160.15 2
 2 14 -11 839.207 872.926 1
 2 14 -11 2401.55 1318.94 5
 2 14 -11 2084.25 1267.2 4
 2 14 -10 79078.9 3351.49 1
 2 14 -10 91041.4 4370.33 4
 2 14 -10 78765 3932.2 5
 -2 14 10 79580.9 4080.84 2
 -2 14 9 20310.4 2095.16 2
 2 14 -9 18155.7 1369.97 6
 2 14 -9 16239.3 1860.81 5
 2 14 -9 15683.5 1915.21 4
 2 14 -9 16640.3 1666.69 1
 -2 14 8 3834.68 612.66 5
 2 14 -8 3538.1 1044.83 5
 2 14 -8 4908.3 1266.77 4
 -2 14 8 3842.17 1299.84 2
 2 14 -8 4092.65 782.571 6
 2 14 -8 5077.08 1063 1
 2 14 -7 -144.167 569.017 6
 -2 14 7 653.112 431.615 5
 2 14 -7 845.189 1000.29 4
 2 14 -7 927.659 728.346 1
 2 14 -7 1790.18 1033.23 5
 -2 14 7 807.944 1023.39 2
 2 14 -6 53163.6 3116.92 4
 2 14 -6 46410.6 2466.89 6
 2 14 -6 46090.2 2484.97 1
 -2 14 6 44106.8 2959.65 2
 2 14 -6 47996.9 2865.68 5
 -2 14 6 45848.6 1906.24 5
 -2 14 5 21134.4 1904.34 2
 -2 14 5 22191.7 1416.95 5
 2 14 -5 21866.2 1827.21 6
 2 14 -5 20564.1 1949.4 5
 2 14 -5 18135.9 1840.58 4
 2 14 -5 18402 1440.63 3
 -2 14 4 326912 5483.23 5
 2 14 -4 345902 7100.22 5
 2 14 -4 308387 4859.42 3
 -2 14 4 321366 7199.46 2
 2 14 -4 335737 6891.26 6
 2 -14 -4 325112 4271.95 3
 2 14 -4 347676 7430.81 4
 2 14 -3 41622.4 1411.61 3
 2 14 -3 45883.6 2689.11 6
 2 14 -3 49657.5 2687.19 5
 -2 14 3 49854.7 2257.71 5
 2 14 -3 42427.4 2703.88 4
 -2 14 3 42203.1 2734.66 2
 -2 14 2 343637 7135.57 2
 2 14 -2 333576 7296.66 6
 -2 14 2 337667 5941.18 5
 2 14 -2 336399 6699.89 5
 -2 14 1 14950.3 1432.44 5
 2 14 -1 15377.1 1741.92 6
 -2 14 1 19786.4 1820.04 2
 2 14 0 796.281 888.674 6
 -2 14 0 157.334 682.832 5
 -2 14 0 1596.05 912.881 2
 -2 14 -1 1899.39 781.056 2
 -2 14 -1 965.562 734.457 5
 2 14 1 2300.1 981.335 6
 2 14 2 50519.2 3110.52 6
 -2 14 -2 46823.9 2501.05 2
 -2 14 -2 50869.9 2646.33 5
 -2 14 -3 1259.55 779.834 5
 -2 14 -3 3119.39 1060.44 4
 2 14 3 2864.28 1166.25 6
 -2 14 -3 835.582 671.167 2
 -2 14 -4 186222 5440.42 4
 2 14 4 195144 6151.01 6
 -2 14 -4 192333 5297.74 5
 -2 14 -5 13648.3 1248.99 2
 -2 14 -5 17105.7 1796.14 4
 -2 14 -5 15861.5 1703.26 5
 2 14 5 14709.9 2067.09 6
 2 14 6 2321.88 1085.72 6
 -2 14 -6 1773.34 850.984 1
 -2 14 -6 2414.14 1043.18 4
 -2 14 -6 2836.01 1062.79 5
 -2 14 -6 1511.48 553.876 2
 -2 14 -7 14567.7 1206.54 2
 -2 14 -7 14646.5 1635.15 1
 2 14 7 16139.2 1966.33 2
 2 14 7 15998.4 2103.45 6
 -2 14 -7 12384.5 1588.41 5
 -2 14 -7 16862.4 1950.06 4
 -2 14 -8 23011 2318.99 4
 -2 14 -8 21695 2120.62 5
 -2 14 -8 21689.3 1948.77 1
 2 14 8 21471.7 2269.91 2
 -2 14 -8 21841.4 1351.65 2
 -2 14 -9 2402.64 1031.91 4
 -2 14 -9 3902.34 1278.57 5
 -2 14 -9 1385 938.257 1
 2 14 9 4110.17 1386.34 2
 -2 14 -10 28626.2 2573.93 5
 2 14 10 23884.1 2372 2
 -2 14 -10 31857.4 2396.79 1
 -2 14 -10 31664.8 2717.02 4
 -2 14 -11 29608.8 2680.3 4
 -2 14 -11 22700.1 2117.49 1
 2 14 11 22608.5 2312.25 2
 -2 14 -11 22211.1 2273.16 5
 -2 14 -12 73747.3 3636.33 1
 -2 14 -12 78785.7 4222.89 5
 2 14 12 70039.7 4019.47 2
 -2 14 -12 81431 4298.68 4
 -2 14 -13 2182.33 1087.75 1
 -2 14 -13 1431.48 1180.81 4
 2 14 13 -161.026 1131.26 2
 -2 14 -14 7654.07 1523.66 1
 -2 14 -14 6451.45 1676.05 4
 2 14 14 7525.97 1652.68 2
 -2 14 -15 7263.89 1667.73 4
 2 14 15 4941.79 1471.39 2
 -2 14 -16 7722.06 1885.12 4
 2 14 16 3488.9 1452.75 2
 2 14 17 2373.16 1442.27 2
 -2 14 -17 303.888 1446.37 4
 -2 14 -18 27995.3 3130.2 4
 2 14 18 31930.2 3107.28 2
 2 14 19 1858.81 1490.05 2
 -2 -14 -19 -2636.38 2039.71 4
 -2 14 -19 2103.44 1768.64 4
 -2 16 20 11889.7 2429.79 2
 -2 16 19 5709.4 1860.01 2
 -2 16 18 14679.9 2367.75 2
 2 16 -18 16424.6 2744.73 4
 2 16 -17 4984.72 1643.02 4
 -2 16 17 2823.92 1353.13 2
 2 16 -17 6148.27 1742.97 5
 -2 16 16 12701.7 2307.26 2
 2 16 -16 11123.9 2081.35 5
 2 16 -16 16262.2 2578.86 4
 2 16 -15 19671.7 2778.44 4
 2 16 -15 19486.8 2444.07 5
 -2 16 15 14053.2 2191.88 2
 2 16 -14 13070.2 2259.07 4
 -2 16 14 10082.4 2050.29 2
 2 16 -14 15766.6 1895.97 1
 2 16 -14 11847.8 2043.39 5
 2 16 -13 15459 1813.94 1
 2 16 -13 16663.7 2259.53 5
 -2 16 13 16562 2235.95 2
 2 16 -13 19019.8 2525.28 4
 -2 16 12 21850.8 2437.35 2
 2 16 -12 27094.1 2865.79 4
 2 16 -12 24683.2 2144.36 1
 2 16 -12 27552.3 2682.12 5
 2 16 -11 385.948 1173.9 4
 -2 16 11 992.907 1111.99 2
 2 16 -11 2191.69 1179.33 5
 2 16 -11 3302.31 1085.99 1
 -2 16 10 15519.9 2053.98 2
 2 16 -10 14697.4 1645.78 1
 2 16 -10 14747 2128.08 4
 2 16 -10 15954.9 2072.04 5
 -2 16 9 13030.7 1862.07 2
 2 16 -9 13839.1 1973.18 5
 2 16 -9 10266.4 1469.74 1
 2 16 -9 12652 1963.31 4
 2 16 -8 27173.3 2631.28 4
 2 16 -8 27096.3 2143.92 1
 2 16 -8 27140.7 1886.48 6
 -2 16 8 28499.1 2538.56 2
 2 16 -8 27772.5 2434.13 5
 2 16 -7 18189 2061.63 5
 2 16 -7 19883.7 1892.18 1
 -2 16 7 19715.8 1400.53 5
 2 16 -7 16411.7 1521.9 6
 -2 16 7 14934 1874.62 2
 2 16 -7 17055.6 2033.28 4
 2 16 -6 8935.1 1602.32 4
 2 16 -6 6677.04 1119.53 6
 -2 16 6 6334.09 897.283 5
 2 16 -6 8664.84 1563.06 5
 -2 16 6 8162.18 1596.07 2
 2 16 -5 971.726 1104.82 4
 2 16 -5 -1217.03 842.966 6
 -2 16 5 995.892 1052.76 2
 2 16 -5 862.226 901.555 5
 -2 16 5 181.164 648.524 5
 -2 16 4 55187.5 3178.75 2
 2 16 -4 59696.6 3235.11 5
 -2 16 4 56437.7 2498.71 5
 2 16 -4 55338.6 3049.98 6
 2 16 -4 58897.8 3353.07 4
 2 16 -3 -1613.33 1030.58 5
 2 16 -3 -335.735 925.693 6
 -2 16 3 655.146 618.863 5
 -2 16 3 -800.116 1047.63 2
 2 16 -2 58809.7 3335.11 6
 2 16 -2 58097.2 3058.96 5
 -2 16 2 55756.5 3173.85 2
 -2 16 2 58082.6 2723.09 5
 2 16 -1 42158.1 2579.26 5
 -2 16 1 46599.7 2514.65 5
 2 16 -1 46706.4 2984.98 6
 -2 16 1 49973.5 2888.87 2
 -2 16 0 1536.97 830.035 5
 2 16 0 -480.611 917.1 6
 -2 16 0 1124.11 909.738 2
 -2 16 -1 3310.19 981.903 2
 2 16 1 5561.25 1340.38 6
 -2 16 -1 5895.46 1119.18 5
 -2 16 -2 4973.19 1062.57 2
 -2 16 -2 5840.27 1151.1 5
 2 16 3 4166.62 1362.28 6
 -2 16 -3 3631.3 986.446 2
 -2 16 -3 2974.66 1103.8 5
 -2 16 -4 25471.8 2351.04 4
 2 16 4 25167.9 2454.58 6
 -2 16 -4 27983.9 2035.23 2
 -2 16 -4 26037.1 2191.71 5
 -2 16 -5 81181 3884.99 5
 -2 16 -5 76442.3 3101.34 2
 2 16 5 84091.8 4244.22 2
 2 16 5 75780.8 4230.35 6
 -2 16 -5 73869.8 3789.58 4
 -2 16 -6 4415.6 934.779 2
 -2 16 -6 3598.98 1226.17 1
 2 16 6 4028.11 1303.05 2
 -2 16 -6 5558.95 1328.34 5
 -2 16 -6 6689.2 1377.75 4
 -2 16 -7 48910.8 3251.85 4
 2 16 7 43646.2 3162.6 2
 -2 16 -7 49544.8 3095.61 1
 -2 16 -7 45801.6 3084.45 5
 -2 16 -7 48495.4 2326.81 2
 -2 16 -8 1384.76 1080.21 5
 -2 16 -8 -645.361 869.698 1
 -2 16 -8 -869.274 1236.41 4
 -2 16 -9 38636.6 3009.25 4
 2 16 9 36946 3068.25 2
 -2 16 -9 41473 2879.62 1
 -2 16 -9 34034.1 2782.92 5
 -2 16 -10 6400.34 1345.65 1
 -2 16 -10 7241.26 1572.68 5
 2 16 10 6052.55 1547.43 2
 -2 16 -10 5628.65 1559.62 4
 -2 16 -11 1077.62 1186.62 5
 2 16 11 1270.46 987.26 2
 -2 16 -11 1423.79 1005.63 1
 -2 16 -12 32006 2931.82 5
 2 16 12 35076.4 3165.33 2
 -2 16 -12 29405 2540.97 1
 -2 16 -12 34158.9 3040.06 4
 -2 16 -13 32860.6 2676.05 1
 2 16 13 28979.9 2982.19 2
 -2 16 -13 32650.5 3138.96 4
 -2 16 -14 4865.3 1491.81 1
 -2 16 -14 3013.59 1497.3 4
 2 16 14 4296.35 1561.72 2
 -2 16 -15 26773.3 3039.06 4
 2 16 15 28653.6 2925.32 2
 -2 16 -16 6208.62 1846.87 4
 2 16 16 6902.45 1751.93 2
 2 16 17 837.243 1241.59 2
 -2 16 -17 133.993 1779.56 4
 2 16 18 6480.1 1839.1 2
 -2 16 -18 8571.07 2122.27 4
 2 16 19 942.367 1244.21 2
 -2 18 18 458.512 1472.65 2
 2 18 -17 -1596.89 1876.41 4
 -2 18 17 1904.92 1540.9 2
 2 18 -17 2265.65 1512.13 5
 -2 18 16 -1556.92 1561.84 2
 2 18 -16 1597.13 1754.25 4
 2 18 -16 1344.57 1321.04 5
 2 18 -15 37441.7 3427.19 5
 -2 18 15 31085.3 3331.07 2
 2 18 -15 29223.3 3194.58 4
 2 18 -14 129.674 925.394 1
 2 18 -14 2922.7 1341.3 5
 -2 18 14 1024.72 1411.11 2
 2 18 -14 863.02 1514.44 4
 2 18 -13 59009 4244.67 4
 -2 18 13 47661.9 3713.08 2
 2 18 -13 46781.5 3667.67 5
 2 18 -13 54929.7 3291.44 1
 -2 18 12 3086.61 1398.01 2
 2 18 -12 1774.94 1511.48 4
 2 18 -12 1768.46 1382.38 5
 2 18 -12 876.85 904.151 1
 2 18 -11 5413.8 1602.76 4
 2 18 -11 3761.9 1458.02 5
 -2 18 11 3786.93 1230.03 2
 2 18 -11 3790.04 1042.4 1
 2 18 -10 2795.22 1000.07 1
 2 18 -10 1974.07 1359.46 4
 2 18 -10 1575.26 1244.18 5
 -2 18 10 5147.39 1573.38 2
 2 18 -9 38474.3 3228.63 4
 -2 18 9 34097.9 3061.58 2
 2 18 -9 38695.7 2706.52 1
 2 18 -9 34406.1 2984.88 5
 -2 18 8 22895.8 2442.95 2
 2 18 -8 26172.3 2102.76 2
 2 18 -8 27000 2648.12 5
 2 18 -8 26751.6 2281.23 1
 2 18 -8 24344.2 2526.62 4
 2 18 -7 67487.8 4058.01 4
 2 18 -7 61612.1 3391.54 1
 -2 18 7 60354.1 3767.19 2
 2 18 -7 58928.9 3646.43 5
 2 18 -6 11590.9 1863.69 5
 2 18 -6 7719.31 1714.85 4
 -2 18 6 9371.85 1713.41 2
 -2 18 6 10220.1 1182.7 5
 2 18 -5 1690.6 1213.2 4
 -2 18 5 834.4 691.98 5
 2 18 -5 947.314 1113.03 5
 -2 18 5 2646.26 1406.04 2
 2 18 -5 2749.06 1007.81 6
 2 18 -4 1943.67 1143.42 5
 -2 18 4 1101.29 743.027 5
 2 18 -4 637.223 807.938 6
 -2 18 4 1783.07 1198.81 2
 2 18 -3 29738.8 2459.27 6
 -2 18 3 27921.1 2035.48 5
 -2 18 3 29053.8 2714.1 2
 2 18 -3 26244.6 2244.29 5
 -2 18 2 5293.72 1357.21 2
 2 18 -2 6568.94 1401.88 6
 2 18 -2 4709.87 1227.37 5
 -2 18 2 4907.67 1113.1 5
 -2 18 1 19051.1 1874.97 5
 2 18 -1 15240.1 1791.24 5
 2 18 -1 18188.7 2079.72 6
 -2 18 1 16807.1 1979.86 2
 -2 18 0 5757.27 1233 5
 2 18 0 5498.77 1242.07 5
 -2 18 0 5644.09 1395.72 2
 2 18 0 6039.7 1436.57 6
 -2 18 -1 63418.7 3564.32 2
 -2 18 -1 67009.3 3413.41 5
 2 18 1 72253.5 3369.98 5
 -2 18 -2 12016.2 1654.73 5
 -2 18 -2 11433 1602.42 2
 2 18 2 14911.2 1629.1 5
 2 18 2 15504.6 2043.58 6
 -2 18 -3 9307.52 1457.42 2
 2 18 3 9926.83 1834.48 6
 -2 18 -3 5518.4 1349.52 5
 2 18 3 6575.72 1531.33 2
 -2 18 -4 533.045 907.539 2
 -2 18 -4 292.825 932.249 5
 2 18 4 -370.575 1306.23 2
 -2 18 -5 42205.6 2475.79 2
 -2 18 -5 40431.3 3121.74 4
 -2 18 -5 42173.6 2944.24 5
 2 18 5 39638.9 3135.75 2
 2 18 6 6810.75 1704.94 2
 -2 18 -6 11143 1925.54 4
 -2 18 -6 8615.11 1639.92 5
 -2 18 -6 9399.3 1327.65 2
 -2 18 -6 10100.3 1698.81 1
 -2 18 -7 53160.4 2615.39 2
 -2 18 -7 54337.9 3461.75 1
 -2 18 -7 52797.3 3438.25 5
 -2 18 -7 57006.8 3724.41 4
 2 18 7 53905.1 3727.02 2
 -2 18 -8 12902.5 1916.57 5
 -2 18 -8 12338.4 1853.99 1
 2 18 8 15621.1 2210.07 2
 -2 18 -8 11363.3 2029.04 4
 -2 18 -9 51433.3 3417.8 1
 -2 18 -9 49289.9 3601.02 4
 2 18 9 49498.9 3710.93 2
 -2 18 -9 49167.3 3492.75 5
 -2 18 -10 8774.93 1612.66 1
 -2 18 -10 7373.53 1677.82 4
 2 18 10 11244 2028.51 2
 -2 18 -10 10675.9 1951.24 5
 -2 18 -11 2401.83 1366.33 4
 -2 18 -11 3236.78 1468.72 5
 2 18 11 5374.74 1645.36 2
 -2 18 -11 2427.39 1156.44 1
 -2 18 -12 12425.1 2164.92 5
 -2 18 -12 11556.1 1859.7 1
 -2 18 -12 8187.02 1991.9 4
 2 18 12 10371.4 2168.61 2
 -2 18 -13 42276.1 3686.37 4
 2 18 13 41207.2 3631.81 2
 -2 18 -13 42483.5 3118.68 1
 2 18 14 7152.54 1845.95 2
 -2 18 -14 6767.48 1636.79 1
 -2 18 -14 5759.59 1780.37 4
 -2 18 -15 12649.1 2330.71 4
 -2 18 -15 18243.1 2317.64 1
 2 18 15 19253.6 2875.17 2
 2 18 16 15450.6 2528.27 2
 -2 18 -16 12309.5 2336.2 4
 -2 18 -17 12856.1 2374.73 4
 2 18 17 14946.8 2671.4 2
 -2 20 15 19305 2806.09 2
 2 20 -15 18944.9 2868.66 5
 2 20 -15 21369.3 2909.13 4
 2 20 -14 4506.42 2058.33 4
 -2 20 14 4195.61 1691.52 2
 2 20 -14 5932.41 2148.27 5
 2 20 -13 4744.64 1807.59 4
 2 20 -13 7791.53 1803.43 5
 -2 20 13 9450.74 2124.98 2
 -2 20 12 8513.4 2103.15 2
 2 20 -12 7348.68 1979.56 5
 2 20 -12 8372.19 2035.34 4
 2 20 -12 8324.47 1592.8 1
 -2 20 11 14108 2388.93 2
 2 20 -11 9638.64 1633.89 1
 2 20 -11 13703.1 2552.35 4
 2 20 -11 13624 2323.46 5
 2 20 -10 1877.42 1330.18 4
 -2 20 10 4179.06 1615.05 2
 2 20 -10 4673.32 1614.8 5
 2 20 -10 680.941 900.347 1
 2 20 -9 25326.6 2982.13 4
 -2 20 9 20772.7 2707.78 2
 2 20 -9 22362.7 2514.64 5
 2 20 -9 25886.3 2475.37 1
 2 20 -8 10260.6 1808.44 1
 2 20 -8 8118.35 1821.37 5
 -2 20 8 11160.7 2172.27 2
 2 20 -8 6140.78 1797.86 4
 2 20 -7 64947.1 3996.23 5
 2 20 -7 73866.8 4508.34 4
 2 20 -7 68160.7 3567.29 2
 2 20 -7 72767 3913.98 1
 -2 20 7 63427.1 4125.44 2
 2 20 -6 329.902 939.161 2
 2 20 -6 -411.385 1264.6 4
 2 20 -6 -868.073 1039.34 5
 -2 20 6 -264.302 1096.15 2
 2 20 -5 35771.8 2977.05 5
 2 20 -5 32276.1 2629.5 2
 -2 20 5 38580.4 3122.96 2
 -2 20 5 30418.1 2141.38 5
 2 20 -4 623.566 1149.44 2
 2 20 -4 1834.4 1063.12 5
 -2 20 4 2234.5 883.939 5
 -2 20 4 1174.81 1058.73 2
 -2 20 3 -229.33 1267.91 2
 -2 20 3 220.838 753.906 5
 2 20 -3 3051.04 1307.8 5
 2 20 -3 1439.7 1019.79 2
 2 20 -2 14813.9 1904.09 5
 -2 20 2 16863.4 2113.38 2
 -2 20 2 15118.9 1686.53 5
 2 20 -2 12536.8 1841.26 2
 -2 20 1 20465.2 2270.11 2
 2 20 -1 19683.5 2089.36 5
 2 20 -1 18113.9 2204.32 2
 -2 20 1 21755.9 2044.67 5
 2 20 0 16979 1977.7 5
 2 20 0 14252.2 2103 2
 -2 20 0 16972.5 2025.5 2
 -2 20 0 15401.5 1849.7 5
 -2 20 -1 32258.9 2577.43 5
 2 20 1 28000.6 2822.69 2
 2 20 1 33077 2545.25 5
 -2 20 -1 34518.2 2748.65 2
 2 20 2 22275.7 2110.92 5
 -2 20 -2 20359.1 2163.2 5
 -2 20 -2 18702.4 2261.83 2
 2 20 2 21222.2 2508.1 2
 2 20 3 5127.4 1502.31 2
 -2 20 -3 5538.27 1368.75 2
 -2 20 -3 5664.82 1429.23 5
 2 20 3 2588.44 859.86 5
 -2 20 -4 11902.6 1923.39 5
 2 20 4 10876.5 1454.71 5
 2 20 4 7763 1875.13 2
 -2 20 -4 10237 1573.57 2
 -2 20 -5 4324.83 1147.85 2
 2 20 5 2637.38 990.84 5
 2 20 5 4750.16 1416.35 2
 -2 20 -5 3109.94 1368.1 5
 -2 20 -6 6624.83 1661.98 5
 -2 20 -6 7628.28 1321.11 2
 -2 20 -6 8515.17 1684.4 1
 2 20 6 5818.09 1762.57 2
 -2 20 -7 38034.1 3201.82 1
 -2 20 -7 35507.9 3037.26 5
 -2 20 -7 43404.9 3502.48 4
 2 20 7 37475.4 3186.88 2
 -2 20 -8 5643.44 1467.43 1
 -2 20 -8 2963.32 1332.81 5
 -2 20 -8 6388.63 1783.13 4
 2 20 8 2669.39 1465.73 2
 2 20 9 32145.7 3194.47 2
 -2 20 -9 37075.9 3414.85 4
 -2 20 -9 37079.2 3260.88 5
 -2 20 -9 33807.5 2960.19 1
 -2 20 -10 -432.477 1258.22 5
 -2 20 -10 -925.345 1205.02 1
 -2 20 -10 1459.53 1529.42 4
 2 20 10 -2513.9 1510.78 2
 -2 20 -11 326.545 1486.5 4
 -2 20 -11 2127.04 1459.15 5
 -2 20 -11 2186.54 1205.44 1
 2 20 11 1692.83 1376.16 2
 -2 20 -12 -2751.5 1693.38 4
 -2 20 -12 1397.86 1501.31 5
 2 20 12 -369.382 1224.47 2
 -2 20 -12 -1336.25 1327.14 1
 -2 20 -13 28590.3 3284.69 4
 2 20 13 24010.3 3079.67 2
 -2 20 -13 31423.3 2925.27 1
 -2 20 -14 -2039.03 1539.68 1
 2 20 14 668.747 1234.57 2
 -2 20 -14 540.75 1595.34 4
 -2 20 -15 4964.86 1974.7 4
 2 20 15 6549.04 2031.71 2
 -2 20 -15 2931.37 1370.66 1
 2 22 -13 793.606 1597.85 5
 2 22 -13 400.075 1609.95 4
 -2 22 13 1187.7 1593.07 2
 -2 22 12 4365.36 1959.61 2
 2 22 -12 4065.64 1814.21 5
 2 22 -12 2400.93 1602.22 4
 2 22 -11 32978 3533.48 4
 2 22 -11 30895.6 3337.32 5
 2 22 -10 4524.16 1979.82 4
 2 22 -10 4635.33 1728.39 5
 -2 22 10 3520.98 1610.75 2
 2 22 -10 4413.56 1387.34 1
 2 22 -9 3149.91 1734.03 5
 -2 22 9 -655.602 1506.9 2
 2 22 -9 1187.22 1593.51 4
 2 22 -9 -665.183 1211.65 1
 2 22 -8 4510.25 1587.58 5
 2 22 -8 3067.77 1293.72 1
 -2 22 8 5315.28 1961.19 2
 2 22 -8 3621.97 1570.34 4
 2 22 -7 5646.94 1837.09 5
 2 22 -7 6451.65 1504.42 1
 -2 22 7 4221.22 1567.01 2
 2 22 -6 2264.51 1355.11 5
 2 22 -6 1894.44 1081.7 2
 -2 22 6 2166 1584.45 2
 2 22 -5 32491.7 3035.81 5
 -2 22 5 30040.3 2999.19 2
 2 22 -5 35654.1 2976.17 2
 -2 22 4 20868.2 2624.51 2
 2 22 -4 17767.6 2309.09 5
 2 22 -4 18078.6 2313.07 2
 2 22 -3 2187.46 1316.26 2
 -2 22 3 330.155 842.26 5
 -2 22 3 -617.64 1372.95 2
 2 22 -3 718.396 1146.14 5
 -2 22 2 15672.6 2233.53 2
 -2 22 2 14583.4 1788.45 5
 2 22 -2 16906.1 2195.16 5
 2 22 -2 16536 2242.55 2
 -2 22 1 26859.2 2794.36 2
 2 22 -1 26818.9 2782.47 2
 -2 22 1 26216.2 2320.56 5
 2 22 -1 23620.2 2461.51 5
 -2 22 0 691.252 1148.41 2
 2 22 0 -143.486 1081.95 5
 2 22 0 -332.091 1220.22 2
 -2 22 0 95.6733 986.732 5
 2 22 1 10170.6 1635.77 5
 -2 22 -1 8176.94 1659.9 5
 -2 22 -1 7165.78 1642.73 2
 2 22 1 6399.08 1721.8 2
 2 22 2 11646.8 2001.04 2
 2 22 2 12914.3 1751.58 5
 -2 22 -2 11843.9 1780.36 5
 -2 22 -2 10814.4 1787.53 2
 -2 22 -3 1214.46 1046.86 2
 -2 22 -3 -120.449 1114.03 5
 2 22 3 -1201.4 1146.23 5
 2 22 3 -453.481 1584.81 2
 2 22 4 16355.6 1863.58 5
 2 22 4 16091.3 2341.22 2
 -2 22 -4 16415 2137.23 5
 -2 22 -4 15013.7 1883.75 2
 2 22 5 41364.7 3593.02 2
 -2 22 -5 50633.1 3230.75 2
 -2 22 -5 46692 3465.48 5
 -2 22 -6 -693.348 1328.41 1
 -2 22 -6 -1873.47 1389.56 5
 2 22 6 851.442 1460.16 2
 -2 22 -7 8422.02 1594.68 1
 -2 22 -7 3788.09 1460.09 5
 2 22 7 6761.49 1961.44 2
 -2 22 -8 7185.26 2037.58 4
 -2 22 -8 6322.28 1748.65 5
 -2 22 -8 5939.34 1788.56 1
 2 22 8 3939.9 1705.98 2
 -2 22 -9 648.422 1477.79 5
 -2 22 -9 -1162.1 1135.9 1
 -2 22 -9 -1374.61 1647.44 4
 2 22 9 1396.52 1482.34 2
 -2 22 -10 18401.7 2862.73 4
 -2 22 -10 15744 2540.54 5
 -2 22 -10 17927.1 2505.25 1
 2 22 10 17028.5 2705.85 2
 2 22 11 35694.9 3649.83 2
 -2 22 -11 33551.1 3387.22 5
 -2 22 -11 35576.5 3249.29 1
 -2 22 -11 31958.1 3429.75 4
 2 22 12 3376.98 1874.09 2
 -2 22 -12 1757.99 1598.85 5
 -2 22 -12 794.515 1243.42 1
 -2 22 -12 5302.3 2148.21 4
 -2 22 -13 -974.43 1385.66 1
 -2 22 -13 2638.96 1500.47 4
 -2 22 -14 4128.79 1671.99 1
 -2 22 -15 2624.82 1543.26 1
 -2 24 10 14524.2 2726.75 2
 2 24 -10 14709.6 2751.85 4
 2 24 -10 12463.2 2488.31 5
 2 24 -9 15717.6 2473.61 5
 -2 24 9 15645.7 2721.49 2
 2 24 -8 963.473 1480.34 5
 2 24 -8 -1440.41 1379.8 1
 -2 24 8 393.565 1312.15 2
 2 24 -7 1569.38 1345.95 1
 2 24 -7 3932.3 1679.1 5
 -2 24 7 3309.77 1896.48 2
 -2 24 6 4384.23 1578.49 2
 2 24 -6 4375.98 1568.44 5
 2 24 -6 4862.93 1365.12 1
 2 24 -5 31816.1 3077.71 5
 -2 24 5 38443.5 3606.78 2
 2 24 -5 30766.8 2870.34 2
 2 24 -4 38058.8 3156.51 2
 2 24 -4 30987.1 3119.21 5
 -2 24 4 32574.5 3267.15 2
 2 24 -3 7818.75 1736.99 2
 2 24 -3 5716.86 1627.13 5
 -2 24 3 3768.5 1466.41 2
 -2 24 2 5951.02 1706.15 2
 2 24 -2 6110.87 1660.45 5
 2 24 -2 4517.78 1364.26 2
 -2 24 2 5202.69 1426.27 5
 2 24 -1 5925.36 1670.91 5
 -2 24 1 2737.21 1284.63 2
 -2 24 1 5900.01 1507.27 5
 2 24 -1 6336.69 1829.85 2
 -2 24 0 10172.2 1958.2 2
 2 24 0 10675.2 1979.15 5
 -2 24 0 9419.98 1700.97 5
 2 24 0 10553.6 1996.3 2
 -2 24 -1 1916.01 1000.65 5
 -2 24 -1 576.975 1206.96 2
 2 24 1 197.619 1136.84 5
 2 24 1 -1255.23 1445.03 2
 -2 24 -2 2920.43 1342.14 2
 2 24 2 2615.42 1303.72 5
 -2 24 -2 818.48 1153.91 5
 2 24 2 2253.82 1800.56 2
 2 24 3 43.8506 969.572 5
 -2 24 -3 -975.312 1174.13 2
 2 24 3 461.944 1198.37 2
 -2 24 -3 2024.79 1449.52 5
 2 24 4 15861.9 2594.07 2
 -2 24 -4 12108.3 2025.14 5
 -2 24 -5 16866.6 2188.81 5
 2 24 5 18696.9 2691.43 2
 -2 24 -6 7363.76 1814.99 1
 -2 24 -6 6646.43 1883.25 5
 2 24 6 6129.07 1735.67 2
 2 24 7 4159.18 1839.44 2
 -2 24 -7 5209.25 1712.9 5
 -2 24 -7 7582.7 1948.85 1
 -2 24 -8 -212.926 1575.17 5
 2 24 8 -1289.25 1630.72 2
 -2 24 -8 -2401 1603.55 1
 -2 24 -9 6332.68 2031.55 5
 2 24 9 6285.2 2325.71 2
 -2 24 -9 4991.7 1653.73 1
 -2 24 -10 23148.4 3116.94 4
 -2 24 -10 26625.2 3028.53 1
 -2 24 -11 11256.7 2300.75 1
 -2 24 -12 20452.8 2851.32 1
 -2 24 -13 1003.6 1578.43 1
 -2 26 6 20887.6 2893.2 2
 2 26 -6 23389.3 2939.02 5
 2 26 -5 3255.43 1589.07 5
 -2 26 5 5731.55 1918.26 2
 -2 26 4 8896.46 2164.36 2
 2 26 -4 6763 1720.67 2
 2 26 -4 9352.46 2124.96 5
 -2 26 3 2832.06 1577.5 2
 2 26 -3 3515.44 1608.37 2
 2 26 -3 -532.521 1476.11 5
 -2 26 2 42.0803 1359.82 2
 2 26 -2 427.293 1140.83 5
 2 26 -2 -537.057 1352.69 2
 2 26 -1 3575.98 1624.86 2
 2 26 -1 2140.06 1244.88 5
 -2 26 1 2792.63 1488.62 2
 -2 26 0 34014.6 3033.36 5
 2 26 0 34000.6 3499.23 2
 2 26 0 37856.1 3367.35 5
 -2 26 0 34434.4 3390.31 2
 2 26 1 1037.69 1351.3 5
 -2 26 -1 2396.08 1373.95 5
 2 26 1 846.514 1524.66 2
 -2 26 -1 240.943 1341.17 2
 2 26 2 1027.38 1368.99 2
 -2 26 -2 562.186 1342.78 5
 -2 26 -2 134.902 1337.93 2
 -2 26 -3 1943.69 1342.08 5
 2 26 3 925.569 1608.71 2
 -2 26 -4 -290.355 1230.66 5
 2 26 4 -170.259 1448.6 2
 -2 26 -5 -1067.91 1728.42 1
 -2 26 -5 788.511 1413.88 5
 2 26 5 -557.367 1891.15 2
 -2 26 -6 22853.9 2970.15 1
 -2 26 -6 20097.1 2811.52 5
 -2 26 -7 9749.33 2178.9 1
 -2 26 -8 2472.71 1440.88 1
 -2 26 -9 3836.67 1754.78 1
 -2 28 2 5489.12 1907.12 2
 2 28 -2 6169.32 1970.04 5
 2 28 -2 2474.89 1621.3 2
 2 28 -1 -677.101 1296.66 5
 -2 28 1 367.462 1514.16 2
 2 28 -1 15.8248 1902.63 2
 -2 28 0 24445 3204.61 2
 2 28 0 25469.4 3257.48 2
 2 28 0 18302.8 2538.69 5
 -2 28 -1 2638.19 1611.34 5
 2 28 1 -491.976 1724.01 2
 -2 28 -1 1696.9 1674.91 2
 -2 28 -2 4152.56 1898.03 5
 -2 28 -3 3529.97 1650.1 5
 3 1 -22 -1303.23 1630.64 4
 3 -1 -22 723.734 1675.35 4
 3 1 -21 20285 2688.27 4
 3 -1 -21 21162.4 2914.95 4
 3 -1 -20 834.847 1282.48 4
 3 1 -20 2707.55 1602.27 4
 3 -1 -19 23787.5 2839.31 4
 3 1 -19 27377 2871.29 4
 3 -1 -18 771.571 1181.13 4
 3 1 -18 1993.25 1280.25 4
 3 -1 -17 56586 3779.64 4
 3 1 -17 53628.3 3590.66 4
 3 -1 -16 1314.35 1197.04 4
 -3 1 16 2804.47 874.308 2
 3 1 -16 3657.55 1336.74 4
 3 -1 -15 75681.9 3966.62 4
 -3 1 15 77445.5 2982.43 2
 -3 -1 15 83997.9 2825.14 2
 3 1 -15 74459.3 3787.86 4
 3 1 -14 10880.5 1539.66 4
 3 -1 -14 15115.4 1858.29 4
 -3 1 14 14126.7 1344.15 2
 -3 -1 14 11151.1 1063.63 2
 -3 -1 13 45176.1 1977.35 2
 3 1 -13 43422.5 2762.64 4
 3 -1 -13 47007 2908.38 4
 -3 1 13 42374.2 2096.78 2
 -3 -1 12 55644 2108.09 2
 -3 1 12 56756.7 2314.4 2
 3 1 -12 58514.7 2969.1 4
 3 -1 -12 55693.3 3053.06 4
 3 1 -11 -587.177 508.252 5
 -3 1 11 434.835 444.555 2
 3 1 -11 1597.89 853.144 4
 3 -1 -11 61.4628 778.872 4
 -3 -1 11 -304.463 476.226 2
 3 1 -10 13262.1 1011.09 5
 -3 -1 10 14190.1 1038.92 2
 3 -1 -10 15287.3 1464.05 4
 3 1 -10 14020.6 1417.05 4
 -3 1 10 14909.8 1140.78 2
 -3 1 9 168692 3521.85 2
 -3 -1 9 165566 3230.71 2
 3 -1 -9 175724 4522.32 4
 3 1 -9 170881 3231.88 5
 3 1 -9 176075 4317.43 4
 3 1 -8 18312.8 1035.92 5
 -3 -1 8 18127.4 1032.49 2
 3 -1 -8 17615.9 1429.25 4
 3 -1 -8 16023.4 801.686 5
 3 1 -8 14531.4 986.898 2
 3 1 -8 16776.2 1311.25 4
 -3 1 8 17030.3 1125.85 2
 -3 -1 7 163057 2922.95 2
 3 -1 -7 163758 3840.34 4
 -3 1 7 162027 3192.88 2
 3 -1 -7 161777 2272.77 5
 3 1 -7 167167 3670.07 4
 3 1 -7 166693 2873.14 2
 3 1 -6 7898.79 818.113 4
 3 1 -6 7957.25 632.853 2
 3 -1 -6 9863.11 797.01 2
 3 -1 -6 9198.37 898.761 4
 3 -1 -6 7798.31 461.06 5
 -3 -1 6 8834.33 678.04 2
 3 1 -6 8289.36 628.131 5
 -3 1 6 7601.6 702.392 2
 3 -1 -5 63450.3 1776.34 2
 3 -1 -5 59069.5 1994.78 4
 3 1 -5 65144.4 1641.42 2
 3 1 -5 63528.2 1894.48 4
 -3 1 5 63526.2 1792.43 2
 -3 -1 5 60014.9 1616.6 2
 3 1 -4 652.99 251.452 4
 -3 1 4 720.935 280.455 2
 -3 -1 4 1097.5 289.819 2
 -3 -1 4 1043.29 296.023 4
 3 1 -4 533.751 190.576 2
 3 -1 -4 1199.95 302.114 2
 3 -1 -4 1249.01 345.585 4
 3 1 -3 449871 3896.08 4
 3 -1 -3 462793 4308.02 2
 -3 1 3 460775 4338.55 2
 -3 -1 3 462838 4055.29 2
 -3 -1 3 470836 4006.89 4
 3 1 -3 452601 4028.2 2
 3 1 -2 14539.2 592.651 4
 -3 1 2 13098.9 750.885 2
 -3 -1 2 13740.8 704.15 2
 3 1 -1 541641 2958.83 4
 -3 1 1 559953 4283.74 2
 3 1 0 10722.8 617.838 6
 -3 1 0 11126.3 575.186 2
 3 1 1 444171 4003.85 6
 3 -1 1 448343 3424.72 6
 3 -1 1 438500 3853.11 1
 -3 1 -1 425929 3350.38 2
 3 1 2 81486.7 2601.01 3
 3 1 2 77333 1797.16 6
 3 -1 2 81965.8 2631.41 3
 -3 -1 -2 77842.8 1770.23 6
 3 -1 2 81134.7 1335.67 4
 -3 1 -2 80145.3 1772.46 1
 3 -1 2 79851.3 1479.19 6
 -3 1 -2 74993.2 1390.54 6
 -3 1 -2 80578.5 1290.24 4
 3 -1 2 78241.7 1799.42 1
 3 -1 2 76616.4 1405.9 2
 -3 1 -3 2105.19 264.133 6
 -3 1 -3 3165.2 682.683 3
 3 1 3 1908.82 370.843 6
 3 -1 3 1912.1 375.069 1
 3 -1 3 1999.81 579.686 3
 3 1 3 2689.53 677.473 3
 -3 1 -3 2846.64 334.651 4
 -3 1 -3 2092 369.404 1
 3 -1 3 2000.12 302.499 4
 3 -1 3 2559.17 335.589 6
 -3 -1 -3 2268.67 376.467 6
 -3 -1 -3 1796.26 564.031 3
 -3 1 -4 368187 3929.93 4
 3 1 4 362082 4629.36 6
 3 -1 4 366262 3653 6
 -3 1 -4 381305 3483.37 6
 -3 -1 -4 372411 4400.6 6
 3 1 4 370692 6551.23 3
 3 -1 4 375955 4222.07 4
 3 -1 4 384753 6639.74 3
 3 1 5 53885 1929.42 6
 -3 -1 -5 54958.6 1915.09 4
 -3 1 -5 53251.9 1695.28 4
 -3 -1 -5 56060.7 1825.21 6
 3 -1 5 47958.2 2576.65 3
 3 -1 5 54245.9 1552.16 6
 3 1 5 57540 2790.87 3
 -3 1 -5 54501.1 1410.3 6
 3 1 6 46267.5 1891.44 6
 -3 1 -6 48820.4 1808.65 4
 3 1 6 49892.6 2721.25 3
 -3 -1 -6 49719.1 1841.05 6
 -3 -1 -6 46321.6 1921.88 4
 3 -1 6 49328.3 2764.53 3
 3 -1 6 47687.9 1615.33 6
 -3 1 -6 53605.5 1509.32 6
 -3 -1 -7 131404 3466.48 4
 -3 1 -7 140828 2631.27 6
 3 -1 7 139153 2826.91 6
 3 -1 7 139712 4838.63 3
 3 1 7 143534 4891.26 3
 3 1 7 128619 3281.97 6
 -3 1 -7 140944 3317.62 4
 -3 1 -8 73424.4 2018.81 6
 3 -1 8 70290.4 2070.38 6
 3 -1 8 77042.9 3771.59 3
 3 1 8 72426.6 3675.02 3
 -3 -1 -8 70264.6 2713.47 4
 3 1 8 66409.7 2424.01 6
 -3 1 -8 71177 2563.15 4
 3 1 9 48502.9 3175.38 3
 3 -1 9 46437.6 3111.56 3
 -3 1 -9 46991.4 2237.34 4
 -3 1 -9 46882.4 1718.79 6
 3 1 9 46872.8 1780.94 2
 3 -1 9 44685.1 1363.77 2
 -3 -1 -9 48129.2 2373.98 4
 3 1 9 45058.8 2050.38 6
 3 -1 10 27071.2 2575.86 3
 -3 -1 -10 24642.3 1886.01 4
 -3 1 -10 23781 1737.65 4
 3 1 10 23540 1298.75 2
 3 -1 10 24348.9 1039.15 2
 3 1 10 24657.9 2400.43 3
 -3 1 -11 4252.44 930.482 4
 3 -1 11 5618.77 1391.36 3
 3 -1 11 6334.84 598.281 2
 3 1 11 6563.49 1428.75 3
 -3 -1 -11 6004.02 1058.35 4
 3 1 11 5639.1 726.214 2
 -3 1 -12 31631.9 2165.11 4
 3 1 12 32902.5 1591.55 2
 3 1 12 34953 3093.86 3
 -3 -1 -12 36392.9 2447.21 4
 3 -1 12 34018.5 1289.56 2
 3 -1 12 30613.3 2866.59 3
 3 -1 13 36784.2 1431.85 2
 3 1 13 36904.3 1722.09 2
 -3 1 -13 43891.2 2687.97 4
 -3 -1 -13 39022.4 2667.21 4
 -3 -1 -14 -167.996 892.264 4
 3 1 14 -160.825 442.888 2
 -3 1 -14 1335.32 1014.16 4
 -3 1 -15 48823 3114.21 4
 -3 -1 -15 44117.8 3040.86 4
 -3 1 -16 9858.37 1772.53 4
 -3 -1 -16 8314.17 1576.4 4
 -3 -1 -17 19209.8 2249.23 4
 -3 1 -17 19322.3 2280.68 4
 -3 1 -18 5176.36 1474.2 4
 -3 -1 -18 3437.32 1444.3 4
 -3 1 -19 1156.28 1111.15 4
 -3 -1 -19 1410.06 1418.72 4
 -3 -1 -20 -467.081 1327.72 4
 -3 1 -20 -368.165 1297.33 4
 -3 -1 -21 74105.8 4928.49 4
 -3 1 -21 68715 4644.23 4
 -3 -1 -22 3078.26 1593.63 4
 -3 1 -22 1246.52 1838.72 4
 3 -3 -22 708.029 1635.03 4
 3 3 -22 440.057 1451.76 4
 3 3 -21 1224.55 1355.85 4
 3 -3 -21 1424.9 1689.21 4
 3 3 -20 3023.55 1264.78 4
 3 -3 -20 3988.23 1695.37 4
 3 -3 -19 17705.5 2679.18 4
 3 3 -19 15361.5 2293.31 4
 3 -3 -18 8689.91 1783.64 4
 3 3 -18 10866.8 2017.56 4
 -3 3 17 28332.1 2101.98 2
 3 -3 -17 27488 2816.86 4
 3 3 -17 31334.1 2800.92 4
 -3 3 16 4613.97 964.434 2
 3 -3 -16 2310 1190.61 4
 3 3 -16 4682.55 1336.89 4
 -3 3 15 16542.9 1608.37 2
 3 -3 -15 15271.3 2089.4 4
 3 3 -15 18786.1 2108.7 4
 3 -3 -14 77896.5 4029.48 4
 3 3 -14 80072 3789.85 4
 -3 -3 14 80698.8 2385.1 2
 -3 3 14 79352.3 3144.44 2
 3 3 -13 23734.7 1645.65 5
 3 -3 -13 23798.2 2212.38 4
 -3 -3 13 25572 1321.38 2
 3 3 -13 20822.5 1965.49 4
 -3 3 13 25251.9 1813.2 2
 -3 3 12 241411 5119.69 2
 3 3 -12 236488 4808.91 5
 3 -3 -12 247466 6515.36 4
 -3 -3 12 239805 3920.07 2
 3 3 -12 235909 5803.65 4
 3 -3 -11 80452.5 3590.43 4
 3 3 -11 78357.7 2087.12 2
 3 3 -11 79936.7 2743.97 5
 3 3 -11 76866.3 3141.94 4
 -3 3 11 76051.1 2792.73 2
 -3 -3 11 83057.3 2226.73 2
 3 3 -10 207987 4887.43 4
 3 3 -10 208073 4203.76 5
 3 -3 -10 206445 5513.98 4
 -3 3 10 200933 4336.23 2
 -3 -3 10 203264 3403.13 2
 3 3 -10 202948 3289.77 2
 -3 -3 9 47452.9 1607.93 2
 -3 3 9 42277.2 1971.49 2
 3 3 -9 46487.5 2246.48 4
 3 3 -9 46302.6 1934.01 5
 3 -3 -9 43102.3 2453.1 4
 3 3 -9 43875 1520.86 2
 3 3 -8 9527.77 894.213 5
 3 3 -8 10509.4 1077.24 4
 -3 -3 8 8645.91 698.276 2
 3 3 -8 9077.05 685.942 2
 -3 3 8 9776.82 972.107 2
 -3 3 7 143563 3302.21 2
 -3 -3 7 151325 2689.5 2
 3 3 -7 148299 3143.75 5
 -3 -3 7 132871 2768.42 1
 3 3 -7 152532 2582.26 2
 3 3 -7 140079 3389.3 4
 3 3 -6 24465.2 1017.3 2
 -3 3 6 23462 1311.8 2
 3 3 -6 22850.9 1311.8 4
 -3 -3 6 22831.5 1019.53 1
 3 3 -6 23465.3 1196.7 5
 -3 3 5 39157 1596.63 2
 3 3 -5 39098.2 1248.39 2
 3 3 -5 38435.3 1550.78 4
 -3 -3 5 38883.5 1169.14 1
 3 3 -4 225809 2878.48 6
 -3 -3 4 215466 3328.96 4
 -3 3 4 209069 3462.75 2
 -3 -3 4 206148 2332.64 1
 3 3 -4 211555 3354.02 4
 3 3 -4 212608 2956.07 2
 -3 3 3 47224.5 1611.06 2
 3 -3 -3 48481.5 1605.15 2
 3 3 -3 53132.5 1580.75 4
 3 3 -3 54688.1 1460.68 6
 -3 -3 3 52600.7 1428.1 6
 -3 -3 3 55386.7 1593.31 4
 3 3 -3 55351.8 997.977 1
 3 3 -2 367695 3853.4 6
 3 3 -2 363530 3713.59 4
 -3 -3 2 372746 3802.06 6
 -3 -3 2 368923 3718.64 4
 -3 3 2 367943 4113.61 2
 -3 3 1 173427 2663.01 2
 3 3 -1 175540 2780.11 6
 -3 -3 1 178788 2729.31 6
 3 3 -1 172097 2401.54 4
 3 -3 -1 171644 2652.65 2
 -3 -3 1 174180 2383.98 4
 -3 -3 0 72349.2 1839.41 6
 3 -3 0 66645.4 1581.71 2
 3 -3 0 70328.7 1447.78 4
 3 3 0 69084.4 1846.22 6
 -3 -3 0 70293.8 1517.35 4
 -3 3 0 66938.2 1584.86 2
 3 3 1 976253 7349.09 6
 -3 -3 -1 999365 7210.56 6
 -3 3 -1 959487 5395.58 4
 -3 3 -1 999999 5537.12 2
 3 -3 1 985932 5568.96 2
 3 -3 1 953826 5302.4 4
 -3 3 -2 311940 2872.9 2
 3 3 2 311413 5020.04 3
 3 -3 2 295869 3933.86 1
 3 3 2 302391 4351.6 6
 3 -3 2 314069 5174.49 3
 3 -3 2 305427 2870.25 2
 3 -3 2 311142 3240.96 4
 -3 3 -2 310835 3918.02 1
 -3 -3 -2 304870 4246.71 6
 -3 3 -2 303654 3223.08 4
 -3 3 -3 31961.4 868.099 2
 -3 3 -3 28249.6 1735.59 3
 3 3 3 31628.4 1575.58 6
 3 3 3 28702.5 1723.04 3
 3 -3 3 26590 1707.18 3
 3 -3 3 31183.8 851.613 2
 -3 3 -3 37276.1 1282.04 4
 3 -3 3 36598.7 915.356 6
 3 -3 3 32026 1186.59 4
 -3 -3 -3 32713.2 1530.66 6
 -3 3 -3 38533.8 1551 1
 3 -3 4 133424 1686.92 6
 3 -3 4 138355 2602.12 4
 3 3 4 129514 3852.25 3
 -3 3 -4 140925 2936.56 1
 3 -3 4 135347 4021.62 3
 3 -3 4 134947 1608.14 2
 -3 3 -4 133580 2567.86 4
 3 3 4 137338 3370.34 6
 3 3 5 27990 1983.62 3
 -3 3 -5 27279.9 1287.41 4
 -3 3 -5 26572 1390.49 1
 3 3 5 27567.5 1600.09 6
 3 -3 5 27697.9 813.041 6
 3 -3 5 31028.5 2061.57 3
 3 -3 6 67181.2 1420.24 6
 3 -3 6 66999 3172.52 3
 3 3 6 66150.8 3151.47 3
 -3 3 -6 64734.9 1148.26 6
 -3 3 -6 65297.6 2100.96 4
 3 3 6 63026.5 2544.14 6
 3 -3 7 1878.35 280.574 6
 -3 3 -7 1864.25 246.826 6
 -3 3 -7 1671.66 509.939 4
 3 -3 7 1915.1 746.773 3
 3 3 7 2209.06 712.147 6
 3 3 7 1410.71 970.341 3
 3 3 8 156179 5319.23 3
 3 -3 8 168040 5546.22 3
 -3 3 -8 162926 2127.27 6
 3 3 8 155334 4138.09 6
 -3 3 -8 158594 3789.16 4
 3 3 9 129370 3811.21 6
 3 -3 9 133443 5226.37 3
 -3 3 -9 131572 2093.29 6
 -3 3 -9 129695 3618.58 4
 -3 -3 -9 131683 4183.04 4
 3 3 9 139448 5173.09 3
 3 -3 10 78043 4155.87 3
 -3 -3 -10 74772.6 3298.79 4
 3 3 10 75257.3 2647.91 2
 3 3 10 75516.5 4077.76 3
 3 3 10 75072.4 3037.69 6
 -3 3 -10 74657 1705.12 6
 -3 3 -10 76204.8 2970.81 4
 -3 3 -11 7265.82 598.509 6
 -3 -3 -11 8397.98 1257.85 4
 3 3 11 6527.33 858.748 2
 3 3 11 8440.4 1692.8 3
 3 -3 11 8516.19 1726.49 3
 -3 3 -11 8062.1 1129.29 4
 -3 3 -12 86803.9 2036.17 6
 -3 3 -12 87352 3519.75 4
 3 3 12 85031.6 2891.82 2
 3 -3 12 95332.1 5021.86 3
 3 3 12 88361.2 4780.15 3
 -3 -3 -12 88673.5 3947.17 4
 3 3 13 70369.8 2702.82 2
 -3 3 -13 76641.5 3531.74 4
 -3 -3 -13 71916.2 3713.82 4
 3 3 14 3260.78 739.377 2
 -3 3 -14 4017.12 1137.89 4
 -3 -3 -14 1397.11 1067.46 4
 3 3 15 9234.69 1124.92 2
 -3 -3 -15 11610.5 1871.44 4
 -3 3 -15 9596.83 1628.82 4
 -3 3 -16 54793.1 3490.76 4
 -3 -3 -16 57794.5 3712.7 4
 -3 -3 -17 2475.26 1342.79 4
 -3 3 -17 6297.14 1597.07 4
 -3 -3 -18 49136.1 3727.18 4
 -3 3 -18 51652.1 3662.79 4
 -3 3 -19 4086.4 1651.57 4
 -3 -3 -19 3247.54 1714.32 4
 -3 -3 -20 1764.44 1441.71 4
 -3 3 -20 877.841 1254.93 4
 -3 -3 -21 11062.3 2323.68 4
 -3 3 -21 11700.4 2107.74 4
 -3 -3 -22 513.291 1626.77 4
 -3 3 -22 500.229 1354.71 4
 3 5 -22 354.164 1810.04 4
 3 -5 -22 2620.95 1806.82 4
 3 -5 -21 1705.59 1745.02 4
 3 5 -21 -365.985 1432.95 4
 3 -5 -20 12171.8 2463.25 4
 3 5 -20 7976.42 1970.3 4
 3 -5 -19 14947.1 2402.76 4
 3 5 -19 17024.8 2454.93 4
 3 5 -18 77064.6 4448.04 4
 3 -5 -18 82156.7 4922.3 4
 3 -5 -17 583.727 1219.94 4
 -3 5 17 717.579 735.861 2
 3 5 -17 1566.12 1304.89 4
 3 -5 -16 7784.35 1818.88 4
 -3 5 16 5180.2 1057.26 2
 3 5 -16 6331.56 1522.91 4
 3 -5 -15 6844.71 1561.38 4
 -3 5 15 6696.13 1183.13 2
 3 5 -15 6686.48 1478.84 4
 3 5 -15 6859.51 1252.76 5
 3 5 -14 8876.52 1472.82 4
 -3 5 14 8497.26 1205.41 2
 3 5 -14 9535.36 1309.73 5
 3 -5 -14 4918.64 1212.01 4
 -3 5 13 36220.7 2247.42 2
 3 5 -13 37377.7 2591.16 4
 3 -5 -13 33922.3 2750.53 4
 3 5 -13 38933.4 2252.32 5
 3 5 -12 279527 3681.09 2
 3 5 -12 272988 6305.81 4
 -3 5 12 276608 5873.16 2
 3 5 -12 272290 5659.02 5
 3 -5 -12 271007 7217.01 4
 -3 5 11 19751.3 1612.28 2
 3 5 -11 17678.6 1669.05 4
 3 5 -11 18660.3 1007.17 2
 3 5 -11 20095.6 1569.67 5
 3 5 -11 20167.2 1020.5 6
 -3 5 10 173856 4437.63 2
 3 5 -10 180846 2896.54 2
 3 5 -10 185695 4332.57 5
 3 5 -10 177245 4672.25 4
 3 5 -10 169338 2807.89 6
 3 5 -9 38678.3 1331.12 2
 3 5 -9 34553.4 1902.49 5
 3 5 -9 34326.7 2020.83 4
 -3 5 9 34246.3 1917.7 2
 3 5 -8 63892.4 1686.8 6
 3 5 -8 69836.8 2662.11 4
 3 5 -8 69762.3 1783.18 2
 3 5 -8 69857.4 2522.54 5
 3 5 -7 14977.5 1190.4 5
 3 5 -7 17160.4 912.144 2
 3 5 -7 15724.1 1265.69 4
 -3 5 7 16788.7 1307.31 2
 3 5 -7 18661 924.038 6
 3 5 -6 75740.8 1890.11 2
 3 5 -6 72612.6 1786.04 6
 3 5 -6 70838.9 2318.5 5
 -3 -5 6 73980.2 1979.32 1
 3 5 -6 73189.8 1885.71 1
 -3 5 6 71871.2 2539.63 2
 3 5 -6 74659.6 2519.33 4
 3 5 -5 43807.1 1825.84 4
 -3 5 5 39365.9 1795.93 2
 3 5 -5 39565.4 1358.05 6
 3 5 -5 41289.1 1320.91 1
 -3 5 4 14457.7 1061.37 2
 -3 -5 4 15319.5 836.298 6
 3 5 -4 13314.7 978.83 4
 3 5 -4 13440 746.494 1
 3 5 -4 14717 875.923 6
 3 -5 -3 3462.01 309.109 5
 -3 5 3 3355.76 559.261 2
 3 5 -3 3384.89 544.014 4
 3 5 -3 3070.1 465.947 6
 -3 -5 3 3143.59 438.099 6
 -3 5 2 84136.3 2284.21 2
 3 5 -2 86573.1 2240.53 4
 -3 -5 2 85462.1 2144.82 6
 3 5 -2 87631.7 2242.91 6
 3 -5 -2 84958.8 1639 5
 3 -5 -1 32572.2 1128.12 5
 3 5 -1 31111.5 1439.82 6
 -3 5 1 33115.6 1372.85 2
 3 -5 -1 33174.3 1391.09 2
 3 5 -1 33710 1368.37 4
 -3 -5 1 30381 1351.84 6
 -3 5 1 34056.2 1150.78 5
 -3 -5 1 31733.8 1332.08 4
 -3 -5 0 134656 2971.68 6
 3 -5 0 134770 2452.36 5
 3 -5 0 131837 2597.07 4
 -3 5 0 131225 2544 2
 3 -5 0 132363 2651.03 2
 -3 5 0 130899 2441.03 5
 -3 -5 0 131852 2673.35 4
 3 5 0 125357 3005.38 6
 3 -5 1 17888.4 991.073 5
 3 -5 1 18045 981.864 4
 3 5 1 16458.9 1185.13 6
 3 -5 1 17287.5 935.916 2
 -3 5 -1 17576.5 963.618 4
 -3 5 -1 18583.1 920.824 2
 -3 5 -1 17785.8 999.153 5
 3 -5 2 2702.31 361.081 2
 -3 5 -2 2582.51 433.179 4
 3 5 2 2423.85 552.873 3
 -3 5 -2 1749.16 316.253 2
 3 -5 2 2600.97 573.914 3
 3 -5 2 2210.15 384.675 4
 3 5 2 2350.34 646.695 6
 3 5 3 162261 3950.34 3
 3 5 3 163990 4023.86 6
 -3 5 -3 160702 3349.26 1
 -3 5 -3 159367 2263.38 2
 3 -5 3 166816 2401.52 2
 3 -5 3 168282 4146.28 3
 -3 5 -3 159530 3059.21 4
 -3 5 -4 213247 3688.65 4
 3 5 4 216422 4819.84 6
 3 -5 4 209028 5009.9 3
 -3 5 -4 218896 2386.93 2
 3 -5 4 221449 2488.52 2
 3 5 4 212891 4884.12 3
 -3 5 -4 216625 3993.65 1
 3 -5 5 68863 1221.37 2
 3 5 5 68871.3 2827.95 6
 -3 5 -5 71272.2 2395.2 1
 -3 5 -5 68393.7 1142.93 2
 3 5 5 64604 2902.36 3
 -3 5 -5 73287.8 2283.98 4
 3 -5 5 70326.4 3097.74 3
 3 5 6 188878 4783.36 6
 3 5 6 187278 5118.27 3
 -3 5 -6 182106 3810.94 4
 -3 5 -6 181235 3945.3 1
 3 -5 6 188525 5355.24 3
 -3 5 -7 11748.2 1140.77 4
 -3 5 -7 11217.5 1127.87 1
 3 5 7 13003.4 1536.33 3
 3 -5 7 9838.73 1380.11 3
 3 5 7 10400.7 1290.45 6
 -3 5 -8 32598.3 1922.5 1
 -3 5 -8 30501.7 1780.4 4
 3 5 8 30592.7 2108.83 6
 3 -5 8 32830.8 2588.06 3
 3 5 8 31453.4 2450.63 3
 3 -5 9 62336.8 3570.89 3
 3 5 9 64251.5 3539.08 3
 -3 5 -9 65105.2 2695.91 4
 3 5 9 66773.2 3078.28 6
 3 5 10 164880 5802.4 3
 3 5 10 159989 4736.76 6
 3 -5 10 158691 5907.69 3
 -3 5 -10 162416 4402.49 4
 3 5 10 162558 4300.33 2
 3 -5 11 1296.7 962.923 3
 3 5 11 2076.23 722.461 2
 -3 5 -11 1450.02 845.4 4
 3 5 11 1025.14 1022.11 3
 -3 5 -12 72392.9 3322.95 4
 -3 -5 -12 69303.8 3655.59 4
 3 5 12 69944.2 2933.6 2
 -3 -5 -13 23823.4 2380.01 4
 3 5 13 25777.7 1877.96 2
 -3 5 -13 26288.2 2184.69 4
 3 5 14 3182.25 806.647 2
 -3 5 -14 4195.09 1140.92 4
 -3 -5 -14 5093.17 1332.94 4
 3 5 15 8764.05 1235 2
 -3 -5 -15 8461.81 1730.5 4
 -3 5 -15 7550.71 1315.8 4
 -3 -5 -16 60917.8 3983.25 4
 -3 5 -16 60078.6 3605.66 4
 -3 -5 -17 5777.36 1608.17 4
 -3 5 -17 9818.54 1803.78 4
 -3 5 -18 32238.9 2989.44 4
 -3 -5 -18 30371.4 2965.27 4
 -3 5 -19 8312.68 1835.48 4
 -3 -5 -19 9182.25 2244.64 4
 -3 -5 -20 20865.6 2792.95 4
 -3 5 -20 15868.7 2388.39 4
 -3 5 -21 1385.49 1409.35 4
 -3 -5 -21 1403.93 1632.18 4
 -3 -5 -22 -1635.34 2021.47 4
 -3 5 -22 -921.329 1388.33 4
 3 7 -22 1335.03 1744.69 4
 3 -7 -22 -880.192 1702.89 4
 3 7 -21 17060.4 2689.9 4
 3 -7 -21 12225.1 2673.01 4
 3 -7 -20 18956.6 2752.44 4
 3 7 -20 17163.2 2532.57 4
 3 -7 -19 12493.6 2280.33 4
 3 7 -19 14947.3 2274.84 4
 3 7 -18 20066.2 2427.29 4
 -3 7 18 16482.8 1971.88 2
 3 -7 -18 18068.2 2732.26 4
 3 7 -17 31118.6 2848.04 4
 3 -7 -17 32729.8 3329.16 4
 -3 7 17 31244.7 2535.41 2
 3 7 -16 1078.71 1148.77 4
 3 -7 -16 752.177 1299.29 4
 3 7 -16 1685.3 1037.97 5
 -3 7 16 496.383 888.89 2
 3 -7 -15 5867.83 1449.81 4
 -3 7 15 7355.24 1328.56 2
 3 7 -15 3551.78 1296.47 4
 3 7 -15 6766.02 1251.3 5
 -3 7 14 96297.5 3934.45 2
 3 7 -14 95974.7 4303.03 4
 3 7 -14 100023 3918.82 5
 3 7 -13 20199.7 988.971 6
 -3 7 13 18235.8 1944.05 2
 3 7 -13 19056.5 1842.65 4
 3 7 -13 19083.2 1756.29 5
 3 7 -12 106960 2237.98 2
 -3 7 12 113572 3983.29 2
 3 7 -12 109788 4197.2 4
 3 7 -12 111360 3881.72 5
 3 7 -12 113137 2289.84 6
 3 7 -11 3024.17 430.103 6
 3 7 -11 2501.85 420.87 2
 3 7 -11 2313.46 822.312 5
 -3 7 11 1990.06 771.251 2
 3 7 -11 2417.29 1005.35 4
 -3 7 10 57951 2708.81 2
 3 7 -10 58741.9 2850.52 4
 3 7 -10 60894.1 1697.46 6
 3 7 -10 59269.1 2692.19 5
 3 7 -10 61709.4 1709.46 2
 3 7 -9 24965 1845.03 4
 3 7 -9 25316.5 1134.87 6
 3 7 -9 25070.3 1133.57 2
 -3 7 9 23921.7 1807.1 2
 3 7 -9 28337.2 1852.88 5
 3 7 -8 259080 3694.9 6
 3 7 -8 264504 5500.32 4
 3 7 -8 265300 3694.58 2
 3 7 -8 264572 5294.81 5
 -3 7 8 262700 5488.52 2
 3 7 -8 261964 4427.65 1
 3 7 -7 24084.4 1167.62 6
 -3 7 7 24507.1 1709.45 2
 3 7 -7 26527.1 1341.3 1
 3 7 -7 22556.5 1533.95 5
 3 7 -7 22903.1 1638.4 4
 3 7 -6 2183.63 422.19 1
 3 7 -6 3818.91 735.644 4
 -3 -7 6 3207.64 453.899 6
 3 7 -6 2151.96 566.141 5
 -3 7 6 2349.12 211.634 5
 3 7 -6 2861.94 516.228 6
 -3 7 6 2419.01 725.474 2
 3 7 -5 48806.5 1662.58 1
 -3 7 5 47892.1 1073.02 5
 3 7 -5 51711.6 1826.17 6
 -3 7 5 49157.9 2248.54 2
 -3 -7 5 50544.9 1645.43 6
 3 7 -5 50830.1 2191.6 4
 3 7 -4 9295.59 845.287 6
 -3 -7 4 9845.16 788.333 6
 -3 7 4 10231.4 584.067 5
 3 7 -4 11575.5 1063.05 4
 -3 7 4 11111.2 1064.58 2
 3 7 -3 2703.2 610.061 4
 3 7 -3 3302.34 599.404 6
 -3 7 3 3726.37 425.484 5
 -3 7 3 3170.27 743.586 2
 -3 7 2 31528.2 1204 5
 3 -7 -2 30943.9 1192.21 5
 3 7 -2 29851.7 1546.33 4
 -3 7 2 28546 1531.72 2
 3 7 -2 32541.1 1671.96 6
 3 7 -1 15478.2 1123.37 4
 -3 7 1 14849.6 1056.91 2
 3 7 -1 15557.3 1246.86 6
 3 -7 -1 14721.4 906.762 5
 -3 7 1 14659.7 887.186 5
 -3 7 0 343220 4483.91 5
 3 7 0 345485 5813.59 6
 -3 7 0 334310 4709.09 2
 3 -7 1 40180.3 1695.81 3
 3 7 1 40823.9 2100.41 6
 -3 7 -1 41509.9 1606.57 2
 -3 7 -1 42179.5 1716.81 5
 -3 7 -1 40191.9 1718.74 4
 3 7 2 55171.5 2556.16 6
 3 -7 2 53305.6 1822.01 2
 3 -7 2 50927.7 2127.62 3
 -3 7 -2 54249.9 1992.17 4
 -3 7 -2 52920.7 1993.33 5
 -3 7 -2 51294.2 1671.56 2
 3 7 2 56382.2 2084.21 3
 3 7 3 550758 8245.68 6
 -3 7 -3 564254 6643.56 4
 -3 7 -3 553800 5091.83 2
 -3 7 -3 560790 6883.96 1
 3 7 3 548704 7077.94 3
 -3 7 -3 554893 6707.35 5
 3 -7 3 557371 7506.12 3
 -3 7 -4 324366 3671.5 2
 3 -7 4 330497 3748.4 6
 3 7 4 312079 5828.9 3
 3 7 4 311032 6389.22 6
 -3 7 -4 315695 5282.79 5
 3 -7 4 312992 6104.61 3
 -3 7 -4 314887 5275.37 1
 -3 7 -4 338637 5354.11 4
 3 -7 5 304780 3260.49 6
 3 -7 5 318637 6509.41 3
 -3 7 -5 318660 5546.88 5
 -3 7 -5 320909 3261.7 2
 3 7 5 300442 6078.36 3
 3 7 5 315769 6564.08 6
 -3 7 -5 310399 5385.6 1
 -3 7 -5 322741 5324.19 4
 3 7 6 36900 2323.64 3
 3 7 6 37130.7 2350.64 6
 3 -7 6 36537.2 2435.07 3
 -3 7 -6 32358.1 994.429 2
 -3 7 -6 39229.7 2019.1 1
 -3 7 -6 36502.8 1899.33 4
 3 -7 7 8030.5 1333.6 3
 -3 7 -7 8512.76 1084.16 1
 3 7 7 8070.67 1205.04 3
 -3 7 -7 8975.33 1065.45 4
 3 7 7 7272.15 1075.27 6
 3 7 8 29801.4 2174.58 6
 3 7 8 29736.3 2299.7 3
 -3 7 -8 34384.1 1975.99 4
 -3 7 -8 31222.7 1928.35 1
 3 -7 8 32471.8 2514.38 3
 3 -7 9 25964.1 2416.11 3
 3 7 9 19858.6 1862.12 6
 -3 7 -9 20949.8 1637.84 4
 -3 7 -9 26908.1 1842.98 1
 3 7 9 25830.2 2312.01 3
 -3 7 -10 16225.9 1585.13 4
 3 7 10 16122.8 1565.55 2
 3 -7 10 16889.3 2150.74 3
 3 7 10 16964.1 2032.8 3
 3 7 10 16851.5 1800.1 6
 3 7 11 8.48831 721.603 2
 -3 7 -11 85.9041 708.28 4
 3 7 12 13407.2 1495.99 2
 -3 7 -12 12980.6 1627.8 4
 -3 7 -13 -1425.43 998.171 4
 3 7 13 531.751 732.914 2
 -3 7 -14 47164 3106.43 4
 -3 -7 -14 49632.6 3507.96 4
 3 7 14 51556.2 2840.55 2
 -3 -7 -15 30044.8 2887.92 4
 3 7 15 23928.7 2012.13 2
 -3 7 -15 27504.2 2495.04 4
 -3 -7 -16 11827.9 2043.81 4
 3 7 16 12963.1 1599.54 2
 -3 7 -16 15542.3 2107.05 4
 -3 7 -17 37395.3 3139.24 4
 -3 -7 -17 31397 3223.75 4
 -3 7 -18 14946.1 2175.67 4
 -3 -7 -18 17154.3 2563.84 4
 -3 7 -19 11654.3 2122.53 4
 -3 -7 -19 8268.39 1991.26 4
 -3 -7 -20 46360.1 4148.43 4
 -3 7 -20 50589.6 4065.19 4
 -3 -7 -21 11496.5 2569.76 4
 -3 7 -21 16867.9 2589.91 4
 -3 7 -22 28.7818 1783.97 4
 3 9 -21 26919.9 3210.97 4
 3 -9 -21 21698.5 3236.4 4
 3 -9 -20 8390.1 2271.3 4
 3 9 -20 12305 2248.78 4
 -3 9 19 705.025 989.78 2
 3 -9 -19 1622.71 1253.9 4
 3 9 -19 2575.19 1617.45 4
 -3 9 18 2802.47 1196.68 2
 3 -9 -18 703.422 1425.7 4
 3 9 -18 4329.48 1626.07 4
 -3 9 17 16045.8 1935.12 2
 3 9 -17 17482.8 2120.7 5
 3 -9 -17 14579.6 2355.7 4
 3 9 -17 14937.4 2101.07 4
 3 9 -16 18610.8 2256.19 4
 3 9 -16 19828.9 2121.78 5
 -3 9 16 16632.6 1905.54 2
 -3 9 15 804.184 825.762 2
 3 9 -15 340.646 848.846 5
 3 9 -15 1141.2 1044.09 4
 3 9 -14 153008 5103.92 5
 3 9 -14 161536 5595.05 4
 -3 9 14 146821 5164.18 2
 3 9 -13 15968.4 1992.97 4
 3 9 -13 13420.6 1664.21 5
 -3 9 13 17807.5 1930.45 2
 -3 9 12 3909.84 1107.81 2
 3 9 -12 4457.74 1229.73 4
 3 9 -12 4893.25 1082.25 5
 3 9 -12 3538.73 469.883 6
 3 9 -11 -518.72 818.827 4
 3 9 -11 14.6614 317.648 6
 3 9 -11 231.096 333.279 2
 3 9 -11 -313.48 768.145 5
 -3 9 11 131.407 882.193 2
 3 9 -10 13829.1 1499.2 5
 3 9 -10 15100.9 1670.6 4
 3 9 -10 12655.2 911.511 6
 -3 9 10 16234.3 1718.17 2
 3 9 -10 12400 1250.39 1
 3 9 -9 11658.6 1391.59 5
 3 9 -9 13271.9 955.947 6
 3 9 -9 12004.1 1136.44 1
 3 9 -9 13005.5 1550.83 4
 -3 9 9 9429.68 1376.74 2
 3 9 -8 296698 5007.97 1
 3 9 -8 312186 6345.62 4
 3 9 -8 304880 6187.55 5
 3 9 -8 302119 4536.75 6
 -3 9 8 293603 6240.36 2
 -3 9 7 200335 2211.23 5
 3 9 -7 201212 4018.99 1
 -3 9 7 209797 5184.9 2
 -3 -9 7 203546 3322.72 6
 3 9 -7 206757 3920.94 6
 3 9 -7 209367 5116.75 4
 3 9 -7 214375 5034.76 5
 3 9 -6 3301.36 794.311 4
 -3 9 6 2958.47 369.521 5
 -3 9 6 3728.47 943.682 2
 3 9 -6 1820.57 560.745 6
 3 9 -6 1982.43 745.954 5
 3 9 -6 3188.53 629.895 1
 3 9 -5 94353.4 2876.58 6
 3 9 -5 94520.1 2592.37 1
 3 9 -5 101659 3446.31 4
 -3 9 5 97720.4 3406.87 2
 -3 9 5 90694.2 1922.21 5
 3 9 -4 38257 1938.55 6
 -3 9 4 34980.7 1291.57 5
 3 9 -4 40285.6 2137.58 4
 -3 9 4 39074.6 2107.62 2
 -3 9 3 50716.9 1668.87 5
 -3 9 3 48110 2330.82 2
 3 9 -3 51669.1 2329.62 4
 3 9 -3 52376 2339.08 6
 3 9 -2 49553.1 2230.14 4
 3 9 -2 46850 2294.47 6
 -3 9 2 45463.3 2176.03 2
 -3 9 2 49003.8 1757.23 5
 -3 9 1 101566 2612.05 5
 3 9 -1 93400.4 3353.42 6
 -3 9 1 95930.2 3021.8 2
 3 9 -1 104747 3217.28 4
 -3 9 0 134270 3203.53 5
 -3 9 0 139297 3441.66 2
 3 9 0 137687 4143.79 6
 3 9 1 41483.1 1601.24 3
 3 9 1 39161.1 2370.11 6
 -3 9 -1 41689.6 1821.53 2
 3 -9 1 39588.8 1646.64 3
 -3 9 -1 38823.6 1823.53 5
 3 -9 2 322045 5184.45 3
 3 9 2 329548 4842.7 3
 -3 9 -2 317399 4792.31 2
 3 9 2 323788 6698.91 6
 -3 9 -2 327354 5370.45 5
 -3 9 -2 321481 5494.45 4
 3 9 3 74852.3 2534.61 3
 3 -9 3 76032.9 2456.98 6
 -3 9 -3 71319.9 2258.06 2
 3 -9 3 75216.6 2753.94 3
 -3 9 -3 78239.2 2769.98 4
 -3 9 -3 77412.1 2765.05 5
 3 9 3 71779.7 3267.37 6
 3 -9 4 60176.8 2639.72 3
 3 9 4 59152.6 3065.66 6
 3 9 4 56972.5 2397.02 3
 -3 9 -4 63744.3 2617.57 1
 -3 9 -4 62089 1918.02 2
 -3 9 -4 61685.3 2580.22 5
 -3 9 -4 61853.9 2585.48 4
 3 -9 4 60302.2 2070.64 6
 3 -9 5 53461 1750.79 6
 3 9 5 52050.7 2461.87 3
 -3 9 -5 50917.6 2357.01 1
 3 -9 5 49441.3 2623.85 3
 -3 9 -5 52267.6 2487.21 5
 -3 9 -5 58059.1 2601.89 4
 -3 9 -5 53859.8 1673.71 2
 3 9 5 50841.7 2907.98 6
 -3 9 -6 21794.1 1701.95 4
 -3 9 -6 18136.9 954.092 2
 -3 9 -6 19621.6 1641.33 5
 3 -9 6 19074.7 1780.08 3
 3 9 6 18263.9 1627.62 3
 -3 9 -6 20067.7 1608.56 1
 3 9 6 16939.2 1801.65 6
 3 -9 6 17412.7 860.286 6
 -3 9 -7 29520.1 1007.93 2
 -3 9 -7 26875.7 1825.85 1
 3 9 7 29952.1 2174.29 3
 3 -9 7 26927.2 2174.82 3
 -3 9 -7 32791.9 2113.11 5
 -3 9 -7 30061.2 1959.12 4
 3 9 7 27974.8 2218.75 6
 -3 9 -8 110130 3719.94 1
 -3 9 -8 107510 1474.47 2
 3 9 8 108731 4260.32 3
 3 9 8 110853 4473.91 6
 -3 9 -8 114638 3854.25 4
 3 -9 8 106707 4496.72 3
 -3 9 -9 6020.74 1068.2 1
 -3 9 -9 5704.31 1114.58 4
 3 9 9 7637.06 1412.7 6
 3 -9 9 3353.49 1036.91 3
 3 9 9 3994.02 1060.1 3
 -3 9 -10 2943.78 924.363 1
 3 9 10 5742.5 1201.55 2
 -3 9 -10 4196.26 1031.94 4
 3 9 10 4441.84 1300.03 6
 -3 9 -11 14484.3 1601.95 1
 -3 9 -11 11035 1466.81 4
 3 9 11 13824.9 1687.57 2
 -3 9 -12 -590.516 968.958 4
 3 9 12 1330.65 964.138 2
 -3 9 -13 3000.86 1233.74 4
 3 9 13 336.648 780.884 2
 3 9 14 110392 4422.94 2
 -3 9 -14 117900 4808.18 4
 3 9 15 44027 2948.95 2
 -3 9 -15 42537.1 3095.52 4
 3 9 16 2496.32 1066.02 2
 -3 -9 -16 823.457 1454.38 4
 3 9 17 16142.4 1881.76 2
 -3 -9 -17 13032.8 2204.41 4
 -3 9 -17 20223.4 2509.91 4
 -3 9 -18 1166.07 1300.4 4
 -3 -9 -18 386.629 1334.76 4
 -3 -9 -19 1536.35 1623.81 4
 -3 9 -19 -2785.87 1816.05 4
 -3 9 -20 41135.9 3645.47 4
 -3 -9 -20 35831.5 3784.51 4
 -3 9 -21 10532.9 2169.49 4
 -3 -9 -21 9810.66 2303.82 4
 3 11 -21 -372.292 1798.81 4
 3 11 -20 5574.64 2112.73 4
 3 -11 -20 4691.17 1893.4 4
 3 11 -19 14598.4 2482.48 4
 -3 11 19 18551 2425.17 2
 3 -11 -19 18061.8 2876.21 4
 3 11 -18 -567.66 1379.54 4
 -3 11 18 521.481 1113.4 2
 3 -11 -18 -1624.63 1754.2 4
 -3 11 17 6009.78 1570.08 2
 3 11 -17 4676.45 1565.47 4
 3 11 -17 5911.13 1605.93 5
 3 11 -16 -656.905 1200.43 5
 3 11 -16 -776.597 1242.31 4
 -3 11 16 2659.4 1357.17 2
 -3 11 15 22904.3 2294.26 2
 3 11 -15 18705.8 2241.75 4
 3 11 -15 18796.8 2112.88 5
 -3 11 14 47039.1 3105.66 2
 3 11 -14 50183.7 3166.68 5
 3 11 -14 45023.8 3187.8 4
 -3 11 13 10886.8 1718.36 2
 3 11 -13 9397.35 1649.25 4
 3 11 -13 10869.9 1690.73 5
 3 11 -12 44908.5 3029.97 4
 3 11 -12 47512.5 3003.74 5
 -3 11 12 45915.8 3003.71 2
 3 11 -11 16499.4 1485.95 1
 3 11 -11 15129.5 1809.02 4
 3 11 -11 17155.3 1110.63 6
 3 11 -11 14847.8 1699.91 5
 -3 11 11 15118.6 1883.46 2
 3 11 -10 19404.2 1960.72 4
 -3 11 10 15614.1 1801.87 2
 3 11 -10 16135.6 1753.7 5
 3 11 -10 14319.7 1366.61 1
 3 11 -10 13569 1055.89 6
 3 11 -9 31377.6 1663.86 6
 -3 11 9 26747.6 801.539 5
 -3 11 9 30199.3 2270.82 2
 3 11 -9 29472.4 2214.21 5
 3 11 -9 32085.4 2375.73 4
 3 11 -9 27249.6 1752.62 1
 3 11 -8 161113 4987.3 4
 3 11 -8 153804 3793.51 6
 3 11 -8 163716 4908.91 5
 -3 11 8 154062 2249.09 5
 3 11 -8 159065 3967.21 1
 -3 11 8 165635 5021.41 2
 3 11 -7 80141.3 2855.73 6
 -3 11 7 80875.2 3459.08 2
 3 11 -7 76290.2 3310.06 5
 3 11 -7 76724 2705.24 1
 -3 11 7 76131 1781.07 5
 3 11 -7 84996.6 3652.4 4
 3 11 -6 164427 3894.45 1
 -3 11 6 164273 2857.44 5
 3 11 -6 172137 4318.3 6
 3 11 -6 175497 4816.21 5
 -3 11 6 179372 4994.53 2
 3 11 -6 179040 5069.94 4
 3 11 -5 352.492 542.812 6
 -3 11 5 178.997 602.685 2
 -3 11 5 -114.333 299.693 5
 3 11 -5 378.553 660.701 5
 3 11 -5 135.091 661.272 4
 -3 11 4 -16.2392 389.522 5
 -3 11 4 -102.67 669.147 2
 3 11 -4 274.053 691.752 6
 3 11 -4 -427.959 691.604 4
 3 11 -3 340535 6589.12 6
 -3 11 3 340017 4875.81 5
 3 11 -3 350344 6601.43 4
 -3 11 3 339658 6480.78 2
 3 11 -2 62513.8 2784.01 4
 -3 11 2 67281.7 2827.59 2
 3 11 -2 64319 3010.39 6
 -3 11 2 67546.4 2315.15 5
 3 11 -1 80853.9 3438.66 6
 -3 11 1 86567.4 3124.22 2
 -3 11 1 86183.3 2751.35 5
 3 11 0 7536.61 1326.15 6
 3 -11 0 7438.84 636.761 3
 -3 11 0 6734.58 880.217 5
 3 11 0 7527.8 632.025 3
 -3 11 0 6157.56 956.003 2
 -3 11 -1 5925.63 919.424 2
 3 11 1 5268.1 1181.63 6
 3 -11 1 5027.44 599.783 3
 -3 11 -1 3873.15 777.32 5
 3 11 1 4510.91 521.62 3
 -3 11 -2 17850.8 1327.85 2
 -3 11 -2 14237.4 1374.14 4
 3 11 2 14751.5 994.131 3
 3 11 2 14716.3 1648.39 6
 -3 11 -2 15368.4 1378.4 5
 3 -11 2 16359 1119.83 3
 -3 11 -3 158410 4235.63 5
 3 11 3 153884 5085.05 6
 3 -11 3 148975 3714.98 3
 3 11 3 148986 3358.87 3
 -3 11 -3 150030 3617.47 2
 -3 11 -3 149320 4219.51 4
 -3 11 -4 22476.7 1741.45 5
 3 11 4 21714.4 2105.14 6
 -3 11 -4 21179.8 1744.67 4
 -3 11 -4 23246.8 1372.32 2
 3 -11 4 22401.8 1619.77 3
 3 11 4 20955.7 1447 3
 3 11 5 6162.15 921.576 3
 -3 11 -5 7009.64 780.454 2
 3 -11 5 6376.45 780.708 6
 -3 11 -5 7433.8 1125.55 4
 -3 11 -5 7056.09 1128.76 5
 3 -11 5 7253.6 1104.85 3
 -3 11 -5 9143.06 1233.65 1
 3 11 5 7657.89 1328.08 6
 -3 11 -6 28081.6 1962.37 1
 3 -11 6 30779.2 2141.34 3
 -3 11 -6 26314.3 1937.45 4
 -3 11 -6 30420.1 2172.23 5
 3 11 6 26284.5 1851.63 3
 3 -11 6 28515.4 1350.56 6
 -3 11 -6 22910.5 1228.88 2
 3 11 6 25563.1 2296.3 6
 -3 11 -7 1671.43 739.887 4
 -3 11 -7 3531.24 555.782 2
 3 11 7 3071.78 843.359 3
 -3 11 -7 3902.71 1116.22 5
 3 -11 7 3820.43 1001.66 3
 3 11 7 2412.54 1093.99 6
 3 -11 7 2398.05 350.667 6
 -3 11 -7 3071.78 896.577 1
 -3 11 -8 118728 2247.98 2
 -3 11 -8 118747 4268.52 4
 -3 11 -8 116985 4317.67 5
 -3 11 -8 107112 3895.02 1
 3 11 8 115935 4805 6
 -3 11 -9 62250.3 3165.46 4
 3 11 9 58616.4 3549.62 6
 -3 11 -9 63660 3265.78 5
 -3 11 -9 57342.2 2875.05 1
 -3 11 -10 23979.3 1998.62 1
 3 11 10 23863.3 2468.9 6
 3 11 10 19867.4 1927.83 2
 -3 11 -10 20596.8 1980.35 4
 -3 11 -11 1800.12 928.701 4
 3 11 11 4873.21 1223.96 2
 -3 11 -11 5857.22 1232.43 1
 -3 11 -12 1174.49 964.534 4
 -3 11 -12 3584 1211.5 1
 3 11 12 1775.17 976.164 2
 3 11 13 39587.1 2882.38 2
 -3 11 -13 39507.9 2920.88 4
 3 11 14 23619.8 2323.45 2
 -3 11 -14 25857 2448.33 4
 -3 11 -15 6990.3 1437.69 4
 3 11 15 7240.02 1521.85 2
 -3 11 -16 24001.3 2669.76 4
 3 11 16 24093 2429.35 2
 3 11 17 -398.03 1035.85 2
 -3 -11 -17 -893.129 1397.44 4
 -3 11 -18 -344.458 1157.56 4
 -3 -11 -18 -581.416 1693.12 4
 -3 -11 -19 39555 3862.91 4
 -3 11 -19 43950.7 3731.95 4
 -3 -11 -20 12743.3 2548.26 4
 -3 11 -20 11138.6 2282.06 4
 -3 13 20 2582.34 1561.64 2
 3 -13 -20 -2880.53 1860.19 4
 3 13 -20 -565.143 1720.91 4
 3 13 -19 71267.1 4869.9 4
 -3 13 19 56649.4 3978.27 2
 3 -13 -19 65872.5 4986.22 4
 3 13 -18 5279.63 1953.39 4
 3 13 -18 563.267 1092.33 5
 -3 13 18 3858.89 1515.11 2
 -3 13 17 2540.64 1279.18 2
 3 13 -17 2145.72 1363.82 4
 3 13 -16 1065.73 1222.19 4
 -3 13 16 476.754 1015.84 2
 3 13 -16 61.9443 1223.51 5
 3 13 -15 33907.3 2925.76 4
 3 13 -15 33804.1 2869.8 5
 -3 13 15 26665.9 2796.65 2
 3 13 -14 447.917 1172.14 4
 -3 13 14 2587.16 1217.18 2
 3 13 -14 -1226.54 1315.92 5
 3 13 -13 30758.5 2638.69 5
 -3 13 13 30986.8 2698.54 2
 3 13 -13 34521.6 2905.41 4
 3 13 -12 7843.43 1566.39 4
 3 13 -12 10552 1386.52 1
 3 13 -12 8225.75 1608.57 5
 -3 13 12 9854.4 1693.08 2
 3 13 -11 -77.1904 701.014 1
 3 13 -11 -782.623 1056.93 4
 -3 13 11 1210.02 1159.76 2
 3 13 -11 -820.319 991.385 5
 3 13 -10 3232.27 1167.39 4
 3 13 -10 2940.89 727.39 6
 3 13 -10 2090.37 833.082 1
 3 13 -10 4415.37 1267.32 5
 -3 13 10 3851.07 1322.84 2
 3 13 -9 16651.1 1341.74 6
 -3 13 9 17404.5 1922.53 2
 3 13 -9 19139 1613.4 1
 3 13 -9 18309.4 1943.48 5
 3 13 -9 20483.4 2144.87 4
 3 13 -8 3198.19 729.702 1
 -3 13 8 4248.92 544.541 5
 -3 13 8 2589.53 904.557 2
 3 13 -8 3838.85 1099.12 4
 3 13 -8 4538.35 866.68 6
 3 13 -8 2694.52 995.204 5
 3 13 -7 32191.7 2386.9 5
 3 13 -7 28692.5 1925.56 6
 3 13 -7 27018.6 2320.91 4
 -3 13 7 28336.3 1309.12 5
 3 13 -7 30320.6 1910.87 1
 -3 13 7 31069.7 2415.66 2
 -3 13 6 21588.1 1965.15 2
 3 13 -6 20885.5 1637.4 1
 3 13 -6 21286.4 1748.76 6
 3 13 -6 20592.1 1850.73 5
 -3 13 6 22882.7 1263.95 5
 3 13 -6 23818.7 2124.98 4
 3 13 -5 11335.6 1579.08 4
 -3 13 5 11825.6 995.912 5
 3 13 -5 11436.8 1374.07 6
 3 13 -5 11317.1 1484.24 5
 3 -13 -5 11335 1066.8 3
 -3 13 5 10187.5 1398.03 2
 3 13 -4 6099.71 1323.2 4
 -3 13 4 3929.87 642.153 5
 3 13 -4 4396.58 675.108 3
 3 13 -4 5316.97 1117.46 6
 -3 13 4 3373.69 993.818 2
 3 -13 -4 3784.46 576.089 3
 3 13 -4 2993.43 1011.27 5
 3 13 -3 248780 6152.01 6
 3 13 -3 244765 6023.25 4
 -3 13 3 249260 4658.57 5
 3 13 -3 248989 3807.23 3
 -3 13 3 259258 6035.31 2
 3 13 -2 21831.3 2017.57 6
 -3 13 2 22110.7 1911.18 2
 -3 13 2 20693.2 1440.31 5
 -3 13 1 21455.7 1838.95 2
 -3 13 1 20126.2 1497.4 5
 3 13 -1 21296.9 2047.73 6
 3 13 0 -892.232 899.283 6
 -3 13 0 48.1042 590.603 5
 -3 13 -1 3104.74 788.482 5
 3 -13 1 3312.78 390.887 3
 3 13 1 2397.04 326.44 3
 -3 13 -1 4011.48 889.16 2
 3 13 1 2754.04 969.922 6
 -3 13 -2 6284.58 999.108 2
 3 -13 2 5763.13 638.26 3
 3 13 2 4168.04 1169.73 6
 -3 13 -2 7156.17 1144.52 5
 3 13 2 5217.09 538.714 3
 -3 13 -3 308595 6581.08 4
 3 13 3 301489 4362.9 3
 -3 13 -3 306214 6298.4 5
 3 13 3 303953 7600.13 6
 -3 13 -3 311904 5763.52 2
 -3 13 -4 3004.86 948.754 4
 3 13 4 4387.05 1404.77 6
 -3 13 -4 3262.62 974.662 5
 -3 13 -4 3359.01 729.195 2
 -3 13 -5 1390 758.631 1
 3 13 5 -55.2098 846.128 6
 -3 13 -5 1163.25 773.87 4
 -3 13 -5 -17.7071 471.625 2
 -3 13 -5 840.263 760.922 5
 -3 13 -6 12314 1492.58 4
 -3 13 -6 15638.2 1625.27 1
 3 13 6 11472.3 1758.77 6
 -3 13 -6 13701 1134.05 2
 -3 13 -6 13538.2 1595.96 5
 -3 13 -7 1093.71 950.276 5
 -3 13 -7 472.719 391.899 2
 -3 13 -7 -138.221 853.944 4
 3 13 7 2720.43 1240.7 6
 -3 13 -7 2162.65 940.856 1
 3 13 8 -871.479 918.937 6
 -3 13 -8 135.102 408.112 2
 -3 13 -8 1078.64 1055.66 4
 -3 13 -8 868.386 939.23 5
 -3 13 -8 -719.145 821.767 1
 -3 13 -9 125256 4813.73 4
 3 13 9 121022 4907.91 2
 -3 13 -9 118093 4676.9 5
 3 13 9 119815 5232.5 6
 -3 13 -9 123775 4452.68 1
 -3 13 -10 59416.3 3519.63 4
 -3 13 -10 52517.7 3286.74 5
 -3 13 -10 52048.4 3009.46 1
 3 13 10 53632.6 3401.91 2
 -3 13 -11 853.42 851.088 1
 3 13 11 1368.98 1070.97 2
 -3 13 -11 -298.322 1115.45 4
 -3 13 -12 828.737 911.38 1
 3 13 12 1005.96 1025.65 2
 -3 13 -12 56.1406 1022.29 4
 -3 13 -13 54800.3 3275.67 1
 3 13 13 48215.7 3276.04 2
 -3 13 -13 56624.1 3597.42 4
 -3 13 -14 2217.7 1224.99 4
 3 13 14 2933.37 1309.86 2
 -3 13 -15 3576.13 1406.1 4
 3 13 15 2378.14 1278.82 2
 3 13 16 11625.5 1863.34 2
 -3 13 -16 9582.62 1863.37 4
 3 13 17 5509.4 1499.81 2
 -3 13 -17 9076.27 1984.09 4
 -3 13 -18 204.732 1177.12 4
 3 13 18 -91.6334 1171.55 2
 -3 -13 -19 53619.9 4613.54 4
 -3 13 -19 62712.3 4477.07 4
 -3 13 -20 6001.4 2148.06 4
 -3 15 20 436.606 1398.33 2
 -3 15 19 65580.1 4496.17 2
 3 15 -19 64405.5 4754.63 4
 -3 15 18 -939.798 1441.34 2
 3 15 -18 -1651.62 1508.75 4
 3 15 -18 1706.45 1408.23 5
 -3 15 17 2764.01 1385.75 2
 3 15 -17 1544.03 1435.52 5
 3 15 -17 -474.18 1533.12 4
 3 15 -16 6011.64 1776.04 4
 3 15 -16 6318.12 1674.16 5
 -3 15 16 5065.7 1643.69 2
 3 15 -15 10548.2 2001.55 4
 3 15 -15 7494.55 1862.8 5
 -3 15 15 9935.74 1946.65 2
 -3 15 14 9425.61 1821.21 2
 3 15 -14 6248.68 1565.26 4
 3 15 -14 7040.17 1617.71 5
 3 15 -13 97072.4 5015.28 4
 3 15 -13 94137 3895.33 1
 3 15 -13 89091.3 4586.62 5
 -3 15 13 91788.9 4637.72 2
 -3 15 12 115.783 1037.81 2
 3 15 -12 2124.94 970.938 1
 3 15 -12 2324.83 1449.66 4
 3 15 -12 1844.71 1215.65 5
 3 15 -11 6000.95 1542.12 5
 -3 15 11 5055.55 1412.35 2
 3 15 -11 3304.84 1287.18 4
 3 15 -11 3576.69 912.354 1
 3 15 -10 37522.2 3037.74 4
 3 15 -10 33355.3 2248.2 1
 -3 15 10 31556.7 2690.4 2
 3 15 -10 35988.2 2830.16 5
 3 15 -9 59544.7 2695.45 6
 3 15 -9 59402.3 3669.65 4
 -3 15 9 60639.3 3607.38 2
 3 15 -9 58424.8 2872.82 1
 3 15 -9 57487.7 3434.16 5
 3 15 -8 43179.4 2488.4 1
 3 15 -8 41629.9 2323.3 6
 -3 15 8 40160 2915.46 2
 3 15 -8 42056.9 3046.69 4
 3 15 -8 40979.3 2901.68 5
 3 15 -7 134.947 1059.34 4
 3 15 -7 -314.548 780.953 6
 3 15 -7 480.842 873.339 5
 -3 15 7 1602.44 1055.45 2
 -3 15 7 976.928 499.624 5
 3 15 -7 1276.5 779.38 1
 -3 15 6 4067.94 742.06 5
 3 15 -6 4413.01 1278.78 4
 3 15 -6 4640.44 1086.87 6
 3 15 -6 6104.83 1296.83 5
 -3 15 6 4103.8 1229.9 2
 -3 15 5 -712.557 1003.8 2
 3 15 -5 877.296 796.996 6
 -3 15 5 472.003 519.126 5
 3 15 -5 -449.057 838.355 5
 3 15 -5 -450.472 890.466 4
 3 15 -4 19915.9 2039.84 4
 3 15 -4 17097.4 1773.04 5
 -3 15 4 22241.2 2109.03 2
 3 15 -4 19692 1906.89 6
 -3 15 4 19594.6 1454.96 5
 3 15 -3 128633 4411.03 5
 -3 15 3 131511 4653.96 2
 3 15 -3 143273 4958.35 4
 -3 15 3 133079 3756.55 5
 3 15 -3 132812 4798.76 6
 -3 15 2 6262.69 1290.47 2
 3 15 -2 5697.54 1201.15 6
 -3 15 2 5784.41 944.648 5
 3 15 -1 45328.8 3011.8 6
 -3 15 1 41193.6 2573.76 2
 -3 15 1 38519.8 2246.04 5
 -3 15 0 1587.15 981.111 2
 3 15 0 534.898 861.964 6
 -3 15 0 1715.86 919.757 5
 -3 15 -1 20682.7 1775.29 5
 -3 15 -1 20630.1 1809.89 2
 3 15 1 20439 2219.6 6
 3 15 2 8585.55 1470.32 6
 -3 15 -2 9243.63 1365.96 5
 -3 15 -2 10163.7 1279.74 2
 3 15 3 105350 4785.99 6
 -3 15 -3 101901 3627.91 2
 -3 15 -3 102781 3962.28 5
 -3 15 -4 537.666 618.522 2
 -3 15 -4 -40.7639 796.851 4
 3 15 4 646.813 1094.85 6
 -3 15 -4 583.129 949.623 5
 -3 15 -5 -280.257 873.646 4
 -3 15 -5 1242.04 679.529 2
 3 15 5 1657.25 1292.11 6
 -3 15 -5 534.78 902.935 1
 -3 15 -5 573.871 884.861 5
 -3 15 -6 -1172.73 1065.91 4
 3 15 6 1830.03 970.523 6
 -3 15 -6 2127.26 933.881 1
 -3 15 -6 2331.75 1054.6 5
 -3 15 -6 1284.01 713.83 2
 -3 15 -7 7397.85 1437.05 4
 3 15 7 6302.36 1731.12 6
 -3 15 -7 4618.74 1233.81 1
 -3 15 -7 5111.19 1281.83 5
 -3 15 -7 6178.99 918.463 2
 3 15 8 50799.1 3560.37 6
 -3 15 -8 47015.6 3159.53 5
 3 15 8 49438.6 3379.65 2
 -3 15 -8 50784.1 3202.77 4
 -3 15 -8 51888.2 3162.91 1
 -3 15 -9 41181.9 3069.2 5
 -3 15 -9 44033.6 3122.86 4
 3 15 9 41192 3167.29 2
 -3 15 -9 41363.3 2824.84 1
 -3 15 -10 3951.38 1461.8 4
 -3 15 -10 1874.83 1085.06 5
 3 15 10 -480.903 1241.56 2
 -3 15 -10 1449.83 1032.11 1
 -3 15 -11 368.837 906.758 1
 3 15 11 1900.1 1204.68 2
 -3 15 -11 1713.28 1205.29 4
 -3 15 -12 152.933 955.435 1
 3 15 12 1199.79 1044.16 2
 -3 15 -12 -1724.45 1264.32 4
 3 15 13 23602.4 2565.18 2
 -3 15 -13 29450.2 3032.08 4
 -3 15 -13 26502.9 2479.4 1
 -3 15 -14 31849.9 3097.79 4
 -3 15 -14 29116.8 2587.42 1
 3 15 14 26766.8 2776.54 2
 3 15 15 6594.27 1791.46 2
 -3 15 -15 5088.55 1579.22 4
 3 15 16 -530.812 1163.65 2
 -3 15 -16 -846.226 1453.62 4
 -3 15 -17 4442.11 1910.38 4
 3 15 17 29.7238 1208.32 2
 3 15 18 3352.95 1473.83 2
 -3 15 -18 4099.72 1732.3 4
 -3 17 19 8295.19 2131.5 2
 3 17 -18 -1867.12 1621.81 5
 -3 17 18 -659.54 1409.4 2
 3 17 -17 -1708.29 1767.44 4
 3 17 -17 554.12 1503.62 5
 -3 17 17 3035.21 1486.39 2
 3 17 -16 11836.5 2351.4 4
 -3 17 16 10510.2 2079.66 2
 3 17 -16 11055.1 2290.09 5
 3 17 -15 2561.57 1495.08 4
 -3 17 15 1641.27 1331.68 2
 3 17 -14 71118.5 4418.35 5
 3 17 -14 64526.1 4440.27 4
 -3 17 14 65118.3 4254.89 2
 3 17 -13 47274.9 3738.41 4
 3 17 -13 44707.4 3544.72 5
 -3 17 13 44714.1 3579.14 2
 3 17 -13 48391.4 2972.83 1
 3 17 -12 -549.597 838.47 1
 -3 17 12 1981.2 1310.22 2
 3 17 -12 2274.41 1516.1 5
 3 17 -12 807.858 1232.19 4
 -3 17 11 -709.082 1080.67 2
 3 17 -11 -32.5841 1297.47 4
 3 17 -11 756.193 1240.35 5
 3 17 -11 -783.194 796.614 1
 -3 17 10 8063.21 1594.93 2
 3 17 -10 9211.25 1383.64 1
 3 17 -10 11916.9 2013.49 5
 3 17 -10 10237.4 1948.25 4
 -3 17 9 8559.43 1635.49 2
 3 17 -9 10383.5 1811.72 5
 3 17 -9 9389.57 1877.38 4
 3 17 -9 12324.6 1612.89 1
 3 17 -8 47991.2 3462.85 4
 3 17 -8 59664.3 3680.38 5
 3 17 -8 52241 2788.17 6
 -3 17 8 52642.4 3498.41 2
 3 17 -8 53890.3 3035.47 1
 -3 17 7 166.931 1094.72 2
 3 17 -7 -1356.68 1000.7 1
 3 17 -7 -208.464 1025 5
 3 17 -7 -1115.66 1381.58 4
 3 17 -7 558.647 870.081 6
 -3 17 6 13959.5 1889.07 2
 -3 17 6 15294.3 1315.52 5
 3 17 -6 14587.1 1882.66 5
 3 17 -6 13633.6 1677.8 6
 3 17 -6 15778.7 1990.5 4
 3 17 -5 262.796 841.865 6
 3 17 -5 57.0368 1005.74 5
 3 17 -5 1486.94 1173.52 4
 -3 17 5 237.22 572.997 5
 -3 17 5 1056.34 1032.68 2
 -3 17 4 7190.83 1455.54 2
 3 17 -4 9259.31 1720.05 4
 3 17 -4 7653.01 1402.96 6
 3 17 -4 5189.35 1180.23 5
 -3 17 4 6719.46 1018.1 5
 -3 17 3 934.659 961.623 2
 3 17 -3 947.878 965.73 5
 -3 17 3 2985.41 861.366 5
 3 17 -3 190.808 911.394 6
 -3 17 2 26667.3 1956.78 5
 3 17 -2 26782.3 2220.51 5
 3 17 -2 29110.8 2550.75 6
 -3 17 2 24613.7 2347.88 2
 -3 17 1 -495.27 847.407 2
 3 17 -1 978.744 935.883 6
 -3 17 1 47.9227 702.654 5
 -3 17 0 1845.26 953.948 2
 -3 17 0 2163.25 926.708 5
 3 17 0 2030.77 1028.52 6
 -3 17 -1 2595.14 1095.53 2
 -3 17 -1 3979.8 1106.23 5
 3 17 1 5764.22 1624.5 6
 -3 17 -2 81237.2 3641.42 5
 3 17 2 77519.8 4305.78 6
 -3 17 -2 82656.7 3572.94 2
 -3 17 -3 27150.5 2275.21 5
 3 17 3 29731.7 2775.98 6
 -3 17 -3 28425 2150.64 2
 3 17 4 36184.6 3081.41 6
 -3 17 -4 37582.2 2680.03 5
 -3 17 -4 37226.8 2367.23 2
 -3 17 -5 6324.16 1071.24 2
 -3 17 -5 5521.61 1328.95 5
 3 17 5 8725.85 1677.98 6
 -3 17 -5 9272.98 1646.53 4
 3 17 6 1309.87 1175.48 6
 -3 17 -6 1355.15 1184.83 1
 -3 17 -6 1635.34 1172.07 5
 -3 17 -6 776.176 669.417 2
 -3 17 -6 1071.52 1206.42 4
 -3 17 -7 17298.9 2112.33 4
 -3 17 -7 15716.2 1427.16 2
 -3 17 -7 15767.6 2089.03 5
 3 17 7 16808.1 2506.31 6
 -3 17 -7 11589.7 1745.47 1
 3 17 7 13897.2 1988.63 2
 -3 17 -8 130903 5333.22 5
 3 17 8 122332 5347.04 2
 -3 17 -8 126192 5056.79 1
 -3 17 -8 130702 5478.29 4
 -3 17 -9 24427.4 2400.21 1
 -3 17 -9 27578.7 2776.39 4
 -3 17 -9 24745.8 2528.35 5
 3 17 9 22558.2 2505.71 2
 -3 17 -10 7498.41 1873.06 4
 -3 17 -10 3219.41 1430.27 5
 3 17 10 8613.51 1937.51 2
 -3 17 -10 6230.23 1504.7 1
 -3 17 -11 331.598 1049.98 1
 3 17 11 2668.91 1382.02 2
 -3 17 -11 21.3669 1263.9 4
 -3 17 -12 4199.11 1432.98 4
 -3 17 -12 6540.63 1498.04 1
 3 17 12 3318.39 1266.31 2
 -3 17 -13 2111.85 1295.25 4
 -3 17 -13 6587.68 1589.36 1
 3 17 13 5765.88 1820.62 2
 -3 17 -14 45954.3 3730.53 4
 -3 17 -14 53248.3 3576.99 1
 3 17 14 57031.8 4104.37 2
 3 17 15 9787.64 2082.51 2
 -3 17 -15 6330.27 1908.24 4
 -3 17 -15 8164.45 1793.25 1
 -3 17 -16 -1467.81 1620.26 4
 3 17 16 -2193.7 1556.05 2
 -3 17 -17 2967.69 1804.9 4
 3 17 17 4085.34 1824.9 2
 3 17 18 291.566 1413.38 2
 -3 19 17 3333.74 1676.39 2
 3 19 -16 8528.4 2386.25 4
 -3 19 16 10315.4 2362.01 2
 3 19 -16 6557.96 1882.77 5
 3 19 -15 4711.84 1923.21 4
 -3 19 15 2786.37 1612.7 2
 3 19 -15 999.6 1309.21 5
 3 19 -14 55373.8 4231.61 4
 3 19 -14 49418.8 3985.09 5
 -3 19 14 45180.2 3891.36 2
 3 19 -13 -1616.29 1513.44 4
 -3 19 13 1083.64 1660.66 2
 3 19 -13 -840.939 1407.59 5
 3 19 -12 -158.284 1487.47 4
 3 19 -12 2271.54 1408.33 5
 -3 19 12 1482.71 1439.69 2
 3 19 -11 388.089 1426.59 4
 -3 19 11 1914.07 1503.29 2
 3 19 -11 1105.95 1261.36 5
 3 19 -11 -818.72 915.77 1
 3 19 -10 3904.4 1236.65 1
 -3 19 10 -2123.01 1496.42 2
 3 19 -10 -1111.75 1342.34 4
 3 19 -10 2098.24 1461.92 5
 3 19 -9 458.469 1216.07 4
 3 19 -9 -68.9525 1306.33 5
 3 19 -9 2781.48 1079.88 1
 -3 19 9 -1746.68 1501.29 2
 3 19 -8 62400.6 3972.06 5
 3 19 -8 65480.8 4215.56 4
 -3 19 8 64529.4 4095.82 2
 3 19 -8 62621.8 3478.44 1
 3 19 -7 921.997 1127.98 5
 -3 19 7 493.169 1036.76 2
 3 19 -7 1081.25 1275.53 4
 3 19 -7 256.892 898.051 1
 -3 19 6 6234.68 1672.71 2
 3 19 -6 5744.88 1625.06 5
 3 19 -6 7462.62 1728.63 4
 3 19 -6 5768.16 1243.64 6
 -3 19 5 1097.27 1233.07 2
 3 19 -5 1293.97 1131.53 5
 -3 19 5 2528.99 907.391 5
 3 19 -5 2221.05 1166.35 6
 -3 19 4 5769.57 1514.35 2
 3 19 -4 3885.06 1325 5
 3 19 -4 5005.9 1301.03 6
 -3 19 4 5578.99 1116.83 5
 3 19 -3 9095.53 1523.04 5
 -3 19 3 10484.8 1440.28 5
 -3 19 3 10145 1774.47 2
 3 19 -3 8378.49 1565.99 6
 -3 19 2 42522.6 2582.51 5
 3 19 -2 42454.8 2938.35 5
 -3 19 2 38940.9 2993.11 2
 3 19 -2 45959.1 3288.81 6
 -3 19 1 8198.28 1553.08 2
 3 19 -1 7640.65 1619.63 6
 3 19 -1 7280.84 1399.45 5
 -3 19 1 7028.08 1278.02 5
 -3 19 0 900.13 1003.94 2
 3 19 0 1067.53 953.338 5
 3 19 0 714.107 1179.83 6
 -3 19 0 -907.593 834.005 5
 -3 19 -1 25652.1 2375.33 2
 3 19 1 24706.7 2632.61 6
 -3 19 -1 22004.4 2027.47 5
 -3 19 -2 50273.6 3118.91 5
 3 19 2 49776.9 3620.43 6
 -3 19 -2 52820 3138.91 2
 -3 19 -3 -1332.82 1137.28 5
 3 19 3 -1188.95 1313.92 6
 -3 19 -3 627.558 943.622 2
 -3 19 -4 26619.6 2480.55 5
 -3 19 -4 28180.7 2173.77 2
 3 19 4 26129.3 2703.07 2
 3 19 4 28683.9 2891.1 6
 3 19 5 31225.7 2870.04 2
 -3 19 -5 26779.2 2256.04 2
 3 19 5 32513.7 3188.15 6
 -3 19 -5 34218.3 2844.08 5
 -3 19 -6 6209.04 1591.61 1
 -3 19 -6 5282.15 1477.81 4
 -3 19 -6 6682.68 1543.1 5
 3 19 6 6825.73 1789.01 2
 -3 19 -6 5940.84 1124.31 2
 -3 19 -7 28113.1 2745.09 1
 -3 19 -7 34113.9 2917.98 5
 -3 19 -7 29269.8 2860.45 4
 3 19 7 27345.7 2848.49 2
 3 19 8 87137.7 4844.29 2
 -3 19 -8 82776 4609.04 4
 -3 19 -8 79730.2 4459.13 5
 -3 19 -8 87466.3 4489.4 1
 -3 19 -9 406.124 1282.2 1
 -3 19 -9 515.866 1228.35 5
 3 19 9 -540.729 1208.13 2
 -3 19 -9 -501.798 1396.13 4
 -3 19 -10 5669.49 1766.89 5
 -3 19 -10 3523.31 1357.31 1
 -3 19 -10 5608.24 1732.1 4
 3 19 10 1119.17 1422.25 2
 -3 19 -11 2998.24 1379.65 4
 3 19 11 3356.68 1633.09 2
 -3 19 -11 3843.28 1460.33 1
 -3 19 -12 11724.4 1947.18 1
 -3 19 -12 13892.2 2383.11 4
 3 19 12 12641 2326.43 2
 -3 19 -13 2665.28 1612.14 1
 -3 19 -13 -436.137 1219.1 4
 3 19 13 740.494 1424.26 2
 -3 19 -14 45242.2 3509.17 1
 -3 19 -14 41328.7 3729.01 4
 3 19 14 42060.2 3830.03 2
 3 19 15 2683.77 1651.54 2
 -3 19 -15 2218.93 1609.48 4
 -3 19 -15 2465.09 1500.75 1
 3 19 16 4324.64 1690.35 2
 -3 19 -16 1031.01 1485.34 4
 3 21 -14 19569.9 2695.25 5
 -3 21 14 19514.4 2823.96 2
 3 21 -14 21746.1 3130.41 4
 3 21 -13 7728.64 2251.55 4
 -3 21 13 9226.56 2154.32 2
 3 21 -13 7332.61 1992.97 5
 -3 21 12 6342.09 1675.86 2
 3 21 -12 13450.2 2368.62 4
 3 21 -12 12839.5 2267.91 5
 -3 21 11 499.168 1113.35 2
 3 21 -11 329.972 1522.8 4
 3 21 -11 3937.45 1827.91 5
 3 21 -10 4189.21 1378.08 5
 -3 21 10 7076.04 1846.22 2
 3 21 -10 7025.18 2156.67 4
 3 21 -9 8960.82 1951.71 5
 -3 21 9 7490.83 1853.77 2
 3 21 -9 10485.7 2231.86 4
 3 21 -9 10929.5 1749.86 1
 -3 21 8 27217.3 3007.51 2
 3 21 -8 24324.3 2532.68 1
 3 21 -8 20591.6 2535.4 5
 3 21 -8 21959.1 2826.22 4
 3 21 -7 2917.99 1605.03 4
 -3 21 7 3965.12 1494.85 2
 3 21 -7 3510.36 1320.3 1
 3 21 -7 4311.89 1295.08 2
 3 21 -7 2813.45 1340.23 5
 -3 21 6 -900.512 1402.31 2
 3 21 -6 1820.3 1218.94 5
 3 21 -6 792.278 1034.28 2
 -3 21 5 1487.45 1322.13 2
 3 21 -5 424.916 1131.13 5
 -3 21 4 14216.1 2113.61 2
 3 21 -4 10960.3 1812.24 5
 -3 21 4 14473.5 1650.09 5
 3 21 -4 15918.9 2113.08 6
 3 21 -3 44824.2 3303.84 5
 3 21 -3 48250.4 3407.58 6
 -3 21 3 42189.6 2677.07 5
 -3 21 3 48024.6 3468.32 2
 -3 21 2 36199.4 2643.17 5
 -3 21 2 33187.2 2942.91 2
 3 21 -2 32154.4 2771.34 5
 3 21 -2 40523 3276.25 6
 -3 21 1 7516.59 1777.17 2
 3 21 -1 8337.9 1808.87 6
 -3 21 1 5937.04 1345.38 5
 3 21 -1 4931.88 1463.63 5
 -3 21 0 2638.06 1365.11 2
 3 21 0 -1313.43 1412.28 2
 3 21 0 1799.59 961.567 5
 -3 21 0 1215.36 969.423 5
 3 21 0 1834.12 1374.38 6
 3 21 1 8188.23 1908.21 6
 -3 21 -1 4941.69 1344.19 5
 -3 21 -1 7218.46 1692.75 2
 3 21 1 4316.82 1523.67 2
 3 21 1 5325.11 1355.29 5
 -3 21 -2 4826.98 1331.85 2
 3 21 2 4568.42 1191.99 5
 -3 21 -2 4073.16 1320.9 5
 3 21 2 4217.46 1485.11 2
 3 21 3 14223.4 1759.97 5
 -3 21 -3 15225.6 2018.54 2
 -3 21 -3 15876.4 2091.13 5
 3 21 3 11065 2198.09 2
 3 21 4 32245.5 2481.21 5
 -3 21 -4 35842.4 2968.43 5
 -3 21 -4 32447.3 2608.67 2
 3 21 4 38047.6 3395.87 2
 -3 21 -5 4413.56 1218.45 2
 -3 21 -5 8373.17 1743.01 5
 3 21 5 6783.32 1893 2
 -3 21 -6 328.048 1270.88 1
 -3 21 -6 1780.88 1273.27 5
 3 21 6 3841.5 1713.74 2
 -3 21 -7 19320.4 2512.37 5
 -3 21 -7 21473.2 2565.91 1
 3 21 7 15309.9 2473.39 2
 -3 21 -8 47770.8 3747.98 5
 -3 21 -8 40628.9 3568.5 4
 3 21 8 52897.7 4009.08 2
 -3 21 -8 54354.4 3921.17 1
 3 21 9 2717.34 1756.63 2
 -3 21 -9 4188.54 1565.71 1
 -3 21 -9 1591.44 1282.3 5
 -3 21 -9 1402.42 1169.64 4
 3 21 10 1257.43 1323.4 2
 -3 21 -10 5569.66 1587.16 1
 -3 21 -10 4096.34 1513.97 5
 -3 21 -10 3689.71 1429.47 4
 -3 21 -11 -247.748 1486.7 4
 -3 21 -11 -595.668 1364.44 1
 3 21 11 381.625 1520.5 2
 -3 21 -12 -54.268 1476.05 4
 -3 21 -12 848.336 1343.63 1
 3 21 12 1412.29 1458 2
 -3 21 -13 2364.59 1384.86 1
 -3 21 -13 931.668 1632.57 4
 3 21 13 4225.82 1753.14 2
 -3 21 -14 15281.7 2745.07 4
 -3 21 -14 15548.2 2384.45 1
 -3 21 -15 751.7 1323.55 1
 -3 23 11 1160.16 1538.73 2
 3 23 -11 -1116.3 1355.15 5
 3 23 -11 3779.57 1987.57 4
 3 23 -10 19999.2 2753.56 5
 -3 23 10 20691.8 2842.27 2
 3 23 -10 21876.7 3011.12 4
 -3 23 9 7121.58 2214.5 2
 3 23 -9 5599.46 1860.26 4
 3 23 -9 8614.25 1975.09 5
 -3 23 8 1389.56 1532.98 2
 3 23 -8 1043.06 1337.88 5
 3 23 -7 292.816 1309.68 5
 -3 23 7 7.04696 1401.21 2
 3 23 -7 -704.738 1048.66 1
 -3 23 6 18480.4 2543.82 2
 3 23 -6 14477.1 2272.51 5
 3 23 -6 15153 2056.8 2
 -3 23 5 10939.7 2269.78 2
 3 23 -5 10989.7 2008.25 5
 3 23 -5 14098.8 2107.01 2
 3 23 -4 23115.5 2613.29 5
 -3 23 4 21319.7 2600.08 2
 3 23 -4 24810.2 2740.19 2
 3 23 -3 51609.1 3683.38 5
 3 23 -3 56301.7 3946.18 2
 -3 23 3 50317.9 3797.42 2
 -3 23 2 3394.79 1453.59 2
 3 23 -2 1746.56 1226.99 5
 -3 23 2 3019.06 1246.69 5
 3 23 -2 2377.07 1462.31 2
 -3 23 1 359.932 1056.43 2
 3 23 -1 1284.26 1132.92 5
 3 23 -1 1455.78 1313.29 2
 -3 23 1 249.354 1008.89 5
 3 23 0 -459.774 964.669 5
 -3 23 0 84.1938 1073.47 5
 3 23 0 380.902 1120.33 2
 -3 23 0 -131.529 1349.35 2
 3 23 1 -1569.86 1545.61 2
 -3 23 -1 1226.42 1065.68 5
 3 23 1 1383.95 1123.61 5
 -3 23 -1 604.541 1129.1 2
 3 23 2 2419.61 1194.26 5
 3 23 2 517.924 1182.88 2
 -3 23 -2 -63.7722 1084.08 5
 -3 23 -2 867.705 1337.86 2
 -3 23 -3 43997.7 3391.02 5
 3 23 3 35978.3 3469.91 2
 3 23 3 35700.9 2782.92 5
 -3 23 -3 33076.8 3121.45 2
 -3 23 -4 25645.8 2587.96 2
 3 23 4 26117.1 2431.29 5
 -3 23 -4 26392 2770.35 5
 3 23 4 23124.6 2905.54 2
 -3 23 -5 2757.54 1441.25 5
 -3 23 -5 -904.254 1415.18 1
 3 23 5 -644.672 1491.43 2
 -3 23 -6 4569.79 1689.74 5
 -3 23 -6 7584.33 1955.77 1
 3 23 6 4531.61 1718.65 2
 -3 23 -7 -163.926 1422.66 5
 -3 23 -7 -432.261 1300.39 1
 3 23 7 -26.4347 1559.43 2
 -3 23 -8 -1160.92 1746.74 5
 3 23 8 1923.82 1523.06 2
 -3 23 -8 -972.22 1305.38 1
 -3 23 -9 9922.1 2205.23 5
 3 23 9 6585.82 2160.17 2
 -3 23 -9 10608.8 2129.1 1
 -3 23 -9 6941.45 2102.92 4
 -3 23 -10 5257.1 1804.51 1
 -3 23 -10 1939.68 1438.55 4
 -3 23 -10 3988.34 1807.23 5
 3 23 10 2723.14 1934.97 2
 -3 23 -11 1955.16 1442.48 1
 -3 23 -11 -1300.77 1804.27 4
 -3 23 -12 20422.1 2718.95 1
 -3 23 -13 12402.9 2235.04 1
 3 25 -8 5449.58 1841.72 5
 -3 25 8 4807.95 1783.76 2
 3 25 -7 2697.34 1581.5 5
 -3 25 7 6165.74 2205.72 2
 3 25 -6 1418.68 1372.84 5
 -3 25 6 2574.47 1503.54 2
 3 25 -5 -728.045 1257.56 2
 -3 25 5 -1380.12 1666.84 2
 3 25 -5 1135.75 1526.93 5
 3 25 -4 19580.5 2574.31 5
 -3 25 4 16809.3 2621.02 2
 3 25 -4 14974.7 2281.91 2
 3 25 -3 21674.1 2661.46 5
 -3 25 3 23282.4 2846.77 2
 3 25 -3 16932.2 2459.14 2
 -3 25 2 5551.19 1902.99 2
 3 25 -2 3045.47 1550.77 2
 3 25 -2 4642.37 1605.44 5
 -3 25 1 8159.71 1765.11 5
 -3 25 1 7457.01 1943.09 2
 3 25 -1 7734.79 1640.36 5
 3 25 -1 6791.5 1886.55 2
 -3 25 0 2226.62 1465.81 2
 -3 25 0 -1237.05 1336.26 5
 3 25 0 2733.43 1742.81 2
 3 25 0 1632.59 1099.79 5
 3 25 1 13858.4 2058.35 5
 -3 25 -1 14077.6 2211.54 2
 -3 25 -1 17009.5 2262.75 5
 3 25 1 16115.7 2587.73 2
 -3 25 -2 1850.19 1453.62 2
 3 25 2 920.208 1488.76 2
 3 25 2 -1166.69 1303.82 5
 -3 25 -2 -1571.46 1434.44 5
 -3 25 -3 8771.67 1899.17 5
 -3 25 -3 7405.6 1775.82 2
 3 25 3 10368.7 2077.52 2
 -3 25 -4 1443.68 1425.87 5
 3 25 4 -1404.67 1922.55 2
 -3 25 -5 2460.68 1739.38 5
 3 25 5 2526.4 1771.4 2
 -3 25 -5 3073.02 1684.67 1
 -3 25 -6 11261.4 2170.39 1
 -3 25 -6 14249.9 2452.85 5
 3 25 6 8691.34 2135.07 2
 -3 25 -7 26770.6 3151.43 5
 3 25 7 21786.5 3076.17 2
 -3 25 -7 21051.9 2857.26 1
 -3 25 -8 -840.401 1558.36 1
 -3 25 -8 -723.02 1488.14 5
 -3 25 -9 3847.36 1854 1
 -3 25 -10 1398.35 1524.56 1
 -3 27 4 1997.3 1742.09 2
 3 27 -4 1043.34 1484.52 5
 3 27 -3 2954.14 1551.52 5
 -3 27 3 2627.59 1521.45 2
 3 27 -3 1006.25 1448.22 2
 -3 27 2 -586.512 1456.4 2
 3 27 -2 2163.03 1374.45 5
 3 27 -2 -463.842 1402.27 2
 3 27 -1 26338.7 2951.03 5
 3 27 -1 22137.7 2971.68 2
 -3 27 0 2379.62 1447.89 2
 3 27 0 -280.96 1445.17 2
 3 27 0 -390.077 1322.24 5
 -3 27 -1 13990.1 2179.86 5
 -3 27 -1 16462 2547.86 2
 3 27 1 10417.8 2413.75 2
 3 27 1 14882.2 2227.22 5
 -3 27 -2 968.782 1304.59 5
 3 27 2 -100.771 1710.1 2
 -3 27 -3 1334.37 1340.8 5
 -3 27 -4 -2322.76 1714.69 5
 -3 27 -5 10469.3 2272.05 1
 4 0 -22 157867 7162.12 4
 4 0 -21 -2906.67 1845.59 4
 4 0 -20 4867.55 1795.81 4
 4 0 -19 277.843 1227.17 4
 4 0 -18 20824.5 2400.11 4
 4 0 -17 -122.978 1025.28 4
 -4 0 16 198554 4858.57 2
 4 0 -16 180977 6192.97 4
 4 0 -15 1915.78 1181.03 4
 -4 0 15 24.2476 533.372 2
 -4 0 14 37164.2 2029.94 2
 4 0 -14 36827 2766.46 4
 4 0 -13 -300.971 880.136 4
 -4 0 13 69.9104 511.86 2
 -4 0 12 103948 3128.31 2
 4 0 -12 100643 3911.76 4
 4 0 -11 74.9774 351.104 5
 4 0 -11 -295.434 770.054 4
 -4 0 11 173.581 427.636 2
 4 0 -10 3090.13 538.098 5
 -4 0 10 2742.94 625.074 2
 4 0 -10 3493.48 926.168 4
 4 0 -9 119.824 312.22 5
 4 0 -9 -300.126 586.615 4
 -4 0 9 9.28209 375.734 2
 -4 0 8 30288.6 1542.12 2
 4 0 -8 32467.3 1798.62 4
 4 0 -7 -211.032 393.161 4
 4 0 -7 344.465 270.622 5
 -4 0 7 165.141 340.23 2
 -4 0 6 281549 4094.72 2
 4 0 -6 282344 4499.04 4
 4 0 -5 -16.8469 221.643 2
 -4 0 5 -82.1804 269.996 2
 -4 0 4 384320 4449.37 2
 -4 0 4 375088 4348.75 4
 4 0 -4 388579 4400.59 2
 4 0 -4 381474 4282.28 4
 -4 0 3 57.7022 284.745 2
 -4 0 3 21.6575 185.843 4
 4 0 -3 24.853 223.476 2
 4 0 -3 102.124 177.294 4
 4 0 -2 614131 5206.26 2
 4 0 -2 619460 3788 4
 -4 0 2 623615 5243.04 2
 -4 0 2 633785 4051.78 4
 -4 0 1 520 261.313 2
 4 0 -1 91.2037 173.791 2
 -4 0 1 184.513 126.062 1
 4 0 0 69202.9 1664.31 2
 -4 0 0 68152.2 1306.09 1
 4 0 0 66403.3 1610.48 6
 4 0 0 68723.6 1380.16 1
 -4 0 -1 63.3944 137.793 6
 4 0 1 -68.2011 196.699 2
 4 0 1 237.717 184.774 6
 -4 0 -1 346.117 206.291 1
 4 0 1 -69.2517 160.945 1
 -4 0 -2 57402.5 1124.93 4
 4 0 2 56697 1600.92 1
 -4 0 -2 58184.9 1546.16 6
 4 0 2 58338.4 1571.61 6
 4 0 3 140.101 226.252 1
 -4 0 -3 -188.35 196.848 6
 -4 0 -3 59.8093 197.419 4
 4 0 3 -334.027 268.52 6
 4 0 3 342.556 680.898 3
 4 0 4 19734.8 1652.99 3
 -4 0 -4 21499.7 1043.58 6
 -4 0 -4 19420.2 969.844 4
 4 0 4 22442.2 1103.07 6
 -4 0 -5 163.082 283.701 4
 4 0 5 161.452 327.823 6
 4 0 5 -163.805 639.503 3
 -4 0 -5 -100.688 244.565 6
 -4 0 -6 183161 3606.06 4
 4 0 6 189999 3694.42 6
 -4 0 -6 193582 3362.79 6
 4 0 6 188913 5604.51 3
 4 0 7 -254.265 938.379 3
 -4 0 -7 -244.411 492.515 4
 4 0 7 -215.659 428.278 6
 -4 0 -8 1260.23 461.723 4
 4 0 8 596.912 801.613 3
 4 0 8 1190.68 495.629 6
 -4 0 -9 -260.027 513.76 4
 4 0 9 -652.24 805.423 3
 4 0 9 -515.112 439.653 6
 4 0 10 55209 2264.13 6
 4 0 10 48724.7 3447.86 3
 -4 0 -10 49135.4 2482.26 4
 4 0 10 50905 1767.88 2
 4 0 11 -1409.9 1271.31 3
 -4 0 -11 418.639 622.226 4
 4 0 11 -342.47 388.028 2
 4 0 12 41273.9 3450.59 3
 -4 0 -12 46266.7 2642.65 4
 4 0 12 39485.6 1615.33 2
 4 0 13 34.187 420.86 2
 4 0 13 -1530.9 1217.95 3
 -4 0 -13 43.2953 851.134 4
 -4 0 -14 304.619 836.834 4
 -4 0 -15 -1226.11 1021.4 4
 -4 0 -16 105511 4739.77 4
 -4 0 -17 314.225 1106.74 4
 -4 0 -18 4482.15 1521.44 4
 -4 0 -19 1695.44 1504.62 4
 -4 0 -20 6418.39 1722.31 4
 -4 0 -21 -2044.79 1653.5 4
 -4 0 -22 106244 5920.81 4
 4 -2 -22 77695.6 5204.92 4
 4 2 -22 63548.9 4674.54 4
 4 -2 -21 5812.01 1862.05 4
 4 2 -21 3777.12 1640.89 4
 4 2 -20 223.251 1478 4
 4 -2 -20 1738.91 1565.06 4
 4 2 -19 7684.27 1927.36 4
 4 -2 -19 4688.99 1676.35 4
 4 -2 -18 56099 3956.18 4
 4 2 -18 57673 3810.44 4
 -4 2 17 396.652 762.109 2
 4 -2 -17 1368.4 1112.82 4
 4 2 -17 3156.31 1388.76 4
 4 2 -16 97735.9 4527.63 4
 4 -2 -16 100217 4743.62 4
 -4 2 16 102956 3762.27 2
 -4 2 15 282.727 585.859 2
 -4 -2 15 -400.853 549.418 2
 4 2 -15 612.797 937.512 4
 4 -2 -15 60.7734 998.888 4
 4 -2 -14 48548.2 3144.02 4
 -4 -2 14 49600.3 2174.56 2
 4 2 -14 49217.7 2965.77 4
 -4 2 14 46570.6 2435.29 2
 4 2 -13 24616.6 2097.45 4
 -4 2 13 26953 1800.53 2
 -4 -2 13 26316.4 1549.25 2
 4 2 -13 25008.4 1587.98 5
 4 -2 -13 27459.6 2319.27 4
 4 2 -12 29849.7 1649.96 5
 4 -2 -12 29378.4 2315.93 4
 -4 -2 12 29654.9 1576.42 2
 -4 2 12 30347.6 1840.59 2
 4 2 -12 30634.7 2180.75 4
 -4 2 11 136310 3696.56 2
 -4 -2 11 138525 3231.65 2
 4 -2 -11 143936 4637.62 4
 4 2 -11 136798 3336.3 5
 4 2 -11 138159 4255.57 4
 -4 2 10 101148 3060.79 2
 4 2 -10 94683.5 3307.72 4
 4 2 -10 94870.4 2691.55 5
 4 -2 -10 95483.7 3660.13 4
 -4 -2 10 94840.8 2607.95 2
 4 -2 -9 33526.6 1057.57 5
 -4 2 9 33764 1747.2 2
 4 2 -9 34746.9 1976.34 4
 4 2 -9 32594.8 1524.95 5
 -4 -2 9 31873.2 1492.6 2
 4 -2 -9 35205.8 2146.81 4
 4 2 -8 4224.39 598.634 5
 -4 -2 8 4270.41 560.587 2
 4 -2 -8 3621.98 769.529 4
 4 -2 -8 3927.05 357.918 5
 -4 2 8 3803.55 708.194 2
 4 2 -8 5561.59 839.683 4
 -4 2 7 158269 3412.08 2
 4 -2 -7 149864 3883.89 4
 4 2 -7 152910 3488.21 4
 4 -2 -7 158998 1911.04 5
 4 2 -7 162541 2997.45 2
 -4 -2 7 153869 2989.39 2
 4 2 -7 155741 2986.11 5
 4 2 -6 297219 4062.32 2
 -4 2 6 317601 4648.29 2
 4 2 -6 308014 4596.41 4
 -4 -2 6 312487 4121.62 2
 -4 -2 5 72733.5 1955.42 2
 4 2 -5 72716.4 1902.77 2
 -4 2 5 71573.5 2131.31 2
 4 2 -5 72655.4 2043.93 4
 -4 -2 4 36076.5 1356.46 2
 -4 -2 4 36877.7 1339.26 4
 -4 2 4 37361.4 1475.46 2
 4 2 -4 37640.8 1361.18 2
 -4 -2 4 36634.1 793.843 1
 4 2 -4 35257.2 1304.32 4
 4 -2 -3 511690 5143.35 2
 4 2 -3 473046 4574.08 6
 4 2 -3 491897 4812.91 2
 -4 -2 3 501896 4359.83 4
 -4 2 3 489650 5082.92 2
 4 2 -3 493520 4380.18 4
 4 -2 -2 19440.6 985.659 2
 -4 2 2 18209.9 957.605 2
 -4 -2 2 18813.8 751.251 4
 4 2 -2 22324 845.972 4
 4 2 -2 18973 971.362 2
 4 2 -2 18084.3 909.323 6
 4 2 -1 21457.9 757.836 4
 -4 2 1 21183.8 1013.93 2
 -4 -2 1 21291.2 989.857 6
 -4 -2 1 21393.1 714.517 4
 4 -2 -1 22886 1019.97 2
 4 2 -1 21625 1025.88 6
 -4 -2 0 592396 3655.14 4
 4 -2 0 610046 5002.59 2
 -4 -2 0 614298 5426.68 6
 4 -2 0 613345 3336.83 4
 -4 2 0 616419 4964.69 2
 4 2 0 617590 5483.94 6
 -4 2 -1 62628.5 1120.84 4
 4 -2 1 60871.1 1679.36 1
 4 2 1 59897.9 1792.85 6
 4 -2 1 62180.9 1539.49 2
 -4 -2 -1 64072.5 1812.82 6
 -4 2 -1 62786.7 1677.57 1
 4 -2 1 64503.3 1115.95 4
 -4 2 -1 62970.3 1523.67 2
 4 -2 2 73897.4 2022.89 1
 4 2 2 74502.3 2100.77 6
 4 -2 2 74758.9 1607.01 6
 4 -2 2 69515 1593.85 2
 -4 2 -2 75602.5 1396.12 4
 4 -2 2 76404.4 1400.06 4
 -4 -2 -2 78129.5 2084.53 6
 -4 2 -2 75522.8 1955.65 1
 -4 2 -2 72168.6 1552.49 2
 4 2 3 9358.63 840.439 6
 4 -2 3 9343.63 589.617 6
 4 -2 3 8824.15 563.346 2
 4 -2 3 8441.92 1059.44 3
 -4 2 -3 8314.55 737.576 1
 -4 -2 -3 9395.44 800.74 6
 4 2 3 10188.9 1186.96 3
 -4 2 -3 9214.99 589.652 4
 4 -2 3 9962.73 611.636 4
 -4 2 -4 13752.8 671.945 6
 4 -2 4 12864.9 698.711 6
 4 2 4 15613.3 1467.82 3
 4 2 4 15169.8 1135.75 6
 4 -2 4 13525.4 1420.12 3
 -4 2 -4 14749.4 1007.72 1
 4 -2 4 13114.7 817.531 4
 4 -2 4 12578.3 631.784 2
 -4 2 -4 13839.1 797.885 4
 4 -2 5 108840 4097.95 3
 4 2 5 109098 4039.11 3
 4 2 5 106578 3019.08 6
 -4 2 -5 103652 2368.69 4
 -4 2 -5 106387 1879.79 6
 4 -2 5 108646 1806.17 2
 4 -2 5 111177 2128.14 6
 4 -2 6 115912 4423.92 3
 4 -2 6 121751 2448.52 6
 4 2 6 120814 4452.31 3
 4 2 6 117463 3369.51 6
 -4 2 -6 121062 2789.4 4
 -4 2 -6 120751 2116.92 6
 4 -2 6 118220 1901.08 2
 4 -2 7 2275.49 440.311 6
 -4 -2 -7 1364.63 490.339 4
 4 2 7 2335.64 631.831 6
 4 -2 7 2655.82 979.324 3
 4 2 7 3315.19 1140.39 3
 -4 2 -7 1715.32 305.379 6
 -4 2 -7 3223.27 646.617 4
 -4 2 -8 3931.66 471.525 6
 -4 -2 -8 2423.25 696.22 4
 4 2 8 3704.95 1127.63 3
 4 -2 8 3266.88 543.686 6
 -4 2 -8 3470.45 700.668 4
 4 2 8 3050.91 804.146 6
 4 -2 8 4354.29 1254.18 3
 4 2 9 -93.0443 588.923 6
 4 -2 9 1888.17 1185.98 3
 4 2 9 1131.77 991.328 3
 4 -2 9 243.02 339.668 6
 -4 -2 -9 414.211 572.554 4
 -4 2 -9 319.324 483.26 4
 -4 2 -9 503.977 322.613 6
 -4 2 -10 18857.8 1543.49 4
 4 2 10 18326.2 1529.6 6
 -4 -2 -10 17831.9 1631 4
 4 2 10 20008.3 2309.15 3
 -4 2 -10 17727.5 1031.42 6
 4 -2 10 17605.6 800.833 2
 4 -2 10 16513.3 2037.81 3
 -4 -2 -11 108176 4004.2 4
 4 2 11 111948 5249.3 3
 4 -2 11 102864 1916.66 2
 4 2 11 104650 3537.15 6
 -4 2 -11 107166 3725.99 4
 4 -2 11 102948 5119.93 3
 -4 2 -11 104107 2528.35 6
 4 2 11 100186 2992.15 2
 -4 2 -12 65154.6 3087.74 4
 4 2 12 65202.1 4254.11 3
 4 -2 12 72210.4 4457.93 3
 -4 -2 -12 62521.5 3228.38 4
 4 2 12 61834.1 2404.6 2
 4 -2 12 71554.7 1628.3 2
 4 -2 13 29290.3 3079.95 3
 4 2 13 22570.7 2650.12 3
 -4 2 -13 24526.3 2028.01 4
 4 2 13 28260.6 1638.53 2
 -4 -2 -13 25661.8 2226 4
 4 2 14 3471.94 737.236 2
 -4 -2 -14 2276.96 993.727 4
 -4 2 -14 2259.89 916.469 4
 -4 -2 -15 -595.647 1045.32 4
 -4 2 -15 -97.8792 908.076 4
 -4 -2 -16 60597.9 3731.65 4
 -4 2 -16 63649.6 3705.91 4
 -4 -2 -17 66949 4138.36 4
 -4 2 -17 60237.6 3737.59 4
 -4 -2 -18 4207.82 1436.12 4
 -4 2 -18 516.697 1302.19 4
 -4 -2 -19 16978.8 2489.18 4
 -4 2 -19 16294.7 2315.62 4
 -4 2 -20 -139.4 1296.17 4
 -4 -2 -20 221.424 1362.88 4
 -4 2 -21 -2055.86 1820.62 4
 -4 -2 -21 455.087 1354.05 4
 -4 2 -22 44861.8 3971.13 4
 -4 -2 -22 55315.8 4498.08 4
 4 -4 -22 3454.43 1878.82 4
 4 4 -22 -161.091 1359.64 4
 4 -4 -21 23802.9 3134.72 4
 4 4 -21 25710.8 3049.99 4
 4 -4 -20 8210.5 1892.45 4
 4 4 -20 10123.6 2183.11 4
 4 -4 -19 -67.5556 1466.56 4
 4 4 -19 291.378 1187.23 4
 4 -4 -18 11778.2 2231.25 4
 4 4 -18 12699.1 2047.9 4
 -4 4 17 118201 4372.95 2
 4 -4 -17 104175 5243.63 4
 4 4 -17 117639 5164.08 4
 4 4 -16 6428.85 1543.66 4
 -4 4 16 5588.16 1151.82 2
 4 -4 -16 6165.32 1651.91 4
 -4 4 15 4266.14 1048.19 2
 4 4 -15 3150.78 974.217 4
 4 -4 -15 3090.57 1176.47 4
 4 4 -15 4538.12 1008.88 5
 -4 4 14 -40.1052 667.409 2
 4 -4 -14 609.851 1062.71 4
 4 4 -14 768.785 731.825 5
 4 4 -14 950.916 1074.08 4
 4 -4 -13 24884.6 2312.11 4
 -4 4 13 25790.5 1864.36 2
 4 4 -13 24686.3 1767.35 5
 4 4 -13 23954.5 2050.67 4
 4 -4 -12 3188.28 1031.46 4
 4 4 -12 5486.75 1002.4 5
 -4 4 12 5627.85 983.839 2
 4 4 -12 4469.83 1127.79 4
 4 -4 -11 166749 5304.32 4
 -4 4 11 169994 4458.22 2
 4 4 -11 172401 4163.79 5
 4 4 -11 168206 4715.17 4
 4 4 -10 164553 3904.48 5
 -4 4 10 161936 4194.46 2
 4 4 -10 162075 4431 4
 4 4 -9 79380.9 2637.49 5
 4 4 -9 78485.6 2937.56 4
 -4 4 9 75190.6 2803.41 2
 4 4 -8 9619.93 1046.21 4
 4 4 -8 8621.97 900.872 5
 -4 4 8 8669.46 941.142 2
 4 4 -7 72266.6 1939.51 6
 -4 -4 7 68220.6 1891.72 1
 -4 4 7 74505.9 2576.73 2
 4 4 -7 74051.9 2521.08 4
 4 4 -7 72785.5 2003.12 2
 -4 -4 6 71191.7 1713.65 1
 4 4 -6 69518.1 1930.18 2
 -4 4 6 72791.4 2462.18 2
 4 4 -6 69548.4 2341.23 4
 -4 4 5 277218 4580.5 2
 -4 -4 5 279631 3015.54 1
 4 4 -5 281419 4382.04 4
 4 4 -5 277810 3906.38 2
 4 4 -5 264808 3654.95 6
 -4 4 4 151132 3258.51 2
 4 4 -4 148455 2754.35 6
 4 4 -4 152479 1826 1
 4 4 -4 147585 3011.48 4
 -4 -4 3 -44.2054 220.646 6
 -4 4 3 15.3034 318.919 2
 4 4 -3 149.146 266.373 6
 4 4 -3 831.468 311.188 4
 4 4 -3 192.998 111.277 1
 -4 -4 3 287.523 232.22 4
 -4 -4 2 277666 3904.66 6
 -4 4 2 278130 4017.25 2
 4 4 -2 288061 4019.89 6
 -4 -4 2 280959 3564.94 4
 4 4 -2 285781 3799.06 4
 -4 -4 1 168527 2731.98 4
 4 4 -1 165180 3155.06 6
 4 -4 -1 168558 3026.45 2
 4 4 -1 167149 2713.14 4
 -4 4 1 159685 2972.71 2
 -4 -4 1 167218 3132.16 6
 4 -4 0 30759 1119.85 4
 -4 -4 0 28398 1134.25 4
 4 4 0 29524.1 1427.11 6
 4 -4 0 30733.1 1238.16 2
 -4 4 0 29176.1 1192 2
 4 -4 1 5498.74 482.187 4
 -4 4 -1 5303.64 534.119 2
 4 4 1 5923.47 725.276 6
 -4 4 -1 5300.08 492.314 4
 4 -4 1 4898.9 500.291 2
 -4 4 -2 25291.3 1088.65 4
 4 -4 2 24587.4 1013.7 2
 -4 4 -2 25656.2 1293.31 1
 -4 4 -2 24514.4 990.687 2
 4 4 2 23880.7 1426.26 6
 4 -4 2 24063.7 1012.2 4
 -4 4 -3 -0.29619 239.977 4
 4 -4 3 36.0293 480.87 3
 4 4 3 764.85 493.94 3
 4 -4 3 10.9806 164.376 2
 4 -4 3 206.534 226.533 4
 4 4 3 -355.48 408.353 6
 -4 4 -3 120.209 375.234 1
 -4 4 -3 300.071 217.196 2
 -4 4 -4 78770 1502.37 2
 4 -4 4 76248.5 3225.88 3
 4 -4 4 76400.8 1550.02 2
 4 4 4 78027.5 3180.64 3
 4 4 4 81576.9 2854.12 6
 -4 4 -4 83170.7 2471.44 1
 -4 4 -4 77560.1 2091.57 4
 4 -4 5 239488 2492.99 2
 4 4 5 238725 5103.69 6
 4 -4 5 232328 2558.26 6
 4 4 5 233721 5853.05 3
 4 -4 5 253103 6191.39 3
 -4 4 -5 236394 3881.18 4
 -4 4 -5 239941 4394.85 1
 4 -4 6 7852.03 424.498 2
 -4 4 -6 9040.21 962.406 1
 4 4 6 7720.08 1338.97 3
 4 4 6 10032.5 1209.92 6
 4 -4 6 8353.15 513.96 6
 4 -4 6 8346.67 1352.6 3
 -4 4 -6 8254.3 847.448 4
 -4 4 -7 122.021 465.147 1
 4 -4 7 343.684 203.079 6
 4 4 7 -627.706 910.741 3
 4 -4 7 1554.5 1039.55 3
 -4 4 -7 120.744 461.997 4
 4 4 7 -24.5497 578.423 6
 4 4 8 8548.59 1400.08 3
 4 -4 8 9197.08 569.935 6
 4 4 8 7822.93 1183.77 6
 4 -4 8 10669.1 1659.87 3
 -4 4 -8 9285.23 1050.6 4
 4 4 9 23796.6 1858.93 6
 4 -4 9 25889.5 2453.66 3
 4 4 9 27469.5 2509.04 3
 -4 4 -9 26582.2 1727.45 4
 -4 -4 -10 12815 1504.19 4
 4 4 10 10752.1 1691.29 3
 -4 4 -10 12927.5 1337.34 4
 4 -4 10 12300.7 1958.54 3
 4 4 10 11347.7 1386.97 6
 -4 -4 -11 183491 5554.49 4
 4 4 11 184812 5146.26 6
 4 4 11 180282 4469.69 2
 -4 4 -11 184948 4911.84 4
 -4 4 -11 168986 2176.76 6
 4 4 11 190623 6825.35 3
 4 -4 11 187202 6860.35 3
 -4 4 -12 104264 3895.91 4
 4 4 12 113647 5491 3
 -4 -4 -12 103463 4353.55 4
 4 -4 12 109319 5459.68 3
 4 4 12 101975 3427.11 2
 4 -4 13 -1555.77 1334.51 3
 -4 -4 -13 359.243 952.525 4
 4 4 13 1789.91 1387.5 3
 -4 4 -13 -257.647 868.068 4
 4 4 13 23.5608 648.704 2
 -4 -4 -14 7356.16 1602.22 4
 4 4 14 5676.99 1018.07 2
 -4 4 -14 6217.21 1311.55 4
 -4 -4 -15 133.519 1088.81 4
 4 4 15 992.24 668.815 2
 -4 4 -15 1205.26 1076.83 4
 -4 -4 -16 22031.3 2517.68 4
 -4 4 -16 22753.6 2309.9 4
 -4 -4 -17 82385.3 4607.43 4
 -4 4 -17 77330.2 4270.85 4
 -4 -4 -18 11871.5 2184.46 4
 -4 4 -18 6090.02 1451.42 4
 -4 4 -19 2538.77 1282.51 4
 -4 -4 -19 2858.8 1331.74 4
 -4 -4 -20 1033.97 1521.11 4
 -4 4 -20 -2414.01 1696.8 4
 -4 4 -21 3469.21 1780.35 4
 -4 -4 -21 3680 1585.06 4
 -4 -4 -22 3020.59 1843.73 4
 -4 4 -22 2862.12 1798.58 4
 4 6 -22 1348.96 1561.11 4
 4 -6 -22 3752.49 2080.75 4
 4 6 -21 16929.2 2779 4
 4 -6 -21 19592.5 3063.73 4
 4 6 -20 22278.5 2676.79 4
 4 -6 -20 22993.4 3107.41 4
 4 -6 -19 -102.168 1190.28 4
 4 6 -19 2797.23 1815.57 4
 -4 6 18 24970 2315.75 2
 4 -6 -18 25402 2904.79 4
 4 6 -18 29871.6 2857.39 4
 4 6 -17 158424 6045.66 4
 -4 6 17 146999 5098.75 2
 4 -6 -17 151724 6538.82 4
 -4 6 16 7342.84 1462.08 2
 4 6 -16 8062.8 1297.68 5
 4 -6 -16 8278.58 1740.52 4
 4 6 -16 9023.04 1748.76 4
 4 -6 -15 10984 1912.83 4
 4 6 -15 8479.6 1234.4 5
 -4 6 15 8792.11 1385.72 2
 4 6 -15 12452.9 1756.34 4
 4 -6 -14 36503.4 2995.61 4
 4 6 -14 37288.1 2733.43 4
 4 6 -14 38402.2 2385.07 5
 4 6 -14 38490.6 1575.8 6
 -4 6 14 38089.2 2451.06 2
 4 6 -13 -0.80448 677.105 5
 4 6 -13 1256.71 393.229 6
 4 -6 -13 -739.741 1158.94 4
 -4 6 13 1508.3 725.919 2
 4 6 -13 1461.84 896.632 4
 4 6 -12 420.619 764.521 4
 4 6 -12 1466.17 449.34 6
 4 6 -12 680.224 630.438 5
 -4 6 12 -142.018 699.828 2
 4 6 -11 262954 3910.57 6
 4 6 -11 263646 6080.42 4
 -4 6 11 259809 5876.16 2
 4 6 -11 260840 5541.14 5
 4 6 -10 4690.29 970.359 4
 4 6 -10 3576.79 527.88 6
 4 6 -10 2947.77 774.112 5
 -4 6 10 4404.44 892.379 2
 -4 6 9 8499.77 1125.83 2
 4 6 -9 8078.53 1077.31 5
 4 6 -9 9056.09 763.363 6
 4 6 -9 8315.13 1129.18 4
 4 6 -8 1491.73 693.811 4
 4 6 -8 1739.67 657.239 5
 -4 6 8 1055.54 522.406 2
 4 6 -8 1818.31 445.808 6
 4 6 -7 59446.9 1859.71 6
 -4 6 7 55103 2555.33 2
 4 6 -7 62539.3 1868.81 1
 4 6 -7 63487 2510.6 4
 4 6 -7 65028.9 2441.21 5
 -4 6 6 199.987 496.929 2
 4 6 -6 280.635 295.292 6
 4 6 -6 304.563 268.822 1
 4 6 -6 902.106 538.402 4
 4 6 -5 33616.2 1479.68 6
 -4 -6 5 35090.5 1408.54 6
 4 6 -5 34740.2 1209.71 1
 4 6 -5 37460 1808.09 4
 -4 6 5 36232.1 1824.23 2
 4 6 -4 32104.8 1459.69 6
 4 6 -4 30969.1 1074.18 1
 4 -6 -4 30288.8 909.7 5
 4 6 -4 28918.1 1550.1 4
 -4 6 4 30003.6 1631.53 2
 4 6 -3 40633.5 1749.41 4
 4 6 -3 38286.7 1663.59 6
 4 -6 -3 38370 1154.07 5
 -4 6 3 37375.3 1744.05 2
 4 -6 -2 49649.1 1445.85 5
 4 6 -2 47925.7 1909.51 6
 4 6 -2 47698.1 1798.3 4
 -4 6 2 48478.1 1917.42 2
 4 6 -1 265611 4153.52 4
 4 -6 -1 269024 3600.84 5
 4 6 -1 260956 4613.38 6
 -4 6 1 265749 4241.75 2
 4 6 0 51485.6 2171.83 6
 -4 6 0 52647.4 1805.3 2
 -4 6 -1 229008 3570.62 2
 -4 6 -1 225860 3705.73 4
 4 6 1 225560 4689.68 6
 4 -6 1 228179 3668.86 2
 4 6 2 7439.56 901.294 3
 -4 6 -2 5700.35 667.782 4
 -4 6 -2 6082.13 597.386 2
 4 6 2 5944.95 908.008 6
 4 -6 2 7775.94 975.872 3
 4 -6 2 6017.42 601.753 2
 4 -6 3 4202.1 494.876 2
 4 -6 3 6345.77 1044.93 3
 4 6 3 4225.08 844.736 3
 -4 6 -3 4105.74 571.915 4
 -4 6 -3 4375.45 681.743 1
 -4 6 -3 4395.75 483.345 2
 4 6 3 4426.52 853.132 6
 4 6 4 673709 9191.82 3
 -4 6 -4 665051 5091.76 2
 4 -6 4 671967 9544.26 3
 4 6 4 649462 9004.66 6
 4 -6 4 655466 5225.47 2
 -4 6 -4 667425 7654.42 1
 -4 6 -4 682329 7046.07 4
 -4 6 -5 543019 7030.43 1
 4 6 5 549806 8532.26 6
 4 -6 5 538864 9093.93 3
 -4 6 -5 569120 4215.04 2
 4 -6 5 546371 4336.51 2
 4 6 5 558339 8894.2 3
 -4 6 -5 545399 6526.32 4
 4 -6 6 51152.5 1024.31 6
 -4 6 -6 54591.5 2333.85 1
 4 6 6 47161.8 2634.71 6
 4 6 6 50891.3 2894.13 3
 4 -6 6 50435.8 2971.1 3
 4 -6 6 51981.4 1190.15 2
 -4 6 -6 47579.8 1064.28 2
 -4 6 -6 55471 2219.53 4
 -4 6 -7 1945.92 622.899 4
 4 6 7 1368.13 699.19 6
 -4 6 -7 718.671 694.924 1
 4 6 7 1415 840.713 3
 4 -6 7 1143.27 857.129 3
 4 6 8 23573.5 2027.77 6
 4 -6 8 19642.4 2153.45 3
 4 6 8 19186.3 1935.19 3
 -4 6 -8 21465.7 1643.62 1
 -4 6 -8 21244.3 1600.65 4
 -4 6 -9 23118.2 1740.08 1
 4 6 9 19301.1 2122.85 3
 4 -6 9 23380 2364.75 3
 -4 6 -9 21222.2 1639.19 4
 4 6 9 20779.1 1932.24 6
 4 6 10 13741.1 1602.24 6
 4 -6 10 16228.2 2134.8 3
 4 6 10 15325.8 2152.33 3
 -4 6 -10 17393.9 1564.69 4
 -4 6 -11 132050 4309.48 4
 4 -6 11 134693 5903.26 3
 4 6 11 132937 4741.78 6
 4 6 11 149507 5974.53 3
 4 6 12 22070.3 2046.79 6
 4 -6 12 18523 2466.53 3
 4 6 12 20880.6 2449.26 3
 4 6 12 19194.6 1763.81 2
 -4 6 -12 20297.5 1837.21 4
 -4 -6 -13 3938.4 1176.46 4
 4 6 13 7213.75 1189.42 2
 -4 6 -13 4783.69 1177.48 4
 4 6 14 7376.83 1195.87 2
 -4 -6 -14 8440.43 1609.6 4
 -4 6 -14 6518.85 1348.79 4
 4 6 15 8466.29 1337.23 2
 -4 -6 -15 9914.02 1758.56 4
 -4 6 -15 8718.14 1676.01 4
 -4 6 -16 5967.54 1639.44 4
 -4 -6 -16 4166.28 1520.63 4
 -4 6 -17 51189.9 3540.12 4
 -4 -6 -17 47724.2 3643.13 4
 -4 -6 -18 20739 2717.13 4
 -4 6 -18 20146.2 2418.8 4
 -4 -6 -19 1708.47 1623.38 4
 -4 6 -19 1017.82 1301.37 4
 -4 -6 -20 16447.4 2616.38 4
 -4 6 -20 17795.6 2554.54 4
 -4 -6 -21 17600.2 2884.26 4
 -4 6 -21 19185.9 2763.48 4
 -4 -6 -22 2794.41 1662.02 4
 -4 6 -22 5324.29 1808.1 4
 4 -8 -21 25188 3292.51 4
 4 8 -21 22123.4 2930.2 4
 4 -8 -20 18323.7 2739.68 4
 4 8 -20 23124.5 2763.06 4
 -4 8 19 6038.03 1525.93 2
 4 -8 -19 8851.01 2267.29 4
 4 8 -19 5926.6 1700.47 4
 4 -8 -18 10835 2320.61 4
 4 8 -18 11644.8 2189.59 4
 -4 8 18 9706.6 1551.56 2
 4 8 -17 6870.55 1469.95 5
 -4 8 17 5674.55 1306.72 2
 4 -8 -17 1873.83 1347.64 4
 4 8 -17 4874.65 1575.48 4
 -4 8 16 23431.3 2248.57 2
 4 8 -16 21095.2 2298.39 4
 4 -8 -16 20598.7 2674.18 4
 4 8 -16 24989.9 2207.8 5
 4 8 -15 23602.1 2109.07 5
 -4 8 15 21590.2 2133 2
 4 8 -15 23350 2348.55 4
 -4 8 14 18050.5 1895.49 2
 4 8 -14 17105.9 2078.83 4
 4 8 -14 16113.6 1710.81 5
 4 8 -13 68059.7 2003.34 6
 4 8 -13 59321.4 3009.32 5
 4 8 -13 63032.5 3427.04 4
 -4 8 13 61019.4 3253.6 2
 4 8 -12 27065.8 1296.99 6
 4 8 -12 26810.3 2210.35 4
 4 8 -12 30039.1 2216.62 5
 -4 8 12 25512.4 2094.32 2
 4 8 -11 19052.1 1870.58 4
 4 8 -11 22600.2 1224.03 6
 4 8 -11 22949.8 1846.06 5
 4 8 -10 6228.58 1075.94 5
 4 8 -10 7747.67 746.521 6
 -4 8 10 7165.82 1187.42 2
 4 8 -10 8177.16 1245.98 4
 4 8 -9 100651 2601.95 6
 4 8 -9 94021.7 3451.8 5
 -4 8 9 100165 3677.37 2
 4 8 -9 107251 2958.34 1
 4 8 -9 102402 3726.09 4
 4 8 -8 26167.4 1380.79 6
 4 8 -8 25950.5 1846.33 4
 4 8 -8 26046.4 1409.8 1
 -4 8 8 28158 1952.17 2
 4 8 -8 22811.7 1722.54 5
 4 8 -7 144148 4009.7 5
 -4 8 7 139308 4111.34 2
 4 8 -7 135196 3010.3 1
 4 8 -7 146026 4128.91 4
 4 8 -7 141227 3196.42 6
 4 8 -6 125926 3106.94 6
 4 8 -6 129578 3782.12 4
 -4 8 6 135365 3891.08 2
 4 8 -6 129960 2811.74 1
 4 8 -5 138527 3825.1 4
 4 8 -5 128555 2688.12 1
 -4 8 5 132215 3820.18 2
 4 8 -5 133846 3302.87 6
 4 8 -4 13012.4 1217.77 4
 4 8 -4 10965.7 995.845 6
 -4 8 4 11283.1 1156.04 2
 4 -8 -3 24553.9 1113.7 5
 -4 8 3 22899 1061.11 5
 4 8 -3 22961.5 1534.68 6
 -4 8 3 22204.3 1544.58 2
 4 8 -3 23102.9 1559.28 4
 4 8 -2 3981.02 748.812 4
 4 8 -2 3379.18 661.372 6
 -4 8 2 2797.24 610.546 2
 -4 8 2 2737.63 453.028 5
 -4 8 1 10756.8 1021.03 2
 4 8 -1 12072.5 1248.8 6
 4 8 -1 13580.5 1152.76 4
 -4 8 1 13283.7 968.012 5
 4 8 0 214413 4997.69 6
 -4 8 0 213545 3875.4 5
 -4 8 0 208770 4057.49 2
 -4 8 -1 893212 8357.12 5
 4 8 1 918209 10660.2 6
 -4 8 -1 896152 7987.81 2
 -4 8 -2 52889.4 1878.48 2
 4 8 2 52502.1 2282.14 3
 -4 8 -2 49787.2 2103.54 5
 4 8 2 51431.9 2681.85 6
 -4 8 -2 52263.2 2097.22 4
 4 -8 2 52473.1 2371.3 3
 -4 8 -3 8526.84 755.28 2
 4 -8 3 8729.98 1072.61 3
 -4 8 -3 9430.22 1101.99 1
 -4 8 -3 8437.93 974.966 5
 4 8 3 9237.3 1333.84 6
 -4 8 -3 9410.83 976.677 4
 4 8 3 7486.33 1001.82 3
 -4 8 -4 86961.1 3019.58 1
 -4 8 -4 87236.8 2896.35 4
 -4 8 -4 89648.1 2183.41 2
 4 8 4 86050 3279.86 3
 4 8 4 85884.4 3653.6 6
 4 -8 4 81189.1 3367.08 3
 -4 8 -5 22134.5 1564.23 4
 -4 8 -5 20916.4 982.988 2
 4 -8 5 20649.9 1862.16 3
 4 8 5 20664.5 1764.52 3
 4 8 5 17451.3 1789.39 6
 -4 8 -5 22089.4 1604.28 1
 4 -8 5 19573.1 979.57 6
 -4 8 -6 58378.3 1495.25 2
 4 8 6 58174.8 3029.88 3
 -4 8 -6 58200.2 2580.61 1
 4 -8 6 54028.9 3117.08 3
 4 8 6 63102.7 3261.47 6
 4 -8 6 57006.7 1454.28 6
 -4 8 -6 62205.7 2559.12 4
 -4 8 -7 23483 805.619 2
 4 8 7 26800.2 2218.7 6
 4 -8 7 26908.4 2293.74 3
 -4 8 -7 23019.6 1730.33 1
 -4 8 -7 24969.2 1764.95 4
 4 8 7 25208.9 2144.58 3
 -4 8 -8 7674.96 1101.42 4
 4 8 8 8327.57 1338.56 3
 -4 8 -8 9664.29 1225.71 1
 4 8 8 8155.82 1359.63 6
 4 -8 8 8037.85 1475.42 3
 -4 8 -9 14221.4 1455.96 1
 -4 8 -9 13568.8 1453.02 4
 4 8 9 15343.5 1829.12 3
 4 -8 9 13328.1 1898.55 3
 4 8 9 14588.1 1735.07 6
 -4 8 -10 697.063 753.812 4
 -4 8 -10 863.632 850.383 1
 4 -8 10 288.192 974.761 3
 4 8 10 1718.66 1222.63 3
 4 8 10 126.483 980.751 6
 4 8 11 22934.3 2242.09 6
 4 8 11 23124.5 1994.55 2
 4 -8 11 21854.1 2508.13 3
 4 8 11 19658.4 2266.85 3
 -4 8 -11 23177.5 1973.52 4
 -4 8 -12 -788.614 788.053 4
 4 8 12 -444.896 761.754 2
 4 8 12 545.171 924.732 6
 4 8 12 1027.11 1169.24 3
 -4 8 -13 35037.3 2605.18 4
 4 8 13 36365.7 2541.15 2
 -4 8 -14 1560.62 1003.08 4
 4 8 14 212.061 849.199 2
 4 8 15 56657.6 3187.65 2
 -4 8 -15 54621.8 3425.36 4
 -4 -8 -15 49304.3 3762.33 4
 -4 8 -16 33414.7 2936.74 4
 4 8 16 25119.2 2249.13 2
 -4 -8 -16 27537.4 2897.78 4
 -4 -8 -17 32119.5 3323.66 4
 -4 8 -17 36445.8 3107.63 4
 -4 -8 -18 1616.11 1382.6 4
 -4 8 -18 1746.15 1448.31 4
 -4 8 -19 419.216 1394.54 4
 -4 -8 -19 232.75 1359.58 4
 -4 8 -20 6051.77 1833.95 4
 -4 -8 -20 6271.2 1974.98 4
 -4 8 -21 30573.9 3380.47 4
 -4 -8 -21 33092.2 3740.72 4
 4 10 -21 9026.04 2223.3 4
 4 -10 -21 10851 2512.97 4
 4 -10 -20 -537.67 1685.6 4
 4 10 -20 -348.913 1333.47 4
 4 10 -19 3452.74 1538.47 4
 -4 10 19 5316.69 1595.71 2
 4 -10 -19 2260.34 1513.85 4
 4 10 -18 1405.59 1213.04 5
 -4 10 18 2796.5 1209.31 2
 4 -10 -18 -2009.06 1632.03 4
 4 10 -18 331.675 1200.03 4
 4 10 -17 1358.99 1184.44 4
 4 -10 -17 1361.98 1411.17 4
 -4 10 17 1807.46 1056.81 2
 4 10 -17 -146.983 1022.13 5
 4 10 -16 19216.4 2398.59 4
 4 10 -16 19792.8 2126.08 5
 -4 10 16 21835.4 2342.93 2
 4 10 -15 23297.1 2520.02 4
 -4 10 15 20142.9 2048.14 2
 4 10 -15 15720.4 1871.08 5
 4 10 -14 1226.08 975.231 4
 4 10 -14 1242.46 1062.59 5
 -4 10 14 1118.75 959.733 2
 -4 10 13 35139.2 2725.78 2
 4 10 -13 36459.1 2597.35 5
 4 10 -13 34786.2 2702.88 4
 4 10 -12 40299.8 2698.14 5
 4 10 -12 38345.2 2732.86 4
 -4 10 12 37814.7 2677.82 2
 4 10 -11 13918.7 1708.98 4
 4 10 -11 10660.9 956.297 6
 -4 10 11 8987.09 1261.35 2
 4 10 -11 10479.9 1530.28 5
 4 10 -10 7020.68 1353.5 4
 -4 10 10 5333.72 1128.43 2
 4 10 -10 5572.29 934.058 1
 4 10 -10 5241.84 1083.46 5
 4 10 -10 5783.05 761.529 6
 -4 10 9 114367 4223.47 2
 4 10 -9 110755 4019.01 5
 4 10 -9 108382 3050.93 6
 4 10 -9 110295 3197.48 1
 4 10 -9 119985 4242.4 4
 4 10 -8 2703 849.452 4
 -4 10 8 3075.88 966.445 2
 4 10 -8 3745.56 925.471 5
 4 10 -8 4231.66 794.038 6
 4 10 -8 4075.87 718.447 1
 4 10 -7 291545 6296.17 4
 4 10 -7 283976 5227.73 6
 4 10 -7 283581 6021.85 5
 4 10 -7 277446 4727.99 1
 -4 10 7 297026 6289.99 2
 4 10 -6 136714 4334.32 4
 4 10 -6 125543 3131.52 1
 -4 10 6 125578 4117.64 2
 4 10 -6 130545 3631.05 6
 -4 10 6 129465 2250.04 5
 -4 10 5 3035.79 919.607 2
 -4 10 5 4043.91 508.156 5
 4 10 -5 3430.14 910.086 4
 -4 10 4 9510.14 789.115 5
 -4 10 4 7437.54 1080.49 2
 4 10 -4 9843.91 1167.98 6
 4 10 -4 7619.26 1086.98 4
 -4 10 3 838.393 620.511 2
 4 10 -3 435.786 634.393 4
 -4 10 3 577.557 312.833 5
 4 10 -3 -37.551 573.827 6
 4 10 -2 16851.1 1586.09 6
 -4 10 2 14319.3 1338.06 2
 -4 10 2 15240.3 1074.98 5
 4 10 -2 15483.7 1406.07 4
 -4 10 1 22176.2 1373.6 5
 4 10 -1 23076.7 1862.23 6
 -4 10 1 24984.7 1644.11 2
 4 10 0 103850 3908.12 6
 -4 10 0 104396 2979.7 5
 -4 10 0 98071.2 3184.77 2
 4 10 1 18899.5 1836.73 6
 4 -10 1 18488.5 1311.92 3
 4 10 1 18556.4 1282.11 3
 -4 10 -1 19363 1403.29 5
 -4 10 -1 19769.4 1355.35 2
 4 10 2 1151.27 833.26 6
 4 10 2 1378.09 573.805 3
 4 -10 2 287.479 429.959 3
 -4 10 -2 1672.39 582.534 2
 -4 10 -2 1417.8 693.598 5
 -4 10 -2 1790.67 667.556 4
 4 10 3 37462.6 2001.05 3
 4 10 3 38629.2 2614.96 6
 -4 10 -3 39971 2124.96 4
 -4 10 -3 34782.6 1969.01 5
 4 -10 3 36947.9 2135.14 3
 -4 10 -3 38052.1 1745.34 2
 -4 10 -4 6859.31 1046.47 4
 -4 10 -4 6375.28 1078.47 1
 4 10 4 6051.19 987.709 3
 -4 10 -4 7423.13 774.999 2
 -4 10 -4 5906.64 1035.83 5
 4 10 4 6721.32 1284.78 6
 4 -10 4 7997.09 1215.68 3
 -4 10 -5 20388.7 1206.06 2
 -4 10 -5 21634.8 1744.89 1
 -4 10 -5 20609.3 1658.8 4
 4 -10 5 20778.9 1837.09 3
 4 10 5 18726.6 2008.14 6
 4 10 5 21101.4 1715.34 3
 4 -10 5 20207.4 1243.65 6
 -4 10 -5 20049.5 1661.84 5
 -4 10 -6 103717 3625.26 4
 4 -10 6 101843 2426.8 6
 -4 10 -6 99258.8 2331.56 2
 4 10 6 99690.6 4366.82 6
 4 10 6 97307.8 3805.81 3
 4 -10 6 105533 4177.22 3
 -4 10 -6 100890 3587.51 1
 -4 10 -7 125079 4127.92 4
 -4 10 -7 125877 2363 2
 4 -10 7 129460 4876.28 3
 4 10 7 116463 4300.44 3
 4 -10 7 112452 2029.72 6
 -4 10 -7 120762 3975.58 1
 4 10 7 119609 4844.21 6
 4 10 8 2335.87 1031.99 6
 -4 10 -8 5270.84 1118.25 1
 -4 10 -8 5138.36 1021.56 4
 4 -10 8 4988.14 1244.59 3
 4 10 8 3063.8 1017.72 3
 -4 10 -8 4250.17 414.578 2
 4 -10 9 59810 3720.53 3
 -4 10 -9 53703.5 2804.75 1
 4 10 9 62903.8 3621.21 6
 4 10 9 61270.8 3495.67 3
 -4 10 -9 55375.7 2913.39 4
 4 10 10 39703.7 3004.51 6
 4 -10 10 36188.5 3013 3
 4 10 10 37840 2917.17 3
 -4 10 -10 42483.2 2545.11 1
 -4 10 -10 34988 2382.34 4
 -4 10 -11 619.702 832.898 4
 4 10 11 485.016 920.978 6
 4 10 11 1113.29 929.398 2
 -4 10 -11 1930.36 812.608 1
 -4 10 -12 10141 1542.7 4
 -4 10 -12 8685.18 1463.48 1
 4 10 12 8335.9 1491.08 2
 -4 10 -13 40390.7 2897.8 4
 4 10 13 41290.4 2958.75 2
 4 10 14 831.422 952.04 2
 -4 10 -14 1069.35 1130.75 4
 -4 10 -15 58994.1 3681.21 4
 4 10 15 58100.4 3435.96 2
 -4 10 -16 33992.9 2994.81 4
 4 10 16 32083.2 2629.11 2
 4 10 17 110.171 993.2 2
 -4 -10 -17 591.448 1454.65 4
 -4 10 -17 2477.86 1444.54 4
 -4 10 -18 7789.19 1752.33 4
 -4 -10 -18 4752.88 1543.8 4
 -4 -10 -19 -2021.06 1726.16 4
 -4 10 -19 -1522.08 1429.53 4
 -4 10 -20 311.43 1421.84 4
 -4 -10 -20 2620.39 1952.91 4
 -4 10 -21 13830.7 2559.62 4
 4 12 -20 34811.9 3577.01 4
 -4 12 20 31861.6 3131.32 2
 4 -12 -20 33196.9 3784.42 4
 4 12 -19 -944.566 1334.23 4
 4 -12 -19 61.173 1564.6 4
 4 12 -19 951.155 1242.52 5
 -4 12 19 -198.971 1175.99 2
 4 12 -18 35962.4 3101.94 5
 -4 12 18 36493.2 3050.12 2
 4 12 -18 37621.5 3494.46 4
 4 12 -17 1811.49 1433.79 4
 -4 12 17 4106.49 1277.36 2
 4 12 -17 3246.16 1483.96 5
 -4 12 16 24847 2610.03 2
 4 12 -16 21968.1 2586.67 4
 4 12 -16 24095 2442.22 5
 4 12 -15 4014.07 1319.27 4
 -4 12 15 3024.52 1081.84 2
 4 12 -15 3681.45 1281.03 5
 4 12 -14 4805.11 1485.21 4
 -4 12 14 5123.3 1299.72 2
 4 12 -14 3683.03 1097.79 5
 4 12 -13 4325.08 1275.52 4
 -4 12 13 3838.53 1257.38 2
 4 12 -13 2885.54 1060.07 5
 -4 12 12 38235.2 2880.87 2
 4 12 -12 36294.2 2698.16 5
 4 12 -12 42419.3 2968.11 4
 4 12 -11 15182.9 1757.87 5
 -4 12 11 19142.9 2064 2
 4 12 -11 16963.4 1477.52 1
 4 12 -11 13253.9 1758.11 4
 4 12 -10 20932.9 2025.19 5
 4 12 -10 20493.4 1562.39 1
 4 12 -10 21946.7 1550.95 6
 -4 12 10 19361.8 1973.25 2
 4 12 -10 23359.2 2179.65 4
 4 12 -9 39176 2721.75 4
 4 12 -9 40024.8 2710.06 5
 -4 12 9 34307.9 2521.47 2
 4 12 -9 35630.7 2040.27 6
 4 12 -9 35306.8 1977.22 1
 -4 12 8 7856.96 1285.26 2
 4 12 -8 6724.24 913.175 1
 -4 12 8 6739.45 518.847 5
 4 12 -8 9280.91 1420.47 5
 4 12 -8 8763.03 1164.08 6
 4 12 -8 9038.86 1381.41 4
 4 12 -7 136306 3664.27 1
 4 12 -7 142434 4864.71 4
 4 12 -7 135893 4564.86 5
 -4 12 7 144236 4815.14 2
 4 12 -7 134465 4063.76 6
 -4 12 7 137135 2504.64 5
 4 12 -6 18008.1 1366.67 1
 4 12 -6 20326.9 1698.64 6
 4 12 -6 21942.9 1927.59 4
 4 12 -6 18169.6 1661.72 5
 -4 12 6 22282.9 1961.93 2
 -4 12 6 19714.4 1063.35 5
 -4 12 5 2746.29 870.922 2
 4 12 -5 1870.04 747.416 6
 -4 12 5 955 392.927 5
 4 12 -5 803.274 741.986 4
 4 12 -4 135159 4394.82 4
 4 12 -4 122628 4204.09 6
 -4 12 4 118308 2909.96 5
 -4 12 4 132970 4257.94 2
 4 12 -3 53927.1 2870.93 6
 4 12 -3 52184.8 2713.56 4
 -4 12 3 53930.4 2084.13 5
 -4 12 3 55885.2 2774.59 2
 4 12 -2 112324 3846.54 4
 4 12 -2 115744 4263.79 6
 -4 12 2 119620 3875.09 2
 -4 12 2 107519 3089.15 5
 4 12 -1 56598.5 3115.68 6
 -4 12 1 57973.5 2701.66 2
 -4 12 1 58485.5 2422.44 5
 4 12 0 45477.6 2887.53 6
 4 -12 0 43359.7 1765.35 3
 -4 12 0 39685.6 2026.92 5
 -4 12 0 40161.5 2257.75 2
 -4 12 -1 999.567 740.846 2
 4 12 1 -78.7732 345.482 3
 4 -12 1 540.859 451.141 3
 4 12 1 599.482 848.664 6
 -4 12 -1 -391.858 642.113 5
 4 12 2 55253.7 3249.43 6
 -4 12 -2 56180.7 2364.59 2
 4 12 2 56236.3 2151.73 3
 -4 12 -2 58458.9 2635.72 5
 -4 12 -3 12772 1144.28 2
 4 -12 3 14810.3 1372.37 3
 4 12 3 13458.8 1791.88 6
 -4 12 -3 12104.1 1371.43 4
 4 12 3 13041.9 1124.13 3
 -4 12 -3 12307 1346.71 5
 4 12 4 25001.2 1689.72 3
 -4 12 -4 29495.9 2097.56 4
 -4 12 -4 26986.3 1982.98 5
 4 12 4 23765.7 2310.02 6
 -4 12 -4 27383.5 1582.93 2
 4 -12 4 25814.9 1847.81 3
 -4 12 -5 2245.91 877.098 1
 -4 12 -5 3469.25 994.041 4
 4 -12 5 1689.09 691.717 3
 -4 12 -5 1977.93 519.765 2
 4 12 5 2925.58 1101.22 6
 4 12 5 2661.68 720.274 3
 -4 12 -5 1726.4 844.974 5
 -4 12 -6 35966 1703.24 2
 4 12 6 32410 2761.57 6
 4 12 6 36539.7 2309.29 3
 -4 12 -6 38949.2 2514.84 5
 -4 12 -6 36462.7 2434.15 1
 4 -12 6 33595.9 1672.39 6
 4 -12 6 32535.8 2360.2 3
 -4 12 -6 36174.7 2404.2 4
 -4 12 -7 203.464 904.01 5
 -4 12 -7 -554.138 759.328 1
 4 12 7 -56.0362 908.136 6
 4 12 7 437.145 805.864 3
 -4 12 -7 317.268 406.163 2
 4 -12 7 216.147 741.078 3
 -4 12 -7 691.104 795.691 4
 4 -12 8 9688.13 1547.25 3
 -4 12 -8 7932.96 1357.01 4
 -4 12 -8 8280.44 719.044 2
 4 12 8 7361.09 1297.78 3
 4 12 8 9220.53 1737.12 6
 -4 12 -8 7467.97 1241.06 1
 -4 12 -9 28573.7 2350.17 4
 4 12 9 28649.8 2679.49 6
 4 12 9 27811.9 2359.21 3
 -4 12 -9 25378.5 2114.65 1
 -4 12 -10 152708 5227.62 4
 4 12 10 154589 6007 6
 -4 12 -10 143259 4833.82 1
 -4 12 -11 21479.6 2127.46 4
 4 12 11 25882.8 2594.37 6
 -4 12 -11 25089.3 2144.12 1
 4 12 11 28510.1 2542.39 2
 -4 12 -12 6906.91 1348.41 4
 -4 12 -12 9060.42 1492 1
 4 12 12 9233.09 1614.93 2
 -4 12 -13 31061.7 2582.49 1
 4 12 13 28603.7 2642.35 2
 -4 12 -13 28493.3 2613.39 4
 -4 12 -14 14441.9 2045.01 4
 4 12 14 12897.6 2018.09 2
 -4 12 -15 15906.7 2152.08 4
 4 12 15 19228.3 2261.71 2
 -4 12 -16 15761.4 2214.9 4
 4 12 16 20968.1 2347.25 2
 4 12 17 1448.36 1068.59 2
 -4 12 -17 -286.795 1282.87 4
 -4 12 -18 18038.8 2583.15 4
 -4 -12 -18 13819.8 2649.72 4
 -4 12 -19 6319.84 1798.38 4
 -4 -12 -19 7113.1 2166.5 4
 -4 -12 -20 10117.2 2782 4
 -4 12 -20 5916.62 2020.51 4
 -4 14 20 26286.1 2987.86 2
 4 14 -19 3165.59 1728.26 4
 -4 14 19 -499.457 1396.64 2
 4 14 -19 4337.86 1853.3 5
 -4 14 18 74802.2 4571.99 2
 4 14 -18 80938.9 4741.43 5
 4 14 -18 74955.5 4917.81 4
 4 14 -17 4637.36 1577.46 4
 4 14 -17 7489.02 1846.25 5
 -4 14 17 4952.47 1713.44 2
 4 14 -16 9518.41 2048.4 4
 4 14 -16 9046.8 1895.88 5
 -4 14 16 7705.72 1733.94 2
 4 14 -15 1756.69 1333.49 4
 4 14 -15 1823.2 1137.78 5
 -4 14 15 -80.418 1137.54 2
 4 14 -14 -678.539 1301.61 4
 -4 14 14 -482.905 933.214 2
 4 14 -14 -1341.01 1369.3 5
 4 14 -13 3691.52 1484.19 5
 -4 14 13 801.993 1108.41 2
 4 14 -13 2401.4 1373.39 4
 4 14 -13 2297.92 871.839 1
 4 14 -12 56389.3 3634.07 4
 -4 14 12 48935.9 3479.38 2
 4 14 -12 49913.7 2691.77 1
 4 14 -12 49595.1 3287.07 5
 4 14 -11 1963.38 1139.24 5
 -4 14 11 717.765 964.761 2
 4 14 -11 1085.07 1071.48 4
 4 14 -11 2053.08 816.061 1
 4 14 -10 42930.5 3104.29 4
 -4 14 10 44360.8 3090.71 2
 4 14 -10 41552.6 2919.59 5
 4 14 -10 40203.6 2276.82 1
 4 14 -9 -231.05 641.029 1
 -4 14 9 -24.494 845.028 2
 4 14 -9 1446.66 1093.41 4
 4 14 -9 205.04 1005.62 5
 4 14 -9 -157.904 607.816 6
 4 14 -8 1117.78 895.864 5
 -4 14 8 134.94 851.14 2
 4 14 -8 647.885 977.824 4
 4 14 -8 46.4358 779.586 6
 4 14 -8 24.8852 545.388 1
 -4 14 7 4253.41 1275.42 2
 4 14 -7 3335.8 1151.85 5
 -4 14 7 2392.75 497.77 5
 4 14 -7 2497.17 768.147 6
 4 14 -7 3833.61 852.047 1
 4 14 -7 2842.34 1170.68 4
 -4 14 6 21187.8 1987 2
 4 14 -6 23379.5 1969.88 6
 4 14 -6 23876.1 2219.95 4
 4 14 -6 22441.2 2050.34 5
 -4 14 6 21794.2 1291.15 5
 -4 14 5 2548.48 1029.84 2
 4 14 -5 1524.72 907.963 6
 -4 14 5 1971.52 573.662 5
 4 14 -5 1742.15 908.498 5
 4 14 -5 2044 906.53 4
 4 14 -4 302711 7155.82 6
 -4 14 4 304798 7042.72 2
 -4 14 4 290914 5037.94 5
 4 14 -4 309418 7147.11 4
 -4 14 3 3370.13 968.255 2
 4 14 -3 2222.41 929.605 6
 4 14 -3 1738.85 965.601 4
 -4 14 3 2009.82 587.414 5
 -4 14 2 145714 4663.31 2
 -4 14 2 147449 3869.77 5
 4 14 -2 149777 5288.23 6
 -4 14 1 2599.48 945.756 2
 4 14 -1 2531.47 1149.28 6
 4 -14 -1 1757.42 343.656 3
 -4 14 1 1924.42 649.57 5
 -4 14 0 1608.91 714.751 2
 4 14 0 1809.94 353.834 3
 4 14 0 1393.74 1120.7 6
 4 -14 0 1406.34 314.663 3
 -4 14 0 1243.74 709.261 5
 4 14 1 4299.9 1409.31 6
 -4 14 -1 1791.44 844.517 2
 4 14 1 3433.29 522.468 3
 -4 14 -1 3611.49 932.398 5
 4 -14 1 2364.33 448.046 3
 -4 14 -2 73148.9 3156.77 5
 4 14 2 72359.3 2147.98 3
 4 14 2 75345.5 3970.47 6
 4 -14 2 70973.8 2338.45 3
 -4 14 -2 70606.2 3014.06 2
 -4 14 -3 -134.317 800.578 5
 4 14 3 47.9787 980.974 6
 4 14 3 228.959 355.669 3
 4 -14 3 521.643 488.039 3
 -4 14 -3 1252.16 692.068 2
 -4 14 -4 47433.5 2833.78 4
 4 14 4 49070.6 2167.63 3
 4 14 4 54574.2 3547.45 6
 -4 14 -4 51254.8 2851.35 5
 4 -14 4 49065.2 2419.8 3
 -4 14 -4 47833.9 2328.82 2
 -4 14 -5 193.928 813.579 1
 4 14 5 1275.17 1163.4 6
 -4 14 -5 1143.1 611.515 2
 -4 14 -5 1047.03 900.158 5
 4 14 5 2014.85 598.672 3
 4 -14 5 1201.55 723.792 3
 -4 14 -5 1497.81 963.717 4
 -4 14 -6 4179.09 1116.37 4
 -4 14 -6 3306.24 709.448 2
 4 14 6 2536.6 1132.03 6
 -4 14 -6 4221.88 1162.96 1
 -4 14 -6 3062.03 1063.13 5
 4 14 6 3321.72 874.459 3
 -4 14 -7 34311.3 1756.48 2
 -4 14 -7 33497.5 2496.62 4
 -4 14 -7 35321.6 2582.17 5
 4 14 7 38474.5 3180.64 6
 -4 14 -7 35431.1 2567.01 1
 -4 14 -8 8655.5 1395.49 4
 -4 14 -8 9148.21 1537.62 1
 -4 14 -8 9204.73 1595.42 5
 4 14 8 6288.48 1585.28 6
 -4 14 -9 1435.2 1014.64 1
 -4 14 -9 1724.27 1121.26 4
 4 14 9 2787 1515.92 6
 -4 14 -10 19449.3 2262.51 4
 4 14 10 16993.9 2281.41 6
 4 14 10 14772.2 2034.47 2
 -4 14 -10 14254.8 1764.2 1
 -4 14 -11 15281.4 2015.46 4
 4 14 11 14498.7 2043.75 2
 -4 14 -11 16594.1 1856.41 1
 -4 14 -12 37554.4 3071.91 4
 -4 14 -12 34048.1 2680.24 1
 4 14 12 29462.3 2731.58 2
 -4 14 -13 1623.86 1189.72 1
 -4 14 -13 -368.122 1154.97 4
 4 14 13 1243.64 1114.31 2
 -4 14 -14 12652.9 1996.35 4
 -4 14 -14 11902.6 1875.32 1
 4 14 14 13848.6 2178.01 2
 -4 14 -15 1173.35 1289.08 4
 4 14 15 1910.1 1461.07 2
 -4 14 -16 -370.945 1329.05 4
 4 14 16 1154.01 1442.41 2
 -4 14 -17 1695.57 1449.84 4
 4 14 17 895.134 1326.46 2
 4 14 18 13440 2289.19 2
 -4 14 -18 19323.1 2659.4 4
 -4 14 -19 266.563 1435.54 4
 -4 -14 -19 -4464.83 2242.14 4
 -4 16 20 9131.82 2234.27 2
 -4 16 19 -214.908 1524.92 2
 4 16 -19 1873.61 1421.5 5
 -4 16 18 18696.7 2659.47 2
 4 16 -18 19738 2946.79 4
 4 16 -18 20225.8 2824.67 5
 4 16 -17 7465.32 1889.07 4
 -4 16 17 9703.95 2014.64 2
 4 16 -17 8997.18 2121.44 5
 4 16 -16 -634.32 1691.65 4
 -4 16 16 2994.43 1387.03 2
 4 16 -16 3351.08 1530.02 5
 -4 16 15 34244.2 3144.08 2
 4 16 -15 33515.5 3137.41 5
 4 16 -15 34343.9 3367 4
 4 16 -14 11515.4 1884.86 5
 4 16 -14 11718.3 2217.18 4
 -4 16 14 13143.3 2292.62 2
 4 16 -13 14057.6 2230.68 4
 4 16 -13 13898.5 1666.95 1
 -4 16 13 14122 2120.53 2
 4 16 -13 12202.7 2019.18 5
 4 16 -12 15008.8 2262.81 4
 4 16 -12 20636.9 1863.67 1
 -4 16 12 18091.4 2442.13 2
 4 16 -12 21592.6 2537.05 5
 4 16 -11 2138.08 1143.36 4
 4 16 -11 2248.16 1331.98 5
 4 16 -11 2756.4 875.211 1
 -4 16 11 1602.07 1253.17 2
 4 16 -10 26212.3 2712.22 4
 4 16 -10 25868.9 2504.97 5
 4 16 -10 22077.2 1892.62 1
 -4 16 10 24597.3 2489.81 2
 4 16 -9 37380.6 3096.19 4
 4 16 -9 34437.3 2307.84 1
 -4 16 9 37319.5 2980.2 2
 4 16 -9 35451.8 2881.65 5
 4 16 -8 3933.35 1474.93 4
 4 16 -8 850.218 751.947 6
 4 16 -8 1348.43 1057.49 5
 -4 16 8 1334.72 1053.64 2
 4 16 -8 1918.29 760.286 1
 4 16 -7 19995.8 1721.74 1
 4 16 -7 20940.6 2037.85 6
 4 16 -7 19678.9 2069.89 5
 4 16 -7 24243.2 2435.56 4
 -4 16 7 18224.9 2121.75 2
 4 16 -6 51734.1 3332.77 4
 -4 16 6 47630.7 2095.5 5
 4 16 -6 47848.5 2987.91 6
 4 16 -6 46407.4 3036.16 5
 -4 16 6 48733.1 3159.18 2
 4 16 -5 1247 874.875 5
 4 16 -5 1869.48 1074.18 4
 -4 16 5 2010.59 593.186 5
 -4 16 5 2010.84 1049.54 2
 4 16 -5 2668.77 967.431 6
 4 16 -4 118063 4771.52 6
 4 16 -4 127707 4974.94 4
 -4 16 4 120991 4752.37 2
 4 16 -4 125653 4668.56 5
 -4 16 4 124651 3619.95 5
 -4 16 3 9713.65 1538.19 2
 -4 16 3 10342.4 1218.25 5
 4 16 -3 7119.67 1341.17 6
 4 16 -2 78819.8 4092.64 6
 -4 16 2 76280.3 3055.03 5
 -4 16 2 78553 3682.77 2
 4 16 -1 66167.2 3819.29 6
 -4 16 1 62708.3 3271.22 2
 -4 16 1 62192.3 2909.09 5
 -4 16 0 788.259 902.539 2
 -4 16 0 461.217 728.947 5
 4 16 0 -541.285 1141.69 6
 -4 16 -1 998.557 742.299 2
 4 16 1 1382.47 1088.39 6
 -4 16 -1 2040.55 972.681 5
 -4 16 -2 5933.21 1152.83 5
 4 16 2 6457.34 1669.84 6
 -4 16 -2 4162.25 1018.03 2
 -4 16 -3 9270.39 1321.78 2
 4 16 3 12419.4 2093.22 6
 -4 16 -3 11589.9 1554.67 5
 4 16 4 75317.4 4343.49 6
 -4 16 -4 68326.4 3467.43 5
 -4 16 -4 71503.6 3700.21 4
 -4 16 -4 71220.6 3078.59 2
 -4 16 -5 37554.4 2744.42 1
 -4 16 -5 35220.9 2699.56 4
 4 16 5 36814.6 3163.03 6
 -4 16 -5 40583.2 2810.29 5
 -4 16 -5 37121 2239.79 2
 -4 16 -6 933.664 660.715 2
 -4 16 -6 1298.27 971.903 4
 -4 16 -6 -482.64 1086.94 5
 4 16 6 -559.722 1280.3 6
 -4 16 -6 2104.88 1235.39 1
 -4 16 -7 35635.4 2755.74 1
 -4 16 -7 34464 2777.6 5
 -4 16 -7 37503.1 2872.08 4
 -4 16 -7 36002.5 1967.11 2
 4 16 7 32032.8 3000.09 6
 -4 16 -8 11973.9 1819.87 1
 -4 16 -8 14609.9 1957.92 5
 -4 16 -8 14770.5 2035.04 4
 4 16 8 16745.4 2448.5 6
 4 16 9 52245.5 3669.1 2
 -4 16 -9 54172.1 3563.21 4
 4 16 9 52447.4 3898.71 6
 -4 16 -9 54388.1 3392.2 1
 -4 16 -10 32328.5 2889.15 4
 -4 16 -10 31564.5 2653.69 1
 4 16 10 32633.3 2988.97 2
 -4 16 -11 1747.33 1395.85 4
 -4 16 -11 916.704 1146.5 1
 4 16 11 -42.5626 1249.21 2
 -4 16 -12 25106.8 2636.19 4
 -4 16 -12 27674.1 2583.9 1
 4 16 12 25750.7 2778.86 2
 -4 16 -13 20231.6 2558.87 4
 4 16 13 16046.7 2243.9 2
 -4 16 -13 19669.4 2315.4 1
 -4 16 -14 1731.23 1480.37 4
 4 16 14 1787.55 1267.92 2
 -4 16 -14 1420.29 1153.28 1
 -4 16 -15 18002.5 2623.27 4
 4 16 15 19104.4 2440.67 2
 4 16 16 5452.01 1521.19 2
 -4 16 -16 8469.21 2093.24 4
 4 16 17 1134.82 1453.51 2
 -4 16 -17 -2101.04 1620 4
 4 16 18 5748.53 1938.85 2
 -4 16 -18 4192.4 1724.75 4
 -4 18 18 -505.316 1615.31 2
 4 18 -17 714.659 1743.34 4
 4 18 -17 2575.99 1770.68 5
 -4 18 17 1294.31 1286.51 2
 4 18 -16 -1079.24 1752.02 4
 -4 18 16 2277.04 1582.55 2
 4 18 -16 -407.299 1527.73 5
 4 18 -15 68972.4 4839.19 4
 -4 18 15 58586.5 4384.92 2
 4 18 -15 69692.6 4648.05 5
 4 18 -14 11608.1 2314.29 4
 -4 18 14 14459.2 2383.15 2
 4 18 -14 15249.2 2336.33 5
 -4 18 13 31992.5 3111.77 2
 4 18 -13 37015.3 3443.68 4
 4 18 -13 34467 3213.44 5
 -4 18 12 217.257 1243.07 2
 4 18 -12 -1494.78 1317.65 5
 4 18 -12 -1592.88 1504.57 4
 -4 18 11 10715 2112.53 2
 4 18 -11 11576.7 2042.16 4
 4 18 -11 10096.6 1880.38 5
 4 18 -11 9838.32 1503.57 1
 4 18 -10 -163.827 881.764 1
 4 18 -10 -332.685 1268.77 4
 4 18 -10 97.6036 1235.9 5
 -4 18 10 -426.265 1397.67 2
 4 18 -9 33085.4 3017.62 4
 4 18 -9 33997.3 2966.58 5
 4 18 -9 29095 2284.41 1
 -4 18 9 31873.2 2901.18 2
 4 18 -8 37557.5 2502.5 1
 4 18 -8 40794.4 3251.91 4
 4 18 -8 39429.2 3163.84 5
 -4 18 8 37024.9 3113.79 2
 4 18 -7 49103.4 3068.68 6
 4 18 -7 39629 3114.16 5
 4 18 -7 42997.2 2715.8 1
 -4 18 7 41804.3 3191.77 2
 4 18 -7 40876.1 3282.76 4
 4 18 -6 5328.4 1455.14 5
 -4 18 6 5392.73 1400.31 2
 4 18 -6 5094 1211.69 6
 4 18 -6 4875.79 1444.47 4
 -4 18 5 1781.21 1103.24 2
 4 18 -5 328.637 1191.1 4
 4 18 -5 4109.81 1377.12 5
 4 18 -5 2089.47 1140.21 6
 -4 18 5 2876.29 796.433 5
 -4 18 4 12012.6 1903.74 2
 4 18 -4 10454.2 1686.94 5
 4 18 -4 12878 1827.87 6
 -4 18 4 11224.1 1314.56 5
 4 18 -3 16057.9 1878.61 5
 4 18 -3 16641.6 1926.7 6
 -4 18 3 16031.6 1587.19 5
 -4 18 3 15965 2035.45 2
 -4 18 2 5724.87 1512.03 2
 -4 18 2 8377.85 1237.05 5
 4 18 -2 8241.17 1726.04 6
 -4 18 1 54625.9 3286.78 2
 4 18 -1 59677.4 3738.44 6
 -4 18 1 53270.1 2868.21 5
 4 18 0 64357.9 3992.97 6
 -4 18 0 62377.1 3457.63 2
 -4 18 0 61465 3133.78 5
 -4 18 -1 38343.7 2589.25 5
 4 18 1 35664.2 3104.44 6
 -4 18 -1 39484.5 2691.51 2
 -4 18 -2 12838.1 1791.45 2
 4 18 2 10120.3 1825.95 6
 -4 18 -2 16235.2 1787.63 5
 -4 18 -3 11293.9 1461.92 2
 -4 18 -3 15738.2 1944.61 5
 4 18 3 10754 1916.45 6
 4 18 4 28330.2 2891.21 6
 -4 18 -4 27763.5 2471.21 5
 -4 18 -4 26484.2 2132.19 2
 -4 18 -5 27287.6 2507.92 5
 4 18 5 26103.8 2856.98 6
 -4 18 -5 25924.8 2000.82 2
 -4 18 -5 25456.2 2450.72 1
 -4 18 -6 23637.2 2491.65 1
 -4 18 -6 23423.5 2424.92 4
 4 18 6 20728.4 2673.06 6
 -4 18 -6 21176.4 2319.03 5
 -4 18 -6 21181.4 1757.01 2
 -4 18 -7 25241.8 2534.18 4
 -4 18 -7 26410.7 2655.48 1
 -4 18 -7 27901.3 2694.11 5
 4 18 7 27768.9 3065.69 6
 4 18 8 1423.92 1480.15 6
 -4 18 -8 -920.739 1341.85 4
 -4 18 -8 -1681.9 1254.3 5
 -4 18 -8 1204.44 1016.51 1
 4 18 8 1165.36 1408.8 2
 -4 18 -9 80230.6 4518.48 4
 -4 18 -9 79945.9 4314.87 1
 4 18 9 79884.2 4756.96 2
 -4 18 -10 13026.2 2000.38 1
 -4 18 -10 6941.57 1604.06 4
 4 18 10 8213.59 2050.71 2
 -4 18 -11 1114.06 1394.37 4
 4 18 11 -377.957 1138.74 2
 -4 18 -11 279.383 1143.57 1
 -4 18 -12 9577.26 2059.61 4
 -4 18 -12 8040.17 1625.25 1
 4 18 12 10335.7 1950.55 2
 -4 18 -13 32889.5 2958.52 1
 -4 18 -13 37244.3 3372.93 4
 4 18 13 26550 3098.91 2
 -4 18 -14 4348.25 1445.68 1
 -4 18 -14 2589.03 1520.61 4
 4 18 14 2351.71 1505.38 2
 -4 18 -15 21372.6 2821.12 4
 4 18 15 16215.3 2501.51 2
 -4 18 -15 25349.7 2769.25 1
 4 18 16 7451.27 2017.66 2
 -4 18 -16 12211.6 2290 4
 4 18 17 5463.96 1810.14 2
 -4 20 15 27725.2 3257.27 2
 4 20 -15 28101.8 3334.83 4
 4 20 -15 29335.4 3348.37 5
 -4 20 14 2205.88 1455.29 2
 4 20 -14 5348.95 1986.78 4
 4 20 -14 2774.33 1513.01 5
 4 20 -13 13516.1 2558.03 5
 -4 20 13 12182.9 2312.86 2
 4 20 -13 18712.2 2814.82 4
 4 20 -12 8616.86 1991.95 4
 4 20 -12 8317.79 2119.8 5
 -4 20 12 7919.17 1987.67 2
 -4 20 11 19076.9 2540.23 2
 4 20 -11 16717.9 2503.89 5
 4 20 -11 16662.5 2687.05 4
 4 20 -10 1136.56 1557.58 4
 4 20 -10 -1968.33 1478.74 5
 -4 20 10 1410.32 1385.85 2
 4 20 -9 8988.55 2159.33 4
 -4 20 9 4834.61 1550.88 2
 4 20 -9 7296.3 1791.82 5
 4 20 -9 8495.6 1576.88 1
 4 20 -8 9593.17 1918.78 5
 -4 20 8 7983.34 1890.46 2
 4 20 -8 7695.8 1970.81 4
 4 20 -8 7209.65 1425.12 1
 4 20 -7 36213 2722.55 1
 4 20 -7 32763.1 3082.47 4
 4 20 -7 35453.4 3147.68 5
 -4 20 7 36753.4 3268.93 2
 4 20 -6 -1426.68 1355.88 4
 4 20 -6 -1132.62 1078.16 6
 4 20 -6 203.648 1210.88 5
 -4 20 6 -305.654 1229.03 2
 4 20 -5 35330 2952.46 5
 4 20 -5 43084.3 3222.51 6
 -4 20 5 36665.6 3254.88 2
 -4 20 4 1410.16 839.426 5
 4 20 -4 702.927 1076.72 6
 4 20 -4 2382.85 1278.31 5
 -4 20 4 1377.08 1200.27 2
 -4 20 3 17650 2169.59 2
 4 20 -3 17501 2194.08 5
 -4 20 3 19251 1830.5 5
 4 20 -3 13880.9 2013.18 6
 -4 20 2 6934.52 1554.27 2
 4 20 -2 10422.2 1946.33 6
 4 20 -2 7686.45 1477.86 5
 -4 20 2 6517.16 1311.04 5
 4 20 -1 34014.1 2674.46 5
 4 20 -1 38991.6 3314.76 6
 -4 20 1 36951.7 2553.21 5
 -4 20 1 34220.4 2899.17 2
 4 20 0 27584.1 2866.43 6
 -4 20 0 24211.4 2165.24 5
 -4 20 0 30649.6 2655.3 2
 -4 20 -1 20852.9 2072.25 5
 -4 20 -1 17190.8 2199.36 2
 -4 20 -2 23606.3 2283.62 5
 4 20 2 21612.7 2657.66 6
 -4 20 -2 20249.7 2171.83 2
 -4 20 -3 10650.9 1627.33 2
 -4 20 -3 10437.8 1771.07 5
 4 20 3 10137 1988.87 6
 4 20 4 9032.93 1906.81 6
 -4 20 -4 8262.44 1647.7 5
 -4 20 -4 11510.2 1621.82 2
 -4 20 -5 11231.5 1909.47 1
 -4 20 -5 8465.85 1421.35 2
 4 20 5 13656.9 2479.59 6
 -4 20 -5 10069.7 1852.04 5
 -4 20 -6 19552.4 2377.52 1
 4 20 6 21814.5 2841.02 6
 -4 20 -6 21068.8 2534.29 5
 4 20 6 21042.6 2686.8 2
 -4 20 -7 29187 2929.46 4
 -4 20 -7 31336.8 2940.91 5
 -4 20 -7 31244.4 2903.38 1
 4 20 7 27591.1 2952.44 2
 -4 20 -8 8677.67 1855.01 4
 -4 20 -8 6481.82 1631.8 5
 -4 20 -8 8798.68 1822.93 1
 4 20 8 9028.16 2167.34 2
 -4 20 -9 31942.3 3192.26 4
 4 20 9 31315.7 3251.94 2
 -4 20 -9 37616.3 3210.65 1
 -4 20 -10 1602.82 1196.95 1
 -4 20 -10 -168.989 1352.02 4
 4 20 10 1164.72 1441.3 2
 -4 20 -11 2259.03 1333.31 4
 -4 20 -11 3509.04 1497.68 1
 4 20 11 3774.23 1693.88 2
 4 20 12 -894.496 1508.12 2
 -4 20 -12 1237.27 1341.37 1
 -4 20 -13 24028.8 2700.5 1
 -4 20 -13 30487.6 3271.06 4
 4 20 13 23877.8 3242.72 2
 -4 20 -14 2214.2 1528.55 1
 -4 20 -14 543.882 1610.34 4
 4 20 14 -775.274 1704.62 2
 -4 20 -15 9738.18 2597.02 4
 -4 20 -15 6352.14 1805.68 1
 -4 22 13 -105.887 1723.85 2
 4 22 -13 2747.04 1802.75 5
 4 22 -12 12846.7 2457.17 5
 4 22 -12 10447.5 2412.27 4
 -4 22 12 11506.2 2349.36 2
 4 22 -11 25886.1 3014.22 5
 -4 22 11 25269.1 3217.43 2
 4 22 -11 27402.9 3335.3 4
 4 22 -10 -1075.24 1691.77 4
 -4 22 10 2621.93 1567.11 2
 4 22 -10 2860.9 1580.08 5
 -4 22 9 -395.563 1454.37 2
 4 22 -9 -3203.91 2091.31 4
 4 22 -9 -1894.39 1623.94 5
 4 22 -8 10893 2332.06 4
 4 22 -8 8664.74 1913.4 5
 -4 22 8 8204.94 2018.97 2
 -4 22 7 712.061 1221.24 2
 4 22 -7 329.457 1014.48 1
 4 22 -7 1190.88 1276.08 5
 -4 22 6 3204.37 1538.68 2
 4 22 -6 1368.81 1325.75 5
 4 22 -5 54013.6 3597.91 6
 4 22 -5 51537.5 3724.55 5
 -4 22 5 43111.3 3768.43 2
 -4 22 4 18537.7 2512.57 2
 4 22 -4 17478.8 2291.52 6
 4 22 -4 19825.3 2441.81 5
 -4 22 3 433.945 1175.67 2
 -4 22 3 -985.734 998.424 5
 4 22 -3 -1208 1154.3 6
 4 22 -3 1650.69 1389.16 5
 -4 22 2 20165.5 2010.61 5
 4 22 -2 17831.5 2171.89 5
 4 22 -2 19688.5 2570.39 6
 -4 22 2 22152.9 2573.97 2
 4 22 -1 10438.3 1992.59 6
 -4 22 1 9692.43 1579.96 5
 -4 22 1 9378.28 1868.82 2
 4 22 -1 8997.15 1696.81 5
 -4 22 0 -707.989 1241.85 2
 4 22 0 -736.262 1073.66 5
 -4 22 0 1379.73 1064.19 5
 4 22 0 3118.78 1637.54 6
 -4 22 -1 4939.97 1500.9 2
 4 22 1 5007.85 1678.46 6
 4 22 1 5308.57 1498.17 5
 -4 22 -1 3905.22 1369.94 5
 4 22 2 15638.9 2443.58 6
 4 22 2 19557.9 2099.2 5
 -4 22 -2 13052.4 1954.82 2
 4 22 2 15700.9 2407.94 2
 -4 22 -2 15036.6 2075.6 5
 -4 22 -3 2218.59 1230.87 5
 -4 22 -3 7402.04 1551.13 2
 4 22 3 6201.42 1425.37 5
 4 22 3 4441.61 1626.13 6
 4 22 3 4293.06 1686.49 2
 -4 22 -4 11989.4 1745.59 2
 -4 22 -4 10956.7 1876.32 5
 4 22 4 12824.7 2436.51 2
 -4 22 -5 26519.3 2824.35 1
 -4 22 -5 27166.7 2848.41 5
 4 22 5 27999 3096.29 2
 -4 22 -6 -1360.04 1588.48 5
 -4 22 -6 2112.98 1337.56 1
 4 22 6 -59.9328 1452.34 2
 -4 22 -7 11282.2 2151.45 1
 -4 22 -7 9042.84 1948.52 5
 4 22 7 11404.8 2453.78 2
 4 22 8 3012.16 1714.54 2
 -4 22 -8 4342.48 1523.18 1
 -4 22 -8 1279.27 1533.04 5
 -4 22 -9 3029.1 1765.56 4
 4 22 9 -1319.94 1457.37 2
 -4 22 -9 276.106 1243.94 1
 -4 22 -10 17761.3 2595.17 1
 4 22 10 13631.4 2496.88 2
 -4 22 -10 17607.7 2612.18 4
 -4 22 -11 38471.5 3686.49 4
 -4 22 -11 43918.2 3674.86 1
 4 22 11 39805.5 3954.24 2
 -4 22 -12 2467.12 1798.35 4
 -4 22 -12 2962.82 1426.92 1
 -4 22 -13 -2691.98 1896.4 4
 -4 22 -13 -79.2353 1380.62 1
 4 24 -10 1964.27 1445.43 5
 -4 24 10 4781.1 1862.84 2
 -4 24 9 5687.88 1912.45 2
 4 24 -9 7431.31 2171.59 5
 -4 24 8 3129.29 1649.5 2
 4 24 -8 -218.816 1369.35 5
 -4 24 7 -1239.56 1354.4 2
 4 24 -7 2212.93 1575.69 5
 -4 24 6 9973.24 2147.67 2
 4 24 -6 5424.36 1724.49 5
 -4 24 5 34219.9 3288.19 2
 4 24 -5 31069.1 2996.74 2
 4 24 -5 32486.2 3195 5
 4 24 -4 17912.5 2545.6 5
 -4 24 4 15371.9 2392.42 2
 4 24 -4 18878.7 2496.78 2
 4 24 -3 3054.97 1567.93 2
 4 24 -3 3991.98 1693.8 5
 -4 24 3 3757.27 1747.28 2
 4 24 -2 18793.7 2446.89 5
 -4 24 2 23628.1 2719.17 2
 4 24 -2 20294.8 2661.44 2
 -4 24 1 1978.74 1340.88 2
 -4 24 1 3812.16 1368.54 5
 4 24 -1 637.133 1157.94 2
 4 24 -1 1580.11 1116.51 5
 4 24 0 3772.56 1382.62 5
 -4 24 0 4692.76 1569.17 2
 -4 24 0 3998.79 1395.04 5
 4 24 0 4107.84 1731.15 2
 -4 24 -1 49.5728 1089.11 2
 -4 24 -1 1121.08 1070.83 5
 4 24 1 1775.65 1290.95 5
 4 24 1 -476.892 1456.03 2
 4 24 2 2796.21 1475.83 2
 -4 24 -2 6176.15 1615.4 2
 -4 24 -2 5517.69 1593.07 5
 4 24 2 5545.82 1453.98 5
 4 24 3 2270.53 1384.13 5
 -4 24 -3 2609.99 1505.19 5
 -4 24 -3 1924.03 1260.75 2
 4 24 3 -352.614 1673.03 2
 -4 24 -4 7561.27 1575.12 5
 4 24 4 9697.83 2278.44 2
 -4 24 -5 9348.53 1933.81 5
 4 24 5 10169.4 2147.46 2
 -4 24 -5 7230.71 2028.71 1
 -4 24 -6 8388.95 2082.97 1
 -4 24 -6 13384.1 2362.39 5
 4 24 6 10470.2 2229.45 2
 -4 24 -7 9250.41 2202.42 1
 -4 24 -7 7501.67 2224.12 5
 4 24 7 7984.86 2113.44 2
 -4 24 -8 -344.179 1308.57 1
 4 24 8 909.739 1585.91 2
 -4 24 -9 -1388.91 1525.02 1
 -4 24 -10 7690.33 1959.43 1
 -4 24 -11 8834.4 2149.31 1
 4 26 -6 35802.5 3573.91 5
 -4 26 6 37939.6 3811.16 2
 4 26 -5 1673.28 1495.58 5
 -4 26 5 4630.7 1658.84 2
 -4 26 4 7347.59 1931.38 2
 4 26 -4 6968.82 2072.84 2
 4 26 -4 7845.77 2043.49 5
 -4 26 3 -230.195 1346.6 2
 4 26 -3 3911.31 1593.77 2
 4 26 -3 171.663 1224.75 5
 4 26 -2 1163.88 1396.59 5
 -4 26 2 569.111 1262.6 2
 4 26 -2 -2553.28 1762.86 2
 -4 26 1 -698.207 1374.63 2
 4 26 -1 477.212 1258.44 5
 4 26 -1 -1969.61 1550.29 2
 4 26 0 35241.2 3274.75 5
 -4 26 0 30686 2898.78 5
 -4 26 0 30202.4 3175.64 2
 4 26 0 35295.9 3630.67 2
 4 26 1 2551.9 1548.76 5
 -4 26 -1 -69.9509 1351.92 5
 4 26 1 765.716 1551.06 2
 -4 26 -1 -168.478 1435.25 2
 -4 26 -2 644.863 1131.94 5
 4 26 2 3363.28 1567.11 5
 4 26 2 3420.76 1676.72 2
 -4 26 -2 1197.71 1326.83 2
 -4 26 -3 569.302 1331.79 5
 4 26 3 660.941 1606.4 2
 -4 26 -4 1149.06 1360.25 5
 4 26 4 139.804 1390.34 2
 -4 26 -5 -1937.92 1826.21 1
 -4 26 -5 -938.426 1514.99 5
 -4 26 -6 24397 3002.87 5
 -4 26 -6 24651.4 3240.09 1
 -4 26 -7 4683.31 1988.81 1
 4 28 -3 2542.65 1715.92 2
 -4 28 2 -51.6945 1507.69 2
 4 28 -2 1923.59 1634.01 2
 4 28 -1 -674.231 1473.94 5
 -4 28 1 -54.3214 1390.8 2
 4 28 -1 -3066.58 1795.08 2
 4 28 0 33534 3360.16 5
 -4 28 0 32764.9 3401.44 2
 -4 28 -2 4987.65 1749.3 5
 5 -1 -22 2286.87 1804.53 4
 5 1 -22 600.306 1383.02 4
 5 1 -21 42635.4 3724.75 4
 5 -1 -21 42869.1 3808.74 4
 5 1 -20 -1956.35 1294.12 4
 5 -1 -20 52.6882 1219.13 4
 5 1 -19 10723.5 1912.9 4
 5 -1 -19 13384.7 2225.39 4
 5 1 -18 802.935 1037.84 4
 5 -1 -18 1378.22 1383.22 4
 5 -1 -17 4053.34 1301.51 4
 5 1 -17 5639.97 1421.72 4
 -5 1 17 5510.25 1061.24 2
 -5 -1 16 -786.86 709.25 2
 5 -1 -16 68.7585 955.78 4
 5 1 -16 -1641.7 1082.11 4
 -5 1 16 -387.654 717.958 2
 5 1 -15 126151 4899.5 4
 -5 1 15 135388 4196.71 2
 -5 -1 15 131352 3885.48 2
 5 -1 -15 138681 5279.36 4
 5 1 -14 3660.53 1156.89 4
 -5 -1 14 3476.92 760.975 2
 5 1 -14 3370.47 691.927 5
 5 -1 -14 5606.11 1441.53 4
 -5 1 14 4187.06 911.304 2
 -5 -1 13 1505.47 665.171 2
 5 1 -13 1821.63 584.933 5
 -5 1 13 1686.2 731.316 2
 5 -1 -13 1642.94 975.106 4
 5 1 -13 3197.51 1023.3 4
 5 -1 -12 112978 2599.56 5
 -5 1 12 120510 3633.95 2
 5 -1 -12 121629 4389.67 4
 5 1 -12 121124 3082.1 5
 -5 -1 12 119593 3402.23 2
 5 1 -12 118711 4206.86 4
 -5 -1 11 1405.77 547.412 2
 5 -1 -11 1137.21 338.689 5
 -5 1 11 1462.93 621.89 2
 5 1 -11 326.113 418.913 5
 5 -1 -11 524.921 723.567 4
 5 1 -11 784.447 701.312 4
 -5 1 10 22387.7 1495.99 2
 5 1 -10 21152.7 1638.68 4
 -5 -1 10 20882.3 1404.95 2
 5 -1 -10 19681.7 1645.08 4
 5 1 -10 21468.1 1261.58 5
 5 -1 -10 21986 1046.11 5
 5 1 -9 183538 4393.03 4
 -5 1 9 184728 4062.89 2
 5 1 -9 189230 3421.65 5
 5 -1 -9 190304 2860.43 5
 -5 -1 9 185800 3847.3 2
 5 -1 -9 183016 4670 4
 5 -1 -8 30387.9 1120.94 5
 -5 -1 8 31657.7 1581.39 2
 -5 1 8 33358.2 1682.12 2
 5 1 -8 30244.8 1688.61 4
 5 -1 -8 30013.3 1828.73 4
 5 1 -7 434953 5957.46 4
 -5 -1 7 426326 5546.16 2
 -5 1 7 430882 5809.65 2
 5 -1 -7 434520 6231.05 4
 5 -1 -6 80697.2 2492.7 4
 5 1 -6 80219.6 2343.75 4
 -5 -1 6 80130.5 2323.01 2
 -5 1 6 82702.8 2445.04 2
 -5 1 5 13970.2 1000.97 2
 -5 -1 5 16049 1034.04 2
 5 -1 -5 15586 1043.77 4
 5 1 -5 16577.3 988.591 4
 5 1 -4 242572 3295.86 4
 -5 1 4 254065 3965.73 2
 5 -1 -4 248218 3617.43 4
 -5 -1 4 248602 3436.52 4
 -5 -1 4 243314 3814.77 2
 5 -1 -3 1881.44 301.78 4
 5 1 -3 1524.92 348.147 2
 -5 -1 3 1994.51 400.806 2
 -5 -1 3 2031.67 300.639 4
 5 1 -3 1712.13 298.281 4
 -5 1 3 1870.23 445.92 2
 -5 1 2 48166.2 1661.52 2
 5 -1 -2 51102.9 1664.37 2
 -5 -1 2 50888.7 1124.39 4
 5 1 -2 50155.4 1135.12 4
 -5 -1 2 48809.2 1658.08 2
 5 1 -2 48765.2 1627.52 2
 -5 1 1 799961 6445.42 2
 5 -1 -1 778479 6341.05 2
 -5 -1 1 817248 3878.7 1
 -5 -1 1 818607 3573.3 4
 5 1 -1 790042 4122.03 1
 5 1 -1 795449 3638.07 4
 5 1 -1 800491 6535.58 2
 5 1 0 34358.9 1371.25 6
 -5 -1 0 33197.2 1311.3 6
 5 -1 0 34777.7 1327.49 2
 5 1 0 35107.8 1026.01 1
 -5 1 0 34248.6 1311.58 2
 -5 1 0 35503.8 1178.34 1
 5 -1 1 80796.2 1978.38 1
 -5 1 -1 81128.1 1944.83 2
 5 -1 1 82891.6 1976.07 6
 -5 -1 -1 81453.7 2075.41 6
 5 -1 1 77827.1 1939.12 2
 5 1 1 82083.1 1800.51 1
 -5 1 -1 83908 1922.84 1
 5 1 1 84389.7 2153.84 6
 -5 1 -2 300.954 124.465 4
 -5 -1 -2 173.743 248.172 6
 5 1 2 73.4362 331.176 6
 5 -1 2 250.927 146.662 4
 5 -1 2 -152.817 215.235 2
 5 1 2 328.661 268.211 1
 5 -1 2 490.462 247.46 1
 -5 1 -2 349.921 285.901 1
 5 -1 2 -73.2682 221.868 6
 5 -1 3 2118.44 395.024 6
 -5 -1 -3 2207.64 431.769 6
 -5 1 -3 1683.8 397.291 1
 -5 1 -3 2702.73 413.312 6
 5 1 3 1896.97 451.069 6
 5 1 3 2043.47 769.799 3
 5 -1 3 2934.77 881.643 3
 5 -1 3 2271 317.078 4
 5 -1 3 2486.48 391.321 2
 -5 1 -3 2133.26 288.396 4
 5 -1 4 21948.3 1891.3 3
 5 -1 4 22423.6 1115.88 6
 5 1 4 23287.5 1311.07 6
 -5 1 -4 22727.6 1059.1 6
 5 -1 4 24442.6 1113.65 2
 5 1 4 23233.3 1902.69 3
 -5 -1 -4 22319.4 1090.79 4
 5 -1 4 21703.9 1054.85 4
 -5 1 -4 26967.4 1072.23 4
 5 -1 5 255423 6539.54 3
 -5 1 -5 251522 3567.57 6
 5 1 5 258850 6568.82 3
 5 -1 5 249558 3804.57 6
 5 1 5 247412 4434.11 6
 -5 -1 -5 250132 4018.96 4
 -5 1 -6 43741.9 1715.73 4
 5 -1 6 42210.7 2871.8 3
 -5 1 -6 45484 1580.16 6
 5 1 6 45908.5 2954.13 3
 5 1 6 45337.8 2013.08 6
 -5 -1 -6 42885.2 1837.57 4
 5 -1 6 43340.8 1709.39 6
 5 -1 7 251290 7171.23 3
 5 1 7 249484 6982.78 3
 -5 1 -7 247944 4354.49 4
 -5 1 -7 249296 3854.6 6
 -5 -1 -7 249503 4682.87 4
 5 -1 7 244429 4277.11 6
 5 1 7 251306 4990.35 6
 5 -1 8 843.095 423.399 6
 -5 -1 -8 -516.977 512.583 4
 5 -1 8 2268.38 1239.89 3
 5 1 8 379.853 971.717 3
 -5 1 -8 485.173 503.006 4
 5 1 8 93.3874 515.268 6
 5 -1 9 60268.8 2332.06 6
 5 1 9 62248.4 3814.07 3
 5 1 9 66887.6 2741.42 6
 -5 1 -9 66538.2 2616.55 4
 5 -1 9 66780.5 4042.85 3
 -5 -1 -9 64430.6 2729.84 4
 5 -1 10 33023.1 1756.77 6
 5 1 10 34126.7 2990.51 3
 5 -1 10 33812.4 3012.41 3
 5 1 10 36925 2092.2 6
 -5 -1 -10 35142.8 2170.57 4
 -5 1 -10 38140.6 2151.62 4
 5 1 11 1411.24 1454.58 3
 5 -1 11 1489.12 570.203 6
 5 1 11 1298.72 658.634 6
 5 -1 11 1301.11 390.243 2
 -5 -1 -11 1328.45 823.674 4
 -5 1 -11 1670.53 724.242 4
 5 -1 11 725.393 1134.07 3
 5 -1 12 7871.45 1795.61 3
 5 -1 12 5200.8 584.293 2
 5 1 12 6190.87 1076.78 6
 -5 -1 -12 5056.98 1032.4 4
 5 1 12 6349.87 1568.78 3
 -5 1 -12 6345.31 1191.22 4
 5 1 12 6519.22 771.886 2
 5 -1 13 15221.1 2432.14 3
 5 1 13 16166.4 2345.83 3
 -5 1 -13 14144 1631.01 4
 -5 -1 -13 15345.9 1798.32 4
 5 1 13 14715.9 1184.93 2
 5 1 14 -754.972 1324.24 3
 5 -1 14 526.328 1429.16 3
 -5 -1 -14 1926.7 1024.97 4
 -5 1 -14 681.665 946.789 4
 5 1 15 57021.1 4629.56 3
 -5 -1 -15 55001.8 3407.88 4
 5 -1 15 53296.7 4392.51 3
 -5 1 -15 53631.3 3275.18 4
 -5 -1 -16 21522.7 2284.31 4
 -5 1 -16 14953.1 1929.42 4
 -5 -1 -17 3072.75 1353.41 4
 -5 1 -17 1615.86 1192.39 4
 -5 -1 -18 7439.15 1662.46 4
 -5 1 -18 10973.3 1984.08 4
 -5 -1 -19 2091.38 1398.77 4
 -5 1 -19 5137.52 1718.22 4
 -5 -1 -20 -3012.84 1708.64 4
 -5 1 -20 2865.38 1615.93 4
 -5 -1 -21 54829 4224.62 4
 -5 1 -21 54090.2 4119.96 4
 -5 -1 -22 1516.86 1765.1 4
 -5 1 -22 -2132.59 1605.25 4
 5 3 -22 -4298.19 1944.44 4
 5 -3 -22 -1113.45 1697.19 4
 5 -3 -21 1966.58 1559.85 4
 5 3 -21 413.896 1279.82 4
 5 3 -20 12386.6 2189.69 4
 5 -3 -20 13295.1 2463.11 4
 5 3 -19 35013.4 3256.41 4
 5 -3 -19 32219.7 3319.95 4
 5 -3 -18 18241 2419.42 4
 5 3 -18 21923.8 2573.89 4
 5 -3 -17 10983.2 1934.59 4
 -5 3 17 11124.4 1478.15 2
 5 3 -17 11652.3 1808.04 4
 5 3 -16 13495.1 1847.39 4
 -5 3 16 15525.2 1677.71 2
 5 -3 -16 15902.5 2065.94 4
 5 3 -15 67840 2848.08 5
 -5 3 15 70893.3 3256.01 2
 5 -3 -15 68049.8 3934.33 4
 5 3 -15 68616.1 3713.82 4
 -5 -3 15 71110.8 2656.27 2
 5 3 -14 7712.23 1042.58 5
 -5 -3 14 8101.37 957.321 2
 -5 3 14 8069.98 1192.41 2
 5 -3 -14 8021.97 1473.52 4
 5 3 -14 8127.68 1466.14 4
 -5 3 13 37169.2 2271.92 2
 -5 -3 13 34430.6 1811.46 2
 5 3 -13 38983.8 2055.34 5
 5 -3 -13 34885 2655.51 4
 5 3 -13 37294.9 2485.44 4
 5 3 -12 180643 4165.75 5
 -5 -3 12 177442 3943.99 2
 -5 3 12 173152 4582.34 2
 5 -3 -12 181100 5588.13 4
 5 3 -12 187015 5196.22 4
 -5 -3 11 55297.1 2148.4 2
 -5 3 11 55463.4 2574.01 2
 5 -3 -11 57160.5 3081.79 4
 5 3 -11 58680.7 2803.13 4
 5 3 -11 54259.7 2238.65 5
 -5 3 10 136310 3800.57 2
 5 3 -10 141846 3480.32 5
 -5 -3 10 133030 3248.17 2
 5 -3 -10 133721 4442.04 4
 5 3 -10 139397 4050.45 4
 5 -3 -9 38199.9 934.69 5
 -5 3 9 38740.4 1966.72 2
 5 3 -9 41510.5 1859.39 5
 5 -3 -9 38959.1 2294 4
 5 3 -9 39311.3 2088.87 4
 -5 -3 9 37936.7 1709.25 2
 -5 -3 8 10542.6 908.978 2
 5 -3 -8 9958.47 454.405 5
 -5 3 8 12113 1182.99 2
 -5 -3 8 10659.8 795.549 1
 5 3 -8 11275.4 1095.02 4
 -5 -3 7 200297 3706.77 2
 -5 3 7 195243 4125.07 2
 -5 -3 7 194658 2826.24 1
 5 3 -7 191739 4032.2 4
 -5 3 6 133717 3284.76 2
 5 3 -6 138123 3168.61 4
 -5 -3 6 133049 2062.55 1
 -5 3 5 8019.53 852.701 2
 -5 -3 5 8744.9 448.487 1
 5 3 -5 8413.25 740.655 6
 5 3 -5 7734.29 773.706 4
 -5 3 4 345053 4940.85 2
 5 3 -4 346737 4366.97 4
 5 3 -3 100008 2392.33 6
 -5 -3 3 105957 2153.32 4
 -5 3 3 99054 2552.94 2
 5 3 -3 99027.6 2145.84 4
 5 3 -2 2633.29 354.683 4
 -5 3 2 3486.98 524.64 2
 5 3 -2 3710.68 552.643 6
 -5 -3 2 3667.13 400.766 4
 -5 3 1 42101.7 1554.69 2
 5 3 -1 41649 1599.56 6
 5 3 -1 39636.4 1214.8 4
 5 -3 -1 44240.7 1586.68 2
 -5 -3 1 41265.8 1178.5 4
 5 -3 0 18316.1 999.463 2
 5 3 0 16861.1 1074.3 6
 5 -3 0 19565.8 744.507 4
 -5 -3 0 19208.5 810.731 4
 -5 3 0 18498.1 1017.28 2
 -5 3 -1 155412 2985.62 1
 5 -3 1 148194 2723.72 2
 -5 3 -1 148168 2080.59 4
 -5 3 -1 151129 2730.9 2
 5 -3 1 152842 2031.36 4
 5 3 1 150015 3241.34 6
 -5 3 -2 6225.39 491.946 4
 5 3 2 5077.6 711.635 6
 -5 3 -2 5414.73 522.683 2
 5 -3 2 5723 448.16 4
 5 -3 2 5183.99 515.398 2
 -5 3 -2 5519.91 673.077 1
 5 -3 3 17380.4 881.016 6
 5 -3 3 17737.7 1618 3
 5 -3 3 18994.3 878.29 4
 5 -3 3 17509 874.988 2
 5 3 3 19129.2 1303.48 6
 5 3 3 18255.2 1610.94 3
 -5 3 -3 18503.9 1168.04 1
 -5 3 -3 17298.3 857.96 4
 -5 3 -3 17948.2 883.811 2
 5 3 4 82439.3 3513.99 3
 5 3 4 84703.1 2801.75 6
 -5 3 -4 83008.4 2019.24 4
 5 -3 4 81574.4 3520.28 3
 5 -3 4 83007.3 1882.75 6
 5 -3 4 81605 1836.36 2
 5 -3 4 86707.6 2060.84 4
 -5 3 -4 86868.4 2540.18 1
 5 -3 5 1305.27 311.067 6
 5 3 5 2050.07 888.61 3
 5 -3 5 2302.67 886.59 3
 -5 3 -5 1461.33 445.978 1
 5 -3 5 1420.5 277.089 2
 5 3 5 2244.43 652.755 6
 -5 3 -5 1977.66 442.037 4
 5 3 6 250193 5308.73 6
 5 -3 6 260635 6941.56 3
 5 -3 6 258958 3444.62 6
 5 3 6 249889 6778.38 3
 5 -3 6 249012 3001.3 2
 -5 3 -6 257274 4188.88 4
 5 3 7 207191 5048.41 6
 5 3 7 215742 6593.85 3
 5 -3 7 205450 2621.71 2
 5 -3 7 214280 6606.39 3
 -5 3 -7 209909 4034.81 4
 5 -3 7 211382 3345.28 6
 5 -3 8 1332.14 285.136 2
 5 3 8 562.057 691.626 6
 5 3 8 625.673 896.853 3
 5 -3 8 1533.83 427.602 6
 5 -3 8 1526.93 1115.57 3
 -5 3 -8 1242.23 288.383 6
 -5 3 -8 975.128 487.001 4
 -5 3 -9 40944.1 2049.06 4
 -5 3 -9 37418.2 1258.53 6
 5 -3 9 42587.5 3281.51 3
 -5 -3 -9 39574.4 2323.23 4
 5 3 9 41157.7 2389.61 6
 5 3 9 41095.8 3221.24 3
 5 -3 9 39414.4 1088.61 2
 5 -3 9 37658.6 1528.49 6
 5 -3 10 92150.4 2339.01 6
 5 3 10 90277.7 3594.89 6
 5 -3 10 92977 4867.43 3
 -5 3 -10 91857.4 2050.48 6
 -5 -3 -10 89638.4 3605.36 4
 5 3 10 90581.4 4738.56 3
 -5 3 -10 90994.5 3224.73 4
 5 -3 10 87145.7 1558.87 2
 5 -3 10 86347.7 1599.96 2
 5 -3 11 163.407 164.575 2
 -5 3 -11 130.669 278.24 6
 5 3 11 -25.9694 657.008 6
 5 3 11 -152.053 980.29 3
 5 -3 11 367.013 1068.2 3
 -5 -3 -11 92.5716 701.486 4
 -5 3 -11 1319.34 822.577 4
 5 3 12 48720.4 3817.71 3
 5 -3 12 51407.9 3943.09 3
 -5 -3 -12 44889.5 2824.18 4
 5 3 12 44395.7 2241.86 2
 -5 3 -12 45136.3 2596.12 4
 5 3 12 41001.8 2480.8 6
 -5 -3 -13 83008.4 3896.82 4
 5 3 13 83861.7 5032.39 3
 5 -3 13 81148.3 5032.08 3
 5 3 13 78116.6 2955.86 2
 -5 3 -13 80420.3 3600.72 4
 5 -3 14 -178.559 1380.95 3
 5 3 14 653.797 1195.85 3
 5 3 14 1075.57 655.809 2
 -5 -3 -14 1075.35 940.886 4
 -5 3 -14 1474.42 1038.53 4
 -5 -3 -15 16075.8 2047.22 4
 -5 3 -15 12210.3 1702.17 4
 -5 -3 -16 75778.2 4223.08 4
 -5 3 -16 77888.9 4038.17 4
 -5 -3 -17 1734.04 1307.6 4
 -5 3 -17 3403.26 1474.98 4
 -5 -3 -18 21406.9 2549.08 4
 -5 3 -18 18931.9 2355.19 4
 -5 -3 -19 2037.69 1403.45 4
 -5 3 -19 1258.51 1255.12 4
 -5 -3 -20 -226.493 1419.34 4
 -5 3 -20 3119.26 1667.01 4
 -5 -3 -21 24939.8 3082.48 4
 -5 3 -21 28877.1 3334.97 4
 -5 -3 -22 3280.38 1734.48 4
 -5 3 -22 -366.646 1553.31 4
 5 -5 -22 2255.58 1746.82 4
 5 5 -22 1616.57 1631.01 4
 5 -5 -21 7800.63 2326.96 4
 5 5 -21 7225.51 2128.72 4
 5 -5 -20 11054.6 2269.68 4
 5 5 -20 15260.2 2432.97 4
 5 -5 -19 22647.1 2957.82 4
 5 5 -19 25061.2 2829.58 4
 -5 5 18 100744 4309.98 2
 5 -5 -18 105186 5442.53 4
 5 5 -18 106291 5177.01 4
 5 5 -17 2519.3 1017.74 5
 -5 5 17 1202.76 867.813 2
 5 -5 -17 1583.89 1273.23 4
 5 5 -17 -645.345 1173.41 4
 5 -5 -16 857.748 1186.45 4
 -5 5 16 -471.543 765.533 2
 5 5 -16 42.2471 729.643 5
 5 5 -16 1382.39 1089.24 4
 -5 5 15 1378.6 845.518 2
 5 5 -15 1916.62 861.367 5
 5 -5 -15 327.371 1191.71 4
 5 5 -15 -854.558 1195.39 4
 -5 5 14 13710.5 1601.01 2
 5 5 -14 12063.2 1373.56 5
 5 -5 -14 10708.9 1855.42 4
 5 5 -14 10200.1 1494.31 4
 -5 5 13 43715.4 2641.81 2
 5 5 -13 46101.6 2389.71 5
 5 5 -13 43145.1 2742.94 4
 5 -5 -13 45877.5 3104 4
 5 5 -12 178693 4558.04 5
 5 -5 -12 165279 5699.93 4
 -5 5 12 167887 4809.77 2
 5 5 -12 169813 5079.72 4
 -5 5 11 10190.7 1215.69 2
 5 5 -11 10348.8 946.066 6
 5 5 -11 10931.9 1212.65 5
 5 5 -11 11631.2 1380.98 4
 5 5 -10 268030 5262 5
 5 5 -10 267043 5797.95 4
 -5 5 10 266988 5711.74 2
 5 5 -10 261087 4253.28 6
 -5 5 9 35856.6 2100.95 2
 5 5 -9 31891.1 1500.03 6
 5 5 -9 37884.9 2146.28 4
 5 5 -9 34549 1850.27 5
 -5 5 8 26597.8 1757.44 2
 5 5 -8 23273.1 1253.5 6
 5 5 -8 25330.2 1706.92 4
 -5 -5 8 27489.7 1280.51 1
 5 5 -7 50144.6 1794.85 6
 -5 -5 7 48060 1563.89 1
 -5 5 7 52050 2307.37 2
 5 5 -7 49802.7 2204.77 4
 5 5 -6 82755.4 2683.89 4
 5 5 -6 83123.2 2309.93 6
 -5 5 6 85136.6 2861.92 2
 5 5 -5 385.474 344.754 4
 5 5 -5 235.002 181.569 1
 5 5 -5 878.186 397.043 6
 5 -5 -5 198.528 134.568 5
 -5 5 5 383.57 426.971 2
 -5 5 4 53987.1 2128.04 2
 5 -5 -4 53247.6 1231.3 5
 5 5 -4 56156 1973.6 6
 5 5 -4 53934 1130.31 1
 5 5 -4 55227.8 1997.75 4
 5 5 -3 42200.7 1669.32 4
 -5 5 3 41361.4 1793.43 2
 5 5 -3 41114.4 1710.5 6
 5 5 -2 181738 3256.35 4
 -5 5 2 174858 3519.29 2
 5 5 -2 178769 3602.6 6
 -5 -5 1 139139 2796.91 4
 5 5 -1 133265 3210.6 6
 5 5 -1 130169 2705.37 4
 -5 5 1 136908 2982.71 2
 -5 -5 0 1853.08 445.41 4
 -5 5 0 1354.34 458.332 2
 5 -5 0 1051.26 355.032 4
 5 5 0 1859.56 603.461 6
 5 -5 1 55545.9 1791.61 2
 5 -5 1 55631.5 1709.5 4
 5 5 1 60668.3 2347.1 6
 -5 -5 -1 52723.6 1716.22 4
 -5 5 -1 56375.7 1680.93 4
 -5 5 -1 56137 1784.07 2
 5 -5 2 200466 3242.55 2
 -5 5 -2 202794 3939.77 1
 5 5 2 202324 4482.21 6
 -5 5 -2 198791 3222.98 2
 -5 5 -2 207437 3279.16 4
 5 -5 2 199544 3166.57 4
 5 -5 3 336643 4022.67 2
 -5 5 -3 351248 4577.99 4
 5 5 3 355875 6819.38 3
 5 -5 3 340034 6884.27 3
 -5 5 -3 333866 3961.78 2
 5 5 3 339994 6030.92 6
 -5 5 -3 341706 5285 1
 5 -5 4 406673 4209.73 2
 5 5 4 419019 6990.89 6
 5 -5 4 407004 7902.91 3
 5 5 4 415137 7798.54 3
 -5 5 -4 421192 4123.24 2
 -5 5 -4 415812 5979.31 1
 -5 5 -4 408967 5071.18 4
 5 -5 5 202783 2741.43 2
 5 -5 5 199069 2646.97 6
 5 5 5 198175 5015.73 6
 5 5 5 194875 5656.51 3
 5 -5 5 195710 5767.25 3
 -5 5 -5 198053 4277.9 1
 -5 5 -5 190498 3690.11 4
 -5 5 -5 189748 2587.32 2
 5 -5 6 162318 2369.77 6
 5 5 6 162895 5433.14 3
 5 -5 6 167621 2324.38 2
 5 -5 6 159862 5502.63 3
 -5 5 -6 165425 4054.08 1
 -5 5 -6 164155 3635.83 4
 5 5 6 159363 4734.76 6
 5 -5 7 1045.13 251.588 6
 -5 5 -7 1392.1 555.176 4
 5 -5 7 961.679 885.838 3
 5 5 7 740.899 794.894 6
 5 -5 7 1609.74 251.441 2
 -5 5 -7 1120.13 653.416 1
 5 5 7 685.961 786.868 3
 5 -5 8 70363.3 1603.62 6
 5 -5 8 69301.8 3867.92 3
 -5 5 -8 74983.1 2996.23 1
 5 5 8 70192.3 3311.65 6
 5 5 8 80601.6 4149.01 3
 -5 5 -8 72863.9 2725.97 4
 5 -5 9 87622.6 1664.67 6
 5 5 9 95378.1 3948.67 6
 5 -5 9 91521.1 4689.93 3
 -5 5 -9 99755 3314.47 4
 5 5 9 102871 4780.3 3
 5 5 10 75526.1 3517.41 6
 5 -5 10 74009.2 4310.7 3
 5 5 10 72679.8 4247.83 3
 -5 5 -10 76334.8 3046.56 4
 -5 -5 -11 2156.94 768.281 4
 5 5 11 3094.01 1079.66 6
 5 -5 11 284.801 1145.31 3
 5 5 11 3159.52 1307.03 3
 -5 5 -11 3198.75 883.697 4
 5 5 12 30875.3 3057.35 3
 -5 -5 -12 21903.8 2140.98 4
 5 -5 12 24639.3 2915.34 3
 -5 5 -12 26194.6 2081.34 4
 5 5 12 26141.6 2242.4 6
 5 5 13 75821.2 3627.89 6
 5 5 13 76780.2 4801.19 3
 5 -5 13 74454.6 4875.58 3
 -5 -5 -13 73312.2 3915.82 4
 5 5 13 73754 3181.25 2
 -5 5 -13 76864.2 3571.72 4
 5 -5 14 6055.46 2034.63 3
 -5 -5 -14 5902.24 1320.97 4
 5 5 14 5145.93 1087.86 2
 5 5 14 9771.19 2139.55 3
 -5 5 -14 8821.9 1539.41 4
 -5 5 -15 -1333.51 1113.71 4
 5 5 15 -18.7697 659.256 2
 -5 -5 -16 20919.7 2473.18 4
 -5 5 -16 16587.3 2107.03 4
 -5 -5 -17 2051.19 1378.97 4
 -5 5 -17 -2006.53 1466.53 4
 -5 -5 -18 23029.3 2799.19 4
 -5 5 -18 20515.2 2488.07 4
 -5 5 -19 21727.9 2648.75 4
 -5 -5 -19 17043.7 2446.08 4
 -5 -5 -20 2659.23 1465.17 4
 -5 5 -20 7494.69 1901.34 4
 -5 -5 -21 -2362.15 1732.11 4
 -5 5 -21 -3368.39 1839.48 4
 -5 -5 -22 1596.11 1508.06 4
 -5 5 -22 1275.93 1628.93 4
 5 -7 -22 3004.69 2144.54 4
 5 7 -22 789.928 1670.28 4
 5 -7 -21 8633.09 2436.59 4
 5 7 -21 13499 2400.21 4
 5 -7 -20 10516.7 2341.03 4
 5 7 -20 14886.2 2438.95 4
 5 7 -19 18110.2 2446.44 4
 -5 7 19 13086.6 1878.13 2
 5 -7 -19 14195 2489.29 4
 -5 7 18 68276.4 3792.18 2
 5 -7 -18 76578.8 4902.53 4
 5 7 -18 76839.8 3748.83 5
 5 7 -18 77031.1 4574.53 4
 5 7 -17 30348.5 2393.41 5
 -5 7 17 27510.4 2325.92 2
 5 -7 -17 29521.6 3071.35 4
 5 7 -17 33784 2954.32 4
 5 7 -16 4163.66 1359.12 4
 5 -7 -16 2573.58 1201.26 4
 5 7 -16 3221.72 1045.91 5
 -5 7 16 4044.66 1137.38 2
 -5 7 15 14184 1817.31 2
 5 7 -15 15325 1664.01 5
 5 -7 -15 13195.4 2125.22 4
 5 7 -15 13799.7 1869.5 4
 -5 7 14 147262 4944.59 2
 5 7 -14 141621 4617.16 5
 5 -7 -14 135995 5812.07 4
 5 7 -14 146935 5296.91 4
 5 7 -13 2212.7 551.406 6
 5 7 -13 1168.47 832.744 5
 5 7 -13 447.106 798.412 4
 -5 7 13 122.844 846.893 2
 5 7 -12 61004.8 2103.03 6
 5 7 -12 59758.1 2873.93 5
 -5 7 12 56976.3 3012.51 2
 5 7 -12 62085.4 3224.36 4
 5 7 -11 -754.628 747.662 5
 -5 7 11 -863.755 856.474 2
 5 7 -11 248.651 406.929 6
 5 7 -11 -430.314 751.245 4
 -5 7 10 34065.7 2265.3 2
 5 7 -10 35046.3 1584.99 6
 5 7 -10 35390.2 2135.43 5
 5 7 -10 35183.2 2277.42 4
 -5 7 9 38673.5 2338.82 2
 5 7 -9 32659.7 2008.92 5
 5 7 -9 37841.6 1648.26 6
 5 7 -9 33404.5 2138.2 4
 5 7 -8 236633 4159.59 6
 5 7 -8 230343 5178.5 4
 5 7 -7 2350.27 727.028 4
 5 7 -7 3229.92 590.253 6
 -5 7 7 2012.72 626.871 2
 5 7 -7 2794.08 475.126 1
 5 7 -6 2238.61 638.429 4
 5 7 -6 1822.45 361.751 1
 -5 7 6 2579.98 767.987 2
 5 7 -6 2232.65 553.542 6
 -5 7 5 24071.5 1653.32 2
 5 7 -5 25419.1 1444.68 6
 5 -7 -5 24144.5 833.951 5
 5 7 -5 22104.4 1494.87 4
 5 7 -5 21556.7 1006.76 1
 5 7 -4 36267.7 1868.33 4
 5 -7 -4 38192.1 1203.67 5
 -5 7 4 35039 1907.19 2
 5 7 -4 34758.1 1743.4 6
 -5 7 3 88283.6 2840.77 2
 5 7 -3 84126.6 2684.36 4
 5 7 -3 81904.1 2719.73 6
 5 -7 -3 84649.7 1973.21 5
 -5 7 2 357703 5539.49 2
 5 7 -2 359670 5292.78 4
 5 7 -2 346926 5667.31 6
 5 7 -1 154027 3490.9 4
 5 7 -1 149333 3899.89 6
 -5 7 1 156606 3596.04 2
 -5 7 0 189855 3751.09 2
 5 7 0 196775 4629.82 6
 -5 7 -1 416987 5281.41 2
 5 7 1 402216 6842.49 6
 -5 7 -2 804865 7604 4
 -5 7 -2 798623 7062.91 2
 5 7 2 810539 9967.02 6
 5 -7 2 804051 9957.77 3
 -5 7 -3 275646 4582.23 4
 -5 7 -3 278780 5221.78 1
 -5 7 -3 270471 3931.06 2
 5 7 3 281117 6132.86 6
 5 -7 3 273285 6191.52 3
 5 -7 3 264545 4084.03 2
 5 7 3 275062 5943.52 3
 -5 7 -4 159780 3672.83 4
 5 7 4 149774 4711.44 6
 -5 7 -4 152942 2787.98 2
 5 7 4 152595 4694.61 3
 5 -7 4 147123 2855.31 2
 5 -7 4 143043 4753.85 3
 -5 7 -4 150198 3898.82 1
 5 -7 5 27958.1 2245.49 3
 5 7 5 30713.3 2296.6 6
 -5 7 -5 27433.5 1142.62 2
 5 7 5 28693.5 2183.94 3
 5 -7 5 31376.5 1234.48 2
 -5 7 -5 27932.5 1810.92 1
 -5 7 -5 30630.3 1671.6 4
 5 7 6 96768.9 3968.41 6
 5 7 6 91598.5 4006.31 3
 -5 7 -6 90565.7 1794.5 2
 5 -7 6 90087.2 1667.34 6
 5 -7 6 94460.5 4241.88 3
 5 -7 6 96373.6 1968.62 2
 -5 7 -6 88612.8 3178.41 1
 -5 7 -6 93027.2 2996.78 4
 5 -7 7 53122.5 3366.3 3
 5 7 7 45834.1 2979.3 3
 5 -7 7 42880 1038.77 6
 -5 7 -7 47956.1 2414.13 1
 5 7 7 44597.3 2832.36 6
 -5 7 -7 51248.9 2316.04 4
 5 -7 8 132560 5437.51 3
 -5 7 -8 138114 4124.75 1
 5 7 8 132944 5210.48 3
 5 7 8 134005 4891.32 6
 -5 7 -8 140994 3934.48 4
 -5 7 -9 11127.3 1316.79 4
 5 7 9 6138.84 1302.38 6
 5 7 9 8879.71 1602.8 3
 5 -7 9 11614.6 1864.06 3
 -5 7 -9 9368.62 1304.35 1
 -5 7 -10 7781 1152 4
 5 7 10 9337.79 1526.98 6
 5 -7 10 8492.08 1857.16 3
 5 7 10 9759.07 1620.49 3
 -5 7 -11 1658.21 690.282 4
 5 -7 11 1541.24 1072.81 3
 5 7 11 4540.72 1593.69 3
 5 7 11 3687.03 1162.81 6
 5 7 12 29354 3046.2 3
 5 7 12 31305.9 2584.15 6
 5 -7 12 28465.2 3030.34 3
 -5 7 -12 33549.5 2383.41 4
 -5 7 -13 -298.413 940.907 4
 5 7 13 -987.563 1160.97 3
 5 7 13 1046.75 970.981 6
 5 -7 13 1130.62 1358.32 3
 5 7 13 -568.764 818.139 2
 -5 -7 -14 14000.5 1885.12 4
 5 7 14 14453.4 1693.81 2
 -5 7 -14 17038.1 1909.64 4
 -5 -7 -15 40322 3272.33 4
 5 7 15 45562.2 2758.73 2
 -5 7 -15 43415.8 3052.88 4
 -5 -7 -16 4385.18 1583.29 4
 -5 7 -16 1550.58 1141.92 4
 -5 -7 -17 18425.8 2541.9 4
 -5 7 -17 18789.2 2338.46 4
 -5 -7 -18 7713.29 2032.41 4
 -5 7 -18 9011.89 1960.91 4
 -5 7 -19 12070.9 2120.35 4
 -5 -7 -19 13760.2 2405.72 4
 -5 -7 -20 20771.4 2810.38 4
 -5 7 -20 20695 2725.64 4
 -5 -7 -21 9493.55 2296.04 4
 -5 7 -21 10014.6 2265.51 4
 5 9 -21 23345.7 3156.15 4
 5 -9 -21 21905.9 3147.58 4
 5 -9 -20 20283.6 3134.17 4
 5 9 -20 23555.2 2991.6 4
 5 -9 -19 -1133.78 1531.33 4
 -5 9 19 804.364 1135.86 2
 5 9 -19 -739.34 1245.75 5
 5 9 -19 -404.184 1547.68 4
 -5 9 18 2737.99 1282.95 2
 5 9 -18 2289.08 1261.58 5
 5 -9 -18 2203.15 1267.57 4
 5 9 -18 1221.39 1298.72 4
 -5 9 17 36839 2894.06 2
 5 -9 -17 28034 3116.46 4
 5 9 -17 36924.2 2805.43 5
 5 9 -17 37574.2 3284.31 4
 5 9 -16 3425.23 1229.52 4
 5 -9 -16 735.11 1710.74 4
 -5 9 16 5144.56 1379.81 2
 5 9 -16 4346.63 1176.48 5
 5 9 -15 11293.2 1800 4
 -5 9 15 15409.6 1857.47 2
 5 9 -15 12648.6 1707.04 5
 -5 9 14 80619.3 3951.64 2
 5 9 -14 83556.8 3762.05 5
 5 9 -14 84497.1 4189.47 4
 5 9 -13 16354.7 1834.4 5
 -5 9 13 14909.2 1769.87 2
 5 9 -13 15132 1836.36 4
 5 9 -12 -197.106 799.196 4
 5 9 -12 414.688 411.866 6
 5 9 -12 805.76 794.171 5
 -5 9 12 -250.745 844.846 2
 5 9 -11 9505.89 1460.74 4
 -5 9 11 9066.89 1422.42 2
 5 9 -11 10685.4 1009.63 6
 5 9 -11 6773.99 1204.15 5
 5 9 -10 20140.3 1884.22 4
 -5 9 10 22053.5 1913.25 2
 5 9 -10 21801.6 1900.06 5
 5 9 -10 22203.1 1398.43 6
 5 9 -9 18377.7 1779.14 4
 5 9 -9 18485.5 1323.79 6
 5 9 -9 19126.8 1740.24 5
 -5 9 9 17907.1 1673.41 2
 5 9 -9 20695.5 1313.78 1
 5 9 -8 170308 4672.05 5
 5 9 -8 172237 3895.29 6
 5 9 -8 179336 3581.26 1
 5 9 -8 169578 4792 4
 -5 9 8 177784 5001.93 2
 5 9 -7 137786 3543.49 6
 5 9 -7 137494 3019.3 1
 -5 9 7 132457 4322.56 2
 5 9 -7 145655 4284.63 4
 5 9 -6 10344.5 1274.79 4
 5 9 -6 9098.98 1006.51 6
 5 9 -6 8231.53 767.857 1
 -5 9 6 8846.44 1207.53 2
 5 9 -5 24966 1776.42 4
 5 9 -5 24121.9 1617.24 6
 -5 9 5 24486.3 1790.52 2
 5 9 -4 11348.6 1179.53 6
 5 9 -4 10971.3 1286.13 4
 -5 9 4 11749.7 1240.62 2
 5 9 -3 27869.7 1767.03 4
 5 9 -3 26666.9 1806.88 6
 -5 9 3 27473.9 1808.53 2
 5 9 -2 27979.5 1875.58 6
 5 9 -2 28039.5 1736.77 4
 -5 9 2 31608.1 1823.45 2
 5 9 -1 88503.1 3382.5 6
 -5 9 1 88787.6 2909.87 2
 5 9 0 71602.5 3182.64 6
 -5 9 0 73907.7 2626.82 2
 -5 9 -1 157631 3691.3 2
 5 9 1 156176 4816.02 6
 -5 9 -2 80427.3 2527.51 2
 5 9 2 81570.2 3581.01 6
 5 -9 2 78725.5 3176.21 3
 -5 9 -2 84451.8 2823.8 4
 5 9 2 84361.8 3113.52 3
 -5 9 -3 6011.86 716.101 2
 5 9 3 6097.86 1012.25 3
 5 -9 3 4470.05 862.381 3
 -5 9 -3 5266.68 853.735 4
 5 9 3 8612.62 1418.2 6
 -5 9 -3 5627.1 971.07 1
 5 -9 4 74344.9 3428.05 3
 -5 9 -4 67944.4 2889.34 1
 5 9 4 74467.7 3587.09 6
 -5 9 -4 78095.3 2817.56 4
 -5 9 -4 73003.9 2227.96 2
 5 9 4 68220.8 3157.68 3
 -5 9 -5 702.94 537.494 4
 5 9 5 2097.72 975.674 6
 5 9 5 1539.72 890.755 3
 -5 9 -5 779.612 401.654 2
 5 -9 5 -599.853 661.968 3
 -5 9 -5 131.819 576.174 1
 -5 9 -6 7720.41 1091.39 4
 5 9 6 5483.35 1296.8 6
 -5 9 -6 5858.99 1050.29 1
 5 -9 6 6787.12 640.451 6
 5 9 6 6699.6 1251.67 3
 5 -9 6 7707.04 1436.28 3
 -5 9 -6 6166.12 600.999 2
 5 -9 7 36028.1 2802.18 3
 -5 9 -7 42703.6 2328.79 4
 5 9 7 40209.8 2879.33 6
 5 -9 7 38277.1 1218.07 6
 5 9 7 38686.6 2712.16 3
 -5 9 -7 40980.9 1284.5 2
 -5 9 -7 43162.9 2392.16 1
 -5 9 -8 96042.5 3556.91 4
 -5 9 -8 92170.4 3590.67 1
 5 9 8 90682.3 4291.11 3
 5 9 8 93205.2 4325.08 6
 5 -9 8 87434.8 4404.16 3
 -5 9 -8 84473.7 1497.63 2
 -5 9 -9 1751.85 819.484 4
 5 9 9 3069.23 1203.31 6
 -5 9 -9 3739.27 1062.04 1
 5 -9 9 848.588 1032.17 3
 5 9 9 1821.75 979.221 3
 -5 9 -10 5533.88 1160.79 4
 5 -9 10 6489.25 1627.36 3
 -5 9 -10 3946.52 1052.23 1
 5 9 10 4148.44 1328.68 6
 5 9 10 5194 1397.77 3
 -5 9 -11 4072.93 1091.62 4
 5 9 11 4161.4 1332.99 6
 5 9 11 3273.93 1333.46 3
 -5 9 -11 5567.89 1293.52 1
 5 -9 11 3360.09 1329.46 3
 -5 9 -12 664.557 984.216 4
 5 -9 12 -399.208 1250.09 3
 5 9 12 645.235 971.787 2
 5 9 12 165.018 988.868 6
 5 9 12 1570.61 1467.46 3
 -5 9 -13 2424.81 1083.09 4
 5 9 13 1753.07 1277.87 6
 5 9 13 3044.4 1094.42 2
 5 9 14 49856.1 3107.63 2
 -5 9 -14 54653.2 3327.72 4
 5 9 15 27832.1 2396.61 2
 -5 9 -15 33150.3 2781.94 4
 -5 9 -16 -370.978 1129.4 4
 -5 -9 -16 -2056.47 1569.81 4
 5 9 16 253.236 952.152 2
 -5 9 -17 3443.87 1537.15 4
 -5 -9 -17 2351.02 1347.29 4
 -5 9 -18 2164.53 1363.12 4
 -5 -9 -18 4864.99 1915.75 4
 -5 9 -19 6663.11 1745.9 4
 -5 -9 -19 11727.5 2397.41 4
 -5 9 -20 34762.7 3418.25 4
 -5 -9 -20 36534.4 3767.65 4
 -5 9 -21 20395.3 2888.35 4
 -5 -9 -21 19372.9 2864.28 4
 5 11 -20 -1534.03 1865.68 4
 5 -11 -20 117.46 1465.96 4
 -5 11 20 421.567 1239.23 2
 -5 11 19 26000.1 2637.78 2
 5 11 -19 24364.3 3075.37 4
 5 11 -19 24505.4 2659 5
 5 11 -18 -3206.47 1588.62 4
 5 11 -18 -769.191 1165.08 5
 -5 11 18 -1510.63 1269.46 2
 5 -11 -18 -1504.56 1920.78 4
 5 11 -17 773.379 1100.1 4
 -5 11 17 3855.91 1493.87 2
 5 11 -17 3188.6 1338.72 5
 5 11 -16 -1682.32 1475.64 4
 -5 11 16 1613.83 1304.15 2
 5 11 -16 2806.41 1288.8 5
 5 11 -15 13728 1988.95 4
 -5 11 15 16634.3 2132.62 2
 5 11 -15 14624.1 1941.35 5
 -5 11 14 29360 2622.07 2
 5 11 -14 30888.6 2575.96 5
 5 11 -14 31766.3 2803.45 4
 -5 11 13 42863.9 2936.01 2
 5 11 -13 46272.9 3011.86 5
 5 11 -13 40510.6 2983.14 4
 5 11 -12 60870.8 3333.88 5
 5 11 -12 59255 3473.01 4
 -5 11 12 54997.3 3509.79 2
 -5 11 11 4672.82 1227.85 2
 5 11 -11 6551.64 1454.28 4
 5 11 -11 7044.99 927.844 6
 5 11 -11 5328.73 1257.31 5
 5 11 -10 9120.04 1476.47 4
 5 11 -10 6364.83 1308.64 5
 5 11 -10 6486.5 902.966 6
 -5 11 10 5276.99 1155.12 2
 5 11 -10 6343.63 924.871 1
 5 11 -9 91852.7 3146.35 6
 5 11 -9 88808.8 3738.71 5
 5 11 -9 91123.9 2902.92 1
 5 11 -9 93862.6 3905.3 4
 5 11 -8 117790 4332.89 4
 -5 11 8 124734 4372.9 2
 5 11 -8 116871 3602.61 6
 5 11 -8 116574 4152.23 5
 5 11 -8 119905 3215.47 1
 5 11 -7 127332 4468.31 4
 5 11 -7 116234 3122.64 1
 5 11 -7 114757 3654.28 6
 -5 11 7 116601 4211.34 2
 5 11 -6 112371 4008.01 4
 5 11 -6 101295 3513.02 6
 5 11 -6 101032 2866.81 1
 -5 11 6 101949 3968.21 2
 5 11 -5 962.127 614.763 4
 5 11 -5 2472.53 795.623 6
 -5 11 5 2773.16 926.646 2
 -5 11 4 -613.907 655.054 2
 5 11 -4 501.517 798.921 4
 5 11 -4 13.0497 681.866 6
 5 11 -3 166927 4601.98 4
 -5 11 3 163789 3478.04 5
 5 11 -3 156064 4742.49 6
 -5 11 3 157736 4502.92 2
 5 11 -2 17286 1514.37 4
 -5 11 2 18546.9 1283.16 5
 5 11 -2 16427.8 1752.54 6
 -5 11 2 20258.2 1602.54 2
 -5 11 1 1883.02 713.091 2
 5 11 -1 1887.29 811.757 6
 -5 11 1 2301.66 637.338 5
 5 11 0 9000.37 1458.75 6
 -5 11 0 6216.33 959.115 2
 -5 11 0 6775.46 950.743 5
 5 -11 1 7369.31 1034.53 3
 -5 11 -1 4994.47 848.823 5
 -5 11 -1 5182.09 859.068 2
 5 11 2 21669.7 1587.76 3
 5 11 2 18798.1 1974.45 6
 -5 11 -2 19682.5 1540.26 5
 5 -11 2 21784.3 1752.51 3
 -5 11 -2 20172 1424.64 2
 -5 11 -3 30062.7 1650.82 2
 5 11 3 31330.4 2515.11 6
 5 11 3 27982.1 1918.78 3
 -5 11 -3 31058.7 2004.52 4
 5 -11 3 29514.3 2058.01 3
 5 11 4 6825.34 1486.13 6
 -5 11 -4 6249.68 817.343 2
 -5 11 -4 5239.2 1043.86 4
 5 -11 4 6105.62 1169.33 3
 5 11 4 6362.72 1133.56 3
 -5 11 -4 4570.56 982.623 1
 -5 11 -5 609.982 712.743 4
 -5 11 -5 294.27 700.805 1
 5 -11 5 -156.91 830.158 3
 5 11 5 -1147.21 1194.84 6
 -5 11 -5 189.519 408.317 2
 5 11 5 412.267 716.86 3
 -5 11 -6 61336.7 2988.63 4
 -5 11 -6 56871.1 1977.97 2
 5 -11 6 54373.5 2001.76 6
 5 11 6 57147.5 3538.54 6
 5 11 6 61467.4 3180.08 3
 -5 11 -6 59556.1 2992.89 1
 5 -11 6 57994.7 3278.3 3
 -5 11 -7 4721 614.22 2
 5 11 7 3467.34 1129.47 3
 -5 11 -7 5550.06 1110.56 1
 -5 11 -7 2860.27 958.581 4
 5 11 7 1341.33 1007.49 6
 5 -11 7 3254.8 1137.65 3
 -5 11 -8 46761.2 2818.47 4
 5 11 8 44083.2 2948.32 3
 5 11 8 42883.1 3223.7 6
 -5 11 -8 46533.8 1447.39 2
 5 -11 8 46497 3299.97 3
 -5 11 -8 48068.2 2777.19 1
 -5 11 -9 44532.7 2766.35 4
 5 -11 9 37756.5 3155.49 3
 5 11 9 40462.9 3159.63 6
 5 11 9 38355.9 2854.1 3
 -5 11 -9 40615.4 2622.77 1
 -5 11 -10 512.068 911.532 4
 5 11 10 1427.54 1238.71 6
 5 11 10 1300.69 1080.1 3
 -5 11 -10 1816.4 927.863 1
 5 -11 10 2158.1 1247.8 3
 -5 11 -11 3816.9 1180.8 4
 5 11 11 2841.57 1229.65 6
 5 -11 11 2500.85 1543.32 3
 5 11 11 3842.64 1341.9 3
 -5 11 -11 5703.69 1339.5 1
 -5 11 -12 14190.4 1792.24 4
 -5 11 -12 14259.9 1781.46 1
 5 11 12 18019.7 2244.59 6
 5 11 12 13842.9 1883.67 2
 -5 11 -13 21701.2 2265.18 4
 5 11 13 19814.5 2165 2
 5 11 14 69707.1 3856.81 2
 -5 11 -14 70363.7 3990.01 4
 -5 11 -15 20802.2 2394.34 4
 5 11 15 21225.7 2325.78 2
 -5 11 -16 10894.2 1856.71 4
 5 11 16 11264.6 1819.25 2
 -5 11 -17 317.679 1317.98 4
 5 11 17 1233.35 1074.16 2
 -5 11 -18 335.345 1402.48 4
 -5 -11 -18 296.353 1400.14 4
 -5 11 -19 35514.4 3441.42 4
 -5 -11 -19 39003.5 3878.82 4
 -5 11 -20 26638.9 3112.84 4
 -5 -11 -20 22129.2 3337.83 4
 -5 13 20 4458.73 1723.16 2
 5 13 -20 3933.6 1800.6 4
 5 13 -20 1928.11 1313.6 5
 5 -13 -20 -1630.27 1832.58 4
 5 -13 -19 53670.8 4843.83 4
 -5 13 19 62788.3 4165.19 2
 5 13 -19 71147.7 4421.14 5
 5 13 -19 68259.1 4896.96 4
 5 13 -18 2212.3 1540.19 4
 -5 13 18 -950.959 1142.18 2
 5 13 -18 1124.32 1108.75 5
 5 13 -17 3532.76 1722.56 4
 -5 13 17 1672.62 1225.12 2
 5 13 -17 1533.22 1273.1 5
 5 13 -16 957.974 1134.11 4
 -5 13 16 2328.78 1304.52 2
 5 13 -16 681.522 1142.97 5
 5 13 -15 27799.5 2792.14 4
 -5 13 15 22340.9 2474.48 2
 5 13 -15 32185 2837.19 5
 5 13 -14 12749.1 1949.73 4
 -5 13 14 11599.2 1901.58 2
 5 13 -14 11906.3 1928.35 5
 5 13 -13 65919.8 3778 5
 -5 13 13 60513.5 3679.82 2
 5 13 -13 64856.7 3906.98 4
 5 13 -12 35713.8 2733.04 5
 5 13 -12 41222.3 2340.39 1
 -5 13 12 33743.6 2807.85 2
 5 13 -12 32241.7 2782.29 4
 5 13 -11 557.238 635.28 1
 5 13 -11 -1247.98 1078.81 5
 -5 13 11 1043.65 939.251 2
 5 13 -11 1051.64 981.902 4
 5 13 -10 559.684 968.725 4
 5 13 -10 567.469 967.35 5
 5 13 -10 174.495 583.143 1
 -5 13 10 417.088 1011.56 2
 5 13 -10 293.608 624.791 6
 5 13 -9 32194.7 2750.14 4
 5 13 -9 27151 1917.01 6
 5 13 -9 29519.6 2400.48 5
 5 13 -9 30334.7 1838.97 1
 -5 13 9 26940 2351.45 2
 -5 13 8 2535.75 929.919 2
 5 13 -8 2567.77 868.377 6
 5 13 -8 2255.12 659.458 1
 5 13 -8 3376.21 1092.52 5
 5 13 -8 2828.82 1125.94 4
 5 13 -7 6404.54 1321.41 4
 -5 13 7 6526.83 1448.08 2
 5 13 -7 7461.78 1386.88 5
 5 13 -7 6381.99 927.094 1
 5 13 -7 7122.27 1203.08 6
 5 13 -6 44529.4 2650.51 6
 5 13 -6 45260.7 2870.06 4
 -5 13 6 40018 2666.72 2
 -5 13 5 9110.71 1340.95 2
 5 13 -5 11028.2 1511.27 4
 -5 13 5 12274.2 1020.97 5
 5 13 -5 10798.3 1412.53 6
 -5 13 4 11335 1499.2 2
 5 13 -4 11049.8 1545.51 4
 5 13 -4 11665.3 1585.43 6
 -5 13 4 10893.8 1046.34 5
 5 13 -3 203894 5477.51 4
 5 13 -3 207579 5940.59 6
 -5 13 3 197262 4189.61 5
 -5 13 3 202218 5327.25 2
 -5 13 2 9363.18 1307.87 2
 5 13 -2 7699.84 1393.7 6
 -5 13 2 10285.1 1090.44 5
 5 13 -1 1417.89 868.951 6
 -5 13 1 2676.3 706.826 5
 -5 13 1 897.215 771.621 2
 5 -13 0 2036.27 575.21 3
 5 13 0 1703.77 933.605 6
 -5 13 0 2601.29 766.715 2
 -5 13 0 1784.79 660.867 5
 5 13 1 3608.63 695.811 3
 -5 13 -1 1950.8 811.046 2
 5 -13 1 2734.5 714.225 3
 5 13 1 2771.83 1190.28 6
 -5 13 -1 2379.57 821.735 5
 5 -13 2 25.7399 581.533 3
 -5 13 -2 -261.818 627.042 2
 5 13 2 432.075 1161.57 6
 5 13 2 308.543 496.494 3
 -5 13 -2 -456.445 714.646 5
 -5 13 -3 188667 5088.76 5
 5 13 3 183255 4535.17 3
 5 -13 3 183563 4890.2 3
 -5 13 -3 186331 5186.7 4
 5 13 3 191414 6404.5 6
 -5 13 -3 186608 4482.7 2
 -5 13 -4 7229.89 996.236 2
 5 13 4 6696.73 1100.88 3
 -5 13 -4 5935.21 1213.24 1
 5 13 4 7229.45 1532.51 6
 5 -13 4 5778.21 1048.3 3
 -5 13 -4 4526.7 1089.92 5
 -5 13 -4 5598.71 1022.44 4
 -5 13 -5 789.897 818.592 1
 5 13 5 1311.74 1077.76 6
 5 13 5 2106.95 746.238 3
 5 -13 5 1746.11 833.437 3
 -5 13 -5 1316.72 506.078 2
 -5 13 -5 1736.5 899.485 4
 5 13 6 9135.23 1299.71 3
 -5 13 -6 9888.2 1473.29 1
 5 -13 6 6870.33 1271.54 3
 5 13 6 8227.52 1676.29 6
 -5 13 -6 6565.34 1277.27 4
 -5 13 -6 8148.62 914.367 2
 -5 13 -7 7193.31 1271.02 4
 -5 13 -7 7871.78 892.369 2
 5 13 7 7871.9 1687.45 6
 5 13 7 9059.25 1379 3
 5 -13 7 7943.56 1494.39 3
 -5 13 -7 9433.88 1492.13 1
 -5 13 -8 579.948 790.714 4
 -5 13 -8 -368.971 916.259 1
 5 13 8 362.309 1200.98 6
 -5 13 -8 -272.097 362.604 2
 5 13 8 -637.397 843.956 3
 5 -13 8 58.9179 868.55 3
 -5 13 -9 76213.6 3834.21 4
 5 13 9 87855.7 4657.22 6
 5 13 9 82145.5 4046.21 3
 5 -13 9 82411.5 4420.32 3
 -5 13 -9 73053.6 3661.75 1
 5 13 10 46452 3216.59 3
 -5 13 -10 46407 3095.21 4
 -5 13 -10 43676.5 2859.46 1
 5 13 10 42273.8 3394.24 6
 -5 13 -11 1463.33 1042.46 4
 5 13 11 2025.19 1316.07 6
 -5 13 -11 1340.16 1036.23 1
 5 13 12 7404.12 1828.09 6
 -5 13 -12 6069.82 1349.52 1
 -5 13 -12 5169.03 1354.65 4
 5 13 12 4595.21 1473.1 2
 -5 13 -13 25031.3 2382.43 1
 -5 13 -13 26216.7 2553.04 4
 5 13 13 26393.6 2726.57 2
 -5 13 -14 4223.45 1290.94 4
 5 13 14 6646.77 1669.26 2
 -5 13 -15 6297.96 1671.3 4
 5 13 15 4771.3 1526.84 2
 -5 13 -16 1759.85 1217.8 4
 5 13 16 7999.91 1760.3 2
 -5 13 -17 7811.42 1795.3 4
 5 13 17 7815.86 1758.05 2
 -5 13 -18 2527.23 1537.46 4
 -5 -13 -18 -2121.45 2076.01 4
 -5 -13 -19 36986.1 3985.34 4
 -5 13 -19 56094.2 4342.78 4
 -5 15 21 -612.677 1495.14 2
 -5 15 20 4443.55 1750.34 2
 5 15 -20 2093.55 1534.14 5
 5 15 -19 47841.5 3824.74 5
 -5 15 19 50972.4 4033.88 2
 -5 15 18 -1360.66 1383.36 2
 5 15 -18 1535.65 1800.27 4
 5 15 -18 2493.54 1534.07 5
 -5 15 17 2398.01 1546.19 2
 5 15 -17 2603.52 1673.82 4
 5 15 -17 2734.63 1401.63 5
 5 15 -16 5028.11 1724.61 4
 -5 15 16 3287.23 1640.17 2
 5 15 -16 1488.01 1231.66 5
 5 15 -15 721.487 1261.36 4
 -5 15 15 3029.06 1601.97 2
 5 15 -15 406.718 1319.19 5
 5 15 -14 10617.2 1947.88 4
 -5 15 14 11473.9 2022.22 2
 5 15 -14 13674.4 2059.41 5
 5 15 -13 69875.3 4320.65 4
 5 15 -13 62414.9 3911.56 5
 -5 15 13 62254.6 3989.56 2
 5 15 -12 1797.1 1169.61 4
 5 15 -12 650.416 685.968 1
 5 15 -12 1474.97 1213.07 5
 -5 15 12 1502.2 1148.37 2
 5 15 -11 -379.608 1385.72 4
 5 15 -11 139.353 680.894 1
 5 15 -11 1255.8 1085.63 5
 -5 15 11 1307.54 1064.76 2
 5 15 -10 4030.61 1318.94 4
 -5 15 10 5091.38 1542.13 2
 5 15 -10 4484.67 943.643 1
 5 15 -10 3079.4 1199.16 5
 5 15 -9 64813.6 3831.9 4
 5 15 -9 64896.5 3196.84 6
 5 15 -9 55686.6 3434.5 5
 5 15 -9 59495.8 2767.98 1
 -5 15 9 58236.6 3573.43 2
 5 15 -8 42927.4 2985.8 5
 5 15 -8 49704.8 3317.77 4
 5 15 -8 43350 2694.88 6
 -5 15 8 48476.5 3317.1 2
 5 15 -8 42855 2348.99 1
 5 15 -7 6158.32 1048.64 1
 5 15 -7 6544.72 1296 6
 5 15 -7 7465.79 1581.36 4
 5 15 -7 5732.16 1436.96 5
 -5 15 7 6105.74 1509.42 2
 -5 15 6 2111.33 1129.05 2
 5 15 -6 4937.94 1416.38 4
 5 15 -6 1556.94 889.939 6
 5 15 -6 2786.96 985.847 5
 -5 15 6 3056.03 636.534 5
 5 15 -5 262.328 936.842 4
 5 15 -5 649.476 875.572 6
 -5 15 5 13.464 475.047 5
 -5 15 5 83.0979 818.215 2
 -5 15 4 -351.582 908.12 2
 5 15 -4 2677.66 1217.82 4
 -5 15 4 628.05 524.125 5
 5 15 -4 901.471 859.028 6
 -5 15 3 106489 3380.73 5
 5 15 -3 107999 4687.28 6
 -5 15 3 105940 4231.16 2
 -5 15 2 33986.6 2036.88 5
 -5 15 2 35019.4 2486.08 2
 5 15 -2 37221.3 2862.66 6
 -5 15 1 11557.4 1574.2 2
 -5 15 1 11477 1316.49 5
 5 -15 -1 11446.1 950.277 3
 5 15 -1 11749.7 1769.5 6
 -5 15 0 10005.1 1403.87 2
 5 15 0 8550.68 830.205 3
 5 -15 0 9942.31 912.335 3
 5 15 0 11173.5 1908.08 6
 -5 15 0 10028.2 1348.9 5
 5 15 1 9786.72 1641.82 6
 5 15 1 8690.71 863.667 3
 5 -15 1 8650.91 912.834 3
 -5 15 -1 8371.12 1230.98 5
 -5 15 -1 7824.69 1257.55 2
 5 15 2 9700.46 1810.66 6
 -5 15 -2 9883.01 1334.26 2
 5 -15 2 11246.9 1119.03 3
 -5 15 -2 9932.89 1385.88 5
 5 15 2 10091.5 932.933 3
 5 -15 3 133296 3852.95 3
 5 15 3 137740 5777.88 6
 -5 15 -3 137824 4647.69 5
 5 15 3 137397 3506.92 3
 -5 15 -3 140453 4214.79 2
 5 15 4 230.162 1170.88 6
 -5 15 -4 1378.51 884.534 4
 -5 15 -4 1145.52 964.83 5
 5 15 4 136.252 530.805 3
 5 -15 4 -437.423 593.257 3
 -5 15 -4 299.529 591.627 2
 5 15 5 2543 753.913 3
 -5 15 -5 365.793 917.632 5
 -5 15 -5 1522.63 889.052 4
 5 -15 5 1805.16 828.576 3
 -5 15 -5 1392.25 800.323 2
 -5 15 -5 2061.51 967.156 1
 -5 15 -6 2149.93 1131.72 1
 5 -15 6 2576.76 943.868 3
 -5 15 -6 5319.5 1313.55 4
 5 15 6 1579.78 1218.67 6
 5 15 6 2774.32 912.036 3
 -5 15 -6 3289.23 795.16 2
 -5 15 -7 506.551 475.25 2
 -5 15 -7 1646.77 967.05 4
 -5 15 -7 1467.15 1069.3 1
 5 15 7 2964.27 1511.36 6
 5 15 7 737.793 634.927 3
 -5 15 -8 18477.6 2120.73 4
 5 15 8 15874 2245.86 6
 -5 15 -8 15553.9 1919.12 1
 5 15 9 111079 5528.01 6
 -5 15 -9 103295 4675.82 4
 -5 15 -9 109379 4615.88 1
 5 15 10 1304.94 1366.77 6
 -5 15 -10 2934.98 1488.47 4
 -5 15 -10 2428.75 1313.95 1
 -5 15 -11 1189.47 1006.81 4
 5 15 11 1149.56 1201.42 6
 -5 15 -11 402.714 1064.2 1
 -5 15 -12 1069.84 1138.06 4
 -5 15 -12 3560.68 1254.14 1
 -5 15 -13 16195.9 2297.56 4
 5 15 13 20386.6 2509.38 2
 -5 15 -13 17097.3 2187.96 1
 -5 15 -14 21999.1 2417.59 1
 -5 15 -14 21087.4 2599.94 4
 5 15 14 24720.3 2825.78 2
 -5 15 -15 3537.28 1755.35 4
 5 15 15 2632.12 1393.21 2
 -5 15 -16 823.039 1566.95 4
 5 15 16 4837.33 1674.14 2
 5 15 17 2531.82 1459.56 2
 -5 15 -17 3268 1625.55 4
 5 15 18 -163.759 1344.3 2
 -5 15 -18 -3440.73 1898.93 4
 5 17 -19 11366.1 2245.72 5
 -5 17 19 9344.62 2232.16 2
 -5 17 18 856.069 1425.27 2
 5 17 -18 -1649.1 1699.86 5
 -5 17 17 4420.1 1988.32 2
 5 17 -17 -503.935 1596.56 4
 5 17 -17 3959.53 2017.92 5
 5 17 -16 9561.26 2041.75 4
 -5 17 16 13757.9 2392.97 2
 5 17 -16 10772.5 2072.51 5
 5 17 -15 337.613 1258.08 4
 -5 17 15 2830.21 1421.56 2
 5 17 -15 501.672 1167.95 5
 -5 17 14 117528 5633.97 2
 5 17 -14 115179 5529.15 5
 5 17 -14 119987 6084.72 4
 5 17 -13 47727.3 3870.93 4
 5 17 -13 56840.4 3995.02 5
 -5 17 13 43546.6 3577.54 2
 5 17 -12 2594.14 1557.95 4
 5 17 -12 4240.46 1794.79 5
 -5 17 12 3224.88 1523.19 2
 5 17 -11 390.901 1221.72 4
 -5 17 11 1053.22 1363.64 2
 5 17 -11 337.225 1136.07 5
 5 17 -10 3058.13 934.51 1
 5 17 -10 2644.59 1424.02 4
 -5 17 10 2941.32 1297.76 2
 5 17 -10 650.179 976.612 5
 -5 17 9 24848.3 2576.22 2
 5 17 -9 23415.4 2512.18 5
 5 17 -9 28028.1 2789.64 4
 5 17 -9 23243.8 1906.56 1
 5 17 -8 125707 4300.06 1
 5 17 -8 137006 5634.99 4
 5 17 -8 125570 5228.05 5
 5 17 -8 127681 4834.35 6
 -5 17 8 115781 5130.39 2
 5 17 -7 1904.17 969 6
 5 17 -7 1623.13 1115.9 5
 5 17 -7 -317.855 880.897 1
 5 17 -7 1268.7 1094.49 4
 -5 17 7 411.058 1126.05 2
 5 17 -6 18366 2099.05 4
 5 17 -6 20623 2141.33 6
 -5 17 6 17463.4 1369.72 5
 5 17 -6 17493.8 2055.85 5
 -5 17 6 17364.6 2132.42 2
 -5 17 5 -16.0103 542.924 5
 -5 17 5 -459.927 1168.54 2
 5 17 -5 2991.82 1317.82 6
 5 17 -5 8.11996 1030.21 5
 5 17 -5 964.478 921.464 4
 -5 17 4 8858.29 1669.55 2
 5 17 -4 6828.34 1421.97 6
 -5 17 4 5600.78 995.013 5
 5 17 -3 38420.5 3084.74 6
 -5 17 3 37268.6 2192.02 5
 -5 17 3 38929.9 2792.65 2
 5 17 -2 37528.6 3018.68 6
 -5 17 2 32810 2551.43 2
 -5 17 2 33346.8 2165.71 5
 -5 17 1 3766.3 1216.91 2
 5 17 -1 2593.65 1268.76 6
 -5 17 1 3713.16 919.815 5
 5 17 0 1822.07 1103.72 6
 -5 17 0 3628.55 1131.5 2
 -5 17 0 2524.55 1031.08 5
 5 17 1 913.957 1079.88 6
 -5 17 -1 2015.21 1037.92 5
 -5 17 -1 1180.07 851.421 2
 5 17 2 112319 5402.72 6
 -5 17 -2 103396 4190.89 5
 -5 17 -2 98896.4 3956.16 2
 5 17 3 69522.4 4342.69 6
 -5 17 -3 66079 3481.98 5
 -5 17 -3 64943.8 3143.98 2
 5 17 4 7851.13 1927.88 6
 -5 17 -4 6957.25 1164.51 2
 -5 17 -4 6562.65 1463.17 5
 -5 17 -5 5002.72 1424.46 1
 -5 17 -5 3000.83 1223.42 4
 5 17 5 3800.65 1452.11 6
 -5 17 -5 5495.36 1480.99 5
 -5 17 -5 2789.31 805.894 2
 -5 17 -6 -406.62 639.723 2
 -5 17 -6 -1692.82 1142.1 1
 5 17 6 -1459.58 1552.09 6
 -5 17 -6 -1064.7 1089.34 5
 -5 17 -6 182.009 1113.71 4
 -5 17 -7 8113.82 1657.96 1
 -5 17 -7 6946.02 1650.05 4
 5 17 7 7905.2 2021.38 6
 5 17 8 108981 5725.14 6
 -5 17 -8 116215 5160.14 4
 -5 17 -8 123284 5260.97 1
 -5 17 -9 27894.4 2776.35 4
 5 17 9 29751.7 3271.05 6
 -5 17 -9 23413.3 2512.16 1
 -5 17 -10 1779.01 1134.61 4
 5 17 10 1404.41 1390.36 6
 5 17 10 1874.53 1498.7 2
 -5 17 -10 44.7986 1175.05 1
 -5 17 -11 -739.383 1182.98 1
 5 17 11 993.797 1174.72 2
 -5 17 -11 2560.12 1148.47 4
 -5 17 -12 5441.04 1724.23 4
 -5 17 -12 5009.33 1277.79 1
 5 17 12 3607.85 1508.31 2
 -5 17 -13 6022.94 1690.34 4
 -5 17 -13 2028.48 1203.86 1
 5 17 13 4356.64 1510.79 2
 -5 17 -14 47070.5 3919.97 4
 -5 17 -14 42149.3 3321.09 1
 5 17 14 45167.5 3827.29 2
 -5 17 -15 1422.39 1545.95 4
 -5 17 -15 4283.52 1740.56 1
 5 17 15 1901.3 1346.17 2
 -5 17 -16 -214.621 1540.47 4
 5 17 16 1210.19 1453.92 2
 5 17 17 4401.62 1641.32 2
 -5 17 -17 1247.66 1448.36 4
 5 17 18 -608.089 1471.95 2
 5 19 -16 7506.95 2277.7 4
 -5 19 16 5608.91 1743.68 2
 5 19 -16 6772.1 1942.26 5
 5 19 -15 8828.68 2487.22 4
 -5 19 15 5627.47 2031.21 2
 5 19 -15 4383.66 1683.24 5
 5 19 -14 118616 6246.58 4
 5 19 -14 118074 5968.63 5
 -5 19 14 111035 6019.14 2
 -5 19 13 1279.9 1436.4 2
 5 19 -13 5225.23 1701.14 5
 5 19 -13 4868.32 1939.64 4
 -5 19 12 4639.01 1589.33 2
 5 19 -12 5475.38 1739.72 5
 5 19 -12 3454.5 1461.63 4
 5 19 -11 407.22 1454.23 4
 -5 19 11 3542.38 1626.3 2
 5 19 -11 1248.15 1403.79 5
 5 19 -10 5721.26 1928.93 4
 -5 19 10 5600.53 1830.9 2
 5 19 -10 2754.17 1472.05 5
 5 19 -9 -1807.01 1540.53 4
 5 19 -9 -1435.28 1301.07 5
 -5 19 9 -2197.7 1217.62 2
 5 19 -8 45799.7 2877.7 1
 -5 19 8 46599.9 3534.3 2
 5 19 -8 50281.5 3654.81 5
 5 19 -8 45998.5 3532.84 4
 5 19 -7 1826.27 1201.9 6
 5 19 -7 1537.47 1362.37 5
 5 19 -7 853.479 973.063 1
 5 19 -7 1030.08 1315.58 4
 -5 19 7 1210.74 1279.09 2
 -5 19 6 729.632 1273.64 2
 5 19 -6 376.402 1052.37 6
 5 19 -6 1320.36 1220.53 5
 5 19 -6 -178.706 1191.76 4
 5 19 -5 521.098 1108.63 6
 5 19 -5 611.95 974.581 5
 -5 19 5 1535.68 1166.67 2
 -5 19 4 3960.62 1437.63 2
 5 19 -4 3108.61 1128.34 5
 -5 19 4 3058.93 851.801 5
 5 19 -4 2855.32 1358.14 6
 -5 19 3 5357.97 1319.51 2
 5 19 -3 6304.17 1654.85 6
 5 19 -3 4316.28 1339.37 5
 -5 19 3 5402.57 1084.84 5
 5 19 -2 85935.8 4752.23 6
 -5 19 2 78703.7 3477.43 5
 -5 19 2 81818.8 4237.22 2
 -5 19 1 5401.01 1319.54 2
 -5 19 1 4488.56 1091.64 5
 5 19 -1 6097.12 1778.91 6
 -5 19 0 35.7295 848.486 5
 5 19 0 -1043.75 1310.17 6
 -5 19 0 513.651 990.714 2
 5 19 1 31688.9 3102.07 6
 -5 19 -1 32148.8 2551.07 5
 -5 19 -1 34830.6 2675.73 2
 5 19 2 37641.7 3323.01 6
 -5 19 -2 47126.8 3032.83 5
 -5 19 -2 44096.6 2873.2 2
 5 19 3 7349.57 1886.33 6
 -5 19 -3 9230.47 1500.04 2
 -5 19 -3 6027.96 1522.49 5
 5 19 4 17078.6 2601.92 6
 -5 19 -4 12871.6 1653.12 2
 -5 19 -4 12489.1 1701.51 5
 -5 19 -5 13088.1 2000.52 1
 -5 19 -5 10747.4 1448.06 2
 5 19 5 10518 2229.98 6
 -5 19 -5 8838.05 1561.41 5
 -5 19 -6 10.9487 1213.02 5
 -5 19 -6 -1834.12 1390.18 1
 5 19 6 462.587 1182.38 6
 -5 19 -7 30788.6 2851.07 4
 -5 19 -7 27195.5 2821.3 1
 5 19 7 26422.1 3144.27 6
 -5 19 -8 84970 4720.42 4
 5 19 8 88870 5372.3 6
 5 19 8 75813.1 4766.28 2
 -5 19 -8 84373.6 4625.35 1
 -5 19 -9 6016.96 1714.32 4
 -5 19 -9 4908.04 1520.67 1
 5 19 9 3240.97 1499.75 6
 5 19 9 2630.68 1580.75 2
 5 19 10 5235.63 1832.03 2
 -5 19 -10 3345.71 1420.8 1
 -5 19 -10 2071.55 1243.08 4
 -5 19 -11 1638.99 1467.31 4
 -5 19 -11 4016.79 1634.72 1
 5 19 11 -975.23 1496.8 2
 -5 19 -12 2241.29 1330.56 4
 -5 19 -12 4559.82 1604.85 1
 5 19 12 464.246 1519.07 2
 -5 19 -13 -1434.43 1492.99 1
 5 19 13 -211.978 1419.07 2
 -5 19 -14 65339.6 4670.71 4
 -5 19 -14 64414.2 4189.29 1
 5 19 14 63906.8 4637.23 2
 -5 19 -15 1763.92 1527.36 1
 -5 19 -15 1662.07 1604.78 4
 5 19 15 1765.7 1651.57 2
 -5 19 -16 -884.444 1652.84 4
 5 21 -14 26235.1 3220.57 4
 -5 21 14 19046.2 2752.54 2
 5 21 -14 24409.5 3281.97 5
 -5 21 13 9192.52 2200.67 2
 5 21 -13 9995.45 2278.89 4
 5 21 -13 10203.1 2398.24 5
 -5 21 12 12419.6 2341.93 2
 5 21 -12 10783.4 2203.51 5
 5 21 -12 13079.7 2199.87 4
 -5 21 11 -305.852 1444.09 2
 5 21 -11 336.703 1254.26 5
 5 21 -11 -2787.28 1862.65 4
 5 21 -10 9032.29 2265.91 4
 -5 21 10 10172.6 1967.99 2
 5 21 -10 10458.1 2150.04 5
 5 21 -9 6471.7 1824.45 5
 -5 21 9 6474.17 1919.83 2
 5 21 -9 7673.23 2062.63 4
 5 21 -8 13703.6 2401.67 4
 -5 21 8 13113.9 2185.65 2
 5 21 -8 13690.6 2333.89 5
 -5 21 7 2517.33 1444.38 2
 5 21 -7 1454.33 1118.49 5
 5 21 -7 2128.15 1355.76 4
 -5 21 6 5613.08 1636.87 2
 5 21 -6 7589.93 1659.85 6
 5 21 -6 7278.69 1875.57 5
 5 21 -5 9563.58 1839.91 6
 5 21 -5 11454.7 2039.54 5
 -5 21 5 10774.8 2043.46 2
 -5 21 4 2923.52 1429.97 2
 5 21 -4 772.613 1009.96 5
 5 21 -4 1101.25 1189.21 6
 5 21 -3 68512.6 4335.97 6
 5 21 -3 69576.5 4013.5 5
 -5 21 3 75163.3 3546.31 5
 -5 21 3 71861.3 4223.42 2
 5 21 -2 36730.6 2923.15 5
 -5 21 2 38214.3 3122.03 2
 5 21 -2 35959.7 3260.58 6
 -5 21 2 33816.4 2519.25 5
 -5 21 1 -1302.59 1220.72 2
 -5 21 1 178.762 919.534 5
 5 21 -1 -2137.43 1500.5 6
 5 21 -1 -1661.84 1137.36 5
 -5 21 0 -282.199 1113.24 2
 5 21 0 2959.4 1514.77 6
 -5 21 0 661.228 998.707 5
 -5 21 -1 2858.74 1300.7 2
 5 21 1 -405.351 1503.23 6
 -5 21 -1 3527.13 1224.72 5
 -5 21 -2 8572.85 1608.77 2
 5 21 2 9984.8 2131 6
 -5 21 -2 7958 1563.33 5
 5 21 3 46022.8 3818.92 6
 -5 21 -3 46754.5 3271.14 5
 -5 21 -3 41775.8 2955.73 2
 -5 21 -4 19297.7 2036.02 2
 5 21 4 18009 2707.19 6
 -5 21 -4 15965.2 2218.75 5
 -5 21 -5 1675.07 1180.28 5
 5 21 5 6853.65 2214.86 6
 -5 21 -5 5917.7 1697.17 1
 5 21 6 -863.342 1554.71 2
 5 21 6 3288.79 1801.53 6
 -5 21 -6 -1039.84 1222.18 1
 -5 21 -7 11474.5 2141.68 1
 5 21 7 13149.7 2603.49 6
 5 21 7 7320.66 1962.85 2
 5 21 8 17630.7 2635.37 2
 -5 21 -8 15630.1 2390.87 4
 -5 21 -8 17342.9 2483.9 1
 -5 21 -9 4280.36 1609.51 4
 -5 21 -9 4610.63 1506.26 1
 5 21 9 3553.13 1653.25 2
 -5 21 -10 6763.89 1809.04 1
 -5 21 -10 8038.69 2042.12 4
 5 21 10 7399.35 1973.9 2
 -5 21 -11 1350.29 1593.09 4
 -5 21 -11 1195.94 1653.06 1
 5 21 11 -86.3433 1574.56 2
 -5 21 -12 966.363 1512.16 4
 -5 21 -12 1634.35 1511.78 1
 5 21 12 238.577 1720.16 2
 -5 21 -13 -255.309 1443.43 4
 -5 21 -13 4709.95 1740.32 1
 -5 21 -14 25515.1 3321.61 4
 -5 21 -14 21250.9 2750.97 1
 5 23 -11 -622.277 1601.02 4
 5 23 -11 2261.28 1846.05 5
 -5 23 11 2326.52 1832.49 2
 5 23 -10 19335.3 2688.85 5
 5 23 -10 18217 2909.2 4
 -5 23 10 22480.6 2949.06 2
 -5 23 9 8389.97 1880.71 2
 5 23 -9 6704.36 2303.9 4
 5 23 -9 7681.09 1910.61 5
 -5 23 8 -1320.26 1613.18 2
 5 23 -8 687.236 1606.82 5
 -5 23 7 1935.5 1562.65 2
 5 23 -7 1095.19 1404.74 5
 -5 23 6 4986.94 1458.32 2
 5 23 -6 5043.04 1579.16 5
 -5 23 5 2613.66 1302.22 2
 5 23 -5 2607.33 1400.11 5
 5 23 -4 17363.7 2435.17 6
 5 23 -4 15415.5 2315.03 5
 -5 23 4 15363.5 2311.4 2
 5 23 -3 37821.3 3246.11 5
 5 23 -3 43003.2 3711.77 6
 -5 23 3 43017.4 3444.45 2
 -5 23 2 4304.4 1593.68 2
 -5 23 2 2444.72 1154.62 5
 5 23 -2 2623.57 1479.49 6
 5 23 -2 5413.7 1541.43 5
 -5 23 1 3076.27 1136.31 5
 5 23 -1 2284.33 1255.24 5
 -5 23 1 522.393 1251.99 2
 5 23 -1 1976.41 1576.53 6
 -5 23 0 954.535 1169.85 2
 5 23 0 3846.97 1839.33 6
 5 23 0 1625.99 1167.19 5
 -5 23 0 1725.58 1125.89 5
 -5 23 -1 5395.72 1610.34 2
 5 23 1 2187.85 1296.52 5
 5 23 1 2896.93 1538.93 6
 -5 23 -1 3045.64 1254.18 5
 5 23 2 1144.67 1168.36 5
 5 23 2 -509.256 1392.62 6
 -5 23 -2 502.492 1100.87 2
 -5 23 -2 -137.695 1025.64 5
 -5 23 -3 24699.6 2515.13 2
 5 23 3 27110.9 3253.59 6
 -5 23 -3 26146.1 2755.79 5
 5 23 3 24182.4 2927.16 2
 5 23 4 18189.7 2760.93 6
 -5 23 -4 16954.7 2455.65 5
 5 23 4 12511.6 2317.76 2
 -5 23 -5 2707.93 1642.86 1
 5 23 5 2189.1 1845.41 2
 -5 23 -6 2450.2 1747.1 1
 5 23 6 257.805 1500.56 2
 -5 23 -7 1978.05 1593.23 1
 5 23 7 3563.31 1707.83 2
 -5 23 -8 1738.75 1648.73 1
 5 23 8 -1030.75 1565.76 2
 -5 23 -9 18885 2657.85 1
 5 23 9 20065.5 2931.93 2
 -5 23 -10 1990.72 1294.95 1
 -5 23 -10 5094.84 1998.42 4
 -5 23 -11 -2198.67 1940.71 4
 -5 23 -11 -548.12 1241.58 1
 -5 25 8 10797.3 2160.02 2
 5 25 -8 7861.43 2035.36 5
 5 25 -7 10333.4 2461.43 5
 -5 25 7 13240.1 2669.75 2
 -5 25 6 -1095.37 1481.74 2
 5 25 -6 2546.61 1597.59 5
 5 25 -5 2091.73 1442.01 5
 5 25 -5 4414.23 1774.04 2
 -5 25 5 2618.88 1546.49 2
 -5 25 4 5920.88 1881.43 2
 5 25 -4 5683.16 1805.89 2
 5 25 -4 8912.74 2272.93 5
 -5 25 3 5460.21 1713.59 2
 5 25 -3 4236.08 1691.44 5
 5 25 -3 4206.28 1570.81 2
 -5 25 2 535.162 1249.5 2
 5 25 -2 2517.2 1527.99 2
 5 25 -2 4144.73 1592.31 5
 5 25 -1 4221.13 1516.62 5
 -5 25 1 315.18 1287.86 2
 5 25 -1 1570.55 1497.22 2
 -5 25 0 545.899 1216.55 2
 5 25 0 768.26 1258.25 5
 -5 25 0 523.744 1211.83 5
 5 25 0 559.075 1669.35 2
 -5 25 -1 9367.49 1744.83 2
 5 25 1 6179.58 1634.4 5
 -5 25 -1 10090.2 1881.01 5
 5 25 1 4889.11 1697.59 2
 -5 25 -2 1823.25 1431.52 2
 -5 25 -2 608.52 1247.45 5
 5 25 2 2764.24 1610.98 2
 5 25 2 697.875 1229.86 5
 5 25 3 14953.3 2117.2 5
 -5 25 -3 14771.6 2312.64 5
 5 25 3 13939.8 2538.52 2
 5 25 4 3859.79 2034.18 2
 5 25 5 10940.6 2436.89 2
 -5 25 -5 14263.5 2507.63 1
 -5 25 -6 9785.92 2281.4 1
 5 25 6 12558.7 2805.71 2
 -5 25 -7 21389 3006.49 1
 -5 25 -8 -2370.19 1706.11 1
 5 27 -4 -1539.34 1718.14 2
 -5 27 4 1461.99 1735.28 2
 -5 27 3 3117.49 2033.63 2
 5 27 -3 3797.98 1866.81 2
 5 27 -3 5804.11 1774.25 5
 -5 27 2 560.791 1578.91 2
 5 27 -2 2419.9 1554.12 5
 5 27 -2 -922.874 1764.26 2
 -5 27 1 14436.7 2380.38 2
 5 27 -1 12676.7 2547.73 2
 5 27 -1 11167 2221.16 5
 5 27 0 588.898 1414.63 5
 5 27 0 -1643.87 1875.83 2
 5 27 1 6145.45 1798.19 5
 5 27 1 7741.29 2130.9 2
 6 0 -22 78323.8 5184.94 4
 6 0 -21 1959.93 1574.1 4
 6 0 -20 15303.2 2344.58 4
 6 0 -19 2010.31 1449.29 4
 6 0 -18 10386.2 1901.64 4
 6 0 -17 896.106 1234.13 4
 -6 0 16 24035.5 1922.66 2
 6 0 -16 26674.2 2499.44 4
 -6 0 15 1809.74 820.282 2
 6 0 -15 1514.09 1102.43 4
 6 0 -14 9582.22 949.659 5
 6 0 -14 10464.3 1565.03 4
 -6 0 14 7085.64 1078.56 2
 6 0 -13 -878.585 1017.92 4
 6 0 -13 -168.692 418.266 5
 -6 0 13 -860.999 571.666 2
 6 0 -12 14802.6 1059.38 5
 -6 0 12 15351.6 1386.67 2
 6 0 -12 16008.1 1770.85 4
 6 0 -11 98.5341 362.636 5
 6 0 -11 124.746 718.33 4
 -6 0 11 260.116 537.798 2
 6 0 -10 43733.3 1621.87 5
 -6 0 10 43382.3 2126.31 2
 6 0 -10 45027 2430.59 4
 6 0 -9 -195.592 323.549 5
 6 0 -9 114.398 605.051 4
 -6 0 9 -463.291 483.934 2
 -6 0 8 273195 4899.58 2
 6 0 -8 271495 5066.99 4
 -6 0 7 -508.502 458.365 2
 6 0 -7 -270.153 470.784 4
 6 0 -6 109511 2775.41 4
 -6 0 6 106747 2880.41 2
 -6 0 5 261.303 400.528 2
 6 0 -5 -49.8386 301.427 4
 -6 0 4 19126.4 1195.43 2
 6 0 -4 17202 924.643 4
 -6 0 3 261.224 381.458 2
 6 0 -3 -8.27464 188.665 4
 6 0 -2 63948.3 1199.31 4
 -6 0 2 62438 2000.54 2
 -6 0 1 144.099 169.2 1
 -6 0 1 160.98 281.257 2
 6 0 0 77512.7 1866.04 1
 6 0 0 87250 2331.17 6
 -6 0 0 85191.8 1837.14 1
 6 0 1 163.222 272.637 6
 6 0 1 -74.7477 230.856 1
 -6 0 -1 284.349 267.606 1
 -6 0 -2 137.309 113.922 4
 6 0 2 373.887 334.019 6
 6 0 3 486.39 406.299 6
 -6 0 -3 82.6608 186.263 4
 6 0 4 159626 5147.6 3
 6 0 4 153363 3265.34 6
 -6 0 -4 151364 2539.53 4
 6 0 5 120.162 376.794 6
 6 0 5 -410.073 820.207 3
 -6 0 -5 -191.514 328.453 4
 6 0 6 279260 7524.21 3
 6 0 6 275288 4820.21 6
 -6 0 -6 282535 4341.31 4
 6 0 7 -439.536 534.623 6
 6 0 7 834.427 919.822 3
 -6 0 -7 -13.0604 404.936 4
 6 0 8 5956.96 970.769 6
 6 0 8 4409.54 1332.96 3
 -6 0 -8 4531.31 755.767 4
 6 0 9 -33.9476 525.977 6
 6 0 9 -1223.11 1147.93 3
 -6 0 -9 -224.12 571.24 4
 6 0 10 77531.3 4584.53 3
 6 0 10 71527.1 2891.02 6
 -6 0 -10 76167.4 3004.07 4
 6 0 11 -546.507 589.68 6
 6 0 11 1155.23 1213.45 3
 -6 0 -11 -241.818 720.231 4
 -6 0 -12 44938.6 2604.49 4
 6 0 12 45085.4 2308.99 6
 6 0 12 43275.5 3747.73 3
 6 0 13 212.836 575.993 6
 6 0 13 -1061.29 1169.68 3
 -6 0 -13 -162.463 773.106 4
 6 0 14 1739.96 1791.2 3
 -6 0 -14 532.813 918.232 4
 6 0 15 3793.17 1976.74 3
 -6 0 -15 -243.644 871.094 4
 6 0 16 149449 7535.05 3
 -6 0 -16 137461 5382.51 4
 -6 0 -17 -1127.13 1188.14 4
 -6 0 -18 533.088 1286.54 4
 -6 0 -19 3207.7 1481.36 4
 -6 0 -20 11411.7 2101.82 4
 -6 0 -21 971.834 1712.11 4
 -6 0 -22 75647 5108.2 4
 6 -2 -22 46106.7 4109.68 4
 6 2 -22 48960 4171.4 4
 6 -2 -21 1755.78 1431.01 4
 6 2 -21 3661.43 1850.71 4
 6 -2 -20 3891.75 1409.75 4
 6 2 -20 3937.07 1385.76 4
 6 -2 -19 1560.06 1372.35 4
 6 2 -19 3095.23 1622.22 4
 6 -2 -18 8117.89 1684.07 4
 6 2 -18 10250 1793.26 4
 6 -2 -17 14649.5 2212.38 4
 -6 2 17 14208.2 1626.89 2
 6 2 -17 15860.9 2102.14 4
 6 -2 -16 113691 5030.82 4
 6 2 -16 112980 4875.02 4
 6 2 -16 111367 3539.89 5
 -6 2 16 105627 4105.18 2
 -6 -2 16 114843 3726.58 2
 -6 -2 15 7418.42 1023.24 2
 6 2 -15 7861.65 1052.06 5
 -6 2 15 8969.53 1286.03 2
 6 -2 -15 6344.12 1373.31 4
 6 2 -15 10134.1 1634.47 4
 -6 -2 14 9052.39 1123.01 2
 6 2 -14 8601.51 1062.41 5
 -6 2 14 10192.9 1323.84 2
 6 -2 -14 11244.7 1788.09 4
 6 2 -14 10321.6 1638.38 4
 -6 2 13 27603.9 1931.17 2
 6 2 -13 27168.6 1629 5
 6 2 -13 24506.9 2145.78 4
 6 -2 -13 28349 2357.45 4
 -6 2 12 23577.4 1782.27 2
 6 -2 -12 24675.2 2159.23 4
 6 2 -12 24955.7 1514.15 5
 6 -2 -12 22983 1057.72 5
 6 2 -12 26004.8 2024.63 4
 6 2 -11 63035.4 2311.58 5
 6 -2 -11 66570.2 1663.77 5
 6 -2 -11 67758.2 3250.69 4
 6 2 -11 70231.4 3072.49 4
 -6 2 11 63920.4 2735.61 2
 -6 2 10 120704 3625.81 2
 6 2 -10 115439 2991.1 5
 6 -2 -10 122322 4086.11 4
 6 2 -10 126082 3840.23 4
 -6 -2 10 114936 3258.11 2
 6 -2 -10 118267 2154.91 5
 -6 2 9 72373.7 2754.63 2
 6 -2 -9 73734.7 1650.78 5
 6 2 -9 70107 2746.17 4
 6 -2 -9 73391.5 3015.92 4
 -6 -2 9 67382.6 2412.06 2
 -6 2 8 26323 1653.04 2
 6 2 -8 27767.1 1637.53 4
 6 -2 -8 24391.4 1715.11 4
 -6 -2 8 27129.2 1593 2
 6 -2 -7 43124.1 2090.86 4
 6 2 -7 42750.5 1899.59 4
 -6 -2 7 43652.3 1857.4 2
 -6 2 7 41831.2 1985.22 2
 -6 2 6 237362 4583.68 2
 6 -2 -6 247674 4586.81 4
 6 2 -6 248063 4197.6 4
 -6 -2 6 240109 4285.17 2
 -6 -2 5 273570 4448.19 2
 -6 2 5 281598 4739.59 2
 6 2 -5 275874 4050.65 4
 -6 -2 4 9147.9 693.918 4
 6 2 -4 9761.18 735.69 4
 -6 2 4 7750.33 824.655 2
 -6 2 3 361693 5064.95 2
 6 2 -3 356874 4799.97 6
 6 2 -3 361318 3862.87 4
 6 2 -2 28273.4 1365.92 6
 -6 2 2 29716.5 1429.87 2
 -6 -2 2 31997.5 975.8 4
 6 2 -2 30996.6 1015.35 4
 -6 2 1 3642.66 547.002 2
 6 2 -1 3680.85 562.943 6
 6 2 -1 3938.59 335.928 4
 6 2 -1 4405.59 347.893 1
 -6 -2 1 3792.3 327.868 4
 -6 -2 0 197892 2117.78 4
 6 -2 0 193824 1798.03 4
 -6 2 0 203259 3244.05 1
 -6 2 0 192370 3388.72 2
 6 2 0 196813 2576.27 1
 6 2 0 198599 3653.7 6
 -6 2 -1 80790.5 2135.68 2
 6 -2 1 80522.3 2165.03 2
 6 2 1 86109.2 1973.66 1
 -6 2 -1 81150.8 1231.78 4
 6 2 1 80643.2 2397.68 6
 6 -2 1 83142.3 1184.71 4
 -6 2 -1 81876.7 2167.89 1
 -6 2 -2 18820.1 1031.27 2
 6 -2 2 18961.2 1052.36 6
 6 2 2 20898.7 1295.35 6
 6 -2 2 20518.5 704.81 4
 6 -2 2 18750.2 1070.41 2
 -6 2 -2 19064.6 1108.13 1
 -6 2 -2 19579.2 699.504 4
 6 -2 3 3024.37 487.02 2
 6 2 3 2792.72 533.957 6
 6 -2 3 4224.48 556.194 6
 -6 2 -3 3650.1 626.189 1
 6 -2 3 3863.98 404.357 4
 -6 2 -3 3945.64 400.134 4
 -6 2 -4 2991.77 609.158 1
 6 -2 4 1920.42 423.937 6
 6 2 4 1722.32 523.041 6
 6 -2 4 1351.97 737.55 3
 6 -2 4 2065.25 365.464 4
 6 2 4 3219.45 1123.9 3
 6 -2 4 1769.13 408.919 2
 -6 2 -4 1986.62 325.61 4
 6 -2 5 68008.4 3573.07 3
 6 -2 5 67105.9 2011.19 6
 6 2 5 65182.1 3508.1 3
 6 -2 5 65085.9 1873.41 2
 -6 2 -5 66643.4 1871.88 4
 6 2 5 66731.1 2589.9 6
 -6 2 -6 156800 2892.88 6
 6 -2 6 155589 3166.76 6
 6 2 6 170309 4282.96 6
 6 2 6 160442 5646.6 3
 6 -2 6 160485 5752.57 3
 -6 -2 -6 152559 3575.13 4
 -6 2 -6 152655 3121.63 4
 6 -2 6 153392 2813.06 2
 6 2 7 1926.32 788.055 6
 6 -2 7 1485.36 529.203 6
 6 -2 7 1062.85 326.969 2
 6 2 7 609.115 977.7 3
 -6 -2 -7 680.095 491.904 4
 -6 2 -7 713.311 470.104 4
 6 -2 7 1780.03 1244.36 3
 6 -2 8 4978.47 576.43 2
 6 -2 8 5530.23 760.526 6
 6 2 8 4066.97 1356.13 3
 -6 -2 -8 5984.19 940.014 4
 6 -2 8 4750.97 1404.97 3
 6 2 8 5627.69 969.577 6
 -6 2 -8 5424.9 783.46 4
 6 2 9 164775 6415.82 3
 -6 -2 -9 161229 4386.68 4
 6 2 9 162300 4699.29 6
 6 -2 9 158014 3726.27 6
 6 -2 9 168642 6527.29 3
 -6 2 -9 167472 4076.6 4
 6 -2 9 168250 2910.22 2
 6 -2 10 12656.8 1154.02 6
 6 2 10 14797.8 1538.89 6
 6 2 10 11674 1933.66 3
 6 -2 10 12617.2 2162.54 3
 -6 -2 -10 13571.9 1494.59 4
 -6 2 -10 14064.7 1362.54 4
 6 -2 10 12675.2 837.621 2
 6 2 11 56044.5 2880.37 6
 6 -2 11 54936.1 2273.16 6
 -6 2 -11 58546.5 2721.69 4
 -6 -2 -11 60484.4 2994.68 4
 6 -2 11 58584.7 4207.1 3
 6 2 11 51493.1 3976.3 3
 6 2 12 60577.4 4268.65 3
 6 -2 12 69551.3 4659.05 3
 6 2 12 58580.9 2936.57 6
 6 -2 12 64765.4 2378.51 6
 -6 -2 -12 63727.2 3244.71 4
 -6 2 -12 63150.2 3064.75 4
 6 2 13 3485.08 1038.78 6
 6 -2 13 4129.34 1640.74 3
 6 2 13 2904.77 1577.34 3
 -6 -2 -13 2763.68 1048.22 4
 6 2 13 2959.28 746.425 2
 -6 2 -13 1343 804.66 4
 6 -2 14 20277.4 2862.32 3
 6 2 14 21792 3034.65 3
 -6 -2 -14 17073.6 1960.4 4
 -6 2 -14 18621.6 1933.58 4
 -6 2 -15 3079.95 1077.24 4
 6 -2 15 3553.52 1910.24 3
 6 2 15 3256.62 1853.39 3
 -6 -2 -15 3286.85 1266.37 4
 6 2 16 68428.2 5244.83 3
 -6 -2 -16 57188.8 3621.85 4
 6 -2 16 66070.1 5158.84 3
 -6 2 -16 60241.2 3579.36 4
 -6 2 -17 51742.5 3466.12 4
 -6 -2 -17 58112.7 3797.75 4
 -6 -2 -18 813.681 1110.99 4
 -6 2 -18 1488.67 1246.06 4
 -6 -2 -19 7494.6 1883.9 4
 -6 2 -19 4617.14 1568.3 4
 -6 -2 -20 3071.16 1587.31 4
 -6 2 -20 1612.04 1137.24 4
 -6 -2 -21 3988.84 1816.55 4
 -6 2 -21 5396.53 2081.91 4
 -6 2 -22 47464.6 4130.05 4
 -6 -2 -22 41983.1 3867.8 4
 6 -4 -22 -665.593 1703.37 4
 6 4 -22 992.584 1700.56 4
 6 -4 -21 22331.7 3028.34 4
 6 4 -21 14498.9 2400.69 4
 6 -4 -20 4741.58 1614.09 4
 6 4 -20 5909.45 1863.09 4
 6 -4 -19 2210.36 1643.08 4
 6 4 -19 339.577 1144.35 4
 -6 4 18 14605 1875.93 2
 6 -4 -18 16948.5 2346 4
 6 4 -18 16950.3 2318.69 4
 6 4 -17 55877.2 2863.49 5
 6 -4 -17 54912.4 3845.34 4
 6 4 -17 61166.7 3824.35 4
 -6 4 17 53602.9 3131.14 2
 -6 4 16 34337.1 2488.55 2
 6 4 -16 35776.2 2232.98 5
 6 -4 -16 33733.3 3009.17 4
 6 4 -16 34547.7 2781.56 4
 6 4 -15 8381.17 1158.08 5
 -6 4 15 6742.4 1201.05 2
 6 -4 -15 10574.5 1700.67 4
 6 4 -15 9171.43 1597.37 4
 -6 4 14 2793.32 951.427 2
 6 4 -14 2159.82 757.667 5
 6 -4 -14 2389.76 1095.1 4
 6 4 -14 1399.33 966.796 4
 6 4 -13 8925.18 1113.94 5
 -6 4 13 9478.83 1354.84 2
 6 -4 -13 7822.33 1546.7 4
 6 4 -13 10079.9 1522.63 4
 6 4 -12 17136.6 1439.68 5
 6 -4 -12 18729.4 1978.91 4
 -6 4 12 16850.7 1655.44 2
 6 4 -12 18262.3 1805.49 4
 6 4 -11 253333 5027.23 5
 -6 4 11 254494 5667.15 2
 6 -4 -11 258453 6629.04 4
 6 4 -11 254607 5824.86 4
 6 4 -10 199906 4343.43 5
 -6 4 10 202534 4975.65 2
 6 -4 -10 207974 5673.97 4
 6 4 -10 207308 5029.95 4
 -6 4 9 78191.2 2985.31 2
 6 4 -9 82540.2 3036.63 4
 6 4 -8 8140.15 854.438 6
 -6 -4 8 9855.55 708.714 1
 -6 4 8 10070.5 1127.49 2
 6 4 -8 8216.36 1002.65 4
 6 4 -7 92654.2 2632.92 6
 6 4 -7 90619 2876.43 4
 -6 -4 7 98376.8 1890.33 1
 -6 4 7 96837.8 3124.61 2
 -6 -4 6 290334 2786.24 1
 6 4 -6 288272 4483.69 6
 -6 4 6 288194 5221.2 2
 6 4 -6 287017 4759.58 4
 -6 4 5 40168 1918.33 2
 6 4 -5 39796.1 1695.37 6
 6 4 -5 40985.5 1733.52 4
 6 4 -4 247158 4201.7 6
 -6 4 4 255559 4644.93 2
 6 4 -4 257409 4003.9 4
 6 4 -3 46220.9 1851.58 6
 -6 4 3 46942.8 1918.91 2
 -6 -4 3 48179.4 1585.32 4
 6 4 -3 44825.1 1600.27 4
 6 4 -2 210441 3258.84 4
 6 4 -2 207019 3939.95 6
 -6 4 2 208550 3900.95 2
 -6 -4 2 214201 3143.78 4
 6 4 -1 80548.6 2522.42 6
 6 4 -1 80332.9 1934.13 4
 -6 4 1 85189.5 2432.22 2
 -6 -4 1 83795.2 1913.73 4
 -6 -4 0 28876.9 1143.91 4
 6 -4 0 31436.3 1109.56 4
 6 4 0 29705.3 1594.28 6
 -6 4 0 28521.6 1371.11 2
 -6 4 -1 27484.9 1422.17 1
 6 4 1 27527.2 1588.21 6
 -6 4 -1 27191.3 1022.05 4
 -6 -4 -1 24592.5 1058.95 4
 -6 4 -1 28631.8 1356.08 2
 6 -4 1 27038.1 1018.11 4
 -6 4 -2 41700 1807.08 1
 -6 4 -2 39758.5 1309.74 4
 6 -4 2 41625.1 1541.86 2
 -6 4 -2 41414 1560.34 2
 6 4 2 38761.6 1935.48 6
 6 -4 2 41094.9 1289.78 4
 6 -4 3 20516.6 1054.38 2
 6 -4 3 18527.9 1790.77 3
 6 4 3 17179 1387.3 6
 6 -4 3 19837.6 975.587 4
 -6 4 -3 18621.7 1013.22 2
 -6 4 -3 19373 1294.5 1
 -6 4 -3 19541.7 984.607 4
 -6 4 -4 21598.7 1037.22 2
 6 4 4 22597.6 2028.93 3
 6 -4 4 22025.7 1063.36 6
 6 -4 4 22444.6 1095.47 2
 6 -4 4 24643.6 2132.91 3
 -6 4 -4 22591.5 1422.1 1
 6 4 4 23256.4 1667.78 6
 -6 4 -4 23981.7 1167.46 4
 6 -4 5 454348 4683.6 6
 6 4 5 449208 7368.17 6
 6 4 5 455031 9034.96 3
 6 -4 5 455068 4605.48 2
 -6 4 -5 466554 6581.71 1
 6 -4 5 439658 9013.52 3
 -6 4 -5 450017 5323.52 4
 -6 4 -6 14428.4 1297.06 1
 6 4 6 13868.5 1882.15 3
 6 -4 6 10710.4 1652.82 3
 6 4 6 10616.4 1292.88 6
 6 -4 6 12732.7 818.267 6
 -6 4 -6 11786.8 983.842 4
 6 -4 6 13427.6 801.148 2
 6 -4 7 13458.6 774.587 2
 6 4 7 12943.2 1516.44 6
 6 4 7 13522.8 1871.2 3
 6 -4 7 13591.3 869.634 6
 -6 4 -7 13703.2 1355.39 1
 6 -4 7 13253.2 1901.82 3
 -6 4 -7 13043.6 1067.65 4
 6 4 8 5116 1371.89 3
 6 -4 8 3212.8 1325.13 3
 6 4 8 5457.81 1288.27 6
 6 -4 8 3920.61 438.498 2
 6 -4 8 4797.51 608.79 6
 -6 4 -8 5071.39 842.019 4
 6 -4 9 85746.6 2304.46 6
 6 -4 9 79488.9 1655.92 2
 6 4 9 82898.4 3684.21 6
 6 4 9 87509.2 4699.74 3
 6 -4 9 87573.8 4755.18 3
 -6 4 -9 82796.6 2981.33 4
 6 4 10 4807.29 1050.96 6
 6 4 10 7204.37 1662.71 3
 6 -4 10 2925.55 1233.79 3
 -6 -4 -10 5253.82 994.357 4
 -6 4 -10 6823.21 1067.2 4
 6 -4 10 5589.06 646.279 6
 -6 -4 -11 120010 4490.58 4
 6 4 11 122426 4554.95 6
 6 -4 11 123049 5996.06 3
 6 -4 11 122753 2606.26 6
 6 4 11 135090 6115 3
 -6 4 -11 124869 4034.97 4
 6 4 12 92497.7 5229.19 3
 6 4 12 89369.5 3955.23 6
 6 -4 12 86921.6 5241.96 3
 -6 -4 -12 97075.4 4199.87 4
 -6 4 -12 89655.5 3609.85 4
 6 4 13 2258.41 788.438 2
 6 4 13 453.773 898.482 6
 6 4 13 3118.5 1328.34 3
 -6 -4 -13 2770.46 1075.46 4
 6 -4 13 1573.54 1203.63 3
 -6 4 -13 1882.6 961.609 4
 6 4 14 21044.4 2861.89 3
 6 -4 14 22241.6 2940.04 3
 -6 -4 -14 23341.2 2294.74 4
 6 4 14 21307.1 1782.25 2
 -6 4 -14 25353 2239.04 4
 6 4 15 7293.65 2096.3 3
 6 -4 15 12384.2 2743.36 3
 -6 -4 -15 10040.2 1714.68 4
 -6 4 -15 6888.71 1418.23 4
 -6 -4 -16 23434.3 2532.7 4
 -6 4 -16 25591.7 2424.04 4
 -6 -4 -17 47307 3567.07 4
 -6 4 -17 46912.3 3350.87 4
 -6 -4 -18 1434.49 1343.34 4
 -6 4 -18 5252.69 1600.69 4
 -6 -4 -19 3869.91 1645.33 4
 -6 4 -19 3436.14 1530.22 4
 -6 -4 -20 1020.72 1483.92 4
 -6 4 -20 742.795 1651.59 4
 -6 -4 -21 5603.26 1788.23 4
 -6 4 -21 9906.19 2150.55 4
 -6 -4 -22 1929.01 1612.55 4
 -6 4 -22 3994.93 1769.69 4
 6 -6 -22 10398.3 2495.2 4
 6 6 -22 10195 2322.73 4
 6 -6 -21 20164.8 3015.19 4
 6 6 -21 23788.9 2968.23 4
 6 -6 -20 27352.5 3235.97 4
 6 6 -20 29904.2 3103.06 4
 -6 6 19 11524.8 1790.35 2
 6 -6 -19 16867.9 2712.18 4
 6 6 -19 16275.1 2471.43 4
 -6 6 18 31717.3 2637.48 2
 6 6 -18 28477.4 2280.16 5
 6 -6 -18 24529 2937.54 4
 6 6 -18 35923.8 3182.72 4
 6 -6 -17 104889 5509.69 4
 -6 6 17 102044 4508.35 2
 6 6 -17 116706 5306.95 4
 6 6 -17 106356 4149.05 5
 -6 6 16 671.789 915.421 2
 6 -6 -16 -987.384 1365.86 4
 6 6 -16 -197.908 789.506 5
 6 6 -16 -203.363 1096.08 4
 6 6 -15 98960.9 3839.65 5
 6 6 -15 97020.5 4460.69 4
 6 -6 -15 100586 5030.48 4
 -6 6 15 108739 4332.39 2
 6 6 -14 1602.19 502.553 6
 -6 6 14 -383.987 899.924 2
 6 6 -14 1610.2 793.23 5
 6 6 -14 -919.063 1052.01 4
 -6 6 13 1520.13 773.879 2
 6 6 -13 2064.31 619.248 6
 6 6 -13 1164.4 805.006 5
 6 -6 -13 1716.56 919.242 4
 6 6 -13 492.9 791.839 4
 6 6 -12 1382.96 492.793 6
 -6 6 12 1805.8 684.386 2
 6 6 -12 2482.5 859.971 5
 6 6 -12 2133.69 1002.37 4
 6 6 -11 251364 4481.57 6
 -6 6 11 245336 5992.59 2
 6 6 -11 251238 5466.65 5
 6 6 -11 263598 6111.85 4
 -6 6 10 19996.1 1804.29 2
 6 6 -10 18792.9 1269.67 6
 6 6 -10 17282.2 1513.29 5
 6 6 -10 18195.6 1627.51 4
 6 6 -9 8962.45 911.223 6
 -6 6 9 7608.96 1117.79 2
 6 6 -9 10133.1 1156.81 4
 6 6 -8 2048.98 544.92 6
 -6 6 8 2712.95 806.439 2
 6 6 -8 973.834 557.4 4
 6 6 -7 1557.08 621.496 4
 6 6 -7 1946.75 547.44 6
 -6 6 7 2483.25 760.921 2
 -6 6 6 62820.4 2614.96 2
 6 6 -6 63197.9 2261.52 6
 6 6 -6 64743.8 1424.86 1
 6 6 -6 62038 2434.67 4
 6 -6 -6 59880.9 1136.17 5
 6 6 -5 145569 2018.88 1
 6 6 -5 149509 3465.39 6
 6 -6 -5 144099 2097.88 5
 -6 6 5 148124 3885.96 2
 6 6 -5 147461 3555.21 4
 6 6 -4 10396.9 953.456 4
 6 6 -4 8858.07 938.554 6
 -6 6 4 10409.7 1071.57 2
 6 -6 -4 9468.15 627.536 5
 6 6 -3 9540.73 888.699 4
 6 6 -3 10519.3 1021.88 6
 -6 6 3 8173.02 932.244 2
 6 -6 -3 10073.9 724.993 5
 6 6 -2 14577.3 1061.27 4
 6 6 -2 14795.2 1210.6 6
 -6 6 2 14050.1 1171.05 2
 6 6 -1 574034 7434.52 6
 6 6 -1 591008 6348.31 4
 6 6 0 9910.04 1277.61 6
 -6 6 0 8058.59 942.422 2
 6 6 1 357444 6218.44 6
 -6 6 -1 358023 4941.65 2
 -6 6 -2 75664.5 2182.56 4
 -6 6 -2 77842.8 2697.78 1
 6 6 2 74184.7 3012.59 6
 -6 6 -2 76201.5 2193.67 2
 -6 6 -3 72869.3 2208.27 4
 6 6 3 73482.6 3090.94 6
 6 6 3 74113.9 3369.41 3
 -6 6 -3 71320.6 2086.3 2
 -6 6 -3 76780.6 2747.66 1
 6 -6 3 71375.9 3386.85 3
 -6 6 -4 311498 4807.66 4
 6 6 4 301261 6384.08 6
 -6 6 -4 308421 4032.07 2
 6 -6 4 292262 7078.13 3
 -6 6 -4 313677 5616.33 1
 6 6 4 306276 7065.64 3
 6 -6 4 302749 4067.05 2
 6 -6 5 218719 3214.75 6
 6 6 5 229692 5823.31 6
 6 6 5 227750 6350.24 3
 -6 6 -5 224847 4209.29 4
 -6 6 -5 214308 3202.44 2
 -6 6 -5 220626 4846.51 1
 6 -6 5 237432 3430.56 2
 6 -6 5 219049 6455.69 3
 6 6 6 146293 4847.39 6
 6 6 6 146044 5347.37 3
 -6 6 -6 150268 3580.01 4
 6 -6 6 152882 5641.59 3
 6 -6 6 149762 2518.54 6
 -6 6 -6 146461 4044.59 1
 6 -6 7 51874.9 3435.2 3
 6 -6 7 51416.1 1431.01 6
 6 6 7 47691.6 2884.37 6
 6 6 7 50724.9 3405.5 3
 -6 6 -7 53697.8 2552.63 1
 6 -6 7 51442.4 1404.99 2
 -6 6 -7 51551.8 2232.3 4
 6 6 8 66861.6 4061.51 3
 6 -6 8 66726.4 4077.55 3
 6 -6 8 59072.6 1342.01 2
 6 6 8 65409.5 3501.2 6
 -6 6 -8 62589.1 2836.64 1
 6 -6 8 63220.3 1593.49 6
 -6 6 -8 60237.9 2539.29 4
 -6 6 -9 4455.98 833.144 4
 6 -6 9 4892.06 455.415 6
 6 6 9 5889.42 1293.36 6
 -6 6 -9 6489.03 1208.04 1
 6 6 9 4801.66 1378.48 3
 6 -6 9 6710.75 1732.24 3
 6 6 10 33222.6 2652.43 6
 6 6 10 36663.9 3246.63 3
 -6 6 -10 35193.8 2203.73 4
 6 -6 10 36226.4 3313.82 3
 6 6 11 105842 4520.09 6
 6 6 11 103300 5328.21 3
 6 -6 11 101978 5399.92 3
 -6 6 -11 105130 3811.99 4
 6 6 12 5870.23 1344.73 6
 -6 -6 -12 1828.31 930.719 4
 6 6 12 3316.39 1396.49 3
 6 -6 12 5156.21 1654.94 3
 -6 6 -12 4669.47 1204.09 4
 6 6 13 1341.19 939.665 6
 6 6 13 -325.723 1235.84 3
 -6 -6 -13 197.356 1055.06 4
 6 -6 13 679.35 1288.69 3
 -6 6 -13 1216.53 867.222 4
 6 -6 14 1048.44 1671.31 3
 6 6 14 322.242 999.318 6
 -6 -6 -14 288.572 971.436 4
 6 6 14 41.8189 1237.18 3
 6 6 14 755.798 833.526 2
 -6 6 -14 1584.01 1040.65 4
 -6 6 -15 40369.9 2920.78 4
 -6 -6 -15 40595 3240.46 4
 6 -6 15 43557.5 4223.87 3
 6 6 15 38358 2563.97 2
 6 6 15 43204.8 4077.48 3
 -6 -6 -16 9900.87 1950.54 4
 -6 6 -16 10877.3 1827.61 4
 -6 -6 -17 20840.2 2657.91 4
 -6 6 -17 17536.1 2226.13 4
 -6 -6 -18 14203.7 2199.89 4
 -6 6 -18 17596.2 2391.99 4
 -6 -6 -19 11498.8 2295.25 4
 -6 6 -19 10443.8 2000.23 4
 -6 -6 -20 13345.4 2323.8 4
 -6 6 -20 5281.98 1843.55 4
 -6 -6 -21 11189.9 2432.75 4
 -6 6 -21 7808.15 1949.25 4
 -6 6 -22 9085.03 2297.89 4
 6 -8 -21 17056.5 3002.22 4
 6 8 -21 19885.3 2826.83 4
 6 -8 -20 22438.8 3191.7 4
 6 8 -20 25614 3033.17 4
 -6 8 19 -41.5532 1011.82 2
 6 8 -19 950.99 1051.34 5
 6 -8 -19 -342.97 1596.2 4
 6 8 -19 -623.892 1250.78 4
 6 -8 -18 7697.8 1882.44 4
 -6 8 18 8528.19 1621.49 2
 6 8 -18 9758.65 1698.87 5
 6 8 -18 11505.2 2165.01 4
 6 8 -17 30081.1 2462.18 5
 -6 8 17 26641.5 2496.61 2
 6 -8 -17 26479.8 3136.82 4
 6 8 -17 33139.4 2982.83 4
 -6 8 16 39212.8 2916.32 2
 6 8 -16 40939.4 2748.76 5
 6 -8 -16 36485.8 3377.91 4
 6 8 -16 41165.4 3201.7 4
 6 8 -15 47304.8 2883.92 5
 -6 8 15 42583.4 3052.64 2
 6 -8 -15 37930.7 3359.13 4
 6 8 -15 49502.6 3338.81 4
 -6 8 14 9202.18 1527.15 2
 6 8 -14 9241.69 1403.85 5
 6 8 -14 10165.5 1655.5 4
 6 8 -13 20726.1 1393.25 6
 -6 8 13 18147 1947.21 2
 6 8 -13 17928.6 1760.55 5
 6 8 -13 19511.5 2042.82 4
 6 8 -12 949.335 844.105 4
 6 8 -12 2621.76 666.626 6
 -6 8 12 2143.64 979.031 2
 6 8 -12 3224.04 1046.43 5
 6 8 -11 9496.12 1386.71 4
 -6 8 11 9267.75 1403.92 2
 6 8 -11 10767.2 1036.2 6
 6 8 -11 11351.2 1393.52 5
 -6 8 10 35213.3 2427.6 2
 6 8 -10 34194.4 1770.41 6
 6 8 -10 36799.5 2278.85 5
 6 8 -10 36435.5 2398.34 4
 -6 8 9 60298.4 3028.89 2
 6 8 -9 60227.4 2898.53 4
 6 8 -9 57313.2 2266.47 6
 6 8 -8 1815.93 640.958 4
 -6 8 8 1512.84 656.49 2
 6 8 -8 2033.9 451.712 1
 6 8 -8 1605.84 560.849 6
 -6 8 7 179228 4810.92 2
 6 8 -7 180714 4059.25 6
 6 8 -7 183035 3046.8 1
 6 8 -7 185987 4693.88 4
 -6 8 6 115746 3809.26 2
 6 8 -6 112353 3275.87 6
 6 8 -6 106497 2280.29 1
 6 8 -6 108873 3525.35 4
 6 8 -5 32479.6 1914.75 4
 -6 8 5 34205.3 2085.72 2
 6 8 -5 30713.3 1171.07 1
 6 8 -5 30097.9 1757.45 6
 6 -8 -5 34951.4 1198.57 5
 6 8 -4 -84.6302 483.19 4
 6 -8 -4 -6.96146 262.977 5
 6 8 -4 101.433 503.017 6
 -6 8 4 -392.077 551.305 2
 -6 8 3 14561 1340.25 2
 6 8 -3 15034.1 1280.56 4
 6 8 -3 14659 1308.38 6
 -6 8 2 17796.9 1443.55 2
 6 8 -2 18813.5 1364.71 4
 6 8 -2 18882.5 1517.09 6
 6 8 -1 219959 5118.19 6
 -6 8 1 209506 4444.01 2
 6 8 0 170584 4673.35 6
 -6 8 0 166086 3798.44 2
 -6 8 -1 390187 5612.96 2
 6 8 1 392604 7271.74 6
 6 -8 2 33181.9 2192.08 3
 6 8 2 33608.6 2278.61 6
 -6 8 -2 33285 1609.86 2
 -6 8 -2 34144.1 1722.77 4
 -6 8 -3 54332.7 2521.09 1
 -6 8 -3 56120.1 2240.06 4
 6 8 3 58769 3119.34 6
 -6 8 -3 57992.1 2023.89 2
 6 8 3 60552.3 3039.25 3
 6 -8 3 56274.5 3040.31 3
 -6 8 -4 97038.2 3386.62 1
 -6 8 -4 98325.7 2512.12 2
 -6 8 -4 89600.9 2909.46 4
 6 8 4 97675.7 4066 6
 6 8 4 100634 4027.99 3
 6 -8 4 87190.7 3916.36 3
 -6 8 -5 17537.3 1388.84 4
 6 8 5 17811.6 1883.35 6
 -6 8 -5 16846.4 1489.85 1
 -6 8 -5 17008.8 1022.78 2
 6 8 5 17103.4 1832.83 3
 6 -8 5 16797.5 1919.11 3
 6 -8 5 16089.2 1061.18 2
 -6 8 -6 208325 4670.36 4
 6 -8 6 211318 6636.09 3
 6 -8 6 200089 2947.41 6
 6 8 6 214427 6245.01 6
 -6 8 -6 203024 3146.47 2
 6 -8 6 212658 3374.36 2
 -6 8 -6 206481 5035.56 1
 6 8 6 198894 6186.42 3
 6 -8 7 89710.8 1789.39 6
 6 8 7 91892.5 4216.63 6
 6 -8 7 94544.8 4591.27 3
 6 8 7 90667.8 4369.86 3
 6 -8 7 91425.2 2072.76 2
 -6 8 -7 91454.8 3465.09 1
 -6 8 -7 86338.1 1855.21 2
 -6 8 -7 89831.8 3197.31 4
 -6 8 -8 1385.13 676.027 4
 -6 8 -8 2119.47 886.522 1
 6 -8 8 844.841 210.779 6
 6 8 8 2103.2 1207.84 3
 6 -8 8 1701.9 1100.75 3
 6 8 8 1029.99 960.333 6
 -6 8 -9 15389.1 1521.89 4
 -6 8 -9 18530.7 1758 1
 6 8 9 23089.4 2386.05 6
 6 8 9 19922.5 2382.02 3
 6 -8 9 19465.3 2431.64 3
 -6 8 -10 1804.74 960.885 1
 6 8 10 -458.912 1223.56 6
 6 8 10 1402.18 1135.57 3
 6 -8 10 601.533 1136.47 3
 -6 8 -10 -54.4173 636.987 4
 6 8 11 18938.4 2040.73 6
 6 8 11 24266.6 2751.13 3
 6 -8 11 23914.2 2734.67 3
 -6 8 -11 24236.2 2004.79 4
 -6 8 -12 20520.9 1937.84 4
 6 8 12 16513.5 2039.75 6
 6 -8 12 15191 2494.02 3
 6 8 12 18376.2 2514.36 3
 -6 8 -13 1951.82 967.154 4
 6 8 13 3750.88 1321.86 6
 6 8 13 4364.59 1742.74 3
 6 -8 13 2235.77 1608.01 3
 6 8 13 4273.81 1206.77 2
 -6 8 -14 13676.6 1845.28 4
 6 8 14 12326.2 1952.64 6
 6 8 14 11371.3 1698.68 2
 6 8 14 15184.1 2594.46 3
 -6 -8 -14 9627.11 1745.47 4
 6 -8 14 15400.4 2727.48 3
 -6 8 -15 12817.4 1799.35 4
 -6 -8 -15 10738.5 2024.99 4
 6 8 15 12752.4 1741.35 2
 -6 -8 -16 38768.1 3449.48 4
 -6 8 -16 40744.1 3165.16 4
 -6 8 -17 6304.25 1716.41 4
 -6 -8 -17 9243.59 1898.58 4
 -6 8 -18 433.555 1213.29 4
 -6 -8 -18 275.864 1431.56 4
 -6 8 -19 2119.22 1631.06 4
 -6 -8 -19 3.87801 1463.68 4
 -6 8 -20 -1753.5 1666.96 4
 -6 -8 -20 784.2 1653.35 4
 -6 8 -21 5600.02 1945.74 4
 -6 -8 -21 9499.12 2314.85 4
 6 10 -21 7057.02 2187.39 4
 6 -10 -21 5414.9 2147.25 4
 6 10 -20 1815.44 1502.94 4
 6 -10 -20 -1718.95 1764.22 4
 -6 10 20 2434.86 1335.93 2
 6 10 -20 2971.68 1431.85 5
 6 10 -19 4086.99 1477.49 4
 -6 10 19 4178.24 1480.62 2
 6 10 -19 4204.82 1346.04 5
 6 -10 -19 4719.39 1900.23 4
 6 10 -18 14949.5 2333.46 4
 -6 10 18 15309.2 2125.67 2
 6 -10 -18 9673.85 2160.31 4
 6 10 -18 14191.4 1903.48 5
 6 10 -17 479.631 1444.2 4
 -6 10 17 593.276 1096.04 2
 6 10 -17 -1132.42 1051.71 5
 6 -10 -17 -376.112 1817.13 4
 6 10 -16 10527.8 1964.59 4
 6 10 -16 12234.7 1792.15 5
 -6 10 16 12988.5 1927.05 2
 6 10 -15 5191.94 1506.23 4
 -6 10 15 5673.78 1473.42 2
 6 10 -15 5802.75 1307.16 5
 6 10 -14 -179.462 1127.94 4
 -6 10 14 1366.33 1080.39 2
 6 10 -13 20537.9 2079.37 4
 -6 10 13 18857.9 2096.93 2
 6 10 -13 17590.8 1870.46 5
 -6 10 12 25300.1 2259.58 2
 6 10 -12 24730.9 2202.13 4
 6 10 -12 25126.9 1583.92 6
 6 10 -12 23259.2 2148.66 5
 -6 10 11 35024.6 2515.76 2
 6 10 -11 36835.1 2533.98 5
 6 10 -11 39046.5 2010.28 6
 6 10 -11 37370.9 2630.92 4
 -6 10 10 36592.9 2538.05 2
 6 10 -10 33999.1 2349.2 5
 6 10 -10 35201.9 1919.13 6
 6 10 -10 37701.4 2545.66 4
 -6 10 9 72188.9 3463.48 2
 6 10 -9 70063.8 2710.57 6
 6 10 -9 67632.3 3191.99 5
 6 10 -9 71427.8 2353.87 1
 6 10 -9 67968.9 3285.62 4
 6 10 -8 -415.111 549.73 6
 -6 10 8 -401.833 942.692 2
 6 10 -8 -200.802 827.422 4
 6 10 -8 619.552 436.874 1
 6 10 -7 167315 4884.35 4
 6 10 -7 166485 4298.08 6
 6 10 -7 166550 3339.54 1
 -6 10 7 163621 4962.62 2
 6 10 -6 102729 3759.39 4
 6 10 -6 92962.8 2476.66 1
 6 10 -6 96692.9 3350.9 6
 -6 10 6 92827 3663.73 2
 -6 10 5 1872.77 634.258 2
 6 10 -5 1083.36 622.65 6
 6 10 -5 470.865 674.652 4
 6 10 -4 3634.02 859.063 4
 6 10 -4 5827.99 988.257 6
 -6 10 4 4602.61 999.153 2
 -6 10 3 6332.3 1025.79 2
 6 10 -3 5632.11 922.7 4
 6 10 -3 5434.67 980.447 6
 6 10 -2 537.989 648.201 4
 -6 10 2 520.166 642.688 2
 6 10 -2 -37.415 689.863 6
 -6 10 1 65390.5 2684.41 2
 6 10 -1 68757.8 3245.12 6
 -6 10 0 14398.5 1319.63 2
 6 10 0 14648.1 1662.07 6
 -6 10 -1 55610.4 2371.21 2
 6 10 1 54709.6 3088.15 6
 6 10 2 30445.5 2421.84 6
 -6 10 -2 28479.4 1678.35 2
 6 10 2 27868.9 1989.95 3
 6 -10 2 29436.1 2119.6 3
 6 10 3 28420.6 2389.58 6
 -6 10 -3 26934.4 1506.55 2
 -6 10 -3 28375.7 1814.01 4
 -6 10 -3 28552.1 2017.99 1
 6 10 3 31767.8 2177.93 3
 6 -10 3 27235.9 2111.05 3
 -6 10 -4 10095.8 1185.1 4
 6 10 4 9181.79 1322.84 3
 6 -10 4 8167.01 1347.33 3
 -6 10 -4 9500.43 891.5 2
 -6 10 -4 7092.8 1115.21 1
 6 10 4 8158.83 1601.94 6
 -6 10 -5 5608.18 1050.01 4
 6 -10 5 6014.63 1317.62 3
 6 10 5 6357.39 1246.02 3
 -6 10 -5 5764.42 738.089 2
 6 10 5 3550.61 1175.94 6
 -6 10 -5 5450.54 1014.99 1
 -6 10 -6 112374 3760.4 4
 6 -10 6 101939 4694.76 3
 -6 10 -6 107474 2593.81 2
 6 10 6 104593 4701.14 6
 6 10 6 105961 4465.11 3
 -6 10 -6 102431 3834.33 1
 -6 10 -7 100714 3756.59 4
 6 -10 7 96030.9 4642.06 3
 6 10 7 105476 4777.61 6
 6 10 7 93099.8 4361.61 3
 -6 10 -7 100177 2270.56 2
 -6 10 -7 95806.9 3757.33 1
 -6 10 -8 33814.7 2268.11 4
 6 10 8 34210.9 2783.03 3
 6 10 8 34105.9 2871.72 6
 -6 10 -8 34484.1 2320.67 1
 -6 10 -8 33031.1 1153.32 2
 6 -10 8 39468.8 3180.9 3
 -6 10 -9 5008.39 1032.71 1
 -6 10 -9 4679.61 1030.74 4
 6 -10 9 4936.04 1605.78 3
 6 10 9 5366.12 1332.31 3
 6 10 9 4218.04 1405.51 6
 6 10 10 68901.9 4134.25 6
 6 10 10 69936.4 4227.38 3
 6 -10 10 64673.8 4256.26 3
 -6 10 -10 69048.8 3411.57 1
 -6 10 -10 69733.9 3377.26 4
 6 10 11 2101.79 1250.29 6
 -6 10 -11 648.681 887.133 4
 -6 10 -11 1791.61 1022.57 1
 6 10 11 135.432 1144.57 3
 6 -10 11 487.198 1162.76 3
 -6 10 -12 5647.62 1305.56 4
 6 10 12 3759.98 1268.06 6
 6 10 12 5041.99 1564.62 3
 6 -10 12 7815.75 1976.85 3
 6 10 13 71135.3 4227.21 6
 6 10 13 76555.6 4888.97 3
 6 -10 13 69100.8 4862.32 3
 6 10 13 69298.1 3825.06 2
 -6 10 -13 75340.3 3873.41 4
 -6 10 -14 2287.58 1180.32 4
 6 10 14 1066.25 1198.87 2
 6 10 15 38617.4 2952.08 2
 -6 10 -15 34807.9 2905.19 4
 6 10 16 30855.4 2678.58 2
 -6 10 -16 32720.4 2955.42 4
 -6 10 -17 222.897 1154.06 4
 -6 -10 -17 1649.3 1300.19 4
 -6 10 -18 17580 2577.78 4
 -6 -10 -18 13459 2447.99 4
 -6 10 -19 3609.77 1758.79 4
 -6 -10 -19 2559.96 1580.97 4
 -6 10 -20 4068.52 1800.29 4
 -6 -10 -20 2937.29 1774.47 4
 -6 10 -21 11845.3 2477.18 4
 6 12 -20 10610.7 2281.25 4
 6 12 -20 8348.46 1976.55 5
 -6 12 20 11675.1 2111.49 2
 6 -12 -20 4684.16 1871.45 4
 6 12 -19 -1183.78 1531.07 4
 -6 12 19 -928.959 1145.17 2
 6 12 -19 -235.282 1258.09 5
 6 -12 -19 -3231.99 1945.57 4
 -6 12 18 52448.8 3859.14 2
 6 12 -18 53328.2 3628.53 5
 6 -12 -18 50112.7 4437.35 4
 6 12 -18 52697.7 4094.17 4
 6 12 -17 923.182 1240.94 4
 6 12 -17 -141.722 1142.39 5
 -6 12 17 -204.168 1219.69 2
 6 12 -16 5097.69 1642.12 4
 -6 12 16 5690.1 1672.07 2
 6 12 -16 6451.9 1555.39 5
 6 12 -15 1243.38 1243.6 4
 -6 12 15 4199.41 1383.86 2
 6 12 -15 717.671 988.617 5
 6 12 -14 318.108 1137.5 4
 -6 12 14 -254.575 1061.78 2
 6 12 -14 681.436 885.001 5
 -6 12 13 43921.8 3145.85 2
 6 12 -13 40473.5 2928.13 5
 6 12 -13 38169.6 2996.15 4
 -6 12 12 34561.2 2695.86 2
 6 12 -12 31838.7 2588.32 5
 6 12 -12 28724.1 2523.9 4
 -6 12 11 43956.2 2963.37 2
 6 12 -11 42694.8 2289.61 6
 6 12 -11 46350.5 3002.59 5
 6 12 -11 45307.2 2223.55 1
 6 12 -11 41642.1 2844.83 4
 6 12 -10 21740.9 1728.89 6
 -6 12 10 19990 2104.7 2
 6 12 -10 22444.4 2051.47 5
 6 12 -10 22057.4 1536.63 1
 6 12 -10 27464.5 2409.81 4
 6 12 -9 37302.7 2711.62 4
 6 12 -9 34453.8 2153.68 6
 6 12 -9 37509.1 2576.2 5
 6 12 -9 35843.5 1841.29 1
 -6 12 9 35660.8 2594.99 2
 6 12 -8 1141.01 467.938 1
 6 12 -8 1669.4 1042.85 4
 -6 12 8 1327.16 1006.94 2
 6 12 -8 1084.1 851.302 6
 6 12 -7 66923.8 3364.28 4
 6 12 -7 63849.3 3006.02 6
 -6 12 7 66145.2 3364.6 2
 6 12 -7 59734.5 2285.08 1
 6 12 -6 39344.5 2527.98 4
 6 12 -6 41074.4 1888.39 1
 6 12 -6 43189.3 2598.62 6
 -6 12 6 43014.7 2640.56 2
 6 12 -5 6748.42 1229.85 4
 6 12 -5 5635.06 1080.27 6
 -6 12 5 6682.52 1275.42 2
 6 12 -4 44113.6 2577.27 4
 6 12 -4 38049 2450.87 6
 -6 12 4 45156.3 2579.18 2
 6 12 -3 55096.1 2846.56 4
 -6 12 3 50780.6 2722.79 2
 6 12 -3 52713.9 2973.63 6
 6 12 -2 21226.3 2003.56 6
 -6 12 2 26209.2 1909.5 2
 -6 12 1 12972.5 1417.49 2
 6 12 -1 11829.5 1640.15 6
 6 12 0 7783.66 1490.91 6
 -6 12 0 9885.83 1253.16 2
 -6 12 -1 13092.4 1294.09 2
 6 -12 1 14445.1 1444.06 3
 6 12 1 14425.4 1826.81 6
 -6 12 -2 118130 3578.82 2
 6 12 2 111779 4789.21 6
 6 -12 2 115979 4100.88 3
 6 12 2 112330 3815.99 3
 -6 12 -3 1374.62 780.638 4
 6 12 3 1631.03 792.896 3
 6 -12 3 128.035 702.262 3
 6 12 3 2166.85 1242.82 6
 -6 12 -3 1713.49 670.197 2
 -6 12 -4 26693.6 2136.38 1
 6 12 4 26542.2 2534.07 6
 -6 12 -4 28624.7 2017.4 4
 6 12 4 25411.8 2034.37 3
 -6 12 -4 27352.8 1633.59 2
 6 -12 4 26965 2267.88 3
 -6 12 -5 6452.57 851.691 2
 6 12 5 5605.2 1438.48 6
 6 12 5 6889.02 1233.9 3
 6 -12 5 4674.69 1195.45 3
 -6 12 -5 5900.12 1076.25 4
 -6 12 -5 6100.01 1238.34 1
 -6 12 -6 17190.6 1768.35 4
 -6 12 -6 13979 1106.03 2
 6 12 6 14871.7 2061.9 6
 6 12 6 11170.7 1587.14 3
 6 -12 6 15159.2 1880.15 3
 -6 12 -6 16078.4 1804.16 1
 -6 12 -7 969.655 930.198 4
 6 12 7 213.49 1164.77 6
 -6 12 -7 645.855 813.206 1
 6 12 7 609.334 912.314 3
 6 -12 7 618.196 994.861 3
 -6 12 -7 625.706 444.725 2
 -6 12 -8 39214.3 2574.94 4
 6 -12 8 35372.3 2958.07 3
 6 12 8 35038.8 3107.7 6
 -6 12 -8 34413.7 1414.23 2
 6 12 8 37844.1 2844.54 3
 -6 12 -8 32042.5 2426.2 1
 6 12 9 25634 2545.43 3
 -6 12 -9 25600.8 2222.48 4
 6 12 9 26417.6 2862.93 6
 6 -12 9 21422.3 2452.27 3
 -6 12 -9 25042.1 2183.6 1
 -6 12 -10 88160.1 4068.32 4
 6 -12 10 86456.5 4871.18 3
 6 12 10 77880.5 4556.57 6
 -6 12 -10 80600 3824.53 1
 6 12 10 86409.1 4619.43 3
 6 -12 11 1172.5 1156.46 3
 -6 12 -11 2079.25 1055.99 1
 6 12 11 2338.28 1452.64 6
 6 12 11 2954.76 1370.37 3
 -6 12 -11 3059.26 1168.32 4
 6 -12 12 12069 2263.6 3
 -6 12 -12 11301.5 1590.36 4
 6 12 12 12277.3 2163.74 6
 -6 12 -12 10371.8 1774.74 1
 6 12 12 9157.61 1941.62 3
 6 12 13 53869.2 3972.21 6
 -6 12 -13 55882.7 3461.99 1
 6 12 13 51573.5 3510.6 2
 -6 12 -13 52991.6 3432.66 4
 -6 12 -14 -1220.08 1259.07 4
 6 12 14 -1223.37 1227.11 2
 -6 12 -15 39476.9 3220.52 4
 6 12 15 26956.1 2642.75 2
 -6 12 -16 14888.5 2237.52 4
 6 12 16 14617 2125.11 2
 -6 12 -17 2285.48 1384.86 4
 -6 -12 -17 -985.895 1870.54 4
 6 12 17 -827.099 1235.74 2
 -6 12 -18 33558.6 3367.69 4
 -6 -12 -18 27113.1 3332.66 4
 -6 12 -19 16000.9 2496.12 4
 -6 -12 -19 13142.3 2768.7 4
 -6 12 -20 10095 2427.09 4
 -6 14 21 -288.476 1567.31 2
 6 14 -21 -641.507 1489.34 5
 6 14 -20 26681 3044.08 5
 -6 14 20 23316.4 2828.11 2
 6 14 -19 1857.19 1469.01 4
 6 14 -19 593.534 1183.63 5
 -6 14 19 -749.528 1202.54 2
 -6 14 18 61649.2 4249.85 2
 6 14 -18 60863 4149.23 5
 6 14 -18 58825.1 4414.22 4
 6 14 -17 371.835 1144.68 4
 -6 14 17 1842.44 1311.97 2
 6 14 -17 -762.271 1146.32 5
 -6 14 16 -52.1472 1191.39 2
 6 14 -16 3669.7 1519.41 5
 6 14 -16 510.744 1271.78 4
 -6 14 15 1676.17 1504.85 2
 6 14 -15 -164.54 1035.74 5
 6 14 -15 22.4269 1364.56 4
 6 14 -14 3515.35 1379.79 4
 -6 14 14 4615.19 1585.32 2
 6 14 -14 4573.37 1543.32 5
 6 14 -13 1537.41 1067.49 5
 6 14 -13 -899.414 1016.16 4
 -6 14 13 -671.085 1058.91 2
 -6 14 12 4696.73 1502.9 2
 6 14 -12 3074.34 1448.02 4
 6 14 -12 3859.78 1370.2 5
 6 14 -12 3630.02 976.605 1
 6 14 -11 -737.582 1342.83 4
 6 14 -11 469.193 644.552 1
 -6 14 11 554.262 1002.72 2
 6 14 -11 1057.06 1172.83 5
 6 14 -10 23545.7 2428.94 4
 -6 14 10 17678.6 2301.51 2
 6 14 -10 20453 1826.9 6
 6 14 -10 18471.3 2063.48 5
 6 14 -10 17051.5 1453.59 1
 6 14 -9 491.721 619.603 1
 -6 14 9 1500.72 1046.96 2
 6 14 -9 983.451 1074.77 4
 6 14 -9 -79.5002 1058.21 5
 6 14 -9 807.819 805.949 6
 -6 14 8 6399.47 1358.86 2
 6 14 -8 5287.31 1352.42 4
 6 14 -8 5247.61 1188.89 6
 6 14 -8 4953.83 1150.91 5
 6 14 -8 5998.17 921.348 1
 6 14 -7 8137.72 1529.28 4
 6 14 -7 7730.18 1398.68 6
 6 14 -7 8114.9 1007.81 1
 -6 14 7 8608.98 1423.91 2
 6 14 -6 1599.58 1042.96 4
 -6 14 6 2108.32 958.329 2
 6 14 -6 2388.91 979.485 6
 -6 14 5 9472.26 1561.04 2
 6 14 -5 8781.75 1509.31 4
 6 14 -5 10250.3 1604.58 6
 6 14 -4 132782 4745.62 4
 6 14 -4 134590 5049.73 6
 -6 14 4 132516 4759.85 2
 -6 14 3 7147.88 1345.23 2
 6 14 -3 7087.74 1293.58 4
 6 14 -3 10091.9 1606.74 6
 -6 14 2 57459.3 3021.75 2
 6 14 -2 56097.8 3505.1 6
 6 14 -1 3525.07 1247.68 6
 -6 14 1 4311.98 1055.23 2
 -6 14 0 1237.07 889.683 2
 6 -14 0 1428.29 661.103 3
 6 14 0 3103.56 1243.62 6
 -6 14 -1 1654.39 765.094 2
 6 -14 1 2681.81 847.712 3
 6 14 1 3668.54 804.521 3
 6 14 1 1804.44 1060 6
 -6 14 -2 54017 2710.61 2
 6 -14 2 53301.8 2767.43 3
 6 14 2 57448.5 3690.19 6
 6 14 2 52206.4 2528.17 3
 6 -14 3 372.023 694.388 3
 6 14 3 965.31 1183.77 6
 6 14 3 367.874 683.118 3
 -6 14 -3 1021.82 638.595 2
 -6 14 -4 24852.8 2150.99 4
 6 14 4 27775.4 2075.18 3
 -6 14 -4 27489.2 2319.18 1
 -6 14 -4 26495.1 1790.76 2
 6 14 4 27640.1 2756.77 6
 6 -14 4 27031.7 2159.08 3
 6 14 5 3918.73 1508.08 6
 -6 14 -5 3470.47 804.615 2
 -6 14 -5 5021.69 1178.82 4
 6 14 5 3482.07 917.941 3
 6 -14 5 4370 1060.29 3
 -6 14 -5 2981.13 1079.48 1
 -6 14 -6 17271.6 1911.13 1
 -6 14 -6 18660.3 1438.3 2
 6 14 6 17660.8 1827.94 3
 6 -14 6 19755.2 2108.11 3
 -6 14 -6 19368.1 1949.06 4
 6 14 6 18380 2431.66 6
 6 14 7 9180.18 1899.12 6
 6 -14 7 8736.72 1587.16 3
 -6 14 -7 9940.66 1581.21 4
 -6 14 -7 10610.3 1070.36 2
 -6 14 -7 10004 1656.73 1
 6 14 7 12000.9 1571.48 3
 6 14 8 3832.97 1304.61 6
 -6 14 -8 6215.81 1297.21 4
 6 14 8 8533.05 1532.52 3
 6 -14 8 5415.07 1320.79 3
 -6 14 -8 6505.85 1417.88 1
 -6 14 -9 1384.46 1000.26 4
 6 14 9 2573.25 1422.25 6
 6 14 9 2508.63 1097.73 3
 6 -14 9 3316.25 1331.43 3
 -6 14 -9 713.795 996.961 1
 -6 14 -10 38294.1 2913.92 4
 6 -14 10 38939.6 3471.57 3
 6 14 10 35652.3 2955.93 3
 6 14 10 41197.1 3530.64 6
 -6 14 -10 39706.6 2928.27 1
 -6 14 -11 -686.403 1187.32 1
 -6 14 -11 1105.57 1123.31 4
 6 14 11 1467.13 1314.01 6
 -6 14 -12 7780.61 1657.72 1
 6 14 12 8918.09 1875.96 6
 -6 14 -12 4389.05 1329.28 4
 6 14 12 10623.9 1903.43 2
 -6 14 -13 1749.5 1199.98 4
 6 14 13 1745.08 1166.13 2
 -6 14 -13 3145.71 1390.53 1
 -6 14 -14 4298.78 1532.88 4
 6 14 14 7342.95 1798.82 2
 -6 14 -15 281.481 1163.28 4
 6 14 15 -1636.77 1383.77 2
 -6 14 -16 2262.13 1532.55 4
 6 14 16 3365.5 1530.43 2
 -6 14 -17 3610.15 1584.52 4
 6 14 17 3872.6 1542.46 2
 -6 14 -18 28274.2 3230.95 4
 -6 14 -19 -1658.88 1716.22 4
 6 16 -20 7509.55 2105.64 5
 -6 16 19 -1261.88 1665.09 2
 6 16 -19 -329.859 1526.72 5
 -6 16 18 16379.9 2551.93 2
 6 16 -18 20850.7 2814.6 5
 6 16 -18 18398 2897.2 4
 6 16 -17 6866.41 1885.77 4
 6 16 -17 10245.7 2048.26 5
 -6 16 17 6934.44 1769.88 2
 6 16 -16 2194.94 1404.2 4
 -6 16 16 681.642 1327.78 2
 6 16 -16 1284.67 1564.86 5
 6 16 -15 45395.8 3800.54 4
 -6 16 15 38664.1 3463.72 2
 6 16 -15 37431.9 3272.87 5
 6 16 -14 13128 2297.92 4
 -6 16 14 13294.5 2235.46 2
 6 16 -14 12621.9 1998.85 5
 6 16 -13 18835 2589.11 4
 -6 16 13 14765.9 2180.7 2
 6 16 -13 19952.2 2505.52 5
 6 16 -12 18875.3 2447.66 4
 -6 16 12 13926 2138.99 2
 6 16 -12 18689.9 2382.38 5
 6 16 -11 2345.68 1614.79 4
 -6 16 11 -375.96 1233.46 2
 6 16 -11 977.673 1112 5
 6 16 -10 30341.8 2973.21 4
 -6 16 10 31629.5 2816.68 2
 6 16 -10 33191.9 2917.73 5
 6 16 -10 29182.6 2023.56 1
 6 16 -9 47217.2 3396.6 4
 6 16 -9 44267 2866.36 6
 6 16 -9 53276.2 3446.37 5
 6 16 -9 45603.9 2455.37 1
 -6 16 9 50605.8 3449.45 2
 -6 16 8 918.204 1154.02 2
 6 16 -8 1469.47 1257.83 4
 6 16 -8 -248.696 921.091 6
 6 16 -8 -144.651 893.678 5
 6 16 -8 -591.636 633.139 1
 6 16 -7 64053.8 2882.4 1
 6 16 -7 64242.7 3612.69 6
 6 16 -7 58619 3632.78 4
 6 16 -7 62770.9 3632.08 5
 -6 16 7 59494.9 3615.9 2
 6 16 -6 43332.3 3071.74 4
 6 16 -6 39462.8 2955.97 6
 -6 16 6 42243.4 2921.92 2
 6 16 -5 24891.9 2411.87 4
 6 16 -5 25114.2 2437.11 6
 -6 16 5 23695.2 2358.13 2
 6 16 -4 98481.7 4669.81 6
 6 16 -4 100920 4473.74 4
 -6 16 4 99278.2 4401.43 2
 -6 16 3 9802.3 1475.51 2
 6 16 -3 11337.2 2007.63 6
 -6 16 2 91026.6 4038.74 2
 6 16 -2 89127.9 4600.31 6
 6 16 -1 42757.8 3324.84 6
 -6 16 1 42881.4 2440.64 5
 -6 16 1 46589.4 2878.61 2
 -6 16 0 2335.9 1008.35 2
 6 16 0 3157.15 1460.12 6
 -6 16 -1 49.2795 872.815 2
 6 16 1 2176.97 1408.26 6
 6 16 2 12139.8 2187.29 6
 -6 16 -2 9256.78 1412.59 2
 -6 16 -3 17930 1711.36 2
 6 16 3 16374.5 2301.48 6
 -6 16 -4 65226 3010.7 2
 -6 16 -4 64026.5 3675.66 1
 6 16 4 68212.2 4406.16 6
 -6 16 -5 5226.12 1332.51 4
 6 16 5 6135.54 1764.72 6
 -6 16 -5 5944.74 1048.61 2
 -6 16 -5 7117.14 1537.7 1
 6 16 6 7028 1976.6 6
 -6 16 -6 6093.84 1425.12 1
 -6 16 -6 5669.51 952.253 2
 -6 16 -6 5589.89 1386.49 4
 -6 16 -7 21235.2 2240.9 4
 6 16 7 19628.3 2575.73 6
 -6 16 -7 16759.2 2103.19 1
 -6 16 -8 2104.71 1011.16 4
 -6 16 -8 6508.32 1504.05 1
 6 16 8 7920.18 2071.74 6
 6 16 9 46774.7 3929.11 6
 -6 16 -9 48150.1 3301.52 4
 -6 16 -9 44814 3200.89 1
 -6 16 -10 59852.4 3779.71 4
 6 16 10 54317.3 4227.01 6
 -6 16 -10 48880.1 3372.3 1
 -6 16 -11 685.696 1130.55 4
 6 16 11 260.766 1414.64 2
 6 16 11 673.866 1179.22 6
 -6 16 -11 -828.175 1222.43 1
 -6 16 -12 19893.5 2491.4 4
 -6 16 -12 20527.7 2423.63 1
 6 16 12 23088.9 2970.95 6
 6 16 12 19335.3 2537.21 2
 -6 16 -13 16365.9 2418.66 4
 -6 16 -13 13794.5 2054.37 1
 6 16 13 14453 2286.76 2
 -6 16 -14 -483.804 1211.05 1
 -6 16 -14 -400.086 1375.66 4
 6 16 14 -109.634 1426.7 2
 -6 16 -15 12885 2241.56 4
 6 16 15 11143.3 2224.28 2
 -6 16 -16 3971.22 1758.83 4
 6 16 16 2445.83 1594.17 2
 -6 16 -17 3538.85 1836.4 4
 6 16 17 8167.28 2004.83 2
 6 16 18 8042.01 2132.88 2
 -6 16 -18 8344.33 2141.65 4
 -6 18 17 5100.9 1976.48 2
 6 18 -17 2586.4 1840.48 5
 -6 18 16 5214.5 1791.03 2
 6 18 -16 473.188 1757.91 4
 6 18 -16 4483.91 1844.39 5
 -6 18 15 62407.3 4409.8 2
 6 18 -15 57548.9 4516.65 4
 6 18 -15 59256.9 4218.53 5
 6 18 -14 6013.86 2026.75 4
 -6 18 14 3741.22 1627.55 2
 6 18 -14 3865.39 1620.17 5
 6 18 -13 37836.3 3572.83 4
 -6 18 13 29152.5 3060.23 2
 6 18 -13 33453.1 3203.49 5
 6 18 -12 17312.7 2627.23 4
 -6 18 12 16907.1 2423.88 2
 6 18 -12 13293.3 2310.11 5
 6 18 -11 13870.8 2237.94 5
 6 18 -11 11964.2 2125.1 4
 -6 18 11 14027.4 2207.52 2
 6 18 -10 1367.07 1464.39 5
 -6 18 10 930.34 1202.46 2
 -6 18 9 22233.3 2526.03 2
 6 18 -9 27168 2886.35 4
 6 18 -9 23218.4 2503.55 5
 -6 18 8 -333.46 1095.45 2
 6 18 -8 1326.15 1126.71 4
 6 18 -8 -1068.97 827.35 1
 6 18 -8 -2086.65 1202.7 5
 6 18 -8 1490.3 923.238 6
 6 18 -7 81154.6 4535.33 4
 6 18 -7 73979 4089.87 6
 6 18 -7 73999.5 4062.51 5
 6 18 -7 78432.8 3459.61 1
 -6 18 7 81869.8 4368.25 2
 -6 18 6 6380.26 1655.42 2
 6 18 -6 4949.63 1342.32 4
 6 18 -6 5217.57 1442.44 6
 6 18 -6 5005.02 1249.55 5
 6 18 -5 9236.01 1777.83 6
 -6 18 5 5438 1399.45 2
 6 18 -5 9054.18 1797.99 4
 -6 18 4 21179.9 2396.15 2
 6 18 -4 22282.4 2509.2 6
 6 18 -3 10563.9 1968.17 6
 -6 18 3 10927.7 1775.36 2
 -6 18 2 14167.2 1872.4 2
 -6 18 2 15792.4 1645.22 5
 6 18 -2 14518.1 2291.25 6
 6 18 -1 36362.9 3264.97 6
 -6 18 1 37525.2 2441.62 5
 -6 18 1 34228.3 2675.64 2
 6 18 0 26253.5 2876.71 6
 -6 18 0 30018.9 2331.78 5
 -6 18 0 27295.2 2361.94 2
 6 18 1 30674.1 3078.27 6
 -6 18 -1 30766.3 2393.79 5
 -6 18 -1 31920.3 2430.75 2
 -6 18 -2 704.392 821.037 2
 6 18 2 454.094 1416.43 6
 6 18 3 3629.41 1674.47 6
 -6 18 -3 6318.06 1235.06 2
 6 18 4 9341.66 2043.48 6
 -6 18 -4 12255.7 1538.48 2
 -6 18 -5 6119.23 1153.2 2
 6 18 5 4532.88 1586.3 6
 -6 18 -5 5890.26 1641.97 1
 6 18 6 15341.8 2563.37 6
 -6 18 -6 12570 1885.07 4
 -6 18 -6 12760.9 2002.57 1
 6 18 7 43755.6 3801.29 6
 -6 18 -7 36882.8 3064.29 4
 -6 18 -7 38594 3146.05 1
 -6 18 -8 3574.74 1416.98 4
 6 18 8 1347.84 1559.33 6
 -6 18 -8 2083.34 1413.81 1
 -6 18 -9 64217.3 4089.04 4
 6 18 9 70449.4 4904.3 6
 -6 18 -9 58783.1 3854.69 1
 -6 18 -10 785.822 1133.37 4
 6 18 10 1340.35 1537.53 2
 6 18 10 864.291 1526.91 6
 -6 18 -10 3970.68 1549.9 1
 -6 18 -11 74.228 1128.62 4
 6 18 11 1721.67 1402.47 6
 -6 18 -11 -856.84 1429.87 1
 6 18 11 1470.68 1249.57 2
 -6 18 -12 7922.53 1903.96 4
 -6 18 -12 8315.88 1804.43 1
 6 18 12 8690.02 1948.65 2
 -6 18 -13 23916 2835.93 4
 -6 18 -13 20177.3 2461.86 1
 6 18 13 20949.3 2794.25 2
 -6 18 -14 3329.58 1756.94 4
 -6 18 -14 2201.29 1500.36 1
 6 18 14 4589.94 1913.01 2
 -6 18 -15 27148.8 3182.65 4
 -6 18 -15 29026 3065.9 1
 6 18 15 26986 3194.02 2
 -6 18 -16 3003.47 1674.57 4
 6 18 16 2094.35 1546.85 2
 -6 20 15 27038.6 3279.43 2
 6 20 -15 19910.2 2984.02 4
 6 20 -15 20431.9 2798.19 5
 6 20 -14 7967.51 2354.16 4
 6 20 -14 6800.63 1937.03 5
 -6 20 14 6508.72 2154.01 2
 -6 20 13 27884 3153.69 2
 6 20 -13 26225.2 3008.28 5
 6 20 -13 22202.2 2904.64 4
 6 20 -12 127.988 1566.27 4
 -6 20 12 -1373.03 1460.03 2
 6 20 -12 640.934 1199.45 5
 -6 20 11 17974.5 2535.25 2
 6 20 -11 14612.3 2405.94 4
 6 20 -11 12097.4 2070.11 5
 -6 20 10 2188.75 1665.23 2
 6 20 -10 4882.34 1879.56 4
 6 20 -10 1522.41 1100.49 5
 -6 20 9 1113.56 1225.8 2
 6 20 -9 3489.88 1573.52 4
 6 20 -9 3597.04 1583.61 5
 -6 20 8 2029.42 1483.74 2
 6 20 -8 916.205 1277.7 4
 6 20 -8 -359.872 1306 5
 -6 20 7 9339.44 1808.55 2
 6 20 -7 15270.3 2066.06 6
 6 20 -7 14297.1 2176.43 5
 6 20 -7 13906.9 2416.25 4
 -6 20 6 5125.43 1690.05 2
 6 20 -6 1132.61 1275.52 5
 6 20 -6 2950.61 1215.34 6
 6 20 -5 48889.1 3492.45 5
 6 20 -5 50857.3 3681.58 6
 -6 20 5 51446.5 3652.77 2
 -6 20 4 7898.38 1754.8 2
 6 20 -4 11475 2017.47 6
 6 20 -4 7809.76 1612.58 5
 6 20 -3 25806.5 2785.19 6
 -6 20 3 30363.5 2746.71 2
 -6 20 2 26849.3 2555.11 2
 6 20 -2 31623.5 3111.17 6
 -6 20 2 26055.4 2115.92 5
 6 20 -1 33756.3 3272.1 6
 -6 20 1 29219.2 2341.42 5
 -6 20 1 37133.4 2987.23 2
 -6 20 0 9007.03 1495.64 5
 -6 20 0 10696 1796.76 2
 6 20 0 8464.42 2054.92 6
 6 20 1 25701.3 2941.44 6
 -6 20 -1 27099.1 2481.32 2
 6 20 2 14162 2413.88 6
 -6 20 -2 14160.3 1864.24 2
 -6 20 -3 698.931 927.993 2
 6 20 3 -1424.93 1418.02 6
 -6 20 -4 9310.5 1453.24 2
 6 20 4 11548.3 2285.12 6
 6 20 5 19499.2 2861.46 6
 -6 20 -5 19059.2 2432.77 1
 6 20 6 2793.47 1720.55 6
 -6 20 -6 5975.15 1726.22 1
 -6 20 -7 19807.6 2576.44 1
 6 20 7 21013.2 2884.14 6
 -6 20 -8 5625.72 1742.91 4
 6 20 8 10268.5 2404.38 6
 -6 20 -8 6333.7 1724.58 1
 -6 20 -9 14651.8 2353.15 4
 -6 20 -9 14281.3 2397.14 1
 6 20 9 13294.9 2437.89 6
 6 20 9 14226.2 2338.02 2
 -6 20 -10 2115.62 1386.42 1
 -6 20 -10 2433.48 1638.79 4
 6 20 10 1999.72 1576.48 2
 -6 20 -11 9113.43 2170.86 4
 -6 20 -11 10723.1 2122.85 1
 6 20 11 10952.7 2349.11 2
 -6 20 -12 -1044.71 1494.85 4
 6 20 12 911.319 1540.45 2
 -6 20 -12 -1972.57 1526.24 1
 6 20 13 8794.8 2266.26 2
 -6 20 -13 9922.24 2109.31 1
 -6 20 -13 13229.8 2488.77 4
 -6 20 -14 -524.529 1534.81 4
 -6 20 -14 4314.29 1842.59 1
 -6 20 -15 13125.6 2581.33 4
 6 22 -12 21426.6 3247.08 4
 6 22 -12 17820.5 2850.23 5
 -6 22 12 16968.7 2722.74 2
 -6 22 11 29666.5 3558.81 2
 6 22 -11 28105.4 3334.34 4
 6 22 -11 25758.6 3111.6 5
 -6 22 10 3337.26 1716.78 2
 6 22 -10 -845.717 1411.7 4
 6 22 -10 198.239 1293.46 5
 6 22 -9 -675.047 1678.91 4
 6 22 -9 -1509.63 1583.37 5
 -6 22 9 2173.96 1459.62 2
 -6 22 8 2996.21 1473.82 2
 6 22 -8 -319.521 1360.83 4
 6 22 -8 855.515 1462.05 5
 -6 22 7 -443.577 1441.66 2
 6 22 -7 -2422.63 1627.39 5
 -6 22 6 3985.54 1689.26 2
 6 22 -6 623.389 1159.95 5
 6 22 -5 45262.5 3606.52 6
 6 22 -5 39926.9 3371.78 5
 -6 22 5 40092.7 3353.13 2
 -6 22 4 26409.4 2859.05 2
 6 22 -4 28777.4 2872.68 5
 6 22 -4 26820.3 2948.73 6
 -6 22 3 2465.03 1382.87 2
 6 22 -3 1466.95 1456.15 6
 6 22 -3 930.538 1298.92 5
 6 22 -2 45994.4 3845.72 6
 6 22 -2 36227.5 3012.94 5
 -6 22 2 44541.9 3382.3 2
 -6 22 1 12918.3 2049.61 2
 6 22 -1 11492.5 2238.46 6
 -6 22 0 -105.035 1126.32 2
 6 22 0 -1170.48 1467.08 6
 -6 22 -1 1577.91 1358.39 2
 6 22 1 1564.08 1625.14 6
 6 22 2 27022.9 3273.03 6
 -6 22 -2 20900.2 2208.02 2
 6 22 3 2484.89 1577.17 6
 -6 22 -3 627.958 970.19 2
 6 22 4 24823.1 3105.12 6
 6 22 5 9394.94 2166.39 6
 -6 22 -5 10585.4 1969.33 1
 6 22 6 3532.38 1796.72 6
 -6 22 -6 -663.473 1622.97 1
 -6 22 -7 3418.86 1986.15 1
 6 22 7 -1107.74 1463.22 6
 6 22 7 -1016.11 1701.91 2
 -6 22 -8 2962.67 1670.08 1
 6 22 8 1925.77 1486.48 2
 -6 22 -9 1086.46 1462.6 1
 6 22 9 -3099.36 2119.7 2
 -6 22 -10 10757.2 2278.65 1
 -6 22 -10 9168.06 2305.75 4
 6 22 10 4171.02 1677.79 2
 -6 22 -11 10103.8 2302.64 4
 -6 22 -11 14371.4 2523.52 1
 -6 22 -12 7040.97 2146.17 4
 -6 22 -12 7958.87 2060.13 1
 -6 24 9 -1836.81 1550.04 2
 6 24 -9 1804.47 1951.15 5
 6 24 -8 3120.41 1671.19 5
 -6 24 8 7475.3 2125.06 2
 -6 24 7 1383.24 1713.83 2
 6 24 -7 -355.097 1497.69 5
 -6 24 6 8339.83 2091.99 2
 6 24 -6 8892.49 2031.23 5
 -6 24 5 17112.1 2617.5 2
 6 24 -5 18426 2503.3 5
 6 24 -4 7966.4 1844.35 5
 6 24 -4 8708.19 2082.02 6
 -6 24 4 5579.79 1598.38 2
 -6 24 3 874.626 1468.62 2
 6 24 -3 -844.088 1427.83 6
 6 24 -3 2194.43 1640.52 5
 -6 24 2 9036.85 2053.55 2
 6 24 -2 6865.77 1783.77 5
 6 24 -2 5482.5 1947.37 6
 6 24 -1 -315.022 1177.68 5
 -6 24 1 1120.98 1200.55 2
 6 24 -1 -1444.92 1734.35 6
 6 24 0 6605.44 1730.1 5
 -6 24 0 5769.87 1631.13 2
 6 24 0 5483.56 1847.85 6
 -6 24 -1 1216.54 1323.9 2
 6 24 1 2184.55 1824.17 6
 6 24 1 1153.45 1194.59 5
 6 24 2 13092.2 2666.57 6
 -6 24 -2 13818.5 2128.07 2
 6 24 3 94.2756 1587.74 6
 -6 24 -4 3304.87 1636.88 1
 6 24 4 4194.76 1974.51 6
 6 24 4 660.964 1685.91 2
 -6 24 -5 14198.4 2740.9 1
 6 24 5 9460.03 2344.34 2
 -6 24 -6 18076.7 2937.36 1
 6 24 6 18342.4 2801.56 2
 -6 24 -7 4870.67 1962.6 1
 6 24 7 1287.87 1712.9 2
 -6 24 -8 -4.03772 1635.57 1
 -6 24 -9 836.047 1646.88 1
 -6 26 6 23112.8 3035.9 2
 -6 26 5 4653.36 1543.43 2
 6 26 -5 5552.42 1667.16 5
 6 26 -5 3451.38 1907.37 2
 -6 26 4 -391.036 1295.48 2
 6 26 -4 -1350.93 1754.77 5
 6 26 -4 -263.462 1547.1 2
 -6 26 3 5510.42 1904.14 2
 6 26 -3 3730.18 1894.14 2
 6 26 -3 1647.44 1351.46 5
 6 26 -2 3308.62 1761.83 5
 -6 26 2 -1217.61 1640.79 2
 6 26 -2 -438.879 1646.31 2
 -6 26 1 -204.234 1402.07 2
 6 26 -1 -1729.29 1611.27 5
 6 26 -1 477.329 1660.9 2
 -6 26 0 23528.1 2870.85 2
 6 26 0 18823.8 2627.93 5
 6 26 0 21491.3 2960.78 2
 -6 26 -1 -1409.72 1548.12 2
 6 26 1 -1038.49 1340.6 5
 6 26 1 -1069.6 1805.59 2
 6 26 2 -1178.08 1227.5 5
 6 26 2 194.5 1477.03 2
 6 26 3 -1024.37 1855.11 2
 6 28 -3 -12.6628 1451.32 2
 -6 28 2 409.503 1634.29 2
 -6 28 1 788.223 1709.51 2
 6 28 1 -2965.07 1744.31 5
 7 -1 -22 -289.849 1564.62 4
 7 1 -22 -3570.97 1913.32 4
 7 -1 -21 58960.4 4397.03 4
 7 1 -21 57574 4358.75 4
 7 -1 -20 11385.8 2255.75 4
 7 1 -20 9747.33 2103.87 4
 7 -1 -19 3243.94 1419.68 4
 7 1 -19 4337.09 1640.84 4
 7 -1 -18 2231.92 1134.1 4
 7 1 -18 6747.27 1774.56 4
 -7 1 17 21746 1993.65 2
 7 -1 -17 23868.2 2529.59 4
 7 1 -17 21535 2238.7 4
 -7 1 16 26462.7 2117.95 2
 7 1 -16 23297.7 1590.24 5
 -7 -1 16 26261.2 1991.7 2
 7 -1 -16 22982 2442.61 4
 7 1 -16 21938.9 2341.39 4
 -7 -1 15 82886.1 3367.94 2
 7 1 -15 87411.4 2888.49 5
 -7 1 15 87775.1 3607.75 2
 7 -1 -15 82965.4 4207.02 4
 7 1 -15 86019.1 4111.73 4
 -7 1 14 30950 2171.26 2
 7 1 -14 31543.8 1690.92 5
 7 -1 -14 33845.5 1521.63 5
 -7 -1 14 35597.8 2194.65 2
 7 -1 -14 30319 2583.74 4
 7 1 -14 35177.1 2634.54 4
 -7 -1 13 9613.35 1175.08 2
 7 1 -13 8712.21 963.792 5
 7 -1 -13 9252.35 820.721 5
 7 1 -13 10346.5 1518.69 4
 7 -1 -13 9376.63 1443.46 4
 -7 1 13 9986.39 1328.18 2
 -7 1 12 20655 1681.56 2
 7 1 -12 16101.2 1200.11 5
 7 -1 -12 22153.1 1169.8 5
 -7 -1 12 20792.2 1580.56 2
 7 -1 -12 21365.8 1993.19 4
 7 1 -12 20384.9 1856.7 4
 7 1 -11 1949.06 494.291 5
 7 -1 -11 1916.31 425.725 5
 7 -1 -11 3141.76 957.747 4
 -7 -1 11 2194.04 729.648 2
 7 1 -11 2121.8 752.846 4
 -7 1 11 1900.65 741.252 2
 -7 -1 10 11820 1141.13 2
 7 -1 -10 12032.4 856.808 5
 7 -1 -10 11484.3 1282.46 4
 7 1 -10 11916 1282.71 4
 -7 1 10 11435.2 1230.93 2
 -7 1 9 103216 3300.43 2
 7 -1 -9 99974.9 3418.99 4
 -7 -1 9 96409.5 3161.28 2
 7 1 -9 102789 3316.26 4
 -7 1 8 15717.6 1342.83 2
 7 1 -8 16462.1 1300.39 4
 -7 -1 8 16831.4 1305.15 2
 7 -1 -8 15261.3 1315.66 4
 -7 1 7 222099 4668.21 2
 7 -1 -7 229160 4520.54 4
 7 1 -7 221598 4251.1 4
 -7 -1 7 235647 4625.88 2
 -7 -1 6 385.834 403.631 2
 7 -1 -6 425.131 465.928 4
 7 1 -6 473.917 359.596 4
 -7 1 6 639.216 509.994 2
 -7 1 5 32586.5 1722.36 2
 7 -1 -5 31254.7 1443.38 4
 7 1 -5 32626.2 1393.66 4
 -7 -1 5 31841 1684.63 2
 -7 1 4 60879.7 2247.05 2
 -7 -1 4 59658.4 1742.22 4
 7 -1 -4 59831.2 1762.63 4
 7 1 -4 61058.8 1685.58 4
 -7 -1 4 56561.3 2150.72 2
 -7 -1 3 55848.4 1062.39 1
 -7 -1 3 53112.4 2041.08 2
 7 -1 -3 54744.7 1452.1 4
 -7 1 3 53078.3 2056.33 2
 7 1 -3 54417 1413.57 4
 -7 -1 3 53552 1430.54 4
 7 1 -2 17401.9 1166.97 6
 7 -1 -2 18993.6 700.668 4
 -7 -1 2 17959.5 673.95 1
 -7 -1 2 16522.8 676.569 4
 -7 1 2 17962.7 1192.34 2
 7 1 -2 17823.6 688.636 4
 -7 1 1 602811 5247.45 1
 7 1 -1 578060 3199.03 4
 7 1 -1 567141 6446.39 6
 7 1 -1 587989 4544.24 1
 -7 -1 1 606382 4296.1 1
 -7 -1 1 588017 3050.67 4
 -7 1 1 600777 6486.61 2
 -7 1 0 2579.55 516.703 2
 -7 1 0 2875.99 475.607 1
 7 1 0 2704.48 542.092 6
 7 -1 0 2266.9 493.237 6
 7 1 0 2798.34 402.141 1
 7 -1 1 250203 4053.56 6
 7 1 1 235296 4207.72 6
 -7 1 -1 236501 3661.4 1
 7 1 1 234517 3528.43 1
 7 -1 2 16173.4 1092.76 6
 -7 1 -2 17219.6 1067.17 1
 7 1 2 15123.8 1151.05 6
 -7 1 -2 15627.1 538.829 4
 7 1 3 18175 1228.84 6
 7 -1 3 19172.8 1198.87 6
 -7 -1 -3 16789.2 794.898 4
 -7 1 -3 18414.4 722.303 4
 -7 1 -3 18383.3 1173.17 1
 7 1 4 2200.51 608.524 6
 7 1 4 505.383 856.939 3
 7 -1 4 1704.66 509.807 6
 7 -1 4 1423.88 728.245 3
 -7 -1 -4 2770.76 456.499 4
 -7 1 -4 2375.21 392.317 4
 7 1 5 90620.4 4334.05 3
 7 1 5 93057.4 2998.24 6
 -7 -1 -5 89898.8 2350.31 4
 7 -1 5 91470.7 2668.15 6
 -7 1 -5 94756.9 2174.99 4
 7 -1 5 90684.1 4331.53 3
 7 -1 6 21232.4 1396.36 6
 7 1 6 21710.5 1559.36 6
 -7 1 -6 22042.2 1206.24 4
 7 1 6 23140.2 2358.42 3
 7 -1 6 20872.3 2305.81 3
 -7 -1 -6 21445.3 1291.48 4
 7 -1 7 341221 5552.03 6
 7 -1 7 368276 9278.01 3
 7 1 7 354921 9192.76 3
 -7 -1 -7 348792 5433.67 4
 -7 1 -7 347909 5065.61 4
 7 1 7 352527 6271.74 6
 7 -1 8 10142.4 1877.34 3
 7 1 8 8151.25 1792.2 3
 7 1 8 7347.23 1065.41 6
 -7 -1 -8 7587.48 1005.76 4
 -7 1 -8 7816.77 925.69 4
 7 -1 8 9287.78 1067.32 6
 7 -1 9 7210.36 1619.79 3
 7 -1 9 6668.21 1030.01 6
 7 1 9 7045.04 1699.07 3
 -7 -1 -9 7540.54 1081.26 4
 -7 1 -9 7991.88 1008.16 4
 7 1 9 7961.46 1148.64 6
 7 -1 10 34073.2 2063.77 6
 7 1 10 36244.8 2289.3 6
 7 1 10 36788.9 3398.1 3
 7 -1 10 32655.5 3144.77 3
 -7 -1 -10 35533.6 2115.73 4
 -7 1 -10 34170.4 2031.14 4
 7 1 11 1690.73 1285.02 3
 7 -1 11 1293.11 738.925 6
 7 1 11 2748.63 928.86 6
 7 -1 11 1271.56 1405.09 3
 -7 -1 -11 1953.48 931.304 4
 -7 1 -11 1750.72 883.091 4
 7 -1 12 628.748 589.696 6
 7 1 12 87.1916 739.499 6
 7 1 12 2402.46 1390.22 3
 7 -1 12 398.281 1295.36 3
 -7 1 -12 802.493 804.072 4
 -7 -1 -12 779.883 763.735 4
 7 1 13 37036.8 2353.86 6
 7 1 13 33651.1 3530.6 3
 7 -1 13 36000.9 3707.96 3
 -7 -1 -13 35266.7 2512.4 4
 -7 1 -13 38440.4 2515.25 4
 7 1 14 -650.576 1361.45 3
 7 -1 14 -2143.2 1857.96 3
 -7 -1 -14 -273.151 886.924 4
 -7 1 -14 2085.27 1071.26 4
 7 1 15 93142 5978.51 3
 7 -1 15 103614 6239.24 3
 -7 -1 -15 97279.5 4393.78 4
 -7 1 -15 94610.4 4257.56 4
 7 1 16 25782.3 3545.85 3
 7 -1 16 22390.7 3305 3
 -7 -1 -16 21600 2305.46 4
 -7 1 -16 21527.7 2354.79 4
 7 1 17 5369.45 2076.39 3
 -7 -1 -17 2215.91 1265.09 4
 -7 1 -17 2234.82 1282.24 4
 -7 -1 -18 5120.84 1530.72 4
 -7 1 -18 -51.0646 1142.07 4
 -7 -1 -19 9121.52 1806.4 4
 -7 1 -19 9488.06 1928.87 4
 -7 -1 -20 -2696.06 1675.01 4
 -7 1 -20 794.713 1388.28 4
 -7 -1 -21 60015.6 4453.82 4
 -7 1 -21 60811.2 4374.42 4
 -7 -1 -22 1279.42 1720.23 4
 -7 1 -22 -458.276 1534.45 4
 7 -3 -22 3310.55 2020.82 4
 7 3 -22 -3582.22 1762.56 4
 7 -3 -21 18006.7 2701.15 4
 7 3 -21 19145.4 2648.6 4
 7 -3 -20 19437.8 2646.5 4
 7 3 -20 26497.3 3016.8 4
 7 -3 -19 17523.2 2508.77 4
 7 3 -19 19002.3 2568.69 4
 -7 3 18 40736.9 2767.33 2
 7 -3 -18 38204.1 3329.96 4
 7 3 -18 38255.1 3190.68 4
 7 3 -17 12010.2 1336.39 5
 7 -3 -17 15289 2208.99 4
 -7 3 17 13631.6 1785.7 2
 7 3 -17 15462.9 2121.03 4
 -7 -3 16 28555.2 1980.45 2
 -7 3 16 22956.8 2160.44 2
 7 3 -16 26062.5 1875.14 5
 7 -3 -16 25080.7 2577.96 4
 7 3 -16 26907.1 2537.51 4
 -7 -3 15 107770 3649.63 2
 7 3 -15 110503 3616.84 5
 -7 3 15 108313 4149.75 2
 7 -3 -15 112825 4943.56 4
 7 3 -15 110565 4609.9 4
 -7 -3 14 272.981 587.328 2
 7 3 -14 580.62 605.063 5
 -7 3 14 1766.01 854.691 2
 7 -3 -14 216.459 902.344 4
 7 3 -14 264.663 970.357 4
 -7 3 13 28510.3 2130.65 2
 7 3 -13 27948 1755.81 5
 7 -3 -13 27279.7 2408.82 4
 7 3 -13 24532.7 2097.53 4
 -7 -3 13 25603.4 1797.82 2
 7 3 -12 26484.6 1709.5 5
 -7 3 12 27197.4 1976.55 2
 7 -3 -12 25498 947.433 5
 7 -3 -12 25192.6 2243.46 4
 7 3 -12 27106.6 2115.47 4
 -7 -3 12 26500.7 1781.88 2
 7 -3 -11 5764.61 1178.57 4
 -7 -3 11 6666.23 984.367 2
 7 3 -11 7193.13 937.673 5
 7 3 -11 8066.57 1161.68 4
 7 -3 -11 7082.51 516.742 5
 -7 3 11 8196.45 1192.08 2
 -7 -3 10 227557 4833.47 2
 7 -3 -10 238630 2758.98 5
 7 -3 -10 233322 5813.5 4
 -7 3 10 232356 5311.3 2
 7 3 -10 229268 5238.41 4
 -7 -3 9 126137 3512.35 2
 7 -3 -9 123287 4049.96 4
 -7 -3 9 120841 2531.44 1
 7 3 -9 129609 3720.21 4
 -7 3 9 122070 3770.42 2
 -7 -3 8 13092.2 1200.28 2
 7 -3 -8 11819.9 1240.09 4
 -7 -3 8 11544.9 720.754 1
 -7 3 8 14394.7 1366.1 2
 7 3 -8 12121.5 1175.51 4
 -7 3 7 95573.7 3152.78 2
 -7 -3 7 99627.7 1677.87 1
 7 3 -7 99406.5 2921.36 4
 -7 3 6 25239.1 1630.89 2
 -7 -3 6 22503.5 648.593 1
 7 3 -6 25755.4 1430.66 4
 -7 3 5 25037.4 1523.98 2
 7 3 -5 26065 1334.54 4
 7 3 -5 23178.5 1396.77 6
 7 3 -4 198908 3907.12 6
 -7 3 4 208051 4254.65 2
 7 3 -4 203516 3417.52 4
 7 3 -3 18359.3 1235.12 6
 -7 3 3 17459 1241.38 2
 -7 -3 3 18878.5 925.801 4
 7 3 -3 18477 978.243 4
 7 3 -2 35744.5 1261.57 4
 7 3 -2 32942 1653.37 6
 -7 3 2 34069.8 1663.02 2
 -7 -3 2 34935.9 1166.63 4
 7 3 -2 35565.7 807.949 1
 7 3 -1 305264 4971.46 6
 7 3 -1 317346 3401.78 4
 -7 3 1 319033 4834.77 2
 7 3 -1 312554 3001.72 1
 -7 -3 1 305737 3221.47 4
 -7 -3 0 72397.3 1564.69 4
 7 -3 0 71675.5 1359.18 4
 7 3 0 68622.3 2410.47 6
 -7 3 0 71323.4 2178.71 1
 -7 3 0 70891.7 2245.59 2
 -7 -3 -1 21194.5 870.941 4
 7 3 1 21712.4 1407.89 6
 -7 3 -1 20246.7 1189.37 2
 7 -3 1 21390.6 735.423 4
 -7 3 -1 21321.1 1286.66 1
 -7 3 -2 13607 680.139 4
 7 -3 2 16237.3 1044.31 6
 7 3 2 15638.1 1253.76 6
 7 -3 2 16234.1 700.769 4
 -7 3 -2 14203.1 1063.35 1
 -7 3 -2 14608.5 993.499 2
 -7 3 -3 77503.5 2238.89 2
 7 -3 3 83232 2345.72 6
 7 3 3 91866 3021.43 6
 7 -3 3 92245.5 1866.61 4
 -7 3 -3 83357.5 2601.68 1
 -7 3 -3 93113.7 1890.59 4
 7 3 4 189611 5952.05 3
 7 3 4 169344 4241.77 6
 7 -3 4 176931 5802.45 3
 7 -3 4 186474 3018.99 4
 -7 3 -4 185645 4011.06 1
 7 -3 4 172832 3331.34 6
 -7 3 -4 173890 2877.25 4
 7 -3 5 4353.43 617.927 6
 7 3 5 5141.14 1181.7 3
 7 -3 5 4931.43 1233.39 3
 7 3 5 7351 1068.65 6
 -7 3 -5 5325.53 834.607 1
 -7 3 -5 5484.1 631.637 4
 7 -3 5 5165.02 603.022 2
 7 -3 6 79072 2319.14 6
 7 3 6 83173.8 3267.55 6
 7 3 6 78617 4187.29 3
 -7 3 -6 83771.5 2947.85 1
 7 -3 6 73707.4 2118.72 2
 7 -3 6 83412.8 4323.3 3
 -7 3 -6 77941.1 2313.27 4
 7 3 7 129835 4228.07 6
 7 -3 7 130161 5588.17 3
 7 -3 7 128326 3019.4 6
 7 -3 7 129525 2709.64 2
 -7 3 -7 127392 3159.41 4
 7 -3 8 6272.55 655.718 2
 7 3 8 5956.91 1208.95 6
 7 3 8 7988.34 1760.42 3
 7 -3 8 5812.89 1549.82 3
 7 -3 8 5385.24 727.876 6
 -7 -3 -8 6384.07 985.894 4
 -7 3 -8 6285.69 877.156 4
 7 -3 9 2574.74 464.093 2
 7 -3 9 1824.41 1169.47 3
 7 3 9 2381.64 954.749 6
 7 3 9 3753.03 1484.56 3
 -7 -3 -9 2954.8 798.564 4
 7 -3 9 3881.95 719.194 6
 -7 3 -9 2729.09 709.471 4
 7 3 10 184657 7150.49 3
 7 3 10 173991 5328.89 6
 7 -3 10 175757 3971.07 6
 7 -3 10 169746 7026.65 3
 -7 3 -10 177103 4534.79 4
 -7 -3 -10 176626 4992.05 4
 7 -3 11 -316.243 506.579 6
 7 3 11 734.931 1324.37 3
 7 -3 11 -1496.92 1322.76 3
 7 3 11 553.309 873.361 6
 -7 -3 -11 -61.1484 815.416 4
 -7 3 -11 -718.198 732.569 4
 7 -3 12 51010.2 4199.11 3
 7 3 12 46464.8 2852.6 6
 7 3 12 42832 3850.64 3
 -7 3 -12 44986.8 2607.37 4
 -7 -3 -12 45881.8 2842.03 4
 7 3 13 71854.3 3528.42 6
 7 -3 13 71502.3 5001.99 3
 -7 -3 -13 73506 3675.13 4
 -7 3 -13 76331.8 3477.44 4
 7 3 13 75263.9 5090.91 3
 7 3 14 2903.31 1095.79 6
 7 3 14 2322.43 1587.4 3
 7 -3 14 955.189 1550.72 3
 -7 -3 -14 1976.53 1105.21 4
 -7 3 -14 714.265 962.151 4
 7 3 15 42368.8 4037.64 3
 7 -3 15 49290.3 4463.14 3
 -7 -3 -15 47686.8 3288.37 4
 -7 3 -15 47656.4 3087.37 4
 7 -3 16 55208.2 4877.65 3
 7 3 16 66249.1 5301.99 3
 -7 -3 -16 60894.4 3788.82 4
 -7 3 -16 59036.2 3547.73 4
 -7 -3 -17 1034.51 1112.71 4
 -7 3 -17 383.765 1116.41 4
 -7 -3 -18 14797.9 2283.49 4
 -7 3 -18 14480.3 2136.88 4
 -7 -3 -19 11690.8 2066.55 4
 -7 3 -19 16713.2 2328.33 4
 -7 -3 -20 -1064.82 1635.64 4
 -7 3 -20 763.481 1447.65 4
 -7 -3 -21 16859.4 2629.83 4
 -7 3 -21 13740.2 2422.25 4
 -7 -3 -22 -883.286 1713.06 4
 -7 3 -22 6173.53 2263.33 4
 7 -5 -22 1817.49 1679.39 4
 7 5 -22 3981.6 1839.79 4
 7 -5 -21 7526.2 2164.21 4
 7 5 -21 8992.13 2025.47 4
 7 -5 -20 28468.5 3380.92 4
 7 5 -20 31093.9 3188.74 4
 -7 5 19 32893.6 2751.75 2
 7 -5 -19 33498.3 3388.82 4
 7 5 -19 32410.9 3110.48 4
 7 5 -18 99501.4 3967.42 5
 7 -5 -18 94666.8 5227.19 4
 7 5 -18 109182 5213.54 4
 -7 5 18 103233 4557.41 2
 7 5 -17 19418.3 1751.1 5
 -7 5 17 21354.1 2151.04 2
 7 -5 -17 23439.6 2751.75 4
 7 5 -17 16710.9 2230.83 4
 7 5 -16 637.206 767.115 5
 -7 5 16 1220.5 993.425 2
 7 -5 -16 224.33 1196.4 4
 7 5 -16 -1427.48 1346.25 4
 7 5 -15 5700.32 1095.21 5
 -7 5 15 6727.63 1246.86 2
 7 -5 -15 5729.1 1669.95 4
 7 5 -15 3591.18 1135.26 4
 -7 5 14 29236.8 2380.5 2
 7 5 -14 29666.9 1846.57 6
 7 5 -14 29050.1 2027.68 5
 7 5 -14 28503.2 2434.44 4
 7 -5 -14 29445.5 2698.48 4
 7 5 -13 5417.72 886.254 6
 7 5 -13 6942.41 1123.66 5
 -7 5 13 5041.57 1144.47 2
 7 -5 -13 7576.54 1457.39 4
 7 5 -13 6291.25 1191.36 4
 7 5 -12 42963.8 2102.76 6
 7 -5 -12 41337.8 2940.9 4
 -7 5 12 46103.4 2662.67 2
 7 5 -12 47333.5 2422.13 5
 7 5 -12 51588.1 2884.64 4
 7 -5 -11 304.223 1004.86 4
 7 5 -11 1563.46 689.368 5
 7 5 -11 1144.28 532.387 6
 -7 5 11 758.729 701.039 2
 7 5 -11 -100.29 768.71 4
 7 5 -10 182515 4087.82 6
 -7 5 10 189689 5022.78 2
 7 5 -10 182658 4847.35 4
 -7 5 9 68669.7 3010.64 2
 7 5 -9 70492.6 2485.3 6
 7 5 -9 68231.9 2844.6 4
 -7 -5 9 69015.8 1911.51 1
 7 5 -8 1653.62 517.172 6
 -7 5 8 1914.77 724.664 2
 -7 -5 8 1882.38 347.915 1
 7 5 -8 1700.65 641.646 4
 7 5 -7 103693 2989.65 6
 -7 5 7 107703 3538.31 2
 7 5 -7 107383 3222.77 4
 7 5 -6 69497.7 2438.52 6
 -7 5 6 73855.4 2854.75 2
 7 5 -6 72741.4 2567.04 4
 7 5 -5 3780.97 650.238 4
 -7 5 5 4664.68 869.183 2
 7 5 -5 3372.01 640.379 6
 -7 5 4 316780 5502.06 2
 7 5 -4 316539 5243.85 6
 7 5 -4 323086 4801.16 4
 7 5 -3 93975.8 2539.18 4
 7 5 -3 90910.2 2855.68 6
 -7 5 3 90195.6 2888.06 2
 7 5 -2 362583 4678.39 4
 7 5 -2 354712 5730.54 6
 -7 5 2 348195 5569.58 2
 -7 -5 1 2061.52 435.003 4
 7 5 -1 1641.66 549.451 6
 -7 5 1 941.813 470.824 2
 7 -5 -1 2024.5 362.855 4
 7 5 -1 2081.9 445.799 4
 7 5 0 75867.3 2779.09 6
 -7 -5 0 76455.9 2088.06 4
 7 -5 0 79103.6 1988.4 4
 -7 5 0 78809.2 2475.28 2
 7 -5 1 69.314 246.369 4
 7 5 1 250.332 525.508 6
 -7 5 -1 -46.9135 462.823 1
 -7 -5 -1 -59.1467 322.616 4
 -7 5 -1 -255.932 455.119 2
 -7 5 -2 406725 6061.29 1
 -7 5 -2 398109 4543.29 4
 7 5 2 419674 6862.32 6
 -7 5 -2 399278 5204.22 2
 7 -5 2 401122 4385.64 4
 -7 5 -3 88177.9 2251.55 4
 7 5 3 87978.4 3292.58 6
 -7 5 -3 87201.4 2386.99 2
 7 -5 3 89382 2188.46 4
 -7 5 -3 89976.9 2925.05 1
 7 -5 4 119499 2704.77 6
 7 -5 4 127048 4974.27 3
 7 5 4 123497 4052.8 6
 7 5 4 124808 4845.52 3
 -7 5 -4 127902 3558.89 1
 -7 5 -4 122154 2677.84 2
 -7 5 -4 121446 2743.67 4
 7 -5 5 24170 2321.76 3
 7 -5 5 25031.7 1223.25 6
 7 -5 5 24324.5 1239.8 2
 7 5 5 28294.1 2088.56 6
 7 5 5 26692.1 2404.76 3
 -7 5 -5 25238 1682.18 1
 -7 5 -5 27711.3 1418.67 4
 7 -5 6 105891 2473.71 6
 7 -5 6 100055 2363.75 2
 7 5 6 110926 4868.53 3
 7 -5 6 104929 4860.05 3
 -7 5 -6 105196 3448.23 1
 7 5 6 102650 3981.45 6
 -7 5 -6 103013 2870.09 4
 -7 5 -7 1036.86 511.811 4
 -7 5 -7 741.753 639.301 1
 7 5 7 1857.85 976.799 6
 7 -5 7 1307.08 371.754 2
 7 5 7 854.636 967.408 3
 7 -5 7 1726.84 1106.81 3
 7 -5 7 646.275 367.375 6
 7 -5 8 11412.7 754.1 2
 7 -5 8 7668.84 1634.72 3
 7 5 8 12892.4 2093.33 3
 -7 5 -8 11720.3 1406.45 1
 7 -5 8 10808.8 833.401 6
 7 5 8 12195.1 1692.22 6
 -7 5 -8 9885.39 1075.37 4
 7 -5 9 48380.3 1376.67 2
 7 -5 9 48066.8 1740.23 6
 7 5 9 41713.7 2862.44 6
 7 5 9 45354.8 3610.41 3
 7 -5 9 45086.8 3651.23 3
 -7 5 -9 47346.9 2334.62 4
 7 5 10 79853.2 4763.8 3
 7 -5 10 78769.5 2227.13 6
 7 -5 10 82807 4994.39 3
 -7 5 -10 81402.5 3183.64 4
 7 5 10 75280.8 3825.84 6
 7 5 11 190.509 877.52 6
 7 5 11 -921.623 1593.81 3
 7 -5 11 774.643 1268.25 3
 -7 -5 -11 105.861 825.307 4
 -7 5 -11 -1238.79 848.054 4
 7 5 12 33678.3 2676.22 6
 7 5 12 34447.4 3427.86 3
 7 -5 12 30247.9 3248.7 3
 -7 -5 -12 32990 2585.76 4
 -7 5 -12 34313.7 2306.7 4
 7 -5 13 30488.6 3435.08 3
 7 5 13 29043.9 2433.98 6
 -7 -5 -13 34884.5 2742.14 4
 7 5 13 29616.9 3309.08 3
 -7 5 -13 33123.3 2454.22 4
 7 5 14 5434.95 1311.73 6
 7 5 14 7224.59 2205.45 3
 7 -5 14 2633.92 1433.78 3
 -7 -5 -14 4116.99 1317.7 4
 7 5 14 4357.28 1108.99 2
 -7 5 -14 4028.51 1183.31 4
 7 5 15 1017.12 1561.37 3
 7 -5 15 2324.35 1565.06 3
 -7 -5 -15 2181.45 1191.88 4
 -7 5 -15 2717.35 1142.92 4
 7 5 16 12679.6 2640.39 3
 7 -5 16 11647.1 2568.77 3
 -7 -5 -16 10052.5 1804.49 4
 -7 5 -16 11025.2 1851.26 4
 -7 -5 -17 1321.64 1298.17 4
 -7 5 -17 -972.255 1192.09 4
 -7 -5 -18 24821.5 2848.32 4
 -7 5 -18 24924.8 2627 4
 -7 -5 -19 26408.6 3018.61 4
 -7 5 -19 25391.5 2871.8 4
 -7 -5 -20 3622.16 1705.36 4
 -7 5 -20 3670.15 1664.79 4
 -7 -5 -21 1330.81 1422.37 4
 -7 5 -21 1712.99 1497.9 4
 -7 5 -22 -3744 1862.09 4
 7 -7 -22 3793.41 1850.88 4
 7 7 -22 975.435 1763.59 4
 7 -7 -21 46573.8 4332.44 4
 7 7 -21 56057.8 4372.52 4
 7 -7 -20 38626 3909.76 4
 7 7 -20 38490.7 3599.31 4
 -7 7 19 15604.8 2042.86 2
 7 7 -19 14936.8 1767.78 5
 7 -7 -19 11135 2323.61 4
 7 7 -19 14183.5 2257.76 4
 -7 7 18 118272 5109.6 2
 7 7 -18 112164 4508.52 5
 7 -7 -18 117488 6158.94 4
 7 7 -18 124872 5680.23 4
 -7 7 17 27899.3 2597.32 2
 7 7 -17 27008 2278.74 5
 7 -7 -17 25324.3 2972.48 4
 7 7 -17 29191.7 2797.18 4
 7 -7 -16 695.522 1269.39 4
 -7 7 16 -61.7922 922.265 2
 7 7 -16 3534.5 1140.27 5
 7 7 -16 -1056.92 1239.47 4
 -7 7 15 19625.5 2030.53 2
 7 7 -15 19704 1864.26 5
 7 -7 -15 18752.4 2405.91 4
 7 7 -15 19092.9 2145.83 4
 7 7 -14 109741 3290.76 6
 -7 7 14 102894 4344.79 2
 7 7 -14 110159 4089.39 5
 7 -7 -14 112357 5250.3 4
 7 7 -14 114183 4706.29 4
 -7 7 13 2891.65 1098.61 2
 7 7 -13 2464.28 685.389 6
 7 7 -13 773.087 788.658 5
 7 7 -13 3104.2 1124.03 4
 -7 7 12 33544.8 2485.16 2
 7 7 -12 38419.9 1952.45 6
 7 7 -12 38616.8 2375.16 5
 7 7 -12 36745.1 2544.68 4
 7 7 -11 537.983 545.906 6
 -7 7 11 -939.917 780.28 2
 7 7 -11 208.825 690.563 5
 7 7 -11 -707.082 983.55 4
 -7 7 10 28280.1 2130.39 2
 7 7 -10 30348.6 1730.5 6
 7 7 -10 26913.4 2039.09 4
 7 7 -9 4050.82 921.538 4
 7 7 -9 3633.94 713.014 6
 -7 7 9 2837.81 1003.15 2
 7 7 -8 96011.8 3009.07 6
 -7 7 8 94803.8 3635.68 2
 7 7 -8 102606 3503.24 4
 7 7 -7 168269 3995.25 6
 7 -7 -7 157744 1903.06 5
 -7 7 7 160265 4602.27 2
 7 7 -7 171011 4338.81 4
 7 7 -6 8649.45 1042.89 4
 7 7 -6 7761.48 994.043 6
 7 -7 -6 8171.89 552.128 5
 7 7 -6 8637.08 542.241 1
 -7 7 6 7490.84 1201.06 2
 7 7 -5 5981.94 921.465 4
 7 7 -5 5496.78 881.196 6
 -7 7 5 5426.82 881.322 2
 7 -7 -5 5787.2 534.134 5
 7 7 -5 5748.21 430.642 1
 7 7 -4 169927 4007.19 4
 7 7 -4 162544 4073.46 6
 7 -7 -4 160861 2867.57 5
 -7 7 4 166416 4245.84 2
 7 7 -3 13865.7 1157.17 4
 -7 7 3 15691.6 1376.82 2
 7 7 -3 13759.5 1237.96 6
 -7 7 2 205188 4463.78 2
 7 7 -2 215425 4216.8 4
 7 7 -2 219019 4867.89 6
 7 7 -1 263625 5510.66 6
 -7 7 1 260619 4888.27 2
 7 7 0 5682.48 1067.63 6
 -7 7 0 5561.84 869.869 2
 -7 7 -1 258182 4731.98 2
 7 7 1 274438 5977.21 6
 -7 7 -2 361884 6221.57 1
 7 7 2 347592 6951.18 6
 -7 7 -2 347763 5034.57 4
 -7 7 -2 358555 5236.63 2
 -7 7 -3 204756 4801.11 1
 -7 7 -3 197866 3901.75 4
 7 -7 3 195985 5909.7 3
 7 7 3 201402 5475.35 6
 -7 7 -3 200660 3830.53 2
 7 7 3 200349 5733.28 3
 -7 7 -4 39516.2 1827.55 4
 7 7 4 41479.2 2645.23 6
 -7 7 -4 40386.1 1681.5 2
 7 -7 4 40757.3 2915.95 3
 -7 7 -4 43536.5 2270.67 1
 7 7 4 43825.2 2917.08 3
 7 7 5 15793.5 1795.13 6
 -7 7 -5 19016.3 1092.66 2
 7 -7 5 17639.9 2023.03 3
 -7 7 -5 19036.4 1360.53 4
 -7 7 -5 19388.7 1590.27 1
 7 7 5 20057.3 2071.24 3
 7 -7 6 61004.4 3734.76 3
 7 7 6 62656.1 3709.88 3
 7 -7 6 60245.8 1774.2 6
 7 7 6 62446.6 3394.1 6
 -7 7 -6 61752.8 2826.59 1
 7 -7 6 58664 1862.21 2
 -7 7 -6 55999.8 1729.43 2
 -7 7 -6 58699.3 2384.1 4
 7 -7 7 62394.6 1736.28 6
 7 7 7 54627 3315.81 6
 7 7 7 56427.4 3714.84 3
 7 -7 7 59065.3 3843.39 3
 -7 7 -7 56058.7 2758.9 1
 7 -7 7 55216.2 1735.3 2
 -7 7 -7 60560.2 2510.36 4
 7 -7 8 112579 2250.46 6
 7 -7 8 111964 5477.99 3
 7 7 8 117521 4848.14 6
 7 7 8 118551 5379.42 3
 -7 7 -8 119417 4061.72 1
 7 -7 8 110546 2175.06 2
 -7 7 -8 112151 3528.11 4
 -7 7 -9 15672 1459.65 4
 -7 7 -9 17150.5 1773.79 1
 7 -7 9 15356.8 2274.58 3
 7 7 9 15649 1936.3 6
 7 7 9 15331 2089.6 3
 7 -7 9 13172.3 780.484 6
 -7 7 -10 7321.57 1100.64 4
 7 7 10 6848.98 1545.08 6
 7 7 10 5108.6 1460.34 3
 7 -7 10 6933.95 1653.41 3
 -7 7 -11 -245.662 762.392 4
 7 7 11 -992.392 1153.67 6
 7 7 11 -261.676 1143.86 3
 7 -7 11 -918.852 1533.82 3
 7 7 12 32439.3 3236.57 3
 7 -7 12 32758.6 3491.13 3
 7 7 12 27420.5 2555.39 6
 -7 7 -12 31652.2 2329.7 4
 -7 7 -13 3745.12 1132.96 4
 7 7 13 4829.64 1370.76 6
 7 7 13 3751.31 1493.32 3
 -7 -7 -13 1320.14 1073.61 4
 7 -7 13 2141.5 1478.43 3
 -7 7 -14 25986.4 2282.23 4
 -7 -7 -14 26589.4 2655.48 4
 7 7 14 26719.3 2563.3 6
 7 -7 14 30535.2 3525.66 3
 7 7 14 30983 2433.72 2
 7 7 14 30841.6 3510.03 3
 -7 -7 -15 23327.8 2545.97 4
 7 7 15 19636.2 2919.71 3
 7 -7 15 24890.6 3227.54 3
 7 7 15 22171.3 2163.93 2
 -7 7 -15 20620.5 2241.83 4
 -7 -7 -16 2512.81 1351.45 4
 -7 7 -16 2087.68 1240.58 4
 -7 -7 -17 3418.79 1548.37 4
 -7 7 -17 2485.37 1385.28 4
 -7 -7 -18 5150.82 1734.23 4
 -7 7 -18 4205.35 1593.5 4
 -7 7 -19 10746.7 2062.39 4
 -7 -7 -19 12656.1 2433.85 4
 -7 7 -20 8726.18 2094.75 4
 -7 -7 -20 8954.89 1959.6 4
 -7 7 -21 10256.2 2309.67 4
 -7 -7 -21 7067.2 2081.84 4
 7 9 -21 13376.6 2510.1 4
 7 -9 -21 14054.7 2906.62 4
 7 9 -20 19465.6 2654.51 4
 -7 9 20 19707.6 2486.27 2
 7 9 -20 19665.5 2262.57 5
 7 -9 -20 17659 2958.66 4
 7 9 -19 2796.44 1417.85 4
 7 9 -19 2873.21 1159.02 5
 7 -9 -19 3797.51 1969.89 4
 -7 9 19 271.621 1120.53 2
 7 9 -18 19078.4 2580.82 4
 7 9 -18 19224.3 2207.07 5
 -7 9 18 21256.6 2366.67 2
 7 -9 -18 16478.6 2644.32 4
 7 9 -17 9314.79 1813.09 4
 -7 9 17 10857.9 1815.76 2
 7 9 -17 7283.27 1421.61 5
 7 -9 -17 4503.19 1467.43 4
 7 9 -16 -532.851 1227.53 4
 -7 9 16 1106.36 946.727 2
 7 -9 -16 383.502 1522.01 4
 7 9 -15 23527.9 2423.6 4
 -7 9 15 23742.3 2402.22 2
 7 9 -15 21309.6 2110.87 5
 7 9 -14 70179.6 3511.46 5
 7 9 -14 73929.4 3921.5 4
 -7 9 14 69364.8 3942.01 2
 7 9 -13 8204.23 1542.79 4
 7 9 -13 7723.65 1043.62 6
 7 9 -13 5522.43 1093.44 5
 -7 9 13 4556.91 1345.87 2
 7 9 -12 1137.14 949.172 4
 7 9 -12 855.324 876.535 5
 7 9 -12 1348.06 631.838 6
 -7 9 12 3317.29 1289 2
 7 9 -11 -550.887 970.383 4
 7 9 -11 -185.387 534.294 6
 -7 9 11 -265.763 905.358 2
 7 9 -11 -133.397 904.153 5
 7 9 -10 2001.17 902.467 4
 7 9 -10 3274.86 753.764 6
 7 9 -10 4502.37 1114.49 5
 -7 9 10 2570.87 958.485 2
 -7 9 9 46777.8 2752.31 2
 7 9 -9 42950.6 2162.94 6
 7 9 -9 44685.4 2605.27 4
 -7 9 8 101857 3923.53 2
 7 9 -8 95762.8 3220.63 6
 7 9 -8 97349.4 2366.02 1
 7 9 -8 94319 3637.56 4
 -7 9 7 33868.2 2255.54 2
 7 9 -7 32263.8 1934.14 6
 7 9 -7 33340.1 1353.45 1
 7 9 -7 35092.3 2182.96 4
 7 9 -6 64613.8 2887.53 4
 -7 9 6 60967.2 2946.89 2
 7 -9 -6 63117.9 1627.04 5
 7 9 -6 62985.9 2687.56 6
 7 9 -6 61901.7 1755.93 1
 -7 9 5 17907.7 1643.68 2
 7 9 -5 16964.1 1482.51 6
 7 9 -5 17841.1 1502.23 4
 7 -9 -5 18323.1 1005.68 5
 -7 9 4 13226.7 1401.71 2
 7 9 -4 11487.4 1256.93 4
 7 9 -4 12349.3 1346.24 6
 -7 9 3 69736.1 2847.04 2
 7 9 -3 73530.9 2851.36 4
 7 9 -3 67863.2 2968.93 6
 -7 9 2 65610.4 2719.09 2
 7 9 -2 63896.2 2613.62 4
 7 9 -2 59727.5 2868.26 6
 7 9 -1 193636 5195.44 6
 -7 9 1 197669 4620.89 2
 7 9 0 20650.8 1814.36 6
 -7 9 0 18356.5 1456.85 2
 -7 9 -1 126804 3437.93 2
 7 9 1 127700 4538.42 6
 -7 9 -2 95859.5 2938.45 2
 7 -9 2 96167.5 3970.3 3
 -7 9 -3 1680.2 748.232 1
 7 9 3 1721.06 859.841 6
 7 9 3 1671.09 795.095 3
 7 -9 3 1435.91 925.097 3
 -7 9 -3 2645.75 627.213 2
 -7 9 -3 1889.28 597.071 4
 -7 9 -4 25015.8 1900.08 1
 -7 9 -4 26855 1690.83 4
 7 9 4 27039.4 2386.5 6
 7 9 4 28590.7 2371.22 3
 7 -9 4 24694 2327.14 3
 -7 9 -4 26825.5 1460.35 2
 -7 9 -5 57435 2523.61 4
 7 9 5 52379.8 3257.26 6
 7 -9 5 50508.6 3343.43 3
 -7 9 -5 55405.4 1967.85 2
 7 9 5 51493.5 3203.19 3
 -7 9 -5 56452.6 2851.62 1
 -7 9 -6 6627.29 694.172 2
 -7 9 -6 5498.89 1041.88 1
 -7 9 -6 8581.21 1134.63 4
 7 9 6 9533.42 1540.08 3
 7 -9 6 9792.31 1753.68 3
 7 9 6 10860.6 1765.98 6
 -7 9 -7 107620 3732.09 4
 7 -9 7 101524 2168.76 6
 7 9 7 109987 4917.04 6
 7 -9 7 104559 5044.43 3
 7 9 7 98429.4 4783.3 3
 -7 9 -7 101344 3857.15 1
 -7 9 -7 96118.7 2252.67 2
 7 9 8 84859.6 4399.11 6
 7 -9 8 87304.1 4856.9 3
 7 -9 8 88451.5 1833.63 6
 -7 9 -8 86204.9 3659.91 1
 7 9 8 93537.4 4764.34 3
 -7 9 -8 88533.6 3413.23 4
 7 9 9 37066.1 3043.41 6
 -7 9 -9 37068.6 2507.13 1
 7 9 9 37363.6 3256.7 3
 7 -9 9 33082.6 3095.32 3
 -7 9 -9 38336.5 2408.09 4
 -7 9 -10 489.566 837.163 4
 7 9 10 1568.84 1308.29 6
 7 9 10 1229.23 1368.98 3
 7 -9 10 -140.004 1091.89 3
 -7 9 -10 849.509 860.081 1
 -7 9 -11 11800.9 1589.32 4
 -7 9 -11 14811.2 1846.68 1
 7 9 11 11724.4 2037.71 3
 7 -9 11 13040.4 2273.16 3
 7 9 11 11463.4 1769.68 6
 -7 9 -12 2428.04 958.126 4
 7 9 12 4067.26 1273.75 6
 7 9 12 4130.15 1629.29 3
 7 -9 12 2285.93 1247.86 3
 -7 9 -13 17001.4 1924.32 4
 7 9 13 15081.5 2127.26 6
 7 9 13 21951.5 2936.01 3
 7 -9 13 17461.1 2730.1 3
 7 9 14 91989.7 4874.97 6
 7 -9 14 91855.6 5833.17 3
 7 9 14 95571.4 5833.72 3
 7 9 14 93672.1 4370.95 2
 -7 9 -14 93928.7 4366.52 4
 -7 9 -15 16597.4 2057.04 4
 7 9 15 17380.7 2776.05 3
 7 -9 15 15098.9 2747.64 3
 -7 -9 -15 14095.1 2129.19 4
 7 9 15 14320.8 1906.86 2
 -7 9 -16 652.545 1160.73 4
 -7 -9 -16 -1856.07 1449.22 4
 -7 9 -17 208.361 1207.03 4
 -7 -9 -17 3232.93 1493.17 4
 -7 9 -18 3400.72 1434.19 4
 -7 -9 -18 2404.39 1596.07 4
 -7 9 -19 3932.32 1588.77 4
 -7 -9 -19 5357.26 2070.27 4
 -7 9 -20 20497 2783.58 4
 -7 -9 -20 17963.4 2835.35 4
 -7 9 -21 11345.8 2436.22 4
 7 11 -20 4341.02 1919.68 4
 -7 11 20 841.614 1208.68 2
 7 11 -20 5596.21 1705.38 5
 7 -11 -20 1318.38 1924.74 4
 7 11 -19 36833.6 3488.01 4
 -7 11 19 30322.3 3077.01 2
 7 -11 -19 30690.4 3681.67 4
 7 11 -19 30076.3 2786.2 5
 7 11 -18 2665.66 1364.88 4
 7 11 -18 2650.29 1269.67 5
 7 -11 -18 -91.8869 1483.39 4
 -7 11 18 1277.85 1239.44 2
 7 11 -17 19.3687 1344.46 4
 7 11 -17 3016.18 1291.27 5
 -7 11 17 1522.85 1275.56 2
 7 11 -16 4183.23 1409.37 4
 -7 11 16 5287.53 1489.64 2
 7 11 -16 4574.07 1395.34 5
 7 11 -15 4815.97 1452.96 4
 -7 11 15 3967.26 1382.06 2
 7 11 -15 4847.17 1352.82 5
 -7 11 14 64637.5 3762.59 2
 7 11 -14 60571.3 3499.71 5
 7 11 -14 63452.7 3838.44 4
 -7 11 13 31641.3 2726.26 2
 7 11 -13 30120.7 2485.98 5
 7 11 -13 30694.7 2643.72 4
 7 11 -12 23820.4 2311.46 4
 7 11 -12 20911.3 1633.72 6
 -7 11 12 25157.6 2416.7 2
 7 11 -12 22119 2137.02 5
 7 11 -11 8831.23 1569.46 4
 7 11 -11 6111.57 1026.48 6
 -7 11 11 8457.53 1515.54 2
 7 11 -11 7233.43 1342.69 5
 -7 11 10 28977.6 2444.61 2
 7 11 -10 22981.2 1712.11 6
 7 11 -10 23500.6 2099.61 5
 7 11 -10 26477.5 1498.28 1
 7 11 -10 23856 2208.27 4
 -7 11 9 88604.4 4003.11 2
 7 11 -9 86516.8 3292.71 6
 7 11 -9 83994.4 2550.06 1
 7 11 -9 85484.4 3861.96 4
 7 11 -8 109909 4241.75 4
 -7 11 8 109744 4300.42 2
 7 11 -8 111014 2801.24 1
 7 11 -8 104609 3689.38 6
 -7 11 7 22346.5 2017.47 2
 7 11 -7 21124.9 1962.45 4
 7 11 -7 19990.9 1698.81 6
 7 11 -7 19871.9 1229.56 1
 -7 11 6 33154 2386.89 2
 7 11 -6 32102 2222.16 4
 7 11 -6 28170.8 1385.32 1
 7 11 -6 30739.3 2110.39 6
 7 11 -5 2155.56 886.441 6
 -7 11 5 1814.64 854.97 2
 7 11 -5 3612.66 889.706 4
 7 11 -4 16147.6 1598.46 4
 7 11 -4 16991 1687.49 6
 -7 11 4 16539.6 1646.51 2
 -7 11 3 67834 3083.85 2
 7 11 -3 66746.9 2945.11 4
 7 11 -3 66897.5 3263.51 6
 -7 11 2 34141.7 2147.87 2
 7 11 -2 31604.2 2341.06 6
 7 11 -2 39190.8 2267.29 4
 -7 11 1 40301.9 2284.34 2
 7 11 -1 53970.2 3111.76 6
 7 11 0 13214.2 1633.51 6
 -7 11 0 15012.8 1430.61 2
 7 11 1 2202.95 1076.2 6
 -7 11 -1 3283.4 803.441 2
 7 -11 2 63163.4 3265.12 3
 -7 11 -2 64637.4 2609.24 2
 7 11 2 58262 3418.14 6
 7 11 2 67356.6 3193.79 3
 -7 11 -3 89543.6 3303.82 4
 -7 11 -3 97227.7 3814.21 1
 -7 11 -3 94233.8 3058.8 2
 7 -11 3 91770.3 4069.12 3
 7 11 3 93421.4 4472.13 6
 7 11 3 90989.7 3825.84 3
 -7 11 -4 29065.7 1687.34 2
 -7 11 -4 31515.9 2283.86 1
 7 11 4 29919.6 2741.42 6
 -7 11 -4 29575.3 1949.5 4
 7 -11 4 30378.6 2523.3 3
 7 11 4 27297.3 2263.46 3
 -7 11 -5 -27.5966 450.027 2
 -7 11 -5 696.321 719.158 4
 7 -11 5 1229.39 1029.93 3
 7 11 5 1892.77 1173.34 6
 7 11 5 179.931 883.337 3
 -7 11 -5 -90.8505 851.35 1
 -7 11 -6 26965.6 1964.38 4
 -7 11 -6 23247.2 2030.77 1
 7 11 6 25061.7 2395.31 3
 7 11 6 25055.6 2634.54 6
 7 -11 6 22883.5 2403.47 3
 -7 11 -6 24698 1393.18 2
 -7 11 -7 29526.3 2124.29 4
 7 11 7 30175.1 2667.36 3
 7 11 7 32075.8 3028.02 6
 -7 11 -7 30209.4 1458.56 2
 -7 11 -7 29793.9 2274.19 1
 7 -11 7 31375.6 2882.06 3
 -7 11 -8 29285.2 2229.98 4
 7 -11 8 29555.1 2900.39 3
 7 11 8 27586.3 2784.23 6
 7 11 8 26521.3 2550.67 3
 -7 11 -8 26135.6 1166.74 2
 -7 11 -8 26119.8 2188.87 1
 -7 11 -9 86259.6 3835.57 4
 7 -11 9 78760.5 4690.45 3
 7 11 9 79773.7 4540.44 6
 7 11 9 80190.8 4513.73 3
 -7 11 -9 84163.7 3802.12 1
 -7 11 -10 481.049 939.248 4
 7 11 10 1470.98 1299.62 3
 7 11 10 -1435.14 1490.44 6
 7 -11 10 -87.2488 1161.97 3
 -7 11 -10 -1225.59 1051.36 1
 -7 11 -11 5491.85 1274.45 4
 -7 11 -11 3737.93 1335.27 1
 7 11 11 2465.22 1475.04 3
 7 -11 11 6023.29 1737.93 3
 7 11 11 5293.1 1507.87 6
 7 11 12 58229.1 4104.21 6
 7 11 12 53261.5 4018.2 3
 7 -11 12 61617.2 4634.38 3
 -7 11 -12 60955.6 3538.46 1
 -7 11 -12 55787.1 3370.12 4
 -7 11 -13 24416.6 2391.92 4
 7 11 13 19191.7 2508.66 6
 7 11 13 22291.8 2900.58 3
 7 -11 13 26489.4 3320.66 3
 7 11 14 82681.2 4812.62 6
 7 11 14 85362.8 5448.46 3
 7 -11 14 75924.8 5309.48 3
 7 11 14 77416.1 4224.69 2
 -7 11 -14 77047.6 4081.25 4
 -7 11 -15 27804.9 2679.91 4
 7 11 15 28891.2 2749.8 2
 -7 11 -16 12383.4 1989.64 4
 -7 -11 -16 12338.4 2195.41 4
 7 11 16 11017.9 1854.38 2
 -7 11 -17 7582.77 1716.79 4
 -7 -11 -17 6400.96 2095.31 4
 -7 11 -18 221.694 1334.82 4
 -7 -11 -18 603.478 1588.41 4
 -7 11 -19 33830.1 3393 4
 -7 -11 -19 34710.6 3645.15 4
 -7 11 -20 18703.9 2808.38 4
 -7 -11 -20 21209 3233.35 4
 -7 13 21 217.208 1441.05 2
 7 13 -21 -1742.09 1654.47 5
 -7 13 20 2889.81 1418.37 2
 7 13 -20 2567.58 1555.18 5
 -7 13 19 64529.9 4396.24 2
 7 13 -19 65356.7 4237.86 5
 7 -13 -19 62650 5123.01 4
 7 13 -19 66761.3 4712.42 4
 7 13 -18 1935.09 1583.85 4
 -7 13 18 -739.429 1358.56 2
 7 13 -18 1197.12 1377.38 5
 7 13 -17 903.957 1278.82 4
 -7 13 17 -688.585 1176.72 2
 7 13 -17 2948.34 1468.56 5
 7 13 -16 531.739 1291.47 4
 -7 13 16 2148.76 1339.45 2
 7 13 -16 -1439.01 1272.35 5
 7 13 -15 3391.41 1520.9 4
 -7 13 15 960.077 1138.38 2
 7 13 -15 4506.3 1538.23 5
 7 13 -14 23037.4 2537.75 4
 -7 13 14 18282.1 2270.84 2
 7 13 -14 18691.5 2326.66 5
 -7 13 13 97959 4724.15 2
 7 13 -13 100461 4635.59 5
 7 13 -13 96741.1 4713.32 4
 -7 13 12 9181.77 1724.09 2
 7 13 -12 8475.39 1669.18 4
 7 13 -12 7924.27 1502.36 5
 7 13 -11 689.08 609.287 1
 -7 13 11 617.012 863.77 2
 7 13 -11 511.734 664.971 6
 7 13 -11 -1583.31 1092.35 5
 7 13 -11 -1324.77 1058.4 4
 7 13 -10 976.993 915.62 4
 7 13 -10 2533.14 800.315 6
 7 13 -10 848.89 513.091 1
 7 13 -10 2018.34 1114.73 5
 -7 13 10 454.81 1019.53 2
 -7 13 9 61457.7 3510.68 2
 7 13 -9 63826.8 3625.38 4
 7 13 -9 63715.7 3438.38 5
 7 13 -9 61544.1 3113.24 6
 7 13 -9 64276.8 2468.03 1
 -7 13 8 18293.7 1964.16 2
 7 13 -8 19829.9 2142.86 4
 7 13 -8 17807.5 1819.32 6
 7 13 -8 18383 1360.2 1
 7 13 -7 8597.16 1390.93 4
 7 13 -7 7067.13 886.237 1
 -7 13 7 7604.47 1374.33 2
 7 13 -7 7950.37 1356.59 6
 -7 13 6 39861.3 2741.78 2
 7 13 -6 36861.9 2585.54 6
 7 13 -6 39277.2 2699.1 4
 7 13 -5 14502.1 1720.58 4
 7 13 -5 15693.4 1825.04 6
 7 13 -4 18255.4 1752.75 4
 -7 13 4 13724.9 1604.84 2
 7 13 -4 15958.4 1887.28 6
 -7 13 3 112249 4173.91 2
 7 13 -3 110698 4613.57 6
 7 13 -3 106710 4063.07 4
 -7 13 2 753.773 846.035 2
 7 13 -2 -268.253 907.369 6
 -7 13 1 1311.88 836.034 2
 7 13 -1 556.637 1097.65 6
 7 13 0 4991.88 1415.39 6
 -7 13 0 5039.49 1067.2 2
 -7 13 -1 32905.9 2138.58 2
 7 13 1 34519.7 2861.44 6
 7 -13 1 34941.5 2379.13 3
 7 13 2 3558.87 860.061 3
 -7 13 -2 3033.83 772.865 2
 7 -13 2 2562.53 820.192 3
 7 13 2 3156.21 1402.15 6
 -7 13 -3 176552 4455.74 2
 7 -13 3 170717 5643.84 3
 7 13 3 181143 6487.84 6
 7 13 3 173836 5225.81 3
 -7 13 -4 6350.27 1240.33 4
 -7 13 -4 5560.49 1306.43 1
 7 13 4 3703.9 1008.34 3
 7 13 4 3438.94 1549.9 6
 -7 13 -4 5428.38 917.047 2
 7 -13 4 4710.91 1204.59 3
 -7 13 -5 1874.06 765.183 4
 7 13 5 2289.76 1512.16 6
 7 13 5 1193.02 818.107 3
 -7 13 -5 3127.59 708.977 2
 7 -13 5 16.7379 767.718 3
 -7 13 -5 2102.85 1129.18 1
 -7 13 -6 3516.96 1052.58 4
 7 13 6 6531.13 1769.57 6
 7 13 6 5074.63 1339.48 3
 7 -13 6 3233.27 1491.88 3
 -7 13 -6 2483.78 800.203 2
 -7 13 -6 4937.8 1226.91 1
 -7 13 -7 6867.62 1312.13 4
 -7 13 -7 8214.35 1520.57 1
 7 13 7 4577.84 1609.6 6
 7 13 7 5878.55 1372.07 3
 7 -13 7 5715.72 1379.62 3
 -7 13 -7 6683.8 869.823 2
 -7 13 -8 6452.18 1245.77 1
 -7 13 -8 8724.53 1490.46 4
 7 13 8 8112.75 1606.82 3
 7 -13 8 6954.89 1673.71 3
 7 13 8 8188.22 1785.66 6
 -7 13 -9 69327.5 3644.46 1
 -7 13 -9 66241.6 3521.29 4
 7 13 9 68631 4442.15 6
 7 13 9 67666.4 4077.89 3
 7 -13 9 73058.4 4469.37 3
 7 13 10 9576.78 1994.09 6
 -7 13 -10 6437.77 1418.11 4
 -7 13 -10 6411.56 1394.56 1
 7 13 10 6400.7 1625.79 3
 7 -13 10 5841.55 1363.22 3
 -7 13 -11 3064.17 1353.85 4
 -7 13 -11 2775.64 1253.16 1
 7 -13 11 1132.45 1389.68 3
 7 13 11 -700.932 1232.01 3
 7 13 11 5916.69 1769.04 6
 -7 13 -12 5575.13 1531.06 4
 -7 13 -12 7314.86 1616.76 1
 7 13 12 4173.36 1771.62 6
 7 13 12 8433.41 1935 3
 7 -13 12 5178.6 1793.32 3
 -7 13 -13 16426.1 2183.47 1
 -7 13 -13 15046.7 2055.29 4
 7 13 13 17746.5 2602.25 6
 7 13 13 14425.5 2091.37 2
 -7 13 -14 295.221 1252.71 4
 7 13 14 760.376 1478.92 6
 7 13 14 -1334.54 1310.12 2
 -7 13 -15 5960.47 1692.69 4
 7 13 15 6825.2 1796.29 2
 -7 13 -16 7052.77 1663.32 4
 7 13 16 5868.43 1705.83 2
 -7 13 -17 9634.07 2055.13 4
 7 13 17 7981.35 1789.71 2
 -7 13 -18 519.879 1486.51 4
 -7 -13 -18 -1959.08 1913.46 4
 -7 13 -19 34165.5 3557.01 4
 -7 -13 -19 35305.6 3866.66 4
 7 15 -21 3168.9 1584.92 5
 -7 15 20 7358.36 1979.78 2
 7 15 -20 6071.18 1845.91 5
 -7 15 19 40555.2 3896.69 2
 7 15 -19 45734.7 3699.23 5
 7 15 -18 -1132.25 1556.74 4
 7 15 -18 -807.494 1459.23 5
 -7 15 18 -1515.22 1506.15 2
 -7 15 17 213.765 1262.46 2
 7 15 -17 2971.03 1444.83 5
 7 15 -17 3615.91 1562.51 4
 7 15 -16 1193.47 1586.26 4
 -7 15 16 2104.42 1419.67 2
 7 15 -16 -1218.86 1238.98 5
 -7 15 15 1174.52 1387.66 2
 7 15 -15 -1051.55 1281.08 5
 7 15 -15 -730.269 1485.72 4
 7 15 -14 10539.1 2095.87 4
 -7 15 14 8310.88 1925.12 2
 7 15 -14 10508.8 1882.17 5
 7 15 -13 89303.2 4930.3 4
 -7 15 13 89830.4 4855.17 2
 7 15 -13 83798.5 4460.52 5
 -7 15 12 5362.98 1516.37 2
 7 15 -12 8250.53 1854.18 4
 7 15 -12 4194.92 1536.81 5
 7 15 -11 7483.85 1770.99 4
 7 15 -11 8701.71 1759.41 5
 -7 15 11 6315.09 1725.95 2
 7 15 -10 -1758.71 1414.34 4
 -7 15 10 -1300.28 1104.86 2
 7 15 -10 -757.741 1005.39 5
 7 15 -10 -21.9997 802.9 6
 -7 15 9 53374.5 3560.57 2
 7 15 -9 53192.7 3495.44 4
 7 15 -9 53577.4 3097.04 6
 7 15 -9 51262.5 3336.03 5
 7 15 -9 55663.8 2485.37 1
 7 15 -8 43167.4 3127.42 4
 7 15 -8 33396.1 2583.71 6
[truncated: 466,380 more chars]
